# Supplementary material for: Past, present, and future of global health financing: a review of development assistance, government, out-of-pocket, and other private spending on health for 195 countries, 1995–2050
Source: PubMed Central journal article supplement (PMC6548764; doi:10.1016/s0140-6736(19)30841-4), 2019-06-01

# THE LANCET

## Supplementary appendix

This appendix formed part of the original submission and has been peer reviewed. We post it as supplied by the authors.

Supplement to: Global Burden of Disease Health Financing Collaborator Network. Past, present, and future of global health financing: a review of development assistance, government, out-of-pocket, and other private spending on health for 195 countries, 1995–2050. *Lancet* 2019; published online April 25. [http://dx.doi.org/10.1016/S0140-6736\(19\)30841-4](http://dx.doi.org/10.1016/S0140-6736(19)30841-4).

SUPPLEMENTARY METHODS ANNEX

Past, present, and future of global health financing: a review of development assistance, government, out-of-pocket, and other private spending on health for 195 countries, 1995-2050

Version: April 22, 2019

Global Burden of Disease Health Financing Collaborator Network

## Table of Contents

### SECTION 1. METHODS OVERVIEW

Overview

Estimating domestic health spending: 1995-2016

Estimating development assistance for health: 1990-2018

Factors associated with changes in government health spending: 1995-2016

Estimating health spending in the future: 2017-2050

Alternative future government health spending scenarios

Reporting and uncertainty analysis

Role of the funding source

### SECTION 2. TRACKING TOTAL HEALTH SPENDING AND ITS COMPONENTS

Overview

Statistical model to fill missingness in health expenditure variables

### SECTION 3. TRACKING DEVELOPMENT ASSISTANCE FOR HEALTH FROM TRADITIONAL DONORS

Overview

Tracking development assistance for health from bilateral aid agencies and the European Commission

Tracking development assistance for health from the development banks

Tracking contributions from GFATM and GAVI

Tracking expenditure by United Nations Agencies active in the health domain

Tracking development assistance for health from private foundations

Tracking non-governmental organizations

Calculating the technical assistance and program support component of development assistance for health from loan-and grant-making channels of assistance

References

### SECTION 4: TRACKING DEVELOPMENT ASSISTANCE FOR HEALTH FROM CHINA

Overview

### SECTION 5. FORECASTING HEALTH SPENDING FROM 2017 through 2050

Data

Covariates

Ensemble Modeling

Package and Architecture

Inclusion and Exclusion Criteria

Creating the Forecasts

Ad-hoc Draws Correlation

Future Health Scenarios

Tables and Figures

Additional Tables Figures

## Abbreviations

|          |                                                                                                                                                                                                                                             |
|----------|---------------------------------------------------------------------------------------------------------------------------------------------------------------------------------------------------------------------------------------------|
| ADB      | Asian Development Bank and                                                                                                                                                                                                                  |
| AfDB     | African Development Bank                                                                                                                                                                                                                    |
| BMGF     | Bill & Melinda Gates Foundation                                                                                                                                                                                                             |
| CRS      | Creditor Reporting System                                                                                                                                                                                                                   |
| DAC      | Development Assistance Committee                                                                                                                                                                                                            |
| DAH      | Development assistance for health                                                                                                                                                                                                           |
| EC       | European Commission                                                                                                                                                                                                                         |
| GDP      | Gross domestic product                                                                                                                                                                                                                      |
| GFATM    | Global Fund for AIDS, Tuberculosis and Malaria                                                                                                                                                                                              |
| GGHE     | General government health expenditure                                                                                                                                                                                                       |
| GHED     | Global Health Expenditure Database                                                                                                                                                                                                          |
| GHES     | Government health spending (Aggregate of "Social insurance contributions", "Transfers from government domestic revenue (allocated to health purposes)", and "Compulsory prepayment (Other, and unspecified, than FS.3)" as defined in GHED) |
| HSS      | Health System Strengthening                                                                                                                                                                                                                 |
| IBRD     | International Bank for Reconstruction and Development                                                                                                                                                                                       |
| IDA      | International Development Association                                                                                                                                                                                                       |
| IDB      | Inter-American Development Bank                                                                                                                                                                                                             |
| LCU      | Local currency units                                                                                                                                                                                                                        |
| NASA     | National AIDS Spending Assessments                                                                                                                                                                                                          |
| NGO      | Non-governmental organizations                                                                                                                                                                                                              |
| NHA      | National Health Accounts                                                                                                                                                                                                                    |
| NPISH    | Non-profit institutions serving households                                                                                                                                                                                                  |
| ODA      | Official development assistance                                                                                                                                                                                                             |
| OECD     | Organisation for Economic Co-operation and Development                                                                                                                                                                                      |
| OOP      | Out-of-pocket (defined in GHED: "Other revenues from households n.e.c")                                                                                                                                                                     |
| PAHO     | Pan American Regional Office for WHO                                                                                                                                                                                                        |
| PI       | Private insurance                                                                                                                                                                                                                           |
| PPP      | Pre-paid private ( Aggregate of "Voluntary prepayment", "Other revenues from corporations n.e.c." and "Other revenues from NPISH n.e.c." as defined in GHED)                                                                                |
| SHA 2011 | System of Health Accounts 2011                                                                                                                                                                                                              |

|        |                                                                                                                       |
|--------|-----------------------------------------------------------------------------------------------------------------------|
| SWAps  | Sector Wide Approaches                                                                                                |
| TB     | Tuberculosis                                                                                                          |
| THE    | Total health expenditure (defined in GHED: “Current health expenditure by revenues of health care financing schemes”) |
| UNICEF | United Nations Children’s Fund                                                                                        |
| UNAIDS | Joint United Nations Programme on HIV/AIDS                                                                            |
| UNFPA  | United Nations Population Fund                                                                                        |
| VolAg  | Report of Voluntary Agencies                                                                                          |
| WHO    | World Health Organization                                                                                             |

## SECTION 1. METHODS OVERVIEW

### Overview

The methods presented here summarize the various components of the estimation process; interested readers are encouraged to consult the appendix for additional details on data sources, methods, and for additional results presented in alternative units. “Health spending” is defined as money spent on services, supplies, and basic infrastructure to deliver health care, using the same definition employed by the System of Health Accounts 2011 and the WHO Global Health Expenditure Database (GHED).<sup>1,2</sup> Health “financing” and “funding” are used interchangeably to refer to the source, as opposed to the utilization, of financial resources. “Economic development” refers to GDP per capita.

We estimated health spending from four main sources – government, out-of-pocket, prepaid private, and DAH – for 195 countries and territories. For brevity, “countries and territories” are referred to only as “countries”, all of which are categorized into four World Bank income groups (high-, upper-middle-, lower-middle-, and low-income) and seven Global Burden of Disease (GBD) super-regions (Central Europe, Eastern Europe, and Central Asia; GBD high income; Latin America and Caribbean; North Africa and Middle East; South Asia; Southeast Asia, East Asia, and Oceania; and sub-Saharan Africa). Data tracking government, out-of-pocket, and prepaid private health spending, which together comprise total domestic health spending, were available from 1995 through 2016. Government health spending includes social health insurance and mandated private health insurance, as well as government public health programmes. Out-of-pocket health spending includes health care spending paid by the patient or his or her household, excluding insurance premiums paid in advance of care. Prepaid private health spending includes voluntary private insurance and non-governmental agency spending on health.

Estimates of DAH, defined as the financial and in-kind contributions from major development agencies to low- and middle-income countries for the purpose of maintaining or improving population health, were generated from 1990 through 2018, although transfers to recipient countries can only be estimated until 2017. In other words, the total amount of DAH, by source, is estimated through 2018, but is not allocated by recipient country for 2018. The sum of domestic health spending and DAH, net of the administrative costs needed to run the development agencies, form the envelope of total health spending for each country and year.

Domestic health spending from each of the three sources was projected for each country from 2017 to 2050, and DAH was projected from 2018 to 2050, by modelling rates of change across time. These models incorporate country-specific time trends that attenuate across time and converge to the global average, consider a broad set of covariates and time-series modelling techniques, and propagate four types of uncertainty - model, data, parameter, and fundamental uncertainty.

### Estimating domestic health spending: 1995–2016

We extracted data on gross domestic product (GDP) per capita from five leading sources of these estimates (World Bank, International Monetary Fund [IMF], United Nations, Penn World Tables, and Maddison) and built from methods described by James and colleagues to generate a single series of GDP per capita using Gaussian processes.<sup>3-7</sup> This method incorporated data from all five GDP series and also propagated uncertainty through the estimates.<sup>8</sup> The resulting series spans 195 countries from 1970 to 2017, and larger uncertainty intervals highlight countries where the input data from the five sources was discordant or estimates were missing.

We extracted data from the WHO’s Global Health Expenditure Database (GHED) on government domestic revenue transfers allocated for health, compulsory prepayment, voluntary prepayment, social insurance

contributions, and other domestic revenue from households, corporations, and non-profit institutions serving households.<sup>9</sup> Data from GHED excludes spending on major investments such as hospital construction, health worker education and training, and research and development. Countries report these data and the data source to WHO; when possible, these are based on National Health Accounts, but alternative sources are used in many cases. Health spending estimates were extracted in current national currency units, deflated 2018 national currency units, and exchanged to 2018 US dollars. Deflator series and exchange rates used were based on those reported in the IMF World Economic Outlook.<sup>5</sup>

We estimated domestic government spending on health by aggregating transfers from government domestic revenue for health purposes, compulsory prepayment, and social insurance contributions. Then, to estimate domestic prepaid private health spending, we aggregated voluntary prepayment, other domestic revenues from non-profit institutions serving the household, and other domestic revenues from corporations. All payments by households other than social insurance contributions were designated as out-of-pocket spending. To generate domestic health spending estimates in purchasing-power parity-adjusted (PPP) dollars, we multiplied the health spending fractions by GDP per capita measured in 2018 PPP dollars.

The extracted data were evaluated for quality. Some of the extracted data points were not tied to an underlying data source and were estimated using a diverse set or poorly defined methods. Furthermore, for a given country, some data varied substantially across time. To overcome these concerns, we used a spatiotemporal Gaussian process regression model to estimate health spending across time, country, and spending category.<sup>10</sup> To prevent data with insufficiently described estimation methods or without data source identification from substantially influencing our model estimation, each data point was assessed and assigned a weight between one and five using the point-specific metadata provided in the GHED. We based weights on metadata completeness, documented source information, and documented methods for estimation. The distribution of data points assigned to each of the five data quality scores, by country income group, is presented in the appendix. Our guidelines for assessing the metadata, a detailed description of how the weights were created, and additional information about the spatiotemporal Gaussian process regression model can also be found in the appendix.

#### [Estimating development assistance for health: 1990–2018](#)

To track DAH, we relied on revenue data in financial statements, annual reports, budget documents, and project disbursement records reported by international development agencies such as the Organisation for Economic Co-operation and Development (OECD) Creditor Reporting System, the World Bank, the Global Fund, and major philanthropic entities like the Bill & Melinda Gates Foundation, Susan Thompson Buffet Foundation, and Rotary International.<sup>11–20</sup> We used budget and commitment data to generate estimates for recent years for which disbursement data were not yet available; for most channels data extends to 2017 or 2018 so that at most one year of estimation was needed.

Our DAH estimates tracked disbursements from the originating donor (called the source); to the development agency responsible for disbursing the funds to the recipient country (called the channel); to the recipient country. We used revenue and disbursement data to count only once the transfers between development agencies to limit double counting. In addition to reporting the source, channel, and recipient of DAH, spending was disaggregated into nine major health focus areas (as well as more detailed programme areas) by searching project titles and descriptions for keywords, as well as using other indicators in the data. Health focus areas included HIV/AIDS; malaria; tuberculosis; reproductive and maternal health; newborn and child health; non-communicable diseases; other infectious diseases; sector-wide approaches and health system strengthening; and other. The “Other” category captured projects such as general support for a conference on the Millennium Development Goals that were not allocated to any of the eight specific



health focus areas; remaining funds for which no project descriptions were available were classified as “unallocable.” The list of keywords used to isolate relevant health projects for each of the health focus areas are included in the supplemental appendix.

While the majority of the methods used for tracking DAH have been described previously, we incorporated several major improvements.<sup>21-25</sup> These include (i) the addition of China as a source of funding; (ii) the inclusion of the Coalition for Epidemic Preparedness Innovations as a channel; and (iii) the addition of antimicrobial resistance as a programme area.<sup>26</sup> The estimate we generated for antimicrobial resistance is restricted to funds that were disbursed through development agencies. These improvements expand the scope of our DAH resource tracking to capture some of the emerging areas of importance in the current global health financing landscape. For all DAH tracking, we include on funds that were transferred through major development agencies included in our research, as well as private foundation and non-governmental agencies for whom we have data. This definition of DAH excludes spending on basic bench science which may have down-stream effects on the development of new drugs. Detailed descriptions of the methodology used for these improvements, including data sources and keywords used to isolate relevant projects, are included in the appendix.

#### Factors associated with changes in government health spending: 1995–2016

We completed a decomposition analysis to understand the relationship between changes in per capita government health spending between 1995 and 2016 and underlying factors that may have contributed to these changes.

A standard demographic decomposition technique popularised by Das Gupta was applied; this approach yields estimates of how changes in each of a set of pre-specified factors are associated with changes in the outcome (government health spending per capita).<sup>27</sup> The three factors examined for their role in government health spending were: (i) economic development, (ii) increased total government spending, and (iii) greater government prioritisation of the health sector. More specifically, we measured these three factors as (i) GDP per person ( $\frac{GDP}{Total\ pop}$ ), (ii) the proportion of GDP that is government spending ( $\frac{Gov}{GDP}$ ), and (iii) the proportion of total government spending spent on the health sector ( $\frac{Gov\ Health}{Gov}$ ). The product of these three factors is government health spending per capita ( $\frac{Gov\ Health}{Total\ pop}$ ).

$$\frac{Gov\ Health}{Total\ pop} \equiv \frac{GDP}{Total\ pop} \times \frac{Gov}{GDP} \times \frac{Gov\ Health}{Gov}$$

The three factors form a comprehensive set of factors, such that all other factors that influence government health spending must operate on or through one or more of the factors examined. For example, if the people of a country demand more health services or a population ages and requires more health services from the government, it must lead to an increase in total government spending or a reprioritization of the existing government spending towards health. This decomposition approach measures the relative contribution of each factor to changes in per capita government health spending during the time period examined. A detailed explanation of the decomposition analysis can be found in the supplementary appendix.

#### Estimating health spending in the future: 2017–2050

Future health spending scenarios were estimated using an ensemble modelling framework and key covariates. A process diagram in the supplementary appendix displays the flow of input data and models for each step of the forecasting process. Rather than using a single model, ensemble modelling estimates a large set of future scenarios using a large number of distinct sub-models, and then takes the average across

all sub-models that pass pre-determined inclusion criterion.<sup>28</sup> Each sub-model has a distinct specification or set of covariates. The primary covariates considered were GDP per capita, total government spending, total fertility rate, and fraction of the population older than 65 years, as well as country-specific time trends. Total fertility rates and age-specific population were extracted from the United Nations World Population Prospects, while we generated our own estimates of GDP per capita and fraction of GDP from government spending.<sup>29</sup> These covariates were considered because estimates of these variables already exist through 2050 or because the covariate is believed to be a fundamental driver of health spending.

In order to project expected GDP per capita for each of the 195 countries from 2018 through 2050, we estimated the GDP per working-aged adult growth rate. Working-aged adult was set to be ages 20 through 64 years. Using out-of-sample validation, we showed that GDP per capita could be more accurately estimated (smaller root-mean-squared error) by estimating GDP per working-aged adult growth rates, rather than GDP per capita growth rates. Sub-models considered in the GDP per working-aged adult growth rate ensemble model included time components such as autoregressive and moving average terms, and a convergence term, which is the one-year lag of the non-differenced dependent variable, and a random country intercept. Inclusion of the convergence term allows for countries with more GDP per working-aged adult to have slower growth rates. We also accounted for the possibility that more recent time trends are better predictors of the future by including sub-models that placed more weight on more recent data. The country-specific random intercepts estimate the country-specific time trends, conditional on all other factors included in the model. We attenuated country-specific time trends toward zero in order to progressively transition countries toward the global growth rate because the country-specific growth rates observed in the past are generated using a relatively short time span. We excluded sub-models with non-significant independent variables (p-value greater than 0.10), an estimated coefficient on the convergence term greater than zero, and predictions that fell outside the bounds of the historical growth rate of the predicted variable.

For each country, we selected the 10% of sub-models that had the lowest root-mean-squared-error in out-of-sample tests and generated 1,000 draws. The draws were simulated to capture multiple types of uncertainty. First, we propagated parameter uncertainty by randomly sampling from each sub-model's joint precision matrix. Second, we built our estimates from the best fit sub-models rather than relying on a single model. Finally, we propagated the empirical variation around the linear fit of the sub-model using a first-order random walk where the variance of the random walk was determined by the estimated residuals from the retrospective data.

After estimating GDP per capita, we used the same method to estimate future scenarios of (i) total government spending as a fraction of GDP, (ii) government health spending as a fraction of total government spending, (iii) prepaid private health spending as a fraction of GDP, and (iv) out-of-pocket health spending as a fraction of GDP. We called these our reference future scenarios. In addition, we estimated future scenarios of the share of health spending that was provided as DAH from each major donor country, which allowed us to estimate total DAH expected to be disbursed between 2019 and 2050. Next, we estimated the fraction of the total amount of DAH that we expected each low- and middle-income country to receive. Finally, if a country was projected to reach high-income status before 2050, then it was deemed ineligible to receive DAH from that year onward and DAH it was otherwise expected to receive was reallocated to all other countries eligible to receive DAH. The World Bank sets the threshold for high-income countries at GDP per capita of \$12,056, measured using the Atlas method. We used linear regression to convert this estimate to GDP per capita in 2018 US dollars based on market exchange rates, and found the threshold at which a country would be considered high-income to be GDP per capita of \$17,599. To estimate total health spending for each country and year, we added DAH received by countries to estimates of government, prepaid private, and out-of-pocket health spending.

### Alternative future government health spending scenarios

To assess the potential for governments to generate more resources for health, we estimated two alternative future scenarios associated with higher government health spending: the first alternative scenario reflects increased prioritisation of the health sector, and the second reflects both increased overall government spending and increased government prioritisation of health. To generate the two scenarios, we assessed the observed 2016 fraction of government spending that was allocated to the health sector ( $\frac{Gov\ Health}{Gov}$ ) and the fraction of GDP that is based on government spending ( $\frac{Gov}{GDP}$ ) across the 195 countries. We then set the target levels of the two fractions as the 90<sup>th</sup> percentile of the observed fractions' distributions, which we believe is an aspirational yet attainable target for many countries. Building on the existing GDP per capita projections, scenario 1 adjusts all countries so that the fraction of government spending on health is at least the target fraction (ie the 90<sup>th</sup> percentile), and scenario 2 adjusts all countries so that both the fraction of government spending on health and the fraction of GDP that is based on government spending is at least the target levels (again, the 90<sup>th</sup> percentiles). These scenarios measure how much a country's government would spend if it dedicated more resources to health and if it raised and spent more government resources, in addition to dedicating more of those resources to health.

### Reporting and uncertainty analysis

All inflation-adjusted health spending estimates are reported using 2018 prices. Future values are not discounted. We report health spending per capita in US dollars and purchasing-power parity adjusted dollars and as a fraction of GDP. When not otherwise indicated, estimates are reported in 2018 US dollars. We report country spending estimates using 2017 Global Burden of Disease super-regions and 2018 World Bank income groups, regardless of whether a country changed, or is projected to change, income groups during the study period.<sup>30,31</sup> Rates were calculated to reflect each group, rather than the average of countries within the group, such that spending per capita estimates for an income group or region more heavily reflect rates in more populous countries. The uncertainty interval around each estimate was computed using the 2.5<sup>th</sup> and 97.5<sup>th</sup> percentiles of the 1,000 draws. All analyses were done using R (version 3.5.2) and Stata (version 13).

### Role of the funding source

The funder of this study had no role in study design, data collection, data analysis, data interpretation, or writing of the manuscript. All authors had full access to all the data in the study, and JLD and CJLM had final responsibility for the decision to submit for publication.

### References

- 1WHO | Global Health Expenditure Database. WHO. <http://www.who.int/health-accounts/ghed/en/> (accessed Dec 23, 2017).
- 2OECD, Eurostat and World Health Organization. A System of Health Accounts 2011: Revised edition. Paris: OECD Publishing, 2017 [https://read.oecd-ilibrary.org/social-issues-migration-health/a-system-of-health-accounts-2011\\_9789264270985-en](https://read.oecd-ilibrary.org/social-issues-migration-health/a-system-of-health-accounts-2011_9789264270985-en) (accessed March 7, 2019).
- 3The Database | Penn World Table version 9.0. Groningen Growth and Development Centre: Faculty of Economics and Business. <https://www.rug.nl/ggdc/productivity/pwt/> (accessed Dec 21, 2018).
- 4DataBank | The World Bank. The World Bank. <http://databank.worldbank.org/data/home.aspx> (accessed Dec 21, 2018).

- 5International Monetary Fund. World Economic Outlook, October 2018: Challenges to Steady Growth. International Monetary Fund, 2018 <https://www.imf.org/en/Publications/WEO/Issues/2018/09/24/world-economic-outlook-october-2018> (accessed Dec 21, 2018).
- 6Maddison Project Database 2018. Groningen Growth and Development Centre: Faculty of Economics and Business. <https://www.rug.nl/ggdc/historicaldevelopment/maddison/releases/maddison-project-database-2018> (accessed Dec 21, 2018).
- 7National Accounts Main Aggregates Database. United Nations Statistics Division - National Health Accounts. <https://unstats.un.org/unsd/snaama/Introduction.asp> (accessed Dec 21, 2018).
- 8James SL, Gubbins P, Murray CJ, Gakidou E. Developing a comprehensive time series of GDP per capita for 210 countries from 1950 to 2015. *Population Health Metrics* 2012; **10**: 12.
- 9Global Health Expenditure Database. World Health Organization. <http://apps.who.int/nha/database> (accessed Dec 21, 2018).
- 10GBD 2015 Risk Factors Collaborators. Global, regional, and national comparative risk assessment of 79 behavioural, environmental and occupational, and metabolic risks or clusters of risks, 1990–2015: a systematic analysis for the Global Burden of Disease Study 2015. *The Lancet* 2016; **388**: 1659–724.
- 11Find a Grant. <https%3a%2f%2fwww.theglobalfund.org%2fen%2fportfolio%2ffind%2f> (accessed Dec 22, 2018).
- 12OECD Statistics. <https://stats.oecd.org/> (accessed Dec 22, 2018).
- 13Malaria Operational Plans (MOPs) | PMI. <https://www.pmi.gov/resource-library/mops/> (accessed Dec 22, 2018).
- 14Key figures: donor contributions & pledges. <https://www.gavi.org/investing/funding/donor-contributions-pledges/> (accessed Dec 22, 2018).
- 15Trustees reports and financial statements - International Finance Facility for Immunisation. <https://www.iffim.org/finance/trustees-reports-and-financial-statements/> (accessed Dec 22, 2018).
- 16Financial reports. <https://www.gavi.org/investing/funding/financial-reports/> (accessed Dec 22, 2018).
- 17Disbursements and commitments. <https://www.gavi.org/results/disbursements/> (accessed Dec 22, 2018).
- 18PCB Archive. <http://www.unaids.org/en/aboutunaids/unaidsprogramme coordinatingboard/pcbmeetingarchive> (accessed Dec 22, 2018).
- 19Executive Board. </executive-board> (accessed Dec 22, 2018).
- 20GB | Governing Body Documentation. <http://apps.who.int/gb/> (accessed Dec 22, 2018).
- 21Ravishankar N, Gubbins P, Cooley RJ, *et al.* Financing of global health: tracking development assistance for health from 1990 to 2007. *The Lancet* 2009; **373**: 2113–24.
- 22Leach-Kemon K, Chou DP, Schneider MT, *et al.* The Global Financial Crisis Has Led To A Slowdown In Growth Of Funding To Improve Health In Many Developing Countries. *Health Affairs* 2012; **31**: 228–35.
- 23Dieleman JL, Graves C, Johnson E, *et al.* Sources and Focus of Health Development Assistance, 1990–2014. *JAMA* 2015; **313**: 2359–68.
- 24Dieleman JL, Graves CM, Templin T, *et al.* Global health development assistance remained steady in 2013 but did not align with recipients' disease burden. *Health Aff (Millwood)* 2014; **33**: 878–86.

- 25Dieleman JL, Templin T, Sadat N, *et al.* National spending on health by source for 184 countries between 2013 and 2040. *The Lancet* 2016; **387**: 2521–35.
- 26Micah AE, Zhao Y, Chen CS, *et al.* Tracking development assistance for health from China, 2000–2018. *BMJ Global Health* under review.
- 27Das Gupta P. Standardization and Decomposition of Rates: A User’s Manual. U.S. Bureau of the Census, 1993 <https://www.census.gov/content/dam/Census/library/publications/1993/demo/p23-186.pdf> (accessed Dec 21, 2018).
- 28Foreman KJ, Lozano R, Lopez AD, Murray CJ. Modeling causes of death: an integrated approach using CODEm. *Population Health Metrics* 2012; **10**: 1.
- 29World Population Prospects: The 2017 Revision | Multimedia Library - United Nations Department of Economic and Social Affairs. United Nations Department of Economic and Social Affairs. <https://www.un.org/development/desa/publications/world-population-prospects-the-2017-revision.html> (accessed Dec 21, 2018).
- 30World Bank Country and Lending Groups – World Bank Data Help Desk. The World Bank. <https://datahelpdesk.worldbank.org/knowledgebase/articles/906519-world-bank-country-and-lending-groups> (accessed Dec 21, 2018).
- 31Abate KH, Abay SM, Abbafati C, *et al.* Global, regional, and national age-sex-specific mortality and life expectancy, 1950–2017: a systematic analysis for the Global Burden of Disease Study 2017. *The Lancet* 2018; **392**: 1684–735.

## SECTION 2. TRACKING TOTAL HEALTH SPENDING AND ITS COMPONENTS

### List of Tables and Figures

eTable 1. Rules for assigning weight values to metadata

eTable 2. Countries and income groups, assigned weights

eFigure 1. Comparison of WHO GHED extracted and IHME ST-GPR THE in GDPpc space, 2000-2016

eFigure 2. Comparison of WHO GHED extracted and IHME ST-GPR THE in per GDP space, 2000-2016

eFigure 3. Health spending per GDP in 1995, 2016, 2030, and 2050

eFigure 4. Health spending per GDP by gross domestic product per capita, 1995, 2016, 2030, and 2050

eFigure 5. Annualised rate of change in health spending per GDP by source, by income group [A] and Global Burden of Disease super-region [B], 1995–2016

eFigure 6. Distribution of government health spending per GDP, global and by income group, 1995, 2016, 2030, 2050, and two future scenarios

eFigure 7. Flow of input data and models for each step of the forecasting process

eFigure 8. Economic development and the composition of health spending by source and proportion of health spending from the government, 1995, 2016, 2030, 2050, composition by source

### Overview of GHED data cleaning process

We used Global Health Expenditure Database (GHED) data from the World Health Organization (WHO) to generate our estimates.<sup>1</sup> From the GHED, we extracted "Current health expenditure by revenues of health care financing schemes" for total health expenditure (THE), "Other revenues from households n.e.c" for out-of-pocket (OOP), "Gross Domestic Product" for GDP. We summed "Social insurance contributions", "Transfers from government domestic revenue (allocated to health purposes)", and "Compulsory prepayment (Other, and unspecified, than FS.3)" for government health spending (GHE). We summed "Voluntary prepayment", "Other revenues from corporations n.e.c." and "Other revenues from NPISH n.e.c." for pre-paid private (PPP).

To ensure we used the best possible data from the GHED, we evaluated the metadata also provided by GHED to establish the reliability of the data. To do so, we downloaded the metadata from the GHED website for each data point for the five indicators. We used the metadata to decide how each given data point should be weighted, from 0 to 5, with 0 meaning drop, and 1 through 5 meaning keep and treated these weights as inverse variance weights.

To assign the weights, we established guidelines for the metadata that informed how the underlying data points should be weighted. We gave priority to factors such as complete, documented source information and penalized factors such as having been derived or estimated. eTable 1 below describes the guidelines we created; any metadata that did not meet any of the disqualifying factors were given a value of 5 to reflect highest reliability.

We used the four primary metadata variables from the GHED database: data type, method of estimation, comments, and sources. We applied the guidelines to each unique set of metadata across these four variables. For a subset of data points, the metadata indicated that the data point was the sum of other data points. In these cases, if the indicator was a sub-indicator of GHES, PPP, or OOP, we assigned the data

point a value of 2 to reflect that even though we could not determine if the sub-components existed, as they are not reported in GHED, we did not feel that being a sum warranted dropping the data. We assigned the summed GHES, PPP, and OOP indicators the lowest value of its sub-indicators. If the summed data point was THE, however, we assigned the data point the lowest value of its sub-components, the summed GHES, PPP, and OOP indicators.

After designating each of the 3,005 unique sets of metadata a value weight, we applied these weights to the underlying data points. In total, we had 16,716 data points, as multiple data points shared the same unique set of metadata. Once the weights were applied to the data, we reassigned all high-income country data points that were a 0 based on the metadata to 3. We made this change to reflect that high-income countries have higher quality data and thus should not be dropped, but should also not be given the highest weight value. The high-income classification comes from the World Bank.<sup>2</sup> For all countries across all years of data their relative weighting scores can be seen in eTable 2.

Each component of health expenditure was aggregated for all component-year-country combinations by taking component values (downloaded in current national unit); dividing by GHED reported GDP for the corresponding year-country (also in current national unit) to convert each component into its fraction of GDP; and finally multiplying those fractions by IHME GDP series measured in USD 2018. (Note: though we harvested and cleaned metadata for THE and GDP, we do not model THE (we model GHE, PPP, OOP and then aggregate) or use the WHO's GDP data since we have our own methods with multiple sources for determination of our value).

Each component of health expenditure was then converted into three spending metrics for the time period between 1995-2016, measured in purchasing power parity (PPP): health spending per capita (\$), annualized rate of change in health spending per capita 1995-2016 (%), and annualized rate of change in health spending 1995-2016 (%). These metrics are shown below in Table 1. Then, each component of health expenditure was aggregated and converted into six spending metrics for the time period between 2017-2050, measured in PPP: health spending per capita (\$), annualized rate of change in health spending per capita 2017-2050 (%), annualized rate of change in health spending 2017-2050 (%), Government health spending per capita (\$), difference between GHEpc (government health expenditure per capita) reference scenario and better scenario 1, 2050 (\$), and difference between GHEpc reference scenario and better scenario 2, 2050 (\$). Table 2 contains these values.

### **Currency exchange and deflation**

To convert a metric (for example, DAH) from 2018 USD to 2018 PPP, the following steps were taken. First, we used the US deflator series to convert the series (DAH as example) from 2018 USD to nominal USD series for all country-years. Next, we converted the nominal USD series to nominal LCU (local currency unit) series by multiplying with country-year specific USD to LCU exchange rates. After which, we used country-year specific deflator series (based to year 2018) to convert from nominal LCU to 2018 LCU series. Finally, we converted from 2018 LCU to 2018 PPP (purchasing power parity) series using the country specific 2018 LCU to PPP conversion series. The source of country-year specific USD to LCU exchange rates is the OECD exchange rate database.<sup>4</sup>

**eTable 1. Rules for assigning weight values to metadata**

| Data type | Methods of estimation                                             | Sources and/or Comments                                                                               | Weight                             |
|-----------|-------------------------------------------------------------------|-------------------------------------------------------------------------------------------------------|------------------------------------|
| Blank     |                                                                   |                                                                                                       | 0                                  |
| Estimated |                                                                   |                                                                                                       | 0                                  |
|           | Derived by applying the sum of the components                     |                                                                                                       | Lowest weight of the components    |
|           | Interpolated but with additional information                      |                                                                                                       | 2                                  |
|           | Method description is unclear or provides very little information |                                                                                                       | 0                                  |
|           | Time trend interpolation                                          |                                                                                                       | 1                                  |
|           | Uses data from other countries                                    |                                                                                                       | 0                                  |
|           |                                                                   | Abstract that's not from something documented                                                         | 1 or method (whichever is bigger)  |
|           |                                                                   | Adjusted                                                                                              | 0 or method (whichever is bigger)  |
|           |                                                                   | Adjusted using something                                                                              | 2 or method (whichever is bigger)  |
|           |                                                                   | Any suggestion that the WHO is unclear or unsure about some aspect of the data point's metadata       | 0 or method (whichever is bigger)  |
|           |                                                                   | Approximation                                                                                         | 0 or method (whichever is bigger)  |
|           |                                                                   | Assumption                                                                                            | 0 or method (whichever is bigger)  |
|           |                                                                   | Both blank                                                                                            | 0 or method (whichever is bigger)  |
|           |                                                                   | Both with no intelligible information                                                                 | 0 or method (whichever is bigger)  |
|           |                                                                   | Budget address                                                                                        | 1 or method (whichever is smaller) |
|           |                                                                   | Calculation was used to generate the estimate                                                         | 1 or method (whichever is bigger)  |
|           |                                                                   | Consultation/contact (without an additional documented source)                                        | 1 or method (whichever is smaller) |
|           |                                                                   | Consultations with additional source, but no specifics and just consult is documented                 | 1 or method (whichever is bigger)  |
|           |                                                                   | Currency conversion                                                                                   | 1 or method (whichever is bigger)  |
|           |                                                                   | Data delivered/provided/reported by (a non-documented source)                                         | 1 or method (whichever is smaller) |
|           |                                                                   | Data provided but not clear by whom, with an additional source if additional source is not documented | 1 or method (whichever is smaller) |
|           |                                                                   | Derived                                                                                               | 0 or method (whichever is bigger)  |
|           |                                                                   | Estimated based on                                                                                    | 1 or method (whichever is bigger)  |



| Data type | Methods of estimation | Sources and/or Comments                                                                                        | Weight                                                   |
|-----------|-----------------------|----------------------------------------------------------------------------------------------------------------|----------------------------------------------------------|
|           |                       | Estimation                                                                                                     | 0 or method (whichever is bigger)                        |
|           |                       | Excludes (if it excludes what we do want)                                                                      | 0 (supersedes method)                                    |
|           |                       | Extrapolated                                                                                                   | 0 or method (whichever is bigger)                        |
|           |                       | Forecasted                                                                                                     | 0 or method (whichever is bigger)                        |
|           |                       | Government department, no explicit documented source                                                           | 1 or method (whichever is bigger)                        |
|           |                       | Government ministry, but no explicit documented source                                                         | 1 or method (whichever is bigger)                        |
|           |                       | Includes (if it includes what we don't want)                                                                   | 0 (supersedes method)                                    |
|           |                       | Inferred                                                                                                       | 0 or method (whichever is bigger)                        |
|           |                       | Interpolation                                                                                                  | 0 or method (whichever is bigger)                        |
|           |                       | Missing (if missing something that should be included)                                                         | 0 (supersedes method)                                    |
|           |                       | Modified                                                                                                       | 0 or method (whichever is bigger)                        |
|           |                       | Modified from something/modified using something                                                               | 2 or method (whichever is bigger)                        |
|           |                       | Needs assessment                                                                                               | 1 or method (whichever is smaller)                       |
|           |                       | Needs discussion                                                                                               | 1 or method (whichever is smaller)                       |
|           |                       | Needs validation                                                                                               | 1 or method (whichever is smaller)                       |
|           |                       | Needs verification                                                                                             | 1 or method (whichever is smaller)                       |
|           |                       | Only provides hint of a source                                                                                 | 1 or method (whichever is smaller)                       |
|           |                       | Projected                                                                                                      | 0 or method (whichever is bigger)                        |
|           |                       | Provides only a vague term that does not provide adequate information to infer or determine what the source is | 0 or method (whichever is bigger)                        |
|           |                       | Reply                                                                                                          | 1 or method (whichever is smaller)                       |
|           |                       | Response                                                                                                       | 1 or method (whichever is smaller)                       |
|           |                       | Speech                                                                                                         | 1 or method (whichever is smaller)                       |
|           |                       | Sum of                                                                                                         | 2 (except for THE, which is lowest weight of components) |
|           |                       | Total of                                                                                                       | 3 (except for THE, which is lowest weight of components) |
|           |                       | Underestimated                                                                                                 | 0 (supersedes method)                                    |
|           |                       | Unpublished                                                                                                    | 1 or method (whichever is smaller)                       |
|           |                       | Validated figures, but without specifics                                                                       | 2 or method (whichever is bigger)                        |
|           |                       | Weights                                                                                                        | 0 or method (whichever is bigger)                        |

**eTable 2. Countries and income groups, assigned weights**

| Country                          | Weight | Count |
|----------------------------------|--------|-------|
| Afghanistan                      | 0      | 36    |
| Albania                          | 0      | 50    |
| Algeria                          | 0      | 51    |
| Andorra                          | 0      | 0     |
| Angola                           | 0      | 51    |
| Antigua and Barbuda              | 0      | 21    |
| Argentina                        | 0      | 48    |
| Armenia                          | 0      | 51    |
| Australia                        | 0      | 0     |
| Austria                          | 0      | 0     |
| Azerbaijan                       | 0      | 51    |
| Bahamas                          | 0      | 0     |
| Bahrain                          | 0      | 3     |
| Bangladesh                       | 0      | 35    |
| Barbados                         | 0      | 12    |
| Belarus                          | 0      | 17    |
| Belgium                          | 0      | 0     |
| Belize                           | 0      | 51    |
| Benin                            | 0      | 51    |
| Bhutan                           | 0      | 51    |
| Bolivia Plurinational States of  | 0      | 51    |
| Bosnia and Herzegovina           | 0      | 34    |
| Botswana                         | 0      | 51    |
| Brazil                           | 0      | 51    |
| Brunei Darussalam                | 0      | 0     |
| Bulgaria                         | 0      | 51    |
| Burkina Faso                     | 0      | 51    |
| Burundi                          | 0      | 51    |
| Cabo Verde Republic of           | 0      | 48    |
| Cambodia                         | 0      | 51    |
| Cameroon                         | 0      | 51    |
| Canada                           | 0      | 0     |
| Central African Republic         | 0      | 51    |
| Chad                             | 0      | 50    |
| Chile                            | 0      | 27    |
| China                            | 0      | 51    |
| Colombia                         | 0      | 51    |
| Comoros                          | 0      | 51    |
| Congo                            | 0      | 34    |
| Cook Islands                     | 0      | 51    |
| Costa Rica                       | 0      | 51    |
| Cote d'Ivoire                    | 0      | 51    |
| Croatia                          | 0      | 27    |
| Cuba                             | 0      | 51    |
| Cyprus                           | 0      | 0     |
| Czech Republic                   | 0      | 18    |
| Democratic Republic of the Congo | 0      | 51    |
| Denmark                          | 0      | 0     |
| Djibouti                         | 0      | 46    |
| Dominica                         | 0      | 51    |
| Dominican Republic               | 0      | 51    |

|                                         |   |    |
|-----------------------------------------|---|----|
| <b>Ecuador</b>                          | 0 | 51 |
| <b>Egypt</b>                            | 0 | 34 |
| <b>El Salvador</b>                      | 0 | 45 |
| <b>Equatorial Guinea</b>                | 0 | 27 |
| <b>Eritrea</b>                          | 0 | 34 |
| <b>Estonia</b>                          | 0 | 18 |
| <b>Ethiopia</b>                         | 0 | 50 |
| <b>Fiji</b>                             | 0 | 35 |
| <b>Finland</b>                          | 0 | 0  |
| <b>France</b>                           | 0 | 0  |
| <b>Gabon</b>                            | 0 | 45 |
| <b>Gambia</b>                           | 0 | 34 |
| <b>Georgia</b>                          | 0 | 51 |
| <b>Germany</b>                          | 0 | 0  |
| <b>Ghana</b>                            | 0 | 51 |
| <b>Greece</b>                           | 0 | 0  |
| <b>Grenada</b>                          | 0 | 51 |
| <b>Guatemala</b>                        | 0 | 51 |
| <b>Guinea</b>                           | 0 | 51 |
| <b>Guinea-Bissau</b>                    | 0 | 51 |
| <b>Guyana</b>                           | 0 | 51 |
| <b>Haiti</b>                            | 0 | 51 |
| <b>Honduras</b>                         | 0 | 51 |
| <b>Hungary</b>                          | 0 | 27 |
| <b>Iceland</b>                          | 0 | 0  |
| <b>India</b>                            | 0 | 51 |
| <b>Indonesia</b>                        | 0 | 51 |
| <b>Iran</b>                             | 0 | 50 |
| <b>Iraq</b>                             | 0 | 50 |
| <b>Ireland</b>                          | 0 | 0  |
| <b>Israel</b>                           | 0 | 0  |
| <b>Italy</b>                            | 0 | 0  |
| <b>Jamaica</b>                          | 0 | 51 |
| <b>Japan</b>                            | 0 | 0  |
| <b>Jordan</b>                           | 0 | 50 |
| <b>Kazakhstan</b>                       | 0 | 17 |
| <b>Kenya</b>                            | 0 | 49 |
| <b>Kiribati</b>                         | 0 | 51 |
| <b>Kuwait</b>                           | 0 | 0  |
| <b>Kyrgyzstan</b>                       | 0 | 51 |
| <b>Lao People's Democratic Republic</b> | 0 | 51 |
| <b>Latvia</b>                           | 0 | 33 |
| <b>Lebanon</b>                          | 0 | 50 |
| <b>Lesotho</b>                          | 0 | 17 |
| <b>Liberia</b>                          | 0 | 50 |
| <b>Libya</b>                            | 0 | 51 |
| <b>Lithuania</b>                        | 0 | 36 |
| <b>Luxembourg</b>                       | 0 | 0  |
| <b>Madagascar</b>                       | 0 | 51 |
| <b>Malawi</b>                           | 0 | 51 |
| <b>Malaysia</b>                         | 0 | 51 |
| <b>Maldives</b>                         | 0 | 51 |
| <b>Mali</b>                             | 0 | 47 |

|                                  |   |     |
|----------------------------------|---|-----|
| Malta                            | 0 | 1   |
| Marshall Islands                 | 0 | 51  |
| Mauritania                       | 0 | 51  |
| Mauritius                        | 0 | 50  |
| Mexico                           | 0 | 40  |
| Micronesia (Federated States of) | 0 | 51  |
| Monaco                           | 0 | 0   |
| Mongolia                         | 0 | 51  |
| Montenegro                       | 0 | 34  |
| Morocco                          | 0 | 50  |
| Mozambique                       | 0 | 51  |
| Myanmar                          | 0 | 51  |
| Namibia                          | 0 | 49  |
| Nauru                            | 0 | 48  |
| Nepal                            | 0 | 35  |
| Netherlands                      | 0 | 0   |
| New Zealand                      | 0 | 0   |
| Nicaragua                        | 0 | 51  |
| Niger                            | 0 | 102 |
| Nigeria                          | 0 | 51  |
| Niue                             | 0 | 51  |
| Norway                           | 0 | 0   |
| Oman                             | 0 | 21  |
| Pakistan                         | 0 | 35  |
| Palau                            | 0 | 48  |
| Panama                           | 0 | 51  |
| Papua New Guinea                 | 0 | 51  |
| Paraguay                         | 0 | 51  |
| Peru                             | 0 | 51  |
| Philippines                      | 0 | 51  |
| Poland                           | 0 | 27  |
| Portugal                         | 0 | 0   |
| Qatar                            | 0 | 0   |
| Republic of Korea                | 0 | 3   |
| Republic of Moldova              | 0 | 51  |
| Romania                          | 0 | 51  |
| Russian Federation               | 0 | 28  |
| Rwanda                           | 0 | 51  |
| Saint Kitts and Nevis            | 0 | 33  |
| Saint Lucia                      | 0 | 51  |
| Saint Vincent and the Grenadines | 0 | 51  |
| Samoa                            | 0 | 51  |
| San Marino                       | 0 | 0   |
| Sao Tome and Principe            | 0 | 34  |
| Saudi Arabia                     | 0 | 12  |
| Senegal                          | 0 | 51  |
| Serbia                           | 0 | 49  |
| Seychelles                       | 0 | 41  |
| Sierra Leone                     | 0 | 37  |
| Singapore                        | 0 | 0   |
| Slovakia                         | 0 | 21  |
| Slovenia                         | 0 | 0   |
| Solomon Islands                  | 0 | 51  |

|                                                  |   |    |
|--------------------------------------------------|---|----|
| <b>Somalia</b>                                   | 0 | 17 |
| <b>South Africa</b>                              | 0 | 35 |
| <b>Spain</b>                                     | 0 | 0  |
| <b>Sri Lanka</b>                                 | 0 | 51 |
| <b>Sudan</b>                                     | 0 | 48 |
| <b>Suriname</b>                                  | 0 | 51 |
| <b>Swaziland</b>                                 | 0 | 51 |
| <b>Sweden</b>                                    | 0 | 0  |
| <b>Switzerland</b>                               | 0 | 0  |
| <b>Syria</b>                                     | 0 | 51 |
| <b>Tajikistan</b>                                | 0 | 51 |
| <b>Thailand</b>                                  | 0 | 37 |
| <b>The former Yugoslav Republic of Macedonia</b> | 0 | 34 |
| <b>Timor-Leste</b>                               | 0 | 51 |
| <b>Togo</b>                                      | 0 | 51 |
| <b>Tonga</b>                                     | 0 | 51 |
| <b>Trinidad and Tobago</b>                       | 0 | 18 |
| <b>Tunisia</b>                                   | 0 | 50 |
| <b>Turkey</b>                                    | 0 | 51 |
| <b>Turkmenistan</b>                              | 0 | 51 |
| <b>Tuvalu</b>                                    | 0 | 51 |
| <b>Uganda</b>                                    | 0 | 40 |
| <b>Ukraine</b>                                   | 0 | 17 |
| <b>United Arab Emirates</b>                      | 0 | 0  |
| <b>United Kingdom</b>                            | 0 | 0  |
| <b>United Republic of Tanzania</b>               | 0 | 34 |
| <b>United States of America</b>                  | 0 | 0  |
| <b>Uruguay</b>                                   | 0 | 36 |
| <b>Uzbekistan</b>                                | 0 | 51 |
| <b>Vanuatu</b>                                   | 0 | 51 |
| <b>Venezuela (Bolivarian Republic of)</b>        | 0 | 48 |
| <b>Viet Nam</b>                                  | 0 | 38 |
| <b>Yemen</b>                                     | 0 | 51 |
| <b>Zambia</b>                                    | 0 | 37 |
| <b>Zimbabwe</b>                                  | 0 | 51 |
| <b>Afghanistan</b>                               | 1 | 14 |
| <b>Albania</b>                                   | 1 | 0  |
| <b>Algeria</b>                                   | 1 | 0  |
| <b>Andorra</b>                                   | 1 | 0  |
| <b>Angola</b>                                    | 1 | 0  |
| <b>Antigua and Barbuda</b>                       | 1 | 0  |
| <b>Argentina</b>                                 | 1 | 0  |
| <b>Armenia</b>                                   | 1 | 0  |
| <b>Australia</b>                                 | 1 | 0  |
| <b>Austria</b>                                   | 1 | 0  |
| <b>Azerbaijan</b>                                | 1 | 0  |
| <b>Bahamas</b>                                   | 1 | 0  |
| <b>Bahrain</b>                                   | 1 | 0  |
| <b>Bangladesh</b>                                | 1 | 0  |
| <b>Barbados</b>                                  | 1 | 0  |
| <b>Belarus</b>                                   | 1 | 0  |
| <b>Belgium</b>                                   | 1 | 0  |
| <b>Belize</b>                                    | 1 | 0  |

|                                         |   |    |
|-----------------------------------------|---|----|
| <b>Benin</b>                            | 1 | 0  |
| <b>Bhutan</b>                           | 1 | 0  |
| <b>Bolivia Plurinational States of</b>  | 1 | 0  |
| <b>Bosnia and Herzegovina</b>           | 1 | 0  |
| <b>Botswana</b>                         | 1 | 0  |
| <b>Brazil</b>                           | 1 | 0  |
| <b>Brunei Darussalam</b>                | 1 | 0  |
| <b>Bulgaria</b>                         | 1 | 0  |
| <b>Burkina Faso</b>                     | 1 | 0  |
| <b>Burundi</b>                          | 1 | 0  |
| <b>Cabo Verde Republic of</b>           | 1 | 0  |
| <b>Cambodia</b>                         | 1 | 0  |
| <b>Cameroon</b>                         | 1 | 0  |
| <b>Canada</b>                           | 1 | 0  |
| <b>Central African Republic</b>         | 1 | 0  |
| <b>Chad</b>                             | 1 | 0  |
| <b>Chile</b>                            | 1 | 9  |
| <b>China</b>                            | 1 | 0  |
| <b>Colombia</b>                         | 1 | 0  |
| <b>Comoros</b>                          | 1 | 0  |
| <b>Congo</b>                            | 1 | 13 |
| <b>Cook Islands</b>                     | 1 | 0  |
| <b>Costa Rica</b>                       | 1 | 0  |
| <b>Cote d'Ivoire</b>                    | 1 | 0  |
| <b>Croatia</b>                          | 1 | 0  |
| <b>Cuba</b>                             | 1 | 0  |
| <b>Cyprus</b>                           | 1 | 0  |
| <b>Czech Republic</b>                   | 1 | 0  |
| <b>Democratic Republic of the Congo</b> | 1 | 0  |
| <b>Denmark</b>                          | 1 | 0  |
| <b>Djibouti</b>                         | 1 | 0  |
| <b>Dominica</b>                         | 1 | 0  |
| <b>Dominican Republic</b>               | 1 | 0  |
| <b>Ecuador</b>                          | 1 | 0  |
| <b>Egypt</b>                            | 1 | 16 |
| <b>El Salvador</b>                      | 1 | 6  |
| <b>Equatorial Guinea</b>                | 1 | 0  |
| <b>Eritrea</b>                          | 1 | 0  |
| <b>Estonia</b>                          | 1 | 0  |
| <b>Ethiopia</b>                         | 1 | 0  |
| <b>Fiji</b>                             | 1 | 1  |
| <b>Finland</b>                          | 1 | 0  |
| <b>France</b>                           | 1 | 0  |
| <b>Gabon</b>                            | 1 | 0  |
| <b>Gambia</b>                           | 1 | 17 |
| <b>Georgia</b>                          | 1 | 0  |
| <b>Germany</b>                          | 1 | 0  |
| <b>Ghana</b>                            | 1 | 0  |
| <b>Greece</b>                           | 1 | 0  |
| <b>Grenada</b>                          | 1 | 0  |
| <b>Guatemala</b>                        | 1 | 0  |
| <b>Guinea</b>                           | 1 | 0  |
| <b>Guinea-Bissau</b>                    | 1 | 0  |

|                                         |   |    |
|-----------------------------------------|---|----|
| <b>Guyana</b>                           | 1 | 0  |
| <b>Haiti</b>                            | 1 | 0  |
| <b>Honduras</b>                         | 1 | 0  |
| <b>Hungary</b>                          | 1 | 0  |
| <b>Iceland</b>                          | 1 | 0  |
| <b>India</b>                            | 1 | 0  |
| <b>Indonesia</b>                        | 1 | 0  |
| <b>Iran</b>                             | 1 | 0  |
| <b>Iraq</b>                             | 1 | 0  |
| <b>Ireland</b>                          | 1 | 0  |
| <b>Israel</b>                           | 1 | 0  |
| <b>Italy</b>                            | 1 | 0  |
| <b>Jamaica</b>                          | 1 | 0  |
| <b>Japan</b>                            | 1 | 0  |
| <b>Jordan</b>                           | 1 | 0  |
| <b>Kazakhstan</b>                       | 1 | 0  |
| <b>Kenya</b>                            | 1 | 0  |
| <b>Kiribati</b>                         | 1 | 0  |
| <b>Kuwait</b>                           | 1 | 0  |
| <b>Kyrgyzstan</b>                       | 1 | 0  |
| <b>Lao People's Democratic Republic</b> | 1 | 0  |
| <b>Latvia</b>                           | 1 | 0  |
| <b>Lebanon</b>                          | 1 | 0  |
| <b>Lesotho</b>                          | 1 | 0  |
| <b>Liberia</b>                          | 1 | 0  |
| <b>Libya</b>                            | 1 | 0  |
| <b>Lithuania</b>                        | 1 | 0  |
| <b>Luxembourg</b>                       | 1 | 0  |
| <b>Madagascar</b>                       | 1 | 0  |
| <b>Malawi</b>                           | 1 | 0  |
| <b>Malaysia</b>                         | 1 | 0  |
| <b>Maldives</b>                         | 1 | 0  |
| <b>Mali</b>                             | 1 | 0  |
| <b>Malta</b>                            | 1 | 0  |
| <b>Marshall Islands</b>                 | 1 | 0  |
| <b>Mauritania</b>                       | 1 | 0  |
| <b>Mauritius</b>                        | 1 | 0  |
| <b>Mexico</b>                           | 1 | 0  |
| <b>Micronesia (Federated States of)</b> | 1 | 0  |
| <b>Monaco</b>                           | 1 | 0  |
| <b>Mongolia</b>                         | 1 | 0  |
| <b>Montenegro</b>                       | 1 | 0  |
| <b>Morocco</b>                          | 1 | 0  |
| <b>Mozambique</b>                       | 1 | 0  |
| <b>Myanmar</b>                          | 1 | 0  |
| <b>Namibia</b>                          | 1 | 0  |
| <b>Nauru</b>                            | 1 | 0  |
| <b>Nepal</b>                            | 1 | 16 |
| <b>Netherlands</b>                      | 1 | 0  |
| <b>New Zealand</b>                      | 1 | 0  |
| <b>Nicaragua</b>                        | 1 | 0  |
| <b>Niger</b>                            | 1 | 0  |
| <b>Nigeria</b>                          | 1 | 0  |

|                                           |   |    |
|-------------------------------------------|---|----|
| Niue                                      | 1 | 0  |
| Norway                                    | 1 | 0  |
| Oman                                      | 1 | 0  |
| Pakistan                                  | 1 | 0  |
| Palau                                     | 1 | 0  |
| Panama                                    | 1 | 0  |
| Papua New Guinea                          | 1 | 0  |
| Paraguay                                  | 1 | 0  |
| Peru                                      | 1 | 0  |
| Philippines                               | 1 | 0  |
| Poland                                    | 1 | 0  |
| Portugal                                  | 1 | 0  |
| Qatar                                     | 1 | 0  |
| Republic of Korea                         | 1 | 0  |
| Republic of Moldova                       | 1 | 0  |
| Romania                                   | 1 | 0  |
| Russian Federation                        | 1 | 0  |
| Rwanda                                    | 1 | 0  |
| Saint Kitts and Nevis                     | 1 | 0  |
| Saint Lucia                               | 1 | 0  |
| Saint Vincent and the Grenadines          | 1 | 0  |
| Samoa                                     | 1 | 0  |
| San Marino                                | 1 | 0  |
| Sao Tome and Principe                     | 1 | 0  |
| Saudi Arabia                              | 1 | 0  |
| Senegal                                   | 1 | 0  |
| Serbia                                    | 1 | 0  |
| Seychelles                                | 1 | 0  |
| Sierra Leone                              | 1 | 14 |
| Singapore                                 | 1 | 0  |
| Slovakia                                  | 1 | 0  |
| Slovenia                                  | 1 | 0  |
| Solomon Islands                           | 1 | 0  |
| Somalia                                   | 1 | 0  |
| South Africa                              | 1 | 0  |
| Spain                                     | 1 | 0  |
| Sri Lanka                                 | 1 | 0  |
| Sudan                                     | 1 | 0  |
| Suriname                                  | 1 | 0  |
| Swaziland                                 | 1 | 0  |
| Sweden                                    | 1 | 0  |
| Switzerland                               | 1 | 0  |
| Syria                                     | 1 | 0  |
| Tajikistan                                | 1 | 0  |
| Thailand                                  | 1 | 13 |
| The former Yugoslav Republic of Macedonia | 1 | 0  |
| Timor-Leste                               | 1 | 0  |
| Togo                                      | 1 | 0  |
| Tonga                                     | 1 | 0  |
| Trinidad and Tobago                       | 1 | 0  |
| Tunisia                                   | 1 | 0  |
| Turkey                                    | 1 | 0  |
| Turkmenistan                              | 1 | 0  |



|                                           |   |    |
|-------------------------------------------|---|----|
| <b>Tuvalu</b>                             | 1 | 0  |
| <b>Uganda</b>                             | 1 | 11 |
| <b>Ukraine</b>                            | 1 | 0  |
| <b>United Arab Emirates</b>               | 1 | 0  |
| <b>United Kingdom</b>                     | 1 | 0  |
| <b>United Republic of Tanzania</b>        | 1 | 17 |
| <b>United States of America</b>           | 1 | 0  |
| <b>Uruguay</b>                            | 1 | 0  |
| <b>Uzbekistan</b>                         | 1 | 0  |
| <b>Vanuatu</b>                            | 1 | 0  |
| <b>Venezuela (Bolivarian Republic of)</b> | 1 | 0  |
| <b>Viet Nam</b>                           | 1 | 0  |
| <b>Yemen</b>                              | 1 | 0  |
| <b>Zambia</b>                             | 1 | 14 |
| <b>Zimbabwe</b>                           | 1 | 0  |
| <b>Afghanistan</b>                        | 2 | 1  |
| <b>Albania</b>                            | 2 | 1  |
| <b>Algeria</b>                            | 2 | 0  |
| <b>Andorra</b>                            | 2 | 0  |
| <b>Angola</b>                             | 2 | 0  |
| <b>Antigua and Barbuda</b>                | 2 | 0  |
| <b>Argentina</b>                          | 2 | 0  |
| <b>Armenia</b>                            | 2 | 0  |
| <b>Australia</b>                          | 2 | 0  |
| <b>Austria</b>                            | 2 | 0  |
| <b>Azerbaijan</b>                         | 2 | 0  |
| <b>Bahamas</b>                            | 2 | 0  |
| <b>Bahrain</b>                            | 2 | 0  |
| <b>Bangladesh</b>                         | 2 | 0  |
| <b>Barbados</b>                           | 2 | 0  |
| <b>Belarus</b>                            | 2 | 0  |
| <b>Belgium</b>                            | 2 | 0  |
| <b>Belize</b>                             | 2 | 0  |
| <b>Benin</b>                              | 2 | 0  |
| <b>Bhutan</b>                             | 2 | 0  |
| <b>Bolivia Plurinational States of</b>    | 2 | 0  |
| <b>Bosnia and Herzegovina</b>             | 2 | 0  |
| <b>Botswana</b>                           | 2 | 0  |
| <b>Brazil</b>                             | 2 | 0  |
| <b>Brunei Darussalam</b>                  | 2 | 0  |
| <b>Bulgaria</b>                           | 2 | 0  |
| <b>Burkina Faso</b>                       | 2 | 0  |
| <b>Burundi</b>                            | 2 | 0  |
| <b>Cabo Verde Republic of</b>             | 2 | 0  |
| <b>Cambodia</b>                           | 2 | 0  |
| <b>Cameroon</b>                           | 2 | 0  |
| <b>Canada</b>                             | 2 | 0  |
| <b>Central African Republic</b>           | 2 | 0  |
| <b>Chad</b>                               | 2 | 0  |
| <b>Chile</b>                              | 2 | 0  |
| <b>China</b>                              | 2 | 0  |
| <b>Colombia</b>                           | 2 | 0  |
| <b>Comoros</b>                            | 2 | 0  |

|                                         |   |   |
|-----------------------------------------|---|---|
| <b>Congo</b>                            | 2 | 0 |
| <b>Cook Islands</b>                     | 2 | 0 |
| <b>Costa Rica</b>                       | 2 | 0 |
| <b>Cote d'Ivoire</b>                    | 2 | 0 |
| <b>Croatia</b>                          | 2 | 0 |
| <b>Cuba</b>                             | 2 | 0 |
| <b>Cyprus</b>                           | 2 | 0 |
| <b>Czech Republic</b>                   | 2 | 0 |
| <b>Democratic Republic of the Congo</b> | 2 | 0 |
| <b>Denmark</b>                          | 2 | 0 |
| <b>Djibouti</b>                         | 2 | 1 |
| <b>Dominica</b>                         | 2 | 0 |
| <b>Dominican Republic</b>               | 2 | 0 |
| <b>Ecuador</b>                          | 2 | 0 |
| <b>Egypt</b>                            | 2 | 1 |
| <b>El Salvador</b>                      | 2 | 0 |
| <b>Equatorial Guinea</b>                | 2 | 0 |
| <b>Eritrea</b>                          | 2 | 0 |
| <b>Estonia</b>                          | 2 | 0 |
| <b>Ethiopia</b>                         | 2 | 0 |
| <b>Fiji</b>                             | 2 | 0 |
| <b>Finland</b>                          | 2 | 0 |
| <b>France</b>                           | 2 | 0 |
| <b>Gabon</b>                            | 2 | 0 |
| <b>Gambia</b>                           | 2 | 0 |
| <b>Georgia</b>                          | 2 | 0 |
| <b>Germany</b>                          | 2 | 0 |
| <b>Ghana</b>                            | 2 | 0 |
| <b>Greece</b>                           | 2 | 0 |
| <b>Grenada</b>                          | 2 | 0 |
| <b>Guatemala</b>                        | 2 | 0 |
| <b>Guinea</b>                           | 2 | 0 |
| <b>Guinea-Bissau</b>                    | 2 | 0 |
| <b>Guyana</b>                           | 2 | 0 |
| <b>Haiti</b>                            | 2 | 0 |
| <b>Honduras</b>                         | 2 | 0 |
| <b>Hungary</b>                          | 2 | 0 |
| <b>Iceland</b>                          | 2 | 0 |
| <b>India</b>                            | 2 | 0 |
| <b>Indonesia</b>                        | 2 | 0 |
| <b>Iran</b>                             | 2 | 1 |
| <b>Iraq</b>                             | 2 | 1 |
| <b>Ireland</b>                          | 2 | 0 |
| <b>Israel</b>                           | 2 | 0 |
| <b>Italy</b>                            | 2 | 0 |
| <b>Jamaica</b>                          | 2 | 0 |
| <b>Japan</b>                            | 2 | 0 |
| <b>Jordan</b>                           | 2 | 1 |
| <b>Kazakhstan</b>                       | 2 | 0 |
| <b>Kenya</b>                            | 2 | 0 |
| <b>Kiribati</b>                         | 2 | 0 |
| <b>Kuwait</b>                           | 2 | 0 |
| <b>Kyrgyzstan</b>                       | 2 | 0 |

|                                         |   |    |
|-----------------------------------------|---|----|
| <b>Lao People's Democratic Republic</b> | 2 | 0  |
| <b>Latvia</b>                           | 2 | 0  |
| <b>Lebanon</b>                          | 2 | 1  |
| <b>Lesotho</b>                          | 2 | 0  |
| <b>Liberia</b>                          | 2 | 0  |
| <b>Libya</b>                            | 2 | 0  |
| <b>Lithuania</b>                        | 2 | 0  |
| <b>Luxembourg</b>                       | 2 | 0  |
| <b>Madagascar</b>                       | 2 | 0  |
| <b>Malawi</b>                           | 2 | 0  |
| <b>Malaysia</b>                         | 2 | 0  |
| <b>Maldives</b>                         | 2 | 0  |
| <b>Mali</b>                             | 2 | 0  |
| <b>Malta</b>                            | 2 | 0  |
| <b>Marshall Islands</b>                 | 2 | 0  |
| <b>Mauritania</b>                       | 2 | 0  |
| <b>Mauritius</b>                        | 2 | 0  |
| <b>Mexico</b>                           | 2 | 0  |
| <b>Micronesia (Federated States of)</b> | 2 | 0  |
| <b>Monaco</b>                           | 2 | 0  |
| <b>Mongolia</b>                         | 2 | 0  |
| <b>Montenegro</b>                       | 2 | 0  |
| <b>Morocco</b>                          | 2 | 1  |
| <b>Mozambique</b>                       | 2 | 0  |
| <b>Myanmar</b>                          | 2 | 0  |
| <b>Namibia</b>                          | 2 | 0  |
| <b>Nauru</b>                            | 2 | 0  |
| <b>Nepal</b>                            | 2 | 0  |
| <b>Netherlands</b>                      | 2 | 0  |
| <b>New Zealand</b>                      | 2 | 0  |
| <b>Nicaragua</b>                        | 2 | 0  |
| <b>Niger</b>                            | 2 | 0  |
| <b>Nigeria</b>                          | 2 | 0  |
| <b>Niue</b>                             | 2 | 0  |
| <b>Norway</b>                           | 2 | 0  |
| <b>Oman</b>                             | 2 | 0  |
| <b>Pakistan</b>                         | 2 | 16 |
| <b>Palau</b>                            | 2 | 0  |
| <b>Panama</b>                           | 2 | 0  |
| <b>Papua New Guinea</b>                 | 2 | 0  |
| <b>Paraguay</b>                         | 2 | 0  |
| <b>Peru</b>                             | 2 | 0  |
| <b>Philippines</b>                      | 2 | 0  |
| <b>Poland</b>                           | 2 | 0  |
| <b>Portugal</b>                         | 2 | 0  |
| <b>Qatar</b>                            | 2 | 0  |
| <b>Republic of Korea</b>                | 2 | 0  |
| <b>Republic of Moldova</b>              | 2 | 0  |
| <b>Romania</b>                          | 2 | 0  |
| <b>Russian Federation</b>               | 2 | 0  |
| <b>Rwanda</b>                           | 2 | 0  |
| <b>Saint Kitts and Nevis</b>            | 2 | 0  |
| <b>Saint Lucia</b>                      | 2 | 0  |

|                                                  |   |    |
|--------------------------------------------------|---|----|
| <b>Saint Vincent and the Grenadines</b>          | 2 | 0  |
| <b>Samoa</b>                                     | 2 | 0  |
| <b>San Marino</b>                                | 2 | 0  |
| <b>Sao Tome and Principe</b>                     | 2 | 0  |
| <b>Saudi Arabia</b>                              | 2 | 0  |
| <b>Senegal</b>                                   | 2 | 0  |
| <b>Serbia</b>                                    | 2 | 1  |
| <b>Seychelles</b>                                | 2 | 0  |
| <b>Sierra Leone</b>                              | 2 | 0  |
| <b>Singapore</b>                                 | 2 | 0  |
| <b>Slovakia</b>                                  | 2 | 0  |
| <b>Slovenia</b>                                  | 2 | 0  |
| <b>Solomon Islands</b>                           | 2 | 0  |
| <b>Somalia</b>                                   | 2 | 0  |
| <b>South Africa</b>                              | 2 | 0  |
| <b>Spain</b>                                     | 2 | 0  |
| <b>Sri Lanka</b>                                 | 2 | 0  |
| <b>Sudan</b>                                     | 2 | 1  |
| <b>Suriname</b>                                  | 2 | 0  |
| <b>Swaziland</b>                                 | 2 | 0  |
| <b>Sweden</b>                                    | 2 | 0  |
| <b>Switzerland</b>                               | 2 | 0  |
| <b>Syria</b>                                     | 2 | 0  |
| <b>Tajikistan</b>                                | 2 | 0  |
| <b>Thailand</b>                                  | 2 | 0  |
| <b>The former Yugoslav Republic of Macedonia</b> | 2 | 0  |
| <b>Timor-Leste</b>                               | 2 | 0  |
| <b>Togo</b>                                      | 2 | 0  |
| <b>Tonga</b>                                     | 2 | 0  |
| <b>Trinidad and Tobago</b>                       | 2 | 0  |
| <b>Tunisia</b>                                   | 2 | 1  |
| <b>Turkey</b>                                    | 2 | 0  |
| <b>Turkmenistan</b>                              | 2 | 0  |
| <b>Tuvalu</b>                                    | 2 | 0  |
| <b>Uganda</b>                                    | 2 | 0  |
| <b>Ukraine</b>                                   | 2 | 0  |
| <b>United Arab Emirates</b>                      | 2 | 0  |
| <b>United Kingdom</b>                            | 2 | 0  |
| <b>United Republic of Tanzania</b>               | 2 | 0  |
| <b>United States of America</b>                  | 2 | 0  |
| <b>Uruguay</b>                                   | 2 | 0  |
| <b>Uzbekistan</b>                                | 2 | 0  |
| <b>Vanuatu</b>                                   | 2 | 0  |
| <b>Venezuela (Bolivarian Republic of)</b>        | 2 | 0  |
| <b>Viet Nam</b>                                  | 2 | 0  |
| <b>Yemen</b>                                     | 2 | 0  |
| <b>Zambia</b>                                    | 2 | 0  |
| <b>Zimbabwe</b>                                  | 2 | 0  |
| <b>Afghanistan</b>                               | 3 | 0  |
| <b>Albania</b>                                   | 3 | 0  |
| <b>Algeria</b>                                   | 3 | 0  |
| <b>Andorra</b>                                   | 3 | 34 |
| <b>Angola</b>                                    | 3 | 0  |

|                                         |   |    |
|-----------------------------------------|---|----|
| <b>Antigua and Barbuda</b>              | 3 | 30 |
| <b>Argentina</b>                        | 3 | 3  |
| <b>Armenia</b>                          | 3 | 0  |
| <b>Australia</b>                        | 3 | 51 |
| <b>Austria</b>                          | 3 | 51 |
| <b>Azerbaijan</b>                       | 3 | 0  |
| <b>Bahamas</b>                          | 3 | 51 |
| <b>Bahrain</b>                          | 3 | 48 |
| <b>Bangladesh</b>                       | 3 | 0  |
| <b>Barbados</b>                         | 3 | 39 |
| <b>Belarus</b>                          | 3 | 0  |
| <b>Belgium</b>                          | 3 | 51 |
| <b>Belize</b>                           | 3 | 0  |
| <b>Benin</b>                            | 3 | 0  |
| <b>Bhutan</b>                           | 3 | 0  |
| <b>Bolivia Plurinational States of</b>  | 3 | 0  |
| <b>Bosnia and Herzegovina</b>           | 3 | 0  |
| <b>Botswana</b>                         | 3 | 0  |
| <b>Brazil</b>                           | 3 | 0  |
| <b>Brunei Darussalam</b>                | 3 | 51 |
| <b>Bulgaria</b>                         | 3 | 0  |
| <b>Burkina Faso</b>                     | 3 | 0  |
| <b>Burundi</b>                          | 3 | 0  |
| <b>Cabo Verde Republic of</b>           | 3 | 0  |
| <b>Cambodia</b>                         | 3 | 0  |
| <b>Cameroon</b>                         | 3 | 0  |
| <b>Canada</b>                           | 3 | 51 |
| <b>Central African Republic</b>         | 3 | 0  |
| <b>Chad</b>                             | 3 | 0  |
| <b>Chile</b>                            | 3 | 15 |
| <b>China</b>                            | 3 | 0  |
| <b>Colombia</b>                         | 3 | 0  |
| <b>Comoros</b>                          | 3 | 0  |
| <b>Congo</b>                            | 3 | 0  |
| <b>Cook Islands</b>                     | 3 | 0  |
| <b>Costa Rica</b>                       | 3 | 0  |
| <b>Cote d'Ivoire</b>                    | 3 | 0  |
| <b>Croatia</b>                          | 3 | 24 |
| <b>Cuba</b>                             | 3 | 0  |
| <b>Cyprus</b>                           | 3 | 51 |
| <b>Czech Republic</b>                   | 3 | 33 |
| <b>Democratic Republic of the Congo</b> | 3 | 0  |
| <b>Denmark</b>                          | 3 | 17 |
| <b>Djibouti</b>                         | 3 | 0  |
| <b>Dominica</b>                         | 3 | 0  |
| <b>Dominican Republic</b>               | 3 | 0  |
| <b>Ecuador</b>                          | 3 | 0  |
| <b>Egypt</b>                            | 3 | 0  |
| <b>El Salvador</b>                      | 3 | 0  |
| <b>Equatorial Guinea</b>                | 3 | 24 |
| <b>Eritrea</b>                          | 3 | 0  |
| <b>Estonia</b>                          | 3 | 33 |
| <b>Ethiopia</b>                         | 3 | 0  |

|                                         |   |    |
|-----------------------------------------|---|----|
| <b>Fiji</b>                             | 3 | 0  |
| <b>Finland</b>                          | 3 | 51 |
| <b>France</b>                           | 3 | 51 |
| <b>Gabon</b>                            | 3 | 0  |
| <b>Gambia</b>                           | 3 | 0  |
| <b>Georgia</b>                          | 3 | 0  |
| <b>Germany</b>                          | 3 | 51 |
| <b>Ghana</b>                            | 3 | 0  |
| <b>Greece</b>                           | 3 | 51 |
| <b>Grenada</b>                          | 3 | 0  |
| <b>Guatemala</b>                        | 3 | 0  |
| <b>Guinea</b>                           | 3 | 0  |
| <b>Guinea-Bissau</b>                    | 3 | 0  |
| <b>Guyana</b>                           | 3 | 0  |
| <b>Haiti</b>                            | 3 | 0  |
| <b>Honduras</b>                         | 3 | 0  |
| <b>Hungary</b>                          | 3 | 24 |
| <b>Iceland</b>                          | 3 | 51 |
| <b>India</b>                            | 3 | 0  |
| <b>Indonesia</b>                        | 3 | 0  |
| <b>Iran</b>                             | 3 | 0  |
| <b>Iraq</b>                             | 3 | 0  |
| <b>Ireland</b>                          | 3 | 51 |
| <b>Israel</b>                           | 3 | 51 |
| <b>Italy</b>                            | 3 | 34 |
| <b>Jamaica</b>                          | 3 | 0  |
| <b>Japan</b>                            | 3 | 51 |
| <b>Jordan</b>                           | 3 | 0  |
| <b>Kazakhstan</b>                       | 3 | 0  |
| <b>Kenya</b>                            | 3 | 0  |
| <b>Kiribati</b>                         | 3 | 0  |
| <b>Kuwait</b>                           | 3 | 51 |
| <b>Kyrgyzstan</b>                       | 3 | 0  |
| <b>Lao People's Democratic Republic</b> | 3 | 0  |
| <b>Latvia</b>                           | 3 | 18 |
| <b>Lebanon</b>                          | 3 | 0  |
| <b>Lesotho</b>                          | 3 | 0  |
| <b>Liberia</b>                          | 3 | 0  |
| <b>Libya</b>                            | 3 | 0  |
| <b>Lithuania</b>                        | 3 | 15 |
| <b>Luxembourg</b>                       | 3 | 51 |
| <b>Madagascar</b>                       | 3 | 0  |
| <b>Malawi</b>                           | 3 | 0  |
| <b>Malaysia</b>                         | 3 | 0  |
| <b>Maldives</b>                         | 3 | 0  |
| <b>Mali</b>                             | 3 | 0  |
| <b>Malta</b>                            | 3 | 16 |
| <b>Marshall Islands</b>                 | 3 | 0  |
| <b>Mauritania</b>                       | 3 | 0  |
| <b>Mauritius</b>                        | 3 | 0  |
| <b>Mexico</b>                           | 3 | 0  |
| <b>Micronesia (Federated States of)</b> | 3 | 0  |
| <b>Monaco</b>                           | 3 | 34 |

|                                         |   |    |
|-----------------------------------------|---|----|
| <b>Mongolia</b>                         | 3 | 0  |
| <b>Montenegro</b>                       | 3 | 0  |
| <b>Morocco</b>                          | 3 | 0  |
| <b>Mozambique</b>                       | 3 | 0  |
| <b>Myanmar</b>                          | 3 | 0  |
| <b>Namibia</b>                          | 3 | 0  |
| <b>Nauru</b>                            | 3 | 3  |
| <b>Nepal</b>                            | 3 | 0  |
| <b>Netherlands</b>                      | 3 | 51 |
| <b>New Zealand</b>                      | 3 | 51 |
| <b>Nicaragua</b>                        | 3 | 0  |
| <b>Niger</b>                            | 3 | 0  |
| <b>Nigeria</b>                          | 3 | 0  |
| <b>Niue</b>                             | 3 | 0  |
| <b>Norway</b>                           | 3 | 51 |
| <b>Oman</b>                             | 3 | 30 |
| <b>Pakistan</b>                         | 3 | 0  |
| <b>Palau</b>                            | 3 | 3  |
| <b>Panama</b>                           | 3 | 0  |
| <b>Papua New Guinea</b>                 | 3 | 0  |
| <b>Paraguay</b>                         | 3 | 0  |
| <b>Peru</b>                             | 3 | 0  |
| <b>Philippines</b>                      | 3 | 0  |
| <b>Poland</b>                           | 3 | 24 |
| <b>Portugal</b>                         | 3 | 51 |
| <b>Qatar</b>                            | 3 | 51 |
| <b>Republic of Korea</b>                | 3 | 48 |
| <b>Republic of Moldova</b>              | 3 | 0  |
| <b>Romania</b>                          | 3 | 0  |
| <b>Russian Federation</b>               | 3 | 6  |
| <b>Rwanda</b>                           | 3 | 0  |
| <b>Saint Kitts and Nevis</b>            | 3 | 18 |
| <b>Saint Lucia</b>                      | 3 | 0  |
| <b>Saint Vincent and the Grenadines</b> | 3 | 0  |
| <b>Samoa</b>                            | 3 | 0  |
| <b>San Marino</b>                       | 3 | 34 |
| <b>Sao Tome and Principe</b>            | 3 | 0  |
| <b>Saudi Arabia</b>                     | 3 | 39 |
| <b>Senegal</b>                          | 3 | 0  |
| <b>Serbia</b>                           | 3 | 0  |
| <b>Seychelles</b>                       | 3 | 9  |
| <b>Sierra Leone</b>                     | 3 | 0  |
| <b>Singapore</b>                        | 3 | 51 |
| <b>Slovakia</b>                         | 3 | 30 |
| <b>Slovenia</b>                         | 3 | 51 |
| <b>Solomon Islands</b>                  | 3 | 0  |
| <b>Somalia</b>                          | 3 | 0  |
| <b>South Africa</b>                     | 3 | 0  |
| <b>Spain</b>                            | 3 | 51 |
| <b>Sri Lanka</b>                        | 3 | 0  |
| <b>Sudan</b>                            | 3 | 0  |
| <b>Suriname</b>                         | 3 | 0  |
| <b>Swaziland</b>                        | 3 | 0  |

|                                           |   |    |
|-------------------------------------------|---|----|
| Sweden                                    | 3 | 51 |
| Switzerland                               | 3 | 51 |
| Syria                                     | 3 | 0  |
| Tajikistan                                | 3 | 0  |
| Thailand                                  | 3 | 0  |
| The former Yugoslav Republic of Macedonia | 3 | 0  |
| Timor-Leste                               | 3 | 0  |
| Togo                                      | 3 | 0  |
| Tonga                                     | 3 | 0  |
| Trinidad and Tobago                       | 3 | 33 |
| Tunisia                                   | 3 | 0  |
| Turkey                                    | 3 | 0  |
| Turkmenistan                              | 3 | 0  |
| Tuvalu                                    | 3 | 0  |
| Uganda                                    | 3 | 0  |
| Ukraine                                   | 3 | 0  |
| United Arab Emirates                      | 3 | 51 |
| United Kingdom                            | 3 | 34 |
| United Republic of Tanzania               | 3 | 0  |
| United States of America                  | 3 | 51 |
| Uruguay                                   | 3 | 15 |
| Uzbekistan                                | 3 | 0  |
| Vanuatu                                   | 3 | 0  |
| Venezuela (Bolivarian Republic of)        | 3 | 3  |
| Viet Nam                                  | 3 | 0  |
| Yemen                                     | 3 | 0  |
| Zambia                                    | 3 | 0  |
| Zimbabwe                                  | 3 | 0  |
| Afghanistan                               | 4 | 0  |
| Albania                                   | 4 | 0  |
| Algeria                                   | 4 | 0  |
| Andorra                                   | 4 | 0  |
| Angola                                    | 4 | 0  |
| Antigua and Barbuda                       | 4 | 0  |
| Argentina                                 | 4 | 0  |
| Armenia                                   | 4 | 0  |
| Australia                                 | 4 | 0  |
| Austria                                   | 4 | 0  |
| Azerbaijan                                | 4 | 0  |
| Bahamas                                   | 4 | 0  |
| Bahrain                                   | 4 | 0  |
| Bangladesh                                | 4 | 0  |
| Barbados                                  | 4 | 0  |
| Belarus                                   | 4 | 0  |
| Belgium                                   | 4 | 0  |
| Belize                                    | 4 | 0  |
| Benin                                     | 4 | 0  |
| Bhutan                                    | 4 | 0  |
| Bolivia Plurinational States of           | 4 | 0  |
| Bosnia and Herzegovina                    | 4 | 0  |
| Botswana                                  | 4 | 0  |
| Brazil                                    | 4 | 0  |
| Brunei Darussalam                         | 4 | 0  |



|                                         |   |   |
|-----------------------------------------|---|---|
| <b>Bulgaria</b>                         | 4 | 0 |
| <b>Burkina Faso</b>                     | 4 | 0 |
| <b>Burundi</b>                          | 4 | 0 |
| <b>Cabo Verde Republic of</b>           | 4 | 0 |
| <b>Cambodia</b>                         | 4 | 0 |
| <b>Cameroon</b>                         | 4 | 0 |
| <b>Canada</b>                           | 4 | 0 |
| <b>Central African Republic</b>         | 4 | 0 |
| <b>Chad</b>                             | 4 | 0 |
| <b>Chile</b>                            | 4 | 0 |
| <b>China</b>                            | 4 | 0 |
| <b>Colombia</b>                         | 4 | 0 |
| <b>Comoros</b>                          | 4 | 0 |
| <b>Congo</b>                            | 4 | 0 |
| <b>Cook Islands</b>                     | 4 | 0 |
| <b>Costa Rica</b>                       | 4 | 0 |
| <b>Cote d'Ivoire</b>                    | 4 | 0 |
| <b>Croatia</b>                          | 4 | 0 |
| <b>Cuba</b>                             | 4 | 0 |
| <b>Cyprus</b>                           | 4 | 0 |
| <b>Czech Republic</b>                   | 4 | 0 |
| <b>Democratic Republic of the Congo</b> | 4 | 0 |
| <b>Denmark</b>                          | 4 | 0 |
| <b>Djibouti</b>                         | 4 | 1 |
| <b>Dominica</b>                         | 4 | 0 |
| <b>Dominican Republic</b>               | 4 | 0 |
| <b>Ecuador</b>                          | 4 | 0 |
| <b>Egypt</b>                            | 4 | 0 |
| <b>El Salvador</b>                      | 4 | 0 |
| <b>Equatorial Guinea</b>                | 4 | 0 |
| <b>Eritrea</b>                          | 4 | 0 |
| <b>Estonia</b>                          | 4 | 0 |
| <b>Ethiopia</b>                         | 4 | 0 |
| <b>Fiji</b>                             | 4 | 0 |
| <b>Finland</b>                          | 4 | 0 |
| <b>France</b>                           | 4 | 0 |
| <b>Gabon</b>                            | 4 | 0 |
| <b>Gambia</b>                           | 4 | 0 |
| <b>Georgia</b>                          | 4 | 0 |
| <b>Germany</b>                          | 4 | 0 |
| <b>Ghana</b>                            | 4 | 0 |
| <b>Greece</b>                           | 4 | 0 |
| <b>Grenada</b>                          | 4 | 0 |
| <b>Guatemala</b>                        | 4 | 0 |
| <b>Guinea</b>                           | 4 | 0 |
| <b>Guinea-Bissau</b>                    | 4 | 0 |
| <b>Guyana</b>                           | 4 | 0 |
| <b>Haiti</b>                            | 4 | 0 |
| <b>Honduras</b>                         | 4 | 0 |
| <b>Hungary</b>                          | 4 | 0 |
| <b>Iceland</b>                          | 4 | 0 |
| <b>India</b>                            | 4 | 0 |
| <b>Indonesia</b>                        | 4 | 0 |

|                                         |   |   |
|-----------------------------------------|---|---|
| <b>Iran</b>                             | 4 | 0 |
| <b>Iraq</b>                             | 4 | 0 |
| <b>Ireland</b>                          | 4 | 0 |
| <b>Israel</b>                           | 4 | 0 |
| <b>Italy</b>                            | 4 | 0 |
| <b>Jamaica</b>                          | 4 | 0 |
| <b>Japan</b>                            | 4 | 0 |
| <b>Jordan</b>                           | 4 | 0 |
| <b>Kazakhstan</b>                       | 4 | 0 |
| <b>Kenya</b>                            | 4 | 0 |
| <b>Kiribati</b>                         | 4 | 0 |
| <b>Kuwait</b>                           | 4 | 0 |
| <b>Kyrgyzstan</b>                       | 4 | 0 |
| <b>Lao People's Democratic Republic</b> | 4 | 0 |
| <b>Latvia</b>                           | 4 | 0 |
| <b>Lebanon</b>                          | 4 | 0 |
| <b>Lesotho</b>                          | 4 | 0 |
| <b>Liberia</b>                          | 4 | 0 |
| <b>Libya</b>                            | 4 | 0 |
| <b>Lithuania</b>                        | 4 | 0 |
| <b>Luxembourg</b>                       | 4 | 0 |
| <b>Madagascar</b>                       | 4 | 0 |
| <b>Malawi</b>                           | 4 | 0 |
| <b>Malaysia</b>                         | 4 | 0 |
| <b>Maldives</b>                         | 4 | 0 |
| <b>Mali</b>                             | 4 | 0 |
| <b>Malta</b>                            | 4 | 0 |
| <b>Marshall Islands</b>                 | 4 | 0 |
| <b>Mauritania</b>                       | 4 | 0 |
| <b>Mauritius</b>                        | 4 | 0 |
| <b>Mexico</b>                           | 4 | 0 |
| <b>Micronesia (Federated States of)</b> | 4 | 0 |
| <b>Monaco</b>                           | 4 | 0 |
| <b>Mongolia</b>                         | 4 | 0 |
| <b>Montenegro</b>                       | 4 | 0 |
| <b>Morocco</b>                          | 4 | 0 |
| <b>Mozambique</b>                       | 4 | 0 |
| <b>Myanmar</b>                          | 4 | 0 |
| <b>Namibia</b>                          | 4 | 0 |
| <b>Nauru</b>                            | 4 | 0 |
| <b>Nepal</b>                            | 4 | 0 |
| <b>Netherlands</b>                      | 4 | 0 |
| <b>New Zealand</b>                      | 4 | 0 |
| <b>Nicaragua</b>                        | 4 | 0 |
| <b>Niger</b>                            | 4 | 0 |
| <b>Nigeria</b>                          | 4 | 0 |
| <b>Niue</b>                             | 4 | 0 |
| <b>Norway</b>                           | 4 | 0 |
| <b>Oman</b>                             | 4 | 0 |
| <b>Pakistan</b>                         | 4 | 0 |
| <b>Palau</b>                            | 4 | 0 |
| <b>Panama</b>                           | 4 | 0 |
| <b>Papua New Guinea</b>                 | 4 | 0 |

|                                                  |   |   |
|--------------------------------------------------|---|---|
| <b>Paraguay</b>                                  | 4 | 0 |
| <b>Peru</b>                                      | 4 | 0 |
| <b>Philippines</b>                               | 4 | 0 |
| <b>Poland</b>                                    | 4 | 0 |
| <b>Portugal</b>                                  | 4 | 0 |
| <b>Qatar</b>                                     | 4 | 0 |
| <b>Republic of Korea</b>                         | 4 | 0 |
| <b>Republic of Moldova</b>                       | 4 | 0 |
| <b>Romania</b>                                   | 4 | 0 |
| <b>Russian Federation</b>                        | 4 | 0 |
| <b>Rwanda</b>                                    | 4 | 0 |
| <b>Saint Kitts and Nevis</b>                     | 4 | 0 |
| <b>Saint Lucia</b>                               | 4 | 0 |
| <b>Saint Vincent and the Grenadines</b>          | 4 | 0 |
| <b>Samoa</b>                                     | 4 | 0 |
| <b>San Marino</b>                                | 4 | 0 |
| <b>Sao Tome and Principe</b>                     | 4 | 0 |
| <b>Saudi Arabia</b>                              | 4 | 0 |
| <b>Senegal</b>                                   | 4 | 0 |
| <b>Serbia</b>                                    | 4 | 0 |
| <b>Seychelles</b>                                | 4 | 0 |
| <b>Sierra Leone</b>                              | 4 | 0 |
| <b>Singapore</b>                                 | 4 | 0 |
| <b>Slovakia</b>                                  | 4 | 0 |
| <b>Slovenia</b>                                  | 4 | 0 |
| <b>Solomon Islands</b>                           | 4 | 0 |
| <b>Somalia</b>                                   | 4 | 0 |
| <b>South Africa</b>                              | 4 | 0 |
| <b>Spain</b>                                     | 4 | 0 |
| <b>Sri Lanka</b>                                 | 4 | 0 |
| <b>Sudan</b>                                     | 4 | 0 |
| <b>Suriname</b>                                  | 4 | 0 |
| <b>Swaziland</b>                                 | 4 | 0 |
| <b>Sweden</b>                                    | 4 | 0 |
| <b>Switzerland</b>                               | 4 | 0 |
| <b>Syria</b>                                     | 4 | 0 |
| <b>Tajikistan</b>                                | 4 | 0 |
| <b>Thailand</b>                                  | 4 | 0 |
| <b>The former Yugoslav Republic of Macedonia</b> | 4 | 0 |
| <b>Timor-Leste</b>                               | 4 | 0 |
| <b>Togo</b>                                      | 4 | 0 |
| <b>Tonga</b>                                     | 4 | 0 |
| <b>Trinidad and Tobago</b>                       | 4 | 0 |
| <b>Tunisia</b>                                   | 4 | 0 |
| <b>Turkey</b>                                    | 4 | 0 |
| <b>Turkmenistan</b>                              | 4 | 0 |
| <b>Tuvalu</b>                                    | 4 | 0 |
| <b>Uganda</b>                                    | 4 | 0 |
| <b>Ukraine</b>                                   | 4 | 0 |
| <b>United Arab Emirates</b>                      | 4 | 0 |
| <b>United Kingdom</b>                            | 4 | 0 |
| <b>United Republic of Tanzania</b>               | 4 | 0 |
| <b>United States of America</b>                  | 4 | 0 |

|                                    |   |    |
|------------------------------------|---|----|
| Uruguay                            | 4 | 0  |
| Uzbekistan                         | 4 | 0  |
| Vanuatu                            | 4 | 0  |
| Venezuela (Bolivarian Republic of) | 4 | 0  |
| Viet Nam                           | 4 | 0  |
| Yemen                              | 4 | 0  |
| Zambia                             | 4 | 0  |
| Zimbabwe                           | 4 | 0  |
| Afghanistan                        | 5 | 0  |
| Albania                            | 5 | 0  |
| Algeria                            | 5 | 0  |
| Andorra                            | 5 | 0  |
| Angola                             | 5 | 0  |
| Antigua and Barbuda                | 5 | 0  |
| Argentina                          | 5 | 0  |
| Armenia                            | 5 | 0  |
| Australia                          | 5 | 0  |
| Austria                            | 5 | 0  |
| Azerbaijan                         | 5 | 0  |
| Bahamas                            | 5 | 0  |
| Bahrain                            | 5 | 0  |
| Bangladesh                         | 5 | 16 |
| Barbados                           | 5 | 0  |
| Belarus                            | 5 | 0  |
| Belgium                            | 5 | 0  |
| Belize                             | 5 | 0  |
| Benin                              | 5 | 0  |
| Bhutan                             | 5 | 0  |
| Bolivia Plurinational States of    | 5 | 0  |
| Bosnia and Herzegovina             | 5 | 0  |
| Botswana                           | 5 | 0  |
| Brazil                             | 5 | 0  |
| Brunei Darussalam                  | 5 | 0  |
| Bulgaria                           | 5 | 0  |
| Burkina Faso                       | 5 | 0  |
| Burundi                            | 5 | 0  |
| Cabo Verde Republic of             | 5 | 3  |
| Cambodia                           | 5 | 0  |
| Cameroon                           | 5 | 0  |
| Canada                             | 5 | 0  |
| Central African Republic           | 5 | 0  |
| Chad                               | 5 | 1  |
| Chile                              | 5 | 0  |
| China                              | 5 | 0  |
| Colombia                           | 5 | 0  |
| Comoros                            | 5 | 0  |
| Congo                              | 5 | 4  |
| Cook Islands                       | 5 | 0  |
| Costa Rica                         | 5 | 0  |
| Cote d'Ivoire                      | 5 | 0  |
| Croatia                            | 5 | 0  |
| Cuba                               | 5 | 0  |
| Cyprus                             | 5 | 0  |

|                                         |   |    |
|-----------------------------------------|---|----|
| <b>Czech Republic</b>                   | 5 | 0  |
| <b>Democratic Republic of the Congo</b> | 5 | 0  |
| <b>Denmark</b>                          | 5 | 0  |
| <b>Djibouti</b>                         | 5 | 3  |
| <b>Dominica</b>                         | 5 | 0  |
| <b>Dominican Republic</b>               | 5 | 0  |
| <b>Ecuador</b>                          | 5 | 0  |
| <b>Egypt</b>                            | 5 | 0  |
| <b>El Salvador</b>                      | 5 | 0  |
| <b>Equatorial Guinea</b>                | 5 | 0  |
| <b>Eritrea</b>                          | 5 | 17 |
| <b>Estonia</b>                          | 5 | 0  |
| <b>Ethiopia</b>                         | 5 | 1  |
| <b>Fiji</b>                             | 5 | 15 |
| <b>Finland</b>                          | 5 | 0  |
| <b>France</b>                           | 5 | 0  |
| <b>Gabon</b>                            | 5 | 6  |
| <b>Gambia</b>                           | 5 | 0  |
| <b>Georgia</b>                          | 5 | 0  |
| <b>Germany</b>                          | 5 | 0  |
| <b>Ghana</b>                            | 5 | 0  |
| <b>Greece</b>                           | 5 | 0  |
| <b>Grenada</b>                          | 5 | 0  |
| <b>Guatemala</b>                        | 5 | 0  |
| <b>Guinea</b>                           | 5 | 0  |
| <b>Guinea-Bissau</b>                    | 5 | 0  |
| <b>Guyana</b>                           | 5 | 0  |
| <b>Haiti</b>                            | 5 | 0  |
| <b>Honduras</b>                         | 5 | 0  |
| <b>Hungary</b>                          | 5 | 0  |
| <b>Iceland</b>                          | 5 | 0  |
| <b>India</b>                            | 5 | 0  |
| <b>Indonesia</b>                        | 5 | 0  |
| <b>Iran</b>                             | 5 | 0  |
| <b>Iraq</b>                             | 5 | 0  |
| <b>Ireland</b>                          | 5 | 0  |
| <b>Israel</b>                           | 5 | 0  |
| <b>Italy</b>                            | 5 | 0  |
| <b>Jamaica</b>                          | 5 | 0  |
| <b>Japan</b>                            | 5 | 0  |
| <b>Jordan</b>                           | 5 | 0  |
| <b>Kazakhstan</b>                       | 5 | 0  |
| <b>Kenya</b>                            | 5 | 2  |
| <b>Kiribati</b>                         | 5 | 0  |
| <b>Kuwait</b>                           | 5 | 0  |
| <b>Kyrgyzstan</b>                       | 5 | 0  |
| <b>Lao People's Democratic Republic</b> | 5 | 0  |
| <b>Latvia</b>                           | 5 | 0  |
| <b>Lebanon</b>                          | 5 | 0  |
| <b>Lesotho</b>                          | 5 | 0  |
| <b>Liberia</b>                          | 5 | 1  |
| <b>Libya</b>                            | 5 | 0  |
| <b>Lithuania</b>                        | 5 | 0  |

|                                         |   |    |
|-----------------------------------------|---|----|
| <b>Luxembourg</b>                       | 5 | 0  |
| <b>Madagascar</b>                       | 5 | 0  |
| <b>Malawi</b>                           | 5 | 0  |
| <b>Malaysia</b>                         | 5 | 0  |
| <b>Maldives</b>                         | 5 | 0  |
| <b>Mali</b>                             | 5 | 4  |
| <b>Malta</b>                            | 5 | 0  |
| <b>Marshall Islands</b>                 | 5 | 0  |
| <b>Mauritania</b>                       | 5 | 0  |
| <b>Mauritius</b>                        | 5 | 1  |
| <b>Mexico</b>                           | 5 | 11 |
| <b>Micronesia (Federated States of)</b> | 5 | 0  |
| <b>Monaco</b>                           | 5 | 0  |
| <b>Mongolia</b>                         | 5 | 0  |
| <b>Montenegro</b>                       | 5 | 0  |
| <b>Morocco</b>                          | 5 | 0  |
| <b>Mozambique</b>                       | 5 | 0  |
| <b>Myanmar</b>                          | 5 | 0  |
| <b>Namibia</b>                          | 5 | 2  |
| <b>Nauru</b>                            | 5 | 0  |
| <b>Nepal</b>                            | 5 | 0  |
| <b>Netherlands</b>                      | 5 | 0  |
| <b>New Zealand</b>                      | 5 | 0  |
| <b>Nicaragua</b>                        | 5 | 0  |
| <b>Niger</b>                            | 5 | 0  |
| <b>Nigeria</b>                          | 5 | 0  |
| <b>Niue</b>                             | 5 | 0  |
| <b>Norway</b>                           | 5 | 0  |
| <b>Oman</b>                             | 5 | 0  |
| <b>Pakistan</b>                         | 5 | 0  |
| <b>Palau</b>                            | 5 | 0  |
| <b>Panama</b>                           | 5 | 0  |
| <b>Papua New Guinea</b>                 | 5 | 0  |
| <b>Paraguay</b>                         | 5 | 0  |
| <b>Peru</b>                             | 5 | 0  |
| <b>Philippines</b>                      | 5 | 0  |
| <b>Poland</b>                           | 5 | 0  |
| <b>Portugal</b>                         | 5 | 0  |
| <b>Qatar</b>                            | 5 | 0  |
| <b>Republic of Korea</b>                | 5 | 0  |
| <b>Republic of Moldova</b>              | 5 | 0  |
| <b>Romania</b>                          | 5 | 0  |
| <b>Russian Federation</b>               | 5 | 0  |
| <b>Rwanda</b>                           | 5 | 0  |
| <b>Saint Kitts and Nevis</b>            | 5 | 0  |
| <b>Saint Lucia</b>                      | 5 | 0  |
| <b>Saint Vincent and the Grenadines</b> | 5 | 0  |
| <b>Samoa</b>                            | 5 | 0  |
| <b>San Marino</b>                       | 5 | 0  |
| <b>Sao Tome and Principe</b>            | 5 | 17 |
| <b>Saudi Arabia</b>                     | 5 | 0  |
| <b>Senegal</b>                          | 5 | 0  |
| <b>Serbia</b>                           | 5 | 1  |

|                                           |   |      |
|-------------------------------------------|---|------|
| Seychelles                                | 5 | 1    |
| Sierra Leone                              | 5 | 0    |
| Singapore                                 | 5 | 0    |
| Slovakia                                  | 5 | 0    |
| Slovenia                                  | 5 | 0    |
| Solomon Islands                           | 5 | 0    |
| Somalia                                   | 5 | 0    |
| South Africa                              | 5 | 16   |
| Spain                                     | 5 | 0    |
| Sri Lanka                                 | 5 | 0    |
| Sudan                                     | 5 | 2    |
| Suriname                                  | 5 | 0    |
| Swaziland                                 | 5 | 0    |
| Sweden                                    | 5 | 0    |
| Switzerland                               | 5 | 0    |
| Syria                                     | 5 | 0    |
| Tajikistan                                | 5 | 0    |
| Thailand                                  | 5 | 1    |
| The former Yugoslav Republic of Macedonia | 5 | 0    |
| Timor-Leste                               | 5 | 0    |
| Togo                                      | 5 | 0    |
| Tonga                                     | 5 | 0    |
| Trinidad and Tobago                       | 5 | 0    |
| Tunisia                                   | 5 | 0    |
| Turkey                                    | 5 | 0    |
| Turkmenistan                              | 5 | 0    |
| Tuvalu                                    | 5 | 0    |
| Uganda                                    | 5 | 0    |
| Ukraine                                   | 5 | 0    |
| United Arab Emirates                      | 5 | 0    |
| United Kingdom                            | 5 | 0    |
| United Republic of Tanzania               | 5 | 0    |
| United States of America                  | 5 | 0    |
| Uruguay                                   | 5 | 0    |
| Uzbekistan                                | 5 | 0    |
| Vanuatu                                   | 5 | 0    |
| Venezuela (Bolivarian Republic of)        | 5 | 0    |
| Viet Nam                                  | 5 | 13   |
| Yemen                                     | 5 | 0    |
| Zambia                                    | 5 | 0    |
| Zimbabwe                                  | 5 | 0    |
| GBD-High income                           | 0 | 357  |
| GBD-High income                           | 1 | 9    |
| GBD-High income                           | 2 | 0    |
| GBD-High income                           | 3 | 4207 |
| GBD-High income                           | 4 | 0    |
| GBD-High income                           | 5 | 0    |
| High income                               | 0 | 1769 |
| High income                               | 1 | 9    |
| High income                               | 2 | 0    |
| High income                               | 3 | 4207 |
| High income                               | 4 | 0    |
| High income                               | 5 | 1    |

|                            |   |      |
|----------------------------|---|------|
| <b>Low income</b>          | 0 | 4647 |
| <b>Low income</b>          | 1 | 89   |
| <b>Low income</b>          | 2 | 0    |
| <b>Low income</b>          | 3 | 0    |
| <b>Low income</b>          | 4 | 0    |
| <b>Low income</b>          | 5 | 40   |
| <b>Lower-middle income</b> | 0 | 6616 |
| <b>Lower-middle income</b> | 1 | 49   |
| <b>Lower-middle income</b> | 2 | 21   |
| <b>Lower-middle income</b> | 3 | 0    |
| <b>Lower-middle income</b> | 4 | 1    |
| <b>Lower-middle income</b> | 5 | 62   |
| <b>Upper-middle income</b> | 0 | 7955 |
| <b>Upper-middle income</b> | 1 | 14   |
| <b>Upper-middle income</b> | 2 | 6    |
| <b>Upper-middle income</b> | 3 | 98   |
| <b>Upper-middle income</b> | 4 | 0    |
| <b>Upper-middle income</b> | 5 | 53   |

### Statistical model to fill missingness in health expenditure variables

After the cleaning up of the data previously described above, we used Spatiotemporal Gaussian process regression (ST-GPR) in order to predict and fill out the missingness that existed in the resulting health expenditure dataset. ST-GPR is a stochastic modeling technique designed to detect signals amidst noisy data. It also serves as a powerful tool for interpolating non-linear trends. Unlike classical linear models that assume that the trend underlying data follows a definitive functional form, GPR assumes that the specific trend of interest follows a gaussian process, where each point can be estimated with a mean and covariance function.

The first step to implementing ST-GPR is to identify relevant covariates that would be helpful in predicting each health expenditure variable of interest. Using the following set of covariates, we estimated the first stage of the process (space-time) in order to predict and fill up the dependent variables. The covariates used are:

- a) All-sector government expenditure per capita, logged
- b) Healthcare Access and Quality Index, logged
- c) Proportion of total population above the age of 65, logit transformed.

where the dependent variables were logs of GHE per capita, PPP per capita and OOP per capita.

Given the weight of data, we were able to adjust the weight of each data point that contributed to the likelihood function of the Gaussian process, by inflating the pointwise variance for data points with lower weights. For missing data points, the resulting uncertainty was determined by region specific estimates. The final resulting dataset was a complete set of GHE, PPP and OOP per capita estimates for 195 countries from 1995 through 2016, where the uncertainty around each point was constructed by simulating from a normal distribution. Goodness-of-fit was determined using out-of-sample validation and choosing the models with the best performing set of hyperparameters. Overall, ST-GPR is a stochastic modeling technique that performs well at detecting signals among datasets that are noisy. It deviates from classic linear models that assume trend of its underlying data must follow a definitive functional form. Instead, GPR assumes the trend must follow a Gaussian Process form, having a covariance function and a pointwise mean. For the distribution of the Gaussian process, we used a Matérn covariance matrix. GPRs were run repeatedly to ensure that every country-year estimate per metric had 1,000 draws.



This ST-GPR process follows the same form of that found in the Global Burden of Disease Study 2017 appendix.<sup>3</sup> This analysis was conducted in the following programs: Stata (version 13.1) and R (version 3.5.1).

eFigure 1 below shows the comparison of WHO GHED extracted data and IHME ST-GPR THE in GDP per capita space from 2000-2016. eFigure 2 shows the comparison of WHO GHED extracted data and IHME ST-GPR THE in per GDP space from 2000-2016.

**eFigure 1. Comparison of WHO GHED extracted and IHME ST-GPR THE in *GDPpc* space, 2000-2016**

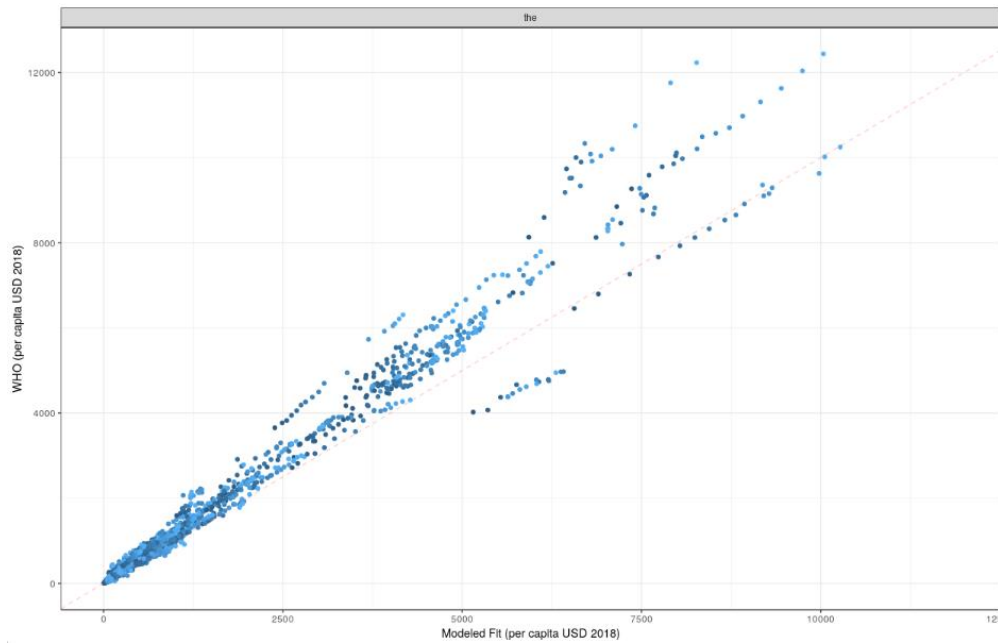

**eFigure 2. Comparison of WHO GHED extracted and IHME ST-GPR THE in *per GDP* space, 2000-2016**

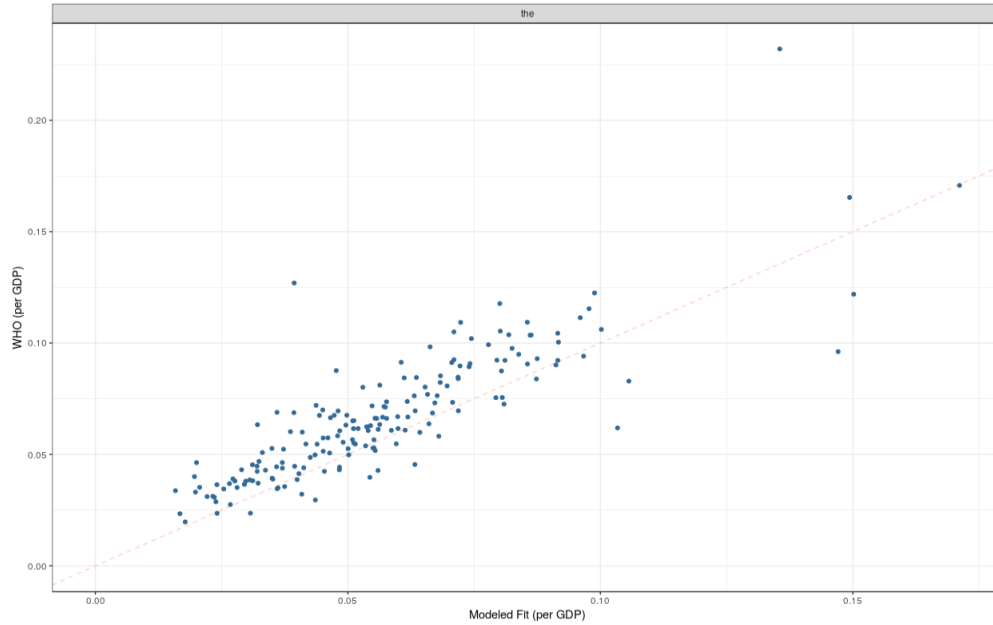

To make results in terms of percent of GDP evident we have added new versions of figures 1, 2, 3, and 8, remade using percent of GDP rather than US dollar below. They have been added as eFigures 3, 4, 5, and 6, respectively.

**eFigure 3. Health spending per GDP in 1995, 2016, 2030, and 2050**

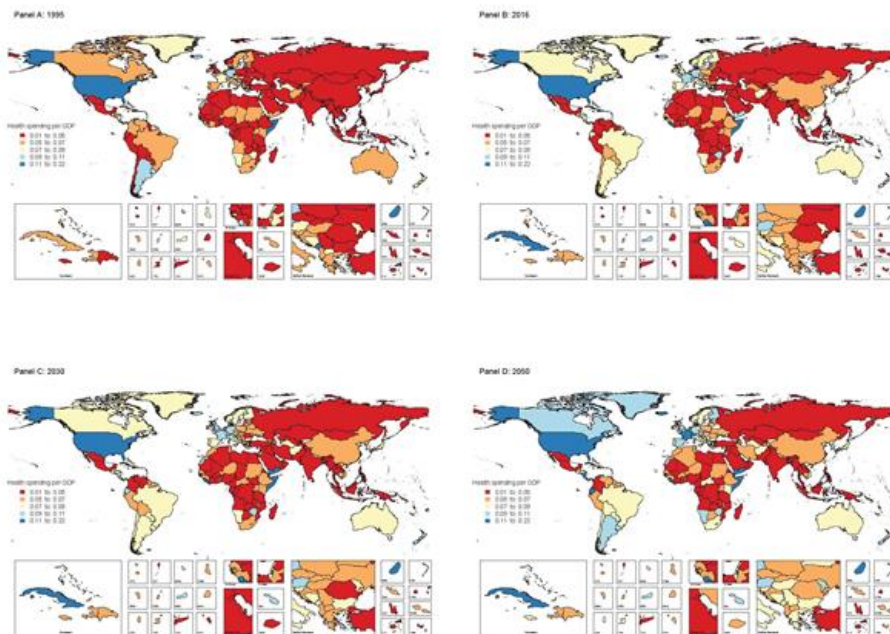

**eFigure 4. Health spending per GDP by gross domestic product per capita, 1995, 2016, 2030, and 2050**

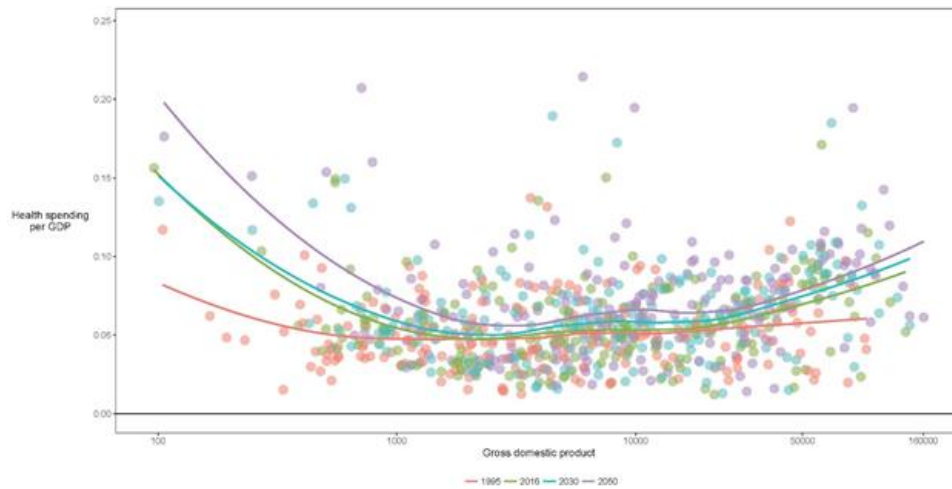

**eFigure 5. Annualised rate of change in health spending per GDP by source, by income group [A] and Global Burden of Disease super-region [B], 1995–2016**

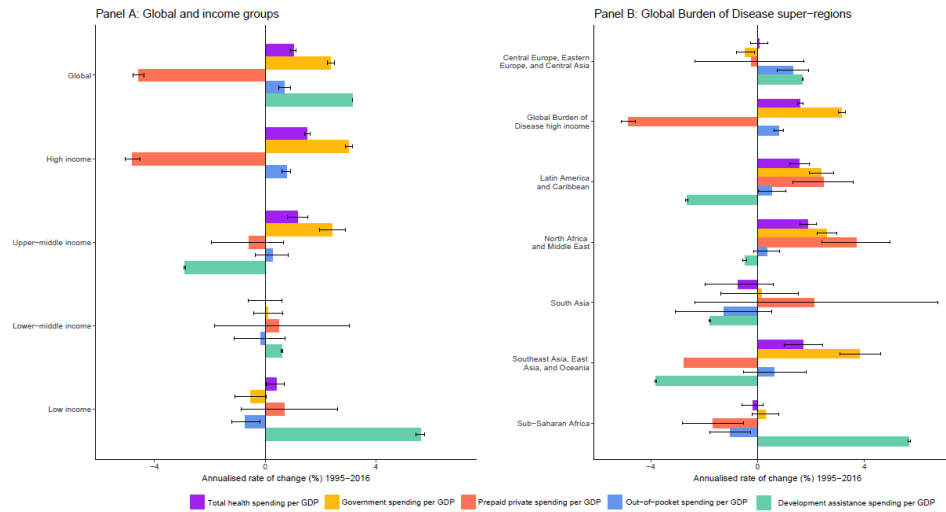

**eFigure 6. Distribution of government health spending per GDP, global and by income group, 1995, 2016, 2030, 2050, and two future scenarios**

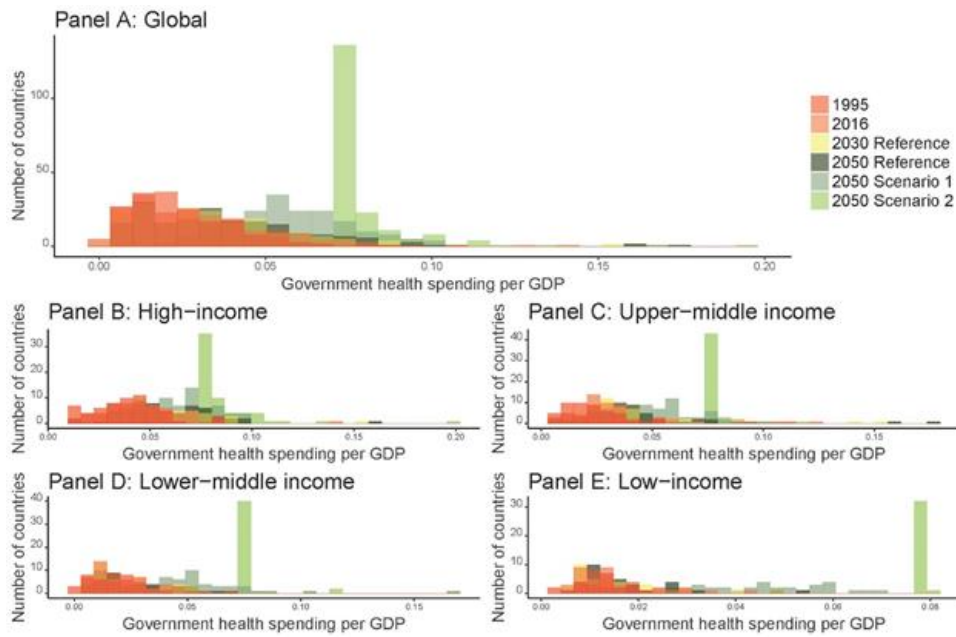

eFigure 7 is a process diagram that displays the flow of input data and models for each step of the forecasting process. eFigure 8 explores how the sources of health spending tend to evolve with economic development showing this relationship in past and future years.

**eFigure 7. Flow of input data and models for each step of the forecasting process**

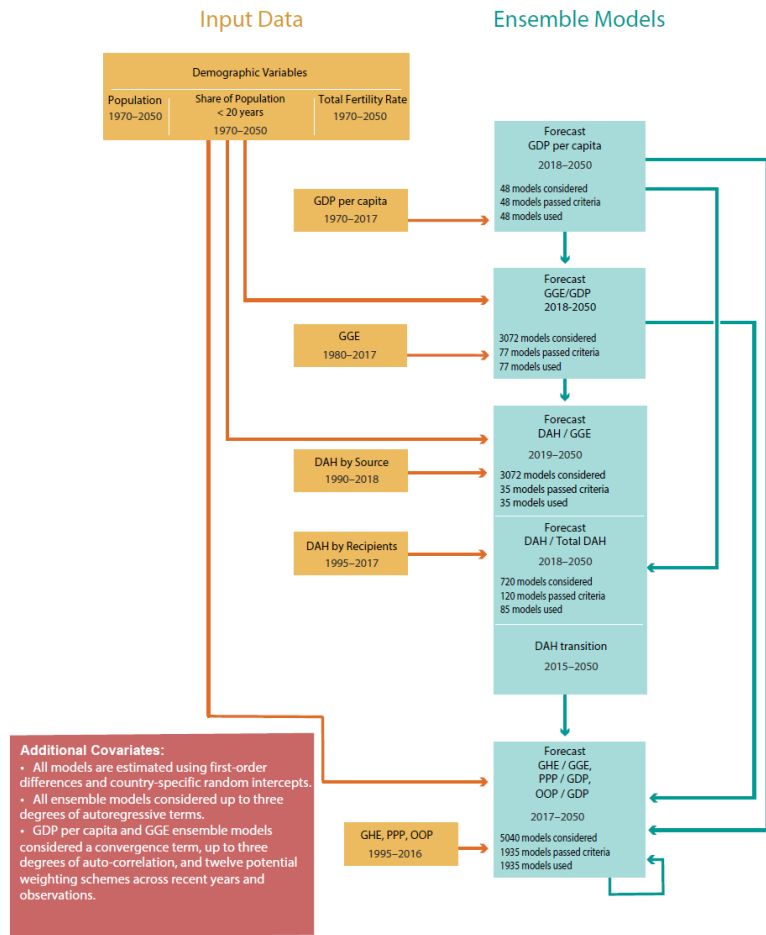

**eFigure 8. Economic development and the composition of health spending by source and proportion of health spending from the government, 1995, 2016, 2030, 2050, composition by source**

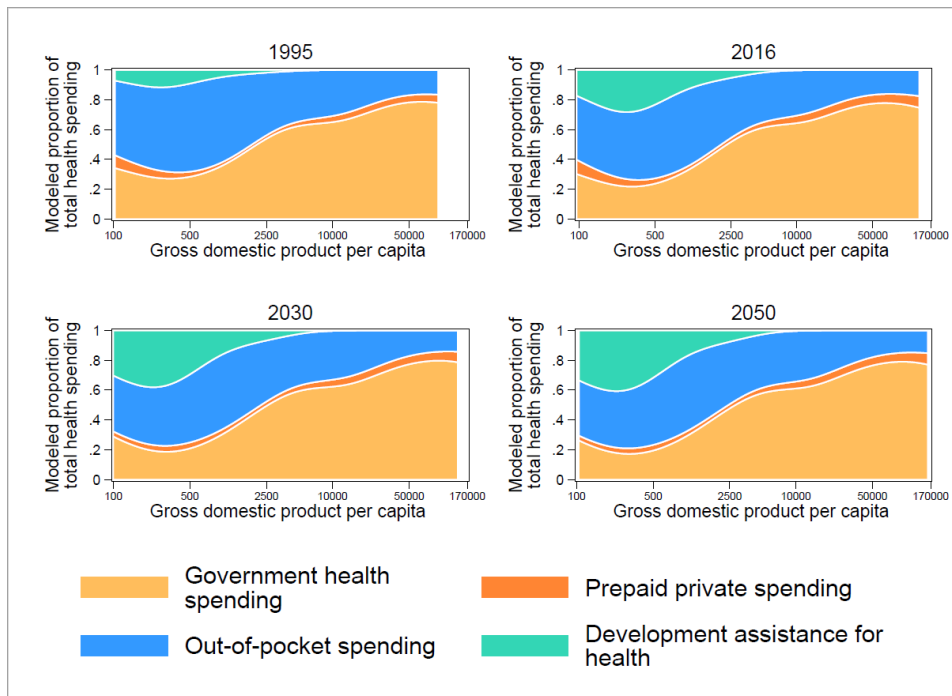

## References

- 1Global Health Expenditure Database. World Health Organ. <http://apps.who.int/nha/database> (accessed Dec 21, 2018).
- 2World Bank Country and Lending Groups – World Bank Data Help Desk. World Bank. <https://datahelpdesk.worldbank.org/knowledgebase/articles/906519-world-bank-country-and-lending-groups> (accessed Dec 21, 2018).
- 3Stanaway JD, Afshin A, Gakidou E, *et al.* Global, regional, and national comparative risk assessment of 84 behavioural, environmental and occupational, and metabolic risks or clusters of risks for 195 countries and territories, 1990–2017: a systematic analysis for the Global Burden of Disease Study 2017. *The Lancet* 2018; **392**: 1923–94.
- 4 OECD. OECD Statistics [Internet]. [cited 2019 Dec 19].  
Available from <https://stats.oecd.org/index.aspx?queryid=169>

## SECTION 3. TRACKING DEVELOPMENT ASSISTANCE FOR HEALTH FROM TRADITIONAL DONORS

### List of Figures

- eFigure 1 Comparing CRS commitments, CRS disbursements, and DAC commitments
- eFigure 2 CRS disbursement to commitment ratio and cutoff points by donor agency
- eFigure 3 One- to six-year disbursement schedules for bilateral channels
- eFigure 4 DAH as a percentage of corresponding budget data by bilateral agency
- eFigure 5 Malaria DAH to program areas as assigned by keyword search and PMI reports
- eFigure 6 World Bank's annual health sector commitments and disbursements
- eFigure 7 Disbursements by the African Development Bank
- eFigure 8 Disbursements by Asian Development Bank
- eFigure 9 Disbursements by Inter-American Development Bank
- eFigure 10 Contributions received by the Global Fund to Fight AIDS, Tuberculosis and Malaria
- eFigure 11 The Global Fund to Fight AIDS, Tuberculosis and Malaria's commitments and disbursements
- eFigure 12 Gavi's income and disbursements
- eFigure 13 Total revenue received by non-governmental organizations
- eFigure 14 Expenditure by non-governmental organizations
- eFigure 15 In-kind contributions by loan- and grant-making DAH channels of assistance

### List of Tables

- eTable 1. Definitions of health spending sources
- eTable 2. Summary of primary data sources and databases
- eTable 3. Data sources received via personal correspondence
- eTable 4. Additional data sources, databases and model choices used for preliminary estimates of DAH
- eTable 5. Terms for keyword searches
- eTable 6. Additional health focus area categorizations
- eTable 7 World Bank's health sector and theme codes
- eTable 8 Summary of data sources for the regional development banks
- eTable 9 Summary of US non-governmental organizations in the study
- eTable 10 Summary of data sources for calculating in-kind contributions
- eTable 11. Rules for assigning level values to metadata
- eTable 12. Supplemental table for data classification

eTable 13. Supplemental table: Gross Domestic Product

eTable 14. Supplemental table: Total expenditure on health

eTable 15. Supplemental table: General government expenditure on health

eTable 16. Supplemental table: Out of pocket expenditures

eTable 17. Supplemental table: Pre-paid private

eTable 18. Count of data sources, by financing sources and spending functions

eTable 19. Count of data sources, by GBD super region

Box 1. EXAMPLE - Australia's primary and additional data sources

Box 2. EXAMPLE. Post-keyword search weighting

Box 3. EXAMPLE. Australia's CRS disbursement to commitment ratio and cutoff year

Box 4. EXAMPLE. Australia's one- to six-year disbursement schedules

Box 5. EXAMPLE. Australia's DAH as a percentage of corresponding budget data

## Overview

Development assistance for health (DAH) estimates were obtained from the Institute for Health Metrics and Evaluation's development assistance for health database. We summarize the original methodology as well as updates for this year's estimates below. A more detailed description of the original methodology used to obtain the estimates in the database can be found in Dieleman et al.<sup>1</sup> All known, systematically reported, available data on health-related disbursements and expenditures were extracted, as well as income and revenue from existing project databases, annual reports, and audited financial statements. The channels included and the corresponding data sources are summarized in eTable 2. Data sources obtained via personal correspondence are summarized in eTable 3.

DAH for bilateral agencies included all health-related disbursements from bilateral donor agencies, excluding funds that they transferred to any of the other channels we tracked in order to avoid double-counting. This information was extracted from the Creditor Reporting System (CRS) and Development Assistance Committee (DAC) databases of the Development Assistance Committee of the Organisation for Economic Co-operation and Development (OECD-DAC). In some cases, donor agencies did not report disbursement data to the CRS. A method for predicting disbursements from commitment data was implemented to address this challenge. For detailed description of this method see Tracking Development Assistance for Health from Bilateral Aid Agencies and the European Commission section below as well as in Dieleman et al.<sup>1</sup>

For other grant- and loan-making institutions, annual disbursements on health grants and loans were similarly included, excluding transfers to any other channels and ignoring any repayments on outstanding debts. For a more detailed description of this process see Dieleman et al.<sup>1</sup> The annual disbursements for grant- and loan-making institutions only reflect the financial transfers made by these agencies. Therefore, in-kind transfers from these institutions in the form of staff time for providing technical assistance and the costs of managing programs were estimated separately.<sup>1</sup>

Estimates of DAH for the United Nations (UN) agencies included annual expenditures on health both from their core budgets and from voluntary contributions. Calculating DAH for the United Nations Children's Fund (UNICEF) involved estimating the fraction of its total expenditure spent on health prior to 2001.<sup>1</sup>



Non-governmental organizations' (NGOs) DAH estimates utilized data from US government sources, Guidestar Research Fundamental Plus dataset and a survey of health expenditure for a sample of NGOs to estimate DAH from US-based and internationally based NGOs receiving support from the US government. We were unable to include other NGOs due to the lack of audited and comparable data.

The database also included an analysis of the composition of health funding by recipient country, health focus area and program area. In this round of updates to the databases we have made several important improvements. These improvements include the inclusion of China as a bilateral source of funding, the inclusion of European Economic Area, and Coalition for Epidemic Preparedness Innovations as disbursing agencies of DAH funding, the addition of new program areas – antimicrobial resistance/drug resistance under the HIV/AIDS, tuberculosis, malaria, and other infectious diseases health focus areas, the disaggregation of human resources for health within the Sector wide approach and Health system strengthening (SWAp/HSS) health focus area, and modifications to our health focus area key word search terms. All methodological updates made are detailed in their relevant channel sub-section below. The improvements to our health focus area keyword search terms are detailed in eTable 5 and in the section below titled Disaggregation by health focus area, respectively.

For many channels, reporting-time lags prevent primary disbursement data for the most recent year(s). For those years, the values of DAH were predicted, using channel-specific time trends. The methods employed to obtain these predictions are summarized in eTable 4. In general, these methods depend on data availability. The estimates are based on channel-specific budget, commitment, and appropriations data, and in many cases assume the most recent disbursement patterns persist. Due to the lack of more detailed disaggregated data, estimates for the most recent year are not provided for recipient countries.

We predicted ebola funding in 2018 for bilateral sources and the European Commission by assuming that 2018 ebola funding was equal to 2017 ebola funding.

In addition, for SWAp/HSS funding, we allocated SWAP/HSS projects with multiple health focus areas identified by a proportional allocation based on the relative proportions of the project going to the various health focus areas.

For countries that only began existing in certain years, we backcasted DAH in years before their existence as follows. For countries that split off from parent countries, we calculated a three-year average ratio of child country DAH received to parent country DAH received. In years before the child country split off, DAH received by the parent country would have included DAH received in the region that would split off to become the child country. Therefore we reallocated funding from the parent country, in all years before the child country split off, adding this proportion of the parent country's DAH to the child country's DAH and subtracting out this value from the parent country's DAH. By this method, total annual DAH between the parent and child country do not change, but the allocation of funding between the parent country and child country change. For any country that ceased to exist (such as former Yugoslavia and former USSR) and that had observed DAH received in certain years, we split the funding equally among its new constituent countries.

## Currency exchange and deflation

All results are presented in real 2018 US dollars. All disbursement sequences were converted into real 2018 US dollars by taking disbursements in nominal US dollars in the year of disbursement and adjusting these sequences into real 2018 US dollars using US gross domestic product (GDP) deflators. Analyses were conducted in Stata (version 13.1).

**eTable 2. Summary of primary data sources and databases**

| Channel                                             | Source                                                          |
|-----------------------------------------------------|-----------------------------------------------------------------|
| Bilateral agencies                                  | OECD-DAC and CRS databases <sup>2</sup>                         |
| European Commission                                 | OECD-DAC and CRS databases <sup>3</sup>                         |
| Joint United Nations Programme on HIV/AIDS (UNAIDS) | Financial reports and audited financial statements <sup>4</sup> |

|                                                                        |                                                                                                                                                                                                                                                                                            |
|------------------------------------------------------------------------|--------------------------------------------------------------------------------------------------------------------------------------------------------------------------------------------------------------------------------------------------------------------------------------------|
| <b>United Nations Children’s Fund (UNICEF)</b>                         | Financial reports and audited financial statements <sup>5-7</sup>                                                                                                                                                                                                                          |
| <b>United Nations Population Fund (UNFPA)</b>                          | Financial reports and audited financial statements <sup>8</sup>                                                                                                                                                                                                                            |
| <b>UNITAID</b>                                                         | Project level data from IATI database shared through correspondence, financial reports and audited financial statements <sup>9</sup>                                                                                                                                                       |
| <b>Pan American Health Organization (PAHO)</b>                         | Financial reports and audited financial statements <sup>10</sup>                                                                                                                                                                                                                           |
| <b>World Health Organization (WHO)</b>                                 | Financial reports and audited financial statements <sup>11</sup>                                                                                                                                                                                                                           |
| <b>World Bank</b>                                                      | Online project database and correspondence <sup>12,13</sup>                                                                                                                                                                                                                                |
| <b>African Development Bank (AfDB)</b>                                 | Correspondence and compendium of statistics <sup>14,15</sup>                                                                                                                                                                                                                               |
| <b>Inter-American Development Bank (IDB)</b>                           | Online project database and correspondence <sup>16,17</sup>                                                                                                                                                                                                                                |
| <b>Gavi, the Vaccine Alliance</b>                                      | Online project database, cash received database, International Finance Facility for Immunisation (IFFIm) annual reports, Advance Market Commitment for Pneumococcal Vaccines (AMC) annual reports, and annual reports <sup>18-21</sup>                                                     |
| <b>The Global Fund to Fight AIDS, Tuberculosis and Malaria (GFATM)</b> | Online grant database, contributions report and annual reports <sup>22-24</sup>                                                                                                                                                                                                            |
| <b>Coalition for Epidemic Preparedness and Innovation (CEPI)</b>       | Project level data through correspondence                                                                                                                                                                                                                                                  |
| <b>NGOs registered in the US</b>                                       | United States Agency for International Development (USAID) Report of Voluntary Agencies (VolAg), tax filings, annual reports, financial statements, RED BOOK Expanded Database, and WHO’s Model List of Essential Medicines, Guidestar Research Fundamentals Plus dataset <sup>25-29</sup> |
| <b>Bill &amp; Melinda Gates Foundation (BMGF)</b>                      | Online grant database, IRS 990 tax forms, and correspondence <sup>30,31</sup>                                                                                                                                                                                                              |
| <b>Other private US foundations</b>                                    | Foundation Center’s grants database <sup>32</sup>                                                                                                                                                                                                                                          |
| <b>Wellcome Trust</b>                                                  | Project level data through correspondence                                                                                                                                                                                                                                                  |
| <b>European Economic Area</b>                                          | Online project database <sup>33</sup> and correspondence <sup>34</sup>                                                                                                                                                                                                                     |
| <b>China</b>                                                           | Financial reports and yearbooks                                                                                                                                                                                                                                                            |

**eTable 3. Data sources received via personal correspondence**

| <b>Channel</b>                  | <b>Data received</b>                                                       |
|---------------------------------|----------------------------------------------------------------------------|
| <b>World Bank</b>               | Health project-level disbursement data, 1990 – August 2018 <sup>13</sup>   |
| <b>BMGF</b>                     | Health disbursement data, 2017 <sup>31</sup>                               |
| <b>CEPI</b>                     | Health disbursement data, 2018                                             |
| <b>IDB</b>                      | Health project-level loan disbursement data, 2018 <sup>17</sup>            |
| <b>African Development Bank</b> | Health project-level disbursement data, 2002 – December 2018 <sup>35</sup> |
| <b>Asian Development Bank</b>   | Health project-level disbursement data, 1990-2018                          |
| <b>UNITAID</b>                  | Health project-level disbursement data, 2007- 2018 <sup>36</sup>           |
| <b>UAE bilateral</b>            | UAE Foreign Assistance in Health 1990 - 2008 <sup>37</sup>                 |
| <b>Wellcome Trust</b>           | Health project-level disbursement data, 1990-2018                          |
| <b>European Economic Area</b>   | Health project-level disbursement data, 2007-2018                          |

**eTable 4. Additional data sources, databases and model choices used for preliminary estimates of DAH**

| <b>Channel</b>             | <b>Data source</b>                                                                                                          | <b>Variables used</b>                                                                     | <b>Years of budget data used for modeling*</b> | <b>Years underlying DAH data not available; thus modeled*</b> | <b>Model used</b>                                       |
|----------------------------|-----------------------------------------------------------------------------------------------------------------------------|-------------------------------------------------------------------------------------------|------------------------------------------------|---------------------------------------------------------------|---------------------------------------------------------|
| <b>National agencies</b>   |                                                                                                                             |                                                                                           |                                                |                                                               |                                                         |
| <b>Australia</b>           | Australia's International Development Assistance (2008-2018); Australia's Overseas Aid Program (1998-2008) <sup>38,39</sup> | Health official development assistance (ODA): International development assistance budget | 1998-2018                                      | 2018                                                          | Weighted average of actual DAH/budgeted DAH             |
| <b>Austria</b>             | Austria Federal Ministry of Finance budget <sup>40</sup>                                                                    | General ODA: Federal ODA budget                                                           | 2007-2018                                      | 2018                                                          | Weighted average of DAH/budgeted ODA                    |
| <b>Belgium</b>             | Project Budget General – general expenses <sup>41</sup>                                                                     | General ODA: Foreign affairs, foreign trade development and cooperation                   | 2000-2018                                      | 2018                                                          | Weighted average of DAH/budgeted ODA                    |
| <b>Canada</b>              | Canadian International Development Agency – Report on Plans and Priorities <sup>42</sup>                                    | General ODA: Financial summary – planned spending                                         | 1996-2018                                      | 2018                                                          | Weighted average of DAH/budgeted ODA                    |
| <b>Denmark</b>             | Danish Ministry of Foreign Affairs Budget <sup>43</sup>                                                                     | General ODA: Budgeted expenditures on overseas development assistance                     | 2000-2018                                      | 2018                                                          | Weighted average of DAH/budgeted ODA                    |
| <b>European Commission</b> | General budget <sup>44</sup>                                                                                                | Data not used as they were inconsistent with disbursements                                | –                                              | 2018                                                          | Based on weighted average of trends in member countries |
| <b>Finland</b>             | Document Assembly in budget years 1998-2018 <sup>45</sup>                                                                   | General ODA: Ministry of Foreign Affairs' administrative appropriations,                  | 2002-2018                                      | 2018                                                          | Weighted average of DAH/budgeted ODA                    |

| <b>Channel</b>      | <b>Data source</b>                                                                                                                    | <b>Variables used</b>                                                                                          | <b>Years of budget data used for modeling*</b> | <b>Years underlying DAH data not available; thus modeled*</b> | <b>Model used</b>                    |
|---------------------|---------------------------------------------------------------------------------------------------------------------------------------|----------------------------------------------------------------------------------------------------------------|------------------------------------------------|---------------------------------------------------------------|--------------------------------------|
|                     |                                                                                                                                       | international development                                                                                      |                                                |                                                               |                                      |
| <b>France</b>       | Budget and Financial documents <sup>46,47</sup>                                                                                       | General ODA: aggregated project data; Total ODA                                                                | 2009-2018                                      | 2018                                                          | Weighted average of DAH/budgeted ODA |
| <b>Germany</b>      | Plan of the Federal Budget <sup>48</sup>                                                                                              | General ODA: Development expenditure                                                                           | 2001-2018                                      | 2018                                                          | Weighted average of DAH/budgeted ODA |
| <b>Greece</b>       | Ministry of Finance Budget (2013-2018); OECD Data (1996-2017) <sup>2,49,50</sup>                                                      | General ODA; ODA commitments                                                                                   | 1996-2018                                      | 2018                                                          | Weighted average of DAH/budgeted ODA |
| <b>Ireland</b>      | Department of Finance – budget 2000-2004; Estimates for Public Services and Summary Public Capital Programme, 2005-2018 <sup>51</sup> | General ODA: Summary of adjustments to gross current estimates – international co-operation                    | 2002-2018                                      | 2018                                                          | Weighted average of DAH/budgeted ODA |
| <b>Italy</b>        | The Italian Agency for Development Cooperation <sup>52</sup>                                                                          | General ODA: Net development corporation                                                                       | 2007-2018                                      | 2018                                                          | Weighted average of DAH/budgeted ODA |
| <b>Japan</b>        | Highlights of the Budget for FY1999-2018 <sup>53</sup>                                                                                | General ODA: Major budget expenditures                                                                         | 2003-2018                                      | 2018                                                          | Weighted average of DAH/budgeted ODA |
| <b>Korea, South</b> | ODA Korea comprehensive implementation plan <sup>54</sup>                                                                             | General ODA: Plan for international development cooperation                                                    | 2008-2018                                      | 2018                                                          | Weighted average of DAH/budgeted ODA |
| <b>Luxembourg</b>   | State Budget <sup>55</sup>                                                                                                            | General ODA: Ministry of Foreign Affairs – budgeted international development cooperation and humanitarian aid | 2001-2018                                      | 2018                                                          | Weighted average of DAH/budgeted ODA |
| <b>Netherlands</b>  | Netherlands International                                                                                                             | General ODA: Total annual                                                                                      | 2001-2018                                      | 2018                                                          | Weighted average of                  |

| <b>Channel</b>     | <b>Data source</b>                                                                                         | <b>Variables used</b>                                                                                                                   | <b>Years of budget data used for modeling*</b> | <b>Years underlying DAH data not available; thus modeled*</b> | <b>Model used</b>                    |
|--------------------|------------------------------------------------------------------------------------------------------------|-----------------------------------------------------------------------------------------------------------------------------------------|------------------------------------------------|---------------------------------------------------------------|--------------------------------------|
|                    | Cooperation Budget (2001-2016)                                                                             | official development assistance expenditure                                                                                             |                                                |                                                               | DAH/budgeted ODA                     |
| <b>New Zealand</b> | Vote Foreign Affairs and Trade (1998-2001); VOTE Official Development Assistance (2002-2018) <sup>56</sup> | General ODA: Total annual official development assistance expenditure                                                                   | 1998-2018                                      | 2018                                                          | Weighted average of DAH/budgeted ODA |
| <b>Norway</b>      | Norwegian Ministry of Finance National Budget (2014-2018); Correspondence (2000-2013) <sup>57,58</sup>     | General ODA: ODA budget                                                                                                                 | 2000-2018                                      | 2018                                                          | Weighted average of DAH/budgeted ODA |
| <b>Portugal</b>    | Ministry of Finance and Public Administration State Budget 2003-2018 <sup>59</sup>                         | General ODA: Integrated service expenditure – external cooperation budget                                                               | 2003-2018                                      | 2018                                                          | Weighted average of DAH/budgeted ODA |
| <b>Spain</b>       | Annual Plans of Spanish International Cooperation <sup>60</sup>                                            | General ODA: Spanish total development cooperation                                                                                      | 2003-2018                                      | 2018                                                          | Weighted average of DAH/budgeted ODA |
| <b>Sweden</b>      | Correspondence (2000-2010); Ministry of Foreign Affairs Budget (2010-2018) <sup>61</sup>                   | General ODA: Ministry for Foreign Affairs budgets for expenditure – international development cooperation                               | 2000-2018                                      | 2018                                                          | Weighted average of DAH/budgeted ODA |
| <b>Switzerland</b> | Foreign Affairs (2000-2006); Budget – Further Explanations and Statistics (2007-2018)                      | General ODA: Direction of development and cooperation (2000-2006); foreign affairs – international cooperation, development aid (in the | 2000-2018                                      | 2018                                                          | Weighted average of DAH/budgeted ODA |

| <b>Channel</b>        | <b>Data source</b>                                                                                 | <b>Variables used</b>                                                                                                  | <b>Years of budget data used for modeling*</b> | <b>Years underlying DAH data not available; thus modeled*</b> | <b>Model used</b>                           |
|-----------------------|----------------------------------------------------------------------------------------------------|------------------------------------------------------------------------------------------------------------------------|------------------------------------------------|---------------------------------------------------------------|---------------------------------------------|
|                       |                                                                                                    | South and East) (2007-2016)                                                                                            |                                                |                                                               |                                             |
| <b>United Kingdom</b> | IATA (Department for International Development (DFID)) <sup>62,63</sup>                            | General ODA: assistance for international development; Sum (revised) - aggregated project data                         | 1998-2018                                      | 2018                                                          | Weighted average of DAH/budgeted ODA        |
| <b>United States</b>  | Foreign Assistance Dashboard (2006-2018); Budget of the US Government (2005-2018) <sup>64,65</sup> | Global health ODA: Planned foreign assistance for health; Department of Health and Human Services global health budget | 2005-2018                                      | 2018                                                          | Weighted average of actual DAH/budgeted DAH |
| <b>UN agencies</b>    |                                                                                                    |                                                                                                                        |                                                |                                                               |                                             |
| <b>WHO</b>            | Programme budget <sup>66</sup>                                                                     | DAH budget: Programme budget                                                                                           | 2002-2017                                      | 2018                                                          | Weighted average of DAH/budget              |
| <b>UNAIDS</b>         | Unified Budget and Workplan, bienniums 2002-2017 and 2018-2019 <sup>67,68</sup>                    | DAH budget: Unified Budget and Workplan                                                                                | 2002-2017                                      | 2018                                                          | Weighted average of DAH/Core Budget         |
| <b>UNICEF</b>         | Financial report and audited financial statements; correspondence <sup>7,69,70</sup>               | Total expenditure; Total health expenditure                                                                            | 1990-2017                                      | 2016-2018                                                     | Weighted average of DAH/budget              |
| <b>UNFPA</b>          | Audited Financial report and contributions report <sup>71,72</sup>                                 | Total health expenditure                                                                                               | 2002-2017                                      | 2016-2018                                                     | Weighted average of DAH/budget              |
| <b>PAHO</b>           | Proposed program budget <sup>10</sup>                                                              | Total regular budget, estimated voluntary contributions                                                                | 2000-2017                                      | 2018                                                          | Weighted average of DAH/budget              |
|                       |                                                                                                    |                                                                                                                        |                                                |                                                               |                                             |

| <b>Channel</b> | <b>Data source</b>                                                       | <b>Variables used</b>                                                                                 | <b>Years of budget data used for modeling*</b> | <b>Years underlying DAH data not available; thus modeled*</b> | <b>Model used</b>                                                                     |
|----------------|--------------------------------------------------------------------------|-------------------------------------------------------------------------------------------------------|------------------------------------------------|---------------------------------------------------------------|---------------------------------------------------------------------------------------|
| <b>NGOs</b>    | VolAg (1990-2014), GuideStar (2015), sample of top NGOs <sup>25,26</sup> | Revenue breakdowns for: US public, non-US public, private, in-kind, BMGF; total overseas expenditures | 1990-2015                                      | 2016-2018                                                     | Regression on DAH, US GDP, and USAID and private voluntary organization (PVO) revenue |

\* Years of budget data used for modeling versus years underlying DAH data unavailable thus modeled: The data used to estimate DAH by channel vary across channels. eTable 2 reports our primary data used for each channel. Due to reporting lags there are some years we need to estimate disbursement using additional data sources. These additional data sources, the years in which the primary data is modeled, the years the additional data is available, and the methods for this estimating these modeled years are reported in eTable 4. Years of budget data used for modeling are the years of additional data available to us. We rely on historic trends to inform our estimates so we rely on many years of additional data despite only modeling a few years of primary data. Years underlying DAH data unavailable thus modeled are the years the primary data is incomplete and thus estimated using additional data. See example below for more details for Australia

### **Box 1. EXAMPLE - Australia's primary and additional data sources**

**Project-level data for health-related projects funded by Australia's bilateral aid agencies are available from the OECD's CRS database through 2017. This is the primary data source used to estimate DAH channeled by Australian aid agencies, as described in eTable 2. 2018 is incomplete because of lags in reporting. To estimate DAH disbursed for 2018, additional data are available from Australia's International Development Assistance budget (2008-2018) and Australia's Overseas Aid Program budget (1998-2008), as described in eTable 4. These sources provide health-specific official development assistance (ODA) budgeted by Australia, 1998-2018. We convert countries' budgeted ODA, as given in nominal local currency units, to nominal US dollars using the OECD's currency exchange rate series based on USD monthly averages. To estimate DAH disbursed in 2018, we calculated the ratio of disbursed DAH (from the CRS database) relative to budgeted DAH (from the International Development Assistance and Overseas Aid Program budgets) for 1998-2017. We combine the most recent three ratios into a single estimate by taking a weighted average, weighting substantially higher the most recent year. We multiply this ratio – the estimated disbursed DAH to budgeted DAH – by the 2018 budgeted DAH to estimate disbursed DAH in those years. These methods are described more fully in Dieleman et al.<sup>1</sup>**

### **DISAGGREGATING BY HEALTH FOCUS AREA**

We improved our analysis of the disaggregation of health funding by health focus areas by augmenting our keyword search terms. In particular, we added new keywords to the antimicrobial resistance/drug resistance program area of HIV/AIDS, tuberculosis, malaria, and other infectious diseases health focus areas and human resources for health program areas as well as updated the keywords in all other health focus areas and program areas. Similar to our previous work, the analysis of health focus areas included assessments of development assistance for HIV/AIDS, tuberculosis (TB), malaria, reproductive and maternal health, newborn and child health, other infectious diseases, non-communicable diseases, and SWAps and health system strengthening, using keyword searches within descriptive fields. These were chosen as the areas of focus because of their relevance to current policy debates about global health financing and data availability.

In effect, DAH was disaggregated into eight health focus areas: HIV/AIDS; tuberculosis; malaria; reproductive ,maternal, newborn and child health; non-communicable diseases; SWAps/health sector support; other infectious diseases; and other. For most data sources, project-level data were available only through 2017. Methods to estimate health focus area allocations for 2018 are described in more detail below. Keyword searches were performed for a subset of global health channels that provide project-level data with project titles or descriptions. These sources include the bilateral development assistance agencies from 24 DAC member countries, one DAC participant country, GFATM, the World Bank, Asian Development Bank, African Development Bank, Inter-American Development Bank, Bill & Melinda Gates Foundations, Non-government Organizations, US foundations, Wellcome Trust and the European Economic Area. The keywords used are outlined in eTable 5 below. Descriptive fields were adjusted so that they were all in capitalized letters, special characters were modified, and search terms with multiple words were put between quotation marks. All keywords were translated into nine major languages (English, Spanish, French, Portuguese, Italian, Dutch, German, Norwegian, and Swedish) used in the OECD CRS, checked for double meanings across all languages, and adjusted accordingly.

Total DAH was split across the health focus areas using weighted averages based on the number of keywords present in each project's descriptive variables. If, for example, three keywords suggested the project focused on HIV/AIDS and two keywords related to tuberculosis were also tagged, three-fifths of the project's total DAH was allocated to HIV/AIDS and two-fifths was allocated to tuberculosis. To account for the sensitivity of this method, several checks were implemented after the keyword searches to ensure the project was accurately categorized. First, projects that were tagged as child and newborn vaccines and other infectious diseases were categorized as child and newborn vaccines only. Second, projects that were tagged as one of the three major infectious diseases (HIV/AIDS,



tuberculosis, or malaria) and other infectious diseases were categorized under only HIV/AIDS, tuberculosis, or malaria.

**Box 2. EXAMPLE. Post-keyword search weighting**

**A project in the CRS database had a value of \$1,000 of DAH. A keyword search conducted on this project's title and description tagged five keywords: 3 keywords related to HIV/AIDS and 2 keywords related to tuberculosis. Therefore, \$600, or 3/5 of total DAH, was allocated to HIV/AIDS, while \$400, or 2/5 of total DAH, was allocated to tuberculosis.**

In addition to keyword searches, funds were allocated to health focus areas based on characteristics of the channel or additional channel variables. For the bilateral agencies and the EC, purpose codes from the CRS were used to supplement keyword searches. For the World Bank-IDA and -IBRD, health focus areas were also determined by the project sector codes and theme codes, which included percentages of health funds that targeted each theme. All funds from Gavi were allocated to child and newborn vaccines, health system strengthening and non-communicable diseases and all funds from UNICEF to maternal, newborn, and child health, unspecified. Funds from GFATM were distributed to malaria, HIV/AIDS, TB, and health sector support based on disease components. Within each disease component, keyword searches on programmatic budget data and project descriptions were conducted to distribute among program areas. Funds from UNAIDS were allocated to HIV/AIDS, and specific program areas were determined by budget information. UNFPA, PAHO, and WHO funds were allocated to specific health focus areas based on project expenditure data from their annual reports and annual financial reports. For all channels, projects listed as HIV/TB were distributed evenly among the two health focus categories. See eTable 6 below for more details on these categorizations.

**eTable 5. Terms for keyword searches**

| Health focus area level | Program area                    | Keywords                                                                                                                                                                                                                                                                                                                                                                                                                                                                                                                                               |
|-------------------------|---------------------------------|--------------------------------------------------------------------------------------------------------------------------------------------------------------------------------------------------------------------------------------------------------------------------------------------------------------------------------------------------------------------------------------------------------------------------------------------------------------------------------------------------------------------------------------------------------|
| HIV/AIDS                | HIV envelope/other              | " HUMANIMMUNODEFVIRUS " " SIDA " " OVC " " HIV " " HIV " " AIDS " " HUMAN IMMUNODEFICIENCY " " REVERSE TRANSCRIPTASE INHIBITOR " " ACQUIRED IMMUNE DEFICIENCY SYNDROME " " ACQUIRED IMMUNODEFICIENCY " "RETROVIRAL " " VCT " " MALE CIRCUMCISION" " ART " " ARV " " CD4 COUNT " " HAART " " PMTCT " " MOTHER TO CHILD TRANSMISSION" " MOTHER TO CHILD AIDS TRANSMISSION" " PARENT TO CHILD TRANSMISSION" " PRESIDENT S EMERGENCY PLAN FOR AIDS RELIEF " " PEPFAR " " THREE DISEASES FUND " " 3 DISEASES FUND " " EMTCT " " 90 90 90 " " MOTHERTOCHILD" |
|                         | Care and Support                | " CAREANDSUPPORT " " CARE ACTIVIT" " PAIN RELIEF " " SYMPTOM RELIEF " " PSYCHO SOCIAL SUPPORT " " CHRONICALLY ILL " " CLINICAL MONITORING " " CARE AND SUPPORT " " PSYCHOLOGICAL SERVICE" " PSYCHOLOGICAL SUPPORT " " PSYCHOSOCIAL SUPPORT " " PSYCHOSOCIAL SERVICE" " MATERIAL SUPPORT " " HOME BASED CARE " " PALLIATIVE CARE "                                                                                                                                                                                                                      |
|                         | Counseling and Testing          | " COUNSELING " " TESTING " " VCT " " COUNSELLING " " COUNSELINGANDTESTING " " DIAGNOS"                                                                                                                                                                                                                                                                                                                                                                                                                                                                 |
|                         | Orphans and Vulnerable Children | " VULNERABLECHILD" " OVC " " ORPHAN" " VULNERABLE CHILD" " INFECTED CHILD"                                                                                                                                                                                                                                                                                                                                                                                                                                                                             |

| Health focus area level | Program area                                       | Keywords                                                                                                                                                                                                                                                                                                                                     |
|-------------------------|----------------------------------------------------|----------------------------------------------------------------------------------------------------------------------------------------------------------------------------------------------------------------------------------------------------------------------------------------------------------------------------------------------|
|                         | Prevention of mother-to-child transmission (PMTCT) | " MOTHER TO CHILD" " MOTHER TO CHILD" " PARENT TO CHILD" " PMTCT " " EMTCT " " OPTION B "                                                                                                                                                                                                                                                    |
|                         | Prevention                                         | " CONDOM" " PREVENT" " HIV EDUCATION " " AIDS EDUCATION " " REDUCING THE TRANSMISSION OF HIV " " REDUCE THE TRANSMISSION OF HIV " " MALE CIRCUMCISION" " SAFE BLOOD SUPPL" " SAFE INJECTION" " ABSTINENCE " " BLOOD SAFETY " " MICROBICIDE" " HARM REDUCTION " " PREP " " PEP " " PROPHYLAXIS " " ABCD " " BE FAITHFUL " " EARLY DETECTION " |
|                         | Treatment                                          | "RETROVIRAL " " TREAT" " ART " " ARV " " CD4 COUNT " " HAART " " VIRAL LOAD " " VIRAL BURDEN " " VIRAL TITER " " DRUG REGIMEN" " FIRST LINE " " REVERSE TRANSCRIPTASE INHIBITOR "                                                                                                                                                            |
|                         | Antimicrobial resistance                           | " ANTIMICROBIAL RESISTAN" " ANTI MICROBIAL RESISTAN" " ANTIBIOTIC RESISTAN" " AMR " "DRUG RESISTAN" " MDR " " XDR " " RESISTANCE TESTING " " DRUG SUSCEPTIBILITY TESTING " " DST " " SECOND LINE "                                                                                                                                           |
| <b>Tuberculosis</b>     | Tuberculosis envelope/other                        | " TUBERCULOSIS " " TB " " TBC " " TUBERCULAR" " DOTS " " DIRECTLY OBSERVED TREATMENT " " RIFAMPICIN " " ISONIAZID " " THREE DISEASES FUND " " 3 DISEASES FUND " " RIFAMPIN "                                                                                                                                                                 |
|                         | Treatment                                          | " TREAT" " DOTS " " FIRST LINE " " DRUGS " " RIFAMPICIN " " RIFAMPIN " " ISONIAZID " " INH " " PYRAZINAMIDE " " PZA " " ETHAMBUTOL " " EMB " " STREPTOMYCIN " " SM " " STM " " PATIENT KIT " " INJECTABLE AGENT" " " FLUOROQUINOLONES " " REGIMEN" " CASE MANAGEMENT " " ANTIMICROBIAL THERAPY " " DRUG SUSCEPTIBLE " " DRUG SENSITIVE "     |
|                         | Diagnosis                                          | " MICROSCOPY " " SPUTUM " " SMEAR " " CULTURE " " BACTERIOLOGICALLY CONFIRMED " " LABORATORY CONFIRMED " " GENEXPERT " " XPERT MTB RIF " " CHEST X RAY" " DIAGNOS" " LINE PROBE ASSAY "                                                                                                                                                      |
|                         | Antimicrobial resistance                           | " ANTIMICROBIAL RESISTAN" " ANTI MICROBIAL RESISTAN" " ANTIBIOTIC RESISTAN" " AMR " "DRUG RESISTAN" " MDR " " XDR " " RESISTANCE TESTING " " DRUG SUSCEPTIBILITY TESTING " " DST " " SECOND LINE "                                                                                                                                           |
| <b>Malaria</b>          | Malaria envelope/other                             | " MALARIA " " FALCIPARUM " " ANOPHELES " " ARTEMISININ " " PRIMAQUINE " " INDOOR RESIDUAL SPRAY" " INDOORRESIDUALSPRAY" " IRS " "VIVAX " " BEDNET" " BED NET" " SMITN " " ITN " " LLIN " " INSECTICIDAL NET" " INSECTICIDE TREATED NET" " THREE DISEASES FUND " " 3 DISEASES FUND " " CHLOROQUINE " " ANTI MALARIAL " " ANTIMALARIAL "       |
|                         | Diagnosis                                          | " DIAGNOS" " CASE DETECTION " " MICROSCOPY " " BLOOD SURVEY" " BIOLOGICAL TESTING " " EDT " " LAMP " " RDT "                                                                                                                                                                                                                                 |
|                         | Community outreach                                 | " COMMUNITYOUTREACH " " OUTREACH " " COMMUNITY MOBILIZATION" " AWARE" " COMMUNICATION STRATEGY " " SOCIAL COMMUNICATION " " PARTNERSHIP" " " ACTIVITIES NEAR COMMUNITIES " " BCC " " BEHAVIORAL CHANGE COMMUNICATION " " BEHAVIOURAL CHANGE COMMUNICATION " " BEHAVIOR CHANGE "                                                              |

| Health focus area level                 | Program area                               | Keywords                                                                                                                                                                                                                                                                                                                                                                                                                                                                                                                                                                                                                                                                                                                                                                                                                                                                                       |
|-----------------------------------------|--------------------------------------------|------------------------------------------------------------------------------------------------------------------------------------------------------------------------------------------------------------------------------------------------------------------------------------------------------------------------------------------------------------------------------------------------------------------------------------------------------------------------------------------------------------------------------------------------------------------------------------------------------------------------------------------------------------------------------------------------------------------------------------------------------------------------------------------------------------------------------------------------------------------------------------------------|
|                                         |                                            | COMMUNICATION " " BEHAVIOUR CHANGE<br>COMMUNICATION " " SOCIAL MOBILIZATION "                                                                                                                                                                                                                                                                                                                                                                                                                                                                                                                                                                                                                                                                                                                                                                                                                  |
|                                         | Vector control: bednets                    | " BEDNET" " BED NET" " SMITN " " ITN " " LLIN " " INSECTICIDAL NET" " INSECTICIDE TREAT"                                                                                                                                                                                                                                                                                                                                                                                                                                                                                                                                                                                                                                                                                                                                                                                                       |
|                                         | Vector control: irs                        | " INDOORRESIDUALSPRAY" " IRS " " REDUCE THE PARASITE RESERVOIR " " FOGGING " " COILS " " LARVICID" " LARVACID" " VECTOR CONTROL" "RESIDUAL SPRAY" " RESIDUALSSPRAY " "INDOOR SPRAY" " INDOORSPRAY "                                                                                                                                                                                                                                                                                                                                                                                                                                                                                                                                                                                                                                                                                            |
|                                         | Vector control: other than bednets and irs | " PREVENT" " IPT " " SMC " " SEASONAL MALARIA CHEMOPREVENTION "                                                                                                                                                                                                                                                                                                                                                                                                                                                                                                                                                                                                                                                                                                                                                                                                                                |
|                                         | Treatment                                  | " ARTEMISININ " " PRIMAQUINE " " ACT " " DRUG" " TREAT" " CASE MANAGEMENT " " COMBINATION THERAPY " " ANTI MALARIAL " " ANTIMALARIAL " " CHLOROQUINE "                                                                                                                                                                                                                                                                                                                                                                                                                                                                                                                                                                                                                                                                                                                                         |
|                                         | Antimicrobial resistance                   | " ANTIMICROBIAL RESISTAN" " ANTI MICROBIAL RESISTAN" " ANTIBIOTIC RESISTAN" " AMR " "DRUG RESISTAN" " MDR " " XDR " " RESISTANCE TESTING " " DRUG SUSCEPTIBILITY TESTING " " DST " " SECOND LINE "                                                                                                                                                                                                                                                                                                                                                                                                                                                                                                                                                                                                                                                                                             |
| <b>Reproductive and maternal health</b> | envelope/other                             | " FERTILITY " " FAMILY PLANNING " " FP " " BIRTH" " WOMEN HEALTH " " WOMEN S HEALTH " " WOMENS HEALTH " " CONTRACEP" " IPPF " " PLANNED PARENTHOOD " " ABORTION" " UNFPA " " POSTPARTUM " " POST PARTUM " " MATERNAL " " MATERNITY " " MOTHER" " SBA " " ANTENATAL " " PRENATAL " " PERINATAL " " POSTNATAL " " FETUS" " FETAL" " IPTP " " REPRODUCTIVE HEALTH " " OBSTETRIC" " PREGNANC" " RH " " REPROD " " RHCS " " SEXUAL HEALTH " " SYPHILIS " " FISTULA " " ANEMI" " ANAEMI" " FOETUS" " FOETAL " " FGM " " FEMALE GENITAL MUTILATION " " FEMALE GENITAL CUTTING " " FEMALE CIRCUMCISION " " SBAS " " OBSTRUCTED LABOR " " OBSTRUCTED LABOUR " " MNCH" " RNCH " " RCH " " RNH " " MNH " " MCH " " EMAS " " MCNH " " PMNCH " "ECLAMPSIA " " PRETERM " " ANC " " WCAH " " TBA " " TBAS " " BIRTH ATTENDANT" " CESAREAN" " CAESAREAN" " C SECTION" " STI " " STD " " SEXUALLY TRANSMITTED " |
|                                         | Family planning                            | " FERTILITY " " FAMILY PLANNING " " FP " " BIRTH SPACING " " CONTRACEPT" " FAMILY SIZE" " IPPF " " PLANNED PARENTHOOD " " ABORTION" " BIRTH CONTROL " " CONDOM" " IUD " " VASECTOMY " " TUBULAR LIGATION"                                                                                                                                                                                                                                                                                                                                                                                                                                                                                                                                                                                                                                                                                      |
|                                         | Maternal health                            | " POSTPARTUM " " POST PARTUM " " MATERNAL HEALTH " " MATERNAL MORTALITY " " MATERNAL DEATH" " SAFE MOTHERHOOD " " BIRTH ATTENDANT" " SBA " " ANTENATAL " " PRENATAL " " PERINATAL " " POSTNATAL " " FETUS" " FETAL" " IPTP " " MATERNITY " " OBSTETRIC" " PREGNANC" " FISTULA " " SEPSIS " " SEPTICEMIA " " ANEMI" " ANAEMI" " FOETUS" " FOETAL " " SBAS " " OBSTRUCTED LABOR " " OBSTRUCTED LABOUR " " DELIVERY ROOM" " CHILD DELIVERY " " MIDWIV" " MIDWIFE" "ECLAMPSIA " " PRETERM " " ANC " " TBA " " TBAS " " CESAREAN" " CAESAREAN" " C SECTION" " MNH " " MCH " " MNCH " " MCNH "                                                                                                                                                                                                                                                                                                       |

| Health focus area level          | Program area            | Keywords                                                                                                                                                                                                                                                                                                                                                                                                                                                                                                                                                                                                                                                                                                                                                                                                                                                                                                                                                                                                                                                                                                     |
|----------------------------------|-------------------------|--------------------------------------------------------------------------------------------------------------------------------------------------------------------------------------------------------------------------------------------------------------------------------------------------------------------------------------------------------------------------------------------------------------------------------------------------------------------------------------------------------------------------------------------------------------------------------------------------------------------------------------------------------------------------------------------------------------------------------------------------------------------------------------------------------------------------------------------------------------------------------------------------------------------------------------------------------------------------------------------------------------------------------------------------------------------------------------------------------------|
| <b>Newborn and child health</b>  | envelope/other          | " NEONATAL " " PERINATAL " " POSTNATAL " " MALNUTRITION " " VITAMIN A " " BREAST FE " " BREASTFE " " MICRONUTRIENT " " FORTIFICATION " " STUNT " " WASTING " " BABY FRIENDLY HOSPITAL INITIATIVE " " BREASTMILK " " BREAST MILK " " IODINE " " IODIZED " " IODIZATION " " VAD " " LACTAT " " FOLIC ACID " " FOLAT " " VACCIN " " IMMUNIZ " " POLIO " " DIPHThERIA " " TETANUS " " PERTUSSIS " " DTP " " HIB " " ROTAVIRUS " " MEASLES " " IMMUNIS " " HEPB " " INJECTION SAFETY " " RUBELLA " " MENINGITIS " " PENTA " " PENTAVALENT " " PNEUMONIA " " PNEUMOCOCC " " HAEMOPHILUS INFLUENZAE " " TETRA " " GAVI " " CHILDHEALTH " " CHILD HEALTH " " CHILDREN " " INFANT " " NEWBORN " " CHILD MORTALITY " " UNDER FIVE MORTALITY " " CHILD SURVIVAL " " CHILDHOOD ILLNESS " " LRI " " RESPIRATORY INFECTION " " DIARRHEA " " DIARRHOEA " " ORAL REHYDRATION " " ORT " " ORS " " UNICEF " " MNCH " " RNCH " " RCH " " RNH " " MNH " " MCH " " EMAS " " MCNH " " POLIOVIRUS "                                                                                                                                 |
|                                  | Child/newborn nutrition | " NUTRITION " " MALNUTRITION " " BIRTH WEIGHT " " BIRTHWEIGHT " " VITAMIN A " " BREAST FE " " BREASTFE " " FEEDING " " MICRONUTRIENT " " ZINC " " FORTIFICATION " " STUNT " " WASTING " " UNDERWEIGHT " " BABY FRIENDLY HOSPITAL INITIATIVE " " BREASTMILK " " BREAST MILK " " IODINE " " IODIZED " " IODIZATION " " VAD " " LACTAT " " FOLIC ACID " " FOLAT " " IRON " " DEWORMING "                                                                                                                                                                                                                                                                                                                                                                                                                                                                                                                                                                                                                                                                                                                        |
|                                  | Child/newborn vaccines  | " POLIO " " VACCIN " " IMMUNIZ " " DIPHThERIA " " TETANUS " " PERTUSSIS " " DTP " " HIB " " ROTAVIRUS " " MEASLES " " IMMUNIS " " HEPB " " INJECTION SAFETY " " RUBELLA " " MENINGITIS " " PENTA " " PENTAVALENT " " PNEUMONIA " " PNEUMOCOCC " " HAEMOPHILUS INFLUENZAE " " TETRA " " GAVI " " POLIOVIRUS " " DPT " " PCV "                                                                                                                                                                                                                                                                                                                                                                                                                                                                                                                                                                                                                                                                                                                                                                                 |
| <b>Non-communicable diseases</b> | envelope/other          | " TOBACCO " " SMOK " " CIGAR " " FCTC " " TFI " " SCHIZOPHRENIA " " MENTAL HEALTH " " NEUROTIC " " NEUROSES " " NEUROLOGICAL " " PSYCHOLOG " " PSYCHIATR " " EMOTIONAL DISORDER " " OBSESSIVE COMPULSIVE " " OCD " " PTSD " " POST TRAUMATIC " " POSTTRAUMATIC " " ALCOHOL DEPENDEN " " ALCOHOL ABUSE " " ADDICTION " " BEHAVIORAL DISORDER " " DRUG ABUSE " " SUBSTANCE ABUSE " " OPIOID " " COCAINE " " AMPHETAMIN " " DEPRESSIVE DISORDER " " DEPRESSION " " DYSTHYMIA " " BIPOLAR " " ANXIETY " " EATING DISORDER " " PHOBIA " " DRUG DEPENDEN " " ATTENTION DEFICIT HYPERACTIVITY DISORDER " " ADHD " " PANIC DISORDER " " SELF HARM " " STRESS DISORDER " " SUBSTANCE USE DISORDER " " DRUG USE DISORDER " " MENTAL ILLNESS " " MENTAL DISORDER " " PSYCHOSOCIAL " " PSYCHO SOCIAL " " HEROIN " " OXYCODONE " " ATTENTION DEFICIT DISORDER " " SUICIDE PREVENTION " " HEADACHE " " ANOREXIA " " BULIMIA " " HYPERKINETIC DISORDER " " PERSONALITY DISORDER " " FETAL ALCOHOL SYNDROME " " PSYCHOSIS " " DOWN SYNDROME " " DOWN S SYNDROME " " DOWNS SYNDROME " " AUTISM " " ASPERGER " " DEVELOPMENTAL |

| Health focus area level | Program area | Keywords                                                                                                                                                                                                                                                                                                                                                                                                                                                                                                                                                                                                                                                                                                                                                                                                                                                                                                                                                                                                                                                                                                                                                                                                                                                                                                                                                                                                                                                                                                                                                                                                                                                                                                                                                                                                                                                                                                                                                                                                                                                                                                                                                                                                                                                                                                                                                                                                                                                                                                                                                                                                                                                                                                                                                  |
|-------------------------|--------------|-----------------------------------------------------------------------------------------------------------------------------------------------------------------------------------------------------------------------------------------------------------------------------------------------------------------------------------------------------------------------------------------------------------------------------------------------------------------------------------------------------------------------------------------------------------------------------------------------------------------------------------------------------------------------------------------------------------------------------------------------------------------------------------------------------------------------------------------------------------------------------------------------------------------------------------------------------------------------------------------------------------------------------------------------------------------------------------------------------------------------------------------------------------------------------------------------------------------------------------------------------------------------------------------------------------------------------------------------------------------------------------------------------------------------------------------------------------------------------------------------------------------------------------------------------------------------------------------------------------------------------------------------------------------------------------------------------------------------------------------------------------------------------------------------------------------------------------------------------------------------------------------------------------------------------------------------------------------------------------------------------------------------------------------------------------------------------------------------------------------------------------------------------------------------------------------------------------------------------------------------------------------------------------------------------------------------------------------------------------------------------------------------------------------------------------------------------------------------------------------------------------------------------------------------------------------------------------------------------------------------------------------------------------------------------------------------------------------------------------------------------------|
|                         |              | <p>DISORDER" " CONDUCT DISORDER" " INTELLECTUAL DISABILIT" " MENTAL DISAB" " MENTAL RETARDATION " " ALZHEIMER" " DEMENTIA" " EPILEPSY " " MIGRAINE " " PARKINSON" " MENTALLY DISAB" " NERVOUS SYSTEM" " SYNAPSE" " NON COMMUNICABLE " " NONCOMMUNICABLE " " CANCER" " CHEMOTHERAPY " " RADIATION " " NEOPLAS" " TUMOR " " LEUKEMIA " " LYMPHOMA " " MYELOMA " " HPV " " HUMAN PAPILLOMA VIRUS " " HEP C " " HEPATITIS C " " DIABET" " INSULIN " " ENDOCRINE " " RHEUMAT" " ISCHAEMIC " " ISCHEMIC " " CIRCULATORY " " CIRRHOSIS " " DIGESTIVE DISEASE" " OTHER DIGESTIVE " " PEPTIC " " APPENDICITIS " " GASTRITIS " " GENITOURINARY " " UROGENITAL " " MUSCULOSKELETAL " " GOUT " " BACK PAIN " " MACULAR " " HEARING " " AUDIOLOG" " PERIODONTAL " " CARIES " " CONGENITAL " " OBESITY " " OVERWEIGHT " " GLAUCOMA " " HYPERTENSI" " HERNIA " " ARTHRITIS " " CLEFT LIP" " CLEFT PALATE" " PHENYLKETONURIA " " SICKLE CELL" " DREPANOCYTOSIS " " HEMOPHILIA " " HAEMOPHILIA " " THALASSEMIA " " GENETIC DISORDER" " HEART DISEASE" " CHRONIC RESPIRATORY " " COPD " " STROKE " " CATARACT" " CHRONIC OBSTRUCTIVE PULMONARY DISEASE" " ASTHMA " " SKIN DISEASE" " DERMATITIS " " PSORIASIS " " SCABIES " " PHYSICAL DISAB" " DENTAL " " ORAL HEALTH " " CVD " " IHD " " CKD " " KIDNEY DISEASE" " MSK " " EYE " " CEREBROVASCULAR " " VASCULAR " " BLOOD PRESSURE " " ACUTE GLOMERULONEPHRITIS " " ALOPECIA AREATA " " ANEURYSM " " ANGINA " " ARTERY " " ATHEROSCLEROSIS " " ATRIAL FIBRILLATION" " ATRIAL FLUTTER " " BENIGN PROSTATIC HYPERPLASIA " "BLASTOMA" " BLIND " " PREVENTABLE BLINDNESS " " AVOIDABLE BLINDNESS " " BLOOD DISORDER" " BRONCHITI" " CARCINOMA " " CARDIAC " " CARDIO" " CELLULITIS " " CEREBRAL " " CORONARY " " DEAF" " DECUBITUS ULCER " "DIALYSIS" " DUODENITIS " " ECZEMA " " EKZEMA " " EDENTULISM " " ENDOCARDITIS " " FIBROSIS " " G6PD DEFICIENCY " " GALL BLADDER " " BILE DUCT " " GLYCEMI" " GLYCAEMI" " HEMOGLOBINOPATH" " HEMOLYTIC ANEMIA " " HODGKIN" " INSOMNIA " " INTERSTITIAL LUNG DISEASE" " INTESTINAL OBSTRUCTION" " LEUKAEMIA " " MELANOMA" " MULTIPLE SCLEROSIS " " MYOCARD" " NCD " " NECK PAIN " " NEPHRITIS " " NEPHROSIS " " NEURAL TUBE DEFECT" " NEURODEGENERATIVE " " INFLAMMATORY BOWEL" " ONCOLOG" " OPTICAL " " OSTEOMYELITIS " " OTITIS MEDIA " " PANCREATITIS " " PARALYTIC ILEUS " " PERITONEAL " " PNEUMOCONIOSIS " " PROSTATE " " PRURITUS " " SARCOIDOSIS " " PYELONEPHRITIS " " REFRACTIVE ERROR" " RENAL " " RETINA " " SARCOMA " " SUBCUTANEOUS DISEASE" " URINARY DISEASE" " URINARY TRACT INFECTION" " UROLITHIASIS " " URTICARIA " " VENTRICULAR " " VISION LOSS " " ACCOMODATION DISORDER" " SENSE ORGAN " " GUILLAIN BARRE SYNDROME" " IMPETIGO " " LOSE WEIGHT " " BIRTH</p> |

| Health focus area level             | Program area   | Keywords                                                                                                                                                                                                                                                                                                                                                                                                                                                                                                                                                                                                                                                                                                                                                                                                                                                                                                                                                                                                                                                                                                                                                                                                                                                             |
|-------------------------------------|----------------|----------------------------------------------------------------------------------------------------------------------------------------------------------------------------------------------------------------------------------------------------------------------------------------------------------------------------------------------------------------------------------------------------------------------------------------------------------------------------------------------------------------------------------------------------------------------------------------------------------------------------------------------------------------------------------------------------------------------------------------------------------------------------------------------------------------------------------------------------------------------------------------------------------------------------------------------------------------------------------------------------------------------------------------------------------------------------------------------------------------------------------------------------------------------------------------------------------------------------------------------------------------------|
|                                     |                | DEFECT" "PAPILLOMAVIRUS" " GENE DEFECT" " PHYSICALLY DISAB" " TUMOUR" " BRAIN INJUR" " MAMMOGRA" " ANTITUMOR " " ANTITUMOUR " " BARIATRIC" " FATTY LIVER" " IMMUNOTHERAPY " " CHROMOSOMAL ABERRATION" " PERIODONTITIS " " OSTEOPOROSIS " "MALIGNANC" " NEURON"                                                                                                                                                                                                                                                                                                                                                                                                                                                                                                                                                                                                                                                                                                                                                                                                                                                                                                                                                                                                       |
|                                     | Mental health  | " SCHIZOPHRENIA " " MENTAL HEALTH " " NEUROTIC " " NEUROSI " " NEUROSES " " NEUROLOGICAL " " PSYCHOLOG" " PSYCHIATR" " EMOTIONAL DISORDER" " OBSESSIVE COMPULSIVE " " OCD " " PTSD " " POST TRAUMATIC " " POSTTRAUMATIC " " ALCOHOL DEPENDEN" " ALCOHOL ABUSE " " ADDICTION " " BEHAVIORAL DISORDER" " DRUG ABUSE " " SUBSTANCE ABUSE " " OPIOID " " COCAINE " " AMPHETAMIN" " DEPRESSIVE DISORDER" " DEPRESSION " " DYSTHYMIA " " BIPOLAR " " ANXIETY " " EATING DISORDER " " PHOBIA " " DRUG DEPENDEN" " ATTENTION DEFICIT HYPERACTIVITY DISORDER " " ADHD " " PANIC DISORDER" " SELF HARM " " STRESS DISORDER" " SUBSTANCE USE DISORDER" " DRUG USE DISORDER" " MENTAL ILLNESS" " MENTAL DISORDER" " PSYCHOSOCIAL " " PSYCHO SOCIAL " " HEROIN " " OXYCODONE " " ATTENTION DEFICIT DISORDER " " SUICIDE PREVENTION" " HEADACHE " " ANOREXIA " " BULIMIA " " HYPERKINETIC DISORDER" " PERSONALITY DISORDER" " FETAL ALCOHOL SYNDROME" " PSYCHOSIS " " DOWN SYNDROME " " DOWN S SYNDROME " " DOWNS SYNDROME " " AUTISM " " ASPERGER " " DEVELOPMENTAL DISORDER" " CONDUCT DISORDER" " INTELLECTUAL DISABILIT" " MENTAL DISAB" " MENTAL RETARDATION " " ALZHEIMER" " DEMENTIA" " EPILEPSY " " MIGRAINE " " PARKINSON" " MENTALLY DISAB" " NERVOUS SYSTEM" " SYNAPSE" |
|                                     | Tobacco        | " TOBACCO" " SMOK" "CIGAR" " FCTC " " TFI "                                                                                                                                                                                                                                                                                                                                                                                                                                                                                                                                                                                                                                                                                                                                                                                                                                                                                                                                                                                                                                                                                                                                                                                                                          |
| <b>SWAps/ Health sector support</b> | envelope/other | " SWAP" " TRAINING " " CAPACIT" " DATA SYSTEM" " SECTOR WIDE APPROACH" " HEALTH SYSTEM" " SECTOR PROGRAM" " BUDGET SUPPORT" " SECTOR SUPPORT " " HSS " " TRACKING PROGRESS " " SKILLED WORKER" " HEALTH WORKER" " SKILLED STAFF " " HEALTH PROFESSIONAL" " FACILITIES " " ESSENTIAL MEDICINES " " POLICY DEVELOPMENT" " MEDICAL EQUIPMENT" " SURGICAL EQUIPMENT" " HOSPITAL EQUIPMENT" " HOSPITAL EQMT " " INSTITUTIONAL STRENGTHENING " " HSPSP " " M&E " " M & E " " MONITORING " " SURVEILLANCE " " GOVERNANCE " " HUMAN RESOURCE" " HUMAN CAPITAL " " SCALING UP " " REALLOCATE RESOURCES " " STRATEGIES AND PROGRAM" " HIV STRATEG" " PROGRAM IN COUNTRY ACTIVITIES " " STRATEGIC INFORMATION " " PROCUREMENT " "                                                                                                                                                                                                                                                                                                                                                                                                                                                                                                                                               |

| Health focus area level | Program area          | Keywords                                                                                                                                                                                                                                                                                                                                                                                                                                                                                                                                                                                                                                                                                                                                                                                                                                                                                                                                                                                                                                       |
|-------------------------|-----------------------|------------------------------------------------------------------------------------------------------------------------------------------------------------------------------------------------------------------------------------------------------------------------------------------------------------------------------------------------------------------------------------------------------------------------------------------------------------------------------------------------------------------------------------------------------------------------------------------------------------------------------------------------------------------------------------------------------------------------------------------------------------------------------------------------------------------------------------------------------------------------------------------------------------------------------------------------------------------------------------------------------------------------------------------------|
|                         |                       | EVIDENCE BASED " " CASE REPORTING " " MEDICAL WORKER" " HEALTH CARE PERSONNEL " " OPERATIONAL RESEARCH " " SUPPORTIVE ENVIRONMENT " " INFORMATION SYSTEM" " WORKFORCE " " INFRASTRUCTUR" " MEDICAL EDUCATION " " CASE NOTIFICATION " " CASE FINDING " " LABORATORY STRENGTHENING " " LABORATORY QUALITY " " LABORATORY NETWORK" " CONTROL SERVICES " " INFECTION CONTROL " " CONTROL PROGRAM" " SCALE UP" " STOP TB STRATEGY " " HEALTH EDUCATION " " CONTINUING EDUCATION " " SUPPLY " " HEALTH MANAGEMENT" " HEALTH POLICY " " MANAGEMENT AND COORDINATION " " ADMINISTRATIVE MANAGEMENT " " MANAGEMENT AND ADMINISTRATION " " COLD CHAIN" " HEALTH PROMOTION " " TECHNICAL ASSISTANCE " " DSS " " DISTRIBUTION SYSTEMS " " SERVICE DELIVERY " " BUILDINGS " " HEALTH FACILIT" " CONSTRUCT" " MEDICAL SCHOOL" "CENTERS OF EXCELLENCE" "NURSE" "DOCTOR" "PHYSICIAN" "MEDICAL LABORATORY SCIENTIST" "SURGEON" "SPECIALIST" "PHARMACIST" "HEALTH LABOR" "LABOR MARKET" "PERSONNEL" "MEDICAL PRACTITIONER" "DENTAL PRACTITIONER" "TASK SHIFTING" |
|                         | Human resources       | " INFRASTRUCTUR" " MEDICAL EQUIPMENT" " SURGICAL EQUIPMENT" " HOSPITAL EQUIPMENT" " HOSPITAL EQMT " " BUILDINGS " " HEALTH FACILIT" " CONSTRUCT" " MEDICAL SCHOOL" "CENTERS OF EXCELLENCE" " TRAINING " " CAPACIT" " SKILLED WORKER" " HEALTH WORKER" " SKILLED STAFF " " HEALTH PROFESSIONAL" " HUMAN RESOURCE" " HUMAN CAPITAL " " MEDICAL WORKER" " WORKFORCE " " MEDICAL EDUCATION " " HEALTH EDUCATION " " CONTINUING EDUCATION " " HEALTH MANAGEMENT" " MANAGEMENT AND COORDINATION " " ADMINISTRATIVE MANAGEMENT " " MANAGEMENT AND ADMINISTRATION " "NURSE" "DOCTOR" "PHYSICIAN" "MIDWIFE" "MIDWIVES" "MEDICAL LABORATORY SCIENTIST" "SURGEON" "SPECIALIST" "PHARMACIST" "HEALTH LABOR" "LABOR MARKET" "PERSONNEL" "MEDICAL PRACTITIONER" "DENTAL PRACTITIONER" "TASK SHIFTING" " TECHNICAL ASSISTANCE "                                                                                                                                                                                                                               |
|                         | Pandemic preparedness | " PANDEMIC PREPAREDNESS " " PANDEMIC RESPONSE" " PANDEMIC ALERT" " EPIDEMIC ALERT" " EPIDEMIC RESPONSE" " EPIDEMIC PREPAREDNESS " " OUTBREAK RESPONSE" " OUTBREAK ALERT" " OUTBREAK PREPAREDNESS " " PANDEMIC INFLUENZA " " EPIDEMIOLOGICAL INVESTIGATION" " CONTACT MANAGEMENT " " PREPAREDNESS AND RESPONSE PLAN" " PREPAREDNESS & RESPONSE PLAN" " BIOSAFETY MEASURE" "EARLY WARNING " " HEALTH SECURITY PREPAREDNESS " " HEALTH SECURITY RISK ASSESSMENT " " RAPID RESPONSE STRATEG"                                                                                                                                                                                                                                                                                                                                                                                                                                                                                                                                                       |

| Health focus area level   | Program area             | Keywords                                                                                                                                                                                                                                                                                                                                                                                                                                                                                                                                                                                                                                                                                                                                                                                                                                                                                                                                                                                                                          |
|---------------------------|--------------------------|-----------------------------------------------------------------------------------------------------------------------------------------------------------------------------------------------------------------------------------------------------------------------------------------------------------------------------------------------------------------------------------------------------------------------------------------------------------------------------------------------------------------------------------------------------------------------------------------------------------------------------------------------------------------------------------------------------------------------------------------------------------------------------------------------------------------------------------------------------------------------------------------------------------------------------------------------------------------------------------------------------------------------------------|
| Other infectious diseases | envelope/other           | " INFECTIOUS " " COMMUNICABLE " " TRICHURIASIS " " YELLOW FEVER " " WHIPWORM " " TRACHOMA " " SCHISTOSOMIASIS " " BILHARZIA " " SNAIL FEVER " " KAYAYAMA FEVER " " RABIES " " ONCHOCERCIASIS " " RIVER BLINDNESS " " ROBLES DISEASE " " LYMPHATIC FILARIASIS " " ELEPHANTIASIS " " LEISHMANIASIS " " LEISHMANIOSIS " " HOOKWORM " " FOOD BORNE " " FOODBORNE " " ECHINOCOCCOSIS " " HYDATID DISEASE " " HYDATIDOSIS " " DENGUE " " CYSTICERCOSIS " " CHAGAS " " TRYPANOSOMIASIS " " SLEEPING SICKNESS " " ASCARIASIS " " TROPICAL DISEASE " " CHOLERA " " DYSENTERY " " PARASITE DISEASE " " FAO " " NEGLECTED TROPICAL DISEASE " " TYPHOID " " LEPROSY " " BURULI ULCER " " EBOLA " " EBOV " " EVD " " ZIKA " " ZIKV " " GUINEA WORM " " DRACUNCULIASIS " " FILARIASIS " " HEPATITIS E " " ENCEPHALITIS " " VARICELLA " " INFLUENZA " " FLU " " NTD " " HEPATITIS A " " HEPATITIS D " " HEP A " " HEP D " " ROUNDWORM " " RINGWORM " " TAPEWORM " " FLATWORM " " CHIKUNGUNYA " " LASSA " " MERS " " NIPAH " " MARBURG " " SARS " |
|                           | Antimicrobial resistance | " ANTIMICROBIAL RESISTAN " " ANTI MICROBIAL RESISTAN " " ANTIBIOTIC RESISTAN " " AMR " " DRUG RESISTAN " " MDR " " XDR " " RESISTANCE TESTING " " DRUG SUSCEPTIBILITY TESTING " " DST " " SECOND LINE "                                                                                                                                                                                                                                                                                                                                                                                                                                                                                                                                                                                                                                                                                                                                                                                                                           |

eTable 6. Additional health focus area categorizations

| Channel               | Allocation criteria                                                                                                       | Health focus area                                   |                                         |
|-----------------------|---------------------------------------------------------------------------------------------------------------------------|-----------------------------------------------------|-----------------------------------------|
| Bilaterals and the EC | CRS purpose code 13030, family planning                                                                                   | Family planning                                     |                                         |
|                       | CRS purpose code 13020, reproductive health care                                                                          | Maternal health, non-family planning                |                                         |
|                       | CRS purpose code 12240, basic nutrition                                                                                   | Child and newborn nutrition                         |                                         |
|                       | CRS purpose code 12250, infectious disease control and the keywords “child” or “vaccine” present in descriptive variables | Child and newborn vaccines                          |                                         |
|                       | CRS purpose code 13040, STD control including HIV/AIDS                                                                    | HIV/AIDS                                            |                                         |
|                       | CRS purpose code 12262, malaria control                                                                                   | Malaria, unspecified                                |                                         |
|                       | CRS purpose code 12250, infectious disease control and no other keywords present in the descriptive variables             | Other infectious diseases                           |                                         |
|                       | CRS purpose code 12263, tuberculosis control                                                                              | Tuberculosis                                        |                                         |
|                       | CRS purpose code 12230, basic health infrastructure                                                                       | SWAPs/health system strengthening - other           |                                         |
|                       | CRS purpose code 12281, health personnel development                                                                      | SWAPs/health system strengthening - Human resources |                                         |
|                       | CRS purpose code 12281, medical education/training                                                                        | SWAPs/health system strengthening - Human resources |                                         |
|                       | World Bank IDA and IBRD                                                                                                   | Theme code population and reproductive health       | Reproductive and maternal health, other |



| <b>Channel</b>     | <b>Allocation criteria</b>                                                                                                                                                                                                                             | <b>Health focus area</b>                                                                                                        |
|--------------------|--------------------------------------------------------------------------------------------------------------------------------------------------------------------------------------------------------------------------------------------------------|---------------------------------------------------------------------------------------------------------------------------------|
|                    | Theme code tuberculosis                                                                                                                                                                                                                                | Tuberculosis, other                                                                                                             |
|                    | Theme code child health                                                                                                                                                                                                                                | Newborn and child health, other                                                                                                 |
|                    | Theme code HIV/AIDS                                                                                                                                                                                                                                    | HIV/AIDS, other                                                                                                                 |
|                    | Theme code malaria                                                                                                                                                                                                                                     | Malaria, other                                                                                                                  |
|                    | Theme code injuries and non-communicable diseases                                                                                                                                                                                                      | Non-communicable diseases, other                                                                                                |
|                    | Theme code nutrition and food security                                                                                                                                                                                                                 | Newborn and child health, nutrition                                                                                             |
|                    | Theme code other communicable diseases                                                                                                                                                                                                                 | Other infectious diseases, other                                                                                                |
|                    | Theme code health system performance                                                                                                                                                                                                                   | SWAPs/health systems strengthening, other                                                                                       |
|                    | Theme code social analysis and monitoring                                                                                                                                                                                                              | SWAPs/health systems strengthening, other                                                                                       |
| <b>UNFPA</b>       | Family planning, population and development strategies, population and development, population dynamics                                                                                                                                                | Family planning                                                                                                                 |
|                    | Reproductive health, maternal and newborn health, young people's SRH and sexuality education, HIV and STI prevention services, sexual and reproductive health, sexuality education                                                                     | Maternal health                                                                                                                 |
|                    | Gender equality and women's empowerment, gender equality and reproductive rights, program coordination and assistance, adolescents and youth, civil society and rights for all, ending harmful practices, marginalized girls, protection rights, other | Family planning and Maternal health, unspecified, according to proportions between the two.                                     |
|                    | HIV and STI prevention services, HIV and AIDS                                                                                                                                                                                                          | HIV prevention                                                                                                                  |
| <b>UNICEF</b>      | All DAH                                                                                                                                                                                                                                                | HIV prevention                                                                                                                  |
|                    |                                                                                                                                                                                                                                                        | Maternal, newborn, and child health (vaccines, maternal health, and health system strengthening)                                |
| <b>UNAIDS</b>      | The keyword search was run on budget information for years 2008-2017<br>Program components in budget documents from 1998 to 2007                                                                                                                       | All program areas under HIV/AIDS and TB                                                                                         |
| <b>UNITAID</b>     | Assigned in database received through correspondence                                                                                                                                                                                                   | HIV/AIDS (treatment, counseling and testing, prevention) , TB (treatment and diagnosis), Malaria (diagnosis and treatment), HSS |
| <b>GAVI</b>        | Vaccine DAH for HPV vaccine<br>All other vaccine DAH<br>HSS DAH                                                                                                                                                                                        | NCD other<br>Child and newborn vaccines<br>Maternal and child health HSS                                                        |
| <b>GLOBAL FUND</b> | Disease components for Malaria, HIV/AIDS, TB, TB/HIV, and Other (health systems strengthening)<br>Keyword search on program service delivery areas                                                                                                     | All program areas under Malaria, TB, HIV and Swap/HSS                                                                           |
| <b>WHO</b>         | Reproductive, maternal, newborn, child, and adolescent health (divided by 2); Research in human reproduction                                                                                                                                           | Maternal health, unspecified                                                                                                    |
|                    | Nutrition                                                                                                                                                                                                                                              | Child and newborn nutrition                                                                                                     |
|                    | Vaccine-preventable diseases                                                                                                                                                                                                                           | Child and newborn vaccines                                                                                                      |

| <b>Channel</b> | <b>Allocation criteria</b>                                                                                                                                                                                                                                                                         | <b>Health focus area</b>                                 |
|----------------|----------------------------------------------------------------------------------------------------------------------------------------------------------------------------------------------------------------------------------------------------------------------------------------------------|----------------------------------------------------------|
|                | Reproductive, maternal, newborn, child and adolescent health (divided by 2)                                                                                                                                                                                                                        | Child and newborn health, unspecified                    |
|                | Aging and health; gender, equity and human rights mainstreaming                                                                                                                                                                                                                                    | Maternal, newborn, and child health, unspecified         |
|                | HIV/AIDS                                                                                                                                                                                                                                                                                           | HIV/AIDS                                                 |
|                | Malaria                                                                                                                                                                                                                                                                                            | Malaria                                                  |
|                | Tuberculosis                                                                                                                                                                                                                                                                                       | Tuberculosis                                             |
|                | Mental health and substance abuse                                                                                                                                                                                                                                                                  | Non-communicable diseases, mental health                 |
|                | Disabilities and rehabilitation; Non-communicable diseases; Violence and injuries                                                                                                                                                                                                                  | Non-communicable diseases, unspecified                   |
|                | Neglected tropical diseases; Tropical disease research; Infectious hazard management; Outbreak and crisis response (50%); Alert and response capacities (50%)                                                                                                                                      | Other infectious diseases                                |
|                | Health system information and evidence; Integrated people-centered health services; National health policies, strategies and plans; Access to medicines and health technologies and strengthening regulatory capacity; health emergency information and risk assessment (50%)                      | SWAps/health system strengthening                        |
|                | Country health emergency preparedness and the International Health Regulations; health emergency information and risk assessment(50%); Emergency operations; Emergency core services; Outbreak and crisis response(50%); Epidemic- and pandemic-prone diseases; Alert and response capacities(50%) | SWAps/health system strengthening, pandemic preparedness |
|                | Social determinants for health; Health and the environment; Food safety; Antimicrobial resistance                                                                                                                                                                                                  | Other                                                    |
| <b>PAHO</b>    | HIV/AIDS and STIs; HIV/AIDS, TB and malaria (33%)                                                                                                                                                                                                                                                  | HIV/AIDS, unspecified                                    |
|                | Tuberculosis; HIV/AIDS, TB and malaria (33%)                                                                                                                                                                                                                                                       | Tuberculosis, unspecified                                |
|                | HIV/AIDS, TB and malaria (33%); Malaria and other Vector-Borne Diseases (50%);                                                                                                                                                                                                                     | Malaria, unspecified                                     |
|                | Communicable diseases; Malaria and other Vector-Borne Diseases (50%); Neglected Tropical and zoonotic diseases                                                                                                                                                                                     | Other infectious diseases                                |
|                | Nutrition; Food Safety                                                                                                                                                                                                                                                                             | Child and newborn nutrition                              |
|                | Vaccine-Preventable Diseases                                                                                                                                                                                                                                                                       | Child and newborn vaccines                               |
|                | Women, maternal, newborn, child, and adolescent and adult health                                                                                                                                                                                                                                   | Maternal and child health, unspecified                   |
|                | Mental Health and psychoactive substance use disorders                                                                                                                                                                                                                                             | Non-communicable diseases, mental health                 |
|                | Non Communicable Diseases and Risk Factors; Chronic noncommunicable diseases                                                                                                                                                                                                                       | Non-communicable diseases, unspecified                   |
|                | Health systems leadership and governance; Human resources for health; Social protection and financing; Health systems information and evidence; Health services; People-centered integrated health services; Access to medical                                                                     | Swap/health system strengthening                         |

| Channel | Allocation criteria                                                                                                                                                                                                                                                                                    | Health focus area |
|---------|--------------------------------------------------------------------------------------------------------------------------------------------------------------------------------------------------------------------------------------------------------------------------------------------------------|-------------------|
|         | products and strengthening regulatory capacity; Health governance and financing, national health policies, strategies and plans                                                                                                                                                                        |                   |
|         | Violence and Injuries; Disabilities and Rehabilitation; Antimicrobial resistance; Aging and health; Gender, equity, human rights and ethnicity; Social determinants of health; Health and the environment; Strategic communications; Management and administration; Flexible and learning organization | Other             |

**Disaggregating preliminary estimates by health focus area**

Estimates by health focus area for years in which descriptive data were not available (usually 2018) were obtained by modeling channel-specific DAH per health focus area as a function of time. Out-of-sample validation was used to test the predictive accuracy of a large suite of models, estimating the models using 1990-2010 data and predicting 2011 and 2012. The potential models included fractional multinomial logit regression, OLS regression, autoregressive integrated moving average (ARIMA) models, epanechnikov kernel-weighted local polynomial smoothing, and multivariable fractional polynomial models. For each model, time was modeled linearly, with splines, and by including lag-dependent variables. Other methodologies considered included modeling health-focus-area-specific DAH as a dollar amount and as a fraction of the channel-specific total DAH. Lastly, models that involved transforming the dependent variable in natural log and logit transformed space were considered. In order to accommodate zero values in the logit transformation, the transformation described in Smithson and Verkuilen were applied.<sup>73</sup> Over 40 models and specifications were evaluated in total.

Each of the potential model and specification described above were estimated using data from 1990 through 2010, and then the estimated model was used to predict DAH by health focus area for 2011 and 2012. Since we have DAH estimates for 2011 and 2012, we compared the modeled estimates and the observed estimates and calculated average percent deviation and average total absolute deviation for each model and specification across all the channels and health focus areas. A variant of the Epanechnikov kernel-weighted local polynomial smoothing had the smallest average percent deviations and average total absolute error. In this model and specification, health focus area-specific DAH fractions were independently estimated at the channel level after they were logit transformed. Time was the only independent variable included in the model. The health focus area-specific DAH estimates were adjusted so the sum of the channel’s health focus area disbursements totaled channel-specific DAH envelope. Our preferred model, the Epanechnikov kernel-weighted local polynomial smoothing, minimized both the average percent deviation and the total absolute error out of sample, predicting two years ahead. See Dieleman et al. for a table that demonstrates the performance of four models, each with their optimal specification (as determined by the out-of-sample average percent deviation and total absolute error).<sup>1</sup>

[Tracking development assistance for health from bilateral aid agencies and the European Commission](#)

OECD-DAC maintains two databases on aid flows: 1) the DAC annual aggregates database, which provides summaries of the total volume of flows from different donor countries and institutions, and 2) the CRS, which contains project- or activity-level data.<sup>3</sup> This year, we used the DAC databases to track health ODA from 24 OECD-DAC members (Austria, Australia, Belgium, Canada, Denmark, Finland, France, Germany, Greece, Ireland, Italy, Japan, Luxembourg, the Netherlands, New Zealand, Norway, Portugal, South Korea, Spain, Sweden, Switzerland, the United Kingdom, the United States, and the EC), and one DAC Participant country, United Arab Emirates, for the years 1990 to 2018. Observed data for the DAC members was available from 1990 to 2017, and observed data for the United Arab Emirates was available from 2009 to 2017. United Arab Emirates bilateral health ODA from 1990 to 2008 was obtained through personal correspondence.

These two DAC databases track the following types of resource flows:

Official development assistance (ODA), defined as “flows of official financing administered with the promotion of the economic development and welfare of developing countries as the main objective”<sup>69</sup> is tracked from its 30 members (Austria, Australia, Belgium, Canada, Czech Republic, Denmark, Finland, France, Germany, Greece, Hungary, Iceland, Ireland, Italy, Japan, Luxembourg, the Netherlands, New Zealand, Norway, Poland, Portugal, Slovakia, Slovenia, South Korea, Spain, Sweden, Switzerland, the United Kingdom, the United States, and the EC). The CRS also now includes some private ODA, such as that funded by BMGF and the Global Fund to Fight AIDS, Tuberculosis and Malaria (GFATM), as well as assistance from a number of non-DAC countries such as the United Arab Emirates and Kuwait.

ODA includes:

- Bilateral ODA, which is given directly by DAC members as aid to recipient governments, core contributions to NGOs and public-private partnerships, and earmarked funding to international organizations.

- Multilateral ODA, which includes core contributions to multilateral agencies such as WHO, UNFPA, GFATM, Gavi, UNAIDS, UNICEF, PAHO, the World Bank, and other regional development banks. Only regular budgetary contributions to these institutions can be reported to the OECD-DAC; hence, extrabudgetary funds, including earmarked contributions that donors can report as bilateral ODA, are not included as multilateral ODA. Only 70% of core contributions to WHO can be counted as multilateral ODA.

a. Official development finance (ODF), which includes grants and loans made by multilateral agencies.

b. Other official flows (OOF), which refers to transactions that “do not meet the conditions for eligibility as Official Development Assistance or Official Aid, either because they are not primarily aimed at development, or because they have a Grant Element of less than 25 percent.”

The DAC aggregate tables include all multilateral development banks, GFATM, operational activities of UN agencies and funds, and a few other multilateral agencies. The project-level data in the CRS cover a smaller subset of multilateral institutions, including UNAIDS, UNFPA, UNICEF, public-private partnerships including Gavi and GFATM, some development banks, and BMGF, but do not reflect the core-funded operational activities of WHO prior to 2009, disbursements by Gavi prior to 2007 and BMGF prior to 2009, or all loans from the World Bank.

This research utilized the CRS as the principal source for tracking bilateral DAH. This is because the DAC aggregate tables do not report detailed project-level information about the recipient country and health focus area. The OECD sector codes for general health (121), basic health (122), and population programs (130) were used to identify health flows in the CRS. Only ODA related flows are used in our analysis, including OECD flow codes corresponding to ODA grants (11), ODA grant-like (12), ODA loans (13), and equity investment (19). In addition, we included select projects with OECD sector code for emergency aid (720) in order to capture additional funding for ebola and zika outbreaks. Projects with purpose code emergency food aid (72040) were excluded, and the remaining project descriptive variables were parsed for the keywords “EBOLA” and “ZIKA” to identify emergency aid projects targeting these diseases. Based on our definition of DAH, we also excluded any remaining projects containing any of the following keywords: " WATER " " SANITATION " " FOOD " " EARTHQUAKE " " HURRICANE " " TERREMOTO " " HURACAN " " FAMILY CARE STRUCTURES ".

To avoid double-counting, all identifiable earmarked commitments and disbursements between one disbursing agency to another were tagged and removed before calculating final DAH estimates. Income statements, expenditure statements, and keyword searches in the descriptive project fields were used to identify potential sources of double-counting.

In multilateral agencies, public-private partnerships, development banks, and foundations, when expenditure by recipient agency information was available, double counting was tagged and dropped in the disbursing agency from whom the resources was transferred. In the absence of detailed expenditure data in the disbursing agency that transferred resources ,the income statement of the receiving disbursing agency that reflected

the disbursement was used to flag the disbursement in the initial disbursing agency. Preliminary estimates were generated based on the annual disbursed envelope exclusive of resources flagged as transfers to other agencies.

Channel codes in the CRS data were used to track DAH to international and donor-country-based non-government organizations. The names of NGOs that were captured in IHME's NGO data (as detailed in the section titled "Tracking non-governmental organizations") were searched for in the CRS descriptive variables and tagged as double-counting. Research funds for HIV/AIDS channeled by the US government through the National Institutes for Health (NIH) were also removed from the total since they do not meet the definition of DAH as contributions from institutions whose primary purpose is development assistance. Official development finance (ODF) from the CRS was not counted because these expenditures were included elsewhere, either in the analysis of multilateral institutions relevant to the study or in the assessment of health spending by BMGF, the data for which were obtained via correspondence and from their annual reports, audited financial statements, and project databases. To avoid double-counting, only health assistance flows from multilateral institutions to low- and middle-income countries were counted, and not transfers to multilateral institutions. Also, for regional projects the disbursements are split amongst all countries in the specified OECD region. For example, a project allocated to recipient "North of Sahara, regional" would have its disbursements split equally between all the countries in the corresponding OECD region: Algeria, Egypt, Libya, Morocco, and Tunisia.

Allocation of funding to health focus areas was assigned as described in the section "DISAGGREGATING BY HEALTH FOCUS AREA", based on a keyword search of five descriptive variables in the CRS: project title, short description, long description, channel name, and channel reported name. Additional adjustments were made based on CRS purpose codes, as detailed in eTable 6, in order to ensure that the specified purpose corresponded to the highest-weighted health focus area.

### **Estimating disbursements for the 24 bilateral channels and the EC**

Both the DAC tables and the CRS rely on information reported by DAC members and other institutions to the OECD-DAC. Hence, the quality of the data varies considerably over time and across donors. Three variables were used to estimate yearly donor disbursements: CRS commitments, CRS disbursements, and DAC commitments. There were two main challenges in using the data from the CRS for this research:

1. underreporting of aid activity to the CRS compared to what is reported to the DAC, and
2. underreporting of disbursement data to the CRS compared to commitment data reported to the CRS.

These issues are highlighted in eFigure 1. Methods developed to account for both these challenges are discussed below. Details on how we estimated the cost of providing technical assistance and program support for these institutions are highlighted below in the section titled calculating the technical assistance and program support component of development assistance for health from loan-and grant-making channels of assistance.

To address these two challenges, we determined a cutoff point for each channel. We defined this channel-specific cutoff year as when the ratio of total CRS disbursements to commitments was greater than 50% and did not drop subsequently below 30%. eFigure 2 below shows each donor's CRS disbursement to commitment ratio in green, and the estimated cutoff year is marked with a vertical red line. For years after the cutoff year, DAH is measured using the unadjusted disbursement data. For the time prior to the cutoff year, it was determined that the disbursement data are not of high enough quality, and adjusted commitments were used instead.

Two adjustments were made to commitments to estimate disbursements before each donor-specific cutoff point:

- I. The first adjustment addressed underreporting of aid activity to the CRS (relative to the DAC). To address this challenge, all CRS commitments for the health sector were adjusted upward using the DAC commitment to CRS commitment coverage ratio. The coverage ratio of the CRS was well below 10% before 1996 but has improved steadily over time.

- II. The second adjustment addressed underreporting of disbursements data to the CRS (relative to commitments reported to the CRS). To address this challenge, we pooled completed projects in the CRS that have disbursement data for each channel and computed yearly project disbursement rates (the fraction of total commitments disbursed for each year of a project) and overall project disbursement rates (the fraction of total commitments disbursed over the life of each project) by project length. Yearly disbursement schedules were calculated for projects with lengths of one, two, three, four, five, and six years. When an observed project length was more than six years, all expenditure after the sixth year was aggregated and assumed to be expended in the sixth year. This does not happen often. Yearly disbursement rates were the median of these shares, averaged across projects for every donor in each project year. The sum of these averages equals one, so that all the disbursements were expended over the lifetime of a project. We also adjusted donor disbursement schedules by the ratio of disbursements to commitments in the CRS in order to reflect the fact that not all commitments are typically disbursed. The product of these donor-specific yearly disbursement rates, the donor-specific overall disbursement rates, and the donor-specific disbursement to commitment ratios produced the donor-specific disbursement schedules. The donor-specific disbursement schedules were applied to project-level DAC-adjusted commitments reported in the CRS. eFigure 3 shows the yearly disbursement rates and overall disbursement rates for projects with one- to six-year lifespans for each of the 24 member countries and the EC.

Lastly, to address the challenge of underreporting of aid activity to the CRS compared to the DAC for all years, the difference between each donor's aggregate DAC health commitments and CRS health disbursements was added to each donor's yearly DAH. Since only aggregate commitments are reported to the DAC, several adjustments were made, based on more detailed CRS data:

- I. First, each donor's yearly median project length was calculated by applying the donor-specific disbursement schedules described above to CRS projects that had disbursement in order to get adjusted DAC commitments.
- II. Commitments for projects that have not opened yet were then subtracted, based on the open date reporting in the CRS. This ensured that future disbursements were not captured.
- III. The donor-specific ratio of disbursements to commitments was applied to adjusted DAC commitments in order to account for the fact that not all commitments are usually disbursed.
- IV. Lastly, these DAC-adjusted commitments were compared to CRS disbursements, inclusive of transfers that were later dropped as double-counting.

In addition to tracking disbursements from the EC, gross disbursements from the DAC were used to compile data on the sources of funding for the EC.

### **eFigure 1 Comparing CRS commitments, CRS disbursements, and DAC commitments**

This figure compares commitments and disbursements from the Creditor Reporting System (CRS) and Development Assistance Committee (DAC) databases of the Development Assistance Committee of the Organisation for Economic Co-operation and Development (OECD-DAC) from 1990 to 2016. CRS disbursements are usually underreported when compared to both CRS and DAC commitments data, especially in earlier years. Because of this gap between CRS and DAC, CRS disbursements data were adjusted to fit DAC commitments data.

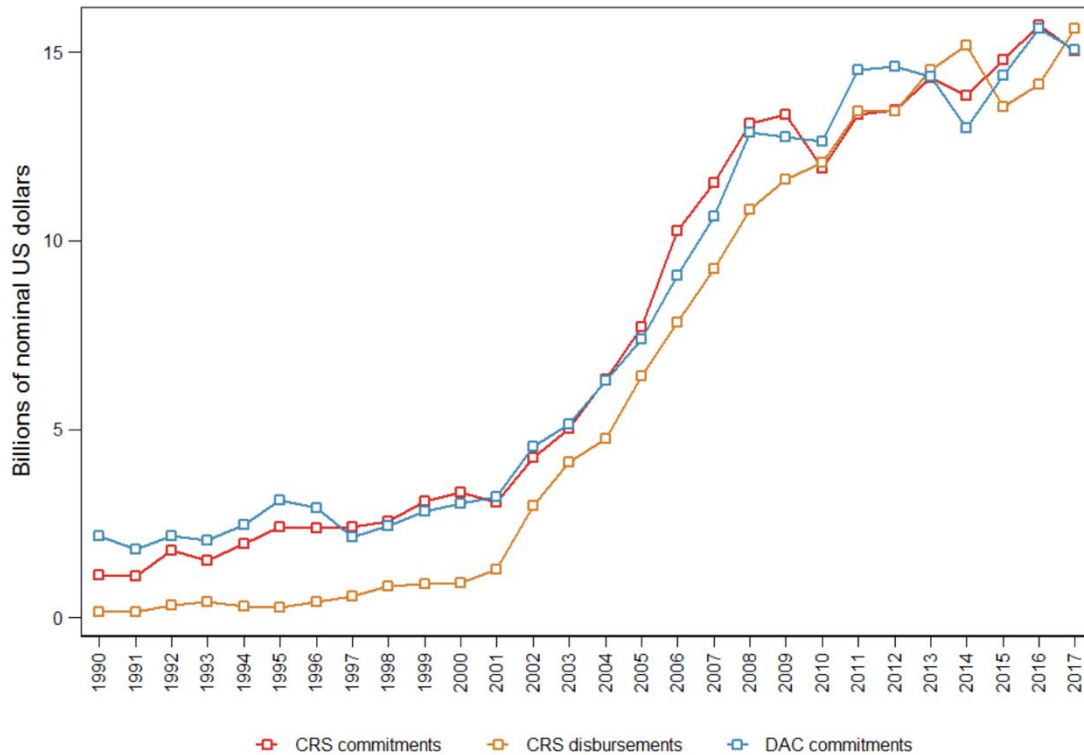

Source: OECD-DAC and OECD Creditor Reporting System

**eFigure 2 CRS disbursement to commitment ratio and cutoff points by donor agency**

This figure shows the channel-specific cutoff year. Before this year, we adjust CRS commitments using disbursement schedules. After this cutoff we rely on CRS-reported disbursements. The total CRS disbursements to commitments ratio is in green, and the cutoff year is marked with a vertical red line. The cutoff year is determined to be when the ratio goes above 50% and does not fall back below 30%. The vertical axis represents the CRS disbursement to commitment ratio as a percentage. ARE = United Arab Emirates, AUS = Australia, AUT = Austria, BEL = Belgium, CAN = Canada, CHE = Switzerland, DEU = Germany, DNK = Denmark, EC = European Commission, ESP = Spain, FIN = Finland, FRA = France, GBR = Great Britain, GRC = Greece, IRL = Ireland, ITA = Italy, JPN = Japan, KOR = South Korea, LUX = Luxembourg, NLD = the Netherlands, NOR = Norway, NZL = New Zealand, PRT = Portugal, SWE = Sweden, USA = United States of America

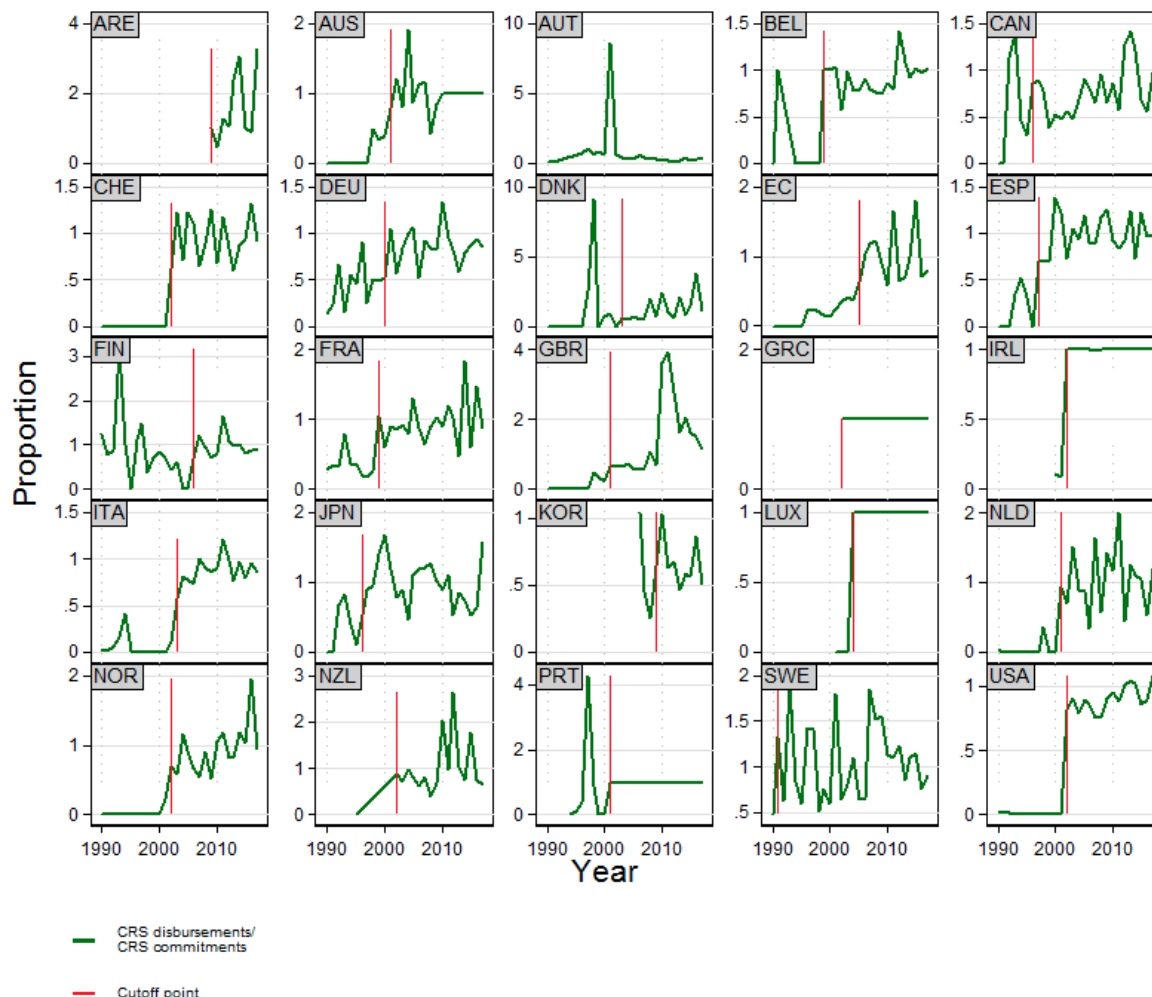

Source: OECD Creditor Reporting System

**Box 3. EXAMPLE. Australia’s CRS disbursement to commitment ratio and cutoff year**

The green line shows the ratio of Australia’s disbursements to commitments, as reported in the CRS. Prior to 2001, the ratio was always below 50%. In 2001, the ratio rose above 50%; it did not fall below 30% in subsequent years, thereby defining 2001 as the cutoff year. Thus, for Australia, before 2001 DAH is based on adjusted CRS commitment data. These data are adjusted using disbursements schedules (eFigure 3) and data from the DAC. After 2001, Australia’s DAH is based on the disbursements reported in the CRS.

**eFigure 3 One- to six-year disbursement schedules for bilateral channels**

This figure shows the estimated disbursement schedules for bilateral channels. Before the channel-specific cutoff year, we rely on commitment data to inform our estimates of DAH. Commitment data are adjusted to reflect disbursements over time using schedules estimated from projects in the CRS that have both commitment and disbursement data. The vertical axis represents the percentage of the commitment disbursed. ARE = United Arab Emirates, AUS = Australia, AUT = Austria, BEL = Belgium, CAN = Canada, CHE = Switzerland, DEU = Germany, DNK = Denmark, EC = European Commission, ESP = Spain, FIN = Finland, FRA = France, GBR = Great Britain, GRC = Greece, IRL = Ireland, ITA = Italy, JPN = Japan, KOR = South Korea, LUX = Luxembourg,



NLD = the Netherlands, NOR = Norway, NZL = New Zealand, PRT = Portugal, SWE = Sweden, USA = United States of America

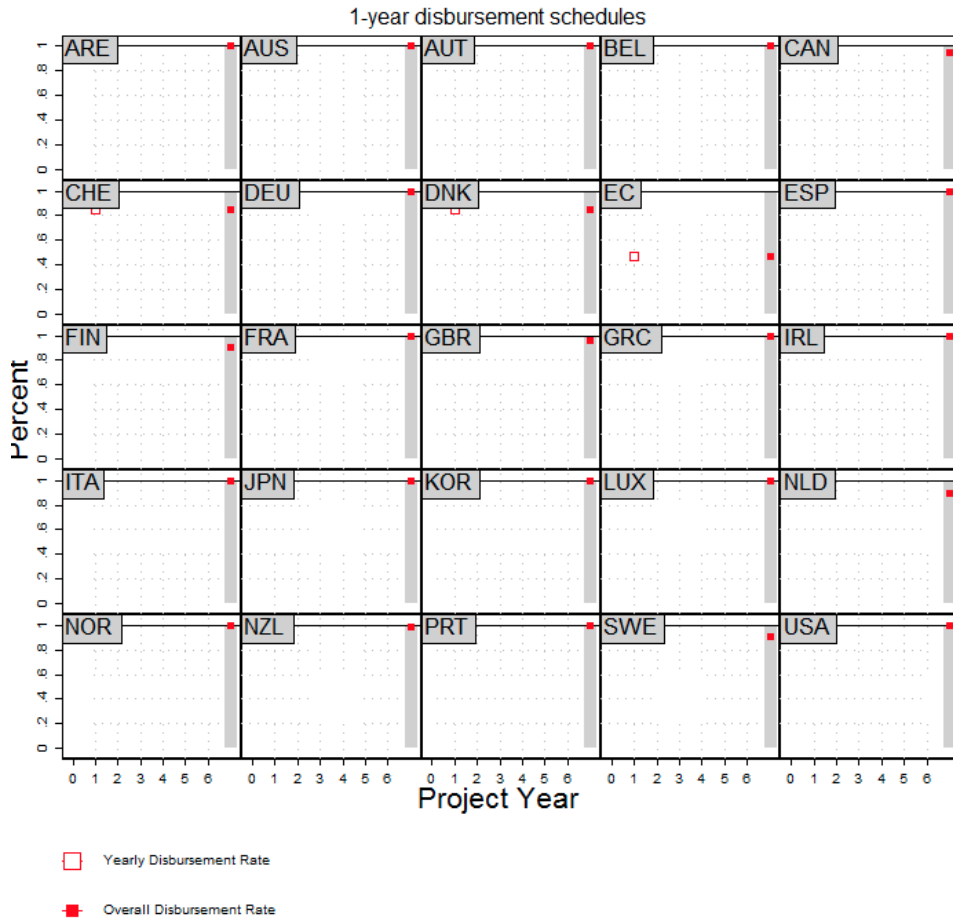

2-year disbursement schedules

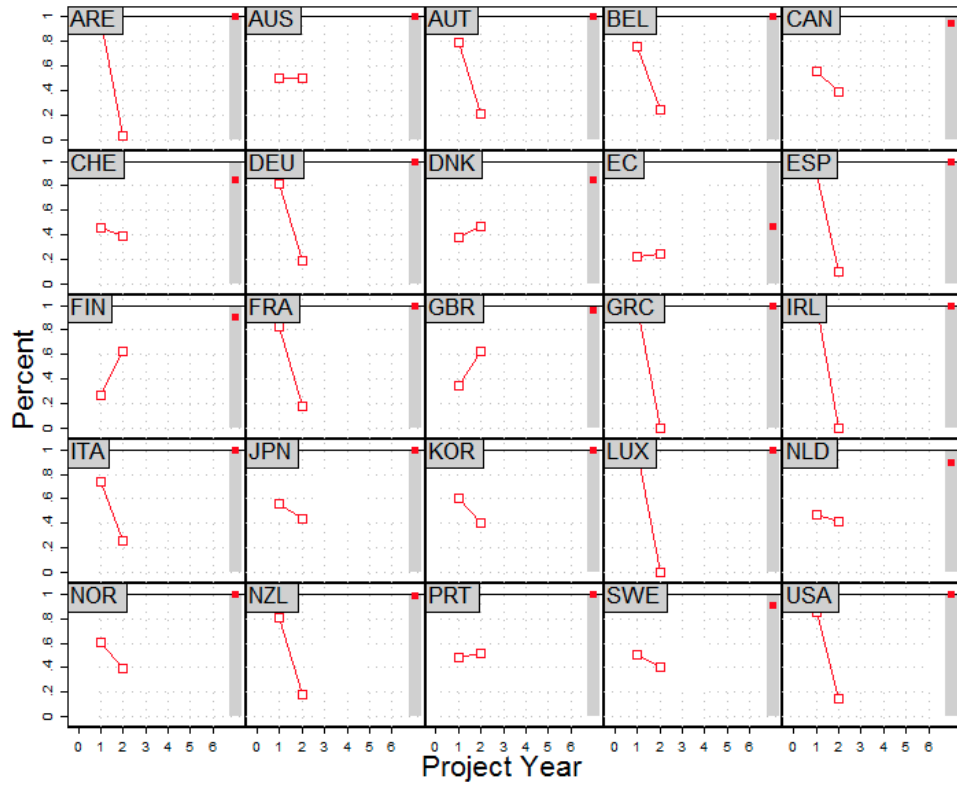

□ Yearly Disbursement Rate

■ Overall Disbursement Rate

### 3-year disbursement schedules

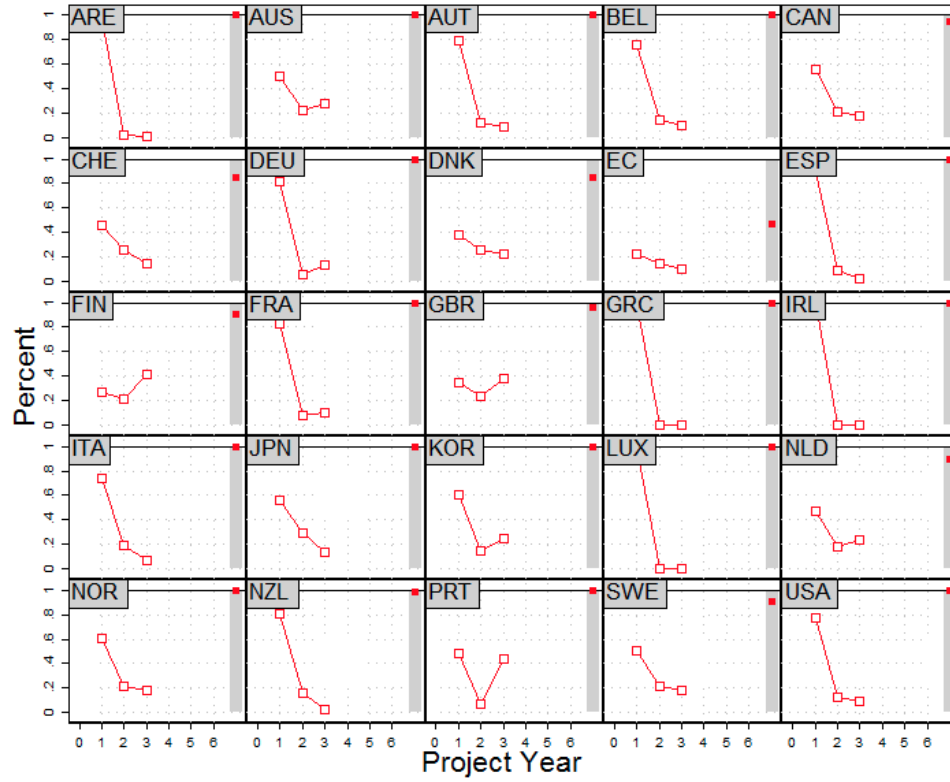

- Yearly Disbursement Rate
- Overall Disbursement Rate

4-year disbursement schedules

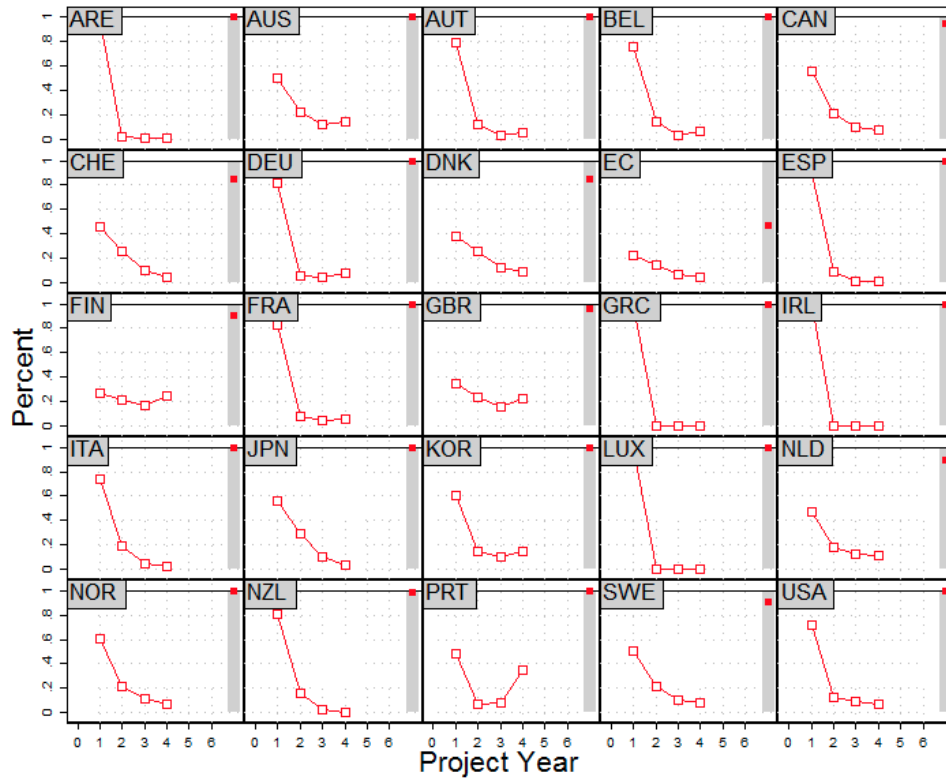

- Yearly Disbursement Rate
- Overall Disbursement Rate

5-year disbursement schedules

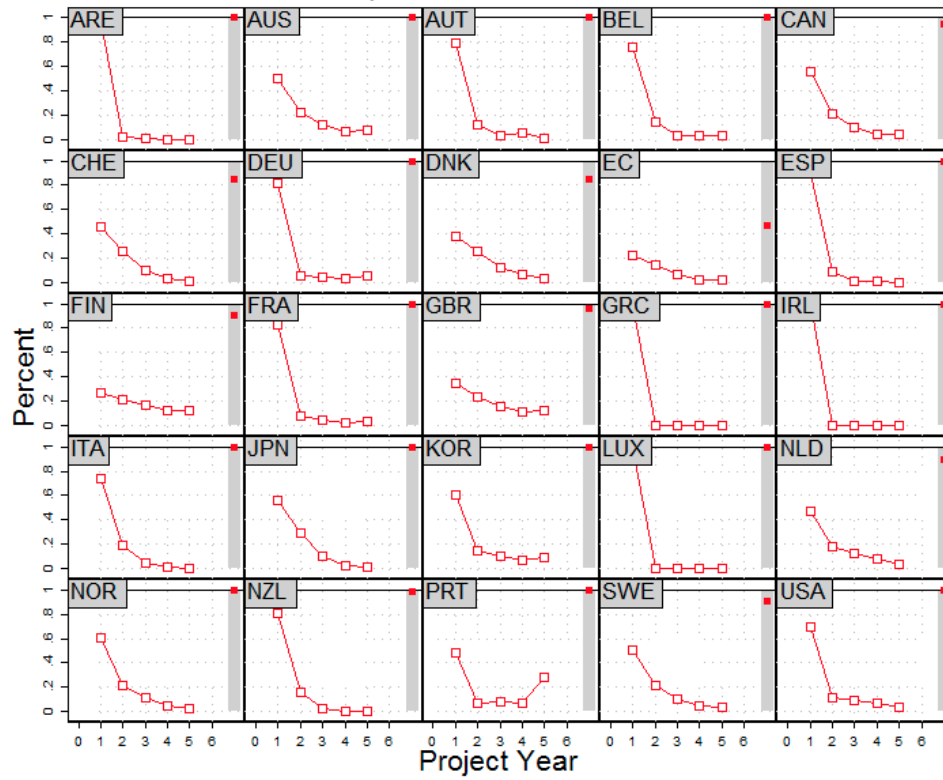

- Yearly Disbursement Rate
- Overall Disbursement Rate

6-year disbursement schedules

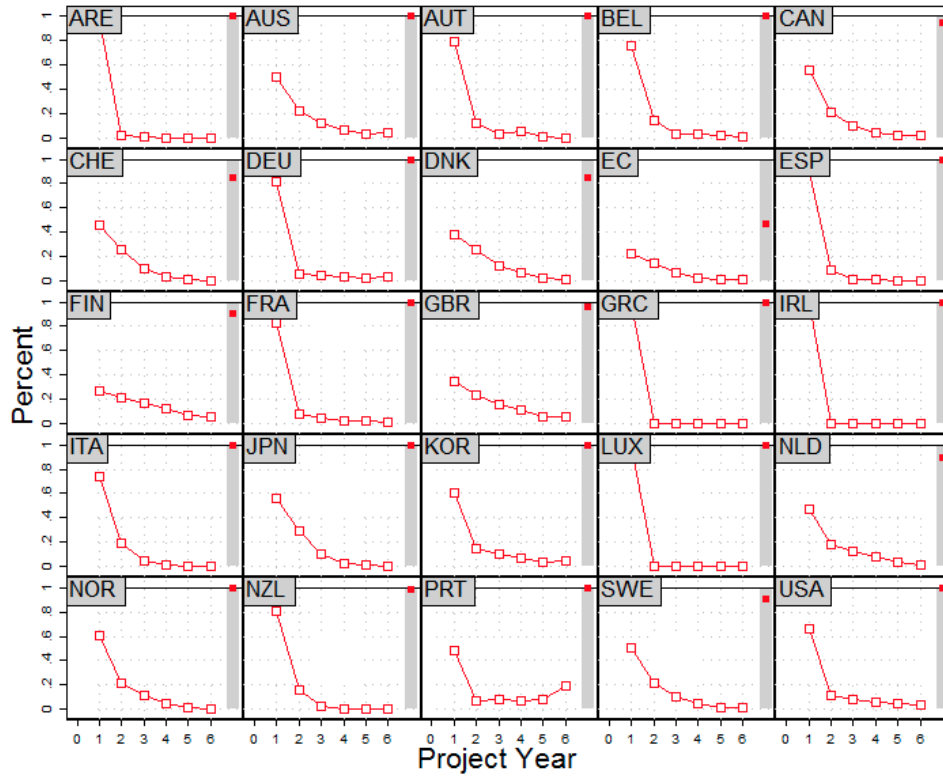

- Yearly Disbursement Rate
- Overall Disbursement Rate

**Box 4. EXAMPLE. Australia’s one- to six-year disbursement schedules**

To estimate disbursements using commitment data, we rely on disbursement schedules derived from CRS data that include both commitments and disbursements. Disbursement schedules are specific for each channel and the length of a project. These schedules also take into consideration the average amount of commitments for each channel that lead to disbursements. Across all Australian projects in the CRS with complete disbursements data, Australia disbursed 100% of the funds that it committed, as shown by the solid red dot on the right-hand side of the Australia panel (upper left corner of the first panel of eFigure 3). In projects with a length of one year, Australia disbursed 100% of the funds that it committed in that year. For two-year projects, Australia disbursed 50% of total disbursements in year one and 50% of total disbursements in year two. In projects with lengths of three years, Australia disbursed about 50% of total disbursements in year one and 23% and 27% of total disbursements in years two and three, respectively. This is estimated for projects ranging from one to six years. The disbursement schedules were applied to commitment data from the CRS to estimate disbursements for years prior to the cutoff year, which is 2001 for Australia.

To predict DAH for the recent years not reported in the CRS, budget data were extracted from a variety of sources. These data are listed in eTable 4. Global health budgetary data were utilized whenever possible, but these detailed data were available as a complete time series only for Australia and the United States. For all other bilateral channels, general ODA budgets were used. In order to predict DAH for 2018 for 24 bilateral agencies, the budget ratio for each donor was calculated by dividing DAH estimates by the corresponding budget data (ODA or global health). Budget ratios were projected using a weighted average of the previous three years (placing one-half weight on the one-year lagged ratio, one-third weight on the two-year lagged ratio, and one-sixth weight on the three-year lagged ratio), and this ratio was multiplied by the observed budgeted DAH for those same years. eFigure 4 plots the budget ratio for each bilateral channel. Budget data for the EC were inconsistent and did not match the disbursement series. Instead, DAH for 2018 was estimated based on trends in DAH for EC member countries. A weighted average was applied to the percent change in DAH from 2016-2018 for all EC member countries. The weighting was based on each country’s total national contributions to the EC. These data were collected from the EC’s financial statements.<sup>74</sup> The weighted average was then applied to the EC’s 2017 DAH to forecast 2018.

**eFigure 4 DAH as a percentage of corresponding budget data by bilateral agency**

This figure shows the trend of the ratio of DAH measured as a share of budget data. Green dots indicate that a donor provided global-health-specific budget data, so in these cases the denominator is all global-health-specific budgeted data. The numerator is estimated DAH. Red dots indicate that a donor did not have global-health-specific budget data, so overall ODA budget data were used in calculating the DAH to budget ratios. The vertical axis represents estimated DAH as a fraction of corresponding budget data. ARE = United Arab Emirates, AUS = Australia, AUT = Austria, BEL = Belgium, CAN = Canada, CHE = Switzerland, DEU = Germany, DNK = Denmark, ESP = Spain, FIN = Finland, FRA = France, GBR = Great Britain, GRC = Greece, IRL = Ireland, ITA = Italy, JPN = Japan, KOR = South Korea, LUX = Luxembourg, NLD = the Netherlands, NOR = Norway, NZL = New Zealand, PRT = Portugal, SWE = Sweden, USA = United States of America

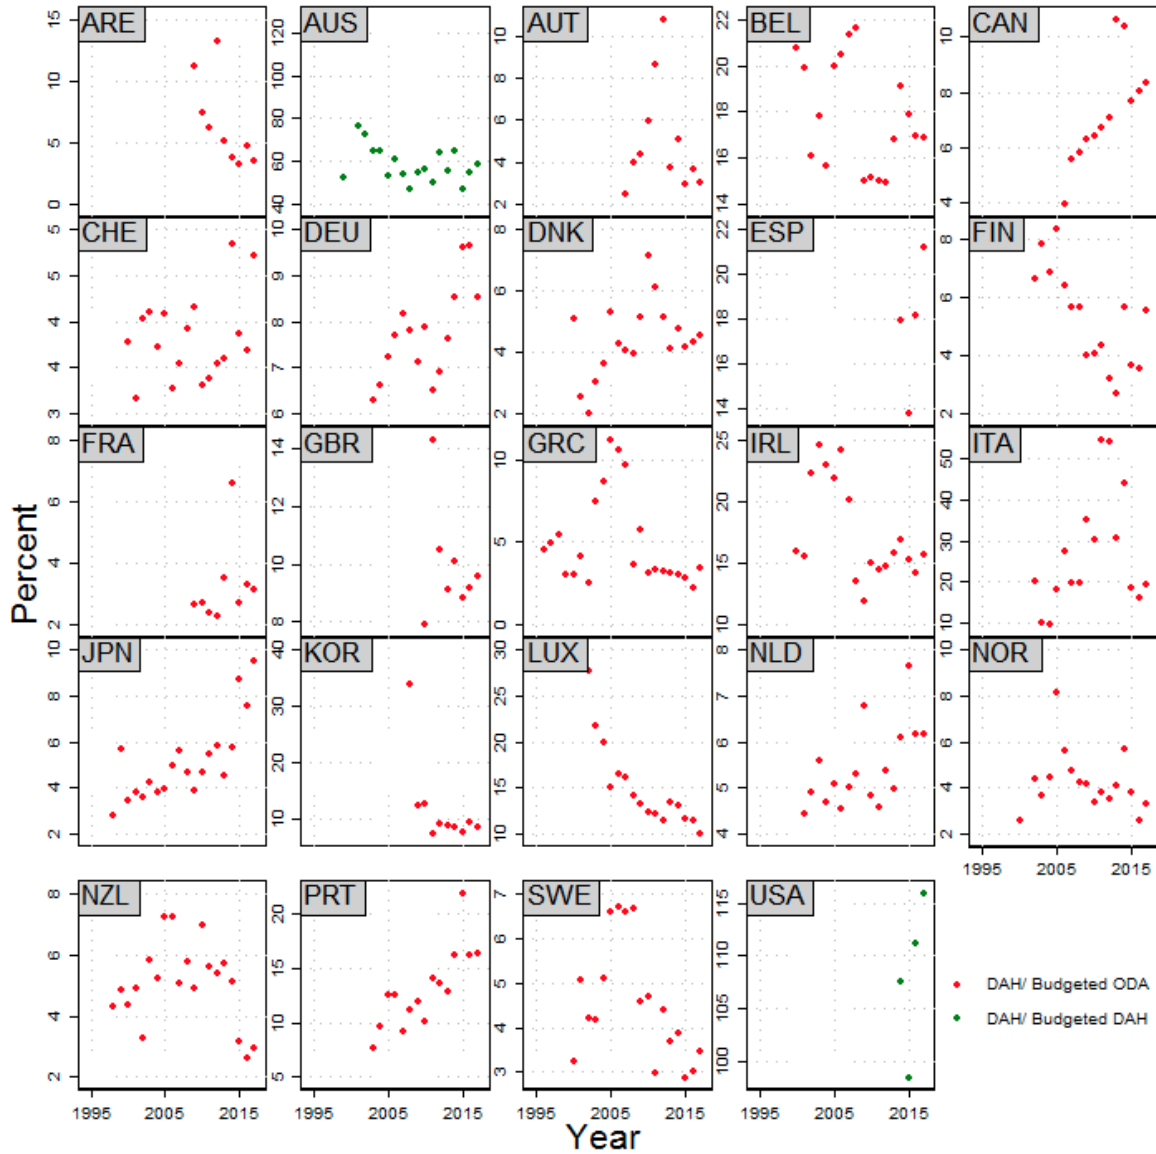

Source: IHME DAH Database (2018) and corresponding bilateral ODA/DAH budget documents outlined in eTable 2 and 4.

**Box 5. EXAMPLE. Australia’s DAH as a percentage of corresponding budget data**

Australia provided global-health-specific budget data for 1998-2018 through its International Development Assistance and Overseas Aid Program budgets. For 1998-2017, health ODA and observed DAH were used to create DAH to budget ratios. These budget ratios were then applied to 2018 health ODA budget data to project DAH in 2018, using a weighted average:

$$(Total\ DAH_t) = \left(\frac{1}{2}\right) (Budget\ ratio_{t-1}) (Budgeted\ GHE_t) + \left(\frac{1}{3}\right) (Budget\ ratio_{t-2})(Budgeted\ GHE_t) + \left(\frac{1}{6}\right) (Budget\ ratio_{t-3})(Budgeted\ GHE_t)$$

where t = year to be modeled.

To supplement our estimates of development assistance for health to HIV/AIDS and malaria program areas for the United States, we used additional available data from the President’s Emergency Plan for AIDS Relief (PEPFAR)



and the President’s Malaria Initiative (PMI). We downloaded data on all planned funding by PEPFAR by recipient country, year, and program area from 2004 to 2017.<sup>75</sup> All PEPFAR projects were assigned to our eight HIV/AIDS program areas using PEPFAR budget codes, splitting out overhead costs equally to all other program areas. We then created country-year specific HIV/AIDS program area fractions out of total annual HIV/AIDS DAH, which we applied to all United States HIV/AIDS projects in the CRS from 2004 to 2017 by country-year. To inform malaria funding by program areas, we downloaded the most recently available malaria funding tables from malaria operational plans for all countries and years.<sup>76</sup> We used a keyword search to assign each line item in these tables to our eight malaria program areas, and then created fractions for the malaria program areas out of the total annual malaria DAH specific to each country-year. These fractions were applied to all United States malaria projects in the CRS from 2006 to 2017 by country-year.

**eFigure 5 Malaria DAH to program areas as assigned by keyword search and PMI reports**

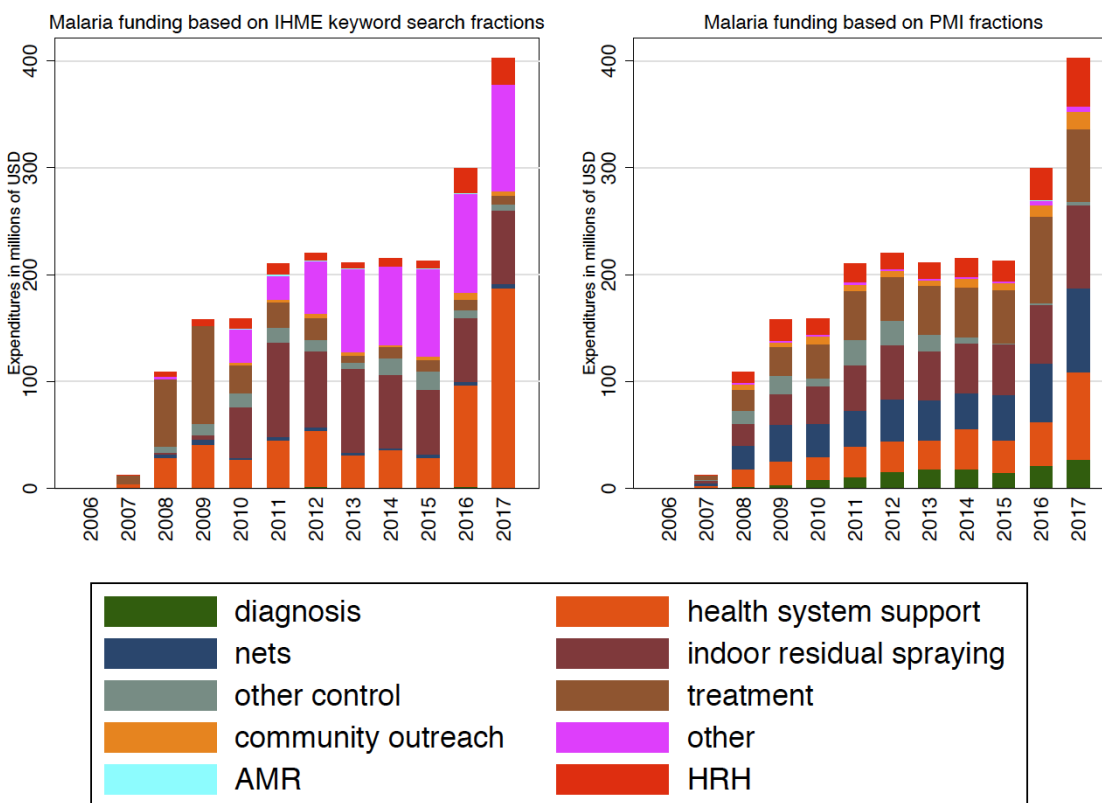

Source: IHME DAH Database (2018) and PMI malaria operational plans

This figure outlines the assignment of funding to malaria program areas for United States projects from the OECD CRS from 2006 onwards. The figure on the left shows how malaria funding is broken out based on keyword search. The figure on the right shows the breakdown of funding to malaria program areas based on PMI malaria funding tables. Using the data from PMI reduces the amount of funding allocated to the “other” program area. As such, in as often as more disaggregated information on project allocation is available, IHME uses such project information available in project budget documents or other project documents to disaggregate into program areas.

The World Bank project-level health disbursement data for 1990 through August 2018 were obtained through correspondence with Kathleen E. Krackenberg, Operations Analyst.<sup>77</sup> The World Bank recently underwent a recoding process for their disbursements. This recoding affected health disbursements, however the recoding was not completed for projects with disbursements prior to 2001. To create a comparable dataset adjustments had to be made. Regression analysis to predict health disbursements were explored, however, in the end the average percent change between project-level health disbursements before and after recoding was used to adjust health disbursements prior to 2001. It was observed that on average, between 2001 and 2005 (inclusive) the recoding process decreased health disbursements by 0.22%. This number was used to adjust all project-level health disbursements prior to 2001.<sup>78</sup> Health disbursements included all health projects as well as other sector projects with a health sector code. In addition, data were collected from the World Bank online loans database in order to fill in descriptive information for loans from the two arms of the World Bank: the International Development Association (IDA) and the International Bank for Reconstruction and Development (IBRD).<sup>79</sup> Along with keyword searches, health theme codes were used to allocate disbursements by health focus area. The online database contains up to five sector codes and five theme codes that can be assigned to each project. Sector codes represent economic, political, and social subdivisions, while theme codes represent the goals or objectives of World Bank activities. The codes are summarized in eTable 7. Emergency recovery loans were excluded since they do not fit the definition of DAH.

**eTable 7 World Bank’s health sector and theme codes**

| <b>Health sector codes</b><br><b>Sector codes represent economic, political, or social subdivisions within society. World Bank projects are classified by up to five sectors.</b>                                                                                                                                                                                                                                                                                                                                                                                               | <b>Health theme codes</b><br><b>Theme codes represent the goals or objectives of World Bank activities.</b>                                                                                                                                                                                                                                                                                                                              |
|---------------------------------------------------------------------------------------------------------------------------------------------------------------------------------------------------------------------------------------------------------------------------------------------------------------------------------------------------------------------------------------------------------------------------------------------------------------------------------------------------------------------------------------------------------------------------------|------------------------------------------------------------------------------------------------------------------------------------------------------------------------------------------------------------------------------------------------------------------------------------------------------------------------------------------------------------------------------------------------------------------------------------------|
| <p><b>Historic (prior to 2001):</b></p> <ul style="list-style-type: none"> <li>(1) <b>Basic health</b></li> <li>(2) <b>Other population health and nutrition</b></li> <li>(3) <b>Targeted health</b></li> <li>(4) <b>Primary health, including reproductive health, child health, and health promotion</b></li> </ul> <p><b>Current (as of 2001):</b></p> <ul style="list-style-type: none"> <li>(1) <b>Health</b></li> <li>(2) <b>Compulsory health finance</b></li> <li>(3) <b>Public administration – health</b></li> <li>(4) <b>Noncompulsory health finance</b></li> </ul> | <p><b>Current:</b></p> <ul style="list-style-type: none"> <li>(1) HIV/AIDS</li> <li>(2) Malaria</li> <li>(3) Tuberculosis</li> <li>(4) Other communicable diseases</li> <li>(5) Population and reproductive health</li> <li>(6) Child health</li> <li>(7) Nutrition and food security</li> <li>(8) Injuries and non-communicable diseases</li> <li>(9) Health system performance</li> <li>(10) Social analysis and monitoring</li> </ul> |

Data on yearly government contributions were obtained from the DAC statistics in order to disaggregate IDA flows by source. Because China does not report to DAC, we generated contribution estimates using replenishment data. We split the 3-year replenishment amount over the three years of the 16th-19th replenishment, to obtain China’s contributions to the World Bank from 2008-2017. We validated our use of replenishment data by extracting China’s and other countries’ contributions to the World Bank International Development Association (IDA) 16th, 17th and 18th replenishment and comparing the number with the contribution we extracted from the OECD Creditor’s Reporting System (CRS)<sup>80</sup>. The trend of contribution from major donors was similar, we therefore used China’s replenishment contribution as a proxy of the contribution to World Bank IDA. We further disaggregated the DAH contribution to World Bank IDA from China by multiplying China’s contributing proportion over World Bank IDA’s total health envelope.

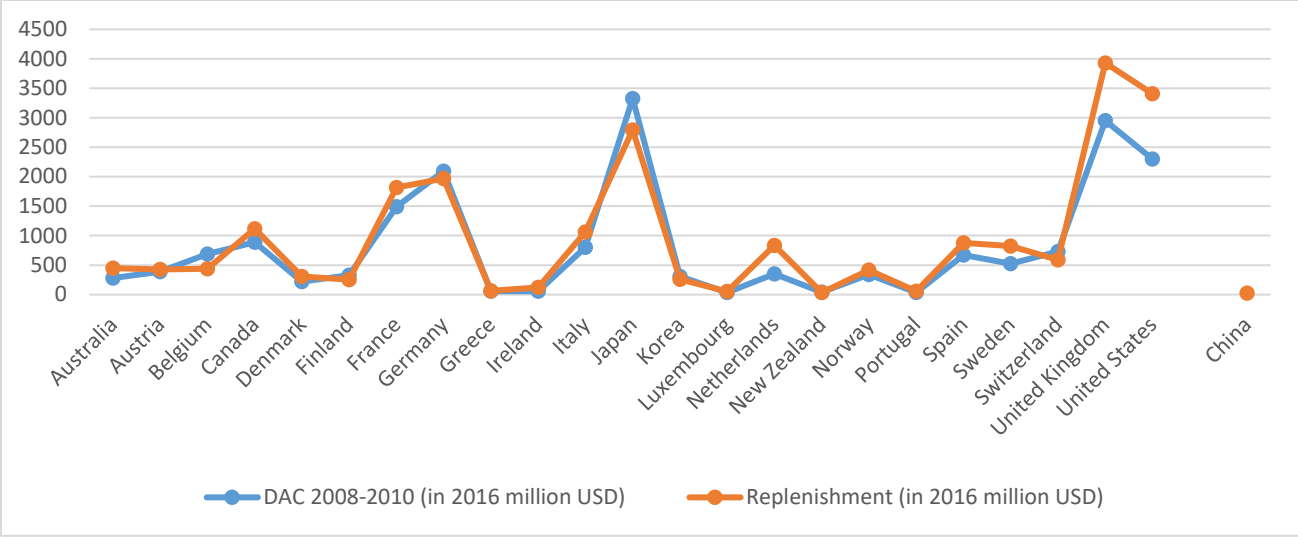

**Panel a. Comparison of World Bank International Development Association 16<sup>th</sup> Replenishment**

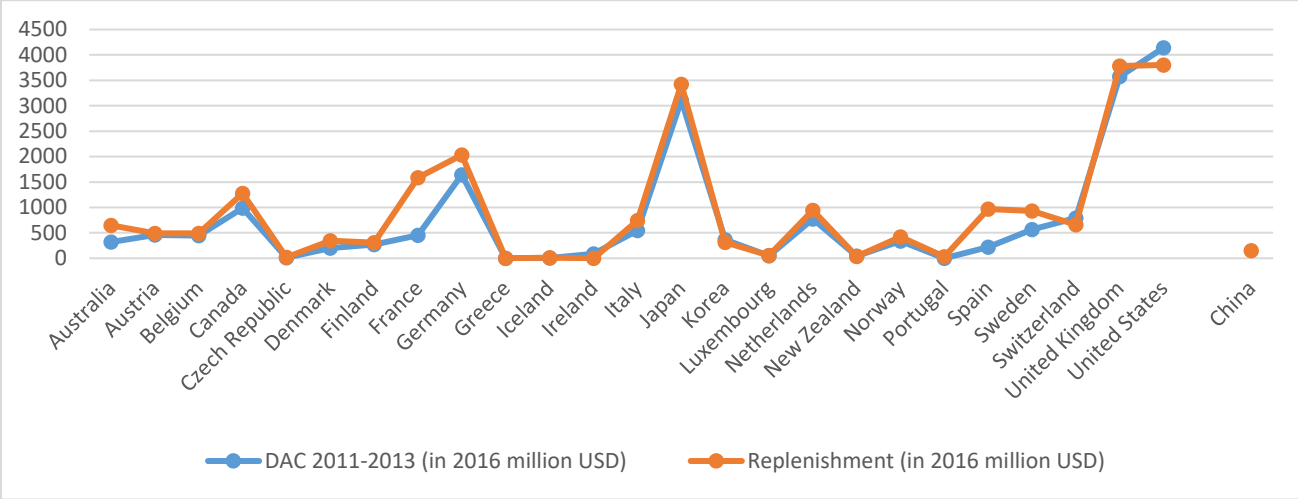

**Panel b. Comparison of World Bank International Development Association 17<sup>th</sup> Replenishment**

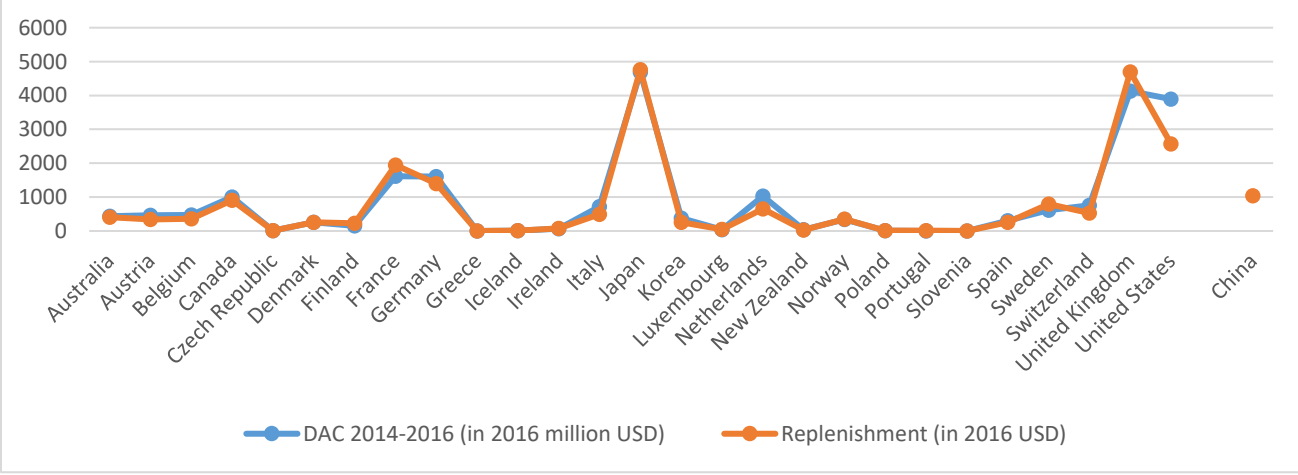

**Panel c. Comparison of World Bank International Development Association 18<sup>th</sup> Replenishment**

## eFigure 6 Comparison of World Bank IDA Replenishment and DAC

The three figures show the comparison of country commitment to World Bank IDA replenishment rounds, and yearly government contributions reported to DAC statistics. The orange line shows the country commitment to each IDA replenishment round. The blue line shows the sum of yearly reported contribution during the three-year replenishment round. Panel a is contributions and commitments from replenishment round 16; panel b is contributions and commitments from replenishment round 17; panel c is contributions and commitments from replenishment round 18.

Details on how we estimated the cost of providing technical assistance and program support for these institutions are highlighted below in the section titled “Calculating the technical assistance and program support component of development assistance for health from loan-and grant-making channels of assistance.” The data received from the World Bank captured disbursements for Jan 1st to Aug 15th of 2018, so the 2018 total estimate for IDA and IBRD were rescaled to 12 months.

### Regional development banks

The Asian Development Bank (ADB), and Inter-American Development Bank (IDB) all maintain their own loan databases, which were used to estimate disbursements.<sup>15,16,81</sup> To estimate health disbursements from the African Development Bank (AfDB), data was received via correspondence with Ms. Josselyne Ahogny (Manager, Loan accounting division)<sup>35</sup> To estimate health disbursement from the Asian Development Bank (ADB), data were received via correspondence with Dr. Rouselle F. Lavado. eTable 8 provides a summary of the data sources used across the regional banks. Furthermore, eFigure 6 displays the disbursements for AfDB from 1990 to 2018 and eFigures 7, and 8 display commitments and disbursements from 1990 to 2018 for AsDB and IDB.

For AfDB, we received project level disbursement data from 2001 through December 2018. For pre-2001 estimates, data from the Compendium of Statistics were used for estimates pre-2001. Donor information for projects funded by the African Development Fund was based on subscription information from the 9<sup>th</sup> to 14<sup>th</sup> replenishment reports<sup>82</sup>. The sole donor to projects implemented by the Nigeria Trust Fund was Nigeria, and all income for African Development Bank projects was attributable to other sources.

For ADB, we received project-level disbursement data from 1990 through 2018, including recipient, project title and description and annual disbursement. Keyword search was performed to identify health focus area of the projects. For income source of ADB, data for country donations were extracted from the replenishment reports of Asian Development Fund, and we manually divide the three or four years’ replenishment into annual contributions<sup>83</sup>. We extracted the total revenue of Ordinary Capital Resources and Asian Development Fund from the Financial reports of ADB to generate the total envelope of income sources, and subtracted the country contribution to provide the estimate for resources coming from the bank itself. Using the fraction for the Bank’s own resources and country contribution, we provided the estimate of income source for each project. For 2018, where we do not yet have the total envelope, the 2017 fraction for income source was used as a preliminary estimate for 2018.

The IDB’s project database also provided commitments and disbursements for all projects. The same methods were used for estimating annual disbursements from the IDB as were used for the ADB. Through correspondence, 2018 health loan disbursements were obtained. These numbers were used in the 2018 estimates. The dataset used to estimate disbursements for IDB was updated in September 2018. However, since these channels have so few new projects each year, it was assumed that smoothing disbursements over time for reported projects captured the majority of total disbursements for 2018. The contribution quotas by donor for the Fund for Special Operations from 1990-2016 were extracted from Annual Financial reports for the IDB. The ratio of each donor’s contribution to total contribution was applied to total disbursements to assign income sources. In 2017, the Fund for Special Operations was transferred to the Ordinary Capital. Donor assignments in 2017 onwards are unallocable.

**eTable 8 Summary of data sources for the regional development banks**

This figure indicates the data available and used to estimate DAH. (X) indicates that project-level data are present in the dataset. (-) indicates that project-level data are not present in the dataset.

| Institution                            | Data source              | Commitments | Cumulative disbursements | Yearly disbursement                    | Notes                                                                                                                                                                           |
|----------------------------------------|--------------------------|-------------|--------------------------|----------------------------------------|---------------------------------------------------------------------------------------------------------------------------------------------------------------------------------|
| <b>African Development Bank (AfDB)</b> | Compendium of Statistics | X           |                          | (Aggregate - not at the project level) | The Compendium of Statistics was not available for 1990-1993, 1995, and 1998-1999; we estimated yearly disbursements using the average of neighboring disbursements             |
|                                        | Correspondence           |             |                          | X                                      | Annual loan disbursements from 2001 through December 2018 were provided.                                                                                                        |
| <b>Asian Development Bank</b>          | Correspondence           | X           | X                        | X                                      | Annual grant loan disbursements from 1990 through 2018 were provided.                                                                                                           |
| <b>InterAmerican Development Bank</b>  | Online projects database |             | X                        |                                        | As yearly disbursement amounts are not provided in the online database, we estimated yearly disbursements by allocating cumulative disbursements over each year of the project. |
|                                        | Correspondence           |             |                          | X                                      | Loan disbursements from January modelled December 2018 were provided.                                                                                                           |

**eFigure 7 Disbursements by the African Development Bank**

The orange line with triangles shows estimated disbursements based on the Compendium of Statistics from 1990 through 2001 and actual disbursements received from 2001 onwards.

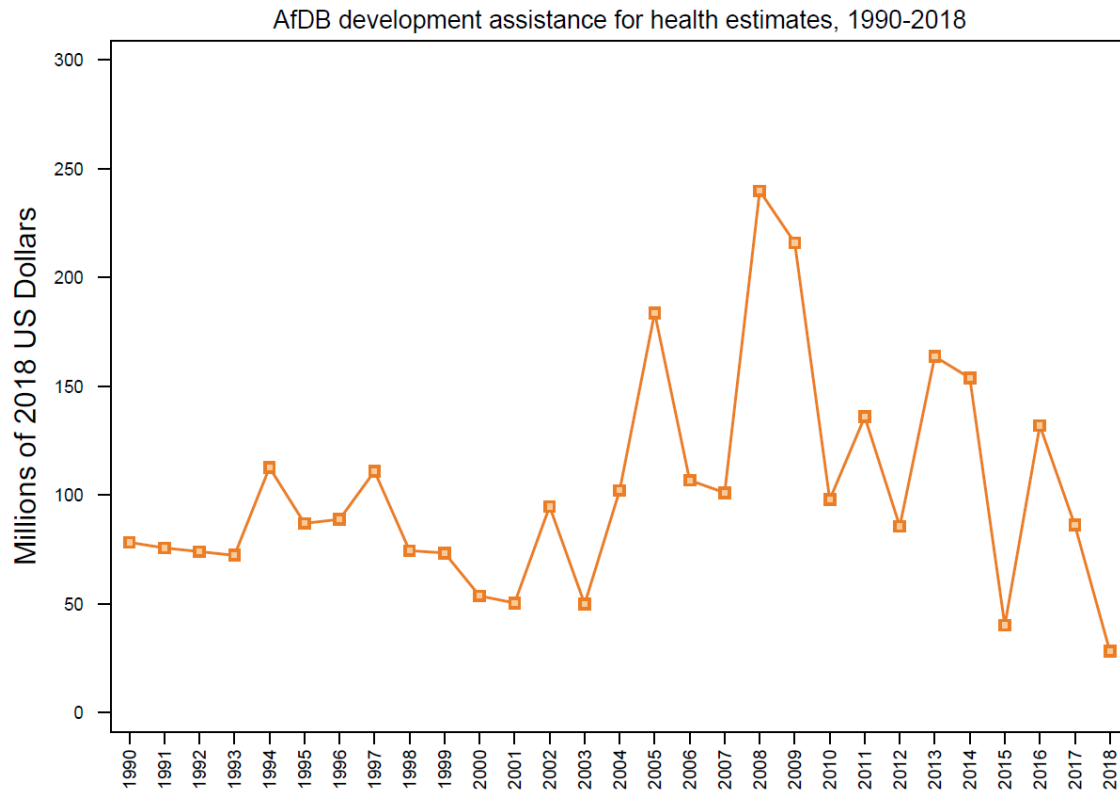

Source: IHME DAH Database (2018) and African Development Bank Compendium of Statistics.

**eFigure 8 Disbursements by Asian Development Bank**

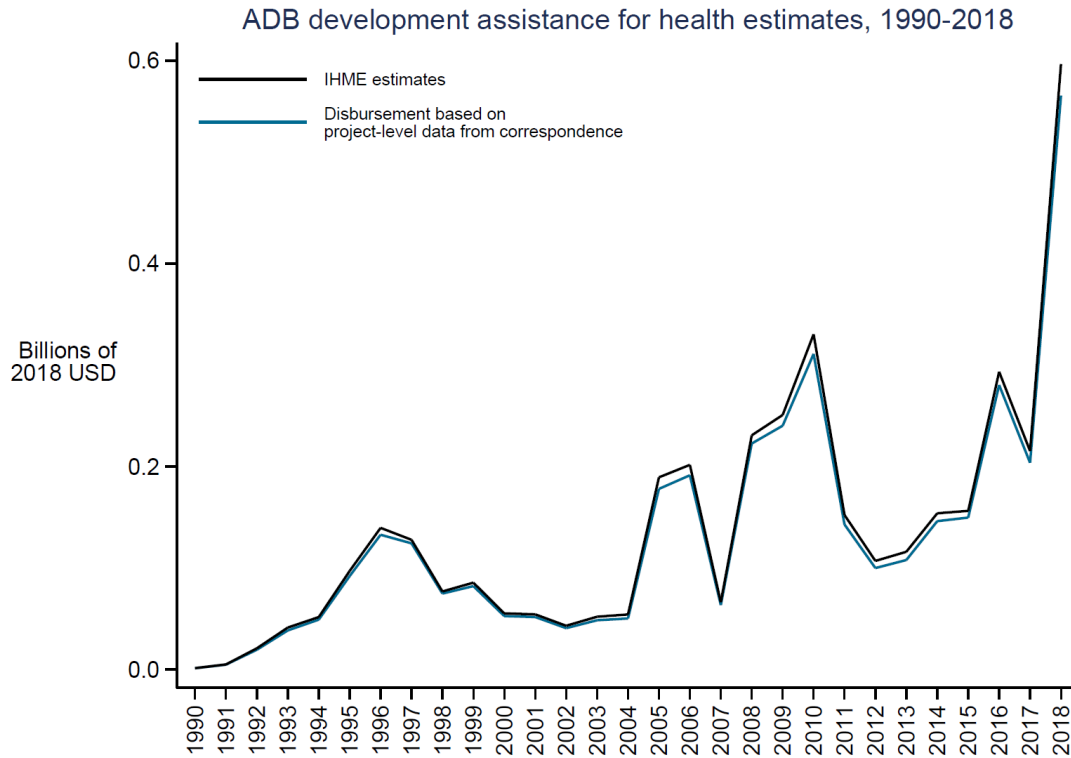

Source: IHME DAH Database (2018)

#### eFigure 9 Commitments and disbursements by Inter-American Development Bank

The dashed green line shows commitments from the Inter-American Development Bank's (IDB) online projects database. The orange line shows smoothed disbursements from the online projects database, and from correspondence for 2017.

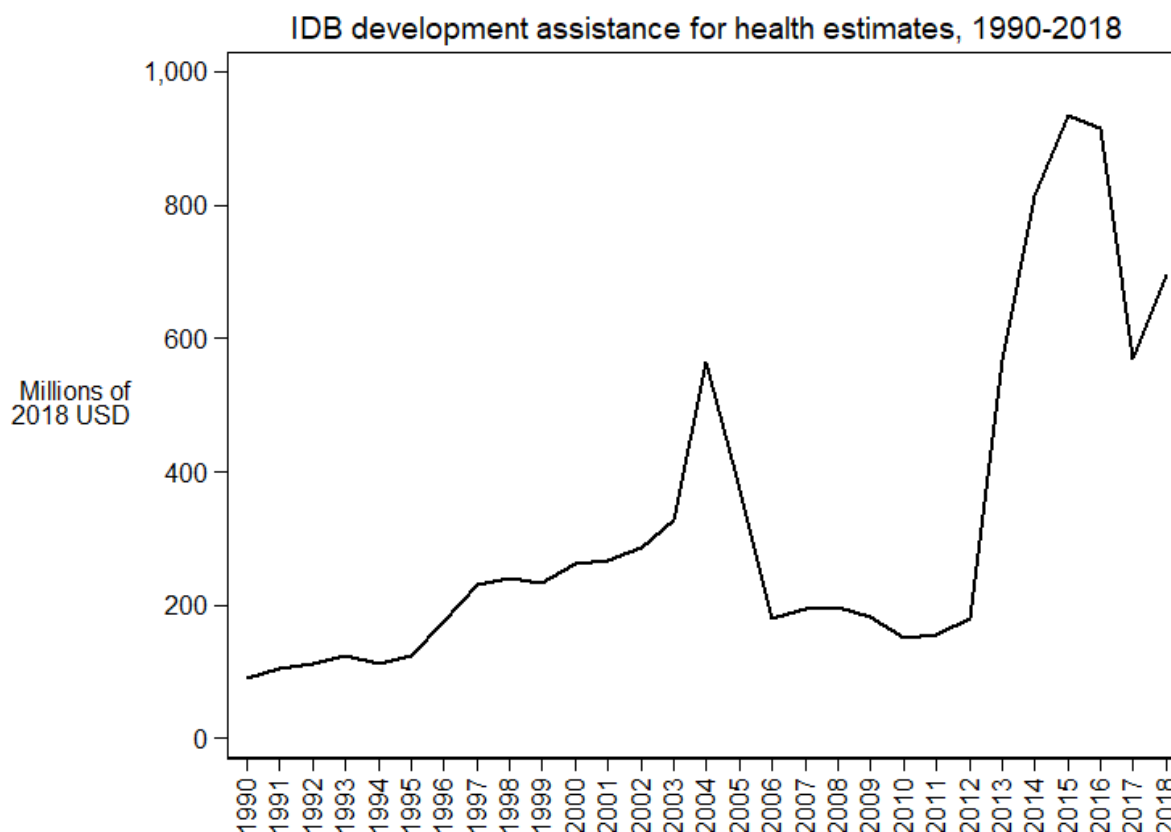

Source: IHME DAH Database (2017) and correspondence

#### Tracking contributions from GFATM and GAVI

#### The Global Fund to Fight AIDS, Tuberculosis and Malaria

The grants database made available online by the Global Fund to Fight AIDS, Tuberculosis and Malaria (GFATM) provides grant-level commitments and annual disbursements from its inception in 2002 to the present year.<sup>22</sup> In addition, sources of funding were compiled from the GFATM contributions dataset and annual reports, all downloaded from the GFATM website.<sup>23,24</sup> Regional grants were split evenly between all countries identified in the regional grant documents found on the GFATM website. eFigure 10 shows GFATM's annual contributions received from public and private sources. eFigure 10 shows GFATM's annual commitments and disbursements from its project database from 2002 through 2018.

**eFigure 10 Contributions received by the Global Fund to Fight AIDS, Tuberculosis and Malaria**



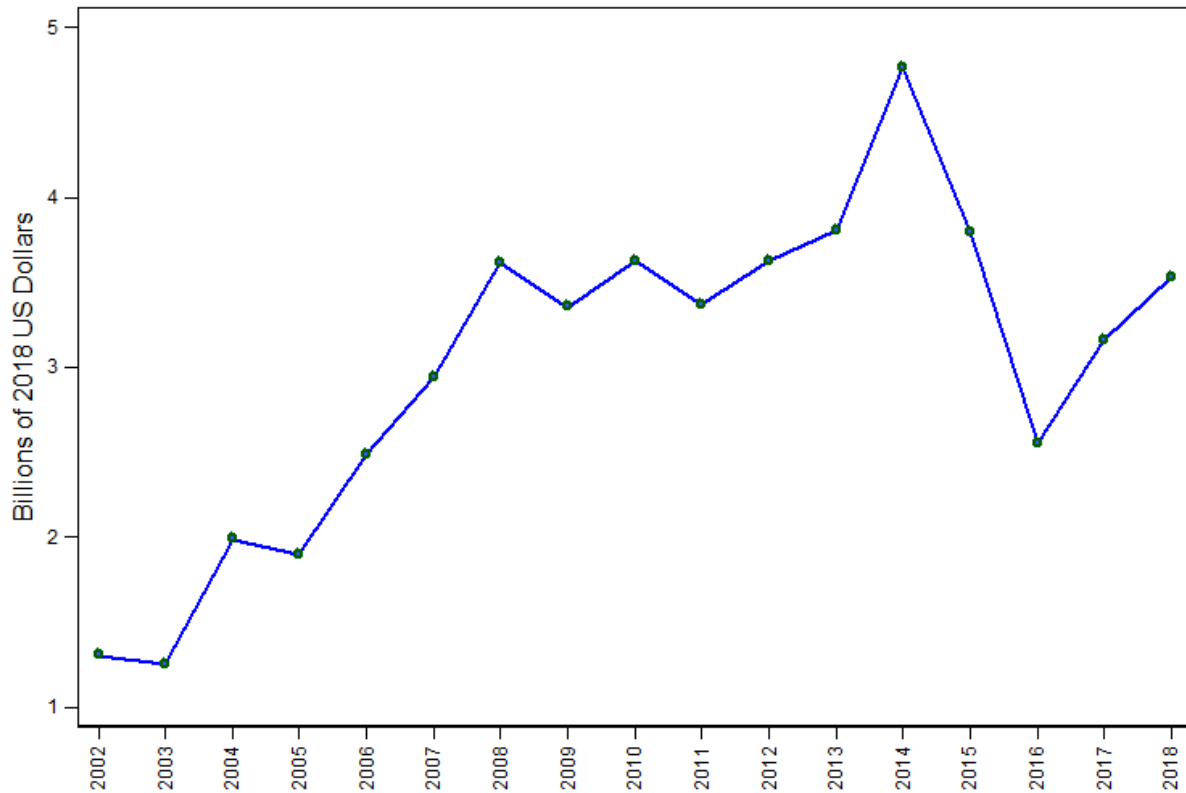

Source: GFATM pledges and contributions 2018

**eFigure 11 The Global Fund to Fight AIDS, Tuberculosis and Malaria’s commitments and disbursements**

The dashed green line shows commitments from the Global Fund to Fight AIDS, Tuberculosis and Malaria’s (GFATM) online grants database. The orange line shows disbursements from the online grants database.

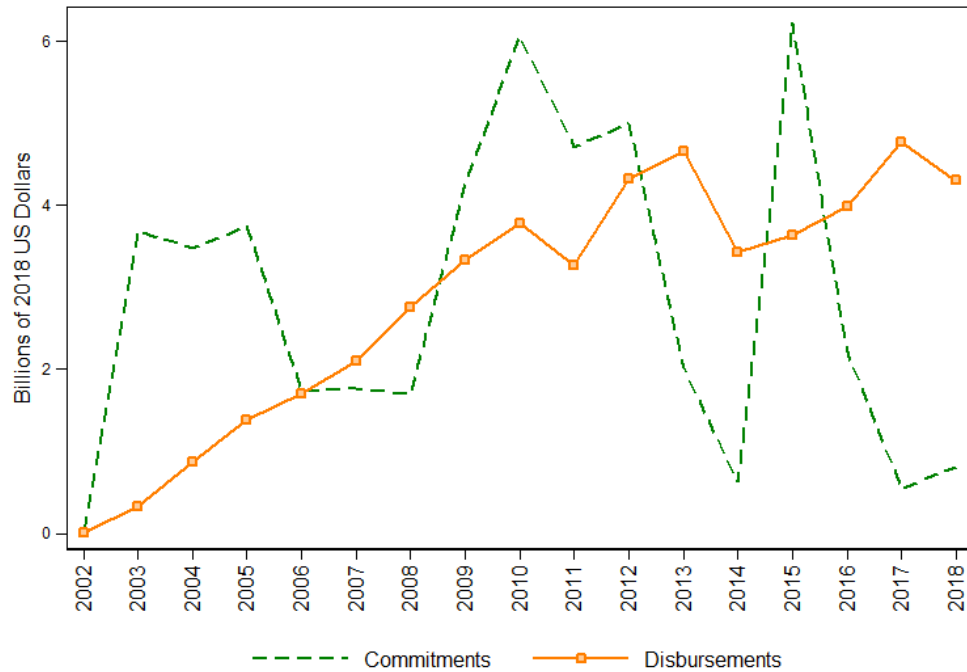

Source: IHME DAH Database (2018)

### Gavi, the Vaccine Alliance

Gavi provided publicly available project-level data on commitments, disbursements, and investment cases from 2000 through the present.<sup>18,21</sup> Gavi's annual DAH was defined as the sum of (1) project-level disbursements by year paid; (2) investment cases (one-time investments in disease prevention and control); and (3) administrative and work plan costs. Data from Gavi's online databases include expenditure for (1) and (2), but not (3). However, project level data from the CRS for 2007-2012 did include administrative and work plan costs, so disbursements data from the online database were adjusted to match the CRS in those years. The average fraction of administrative and work plan costs was added to total disbursements in 2000-2006 and 2013-2015, the years in which the CRS did not include these data. Contributions data from Gavi's website as well as annual reports from the International Finance Facility for Immunisation (IFFIm) and Advance Market Commitment for Pneumococcal Vaccines were used to determine Gavi's annual income.<sup>19,20,84</sup>

All of the data sources used for Gavi estimates were complete through 2017. Donor contributions received and outstanding pledges data were available on Gavi's website. The unadjusted total pledges were used as total disbursements for 2018. Gavi disbursements were assigned to health focus areas including child and newborn vaccines, HSS, and non-communicable disease as documented in eTable 6 above. Of note, we reclassified all GAVI health system strengthening projects as maternal, newborn, child health specific health system strengthening disbursements

### eFigure 12 Gavi's income and disbursements

The dashed green line shows commitments from Gavi's online database. The dashed orange line shows the disbursements from Gavi's online database, which are the sum of project-level disbursements and investment cases.

These data are adjusted using Gavi expenditure data reported to the Creditor Reporting System (CRS) to add administrative and work plan costs to the total. Adjusted disbursements are shown by the solid orange line.

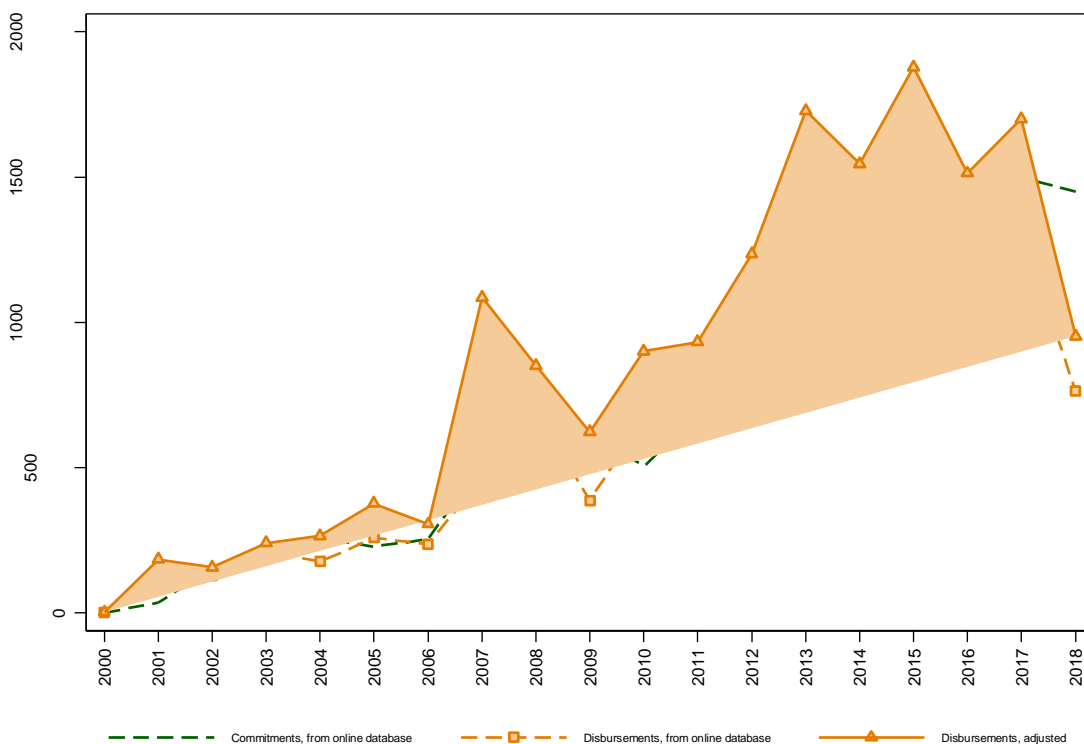

Source: IHME DAH Database (2018)

### Coalition for Epidemic Preparedness and Innovation

CEPI provided a complete dataset of all disbursed funding by disease and all income received from donors in 2018, the first year of CEPI disbursements. Funding data was provided per target vaccine and all were classified under the other infectious diseases health focus area. Since CEPI donor data spans from 2017-2018, the proportions by donor across these two years was applied to total disbursements in 2018.

### Tracking expenditure by United Nations Agencies active in the health domain

Data on income and expenditures were collected for six UN agencies: WHO, UNICEF, UNFPA, UNAIDS, UNITAID and PAHO. The data sources and calculations for each are described in detail below. Similar to the bilateral channels, we extracted budget data for the UN agencies to predict DAH for years for which we did not have health expenditure data. Model choices and budget measures for UN agencies are presented in eTable 4.

### World Health Organization

Data on WHO's budgetary and extrabudgetary income and expenditure were compiled from annual reports and audited financial statements released by WHO.<sup>85</sup> Income data were extracted from WHO's assessed and voluntary

contributions, while expenditure data were extracted from both budgetary and extrabudgetary spending reports. For financial statements representing activities over a two-year period, both income and expenditure data were divided by two, in order to approximate yearly amounts, and dollars were deflated using the US GDP deflator specific to the reporting year. Expenditures from trust funds, regional offices tracked separately, and associated entities not part of WHO's program of activities, such as UNAIDS and GFATM trust funds were excluded. Expenditures from supply services funds were also excluded, as these expenditures pertain to services provided by WHO but paid for by recipient countries. Additionally, WHO projects tracked as paid Ebola expenditure were extracted from the UNOCHA Financial Tracking System database and included as WHO health expenditure.

Disbursement data were not available for WHO in 2018. Much like the bilateral agencies, the ratio of DAH to the total program budget was estimated for 1990-2017 and then predicted for 2018 using the single-year average of previous year. The predicted ratio was then multiplied by the observed program budget for 2018 to get the estimates of DAH.

### **United Nations Population Fund**

Data on income and expenditure were extracted for UNFPA from its audited financial statements.<sup>72</sup> As the 1990-2005 statements represent activities over a two-year period, income and expenditure data were divided by two in order to approximate yearly amounts.

Income and expenditures associated with procurement and cost-sharing activities were excluded from estimates of health assistance because UNFPA uses cost-sharing accounts when a donor contributes to UNFPA for a project to be conducted in the donor's own country. Since this money can be considered domestic spending that goes through UNFPA before being returned to the country in the form of a UNFPA program, it is not included in calculations of total DAH. UNFPA's additional expenditures for these projects come from trust funds or regular resources and are therefore, captured in our estimates. To estimate disbursements by health focus areas, UNFPA's total health expenditure was multiplied by the proportion of funding reported for each program area from annual reports from 1997 through 2013 and from the UNFPA transparency portal for 2014 through 2017. Maternal and child health spending classified as "other" was split equally between the maternal and child health program areas. Additionally, UNFPA projects tracked as paid Ebola expenditure were extracted from the UNOCHA Financial Tracking System database and added to UNFPA health expenditure.

The disbursement data for UNFPA were available through 2017. For year 2018, much like the bilateral agencies, the ratio of DAH and income was estimated for 1990-2017 and then predicted for 2018 using the three-year weighted average of previous years. The predicted ratio was multiplied by observed income to estimate DAH for 2018.

### **United Nations Children's Fund**

Data on income and expenditure for UNICEF were extracted from its audited financial statements.<sup>69</sup> As these statements represent activities over a two-year period from 1990-2011, income and expenditure data were divided by two in order to approximate yearly amounts. The audited financial statements from 2012 onwards are produced on an annual basis.

Since UNICEF's activities are not limited to the health sector, the fraction of UNICEF's expenditure that was for health was estimated using either financial data from correspondence (2001-2013 observed data used to estimate 1990 through 2000 expenditure) or a combination of annual reports and annual results reports from 2014 through 2017. The annual results reports provide the proportion of funding for each program area, the average of 2014 through 2017 proportions was used to estimate the spending proportion for the years 1990 through 2013. In the annual results report, HIV/AIDS funding was reported separately from health funding so the percentages spent on each health program were proportioned based on total spending for Health. Furthermore, UNICEF projects tracked as paid Ebola expenditure were extracted from the UNOCHA Financial Tracking System and added to estimates for UNICEF's health expenditure.

The product of observed program budget and the weighted average of the DAH to budget ratio (placing one-half weight on the one-year lagged ratio, one-third weight on the two-year lagged ratio, and one-sixth weight on the three-year lagged ratio) was used to predict DAH in 2018.

### **Joint United Nations Programme on HIV/AIDS**

UNAIDS income and expenditure data for both its core and noncore budgets were extracted from its audited financial statements.<sup>67</sup> As financial data are provided on a biennial basis in all years except for 2012 and 2013, the values were divided by two to obtain yearly amounts for all biennium data. Dollars were deflated using the US GDP deflator specific to the reporting year.

For UNAIDS, budget measures were available only for a subset of reported total disbursements. UNAIDS reported total expenditure, which combined Unified Budget and Workplan (UBW) and non-UWB components, but only UBW budget data were available.<sup>68</sup> To predict DAH for UNAIDS in 2018, disbursements in those years were calculated by multiplying the observed UBW budget by the three-year weighted average of the ratio of DAH to the UWB budget (placing one-half weight on the one-year lagged ratio, one-third weight on the two-year lagged ratio, and one-sixth weight on the three-year lagged ratio). UNAIDS disbursements were assigned to HIV/AIDS and TB program areas as documented in eTable 6 above.

### **UNITAID**

Data on project level disbursement was obtained through correspondence with UNITAID. Income data was extracted from the annual financial statements downloaded from UNITAID's website. The project level data provided covered project disbursements from 2007 through 2017 and project budget commitments was provided for 2018.

### **Pan American Health Organization**

The Pan American Regional Office for WHO, or PAHO, reports its income and expenditure in its biennial financial report.<sup>10,86</sup> The funds transferred through the "Rotating Fund" were excluded because developing countries fund this procurement of health commodities which are then used within that funding country, and it therefore does not fit the definition of DAH.

As the financial data are provided on a biennial basis (with the exception of 2010 through 2016, where single-year financial reports were available), the quantities were divided by two to obtain yearly amounts. Dollars were deflated using the US GDP deflator specific to the reporting year.

Correspondence with PAHO revealed that data from the financial statements include both Program and non-Program funds. The latter include funds that countries provide PAHO, so that PAHO can reinvest these funds into the countries' national health systems. These funds should not be included as development assistance for health, and PAHO provided corrected disbursement numbers for 2008 to 2013. The corresponding disbursement numbers for 2014 and 2015 were identified in the PAHO End-of-Biennium Assessment 2014-2015. These funds were provided as biennial disbursements, so they were divided by two to obtain yearly disbursements. The ratio of Program disbursements numbers provided by PAHO and the sum of Program and non-Program funds collected from financial statements was taken for the years 2008 to 2015. The average ratio was calculated, and this ratio was multiplied through disbursement numbers collected from financial statements from earlier years. In this way, Program and non-Program funds collected from audited statements from earlier years were adjusted to estimate DAH.

For PAHO, disbursement data were not available for 2018. PAHO provided budget information along with disbursements for 2008 to 2017. The average ratio between spending and budget was calculated over the years 2008 to 2017, and this ratio was used to estimate 2018 disbursements.

## Tracking development assistance for health from private foundations

Previous studies on foundations outside the US have documented the severe paucity of reliable time series data and lack of comparability across countries.<sup>87</sup> Hence, this research focused efforts on tracking only US foundations.

### US Foundations

The Foundation Center maintains a database of all grants of \$10,000 or more awarded by over 1,000 US foundations. The Foundation Center has coded each grant by sector and international focus and therefore is able to identify global health grants. IHME purchased a customized dataset with cross-border health grants and health grants to US-based international programs from 1992 to 2015 from the Foundation Center.<sup>32</sup> Grants from BMGF, which were tracked separately, were excluded. Additionally, grants to channels that this research already tracks were excluded.

The Foundation Center adopted a new classification methodology as of FGH 2016. The Foundation Center was able to provide historic data based on the new classification system from 2002 to 2012. In order to obtain the series from 1990 to 2001, we multiplied a weighted fraction calculated based on both old and new classification data values from 2002 through 2004 by the old data series (1992 to 2001) we had previously obtained.

$$\begin{aligned} & \text{(Weighted fraction)} \\ &= \left(\frac{1}{2}\right) (DAH_{new\ classification}) / (DAH_{old\ classification}) 2002 \\ &+ \left(\frac{1}{3}\right) (DAH_{new\ classification}) / (DAH_{old\ classification}) 2003 \\ &+ \left(\frac{1}{6}\right) (DAH_{new\ classification}) / (DAH_{old\ classification}) 2004 \end{aligned}$$

$$(DAH\ Estimate_t) = (Weighted\ fraction)(DAH\ Observed_t)$$

where DAH Observed is the old data values for the series 1990 through 2001

To estimate total health grants in 1990-1991 and 2016-2018, natural log of US foundation DAH was regressed on the lagged natural log of US GDP per capita and year using ordinary least squares estimation. The missing years of data were predicted based on estimated regression coefficients from the equation. Exponents of the predicted values were used as final estimates

$$(\ln\ Foundation_t) = \alpha + 1.\beta_1(\ln\ US\ GDP\ per\ capita_t) + \beta_2(year_t) + \varepsilon$$

Details on how we estimated the cost of providing technical assistance and program support for these US foundations are highlighted below in the section titled calculating the technical assistance and program support component of development assistance for health from loan-and grant-making channels of assistance.

### Bill & Melinda Gates Foundation

BMGF has been the single largest grant-making institution in the health domain since 2000; hence, additional research was undertaken to accurately capture its annual disbursements. BMGF's IRS 990PF filings for years 1999-2008, which report all global health grants disbursed per year, were downloaded from the BMGF website. Additionally, disbursement data for years 2009-2017 were collected from the BMGF online grants database, the OECD CRS and personal correspondence. The OECD CRS data was used to identify NGOs that are double-counted from other data sources.

An ordinary least squares linear regression model was used to predict the disbursement for BMGF for 2018. Since there is a strong correlation between market trends and BMGF annual disbursements, market data including lagged US GDP, lagged yearly average of Berkshire stock returns, lagged yearly average of the Russell Index, and lagged total assets of the BMGF Trust were utilized to predict the total disbursement for year 2018.

$$\begin{aligned}
 (\text{BMGF total disbursement}_t) & \\
 &= \alpha + \beta_1(\text{US GDP per capita}_{t-2}) + \beta_2(\text{Berkshire stock returns}_{t-2}) \\
 &+ \beta_3(\text{Russell Index}_{t-2}) + \beta_4(\text{BMGF total asset}_{t-2}) + \varepsilon
 \end{aligned}$$

BMGF's predicted DAH was adjusted to account for in-kind DAH and double-counting. The difference between BMGF's final DAH and DAH without in-kind added and double-counting removed from 2003-2017 was regressed using ordinary least squares on DAH without in-kind added and double-counting removed and year. The predicted difference was then subtracted from the predicted DAH from the previous regression for 2018.

### **The Wellcome Trust**

We obtained a complete database of all grants awarded by the trust since 1990 through correspondence. While the primary focus of Wellcome Trust grants is healthcare, the Trust provided a variable that distinguishes grant work intended for low- and lower-middle-income countries from research primarily focused in high-income recipient countries. Wellcome Trust DAH is defined as this subset of low- and lower-middle-income focused grants. The annual disbursement amount was obtained by redistributing the lump sum value of the grant over the stipulated duration of the grant by calculating the number of days per year in which the grant was active and multiplying by the average amount disbursed in each day the grant was active. All data were provided in nominal GBP and were converted to real 2018 USD.

### **European Economic Area**

DAH estimates for the European Economic Area were based on two downloadable project datasets available online. IHME DAH data for 2014 to 2018 was obtained from projects in the 2009-2014 grant period dataset with programme area "public health initiatives", and 2007-2012 data was obtained from projects in the 2004-2009 grant period dataset with sector "health and childcare". Childcare projects not related to health were identified and excluded based on manual screening and keyword search for the following terms: "NURSERY" "ORPHANAGE" "RECREATION" "FOSTER" " CARE HOME " " CHILDREN S HOME " " CHILD DEVELOPMENT CENTRE " " YOUTH CENTER" " YOUTH CAMPS " " RESIDENTIAL CENTRE" " RESIDENTIAL CARE FACILITIES " "CHILDCARE" " INFORMAL EDUCATION FOR CHILDREN " " PREVENT INSTITUTIONALISATION " " SPORTS FIELD" " SPORT FIELD" " SPORTS FACILIT" " SPORTS ACTIVIT" " SPORTS INFRASTRUCTURE" " REINTEGRATION OF JUVENILE OFFENDERS "

We determined that no health projects to low- and middle-income countries were implemented by the EEA prior to the 2004-2009 grant period, based on the report on the Financial Instrument 1999-2003 and the Financial Mechanism 1994-1998.<sup>88,89</sup> Project summary variables were obtained through correspondence, and were used together with project titles to assign DAH to health focus areas using a keyword search. To assign annual funding for projects that were implemented across multiple years, project grants were split based on the average daily spending across the duration of the project and the proportion of the year that the project was in implementation. The relative contributions of donors to the EEA grants (Norway, Iceland, and Liechtenstein) were obtained as constant ratios based on the 2016-2017 Annual Report.<sup>90</sup>

## Tracking non-governmental organizations

Currently, there are no centralized, easily accessible databases for tracking program expenses of the thousands of NGOs based in high-income countries that are active in providing development assistance and humanitarian relief worldwide. This study relied on CRS data and the only comprehensive data source identified for a large subset of these NGOs, namely the United States Agency for International Development's Report of Voluntary Agencies (USAID's VolAg report).<sup>27</sup> The report, which includes both US-based and international NGOs that received funding from the US government, provides data from 1990 to 2014 on domestic and overseas expenditures for these NGOs as well as their revenue from US and other public sources, private contributions, and in-kind. Total revenue and expenditure data obtained from the NGOs' IRS tax forms, accessed through the GuideStar online database, were also used in tracking NGOs incorporated in the US.<sup>26</sup> The Guidestar Research Fundamentals Plus dataset was used to obtain information for US-based NGOs in fiscal year 2015, including domestic, overseas, and total expenses, and revenues from all public and private sources.

First, in order to track disbursements from OECD donor countries to NGOs, we utilized channel codes present in the CRS database. The code 21000 identified international NGOs and the code 22000 identified donor-country-based NGOs. In order to remove double-counting, we conducted a keyword search on channels where the donor country was the United States to exclude NGOs present in the USAID VolAg report. Allocation of funding to health focus areas for NGOs tracked through the CRS was assigned as described in the section "DISAGGREGATING BY HEALTH FOCUS AREA", based on a keyword search of five descriptive variables in the CRS: project title, short description, long description, channel name, and channel reported name. For NGOs tracked in the USAID VolAg report, allocation of funding to health focus areas was assigned as described in the section "DISAGGREGATING BY HEALTH FOCUS AREA", based on a keyword search of the NGO's description given in the VolAg report.

In order to use the USAID VolAg data, several challenges were overcome. We outline these challenges here and discuss below the methods employed to estimate a consistent series of DAH channeled through NGOs despite these challenges. First, with the exception of BMGF, it was impossible to track the amount of funding from US foundations routed through US NGOs, which may have led to double-counting in estimates of total health assistance. The second challenge relates to the incompleteness of the universe of NGOs captured through the USAID report. The report provides data on NGOs that received funding from the US government. While this covers many of the largest NGOs, it is not a comprehensive list. A related problem is that the VolAg report only includes NGOs that received funds in a given year. While many of the largest NGOs are consistently funded by the US government and are therefore in the report every year, not all NGOs are reported across all years. Third, health sector-specific expenditure is not reported in the VolAg or systematically reported in IRS tax forms. The VolAg does report overseas expenditure but does not disaggregate this expenditure by sector. Fourth, complete data are lacking in several time periods. The 2016 VolAg provided data through 2014. For NGOs incorporated in the US, IRS tax forms were obtained. Furthermore, prior to 1998 the VolAg report did not include international NGOs. Attempts were made to compile other data on the health expenditures of the top international NGOs, in terms of overseas expenditure, by searching other websites for financial documents and contacting these organizations directly. Getting reliable time series data before 2000 proved to be extremely difficult for even this small sample of international NGOs.

Estimates of the share of overseas expenditure spent on health-related projects drew upon a sample of NGOs for which such data were available. Collecting financial data on health expenditures for each NGO would have been prohibitively time-consuming. Therefore, a sample of NGOs was drawn from the list for each year; the sample included the top 30 NGOs in terms of overseas expenditure and 20 randomly selected US-based NGOs from the remaining pool, with the probability of being selected set proportional to overseas expenditure. Next, health expenditure data were collected for each NGO in this sample by seeking out annual reports, audited financial statements, 990 tax forms, and data from NGO websites. Health expenditure was carefully reviewed to ensure that expenditures on food aid, food security, disaster relief, and water and sanitation projects were not included. eTable 9 summarizes the number of NGOs included each year in the USAID report, the number of NGOs in the sample by



year, and the number of NGOs for which health expenditure data were successfully compiled.

**eTable 9 Summary of US non-governmental organizations in the study**

| <b>Year</b> | <b>Number of US NGOs in VolAG report</b> | <b>Number of international NGOs in VolAG report</b> | <b>Number of US NGOs in IHME sample</b> | <b>Number of US NGOs from sample for which data on health expenditure were found</b> |
|-------------|------------------------------------------|-----------------------------------------------------|-----------------------------------------|--------------------------------------------------------------------------------------|
| <b>1990</b> | 267                                      | -                                                   | 16                                      | 9                                                                                    |
| <b>1991</b> | 334                                      | -                                                   | 19                                      | 14                                                                                   |
| <b>1992</b> | 385                                      | -                                                   | 18                                      | 15                                                                                   |
| <b>1993</b> | 411                                      | -                                                   | 17                                      | 12                                                                                   |
| <b>1994</b> | 424                                      | -                                                   | 17                                      | 10                                                                                   |
| <b>1995</b> | 416                                      | -                                                   | 16                                      | 12                                                                                   |
| <b>1996</b> | 423                                      | -                                                   | 21                                      | 14                                                                                   |
| <b>1997</b> | 425                                      | -                                                   | 23                                      | 18                                                                                   |
| <b>1998</b> | 435                                      | 42                                                  | 24                                      | 22                                                                                   |
| <b>1999</b> | 438                                      | -                                                   | 33                                      | 28                                                                                   |
| <b>2000</b> | 433                                      | 50                                                  | 34                                      | 28                                                                                   |
| <b>2001</b> | 442                                      | 51                                                  | 33                                      | 26                                                                                   |
| <b>2002</b> | 486                                      | 58                                                  | 33                                      | 27                                                                                   |
| <b>2003</b> | 507                                      | 54                                                  | 42                                      | 32                                                                                   |
| <b>2004</b> | 508                                      | 55                                                  | 47                                      | 33                                                                                   |
| <b>2005</b> | 494                                      | 59                                                  | 45                                      | 36                                                                                   |
| <b>2006</b> | 536                                      | 67                                                  | 50                                      | 38                                                                                   |
| <b>2007</b> | 556                                      | 68                                                  | 50                                      | 40                                                                                   |
| <b>2008</b> | 565                                      | 78                                                  | 58                                      | 48                                                                                   |
| <b>2009</b> | 580                                      | 90                                                  | 57                                      | 45                                                                                   |
| <b>2010</b> | 579                                      | 94                                                  | 69                                      | 57                                                                                   |
| <b>2011</b> | 595                                      | 112                                                 | 73                                      | 63                                                                                   |
| <b>2012</b> | 579                                      | 94                                                  | 69                                      | 60                                                                                   |
| <b>2013</b> | 519                                      | 113                                                 | 69                                      | 52                                                                                   |
| <b>2014</b> | 485                                      | 106                                                 | 73                                      | 54                                                                                   |
| <b>2015</b> | -                                        | -                                                   | 67                                      | 58                                                                                   |

A random effects regression model was fit to predict health expenditure as a fraction of total expenditure using the data for the sampled NGOs. A random effects model was chosen because the sample included observations for several NGOs for multiple years. A random effects model allows for the effect of each type of NGO to be captured distinctly. This model was used to predict the fraction of expenditure spent on health for the remaining NGOs. To ensure that the predicted health fractions were bounded between zero and one, the regression utilized the logit-transformed health fraction as the dependent variable. Since several NGOs in the sample were observed for multiple years, the regression included a random effect that varied by NGO. Five of the nine variables used to predict the health fraction were drawn from the VolAg reports and the Guidestar dataset. They were (1) fraction of revenue from in-kind donations, (2) fraction of revenue from the US government, (3) fraction of revenue from private financial contributions, (4) overseas expenditure as a fraction of total expenditure, and (5) calendar year. The remaining four variables used to predict the health fraction were binary indicators that were constructed based on

keyword searches on the NGO name and NGO description found in the VolAg. For both the NGO name and description, a keyword search was conducted to indicate whether the name or description was sufficiently health-related. Another keyword search was conducted independently on the NGO names and descriptions for keywords that indicated if the NGOs might focus on something other than health. These four indicators proved excellent predictors of health fractions.

$$\begin{aligned}
 \text{logit}(NGO - \text{specific } DAH_{it}) &= \alpha + \beta_1(\text{Inkind contributions fraction}_{it}) \\
 &+ \beta_2(\text{US government contributions fraction}_{it}) \\
 &+ \beta_3(\text{Private financial contributions fractions}_{it}) \\
 &+ \beta_4(\text{Overseas expenditure as a fraction of total expenditure}_{it}) \\
 &+ \beta_5(\text{Health - related name}_{it}) + \beta_6(\text{Non - health - related name}_{it}) \\
 &+ \beta_7(\text{Health - related description}_{it}) + \beta_8(\text{Non - health - related description}_{it}) + U_i + \varepsilon
 \end{aligned}$$

Overseas health expenditure was calculated for individual NGOs in each year by multiplying the estimated health fraction and total overseas expenditure. For the NGOs that were sampled, the observed health fraction acquired through data collection was used. For the unsampled NGOs, the fitted fraction from the previously described random effects regression was used. Total overseas expenditure, reported in the VolAg, was not available for 2015-2018. For US-based NGOs, the 2016 NGO overseas fraction was calculated by regressing the logit transformed observed overseas fraction on a linear time trend using ordinary least squares, for each NGO independently. For these cases, the overseas health fraction was calculated as the product of estimated overseas fraction, estimated health fraction, and total expenditure found in the IRS 990 forms.

$$\text{logit}(\text{Observed overseas health expenditure}_i) = \alpha + \beta_i(\text{year}_t) + U_i + \varepsilon$$

At this point three reasons remained why the overseas health expenditure for some NGOs remained unknown. First, if an observation was non-US-based, then IRS tax forms were not available and total overseas expenditure could not be calculated. Second, for 2017 to 2018, no data were available. Finally, if an NGO was reported in the VolAg in multiple years but not for an intermittent year, no NGO-specific data were available for the gap year. This would be the case if an NGO received support from the US government one year and then again in a nonconsecutive year. For all three of these scenarios, a panel-based hierarchical linear regression model was used to fill in the overseas health expenditure gaps. Total overseas health expenditure (measured at the NGO-year level) was regressed on US GDP per capita and US bilateral DAH disbursed. Because the US government funds many of these NGOs, US bilateral DAH was an excellent predictor of NGO DAH. A flexible model was employed to allow both the GDP and US government DAH coefficients to vary randomly across NGOs, such that each NGO employed a unique (but not independent) relationship between overseas health expenditure, GDP, and US government DAH. A random intercept was also included to capture the significant unobserved heterogeneity present in our set of NGOs. Once fit, this model was used to predict overseas health expenditure for all remaining gaps.

$$(NGO \text{ } DAH_{it}) = \alpha + \beta_{1i}(\text{US GDP per capita}_t) + \beta_{2i}(\text{US bilateral DAH per capita}_t) + U_i + \varepsilon$$

Expenditures financed from each revenue source were then calculated by multiplying overseas health expenditure by NGO-specific revenue fractions. Expenditures from in-kind sources were deflated by a constant fraction. This was determined by comparing the federal upper limit and average wholesale price valuations of drugs on the WHO's Model List of Essential Medicines from the RED BOOK Expanded Database.<sup>28,29</sup> eFigure 13 and eFigure 14 show the income and estimated overseas health expenditure, respectively, of the NGOs in the universe of US- and non-US-based NGOs that were tracked in this study from 1990 to 2015 in constant 2018 US dollars.

**eFigure 13 Total revenue received by non-governmental organizations**

The orange line shows total revenue for all sources, both public and private, received by NGOs. The green line shows estimates of private financial contributions to NGOs, while the blue line shows private in-kind donations to NGOs.

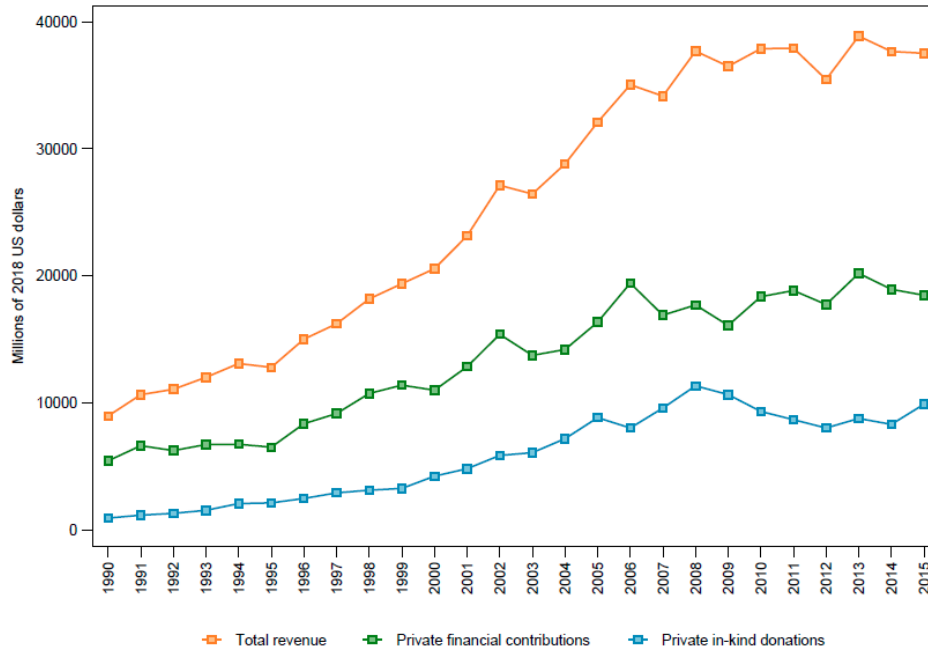

Source: IHME DAH Database (2018)

**eFigure 14 Expenditure by non-governmental organizations**

The orange line illustrates total overseas expenditure by NGOs, regardless of sector. The green line shows overseas expenditure by NGOs to health-specific recipients, or DAH.

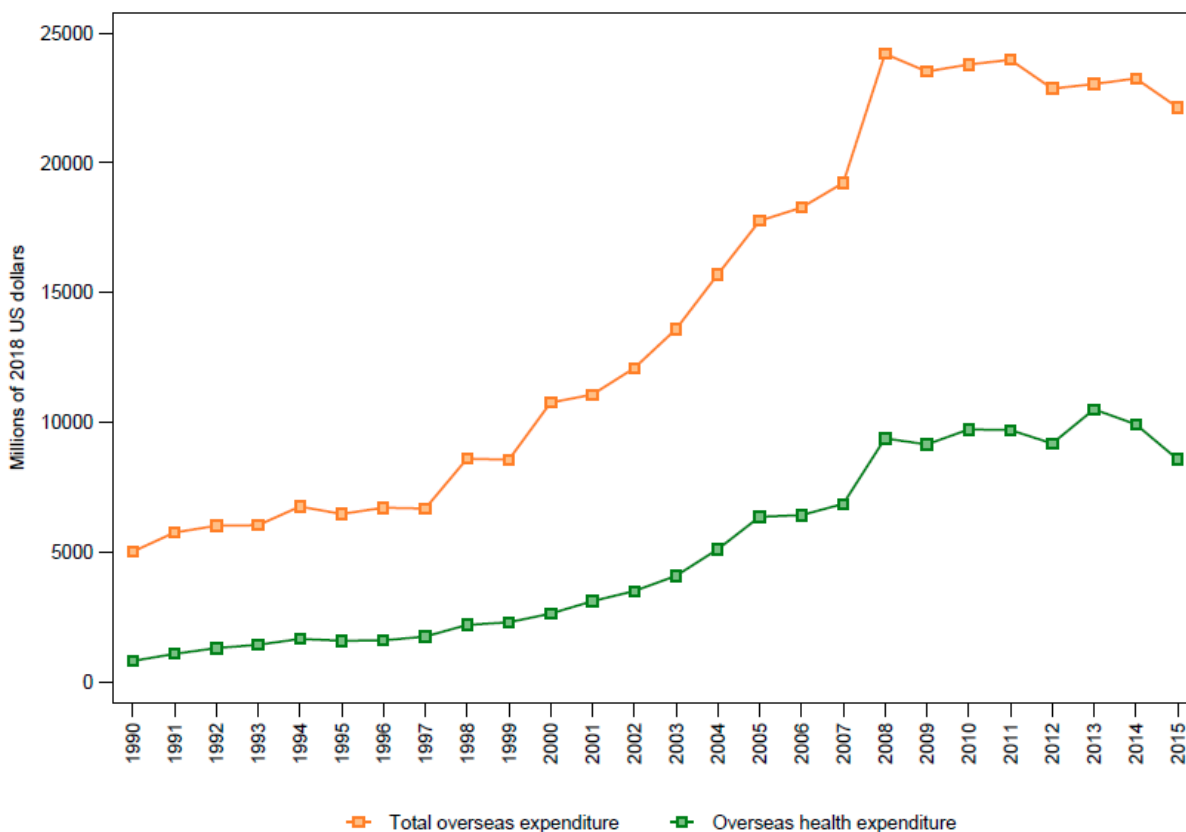

Source: IHME DAH Database (2018)

### Calculating the technical assistance and program support component of development assistance for health from loan-and grant-making channels of assistance

The following methods were used to estimate the costs incurred by loan- and grant-making institutions for administering and supporting health sector loans and grants, which includes costs related to staffing and program management.

Data on the total administrative costs were compiled for institutions in our universe for which these data were readily available: IDA, IBRD, ADB, AfDB, IDB, BMGF, the Wellcome Trust, US Foundations, CEPI, GFATM, Gavi, UNICEF, UNFPA, WHO, UNITAID, PAHO, UNAIDS, USAID, and the UK Department for International Development (DFID), Japan International Cooperation Agency (JICA), Norwegian Aid Agency (NORAD) and the Swedish International Development Agency (SIDA). The sources of data for the institutions in this sample are summarized in eTable 10. The ratio of total administrative costs to total grants and loans was calculated for each source by year. It was assumed that the percentage of operating and administrative costs devoted to health would be equal to the percentage of grants and loans that were for health. In other words, if 20% of a foundation's grants were for health, the model assumed that 20% of administrative costs of the foundation were spent on facilitating these health grants. Given this assumption, the ratios of the observed administrative costs to grants/loans were used to estimate the in-kind contribution made by each of these organizations toward maintaining their health grants and loans. For the institutions not in this sample, the ratio from the institution most similar to it was used to arrive at an estimate of in-kind contributions. For example, for US foundations we selected the top 10 and bottom 10 US foundations based on total disbursements across the entire time period. For each foundation, we

calculated the ratio of the "cash basis" column of total operating and administrative expenses to grants paid. We then used the average of these top 10 and bottom 10 foundations ratio as the in-kind ratio across time. Total in-kind contributions from all grant- and loan-making global health institutions are shown in eFigure 14.

**eTable 10 Summary of data sources for calculating in-kind contributions**

| <b>Organization</b>   | <b>Source</b>                                                              | <b>Notes</b>                                                                                                                                                                                                                      |
|-----------------------|----------------------------------------------------------------------------|-----------------------------------------------------------------------------------------------------------------------------------------------------------------------------------------------------------------------------------|
| <b>BMGF</b>           | 990 tax returns (1999-2006)<br>BMGF Trust financial statements (2007-2017) | Used "cash basis" column to calculate ratio of total operating and administrative expenses to grants paid.<br>Used "grants expenditure" statement to calculate ratio of administrative expenditure to grants/program expenditure. |
| <b>US Foundations</b> | 990 tax returns                                                            | Calculated the average across time of the ratio of the "cash basis" column of total operating and administrative expenses to grants paid.                                                                                         |
| <b>Wellcome Trust</b> | Annual report                                                              | Calculated ratio of support costs to grants awarded by the trust                                                                                                                                                                  |
| <b>CEPI</b>           | Board of directors report, 2016-2017                                       | Calculated ratio of operating expenses to total expenditure.                                                                                                                                                                      |
| <b>GFATM</b>          | Annual report financial statements                                         | Calculated ratio of operating expenses to grants disbursed.                                                                                                                                                                       |
| <b>Gavi</b>           | Annual report financial statements                                         | Calculated ratio of management, general, and fundraising expenses to program expenses.                                                                                                                                            |
| <b>UNICEF</b>         | Annual report financial statements                                         | Calculated ratio of programme support to total expenditure (1990-2011)<br>Calculated ratio of institutional budget to total programme and emergency budgets (2012-2017)                                                           |
| <b>UNFPA</b>          | Annual financial review                                                    | Calculated ratio of institutional budget to total expenses                                                                                                                                                                        |
| <b>WHO</b>            | Financial report and annual financial statements                           | Calculated ratio of general operating expenses to total expenses                                                                                                                                                                  |
| <b>UNITAID</b>        | Financial statement                                                        | Calculated ratio of operating expenses to program expenses                                                                                                                                                                        |
| <b>USAID</b>          | US government budget database                                              | Used outlays spreadsheet to calculate ratio of total outlays for USAID operating account to sum of outlays for bilateral accounts.                                                                                                |
| <b>DFID</b>           | Annual report expense summary                                              | Calculated ratio of DFID's administration expenses to DFID's bilateral program expenses from 2002 onward.                                                                                                                         |
| <b>JICA</b>           | Statement of income in annual report                                       | Calculated ratio of general administrative expenses to operating expenses less depreciation                                                                                                                                       |

|                                                          |                                                |                                                                                                                                            |
|----------------------------------------------------------|------------------------------------------------|--------------------------------------------------------------------------------------------------------------------------------------------|
| <b>SIDA and other Swedish agencies disbursing aid</b>    | Swedish OpenAid website <sup>91</sup>          | Calculated ratio of administrative costs to the sum of all program expenses                                                                |
| <b>NORAD and other Norwegian agencies disbursing aid</b> | Norwegian Aid statistics website <sup>92</sup> | Calculated ratio of general administrative expenses to operating expenses less depreciation                                                |
| <b>IDA</b>                                               | World Bank audited financial statements        | Calculated ratio of management fee charged by IBRD to development credit disbursements.                                                    |
| <b>IBRD</b>                                              | World Bank audited financial statements        | Calculated ratio of administrative expenses to loan disbursements.                                                                         |
| <b>AfDB</b>                                              | Income statements in annual reports            | Calculated ratio of administrative expenses to the sum of loan and grant disbursements                                                     |
| <b>ADB</b>                                               | Annual report                                  | Calculated ratio of administrative expenses to the sum of loan and grant disbursements                                                     |
| <b>IDB</b>                                               | Annual report and financial statement          | Calculated the ratio of administrative expenses to total loan disbursements                                                                |
| <b>EEA</b>                                               | Administrative budget data <sup>93</sup>       | Calculated ratio of donor states' management budget and donor programme partners' participation to Net allocation to beneficiary countries |
| <b>PAHO</b>                                              | Audited financial statements                   | Calculated ratio of general operating expenses and contractual services to total expenses.                                                 |
| <b>UNAIDS</b>                                            | Audited financial statements                   | Calculated ratio of general operating expenses to total expenses.                                                                          |

**eFigure 15 In-kind contributions by loan- and grant-making DAH channels of assistance**

This figure illustrates the proportions of financial and in-kind DAH disbursed by loan- and grant-making institutions. The proportion of in-kind DAH varies, based on the channel. The overall proportion of in-kind DAH received across all channels has grown over time.

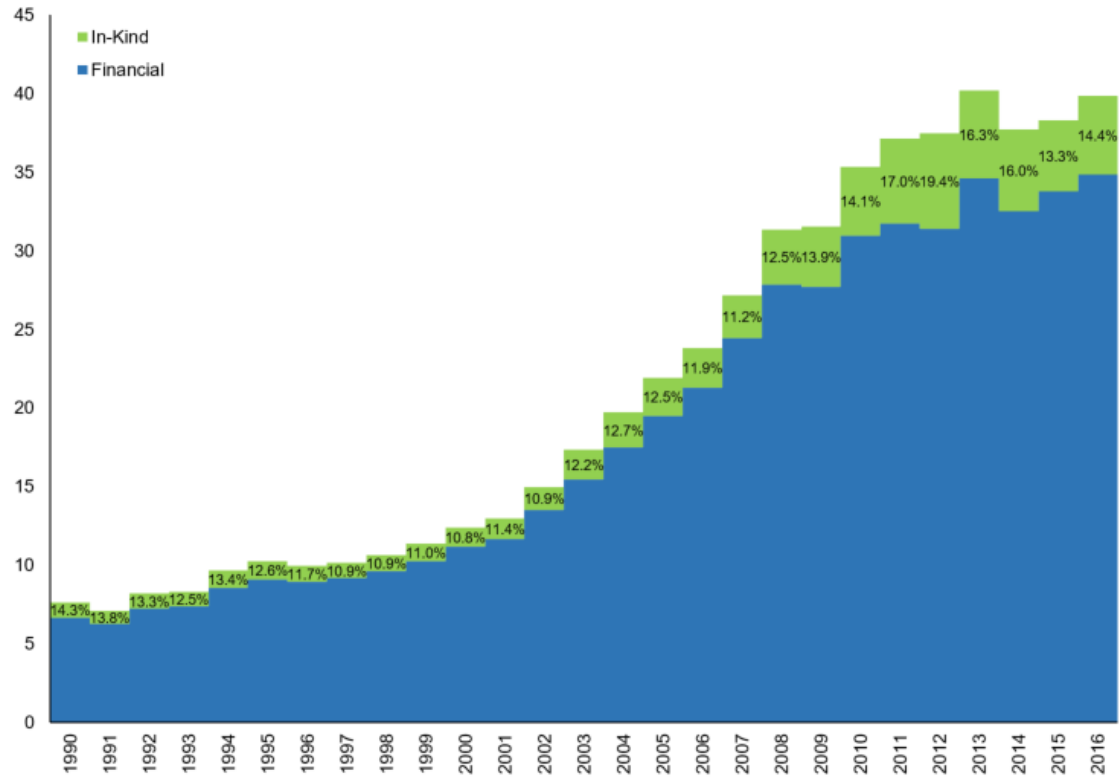

Source: IHME DAH Database (2018)

## REFERENCES

- 1 Dieleman JL, Schneider MT, Haakenstad A, *et al.* Development assistance for health: past trends, associations, and the future of international financial flows for health. *The Lancet* 2016; **387**: 2536–44.
- 2 OECD. International Development Statistics (IDS) online databases. <https://www.oecd.org/development/stats/idsonline.htm> (accessed Jan 7, 2017).
- 3 European Commission. Annual reports - international cooperation and development. Int. Coop. Dev. /europeaid/annual-reports\_en (accessed Jan 26, 2017).
- 4 UNAIDS. PCB Archive. <http://www.unaids.org/en/aboutunaids/unaidsprogrammecoordinatingboard/pcbmeetingarchive> (accessed Jan 26, 2017).
- 5 UNICEF. UNICEF integrated budget, 2014-2017. 2013. [https://www.unicef.org/about/execboard/files/2013-ABL4-UNICEF\\_integrated\\_budget-11Jul2013.pdf](https://www.unicef.org/about/execboard/files/2013-ABL4-UNICEF_integrated_budget-11Jul2013.pdf).
- 6 UNICEF. United Nations Children’s Fund financial report and audited financial statements. New York: United Nations.
- 7 UNICEF. Annual Report 2015. UNICEF. [https://www.unicef.org/publications/index\\_92018.html](https://www.unicef.org/publications/index_92018.html) (accessed Jan 30, 2017).
- 8 United Nations Population Fund. Annual Report 2015. <http://www.unfpa.org/annual-report> (accessed Jan 30, 2017).
- 9 UNITAID. Audited Financial Statements (2007-2016). Unitaids. <https://unitaid.eu/publications/> (accessed Dec 22, 2017).
- 10 Pan American Health Organization, World Health Organization. Executive Committee Session. 2016; published online Dec 20. [http://www.paho.org/hq/index.php?option=com\\_content&view=category&id=1258&layout=blog&Itemid=1160&lang=en](http://www.paho.org/hq/index.php?option=com_content&view=category&id=1258&layout=blog&Itemid=1160&lang=en) (accessed Jan 30, 2017).
- 11 World Health Organization. Financial report and audited financial statement, 2014. World Health Organization, 2015 [http://apps.who.int/gb/ebwha/pdf\\_files/WHA68/A68\\_38-en.pdf](http://apps.who.int/gb/ebwha/pdf_files/WHA68/A68_38-en.pdf).
- 12 The World Bank. Projects & Operations. <http://projects.worldbank.org/> (accessed Jan 30, 2017).
- 13 Paris M. Project database 1990-2016 obtained through personal correspondence. 2016; published online Sept 29.
- 14 African Development Bank. Compendium of statistics on bank group operations. Tunis, Tunisia: Statistics Department, African Development Bank.
- 15 African Development Bank. Online project database. <https://www.afdb.org/en/projects-and-operations/project-portfolio/> (accessed Jan 30, 2017).
- 16 Inter-American Development Bank. Projects database. <http://www.iadb.org/en/projects/projects,1229.html> (accessed Jan 30, 2017).
- 17 Neret M. health disbursement data. 2016; published online Dec 16.



- 18 Gavi, the Vaccine Alliance. Disbursements and commitments. <http://www.gavi.org/results/disbursements/> (accessed Feb 27, 2017).
- 19 Gavi, the Vaccine Alliance. Pneumococcal AMC. <http://www.gavi.org/funding/pneumococcal-amc/> (accessed Jan 30, 2017).
- 20 Gavi, the Vaccine Alliance. Financial reports. <http://www.gavi.org/funding/financial-reports/> (accessed Feb 27, 2017).
- 21 Gavi, the Vaccine Alliance. Cash Received database. <http://www.gavi.org/funding/donor-contributions-pledges/cash-receipts/> (accessed Feb 27, 2017).
- 22 The Global Fund to fight AIDS, Tuberculosis and Malaria. Grants in detail and Disbursements. <http://www.theglobalfund.org/en/portfolio/> (accessed Jan 30, 2017).
- 23 The Global Fund to fight AIDS, Tuberculosis and Malaria. GFATM annual reports. 2017; published online Jan 30. <http://www.theglobalfund.org/en/archive/annualreports/> (accessed Jan 30, 2017).
- 24 The Global Fund to fight AIDS, Tuberculosis and Malaria. GFATM pledges & contributions report. <http://www.theglobalfund.org/en/> (accessed Jan 30, 2017).
- 25 GuideStar USA. Income tax filings. <http://www2.guidestar.org/Home.aspx> (accessed Jan 30, 2017).
- 26 United States Agency for International Development. VolAg report: report of voluntary agencies engaged in overseas relief and development. <https://www.usaid.gov/pvo/volag-report> (accessed Jan 30, 2017).
- 27 Thomson Reuters. Red book expanded database. New York: Thomson Reuters, 2009.
- 28 World Health Organization. WHO | Essential medicines. WHO. [http://www.who.int/topics/essential\\_medicines/en/](http://www.who.int/topics/essential_medicines/en/) (accessed Feb 15, 2017).
- 29 GuideStar. Data Sets for Research. <https://learn.guidestar.org/products/data-sets-for-research> (accessed Dec 21, 2018).
- 30 Bill & Melinda Gates Foundation. Audited Financial statements. Seattle, WA: Bill & Melinda Gates Foundation <http://www.gatesfoundation.org/Who-We-Are/General-Information/Financials> (accessed Jan 30, 2017).
- 31 Chan S. Foundation Awards and Payments. 2016; published online Aug 16.
- 32 Foundation Center. Grants database. Found. Cent. <http://foundationcenter.org> (accessed Jan 30, 2017).
- 33 EEA Grants-Norway Grants, Financial Mechanism Office. EEA Grants project portal. <https://eeagrants.org/project-portal> (accessed Dec 21, 2018).
- 34 Stimpson A. EEA project data obtained through personal correspondence. Brussels, Belgium. EEA and Norway Grants. 2018; published online Sept 20.
- 35 Ahogny J. AfDB development support for health projects enquiry. 2017; published online Nov 16.

- 36 Rouzinova R. Incorporating UNITAID into Financing Global Health Landscape. 2017; published online Aug 21.
- 37 Al Anood Al Abdool., United Arab Emirates Ministry of Foreign Affairs and International Cooperation. UAE Foreign Assistance in Health 1990-2008 through personal correspondence. 2018; published online Jan 24.
- 38 Australian Government. Department of Foreign Affairs and Trade. Aid budget and statistical information. Dep. Foreign Aff. Trade. <http://dfat.gov.au/aid/aid-budgets-statistics/Pages/default.aspx> (accessed Feb 27, 2017).
- 39 Department of Foreign Affairs and Trade. Annual reports. Dep. Foreign Aff. Trade. <http://dfat.gov.au/about-us/publications/corporate/annual-reports/pages/annual-reports.aspx> (accessed Feb 15, 2017).
- 40 Austria Federal Ministry of Finance. Federal budget. <https://www.bmf.gv.at/budget/das-budget/das-budget.html> (accessed Jan 30, 2017).
- 41 Belgium House of Representatives. Project budgets. [http://www.lachambre.be/kvvcr/showpage.cfm?section=/pri/budget&language=fr&rightmenu=right\\_pr i&story=2017-budget.xml](http://www.lachambre.be/kvvcr/showpage.cfm?section=/pri/budget&language=fr&rightmenu=right_pr i&story=2017-budget.xml) (accessed Feb 13, 2018).
- 42 Government of Canada. Planning and performance. GAC. <http://international.gc.ca/gac-amc/publications/plans/index.aspx?lang=eng#rpp> (accessed Jan 30, 2017).
- 43 Danish Ministry of Foreign Affairs. Foreign affairs budget. <http://www.oes-cs.dk/bevillingslove/> (accessed Jan 30, 2017).
- 44 European Commission. General Budget - budget on-line. <http://eur-lex.europa.eu/budget/www/index-en.htm> (accessed Jan 30, 2017).
- 45 Ministry of Finance Finland. State budget bills [in Finnish]. <http://budjetti.vm.fi/indox/index.jsp> (accessed Jan 31, 2017).
- 46 Ministry of Foreign Affairs and International Development. Politique française en faveur du développement. Ministry of Foreign Affairs and International Development, 2017 [https://www.performance-publique.budget.gouv.fr/sites/performance\\_publique/files/farandole/ressources/2017/pap/pdf/DPT/DP T2017\\_politique\\_developpement.pdf](https://www.performance-publique.budget.gouv.fr/sites/performance_publique/files/farandole/ressources/2017/pap/pdf/DPT/DP T2017_politique_developpement.pdf) (accessed Feb 12, 2018).
- 47 Legifrance. Republique Francaise. Budget and financial documents. <https://www.legifrance.gouv.fr/initRechTexte.do> (accessed Feb 15, 2018).
- 48 German Federal Ministry of Economic Cooperation and Development. Plan of the federal budget. Fed. Minist. Econ. Coop. Dev. <http://www.bmz.de/en/ministry/InDetail/budget/index.html> (accessed Feb 13, 2018).
- 49 Greece Standing Committee on Economic Affairs. The state budget and budgets for certain special funds and services, 2013 and 2014 [in Greek]. 2014. <http://www.hellenicparliament.gr/UserFiles/7b24652e-78eb-4807-9d68-e9a5d4576eff/Proyp2014-prak.pdf>.

- 50 Greece Standing Committee on Economic Affairs. Ratification of the State Budget for the financial year 2017. [http://www.hellenicparliament.gr/Nomothetiko-Ergo/Anazitisi-Nomothetikou-Ergou?law\\_id=76e87dd3-8cae-433f-963f-a6c50141de97](http://www.hellenicparliament.gr/Nomothetiko-Ergo/Anazitisi-Nomothetikou-Ergou?law_id=76e87dd3-8cae-433f-963f-a6c50141de97) (accessed Feb 13, 2018).
- 51 Department of Finance, Government of Ireland. The Budget. <http://www.budget.gov.ie/Budgets/2017/2017.aspx> (accessed Feb 15, 2018).
- 52 Ministry of Foreign Affairs and International Cooperation. Stato di previsione del ministero degli affari esteri e della cooperazione internazionale. 2017. [http://www.rgs.mef.gov.it/\\_Documenti/VERSIONE-I/Attivit--i/Bilancio\\_di\\_previsione/Bilancio\\_finanziario/2017/Allegato-t-17-19/2017-DLB-04-AT-060-Esteri.pdf](http://www.rgs.mef.gov.it/_Documenti/VERSIONE-I/Attivit--i/Bilancio_di_previsione/Bilancio_finanziario/2017/Allegato-t-17-19/2017-DLB-04-AT-060-Esteri.pdf) (accessed Feb 15, 2018).
- 53 Ministry of Finance Japan. Budget. <http://www.mof.go.jp/english/budget/budget/index.html> (accessed Jan 31, 2017).
- 54 Korea Official Development Assistance. Comprehensive Implementation plan for international development cooperation by year. [http://www.odakorea.go.kr/hz.bltn2.YearPlanSIPL.do?brd\\_seq=3&bltn\\_div=oda](http://www.odakorea.go.kr/hz.bltn2.YearPlanSIPL.do?brd_seq=3&bltn_div=oda) (accessed Feb 15, 2018).
- 55 Ministry of Finance Luxembourg. State Budget[in French]. <http://www.igf.etat.lu/>.
- 56 New Zealand Treasury. Vote budget data - budgets of the New Zealand Government. 2017; published online Jan 31. <http://www.treasury.govt.nz/budget> (accessed Jan 31, 2017).
- 57 Ministry of Foreign Affairs Norway. Email correspondences. April 18, 2011, February 13, 2012, and August 14, 2013. .
- 58 Norwegian Ministry of Finance. National Budget. <https://www.statsbudsjettet.no/english/> (accessed Feb 15, 2018).
- 59 Ministry of Finance Portugal. State budget report. <http://www.dgo.pt/Paginas/default.aspx> (accessed Jan 31, 2017).
- 60 Ministry of Finance and Public Function Spain. Annual plan of cooperation (PACI). [http://www.aecid.es/EN/cultura/Paginas/Publicaciones/Coop\\_Espanola/PACI/PACI.aspx](http://www.aecid.es/EN/cultura/Paginas/Publicaciones/Coop_Espanola/PACI/PACI.aspx) (accessed Feb 15, 2018).
- 61 Ministry of Foreign Affairs Sweden. International aid budget. <http://www.regeringen.se/> (accessed Jan 31, 2017).
- 62 UK - Department for International Development. IATI Dashboard. <http://dashboard.iatistandard.org/publisher/dfid.html> (accessed Feb 22, 2017).
- 63 Her Majesty's Treasury United Kingdom. Budget. <https://www.gov.uk/government/publications/spring-budget-2017-documents> (accessed Feb 15, 2018).
- 64 Executive Office of the President of the United States. Budget of the United States Government. <https://www.gpo.gov/fdsys/browse/collection.action?collectionCode=BUDGET&browsePath=Fiscal+>

- Year+2014&isCollapsed=true&leafLevelBrowse=false&isDocumentResults=true&ycord=0 (accessed Jan 31, 2017).
- 65 US Foreign Assistance Dashboard. Foreign assistance by category, health-planned stage. <https://www.foreignassistance.gov/explore> (accessed Feb 15, 2018).
- 66 World Health Organization. Proposed programme budget. <http://www.who.int/about/finances-accountability/budget/en/> (accessed Jan 31, 2017).
- 67 Joint United Nations Programme on HIV/AIDS. Financial report and audited financial statement. <http://www.unaids.org/en/aboutunaids/unaidsprogrammecoordinatingboard/pcbmeetingarchive/> (accessed Jan 31, 2017).
- 68 Joint United Nations Programme on HIV/AIDS. Unified budget and workplan. <http://www.unaids.org/en/aboutunaids/unaidsprogrammecoordinatingboard/pcbmeetingarchive/> (accessed Jan 31, 2017).
- 69 United Nations Children’s Fund. Financial Report and Audited Financial Statement - Executive Board documents. [https://www.unicef.org/about/execboard/index\\_25993.html](https://www.unicef.org/about/execboard/index_25993.html) (accessed Jan 31, 2017).
- 70 Sabbah L. Health expenditure data - UNICEF. 2015; published online Sept 29.
- 71 UNFPA. Report on contributions by member states and others to UNFPA and revenue projections. <https://executiveboard.unfpa.org/> (accessed Jan 31, 2017).
- 72 UNFPA. Statistical and Financial review - Audited Financial report. <https://executiveboard.unfpa.org/> (accessed Jan 31, 2017).
- 73 Smithson M, Verkuilen J. A better lemon squeezer? Maximum-likelihood regression with beta-distributed dependent variables. *Psychol Methods* 2006; **11**: 54–71.
- 74 Office of the European Union. EU budget 2014 Financial report. Luxembourg: Office of the European Union, 2015 [http://ec.europa.eu/budget/financialreport/2014/lib/financial\\_report\\_2014\\_en.pdf](http://ec.europa.eu/budget/financialreport/2014/lib/financial_report_2014_en.pdf) (accessed April 17, 2017).
- 75 President’s Emergency Plan for AIDS Relief/ US Government. PEPFAR Dashboards- Country and regional program results, FY 2016. 2017. <https://data.pepfar.net/global> (accessed Feb 14, 2018).
- 76 President’s Malaria Initiative/US Government. Malaria Operational Plans (MOPs). 2017. <https://www.pmi.gov/resource-library/mops> (accessed Feb 14, 2018).
- 77 Krackenberger K. IHME-WB FGH 2018 data request. 2018; published online Sept 10.
- 78 Projects & Operations - Sectors. <http://projects.worldbank.org/sector> (accessed Jan 26, 2018).
- 79 Miyuki Parris. Project database 1990-2016 obtained through personal correspondence. Washington D.C.: The World Bank, 2016.
- 80 World Bank Group - International Development Association. IDA18 Replenishment. Int. Dev. Assoc. - World Bank. 2016; published online Feb 16. <http://ida.worldbank.org/financing/replenishments/ida18-replenishment> (accessed Dec 21, 2018).

- 81 Asian Development Bank. Online project database. <https://www.adb.org/projects> (accessed Jan 30, 2017).
- 82 African Development Bank Group. Resource Mobilization and Partnerships. <https://frmb.afdb.org/?page=adf&subpage=adf-ar> (accessed Dec 21, 2018).
- 83 Asian Development Bank. Asian Development Fund Replenishments. Asian Dev. Bank. 2014; published online Aug 5. <https://www.adb.org/site/adf/replenishments> (accessed Dec 21, 2018).
- 84 Gavi, the Vaccine Alliance. Annual financial reports. <http://www.gavialliance.org/funding/financial-reports/> (accessed Jan 30, 2017).
- 85 World Health Organization. WHO Programmatic and Financial Report (including audited financial statements). Geneva, Switzerland: World Health Organization, 2016 [http://apps.who.int/gb/ebwha/pdf\\_files/WHA69/A69\\_45-en.pdf?ua=1](http://apps.who.int/gb/ebwha/pdf_files/WHA69/A69_45-en.pdf?ua=1) (accessed April 17, 2017).
- 86 Pan American Health Organization. Financial Report of the Director and Report of the External Auditor. 1 January 2015 - 31 December 2015. Washington D.C.: Pan American Health Organization, 2016 <http://iris.paho.org/xmlui/handle/123456789/33710>.
- 87 Schlutter A, Volker T, Walkenhorst P. Foundations in Europe: International Reference Book on Society, Management and Law. Gutersloh, Germany; Washington, DC: Bertelsmann Stiftung; Brookings Institution Press, 2001.
- 88 European Economic Area. EEA grants report. Financial Instrument 1999-2003. Final report. <http://eeagrants.org/content/download/10037/139187/version/3/file/141219+FI99-03+final+report.pdf>.
- 89 European Economic Area. EEA report - Financial Mechanism 1994-1998. Final report. <http://eeagrants.org/content/download/5915/65422/version/1/file/Financial+Mechanism+1994-1998+Final+Report.pdf>.
- 90 European Economic Area. EEA Annual Report - 2016-2017. <https://eeagrants.org/content/download/13045/175890/version/1/file/Annual+Report+2016-2017.pdf>.
- 91 Swedish International Development Agency. Sweden's aid to the world for all sectors in. <https://openaid.se/aid/> (accessed Dec 21, 2018).
- 92 NORAD. Norwegian Aid Statistics. NoradDev. <https://norad.no/en/front/toolspublications/norwegian-aid-statistics/> (accessed Dec 21, 2018).
- 93 European Economic Area. Administrative budget - EEA Grants. <https://eeagrants.org/Who-we-are/How-we-work/Administrative-budget> (accessed Dec 21, 2018).

## SECTION 4: Tracking development assistance for health from China

### 1. Overview

The estimates of DAH contributions from China is based on data from diverse sources including government reports and international development agencies databases. We generate estimates for bilateral and multilateral contributions from China separately and aggregate to obtain the total DAH contributions from China. We use project descriptions and reports where available to determine health focus areas of the contributions. For years with limited data, we use various methods inclusive of interpolation and modeling to generate estimates. Research explaining these methods completely is currently under review.

# 1 Data

## 1.1 Summary of Data Sources

We used data from seven sources for the analyses:

- World Health Organization's (WHO) Global Health Expenditure Database
- Institute for Health Metrics and Evaluation's Development Assistance for Health Database (IHME)
- International Monetary Fund's (IMF) World Economic Outlook (WEO) database
- Penn World Tables 9.0 (PWT)
- World Bank (WB) World Development Indicators database (WDI)
- Angus Maddison Project
- United Nations (UN) World Population Prospects (WPP)

Specifically, we collected health expenditure information on all available sources that is comparable across countries and complete for most countries from WHO and IHME, and demographic data from the WPP, while the underlying data for producing gross domestic product (GDP) and general government expenditure (GGE) were extracted from the IMF, WB, and PWT. Table 1 presents the definitions for the various health expenditure sources.

## 1.2 Institute for Health Metrics and Evaluation's Development Assistance for Health Database

Development assistance for health estimates were obtained from the Institute for Health Metrics and Evaluation's Development Assistance for Health Database. To generate these estimates, IHME collected audited budgets, annual reports, and project records from the primary development agencies providing assistance for the health sector. These records are augmented by information acquired via correspondence, and are standardized and compiled to provide a comprehensive perspective on international financial flows for health. These estimates are tracked backward to the source of the funds and forward to the country recipient, and are available from 1990 through 2018 and 2016, respectively.

---

### 1.3 World Health Organization’s Global Health Expenditure Database

We used Global Health Expenditure Database (GHED) data from the WHO to generate our estimates, which spans for 185 countries between 2000 through 2016. From the GHED, we pulled the following variables:

- (i) Compulsory prepayment (Other, and unspecified, than FS.3)
- (ii) Other revenues from NPISH n.e.c.
- (iii) Other revenues from corporations n.e.c.
- (iv) Other revenues from households n.e.c.
- (v) Social insurance contributions
- (vi) Transfers from government domestic revenue (allocated to health purposes)
- (vii) Gross Domestic Product
- (viii) Voluntary prepayment

To ensure we were using the best possible data, we downloaded the metadata for each data point for all of the indicators from the GHED website. We used the metadata to decide how each given data point should be weighted, from 1 to 5, being applied as inverse variance weights. We established guidelines for the metadata that informed how the underlying data points should be weighted, giving priority to factors such as complete, documented source information and penalizing factors such as having been derived or estimated. We adjusted these data by converting them from current local currency to 2018 US\$ . Details of the weighting guidelines and classification are explained in the supplementary appendix our retrospective analysis paper.

Once we have an incomplete set of data points for the health expenditure variables we are interested in forecasting, we used Spatiotemporal Gaussian process regression (ST-GPR) to model the full time-series for each variable across a total of 195 countries. ST-GPR is a stochastic modeling technique that is designed to detect signals amidst noisy data. Unlike classical linear models that assume that the trend underlying data follows a definitive functional form, GPR assumes that the specific trend of interest follows a Gaussian Process, existing with some pointwise mean and covariance function. [1]. The covariates that were used in order to determine the initial fit of our health expenditure variables are: lag-distributed income, all-sector government expenditure per capita, healthcare access and



---

quality index [2], and proportion of total population over the age of 64; using a Matérn covariance function for the distribution of the Gaussian process. Once we determined an initial prediction of our dependent variables, using the variability of data across regions, Gaussian process regressions (GPR) were run in order to estimate 1,000 draws of each country-year estimate per metric.

## 1.4 United Nations World Population Prospects 2017

The United Nations (UN) World Population Prospects (WPP) provides population estimates and forecasts by age, sex, country, and year from 1950 until 2100. Using a cohort-component approach, WPP utilizes life tables to generate forecasts of age-specific mortality rates. Their modeling strategy involves a hierarchical Bayesian model (with an AR(1) process) of female life expectancy (with male life expectancy being highly correlated with female's) that prioritizes country data if available, but otherwise draws on regional data [3, 4]. A separate step models the male-female difference in life expectancy. From their final data source, we generate multiple indicators of demographic context, such as the total fertility rate (TFR), the proportion of the population under the age of 20, the proportion aged 65 years and over, and the total population for each country and year.

For a certain set of countries where either age-sex specific population or the TFR data were missing, we used a combination of a secondary data source (the US Census Bureau [5], which spanned from 2000 through 2050) and the global burden of disease (GBD) region specific rate of change to fill in and extrapolate, therefore giving us complete country-year time series for TFR and age-sex specific population spanning from 1950 through 2099 (2099 being the final year of TFR data available for other countries with existing data points).

## 1.5 WB, IMF, PWT, and Maddison

The WDI Database provides data on a wide range of development related variables, including data on GDP and GDP per capita. Data series in this database begin in 1960. The IMF's WEO Database provides data on various macroeconomic indicators. Macroeconomic series data are available from 1980 to present. The PWT is a database that provides real national accounts data for 167 countries and territories. The data series starts in 1950. The Maddison Project database provides historical GDP, GDP per capita, and population data dating as far back as Roman times. We utilized GDP per capita as a primary covariate to produce forecasts. GDP per capita from 1950 through 2017 was constructed using the method described in *James et al* [6]. The method utilized extracted data from a number of sources (IMF, WB, PWT and Maddison), and used multiple random effects models to

---

estimate a mean GDP per capita series to be used in our analysis. Similarly, we used the same methodology to produce a mean general government expenditure (GGE) per GDP series, from 1980 through 2017.

In order to forecast GDP per capita, we first convert GDP per capita to GDP per working population in the following manner:

$$\text{GDP}_{\text{working population}} = \text{GDP}_{\text{total population}} \times \frac{\text{Working population (20-64 years old)}}{\text{Total Population}}$$

We forecast GDP per working population from 2018-2050 and convert back to GDP per capita for further analysis. The out-of-sample root-mean-squared-error (RMSE) based on using GDP per working population was smaller than forecasting with GDP per capita.

---

## 2 Covariates

### 2.1 List of Forecasted Variables

The following are the list of variables which are forecasted in the manuscript:

- GDP: Gross Domestic Product (national income of a country)
- GGE: General Government Expenditure (all sector government expenditure in a country)
- $DAH_d$ : Development Assistance for Health donated
- $DAH_r$ : Development Assistance for Health received
- GHE: Government Health Expenditure
- OOP: Out-of-pocket Private Expenditure
- PPP: Prepaid Private Expenditure
- THE: Total Health Expenditure

### 2.2 Covariates Used for Forecasting

The following covariates are used as predictors, or independent variables, in our models:

- Total population of a country (1950 - 2050)
- Proportion of total population below the age of 15 (1950 - 2050)
- Proportion of total population above the age of 64 (1950 - 2050)
- Total Fertility Rate (1950 - 2050)
- Education attainment per capita [7, 8] (1980 - 2050)
- An indicator variable used to denote the anomalous disbursement of DAH in our  $DAH_d$  forecasts (1 for years in 2000 - 2010, 0 otherwise)
- An indicator variable used to denote the Ebola crisis in Guinea, Sierra Leone and Liberia in our  $DAH_r$  forecasts (1 for years in 2014 and 2015 for the three aforementioned countries, 0 otherwise).

---

Additionally, we also use the forecasted GDP and GGE per capita as covariates to predict the health expenditure variables. Section A.1 in the Tables and Figures section shows our full pathway for forecasting all our endogenous variables and how each of those variable fed into a succeeding model.

---

## 3 Ensemble Modeling

The purpose of ensemble modeling is to make sure that we capture the most out of what we have in our arsenal in terms of covariates and model specifications. We are agnostic about one model being the sole predictor of the future, and allow an ensemble of beliefs about predicting off of the past trends. ‘Ensembling’, in simple terms, is a way of pooling a number of sub-models, where the space of sub-models span different inclusions and combinations of predictors, and/or different econometric specifications.

### 3.1 Sub-model Setup

Our basic sub-model is a linear mixed effect model of the following form, for country  $i$  and time  $t$ :

$$\Delta_t Y_{i,t} = (\alpha + \alpha_i) + \left( \sum_{p=1}^3 \rho_p \Delta_t Y_{i,t-p} \right) + \Delta_t X' \beta + \varepsilon_{i,t} \quad (1)$$

where

$$(\alpha, \vec{\beta}) \quad \text{(Fixed effects)} \quad (2)$$

$$\alpha_i \sim N(0, \sigma_a^2) \quad \text{(Country specific random intercept)} \quad (3)$$

$$\varepsilon_{i,t} \sim N\left(\sum_{m=1}^3 \phi_m \varepsilon_{i,t-m}, \sigma_i^2\right) \quad \text{(Autocorrelated residuals as time random effects)} \quad (4)$$

‘Fixed effect’ is the equivalent of a non-random coefficient in a linear regression setting, and is estimated globally across all countries and time periods. The likelihood function for the data were all set to be Gaussian distributions for all of our metrics and models.

### 3.2 Covariates

Using our linear baseline model as defined in section 3.1, we created our set of ensemble sub-models by using all combinations of each of the covariates in Table A.2. For example, if we were predicting GDP per capita with TFR and Population as the predictors, then we would get a possible combination of four specifications to use (including one with no fixed effects). All covariates were included as fixed effects, and all specifications had the random effect on country intercepts.

---

### 3.3 Convergence to Global Growth Rates

We believe that the very-long-term trajectory of a variable forecasted for each country will gradually taper to the global growth rates. The way that we implemented this growth rate convergence is in the following manner:

- 1) Suppose that we are forecasting  $Y_{i,t}$ , which includes an intercept at the global level and the country level. Let us also assume that there were  $\tilde{T}$  time periods of  $Y$  observed in the past for each country  $i$ .
- 2) We start the tapering of the growth rate to start from 10 years before  $\tilde{T}$  into the future starting from the present, converging to the global value 10 years after  $\tilde{T}$ . Therefore, if the present time period is  $H$ , then our decaying scheme will start off from the year  $h + \tilde{T} - 10$  and end at  $h + \tilde{T} + 10$ .
- 3) Our main objective is to slowly taper all the countries' random intercepts to decay to zero, so that they are all following a global intercept. In a first-difference model, since the intercepts represent the linear time trend, this scheme will slowly converge the linear time trends of all countries to decay to the global time trend.
- 4) Starting from the first year of decay, we will transform the country specific intercepts as such:

$$\hat{\alpha}_i = (\hat{\alpha}_i) \times \frac{20 - t}{20}$$

where  $t$  are all the time periods between  $h + \tilde{T} - 10$  and  $h + \tilde{T} + 10$ .

- 5) By the time  $t$  reaches  $h + \tilde{T} + 10$ , the value of  $\hat{\alpha}_i$  will have decayed to zero, and therefore, all the countries will have reached a global linear time trend estimate.

### 3.4 Specifications

- 1) **ARIMA (Autoregressive Integrated Moving Average) terms:** We allowed up to three degrees of lags in the model (traditional auto-regressive terms), where each degree of AR term will include itself and all other lower degrees of lags. For example, a GDP per capita model with AR(3) specification (predicting log of GDP per capita) will include once, twice and thrice lagged log GDP per capita term. These were included as fixed effects.

Additionally, in order to predict the best set of fixed effect coefficients, we test and include auto-correlated residuals in our models (traditional moving-average terms in an ARIMA setup). This basically means that we allow our models to estimate the residuals with

---

an autoregressive process of their own. These were included as random effects, and we allowed this to exist at the country-year level.

All of the variables we forecasted used the first-differences transformation (across time) as the dependent variable, except DAH received which was forecasted in non-differenced space, because of the presence of very high noise, thereby making the differenced series very unstable to forecast.

- 2) **Recency weights:** One of the other specifications we included in our sub-models was the option of weighting the recent years higher. This is particularly helpful for countries like Ethiopia and Nigeria, where they had rapid economic growth in recent years, and we believe that is a better predictor of the GDP forecasts than the further past. The weighting function was defined as such:

$$\text{Weight} = f(\tau, t) = (T - t + 1)^\tau \quad (5)$$

where  $T$  is the final year of in-sample data we have, and  $t$  is the year at that data point. This is an exponential decaying weighting function, where the degree of decaying is determined by  $\tau$ , and we test and include a set of values of  $\tau$  ranging between 0 and 0.5, where  $\tau = 0$  refers to equal weights (all time periods are weighed equally at 100). Given that  $\left. \frac{df(\tau, t)}{dt} \right|_{\tau > 0} < 0$ , this allows to weight our data with higher contributions to the likelihood from the recent past, and slowly decaying as we move further into the past towards the first observed time period. These recency weights were multiplied with the pointwise data variance parameter in order to weight the data points.

- 3) **Convergence Term:** We also allowed for the inclusion of a ‘convergence term’ in the list of sub-models. A convergence term is the one-year lag of the non-differenced dependent variable, and gets updated as each year is forecasted in the future. If a convergence term was considered in a sub-model, then we only included that sub-model if the coefficient on the convergence term was estimated to be negative (and statistically significant at 10% level).

---

## 4 Package and Architecture

### 4.1 Architecture

All analysis and forecasting were done on a parallel computing cluster with 20,000 nodes with a CentOS interface. We compiled R[9] version 3.5.1 from source code on a Docker based on Debian OS, which was deployed as a Singularity container with all the necessary compilers and binaries (GCC, G++ and Fortran 8.2.0).

### 4.2 Template Model Model

We used the R library **TMB**[10] to run our baseline mixed effects models. TMB stands for Template Model Builder, and it's a powerful method of approximating the integral of the Gaussian probability distribution function (which doesn't exist in closed form) by using a Laplace Approximation, which gives very precise results, and is relatively faster than other approximation packages which exist like Stan or Bugs. TMB uses automatic differentiation on the negative log-likelihood function in order to optimize the model parameters, and also returns a sparse joint precision matrix, from which we can simulate posterior parameter draws.



---

## 5 Inclusion and Exclusion Criteria

After we ran all possible combination of our sub-models and created a mean set of forecasts, we only want to keep the best possible set of sub-models. Hence, we implied the following set of inclusion and exclusion criteria in order to filter out the ‘unrealistic’ sub-models:

- (1) All of the estimated coefficients must be **statistically significant at 10% level of significance**. For the fixed effects, we took the mean and the standard deviation of the posterior estimates, and filtered out the sub-model if the absolute z-score is below 1.645 (the absolute value of the one-sided 95th quantile of a standard normal distribution).

For the random effects, we look at the whether the measure of variance is statistically significant or not. The model outputs the mean and standard deviation of the *precision of the random effects*, and therefore allowed us to exclude the specification if the precisions are not statistically significant at 10% level.

- (2) If there were any estimated coefficient that **defied a prior belief we have on the direction of the value**, then we dropped that sub-model from consideration. For example, we strongly believe that as a donor country’s (high income countries) income (GDP per capita) grows, they will be able to donate more DAH to lower income countries, and so, if we ran a sub-model predicting  $DAH_d$  and get a negative coefficient on GDP per capita, we dropped that sub-model from consideration.

Our prior beliefs on the covariates for each dependent variable are listed in Table A.2.

- (3) The forecasted trajectory growth **must not exceed observed growth rates**. We believe that a country will not grow faster than how much it has grown in the past trend. In order to come up with the bounds, we run a stochastic frontier analysis (SFA) of the change in the predicted variable against the level value of the predicted variable. SFA is just like an ordinary least squares specification, except with the addition of an additional ‘inefficiency’ term with a half-normal distribution. This allows us to estimate (for example, for GDP per capita): conditional of a country’s income, how much growth rate did we see in the country’s GDP. We ran this analysis across all of the observed data points, and derived a relationship binding the growth rates of GDP against the absolute values of GDP.

---

## 6 Creating the Forecasts

### 6.1 Ranking Sub-Models

In order to find out with sub-models would be able to predict a country's future the best, we ran out-of-sample predictive validity (OOS-PV) tests[11]. Simply put: we took each sub-model that passed the criteria in section 5, and instead of running it on all of the past data, we left out some number of recent most years. Following that, we ran the sub-model on the truncated past, and forecasted those years left out. For example, our GDP data extends from 1970 through 2017; we left out 15 years of data, and reran a sub-model from 1970 - 2007, and use the results of that sub-model to forecast GDP for the out-of-sample years (2003 - 2017).

This gave us essentially two trajectories between 2003 through 2017: the truth and the out-of-sample predictions. For each year, we computed the squared error (the difference) between these two lines, and averaged these errors for each of the neighboring years. So for example, we had squared errors for 15 data points between 2003 and 2017, and so the first mean squared error sum was just the squared error at 2003 and 2004, the second was the mean of the sum of squared errors for 2003, 2004 and 2005, and so on. We then took the square root of this new series to get the running root mean squared errors (RMSE) for a given country.

We looked at a country's 2003 RMSE values for each sub-models ran, and listed out the best 10% of the sub-models (that is, the lowest 10% RMSE values), and we did so for every year out-of-sample. For a single country, we may potentially have completely different set of sub-models for each of the OOS years. Then, for the 10% of the sub-models selected in the *first* year OOS, we only used those models to predict the *first* year of forecast for each country; the set of 10% of the sub-models selected in the *second* year OOS were used to predict the *second* year of forecast for each country, and so on, until the last year OOS model selections are used to compute the forecast the remaining years. This allowed us to narrow down every country's trajectory with the best performing OOS-PV sub-models for each year.

### 6.2 Uncertainty Estimation

To estimate the uncertainty intervals (UI), we reran the selected, ranked sub-models from section 6.1 and simulated draws instead of just getting a mean estimate of the future. There are four types of uncertainty we implemented in forecasting:

- (i) **Model Uncertainty** : This type of uncertainty comes from having more than one

---

type of specification to create forecasts, and therefore we included a set of sub-models in the ensemble to incorporate for this uncertainty (which are ranked within each country-year).

- (ii) **Data Uncertainty** : If our covariates themselves had draws of the future data (for example, when we forecasted GDP as a covariate to forecast PPP), then we picked randomly from the draws of the independent variable when predicting a sub-model's trajectory, if that covariate was included.
- (iii) **Parameter Uncertainty** : This type of uncertainty is due to the variance for the posterior distributions. Once we have run a sub-model, we simulated from each of the estimated posterior distribution to create a set of simulated coefficients. This is done by simulating from the joint precision matrix of all the parameters estimated, and therefore produces a correlated set of coefficients.
- (iv) **Fundamental Uncertainty** : The in-sample data and the fitted line in the past will never line up perfectly: there will always be errors from the model fit. We needed to reflect this level of uncertainty in our forecasts as well. By extracting these empirical residuals produced by a sub-model, we forecasted future country-specific residuals by using a random walk process, where the variance of the process is the variance of the residuals from the model fit  $\sigma_{\varepsilon}^2$ :

$$\hat{\varepsilon}_{i,t} \sim N(\varepsilon_{i,t-1}, \sigma_{\varepsilon,t}^2) \tag{6}$$

A random walk is an AR(1) process with the coefficient equal to 1: in other words, the current value is independent of last year's value (except for the starting position), and will propagate forward with a random Gaussian noise of  $\sigma_{\varepsilon,t}^2$  variance.

All of the above were used to simulate 1,000 forecasts (or draws), and so in order to construct our UIs, we took the mean and the values of the 2.5th and 97.5th quantiles to estimate 95% UIs.

Table B.1 shows all of the retrospective and prospective estimates of our health spending outcomes in 2018 USD and 2018 PPP in per capita space.

---

## 7 Ad-hoc Draws Correlation

### 7.1 Motivation

Given our current setup of compiling draws for each single year, there is no way of enforcing a temporal correlation across the draws right from the ensemble architecture. For example, the sub-models used in the first 15 years of GDP per capita forecasts were independently constructed and only depended on OOS-PV fits, while the 10th year (2032) onwards all draw from the same set of sub-models. This section details on the method used to generate the same correlation in the first 10 years of that example, drawing from the existing correlation from the 10th year onwards.

### 7.2 Bivariate Correlated Distributions

Using the GDP per capita example: following from uncertainty estimation, once we generated approximately 1,000 forecast draws for a country and year for any of the covariates, we used the following strategy to achieve consistent temporal correlation across all time periods in the future:

- (a) For each country, we recorded country-specific Spearman's correlation coefficient across all draws between 2032 and 2050, which gave us a country-specific correlation vector.
- (b) For each value of correlation in step (a), we simulated a bivariate uniform distribution for each country and year (2018 through 2032). This simulated distribution was ranked in such a way that the marginal distributions in the joint distribution were correlated with that value of correlation coefficient we supplied (this joint distribution is known as a *copula*).
- (c) We recorded the ranks of the copula, and sorted our draws (within each country) using those temporal ranks, and therefore we ended up with a complete time-series data for all draws, such that each country and year will follow the same rank correlation structure that exists between 2032 and 2050.
- (d) Finally, we calculated our final set of uncertainty intervals by taking the 2.5th and 97.5th percentiles of these correlated draws.

We used this method at the end of forecasting every metric, since one metric fed into the other sequentially.

---

## 8 Future Health Scenarios

We established the trajectories that our health expenditures are expected to take in the next 33 years using our ensemble models (from hereby referred to as the ‘reference’ case). The reference forecasts were built upon the basis of each country’s past trends and expected future trends from covariates. We additionally also predicted what the possible trajectories for each country would look like if they were to follow the possible optimistic and pessimistic growth rates observed globally (referred to as ‘better’ and ‘worse’ cases, respectively).

### 8.1 Long-term Growth Regressions

In order to determine what the possible better and worse growth rates for each country would be, we ran long-term growth regressions with the following specification:

$$Y_{i,T} - Y_{i,t} = \alpha + \beta Y_{i,t} + \epsilon_{i,t} \quad (7)$$

where the dependent variable represented the long term growth rate of  $Y$  for country  $i$ , which was computed either as logarithmic or logistic growth rates (for fractions).

The only independent variable we used ( $Y_{i,t}$ ) was the value of  $Y_i$  at time  $t$ , and it served as a convergence term in this regression. This allowed us to predict the long-term growth rates of  $Y$ , conditional on a country’s level of  $Y$  at time  $t$ .

### 8.2 Forecasting Better and Worse Scenarios

In order to estimate what the future better and worse trajectories would be for each country, we followed these steps (assuming that we are forecasting from 2017 through 2050, with observed data between 1995 and 2016):

- (i) We computed the 85th and 15th percentiles of the empirical residuals  $\epsilon$ , as  $Q_{0.85}(\hat{\epsilon}_{i,t})$  and  $Q_{0.15}(\hat{\epsilon}_{i,t})$  respectively, where  $Q_p(\cdot)$  is a quantile function for a percentile  $p$ .
- (ii) We computed the starting annualized growth rate from the fitted scenario regression, such that, for country  $i$ :

$$\text{Better growth rate} = \exp(\hat{\alpha}) \times \exp(Q_{0.85}(\hat{\epsilon}_{i,t})) \times (Y_{i,2016}^{\hat{\beta}})^{(1/(2016-1995))} \quad (8)$$

$$\text{Worse growth rate} = \exp(\hat{\alpha}) \times \exp(Q_{0.15}(\hat{\epsilon}_{i,t})) \times (Y_{i,2016}^{\hat{\beta}})^{(1/(2016-1995))} \quad (9)$$

- (iii) Finally, once we have established the growth rates as a function of the convergence term, we recursively created better and worse trajectories, conditional on the updated

---

growth rates every year, such that:

$$Y_{i,t+1} = Y_{i,t} \times \exp(\hat{\alpha}) \times \exp(Q_{0.85}(\hat{\epsilon}_{i,t})) \times (Y_{i,t}^{\hat{\beta}}) \quad (10)$$

where  $\exp(\hat{\alpha}) \times \exp(Q_{0.85}(\hat{\epsilon}_{i,t})) \times (Y_{i,t}^{\hat{\beta}})$  was the conditional growth rate for a single year.

One condition that we imposed for the computed scenarios is: the better projection cannot be lower than the reference projection, and the worse projection cannot be higher than the reference projection. For countries with wide forecasts where this case did happen, we moved the better and worse forecasts down and up to overlap on top of the reference line respectively.

### 8.3 Uncertainty Estimation

The uncertainty intervals around a scenario were expected to take the same shape as the uncertainty around our reference forecasts. Therefore, once we have propagated a mean set of better and worse forecasts in section 8.2, we created the draws around our scenarios in the following way:

- (i) We took our reference forecast's mean line and the 1,000 draws around that line.
- (ii) We computed the deviation of the mean from each of the draws (in logarithmic or logistic transformation, depending on the space of the covariate).
- (iii) We took each of the scenario mean lines and added the deviations from the previous step to the mean lines, giving us 1,000 draws of the scenario projections.

Figure set B.2 visualizes the future health scenarios of our health outcomes in per capita space (in 2018 USD).

---

## A Tables and Figures

Table 1: Definitions of health expenditure sources

| Health Expenditure Type                 | Definition                                                                                                                                      |
|-----------------------------------------|-------------------------------------------------------------------------------------------------------------------------------------------------|
| Development assistance for health       | Financial and in-kind contributions from global health channels that aim to improve or maintain health in low- or middle-income countries.      |
| Government health expenditure as source | Government health expenditure as source only includes domestically financed government expenditure on health, including public health spending. |
| Out-of-pocket expenditure               | Paid by individuals for health services; considered catastrophic if exceeding 40% of a household's annual income.                               |
| Prepaid private health expenditure      | Private risk pooling against catastrophic health expenditure; includes private insurance and non-governmental organizations.                    |

## A.1 State Space Diagram of Forecasting Components

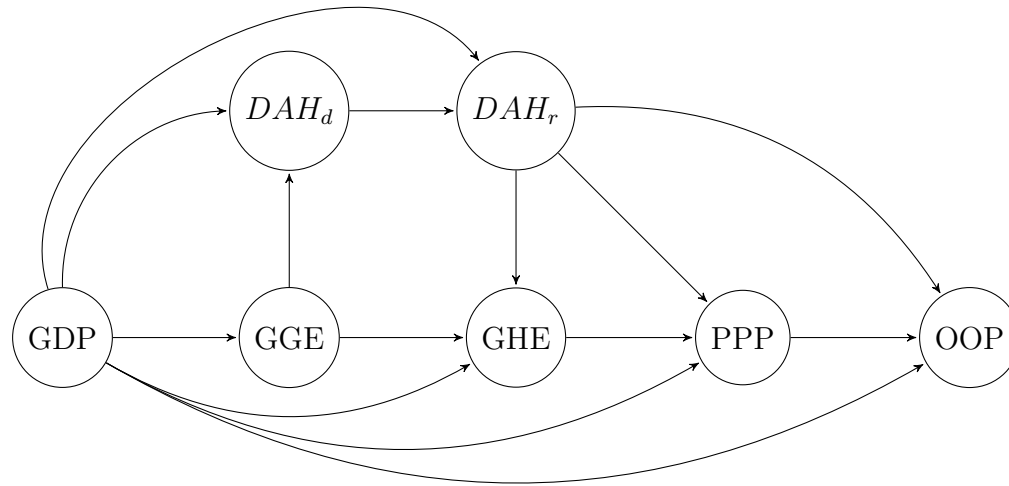



## A.2 Prediction and Covariates Map with Transformations

|   | Predicted Variables                              | Covariates                                                                                                                         | Extra Specifications |
|---|--------------------------------------------------|------------------------------------------------------------------------------------------------------------------------------------|----------------------|
| 1 | GDP per labour<br>(both in log)                  |                                                                                                                                    | ARIMA(2-3, 1, 0)     |
| 2 | GGE per GDP<br>(logit)                           | GDPpc <sup>+</sup> , Pop >64 <sup>+</sup> , Education <sup>+</sup>                                                                 | ARIMA(0-3, 1, 0-3)   |
| 3 | DAH donated per<br>GGE (logit)                   | GDPpc <sup>+</sup> , GGE/GDP <sup>+</sup> , Bush Era Dummy <sup>+</sup>                                                            | ARIMA(0-3, 1, 0-3)   |
| 4 | DAH received per<br>total DAH donated<br>(logit) | GDPpc <sup>-</sup> , Pop <sup>-</sup> , Pop <15 <sup>+</sup> , TFR <sup>+</sup> ,<br>Ebola dummy <sup>+</sup> , total DAH envelope | ARIMA(0-3, 0, 0-3)   |
| 5 | GHE per GGE<br>(logit)                           | GDPpc <sup>+</sup> , Pop >64 <sup>+</sup> ,<br>GGE/GDP <sup>+</sup> , DAH/GDP <sup>-</sup>                                         | ARIMA(0-3, 1, 0-3)   |
| 6 | PPP per GDP<br>(logit)                           | GDPpc <sup>+</sup> , Pop >64 <sup>+</sup> , GGE/GDP.<br>DAH/GDP, GHE/GDP,                                                          | ARIMA(0-3, 1, 0-3)   |
| 7 | OOP per GDP<br>(logit)                           | GDPpc <sup>-</sup> , Pop >64 <sup>+</sup> , GGE/GDP,<br>DAH/GDP, GHE/GDP, PPP/GDP                                                  | ARIMA(0-3, 1, 0-3)   |

---

## References

- [1] Emmanuela Gakidou, Ashkan Afshin, Amanuel Alemu Abajobir, Kalkidan Hassen Abate, Abbafati, Ben Zipkin, Sanjay Zodpey, Stephen S Lim, and Christopher J L Murray. Global, regional, and national comparative risk assessment of 84 behavioural, environmental and occupational, and metabolic risks or clusters of risks, 1990-2016: a systematic analysis for the Global Burden of Disease Study 2016. *The Lancet*, 390(10100):1345–1422, nov 2017. ISSN 0140-6736. doi: 10.1016/S0140-6736(17)32366-8. URL [http://dx.doi.org/10.1016/S0140-6736\(17\)32366-8](http://dx.doi.org/10.1016/S0140-6736(17)32366-8).
- [2] Measuring progress and projecting attainment on the basis of past trends of the health-related sustainable development goals in 188 countries: an analysis from the global burden of disease study 2016. *The Lancet*, 390(10100):1423 – 1459, 2017. ISSN 0140-6736. doi: [https://doi.org/10.1016/S0140-6736\(17\)32336-X](https://doi.org/10.1016/S0140-6736(17)32336-X). URL <http://www.sciencedirect.com/science/article/pii/S014067361732336X>.
- [3] Adrian E Raftery, Leontine Alkema, and Patrick Gerland. Bayesian population projections for the united nations. *Statistical science: a review journal of the Institute of Mathematical Statistics*, 29(1):58, 2014.
- [4] United Nations. United nations, department of economic and social affairs, population division (2017). world population prospects: The 2017 revision, methodology of the united nations population estimates and projections. *Working Paper No. ESA/P/WP.250*, 2017.
- [5] US census bureau. <https://www.census.gov/topics/population.html>. Accessed: 2017-12-20.
- [6] Spencer L James, Paul Gubbins, Christopher JL Murray, and Emmanuela Gakidou. Developing a comprehensive time series of gdp per capita for 210 countries from 1950 to 2015. *Population health metrics*, 10(1):12, 2012.
- [7] Emmanuela Gakidou, Krycia Cowling, Rafael Lozano, and Christopher JL Murray. Increased educational attainment and its effect on child mortality in 175 countries between 1970 and 2009: a systematic analysis. *The Lancet*, 376(9745):959–974, 2010.
- [8] Kyle J Foreman, Neal Marquez, Andrew Dolgert, Kai Fukutaki, Nancy Fullman, Madeline McGaughey, Martin A Pletcher, Amanda E Smith, Kendrick Tang, Chun-Wei Yuan,

---

et al. Forecasting life expectancy, years of life lost, and all-cause and cause-specific mortality for 250 causes of death: reference and alternative scenarios for 2016–40 for 195 countries and territories. *The Lancet*, 392(10159):2052–2090, 2018.

- [9] R Core Team. *R: A Language and Environment for Statistical Computing*. R Foundation for Statistical Computing, Vienna, Austria, 2017. URL <https://www.R-project.org/>. Accessed: 2017-12-20.
- [10] Kasper Kristensen, Anders Nielsen, Casper W Berg, Hans Skaug, and Brad Bell. Tmb: automatic differentiation and laplace approximation. *arXiv preprint arXiv:1509.00660*, 2015.
- [11] Kyle J Foreman, Rafael Lozano, Alan D Lopez, and Christopher JL Murray. Modeling causes of death: an integrated approach using codem. *Population health metrics*, 10(1): 1, 2012.

---

## **B Additional Tables and Figures**

The following are the list of additional tables and figures containing our data and results from our analysis.

### **B.1 Table: Health Spending from 1995-2050**

This table shows all of our health spending outcomes for every country and year from 1995 through 2050. The variables are in per capita measures, and for currencies 2018 USD and 2018 purchasing-power-parity.

### **B.2 Table: Health spending by source and alternative future scenarios of government health spending, 2050**

B.1 Table

| Country     | Year | 2018 US Dollars per capita |                            |                               |                                 |                                   | 2018 PPP per capita    |                            |                               |                                 |                                   |
|-------------|------|----------------------------|----------------------------|-------------------------------|---------------------------------|-----------------------------------|------------------------|----------------------------|-------------------------------|---------------------------------|-----------------------------------|
|             |      | Health spending            | Government health spending | Out-of-pocket health spending | Prepaid private health spending | Development assistance for health | Health spending        | Government health spending | Out-of-pocket health spending | Prepaid private health spending | Development assistance for health |
| Afghanistan | 1995 | 27.7 (19.6 to 37.8)        | 0.9 (0.7 to 1.2)           | 26.5 (18.5 to 36.6)           | 0.1 (0.0 to 0.1)                | 0.3 (0.3 to 0.3)                  | 99.6 (70.5 to 135.5)   | 3.3 (2.5 to 4.2)           | 95.1 (66.3 to 131.4)          | 0.2 (0.1 to 0.4)                | 1.0 (1.0 to 1.0)                  |
| Afghanistan | 1996 | 27.1 (19.5 to 36.2)        | 0.8 (0.7 to 1.1)           | 25.8 (18.2 to 35.0)           | 0.1 (0.0 to 0.1)                | 0.3 (0.3 to 0.3)                  | 97.2 (70.1 to 129.9)   | 3.0 (2.3 to 4.0)           | 92.7 (65.4 to 125.4)          | 0.2 (0.1 to 0.4)                | 1.2 (1.2 to 1.2)                  |
| Afghanistan | 1997 | 26.9 (19.5 to 35.9)        | 0.8 (0.6 to 1.0)           | 25.4 (18.2 to 34.4)           | 0.0 (0.0 to 0.1)                | 0.6 (0.6 to 0.6)                  | 96.3 (69.9 to 129.0)   | 2.8 (2.2 to 3.7)           | 91.2 (65.2 to 123.6)          | 0.2 (0.1 to 0.3)                | 2.2 (2.2 to 2.2)                  |
| Afghanistan | 1998 | 26.1 (18.8 to 35.3)        | 0.7 (0.5 to 0.9)           | 25.0 (17.9 to 34.2)           | 0.0 (0.0 to 0.1)                | 0.3 (0.3 to 0.3)                  | 93.5 (67.5 to 126.5)   | 2.6 (2.0 to 3.4)           | 89.7 (64.2 to 122.7)          | 0.2 (0.1 to 0.3)                | 1.0 (1.0 to 1.0)                  |
| Afghanistan | 1999 | 25.6 (18.5 to 34.2)        | 0.7 (0.5 to 0.9)           | 24.4 (17.3 to 32.8)           | 0.0 (0.0 to 0.1)                | 0.5 (0.5 to 0.5)                  | 91.9 (66.6 to 122.7)   | 2.4 (1.8 to 3.1)           | 87.5 (62.1 to 117.9)          | 0.2 (0.1 to 0.3)                | 1.7 (1.7 to 1.7)                  |
| Afghanistan | 2000 | 24.9 (17.8 to 33.4)        | 0.6 (0.5 to 0.8)           | 23.7 (16.7 to 32.2)           | 0.0 (0.0 to 0.1)                | 0.5 (0.5 to 0.5)                  | 89.3 (63.8 to 120.0)   | 2.3 (1.8 to 3.0)           | 85.2 (59.8 to 115.4)          | 0.2 (0.1 to 0.3)                | 1.7 (1.7 to 1.7)                  |
| Afghanistan | 2001 | 24.1 (17.4 to 31.6)        | 0.6 (0.5 to 0.8)           | 22.8 (16.1 to 30.2)           | 0.0 (0.0 to 0.1)                | 0.7 (0.7 to 0.7)                  | 86.6 (62.5 to 113.5)   | 2.2 (1.6 to 2.8)           | 81.6 (57.7 to 108.4)          | 0.2 (0.1 to 0.3)                | 2.7 (2.7 to 2.7)                  |
| Afghanistan | 2002 | 28.8 (21.2 to 37.8)        | 0.8 (0.6 to 1.0)           | 26.5 (18.8 to 35.5)           | 0.1 (0.0 to 0.1)                | 1.5 (1.5 to 1.5)                  | 103.4 (76.0 to 135.5)  | 2.8 (2.1 to 3.7)           | 95.0 (67.5 to 127.4)          | 0.2 (0.1 to 0.4)                | 5.3 (5.3 to 5.3)                  |
| Afghanistan | 2003 | 34.0 (25.7 to 44.0)        | 1.5 (1.1 to 1.9)           | 30.3 (22.0 to 40.4)           | 0.1 (0.0 to 0.2)                | 2.1 (2.1 to 2.1)                  | 121.9 (92.2 to 157.9)  | 5.3 (4.0 to 6.9)           | 108.8 (79.0 to 144.9)         | 0.3 (0.2 to 0.6)                | 7.5 (7.5 to 7.5)                  |
| Afghanistan | 2004 | 37.8 (29.3 to 47.7)        | 1.7 (1.3 to 2.2)           | 30.7 (22.2 to 40.5)           | 0.1 (0.0 to 0.2)                | 5.3 (5.3 to 5.3)                  | 135.7 (105.2 to 171.1) | 6.2 (4.6 to 8.0)           | 110.3 (79.8 to 145.4)         | 0.4 (0.2 to 0.7)                | 18.9 (18.9 to 18.9)               |
| Afghanistan | 2005 | 40.3 (31.5 to 50.0)        | 2.0 (1.5 to 2.5)           | 31.7 (23.0 to 41.6)           | 0.1 (0.1 to 0.2)                | 6.5 (6.5 to 6.5)                  | 144.5 (113.1 to 179.2) | 7.0 (5.3 to 9.1)           | 113.9 (82.7 to 149.2)         | 0.4 (0.2 to 0.8)                | 23.2 (23.2 to 23.2)               |
| Afghanistan | 2006 | 40.6 (32.1 to 50.1)        | 2.1 (1.6 to 2.7)           | 32.2 (23.7 to 41.7)           | 0.1 (0.1 to 0.2)                | 6.2 (6.2 to 6.2)                  | 145.6 (115.1 to 179.8) | 7.4 (5.6 to 9.6)           | 115.6 (85.0 to 149.5)         | 0.4 (0.2 to 0.8)                | 22.3 (22.3 to 22.3)               |
| Afghanistan | 2007 | 43.4 (34.9 to 53.0)        | 2.3 (1.8 to 3.0)           | 33.4 (24.8 to 43.0)           | 0.1 (0.1 to 0.2)                | 7.5 (7.5 to 7.5)                  | 155.8 (125.1 to 190.2) | 8.3 (6.3 to 10.6)          | 119.9 (89.1 to 154.4)         | 0.4 (0.2 to 0.9)                | 27.1 (27.1 to 27.1)               |
| Afghanistan | 2008 | 44.6 (36.3 to 54.2)        | 2.5 (1.8 to 3.1)           | 34.6 (26.2 to 44.3)           | 0.1 (0.1 to 0.3)                | 7.4 (7.4 to 7.4)                  | 160.0 (130.4 to 194.3) | 8.8 (6.6 to 11.2)          | 124.0 (94.2 to 158.8)         | 0.5 (0.2 to 0.9)                | 26.7 (26.7 to 26.7)               |
| Afghanistan | 2009 | 49.7 (40.7 to 59.9)        | 2.7 (2.1 to 3.5)           | 37.1 (28.1 to 47.3)           | 0.1 (0.1 to 0.3)                | 9.7 (9.7 to 9.7)                  | 178.3 (146.0 to 214.8) | 9.7 (7.4 to 12.5)          | 133.2 (100.8 to 169.9)        | 0.5 (0.2 to 1.0)                | 34.9 (34.9 to 34.9)               |
| Afghanistan | 2010 | 50.7 (41.5 to 61.0)        | 2.7 (2.0 to 3.4)           | 37.2 (28.1 to 47.6)           | 0.1 (0.1 to 0.3)                | 10.7 (10.7 to 10.7)               | 181.9 (148.8 to 219.0) | 9.6 (7.3 to 12.3)          | 133.4 (100.9 to 170.7)        | 0.5 (0.2 to 1.0)                | 38.4 (38.4 to 38.4)               |
| Afghanistan | 2011 | 52.7 (43.8 to 63.5)        | 2.6 (2.0 to 3.4)           | 36.8 (27.9 to 47.5)           | 0.1 (0.1 to 0.3)                | 13.1 (13.1 to 13.1)               | 189.0 (157.3 to 227.8) | 9.4 (7.1 to 12.1)          | 132.1 (100.2 to 170.4)        | 0.5 (0.3 to 1.0)                | 47.0 (47.0 to 47.0)               |
| Afghanistan | 2012 | 51.9 (42.6 to 63.9)        | 2.7 (2.0 to 3.5)           | 38.4 (28.8 to 50.0)           | 0.2 (0.1 to 0.3)                | 10.7 (10.7 to 10.7)               | 186.3 (152.8 to 229.2) | 9.6 (7.2 to 12.4)          | 137.6 (103.5 to 179.4)        | 0.5 (0.3 to 1.1)                | 38.6 (38.6 to 38.6)               |
| Afghanistan | 2013 | 54.4 (44.0 to 67.4)        | 2.8 (2.1 to 3.6)           | 40.6 (30.5 to 53.3)           | 0.2 (0.1 to 0.3)                | 10.9 (10.9 to 10.9)               | 195.2 (158.0 to 241.9) | 10.1 (7.5 to 13.0)         | 145.5 (109.4 to 191.4)        | 0.6 (0.3 to 1.1)                | 39.0 (39.0 to 39.0)               |
| Afghanistan | 2014 | 56.6 (45.8 to 70.4)        | 3.0 (2.2 to 3.9)           | 43.5 (32.6 to 56.9)           | 0.2 (0.1 to 0.3)                | 10.0 (10.0 to 10.0)               | 203.2 (164.5 to 252.7) | 10.6 (7.9 to 13.8)         | 156.0 (117.1 to 204.2)        | 0.6 (0.3 to 1.2)                | 36.0 (36.0 to 36.0)               |
| Afghanistan | 2015 | 58.8 (46.9 to 73.2)        | 3.1 (2.3 to 4.0)           | 46.1 (34.5 to 60.9)           | 0.2 (0.1 to 0.3)                | 9.4 (9.4 to 9.4)                  | 210.9 (168.4 to 262.6) | 11.0 (8.3 to 14.5)         | 165.5 (123.8 to 218.4)        | 0.7 (0.3 to 1.2)                | 33.6 (33.6 to 33.6)               |

| Country     | Year | 2018 US Dollars per capita |                            |                               |                                 |                                   | 2018 PPP per capita    |                            |                               |                                 |                                   |
|-------------|------|----------------------------|----------------------------|-------------------------------|---------------------------------|-----------------------------------|------------------------|----------------------------|-------------------------------|---------------------------------|-----------------------------------|
|             |      | Health spending            | Government health spending | Out-of-pocket health spending | Prepaid private health spending | Development assistance for health | Health spending        | Government health spending | Out-of-pocket health spending | Prepaid private health spending | Development assistance for health |
| Afghanistan | 2016 | 55.8 (43.4 to 71.4)        | 3.1 (2.3 to 4.1)           | 47.2 (35.1 to 62.6)           | 0.2 (0.1 to 0.3)                | 5.3 (5.3 to 5.3)                  | 200.2 (155.8 to 256.1) | 11.2 (8.4 to 14.8)         | 169.2 (125.8 to 224.5)        | 0.7 (0.3 to 1.2)                | 19.1 (19.1 to 19.1)               |
| Afghanistan | 2017 | 55.6 (43.3 to 70.9)        | 3.0 (2.3 to 4.0)           | 47.4 (35.3 to 63.0)           | 0.2 (0.1 to 0.3)                | 5.0 (5.0 to 5.0)                  | 199.6 (155.3 to 254.4) | 10.9 (8.2 to 14.4)         | 170.1 (126.6 to 225.9)        | 0.7 (0.3 to 1.2)                | 17.9 (17.9 to 17.9)               |
| Afghanistan | 2018 | 56.0 (43.4 to 71.6)        | 3.1 (2.3 to 4.1)           | 48.1 (35.7 to 63.6)           | 0.2 (0.1 to 0.3)                | 4.6 (4.6 to 4.6)                  | 200.9 (155.6 to 257.0) | 11.2 (8.4 to 14.7)         | 172.6 (128.2 to 228.4)        | 0.7 (0.3 to 1.2)                | 16.5 (16.5 to 16.5)               |
| Afghanistan | 2019 | 56.7 (43.9 to 72.6)        | 3.2 (2.4 to 4.2)           | 48.8 (36.1 to 64.7)           | 0.2 (0.1 to 0.4)                | 4.5 (4.2 to 4.8)                  | 203.6 (157.5 to 260.6) | 11.4 (8.5 to 15.1)         | 175.2 (129.5 to 232.2)        | 0.7 (0.3 to 1.3)                | 16.3 (15.2 to 17.2)               |
| Afghanistan | 2020 | 57.6 (44.2 to 74.0)        | 3.2 (2.4 to 4.3)           | 49.6 (36.6 to 65.7)           | 0.2 (0.1 to 0.4)                | 4.5 (4.1 to 4.9)                  | 206.5 (158.7 to 265.6) | 11.6 (8.8 to 15.3)         | 178.0 (131.5 to 235.6)        | 0.7 (0.3 to 1.3)                | 16.1 (14.8 to 17.4)               |
| Afghanistan | 2021 | 58.4 (45.1 to 74.7)        | 3.3 (2.5 to 4.4)           | 50.5 (37.2 to 66.9)           | 0.2 (0.1 to 0.4)                | 4.5 (4.0 to 4.9)                  | 209.7 (161.8 to 268.2) | 11.9 (8.9 to 15.7)         | 181.1 (133.4 to 240.0)        | 0.7 (0.3 to 1.3)                | 16.0 (14.3 to 17.7)               |
| Afghanistan | 2022 | 59.4 (45.9 to 76.4)        | 3.4 (2.5 to 4.5)           | 51.4 (37.8 to 68.1)           | 0.2 (0.1 to 0.4)                | 4.4 (3.9 to 5.0)                  | 213.2 (164.5 to 274.1) | 12.2 (9.1 to 16.1)         | 184.3 (135.6 to 244.5)        | 0.8 (0.3 to 1.4)                | 15.9 (13.9 to 18.0)               |
| Afghanistan | 2023 | 60.5 (46.5 to 77.6)        | 3.5 (2.6 to 4.6)           | 52.4 (38.5 to 69.3)           | 0.2 (0.1 to 0.4)                | 4.4 (3.8 to 5.1)                  | 216.9 (166.9 to 278.5) | 12.5 (9.4 to 16.5)         | 187.9 (138.2 to 248.8)        | 0.8 (0.4 to 1.4)                | 15.7 (13.5 to 18.1)               |
| Afghanistan | 2024 | 61.6 (47.3 to 79.1)        | 3.6 (2.7 to 4.7)           | 53.4 (39.1 to 70.9)           | 0.2 (0.1 to 0.4)                | 4.4 (3.7 to 5.1)                  | 221.1 (169.6 to 283.8) | 12.9 (9.6 to 16.9)         | 191.8 (140.5 to 254.4)        | 0.8 (0.4 to 1.4)                | 15.6 (13.3 to 18.5)               |
| Afghanistan | 2025 | 62.9 (48.5 to 80.7)        | 3.7 (2.7 to 4.8)           | 54.7 (40.4 to 72.6)           | 0.2 (0.1 to 0.4)                | 4.3 (3.6 to 5.1)                  | 225.7 (174.0 to 289.7) | 13.2 (9.8 to 17.3)         | 196.1 (145.1 to 260.6)        | 0.8 (0.4 to 1.4)                | 15.6 (13.0 to 18.5)               |
| Afghanistan | 2026 | 64.2 (49.4 to 82.7)        | 3.8 (2.8 to 4.9)           | 55.9 (41.3 to 74.5)           | 0.2 (0.1 to 0.4)                | 4.3 (3.6 to 5.2)                  | 230.4 (177.4 to 296.6) | 13.5 (10.1 to 17.7)        | 200.6 (148.3 to 267.3)        | 0.8 (0.4 to 1.5)                | 15.6 (12.9 to 18.5)               |
| Afghanistan | 2027 | 65.6 (50.5 to 84.6)        | 3.9 (2.9 to 5.0)           | 57.2 (42.3 to 76.2)           | 0.2 (0.1 to 0.4)                | 4.3 (3.6 to 5.2)                  | 235.3 (181.1 to 303.4) | 13.8 (10.3 to 18.1)        | 205.1 (151.9 to 273.3)        | 0.8 (0.4 to 1.5)                | 15.5 (12.8 to 18.8)               |
| Afghanistan | 2028 | 67.0 (51.4 to 86.4)        | 3.9 (2.9 to 5.2)           | 58.4 (43.1 to 77.8)           | 0.2 (0.1 to 0.4)                | 4.3 (3.6 to 5.3)                  | 240.3 (184.3 to 309.9) | 14.1 (10.6 to 18.5)        | 209.7 (154.8 to 279.3)        | 0.9 (0.4 to 1.6)                | 15.6 (12.9 to 18.9)               |
| Afghanistan | 2029 | 68.3 (52.1 to 88.1)        | 4.0 (3.0 to 5.3)           | 59.7 (43.6 to 79.4)           | 0.2 (0.1 to 0.4)                | 4.4 (3.5 to 5.4)                  | 245.2 (187.0 to 315.9) | 14.5 (10.8 to 19.0)        | 214.2 (156.6 to 284.8)        | 0.9 (0.4 to 1.6)                | 15.6 (12.7 to 19.2)               |
| Afghanistan | 2030 | 69.7 (53.0 to 90.2)        | 4.1 (3.1 to 5.4)           | 60.9 (44.4 to 81.1)           | 0.3 (0.1 to 0.5)                | 4.4 (3.5 to 5.4)                  | 250.0 (190.1 to 323.7) | 14.8 (11.0 to 19.3)        | 218.6 (159.2 to 291.1)        | 0.9 (0.4 to 1.6)                | 15.7 (12.7 to 19.4)               |
| Afghanistan | 2031 | 71.0 (53.5 to 92.1)        | 4.2 (3.1 to 5.5)           | 62.2 (44.8 to 83.5)           | 0.3 (0.1 to 0.5)                | 4.4 (3.5 to 5.5)                  | 254.9 (192.1 to 330.3) | 15.1 (11.3 to 19.6)        | 223.2 (160.9 to 299.7)        | 0.9 (0.4 to 1.7)                | 15.7 (12.6 to 19.8)               |
| Afghanistan | 2032 | 72.4 (54.3 to 94.2)        | 4.3 (3.2 to 5.6)           | 63.5 (45.8 to 85.9)           | 0.3 (0.1 to 0.5)                | 4.4 (3.5 to 5.6)                  | 259.8 (194.7 to 338.0) | 15.4 (11.6 to 20.2)        | 227.7 (164.4 to 308.1)        | 0.9 (0.4 to 1.7)                | 15.8 (12.5 to 20.0)               |
| Afghanistan | 2033 | 73.8 (55.1 to 97.1)        | 4.4 (3.3 to 5.7)           | 64.7 (46.4 to 87.9)           | 0.3 (0.1 to 0.5)                | 4.4 (3.5 to 5.7)                  | 264.7 (197.6 to 348.3) | 15.7 (11.8 to 20.6)        | 232.2 (166.6 to 315.5)        | 1.0 (0.4 to 1.7)                | 15.9 (12.5 to 20.4)               |
| Afghanistan | 2034 | 75.2 (56.1 to 99.0)        | 4.5 (3.3 to 5.8)           | 66.0 (47.4 to 90.1)           | 0.3 (0.1 to 0.5)                | 4.5 (3.5 to 5.9)                  | 269.8 (201.4 to 355.3) | 16.0 (12.0 to 21.0)        | 236.8 (170.0 to 323.2)        | 1.0 (0.5 to 1.8)                | 16.0 (12.5 to 21.1)               |
| Afghanistan | 2035 | 76.6 (56.9 to 101.5)       | 4.6 (3.4 to 6.0)           | 67.3 (48.3 to 92.2)           | 0.3 (0.1 to 0.5)                | 4.5 (3.5 to 5.9)                  | 275.0 (204.2 to 364.1) | 16.4 (12.3 to 21.5)        | 241.5 (173.4 to 331.0)        | 1.0 (0.5 to 1.8)                | 16.1 (12.5 to 21.2)               |
| Afghanistan | 2036 | 78.1 (57.4 to 104.0)       | 4.6 (3.5 to 6.1)           | 68.6 (49.2 to 94.4)           | 0.3 (0.1 to 0.5)                | 4.5 (3.5 to 6.0)                  | 280.1 (205.8 to 373.3) | 16.7 (12.5 to 22.0)        | 246.1 (176.6 to 338.5)        | 1.0 (0.5 to 1.8)                | 16.3 (12.6 to 21.7)               |

| Country     | Year | 2018 US Dollars per capita |                            |                               |                                 |                                   | 2018 PPP per capita    |                            |                               |                                 |                                   |
|-------------|------|----------------------------|----------------------------|-------------------------------|---------------------------------|-----------------------------------|------------------------|----------------------------|-------------------------------|---------------------------------|-----------------------------------|
|             |      | Health spending            | Government health spending | Out-of-pocket health spending | Prepaid private health spending | Development assistance for health | Health spending        | Government health spending | Out-of-pocket health spending | Prepaid private health spending | Development assistance for health |
| Afghanistan | 2037 | 79.5 (58.1 to 106.1)       | 4.7 (3.5 to 6.3)           | 69.9 (49.7 to 96.5)           | 0.3 (0.1 to 0.5)                | 4.6 (3.5 to 6.1)                  | 285.1 (208.6 to 380.8) | 17.0 (12.6 to 22.5)        | 250.6 (178.2 to 346.2)        | 1.0 (0.5 to 1.9)                | 16.4 (12.5 to 22.1)               |
| Afghanistan | 2038 | 80.9 (59.3 to 108.9)       | 4.8 (3.6 to 6.4)           | 71.2 (50.2 to 98.9)           | 0.3 (0.1 to 0.5)                | 4.6 (3.5 to 6.3)                  | 290.3 (212.7 to 390.8) | 17.3 (13.0 to 22.9)        | 255.3 (180.1 to 355.0)        | 1.1 (0.5 to 1.9)                | 16.5 (12.5 to 22.7)               |
| Afghanistan | 2039 | 82.3 (60.3 to 111.1)       | 4.9 (3.7 to 6.5)           | 72.5 (50.9 to 101.1)          | 0.3 (0.1 to 0.6)                | 4.6 (3.5 to 6.4)                  | 295.4 (216.3 to 398.7) | 17.7 (13.2 to 23.3)        | 260.0 (182.5 to 362.9)        | 1.1 (0.5 to 2.0)                | 16.7 (12.5 to 22.9)               |
| Afghanistan | 2040 | 83.8 (61.3 to 113.4)       | 5.0 (3.7 to 6.6)           | 73.8 (51.7 to 103.3)          | 0.3 (0.1 to 0.6)                | 4.7 (3.5 to 6.6)                  | 300.6 (219.9 to 406.9) | 18.0 (13.4 to 23.8)        | 264.6 (185.3 to 370.7)        | 1.1 (0.5 to 2.0)                | 16.8 (12.7 to 23.8)               |
| Afghanistan | 2041 | 85.2 (61.9 to 115.4)       | 5.1 (3.8 to 6.8)           | 75.0 (52.4 to 105.3)          | 0.3 (0.1 to 0.6)                | 4.7 (3.6 to 6.7)                  | 305.6 (222.1 to 414.1) | 18.3 (13.7 to 24.3)        | 269.0 (188.2 to 378.0)        | 1.1 (0.5 to 2.1)                | 17.0 (12.8 to 24.1)               |
| Afghanistan | 2042 | 86.6 (62.7 to 117.7)       | 5.2 (3.9 to 6.9)           | 76.2 (53.0 to 107.1)          | 0.3 (0.1 to 0.6)                | 4.8 (3.5 to 6.9)                  | 310.7 (225.1 to 422.5) | 18.7 (14.0 to 24.9)        | 273.6 (190.2 to 384.4)        | 1.1 (0.5 to 2.1)                | 17.2 (12.7 to 24.9)               |
| Afghanistan | 2043 | 88.0 (63.8 to 120.3)       | 5.3 (4.0 to 7.1)           | 77.5 (53.5 to 109.1)          | 0.3 (0.2 to 0.6)                | 4.9 (3.5 to 7.1)                  | 315.9 (228.9 to 431.6) | 19.1 (14.2 to 25.4)        | 278.2 (192.1 to 391.5)        | 1.2 (0.5 to 2.1)                | 17.4 (12.7 to 25.4)               |
| Afghanistan | 2044 | 89.4 (64.9 to 121.7)       | 5.4 (4.0 to 7.2)           | 78.8 (54.0 to 110.9)          | 0.3 (0.2 to 0.6)                | 4.9 (3.6 to 7.2)                  | 321.0 (233.0 to 436.7) | 19.4 (14.5 to 25.8)        | 282.7 (193.8 to 398.0)        | 1.2 (0.6 to 2.2)                | 17.7 (12.9 to 25.9)               |
| Afghanistan | 2045 | 90.9 (65.9 to 123.7)       | 5.5 (4.1 to 7.4)           | 80.1 (54.8 to 112.6)          | 0.3 (0.2 to 0.6)                | 5.0 (3.6 to 7.6)                  | 326.1 (236.4 to 443.7) | 19.8 (14.7 to 26.5)        | 287.3 (196.7 to 404.1)        | 1.2 (0.6 to 2.2)                | 17.9 (12.9 to 27.4)               |
| Afghanistan | 2046 | 92.4 (67.1 to 125.4)       | 5.6 (4.2 to 7.6)           | 81.4 (55.8 to 114.2)          | 0.3 (0.2 to 0.6)                | 5.1 (3.6 to 7.8)                  | 331.6 (240.6 to 449.8) | 20.2 (14.9 to 27.2)        | 292.1 (200.2 to 409.6)        | 1.2 (0.6 to 2.2)                | 18.1 (13.1 to 27.8)               |
| Afghanistan | 2047 | 93.9 (67.7 to 127.3)       | 5.7 (4.2 to 7.8)           | 82.6 (56.7 to 115.8)          | 0.4 (0.2 to 0.6)                | 5.1 (3.7 to 8.2)                  | 336.8 (242.9 to 456.9) | 20.6 (15.1 to 27.9)        | 296.6 (203.6 to 415.4)        | 1.3 (0.6 to 2.3)                | 18.4 (13.1 to 29.3)               |
| Afghanistan | 2048 | 95.4 (68.9 to 129.4)       | 5.9 (4.3 to 7.9)           | 84.0 (57.7 to 117.9)          | 0.4 (0.2 to 0.7)                | 5.2 (3.7 to 8.4)                  | 342.3 (247.3 to 464.2) | 21.0 (15.3 to 28.5)        | 301.3 (207.2 to 422.9)        | 1.3 (0.6 to 2.3)                | 18.7 (13.3 to 30.2)               |
| Afghanistan | 2049 | 96.9 (69.9 to 131.3)       | 6.0 (4.3 to 8.1)           | 85.3 (58.4 to 119.8)          | 0.4 (0.2 to 0.7)                | 5.3 (3.8 to 8.7)                  | 347.7 (250.8 to 471.0) | 21.4 (15.6 to 29.1)        | 306.0 (209.5 to 429.7)        | 1.3 (0.6 to 2.4)                | 19.0 (13.5 to 31.3)               |
| Afghanistan | 2050 | 98.4 (71.2 to 133.8)       | 6.1 (4.4 to 8.3)           | 86.6 (58.9 to 121.6)          | 0.4 (0.2 to 0.7)                | 5.4 (3.8 to 8.8)                  | 353.1 (255.4 to 480.3) | 21.8 (15.9 to 30.0)        | 310.6 (211.4 to 436.3)        | 1.3 (0.6 to 2.4)                | 19.3 (13.6 to 31.6)               |
| Albania     | 1995 | 125.1 (106.9 to 145.2)     | 31.5 (25.2 to 39.3)        | 88.3 (71.9 to 108.5)          | 0.0 (0.0 to 0.0)                | 5.3 (5.3 to 5.3)                  | 328.6 (280.8 to 381.4) | 82.7 (66.1 to 103.4)       | 231.9 (188.9 to 285.1)        | 0.0 (0.0 to 0.1)                | 14.0 (14.0 to 14.0)               |
| Albania     | 1996 | 138.2 (119.4 to 159.0)     | 35.5 (28.6 to 43.9)        | 98.0 (81.7 to 118.4)          | 0.0 (0.0 to 0.0)                | 4.7 (4.7 to 4.7)                  | 363.2 (313.6 to 417.6) | 93.3 (75.2 to 115.3)       | 257.4 (214.5 to 311.0)        | 0.0 (0.0 to 0.1)                | 12.5 (12.5 to 12.5)               |
| Albania     | 1997 | 126.6 (111.3 to 144.8)     | 34.7 (28.1 to 42.4)        | 90.3 (76.5 to 106.9)          | 0.0 (0.0 to 0.0)                | 1.6 (1.6 to 1.6)                  | 332.6 (292.4 to 380.3) | 91.3 (73.9 to 111.4)       | 237.3 (200.8 to 280.9)        | 0.0 (0.0 to 0.1)                | 4.1 (4.1 to 4.1)                  |
| Albania     | 1998 | 136.2 (120.7 to 154.0)     | 39.5 (32.1 to 47.8)        | 89.5 (76.7 to 104.7)          | 0.0 (0.0 to 0.0)                | 7.2 (7.2 to 7.2)                  | 357.8 (317.0 to 404.5) | 103.7 (84.4 to 125.6)      | 235.1 (201.4 to 275.1)        | 0.0 (0.0 to 0.1)                | 19.0 (19.0 to 19.0)               |
| Albania     | 1999 | 149.0 (133.6 to 167.8)     | 47.3 (38.6 to 57.2)        | 92.9 (79.9 to 109.0)          | 0.0 (0.0 to 0.0)                | 8.8 (8.8 to 8.8)                  | 391.5 (350.8 to 440.8) | 124.4 (101.3 to 150.2)     | 244.0 (210.0 to 286.3)        | 0.0 (0.0 to 0.1)                | 23.2 (23.2 to 23.2)               |
| Albania     | 2000 | 153.0 (137.4 to 171.6)     | 51.0 (41.6 to 60.9)        | 94.1 (80.5 to 110.7)          | 0.0 (0.0 to 0.0)                | 7.9 (7.9 to 7.9)                  | 401.9 (360.8 to 450.8) | 133.9 (109.2 to 159.9)     | 247.1 (211.4 to 290.7)        | 0.0 (0.0 to 0.1)                | 20.9 (20.9 to 20.9)               |
| Albania     | 2001 | 160.4 (143.9 to 178.5)     | 55.6 (46.1 to 65.8)        | 96.9 (83.2 to 112.7)          | 0.0 (0.0 to 0.0)                | 7.9 (7.9 to 7.9)                  | 421.5 (378.1 to 469.0) | 146.1 (121.2 to 172.8)     | 254.5 (218.5 to 296.0)        | 0.0 (0.0 to 0.1)                | 20.8 (20.8 to 20.8)               |

| Country | Year | 2018 US Dollars per capita |                            |                               |                                 |                                   | 2018 PPP per capita      |                            |                               |                                 |                                   |
|---------|------|----------------------------|----------------------------|-------------------------------|---------------------------------|-----------------------------------|--------------------------|----------------------------|-------------------------------|---------------------------------|-----------------------------------|
|         |      | Health spending            | Government health spending | Out-of-pocket health spending | Prepaid private health spending | Development assistance for health | Health spending          | Government health spending | Out-of-pocket health spending | Prepaid private health spending | Development assistance for health |
| Albania | 2002 | 163.5 (147.6 to 181.6)     | 58.9 (48.9 to 69.3)        | 98.5 (85.0 to 113.6)          | 0.0 (0.0 to 0.0)                | 6.1 (6.1 to 6.1)                  | 429.6 (387.8 to 477.1)   | 154.7 (128.4 to 182.2)     | 258.9 (223.4 to 298.5)        | 0.0 (0.0 to 0.1)                | 16.0 (16.0 to 16.0)               |
| Albania | 2003 | 172.0 (155.3 to 190.6)     | 64.3 (53.3 to 75.5)        | 99.6 (86.0 to 115.4)          | 0.0 (0.0 to 0.0)                | 8.0 (8.0 to 8.0)                  | 451.8 (407.9 to 500.7)   | 169.0 (140.1 to 198.3)     | 261.6 (225.9 to 303.3)        | 0.0 (0.0 to 0.1)                | 21.1 (21.1 to 21.1)               |
| Albania | 2004 | 182.1 (163.8 to 203.0)     | 73.1 (61.3 to 84.9)        | 101.1 (86.8 to 117.8)         | 0.0 (0.0 to 0.0)                | 7.8 (7.8 to 7.8)                  | 478.4 (430.3 to 533.4)   | 192.1 (161.0 to 223.0)     | 265.7 (227.9 to 309.4)        | 0.0 (0.0 to 0.1)                | 20.5 (20.5 to 20.5)               |
| Albania | 2005 | 191.1 (172.7 to 210.5)     | 79.7 (67.5 to 92.4)        | 101.5 (86.7 to 117.0)         | 0.0 (0.0 to 0.0)                | 9.9 (9.9 to 9.9)                  | 502.0 (453.7 to 552.9)   | 209.4 (177.3 to 242.7)     | 266.7 (227.6 to 307.3)        | 0.1 (0.0 to 0.1)                | 25.9 (25.9 to 25.9)               |
| Albania | 2006 | 197.9 (178.4 to 219.1)     | 85.1 (72.4 to 98.5)        | 102.2 (88.1 to 117.5)         | 0.0 (0.0 to 0.0)                | 10.6 (10.6 to 10.6)               | 519.9 (468.7 to 575.6)   | 223.5 (190.1 to 258.7)     | 268.6 (231.5 to 308.6)        | 0.1 (0.0 to 0.1)                | 27.8 (27.8 to 27.8)               |
| Albania | 2007 | 201.8 (181.8 to 224.0)     | 91.2 (77.7 to 105.1)       | 105.0 (90.2 to 120.5)         | 0.0 (0.0 to 0.0)                | 5.7 (5.7 to 5.7)                  | 530.1 (477.7 to 588.4)   | 239.5 (204.2 to 276.2)     | 275.7 (237.0 to 316.7)        | 0.1 (0.0 to 0.1)                | 14.8 (14.8 to 14.8)               |
| Albania | 2008 | 213.6 (194.3 to 237.4)     | 100.5 (86.1 to 116.5)      | 104.4 (89.8 to 120.7)         | 0.0 (0.0 to 0.0)                | 8.7 (8.7 to 8.7)                  | 561.2 (510.3 to 623.6)   | 263.9 (226.1 to 306.1)     | 274.4 (236.0 to 317.2)        | 0.1 (0.0 to 0.1)                | 22.9 (22.9 to 22.9)               |
| Albania | 2009 | 215.7 (196.1 to 238.8)     | 107.1 (91.6 to 124.7)      | 101.9 (87.7 to 118.0)         | 0.0 (0.0 to 0.0)                | 6.7 (6.7 to 6.7)                  | 566.5 (515.3 to 627.2)   | 281.2 (240.7 to 327.7)     | 267.6 (230.3 to 310.1)        | 0.1 (0.0 to 0.1)                | 17.6 (17.6 to 17.6)               |
| Albania | 2010 | 223.9 (203.7 to 247.8)     | 110.4 (94.1 to 129.0)      | 107.7 (93.2 to 124.7)         | 0.0 (0.0 to 0.0)                | 5.8 (5.8 to 5.8)                  | 588.3 (535.1 to 651.0)   | 289.9 (247.2 to 338.9)     | 283.0 (244.8 to 327.5)        | 0.1 (0.0 to 0.1)                | 15.2 (15.2 to 15.2)               |
| Albania | 2011 | 246.1 (224.1 to 270.2)     | 115.4 (99.2 to 134.4)      | 119.4 (103.5 to 137.7)        | 0.0 (0.0 to 0.0)                | 11.3 (11.3 to 11.3)               | 646.6 (588.7 to 709.9)   | 303.3 (260.6 to 353.1)     | 313.6 (271.8 to 361.8)        | 0.1 (0.0 to 0.1)                | 29.6 (29.6 to 29.6)               |
| Albania | 2012 | 258.7 (235.8 to 285.2)     | 119.6 (103.4 to 138.0)     | 134.7 (117.8 to 154.0)        | 0.0 (0.0 to 0.1)                | 4.3 (4.3 to 4.3)                  | 679.6 (619.6 to 749.3)   | 314.3 (271.7 to 362.6)     | 354.0 (309.5 to 404.7)        | 0.1 (0.0 to 0.1)                | 11.3 (11.3 to 11.3)               |
| Albania | 2013 | 276.3 (251.6 to 304.5)     | 124.1 (107.0 to 142.2)     | 151.2 (132.4 to 173.1)        | 0.0 (0.0 to 0.1)                | 1.1 (1.1 to 1.1)                  | 725.8 (660.9 to 799.8)   | 325.9 (281.2 to 373.4)     | 397.1 (347.9 to 454.8)        | 0.1 (0.0 to 0.1)                | 2.8 (2.8 to 2.8)                  |
| Albania | 2014 | 305.0 (277.4 to 336.3)     | 131.6 (112.9 to 151.3)     | 168.5 (147.8 to 194.1)        | 0.0 (0.0 to 0.1)                | 4.9 (4.9 to 4.9)                  | 801.3 (728.7 to 883.6)   | 345.8 (296.6 to 397.6)     | 442.5 (388.4 to 509.9)        | 0.1 (0.0 to 0.1)                | 12.8 (12.8 to 12.8)               |
| Albania | 2015 | 318.1 (286.9 to 353.0)     | 135.8 (115.4 to 157.3)     | 180.0 (156.7 to 208.2)        | 0.0 (0.0 to 0.1)                | 2.4 (2.4 to 2.4)                  | 835.7 (753.7 to 927.3)   | 356.6 (303.2 to 413.1)     | 472.8 (411.6 to 546.9)        | 0.1 (0.0 to 0.1)                | 6.3 (6.3 to 6.3)                  |
| Albania | 2016 | 330.0 (292.4 to 371.4)     | 139.5 (117.0 to 166.8)     | 188.9 (161.2 to 223.9)        | 0.0 (0.0 to 0.1)                | 1.6 (1.6 to 1.6)                  | 867.0 (768.2 to 975.7)   | 366.6 (307.4 to 438.2)     | 496.1 (423.4 to 588.1)        | 0.1 (0.0 to 0.1)                | 4.2 (4.2 to 4.2)                  |
| Albania | 2017 | 342.2 (303.8 to 385.9)     | 145.0 (121.6 to 173.3)     | 195.7 (166.3 to 231.7)        | 0.0 (0.0 to 0.1)                | 1.6 (1.6 to 1.6)                  | 899.1 (798.0 to 1013.8)  | 380.8 (319.4 to 455.3)     | 514.0 (436.8 to 608.7)        | 0.1 (0.0 to 0.2)                | 4.2 (4.2 to 4.2)                  |
| Albania | 2018 | 352.7 (311.4 to 398.3)     | 149.7 (125.5 to 178.9)     | 201.5 (170.6 to 240.9)        | 0.0 (0.0 to 0.1)                | 1.5 (1.4 to 1.5)                  | 926.6 (818.1 to 1046.3)  | 393.3 (329.8 to 470.1)     | 529.4 (448.1 to 632.9)        | 0.1 (0.0 to 0.2)                | 3.8 (3.6 to 4.0)                  |
| Albania | 2019 | 363.1 (321.3 to 408.3)     | 154.3 (129.5 to 184.3)     | 207.4 (175.3 to 247.3)        | 0.0 (0.0 to 0.1)                | 1.5 (1.3 to 1.6)                  | 953.9 (844.1 to 1072.6)  | 405.2 (340.3 to 484.1)     | 544.7 (460.6 to 649.7)        | 0.1 (0.0 to 0.2)                | 3.9 (3.5 to 4.2)                  |
| Albania | 2020 | 374.5 (330.9 to 425.1)     | 159.8 (134.0 to 191.1)     | 213.1 (180.0 to 254.2)        | 0.0 (0.0 to 0.1)                | 1.5 (1.3 to 1.7)                  | 983.8 (869.4 to 1116.8)  | 419.9 (351.9 to 502.0)     | 559.9 (472.9 to 667.8)        | 0.1 (0.0 to 0.2)                | 3.9 (3.4 to 4.4)                  |
| Albania | 2021 | 386.4 (342.6 to 435.2)     | 165.6 (138.9 to 197.7)     | 219.3 (185.2 to 261.0)        | 0.0 (0.0 to 0.1)                | 1.5 (1.3 to 1.7)                  | 1015.1 (899.9 to 1143.2) | 435.0 (364.9 to 519.3)     | 576.0 (486.5 to 685.7)        | 0.1 (0.0 to 0.2)                | 4.0 (3.5 to 4.5)                  |
| Albania | 2022 | 395.2 (349.5 to 448.3)     | 170.6 (143.3 to 204.0)     | 223.0 (188.5 to 266.6)        | 0.0 (0.0 to 0.1)                | 1.6 (1.3 to 1.8)                  | 1038.3 (918.0 to 1177.7) | 448.2 (376.4 to 536.0)     | 585.9 (495.2 to 700.4)        | 0.1 (0.0 to 0.2)                | 4.1 (3.5 to 4.8)                  |



| Country | Year | 2018 US Dollars per capita |                            |                               |                                 |                                   | 2018 PPP per capita       |                            |                               |                                 |                                   |
|---------|------|----------------------------|----------------------------|-------------------------------|---------------------------------|-----------------------------------|---------------------------|----------------------------|-------------------------------|---------------------------------|-----------------------------------|
|         |      | Health spending            | Government health spending | Out-of-pocket health spending | Prepaid private health spending | Development assistance for health | Health spending           | Government health spending | Out-of-pocket health spending | Prepaid private health spending | Development assistance for health |
| Albania | 2023 | 402.3 (357.3 to 451.3)     | 175.1 (146.7 to 208.3)     | 225.6 (190.6 to 269.2)        | 0.0 (0.0 to 0.1)                | 1.6 (1.4 to 1.9)                  | 1056.9 (938.6 to 1185.5)  | 460.0 (385.3 to 547.3)     | 592.6 (500.7 to 707.3)        | 0.1 (0.0 to 0.2)                | 4.3 (3.6 to 5.0)                  |
| Albania | 2024 | 409.4 (359.6 to 461.7)     | 179.6 (150.9 to 213.2)     | 228.0 (192.7 to 272.0)        | 0.0 (0.0 to 0.1)                | 1.7 (1.4 to 2.0)                  | 1075.5 (944.8 to 1212.9)  | 471.9 (396.3 to 560.0)     | 599.1 (506.1 to 714.6)        | 0.1 (0.0 to 0.2)                | 4.4 (3.6 to 5.2)                  |
| Albania | 2025 | 416.4 (368.8 to 469.1)     | 184.1 (154.1 to 217.9)     | 230.6 (194.6 to 274.7)        | 0.0 (0.0 to 0.1)                | 1.7 (1.4 to 2.0)                  | 1094.0 (968.9 to 1232.3)  | 483.6 (404.9 to 572.4)     | 605.8 (511.2 to 721.7)        | 0.1 (0.0 to 0.2)                | 4.5 (3.7 to 5.4)                  |
| Albania | 2026 | 423.8 (373.0 to 478.9)     | 188.6 (157.4 to 223.0)     | 233.3 (196.5 to 278.1)        | 0.0 (0.0 to 0.1)                | 1.8 (1.5 to 2.1)                  | 1113.2 (980.0 to 1258.0)  | 495.6 (413.5 to 586.0)     | 612.9 (516.2 to 730.6)        | 0.1 (0.0 to 0.2)                | 4.7 (3.8 to 5.6)                  |
| Albania | 2027 | 430.3 (380.2 to 486.9)     | 192.9 (161.4 to 228.3)     | 235.6 (197.7 to 280.5)        | 0.0 (0.0 to 0.1)                | 1.8 (1.5 to 2.2)                  | 1130.5 (998.8 to 1279.2)  | 506.7 (423.9 to 599.8)     | 618.9 (519.3 to 736.9)        | 0.1 (0.0 to 0.2)                | 4.8 (3.9 to 5.8)                  |
| Albania | 2028 | 437.1 (387.3 to 498.4)     | 197.2 (164.9 to 232.7)     | 238.0 (199.3 to 283.6)        | 0.0 (0.0 to 0.1)                | 1.9 (1.5 to 2.3)                  | 1148.3 (1017.4 to 1309.3) | 517.9 (433.1 to 611.2)     | 625.3 (523.5 to 745.0)        | 0.1 (0.0 to 0.2)                | 5.0 (4.0 to 6.2)                  |
| Albania | 2029 | 444.6 (390.6 to 502.5)     | 201.8 (167.9 to 238.1)     | 240.9 (201.5 to 288.3)        | 0.0 (0.0 to 0.1)                | 2.0 (1.6 to 2.4)                  | 1168.0 (1026.2 to 1320.2) | 530.0 (441.1 to 625.5)     | 632.8 (529.4 to 757.4)        | 0.1 (0.0 to 0.2)                | 5.1 (4.1 to 6.4)                  |
| Albania | 2030 | 452.1 (397.8 to 514.4)     | 206.3 (172.0 to 244.1)     | 243.7 (203.3 to 291.8)        | 0.0 (0.0 to 0.1)                | 2.0 (1.6 to 2.5)                  | 1187.8 (1045.1 to 1351.3) | 542.1 (451.8 to 641.3)     | 640.3 (534.1 to 766.4)        | 0.1 (0.0 to 0.2)                | 5.3 (4.2 to 6.7)                  |
| Albania | 2031 | 460.5 (404.2 to 519.4)     | 211.3 (176.2 to 250.3)     | 247.1 (205.5 to 295.9)        | 0.0 (0.0 to 0.1)                | 2.1 (1.7 to 2.6)                  | 1209.6 (1061.9 to 1364.6) | 555.0 (463.0 to 657.5)     | 649.0 (540.0 to 777.5)        | 0.1 (0.0 to 0.2)                | 5.5 (4.3 to 7.0)                  |
| Albania | 2032 | 468.9 (411.7 to 534.9)     | 216.2 (179.8 to 255.8)     | 250.6 (208.5 to 302.0)        | 0.0 (0.0 to 0.1)                | 2.2 (1.7 to 2.8)                  | 1231.9 (1081.4 to 1405.1) | 567.9 (472.5 to 671.9)     | 658.2 (547.6 to 793.2)        | 0.1 (0.0 to 0.3)                | 5.7 (4.5 to 7.2)                  |
| Albania | 2033 | 477.3 (419.6 to 541.3)     | 220.9 (184.7 to 261.1)     | 254.1 (210.6 to 308.2)        | 0.0 (0.0 to 0.1)                | 2.2 (1.7 to 2.9)                  | 1253.9 (1102.4 to 1421.9) | 580.4 (485.2 to 685.9)     | 667.4 (553.2 to 809.6)        | 0.1 (0.0 to 0.3)                | 5.9 (4.5 to 7.6)                  |
| Albania | 2034 | 486.3 (425.0 to 558.4)     | 226.1 (188.3 to 267.9)     | 257.9 (214.0 to 312.9)        | 0.0 (0.0 to 0.1)                | 2.3 (1.8 to 3.0)                  | 1277.5 (1116.4 to 1466.8) | 593.9 (494.7 to 703.7)     | 677.4 (562.2 to 821.9)        | 0.1 (0.0 to 0.3)                | 6.1 (4.7 to 7.9)                  |
| Albania | 2035 | 495.4 (430.7 to 564.5)     | 231.2 (192.5 to 274.8)     | 261.7 (216.5 to 317.6)        | 0.0 (0.0 to 0.1)                | 2.4 (1.8 to 3.2)                  | 1301.5 (1131.4 to 1483.1) | 607.5 (505.7 to 721.9)     | 687.6 (568.9 to 834.4)        | 0.1 (0.0 to 0.3)                | 6.3 (4.8 to 8.4)                  |
| Albania | 2036 | 504.9 (439.6 to 582.3)     | 236.5 (196.8 to 281.9)     | 265.8 (219.8 to 324.3)        | 0.1 (0.0 to 0.1)                | 2.5 (1.9 to 3.4)                  | 1326.3 (1154.8 to 1529.6) | 621.4 (517.0 to 740.5)     | 698.3 (577.5 to 852.1)        | 0.1 (0.0 to 0.3)                | 6.5 (4.9 to 8.9)                  |
| Albania | 2037 | 514.5 (448.5 to 593.3)     | 242.0 (201.7 to 287.8)     | 269.9 (222.8 to 332.1)        | 0.1 (0.0 to 0.1)                | 2.6 (1.9 to 3.5)                  | 1351.6 (1178.4 to 1558.6) | 635.6 (529.9 to 756.1)     | 709.1 (585.4 to 872.5)        | 0.1 (0.0 to 0.3)                | 6.7 (5.1 to 9.2)                  |
| Albania | 2038 | 523.7 (456.1 to 601.3)     | 247.2 (205.8 to 294.8)     | 273.8 (225.7 to 339.8)        | 0.1 (0.0 to 0.1)                | 2.7 (2.0 to 3.7)                  | 1375.9 (1198.3 to 1579.6) | 649.4 (540.6 to 774.5)     | 719.3 (592.9 to 892.6)        | 0.1 (0.0 to 0.3)                | 7.0 (5.2 to 9.6)                  |
| Albania | 2039 | 534.0 (465.3 to 613.9)     | 253.0 (209.8 to 301.4)     | 278.2 (228.9 to 348.6)        | 0.1 (0.0 to 0.1)                | 2.8 (2.0 to 3.8)                  | 1402.8 (1222.5 to 1612.8) | 664.6 (551.3 to 791.8)     | 730.7 (601.3 to 915.8)        | 0.1 (0.0 to 0.3)                | 7.2 (5.4 to 10.0)                 |
| Albania | 2040 | 544.0 (470.5 to 627.2)     | 258.7 (214.3 to 308.4)     | 282.4 (231.7 to 355.4)        | 0.1 (0.0 to 0.1)                | 2.8 (2.1 to 4.0)                  | 1429.1 (1236.1 to 1647.6) | 679.5 (563.1 to 810.3)     | 741.9 (608.8 to 933.8)        | 0.2 (0.0 to 0.3)                | 7.5 (5.6 to 10.4)                 |
| Albania | 2041 | 554.5 (485.2 to 638.2)     | 264.5 (218.4 to 316.3)     | 287.0 (234.6 to 362.0)        | 0.1 (0.0 to 0.1)                | 3.0 (2.2 to 4.2)                  | 1456.8 (1274.6 to 1676.6) | 694.9 (573.8 to 830.9)     | 754.0 (616.4 to 951.0)        | 0.2 (0.0 to 0.3)                | 7.8 (5.7 to 11.0)                 |
| Albania | 2042 | 565.4 (488.2 to 652.6)     | 270.6 (222.9 to 322.8)     | 291.7 (237.9 to 368.0)        | 0.1 (0.0 to 0.1)                | 3.1 (2.2 to 4.4)                  | 1485.2 (1282.5 to 1714.4) | 710.8 (585.5 to 848.1)     | 766.2 (624.8 to 966.7)        | 0.2 (0.0 to 0.4)                | 8.0 (5.9 to 11.6)                 |
| Albania | 2043 | 576.7 (500.3 to 668.2)     | 276.9 (228.2 to 331.1)     | 296.5 (241.2 to 374.8)        | 0.1 (0.0 to 0.1)                | 3.2 (2.3 to 4.7)                  | 1514.9 (1314.2 to 1755.3) | 727.5 (599.4 to 869.8)     | 778.9 (633.6 to 984.6)        | 0.2 (0.0 to 0.4)                | 8.3 (6.0 to 12.3)                 |

| Country | Year | 2018 US Dollars per capita |                            |                               |                                 |                                   | 2018 PPP per capita       |                            |                               |                                 |                                   |
|---------|------|----------------------------|----------------------------|-------------------------------|---------------------------------|-----------------------------------|---------------------------|----------------------------|-------------------------------|---------------------------------|-----------------------------------|
|         |      | Health spending            | Government health spending | Out-of-pocket health spending | Prepaid private health spending | Development assistance for health | Health spending           | Government health spending | Out-of-pocket health spending | Prepaid private health spending | Development assistance for health |
| Albania | 2044 | 587.5 (510.8 to 685.3)     | 283.1 (233.3 to 338.9)     | 301.0 (244.3 to 381.7)        | 0.1 (0.0 to 0.1)                | 3.3 (2.4 to 4.9)                  | 1543.3 (1341.8 to 1800.2) | 743.8 (612.8 to 890.4)     | 790.7 (641.7 to 1002.8)       | 0.2 (0.0 to 0.4)                | 8.6 (6.3 to 12.8)                 |
| Albania | 2045 | 598.5 (519.5 to 699.4)     | 289.5 (238.4 to 348.0)     | 305.4 (247.4 to 389.4)        | 0.1 (0.0 to 0.1)                | 3.4 (2.5 to 5.2)                  | 1572.2 (1364.8 to 1837.4) | 760.6 (626.3 to 914.1)     | 802.4 (649.8 to 1022.8)       | 0.2 (0.0 to 0.4)                | 9.0 (6.5 to 13.6)                 |
| Albania | 2046 | 609.2 (526.2 to 719.1)     | 295.8 (243.1 to 355.3)     | 309.8 (250.8 to 395.7)        | 0.1 (0.0 to 0.2)                | 3.5 (2.5 to 5.5)                  | 1600.5 (1382.3 to 1889.0) | 777.2 (638.8 to 933.5)     | 813.8 (658.8 to 1039.5)       | 0.2 (0.0 to 0.4)                | 9.3 (6.6 to 14.4)                 |
| Albania | 2047 | 620.5 (538.4 to 721.0)     | 302.5 (248.5 to 364.3)     | 314.2 (254.1 to 402.1)        | 0.1 (0.0 to 0.2)                | 3.7 (2.6 to 5.7)                  | 1630.0 (1414.4 to 1894.1) | 794.6 (652.7 to 957.1)     | 825.5 (667.6 to 1056.5)       | 0.2 (0.0 to 0.4)                | 9.6 (6.9 to 14.9)                 |
| Albania | 2048 | 631.6 (544.8 to 740.0)     | 309.2 (253.0 to 371.8)     | 318.6 (257.2 to 408.6)        | 0.1 (0.0 to 0.2)                | 3.8 (2.7 to 6.1)                  | 1659.3 (1431.1 to 1944.0) | 812.2 (664.7 to 976.8)     | 836.9 (675.7 to 1073.4)       | 0.2 (0.0 to 0.4)                | 10.0 (7.1 to 16.1)                |
| Albania | 2049 | 643.2 (558.4 to 748.1)     | 316.1 (258.3 to 381.0)     | 323.1 (260.7 to 415.2)        | 0.1 (0.0 to 0.2)                | 4.0 (2.8 to 6.3)                  | 1689.7 (1467.0 to 1965.3) | 830.4 (678.5 to 1000.8)    | 848.7 (684.8 to 1090.7)       | 0.2 (0.0 to 0.4)                | 10.4 (7.2 to 16.6)                |
| Albania | 2050 | 654.7 (562.5 to 770.7)     | 323.0 (262.4 to 390.1)     | 327.5 (264.1 to 421.8)        | 0.1 (0.0 to 0.2)                | 4.1 (2.8 to 6.7)                  | 1719.8 (1477.7 to 2024.6) | 848.5 (689.4 to 1024.8)    | 860.3 (693.8 to 1108.0)       | 0.2 (0.0 to 0.5)                | 10.8 (7.5 to 17.6)                |
| Algeria | 1995 | 106.6 (92.0 to 123.1)      | 75.1 (62.1 to 89.4)        | 28.6 (20.5 to 39.1)           | 2.4 (1.1 to 4.4)                | 0.5 (0.5 to 0.5)                  | 369.9 (319.0 to 427.0)    | 260.6 (215.3 to 309.9)     | 99.1 (71.0 to 135.7)          | 8.3 (3.9 to 15.2)               | 1.9 (1.9 to 1.9)                  |
| Algeria | 1996 | 107.3 (93.8 to 123.6)      | 76.2 (64.6 to 89.7)        | 28.1 (20.4 to 37.7)           | 2.4 (1.1 to 4.4)                | 0.5 (0.5 to 0.5)                  | 372.1 (325.2 to 428.6)    | 264.3 (224.0 to 311.0)     | 97.5 (70.8 to 130.8)          | 8.4 (4.0 to 15.4)               | 1.9 (1.9 to 1.9)                  |
| Algeria | 1997 | 108.1 (94.4 to 124.3)      | 75.8 (64.4 to 89.0)        | 29.3 (21.5 to 38.5)           | 2.5 (1.2 to 4.6)                | 0.6 (0.6 to 0.6)                  | 375.1 (327.4 to 431.3)    | 263.1 (223.4 to 308.6)     | 101.6 (74.6 to 133.5)         | 8.5 (4.1 to 15.8)               | 1.9 (1.9 to 1.9)                  |
| Algeria | 1998 | 109.7 (96.0 to 125.0)      | 77.0 (65.9 to 89.9)        | 30.1 (22.4 to 39.2)           | 2.5 (1.2 to 4.7)                | 0.1 (0.1 to 0.1)                  | 380.6 (332.9 to 433.5)    | 267.1 (228.6 to 311.7)     | 104.5 (77.7 to 136.0)         | 8.6 (4.2 to 16.3)               | 0.3 (0.3 to 0.3)                  |
| Algeria | 1999 | 111.1 (97.7 to 125.8)      | 78.3 (67.4 to 90.9)        | 30.0 (22.4 to 38.7)           | 2.5 (1.2 to 4.8)                | 0.2 (0.2 to 0.2)                  | 385.3 (339.0 to 436.4)    | 271.7 (233.8 to 315.3)     | 104.1 (77.7 to 134.3)         | 8.7 (4.2 to 16.6)               | 0.7 (0.7 to 0.7)                  |
| Algeria | 2000 | 117.2 (103.8 to 132.1)     | 84.7 (73.5 to 96.9)        | 29.7 (22.3 to 37.8)           | 2.7 (1.3 to 5.1)                | 0.1 (0.1 to 0.1)                  | 406.6 (359.9 to 458.1)    | 293.8 (254.8 to 336.2)     | 103.1 (77.3 to 131.1)         | 9.3 (4.4 to 17.7)               | 0.3 (0.3 to 0.3)                  |
| Algeria | 2001 | 119.5 (106.1 to 134.8)     | 87.8 (76.7 to 101.3)       | 28.9 (22.0 to 37.2)           | 2.8 (1.3 to 5.4)                | 0.1 (0.1 to 0.1)                  | 414.6 (368.1 to 467.5)    | 304.6 (266.0 to 351.2)     | 100.2 (76.3 to 129.2)         | 9.6 (4.6 to 18.7)               | 0.3 (0.3 to 0.3)                  |
| Algeria | 2002 | 122.3 (108.8 to 138.5)     | 90.2 (78.7 to 103.4)       | 29.2 (22.6 to 37.4)           | 2.9 (1.4 to 5.6)                | 0.0 (0.0 to 0.0)                  | 424.4 (377.5 to 480.4)    | 312.7 (272.8 to 358.7)     | 101.4 (78.3 to 129.6)         | 10.0 (4.9 to 19.4)              | 0.2 (0.2 to 0.2)                  |
| Algeria | 2003 | 126.7 (112.9 to 143.1)     | 93.2 (80.9 to 107.4)       | 30.4 (23.9 to 38.5)           | 3.0 (1.4 to 6.0)                | 0.0 (0.0 to 0.0)                  | 439.4 (391.7 to 496.3)    | 323.3 (280.7 to 372.5)     | 105.5 (83.1 to 133.6)         | 10.5 (5.0 to 20.9)              | 0.1 (0.1 to 0.1)                  |
| Algeria | 2004 | 127.8 (113.9 to 143.9)     | 91.8 (80.0 to 105.0)       | 32.8 (26.1 to 41.4)           | 3.1 (1.5 to 6.1)                | 0.1 (0.1 to 0.1)                  | 443.4 (395.1 to 499.1)    | 318.5 (277.3 to 364.2)     | 113.8 (90.6 to 143.7)         | 10.8 (5.1 to 21.3)              | 0.3 (0.3 to 0.3)                  |
| Algeria | 2005 | 132.5 (117.5 to 149.0)     | 93.9 (81.6 to 107.6)       | 35.4 (28.2 to 44.9)           | 3.2 (1.5 to 6.0)                | 0.1 (0.1 to 0.1)                  | 459.6 (407.5 to 516.8)    | 325.6 (282.9 to 373.3)     | 122.8 (97.8 to 155.6)         | 10.9 (5.2 to 21.0)              | 0.3 (0.3 to 0.3)                  |
| Algeria | 2006 | 139.7 (124.5 to 156.2)     | 98.2 (85.4 to 111.6)       | 38.3 (30.6 to 48.1)           | 3.1 (1.5 to 6.0)                | 0.1 (0.1 to 0.1)                  | 484.7 (431.9 to 541.6)    | 340.5 (296.3 to 387.1)     | 132.9 (106.3 to 166.8)        | 10.9 (5.2 to 20.9)              | 0.4 (0.4 to 0.4)                  |
| Algeria | 2007 | 153.2 (137.7 to 170.0)     | 107.7 (94.1 to 122.1)      | 42.2 (33.5 to 53.5)           | 3.2 (1.4 to 6.2)                | 0.1 (0.1 to 0.1)                  | 531.4 (477.6 to 589.8)    | 373.6 (326.5 to 423.6)     | 146.3 (116.3 to 185.7)        | 11.1 (5.0 to 21.5)              | 0.4 (0.4 to 0.4)                  |
| Algeria | 2008 | 173.3 (156.3 to 192.1)     | 122.6 (108.1 to 138.9)     | 47.2 (37.2 to 58.9)           | 3.4 (1.5 to 6.4)                | 0.2 (0.2 to 0.2)                  | 601.1 (542.0 to 666.2)    | 425.3 (375.0 to 482.0)     | 163.6 (129.2 to 204.4)        | 11.6 (5.3 to 22.1)              | 0.6 (0.6 to 0.6)                  |

| Country | Year | 2018 US Dollars per capita |                            |                               |                                 |                                   | 2018 PPP per capita      |                            |                               |                                 |                                   |
|---------|------|----------------------------|----------------------------|-------------------------------|---------------------------------|-----------------------------------|--------------------------|----------------------------|-------------------------------|---------------------------------|-----------------------------------|
|         |      | Health spending            | Government health spending | Out-of-pocket health spending | Prepaid private health spending | Development assistance for health | Health spending          | Government health spending | Out-of-pocket health spending | Prepaid private health spending | Development assistance for health |
| Algeria | 2009 | 190.2 (172.9 to 210.8)     | 133.5 (117.9 to 150.5)     | 53.2 (42.0 to 65.6)           | 3.4 (1.6 to 6.5)                | 0.1 (0.1 to 0.1)                  | 659.6 (599.6 to 731.3)   | 463.0 (409.0 to 521.9)     | 184.4 (145.8 to 227.6)        | 12.0 (5.6 to 22.6)              | 0.3 (0.3 to 0.3)                  |
| Algeria | 2010 | 209.4 (190.4 to 232.8)     | 147.5 (131.1 to 166.2)     | 58.3 (46.3 to 71.2)           | 3.5 (1.6 to 6.7)                | 0.1 (0.1 to 0.1)                  | 726.5 (660.4 to 807.5)   | 511.7 (454.6 to 576.4)     | 202.2 (160.5 to 246.8)        | 12.2 (5.7 to 23.1)              | 0.4 (0.4 to 0.4)                  |
| Algeria | 2011 | 226.9 (205.8 to 252.0)     | 161.0 (143.7 to 181.1)     | 62.1 (49.5 to 75.5)           | 3.6 (1.7 to 6.7)                | 0.2 (0.2 to 0.2)                  | 787.0 (713.7 to 874.0)   | 558.3 (498.5 to 628.2)     | 215.5 (171.7 to 261.9)        | 12.3 (5.7 to 23.3)              | 0.8 (0.8 to 0.8)                  |
| Algeria | 2012 | 247.1 (224.3 to 274.1)     | 176.5 (158.3 to 197.7)     | 66.8 (53.1 to 81.9)           | 3.7 (1.8 to 6.9)                | 0.1 (0.1 to 0.1)                  | 857.0 (777.9 to 950.8)   | 612.2 (549.2 to 685.7)     | 231.7 (184.2 to 284.2)        | 12.8 (6.1 to 23.8)              | 0.3 (0.3 to 0.3)                  |
| Algeria | 2013 | 261.3 (236.9 to 288.5)     | 185.8 (167.2 to 206.8)     | 71.5 (57.5 to 88.1)           | 3.8 (1.8 to 7.1)                | 0.2 (0.2 to 0.2)                  | 906.4 (821.6 to 1000.7)  | 644.6 (580.1 to 717.1)     | 248.1 (199.6 to 305.7)        | 13.2 (6.4 to 24.6)              | 0.6 (0.6 to 0.6)                  |
| Algeria | 2014 | 279.5 (251.8 to 308.7)     | 198.1 (177.2 to 221.5)     | 77.2 (61.6 to 95.9)           | 4.0 (2.0 to 7.6)                | 0.2 (0.2 to 0.2)                  | 969.4 (873.4 to 1070.7)  | 687.1 (614.7 to 768.3)     | 267.9 (213.6 to 332.8)        | 13.9 (6.9 to 26.2)              | 0.5 (0.5 to 0.5)                  |
| Algeria | 2015 | 297.7 (266.5 to 332.0)     | 209.0 (185.3 to 235.4)     | 84.3 (67.1 to 104.9)          | 4.3 (2.1 to 8.1)                | 0.1 (0.1 to 0.1)                  | 1032.5 (924.4 to 1151.4) | 724.9 (642.6 to 816.7)     | 292.5 (232.8 to 364.0)        | 14.9 (7.2 to 28.2)              | 0.2 (0.2 to 0.2)                  |
| Algeria | 2016 | 304.0 (267.1 to 341.4)     | 210.8 (182.6 to 241.6)     | 88.7 (69.6 to 111.3)          | 4.4 (2.2 to 8.0)                | 0.0 (0.0 to 0.0)                  | 1054.5 (926.3 to 1184.1) | 731.2 (633.3 to 838.0)     | 307.7 (241.5 to 386.1)        | 15.4 (7.7 to 27.9)              | 0.2 (0.2 to 0.2)                  |
| Algeria | 2017 | 283.0 (248.1 to 319.5)     | 189.8 (164.5 to 217.6)     | 88.7 (69.8 to 111.7)          | 4.4 (2.2 to 8.0)                | 0.0 (0.0 to 0.0)                  | 981.5 (860.5 to 1108.3)  | 658.3 (570.7 to 754.8)     | 307.7 (241.9 to 387.3)        | 15.3 (7.7 to 27.6)              | 0.2 (0.2 to 0.2)                  |
| Algeria | 2018 | 283.6 (249.1 to 319.7)     | 188.7 (163.8 to 216.8)     | 90.5 (70.9 to 113.9)          | 4.5 (2.2 to 8.1)                | 0.0 (0.0 to 0.0)                  | 983.8 (864.0 to 1108.9)  | 654.3 (568.0 to 752.0)     | 313.8 (246.0 to 395.2)        | 15.5 (7.8 to 28.0)              | 0.2 (0.2 to 0.2)                  |
| Algeria | 2019 | 286.0 (250.8 to 322.1)     | 189.2 (163.9 to 217.6)     | 92.3 (72.2 to 116.1)          | 4.5 (2.3 to 8.2)                | 0.0 (0.0 to 0.0)                  | 992.2 (869.9 to 1117.3)  | 656.2 (568.6 to 754.8)     | 320.1 (250.5 to 402.9)        | 15.7 (7.9 to 28.3)              | 0.2 (0.1 to 0.2)                  |
| Algeria | 2020 | 288.2 (252.5 to 325.5)     | 189.5 (164.1 to 217.9)     | 94.1 (73.6 to 118.3)          | 4.6 (2.3 to 8.2)                | 0.0 (0.0 to 0.0)                  | 999.7 (875.9 to 1128.9)  | 657.4 (569.3 to 755.9)     | 326.3 (255.2 to 410.5)        | 15.8 (7.9 to 28.6)              | 0.2 (0.1 to 0.2)                  |
| Algeria | 2021 | 291.1 (254.8 to 328.8)     | 190.5 (164.5 to 218.9)     | 96.0 (74.7 to 120.9)          | 4.6 (2.3 to 8.3)                | 0.0 (0.0 to 0.0)                  | 1009.8 (883.9 to 1140.6) | 660.7 (570.6 to 759.4)     | 332.9 (259.0 to 419.2)        | 16.0 (8.0 to 28.9)              | 0.2 (0.1 to 0.2)                  |
| Algeria | 2022 | 295.2 (258.6 to 333.4)     | 192.6 (166.4 to 221.7)     | 97.9 (76.0 to 123.2)          | 4.6 (2.3 to 8.4)                | 0.0 (0.0 to 0.1)                  | 1023.8 (897.0 to 1156.3) | 668.0 (577.2 to 769.0)     | 339.5 (263.4 to 427.4)        | 16.1 (8.1 to 29.0)              | 0.2 (0.1 to 0.2)                  |
| Algeria | 2023 | 298.1 (261.2 to 336.4)     | 193.8 (167.4 to 222.8)     | 99.6 (77.3 to 125.8)          | 4.7 (2.3 to 8.4)                | 0.0 (0.0 to 0.1)                  | 1034.1 (906.1 to 1166.7) | 672.2 (580.8 to 772.8)     | 345.6 (268.0 to 436.4)        | 16.2 (8.1 to 29.0)              | 0.2 (0.1 to 0.2)                  |
| Algeria | 2024 | 301.2 (263.5 to 339.9)     | 195.1 (168.2 to 224.6)     | 101.4 (79.0 to 128.3)         | 4.7 (2.3 to 8.4)                | 0.0 (0.0 to 0.1)                  | 1044.7 (914.0 to 1179.1) | 676.6 (583.3 to 779.0)     | 351.8 (273.9 to 445.0)        | 16.2 (8.1 to 29.2)              | 0.2 (0.1 to 0.2)                  |
| Algeria | 2025 | 305.2 (267.0 to 343.9)     | 197.1 (169.7 to 226.9)     | 103.4 (80.1 to 130.3)         | 4.7 (2.4 to 8.5)                | 0.0 (0.0 to 0.1)                  | 1058.7 (926.0 to 1192.9) | 683.5 (588.6 to 786.9)     | 358.6 (277.9 to 452.1)        | 16.4 (8.2 to 29.5)              | 0.2 (0.1 to 0.2)                  |
| Algeria | 2026 | 309.6 (270.9 to 349.6)     | 199.3 (171.6 to 229.6)     | 105.5 (81.9 to 133.2)         | 4.8 (2.4 to 8.6)                | 0.0 (0.0 to 0.1)                  | 1073.8 (939.8 to 1212.5) | 691.3 (595.2 to 796.4)     | 365.8 (284.0 to 462.0)        | 16.5 (8.2 to 29.8)              | 0.2 (0.1 to 0.2)                  |
| Algeria | 2027 | 314.8 (275.1 to 356.9)     | 202.2 (173.7 to 234.1)     | 107.8 (83.7 to 136.8)         | 4.8 (2.4 to 8.7)                | 0.1 (0.0 to 0.1)                  | 1092.1 (954.3 to 1238.0) | 701.4 (602.6 to 811.8)     | 373.8 (290.1 to 474.4)        | 16.7 (8.3 to 30.2)              | 0.2 (0.1 to 0.2)                  |
| Algeria | 2028 | 320.7 (279.3 to 364.3)     | 205.6 (176.6 to 238.8)     | 110.2 (85.3 to 140.9)         | 4.9 (2.4 to 8.8)                | 0.1 (0.0 to 0.1)                  | 1112.4 (968.7 to 1263.6) | 713.2 (612.4 to 828.3)     | 382.1 (295.9 to 488.8)        | 16.9 (8.5 to 30.7)              | 0.2 (0.1 to 0.2)                  |
| Algeria | 2029 | 327.2 (283.7 to 371.8)     | 209.5 (179.5 to 243.9)     | 112.7 (86.7 to 143.4)         | 5.0 (2.5 to 9.0)                | 0.1 (0.0 to 0.1)                  | 1134.8 (984.2 to 1289.8) | 726.6 (622.7 to 846.0)     | 390.8 (300.8 to 497.6)        | 17.2 (8.6 to 31.2)              | 0.2 (0.1 to 0.2)                  |

| Country | Year | 2018 US Dollars per capita |                            |                               |                                 |                                   | 2018 PPP per capita       |                            |                               |                                 |                                   |
|---------|------|----------------------------|----------------------------|-------------------------------|---------------------------------|-----------------------------------|---------------------------|----------------------------|-------------------------------|---------------------------------|-----------------------------------|
|         |      | Health spending            | Government health spending | Out-of-pocket health spending | Prepaid private health spending | Development assistance for health | Health spending           | Government health spending | Out-of-pocket health spending | Prepaid private health spending | Development assistance for health |
| Algeria | 2030 | 334.0 (288.9 to 380.1)     | 213.7 (182.2 to 249.3)     | 115.2 (88.4 to 146.6)         | 5.0 (2.5 to 9.2)                | 0.1 (0.0 to 0.1)                  | 1158.5 (1002.1 to 1318.3) | 741.1 (632.1 to 864.6)     | 399.8 (306.6 to 508.3)        | 17.5 (8.7 to 31.8)              | 0.2 (0.2 to 0.2)                  |
| Algeria | 2031 | 341.1 (295.4 to 389.5)     | 218.0 (186.4 to 255.2)     | 117.9 (90.2 to 150.0)         | 5.1 (2.6 to 9.3)                | 0.1 (0.0 to 0.1)                  | 1183.1 (1024.6 to 1351.2) | 756.3 (646.4 to 885.0)     | 408.8 (312.9 to 520.2)        | 17.8 (8.9 to 32.4)              | 0.2 (0.2 to 0.2)                  |
| Algeria | 2032 | 348.4 (300.6 to 398.0)     | 222.6 (189.5 to 260.6)     | 120.5 (91.9 to 154.3)         | 5.2 (2.6 to 9.5)                | 0.1 (0.0 to 0.1)                  | 1208.6 (1042.6 to 1380.5) | 772.2 (657.3 to 903.9)     | 418.1 (318.8 to 535.1)        | 18.1 (9.0 to 33.0)              | 0.2 (0.2 to 0.2)                  |
| Algeria | 2033 | 356.2 (304.4 to 407.0)     | 227.5 (193.6 to 267.0)     | 123.3 (93.5 to 159.6)         | 5.3 (2.7 to 9.7)                | 0.1 (0.0 to 0.1)                  | 1235.5 (1055.9 to 1411.9) | 789.2 (671.4 to 926.0)     | 427.6 (324.2 to 553.5)        | 18.5 (9.2 to 33.7)              | 0.2 (0.2 to 0.3)                  |
| Algeria | 2034 | 364.0 (311.2 to 417.0)     | 232.6 (198.0 to 273.9)     | 126.0 (95.1 to 163.9)         | 5.4 (2.7 to 9.9)                | 0.1 (0.0 to 0.1)                  | 1262.7 (1079.5 to 1446.4) | 806.7 (686.7 to 950.1)     | 437.0 (329.9 to 568.5)        | 18.8 (9.4 to 34.4)              | 0.2 (0.2 to 0.3)                  |
| Algeria | 2035 | 371.7 (317.7 to 426.4)     | 237.5 (201.8 to 279.9)     | 128.6 (96.7 to 167.6)         | 5.5 (2.8 to 10.1)               | 0.1 (0.0 to 0.1)                  | 1289.4 (1102.0 to 1479.1) | 823.8 (699.8 to 970.9)     | 446.2 (335.4 to 581.4)        | 19.2 (9.6 to 35.1)              | 0.2 (0.2 to 0.3)                  |
| Algeria | 2036 | 379.1 (323.0 to 437.7)     | 242.2 (205.6 to 285.8)     | 131.2 (98.6 to 171.9)         | 5.6 (2.8 to 10.3)               | 0.1 (0.0 to 0.1)                  | 1315.1 (1120.4 to 1518.4) | 840.2 (713.0 to 991.2)     | 455.1 (341.9 to 596.3)        | 19.5 (9.7 to 35.8)              | 0.2 (0.2 to 0.3)                  |
| Algeria | 2037 | 386.3 (328.0 to 446.8)     | 246.8 (208.1 to 292.0)     | 133.7 (99.9 to 176.5)         | 5.7 (2.8 to 10.5)               | 0.1 (0.0 to 0.1)                  | 1339.9 (1137.7 to 1549.9) | 856.1 (721.9 to 1012.8)    | 463.8 (346.6 to 612.3)        | 19.8 (9.9 to 36.5)              | 0.2 (0.2 to 0.3)                  |
| Algeria | 2038 | 393.5 (333.6 to 455.4)     | 251.5 (211.8 to 297.6)     | 136.2 (101.5 to 180.6)        | 5.8 (2.9 to 10.7)               | 0.1 (0.0 to 0.1)                  | 1365.0 (1157.3 to 1579.5) | 872.3 (734.6 to 1032.3)    | 472.3 (352.0 to 626.4)        | 20.2 (10.0 to 37.1)             | 0.2 (0.2 to 0.3)                  |
| Algeria | 2039 | 400.6 (339.5 to 464.0)     | 256.1 (214.9 to 302.7)     | 138.6 (103.1 to 183.7)        | 5.9 (2.9 to 10.9)               | 0.1 (0.0 to 0.1)                  | 1389.6 (1177.7 to 1609.4) | 888.3 (745.4 to 1050.1)    | 480.6 (357.5 to 637.2)        | 20.5 (10.2 to 37.8)             | 0.2 (0.2 to 0.3)                  |
| Algeria | 2040 | 407.7 (344.0 to 471.6)     | 260.7 (217.4 to 309.0)     | 140.9 (104.5 to 187.0)        | 6.0 (3.0 to 11.1)               | 0.1 (0.0 to 0.1)                  | 1414.0 (1193.3 to 1635.8) | 904.4 (753.9 to 1071.9)    | 488.6 (362.3 to 648.5)        | 20.8 (10.3 to 38.4)             | 0.2 (0.2 to 0.3)                  |
| Algeria | 2041 | 414.3 (348.7 to 481.3)     | 265.1 (220.2 to 314.9)     | 143.1 (105.7 to 190.3)        | 6.1 (3.0 to 11.3)               | 0.1 (0.0 to 0.1)                  | 1437.0 (1209.4 to 1669.4) | 919.4 (763.9 to 1092.3)    | 496.3 (366.8 to 660.2)        | 21.1 (10.5 to 39.0)             | 0.2 (0.2 to 0.3)                  |
| Algeria | 2042 | 420.9 (353.5 to 489.7)     | 269.5 (222.8 to 319.8)     | 145.2 (107.1 to 193.6)        | 6.2 (3.1 to 11.4)               | 0.1 (0.1 to 0.1)                  | 1460.0 (1226.0 to 1698.6) | 934.7 (772.8 to 1109.4)    | 503.6 (371.3 to 671.7)        | 21.4 (10.6 to 39.6)             | 0.2 (0.2 to 0.3)                  |
| Algeria | 2043 | 427.5 (358.8 to 497.5)     | 273.9 (225.9 to 325.3)     | 147.3 (108.2 to 196.7)        | 6.2 (3.1 to 11.6)               | 0.1 (0.1 to 0.1)                  | 1482.7 (1244.5 to 1725.8) | 950.1 (783.4 to 1128.5)    | 510.7 (375.3 to 682.4)        | 21.7 (10.7 to 40.2)             | 0.2 (0.2 to 0.3)                  |
| Algeria | 2044 | 433.8 (361.7 to 508.9)     | 278.2 (228.8 to 331.5)     | 149.2 (109.4 to 199.6)        | 6.3 (3.1 to 11.8)               | 0.1 (0.1 to 0.1)                  | 1504.7 (1254.6 to 1765.0) | 965.1 (793.6 to 1149.8)    | 517.5 (379.4 to 692.2)        | 21.9 (10.8 to 40.8)             | 0.2 (0.2 to 0.4)                  |
| Algeria | 2045 | 440.1 (365.9 to 515.6)     | 282.6 (232.1 to 338.0)     | 151.0 (110.5 to 202.4)        | 6.4 (3.2 to 11.9)               | 0.1 (0.1 to 0.1)                  | 1526.4 (1269.3 to 1788.4) | 980.1 (805.0 to 1172.3)    | 523.9 (383.4 to 702.2)        | 22.2 (11.0 to 41.3)             | 0.2 (0.2 to 0.4)                  |
| Algeria | 2046 | 446.0 (369.8 to 524.7)     | 286.7 (234.4 to 344.1)     | 152.8 (111.7 to 205.3)        | 6.5 (3.2 to 12.1)               | 0.1 (0.1 to 0.1)                  | 1546.9 (1282.7 to 1820.0) | 994.3 (813.0 to 1193.4)    | 529.9 (387.3 to 712.1)        | 22.4 (11.1 to 41.9)             | 0.3 (0.2 to 0.4)                  |
| Algeria | 2047 | 451.7 (373.9 to 532.4)     | 290.7 (236.8 to 350.2)     | 154.4 (113.1 to 208.1)        | 6.5 (3.2 to 12.2)               | 0.1 (0.1 to 0.1)                  | 1566.7 (1296.9 to 1846.7) | 1008.2 (821.3 to 1214.6)   | 535.6 (392.4 to 721.8)        | 22.7 (11.2 to 42.4)             | 0.3 (0.2 to 0.4)                  |
| Algeria | 2048 | 457.5 (379.4 to 539.4)     | 294.8 (239.2 to 356.5)     | 156.0 (114.1 to 210.9)        | 6.6 (3.3 to 12.4)               | 0.1 (0.1 to 0.1)                  | 1586.8 (1315.9 to 1870.8) | 1022.4 (829.8 to 1236.5)   | 541.2 (395.9 to 731.6)        | 22.9 (11.3 to 42.9)             | 0.3 (0.2 to 0.4)                  |
| Algeria | 2049 | 463.1 (383.4 to 546.7)     | 298.7 (241.5 to 362.9)     | 157.7 (115.1 to 213.5)        | 6.7 (3.3 to 12.5)               | 0.1 (0.1 to 0.1)                  | 1606.3 (1329.9 to 1896.2) | 1036.1 (837.8 to 1258.8)   | 546.8 (399.4 to 740.6)        | 23.1 (11.4 to 43.4)             | 0.3 (0.2 to 0.4)                  |
| Algeria | 2050 | 468.8 (387.8 to 556.1)     | 302.7 (244.3 to 369.3)     | 159.3 (116.4 to 216.3)        | 6.7 (3.3 to 12.7)               | 0.1 (0.1 to 0.1)                  | 1626.0 (1345.1 to 1928.9) | 1049.9 (847.5 to 1281.0)   | 552.5 (403.6 to 750.2)        | 23.4 (11.5 to 43.9)             | 0.3 (0.2 to 0.5)                  |

| Country        | Year | 2018 US Dollars per capita |                            |                               |                                 |                                   | 2018 PPP per capita       |                            |                               |                                 |                                   |
|----------------|------|----------------------------|----------------------------|-------------------------------|---------------------------------|-----------------------------------|---------------------------|----------------------------|-------------------------------|---------------------------------|-----------------------------------|
|                |      | Health spending            | Government health spending | Out-of-pocket health spending | Prepaid private health spending | Development assistance for health | Health spending           | Government health spending | Out-of-pocket health spending | Prepaid private health spending | Development assistance for health |
| American Samoa | 1995 | 1109.7 (886.4 to 1383.4)   | 1032.9 (810.2 to 1303.1)   | 68.8 (49.2 to 95.2)           | 8.1 (4.0 to 14.8)               | 0.0 (0.0 to 0.0)                  | 1109.7 (886.4 to 1383.4)  | 1032.9 (810.2 to 1303.1)   | 68.8 (49.2 to 95.2)           | 8.1 (4.0 to 14.8)               | 0.0 (0.0 to 0.0)                  |
| American Samoa | 1996 | 1097.9 (885.2 to 1359.6)   | 1022.5 (812.1 to 1292.5)   | 67.6 (47.9 to 92.9)           | 7.8 (3.8 to 14.2)               | 0.0 (0.0 to 0.0)                  | 1097.9 (885.2 to 1359.6)  | 1022.5 (812.1 to 1292.5)   | 67.6 (47.9 to 92.9)           | 7.8 (3.8 to 14.2)               | 0.0 (0.0 to 0.0)                  |
| American Samoa | 1997 | 1093.8 (892.9 to 1340.4)   | 1019.7 (822.0 to 1260.9)   | 66.8 (47.3 to 90.4)           | 7.4 (3.5 to 13.8)               | 0.0 (0.0 to 0.0)                  | 1093.8 (892.9 to 1340.4)  | 1019.7 (822.0 to 1260.9)   | 66.8 (47.3 to 90.4)           | 7.4 (3.5 to 13.8)               | 0.0 (0.0 to 0.0)                  |
| American Samoa | 1998 | 1081.5 (894.4 to 1296.1)   | 1009.0 (830.7 to 1218.9)   | 65.8 (46.1 to 89.1)           | 6.7 (3.3 to 12.4)               | 0.0 (0.0 to 0.0)                  | 1081.5 (894.4 to 1296.1)  | 1009.0 (830.7 to 1218.9)   | 65.8 (46.1 to 89.1)           | 6.7 (3.3 to 12.4)               | 0.0 (0.0 to 0.0)                  |
| American Samoa | 1999 | 1072.0 (911.2 to 1254.3)   | 1001.2 (844.6 to 1175.3)   | 64.9 (45.3 to 88.3)           | 5.8 (2.8 to 10.8)               | 0.0 (0.0 to 0.0)                  | 1072.0 (911.2 to 1254.3)  | 1001.2 (844.6 to 1175.3)   | 64.9 (45.3 to 88.3)           | 5.8 (2.8 to 10.8)               | 0.0 (0.0 to 0.0)                  |
| American Samoa | 2000 | 1073.2 (935.1 to 1221.8)   | 1003.8 (869.0 to 1148.5)   | 64.5 (45.0 to 88.9)           | 4.9 (2.4 to 9.2)                | 0.0 (0.0 to 0.0)                  | 1073.2 (935.1 to 1221.8)  | 1003.8 (869.0 to 1148.5)   | 64.5 (45.0 to 88.9)           | 4.9 (2.4 to 9.2)                | 0.0 (0.0 to 0.0)                  |
| American Samoa | 2001 | 1070.4 (966.7 to 1182.0)   | 1002.1 (896.3 to 1110.4)   | 64.3 (44.9 to 88.6)           | 3.9 (1.9 to 7.3)                | 0.0 (0.0 to 0.0)                  | 1070.4 (966.7 to 1182.0)  | 1002.1 (896.3 to 1110.4)   | 64.3 (44.9 to 88.6)           | 3.9 (1.9 to 7.3)                | 0.0 (0.0 to 0.0)                  |
| American Samoa | 2002 | 1067.2 (995.5 to 1140.5)   | 998.6 (927.4 to 1070.3)    | 64.9 (44.7 to 90.9)           | 3.7 (1.8 to 7.1)                | 0.0 (0.0 to 0.0)                  | 1067.2 (995.5 to 1140.5)  | 998.6 (927.4 to 1070.3)    | 64.9 (44.7 to 90.9)           | 3.7 (1.8 to 7.1)                | 0.0 (0.0 to 0.0)                  |
| American Samoa | 2003 | 1064.0 (1008.9 to 1122.1)  | 994.6 (945.1 to 1050.0)    | 65.7 (45.4 to 91.6)           | 3.6 (1.8 to 7.0)                | 0.0 (0.0 to 0.0)                  | 1064.0 (1008.9 to 1122.1) | 994.6 (945.1 to 1050.0)    | 65.7 (45.4 to 91.6)           | 3.6 (1.8 to 7.0)                | 0.0 (0.0 to 0.0)                  |
| American Samoa | 2004 | 1039.8 (974.3 to 1108.8)   | 969.8 (905.9 to 1034.2)    | 66.2 (46.0 to 91.5)           | 3.7 (1.8 to 7.1)                | 0.0 (0.0 to 0.0)                  | 1039.8 (974.3 to 1108.8)  | 969.8 (905.9 to 1034.2)    | 66.2 (46.0 to 91.5)           | 3.7 (1.8 to 7.1)                | 0.0 (0.0 to 0.0)                  |
| American Samoa | 2005 | 1005.4 (913.7 to 1100.8)   | 935.5 (845.8 to 1030.1)    | 66.0 (46.0 to 89.9)           | 4.0 (1.9 to 7.7)                | 0.0 (0.0 to 0.0)                  | 1005.4 (913.7 to 1100.8)  | 935.5 (845.8 to 1030.1)    | 66.0 (46.0 to 89.9)           | 4.0 (1.9 to 7.7)                | 0.0 (0.0 to 0.0)                  |
| American Samoa | 2006 | 942.7 (839.4 to 1065.4)    | 873.8 (768.2 to 996.0)     | 64.5 (45.1 to 87.8)           | 4.4 (2.1 to 8.4)                | 0.0 (0.0 to 0.0)                  | 942.7 (839.4 to 1065.4)   | 873.8 (768.2 to 996.0)     | 64.5 (45.1 to 87.8)           | 4.4 (2.1 to 8.4)                | 0.0 (0.0 to 0.0)                  |
| American Samoa | 2007 | 926.7 (811.4 to 1066.0)    | 856.3 (740.7 to 992.8)     | 65.1 (45.1 to 90.4)           | 5.4 (2.6 to 10.1)               | 0.0 (0.0 to 0.0)                  | 926.7 (811.4 to 1066.0)   | 856.3 (740.7 to 992.8)     | 65.1 (45.1 to 90.4)           | 5.4 (2.6 to 10.1)               | 0.0 (0.0 to 0.0)                  |
| American Samoa | 2008 | 887.3 (771.2 to 1018.9)    | 815.3 (698.0 to 949.7)     | 64.8 (44.8 to 89.8)           | 7.2 (3.5 to 14.0)               | 0.0 (0.0 to 0.0)                  | 887.3 (771.2 to 1018.9)   | 815.3 (698.0 to 949.7)     | 64.8 (44.8 to 89.8)           | 7.2 (3.5 to 14.0)               | 0.0 (0.0 to 0.0)                  |
| American Samoa | 2009 | 835.5 (726.7 to 953.7)     | 763.1 (653.8 to 882.8)     | 63.8 (43.6 to 88.2)           | 8.7 (4.2 to 16.2)               | 0.0 (0.0 to 0.0)                  | 835.5 (726.7 to 953.7)    | 763.1 (653.8 to 882.8)     | 63.8 (43.6 to 88.2)           | 8.7 (4.2 to 16.2)               | 0.0 (0.0 to 0.0)                  |
| American Samoa | 2010 | 807.0 (708.3 to 912.2)     | 733.6 (638.9 to 837.9)     | 63.4 (43.6 to 87.3)           | 10.0 (4.9 to 18.6)              | 0.0 (0.0 to 0.0)                  | 807.0 (708.3 to 912.2)    | 733.6 (638.9 to 837.9)     | 63.4 (43.6 to 87.3)           | 10.0 (4.9 to 18.6)              | 0.0 (0.0 to 0.0)                  |
| American Samoa | 2011 | 784.2 (704.3 to 868.8)     | 710.4 (636.0 to 793.4)     | 62.7 (43.0 to 86.9)           | 11.1 (5.3 to 20.2)              | 0.0 (0.0 to 0.0)                  | 784.2 (704.3 to 868.8)    | 710.4 (636.0 to 793.4)     | 62.7 (43.0 to 86.9)           | 11.1 (5.3 to 20.2)              | 0.0 (0.0 to 0.0)                  |
| American Samoa | 2012 | 738.3 (679.5 to 802.0)     | 666.2 (614.8 to 723.5)     | 60.6 (41.9 to 85.4)           | 11.4 (5.4 to 20.9)              | 0.0 (0.0 to 0.0)                  | 738.3 (679.5 to 802.0)    | 666.2 (614.8 to 723.5)     | 60.6 (41.9 to 85.4)           | 11.4 (5.4 to 20.9)              | 0.0 (0.0 to 0.0)                  |
| American Samoa | 2013 | 702.4 (654.6 to 750.7)     | 632.0 (590.0 to 677.8)     | 58.8 (40.8 to 82.8)           | 11.5 (5.4 to 21.2)              | 0.0 (0.0 to 0.0)                  | 702.4 (654.6 to 750.7)    | 632.0 (590.0 to 677.8)     | 58.8 (40.8 to 82.8)           | 11.5 (5.4 to 21.2)              | 0.0 (0.0 to 0.0)                  |
| American Samoa | 2014 | 694.0 (637.9 to 750.3)     | 624.1 (571.8 to 676.8)     | 58.1 (40.7 to 81.2)           | 11.8 (5.5 to 21.9)              | 0.0 (0.0 to 0.0)                  | 694.0 (637.9 to 750.3)    | 624.1 (571.8 to 676.8)     | 58.1 (40.7 to 81.2)           | 11.8 (5.5 to 21.9)              | 0.0 (0.0 to 0.0)                  |
| American Samoa | 2015 | 691.8 (618.4 to 770.2)     | 622.6 (553.1 to 696.3)     | 57.5 (39.9 to 79.5)           | 11.8 (5.5 to 21.9)              | 0.0 (0.0 to 0.0)                  | 691.8 (618.4 to 770.2)    | 622.6 (553.1 to 696.3)     | 57.5 (39.9 to 79.5)           | 11.8 (5.5 to 21.9)              | 0.0 (0.0 to 0.0)                  |

| Country        | Year | 2018 US Dollars per capita |                            |                               |                                 |                                   | 2018 PPP per capita    |                            |                               |                                 |                                   |
|----------------|------|----------------------------|----------------------------|-------------------------------|---------------------------------|-----------------------------------|------------------------|----------------------------|-------------------------------|---------------------------------|-----------------------------------|
|                |      | Health spending            | Government health spending | Out-of-pocket health spending | Prepaid private health spending | Development assistance for health | Health spending        | Government health spending | Out-of-pocket health spending | Prepaid private health spending | Development assistance for health |
| American Samoa | 2016 | 691.8 (603.9 to 790.6)     | 623.1 (535.6 to 715.3)     | 57.1 (39.6 to 81.4)           | 11.5 (5.3 to 21.9)              | 0.0 (0.0 to 0.0)                  | 691.8 (603.9 to 790.6) | 623.1 (535.6 to 715.3)     | 57.1 (39.6 to 81.4)           | 11.5 (5.3 to 21.9)              | 0.0 (0.0 to 0.0)                  |
| American Samoa | 2017 | 689.2 (596.8 to 789.7)     | 620.7 (532.6 to 713.1)     | 57.0 (39.7 to 81.0)           | 11.5 (5.3 to 22.0)              | 0.0 (0.0 to 0.0)                  | 689.2 (596.8 to 789.7) | 620.7 (532.6 to 713.1)     | 57.0 (39.7 to 81.0)           | 11.5 (5.3 to 22.0)              | 0.0 (0.0 to 0.0)                  |
| American Samoa | 2018 | 700.3 (608.6 to 800.1)     | 631.0 (541.6 to 727.6)     | 57.6 (39.8 to 82.0)           | 11.7 (5.4 to 22.5)              | 0.0 (0.0 to 0.0)                  | 700.3 (608.6 to 800.1) | 631.0 (541.6 to 727.6)     | 57.6 (39.8 to 82.0)           | 11.7 (5.4 to 22.5)              | 0.0 (0.0 to 0.0)                  |
| American Samoa | 2019 | 711.4 (615.7 to 814.3)     | 641.2 (550.5 to 740.1)     | 58.2 (40.2 to 83.0)           | 11.9 (5.5 to 22.9)              | 0.0 (0.0 to 0.0)                  | 711.4 (615.7 to 814.3) | 641.2 (550.5 to 740.1)     | 58.2 (40.2 to 83.0)           | 11.9 (5.5 to 22.9)              | 0.0 (0.0 to 0.0)                  |
| American Samoa | 2020 | 724.3 (630.8 to 829.4)     | 653.2 (560.0 to 755.0)     | 58.9 (40.8 to 84.0)           | 12.2 (5.6 to 23.3)              | 0.0 (0.0 to 0.0)                  | 724.3 (630.8 to 829.4) | 653.2 (560.0 to 755.0)     | 58.9 (40.8 to 84.0)           | 12.2 (5.6 to 23.3)              | 0.0 (0.0 to 0.0)                  |
| American Samoa | 2021 | 738.3 (637.7 to 846.7)     | 666.1 (570.8 to 770.1)     | 59.8 (41.4 to 84.7)           | 12.5 (5.8 to 23.8)              | 0.0 (0.0 to 0.0)                  | 738.3 (637.7 to 846.7) | 666.1 (570.8 to 770.1)     | 59.8 (41.4 to 84.7)           | 12.5 (5.8 to 23.8)              | 0.0 (0.0 to 0.0)                  |
| American Samoa | 2022 | 751.4 (651.7 to 859.8)     | 678.1 (579.3 to 784.2)     | 60.5 (41.9 to 86.1)           | 12.7 (5.9 to 24.3)              | 0.0 (0.0 to 0.0)                  | 751.4 (651.7 to 859.8) | 678.1 (579.3 to 784.2)     | 60.5 (41.9 to 86.1)           | 12.7 (5.9 to 24.3)              | 0.0 (0.0 to 0.0)                  |
| American Samoa | 2023 | 763.3 (659.4 to 876.5)     | 689.1 (588.4 to 795.6)     | 61.2 (42.3 to 87.2)           | 13.0 (6.0 to 24.7)              | 0.0 (0.0 to 0.0)                  | 763.3 (659.4 to 876.5) | 689.1 (588.4 to 795.6)     | 61.2 (42.3 to 87.2)           | 13.0 (6.0 to 24.7)              | 0.0 (0.0 to 0.0)                  |
| American Samoa | 2024 | 773.2 (670.0 to 884.8)     | 698.3 (596.8 to 804.8)     | 61.7 (42.5 to 88.0)           | 13.2 (6.1 to 25.0)              | 0.0 (0.0 to 0.0)                  | 773.2 (670.0 to 884.8) | 698.3 (596.8 to 804.8)     | 61.7 (42.5 to 88.0)           | 13.2 (6.1 to 25.0)              | 0.0 (0.0 to 0.0)                  |
| American Samoa | 2025 | 782.7 (675.9 to 897.1)     | 707.1 (605.0 to 814.7)     | 62.2 (42.9 to 88.6)           | 13.4 (6.2 to 25.3)              | 0.0 (0.0 to 0.0)                  | 782.7 (675.9 to 897.1) | 707.1 (605.0 to 814.7)     | 62.2 (42.9 to 88.6)           | 13.4 (6.2 to 25.3)              | 0.0 (0.0 to 0.0)                  |
| American Samoa | 2026 | 788.1 (683.3 to 903.9)     | 712.3 (608.3 to 821.0)     | 62.3 (43.1 to 88.7)           | 13.5 (6.2 to 25.5)              | 0.0 (0.0 to 0.0)                  | 788.1 (683.3 to 903.9) | 712.3 (608.3 to 821.0)     | 62.3 (43.1 to 88.7)           | 13.5 (6.2 to 25.5)              | 0.0 (0.0 to 0.0)                  |
| American Samoa | 2027 | 790.8 (681.1 to 906.7)     | 715.1 (609.3 to 824.6)     | 62.2 (43.2 to 87.9)           | 13.6 (6.3 to 25.6)              | 0.0 (0.0 to 0.0)                  | 790.8 (681.1 to 906.7) | 715.1 (609.3 to 824.6)     | 62.2 (43.2 to 87.9)           | 13.6 (6.3 to 25.6)              | 0.0 (0.0 to 0.0)                  |
| American Samoa | 2028 | 793.8 (685.6 to 910.2)     | 718.0 (610.9 to 828.1)     | 62.1 (43.1 to 87.3)           | 13.7 (6.3 to 25.7)              | 0.0 (0.0 to 0.0)                  | 793.8 (685.6 to 910.2) | 718.0 (610.9 to 828.1)     | 62.1 (43.1 to 87.3)           | 13.7 (6.3 to 25.7)              | 0.0 (0.0 to 0.0)                  |
| American Samoa | 2029 | 797.6 (686.4 to 916.6)     | 721.7 (613.3 to 833.0)     | 62.1 (43.0 to 87.3)           | 13.8 (6.4 to 25.9)              | 0.0 (0.0 to 0.0)                  | 797.6 (686.4 to 916.6) | 721.7 (613.3 to 833.0)     | 62.1 (43.0 to 87.3)           | 13.8 (6.4 to 25.9)              | 0.0 (0.0 to 0.0)                  |
| American Samoa | 2030 | 801.4 (689.1 to 919.1)     | 725.4 (615.3 to 837.8)     | 62.1 (43.0 to 87.3)           | 13.9 (6.4 to 26.0)              | 0.0 (0.0 to 0.0)                  | 801.4 (689.1 to 919.1) | 725.4 (615.3 to 837.8)     | 62.1 (43.0 to 87.3)           | 13.9 (6.4 to 26.0)              | 0.0 (0.0 to 0.0)                  |
| American Samoa | 2031 | 805.3 (693.6 to 926.3)     | 729.2 (618.4 to 843.0)     | 62.1 (42.9 to 87.3)           | 14.0 (6.5 to 26.2)              | 0.0 (0.0 to 0.0)                  | 805.3 (693.6 to 926.3) | 729.2 (618.4 to 843.0)     | 62.1 (42.9 to 87.3)           | 14.0 (6.5 to 26.2)              | 0.0 (0.0 to 0.0)                  |
| American Samoa | 2032 | 809.5 (692.7 to 929.4)     | 733.3 (621.7 to 848.5)     | 62.1 (42.9 to 87.5)           | 14.1 (6.6 to 26.5)              | 0.0 (0.0 to 0.0)                  | 809.5 (692.7 to 929.4) | 733.3 (621.7 to 848.5)     | 62.1 (42.9 to 87.5)           | 14.1 (6.6 to 26.5)              | 0.0 (0.0 to 0.0)                  |
| American Samoa | 2033 | 813.3 (697.7 to 937.4)     | 737.0 (624.7 to 854.0)     | 62.1 (42.9 to 87.6)           | 14.2 (6.6 to 26.8)              | 0.0 (0.0 to 0.0)                  | 813.3 (697.7 to 937.4) | 737.0 (624.7 to 854.0)     | 62.1 (42.9 to 87.6)           | 14.2 (6.6 to 26.8)              | 0.0 (0.0 to 0.0)                  |
| American Samoa | 2034 | 816.8 (698.4 to 939.5)     | 740.4 (627.1 to 858.9)     | 62.1 (42.9 to 87.7)           | 14.3 (6.7 to 26.9)              | 0.0 (0.0 to 0.0)                  | 816.8 (698.4 to 939.5) | 740.4 (627.1 to 858.9)     | 62.1 (42.9 to 87.7)           | 14.3 (6.7 to 26.9)              | 0.0 (0.0 to 0.0)                  |
| American Samoa | 2035 | 820.6 (704.1 to 949.1)     | 744.2 (628.5 to 865.1)     | 62.0 (42.9 to 87.5)           | 14.4 (6.7 to 27.1)              | 0.0 (0.0 to 0.0)                  | 820.6 (704.1 to 949.1) | 744.2 (628.5 to 865.1)     | 62.0 (42.9 to 87.5)           | 14.4 (6.7 to 27.1)              | 0.0 (0.0 to 0.0)                  |
| American Samoa | 2036 | 824.6 (703.2 to 952.7)     | 748.1 (630.3 to 871.1)     | 62.0 (42.9 to 87.2)           | 14.5 (6.8 to 27.2)              | 0.0 (0.0 to 0.0)                  | 824.6 (703.2 to 952.7) | 748.1 (630.3 to 871.1)     | 62.0 (42.9 to 87.2)           | 14.5 (6.8 to 27.2)              | 0.0 (0.0 to 0.0)                  |

| Country        | Year | 2018 US Dollars per capita |                            |                               |                                 |                                   | 2018 PPP per capita       |                            |                               |                                 |                                   |
|----------------|------|----------------------------|----------------------------|-------------------------------|---------------------------------|-----------------------------------|---------------------------|----------------------------|-------------------------------|---------------------------------|-----------------------------------|
|                |      | Health spending            | Government health spending | Out-of-pocket health spending | Prepaid private health spending | Development assistance for health | Health spending           | Government health spending | Out-of-pocket health spending | Prepaid private health spending | Development assistance for health |
| American Samoa | 2037 | 828.8 (707.8 to 956.7)     | 752.2 (632.6 to 875.5)     | 62.0 (42.9 to 87.3)           | 14.6 (6.8 to 27.4)              | 0.0 (0.0 to 0.0)                  | 828.8 (707.8 to 956.7)    | 752.2 (632.6 to 875.5)     | 62.0 (42.9 to 87.3)           | 14.6 (6.8 to 27.4)              | 0.0 (0.0 to 0.0)                  |
| American Samoa | 2038 | 833.2 (709.9 to 967.3)     | 756.4 (634.5 to 880.8)     | 62.0 (42.9 to 87.3)           | 14.7 (6.9 to 27.5)              | 0.0 (0.0 to 0.0)                  | 833.2 (709.9 to 967.3)    | 756.4 (634.5 to 880.8)     | 62.0 (42.9 to 87.3)           | 14.7 (6.9 to 27.5)              | 0.0 (0.0 to 0.0)                  |
| American Samoa | 2039 | 837.6 (713.8 to 968.0)     | 760.7 (636.6 to 888.4)     | 62.0 (42.8 to 87.3)           | 14.9 (6.9 to 27.7)              | 0.0 (0.0 to 0.0)                  | 837.6 (713.8 to 968.0)    | 760.7 (636.6 to 888.4)     | 62.0 (42.8 to 87.3)           | 14.9 (6.9 to 27.7)              | 0.0 (0.0 to 0.0)                  |
| American Samoa | 2040 | 841.7 (714.1 to 976.0)     | 764.7 (638.4 to 893.5)     | 62.0 (42.7 to 87.3)           | 15.0 (7.0 to 27.8)              | 0.0 (0.0 to 0.0)                  | 841.7 (714.1 to 976.0)    | 764.7 (638.4 to 893.5)     | 62.0 (42.7 to 87.3)           | 15.0 (7.0 to 27.8)              | 0.0 (0.0 to 0.0)                  |
| American Samoa | 2041 | 845.5 (718.6 to 978.4)     | 768.5 (640.9 to 898.1)     | 62.0 (42.6 to 87.1)           | 15.1 (7.0 to 28.0)              | 0.0 (0.0 to 0.0)                  | 845.5 (718.6 to 978.4)    | 768.5 (640.9 to 898.1)     | 62.0 (42.6 to 87.1)           | 15.1 (7.0 to 28.0)              | 0.0 (0.0 to 0.0)                  |
| American Samoa | 2042 | 849.3 (717.1 to 987.7)     | 772.2 (644.0 to 903.6)     | 61.9 (42.5 to 86.9)           | 15.2 (7.1 to 28.3)              | 0.0 (0.0 to 0.0)                  | 849.3 (717.1 to 987.7)    | 772.2 (644.0 to 903.6)     | 61.9 (42.5 to 86.9)           | 15.2 (7.1 to 28.3)              | 0.0 (0.0 to 0.0)                  |
| American Samoa | 2043 | 853.1 (724.2 to 990.8)     | 775.9 (646.3 to 908.1)     | 61.9 (42.3 to 86.7)           | 15.3 (7.2 to 28.6)              | 0.0 (0.0 to 0.0)                  | 853.1 (724.2 to 990.8)    | 775.9 (646.3 to 908.1)     | 61.9 (42.3 to 86.7)           | 15.3 (7.2 to 28.6)              | 0.0 (0.0 to 0.0)                  |
| American Samoa | 2044 | 856.9 (722.3 to 1000.1)    | 779.7 (649.0 to 913.9)     | 61.8 (42.3 to 86.5)           | 15.4 (7.2 to 28.9)              | 0.0 (0.0 to 0.0)                  | 856.9 (722.3 to 1000.1)   | 779.7 (649.0 to 913.9)     | 61.8 (42.3 to 86.5)           | 15.4 (7.2 to 28.9)              | 0.0 (0.0 to 0.0)                  |
| American Samoa | 2045 | 861.2 (728.0 to 1002.3)    | 783.9 (652.0 to 921.8)     | 61.8 (42.3 to 86.6)           | 15.5 (7.3 to 29.1)              | 0.0 (0.0 to 0.0)                  | 861.2 (728.0 to 1002.3)   | 783.9 (652.0 to 921.8)     | 61.8 (42.3 to 86.6)           | 15.5 (7.3 to 29.1)              | 0.0 (0.0 to 0.0)                  |
| American Samoa | 2046 | 865.7 (726.6 to 1011.4)    | 788.3 (654.2 to 928.0)     | 61.8 (42.2 to 86.5)           | 15.6 (7.3 to 29.2)              | 0.0 (0.0 to 0.0)                  | 865.7 (726.6 to 1011.4)   | 788.3 (654.2 to 928.0)     | 61.8 (42.2 to 86.5)           | 15.6 (7.3 to 29.2)              | 0.0 (0.0 to 0.0)                  |
| American Samoa | 2047 | 870.5 (734.5 to 1014.6)    | 792.9 (656.5 to 934.5)     | 61.8 (42.2 to 86.5)           | 15.8 (7.4 to 29.4)              | 0.0 (0.0 to 0.0)                  | 870.5 (734.5 to 1014.6)   | 792.9 (656.5 to 934.5)     | 61.8 (42.2 to 86.5)           | 15.8 (7.4 to 29.4)              | 0.0 (0.0 to 0.0)                  |
| American Samoa | 2048 | 875.7 (731.1 to 1026.6)    | 798.0 (659.1 to 942.9)     | 61.8 (42.3 to 86.4)           | 15.9 (7.5 to 29.6)              | 0.0 (0.0 to 0.0)                  | 875.7 (731.1 to 1026.6)   | 798.0 (659.1 to 942.9)     | 61.8 (42.3 to 86.4)           | 15.9 (7.5 to 29.6)              | 0.0 (0.0 to 0.0)                  |
| American Samoa | 2049 | 881.0 (740.0 to 1029.5)    | 803.1 (661.7 to 951.3)     | 61.8 (42.3 to 86.6)           | 16.0 (7.6 to 29.8)              | 0.0 (0.0 to 0.0)                  | 881.0 (740.0 to 1029.5)   | 803.1 (661.7 to 951.3)     | 61.8 (42.3 to 86.6)           | 16.0 (7.6 to 29.8)              | 0.0 (0.0 to 0.0)                  |
| American Samoa | 2050 | 886.8 (739.5 to 1043.6)    | 808.7 (664.0 to 960.5)     | 61.9 (42.3 to 86.8)           | 16.2 (7.6 to 30.1)              | 0.0 (0.0 to 0.0)                  | 886.8 (739.5 to 1043.6)   | 808.7 (664.0 to 960.5)     | 61.9 (42.3 to 86.8)           | 16.2 (7.6 to 30.1)              | 0.0 (0.0 to 0.0)                  |
| Andorra        | 1995 | 3342.7 (3218.7 to 3478.3)  | 1425.0 (1334.2 to 1525.9)  | 1555.4 (1486.4 to 1623.5)     | 362.3 (320.1 to 409.5)          | 0.0 (0.0 to 0.0)                  | 6209.1 (5978.9 to 6461.0) | 2646.9 (2478.3 to 2834.4)  | 2889.2 (2761.1 to 3015.7)     | 673.0 (594.6 to 760.6)          | 0.0 (0.0 to 0.0)                  |
| Andorra        | 1996 | 3450.6 (3350.4 to 3548.1)  | 1465.9 (1390.4 to 1541.8)  | 1597.0 (1546.2 to 1647.0)     | 387.7 (353.2 to 425.3)          | 0.0 (0.0 to 0.0)                  | 6409.7 (6223.5 to 6590.6) | 2723.0 (2582.7 to 2863.9)  | 2966.5 (2872.0 to 3059.4)     | 720.1 (656.1 to 790.0)          | 0.0 (0.0 to 0.0)                  |
| Andorra        | 1997 | 3671.9 (3577.1 to 3759.3)  | 1561.5 (1495.7 to 1635.3)  | 1684.6 (1632.1 to 1734.6)     | 425.8 (391.6 to 462.8)          | 0.0 (0.0 to 0.0)                  | 6820.6 (6644.6 to 6983.0) | 2900.6 (2778.3 to 3037.5)  | 3129.2 (3031.7 to 3222.0)     | 790.9 (727.5 to 859.7)          | 0.0 (0.0 to 0.0)                  |
| Andorra        | 1998 | 3789.2 (3692.6 to 3882.3)  | 1605.3 (1536.4 to 1678.3)  | 1733.9 (1683.9 to 1786.2)     | 450.0 (415.4 to 486.4)          | 0.0 (0.0 to 0.0)                  | 7038.4 (6859.0 to 7211.4) | 2981.8 (2854.0 to 3117.5)  | 3220.8 (3127.8 to 3317.9)     | 835.9 (771.7 to 903.4)          | 0.0 (0.0 to 0.0)                  |
| Andorra        | 1999 | 3785.9 (3693.6 to 3873.9)  | 1596.8 (1531.1 to 1668.8)  | 1767.8 (1717.5 to 1822.3)     | 421.3 (390.0 to 455.1)          | 0.0 (0.0 to 0.0)                  | 7032.4 (6861.0 to 7195.8) | 2966.1 (2844.0 to 3099.9)  | 3283.8 (3190.3 to 3385.0)     | 782.6 (724.5 to 845.4)          | 0.0 (0.0 to 0.0)                  |
| Andorra        | 2000 | 3748.0 (3661.0 to 3830.3)  | 1567.8 (1504.7 to 1635.1)  | 1783.7 (1737.1 to 1836.5)     | 396.4 (368.6 to 425.9)          | 0.0 (0.0 to 0.0)                  | 6961.9 (6800.4 to 7114.9) | 2912.3 (2795.0 to 3037.3)  | 3313.2 (3226.7 to 3411.4)     | 736.4 (684.7 to 791.1)          | 0.0 (0.0 to 0.0)                  |
| Andorra        | 2001 | 3816.0 (3722.3 to 3905.4)  | 1577.1 (1509.7 to 1643.2)  | 1837.6 (1790.9 to 1885.9)     | 401.3 (375.6 to 427.4)          | 0.0 (0.0 to 0.0)                  | 7088.3 (6914.2 to 7254.5) | 2929.5 (2804.4 to 3052.4)  | 3413.4 (3326.6 to 3503.2)     | 745.4 (697.7 to 793.9)          | 0.0 (0.0 to 0.0)                  |

| Country | Year | 2018 US Dollars per capita |                            |                               |                                 |                                   | 2018 PPP per capita       |                            |                               |                                 |                                   |
|---------|------|----------------------------|----------------------------|-------------------------------|---------------------------------|-----------------------------------|---------------------------|----------------------------|-------------------------------|---------------------------------|-----------------------------------|
|         |      | Health spending            | Government health spending | Out-of-pocket health spending | Prepaid private health spending | Development assistance for health | Health spending           | Government health spending | Out-of-pocket health spending | Prepaid private health spending | Development assistance for health |
| Andorra | 2002 | 3834.7 (3742.3 to 3923.4)  | 1531.9 (1463.5 to 1601.0)  | 1890.2 (1840.3 to 1940.0)     | 412.6 (387.6 to 439.7)          | 0.0 (0.0 to 0.0)                  | 7123.0 (6951.4 to 7287.9) | 2845.5 (2718.4 to 2973.9)  | 3511.1 (3418.4 to 3603.5)     | 766.3 (720.0 to 816.8)          | 0.0 (0.0 to 0.0)                  |
| Andorra | 2003 | 3876.8 (3791.6 to 3967.5)  | 1490.3 (1427.0 to 1558.0)  | 1958.2 (1908.8 to 2007.9)     | 428.3 (401.3 to 456.2)          | 0.0 (0.0 to 0.0)                  | 7201.2 (7043.0 to 7369.8) | 2768.2 (2650.7 to 2894.1)  | 3637.4 (3545.7 to 3729.7)     | 795.6 (745.4 to 847.3)          | 0.0 (0.0 to 0.0)                  |
| Andorra | 2004 | 3892.9 (3808.6 to 3980.2)  | 1450.5 (1390.0 to 1519.1)  | 2002.5 (1956.0 to 2050.4)     | 439.9 (412.2 to 467.7)          | 0.0 (0.0 to 0.0)                  | 7231.1 (7074.6 to 7393.2) | 2694.4 (2581.9 to 2821.7)  | 3719.6 (3633.3 to 3808.7)     | 817.1 (765.6 to 868.7)          | 0.0 (0.0 to 0.0)                  |
| Andorra | 2005 | 4040.6 (3952.0 to 4132.4)  | 1509.8 (1447.3 to 1580.3)  | 2069.6 (2022.8 to 2117.7)     | 461.2 (431.4 to 490.8)          | 0.0 (0.0 to 0.0)                  | 7505.6 (7341.0 to 7675.9) | 2804.5 (2688.4 to 2935.4)  | 3844.4 (3757.4 to 3933.8)     | 856.7 (801.3 to 911.7)          | 0.0 (0.0 to 0.0)                  |
| Andorra | 2006 | 4090.5 (3994.5 to 4174.6)  | 1549.4 (1481.2 to 1615.6)  | 2076.9 (2027.3 to 2129.2)     | 464.1 (435.4 to 491.9)          | 0.0 (0.0 to 0.0)                  | 7598.1 (7420.0 to 7754.3) | 2878.1 (2751.4 to 3001.1)  | 3857.9 (3765.8 to 3955.0)     | 862.2 (808.7 to 913.8)          | 0.0 (0.0 to 0.0)                  |
| Andorra | 2007 | 4027.5 (3932.4 to 4112.5)  | 1576.7 (1506.9 to 1647.9)  | 2003.2 (1954.8 to 2054.1)     | 447.6 (419.7 to 475.8)          | 0.0 (0.0 to 0.0)                  | 7481.1 (7304.5 to 7639.0) | 2928.7 (2799.1 to 3061.0)  | 3720.9 (3631.1 to 3815.5)     | 831.5 (779.5 to 883.9)          | 0.0 (0.0 to 0.0)                  |
| Andorra | 2008 | 3781.2 (3694.1 to 3859.5)  | 1546.3 (1478.7 to 1613.2)  | 1830.3 (1782.2 to 1877.4)     | 404.6 (376.7 to 431.8)          | 0.0 (0.0 to 0.0)                  | 7023.6 (6861.9 to 7169.1) | 2872.3 (2746.7 to 2996.6)  | 3399.8 (3310.4 to 3487.3)     | 751.5 (699.8 to 802.1)          | 0.0 (0.0 to 0.0)                  |
| Andorra | 2009 | 3741.7 (3656.2 to 3824.1)  | 1612.3 (1545.3 to 1679.3)  | 1744.1 (1700.9 to 1791.3)     | 385.3 (359.0 to 412.3)          | 0.0 (0.0 to 0.0)                  | 6950.3 (6791.5 to 7103.4) | 2994.9 (2870.5 to 3119.3)  | 3239.6 (3159.5 to 3327.4)     | 715.8 (666.9 to 765.8)          | 0.0 (0.0 to 0.0)                  |
| Andorra | 2010 | 3746.9 (3664.8 to 3829.6)  | 1672.1 (1606.4 to 1738.4)  | 1699.1 (1654.3 to 1744.3)     | 375.7 (349.9 to 404.6)          | 0.0 (0.0 to 0.0)                  | 6960.0 (6807.4 to 7113.6) | 3106.0 (2984.0 to 3229.2)  | 3156.0 (3072.8 to 3240.1)     | 697.9 (650.0 to 751.5)          | 0.0 (0.0 to 0.0)                  |
| Andorra | 2011 | 3859.3 (3772.5 to 3948.0)  | 1758.0 (1689.8 to 1829.8)  | 1719.7 (1676.1 to 1766.2)     | 381.6 (355.2 to 408.7)          | 0.0 (0.0 to 0.0)                  | 7168.7 (7007.5 to 7333.6) | 3265.5 (3138.8 to 3399.0)  | 3194.4 (3113.3 to 3280.7)     | 708.8 (659.8 to 759.2)          | 0.0 (0.0 to 0.0)                  |
| Andorra | 2012 | 4012.2 (3926.4 to 4097.9)  | 1858.0 (1790.6 to 1923.6)  | 1764.8 (1720.1 to 1811.0)     | 389.4 (364.1 to 416.7)          | 0.0 (0.0 to 0.0)                  | 7452.8 (7293.3 to 7612.0) | 3451.3 (3326.1 to 3573.1)  | 3278.2 (3195.1 to 3364.0)     | 723.4 (676.3 to 774.0)          | 0.0 (0.0 to 0.0)                  |
| Andorra | 2013 | 4113.1 (4029.3 to 4203.2)  | 1939.5 (1869.5 to 2008.1)  | 1782.4 (1736.6 to 1830.0)     | 391.2 (365.1 to 418.5)          | 0.0 (0.0 to 0.0)                  | 7640.2 (7484.6 to 7807.6) | 3602.7 (3472.6 to 3730.0)  | 3310.9 (3225.7 to 3399.3)     | 726.6 (678.3 to 777.3)          | 0.0 (0.0 to 0.0)                  |
| Andorra | 2014 | 4220.1 (4136.6 to 4315.8)  | 2027.8 (1958.2 to 2100.9)  | 1799.0 (1755.8 to 1847.7)     | 393.3 (365.0 to 421.3)          | 0.0 (0.0 to 0.0)                  | 7839.0 (7683.9 to 8016.8) | 3766.7 (3637.3 to 3902.5)  | 3341.7 (3261.4 to 3432.2)     | 730.5 (678.0 to 782.5)          | 0.0 (0.0 to 0.0)                  |
| Andorra | 2015 | 4263.8 (4168.3 to 4358.8)  | 2076.8 (1998.8 to 2151.3)  | 1792.6 (1744.7 to 1841.7)     | 394.4 (367.2 to 422.4)          | 0.0 (0.0 to 0.0)                  | 7920.1 (7742.7 to 8096.6) | 3857.8 (3712.8 to 3996.1)  | 3329.7 (3240.9 to 3421.0)     | 732.6 (682.1 to 784.6)          | 0.0 (0.0 to 0.0)                  |
| Andorra | 2016 | 4234.2 (4106.9 to 4356.9)  | 2069.9 (1973.1 to 2164.3)  | 1772.9 (1706.1 to 1839.3)     | 391.4 (355.2 to 430.2)          | 0.0 (0.0 to 0.0)                  | 7865.1 (7628.6 to 8093.1) | 3844.9 (3665.0 to 4020.2)  | 3293.2 (3169.0 to 3416.6)     | 727.1 (659.9 to 799.0)          | 0.0 (0.0 to 0.0)                  |
| Andorra | 2017 | 4333.3 (4206.1 to 4466.7)  | 2117.4 (2014.0 to 2224.8)  | 1810.2 (1743.2 to 1878.7)     | 405.8 (368.1 to 446.8)          | 0.0 (0.0 to 0.0)                  | 8049.2 (7812.9 to 8296.9) | 3933.0 (3741.1 to 4132.7)  | 3362.4 (3238.1 to 3489.7)     | 753.7 (683.8 to 830.0)          | 0.0 (0.0 to 0.0)                  |
| Andorra | 2018 | 4353.5 (4223.2 to 4477.9)  | 2124.6 (2022.1 to 2230.9)  | 1817.9 (1751.2 to 1886.0)     | 411.0 (372.3 to 453.1)          | 0.0 (0.0 to 0.0)                  | 8086.6 (7844.7 to 8317.9) | 3946.5 (3756.0 to 4144.0)  | 3376.8 (3253.0 to 3503.4)     | 763.4 (691.5 to 841.7)          | 0.0 (0.0 to 0.0)                  |
| Andorra | 2019 | 4376.0 (4244.8 to 4514.6)  | 2137.1 (2033.0 to 2249.4)  | 1822.9 (1756.4 to 1891.1)     | 416.0 (376.6 to 459.1)          | 0.0 (0.0 to 0.0)                  | 8128.5 (7884.7 to 8386.0) | 3969.7 (3776.4 to 4178.2)  | 3386.1 (3262.6 to 3512.7)     | 772.7 (699.5 to 852.7)          | 0.0 (0.0 to 0.0)                  |
| Andorra | 2020 | 4390.9 (4253.1 to 4526.7)  | 2147.2 (2039.1 to 2263.1)  | 1822.8 (1755.3 to 1894.8)     | 421.0 (382.0 to 464.0)          | 0.0 (0.0 to 0.0)                  | 8156.1 (7900.1 to 8408.4) | 3988.4 (3787.8 to 4203.8)  | 3385.8 (3260.4 to 3519.6)     | 781.9 (709.5 to 861.8)          | 0.0 (0.0 to 0.0)                  |
| Andorra | 2021 | 4408.1 (4269.3 to 4548.4)  | 2158.6 (2049.0 to 2273.9)  | 1823.6 (1755.5 to 1900.1)     | 425.9 (386.5 to 469.4)          | 0.0 (0.0 to 0.0)                  | 8188.1 (7930.3 to 8448.8) | 4009.6 (3806.1 to 4223.9)  | 3387.3 (3260.9 to 3529.5)     | 791.1 (717.9 to 871.9)          | 0.0 (0.0 to 0.0)                  |
| Andorra | 2022 | 4437.3 (4295.9 to 4577.9)  | 2178.4 (2066.2 to 2294.0)  | 1827.6 (1757.6 to 1903.9)     | 431.3 (391.7 to 475.1)          | 0.0 (0.0 to 0.0)                  | 8242.5 (7979.7 to 8503.5) | 4046.4 (3838.1 to 4261.2)  | 3394.8 (3264.9 to 3536.6)     | 801.2 (727.6 to 882.5)          | 0.0 (0.0 to 0.0)                  |



| Country | Year | 2018 US Dollars per capita |                            |                               |                                 |                                   | 2018 PPP per capita        |                            |                               |                                 |                                   |
|---------|------|----------------------------|----------------------------|-------------------------------|---------------------------------|-----------------------------------|----------------------------|----------------------------|-------------------------------|---------------------------------|-----------------------------------|
|         |      | Health spending            | Government health spending | Out-of-pocket health spending | Prepaid private health spending | Development assistance for health | Health spending            | Government health spending | Out-of-pocket health spending | Prepaid private health spending | Development assistance for health |
| Andorra | 2023 | 4486.4 (4345.0 to 4638.5)  | 2214.8 (2091.5 to 2335.7)  | 1834.5 (1762.4 to 1909.4)     | 437.1 (396.8 to 481.7)          | 0.0 (0.0 to 0.0)                  | 8333.6 (8070.9 to 8616.1)  | 4114.1 (3885.0 to 4338.6)  | 3407.6 (3273.7 to 3546.7)     | 811.9 (737.0 to 894.8)          | 0.0 (0.0 to 0.0)                  |
| Andorra | 2024 | 4508.6 (4352.2 to 4657.0)  | 2237.5 (2108.6 to 2363.6)  | 1830.8 (1756.3 to 1907.5)     | 440.3 (399.7 to 485.6)          | 0.0 (0.0 to 0.0)                  | 8374.9 (8084.3 to 8650.5)  | 4156.2 (3916.8 to 4390.5)  | 3400.8 (3262.4 to 3543.2)     | 817.9 (742.5 to 901.9)          | 0.0 (0.0 to 0.0)                  |
| Andorra | 2025 | 4531.1 (4384.5 to 4693.3)  | 2260.0 (2133.5 to 2395.6)  | 1827.6 (1753.1 to 1904.4)     | 443.5 (402.7 to 489.4)          | 0.0 (0.0 to 0.0)                  | 8416.5 (8144.3 to 8718.0)  | 4198.1 (3963.0 to 4449.9)  | 3394.7 (3256.3 to 3537.4)     | 823.7 (748.0 to 909.1)          | 0.0 (0.0 to 0.0)                  |
| Andorra | 2026 | 4552.6 (4386.6 to 4723.1)  | 2282.7 (2150.1 to 2423.6)  | 1823.5 (1744.0 to 1903.2)     | 446.4 (404.9 to 494.0)          | 0.0 (0.0 to 0.0)                  | 8456.6 (8148.2 to 8773.3)  | 4240.2 (3993.8 to 4501.9)  | 3387.2 (3239.4 to 3535.3)     | 829.2 (752.1 to 917.6)          | 0.0 (0.0 to 0.0)                  |
| Andorra | 2027 | 4568.7 (4409.9 to 4752.7)  | 2300.9 (2163.8 to 2450.9)  | 1818.5 (1735.7 to 1901.8)     | 449.3 (406.9 to 498.2)          | 0.0 (0.0 to 0.0)                  | 8486.4 (8191.5 to 8828.3)  | 4274.0 (4019.4 to 4552.6)  | 3377.8 (3224.2 to 3532.7)     | 834.5 (755.9 to 925.4)          | 0.0 (0.0 to 0.0)                  |
| Andorra | 2028 | 4590.0 (4412.4 to 4782.3)  | 2323.9 (2179.7 to 2493.0)  | 1814.0 (1725.6 to 1900.4)     | 452.1 (409.3 to 502.5)          | 0.0 (0.0 to 0.0)                  | 8526.0 (8196.2 to 8883.1)  | 4316.7 (4048.9 to 4630.8)  | 3369.5 (3205.3 to 3530.0)     | 839.9 (760.2 to 933.3)          | 0.0 (0.0 to 0.0)                  |
| Andorra | 2029 | 4608.1 (4434.6 to 4808.3)  | 2345.7 (2192.5 to 2517.3)  | 1807.8 (1713.1 to 1895.4)     | 454.6 (411.6 to 506.7)          | 0.0 (0.0 to 0.0)                  | 8559.7 (8237.4 to 8931.5)  | 4357.2 (4072.7 to 4676.0)  | 3358.1 (3182.1 to 3520.8)     | 844.4 (764.6 to 941.3)          | 0.0 (0.0 to 0.0)                  |
| Andorra | 2030 | 4647.1 (4453.7 to 4851.4)  | 2378.5 (2219.0 to 2557.4)  | 1809.6 (1706.6 to 1901.7)     | 459.0 (415.6 to 511.7)          | 0.0 (0.0 to 0.0)                  | 8632.0 (8272.8 to 9011.7)  | 4418.1 (4121.8 to 4750.4)  | 3361.3 (3170.1 to 3532.4)     | 852.6 (772.0 to 950.4)          | 0.0 (0.0 to 0.0)                  |
| Andorra | 2031 | 4691.0 (4504.7 to 4912.9)  | 2413.7 (2248.1 to 2601.4)  | 1813.3 (1699.3 to 1911.1)     | 464.0 (418.9 to 517.1)          | 0.0 (0.0 to 0.0)                  | 8713.7 (8367.5 to 9125.7)  | 4483.6 (4175.9 to 4832.1)  | 3368.2 (3156.4 to 3550.0)     | 861.9 (778.1 to 960.5)          | 0.0 (0.0 to 0.0)                  |
| Andorra | 2032 | 4734.0 (4511.6 to 4954.7)  | 2447.3 (2266.7 to 2657.7)  | 1817.5 (1696.8 to 1921.2)     | 469.2 (422.5 to 523.3)          | 0.0 (0.0 to 0.0)                  | 8793.5 (8380.5 to 9203.4)  | 4545.9 (4210.5 to 4936.8)  | 3376.1 (3151.8 to 3568.7)     | 871.6 (784.8 to 972.1)          | 0.0 (0.0 to 0.0)                  |
| Andorra | 2033 | 4776.9 (4558.4 to 5016.5)  | 2480.8 (2292.9 to 2680.2)  | 1821.6 (1690.3 to 1932.9)     | 474.5 (426.4 to 531.0)          | 0.0 (0.0 to 0.0)                  | 8873.1 (8467.4 to 9318.2)  | 4608.1 (4259.1 to 4978.5)  | 3383.8 (3139.8 to 3590.4)     | 881.3 (792.0 to 986.3)          | 0.0 (0.0 to 0.0)                  |
| Andorra | 2034 | 4820.3 (4570.2 to 5071.1)  | 2514.6 (2317.5 to 2724.7)  | 1825.9 (1684.5 to 1942.6)     | 479.8 (430.3 to 537.8)          | 0.0 (0.0 to 0.0)                  | 8953.8 (8489.3 to 9419.7)  | 4670.9 (4304.8 to 5061.2)  | 3391.6 (3129.0 to 3608.4)     | 891.2 (799.4 to 998.9)          | 0.0 (0.0 to 0.0)                  |
| Andorra | 2035 | 4861.2 (4619.8 to 5128.6)  | 2547.8 (2334.9 to 2763.6)  | 1828.7 (1677.8 to 1950.5)     | 484.8 (433.9 to 543.9)          | 0.0 (0.0 to 0.0)                  | 9029.9 (8581.3 to 9526.5)  | 4732.5 (4337.1 to 5133.5)  | 3396.8 (3116.5 to 3623.2)     | 900.5 (806.0 to 1010.2)         | 0.0 (0.0 to 0.0)                  |
| Andorra | 2036 | 4909.1 (4624.7 to 5179.4)  | 2585.3 (2372.2 to 2817.5)  | 1833.4 (1674.7 to 1960.2)     | 490.3 (438.0 to 550.3)          | 0.0 (0.0 to 0.0)                  | 9118.7 (8590.5 to 9620.9)  | 4802.3 (4406.4 to 5233.6)  | 3405.7 (3110.9 to 3641.2)     | 910.8 (813.7 to 1022.2)         | 0.0 (0.0 to 0.0)                  |
| Andorra | 2037 | 4949.3 (4694.1 to 5244.8)  | 2618.2 (2395.9 to 2867.8)  | 1835.8 (1670.0 to 1966.2)     | 495.3 (441.4 to 557.2)          | 0.0 (0.0 to 0.0)                  | 9193.5 (8719.4 to 9742.4)  | 4863.4 (4450.5 to 5327.0)  | 3410.0 (3102.0 to 3652.3)     | 920.0 (819.9 to 1035.0)         | 0.0 (0.0 to 0.0)                  |
| Andorra | 2038 | 4989.7 (4679.0 to 5288.0)  | 2651.2 (2411.6 to 2904.2)  | 1838.2 (1665.7 to 1971.8)     | 500.3 (445.2 to 562.8)          | 0.0 (0.0 to 0.0)                  | 9268.5 (8691.4 to 9822.7)  | 4924.7 (4479.6 to 5394.7)  | 3414.4 (3094.0 to 3662.7)     | 929.4 (827.0 to 1045.5)         | 0.0 (0.0 to 0.0)                  |
| Andorra | 2039 | 5032.7 (4742.5 to 5351.1)  | 2685.9 (2433.1 to 2960.2)  | 1841.2 (1662.6 to 1980.4)     | 505.6 (449.0 to 569.3)          | 0.0 (0.0 to 0.0)                  | 9348.4 (8809.2 to 9939.7)  | 4989.1 (4519.6 to 5498.7)  | 3420.1 (3088.3 to 3678.7)     | 939.2 (834.1 to 1057.4)         | 0.0 (0.0 to 0.0)                  |
| Andorra | 2040 | 5071.6 (4742.9 to 5390.8)  | 2718.4 (2462.9 to 3001.4)  | 1842.7 (1658.6 to 1985.9)     | 510.5 (452.3 to 575.6)          | 0.0 (0.0 to 0.0)                  | 9420.6 (8810.0 to 10013.6) | 5049.4 (4574.9 to 5575.2)  | 3422.9 (3080.9 to 3688.8)     | 948.3 (840.1 to 1069.3)         | 0.0 (0.0 to 0.0)                  |
| Andorra | 2041 | 5112.0 (4788.5 to 5466.9)  | 2751.7 (2478.2 to 3047.7)  | 1844.7 (1656.5 to 1990.5)     | 515.6 (455.2 to 582.9)          | 0.0 (0.0 to 0.0)                  | 9495.7 (8894.7 to 10154.9) | 5111.4 (4603.2 to 5661.1)  | 3426.6 (3076.9 to 3697.5)     | 957.7 (845.6 to 1082.7)         | 0.0 (0.0 to 0.0)                  |
| Andorra | 2042 | 5146.2 (4796.0 to 5489.9)  | 2779.9 (2488.4 to 3101.8)  | 1845.8 (1653.8 to 1994.5)     | 520.5 (457.9 to 590.5)          | 0.0 (0.0 to 0.0)                  | 9559.2 (8908.7 to 10197.6) | 5163.8 (4622.3 to 5761.6)  | 3428.6 (3072.0 to 3704.8)     | 966.9 (850.6 to 1096.8)         | 0.0 (0.0 to 0.0)                  |
| Andorra | 2043 | 5185.5 (4832.0 to 5564.4)  | 2810.6 (2508.7 to 3146.3)  | 1848.8 (1653.2 to 1998.9)     | 526.1 (462.5 to 598.2)          | 0.0 (0.0 to 0.0)                  | 9632.2 (8975.6 to 10336.0) | 5220.8 (4660.0 to 5844.3)  | 3434.2 (3070.9 to 3713.1)     | 977.2 (859.1 to 1111.1)         | 0.0 (0.0 to 0.0)                  |

| Country | Year | 2018 US Dollars per capita |                            |                               |                                 |                                   | 2018 PPP per capita         |                            |                               |                                 |                                   |
|---------|------|----------------------------|----------------------------|-------------------------------|---------------------------------|-----------------------------------|-----------------------------|----------------------------|-------------------------------|---------------------------------|-----------------------------------|
|         |      | Health spending            | Government health spending | Out-of-pocket health spending | Prepaid private health spending | Development assistance for health | Health spending             | Government health spending | Out-of-pocket health spending | Prepaid private health spending | Development assistance for health |
| Andorra | 2044 | 5225.9 (4858.1 to 5615.9)  | 2842.2 (2536.5 to 3176.8)  | 1851.9 (1653.1 to 2001.2)     | 531.7 (466.3 to 607.0)          | 0.0 (0.0 to 0.0)                  | 9707.2 (9024.1 to 10431.6)  | 5279.4 (4711.5 to 5900.9)  | 3440.0 (3070.7 to 3717.2)     | 987.7 (866.2 to 1127.5)         | 0.0 (0.0 to 0.0)                  |
| Andorra | 2045 | 5262.6 (4883.4 to 5664.7)  | 2871.0 (2547.2 to 3216.4)  | 1854.4 (1652.0 to 2002.3)     | 537.3 (469.9 to 615.8)          | 0.0 (0.0 to 0.0)                  | 9775.5 (9071.1 to 10522.4)  | 5332.9 (4731.5 to 5974.5)  | 3444.6 (3068.7 to 3719.4)     | 998.0 (872.9 to 1143.8)         | 0.0 (0.0 to 0.0)                  |
| Andorra | 2046 | 5303.1 (4914.7 to 5701.8)  | 2902.2 (2563.8 to 3275.5)  | 1857.8 (1651.8 to 2010.9)     | 543.1 (473.8 to 624.0)          | 0.0 (0.0 to 0.0)                  | 9850.7 (9129.2 to 10591.1)  | 5390.9 (4762.3 to 6084.3)  | 3450.9 (3068.3 to 3735.3)     | 1008.9 (880.2 to 1159.0)        | 0.0 (0.0 to 0.0)                  |
| Andorra | 2047 | 5343.4 (4945.0 to 5763.9)  | 2931.6 (2580.1 to 3313.1)  | 1862.4 (1652.2 to 2019.0)     | 549.5 (478.2 to 632.7)          | 0.0 (0.0 to 0.0)                  | 9925.5 (9185.5 to 10706.6)  | 5445.4 (4792.6 to 6154.2)  | 3459.4 (3069.1 to 3750.3)     | 1020.7 (888.2 to 1175.3)        | 0.0 (0.0 to 0.0)                  |
| Andorra | 2048 | 5381.3 (4958.0 to 5812.8)  | 2959.5 (2594.5 to 3354.0)  | 1866.1 (1651.9 to 2022.9)     | 555.7 (482.5 to 641.3)          | 0.0 (0.0 to 0.0)                  | 9995.8 (9209.6 to 10797.5)  | 5497.4 (4819.3 to 6230.2)  | 3466.3 (3068.4 to 3757.5)     | 1032.2 (896.3 to 1191.3)        | 0.0 (0.0 to 0.0)                  |
| Andorra | 2049 | 5419.6 (5022.6 to 5851.9)  | 2987.1 (2613.8 to 3390.1)  | 1870.4 (1653.1 to 2029.4)     | 562.1 (486.8 to 649.7)          | 0.0 (0.0 to 0.0)                  | 10067.0 (9329.5 to 10870.0) | 5548.5 (4855.2 to 6297.2)  | 3474.3 (3070.7 to 3769.7)     | 1044.2 (904.3 to 1206.8)        | 0.0 (0.0 to 0.0)                  |
| Andorra | 2050 | 5463.4 (5006.0 to 5931.2)  | 3017.5 (2635.2 to 3422.5)  | 1876.6 (1656.0 to 2039.3)     | 569.2 (491.5 to 659.7)          | 0.0 (0.0 to 0.0)                  | 10148.3 (9298.7 to 11017.3) | 5605.2 (4895.0 to 6357.3)  | 3485.8 (3076.1 to 3788.1)     | 1057.3 (912.9 to 1225.4)        | 0.0 (0.0 to 0.0)                  |
| Angola  | 1995 | 124.1 (103.1 to 148.7)     | 53.7 (42.9 to 67.2)        | 40.4 (30.2 to 53.7)           | 26.3 (14.8 to 43.5)             | 3.7 (3.7 to 3.7)                  | 206.3 (171.5 to 247.3)      | 89.3 (71.3 to 111.8)       | 67.2 (50.2 to 89.3)           | 43.7 (24.6 to 72.3)             | 6.1 (6.1 to 6.1)                  |
| Angola  | 1996 | 95.6 (80.9 to 112.2)       | 44.0 (35.3 to 54.6)        | 26.5 (19.7 to 35.3)           | 17.9 (10.2 to 29.5)             | 7.1 (7.1 to 7.1)                  | 158.9 (134.5 to 186.5)      | 73.3 (58.7 to 90.8)        | 44.0 (32.7 to 58.7)           | 29.8 (16.9 to 49.0)             | 11.9 (11.9 to 11.9)               |
| Angola  | 1997 | 84.2 (70.8 to 98.8)        | 40.6 (32.8 to 50.4)        | 25.7 (18.9 to 33.8)           | 14.5 (8.1 to 23.5)              | 3.5 (3.5 to 3.5)                  | 140.0 (117.7 to 164.3)      | 67.5 (54.5 to 83.8)        | 42.7 (31.5 to 56.2)           | 24.1 (13.5 to 39.1)             | 5.7 (5.7 to 5.7)                  |
| Angola  | 1998 | 81.9 (69.0 to 95.6)        | 39.8 (31.9 to 49.1)        | 27.1 (20.1 to 35.3)           | 13.0 (7.4 to 21.0)              | 2.0 (2.0 to 2.0)                  | 136.2 (114.7 to 159.1)      | 66.1 (53.0 to 81.6)        | 45.1 (33.4 to 58.8)           | 21.6 (12.3 to 34.9)             | 3.3 (3.3 to 3.3)                  |
| Angola  | 1999 | 82.0 (69.2 to 96.2)        | 41.5 (33.5 to 51.3)        | 26.3 (19.6 to 34.0)           | 12.0 (6.8 to 20.0)              | 2.3 (2.3 to 2.3)                  | 136.4 (115.1 to 159.9)      | 69.0 (55.7 to 85.3)        | 43.7 (32.5 to 56.5)           | 19.9 (11.2 to 33.2)             | 3.8 (3.8 to 3.8)                  |
| Angola  | 2000 | 82.2 (69.7 to 96.0)        | 40.8 (33.0 to 50.3)        | 28.7 (21.4 to 36.8)           | 10.4 (5.7 to 17.0)              | 2.3 (2.3 to 2.3)                  | 136.7 (115.9 to 159.7)      | 67.9 (54.9 to 83.7)        | 47.6 (35.7 to 61.3)           | 17.3 (9.5 to 28.2)              | 3.9 (3.9 to 3.9)                  |
| Angola  | 2001 | 102.3 (87.0 to 119.5)      | 46.2 (37.8 to 56.9)        | 42.2 (32.2 to 54.8)           | 11.1 (6.1 to 18.2)              | 2.8 (2.8 to 2.8)                  | 170.2 (144.6 to 198.7)      | 76.9 (62.9 to 94.6)        | 70.2 (53.5 to 91.1)           | 18.4 (10.2 to 30.3)             | 4.7 (4.7 to 4.7)                  |
| Angola  | 2002 | 101.2 (86.7 to 118.3)      | 43.4 (35.0 to 53.3)        | 45.4 (34.7 to 59.4)           | 10.0 (5.4 to 16.4)              | 2.4 (2.4 to 2.4)                  | 168.3 (144.2 to 196.7)      | 72.2 (58.2 to 88.6)        | 75.5 (57.6 to 98.9)           | 16.6 (9.0 to 27.3)              | 4.0 (4.0 to 4.0)                  |
| Angola  | 2003 | 102.5 (87.3 to 119.5)      | 43.3 (35.5 to 52.6)        | 46.9 (35.9 to 61.2)           | 9.7 (5.3 to 15.6)               | 2.6 (2.6 to 2.6)                  | 170.4 (145.2 to 198.8)      | 72.1 (59.0 to 87.5)        | 78.0 (59.8 to 101.7)          | 16.1 (8.8 to 26.0)              | 4.3 (4.3 to 4.3)                  |
| Angola  | 2004 | 106.9 (90.9 to 124.6)      | 46.8 (38.2 to 57.0)        | 47.0 (35.9 to 61.0)           | 10.1 (5.5 to 16.6)              | 3.1 (3.1 to 3.1)                  | 177.8 (151.2 to 207.2)      | 77.8 (63.6 to 94.8)        | 78.1 (59.6 to 101.4)          | 16.8 (9.1 to 27.5)              | 5.2 (5.2 to 5.2)                  |
| Angola  | 2005 | 112.2 (96.1 to 130.1)      | 51.6 (42.4 to 62.4)        | 42.9 (32.5 to 55.4)           | 10.6 (5.8 to 17.8)              | 7.1 (7.1 to 7.1)                  | 186.6 (159.8 to 216.3)      | 85.8 (70.5 to 103.8)       | 71.3 (54.1 to 92.2)           | 17.7 (9.7 to 29.7)              | 11.8 (11.8 to 11.8)               |
| Angola  | 2006 | 115.0 (98.4 to 133.4)      | 61.1 (50.4 to 73.7)        | 38.5 (29.0 to 49.9)           | 12.0 (6.5 to 20.0)              | 3.5 (3.5 to 3.5)                  | 191.3 (163.6 to 221.9)      | 101.5 (83.9 to 122.5)      | 64.0 (48.2 to 83.0)           | 20.0 (10.7 to 33.3)             | 5.8 (5.8 to 5.8)                  |
| Angola  | 2007 | 126.6 (109.0 to 147.1)     | 72.2 (59.5 to 86.8)        | 35.9 (26.8 to 46.5)           | 14.4 (8.1 to 23.7)              | 4.1 (4.1 to 4.1)                  | 210.5 (181.2 to 244.6)      | 120.1 (99.0 to 144.4)      | 59.7 (44.6 to 77.4)           | 23.9 (13.5 to 39.4)             | 6.9 (6.9 to 6.9)                  |
| Angola  | 2008 | 140.3 (120.7 to 163.1)     | 84.5 (69.9 to 101.0)       | 32.9 (24.6 to 42.6)           | 17.4 (9.5 to 29.1)              | 5.4 (5.4 to 5.4)                  | 233.3 (200.8 to 271.3)      | 140.6 (116.3 to 167.9)     | 54.7 (40.8 to 70.8)           | 29.0 (15.8 to 48.3)             | 9.0 (9.0 to 9.0)                  |

| Country | Year | 2018 US Dollars per capita |                            |                               |                                 |                                   | 2018 PPP per capita    |                            |                               |                                 |                                   |
|---------|------|----------------------------|----------------------------|-------------------------------|---------------------------------|-----------------------------------|------------------------|----------------------------|-------------------------------|---------------------------------|-----------------------------------|
|         |      | Health spending            | Government health spending | Out-of-pocket health spending | Prepaid private health spending | Development assistance for health | Health spending        | Government health spending | Out-of-pocket health spending | Prepaid private health spending | Development assistance for health |
| Angola  | 2009 | 131.6 (112.3 to 153.7)     | 81.8 (67.6 to 99.1)        | 27.4 (20.4 to 35.4)           | 18.0 (9.7 to 30.0)              | 4.4 (4.4 to 4.4)                  | 218.8 (186.7 to 255.7) | 136.1 (112.4 to 164.8)     | 45.6 (34.0 to 58.9)           | 29.9 (16.1 to 49.9)             | 7.3 (7.3 to 7.3)                  |
| Angola  | 2010 | 125.5 (107.8 to 146.9)     | 78.5 (64.5 to 94.7)        | 25.0 (18.3 to 32.6)           | 17.8 (9.8 to 29.7)              | 4.3 (4.3 to 4.3)                  | 208.7 (179.3 to 244.3) | 130.5 (107.3 to 157.5)     | 41.6 (30.5 to 54.2)           | 29.5 (16.3 to 49.5)             | 7.1 (7.1 to 7.1)                  |
| Angola  | 2011 | 124.0 (106.3 to 145.8)     | 78.3 (65.0 to 94.5)        | 24.4 (17.9 to 32.0)           | 18.1 (10.2 to 30.0)             | 3.2 (3.2 to 3.2)                  | 206.2 (176.8 to 242.4) | 130.2 (108.1 to 157.1)     | 40.6 (29.8 to 53.2)           | 30.1 (16.9 to 49.9)             | 5.3 (5.3 to 5.3)                  |
| Angola  | 2012 | 122.5 (105.1 to 143.0)     | 75.0 (62.0 to 90.3)        | 24.7 (18.2 to 32.9)           | 18.1 (10.1 to 30.5)             | 4.8 (4.8 to 4.8)                  | 203.7 (174.8 to 237.7) | 124.7 (103.2 to 150.2)     | 41.1 (30.2 to 54.6)           | 30.0 (16.8 to 50.7)             | 7.9 (7.9 to 7.9)                  |
| Angola  | 2013 | 126.4 (108.4 to 148.5)     | 73.7 (60.8 to 88.8)        | 28.3 (20.8 to 37.9)           | 19.0 (10.4 to 32.7)             | 5.3 (5.3 to 5.3)                  | 210.1 (180.3 to 246.9) | 122.5 (101.0 to 147.7)     | 47.1 (34.5 to 63.0)           | 31.7 (17.3 to 54.4)             | 8.9 (8.9 to 8.9)                  |
| Angola  | 2014 | 123.5 (104.8 to 145.5)     | 68.1 (55.9 to 82.3)        | 32.2 (23.7 to 43.0)           | 19.5 (10.7 to 33.3)             | 3.6 (3.6 to 3.6)                  | 205.4 (174.4 to 241.9) | 113.3 (92.9 to 136.9)      | 53.6 (39.3 to 71.5)           | 32.4 (17.7 to 55.4)             | 6.1 (6.1 to 6.1)                  |
| Angola  | 2015 | 123.5 (103.8 to 145.9)     | 63.0 (50.7 to 76.3)        | 36.6 (26.7 to 49.0)           | 20.0 (10.5 to 34.0)             | 3.9 (3.9 to 3.9)                  | 205.5 (172.5 to 242.6) | 104.8 (84.3 to 127.0)      | 60.9 (44.3 to 81.4)           | 33.2 (17.4 to 56.6)             | 6.5 (6.5 to 6.5)                  |
| Angola  | 2016 | 120.8 (100.4 to 142.5)     | 58.3 (46.7 to 71.2)        | 38.3 (27.6 to 52.0)           | 19.9 (10.3 to 34.0)             | 4.3 (4.3 to 4.3)                  | 201.0 (167.0 to 237.0) | 96.9 (77.6 to 118.4)       | 63.8 (46.0 to 86.5)           | 33.1 (17.1 to 56.5)             | 7.2 (7.2 to 7.2)                  |
| Angola  | 2017 | 117.5 (97.6 to 138.5)      | 55.5 (44.5 to 67.8)        | 38.4 (27.9 to 52.5)           | 19.3 (10.0 to 32.9)             | 4.3 (4.3 to 4.3)                  | 195.4 (162.3 to 230.4) | 92.3 (74.1 to 112.8)       | 63.9 (46.3 to 87.4)           | 32.1 (16.6 to 54.7)             | 7.1 (7.1 to 7.1)                  |
| Angola  | 2018 | 118.4 (98.5 to 139.7)      | 55.9 (44.9 to 68.2)        | 39.0 (28.2 to 53.2)           | 19.5 (10.1 to 33.2)             | 4.0 (4.0 to 4.0)                  | 196.9 (163.8 to 232.3) | 93.0 (74.7 to 113.4)       | 64.9 (46.8 to 88.4)           | 32.4 (16.8 to 55.3)             | 6.6 (6.6 to 6.6)                  |
| Angola  | 2019 | 119.6 (99.5 to 141.0)      | 56.3 (45.2 to 69.0)        | 39.6 (28.7 to 54.1)           | 19.7 (10.2 to 33.5)             | 3.9 (3.7 to 4.2)                  | 198.9 (165.4 to 234.5) | 93.7 (75.1 to 114.7)       | 65.9 (47.7 to 90.0)           | 32.7 (16.9 to 55.7)             | 6.6 (6.1 to 6.9)                  |
| Angola  | 2020 | 120.9 (100.2 to 142.8)     | 56.8 (45.7 to 69.5)        | 40.3 (29.2 to 55.1)           | 19.9 (10.3 to 33.8)             | 3.9 (3.6 to 4.2)                  | 201.0 (166.6 to 237.5) | 94.5 (75.9 to 115.6)       | 67.0 (48.5 to 91.6)           | 33.0 (17.1 to 56.1)             | 6.5 (6.0 to 7.1)                  |
| Angola  | 2021 | 122.3 (101.1 to 144.3)     | 57.4 (46.0 to 70.3)        | 40.9 (29.6 to 56.1)           | 20.1 (10.4 to 34.1)             | 3.9 (3.5 to 4.4)                  | 203.4 (168.2 to 239.9) | 95.4 (76.5 to 116.9)       | 68.1 (49.2 to 93.4)           | 33.4 (17.3 to 56.8)             | 6.5 (5.9 to 7.2)                  |
| Angola  | 2022 | 124.2 (102.8 to 147.1)     | 58.2 (46.7 to 71.7)        | 41.7 (30.1 to 57.3)           | 20.3 (10.6 to 34.7)             | 4.0 (3.5 to 4.4)                  | 206.5 (170.9 to 244.6) | 96.8 (77.6 to 119.2)       | 69.3 (50.1 to 95.3)           | 33.8 (17.6 to 57.7)             | 6.6 (5.8 to 7.3)                  |
| Angola  | 2023 | 127.3 (105.6 to 150.8)     | 60.2 (48.3 to 74.0)        | 42.5 (30.8 to 58.5)           | 20.6 (10.7 to 35.1)             | 4.0 (3.5 to 4.5)                  | 211.6 (175.6 to 250.8) | 100.0 (80.3 to 123.1)      | 70.7 (51.2 to 97.2)           | 34.3 (17.8 to 58.4)             | 6.6 (5.8 to 7.5)                  |
| Angola  | 2024 | 130.2 (108.3 to 154.7)     | 61.9 (49.5 to 76.2)        | 43.4 (31.4 to 59.4)           | 20.9 (10.9 to 35.8)             | 4.0 (3.5 to 4.6)                  | 216.4 (180.1 to 257.3) | 102.9 (82.3 to 126.7)      | 72.1 (52.2 to 98.7)           | 34.8 (18.1 to 59.5)             | 6.7 (5.7 to 7.7)                  |
| Angola  | 2025 | 131.8 (109.6 to 156.7)     | 62.4 (49.9 to 77.0)        | 44.2 (32.0 to 60.6)           | 21.2 (11.1 to 36.4)             | 4.0 (3.4 to 4.7)                  | 219.1 (182.2 to 260.6) | 103.7 (82.9 to 128.0)      | 73.4 (53.3 to 100.8)          | 35.2 (18.4 to 60.5)             | 6.7 (5.7 to 7.8)                  |
| Angola  | 2026 | 133.4 (110.9 to 158.5)     | 62.9 (50.3 to 77.7)        | 45.0 (32.7 to 61.9)           | 21.5 (11.2 to 37.0)             | 4.0 (3.4 to 4.7)                  | 221.9 (184.3 to 263.6) | 104.7 (83.7 to 129.1)      | 74.8 (54.4 to 103.0)          | 35.7 (18.7 to 61.5)             | 6.7 (5.7 to 7.9)                  |
| Angola  | 2027 | 135.8 (113.3 to 161.5)     | 64.1 (51.2 to 78.9)        | 45.9 (33.3 to 63.6)           | 21.8 (11.4 to 37.4)             | 4.1 (3.4 to 4.8)                  | 225.8 (188.5 to 268.6) | 106.6 (85.2 to 131.3)      | 76.3 (55.5 to 105.7)          | 36.3 (18.9 to 62.3)             | 6.8 (5.7 to 8.0)                  |
| Angola  | 2028 | 138.5 (115.7 to 165.8)     | 65.5 (52.4 to 80.8)        | 46.8 (33.8 to 65.1)           | 22.1 (11.6 to 37.9)             | 4.1 (3.4 to 4.9)                  | 230.4 (192.4 to 275.7) | 109.0 (87.1 to 134.3)      | 77.8 (56.2 to 108.3)          | 36.8 (19.2 to 63.0)             | 6.8 (5.7 to 8.2)                  |
| Angola  | 2029 | 140.1 (116.9 to 168.0)     | 65.9 (52.7 to 81.1)        | 47.6 (34.3 to 66.2)           | 22.5 (11.7 to 38.4)             | 4.1 (3.4 to 5.0)                  | 233.0 (194.4 to 279.3) | 109.6 (87.6 to 134.9)      | 79.2 (57.0 to 110.2)          | 37.4 (19.5 to 63.8)             | 6.9 (5.7 to 8.4)                  |

| Country | Year | 2018 US Dollars per capita |                            |                               |                                 |                                   | 2018 PPP per capita    |                            |                               |                                 |                                   |
|---------|------|----------------------------|----------------------------|-------------------------------|---------------------------------|-----------------------------------|------------------------|----------------------------|-------------------------------|---------------------------------|-----------------------------------|
|         |      | Health spending            | Government health spending | Out-of-pocket health spending | Prepaid private health spending | Development assistance for health | Health spending        | Government health spending | Out-of-pocket health spending | Prepaid private health spending | Development assistance for health |
| Angola  | 2030 | 142.1 (117.8 to 170.2)     | 66.7 (52.9 to 82.2)        | 48.5 (34.7 to 67.3)           | 22.8 (11.9 to 39.0)             | 4.2 (3.4 to 5.1)                  | 236.3 (195.8 to 283.0) | 110.9 (88.0 to 136.8)      | 80.6 (57.7 to 111.8)          | 37.9 (19.8 to 64.9)             | 6.9 (5.7 to 8.5)                  |
| Angola  | 2031 | 143.6 (119.3 to 172.5)     | 67.0 (53.1 to 83.3)        | 49.3 (35.0 to 68.3)           | 23.1 (12.1 to 39.7)             | 4.2 (3.4 to 5.3)                  | 238.8 (198.4 to 286.8) | 111.4 (88.4 to 138.5)      | 81.9 (58.2 to 113.6)          | 38.5 (20.1 to 66.1)             | 7.0 (5.6 to 8.7)                  |
| Angola  | 2032 | 145.0 (120.1 to 173.6)     | 67.2 (53.2 to 83.5)        | 50.1 (35.4 to 69.8)           | 23.5 (12.3 to 40.3)             | 4.2 (3.4 to 5.3)                  | 241.2 (199.8 to 288.7) | 111.8 (88.5 to 138.8)      | 83.3 (58.8 to 116.1)          | 39.0 (20.4 to 67.1)             | 7.0 (5.6 to 8.8)                  |
| Angola  | 2033 | 146.6 (121.2 to 174.6)     | 67.6 (53.6 to 83.9)        | 50.9 (35.7 to 71.4)           | 23.8 (12.4 to 40.9)             | 4.3 (3.4 to 5.5)                  | 243.8 (201.5 to 290.3) | 112.4 (89.1 to 139.6)      | 84.6 (59.3 to 118.8)          | 39.6 (20.7 to 68.0)             | 7.1 (5.6 to 9.1)                  |
| Angola  | 2034 | 148.3 (122.6 to 178.1)     | 68.1 (54.0 to 84.6)        | 51.7 (36.0 to 72.7)           | 24.2 (12.6 to 41.5)             | 4.3 (3.4 to 5.6)                  | 246.6 (203.9 to 296.1) | 113.2 (89.7 to 140.7)      | 86.0 (59.8 to 120.9)          | 40.2 (21.0 to 69.0)             | 7.2 (5.7 to 9.3)                  |
| Angola  | 2035 | 150.1 (123.3 to 180.8)     | 68.6 (54.2 to 85.0)        | 52.6 (36.3 to 74.1)           | 24.5 (12.8 to 42.1)             | 4.4 (3.4 to 5.7)                  | 249.5 (205.0 to 300.6) | 114.0 (90.2 to 141.4)      | 87.4 (60.4 to 123.2)          | 40.8 (21.3 to 70.0)             | 7.3 (5.7 to 9.5)                  |
| Angola  | 2036 | 151.7 (124.2 to 182.1)     | 69.0 (54.3 to 85.9)        | 53.4 (36.7 to 75.5)           | 24.9 (13.0 to 42.7)             | 4.4 (3.4 to 5.9)                  | 252.2 (206.5 to 302.8) | 114.7 (90.4 to 142.9)      | 88.7 (61.0 to 125.5)          | 41.4 (21.6 to 71.0)             | 7.4 (5.7 to 9.9)                  |
| Angola  | 2037 | 153.2 (125.9 to 183.9)     | 69.3 (54.6 to 86.4)        | 54.2 (37.1 to 77.0)           | 25.3 (13.2 to 43.3)             | 4.5 (3.4 to 6.0)                  | 254.8 (209.3 to 305.9) | 115.2 (90.8 to 143.7)      | 90.1 (61.7 to 128.0)          | 42.1 (21.9 to 72.0)             | 7.4 (5.7 to 10.0)                 |
| Angola  | 2038 | 154.6 (126.5 to 185.6)     | 69.5 (54.5 to 86.8)        | 54.9 (37.4 to 78.5)           | 25.7 (13.4 to 43.9)             | 4.5 (3.5 to 6.3)                  | 257.1 (210.3 to 308.6) | 115.6 (90.6 to 144.3)      | 91.4 (62.2 to 130.5)          | 42.7 (22.3 to 73.0)             | 7.5 (5.7 to 10.4)                 |
| Angola  | 2039 | 156.4 (128.2 to 188.4)     | 70.0 (54.8 to 87.6)        | 55.7 (37.7 to 79.8)           | 26.0 (13.6 to 44.6)             | 4.6 (3.5 to 6.4)                  | 260.0 (213.2 to 313.3) | 116.4 (91.2 to 145.7)      | 92.7 (62.8 to 132.7)          | 43.3 (22.6 to 74.2)             | 7.6 (5.8 to 10.6)                 |
| Angola  | 2040 | 158.0 (128.9 to 191.3)     | 70.4 (55.0 to 88.3)        | 56.5 (38.1 to 81.0)           | 26.4 (13.8 to 45.3)             | 4.7 (3.5 to 6.4)                  | 262.7 (214.3 to 318.1) | 117.0 (91.5 to 146.9)      | 94.0 (63.4 to 134.7)          | 43.9 (22.9 to 75.3)             | 7.7 (5.9 to 10.7)                 |
| Angola  | 2041 | 159.5 (131.0 to 193.1)     | 70.7 (54.9 to 88.8)        | 57.3 (38.6 to 82.2)           | 26.8 (14.0 to 46.0)             | 4.7 (3.6 to 6.6)                  | 265.3 (217.9 to 321.1) | 117.6 (91.4 to 147.6)      | 95.3 (64.1 to 136.7)          | 44.6 (23.2 to 76.5)             | 7.9 (5.9 to 10.9)                 |
| Angola  | 2042 | 161.0 (132.6 to 194.1)     | 71.0 (55.2 to 89.6)        | 58.0 (38.9 to 83.3)           | 27.2 (14.1 to 46.6)             | 4.8 (3.6 to 6.9)                  | 267.7 (220.5 to 322.8) | 118.1 (91.7 to 148.9)      | 96.5 (64.7 to 138.6)          | 45.2 (23.5 to 77.6)             | 8.0 (6.0 to 11.4)                 |
| Angola  | 2043 | 162.8 (133.3 to 196.9)     | 71.5 (55.6 to 90.4)        | 58.8 (39.2 to 84.8)           | 27.6 (14.3 to 47.3)             | 4.9 (3.6 to 7.1)                  | 270.7 (221.6 to 327.4) | 119.0 (92.4 to 150.4)      | 97.8 (65.2 to 141.0)          | 45.8 (23.8 to 78.6)             | 8.1 (6.0 to 11.7)                 |
| Angola  | 2044 | 164.5 (133.8 to 200.1)     | 72.1 (55.7 to 90.9)        | 59.6 (39.7 to 86.1)           | 27.9 (14.4 to 47.9)             | 5.0 (3.7 to 7.2)                  | 273.6 (222.6 to 332.7) | 119.8 (92.7 to 151.1)      | 99.0 (66.0 to 143.2)          | 46.5 (24.0 to 79.7)             | 8.3 (6.1 to 11.9)                 |
| Angola  | 2045 | 166.3 (135.6 to 202.6)     | 72.5 (56.0 to 91.9)        | 60.3 (40.1 to 87.1)           | 28.4 (14.6 to 48.6)             | 5.1 (3.6 to 7.6)                  | 276.5 (225.6 to 336.9) | 120.6 (93.2 to 152.9)      | 100.3 (66.8 to 144.9)         | 47.2 (24.3 to 80.9)             | 8.4 (6.1 to 12.7)                 |
| Angola  | 2046 | 168.0 (136.8 to 203.9)     | 73.0 (56.3 to 92.6)        | 61.0 (40.6 to 88.0)           | 28.8 (14.8 to 49.3)             | 5.1 (3.7 to 7.9)                  | 279.3 (227.5 to 339.1) | 121.4 (93.6 to 154.0)      | 101.5 (67.5 to 146.4)         | 47.9 (24.6 to 82.0)             | 8.5 (6.2 to 13.1)                 |
| Angola  | 2047 | 170.2 (139.0 to 207.6)     | 73.9 (56.9 to 94.0)        | 61.8 (41.2 to 89.2)           | 29.2 (15.1 to 50.1)             | 5.2 (3.8 to 8.3)                  | 283.1 (231.1 to 345.3) | 122.9 (94.6 to 156.4)      | 102.8 (68.5 to 148.3)         | 48.6 (25.0 to 83.3)             | 8.7 (6.3 to 13.7)                 |
| Angola  | 2048 | 172.3 (139.7 to 211.0)     | 74.6 (57.6 to 94.9)        | 62.6 (41.8 to 90.4)           | 29.7 (15.3 to 50.9)             | 5.3 (3.8 to 8.5)                  | 286.5 (232.3 to 350.8) | 124.0 (95.8 to 157.9)      | 104.2 (69.5 to 150.4)         | 49.4 (25.4 to 84.6)             | 8.9 (6.4 to 14.2)                 |
| Angola  | 2049 | 174.9 (141.9 to 215.1)     | 75.8 (58.3 to 96.5)        | 63.5 (42.4 to 91.7)           | 30.2 (15.5 to 51.6)             | 5.4 (3.9 to 8.8)                  | 290.8 (236.0 to 357.7) | 126.0 (96.9 to 160.5)      | 105.6 (70.6 to 152.5)         | 50.2 (25.8 to 85.9)             | 9.1 (6.5 to 14.6)                 |
| Angola  | 2050 | 177.3 (143.0 to 216.6)     | 76.7 (59.1 to 97.8)        | 64.3 (43.0 to 93.0)           | 30.7 (15.7 to 52.5)             | 5.6 (3.9 to 9.1)                  | 294.8 (237.8 to 360.2) | 127.6 (98.3 to 162.6)      | 107.0 (71.5 to 154.7)         | 51.0 (26.1 to 87.3)             | 9.3 (6.5 to 15.2)                 |

| Country             | Year | 2018 US Dollars per capita |                            |                               |                                 |                                   | 2018 PPP per capita       |                            |                               |                                 |                                   |
|---------------------|------|----------------------------|----------------------------|-------------------------------|---------------------------------|-----------------------------------|---------------------------|----------------------------|-------------------------------|---------------------------------|-----------------------------------|
|                     |      | Health spending            | Government health spending | Out-of-pocket health spending | Prepaid private health spending | Development assistance for health | Health spending           | Government health spending | Out-of-pocket health spending | Prepaid private health spending | Development assistance for health |
| Antigua and Barbuda | 1995 | 454.4 (411.2 to 501.4)     | 292.8 (261.2 to 328.9)     | 135.7 (113.5 to 157.7)        | 26.0 (15.2 to 42.3)             | 0.0 (0.0 to 0.0)                  | 737.5 (667.3 to 813.7)    | 475.2 (423.9 to 533.8)     | 220.2 (184.2 to 256.0)        | 42.1 (24.6 to 68.6)             | 0.0 (0.0 to 0.0)                  |
| Antigua and Barbuda | 1996 | 461.1 (422.4 to 501.5)     | 297.0 (269.1 to 328.3)     | 137.9 (117.1 to 158.6)        | 26.0 (15.6 to 40.9)             | 0.1 (0.1 to 0.1)                  | 748.3 (685.5 to 813.8)    | 482.1 (436.8 to 532.9)     | 223.9 (190.1 to 257.4)        | 42.2 (25.4 to 66.4)             | 0.2 (0.2 to 0.2)                  |
| Antigua and Barbuda | 1997 | 469.9 (432.8 to 510.0)     | 307.5 (279.9 to 337.1)     | 136.4 (118.0 to 155.8)        | 25.9 (15.9 to 39.9)             | 0.1 (0.1 to 0.1)                  | 762.6 (702.3 to 827.6)    | 499.0 (454.3 to 547.1)     | 221.4 (191.6 to 252.9)        | 42.0 (25.9 to 64.8)             | 0.2 (0.2 to 0.2)                  |
| Antigua and Barbuda | 1998 | 492.8 (456.8 to 531.0)     | 316.1 (288.9 to 345.4)     | 133.5 (116.1 to 152.0)        | 25.7 (16.7 to 37.8)             | 17.5 (17.5 to 17.5)               | 799.8 (741.3 to 861.7)    | 513.0 (468.8 to 560.5)     | 216.7 (188.4 to 246.6)        | 41.7 (27.0 to 61.3)             | 28.4 (28.4 to 28.4)               |
| Antigua and Barbuda | 1999 | 510.7 (476.4 to 546.7)     | 325.1 (295.7 to 353.3)     | 133.5 (116.4 to 151.3)        | 26.9 (17.9 to 38.3)             | 25.2 (25.2 to 25.2)               | 828.8 (773.2 to 887.3)    | 527.6 (479.9 to 573.3)     | 216.7 (188.9 to 245.6)        | 43.6 (29.1 to 62.2)             | 40.9 (40.9 to 40.9)               |
| Antigua and Barbuda | 2000 | 534.6 (499.8 to 570.4)     | 345.9 (316.6 to 373.5)     | 142.0 (123.8 to 161.0)        | 30.5 (20.6 to 43.6)             | 16.3 (16.3 to 16.3)               | 867.6 (811.2 to 925.6)    | 561.3 (513.8 to 606.1)     | 230.4 (200.8 to 261.3)        | 49.4 (33.5 to 70.7)             | 26.5 (26.5 to 26.5)               |
| Antigua and Barbuda | 2001 | 528.6 (494.1 to 564.1)     | 345.6 (317.5 to 372.5)     | 148.6 (131.0 to 168.9)        | 32.9 (22.0 to 46.1)             | 1.5 (1.5 to 1.5)                  | 857.8 (801.9 to 915.5)    | 560.8 (515.3 to 604.5)     | 241.2 (212.6 to 274.2)        | 53.3 (35.7 to 74.8)             | 2.4 (2.4 to 2.4)                  |
| Antigua and Barbuda | 2002 | 543.2 (509.5 to 580.3)     | 353.5 (326.7 to 379.1)     | 154.7 (137.8 to 174.9)        | 35.0 (23.7 to 49.0)             | 0.1 (0.1 to 0.1)                  | 881.6 (826.9 to 941.8)    | 573.6 (530.2 to 615.3)     | 251.1 (223.7 to 283.9)        | 56.8 (38.5 to 79.5)             | 0.2 (0.2 to 0.2)                  |
| Antigua and Barbuda | 2003 | 573.2 (538.5 to 611.4)     | 365.1 (339.2 to 392.6)     | 166.7 (149.2 to 187.0)        | 37.9 (26.3 to 53.3)             | 3.6 (3.6 to 3.6)                  | 930.3 (874.0 to 992.2)    | 592.5 (550.5 to 637.2)     | 270.5 (242.2 to 303.5)        | 61.5 (42.7 to 86.5)             | 5.8 (5.8 to 5.8)                  |
| Antigua and Barbuda | 2004 | 597.1 (562.9 to 633.8)     | 374.4 (347.5 to 401.0)     | 177.3 (159.8 to 196.4)        | 39.7 (27.7 to 54.5)             | 5.8 (5.8 to 5.8)                  | 969.0 (913.6 to 1028.6)   | 607.6 (564.0 to 650.8)     | 287.7 (259.3 to 318.7)        | 64.3 (45.0 to 88.5)             | 9.4 (9.4 to 9.4)                  |
| Antigua and Barbuda | 2005 | 640.1 (603.5 to 679.3)     | 402.4 (376.6 to 430.4)     | 194.2 (176.7 to 214.2)        | 43.3 (31.2 to 59.0)             | 0.2 (0.2 to 0.2)                  | 1038.8 (979.5 to 1102.4)  | 653.1 (611.2 to 698.4)     | 315.2 (286.8 to 347.7)        | 70.2 (50.7 to 95.7)             | 0.4 (0.4 to 0.4)                  |
| Antigua and Barbuda | 2006 | 719.9 (682.7 to 761.0)     | 453.6 (426.0 to 482.7)     | 216.8 (197.8 to 238.4)        | 49.2 (36.0 to 65.3)             | 0.3 (0.3 to 0.3)                  | 1168.3 (1107.9 to 1235.0) | 736.2 (691.3 to 783.4)     | 351.8 (321.0 to 387.0)        | 79.9 (58.4 to 105.9)            | 0.4 (0.4 to 0.4)                  |
| Antigua and Barbuda | 2007 | 790.4 (753.9 to 833.6)     | 505.9 (477.0 to 539.0)     | 230.8 (211.7 to 253.4)        | 53.5 (39.6 to 71.1)             | 0.2 (0.2 to 0.2)                  | 1282.8 (1223.5 to 1352.9) | 821.1 (774.1 to 874.7)     | 374.5 (343.6 to 411.3)        | 86.8 (64.3 to 115.4)            | 0.4 (0.4 to 0.4)                  |
| Antigua and Barbuda | 2008 | 817.1 (780.0 to 860.1)     | 541.1 (510.6 to 575.8)     | 223.6 (203.8 to 245.6)        | 52.1 (38.0 to 69.9)             | 0.2 (0.2 to 0.2)                  | 1326.0 (1265.9 to 1395.8) | 878.2 (828.6 to 934.5)     | 362.9 (330.8 to 398.5)        | 84.5 (61.6 to 113.4)            | 0.3 (0.3 to 0.3)                  |
| Antigua and Barbuda | 2009 | 762.7 (726.0 to 803.5)     | 513.3 (483.1 to 543.8)     | 195.2 (176.6 to 215.3)        | 45.1 (32.5 to 60.5)             | 9.1 (9.1 to 9.1)                  | 1237.8 (1178.2 to 1304.0) | 833.1 (784.1 to 882.5)     | 316.9 (286.6 to 349.4)        | 73.1 (52.7 to 98.1)             | 14.7 (14.7 to 14.7)               |
| Antigua and Barbuda | 2010 | 742.8 (704.0 to 783.6)     | 502.7 (472.3 to 535.4)     | 190.0 (171.0 to 209.8)        | 43.8 (32.0 to 58.9)             | 6.3 (6.3 to 6.3)                  | 1205.5 (1142.5 to 1271.8) | 815.9 (766.4 to 868.9)     | 308.3 (277.5 to 340.5)        | 71.0 (52.0 to 95.6)             | 10.3 (10.3 to 10.3)               |
| Antigua and Barbuda | 2011 | 743.2 (704.8 to 780.7)     | 498.1 (468.3 to 529.7)     | 191.3 (172.1 to 211.0)        | 44.5 (32.5 to 60.1)             | 9.4 (9.4 to 9.4)                  | 1206.2 (1143.7 to 1267.1) | 808.3 (760.0 to 859.7)     | 310.5 (279.3 to 342.5)        | 72.2 (52.8 to 97.6)             | 15.2 (15.2 to 15.2)               |
| Antigua and Barbuda | 2012 | 741.5 (702.9 to 778.9)     | 498.1 (470.0 to 529.5)     | 197.3 (178.0 to 217.3)        | 45.7 (33.6 to 61.9)             | 0.3 (0.3 to 0.3)                  | 1203.4 (1140.7 to 1264.1) | 808.4 (762.7 to 859.4)     | 320.2 (288.9 to 352.7)        | 74.2 (54.5 to 100.4)            | 0.6 (0.6 to 0.6)                  |
| Antigua and Barbuda | 2013 | 749.2 (713.4 to 785.1)     | 502.5 (474.4 to 533.8)     | 200.2 (181.7 to 219.7)        | 46.3 (33.8 to 61.7)             | 0.3 (0.3 to 0.3)                  | 1215.9 (1157.8 to 1274.2) | 815.5 (769.9 to 866.4)     | 324.8 (294.9 to 356.5)        | 75.1 (54.9 to 100.1)            | 0.5 (0.5 to 0.5)                  |
| Antigua and Barbuda | 2014 | 786.7 (750.0 to 824.9)     | 528.9 (498.5 to 562.2)     | 209.2 (190.7 to 229.2)        | 48.3 (35.1 to 63.9)             | 0.3 (0.3 to 0.3)                  | 1276.7 (1217.1 to 1338.8) | 858.4 (809.0 to 912.4)     | 339.5 (309.4 to 371.9)        | 78.4 (57.0 to 103.7)            | 0.5 (0.5 to 0.5)                  |
| Antigua and Barbuda | 2015 | 769.9 (730.9 to 816.4)     | 512.5 (478.5 to 549.7)     | 209.9 (190.4 to 231.3)        | 47.4 (33.9 to 63.6)             | 0.2 (0.2 to 0.2)                  | 1249.5 (1186.1 to 1325.0) | 831.7 (776.6 to 892.1)     | 340.6 (309.0 to 375.4)        | 76.9 (55.0 to 103.2)            | 0.4 (0.4 to 0.4)                  |

| Country             | Year | 2018 US Dollars per capita |                            |                               |                                 |                                   | 2018 PPP per capita       |                            |                               |                                 |                                   |
|---------------------|------|----------------------------|----------------------------|-------------------------------|---------------------------------|-----------------------------------|---------------------------|----------------------------|-------------------------------|---------------------------------|-----------------------------------|
|                     |      | Health spending            | Government health spending | Out-of-pocket health spending | Prepaid private health spending | Development assistance for health | Health spending           | Government health spending | Out-of-pocket health spending | Prepaid private health spending | Development assistance for health |
| Antigua and Barbuda | 2016 | 759.9 (712.4 to 811.1)     | 489.7 (449.6 to 531.5)     | 221.3 (196.1 to 247.7)        | 48.7 (33.9 to 67.2)             | 0.3 (0.3 to 0.3)                  | 1233.3 (1156.1 to 1316.3) | 794.7 (729.7 to 862.6)     | 359.1 (318.2 to 402.1)        | 79.0 (55.0 to 109.1)            | 0.4 (0.4 to 0.4)                  |
| Antigua and Barbuda | 2017 | 762.8 (712.7 to 818.1)     | 487.6 (448.0 to 529.8)     | 225.0 (199.6 to 251.8)        | 50.0 (34.8 to 69.2)             | 0.2 (0.2 to 0.2)                  | 1238.0 (1156.7 to 1327.7) | 791.3 (727.0 to 859.8)     | 365.1 (323.9 to 408.6)        | 81.1 (56.5 to 112.2)            | 0.4 (0.4 to 0.4)                  |
| Antigua and Barbuda | 2018 | 777.3 (727.0 to 830.2)     | 498.4 (456.5 to 543.7)     | 227.7 (202.0 to 254.9)        | 51.0 (35.5 to 70.2)             | 0.2 (0.0 to 0.2)                  | 1261.6 (1179.9 to 1347.3) | 808.9 (740.8 to 882.4)     | 369.6 (327.8 to 413.7)        | 82.7 (57.6 to 113.9)            | 0.3 (0.0 to 0.4)                  |
| Antigua and Barbuda | 2019 | 789.2 (736.3 to 848.3)     | 506.9 (463.9 to 553.8)     | 230.2 (204.2 to 257.7)        | 52.0 (36.1 to 71.6)             | 0.2 (0.0 to 0.2)                  | 1280.8 (1194.9 to 1376.7) | 822.6 (752.8 to 898.8)     | 373.5 (331.4 to 418.2)        | 84.3 (58.6 to 116.3)            | 0.3 (0.0 to 0.4)                  |
| Antigua and Barbuda | 2020 | 800.4 (747.6 to 853.7)     | 514.8 (471.4 to 562.5)     | 232.5 (206.0 to 260.7)        | 52.9 (36.7 to 72.9)             | 0.2 (0.0 to 0.2)                  | 1299.0 (1213.2 to 1385.5) | 835.5 (765.1 to 912.8)     | 377.3 (334.3 to 423.0)        | 85.9 (59.6 to 118.3)            | 0.3 (0.0 to 0.4)                  |
| Antigua and Barbuda | 2021 | 812.6 (757.7 to 872.2)     | 523.8 (480.3 to 571.4)     | 234.7 (208.4 to 263.1)        | 53.9 (37.3 to 74.2)             | 0.2 (0.0 to 0.3)                  | 1318.8 (1229.7 to 1415.5) | 850.1 (779.5 to 927.3)     | 380.9 (338.2 to 426.9)        | 87.4 (60.6 to 120.5)            | 0.3 (0.0 to 0.4)                  |
| Antigua and Barbuda | 2022 | 826.5 (771.7 to 882.3)     | 534.2 (490.1 to 582.2)     | 237.3 (209.7 to 266.3)        | 54.9 (38.0 to 75.7)             | 0.2 (0.0 to 0.3)                  | 1341.4 (1252.3 to 1431.9) | 867.0 (795.3 to 944.8)     | 385.0 (340.3 to 432.2)        | 89.0 (61.6 to 122.8)            | 0.3 (0.0 to 0.4)                  |
| Antigua and Barbuda | 2023 | 838.0 (779.9 to 900.8)     | 542.7 (497.8 to 591.8)     | 239.3 (211.8 to 269.1)        | 55.7 (38.6 to 76.9)             | 0.2 (0.0 to 0.3)                  | 1359.9 (1265.8 to 1462.0) | 880.8 (807.9 to 960.4)     | 388.4 (343.8 to 436.7)        | 90.5 (62.7 to 124.8)            | 0.3 (0.0 to 0.5)                  |
| Antigua and Barbuda | 2024 | 849.8 (793.4 to 909.0)     | 551.7 (505.5 to 601.8)     | 241.3 (213.2 to 271.0)        | 56.6 (39.3 to 78.1)             | 0.2 (0.0 to 0.3)                  | 1379.2 (1287.6 to 1475.2) | 895.3 (820.4 to 976.6)     | 391.6 (346.0 to 439.9)        | 91.9 (63.8 to 126.8)            | 0.3 (0.0 to 0.5)                  |
| Antigua and Barbuda | 2025 | 861.1 (801.1 to 926.4)     | 560.3 (513.2 to 612.0)     | 243.1 (214.8 to 272.8)        | 57.5 (40.0 to 79.3)             | 0.2 (0.0 to 0.3)                  | 1397.5 (1300.1 to 1503.5) | 909.3 (832.8 to 993.3)     | 394.6 (348.6 to 442.8)        | 93.3 (64.9 to 128.8)            | 0.3 (0.0 to 0.5)                  |
| Antigua and Barbuda | 2026 | 870.2 (811.2 to 930.9)     | 567.0 (519.0 to 621.1)     | 244.7 (216.1 to 274.5)        | 58.3 (40.6 to 80.6)             | 0.2 (0.0 to 0.3)                  | 1412.2 (1316.5 to 1510.8) | 920.3 (842.2 to 1007.9)    | 397.1 (350.7 to 445.5)        | 94.6 (65.9 to 130.8)            | 0.3 (0.0 to 0.5)                  |
| Antigua and Barbuda | 2027 | 878.4 (815.2 to 944.9)     | 573.2 (524.1 to 628.9)     | 246.0 (217.4 to 276.9)        | 59.0 (41.2 to 81.7)             | 0.2 (0.0 to 0.3)                  | 1425.6 (1322.9 to 1533.6) | 930.2 (850.6 to 1020.6)    | 399.3 (352.8 to 449.3)        | 95.8 (66.9 to 132.5)            | 0.3 (0.0 to 0.5)                  |
| Antigua and Barbuda | 2028 | 886.6 (823.2 to 951.0)     | 579.3 (529.8 to 636.9)     | 247.3 (218.4 to 278.4)        | 59.8 (41.8 to 82.6)             | 0.2 (0.0 to 0.3)                  | 1438.9 (1335.9 to 1543.4) | 940.2 (859.8 to 1033.6)    | 401.4 (354.5 to 451.8)        | 97.0 (67.8 to 134.0)            | 0.3 (0.0 to 0.6)                  |
| Antigua and Barbuda | 2029 | 893.5 (828.7 to 964.6)     | 584.6 (534.0 to 643.0)     | 248.2 (219.1 to 279.6)        | 60.5 (42.3 to 83.5)             | 0.2 (0.0 to 0.4)                  | 1450.1 (1345.0 to 1565.4) | 948.8 (866.7 to 1043.5)    | 402.9 (355.7 to 453.8)        | 98.1 (68.7 to 135.5)            | 0.3 (0.0 to 0.6)                  |
| Antigua and Barbuda | 2030 | 898.5 (832.5 to 965.1)     | 588.5 (536.7 to 648.1)     | 248.8 (218.8 to 280.8)        | 61.0 (42.8 to 84.4)             | 0.2 (0.0 to 0.4)                  | 1458.2 (1351.0 to 1566.3) | 955.1 (871.0 to 1051.8)    | 403.7 (355.1 to 455.8)        | 99.0 (69.4 to 137.0)            | 0.3 (0.0 to 0.6)                  |
| Antigua and Barbuda | 2031 | 903.7 (835.8 to 977.4)     | 592.7 (540.3 to 654.0)     | 249.2 (219.1 to 282.0)        | 61.6 (43.1 to 85.3)             | 0.2 (0.0 to 0.4)                  | 1466.7 (1356.5 to 1586.3) | 962.0 (876.9 to 1061.3)    | 404.5 (355.6 to 457.6)        | 100.0 (70.0 to 138.4)           | 0.3 (0.0 to 0.6)                  |
| Antigua and Barbuda | 2032 | 907.7 (839.1 to 977.5)     | 596.0 (542.9 to 658.8)     | 249.3 (219.2 to 282.7)        | 62.1 (43.3 to 86.1)             | 0.2 (0.0 to 0.4)                  | 1473.0 (1361.7 to 1586.5) | 967.3 (881.0 to 1069.3)    | 404.7 (355.7 to 458.8)        | 100.8 (70.3 to 139.7)           | 0.3 (0.0 to 0.6)                  |
| Antigua and Barbuda | 2033 | 911.2 (840.7 to 987.2)     | 599.1 (544.7 to 663.3)     | 249.4 (218.6 to 283.5)        | 62.6 (43.5 to 86.7)             | 0.2 (0.0 to 0.4)                  | 1478.8 (1364.4 to 1602.2) | 972.3 (884.0 to 1076.5)    | 404.7 (354.8 to 460.1)        | 101.5 (70.6 to 140.7)           | 0.3 (0.0 to 0.7)                  |
| Antigua and Barbuda | 2034 | 914.1 (842.6 to 986.9)     | 601.6 (546.4 to 667.9)     | 249.3 (217.8 to 284.0)        | 63.0 (43.9 to 87.4)             | 0.2 (0.0 to 0.4)                  | 1483.5 (1367.4 to 1601.6) | 976.3 (886.8 to 1083.9)    | 404.6 (353.4 to 460.9)        | 102.3 (71.2 to 141.9)           | 0.3 (0.0 to 0.7)                  |
| Antigua and Barbuda | 2035 | 918.2 (845.8 to 997.4)     | 605.0 (548.6 to 673.3)     | 249.5 (217.5 to 285.0)        | 63.5 (44.3 to 88.4)             | 0.2 (0.0 to 0.4)                  | 1490.2 (1372.7 to 1618.6) | 981.8 (890.4 to 1092.8)    | 405.0 (352.9 to 462.5)        | 103.1 (71.8 to 143.4)           | 0.3 (0.0 to 0.7)                  |
| Antigua and Barbuda | 2036 | 924.6 (852.2 to 1000.9)    | 609.9 (552.5 to 679.8)     | 250.3 (217.6 to 286.7)        | 64.2 (44.7 to 89.3)             | 0.2 (0.0 to 0.5)                  | 1500.6 (1383.0 to 1624.4) | 989.9 (896.6 to 1103.3)    | 406.2 (353.2 to 465.4)        | 104.2 (72.6 to 144.8)           | 0.3 (0.0 to 0.7)                  |

| Country             | Year | 2018 US Dollars per capita |                            |                               |                                 |                                   | 2018 PPP per capita       |                            |                               |                                 |                                   |
|---------------------|------|----------------------------|----------------------------|-------------------------------|---------------------------------|-----------------------------------|---------------------------|----------------------------|-------------------------------|---------------------------------|-----------------------------------|
|                     |      | Health spending            | Government health spending | Out-of-pocket health spending | Prepaid private health spending | Development assistance for health | Health spending           | Government health spending | Out-of-pocket health spending | Prepaid private health spending | Development assistance for health |
| Antigua and Barbuda | 2037 | 931.1 (856.2 to 1015.8)    | 614.9 (555.8 to 687.1)     | 251.1 (218.0 to 288.5)        | 64.9 (45.3 to 90.0)             | 0.2 (0.0 to 0.5)                  | 1511.1 (1389.5 to 1648.5) | 998.0 (902.0 to 1115.1)    | 407.5 (353.8 to 468.2)        | 105.3 (73.4 to 146.0)           | 0.3 (0.0 to 0.8)                  |
| Antigua and Barbuda | 2038 | 939.4 (862.5 to 1020.8)    | 621.1 (559.9 to 695.2)     | 252.3 (218.7 to 290.3)        | 65.7 (45.8 to 91.1)             | 0.2 (0.0 to 0.5)                  | 1524.5 (1399.7 to 1656.6) | 1008.0 (908.6 to 1128.2)   | 409.5 (354.9 to 471.2)        | 106.7 (74.3 to 147.9)           | 0.3 (0.0 to 0.8)                  |
| Antigua and Barbuda | 2039 | 948.0 (868.4 to 1037.2)    | 627.5 (564.1 to 705.3)     | 253.8 (219.8 to 292.1)        | 66.6 (46.4 to 92.5)             | 0.2 (0.0 to 0.5)                  | 1538.5 (1409.4 to 1683.2) | 1018.3 (915.4 to 1144.6)   | 411.8 (356.7 to 474.1)        | 108.1 (75.4 to 150.1)           | 0.3 (0.0 to 0.9)                  |
| Antigua and Barbuda | 2040 | 957.6 (877.2 to 1042.7)    | 634.4 (568.9 to 714.7)     | 255.4 (220.8 to 294.1)        | 67.6 (47.1 to 93.9)             | 0.2 (0.0 to 0.5)                  | 1554.0 (1423.6 to 1692.3) | 1029.6 (923.3 to 1159.9)   | 414.5 (358.3 to 477.4)        | 109.6 (76.5 to 152.4)           | 0.3 (0.0 to 0.9)                  |
| Antigua and Barbuda | 2041 | 969.4 (882.4 to 1063.3)    | 643.0 (576.0 to 725.8)     | 257.6 (222.2 to 297.1)        | 68.6 (47.9 to 95.5)             | 0.2 (0.0 to 0.6)                  | 1573.2 (1432.0 to 1725.7) | 1043.5 (934.8 to 1177.8)   | 418.0 (360.5 to 482.2)        | 111.4 (77.7 to 155.0)           | 0.3 (0.0 to 0.9)                  |
| Antigua and Barbuda | 2042 | 982.4 (897.7 to 1072.5)    | 652.4 (583.1 to 737.8)     | 260.0 (224.0 to 300.5)        | 69.8 (48.6 to 97.2)             | 0.2 (0.0 to 0.6)                  | 1594.4 (1456.9 to 1740.7) | 1058.7 (946.2 to 1197.3)   | 422.0 (363.5 to 487.7)        | 113.3 (78.9 to 157.8)           | 0.3 (0.0 to 1.0)                  |
| Antigua and Barbuda | 2043 | 996.5 (905.6 to 1095.5)    | 662.4 (590.8 to 750.5)     | 262.8 (226.2 to 304.3)        | 71.1 (49.5 to 99.0)             | 0.2 (0.0 to 0.6)                  | 1617.2 (1469.7 to 1777.9) | 1075.0 (958.9 to 1218.1)   | 426.5 (367.1 to 493.9)        | 115.4 (80.3 to 160.7)           | 0.3 (0.0 to 1.0)                  |
| Antigua and Barbuda | 2044 | 1010.4 (920.3 to 1105.8)   | 672.4 (597.1 to 763.5)     | 265.4 (228.2 to 307.5)        | 72.4 (50.3 to 100.7)            | 0.2 (0.0 to 0.6)                  | 1639.8 (1493.6 to 1794.6) | 1091.2 (969.1 to 1239.1)   | 430.8 (370.3 to 499.1)        | 117.5 (81.7 to 163.4)           | 0.3 (0.0 to 1.0)                  |
| Antigua and Barbuda | 2045 | 1025.3 (930.1 to 1132.1)   | 683.4 (605.1 to 777.7)     | 268.0 (230.0 to 310.7)        | 73.7 (51.2 to 102.6)            | 0.2 (0.0 to 0.7)                  | 1663.9 (1509.5 to 1837.2) | 1109.1 (982.0 to 1262.1)   | 435.0 (373.3 to 504.2)        | 119.6 (83.1 to 166.5)           | 0.3 (0.0 to 1.1)                  |
| Antigua and Barbuda | 2046 | 1041.0 (944.0 to 1143.4)   | 695.2 (614.0 to 793.9)     | 270.6 (232.2 to 314.0)        | 75.0 (52.0 to 104.7)            | 0.2 (0.0 to 0.7)                  | 1689.4 (1532.1 to 1855.7) | 1128.2 (996.5 to 1288.4)   | 439.2 (376.8 to 509.6)        | 121.7 (84.4 to 169.9)           | 0.3 (0.0 to 1.1)                  |
| Antigua and Barbuda | 2047 | 1057.3 (956.9 to 1170.1)   | 707.7 (623.5 to 809.6)     | 273.1 (234.4 to 317.1)        | 76.3 (52.8 to 106.7)            | 0.2 (0.0 to 0.7)                  | 1715.9 (1552.9 to 1899.0) | 1148.5 (1011.8 to 1313.9)  | 443.3 (380.4 to 514.7)        | 123.9 (85.7 to 173.2)           | 0.3 (0.0 to 1.2)                  |
| Antigua and Barbuda | 2048 | 1074.3 (968.6 to 1184.5)   | 720.9 (634.3 to 827.3)     | 275.6 (236.7 to 320.3)        | 77.7 (53.7 to 108.7)            | 0.2 (0.0 to 0.8)                  | 1743.6 (1572.0 to 1922.3) | 1169.9 (1029.4 to 1342.6)  | 447.3 (384.1 to 519.8)        | 126.0 (87.1 to 176.4)           | 0.3 (0.0 to 1.2)                  |
| Antigua and Barbuda | 2049 | 1092.4 (983.8 to 1214.2)   | 735.0 (644.3 to 845.9)     | 278.2 (239.0 to 323.2)        | 79.0 (54.5 to 110.7)            | 0.2 (0.0 to 0.8)                  | 1772.9 (1596.6 to 1970.5) | 1192.8 (1045.7 to 1372.8)  | 451.5 (387.8 to 524.6)        | 128.3 (88.4 to 179.6)           | 0.3 (0.0 to 1.3)                  |
| Antigua and Barbuda | 2050 | 1110.9 (1000.2 to 1228.7)  | 749.6 (655.4 to 866.1)     | 280.7 (241.2 to 326.4)        | 80.4 (55.2 to 112.7)            | 0.2 (0.0 to 0.8)                  | 1802.9 (1623.2 to 1994.1) | 1216.5 (1063.7 to 1405.6)  | 455.6 (391.4 to 529.7)        | 130.5 (89.7 to 182.9)           | 0.3 (0.0 to 1.3)                  |
| Argentina           | 1995 | 928.7 (869.7 to 991.1)     | 563.5 (523.2 to 607.1)     | 238.4 (208.8 to 273.7)        | 119.9 (91.7 to 151.6)           | 6.9 (6.9 to 6.9)                  | 1400.9 (1311.8 to 1495.0) | 850.0 (789.1 to 915.7)     | 359.6 (315.0 to 412.8)        | 180.9 (138.2 to 228.6)          | 10.4 (10.4 to 10.4)               |
| Argentina           | 1996 | 998.7 (948.7 to 1055.8)    | 602.4 (568.5 to 638.8)     | 255.0 (227.9 to 286.2)        | 131.8 (105.8 to 160.8)          | 9.5 (9.5 to 9.5)                  | 1506.4 (1431.0 to 1592.5) | 908.6 (857.5 to 963.5)     | 384.7 (343.8 to 431.8)        | 198.8 (159.5 to 242.6)          | 14.3 (14.3 to 14.3)               |
| Argentina           | 1997 | 1051.0 (1001.5 to 1107.7)  | 619.7 (587.4 to 653.2)     | 269.8 (243.8 to 298.3)        | 147.8 (122.8 to 176.7)          | 13.6 (13.6 to 13.6)               | 1585.3 (1510.6 to 1670.8) | 934.8 (886.0 to 985.3)     | 406.9 (367.7 to 449.9)        | 223.0 (185.2 to 266.5)          | 20.6 (20.6 to 20.6)               |
| Argentina           | 1998 | 1081.6 (1031.2 to 1136.2)  | 623.1 (588.4 to 657.9)     | 281.4 (254.9 to 309.5)        | 158.2 (132.3 to 186.7)          | 18.9 (18.9 to 18.9)               | 1631.5 (1555.4 to 1713.9) | 939.8 (887.5 to 992.3)     | 424.5 (384.5 to 466.8)        | 238.6 (199.5 to 281.6)          | 28.6 (28.6 to 28.6)               |
| Argentina           | 1999 | 1043.9 (995.4 to 1094.9)   | 590.2 (557.9 to 625.2)     | 282.4 (255.5 to 310.3)        | 159.1 (134.5 to 188.7)          | 12.2 (12.2 to 12.2)               | 1574.6 (1501.4 to 1651.5) | 890.3 (841.5 to 943.1)     | 425.9 (385.4 to 468.0)        | 240.0 (202.9 to 284.6)          | 18.4 (18.4 to 18.4)               |
| Argentina           | 2000 | 991.6 (944.9 to 1040.1)    | 549.1 (519.1 to 581.8)     | 278.4 (251.6 to 308.0)        | 156.0 (131.8 to 185.6)          | 8.1 (8.1 to 8.1)                  | 1495.7 (1425.3 to 1568.9) | 828.2 (783.0 to 877.5)     | 419.9 (379.5 to 464.6)        | 235.2 (198.8 to 280.0)          | 12.2 (12.2 to 12.2)               |
| Argentina           | 2001 | 906.2 (859.8 to 954.5)     | 492.1 (463.3 to 521.8)     | 262.5 (237.1 to 292.5)        | 144.2 (121.1 to 172.8)          | 7.3 (7.3 to 7.3)                  | 1366.8 (1296.9 to 1439.7) | 742.2 (698.8 to 787.0)     | 396.0 (357.7 to 441.2)        | 217.5 (182.7 to 260.6)          | 11.0 (11.0 to 11.0)               |

| Country   | Year | 2018 US Dollars per capita |                            |                               |                                 |                                   | 2018 PPP per capita       |                            |                               |                                 |                                   |
|-----------|------|----------------------------|----------------------------|-------------------------------|---------------------------------|-----------------------------------|---------------------------|----------------------------|-------------------------------|---------------------------------|-----------------------------------|
|           |      | Health spending            | Government health spending | Out-of-pocket health spending | Prepaid private health spending | Development assistance for health | Health spending           | Government health spending | Out-of-pocket health spending | Prepaid private health spending | Development assistance for health |
| Argentina | 2002 | 764.0 (722.8 to 804.6)     | 409.5 (384.7 to 436.4)     | 230.1 (206.8 to 256.3)        | 122.1 (101.8 to 145.9)          | 2.3 (2.3 to 2.3)                  | 1152.4 (1090.2 to 1213.6) | 617.6 (580.2 to 658.3)     | 347.1 (312.0 to 386.6)        | 184.1 (153.5 to 220.1)          | 3.5 (3.5 to 3.5)                  |
| Argentina | 2003 | 768.6 (728.5 to 810.7)     | 400.7 (376.1 to 427.4)     | 224.9 (201.4 to 251.4)        | 122.0 (101.5 to 145.7)          | 20.9 (20.9 to 20.9)               | 1159.3 (1098.9 to 1222.8) | 604.5 (567.3 to 644.7)     | 339.2 (303.8 to 379.2)        | 184.1 (153.1 to 219.8)          | 31.6 (31.6 to 31.6)               |
| Argentina | 2004 | 763.1 (721.8 to 806.9)     | 403.7 (377.7 to 433.2)     | 231.2 (208.0 to 257.2)        | 122.2 (101.8 to 145.6)          | 6.0 (6.0 to 6.0)                  | 1151.0 (1088.7 to 1217.0) | 608.9 (569.8 to 653.4)     | 348.7 (313.8 to 387.9)        | 184.4 (153.5 to 219.6)          | 9.1 (9.1 to 9.1)                  |
| Argentina | 2005 | 815.4 (772.1 to 863.5)     | 431.1 (404.6 to 460.5)     | 255.6 (230.1 to 282.1)        | 126.4 (106.0 to 150.3)          | 2.3 (2.3 to 2.3)                  | 1229.8 (1164.6 to 1302.5) | 650.3 (610.3 to 694.7)     | 385.5 (347.1 to 425.6)        | 190.6 (159.9 to 226.7)          | 3.5 (3.5 to 3.5)                  |
| Argentina | 2006 | 880.6 (835.4 to 929.6)     | 475.3 (446.5 to 506.4)     | 268.9 (241.5 to 296.3)        | 134.3 (113.5 to 159.1)          | 2.0 (2.0 to 2.0)                  | 1328.3 (1260.1 to 1402.2) | 717.0 (673.5 to 763.8)     | 405.6 (364.3 to 446.9)        | 202.6 (171.3 to 239.9)          | 3.1 (3.1 to 3.1)                  |
| Argentina | 2007 | 970.0 (923.8 to 1018.4)    | 542.9 (511.8 to 575.7)     | 273.8 (246.2 to 301.0)        | 145.2 (122.7 to 171.3)          | 8.0 (8.0 to 8.0)                  | 1463.1 (1393.4 to 1536.1) | 818.9 (772.0 to 868.3)     | 413.0 (371.4 to 454.1)        | 219.0 (185.0 to 258.4)          | 12.1 (12.1 to 12.1)               |
| Argentina | 2008 | 1030.4 (981.3 to 1080.5)   | 609.1 (577.0 to 644.2)     | 263.3 (238.1 to 288.6)        | 153.5 (128.7 to 180.2)          | 4.4 (4.4 to 4.4)                  | 1554.1 (1480.1 to 1629.7) | 918.8 (870.3 to 971.6)     | 397.1 (359.2 to 435.4)        | 231.5 (194.1 to 271.8)          | 6.7 (6.7 to 6.7)                  |
| Argentina | 2009 | 1050.5 (1000.1 to 1098.8)  | 649.1 (617.9 to 683.5)     | 241.5 (217.5 to 264.0)        | 155.7 (131.6 to 182.4)          | 4.1 (4.1 to 4.1)                  | 1584.5 (1508.5 to 1657.4) | 979.1 (932.0 to 1030.9)    | 364.2 (328.0 to 398.2)        | 234.9 (198.5 to 275.2)          | 6.3 (6.3 to 6.3)                  |
| Argentina | 2010 | 1129.2 (1077.6 to 1178.3)  | 735.5 (701.8 to 774.0)     | 225.5 (202.3 to 248.6)        | 163.8 (138.0 to 192.0)          | 4.5 (4.5 to 4.5)                  | 1703.2 (1625.4 to 1777.2) | 1109.4 (1058.5 to 1167.5)  | 340.1 (305.2 to 375.0)        | 247.0 (208.2 to 289.5)          | 6.7 (6.7 to 6.7)                  |
| Argentina | 2011 | 1177.1 (1127.8 to 1230.1)  | 805.8 (769.6 to 843.2)     | 206.1 (184.1 to 229.7)        | 157.5 (132.8 to 184.1)          | 7.7 (7.7 to 7.7)                  | 1775.5 (1701.1 to 1855.4) | 1215.5 (1160.8 to 1271.9)  | 310.9 (277.6 to 346.5)        | 237.6 (200.3 to 277.7)          | 11.6 (11.6 to 11.6)               |
| Argentina | 2012 | 1156.7 (1110.2 to 1208.9)  | 831.5 (793.3 to 869.9)     | 180.9 (161.3 to 201.8)        | 138.1 (116.0 to 163.9)          | 6.3 (6.3 to 6.3)                  | 1744.8 (1674.5 to 1823.4) | 1254.2 (1196.6 to 1312.2)  | 272.8 (243.3 to 304.4)        | 208.3 (174.9 to 247.3)          | 9.5 (9.5 to 9.5)                  |
| Argentina | 2013 | 1160.4 (1112.9 to 1209.5)  | 863.0 (825.6 to 901.2)     | 171.0 (152.0 to 191.3)        | 119.5 (100.8 to 142.2)          | 6.9 (6.9 to 6.9)                  | 1750.2 (1678.7 to 1824.4) | 1301.7 (1245.3 to 1359.3)  | 257.9 (229.3 to 288.6)        | 180.2 (152.0 to 214.5)          | 10.4 (10.4 to 10.4)               |
| Argentina | 2014 | 1119.1 (1074.3 to 1164.4)  | 856.5 (818.3 to 894.4)     | 162.5 (143.5 to 181.8)        | 100.0 (82.8 to 120.4)           | 0.1 (0.1 to 0.1)                  | 1688.1 (1620.4 to 1756.3) | 1291.9 (1234.3 to 1349.1)  | 245.1 (216.4 to 274.2)        | 150.9 (124.9 to 181.6)          | 0.2 (0.2 to 0.2)                  |
| Argentina | 2015 | 1140.0 (1086.5 to 1190.9)  | 877.1 (833.6 to 918.7)     | 162.2 (141.2 to 184.2)        | 96.2 (76.8 to 118.8)            | 4.5 (4.5 to 4.5)                  | 1719.5 (1638.9 to 1796.4) | 1323.0 (1257.4 to 1385.7)  | 244.6 (213.0 to 277.8)        | 145.1 (115.9 to 179.2)          | 6.8 (6.8 to 6.8)                  |
| Argentina | 2016 | 1071.3 (1007.7 to 1135.4)  | 815.7 (764.5 to 866.9)     | 158.4 (134.4 to 185.3)        | 90.1 (68.3 to 116.4)            | 7.1 (7.1 to 7.1)                  | 1615.9 (1519.9 to 1712.6) | 1230.4 (1153.2 to 1307.5)  | 238.9 (202.7 to 279.5)        | 135.9 (103.0 to 175.5)          | 10.7 (10.7 to 10.7)               |
| Argentina | 2017 | 1075.9 (1011.5 to 1140.9)  | 824.8 (772.3 to 878.3)     | 159.0 (134.4 to 186.2)        | 92.1 (69.7 to 119.3)            | 0.1 (0.1 to 0.1)                  | 1622.9 (1525.7 to 1720.9) | 1244.0 (1164.9 to 1324.8)  | 239.8 (202.8 to 280.8)        | 138.9 (105.1 to 179.9)          | 0.2 (0.2 to 0.2)                  |
| Argentina | 2018 | 1092.3 (1029.2 to 1156.9)  | 839.5 (786.7 to 894.0)     | 159.0 (134.7 to 185.8)        | 93.7 (70.6 to 121.6)            | 0.1 (0.1 to 0.1)                  | 1647.6 (1552.4 to 1745.1) | 1266.3 (1186.6 to 1348.5)  | 239.8 (203.2 to 280.2)        | 141.3 (106.6 to 183.4)          | 0.2 (0.2 to 0.2)                  |
| Argentina | 2019 | 1108.9 (1041.9 to 1176.3)  | 854.6 (800.5 to 910.2)     | 159.0 (134.7 to 185.0)        | 95.2 (71.9 to 123.7)            | 0.1 (0.1 to 0.1)                  | 1672.6 (1571.6 to 1774.3) | 1289.0 (1207.4 to 1372.9)  | 239.8 (203.2 to 279.1)        | 143.7 (108.4 to 186.5)          | 0.2 (0.2 to 0.2)                  |
| Argentina | 2020 | 1125.7 (1061.4 to 1191.9)  | 869.8 (814.1 to 925.8)     | 158.9 (134.8 to 186.3)        | 96.8 (73.0 to 125.8)            | 0.1 (0.1 to 0.1)                  | 1697.9 (1600.9 to 1797.8) | 1312.0 (1228.0 to 1396.5)  | 239.7 (203.3 to 281.0)        | 146.0 (110.1 to 189.8)          | 0.2 (0.2 to 0.2)                  |
| Argentina | 2021 | 1141.7 (1073.1 to 1215.3)  | 884.3 (827.8 to 941.5)     | 158.9 (134.7 to 187.0)        | 98.3 (74.1 to 127.6)            | 0.1 (0.1 to 0.1)                  | 1722.0 (1618.6 to 1833.1) | 1333.9 (1248.7 to 1420.2)  | 239.7 (203.2 to 282.0)        | 148.3 (111.7 to 192.5)          | 0.2 (0.2 to 0.2)                  |
| Argentina | 2022 | 1158.8 (1088.6 to 1227.7)  | 899.8 (840.3 to 958.8)     | 159.0 (135.1 to 186.5)        | 99.9 (75.4 to 129.5)            | 0.1 (0.1 to 0.1)                  | 1747.9 (1642.0 to 1851.8) | 1357.2 (1267.4 to 1446.2)  | 239.8 (203.8 to 281.2)        | 150.7 (113.7 to 195.3)          | 0.2 (0.2 to 0.2)                  |



| Country   | Year | 2018 US Dollars per capita |                            |                               |                                 |                                   | 2018 PPP per capita       |                            |                               |                                 |                                   |
|-----------|------|----------------------------|----------------------------|-------------------------------|---------------------------------|-----------------------------------|---------------------------|----------------------------|-------------------------------|---------------------------------|-----------------------------------|
|           |      | Health spending            | Government health spending | Out-of-pocket health spending | Prepaid private health spending | Development assistance for health | Health spending           | Government health spending | Out-of-pocket health spending | Prepaid private health spending | Development assistance for health |
| Argentina | 2023 | 1176.1 (1104.2 to 1248.0)  | 915.1 (853.4 to 975.8)     | 159.4 (135.5 to 186.2)        | 101.5 (76.5 to 131.3)           | 0.1 (0.1 to 0.1)                  | 1774.0 (1665.6 to 1882.4) | 1380.3 (1287.3 to 1471.9)  | 240.5 (204.4 to 280.9)        | 153.1 (115.5 to 198.1)          | 0.2 (0.2 to 0.2)                  |
| Argentina | 2024 | 1194.5 (1124.6 to 1270.6)  | 931.1 (867.4 to 994.1)     | 160.0 (135.6 to 187.5)        | 103.2 (77.6 to 133.2)           | 0.1 (0.1 to 0.1)                  | 1801.7 (1696.2 to 1916.5) | 1404.5 (1308.4 to 1499.4)  | 241.4 (204.5 to 282.8)        | 155.6 (117.1 to 201.0)          | 0.2 (0.2 to 0.2)                  |
| Argentina | 2025 | 1212.9 (1139.4 to 1289.4)  | 947.0 (880.9 to 1012.2)    | 161.0 (135.7 to 189.0)        | 104.8 (78.8 to 135.7)           | 0.1 (0.1 to 0.2)                  | 1829.5 (1718.6 to 1944.9) | 1428.4 (1328.7 to 1526.8)  | 242.8 (204.6 to 285.1)        | 158.1 (118.8 to 204.6)          | 0.2 (0.2 to 0.2)                  |
| Argentina | 2026 | 1231.4 (1155.5 to 1308.4)  | 962.9 (893.9 to 1029.9)    | 161.9 (136.5 to 189.9)        | 106.5 (80.0 to 138.1)           | 0.1 (0.1 to 0.2)                  | 1857.4 (1742.9 to 1973.5) | 1452.3 (1348.3 to 1553.5)  | 244.2 (205.9 to 286.5)        | 160.6 (120.7 to 208.3)          | 0.2 (0.2 to 0.2)                  |
| Argentina | 2027 | 1250.4 (1171.2 to 1332.4)  | 979.2 (907.1 to 1049.8)    | 162.9 (136.9 to 191.1)        | 108.2 (81.3 to 140.2)           | 0.1 (0.1 to 0.2)                  | 1886.1 (1766.6 to 2009.7) | 1477.0 (1368.2 to 1583.4)  | 245.7 (206.5 to 288.2)        | 163.2 (122.7 to 211.4)          | 0.2 (0.2 to 0.2)                  |
| Argentina | 2028 | 1269.2 (1186.9 to 1351.8)  | 995.4 (922.6 to 1068.1)    | 163.8 (136.8 to 192.5)        | 109.9 (82.6 to 142.2)           | 0.1 (0.1 to 0.2)                  | 1914.5 (1790.3 to 2039.0) | 1501.4 (1391.6 to 1611.1)  | 247.1 (206.4 to 290.4)        | 165.7 (124.6 to 214.4)          | 0.2 (0.2 to 0.3)                  |
| Argentina | 2029 | 1287.7 (1195.5 to 1376.3)  | 1011.3 (936.4 to 1085.7)   | 164.7 (136.6 to 193.5)        | 111.5 (83.9 to 144.2)           | 0.1 (0.1 to 0.2)                  | 1942.3 (1803.2 to 2075.9) | 1525.3 (1412.4 to 1637.7)  | 248.5 (206.0 to 291.8)        | 168.2 (126.5 to 217.4)          | 0.2 (0.2 to 0.3)                  |
| Argentina | 2030 | 1307.4 (1217.2 to 1396.1)  | 1028.2 (950.8 to 1105.4)   | 165.8 (137.2 to 194.5)        | 113.3 (85.2 to 146.8)           | 0.1 (0.1 to 0.2)                  | 1972.0 (1836.0 to 2105.8) | 1550.8 (1434.1 to 1667.3)  | 250.1 (207.0 to 293.4)        | 170.9 (128.6 to 221.4)          | 0.2 (0.2 to 0.3)                  |
| Argentina | 2031 | 1327.9 (1237.0 to 1423.1)  | 1045.6 (964.3 to 1128.0)   | 166.9 (137.6 to 195.9)        | 115.2 (86.6 to 149.2)           | 0.1 (0.1 to 0.2)                  | 2002.9 (1865.8 to 2146.6) | 1577.2 (1454.5 to 1701.4)  | 251.8 (207.6 to 295.5)        | 173.7 (130.7 to 225.0)          | 0.2 (0.2 to 0.3)                  |
| Argentina | 2032 | 1349.1 (1255.6 to 1442.4)  | 1063.7 (978.7 to 1149.2)   | 168.2 (138.2 to 197.3)        | 117.1 (88.1 to 151.5)           | 0.1 (0.0 to 0.2)                  | 2034.9 (1893.9 to 2175.6) | 1604.5 (1476.2 to 1733.4)  | 253.7 (208.4 to 297.6)        | 176.6 (132.9 to 228.5)          | 0.2 (0.0 to 0.3)                  |
| Argentina | 2033 | 1368.9 (1266.9 to 1468.5)  | 1080.7 (992.6 to 1171.3)   | 169.2 (138.4 to 199.6)        | 118.8 (89.5 to 153.6)           | 0.2 (0.0 to 0.2)                  | 2064.9 (1910.9 to 2215.0) | 1630.1 (1497.1 to 1766.7)  | 255.3 (208.8 to 301.1)        | 179.3 (135.1 to 231.6)          | 0.2 (0.0 to 0.3)                  |
| Argentina | 2034 | 1391.1 (1294.3 to 1501.3)  | 1099.5 (1008.2 to 1195.2)  | 170.6 (138.9 to 201.3)        | 120.8 (91.0 to 156.2)           | 0.2 (0.0 to 0.2)                  | 2098.2 (1952.2 to 2264.4) | 1658.5 (1520.7 to 1802.8)  | 257.3 (209.5 to 303.6)        | 182.2 (137.2 to 235.5)          | 0.2 (0.0 to 0.3)                  |
| Argentina | 2035 | 1412.6 (1305.8 to 1520.9)  | 1117.9 (1020.1 to 1218.8)  | 171.8 (139.5 to 203.2)        | 122.8 (92.4 to 158.5)           | 0.2 (0.0 to 0.2)                  | 2130.8 (1969.6 to 2294.0) | 1686.2 (1538.7 to 1838.4)  | 259.2 (210.4 to 306.5)        | 185.2 (139.4 to 239.1)          | 0.2 (0.0 to 0.3)                  |
| Argentina | 2036 | 1434.9 (1331.0 to 1549.5)  | 1136.9 (1034.4 to 1243.4)  | 173.2 (140.2 to 204.7)        | 124.8 (94.0 to 161.0)           | 0.2 (0.0 to 0.2)                  | 2164.4 (2007.6 to 2337.2) | 1714.8 (1560.2 to 1875.5)  | 261.2 (211.5 to 308.8)        | 188.2 (141.7 to 242.8)          | 0.2 (0.0 to 0.3)                  |
| Argentina | 2037 | 1457.2 (1335.2 to 1573.5)  | 1155.8 (1049.6 to 1267.6)  | 174.5 (141.1 to 206.4)        | 126.8 (95.6 to 163.6)           | 0.2 (0.0 to 0.2)                  | 2198.0 (2014.0 to 2373.4) | 1743.4 (1583.2 to 1912.0)  | 263.2 (212.8 to 311.3)        | 191.2 (144.3 to 246.8)          | 0.2 (0.0 to 0.4)                  |
| Argentina | 2038 | 1479.8 (1363.8 to 1600.1)  | 1175.0 (1065.1 to 1292.5)  | 175.9 (141.9 to 208.1)        | 128.8 (97.3 to 166.3)           | 0.1 (0.0 to 0.2)                  | 2232.1 (2057.1 to 2413.5) | 1772.3 (1606.6 to 1949.5)  | 265.3 (214.0 to 313.8)        | 194.3 (146.7 to 250.8)          | 0.2 (0.0 to 0.4)                  |
| Argentina | 2039 | 1499.9 (1377.2 to 1620.2)  | 1192.1 (1078.7 to 1315.1)  | 177.0 (142.8 to 209.3)        | 130.6 (98.7 to 168.9)           | 0.1 (0.0 to 0.3)                  | 2262.3 (2077.3 to 2443.9) | 1798.2 (1627.1 to 1983.6)  | 267.0 (215.5 to 315.7)        | 197.0 (148.9 to 254.7)          | 0.2 (0.0 to 0.4)                  |
| Argentina | 2040 | 1520.5 (1392.8 to 1651.4)  | 1209.7 (1091.6 to 1337.2)  | 178.2 (143.9 to 210.8)        | 132.4 (100.3 to 171.4)          | 0.1 (0.0 to 0.3)                  | 2293.4 (2100.9 to 2490.9) | 1824.6 (1646.6 to 2017.0)  | 268.8 (217.1 to 317.9)        | 199.8 (151.2 to 258.5)          | 0.2 (0.0 to 0.4)                  |
| Argentina | 2041 | 1539.4 (1411.2 to 1670.0)  | 1225.9 (1103.2 to 1356.2)  | 179.2 (144.9 to 212.7)        | 134.2 (101.7 to 173.1)          | 0.1 (0.0 to 0.3)                  | 2322.0 (2128.6 to 2518.9) | 1849.1 (1664.0 to 2045.6)  | 270.3 (218.5 to 320.9)        | 202.4 (153.4 to 261.1)          | 0.2 (0.0 to 0.4)                  |
| Argentina | 2042 | 1558.8 (1423.4 to 1700.8)  | 1242.5 (1115.1 to 1375.8)  | 180.3 (146.0 to 214.7)        | 135.9 (103.2 to 176.1)          | 0.1 (0.0 to 0.3)                  | 2351.3 (2146.9 to 2565.4) | 1874.1 (1681.9 to 2075.2)  | 271.9 (220.3 to 323.8)        | 205.0 (155.6 to 265.7)          | 0.2 (0.0 to 0.4)                  |
| Argentina | 2043 | 1576.4 (1428.6 to 1718.7)  | 1257.6 (1125.5 to 1395.2)  | 181.2 (147.0 to 216.6)        | 137.5 (104.2 to 178.7)          | 0.1 (0.0 to 0.3)                  | 2377.8 (2154.9 to 2592.5) | 1896.9 (1697.7 to 2104.5)  | 273.3 (221.8 to 326.7)        | 207.4 (157.2 to 269.5)          | 0.2 (0.0 to 0.4)                  |

| Country   | Year | 2018 US Dollars per capita |                            |                               |                                 |                                   | 2018 PPP per capita       |                            |                               |                                 |                                   |
|-----------|------|----------------------------|----------------------------|-------------------------------|---------------------------------|-----------------------------------|---------------------------|----------------------------|-------------------------------|---------------------------------|-----------------------------------|
|           |      | Health spending            | Government health spending | Out-of-pocket health spending | Prepaid private health spending | Development assistance for health | Health spending           | Government health spending | Out-of-pocket health spending | Prepaid private health spending | Development assistance for health |
| Argentina | 2044 | 1596.8 (1454.1 to 1743.0)  | 1274.9 (1137.9 to 1418.5)  | 182.4 (148.6 to 218.0)        | 139.3 (105.6 to 181.6)          | 0.1 (0.0 to 0.3)                  | 2408.5 (2193.3 to 2629.1) | 1923.0 (1716.3 to 2139.5)  | 275.1 (224.1 to 328.9)        | 210.1 (159.3 to 273.8)          | 0.2 (0.0 to 0.5)                  |
| Argentina | 2045 | 1617.1 (1467.0 to 1771.3)  | 1292.2 (1150.1 to 1440.3)  | 183.6 (150.3 to 221.0)        | 141.2 (106.7 to 184.1)          | 0.1 (0.0 to 0.3)                  | 2439.2 (2212.7 to 2671.7) | 1949.1 (1734.8 to 2172.5)  | 277.0 (226.7 to 333.4)        | 212.9 (160.9 to 277.7)          | 0.2 (0.0 to 0.5)                  |
| Argentina | 2046 | 1637.9 (1483.2 to 1807.5)  | 1309.7 (1162.6 to 1463.7)  | 184.9 (151.8 to 223.8)        | 143.1 (108.2 to 186.8)          | 0.1 (0.0 to 0.3)                  | 2470.5 (2237.2 to 2726.4) | 1975.5 (1753.6 to 2207.8)  | 278.9 (229.0 to 337.6)        | 215.8 (163.2 to 281.7)          | 0.2 (0.0 to 0.5)                  |
| Argentina | 2047 | 1658.5 (1502.8 to 1822.5)  | 1327.1 (1175.0 to 1487.3)  | 186.2 (153.2 to 226.0)        | 145.0 (109.4 to 189.6)          | 0.1 (0.0 to 0.4)                  | 2501.6 (2266.8 to 2749.0) | 2001.7 (1772.3 to 2243.3)  | 280.9 (231.1 to 340.9)        | 218.7 (165.1 to 286.0)          | 0.2 (0.0 to 0.5)                  |
| Argentina | 2048 | 1680.2 (1509.2 to 1854.3)  | 1345.3 (1187.8 to 1511.9)  | 187.7 (155.2 to 227.9)        | 147.0 (111.0 to 192.8)          | 0.1 (0.0 to 0.4)                  | 2534.3 (2276.5 to 2796.9) | 2029.2 (1791.6 to 2280.5)  | 283.1 (234.1 to 343.8)        | 221.8 (167.4 to 290.9)          | 0.2 (0.0 to 0.6)                  |
| Argentina | 2049 | 1700.9 (1526.5 to 1877.3)  | 1362.7 (1199.9 to 1535.8)  | 189.0 (156.3 to 230.0)        | 149.0 (112.5 to 196.0)          | 0.1 (0.0 to 0.4)                  | 2565.5 (2302.5 to 2831.7) | 2055.4 (1809.9 to 2316.6)  | 285.1 (235.7 to 346.9)        | 224.8 (169.7 to 295.6)          | 0.2 (0.0 to 0.6)                  |
| Argentina | 2050 | 1722.1 (1544.4 to 1914.7)  | 1380.5 (1211.9 to 1560.1)  | 190.4 (158.0 to 232.8)        | 151.0 (114.1 to 199.2)          | 0.1 (0.0 to 0.4)                  | 2597.5 (2329.6 to 2888.0) | 2082.3 (1828.0 to 2353.2)  | 287.2 (238.3 to 351.1)        | 227.8 (172.1 to 300.5)          | 0.2 (0.0 to 0.6)                  |
| Armenia   | 1995 | 40.6 (33.7 to 47.8)        | 17.0 (13.0 to 21.5)        | 19.7 (14.1 to 26.2)           | 0.8 (0.4 to 1.6)                | 3.0 (3.0 to 3.0)                  | 103.7 (86.1 to 122.3)     | 43.5 (33.2 to 55.1)        | 50.4 (36.2 to 67.0)           | 2.1 (0.9 to 4.0)                | 7.8 (7.8 to 7.8)                  |
| Armenia   | 1996 | 41.8 (34.9 to 49.4)        | 16.4 (12.6 to 20.6)        | 21.2 (15.6 to 27.9)           | 1.0 (0.4 to 1.8)                | 3.3 (3.3 to 3.3)                  | 106.9 (89.4 to 126.3)     | 41.8 (32.3 to 52.7)        | 54.1 (39.8 to 71.4)           | 2.4 (1.1 to 4.6)                | 8.5 (8.5 to 8.5)                  |
| Armenia   | 1997 | 44.5 (37.5 to 52.3)        | 15.5 (12.0 to 19.5)        | 23.8 (18.1 to 30.6)           | 1.0 (0.5 to 2.0)                | 4.1 (4.1 to 4.1)                  | 113.7 (96.0 to 133.8)     | 39.7 (30.7 to 49.9)        | 60.9 (46.4 to 78.4)           | 2.6 (1.2 to 5.0)                | 10.5 (10.5 to 10.5)               |
| Armenia   | 1998 | 46.9 (39.6 to 55.5)        | 16.1 (12.3 to 20.3)        | 27.7 (21.7 to 35.3)           | 1.1 (0.5 to 2.2)                | 2.0 (2.0 to 2.0)                  | 119.9 (101.3 to 142.0)    | 41.2 (31.6 to 52.0)        | 70.8 (55.6 to 90.3)           | 2.9 (1.3 to 5.7)                | 5.1 (5.1 to 5.1)                  |
| Armenia   | 1999 | 53.2 (45.3 to 62.2)        | 15.8 (12.2 to 20.0)        | 33.4 (26.0 to 41.6)           | 1.2 (0.5 to 2.2)                | 2.8 (2.8 to 2.8)                  | 136.1 (115.9 to 159.1)    | 40.5 (31.3 to 51.1)        | 85.3 (66.6 to 106.5)          | 3.0 (1.4 to 5.6)                | 7.3 (7.3 to 7.3)                  |
| Armenia   | 2000 | 67.0 (57.5 to 77.9)        | 15.4 (12.0 to 19.2)        | 45.4 (36.2 to 55.5)           | 1.2 (0.5 to 2.3)                | 5.1 (5.1 to 5.1)                  | 171.5 (147.0 to 199.1)    | 39.4 (30.7 to 49.1)        | 116.0 (92.7 to 142.0)         | 3.0 (1.4 to 5.8)                | 13.1 (13.1 to 13.1)               |
| Armenia   | 2001 | 76.9 (65.9 to 89.1)        | 17.4 (13.6 to 21.8)        | 55.1 (44.9 to 66.5)           | 1.3 (0.6 to 2.5)                | 3.1 (3.1 to 3.1)                  | 196.6 (168.5 to 228.0)    | 44.6 (34.9 to 55.9)        | 140.9 (114.8 to 170.1)        | 3.3 (1.5 to 6.3)                | 7.8 (7.8 to 7.8)                  |
| Armenia   | 2002 | 90.7 (78.1 to 103.6)       | 19.7 (15.4 to 24.6)        | 64.8 (53.0 to 77.3)           | 1.3 (0.6 to 2.6)                | 4.9 (4.9 to 4.9)                  | 232.1 (199.9 to 265.0)    | 50.3 (39.4 to 63.0)        | 165.8 (135.5 to 197.8)        | 3.4 (1.6 to 6.5)                | 12.6 (12.6 to 12.6)               |
| Armenia   | 2003 | 105.3 (91.2 to 120.8)      | 22.9 (18.2 to 28.5)        | 79.1 (65.7 to 92.9)           | 1.2 (0.6 to 2.5)                | 2.0 (2.0 to 2.0)                  | 269.4 (233.1 to 309.0)    | 58.6 (46.5 to 72.9)        | 202.4 (168.0 to 237.7)        | 3.2 (1.6 to 6.3)                | 5.2 (5.2 to 5.2)                  |
| Armenia   | 2004 | 128.8 (111.9 to 147.2)     | 26.7 (21.3 to 33.2)        | 98.1 (82.4 to 114.0)          | 0.9 (0.4 to 1.8)                | 3.1 (3.1 to 3.1)                  | 329.6 (286.2 to 376.5)    | 68.3 (54.5 to 84.9)        | 251.0 (210.8 to 291.5)        | 2.3 (1.1 to 4.5)                | 8.0 (8.0 to 8.0)                  |
| Armenia   | 2005 | 140.8 (122.7 to 160.3)     | 31.9 (25.5 to 39.9)        | 102.3 (86.4 to 119.0)         | 0.5 (0.2 to 0.9)                | 6.2 (6.2 to 6.2)                  | 360.2 (313.9 to 410.1)    | 81.7 (65.3 to 102.0)       | 261.6 (221.0 to 304.3)        | 1.2 (0.6 to 2.2)                | 15.8 (15.8 to 15.8)               |
| Armenia   | 2006 | 146.2 (127.7 to 165.6)     | 38.0 (30.6 to 47.2)        | 98.5 (83.0 to 114.9)          | 0.3 (0.2 to 0.6)                | 9.4 (9.4 to 9.4)                  | 374.0 (326.6 to 423.5)    | 97.2 (78.3 to 120.8)       | 251.9 (212.4 to 293.9)        | 0.8 (0.4 to 1.6)                | 24.0 (24.0 to 24.0)               |
| Armenia   | 2007 | 153.2 (133.9 to 174.0)     | 44.6 (35.9 to 55.3)        | 97.9 (82.9 to 115.8)          | 0.3 (0.2 to 0.6)                | 10.4 (10.4 to 10.4)               | 392.0 (342.6 to 445.1)    | 114.0 (91.9 to 141.3)      | 250.5 (212.1 to 296.1)        | 0.8 (0.4 to 1.6)                | 26.7 (26.7 to 26.7)               |
| Armenia   | 2008 | 149.9 (131.2 to 170.7)     | 48.3 (39.1 to 60.3)        | 92.9 (78.1 to 109.5)          | 0.4 (0.2 to 0.8)                | 8.2 (8.2 to 8.2)                  | 383.4 (335.7 to 436.5)    | 123.6 (99.9 to 154.3)      | 237.7 (199.8 to 280.0)        | 1.1 (0.5 to 2.0)                | 21.1 (21.1 to 21.1)               |

| Country | Year | 2018 US Dollars per capita |                            |                               |                                 |                                   | 2018 PPP per capita       |                            |                               |                                 |                                   |
|---------|------|----------------------------|----------------------------|-------------------------------|---------------------------------|-----------------------------------|---------------------------|----------------------------|-------------------------------|---------------------------------|-----------------------------------|
|         |      | Health spending            | Government health spending | Out-of-pocket health spending | Prepaid private health spending | Development assistance for health | Health spending           | Government health spending | Out-of-pocket health spending | Prepaid private health spending | Development assistance for health |
| Armenia | 2009 | 146.2 (128.8 to 165.4)     | 45.3 (36.3 to 56.4)        | 85.5 (71.9 to 100.6)          | 0.5 (0.3 to 1.0)                | 14.9 (14.9 to 14.9)               | 373.9 (329.4 to 423.0)    | 115.8 (92.8 to 144.4)      | 218.7 (184.0 to 257.4)        | 1.4 (0.7 to 2.6)                | 38.0 (38.0 to 38.0)               |
| Armenia | 2010 | 150.0 (131.7 to 168.9)     | 46.6 (37.1 to 57.2)        | 92.4 (78.5 to 107.8)          | 0.9 (0.4 to 1.8)                | 10.0 (10.0 to 10.0)               | 383.7 (336.9 to 432.0)    | 119.3 (94.8 to 146.2)      | 236.4 (200.7 to 275.7)        | 2.4 (1.1 to 4.6)                | 25.7 (25.7 to 25.7)               |
| Armenia | 2011 | 159.5 (141.0 to 178.9)     | 48.4 (38.4 to 59.3)        | 99.1 (85.0 to 114.8)          | 1.5 (0.7 to 2.8)                | 10.5 (10.5 to 10.5)               | 407.9 (360.7 to 457.7)    | 123.9 (98.3 to 151.8)      | 253.5 (217.4 to 293.8)        | 3.7 (1.7 to 7.2)                | 26.8 (26.8 to 26.8)               |
| Armenia | 2012 | 208.2 (186.7 to 231.3)     | 49.7 (39.5 to 61.0)        | 144.8 (126.1 to 165.4)        | 2.3 (1.1 to 4.4)                | 11.4 (11.4 to 11.4)               | 532.5 (477.5 to 591.6)    | 127.1 (101.1 to 155.9)     | 370.4 (322.5 to 423.1)        | 5.9 (2.7 to 11.2)               | 29.1 (29.1 to 29.1)               |
| Armenia | 2013 | 260.4 (235.6 to 287.6)     | 50.6 (40.1 to 62.7)        | 197.7 (175.7 to 222.5)        | 3.1 (1.4 to 6.0)                | 9.0 (9.0 to 9.0)                  | 666.0 (602.6 to 735.8)    | 129.3 (102.6 to 160.3)     | 505.7 (449.4 to 569.2)        | 8.0 (3.6 to 15.2)               | 23.0 (23.0 to 23.0)               |
| Armenia | 2014 | 312.7 (284.9 to 345.6)     | 52.7 (41.6 to 65.8)        | 250.8 (225.1 to 280.9)        | 3.7 (1.7 to 7.2)                | 5.5 (5.5 to 5.5)                  | 799.8 (728.6 to 884.1)    | 134.8 (106.4 to 168.4)     | 641.5 (575.8 to 718.6)        | 9.5 (4.3 to 18.4)               | 14.0 (14.0 to 14.0)               |
| Armenia | 2015 | 347.8 (312.4 to 384.9)     | 55.8 (44.1 to 69.8)        | 283.9 (251.4 to 319.1)        | 4.2 (1.9 to 8.0)                | 3.9 (3.9 to 3.9)                  | 889.7 (799.0 to 984.6)    | 142.7 (112.7 to 178.6)     | 726.1 (643.1 to 816.2)        | 10.8 (4.9 to 20.4)              | 10.1 (10.1 to 10.1)               |
| Armenia | 2016 | 364.9 (323.2 to 410.8)     | 57.5 (45.2 to 72.5)        | 296.1 (256.7 to 338.5)        | 4.3 (2.0 to 8.1)                | 7.0 (7.0 to 7.0)                  | 933.3 (826.8 to 1050.9)   | 147.2 (115.7 to 185.5)     | 757.3 (656.6 to 865.9)        | 11.1 (5.2 to 20.8)              | 17.8 (17.8 to 17.8)               |
| Armenia | 2017 | 386.8 (342.2 to 434.9)     | 60.0 (46.9 to 75.7)        | 317.4 (274.6 to 363.8)        | 4.6 (2.2 to 8.7)                | 4.8 (4.8 to 4.8)                  | 989.4 (875.3 to 1112.5)   | 153.4 (120.1 to 193.7)     | 811.9 (702.4 to 930.5)        | 11.8 (5.5 to 22.1)              | 12.2 (12.2 to 12.2)               |
| Armenia | 2018 | 398.7 (352.2 to 448.9)     | 61.9 (48.3 to 78.1)        | 327.5 (283.4 to 375.4)        | 4.8 (2.2 to 8.9)                | 4.5 (4.5 to 4.5)                  | 1019.9 (900.9 to 1148.2)  | 158.4 (123.6 to 199.7)     | 837.7 (724.9 to 960.2)        | 12.2 (5.7 to 22.8)              | 11.6 (11.6 to 11.6)               |
| Armenia | 2019 | 405.8 (359.2 to 457.2)     | 63.7 (49.5 to 80.3)        | 332.6 (289.4 to 381.1)        | 4.9 (2.3 to 9.1)                | 4.6 (4.3 to 4.9)                  | 1037.9 (918.7 to 1169.5)  | 163.0 (126.5 to 205.3)     | 850.7 (740.3 to 974.8)        | 12.5 (5.8 to 23.4)              | 11.8 (11.0 to 12.5)               |
| Armenia | 2020 | 412.7 (366.8 to 465.5)     | 65.6 (50.5 to 83.1)        | 337.4 (293.0 to 386.3)        | 5.0 (2.3 to 9.4)                | 4.7 (4.3 to 5.1)                  | 1055.5 (938.3 to 1190.7)  | 167.8 (129.3 to 212.6)     | 862.9 (749.4 to 988.0)        | 12.8 (6.0 to 24.0)              | 12.0 (11.0 to 13.0)               |
| Armenia | 2021 | 419.4 (371.2 to 471.8)     | 67.8 (52.3 to 85.4)        | 341.7 (296.3 to 391.4)        | 5.1 (2.4 to 9.6)                | 4.8 (4.3 to 5.3)                  | 1072.7 (949.5 to 1206.9)  | 173.3 (133.8 to 218.3)     | 874.0 (757.9 to 1001.1)       | 13.1 (6.1 to 24.6)              | 12.4 (11.1 to 13.7)               |
| Armenia | 2022 | 439.4 (387.7 to 495.4)     | 69.9 (53.7 to 88.5)        | 359.3 (310.7 to 411.7)        | 5.2 (2.4 to 9.8)                | 5.0 (4.4 to 5.6)                  | 1123.9 (991.7 to 1267.3)  | 178.7 (137.5 to 226.3)     | 919.0 (794.6 to 1053.1)       | 13.4 (6.2 to 25.2)              | 12.8 (11.3 to 14.2)               |
| Armenia | 2023 | 459.7 (405.6 to 518.3)     | 72.0 (54.9 to 91.4)        | 377.2 (324.8 to 432.0)        | 5.4 (2.5 to 10.1)               | 5.2 (4.5 to 5.9)                  | 1175.9 (1037.4 to 1325.8) | 184.2 (140.4 to 233.8)     | 964.8 (830.8 to 1105.1)       | 13.7 (6.4 to 25.8)              | 13.2 (11.5 to 15.0)               |
| Armenia | 2024 | 480.8 (422.6 to 543.4)     | 74.2 (56.7 to 93.8)        | 395.8 (341.7 to 453.5)        | 5.5 (2.5 to 10.3)               | 5.3 (4.6 to 6.2)                  | 1229.8 (1081.0 to 1389.9) | 189.7 (144.9 to 240.0)     | 1012.5 (874.1 to 1160.0)      | 14.0 (6.5 to 26.4)              | 13.7 (11.8 to 15.7)               |
| Armenia | 2025 | 503.4 (444.0 to 569.0)     | 76.4 (58.2 to 97.1)        | 415.9 (359.3 to 477.3)        | 5.6 (2.6 to 10.6)               | 5.5 (4.7 to 6.5)                  | 1287.7 (1135.7 to 1455.5) | 195.5 (149.0 to 248.3)     | 1063.8 (919.0 to 1220.8)      | 14.3 (6.6 to 27.1)              | 14.1 (12.0 to 16.5)               |
| Armenia | 2026 | 527.1 (464.3 to 596.2)     | 78.8 (60.1 to 100.4)       | 436.9 (377.9 to 501.1)        | 5.7 (2.7 to 10.9)               | 5.7 (4.8 to 6.7)                  | 1348.2 (1187.5 to 1524.9) | 201.5 (153.8 to 256.8)     | 1117.5 (966.7 to 1281.7)      | 14.7 (6.8 to 27.8)              | 14.6 (12.3 to 17.1)               |
| Armenia | 2027 | 552.4 (482.9 to 628.1)     | 81.3 (61.9 to 104.0)       | 459.4 (394.3 to 530.0)        | 5.9 (2.7 to 11.1)               | 5.9 (4.9 to 7.0)                  | 1413.0 (1235.3 to 1606.6) | 207.9 (158.3 to 266.0)     | 1175.1 (1008.5 to 1355.6)     | 15.0 (7.0 to 28.5)              | 15.1 (12.6 to 17.9)               |
| Armenia | 2028 | 578.3 (505.9 to 657.5)     | 83.8 (64.1 to 108.0)       | 482.4 (410.6 to 558.4)        | 6.0 (2.8 to 11.4)               | 6.1 (5.1 to 7.4)                  | 1479.3 (1294.1 to 1681.7) | 214.3 (163.9 to 276.3)     | 1233.9 (1050.1 to 1428.3)     | 15.4 (7.2 to 29.2)              | 15.6 (13.0 to 18.8)               |
| Armenia | 2029 | 605.1 (523.9 to 690.3)     | 86.5 (65.7 to 111.9)       | 506.1 (426.9 to 587.0)        | 6.2 (2.9 to 11.7)               | 6.3 (5.2 to 7.7)                  | 1547.6 (1340.2 to 1765.6) | 221.2 (168.0 to 286.3)     | 1294.4 (1092.1 to 1501.5)     | 15.9 (7.3 to 30.0)              | 16.1 (13.3 to 19.7)               |

| Country | Year | 2018 US Dollars per capita |                            |                               |                                 |                                   | 2018 PPP per capita       |                            |                               |                                 |                                   |
|---------|------|----------------------------|----------------------------|-------------------------------|---------------------------------|-----------------------------------|---------------------------|----------------------------|-------------------------------|---------------------------------|-----------------------------------|
|         |      | Health spending            | Government health spending | Out-of-pocket health spending | Prepaid private health spending | Development assistance for health | Health spending           | Government health spending | Out-of-pocket health spending | Prepaid private health spending | Development assistance for health |
| Armenia | 2030 | 631.7 (543.1 to 725.6)     | 89.0 (67.5 to 116.3)       | 529.7 (442.8 to 620.4)        | 6.4 (3.0 to 12.1)               | 6.5 (5.3 to 8.0)                  | 1615.7 (1389.1 to 1856.0) | 227.8 (172.6 to 297.5)     | 1355.0 (1132.6 to 1586.8)     | 16.3 (7.5 to 30.9)              | 16.6 (13.6 to 20.4)               |
| Armenia | 2031 | 659.3 (563.8 to 759.1)     | 91.8 (69.6 to 119.3)       | 554.1 (460.2 to 654.8)        | 6.6 (3.0 to 12.4)               | 6.7 (5.4 to 8.4)                  | 1686.3 (1442.0 to 1941.6) | 234.9 (178.0 to 305.2)     | 1417.4 (1177.2 to 1674.8)     | 16.8 (7.8 to 31.8)              | 17.2 (13.9 to 21.5)               |
| Armenia | 2032 | 687.8 (585.4 to 795.0)     | 94.7 (72.0 to 124.3)       | 579.4 (474.9 to 688.3)        | 6.8 (3.2 to 12.8)               | 6.9 (5.6 to 8.7)                  | 1759.4 (1497.3 to 2033.4) | 242.3 (184.2 to 317.8)     | 1482.0 (1214.6 to 1760.6)     | 17.3 (8.1 to 32.9)              | 17.7 (14.2 to 22.3)               |
| Armenia | 2033 | 716.3 (603.3 to 833.3)     | 97.6 (73.3 to 127.3)       | 604.5 (493.7 to 722.9)        | 7.0 (3.3 to 13.3)               | 7.2 (5.7 to 9.2)                  | 1832.1 (1543.2 to 2131.5) | 249.6 (187.4 to 325.7)     | 1546.3 (1262.9 to 1849.2)     | 17.9 (8.3 to 33.9)              | 18.3 (14.6 to 23.5)               |
| Armenia | 2034 | 745.1 (620.1 to 873.6)     | 100.5 (74.8 to 131.6)      | 629.9 (509.3 to 756.5)        | 7.2 (3.4 to 13.7)               | 7.4 (5.8 to 9.6)                  | 1905.9 (1586.0 to 2234.5) | 257.2 (191.4 to 336.6)     | 1611.3 (1302.7 to 1935.1)     | 18.5 (8.6 to 35.1)              | 19.0 (14.9 to 24.5)               |
| Armenia | 2035 | 774.1 (642.1 to 912.9)     | 103.6 (76.8 to 135.8)      | 655.4 (524.6 to 790.8)        | 7.5 (3.5 to 14.2)               | 7.7 (6.0 to 10.0)                 | 1980.1 (1642.3 to 2335.0) | 265.0 (196.3 to 347.4)     | 1676.4 (1341.9 to 2022.8)     | 19.1 (8.9 to 36.3)              | 19.6 (15.2 to 25.6)               |
| Armenia | 2036 | 802.8 (668.5 to 956.2)     | 106.8 (79.6 to 140.5)      | 680.5 (540.8 to 829.7)        | 7.7 (3.6 to 14.7)               | 7.9 (6.1 to 10.6)                 | 2053.5 (1709.9 to 2445.7) | 273.1 (203.6 to 359.4)     | 1740.5 (1383.2 to 2122.3)     | 19.7 (9.1 to 37.5)              | 20.2 (15.6 to 27.2)               |
| Armenia | 2037 | 830.8 (678.7 to 992.9)     | 109.8 (81.7 to 144.6)      | 704.9 (559.1 to 864.6)        | 7.9 (3.7 to 15.1)               | 8.2 (6.3 to 11.0)                 | 2125.0 (1736.1 to 2539.7) | 280.8 (209.1 to 369.8)     | 1802.9 (1430.0 to 2211.5)     | 20.3 (9.4 to 38.7)              | 20.9 (16.0 to 28.0)               |
| Armenia | 2038 | 858.2 (698.6 to 1029.8)    | 113.0 (83.8 to 150.0)      | 728.7 (574.8 to 898.9)        | 8.2 (3.8 to 15.6)               | 8.4 (6.4 to 11.7)                 | 2195.2 (1787.0 to 2634.0) | 288.9 (214.4 to 383.6)     | 1863.8 (1470.2 to 2299.3)     | 20.9 (9.7 to 39.9)              | 21.6 (16.4 to 30.1)               |
| Armenia | 2039 | 884.6 (719.0 to 1071.3)    | 116.0 (86.2 to 153.5)      | 751.4 (589.0 to 934.9)        | 8.4 (3.9 to 16.0)               | 8.7 (6.7 to 12.1)                 | 2262.7 (1839.0 to 2740.2) | 296.8 (220.4 to 392.7)     | 1922.1 (1506.5 to 2391.2)     | 21.5 (10.0 to 41.0)             | 22.3 (17.0 to 30.9)               |
| Armenia | 2040 | 910.8 (742.9 to 1101.2)    | 119.3 (88.2 to 157.7)      | 773.8 (600.8 to 965.9)        | 8.7 (4.0 to 16.5)               | 9.0 (6.8 to 12.5)                 | 2329.7 (1900.3 to 2816.6) | 305.1 (225.5 to 403.4)     | 1979.3 (1536.8 to 2470.5)     | 22.2 (10.3 to 42.2)             | 23.1 (17.5 to 32.0)               |
| Armenia | 2041 | 936.4 (754.4 to 1145.1)    | 122.7 (91.5 to 162.8)      | 795.4 (611.2 to 996.2)        | 8.9 (4.1 to 17.0)               | 9.3 (7.0 to 13.0)                 | 2395.1 (1929.6 to 2928.9) | 313.9 (233.9 to 416.4)     | 2034.5 (1563.4 to 2548.2)     | 22.9 (10.6 to 43.5)             | 23.9 (17.9 to 33.2)               |
| Armenia | 2042 | 960.6 (770.6 to 1174.6)    | 126.1 (93.6 to 168.1)      | 815.6 (620.6 to 1027.6)       | 9.2 (4.2 to 17.5)               | 9.7 (7.2 to 13.8)                 | 2457.0 (1971.2 to 3004.4) | 322.6 (239.4 to 430.0)     | 2086.1 (1587.4 to 2628.5)     | 23.5 (10.9 to 44.9)             | 24.8 (18.5 to 35.3)               |
| Armenia | 2043 | 983.6 (775.2 to 1203.5)    | 129.6 (95.4 to 172.7)      | 834.5 (634.1 to 1056.0)       | 9.5 (4.4 to 18.1)               | 10.0 (7.4 to 14.5)                | 2515.8 (1983.0 to 3078.3) | 331.6 (243.9 to 441.7)     | 2134.4 (1621.9 to 2701.1)     | 24.2 (11.2 to 46.2)             | 25.7 (18.9 to 37.0)               |
| Armenia | 2044 | 1005.1 (797.7 to 1250.0)   | 133.2 (98.0 to 176.9)      | 851.8 (643.9 to 1083.6)       | 9.7 (4.5 to 18.6)               | 10.4 (7.6 to 15.1)                | 2571.0 (2040.4 to 3197.3) | 340.6 (250.7 to 452.5)     | 2178.9 (1647.1 to 2771.6)     | 24.8 (11.5 to 47.6)             | 26.6 (19.6 to 38.5)               |
| Armenia | 2045 | 1025.4 (811.8 to 1271.2)   | 136.8 (100.7 to 182.8)     | 867.8 (654.1 to 1108.6)       | 10.0 (4.6 to 19.0)              | 10.8 (7.8 to 16.4)                | 2622.9 (2076.5 to 3251.4) | 350.0 (257.5 to 467.7)     | 2219.7 (1673.0 to 2835.6)     | 25.5 (11.8 to 48.7)             | 27.7 (20.0 to 41.8)               |
| Armenia | 2046 | 1044.0 (819.5 to 1298.6)   | 140.6 (103.2 to 189.6)     | 881.9 (663.5 to 1130.4)       | 10.2 (4.7 to 19.5)              | 11.3 (8.1 to 17.3)                | 2670.4 (2096.1 to 3321.5) | 359.8 (264.0 to 485.1)     | 2255.8 (1697.2 to 2891.5)     | 26.1 (12.0 to 49.8)             | 28.8 (20.8 to 44.4)               |
| Armenia | 2047 | 1060.2 (841.1 to 1316.3)   | 144.3 (105.1 to 194.4)     | 893.7 (671.5 to 1148.6)       | 10.5 (4.8 to 20.0)              | 11.7 (8.4 to 18.5)                | 2711.9 (2151.4 to 3367.0) | 369.2 (268.9 to 497.2)     | 2285.9 (1717.6 to 2937.9)     | 26.8 (12.3 to 51.0)             | 30.0 (21.5 to 47.2)               |
| Armenia | 2048 | 1076.9 (847.6 to 1344.5)   | 148.3 (108.1 to 200.7)     | 905.6 (680.8 to 1168.1)       | 10.7 (4.9 to 20.5)              | 12.2 (8.7 to 19.6)                | 2754.4 (2167.9 to 3438.9) | 379.3 (276.5 to 513.4)     | 2316.5 (1741.4 to 2987.8)     | 27.4 (12.6 to 52.3)             | 31.3 (22.3 to 50.2)               |
| Armenia | 2049 | 1091.6 (848.8 to 1365.7)   | 151.8 (110.9 to 205.1)     | 916.2 (685.8 to 1186.3)       | 10.9 (5.0 to 20.9)              | 12.7 (9.1 to 20.6)                | 2792.1 (2171.2 to 3493.3) | 388.2 (283.6 to 524.5)     | 2343.4 (1754.2 to 3034.4)     | 27.9 (12.8 to 53.5)             | 32.6 (23.2 to 52.6)               |
| Armenia | 2050 | 1106.8 (861.6 to 1392.3)   | 155.5 (114.1 to 210.2)     | 926.8 (691.5 to 1204.8)       | 11.1 (5.1 to 21.4)              | 13.3 (9.3 to 21.7)                | 2830.9 (2203.9 to 3561.3) | 397.8 (291.9 to 537.7)     | 2370.6 (1768.8 to 3081.6)     | 28.5 (13.1 to 54.7)             | 34.1 (23.8 to 55.4)               |

| Country   | Year | 2018 US Dollars per capita |                            |                               |                                 |                                   | 2018 PPP per capita       |                            |                               |                                 |                                   |
|-----------|------|----------------------------|----------------------------|-------------------------------|---------------------------------|-----------------------------------|---------------------------|----------------------------|-------------------------------|---------------------------------|-----------------------------------|
|           |      | Health spending            | Government health spending | Out-of-pocket health spending | Prepaid private health spending | Development assistance for health | Health spending           | Government health spending | Out-of-pocket health spending | Prepaid private health spending | Development assistance for health |
| Australia | 1995 | 2827.1 (2748.9 to 2907.1)  | 1872.1 (1812.1 to 1931.2)  | 475.7 (440.2 to 510.8)        | 479.3 (435.5 to 527.7)          | 0.0 (0.0 to 0.0)                  | 2583.2 (2511.7 to 2656.3) | 1710.6 (1655.7 to 1764.6)  | 434.6 (402.2 to 466.7)        | 437.9 (397.9 to 482.1)          | 0.0 (0.0 to 0.0)                  |
| Australia | 1996 | 2950.3 (2887.6 to 3012.3)  | 1963.5 (1917.3 to 2012.0)  | 517.2 (490.1 to 547.0)        | 469.7 (433.8 to 507.2)          | 0.0 (0.0 to 0.0)                  | 2695.8 (2638.5 to 2752.4) | 1794.1 (1751.9 to 1838.4)  | 472.5 (447.8 to 499.8)        | 429.2 (396.4 to 463.4)          | 0.0 (0.0 to 0.0)                  |
| Australia | 1997 | 3079.1 (3019.2 to 3144.6)  | 2076.8 (2031.9 to 2124.2)  | 566.4 (540.1 to 596.4)        | 435.9 (403.8 to 470.6)          | 0.0 (0.0 to 0.0)                  | 2813.4 (2758.7 to 2873.3) | 1897.6 (1856.6 to 1940.9)  | 517.5 (493.5 to 544.9)        | 398.3 (368.9 to 430.0)          | 0.0 (0.0 to 0.0)                  |
| Australia | 1998 | 3237.6 (3173.5 to 3302.6)  | 2199.5 (2151.8 to 2250.9)  | 637.4 (608.2 to 665.7)        | 400.7 (369.4 to 432.3)          | 0.0 (0.0 to 0.0)                  | 2958.2 (2899.7 to 3017.7) | 2009.8 (1966.1 to 2056.7)  | 582.4 (555.8 to 608.2)        | 366.1 (337.5 to 395.0)          | 0.0 (0.0 to 0.0)                  |
| Australia | 1999 | 3402.4 (3339.3 to 3471.1)  | 2334.2 (2284.8 to 2387.0)  | 685.5 (657.0 to 712.4)        | 382.7 (351.3 to 413.6)          | 0.0 (0.0 to 0.0)                  | 3108.8 (3051.2 to 3171.6) | 2132.8 (2087.6 to 2181.0)  | 626.3 (600.3 to 651.0)        | 349.7 (321.0 to 377.9)          | 0.0 (0.0 to 0.0)                  |
| Australia | 2000 | 3529.5 (3466.8 to 3594.1)  | 2414.6 (2366.8 to 2461.5)  | 727.7 (699.1 to 754.6)        | 387.2 (360.9 to 414.2)          | 0.0 (0.0 to 0.0)                  | 3225.0 (3167.7 to 3284.0) | 2206.3 (2162.6 to 2249.1)  | 664.9 (638.8 to 689.5)        | 353.8 (329.7 to 378.4)          | 0.0 (0.0 to 0.0)                  |
| Australia | 2001 | 3660.2 (3596.9 to 3720.4)  | 2494.8 (2447.3 to 2539.8)  | 748.1 (723.5 to 775.1)        | 417.3 (390.6 to 446.3)          | 0.0 (0.0 to 0.0)                  | 3344.4 (3286.5 to 3399.4) | 2279.5 (2236.1 to 2320.7)  | 683.6 (661.0 to 708.2)        | 381.3 (356.9 to 407.8)          | 0.0 (0.0 to 0.0)                  |
| Australia | 2002 | 3816.6 (3754.7 to 3875.3)  | 2604.4 (2556.6 to 2653.7)  | 759.9 (734.6 to 786.9)        | 452.3 (424.8 to 480.8)          | 0.0 (0.0 to 0.0)                  | 3487.3 (3430.8 to 3540.9) | 2379.7 (2336.0 to 2424.8)  | 694.3 (671.2 to 719.0)        | 413.3 (388.1 to 439.3)          | 0.0 (0.0 to 0.0)                  |
| Australia | 2003 | 3948.1 (3889.8 to 4011.2)  | 2691.8 (2644.7 to 2740.0)  | 767.0 (739.1 to 794.2)        | 489.3 (459.4 to 518.5)          | 0.0 (0.0 to 0.0)                  | 3607.5 (3554.2 to 3665.1) | 2459.6 (2416.5 to 2503.6)  | 700.9 (675.3 to 725.7)        | 447.1 (419.8 to 473.8)          | 0.0 (0.0 to 0.0)                  |
| Australia | 2004 | 4077.0 (4016.3 to 4141.0)  | 2782.6 (2733.6 to 2829.6)  | 787.4 (759.6 to 816.5)        | 507.0 (478.3 to 537.9)          | 0.0 (0.0 to 0.0)                  | 3725.2 (3669.7 to 3783.7) | 2542.5 (2497.7 to 2585.5)  | 719.5 (694.1 to 746.1)        | 463.2 (437.0 to 491.5)          | 0.0 (0.0 to 0.0)                  |
| Australia | 2005 | 4132.8 (4071.2 to 4196.1)  | 2826.7 (2780.9 to 2874.4)  | 804.1 (777.3 to 832.0)        | 502.0 (475.2 to 533.1)          | 0.0 (0.0 to 0.0)                  | 3776.3 (3720.0 to 3834.1) | 2582.8 (2540.9 to 2626.4)  | 734.7 (710.2 to 760.2)        | 458.7 (434.2 to 487.1)          | 0.0 (0.0 to 0.0)                  |
| Australia | 2006 | 4211.0 (4151.1 to 4270.8)  | 2888.2 (2839.2 to 2936.8)  | 820.3 (793.6 to 849.0)        | 502.6 (476.1 to 532.5)          | 0.0 (0.0 to 0.0)                  | 3847.7 (3793.0 to 3902.4) | 2639.0 (2594.3 to 2683.4)  | 749.5 (725.1 to 775.8)        | 459.2 (435.0 to 486.5)          | 0.0 (0.0 to 0.0)                  |
| Australia | 2007 | 4359.5 (4296.7 to 4419.3)  | 3008.4 (2957.6 to 3057.0)  | 836.5 (808.9 to 863.5)        | 514.7 (485.5 to 544.5)          | 0.0 (0.0 to 0.0)                  | 3983.4 (3926.0 to 4038.0) | 2748.8 (2702.4 to 2793.2)  | 764.3 (739.1 to 789.0)        | 470.3 (443.6 to 497.5)          | 0.0 (0.0 to 0.0)                  |
| Australia | 2008 | 4496.0 (4435.6 to 4558.8)  | 3108.5 (3059.2 to 3156.7)  | 858.0 (830.2 to 885.2)        | 529.6 (501.3 to 558.1)          | 0.0 (0.0 to 0.0)                  | 4108.1 (4052.9 to 4165.5) | 2840.3 (2795.2 to 2884.3)  | 783.9 (758.6 to 808.8)        | 483.9 (458.1 to 509.9)          | 0.0 (0.0 to 0.0)                  |
| Australia | 2009 | 4602.8 (4540.7 to 4670.2)  | 3180.4 (3127.8 to 3233.3)  | 883.9 (857.1 to 912.0)        | 538.5 (509.3 to 569.6)          | 0.0 (0.0 to 0.0)                  | 4205.6 (4148.9 to 4267.3) | 2906.0 (2858.0 to 2954.4)  | 807.6 (783.1 to 833.3)        | 492.0 (465.4 to 520.4)          | 0.0 (0.0 to 0.0)                  |
| Australia | 2010 | 4695.3 (4634.8 to 4761.0)  | 3236.6 (3187.1 to 3289.5)  | 912.3 (883.9 to 942.1)        | 546.4 (514.4 to 579.4)          | 0.0 (0.0 to 0.0)                  | 4290.2 (4234.9 to 4350.2) | 2957.3 (2912.1 to 3005.7)  | 833.6 (807.7 to 860.8)        | 499.2 (470.0 to 529.4)          | 0.0 (0.0 to 0.0)                  |
| Australia | 2011 | 4806.2 (4739.6 to 4877.5)  | 3297.3 (3248.3 to 3346.8)  | 939.1 (911.2 to 969.4)        | 569.8 (540.6 to 602.5)          | 0.0 (0.0 to 0.0)                  | 4391.5 (4330.6 to 4456.7) | 3012.8 (2968.0 to 3058.1)  | 858.1 (832.6 to 885.8)        | 520.7 (494.0 to 550.5)          | 0.0 (0.0 to 0.0)                  |
| Australia | 2012 | 4920.2 (4854.0 to 4994.1)  | 3339.3 (3288.5 to 3394.3)  | 972.7 (942.0 to 1002.5)       | 608.2 (577.7 to 637.4)          | 0.0 (0.0 to 0.0)                  | 4495.7 (4435.2 to 4563.2) | 3051.2 (3004.8 to 3101.4)  | 888.8 (860.7 to 916.0)        | 555.7 (527.9 to 582.4)          | 0.0 (0.0 to 0.0)                  |
| Australia | 2013 | 5050.4 (4983.9 to 5120.9)  | 3409.7 (3359.4 to 3461.3)  | 996.3 (965.4 to 1026.4)       | 644.3 (612.5 to 677.2)          | 0.0 (0.0 to 0.0)                  | 4614.6 (4553.9 to 4679.1) | 3115.5 (3069.5 to 3162.7)  | 910.4 (882.1 to 937.8)        | 588.7 (559.7 to 618.8)          | 0.0 (0.0 to 0.0)                  |
| Australia | 2014 | 5235.5 (5163.3 to 5305.9)  | 3536.1 (3484.1 to 3591.1)  | 1019.7 (986.2 to 1048.9)      | 679.6 (647.2 to 715.2)          | 0.0 (0.0 to 0.0)                  | 4783.7 (4717.8 to 4848.1) | 3231.0 (3183.5 to 3281.3)  | 931.7 (901.1 to 958.4)        | 621.0 (591.4 to 653.5)          | 0.0 (0.0 to 0.0)                  |
| Australia | 2015 | 5440.8 (5366.5 to 5514.4)  | 3698.2 (3644.4 to 3751.9)  | 1038.8 (1005.1 to 1069.8)     | 703.8 (669.6 to 737.7)          | 0.0 (0.0 to 0.0)                  | 4971.3 (4903.5 to 5038.6) | 3379.2 (3330.0 to 3428.2)  | 949.1 (918.4 to 977.5)        | 643.0 (611.8 to 674.0)          | 0.0 (0.0 to 0.0)                  |

| Country   | Year | 2018 US Dollars per capita |                            |                               |                                 |                                   | 2018 PPP per capita       |                            |                               |                                 |                                   |
|-----------|------|----------------------------|----------------------------|-------------------------------|---------------------------------|-----------------------------------|---------------------------|----------------------------|-------------------------------|---------------------------------|-----------------------------------|
|           |      | Health spending            | Government health spending | Out-of-pocket health spending | Prepaid private health spending | Development assistance for health | Health spending           | Government health spending | Out-of-pocket health spending | Prepaid private health spending | Development assistance for health |
| Australia | 2016 | 5562.8 (5476.0 to 5649.9)  | 3801.9 (3730.5 to 3873.8)  | 1050.8 (1005.0 to 1096.4)     | 710.1 (665.3 to 755.5)          | 0.0 (0.0 to 0.0)                  | 5082.8 (5003.5 to 5162.4) | 3473.8 (3408.6 to 3539.6)  | 960.1 (918.3 to 1001.8)       | 648.9 (607.9 to 690.3)          | 0.0 (0.0 to 0.0)                  |
| Australia | 2017 | 5596.2 (5505.5 to 5686.9)  | 3812.6 (3740.8 to 3887.2)  | 1063.9 (1012.5 to 1111.1)     | 719.8 (673.5 to 766.7)          | 0.0 (0.0 to 0.0)                  | 5113.3 (5030.4 to 5196.2) | 3483.6 (3418.0 to 3551.8)  | 972.1 (925.1 to 1015.2)       | 657.7 (615.4 to 700.5)          | 0.0 (0.0 to 0.0)                  |
| Australia | 2018 | 5662.0 (5564.7 to 5762.1)  | 3855.4 (3782.2 to 3930.3)  | 1078.4 (1026.8 to 1129.6)     | 728.3 (682.6 to 774.6)          | 0.0 (0.0 to 0.0)                  | 5173.5 (5084.5 to 5265.0) | 3522.7 (3455.9 to 3591.2)  | 985.3 (938.2 to 1032.2)       | 665.4 (623.7 to 707.8)          | 0.0 (0.0 to 0.0)                  |
| Australia | 2019 | 5728.0 (5624.4 to 5833.6)  | 3898.4 (3823.3 to 3982.3)  | 1093.1 (1037.7 to 1145.7)     | 736.5 (691.8 to 783.6)          | 0.0 (0.0 to 0.0)                  | 5233.8 (5139.1 to 5330.3) | 3562.1 (3493.4 to 3638.7)  | 998.8 (948.2 to 1046.8)       | 672.9 (632.1 to 716.0)          | 0.0 (0.0 to 0.0)                  |
| Australia | 2020 | 5798.8 (5683.5 to 5908.2)  | 3945.2 (3862.5 to 4034.8)  | 1108.4 (1047.3 to 1165.6)     | 745.2 (700.6 to 793.6)          | 0.0 (0.0 to 0.0)                  | 5298.5 (5193.1 to 5398.4) | 3604.8 (3529.2 to 3686.6)  | 1012.8 (956.9 to 1065.0)      | 680.9 (640.2 to 725.1)          | 0.0 (0.0 to 0.0)                  |
| Australia | 2021 | 5860.2 (5745.4 to 5973.9)  | 3983.1 (3895.2 to 4071.0)  | 1123.8 (1060.6 to 1184.2)     | 753.2 (706.5 to 802.3)          | 0.0 (0.0 to 0.0)                  | 5354.5 (5249.7 to 5458.5) | 3639.5 (3559.1 to 3719.8)  | 1026.8 (969.1 to 1082.0)      | 688.2 (645.5 to 733.1)          | 0.0 (0.0 to 0.0)                  |
| Australia | 2022 | 5936.3 (5814.1 to 6050.5)  | 4033.2 (3944.2 to 4120.2)  | 1140.6 (1076.1 to 1205.4)     | 762.5 (716.3 to 812.1)          | 0.0 (0.0 to 0.0)                  | 5424.1 (5312.4 to 5528.5) | 3685.2 (3603.8 to 3764.7)  | 1042.1 (983.3 to 1101.4)      | 696.7 (654.5 to 742.0)          | 0.0 (0.0 to 0.0)                  |
| Australia | 2023 | 6018.5 (5892.2 to 6139.3)  | 4088.1 (3995.8 to 4181.2)  | 1158.1 (1095.6 to 1227.7)     | 772.3 (724.5 to 822.5)          | 0.0 (0.0 to 0.0)                  | 5499.2 (5383.8 to 5609.6) | 3735.4 (3651.1 to 3820.5)  | 1058.2 (1001.0 to 1121.8)     | 705.7 (662.0 to 751.6)          | 0.0 (0.0 to 0.0)                  |
| Australia | 2024 | 6105.6 (5971.1 to 6233.0)  | 4147.1 (4050.9 to 4249.9)  | 1175.9 (1102.0 to 1249.7)     | 782.5 (734.5 to 833.8)          | 0.0 (0.0 to 0.0)                  | 5578.8 (5455.9 to 5695.2) | 3789.3 (3701.4 to 3883.2)  | 1074.5 (1006.9 to 1141.9)     | 715.0 (671.2 to 761.8)          | 0.0 (0.0 to 0.0)                  |
| Australia | 2025 | 6192.8 (6047.3 to 6325.6)  | 4206.2 (4103.7 to 4314.2)  | 1193.9 (1119.3 to 1273.8)     | 792.7 (744.5 to 844.5)          | 0.0 (0.0 to 0.0)                  | 5658.5 (5525.6 to 5779.9) | 3843.3 (3749.7 to 3942.0)  | 1090.9 (1022.8 to 1163.9)     | 724.3 (680.2 to 771.6)          | 0.0 (0.0 to 0.0)                  |
| Australia | 2026 | 6283.3 (6125.9 to 6438.0)  | 4267.4 (4155.0 to 4384.0)  | 1212.4 (1131.0 to 1306.1)     | 803.5 (753.9 to 857.0)          | 0.0 (0.0 to 0.0)                  | 5741.2 (5597.3 to 5882.6) | 3899.2 (3796.5 to 4005.8)  | 1107.8 (1033.4 to 1193.4)     | 734.2 (688.8 to 783.1)          | 0.0 (0.0 to 0.0)                  |
| Australia | 2027 | 6373.3 (6200.6 to 6549.6)  | 4328.0 (4205.3 to 4454.7)  | 1231.0 (1140.4 to 1338.6)     | 814.2 (762.2 to 870.1)          | 0.0 (0.0 to 0.0)                  | 5823.4 (5665.6 to 5984.5) | 3954.6 (3842.4 to 4070.4)  | 1124.8 (1042.0 to 1223.1)     | 744.0 (696.5 to 795.0)          | 0.0 (0.0 to 0.0)                  |
| Australia | 2028 | 6465.4 (6275.8 to 6660.8)  | 4390.2 (4254.9 to 4525.6)  | 1249.9 (1145.9 to 1375.2)     | 825.2 (770.9 to 882.8)          | 0.0 (0.0 to 0.0)                  | 5907.5 (5734.3 to 6086.1) | 4011.4 (3887.7 to 4135.1)  | 1142.1 (1047.0 to 1256.5)     | 754.0 (704.3 to 806.6)          | 0.0 (0.0 to 0.0)                  |
| Australia | 2029 | 6558.9 (6359.6 to 6779.4)  | 4453.3 (4304.4 to 4604.8)  | 1269.1 (1149.8 to 1412.8)     | 836.6 (779.7 to 895.8)          | 0.0 (0.0 to 0.0)                  | 5993.0 (5810.9 to 6194.5) | 4069.0 (3933.0 to 4207.5)  | 1159.6 (1050.6 to 1290.9)     | 764.4 (712.4 to 818.5)          | 0.0 (0.0 to 0.0)                  |
| Australia | 2030 | 6654.5 (6434.6 to 6895.6)  | 4517.5 (4354.1 to 4688.4)  | 1288.6 (1156.0 to 1452.2)     | 848.4 (789.0 to 910.0)          | 0.0 (0.0 to 0.0)                  | 6080.3 (5879.4 to 6300.6) | 4127.7 (3978.4 to 4283.8)  | 1177.4 (1056.3 to 1326.9)     | 775.2 (720.9 to 831.5)          | 0.0 (0.0 to 0.0)                  |
| Australia | 2031 | 6749.3 (6508.3 to 7012.5)  | 4580.5 (4402.2 to 4765.3)  | 1308.1 (1159.9 to 1490.3)     | 860.6 (798.1 to 925.0)          | 0.0 (0.0 to 0.0)                  | 6167.0 (5946.7 to 6407.5) | 4185.3 (4022.4 to 4354.2)  | 1195.3 (1059.8 to 1361.7)     | 786.4 (729.2 to 845.2)          | 0.0 (0.0 to 0.0)                  |
| Australia | 2032 | 6847.4 (6584.9 to 7143.1)  | 4645.7 (4449.7 to 4845.3)  | 1328.1 (1163.8 to 1526.1)     | 873.6 (809.6 to 941.1)          | 0.0 (0.0 to 0.0)                  | 6256.6 (6016.8 to 6526.8) | 4244.9 (4065.8 to 4427.3)  | 1213.5 (1063.4 to 1394.4)     | 798.2 (739.7 to 859.9)          | 0.0 (0.0 to 0.0)                  |
| Australia | 2033 | 6948.1 (6653.0 to 7272.2)  | 4712.7 (4500.7 to 4926.2)  | 1348.4 (1173.6 to 1564.6)     | 887.1 (820.3 to 957.3)          | 0.0 (0.0 to 0.0)                  | 6348.6 (6079.0 to 6644.7) | 4306.0 (4112.3 to 4501.2)  | 1232.0 (1072.4 to 1429.6)     | 810.5 (749.5 to 874.7)          | 0.0 (0.0 to 0.0)                  |
| Australia | 2034 | 7051.4 (6742.7 to 7395.9)  | 4781.7 (4552.7 to 5006.9)  | 1368.9 (1179.3 to 1602.7)     | 900.8 (830.8 to 974.6)          | 0.0 (0.0 to 0.0)                  | 6443.0 (6161.0 to 6757.8) | 4369.2 (4159.8 to 4574.9)  | 1250.8 (1077.6 to 1464.4)     | 823.1 (759.1 to 890.5)          | 0.0 (0.0 to 0.0)                  |
| Australia | 2035 | 7159.6 (6828.7 to 7517.8)  | 4854.7 (4610.3 to 5099.7)  | 1389.8 (1186.4 to 1640.7)     | 915.1 (841.7 to 992.2)          | 0.0 (0.0 to 0.0)                  | 6541.9 (6239.5 to 6869.2) | 4435.9 (4212.5 to 4659.7)  | 1269.9 (1084.1 to 1499.1)     | 836.1 (769.1 to 906.6)          | 0.0 (0.0 to 0.0)                  |
| Australia | 2036 | 7266.1 (6904.1 to 7647.8)  | 4926.0 (4660.6 to 5182.7)  | 1410.7 (1195.6 to 1677.6)     | 929.4 (852.0 to 1008.9)         | 0.0 (0.0 to 0.0)                  | 6639.2 (6308.4 to 6987.9) | 4500.9 (4258.4 to 4735.5)  | 1289.0 (1092.4 to 1532.9)     | 849.2 (778.5 to 921.8)          | 0.0 (0.0 to 0.0)                  |

| Country   | Year | 2018 US Dollars per capita |                            |                               |                                 |                                   | 2018 PPP per capita       |                            |                               |                                 |                                   |
|-----------|------|----------------------------|----------------------------|-------------------------------|---------------------------------|-----------------------------------|---------------------------|----------------------------|-------------------------------|---------------------------------|-----------------------------------|
|           |      | Health spending            | Government health spending | Out-of-pocket health spending | Prepaid private health spending | Development assistance for health | Health spending           | Government health spending | Out-of-pocket health spending | Prepaid private health spending | Development assistance for health |
| Australia | 2037 | 7373.5 (6987.5 to 7787.1)  | 4997.9 (4713.0 to 5277.1)  | 1431.7 (1204.6 to 1714.2)     | 943.9 (862.7 to 1026.3)         | 0.0 (0.0 to 0.0)                  | 6737.3 (6384.6 to 7115.2) | 4566.7 (4306.4 to 4821.8)  | 1308.1 (1100.7 to 1566.3)     | 862.5 (788.3 to 937.8)          | 0.0 (0.0 to 0.0)                  |
| Australia | 2038 | 7485.8 (7080.8 to 7908.8)  | 5073.8 (4769.6 to 5371.6)  | 1453.0 (1214.1 to 1752.7)     | 959.0 (873.9 to 1045.2)         | 0.0 (0.0 to 0.0)                  | 6839.9 (6469.9 to 7226.4) | 4636.0 (4358.1 to 4908.1)  | 1327.7 (1109.4 to 1601.5)     | 876.3 (798.5 to 955.0)          | 0.0 (0.0 to 0.0)                  |
| Australia | 2039 | 7599.2 (7178.2 to 8060.3)  | 5150.3 (4825.4 to 5472.4)  | 1474.5 (1224.3 to 1789.9)     | 974.4 (885.9 to 1064.9)         | 0.0 (0.0 to 0.0)                  | 6943.5 (6558.9 to 7364.8) | 4705.9 (4409.0 to 5000.2)  | 1347.3 (1118.7 to 1635.5)     | 890.3 (809.4 to 973.0)          | 0.0 (0.0 to 0.0)                  |
| Australia | 2040 | 7715.1 (7264.3 to 8195.3)  | 5228.4 (4882.9 to 5568.7)  | 1496.3 (1235.9 to 1825.8)     | 990.4 (898.1 to 1085.5)         | 0.0 (0.0 to 0.0)                  | 7049.4 (6637.5 to 7488.2) | 4777.3 (4461.6 to 5088.2)  | 1367.2 (1129.2 to 1668.3)     | 904.9 (820.6 to 991.9)          | 0.0 (0.0 to 0.0)                  |
| Australia | 2041 | 7826.4 (7359.1 to 8336.3)  | 5302.2 (4940.4 to 5660.9)  | 1517.7 (1248.5 to 1859.0)     | 1006.6 (910.9 to 1105.7)        | 0.0 (0.0 to 0.0)                  | 7151.2 (6724.1 to 7617.1) | 4844.7 (4514.2 to 5172.5)  | 1386.7 (1140.7 to 1698.6)     | 919.7 (832.3 to 1010.3)         | 0.0 (0.0 to 0.0)                  |
| Australia | 2042 | 7941.0 (7437.0 to 8483.5)  | 5378.0 (4992.0 to 5755.2)  | 1539.4 (1261.9 to 1890.8)     | 1023.6 (923.8 to 1127.2)        | 0.0 (0.0 to 0.0)                  | 7255.8 (6795.3 to 7751.5) | 4914.0 (4561.3 to 5258.6)  | 1406.5 (1153.0 to 1727.6)     | 935.3 (844.1 to 1029.9)         | 0.0 (0.0 to 0.0)                  |
| Australia | 2043 | 8057.8 (7541.2 to 8626.8)  | 5455.5 (5037.7 to 5851.8)  | 1561.2 (1276.6 to 1920.0)     | 1041.1 (936.7 to 1150.2)        | 0.0 (0.0 to 0.0)                  | 7362.6 (6890.5 to 7882.5) | 4984.8 (4603.0 to 5346.9)  | 1426.5 (1166.4 to 1754.3)     | 951.3 (855.9 to 1050.9)         | 0.0 (0.0 to 0.0)                  |
| Australia | 2044 | 8175.6 (7655.6 to 8753.5)  | 5534.0 (5091.9 to 5956.4)  | 1583.0 (1289.7 to 1946.8)     | 1058.6 (950.1 to 1172.9)        | 0.0 (0.0 to 0.0)                  | 7470.2 (6995.1 to 7998.2) | 5056.5 (4652.5 to 5442.4)  | 1446.4 (1178.4 to 1778.8)     | 967.3 (868.1 to 1071.7)         | 0.0 (0.0 to 0.0)                  |
| Australia | 2045 | 8294.9 (7755.3 to 8878.3)  | 5614.3 (5149.1 to 6055.1)  | 1604.8 (1303.8 to 1976.7)     | 1075.9 (962.9 to 1195.4)        | 0.0 (0.0 to 0.0)                  | 7579.2 (7086.2 to 8112.3) | 5129.9 (4704.8 to 5532.6)  | 1466.3 (1191.3 to 1806.2)     | 983.0 (879.8 to 1092.2)         | 0.0 (0.0 to 0.0)                  |
| Australia | 2046 | 8408.7 (7860.3 to 9043.0)  | 5690.0 (5200.0 to 6150.9)  | 1626.0 (1321.1 to 2003.7)     | 1092.6 (975.2 to 1217.4)        | 0.0 (0.0 to 0.0)                  | 7683.1 (7182.1 to 8262.8) | 5199.1 (4751.3 to 5620.2)  | 1485.7 (1207.1 to 1830.8)     | 998.3 (891.1 to 1112.4)         | 0.0 (0.0 to 0.0)                  |
| Australia | 2047 | 8523.9 (7932.4 to 9170.0)  | 5767.4 (5263.1 to 6255.6)  | 1647.2 (1340.5 to 2031.0)     | 1109.4 (987.3 to 1239.6)        | 0.0 (0.0 to 0.0)                  | 7788.5 (7248.0 to 8378.8) | 5269.7 (4809.0 to 5715.8)  | 1505.1 (1224.9 to 1855.7)     | 1013.7 (902.2 to 1132.6)        | 0.0 (0.0 to 0.0)                  |
| Australia | 2048 | 8638.6 (8043.2 to 9318.4)  | 5844.3 (5314.1 to 6356.2)  | 1668.5 (1358.0 to 2055.7)     | 1125.8 (999.0 to 1261.9)        | 0.0 (0.0 to 0.0)                  | 7893.2 (7349.2 to 8514.4) | 5340.1 (4855.6 to 5807.8)  | 1524.5 (1240.8 to 1878.3)     | 1028.6 (912.8 to 1153.1)        | 0.0 (0.0 to 0.0)                  |
| Australia | 2049 | 8756.7 (8137.1 to 9475.1)  | 5924.0 (5371.8 to 6464.4)  | 1690.2 (1375.0 to 2084.3)     | 1142.5 (1009.9 to 1283.8)       | 0.0 (0.0 to 0.0)                  | 8001.1 (7435.1 to 8657.6) | 5412.9 (4908.3 to 5906.7)  | 1544.4 (1256.4 to 1904.4)     | 1043.9 (922.8 to 1173.1)        | 0.0 (0.0 to 0.0)                  |
| Australia | 2050 | 8875.4 (8221.6 to 9605.3)  | 6004.2 (5423.6 to 6571.8)  | 1712.1 (1394.3 to 2113.2)     | 1159.1 (1020.7 to 1305.8)       | 0.0 (0.0 to 0.0)                  | 8109.6 (7512.2 to 8776.6) | 5486.2 (4955.6 to 6004.8)  | 1564.3 (1274.0 to 1930.8)     | 1059.1 (932.6 to 1193.2)        | 0.0 (0.0 to 0.0)                  |
| Austria   | 1995 | 3668.3 (3574.4 to 3764.8)  | 2541.8 (2470.0 to 2611.8)  | 615.8 (577.1 to 655.9)        | 510.8 (453.8 to 567.8)          | 0.0 (0.0 to 0.0)                  | 3644.5 (3551.2 to 3740.3) | 2525.3 (2453.9 to 2594.9)  | 611.8 (573.4 to 651.6)        | 507.4 (450.9 to 564.1)          | 0.0 (0.0 to 0.0)                  |
| Austria   | 1996 | 3711.4 (3642.2 to 3780.1)  | 2606.7 (2558.3 to 2657.6)  | 635.3 (607.5 to 665.8)        | 469.4 (431.1 to 512.1)          | 0.0 (0.0 to 0.0)                  | 3687.3 (3618.5 to 3755.6) | 2589.7 (2541.6 to 2640.3)  | 631.2 (603.5 to 661.5)        | 466.3 (428.3 to 508.8)          | 0.0 (0.0 to 0.0)                  |
| Austria   | 1997 | 3761.5 (3694.7 to 3830.0)  | 2709.0 (2659.6 to 2764.6)  | 656.1 (629.1 to 684.9)        | 396.3 (365.2 to 430.1)          | 0.0 (0.0 to 0.0)                  | 3737.0 (3670.7 to 3805.0) | 2691.4 (2642.3 to 2746.6)  | 651.9 (625.0 to 680.5)        | 393.8 (362.8 to 427.3)          | 0.0 (0.0 to 0.0)                  |
| Austria   | 1998 | 3881.8 (3813.6 to 3951.9)  | 2841.7 (2789.7 to 2898.5)  | 681.2 (652.0 to 710.0)        | 358.8 (328.7 to 392.1)          | 0.0 (0.0 to 0.0)                  | 3856.5 (3788.7 to 3926.2) | 2823.2 (2771.6 to 2879.6)  | 676.8 (647.7 to 705.3)        | 356.5 (326.5 to 389.5)          | 0.0 (0.0 to 0.0)                  |
| Austria   | 1999 | 3989.4 (3920.0 to 4052.9)  | 2948.6 (2898.0 to 2999.7)  | 703.2 (676.2 to 728.6)        | 337.5 (308.3 to 368.6)          | 0.0 (0.0 to 0.0)                  | 3963.4 (3894.5 to 4026.5) | 2929.4 (2879.1 to 2980.2)  | 698.6 (671.8 to 723.9)        | 335.4 (306.3 to 366.2)          | 0.0 (0.0 to 0.0)                  |
| Austria   | 2000 | 4081.6 (4018.5 to 4142.9)  | 3025.1 (2976.4 to 3075.5)  | 729.5 (706.0 to 755.3)        | 327.0 (300.7 to 357.1)          | 0.0 (0.0 to 0.0)                  | 4055.1 (3992.4 to 4115.9) | 3005.4 (2957.1 to 3055.5)  | 724.8 (701.4 to 750.4)        | 324.9 (298.7 to 354.8)          | 0.0 (0.0 to 0.0)                  |
| Austria   | 2001 | 4126.5 (4066.5 to 4185.6)  | 3044.1 (2993.5 to 3093.9)  | 757.0 (734.7 to 781.6)        | 325.4 (299.5 to 355.8)          | 0.0 (0.0 to 0.0)                  | 4099.7 (4040.0 to 4158.3) | 3024.3 (2974.0 to 3073.8)  | 752.1 (729.9 to 776.5)        | 323.3 (297.5 to 353.5)          | 0.0 (0.0 to 0.0)                  |

| Country | Year | 2018 US Dollars per capita |                            |                               |                                 |                                   | 2018 PPP per capita       |                            |                               |                                 |                                   |
|---------|------|----------------------------|----------------------------|-------------------------------|---------------------------------|-----------------------------------|---------------------------|----------------------------|-------------------------------|---------------------------------|-----------------------------------|
|         |      | Health spending            | Government health spending | Out-of-pocket health spending | Prepaid private health spending | Development assistance for health | Health spending           | Government health spending | Out-of-pocket health spending | Prepaid private health spending | Development assistance for health |
| Austria | 2002 | 4237.4 (4178.0 to 4298.6)  | 3110.1 (3060.8 to 3159.1)  | 790.5 (767.6 to 813.8)        | 336.8 (310.9 to 365.1)          | 0.0 (0.0 to 0.0)                  | 4209.8 (4150.8 to 4270.6) | 3089.9 (3040.9 to 3138.5)  | 785.3 (762.6 to 808.5)        | 334.6 (308.9 to 362.7)          | 0.0 (0.0 to 0.0)                  |
| Austria | 2003 | 4313.7 (4250.9 to 4376.9)  | 3145.0 (3096.1 to 3191.4)  | 819.2 (794.9 to 844.4)        | 349.4 (322.1 to 376.3)          | 0.0 (0.0 to 0.0)                  | 4285.6 (4223.2 to 4348.4) | 3124.6 (3076.0 to 3170.6)  | 813.9 (789.7 to 838.9)        | 347.1 (320.0 to 373.9)          | 0.0 (0.0 to 0.0)                  |
| Austria | 2004 | 4450.1 (4389.0 to 4514.1)  | 3227.3 (3179.2 to 3271.9)  | 852.9 (826.6 to 877.4)        | 370.0 (342.8 to 398.0)          | 0.0 (0.0 to 0.0)                  | 4421.2 (4360.4 to 4484.7) | 3206.3 (3158.5 to 3250.6)  | 847.3 (821.2 to 871.7)        | 367.6 (340.6 to 395.4)          | 0.0 (0.0 to 0.0)                  |
| Austria | 2005 | 4504.0 (4444.2 to 4563.7)  | 3266.0 (3219.8 to 3310.3)  | 863.5 (840.7 to 887.3)        | 374.5 (348.2 to 401.4)          | 0.0 (0.0 to 0.0)                  | 4474.7 (4415.3 to 4534.0) | 3244.8 (3198.9 to 3288.7)  | 857.9 (835.2 to 881.5)        | 372.0 (346.0 to 398.8)          | 0.0 (0.0 to 0.0)                  |
| Austria | 2006 | 4611.9 (4549.6 to 4673.7)  | 3355.2 (3307.0 to 3406.0)  | 872.8 (849.0 to 897.3)        | 383.9 (357.7 to 414.1)          | 0.0 (0.0 to 0.0)                  | 4581.9 (4520.0 to 4643.3) | 3333.3 (3285.5 to 3383.9)  | 867.2 (843.5 to 891.4)        | 381.4 (355.4 to 411.4)          | 0.0 (0.0 to 0.0)                  |
| Austria | 2007 | 4767.5 (4698.7 to 4832.1)  | 3481.9 (3428.1 to 3535.0)  | 887.7 (861.9 to 911.5)        | 397.9 (370.2 to 427.3)          | 0.0 (0.0 to 0.0)                  | 4736.5 (4668.2 to 4800.7) | 3459.3 (3405.7 to 3512.0)  | 882.0 (856.3 to 905.6)        | 395.3 (367.7 to 424.6)          | 0.0 (0.0 to 0.0)                  |
| Austria | 2008 | 4931.0 (4864.9 to 4996.4)  | 3615.4 (3563.4 to 3663.9)  | 900.1 (875.1 to 924.2)        | 415.5 (387.9 to 446.3)          | 0.0 (0.0 to 0.0)                  | 4898.9 (4833.2 to 4963.9) | 3591.8 (3540.2 to 3640.0)  | 894.3 (869.4 to 918.2)        | 412.8 (385.4 to 443.4)          | 0.0 (0.0 to 0.0)                  |
| Austria | 2009 | 4930.8 (4868.9 to 4995.2)  | 3595.6 (3545.9 to 3648.0)  | 901.7 (875.9 to 927.5)        | 433.5 (405.0 to 463.1)          | 0.0 (0.0 to 0.0)                  | 4898.8 (4837.2 to 4962.7) | 3572.2 (3522.8 to 3624.3)  | 895.9 (870.2 to 921.5)        | 430.7 (402.4 to 460.1)          | 0.0 (0.0 to 0.0)                  |
| Austria | 2010 | 5001.6 (4939.6 to 5061.8)  | 3634.4 (3583.8 to 3682.4)  | 924.4 (897.8 to 950.4)        | 442.8 (412.9 to 473.7)          | 0.0 (0.0 to 0.0)                  | 4969.0 (4907.5 to 5028.9) | 3610.7 (3560.5 to 3658.4)  | 918.4 (891.9 to 944.2)        | 439.9 (410.2 to 470.7)          | 0.0 (0.0 to 0.0)                  |
| Austria | 2011 | 5085.5 (5019.0 to 5151.0)  | 3694.8 (3644.8 to 3749.5)  | 948.1 (920.7 to 974.5)        | 442.6 (413.0 to 474.1)          | 0.0 (0.0 to 0.0)                  | 5052.4 (4986.4 to 5117.5) | 3670.8 (3621.0 to 3725.1)  | 941.9 (914.7 to 968.1)        | 439.7 (410.3 to 471.0)          | 0.0 (0.0 to 0.0)                  |
| Austria | 2012 | 5146.7 (5080.5 to 5214.0)  | 3737.0 (3687.1 to 3787.7)  | 967.9 (941.6 to 994.9)        | 441.8 (412.7 to 471.6)          | 0.0 (0.0 to 0.0)                  | 5113.2 (5047.5 to 5180.1) | 3712.7 (3663.1 to 3763.1)  | 961.6 (935.5 to 988.4)        | 439.0 (410.0 to 468.5)          | 0.0 (0.0 to 0.0)                  |
| Austria | 2013 | 5170.7 (5106.6 to 5237.8)  | 3745.6 (3695.7 to 3797.0)  | 984.5 (958.0 to 1010.8)       | 440.6 (409.5 to 472.7)          | 0.0 (0.0 to 0.0)                  | 5137.1 (5073.3 to 5203.8) | 3721.2 (3671.6 to 3772.3)  | 978.1 (951.8 to 1004.2)       | 437.7 (406.8 to 469.6)          | 0.0 (0.0 to 0.0)                  |
| Austria | 2014 | 5205.8 (5141.6 to 5271.6)  | 3774.1 (3722.7 to 3824.9)  | 993.7 (968.3 to 1019.7)       | 438.0 (407.9 to 471.8)          | 0.0 (0.0 to 0.0)                  | 5171.9 (5108.1 to 5237.3) | 3749.5 (3698.5 to 3800.0)  | 987.3 (962.0 to 1013.1)       | 435.1 (405.3 to 468.7)          | 0.0 (0.0 to 0.0)                  |
| Austria | 2015 | 5237.9 (5174.4 to 5308.3)  | 3803.8 (3752.0 to 3852.4)  | 996.6 (970.7 to 1024.6)       | 437.5 (407.1 to 471.9)          | 0.0 (0.0 to 0.0)                  | 5203.8 (5140.7 to 5273.8) | 3779.0 (3727.6 to 3827.4)  | 990.1 (964.4 to 1018.0)       | 434.7 (404.4 to 468.8)          | 0.0 (0.0 to 0.0)                  |
| Austria | 2016 | 5286.6 (5199.4 to 5378.7)  | 3837.4 (3772.8 to 3907.6)  | 1000.7 (961.8 to 1038.0)      | 448.5 (408.0 to 495.8)          | 0.0 (0.0 to 0.0)                  | 5252.2 (5165.6 to 5343.7) | 3812.4 (3748.3 to 3882.2)  | 994.2 (955.5 to 1031.2)       | 445.6 (405.4 to 492.5)          | 0.0 (0.0 to 0.0)                  |
| Austria | 2017 | 5358.7 (5265.0 to 5456.7)  | 3881.3 (3809.9 to 3956.6)  | 1019.9 (980.5 to 1058.5)      | 457.6 (415.8 to 504.6)          | 0.0 (0.0 to 0.0)                  | 5323.9 (5230.7 to 5421.2) | 3856.1 (3785.1 to 3930.9)  | 1013.2 (974.1 to 1051.6)      | 454.6 (413.1 to 501.3)          | 0.0 (0.0 to 0.0)                  |
| Austria | 2018 | 5433.2 (5331.9 to 5533.9)  | 3933.4 (3855.1 to 4012.7)  | 1034.4 (993.1 to 1078.0)      | 465.3 (423.6 to 512.8)          | 0.0 (0.0 to 0.0)                  | 5397.8 (5297.2 to 5497.9) | 3907.9 (3830.0 to 3986.6)  | 1027.7 (986.6 to 1071.0)      | 462.3 (420.8 to 509.4)          | 0.0 (0.0 to 0.0)                  |
| Austria | 2019 | 5503.0 (5404.2 to 5608.6)  | 3982.7 (3900.1 to 4069.4)  | 1048.4 (1002.7 to 1096.6)     | 471.9 (429.5 to 520.3)          | 0.0 (0.0 to 0.0)                  | 5467.2 (5369.0 to 5572.1) | 3956.7 (3874.7 to 4042.9)  | 1041.6 (996.2 to 1089.5)      | 468.9 (426.7 to 516.9)          | 0.0 (0.0 to 0.0)                  |
| Austria | 2020 | 5570.2 (5454.0 to 5680.2)  | 4029.7 (3937.8 to 4129.5)  | 1062.1 (1013.3 to 1114.9)     | 478.4 (434.6 to 527.7)          | 0.0 (0.0 to 0.0)                  | 5533.9 (5418.5 to 5643.3) | 4003.5 (3912.2 to 4102.6)  | 1055.2 (1006.7 to 1107.6)     | 475.2 (431.8 to 524.3)          | 0.0 (0.0 to 0.0)                  |
| Austria | 2021 | 5635.0 (5507.8 to 5762.5)  | 4075.1 (3974.6 to 4186.5)  | 1075.6 (1024.7 to 1131.7)     | 484.3 (439.5 to 533.8)          | 0.0 (0.0 to 0.0)                  | 5598.3 (5472.0 to 5725.0) | 4048.6 (3948.7 to 4159.3)  | 1068.6 (1018.0 to 1124.4)     | 481.1 (436.7 to 530.4)          | 0.0 (0.0 to 0.0)                  |
| Austria | 2022 | 5701.6 (5560.7 to 5846.3)  | 4122.2 (4010.1 to 4245.9)  | 1089.1 (1034.5 to 1147.3)     | 490.2 (444.8 to 540.1)          | 0.0 (0.0 to 0.0)                  | 5664.5 (5524.5 to 5808.2) | 4095.4 (3984.0 to 4218.3)  | 1082.1 (1027.8 to 1139.9)     | 487.0 (441.9 to 536.6)          | 0.0 (0.0 to 0.0)                  |



| Country | Year | 2018 US Dollars per capita |                            |                               |                                 |                                   | 2018 PPP per capita       |                            |                               |                                 |                                   |
|---------|------|----------------------------|----------------------------|-------------------------------|---------------------------------|-----------------------------------|---------------------------|----------------------------|-------------------------------|---------------------------------|-----------------------------------|
|         |      | Health spending            | Government health spending | Out-of-pocket health spending | Prepaid private health spending | Development assistance for health | Health spending           | Government health spending | Out-of-pocket health spending | Prepaid private health spending | Development assistance for health |
| Austria | 2023 | 5768.7 (5615.6 to 5933.5)  | 4169.7 (4043.4 to 4311.2)  | 1103.1 (1043.6 to 1163.2)     | 495.9 (449.3 to 546.3)          | 0.0 (0.0 to 0.0)                  | 5731.1 (5579.1 to 5894.9) | 4142.6 (4017.1 to 4283.2)  | 1095.9 (1036.8 to 1155.7)     | 492.7 (446.4 to 542.8)          | 0.0 (0.0 to 0.0)                  |
| Austria | 2024 | 5840.1 (5670.8 to 6011.2)  | 4221.5 (4076.9 to 4374.8)  | 1117.0 (1052.4 to 1180.2)     | 501.6 (453.8 to 553.2)          | 0.0 (0.0 to 0.0)                  | 5802.1 (5633.9 to 5972.1) | 4194.0 (4050.4 to 4346.3)  | 1109.8 (1045.5 to 1172.5)     | 498.3 (450.8 to 549.6)          | 0.0 (0.0 to 0.0)                  |
| Austria | 2025 | 5909.5 (5728.2 to 6092.5)  | 4272.5 (4109.4 to 4445.2)  | 1130.1 (1063.8 to 1198.8)     | 506.9 (458.2 to 558.3)          | 0.0 (0.0 to 0.0)                  | 5871.0 (5690.9 to 6052.8) | 4244.7 (4082.7 to 4416.3)  | 1122.8 (1056.8 to 1191.0)     | 503.6 (455.2 to 554.6)          | 0.0 (0.0 to 0.0)                  |
| Austria | 2026 | 5973.9 (5773.7 to 6177.6)  | 4318.9 (4141.8 to 4508.9)  | 1143.1 (1069.8 to 1218.0)     | 511.9 (462.7 to 563.6)          | 0.0 (0.0 to 0.0)                  | 5935.0 (5736.2 to 6137.4) | 4290.8 (4114.8 to 4479.6)  | 1135.6 (1062.9 to 1210.1)     | 508.6 (459.7 to 559.9)          | 0.0 (0.0 to 0.0)                  |
| Austria | 2027 | 6037.6 (5824.8 to 6263.7)  | 4364.9 (4167.4 to 4567.5)  | 1155.9 (1073.6 to 1241.6)     | 516.7 (466.8 to 570.1)          | 0.0 (0.0 to 0.0)                  | 5998.3 (5786.9 to 6222.9) | 4336.5 (4140.2 to 4537.8)  | 1148.4 (1066.6 to 1233.6)     | 513.3 (463.8 to 566.3)          | 0.0 (0.0 to 0.0)                  |
| Austria | 2028 | 6099.8 (5858.1 to 6363.3)  | 4409.9 (4197.8 to 4637.2)  | 1168.7 (1075.0 to 1264.1)     | 521.3 (470.8 to 576.2)          | 0.0 (0.0 to 0.0)                  | 6060.1 (5819.9 to 6321.9) | 4381.2 (4170.5 to 4607.0)  | 1161.1 (1068.0 to 1255.9)     | 517.9 (467.7 to 572.5)          | 0.0 (0.0 to 0.0)                  |
| Austria | 2029 | 6159.2 (5893.8 to 6443.4)  | 4452.6 (4221.5 to 4694.1)  | 1181.1 (1076.2 to 1292.8)     | 525.5 (473.6 to 582.1)          | 0.0 (0.0 to 0.0)                  | 6119.1 (5855.5 to 6401.5) | 4423.6 (4194.0 to 4663.6)  | 1173.4 (1069.2 to 1284.4)     | 522.1 (470.5 to 578.3)          | 0.0 (0.0 to 0.0)                  |
| Austria | 2030 | 6216.7 (5937.7 to 6538.7)  | 4493.7 (4242.6 to 4768.2)  | 1193.4 (1076.1 to 1320.5)     | 529.6 (477.5 to 587.9)          | 0.0 (0.0 to 0.0)                  | 6176.3 (5899.1 to 6496.1) | 4464.4 (4215.0 to 4737.1)  | 1185.6 (1069.1 to 1311.9)     | 526.2 (474.4 to 584.0)          | 0.0 (0.0 to 0.0)                  |
| Austria | 2031 | 6273.6 (5963.5 to 6608.8)  | 4533.9 (4267.2 to 4823.7)  | 1205.9 (1078.5 to 1349.9)     | 533.9 (480.6 to 592.3)          | 0.0 (0.0 to 0.0)                  | 6232.8 (5924.7 to 6565.8) | 4504.4 (4239.5 to 4792.3)  | 1198.0 (1071.5 to 1341.1)     | 530.4 (477.5 to 588.5)          | 0.0 (0.0 to 0.0)                  |
| Austria | 2032 | 6328.0 (5994.8 to 6691.6)  | 4571.9 (4283.1 to 4890.7)  | 1218.2 (1081.0 to 1376.1)     | 537.9 (484.9 to 596.4)          | 0.0 (0.0 to 0.0)                  | 6286.8 (5955.8 to 6648.0) | 4542.2 (4255.2 to 4858.9)  | 1210.2 (1074.0 to 1367.2)     | 534.4 (481.7 to 592.5)          | 0.0 (0.0 to 0.0)                  |
| Austria | 2033 | 6386.0 (6055.2 to 6771.7)  | 4612.8 (4300.1 to 4940.3)  | 1230.8 (1080.8 to 1407.3)     | 542.3 (488.6 to 601.8)          | 0.0 (0.0 to 0.0)                  | 6344.4 (6015.8 to 6727.6) | 4582.8 (4272.1 to 4908.1)  | 1222.8 (1073.7 to 1398.1)     | 538.8 (485.4 to 597.9)          | 0.0 (0.0 to 0.0)                  |
| Austria | 2034 | 6445.9 (6077.9 to 6851.6)  | 4654.7 (4325.0 to 4998.8)  | 1244.0 (1083.9 to 1437.6)     | 547.2 (492.5 to 607.4)          | 0.0 (0.0 to 0.0)                  | 6403.9 (6038.3 to 6807.0) | 4624.4 (4296.9 to 4966.2)  | 1235.9 (1076.8 to 1428.2)     | 543.6 (489.3 to 603.4)          | 0.0 (0.0 to 0.0)                  |
| Austria | 2035 | 6507.9 (6115.9 to 6935.9)  | 4697.7 (4343.7 to 5072.9)  | 1257.6 (1084.9 to 1463.3)     | 552.6 (496.4 to 613.9)          | 0.0 (0.0 to 0.0)                  | 6465.6 (6076.1 to 6890.8) | 4667.2 (4315.5 to 5039.9)  | 1249.4 (1077.8 to 1453.8)     | 549.0 (493.2 to 609.9)          | 0.0 (0.0 to 0.0)                  |
| Austria | 2036 | 6572.4 (6151.8 to 7031.3)  | 4742.0 (4378.2 to 5136.6)  | 1271.8 (1089.6 to 1491.1)     | 558.5 (500.8 to 622.2)          | 0.0 (0.0 to 0.0)                  | 6529.6 (6111.8 to 6985.6) | 4711.2 (4349.7 to 5103.2)  | 1263.5 (1082.5 to 1481.4)     | 554.9 (497.6 to 618.2)          | 0.0 (0.0 to 0.0)                  |
| Austria | 2037 | 6640.0 (6183.3 to 7108.4)  | 4788.2 (4410.2 to 5207.4)  | 1286.6 (1095.6 to 1518.7)     | 565.1 (505.8 to 631.3)          | 0.0 (0.0 to 0.0)                  | 6596.8 (6143.1 to 7062.1) | 4757.1 (4381.5 to 5173.5)  | 1278.2 (1088.5 to 1508.9)     | 561.4 (502.5 to 627.2)          | 0.0 (0.0 to 0.0)                  |
| Austria | 2038 | 6711.2 (6238.6 to 7209.1)  | 4836.7 (4449.7 to 5274.6)  | 1302.1 (1102.9 to 1545.5)     | 572.4 (511.2 to 640.7)          | 0.0 (0.0 to 0.0)                  | 6667.5 (6198.0 to 7162.2) | 4805.2 (4420.7 to 5240.2)  | 1293.6 (1095.7 to 1535.4)     | 568.6 (507.9 to 636.5)          | 0.0 (0.0 to 0.0)                  |
| Austria | 2039 | 6784.2 (6294.2 to 7293.7)  | 4886.3 (4479.8 to 5333.2)  | 1317.9 (1109.7 to 1575.4)     | 580.0 (517.1 to 649.4)          | 0.0 (0.0 to 0.0)                  | 6740.1 (6253.2 to 7246.2) | 4854.5 (4450.7 to 5298.5)  | 1309.4 (1102.5 to 1565.1)     | 576.2 (513.7 to 645.2)          | 0.0 (0.0 to 0.0)                  |
| Austria | 2040 | 6860.6 (6343.7 to 7372.2)  | 4938.5 (4515.1 to 5410.6)  | 1334.2 (1116.5 to 1604.9)     | 588.0 (523.2 to 658.6)          | 0.0 (0.0 to 0.0)                  | 6816.0 (6302.4 to 7324.2) | 4906.4 (4485.7 to 5375.4)  | 1325.5 (1109.2 to 1594.5)     | 584.1 (519.8 to 654.3)          | 0.0 (0.0 to 0.0)                  |
| Austria | 2041 | 6937.2 (6417.4 to 7492.3)  | 4990.0 (4551.4 to 5480.8)  | 1350.8 (1125.2 to 1633.9)     | 596.4 (529.3 to 668.6)          | 0.0 (0.0 to 0.0)                  | 6892.0 (6375.7 to 7443.6) | 4957.6 (4521.8 to 5445.2)  | 1342.0 (1117.9 to 1623.3)     | 592.5 (525.9 to 664.2)          | 0.0 (0.0 to 0.0)                  |
| Austria | 2042 | 7016.2 (6488.6 to 7628.6)  | 5043.1 (4586.7 to 5540.5)  | 1367.8 (1136.0 to 1662.4)     | 605.3 (536.5 to 680.7)          | 0.0 (0.0 to 0.0)                  | 6970.5 (6446.4 to 7579.0) | 5010.3 (4556.8 to 5504.4)  | 1358.9 (1128.6 to 1651.6)     | 601.3 (533.1 to 676.3)          | 0.0 (0.0 to 0.0)                  |
| Austria | 2043 | 7099.7 (6544.4 to 7730.0)  | 5099.7 (4624.9 to 5613.4)  | 1385.4 (1148.1 to 1684.3)     | 614.7 (543.9 to 692.5)          | 0.0 (0.0 to 0.0)                  | 7053.5 (6501.8 to 7679.7) | 5066.5 (4594.9 to 5576.9)  | 1376.4 (1140.6 to 1673.4)     | 610.7 (540.4 to 688.0)          | 0.0 (0.0 to 0.0)                  |

| Country    | Year | 2018 US Dollars per capita |                            |                               |                                 |                                   | 2018 PPP per capita       |                            |                               |                                 |                                   |
|------------|------|----------------------------|----------------------------|-------------------------------|---------------------------------|-----------------------------------|---------------------------|----------------------------|-------------------------------|---------------------------------|-----------------------------------|
|            |      | Health spending            | Government health spending | Out-of-pocket health spending | Prepaid private health spending | Development assistance for health | Health spending           | Government health spending | Out-of-pocket health spending | Prepaid private health spending | Development assistance for health |
| Austria    | 2044 | 7181.9 (6615.3 to 7820.6)  | 5155.3 (4664.7 to 5697.5)  | 1402.7 (1160.8 to 1703.5)     | 623.9 (550.9 to 704.0)          | 0.0 (0.0 to 0.0)                  | 7135.2 (6572.3 to 7769.8) | 5121.7 (4634.3 to 5660.4)  | 1393.6 (1153.3 to 1692.4)     | 619.8 (547.3 to 699.4)          | 0.0 (0.0 to 0.0)                  |
| Austria    | 2045 | 7265.0 (6669.3 to 7905.4)  | 5212.2 (4710.1 to 5768.3)  | 1419.9 (1174.1 to 1720.6)     | 632.9 (557.0 to 716.5)          | 0.0 (0.0 to 0.0)                  | 7217.8 (6625.9 to 7854.0) | 5178.3 (4679.4 to 5730.8)  | 1410.7 (1166.5 to 1709.4)     | 628.8 (553.4 to 711.8)          | 0.0 (0.0 to 0.0)                  |
| Austria    | 2046 | 7344.5 (6765.2 to 8036.4)  | 5265.8 (4738.3 to 5848.3)  | 1436.8 (1188.4 to 1743.4)     | 641.9 (563.4 to 728.3)          | 0.0 (0.0 to 0.0)                  | 7296.7 (6721.1 to 7984.1) | 5231.6 (4707.4 to 5810.2)  | 1427.5 (1180.7 to 1732.0)     | 637.7 (559.7 to 723.6)          | 0.0 (0.0 to 0.0)                  |
| Austria    | 2047 | 7423.5 (6819.7 to 8128.9)  | 5319.2 (4766.5 to 5920.4)  | 1453.6 (1203.4 to 1765.6)     | 650.7 (569.5 to 741.9)          | 0.0 (0.0 to 0.0)                  | 7375.2 (6775.3 to 8076.0) | 5284.6 (4735.4 to 5881.9)  | 1444.2 (1195.5 to 1754.1)     | 646.4 (565.8 to 737.1)          | 0.0 (0.0 to 0.0)                  |
| Austria    | 2048 | 7502.5 (6896.3 to 8217.7)  | 5372.8 (4800.0 to 6003.0)  | 1470.4 (1218.9 to 1788.5)     | 659.3 (575.5 to 753.2)          | 0.0 (0.0 to 0.0)                  | 7453.7 (6851.4 to 8164.2) | 5337.9 (4768.8 to 5963.9)  | 1460.8 (1210.9 to 1776.9)     | 655.0 (571.8 to 748.3)          | 0.0 (0.0 to 0.0)                  |
| Austria    | 2049 | 7584.9 (6969.1 to 8338.6)  | 5429.3 (4839.0 to 6071.3)  | 1487.4 (1234.2 to 1802.4)     | 668.2 (581.5 to 766.1)          | 0.0 (0.0 to 0.0)                  | 7535.5 (6923.8 to 8284.3) | 5394.0 (4807.5 to 6031.8)  | 1477.7 (1226.2 to 1790.7)     | 663.8 (577.7 to 761.2)          | 0.0 (0.0 to 0.0)                  |
| Austria    | 2050 | 7665.7 (7012.1 to 8382.2)  | 5484.4 (4874.5 to 6154.4)  | 1504.4 (1248.5 to 1823.5)     | 677.0 (586.8 to 779.0)          | 0.0 (0.0 to 0.0)                  | 7615.9 (6966.5 to 8327.7) | 5448.7 (4842.8 to 6114.4)  | 1494.6 (1240.4 to 1811.6)     | 672.6 (583.0 to 773.9)          | 0.0 (0.0 to 0.0)                  |
| Azerbaijan | 1995 | 48.7 (40.0 to 58.9)        | 13.4 (10.1 to 17.6)        | 35.3 (27.4 to 45.0)           | 0.0 (0.0 to 0.0)                | 0.0 (0.0 to 0.0)                  | 195.7 (160.6 to 236.6)    | 54.0 (40.6 to 70.7)        | 141.7 (110.3 to 180.7)        | 0.0 (0.0 to 0.0)                | 0.0 (0.0 to 0.0)                  |
| Azerbaijan | 1996 | 49.5 (41.0 to 59.5)        | 12.8 (9.7 to 16.6)         | 36.7 (28.8 to 46.1)           | 0.0 (0.0 to 0.1)                | 0.1 (0.1 to 0.1)                  | 199.1 (164.8 to 239.1)    | 51.2 (38.9 to 66.6)        | 147.4 (115.8 to 185.3)        | 0.1 (0.1 to 0.2)                | 0.3 (0.3 to 0.3)                  |
| Azerbaijan | 1997 | 49.8 (41.4 to 59.5)        | 11.8 (9.0 to 15.1)         | 36.8 (29.3 to 46.3)           | 0.1 (0.0 to 0.2)                | 1.2 (1.2 to 1.2)                  | 200.2 (166.3 to 239.1)    | 47.3 (36.1 to 60.8)        | 147.9 (117.7 to 186.1)        | 0.4 (0.2 to 0.8)                | 4.7 (4.7 to 4.7)                  |
| Azerbaijan | 1998 | 48.8 (40.7 to 58.3)        | 10.7 (8.3 to 13.6)         | 37.8 (30.3 to 46.9)           | 0.2 (0.1 to 0.4)                | 0.1 (0.1 to 0.1)                  | 196.0 (163.6 to 234.4)    | 42.9 (33.2 to 54.4)        | 152.0 (121.5 to 188.6)        | 0.8 (0.3 to 1.5)                | 0.4 (0.4 to 0.4)                  |
| Azerbaijan | 1999 | 53.5 (45.5 to 63.3)        | 10.7 (8.2 to 13.6)         | 39.4 (31.8 to 48.4)           | 0.3 (0.1 to 0.5)                | 3.1 (3.1 to 3.1)                  | 214.8 (182.8 to 254.2)    | 43.0 (33.1 to 54.6)        | 158.2 (127.8 to 194.5)        | 1.1 (0.5 to 2.0)                | 12.5 (12.5 to 12.5)               |
| Azerbaijan | 2000 | 54.3 (46.4 to 63.5)        | 10.9 (8.5 to 14.0)         | 40.8 (33.5 to 50.0)           | 0.3 (0.1 to 0.5)                | 2.3 (2.3 to 2.3)                  | 218.1 (186.4 to 255.3)    | 43.8 (34.0 to 56.2)        | 164.0 (134.5 to 200.7)        | 1.1 (0.5 to 2.1)                | 9.3 (9.3 to 9.3)                  |
| Azerbaijan | 2001 | 57.3 (49.0 to 66.9)        | 11.4 (8.8 to 14.6)         | 45.2 (37.4 to 54.6)           | 0.3 (0.1 to 0.5)                | 0.4 (0.4 to 0.4)                  | 230.2 (196.9 to 268.6)    | 45.7 (35.3 to 58.7)        | 181.8 (150.1 to 219.2)        | 1.1 (0.5 to 2.2)                | 1.8 (1.8 to 1.8)                  |
| Azerbaijan | 2002 | 67.6 (58.0 to 78.4)        | 12.0 (9.4 to 15.5)         | 54.6 (45.5 to 64.9)           | 0.3 (0.1 to 0.5)                | 0.8 (0.8 to 0.8)                  | 271.7 (232.9 to 315.0)    | 48.4 (37.7 to 62.2)        | 219.2 (182.8 to 260.6)        | 1.1 (0.5 to 2.2)                | 3.0 (3.0 to 3.0)                  |
| Azerbaijan | 2003 | 89.2 (77.0 to 102.7)       | 13.6 (10.5 to 17.4)        | 74.9 (62.9 to 88.1)           | 0.3 (0.1 to 0.6)                | 0.5 (0.5 to 0.5)                  | 358.4 (309.3 to 412.5)    | 54.5 (42.2 to 69.9)        | 300.9 (252.7 to 354.1)        | 1.2 (0.5 to 2.3)                | 1.8 (1.8 to 1.8)                  |
| Azerbaijan | 2004 | 112.5 (98.2 to 128.3)      | 15.5 (12.0 to 20.0)        | 96.2 (82.5 to 111.4)          | 0.4 (0.2 to 0.7)                | 0.4 (0.4 to 0.4)                  | 452.0 (394.5 to 515.3)    | 62.5 (48.3 to 80.3)        | 386.5 (331.3 to 447.4)        | 1.5 (0.7 to 2.9)                | 1.6 (1.6 to 1.6)                  |
| Azerbaijan | 2005 | 139.4 (123.0 to 157.1)     | 19.3 (15.1 to 24.9)        | 118.3 (102.7 to 135.7)        | 0.5 (0.2 to 0.9)                | 1.3 (1.3 to 1.3)                  | 559.9 (494.2 to 631.1)    | 77.6 (60.8 to 100.0)       | 475.3 (412.5 to 545.1)        | 1.9 (0.9 to 3.6)                | 5.1 (5.1 to 5.1)                  |
| Azerbaijan | 2006 | 161.1 (143.5 to 180.2)     | 25.5 (20.1 to 32.5)        | 133.2 (116.2 to 151.4)        | 0.6 (0.3 to 1.1)                | 1.8 (1.8 to 1.8)                  | 647.4 (576.7 to 723.8)    | 102.5 (80.6 to 130.4)      | 535.2 (467.0 to 608.2)        | 2.5 (1.1 to 4.5)                | 7.2 (7.2 to 7.2)                  |
| Azerbaijan | 2007 | 176.0 (157.8 to 195.7)     | 32.8 (26.0 to 41.3)        | 140.9 (123.8 to 159.5)        | 0.8 (0.4 to 1.6)                | 1.5 (1.5 to 1.5)                  | 707.1 (634.0 to 786.4)    | 131.8 (104.7 to 166.1)     | 566.0 (497.2 to 640.7)        | 3.4 (1.6 to 6.2)                | 6.0 (6.0 to 6.0)                  |
| Azerbaijan | 2008 | 184.9 (166.3 to 205.7)     | 38.1 (30.8 to 47.9)        | 143.9 (126.5 to 163.1)        | 1.0 (0.5 to 1.9)                | 1.8 (1.8 to 1.8)                  | 742.9 (668.1 to 826.5)    | 153.1 (123.6 to 192.3)     | 578.3 (508.2 to 655.1)        | 4.1 (1.9 to 7.4)                | 7.4 (7.4 to 7.4)                  |

| Country    | Year | 2018 US Dollars per capita |                            |                               |                                 |                                   | 2018 PPP per capita       |                            |                               |                                 |                                   |
|------------|------|----------------------------|----------------------------|-------------------------------|---------------------------------|-----------------------------------|---------------------------|----------------------------|-------------------------------|---------------------------------|-----------------------------------|
|            |      | Health spending            | Government health spending | Out-of-pocket health spending | Prepaid private health spending | Development assistance for health | Health spending           | Government health spending | Out-of-pocket health spending | Prepaid private health spending | Development assistance for health |
| Azerbaijan | 2009 | 204.2 (183.3 to 228.0)     | 44.8 (36.3 to 56.2)        | 155.6 (136.5 to 176.2)        | 1.3 (0.6 to 2.3)                | 2.6 (2.6 to 2.6)                  | 820.2 (736.5 to 916.1)    | 179.8 (145.9 to 225.8)     | 625.0 (548.2 to 707.9)        | 5.0 (2.3 to 9.2)                | 10.3 (10.3 to 10.3)               |
| Azerbaijan | 2010 | 212.6 (190.8 to 236.6)     | 48.8 (39.4 to 60.8)        | 159.4 (140.4 to 181.1)        | 1.3 (0.6 to 2.4)                | 3.0 (3.0 to 3.0)                  | 854.0 (766.5 to 950.6)    | 196.1 (158.1 to 244.2)     | 640.6 (564.2 to 727.7)        | 5.4 (2.4 to 9.7)                | 11.9 (11.9 to 11.9)               |
| Azerbaijan | 2011 | 217.4 (194.7 to 240.6)     | 50.8 (41.0 to 62.7)        | 160.8 (142.1 to 181.9)        | 1.3 (0.6 to 2.4)                | 4.6 (4.6 to 4.6)                  | 873.6 (782.2 to 966.8)    | 204.0 (164.8 to 251.8)     | 645.9 (570.7 to 730.9)        | 5.3 (2.4 to 9.7)                | 18.3 (18.3 to 18.3)               |
| Azerbaijan | 2012 | 224.2 (201.1 to 247.6)     | 52.7 (42.5 to 65.4)        | 167.7 (147.8 to 188.4)        | 1.4 (0.6 to 2.5)                | 2.4 (2.4 to 2.4)                  | 900.7 (808.0 to 994.6)    | 211.6 (170.9 to 262.8)     | 673.8 (594.0 to 757.1)        | 5.5 (2.4 to 9.9)                | 9.8 (9.8 to 9.8)                  |
| Azerbaijan | 2013 | 240.4 (215.4 to 266.2)     | 54.8 (44.1 to 68.0)        | 181.0 (159.9 to 201.7)        | 1.5 (0.7 to 2.8)                | 3.0 (3.0 to 3.0)                  | 965.6 (865.5 to 1069.5)   | 220.2 (177.1 to 273.4)     | 727.3 (642.3 to 810.4)        | 6.0 (2.7 to 11.2)               | 12.2 (12.2 to 12.2)               |
| Azerbaijan | 2014 | 258.3 (230.9 to 286.0)     | 57.0 (45.8 to 71.3)        | 197.6 (174.0 to 220.8)        | 1.7 (0.7 to 3.1)                | 1.9 (1.9 to 1.9)                  | 1037.6 (927.7 to 1149.2)  | 229.2 (183.9 to 286.5)     | 793.8 (699.2 to 887.1)        | 6.8 (3.0 to 12.6)               | 7.8 (7.8 to 7.8)                  |
| Azerbaijan | 2015 | 285.7 (253.2 to 317.9)     | 60.7 (48.6 to 76.1)        | 222.0 (193.6 to 251.3)        | 2.0 (0.9 to 3.7)                | 1.0 (1.0 to 1.0)                  | 1147.8 (1017.2 to 1277.2) | 243.9 (195.1 to 305.9)     | 891.8 (777.9 to 1009.5)       | 8.1 (3.6 to 14.8)               | 4.0 (4.0 to 4.0)                  |
| Azerbaijan | 2016 | 296.7 (269.9 to 335.2)     | 61.2 (48.5 to 77.1)        | 232.5 (199.3 to 267.6)        | 2.2 (1.0 to 4.0)                | 0.9 (0.9 to 0.9)                  | 1192.2 (1048.3 to 1346.8) | 245.7 (194.8 to 309.6)     | 934.1 (800.9 to 1075.2)       | 8.7 (4.0 to 16.1)               | 3.7 (3.7 to 3.7)                  |
| Azerbaijan | 2017 | 307.8 (269.7 to 350.5)     | 62.1 (49.0 to 77.9)        | 242.1 (208.1 to 279.4)        | 2.2 (1.0 to 4.0)                | 1.3 (1.3 to 1.3)                  | 1236.4 (1083.6 to 1408.2) | 249.6 (197.0 to 313.0)     | 972.7 (836.1 to 1122.7)       | 8.7 (4.0 to 16.0)               | 5.3 (5.3 to 5.3)                  |
| Azerbaijan | 2018 | 321.1 (281.3 to 365.9)     | 63.9 (50.3 to 80.7)        | 253.7 (217.3 to 293.6)        | 2.2 (1.0 to 4.1)                | 1.2 (1.2 to 1.2)                  | 1290.0 (1130.3 to 1470.2) | 256.8 (201.9 to 324.0)     | 1019.5 (873.1 to 1179.7)      | 8.9 (4.1 to 16.4)               | 4.8 (4.7 to 4.9)                  |
| Azerbaijan | 2019 | 335.2 (292.0 to 383.3)     | 65.9 (51.9 to 82.8)        | 265.9 (227.9 to 308.0)        | 2.3 (1.0 to 4.2)                | 1.2 (1.1 to 1.3)                  | 1346.9 (1173.1 to 1539.8) | 264.7 (208.6 to 332.7)     | 1068.2 (915.6 to 1237.6)      | 9.1 (4.1 to 16.8)               | 4.8 (4.5 to 5.2)                  |
| Azerbaijan | 2020 | 349.7 (304.4 to 398.8)     | 67.8 (53.8 to 85.4)        | 278.3 (237.3 to 321.4)        | 2.3 (1.0 to 4.3)                | 1.2 (1.1 to 1.3)                  | 1405.0 (1223.1 to 1602.4) | 272.5 (216.0 to 343.2)     | 1118.3 (953.2 to 1291.1)      | 9.3 (4.2 to 17.1)               | 4.9 (4.5 to 5.4)                  |
| Azerbaijan | 2021 | 362.5 (315.0 to 415.2)     | 70.1 (55.2 to 87.9)        | 288.8 (244.7 to 335.9)        | 2.4 (1.1 to 4.3)                | 1.3 (1.1 to 1.4)                  | 1456.6 (1265.7 to 1668.3) | 281.7 (221.9 to 353.2)     | 1160.3 (983.1 to 1349.5)      | 9.5 (4.3 to 17.5)               | 5.0 (4.5 to 5.6)                  |
| Azerbaijan | 2022 | 368.7 (321.0 to 419.2)     | 72.1 (56.6 to 90.2)        | 292.9 (247.2 to 340.3)        | 2.4 (1.1 to 4.4)                | 1.3 (1.2 to 1.5)                  | 1481.2 (1289.5 to 1684.3) | 289.6 (227.2 to 362.2)     | 1176.7 (993.1 to 1367.2)      | 9.7 (4.4 to 17.7)               | 5.3 (4.6 to 5.9)                  |
| Azerbaijan | 2023 | 370.5 (321.6 to 423.0)     | 73.9 (58.0 to 93.2)        | 292.8 (247.0 to 340.8)        | 2.4 (1.1 to 4.5)                | 1.4 (1.2 to 1.5)                  | 1488.7 (1291.9 to 1699.6) | 296.9 (233.1 to 374.5)     | 1176.5 (992.2 to 1369.3)      | 9.8 (4.4 to 17.9)               | 5.4 (4.7 to 6.2)                  |
| Azerbaijan | 2024 | 371.9 (323.2 to 423.2)     | 75.7 (59.5 to 95.6)        | 292.3 (246.1 to 340.3)        | 2.5 (1.1 to 4.5)                | 1.4 (1.2 to 1.6)                  | 1494.1 (1298.5 to 1700.3) | 304.2 (238.9 to 384.3)     | 1174.3 (988.7 to 1367.2)      | 9.9 (4.5 to 18.2)               | 5.6 (4.8 to 6.4)                  |
| Azerbaijan | 2025 | 382.3 (328.7 to 438.2)     | 76.4 (60.0 to 96.6)        | 302.0 (252.3 to 354.1)        | 2.5 (1.1 to 4.6)                | 1.4 (1.2 to 1.7)                  | 1535.8 (1320.5 to 1760.7) | 306.8 (241.0 to 387.9)     | 1213.3 (1013.8 to 1422.6)     | 10.0 (4.5 to 18.4)              | 5.8 (4.9 to 6.8)                  |
| Azerbaijan | 2026 | 392.8 (332.9 to 454.7)     | 76.9 (60.3 to 97.2)        | 311.9 (255.6 to 367.9)        | 2.5 (1.1 to 4.6)                | 1.5 (1.2 to 1.7)                  | 1578.0 (1337.6 to 1826.8) | 309.0 (242.1 to 390.6)     | 1253.0 (1026.8 to 1478.2)     | 10.1 (4.5 to 18.5)              | 5.9 (5.0 to 7.0)                  |
| Azerbaijan | 2027 | 404.0 (335.5 to 471.6)     | 77.6 (60.7 to 98.1)        | 322.4 (256.6 to 384.6)        | 2.5 (1.1 to 4.6)                | 1.5 (1.3 to 1.8)                  | 1623.3 (1347.9 to 1894.8) | 311.7 (243.8 to 394.1)     | 1295.3 (1030.8 to 1545.0)     | 10.1 (4.6 to 18.7)              | 6.1 (5.1 to 7.3)                  |
| Azerbaijan | 2028 | 415.8 (334.8 to 489.1)     | 78.4 (61.3 to 99.3)        | 333.3 (256.5 to 402.8)        | 2.5 (1.2 to 4.7)                | 1.6 (1.3 to 1.9)                  | 1670.7 (1345.1 to 1965.2) | 315.0 (246.2 to 399.1)     | 1339.1 (1030.6 to 1618.2)     | 10.2 (4.6 to 18.9)              | 6.3 (5.3 to 7.7)                  |
| Azerbaijan | 2029 | 428.3 (340.6 to 509.3)     | 79.4 (61.8 to 101.2)       | 344.6 (257.0 to 422.5)        | 2.6 (1.2 to 4.8)                | 1.6 (1.3 to 2.0)                  | 1720.5 (1368.5 to 2046.3) | 319.0 (248.4 to 406.7)     | 1384.6 (1032.5 to 1697.4)     | 10.4 (4.7 to 19.2)              | 6.5 (5.4 to 8.0)                  |

| Country    | Year | 2018 US Dollars per capita |                            |                               |                                 |                                   | 2018 PPP per capita       |                            |                               |                                 |                                   |
|------------|------|----------------------------|----------------------------|-------------------------------|---------------------------------|-----------------------------------|---------------------------|----------------------------|-------------------------------|---------------------------------|-----------------------------------|
|            |      | Health spending            | Government health spending | Out-of-pocket health spending | Prepaid private health spending | Development assistance for health | Health spending           | Government health spending | Out-of-pocket health spending | Prepaid private health spending | Development assistance for health |
| Azerbaijan | 2030 | 440.7 (336.8 to 528.9)     | 80.5 (62.5 to 103.2)       | 355.9 (259.1 to 442.8)        | 2.6 (1.2 to 4.9)                | 1.7 (1.4 to 2.1)                  | 1770.7 (1353.2 to 2125.0) | 323.4 (250.9 to 414.4)     | 1430.0 (1040.9 to 1779.0)     | 10.5 (4.8 to 19.5)              | 6.7 (5.5 to 8.3)                  |
| Azerbaijan | 2031 | 453.6 (341.9 to 552.6)     | 81.8 (63.4 to 105.1)       | 367.5 (260.0 to 462.5)        | 2.7 (1.2 to 4.9)                | 1.7 (1.4 to 2.2)                  | 1822.6 (1373.4 to 2220.3) | 328.5 (254.7 to 422.3)     | 1476.5 (1044.6 to 1858.3)     | 10.7 (4.9 to 19.9)              | 7.0 (5.6 to 8.8)                  |
| Azerbaijan | 2032 | 467.0 (344.5 to 574.9)     | 83.2 (64.6 to 106.8)       | 379.3 (262.2 to 482.6)        | 2.7 (1.2 to 5.1)                | 1.8 (1.4 to 2.3)                  | 1876.2 (1383.9 to 2309.6) | 334.2 (259.6 to 429.1)     | 1523.9 (1053.4 to 1939.0)     | 10.8 (5.0 to 20.3)              | 7.2 (5.7 to 9.1)                  |
| Azerbaijan | 2033 | 481.2 (349.3 to 595.9)     | 85.0 (65.7 to 109.4)       | 391.6 (265.8 to 503.1)        | 2.8 (1.3 to 5.2)                | 1.8 (1.4 to 2.4)                  | 1933.3 (1403.5 to 2394.2) | 341.3 (264.0 to 439.4)     | 1573.5 (1068.0 to 2021.2)     | 11.1 (5.0 to 20.8)              | 7.4 (5.8 to 9.5)                  |
| Azerbaijan | 2034 | 495.4 (351.9 to 620.5)     | 86.8 (66.8 to 111.8)       | 403.9 (268.3 to 525.3)        | 2.8 (1.3 to 5.3)                | 1.9 (1.5 to 2.5)                  | 1990.2 (1413.9 to 2492.8) | 348.6 (268.6 to 449.2)     | 1622.7 (1078.1 to 2110.6)     | 11.3 (5.1 to 21.2)              | 7.6 (5.9 to 9.9)                  |
| Azerbaijan | 2035 | 509.0 (358.7 to 643.5)     | 88.5 (68.2 to 114.2)       | 415.6 (270.3 to 547.0)        | 2.9 (1.3 to 5.4)                | 2.0 (1.5 to 2.5)                  | 2044.8 (1441.0 to 2585.3) | 355.6 (273.9 to 458.6)     | 1669.9 (1085.8 to 2197.6)     | 11.5 (5.2 to 21.6)              | 7.8 (6.1 to 10.2)                 |
| Azerbaijan | 2036 | 522.0 (362.4 to 664.3)     | 90.2 (69.4 to 116.6)       | 426.8 (272.3 to 566.2)        | 2.9 (1.3 to 5.5)                | 2.0 (1.6 to 2.7)                  | 2097.1 (1456.0 to 2668.7) | 362.4 (279.0 to 468.6)     | 1714.9 (1094.1 to 2274.9)     | 11.7 (5.4 to 22.1)              | 8.1 (6.3 to 10.9)                 |
| Azerbaijan | 2037 | 535.1 (367.6 to 687.2)     | 92.0 (70.6 to 118.4)       | 438.0 (274.0 to 586.1)        | 3.0 (1.4 to 5.6)                | 2.1 (1.6 to 2.8)                  | 2149.7 (1477.0 to 2761.0) | 369.6 (283.8 to 475.7)     | 1759.7 (1100.9 to 2354.9)     | 12.0 (5.5 to 22.6)              | 8.3 (6.4 to 11.3)                 |
| Azerbaijan | 2038 | 548.1 (371.7 to 707.7)     | 93.9 (72.0 to 120.9)       | 449.0 (277.3 to 606.3)        | 3.0 (1.4 to 5.7)                | 2.1 (1.6 to 3.0)                  | 2202.1 (1493.2 to 2843.2) | 377.3 (289.2 to 485.6)     | 1804.0 (1114.0 to 2436.0)     | 12.2 (5.6 to 23.1)              | 8.6 (6.5 to 11.9)                 |
| Azerbaijan | 2039 | 560.4 (373.8 to 727.5)     | 95.7 (73.4 to 123.7)       | 459.4 (279.6 to 624.1)        | 3.1 (1.4 to 5.9)                | 2.2 (1.7 to 3.1)                  | 2251.3 (1501.8 to 2922.7) | 384.5 (294.8 to 496.9)     | 1845.5 (1123.4 to 2507.5)     | 12.5 (5.7 to 23.5)              | 8.8 (6.7 to 12.3)                 |
| Azerbaijan | 2040 | 572.5 (380.3 to 750.4)     | 97.6 (75.0 to 126.6)       | 469.5 (282.1 to 642.3)        | 3.2 (1.4 to 6.0)                | 2.3 (1.7 to 3.1)                  | 2300.2 (1527.9 to 3014.7) | 392.1 (301.2 to 508.5)     | 1886.3 (1133.3 to 2580.3)     | 12.7 (5.8 to 24.0)              | 9.1 (6.9 to 12.6)                 |
| Azerbaijan | 2041 | 583.8 (384.0 to 766.0)     | 99.4 (76.2 to 129.1)       | 478.9 (284.6 to 659.1)        | 3.2 (1.5 to 6.1)                | 2.3 (1.8 to 3.3)                  | 2345.6 (1542.7 to 3077.4) | 399.4 (306.2 to 518.5)     | 1923.8 (1143.6 to 2648.2)     | 12.9 (5.9 to 24.4)              | 9.4 (7.0 to 13.2)                 |
| Azerbaijan | 2042 | 595.0 (390.6 to 787.2)     | 101.3 (77.7 to 131.5)      | 488.0 (288.1 to 676.0)        | 3.3 (1.5 to 6.2)                | 2.4 (1.8 to 3.5)                  | 2390.3 (1569.3 to 3162.6) | 407.1 (312.1 to 528.5)     | 1960.4 (1157.6 to 2715.9)     | 13.2 (6.1 to 24.8)              | 9.7 (7.2 to 14.1)                 |
| Azerbaijan | 2043 | 605.2 (397.1 to 803.4)     | 103.1 (79.1 to 133.5)      | 496.2 (290.5 to 690.4)        | 3.3 (1.5 to 6.3)                | 2.5 (1.8 to 3.6)                  | 2431.4 (1595.3 to 3227.9) | 414.3 (317.7 to 536.5)     | 1993.7 (1167.3 to 2773.9)     | 13.4 (6.2 to 25.2)              | 10.0 (7.4 to 14.6)                |
| Azerbaijan | 2044 | 614.9 (401.6 to 821.3)     | 104.9 (80.3 to 136.0)      | 504.0 (293.0 to 704.7)        | 3.4 (1.6 to 6.4)                | 2.6 (1.9 to 3.8)                  | 2470.4 (1613.3 to 3299.5) | 421.4 (322.5 to 546.5)     | 2025.0 (1177.1 to 2831.1)     | 13.6 (6.3 to 25.6)              | 10.3 (7.6 to 15.1)                |
| Azerbaijan | 2045 | 624.1 (402.7 to 834.3)     | 106.7 (81.3 to 138.5)      | 511.3 (295.5 to 718.6)        | 3.5 (1.6 to 6.5)                | 2.7 (1.9 to 4.0)                  | 2507.5 (1618.0 to 3351.7) | 428.5 (326.8 to 556.3)     | 2054.4 (1187.0 to 2886.9)     | 13.9 (6.4 to 26.1)              | 10.7 (7.7 to 16.1)                |
| Azerbaijan | 2046 | 632.1 (405.3 to 851.7)     | 108.2 (82.2 to 140.6)      | 517.6 (297.3 to 730.2)        | 3.5 (1.6 to 6.6)                | 2.7 (2.0 to 4.2)                  | 2539.4 (1628.2 to 3421.7) | 434.7 (330.2 to 564.8)     | 2079.6 (1194.6 to 2933.6)     | 14.1 (6.5 to 26.5)              | 11.0 (7.9 to 17.0)                |
| Azerbaijan | 2047 | 639.1 (407.0 to 856.4)     | 109.6 (83.1 to 143.1)      | 523.1 (298.0 to 741.0)        | 3.6 (1.7 to 6.7)                | 2.8 (2.0 to 4.4)                  | 2567.7 (1635.1 to 3440.5) | 440.4 (333.8 to 575.0)     | 2101.7 (1197.2 to 2977.1)     | 14.3 (6.7 to 26.9)              | 11.4 (8.0 to 17.8)                |
| Azerbaijan | 2048 | 646.0 (408.3 to 871.3)     | 111.0 (84.3 to 144.7)      | 528.5 (298.4 to 751.7)        | 3.6 (1.7 to 6.8)                | 2.9 (2.1 to 4.8)                  | 2595.4 (1640.4 to 3500.6) | 445.9 (338.6 to 581.5)     | 2123.3 (1198.8 to 3019.9)     | 14.5 (6.7 to 27.3)              | 11.8 (8.3 to 19.2)                |
| Azerbaijan | 2049 | 653.1 (411.0 to 882.2)     | 112.4 (85.5 to 146.4)      | 534.0 (298.8 to 761.3)        | 3.6 (1.7 to 6.9)                | 3.0 (2.2 to 5.0)                  | 2623.8 (1651.4 to 3544.2) | 451.5 (343.5 to 588.3)     | 2145.5 (1200.6 to 3058.8)     | 14.6 (6.8 to 27.6)              | 12.2 (8.7 to 20.0)                |
| Azerbaijan | 2050 | 659.9 (413.9 to 894.6)     | 113.6 (86.6 to 148.2)      | 539.5 (299.5 to 773.2)        | 3.7 (1.7 to 7.0)                | 3.2 (2.2 to 5.2)                  | 2651.4 (1662.9 to 3594.2) | 456.5 (348.0 to 595.4)     | 2167.3 (1203.1 to 3106.6)     | 14.8 (6.9 to 27.9)              | 12.7 (8.8 to 21.1)                |

| Country | Year | 2018 US Dollars per capita |                            |                               |                                 |                                   | 2018 PPP per capita       |                            |                               |                                 |                                   |
|---------|------|----------------------------|----------------------------|-------------------------------|---------------------------------|-----------------------------------|---------------------------|----------------------------|-------------------------------|---------------------------------|-----------------------------------|
|         |      | Health spending            | Government health spending | Out-of-pocket health spending | Prepaid private health spending | Development assistance for health | Health spending           | Government health spending | Out-of-pocket health spending | Prepaid private health spending | Development assistance for health |
| Bahrain | 1995 | 948.4 (878.4 to 1024.6)    | 625.9 (576.2 to 682.3)     | 254.0 (220.8 to 291.6)        | 68.6 (48.4 to 94.7)             | 0.0 (0.0 to 0.0)                  | 1918.2 (1776.6 to 2072.3) | 1265.8 (1165.4 to 1380.0)  | 513.7 (446.5 to 589.8)        | 138.7 (98.0 to 191.5)           | 0.0 (0.0 to 0.0)                  |
| Bahrain | 1996 | 955.5 (899.5 to 1019.4)    | 631.3 (589.1 to 676.3)     | 254.4 (225.5 to 285.2)        | 69.8 (50.7 to 93.7)             | 0.0 (0.0 to 0.0)                  | 1932.6 (1819.3 to 2061.8) | 1276.9 (1191.5 to 1367.9)  | 514.6 (456.0 to 576.8)        | 141.1 (102.5 to 189.5)          | 0.0 (0.0 to 0.0)                  |
| Bahrain | 1997 | 973.4 (923.8 to 1028.8)    | 645.5 (606.7 to 685.8)     | 256.0 (229.8 to 284.6)        | 72.0 (54.3 to 93.4)             | 0.0 (0.0 to 0.0)                  | 1968.8 (1868.5 to 2080.8) | 1305.5 (1227.0 to 1387.0)  | 517.7 (464.7 to 575.6)        | 145.5 (109.8 to 188.8)          | 0.0 (0.0 to 0.0)                  |
| Bahrain | 1998 | 968.5 (921.3 to 1020.9)    | 639.9 (603.9 to 681.3)     | 255.3 (230.1 to 282.9)        | 73.2 (57.2 to 92.8)             | 0.1 (0.1 to 0.1)                  | 1958.8 (1863.3 to 2064.9) | 1294.2 (1221.3 to 1377.9)  | 516.3 (465.4 to 572.2)        | 148.0 (115.6 to 187.6)          | 0.2 (0.2 to 0.2)                  |
| Bahrain | 1999 | 967.2 (920.8 to 1015.3)    | 639.7 (606.8 to 676.8)     | 253.2 (229.3 to 279.8)        | 74.2 (58.6 to 92.2)             | 0.0 (0.0 to 0.0)                  | 1956.2 (1862.3 to 2053.5) | 1293.9 (1227.3 to 1368.9)  | 512.2 (463.8 to 565.8)        | 150.1 (118.6 to 186.5)          | 0.1 (0.1 to 0.1)                  |
| Bahrain | 2000 | 978.6 (934.5 to 1022.8)    | 650.3 (617.6 to 687.5)     | 252.5 (228.9 to 277.9)        | 75.7 (60.3 to 93.6)             | 0.0 (0.0 to 0.0)                  | 1979.3 (1890.1 to 2068.6) | 1315.3 (1249.1 to 1390.5)  | 510.7 (462.9 to 562.0)        | 153.2 (122.0 to 189.3)          | 0.1 (0.1 to 0.1)                  |
| Bahrain | 2001 | 967.5 (926.3 to 1008.8)    | 640.2 (606.6 to 673.3)     | 255.0 (232.6 to 279.7)        | 72.4 (58.0 to 89.8)             | 0.0 (0.0 to 0.0)                  | 1956.8 (1873.4 to 2040.2) | 1294.7 (1226.9 to 1361.7)  | 515.7 (470.4 to 565.7)        | 146.4 (117.2 to 181.5)          | 0.0 (0.0 to 0.0)                  |
| Bahrain | 2002 | 940.0 (899.2 to 982.0)     | 615.0 (585.6 to 646.2)     | 260.5 (238.3 to 284.2)        | 64.5 (51.5 to 80.0)             | 0.0 (0.0 to 0.0)                  | 1901.1 (1818.7 to 1986.0) | 1243.9 (1184.3 to 1307.0)  | 526.8 (481.9 to 574.7)        | 130.5 (104.1 to 161.8)          | 0.0 (0.0 to 0.0)                  |
| Bahrain | 2003 | 925.6 (884.8 to 968.4)     | 598.8 (567.6 to 630.3)     | 271.9 (249.7 to 295.9)        | 54.9 (43.6 to 68.9)             | 0.0 (0.0 to 0.0)                  | 1872.1 (1789.6 to 1958.5) | 1211.0 (1148.0 to 1274.9)  | 549.9 (505.1 to 598.5)        | 111.1 (88.1 to 139.3)           | 0.0 (0.0 to 0.0)                  |
| Bahrain | 2004 | 861.0 (823.5 to 902.4)     | 562.9 (532.8 to 596.0)     | 255.2 (233.1 to 276.8)        | 42.9 (33.6 to 54.4)             | 0.0 (0.0 to 0.0)                  | 1741.5 (1665.5 to 1825.0) | 1138.5 (1077.6 to 1205.3)  | 516.2 (471.5 to 559.9)        | 86.7 (68.0 to 110.0)            | 0.0 (0.0 to 0.0)                  |
| Bahrain | 2005 | 822.4 (782.6 to 862.2)     | 547.1 (515.9 to 579.6)     | 236.9 (216.3 to 258.3)        | 38.3 (29.7 to 48.7)             | 0.0 (0.0 to 0.0)                  | 1663.2 (1582.8 to 1743.9) | 1106.6 (1043.5 to 1172.3)  | 479.2 (437.4 to 522.4)        | 77.5 (60.0 to 98.6)             | 0.0 (0.0 to 0.0)                  |
| Bahrain | 2006 | 781.3 (743.5 to 818.9)     | 521.9 (490.6 to 553.8)     | 223.3 (204.1 to 244.5)        | 36.1 (27.9 to 45.4)             | 0.0 (0.0 to 0.0)                  | 1580.2 (1503.8 to 1656.2) | 1055.5 (992.2 to 1120.0)   | 451.7 (412.8 to 494.6)        | 72.9 (56.4 to 91.8)             | 0.0 (0.0 to 0.0)                  |
| Bahrain | 2007 | 795.2 (757.1 to 834.7)     | 524.7 (495.0 to 555.6)     | 229.3 (210.2 to 251.6)        | 41.2 (32.2 to 52.1)             | 0.0 (0.0 to 0.0)                  | 1608.2 (1531.2 to 1688.1) | 1061.3 (1001.2 to 1123.6)  | 463.7 (425.1 to 508.8)        | 83.3 (65.1 to 105.3)            | 0.0 (0.0 to 0.0)                  |
| Bahrain | 2008 | 823.0 (783.9 to 862.7)     | 538.7 (508.9 to 573.1)     | 232.6 (213.7 to 253.2)        | 51.7 (41.1 to 64.1)             | 0.0 (0.0 to 0.0)                  | 1664.6 (1585.6 to 1744.7) | 1089.4 (1029.4 to 1159.2)  | 470.5 (432.2 to 512.0)        | 104.6 (83.2 to 129.6)           | 0.0 (0.0 to 0.0)                  |
| Bahrain | 2009 | 827.5 (787.2 to 867.2)     | 528.2 (499.9 to 559.8)     | 238.1 (218.9 to 260.2)        | 61.2 (49.5 to 76.4)             | 0.0 (0.0 to 0.0)                  | 1673.7 (1592.0 to 1753.9) | 1068.3 (1011.0 to 1132.3)  | 481.6 (442.7 to 526.2)        | 123.8 (100.0 to 154.4)          | 0.0 (0.0 to 0.0)                  |
| Bahrain | 2010 | 840.9 (801.8 to 880.1)     | 534.5 (505.3 to 565.8)     | 238.7 (217.9 to 259.8)        | 67.7 (55.7 to 82.9)             | 0.0 (0.0 to 0.0)                  | 1700.7 (1621.7 to 1780.0) | 1081.0 (1022.0 to 1144.4)  | 482.8 (440.7 to 525.4)        | 136.9 (112.7 to 167.7)          | 0.0 (0.0 to 0.0)                  |
| Bahrain | 2011 | 860.0 (820.0 to 899.4)     | 549.8 (517.9 to 581.3)     | 238.7 (217.8 to 259.5)        | 71.5 (58.5 to 86.7)             | 0.0 (0.0 to 0.0)                  | 1739.5 (1658.4 to 1819.0) | 1112.0 (1047.4 to 1175.6)  | 482.7 (440.4 to 524.9)        | 144.7 (118.2 to 175.4)          | 0.0 (0.0 to 0.0)                  |
| Bahrain | 2012 | 918.2 (876.4 to 956.9)     | 592.1 (559.7 to 624.3)     | 249.4 (229.9 to 270.6)        | 76.7 (64.2 to 91.8)             | 0.0 (0.0 to 0.0)                  | 1857.1 (1772.5 to 1935.3) | 1197.5 (1132.1 to 1262.7)  | 504.5 (465.1 to 547.3)        | 155.1 (129.9 to 185.7)          | 0.0 (0.0 to 0.0)                  |
| Bahrain | 2013 | 989.4 (946.1 to 1031.0)    | 640.0 (607.0 to 675.5)     | 264.8 (244.8 to 287.1)        | 84.6 (70.9 to 100.9)            | 0.0 (0.0 to 0.0)                  | 2001.1 (1913.4 to 2085.3) | 1294.5 (1227.7 to 1366.2)  | 535.5 (495.1 to 580.6)        | 171.1 (143.4 to 204.1)          | 0.0 (0.0 to 0.0)                  |
| Bahrain | 2014 | 1060.0 (1014.6 to 1106.1)  | 684.4 (651.5 to 719.8)     | 280.0 (258.1 to 303.3)        | 95.6 (80.1 to 113.8)            | 0.0 (0.0 to 0.0)                  | 2143.8 (2052.1 to 2237.2) | 1384.3 (1317.6 to 1455.8)  | 566.3 (522.0 to 613.4)        | 193.3 (162.1 to 230.1)          | 0.0 (0.0 to 0.0)                  |
| Bahrain | 2015 | 1131.6 (1083.4 to 1181.1)  | 723.1 (687.0 to 762.5)     | 300.2 (276.0 to 325.1)        | 108.3 (90.3 to 130.7)           | 0.0 (0.0 to 0.0)                  | 2288.8 (2191.3 to 2388.9) | 1462.6 (1389.4 to 1542.3)  | 607.2 (558.1 to 657.5)        | 219.0 (182.6 to 264.3)          | 0.0 (0.0 to 0.0)                  |

| Country | Year | 2018 US Dollars per capita |                            |                               |                                 |                                   | 2018 PPP per capita       |                            |                               |                                 |                                   |
|---------|------|----------------------------|----------------------------|-------------------------------|---------------------------------|-----------------------------------|---------------------------|----------------------------|-------------------------------|---------------------------------|-----------------------------------|
|         |      | Health spending            | Government health spending | Out-of-pocket health spending | Prepaid private health spending | Development assistance for health | Health spending           | Government health spending | Out-of-pocket health spending | Prepaid private health spending | Development assistance for health |
| Bahrain | 2016 | 1169.3 (1108.8 to 1232.9)  | 733.6 (687.0 to 783.9)     | 317.3 (286.6 to 350.1)        | 118.5 (96.2 to 146.8)           | 0.0 (0.0 to 0.0)                  | 2365.0 (2242.6 to 2493.6) | 1483.7 (1389.5 to 1585.5)  | 641.7 (579.6 to 708.2)        | 239.6 (194.6 to 297.0)          | 0.0 (0.0 to 0.0)                  |
| Bahrain | 2017 | 1138.6 (1080.1 to 1198.7)  | 705.0 (660.6 to 755.1)     | 317.7 (286.2 to 352.4)        | 115.9 (94.1 to 143.6)           | 0.0 (0.0 to 0.0)                  | 2302.9 (2184.5 to 2424.4) | 1425.8 (1336.2 to 1527.2)  | 642.6 (578.9 to 712.8)        | 234.4 (190.3 to 290.5)          | 0.0 (0.0 to 0.0)                  |
| Bahrain | 2018 | 1148.6 (1088.8 to 1209.5)  | 709.6 (665.4 to 759.1)     | 321.2 (289.1 to 355.5)        | 117.8 (95.6 to 145.9)           | 0.0 (0.0 to 0.0)                  | 2323.0 (2202.1 to 2446.3) | 1435.2 (1345.7 to 1535.3)  | 649.5 (584.6 to 718.9)        | 238.2 (193.3 to 295.1)          | 0.0 (0.0 to 0.0)                  |
| Bahrain | 2019 | 1163.4 (1102.5 to 1227.7)  | 719.4 (674.3 to 773.5)     | 324.7 (292.4 to 360.3)        | 119.3 (96.6 to 147.5)           | 0.0 (0.0 to 0.0)                  | 2352.9 (2229.8 to 2483.0) | 1455.0 (1363.7 to 1564.4)  | 656.7 (591.4 to 728.7)        | 241.2 (195.4 to 298.4)          | 0.0 (0.0 to 0.0)                  |
| Bahrain | 2020 | 1181.9 (1116.5 to 1247.0)  | 732.4 (681.1 to 787.8)     | 328.6 (294.5 to 365.1)        | 120.9 (98.1 to 149.5)           | 0.0 (0.0 to 0.0)                  | 2390.4 (2258.0 to 2522.1) | 1481.2 (1377.6 to 1593.4)  | 664.6 (595.6 to 738.4)        | 244.6 (198.4 to 302.4)          | 0.0 (0.0 to 0.0)                  |
| Bahrain | 2021 | 1199.8 (1130.8 to 1272.1)  | 746.1 (689.3 to 806.1)     | 331.9 (297.5 to 369.8)        | 121.7 (98.9 to 150.3)           | 0.0 (0.0 to 0.0)                  | 2426.7 (2287.0 to 2572.8) | 1509.1 (1394.0 to 1630.3)  | 671.4 (601.7 to 748.0)        | 246.2 (200.1 to 303.9)          | 0.0 (0.0 to 0.0)                  |
| Bahrain | 2022 | 1222.4 (1146.7 to 1302.7)  | 763.5 (699.2 to 835.6)     | 336.0 (301.0 to 376.7)        | 122.9 (99.8 to 151.5)           | 0.0 (0.0 to 0.0)                  | 2472.4 (2319.3 to 2634.7) | 1544.2 (1414.2 to 1690.1)  | 679.6 (608.8 to 761.9)        | 248.5 (201.8 to 306.4)          | 0.0 (0.0 to 0.0)                  |
| Bahrain | 2023 | 1247.5 (1161.4 to 1336.8)  | 783.4 (709.5 to 862.8)     | 339.9 (302.3 to 379.9)        | 124.2 (100.8 to 152.7)          | 0.0 (0.0 to 0.0)                  | 2523.0 (2349.0 to 2703.7) | 1584.5 (1435.0 to 1745.0)  | 687.4 (611.5 to 768.3)        | 251.2 (203.9 to 308.9)          | 0.0 (0.0 to 0.0)                  |
| Bahrain | 2024 | 1271.8 (1181.1 to 1368.6)  | 802.7 (724.5 to 892.2)     | 343.5 (305.7 to 383.8)        | 125.5 (101.7 to 154.6)          | 0.0 (0.0 to 0.0)                  | 2572.2 (2388.8 to 2768.1) | 1623.5 (1465.2 to 1804.5)  | 694.8 (618.3 to 776.2)        | 253.9 (205.6 to 312.8)          | 0.0 (0.0 to 0.0)                  |
| Bahrain | 2025 | 1297.9 (1202.1 to 1403.3)  | 823.3 (737.7 to 916.4)     | 347.5 (309.2 to 390.4)        | 127.1 (102.8 to 156.7)          | 0.0 (0.0 to 0.0)                  | 2625.0 (2431.2 to 2838.2) | 1665.1 (1492.1 to 1853.5)  | 702.8 (625.4 to 789.5)        | 257.1 (207.9 to 317.0)          | 0.0 (0.0 to 0.0)                  |
| Bahrain | 2026 | 1316.2 (1213.6 to 1426.7)  | 837.9 (746.8 to 938.4)     | 350.3 (309.3 to 394.3)        | 128.0 (103.7 to 157.6)          | 0.0 (0.0 to 0.0)                  | 2662.1 (2454.4 to 2885.6) | 1694.7 (1510.4 to 1897.9)  | 708.4 (625.6 to 797.5)        | 258.9 (209.7 to 318.7)          | 0.0 (0.0 to 0.0)                  |
| Bahrain | 2027 | 1339.1 (1226.4 to 1459.6)  | 856.2 (755.0 to 965.4)     | 353.6 (309.1 to 401.4)        | 129.3 (105.0 to 159.5)          | 0.0 (0.0 to 0.0)                  | 2708.4 (2480.4 to 2952.0) | 1731.7 (1526.9 to 1952.6)  | 715.2 (625.2 to 811.8)        | 261.5 (212.3 to 322.6)          | 0.0 (0.0 to 0.0)                  |
| Bahrain | 2028 | 1363.9 (1241.4 to 1496.7)  | 875.9 (765.9 to 992.6)     | 357.3 (309.5 to 409.7)        | 130.8 (106.1 to 161.1)          | 0.0 (0.0 to 0.0)                  | 2758.5 (2510.8 to 3027.0) | 1771.4 (1549.1 to 2007.5)  | 722.6 (626.1 to 828.6)        | 264.5 (214.6 to 325.9)          | 0.0 (0.0 to 0.0)                  |
| Bahrain | 2029 | 1390.1 (1259.5 to 1529.8)  | 896.5 (779.4 to 1022.6)    | 361.3 (310.2 to 418.3)        | 132.4 (107.6 to 163.0)          | 0.0 (0.0 to 0.0)                  | 2811.6 (2547.4 to 3094.1) | 1813.2 (1576.3 to 2068.2)  | 730.7 (627.4 to 846.0)        | 267.7 (217.7 to 329.6)          | 0.0 (0.0 to 0.0)                  |
| Bahrain | 2030 | 1417.1 (1272.8 to 1564.3)  | 917.7 (788.8 to 1053.4)    | 365.3 (311.0 to 427.0)        | 134.0 (109.1 to 165.0)          | 0.0 (0.0 to 0.0)                  | 2866.1 (2574.3 to 3163.9) | 1856.1 (1595.3 to 2130.5)  | 738.9 (628.9 to 863.6)        | 271.1 (220.6 to 333.6)          | 0.0 (0.0 to 0.0)                  |
| Bahrain | 2031 | 1439.1 (1286.7 to 1599.4)  | 935.3 (799.7 to 1079.5)    | 368.6 (311.3 to 434.2)        | 135.2 (110.0 to 166.3)          | 0.0 (0.0 to 0.0)                  | 2910.5 (2602.3 to 3234.9) | 1891.6 (1617.3 to 2183.4)  | 745.4 (629.6 to 878.1)        | 273.4 (222.4 to 336.4)          | 0.0 (0.0 to 0.0)                  |
| Bahrain | 2032 | 1463.0 (1294.3 to 1634.2)  | 954.4 (810.5 to 1110.6)    | 372.1 (311.2 to 443.8)        | 136.5 (110.9 to 167.8)          | 0.0 (0.0 to 0.0)                  | 2958.9 (2617.8 to 3305.1) | 1930.3 (1639.2 to 2246.2)  | 752.5 (629.3 to 897.6)        | 276.1 (224.2 to 339.4)          | 0.0 (0.0 to 0.0)                  |
| Bahrain | 2033 | 1487.8 (1314.5 to 1669.1)  | 974.2 (816.8 to 1138.7)    | 375.7 (312.4 to 453.7)        | 137.9 (111.7 to 169.9)          | 0.0 (0.0 to 0.0)                  | 3009.2 (2658.6 to 3375.9) | 1970.4 (1651.9 to 2303.1)  | 759.9 (631.9 to 917.5)        | 278.9 (226.0 to 343.6)          | 0.0 (0.0 to 0.0)                  |
| Bahrain | 2034 | 1512.4 (1323.5 to 1705.9)  | 993.6 (828.9 to 1171.2)    | 379.5 (313.1 to 464.3)        | 139.3 (112.6 to 171.9)          | 0.0 (0.0 to 0.0)                  | 3058.8 (2676.9 to 3450.3) | 2009.6 (1676.6 to 2368.7)  | 767.4 (633.3 to 939.1)        | 281.7 (227.7 to 347.7)          | 0.0 (0.0 to 0.0)                  |
| Bahrain | 2035 | 1537.5 (1337.7 to 1743.5)  | 1013.5 (837.8 to 1198.2)   | 383.3 (313.5 to 474.6)        | 140.8 (113.6 to 173.6)          | 0.0 (0.0 to 0.0)                  | 3109.6 (2705.6 to 3526.3) | 2049.8 (1694.5 to 2423.4)  | 775.1 (634.0 to 959.9)        | 284.7 (229.8 to 351.0)          | 0.0 (0.0 to 0.0)                  |
| Bahrain | 2036 | 1557.7 (1348.0 to 1783.0)  | 1029.7 (845.8 to 1223.6)   | 386.2 (312.5 to 483.8)        | 141.7 (114.3 to 175.0)          | 0.0 (0.0 to 0.0)                  | 3150.5 (2726.3 to 3606.2) | 2082.6 (1710.6 to 2474.7)  | 781.2 (632.0 to 978.5)        | 286.7 (231.3 to 354.0)          | 0.0 (0.0 to 0.0)                  |

| Country    | Year | 2018 US Dollars per capita |                            |                               |                                 |                                   | 2018 PPP per capita       |                            |                               |                                 |                                   |
|------------|------|----------------------------|----------------------------|-------------------------------|---------------------------------|-----------------------------------|---------------------------|----------------------------|-------------------------------|---------------------------------|-----------------------------------|
|            |      | Health spending            | Government health spending | Out-of-pocket health spending | Prepaid private health spending | Development assistance for health | Health spending           | Government health spending | Out-of-pocket health spending | Prepaid private health spending | Development assistance for health |
| Bahrain    | 2037 | 1580.5 (1364.7 to 1809.5)  | 1047.7 (854.8 to 1257.8)   | 389.7 (312.1 to 493.3)        | 143.0 (115.2 to 176.6)          | 0.0 (0.0 to 0.0)                  | 3196.5 (2760.2 to 3659.8) | 2119.1 (1728.9 to 2544.0)  | 788.2 (631.2 to 997.7)        | 289.2 (233.0 to 357.1)          | 0.0 (0.0 to 0.0)                  |
| Bahrain    | 2038 | 1605.0 (1377.5 to 1853.5)  | 1067.3 (860.0 to 1289.0)   | 393.4 (312.1 to 502.6)        | 144.4 (116.3 to 178.4)          | 0.0 (0.0 to 0.0)                  | 3246.2 (2785.9 to 3748.7) | 2158.6 (1739.3 to 2607.0)  | 795.6 (631.2 to 1016.6)       | 292.0 (235.3 to 360.8)          | 0.0 (0.0 to 0.0)                  |
| Bahrain    | 2039 | 1628.5 (1391.2 to 1888.5)  | 1085.8 (868.0 to 1323.5)   | 397.0 (311.7 to 512.3)        | 145.7 (117.3 to 180.2)          | 0.0 (0.0 to 0.0)                  | 3293.7 (2813.8 to 3819.5) | 2196.1 (1755.5 to 2676.9)  | 802.9 (630.4 to 1036.2)       | 294.7 (237.3 to 364.5)          | 0.0 (0.0 to 0.0)                  |
| Bahrain    | 2040 | 1653.8 (1398.8 to 1925.0)  | 1105.9 (878.9 to 1355.5)   | 400.8 (311.5 to 521.5)        | 147.2 (118.5 to 182.5)          | 0.0 (0.0 to 0.0)                  | 3344.9 (2829.1 to 3893.3) | 2236.6 (1777.5 to 2741.5)  | 810.7 (630.0 to 1054.8)       | 297.6 (239.7 to 369.0)          | 0.0 (0.0 to 0.0)                  |
| Bahrain    | 2041 | 1673.7 (1409.1 to 1963.5)  | 1121.6 (883.2 to 1385.4)   | 403.9 (311.6 to 528.9)        | 148.2 (119.3 to 183.8)          | 0.0 (0.0 to 0.0)                  | 3385.1 (2849.8 to 3971.1) | 2268.4 (1786.4 to 2801.9)  | 816.9 (630.3 to 1069.7)       | 299.7 (241.3 to 371.7)          | 0.0 (0.0 to 0.0)                  |
| Bahrain    | 2042 | 1693.3 (1428.1 to 1992.8)  | 1136.8 (893.2 to 1404.2)   | 407.1 (311.4 to 537.5)        | 149.3 (120.0 to 185.7)          | 0.0 (0.0 to 0.0)                  | 3424.7 (2888.4 to 4030.5) | 2299.3 (1806.4 to 2840.1)  | 823.4 (629.8 to 1087.1)       | 302.0 (242.7 to 375.6)          | 0.0 (0.0 to 0.0)                  |
| Bahrain    | 2043 | 1713.0 (1438.7 to 2019.3)  | 1152.1 (899.3 to 1433.8)   | 410.4 (310.9 to 544.6)        | 150.5 (120.9 to 187.7)          | 0.0 (0.0 to 0.0)                  | 3464.5 (2909.9 to 4084.1) | 2330.1 (1818.9 to 2899.9)  | 830.0 (628.7 to 1101.5)       | 304.4 (244.5 to 379.5)          | 0.0 (0.0 to 0.0)                  |
| Bahrain    | 2044 | 1732.6 (1454.8 to 2050.8)  | 1167.0 (904.5 to 1465.6)   | 413.8 (311.5 to 551.8)        | 151.8 (121.6 to 189.2)          | 0.0 (0.0 to 0.0)                  | 3504.1 (2942.4 to 4147.7) | 2360.2 (1829.4 to 2964.2)  | 836.9 (630.1 to 1116.1)       | 307.1 (246.0 to 382.7)          | 0.0 (0.0 to 0.0)                  |
| Bahrain    | 2045 | 1753.3 (1456.1 to 2082.0)  | 1182.5 (909.7 to 1492.6)   | 417.5 (311.5 to 559.1)        | 153.3 (122.6 to 191.5)          | 0.0 (0.0 to 0.0)                  | 3546.1 (2945.1 to 4210.9) | 2391.6 (1839.9 to 3018.7)  | 844.3 (630.0 to 1130.7)       | 310.1 (247.9 to 387.4)          | 0.0 (0.0 to 0.0)                  |
| Bahrain    | 2046 | 1772.3 (1474.0 to 2113.3)  | 1196.9 (916.1 to 1504.1)   | 420.8 (311.0 to 566.0)        | 154.6 (123.3 to 193.7)          | 0.0 (0.0 to 0.0)                  | 3584.5 (2981.2 to 4274.2) | 2420.8 (1852.8 to 3042.1)  | 851.0 (628.9 to 1144.7)       | 312.7 (249.4 to 391.7)          | 0.0 (0.0 to 0.0)                  |
| Bahrain    | 2047 | 1790.7 (1481.3 to 2138.1)  | 1210.8 (926.1 to 1532.8)   | 424.0 (312.5 to 572.5)        | 155.8 (124.0 to 195.2)          | 0.0 (0.0 to 0.0)                  | 3621.7 (2996.0 to 4324.4) | 2448.9 (1873.1 to 3100.2)  | 857.6 (632.1 to 1158.0)       | 315.1 (250.8 to 394.9)          | 0.0 (0.0 to 0.0)                  |
| Bahrain    | 2048 | 1810.7 (1490.5 to 2175.0)  | 1225.9 (929.7 to 1554.8)   | 427.6 (312.6 to 579.2)        | 157.2 (124.9 to 197.3)          | 0.0 (0.0 to 0.0)                  | 3662.2 (3014.5 to 4398.9) | 2479.5 (1880.3 to 3144.6)  | 864.8 (632.2 to 1171.5)       | 317.9 (252.6 to 399.1)          | 0.0 (0.0 to 0.0)                  |
| Bahrain    | 2049 | 1830.3 (1506.2 to 2201.7)  | 1240.4 (937.2 to 1579.9)   | 431.2 (313.0 to 585.9)        | 158.6 (125.9 to 198.9)          | 0.0 (0.0 to 0.0)                  | 3701.7 (3046.3 to 4453.1) | 2508.8 (1895.5 to 3195.3)  | 872.1 (633.1 to 1185.0)       | 320.8 (254.7 to 402.3)          | 0.0 (0.0 to 0.0)                  |
| Bahrain    | 2050 | 1851.1 (1519.1 to 2230.9)  | 1255.8 (947.5 to 1598.5)   | 435.0 (313.2 to 593.0)        | 160.3 (126.7 to 200.6)          | 0.0 (0.0 to 0.0)                  | 3743.8 (3072.3 to 4512.1) | 2539.8 (1916.3 to 3232.9)  | 879.9 (633.4 to 1199.4)       | 324.1 (256.3 to 405.7)          | 0.0 (0.0 to 0.0)                  |
| Bangladesh | 1995 | 16.9 (13.3 to 21.1)        | 4.3 (3.3 to 5.6)           | 11.1 (7.7 to 15.3)            | 0.6 (0.3 to 1.1)                | 1.0 (1.0 to 1.0)                  | 45.4 (35.7 to 56.6)       | 11.6 (8.9 to 15.1)         | 29.7 (20.7 to 41.1)           | 1.5 (0.7 to 2.8)                | 2.6 (2.6 to 2.6)                  |
| Bangladesh | 1996 | 16.1 (12.7 to 20.1)        | 4.1 (3.2 to 5.4)           | 10.5 (7.3 to 14.4)            | 0.6 (0.3 to 1.1)                | 0.9 (0.9 to 0.9)                  | 43.1 (34.0 to 54.0)       | 11.1 (8.5 to 14.4)         | 28.1 (19.6 to 38.5)           | 1.6 (0.7 to 2.9)                | 2.4 (2.4 to 2.4)                  |
| Bangladesh | 1997 | 15.0 (12.1 to 18.8)        | 4.0 (3.0 to 5.2)           | 9.4 (6.7 to 12.7)             | 0.6 (0.3 to 1.1)                | 1.1 (1.1 to 1.1)                  | 40.3 (32.3 to 50.4)       | 10.6 (8.1 to 13.8)         | 25.2 (17.9 to 34.1)           | 1.5 (0.7 to 2.9)                | 3.0 (3.0 to 3.0)                  |
| Bangladesh | 1998 | 15.8 (12.9 to 19.3)        | 3.8 (2.9 to 4.9)           | 9.1 (6.6 to 12.4)             | 0.6 (0.3 to 1.1)                | 2.3 (2.3 to 2.3)                  | 42.2 (34.5 to 51.7)       | 10.2 (7.7 to 13.1)         | 24.5 (17.6 to 33.3)           | 1.5 (0.7 to 2.9)                | 6.0 (6.0 to 6.0)                  |
| Bangladesh | 1999 | 15.9 (13.1 to 19.5)        | 3.8 (2.9 to 4.9)           | 9.3 (6.7 to 12.8)             | 0.6 (0.3 to 1.1)                | 2.2 (2.2 to 2.2)                  | 42.7 (35.1 to 52.4)       | 10.1 (7.7 to 13.1)         | 25.0 (18.0 to 34.2)           | 1.5 (0.7 to 2.9)                | 6.0 (6.0 to 6.0)                  |
| Bangladesh | 2000 | 15.9 (13.1 to 19.8)        | 4.0 (3.0 to 5.1)           | 9.7 (7.0 to 13.3)             | 0.5 (0.2 to 0.9)                | 1.8 (1.8 to 1.8)                  | 42.7 (35.1 to 53.2)       | 10.6 (8.1 to 13.7)         | 26.0 (18.8 to 35.6)           | 1.3 (0.6 to 2.5)                | 4.8 (4.8 to 4.8)                  |
| Bangladesh | 2001 | 16.2 (13.3 to 20.2)        | 3.9 (3.0 to 5.0)           | 10.2 (7.4 to 14.0)            | 0.5 (0.2 to 0.9)                | 1.6 (1.6 to 1.6)                  | 43.5 (35.7 to 54.2)       | 10.6 (8.1 to 13.5)         | 27.2 (19.9 to 37.5)           | 1.3 (0.6 to 2.5)                | 4.3 (4.3 to 4.3)                  |

| Country    | Year | 2018 US Dollars per capita |                            |                               |                                 |                                   | 2018 PPP per capita   |                            |                               |                                 |                                   |
|------------|------|----------------------------|----------------------------|-------------------------------|---------------------------------|-----------------------------------|-----------------------|----------------------------|-------------------------------|---------------------------------|-----------------------------------|
|            |      | Health spending            | Government health spending | Out-of-pocket health spending | Prepaid private health spending | Development assistance for health | Health spending       | Government health spending | Out-of-pocket health spending | Prepaid private health spending | Development assistance for health |
| Bangladesh | 2002 | 16.8 (13.6 to 21.0)        | 4.2 (3.2 to 5.4)           | 10.9 (7.9 to 14.9)            | 0.5 (0.2 to 1.0)                | 1.2 (1.2 to 1.2)                  | 45.0 (36.5 to 56.3)   | 11.3 (8.5 to 14.4)         | 29.2 (21.1 to 40.0)           | 1.4 (0.7 to 2.7)                | 3.1 (3.1 to 3.1)                  |
| Bangladesh | 2003 | 17.7 (14.3 to 22.5)        | 4.4 (3.4 to 5.7)           | 11.6 (8.4 to 16.0)            | 0.6 (0.3 to 1.1)                | 1.2 (1.2 to 1.2)                  | 47.5 (38.3 to 60.3)   | 11.9 (9.1 to 15.4)         | 31.1 (22.5 to 42.8)           | 1.5 (0.7 to 2.9)                | 3.1 (3.1 to 3.1)                  |
| Bangladesh | 2004 | 18.8 (15.1 to 24.1)        | 4.6 (3.5 to 6.0)           | 12.4 (9.0 to 17.5)            | 0.6 (0.3 to 1.2)                | 1.2 (1.2 to 1.2)                  | 50.5 (40.6 to 64.5)   | 12.3 (9.4 to 16.1)         | 33.2 (24.1 to 47.0)           | 1.6 (0.8 to 3.1)                | 3.3 (3.3 to 3.3)                  |
| Bangladesh | 2005 | 20.5 (16.6 to 26.1)        | 4.8 (3.6 to 6.1)           | 13.4 (9.8 to 18.9)            | 0.7 (0.3 to 1.3)                | 1.6 (1.6 to 1.6)                  | 54.9 (44.6 to 70.0)   | 12.8 (9.7 to 16.5)         | 36.0 (26.2 to 50.7)           | 1.8 (0.8 to 3.5)                | 4.3 (4.3 to 4.3)                  |
| Bangladesh | 2006 | 21.9 (17.6 to 27.7)        | 5.1 (3.8 to 6.6)           | 14.7 (10.6 to 20.4)           | 0.8 (0.4 to 1.4)                | 1.4 (1.4 to 1.4)                  | 58.8 (47.2 to 74.3)   | 13.6 (10.3 to 17.7)        | 39.3 (28.4 to 54.8)           | 2.0 (0.9 to 3.8)                | 3.8 (3.8 to 3.8)                  |
| Bangladesh | 2007 | 23.0 (18.2 to 29.4)        | 5.4 (4.0 to 6.9)           | 15.9 (11.4 to 22.2)           | 0.8 (0.4 to 1.5)                | 0.9 (0.9 to 0.9)                  | 61.6 (48.9 to 79.0)   | 14.4 (10.8 to 18.6)        | 42.6 (30.5 to 59.5)           | 2.1 (1.0 to 4.0)                | 2.5 (2.5 to 2.5)                  |
| Bangladesh | 2008 | 24.6 (19.4 to 31.2)        | 5.5 (4.1 to 7.1)           | 16.8 (12.1 to 23.4)           | 0.8 (0.4 to 1.5)                | 1.5 (1.5 to 1.5)                  | 66.0 (52.1 to 83.8)   | 14.7 (11.1 to 19.1)        | 45.2 (32.3 to 62.7)           | 2.1 (1.0 to 4.0)                | 4.1 (4.1 to 4.1)                  |
| Bangladesh | 2009 | 26.2 (20.8 to 33.1)        | 5.7 (4.2 to 7.4)           | 18.0 (12.8 to 25.1)           | 0.8 (0.4 to 1.5)                | 1.7 (1.7 to 1.7)                  | 70.2 (55.9 to 88.8)   | 15.2 (11.4 to 19.9)        | 48.2 (34.3 to 67.2)           | 2.2 (1.0 to 4.1)                | 4.6 (4.6 to 4.6)                  |
| Bangladesh | 2010 | 28.1 (22.2 to 35.4)        | 6.0 (4.5 to 7.9)           | 19.4 (13.9 to 26.6)           | 0.8 (0.4 to 1.6)                | 1.8 (1.8 to 1.8)                  | 75.4 (59.5 to 95.1)   | 16.2 (12.1 to 21.3)        | 52.1 (37.2 to 71.5)           | 2.3 (1.0 to 4.4)                | 4.8 (4.8 to 4.8)                  |
| Bangladesh | 2011 | 29.9 (23.4 to 37.8)        | 6.4 (4.8 to 8.4)           | 21.0 (14.8 to 28.3)           | 0.9 (0.4 to 1.7)                | 1.5 (1.5 to 1.5)                  | 80.1 (62.7 to 101.5)  | 17.2 (12.8 to 22.6)        | 56.3 (39.6 to 76.0)           | 2.4 (1.1 to 4.6)                | 4.1 (4.1 to 4.1)                  |
| Bangladesh | 2012 | 32.0 (25.4 to 39.9)        | 6.6 (4.9 to 8.6)           | 22.2 (15.8 to 30.5)           | 0.9 (0.4 to 1.7)                | 2.3 (2.3 to 2.3)                  | 85.8 (68.1 to 107.1)  | 17.8 (13.3 to 23.1)        | 59.5 (42.3 to 81.9)           | 2.5 (1.1 to 4.7)                | 6.1 (6.1 to 6.1)                  |
| Bangladesh | 2013 | 33.8 (26.7 to 42.7)        | 6.7 (5.0 to 8.7)           | 23.2 (16.4 to 32.3)           | 0.9 (0.4 to 1.7)                | 3.0 (3.0 to 3.0)                  | 90.7 (71.7 to 114.6)  | 18.0 (13.5 to 23.3)        | 62.2 (44.0 to 86.5)           | 2.5 (1.1 to 4.7)                | 8.0 (8.0 to 8.0)                  |
| Bangladesh | 2014 | 34.3 (26.8 to 44.3)        | 6.7 (5.2 to 8.8)           | 24.3 (17.1 to 34.0)           | 0.9 (0.4 to 1.8)                | 2.3 (2.3 to 2.3)                  | 92.1 (71.7 to 118.9)  | 18.1 (13.8 to 23.5)        | 65.2 (46.0 to 91.2)           | 2.5 (1.2 to 4.8)                | 6.2 (6.2 to 6.2)                  |
| Bangladesh | 2015 | 35.7 (27.8 to 46.2)        | 6.8 (5.1 to 8.7)           | 25.6 (18.0 to 35.8)           | 1.0 (0.5 to 1.8)                | 2.3 (2.3 to 2.3)                  | 95.7 (74.6 to 124.0)  | 18.3 (13.8 to 23.3)        | 68.6 (48.2 to 96.0)           | 2.6 (1.2 to 4.8)                | 6.2 (6.2 to 6.2)                  |
| Bangladesh | 2016 | 37.1 (29.2 to 47.7)        | 7.0 (5.3 to 9.1)           | 26.6 (18.6 to 37.2)           | 1.0 (0.5 to 1.9)                | 2.4 (2.4 to 2.4)                  | 99.5 (78.3 to 127.8)  | 18.9 (14.2 to 24.4)        | 71.4 (50.0 to 99.9)           | 2.7 (1.3 to 5.1)                | 6.6 (6.6 to 6.6)                  |
| Bangladesh | 2017 | 39.3 (31.1 to 50.3)        | 7.5 (5.6 to 9.7)           | 28.1 (19.7 to 39.2)           | 1.1 (0.5 to 2.1)                | 2.7 (2.7 to 2.7)                  | 105.5 (83.4 to 134.8) | 20.2 (15.1 to 26.1)        | 75.3 (52.7 to 105.1)          | 2.9 (1.4 to 5.5)                | 7.2 (7.2 to 7.2)                  |
| Bangladesh | 2018 | 40.6 (31.8 to 52.0)        | 7.9 (5.9 to 10.1)          | 29.2 (20.4 to 40.6)           | 1.1 (0.5 to 2.1)                | 2.4 (2.3 to 2.4)                  | 108.8 (85.4 to 139.5) | 21.1 (15.8 to 27.2)        | 78.4 (54.7 to 108.9)          | 3.0 (1.4 to 5.8)                | 6.3 (6.3 to 6.4)                  |
| Bangladesh | 2019 | 42.1 (33.1 to 53.8)        | 8.2 (6.1 to 10.5)          | 30.4 (21.2 to 42.4)           | 1.2 (0.5 to 2.2)                | 2.3 (2.2 to 2.5)                  | 112.9 (88.8 to 144.3) | 21.9 (16.4 to 28.3)        | 81.6 (56.9 to 113.8)          | 3.1 (1.5 to 6.0)                | 6.3 (5.8 to 6.7)                  |
| Bangladesh | 2020 | 43.7 (34.1 to 56.5)        | 8.5 (6.4 to 11.0)          | 31.7 (22.2 to 44.2)           | 1.2 (0.6 to 2.3)                | 2.3 (2.1 to 2.5)                  | 117.3 (91.5 to 151.6) | 22.8 (17.1 to 29.4)        | 85.0 (59.6 to 118.5)          | 3.3 (1.5 to 6.2)                | 6.2 (5.7 to 6.7)                  |
| Bangladesh | 2021 | 45.5 (35.2 to 59.0)        | 8.8 (6.6 to 11.4)          | 33.1 (23.2 to 46.1)           | 1.3 (0.6 to 2.4)                | 2.3 (2.1 to 2.5)                  | 121.9 (94.5 to 158.3) | 23.7 (17.8 to 30.7)        | 88.6 (62.3 to 123.6)          | 3.4 (1.6 to 6.5)                | 6.2 (5.5 to 6.8)                  |
| Bangladesh | 2022 | 47.3 (36.8 to 60.8)        | 9.2 (6.9 to 11.9)          | 34.5 (24.2 to 48.4)           | 1.3 (0.6 to 2.5)                | 2.3 (2.1 to 2.6)                  | 126.9 (98.7 to 163.1) | 24.7 (18.5 to 32.0)        | 92.4 (64.9 to 129.8)          | 3.5 (1.7 to 6.7)                | 6.2 (5.5 to 7.0)                  |



| Country    | Year | 2018 US Dollars per capita |                            |                               |                                 |                                   | 2018 PPP per capita    |                            |                               |                                 |                                   |
|------------|------|----------------------------|----------------------------|-------------------------------|---------------------------------|-----------------------------------|------------------------|----------------------------|-------------------------------|---------------------------------|-----------------------------------|
|            |      | Health spending            | Government health spending | Out-of-pocket health spending | Prepaid private health spending | Development assistance for health | Health spending        | Government health spending | Out-of-pocket health spending | Prepaid private health spending | Development assistance for health |
| Bangladesh | 2023 | 49.2 (38.0 to 63.6)        | 9.6 (7.2 to 12.4)          | 35.9 (25.1 to 50.3)           | 1.4 (0.6 to 2.6)                | 2.4 (2.0 to 2.7)                  | 132.0 (102.0 to 170.6) | 25.7 (19.2 to 33.3)        | 96.3 (67.4 to 134.8)          | 3.7 (1.7 to 7.0)                | 6.3 (5.5 to 7.2)                  |
| Bangladesh | 2024 | 51.2 (39.7 to 66.2)        | 10.0 (7.4 to 13.0)         | 37.4 (26.3 to 52.3)           | 1.4 (0.7 to 2.7)                | 2.4 (2.1 to 2.8)                  | 137.4 (106.5 to 177.5) | 26.8 (20.0 to 34.8)        | 100.3 (70.6 to 140.2)         | 3.8 (1.8 to 7.3)                | 6.4 (5.5 to 7.5)                  |
| Bangladesh | 2025 | 53.2 (41.1 to 68.4)        | 10.4 (7.7 to 13.6)         | 38.9 (27.4 to 54.6)           | 1.5 (0.7 to 2.8)                | 2.4 (2.1 to 2.9)                  | 142.8 (110.1 to 183.4) | 27.9 (20.7 to 36.3)        | 104.4 (73.4 to 146.4)         | 4.0 (1.8 to 7.6)                | 6.6 (5.6 to 7.7)                  |
| Bangladesh | 2026 | 55.4 (43.3 to 72.3)        | 10.9 (8.0 to 14.3)         | 40.5 (28.5 to 57.0)           | 1.5 (0.7 to 3.0)                | 2.5 (2.1 to 2.9)                  | 148.6 (116.0 to 194.0) | 29.1 (21.5 to 38.3)        | 108.7 (76.5 to 152.8)         | 4.1 (1.9 to 7.9)                | 6.7 (5.6 to 7.9)                  |
| Bangladesh | 2027 | 57.7 (44.5 to 74.8)        | 11.3 (8.4 to 14.9)         | 42.2 (29.6 to 59.1)           | 1.6 (0.7 to 3.1)                | 2.5 (2.1 to 3.1)                  | 154.6 (119.3 to 200.7) | 30.4 (22.4 to 39.9)        | 113.2 (79.4 to 158.6)         | 4.3 (2.0 to 8.2)                | 6.8 (5.7 to 8.2)                  |
| Bangladesh | 2028 | 60.0 (46.5 to 78.0)        | 11.8 (8.7 to 15.6)         | 43.9 (30.6 to 61.9)           | 1.7 (0.8 to 3.2)                | 2.6 (2.2 to 3.2)                  | 160.8 (124.6 to 209.1) | 31.8 (23.4 to 41.8)        | 117.7 (82.2 to 165.9)         | 4.4 (2.1 to 8.6)                | 7.0 (5.8 to 8.5)                  |
| Bangladesh | 2029 | 62.3 (47.9 to 81.5)        | 12.4 (9.0 to 16.3)         | 45.6 (31.8 to 64.9)           | 1.7 (0.8 to 3.3)                | 2.7 (2.2 to 3.3)                  | 167.2 (128.5 to 218.6) | 33.2 (24.2 to 43.6)        | 122.3 (85.3 to 174.0)         | 4.6 (2.1 to 8.9)                | 7.1 (5.8 to 8.8)                  |
| Bangladesh | 2030 | 64.7 (49.9 to 83.8)        | 12.9 (9.4 to 17.0)         | 47.3 (33.2 to 67.5)           | 1.8 (0.8 to 3.4)                | 2.7 (2.2 to 3.4)                  | 173.6 (133.9 to 224.8) | 34.6 (25.1 to 45.7)        | 127.0 (89.1 to 181.1)         | 4.8 (2.2 to 9.2)                | 7.3 (5.9 to 9.1)                  |
| Bangladesh | 2031 | 67.2 (51.4 to 88.0)        | 13.4 (9.7 to 17.8)         | 49.1 (34.2 to 70.1)           | 1.8 (0.9 to 3.5)                | 2.8 (2.2 to 3.5)                  | 180.1 (137.9 to 236.0) | 36.0 (26.1 to 47.8)        | 131.7 (91.7 to 188.0)         | 4.9 (2.3 to 9.5)                | 7.5 (5.9 to 9.4)                  |
| Bangladesh | 2032 | 69.6 (53.1 to 91.0)        | 14.0 (10.1 to 18.6)        | 50.9 (35.2 to 72.9)           | 1.9 (0.9 to 3.7)                | 2.8 (2.2 to 3.6)                  | 186.7 (142.4 to 244.2) | 37.4 (27.0 to 49.9)        | 136.5 (94.4 to 195.6)         | 5.1 (2.4 to 9.8)                | 7.6 (6.0 to 9.7)                  |
| Bangladesh | 2033 | 72.1 (55.2 to 94.4)        | 14.5 (10.5 to 19.5)        | 52.7 (36.2 to 75.6)           | 2.0 (0.9 to 3.8)                | 2.9 (2.2 to 3.8)                  | 193.4 (148.0 to 253.2) | 38.9 (28.1 to 52.2)        | 141.4 (97.0 to 202.8)         | 5.3 (2.5 to 10.2)               | 7.8 (6.0 to 10.2)                 |
| Bangladesh | 2034 | 74.6 (56.5 to 98.0)        | 15.1 (10.9 to 20.3)        | 54.5 (37.1 to 78.4)           | 2.0 (0.9 to 4.0)                | 3.0 (2.3 to 3.9)                  | 200.2 (151.5 to 262.8) | 40.4 (29.1 to 54.4)        | 146.2 (99.5 to 210.3)         | 5.5 (2.5 to 10.6)               | 8.0 (6.0 to 10.5)                 |
| Bangladesh | 2035 | 77.2 (58.3 to 103.5)       | 15.6 (11.3 to 21.2)        | 56.4 (38.2 to 81.2)           | 2.1 (1.0 to 4.1)                | 3.1 (2.3 to 4.0)                  | 207.1 (156.4 to 277.6) | 42.0 (30.3 to 56.7)        | 151.2 (102.6 to 217.7)        | 5.7 (2.6 to 10.9)               | 8.3 (6.1 to 10.8)                 |
| Bangladesh | 2036 | 79.8 (59.6 to 106.1)       | 16.2 (11.7 to 22.2)        | 58.2 (39.3 to 84.5)           | 2.2 (1.0 to 4.2)                | 3.2 (2.3 to 4.3)                  | 214.1 (159.8 to 284.6) | 43.6 (31.4 to 59.4)        | 156.1 (105.3 to 226.6)        | 5.9 (2.7 to 11.4)               | 8.5 (6.2 to 11.4)                 |
| Bangladesh | 2037 | 82.5 (62.4 to 109.2)       | 16.9 (12.2 to 23.1)        | 60.1 (40.3 to 87.4)           | 2.3 (1.1 to 4.4)                | 3.2 (2.3 to 4.4)                  | 221.2 (167.3 to 292.9) | 45.2 (32.6 to 62.1)        | 161.1 (108.2 to 234.3)        | 6.1 (2.8 to 11.8)               | 8.7 (6.3 to 11.9)                 |
| Bangladesh | 2038 | 85.1 (63.6 to 113.6)       | 17.5 (12.6 to 24.1)        | 62.0 (41.5 to 90.3)           | 2.4 (1.1 to 4.6)                | 3.3 (2.4 to 4.7)                  | 228.3 (170.6 to 304.5) | 46.9 (33.9 to 64.6)        | 166.2 (111.3 to 242.1)        | 6.3 (2.9 to 12.2)               | 8.9 (6.4 to 12.5)                 |
| Bangladesh | 2039 | 87.8 (65.3 to 117.6)       | 18.2 (13.0 to 25.0)        | 63.8 (42.7 to 93.2)           | 2.4 (1.1 to 4.7)                | 3.4 (2.4 to 4.9)                  | 235.6 (175.3 to 315.4) | 48.7 (34.9 to 67.0)        | 171.2 (114.5 to 249.8)        | 6.5 (3.0 to 12.6)               | 9.2 (6.4 to 13.2)                 |
| Bangladesh | 2040 | 90.6 (66.7 to 119.9)       | 18.8 (13.4 to 26.1)        | 65.7 (43.9 to 96.1)           | 2.5 (1.2 to 4.9)                | 3.5 (2.5 to 5.0)                  | 242.9 (178.9 to 321.7) | 50.5 (35.9 to 70.0)        | 176.2 (117.7 to 257.6)        | 6.8 (3.2 to 13.0)               | 9.4 (6.6 to 13.5)                 |
| Bangladesh | 2041 | 93.3 (68.6 to 125.6)       | 19.5 (13.8 to 27.2)        | 67.6 (45.1 to 99.0)           | 2.6 (1.2 to 5.0)                | 3.6 (2.5 to 5.2)                  | 250.2 (183.9 to 336.8) | 52.4 (37.0 to 73.0)        | 181.2 (120.9 to 265.4)        | 7.0 (3.3 to 13.4)               | 9.7 (6.8 to 14.1)                 |
| Bangladesh | 2042 | 96.1 (70.2 to 129.7)       | 20.2 (14.2 to 28.5)        | 69.4 (46.4 to 102.3)          | 2.7 (1.3 to 5.2)                | 3.7 (2.5 to 5.5)                  | 257.7 (188.2 to 347.9) | 54.3 (38.1 to 76.3)        | 186.2 (124.5 to 274.4)        | 7.2 (3.4 to 13.9)               | 10.0 (6.7 to 14.8)                |
| Bangladesh | 2043 | 98.9 (73.8 to 133.3)       | 21.0 (14.7 to 29.7)        | 71.3 (47.7 to 105.1)          | 2.8 (1.3 to 5.3)                | 3.8 (2.6 to 5.6)                  | 265.2 (197.8 to 357.5) | 56.3 (39.5 to 79.5)        | 191.1 (128.0 to 282.0)        | 7.5 (3.5 to 14.3)               | 10.3 (6.9 to 15.1)                |

| Country    | Year | 2018 US Dollars per capita |                            |                               |                                 |                                   | 2018 PPP per capita       |                            |                               |                                 |                                   |
|------------|------|----------------------------|----------------------------|-------------------------------|---------------------------------|-----------------------------------|---------------------------|----------------------------|-------------------------------|---------------------------------|-----------------------------------|
|            |      | Health spending            | Government health spending | Out-of-pocket health spending | Prepaid private health spending | Development assistance for health | Health spending           | Government health spending | Out-of-pocket health spending | Prepaid private health spending | Development assistance for health |
| Bangladesh | 2044 | 101.7 (76.1 to 137.5)      | 21.7 (15.2 to 31.0)        | 73.1 (48.9 to 107.8)          | 2.9 (1.3 to 5.5)                | 4.0 (2.6 to 5.9)                  | 272.8 (204.0 to 368.8)    | 58.3 (40.7 to 83.1)        | 196.1 (131.3 to 289.2)        | 7.7 (3.6 to 14.8)               | 10.7 (6.9 to 15.8)                |
| Bangladesh | 2045 | 104.5 (78.1 to 141.5)      | 22.5 (15.6 to 32.3)        | 74.9 (50.1 to 110.5)          | 3.0 (1.4 to 5.7)                | 4.1 (2.7 to 6.3)                  | 280.3 (209.5 to 379.4)    | 60.4 (41.9 to 86.7)        | 200.9 (134.4 to 296.4)        | 8.0 (3.7 to 15.2)               | 11.0 (7.2 to 16.9)                |
| Bangladesh | 2046 | 107.3 (80.2 to 144.7)      | 23.3 (16.0 to 33.7)        | 76.7 (51.3 to 113.1)          | 3.1 (1.4 to 5.9)                | 4.2 (2.7 to 6.7)                  | 287.7 (215.2 to 388.0)    | 62.5 (43.0 to 90.3)        | 205.6 (137.6 to 303.2)        | 8.2 (3.8 to 15.7)               | 11.4 (7.3 to 18.1)                |
| Bangladesh | 2047 | 110.1 (82.0 to 147.6)      | 24.1 (16.5 to 35.2)        | 78.4 (52.5 to 116.0)          | 3.2 (1.5 to 6.0)                | 4.4 (2.8 to 7.2)                  | 295.2 (219.8 to 395.9)    | 64.7 (44.2 to 94.5)        | 210.2 (140.8 to 311.2)        | 8.5 (4.0 to 16.2)               | 11.8 (7.5 to 19.3)                |
| Bangladesh | 2048 | 112.9 (83.4 to 153.9)      | 25.0 (16.9 to 36.9)        | 80.1 (53.7 to 118.8)          | 3.3 (1.5 to 6.2)                | 4.6 (2.9 to 7.3)                  | 302.9 (223.6 to 412.8)    | 66.9 (45.3 to 98.9)        | 214.9 (144.1 to 318.6)        | 8.8 (4.1 to 16.6)               | 12.3 (7.7 to 19.7)                |
| Bangladesh | 2049 | 115.8 (86.1 to 158.1)      | 25.8 (17.3 to 38.4)        | 81.9 (54.9 to 121.6)          | 3.4 (1.6 to 6.4)                | 4.8 (3.0 to 8.0)                  | 310.6 (231.0 to 424.0)    | 69.2 (46.4 to 103.0)       | 219.6 (147.3 to 326.1)        | 9.0 (4.2 to 17.1)               | 12.8 (8.0 to 21.4)                |
| Bangladesh | 2050 | 118.7 (87.3 to 161.3)      | 26.6 (17.7 to 40.1)        | 83.7 (56.0 to 124.4)          | 3.5 (1.6 to 6.6)                | 5.0 (3.0 to 8.5)                  | 318.5 (234.2 to 432.5)    | 71.5 (47.4 to 107.6)       | 224.4 (150.3 to 333.6)        | 9.3 (4.3 to 17.7)               | 13.4 (8.1 to 22.9)                |
| Barbados   | 1995 | 807.6 (749.4 to 867.7)     | 472.0 (426.6 to 522.3)     | 269.8 (242.4 to 301.1)        | 64.8 (44.6 to 90.6)             | 1.1 (1.1 to 1.1)                  | 845.9 (784.9 to 908.9)    | 494.3 (446.8 to 547.0)     | 282.6 (253.9 to 315.4)        | 67.9 (46.7 to 94.9)             | 1.1 (1.1 to 1.1)                  |
| Barbados   | 1996 | 847.9 (796.2 to 903.5)     | 496.1 (457.6 to 538.2)     | 283.1 (259.3 to 309.5)        | 67.8 (49.3 to 91.3)             | 0.8 (0.8 to 0.8)                  | 888.1 (834.0 to 946.3)    | 519.7 (479.4 to 563.7)     | 296.6 (271.6 to 324.2)        | 71.0 (51.7 to 95.6)             | 0.9 (0.9 to 0.9)                  |
| Barbados   | 1997 | 872.6 (825.3 to 924.2)     | 501.7 (466.9 to 539.7)     | 300.1 (278.1 to 325.0)        | 69.9 (51.0 to 92.2)             | 0.8 (0.8 to 0.8)                  | 913.9 (864.4 to 968.0)    | 525.5 (489.0 to 565.3)     | 314.3 (291.3 to 340.4)        | 73.3 (53.4 to 96.6)             | 0.9 (0.9 to 0.9)                  |
| Barbados   | 1998 | 870.8 (825.8 to 918.2)     | 492.5 (459.8 to 528.1)     | 307.6 (286.7 to 331.1)        | 69.9 (52.2 to 90.3)             | 0.8 (0.8 to 0.8)                  | 912.1 (865.0 to 961.7)    | 515.9 (481.6 to 553.1)     | 322.2 (300.3 to 346.8)        | 73.2 (54.7 to 94.6)             | 0.8 (0.8 to 0.8)                  |
| Barbados   | 1999 | 870.4 (827.0 to 913.9)     | 483.9 (451.6 to 520.1)     | 315.8 (295.2 to 337.8)        | 70.0 (53.2 to 89.1)             | 0.8 (0.8 to 0.8)                  | 911.7 (866.3 to 957.2)    | 506.8 (473.0 to 544.8)     | 330.7 (309.2 to 353.8)        | 73.3 (55.7 to 93.3)             | 0.8 (0.8 to 0.8)                  |
| Barbados   | 2000 | 877.8 (835.4 to 921.1)     | 481.0 (448.5 to 516.7)     | 326.0 (306.3 to 346.5)        | 70.9 (54.8 to 89.5)             | 0.0 (0.0 to 0.0)                  | 919.4 (875.1 to 964.8)    | 503.8 (469.8 to 541.2)     | 341.4 (320.8 to 363.0)        | 74.2 (57.5 to 93.8)             | 0.0 (0.0 to 0.0)                  |
| Barbados   | 2001 | 874.5 (833.3 to 918.6)     | 477.8 (443.6 to 510.1)     | 326.5 (307.3 to 346.4)        | 68.8 (53.6 to 86.9)             | 1.4 (1.4 to 1.4)                  | 915.9 (872.8 to 962.1)    | 500.5 (464.6 to 534.3)     | 342.0 (321.8 to 362.9)        | 72.0 (56.1 to 91.0)             | 1.5 (1.5 to 1.5)                  |
| Barbados   | 2002 | 915.1 (873.4 to 959.8)     | 508.6 (474.0 to 542.7)     | 338.3 (317.8 to 357.8)        | 68.1 (53.4 to 86.2)             | 0.0 (0.0 to 0.0)                  | 958.5 (914.8 to 1005.3)   | 532.7 (496.5 to 568.4)     | 354.4 (332.9 to 374.8)        | 71.4 (55.9 to 90.3)             | 0.0 (0.0 to 0.0)                  |
| Barbados   | 2003 | 1011.7 (966.0 to 1055.9)   | 564.0 (526.6 to 600.8)     | 361.1 (340.4 to 382.5)        | 69.0 (53.1 to 87.5)             | 17.5 (17.5 to 17.5)               | 1059.7 (1011.8 to 1105.9) | 590.8 (551.5 to 629.3)     | 378.2 (356.6 to 400.6)        | 72.3 (55.6 to 91.6)             | 18.4 (18.4 to 18.4)               |
| Barbados   | 2004 | 1080.5 (1033.2 to 1130.1)  | 609.1 (570.9 to 649.9)     | 376.1 (353.9 to 399.1)        | 71.5 (55.7 to 88.9)             | 23.9 (23.9 to 23.9)               | 1131.8 (1082.2 to 1183.7) | 638.0 (597.9 to 680.7)     | 394.0 (370.7 to 418.0)        | 74.9 (58.3 to 93.2)             | 25.0 (25.0 to 25.0)               |
| Barbados   | 2005 | 1080.1 (1034.4 to 1127.9)  | 617.6 (580.2 to 656.0)     | 381.9 (360.5 to 403.9)        | 72.1 (56.4 to 89.7)             | 8.6 (8.6 to 8.6)                  | 1131.4 (1083.5 to 1181.4) | 646.9 (607.7 to 687.1)     | 400.0 (377.6 to 423.1)        | 75.5 (59.1 to 94.0)             | 9.0 (9.0 to 9.0)                  |
| Barbados   | 2006 | 1085.6 (1043.6 to 1133.1)  | 623.3 (589.5 to 662.1)     | 389.4 (367.5 to 410.7)        | 72.9 (56.9 to 91.9)             | 0.0 (0.0 to 0.0)                  | 1137.0 (1093.1 to 1186.8) | 652.8 (617.4 to 693.5)     | 407.9 (384.9 to 430.2)        | 76.3 (59.6 to 96.3)             | 0.0 (0.0 to 0.0)                  |
| Barbados   | 2007 | 1090.9 (1047.3 to 1136.9)  | 622.7 (589.9 to 661.0)     | 396.5 (375.8 to 417.0)        | 71.7 (57.7 to 89.7)             | 0.0 (0.0 to 0.0)                  | 1142.7 (1097.0 to 1190.8) | 652.2 (617.9 to 692.3)     | 415.3 (393.6 to 436.8)        | 75.1 (60.4 to 94.0)             | 0.0 (0.0 to 0.0)                  |
| Barbados   | 2008 | 1107.1 (1060.6 to 1150.7)  | 629.0 (595.1 to 664.5)     | 407.2 (387.1 to 428.6)        | 70.8 (56.2 to 87.1)             | 0.0 (0.0 to 0.0)                  | 1159.6 (1110.9 to 1205.3) | 658.9 (623.3 to 696.0)     | 426.5 (405.4 to 449.0)        | 74.1 (58.9 to 91.2)             | 0.0 (0.0 to 0.0)                  |

| Country  | Year | 2018 US Dollars per capita |                            |                               |                                 |                                   | 2018 PPP per capita       |                            |                               |                                 |                                   |
|----------|------|----------------------------|----------------------------|-------------------------------|---------------------------------|-----------------------------------|---------------------------|----------------------------|-------------------------------|---------------------------------|-----------------------------------|
|          |      | Health spending            | Government health spending | Out-of-pocket health spending | Prepaid private health spending | Development assistance for health | Health spending           | Government health spending | Out-of-pocket health spending | Prepaid private health spending | Development assistance for health |
| Barbados | 2009 | 1110.0 (1062.2 to 1156.0)  | 622.7 (588.2 to 658.9)     | 418.5 (398.9 to 440.9)        | 68.7 (55.1 to 85.0)             | 0.0 (0.0 to 0.0)                  | 1162.6 (1112.6 to 1210.8) | 652.3 (616.1 to 690.2)     | 438.4 (417.8 to 461.8)        | 72.0 (57.8 to 89.0)             | 0.0 (0.0 to 0.0)                  |
| Barbados | 2010 | 1135.6 (1091.6 to 1182.0)  | 622.2 (585.1 to 659.4)     | 443.0 (422.3 to 465.9)        | 70.4 (56.9 to 85.9)             | 0.0 (0.0 to 0.0)                  | 1189.5 (1143.4 to 1238.1) | 651.8 (612.8 to 690.6)     | 464.0 (442.4 to 488.0)        | 73.7 (59.6 to 89.9)             | 0.0 (0.0 to 0.0)                  |
| Barbados | 2011 | 1185.1 (1142.9 to 1231.5)  | 628.7 (594.3 to 664.7)     | 482.8 (460.8 to 504.6)        | 73.6 (59.6 to 89.3)             | 0.0 (0.0 to 0.0)                  | 1241.4 (1197.1 to 1289.9) | 658.5 (622.4 to 696.2)     | 505.8 (482.6 to 528.5)        | 77.1 (62.5 to 93.6)             | 0.0 (0.0 to 0.0)                  |
| Barbados | 2012 | 1251.3 (1208.1 to 1298.6)  | 655.5 (620.9 to 694.4)     | 516.7 (494.8 to 539.7)        | 79.0 (65.2 to 95.6)             | 0.0 (0.0 to 0.0)                  | 1310.7 (1265.4 to 1360.2) | 686.6 (650.3 to 727.3)     | 541.2 (518.2 to 565.3)        | 82.8 (68.2 to 100.1)            | 0.0 (0.0 to 0.0)                  |
| Barbados | 2013 | 1254.2 (1208.8 to 1301.6)  | 634.4 (598.0 to 671.8)     | 536.9 (513.3 to 561.3)        | 82.9 (67.7 to 99.1)             | 0.0 (0.0 to 0.0)                  | 1313.7 (1266.2 to 1363.3) | 664.5 (626.4 to 703.6)     | 562.4 (537.7 to 588.0)        | 86.8 (71.0 to 103.8)            | 0.0 (0.0 to 0.0)                  |
| Barbados | 2014 | 1216.4 (1168.0 to 1265.0)  | 591.5 (554.1 to 631.7)     | 541.0 (518.0 to 566.5)        | 83.9 (68.0 to 101.8)            | 0.0 (0.0 to 0.0)                  | 1274.1 (1223.4 to 1325.0) | 619.6 (580.4 to 661.6)     | 566.6 (542.6 to 593.3)        | 87.8 (71.3 to 106.7)            | 0.0 (0.0 to 0.0)                  |
| Barbados | 2015 | 1195.2 (1142.2 to 1248.7)  | 567.3 (528.7 to 610.3)     | 542.6 (518.2 to 569.8)        | 85.2 (67.0 to 106.4)            | 0.0 (0.0 to 0.0)                  | 1251.8 (1196.4 to 1307.9) | 594.2 (553.8 to 639.3)     | 568.4 (542.8 to 596.8)        | 89.3 (70.2 to 111.4)            | 0.0 (0.0 to 0.0)                  |
| Barbados | 2016 | 1187.6 (1123.5 to 1256.8)  | 556.8 (508.9 to 607.2)     | 543.8 (510.9 to 578.8)        | 86.9 (63.9 to 112.8)            | 0.0 (0.0 to 0.0)                  | 1243.9 (1176.8 to 1316.4) | 583.3 (533.0 to 636.0)     | 569.6 (535.1 to 606.2)        | 91.0 (67.0 to 118.1)            | 0.0 (0.0 to 0.0)                  |
| Barbados | 2017 | 1201.2 (1135.9 to 1270.5)  | 560.0 (511.9 to 611.9)     | 553.1 (519.3 to 589.3)        | 88.1 (64.8 to 114.4)            | 0.0 (0.0 to 0.0)                  | 1258.2 (1189.7 to 1330.7) | 586.6 (536.2 to 640.9)     | 579.4 (543.9 to 617.2)        | 92.3 (67.9 to 119.8)            | 0.0 (0.0 to 0.0)                  |
| Barbados | 2018 | 1210.6 (1144.8 to 1280.1)  | 560.8 (512.0 to 612.0)     | 560.7 (524.6 to 597.4)        | 89.1 (65.6 to 115.7)            | 0.0 (0.0 to 0.0)                  | 1268.1 (1199.1 to 1340.8) | 587.4 (536.3 to 641.0)     | 587.3 (549.5 to 625.8)        | 93.3 (68.7 to 121.1)            | 0.0 (0.0 to 0.0)                  |
| Barbados | 2019 | 1222.3 (1155.7 to 1294.0)  | 563.9 (514.6 to 620.6)     | 568.4 (532.5 to 607.3)        | 90.0 (66.2 to 117.0)            | 0.0 (0.0 to 0.0)                  | 1280.3 (1210.5 to 1355.4) | 590.6 (539.0 to 650.1)     | 595.4 (557.8 to 636.1)        | 94.3 (69.3 to 122.6)            | 0.0 (0.0 to 0.0)                  |
| Barbados | 2020 | 1232.7 (1162.5 to 1309.1)  | 565.5 (515.2 to 625.1)     | 576.3 (539.1 to 615.7)        | 90.8 (67.0 to 118.1)            | 0.0 (0.0 to 0.0)                  | 1291.1 (1217.6 to 1371.2) | 592.4 (539.6 to 654.7)     | 603.6 (564.7 to 644.9)        | 95.2 (70.1 to 123.7)            | 0.0 (0.0 to 0.0)                  |
| Barbados | 2021 | 1244.4 (1172.4 to 1324.1)  | 568.4 (517.2 to 628.2)     | 584.5 (545.1 to 625.7)        | 91.6 (67.5 to 119.3)            | 0.0 (0.0 to 0.0)                  | 1303.5 (1228.0 to 1386.9) | 595.3 (541.7 to 658.0)     | 612.2 (571.0 to 655.4)        | 95.9 (70.7 to 124.9)            | 0.0 (0.0 to 0.0)                  |
| Barbados | 2022 | 1257.5 (1184.2 to 1340.9)  | 572.3 (519.6 to 635.1)     | 592.8 (551.9 to 636.0)        | 92.4 (68.1 to 120.5)            | 0.0 (0.0 to 0.0)                  | 1317.1 (1240.4 to 1404.5) | 599.4 (544.2 to 665.2)     | 621.0 (578.1 to 666.2)        | 96.8 (71.3 to 126.2)            | 0.0 (0.0 to 0.0)                  |
| Barbados | 2023 | 1271.8 (1196.6 to 1356.1)  | 577.4 (524.3 to 640.9)     | 601.2 (559.2 to 647.4)        | 93.2 (68.7 to 121.5)            | 0.0 (0.0 to 0.0)                  | 1332.1 (1253.4 to 1420.5) | 604.8 (549.2 to 671.2)     | 629.8 (585.7 to 678.1)        | 97.6 (72.0 to 127.3)            | 0.0 (0.0 to 0.0)                  |
| Barbados | 2024 | 1284.7 (1205.8 to 1371.3)  | 581.4 (527.5 to 647.0)     | 609.3 (563.1 to 660.1)        | 94.0 (69.3 to 122.6)            | 0.0 (0.0 to 0.0)                  | 1345.6 (1263.0 to 1436.3) | 609.0 (552.5 to 677.7)     | 638.2 (589.8 to 691.4)        | 98.4 (72.6 to 128.4)            | 0.0 (0.0 to 0.0)                  |
| Barbados | 2025 | 1297.2 (1218.6 to 1383.9)  | 585.2 (531.1 to 650.0)     | 617.4 (570.1 to 670.2)        | 94.7 (69.8 to 123.6)            | 0.0 (0.0 to 0.0)                  | 1358.8 (1276.4 to 1449.5) | 613.0 (556.2 to 680.8)     | 646.6 (597.1 to 701.9)        | 99.1 (73.1 to 129.4)            | 0.0 (0.0 to 0.0)                  |
| Barbados | 2026 | 1311.6 (1230.1 to 1399.0)  | 590.2 (535.6 to 655.3)     | 625.8 (572.5 to 682.5)        | 95.5 (70.2 to 124.7)            | 0.0 (0.0 to 0.0)                  | 1373.8 (1288.4 to 1465.4) | 618.2 (561.0 to 686.4)     | 655.5 (599.7 to 714.9)        | 100.1 (73.6 to 130.6)           | 0.0 (0.0 to 0.0)                  |
| Barbados | 2027 | 1325.7 (1243.6 to 1421.4)  | 595.0 (539.8 to 661.9)     | 634.3 (574.5 to 698.0)        | 96.4 (70.7 to 125.6)            | 0.0 (0.0 to 0.0)                  | 1388.5 (1302.5 to 1488.8) | 623.2 (565.4 to 693.2)     | 664.4 (601.7 to 731.1)        | 100.9 (74.1 to 131.6)           | 0.0 (0.0 to 0.0)                  |
| Barbados | 2028 | 1339.6 (1255.3 to 1440.6)  | 599.7 (543.8 to 667.0)     | 642.7 (576.7 to 714.3)        | 97.2 (71.5 to 126.6)            | 0.0 (0.0 to 0.0)                  | 1403.1 (1314.9 to 1509.0) | 628.1 (569.6 to 698.7)     | 673.2 (604.1 to 748.2)        | 101.8 (74.9 to 132.6)           | 0.0 (0.0 to 0.0)                  |
| Barbados | 2029 | 1353.8 (1266.8 to 1461.2)  | 604.5 (548.0 to 672.9)     | 651.2 (578.0 to 730.9)        | 98.1 (72.3 to 127.6)            | 0.0 (0.0 to 0.0)                  | 1418.0 (1326.9 to 1530.5) | 633.2 (574.0 to 704.8)     | 682.1 (605.5 to 765.6)        | 102.7 (75.8 to 133.6)           | 0.0 (0.0 to 0.0)                  |

| Country  | Year | 2018 US Dollars per capita |                            |                               |                                 |                                   | 2018 PPP per capita       |                            |                               |                                 |                                   |
|----------|------|----------------------------|----------------------------|-------------------------------|---------------------------------|-----------------------------------|---------------------------|----------------------------|-------------------------------|---------------------------------|-----------------------------------|
|          |      | Health spending            | Government health spending | Out-of-pocket health spending | Prepaid private health spending | Development assistance for health | Health spending           | Government health spending | Out-of-pocket health spending | Prepaid private health spending | Development assistance for health |
| Barbados | 2030 | 1368.5 (1274.9 to 1486.7)  | 609.8 (551.9 to 678.6)     | 659.7 (580.0 to 746.0)        | 99.0 (72.8 to 128.6)            | 0.0 (0.0 to 0.0)                  | 1433.4 (1335.3 to 1557.2) | 638.7 (578.0 to 710.8)     | 691.0 (607.5 to 781.4)        | 103.7 (76.3 to 134.7)           | 0.0 (0.0 to 0.0)                  |
| Barbados | 2031 | 1384.9 (1285.5 to 1507.3)  | 616.2 (558.0 to 685.2)     | 668.6 (582.8 to 762.4)        | 100.1 (73.6 to 130.0)           | 0.0 (0.0 to 0.0)                  | 1450.6 (1346.5 to 1578.7) | 645.4 (584.4 to 717.7)     | 700.3 (610.4 to 798.5)        | 104.9 (77.1 to 136.1)           | 0.0 (0.0 to 0.0)                  |
| Barbados | 2032 | 1401.8 (1297.2 to 1532.9)  | 622.9 (563.7 to 692.2)     | 677.6 (585.3 to 780.9)        | 101.3 (74.5 to 131.4)           | 0.0 (0.0 to 0.0)                  | 1468.3 (1358.8 to 1605.6) | 652.5 (590.5 to 725.0)     | 709.7 (613.0 to 817.9)        | 106.1 (78.1 to 137.6)           | 0.0 (0.0 to 0.0)                  |
| Barbados | 2033 | 1418.7 (1307.8 to 1558.4)  | 629.7 (569.6 to 700.8)     | 686.4 (587.3 to 798.7)        | 102.5 (75.6 to 132.7)           | 0.0 (0.0 to 0.0)                  | 1485.9 (1369.8 to 1632.3) | 659.6 (596.6 to 734.0)     | 719.0 (615.1 to 836.6)        | 107.4 (79.1 to 139.0)           | 0.0 (0.0 to 0.0)                  |
| Barbados | 2034 | 1435.9 (1317.3 to 1583.3)  | 636.7 (575.1 to 708.0)     | 695.4 (590.1 to 817.0)        | 103.8 (76.5 to 134.8)           | 0.0 (0.0 to 0.0)                  | 1504.0 (1379.8 to 1658.4) | 666.9 (602.4 to 741.5)     | 728.4 (618.1 to 855.7)        | 108.7 (80.1 to 141.2)           | 0.0 (0.0 to 0.0)                  |
| Barbados | 2035 | 1452.6 (1330.1 to 1608.8)  | 643.4 (579.4 to 716.4)     | 704.2 (594.3 to 834.7)        | 105.0 (77.4 to 136.4)           | 0.0 (0.0 to 0.0)                  | 1521.5 (1393.2 to 1685.1) | 674.0 (606.8 to 750.4)     | 737.6 (622.5 to 874.3)        | 109.9 (81.0 to 142.8)           | 0.0 (0.0 to 0.0)                  |
| Barbados | 2036 | 1470.4 (1346.2 to 1630.8)  | 650.9 (584.6 to 726.9)     | 713.3 (598.4 to 851.0)        | 106.3 (78.4 to 137.7)           | 0.0 (0.0 to 0.0)                  | 1540.1 (1410.0 to 1708.2) | 681.7 (612.3 to 761.3)     | 747.1 (626.7 to 891.4)        | 111.3 (82.1 to 144.2)           | 0.0 (0.0 to 0.0)                  |
| Barbados | 2037 | 1487.5 (1358.3 to 1661.7)  | 657.9 (589.4 to 735.9)     | 722.1 (600.7 to 866.8)        | 107.5 (79.3 to 139.5)           | 0.0 (0.0 to 0.0)                  | 1558.1 (1422.7 to 1740.5) | 689.1 (617.4 to 770.8)     | 756.4 (629.2 to 907.9)        | 112.6 (83.1 to 146.1)           | 0.0 (0.0 to 0.0)                  |
| Barbados | 2038 | 1505.3 (1366.7 to 1689.1)  | 665.3 (594.6 to 744.7)     | 731.1 (605.0 to 884.1)        | 108.8 (80.4 to 141.7)           | 0.0 (0.0 to 0.0)                  | 1576.7 (1431.5 to 1769.2) | 696.9 (622.8 to 780.0)     | 765.8 (633.7 to 926.0)        | 114.0 (84.2 to 148.4)           | 0.0 (0.0 to 0.0)                  |
| Barbados | 2039 | 1522.9 (1375.3 to 1712.5)  | 672.7 (600.0 to 753.4)     | 740.0 (608.8 to 899.0)        | 110.2 (81.1 to 143.0)           | 0.0 (0.0 to 0.0)                  | 1595.1 (1440.5 to 1793.7) | 704.6 (628.4 to 789.2)     | 775.1 (637.7 to 941.7)        | 115.4 (85.0 to 149.8)           | 0.0 (0.0 to 0.0)                  |
| Barbados | 2040 | 1541.3 (1391.4 to 1737.8)  | 680.7 (607.0 to 764.1)     | 749.0 (613.1 to 913.5)        | 111.6 (82.2 to 144.9)           | 0.0 (0.0 to 0.0)                  | 1614.4 (1457.4 to 1820.2) | 713.0 (635.8 to 800.3)     | 784.5 (642.2 to 956.9)        | 116.9 (86.1 to 151.8)           | 0.0 (0.0 to 0.0)                  |
| Barbados | 2041 | 1561.4 (1401.0 to 1755.6)  | 689.9 (612.5 to 776.1)     | 758.4 (618.1 to 928.2)        | 113.2 (83.6 to 147.3)           | 0.0 (0.0 to 0.0)                  | 1635.5 (1467.5 to 1838.8) | 722.6 (641.6 to 812.9)     | 794.3 (647.4 to 972.2)        | 118.5 (87.6 to 154.3)           | 0.0 (0.0 to 0.0)                  |
| Barbados | 2042 | 1582.1 (1420.8 to 1789.3)  | 699.5 (621.0 to 787.0)     | 767.8 (624.1 to 944.2)        | 114.9 (85.0 to 149.5)           | 0.0 (0.0 to 0.0)                  | 1657.2 (1488.2 to 1874.2) | 732.7 (650.4 to 824.3)     | 804.2 (653.7 to 988.9)        | 120.3 (89.1 to 156.5)           | 0.0 (0.0 to 0.0)                  |
| Barbados | 2043 | 1602.7 (1433.5 to 1813.7)  | 709.1 (627.7 to 798.2)     | 777.0 (629.8 to 959.7)        | 116.6 (86.3 to 151.8)           | 0.0 (0.0 to 0.0)                  | 1678.7 (1501.5 to 1899.7) | 742.7 (657.5 to 836.0)     | 813.9 (659.7 to 1005.2)       | 122.1 (90.4 to 159.0)           | 0.0 (0.0 to 0.0)                  |
| Barbados | 2044 | 1623.8 (1448.3 to 1841.4)  | 719.0 (634.6 to 809.8)     | 786.4 (635.5 to 974.9)        | 118.3 (87.5 to 154.6)           | 0.0 (0.0 to 0.0)                  | 1700.8 (1517.0 to 1928.7) | 753.1 (664.8 to 848.2)     | 823.7 (665.6 to 1021.2)       | 123.9 (91.7 to 161.9)           | 0.0 (0.0 to 0.0)                  |
| Barbados | 2045 | 1644.1 (1464.4 to 1866.7)  | 728.5 (641.1 to 822.7)     | 795.6 (641.6 to 988.8)        | 120.0 (88.6 to 157.3)           | 0.0 (0.0 to 0.0)                  | 1722.0 (1533.9 to 1955.2) | 763.0 (671.5 to 861.8)     | 833.3 (672.0 to 1035.7)       | 125.7 (92.8 to 164.8)           | 0.0 (0.0 to 0.0)                  |
| Barbados | 2046 | 1665.3 (1479.6 to 1888.0)  | 738.5 (648.8 to 837.5)     | 805.0 (647.9 to 1000.5)       | 121.8 (89.9 to 160.1)           | 0.0 (0.0 to 0.0)                  | 1744.3 (1549.8 to 1977.6) | 773.5 (679.6 to 877.2)     | 843.2 (678.7 to 1048.0)       | 127.6 (94.2 to 167.6)           | 0.0 (0.0 to 0.0)                  |
| Barbados | 2047 | 1686.7 (1502.1 to 1919.1)  | 748.7 (656.9 to 849.7)     | 814.4 (654.9 to 1014.4)       | 123.6 (90.9 to 163.0)           | 0.0 (0.0 to 0.0)                  | 1766.7 (1573.3 to 2010.1) | 784.2 (688.1 to 890.0)     | 853.0 (686.0 to 1062.5)       | 129.5 (95.2 to 170.7)           | 0.0 (0.0 to 0.0)                  |
| Barbados | 2048 | 1707.9 (1520.1 to 1936.0)  | 758.7 (664.8 to 862.8)     | 823.8 (660.6 to 1028.3)       | 125.4 (91.9 to 165.5)           | 0.0 (0.0 to 0.0)                  | 1788.9 (1592.2 to 2027.8) | 794.6 (696.3 to 903.7)     | 862.9 (691.9 to 1077.1)       | 131.4 (96.3 to 173.3)           | 0.0 (0.0 to 0.0)                  |
| Barbados | 2049 | 1728.5 (1536.6 to 1971.4)  | 768.2 (671.7 to 878.0)     | 833.1 (668.8 to 1042.1)       | 127.2 (93.1 to 167.9)           | 0.0 (0.0 to 0.0)                  | 1810.5 (1609.5 to 2064.9) | 804.7 (703.5 to 919.7)     | 872.6 (700.5 to 1091.5)       | 133.2 (97.5 to 175.8)           | 0.0 (0.0 to 0.0)                  |
| Barbados | 2050 | 1750.7 (1559.6 to 1998.8)  | 778.7 (679.3 to 891.0)     | 842.8 (675.4 to 1056.7)       | 129.1 (94.5 to 170.5)           | 0.0 (0.0 to 0.0)                  | 1833.8 (1633.5 to 2093.6) | 815.7 (711.5 to 933.2)     | 882.8 (707.4 to 1106.8)       | 135.3 (99.0 to 178.6)           | 0.0 (0.0 to 0.0)                  |

| Country | Year | 2018 US Dollars per capita |                            |                               |                                 |                                   | 2018 PPP per capita       |                            |                               |                                 |                                   |
|---------|------|----------------------------|----------------------------|-------------------------------|---------------------------------|-----------------------------------|---------------------------|----------------------------|-------------------------------|---------------------------------|-----------------------------------|
|         |      | Health spending            | Government health spending | Out-of-pocket health spending | Prepaid private health spending | Development assistance for health | Health spending           | Government health spending | Out-of-pocket health spending | Prepaid private health spending | Development assistance for health |
| Belarus | 1995 | 105.8 (90.7 to 122.6)      | 79.7 (66.9 to 94.4)        | 19.2 (13.9 to 25.3)           | 6.9 (3.1 to 13.9)               | 0.0 (0.0 to 0.0)                  | 349.5 (299.6 to 405.1)    | 263.3 (221.2 to 311.8)     | 63.3 (46.0 to 83.6)           | 22.9 (10.4 to 45.9)             | 0.0 (0.0 to 0.0)                  |
| Belarus | 1996 | 107.8 (93.5 to 124.0)      | 83.4 (71.2 to 97.3)        | 17.2 (12.6 to 22.5)           | 7.2 (3.4 to 14.3)               | 0.0 (0.0 to 0.0)                  | 356.2 (309.0 to 409.9)    | 275.6 (235.4 to 321.4)     | 56.7 (41.8 to 74.5)           | 23.9 (11.1 to 47.3)             | 0.0 (0.0 to 0.0)                  |
| Belarus | 1997 | 117.0 (101.4 to 133.9)     | 92.7 (79.1 to 107.8)       | 16.3 (12.2 to 21.4)           | 7.9 (3.8 to 15.4)               | 0.0 (0.0 to 0.0)                  | 386.5 (335.1 to 442.4)    | 306.3 (261.3 to 356.3)     | 53.9 (40.3 to 70.9)           | 26.2 (12.7 to 50.9)             | 0.0 (0.0 to 0.0)                  |
| Belarus | 1998 | 123.4 (108.4 to 140.4)     | 96.8 (83.3 to 111.1)       | 18.4 (13.9 to 23.9)           | 8.3 (4.0 to 16.2)               | 0.0 (0.0 to 0.0)                  | 407.9 (358.1 to 463.9)    | 319.7 (275.4 to 367.2)     | 60.7 (46.0 to 79.0)           | 27.4 (13.1 to 53.6)             | 0.0 (0.0 to 0.0)                  |
| Belarus | 1999 | 128.1 (113.2 to 144.2)     | 99.5 (86.0 to 113.7)       | 20.4 (15.6 to 26.0)           | 8.1 (3.9 to 15.7)               | 0.0 (0.0 to 0.0)                  | 423.2 (374.0 to 476.5)    | 328.9 (284.2 to 375.7)     | 67.3 (51.7 to 85.9)           | 26.9 (12.9 to 51.8)             | 0.1 (0.1 to 0.1)                  |
| Belarus | 2000 | 136.2 (121.4 to 153.1)     | 104.7 (91.0 to 119.3)      | 23.5 (18.1 to 30.0)           | 7.9 (3.8 to 14.6)               | 0.0 (0.0 to 0.0)                  | 450.0 (401.3 to 506.0)    | 346.1 (300.6 to 394.1)     | 77.7 (59.8 to 99.1)           | 26.1 (12.6 to 48.4)             | 0.1 (0.1 to 0.1)                  |
| Belarus | 2001 | 148.0 (132.3 to 166.1)     | 111.7 (97.5 to 126.5)      | 28.6 (22.4 to 35.9)           | 7.6 (3.7 to 14.5)               | 0.1 (0.1 to 0.1)                  | 489.1 (437.2 to 549.0)    | 369.3 (322.2 to 417.9)     | 94.5 (74.0 to 118.8)          | 25.1 (12.3 to 47.9)             | 0.2 (0.2 to 0.2)                  |
| Belarus | 2002 | 159.0 (142.2 to 177.3)     | 118.7 (104.0 to 133.7)     | 33.0 (26.0 to 41.1)           | 7.3 (3.5 to 13.9)               | 0.1 (0.1 to 0.1)                  | 525.3 (469.8 to 585.9)    | 392.2 (343.5 to 442.0)     | 108.9 (86.0 to 136.0)         | 24.0 (11.6 to 45.9)             | 0.2 (0.2 to 0.2)                  |
| Belarus | 2003 | 174.2 (156.9 to 193.5)     | 130.1 (115.1 to 145.5)     | 36.5 (29.1 to 44.9)           | 7.5 (3.7 to 14.3)               | 0.1 (0.1 to 0.1)                  | 575.5 (518.5 to 639.3)    | 429.9 (380.2 to 480.9)     | 120.5 (96.1 to 148.3)         | 24.8 (12.1 to 47.1)             | 0.3 (0.3 to 0.3)                  |
| Belarus | 2004 | 195.4 (176.7 to 216.0)     | 145.4 (129.3 to 162.2)     | 41.5 (33.7 to 51.2)           | 8.3 (4.1 to 15.6)               | 0.2 (0.2 to 0.2)                  | 645.8 (583.9 to 713.7)    | 480.3 (427.2 to 536.1)     | 137.2 (111.4 to 169.2)        | 27.6 (13.6 to 51.6)             | 0.7 (0.7 to 0.7)                  |
| Belarus | 2005 | 217.9 (197.2 to 240.5)     | 158.9 (141.5 to 176.5)     | 49.1 (40.4 to 60.4)           | 9.1 (4.5 to 16.7)               | 0.8 (0.8 to 0.8)                  | 720.2 (651.8 to 794.8)    | 525.1 (467.7 to 583.1)     | 162.3 (133.4 to 199.4)        | 29.9 (14.9 to 55.3)             | 2.7 (2.7 to 2.7)                  |
| Belarus | 2006 | 236.0 (214.1 to 259.0)     | 168.5 (150.4 to 187.3)     | 57.1 (46.9 to 70.4)           | 9.7 (4.8 to 17.6)               | 0.6 (0.6 to 0.6)                  | 779.8 (707.3 to 855.9)    | 556.8 (496.9 to 619.0)     | 188.8 (155.0 to 232.6)        | 32.0 (15.8 to 58.2)             | 2.1 (2.1 to 2.1)                  |
| Belarus | 2007 | 254.2 (231.0 to 278.4)     | 176.7 (157.7 to 195.1)     | 66.3 (55.0 to 81.1)           | 10.2 (5.1 to 18.5)              | 1.0 (1.0 to 1.0)                  | 840.1 (763.4 to 920.0)    | 584.0 (521.1 to 644.5)     | 218.9 (181.8 to 268.1)        | 33.9 (16.8 to 61.3)             | 3.3 (3.3 to 3.3)                  |
| Belarus | 2008 | 273.5 (248.3 to 298.7)     | 184.9 (165.0 to 205.1)     | 76.3 (63.8 to 92.8)           | 10.7 (5.3 to 18.6)              | 1.6 (1.6 to 1.6)                  | 903.8 (820.6 to 987.0)    | 611.0 (545.3 to 677.8)     | 252.2 (210.7 to 306.8)        | 35.2 (17.6 to 61.6)             | 5.4 (5.4 to 5.4)                  |
| Belarus | 2009 | 273.4 (248.6 to 298.4)     | 180.2 (160.5 to 200.3)     | 81.5 (68.4 to 97.5)           | 10.0 (5.1 to 17.9)              | 1.7 (1.7 to 1.7)                  | 903.5 (821.5 to 986.0)    | 595.5 (530.5 to 661.7)     | 269.3 (226.1 to 322.0)        | 33.0 (16.7 to 59.0)             | 5.7 (5.7 to 5.7)                  |
| Belarus | 2010 | 289.1 (263.2 to 314.3)     | 189.6 (169.5 to 211.0)     | 88.3 (74.3 to 104.2)          | 9.2 (4.7 to 16.7)               | 2.0 (2.0 to 2.0)                  | 955.3 (869.6 to 1038.6)   | 626.6 (560.1 to 697.2)     | 291.7 (245.4 to 344.4)        | 30.3 (15.5 to 55.1)             | 6.7 (6.7 to 6.7)                  |
| Belarus | 2011 | 299.8 (272.3 to 326.4)     | 194.4 (173.2 to 216.4)     | 94.7 (79.5 to 111.7)          | 9.1 (4.6 to 16.8)               | 1.6 (1.6 to 1.6)                  | 990.6 (899.9 to 1078.6)   | 642.3 (572.5 to 715.1)     | 312.9 (262.6 to 369.0)        | 30.0 (15.4 to 55.6)             | 5.4 (5.4 to 5.4)                  |
| Belarus | 2012 | 313.4 (284.5 to 341.7)     | 201.4 (179.8 to 223.5)     | 100.9 (84.7 to 118.8)         | 9.5 (4.8 to 17.6)               | 1.6 (1.6 to 1.6)                  | 1035.7 (940.2 to 1129.0)  | 665.5 (594.0 to 738.7)     | 333.5 (279.8 to 392.7)        | 31.4 (15.8 to 58.3)             | 5.3 (5.3 to 5.3)                  |
| Belarus | 2013 | 325.4 (296.4 to 355.3)     | 204.9 (183.6 to 227.5)     | 109.4 (92.0 to 129.1)         | 9.7 (4.7 to 18.0)               | 1.5 (1.5 to 1.5)                  | 1075.4 (979.4 to 1173.9)  | 677.0 (606.6 to 751.8)     | 361.4 (304.1 to 426.7)        | 32.0 (15.5 to 59.6)             | 5.0 (5.0 to 5.0)                  |
| Belarus | 2014 | 336.3 (306.5 to 368.7)     | 209.8 (187.3 to 234.7)     | 116.0 (96.8 to 138.0)         | 9.2 (4.5 to 17.0)               | 1.3 (1.3 to 1.3)                  | 1111.3 (1012.7 to 1218.4) | 693.3 (618.9 to 775.5)     | 383.2 (320.0 to 456.1)        | 30.3 (14.8 to 56.2)             | 4.5 (4.5 to 4.5)                  |
| Belarus | 2015 | 345.3 (312.5 to 381.0)     | 212.2 (189.1 to 238.2)     | 122.9 (101.2 to 148.7)        | 9.5 (4.5 to 17.3)               | 0.7 (0.7 to 0.7)                  | 1141.1 (1032.6 to 1259.1) | 701.1 (624.9 to 787.0)     | 406.2 (334.3 to 491.2)        | 31.3 (15.0 to 57.3)             | 2.5 (2.5 to 2.5)                  |

| Country | Year | 2018 US Dollars per capita |                            |                               |                                 |                                   | 2018 PPP per capita       |                            |                               |                                 |                                   |
|---------|------|----------------------------|----------------------------|-------------------------------|---------------------------------|-----------------------------------|---------------------------|----------------------------|-------------------------------|---------------------------------|-----------------------------------|
|         |      | Health spending            | Government health spending | Out-of-pocket health spending | Prepaid private health spending | Development assistance for health | Health spending           | Government health spending | Out-of-pocket health spending | Prepaid private health spending | Development assistance for health |
| Belarus | 2016 | 354.0 (318.1 to 395.8)     | 216.1 (190.2 to 246.6)     | 127.2 (101.8 to 156.7)        | 9.6 (4.6 to 17.7)               | 1.1 (1.1 to 1.1)                  | 1169.9 (1051.2 to 1308.0) | 714.2 (628.4 to 814.9)     | 420.4 (336.4 to 517.8)        | 31.8 (15.1 to 58.4)             | 3.5 (3.5 to 3.5)                  |
| Belarus | 2017 | 356.8 (319.6 to 401.4)     | 214.0 (188.2 to 244.4)     | 131.9 (105.4 to 162.6)        | 9.7 (4.6 to 17.9)               | 1.2 (1.2 to 1.2)                  | 1179.0 (1056.1 to 1326.5) | 707.1 (622.0 to 807.8)     | 435.7 (348.4 to 537.3)        | 32.2 (15.3 to 59.2)             | 4.0 (4.0 to 4.0)                  |
| Belarus | 2018 | 367.5 (326.9 to 411.9)     | 218.0 (191.1 to 249.1)     | 138.4 (110.3 to 170.6)        | 10.0 (4.7 to 18.3)              | 1.1 (1.1 to 1.1)                  | 1214.5 (1080.2 to 1361.1) | 720.5 (631.4 to 823.1)     | 457.4 (364.5 to 563.8)        | 32.9 (15.6 to 60.6)             | 3.6 (3.6 to 3.7)                  |
| Belarus | 2019 | 377.8 (336.8 to 424.2)     | 221.3 (193.5 to 252.7)     | 145.2 (115.4 to 179.8)        | 10.1 (4.8 to 18.6)              | 1.1 (1.1 to 1.2)                  | 1248.3 (1112.8 to 1401.9) | 731.4 (639.5 to 834.9)     | 479.8 (381.5 to 594.2)        | 33.4 (15.9 to 61.6)             | 3.8 (3.5 to 4.0)                  |
| Belarus | 2020 | 388.1 (345.7 to 438.3)     | 224.5 (196.0 to 256.0)     | 152.2 (121.2 to 188.9)        | 10.3 (4.9 to 18.9)              | 1.2 (1.1 to 1.3)                  | 1282.5 (1142.2 to 1448.3) | 741.9 (647.8 to 845.9)     | 502.8 (400.6 to 624.4)        | 33.9 (16.1 to 62.5)             | 3.9 (3.6 to 4.3)                  |
| Belarus | 2021 | 397.7 (351.9 to 449.9)     | 226.8 (198.0 to 258.4)     | 159.3 (127.2 to 197.0)        | 10.4 (4.9 to 19.1)              | 1.3 (1.1 to 1.4)                  | 1314.3 (1162.8 to 1486.7) | 749.3 (654.3 to 853.8)     | 526.5 (420.4 to 651.1)        | 34.3 (16.2 to 63.1)             | 4.2 (3.7 to 4.6)                  |
| Belarus | 2022 | 407.1 (360.7 to 458.8)     | 228.7 (199.7 to 260.4)     | 166.7 (132.5 to 206.1)        | 10.5 (5.0 to 19.3)              | 1.3 (1.1 to 1.5)                  | 1345.3 (1191.8 to 1516.1) | 755.6 (659.9 to 860.6)     | 550.7 (438.0 to 681.2)        | 34.6 (16.4 to 63.8)             | 4.3 (3.8 to 4.9)                  |
| Belarus | 2023 | 416.7 (368.8 to 471.7)     | 230.5 (201.5 to 262.9)     | 174.3 (137.9 to 215.9)        | 10.6 (5.0 to 19.5)              | 1.4 (1.2 to 1.5)                  | 1377.0 (1218.7 to 1558.8) | 761.7 (665.9 to 868.6)     | 575.9 (455.5 to 713.5)        | 35.0 (16.5 to 64.5)             | 4.5 (3.9 to 5.1)                  |
| Belarus | 2024 | 426.7 (377.6 to 481.3)     | 232.4 (203.7 to 264.7)     | 182.2 (144.1 to 226.0)        | 10.7 (5.0 to 19.7)              | 1.4 (1.2 to 1.6)                  | 1409.9 (1247.7 to 1590.3) | 768.0 (673.1 to 874.8)     | 601.9 (476.3 to 746.7)        | 35.4 (16.7 to 65.2)             | 4.6 (4.0 to 5.4)                  |
| Belarus | 2025 | 437.5 (387.8 to 496.4)     | 234.7 (205.7 to 267.8)     | 190.5 (151.1 to 237.2)        | 10.8 (5.1 to 20.0)              | 1.5 (1.2 to 1.7)                  | 1445.6 (1281.4 to 1640.2) | 775.5 (679.7 to 884.9)     | 629.5 (499.4 to 783.8)        | 35.8 (16.9 to 66.0)             | 4.8 (4.1 to 5.7)                  |
| Belarus | 2026 | 448.0 (394.5 to 507.3)     | 236.3 (206.9 to 269.9)     | 199.2 (158.1 to 247.6)        | 10.9 (5.2 to 20.2)              | 1.5 (1.3 to 1.8)                  | 1480.3 (1303.5 to 1676.5) | 780.8 (683.7 to 891.8)     | 658.4 (522.5 to 818.2)        | 36.1 (17.0 to 66.8)             | 5.0 (4.2 to 5.9)                  |
| Belarus | 2027 | 459.4 (403.3 to 520.7)     | 238.3 (208.4 to 272.1)     | 208.5 (165.6 to 260.3)        | 11.1 (5.2 to 20.5)              | 1.6 (1.3 to 1.9)                  | 1517.9 (1332.5 to 1720.7) | 787.3 (688.7 to 899.1)     | 688.9 (547.1 to 860.2)        | 36.6 (17.2 to 67.7)             | 5.2 (4.3 to 6.2)                  |
| Belarus | 2028 | 472.2 (413.8 to 536.9)     | 241.3 (211.0 to 275.4)     | 218.0 (172.7 to 274.3)        | 11.2 (5.3 to 20.8)              | 1.6 (1.4 to 2.0)                  | 1560.2 (1367.2 to 1774.0) | 797.4 (697.3 to 910.1)     | 720.3 (570.8 to 906.5)        | 37.1 (17.5 to 68.8)             | 5.4 (4.5 to 6.5)                  |
| Belarus | 2029 | 485.9 (426.4 to 551.4)     | 245.0 (214.4 to 279.5)     | 227.8 (179.7 to 288.1)        | 11.4 (5.4 to 21.2)              | 1.7 (1.4 to 2.1)                  | 1605.7 (1409.1 to 1822.1) | 809.7 (708.5 to 923.4)     | 752.6 (593.9 to 952.1)        | 37.8 (17.8 to 70.0)             | 5.6 (4.6 to 6.9)                  |
| Belarus | 2030 | 500.3 (437.9 to 570.0)     | 249.2 (217.7 to 284.3)     | 237.7 (186.4 to 301.1)        | 11.6 (5.5 to 21.6)              | 1.8 (1.4 to 2.2)                  | 1653.2 (1447.2 to 1883.7) | 823.4 (719.3 to 939.4)     | 785.6 (616.0 to 994.9)        | 38.5 (18.1 to 71.3)             | 5.8 (4.7 to 7.1)                  |
| Belarus | 2031 | 514.9 (448.5 to 589.4)     | 253.5 (221.4 to 289.0)     | 247.7 (192.6 to 316.0)        | 11.9 (5.6 to 22.0)              | 1.8 (1.5 to 2.3)                  | 1701.3 (1482.2 to 1947.7) | 837.6 (731.7 to 954.9)     | 818.6 (636.3 to 1044.1)       | 39.2 (18.4 to 72.7)             | 6.0 (4.8 to 7.6)                  |
| Belarus | 2032 | 529.9 (462.2 to 612.6)     | 258.1 (225.5 to 294.5)     | 257.8 (199.3 to 330.0)        | 12.1 (5.7 to 22.4)              | 1.9 (1.5 to 2.4)                  | 1751.0 (1527.2 to 2024.4) | 852.9 (745.1 to 973.2)     | 851.9 (658.4 to 1090.5)       | 40.0 (18.8 to 74.1)             | 6.2 (5.0 to 7.8)                  |
| Belarus | 2033 | 545.7 (474.1 to 631.6)     | 263.4 (229.6 to 300.9)     | 268.1 (205.7 to 346.9)        | 12.4 (5.8 to 22.9)              | 1.9 (1.6 to 2.5)                  | 1803.4 (1566.7 to 2087.3) | 870.2 (758.8 to 994.4)     | 885.9 (679.8 to 1146.4)       | 40.8 (19.2 to 75.7)             | 6.4 (5.1 to 8.3)                  |
| Belarus | 2034 | 561.3 (484.8 to 647.0)     | 268.5 (233.4 to 307.0)     | 278.1 (212.6 to 362.3)        | 12.6 (5.9 to 23.4)              | 2.0 (1.6 to 2.6)                  | 1854.7 (1602.0 to 2138.0) | 887.2 (771.3 to 1014.5)    | 919.1 (702.5 to 1197.1)       | 41.7 (19.5 to 77.2)             | 6.7 (5.2 to 8.7)                  |
| Belarus | 2035 | 577.1 (497.5 to 666.3)     | 273.9 (237.6 to 313.7)     | 288.2 (218.9 to 375.9)        | 12.9 (6.0 to 23.9)              | 2.1 (1.6 to 2.8)                  | 1906.9 (1644.1 to 2201.8) | 905.1 (785.1 to 1036.6)    | 952.3 (723.3 to 1242.0)       | 42.6 (19.9 to 78.9)             | 6.9 (5.4 to 9.1)                  |
| Belarus | 2036 | 592.8 (509.4 to 690.0)     | 279.4 (242.2 to 320.2)     | 298.1 (226.6 to 388.8)        | 13.2 (6.1 to 24.4)              | 2.2 (1.7 to 2.9)                  | 1958.9 (1683.2 to 2280.2) | 923.2 (800.4 to 1058.0)    | 985.0 (748.7 to 1284.8)       | 43.5 (20.3 to 80.5)             | 7.2 (5.6 to 9.6)                  |

| Country | Year | 2018 US Dollars per capita |                            |                               |                                 |                                   | 2018 PPP per capita       |                            |                               |                                 |                                   |
|---------|------|----------------------------|----------------------------|-------------------------------|---------------------------------|-----------------------------------|---------------------------|----------------------------|-------------------------------|---------------------------------|-----------------------------------|
|         |      | Health spending            | Government health spending | Out-of-pocket health spending | Prepaid private health spending | Development assistance for health | Health spending           | Government health spending | Out-of-pocket health spending | Prepaid private health spending | Development assistance for health |
| Belarus | 2037 | 608.3 (523.9 to 709.3)     | 284.9 (246.4 to 326.5)     | 307.7 (233.4 to 404.0)        | 13.5 (6.3 to 24.9)              | 2.2 (1.7 to 3.0)                  | 2010.0 (1731.3 to 2343.7) | 941.4 (814.1 to 1078.8)    | 1016.8 (771.3 to 1335.1)      | 44.5 (20.7 to 82.2)             | 7.4 (5.7 to 10.0)                 |
| Belarus | 2038 | 623.5 (531.0 to 731.1)     | 290.4 (250.5 to 333.7)     | 317.0 (239.9 to 416.3)        | 13.7 (6.4 to 25.4)              | 2.3 (1.8 to 3.2)                  | 2060.3 (1754.8 to 2416.0) | 959.6 (827.7 to 1102.9)    | 1047.6 (792.7 to 1375.6)      | 45.4 (21.1 to 83.9)             | 7.7 (5.8 to 10.6)                 |
| Belarus | 2039 | 638.3 (544.6 to 751.3)     | 295.9 (254.9 to 340.4)     | 326.0 (246.2 to 428.0)        | 14.0 (6.5 to 25.9)              | 2.4 (1.8 to 3.3)                  | 2109.1 (1799.6 to 2482.6) | 977.7 (842.4 to 1124.9)    | 1077.2 (813.6 to 1414.4)      | 46.3 (21.6 to 85.7)             | 8.0 (6.1 to 10.9)                 |
| Belarus | 2040 | 653.2 (555.4 to 769.3)     | 301.6 (259.3 to 347.6)     | 334.7 (250.9 to 440.7)        | 14.3 (6.7 to 26.5)              | 2.5 (1.9 to 3.5)                  | 2158.3 (1835.5 to 2542.2) | 996.7 (856.9 to 1148.6)    | 1106.1 (829.0 to 1456.4)      | 47.3 (22.0 to 87.7)             | 8.2 (6.3 to 11.5)                 |
| Belarus | 2041 | 667.4 (566.1 to 783.6)     | 307.2 (263.9 to 354.9)     | 342.9 (255.8 to 453.4)        | 14.6 (6.8 to 27.1)              | 2.6 (2.0 to 3.6)                  | 2205.3 (1870.6 to 2589.4) | 1015.3 (872.0 to 1172.8)   | 1133.2 (845.2 to 1498.1)      | 48.2 (22.4 to 89.7)             | 8.5 (6.5 to 12.0)                 |
| Belarus | 2042 | 681.6 (574.4 to 801.7)     | 313.1 (268.2 to 362.2)     | 350.9 (260.6 to 465.2)        | 14.9 (6.9 to 27.7)              | 2.7 (2.0 to 3.9)                  | 2252.3 (1898.1 to 2649.3) | 1034.8 (886.2 to 1196.9)   | 1159.4 (861.0 to 1537.4)      | 49.3 (22.8 to 91.5)             | 8.9 (6.6 to 12.7)                 |
| Belarus | 2043 | 695.3 (589.4 to 819.0)     | 319.0 (272.5 to 369.4)     | 358.3 (265.8 to 475.5)        | 15.2 (7.0 to 28.2)              | 2.8 (2.1 to 4.0)                  | 2297.7 (1947.7 to 2706.3) | 1054.3 (900.5 to 1220.7)   | 1184.0 (878.4 to 1571.1)      | 50.3 (23.2 to 93.1)             | 9.2 (6.8 to 13.4)                 |
| Belarus | 2044 | 709.1 (598.7 to 831.6)     | 325.3 (277.3 to 377.2)     | 365.4 (270.7 to 484.2)        | 15.5 (7.2 to 28.7)              | 2.9 (2.1 to 4.2)                  | 2343.1 (1978.4 to 2747.9) | 1074.9 (916.3 to 1246.4)   | 1207.4 (894.4 to 1600.0)      | 51.3 (23.7 to 94.9)             | 9.5 (7.0 to 14.0)                 |
| Belarus | 2045 | 721.4 (609.8 to 851.5)     | 330.9 (281.8 to 385.1)     | 371.6 (274.9 to 493.3)        | 15.8 (7.3 to 29.3)              | 3.0 (2.2 to 4.5)                  | 2383.7 (2015.0 to 2813.8) | 1093.6 (931.3 to 1272.7)   | 1227.9 (908.4 to 1630.2)      | 52.3 (24.0 to 96.7)             | 9.9 (7.2 to 15.0)                 |
| Belarus | 2046 | 732.3 (616.0 to 870.5)     | 336.1 (285.0 to 392.2)     | 376.9 (279.2 to 501.3)        | 16.1 (7.4 to 29.9)              | 3.1 (2.3 to 4.8)                  | 2419.8 (2035.7 to 2876.6) | 1110.8 (941.8 to 1295.9)   | 1245.6 (922.5 to 1656.4)      | 53.2 (24.4 to 98.7)             | 10.3 (7.5 to 15.8)                |
| Belarus | 2047 | 742.8 (627.0 to 882.5)     | 341.5 (288.9 to 399.4)     | 381.7 (282.2 to 508.1)        | 16.4 (7.5 to 30.5)              | 3.2 (2.3 to 5.2)                  | 2454.7 (2071.8 to 2916.2) | 1128.4 (954.8 to 1319.7)   | 1261.5 (932.4 to 1679.1)      | 54.1 (24.8 to 100.7)            | 10.7 (7.7 to 17.1)                |
| Belarus | 2048 | 753.0 (636.9 to 897.8)     | 346.5 (291.9 to 406.4)     | 386.4 (285.8 to 515.1)        | 16.7 (7.6 to 31.0)              | 3.4 (2.4 to 5.3)                  | 2488.2 (2104.7 to 2966.8) | 1145.1 (964.7 to 1342.9)   | 1276.9 (944.4 to 1702.1)      | 55.0 (25.2 to 102.6)            | 11.1 (8.0 to 17.6)                |
| Belarus | 2049 | 763.1 (649.4 to 902.9)     | 351.6 (295.1 to 413.6)     | 391.1 (289.4 to 521.9)        | 16.9 (7.7 to 31.6)              | 3.5 (2.5 to 5.8)                  | 2521.6 (2146.0 to 2983.7) | 1161.8 (975.0 to 1366.6)   | 1292.3 (956.4 to 1724.5)      | 55.9 (25.6 to 104.5)            | 11.6 (8.3 to 19.0)                |
| Belarus | 2050 | 772.9 (656.8 to 918.2)     | 356.4 (298.6 to 420.0)     | 395.7 (292.7 to 528.6)        | 17.2 (7.9 to 32.2)              | 3.6 (2.6 to 6.0)                  | 2554.2 (2170.4 to 3034.1) | 1177.9 (986.7 to 1388.0)   | 1307.5 (967.3 to 1746.7)      | 56.8 (25.9 to 106.4)            | 12.0 (8.4 to 19.9)                |
| Belgium | 1995 | 2919.1 (2813.8 to 3025.4)  | 2276.8 (2182.3 to 2370.0)  | 538.3 (497.7 to 584.2)        | 104.0 (81.6 to 130.9)           | 0.0 (0.0 to 0.0)                  | 2938.8 (2832.8 to 3045.8) | 2292.1 (2197.0 to 2386.0)  | 541.9 (501.0 to 588.1)        | 104.7 (82.1 to 131.8)           | 0.0 (0.0 to 0.0)                  |
| Belgium | 1996 | 3003.5 (2923.5 to 3084.2)  | 2330.8 (2263.6 to 2402.8)  | 559.5 (526.2 to 596.2)        | 113.1 (92.7 to 136.3)           | 0.0 (0.0 to 0.0)                  | 3023.8 (2943.2 to 3105.1) | 2346.6 (2278.9 to 2419.0)  | 563.3 (529.8 to 600.3)        | 113.9 (93.3 to 137.2)           | 0.0 (0.0 to 0.0)                  |
| Belgium | 1997 | 3109.0 (3035.0 to 3187.0)  | 2384.0 (2319.1 to 2449.4)  | 596.2 (565.0 to 631.3)        | 128.8 (109.2 to 151.8)          | 0.0 (0.0 to 0.0)                  | 3130.0 (3055.5 to 3208.5) | 2400.1 (2334.8 to 2466.0)  | 600.3 (568.8 to 635.6)        | 129.7 (109.9 to 152.8)          | 0.0 (0.0 to 0.0)                  |
| Belgium | 1998 | 3191.6 (3116.1 to 3269.8)  | 2423.8 (2354.0 to 2487.7)  | 620.7 (590.5 to 655.3)        | 147.1 (128.2 to 168.6)          | 0.0 (0.0 to 0.0)                  | 3213.1 (3137.1 to 3291.8) | 2440.2 (2369.9 to 2504.5)  | 624.9 (594.5 to 659.8)        | 148.1 (129.1 to 169.7)          | 0.0 (0.0 to 0.0)                  |
| Belgium | 1999 | 3324.0 (3243.9 to 3406.3)  | 2512.8 (2445.5 to 2583.9)  | 642.8 (613.9 to 674.0)        | 168.4 (148.3 to 192.1)          | 0.0 (0.0 to 0.0)                  | 3346.4 (3265.8 to 3429.3) | 2529.8 (2462.0 to 2601.3)  | 647.1 (618.1 to 678.5)        | 169.5 (149.4 to 193.4)          | 0.0 (0.0 to 0.0)                  |
| Belgium | 2000 | 3479.6 (3400.8 to 3556.5)  | 2631.0 (2563.8 to 2700.4)  | 661.5 (633.5 to 691.7)        | 187.1 (166.7 to 208.2)          | 0.0 (0.0 to 0.0)                  | 3503.1 (3423.8 to 3580.5) | 2648.8 (2581.1 to 2718.7)  | 666.0 (637.7 to 696.4)        | 188.4 (167.8 to 209.6)          | 0.0 (0.0 to 0.0)                  |
| Belgium | 2001 | 3583.3 (3503.8 to 3656.4)  | 2708.0 (2635.7 to 2775.3)  | 676.9 (649.6 to 705.4)        | 198.4 (178.6 to 218.3)          | 0.0 (0.0 to 0.0)                  | 3607.5 (3527.5 to 3681.1) | 2726.3 (2653.5 to 2794.1)  | 681.5 (654.0 to 710.1)        | 199.7 (179.8 to 219.8)          | 0.0 (0.0 to 0.0)                  |

| Country | Year | 2018 US Dollars per capita |                            |                               |                                 |                                   | 2018 PPP per capita       |                            |                               |                                 |                                   |
|---------|------|----------------------------|----------------------------|-------------------------------|---------------------------------|-----------------------------------|---------------------------|----------------------------|-------------------------------|---------------------------------|-----------------------------------|
|         |      | Health spending            | Government health spending | Out-of-pocket health spending | Prepaid private health spending | Development assistance for health | Health spending           | Government health spending | Out-of-pocket health spending | Prepaid private health spending | Development assistance for health |
| Belgium | 2002 | 3773.2 (3696.3 to 3856.8)  | 2847.2 (2783.5 to 2918.3)  | 713.4 (687.1 to 741.8)        | 212.6 (193.6 to 233.1)          | 0.0 (0.0 to 0.0)                  | 3798.7 (3721.3 to 3882.9) | 2866.4 (2802.3 to 2938.0)  | 718.2 (691.8 to 746.8)        | 214.1 (194.9 to 234.7)          | 0.0 (0.0 to 0.0)                  |
| Belgium | 2003 | 3979.9 (3903.4 to 4062.2)  | 3009.2 (2935.4 to 3082.8)  | 737.6 (709.4 to 766.8)        | 233.2 (214.1 to 254.1)          | 0.0 (0.0 to 0.0)                  | 4006.8 (3929.8 to 4089.7) | 3029.5 (2955.3 to 3103.6)  | 742.6 (714.2 to 772.0)        | 234.8 (215.5 to 255.8)          | 0.0 (0.0 to 0.0)                  |
| Belgium | 2004 | 4180.4 (4103.2 to 4255.7)  | 3195.2 (3123.6 to 3263.6)  | 734.6 (705.2 to 762.7)        | 250.6 (228.3 to 275.0)          | 0.0 (0.0 to 0.0)                  | 4208.6 (4130.9 to 4284.4) | 3216.8 (3144.7 to 3285.7)  | 739.5 (710.0 to 767.8)        | 252.3 (229.9 to 276.9)          | 0.0 (0.0 to 0.0)                  |
| Belgium | 2005 | 4240.9 (4164.0 to 4312.9)  | 3260.0 (3191.8 to 3332.2)  | 724.1 (696.2 to 752.6)        | 256.8 (234.2 to 280.9)          | 0.0 (0.0 to 0.0)                  | 4269.6 (4192.2 to 4342.0) | 3282.0 (3213.4 to 3354.7)  | 728.9 (700.9 to 757.7)        | 258.6 (235.8 to 282.8)          | 0.0 (0.0 to 0.0)                  |
| Belgium | 2006 | 4282.8 (4205.7 to 4364.0)  | 3295.2 (3222.7 to 3368.4)  | 732.5 (705.4 to 760.3)        | 255.1 (234.2 to 278.9)          | 0.0 (0.0 to 0.0)                  | 4311.8 (4234.1 to 4393.5) | 3317.5 (3244.5 to 3391.2)  | 737.5 (710.2 to 765.5)        | 256.9 (235.8 to 280.8)          | 0.0 (0.0 to 0.0)                  |
| Belgium | 2007 | 4415.8 (4335.5 to 4495.9)  | 3406.7 (3338.2 to 3484.4)  | 757.5 (729.8 to 787.3)        | 251.6 (230.4 to 273.3)          | 0.0 (0.0 to 0.0)                  | 4445.7 (4364.8 to 4526.3) | 3429.7 (3360.7 to 3508.0)  | 762.6 (734.7 to 792.7)        | 253.3 (232.0 to 275.1)          | 0.0 (0.0 to 0.0)                  |
| Belgium | 2008 | 4563.8 (4479.9 to 4644.3)  | 3548.4 (3475.7 to 3617.7)  | 776.4 (746.9 to 805.3)        | 239.0 (217.9 to 259.8)          | 0.0 (0.0 to 0.0)                  | 4594.6 (4510.2 to 4675.6) | 3572.3 (3499.2 to 3642.1)  | 781.6 (752.0 to 810.7)        | 240.7 (219.4 to 261.6)          | 0.0 (0.0 to 0.0)                  |
| Belgium | 2009 | 4642.9 (4561.0 to 4725.8)  | 3626.3 (3556.8 to 3696.0)  | 788.0 (760.0 to 817.1)        | 228.6 (208.4 to 248.1)          | 0.0 (0.0 to 0.0)                  | 4674.2 (4591.8 to 4757.8) | 3650.8 (3580.8 to 3721.0)  | 793.3 (765.1 to 822.6)        | 230.2 (209.8 to 249.8)          | 0.0 (0.0 to 0.0)                  |
| Belgium | 2010 | 4789.0 (4706.9 to 4873.9)  | 3754.5 (3683.8 to 3827.0)  | 804.9 (775.0 to 834.9)        | 229.6 (209.7 to 250.1)          | 0.0 (0.0 to 0.0)                  | 4821.3 (4738.7 to 4906.8) | 3779.9 (3708.7 to 3852.9)  | 810.3 (780.3 to 840.5)        | 231.1 (211.1 to 251.8)          | 0.0 (0.0 to 0.0)                  |
| Belgium | 2011 | 4872.9 (4789.5 to 4954.1)  | 3821.5 (3747.7 to 3893.8)  | 816.5 (785.0 to 845.5)        | 234.9 (213.1 to 256.4)          | 0.0 (0.0 to 0.0)                  | 4905.8 (4821.9 to 4987.6) | 3847.3 (3773.0 to 3920.1)  | 822.0 (790.3 to 851.2)        | 236.4 (214.5 to 258.2)          | 0.0 (0.0 to 0.0)                  |
| Belgium | 2012 | 4923.0 (4845.2 to 5003.6)  | 3863.8 (3791.3 to 3939.3)  | 819.3 (789.7 to 846.6)        | 239.9 (218.4 to 262.9)          | 0.0 (0.0 to 0.0)                  | 4956.3 (4878.0 to 5037.4) | 3889.9 (3816.9 to 3965.9)  | 824.8 (795.0 to 852.3)        | 241.6 (219.9 to 264.7)          | 0.0 (0.0 to 0.0)                  |
| Belgium | 2013 | 4955.6 (4870.5 to 5038.4)  | 3887.4 (3811.0 to 3961.0)  | 818.9 (789.0 to 847.6)        | 249.2 (228.4 to 274.4)          | 0.0 (0.0 to 0.0)                  | 4989.0 (4903.4 to 5072.4) | 3913.7 (3836.7 to 3987.8)  | 824.4 (794.3 to 853.3)        | 250.9 (229.9 to 276.3)          | 0.0 (0.0 to 0.0)                  |
| Belgium | 2014 | 5008.4 (4928.0 to 5094.5)  | 3936.6 (3858.5 to 4012.7)  | 809.1 (779.9 to 840.1)        | 262.6 (241.5 to 288.7)          | 0.0 (0.0 to 0.0)                  | 5042.2 (4961.3 to 5128.9) | 3963.2 (3884.6 to 4039.8)  | 814.6 (785.1 to 845.8)        | 264.4 (243.1 to 290.6)          | 0.0 (0.0 to 0.0)                  |
| Belgium | 2015 | 5022.1 (4941.2 to 5103.7)  | 3959.1 (3882.8 to 4032.9)  | 783.6 (752.9 to 817.8)        | 279.4 (254.0 to 307.1)          | 0.0 (0.0 to 0.0)                  | 5056.0 (4974.6 to 5138.1) | 3985.8 (3909.1 to 4060.2)  | 788.9 (758.0 to 823.3)        | 281.3 (255.8 to 309.2)          | 0.0 (0.0 to 0.0)                  |
| Belgium | 2016 | 5014.3 (4893.7 to 5134.5)  | 3964.9 (3861.7 to 4073.2)  | 757.9 (717.5 to 801.3)        | 291.6 (257.1 to 325.6)          | 0.0 (0.0 to 0.0)                  | 5048.2 (4926.8 to 5169.2) | 3991.7 (3887.8 to 4100.7)  | 763.0 (722.3 to 806.7)        | 293.5 (258.8 to 327.8)          | 0.0 (0.0 to 0.0)                  |
| Belgium | 2017 | 5045.6 (4924.1 to 5171.2)  | 3985.3 (3876.3 to 4094.4)  | 763.6 (722.5 to 809.8)        | 296.7 (261.4 to 331.6)          | 0.0 (0.0 to 0.0)                  | 5079.7 (4957.4 to 5206.1) | 4012.2 (3902.5 to 4122.1)  | 768.8 (727.3 to 815.2)        | 298.7 (263.2 to 333.9)          | 0.0 (0.0 to 0.0)                  |
| Belgium | 2018 | 5093.9 (4970.6 to 5218.3)  | 4024.7 (3924.2 to 4132.6)  | 768.3 (724.8 to 815.7)        | 300.9 (265.2 to 336.4)          | 0.0 (0.0 to 0.0)                  | 5128.4 (5004.1 to 5253.6) | 4051.9 (3950.7 to 4160.5)  | 773.5 (729.7 to 821.2)        | 302.9 (267.0 to 338.7)          | 0.0 (0.0 to 0.0)                  |
| Belgium | 2019 | 5138.4 (5010.0 to 5271.1)  | 4061.1 (3955.7 to 4174.4)  | 772.6 (726.6 to 821.1)        | 304.7 (268.5 to 340.3)          | 0.0 (0.0 to 0.0)                  | 5173.1 (5043.9 to 5306.7) | 4088.5 (3982.4 to 4202.6)  | 777.9 (731.5 to 826.7)        | 306.7 (270.4 to 342.6)          | 0.0 (0.0 to 0.0)                  |
| Belgium | 2020 | 5183.2 (5051.7 to 5315.8)  | 4097.6 (3986.4 to 4217.2)  | 777.1 (725.6 to 827.4)        | 308.5 (271.8 to 345.4)          | 0.0 (0.0 to 0.0)                  | 5218.2 (5085.8 to 5351.7) | 4125.2 (4013.4 to 4245.7)  | 782.3 (730.5 to 833.0)        | 310.6 (273.7 to 347.7)          | 0.0 (0.0 to 0.0)                  |
| Belgium | 2021 | 5224.4 (5088.0 to 5364.9)  | 4130.7 (4015.8 to 4249.5)  | 781.4 (729.0 to 834.2)        | 312.2 (275.4 to 349.0)          | 0.0 (0.0 to 0.0)                  | 5259.7 (5122.4 to 5401.2) | 4158.7 (4042.9 to 4278.3)  | 786.7 (733.9 to 839.8)        | 314.3 (277.3 to 351.4)          | 0.0 (0.0 to 0.0)                  |
| Belgium | 2022 | 5267.8 (5129.5 to 5404.2)  | 4166.0 (4049.6 to 4289.4)  | 785.9 (730.1 to 840.3)        | 315.9 (278.4 to 353.3)          | 0.0 (0.0 to 0.0)                  | 5303.3 (5164.2 to 5440.7) | 4194.1 (4077.0 to 4318.4)  | 791.2 (735.0 to 846.0)        | 318.0 (280.3 to 355.7)          | 0.0 (0.0 to 0.0)                  |



| Country | Year | 2018 US Dollars per capita |                            |                               |                                 |                                   | 2018 PPP per capita       |                            |                               |                                 |                                   |
|---------|------|----------------------------|----------------------------|-------------------------------|---------------------------------|-----------------------------------|---------------------------|----------------------------|-------------------------------|---------------------------------|-----------------------------------|
|         |      | Health spending            | Government health spending | Out-of-pocket health spending | Prepaid private health spending | Development assistance for health | Health spending           | Government health spending | Out-of-pocket health spending | Prepaid private health spending | Development assistance for health |
| Belgium | 2023 | 5309.5 (5164.2 to 5458.4)  | 4199.6 (4076.4 to 4330.6)  | 790.4 (728.9 to 847.4)        | 319.6 (281.7 to 357.7)          | 0.0 (0.0 to 0.0)                  | 5345.4 (5199.1 to 5495.3) | 4228.0 (4104.0 to 4359.9)  | 795.7 (733.9 to 853.1)        | 321.7 (283.6 to 360.1)          | 0.0 (0.0 to 0.0)                  |
| Belgium | 2024 | 5353.0 (5199.6 to 5503.1)  | 4235.0 (4107.6 to 4373.2)  | 794.6 (733.3 to 855.9)        | 323.4 (284.2 to 362.4)          | 0.0 (0.0 to 0.0)                  | 5389.2 (5234.7 to 5540.3) | 4263.6 (4135.4 to 4402.7)  | 800.0 (738.3 to 861.7)        | 325.6 (286.2 to 364.9)          | 0.0 (0.0 to 0.0)                  |
| Belgium | 2025 | 5391.6 (5230.1 to 5556.7)  | 4268.3 (4133.0 to 4413.7)  | 796.3 (734.0 to 856.8)        | 327.0 (287.5 to 366.4)          | 0.0 (0.0 to 0.0)                  | 5428.0 (5265.4 to 5594.2) | 4297.1 (4160.9 to 4443.5)  | 801.7 (739.0 to 862.6)        | 329.2 (289.4 to 368.8)          | 0.0 (0.0 to 0.0)                  |
| Belgium | 2026 | 5428.5 (5258.3 to 5595.7)  | 4300.3 (4155.0 to 4453.0)  | 797.7 (733.9 to 860.6)        | 330.5 (291.2 to 369.7)          | 0.0 (0.0 to 0.0)                  | 5465.2 (5293.8 to 5633.5) | 4329.4 (4183.1 to 4483.0)  | 803.1 (738.9 to 866.4)        | 332.7 (293.1 to 372.2)          | 0.0 (0.0 to 0.0)                  |
| Belgium | 2027 | 5461.5 (5283.1 to 5647.3)  | 4329.2 (4172.5 to 4493.4)  | 798.5 (734.3 to 863.8)        | 333.8 (293.5 to 373.8)          | 0.0 (0.0 to 0.0)                  | 5498.4 (5318.8 to 5685.5) | 4358.5 (4200.6 to 4523.7)  | 803.9 (739.3 to 869.6)        | 336.0 (295.5 to 376.4)          | 0.0 (0.0 to 0.0)                  |
| Belgium | 2028 | 5490.4 (5299.1 to 5682.9)  | 4354.8 (4188.8 to 4529.4)  | 798.7 (732.3 to 867.3)        | 336.8 (296.0 to 377.9)          | 0.0 (0.0 to 0.0)                  | 5527.5 (5334.9 to 5721.2) | 4384.3 (4217.1 to 4560.0)  | 804.1 (737.3 to 873.2)        | 339.1 (298.0 to 380.5)          | 0.0 (0.0 to 0.0)                  |
| Belgium | 2029 | 5519.0 (5316.9 to 5729.0)  | 4380.2 (4204.9 to 4564.3)  | 798.8 (730.3 to 871.5)        | 339.9 (298.5 to 382.1)          | 0.0 (0.0 to 0.0)                  | 5556.3 (5352.8 to 5767.7) | 4409.8 (4233.3 to 4595.1)  | 804.2 (735.3 to 877.4)        | 342.2 (300.5 to 384.7)          | 0.0 (0.0 to 0.0)                  |
| Belgium | 2030 | 5549.7 (5339.4 to 5762.1)  | 4407.3 (4220.1 to 4601.2)  | 799.3 (729.0 to 874.3)        | 343.1 (301.1 to 386.0)          | 0.0 (0.0 to 0.0)                  | 5587.2 (5375.5 to 5801.1) | 4437.1 (4248.6 to 4632.3)  | 804.7 (734.0 to 880.2)        | 345.4 (303.1 to 388.6)          | 0.0 (0.0 to 0.0)                  |
| Belgium | 2031 | 5584.7 (5360.2 to 5819.5)  | 4437.7 (4233.2 to 4646.5)  | 800.4 (729.7 to 877.4)        | 346.6 (304.1 to 389.9)          | 0.0 (0.0 to 0.0)                  | 5622.4 (5396.5 to 5858.8) | 4467.7 (4261.8 to 4677.9)  | 805.8 (734.6 to 883.3)        | 348.9 (306.2 to 392.5)          | 0.0 (0.0 to 0.0)                  |
| Belgium | 2032 | 5621.2 (5388.9 to 5860.0)  | 4469.4 (4253.3 to 4693.9)  | 801.6 (730.3 to 881.2)        | 350.2 (307.2 to 394.8)          | 0.0 (0.0 to 0.0)                  | 5659.2 (5425.3 to 5899.6) | 4499.6 (4282.0 to 4725.6)  | 807.0 (735.2 to 887.2)        | 352.6 (309.3 to 397.5)          | 0.0 (0.0 to 0.0)                  |
| Belgium | 2033 | 5661.0 (5412.2 to 5921.6)  | 4503.7 (4275.9 to 4743.2)  | 803.3 (729.9 to 884.1)        | 354.0 (310.4 to 400.0)          | 0.0 (0.0 to 0.0)                  | 5699.2 (5448.8 to 5961.6) | 4534.1 (4304.8 to 4775.2)  | 808.7 (734.8 to 890.1)        | 356.4 (312.5 to 402.7)          | 0.0 (0.0 to 0.0)                  |
| Belgium | 2034 | 5703.5 (5446.9 to 5978.1)  | 4540.1 (4300.2 to 4796.5)  | 805.3 (730.0 to 888.2)        | 358.1 (313.4 to 405.5)          | 0.0 (0.0 to 0.0)                  | 5742.0 (5483.7 to 6018.5) | 4570.8 (4329.3 to 4828.9)  | 810.7 (734.9 to 894.2)        | 360.5 (315.6 to 408.2)          | 0.0 (0.0 to 0.0)                  |
| Belgium | 2035 | 5745.9 (5466.0 to 6034.4)  | 4576.5 (4322.1 to 4850.0)  | 807.3 (729.1 to 891.6)        | 362.1 (316.5 to 411.7)          | 0.0 (0.0 to 0.0)                  | 5784.7 (5502.9 to 6075.2) | 4607.4 (4351.3 to 4882.7)  | 812.7 (734.0 to 897.6)        | 364.6 (318.6 to 414.5)          | 0.0 (0.0 to 0.0)                  |
| Belgium | 2036 | 5794.8 (5504.8 to 6101.2)  | 4618.1 (4350.3 to 4905.7)  | 810.1 (730.8 to 896.0)        | 366.6 (319.8 to 418.5)          | 0.0 (0.0 to 0.0)                  | 5833.9 (5542.0 to 6142.4) | 4649.3 (4379.7 to 4938.8)  | 815.6 (735.7 to 902.1)        | 369.1 (321.9 to 421.3)          | 0.0 (0.0 to 0.0)                  |
| Belgium | 2037 | 5845.8 (5535.4 to 6171.2)  | 4661.4 (4376.5 to 4968.7)  | 813.2 (732.5 to 900.6)        | 371.2 (324.1 to 424.0)          | 0.0 (0.0 to 0.0)                  | 5885.3 (5572.8 to 6212.9) | 4692.9 (4406.1 to 5002.3)  | 818.7 (737.4 to 906.7)        | 373.8 (326.2 to 426.9)          | 0.0 (0.0 to 0.0)                  |
| Belgium | 2038 | 5896.0 (5575.4 to 6238.4)  | 4704.0 (4402.1 to 5031.6)  | 816.1 (733.7 to 905.0)        | 375.9 (327.8 to 430.5)          | 0.0 (0.0 to 0.0)                  | 5935.9 (5613.1 to 6280.5) | 4735.8 (4431.9 to 5065.6)  | 821.6 (738.7 to 911.2)        | 378.4 (330.0 to 433.4)          | 0.0 (0.0 to 0.0)                  |
| Belgium | 2039 | 5949.8 (5607.9 to 6315.1)  | 4749.6 (4434.1 to 5096.2)  | 819.5 (735.5 to 910.0)        | 380.8 (332.0 to 436.6)          | 0.0 (0.0 to 0.0)                  | 5990.0 (5645.8 to 6357.8) | 4781.7 (4464.1 to 5130.6)  | 825.0 (740.4 to 916.1)        | 383.3 (334.2 to 439.6)          | 0.0 (0.0 to 0.0)                  |
| Belgium | 2040 | 6004.2 (5646.4 to 6390.3)  | 4795.6 (4467.9 to 5161.4)  | 822.9 (737.3 to 915.0)        | 385.7 (336.2 to 442.4)          | 0.0 (0.0 to 0.0)                  | 6044.7 (5684.6 to 6433.5) | 4828.0 (4498.1 to 5196.3)  | 828.4 (742.3 to 921.2)        | 388.3 (338.5 to 445.4)          | 0.0 (0.0 to 0.0)                  |
| Belgium | 2041 | 6061.5 (5678.6 to 6462.7)  | 4844.0 (4501.8 to 5228.8)  | 826.6 (739.4 to 920.5)        | 390.9 (339.8 to 449.3)          | 0.0 (0.0 to 0.0)                  | 6102.4 (5716.9 to 6506.3) | 4876.7 (4532.2 to 5264.2)  | 832.2 (744.4 to 926.7)        | 393.5 (342.1 to 452.3)          | 0.0 (0.0 to 0.0)                  |
| Belgium | 2042 | 6120.4 (5727.2 to 6541.3)  | 4893.6 (4529.0 to 5297.8)  | 830.5 (741.8 to 926.7)        | 396.2 (344.7 to 456.4)          | 0.0 (0.0 to 0.0)                  | 6161.8 (5765.9 to 6585.5) | 4926.7 (4559.6 to 5333.6)  | 836.2 (746.8 to 933.0)        | 398.9 (347.0 to 459.5)          | 0.0 (0.0 to 0.0)                  |
| Belgium | 2043 | 6181.5 (5771.3 to 6619.4)  | 4945.1 (4558.0 to 5369.0)  | 834.7 (743.8 to 933.3)        | 401.7 (348.7 to 464.3)          | 0.0 (0.0 to 0.0)                  | 6223.2 (5810.3 to 6664.1) | 4978.5 (4588.8 to 5405.3)  | 840.3 (748.8 to 939.6)        | 404.4 (351.0 to 467.5)          | 0.0 (0.0 to 0.0)                  |

| Country | Year | 2018 US Dollars per capita |                            |                               |                                 |                                   | 2018 PPP per capita       |                            |                               |                                 |                                   |
|---------|------|----------------------------|----------------------------|-------------------------------|---------------------------------|-----------------------------------|---------------------------|----------------------------|-------------------------------|---------------------------------|-----------------------------------|
|         |      | Health spending            | Government health spending | Out-of-pocket health spending | Prepaid private health spending | Development assistance for health | Health spending           | Government health spending | Out-of-pocket health spending | Prepaid private health spending | Development assistance for health |
| Belgium | 2044 | 6243.2 (5813.9 to 6708.4)  | 4997.2 (4593.2 to 5441.2)  | 838.8 (745.7 to 938.9)        | 407.3 (352.9 to 471.1)          | 0.0 (0.0 to 0.0)                  | 6285.4 (5853.2 to 6753.7) | 5030.9 (4624.2 to 5477.9)  | 844.5 (750.8 to 945.2)        | 410.0 (355.3 to 474.3)          | 0.0 (0.0 to 0.0)                  |
| Belgium | 2045 | 6304.0 (5856.8 to 6781.5)  | 5048.4 (4626.1 to 5512.9)  | 842.8 (747.7 to 944.1)        | 412.8 (357.9 to 479.0)          | 0.0 (0.0 to 0.0)                  | 6346.6 (5896.4 to 6827.3) | 5082.6 (4657.3 to 5550.1)  | 848.5 (752.7 to 950.5)        | 415.6 (360.3 to 482.3)          | 0.0 (0.0 to 0.0)                  |
| Belgium | 2046 | 6365.7 (5898.5 to 6875.3)  | 5100.5 (4658.1 to 5590.2)  | 846.8 (749.8 to 948.7)        | 418.4 (362.5 to 487.2)          | 0.0 (0.0 to 0.0)                  | 6408.7 (5938.3 to 6921.8) | 5135.0 (4689.6 to 5628.0)  | 852.5 (754.8 to 955.1)        | 421.2 (364.9 to 490.5)          | 0.0 (0.0 to 0.0)                  |
| Belgium | 2047 | 6429.9 (5948.6 to 6954.9)  | 5154.6 (4694.9 to 5667.8)  | 851.0 (752.3 to 954.3)        | 424.2 (367.6 to 495.3)          | 0.0 (0.0 to 0.0)                  | 6473.3 (5988.8 to 7001.9) | 5189.4 (4726.6 to 5706.1)  | 856.8 (757.4 to 960.8)        | 427.1 (370.1 to 498.6)          | 0.0 (0.0 to 0.0)                  |
| Belgium | 2048 | 6491.0 (5986.7 to 7049.0)  | 5206.3 (4729.3 to 5742.0)  | 854.8 (755.7 to 959.4)        | 429.9 (371.4 to 502.8)          | 0.0 (0.0 to 0.0)                  | 6534.8 (6027.1 to 7096.6) | 5241.5 (4761.2 to 5780.8)  | 860.6 (760.8 to 965.9)        | 432.8 (373.9 to 506.2)          | 0.0 (0.0 to 0.0)                  |
| Belgium | 2049 | 6553.1 (6034.9 to 7123.9)  | 5258.9 (4762.7 to 5817.4)  | 858.6 (759.8 to 964.6)        | 435.6 (375.3 to 511.5)          | 0.0 (0.0 to 0.0)                  | 6597.4 (6075.6 to 7172.0) | 5294.4 (4794.9 to 5856.7)  | 864.4 (764.9 to 971.1)        | 438.5 (377.8 to 515.0)          | 0.0 (0.0 to 0.0)                  |
| Belgium | 2050 | 6613.3 (6062.9 to 7218.9)  | 5309.9 (4794.7 to 5890.4)  | 862.1 (761.8 to 969.4)        | 441.2 (378.9 to 520.2)          | 0.0 (0.0 to 0.0)                  | 6657.9 (6103.9 to 7267.6) | 5345.8 (4827.1 to 5930.2)  | 868.0 (767.0 to 976.0)        | 444.2 (381.4 to 523.7)          | 0.0 (0.0 to 0.0)                  |
| Belize  | 1995 | 141.3 (120.7 to 163.1)     | 91.7 (76.3 to 108.6)       | 45.7 (34.6 to 59.6)           | 1.8 (0.8 to 3.3)                | 2.1 (2.1 to 2.1)                  | 255.1 (218.0 to 294.5)    | 165.6 (137.7 to 196.1)     | 82.4 (62.5 to 107.6)          | 3.2 (1.5 to 6.0)                | 3.8 (3.8 to 3.8)                  |
| Belize  | 1996 | 131.8 (113.9 to 150.8)     | 83.3 (70.6 to 97.0)        | 44.3 (34.0 to 57.0)           | 1.8 (0.8 to 3.3)                | 2.4 (2.4 to 2.4)                  | 238.0 (205.7 to 272.3)    | 150.5 (127.4 to 175.2)     | 80.0 (61.3 to 102.8)          | 3.2 (1.5 to 5.9)                | 4.3 (4.3 to 4.3)                  |
| Belize  | 1997 | 134.3 (117.6 to 152.1)     | 82.8 (70.1 to 95.5)        | 45.7 (35.2 to 58.4)           | 1.9 (0.8 to 3.5)                | 3.9 (3.9 to 3.9)                  | 242.4 (212.3 to 274.7)    | 149.5 (126.6 to 172.5)     | 82.5 (63.6 to 105.4)          | 3.4 (1.5 to 6.3)                | 7.1 (7.1 to 7.1)                  |
| Belize  | 1998 | 134.4 (118.4 to 151.2)     | 82.5 (71.1 to 94.7)        | 47.5 (37.0 to 59.6)           | 2.0 (0.9 to 3.7)                | 2.4 (2.4 to 2.4)                  | 242.6 (213.8 to 273.1)    | 148.9 (128.4 to 171.0)     | 85.8 (66.7 to 107.5)          | 3.6 (1.7 to 6.7)                | 4.3 (4.3 to 4.3)                  |
| Belize  | 1999 | 146.0 (129.1 to 163.5)     | 85.5 (74.3 to 97.8)        | 52.2 (40.7 to 65.2)           | 2.3 (1.0 to 4.2)                | 6.1 (6.1 to 6.1)                  | 263.7 (233.2 to 295.2)    | 154.3 (134.1 to 176.5)     | 94.2 (73.4 to 117.8)          | 4.1 (1.9 to 7.6)                | 11.0 (11.0 to 11.0)               |
| Belize  | 2000 | 172.9 (154.5 to 193.4)     | 94.5 (82.2 to 108.1)       | 62.0 (48.4 to 77.5)           | 2.7 (1.2 to 5.0)                | 13.7 (13.7 to 13.7)               | 312.2 (278.9 to 349.2)    | 170.6 (148.4 to 195.2)     | 112.0 (87.4 to 140.0)         | 4.9 (2.2 to 9.0)                | 24.8 (24.8 to 24.8)               |
| Belize  | 2001 | 180.3 (161.3 to 201.2)     | 99.3 (86.7 to 112.9)       | 66.9 (52.9 to 83.7)           | 3.0 (1.4 to 5.4)                | 11.1 (11.1 to 11.1)               | 325.5 (291.2 to 363.3)    | 179.3 (156.5 to 203.9)     | 120.8 (95.4 to 151.1)         | 5.3 (2.6 to 9.7)                | 20.0 (20.0 to 20.0)               |
| Belize  | 2002 | 181.9 (161.9 to 203.1)     | 100.7 (87.9 to 114.1)      | 69.4 (54.8 to 86.5)           | 3.3 (1.6 to 6.0)                | 8.6 (8.6 to 8.6)                  | 328.3 (292.2 to 366.7)    | 181.7 (158.7 to 206.0)     | 125.2 (99.0 to 156.1)         | 5.9 (2.9 to 10.8)               | 15.5 (15.5 to 15.5)               |
| Belize  | 2003 | 194.4 (173.3 to 216.4)     | 109.4 (96.2 to 124.0)      | 72.6 (57.7 to 90.6)           | 4.3 (2.1 to 7.8)                | 8.1 (8.1 to 8.1)                  | 350.9 (313.0 to 390.7)    | 197.5 (173.8 to 223.8)     | 131.0 (104.1 to 163.6)        | 7.7 (3.9 to 14.1)               | 14.7 (14.7 to 14.7)               |
| Belize  | 2004 | 197.8 (176.8 to 220.3)     | 112.9 (99.9 to 127.9)      | 71.7 (57.0 to 89.2)           | 4.9 (2.4 to 8.7)                | 8.3 (8.3 to 8.3)                  | 357.1 (319.2 to 397.7)    | 203.9 (180.3 to 231.0)     | 129.4 (102.8 to 161.1)        | 8.8 (4.4 to 15.8)               | 15.1 (15.1 to 15.1)               |
| Belize  | 2005 | 198.5 (178.3 to 220.8)     | 116.3 (102.9 to 131.2)     | 68.7 (54.5 to 85.3)           | 5.5 (2.8 to 10.0)               | 7.9 (7.9 to 7.9)                  | 358.4 (321.9 to 398.7)    | 210.1 (185.8 to 236.9)     | 124.1 (98.4 to 154.1)         | 10.0 (5.0 to 18.0)              | 14.3 (14.3 to 14.3)               |
| Belize  | 2006 | 208.4 (187.2 to 230.7)     | 125.0 (110.1 to 141.7)     | 67.0 (53.9 to 83.5)           | 7.3 (3.7 to 13.0)               | 9.2 (9.2 to 9.2)                  | 376.3 (337.9 to 416.6)    | 225.6 (198.7 to 255.8)     | 120.9 (97.3 to 150.8)         | 13.2 (6.7 to 23.5)              | 16.6 (16.6 to 16.6)               |
| Belize  | 2007 | 216.7 (194.2 to 239.3)     | 134.6 (117.7 to 151.5)     | 65.6 (52.9 to 81.3)           | 9.0 (4.6 to 16.2)               | 7.4 (7.4 to 7.4)                  | 391.2 (350.7 to 432.1)    | 243.0 (212.5 to 273.6)     | 118.5 (95.5 to 146.8)         | 16.2 (8.3 to 29.2)              | 13.4 (13.4 to 13.4)               |
| Belize  | 2008 | 226.8 (203.3 to 250.5)     | 144.2 (126.8 to 162.0)     | 65.2 (52.5 to 80.7)           | 10.6 (5.5 to 19.3)              | 6.9 (6.9 to 6.9)                  | 409.5 (367.0 to 452.3)    | 260.3 (229.0 to 292.5)     | 117.6 (94.8 to 145.8)         | 19.2 (9.9 to 34.9)              | 12.4 (12.4 to 12.4)               |

| Country | Year | 2018 US Dollars per capita |                            |                               |                                 |                                   | 2018 PPP per capita    |                            |                               |                                 |                                   |
|---------|------|----------------------------|----------------------------|-------------------------------|---------------------------------|-----------------------------------|------------------------|----------------------------|-------------------------------|---------------------------------|-----------------------------------|
|         |      | Health spending            | Government health spending | Out-of-pocket health spending | Prepaid private health spending | Development assistance for health | Health spending        | Government health spending | Out-of-pocket health spending | Prepaid private health spending | Development assistance for health |
| Belize  | 2009 | 241.2 (217.1 to 266.8)     | 156.2 (138.0 to 175.9)     | 65.6 (52.8 to 81.3)           | 12.5 (6.5 to 22.6)              | 6.9 (6.9 to 6.9)                  | 435.5 (391.9 to 481.8) | 282.1 (249.2 to 317.6)     | 118.4 (95.3 to 146.9)         | 22.6 (11.8 to 40.8)             | 12.5 (12.5 to 12.5)               |
| Belize  | 2010 | 262.0 (236.4 to 290.7)     | 170.5 (151.2 to 191.7)     | 66.0 (52.8 to 81.8)           | 14.6 (7.6 to 25.7)              | 10.9 (10.9 to 10.9)               | 473.1 (426.9 to 524.9) | 307.8 (273.0 to 346.1)     | 119.2 (95.3 to 147.8)         | 26.4 (13.8 to 46.3)             | 19.7 (19.7 to 19.7)               |
| Belize  | 2011 | 255.0 (229.9 to 282.0)     | 170.3 (151.6 to 192.0)     | 63.8 (50.7 to 79.5)           | 14.9 (7.9 to 26.1)              | 6.1 (6.1 to 6.1)                  | 460.5 (415.1 to 509.2) | 307.5 (273.7 to 346.7)     | 115.1 (91.6 to 143.5)         | 26.9 (14.2 to 47.1)             | 10.9 (10.9 to 10.9)               |
| Belize  | 2012 | 259.2 (233.4 to 285.6)     | 171.3 (152.7 to 191.9)     | 63.6 (50.6 to 78.8)           | 15.5 (8.1 to 26.8)              | 8.8 (8.8 to 8.8)                  | 468.0 (421.4 to 515.6) | 309.4 (275.7 to 346.5)     | 114.8 (91.3 to 142.3)         | 27.9 (14.5 to 48.4)             | 15.9 (15.9 to 15.9)               |
| Belize  | 2013 | 285.3 (258.5 to 313.1)     | 170.5 (152.0 to 191.1)     | 64.0 (50.7 to 79.6)           | 15.8 (8.2 to 27.0)              | 35.0 (35.0 to 35.0)               | 515.1 (466.7 to 565.3) | 307.9 (274.4 to 345.0)     | 115.6 (91.5 to 143.7)         | 28.5 (14.9 to 48.8)             | 63.1 (63.1 to 63.1)               |
| Belize  | 2014 | 262.1 (235.2 to 290.4)     | 173.7 (153.5 to 195.1)     | 64.7 (50.5 to 81.1)           | 16.2 (8.4 to 27.8)              | 7.5 (7.5 to 7.5)                  | 473.2 (424.7 to 524.3) | 313.7 (277.1 to 352.2)     | 116.7 (91.2 to 146.5)         | 29.3 (15.1 to 50.2)             | 13.5 (13.5 to 13.5)               |
| Belize  | 2015 | 283.7 (254.0 to 317.2)     | 185.5 (162.5 to 212.0)     | 66.2 (51.6 to 83.1)           | 17.7 (9.1 to 30.6)              | 14.4 (14.4 to 14.4)               | 512.3 (458.6 to 572.7) | 335.0 (293.4 to 382.8)     | 119.5 (93.2 to 150.0)         | 32.0 (16.5 to 55.2)             | 25.9 (25.9 to 25.9)               |
| Belize  | 2016 | 283.0 (248.6 to 317.2)     | 187.6 (161.5 to 215.9)     | 66.3 (50.5 to 84.8)           | 19.3 (9.6 to 33.5)              | 9.8 (9.8 to 9.8)                  | 511.0 (448.9 to 572.7) | 338.8 (291.6 to 389.7)     | 119.8 (91.2 to 153.1)         | 34.8 (17.3 to 60.4)             | 17.7 (17.7 to 17.7)               |
| Belize  | 2017 | 280.1 (247.5 to 315.2)     | 189.4 (162.7 to 219.0)     | 65.4 (49.8 to 83.8)           | 18.9 (9.4 to 32.9)              | 6.4 (6.4 to 6.4)                  | 505.7 (446.9 to 569.1) | 341.9 (293.7 to 395.4)     | 118.0 (89.8 to 151.3)         | 34.2 (17.0 to 59.5)             | 11.6 (11.6 to 11.6)               |
| Belize  | 2018 | 282.6 (247.4 to 317.2)     | 191.5 (164.4 to 222.4)     | 65.9 (50.1 to 84.4)           | 19.2 (9.5 to 33.4)              | 6.0 (6.0 to 6.0)                  | 510.3 (446.7 to 572.7) | 345.8 (296.9 to 401.6)     | 118.9 (90.5 to 152.5)         | 34.7 (17.2 to 60.2)             | 10.9 (10.9 to 10.9)               |
| Belize  | 2019 | 286.3 (252.0 to 322.6)     | 194.2 (166.6 to 226.2)     | 66.5 (50.7 to 85.3)           | 19.5 (9.7 to 34.0)              | 6.0 (5.6 to 6.4)                  | 516.9 (455.0 to 582.4) | 350.6 (300.8 to 408.3)     | 120.1 (91.5 to 154.0)         | 35.3 (17.5 to 61.3)             | 10.9 (10.2 to 11.5)               |
| Belize  | 2020 | 289.9 (252.6 to 325.3)     | 196.8 (167.9 to 229.7)     | 67.1 (51.2 to 86.1)           | 19.9 (9.9 to 34.4)              | 6.1 (5.6 to 6.6)                  | 523.4 (456.1 to 587.4) | 355.3 (303.1 to 414.7)     | 121.2 (92.5 to 155.5)         | 35.9 (17.8 to 62.2)             | 11.0 (10.1 to 11.9)               |
| Belize  | 2021 | 293.6 (258.1 to 331.9)     | 199.6 (170.9 to 232.9)     | 67.7 (51.6 to 86.8)           | 20.2 (10.0 to 34.9)             | 6.2 (5.5 to 6.8)                  | 530.2 (466.1 to 599.3) | 360.4 (308.5 to 420.5)     | 122.3 (93.2 to 156.8)         | 36.4 (18.1 to 63.0)             | 11.1 (10.0 to 12.3)               |
| Belize  | 2022 | 299.2 (260.9 to 337.7)     | 203.7 (174.0 to 239.2)     | 68.7 (52.3 to 88.1)           | 20.6 (10.3 to 35.7)             | 6.2 (5.5 to 7.0)                  | 540.2 (471.0 to 609.8) | 367.8 (314.2 to 431.8)     | 124.0 (94.5 to 159.1)         | 37.2 (18.5 to 64.4)             | 11.2 (9.9 to 12.6)                |
| Belize  | 2023 | 304.9 (267.8 to 345.6)     | 208.0 (176.5 to 244.1)     | 69.6 (53.0 to 89.4)           | 21.0 (10.5 to 36.5)             | 6.3 (5.4 to 7.1)                  | 550.6 (483.5 to 624.0) | 375.5 (318.6 to 440.8)     | 125.7 (95.7 to 161.4)         | 38.0 (19.0 to 65.9)             | 11.3 (9.8 to 12.8)                |
| Belize  | 2024 | 310.5 (269.6 to 351.2)     | 212.2 (179.6 to 248.8)     | 70.5 (53.6 to 90.5)           | 21.5 (10.7 to 37.2)             | 6.3 (5.4 to 7.3)                  | 560.6 (486.8 to 634.2) | 383.1 (324.3 to 449.2)     | 127.3 (96.8 to 163.5)         | 38.8 (19.3 to 67.2)             | 11.4 (9.8 to 13.2)                |
| Belize  | 2025 | 315.7 (276.4 to 357.9)     | 216.1 (182.7 to 253.3)     | 71.3 (54.3 to 91.6)           | 21.9 (10.9 to 38.0)             | 6.4 (5.5 to 7.5)                  | 570.0 (499.0 to 646.1) | 390.1 (329.8 to 457.3)     | 128.8 (98.0 to 165.4)         | 39.5 (19.6 to 68.6)             | 11.6 (9.8 to 13.5)                |
| Belize  | 2026 | 320.6 (278.2 to 363.4)     | 219.8 (185.3 to 258.4)     | 72.1 (54.8 to 92.6)           | 22.3 (11.0 to 38.7)             | 6.5 (5.5 to 7.7)                  | 578.9 (502.3 to 656.1) | 396.8 (334.6 to 466.6)     | 130.1 (99.0 to 167.3)         | 40.2 (19.9 to 69.8)             | 11.8 (9.9 to 13.8)                |
| Belize  | 2027 | 325.7 (284.3 to 370.5)     | 223.7 (188.8 to 263.6)     | 72.7 (55.3 to 93.6)           | 22.7 (11.2 to 39.4)             | 6.6 (5.5 to 8.0)                  | 588.2 (513.4 to 669.0) | 404.0 (340.9 to 476.0)     | 131.3 (99.9 to 169.0)         | 40.9 (20.3 to 71.1)             | 11.9 (10.0 to 14.4)               |
| Belize  | 2028 | 330.8 (286.3 to 376.8)     | 227.7 (192.1 to 268.9)     | 73.4 (55.8 to 94.4)           | 23.0 (11.5 to 40.0)             | 6.7 (5.6 to 8.2)                  | 597.2 (516.9 to 680.4) | 411.1 (346.8 to 485.4)     | 132.5 (100.8 to 170.5)        | 41.6 (20.7 to 72.3)             | 12.1 (10.2 to 14.8)               |
| Belize  | 2029 | 337.1 (294.0 to 383.9)     | 232.8 (196.1 to 274.6)     | 74.0 (56.3 to 95.3)           | 23.5 (11.7 to 40.8)             | 6.8 (5.6 to 8.4)                  | 608.6 (530.8 to 693.1) | 420.3 (354.1 to 495.8)     | 133.7 (101.7 to 172.0)        | 42.4 (21.1 to 73.7)             | 12.3 (10.2 to 15.2)               |

| Country | Year | 2018 US Dollars per capita |                            |                               |                                 |                                   | 2018 PPP per capita     |                            |                               |                                 |                                   |
|---------|------|----------------------------|----------------------------|-------------------------------|---------------------------------|-----------------------------------|-------------------------|----------------------------|-------------------------------|---------------------------------|-----------------------------------|
|         |      | Health spending            | Government health spending | Out-of-pocket health spending | Prepaid private health spending | Development assistance for health | Health spending         | Government health spending | Out-of-pocket health spending | Prepaid private health spending | Development assistance for health |
| Belize  | 2030 | 343.4 (295.8 to 391.3)     | 237.8 (199.6 to 280.3)     | 74.7 (56.8 to 96.1)           | 23.9 (11.9 to 41.7)             | 7.0 (5.7 to 8.6)                  | 620.1 (534.0 to 706.6)  | 429.4 (360.4 to 506.0)     | 134.9 (102.6 to 173.5)        | 43.1 (21.5 to 75.2)             | 12.6 (10.2 to 15.4)               |
| Belize  | 2031 | 349.8 (303.5 to 400.5)     | 243.0 (203.9 to 286.7)     | 75.4 (57.4 to 97.0)           | 24.3 (12.1 to 42.6)             | 7.1 (5.7 to 8.8)                  | 631.7 (547.9 to 723.1)  | 438.8 (368.1 to 517.7)     | 136.2 (103.6 to 175.1)        | 43.9 (21.9 to 76.8)             | 12.8 (10.3 to 15.9)               |
| Belize  | 2032 | 356.1 (305.5 to 407.1)     | 248.1 (207.1 to 294.9)     | 76.1 (57.9 to 97.8)           | 24.8 (12.4 to 43.3)             | 7.2 (5.8 to 9.1)                  | 643.0 (551.6 to 735.1)  | 447.9 (373.9 to 532.4)     | 137.4 (104.5 to 176.5)        | 44.7 (22.3 to 78.3)             | 13.0 (10.4 to 16.4)               |
| Belize  | 2033 | 362.7 (313.9 to 416.4)     | 253.3 (210.4 to 302.6)     | 76.8 (58.4 to 98.6)           | 25.2 (12.6 to 44.2)             | 7.3 (5.8 to 9.4)                  | 654.9 (566.8 to 751.8)  | 457.4 (379.9 to 546.3)     | 138.7 (105.5 to 178.0)        | 45.5 (22.7 to 79.8)             | 13.2 (10.5 to 17.0)               |
| Belize  | 2034 | 369.6 (315.0 to 423.8)     | 258.9 (214.2 to 310.7)     | 77.6 (59.0 to 99.5)           | 25.7 (12.8 to 45.1)             | 7.5 (5.9 to 9.6)                  | 667.3 (568.7 to 765.2)  | 467.4 (386.8 to 561.1)     | 140.0 (106.5 to 179.7)        | 46.4 (23.2 to 81.4)             | 13.5 (10.6 to 17.4)               |
| Belize  | 2035 | 376.4 (323.8 to 435.3)     | 264.3 (217.8 to 317.4)     | 78.3 (59.5 to 100.4)          | 26.1 (13.1 to 45.8)             | 7.6 (5.9 to 10.0)                 | 679.6 (584.6 to 785.9)  | 477.3 (393.2 to 573.1)     | 141.4 (107.4 to 181.3)        | 47.2 (23.6 to 82.6)             | 13.8 (10.7 to 18.1)               |
| Belize  | 2036 | 383.0 (324.7 to 442.5)     | 269.7 (221.1 to 325.6)     | 79.0 (60.0 to 101.2)          | 26.6 (13.3 to 46.5)             | 7.8 (6.0 to 10.5)                 | 691.6 (586.3 to 799.0)  | 486.9 (399.1 to 587.9)     | 142.6 (108.3 to 182.7)        | 48.0 (23.9 to 83.9)             | 14.1 (10.8 to 18.9)               |
| Belize  | 2037 | 390.0 (333.5 to 453.2)     | 275.3 (224.8 to 333.6)     | 79.7 (60.6 to 102.1)          | 27.1 (13.5 to 47.3)             | 7.9 (6.2 to 10.7)                 | 704.1 (602.2 to 818.3)  | 497.1 (406.0 to 602.3)     | 143.9 (109.4 to 184.4)        | 48.9 (24.3 to 85.4)             | 14.3 (11.1 to 19.3)               |
| Belize  | 2038 | 397.0 (335.4 to 459.4)     | 281.0 (228.6 to 340.6)     | 80.4 (61.0 to 103.1)          | 27.6 (13.7 to 48.0)             | 8.1 (6.2 to 11.1)                 | 716.8 (605.7 to 829.5)  | 507.3 (412.7 to 615.0)     | 145.2 (110.2 to 186.1)        | 49.7 (24.7 to 86.7)             | 14.6 (11.2 to 20.0)               |
| Belize  | 2039 | 404.2 (343.3 to 472.3)     | 286.7 (232.7 to 347.7)     | 81.1 (61.6 to 104.1)          | 28.0 (13.9 to 48.9)             | 8.3 (6.3 to 11.3)                 | 729.7 (619.8 to 852.8)  | 517.7 (420.1 to 627.7)     | 146.5 (111.2 to 187.9)        | 50.6 (25.2 to 88.3)             | 14.9 (11.3 to 20.5)               |
| Belize  | 2040 | 411.9 (346.0 to 477.5)     | 292.9 (237.0 to 357.7)     | 82.0 (62.2 to 105.2)          | 28.6 (14.2 to 49.9)             | 8.4 (6.4 to 11.6)                 | 743.6 (624.7 to 862.1)  | 528.8 (428.0 to 645.8)     | 148.0 (112.4 to 190.0)        | 51.6 (25.7 to 90.1)             | 15.2 (11.6 to 20.9)               |
| Belize  | 2041 | 419.1 (354.3 to 493.9)     | 298.7 (240.7 to 365.5)     | 82.8 (62.8 to 106.2)          | 29.1 (14.5 to 50.9)             | 8.6 (6.5 to 12.2)                 | 756.7 (639.8 to 891.7)  | 539.2 (434.7 to 660.0)     | 149.4 (113.4 to 191.8)        | 52.5 (26.1 to 91.8)             | 15.6 (11.7 to 22.0)               |
| Belize  | 2042 | 426.6 (357.1 to 498.6)     | 304.6 (244.3 to 374.7)     | 83.6 (63.4 to 107.3)          | 29.6 (14.7 to 51.9)             | 8.8 (6.6 to 12.8)                 | 770.2 (644.7 to 900.3)  | 549.9 (441.1 to 676.6)     | 150.9 (114.4 to 193.8)        | 53.5 (26.6 to 93.7)             | 15.9 (11.9 to 23.1)               |
| Belize  | 2043 | 434.2 (365.8 to 513.8)     | 310.6 (248.3 to 382.5)     | 84.4 (64.0 to 108.4)          | 30.2 (15.0 to 52.9)             | 9.0 (6.6 to 13.2)                 | 783.9 (660.6 to 927.8)  | 560.8 (448.4 to 690.7)     | 152.4 (115.5 to 195.8)        | 54.4 (27.1 to 95.6)             | 16.3 (12.0 to 23.8)               |
| Belize  | 2044 | 441.8 (369.1 to 517.1)     | 316.6 (252.0 to 392.9)     | 85.3 (64.6 to 109.6)          | 30.7 (15.3 to 53.9)             | 9.2 (6.8 to 13.6)                 | 797.7 (666.4 to 933.6)  | 571.7 (455.0 to 709.4)     | 154.0 (116.6 to 197.9)        | 55.4 (27.6 to 97.4)             | 16.7 (12.3 to 24.5)               |
| Belize  | 2045 | 449.8 (377.7 to 536.1)     | 323.0 (257.1 to 400.4)     | 86.1 (65.2 to 110.7)          | 31.3 (15.6 to 55.0)             | 9.4 (6.8 to 14.3)                 | 812.2 (681.9 to 967.9)  | 583.2 (464.1 to 723.0)     | 155.5 (117.7 to 199.9)        | 56.5 (28.1 to 99.2)             | 17.0 (12.3 to 25.7)               |
| Belize  | 2046 | 457.6 (379.6 to 538.9)     | 329.3 (261.2 to 410.3)     | 86.9 (65.7 to 111.8)          | 31.8 (15.9 to 55.9)             | 9.7 (7.0 to 14.7)                 | 826.2 (685.5 to 973.0)  | 594.5 (471.6 to 740.8)     | 156.8 (118.7 to 201.8)        | 57.4 (28.6 to 101.0)            | 17.5 (12.6 to 26.5)               |
| Belize  | 2047 | 465.7 (389.1 to 559.2)     | 335.8 (265.2 to 422.8)     | 87.6 (66.3 to 112.9)          | 32.4 (16.1 to 57.0)             | 9.9 (7.2 to 15.5)                 | 840.8 (702.6 to 1009.7) | 606.3 (478.9 to 763.4)     | 158.2 (119.7 to 203.8)        | 58.4 (29.1 to 102.9)            | 17.9 (13.0 to 27.9)               |
| Belize  | 2048 | 473.7 (390.5 to 566.0)     | 342.2 (269.3 to 434.2)     | 88.4 (66.8 to 113.9)          | 32.9 (16.4 to 58.0)             | 10.2 (7.3 to 16.2)                | 855.3 (705.0 to 1021.9) | 617.8 (486.3 to 783.9)     | 159.6 (120.7 to 205.7)        | 59.4 (29.6 to 104.7)            | 18.4 (13.2 to 29.3)               |
| Belize  | 2049 | 481.9 (399.9 to 582.8)     | 348.8 (273.8 to 443.0)     | 89.1 (67.4 to 114.8)          | 33.5 (16.6 to 59.0)             | 10.5 (7.5 to 16.7)                | 870.0 (722.0 to 1052.2) | 629.8 (494.4 to 799.8)     | 160.9 (121.7 to 207.2)        | 60.4 (30.0 to 106.5)            | 18.9 (13.5 to 30.2)               |
| Belize  | 2050 | 490.2 (401.6 to 588.5)     | 355.5 (277.6 to 453.2)     | 89.9 (67.9 to 115.8)          | 34.0 (16.9 to 60.0)             | 10.8 (7.6 to 17.6)                | 885.1 (725.2 to 1062.6) | 641.9 (501.2 to 818.3)     | 162.3 (122.6 to 209.0)        | 61.5 (30.5 to 108.4)            | 19.4 (13.8 to 31.8)               |

| Country | Year | 2018 US Dollars per capita |                            |                               |                                 |                                   | 2018 PPP per capita  |                            |                               |                                 |                                   |
|---------|------|----------------------------|----------------------------|-------------------------------|---------------------------------|-----------------------------------|----------------------|----------------------------|-------------------------------|---------------------------------|-----------------------------------|
|         |      | Health spending            | Government health spending | Out-of-pocket health spending | Prepaid private health spending | Development assistance for health | Health spending      | Government health spending | Out-of-pocket health spending | Prepaid private health spending | Development assistance for health |
| Benin   | 1995 | 28.3 (22.7 to 34.8)        | 7.5 (5.6 to 9.7)           | 16.2 (11.3 to 22.6)           | 1.8 (0.8 to 3.4)                | 2.8 (2.8 to 2.8)                  | 73.6 (59.2 to 90.6)  | 19.4 (14.7 to 25.3)        | 42.3 (29.5 to 59.0)           | 4.6 (2.2 to 8.9)                | 7.3 (7.3 to 7.3)                  |
| Benin   | 1996 | 28.9 (23.5 to 35.4)        | 7.4 (5.6 to 9.6)           | 16.1 (11.3 to 22.3)           | 1.7 (0.8 to 3.4)                | 3.6 (3.6 to 3.6)                  | 75.3 (61.1 to 92.3)  | 19.3 (14.6 to 25.1)        | 42.0 (29.4 to 58.2)           | 4.5 (2.2 to 8.8)                | 9.5 (9.5 to 9.5)                  |
| Benin   | 1997 | 27.8 (22.2 to 34.2)        | 7.4 (5.6 to 9.6)           | 16.1 (11.3 to 22.4)           | 1.7 (0.8 to 3.3)                | 2.6 (2.6 to 2.6)                  | 72.5 (57.8 to 89.0)  | 19.3 (14.7 to 25.0)        | 42.1 (29.4 to 58.3)           | 4.5 (2.1 to 8.7)                | 6.7 (6.7 to 6.7)                  |
| Benin   | 1998 | 31.0 (25.5 to 37.4)        | 7.4 (5.6 to 9.7)           | 16.1 (11.2 to 22.4)           | 1.7 (0.8 to 3.2)                | 5.7 (5.7 to 5.7)                  | 80.7 (66.5 to 97.5)  | 19.3 (14.5 to 25.3)        | 42.1 (29.1 to 58.4)           | 4.4 (2.2 to 8.4)                | 14.9 (14.9 to 14.9)               |
| Benin   | 1999 | 29.4 (23.7 to 35.9)        | 7.6 (5.8 to 10.1)          | 16.5 (11.5 to 22.9)           | 1.7 (0.8 to 3.2)                | 3.5 (3.5 to 3.5)                  | 76.5 (61.8 to 93.4)  | 19.9 (15.2 to 26.2)        | 42.9 (29.8 to 59.6)           | 4.4 (2.1 to 8.3)                | 9.2 (9.2 to 9.2)                  |
| Benin   | 2000 | 31.0 (25.2 to 37.8)        | 8.0 (6.1 to 10.5)          | 16.9 (11.9 to 23.4)           | 1.7 (0.8 to 3.2)                | 4.5 (4.5 to 4.5)                  | 80.8 (65.7 to 98.4)  | 20.8 (15.9 to 27.3)        | 43.9 (30.9 to 60.9)           | 4.4 (2.1 to 8.3)                | 11.7 (11.7 to 11.7)               |
| Benin   | 2001 | 30.8 (25.2 to 38.3)        | 8.2 (6.2 to 10.8)          | 17.1 (12.2 to 23.6)           | 1.7 (0.8 to 3.2)                | 3.9 (3.9 to 3.9)                  | 80.3 (65.7 to 99.7)  | 21.3 (16.2 to 28.0)        | 44.5 (31.7 to 61.6)           | 4.4 (2.1 to 8.2)                | 10.1 (10.1 to 10.1)               |
| Benin   | 2002 | 30.1 (24.7 to 37.5)        | 7.8 (6.0 to 10.1)          | 17.0 (12.0 to 23.7)           | 1.7 (0.8 to 3.1)                | 3.6 (3.6 to 3.6)                  | 78.5 (64.5 to 97.6)  | 20.3 (15.5 to 26.4)        | 44.3 (31.2 to 61.7)           | 4.4 (2.1 to 8.2)                | 9.5 (9.5 to 9.5)                  |
| Benin   | 2003 | 31.4 (26.1 to 38.4)        | 7.5 (5.7 to 9.7)           | 16.8 (11.8 to 23.4)           | 1.7 (0.8 to 3.1)                | 5.5 (5.5 to 5.5)                  | 81.9 (67.9 to 100.1) | 19.5 (14.8 to 25.2)        | 43.7 (30.8 to 60.9)           | 4.4 (2.0 to 8.2)                | 14.3 (14.3 to 14.3)               |
| Benin   | 2004 | 33.3 (28.1 to 39.9)        | 7.5 (5.7 to 9.6)           | 16.6 (11.8 to 22.6)           | 1.7 (0.8 to 3.3)                | 7.4 (7.4 to 7.4)                  | 86.6 (73.2 to 104.0) | 19.6 (15.0 to 25.0)        | 43.3 (30.8 to 58.8)           | 4.4 (2.1 to 8.5)                | 19.3 (19.3 to 19.3)               |
| Benin   | 2005 | 33.2 (28.3 to 39.5)        | 7.3 (5.6 to 9.4)           | 16.0 (11.4 to 21.9)           | 1.7 (0.8 to 3.3)                | 8.2 (8.2 to 8.2)                  | 86.6 (73.8 to 103.0) | 19.0 (14.5 to 24.4)        | 41.7 (29.8 to 57.1)           | 4.4 (2.1 to 8.5)                | 21.4 (21.4 to 21.4)               |
| Benin   | 2006 | 32.2 (27.3 to 38.3)        | 7.2 (5.5 to 9.3)           | 15.7 (11.3 to 21.3)           | 1.7 (0.8 to 3.2)                | 7.6 (7.6 to 7.6)                  | 83.9 (71.2 to 99.7)  | 18.8 (14.3 to 24.2)        | 40.8 (29.3 to 55.5)           | 4.4 (2.1 to 8.4)                | 19.8 (19.8 to 19.8)               |
| Benin   | 2007 | 31.2 (26.3 to 37.2)        | 7.1 (5.3 to 9.1)           | 15.2 (10.7 to 20.8)           | 1.7 (0.8 to 3.3)                | 7.2 (7.2 to 7.2)                  | 81.3 (68.6 to 96.8)  | 18.4 (13.9 to 23.7)        | 39.7 (27.9 to 54.1)           | 4.4 (2.0 to 8.6)                | 18.7 (18.7 to 18.7)               |
| Benin   | 2008 | 32.6 (27.6 to 38.3)        | 7.2 (5.5 to 9.1)           | 14.8 (10.5 to 20.3)           | 1.7 (0.8 to 3.4)                | 8.8 (8.8 to 8.8)                  | 84.8 (71.9 to 99.8)  | 18.8 (14.3 to 23.8)        | 38.6 (27.4 to 53.0)           | 4.5 (2.0 to 8.9)                | 23.0 (23.0 to 23.0)               |
| Benin   | 2009 | 35.4 (30.4 to 41.3)        | 7.7 (5.9 to 9.7)           | 14.7 (10.4 to 20.2)           | 1.8 (0.8 to 3.4)                | 11.1 (11.1 to 11.1)               | 92.1 (79.1 to 107.6) | 20.1 (15.3 to 25.4)        | 38.4 (27.1 to 52.7)           | 4.6 (2.2 to 8.8)                | 29.0 (29.0 to 29.0)               |
| Benin   | 2010 | 34.2 (29.0 to 40.2)        | 7.8 (6.0 to 9.9)           | 14.6 (10.2 to 20.0)           | 1.8 (0.8 to 3.3)                | 10.0 (10.0 to 10.0)               | 89.2 (75.6 to 104.7) | 20.4 (15.6 to 25.9)        | 38.0 (26.5 to 52.1)           | 4.6 (2.1 to 8.7)                | 26.1 (26.1 to 26.1)               |
| Benin   | 2011 | 35.9 (30.7 to 41.9)        | 7.9 (6.1 to 10.1)          | 14.4 (10.2 to 19.8)           | 1.8 (0.8 to 3.4)                | 11.8 (11.8 to 11.8)               | 93.5 (80.0 to 109.1) | 20.6 (15.9 to 26.3)        | 37.5 (26.5 to 51.5)           | 4.6 (2.1 to 8.8)                | 30.7 (30.7 to 30.7)               |
| Benin   | 2012 | 32.0 (26.9 to 37.9)        | 7.9 (6.0 to 10.1)          | 14.2 (10.0 to 19.7)           | 1.8 (0.8 to 3.5)                | 8.1 (8.1 to 8.1)                  | 83.3 (70.0 to 98.7)  | 20.6 (15.6 to 26.3)        | 36.9 (25.9 to 51.3)           | 4.7 (2.2 to 9.0)                | 21.1 (21.1 to 21.1)               |
| Benin   | 2013 | 31.2 (26.2 to 37.1)        | 7.9 (6.0 to 10.0)          | 14.1 (9.8 to 19.7)            | 1.9 (0.8 to 3.5)                | 7.3 (7.3 to 7.3)                  | 81.2 (68.2 to 96.5)  | 20.5 (15.6 to 26.1)        | 36.9 (25.5 to 51.3)           | 4.9 (2.2 to 9.1)                | 18.9 (18.9 to 18.9)               |
| Benin   | 2014 | 33.6 (28.5 to 39.7)        | 7.5 (5.6 to 9.5)           | 14.1 (9.8 to 19.5)            | 1.9 (0.9 to 3.5)                | 10.1 (10.1 to 10.1)               | 87.4 (74.3 to 103.5) | 19.4 (14.7 to 24.7)        | 36.7 (25.5 to 50.8)           | 4.9 (2.3 to 9.1)                | 26.4 (26.4 to 26.4)               |
| Benin   | 2015 | 30.9 (25.8 to 37.2)        | 7.2 (5.4 to 9.1)           | 14.0 (9.7 to 19.3)            | 1.8 (0.9 to 3.5)                | 7.9 (7.9 to 7.9)                  | 80.6 (67.3 to 97.0)  | 18.6 (14.1 to 23.7)        | 36.5 (25.2 to 50.3)           | 4.8 (2.3 to 9.1)                | 20.7 (20.7 to 20.7)               |

| Country | Year | 2018 US Dollars per capita |                            |                               |                                 |                                   | 2018 PPP per capita   |                            |                               |                                 |                                   |
|---------|------|----------------------------|----------------------------|-------------------------------|---------------------------------|-----------------------------------|-----------------------|----------------------------|-------------------------------|---------------------------------|-----------------------------------|
|         |      | Health spending            | Government health spending | Out-of-pocket health spending | Prepaid private health spending | Development assistance for health | Health spending       | Government health spending | Out-of-pocket health spending | Prepaid private health spending | Development assistance for health |
| Benin   | 2016 | 31.7 (26.8 to 37.7)        | 7.1 (5.3 to 9.0)           | 14.1 (9.8 to 19.5)            | 1.9 (0.9 to 3.5)                | 8.7 (8.7 to 8.7)                  | 82.6 (69.7 to 98.2)   | 18.4 (13.8 to 23.5)        | 36.8 (25.4 to 50.7)           | 4.9 (2.3 to 9.2)                | 22.5 (22.5 to 22.5)               |
| Benin   | 2017 | 36.4 (31.4 to 42.7)        | 7.9 (6.0 to 10.2)          | 14.6 (10.1 to 20.2)           | 2.0 (1.0 to 3.8)                | 11.8 (11.8 to 11.8)               | 94.8 (81.7 to 111.3)  | 20.7 (15.5 to 26.5)        | 38.1 (26.3 to 52.5)           | 5.2 (2.5 to 9.8)                | 30.8 (30.8 to 30.8)               |
| Benin   | 2018 | 35.5 (30.1 to 41.6)        | 8.1 (6.1 to 10.4)          | 14.8 (10.2 to 20.5)           | 2.0 (1.0 to 3.8)                | 10.6 (10.5 to 10.7)               | 92.4 (78.4 to 108.3)  | 21.1 (15.9 to 27.0)        | 38.5 (26.6 to 53.5)           | 5.3 (2.5 to 9.9)                | 27.6 (27.4 to 27.8)               |
| Benin   | 2019 | 35.7 (30.4 to 42.0)        | 8.3 (6.2 to 10.6)          | 14.9 (10.3 to 20.7)           | 2.1 (1.0 to 3.9)                | 10.5 (9.7 to 11.1)                | 93.0 (79.1 to 109.3)  | 21.5 (16.1 to 27.7)        | 38.9 (26.9 to 53.9)           | 5.4 (2.6 to 10.2)               | 27.2 (25.4 to 28.9)               |
| Benin   | 2020 | 36.0 (30.3 to 42.4)        | 8.4 (6.3 to 10.8)          | 15.1 (10.5 to 20.9)           | 2.1 (1.0 to 4.0)                | 10.4 (9.5 to 11.3)                | 93.8 (78.9 to 110.4)  | 21.9 (16.5 to 28.2)        | 39.3 (27.2 to 54.5)           | 5.5 (2.6 to 10.4)               | 27.1 (24.8 to 29.4)               |
| Benin   | 2021 | 36.3 (30.8 to 42.9)        | 8.5 (6.4 to 11.0)          | 15.2 (10.6 to 21.1)           | 2.1 (1.0 to 4.1)                | 10.4 (9.3 to 11.5)                | 94.6 (80.3 to 111.8)  | 22.2 (16.7 to 28.6)        | 39.7 (27.5 to 55.1)           | 5.6 (2.7 to 10.6)               | 27.1 (24.3 to 30.0)               |
| Benin   | 2022 | 36.7 (30.8 to 43.3)        | 8.7 (6.5 to 11.2)          | 15.4 (10.7 to 21.4)           | 2.2 (1.0 to 4.1)                | 10.5 (9.3 to 11.8)                | 95.7 (80.3 to 112.8)  | 22.6 (17.0 to 29.1)        | 40.1 (27.8 to 55.7)           | 5.7 (2.7 to 10.8)               | 27.3 (24.2 to 30.6)               |
| Benin   | 2023 | 37.2 (31.4 to 44.1)        | 8.9 (6.7 to 11.4)          | 15.6 (10.8 to 21.7)           | 2.2 (1.1 to 4.2)                | 10.5 (9.1 to 12.0)                | 96.8 (81.9 to 114.9)  | 23.1 (17.3 to 29.6)        | 40.6 (28.1 to 56.4)           | 5.8 (2.8 to 11.0)               | 27.4 (23.7 to 31.2)               |
| Benin   | 2024 | 37.6 (31.4 to 44.6)        | 9.0 (6.8 to 11.6)          | 15.7 (10.9 to 21.9)           | 2.3 (1.1 to 4.3)                | 10.6 (9.1 to 12.2)                | 98.0 (81.9 to 116.1)  | 23.5 (17.6 to 30.3)        | 41.0 (28.3 to 57.0)           | 5.9 (2.8 to 11.1)               | 27.6 (23.7 to 31.7)               |
| Benin   | 2025 | 38.0 (32.1 to 45.1)        | 9.2 (6.9 to 11.9)          | 15.9 (11.0 to 22.2)           | 2.3 (1.1 to 4.4)                | 10.6 (9.0 to 12.4)                | 99.0 (83.6 to 117.5)  | 23.9 (17.9 to 30.9)        | 41.4 (28.7 to 57.7)           | 6.0 (2.9 to 11.4)               | 27.7 (23.5 to 32.3)               |
| Benin   | 2026 | 38.4 (32.0 to 45.3)        | 9.3 (7.0 to 12.1)          | 16.0 (11.1 to 22.3)           | 2.4 (1.1 to 4.4)                | 10.7 (9.0 to 12.5)                | 100.1 (83.5 to 118.0) | 24.3 (18.2 to 31.4)        | 41.8 (28.9 to 58.2)           | 6.1 (2.9 to 11.6)               | 27.8 (23.4 to 32.5)               |
| Benin   | 2027 | 38.9 (32.6 to 46.0)        | 9.5 (7.1 to 12.3)          | 16.2 (11.2 to 22.6)           | 2.4 (1.1 to 4.5)                | 10.7 (9.0 to 12.7)                | 101.2 (84.8 to 119.8) | 24.8 (18.5 to 32.1)        | 42.2 (29.1 to 58.8)           | 6.2 (3.0 to 11.8)               | 28.0 (23.4 to 33.2)               |
| Benin   | 2028 | 39.4 (32.5 to 46.8)        | 9.7 (7.2 to 12.6)          | 16.4 (11.3 to 22.8)           | 2.5 (1.2 to 4.6)                | 10.8 (9.0 to 13.0)                | 102.7 (84.7 to 122.0) | 25.4 (18.9 to 32.9)        | 42.8 (29.5 to 59.4)           | 6.4 (3.1 to 12.1)               | 28.1 (23.4 to 34.0)               |
| Benin   | 2029 | 40.0 (33.4 to 47.4)        | 10.0 (7.4 to 13.0)         | 16.7 (11.5 to 23.0)           | 2.5 (1.2 to 4.8)                | 10.9 (8.9 to 13.3)                | 104.1 (87.1 to 123.5) | 25.9 (19.2 to 33.8)        | 43.4 (30.0 to 59.9)           | 6.5 (3.1 to 12.4)               | 28.3 (23.3 to 34.5)               |
| Benin   | 2030 | 40.6 (33.5 to 48.2)        | 10.2 (7.5 to 13.2)         | 16.9 (11.7 to 23.3)           | 2.6 (1.2 to 4.9)                | 10.9 (8.9 to 13.4)                | 105.6 (87.2 to 125.5) | 26.5 (19.6 to 34.5)        | 44.0 (30.4 to 60.6)           | 6.7 (3.2 to 12.7)               | 28.4 (23.3 to 34.9)               |
| Benin   | 2031 | 41.2 (34.5 to 49.1)        | 10.4 (7.7 to 13.6)         | 17.1 (11.8 to 23.7)           | 2.6 (1.3 to 5.0)                | 11.0 (8.9 to 13.7)                | 107.3 (89.7 to 127.8) | 27.2 (20.1 to 35.5)        | 44.6 (30.8 to 61.8)           | 6.8 (3.3 to 13.0)               | 28.6 (23.1 to 35.8)               |
| Benin   | 2032 | 41.8 (34.7 to 50.0)        | 10.7 (7.9 to 14.0)         | 17.4 (12.0 to 24.2)           | 2.7 (1.3 to 5.1)                | 11.1 (8.9 to 14.0)                | 109.0 (90.5 to 130.2) | 27.9 (20.6 to 36.4)        | 45.3 (31.2 to 63.0)           | 7.0 (3.3 to 13.3)               | 28.8 (23.1 to 36.5)               |
| Benin   | 2033 | 42.5 (35.7 to 50.5)        | 11.0 (8.1 to 14.4)         | 17.7 (12.1 to 24.5)           | 2.7 (1.3 to 5.2)                | 11.2 (8.8 to 14.4)                | 110.8 (93.1 to 131.6) | 28.6 (21.2 to 37.5)        | 46.0 (31.6 to 63.8)           | 7.2 (3.4 to 13.7)               | 29.1 (23.0 to 37.5)               |
| Benin   | 2034 | 43.2 (36.1 to 51.5)        | 11.2 (8.3 to 14.7)         | 17.9 (12.3 to 24.9)           | 2.8 (1.3 to 5.4)                | 11.3 (8.9 to 14.6)                | 112.6 (94.1 to 134.1) | 29.3 (21.6 to 38.2)        | 46.6 (32.1 to 64.9)           | 7.3 (3.5 to 14.0)               | 29.4 (23.1 to 38.0)               |
| Benin   | 2035 | 44.0 (36.3 to 52.2)        | 11.5 (8.5 to 15.1)         | 18.2 (12.5 to 25.4)           | 2.9 (1.4 to 5.5)                | 11.4 (8.9 to 14.9)                | 114.5 (94.5 to 136.0) | 30.0 (22.1 to 39.3)        | 47.3 (32.6 to 66.2)           | 7.5 (3.6 to 14.3)               | 29.7 (23.1 to 38.7)               |
| Benin   | 2036 | 44.7 (37.1 to 52.9)        | 11.8 (8.7 to 15.5)         | 18.4 (12.7 to 25.9)           | 2.9 (1.4 to 5.6)                | 11.5 (8.9 to 15.5)                | 116.5 (96.7 to 137.8) | 30.8 (22.6 to 40.3)        | 48.0 (33.1 to 67.5)           | 7.7 (3.6 to 14.7)               | 29.9 (23.2 to 40.3)               |

| Country | Year | 2018 US Dollars per capita |                            |                               |                                 |                                   | 2018 PPP per capita       |                            |                               |                                 |                                   |
|---------|------|----------------------------|----------------------------|-------------------------------|---------------------------------|-----------------------------------|---------------------------|----------------------------|-------------------------------|---------------------------------|-----------------------------------|
|         |      | Health spending            | Government health spending | Out-of-pocket health spending | Prepaid private health spending | Development assistance for health | Health spending           | Government health spending | Out-of-pocket health spending | Prepaid private health spending | Development assistance for health |
| Benin   | 2037 | 45.5 (37.8 to 54.3)        | 12.1 (8.9 to 15.9)         | 18.7 (12.9 to 26.4)           | 3.0 (1.4 to 5.8)                | 11.6 (8.9 to 15.6)                | 118.4 (98.5 to 141.4)     | 31.6 (23.2 to 41.4)        | 48.7 (33.7 to 68.7)           | 7.8 (3.7 to 15.0)               | 30.2 (23.2 to 40.6)               |
| Benin   | 2038 | 46.2 (38.1 to 55.5)        | 12.4 (9.1 to 16.3)         | 19.0 (13.1 to 26.8)           | 3.1 (1.5 to 5.9)                | 11.7 (8.9 to 16.1)                | 120.4 (99.1 to 144.7)     | 32.4 (23.7 to 42.4)        | 49.5 (34.2 to 69.9)           | 8.0 (3.8 to 15.4)               | 30.5 (23.3 to 42.0)               |
| Benin   | 2039 | 47.0 (38.7 to 57.3)        | 12.8 (9.3 to 16.8)         | 19.3 (13.3 to 27.2)           | 3.2 (1.5 to 6.0)                | 11.8 (9.0 to 16.2)                | 122.5 (100.9 to 149.2)    | 33.2 (24.3 to 43.7)        | 50.2 (34.7 to 70.9)           | 8.2 (3.9 to 15.7)               | 30.8 (23.5 to 42.2)               |
| Benin   | 2040 | 47.9 (39.0 to 57.5)        | 13.1 (9.6 to 17.2)         | 19.6 (13.5 to 27.6)           | 3.2 (1.5 to 6.2)                | 12.0 (9.1 to 16.4)                | 124.7 (101.6 to 149.9)    | 34.1 (24.9 to 44.8)        | 50.9 (35.2 to 71.9)           | 8.4 (4.0 to 16.1)               | 31.2 (23.7 to 42.7)               |
| Benin   | 2041 | 48.7 (40.0 to 58.9)        | 13.4 (9.7 to 17.6)         | 19.8 (13.7 to 28.0)           | 3.3 (1.6 to 6.3)                | 12.1 (9.1 to 17.0)                | 126.8 (104.1 to 153.4)    | 35.0 (25.4 to 45.9)        | 51.7 (35.8 to 72.8)           | 8.6 (4.1 to 16.5)               | 31.6 (23.7 to 44.4)               |
| Benin   | 2042 | 49.6 (40.4 to 59.8)        | 13.8 (10.0 to 18.1)        | 20.1 (13.9 to 28.3)           | 3.4 (1.6 to 6.5)                | 12.3 (9.1 to 17.7)                | 129.1 (105.1 to 155.9)    | 35.9 (26.0 to 47.1)        | 52.4 (36.3 to 73.8)           | 8.8 (4.2 to 16.9)               | 32.0 (23.7 to 46.2)               |
| Benin   | 2043 | 50.5 (41.1 to 61.0)        | 14.1 (10.3 to 18.6)        | 20.4 (14.2 to 28.7)           | 3.5 (1.6 to 6.6)                | 12.5 (9.3 to 18.3)                | 131.5 (107.0 to 158.9)    | 36.8 (26.8 to 48.4)        | 53.2 (36.9 to 74.8)           | 9.0 (4.3 to 17.3)               | 32.5 (24.1 to 47.8)               |
| Benin   | 2044 | 51.4 (41.6 to 62.2)        | 14.5 (10.6 to 19.1)        | 20.7 (14.4 to 29.1)           | 3.5 (1.7 to 6.8)                | 12.6 (9.3 to 18.6)                | 134.0 (108.3 to 162.1)    | 37.8 (27.6 to 49.8)        | 54.0 (37.5 to 75.9)           | 9.2 (4.4 to 17.7)               | 32.9 (24.2 to 48.5)               |
| Benin   | 2045 | 52.4 (42.4 to 63.5)        | 14.9 (10.9 to 19.6)        | 21.0 (14.6 to 29.5)           | 3.6 (1.7 to 6.9)                | 12.8 (9.3 to 19.4)                | 136.5 (110.5 to 165.5)    | 38.8 (28.3 to 51.2)        | 54.8 (38.0 to 76.9)           | 9.5 (4.5 to 18.1)               | 33.4 (24.3 to 50.7)               |
| Benin   | 2046 | 53.4 (43.0 to 64.8)        | 15.3 (11.1 to 20.1)        | 21.3 (14.8 to 30.0)           | 3.7 (1.8 to 7.1)                | 13.0 (9.4 to 19.7)                | 139.0 (112.0 to 168.7)    | 39.8 (29.0 to 52.5)        | 55.6 (38.4 to 78.0)           | 9.7 (4.6 to 18.5)               | 34.0 (24.4 to 51.4)               |
| Benin   | 2047 | 54.4 (44.1 to 65.9)        | 15.6 (11.4 to 20.7)        | 21.7 (14.9 to 30.4)           | 3.8 (1.8 to 7.3)                | 13.3 (9.5 to 20.9)                | 141.6 (114.7 to 171.6)    | 40.8 (29.7 to 54.0)        | 56.4 (38.9 to 79.1)           | 9.9 (4.7 to 18.9)               | 34.5 (24.8 to 54.4)               |
| Benin   | 2048 | 55.4 (44.6 to 68.3)        | 16.0 (11.6 to 21.3)        | 22.0 (15.1 to 30.8)           | 3.9 (1.8 to 7.4)                | 13.5 (9.7 to 21.6)                | 144.3 (116.1 to 177.8)    | 41.8 (30.3 to 55.5)        | 57.2 (39.4 to 80.3)           | 10.1 (4.8 to 19.4)              | 35.2 (25.2 to 56.4)               |
| Benin   | 2049 | 56.4 (46.1 to 69.0)        | 16.5 (11.9 to 21.9)        | 22.3 (15.4 to 31.3)           | 4.0 (1.9 to 7.6)                | 13.7 (9.7 to 22.0)                | 147.0 (120.1 to 179.6)    | 42.8 (30.9 to 56.9)        | 58.1 (40.0 to 81.6)           | 10.4 (4.9 to 19.8)              | 35.7 (25.2 to 57.2)               |
| Benin   | 2050 | 57.5 (46.5 to 71.4)        | 16.9 (12.1 to 22.5)        | 22.6 (15.6 to 31.8)           | 4.1 (1.9 to 7.8)                | 14.0 (9.9 to 22.6)                | 149.9 (121.0 to 186.0)    | 43.9 (31.6 to 58.5)        | 58.9 (40.7 to 82.8)           | 10.6 (5.0 to 20.3)              | 36.4 (25.7 to 58.8)               |
| Bermuda | 1995 | 7317.6 (5490.1 to 10191.9) | 2449.4 (1869.0 to 3130.7)  | 1791.3 (1277.1 to 2453.6)     | 3077.0 (1498.4 to 5854.9)       | 0.0 (0.0 to 0.0)                  | 4729.5 (3548.4 to 6587.2) | 1583.1 (1208.0 to 2023.4)  | 1157.7 (825.4 to 1585.8)      | 1988.7 (968.4 to 3784.1)        | 0.0 (0.0 to 0.0)                  |
| Bermuda | 1996 | 6971.6 (5254.6 to 9516.7)  | 2345.6 (1794.4 to 2972.1)  | 1879.2 (1336.6 to 2538.6)     | 2746.9 (1346.3 to 5110.8)       | 0.0 (0.0 to 0.0)                  | 4505.9 (3396.1 to 6150.8) | 1516.0 (1159.7 to 1920.9)  | 1214.5 (863.8 to 1640.8)      | 1775.4 (870.1 to 3303.2)        | 0.0 (0.0 to 0.0)                  |
| Bermuda | 1997 | 6674.3 (5123.8 to 8729.1)  | 2269.2 (1758.5 to 2855.2)  | 2073.0 (1471.4 to 2801.6)     | 2332.1 (1149.0 to 4220.7)       | 0.0 (0.0 to 0.0)                  | 4313.7 (3311.6 to 5641.7) | 1466.6 (1136.5 to 1845.4)  | 1339.8 (951.0 to 1810.7)      | 1507.3 (742.6 to 2727.9)        | 0.0 (0.0 to 0.0)                  |
| Bermuda | 1998 | 6498.2 (5173.9 to 8237.3)  | 2178.2 (1713.4 to 2711.3)  | 2382.7 (1720.7 to 3183.0)     | 1937.2 (963.1 to 3421.0)        | 0.0 (0.0 to 0.0)                  | 4199.9 (3344.0 to 5323.9) | 1407.8 (1107.4 to 1752.4)  | 1540.0 (1112.1 to 2057.2)     | 1252.1 (622.5 to 2211.1)        | 0.0 (0.0 to 0.0)                  |
| Bermuda | 1999 | 6640.1 (5372.2 to 8248.5)  | 2117.0 (1690.8 to 2603.7)  | 2851.5 (2123.5 to 3741.5)     | 1671.6 (857.4 to 2872.1)        | 0.0 (0.0 to 0.0)                  | 4291.6 (3472.2 to 5331.2) | 1368.2 (1092.8 to 1682.8)  | 1843.0 (1372.5 to 2418.2)     | 1080.4 (554.1 to 1856.3)        | 0.0 (0.0 to 0.0)                  |
| Bermuda | 2000 | 7150.0 (5926.0 to 8725.8)  | 2135.8 (1744.3 to 2589.7)  | 3461.9 (2649.8 to 4474.2)     | 1552.3 (845.0 to 2572.8)        | 0.0 (0.0 to 0.0)                  | 4621.2 (3830.1 to 5639.6) | 1380.4 (1127.4 to 1673.8)  | 2237.5 (1712.6 to 2891.8)     | 1003.3 (546.1 to 1662.9)        | 0.0 (0.0 to 0.0)                  |
| Bermuda | 2001 | 7895.8 (6665.9 to 9400.9)  | 2231.4 (1867.0 to 2649.6)  | 4139.2 (3277.0 to 5217.0)     | 1525.2 (862.8 to 2422.8)        | 0.0 (0.0 to 0.0)                  | 5103.2 (4308.3 to 6076.0) | 1442.2 (1206.7 to 1712.5)  | 2675.2 (2118.0 to 3371.8)     | 985.8 (557.7 to 1565.9)         | 0.0 (0.0 to 0.0)                  |

| Country | Year | 2018 US Dollars per capita   |                            |                               |                                 |                                   | 2018 PPP per capita       |                            |                               |                                 |                                   |
|---------|------|------------------------------|----------------------------|-------------------------------|---------------------------------|-----------------------------------|---------------------------|----------------------------|-------------------------------|---------------------------------|-----------------------------------|
|         |      | Health spending              | Government health spending | Out-of-pocket health spending | Prepaid private health spending | Development assistance for health | Health spending           | Government health spending | Out-of-pocket health spending | Prepaid private health spending | Development assistance for health |
| Bermuda | 2002 | 8347.5 (7222.8 to 9676.0)    | 2223.6 (1921.2 to 2571.7)  | 4603.2 (3769.5 to 5575.9)     | 1520.7 (925.6 to 2343.0)        | 0.0 (0.0 to 0.0)                  | 5395.1 (4668.2 to 6253.8) | 1437.1 (1241.7 to 1662.1)  | 2975.1 (2436.3 to 3603.8)     | 982.9 (598.3 to 1514.3)         | 0.0 (0.0 to 0.0)                  |
| Bermuda | 2003 | 9007.2 (7989.5 to 10181.1)   | 2315.2 (2070.8 to 2587.0)  | 5078.9 (4339.9 to 5927.6)     | 1613.1 (1049.5 to 2347.4)       | 0.0 (0.0 to 0.0)                  | 5821.5 (5163.8 to 6580.2) | 1496.4 (1338.4 to 1672.0)  | 3282.6 (2805.0 to 3831.1)     | 1042.6 (678.3 to 1517.1)        | 0.0 (0.0 to 0.0)                  |
| Bermuda | 2004 | 9573.8 (8662.7 to 10575.9)   | 2396.7 (2195.8 to 2619.7)  | 5456.2 (4793.2 to 6155.9)     | 1720.9 (1199.3 to 2372.1)       | 0.0 (0.0 to 0.0)                  | 6187.7 (5598.9 to 6835.4) | 1549.0 (1419.2 to 1693.1)  | 3526.5 (3097.9 to 3978.7)     | 1112.2 (775.1 to 1533.1)        | 0.0 (0.0 to 0.0)                  |
| Bermuda | 2005 | 9438.1 (8676.5 to 10254.4)   | 2433.4 (2267.4 to 2598.0)  | 5048.4 (4505.9 to 5616.5)     | 1956.4 (1457.5 to 2550.3)       | 0.0 (0.0 to 0.0)                  | 6100.0 (5607.8 to 6627.6) | 1572.7 (1465.5 to 1679.1)  | 3262.8 (2912.2 to 3630.1)     | 1264.5 (942.0 to 1648.3)        | 0.0 (0.0 to 0.0)                  |
| Bermuda | 2006 | 9176.9 (8472.4 to 9957.8)    | 2516.9 (2357.8 to 2676.1)  | 4112.8 (3646.3 to 4574.5)     | 2547.1 (2070.0 to 3087.3)       | 0.0 (0.0 to 0.0)                  | 5931.2 (5475.9 to 6435.9) | 1626.7 (1523.9 to 1729.6)  | 2658.2 (2356.6 to 2956.6)     | 1646.2 (1337.9 to 1995.4)       | 0.0 (0.0 to 0.0)                  |
| Bermuda | 2007 | 9097.3 (8382.5 to 9884.6)    | 2552.0 (2397.4 to 2703.1)  | 2561.2 (2211.3 to 2942.9)     | 3984.0 (3422.2 to 4637.4)       | 0.0 (0.0 to 0.0)                  | 5879.8 (5417.8 to 6388.6) | 1649.4 (1549.5 to 1747.1)  | 1655.4 (1429.2 to 1902.0)     | 2575.0 (2211.8 to 2997.3)       | 0.0 (0.0 to 0.0)                  |
| Bermuda | 2008 | 9829.3 (9155.6 to 10540.6)   | 2710.2 (2553.8 to 2872.4)  | 2041.5 (1723.5 to 2389.2)     | 5077.5 (4471.1 to 5732.0)       | 0.0 (0.0 to 0.0)                  | 6352.8 (5917.5 to 6812.6) | 1751.6 (1650.6 to 1856.5)  | 1319.5 (1114.0 to 1544.2)     | 3281.7 (2889.8 to 3704.7)       | 0.0 (0.0 to 0.0)                  |
| Bermuda | 2009 | 10447.0 (9736.4 to 11138.6)  | 2859.0 (2714.7 to 3021.6)  | 1790.1 (1482.3 to 2124.5)     | 5798.0 (5203.6 to 6420.0)       | 0.0 (0.0 to 0.0)                  | 6752.1 (6292.8 to 7199.1) | 1847.8 (1754.5 to 1952.9)  | 1157.0 (958.0 to 1373.1)      | 3747.3 (3363.2 to 4149.4)       | 0.0 (0.0 to 0.0)                  |
| Bermuda | 2010 | 11340.5 (10603.1 to 12039.9) | 3221.5 (3074.4 to 3396.6)  | 1711.2 (1398.5 to 2073.2)     | 6407.9 (5787.9 to 7051.3)       | 0.0 (0.0 to 0.0)                  | 7329.6 (6853.0 to 7781.6) | 2082.1 (1987.1 to 2195.3)  | 1106.0 (903.9 to 1340.0)      | 4141.5 (3740.8 to 4557.4)       | 0.0 (0.0 to 0.0)                  |
| Bermuda | 2011 | 11907.0 (11168.9 to 12724.7) | 3496.6 (3332.9 to 3666.3)  | 1650.9 (1329.7 to 2017.6)     | 6759.4 (6117.6 to 7444.2)       | 0.0 (0.0 to 0.0)                  | 7695.7 (7218.6 to 8224.2) | 2259.9 (2154.1 to 2369.6)  | 1067.0 (859.4 to 1304.0)      | 4368.7 (3953.9 to 4811.3)       | 0.0 (0.0 to 0.0)                  |
| Bermuda | 2012 | 11627.9 (10906.4 to 12435.5) | 3451.4 (3285.6 to 3615.3)  | 1544.7 (1230.8 to 1909.8)     | 6631.8 (6021.5 to 7314.2)       | 0.0 (0.0 to 0.0)                  | 7515.3 (7049.0 to 8037.3) | 2230.7 (2123.5 to 2336.6)  | 998.3 (795.5 to 1234.3)       | 4286.2 (3891.8 to 4727.3)       | 0.0 (0.0 to 0.0)                  |
| Bermuda | 2013 | 11427.9 (10723.4 to 12185.5) | 3387.8 (3226.6 to 3553.4)  | 1389.3 (1086.4 to 1742.8)     | 6650.8 (6055.9 to 7312.8)       | 0.0 (0.0 to 0.0)                  | 7386.0 (6930.7 to 7875.7) | 2189.6 (2085.4 to 2296.6)  | 897.9 (702.2 to 1126.4)       | 4298.5 (3914.0 to 4726.4)       | 0.0 (0.0 to 0.0)                  |
| Bermuda | 2014 | 11285.8 (10558.9 to 12077.3) | 3319.7 (3137.8 to 3492.7)  | 1226.7 (950.9 to 1570.5)      | 6739.4 (6135.7 to 7411.4)       | 0.0 (0.0 to 0.0)                  | 7294.2 (6824.4 to 7805.8) | 2145.6 (2028.0 to 2257.4)  | 792.8 (614.6 to 1015.0)       | 4355.8 (3965.6 to 4790.1)       | 0.0 (0.0 to 0.0)                  |
| Bermuda | 2015 | 11116.3 (10217.7 to 12047.9) | 3211.4 (2992.0 to 3436.7)  | 1118.6 (850.8 to 1442.6)      | 6786.2 (5960.1 to 7652.5)       | 0.0 (0.0 to 0.0)                  | 7184.7 (6603.9 to 7786.8) | 2075.6 (1933.8 to 2221.2)  | 723.0 (549.9 to 932.4)        | 4386.1 (3852.1 to 4945.9)       | 0.0 (0.0 to 0.0)                  |
| Bermuda | 2016 | 10802.2 (9469.4 to 12351.7)  | 3134.5 (2839.8 to 3464.6)  | 1097.3 (829.2 to 1430.6)      | 6570.4 (5361.2 to 8035.7)       | 0.0 (0.0 to 0.0)                  | 6981.7 (6120.3 to 7983.1) | 2025.9 (1835.4 to 2239.2)  | 709.2 (535.9 to 924.7)        | 4246.6 (3465.1 to 5193.6)       | 0.0 (0.0 to 0.0)                  |
| Bermuda | 2017 | 11094.8 (9790.7 to 12639.0)  | 3211.5 (2915.3 to 3549.0)  | 1105.7 (834.3 to 1453.5)      | 6777.5 (5521.4 to 8289.6)       | 0.0 (0.0 to 0.0)                  | 7170.8 (6327.9 to 8168.8) | 2075.7 (1884.2 to 2293.8)  | 714.7 (539.2 to 939.4)        | 4380.4 (3568.6 to 5357.7)       | 0.0 (0.0 to 0.0)                  |
| Bermuda | 2018 | 11195.8 (9833.6 to 12743.4)  | 3262.1 (2955.2 to 3606.7)  | 1103.8 (833.2 to 1448.4)      | 6829.9 (5570.6 to 8350.8)       | 0.0 (0.0 to 0.0)                  | 7236.0 (6355.7 to 8236.3) | 2108.4 (1910.0 to 2331.1)  | 713.4 (538.5 to 936.1)        | 4414.3 (3600.4 to 5397.3)       | 0.0 (0.0 to 0.0)                  |
| Bermuda | 2019 | 11277.2 (9923.7 to 12837.7)  | 3305.2 (2986.2 to 3659.5)  | 1099.8 (830.3 to 1442.9)      | 6872.2 (5607.6 to 8403.0)       | 0.0 (0.0 to 0.0)                  | 7288.6 (6413.9 to 8297.2) | 2136.2 (1930.1 to 2365.2)  | 710.8 (536.6 to 932.6)        | 4441.6 (3624.3 to 5431.0)       | 0.0 (0.0 to 0.0)                  |
| Bermuda | 2020 | 11355.3 (9954.2 to 12946.1)  | 3348.5 (3020.5 to 3713.7)  | 1095.5 (824.9 to 1439.0)      | 6911.2 (5639.3 to 8456.4)       | 0.0 (0.0 to 0.0)                  | 7339.1 (6433.6 to 8367.3) | 2164.2 (1952.2 to 2400.3)  | 708.1 (533.1 to 930.0)        | 4466.8 (3644.8 to 5465.5)       | 0.0 (0.0 to 0.0)                  |
| Bermuda | 2021 | 11424.5 (10049.1 to 13038.2) | 3389.2 (3060.3 to 3771.3)  | 1090.6 (821.2 to 1431.4)      | 6944.7 (5669.1 to 8506.5)       | 0.0 (0.0 to 0.0)                  | 7383.8 (6494.9 to 8426.8) | 2190.5 (1977.9 to 2437.5)  | 704.9 (530.7 to 925.2)        | 4488.5 (3664.0 to 5497.9)       | 0.0 (0.0 to 0.0)                  |
| Bermuda | 2022 | 11489.3 (10161.0 to 13106.8) | 3429.1 (3085.6 to 3807.7)  | 1085.1 (817.0 to 1422.1)      | 6975.1 (5697.5 to 8545.7)       | 0.0 (0.0 to 0.0)                  | 7425.7 (6567.2 to 8471.2) | 2216.3 (1994.3 to 2461.0)  | 701.3 (528.0 to 919.1)        | 4508.1 (3682.4 to 5523.2)       | 0.0 (0.0 to 0.0)                  |



| Country | Year | 2018 US Dollars per capita   |                            |                               |                                 |                                   | 2018 PPP per capita        |                            |                               |                                 |                                   |
|---------|------|------------------------------|----------------------------|-------------------------------|---------------------------------|-----------------------------------|----------------------------|----------------------------|-------------------------------|---------------------------------|-----------------------------------|
|         |      | Health spending              | Government health spending | Out-of-pocket health spending | Prepaid private health spending | Development assistance for health | Health spending            | Government health spending | Out-of-pocket health spending | Prepaid private health spending | Development assistance for health |
| Bermuda | 2023 | 11555.6 (10163.7 to 13100.5) | 3470.5 (3109.9 to 3867.5)  | 1079.5 (812.8 to 1414.0)      | 7005.6 (5725.9 to 8586.9)       | 0.0 (0.0 to 0.0)                  | 7468.6 (6569.0 to 8467.1)  | 2243.0 (2010.0 to 2499.6)  | 697.7 (525.3 to 913.9)        | 4527.8 (3700.8 to 5549.9)       | 0.0 (0.0 to 0.0)                  |
| Bermuda | 2024 | 11608.8 (10195.3 to 13263.5) | 3508.2 (3133.2 to 3911.7)  | 1072.7 (807.8 to 1405.8)      | 7027.9 (5748.0 to 8619.8)       | 0.0 (0.0 to 0.0)                  | 7503.0 (6589.4 to 8572.4)  | 2267.4 (2025.0 to 2528.2)  | 693.3 (522.1 to 908.6)        | 4542.3 (3715.0 to 5571.1)       | 0.0 (0.0 to 0.0)                  |
| Bermuda | 2025 | 11657.5 (10181.5 to 13282.7) | 3544.5 (3161.3 to 3961.7)  | 1065.6 (802.5 to 1397.2)      | 7047.4 (5767.3 to 8634.2)       | 0.0 (0.0 to 0.0)                  | 7534.4 (6580.5 to 8584.8)  | 2290.9 (2043.2 to 2560.5)  | 688.7 (518.6 to 903.1)        | 4554.9 (3727.5 to 5580.5)       | 0.0 (0.0 to 0.0)                  |
| Bermuda | 2026 | 11692.4 (10263.7 to 13397.6) | 3575.8 (3167.9 to 4014.4)  | 1057.5 (796.5 to 1387.3)      | 7059.1 (5780.3 to 8652.7)       | 0.0 (0.0 to 0.0)                  | 7557.0 (6633.6 to 8659.1)  | 2311.1 (2047.5 to 2594.6)  | 683.5 (514.8 to 896.7)        | 4562.4 (3735.9 to 5592.4)       | 0.0 (0.0 to 0.0)                  |
| Bermuda | 2027 | 11707.2 (10269.5 to 13295.3) | 3600.5 (3180.7 to 4047.8)  | 1047.7 (789.2 to 1374.2)      | 7059.0 (5769.6 to 8626.8)       | 0.0 (0.0 to 0.0)                  | 7566.6 (6637.4 to 8593.0)  | 2327.1 (2055.7 to 2616.2)  | 677.2 (510.1 to 888.2)        | 4562.3 (3729.0 to 5575.6)       | 0.0 (0.0 to 0.0)                  |
| Bermuda | 2028 | 11695.6 (10228.7 to 13307.9) | 3615.6 (3170.8 to 4090.8)  | 1036.2 (781.1 to 1358.7)      | 7043.9 (5744.9 to 8609.5)       | 0.0 (0.0 to 0.0)                  | 7559.1 (6611.0 to 8601.1)  | 2336.8 (2049.4 to 2644.0)  | 669.7 (504.8 to 878.1)        | 4552.6 (3713.0 to 5564.4)       | 0.0 (0.0 to 0.0)                  |
| Bermuda | 2029 | 11694.6 (10241.9 to 13316.2) | 3631.6 (3179.0 to 4108.7)  | 1026.3 (773.7 to 1345.4)      | 7036.8 (5727.0 to 8608.4)       | 0.0 (0.0 to 0.0)                  | 7558.4 (6619.5 to 8606.5)  | 2347.1 (2054.6 to 2655.5)  | 663.3 (500.0 to 869.5)        | 4548.0 (3701.5 to 5563.7)       | 0.0 (0.0 to 0.0)                  |
| Bermuda | 2030 | 11717.9 (10327.0 to 13300.3) | 3652.2 (3202.0 to 4163.5)  | 1019.3 (768.5 to 1335.9)      | 7046.4 (5733.7 to 8628.0)       | 0.0 (0.0 to 0.0)                  | 7573.5 (6674.5 to 8596.2)  | 2360.5 (2069.5 to 2690.9)  | 658.8 (496.7 to 863.4)        | 4554.2 (3705.8 to 5576.4)       | 0.0 (0.0 to 0.0)                  |
| Bermuda | 2031 | 11764.0 (10288.8 to 13342.9) | 3676.7 (3199.9 to 4201.6)  | 1015.2 (765.5 to 1330.2)      | 7072.2 (5760.2 to 8668.0)       | 0.0 (0.0 to 0.0)                  | 7603.3 (6649.9 to 8623.8)  | 2376.3 (2068.1 to 2715.5)  | 656.1 (494.8 to 859.7)        | 4570.9 (3722.9 to 5602.3)       | 0.0 (0.0 to 0.0)                  |
| Bermuda | 2032 | 11820.3 (10290.5 to 13437.7) | 3700.5 (3206.1 to 4216.0)  | 1012.9 (763.9 to 1326.9)      | 7106.8 (5774.3 to 8719.4)       | 0.0 (0.0 to 0.0)                  | 7639.6 (6651.0 to 8685.0)  | 2391.7 (2072.2 to 2724.9)  | 654.7 (493.7 to 857.6)        | 4593.3 (3732.0 to 5635.5)       | 0.0 (0.0 to 0.0)                  |
| Bermuda | 2033 | 11916.5 (10446.0 to 13597.1) | 3732.9 (3230.6 to 4280.0)  | 1015.0 (765.6 to 1329.3)      | 7168.6 (5812.2 to 8803.0)       | 0.0 (0.0 to 0.0)                  | 7701.9 (6751.4 to 8788.0)  | 2412.7 (2088.0 to 2766.3)  | 656.0 (494.8 to 859.1)        | 4633.2 (3756.6 to 5689.5)       | 0.0 (0.0 to 0.0)                  |
| Bermuda | 2034 | 12032.0 (10558.1 to 13763.4) | 3768.4 (3262.0 to 4318.5)  | 1019.4 (769.0 to 1334.6)      | 7244.1 (5872.3 to 8889.8)       | 0.0 (0.0 to 0.0)                  | 7776.5 (6823.9 to 8895.5)  | 2435.6 (2108.3 to 2791.1)  | 658.9 (497.0 to 862.6)        | 4682.0 (3795.4 to 5745.7)       | 0.0 (0.0 to 0.0)                  |
| Bermuda | 2035 | 12168.2 (10625.6 to 13945.4) | 3807.8 (3302.5 to 4370.9)  | 1026.1 (774.1 to 1343.0)      | 7334.3 (5944.1 to 8988.6)       | 0.0 (0.0 to 0.0)                  | 7864.5 (6867.5 to 9013.1)  | 2461.1 (2134.5 to 2825.0)  | 663.2 (500.3 to 868.0)        | 4740.3 (3841.8 to 5809.5)       | 0.0 (0.0 to 0.0)                  |
| Bermuda | 2036 | 12314.8 (10765.5 to 14034.3) | 3848.8 (3336.8 to 4423.4)  | 1033.9 (779.6 to 1353.8)      | 7432.1 (6022.0 to 9123.3)       | 0.0 (0.0 to 0.0)                  | 7959.3 (6957.9 to 9070.6)  | 2487.5 (2156.6 to 2858.9)  | 668.2 (503.9 to 875.0)        | 4803.5 (3892.1 to 5896.5)       | 0.0 (0.0 to 0.0)                  |
| Bermuda | 2037 | 12482.6 (10816.2 to 14283.7) | 3894.6 (3389.5 to 4476.2)  | 1043.8 (786.2 to 1368.1)      | 7544.2 (6107.0 to 9260.4)       | 0.0 (0.0 to 0.0)                  | 8067.8 (6990.7 to 9231.8)  | 2517.1 (2190.7 to 2893.0)  | 674.7 (508.1 to 884.2)        | 4876.0 (3947.1 to 5985.2)       | 0.0 (0.0 to 0.0)                  |
| Bermuda | 2038 | 12666.6 (11005.9 to 14407.7) | 3943.7 (3425.2 to 4540.1)  | 1055.4 (793.8 to 1384.5)      | 7667.5 (6202.0 to 9417.8)       | 0.0 (0.0 to 0.0)                  | 8186.6 (7113.3 to 9312.0)  | 2548.9 (2213.8 to 2934.4)  | 682.1 (513.1 to 894.8)        | 4955.6 (4008.5 to 6086.9)       | 0.0 (0.0 to 0.0)                  |
| Bermuda | 2039 | 12868.6 (11151.4 to 14751.1) | 3997.3 (3477.8 to 4603.6)  | 1068.5 (803.0 to 1403.3)      | 7802.8 (6302.1 to 9584.2)       | 0.0 (0.0 to 0.0)                  | 8317.2 (7207.3 to 9533.9)  | 2583.5 (2247.8 to 2975.4)  | 690.6 (519.0 to 907.0)        | 5043.1 (4073.1 to 6194.4)       | 0.0 (0.0 to 0.0)                  |
| Bermuda | 2040 | 13074.2 (11391.0 to 14981.8) | 4050.4 (3528.9 to 4672.7)  | 1082.2 (813.1 to 1422.1)      | 7941.7 (6402.4 to 9768.1)       | 0.0 (0.0 to 0.0)                  | 8450.1 (7362.2 to 9683.0)  | 2617.8 (2280.8 to 3020.0)  | 699.4 (525.5 to 919.1)        | 5132.8 (4138.0 to 6313.3)       | 0.0 (0.0 to 0.0)                  |
| Bermuda | 2041 | 13299.1 (11615.5 to 15317.9) | 4108.3 (3565.5 to 4738.8)  | 1097.5 (824.3 to 1442.0)      | 8093.3 (6512.3 to 9958.0)       | 0.0 (0.0 to 0.0)                  | 8595.4 (7507.3 to 9900.2)  | 2655.2 (2304.4 to 3062.8)  | 709.3 (532.8 to 932.0)        | 5230.9 (4209.0 to 6436.0)       | 0.0 (0.0 to 0.0)                  |
| Bermuda | 2042 | 13529.7 (11705.0 to 15447.0) | 4166.3 (3598.4 to 4806.0)  | 1113.5 (836.1 to 1462.7)      | 8249.9 (6625.4 to 10169.0)      | 0.0 (0.0 to 0.0)                  | 8744.5 (7565.2 to 9983.7)  | 2692.8 (2325.7 to 3106.2)  | 719.7 (540.4 to 945.4)        | 5332.1 (4282.1 to 6572.4)       | 0.0 (0.0 to 0.0)                  |
| Bermuda | 2043 | 13787.3 (11981.7 to 15844.4) | 4230.6 (3651.5 to 4882.7)  | 1132.0 (849.8 to 1486.8)      | 8424.7 (6753.2 to 10411.9)      | 0.0 (0.0 to 0.0)                  | 8911.0 (7744.0 to 10240.5) | 2734.3 (2360.1 to 3155.8)  | 731.6 (549.2 to 960.9)        | 5445.1 (4364.7 to 6729.4)       | 0.0 (0.0 to 0.0)                  |

| Country | Year | 2018 US Dollars per capita   |                            |                               |                                 |                                   | 2018 PPP per capita         |                            |                               |                                 |                                   |
|---------|------|------------------------------|----------------------------|-------------------------------|---------------------------------|-----------------------------------|-----------------------------|----------------------------|-------------------------------|---------------------------------|-----------------------------------|
|         |      | Health spending              | Government health spending | Out-of-pocket health spending | Prepaid private health spending | Development assistance for health | Health spending             | Government health spending | Out-of-pocket health spending | Prepaid private health spending | Development assistance for health |
| Bermuda | 2044 | 14041.2 (12211.6 to 16173.5) | 4294.6 (3714.8 to 4968.2)  | 1149.7 (862.4 to 1510.0)      | 8596.9 (6878.7 to 10629.9)      | 0.0 (0.0 to 0.0)                  | 9075.1 (7892.6 to 10453.2)  | 2775.7 (2400.9 to 3211.0)  | 743.1 (557.4 to 975.9)        | 5556.3 (4445.8 to 6870.3)       | 0.0 (0.0 to 0.0)                  |
| Bermuda | 2045 | 14302.5 (12488.0 to 16461.7) | 4359.2 (3762.9 to 5055.5)  | 1168.2 (875.2 to 1535.3)      | 8775.1 (7008.1 to 10857.9)      | 0.0 (0.0 to 0.0)                  | 9244.0 (8071.2 to 10639.5)  | 2817.4 (2432.0 to 3267.4)  | 755.0 (565.7 to 992.3)        | 5671.5 (4529.5 to 7017.6)       | 0.0 (0.0 to 0.0)                  |
| Bermuda | 2046 | 14553.4 (12620.4 to 16714.4) | 4421.2 (3821.0 to 5149.1)  | 1185.5 (887.1 to 1558.9)      | 8946.7 (7140.3 to 11103.5)      | 0.0 (0.0 to 0.0)                  | 9406.1 (8156.8 to 10802.8)  | 2857.5 (2469.6 to 3328.0)  | 766.2 (573.4 to 1007.6)       | 5782.4 (4614.9 to 7176.4)       | 0.0 (0.0 to 0.0)                  |
| Bermuda | 2047 | 14810.5 (12797.9 to 17174.4) | 4485.4 (3856.5 to 5219.9)  | 1203.0 (899.6 to 1582.9)      | 9122.1 (7261.5 to 11333.0)      | 0.0 (0.0 to 0.0)                  | 9572.3 (8271.5 to 11100.1)  | 2899.0 (2492.5 to 3373.7)  | 777.5 (581.4 to 1023.1)       | 5895.8 (4693.2 to 7324.7)       | 0.0 (0.0 to 0.0)                  |
| Bermuda | 2048 | 15063.5 (13058.6 to 17396.0) | 4549.2 (3899.5 to 5309.7)  | 1219.7 (912.5 to 1605.9)      | 9294.6 (7394.7 to 11553.5)      | 0.0 (0.0 to 0.0)                  | 9735.8 (8440.0 to 11243.3)  | 2940.2 (2520.3 to 3431.7)  | 788.3 (589.8 to 1037.9)       | 6007.3 (4779.3 to 7467.2)       | 0.0 (0.0 to 0.0)                  |
| Bermuda | 2049 | 15314.6 (13139.3 to 17764.8) | 4613.8 (3953.2 to 5406.0)  | 1235.7 (924.9 to 1626.2)      | 9465.2 (7527.9 to 11768.0)      | 0.0 (0.0 to 0.0)                  | 9898.1 (8492.2 to 11481.7)  | 2982.0 (2555.0 to 3494.0)  | 798.6 (597.8 to 1051.1)       | 6117.5 (4865.4 to 7605.9)       | 0.0 (0.0 to 0.0)                  |
| Bermuda | 2050 | 15572.0 (13383.5 to 18169.5) | 4680.5 (3999.3 to 5478.8)  | 1251.9 (937.5 to 1648.7)      | 9639.6 (7662.1 to 11990.4)      | 0.0 (0.0 to 0.0)                  | 10064.5 (8650.0 to 11743.3) | 3025.1 (2584.8 to 3541.0)  | 809.2 (605.9 to 1065.6)       | 6230.2 (4952.1 to 7749.6)       | 0.0 (0.0 to 0.0)                  |
| Bhutan  | 1995 | 48.7 (39.9 to 58.8)          | 38.1 (29.6 to 48.0)        | 8.5 (6.1 to 11.6)             | 0.4 (0.2 to 0.8)                | 1.6 (1.6 to 1.6)                  | 149.9 (122.9 to 181.1)      | 117.5 (91.3 to 147.7)      | 26.1 (18.8 to 35.7)           | 1.3 (0.6 to 2.5)                | 5.0 (5.0 to 5.0)                  |
| Bhutan  | 1996 | 50.1 (41.3 to 60.4)          | 40.2 (31.4 to 50.5)        | 9.1 (6.5 to 12.6)             | 0.4 (0.2 to 0.8)                | 0.4 (0.4 to 0.4)                  | 154.4 (127.1 to 185.8)      | 123.7 (96.6 to 155.5)      | 28.0 (20.0 to 38.8)           | 1.4 (0.7 to 2.6)                | 1.3 (1.3 to 1.3)                  |
| Bhutan  | 1997 | 72.2 (63.2 to 82.9)          | 40.9 (32.0 to 51.4)        | 9.7 (7.0 to 13.3)             | 0.5 (0.2 to 0.8)                | 21.2 (21.2 to 21.2)               | 222.3 (194.7 to 255.3)      | 125.8 (98.6 to 158.2)      | 30.0 (21.4 to 41.0)           | 1.4 (0.7 to 2.6)                | 65.1 (65.1 to 65.1)               |
| Bhutan  | 1998 | 64.7 (55.7 to 75.8)          | 41.0 (32.7 to 51.6)        | 9.8 (6.9 to 13.5)             | 0.5 (0.2 to 0.8)                | 13.4 (13.4 to 13.4)               | 199.1 (171.6 to 233.3)      | 126.4 (100.7 to 158.9)     | 30.1 (21.2 to 41.5)           | 1.4 (0.7 to 2.6)                | 41.3 (41.3 to 41.3)               |
| Bhutan  | 1999 | 52.5 (43.7 to 63.4)          | 41.5 (33.3 to 52.2)        | 9.1 (6.5 to 12.4)             | 0.5 (0.2 to 0.8)                | 1.4 (1.4 to 1.4)                  | 161.8 (134.6 to 195.3)      | 127.9 (102.4 to 160.6)     | 28.1 (19.9 to 38.3)           | 1.4 (0.7 to 2.6)                | 4.4 (4.4 to 4.4)                  |
| Bhutan  | 2000 | 55.5 (47.0 to 65.9)          | 41.3 (33.1 to 51.9)        | 7.4 (5.3 to 10.0)             | 0.4 (0.2 to 0.8)                | 6.3 (6.3 to 6.3)                  | 170.9 (144.7 to 202.8)      | 127.3 (101.8 to 159.8)     | 22.8 (16.4 to 30.9)           | 1.4 (0.6 to 2.6)                | 19.5 (19.5 to 19.5)               |
| Bhutan  | 2001 | 52.6 (44.4 to 63.5)          | 40.9 (32.8 to 51.0)        | 6.7 (4.7 to 9.1)              | 0.5 (0.2 to 0.8)                | 4.4 (4.4 to 4.4)                  | 161.8 (136.6 to 195.5)      | 126.0 (101.1 to 156.9)     | 20.7 (14.6 to 28.0)           | 1.4 (0.7 to 2.6)                | 13.7 (13.7 to 13.7)               |
| Bhutan  | 2002 | 53.8 (45.4 to 64.5)          | 41.4 (33.0 to 51.7)        | 7.4 (5.3 to 10.1)             | 0.4 (0.2 to 0.7)                | 4.6 (4.6 to 4.6)                  | 165.7 (139.9 to 198.6)      | 127.6 (101.7 to 159.2)     | 22.8 (16.3 to 31.1)           | 1.2 (0.5 to 2.1)                | 14.2 (14.2 to 14.2)               |
| Bhutan  | 2003 | 58.7 (50.2 to 69.4)          | 40.7 (32.7 to 50.6)        | 8.8 (6.3 to 11.9)             | 0.3 (0.1 to 0.5)                | 8.9 (8.9 to 8.9)                  | 180.8 (154.5 to 213.6)      | 125.4 (100.6 to 155.9)     | 27.2 (19.4 to 36.8)           | 0.8 (0.4 to 1.5)                | 27.5 (27.5 to 27.5)               |
| Bhutan  | 2004 | 57.4 (48.9 to 67.8)          | 40.7 (32.7 to 50.6)        | 9.6 (6.9 to 12.9)             | 0.2 (0.1 to 0.4)                | 6.9 (6.9 to 6.9)                  | 176.7 (150.6 to 208.7)      | 125.4 (100.7 to 155.8)     | 29.5 (21.2 to 39.8)           | 0.7 (0.3 to 1.3)                | 21.1 (21.1 to 21.1)               |
| Bhutan  | 2005 | 62.7 (54.0 to 72.3)          | 40.0 (32.0 to 49.9)        | 9.8 (7.0 to 13.2)             | 0.2 (0.1 to 0.3)                | 12.7 (12.7 to 12.7)               | 192.9 (166.2 to 222.7)      | 123.1 (98.4 to 153.7)      | 30.1 (21.4 to 40.7)           | 0.6 (0.3 to 1.1)                | 39.2 (39.2 to 39.2)               |
| Bhutan  | 2006 | 62.0 (53.1 to 71.4)          | 40.0 (32.1 to 49.2)        | 9.8 (7.1 to 13.3)             | 0.2 (0.1 to 0.3)                | 12.0 (12.0 to 12.0)               | 190.8 (163.4 to 219.8)      | 123.2 (98.8 to 151.6)      | 30.2 (21.8 to 41.0)           | 0.5 (0.3 to 0.9)                | 36.9 (36.9 to 36.9)               |
| Bhutan  | 2007 | 63.5 (53.8 to 73.7)          | 43.9 (35.0 to 54.2)        | 10.2 (7.3 to 13.8)            | 0.2 (0.1 to 0.3)                | 9.2 (9.2 to 9.2)                  | 195.4 (165.5 to 227.0)      | 135.2 (107.7 to 166.9)     | 31.4 (22.6 to 42.5)           | 0.6 (0.3 to 1.0)                | 28.3 (28.3 to 28.3)               |
| Bhutan  | 2008 | 60.8 (51.4 to 71.4)          | 43.9 (35.2 to 54.6)        | 10.2 (7.4 to 13.9)            | 0.2 (0.1 to 0.4)                | 6.4 (6.4 to 6.4)                  | 187.1 (158.2 to 219.8)      | 135.3 (108.4 to 168.0)     | 31.4 (22.8 to 42.9)           | 0.7 (0.3 to 1.3)                | 19.7 (19.7 to 19.7)               |

| Country | Year | 2018 US Dollars per capita |                            |                               |                                 |                                   | 2018 PPP per capita    |                            |                               |                                 |                                   |
|---------|------|----------------------------|----------------------------|-------------------------------|---------------------------------|-----------------------------------|------------------------|----------------------------|-------------------------------|---------------------------------|-----------------------------------|
|         |      | Health spending            | Government health spending | Out-of-pocket health spending | Prepaid private health spending | Development assistance for health | Health spending        | Government health spending | Out-of-pocket health spending | Prepaid private health spending | Development assistance for health |
| Bhutan  | 2009 | 61.6 (51.8 to 73.4)        | 46.0 (37.1 to 57.3)        | 10.8 (7.7 to 14.8)            | 0.3 (0.1 to 0.5)                | 4.5 (4.5 to 4.5)                  | 189.6 (159.4 to 226.0) | 141.5 (114.1 to 176.3)     | 33.2 (23.7 to 45.4)           | 0.9 (0.4 to 1.7)                | 14.0 (14.0 to 14.0)               |
| Bhutan  | 2010 | 64.7 (54.9 to 77.3)        | 48.5 (39.1 to 60.7)        | 11.5 (8.2 to 15.8)            | 0.3 (0.2 to 0.7)                | 4.4 (4.4 to 4.4)                  | 199.4 (169.0 to 238.1) | 149.2 (120.3 to 187.1)     | 35.4 (25.1 to 48.6)           | 1.1 (0.5 to 2.0)                | 13.7 (13.7 to 13.7)               |
| Bhutan  | 2011 | 66.4 (56.0 to 79.4)        | 50.0 (40.2 to 62.6)        | 12.3 (8.8 to 16.9)            | 0.4 (0.2 to 0.8)                | 3.8 (3.8 to 3.8)                  | 204.5 (172.5 to 244.4) | 153.8 (123.6 to 192.8)     | 37.8 (27.1 to 51.9)           | 1.4 (0.6 to 2.6)                | 11.6 (11.6 to 11.6)               |
| Bhutan  | 2012 | 71.5 (59.9 to 85.0)        | 51.4 (40.9 to 63.7)        | 13.9 (9.8 to 19.4)            | 0.6 (0.3 to 1.2)                | 5.6 (5.6 to 5.6)                  | 220.2 (184.4 to 261.7) | 158.1 (125.9 to 196.0)     | 42.8 (30.1 to 59.7)           | 2.0 (0.9 to 3.8)                | 17.2 (17.2 to 17.2)               |
| Bhutan  | 2013 | 70.9 (58.7 to 84.5)        | 52.0 (41.7 to 64.2)        | 14.8 (10.4 to 20.7)           | 0.8 (0.4 to 1.5)                | 3.3 (3.3 to 3.3)                  | 218.2 (180.8 to 260.1) | 160.1 (128.4 to 197.8)     | 45.6 (32.1 to 63.9)           | 2.3 (1.1 to 4.6)                | 10.2 (10.2 to 10.2)               |
| Bhutan  | 2014 | 74.1 (61.3 to 88.0)        | 53.9 (42.8 to 66.9)        | 15.5 (10.9 to 21.5)           | 0.8 (0.4 to 1.6)                | 3.9 (3.9 to 3.9)                  | 228.1 (188.9 to 270.9) | 165.9 (131.8 to 205.9)     | 47.6 (33.6 to 66.1)           | 2.5 (1.2 to 4.9)                | 12.0 (12.0 to 12.0)               |
| Bhutan  | 2015 | 81.3 (68.2 to 96.3)        | 58.0 (46.0 to 72.1)        | 16.2 (11.7 to 22.4)           | 0.9 (0.4 to 1.6)                | 6.2 (6.2 to 6.2)                  | 250.3 (210.0 to 296.4) | 178.7 (141.5 to 222.0)     | 49.8 (35.9 to 68.9)           | 2.7 (1.2 to 5.1)                | 19.2 (19.2 to 19.2)               |
| Bhutan  | 2016 | 83.7 (69.3 to 99.5)        | 60.9 (48.0 to 76.0)        | 16.7 (11.8 to 23.1)           | 1.0 (0.4 to 1.9)                | 5.1 (5.1 to 5.1)                  | 257.7 (213.3 to 306.4) | 187.6 (147.9 to 234.1)     | 51.5 (36.3 to 71.1)           | 3.0 (1.4 to 5.7)                | 15.6 (15.6 to 15.6)               |
| Bhutan  | 2017 | 90.9 (74.7 to 109.4)       | 69.2 (54.4 to 86.1)        | 17.6 (12.4 to 24.2)           | 1.0 (0.5 to 2.0)                | 3.1 (3.1 to 3.1)                  | 279.8 (230.1 to 336.8) | 213.0 (167.5 to 265.1)     | 54.1 (38.2 to 74.6)           | 3.1 (1.4 to 6.1)                | 9.6 (9.6 to 9.6)                  |
| Bhutan  | 2018 | 94.5 (77.5 to 113.1)       | 72.3 (57.0 to 90.0)        | 18.2 (12.8 to 25.2)           | 1.1 (0.5 to 2.1)                | 2.9 (2.9 to 2.9)                  | 290.8 (238.6 to 348.4) | 222.6 (175.4 to 277.1)     | 55.9 (39.5 to 77.5)           | 3.3 (1.5 to 6.3)                | 9.0 (9.0 to 9.0)                  |
| Bhutan  | 2019 | 98.0 (80.3 to 117.4)       | 75.2 (59.3 to 94.2)        | 18.8 (13.3 to 26.0)           | 1.1 (0.5 to 2.1)                | 2.9 (2.7 to 3.1)                  | 301.8 (247.3 to 361.4) | 231.6 (182.5 to 290.1)     | 57.8 (40.8 to 80.1)           | 3.4 (1.6 to 6.6)                | 9.0 (8.4 to 9.5)                  |
| Bhutan  | 2020 | 101.6 (83.3 to 121.5)      | 78.1 (61.5 to 97.7)        | 19.4 (13.5 to 26.7)           | 1.1 (0.5 to 2.2)                | 3.0 (2.7 to 3.2)                  | 312.8 (256.6 to 374.2) | 240.5 (189.4 to 300.8)     | 59.7 (41.7 to 82.3)           | 3.5 (1.6 to 6.9)                | 9.1 (8.3 to 9.8)                  |
| Bhutan  | 2021 | 105.1 (85.9 to 126.0)      | 81.0 (63.7 to 101.1)       | 20.0 (13.9 to 27.6)           | 1.2 (0.5 to 2.3)                | 3.0 (2.7 to 3.3)                  | 323.7 (264.6 to 388.0) | 249.3 (196.2 to 311.4)     | 61.6 (42.9 to 84.9)           | 3.6 (1.7 to 7.1)                | 9.2 (8.3 to 10.2)                 |
| Bhutan  | 2022 | 108.8 (88.8 to 130.1)      | 83.9 (65.9 to 104.7)       | 20.6 (14.4 to 28.6)           | 1.2 (0.6 to 2.4)                | 3.1 (2.7 to 3.4)                  | 335.0 (273.5 to 400.6) | 258.2 (203.0 to 322.4)     | 63.6 (44.4 to 88.1)           | 3.8 (1.7 to 7.3)                | 9.4 (8.3 to 10.5)                 |
| Bhutan  | 2023 | 112.5 (91.6 to 134.6)      | 86.8 (68.1 to 108.6)       | 21.2 (14.8 to 29.4)           | 1.3 (0.6 to 2.5)                | 3.1 (2.7 to 3.5)                  | 346.3 (281.9 to 414.5) | 267.4 (209.7 to 334.4)     | 65.4 (45.6 to 90.6)           | 3.9 (1.8 to 7.6)                | 9.6 (8.3 to 10.9)                 |
| Bhutan  | 2024 | 116.2 (94.8 to 139.2)      | 89.8 (70.3 to 112.3)       | 21.9 (15.2 to 30.3)           | 1.3 (0.6 to 2.6)                | 3.2 (2.7 to 3.6)                  | 357.8 (291.7 to 428.7) | 276.6 (216.5 to 345.9)     | 67.3 (46.9 to 93.3)           | 4.1 (1.9 to 7.9)                | 9.8 (8.4 to 11.2)                 |
| Bhutan  | 2025 | 119.9 (98.2 to 144.0)      | 92.8 (73.0 to 115.8)       | 22.5 (15.7 to 31.2)           | 1.4 (0.6 to 2.7)                | 3.2 (2.8 to 3.8)                  | 369.3 (302.4 to 443.3) | 285.9 (224.9 to 356.5)     | 69.3 (48.3 to 96.1)           | 4.2 (2.0 to 8.2)                | 9.9 (8.5 to 11.6)                 |
| Bhutan  | 2026 | 123.9 (101.4 to 149.0)     | 96.0 (75.5 to 119.7)       | 23.2 (16.1 to 32.3)           | 1.4 (0.7 to 2.8)                | 3.3 (2.8 to 3.9)                  | 381.4 (312.3 to 458.9) | 295.6 (232.3 to 368.5)     | 71.4 (49.7 to 99.4)           | 4.4 (2.0 to 8.5)                | 10.1 (8.5 to 11.9)                |
| Bhutan  | 2027 | 127.9 (104.6 to 153.7)     | 99.2 (77.9 to 123.7)       | 23.9 (16.6 to 33.3)           | 1.5 (0.7 to 2.9)                | 3.3 (2.8 to 4.0)                  | 393.9 (322.1 to 473.3) | 305.6 (239.8 to 381.0)     | 73.5 (51.2 to 102.5)          | 4.5 (2.1 to 8.8)                | 10.3 (8.6 to 12.2)                |
| Bhutan  | 2028 | 132.1 (107.9 to 158.8)     | 102.6 (80.5 to 127.9)      | 24.6 (17.1 to 34.3)           | 1.5 (0.7 to 3.0)                | 3.4 (2.9 to 4.1)                  | 406.7 (332.1 to 488.8) | 315.8 (247.8 to 393.9)     | 75.6 (52.7 to 105.5)          | 4.7 (2.2 to 9.1)                | 10.5 (8.8 to 12.7)                |
| Bhutan  | 2029 | 136.4 (111.7 to 164.6)     | 106.0 (83.6 to 132.2)      | 25.3 (17.6 to 35.2)           | 1.6 (0.7 to 3.1)                | 3.5 (2.9 to 4.3)                  | 419.9 (344.0 to 506.7) | 326.5 (257.5 to 407.2)     | 77.8 (54.2 to 108.5)          | 4.9 (2.3 to 9.4)                | 10.7 (8.8 to 13.1)                |

| Country | Year | 2018 US Dollars per capita |                            |                               |                                 |                                   | 2018 PPP per capita     |                            |                               |                                 |                                   |
|---------|------|----------------------------|----------------------------|-------------------------------|---------------------------------|-----------------------------------|-------------------------|----------------------------|-------------------------------|---------------------------------|-----------------------------------|
|         |      | Health spending            | Government health spending | Out-of-pocket health spending | Prepaid private health spending | Development assistance for health | Health spending         | Government health spending | Out-of-pocket health spending | Prepaid private health spending | Development assistance for health |
| Bhutan  | 2030 | 140.6 (115.1 to 169.9)     | 109.5 (86.2 to 137.4)      | 26.0 (18.1 to 36.2)           | 1.6 (0.8 to 3.2)                | 3.6 (2.9 to 4.4)                  | 433.0 (354.4 to 523.2)  | 337.0 (265.3 to 423.1)     | 80.0 (55.7 to 111.4)          | 5.0 (2.3 to 9.8)                | 10.9 (9.0 to 13.4)                |
| Bhutan  | 2031 | 145.0 (118.6 to 174.7)     | 113.0 (88.6 to 142.2)      | 26.7 (18.6 to 37.2)           | 1.7 (0.8 to 3.3)                | 3.6 (2.9 to 4.6)                  | 446.6 (365.0 to 538.0)  | 348.0 (272.8 to 437.9)     | 82.1 (57.2 to 114.6)          | 5.2 (2.4 to 10.2)               | 11.2 (9.0 to 14.1)                |
| Bhutan  | 2032 | 149.4 (122.0 to 181.3)     | 116.6 (91.3 to 146.9)      | 27.4 (19.1 to 38.3)           | 1.8 (0.8 to 3.4)                | 3.7 (3.0 to 4.7)                  | 460.1 (375.8 to 558.2)  | 359.0 (281.1 to 452.3)     | 84.3 (58.7 to 117.8)          | 5.4 (2.5 to 10.5)               | 11.4 (9.2 to 14.5)                |
| Bhutan  | 2033 | 154.0 (125.6 to 187.5)     | 120.3 (93.7 to 152.1)      | 28.1 (19.6 to 39.3)           | 1.8 (0.8 to 3.5)                | 3.8 (3.0 to 4.9)                  | 474.0 (386.7 to 577.2)  | 370.3 (288.6 to 468.4)     | 86.5 (60.2 to 120.9)          | 5.6 (2.6 to 10.9)               | 11.7 (9.2 to 15.0)                |
| Bhutan  | 2034 | 158.6 (129.4 to 192.6)     | 124.0 (96.5 to 157.6)      | 28.8 (20.1 to 40.3)           | 1.9 (0.9 to 3.6)                | 3.9 (3.0 to 5.0)                  | 488.3 (398.4 to 592.9)  | 381.8 (297.2 to 485.3)     | 88.7 (61.8 to 124.1)          | 5.8 (2.7 to 11.2)               | 12.0 (9.4 to 15.4)                |
| Bhutan  | 2035 | 163.4 (132.9 to 198.8)     | 127.9 (99.5 to 163.7)      | 29.6 (20.6 to 41.4)           | 1.9 (0.9 to 3.7)                | 4.0 (3.1 to 5.2)                  | 503.3 (409.1 to 612.1)  | 393.9 (306.2 to 504.2)     | 91.1 (63.5 to 127.5)          | 6.0 (2.7 to 11.5)               | 12.2 (9.5 to 15.9)                |
| Bhutan  | 2036 | 168.4 (136.3 to 205.6)     | 132.0 (102.4 to 169.7)     | 30.4 (21.2 to 42.5)           | 2.0 (0.9 to 3.9)                | 4.1 (3.2 to 5.5)                  | 518.6 (419.6 to 632.9)  | 406.3 (315.2 to 522.6)     | 93.6 (65.1 to 131.0)          | 6.2 (2.8 to 11.9)               | 12.5 (9.7 to 16.8)                |
| Bhutan  | 2037 | 173.6 (140.2 to 214.6)     | 136.1 (105.4 to 175.4)     | 31.2 (21.7 to 43.7)           | 2.1 (1.0 to 4.0)                | 4.2 (3.2 to 5.6)                  | 534.4 (431.8 to 660.9)  | 419.1 (324.4 to 540.1)     | 96.1 (66.9 to 134.6)          | 6.4 (2.9 to 12.3)               | 12.8 (9.8 to 17.3)                |
| Bhutan  | 2038 | 178.9 (144.5 to 220.7)     | 140.4 (108.5 to 180.7)     | 32.1 (22.3 to 45.0)           | 2.1 (1.0 to 4.1)                | 4.3 (3.2 to 5.9)                  | 550.8 (445.1 to 679.6)  | 432.4 (334.0 to 556.3)     | 98.7 (68.7 to 138.6)          | 6.6 (3.0 to 12.6)               | 13.1 (9.9 to 18.2)                |
| Bhutan  | 2039 | 184.4 (149.5 to 229.1)     | 144.9 (111.7 to 186.8)     | 32.9 (22.9 to 46.4)           | 2.2 (1.0 to 4.3)                | 4.3 (3.3 to 6.0)                  | 567.8 (460.4 to 705.3)  | 446.2 (344.1 to 575.3)     | 101.4 (70.6 to 143.0)         | 6.8 (3.1 to 13.1)               | 13.4 (10.2 to 18.6)               |
| Bhutan  | 2040 | 189.8 (153.3 to 235.8)     | 149.3 (115.1 to 193.5)     | 33.8 (23.6 to 47.8)           | 2.3 (1.1 to 4.4)                | 4.4 (3.4 to 6.2)                  | 584.5 (472.0 to 725.9)  | 459.7 (354.4 to 595.8)     | 104.0 (72.5 to 147.2)         | 7.1 (3.2 to 13.6)               | 13.7 (10.4 to 19.1)               |
| Bhutan  | 2041 | 195.3 (156.7 to 243.5)     | 153.7 (118.1 to 199.9)     | 34.6 (24.2 to 49.1)           | 2.4 (1.1 to 4.6)                | 4.6 (3.4 to 6.4)                  | 601.4 (482.4 to 749.7)  | 473.4 (363.8 to 615.6)     | 106.6 (74.5 to 151.3)         | 7.3 (3.4 to 14.1)               | 14.0 (10.5 to 19.6)               |
| Bhutan  | 2042 | 200.8 (161.1 to 252.2)     | 158.2 (121.3 to 205.3)     | 35.5 (24.8 to 50.4)           | 2.4 (1.1 to 4.7)                | 4.7 (3.5 to 6.7)                  | 618.3 (496.0 to 776.4)  | 487.1 (373.5 to 632.1)     | 109.3 (76.4 to 155.1)         | 7.5 (3.5 to 14.6)               | 14.4 (10.7 to 20.7)               |
| Bhutan  | 2043 | 206.4 (166.6 to 259.8)     | 162.8 (124.7 to 214.3)     | 36.4 (25.4 to 51.5)           | 2.5 (1.2 to 4.9)                | 4.8 (3.5 to 7.0)                  | 635.7 (512.8 to 799.8)  | 501.2 (384.1 to 659.9)     | 111.9 (78.2 to 158.7)         | 7.8 (3.6 to 15.1)               | 14.8 (10.9 to 21.4)               |
| Bhutan  | 2044 | 212.0 (170.9 to 268.1)     | 167.3 (127.8 to 223.5)     | 37.2 (26.0 to 52.7)           | 2.6 (1.2 to 5.1)                | 4.9 (3.6 to 7.1)                  | 652.9 (526.2 to 825.6)  | 515.2 (393.5 to 688.2)     | 114.6 (80.1 to 162.3)         | 8.0 (3.7 to 15.6)               | 15.2 (11.1 to 21.9)               |
| Bhutan  | 2045 | 217.6 (174.4 to 277.5)     | 171.8 (131.1 to 230.5)     | 38.0 (26.6 to 53.8)           | 2.7 (1.2 to 5.2)                | 5.1 (3.6 to 7.6)                  | 670.0 (536.9 to 854.5)  | 529.0 (403.5 to 709.8)     | 117.1 (81.9 to 165.7)         | 8.3 (3.8 to 16.0)               | 15.6 (11.2 to 23.4)               |
| Bhutan  | 2046 | 223.0 (178.0 to 286.1)     | 176.2 (134.3 to 239.3)     | 38.8 (27.2 to 54.9)           | 2.8 (1.3 to 5.3)                | 5.2 (3.7 to 8.0)                  | 686.8 (548.1 to 881.0)  | 542.6 (413.6 to 736.8)     | 119.6 (83.7 to 169.0)         | 8.5 (3.9 to 16.4)               | 16.0 (11.5 to 24.7)               |
| Bhutan  | 2047 | 228.7 (182.3 to 295.4)     | 180.8 (137.7 to 248.1)     | 39.6 (27.8 to 56.1)           | 2.8 (1.3 to 5.5)                | 5.3 (3.8 to 8.4)                  | 704.1 (561.3 to 909.4)  | 556.8 (423.9 to 763.9)     | 122.1 (85.5 to 172.6)         | 8.8 (4.0 to 16.9)               | 16.5 (11.8 to 25.9)               |
| Bhutan  | 2048 | 234.2 (187.1 to 306.3)     | 185.3 (140.7 to 258.0)     | 40.4 (28.4 to 57.3)           | 2.9 (1.3 to 5.7)                | 5.5 (3.9 to 8.9)                  | 721.1 (576.1 to 943.1)  | 570.6 (433.2 to 794.5)     | 124.5 (87.3 to 176.3)         | 9.0 (4.1 to 17.4)               | 17.0 (12.0 to 27.4)               |
| Bhutan  | 2049 | 239.4 (189.5 to 317.2)     | 189.6 (143.5 to 266.5)     | 41.2 (28.9 to 58.3)           | 3.0 (1.4 to 5.8)                | 5.7 (4.0 to 9.2)                  | 737.2 (583.6 to 976.7)  | 583.7 (441.8 to 820.7)     | 126.8 (89.0 to 179.6)         | 9.2 (4.2 to 17.9)               | 17.5 (12.4 to 28.4)               |
| Bhutan  | 2050 | 244.8 (192.9 to 327.6)     | 193.9 (146.3 to 276.5)     | 41.9 (29.5 to 59.2)           | 3.1 (1.4 to 5.9)                | 5.9 (4.1 to 9.5)                  | 753.7 (593.9 to 1008.8) | 597.1 (450.6 to 851.5)     | 129.0 (90.7 to 182.4)         | 9.5 (4.4 to 18.2)               | 18.1 (12.6 to 29.3)               |

| Country | Year | 2018 US Dollars per capita |                            |                               |                                 |                                   | 2018 PPP per capita    |                            |                               |                                 |                                   |
|---------|------|----------------------------|----------------------------|-------------------------------|---------------------------------|-----------------------------------|------------------------|----------------------------|-------------------------------|---------------------------------|-----------------------------------|
|         |      | Health spending            | Government health spending | Out-of-pocket health spending | Prepaid private health spending | Development assistance for health | Health spending        | Government health spending | Out-of-pocket health spending | Prepaid private health spending | Development assistance for health |
| Bolivia | 1995 | 77.8 (65.8 to 90.8)        | 37.7 (30.2 to 46.0)        | 29.3 (21.7 to 39.3)           | 4.6 (2.1 to 8.7)                | 6.2 (6.2 to 6.2)                  | 176.5 (149.2 to 206.0) | 85.6 (68.5 to 104.4)       | 66.5 (49.1 to 89.1)           | 10.4 (4.8 to 19.8)              | 14.0 (14.0 to 14.0)               |
| Bolivia | 1996 | 88.2 (75.6 to 101.7)       | 43.9 (35.6 to 53.3)        | 31.1 (23.3 to 41.3)           | 5.0 (2.4 to 9.3)                | 8.2 (8.2 to 8.2)                  | 200.1 (171.5 to 230.8) | 99.7 (80.7 to 120.8)       | 70.6 (52.8 to 93.7)           | 11.3 (5.4 to 21.0)              | 18.6 (18.6 to 18.6)               |
| Bolivia | 1997 | 92.6 (79.0 to 106.3)       | 47.5 (38.8 to 57.3)        | 32.6 (24.5 to 42.8)           | 5.0 (2.5 to 9.7)                | 7.5 (7.5 to 7.5)                  | 210.0 (179.3 to 241.2) | 107.7 (88.0 to 130.1)      | 73.9 (55.6 to 97.0)           | 11.4 (5.6 to 22.0)              | 17.0 (17.0 to 17.0)               |
| Bolivia | 1998 | 103.4 (88.8 to 118.6)      | 53.0 (43.6 to 63.4)        | 35.6 (26.8 to 46.5)           | 5.2 (2.6 to 9.8)                | 9.7 (9.7 to 9.7)                  | 234.7 (201.5 to 269.0) | 120.2 (98.9 to 144.0)      | 80.7 (60.9 to 105.5)          | 11.9 (5.9 to 22.2)              | 21.9 (21.9 to 21.9)               |
| Bolivia | 1999 | 107.4 (92.3 to 122.7)      | 56.3 (46.7 to 67.4)        | 37.3 (28.3 to 48.5)           | 5.2 (2.6 to 9.8)                | 8.6 (8.6 to 8.6)                  | 243.6 (209.5 to 278.4) | 127.7 (106.0 to 153.0)     | 84.6 (64.2 to 110.1)          | 11.9 (5.9 to 22.2)              | 19.4 (19.4 to 19.4)               |
| Bolivia | 2000 | 109.5 (95.5 to 125.2)      | 57.3 (47.8 to 68.6)        | 35.0 (26.6 to 45.3)           | 5.1 (2.5 to 9.7)                | 12.0 (12.0 to 12.0)               | 248.4 (216.7 to 284.1) | 130.0 (108.6 to 155.6)     | 79.5 (60.3 to 102.8)          | 11.6 (5.7 to 21.9)              | 27.3 (27.3 to 27.3)               |
| Bolivia | 2001 | 108.6 (94.4 to 124.5)      | 58.9 (49.1 to 70.1)        | 34.8 (26.8 to 44.7)           | 5.2 (2.6 to 9.8)                | 9.6 (9.6 to 9.6)                  | 246.4 (214.3 to 282.4) | 133.7 (111.5 to 159.0)     | 78.9 (60.9 to 101.5)          | 11.9 (5.9 to 22.2)              | 21.9 (21.9 to 21.9)               |
| Bolivia | 2002 | 107.1 (92.8 to 122.5)      | 59.8 (50.2 to 71.3)        | 34.8 (26.6 to 45.0)           | 5.2 (2.6 to 9.8)                | 7.2 (7.2 to 7.2)                  | 243.1 (210.5 to 277.9) | 135.8 (113.9 to 161.9)     | 79.1 (60.5 to 102.0)          | 11.9 (5.9 to 22.2)              | 16.4 (16.4 to 16.4)               |
| Bolivia | 2003 | 112.2 (98.0 to 127.8)      | 61.1 (51.1 to 72.2)        | 34.8 (26.3 to 44.9)           | 5.3 (2.6 to 9.9)                | 11.0 (11.0 to 11.0)               | 254.5 (222.3 to 289.9) | 138.5 (115.9 to 163.8)     | 79.0 (59.7 to 102.0)          | 12.1 (6.0 to 22.4)              | 24.9 (24.9 to 24.9)               |
| Bolivia | 2004 | 112.0 (97.6 to 127.5)      | 62.0 (52.1 to 72.8)        | 34.5 (26.3 to 44.7)           | 5.2 (2.5 to 9.5)                | 10.3 (10.3 to 10.3)               | 254.2 (221.5 to 289.3) | 140.7 (118.1 to 165.2)     | 78.4 (59.6 to 101.5)          | 11.9 (5.8 to 21.6)              | 23.3 (23.3 to 23.3)               |
| Bolivia | 2005 | 111.5 (97.6 to 127.5)      | 64.1 (54.2 to 75.1)        | 34.6 (26.1 to 45.2)           | 5.2 (2.5 to 9.5)                | 7.5 (7.5 to 7.5)                  | 253.0 (221.5 to 289.4) | 145.5 (123.1 to 170.4)     | 78.5 (59.3 to 102.6)          | 11.9 (5.7 to 21.6)              | 17.1 (17.1 to 17.1)               |
| Bolivia | 2006 | 115.2 (101.1 to 130.9)     | 66.3 (56.8 to 77.7)        | 34.6 (26.2 to 45.2)           | 5.1 (2.5 to 9.2)                | 9.2 (9.2 to 9.2)                  | 261.5 (229.3 to 297.1) | 150.5 (128.9 to 176.3)     | 78.4 (59.5 to 102.5)          | 11.6 (5.6 to 20.8)              | 21.0 (21.0 to 21.0)               |
| Bolivia | 2007 | 117.4 (103.1 to 133.2)     | 69.3 (59.2 to 80.3)        | 34.8 (26.3 to 45.5)           | 5.0 (2.4 to 9.0)                | 8.3 (8.3 to 8.3)                  | 266.4 (234.0 to 302.2) | 157.4 (134.4 to 182.3)     | 79.0 (59.6 to 103.2)          | 11.2 (5.4 to 20.4)              | 18.8 (18.8 to 18.8)               |
| Bolivia | 2008 | 123.5 (108.8 to 139.9)     | 74.1 (62.8 to 85.6)        | 36.3 (27.4 to 47.5)           | 4.9 (2.4 to 9.1)                | 8.2 (8.2 to 8.2)                  | 280.3 (246.9 to 317.5) | 168.1 (142.6 to 194.3)     | 82.4 (62.2 to 107.8)          | 11.2 (5.4 to 20.8)              | 18.6 (18.6 to 18.6)               |
| Bolivia | 2009 | 128.6 (112.5 to 145.8)     | 78.4 (66.7 to 91.0)        | 38.7 (29.4 to 49.8)           | 5.0 (2.4 to 9.6)                | 6.5 (6.5 to 6.5)                  | 291.9 (255.3 to 330.9) | 178.0 (151.3 to 206.4)     | 87.9 (66.8 to 113.1)          | 11.3 (5.4 to 21.7)              | 14.8 (14.8 to 14.8)               |
| Bolivia | 2010 | 136.2 (120.6 to 154.0)     | 82.4 (70.9 to 95.3)        | 41.7 (31.7 to 53.8)           | 5.0 (2.4 to 9.1)                | 7.1 (7.1 to 7.1)                  | 309.1 (273.6 to 349.6) | 187.0 (160.8 to 216.3)     | 94.7 (72.0 to 122.1)          | 11.2 (5.3 to 20.7)              | 16.2 (16.2 to 16.2)               |
| Bolivia | 2011 | 143.4 (127.6 to 162.2)     | 86.8 (74.8 to 100.4)       | 44.2 (33.4 to 57.3)           | 5.0 (2.4 to 9.2)                | 7.4 (7.4 to 7.4)                  | 325.5 (289.5 to 368.0) | 197.0 (169.7 to 227.9)     | 100.3 (75.8 to 130.0)         | 11.4 (5.5 to 21.0)              | 16.8 (16.8 to 16.8)               |
| Bolivia | 2012 | 151.0 (133.6 to 171.9)     | 92.4 (79.9 to 106.6)       | 47.3 (36.0 to 61.4)           | 5.1 (2.5 to 9.5)                | 6.2 (6.2 to 6.2)                  | 342.7 (303.2 to 390.1) | 209.7 (181.2 to 242.0)     | 107.3 (81.7 to 139.4)         | 11.6 (5.6 to 21.5)              | 14.1 (14.1 to 14.1)               |
| Bolivia | 2013 | 166.6 (147.0 to 189.8)     | 103.0 (88.7 to 118.6)      | 51.3 (38.8 to 66.7)           | 5.4 (2.6 to 10.1)               | 6.9 (6.9 to 6.9)                  | 378.0 (333.5 to 430.7) | 233.7 (201.2 to 269.1)     | 116.3 (88.1 to 151.4)         | 12.3 (5.8 to 22.8)              | 15.7 (15.7 to 15.7)               |
| Bolivia | 2014 | 180.6 (158.8 to 206.3)     | 115.8 (99.3 to 134.0)      | 53.4 (40.3 to 69.8)           | 5.9 (2.8 to 11.0)               | 5.5 (5.5 to 5.5)                  | 409.7 (360.3 to 468.2) | 262.7 (225.3 to 304.1)     | 121.1 (91.5 to 158.4)         | 13.4 (6.3 to 25.0)              | 12.6 (12.6 to 12.6)               |
| Bolivia | 2015 | 199.1 (173.5 to 228.2)     | 131.4 (111.2 to 153.9)     | 56.1 (42.3 to 73.1)           | 6.6 (3.1 to 12.3)               | 5.0 (5.0 to 5.0)                  | 451.8 (393.7 to 517.8) | 298.2 (252.3 to 349.3)     | 127.3 (96.0 to 165.9)         | 14.9 (7.1 to 27.8)              | 11.4 (11.4 to 11.4)               |

| Country | Year | 2018 US Dollars per capita |                            |                               |                                 |                                   | 2018 PPP per capita    |                            |                               |                                 |                                   |
|---------|------|----------------------------|----------------------------|-------------------------------|---------------------------------|-----------------------------------|------------------------|----------------------------|-------------------------------|---------------------------------|-----------------------------------|
|         |      | Health spending            | Government health spending | Out-of-pocket health spending | Prepaid private health spending | Development assistance for health | Health spending        | Government health spending | Out-of-pocket health spending | Prepaid private health spending | Development assistance for health |
| Bolivia | 2016 | 214.0 (185.3 to 245.9)     | 142.7 (120.0 to 169.8)     | 60.2 (45.0 to 78.7)           | 7.1 (3.3 to 13.1)               | 3.9 (3.9 to 3.9)                  | 485.6 (420.5 to 558.0) | 323.8 (272.3 to 385.3)     | 136.7 (102.1 to 178.6)        | 16.2 (7.6 to 29.7)              | 8.9 (8.9 to 8.9)                  |
| Bolivia | 2017 | 218.8 (189.7 to 253.7)     | 144.7 (121.5 to 172.4)     | 61.5 (45.9 to 79.9)           | 7.3 (3.4 to 13.4)               | 5.2 (5.2 to 5.2)                  | 496.5 (430.4 to 575.6) | 328.4 (275.8 to 391.1)     | 139.6 (104.2 to 181.4)        | 16.6 (7.8 to 30.4)              | 11.9 (11.9 to 11.9)               |
| Bolivia | 2018 | 220.7 (191.1 to 253.8)     | 146.2 (122.5 to 174.1)     | 62.2 (46.3 to 81.0)           | 7.5 (3.5 to 13.7)               | 4.9 (4.9 to 4.9)                  | 500.9 (433.6 to 575.9) | 331.7 (278.0 to 395.1)     | 141.1 (105.0 to 183.8)        | 17.0 (7.9 to 31.1)              | 11.1 (11.1 to 11.1)               |
| Bolivia | 2019 | 224.5 (194.0 to 261.3)     | 149.0 (125.0 to 177.3)     | 62.9 (46.7 to 81.9)           | 7.7 (3.6 to 14.0)               | 4.9 (4.6 to 5.2)                  | 509.3 (440.1 to 593.0) | 338.1 (283.6 to 402.3)     | 142.8 (106.0 to 185.8)        | 17.4 (8.1 to 31.7)              | 11.1 (10.4 to 11.8)               |
| Bolivia | 2020 | 226.8 (195.9 to 260.2)     | 150.5 (126.3 to 179.0)     | 63.5 (47.2 to 82.8)           | 7.8 (3.6 to 14.3)               | 4.9 (4.5 to 5.3)                  | 514.7 (444.6 to 590.5) | 341.6 (286.6 to 406.3)     | 144.1 (107.0 to 187.9)        | 17.8 (8.3 to 32.4)              | 11.2 (10.3 to 12.1)               |
| Bolivia | 2021 | 230.3 (197.9 to 268.2)     | 153.1 (127.9 to 183.0)     | 64.2 (47.7 to 83.7)           | 8.0 (3.7 to 14.6)               | 5.0 (4.5 to 5.5)                  | 522.5 (449.2 to 608.6) | 347.3 (290.2 to 415.2)     | 145.8 (108.3 to 190.0)        | 18.1 (8.4 to 33.2)              | 11.3 (10.2 to 12.5)               |
| Bolivia | 2022 | 234.4 (202.1 to 268.7)     | 156.1 (130.3 to 186.9)     | 65.1 (48.3 to 84.9)           | 8.2 (3.8 to 14.9)               | 5.1 (4.5 to 5.7)                  | 531.8 (458.5 to 609.7) | 354.1 (295.7 to 424.2)     | 147.6 (109.5 to 192.6)        | 18.5 (8.6 to 33.8)              | 11.5 (10.2 to 12.8)               |
| Bolivia | 2023 | 238.7 (205.7 to 277.4)     | 159.3 (133.0 to 190.9)     | 65.9 (49.1 to 86.0)           | 8.4 (3.9 to 15.3)               | 5.1 (4.5 to 5.8)                  | 541.7 (466.7 to 629.4) | 361.5 (301.7 to 433.1)     | 149.6 (111.4 to 195.3)        | 19.0 (8.8 to 34.6)              | 11.7 (10.2 to 13.2)               |
| Bolivia | 2024 | 243.1 (210.0 to 278.4)     | 162.6 (135.6 to 195.0)     | 66.8 (49.7 to 87.4)           | 8.5 (4.0 to 15.6)               | 5.2 (4.5 to 6.0)                  | 551.7 (476.5 to 631.6) | 368.9 (307.7 to 442.6)     | 151.6 (112.9 to 198.4)        | 19.4 (9.0 to 35.4)              | 11.9 (10.2 to 13.6)               |
| Bolivia | 2025 | 247.5 (213.3 to 287.5)     | 165.8 (138.2 to 198.7)     | 67.7 (50.4 to 88.4)           | 8.7 (4.0 to 16.0)               | 5.3 (4.5 to 6.2)                  | 561.7 (484.0 to 652.5) | 376.3 (313.7 to 450.9)     | 153.5 (114.4 to 200.7)        | 19.8 (9.2 to 36.2)              | 12.0 (10.3 to 14.1)               |
| Bolivia | 2026 | 251.9 (216.7 to 288.9)     | 169.1 (140.6 to 202.6)     | 68.5 (51.0 to 89.5)           | 8.9 (4.1 to 16.4)               | 5.4 (4.5 to 6.3)                  | 571.7 (491.8 to 655.6) | 383.7 (318.9 to 459.7)     | 155.5 (115.7 to 203.0)        | 20.3 (9.4 to 37.2)              | 12.2 (10.3 to 14.3)               |
| Bolivia | 2027 | 256.3 (221.6 to 296.3)     | 172.4 (143.0 to 205.8)     | 69.3 (51.6 to 90.3)           | 9.1 (4.2 to 16.7)               | 5.5 (4.6 to 6.5)                  | 581.6 (502.8 to 672.4) | 391.2 (324.5 to 467.0)     | 157.3 (117.1 to 204.9)        | 20.7 (9.6 to 37.9)              | 12.4 (10.4 to 14.7)               |
| Bolivia | 2028 | 260.9 (224.3 to 300.5)     | 175.8 (146.3 to 210.1)     | 70.2 (52.2 to 91.4)           | 9.3 (4.3 to 17.0)               | 5.6 (4.7 to 6.7)                  | 591.9 (508.9 to 681.9) | 398.9 (332.1 to 476.7)     | 159.2 (118.5 to 207.3)        | 21.1 (9.7 to 38.7)              | 12.6 (10.6 to 15.2)               |
| Bolivia | 2029 | 265.4 (229.4 to 307.9)     | 179.3 (149.0 to 214.2)     | 71.0 (52.9 to 92.7)           | 9.5 (4.4 to 17.4)               | 5.7 (4.7 to 6.9)                  | 602.3 (520.5 to 698.7) | 406.8 (338.0 to 486.1)     | 161.1 (120.0 to 210.2)        | 21.6 (9.9 to 39.5)              | 12.8 (10.6 to 15.7)               |
| Bolivia | 2030 | 270.0 (232.4 to 310.8)     | 182.7 (151.6 to 218.3)     | 71.8 (53.5 to 93.8)           | 9.7 (4.5 to 17.8)               | 5.8 (4.7 to 7.1)                  | 612.6 (527.4 to 705.2) | 414.6 (344.0 to 495.4)     | 162.9 (121.4 to 212.8)        | 22.0 (10.2 to 40.3)             | 13.1 (10.7 to 16.0)               |
| Bolivia | 2031 | 274.5 (236.1 to 320.6)     | 186.1 (154.2 to 222.8)     | 72.6 (54.1 to 94.9)           | 9.9 (4.6 to 18.1)               | 5.9 (4.7 to 7.3)                  | 622.8 (535.8 to 727.5) | 422.3 (350.0 to 505.6)     | 164.8 (122.8 to 215.4)        | 22.5 (10.4 to 41.1)             | 13.3 (10.8 to 16.7)               |
| Bolivia | 2032 | 279.0 (239.8 to 322.1)     | 189.6 (156.8 to 227.1)     | 73.4 (54.7 to 96.1)           | 10.1 (4.7 to 18.5)              | 6.0 (4.8 to 7.5)                  | 633.1 (544.1 to 730.9) | 430.2 (355.8 to 515.2)     | 166.5 (124.0 to 218.2)        | 22.9 (10.6 to 42.0)             | 13.5 (10.9 to 17.0)               |
| Bolivia | 2033 | 283.7 (243.0 to 330.7)     | 193.1 (159.5 to 231.5)     | 74.2 (55.3 to 97.3)           | 10.3 (4.8 to 18.9)              | 6.1 (4.8 to 7.8)                  | 643.7 (551.4 to 750.4) | 438.2 (361.9 to 525.3)     | 168.3 (125.5 to 220.7)        | 23.4 (10.8 to 42.8)             | 13.8 (10.9 to 17.7)               |
| Bolivia | 2034 | 288.5 (247.4 to 334.0)     | 196.8 (162.1 to 236.3)     | 75.0 (55.9 to 98.4)           | 10.5 (4.9 to 19.2)              | 6.2 (4.9 to 8.0)                  | 654.6 (561.4 to 757.8) | 446.5 (367.8 to 536.2)     | 170.2 (126.9 to 223.3)        | 23.8 (11.1 to 43.6)             | 14.1 (11.1 to 18.2)               |
| Bolivia | 2035 | 293.4 (250.6 to 342.3)     | 200.5 (165.0 to 241.4)     | 75.8 (56.3 to 99.3)           | 10.7 (5.0 to 19.6)              | 6.3 (4.9 to 8.3)                  | 665.7 (568.6 to 776.6) | 455.1 (374.5 to 547.7)     | 172.0 (127.9 to 225.3)        | 24.3 (11.3 to 44.5)             | 14.4 (11.2 to 18.7)               |
| Bolivia | 2036 | 298.4 (254.1 to 346.8)     | 204.4 (167.8 to 246.2)     | 76.6 (56.8 to 100.2)          | 10.9 (5.1 to 20.0)              | 6.5 (5.0 to 8.7)                  | 677.1 (576.5 to 786.9) | 463.8 (380.8 to 558.6)     | 173.9 (128.9 to 227.3)        | 24.8 (11.5 to 45.3)             | 14.6 (11.3 to 19.7)               |

| Country                | Year | 2018 US Dollars per capita |                            |                               |                                 |                                   | 2018 PPP per capita     |                            |                               |                                 |                                   |
|------------------------|------|----------------------------|----------------------------|-------------------------------|---------------------------------|-----------------------------------|-------------------------|----------------------------|-------------------------------|---------------------------------|-----------------------------------|
|                        |      | Health spending            | Government health spending | Out-of-pocket health spending | Prepaid private health spending | Development assistance for health | Health spending         | Government health spending | Out-of-pocket health spending | Prepaid private health spending | Development assistance for health |
| Bolivia                | 2037 | 303.5 (259.1 to 354.4)     | 208.3 (170.9 to 251.1)     | 77.5 (57.3 to 101.2)          | 11.1 (5.2 to 20.3)              | 6.6 (5.1 to 8.8)                  | 688.7 (587.9 to 804.3)  | 472.7 (387.8 to 569.9)     | 175.8 (130.0 to 229.7)        | 25.3 (11.7 to 46.1)             | 14.9 (11.5 to 20.1)               |
| Bolivia                | 2038 | 308.7 (262.8 to 358.7)     | 212.3 (174.3 to 256.3)     | 78.3 (57.8 to 102.4)          | 11.4 (5.3 to 20.7)              | 6.7 (5.1 to 9.3)                  | 700.5 (596.4 to 813.9)  | 481.8 (395.5 to 581.5)     | 177.7 (131.1 to 232.3)        | 25.8 (11.9 to 47.0)             | 15.2 (11.6 to 21.2)               |
| Bolivia                | 2039 | 313.9 (267.4 to 366.3)     | 216.4 (177.5 to 262.1)     | 79.1 (58.3 to 103.5)          | 11.6 (5.4 to 21.1)              | 6.8 (5.2 to 9.5)                  | 712.4 (606.7 to 831.2)  | 490.9 (402.8 to 594.6)     | 179.6 (132.2 to 234.9)        | 26.3 (12.2 to 47.9)             | 15.5 (11.9 to 21.6)               |
| Bolivia                | 2040 | 319.2 (271.5 to 371.6)     | 220.4 (180.6 to 266.6)     | 80.0 (58.9 to 104.8)          | 11.8 (5.5 to 21.5)              | 7.0 (5.3 to 9.7)                  | 724.3 (616.1 to 843.2)  | 500.2 (409.7 to 604.9)     | 181.4 (133.6 to 237.9)        | 26.8 (12.4 to 48.7)             | 15.9 (12.0 to 22.0)               |
| Bolivia                | 2041 | 324.5 (276.1 to 381.3)     | 224.6 (183.4 to 271.8)     | 80.8 (59.4 to 106.0)          | 12.0 (5.6 to 21.9)              | 7.1 (5.4 to 9.9)                  | 736.4 (626.5 to 865.3)  | 509.6 (416.1 to 616.6)     | 183.3 (134.9 to 240.6)        | 27.3 (12.6 to 49.7)             | 16.2 (12.2 to 22.5)               |
| Bolivia                | 2042 | 330.0 (278.4 to 385.4)     | 228.8 (186.4 to 277.2)     | 81.6 (60.1 to 107.0)          | 12.3 (5.7 to 22.3)              | 7.3 (5.5 to 10.4)                 | 748.7 (631.6 to 874.4)  | 519.2 (423.0 to 628.9)     | 185.2 (136.3 to 242.8)        | 27.8 (12.8 to 50.6)             | 16.6 (12.4 to 23.6)               |
| Bolivia                | 2043 | 335.4 (283.9 to 396.9)     | 233.0 (189.3 to 283.2)     | 82.4 (60.6 to 108.0)          | 12.5 (5.7 to 22.8)              | 7.5 (5.5 to 10.8)                 | 761.1 (644.1 to 900.6)  | 528.8 (429.5 to 642.6)     | 187.0 (137.6 to 245.0)        | 28.3 (13.0 to 51.7)             | 16.9 (12.6 to 24.5)               |
| Bolivia                | 2044 | 340.9 (286.5 to 399.4)     | 237.3 (192.5 to 288.2)     | 83.2 (61.1 to 109.1)          | 12.7 (5.8 to 23.3)              | 7.6 (5.6 to 11.1)                 | 773.6 (650.1 to 906.4)  | 538.6 (436.8 to 654.0)     | 188.8 (138.7 to 247.5)        | 28.9 (13.3 to 52.8)             | 17.3 (12.8 to 25.1)               |
| Bolivia                | 2045 | 346.5 (293.0 to 410.3)     | 241.7 (194.9 to 295.1)     | 84.0 (61.6 to 110.3)          | 13.0 (6.0 to 23.8)              | 7.8 (5.6 to 11.8)                 | 786.2 (664.7 to 931.0)  | 548.5 (442.3 to 669.5)     | 190.6 (139.9 to 250.3)        | 29.4 (13.5 to 54.0)             | 17.8 (12.8 to 26.8)               |
| Bolivia                | 2046 | 352.1 (294.5 to 412.4)     | 246.1 (197.7 to 301.4)     | 84.8 (62.1 to 111.6)          | 13.2 (6.1 to 24.3)              | 8.0 (5.8 to 12.3)                 | 798.9 (668.3 to 935.8)  | 558.4 (448.6 to 684.0)     | 192.4 (141.0 to 253.2)        | 29.9 (13.7 to 55.1)             | 18.2 (13.1 to 28.0)               |
| Bolivia                | 2047 | 357.7 (301.8 to 425.2)     | 250.5 (200.5 to 306.8)     | 85.6 (62.7 to 112.8)          | 13.4 (6.2 to 24.7)              | 8.2 (5.9 to 12.9)                 | 811.7 (684.9 to 964.8)  | 568.3 (455.0 to 696.1)     | 194.2 (142.2 to 255.8)        | 30.5 (14.0 to 56.1)             | 18.6 (13.4 to 29.4)               |
| Bolivia                | 2048 | 363.3 (301.6 to 428.7)     | 254.9 (203.2 to 312.8)     | 86.4 (63.3 to 113.8)          | 13.7 (6.3 to 25.2)              | 8.4 (6.0 to 13.5)                 | 824.5 (684.4 to 972.8)  | 578.3 (461.0 to 709.8)     | 196.0 (143.5 to 258.2)        | 31.0 (14.2 to 57.2)             | 19.1 (13.6 to 30.7)               |
| Bolivia                | 2049 | 369.1 (309.2 to 438.4)     | 259.3 (206.4 to 319.4)     | 87.2 (63.8 to 114.9)          | 13.9 (6.4 to 25.7)              | 8.6 (6.2 to 13.9)                 | 837.5 (701.5 to 994.9)  | 588.4 (468.4 to 724.8)     | 197.8 (144.9 to 260.7)        | 31.6 (14.5 to 58.2)             | 19.6 (14.0 to 31.6)               |
| Bolivia                | 2050 | 375.0 (309.9 to 442.9)     | 263.9 (209.4 to 326.1)     | 88.0 (64.4 to 116.0)          | 14.2 (6.5 to 26.1)              | 8.9 (6.2 to 14.5)                 | 850.9 (703.1 to 1005.1) | 598.9 (475.2 to 740.0)     | 199.7 (146.1 to 263.3)        | 32.2 (14.7 to 59.3)             | 20.2 (14.1 to 32.8)               |
| Bosnia and Herzegovina | 1995 | 93.7 (80.7 to 108.8)       | 36.2 (30.1 to 42.9)        | 56.6 (45.6 to 69.8)           | 0.6 (0.3 to 1.1)                | 0.4 (0.4 to 0.4)                  | 226.8 (195.4 to 263.3)  | 87.6 (72.8 to 103.8)       | 136.9 (110.3 to 168.9)        | 1.4 (0.7 to 2.6)                | 0.9 (0.9 to 0.9)                  |
| Bosnia and Herzegovina | 1996 | 153.9 (135.5 to 175.0)     | 62.5 (53.1 to 73.1)        | 85.3 (70.1 to 103.5)          | 1.0 (0.5 to 1.9)                | 5.1 (5.1 to 5.1)                  | 372.5 (327.8 to 423.4)  | 151.3 (128.4 to 176.8)     | 206.4 (169.6 to 250.4)        | 2.4 (1.2 to 4.5)                | 12.4 (12.4 to 12.4)               |
| Bosnia and Herzegovina | 1997 | 182.5 (160.3 to 206.7)     | 77.1 (67.0 to 89.8)        | 102.9 (85.3 to 122.8)         | 1.3 (0.6 to 2.5)                | 1.2 (1.2 to 1.2)                  | 441.7 (387.8 to 500.2)  | 186.5 (162.1 to 217.4)     | 249.1 (206.4 to 297.2)        | 3.2 (1.5 to 6.0)                | 3.0 (3.0 to 3.0)                  |
| Bosnia and Herzegovina | 1998 | 213.6 (190.6 to 238.3)     | 88.1 (77.2 to 100.7)       | 113.5 (94.9 to 134.3)         | 1.6 (0.7 to 3.0)                | 10.5 (10.5 to 10.5)               | 516.9 (461.2 to 576.7)  | 213.1 (186.8 to 243.7)     | 274.6 (229.8 to 325.0)        | 3.8 (1.8 to 7.2)                | 25.4 (25.4 to 25.4)               |
| Bosnia and Herzegovina | 1999 | 243.2 (221.2 to 268.2)     | 106.7 (94.5 to 120.6)      | 112.9 (95.0 to 133.0)         | 1.9 (0.9 to 3.7)                | 21.8 (21.8 to 21.8)               | 588.6 (535.2 to 649.1)  | 258.2 (228.6 to 291.7)     | 273.1 (229.9 to 321.8)        | 4.6 (2.2 to 8.9)                | 52.7 (52.7 to 52.7)               |
| Bosnia and Herzegovina | 2000 | 222.0 (202.3 to 243.7)     | 116.0 (103.3 to 129.7)     | 98.8 (83.0 to 117.0)          | 2.1 (1.0 to 4.3)                | 5.1 (5.1 to 5.1)                  | 537.1 (489.5 to 589.6)  | 280.6 (249.9 to 314.0)     | 239.2 (200.8 to 283.2)        | 5.2 (2.5 to 10.3)               | 12.2 (12.2 to 12.2)               |
| Bosnia and Herzegovina | 2001 | 230.6 (211.6 to 252.2)     | 127.0 (113.9 to 141.2)     | 92.9 (78.2 to 109.1)          | 2.5 (1.2 to 4.9)                | 8.2 (8.2 to 8.2)                  | 558.0 (512.1 to 610.3)  | 307.3 (275.5 to 341.6)     | 224.7 (189.2 to 263.9)        | 6.0 (2.9 to 11.9)               | 19.9 (19.9 to 19.9)               |

| Country                | Year | 2018 US Dollars per capita |                            |                               |                                 |                                   | 2018 PPP per capita       |                            |                               |                                 |                                   |
|------------------------|------|----------------------------|----------------------------|-------------------------------|---------------------------------|-----------------------------------|---------------------------|----------------------------|-------------------------------|---------------------------------|-----------------------------------|
|                        |      | Health spending            | Government health spending | Out-of-pocket health spending | Prepaid private health spending | Development assistance for health | Health spending           | Government health spending | Out-of-pocket health spending | Prepaid private health spending | Development assistance for health |
| Bosnia and Herzegovina | 2002 | 242.9 (223.3 to 265.6)     | 142.0 (127.4 to 157.2)     | 93.2 (78.5 to 109.3)          | 3.0 (1.4 to 5.6)                | 4.8 (4.8 to 4.8)                  | 587.8 (540.3 to 642.8)    | 343.6 (308.2 to 380.4)     | 225.5 (190.0 to 264.5)        | 7.2 (3.5 to 13.6)               | 11.6 (11.6 to 11.6)               |
| Bosnia and Herzegovina | 2003 | 268.0 (247.0 to 291.2)     | 158.9 (143.3 to 175.3)     | 100.5 (85.2 to 116.4)         | 3.6 (1.7 to 6.6)                | 5.1 (5.1 to 5.1)                  | 648.5 (597.7 to 704.7)    | 384.5 (346.9 to 424.1)     | 243.1 (206.1 to 281.7)        | 8.6 (4.2 to 15.9)               | 12.3 (12.3 to 12.3)               |
| Bosnia and Herzegovina | 2004 | 298.1 (274.2 to 322.5)     | 170.1 (154.1 to 186.8)     | 120.9 (103.7 to 140.0)        | 4.0 (1.9 to 7.6)                | 3.1 (3.1 to 3.1)                  | 721.3 (663.5 to 780.3)    | 411.6 (373.0 to 452.0)     | 292.5 (251.0 to 338.9)        | 9.8 (4.6 to 18.4)               | 7.5 (7.5 to 7.5)                  |
| Bosnia and Herzegovina | 2005 | 326.6 (300.3 to 353.8)     | 180.4 (163.8 to 196.7)     | 137.7 (118.7 to 160.1)        | 4.5 (2.1 to 8.5)                | 4.0 (4.0 to 4.0)                  | 790.4 (726.6 to 856.1)    | 436.6 (396.5 to 476.1)     | 333.3 (287.3 to 387.4)        | 10.8 (5.1 to 20.5)              | 9.8 (9.8 to 9.8)                  |
| Bosnia and Herzegovina | 2006 | 355.5 (326.8 to 384.6)     | 195.7 (177.8 to 214.0)     | 150.8 (130.5 to 173.2)        | 4.9 (2.3 to 9.1)                | 4.1 (4.1 to 4.1)                  | 860.2 (790.7 to 930.6)    | 473.6 (430.2 to 517.8)     | 364.8 (315.7 to 419.1)        | 11.9 (5.5 to 22.1)              | 9.9 (9.9 to 9.9)                  |
| Bosnia and Herzegovina | 2007 | 384.7 (354.9 to 414.7)     | 215.8 (196.0 to 235.9)     | 159.0 (137.9 to 182.1)        | 5.4 (2.5 to 9.9)                | 4.4 (4.4 to 4.4)                  | 931.0 (858.8 to 1003.6)   | 522.3 (474.2 to 570.8)     | 384.8 (333.6 to 440.5)        | 13.1 (6.1 to 23.9)              | 10.7 (10.7 to 10.7)               |
| Bosnia and Herzegovina | 2008 | 422.7 (393.2 to 454.1)     | 240.3 (220.2 to 261.6)     | 159.0 (137.6 to 182.6)        | 6.0 (2.8 to 11.1)               | 17.4 (17.4 to 17.4)               | 1022.9 (951.6 to 1098.8)  | 581.4 (532.7 to 633.0)     | 384.8 (333.0 to 441.8)        | 14.5 (6.8 to 26.8)              | 42.1 (42.1 to 42.1)               |
| Bosnia and Herzegovina | 2009 | 412.8 (383.4 to 442.0)     | 257.5 (236.3 to 279.5)     | 140.8 (123.0 to 162.1)        | 6.4 (3.0 to 11.8)               | 8.1 (8.1 to 8.1)                  | 999.0 (927.8 to 1069.6)   | 623.2 (571.8 to 676.4)     | 340.7 (297.7 to 392.2)        | 15.5 (7.3 to 28.6)              | 19.6 (19.6 to 19.6)               |
| Bosnia and Herzegovina | 2010 | 427.4 (397.3 to 456.8)     | 273.2 (250.1 to 295.8)     | 133.0 (115.6 to 153.2)        | 6.8 (3.2 to 12.2)               | 14.4 (14.4 to 14.4)               | 1034.3 (961.3 to 1105.3)  | 661.0 (605.2 to 715.7)     | 321.9 (279.6 to 370.7)        | 16.4 (7.8 to 29.6)              | 34.9 (34.9 to 34.9)               |
| Bosnia and Herzegovina | 2011 | 435.0 (404.1 to 464.4)     | 288.1 (264.9 to 311.6)     | 130.5 (113.2 to 150.8)        | 7.2 (3.4 to 13.1)               | 9.2 (9.2 to 9.2)                  | 1052.6 (977.9 to 1123.9)  | 697.2 (641.0 to 754.1)     | 315.8 (273.8 to 364.8)        | 17.4 (8.3 to 31.7)              | 22.1 (22.1 to 22.1)               |
| Bosnia and Herzegovina | 2012 | 445.6 (416.2 to 476.3)     | 299.7 (277.2 to 323.4)     | 130.3 (112.5 to 149.5)        | 7.6 (3.6 to 13.9)               | 8.1 (8.1 to 8.1)                  | 1078.3 (1007.2 to 1152.6) | 725.1 (670.7 to 782.5)     | 315.3 (272.1 to 361.7)        | 18.4 (8.7 to 33.7)              | 19.5 (19.5 to 19.5)               |
| Bosnia and Herzegovina | 2013 | 462.5 (430.7 to 494.7)     | 315.3 (292.7 to 340.0)     | 132.7 (113.2 to 153.2)        | 8.1 (3.8 to 15.4)               | 6.3 (6.3 to 6.3)                  | 1119.1 (1042.2 to 1197.2) | 763.0 (708.2 to 822.7)     | 321.1 (274.0 to 370.6)        | 19.7 (9.3 to 37.3)              | 15.3 (15.3 to 15.3)               |
| Bosnia and Herzegovina | 2014 | 478.4 (445.1 to 513.7)     | 326.7 (302.8 to 354.4)     | 135.1 (114.8 to 156.3)        | 8.6 (4.1 to 16.3)               | 8.0 (8.0 to 8.0)                  | 1157.5 (1077.1 to 1243.0) | 790.5 (732.7 to 857.5)     | 326.9 (277.8 to 378.2)        | 20.7 (10.0 to 39.5)             | 19.4 (19.4 to 19.4)               |
| Bosnia and Herzegovina | 2015 | 491.9 (455.1 to 531.6)     | 341.6 (312.7 to 372.8)     | 139.0 (117.2 to 163.1)        | 9.1 (4.4 to 17.3)               | 2.2 (2.2 to 2.2)                  | 1190.2 (1101.3 to 1286.3) | 826.5 (756.7 to 902.0)     | 336.3 (283.7 to 394.7)        | 22.1 (10.6 to 41.8)             | 5.3 (5.3 to 5.3)                  |
| Bosnia and Herzegovina | 2016 | 517.1 (472.8 to 568.7)     | 354.4 (318.6 to 394.7)     | 142.8 (117.0 to 170.4)        | 9.7 (4.6 to 18.3)               | 10.2 (10.2 to 10.2)               | 1251.3 (1144.0 to 1376.1) | 857.6 (771.0 to 955.1)     | 345.6 (283.2 to 412.3)        | 23.4 (11.0 to 44.3)             | 24.7 (24.7 to 24.7)               |
| Bosnia and Herzegovina | 2017 | 523.6 (477.1 to 573.5)     | 359.8 (323.3 to 401.1)     | 146.4 (119.8 to 175.6)        | 9.9 (4.7 to 18.9)               | 7.6 (7.6 to 7.6)                  | 1267.1 (1154.6 to 1387.8) | 870.5 (782.2 to 970.6)     | 354.2 (290.0 to 425.0)        | 24.0 (11.3 to 45.7)             | 18.3 (18.3 to 18.3)               |
| Bosnia and Herzegovina | 2018 | 534.9 (488.9 to 587.1)     | 368.4 (331.2 to 410.8)     | 149.4 (122.5 to 179.3)        | 10.2 (4.8 to 19.4)              | 6.9 (6.8 to 6.9)                  | 1294.4 (1183.0 to 1420.7) | 891.4 (801.4 to 994.2)     | 361.6 (296.4 to 433.9)        | 24.7 (11.7 to 47.0)             | 16.6 (16.4 to 16.8)               |
| Bosnia and Herzegovina | 2019 | 546.2 (499.0 to 597.3)     | 376.4 (338.4 to 419.5)     | 152.3 (124.8 to 182.7)        | 10.5 (4.9 to 19.9)              | 7.0 (6.5 to 7.4)                  | 1321.6 (1207.4 to 1445.2) | 910.7 (818.9 to 1015.2)    | 368.6 (302.0 to 442.1)        | 25.4 (12.0 to 48.2)             | 16.9 (15.7 to 17.9)               |
| Bosnia and Herzegovina | 2020 | 557.6 (509.4 to 614.0)     | 384.5 (345.5 to 429.4)     | 155.3 (127.2 to 186.0)        | 10.8 (5.1 to 20.3)              | 7.1 (6.5 to 7.7)                  | 1349.4 (1232.6 to 1485.8) | 930.3 (836.1 to 1039.1)    | 375.8 (307.9 to 450.2)        | 26.0 (12.3 to 49.2)             | 17.3 (15.7 to 18.7)               |
| Bosnia and Herzegovina | 2021 | 568.2 (519.4 to 621.5)     | 391.9 (352.0 to 438.0)     | 158.0 (129.5 to 189.1)        | 11.0 (5.2 to 20.8)              | 7.3 (6.6 to 8.1)                  | 1374.9 (1256.9 to 1504.0) | 948.2 (851.8 to 1060.0)    | 382.3 (313.4 to 457.5)        | 26.6 (12.5 to 50.2)             | 17.7 (16.0 to 19.6)               |
| Bosnia and Herzegovina | 2022 | 581.1 (531.6 to 640.6)     | 401.6 (361.6 to 448.8)     | 160.6 (131.7 to 192.4)        | 11.3 (5.3 to 21.3)              | 7.6 (6.7 to 8.5)                  | 1406.1 (1286.4 to 1550.2) | 971.7 (874.9 to 1086.0)    | 388.7 (318.8 to 465.6)        | 27.3 (12.8 to 51.6)             | 18.3 (16.3 to 20.5)               |



| Country                | Year | 2018 US Dollars per capita |                            |                               |                                 |                                   | 2018 PPP per capita       |                            |                               |                                 |                                   |
|------------------------|------|----------------------------|----------------------------|-------------------------------|---------------------------------|-----------------------------------|---------------------------|----------------------------|-------------------------------|---------------------------------|-----------------------------------|
|                        |      | Health spending            | Government health spending | Out-of-pocket health spending | Prepaid private health spending | Development assistance for health | Health spending           | Government health spending | Out-of-pocket health spending | Prepaid private health spending | Development assistance for health |
| Bosnia and Herzegovina | 2023 | 595.0 (543.2 to 652.5)     | 412.3 (370.5 to 460.4)     | 163.3 (133.9 to 195.7)        | 11.6 (5.4 to 21.8)              | 7.8 (6.8 to 8.9)                  | 1439.7 (1314.3 to 1578.9) | 997.6 (896.5 to 1114.1)    | 395.2 (323.9 to 473.6)        | 28.0 (13.1 to 52.7)             | 18.9 (16.4 to 21.4)               |
| Bosnia and Herzegovina | 2024 | 608.9 (557.9 to 671.4)     | 423.1 (379.8 to 472.4)     | 165.9 (135.9 to 198.9)        | 11.9 (5.6 to 22.3)              | 8.1 (7.0 to 9.3)                  | 1473.5 (1350.0 to 1624.8) | 1023.7 (919.0 to 1143.0)   | 401.5 (328.9 to 481.4)        | 28.7 (13.5 to 54.0)             | 19.6 (17.0 to 22.5)               |
| Bosnia and Herzegovina | 2025 | 623.4 (569.2 to 684.8)     | 434.3 (389.5 to 484.5)     | 168.6 (138.1 to 202.2)        | 12.2 (5.7 to 22.9)              | 8.4 (7.2 to 9.9)                  | 1508.5 (1377.3 to 1657.0) | 1050.8 (942.6 to 1172.4)   | 407.9 (334.3 to 489.4)        | 29.4 (13.8 to 55.5)             | 20.3 (17.3 to 23.9)               |
| Bosnia and Herzegovina | 2026 | 638.0 (584.2 to 703.1)     | 445.8 (399.1 to 497.6)     | 171.1 (140.4 to 205.1)        | 12.5 (5.8 to 23.5)              | 8.7 (7.3 to 10.2)                 | 1543.9 (1413.7 to 1701.4) | 1078.8 (965.8 to 1204.1)   | 414.0 (339.6 to 496.3)        | 30.2 (14.1 to 56.9)             | 21.0 (17.7 to 24.8)               |
| Bosnia and Herzegovina | 2027 | 652.2 (592.8 to 716.7)     | 456.8 (408.9 to 509.5)     | 173.7 (142.5 to 208.1)        | 12.8 (6.0 to 24.1)              | 9.0 (7.5 to 10.7)                 | 1578.1 (1434.5 to 1734.3) | 1105.3 (989.5 to 1232.9)   | 420.2 (344.9 to 503.5)        | 30.9 (14.4 to 58.4)             | 21.7 (18.2 to 25.9)               |
| Bosnia and Herzegovina | 2028 | 666.6 (607.7 to 735.7)     | 468.0 (419.0 to 522.5)     | 176.3 (144.7 to 211.1)        | 13.1 (6.1 to 24.8)              | 9.3 (7.8 to 11.3)                 | 1613.0 (1470.6 to 1780.2) | 1132.3 (1013.8 to 1264.3)  | 426.5 (350.1 to 510.8)        | 31.6 (14.8 to 59.9)             | 22.5 (19.0 to 27.3)               |
| Bosnia and Herzegovina | 2029 | 681.4 (620.8 to 752.2)     | 479.3 (428.9 to 536.5)     | 179.1 (147.0 to 214.5)        | 13.4 (6.2 to 25.4)              | 9.7 (8.0 to 11.9)                 | 1648.8 (1502.1 to 1820.1) | 1159.8 (1037.9 to 1298.1)  | 433.3 (355.8 to 519.0)        | 32.4 (15.1 to 61.5)             | 23.4 (19.2 to 28.7)               |
| Bosnia and Herzegovina | 2030 | 695.6 (631.4 to 766.0)     | 489.8 (436.7 to 547.6)     | 182.0 (149.3 to 218.2)        | 13.7 (6.4 to 26.1)              | 10.0 (8.2 to 12.3)                | 1683.1 (1528.0 to 1853.5) | 1185.2 (1056.6 to 1325.1)  | 440.5 (361.4 to 527.9)        | 33.2 (15.5 to 63.1)             | 24.2 (19.9 to 29.7)               |
| Bosnia and Herzegovina | 2031 | 710.1 (645.4 to 783.4)     | 500.5 (445.6 to 559.5)     | 185.2 (151.9 to 221.8)        | 14.0 (6.6 to 26.8)              | 10.4 (8.4 to 13.1)                | 1718.2 (1561.7 to 1895.7) | 1211.0 (1078.2 to 1353.9)  | 448.1 (367.5 to 536.8)        | 34.0 (15.9 to 64.8)             | 25.1 (20.3 to 31.6)               |
| Bosnia and Herzegovina | 2032 | 725.0 (660.0 to 801.7)     | 511.3 (455.1 to 574.3)     | 188.6 (154.7 to 225.9)        | 14.4 (6.7 to 27.4)              | 10.7 (8.6 to 13.5)                | 1754.4 (1597.0 to 1939.9) | 1237.3 (1101.2 to 1389.6)  | 456.3 (374.3 to 546.6)        | 34.8 (16.3 to 66.3)             | 26.0 (20.9 to 32.7)               |
| Bosnia and Herzegovina | 2033 | 740.0 (670.5 to 821.1)     | 522.0 (465.1 to 585.5)     | 192.1 (157.4 to 230.0)        | 14.8 (6.9 to 28.1)              | 11.1 (8.9 to 14.3)                | 1790.6 (1622.4 to 1986.9) | 1263.2 (1125.4 to 1416.8)  | 464.8 (380.9 to 556.7)        | 35.7 (16.7 to 67.9)             | 26.9 (21.4 to 34.6)               |
| Bosnia and Herzegovina | 2034 | 755.2 (684.5 to 835.3)     | 532.9 (474.0 to 599.8)     | 195.6 (160.0 to 234.4)        | 15.1 (7.1 to 28.7)              | 11.6 (9.1 to 15.0)                | 1827.4 (1656.3 to 2021.3) | 1289.4 (1147.1 to 1451.4)  | 473.4 (387.2 to 567.1)        | 36.6 (17.1 to 69.6)             | 28.0 (22.0 to 36.2)               |
| Bosnia and Herzegovina | 2035 | 770.8 (697.5 to 854.6)     | 544.1 (483.8 to 611.9)     | 199.2 (163.0 to 238.7)        | 15.5 (7.3 to 29.4)              | 12.0 (9.3 to 15.5)                | 1865.2 (1687.8 to 2067.9) | 1316.6 (1170.8 to 1480.8)  | 482.1 (394.5 to 577.6)        | 37.5 (17.6 to 71.2)             | 29.0 (22.5 to 37.6)               |
| Bosnia and Herzegovina | 2036 | 786.7 (709.9 to 868.8)     | 555.6 (492.5 to 627.1)     | 202.8 (165.9 to 243.0)        | 15.9 (7.4 to 30.1)              | 12.5 (9.7 to 16.6)                | 1903.7 (1717.9 to 2102.2) | 1344.4 (1191.7 to 1517.5)  | 490.7 (401.5 to 588.0)        | 38.5 (18.0 to 72.9)             | 30.1 (23.4 to 40.2)               |
| Bosnia and Herzegovina | 2037 | 803.4 (726.5 to 887.6)     | 567.7 (501.5 to 641.5)     | 206.5 (169.0 to 247.6)        | 16.3 (7.6 to 30.9)              | 12.9 (10.0 to 17.3)               | 1944.0 (1757.9 to 2147.8) | 1373.6 (1213.4 to 1552.4)  | 499.7 (409.0 to 599.1)        | 39.5 (18.4 to 74.7)             | 31.2 (24.2 to 41.9)               |
| Bosnia and Herzegovina | 2038 | 820.0 (737.8 to 906.3)     | 579.7 (513.6 to 656.8)     | 210.2 (172.1 to 252.2)        | 16.7 (7.8 to 31.7)              | 13.4 (10.2 to 18.6)               | 1984.2 (1785.3 to 2193.0) | 1402.8 (1242.8 to 1589.4)  | 508.5 (416.4 to 610.4)        | 40.4 (18.8 to 76.6)             | 32.4 (24.6 to 45.0)               |
| Bosnia and Herzegovina | 2039 | 836.9 (754.6 to 930.2)     | 592.0 (521.5 to 670.7)     | 213.9 (175.2 to 256.7)        | 17.1 (7.9 to 32.5)              | 13.9 (10.6 to 19.4)               | 2025.1 (1826.0 to 2250.8) | 1432.5 (1261.8 to 1623.0)  | 517.5 (424.1 to 621.3)        | 41.4 (19.2 to 78.6)             | 33.7 (25.7 to 47.0)               |
| Bosnia and Herzegovina | 2040 | 854.6 (769.2 to 944.9)     | 604.9 (535.2 to 684.5)     | 217.8 (178.6 to 261.7)        | 17.6 (8.1 to 33.3)              | 14.4 (11.0 to 20.1)               | 2068.1 (1861.4 to 2286.4) | 1463.6 (1295.1 to 1656.4)  | 527.0 (432.1 to 633.3)        | 42.5 (19.7 to 80.7)             | 35.0 (26.6 to 48.7)               |
| Bosnia and Herzegovina | 2041 | 871.9 (784.8 to 964.2)     | 617.3 (543.3 to 701.5)     | 221.7 (181.9 to 266.7)        | 18.0 (8.3 to 34.2)              | 15.0 (11.2 to 20.9)               | 2109.9 (1898.9 to 2333.2) | 1493.7 (1314.7 to 1697.4)  | 536.4 (440.2 to 645.3)        | 43.5 (20.2 to 82.8)             | 36.3 (27.2 to 50.7)               |
| Bosnia and Herzegovina | 2042 | 890.7 (803.0 to 986.7)     | 630.7 (553.5 to 718.1)     | 225.9 (185.4 to 272.0)        | 18.5 (8.6 to 35.1)              | 15.6 (11.6 to 22.4)               | 2155.3 (1943.1 to 2387.6) | 1526.2 (1339.3 to 1737.7)  | 546.6 (448.5 to 658.3)        | 44.7 (20.7 to 85.0)             | 37.8 (28.2 to 54.2)               |
| Bosnia and Herzegovina | 2043 | 910.2 (815.2 to 1009.8)    | 644.7 (564.2 to 735.5)     | 230.3 (189.3 to 277.6)        | 18.9 (8.8 to 36.1)              | 16.2 (12.0 to 23.5)               | 2202.5 (1972.5 to 2443.4) | 1560.1 (1365.3 to 1779.8)  | 557.4 (458.2 to 671.8)        | 45.8 (21.3 to 87.3)             | 39.3 (29.0 to 56.9)               |

| Country                | Year | 2018 US Dollars per capita |                            |                               |                                 |                                   | 2018 PPP per capita       |                            |                               |                                 |                                   |
|------------------------|------|----------------------------|----------------------------|-------------------------------|---------------------------------|-----------------------------------|---------------------------|----------------------------|-------------------------------|---------------------------------|-----------------------------------|
|                        |      | Health spending            | Government health spending | Out-of-pocket health spending | Prepaid private health spending | Development assistance for health | Health spending           | Government health spending | Out-of-pocket health spending | Prepaid private health spending | Development assistance for health |
| Bosnia and Herzegovina | 2044 | 930.1 (831.3 to 1031.3)    | 658.9 (574.1 to 751.7)     | 234.9 (192.9 to 283.2)        | 19.4 (9.0 to 37.0)              | 16.9 (12.4 to 24.5)               | 2250.7 (2011.7 to 2495.5) | 1594.5 (1389.2 to 1819.0)  | 568.3 (466.8 to 685.2)        | 47.1 (21.9 to 89.6)             | 40.8 (29.9 to 59.3)               |
| Bosnia and Herzegovina | 2045 | 950.0 (850.4 to 1057.3)    | 673.2 (584.9 to 770.3)     | 239.4 (196.3 to 288.7)        | 19.9 (9.3 to 38.0)              | 17.6 (12.6 to 26.6)               | 2298.9 (2057.7 to 2558.6) | 1628.9 (1415.4 to 1863.9)  | 579.2 (475.1 to 698.6)        | 48.3 (22.5 to 91.9)             | 42.5 (30.6 to 64.5)               |
| Bosnia and Herzegovina | 2046 | 970.8 (867.5 to 1081.9)    | 688.1 (598.3 to 787.0)     | 243.9 (200.0 to 294.3)        | 20.5 (9.6 to 38.9)              | 18.3 (13.1 to 28.2)               | 2349.1 (2099.3 to 2618.0) | 1665.1 (1447.9 to 1904.5)  | 590.3 (484.0 to 712.2)        | 49.5 (23.1 to 94.2)             | 44.2 (31.7 to 68.1)               |
| Bosnia and Herzegovina | 2047 | 991.4 (885.9 to 1104.9)    | 703.0 (608.1 to 805.3)     | 248.4 (203.7 to 300.4)        | 21.0 (9.8 to 39.8)              | 19.0 (13.6 to 30.0)               | 2399.0 (2143.7 to 2673.6) | 1701.1 (1471.5 to 1948.7)  | 601.1 (492.9 to 726.9)        | 50.8 (23.7 to 96.4)             | 46.0 (33.0 to 72.6)               |
| Bosnia and Herzegovina | 2048 | 1012.0 (900.5 to 1132.7)   | 717.9 (618.5 to 824.2)     | 252.8 (207.4 to 306.4)        | 21.5 (10.1 to 40.9)             | 19.8 (14.1 to 32.1)               | 2448.9 (2178.9 to 2740.8) | 1737.1 (1496.6 to 1994.5)  | 611.8 (501.9 to 741.5)        | 52.1 (24.4 to 99.0)             | 48.0 (34.2 to 77.7)               |
| Bosnia and Herzegovina | 2049 | 1032.6 (917.5 to 1156.0)   | 732.8 (631.4 to 845.4)     | 257.3 (210.8 to 312.1)        | 22.0 (10.3 to 41.9)             | 20.5 (14.5 to 33.6)               | 2498.7 (2220.2 to 2797.2) | 1773.2 (1527.7 to 2045.7)  | 622.5 (510.0 to 755.2)        | 53.3 (25.0 to 101.4)            | 49.7 (35.0 to 81.3)               |
| Bosnia and Herzegovina | 2050 | 1053.6 (937.8 to 1181.5)   | 748.1 (643.8 to 866.3)     | 261.6 (214.5 to 317.7)        | 22.6 (10.6 to 42.7)             | 21.4 (14.8 to 35.2)               | 2549.6 (2269.4 to 2858.9) | 1810.2 (1557.9 to 2096.2)  | 633.0 (519.0 to 768.7)        | 54.6 (25.6 to 103.4)            | 51.8 (35.7 to 85.2)               |
| Botswana               | 1995 | 292.8 (261.0 to 327.4)     | 198.7 (172.4 to 227.6)     | 29.1 (20.6 to 40.1)           | 51.1 (34.9 to 71.4)             | 13.8 (13.8 to 13.8)               | 685.1 (610.8 to 766.1)    | 465.0 (403.4 to 532.5)     | 68.2 (48.2 to 93.8)           | 119.7 (81.7 to 167.1)           | 32.2 (32.2 to 32.2)               |
| Botswana               | 1996 | 288.5 (257.8 to 320.9)     | 206.1 (182.3 to 232.2)     | 29.2 (21.0 to 40.0)           | 52.7 (37.9 to 70.1)             | 0.6 (0.6 to 0.6)                  | 675.0 (603.4 to 750.9)    | 482.2 (426.7 to 543.4)     | 68.3 (49.1 to 93.5)           | 123.3 (88.6 to 164.1)           | 1.3 (1.3 to 1.3)                  |
| Botswana               | 1997 | 295.4 (267.7 to 324.9)     | 211.8 (188.0 to 236.6)     | 29.5 (21.0 to 40.1)           | 53.0 (39.3 to 69.2)             | 1.1 (1.1 to 1.1)                  | 691.3 (626.5 to 760.3)    | 495.7 (439.8 to 553.6)     | 69.1 (49.1 to 93.9)           | 123.9 (92.0 to 162.0)           | 2.6 (2.6 to 2.6)                  |
| Botswana               | 1998 | 285.2 (259.7 to 313.7)     | 205.9 (184.3 to 229.4)     | 28.8 (20.5 to 38.6)           | 49.6 (37.8 to 65.3)             | 0.9 (0.9 to 0.9)                  | 667.4 (607.7 to 734.0)    | 481.8 (431.2 to 536.9)     | 67.4 (47.9 to 90.4)           | 116.2 (88.5 to 152.7)           | 2.0 (2.0 to 2.0)                  |
| Botswana               | 1999 | 297.7 (270.7 to 326.3)     | 216.6 (195.1 to 240.1)     | 29.8 (21.3 to 40.4)           | 50.8 (38.8 to 66.1)             | 0.5 (0.5 to 0.5)                  | 696.7 (633.5 to 763.5)    | 506.8 (456.6 to 561.8)     | 69.8 (49.7 to 94.6)           | 119.0 (90.9 to 154.6)           | 1.1 (1.1 to 1.1)                  |
| Botswana               | 2000 | 300.1 (273.2 to 329.3)     | 217.5 (195.2 to 240.7)     | 30.6 (22.0 to 41.7)           | 50.9 (39.6 to 66.8)             | 1.1 (1.1 to 1.1)                  | 702.2 (639.3 to 770.5)    | 508.9 (456.9 to 563.2)     | 71.7 (51.4 to 97.5)           | 119.1 (92.7 to 156.2)           | 2.5 (2.5 to 2.5)                  |
| Botswana               | 2001 | 293.9 (267.5 to 323.7)     | 212.0 (190.1 to 235.9)     | 29.5 (21.2 to 39.2)           | 51.2 (39.8 to 67.4)             | 1.1 (1.1 to 1.1)                  | 687.7 (626.0 to 757.5)    | 496.2 (444.9 to 552.0)     | 69.0 (49.7 to 91.8)           | 119.8 (93.1 to 157.6)           | 2.7 (2.7 to 2.7)                  |
| Botswana               | 2002 | 285.9 (261.2 to 315.0)     | 198.4 (178.4 to 220.6)     | 27.5 (20.0 to 37.3)           | 52.1 (40.2 to 68.0)             | 7.8 (7.8 to 7.8)                  | 669.1 (611.3 to 737.0)    | 464.3 (417.6 to 516.1)     | 64.4 (46.7 to 87.2)           | 122.0 (94.0 to 159.2)           | 18.3 (18.3 to 18.3)               |
| Botswana               | 2003 | 305.7 (279.9 to 334.3)     | 207.6 (187.2 to 229.8)     | 25.6 (18.5 to 34.7)           | 56.0 (43.0 to 72.6)             | 16.5 (16.5 to 16.5)               | 715.3 (654.9 to 782.3)    | 485.7 (438.1 to 537.8)     | 59.8 (43.4 to 81.2)           | 131.1 (100.7 to 169.9)          | 38.7 (38.7 to 38.7)               |
| Botswana               | 2004 | 316.2 (290.0 to 343.8)     | 213.9 (192.4 to 236.7)     | 22.9 (16.6 to 31.5)           | 56.9 (43.2 to 73.4)             | 22.5 (22.5 to 22.5)               | 739.8 (678.7 to 804.5)    | 500.6 (450.2 to 553.8)     | 53.5 (38.8 to 73.6)           | 133.2 (101.1 to 171.8)          | 52.6 (52.6 to 52.6)               |
| Botswana               | 2005 | 306.5 (280.9 to 333.6)     | 214.5 (193.0 to 237.8)     | 20.2 (14.7 to 27.6)           | 57.4 (44.0 to 73.7)             | 14.4 (14.4 to 14.4)               | 717.2 (657.3 to 780.6)    | 501.9 (451.5 to 556.6)     | 47.3 (34.3 to 64.5)           | 134.3 (103.0 to 172.5)          | 33.7 (33.7 to 33.7)               |
| Botswana               | 2006 | 323.2 (297.0 to 351.2)     | 219.8 (197.3 to 244.1)     | 18.4 (13.4 to 25.0)           | 58.0 (45.5 to 74.1)             | 27.0 (27.0 to 27.0)               | 756.3 (695.1 to 821.9)    | 514.4 (461.7 to 571.3)     | 43.1 (31.3 to 58.5)           | 135.7 (106.5 to 173.5)          | 63.2 (63.2 to 63.2)               |
| Botswana               | 2007 | 339.3 (312.7 to 368.4)     | 231.5 (207.7 to 258.0)     | 17.6 (12.9 to 23.6)           | 60.6 (47.3 to 77.1)             | 29.7 (29.7 to 29.7)               | 794.1 (731.8 to 862.2)    | 541.7 (486.1 to 603.6)     | 41.2 (30.2 to 55.2)           | 141.8 (110.7 to 180.4)          | 69.4 (69.4 to 69.4)               |
| Botswana               | 2008 | 476.9 (445.6 to 509.0)     | 248.7 (223.4 to 276.8)     | 18.2 (13.3 to 24.4)           | 68.2 (52.8 to 86.2)             | 141.7 (141.7 to 141.7)            | 1116.1 (1042.9 to 1191.0) | 582.1 (522.9 to 647.8)     | 42.6 (31.0 to 57.0)           | 159.7 (123.4 to 201.6)          | 331.7 (331.7 to 331.7)            |

| Country  | Year | 2018 US Dollars per capita |                            |                               |                                 |                                   | 2018 PPP per capita       |                            |                               |                                 |                                   |
|----------|------|----------------------------|----------------------------|-------------------------------|---------------------------------|-----------------------------------|---------------------------|----------------------------|-------------------------------|---------------------------------|-----------------------------------|
|          |      | Health spending            | Government health spending | Out-of-pocket health spending | Prepaid private health spending | Development assistance for health | Health spending           | Government health spending | Out-of-pocket health spending | Prepaid private health spending | Development assistance for health |
| Botswana | 2009 | 464.0 (433.5 to 495.6)     | 237.4 (214.2 to 264.5)     | 18.6 (13.5 to 24.7)           | 77.7 (60.6 to 96.8)             | 130.3 (130.3 to 130.3)            | 1085.9 (1014.3 to 1159.9) | 555.6 (501.2 to 618.9)     | 43.5 (31.7 to 57.8)           | 181.9 (141.8 to 226.5)          | 304.9 (304.9 to 304.9)            |
| Botswana | 2010 | 401.0 (367.9 to 434.0)     | 240.8 (217.6 to 268.5)     | 19.5 (14.2 to 25.7)           | 90.9 (71.4 to 113.5)            | 49.8 (49.8 to 49.8)               | 938.3 (860.9 to 1015.5)   | 563.5 (509.3 to 628.2)     | 45.7 (33.1 to 60.1)           | 212.6 (167.0 to 265.5)          | 116.5 (116.5 to 116.5)            |
| Botswana | 2011 | 420.2 (386.7 to 456.9)     | 246.1 (221.7 to 273.3)     | 20.2 (14.5 to 26.6)           | 101.7 (81.1 to 125.8)           | 52.2 (52.2 to 52.2)               | 983.3 (905.0 to 1069.3)   | 575.8 (518.8 to 639.6)     | 47.4 (34.0 to 62.3)           | 238.1 (189.7 to 294.3)          | 122.1 (122.1 to 122.1)            |
| Botswana | 2012 | 406.7 (372.9 to 443.4)     | 234.4 (211.1 to 259.7)     | 20.9 (15.2 to 28.2)           | 108.4 (86.7 to 132.5)           | 42.9 (42.9 to 42.9)               | 951.8 (872.6 to 1037.6)   | 548.6 (493.9 to 607.7)     | 49.0 (35.6 to 65.9)           | 253.7 (203.0 to 310.2)          | 100.5 (100.5 to 100.5)            |
| Botswana | 2013 | 415.1 (381.0 to 452.1)     | 228.8 (205.4 to 254.5)     | 21.6 (15.7 to 29.0)           | 118.5 (97.4 to 145.7)           | 46.3 (46.3 to 46.3)               | 971.4 (891.7 to 1058.1)   | 535.5 (480.7 to 595.5)     | 50.4 (36.8 to 67.8)           | 277.2 (227.8 to 340.9)          | 108.3 (108.3 to 108.3)            |
| Botswana | 2014 | 415.6 (380.4 to 454.5)     | 232.1 (206.8 to 259.7)     | 22.2 (16.1 to 30.3)           | 126.1 (102.7 to 153.6)          | 35.2 (35.2 to 35.2)               | 972.6 (890.2 to 1063.5)   | 543.2 (483.8 to 607.7)     | 51.9 (37.6 to 70.9)           | 295.1 (240.2 to 359.4)          | 82.4 (82.4 to 82.4)               |
| Botswana | 2015 | 411.3 (372.8 to 451.1)     | 229.7 (204.1 to 258.7)     | 22.4 (16.2 to 30.6)           | 131.9 (105.7 to 163.9)          | 27.2 (27.2 to 27.2)               | 962.4 (872.4 to 1055.7)   | 537.5 (477.6 to 605.3)     | 52.5 (38.0 to 71.6)           | 308.8 (247.4 to 383.5)          | 63.7 (63.7 to 63.7)               |
| Botswana | 2016 | 427.3 (380.5 to 478.0)     | 232.8 (203.6 to 266.3)     | 22.5 (16.3 to 31.0)           | 136.2 (106.1 to 175.8)          | 35.9 (35.9 to 35.9)               | 1000.0 (890.3 to 1118.6)  | 544.7 (476.4 to 623.2)     | 52.6 (38.1 to 72.5)           | 318.7 (248.3 to 411.4)          | 84.0 (84.0 to 84.0)               |
| Botswana | 2017 | 423.0 (375.5 to 474.0)     | 230.9 (201.3 to 264.2)     | 22.6 (16.3 to 31.1)           | 137.2 (107.1 to 176.8)          | 32.3 (32.3 to 32.3)               | 990.0 (878.8 to 1109.2)   | 540.3 (471.1 to 618.3)     | 52.9 (38.1 to 72.7)           | 321.0 (250.5 to 413.8)          | 75.7 (75.7 to 75.7)               |
| Botswana | 2018 | 429.3 (380.2 to 481.6)     | 236.8 (207.5 to 270.1)     | 22.9 (16.6 to 31.3)           | 140.8 (109.7 to 181.2)          | 28.9 (28.6 to 29.1)               | 1004.6 (889.8 to 1127.1)  | 554.1 (485.6 to 632.1)     | 53.6 (38.8 to 73.3)           | 329.4 (256.7 to 423.9)          | 67.6 (66.9 to 68.1)               |
| Botswana | 2019 | 439.4 (388.5 to 493.6)     | 243.0 (212.2 to 277.6)     | 23.2 (16.7 to 31.4)           | 144.4 (112.3 to 186.0)          | 28.8 (26.8 to 30.8)               | 1028.1 (909.0 to 1155.0)  | 568.5 (496.6 to 649.5)     | 54.2 (39.1 to 73.6)           | 337.9 (262.9 to 435.3)          | 67.5 (62.7 to 72.0)               |
| Botswana | 2020 | 449.2 (398.3 to 504.3)     | 248.7 (216.6 to 284.2)     | 23.6 (16.9 to 32.0)           | 147.9 (114.8 to 190.4)          | 29.0 (26.4 to 31.5)               | 1051.3 (932.2 to 1180.0)  | 582.1 (506.9 to 665.1)     | 55.1 (39.6 to 74.9)           | 346.2 (268.6 to 445.6)          | 67.9 (61.7 to 73.7)               |
| Botswana | 2021 | 459.2 (405.0 to 514.9)     | 254.5 (221.5 to 291.1)     | 23.9 (17.2 to 32.4)           | 151.5 (117.8 to 194.8)          | 29.3 (26.2 to 32.6)               | 1074.5 (947.7 to 1205.0)  | 595.5 (518.4 to 681.1)     | 56.0 (40.3 to 75.9)           | 354.4 (275.6 to 455.9)          | 68.6 (61.4 to 76.4)               |
| Botswana | 2022 | 468.5 (414.2 to 526.1)     | 259.7 (225.5 to 297.4)     | 24.2 (17.5 to 33.0)           | 154.8 (120.4 to 199.1)          | 29.8 (26.3 to 33.5)               | 1096.4 (969.4 to 1231.1)  | 607.7 (527.7 to 695.9)     | 56.7 (40.9 to 77.2)           | 362.3 (281.6 to 465.9)          | 69.6 (61.7 to 78.5)               |
| Botswana | 2023 | 477.9 (420.9 to 535.1)     | 265.0 (229.3 to 303.8)     | 24.6 (17.7 to 33.3)           | 158.1 (122.6 to 203.4)          | 30.2 (26.1 to 34.9)               | 1118.2 (985.0 to 1252.2)  | 620.1 (536.7 to 710.9)     | 57.5 (41.3 to 78.0)           | 370.0 (286.9 to 476.0)          | 70.7 (61.0 to 81.6)               |
| Botswana | 2024 | 487.6 (429.6 to 547.7)     | 270.4 (233.6 to 309.8)     | 24.9 (17.9 to 33.7)           | 161.5 (124.8 to 208.3)          | 30.8 (26.5 to 35.7)               | 1141.0 (1005.4 to 1281.8) | 632.8 (546.6 to 724.9)     | 58.2 (41.8 to 78.9)           | 377.8 (292.0 to 487.5)          | 72.1 (62.0 to 83.6)               |
| Botswana | 2025 | 497.7 (437.3 to 560.3)     | 276.0 (238.2 to 317.4)     | 25.2 (18.1 to 34.3)           | 165.0 (127.2 to 212.2)          | 31.4 (26.7 to 36.8)               | 1164.6 (1023.3 to 1311.3) | 646.0 (557.4 to 742.7)     | 59.1 (42.4 to 80.3)           | 386.1 (297.6 to 496.5)          | 73.5 (62.5 to 86.2)               |
| Botswana | 2026 | 507.5 (446.1 to 574.1)     | 281.3 (242.6 to 324.2)     | 25.6 (18.4 to 34.9)           | 168.6 (130.0 to 216.6)          | 32.0 (26.9 to 37.6)               | 1187.6 (1044.0 to 1343.4) | 658.4 (567.7 to 758.5)     | 59.9 (43.0 to 81.7)           | 394.4 (304.2 to 506.8)          | 74.8 (62.9 to 88.0)               |
| Botswana | 2027 | 517.6 (454.9 to 585.6)     | 286.8 (246.5 to 331.3)     | 26.0 (18.6 to 35.3)           | 172.3 (132.9 to 221.3)          | 32.6 (27.2 to 38.8)               | 1211.3 (1064.6 to 1370.4) | 671.1 (576.9 to 775.2)     | 60.8 (43.4 to 82.6)           | 403.1 (311.0 to 517.9)          | 76.3 (63.7 to 90.8)               |
| Botswana | 2028 | 528.4 (464.1 to 598.4)     | 292.4 (250.6 to 339.0)     | 26.4 (18.9 to 35.8)           | 176.3 (136.1 to 226.6)          | 33.3 (27.8 to 40.2)               | 1236.5 (1086.1 to 1400.3) | 684.3 (586.4 to 793.2)     | 61.8 (44.2 to 83.9)           | 412.5 (318.4 to 530.3)          | 77.9 (65.0 to 94.2)               |
| Botswana | 2029 | 539.5 (474.2 to 611.2)     | 298.3 (255.4 to 346.1)     | 26.8 (19.3 to 36.6)           | 180.4 (139.3 to 232.6)          | 34.0 (28.0 to 41.6)               | 1262.5 (1109.7 to 1430.4) | 698.1 (597.6 to 809.9)     | 62.7 (45.2 to 85.8)           | 422.1 (326.0 to 544.3)          | 79.5 (65.4 to 97.4)               |

| Country  | Year | 2018 US Dollars per capita |                            |                               |                                 |                                   | 2018 PPP per capita       |                            |                               |                                 |                                   |
|----------|------|----------------------------|----------------------------|-------------------------------|---------------------------------|-----------------------------------|---------------------------|----------------------------|-------------------------------|---------------------------------|-----------------------------------|
|          |      | Health spending            | Government health spending | Out-of-pocket health spending | Prepaid private health spending | Development assistance for health | Health spending           | Government health spending | Out-of-pocket health spending | Prepaid private health spending | Development assistance for health |
| Botswana | 2030 | 550.7 (482.9 to 628.1)     | 304.2 (259.2 to 353.1)     | 27.2 (19.6 to 37.4)           | 184.6 (142.6 to 238.5)          | 34.7 (28.4 to 42.8)               | 1288.8 (1130.1 to 1469.8) | 712.0 (606.4 to 826.3)     | 63.7 (45.9 to 87.5)           | 432.0 (333.8 to 558.1)          | 81.1 (66.5 to 100.1)              |
| Botswana | 2031 | 562.6 (492.5 to 638.8)     | 310.5 (263.2 to 361.6)     | 27.7 (19.9 to 37.9)           | 189.0 (146.0 to 245.0)          | 35.4 (28.4 to 44.5)               | 1316.5 (1152.5 to 1494.8) | 726.7 (615.9 to 846.2)     | 64.8 (46.7 to 88.7)           | 442.3 (341.8 to 573.2)          | 82.8 (66.3 to 104.1)              |
| Botswana | 2032 | 575.0 (501.4 to 653.7)     | 317.1 (268.4 to 368.4)     | 28.2 (20.3 to 38.7)           | 193.6 (149.7 to 251.2)          | 36.1 (28.8 to 45.8)               | 1345.6 (1173.4 to 1529.8) | 742.1 (628.0 to 862.1)     | 65.9 (47.6 to 90.5)           | 453.0 (350.3 to 587.8)          | 84.5 (67.5 to 107.2)              |
| Botswana | 2033 | 588.0 (511.5 to 667.5)     | 324.1 (273.7 to 377.3)     | 28.7 (20.7 to 39.5)           | 198.4 (153.1 to 257.2)          | 36.9 (29.2 to 47.4)               | 1375.9 (1196.9 to 1562.0) | 758.3 (640.5 to 883.0)     | 67.1 (48.4 to 92.5)           | 464.2 (358.3 to 601.8)          | 86.3 (68.3 to 110.8)              |
| Botswana | 2034 | 601.3 (521.0 to 683.8)     | 331.1 (279.0 to 387.6)     | 29.2 (21.1 to 40.2)           | 203.3 (156.6 to 263.3)          | 37.7 (29.6 to 48.8)               | 1407.2 (1219.2 to 1600.1) | 774.7 (653.0 to 907.1)     | 68.3 (49.3 to 94.2)           | 475.8 (366.5 to 616.2)          | 88.3 (69.2 to 114.3)              |
| Botswana | 2035 | 614.8 (532.0 to 702.5)     | 338.2 (283.9 to 397.1)     | 29.7 (21.3 to 41.1)           | 208.3 (160.6 to 270.3)          | 38.5 (29.8 to 50.6)               | 1438.6 (1244.9 to 1644.0) | 791.5 (664.3 to 929.3)     | 69.5 (49.9 to 96.2)           | 487.5 (375.9 to 632.6)          | 90.2 (69.7 to 118.5)              |
| Botswana | 2036 | 628.1 (542.1 to 716.0)     | 345.4 (288.3 to 406.4)     | 30.2 (21.7 to 42.0)           | 213.2 (164.3 to 277.1)          | 39.3 (30.4 to 53.3)               | 1469.8 (1268.5 to 1675.6) | 808.2 (674.7 to 951.1)     | 70.6 (50.7 to 98.2)           | 499.0 (384.5 to 648.3)          | 92.0 (71.2 to 124.8)              |
| Botswana | 2037 | 641.0 (552.5 to 729.7)     | 352.6 (292.9 to 417.3)     | 30.7 (22.0 to 42.8)           | 218.2 (167.9 to 283.3)          | 39.6 (29.1 to 54.6)               | 1500.1 (1292.8 to 1707.5) | 825.2 (685.3 to 976.5)     | 71.8 (51.4 to 100.2)          | 510.5 (392.8 to 663.0)          | 92.6 (68.0 to 127.7)              |
| Botswana | 2038 | 654.4 (560.1 to 750.5)     | 360.2 (297.5 to 427.9)     | 31.2 (22.3 to 43.6)           | 223.2 (171.8 to 290.4)          | 39.7 (0.0 to 57.1)                | 1531.3 (1310.6 to 1756.2) | 842.9 (696.1 to 1001.2)    | 73.0 (52.1 to 102.0)          | 522.4 (402.0 to 679.6)          | 93.0 (0.0 to 133.7)               |
| Botswana | 2039 | 668.3 (569.9 to 765.3)     | 367.9 (301.6 to 438.9)     | 31.7 (22.6 to 44.5)           | 228.3 (175.2 to 297.2)          | 40.4 (0.0 to 58.4)                | 1564.0 (1333.6 to 1790.9) | 860.9 (705.8 to 1027.1)    | 74.2 (52.9 to 104.0)          | 534.3 (409.9 to 695.4)          | 94.6 (0.0 to 136.7)               |
| Botswana | 2040 | 681.8 (580.2 to 783.1)     | 375.9 (305.8 to 453.9)     | 32.2 (22.9 to 45.2)           | 233.4 (178.9 to 304.5)          | 40.4 (0.0 to 59.6)                | 1595.5 (1357.8 to 1832.5) | 879.6 (715.6 to 1062.2)    | 75.4 (53.5 to 105.9)          | 546.1 (418.7 to 712.6)          | 94.5 (0.0 to 139.5)               |
| Botswana | 2041 | 695.3 (587.4 to 798.9)     | 383.8 (310.4 to 466.0)     | 32.7 (23.2 to 45.9)           | 238.4 (182.9 to 311.8)          | 40.4 (0.0 to 61.1)                | 1627.0 (1374.7 to 1869.5) | 898.1 (726.3 to 1090.4)    | 76.5 (54.2 to 107.5)          | 557.8 (428.0 to 729.6)          | 94.6 (0.0 to 143.1)               |
| Botswana | 2042 | 708.9 (593.7 to 825.0)     | 391.9 (315.3 to 480.2)     | 33.2 (23.5 to 46.7)           | 243.5 (186.9 to 318.7)          | 40.3 (0.0 to 64.7)                | 1658.9 (1389.3 to 1930.6) | 917.0 (737.7 to 1123.7)    | 77.7 (54.9 to 109.3)          | 569.8 (437.5 to 745.8)          | 94.4 (0.0 to 151.4)               |
| Botswana | 2043 | 722.1 (600.1 to 842.0)     | 400.0 (319.5 to 496.1)     | 33.7 (23.7 to 47.4)           | 248.5 (190.6 to 325.5)          | 40.0 (0.0 to 66.9)                | 1689.8 (1404.3 to 1970.4) | 935.9 (747.7 to 1160.9)    | 78.8 (55.5 to 111.0)          | 581.5 (446.1 to 761.6)          | 93.6 (0.0 to 156.5)               |
| Botswana | 2044 | 735.3 (610.6 to 862.3)     | 407.9 (323.2 to 510.7)     | 34.1 (24.0 to 48.2)           | 253.4 (194.4 to 332.1)          | 39.8 (0.0 to 68.4)                | 1720.6 (1429.0 to 2017.9) | 954.4 (756.3 to 1195.0)    | 79.9 (56.2 to 112.8)          | 593.0 (455.0 to 777.2)          | 93.2 (0.0 to 160.1)               |
| Botswana | 2045 | 748.6 (615.9 to 881.7)     | 416.1 (327.0 to 526.5)     | 34.6 (24.3 to 48.9)           | 258.3 (198.0 to 338.7)          | 39.6 (0.0 to 72.9)                | 1751.8 (1441.2 to 2063.3) | 973.7 (765.2 to 1232.2)    | 81.0 (57.0 to 114.5)          | 604.5 (463.3 to 792.7)          | 92.6 (0.0 to 170.6)               |
| Botswana | 2046 | 761.8 (622.9 to 903.6)     | 424.3 (330.9 to 543.2)     | 35.1 (24.6 to 49.7)           | 263.1 (201.4 to 345.2)          | 39.3 (0.0 to 75.4)                | 1782.6 (1457.6 to 2114.5) | 992.9 (774.4 to 1271.1)    | 82.1 (57.5 to 116.2)          | 615.7 (471.4 to 807.9)          | 91.9 (0.0 to 176.5)               |
| Botswana | 2047 | 775.3 (634.2 to 922.9)     | 432.7 (334.7 to 560.8)     | 35.5 (24.8 to 50.3)           | 268.0 (205.1 to 351.8)          | 39.0 (0.0 to 78.5)                | 1814.2 (1484.0 to 2159.7) | 1012.6 (783.3 to 1312.2)   | 83.1 (58.1 to 117.6)          | 627.1 (479.9 to 823.3)          | 91.3 (0.0 to 183.6)               |
| Botswana | 2048 | 788.6 (637.8 to 941.6)     | 440.4 (338.0 to 578.1)     | 35.9 (25.0 to 50.9)           | 272.6 (208.0 to 358.2)          | 39.6 (0.0 to 82.7)                | 1845.3 (1492.6 to 2203.5) | 1030.5 (790.9 to 1352.8)   | 84.1 (58.6 to 119.1)          | 638.0 (486.7 to 838.2)          | 92.8 (0.0 to 193.5)               |
| Botswana | 2049 | 801.8 (644.7 to 964.5)     | 448.0 (341.2 to 591.5)     | 36.4 (25.2 to 51.6)           | 277.4 (211.3 to 364.6)          | 40.0 (0.0 to 85.0)                | 1876.2 (1508.7 to 2256.9) | 1048.4 (798.4 to 1384.1)   | 85.1 (59.0 to 120.7)          | 649.1 (494.5 to 853.2)          | 93.6 (0.0 to 199.0)               |
| Botswana | 2050 | 815.1 (655.6 to 990.9)     | 456.1 (344.9 to 608.7)     | 36.8 (25.5 to 52.2)           | 282.4 (215.9 to 371.9)          | 39.8 (0.0 to 89.5)                | 1907.5 (1534.2 to 2318.7) | 1067.4 (807.1 to 1424.5)   | 86.1 (59.7 to 122.3)          | 660.9 (505.2 to 870.2)          | 93.1 (0.0 to 209.5)               |

| Country | Year | 2018 US Dollars per capita |                            |                               |                                 |                                   | 2018 PPP per capita       |                            |                               |                                 |                                   |
|---------|------|----------------------------|----------------------------|-------------------------------|---------------------------------|-----------------------------------|---------------------------|----------------------------|-------------------------------|---------------------------------|-----------------------------------|
|         |      | Health spending            | Government health spending | Out-of-pocket health spending | Prepaid private health spending | Development assistance for health | Health spending           | Government health spending | Out-of-pocket health spending | Prepaid private health spending | Development assistance for health |
| Brazil  | 1995 | 558.3 (509.4 to 610.7)     | 153.8 (130.3 to 177.9)     | 286.1 (251.4 to 323.2)        | 117.3 (94.8 to 144.5)           | 1.1 (1.1 to 1.1)                  | 934.0 (852.1 to 1021.7)   | 257.3 (218.0 to 297.7)     | 478.6 (420.6 to 540.7)        | 196.2 (158.6 to 241.8)          | 1.9 (1.9 to 1.9)                  |
| Brazil  | 1996 | 582.7 (540.8 to 625.1)     | 163.3 (141.0 to 187.4)     | 294.1 (263.4 to 323.4)        | 123.8 (103.5 to 145.1)          | 1.5 (1.5 to 1.5)                  | 974.8 (904.6 to 1045.8)   | 273.2 (235.9 to 313.6)     | 491.9 (440.7 to 541.1)        | 207.1 (173.1 to 242.7)          | 2.5 (2.5 to 2.5)                  |
| Brazil  | 1997 | 595.2 (555.7 to 634.6)     | 170.5 (149.9 to 193.4)     | 294.9 (268.8 to 321.3)        | 128.0 (109.5 to 147.8)          | 1.9 (1.9 to 1.9)                  | 995.7 (929.5 to 1061.6)   | 285.3 (250.7 to 323.5)     | 493.3 (449.7 to 537.5)        | 214.0 (183.1 to 247.2)          | 3.1 (3.1 to 3.1)                  |
| Brazil  | 1998 | 588.3 (550.6 to 626.6)     | 170.4 (151.4 to 191.4)     | 288.2 (263.1 to 314.7)        | 128.2 (110.6 to 148.7)          | 1.4 (1.4 to 1.4)                  | 984.1 (921.1 to 1048.2)   | 285.0 (253.3 to 320.1)     | 482.2 (440.2 to 526.4)        | 214.5 (185.0 to 248.7)          | 2.4 (2.4 to 2.4)                  |
| Brazil  | 1999 | 576.9 (540.3 to 614.0)     | 169.3 (151.0 to 188.7)     | 275.6 (250.1 to 302.3)        | 129.3 (111.1 to 150.2)          | 2.8 (2.8 to 2.8)                  | 965.1 (903.8 to 1027.1)   | 283.2 (252.5 to 315.7)     | 461.0 (418.3 to 505.7)        | 216.3 (185.8 to 251.2)          | 4.6 (4.6 to 4.6)                  |
| Brazil  | 2000 | 552.4 (517.0 to 587.4)     | 166.7 (148.9 to 185.0)     | 253.8 (230.9 to 278.2)        | 130.4 (112.3 to 151.5)          | 1.5 (1.5 to 1.5)                  | 924.0 (864.8 to 982.6)    | 278.8 (249.1 to 309.5)     | 424.6 (386.2 to 465.3)        | 218.1 (187.9 to 253.4)          | 2.5 (2.5 to 2.5)                  |
| Brazil  | 2001 | 555.8 (521.3 to 590.3)     | 178.0 (159.8 to 197.0)     | 244.3 (221.6 to 268.0)        | 131.7 (112.8 to 150.8)          | 1.7 (1.7 to 1.7)                  | 929.7 (872.0 to 987.5)    | 297.8 (267.4 to 329.5)     | 408.7 (370.6 to 448.3)        | 220.3 (188.7 to 252.2)          | 2.9 (2.9 to 2.9)                  |
| Brazil  | 2002 | 608.3 (570.3 to 647.7)     | 220.3 (199.1 to 243.3)     | 243.6 (220.4 to 268.6)        | 143.2 (123.1 to 163.4)          | 1.2 (1.2 to 1.2)                  | 1017.6 (954.0 to 1083.5)  | 368.6 (333.0 to 407.1)     | 407.6 (368.7 to 449.4)        | 239.5 (206.0 to 273.4)          | 2.0 (2.0 to 2.0)                  |
| Brazil  | 2003 | 626.2 (588.7 to 667.5)     | 245.7 (223.3 to 269.9)     | 234.9 (212.0 to 258.5)        | 143.0 (122.7 to 163.6)          | 2.6 (2.6 to 2.6)                  | 1047.5 (984.8 to 1116.6)  | 411.1 (373.6 to 451.4)     | 392.9 (354.6 to 432.5)        | 239.2 (205.3 to 273.6)          | 4.3 (4.3 to 4.3)                  |
| Brazil  | 2004 | 660.8 (623.6 to 701.6)     | 275.7 (251.9 to 299.7)     | 235.8 (213.2 to 261.7)        | 148.6 (127.7 to 171.0)          | 0.8 (0.8 to 0.8)                  | 1105.5 (1043.2 to 1173.6) | 461.1 (421.3 to 501.3)     | 394.4 (356.7 to 437.8)        | 248.6 (213.6 to 286.1)          | 1.4 (1.4 to 1.4)                  |
| Brazil  | 2005 | 683.9 (646.5 to 724.9)     | 293.7 (269.3 to 320.1)     | 236.0 (212.6 to 262.2)        | 153.3 (133.4 to 175.7)          | 0.9 (0.9 to 0.9)                  | 1144.1 (1081.5 to 1212.7) | 491.3 (450.5 to 535.5)     | 394.8 (355.7 to 438.5)        | 256.4 (223.1 to 293.9)          | 1.5 (1.5 to 1.5)                  |
| Brazil  | 2006 | 710.7 (671.0 to 752.8)     | 309.2 (283.6 to 338.0)     | 239.0 (215.1 to 263.9)        | 161.7 (139.9 to 183.7)          | 0.7 (0.7 to 0.7)                  | 1188.9 (1122.4 to 1259.3) | 517.3 (474.4 to 565.4)     | 399.8 (359.8 to 441.5)        | 270.5 (234.0 to 307.3)          | 1.2 (1.2 to 1.2)                  |
| Brazil  | 2007 | 745.5 (706.5 to 787.8)     | 323.9 (297.5 to 354.3)     | 246.7 (223.3 to 270.0)        | 174.4 (151.7 to 197.0)          | 0.6 (0.6 to 0.6)                  | 1247.2 (1181.8 to 1317.8) | 541.8 (497.7 to 592.6)     | 412.7 (373.5 to 451.7)        | 291.7 (253.7 to 329.6)          | 1.0 (1.0 to 1.0)                  |
| Brazil  | 2008 | 783.2 (742.1 to 826.3)     | 336.0 (308.9 to 367.1)     | 261.0 (236.7 to 283.9)        | 185.5 (161.5 to 211.0)          | 0.7 (0.7 to 0.7)                  | 1310.2 (1241.4 to 1382.3) | 562.1 (516.7 to 614.1)     | 436.6 (396.0 to 474.8)        | 310.3 (270.2 to 352.9)          | 1.2 (1.2 to 1.2)                  |
| Brazil  | 2009 | 809.6 (766.6 to 851.3)     | 331.8 (305.9 to 359.5)     | 289.7 (265.5 to 313.9)        | 187.0 (162.8 to 212.0)          | 1.0 (1.0 to 1.0)                  | 1354.3 (1282.4 to 1424.1) | 555.1 (511.7 to 601.5)     | 484.7 (444.2 to 525.1)        | 312.9 (272.4 to 354.6)          | 1.7 (1.7 to 1.7)                  |
| Brazil  | 2010 | 904.7 (857.5 to 954.8)     | 343.1 (318.5 to 371.5)     | 363.6 (336.6 to 392.1)        | 196.1 (170.5 to 223.2)          | 1.8 (1.8 to 1.8)                  | 1513.3 (1434.5 to 1597.2) | 574.0 (532.8 to 621.4)     | 608.2 (563.1 to 655.9)        | 328.1 (285.2 to 373.4)          | 3.0 (3.0 to 3.0)                  |
| Brazil  | 2011 | 974.0 (923.9 to 1027.4)    | 353.8 (328.3 to 383.2)     | 414.2 (382.6 to 444.6)        | 205.0 (180.2 to 232.1)          | 1.0 (1.0 to 1.0)                  | 1629.4 (1545.5 to 1718.6) | 591.8 (549.2 to 641.0)     | 692.9 (640.0 to 743.8)        | 343.0 (301.4 to 388.3)          | 1.7 (1.7 to 1.7)                  |
| Brazil  | 2012 | 1018.1 (966.8 to 1074.1)   | 357.8 (330.8 to 387.6)     | 447.0 (412.8 to 480.4)        | 212.4 (187.0 to 241.0)          | 0.9 (0.9 to 0.9)                  | 1703.1 (1617.3 to 1796.8) | 598.6 (553.4 to 648.3)     | 747.8 (690.5 to 803.6)        | 355.2 (312.7 to 403.2)          | 1.5 (1.5 to 1.5)                  |
| Brazil  | 2013 | 1073.2 (1023.2 to 1131.1)  | 369.9 (340.8 to 398.8)     | 475.7 (441.6 to 511.3)        | 226.2 (200.4 to 255.6)          | 1.4 (1.4 to 1.4)                  | 1795.4 (1711.6 to 1892.2) | 618.8 (570.1 to 667.2)     | 795.8 (738.7 to 855.3)        | 378.4 (335.3 to 427.6)          | 2.4 (2.4 to 2.4)                  |
| Brazil  | 2014 | 1113.7 (1062.4 to 1170.4)  | 377.5 (347.2 to 409.7)     | 495.8 (461.4 to 533.5)        | 239.1 (212.0 to 267.3)          | 1.3 (1.3 to 1.3)                  | 1863.0 (1777.2 to 1957.9) | 631.5 (580.8 to 685.4)     | 829.4 (771.8 to 892.5)        | 400.0 (354.6 to 447.1)          | 2.1 (2.1 to 2.1)                  |
| Brazil  | 2015 | 1118.0 (1061.0 to 1181.4)  | 373.8 (340.0 to 407.6)     | 497.6 (459.6 to 537.2)        | 246.4 (215.9 to 280.4)          | 0.3 (0.3 to 0.3)                  | 1870.3 (1774.9 to 1976.3) | 625.2 (568.7 to 681.8)     | 832.3 (768.8 to 898.6)        | 412.1 (361.2 to 469.1)          | 0.6 (0.6 to 0.6)                  |

| Country | Year | 2018 US Dollars per capita |                            |                               |                                 |                                   | 2018 PPP per capita       |                            |                               |                                 |                                   |
|---------|------|----------------------------|----------------------------|-------------------------------|---------------------------------|-----------------------------------|---------------------------|----------------------------|-------------------------------|---------------------------------|-----------------------------------|
|         |      | Health spending            | Government health spending | Out-of-pocket health spending | Prepaid private health spending | Development assistance for health | Health spending           | Government health spending | Out-of-pocket health spending | Prepaid private health spending | Development assistance for health |
| Brazil  | 2016 | 1114.2 (1039.6 to 1195.5)  | 370.5 (331.0 to 407.4)     | 489.6 (443.0 to 541.6)        | 253.3 (213.3 to 297.4)          | 0.7 (0.7 to 0.7)                  | 1863.9 (1739.1 to 1999.9) | 619.8 (553.7 to 681.5)     | 819.1 (741.0 to 905.9)        | 423.8 (356.8 to 497.5)          | 1.2 (1.2 to 1.2)                  |
| Brazil  | 2017 | 1109.7 (1033.6 to 1188.6)  | 366.6 (326.9 to 402.9)     | 489.0 (442.8 to 542.0)        | 253.4 (212.9 to 297.7)          | 0.7 (0.7 to 0.7)                  | 1856.4 (1729.1 to 1988.3) | 613.3 (546.9 to 673.9)     | 817.9 (740.8 to 906.7)        | 423.9 (356.1 to 498.0)          | 1.2 (1.2 to 1.2)                  |
| Brazil  | 2018 | 1127.5 (1052.2 to 1209.1)  | 375.8 (335.2 to 413.1)     | 493.0 (446.6 to 546.4)        | 258.0 (216.9 to 302.9)          | 0.6 (0.6 to 0.7)                  | 1886.1 (1760.1 to 2022.6) | 628.7 (560.8 to 691.0)     | 824.7 (747.1 to 914.0)        | 431.6 (362.8 to 506.7)          | 1.1 (1.1 to 1.1)                  |
| Brazil  | 2019 | 1143.2 (1063.6 to 1224.1)  | 382.1 (340.7 to 420.2)     | 497.7 (451.2 to 551.6)        | 262.7 (220.9 to 307.8)          | 0.7 (0.6 to 0.7)                  | 1912.3 (1779.2 to 2047.6) | 639.3 (569.9 to 702.9)     | 832.6 (754.8 to 922.8)        | 439.4 (369.6 to 514.9)          | 1.1 (1.0 to 1.2)                  |
| Brazil  | 2020 | 1157.7 (1079.6 to 1240.8)  | 388.2 (347.2 to 426.4)     | 501.8 (454.4 to 556.1)        | 267.0 (224.3 to 313.6)          | 0.7 (0.6 to 0.7)                  | 1936.6 (1806.1 to 2075.6) | 649.4 (580.8 to 713.4)     | 839.5 (760.2 to 930.2)        | 446.6 (375.2 to 524.5)          | 1.1 (1.0 to 1.2)                  |
| Brazil  | 2021 | 1171.7 (1089.1 to 1253.4)  | 394.2 (352.0 to 433.1)     | 505.6 (457.1 to 560.8)        | 271.2 (227.5 to 318.5)          | 0.7 (0.6 to 0.7)                  | 1960.0 (1821.9 to 2096.8) | 659.4 (588.9 to 724.5)     | 845.8 (764.6 to 938.1)        | 453.6 (380.5 to 532.8)          | 1.1 (1.0 to 1.3)                  |
| Brazil  | 2022 | 1185.1 (1104.6 to 1270.1)  | 400.0 (356.8 to 439.8)     | 509.2 (460.1 to 564.3)        | 275.3 (231.3 to 323.4)          | 0.7 (0.6 to 0.8)                  | 1982.6 (1847.9 to 2124.6) | 669.1 (596.9 to 735.8)     | 851.8 (769.7 to 944.0)        | 460.5 (386.9 to 540.9)          | 1.1 (1.0 to 1.3)                  |
| Brazil  | 2023 | 1197.6 (1113.0 to 1282.0)  | 405.5 (361.3 to 446.4)     | 512.2 (462.9 to 568.5)        | 279.2 (234.2 to 328.6)          | 0.7 (0.6 to 0.8)                  | 2003.4 (1861.9 to 2144.6) | 678.3 (604.4 to 746.8)     | 856.9 (774.3 to 951.0)        | 467.1 (391.7 to 549.7)          | 1.2 (1.0 to 1.3)                  |
| Brazil  | 2024 | 1209.7 (1127.3 to 1296.4)  | 410.9 (365.3 to 452.7)     | 515.1 (465.5 to 570.5)        | 283.0 (237.0 to 332.7)          | 0.7 (0.6 to 0.8)                  | 2023.7 (1885.8 to 2168.6) | 687.3 (611.1 to 757.4)     | 861.7 (778.7 to 954.3)        | 473.5 (396.4 to 556.5)          | 1.2 (1.0 to 1.4)                  |
| Brazil  | 2025 | 1220.7 (1134.0 to 1306.3)  | 415.9 (369.7 to 458.3)     | 517.4 (467.2 to 571.8)        | 286.6 (240.4 to 336.9)          | 0.7 (0.6 to 0.9)                  | 2042.0 (1896.9 to 2185.2) | 695.7 (618.5 to 766.6)     | 865.6 (781.5 to 956.5)        | 479.5 (402.2 to 563.6)          | 1.2 (1.0 to 1.5)                  |
| Brazil  | 2026 | 1231.4 (1147.1 to 1321.7)  | 420.8 (374.0 to 464.2)     | 519.6 (469.2 to 573.0)        | 290.2 (244.0 to 340.3)          | 0.8 (0.6 to 0.9)                  | 2059.9 (1919.0 to 2210.9) | 704.0 (625.7 to 776.5)     | 869.2 (784.9 to 958.5)        | 485.5 (408.1 to 569.3)          | 1.3 (1.1 to 1.5)                  |
| Brazil  | 2027 | 1241.4 (1152.0 to 1329.2)  | 425.5 (378.6 to 470.3)     | 521.5 (470.5 to 574.6)        | 293.6 (246.7 to 345.0)          | 0.8 (0.6 to 0.9)                  | 2076.7 (1927.0 to 2223.5) | 711.9 (633.4 to 786.7)     | 872.3 (787.1 to 961.3)        | 491.2 (412.7 to 577.1)          | 1.3 (1.1 to 1.6)                  |
| Brazil  | 2028 | 1250.6 (1164.5 to 1342.3)  | 430.0 (383.0 to 475.2)     | 522.9 (471.3 to 577.0)        | 296.9 (249.0 to 349.5)          | 0.8 (0.7 to 1.0)                  | 2092.0 (1948.0 to 2245.5) | 719.3 (640.8 to 794.9)     | 874.8 (788.5 to 965.2)        | 496.6 (416.6 to 584.6)          | 1.3 (1.1 to 1.6)                  |
| Brazil  | 2029 | 1260.0 (1167.8 to 1351.3)  | 434.5 (386.7 to 480.9)     | 524.5 (472.6 to 578.7)        | 300.2 (251.5 to 353.7)          | 0.8 (0.7 to 1.0)                  | 2107.8 (1953.5 to 2260.6) | 726.9 (646.9 to 804.4)     | 877.4 (790.5 to 968.1)        | 502.2 (420.7 to 591.7)          | 1.4 (1.1 to 1.7)                  |
| Brazil  | 2030 | 1269.8 (1180.9 to 1362.8)  | 439.2 (390.0 to 486.9)     | 526.2 (473.0 to 580.4)        | 303.6 (253.9 to 357.5)          | 0.8 (0.7 to 1.1)                  | 2124.2 (1975.4 to 2279.7) | 734.7 (652.3 to 814.5)     | 880.2 (791.2 to 971.0)        | 507.9 (424.7 to 598.1)          | 1.4 (1.1 to 1.8)                  |
| Brazil  | 2031 | 1279.6 (1184.9 to 1373.8)  | 443.9 (393.2 to 493.2)     | 527.8 (473.9 to 583.0)        | 307.0 (256.3 to 361.4)          | 0.9 (0.0 to 1.1)                  | 2140.6 (1982.1 to 2298.1) | 742.6 (657.8 to 825.1)     | 883.0 (792.8 to 975.3)        | 513.6 (428.8 to 604.6)          | 1.4 (0.0 to 1.8)                  |
| Brazil  | 2032 | 1290.3 (1198.2 to 1388.0)  | 448.9 (398.0 to 500.8)     | 529.8 (475.6 to 586.6)        | 310.7 (259.3 to 365.5)          | 0.9 (0.0 to 1.1)                  | 2158.5 (2004.4 to 2321.8) | 751.0 (665.8 to 837.7)     | 886.3 (795.6 to 981.3)        | 519.8 (433.7 to 611.4)          | 1.5 (0.0 to 1.9)                  |
| Brazil  | 2033 | 1301.3 (1201.2 to 1398.9)  | 454.0 (402.9 to 507.8)     | 531.9 (477.1 to 590.7)        | 314.5 (262.3 to 369.7)          | 0.9 (0.0 to 1.2)                  | 2176.8 (2009.4 to 2340.2) | 759.6 (674.0 to 849.5)     | 889.7 (798.1 to 988.1)        | 526.0 (438.8 to 618.5)          | 1.5 (0.0 to 2.0)                  |
| Brazil  | 2034 | 1312.1 (1215.9 to 1413.4)  | 459.1 (407.1 to 515.5)     | 533.8 (477.3 to 593.7)        | 318.2 (265.5 to 374.9)          | 0.9 (0.0 to 1.2)                  | 2194.9 (2034.1 to 2364.3) | 768.1 (681.1 to 862.3)     | 893.0 (798.4 to 993.2)        | 532.3 (444.1 to 627.1)          | 1.5 (0.0 to 2.1)                  |
| Brazil  | 2035 | 1322.8 (1218.4 to 1423.9)  | 464.2 (410.6 to 523.1)     | 535.7 (478.1 to 596.5)        | 321.9 (268.4 to 379.4)          | 0.9 (0.0 to 1.3)                  | 2212.9 (2038.1 to 2382.0) | 776.6 (686.8 to 875.0)     | 896.2 (799.8 to 997.8)        | 538.5 (449.0 to 634.7)          | 1.5 (0.0 to 2.2)                  |
| Brazil  | 2036 | 1334.1 (1235.5 to 1441.2)  | 469.6 (414.2 to 530.9)     | 537.8 (479.6 to 599.6)        | 325.8 (271.5 to 384.4)          | 0.9 (0.0 to 1.4)                  | 2231.7 (2066.8 to 2410.9) | 785.5 (692.8 to 888.2)     | 899.6 (802.3 to 1003.1)       | 545.0 (454.2 to 643.0)          | 1.5 (0.0 to 2.3)                  |

| Country | Year | 2018 US Dollars per capita |                            |                               |                                 |                                   | 2018 PPP per capita       |                            |                               |                                 |                                   |
|---------|------|----------------------------|----------------------------|-------------------------------|---------------------------------|-----------------------------------|---------------------------|----------------------------|-------------------------------|---------------------------------|-----------------------------------|
|         |      | Health spending            | Government health spending | Out-of-pocket health spending | Prepaid private health spending | Development assistance for health | Health spending           | Government health spending | Out-of-pocket health spending | Prepaid private health spending | Development assistance for health |
| Brazil  | 2037 | 1345.7 (1237.9 to 1451.6)  | 475.0 (417.9 to 537.7)     | 539.9 (480.9 to 603.1)        | 329.8 (274.6 to 390.1)          | 0.9 (0.0 to 1.4)                  | 2251.1 (2070.9 to 2428.3) | 794.6 (699.0 to 899.4)     | 903.2 (804.4 to 1008.8)       | 551.7 (459.3 to 652.6)          | 1.6 (0.0 to 2.3)                  |
| Brazil  | 2038 | 1357.3 (1254.8 to 1468.3)  | 480.5 (422.3 to 545.9)     | 542.1 (482.4 to 606.1)        | 333.8 (278.0 to 395.8)          | 0.9 (0.0 to 1.4)                  | 2270.6 (2099.1 to 2456.2) | 803.8 (706.4 to 913.2)     | 906.8 (807.0 to 1013.9)       | 558.4 (465.1 to 662.1)          | 1.6 (0.0 to 2.4)                  |
| Brazil  | 2039 | 1368.0 (1257.1 to 1477.0)  | 485.6 (425.1 to 553.7)     | 543.8 (483.7 to 608.3)        | 337.6 (281.1 to 401.2)          | 0.9 (0.0 to 1.5)                  | 2288.4 (2103.0 to 2470.7) | 812.4 (711.1 to 926.2)     | 909.7 (809.2 to 1017.5)       | 564.8 (470.2 to 671.2)          | 1.6 (0.0 to 2.5)                  |
| Brazil  | 2040 | 1377.9 (1270.6 to 1492.0)  | 490.5 (428.0 to 560.1)     | 545.2 (485.1 to 610.1)        | 341.2 (284.2 to 405.3)          | 0.9 (0.0 to 1.6)                  | 2305.0 (2125.6 to 2495.9) | 820.6 (716.0 to 937.0)     | 912.0 (811.5 to 1020.5)       | 570.8 (475.4 to 678.1)          | 1.6 (0.0 to 2.6)                  |
| Brazil  | 2041 | 1388.3 (1272.1 to 1502.2)  | 495.6 (431.2 to 566.8)     | 546.7 (486.2 to 612.1)        | 345.0 (287.1 to 410.8)          | 0.9 (0.0 to 1.7)                  | 2322.4 (2128.0 to 2512.9) | 829.1 (721.3 to 948.1)     | 914.6 (813.3 to 1023.9)       | 577.1 (480.3 to 687.2)          | 1.6 (0.0 to 2.8)                  |
| Brazil  | 2042 | 1398.2 (1286.0 to 1515.9)  | 500.5 (434.5 to 573.2)     | 548.0 (486.6 to 613.9)        | 348.7 (290.0 to 416.1)          | 0.9 (0.0 to 1.7)                  | 2338.9 (2151.3 to 2535.8) | 837.3 (726.8 to 958.9)     | 916.8 (814.0 to 1026.9)       | 583.2 (485.1 to 696.1)          | 1.6 (0.0 to 2.9)                  |
| Brazil  | 2043 | 1408.1 (1286.2 to 1526.2)  | 505.5 (437.6 to 579.8)     | 549.3 (486.9 to 616.1)        | 352.3 (292.5 to 420.5)          | 0.9 (0.0 to 1.8)                  | 2355.6 (2151.6 to 2553.1) | 845.7 (732.0 to 969.9)     | 918.9 (814.6 to 1030.6)       | 589.4 (489.2 to 703.5)          | 1.6 (0.0 to 3.0)                  |
| Brazil  | 2044 | 1417.3 (1299.7 to 1539.3)  | 510.2 (440.5 to 586.2)     | 550.3 (487.4 to 617.9)        | 355.8 (294.5 to 425.4)          | 0.9 (0.0 to 1.9)                  | 2370.9 (2174.1 to 2574.9) | 853.5 (736.8 to 980.6)     | 920.5 (815.3 to 1033.7)       | 595.3 (492.7 to 711.6)          | 1.6 (0.0 to 3.1)                  |
| Brazil  | 2045 | 1425.2 (1299.1 to 1547.9)  | 514.4 (443.2 to 593.4)     | 550.8 (487.5 to 619.3)        | 359.1 (296.3 to 429.9)          | 1.0 (0.0 to 2.0)                  | 2384.2 (2173.1 to 2589.4) | 860.5 (741.5 to 992.6)     | 921.4 (815.5 to 1036.0)       | 600.7 (495.7 to 719.1)          | 1.6 (0.0 to 3.3)                  |
| Brazil  | 2046 | 1433.9 (1311.7 to 1560.8)  | 518.9 (445.6 to 601.4)     | 551.5 (487.8 to 620.9)        | 362.5 (298.2 to 434.6)          | 1.0 (0.0 to 2.0)                  | 2398.7 (2194.3 to 2610.9) | 868.1 (745.4 to 1006.0)    | 922.6 (816.0 to 1038.7)       | 606.4 (498.9 to 727.1)          | 1.6 (0.0 to 3.4)                  |
| Brazil  | 2047 | 1441.2 (1311.8 to 1567.0)  | 522.9 (447.8 to 608.9)     | 551.8 (486.9 to 622.0)        | 365.6 (299.9 to 438.9)          | 1.0 (0.0 to 2.2)                  | 2411.0 (2194.5 to 2621.4) | 874.8 (749.1 to 1018.6)    | 923.0 (814.4 to 1040.5)       | 611.6 (501.7 to 734.3)          | 1.6 (0.0 to 3.6)                  |
| Brazil  | 2048 | 1448.9 (1323.8 to 1579.3)  | 527.0 (450.1 to 616.6)     | 552.1 (486.7 to 622.1)        | 368.8 (301.7 to 442.8)          | 1.0 (0.0 to 2.2)                  | 2423.9 (2214.5 to 2642.0) | 881.7 (753.0 to 1031.5)    | 923.6 (814.2 to 1040.7)       | 617.0 (504.6 to 740.8)          | 1.6 (0.0 to 3.7)                  |
| Brazil  | 2049 | 1456.2 (1322.6 to 1587.7)  | 531.0 (452.0 to 624.1)     | 552.3 (486.4 to 622.6)        | 371.9 (303.6 to 446.7)          | 1.0 (0.0 to 2.3)                  | 2435.9 (2212.4 to 2655.9) | 888.2 (756.1 to 1044.0)    | 923.9 (813.6 to 1041.6)       | 622.2 (507.9 to 747.3)          | 1.7 (0.0 to 3.9)                  |
| Brazil  | 2050 | 1463.3 (1333.8 to 1598.6)  | 534.8 (453.8 to 631.6)     | 552.4 (486.0 to 624.0)        | 375.0 (305.0 to 451.0)          | 1.0 (0.0 to 2.5)                  | 2447.9 (2231.2 to 2674.2) | 894.7 (759.1 to 1056.6)    | 924.1 (813.0 to 1043.9)       | 627.4 (510.2 to 754.4)          | 1.7 (0.0 to 4.1)                  |
| Brunei  | 1995 | 1203.8 (1110.7 to 1299.5)  | 902.8 (820.3 to 985.3)     | 276.2 (242.9 to 314.4)        | 24.8 (11.1 to 46.4)             | 0.0 (0.0 to 0.0)                  | 2994.0 (2762.4 to 3231.9) | 2245.2 (2040.0 to 2450.5)  | 687.0 (604.1 to 781.9)        | 61.8 (27.7 to 115.4)            | 0.0 (0.0 to 0.0)                  |
| Brunei  | 1996 | 1363.4 (1282.4 to 1446.4)  | 1048.2 (976.1 to 1125.2)   | 287.7 (257.2 to 319.5)        | 27.6 (12.6 to 50.5)             | 0.0 (0.0 to 0.0)                  | 3390.8 (3189.5 to 3597.3) | 2606.9 (2427.6 to 2798.5)  | 715.4 (639.6 to 794.6)        | 68.5 (31.4 to 125.7)            | 0.0 (0.0 to 0.0)                  |
| Brunei  | 1997 | 1361.8 (1290.2 to 1438.7)  | 1060.3 (994.4 to 1127.0)   | 274.4 (248.3 to 300.6)        | 27.1 (12.3 to 50.6)             | 0.0 (0.0 to 0.0)                  | 3386.9 (3208.9 to 3578.2) | 2637.0 (2473.1 to 2803.0)  | 682.4 (617.6 to 747.5)        | 67.5 (30.6 to 125.9)            | 0.0 (0.0 to 0.0)                  |
| Brunei  | 1998 | 1357.5 (1289.1 to 1429.3)  | 1075.1 (1010.9 to 1141.4)  | 255.4 (231.5 to 279.7)        | 27.0 (12.4 to 48.9)             | 0.0 (0.0 to 0.0)                  | 3376.1 (3206.1 to 3554.7) | 2673.8 (2514.1 to 2838.7)  | 635.2 (575.7 to 695.6)        | 67.1 (30.7 to 121.6)            | 0.0 (0.0 to 0.0)                  |
| Brunei  | 1999 | 1283.1 (1212.3 to 1351.4)  | 1032.3 (969.7 to 1093.3)   | 225.0 (204.1 to 246.2)        | 25.9 (12.1 to 47.3)             | 0.0 (0.0 to 0.0)                  | 3191.1 (3015.0 to 3361.0) | 2567.3 (2411.7 to 2719.1)  | 559.5 (507.5 to 612.3)        | 64.3 (30.2 to 117.6)            | 0.0 (0.0 to 0.0)                  |
| Brunei  | 2000 | 1173.7 (1112.2 to 1234.8)  | 957.6 (898.7 to 1015.9)    | 191.9 (174.9 to 208.9)        | 24.3 (11.2 to 45.0)             | 0.0 (0.0 to 0.0)                  | 2919.0 (2766.1 to 3070.9) | 2381.5 (2235.1 to 2526.6)  | 477.1 (435.0 to 519.5)        | 60.4 (28.0 to 111.8)            | 0.0 (0.0 to 0.0)                  |
| Brunei  | 2001 | 1116.5 (1056.3 to 1183.0)  | 910.7 (852.9 to 972.1)     | 181.7 (166.2 to 197.5)        | 24.2 (11.2 to 44.7)             | 0.0 (0.0 to 0.0)                  | 2776.8 (2627.2 to 2942.2) | 2264.9 (2121.1 to 2417.7)  | 451.8 (413.3 to 491.3)        | 60.2 (27.9 to 111.2)            | 0.0 (0.0 to 0.0)                  |

| Country | Year | 2018 US Dollars per capita |                            |                               |                                 |                                   | 2018 PPP per capita       |                            |                               |                                 |                                   |
|---------|------|----------------------------|----------------------------|-------------------------------|---------------------------------|-----------------------------------|---------------------------|----------------------------|-------------------------------|---------------------------------|-----------------------------------|
|         |      | Health spending            | Government health spending | Out-of-pocket health spending | Prepaid private health spending | Development assistance for health | Health spending           | Government health spending | Out-of-pocket health spending | Prepaid private health spending | Development assistance for health |
| Brunei  | 2002 | 1089.5 (1031.3 to 1153.3)  | 887.4 (833.7 to 946.1)     | 177.4 (162.7 to 193.7)        | 24.7 (11.5 to 45.7)             | 0.0 (0.0 to 0.0)                  | 2709.5 (2564.9 to 2868.2) | 2207.0 (2073.4 to 2352.9)  | 441.1 (404.5 to 481.7)        | 61.4 (28.7 to 113.7)            | 0.0 (0.0 to 0.0)                  |
| Brunei  | 2003 | 1075.5 (1015.0 to 1139.6)  | 873.6 (818.9 to 931.6)     | 176.2 (161.2 to 192.6)        | 25.7 (12.1 to 47.5)             | 0.0 (0.0 to 0.0)                  | 2674.8 (2524.4 to 2834.3) | 2172.7 (2036.7 to 2316.9)  | 438.3 (400.9 to 479.0)        | 63.8 (30.1 to 118.0)            | 0.0 (0.0 to 0.0)                  |
| Brunei  | 2004 | 1023.2 (963.7 to 1083.2)   | 832.3 (777.8 to 886.6)     | 165.2 (151.0 to 179.4)        | 25.7 (12.3 to 47.1)             | 0.0 (0.0 to 0.0)                  | 2544.8 (2396.8 to 2693.9) | 2070.0 (1934.4 to 2205.1)  | 410.8 (375.6 to 446.2)        | 64.0 (30.5 to 117.1)            | 0.0 (0.0 to 0.0)                  |
| Brunei  | 2005 | 950.9 (893.0 to 1011.2)    | 780.9 (725.3 to 837.5)     | 144.6 (131.8 to 158.6)        | 25.4 (12.1 to 46.1)             | 0.0 (0.0 to 0.0)                  | 2364.9 (2220.8 to 2514.8) | 1942.0 (1803.8 to 2082.8)  | 359.6 (327.8 to 394.5)        | 63.3 (30.2 to 114.8)            | 0.0 (0.0 to 0.0)                  |
| Brunei  | 2006 | 900.3 (845.3 to 960.3)     | 751.3 (698.7 to 807.1)     | 123.3 (111.2 to 135.8)        | 25.7 (12.1 to 47.8)             | 0.0 (0.0 to 0.0)                  | 2239.2 (2102.4 to 2388.2) | 1868.6 (1737.7 to 2007.3)  | 306.7 (276.5 to 337.7)        | 63.9 (30.1 to 118.8)            | 0.0 (0.0 to 0.0)                  |
| Brunei  | 2007 | 850.7 (793.8 to 906.7)     | 721.4 (669.0 to 773.3)     | 103.6 (92.7 to 114.7)         | 25.6 (11.8 to 49.3)             | 0.0 (0.0 to 0.0)                  | 2115.7 (1974.3 to 2255.0) | 1794.2 (1663.7 to 1923.1)  | 257.7 (230.5 to 285.4)        | 63.8 (29.4 to 122.7)            | 0.0 (0.0 to 0.0)                  |
| Brunei  | 2008 | 862.4 (802.5 to 920.5)     | 745.6 (688.7 to 803.0)     | 89.6 (79.4 to 100.1)          | 27.2 (12.8 to 52.4)             | 0.0 (0.0 to 0.0)                  | 2144.8 (1995.9 to 2289.4) | 1854.2 (1712.8 to 1997.2)  | 222.8 (197.6 to 249.0)        | 67.8 (31.8 to 130.3)            | 0.0 (0.0 to 0.0)                  |
| Brunei  | 2009 | 822.0 (766.6 to 881.0)     | 715.9 (663.0 to 771.1)     | 79.3 (69.4 to 89.9)           | 26.8 (12.6 to 50.7)             | 0.0 (0.0 to 0.0)                  | 2044.2 (1906.6 to 2191.1) | 1780.5 (1649.0 to 1917.6)  | 197.1 (172.7 to 223.5)        | 66.6 (31.4 to 126.1)            | 0.0 (0.0 to 0.0)                  |
| Brunei  | 2010 | 788.6 (734.7 to 848.7)     | 693.2 (642.4 to 749.7)     | 68.8 (60.0 to 78.9)           | 26.6 (12.8 to 50.0)             | 0.0 (0.0 to 0.0)                  | 1961.3 (1827.3 to 2110.8) | 1724.0 (1597.7 to 1864.5)  | 171.0 (149.3 to 196.1)        | 66.2 (31.8 to 124.5)            | 0.0 (0.0 to 0.0)                  |
| Brunei  | 2011 | 763.2 (707.4 to 820.0)     | 674.0 (624.9 to 726.1)     | 62.2 (53.9 to 72.1)           | 26.9 (13.0 to 50.1)             | 0.0 (0.0 to 0.0)                  | 1898.0 (1759.4 to 2039.4) | 1676.3 (1554.0 to 1805.8)  | 154.8 (134.0 to 179.4)        | 66.9 (32.4 to 124.5)            | 0.0 (0.0 to 0.0)                  |
| Brunei  | 2012 | 732.4 (676.1 to 788.8)     | 647.4 (598.3 to 699.5)     | 58.1 (49.7 to 67.7)           | 26.8 (12.9 to 50.5)             | 0.0 (0.0 to 0.0)                  | 1821.4 (1681.5 to 1961.8) | 1610.1 (1487.9 to 1739.7)  | 144.6 (123.7 to 168.3)        | 66.7 (32.0 to 125.7)            | 0.0 (0.0 to 0.0)                  |
| Brunei  | 2013 | 706.7 (656.0 to 762.6)     | 626.0 (577.3 to 676.3)     | 53.9 (45.7 to 63.8)           | 26.8 (12.8 to 50.3)             | 0.0 (0.0 to 0.0)                  | 1757.7 (1631.5 to 1896.5) | 1556.8 (1435.8 to 1682.0)  | 134.1 (113.7 to 158.7)        | 66.7 (31.9 to 125.2)            | 0.0 (0.0 to 0.0)                  |
| Brunei  | 2014 | 708.2 (654.2 to 763.4)     | 632.9 (582.8 to 682.5)     | 47.5 (39.9 to 57.0)           | 27.8 (13.6 to 51.6)             | 0.0 (0.0 to 0.0)                  | 1761.3 (1626.9 to 1898.5) | 1573.9 (1449.5 to 1697.4)  | 118.2 (99.4 to 141.8)         | 69.2 (33.8 to 128.4)            | 0.0 (0.0 to 0.0)                  |
| Brunei  | 2015 | 759.5 (697.1 to 828.1)     | 685.5 (624.0 to 748.0)     | 43.4 (35.7 to 53.0)           | 30.6 (14.9 to 56.7)             | 0.0 (0.0 to 0.0)                  | 1888.8 (1733.6 to 2059.5) | 1704.8 (1552.0 to 1860.3)  | 107.9 (88.7 to 131.8)         | 76.1 (37.0 to 141.1)            | 0.0 (0.0 to 0.0)                  |
| Brunei  | 2016 | 769.6 (693.4 to 849.0)     | 696.7 (625.5 to 772.1)     | 40.9 (32.8 to 50.7)           | 31.9 (15.7 to 60.1)             | 0.0 (0.0 to 0.0)                  | 1914.0 (1724.5 to 2111.4) | 1732.8 (1555.5 to 1920.2)  | 101.8 (81.6 to 126.1)         | 79.4 (38.9 to 149.4)            | 0.0 (0.0 to 0.0)                  |
| Brunei  | 2017 | 680.0 (612.9 to 749.5)     | 610.4 (547.8 to 676.8)     | 39.4 (31.7 to 48.9)           | 30.2 (14.7 to 56.8)             | 0.0 (0.0 to 0.0)                  | 1691.2 (1524.3 to 1864.1) | 1518.2 (1362.5 to 1683.1)  | 97.9 (78.8 to 121.6)          | 75.1 (36.7 to 141.2)            | 0.0 (0.0 to 0.0)                  |
| Brunei  | 2018 | 681.9 (613.8 to 751.5)     | 613.0 (549.8 to 679.3)     | 38.4 (30.7 to 47.6)           | 30.6 (14.9 to 57.6)             | 0.0 (0.0 to 0.0)                  | 1696.0 (1526.6 to 1868.9) | 1524.4 (1367.5 to 1689.5)  | 95.5 (76.5 to 118.3)          | 76.0 (37.2 to 143.2)            | 0.0 (0.0 to 0.0)                  |
| Brunei  | 2019 | 682.5 (617.0 to 752.5)     | 614.2 (550.9 to 680.7)     | 37.5 (29.9 to 46.8)           | 30.8 (15.1 to 57.9)             | 0.0 (0.0 to 0.0)                  | 1697.3 (1534.4 to 1871.4) | 1527.5 (1370.2 to 1693.0)  | 93.2 (74.4 to 116.5)          | 76.6 (37.4 to 144.0)            | 0.0 (0.0 to 0.0)                  |
| Brunei  | 2020 | 682.3 (616.1 to 752.4)     | 614.7 (550.6 to 682.0)     | 36.5 (29.2 to 45.6)           | 31.0 (15.2 to 58.2)             | 0.0 (0.0 to 0.0)                  | 1696.8 (1532.3 to 1871.2) | 1528.8 (1369.4 to 1696.1)  | 90.9 (72.7 to 113.4)          | 77.1 (37.7 to 144.7)            | 0.0 (0.0 to 0.0)                  |
| Brunei  | 2021 | 680.8 (611.2 to 752.7)     | 613.9 (550.4 to 681.2)     | 35.6 (28.7 to 44.7)           | 31.2 (15.2 to 58.6)             | 0.0 (0.0 to 0.0)                  | 1693.1 (1520.0 to 1871.9) | 1526.9 (1368.8 to 1694.2)  | 88.6 (71.3 to 111.1)          | 77.6 (37.9 to 145.7)            | 0.0 (0.0 to 0.0)                  |
| Brunei  | 2022 | 678.7 (611.7 to 749.4)     | 612.7 (549.2 to 680.6)     | 34.7 (27.9 to 43.4)           | 31.3 (15.3 to 59.0)             | 0.0 (0.0 to 0.0)                  | 1687.9 (1521.4 to 1863.8) | 1523.7 (1366.0 to 1692.6)  | 86.3 (69.4 to 107.8)          | 77.9 (38.1 to 146.7)            | 0.0 (0.0 to 0.0)                  |



| Country | Year | 2018 US Dollars per capita |                            |                               |                                 |                                   | 2018 PPP per capita       |                            |                               |                                 |                                   |
|---------|------|----------------------------|----------------------------|-------------------------------|---------------------------------|-----------------------------------|---------------------------|----------------------------|-------------------------------|---------------------------------|-----------------------------------|
|         |      | Health spending            | Government health spending | Out-of-pocket health spending | Prepaid private health spending | Development assistance for health | Health spending           | Government health spending | Out-of-pocket health spending | Prepaid private health spending | Development assistance for health |
| Brunei  | 2023 | 676.8 (608.0 to 748.4)     | 611.6 (547.6 to 680.2)     | 33.8 (27.2 to 42.3)           | 31.4 (15.4 to 59.0)             | 0.0 (0.0 to 0.0)                  | 1683.2 (1512.1 to 1861.2) | 1521.0 (1361.9 to 1691.7)  | 84.0 (67.5 to 105.2)          | 78.1 (38.2 to 146.8)            | 0.0 (0.0 to 0.0)                  |
| Brunei  | 2024 | 675.9 (606.2 to 749.9)     | 611.6 (547.3 to 680.9)     | 32.9 (26.3 to 41.1)           | 31.5 (15.4 to 59.0)             | 0.0 (0.0 to 0.0)                  | 1681.0 (1507.5 to 1865.0) | 1521.0 (1361.2 to 1693.5)  | 81.7 (65.4 to 102.3)          | 78.3 (38.3 to 146.7)            | 0.0 (0.0 to 0.0)                  |
| Brunei  | 2025 | 673.9 (604.9 to 745.0)     | 610.4 (545.3 to 680.4)     | 32.0 (25.6 to 40.1)           | 31.5 (15.4 to 58.9)             | 0.0 (0.0 to 0.0)                  | 1676.0 (1504.4 to 1852.9) | 1518.1 (1356.3 to 1692.2)  | 79.5 (63.6 to 99.7)           | 78.4 (38.3 to 146.6)            | 0.0 (0.0 to 0.0)                  |
| Brunei  | 2026 | 673.3 (603.9 to 746.5)     | 610.7 (545.8 to 681.4)     | 31.1 (24.7 to 39.0)           | 31.6 (15.4 to 58.9)             | 0.0 (0.0 to 0.0)                  | 1674.6 (1501.9 to 1856.5) | 1518.7 (1357.5 to 1694.7)  | 77.3 (61.5 to 97.1)           | 78.6 (38.4 to 146.4)            | 0.0 (0.0 to 0.0)                  |
| Brunei  | 2027 | 671.5 (599.3 to 747.7)     | 609.7 (545.4 to 680.6)     | 30.2 (23.9 to 37.8)           | 31.6 (15.4 to 58.8)             | 0.0 (0.0 to 0.0)                  | 1670.0 (1490.4 to 1859.6) | 1516.2 (1356.5 to 1692.6)  | 75.1 (59.5 to 93.9)           | 78.6 (38.4 to 146.1)            | 0.0 (0.0 to 0.0)                  |
| Brunei  | 2028 | 668.5 (598.2 to 741.2)     | 607.4 (543.6 to 678.5)     | 29.4 (23.1 to 36.9)           | 31.6 (15.5 to 58.7)             | 0.0 (0.0 to 0.0)                  | 1662.6 (1487.9 to 1843.5) | 1510.7 (1352.0 to 1687.3)  | 73.2 (57.5 to 91.9)           | 78.7 (38.4 to 145.9)            | 0.0 (0.0 to 0.0)                  |
| Brunei  | 2029 | 665.9 (595.4 to 742.6)     | 605.5 (541.5 to 678.1)     | 28.7 (22.4 to 36.6)           | 31.7 (15.5 to 58.6)             | 0.0 (0.0 to 0.0)                  | 1656.1 (1480.9 to 1846.8) | 1505.9 (1346.6 to 1686.3)  | 71.4 (55.7 to 91.0)           | 78.7 (38.5 to 145.6)            | 0.0 (0.0 to 0.0)                  |
| Brunei  | 2030 | 662.2 (591.2 to 738.6)     | 602.4 (537.4 to 676.7)     | 28.1 (21.8 to 35.9)           | 31.7 (15.5 to 58.5)             | 0.0 (0.0 to 0.0)                  | 1646.9 (1470.2 to 1836.8) | 1498.3 (1336.5 to 1683.0)  | 69.8 (54.1 to 89.4)           | 78.8 (38.5 to 145.5)            | 0.0 (0.0 to 0.0)                  |
| Brunei  | 2031 | 659.2 (586.6 to 737.3)     | 600.0 (534.3 to 674.1)     | 27.5 (21.1 to 35.3)           | 31.7 (15.5 to 58.5)             | 0.0 (0.0 to 0.0)                  | 1639.5 (1458.9 to 1833.6) | 1492.3 (1328.8 to 1676.6)  | 68.4 (52.6 to 87.7)           | 78.8 (38.5 to 145.5)            | 0.0 (0.0 to 0.0)                  |
| Brunei  | 2032 | 656.2 (583.0 to 734.4)     | 597.5 (531.0 to 673.0)     | 27.0 (20.5 to 34.8)           | 31.7 (15.5 to 58.5)             | 0.0 (0.0 to 0.0)                  | 1632.1 (1449.9 to 1826.5) | 1486.1 (1320.7 to 1673.7)  | 67.1 (51.0 to 86.6)           | 78.9 (38.5 to 145.5)            | 0.0 (0.0 to 0.0)                  |
| Brunei  | 2033 | 653.4 (580.9 to 733.0)     | 595.1 (528.0 to 671.9)     | 26.5 (20.0 to 34.4)           | 31.7 (15.5 to 58.5)             | 0.0 (0.0 to 0.0)                  | 1624.9 (1444.7 to 1822.9) | 1479.9 (1313.1 to 1671.1)  | 66.0 (49.8 to 85.5)           | 78.9 (38.6 to 145.5)            | 0.0 (0.0 to 0.0)                  |
| Brunei  | 2034 | 650.5 (575.9 to 732.8)     | 592.5 (524.6 to 670.9)     | 26.2 (19.5 to 34.0)           | 31.8 (15.5 to 58.6)             | 0.0 (0.0 to 0.0)                  | 1617.7 (1432.2 to 1822.4) | 1473.7 (1304.7 to 1668.5)  | 65.0 (48.6 to 84.6)           | 79.0 (38.5 to 145.6)            | 0.0 (0.0 to 0.0)                  |
| Brunei  | 2035 | 647.9 (574.2 to 730.3)     | 590.3 (520.7 to 669.4)     | 25.8 (19.1 to 33.9)           | 31.8 (15.5 to 58.7)             | 0.0 (0.0 to 0.0)                  | 1611.4 (1428.1 to 1816.2) | 1468.1 (1294.9 to 1664.7)  | 64.2 (47.6 to 84.3)           | 79.1 (38.6 to 145.9)            | 0.0 (0.0 to 0.0)                  |
| Brunei  | 2036 | 645.2 (569.4 to 730.1)     | 587.8 (517.1 to 668.4)     | 25.5 (18.8 to 33.7)           | 31.8 (15.5 to 58.6)             | 0.0 (0.0 to 0.0)                  | 1604.5 (1416.2 to 1815.7) | 1461.9 (1286.1 to 1662.2)  | 63.5 (46.8 to 83.9)           | 79.1 (38.6 to 145.7)            | 0.0 (0.0 to 0.0)                  |
| Brunei  | 2037 | 642.9 (564.5 to 726.6)     | 585.7 (514.5 to 668.1)     | 25.3 (18.5 to 33.6)           | 31.9 (15.5 to 58.6)             | 0.0 (0.0 to 0.0)                  | 1598.9 (1403.8 to 1807.0) | 1456.7 (1279.7 to 1661.6)  | 62.9 (46.1 to 83.5)           | 79.2 (38.6 to 145.8)            | 0.0 (0.0 to 0.0)                  |
| Brunei  | 2038 | 639.9 (561.3 to 725.7)     | 582.9 (509.5 to 666.7)     | 25.1 (18.2 to 33.4)           | 31.9 (15.5 to 58.6)             | 0.0 (0.0 to 0.0)                  | 1591.4 (1396.1 to 1804.9) | 1449.7 (1267.2 to 1658.2)  | 62.5 (45.3 to 83.2)           | 79.2 (38.6 to 145.8)            | 0.0 (0.0 to 0.0)                  |
| Brunei  | 2039 | 637.1 (558.1 to 723.8)     | 580.2 (505.6 to 666.1)     | 25.0 (17.9 to 33.5)           | 31.9 (15.5 to 58.9)             | 0.0 (0.0 to 0.0)                  | 1584.4 (1388.1 to 1800.2) | 1443.0 (1257.5 to 1656.6)  | 62.1 (44.5 to 83.4)           | 79.3 (38.6 to 146.4)            | 0.0 (0.0 to 0.0)                  |
| Brunei  | 2040 | 634.2 (555.8 to 721.6)     | 577.5 (501.8 to 664.6)     | 24.9 (17.7 to 33.5)           | 31.9 (15.5 to 58.8)             | 0.0 (0.0 to 0.0)                  | 1577.3 (1382.3 to 1794.7) | 1436.2 (1248.0 to 1653.0)  | 61.9 (44.0 to 83.3)           | 79.2 (38.6 to 146.2)            | 0.0 (0.0 to 0.0)                  |
| Brunei  | 2041 | 631.9 (552.4 to 722.2)     | 575.2 (498.5 to 663.5)     | 24.8 (17.6 to 33.7)           | 31.9 (15.5 to 58.9)             | 0.0 (0.0 to 0.0)                  | 1571.5 (1373.8 to 1796.2) | 1430.5 (1239.7 to 1650.2)  | 61.8 (43.7 to 83.7)           | 79.3 (38.6 to 146.6)            | 0.0 (0.0 to 0.0)                  |
| Brunei  | 2042 | 629.7 (547.7 to 719.6)     | 573.0 (495.5 to 663.2)     | 24.8 (17.5 to 33.7)           | 31.9 (15.5 to 59.1)             | 0.0 (0.0 to 0.0)                  | 1566.1 (1362.1 to 1789.7) | 1425.1 (1232.3 to 1649.4)  | 61.8 (43.6 to 83.9)           | 79.3 (38.6 to 147.0)            | 0.0 (0.0 to 0.0)                  |
| Brunei  | 2043 | 626.9 (541.1 to 719.8)     | 570.1 (491.3 to 662.1)     | 24.9 (17.5 to 34.0)           | 31.9 (15.5 to 59.2)             | 0.0 (0.0 to 0.0)                  | 1559.0 (1345.7 to 1790.1) | 1417.9 (1221.9 to 1646.6)  | 61.9 (43.4 to 84.6)           | 79.3 (38.6 to 147.2)            | 0.0 (0.0 to 0.0)                  |

| Country  | Year | 2018 US Dollars per capita |                            |                               |                                 |                                   | 2018 PPP per capita       |                            |                               |                                 |                                   |
|----------|------|----------------------------|----------------------------|-------------------------------|---------------------------------|-----------------------------------|---------------------------|----------------------------|-------------------------------|---------------------------------|-----------------------------------|
|          |      | Health spending            | Government health spending | Out-of-pocket health spending | Prepaid private health spending | Development assistance for health | Health spending           | Government health spending | Out-of-pocket health spending | Prepaid private health spending | Development assistance for health |
| Brunei   | 2044 | 624.2 (537.5 to 714.4)     | 567.4 (487.1 to 661.1)     | 25.0 (17.5 to 34.5)           | 31.9 (15.5 to 59.1)             | 0.0 (0.0 to 0.0)                  | 1552.4 (1336.8 to 1776.8) | 1411.0 (1211.5 to 1644.2)  | 62.1 (43.4 to 85.8)           | 79.3 (38.6 to 147.0)            | 0.0 (0.0 to 0.0)                  |
| Brunei   | 2045 | 621.3 (535.8 to 716.2)     | 564.4 (482.3 to 659.4)     | 25.1 (17.5 to 35.1)           | 31.9 (15.5 to 59.0)             | 0.0 (0.0 to 0.0)                  | 1545.3 (1332.5 to 1781.2) | 1403.6 (1199.5 to 1639.9)  | 62.4 (43.6 to 87.3)           | 79.3 (38.6 to 146.7)            | 0.0 (0.0 to 0.0)                  |
| Brunei   | 2046 | 618.9 (530.5 to 713.3)     | 561.8 (478.3 to 658.5)     | 25.3 (17.6 to 35.8)           | 31.9 (15.5 to 58.8)             | 0.0 (0.0 to 0.0)                  | 1539.3 (1319.4 to 1774.1) | 1397.1 (1189.4 to 1637.8)  | 62.9 (43.8 to 88.9)           | 79.3 (38.5 to 146.3)            | 0.0 (0.0 to 0.0)                  |
| Brunei   | 2047 | 616.6 (529.9 to 712.6)     | 559.2 (474.1 to 657.7)     | 25.5 (17.7 to 36.6)           | 31.9 (15.5 to 59.0)             | 0.0 (0.0 to 0.0)                  | 1533.5 (1317.9 to 1772.2) | 1390.8 (1179.1 to 1635.7)  | 63.5 (44.0 to 91.0)           | 79.2 (38.5 to 146.8)            | 0.0 (0.0 to 0.0)                  |
| Brunei   | 2048 | 614.6 (523.7 to 711.0)     | 557.0 (471.5 to 657.2)     | 25.8 (17.8 to 37.0)           | 31.9 (15.5 to 59.2)             | 0.0 (0.0 to 0.0)                  | 1528.5 (1302.5 to 1768.2) | 1385.2 (1172.6 to 1634.6)  | 64.1 (44.4 to 92.1)           | 79.2 (38.5 to 147.3)            | 0.0 (0.0 to 0.0)                  |
| Brunei   | 2049 | 612.6 (519.8 to 712.9)     | 554.7 (468.8 to 656.6)     | 26.0 (18.0 to 37.8)           | 31.9 (15.5 to 59.4)             | 0.0 (0.0 to 0.0)                  | 1523.4 (1292.8 to 1773.1) | 1379.5 (1166.0 to 1632.9)  | 64.7 (44.8 to 94.1)           | 79.2 (38.5 to 147.8)            | 0.0 (0.0 to 0.0)                  |
| Brunei   | 2050 | 610.8 (519.8 to 711.0)     | 552.7 (466.2 to 656.1)     | 26.2 (18.2 to 38.6)           | 31.9 (15.5 to 59.5)             | 0.0 (0.0 to 0.0)                  | 1519.0 (1292.7 to 1768.2) | 1374.5 (1159.4 to 1631.7)  | 65.3 (45.2 to 96.1)           | 79.2 (38.5 to 148.1)            | 0.0 (0.0 to 0.0)                  |
| Bulgaria | 1995 | 186.1 (166.0 to 211.3)     | 133.0 (114.6 to 154.0)     | 52.5 (42.4 to 64.7)           | 0.5 (0.2 to 1.0)                | 0.1 (0.1 to 0.1)                  | 488.0 (435.3 to 554.3)    | 348.7 (300.6 to 404.0)     | 137.8 (111.2 to 169.6)        | 1.3 (0.6 to 2.5)                | 0.1 (0.1 to 0.1)                  |
| Bulgaria | 1996 | 174.4 (157.3 to 195.1)     | 121.3 (105.7 to 138.8)     | 52.6 (43.2 to 63.5)           | 0.4 (0.2 to 0.8)                | 0.0 (0.0 to 0.0)                  | 457.4 (412.6 to 511.7)    | 318.3 (277.3 to 364.1)     | 137.9 (113.3 to 166.5)        | 1.2 (0.5 to 2.2)                | 0.1 (0.1 to 0.1)                  |
| Bulgaria | 1997 | 175.8 (159.6 to 195.1)     | 120.3 (106.2 to 136.5)     | 54.7 (45.7 to 65.1)           | 0.4 (0.2 to 0.8)                | 0.3 (0.3 to 0.3)                  | 460.9 (418.6 to 511.6)    | 315.6 (278.6 to 358.0)     | 143.5 (119.9 to 170.7)        | 1.1 (0.5 to 2.0)                | 0.7 (0.7 to 0.7)                  |
| Bulgaria | 1998 | 197.2 (181.1 to 215.9)     | 129.1 (115.5 to 145.3)     | 62.9 (53.4 to 73.7)           | 0.4 (0.2 to 0.8)                | 4.7 (4.7 to 4.7)                  | 517.1 (475.0 to 566.3)    | 338.7 (302.9 to 381.0)     | 165.0 (139.9 to 193.2)        | 1.1 (0.5 to 2.1)                | 12.3 (12.3 to 12.3)               |
| Bulgaria | 1999 | 214.9 (198.3 to 234.3)     | 137.9 (124.1 to 153.5)     | 76.3 (65.6 to 88.4)           | 0.5 (0.2 to 0.8)                | 0.3 (0.3 to 0.3)                  | 563.7 (520.1 to 614.5)    | 361.7 (325.3 to 402.7)     | 200.1 (171.9 to 231.7)        | 1.2 (0.6 to 2.1)                | 0.7 (0.7 to 0.7)                  |
| Bulgaria | 2000 | 248.5 (230.4 to 267.9)     | 152.2 (137.3 to 168.1)     | 94.0 (81.5 to 108.0)          | 0.5 (0.2 to 0.9)                | 1.8 (1.8 to 1.8)                  | 651.8 (604.3 to 702.7)    | 399.1 (360.0 to 440.7)     | 246.6 (213.8 to 283.2)        | 1.3 (0.6 to 2.4)                | 4.8 (4.8 to 4.8)                  |
| Bulgaria | 2001 | 289.0 (268.2 to 310.2)     | 171.1 (154.7 to 187.5)     | 115.5 (102.1 to 131.9)        | 1.1 (0.5 to 1.9)                | 1.4 (1.4 to 1.4)                  | 758.0 (703.4 to 813.5)    | 448.8 (405.7 to 491.7)     | 302.8 (267.8 to 346.0)        | 2.8 (1.3 to 5.0)                | 3.6 (3.6 to 3.6)                  |
| Bulgaria | 2002 | 327.6 (304.4 to 352.2)     | 193.0 (175.4 to 211.3)     | 130.6 (115.9 to 147.2)        | 2.3 (1.1 to 4.1)                | 1.8 (1.8 to 1.8)                  | 859.2 (798.3 to 923.8)    | 506.1 (460.1 to 554.1)     | 342.4 (304.0 to 386.2)        | 5.9 (2.8 to 10.8)               | 4.7 (4.7 to 4.7)                  |
| Bulgaria | 2003 | 351.5 (326.5 to 377.6)     | 207.2 (189.7 to 227.2)     | 139.5 (124.2 to 156.3)        | 3.6 (1.7 to 6.7)                | 1.1 (1.1 to 1.1)                  | 921.8 (856.4 to 990.4)    | 543.5 (497.5 to 595.9)     | 365.8 (325.7 to 409.9)        | 9.5 (4.5 to 17.5)               | 2.9 (2.9 to 2.9)                  |
| Bulgaria | 2004 | 372.6 (346.6 to 400.0)     | 216.9 (198.5 to 236.9)     | 147.3 (130.5 to 164.6)        | 4.8 (2.2 to 8.7)                | 3.7 (3.7 to 3.7)                  | 977.3 (909.1 to 1049.1)   | 568.8 (520.7 to 621.3)     | 386.2 (342.4 to 431.6)        | 12.6 (5.9 to 22.7)              | 9.7 (9.7 to 9.7)                  |
| Bulgaria | 2005 | 389.3 (363.1 to 417.6)     | 223.1 (204.1 to 244.2)     | 155.4 (139.5 to 173.0)        | 5.8 (2.7 to 10.5)               | 5.0 (5.0 to 5.0)                  | 1021.0 (952.4 to 1095.3)  | 585.2 (535.3 to 640.5)     | 407.5 (365.8 to 453.7)        | 15.3 (7.2 to 27.4)              | 13.0 (13.0 to 13.0)               |
| Bulgaria | 2006 | 399.4 (373.0 to 427.5)     | 226.1 (206.6 to 246.1)     | 165.1 (148.7 to 183.2)        | 6.6 (3.2 to 12.0)               | 1.6 (1.6 to 1.6)                  | 1047.6 (978.3 to 1121.3)  | 593.0 (541.9 to 645.4)     | 433.1 (390.0 to 480.4)        | 17.3 (8.3 to 31.6)              | 4.1 (4.1 to 4.1)                  |
| Bulgaria | 2007 | 429.6 (403.0 to 458.7)     | 236.2 (216.9 to 257.9)     | 175.9 (158.0 to 195.0)        | 7.3 (3.5 to 13.5)               | 10.3 (10.3 to 10.3)               | 1126.8 (1056.8 to 1203.0) | 619.4 (568.8 to 676.5)     | 461.2 (414.5 to 511.5)        | 19.3 (9.1 to 35.3)              | 26.9 (26.9 to 26.9)               |
| Bulgaria | 2008 | 451.6 (423.1 to 483.3)     | 249.5 (229.5 to 271.2)     | 190.3 (172.8 to 211.1)        | 8.3 (3.9 to 15.4)               | 3.5 (3.5 to 3.5)                  | 1184.4 (1109.7 to 1267.6) | 654.4 (601.8 to 711.2)     | 499.0 (453.1 to 553.5)        | 21.8 (10.3 to 40.3)             | 9.2 (9.2 to 9.2)                  |

| Country  | Year | 2018 US Dollars per capita |                            |                               |                                 |                                   | 2018 PPP per capita       |                            |                               |                                 |                                   |
|----------|------|----------------------------|----------------------------|-------------------------------|---------------------------------|-----------------------------------|---------------------------|----------------------------|-------------------------------|---------------------------------|-----------------------------------|
|          |      | Health spending            | Government health spending | Out-of-pocket health spending | Prepaid private health spending | Development assistance for health | Health spending           | Government health spending | Out-of-pocket health spending | Prepaid private health spending | Development assistance for health |
| Bulgaria | 2009 | 477.9 (449.8 to 509.4)     | 250.6 (231.3 to 272.5)     | 200.4 (182.6 to 221.1)        | 8.4 (4.0 to 15.5)               | 18.5 (18.5 to 18.5)               | 1253.3 (1179.7 to 1336.0) | 657.2 (606.6 to 714.6)     | 525.5 (478.8 to 579.9)        | 22.0 (10.4 to 40.8)             | 48.6 (48.6 to 48.6)               |
| Bulgaria | 2010 | 489.2 (459.1 to 520.9)     | 263.0 (243.1 to 286.1)     | 215.5 (195.6 to 236.3)        | 8.5 (4.0 to 15.8)               | 2.3 (2.3 to 2.3)                  | 1283.0 (1204.0 to 1366.0) | 689.8 (637.5 to 750.3)     | 565.1 (513.1 to 619.8)        | 22.2 (10.5 to 41.6)             | 5.9 (5.9 to 5.9)                  |
| Bulgaria | 2011 | 519.7 (488.8 to 554.0)     | 275.7 (254.1 to 300.0)     | 233.8 (212.6 to 255.3)        | 8.4 (4.1 to 15.7)               | 1.8 (1.8 to 1.8)                  | 1362.9 (1282.0 to 1453.0) | 723.0 (666.5 to 786.9)     | 613.1 (557.5 to 669.6)        | 22.1 (10.8 to 41.3)             | 4.7 (4.7 to 4.7)                  |
| Bulgaria | 2012 | 549.6 (517.1 to 583.8)     | 285.1 (263.5 to 309.6)     | 254.8 (231.8 to 277.0)        | 8.6 (4.3 to 15.9)               | 1.0 (1.0 to 1.0)                  | 1441.4 (1356.2 to 1531.1) | 747.8 (691.0 to 812.0)     | 668.3 (607.9 to 726.5)        | 22.6 (11.2 to 41.6)             | 2.6 (2.6 to 2.6)                  |
| Bulgaria | 2013 | 584.1 (552.7 to 620.1)     | 300.7 (278.7 to 325.0)     | 273.7 (248.6 to 297.4)        | 9.0 (4.5 to 16.1)               | 0.6 (0.6 to 0.6)                  | 1531.8 (1449.5 to 1626.2) | 788.8 (730.9 to 852.3)     | 717.8 (652.0 to 780.0)        | 23.6 (11.8 to 42.3)             | 1.7 (1.7 to 1.7)                  |
| Bulgaria | 2014 | 623.0 (586.9 to 659.7)     | 319.9 (295.6 to 345.4)     | 292.7 (266.9 to 318.3)        | 9.5 (4.8 to 17.4)               | 1.0 (1.0 to 1.0)                  | 1634.0 (1539.2 to 1730.1) | 839.0 (775.3 to 906.0)     | 767.6 (700.1 to 834.8)        | 24.9 (12.6 to 45.5)             | 2.5 (2.5 to 2.5)                  |
| Bulgaria | 2015 | 652.6 (609.1 to 692.0)     | 332.9 (305.7 to 363.6)     | 308.7 (279.6 to 338.8)        | 10.0 (4.9 to 18.4)              | 1.0 (1.0 to 1.0)                  | 1711.5 (1597.5 to 1815.0) | 873.1 (801.7 to 953.7)     | 809.6 (733.3 to 888.6)        | 26.3 (12.9 to 48.2)             | 2.6 (2.6 to 2.6)                  |
| Bulgaria | 2016 | 680.8 (630.3 to 733.0)     | 346.3 (312.1 to 383.0)     | 323.0 (286.5 to 367.0)        | 10.6 (5.2 to 19.2)              | 1.0 (1.0 to 1.0)                  | 1785.5 (1653.0 to 1922.4) | 908.2 (818.6 to 1004.4)    | 847.1 (751.5 to 962.6)        | 27.7 (13.5 to 50.3)             | 2.5 (2.5 to 2.5)                  |
| Bulgaria | 2017 | 714.6 (661.3 to 774.9)     | 363.9 (327.2 to 403.8)     | 338.9 (299.8 to 384.2)        | 11.1 (5.4 to 20.1)              | 0.7 (0.7 to 0.7)                  | 1874.1 (1734.3 to 2032.2) | 954.3 (858.2 to 1059.1)    | 888.9 (786.4 to 1007.6)       | 29.0 (14.2 to 52.8)             | 1.8 (1.8 to 1.8)                  |
| Bulgaria | 2018 | 734.9 (678.8 to 793.6)     | 371.4 (333.3 to 411.3)     | 351.5 (310.8 to 400.5)        | 11.3 (5.6 to 20.5)              | 0.7 (0.7 to 0.7)                  | 1927.4 (1780.2 to 2081.5) | 974.1 (874.3 to 1078.8)    | 921.9 (815.1 to 1050.4)       | 29.7 (14.6 to 53.9)             | 1.7 (1.7 to 1.7)                  |
| Bulgaria | 2019 | 754.6 (698.2 to 813.0)     | 378.1 (339.4 to 418.9)     | 364.3 (322.0 to 413.1)        | 11.6 (5.7 to 20.9)              | 0.7 (0.6 to 0.7)                  | 1979.1 (1831.1 to 2132.2) | 991.6 (890.0 to 1098.7)    | 955.4 (844.5 to 1083.4)       | 30.3 (14.9 to 54.9)             | 1.8 (1.6 to 1.9)                  |
| Bulgaria | 2020 | 775.0 (717.3 to 839.0)     | 384.7 (344.8 to 426.6)     | 377.8 (335.0 to 427.7)        | 11.8 (5.8 to 21.4)              | 0.7 (0.6 to 0.7)                  | 2032.5 (1881.2 to 2200.5) | 1008.9 (904.3 to 1118.8)   | 990.8 (878.7 to 1121.7)       | 31.0 (15.2 to 56.1)             | 1.8 (1.7 to 2.0)                  |
| Bulgaria | 2021 | 796.1 (737.8 to 859.7)     | 391.7 (352.0 to 434.4)     | 391.6 (346.2 to 441.8)        | 12.1 (5.9 to 21.8)              | 0.7 (0.6 to 0.8)                  | 2088.0 (1935.0 to 2254.7) | 1027.4 (923.2 to 1139.2)   | 1027.1 (908.1 to 1158.8)      | 31.6 (15.5 to 57.3)             | 1.9 (1.7 to 2.1)                  |
| Bulgaria | 2022 | 819.2 (758.1 to 884.1)     | 399.8 (359.7 to 442.7)     | 406.3 (359.2 to 458.0)        | 12.3 (6.0 to 22.3)              | 0.7 (0.7 to 0.8)                  | 2148.4 (1988.3 to 2318.8) | 1048.5 (943.5 to 1161.1)   | 1065.7 (942.0 to 1201.1)      | 32.3 (15.9 to 58.6)             | 2.0 (1.7 to 2.2)                  |
| Bulgaria | 2023 | 843.8 (777.9 to 912.5)     | 408.6 (367.4 to 452.6)     | 421.8 (372.8 to 477.4)        | 12.6 (6.2 to 22.9)              | 0.8 (0.7 to 0.9)                  | 2213.0 (2040.3 to 2393.3) | 1071.6 (963.7 to 1187.2)   | 1106.3 (977.7 to 1252.1)      | 33.1 (16.2 to 60.1)             | 2.0 (1.8 to 2.3)                  |
| Bulgaria | 2024 | 869.2 (804.8 to 945.2)     | 417.6 (375.4 to 463.2)     | 437.9 (387.0 to 496.3)        | 12.9 (6.3 to 23.5)              | 0.8 (0.7 to 0.9)                  | 2279.7 (2110.7 to 2479.0) | 1095.2 (984.5 to 1214.9)   | 1148.4 (1015.0 to 1301.6)     | 33.9 (16.6 to 61.5)             | 2.1 (1.8 to 2.4)                  |
| Bulgaria | 2025 | 896.1 (826.8 to 974.9)     | 427.2 (383.9 to 474.1)     | 454.8 (400.9 to 517.5)        | 13.3 (6.5 to 24.0)              | 0.8 (0.7 to 1.0)                  | 2350.1 (2168.6 to 2556.9) | 1120.3 (1006.8 to 1243.5)  | 1192.8 (1051.4 to 1357.3)     | 34.8 (17.0 to 63.0)             | 2.2 (1.9 to 2.6)                  |
| Bulgaria | 2026 | 923.6 (854.8 to 1004.9)    | 436.8 (392.3 to 484.9)     | 472.3 (414.8 to 540.5)        | 13.6 (6.7 to 24.6)              | 0.9 (0.7 to 1.0)                  | 2422.3 (2241.9 to 2635.5) | 1145.5 (1028.9 to 1271.7)  | 1238.8 (1087.9 to 1417.7)     | 35.7 (17.5 to 64.5)             | 2.3 (1.9 to 2.7)                  |
| Bulgaria | 2027 | 952.8 (879.2 to 1040.6)    | 447.1 (402.6 to 496.5)     | 490.8 (430.6 to 564.8)        | 14.0 (6.8 to 25.3)              | 0.9 (0.8 to 1.1)                  | 2498.9 (2305.9 to 2729.1) | 1172.6 (1055.9 to 1302.1)  | 1287.2 (1129.2 to 1481.4)     | 36.7 (17.8 to 66.4)             | 2.4 (2.0 to 2.8)                  |
| Bulgaria | 2028 | 983.1 (905.0 to 1077.1)    | 458.1 (411.8 to 508.7)     | 509.7 (444.5 to 592.2)        | 14.4 (7.0 to 26.1)              | 0.9 (0.8 to 1.1)                  | 2578.4 (2373.6 to 2825.0) | 1201.5 (1079.9 to 1334.2)  | 1336.8 (1165.8 to 1553.2)     | 37.7 (18.3 to 68.3)             | 2.4 (2.0 to 3.0)                  |
| Bulgaria | 2029 | 1014.4 (924.2 to 1116.5)   | 469.9 (421.4 to 522.9)     | 528.8 (456.5 to 617.1)        | 14.8 (7.2 to 26.8)              | 1.0 (0.8 to 1.2)                  | 2660.4 (2424.0 to 2928.2) | 1232.3 (1105.2 to 1371.5)  | 1386.9 (1197.3 to 1618.4)     | 38.8 (18.8 to 70.4)             | 2.5 (2.1 to 3.1)                  |

| Country  | Year | 2018 US Dollars per capita |                            |                               |                                 |                                   | 2018 PPP per capita       |                            |                               |                                 |                                   |
|----------|------|----------------------------|----------------------------|-------------------------------|---------------------------------|-----------------------------------|---------------------------|----------------------------|-------------------------------|---------------------------------|-----------------------------------|
|          |      | Health spending            | Government health spending | Out-of-pocket health spending | Prepaid private health spending | Development assistance for health | Health spending           | Government health spending | Out-of-pocket health spending | Prepaid private health spending | Development assistance for health |
| Bulgaria | 2030 | 1046.1 (952.7 to 1157.2)   | 481.8 (431.2 to 535.8)     | 548.1 (470.9 to 643.8)        | 15.2 (7.4 to 27.6)              | 1.0 (0.8 to 1.2)                  | 2743.6 (2498.7 to 3035.0) | 1263.7 (1130.8 to 1405.4)  | 1437.4 (1235.0 to 1688.4)     | 39.9 (19.3 to 72.5)             | 2.6 (2.2 to 3.2)                  |
| Bulgaria | 2031 | 1077.1 (976.6 to 1191.0)   | 493.3 (441.5 to 550.0)     | 567.2 (482.8 to 671.4)        | 15.6 (7.6 to 28.4)              | 1.0 (0.8 to 1.3)                  | 2824.9 (2561.2 to 3123.7) | 1293.7 (1157.9 to 1442.5)  | 1487.6 (1266.3 to 1761.0)     | 40.9 (19.8 to 74.6)             | 2.7 (2.2 to 3.4)                  |
| Bulgaria | 2032 | 1108.4 (1005.5 to 1230.3)  | 505.0 (452.1 to 564.5)     | 586.3 (497.7 to 699.8)        | 16.0 (7.8 to 29.2)              | 1.1 (0.9 to 1.4)                  | 2907.1 (2637.2 to 3226.7) | 1324.5 (1185.7 to 1480.6)  | 1537.8 (1305.2 to 1835.5)     | 42.0 (20.3 to 76.7)             | 2.8 (2.2 to 3.6)                  |
| Bulgaria | 2033 | 1140.1 (1029.5 to 1267.9)  | 517.1 (462.3 to 579.5)     | 605.5 (510.0 to 729.2)        | 16.5 (7.9 to 30.0)              | 1.1 (0.9 to 1.4)                  | 2990.3 (2700.1 to 3325.2) | 1356.2 (1212.6 to 1519.9)  | 1588.0 (1337.5 to 1912.3)     | 43.2 (20.8 to 78.6)             | 2.9 (2.3 to 3.8)                  |
| Bulgaria | 2034 | 1171.4 (1053.1 to 1309.9)  | 529.0 (472.3 to 594.4)     | 624.4 (521.2 to 757.8)        | 16.9 (8.1 to 30.7)              | 1.1 (0.0 to 1.5)                  | 3072.2 (2762.0 to 3435.4) | 1387.3 (1238.6 to 1558.9)  | 1637.6 (1367.0 to 1987.5)     | 44.3 (21.4 to 80.6)             | 3.0 (0.0 to 3.9)                  |
| Bulgaria | 2035 | 1203.0 (1073.6 to 1354.5)  | 541.3 (482.6 to 609.9)     | 643.3 (532.3 to 785.0)        | 17.3 (8.3 to 31.5)              | 1.1 (0.0 to 1.6)                  | 3155.2 (2815.8 to 3552.4) | 1419.6 (1265.7 to 1599.6)  | 1687.2 (1396.0 to 2058.9)     | 45.5 (21.9 to 82.5)             | 3.0 (0.0 to 4.1)                  |
| Bulgaria | 2036 | 1233.8 (1093.2 to 1398.5)  | 553.2 (493.8 to 624.5)     | 661.7 (543.5 to 813.8)        | 17.8 (8.5 to 32.2)              | 1.2 (0.0 to 1.7)                  | 3236.0 (2867.0 to 3667.9) | 1450.9 (1295.2 to 1637.8)  | 1735.4 (1425.3 to 2134.2)     | 46.6 (22.4 to 84.4)             | 3.0 (0.0 to 4.4)                  |
| Bulgaria | 2037 | 1264.1 (1118.3 to 1441.2)  | 565.0 (503.4 to 638.7)     | 679.7 (555.0 to 841.2)        | 18.2 (8.7 to 32.9)              | 1.2 (0.0 to 1.7)                  | 3315.3 (2933.0 to 3779.8) | 1481.9 (1320.3 to 1675.1)  | 1782.7 (1455.5 to 2206.2)     | 47.7 (22.9 to 86.3)             | 3.1 (0.0 to 4.6)                  |
| Bulgaria | 2038 | 1295.1 (1138.7 to 1476.5)  | 577.5 (512.8 to 654.1)     | 697.8 (565.8 to 868.3)        | 18.6 (8.9 to 33.8)              | 1.2 (0.0 to 1.8)                  | 3396.7 (2986.4 to 3872.4) | 1514.7 (1345.0 to 1715.4)  | 1830.0 (1484.0 to 2277.3)     | 48.9 (23.4 to 88.5)             | 3.1 (0.0 to 4.8)                  |
| Bulgaria | 2039 | 1325.9 (1167.5 to 1511.8)  | 590.2 (523.4 to 670.1)     | 715.5 (577.2 to 895.0)        | 19.1 (9.1 to 34.5)              | 1.2 (0.0 to 1.9)                  | 3477.6 (3062.0 to 3965.0) | 1547.9 (1372.6 to 1757.4)  | 1876.4 (1513.8 to 2347.3)     | 50.1 (23.9 to 90.5)             | 3.1 (0.0 to 5.1)                  |
| Bulgaria | 2040 | 1356.6 (1190.1 to 1558.3)  | 603.1 (535.2 to 686.6)     | 732.8 (588.5 to 921.2)        | 19.6 (9.3 to 35.4)              | 1.2 (0.0 to 2.0)                  | 3557.9 (3121.4 to 4086.9) | 1581.6 (1403.7 to 1800.7)  | 1921.8 (1543.6 to 2415.9)     | 51.3 (24.5 to 92.8)             | 3.1 (0.0 to 5.3)                  |
| Bulgaria | 2041 | 1385.9 (1213.5 to 1592.2)  | 615.5 (543.9 to 701.9)     | 749.3 (598.5 to 946.2)        | 20.0 (9.5 to 36.3)              | 1.2 (0.0 to 2.1)                  | 3634.9 (3182.7 to 4175.9) | 1614.3 (1426.6 to 1841.0)  | 1965.1 (1569.6 to 2481.7)     | 52.5 (25.0 to 95.2)             | 3.0 (0.0 to 5.5)                  |
| Bulgaria | 2042 | 1415.3 (1234.5 to 1633.9)  | 628.3 (555.5 to 718.3)     | 765.4 (609.1 to 969.9)        | 20.5 (9.7 to 37.2)              | 1.1 (0.0 to 2.2)                  | 3712.0 (3237.8 to 4285.2) | 1647.8 (1457.0 to 1883.8)  | 2007.5 (1597.4 to 2543.8)     | 53.7 (25.5 to 97.5)             | 3.0 (0.0 to 5.8)                  |
| Bulgaria | 2043 | 1445.3 (1264.1 to 1667.6)  | 641.8 (568.5 to 735.0)     | 781.4 (619.8 to 993.2)        | 21.0 (10.0 to 38.0)             | 1.1 (0.0 to 2.3)                  | 3790.6 (3315.3 to 4373.6) | 1683.3 (1491.1 to 1927.7)  | 2049.4 (1625.5 to 2604.8)     | 55.0 (26.1 to 99.6)             | 2.9 (0.0 to 6.1)                  |
| Bulgaria | 2044 | 1475.7 (1281.1 to 1703.9)  | 656.1 (580.0 to 753.1)     | 797.1 (630.2 to 1014.1)       | 21.5 (10.2 to 38.8)             | 1.1 (0.0 to 2.5)                  | 3870.3 (3360.1 to 4468.8) | 1720.7 (1521.3 to 1975.1)  | 2090.5 (1652.9 to 2659.6)     | 56.3 (26.7 to 101.7)            | 2.8 (0.0 to 6.4)                  |
| Bulgaria | 2045 | 1504.7 (1307.3 to 1747.4)  | 669.9 (590.2 to 771.1)     | 811.8 (638.1 to 1032.4)       | 22.0 (10.4 to 39.7)             | 1.1 (0.0 to 2.5)                  | 3946.4 (3428.6 to 4582.8) | 1756.9 (1547.8 to 2022.4)  | 2129.0 (1673.6 to 2707.7)     | 57.7 (27.3 to 104.0)            | 2.8 (0.0 to 6.7)                  |
| Bulgaria | 2046 | 1532.8 (1335.2 to 1779.9)  | 683.6 (600.0 to 787.5)     | 825.6 (649.5 to 1051.3)       | 22.5 (10.6 to 40.7)             | 1.0 (0.0 to 2.7)                  | 4020.1 (3501.9 to 4668.2) | 1792.9 (1573.6 to 2065.4)  | 2165.4 (1703.4 to 2757.3)     | 59.0 (27.9 to 106.7)            | 2.7 (0.0 to 7.1)                  |
| Bulgaria | 2047 | 1561.3 (1352.1 to 1817.5)  | 698.1 (609.5 to 805.5)     | 839.1 (660.7 to 1071.4)       | 23.0 (10.9 to 41.8)             | 1.0 (0.0 to 2.9)                  | 4094.8 (3546.1 to 4766.7) | 1831.0 (1598.5 to 2112.5)  | 2200.7 (1732.7 to 2810.0)     | 60.4 (28.6 to 109.6)            | 2.6 (0.0 to 7.5)                  |
| Bulgaria | 2048 | 1590.5 (1370.6 to 1855.2)  | 713.1 (621.3 to 824.6)     | 852.8 (670.6 to 1087.6)       | 23.6 (11.2 to 42.9)             | 1.0 (0.0 to 3.0)                  | 4171.3 (3594.7 to 4865.7) | 1870.3 (1629.5 to 2162.6)  | 2236.6 (1758.8 to 2852.5)     | 61.9 (29.3 to 112.5)            | 2.5 (0.0 to 7.8)                  |
| Bulgaria | 2049 | 1619.3 (1401.7 to 1883.8)  | 727.9 (632.2 to 843.4)     | 866.3 (679.6 to 1109.2)       | 24.1 (11.5 to 44.0)             | 0.9 (0.0 to 3.2)                  | 4247.0 (3676.3 to 4940.7) | 1909.0 (1658.0 to 2212.0)  | 2272.1 (1782.3 to 2909.2)     | 63.3 (30.0 to 115.5)            | 2.5 (0.0 to 8.3)                  |
| Bulgaria | 2050 | 1647.1 (1425.8 to 1915.8)  | 741.9 (643.3 to 861.4)     | 879.6 (688.0 to 1130.4)       | 24.7 (11.7 to 45.1)             | 0.9 (0.0 to 3.3)                  | 4319.8 (3739.5 to 5024.7) | 1945.8 (1687.1 to 2259.1)  | 2306.8 (1804.5 to 2964.8)     | 64.7 (30.7 to 118.3)            | 2.4 (0.0 to 8.7)                  |

| Country      | Year | 2018 US Dollars per capita |                            |                               |                                 |                                   | 2018 PPP per capita  |                            |                               |                                 |                                   |
|--------------|------|----------------------------|----------------------------|-------------------------------|---------------------------------|-----------------------------------|----------------------|----------------------------|-------------------------------|---------------------------------|-----------------------------------|
|              |      | Health spending            | Government health spending | Out-of-pocket health spending | Prepaid private health spending | Development assistance for health | Health spending      | Government health spending | Out-of-pocket health spending | Prepaid private health spending | Development assistance for health |
| Burkina Faso | 1995 | 18.0 (15.0 to 21.7)        | 4.7 (3.5 to 6.2)           | 8.6 (6.0 to 11.9)             | 1.0 (0.4 to 1.8)                | 3.7 (3.7 to 3.7)                  | 50.1 (41.7 to 60.3)  | 13.2 (9.9 to 17.2)         | 23.9 (16.8 to 33.1)           | 2.7 (1.2 to 5.1)                | 10.3 (10.3 to 10.3)               |
| Burkina Faso | 1996 | 16.7 (13.7 to 20.4)        | 5.2 (3.9 to 6.7)           | 8.7 (6.1 to 12.0)             | 1.0 (0.5 to 2.0)                | 1.8 (1.8 to 1.8)                  | 46.4 (38.1 to 56.7)  | 14.3 (10.7 to 18.6)        | 24.2 (17.0 to 33.3)           | 2.8 (1.3 to 5.5)                | 5.0 (5.0 to 5.0)                  |
| Burkina Faso | 1997 | 18.5 (15.4 to 22.2)        | 5.3 (4.0 to 6.9)           | 8.6 (6.0 to 11.9)             | 1.0 (0.5 to 2.0)                | 3.6 (3.6 to 3.6)                  | 51.4 (42.7 to 61.6)  | 14.8 (11.1 to 19.1)        | 23.8 (16.5 to 33.0)           | 2.8 (1.3 to 5.4)                | 10.0 (10.0 to 10.0)               |
| Burkina Faso | 1998 | 18.6 (15.5 to 22.2)        | 5.5 (4.2 to 7.1)           | 8.4 (5.8 to 11.6)             | 1.0 (0.5 to 1.9)                | 3.8 (3.8 to 3.8)                  | 51.6 (43.1 to 61.5)  | 15.2 (11.5 to 19.6)        | 23.2 (16.2 to 32.2)           | 2.7 (1.3 to 5.2)                | 10.5 (10.5 to 10.5)               |
| Burkina Faso | 1999 | 17.0 (14.1 to 20.3)        | 5.6 (4.3 to 7.3)           | 8.0 (5.6 to 11.1)             | 0.9 (0.4 to 1.8)                | 2.6 (2.6 to 2.6)                  | 47.3 (39.1 to 56.3)  | 15.6 (11.8 to 20.4)        | 22.1 (15.5 to 30.9)           | 2.5 (1.2 to 4.9)                | 7.1 (7.1 to 7.1)                  |
| Burkina Faso | 2000 | 15.6 (13.1 to 18.6)        | 5.3 (4.0 to 7.0)           | 7.0 (4.9 to 9.7)              | 0.7 (0.3 to 1.4)                | 2.6 (2.6 to 2.6)                  | 43.4 (36.2 to 51.7)  | 14.7 (11.2 to 19.3)        | 19.4 (13.7 to 26.9)           | 2.0 (0.9 to 3.9)                | 7.3 (7.3 to 7.3)                  |
| Burkina Faso | 2001 | 16.6 (13.9 to 19.5)        | 5.5 (4.1 to 7.1)           | 6.7 (4.8 to 9.4)              | 0.7 (0.3 to 1.3)                | 3.8 (3.8 to 3.8)                  | 46.0 (38.7 to 54.1)  | 15.2 (11.5 to 19.8)        | 18.5 (13.3 to 26.2)           | 1.9 (0.8 to 3.6)                | 10.5 (10.5 to 10.5)               |
| Burkina Faso | 2002 | 16.2 (13.5 to 19.1)        | 5.7 (4.3 to 7.5)           | 6.5 (4.5 to 8.9)              | 0.7 (0.3 to 1.2)                | 3.3 (3.3 to 3.3)                  | 44.8 (37.4 to 53.0)  | 16.0 (12.1 to 20.8)        | 17.9 (12.5 to 24.6)           | 1.8 (0.8 to 3.4)                | 9.2 (9.2 to 9.2)                  |
| Burkina Faso | 2003 | 19.0 (16.2 to 22.1)        | 6.3 (4.8 to 8.2)           | 6.6 (4.6 to 8.9)              | 0.7 (0.3 to 1.3)                | 5.4 (5.4 to 5.4)                  | 52.6 (45.0 to 61.3)  | 17.5 (13.2 to 22.7)        | 18.2 (12.7 to 24.8)           | 1.8 (0.8 to 3.5)                | 15.1 (15.1 to 15.1)               |
| Burkina Faso | 2004 | 21.5 (18.4 to 24.9)        | 7.3 (5.5 to 9.4)           | 7.1 (5.0 to 9.8)              | 0.7 (0.3 to 1.3)                | 6.3 (6.3 to 6.3)                  | 59.6 (51.1 to 69.2)  | 20.4 (15.4 to 26.1)        | 19.8 (13.8 to 27.1)           | 1.9 (0.9 to 3.7)                | 17.5 (17.5 to 17.5)               |
| Burkina Faso | 2005 | 23.4 (20.2 to 27.0)        | 7.8 (5.8 to 9.9)           | 7.6 (5.3 to 10.4)             | 0.7 (0.3 to 1.4)                | 7.4 (7.4 to 7.4)                  | 65.0 (56.2 to 74.9)  | 21.5 (16.2 to 27.4)        | 21.0 (14.8 to 28.9)           | 2.0 (0.9 to 3.8)                | 20.4 (20.4 to 20.4)               |
| Burkina Faso | 2006 | 24.7 (21.3 to 28.4)        | 8.4 (6.4 to 10.6)          | 8.2 (5.8 to 11.4)             | 0.8 (0.3 to 1.4)                | 7.3 (7.3 to 7.3)                  | 68.5 (59.1 to 78.7)  | 23.2 (17.7 to 29.5)        | 22.9 (16.2 to 31.8)           | 2.1 (1.0 to 4.0)                | 20.3 (20.3 to 20.3)               |
| Burkina Faso | 2007 | 25.1 (21.6 to 29.0)        | 8.6 (6.6 to 11.0)          | 8.7 (6.3 to 12.1)             | 0.9 (0.4 to 1.6)                | 6.8 (6.8 to 6.8)                  | 69.5 (60.0 to 80.4)  | 23.9 (18.2 to 30.5)        | 24.3 (17.4 to 33.5)           | 2.4 (1.1 to 4.6)                | 19.0 (19.0 to 19.0)               |
| Burkina Faso | 2008 | 28.0 (24.4 to 32.1)        | 8.9 (6.7 to 11.3)          | 9.2 (6.6 to 12.7)             | 1.0 (0.5 to 2.0)                | 8.8 (8.8 to 8.8)                  | 77.7 (67.8 to 89.0)  | 24.6 (18.6 to 31.3)        | 25.7 (18.4 to 35.3)           | 2.9 (1.3 to 5.5)                | 24.5 (24.5 to 24.5)               |
| Burkina Faso | 2009 | 28.7 (25.0 to 33.0)        | 9.1 (6.9 to 11.5)          | 9.8 (6.9 to 13.5)             | 1.3 (0.6 to 2.5)                | 8.6 (8.6 to 8.6)                  | 79.6 (69.4 to 91.7)  | 25.2 (19.1 to 32.1)        | 27.1 (19.2 to 37.5)           | 3.5 (1.7 to 7.0)                | 23.8 (23.8 to 23.8)               |
| Burkina Faso | 2010 | 31.2 (27.3 to 35.6)        | 9.1 (6.8 to 11.6)          | 10.2 (7.2 to 13.9)            | 1.3 (0.6 to 2.6)                | 10.6 (10.6 to 10.6)               | 86.6 (75.8 to 98.9)  | 25.2 (19.0 to 32.1)        | 28.3 (19.9 to 38.6)           | 3.7 (1.7 to 7.2)                | 29.5 (29.5 to 29.5)               |
| Burkina Faso | 2011 | 27.2 (23.2 to 32.0)        | 9.2 (6.9 to 11.8)          | 10.5 (7.3 to 14.3)            | 1.4 (0.7 to 2.8)                | 6.1 (6.1 to 6.1)                  | 75.6 (64.3 to 88.7)  | 25.6 (19.2 to 32.9)        | 29.2 (20.4 to 39.6)           | 3.9 (1.8 to 7.6)                | 17.0 (17.0 to 17.0)               |
| Burkina Faso | 2012 | 30.7 (26.5 to 35.6)        | 9.3 (7.0 to 12.1)          | 11.0 (7.7 to 14.9)            | 1.5 (0.7 to 2.9)                | 8.9 (8.9 to 8.9)                  | 85.1 (73.6 to 98.8)  | 25.9 (19.5 to 33.6)        | 30.4 (21.4 to 41.3)           | 4.1 (1.9 to 7.9)                | 24.6 (24.6 to 24.6)               |
| Burkina Faso | 2013 | 32.1 (27.5 to 37.5)        | 10.4 (7.8 to 13.5)         | 12.0 (8.5 to 16.5)            | 1.8 (0.8 to 3.4)                | 7.9 (7.9 to 7.9)                  | 89.0 (76.3 to 104.2) | 28.8 (21.7 to 37.5)        | 33.4 (23.5 to 45.7)           | 5.0 (2.4 to 9.6)                | 21.8 (21.8 to 21.8)               |
| Burkina Faso | 2014 | 33.4 (28.7 to 39.4)        | 11.1 (8.5 to 14.4)         | 12.4 (8.7 to 17.2)            | 2.1 (1.0 to 4.0)                | 7.8 (7.8 to 7.8)                  | 92.8 (79.6 to 109.4) | 30.8 (23.5 to 39.8)        | 34.4 (24.2 to 47.7)           | 5.8 (2.7 to 11.1)               | 21.7 (21.7 to 21.7)               |
| Burkina Faso | 2015 | 35.0 (30.1 to 41.3)        | 11.5 (8.6 to 14.8)         | 12.6 (9.0 to 17.7)            | 2.2 (1.0 to 4.1)                | 8.8 (8.8 to 8.8)                  | 97.2 (83.5 to 114.7) | 31.8 (23.9 to 41.2)        | 35.0 (25.0 to 49.0)           | 6.0 (2.7 to 11.4)               | 24.3 (24.3 to 24.3)               |

| Country      | Year | 2018 US Dollars per capita |                            |                               |                                 |                                   | 2018 PPP per capita    |                            |                               |                                 |                                   |
|--------------|------|----------------------------|----------------------------|-------------------------------|---------------------------------|-----------------------------------|------------------------|----------------------------|-------------------------------|---------------------------------|-----------------------------------|
|              |      | Health spending            | Government health spending | Out-of-pocket health spending | Prepaid private health spending | Development assistance for health | Health spending        | Government health spending | Out-of-pocket health spending | Prepaid private health spending | Development assistance for health |
| Burkina Faso | 2016 | 37.2 (31.8 to 43.6)        | 13.4 (10.2 to 17.4)        | 13.2 (9.5 to 18.6)            | 2.4 (1.1 to 4.5)                | 8.2 (8.2 to 8.2)                  | 103.3 (88.3 to 120.9)  | 37.1 (28.4 to 48.4)        | 36.7 (26.2 to 51.7)           | 6.6 (3.0 to 12.4)               | 22.9 (22.9 to 22.9)               |
| Burkina Faso | 2017 | 40.7 (34.7 to 48.2)        | 16.0 (12.2 to 20.9)        | 13.7 (9.8 to 19.2)            | 2.6 (1.2 to 4.9)                | 8.4 (8.4 to 8.4)                  | 112.9 (96.3 to 133.9)  | 44.4 (34.0 to 57.9)        | 38.0 (27.1 to 53.3)           | 7.2 (3.2 to 13.6)               | 23.3 (23.3 to 23.3)               |
| Burkina Faso | 2018 | 40.7 (34.6 to 48.3)        | 16.5 (12.6 to 21.5)        | 14.0 (10.0 to 19.6)           | 2.6 (1.2 to 5.0)                | 7.6 (7.5 to 7.7)                  | 113.1 (95.9 to 134.2)  | 45.7 (35.1 to 59.8)        | 38.9 (27.7 to 54.4)           | 7.4 (3.3 to 13.9)               | 21.1 (20.7 to 21.4)               |
| Burkina Faso | 2019 | 41.5 (35.3 to 49.2)        | 17.0 (13.0 to 22.2)        | 14.3 (10.2 to 20.0)           | 2.7 (1.2 to 5.2)                | 7.5 (7.0 to 8.0)                  | 115.2 (98.1 to 136.6)  | 47.1 (36.2 to 61.6)        | 39.8 (28.2 to 55.5)           | 7.6 (3.4 to 14.3)               | 20.7 (19.3 to 22.1)               |
| Burkina Faso | 2020 | 42.4 (36.1 to 50.1)        | 17.5 (13.5 to 22.9)        | 14.7 (10.4 to 20.5)           | 2.8 (1.3 to 5.3)                | 7.4 (6.8 to 8.1)                  | 117.7 (100.2 to 139.0) | 48.6 (37.4 to 63.5)        | 40.7 (28.9 to 57.0)           | 7.8 (3.5 to 14.7)               | 20.6 (18.8 to 22.4)               |
| Burkina Faso | 2021 | 43.3 (36.8 to 51.3)        | 18.0 (13.8 to 23.6)        | 15.0 (10.6 to 21.1)           | 2.9 (1.3 to 5.5)                | 7.4 (6.6 to 8.2)                  | 120.2 (102.1 to 142.3) | 50.0 (38.4 to 65.6)        | 41.6 (29.5 to 58.5)           | 8.0 (3.6 to 15.2)               | 20.6 (18.4 to 22.7)               |
| Burkina Faso | 2022 | 44.3 (37.4 to 52.2)        | 18.6 (14.1 to 24.3)        | 15.3 (10.9 to 21.6)           | 3.0 (1.3 to 5.6)                | 7.4 (6.6 to 8.4)                  | 122.9 (103.8 to 144.7) | 51.5 (39.3 to 67.5)        | 42.5 (30.2 to 59.8)           | 8.2 (3.7 to 15.7)               | 20.6 (18.2 to 23.2)               |
| Burkina Faso | 2023 | 45.3 (38.3 to 53.3)        | 19.1 (14.6 to 25.0)        | 15.7 (11.1 to 22.0)           | 3.0 (1.4 to 5.8)                | 7.4 (6.4 to 8.5)                  | 125.7 (106.4 to 148.0) | 53.1 (40.6 to 69.3)        | 43.5 (30.7 to 61.1)           | 8.4 (3.8 to 16.1)               | 20.6 (17.9 to 23.6)               |
| Burkina Faso | 2024 | 46.4 (38.8 to 54.9)        | 19.8 (15.1 to 25.8)        | 16.1 (11.3 to 22.6)           | 3.1 (1.4 to 6.0)                | 7.4 (6.4 to 8.7)                  | 128.7 (107.8 to 152.4) | 54.8 (42.0 to 71.6)        | 44.6 (31.5 to 62.6)           | 8.7 (3.9 to 16.6)               | 20.6 (17.7 to 24.1)               |
| Burkina Faso | 2025 | 47.5 (39.7 to 56.5)        | 20.4 (15.6 to 26.7)        | 16.4 (11.6 to 23.0)           | 3.2 (1.4 to 6.2)                | 7.4 (6.3 to 8.8)                  | 131.7 (110.0 to 156.9) | 56.6 (43.4 to 74.0)        | 45.6 (32.2 to 63.7)           | 9.0 (4.0 to 17.1)               | 20.6 (17.5 to 24.4)               |
| Burkina Faso | 2026 | 48.6 (40.3 to 57.7)        | 21.1 (16.2 to 27.5)        | 16.8 (11.8 to 23.6)           | 3.3 (1.5 to 6.4)                | 7.4 (6.2 to 8.7)                  | 134.9 (111.9 to 160.1) | 58.4 (44.8 to 76.4)        | 46.7 (32.8 to 65.6)           | 9.2 (4.1 to 17.7)               | 20.5 (17.2 to 24.2)               |
| Burkina Faso | 2027 | 49.8 (41.7 to 59.4)        | 21.8 (16.7 to 28.5)        | 17.2 (12.1 to 24.3)           | 3.4 (1.5 to 6.6)                | 7.4 (6.1 to 8.8)                  | 138.2 (115.7 to 164.9) | 60.4 (46.4 to 79.0)        | 47.8 (33.5 to 67.5)           | 9.5 (4.2 to 18.2)               | 20.5 (17.0 to 24.5)               |
| Burkina Faso | 2028 | 51.0 (42.6 to 61.3)        | 22.5 (17.2 to 29.4)        | 17.6 (12.3 to 25.0)           | 3.5 (1.6 to 6.8)                | 7.4 (6.1 to 9.0)                  | 141.6 (118.2 to 170.0) | 62.4 (47.8 to 81.6)        | 48.9 (34.2 to 69.4)           | 9.8 (4.4 to 18.8)               | 20.5 (17.0 to 25.1)               |
| Burkina Faso | 2029 | 52.3 (43.7 to 62.6)        | 23.2 (17.8 to 30.3)        | 18.1 (12.6 to 25.7)           | 3.6 (1.6 to 7.0)                | 7.4 (6.0 to 9.1)                  | 145.2 (121.3 to 173.6) | 64.5 (49.3 to 84.2)        | 50.1 (34.8 to 71.2)           | 10.1 (4.5 to 19.4)              | 20.5 (16.8 to 25.2)               |
| Burkina Faso | 2030 | 53.5 (44.1 to 64.2)        | 23.9 (18.3 to 31.2)        | 18.5 (12.8 to 26.3)           | 3.7 (1.7 to 7.2)                | 7.4 (6.0 to 9.1)                  | 148.6 (122.4 to 178.1) | 66.4 (50.7 to 86.6)        | 51.3 (35.5 to 73.0)           | 10.4 (4.6 to 20.0)              | 20.5 (16.6 to 25.4)               |
| Burkina Faso | 2031 | 54.9 (45.2 to 66.4)        | 24.7 (18.9 to 32.2)        | 18.9 (13.0 to 27.0)           | 3.9 (1.7 to 7.4)                | 7.4 (6.0 to 9.3)                  | 152.3 (125.5 to 184.3) | 68.6 (52.5 to 89.4)        | 52.5 (36.1 to 75.0)           | 10.7 (4.8 to 20.6)              | 20.5 (16.5 to 25.9)               |
| Burkina Faso | 2032 | 56.3 (46.3 to 68.1)        | 25.5 (19.6 to 33.3)        | 19.4 (13.3 to 27.8)           | 4.0 (1.8 to 7.6)                | 7.4 (5.9 to 9.4)                  | 156.2 (128.5 to 188.9) | 70.9 (54.3 to 92.3)        | 53.8 (36.8 to 77.1)           | 11.0 (4.9 to 21.2)              | 20.5 (16.4 to 26.2)               |
| Burkina Faso | 2033 | 57.7 (47.9 to 69.9)        | 26.4 (20.2 to 34.4)        | 19.8 (13.6 to 28.5)           | 4.1 (1.8 to 7.9)                | 7.4 (5.9 to 9.5)                  | 160.2 (133.0 to 194.0) | 73.2 (56.0 to 95.5)        | 55.0 (37.7 to 79.2)           | 11.4 (5.1 to 21.9)              | 20.5 (16.3 to 26.3)               |
| Burkina Faso | 2034 | 59.2 (48.6 to 70.9)        | 27.3 (20.8 to 35.5)        | 20.3 (13.9 to 29.2)           | 4.2 (1.9 to 8.1)                | 7.4 (5.8 to 9.7)                  | 164.3 (134.9 to 196.8) | 75.7 (57.6 to 98.6)        | 56.3 (38.5 to 81.1)           | 11.7 (5.2 to 22.5)              | 20.6 (16.2 to 26.9)               |
| Burkina Faso | 2035 | 60.7 (49.9 to 73.3)        | 28.2 (21.4 to 36.7)        | 20.8 (14.1 to 30.0)           | 4.4 (1.9 to 8.4)                | 7.5 (5.8 to 9.8)                  | 168.5 (138.4 to 203.4) | 78.2 (59.4 to 101.9)       | 57.6 (39.2 to 83.3)           | 12.1 (5.4 to 23.2)              | 20.7 (16.1 to 27.3)               |
| Burkina Faso | 2036 | 62.3 (51.4 to 75.1)        | 29.1 (22.1 to 37.9)        | 21.2 (14.3 to 30.8)           | 4.5 (2.0 to 8.6)                | 7.5 (5.8 to 10.0)                 | 172.8 (142.7 to 208.3) | 80.7 (61.3 to 105.1)       | 58.9 (39.7 to 85.4)           | 12.4 (5.5 to 23.9)              | 20.8 (16.0 to 27.9)               |

| Country      | Year | 2018 US Dollars per capita |                            |                               |                                 |                                   | 2018 PPP per capita    |                            |                               |                                 |                                   |
|--------------|------|----------------------------|----------------------------|-------------------------------|---------------------------------|-----------------------------------|------------------------|----------------------------|-------------------------------|---------------------------------|-----------------------------------|
|              |      | Health spending            | Government health spending | Out-of-pocket health spending | Prepaid private health spending | Development assistance for health | Health spending        | Government health spending | Out-of-pocket health spending | Prepaid private health spending | Development assistance for health |
| Burkina Faso | 2037 | 63.9 (52.6 to 77.5)        | 30.0 (22.8 to 39.0)        | 21.7 (14.6 to 31.5)           | 4.6 (2.1 to 8.9)                | 7.5 (5.7 to 10.2)                 | 177.2 (146.0 to 214.9) | 83.4 (63.3 to 108.4)       | 60.2 (40.5 to 87.4)           | 12.8 (5.7 to 24.7)              | 20.8 (15.9 to 28.2)               |
| Burkina Faso | 2038 | 65.5 (53.9 to 79.6)        | 31.0 (23.5 to 40.3)        | 22.2 (14.9 to 32.3)           | 4.8 (2.1 to 9.2)                | 7.5 (5.7 to 10.3)                 | 181.8 (149.5 to 220.9) | 86.1 (65.3 to 111.8)       | 61.6 (41.2 to 89.7)           | 13.2 (5.9 to 25.4)              | 20.9 (15.8 to 28.7)               |
| Burkina Faso | 2039 | 67.2 (54.8 to 82.2)        | 32.0 (24.2 to 41.6)        | 22.7 (15.1 to 33.0)           | 4.9 (2.2 to 9.4)                | 7.6 (5.7 to 10.3)                 | 186.5 (152.2 to 228.0) | 88.9 (67.3 to 115.6)       | 62.9 (42.0 to 91.7)           | 13.6 (6.0 to 26.2)              | 21.0 (15.8 to 28.6)               |
| Burkina Faso | 2040 | 68.9 (56.5 to 83.1)        | 33.1 (25.0 to 43.1)        | 23.2 (15.4 to 33.8)           | 5.1 (2.2 to 9.7)                | 7.6 (5.7 to 10.6)                 | 191.3 (156.9 to 230.5) | 91.8 (69.3 to 119.5)       | 64.3 (42.8 to 93.7)           | 14.0 (6.2 to 27.0)              | 21.1 (15.8 to 29.3)               |
| Burkina Faso | 2041 | 70.7 (57.7 to 85.6)        | 34.2 (25.7 to 44.5)        | 23.7 (15.7 to 34.6)           | 5.2 (2.3 to 10.0)               | 7.7 (5.7 to 10.9)                 | 196.2 (160.2 to 237.4) | 94.8 (71.4 to 123.6)       | 65.7 (43.5 to 96.0)           | 14.4 (6.4 to 27.8)              | 21.3 (15.8 to 30.2)               |
| Burkina Faso | 2042 | 72.5 (58.9 to 88.1)        | 35.3 (26.6 to 46.0)        | 24.2 (16.0 to 35.4)           | 5.4 (2.4 to 10.3)               | 7.7 (5.6 to 11.2)                 | 201.3 (163.5 to 244.5) | 97.8 (73.7 to 127.8)       | 67.1 (44.4 to 98.1)           | 14.9 (6.6 to 28.6)              | 21.4 (15.6 to 31.0)               |
| Burkina Faso | 2043 | 74.4 (60.4 to 90.9)        | 36.4 (27.4 to 47.6)        | 24.7 (16.3 to 36.1)           | 5.5 (2.4 to 10.6)               | 7.8 (5.7 to 11.5)                 | 206.5 (167.6 to 252.1) | 101.0 (76.0 to 132.1)      | 68.6 (45.2 to 100.2)          | 15.3 (6.8 to 29.5)              | 21.6 (15.8 to 31.9)               |
| Burkina Faso | 2044 | 76.4 (62.7 to 93.4)        | 37.6 (28.2 to 49.3)        | 25.2 (16.6 to 37.0)           | 5.7 (2.5 to 10.9)               | 7.9 (5.7 to 11.5)                 | 211.9 (173.9 to 259.1) | 104.3 (78.4 to 136.7)      | 70.0 (46.1 to 102.6)          | 15.8 (7.0 to 30.4)              | 21.8 (15.8 to 31.9)               |
| Burkina Faso | 2045 | 78.3 (63.3 to 95.5)        | 38.8 (29.1 to 50.9)        | 25.8 (16.9 to 37.8)           | 5.9 (2.6 to 11.3)               | 7.9 (5.7 to 12.1)                 | 217.4 (175.7 to 265.1) | 107.7 (80.7 to 141.2)      | 71.5 (46.9 to 104.9)          | 16.3 (7.2 to 31.3)              | 22.0 (15.8 to 33.6)               |
| Burkina Faso | 2046 | 80.4 (64.4 to 98.8)        | 40.0 (29.9 to 52.6)        | 26.3 (17.3 to 38.5)           | 6.0 (2.7 to 11.6)               | 8.0 (5.7 to 12.2)                 | 223.0 (178.7 to 274.3) | 111.1 (83.1 to 145.9)      | 73.0 (47.9 to 106.9)          | 16.7 (7.5 to 32.2)              | 22.2 (15.9 to 33.9)               |
| Burkina Faso | 2047 | 82.4 (66.2 to 99.6)        | 41.3 (30.8 to 54.3)        | 26.8 (17.6 to 39.2)           | 6.2 (2.8 to 11.9)               | 8.1 (5.8 to 12.7)                 | 228.7 (183.6 to 276.3) | 114.5 (85.6 to 150.8)      | 74.4 (48.8 to 108.8)          | 17.2 (7.7 to 33.2)              | 22.5 (16.1 to 35.3)               |
| Burkina Faso | 2048 | 84.5 (69.1 to 102.9)       | 42.5 (31.8 to 56.1)        | 27.4 (17.9 to 39.9)           | 6.4 (2.9 to 12.3)               | 8.2 (5.8 to 13.2)                 | 234.5 (191.6 to 285.5) | 118.0 (88.1 to 155.6)      | 75.9 (49.8 to 110.8)          | 17.7 (7.9 to 34.2)              | 22.8 (16.0 to 36.6)               |
| Burkina Faso | 2049 | 86.6 (70.0 to 105.9)       | 43.8 (32.6 to 57.7)        | 27.9 (18.3 to 40.7)           | 6.6 (2.9 to 12.7)               | 8.3 (5.7 to 13.4)                 | 240.4 (194.3 to 293.8) | 121.6 (90.5 to 160.2)      | 77.5 (50.7 to 113.0)          | 18.2 (8.2 to 35.2)              | 23.1 (15.9 to 37.0)               |
| Burkina Faso | 2050 | 88.8 (71.7 to 108.5)       | 45.1 (33.5 to 59.3)        | 28.5 (18.6 to 41.6)           | 6.8 (3.0 to 13.0)               | 8.4 (5.9 to 13.6)                 | 246.5 (199.0 to 301.1) | 125.3 (93.0 to 164.7)      | 79.0 (51.6 to 115.4)          | 18.8 (8.4 to 36.2)              | 23.4 (16.3 to 37.8)               |
| Burundi      | 1995 | 23.3 (19.2 to 28.4)        | 7.4 (5.6 to 9.6)           | 9.8 (6.9 to 13.7)             | 3.9 (1.9 to 7.3)                | 2.2 (2.2 to 2.2)                  | 50.9 (42.0 to 62.0)    | 16.1 (12.3 to 21.1)        | 21.4 (15.0 to 29.9)           | 8.5 (4.1 to 15.9)               | 4.9 (4.9 to 4.9)                  |
| Burundi      | 1996 | 21.3 (17.5 to 26.3)        | 7.0 (5.4 to 9.2)           | 9.3 (6.5 to 12.8)             | 3.9 (1.9 to 7.0)                | 1.2 (1.2 to 1.2)                  | 46.6 (38.2 to 57.6)    | 15.3 (11.7 to 20.2)        | 20.3 (14.3 to 28.0)           | 8.5 (4.1 to 15.3)               | 2.5 (2.5 to 2.5)                  |
| Burundi      | 1997 | 21.2 (17.4 to 26.0)        | 6.9 (5.2 to 8.9)           | 9.2 (6.4 to 12.8)             | 3.9 (1.8 to 7.1)                | 1.3 (1.3 to 1.3)                  | 46.4 (38.0 to 56.9)    | 15.0 (11.4 to 19.5)        | 20.1 (14.0 to 27.9)           | 8.4 (3.9 to 15.6)               | 2.8 (2.8 to 2.8)                  |
| Burundi      | 1998 | 22.0 (18.0 to 27.2)        | 7.0 (5.2 to 9.1)           | 9.5 (6.6 to 13.3)             | 4.2 (2.0 to 7.9)                | 1.5 (1.5 to 1.5)                  | 48.2 (39.3 to 59.5)    | 15.2 (11.4 to 19.9)        | 20.7 (14.4 to 29.0)           | 9.1 (4.4 to 17.2)               | 3.2 (3.2 to 3.2)                  |
| Burundi      | 1999 | 22.2 (18.0 to 27.6)        | 6.7 (5.1 to 8.8)           | 9.6 (6.6 to 13.5)             | 4.5 (2.2 to 8.4)                | 1.5 (1.5 to 1.5)                  | 48.6 (39.4 to 60.3)    | 14.6 (11.0 to 19.2)        | 20.9 (14.5 to 29.4)           | 9.7 (4.8 to 18.4)               | 3.4 (3.4 to 3.4)                  |
| Burundi      | 2000 | 23.1 (18.6 to 28.6)        | 6.4 (4.8 to 8.3)           | 9.9 (7.0 to 13.7)             | 5.0 (2.4 to 9.3)                | 1.9 (1.9 to 1.9)                  | 50.4 (40.6 to 62.5)    | 13.9 (10.6 to 18.1)        | 21.6 (15.4 to 30.0)           | 10.9 (5.2 to 20.3)              | 4.1 (4.1 to 4.1)                  |
| Burundi      | 2001 | 22.5 (18.3 to 27.7)        | 6.4 (5.0 to 8.4)           | 10.1 (7.2 to 13.8)            | 4.4 (2.1 to 8.1)                | 1.6 (1.6 to 1.6)                  | 49.3 (40.0 to 60.7)    | 14.1 (10.9 to 18.3)        | 22.0 (15.7 to 30.1)           | 9.7 (4.6 to 17.6)               | 3.4 (3.4 to 3.4)                  |

| Country | Year | 2018 US Dollars per capita |                            |                               |                                 |                                   | 2018 PPP per capita |                            |                               |                                 |                                   |
|---------|------|----------------------------|----------------------------|-------------------------------|---------------------------------|-----------------------------------|---------------------|----------------------------|-------------------------------|---------------------------------|-----------------------------------|
|         |      | Health spending            | Government health spending | Out-of-pocket health spending | Prepaid private health spending | Development assistance for health | Health spending     | Government health spending | Out-of-pocket health spending | Prepaid private health spending | Development assistance for health |
| Burundi | 2002 | 23.3 (18.9 to 28.6)        | 6.5 (5.0 to 8.4)           | 10.3 (7.3 to 14.3)            | 4.4 (2.1 to 8.3)                | 2.0 (2.0 to 2.0)                  | 50.9 (41.4 to 62.6) | 14.2 (10.8 to 18.4)        | 22.5 (15.9 to 31.2)           | 9.7 (4.7 to 18.1)               | 4.5 (4.5 to 4.5)                  |
| Burundi | 2003 | 23.7 (19.6 to 28.9)        | 6.5 (4.9 to 8.4)           | 10.3 (7.2 to 14.1)            | 4.1 (2.0 to 7.6)                | 2.8 (2.8 to 2.8)                  | 51.9 (42.8 to 63.1) | 14.2 (10.7 to 18.4)        | 22.5 (15.8 to 30.8)           | 9.1 (4.3 to 16.6)               | 6.2 (6.2 to 6.2)                  |
| Burundi | 2004 | 26.5 (22.1 to 31.8)        | 7.5 (5.7 to 9.7)           | 10.9 (7.6 to 14.8)            | 4.1 (1.9 to 7.5)                | 4.0 (4.0 to 4.0)                  | 57.9 (48.2 to 69.5) | 16.4 (12.5 to 21.3)        | 23.8 (16.6 to 32.3)           | 8.9 (4.2 to 16.5)               | 8.8 (8.8 to 8.8)                  |
| Burundi | 2005 | 29.0 (24.3 to 34.7)        | 7.8 (5.8 to 10.1)          | 11.4 (8.0 to 15.6)            | 4.3 (2.0 to 7.9)                | 5.5 (5.5 to 5.5)                  | 63.4 (53.1 to 75.8) | 16.9 (12.8 to 22.1)        | 25.0 (17.5 to 34.1)           | 9.4 (4.4 to 17.3)               | 12.1 (12.1 to 12.1)               |
| Burundi | 2006 | 31.5 (26.4 to 37.7)        | 8.1 (6.1 to 10.7)          | 12.4 (8.7 to 17.1)            | 4.8 (2.3 to 8.7)                | 6.2 (6.2 to 6.2)                  | 68.8 (57.6 to 82.5) | 17.8 (13.4 to 23.3)        | 27.1 (18.9 to 37.4)           | 10.4 (4.9 to 19.1)              | 13.5 (13.5 to 13.5)               |
| Burundi | 2007 | 31.1 (25.9 to 37.1)        | 8.1 (6.1 to 10.6)          | 12.8 (9.0 to 17.5)            | 4.7 (2.3 to 8.5)                | 5.5 (5.5 to 5.5)                  | 68.0 (56.6 to 81.1) | 17.7 (13.3 to 23.3)        | 28.0 (19.7 to 38.2)           | 10.2 (4.9 to 18.6)              | 12.1 (12.1 to 12.1)               |
| Burundi | 2008 | 31.1 (26.3 to 36.6)        | 7.5 (5.6 to 9.9)           | 12.2 (8.5 to 16.7)            | 3.7 (1.8 to 7.0)                | 7.7 (7.7 to 7.7)                  | 68.0 (57.4 to 79.9) | 16.4 (12.3 to 21.6)        | 26.6 (18.6 to 36.6)           | 8.2 (3.9 to 15.2)               | 16.8 (16.8 to 16.8)               |
| Burundi | 2009 | 30.5 (26.1 to 35.4)        | 7.9 (6.0 to 10.3)          | 11.7 (8.1 to 16.3)            | 2.5 (1.2 to 4.7)                | 8.5 (8.5 to 8.5)                  | 66.7 (57.1 to 77.4) | 17.2 (13.1 to 22.6)        | 25.5 (17.7 to 35.6)           | 5.4 (2.7 to 10.3)               | 18.6 (18.6 to 18.6)               |
| Burundi | 2010 | 31.1 (27.0 to 35.9)        | 8.2 (6.3 to 10.8)          | 10.6 (7.4 to 14.8)            | 1.1 (0.6 to 2.1)                | 11.1 (11.1 to 11.1)               | 67.9 (59.0 to 78.4) | 18.0 (13.8 to 23.5)        | 23.2 (16.3 to 32.3)           | 2.4 (1.2 to 4.6)                | 24.3 (24.3 to 24.3)               |
| Burundi | 2011 | 30.5 (26.7 to 35.0)        | 8.9 (6.8 to 11.6)          | 9.4 (6.5 to 13.1)             | 0.9 (0.5 to 1.7)                | 11.3 (11.3 to 11.3)               | 66.7 (58.4 to 76.5) | 19.4 (14.8 to 25.4)        | 20.5 (14.2 to 28.5)           | 2.0 (1.0 to 3.8)                | 24.8 (24.8 to 24.8)               |
| Burundi | 2012 | 27.0 (23.5 to 31.0)        | 8.6 (6.5 to 11.3)          | 8.1 (5.6 to 11.2)             | 0.8 (0.4 to 1.5)                | 9.6 (9.6 to 9.6)                  | 59.1 (51.4 to 67.8) | 18.8 (14.3 to 24.6)        | 17.7 (12.3 to 24.5)           | 1.7 (0.8 to 3.2)                | 20.9 (20.9 to 20.9)               |
| Burundi | 2013 | 26.3 (23.2 to 30.0)        | 7.7 (5.9 to 10.2)          | 7.3 (5.1 to 10.1)             | 0.6 (0.3 to 1.1)                | 10.7 (10.7 to 10.7)               | 57.6 (50.7 to 65.7) | 16.9 (12.9 to 22.2)        | 16.0 (11.1 to 22.0)           | 1.3 (0.6 to 2.5)                | 23.3 (23.3 to 23.3)               |
| Burundi | 2014 | 27.1 (23.8 to 31.0)        | 8.4 (6.4 to 11.2)          | 7.6 (5.2 to 10.4)             | 0.6 (0.3 to 1.1)                | 10.5 (10.5 to 10.5)               | 59.3 (52.1 to 67.8) | 18.5 (14.1 to 24.4)        | 16.5 (11.5 to 22.7)           | 1.2 (0.6 to 2.4)                | 23.0 (23.0 to 23.0)               |
| Burundi | 2015 | 25.0 (22.0 to 28.9)        | 8.1 (6.2 to 10.7)          | 7.3 (5.1 to 10.0)             | 0.5 (0.2 to 0.9)                | 9.1 (9.1 to 9.1)                  | 54.7 (48.0 to 63.3) | 17.6 (13.6 to 23.4)        | 16.0 (11.2 to 21.9)           | 1.1 (0.5 to 2.1)                | 19.9 (19.9 to 19.9)               |
| Burundi | 2016 | 28.0 (25.2 to 31.4)        | 7.4 (5.6 to 9.6)           | 7.0 (4.9 to 9.8)              | 0.5 (0.2 to 0.9)                | 13.2 (13.2 to 13.2)               | 61.2 (55.1 to 68.6) | 16.1 (12.3 to 21.1)        | 15.3 (10.7 to 21.4)           | 1.0 (0.5 to 1.9)                | 28.8 (28.8 to 28.8)               |
| Burundi | 2017 | 27.6 (24.7 to 30.9)        | 7.5 (5.8 to 9.9)           | 6.9 (4.9 to 9.7)              | 0.5 (0.2 to 0.9)                | 12.7 (12.7 to 12.7)               | 60.4 (54.1 to 67.6) | 16.5 (12.6 to 21.5)        | 15.1 (10.7 to 21.1)           | 1.0 (0.5 to 1.9)                | 27.8 (27.8 to 27.8)               |
| Burundi | 2018 | 26.3 (23.6 to 29.7)        | 7.5 (5.7 to 9.7)           | 6.8 (4.8 to 9.5)              | 0.4 (0.2 to 0.9)                | 11.6 (11.5 to 11.6)               | 57.6 (51.5 to 65.0) | 16.3 (12.5 to 21.3)        | 15.0 (10.5 to 20.9)           | 1.0 (0.5 to 1.9)                | 25.3 (25.2 to 25.4)               |
| Burundi | 2019 | 26.3 (23.4 to 29.7)        | 7.4 (5.7 to 9.7)           | 6.8 (4.8 to 9.5)              | 0.4 (0.2 to 0.9)                | 11.6 (10.8 to 12.3)               | 57.5 (51.1 to 65.0) | 16.3 (12.5 to 21.3)        | 14.8 (10.4 to 20.7)           | 1.0 (0.5 to 1.9)                | 25.5 (23.7 to 27.0)               |
| Burundi | 2020 | 26.4 (23.5 to 30.0)        | 7.4 (5.6 to 9.8)           | 6.7 (4.7 to 9.4)              | 0.4 (0.2 to 0.9)                | 11.8 (10.8 to 12.8)               | 57.8 (51.3 to 65.5) | 16.2 (12.3 to 21.3)        | 14.7 (10.3 to 20.5)           | 1.0 (0.5 to 1.9)                | 25.9 (23.7 to 27.9)               |
| Burundi | 2021 | 26.6 (23.7 to 30.0)        | 7.4 (5.7 to 9.7)           | 6.7 (4.7 to 9.3)              | 0.4 (0.2 to 0.9)                | 12.1 (10.8 to 13.4)               | 58.1 (51.7 to 65.6) | 16.2 (12.4 to 21.2)        | 14.6 (10.2 to 20.3)           | 1.0 (0.5 to 1.9)                | 26.4 (23.7 to 29.2)               |
| Burundi | 2022 | 26.9 (23.8 to 30.5)        | 7.4 (5.6 to 9.7)           | 6.6 (4.6 to 9.2)              | 0.4 (0.2 to 0.9)                | 12.4 (11.0 to 13.9)               | 58.7 (52.0 to 66.8) | 16.2 (12.4 to 21.2)        | 14.4 (10.1 to 20.1)           | 1.0 (0.5 to 1.9)                | 27.2 (24.1 to 30.4)               |



| Country | Year | 2018 US Dollars per capita |                            |                               |                                 |                                   | 2018 PPP per capita |                            |                               |                                 |                                   |
|---------|------|----------------------------|----------------------------|-------------------------------|---------------------------------|-----------------------------------|---------------------|----------------------------|-------------------------------|---------------------------------|-----------------------------------|
|         |      | Health spending            | Government health spending | Out-of-pocket health spending | Prepaid private health spending | Development assistance for health | Health spending     | Government health spending | Out-of-pocket health spending | Prepaid private health spending | Development assistance for health |
| Burundi | 2023 | 27.1 (23.9 to 30.7)        | 7.4 (5.6 to 9.6)           | 6.5 (4.6 to 9.1)              | 0.4 (0.2 to 0.9)                | 12.7 (11.1 to 14.5)               | 59.2 (52.2 to 67.2) | 16.1 (12.3 to 21.0)        | 14.3 (10.1 to 19.9)           | 1.0 (0.5 to 1.9)                | 27.8 (24.2 to 31.7)               |
| Burundi | 2024 | 27.3 (23.9 to 31.4)        | 7.3 (5.6 to 9.6)           | 6.5 (4.6 to 9.1)              | 0.4 (0.2 to 0.8)                | 13.1 (11.3 to 15.1)               | 59.7 (52.4 to 68.6) | 16.0 (12.2 to 20.9)        | 14.2 (10.0 to 19.8)           | 1.0 (0.4 to 1.9)                | 28.5 (24.7 to 32.9)               |
| Burundi | 2025 | 27.6 (24.2 to 31.3)        | 7.3 (5.6 to 9.5)           | 6.5 (4.5 to 9.0)              | 0.5 (0.2 to 0.8)                | 13.3 (11.4 to 15.6)               | 60.2 (53.0 to 68.5) | 16.0 (12.2 to 20.9)        | 14.1 (9.9 to 19.7)            | 1.0 (0.4 to 1.9)                | 29.2 (24.8 to 34.1)               |
| Burundi | 2026 | 27.8 (24.3 to 31.9)        | 7.3 (5.5 to 9.5)           | 6.4 (4.5 to 9.0)              | 0.5 (0.2 to 0.9)                | 13.6 (11.5 to 15.9)               | 60.7 (53.1 to 69.7) | 15.9 (12.1 to 20.8)        | 14.0 (9.8 to 19.6)            | 1.0 (0.4 to 1.9)                | 29.8 (25.1 to 34.8)               |
| Burundi | 2027 | 28.0 (24.5 to 32.2)        | 7.3 (5.5 to 9.5)           | 6.4 (4.5 to 8.9)              | 0.5 (0.2 to 0.9)                | 13.9 (11.6 to 16.5)               | 61.3 (53.6 to 70.4) | 15.9 (12.1 to 20.8)        | 13.9 (9.8 to 19.5)            | 1.0 (0.4 to 1.9)                | 30.4 (25.4 to 36.2)               |
| Burundi | 2028 | 28.3 (24.7 to 32.8)        | 7.3 (5.5 to 9.5)           | 6.3 (4.4 to 8.9)              | 0.5 (0.2 to 0.9)                | 14.2 (11.8 to 17.2)               | 61.8 (54.1 to 71.8) | 15.9 (12.1 to 20.7)        | 13.9 (9.7 to 19.4)            | 1.0 (0.5 to 1.9)                | 31.1 (25.9 to 37.5)               |
| Burundi | 2029 | 28.5 (24.8 to 32.9)        | 7.3 (5.5 to 9.5)           | 6.3 (4.4 to 8.8)              | 0.5 (0.2 to 0.9)                | 14.5 (11.9 to 17.8)               | 62.4 (54.2 to 72.0) | 15.9 (12.1 to 20.7)        | 13.8 (9.7 to 19.3)            | 1.0 (0.5 to 1.9)                | 31.7 (26.1 to 39.0)               |
| Burundi | 2030 | 28.8 (24.9 to 33.7)        | 7.3 (5.5 to 9.5)           | 6.3 (4.4 to 8.8)              | 0.5 (0.2 to 0.9)                | 14.8 (12.1 to 18.1)               | 63.0 (54.6 to 73.7) | 15.9 (12.1 to 20.8)        | 13.8 (9.6 to 19.2)            | 1.0 (0.5 to 1.9)                | 32.3 (26.4 to 39.5)               |
| Burundi | 2031 | 29.1 (24.9 to 34.0)        | 7.3 (5.5 to 9.5)           | 6.3 (4.4 to 8.7)              | 0.5 (0.2 to 0.9)                | 15.1 (12.2 to 19.1)               | 63.7 (54.4 to 74.4) | 16.0 (12.1 to 20.8)        | 13.7 (9.6 to 19.1)            | 1.0 (0.5 to 1.9)                | 33.0 (26.6 to 41.7)               |
| Burundi | 2032 | 29.4 (25.3 to 34.5)        | 7.3 (5.6 to 9.6)           | 6.2 (4.4 to 8.7)              | 0.5 (0.2 to 0.9)                | 15.4 (12.2 to 19.6)               | 64.3 (55.2 to 75.5) | 16.1 (12.2 to 20.9)        | 13.7 (9.5 to 19.0)            | 1.0 (0.5 to 1.9)                | 33.6 (26.7 to 42.9)               |
| Burundi | 2033 | 29.7 (25.2 to 35.1)        | 7.4 (5.6 to 9.6)           | 6.2 (4.3 to 8.7)              | 0.5 (0.2 to 0.9)                | 15.7 (12.3 to 20.4)               | 65.0 (55.0 to 76.7) | 16.1 (12.2 to 21.0)        | 13.6 (9.5 to 19.0)            | 1.0 (0.5 to 1.9)                | 34.2 (26.9 to 44.7)               |
| Burundi | 2034 | 30.1 (25.6 to 35.8)        | 7.4 (5.6 to 9.7)           | 6.2 (4.3 to 8.6)              | 0.5 (0.2 to 0.9)                | 16.0 (12.4 to 21.1)               | 65.8 (55.9 to 78.3) | 16.2 (12.3 to 21.2)        | 13.6 (9.5 to 18.9)            | 1.0 (0.5 to 1.9)                | 35.0 (27.0 to 46.0)               |
| Burundi | 2035 | 30.4 (25.4 to 36.3)        | 7.5 (5.6 to 9.8)           | 6.2 (4.3 to 8.6)              | 0.5 (0.2 to 0.9)                | 16.3 (12.4 to 21.5)               | 66.5 (55.6 to 79.4) | 16.3 (12.3 to 21.4)        | 13.6 (9.4 to 18.9)            | 1.0 (0.5 to 1.9)                | 35.6 (27.1 to 46.9)               |
| Burundi | 2036 | 30.8 (25.6 to 37.3)        | 7.5 (5.7 to 9.8)           | 6.2 (4.3 to 8.6)              | 0.5 (0.2 to 0.9)                | 16.6 (12.5 to 22.1)               | 67.3 (55.9 to 81.5) | 16.4 (12.4 to 21.4)        | 13.5 (9.4 to 18.9)            | 1.0 (0.5 to 2.0)                | 36.3 (27.3 to 48.3)               |
| Burundi | 2037 | 31.1 (25.6 to 37.5)        | 7.5 (5.7 to 9.9)           | 6.2 (4.3 to 8.6)              | 0.5 (0.2 to 0.9)                | 16.9 (12.6 to 22.8)               | 67.9 (55.9 to 82.0) | 16.5 (12.4 to 21.6)        | 13.5 (9.4 to 18.9)            | 1.0 (0.5 to 2.0)                | 36.9 (27.6 to 49.8)               |
| Burundi | 2038 | 31.4 (25.8 to 38.3)        | 7.6 (5.7 to 9.9)           | 6.2 (4.3 to 8.6)              | 0.5 (0.2 to 0.9)                | 17.1 (12.6 to 24.0)               | 68.6 (56.5 to 83.8) | 16.6 (12.5 to 21.7)        | 13.5 (9.4 to 18.9)            | 1.1 (0.5 to 2.0)                | 37.5 (27.6 to 52.4)               |
| Burundi | 2039 | 31.7 (25.9 to 39.1)        | 7.6 (5.7 to 10.0)          | 6.2 (4.3 to 8.6)              | 0.5 (0.2 to 0.9)                | 17.4 (12.7 to 23.9)               | 69.3 (56.7 to 85.5) | 16.7 (12.5 to 21.8)        | 13.5 (9.4 to 18.9)            | 1.1 (0.5 to 2.0)                | 38.0 (27.8 to 52.3)               |
| Burundi | 2040 | 32.0 (26.4 to 40.0)        | 7.7 (5.8 to 10.0)          | 6.2 (4.3 to 8.6)              | 0.5 (0.2 to 0.9)                | 17.7 (12.9 to 25.2)               | 70.1 (57.7 to 87.5) | 16.8 (12.6 to 21.9)        | 13.5 (9.4 to 18.9)            | 1.1 (0.5 to 2.0)                | 38.7 (28.2 to 55.2)               |
| Burundi | 2041 | 32.4 (26.1 to 40.6)        | 7.7 (5.8 to 10.1)          | 6.2 (4.3 to 8.6)              | 0.5 (0.2 to 0.9)                | 18.0 (13.0 to 25.9)               | 70.9 (57.1 to 88.9) | 16.9 (12.7 to 22.0)        | 13.5 (9.4 to 18.8)            | 1.1 (0.5 to 2.0)                | 39.5 (28.4 to 56.6)               |
| Burundi | 2042 | 32.8 (26.3 to 42.1)        | 7.8 (5.8 to 10.2)          | 6.1 (4.3 to 8.6)              | 0.5 (0.2 to 0.9)                | 18.4 (12.8 to 27.0)               | 71.8 (57.5 to 92.0) | 17.0 (12.8 to 22.2)        | 13.4 (9.3 to 18.8)            | 1.1 (0.5 to 2.0)                | 40.3 (28.1 to 59.1)               |
| Burundi | 2043 | 33.2 (26.6 to 42.8)        | 7.8 (5.9 to 10.3)          | 6.1 (4.3 to 8.6)              | 0.5 (0.2 to 0.9)                | 18.8 (13.0 to 28.4)               | 72.7 (58.2 to 93.7) | 17.1 (12.8 to 22.4)        | 13.4 (9.3 to 18.7)            | 1.1 (0.5 to 2.1)                | 41.1 (28.4 to 62.0)               |

| Country  | Year | 2018 US Dollars per capita |                            |                               |                                 |                                   | 2018 PPP per capita    |                            |                               |                                 |                                   |
|----------|------|----------------------------|----------------------------|-------------------------------|---------------------------------|-----------------------------------|------------------------|----------------------------|-------------------------------|---------------------------------|-----------------------------------|
|          |      | Health spending            | Government health spending | Out-of-pocket health spending | Prepaid private health spending | Development assistance for health | Health spending        | Government health spending | Out-of-pocket health spending | Prepaid private health spending | Development assistance for health |
| Burundi  | 2044 | 33.7 (26.7 to 43.9)        | 7.9 (5.9 to 10.3)          | 6.1 (4.3 to 8.5)              | 0.5 (0.2 to 0.9)                | 19.2 (13.1 to 29.5)               | 73.7 (58.4 to 96.0)    | 17.2 (12.9 to 22.6)        | 13.4 (9.3 to 18.6)            | 1.1 (0.5 to 2.1)                | 42.0 (28.7 to 64.6)               |
| Burundi  | 2045 | 34.2 (27.0 to 45.7)        | 7.9 (5.9 to 10.4)          | 6.1 (4.2 to 8.5)              | 0.5 (0.2 to 1.0)                | 19.7 (13.4 to 30.7)               | 74.7 (59.0 to 100.0)   | 17.3 (12.9 to 22.8)        | 13.4 (9.3 to 18.6)            | 1.1 (0.5 to 2.1)                | 43.0 (29.3 to 67.2)               |
| Burundi  | 2046 | 34.7 (27.2 to 47.2)        | 7.9 (5.9 to 10.4)          | 6.1 (4.2 to 8.5)              | 0.5 (0.2 to 1.0)                | 20.1 (13.5 to 32.7)               | 75.9 (59.5 to 103.2)   | 17.4 (12.9 to 22.8)        | 13.3 (9.3 to 18.6)            | 1.1 (0.5 to 2.1)                | 44.1 (29.6 to 71.6)               |
| Burundi  | 2047 | 35.3 (27.4 to 48.4)        | 8.0 (5.9 to 10.5)          | 6.1 (4.2 to 8.5)              | 0.5 (0.2 to 1.0)                | 20.7 (13.7 to 33.7)               | 77.1 (60.0 to 105.9)   | 17.4 (12.9 to 22.9)        | 13.3 (9.2 to 18.6)            | 1.1 (0.5 to 2.1)                | 45.2 (30.1 to 73.6)               |
| Burundi  | 2048 | 35.9 (27.9 to 49.9)        | 8.0 (6.0 to 10.6)          | 6.1 (4.2 to 8.5)              | 0.5 (0.2 to 1.0)                | 21.3 (14.2 to 35.8)               | 78.5 (61.0 to 109.2)   | 17.5 (13.0 to 23.1)        | 13.3 (9.2 to 18.5)            | 1.1 (0.5 to 2.1)                | 46.5 (31.1 to 78.4)               |
| Burundi  | 2049 | 36.5 (28.3 to 51.7)        | 8.1 (6.0 to 10.6)          | 6.1 (4.2 to 8.5)              | 0.5 (0.2 to 1.0)                | 21.9 (14.4 to 36.8)               | 79.8 (61.8 to 113.0)   | 17.6 (13.1 to 23.3)        | 13.2 (9.2 to 18.5)            | 1.1 (0.5 to 2.1)                | 47.8 (31.4 to 80.4)               |
| Burundi  | 2050 | 37.2 (28.6 to 53.6)        | 8.1 (6.0 to 10.7)          | 6.0 (4.2 to 8.5)              | 0.5 (0.2 to 1.0)                | 22.5 (14.4 to 38.8)               | 81.4 (62.5 to 117.3)   | 17.7 (13.2 to 23.4)        | 13.2 (9.2 to 18.5)            | 1.1 (0.5 to 2.2)                | 49.3 (31.5 to 84.9)               |
| Cambodia | 1995 | 41.3 (35.8 to 48.2)        | 8.5 (6.4 to 10.8)          | 18.7 (13.4 to 25.2)           | 0.4 (0.2 to 0.7)                | 13.8 (13.8 to 13.8)               | 123.0 (106.5 to 143.3) | 25.2 (19.1 to 32.3)        | 55.6 (40.0 to 75.0)           | 1.1 (0.5 to 2.1)                | 41.1 (41.1 to 41.1)               |
| Cambodia | 1996 | 36.3 (30.3 to 43.1)        | 9.1 (7.0 to 11.8)          | 19.6 (14.3 to 26.4)           | 0.4 (0.2 to 0.7)                | 7.1 (7.1 to 7.1)                  | 107.9 (90.3 to 128.2)  | 27.0 (20.7 to 35.0)        | 58.4 (42.7 to 78.4)           | 1.2 (0.5 to 2.2)                | 21.3 (21.3 to 21.3)               |
| Cambodia | 1997 | 35.3 (29.3 to 42.5)        | 9.1 (7.0 to 11.9)          | 19.9 (14.6 to 26.9)           | 0.4 (0.2 to 0.7)                | 5.9 (5.9 to 5.9)                  | 105.0 (87.0 to 126.5)  | 27.1 (20.8 to 35.4)        | 59.3 (43.5 to 80.0)           | 1.1 (0.5 to 2.2)                | 17.4 (17.4 to 17.4)               |
| Cambodia | 1998 | 33.5 (27.3 to 40.7)        | 8.7 (6.8 to 11.5)          | 20.5 (15.0 to 27.6)           | 0.4 (0.2 to 0.7)                | 3.8 (3.8 to 3.8)                  | 99.5 (81.2 to 121.1)   | 26.0 (20.1 to 34.1)        | 61.0 (44.7 to 82.0)           | 1.1 (0.5 to 2.1)                | 11.4 (11.4 to 11.4)               |
| Cambodia | 1999 | 33.8 (27.5 to 41.8)        | 8.5 (6.6 to 11.2)          | 21.6 (15.8 to 29.0)           | 0.4 (0.2 to 0.7)                | 3.4 (3.4 to 3.4)                  | 100.7 (81.9 to 124.5)  | 25.4 (19.7 to 33.2)        | 64.2 (46.9 to 86.3)           | 1.1 (0.5 to 2.1)                | 10.0 (10.0 to 10.0)               |
| Cambodia | 2000 | 34.5 (28.1 to 42.7)        | 7.7 (6.0 to 10.0)          | 22.2 (16.1 to 30.4)           | 0.4 (0.2 to 0.7)                | 4.2 (4.2 to 4.2)                  | 102.6 (83.6 to 126.9)  | 23.0 (17.8 to 29.7)        | 66.1 (48.0 to 90.5)           | 1.1 (0.5 to 2.0)                | 12.4 (12.4 to 12.4)               |
| Cambodia | 2001 | 36.4 (29.8 to 44.7)        | 7.7 (5.9 to 9.7)           | 23.2 (16.9 to 31.6)           | 0.4 (0.2 to 0.7)                | 5.2 (5.2 to 5.2)                  | 108.2 (88.7 to 133.1)  | 22.8 (17.6 to 29.0)        | 68.9 (50.2 to 94.2)           | 1.1 (0.5 to 2.0)                | 15.4 (15.4 to 15.4)               |
| Cambodia | 2002 | 36.3 (29.3 to 44.9)        | 8.1 (6.2 to 10.3)          | 24.4 (18.0 to 32.7)           | 0.4 (0.2 to 0.7)                | 3.5 (3.5 to 3.5)                  | 108.1 (87.3 to 133.5)  | 24.0 (18.3 to 30.6)        | 72.6 (53.7 to 97.4)           | 1.2 (0.5 to 2.2)                | 10.3 (10.3 to 10.3)               |
| Cambodia | 2003 | 40.2 (32.9 to 49.0)        | 8.4 (6.4 to 10.7)          | 25.4 (18.8 to 34.0)           | 0.4 (0.2 to 0.8)                | 6.0 (6.0 to 6.0)                  | 119.7 (97.8 to 145.7)  | 24.9 (19.1 to 31.8)        | 75.7 (55.9 to 101.3)          | 1.3 (0.6 to 2.3)                | 17.8 (17.8 to 17.8)               |
| Cambodia | 2004 | 41.9 (34.1 to 50.7)        | 8.5 (6.5 to 11.0)          | 26.3 (19.1 to 34.7)           | 0.4 (0.2 to 0.8)                | 6.7 (6.7 to 6.7)                  | 124.8 (101.4 to 150.8) | 25.4 (19.4 to 32.8)        | 78.1 (56.9 to 103.3)          | 1.3 (0.6 to 2.5)                | 20.0 (20.0 to 20.0)               |
| Cambodia | 2005 | 46.0 (38.1 to 54.9)        | 8.7 (6.7 to 11.3)          | 27.3 (19.9 to 35.6)           | 0.5 (0.2 to 0.9)                | 9.4 (9.4 to 9.4)                  | 136.8 (113.4 to 163.3) | 26.0 (19.9 to 33.6)        | 81.4 (59.3 to 105.8)          | 1.4 (0.7 to 2.7)                | 28.0 (28.0 to 28.0)               |
| Cambodia | 2006 | 44.9 (37.3 to 53.0)        | 8.7 (6.7 to 11.2)          | 26.5 (19.3 to 34.4)           | 0.5 (0.2 to 0.9)                | 9.2 (9.2 to 9.2)                  | 133.7 (110.9 to 157.7) | 25.9 (19.8 to 33.3)        | 79.0 (57.5 to 102.5)          | 1.5 (0.7 to 2.8)                | 27.3 (27.3 to 27.3)               |
| Cambodia | 2007 | 46.4 (38.8 to 54.7)        | 9.2 (7.1 to 11.9)          | 26.6 (19.5 to 34.8)           | 0.5 (0.2 to 0.9)                | 10.0 (10.0 to 10.0)               | 138.0 (115.3 to 162.9) | 27.5 (21.1 to 35.4)        | 79.2 (58.1 to 103.6)          | 1.5 (0.7 to 2.8)                | 29.7 (29.7 to 29.7)               |
| Cambodia | 2008 | 51.6 (43.0 to 61.0)        | 10.2 (7.8 to 13.0)         | 30.4 (22.4 to 39.9)           | 0.5 (0.3 to 1.0)                | 10.4 (10.4 to 10.4)               | 153.5 (128.0 to 181.5) | 30.3 (23.1 to 38.6)        | 90.6 (66.5 to 118.9)          | 1.6 (0.8 to 2.9)                | 31.0 (31.0 to 31.0)               |

| Country  | Year | 2018 US Dollars per capita |                            |                               |                                 |                                   | 2018 PPP per capita    |                            |                               |                                 |                                   |
|----------|------|----------------------------|----------------------------|-------------------------------|---------------------------------|-----------------------------------|------------------------|----------------------------|-------------------------------|---------------------------------|-----------------------------------|
|          |      | Health spending            | Government health spending | Out-of-pocket health spending | Prepaid private health spending | Development assistance for health | Health spending        | Government health spending | Out-of-pocket health spending | Prepaid private health spending | Development assistance for health |
| Cambodia | 2009 | 56.2 (46.9 to 66.3)        | 11.0 (8.4 to 14.0)         | 33.5 (25.0 to 43.7)           | 0.5 (0.3 to 1.0)                | 11.2 (11.2 to 11.2)               | 167.1 (139.6 to 197.4) | 32.6 (25.0 to 41.8)        | 99.7 (74.3 to 130.1)          | 1.6 (0.8 to 2.9)                | 33.2 (33.2 to 33.2)               |
| Cambodia | 2010 | 62.2 (52.6 to 73.6)        | 12.1 (9.2 to 15.6)         | 36.7 (27.3 to 48.1)           | 0.5 (0.2 to 1.0)                | 12.8 (12.8 to 12.8)               | 185.0 (156.5 to 218.9) | 36.1 (27.5 to 46.3)        | 109.2 (81.3 to 143.0)         | 1.6 (0.7 to 2.8)                | 38.1 (38.1 to 38.1)               |
| Cambodia | 2011 | 67.8 (56.5 to 80.3)        | 13.1 (10.1 to 16.8)        | 41.2 (31.1 to 54.2)           | 0.5 (0.2 to 0.8)                | 13.0 (13.0 to 13.0)               | 201.7 (168.0 to 238.9) | 38.9 (29.9 to 49.9)        | 122.6 (92.5 to 161.2)         | 1.4 (0.6 to 2.5)                | 38.8 (38.8 to 38.8)               |
| Cambodia | 2012 | 67.9 (56.4 to 82.0)        | 14.2 (10.9 to 18.3)        | 44.1 (33.2 to 58.0)           | 0.4 (0.2 to 0.7)                | 9.3 (9.3 to 9.3)                  | 202.2 (167.8 to 243.9) | 42.3 (32.5 to 54.4)        | 131.3 (98.6 to 172.6)         | 1.1 (0.5 to 1.9)                | 27.5 (27.5 to 27.5)               |
| Cambodia | 2013 | 70.7 (58.3 to 85.8)        | 15.1 (11.7 to 19.3)        | 45.2 (33.6 to 59.6)           | 0.2 (0.1 to 0.4)                | 10.3 (10.3 to 10.3)               | 210.5 (173.6 to 255.4) | 44.9 (34.7 to 57.3)        | 134.4 (100.1 to 177.3)        | 0.6 (0.3 to 1.1)                | 30.6 (30.6 to 30.6)               |
| Cambodia | 2014 | 72.0 (59.4 to 86.8)        | 15.5 (11.9 to 19.7)        | 45.4 (34.1 to 59.6)           | 0.2 (0.1 to 0.4)                | 10.9 (10.9 to 10.9)               | 214.2 (176.8 to 258.2) | 46.0 (35.4 to 58.6)        | 135.1 (101.6 to 177.3)        | 0.6 (0.3 to 1.2)                | 32.4 (32.4 to 32.4)               |
| Cambodia | 2015 | 73.6 (61.1 to 89.1)        | 16.5 (12.8 to 21.2)        | 46.3 (35.0 to 61.4)           | 0.3 (0.1 to 0.6)                | 10.4 (10.4 to 10.4)               | 219.0 (181.8 to 265.2) | 49.2 (38.0 to 63.2)        | 137.9 (104.1 to 182.8)        | 0.9 (0.4 to 1.7)                | 30.9 (30.9 to 30.9)               |
| Cambodia | 2016 | 75.7 (62.5 to 93.0)        | 17.6 (13.7 to 22.7)        | 48.1 (36.0 to 65.2)           | 0.4 (0.2 to 0.8)                | 9.6 (9.6 to 9.6)                  | 225.2 (185.9 to 276.7) | 52.4 (40.7 to 67.4)        | 143.0 (107.2 to 194.1)        | 1.2 (0.6 to 2.3)                | 28.6 (28.6 to 28.6)               |
| Cambodia | 2017 | 79.4 (66.1 to 97.1)        | 19.5 (15.1 to 25.2)        | 50.8 (37.9 to 69.0)           | 0.4 (0.2 to 0.8)                | 8.7 (8.7 to 8.7)                  | 236.1 (196.6 to 288.9) | 58.0 (45.1 to 74.9)        | 151.1 (112.7 to 205.3)        | 1.3 (0.6 to 2.3)                | 25.8 (25.8 to 25.8)               |
| Cambodia | 2018 | 81.4 (66.9 to 100.1)       | 20.2 (15.7 to 26.1)        | 52.6 (39.2 to 71.6)           | 0.4 (0.2 to 0.8)                | 8.1 (8.1 to 8.1)                  | 242.1 (199.0 to 297.7) | 60.2 (46.7 to 77.8)        | 156.5 (116.6 to 213.0)        | 1.3 (0.6 to 2.4)                | 24.1 (24.0 to 24.1)               |
| Cambodia | 2019 | 83.5 (68.7 to 103.0)       | 20.9 (16.2 to 27.0)        | 54.0 (40.1 to 73.4)           | 0.5 (0.2 to 0.8)                | 8.1 (7.5 to 8.6)                  | 248.4 (204.4 to 306.5) | 62.2 (48.1 to 80.3)        | 160.7 (119.3 to 218.3)        | 1.4 (0.6 to 2.5)                | 24.1 (22.4 to 25.5)               |
| Cambodia | 2020 | 85.7 (70.2 to 105.3)       | 21.6 (16.7 to 27.9)        | 55.4 (41.2 to 74.9)           | 0.5 (0.2 to 0.9)                | 8.2 (7.5 to 8.8)                  | 254.9 (208.8 to 313.2) | 64.3 (49.6 to 82.9)        | 164.9 (122.7 to 222.8)        | 1.4 (0.7 to 2.6)                | 24.3 (22.2 to 26.2)               |
| Cambodia | 2021 | 87.9 (71.8 to 108.3)       | 22.3 (17.2 to 28.7)        | 56.9 (42.2 to 76.8)           | 0.5 (0.2 to 0.9)                | 8.3 (7.4 to 9.1)                  | 261.6 (213.5 to 322.1) | 66.3 (51.2 to 85.4)        | 169.2 (125.6 to 228.4)        | 1.5 (0.7 to 2.6)                | 24.6 (22.1 to 27.2)               |
| Cambodia | 2022 | 90.2 (74.0 to 110.6)       | 23.0 (17.8 to 29.6)        | 58.3 (43.2 to 78.5)           | 0.5 (0.2 to 0.9)                | 8.4 (7.5 to 9.4)                  | 268.4 (220.1 to 329.2) | 68.4 (52.9 to 88.0)        | 173.4 (128.6 to 233.7)        | 1.5 (0.7 to 2.7)                | 25.0 (22.2 to 27.9)               |
| Cambodia | 2023 | 92.7 (76.7 to 113.9)       | 23.8 (18.5 to 30.7)        | 59.8 (44.3 to 80.7)           | 0.5 (0.2 to 0.9)                | 8.5 (7.4 to 9.7)                  | 275.9 (228.1 to 338.9) | 71.0 (55.0 to 91.3)        | 178.0 (131.9 to 240.0)        | 1.6 (0.7 to 2.8)                | 25.4 (22.1 to 28.9)               |
| Cambodia | 2024 | 95.2 (78.2 to 117.3)       | 24.7 (19.2 to 31.7)        | 61.3 (45.8 to 83.6)           | 0.5 (0.3 to 1.0)                | 8.7 (7.5 to 10.0)                 | 283.3 (232.6 to 349.1) | 73.4 (57.0 to 94.3)        | 182.4 (136.2 to 248.8)        | 1.6 (0.8 to 2.9)                | 25.9 (22.4 to 29.8)               |
| Cambodia | 2025 | 97.9 (80.6 to 119.8)       | 25.6 (19.8 to 32.8)        | 62.9 (46.9 to 85.7)           | 0.6 (0.3 to 1.0)                | 8.9 (7.6 to 10.4)                 | 291.2 (240.0 to 356.3) | 76.1 (59.0 to 97.6)        | 187.0 (139.6 to 254.9)        | 1.7 (0.8 to 3.0)                | 26.4 (22.6 to 30.9)               |
| Cambodia | 2026 | 100.6 (82.4 to 124.0)      | 26.5 (20.5 to 34.1)        | 64.5 (48.1 to 87.6)           | 0.6 (0.3 to 1.0)                | 9.0 (7.6 to 10.6)                 | 299.4 (245.3 to 369.0) | 78.9 (61.1 to 101.4)       | 191.9 (143.2 to 260.7)        | 1.7 (0.8 to 3.1)                | 26.8 (22.6 to 31.4)               |
| Cambodia | 2027 | 103.4 (85.5 to 126.7)      | 27.5 (21.2 to 35.3)        | 66.2 (49.3 to 89.8)           | 0.6 (0.3 to 1.1)                | 9.2 (7.7 to 10.9)                 | 307.8 (254.3 to 377.1) | 81.8 (63.2 to 105.0)       | 196.9 (146.7 to 267.1)        | 1.8 (0.8 to 3.2)                | 27.3 (23.0 to 32.4)               |
| Cambodia | 2028 | 106.4 (87.1 to 130.4)      | 28.5 (22.0 to 36.6)        | 67.9 (50.7 to 92.0)           | 0.6 (0.3 to 1.1)                | 9.4 (7.9 to 11.3)                 | 316.5 (259.2 to 388.0) | 84.8 (65.6 to 108.8)       | 201.9 (150.9 to 273.8)        | 1.8 (0.9 to 3.3)                | 27.9 (23.4 to 33.7)               |
| Cambodia | 2029 | 109.3 (90.2 to 134.3)      | 29.5 (22.7 to 37.8)        | 69.6 (52.1 to 94.9)           | 0.6 (0.3 to 1.1)                | 9.6 (7.9 to 11.7)                 | 325.2 (268.5 to 399.6) | 87.8 (67.7 to 112.5)       | 207.0 (155.0 to 282.3)        | 1.9 (0.9 to 3.4)                | 28.5 (23.5 to 34.9)               |

| Country  | Year | 2018 US Dollars per capita |                            |                               |                                 |                                   | 2018 PPP per capita    |                            |                               |                                 |                                   |
|----------|------|----------------------------|----------------------------|-------------------------------|---------------------------------|-----------------------------------|------------------------|----------------------------|-------------------------------|---------------------------------|-----------------------------------|
|          |      | Health spending            | Government health spending | Out-of-pocket health spending | Prepaid private health spending | Development assistance for health | Health spending        | Government health spending | Out-of-pocket health spending | Prepaid private health spending | Development assistance for health |
| Cambodia | 2030 | 112.4 (91.9 to 138.7)      | 30.6 (23.5 to 39.2)        | 71.4 (53.4 to 97.3)           | 0.7 (0.3 to 1.2)                | 9.8 (8.0 to 12.0)                 | 334.4 (273.4 to 412.7) | 90.9 (69.9 to 116.5)       | 212.4 (158.8 to 289.5)        | 2.0 (0.9 to 3.5)                | 29.1 (23.8 to 35.7)               |
| Cambodia | 2031 | 115.6 (94.8 to 143.5)      | 31.7 (24.2 to 40.6)        | 73.3 (54.5 to 100.0)          | 0.7 (0.3 to 1.2)                | 10.0 (8.1 to 12.6)                | 344.0 (282.0 to 427.1) | 94.2 (72.1 to 120.9)       | 218.0 (162.2 to 297.4)        | 2.0 (1.0 to 3.7)                | 29.7 (24.1 to 37.4)               |
| Cambodia | 2032 | 119.0 (97.6 to 146.7)      | 32.8 (25.1 to 42.2)        | 75.2 (56.0 to 102.9)          | 0.7 (0.3 to 1.3)                | 10.2 (8.2 to 12.9)                | 354.0 (290.4 to 436.6) | 97.7 (74.6 to 125.6)       | 223.9 (166.5 to 306.1)        | 2.1 (1.0 to 3.8)                | 30.3 (24.4 to 38.4)               |
| Cambodia | 2033 | 122.5 (100.2 to 150.3)     | 34.1 (26.0 to 43.9)        | 77.3 (57.5 to 105.9)          | 0.7 (0.3 to 1.3)                | 10.4 (8.2 to 13.4)                | 364.6 (298.0 to 447.2) | 101.4 (77.5 to 130.6)      | 230.1 (171.1 to 315.0)        | 2.2 (1.0 to 4.0)                | 31.0 (24.5 to 39.8)               |
| Cambodia | 2034 | 126.3 (103.1 to 155.7)     | 35.4 (27.0 to 45.7)        | 79.5 (59.1 to 108.9)          | 0.8 (0.4 to 1.4)                | 10.7 (8.4 to 13.7)                | 375.7 (306.8 to 463.4) | 105.2 (80.4 to 136.1)      | 236.5 (175.8 to 323.9)        | 2.3 (1.1 to 4.1)                | 31.7 (24.9 to 40.8)               |
| Cambodia | 2035 | 130.0 (106.2 to 161.3)     | 36.7 (28.0 to 47.6)        | 81.6 (60.7 to 111.7)          | 0.8 (0.4 to 1.4)                | 10.9 (8.4 to 14.2)                | 386.9 (315.9 to 479.9) | 109.2 (83.2 to 141.6)      | 242.9 (180.5 to 332.3)        | 2.3 (1.1 to 4.2)                | 32.4 (25.1 to 42.1)               |
| Cambodia | 2036 | 133.8 (109.7 to 167.3)     | 38.0 (28.9 to 49.4)        | 83.8 (62.1 to 114.9)          | 0.8 (0.4 to 1.5)                | 11.1 (8.6 to 14.9)                | 398.2 (326.3 to 497.8) | 113.2 (86.0 to 147.0)      | 249.4 (184.8 to 341.8)        | 2.4 (1.1 to 4.4)                | 33.1 (25.7 to 44.5)               |
| Cambodia | 2037 | 137.8 (111.9 to 169.3)     | 39.5 (29.9 to 51.3)        | 86.1 (63.5 to 118.5)          | 0.8 (0.4 to 1.5)                | 11.4 (8.7 to 15.3)                | 410.1 (332.9 to 503.9) | 117.5 (89.0 to 152.7)      | 256.3 (189.0 to 352.7)        | 2.5 (1.2 to 4.6)                | 33.8 (26.0 to 45.7)               |
| Cambodia | 2038 | 142.0 (115.0 to 177.4)     | 41.0 (31.0 to 53.3)        | 88.5 (65.0 to 122.3)          | 0.9 (0.4 to 1.6)                | 11.6 (8.8 to 16.1)                | 422.4 (342.3 to 527.8) | 121.9 (92.4 to 158.6)      | 263.3 (193.5 to 363.8)        | 2.6 (1.2 to 4.7)                | 34.6 (26.3 to 48.0)               |
| Cambodia | 2039 | 146.3 (119.6 to 180.7)     | 42.6 (32.2 to 55.4)        | 91.0 (66.9 to 125.6)          | 0.9 (0.4 to 1.7)                | 11.9 (9.0 to 16.5)                | 435.5 (355.9 to 537.8) | 126.7 (95.8 to 164.7)      | 270.8 (198.9 to 373.8)        | 2.7 (1.3 to 4.9)                | 35.3 (26.9 to 49.0)               |
| Cambodia | 2040 | 151.2 (123.2 to 189.1)     | 44.3 (33.5 to 57.8)        | 93.8 (68.9 to 129.3)          | 0.9 (0.4 to 1.7)                | 12.1 (9.2 to 16.9)                | 449.8 (366.6 to 562.8) | 131.9 (99.7 to 172.1)      | 279.0 (204.9 to 384.8)        | 2.8 (1.3 to 5.1)                | 36.0 (27.3 to 50.3)               |
| Cambodia | 2041 | 156.2 (127.5 to 194.7)     | 46.2 (34.9 to 60.3)        | 96.7 (71.1 to 133.2)          | 1.0 (0.5 to 1.8)                | 12.4 (9.3 to 17.3)                | 464.7 (379.4 to 579.2) | 137.4 (103.8 to 179.4)     | 287.6 (211.4 to 396.2)        | 2.9 (1.4 to 5.3)                | 36.8 (27.6 to 51.3)               |
| Cambodia | 2042 | 161.6 (131.8 to 201.4)     | 48.2 (36.4 to 63.0)        | 99.8 (73.3 to 137.4)          | 1.0 (0.5 to 1.9)                | 12.6 (9.4 to 18.2)                | 480.8 (392.2 to 599.3) | 143.3 (108.2 to 187.4)     | 296.8 (218.1 to 408.7)        | 3.0 (1.4 to 5.6)                | 37.6 (27.8 to 54.1)               |
| Cambodia | 2043 | 167.1 (135.7 to 208.7)     | 50.2 (37.9 to 65.8)        | 102.9 (75.5 to 141.9)         | 1.1 (0.5 to 1.9)                | 12.9 (9.5 to 18.7)                | 497.3 (403.9 to 620.9) | 149.5 (112.8 to 195.9)     | 306.3 (224.7 to 422.2)        | 3.2 (1.5 to 5.8)                | 38.3 (28.3 to 55.7)               |
| Cambodia | 2044 | 172.3 (138.8 to 214.7)     | 52.2 (39.4 to 68.6)        | 105.9 (77.6 to 146.0)         | 1.1 (0.5 to 2.0)                | 13.2 (9.6 to 19.1)                | 512.8 (413.0 to 638.8) | 155.3 (117.2 to 204.0)     | 315.0 (231.0 to 434.3)        | 3.3 (1.5 to 6.0)                | 39.2 (28.6 to 56.8)               |
| Cambodia | 2045 | 177.1 (144.3 to 219.9)     | 54.0 (40.7 to 71.2)        | 108.5 (79.6 to 149.4)         | 1.1 (0.5 to 2.1)                | 13.5 (9.7 to 20.3)                | 527.0 (429.4 to 654.4) | 160.7 (121.2 to 211.8)     | 322.7 (236.8 to 444.4)        | 3.4 (1.6 to 6.2)                | 40.2 (28.9 to 60.3)               |
| Cambodia | 2046 | 181.4 (146.2 to 226.6)     | 55.7 (42.0 to 73.5)        | 110.7 (81.3 to 152.1)         | 1.2 (0.6 to 2.1)                | 13.8 (10.0 to 21.4)               | 539.8 (434.9 to 674.2) | 165.7 (124.9 to 218.8)     | 329.5 (241.8 to 452.6)        | 3.5 (1.6 to 6.4)                | 41.2 (29.7 to 63.6)               |
| Cambodia | 2047 | 185.1 (150.1 to 231.7)     | 57.1 (43.0 to 75.6)        | 112.6 (82.6 to 155.1)         | 1.2 (0.6 to 2.2)                | 14.2 (10.1 to 22.3)               | 550.9 (446.5 to 689.4) | 170.0 (128.1 to 224.9)     | 335.0 (245.9 to 461.6)        | 3.6 (1.7 to 6.5)                | 42.3 (30.2 to 66.5)               |
| Cambodia | 2048 | 188.7 (152.8 to 235.1)     | 58.5 (44.1 to 77.6)        | 114.3 (83.9 to 158.0)         | 1.2 (0.6 to 2.2)                | 14.6 (10.4 to 23.6)               | 561.5 (454.7 to 699.6) | 174.1 (131.2 to 231.0)     | 340.1 (249.6 to 470.1)        | 3.7 (1.7 to 6.7)                | 43.6 (30.9 to 70.3)               |
| Cambodia | 2049 | 192.2 (154.3 to 240.4)     | 59.9 (45.1 to 79.6)        | 116.0 (84.9 to 160.3)         | 1.3 (0.6 to 2.3)                | 15.1 (10.7 to 24.4)               | 572.0 (459.1 to 715.3) | 178.2 (134.2 to 236.9)     | 345.2 (252.6 to 477.0)        | 3.8 (1.7 to 6.8)                | 44.8 (31.8 to 72.7)               |
| Cambodia | 2050 | 196.4 (159.2 to 245.0)     | 61.5 (46.2 to 82.0)        | 118.1 (86.2 to 163.2)         | 1.3 (0.6 to 2.4)                | 15.5 (10.8 to 25.1)               | 584.4 (473.8 to 728.9) | 183.1 (137.5 to 243.9)     | 351.3 (256.6 to 485.7)        | 3.9 (1.8 to 7.0)                | 46.2 (32.2 to 74.8)               |

| Country  | Year | 2018 US Dollars per capita |                            |                               |                                 |                                   | 2018 PPP per capita    |                            |                               |                                 |                                   |
|----------|------|----------------------------|----------------------------|-------------------------------|---------------------------------|-----------------------------------|------------------------|----------------------------|-------------------------------|---------------------------------|-----------------------------------|
|          |      | Health spending            | Government health spending | Out-of-pocket health spending | Prepaid private health spending | Development assistance for health | Health spending        | Government health spending | Out-of-pocket health spending | Prepaid private health spending | Development assistance for health |
| Cameroon | 1995 | 42.3 (32.5 to 52.9)        | 7.5 (5.6 to 9.7)           | 33.6 (23.6 to 44.1)           | 0.9 (0.5 to 1.7)                | 0.3 (0.3 to 0.3)                  | 107.2 (82.4 to 134.1)  | 19.1 (14.2 to 24.6)        | 85.2 (59.7 to 111.7)          | 2.3 (1.1 to 4.4)                | 0.6 (0.6 to 0.6)                  |
| Cameroon | 1996 | 48.5 (37.7 to 59.6)        | 7.3 (5.4 to 9.3)           | 36.3 (25.8 to 47.7)           | 0.9 (0.4 to 1.6)                | 4.1 (4.1 to 4.1)                  | 122.8 (95.6 to 150.8)  | 18.4 (13.7 to 23.7)        | 91.8 (65.3 to 120.7)          | 2.2 (1.1 to 4.2)                | 10.5 (10.5 to 10.5)               |
| Cameroon | 1997 | 46.8 (36.3 to 58.1)        | 7.7 (5.8 to 9.9)           | 36.7 (26.5 to 47.8)           | 0.9 (0.4 to 1.7)                | 1.6 (1.6 to 1.6)                  | 118.5 (92.0 to 147.2)  | 19.5 (14.7 to 25.2)        | 92.8 (67.2 to 121.1)          | 2.2 (1.1 to 4.3)                | 3.9 (3.9 to 3.9)                  |
| Cameroon | 1998 | 47.4 (37.3 to 58.2)        | 7.8 (5.8 to 10.1)          | 37.0 (27.1 to 47.8)           | 0.9 (0.4 to 1.7)                | 1.7 (1.7 to 1.7)                  | 120.0 (94.3 to 147.4)  | 19.8 (14.7 to 25.7)        | 93.6 (68.7 to 121.1)          | 2.2 (1.1 to 4.2)                | 4.4 (4.4 to 4.4)                  |
| Cameroon | 1999 | 48.1 (38.0 to 59.5)        | 8.3 (6.2 to 10.7)          | 37.8 (28.1 to 48.8)           | 0.9 (0.4 to 1.7)                | 1.1 (1.1 to 1.1)                  | 121.7 (96.3 to 150.8)  | 21.0 (15.6 to 27.0)        | 95.7 (71.1 to 123.6)          | 2.3 (1.1 to 4.2)                | 2.9 (2.9 to 2.9)                  |
| Cameroon | 2000 | 50.1 (39.4 to 62.5)        | 9.0 (6.8 to 11.7)          | 39.3 (29.0 to 51.5)           | 0.9 (0.5 to 1.8)                | 0.9 (0.9 to 0.9)                  | 126.9 (99.8 to 158.2)  | 22.9 (17.1 to 29.5)        | 99.5 (73.4 to 130.4)          | 2.4 (1.2 to 4.5)                | 2.2 (2.2 to 2.2)                  |
| Cameroon | 2001 | 52.6 (42.0 to 65.6)        | 9.9 (7.4 to 12.9)          | 40.3 (29.7 to 53.4)           | 1.0 (0.5 to 1.9)                | 1.4 (1.4 to 1.4)                  | 133.3 (106.3 to 166.1) | 25.1 (18.9 to 32.7)        | 102.2 (75.1 to 135.3)         | 2.5 (1.2 to 4.9)                | 3.5 (3.5 to 3.5)                  |
| Cameroon | 2002 | 53.4 (42.4 to 66.9)        | 10.5 (7.9 to 13.8)         | 41.0 (30.6 to 54.1)           | 1.0 (0.5 to 2.0)                | 0.9 (0.9 to 0.9)                  | 135.3 (107.3 to 169.4) | 26.7 (20.1 to 34.9)        | 103.7 (77.5 to 137.0)         | 2.6 (1.2 to 5.1)                | 2.2 (2.2 to 2.2)                  |
| Cameroon | 2003 | 54.6 (43.4 to 67.7)        | 10.5 (7.9 to 13.6)         | 41.2 (30.6 to 54.1)           | 1.0 (0.5 to 2.0)                | 1.9 (1.9 to 1.9)                  | 138.3 (110.0 to 171.6) | 26.6 (20.1 to 34.6)        | 104.3 (77.6 to 136.9)         | 2.6 (1.2 to 5.1)                | 4.8 (4.8 to 4.8)                  |
| Cameroon | 2004 | 54.4 (43.3 to 67.1)        | 9.8 (7.4 to 12.7)          | 40.6 (30.1 to 53.0)           | 1.0 (0.5 to 1.9)                | 3.1 (3.1 to 3.1)                  | 137.8 (109.6 to 169.9) | 24.8 (18.6 to 32.1)        | 102.7 (76.2 to 134.2)         | 2.5 (1.2 to 4.8)                | 7.8 (7.8 to 7.8)                  |
| Cameroon | 2005 | 52.9 (42.1 to 65.4)        | 9.0 (6.8 to 11.7)          | 39.7 (29.6 to 52.3)           | 1.0 (0.4 to 1.8)                | 3.2 (3.2 to 3.2)                  | 134.0 (106.7 to 165.7) | 22.9 (17.3 to 29.7)        | 100.6 (75.0 to 132.4)         | 2.4 (1.1 to 4.6)                | 8.1 (8.1 to 8.1)                  |
| Cameroon | 2006 | 53.3 (42.8 to 65.7)        | 8.6 (6.5 to 11.2)          | 39.7 (29.8 to 52.2)           | 0.9 (0.4 to 1.8)                | 4.0 (4.0 to 4.0)                  | 134.9 (108.4 to 166.4) | 21.9 (16.5 to 28.4)        | 100.5 (75.3 to 132.1)         | 2.4 (1.1 to 4.5)                | 10.1 (10.1 to 10.1)               |
| Cameroon | 2007 | 53.0 (42.5 to 65.1)        | 8.3 (6.2 to 10.8)          | 39.8 (29.6 to 51.9)           | 0.9 (0.4 to 1.7)                | 3.9 (3.9 to 3.9)                  | 134.1 (107.7 to 165.0) | 21.0 (15.8 to 27.4)        | 100.8 (75.0 to 131.4)         | 2.4 (1.1 to 4.4)                | 10.0 (10.0 to 10.0)               |
| Cameroon | 2008 | 53.5 (43.2 to 65.5)        | 8.3 (6.3 to 10.9)          | 40.2 (30.0 to 51.6)           | 1.0 (0.5 to 1.8)                | 4.0 (4.0 to 4.0)                  | 135.5 (109.4 to 165.8) | 21.1 (16.0 to 27.5)        | 101.8 (75.9 to 130.7)         | 2.5 (1.2 to 4.5)                | 10.2 (10.2 to 10.2)               |
| Cameroon | 2009 | 53.1 (42.7 to 64.8)        | 8.9 (6.7 to 11.6)          | 39.0 (28.9 to 50.5)           | 1.1 (0.5 to 2.0)                | 4.1 (4.1 to 4.1)                  | 134.5 (108.0 to 164.0) | 22.6 (16.9 to 29.4)        | 98.8 (73.2 to 127.8)          | 2.7 (1.3 to 5.0)                | 10.5 (10.5 to 10.5)               |
| Cameroon | 2010 | 51.0 (41.0 to 62.3)        | 9.5 (7.2 to 12.3)          | 37.2 (27.7 to 48.3)           | 1.2 (0.5 to 2.2)                | 3.1 (3.1 to 3.1)                  | 129.1 (103.7 to 157.7) | 24.2 (18.1 to 31.2)        | 94.2 (70.2 to 122.4)          | 2.9 (1.4 to 5.6)                | 7.9 (7.9 to 7.9)                  |
| Cameroon | 2011 | 51.9 (42.4 to 62.1)        | 10.0 (7.5 to 13.0)         | 33.7 (25.0 to 43.9)           | 1.2 (0.6 to 2.4)                | 6.9 (6.9 to 6.9)                  | 131.4 (107.3 to 157.4) | 25.3 (19.0 to 32.9)        | 85.5 (63.2 to 111.3)          | 3.2 (1.5 to 6.1)                | 17.5 (17.5 to 17.5)               |
| Cameroon | 2012 | 51.7 (41.2 to 62.7)        | 9.0 (6.8 to 11.7)          | 36.6 (26.7 to 47.2)           | 1.2 (0.5 to 2.3)                | 4.9 (4.9 to 4.9)                  | 130.8 (104.5 to 158.9) | 22.8 (17.1 to 29.7)        | 92.7 (67.6 to 119.4)          | 3.0 (1.4 to 5.9)                | 12.3 (12.3 to 12.3)               |
| Cameroon | 2013 | 54.6 (44.1 to 66.1)        | 8.5 (6.4 to 11.2)          | 38.8 (28.7 to 50.3)           | 1.2 (0.5 to 2.3)                | 6.2 (6.2 to 6.2)                  | 138.4 (111.7 to 167.5) | 21.5 (16.1 to 28.2)        | 98.2 (72.7 to 127.3)          | 3.1 (1.4 to 5.9)                | 15.6 (15.6 to 15.6)               |
| Cameroon | 2014 | 54.6 (43.9 to 67.4)        | 8.2 (6.2 to 10.9)          | 40.3 (29.9 to 53.1)           | 1.3 (0.6 to 2.4)                | 4.8 (4.8 to 4.8)                  | 138.3 (111.2 to 170.6) | 20.7 (15.7 to 27.5)        | 102.2 (75.8 to 134.4)         | 3.2 (1.4 to 6.2)                | 12.2 (12.2 to 12.2)               |
| Cameroon | 2015 | 58.9 (47.5 to 73.4)        | 8.6 (6.5 to 11.4)          | 42.3 (31.0 to 56.3)           | 1.4 (0.6 to 2.7)                | 6.6 (6.6 to 6.6)                  | 149.2 (120.2 to 185.8) | 21.8 (16.4 to 28.8)        | 107.1 (78.4 to 142.6)         | 3.5 (1.6 to 6.9)                | 16.7 (16.7 to 16.7)               |

| Country  | Year | 2018 US Dollars per capita |                            |                               |                                 |                                   | 2018 PPP per capita    |                            |                               |                                 |                                   |
|----------|------|----------------------------|----------------------------|-------------------------------|---------------------------------|-----------------------------------|------------------------|----------------------------|-------------------------------|---------------------------------|-----------------------------------|
|          |      | Health spending            | Government health spending | Out-of-pocket health spending | Prepaid private health spending | Development assistance for health | Health spending        | Government health spending | Out-of-pocket health spending | Prepaid private health spending | Development assistance for health |
| Cameroon | 2016 | 58.4 (46.5 to 74.0)        | 8.7 (6.6 to 11.4)          | 43.0 (31.5 to 58.4)           | 1.4 (0.6 to 2.9)                | 5.3 (5.3 to 5.3)                  | 148.0 (117.7 to 187.3) | 22.0 (16.7 to 29.0)        | 108.9 (79.7 to 147.8)         | 3.7 (1.6 to 7.4)                | 13.4 (13.4 to 13.4)               |
| Cameroon | 2017 | 62.0 (50.2 to 77.4)        | 8.2 (6.2 to 10.7)          | 42.6 (31.2 to 57.9)           | 1.4 (0.6 to 2.9)                | 9.8 (9.8 to 9.8)                  | 157.1 (127.2 to 195.9) | 20.7 (15.6 to 27.2)        | 107.9 (78.9 to 146.5)         | 3.6 (1.6 to 7.3)                | 24.8 (24.8 to 24.8)               |
| Cameroon | 2018 | 61.9 (49.9 to 77.5)        | 8.3 (6.2 to 10.9)          | 43.0 (31.3 to 58.4)           | 1.5 (0.6 to 2.9)                | 9.1 (9.1 to 9.2)                  | 156.7 (126.2 to 196.1) | 21.0 (15.8 to 27.6)        | 108.9 (79.2 to 147.9)         | 3.7 (1.6 to 7.4)                | 23.2 (23.1 to 23.2)               |
| Cameroon | 2019 | 62.4 (50.1 to 78.2)        | 8.4 (6.3 to 11.0)          | 43.4 (31.6 to 59.1)           | 1.5 (0.6 to 3.0)                | 9.1 (8.5 to 9.6)                  | 158.0 (126.8 to 198.1) | 21.2 (16.0 to 27.7)        | 110.0 (80.1 to 149.6)         | 3.8 (1.6 to 7.6)                | 23.1 (21.5 to 24.4)               |
| Cameroon | 2020 | 63.0 (50.7 to 78.9)        | 8.4 (6.4 to 11.1)          | 43.9 (32.0 to 59.7)           | 1.5 (0.7 to 3.0)                | 9.1 (8.4 to 9.9)                  | 159.5 (128.3 to 199.9) | 21.4 (16.1 to 28.0)        | 111.1 (81.0 to 151.3)         | 3.8 (1.7 to 7.7)                | 23.1 (21.2 to 25.0)               |
| Cameroon | 2021 | 63.6 (51.5 to 79.7)        | 8.5 (6.4 to 11.2)          | 44.3 (32.3 to 60.3)           | 1.5 (0.7 to 3.1)                | 9.2 (8.3 to 10.2)                 | 161.1 (130.5 to 201.8) | 21.6 (16.3 to 28.3)        | 112.3 (81.8 to 152.8)         | 3.9 (1.7 to 7.9)                | 23.3 (20.9 to 25.7)               |
| Cameroon | 2022 | 64.3 (51.9 to 80.5)        | 8.7 (6.5 to 11.3)          | 44.8 (32.7 to 60.9)           | 1.6 (0.7 to 3.2)                | 9.3 (8.2 to 10.4)                 | 162.9 (131.5 to 203.8) | 22.0 (16.5 to 28.7)        | 113.4 (82.7 to 154.3)         | 4.0 (1.7 to 8.0)                | 23.5 (20.8 to 26.2)               |
| Cameroon | 2023 | 65.0 (52.2 to 81.2)        | 8.8 (6.6 to 11.5)          | 45.2 (33.0 to 61.5)           | 1.6 (0.7 to 3.2)                | 9.4 (8.1 to 10.7)                 | 164.5 (132.3 to 205.7) | 22.3 (16.7 to 29.1)        | 114.5 (83.5 to 155.8)         | 4.0 (1.8 to 8.2)                | 23.7 (20.6 to 27.0)               |
| Cameroon | 2024 | 65.7 (52.7 to 82.3)        | 8.9 (6.7 to 11.7)          | 45.6 (33.3 to 62.4)           | 1.6 (0.7 to 3.3)                | 9.5 (8.2 to 10.9)                 | 166.3 (133.5 to 208.4) | 22.6 (17.0 to 29.6)        | 115.6 (84.3 to 158.0)         | 4.1 (1.8 to 8.3)                | 24.0 (20.7 to 27.7)               |
| Cameroon | 2025 | 66.4 (53.2 to 82.4)        | 9.1 (6.8 to 11.8)          | 46.1 (33.6 to 63.0)           | 1.7 (0.7 to 3.4)                | 9.6 (8.1 to 11.2)                 | 168.2 (134.8 to 208.6) | 23.0 (17.2 to 30.0)        | 116.8 (85.1 to 159.5)         | 4.2 (1.8 to 8.5)                | 24.2 (20.6 to 28.4)               |
| Cameroon | 2026 | 67.2 (53.9 to 84.2)        | 9.2 (6.9 to 12.1)          | 46.6 (33.9 to 63.5)           | 1.7 (0.7 to 3.4)                | 9.7 (8.2 to 11.3)                 | 170.2 (136.4 to 213.1) | 23.4 (17.4 to 30.5)        | 118.1 (85.9 to 160.9)         | 4.3 (1.9 to 8.6)                | 24.5 (20.7 to 28.7)               |
| Cameroon | 2027 | 68.1 (54.5 to 84.5)        | 9.4 (7.0 to 12.3)          | 47.2 (34.3 to 64.2)           | 1.7 (0.7 to 3.5)                | 9.8 (8.2 to 11.7)                 | 172.4 (137.9 to 214.0) | 23.8 (17.7 to 31.1)        | 119.4 (86.8 to 162.7)         | 4.4 (1.9 to 8.8)                | 24.8 (20.8 to 29.7)               |
| Cameroon | 2028 | 69.0 (55.2 to 86.6)        | 9.6 (7.1 to 12.5)          | 47.7 (34.7 to 65.0)           | 1.8 (0.8 to 3.6)                | 9.9 (8.3 to 12.0)                 | 174.7 (139.7 to 219.4) | 24.2 (18.1 to 31.7)        | 120.8 (87.9 to 164.6)         | 4.5 (1.9 to 9.0)                | 25.2 (21.0 to 30.3)               |
| Cameroon | 2029 | 69.9 (55.9 to 87.5)        | 9.8 (7.3 to 12.8)          | 48.3 (35.0 to 65.8)           | 1.8 (0.8 to 3.6)                | 10.1 (8.3 to 12.4)                | 177.1 (141.5 to 221.6) | 24.7 (18.4 to 32.3)        | 122.3 (88.6 to 166.6)         | 4.6 (2.0 to 9.2)                | 25.5 (20.9 to 31.4)               |
| Cameroon | 2030 | 70.9 (57.0 to 88.6)        | 9.9 (7.4 to 13.0)          | 48.9 (35.4 to 66.9)           | 1.8 (0.8 to 3.7)                | 10.2 (8.3 to 12.5)                | 179.5 (144.3 to 224.3) | 25.2 (18.7 to 33.0)        | 123.9 (89.6 to 169.5)         | 4.7 (2.0 to 9.4)                | 25.8 (21.1 to 31.7)               |
| Cameroon | 2031 | 71.9 (57.2 to 90.1)        | 10.1 (7.5 to 13.3)         | 49.5 (35.7 to 67.7)           | 1.9 (0.8 to 3.8)                | 10.3 (8.3 to 13.0)                | 182.0 (144.8 to 228.0) | 25.7 (19.1 to 33.7)        | 125.4 (90.4 to 171.5)         | 4.8 (2.1 to 9.5)                | 26.2 (21.0 to 32.9)               |
| Cameroon | 2032 | 72.8 (58.2 to 90.7)        | 10.4 (7.7 to 13.6)         | 50.1 (36.1 to 68.4)           | 1.9 (0.8 to 3.8)                | 10.5 (8.4 to 13.1)                | 184.5 (147.4 to 229.8) | 26.2 (19.4 to 34.4)        | 126.9 (91.4 to 173.3)         | 4.9 (2.1 to 9.7)                | 26.5 (21.2 to 33.1)               |
| Cameroon | 2033 | 73.9 (58.7 to 92.9)        | 10.6 (7.8 to 13.9)         | 50.7 (36.5 to 69.6)           | 2.0 (0.9 to 3.9)                | 10.6 (8.4 to 13.7)                | 187.1 (148.7 to 235.2) | 26.8 (19.8 to 35.2)        | 128.5 (92.5 to 176.1)         | 5.0 (2.2 to 9.9)                | 26.9 (21.3 to 34.6)               |
| Cameroon | 2034 | 74.9 (59.5 to 94.2)        | 10.8 (8.0 to 14.2)         | 51.3 (36.9 to 70.4)           | 2.0 (0.9 to 4.0)                | 10.8 (8.5 to 14.2)                | 189.8 (150.7 to 238.6) | 27.3 (20.2 to 35.9)        | 130.0 (93.5 to 178.2)         | 5.1 (2.2 to 10.1)               | 27.4 (21.4 to 35.9)               |
| Cameroon | 2035 | 76.0 (60.1 to 95.4)        | 11.0 (8.1 to 14.5)         | 52.0 (37.3 to 71.3)           | 2.0 (0.9 to 4.1)                | 11.0 (8.4 to 14.3)                | 192.5 (152.3 to 241.5) | 27.9 (20.6 to 36.8)        | 131.6 (94.5 to 180.4)         | 5.2 (2.3 to 10.3)               | 27.8 (21.3 to 36.1)               |
| Cameroon | 2036 | 77.1 (61.2 to 96.8)        | 11.3 (8.3 to 14.8)         | 52.6 (37.7 to 72.2)           | 2.1 (0.9 to 4.2)                | 11.2 (8.6 to 14.8)                | 195.3 (155.0 to 245.0) | 28.5 (21.0 to 37.6)        | 133.2 (95.5 to 182.8)         | 5.3 (2.3 to 10.5)               | 28.3 (21.8 to 37.6)               |

| Country  | Year | 2018 US Dollars per capita |                            |                               |                                 |                                   | 2018 PPP per capita       |                            |                               |                                 |                                   |
|----------|------|----------------------------|----------------------------|-------------------------------|---------------------------------|-----------------------------------|---------------------------|----------------------------|-------------------------------|---------------------------------|-----------------------------------|
|          |      | Health spending            | Government health spending | Out-of-pocket health spending | Prepaid private health spending | Development assistance for health | Health spending           | Government health spending | Out-of-pocket health spending | Prepaid private health spending | Development assistance for health |
| Cameroon | 2037 | 78.3 (62.4 to 99.1)        | 11.5 (8.4 to 15.2)         | 53.3 (38.2 to 73.2)           | 2.1 (0.9 to 4.3)                | 11.3 (8.6 to 15.3)                | 198.2 (158.1 to 250.8)    | 29.2 (21.4 to 38.5)        | 134.9 (96.7 to 185.3)         | 5.4 (2.4 to 10.8)               | 28.7 (21.7 to 38.8)               |
| Cameroon | 2038 | 79.4 (63.1 to 99.4)        | 11.8 (8.6 to 15.6)         | 53.9 (38.5 to 74.2)           | 2.2 (0.9 to 4.3)                | 11.5 (8.6 to 15.9)                | 201.1 (159.8 to 251.7)    | 29.8 (21.8 to 39.4)        | 136.5 (97.6 to 187.8)         | 5.5 (2.4 to 11.0)               | 29.2 (21.8 to 40.2)               |
| Cameroon | 2039 | 80.5 (63.7 to 101.8)       | 12.0 (8.8 to 16.0)         | 54.5 (38.9 to 75.1)           | 2.2 (1.0 to 4.4)                | 11.7 (8.7 to 16.5)                | 203.9 (161.4 to 257.8)    | 30.5 (22.2 to 40.4)        | 138.1 (98.4 to 190.2)         | 5.6 (2.5 to 11.2)               | 29.7 (22.1 to 41.7)               |
| Cameroon | 2040 | 81.7 (64.6 to 103.0)       | 12.3 (8.9 to 16.4)         | 55.2 (39.3 to 76.0)           | 2.3 (1.0 to 4.5)                | 12.0 (8.7 to 17.1)                | 206.9 (163.7 to 260.8)    | 31.2 (22.6 to 41.4)        | 139.7 (99.5 to 192.5)         | 5.7 (2.5 to 11.4)               | 30.3 (22.1 to 43.3)               |
| Cameroon | 2041 | 82.9 (66.1 to 105.1)       | 12.6 (9.1 to 16.8)         | 55.8 (39.7 to 77.0)           | 2.3 (1.0 to 4.6)                | 12.2 (8.8 to 17.7)                | 210.0 (167.5 to 266.1)    | 31.9 (23.1 to 42.5)        | 141.3 (100.6 to 195.0)        | 5.9 (2.5 to 11.6)               | 30.9 (22.3 to 44.9)               |
| Cameroon | 2042 | 84.2 (66.6 to 106.5)       | 12.9 (9.3 to 17.2)         | 56.5 (40.2 to 78.0)           | 2.4 (1.0 to 4.7)                | 12.5 (8.8 to 18.4)                | 213.3 (168.7 to 269.8)    | 32.6 (23.6 to 43.6)        | 143.0 (101.8 to 197.5)        | 6.0 (2.6 to 11.8)               | 31.6 (22.4 to 46.6)               |
| Cameroon | 2043 | 85.5 (67.5 to 107.5)       | 13.2 (9.5 to 17.6)         | 57.1 (40.6 to 79.0)           | 2.4 (1.0 to 4.8)                | 12.8 (8.9 to 19.5)                | 216.5 (170.8 to 272.2)    | 33.4 (24.0 to 44.6)        | 144.7 (102.9 to 200.0)        | 6.1 (2.6 to 12.1)               | 32.3 (22.6 to 49.4)               |
| Cameroon | 2044 | 86.8 (68.5 to 110.7)       | 13.5 (9.7 to 18.0)         | 57.8 (41.1 to 80.0)           | 2.5 (1.1 to 4.9)                | 13.1 (9.1 to 19.8)                | 219.9 (173.6 to 280.3)    | 34.2 (24.6 to 45.7)        | 146.4 (104.1 to 202.5)        | 6.2 (2.7 to 12.3)               | 33.1 (23.0 to 50.1)               |
| Cameroon | 2045 | 88.2 (69.6 to 111.6)       | 13.8 (9.9 to 18.5)         | 58.5 (41.6 to 81.0)           | 2.5 (1.1 to 5.0)                | 13.4 (9.3 to 20.6)                | 223.4 (176.4 to 282.5)    | 35.0 (25.1 to 46.9)        | 148.1 (105.3 to 205.1)        | 6.4 (2.7 to 12.6)               | 33.9 (23.4 to 52.2)               |
| Cameroon | 2046 | 89.6 (70.7 to 113.5)       | 14.2 (10.1 to 19.0)        | 59.2 (42.1 to 82.0)           | 2.6 (1.1 to 5.1)                | 13.7 (9.3 to 21.7)                | 226.9 (178.9 to 287.4)    | 35.9 (25.6 to 48.1)        | 149.8 (106.5 to 207.7)        | 6.5 (2.8 to 12.9)               | 34.7 (23.7 to 55.0)               |
| Cameroon | 2047 | 91.0 (72.1 to 113.2)       | 14.5 (10.4 to 19.5)        | 59.8 (42.6 to 82.9)           | 2.6 (1.1 to 5.2)                | 14.1 (9.5 to 23.2)                | 230.5 (182.6 to 286.7)    | 36.8 (26.3 to 49.3)        | 151.5 (107.8 to 209.9)        | 6.6 (2.8 to 13.1)               | 35.6 (24.0 to 58.7)               |
| Cameroon | 2048 | 92.6 (72.6 to 117.9)       | 14.9 (10.6 to 20.0)        | 60.5 (43.1 to 83.9)           | 2.7 (1.1 to 5.3)                | 14.5 (9.6 to 24.2)                | 234.4 (183.7 to 298.6)    | 37.7 (26.9 to 50.6)        | 153.3 (109.2 to 212.4)        | 6.7 (2.9 to 13.3)               | 36.6 (24.3 to 61.4)               |
| Cameroon | 2049 | 94.1 (74.2 to 116.9)       | 15.3 (10.9 to 20.5)        | 61.3 (43.7 to 84.9)           | 2.7 (1.2 to 5.4)                | 14.9 (9.7 to 25.0)                | 238.3 (187.8 to 296.2)    | 38.7 (27.5 to 51.8)        | 155.1 (110.6 to 215.0)        | 6.9 (3.0 to 13.6)               | 37.6 (24.7 to 63.2)               |
| Cameroon | 2050 | 95.7 (75.2 to 122.4)       | 15.7 (11.2 to 21.0)        | 62.0 (44.2 to 86.0)           | 2.8 (1.2 to 5.5)                | 15.3 (9.9 to 25.9)                | 242.4 (190.4 to 309.8)    | 39.7 (28.4 to 53.1)        | 157.0 (111.8 to 217.7)        | 7.0 (3.0 to 13.9)               | 38.7 (25.1 to 65.6)               |
| Canada   | 1995 | 2937.2 (2836.1 to 3040.4)  | 2153.5 (2068.8 to 2243.3)  | 486.4 (448.5 to 529.8)        | 297.3 (266.0 to 331.6)          | 0.0 (0.0 to 0.0)                  | 3143.3 (3035.1 to 3253.8) | 2304.6 (2213.9 to 2400.7)  | 520.5 (480.0 to 567.0)        | 318.1 (284.6 to 354.9)          | 0.0 (0.0 to 0.0)                  |
| Canada   | 1996 | 2924.9 (2852.2 to 3007.4)  | 2132.3 (2071.2 to 2197.4)  | 492.3 (462.2 to 523.4)        | 300.4 (276.1 to 326.7)          | 0.0 (0.0 to 0.0)                  | 3130.2 (3052.3 to 3218.4) | 2281.9 (2216.5 to 2351.6)  | 526.8 (494.6 to 560.2)        | 321.5 (295.5 to 349.6)          | 0.0 (0.0 to 0.0)                  |
| Canada   | 1997 | 3002.8 (2930.4 to 3077.4)  | 2178.8 (2116.9 to 2243.8)  | 511.6 (483.6 to 539.3)        | 312.4 (288.8 to 339.0)          | 0.0 (0.0 to 0.0)                  | 3213.5 (3136.0 to 3293.3) | 2331.7 (2265.5 to 2401.3)  | 547.5 (517.5 to 577.1)        | 334.3 (309.1 to 362.7)          | 0.0 (0.0 to 0.0)                  |
| Canada   | 1998 | 3095.5 (3023.2 to 3166.2)  | 2243.1 (2181.8 to 2306.4)  | 526.4 (500.3 to 553.8)        | 326.0 (302.6 to 352.0)          | 0.0 (0.0 to 0.0)                  | 3312.8 (3235.3 to 3388.3) | 2400.5 (2335.0 to 2468.2)  | 563.4 (535.4 to 592.6)        | 348.9 (323.9 to 376.7)          | 0.0 (0.0 to 0.0)                  |
| Canada   | 1999 | 3218.1 (3146.3 to 3288.4)  | 2336.1 (2275.5 to 2398.7)  | 541.9 (517.0 to 567.1)        | 340.2 (315.2 to 364.2)          | 0.0 (0.0 to 0.0)                  | 3444.0 (3367.1 to 3519.2) | 2500.0 (2435.1 to 2567.0)  | 579.9 (553.3 to 606.9)        | 364.0 (337.3 to 389.7)          | 0.0 (0.0 to 0.0)                  |
| Canada   | 2000 | 3375.7 (3303.1 to 3448.6)  | 2459.0 (2397.1 to 2520.3)  | 554.9 (531.3 to 578.8)        | 361.8 (339.4 to 385.2)          | 0.0 (0.0 to 0.0)                  | 3612.6 (3534.8 to 3690.6) | 2631.6 (2565.3 to 2697.2)  | 593.8 (568.5 to 619.4)        | 387.2 (363.2 to 412.2)          | 0.0 (0.0 to 0.0)                  |
| Canada   | 2001 | 3500.6 (3429.9 to 3567.1)  | 2546.9 (2487.7 to 2607.7)  | 562.5 (539.5 to 585.2)        | 391.3 (369.4 to 414.1)          | 0.0 (0.0 to 0.0)                  | 3746.3 (3670.6 to 3817.4) | 2725.6 (2662.3 to 2790.6)  | 601.9 (577.3 to 626.2)        | 418.8 (395.3 to 443.2)          | 0.0 (0.0 to 0.0)                  |

| Country | Year | 2018 US Dollars per capita |                            |                               |                                 |                                   | 2018 PPP per capita       |                            |                               |                                 |                                   |
|---------|------|----------------------------|----------------------------|-------------------------------|---------------------------------|-----------------------------------|---------------------------|----------------------------|-------------------------------|---------------------------------|-----------------------------------|
|         |      | Health spending            | Government health spending | Out-of-pocket health spending | Prepaid private health spending | Development assistance for health | Health spending           | Government health spending | Out-of-pocket health spending | Prepaid private health spending | Development assistance for health |
| Canada  | 2002 | 3654.1 (3586.5 to 3725.9)  | 2657.2 (2595.2 to 2721.8)  | 574.8 (552.5 to 598.1)        | 422.1 (400.7 to 445.2)          | 0.0 (0.0 to 0.0)                  | 3910.6 (3838.2 to 3987.4) | 2843.7 (2777.3 to 2912.8)  | 615.2 (591.3 to 640.0)        | 451.7 (428.8 to 476.4)          | 0.0 (0.0 to 0.0)                  |
| Canada  | 2003 | 3767.6 (3695.9 to 3837.3)  | 2746.6 (2681.6 to 2811.4)  | 581.0 (559.1 to 603.3)        | 440.0 (417.7 to 463.5)          | 0.0 (0.0 to 0.0)                  | 4032.0 (3955.2 to 4106.6) | 2939.3 (2869.8 to 3008.7)  | 621.7 (598.3 to 645.6)        | 470.9 (447.0 to 496.0)          | 0.0 (0.0 to 0.0)                  |
| Canada  | 2004 | 3870.1 (3792.6 to 3943.5)  | 2824.6 (2759.1 to 2890.6)  | 593.8 (570.1 to 616.4)        | 451.7 (428.4 to 474.8)          | 0.0 (0.0 to 0.0)                  | 4141.7 (4058.7 to 4220.2) | 3022.8 (2952.7 to 3093.5)  | 635.4 (610.1 to 659.6)        | 483.4 (458.5 to 508.1)          | 0.0 (0.0 to 0.0)                  |
| Canada  | 2005 | 3954.4 (3887.0 to 4030.0)  | 2885.3 (2824.5 to 2950.6)  | 610.4 (587.7 to 633.6)        | 458.7 (436.4 to 481.6)          | 0.0 (0.0 to 0.0)                  | 4231.9 (4159.7 to 4312.8) | 3087.7 (3022.7 to 3157.6)  | 653.3 (629.0 to 678.1)        | 490.9 (467.1 to 515.4)          | 0.0 (0.0 to 0.0)                  |
| Canada  | 2006 | 4042.3 (3963.3 to 4116.0)  | 2945.1 (2878.7 to 3010.2)  | 631.4 (608.3 to 654.0)        | 465.8 (442.4 to 489.0)          | 0.0 (0.0 to 0.0)                  | 4325.9 (4241.4 to 4404.9) | 3151.8 (3080.7 to 3221.4)  | 675.7 (651.0 to 699.9)        | 498.5 (473.4 to 523.4)          | 0.0 (0.0 to 0.0)                  |
| Canada  | 2007 | 4157.5 (4082.4 to 4230.8)  | 3032.4 (2964.0 to 3096.6)  | 647.1 (624.3 to 672.3)        | 478.0 (454.2 to 502.1)          | 0.0 (0.0 to 0.0)                  | 4449.2 (4368.9 to 4527.7) | 3245.2 (3171.9 to 3313.9)  | 692.5 (668.1 to 719.5)        | 511.6 (486.1 to 537.3)          | 0.0 (0.0 to 0.0)                  |
| Canada  | 2008 | 4328.9 (4253.7 to 4405.6)  | 3164.8 (3099.7 to 3230.9)  | 665.1 (641.7 to 688.4)        | 499.0 (474.8 to 524.6)          | 0.0 (0.0 to 0.0)                  | 4632.7 (4552.2 to 4714.8) | 3386.9 (3317.2 to 3457.6)  | 711.8 (686.7 to 736.7)        | 534.0 (508.1 to 561.4)          | 0.0 (0.0 to 0.0)                  |
| Canada  | 2009 | 4407.4 (4335.7 to 4482.2)  | 3217.8 (3154.0 to 3278.9)  | 675.7 (652.5 to 700.5)        | 514.0 (489.0 to 538.3)          | 0.0 (0.0 to 0.0)                  | 4716.7 (4640.0 to 4796.7) | 3443.6 (3375.3 to 3509.0)  | 723.1 (698.2 to 749.6)        | 550.0 (523.3 to 576.1)          | 0.0 (0.0 to 0.0)                  |
| Canada  | 2010 | 4565.9 (4491.9 to 4638.8)  | 3343.9 (3278.1 to 3407.0)  | 690.7 (665.1 to 716.3)        | 531.3 (506.1 to 554.5)          | 0.0 (0.0 to 0.0)                  | 4886.2 (4807.1 to 4964.4) | 3578.5 (3508.1 to 3646.1)  | 739.2 (711.8 to 766.5)        | 568.5 (541.6 to 593.5)          | 0.0 (0.0 to 0.0)                  |
| Canada  | 2011 | 4596.3 (4522.3 to 4676.1)  | 3382.6 (3316.0 to 3455.9)  | 679.3 (655.5 to 702.3)        | 534.4 (507.8 to 558.5)          | 0.0 (0.0 to 0.0)                  | 4918.8 (4839.6 to 5004.2) | 3619.9 (3548.7 to 3698.4)  | 726.9 (701.5 to 751.5)        | 571.9 (543.5 to 597.7)          | 0.0 (0.0 to 0.0)                  |
| Canada  | 2012 | 4570.0 (4496.8 to 4651.5)  | 3365.9 (3298.3 to 3435.2)  | 666.6 (642.3 to 690.6)        | 537.5 (512.7 to 566.5)          | 0.0 (0.0 to 0.0)                  | 4890.7 (4812.3 to 4977.9) | 3602.1 (3529.8 to 3676.3)  | 713.3 (687.3 to 739.1)        | 575.2 (548.6 to 606.3)          | 0.0 (0.0 to 0.0)                  |
| Canada  | 2013 | 4583.3 (4504.0 to 4662.3)  | 3373.8 (3300.4 to 3444.0)  | 663.9 (639.8 to 688.0)        | 545.5 (520.0 to 572.7)          | 0.0 (0.0 to 0.0)                  | 4904.9 (4820.1 to 4989.5) | 3610.5 (3532.0 to 3685.7)  | 710.5 (684.7 to 736.3)        | 583.8 (556.5 to 612.9)          | 0.0 (0.0 to 0.0)                  |
| Canada  | 2014 | 4647.9 (4572.9 to 4724.9)  | 3420.9 (3354.0 to 3486.7)  | 672.9 (649.4 to 697.5)        | 554.1 (528.2 to 581.3)          | 0.0 (0.0 to 0.0)                  | 4974.0 (4893.8 to 5056.5) | 3660.9 (3589.3 to 3731.3)  | 720.1 (695.0 to 746.4)        | 593.0 (565.3 to 622.1)          | 0.0 (0.0 to 0.0)                  |
| Canada  | 2015 | 4766.1 (4686.6 to 4848.5)  | 3505.1 (3437.4 to 3575.5)  | 691.7 (663.8 to 718.0)        | 569.3 (542.7 to 596.6)          | 0.0 (0.0 to 0.0)                  | 5100.6 (5015.4 to 5188.8) | 3751.0 (3678.6 to 3826.4)  | 740.2 (710.4 to 768.4)        | 609.3 (580.8 to 638.4)          | 0.0 (0.0 to 0.0)                  |
| Canada  | 2016 | 4874.5 (4772.7 to 4991.0)  | 3583.1 (3496.8 to 3682.7)  | 710.6 (673.6 to 747.4)        | 580.8 (543.8 to 617.9)          | 0.0 (0.0 to 0.0)                  | 5216.6 (5107.6 to 5341.3) | 3834.5 (3742.2 to 3941.1)  | 760.4 (720.8 to 799.8)        | 621.6 (581.9 to 661.2)          | 0.0 (0.0 to 0.0)                  |
| Canada  | 2017 | 4968.1 (4860.1 to 5081.6)  | 3652.6 (3559.3 to 3756.1)  | 722.3 (681.9 to 759.8)        | 593.3 (556.6 to 631.4)          | 0.0 (0.0 to 0.0)                  | 5316.7 (5201.1 to 5438.2) | 3908.9 (3809.0 to 4019.7)  | 772.9 (729.7 to 813.1)        | 634.9 (595.7 to 675.7)          | 0.0 (0.0 to 0.0)                  |
| Canada  | 2018 | 5030.9 (4916.8 to 5149.4)  | 3699.5 (3602.3 to 3805.3)  | 730.5 (689.4 to 770.4)        | 600.9 (563.7 to 639.4)          | 0.0 (0.0 to 0.0)                  | 5383.9 (5261.8 to 5510.8) | 3959.1 (3855.1 to 4072.3)  | 781.7 (737.8 to 824.4)        | 643.1 (603.3 to 684.3)          | 0.0 (0.0 to 0.0)                  |
| Canada  | 2019 | 5088.8 (4970.9 to 5212.1)  | 3743.2 (3637.7 to 3858.7)  | 738.3 (694.4 to 778.8)        | 607.3 (569.7 to 646.4)          | 0.0 (0.0 to 0.0)                  | 5445.9 (5319.8 to 5577.8) | 4005.9 (3892.9 to 4129.4)  | 790.1 (743.1 to 833.5)        | 650.0 (609.6 to 691.7)          | 0.0 (0.0 to 0.0)                  |
| Canada  | 2020 | 5146.8 (5014.1 to 5291.2)  | 3787.1 (3671.0 to 3912.2)  | 746.1 (700.3 to 789.4)        | 613.6 (575.5 to 653.1)          | 0.0 (0.0 to 0.0)                  | 5508.0 (5365.9 to 5662.5) | 4052.8 (3928.6 to 4186.7)  | 798.5 (749.5 to 844.8)        | 656.7 (615.9 to 699.0)          | 0.0 (0.0 to 0.0)                  |
| Canada  | 2021 | 5197.8 (5053.6 to 5346.5)  | 3825.7 (3692.5 to 3964.3)  | 752.9 (703.8 to 800.0)        | 619.3 (580.6 to 658.8)          | 0.0 (0.0 to 0.0)                  | 5562.5 (5408.2 to 5721.7) | 4094.1 (3951.7 to 4242.5)  | 805.7 (753.2 to 856.2)        | 662.7 (621.4 to 705.0)          | 0.0 (0.0 to 0.0)                  |
| Canada  | 2022 | 5244.4 (5090.5 to 5409.0)  | 3865.4 (3719.1 to 4016.5)  | 754.1 (705.2 to 802.3)        | 624.9 (585.6 to 665.0)          | 0.0 (0.0 to 0.0)                  | 5612.4 (5447.7 to 5788.5) | 4136.6 (3980.1 to 4298.3)  | 807.0 (754.7 to 858.6)        | 668.8 (626.7 to 711.6)          | 0.0 (0.0 to 0.0)                  |



|         |      | 2018 US Dollars per capita |                            |                               |                                 |                                   | 2018 PPP per capita       |                            |                               |                                 |                                   |
|---------|------|----------------------------|----------------------------|-------------------------------|---------------------------------|-----------------------------------|---------------------------|----------------------------|-------------------------------|---------------------------------|-----------------------------------|
| Country | Year | Health spending            | Government health spending | Out-of-pocket health spending | Prepaid private health spending | Development assistance for health | Health spending           | Government health spending | Out-of-pocket health spending | Prepaid private health spending | Development assistance for health |
| Canada  | 2023 | 5296.9 (5111.3 to 5475.5)  | 3910.8 (3748.0 to 4078.8)  | 755.2 (706.4 to 802.7)        | 630.9 (590.7 to 672.2)          | 0.0 (0.0 to 0.0)                  | 5668.6 (5470.0 to 5859.8) | 4185.3 (4011.0 to 4365.0)  | 808.2 (756.0 to 859.1)        | 675.1 (632.1 to 719.4)          | 0.0 (0.0 to 0.0)                  |
| Canada  | 2024 | 5343.3 (5152.6 to 5539.3)  | 3952.1 (3773.3 to 4134.6)  | 755.3 (704.4 to 802.6)        | 636.0 (594.9 to 678.1)          | 0.0 (0.0 to 0.0)                  | 5718.3 (5514.2 to 5928.0) | 4229.4 (4038.1 to 4424.7)  | 808.3 (753.8 to 858.9)        | 680.6 (636.7 to 725.7)          | 0.0 (0.0 to 0.0)                  |
| Canada  | 2025 | 5388.9 (5190.3 to 5593.9)  | 3992.1 (3801.3 to 4193.1)  | 756.0 (707.3 to 806.7)        | 640.8 (599.9 to 684.2)          | 0.0 (0.0 to 0.0)                  | 5767.0 (5554.5 to 5986.5) | 4272.2 (4068.0 to 4487.3)  | 809.0 (756.9 to 863.3)        | 685.8 (642.0 to 732.2)          | 0.0 (0.0 to 0.0)                  |
| Canada  | 2026 | 5435.4 (5221.9 to 5664.4)  | 4032.3 (3823.5 to 4244.1)  | 757.1 (706.6 to 807.0)        | 646.0 (604.8 to 690.5)          | 0.0 (0.0 to 0.0)                  | 5816.8 (5588.3 to 6061.8) | 4315.2 (4091.9 to 4542.0)  | 810.2 (756.2 to 863.6)        | 691.3 (647.3 to 739.0)          | 0.0 (0.0 to 0.0)                  |
| Canada  | 2027 | 5488.3 (5251.2 to 5734.5)  | 4077.3 (3853.5 to 4310.4)  | 759.0 (706.8 to 815.1)        | 652.0 (609.1 to 698.2)          | 0.0 (0.0 to 0.0)                  | 5873.5 (5619.7 to 6136.9) | 4363.4 (4123.9 to 4612.9)  | 812.3 (756.4 to 872.3)        | 697.8 (651.9 to 747.2)          | 0.0 (0.0 to 0.0)                  |
| Canada  | 2028 | 5542.8 (5292.4 to 5810.2)  | 4122.8 (3881.4 to 4375.2)  | 761.5 (705.3 to 822.3)        | 658.4 (615.0 to 706.9)          | 0.0 (0.0 to 0.0)                  | 5931.7 (5663.8 to 6217.9) | 4412.2 (4153.8 to 4682.3)  | 814.9 (754.8 to 880.0)        | 704.6 (658.2 to 756.5)          | 0.0 (0.0 to 0.0)                  |
| Canada  | 2029 | 5597.3 (5327.8 to 5885.4)  | 4167.8 (3909.2 to 4437.9)  | 764.3 (705.7 to 832.2)        | 665.2 (620.0 to 715.5)          | 0.0 (0.0 to 0.0)                  | 5990.1 (5701.7 to 6298.4) | 4460.2 (4183.5 to 4749.3)  | 817.9 (755.2 to 890.6)        | 711.9 (663.5 to 765.7)          | 0.0 (0.0 to 0.0)                  |
| Canada  | 2030 | 5657.0 (5372.1 to 5952.4)  | 4216.5 (3938.1 to 4511.9)  | 767.8 (704.5 to 845.3)        | 672.7 (625.4 to 725.4)          | 0.0 (0.0 to 0.0)                  | 6054.0 (5749.1 to 6370.1) | 4512.3 (4214.4 to 4828.5)  | 821.7 (754.0 to 904.7)        | 719.9 (669.3 to 776.3)          | 0.0 (0.0 to 0.0)                  |
| Canada  | 2031 | 5715.0 (5405.3 to 6035.5)  | 4262.3 (3970.9 to 4569.1)  | 771.9 (706.2 to 859.4)        | 680.8 (631.4 to 736.0)          | 0.0 (0.0 to 0.0)                  | 6116.1 (5784.6 to 6459.0) | 4561.4 (4249.5 to 4889.7)  | 826.1 (755.7 to 919.7)        | 728.5 (675.7 to 787.6)          | 0.0 (0.0 to 0.0)                  |
| Canada  | 2032 | 5776.3 (5465.7 to 6107.4)  | 4310.0 (4013.7 to 4629.9)  | 776.8 (709.3 to 871.5)        | 689.5 (639.1 to 747.9)          | 0.0 (0.0 to 0.0)                  | 6181.7 (5849.2 to 6536.0) | 4612.5 (4295.3 to 4954.8)  | 831.3 (759.1 to 932.6)        | 737.9 (684.0 to 800.4)          | 0.0 (0.0 to 0.0)                  |
| Canada  | 2033 | 5840.5 (5499.3 to 6165.9)  | 4359.3 (4047.4 to 4690.5)  | 782.2 (712.9 to 883.6)        | 698.9 (646.1 to 759.4)          | 0.0 (0.0 to 0.0)                  | 6250.3 (5885.2 to 6598.6) | 4665.2 (4331.4 to 5019.6)  | 837.1 (762.9 to 945.6)        | 748.0 (691.4 to 812.7)          | 0.0 (0.0 to 0.0)                  |
| Canada  | 2034 | 5906.6 (5562.6 to 6263.4)  | 4409.9 (4084.9 to 4752.5)  | 787.9 (716.1 to 898.6)        | 708.7 (653.7 to 772.0)          | 0.0 (0.0 to 0.0)                  | 6321.0 (5952.9 to 6702.9) | 4719.4 (4371.6 to 5086.0)  | 843.2 (766.4 to 961.6)        | 758.4 (699.6 to 826.1)          | 0.0 (0.0 to 0.0)                  |
| Canada  | 2035 | 5974.8 (5625.9 to 6352.3)  | 4462.4 (4122.0 to 4819.1)  | 793.8 (719.4 to 914.6)        | 718.7 (661.4 to 784.3)          | 0.0 (0.0 to 0.0)                  | 6394.1 (6020.7 to 6798.0) | 4775.5 (4411.2 to 5157.3)  | 849.5 (769.9 to 978.8)        | 769.1 (707.8 to 839.3)          | 0.0 (0.0 to 0.0)                  |
| Canada  | 2036 | 6040.5 (5648.6 to 6436.4)  | 4511.8 (4154.3 to 4878.9)  | 799.8 (723.0 to 930.7)        | 728.9 (668.7 to 797.8)          | 0.0 (0.0 to 0.0)                  | 6464.4 (6044.9 to 6888.1) | 4828.4 (4445.8 to 5221.2)  | 855.9 (773.7 to 996.0)        | 780.0 (715.6 to 853.8)          | 0.0 (0.0 to 0.0)                  |
| Canada  | 2037 | 6108.0 (5725.2 to 6513.4)  | 4562.5 (4195.8 to 4941.0)  | 806.1 (725.9 to 946.8)        | 739.4 (676.8 to 811.8)          | 0.0 (0.0 to 0.0)                  | 6536.6 (6127.0 to 6970.4) | 4882.7 (4490.3 to 5287.7)  | 862.6 (776.8 to 1013.3)       | 791.3 (724.3 to 868.8)          | 0.0 (0.0 to 0.0)                  |
| Canada  | 2038 | 6176.4 (5763.3 to 6601.2)  | 4613.8 (4239.1 to 5000.1)  | 812.4 (728.7 to 960.5)        | 750.2 (685.4 to 826.1)          | 0.0 (0.0 to 0.0)                  | 6609.8 (6167.7 to 7064.4) | 4937.6 (4536.6 to 5351.0)  | 869.4 (779.8 to 1027.9)       | 802.8 (733.5 to 884.1)          | 0.0 (0.0 to 0.0)                  |
| Canada  | 2039 | 6246.0 (5846.8 to 6662.4)  | 4666.2 (4275.8 to 5066.1)  | 818.8 (732.3 to 977.0)        | 761.1 (693.6 to 840.7)          | 0.0 (0.0 to 0.0)                  | 6684.3 (6257.0 to 7129.9) | 4993.6 (4575.9 to 5421.6)  | 876.2 (783.7 to 1045.6)       | 814.5 (742.3 to 899.7)          | 0.0 (0.0 to 0.0)                  |
| Canada  | 2040 | 6316.4 (5875.9 to 6768.5)  | 4719.3 (4316.0 to 5136.7)  | 825.1 (735.7 to 992.8)        | 772.0 (701.0 to 855.2)          | 0.0 (0.0 to 0.0)                  | 6759.6 (6288.2 to 7243.5) | 5050.4 (4618.9 to 5497.2)  | 883.0 (787.4 to 1062.5)       | 826.2 (750.2 to 915.2)          | 0.0 (0.0 to 0.0)                  |
| Canada  | 2041 | 6384.3 (5958.2 to 6865.8)  | 4769.5 (4349.7 to 5198.9)  | 831.6 (739.5 to 1009.2)       | 783.2 (708.6 to 868.6)          | 0.0 (0.0 to 0.0)                  | 6832.3 (6376.3 to 7347.6) | 5104.2 (4654.9 to 5563.7)  | 889.9 (791.4 to 1080.0)       | 838.1 (758.4 to 929.6)          | 0.0 (0.0 to 0.0)                  |
| Canada  | 2042 | 6455.7 (5997.4 to 6942.6)  | 4822.5 (4387.9 to 5263.1)  | 838.4 (743.7 to 1025.1)       | 794.8 (716.7 to 883.4)          | 0.0 (0.0 to 0.0)                  | 6908.7 (6418.3 to 7429.8) | 5160.9 (4695.8 to 5632.4)  | 897.2 (795.9 to 1097.0)       | 850.6 (767.0 to 945.4)          | 0.0 (0.0 to 0.0)                  |
| Canada  | 2043 | 6528.4 (6042.2 to 7039.7)  | 4876.5 (4431.1 to 5349.5)  | 845.2 (747.7 to 1040.3)       | 806.7 (726.1 to 898.9)          | 0.0 (0.0 to 0.0)                  | 6986.5 (6466.2 to 7533.7) | 5218.7 (4742.0 to 5724.8)  | 904.5 (800.2 to 1113.3)       | 863.3 (777.1 to 962.0)          | 0.0 (0.0 to 0.0)                  |

| Country    | Year | 2018 US Dollars per capita |                            |                               |                                 |                                   | 2018 PPP per capita       |                            |                               |                                 |                                   |
|------------|------|----------------------------|----------------------------|-------------------------------|---------------------------------|-----------------------------------|---------------------------|----------------------------|-------------------------------|---------------------------------|-----------------------------------|
|            |      | Health spending            | Government health spending | Out-of-pocket health spending | Prepaid private health spending | Development assistance for health | Health spending           | Government health spending | Out-of-pocket health spending | Prepaid private health spending | Development assistance for health |
| Canada     | 2044 | 6602.4 (6094.3 to 7122.5)  | 4931.7 (4469.4 to 5427.2)  | 852.0 (752.6 to 1055.2)       | 818.6 (735.7 to 915.5)          | 0.0 (0.0 to 0.0)                  | 7065.7 (6522.0 to 7622.3) | 5277.8 (4783.0 to 5808.0)  | 911.8 (805.4 to 1129.3)       | 876.1 (787.4 to 979.7)          | 0.0 (0.0 to 0.0)                  |
| Canada     | 2045 | 6677.3 (6154.1 to 7241.3)  | 4988.2 (4507.6 to 5503.5)  | 858.6 (757.0 to 1069.6)       | 830.5 (743.4 to 930.4)          | 0.0 (0.0 to 0.0)                  | 7145.8 (6585.9 to 7749.5) | 5338.2 (4823.9 to 5889.7)  | 918.8 (810.1 to 1144.7)       | 888.8 (795.5 to 995.6)          | 0.0 (0.0 to 0.0)                  |
| Canada     | 2046 | 6748.0 (6206.9 to 7312.0)  | 5040.8 (4532.6 to 5586.4)  | 865.0 (761.6 to 1083.7)       | 842.2 (751.4 to 945.1)          | 0.0 (0.0 to 0.0)                  | 7221.6 (6642.4 to 7825.1) | 5394.5 (4850.6 to 5978.5)  | 925.7 (815.1 to 1159.7)       | 901.3 (804.1 to 1011.4)         | 0.0 (0.0 to 0.0)                  |
| Canada     | 2047 | 6819.2 (6287.8 to 7418.7)  | 5093.9 (4566.4 to 5660.0)  | 871.3 (766.5 to 1097.3)       | 854.0 (759.4 to 961.6)          | 0.0 (0.0 to 0.0)                  | 7297.7 (6729.0 to 7939.3) | 5451.4 (4886.8 to 6057.2)  | 932.4 (820.3 to 1174.3)       | 913.9 (812.7 to 1029.0)         | 0.0 (0.0 to 0.0)                  |
| Canada     | 2048 | 6892.3 (6327.2 to 7511.9)  | 5149.0 (4599.7 to 5732.6)  | 877.5 (771.0 to 1111.0)       | 865.9 (767.4 to 977.2)          | 0.0 (0.0 to 0.0)                  | 7376.0 (6771.2 to 8039.0) | 5510.3 (4922.5 to 6134.9)  | 939.0 (825.1 to 1189.0)       | 926.7 (821.3 to 1045.7)         | 0.0 (0.0 to 0.0)                  |
| Canada     | 2049 | 6965.5 (6376.9 to 7638.2)  | 5204.2 (4633.5 to 5800.6)  | 883.6 (775.3 to 1124.5)       | 877.8 (775.5 to 994.0)          | 0.0 (0.0 to 0.0)                  | 7454.3 (6824.4 to 8174.1) | 5569.3 (4958.6 to 6207.7)  | 945.6 (829.7 to 1203.4)       | 939.4 (829.9 to 1063.8)         | 0.0 (0.0 to 0.0)                  |
| Canada     | 2050 | 7041.3 (6432.1 to 7723.4)  | 5261.6 (4677.4 to 5879.4)  | 889.8 (779.8 to 1138.5)       | 889.9 (784.1 to 1012.0)         | 0.0 (0.0 to 0.0)                  | 7535.4 (6883.4 to 8265.4) | 5630.8 (5005.6 to 6292.0)  | 952.3 (834.5 to 1218.4)       | 952.3 (839.1 to 1083.0)         | 0.0 (0.0 to 0.0)                  |
| Cape Verde | 1995 | 80.2 (67.4 to 96.2)        | 67.8 (55.3 to 83.3)        | 10.5 (7.5 to 14.1)            | 1.1 (0.5 to 2.1)                | 0.9 (0.9 to 0.9)                  | 168.8 (141.8 to 202.5)    | 142.6 (116.3 to 175.3)     | 22.1 (15.8 to 29.7)           | 2.3 (1.1 to 4.3)                | 1.8 (1.8 to 1.8)                  |
| Cape Verde | 1996 | 80.8 (68.0 to 97.1)        | 68.8 (56.5 to 84.4)        | 10.9 (7.8 to 14.5)            | 1.1 (0.5 to 2.1)                | 0.0 (0.0 to 0.0)                  | 170.0 (143.2 to 204.3)    | 144.8 (118.9 to 177.6)     | 22.9 (16.4 to 30.5)           | 2.3 (1.1 to 4.5)                | 0.0 (0.0 to 0.0)                  |
| Cape Verde | 1997 | 91.1 (78.1 to 107.0)       | 68.1 (56.3 to 82.6)        | 12.3 (8.9 to 16.5)            | 1.1 (0.5 to 2.0)                | 9.6 (9.6 to 9.6)                  | 191.7 (164.4 to 225.1)    | 143.3 (118.4 to 173.8)     | 26.0 (18.8 to 34.7)           | 2.3 (1.1 to 4.3)                | 20.1 (20.1 to 20.1)               |
| Cape Verde | 1998 | 90.6 (77.5 to 106.3)       | 69.2 (57.3 to 83.3)        | 16.1 (11.6 to 21.6)           | 1.1 (0.5 to 2.0)                | 4.2 (4.2 to 4.2)                  | 190.6 (163.0 to 223.6)    | 145.6 (120.6 to 175.4)     | 33.9 (24.4 to 45.5)           | 2.2 (1.0 to 4.2)                | 8.9 (8.9 to 8.9)                  |
| Cape Verde | 1999 | 99.0 (85.7 to 114.4)       | 70.6 (58.9 to 85.4)        | 18.9 (13.4 to 25.5)           | 1.0 (0.5 to 1.9)                | 8.5 (8.5 to 8.5)                  | 208.3 (180.4 to 240.7)    | 148.5 (123.9 to 179.7)     | 39.8 (28.2 to 53.7)           | 2.2 (1.0 to 4.1)                | 17.8 (17.8 to 17.8)               |
| Cape Verde | 2000 | 98.2 (85.2 to 114.0)       | 69.7 (58.6 to 83.9)        | 21.1 (15.0 to 28.4)           | 0.9 (0.4 to 1.7)                | 6.5 (6.5 to 6.5)                  | 206.7 (179.4 to 239.8)    | 146.6 (123.3 to 176.6)     | 44.4 (31.6 to 59.8)           | 2.0 (0.9 to 3.7)                | 13.7 (13.7 to 13.7)               |
| Cape Verde | 2001 | 115.6 (102.1 to 131.1)     | 70.6 (59.0 to 84.4)        | 22.6 (15.9 to 30.3)           | 0.9 (0.4 to 1.7)                | 21.5 (21.5 to 21.5)               | 243.3 (214.9 to 275.9)    | 148.5 (124.1 to 177.5)     | 47.5 (33.5 to 63.9)           | 1.9 (0.9 to 3.6)                | 45.3 (45.3 to 45.3)               |
| Cape Verde | 2002 | 102.2 (88.5 to 117.0)      | 71.8 (60.0 to 85.6)        | 23.7 (16.8 to 31.4)           | 0.9 (0.4 to 1.8)                | 5.8 (5.8 to 5.8)                  | 215.1 (186.1 to 246.2)    | 151.1 (126.4 to 180.2)     | 49.9 (35.4 to 66.1)           | 2.0 (0.9 to 3.7)                | 12.2 (12.2 to 12.2)               |
| Cape Verde | 2003 | 117.9 (103.6 to 134.0)     | 73.4 (61.1 to 87.4)        | 24.7 (17.6 to 32.9)           | 1.0 (0.5 to 1.8)                | 18.9 (18.9 to 18.9)               | 248.1 (217.9 to 282.0)    | 154.4 (128.5 to 183.8)     | 51.9 (37.0 to 69.3)           | 2.0 (1.0 to 3.9)                | 39.7 (39.7 to 39.7)               |
| Cape Verde | 2004 | 122.8 (108.0 to 138.8)     | 74.8 (62.6 to 88.3)        | 25.6 (18.5 to 34.1)           | 1.0 (0.5 to 1.9)                | 21.4 (21.4 to 21.4)               | 258.3 (227.3 to 292.1)    | 157.3 (131.7 to 185.8)     | 53.8 (38.9 to 71.8)           | 2.1 (1.0 to 4.1)                | 45.0 (45.0 to 45.0)               |
| Cape Verde | 2005 | 131.3 (116.2 to 147.6)     | 75.4 (63.0 to 89.1)        | 26.6 (19.5 to 35.2)           | 1.0 (0.5 to 2.0)                | 28.3 (28.3 to 28.3)               | 276.3 (244.6 to 310.6)    | 158.6 (132.5 to 187.4)     | 55.9 (41.0 to 74.0)           | 2.2 (1.0 to 4.2)                | 59.6 (59.6 to 59.6)               |
| Cape Verde | 2006 | 134.9 (119.3 to 151.1)     | 78.7 (66.1 to 92.8)        | 28.0 (20.6 to 37.2)           | 1.1 (0.5 to 2.1)                | 27.0 (27.0 to 27.0)               | 283.7 (251.1 to 318.0)    | 165.6 (139.0 to 195.3)     | 59.0 (43.4 to 78.4)           | 2.4 (1.1 to 4.4)                | 56.8 (56.8 to 56.8)               |
| Cape Verde | 2007 | 138.8 (122.4 to 155.8)     | 84.2 (70.9 to 99.1)        | 29.3 (21.5 to 38.9)           | 1.3 (0.6 to 2.3)                | 24.0 (24.0 to 24.0)               | 292.0 (257.5 to 327.9)    | 177.2 (149.3 to 208.4)     | 61.7 (45.3 to 81.9)           | 2.7 (1.3 to 4.8)                | 50.5 (50.5 to 50.5)               |
| Cape Verde | 2008 | 142.5 (126.0 to 159.5)     | 85.4 (72.4 to 100.2)       | 30.2 (22.1 to 40.0)           | 1.4 (0.7 to 2.7)                | 25.4 (25.4 to 25.4)               | 299.8 (265.2 to 335.7)    | 179.8 (152.3 to 210.9)     | 63.5 (46.6 to 84.1)           | 3.0 (1.4 to 5.7)                | 53.5 (53.5 to 53.5)               |

| Country    | Year | 2018 US Dollars per capita |                            |                               |                                 |                                   | 2018 PPP per capita    |                            |                               |                                 |                                   |
|------------|------|----------------------------|----------------------------|-------------------------------|---------------------------------|-----------------------------------|------------------------|----------------------------|-------------------------------|---------------------------------|-----------------------------------|
|            |      | Health spending            | Government health spending | Out-of-pocket health spending | Prepaid private health spending | Development assistance for health | Health spending        | Government health spending | Out-of-pocket health spending | Prepaid private health spending | Development assistance for health |
| Cape Verde | 2009 | 131.6 (115.5 to 149.4)     | 86.9 (73.3 to 102.1)       | 31.9 (23.7 to 42.0)           | 1.9 (0.9 to 3.5)                | 11.0 (11.0 to 11.0)               | 276.9 (243.1 to 314.3) | 182.8 (154.3 to 214.8)     | 67.2 (49.9 to 88.4)           | 3.9 (1.8 to 7.3)                | 23.1 (23.1 to 23.1)               |
| Cape Verde | 2010 | 151.8 (134.9 to 169.7)     | 90.1 (76.2 to 105.7)       | 35.7 (26.5 to 46.5)           | 2.8 (1.3 to 5.2)                | 23.2 (23.2 to 23.2)               | 319.3 (283.9 to 357.0) | 189.5 (160.4 to 222.5)     | 75.1 (55.7 to 97.9)           | 5.9 (2.8 to 10.9)               | 48.9 (48.9 to 48.9)               |
| Cape Verde | 2011 | 176.6 (159.7 to 195.7)     | 94.3 (79.9 to 111.1)       | 37.6 (27.8 to 49.3)           | 3.6 (1.7 to 6.5)                | 41.2 (41.2 to 41.2)               | 371.7 (336.0 to 411.7) | 198.4 (168.1 to 233.9)     | 79.1 (58.5 to 103.8)          | 7.5 (3.6 to 13.7)               | 86.6 (86.6 to 86.6)               |
| Cape Verde | 2012 | 166.4 (148.7 to 186.2)     | 96.5 (82.2 to 113.5)       | 39.7 (29.6 to 52.2)           | 4.1 (2.0 to 7.7)                | 26.1 (26.1 to 26.1)               | 350.2 (312.8 to 391.8) | 203.0 (173.0 to 238.9)     | 83.6 (62.2 to 109.8)          | 8.7 (4.2 to 16.2)               | 54.9 (54.9 to 54.9)               |
| Cape Verde | 2013 | 180.0 (160.5 to 200.3)     | 96.0 (81.8 to 112.8)       | 40.6 (30.1 to 53.5)           | 4.3 (2.1 to 7.9)                | 39.1 (39.1 to 39.1)               | 378.7 (337.6 to 421.4) | 201.9 (172.1 to 237.4)     | 85.5 (63.3 to 112.6)          | 9.1 (4.5 to 16.7)               | 82.2 (82.2 to 82.2)               |
| Cape Verde | 2014 | 173.9 (152.8 to 195.5)     | 98.6 (82.7 to 116.8)       | 41.8 (30.9 to 55.5)           | 4.1 (2.0 to 7.8)                | 29.4 (29.4 to 29.4)               | 366.0 (321.6 to 411.5) | 207.4 (174.1 to 245.9)     | 88.0 (65.0 to 116.8)          | 8.7 (4.3 to 16.5)               | 61.8 (61.8 to 61.8)               |
| Cape Verde | 2015 | 169.6 (148.0 to 192.2)     | 102.1 (84.3 to 121.7)      | 41.9 (30.9 to 55.7)           | 4.0 (1.9 to 7.4)                | 21.6 (21.6 to 21.6)               | 356.9 (311.4 to 404.5) | 214.8 (177.4 to 256.2)     | 88.2 (65.0 to 117.2)          | 8.3 (4.1 to 15.7)               | 45.5 (45.5 to 45.5)               |
| Cape Verde | 2016 | 156.6 (134.0 to 182.1)     | 101.5 (83.3 to 122.0)      | 42.9 (31.1 to 57.3)           | 3.9 (1.9 to 7.1)                | 8.4 (8.4 to 8.4)                  | 329.6 (281.9 to 383.1) | 213.6 (175.2 to 256.7)     | 90.2 (65.4 to 120.5)          | 8.2 (3.9 to 14.8)               | 17.6 (17.6 to 17.6)               |
| Cape Verde | 2017 | 161.9 (138.1 to 188.9)     | 107.6 (88.1 to 129.1)      | 44.3 (32.1 to 58.9)           | 4.0 (1.9 to 7.4)                | 6.0 (6.0 to 6.0)                  | 340.8 (290.6 to 397.4) | 226.4 (185.4 to 271.6)     | 93.3 (67.6 to 124.0)          | 8.5 (4.1 to 15.5)               | 12.6 (12.6 to 12.6)               |
| Cape Verde | 2018 | 165.7 (141.0 to 192.9)     | 110.3 (90.2 to 132.3)      | 45.6 (33.0 to 60.6)           | 4.1 (2.0 to 7.5)                | 5.7 (5.6 to 5.7)                  | 348.6 (296.7 to 405.9) | 232.1 (189.7 to 278.3)     | 95.9 (69.5 to 127.6)          | 8.7 (4.2 to 15.8)               | 11.9 (11.9 to 11.9)               |
| Cape Verde | 2019 | 170.2 (145.1 to 199.1)     | 113.3 (91.6 to 136.3)      | 47.0 (34.1 to 62.6)           | 4.2 (2.0 to 7.7)                | 5.7 (5.3 to 6.0)                  | 358.2 (305.4 to 418.9) | 238.3 (192.7 to 286.7)     | 98.9 (71.8 to 131.7)          | 8.9 (4.3 to 16.3)               | 12.0 (11.2 to 12.7)               |
| Cape Verde | 2020 | 175.2 (149.7 to 205.4)     | 116.4 (94.6 to 140.8)      | 48.6 (35.2 to 64.7)           | 4.4 (2.1 to 7.9)                | 5.8 (5.3 to 6.2)                  | 368.6 (315.0 to 432.1) | 244.9 (199.0 to 296.3)     | 102.3 (74.1 to 136.1)         | 9.2 (4.4 to 16.7)               | 12.1 (11.1 to 13.1)               |
| Cape Verde | 2021 | 180.3 (153.4 to 210.3)     | 119.6 (96.9 to 144.2)      | 50.3 (36.5 to 67.1)           | 4.5 (2.1 to 8.2)                | 5.9 (5.3 to 6.5)                  | 379.3 (322.8 to 442.5) | 251.6 (203.9 to 303.5)     | 105.9 (76.8 to 141.2)         | 9.4 (4.5 to 17.2)               | 12.4 (11.1 to 13.7)               |
| Cape Verde | 2022 | 185.5 (157.9 to 217.4)     | 122.8 (99.3 to 148.9)      | 52.1 (37.7 to 69.3)           | 4.6 (2.2 to 8.4)                | 6.0 (5.3 to 6.7)                  | 390.3 (332.3 to 457.4) | 258.4 (208.9 to 313.4)     | 109.6 (79.3 to 145.8)         | 9.7 (4.6 to 17.7)               | 12.6 (11.2 to 14.1)               |
| Cape Verde | 2023 | 190.5 (162.0 to 223.6)     | 125.8 (101.4 to 152.6)     | 53.9 (39.1 to 72.0)           | 4.7 (2.3 to 8.6)                | 6.1 (5.3 to 6.9)                  | 400.9 (340.9 to 470.4) | 264.8 (213.4 to 321.2)     | 113.4 (82.2 to 151.4)         | 9.9 (4.8 to 18.1)               | 12.8 (11.2 to 14.6)               |
| Cape Verde | 2024 | 195.3 (166.5 to 228.7)     | 128.5 (103.3 to 155.8)     | 55.7 (40.3 to 74.1)           | 4.8 (2.3 to 8.8)                | 6.2 (5.4 to 7.2)                  | 410.9 (350.4 to 481.1) | 270.4 (217.4 to 327.9)     | 117.2 (84.9 to 155.9)         | 10.1 (4.9 to 18.5)              | 13.1 (11.3 to 15.1)               |
| Cape Verde | 2025 | 199.7 (169.6 to 234.1)     | 130.8 (105.1 to 158.8)     | 57.6 (41.6 to 76.8)           | 4.9 (2.4 to 9.0)                | 6.4 (5.4 to 7.5)                  | 420.2 (356.9 to 492.6) | 275.3 (221.2 to 334.1)     | 121.1 (87.5 to 161.7)         | 10.4 (5.0 to 18.9)              | 13.4 (11.5 to 15.7)               |
| Cape Verde | 2026 | 204.2 (173.4 to 239.9)     | 133.2 (107.0 to 162.2)     | 59.5 (42.9 to 79.6)           | 5.0 (2.4 to 9.2)                | 6.5 (5.5 to 7.6)                  | 429.7 (364.9 to 504.7) | 280.3 (225.1 to 341.2)     | 125.2 (90.2 to 167.5)         | 10.6 (5.1 to 19.3)              | 13.7 (11.5 to 16.0)               |
| Cape Verde | 2027 | 208.7 (177.0 to 245.8)     | 135.5 (108.7 to 164.7)     | 61.4 (44.1 to 82.3)           | 5.1 (2.5 to 9.4)                | 6.6 (5.6 to 7.9)                  | 439.1 (372.4 to 517.3) | 285.1 (228.7 to 346.5)     | 129.3 (92.7 to 173.3)         | 10.8 (5.2 to 19.7)              | 13.9 (11.7 to 16.6)               |
| Cape Verde | 2028 | 213.3 (181.4 to 250.9)     | 137.9 (110.5 to 167.7)     | 63.4 (45.5 to 85.0)           | 5.2 (2.5 to 9.6)                | 6.8 (5.7 to 8.2)                  | 448.8 (381.7 to 527.9) | 290.1 (232.6 to 352.8)     | 133.4 (95.7 to 178.8)         | 11.0 (5.3 to 20.2)              | 14.3 (11.9 to 17.2)               |
| Cape Verde | 2029 | 217.9 (185.1 to 255.9)     | 140.2 (112.5 to 170.7)     | 65.4 (46.7 to 88.0)           | 5.3 (2.6 to 9.8)                | 6.9 (5.7 to 8.5)                  | 458.4 (389.4 to 538.4) | 295.1 (236.7 to 359.2)     | 137.6 (98.3 to 185.1)         | 11.2 (5.4 to 20.6)              | 14.6 (12.0 to 17.8)               |

| Country    | Year | 2018 US Dollars per capita |                            |                               |                                 |                                   | 2018 PPP per capita    |                            |                               |                                 |                                   |
|------------|------|----------------------------|----------------------------|-------------------------------|---------------------------------|-----------------------------------|------------------------|----------------------------|-------------------------------|---------------------------------|-----------------------------------|
|            |      | Health spending            | Government health spending | Out-of-pocket health spending | Prepaid private health spending | Development assistance for health | Health spending        | Government health spending | Out-of-pocket health spending | Prepaid private health spending | Development assistance for health |
| Cape Verde | 2030 | 222.7 (189.9 to 262.6)     | 142.8 (114.7 to 173.8)     | 67.4 (47.7 to 90.9)           | 5.5 (2.6 to 10.0)               | 7.1 (5.8 to 8.7)                  | 468.6 (399.5 to 552.6) | 300.5 (241.3 to 365.8)     | 141.7 (100.3 to 191.3)        | 11.5 (5.5 to 20.9)              | 14.9 (12.2 to 18.2)               |
| Cape Verde | 2031 | 227.2 (192.3 to 266.9)     | 145.1 (116.7 to 176.4)     | 69.3 (48.8 to 94.4)           | 5.6 (2.7 to 10.1)               | 7.2 (5.8 to 9.0)                  | 478.1 (404.5 to 561.7) | 305.4 (245.6 to 371.2)     | 145.8 (102.6 to 198.7)        | 11.7 (5.6 to 21.4)              | 15.2 (12.3 to 19.0)               |
| Cape Verde | 2032 | 232.1 (196.2 to 273.5)     | 147.8 (118.9 to 180.0)     | 71.3 (50.0 to 97.5)           | 5.7 (2.7 to 10.4)               | 7.4 (5.9 to 9.3)                  | 488.3 (412.9 to 575.4) | 310.9 (250.3 to 378.8)     | 150.0 (105.2 to 205.2)        | 11.9 (5.8 to 21.8)              | 15.5 (12.5 to 19.5)               |
| Cape Verde | 2033 | 236.9 (200.3 to 279.6)     | 150.3 (120.7 to 183.3)     | 73.3 (51.4 to 100.4)          | 5.8 (2.8 to 10.6)               | 7.5 (6.0 to 9.7)                  | 498.4 (421.4 to 588.3) | 316.2 (253.9 to 385.7)     | 154.1 (108.1 to 211.3)        | 12.2 (5.9 to 22.2)              | 15.8 (12.6 to 20.3)               |
| Cape Verde | 2034 | 241.9 (203.1 to 285.1)     | 153.0 (122.4 to 186.7)     | 75.2 (52.6 to 103.6)          | 5.9 (2.9 to 10.8)               | 7.7 (6.1 to 9.9)                  | 508.9 (427.4 to 600.0) | 322.0 (257.6 to 392.9)     | 158.3 (110.7 to 217.9)        | 12.4 (6.1 to 22.7)              | 16.2 (12.8 to 20.9)               |
| Cape Verde | 2035 | 246.9 (206.8 to 291.9)     | 155.8 (124.4 to 190.2)     | 77.2 (53.8 to 106.5)          | 6.0 (2.9 to 11.0)               | 7.9 (6.1 to 10.3)                 | 519.6 (435.1 to 614.1) | 327.8 (261.8 to 400.2)     | 162.5 (113.1 to 224.0)        | 12.7 (6.2 to 23.2)              | 16.6 (12.9 to 21.6)               |
| Cape Verde | 2036 | 251.8 (210.0 to 299.8)     | 158.4 (126.5 to 193.5)     | 79.1 (54.7 to 109.3)          | 6.2 (3.0 to 11.2)               | 8.1 (6.2 to 10.8)                 | 529.8 (442.0 to 630.9) | 333.4 (266.2 to 407.1)     | 166.5 (115.2 to 230.0)        | 12.9 (6.3 to 23.6)              | 16.9 (13.1 to 22.8)               |
| Cape Verde | 2037 | 256.8 (212.5 to 304.4)     | 161.2 (128.7 to 197.0)     | 81.1 (55.8 to 112.4)          | 6.3 (3.1 to 11.5)               | 8.2 (6.3 to 11.0)                 | 540.3 (447.2 to 640.6) | 339.2 (270.7 to 414.5)     | 170.6 (117.3 to 236.5)        | 13.2 (6.5 to 24.1)              | 17.3 (13.3 to 23.2)               |
| Cape Verde | 2038 | 261.7 (217.5 to 310.6)     | 163.9 (130.7 to 200.3)     | 83.0 (56.9 to 115.2)          | 6.4 (3.1 to 11.7)               | 8.4 (6.4 to 11.7)                 | 550.8 (457.7 to 653.5) | 344.9 (275.0 to 421.5)     | 174.7 (119.6 to 242.4)        | 13.5 (6.6 to 24.6)              | 17.7 (13.5 to 24.6)               |
| Cape Verde | 2039 | 266.9 (221.4 to 315.6)     | 166.9 (132.7 to 204.0)     | 84.9 (58.0 to 118.1)          | 6.5 (3.2 to 11.9)               | 8.6 (6.5 to 11.9)                 | 561.7 (465.8 to 664.1) | 351.2 (279.3 to 429.3)     | 178.7 (122.0 to 248.6)        | 13.8 (6.7 to 25.1)              | 18.0 (13.8 to 25.0)               |
| Cape Verde | 2040 | 271.8 (224.0 to 322.9)     | 169.6 (134.6 to 207.6)     | 86.8 (59.2 to 121.0)          | 6.7 (3.3 to 12.2)               | 8.8 (6.7 to 12.1)                 | 572.0 (471.4 to 679.4) | 356.9 (283.2 to 436.8)     | 182.6 (124.5 to 254.7)        | 14.1 (6.8 to 25.7)              | 18.4 (14.0 to 25.5)               |
| Cape Verde | 2041 | 277.1 (229.4 to 328.0)     | 172.7 (136.8 to 211.4)     | 88.7 (60.3 to 123.8)          | 6.8 (3.3 to 12.5)               | 9.0 (6.7 to 12.4)                 | 583.1 (482.7 to 690.2) | 363.4 (287.8 to 444.8)     | 186.5 (127.0 to 260.4)        | 14.4 (7.0 to 26.2)              | 18.8 (14.2 to 26.2)               |
| Cape Verde | 2042 | 282.4 (232.8 to 335.9)     | 175.8 (139.0 to 215.7)     | 90.5 (61.4 to 126.3)          | 7.0 (3.4 to 12.7)               | 9.2 (6.9 to 13.0)                 | 594.2 (489.8 to 706.8) | 369.9 (292.5 to 453.8)     | 190.4 (129.2 to 265.8)        | 14.6 (7.1 to 26.7)              | 19.3 (14.4 to 27.4)               |
| Cape Verde | 2043 | 287.6 (237.5 to 344.6)     | 178.9 (140.9 to 220.0)     | 92.3 (62.4 to 128.8)          | 7.1 (3.4 to 12.9)               | 9.4 (6.9 to 13.5)                 | 605.2 (499.6 to 725.0) | 376.4 (296.5 to 463.0)     | 194.1 (131.4 to 271.1)        | 14.9 (7.2 to 27.2)              | 19.7 (14.6 to 28.4)               |
| Cape Verde | 2044 | 293.0 (240.2 to 348.8)     | 182.1 (143.1 to 224.7)     | 94.0 (63.5 to 131.3)          | 7.2 (3.5 to 13.2)               | 9.6 (7.1 to 13.9)                 | 616.5 (505.4 to 733.9) | 383.2 (301.1 to 472.9)     | 197.8 (133.6 to 276.4)        | 15.3 (7.4 to 27.8)              | 20.2 (14.9 to 29.2)               |
| Cape Verde | 2045 | 298.1 (245.3 to 354.8)     | 185.2 (145.1 to 228.7)     | 95.7 (64.6 to 133.8)          | 7.4 (3.6 to 13.5)               | 9.8 (7.1 to 14.8)                 | 627.2 (516.1 to 746.6) | 389.7 (305.4 to 481.3)     | 201.3 (135.9 to 281.6)        | 15.5 (7.5 to 28.3)              | 20.7 (14.9 to 31.2)               |
| Cape Verde | 2046 | 302.8 (248.1 to 360.4)     | 188.0 (146.9 to 232.9)     | 97.3 (65.7 to 136.3)          | 7.5 (3.6 to 13.7)               | 10.0 (7.3 to 15.5)                | 637.2 (522.1 to 758.3) | 395.6 (309.2 to 490.0)     | 204.7 (138.3 to 286.7)        | 15.8 (7.6 to 28.8)              | 21.1 (15.3 to 32.6)               |
| Cape Verde | 2047 | 307.5 (255.2 to 369.0)     | 190.7 (148.7 to 236.7)     | 98.8 (66.8 to 138.6)          | 7.7 (3.7 to 13.9)               | 10.3 (7.4 to 16.2)                | 647.0 (537.0 to 776.5) | 401.4 (312.8 to 498.1)     | 207.8 (140.5 to 291.5)        | 16.1 (7.8 to 29.3)              | 21.7 (15.6 to 34.2)               |
| Cape Verde | 2048 | 312.0 (258.2 to 373.5)     | 193.4 (150.3 to 240.2)     | 100.3 (67.9 to 140.9)         | 7.8 (3.7 to 14.1)               | 10.6 (7.5 to 17.0)                | 656.5 (543.2 to 785.9) | 406.9 (316.4 to 505.3)     | 211.0 (142.8 to 296.5)        | 16.4 (7.9 to 29.7)              | 22.3 (15.9 to 35.7)               |
| Cape Verde | 2049 | 316.5 (260.1 to 382.8)     | 195.9 (152.5 to 243.3)     | 101.8 (69.0 to 143.4)         | 7.9 (3.8 to 14.4)               | 10.9 (7.7 to 17.5)                | 665.9 (547.3 to 805.6) | 412.2 (320.8 to 512.0)     | 214.2 (145.1 to 301.7)        | 16.7 (8.0 to 30.2)              | 22.9 (16.3 to 36.8)               |
| Cape Verde | 2050 | 320.9 (265.0 to 385.6)     | 198.4 (154.6 to 246.6)     | 103.3 (70.0 to 145.4)         | 8.0 (3.9 to 14.6)               | 11.2 (7.8 to 18.2)                | 675.3 (557.6 to 811.3) | 417.5 (325.2 to 518.9)     | 217.3 (147.4 to 306.0)        | 16.9 (8.1 to 30.7)              | 23.5 (16.5 to 38.3)               |

| Country                  | Year | 2018 US Dollars per capita |                            |                               |                                 |                                   | 2018 PPP per capita |                            |                               |                                 |                                   |
|--------------------------|------|----------------------------|----------------------------|-------------------------------|---------------------------------|-----------------------------------|---------------------|----------------------------|-------------------------------|---------------------------------|-----------------------------------|
|                          |      | Health spending            | Government health spending | Out-of-pocket health spending | Prepaid private health spending | Development assistance for health | Health spending     | Government health spending | Out-of-pocket health spending | Prepaid private health spending | Development assistance for health |
| Central African Republic | 1995 | 24.3 (20.0 to 29.3)        | 8.1 (6.2 to 10.7)          | 12.1 (8.1 to 16.9)            | 0.3 (0.1 to 0.5)                | 3.8 (3.8 to 3.8)                  | 42.0 (34.5 to 50.7) | 14.1 (10.7 to 18.6)        | 20.9 (14.0 to 29.2)           | 0.5 (0.2 to 0.9)                | 6.5 (6.5 to 6.5)                  |
| Central African Republic | 1996 | 19.9 (15.8 to 24.7)        | 7.6 (5.7 to 9.9)           | 11.7 (7.9 to 16.4)            | 0.3 (0.1 to 0.5)                | 0.4 (0.4 to 0.4)                  | 34.4 (27.4 to 42.7) | 13.1 (9.9 to 17.1)         | 20.1 (13.6 to 28.3)           | 0.5 (0.2 to 0.9)                | 0.7 (0.7 to 0.7)                  |
| Central African Republic | 1997 | 20.5 (16.4 to 25.3)        | 7.0 (5.2 to 9.1)           | 11.5 (7.7 to 16.1)            | 0.3 (0.1 to 0.5)                | 1.8 (1.8 to 1.8)                  | 35.4 (28.3 to 43.6) | 12.0 (9.0 to 15.7)         | 19.9 (13.3 to 27.8)           | 0.4 (0.2 to 0.8)                | 3.0 (3.0 to 3.0)                  |
| Central African Republic | 1998 | 25.0 (21.1 to 29.6)        | 6.6 (5.0 to 8.6)           | 11.3 (7.6 to 15.7)            | 0.2 (0.1 to 0.5)                | 6.9 (6.9 to 6.9)                  | 43.2 (36.4 to 51.1) | 11.4 (8.6 to 14.8)         | 19.5 (13.1 to 27.2)           | 0.4 (0.2 to 0.8)                | 11.9 (11.9 to 11.9)               |
| Central African Republic | 1999 | 23.7 (19.5 to 28.5)        | 8.0 (6.0 to 10.3)          | 11.6 (7.8 to 16.1)            | 0.3 (0.1 to 0.5)                | 3.9 (3.9 to 3.9)                  | 41.0 (33.6 to 49.2) | 13.7 (10.3 to 17.8)        | 20.0 (13.5 to 27.8)           | 0.4 (0.2 to 0.8)                | 6.8 (6.8 to 6.8)                  |
| Central African Republic | 2000 | 22.3 (18.0 to 27.3)        | 9.0 (6.7 to 11.5)          | 11.5 (7.8 to 16.1)            | 0.3 (0.1 to 0.5)                | 1.6 (1.6 to 1.6)                  | 38.5 (31.1 to 47.1) | 15.5 (11.6 to 19.8)        | 19.9 (13.5 to 27.8)           | 0.4 (0.2 to 0.8)                | 2.7 (2.7 to 2.7)                  |
| Central African Republic | 2001 | 23.2 (18.9 to 28.3)        | 9.4 (7.1 to 11.9)          | 11.4 (7.9 to 15.9)            | 0.3 (0.1 to 0.5)                | 2.1 (2.1 to 2.1)                  | 40.0 (32.6 to 48.9) | 16.2 (12.2 to 20.5)        | 19.8 (13.6 to 27.4)           | 0.4 (0.2 to 0.8)                | 3.5 (3.5 to 3.5)                  |
| Central African Republic | 2002 | 24.5 (20.1 to 30.0)        | 9.7 (7.3 to 12.3)          | 11.5 (7.7 to 15.9)            | 0.3 (0.1 to 0.5)                | 3.0 (3.0 to 3.0)                  | 42.3 (34.8 to 51.8) | 16.8 (12.7 to 21.2)        | 19.8 (13.4 to 27.5)           | 0.4 (0.2 to 0.8)                | 5.2 (5.2 to 5.2)                  |
| Central African Republic | 2003 | 22.7 (18.5 to 28.3)        | 9.2 (7.0 to 11.6)          | 11.1 (7.6 to 15.7)            | 0.2 (0.1 to 0.4)                | 2.2 (2.2 to 2.2)                  | 39.2 (31.9 to 48.9) | 15.8 (12.0 to 20.0)        | 19.2 (13.1 to 27.2)           | 0.4 (0.2 to 0.8)                | 3.7 (3.7 to 3.7)                  |
| Central African Republic | 2004 | 23.8 (19.7 to 29.5)        | 9.1 (6.8 to 11.6)          | 11.2 (7.7 to 15.9)            | 0.2 (0.1 to 0.5)                | 3.3 (3.3 to 3.3)                  | 41.1 (34.1 to 50.9) | 15.6 (11.8 to 20.0)        | 19.3 (13.4 to 27.4)           | 0.4 (0.2 to 0.8)                | 5.7 (5.7 to 5.7)                  |
| Central African Republic | 2005 | 24.4 (20.4 to 29.9)        | 9.0 (6.7 to 11.5)          | 11.0 (7.7 to 15.3)            | 0.3 (0.1 to 0.5)                | 4.2 (4.2 to 4.2)                  | 42.2 (35.2 to 51.6) | 15.5 (11.6 to 19.9)        | 19.0 (13.3 to 26.4)           | 0.4 (0.2 to 0.8)                | 7.3 (7.3 to 7.3)                  |
| Central African Republic | 2006 | 25.0 (21.1 to 30.1)        | 8.9 (6.7 to 11.5)          | 10.9 (7.7 to 15.3)            | 0.3 (0.1 to 0.5)                | 5.0 (5.0 to 5.0)                  | 43.3 (36.5 to 51.9) | 15.3 (11.7 to 19.8)        | 18.8 (13.2 to 26.4)           | 0.5 (0.2 to 0.9)                | 8.7 (8.7 to 8.7)                  |
| Central African Republic | 2007 | 22.5 (18.7 to 27.4)        | 8.6 (6.5 to 11.3)          | 10.8 (7.5 to 15.1)            | 0.3 (0.1 to 0.5)                | 2.7 (2.7 to 2.7)                  | 38.8 (32.3 to 47.4) | 14.9 (11.3 to 19.5)        | 18.7 (13.0 to 26.0)           | 0.5 (0.2 to 0.9)                | 4.7 (4.7 to 4.7)                  |
| Central African Republic | 2008 | 26.5 (23.1 to 31.5)        | 7.5 (5.6 to 9.8)           | 10.4 (7.3 to 14.6)            | 0.3 (0.1 to 0.5)                | 8.3 (8.3 to 8.3)                  | 45.8 (39.8 to 54.5) | 12.9 (9.8 to 17.0)         | 18.0 (12.6 to 25.3)           | 0.5 (0.2 to 0.9)                | 14.4 (14.4 to 14.4)               |
| Central African Republic | 2009 | 19.8 (16.5 to 24.6)        | 6.2 (4.7 to 8.1)           | 10.1 (7.1 to 14.5)            | 0.3 (0.1 to 0.5)                | 3.2 (3.2 to 3.2)                  | 34.3 (28.5 to 42.5) | 10.7 (8.2 to 13.9)         | 17.5 (12.2 to 25.1)           | 0.5 (0.2 to 0.9)                | 5.5 (5.5 to 5.5)                  |
| Central African Republic | 2010 | 21.7 (18.2 to 26.5)        | 6.1 (4.6 to 7.9)           | 10.3 (7.2 to 14.9)            | 0.3 (0.1 to 0.6)                | 5.0 (5.0 to 5.0)                  | 37.5 (31.5 to 45.8) | 10.5 (7.9 to 13.7)         | 17.8 (12.4 to 25.8)           | 0.5 (0.3 to 1.0)                | 8.6 (8.6 to 8.6)                  |
| Central African Republic | 2011 | 21.5 (18.0 to 26.5)        | 5.7 (4.3 to 7.3)           | 10.3 (7.1 to 14.8)            | 0.3 (0.1 to 0.6)                | 5.2 (5.2 to 5.2)                  | 37.1 (31.2 to 45.8) | 9.8 (7.4 to 12.7)          | 17.7 (12.2 to 25.6)           | 0.6 (0.3 to 1.0)                | 9.0 (9.0 to 9.0)                  |
| Central African Republic | 2012 | 21.4 (17.9 to 26.4)        | 5.4 (4.1 to 7.1)           | 10.5 (7.2 to 15.1)            | 0.3 (0.1 to 0.6)                | 5.1 (5.1 to 5.1)                  | 36.9 (30.9 to 45.6) | 9.4 (7.0 to 12.2)          | 18.1 (12.5 to 26.0)           | 0.6 (0.3 to 1.0)                | 8.9 (8.9 to 8.9)                  |
| Central African Republic | 2013 | 18.2 (15.5 to 22.0)        | 3.3 (2.5 to 4.2)           | 8.5 (5.9 to 12.0)             | 0.2 (0.1 to 0.4)                | 6.2 (6.2 to 6.2)                  | 31.5 (26.8 to 38.0) | 5.7 (4.3 to 7.3)           | 14.6 (10.2 to 20.8)           | 0.4 (0.2 to 0.7)                | 10.8 (10.8 to 10.8)               |
| Central African Republic | 2014 | 20.6 (18.0 to 24.1)        | 3.2 (2.4 to 4.1)           | 8.2 (5.8 to 11.7)             | 0.2 (0.1 to 0.4)                | 8.9 (8.9 to 8.9)                  | 35.6 (31.1 to 41.6) | 5.6 (4.1 to 7.1)           | 14.2 (9.9 to 20.2)            | 0.4 (0.2 to 0.7)                | 15.4 (15.4 to 15.4)               |
| Central African Republic | 2015 | 15.9 (13.3 to 19.3)        | 3.0 (2.2 to 3.9)           | 8.0 (5.5 to 11.3)             | 0.2 (0.1 to 0.4)                | 4.7 (4.7 to 4.7)                  | 27.5 (22.9 to 33.3) | 5.2 (3.9 to 6.7)           | 13.8 (9.6 to 19.5)            | 0.4 (0.2 to 0.7)                | 8.2 (8.2 to 8.2)                  |

| Country                  | Year | 2018 US Dollars per capita |                            |                               |                                 |                                   | 2018 PPP per capita |                            |                               |                                 |                                   |
|--------------------------|------|----------------------------|----------------------------|-------------------------------|---------------------------------|-----------------------------------|---------------------|----------------------------|-------------------------------|---------------------------------|-----------------------------------|
|                          |      | Health spending            | Government health spending | Out-of-pocket health spending | Prepaid private health spending | Development assistance for health | Health spending     | Government health spending | Out-of-pocket health spending | Prepaid private health spending | Development assistance for health |
| Central African Republic | 2016 | 21.6 (19.0 to 24.7)        | 2.9 (2.2 to 3.8)           | 7.9 (5.5 to 10.8)             | 0.2 (0.1 to 0.4)                | 10.6 (10.6 to 10.6)               | 37.3 (32.9 to 42.6) | 5.0 (3.8 to 6.5)           | 13.6 (9.4 to 18.6)            | 0.4 (0.2 to 0.7)                | 18.3 (18.3 to 18.3)               |
| Central African Republic | 2017 | 21.8 (19.1 to 25.1)        | 3.3 (2.4 to 4.2)           | 8.2 (5.7 to 11.2)             | 0.2 (0.1 to 0.4)                | 10.2 (10.2 to 10.2)               | 37.7 (33.0 to 43.4) | 5.7 (4.2 to 7.3)           | 14.1 (9.8 to 19.4)            | 0.4 (0.2 to 0.7)                | 17.5 (17.5 to 17.5)               |
| Central African Republic | 2018 | 21.0 (18.3 to 24.2)        | 3.3 (2.5 to 4.3)           | 8.2 (5.7 to 11.3)             | 0.2 (0.1 to 0.4)                | 9.3 (9.2 to 9.3)                  | 36.3 (31.5 to 41.8) | 5.7 (4.3 to 7.4)           | 14.2 (9.8 to 19.5)            | 0.4 (0.2 to 0.7)                | 16.0 (15.9 to 16.1)               |
| Central African Republic | 2019 | 21.2 (18.4 to 24.7)        | 3.4 (2.5 to 4.3)           | 8.2 (5.7 to 11.3)             | 0.2 (0.1 to 0.4)                | 9.4 (8.8 to 9.9)                  | 36.7 (31.9 to 42.7) | 5.8 (4.3 to 7.5)           | 14.2 (9.9 to 19.5)            | 0.4 (0.2 to 0.8)                | 16.2 (15.2 to 17.1)               |
| Central African Republic | 2020 | 21.5 (18.7 to 24.9)        | 3.4 (2.5 to 4.4)           | 8.3 (5.7 to 11.3)             | 0.2 (0.1 to 0.4)                | 9.6 (8.8 to 10.4)                 | 37.2 (32.3 to 43.0) | 5.9 (4.4 to 7.6)           | 14.3 (9.9 to 19.5)            | 0.4 (0.2 to 0.8)                | 16.6 (15.3 to 18.0)               |
| Central African Republic | 2021 | 21.8 (18.7 to 25.3)        | 3.5 (2.6 to 4.5)           | 8.3 (5.7 to 11.4)             | 0.2 (0.1 to 0.4)                | 9.8 (8.8 to 10.8)                 | 37.6 (32.4 to 43.6) | 6.0 (4.4 to 7.7)           | 14.3 (9.8 to 19.7)            | 0.4 (0.2 to 0.8)                | 16.9 (15.2 to 18.7)               |
| Central African Republic | 2022 | 22.1 (19.0 to 25.4)        | 3.5 (2.6 to 4.5)           | 8.3 (5.7 to 11.4)             | 0.2 (0.1 to 0.5)                | 10.1 (8.9 to 11.3)                | 38.2 (32.8 to 43.9) | 6.0 (4.5 to 7.8)           | 14.3 (9.8 to 19.7)            | 0.4 (0.2 to 0.8)                | 17.4 (15.4 to 19.5)               |
| Central African Republic | 2023 | 22.4 (19.2 to 26.0)        | 3.5 (2.6 to 4.6)           | 8.3 (5.7 to 11.4)             | 0.2 (0.1 to 0.5)                | 10.3 (8.9 to 11.8)                | 38.7 (33.2 to 44.9) | 6.1 (4.6 to 8.0)           | 14.3 (9.9 to 19.8)            | 0.4 (0.2 to 0.8)                | 17.8 (15.4 to 20.4)               |
| Central African Republic | 2024 | 22.7 (19.5 to 26.6)        | 3.6 (2.7 to 4.6)           | 8.3 (5.7 to 11.4)             | 0.2 (0.1 to 0.5)                | 10.6 (9.0 to 12.3)                | 39.2 (33.6 to 46.0) | 6.2 (4.6 to 8.0)           | 14.3 (9.9 to 19.8)            | 0.4 (0.2 to 0.8)                | 18.3 (15.6 to 21.2)               |
| Central African Republic | 2025 | 23.0 (19.5 to 26.9)        | 3.6 (2.7 to 4.7)           | 8.3 (5.8 to 11.5)             | 0.2 (0.1 to 0.5)                | 10.9 (9.2 to 12.7)                | 39.7 (33.6 to 46.4) | 6.2 (4.6 to 8.1)           | 14.3 (10.0 to 19.8)           | 0.4 (0.2 to 0.8)                | 18.7 (15.9 to 22.0)               |
| Central African Republic | 2026 | 23.3 (19.9 to 27.3)        | 3.6 (2.7 to 4.7)           | 8.3 (5.8 to 11.5)             | 0.3 (0.1 to 0.5)                | 11.1 (9.3 to 13.0)                | 40.2 (34.4 to 47.1) | 6.3 (4.6 to 8.2)           | 14.4 (10.0 to 19.8)           | 0.4 (0.2 to 0.8)                | 19.1 (16.0 to 22.5)               |
| Central African Republic | 2027 | 23.6 (20.1 to 28.0)        | 3.7 (2.7 to 4.8)           | 8.4 (5.8 to 11.5)             | 0.3 (0.1 to 0.5)                | 11.3 (9.5 to 13.4)                | 40.8 (34.7 to 48.3) | 6.4 (4.7 to 8.3)           | 14.4 (10.0 to 19.9)           | 0.4 (0.2 to 0.8)                | 19.6 (16.3 to 23.2)               |
| Central African Republic | 2028 | 23.9 (20.4 to 28.3)        | 3.7 (2.8 to 4.8)           | 8.4 (5.8 to 11.6)             | 0.3 (0.1 to 0.5)                | 11.6 (9.7 to 14.0)                | 41.4 (35.2 to 48.8) | 6.4 (4.8 to 8.4)           | 14.5 (10.0 to 20.1)           | 0.4 (0.2 to 0.9)                | 20.0 (16.7 to 24.1)               |
| Central African Republic | 2029 | 24.3 (20.7 to 28.8)        | 3.8 (2.8 to 4.9)           | 8.4 (5.8 to 11.7)             | 0.3 (0.1 to 0.5)                | 11.9 (9.7 to 14.6)                | 41.9 (35.7 to 49.7) | 6.5 (4.8 to 8.4)           | 14.5 (10.0 to 20.2)           | 0.5 (0.2 to 0.9)                | 20.5 (16.8 to 25.1)               |
| Central African Republic | 2030 | 24.6 (20.9 to 28.9)        | 3.8 (2.8 to 4.9)           | 8.4 (5.8 to 11.6)             | 0.3 (0.1 to 0.5)                | 12.1 (9.8 to 15.2)                | 42.5 (36.0 to 50.0) | 6.6 (4.8 to 8.5)           | 14.5 (10.0 to 20.1)           | 0.5 (0.2 to 0.9)                | 20.9 (17.0 to 26.2)               |
| Central African Republic | 2031 | 25.0 (20.8 to 29.6)        | 3.8 (2.8 to 5.0)           | 8.5 (5.8 to 11.7)             | 0.3 (0.1 to 0.5)                | 12.4 (9.9 to 15.7)                | 43.1 (36.0 to 51.2) | 6.6 (4.9 to 8.6)           | 14.6 (10.0 to 20.2)           | 0.5 (0.2 to 0.9)                | 21.4 (17.1 to 27.1)               |
| Central African Republic | 2032 | 25.4 (21.1 to 30.3)        | 3.9 (2.8 to 5.0)           | 8.5 (5.8 to 11.8)             | 0.3 (0.1 to 0.5)                | 12.7 (10.1 to 16.3)               | 43.8 (36.5 to 52.3) | 6.7 (4.9 to 8.7)           | 14.7 (10.0 to 20.3)           | 0.5 (0.2 to 0.9)                | 22.0 (17.5 to 28.1)               |
| Central African Republic | 2033 | 25.8 (21.4 to 30.8)        | 3.9 (2.9 to 5.1)           | 8.5 (5.8 to 11.9)             | 0.3 (0.1 to 0.5)                | 13.0 (10.2 to 17.1)               | 44.5 (37.0 to 53.2) | 6.7 (4.9 to 8.8)           | 14.7 (10.0 to 20.6)           | 0.5 (0.2 to 0.9)                | 22.5 (17.6 to 29.5)               |
| Central African Republic | 2034 | 26.2 (21.6 to 31.8)        | 3.9 (2.9 to 5.1)           | 8.6 (5.8 to 12.0)             | 0.3 (0.1 to 0.5)                | 13.4 (10.4 to 17.8)               | 45.3 (37.4 to 54.9) | 6.8 (5.0 to 8.9)           | 14.8 (10.0 to 20.7)           | 0.5 (0.2 to 0.9)                | 23.2 (18.0 to 30.8)               |
| Central African Republic | 2035 | 26.7 (22.1 to 32.5)        | 4.0 (2.9 to 5.2)           | 8.6 (5.8 to 12.1)             | 0.3 (0.1 to 0.5)                | 13.9 (10.7 to 18.3)               | 46.1 (38.1 to 56.1) | 6.8 (5.0 to 8.9)           | 14.9 (10.0 to 20.9)           | 0.5 (0.2 to 0.9)                | 24.0 (18.4 to 31.6)               |
| Central African Republic | 2036 | 27.2 (22.2 to 33.3)        | 4.0 (2.9 to 5.2)           | 8.7 (5.8 to 12.2)             | 0.3 (0.1 to 0.6)                | 14.3 (10.8 to 19.5)               | 47.1 (38.4 to 57.5) | 6.9 (5.0 to 9.0)           | 14.9 (10.0 to 21.0)           | 0.5 (0.2 to 1.0)                | 24.7 (18.7 to 33.6)               |

| Country                  | Year | 2018 US Dollars per capita |                            |                               |                                 |                                   | 2018 PPP per capita  |                            |                               |                                 |                                   |
|--------------------------|------|----------------------------|----------------------------|-------------------------------|---------------------------------|-----------------------------------|----------------------|----------------------------|-------------------------------|---------------------------------|-----------------------------------|
|                          |      | Health spending            | Government health spending | Out-of-pocket health spending | Prepaid private health spending | Development assistance for health | Health spending      | Government health spending | Out-of-pocket health spending | Prepaid private health spending | Development assistance for health |
| Central African Republic | 2037 | 27.8 (22.7 to 34.5)        | 4.0 (2.9 to 5.3)           | 8.7 (5.8 to 12.2)             | 0.3 (0.1 to 0.6)                | 14.7 (11.0 to 20.1)               | 48.0 (39.2 to 59.6)  | 6.9 (5.1 to 9.1)           | 15.0 (10.1 to 21.0)           | 0.5 (0.2 to 1.0)                | 25.5 (19.0 to 34.7)               |
| Central African Republic | 2038 | 28.4 (22.9 to 35.0)        | 4.1 (2.9 to 5.3)           | 8.8 (5.9 to 12.3)             | 0.3 (0.1 to 0.6)                | 15.2 (11.1 to 21.3)               | 49.0 (39.6 to 60.4)  | 7.0 (5.1 to 9.2)           | 15.1 (10.1 to 21.3)           | 0.5 (0.2 to 1.0)                | 26.3 (19.2 to 36.8)               |
| Central African Republic | 2039 | 28.9 (23.6 to 36.2)        | 4.1 (3.0 to 5.4)           | 8.8 (5.9 to 12.4)             | 0.3 (0.1 to 0.6)                | 15.7 (11.6 to 22.2)               | 50.0 (40.7 to 62.5)  | 7.1 (5.1 to 9.3)           | 15.2 (10.2 to 21.5)           | 0.5 (0.2 to 1.0)                | 27.2 (20.0 to 38.3)               |
| Central African Republic | 2040 | 29.6 (23.8 to 37.3)        | 4.1 (3.0 to 5.4)           | 8.9 (5.9 to 12.6)             | 0.3 (0.1 to 0.6)                | 16.3 (11.9 to 23.4)               | 51.1 (41.1 to 64.4)  | 7.1 (5.1 to 9.4)           | 15.3 (10.2 to 21.7)           | 0.5 (0.3 to 1.0)                | 28.1 (20.5 to 40.3)               |
| Central African Republic | 2041 | 30.3 (24.1 to 38.6)        | 4.2 (3.0 to 5.5)           | 8.9 (5.9 to 12.7)             | 0.3 (0.1 to 0.6)                | 16.9 (12.2 to 24.6)               | 52.3 (41.6 to 66.7)  | 7.2 (5.2 to 9.5)           | 15.5 (10.2 to 21.9)           | 0.5 (0.3 to 1.0)                | 29.1 (21.0 to 42.5)               |
| Central African Republic | 2042 | 31.0 (24.5 to 39.6)        | 4.2 (3.0 to 5.6)           | 9.0 (6.0 to 12.9)             | 0.3 (0.1 to 0.6)                | 17.5 (12.3 to 25.9)               | 53.5 (42.3 to 68.4)  | 7.2 (5.2 to 9.7)           | 15.6 (10.3 to 22.2)           | 0.5 (0.3 to 1.0)                | 30.2 (21.2 to 44.7)               |
| Central African Republic | 2043 | 31.7 (24.7 to 41.5)        | 4.2 (3.0 to 5.7)           | 9.1 (6.0 to 13.0)             | 0.3 (0.2 to 0.6)                | 18.1 (12.6 to 27.2)               | 54.8 (42.7 to 71.7)  | 7.3 (5.3 to 9.8)           | 15.7 (10.4 to 22.5)           | 0.5 (0.3 to 1.0)                | 31.2 (21.7 to 46.9)               |
| Central African Republic | 2044 | 32.5 (25.4 to 42.7)        | 4.3 (3.1 to 5.7)           | 9.2 (6.1 to 13.2)             | 0.3 (0.2 to 0.6)                | 18.7 (12.8 to 28.3)               | 56.2 (43.8 to 73.8)  | 7.4 (5.3 to 9.8)           | 15.9 (10.5 to 22.7)           | 0.6 (0.3 to 1.1)                | 32.3 (22.2 to 48.8)               |
| Central African Republic | 2045 | 33.3 (26.2 to 44.7)        | 4.3 (3.1 to 5.8)           | 9.3 (6.1 to 13.3)             | 0.3 (0.2 to 0.6)                | 19.4 (13.2 to 30.1)               | 57.6 (45.2 to 77.2)  | 7.5 (5.4 to 10.0)          | 16.1 (10.6 to 23.0)           | 0.6 (0.3 to 1.1)                | 33.5 (22.9 to 51.9)               |
| Central African Republic | 2046 | 34.2 (26.4 to 46.5)        | 4.4 (3.2 to 5.9)           | 9.4 (6.2 to 13.5)             | 0.3 (0.2 to 0.6)                | 20.0 (13.5 to 31.9)               | 59.1 (45.5 to 80.2)  | 7.6 (5.4 to 10.2)          | 16.3 (10.7 to 23.3)           | 0.6 (0.3 to 1.1)                | 34.6 (23.3 to 55.1)               |
| Central African Republic | 2047 | 35.1 (27.0 to 48.5)        | 4.5 (3.2 to 6.1)           | 9.5 (6.3 to 13.6)             | 0.3 (0.2 to 0.6)                | 20.8 (13.8 to 33.8)               | 60.7 (46.6 to 83.7)  | 7.8 (5.6 to 10.5)          | 16.5 (10.9 to 23.6)           | 0.6 (0.3 to 1.1)                | 35.9 (23.9 to 58.3)               |
| Central African Republic | 2048 | 36.2 (27.6 to 50.2)        | 4.6 (3.3 to 6.2)           | 9.7 (6.4 to 13.8)             | 0.3 (0.2 to 0.7)                | 21.5 (14.2 to 35.6)               | 62.5 (47.7 to 86.6)  | 8.0 (5.7 to 10.7)          | 16.7 (11.0 to 23.9)           | 0.6 (0.3 to 1.1)                | 37.2 (24.5 to 61.5)               |
| Central African Republic | 2049 | 37.2 (28.3 to 53.2)        | 4.7 (3.4 to 6.4)           | 9.8 (6.5 to 14.0)             | 0.3 (0.2 to 0.7)                | 22.3 (14.5 to 38.6)               | 64.2 (48.9 to 92.0)  | 8.2 (5.8 to 11.0)          | 17.0 (11.1 to 24.2)           | 0.6 (0.3 to 1.2)                | 38.5 (25.0 to 66.7)               |
| Central African Republic | 2050 | 38.3 (28.5 to 55.4)        | 4.9 (3.4 to 6.6)           | 10.0 (6.5 to 14.2)            | 0.3 (0.2 to 0.7)                | 23.2 (14.6 to 39.8)               | 66.2 (49.3 to 95.6)  | 8.4 (6.0 to 11.4)          | 17.2 (11.3 to 24.6)           | 0.6 (0.3 to 1.2)                | 40.0 (25.2 to 68.7)               |
| Chad                     | 1995 | 34.6 (27.9 to 42.6)        | 7.5 (5.7 to 9.5)           | 20.2 (14.2 to 28.3)           | 1.5 (0.7 to 2.9)                | 5.4 (5.4 to 5.4)                  | 95.1 (76.7 to 117.3) | 20.6 (15.6 to 26.2)        | 55.5 (39.1 to 77.8)           | 4.2 (2.0 to 7.9)                | 14.9 (14.9 to 14.9)               |
| Chad                     | 1996 | 31.7 (25.3 to 39.6)        | 7.5 (5.7 to 9.6)           | 19.8 (14.0 to 27.6)           | 1.5 (0.7 to 2.8)                | 2.9 (2.9 to 2.9)                  | 87.1 (69.5 to 109.1) | 20.6 (15.8 to 26.4)        | 54.5 (38.6 to 75.9)           | 4.1 (1.9 to 7.7)                | 7.9 (7.9 to 7.9)                  |
| Chad                     | 1997 | 33.4 (27.1 to 41.3)        | 7.8 (5.9 to 10.1)          | 20.0 (14.0 to 27.4)           | 1.5 (0.7 to 2.7)                | 4.2 (4.2 to 4.2)                  | 91.9 (74.6 to 113.7) | 21.5 (16.3 to 27.7)        | 54.9 (38.6 to 75.4)           | 4.0 (1.9 to 7.5)                | 11.5 (11.5 to 11.5)               |
| Chad                     | 1998 | 32.2 (25.9 to 39.9)        | 8.0 (6.0 to 10.3)          | 19.8 (13.8 to 26.8)           | 1.4 (0.7 to 2.6)                | 3.1 (3.1 to 3.1)                  | 88.7 (71.2 to 109.7) | 22.0 (16.6 to 28.5)        | 54.4 (37.8 to 73.8)           | 3.8 (1.8 to 7.1)                | 8.4 (8.4 to 8.4)                  |
| Chad                     | 1999 | 33.1 (26.7 to 40.6)        | 8.5 (6.4 to 10.9)          | 19.2 (13.5 to 26.4)           | 1.3 (0.6 to 2.4)                | 4.2 (4.2 to 4.2)                  | 91.2 (73.5 to 111.8) | 23.3 (17.7 to 30.1)        | 52.8 (37.1 to 72.6)           | 3.5 (1.7 to 6.5)                | 11.5 (11.5 to 11.5)               |
| Chad                     | 2000 | 30.8 (25.0 to 37.7)        | 9.0 (6.8 to 11.6)          | 17.7 (12.5 to 24.3)           | 1.1 (0.5 to 1.9)                | 3.1 (3.1 to 3.1)                  | 84.8 (68.7 to 103.7) | 24.6 (18.8 to 31.8)        | 48.6 (34.3 to 66.8)           | 2.9 (1.3 to 5.3)                | 8.7 (8.7 to 8.7)                  |
| Chad                     | 2001 | 31.7 (25.6 to 39.2)        | 9.7 (7.4 to 12.6)          | 18.4 (12.8 to 25.5)           | 1.1 (0.5 to 2.1)                | 2.5 (2.5 to 2.5)                  | 87.2 (70.5 to 107.7) | 26.6 (20.4 to 34.6)        | 50.5 (35.3 to 70.1)           | 3.2 (1.5 to 5.7)                | 6.9 (6.9 to 6.9)                  |

| Country | Year | 2018 US Dollars per capita |                            |                               |                                 |                                   | 2018 PPP per capita   |                            |                               |                                 |                                   |
|---------|------|----------------------------|----------------------------|-------------------------------|---------------------------------|-----------------------------------|-----------------------|----------------------------|-------------------------------|---------------------------------|-----------------------------------|
|         |      | Health spending            | Government health spending | Out-of-pocket health spending | Prepaid private health spending | Development assistance for health | Health spending       | Government health spending | Out-of-pocket health spending | Prepaid private health spending | Development assistance for health |
| Chad    | 2002 | 33.6 (27.2 to 41.1)        | 9.7 (7.5 to 12.5)          | 19.6 (13.8 to 26.7)           | 1.3 (0.6 to 2.3)                | 3.0 (3.0 to 3.0)                  | 92.5 (74.8 to 113.2)  | 26.8 (20.6 to 34.4)        | 54.0 (38.0 to 73.6)           | 3.5 (1.7 to 6.4)                | 8.2 (8.2 to 8.2)                  |
| Chad    | 2003 | 34.4 (28.2 to 41.6)        | 10.0 (7.7 to 12.8)         | 18.9 (13.4 to 25.8)           | 1.4 (0.7 to 2.6)                | 4.2 (4.2 to 4.2)                  | 94.7 (77.5 to 114.4)  | 27.5 (21.2 to 35.1)        | 51.9 (36.8 to 70.9)           | 3.9 (1.9 to 7.2)                | 11.5 (11.5 to 11.5)               |
| Chad    | 2004 | 39.3 (32.1 to 47.9)        | 11.8 (9.1 to 15.1)         | 21.7 (15.7 to 29.8)           | 1.7 (0.9 to 3.2)                | 4.0 (4.0 to 4.0)                  | 108.0 (88.2 to 131.8) | 32.5 (24.9 to 41.5)        | 59.8 (43.2 to 82.1)           | 4.8 (2.4 to 8.8)                | 11.0 (11.0 to 11.0)               |
| Chad    | 2005 | 39.7 (32.5 to 48.3)        | 10.8 (8.3 to 13.9)         | 22.4 (16.0 to 30.7)           | 1.8 (0.9 to 3.4)                | 4.7 (4.7 to 4.7)                  | 109.3 (89.3 to 133.0) | 29.8 (22.9 to 38.1)        | 61.6 (44.1 to 84.4)           | 5.0 (2.4 to 9.4)                | 12.8 (12.8 to 12.8)               |
| Chad    | 2006 | 35.6 (28.9 to 43.9)        | 8.6 (6.7 to 11.1)          | 21.9 (15.4 to 29.7)           | 1.7 (0.8 to 3.3)                | 3.3 (3.3 to 3.3)                  | 97.9 (79.4 to 120.8)  | 23.8 (18.3 to 30.6)        | 60.2 (42.5 to 81.6)           | 4.7 (2.2 to 9.0)                | 9.2 (9.2 to 9.2)                  |
| Chad    | 2007 | 33.3 (26.4 to 41.3)        | 7.8 (6.0 to 10.1)          | 21.5 (14.9 to 29.3)           | 1.7 (0.8 to 3.3)                | 2.3 (2.3 to 2.3)                  | 91.6 (72.6 to 113.5)  | 21.4 (16.4 to 27.8)        | 59.1 (41.1 to 80.6)           | 4.8 (2.3 to 9.1)                | 6.3 (6.3 to 6.3)                  |
| Chad    | 2008 | 33.0 (26.2 to 40.6)        | 7.0 (5.3 to 9.2)           | 21.0 (14.8 to 28.5)           | 1.7 (0.8 to 3.4)                | 3.2 (3.2 to 3.2)                  | 90.8 (72.1 to 111.8)  | 19.4 (14.7 to 25.4)        | 57.9 (40.8 to 78.4)           | 4.7 (2.3 to 9.2)                | 8.8 (8.8 to 8.8)                  |
| Chad    | 2009 | 32.2 (25.8 to 40.2)        | 6.8 (5.2 to 9.0)           | 20.8 (14.8 to 28.6)           | 1.8 (0.8 to 3.4)                | 2.8 (2.8 to 2.8)                  | 88.7 (71.0 to 110.5)  | 18.7 (14.3 to 24.8)        | 57.3 (40.6 to 78.7)           | 4.8 (2.3 to 9.3)                | 7.8 (7.8 to 7.8)                  |
| Chad    | 2010 | 35.7 (29.2 to 44.1)        | 7.4 (5.6 to 9.8)           | 21.5 (15.6 to 29.6)           | 1.9 (0.9 to 3.5)                | 5.0 (5.0 to 5.0)                  | 98.3 (80.4 to 121.5)  | 20.4 (15.4 to 26.9)        | 59.1 (43.0 to 81.5)           | 5.1 (2.4 to 9.7)                | 13.6 (13.6 to 13.6)               |
| Chad    | 2011 | 32.8 (26.7 to 40.4)        | 7.2 (5.4 to 9.4)           | 19.9 (14.2 to 27.3)           | 1.7 (0.8 to 3.2)                | 4.1 (4.1 to 4.1)                  | 90.4 (73.5 to 111.2)  | 19.7 (14.9 to 25.8)        | 54.7 (39.1 to 75.0)           | 4.7 (2.2 to 8.9)                | 11.3 (11.3 to 11.3)               |
| Chad    | 2012 | 32.6 (26.6 to 40.6)        | 7.8 (5.9 to 10.2)          | 20.0 (14.3 to 27.3)           | 1.8 (0.8 to 3.4)                | 3.1 (3.1 to 3.1)                  | 89.8 (73.1 to 111.7)  | 21.5 (16.3 to 28.2)        | 54.9 (39.4 to 75.1)           | 4.8 (2.3 to 9.4)                | 8.6 (8.6 to 8.6)                  |
| Chad    | 2013 | 40.1 (33.6 to 48.5)        | 10.0 (7.6 to 13.0)         | 21.3 (15.2 to 29.1)           | 2.0 (1.0 to 3.9)                | 6.8 (6.8 to 6.8)                  | 110.4 (92.4 to 133.6) | 27.5 (20.9 to 35.8)        | 58.6 (41.9 to 80.1)           | 5.6 (2.7 to 10.8)               | 18.8 (18.8 to 18.8)               |
| Chad    | 2014 | 38.4 (31.6 to 46.7)        | 10.0 (7.5 to 13.0)         | 21.6 (15.5 to 29.3)           | 2.1 (1.0 to 3.9)                | 4.8 (4.8 to 4.8)                  | 105.7 (87.0 to 128.4) | 27.5 (20.7 to 35.7)        | 59.5 (42.6 to 80.8)           | 5.7 (2.7 to 10.7)               | 13.1 (13.1 to 13.1)               |
| Chad    | 2015 | 35.8 (28.9 to 44.0)        | 9.2 (7.0 to 11.9)          | 21.8 (15.5 to 29.5)           | 2.0 (1.0 to 3.9)                | 2.8 (2.8 to 2.8)                  | 98.6 (79.5 to 121.2)  | 25.3 (19.2 to 32.8)        | 59.9 (42.7 to 81.3)           | 5.6 (2.6 to 10.7)               | 7.7 (7.7 to 7.7)                  |
| Chad    | 2016 | 35.9 (29.3 to 43.5)        | 7.8 (6.0 to 10.2)          | 20.9 (14.8 to 28.5)           | 1.9 (0.8 to 3.6)                | 5.3 (5.3 to 5.3)                  | 98.8 (80.5 to 119.7)  | 21.5 (16.6 to 28.0)        | 57.6 (40.7 to 78.4)           | 5.1 (2.3 to 9.8)                | 14.5 (14.5 to 14.5)               |
| Chad    | 2017 | 32.9 (26.4 to 40.1)        | 7.5 (5.8 to 9.8)           | 19.8 (13.9 to 27.0)           | 1.8 (0.8 to 3.4)                | 3.8 (3.8 to 3.8)                  | 90.5 (72.8 to 110.2)  | 20.7 (16.0 to 27.0)        | 54.5 (38.4 to 74.2)           | 4.9 (2.2 to 9.3)                | 10.4 (10.4 to 10.4)               |
| Chad    | 2018 | 32.3 (25.9 to 40.1)        | 7.5 (5.8 to 9.7)           | 19.7 (13.8 to 26.8)           | 1.8 (0.8 to 3.4)                | 3.4 (3.4 to 3.4)                  | 89.0 (71.3 to 110.4)  | 20.6 (15.9 to 26.8)        | 54.1 (38.0 to 73.6)           | 4.9 (2.2 to 9.4)                | 9.4 (9.3 to 9.5)                  |
| Chad    | 2019 | 32.3 (26.1 to 39.7)        | 7.5 (5.8 to 9.7)           | 19.6 (13.8 to 26.6)           | 1.8 (0.8 to 3.4)                | 3.4 (3.1 to 3.6)                  | 88.8 (71.7 to 109.2)  | 20.7 (15.9 to 26.7)        | 53.9 (37.9 to 73.1)           | 4.9 (2.3 to 9.4)                | 9.2 (8.6 to 9.8)                  |
| Chad    | 2020 | 32.2 (26.0 to 39.7)        | 7.5 (5.8 to 9.7)           | 19.5 (13.7 to 26.6)           | 1.8 (0.8 to 3.4)                | 3.3 (3.0 to 3.6)                  | 88.6 (71.4 to 109.2)  | 20.7 (15.9 to 26.6)        | 53.8 (37.7 to 73.2)           | 5.0 (2.3 to 9.5)                | 9.2 (8.4 to 10.0)                 |
| Chad    | 2021 | 32.2 (26.0 to 40.0)        | 7.5 (5.8 to 9.7)           | 19.5 (13.6 to 26.5)           | 1.8 (0.8 to 3.5)                | 3.3 (3.0 to 3.7)                  | 88.5 (71.5 to 110.0)  | 20.7 (15.9 to 26.7)        | 53.6 (37.5 to 72.9)           | 5.0 (2.3 to 9.5)                | 9.2 (8.2 to 10.2)                 |
| Chad    | 2022 | 32.2 (25.8 to 39.6)        | 7.5 (5.8 to 9.7)           | 19.4 (13.6 to 26.4)           | 1.8 (0.8 to 3.5)                | 3.4 (3.0 to 3.8)                  | 88.5 (71.1 to 108.9)  | 20.7 (16.0 to 26.8)        | 53.5 (37.4 to 72.7)           | 5.0 (2.3 to 9.6)                | 9.2 (8.1 to 10.4)                 |



| Country | Year | 2018 US Dollars per capita |                            |                               |                                 |                                   | 2018 PPP per capita  |                            |                               |                                 |                                   |
|---------|------|----------------------------|----------------------------|-------------------------------|---------------------------------|-----------------------------------|----------------------|----------------------------|-------------------------------|---------------------------------|-----------------------------------|
|         |      | Health spending            | Government health spending | Out-of-pocket health spending | Prepaid private health spending | Development assistance for health | Health spending      | Government health spending | Out-of-pocket health spending | Prepaid private health spending | Development assistance for health |
| Chad    | 2023 | 32.2 (25.7 to 39.2)        | 7.5 (5.8 to 9.7)           | 19.4 (13.6 to 26.2)           | 1.8 (0.8 to 3.5)                | 3.4 (2.9 to 3.9)                  | 88.5 (70.7 to 107.8) | 20.8 (16.0 to 26.8)        | 53.4 (37.4 to 72.1)           | 5.0 (2.3 to 9.7)                | 9.3 (8.1 to 10.7)                 |
| Chad    | 2024 | 32.1 (25.9 to 39.2)        | 7.5 (5.8 to 9.7)           | 19.4 (13.6 to 26.2)           | 1.8 (0.8 to 3.5)                | 3.4 (2.9 to 4.0)                  | 88.4 (71.3 to 107.7) | 20.7 (15.9 to 26.7)        | 53.2 (37.4 to 72.1)           | 5.1 (2.3 to 9.7)                | 9.4 (8.1 to 10.9)                 |
| Chad    | 2025 | 32.1 (25.8 to 39.6)        | 7.5 (5.7 to 9.7)           | 19.3 (13.5 to 26.0)           | 1.8 (0.8 to 3.5)                | 3.4 (2.9 to 4.0)                  | 88.2 (71.0 to 108.9) | 20.6 (15.8 to 26.6)        | 53.1 (37.2 to 71.6)           | 5.1 (2.3 to 9.7)                | 9.5 (8.0 to 11.0)                 |
| Chad    | 2026 | 32.0 (25.8 to 39.5)        | 7.5 (5.7 to 9.7)           | 19.2 (13.5 to 26.0)           | 1.9 (0.8 to 3.6)                | 3.4 (2.9 to 4.0)                  | 88.1 (71.0 to 108.8) | 20.6 (15.8 to 26.6)        | 52.9 (37.1 to 71.5)           | 5.1 (2.3 to 9.8)                | 9.5 (7.9 to 11.1)                 |
| Chad    | 2027 | 32.0 (25.7 to 39.3)        | 7.5 (5.7 to 9.6)           | 19.2 (13.5 to 26.0)           | 1.9 (0.9 to 3.6)                | 3.5 (2.9 to 4.1)                  | 87.9 (70.6 to 108.1) | 20.5 (15.7 to 26.5)        | 52.8 (37.2 to 71.4)           | 5.1 (2.3 to 9.8)                | 9.5 (7.9 to 11.4)                 |
| Chad    | 2028 | 32.0 (25.8 to 38.9)        | 7.5 (5.7 to 9.6)           | 19.1 (13.5 to 26.0)           | 1.9 (0.9 to 3.6)                | 3.5 (2.9 to 4.3)                  | 87.9 (71.1 to 107.2) | 20.5 (15.7 to 26.5)        | 52.7 (37.1 to 71.4)           | 5.2 (2.4 to 9.9)                | 9.6 (7.9 to 11.7)                 |
| Chad    | 2029 | 32.0 (25.7 to 39.2)        | 7.5 (5.7 to 9.6)           | 19.1 (13.4 to 25.9)           | 1.9 (0.9 to 3.6)                | 3.5 (2.8 to 4.3)                  | 88.0 (70.8 to 107.9) | 20.6 (15.8 to 26.5)        | 52.6 (36.9 to 71.1)           | 5.2 (2.4 to 10.0)               | 9.6 (7.8 to 11.9)                 |
| Chad    | 2030 | 32.1 (26.0 to 39.2)        | 7.5 (5.8 to 9.7)           | 19.1 (13.4 to 25.8)           | 1.9 (0.9 to 3.7)                | 3.5 (2.8 to 4.4)                  | 88.3 (71.5 to 107.7) | 20.7 (15.8 to 26.7)        | 52.6 (36.9 to 71.1)           | 5.2 (2.4 to 10.1)               | 9.7 (7.8 to 12.0)                 |
| Chad    | 2031 | 32.1 (26.0 to 39.4)        | 7.5 (5.8 to 9.7)           | 19.1 (13.4 to 25.9)           | 1.9 (0.9 to 3.7)                | 3.5 (2.8 to 4.5)                  | 88.3 (71.6 to 108.3) | 20.8 (15.8 to 26.7)        | 52.6 (36.8 to 71.2)           | 5.3 (2.4 to 10.2)               | 9.7 (7.7 to 12.3)                 |
| Chad    | 2032 | 32.1 (25.7 to 39.6)        | 7.6 (5.7 to 9.8)           | 19.1 (13.3 to 25.9)           | 1.9 (0.9 to 3.7)                | 3.5 (2.8 to 4.6)                  | 88.4 (70.7 to 109.0) | 20.8 (15.8 to 26.8)        | 52.5 (36.7 to 71.3)           | 5.3 (2.4 to 10.2)               | 9.8 (7.6 to 12.6)                 |
| Chad    | 2033 | 32.2 (25.9 to 39.6)        | 7.6 (5.7 to 9.8)           | 19.1 (13.3 to 25.9)           | 1.9 (0.9 to 3.8)                | 3.6 (2.7 to 4.7)                  | 88.5 (71.4 to 109.0) | 20.8 (15.8 to 26.9)        | 52.5 (36.6 to 71.4)           | 5.4 (2.4 to 10.3)               | 9.8 (7.5 to 12.8)                 |
| Chad    | 2034 | 32.2 (26.1 to 39.7)        | 7.6 (5.7 to 9.8)           | 19.1 (13.3 to 26.0)           | 2.0 (0.9 to 3.8)                | 3.6 (2.7 to 4.8)                  | 88.6 (71.7 to 109.2) | 20.9 (15.8 to 27.0)        | 52.4 (36.5 to 71.4)           | 5.4 (2.5 to 10.4)               | 9.9 (7.5 to 13.1)                 |
| Chad    | 2035 | 32.3 (26.0 to 39.8)        | 7.6 (5.7 to 9.8)           | 19.0 (13.3 to 25.9)           | 2.0 (0.9 to 3.8)                | 3.6 (2.7 to 4.9)                  | 88.8 (71.5 to 109.5) | 21.0 (15.8 to 27.1)        | 52.4 (36.5 to 71.4)           | 5.4 (2.5 to 10.5)               | 10.0 (7.4 to 13.5)                |
| Chad    | 2036 | 32.3 (26.1 to 40.4)        | 7.6 (5.8 to 9.9)           | 19.0 (13.3 to 25.9)           | 2.0 (0.9 to 3.8)                | 3.7 (2.7 to 5.1)                  | 88.9 (71.7 to 111.1) | 21.0 (15.8 to 27.2)        | 52.4 (36.5 to 71.3)           | 5.5 (2.5 to 10.6)               | 10.1 (7.4 to 14.0)                |
| Chad    | 2037 | 32.4 (25.9 to 39.8)        | 7.7 (5.8 to 9.9)           | 19.0 (13.3 to 26.0)           | 2.0 (0.9 to 3.9)                | 3.7 (2.7 to 5.1)                  | 89.1 (71.3 to 109.6) | 21.2 (15.9 to 27.4)        | 52.4 (36.5 to 71.5)           | 5.5 (2.5 to 10.7)               | 10.1 (7.4 to 14.1)                |
| Chad    | 2038 | 32.5 (26.0 to 40.2)        | 7.7 (5.8 to 10.0)          | 19.0 (13.3 to 25.9)           | 2.0 (0.9 to 3.9)                | 3.7 (2.7 to 5.3)                  | 89.3 (71.7 to 110.6) | 21.3 (16.0 to 27.5)        | 52.3 (36.5 to 71.3)           | 5.6 (2.5 to 10.8)               | 10.2 (7.3 to 14.5)                |
| Chad    | 2039 | 32.5 (26.1 to 40.3)        | 7.8 (5.8 to 10.1)          | 19.0 (13.3 to 25.9)           | 2.0 (0.9 to 4.0)                | 3.7 (2.6 to 5.4)                  | 89.5 (71.8 to 110.9) | 21.3 (16.0 to 27.7)        | 52.3 (36.6 to 71.2)           | 5.6 (2.5 to 10.9)               | 10.3 (7.3 to 14.9)                |
| Chad    | 2040 | 32.6 (26.3 to 40.0)        | 7.8 (5.8 to 10.1)          | 19.0 (13.3 to 25.9)           | 2.1 (0.9 to 4.0)                | 3.8 (2.7 to 5.5)                  | 89.7 (72.3 to 110.1) | 21.4 (16.1 to 27.8)        | 52.3 (36.5 to 71.2)           | 5.6 (2.6 to 11.0)               | 10.3 (7.3 to 15.1)                |
| Chad    | 2041 | 32.7 (26.2 to 40.2)        | 7.8 (5.9 to 10.2)          | 19.0 (13.2 to 25.9)           | 2.1 (0.9 to 4.0)                | 3.8 (2.6 to 5.6)                  | 89.9 (72.2 to 110.6) | 21.6 (16.2 to 27.9)        | 52.2 (36.3 to 71.1)           | 5.7 (2.6 to 11.1)               | 10.4 (7.3 to 15.4)                |
| Chad    | 2042 | 32.8 (26.2 to 40.2)        | 7.9 (5.9 to 10.2)          | 19.0 (13.2 to 25.9)           | 2.1 (0.9 to 4.1)                | 3.8 (2.6 to 5.7)                  | 90.2 (72.2 to 110.7) | 21.7 (16.3 to 28.2)        | 52.2 (36.3 to 71.2)           | 5.7 (2.6 to 11.2)               | 10.6 (7.2 to 15.8)                |
| Chad    | 2043 | 32.9 (26.4 to 40.3)        | 7.9 (6.0 to 10.3)          | 19.0 (13.2 to 25.9)           | 2.1 (1.0 to 4.1)                | 3.9 (2.6 to 6.0)                  | 90.5 (72.7 to 110.9) | 21.9 (16.4 to 28.4)        | 52.2 (36.3 to 71.3)           | 5.8 (2.6 to 11.3)               | 10.7 (7.2 to 16.5)                |

| Country | Year | 2018 US Dollars per capita |                            |                               |                                 |                                   | 2018 PPP per capita       |                            |                               |                                 |                                   |
|---------|------|----------------------------|----------------------------|-------------------------------|---------------------------------|-----------------------------------|---------------------------|----------------------------|-------------------------------|---------------------------------|-----------------------------------|
|         |      | Health spending            | Government health spending | Out-of-pocket health spending | Prepaid private health spending | Development assistance for health | Health spending           | Government health spending | Out-of-pocket health spending | Prepaid private health spending | Development assistance for health |
| Chad    | 2044 | 33.0 (26.6 to 40.8)        | 8.0 (6.0 to 10.4)          | 19.0 (13.2 to 25.9)           | 2.1 (1.0 to 4.1)                | 3.9 (2.6 to 6.2)                  | 90.9 (73.2 to 112.2)      | 22.0 (16.4 to 28.6)        | 52.2 (36.4 to 71.3)           | 5.8 (2.6 to 11.4)               | 10.8 (7.1 to 17.0)                |
| Chad    | 2045 | 33.2 (26.6 to 41.1)        | 8.1 (6.0 to 10.5)          | 19.0 (13.2 to 26.0)           | 2.1 (1.0 to 4.2)                | 4.0 (2.6 to 6.4)                  | 91.4 (73.3 to 113.0)      | 22.3 (16.6 to 29.0)        | 52.3 (36.4 to 71.4)           | 5.9 (2.7 to 11.5)               | 10.9 (7.1 to 17.6)                |
| Chad    | 2046 | 33.5 (27.0 to 41.4)        | 8.2 (6.1 to 10.7)          | 19.1 (13.3 to 26.0)           | 2.2 (1.0 to 4.2)                | 4.0 (2.6 to 6.6)                  | 92.1 (74.2 to 113.9)      | 22.7 (16.9 to 29.5)        | 52.4 (36.5 to 71.6)           | 6.0 (2.7 to 11.7)               | 11.1 (7.1 to 18.1)                |
| Chad    | 2047 | 33.8 (27.2 to 41.9)        | 8.4 (6.2 to 11.0)          | 19.1 (13.3 to 26.1)           | 2.2 (1.0 to 4.3)                | 4.1 (2.6 to 6.6)                  | 93.0 (74.8 to 115.4)      | 23.1 (17.2 to 30.3)        | 52.7 (36.7 to 71.9)           | 6.0 (2.7 to 11.8)               | 11.2 (7.2 to 18.1)                |
| Chad    | 2048 | 34.2 (27.3 to 42.4)        | 8.6 (6.4 to 11.3)          | 19.2 (13.4 to 26.2)           | 2.2 (1.0 to 4.4)                | 4.1 (2.6 to 6.9)                  | 94.1 (75.0 to 116.7)      | 23.6 (17.5 to 31.1)        | 52.9 (36.9 to 72.2)           | 6.1 (2.8 to 12.0)               | 11.4 (7.1 to 19.0)                |
| Chad    | 2049 | 34.6 (27.7 to 42.9)        | 8.8 (6.5 to 11.6)          | 19.4 (13.5 to 26.4)           | 2.3 (1.0 to 4.4)                | 4.2 (2.6 to 7.2)                  | 95.3 (76.2 to 118.1)      | 24.3 (17.9 to 31.9)        | 53.2 (37.1 to 72.5)           | 6.2 (2.8 to 12.2)               | 11.5 (7.1 to 19.7)                |
| Chad    | 2050 | 35.1 (28.2 to 43.6)        | 9.1 (6.7 to 12.0)          | 19.5 (13.5 to 26.5)           | 2.3 (1.0 to 4.5)                | 4.3 (2.6 to 7.5)                  | 96.7 (77.6 to 120.0)      | 25.0 (18.5 to 33.0)        | 53.6 (37.3 to 72.9)           | 6.3 (2.8 to 12.4)               | 11.8 (7.2 to 20.5)                |
| Chile   | 1995 | 488.7 (453.2 to 526.0)     | 267.8 (243.8 to 293.4)     | 194.6 (171.1 to 220.5)        | 24.2 (14.9 to 37.7)             | 2.1 (2.1 to 2.1)                  | 864.1 (801.3 to 930.1)    | 473.5 (431.1 to 518.9)     | 344.2 (302.6 to 389.8)        | 42.9 (26.3 to 66.7)             | 3.6 (3.6 to 3.6)                  |
| Chile   | 1996 | 544.7 (511.4 to 579.3)     | 291.5 (270.9 to 313.7)     | 223.4 (200.4 to 249.3)        | 27.9 (17.8 to 41.3)             | 2.0 (2.0 to 2.0)                  | 963.2 (904.2 to 1024.3)   | 515.4 (479.0 to 554.6)     | 395.0 (354.3 to 440.8)        | 49.3 (31.6 to 73.0)             | 3.5 (3.5 to 3.5)                  |
| Chile   | 1997 | 607.6 (574.6 to 642.7)     | 317.5 (298.2 to 338.5)     | 255.5 (232.3 to 279.8)        | 30.9 (20.2 to 44.3)             | 3.7 (3.7 to 3.7)                  | 1074.5 (1016.1 to 1136.5) | 561.4 (527.4 to 598.5)     | 451.8 (410.8 to 494.7)        | 54.6 (35.7 to 78.3)             | 6.6 (6.6 to 6.6)                  |
| Chile   | 1998 | 654.3 (620.2 to 691.2)     | 340.9 (321.3 to 361.3)     | 279.1 (255.8 to 303.1)        | 33.9 (22.7 to 47.6)             | 0.3 (0.3 to 0.3)                  | 1156.9 (1096.7 to 1222.3) | 602.9 (568.1 to 638.8)     | 493.5 (452.4 to 535.9)        | 60.0 (40.2 to 84.2)             | 0.6 (0.6 to 0.6)                  |
| Chile   | 1999 | 663.9 (631.1 to 697.6)     | 346.7 (326.7 to 366.2)     | 283.9 (260.3 to 306.8)        | 33.1 (22.1 to 46.3)             | 0.2 (0.2 to 0.2)                  | 1174.0 (1115.9 to 1233.5) | 613.1 (577.8 to 647.6)     | 501.9 (460.3 to 542.5)        | 58.6 (39.0 to 81.9)             | 0.4 (0.4 to 0.4)                  |
| Chile   | 2000 | 673.4 (640.0 to 708.0)     | 355.5 (335.4 to 375.9)     | 286.5 (263.7 to 309.8)        | 31.2 (21.1 to 43.6)             | 0.2 (0.2 to 0.2)                  | 1190.7 (1131.7 to 1251.9) | 628.6 (593.0 to 664.7)     | 506.6 (466.4 to 547.7)        | 55.1 (37.3 to 77.2)             | 0.4 (0.4 to 0.4)                  |
| Chile   | 2001 | 682.5 (651.3 to 717.8)     | 359.3 (338.9 to 380.2)     | 290.8 (267.8 to 314.3)        | 32.1 (21.9 to 44.1)             | 0.3 (0.3 to 0.3)                  | 1206.8 (1151.6 to 1269.3) | 635.3 (599.3 to 672.2)     | 514.2 (473.6 to 555.8)        | 56.8 (38.8 to 78.0)             | 0.5 (0.5 to 0.5)                  |
| Chile   | 2002 | 691.6 (657.9 to 726.3)     | 362.6 (341.4 to 384.5)     | 295.4 (272.8 to 319.7)        | 33.3 (23.2 to 45.5)             | 0.2 (0.2 to 0.2)                  | 1222.9 (1163.3 to 1284.2) | 641.3 (603.7 to 679.8)     | 522.4 (482.3 to 565.3)        | 58.9 (41.0 to 80.5)             | 0.4 (0.4 to 0.4)                  |
| Chile   | 2003 | 700.2 (668.2 to 733.8)     | 365.7 (345.0 to 387.1)     | 298.9 (276.5 to 323.3)        | 34.9 (24.6 to 47.9)             | 0.7 (0.7 to 0.7)                  | 1238.1 (1181.6 to 1297.5) | 646.7 (610.0 to 684.4)     | 528.6 (489.0 to 571.7)        | 61.6 (43.6 to 84.8)             | 1.2 (1.2 to 1.2)                  |
| Chile   | 2004 | 710.9 (679.0 to 743.3)     | 373.6 (351.8 to 395.4)     | 299.3 (277.5 to 323.4)        | 36.1 (25.5 to 49.4)             | 1.9 (1.9 to 1.9)                  | 1257.0 (1200.6 to 1314.3) | 660.6 (622.0 to 699.1)     | 529.3 (490.7 to 571.9)        | 63.8 (45.1 to 87.4)             | 3.4 (3.4 to 3.4)                  |
| Chile   | 2005 | 708.1 (677.4 to 741.7)     | 375.9 (356.0 to 397.3)     | 295.0 (273.5 to 318.1)        | 36.1 (26.0 to 49.9)             | 1.1 (1.1 to 1.1)                  | 1252.0 (1197.9 to 1311.5) | 664.6 (629.4 to 702.5)     | 521.7 (483.5 to 562.5)        | 63.8 (45.9 to 88.2)             | 1.9 (1.9 to 1.9)                  |
| Chile   | 2006 | 721.6 (689.3 to 757.9)     | 391.6 (370.9 to 413.5)     | 290.8 (269.8 to 314.0)        | 38.7 (27.0 to 53.0)             | 0.4 (0.4 to 0.4)                  | 1276.0 (1218.9 to 1340.1) | 692.5 (655.9 to 731.1)     | 514.3 (477.2 to 555.3)        | 68.4 (47.8 to 93.8)             | 0.8 (0.8 to 0.8)                  |
| Chile   | 2007 | 756.4 (723.7 to 790.5)     | 418.8 (396.8 to 441.7)     | 293.2 (272.0 to 317.9)        | 43.8 (30.8 to 59.6)             | 0.5 (0.5 to 0.5)                  | 1337.4 (1279.7 to 1397.8) | 740.6 (701.6 to 781.1)     | 518.4 (480.9 to 562.2)        | 77.5 (54.4 to 105.4)            | 0.9 (0.9 to 0.9)                  |
| Chile   | 2008 | 799.6 (764.7 to 837.1)     | 451.8 (428.2 to 476.5)     | 297.6 (275.0 to 321.1)        | 49.9 (35.7 to 66.9)             | 0.3 (0.3 to 0.3)                  | 1413.9 (1352.2 to 1480.3) | 798.8 (757.1 to 842.5)     | 526.2 (486.3 to 567.9)        | 88.3 (63.1 to 118.4)            | 0.6 (0.6 to 0.6)                  |

| Country | Year | 2018 US Dollars per capita |                            |                               |                                 |                                   | 2018 PPP per capita       |                            |                               |                                 |                                   |
|---------|------|----------------------------|----------------------------|-------------------------------|---------------------------------|-----------------------------------|---------------------------|----------------------------|-------------------------------|---------------------------------|-----------------------------------|
|         |      | Health spending            | Government health spending | Out-of-pocket health spending | Prepaid private health spending | Development assistance for health | Health spending           | Government health spending | Out-of-pocket health spending | Prepaid private health spending | Development assistance for health |
| Chile   | 2009 | 819.7 (785.6 to 857.8)     | 472.0 (447.9 to 498.2)     | 293.2 (271.4 to 316.4)        | 54.2 (39.2 to 72.8)             | 0.3 (0.3 to 0.3)                  | 1449.4 (1389.2 to 1516.7) | 834.7 (792.0 to 880.9)     | 518.4 (480.0 to 559.5)        | 95.9 (69.3 to 128.7)            | 0.5 (0.5 to 0.5)                  |
| Chile   | 2010 | 862.1 (826.3 to 901.9)     | 507.8 (483.1 to 535.4)     | 297.2 (275.8 to 320.4)        | 56.9 (41.7 to 74.7)             | 0.3 (0.3 to 0.3)                  | 1524.4 (1461.2 to 1594.9) | 897.9 (854.2 to 946.7)     | 525.5 (487.6 to 566.6)        | 100.5 (73.8 to 132.0)           | 0.5 (0.5 to 0.5)                  |
| Chile   | 2011 | 908.8 (873.3 to 948.3)     | 541.5 (518.1 to 566.6)     | 307.8 (285.9 to 331.0)        | 59.4 (44.9 to 77.5)             | 0.2 (0.2 to 0.2)                  | 1607.0 (1544.2 to 1676.8) | 957.5 (916.1 to 1001.9)    | 544.2 (505.6 to 585.3)        | 105.0 (79.4 to 137.1)           | 0.3 (0.3 to 0.3)                  |
| Chile   | 2012 | 966.9 (932.0 to 1001.1)    | 577.4 (554.0 to 600.7)     | 324.8 (303.8 to 347.3)        | 64.6 (50.1 to 82.1)             | 0.0 (0.0 to 0.0)                  | 1709.7 (1648.1 to 1770.3) | 1021.0 (979.6 to 1062.2)   | 574.4 (537.2 to 614.1)        | 114.2 (88.5 to 145.2)           | 0.0 (0.0 to 0.0)                  |
| Chile   | 2013 | 1039.3 (1005.4 to 1073.6)  | 617.5 (595.1 to 640.7)     | 350.9 (330.9 to 373.2)        | 70.9 (55.7 to 89.0)             | 0.0 (0.0 to 0.0)                  | 1837.8 (1777.9 to 1898.3) | 1091.9 (1052.2 to 1133.0)  | 620.4 (585.1 to 659.9)        | 125.4 (98.5 to 157.3)           | 0.1 (0.1 to 0.1)                  |
| Chile   | 2014 | 1106.5 (1070.0 to 1143.3)  | 652.7 (629.5 to 678.0)     | 378.3 (357.7 to 399.2)        | 75.5 (60.2 to 94.5)             | 0.0 (0.0 to 0.0)                  | 1956.5 (1892.0 to 2021.6) | 1154.1 (1113.0 to 1198.9)  | 668.9 (632.5 to 705.8)        | 133.5 (106.5 to 167.1)          | 0.1 (0.1 to 0.1)                  |
| Chile   | 2015 | 1184.8 (1147.5 to 1228.2)  | 695.0 (670.8 to 720.7)     | 408.7 (385.7 to 434.2)        | 81.1 (64.0 to 103.7)            | 0.0 (0.0 to 0.0)                  | 2095.1 (2029.0 to 2171.8) | 1229.0 (1186.2 to 1274.4)  | 722.8 (682.0 to 767.8)        | 143.3 (113.2 to 183.3)          | 0.0 (0.0 to 0.0)                  |
| Chile   | 2016 | 1243.7 (1192.8 to 1293.9)  | 726.9 (694.0 to 764.8)     | 431.3 (399.3 to 465.9)        | 85.5 (64.3 to 113.3)            | 0.0 (0.0 to 0.0)                  | 2199.2 (2109.2 to 2287.9) | 1285.3 (1227.1 to 1352.3)  | 762.6 (706.1 to 823.8)        | 151.2 (113.7 to 200.3)          | 0.0 (0.0 to 0.0)                  |
| Chile   | 2017 | 1262.9 (1210.9 to 1318.2)  | 738.7 (705.4 to 776.8)     | 437.9 (404.1 to 473.0)        | 86.2 (64.8 to 114.1)            | 0.0 (0.0 to 0.0)                  | 2233.1 (2141.2 to 2331.0) | 1306.3 (1247.4 to 1373.6)  | 774.4 (714.6 to 836.4)        | 152.4 (114.6 to 201.8)          | 0.0 (0.0 to 0.0)                  |
| Chile   | 2018 | 1282.6 (1227.8 to 1340.0)  | 750.1 (716.1 to 790.5)     | 444.7 (411.1 to 482.2)        | 87.7 (66.0 to 116.3)            | 0.0 (0.0 to 0.0)                  | 2267.9 (2171.1 to 2369.5) | 1326.5 (1266.2 to 1397.8)  | 786.4 (727.0 to 852.7)        | 155.1 (116.8 to 205.6)          | 0.0 (0.0 to 0.0)                  |
| Chile   | 2019 | 1301.8 (1245.7 to 1363.1)  | 761.3 (727.3 to 802.4)     | 451.4 (416.2 to 490.3)        | 89.1 (67.2 to 118.2)            | 0.0 (0.0 to 0.0)                  | 2301.9 (2202.8 to 2410.3) | 1346.1 (1286.0 to 1418.8)  | 798.2 (735.9 to 866.9)        | 157.6 (118.8 to 209.0)          | 0.0 (0.0 to 0.0)                  |
| Chile   | 2020 | 1321.8 (1264.3 to 1381.2)  | 772.1 (737.6 to 813.9)     | 459.2 (422.0 to 499.8)        | 90.6 (68.0 to 120.1)            | 0.0 (0.0 to 0.0)                  | 2337.3 (2235.5 to 2442.3) | 1365.2 (1304.2 to 1439.1)  | 812.0 (746.1 to 883.8)        | 160.2 (120.3 to 212.4)          | 0.0 (0.0 to 0.0)                  |
| Chile   | 2021 | 1341.2 (1280.8 to 1408.6)  | 781.9 (746.3 to 823.9)     | 467.3 (427.1 to 510.3)        | 92.0 (69.0 to 122.0)            | 0.0 (0.0 to 0.0)                  | 2371.7 (2264.8 to 2490.7) | 1382.7 (1319.6 to 1456.9)  | 826.4 (755.2 to 902.4)        | 162.6 (122.0 to 215.7)          | 0.0 (0.0 to 0.0)                  |
| Chile   | 2022 | 1361.2 (1297.8 to 1427.2)  | 792.4 (755.5 to 836.3)     | 475.4 (432.9 to 520.2)        | 93.4 (70.2 to 123.7)            | 0.0 (0.0 to 0.0)                  | 2406.9 (2294.8 to 2523.7) | 1401.1 (1335.9 to 1478.8)  | 840.7 (765.6 to 919.8)        | 165.1 (124.0 to 218.7)          | 0.0 (0.0 to 0.0)                  |
| Chile   | 2023 | 1388.9 (1325.6 to 1459.4)  | 810.7 (773.4 to 857.0)     | 483.0 (440.5 to 528.2)        | 95.1 (71.5 to 126.1)            | 0.0 (0.0 to 0.0)                  | 2456.0 (2344.0 to 2580.5) | 1433.6 (1367.6 to 1515.4)  | 854.1 (778.9 to 934.0)        | 168.2 (126.3 to 223.0)          | 0.0 (0.0 to 0.0)                  |
| Chile   | 2024 | 1413.5 (1346.6 to 1479.2)  | 829.0 (788.3 to 877.9)     | 487.6 (444.2 to 535.2)        | 96.9 (72.7 to 128.5)            | 0.0 (0.0 to 0.0)                  | 2499.5 (2381.2 to 2615.6) | 1465.9 (1394.0 to 1552.4)  | 862.2 (785.5 to 946.3)        | 171.3 (128.6 to 227.2)          | 0.0 (0.0 to 0.0)                  |
| Chile   | 2025 | 1438.4 (1371.7 to 1510.1)  | 847.7 (805.3 to 897.0)     | 492.0 (447.6 to 539.1)        | 98.7 (74.0 to 130.7)            | 0.0 (0.0 to 0.0)                  | 2543.4 (2425.6 to 2670.2) | 1498.9 (1424.0 to 1586.1)  | 870.1 (791.4 to 953.3)        | 174.5 (130.9 to 231.2)          | 0.0 (0.0 to 0.0)                  |
| Chile   | 2026 | 1463.5 (1392.5 to 1535.6)  | 866.4 (821.4 to 918.7)     | 496.6 (451.4 to 544.1)        | 100.5 (75.4 to 133.0)           | 0.0 (0.0 to 0.0)                  | 2587.8 (2462.3 to 2715.3) | 1532.0 (1452.5 to 1624.5)  | 878.1 (798.2 to 962.2)        | 177.6 (133.3 to 235.2)          | 0.0 (0.0 to 0.0)                  |
| Chile   | 2027 | 1489.0 (1418.2 to 1572.2)  | 885.5 (838.7 to 942.1)     | 501.2 (456.0 to 550.5)        | 102.3 (76.7 to 135.3)           | 0.0 (0.0 to 0.0)                  | 2632.9 (2507.7 to 2780.0) | 1565.8 (1483.1 to 1665.9)  | 886.2 (806.3 to 973.5)        | 180.9 (135.7 to 239.3)          | 0.0 (0.0 to 0.0)                  |
| Chile   | 2028 | 1513.9 (1436.8 to 1588.9)  | 904.4 (854.3 to 961.7)     | 505.5 (458.8 to 556.1)        | 104.1 (78.0 to 137.6)           | 0.0 (0.0 to 0.0)                  | 2677.0 (2540.6 to 2809.6) | 1599.1 (1510.7 to 1700.6)  | 893.8 (811.2 to 983.3)        | 184.0 (137.8 to 243.4)          | 0.0 (0.0 to 0.0)                  |
| Chile   | 2029 | 1539.7 (1458.8 to 1627.5)  | 923.9 (871.4 to 986.0)     | 509.9 (461.4 to 561.5)        | 105.9 (79.2 to 140.1)           | 0.0 (0.0 to 0.0)                  | 2722.6 (2579.6 to 2877.8) | 1633.6 (1540.9 to 1743.5)  | 901.7 (815.9 to 992.9)        | 187.3 (140.1 to 247.7)          | 0.0 (0.0 to 0.0)                  |

| Country | Year | 2018 US Dollars per capita |                            |                               |                                 |                                   | 2018 PPP per capita       |                            |                               |                                 |                                   |
|---------|------|----------------------------|----------------------------|-------------------------------|---------------------------------|-----------------------------------|---------------------------|----------------------------|-------------------------------|---------------------------------|-----------------------------------|
|         |      | Health spending            | Government health spending | Out-of-pocket health spending | Prepaid private health spending | Development assistance for health | Health spending           | Government health spending | Out-of-pocket health spending | Prepaid private health spending | Development assistance for health |
| Chile   | 2030 | 1565.1 (1483.5 to 1646.6)  | 943.2 (887.1 to 1007.6)    | 514.1 (463.6 to 566.4)        | 107.8 (80.5 to 142.5)           | 0.0 (0.0 to 0.0)                  | 2767.6 (2623.2 to 2911.6) | 1667.9 (1568.7 to 1781.7)  | 909.1 (819.7 to 1001.5)       | 190.5 (142.4 to 252.0)          | 0.0 (0.0 to 0.0)                  |
| Chile   | 2031 | 1590.1 (1503.9 to 1682.0)  | 962.3 (901.6 to 1030.9)    | 518.2 (465.6 to 573.4)        | 109.6 (81.8 to 145.0)           | 0.0 (0.0 to 0.0)                  | 2811.8 (2659.3 to 2974.3) | 1701.7 (1594.3 to 1822.8)  | 916.4 (823.3 to 1014.0)       | 193.8 (144.6 to 256.3)          | 0.0 (0.0 to 0.0)                  |
| Chile   | 2032 | 1614.8 (1524.5 to 1702.7)  | 981.3 (916.6 to 1052.0)    | 522.1 (468.2 to 580.2)        | 111.4 (83.0 to 147.4)           | 0.0 (0.0 to 0.0)                  | 2855.4 (2695.7 to 3010.7) | 1735.2 (1620.7 to 1860.3)  | 923.3 (827.9 to 1025.9)       | 196.9 (146.8 to 260.6)          | 0.0 (0.0 to 0.0)                  |
| Chile   | 2033 | 1639.7 (1541.9 to 1743.5)  | 1000.5 (930.8 to 1075.2)   | 526.0 (469.9 to 586.4)        | 113.2 (84.3 to 149.6)           | 0.0 (0.0 to 0.0)                  | 2899.4 (2726.5 to 3083.0) | 1769.1 (1645.8 to 1901.3)  | 930.1 (830.8 to 1036.8)       | 200.2 (149.0 to 264.6)          | 0.0 (0.0 to 0.0)                  |
| Chile   | 2034 | 1664.3 (1569.1 to 1765.0)  | 1019.5 (945.3 to 1098.2)   | 529.8 (471.6 to 591.0)        | 115.0 (85.5 to 152.2)           | 0.0 (0.0 to 0.0)                  | 2942.8 (2774.5 to 3121.0) | 1802.7 (1671.6 to 1941.9)  | 936.8 (833.8 to 1045.0)       | 203.4 (151.2 to 269.1)          | 0.0 (0.0 to 0.0)                  |
| Chile   | 2035 | 1690.2 (1586.0 to 1798.7)  | 1039.3 (957.7 to 1122.0)   | 534.0 (473.7 to 596.8)        | 116.9 (86.9 to 155.0)           | 0.0 (0.0 to 0.0)                  | 2988.7 (2804.5 to 3180.5) | 1837.7 (1693.5 to 1984.0)  | 944.2 (837.6 to 1055.4)       | 206.8 (153.7 to 274.1)          | 0.0 (0.0 to 0.0)                  |
| Chile   | 2036 | 1715.1 (1614.8 to 1825.5)  | 1058.3 (972.5 to 1146.9)   | 538.0 (475.8 to 603.4)        | 118.8 (88.2 to 157.8)           | 0.0 (0.0 to 0.0)                  | 3032.7 (2855.3 to 3228.0) | 1871.3 (1719.6 to 2028.0)  | 951.3 (841.4 to 1066.9)       | 210.1 (156.0 to 279.0)          | 0.0 (0.0 to 0.0)                  |
| Chile   | 2037 | 1740.7 (1623.7 to 1860.6)  | 1077.6 (988.2 to 1171.2)   | 542.2 (477.7 to 609.2)        | 120.8 (89.5 to 160.7)           | 0.0 (0.0 to 0.0)                  | 3078.0 (2871.1 to 3290.0) | 1905.5 (1747.4 to 2071.0)  | 958.8 (844.8 to 1077.3)       | 213.6 (158.3 to 284.1)          | 0.0 (0.0 to 0.0)                  |
| Chile   | 2038 | 1766.3 (1652.8 to 1887.2)  | 1097.0 (1001.8 to 1195.7)  | 546.5 (480.1 to 613.8)        | 122.8 (90.8 to 163.6)           | 0.0 (0.0 to 0.0)                  | 3123.4 (2922.5 to 3337.0) | 1939.8 (1771.5 to 2114.3)  | 966.4 (849.0 to 1085.4)       | 217.2 (160.5 to 289.3)          | 0.0 (0.0 to 0.0)                  |
| Chile   | 2039 | 1793.2 (1670.5 to 1927.3)  | 1117.2 (1017.3 to 1221.5)  | 551.1 (482.7 to 619.6)        | 124.9 (92.2 to 166.7)           | 0.0 (0.0 to 0.0)                  | 3170.8 (2953.9 to 3408.0) | 1975.5 (1798.8 to 2160.0)  | 974.4 (853.6 to 1095.6)       | 220.9 (163.0 to 294.7)          | 0.0 (0.0 to 0.0)                  |
| Chile   | 2040 | 1820.1 (1700.8 to 1951.7)  | 1137.4 (1033.9 to 1246.8)  | 555.6 (485.5 to 625.3)        | 127.1 (93.5 to 169.8)           | 0.0 (0.0 to 0.0)                  | 3218.4 (3007.5 to 3451.1) | 2011.3 (1828.2 to 2204.6)  | 982.5 (858.4 to 1105.6)       | 224.7 (165.3 to 300.2)          | 0.0 (0.0 to 0.0)                  |
| Chile   | 2041 | 1847.4 (1716.0 to 1985.4)  | 1157.7 (1050.5 to 1272.3)  | 560.4 (489.2 to 631.1)        | 129.3 (94.9 to 173.0)           | 0.0 (0.0 to 0.0)                  | 3266.7 (3034.4 to 3510.7) | 2047.1 (1857.6 to 2249.8)  | 991.0 (865.0 to 1115.9)       | 228.6 (167.9 to 305.8)          | 0.0 (0.0 to 0.0)                  |
| Chile   | 2042 | 1874.0 (1745.8 to 2017.0)  | 1177.5 (1065.5 to 1299.5)  | 565.0 (493.4 to 636.7)        | 131.4 (96.3 to 176.2)           | 0.0 (0.0 to 0.0)                  | 3313.8 (3087.0 to 3566.7) | 2082.2 (1884.1 to 2297.8)  | 999.2 (872.4 to 1125.9)       | 232.4 (170.4 to 311.5)          | 0.0 (0.0 to 0.0)                  |
| Chile   | 2043 | 1902.1 (1769.1 to 2058.8)  | 1198.4 (1082.3 to 1326.7)  | 570.0 (497.1 to 642.8)        | 133.7 (97.8 to 179.2)           | 0.0 (0.0 to 0.0)                  | 3363.4 (3128.1 to 3640.4) | 2119.0 (1913.9 to 2346.0)  | 1007.9 (879.0 to 1136.7)      | 236.5 (173.0 to 316.9)          | 0.0 (0.0 to 0.0)                  |
| Chile   | 2044 | 1931.1 (1783.7 to 2089.1)  | 1220.0 (1098.5 to 1353.4)  | 575.1 (501.0 to 649.1)        | 136.1 (99.3 to 182.1)           | 0.0 (0.0 to 0.0)                  | 3414.7 (3154.1 to 3694.1) | 2157.2 (1942.4 to 2393.2)  | 1016.9 (885.9 to 1147.8)      | 240.7 (175.6 to 322.0)          | 0.0 (0.0 to 0.0)                  |
| Chile   | 2045 | 1959.7 (1815.6 to 2126.8)  | 1241.4 (1115.5 to 1383.8)  | 579.8 (505.4 to 655.5)        | 138.4 (100.8 to 185.0)          | 0.0 (0.0 to 0.0)                  | 3465.2 (3210.5 to 3760.8) | 2195.1 (1972.5 to 2446.9)  | 1025.3 (893.7 to 1159.1)      | 244.8 (178.3 to 327.1)          | 0.0 (0.0 to 0.0)                  |
| Chile   | 2046 | 1987.6 (1828.8 to 2171.5)  | 1262.3 (1129.6 to 1408.2)  | 584.6 (508.7 to 660.9)        | 140.7 (102.4 to 188.1)          | 0.0 (0.0 to 0.0)                  | 3514.5 (3233.8 to 3839.7) | 2232.0 (1997.4 to 2490.1)  | 1033.7 (899.6 to 1168.7)      | 248.9 (181.0 to 332.6)          | 0.0 (0.0 to 0.0)                  |
| Chile   | 2047 | 2015.8 (1866.2 to 2187.9)  | 1283.5 (1146.5 to 1434.7)  | 589.2 (512.7 to 666.1)        | 143.1 (104.0 to 191.7)          | 0.0 (0.0 to 0.0)                  | 3564.5 (3300.0 to 3868.9) | 2269.5 (2027.4 to 2536.9)  | 1041.9 (906.6 to 1177.9)      | 253.0 (184.0 to 338.9)          | 0.0 (0.0 to 0.0)                  |
| Chile   | 2048 | 2044.3 (1875.5 to 2241.0)  | 1304.9 (1163.0 to 1460.3)  | 593.9 (516.6 to 671.7)        | 145.5 (105.7 to 194.8)          | 0.0 (0.0 to 0.0)                  | 3614.8 (3316.3 to 3962.7) | 2307.5 (2056.4 to 2582.1)  | 1050.1 (913.5 to 1187.8)      | 257.2 (186.9 to 344.5)          | 0.0 (0.0 to 0.0)                  |
| Chile   | 2049 | 2072.3 (1909.6 to 2263.9)  | 1326.3 (1178.3 to 1490.6)  | 598.2 (520.2 to 677.1)        | 147.8 (107.4 to 198.4)          | 0.0 (0.0 to 0.0)                  | 3664.4 (3376.6 to 4003.1) | 2345.3 (2083.6 to 2635.8)  | 1057.8 (919.9 to 1197.3)      | 261.4 (189.8 to 350.9)          | 0.0 (0.0 to 0.0)                  |
| Chile   | 2050 | 2099.6 (1919.5 to 2303.4)  | 1347.5 (1192.4 to 1517.5)  | 602.1 (523.3 to 681.4)        | 150.1 (108.7 to 202.3)          | 0.0 (0.0 to 0.0)                  | 3712.7 (3394.1 to 4073.0) | 2382.7 (2108.4 to 2683.4)  | 1064.6 (925.3 to 1205.0)      | 265.3 (192.2 to 357.7)          | 0.0 (0.0 to 0.0)                  |

| Country | Year | 2018 US Dollars per capita |                            |                               |                                 |                                   | 2018 PPP per capita    |                            |                               |                                 |                                   |
|---------|------|----------------------------|----------------------------|-------------------------------|---------------------------------|-----------------------------------|------------------------|----------------------------|-------------------------------|---------------------------------|-----------------------------------|
|         |      | Health spending            | Government health spending | Out-of-pocket health spending | Prepaid private health spending | Development assistance for health | Health spending        | Government health spending | Out-of-pocket health spending | Prepaid private health spending | Development assistance for health |
| China   | 1995 | 56.4 (46.4 to 68.2)        | 15.9 (12.8 to 19.4)        | 28.5 (21.5 to 36.1)           | 12.0 (6.3 to 20.7)              | 0.1 (0.1 to 0.1)                  | 104.5 (85.9 to 126.2)  | 29.4 (23.6 to 36.0)        | 52.7 (39.9 to 66.9)           | 22.2 (11.7 to 38.4)             | 0.2 (0.2 to 0.2)                  |
| China   | 1996 | 63.0 (52.7 to 75.9)        | 17.3 (13.9 to 21.0)        | 33.0 (25.8 to 41.5)           | 12.6 (6.7 to 21.9)              | 0.1 (0.1 to 0.1)                  | 116.7 (97.6 to 140.6)  | 32.0 (25.7 to 38.9)        | 61.0 (47.7 to 76.8)           | 23.4 (12.5 to 40.6)             | 0.2 (0.2 to 0.2)                  |
| China   | 1997 | 71.3 (59.8 to 85.5)        | 19.1 (15.4 to 23.0)        | 38.6 (30.8 to 48.3)           | 13.5 (7.2 to 23.1)              | 0.1 (0.1 to 0.1)                  | 132.1 (110.8 to 158.3) | 35.3 (28.6 to 42.6)        | 71.5 (57.0 to 89.4)           | 24.9 (13.3 to 42.8)             | 0.3 (0.3 to 0.3)                  |
| China   | 1998 | 79.1 (67.1 to 94.3)        | 20.5 (16.8 to 24.6)        | 44.6 (35.7 to 54.8)           | 13.9 (7.5 to 23.8)              | 0.2 (0.2 to 0.2)                  | 146.6 (124.2 to 174.7) | 37.9 (31.2 to 45.6)        | 82.5 (66.2 to 101.5)          | 25.8 (13.9 to 44.1)             | 0.3 (0.3 to 0.3)                  |
| China   | 1999 | 87.4 (74.4 to 104.4)       | 22.1 (18.4 to 26.3)        | 50.9 (41.4 to 62.9)           | 14.4 (8.0 to 24.9)              | 0.1 (0.1 to 0.1)                  | 161.9 (137.9 to 193.3) | 40.9 (34.0 to 48.7)        | 94.2 (76.6 to 116.5)          | 26.6 (14.7 to 46.2)             | 0.3 (0.3 to 0.3)                  |
| China   | 2000 | 95.3 (82.0 to 112.0)       | 23.2 (19.2 to 27.5)        | 57.2 (47.3 to 69.6)           | 14.6 (8.0 to 25.8)              | 0.2 (0.2 to 0.2)                  | 176.4 (151.9 to 207.3) | 43.0 (35.6 to 50.9)        | 106.0 (87.7 to 129.0)         | 27.1 (14.9 to 47.7)             | 0.3 (0.3 to 0.3)                  |
| China   | 2001 | 101.7 (87.9 to 119.3)      | 25.3 (21.0 to 30.0)        | 62.7 (52.4 to 76.2)           | 13.6 (7.3 to 24.4)              | 0.1 (0.1 to 0.1)                  | 188.4 (162.8 to 220.9) | 46.8 (39.0 to 55.5)        | 116.2 (97.0 to 141.1)         | 25.2 (13.4 to 45.3)             | 0.2 (0.2 to 0.2)                  |
| China   | 2002 | 111.7 (97.4 to 130.1)      | 29.2 (24.5 to 34.8)        | 68.7 (57.8 to 82.2)           | 13.6 (7.2 to 23.6)              | 0.1 (0.1 to 0.1)                  | 206.8 (180.4 to 240.9) | 54.1 (45.4 to 64.4)        | 127.3 (107.0 to 152.2)        | 25.2 (13.4 to 43.7)             | 0.2 (0.2 to 0.2)                  |
| China   | 2003 | 121.9 (106.7 to 140.5)     | 34.1 (28.9 to 40.4)        | 73.7 (61.9 to 86.6)           | 13.8 (7.3 to 23.5)              | 0.1 (0.1 to 0.1)                  | 225.6 (197.6 to 260.1) | 63.2 (53.5 to 74.8)        | 136.5 (114.6 to 160.4)        | 25.6 (13.6 to 43.5)             | 0.2 (0.2 to 0.2)                  |
| China   | 2004 | 131.6 (116.0 to 149.4)     | 39.8 (33.7 to 46.8)        | 77.5 (65.6 to 90.4)           | 14.1 (7.5 to 23.6)              | 0.2 (0.2 to 0.2)                  | 243.7 (214.7 to 276.7) | 73.7 (62.3 to 86.6)        | 143.6 (121.5 to 167.4)        | 26.1 (13.9 to 43.8)             | 0.4 (0.4 to 0.4)                  |
| China   | 2005 | 141.9 (126.7 to 160.3)     | 46.8 (39.7 to 54.5)        | 81.0 (68.2 to 95.2)           | 14.0 (7.8 to 23.3)              | 0.2 (0.2 to 0.2)                  | 262.8 (234.6 to 296.9) | 86.6 (73.5 to 101.0)       | 149.9 (126.2 to 176.2)        | 26.0 (14.4 to 43.2)             | 0.3 (0.3 to 0.3)                  |
| China   | 2006 | 153.3 (136.9 to 172.4)     | 55.4 (47.6 to 63.9)        | 83.5 (69.9 to 97.7)           | 14.2 (7.8 to 23.3)              | 0.2 (0.2 to 0.2)                  | 283.9 (253.6 to 319.2) | 102.6 (88.2 to 118.4)      | 154.6 (129.4 to 181.0)        | 26.3 (14.4 to 43.1)             | 0.4 (0.4 to 0.4)                  |
| China   | 2007 | 168.9 (150.7 to 189.2)     | 67.5 (58.9 to 77.5)        | 86.0 (72.3 to 101.5)          | 15.0 (8.2 to 24.6)              | 0.3 (0.3 to 0.3)                  | 312.7 (279.1 to 350.3) | 125.0 (109.1 to 143.5)     | 159.3 (133.9 to 188.0)        | 27.8 (15.2 to 45.6)             | 0.6 (0.6 to 0.6)                  |
| China   | 2008 | 187.7 (168.3 to 208.2)     | 82.4 (72.6 to 94.1)        | 89.6 (75.9 to 105.0)          | 15.5 (8.3 to 25.6)              | 0.2 (0.2 to 0.2)                  | 347.6 (311.6 to 385.6) | 152.6 (134.5 to 174.2)     | 165.9 (140.6 to 194.5)        | 28.6 (15.4 to 47.5)             | 0.4 (0.4 to 0.4)                  |
| China   | 2009 | 214.4 (193.5 to 236.4)     | 102.2 (90.6 to 115.7)      | 95.6 (81.7 to 111.9)          | 16.3 (8.8 to 27.2)              | 0.3 (0.3 to 0.3)                  | 397.0 (358.3 to 437.7) | 189.2 (167.7 to 214.2)     | 177.0 (151.3 to 207.2)        | 30.3 (16.2 to 50.4)             | 0.5 (0.5 to 0.5)                  |
| China   | 2010 | 240.6 (219.5 to 265.5)     | 122.5 (109.3 to 138.0)     | 100.9 (86.8 to 117.6)         | 16.9 (9.3 to 28.4)              | 0.2 (0.2 to 0.2)                  | 445.5 (406.5 to 491.7) | 226.8 (202.4 to 255.5)     | 186.8 (160.7 to 217.8)        | 31.4 (17.2 to 52.7)             | 0.4 (0.4 to 0.4)                  |
| China   | 2011 | 269.6 (246.8 to 297.7)     | 144.0 (129.5 to 161.5)     | 108.4 (93.6 to 125.8)         | 17.0 (9.1 to 28.7)              | 0.2 (0.2 to 0.2)                  | 499.3 (457.0 to 551.4) | 266.7 (239.8 to 299.1)     | 200.8 (173.4 to 233.0)        | 31.4 (16.9 to 53.2)             | 0.4 (0.4 to 0.4)                  |
| China   | 2012 | 301.2 (274.8 to 331.7)     | 166.7 (150.9 to 186.5)     | 117.1 (100.9 to 136.5)        | 17.1 (9.2 to 28.4)              | 0.3 (0.3 to 0.3)                  | 557.7 (508.8 to 614.2) | 308.7 (279.4 to 345.4)     | 216.9 (186.9 to 252.8)        | 31.7 (17.0 to 52.6)             | 0.5 (0.5 to 0.5)                  |
| China   | 2013 | 333.7 (304.8 to 366.6)     | 189.7 (172.0 to 211.5)     | 125.9 (107.8 to 147.0)        | 17.9 (9.6 to 29.4)              | 0.1 (0.1 to 0.1)                  | 618.0 (564.5 to 678.9) | 351.4 (318.5 to 391.7)     | 233.1 (199.6 to 272.3)        | 33.2 (17.8 to 54.4)             | 0.3 (0.3 to 0.3)                  |
| China   | 2014 | 366.5 (333.5 to 402.6)     | 212.8 (192.7 to 236.3)     | 134.0 (113.3 to 155.4)        | 19.6 (10.4 to 32.6)             | 0.1 (0.1 to 0.1)                  | 678.7 (617.6 to 745.6) | 394.1 (356.8 to 437.6)     | 248.1 (209.9 to 287.7)        | 36.3 (19.3 to 60.3)             | 0.1 (0.1 to 0.1)                  |
| China   | 2015 | 401.5 (364.5 to 440.3)     | 236.5 (212.6 to 263.5)     | 143.1 (119.7 to 168.2)        | 21.9 (11.5 to 37.7)             | 0.1 (0.1 to 0.1)                  | 743.5 (674.9 to 815.3) | 438.0 (393.7 to 488.0)     | 264.9 (221.6 to 311.4)        | 40.5 (21.4 to 69.9)             | 0.2 (0.2 to 0.2)                  |

| Country | Year | 2018 US Dollars per capita |                            |                               |                                 |                                   | 2018 PPP per capita       |                            |                               |                                 |                                   |
|---------|------|----------------------------|----------------------------|-------------------------------|---------------------------------|-----------------------------------|---------------------------|----------------------------|-------------------------------|---------------------------------|-----------------------------------|
|         |      | Health spending            | Government health spending | Out-of-pocket health spending | Prepaid private health spending | Development assistance for health | Health spending           | Government health spending | Out-of-pocket health spending | Prepaid private health spending | Development assistance for health |
| China   | 2016 | 436.1 (390.5 to 487.0)     | 256.5 (226.8 to 291.8)     | 153.8 (127.0 to 183.2)        | 25.7 (13.4 to 45.2)             | 0.2 (0.2 to 0.2)                  | 807.6 (723.2 to 901.9)    | 475.0 (420.0 to 540.3)     | 284.8 (235.2 to 339.3)        | 47.5 (24.8 to 83.7)             | 0.3 (0.3 to 0.3)                  |
| China   | 2017 | 464.9 (418.3 to 517.8)     | 274.7 (242.9 to 312.2)     | 162.9 (134.2 to 194.8)        | 27.1 (14.2 to 47.8)             | 0.1 (0.1 to 0.1)                  | 860.8 (774.5 to 958.9)    | 508.7 (449.8 to 578.0)     | 301.7 (248.5 to 360.7)        | 50.2 (26.2 to 88.4)             | 0.3 (0.3 to 0.3)                  |
| China   | 2018 | 482.3 (431.5 to 533.2)     | 282.9 (250.1 to 322.0)     | 170.9 (140.6 to 203.5)        | 28.4 (14.8 to 50.2)             | 0.1 (0.1 to 0.1)                  | 893.2 (799.1 to 987.4)    | 523.8 (463.1 to 596.2)     | 316.6 (260.4 to 376.8)        | 52.6 (27.4 to 92.9)             | 0.3 (0.3 to 0.3)                  |
| China   | 2019 | 504.3 (452.6 to 562.4)     | 295.5 (261.1 to 336.6)     | 179.1 (148.1 to 213.4)        | 29.6 (15.4 to 52.5)             | 0.1 (0.1 to 0.1)                  | 933.9 (838.2 to 1041.5)   | 547.1 (483.5 to 623.3)     | 331.6 (274.3 to 395.2)        | 54.9 (28.6 to 97.1)             | 0.3 (0.2 to 0.3)                  |
| China   | 2020 | 528.8 (477.3 to 587.9)     | 310.1 (273.3 to 353.3)     | 187.6 (154.1 to 223.8)        | 31.0 (16.1 to 54.9)             | 0.1 (0.1 to 0.2)                  | 979.2 (883.9 to 1088.7)   | 574.2 (506.0 to 654.2)     | 347.4 (285.4 to 414.4)        | 57.4 (29.9 to 101.6)            | 0.3 (0.2 to 0.3)                  |
| China   | 2021 | 554.7 (494.0 to 615.3)     | 325.6 (287.2 to 370.7)     | 196.5 (162.0 to 235.3)        | 32.4 (16.9 to 57.4)             | 0.1 (0.1 to 0.2)                  | 1027.1 (914.7 to 1139.4)  | 602.9 (531.8 to 686.4)     | 364.0 (300.0 to 435.7)        | 60.0 (31.3 to 106.3)            | 0.3 (0.2 to 0.3)                  |
| China   | 2022 | 582.6 (522.4 to 647.1)     | 342.7 (301.8 to 389.9)     | 205.9 (169.2 to 246.9)        | 33.9 (17.7 to 59.9)             | 0.1 (0.1 to 0.2)                  | 1078.8 (967.4 to 1198.3)  | 634.5 (558.9 to 722.0)     | 381.2 (313.4 to 457.3)        | 62.7 (32.8 to 111.0)            | 0.3 (0.2 to 0.3)                  |
| China   | 2023 | 611.8 (548.4 to 682.3)     | 360.6 (317.5 to 410.5)     | 215.6 (176.7 to 258.9)        | 35.4 (18.5 to 62.5)             | 0.2 (0.1 to 0.2)                  | 1132.9 (1015.5 to 1263.5) | 667.8 (587.8 to 760.2)     | 399.2 (327.2 to 479.3)        | 65.6 (34.2 to 115.8)            | 0.3 (0.2 to 0.3)                  |
| China   | 2024 | 643.1 (577.6 to 717.4)     | 380.1 (333.5 to 431.9)     | 225.7 (185.6 to 271.8)        | 37.0 (19.3 to 65.2)             | 0.2 (0.1 to 0.2)                  | 1190.8 (1069.6 to 1328.4) | 703.9 (617.5 to 799.8)     | 418.0 (343.7 to 503.3)        | 68.6 (35.8 to 120.8)            | 0.3 (0.2 to 0.3)                  |
| China   | 2025 | 675.4 (605.5 to 750.9)     | 400.2 (351.1 to 454.3)     | 236.3 (193.8 to 284.4)        | 38.7 (20.2 to 68.0)             | 0.2 (0.1 to 0.2)                  | 1250.7 (1121.3 to 1390.5) | 741.1 (650.1 to 841.2)     | 437.6 (358.8 to 526.6)        | 71.6 (37.4 to 125.9)            | 0.3 (0.3 to 0.3)                  |
| China   | 2026 | 709.7 (635.5 to 789.3)     | 421.8 (369.7 to 479.6)     | 247.4 (202.8 to 299.0)        | 40.4 (21.1 to 71.0)             | 0.2 (0.1 to 0.2)                  | 1314.2 (1176.7 to 1461.6) | 781.0 (684.6 to 888.1)     | 458.1 (375.5 to 553.8)        | 74.8 (39.0 to 131.5)            | 0.3 (0.3 to 0.4)                  |
| China   | 2027 | 746.2 (665.1 to 834.0)     | 444.9 (389.0 to 507.1)     | 259.0 (211.2 to 313.6)        | 42.2 (22.0 to 74.0)             | 0.2 (0.1 to 0.2)                  | 1381.9 (1231.7 to 1544.4) | 823.9 (720.4 to 939.0)     | 479.6 (391.1 to 580.7)        | 78.1 (40.7 to 137.1)            | 0.3 (0.3 to 0.4)                  |
| China   | 2028 | 784.3 (693.1 to 886.0)     | 469.3 (408.2 to 536.8)     | 270.8 (219.6 to 330.5)        | 44.0 (22.9 to 77.0)             | 0.2 (0.1 to 0.2)                  | 1452.4 (1283.6 to 1640.7) | 869.1 (755.9 to 994.0)     | 501.5 (406.7 to 612.0)        | 81.5 (42.3 to 142.6)            | 0.3 (0.3 to 0.4)                  |
| China   | 2029 | 824.2 (730.7 to 927.3)     | 495.3 (429.8 to 568.0)     | 282.9 (227.9 to 346.7)        | 45.9 (23.8 to 80.1)             | 0.2 (0.1 to 0.2)                  | 1526.3 (1353.1 to 1717.1) | 917.1 (795.8 to 1051.8)    | 523.9 (422.0 to 642.0)        | 85.0 (44.0 to 148.3)            | 0.3 (0.3 to 0.4)                  |
| China   | 2030 | 865.4 (764.2 to 979.7)     | 522.1 (450.8 to 600.3)     | 295.2 (236.7 to 364.0)        | 47.9 (24.7 to 83.5)             | 0.2 (0.0 to 0.2)                  | 1602.5 (1415.2 to 1814.3) | 966.9 (834.8 to 1111.7)    | 546.7 (438.3 to 674.0)        | 88.6 (45.8 to 154.6)            | 0.3 (0.0 to 0.4)                  |
| China   | 2031 | 908.3 (802.7 to 1031.7)    | 550.6 (471.3 to 635.7)     | 307.7 (245.9 to 383.2)        | 49.9 (25.7 to 87.1)             | 0.2 (0.0 to 0.2)                  | 1682.0 (1486.5 to 1910.5) | 1019.5 (872.8 to 1177.1)   | 569.9 (455.4 to 709.7)        | 92.3 (47.6 to 161.4)            | 0.3 (0.0 to 0.4)                  |
| China   | 2032 | 953.3 (834.8 to 1081.3)    | 580.7 (494.2 to 673.3)     | 320.5 (253.9 to 400.7)        | 51.9 (26.7 to 90.9)             | 0.2 (0.0 to 0.2)                  | 1765.3 (1545.9 to 2002.3) | 1075.4 (915.1 to 1246.9)   | 593.4 (470.2 to 742.0)        | 96.2 (49.5 to 168.4)            | 0.3 (0.0 to 0.4)                  |
| China   | 2033 | 1000.7 (875.9 to 1142.1)   | 613.0 (517.8 to 714.3)     | 333.4 (262.5 to 417.7)        | 54.1 (27.8 to 94.9)             | 0.2 (0.0 to 0.2)                  | 1853.0 (1621.9 to 2114.9) | 1135.1 (958.8 to 1322.7)   | 617.5 (486.0 to 773.6)        | 100.2 (51.4 to 175.7)           | 0.3 (0.0 to 0.5)                  |
| China   | 2034 | 1049.3 (906.1 to 1200.0)   | 646.1 (545.3 to 758.2)     | 346.6 (271.6 to 436.3)        | 56.4 (28.9 to 98.8)             | 0.1 (0.0 to 0.3)                  | 1943.0 (1677.8 to 2222.1) | 1196.5 (1009.8 to 1404.0)  | 641.9 (502.9 to 807.9)        | 104.4 (53.6 to 183.0)           | 0.3 (0.0 to 0.5)                  |
| China   | 2035 | 1099.8 (948.4 to 1258.4)   | 681.0 (571.9 to 802.9)     | 359.9 (279.9 to 455.3)        | 58.7 (30.1 to 103.0)            | 0.1 (0.0 to 0.3)                  | 2036.5 (1756.1 to 2330.2) | 1261.0 (1059.0 to 1486.8)  | 666.5 (518.4 to 843.2)        | 108.8 (55.7 to 190.7)           | 0.2 (0.0 to 0.5)                  |
| China   | 2036 | 1151.5 (997.5 to 1318.8)   | 716.7 (599.5 to 848.4)     | 373.4 (289.1 to 474.6)        | 61.2 (31.3 to 107.3)            | 0.1 (0.0 to 0.3)                  | 2132.3 (1847.1 to 2442.1) | 1327.2 (1110.2 to 1571.1)  | 691.5 (535.3 to 878.8)        | 113.4 (57.9 to 198.7)           | 0.2 (0.0 to 0.5)                  |

| Country  | Year | 2018 US Dollars per capita |                            |                               |                                 |                                   | 2018 PPP per capita       |                            |                               |                                 |                                   |
|----------|------|----------------------------|----------------------------|-------------------------------|---------------------------------|-----------------------------------|---------------------------|----------------------------|-------------------------------|---------------------------------|-----------------------------------|
|          |      | Health spending            | Government health spending | Out-of-pocket health spending | Prepaid private health spending | Development assistance for health | Health spending           | Government health spending | Out-of-pocket health spending | Prepaid private health spending | Development assistance for health |
| China    | 2037 | 1204.6 (1033.1 to 1397.1)  | 753.6 (627.3 to 896.6)     | 387.1 (296.5 to 493.9)        | 63.8 (32.5 to 111.8)            | 0.1 (0.0 to 0.3)                  | 2230.7 (1913.1 to 2587.1) | 1395.5 (1161.5 to 1660.3)  | 716.8 (549.1 to 914.5)        | 118.2 (60.2 to 207.1)           | 0.2 (0.0 to 0.5)                  |
| China    | 2038 | 1260.0 (1082.5 to 1453.7)  | 792.5 (657.3 to 947.5)     | 400.9 (306.1 to 513.6)        | 66.6 (33.8 to 116.6)            | 0.1 (0.0 to 0.3)                  | 2333.3 (2004.6 to 2691.9) | 1467.4 (1217.1 to 1754.5)  | 742.4 (566.8 to 951.1)        | 123.3 (62.6 to 215.9)           | 0.1 (0.0 to 0.5)                  |
| China    | 2039 | 1316.4 (1130.6 to 1519.5)  | 831.8 (688.2 to 999.1)     | 415.0 (316.1 to 533.6)        | 69.5 (35.2 to 121.7)            | 0.1 (0.0 to 0.3)                  | 2437.6 (2093.7 to 2813.8) | 1540.3 (1274.4 to 1850.1)  | 768.5 (585.4 to 988.0)        | 128.7 (65.3 to 225.3)           | 0.1 (0.0 to 0.5)                  |
| China    | 2040 | 1375.9 (1193.3 to 1595.2)  | 873.9 (720.4 to 1051.5)    | 429.3 (326.4 to 553.4)        | 72.6 (36.8 to 127.2)            | 0.1 (0.0 to 0.3)                  | 2547.9 (2209.8 to 2953.9) | 1618.2 (1334.0 to 1947.2)  | 795.0 (604.4 to 1024.8)       | 134.5 (68.1 to 235.6)           | 0.1 (0.0 to 0.5)                  |
| China    | 2041 | 1436.9 (1225.2 to 1656.8)  | 917.0 (754.2 to 1106.8)    | 443.9 (335.7 to 572.4)        | 76.0 (38.4 to 133.1)            | 0.0 (0.0 to 0.3)                  | 2660.9 (2268.9 to 3068.1) | 1698.1 (1396.7 to 2049.5)  | 821.9 (621.7 to 1060.0)       | 140.8 (71.1 to 246.5)           | 0.1 (0.0 to 0.5)                  |
| China    | 2042 | 1500.9 (1282.4 to 1745.0)  | 962.4 (788.7 to 1162.6)    | 458.8 (346.0 to 592.6)        | 79.7 (40.2 to 139.4)            | 0.0 (0.0 to 0.3)                  | 2779.3 (2374.7 to 3231.3) | 1782.1 (1460.5 to 2152.9)  | 849.5 (640.7 to 1097.4)       | 147.5 (74.4 to 258.1)           | 0.1 (0.0 to 0.5)                  |
| China    | 2043 | 1566.6 (1329.9 to 1820.9)  | 1009.3 (825.9 to 1216.9)   | 473.8 (355.9 to 612.6)        | 83.5 (42.0 to 146.1)            | 0.0 (0.0 to 0.3)                  | 2901.0 (2462.6 to 3371.9) | 1868.9 (1529.4 to 2253.4)  | 877.3 (659.1 to 1134.4)       | 154.7 (77.8 to 270.6)           | 0.1 (0.0 to 0.5)                  |
| China    | 2044 | 1634.1 (1404.6 to 1894.3)  | 1057.6 (865.2 to 1271.3)   | 488.8 (366.9 to 634.5)        | 87.6 (44.0 to 153.4)            | 0.0 (0.0 to 0.3)                  | 3025.9 (2601.0 to 3507.8) | 1958.5 (1602.1 to 2354.1)  | 905.2 (679.5 to 1175.0)       | 162.2 (81.4 to 284.1)           | 0.0 (0.0 to 0.5)                  |
| China    | 2045 | 1703.2 (1432.5 to 1995.6)  | 1107.7 (907.3 to 1330.9)   | 503.7 (378.4 to 655.9)        | 91.8 (46.0 to 161.2)            | 0.0 (0.0 to 0.3)                  | 3153.9 (2652.6 to 3695.3) | 2051.2 (1680.1 to 2464.5)  | 932.7 (700.7 to 1214.5)       | 170.0 (85.1 to 298.6)           | 0.0 (0.0 to 0.5)                  |
| China    | 2046 | 1772.4 (1516.2 to 2069.5)  | 1158.2 (949.4 to 1392.8)   | 518.1 (388.9 to 673.8)        | 96.0 (48.0 to 169.2)            | 0.0 (0.0 to 0.3)                  | 3282.1 (2807.6 to 3832.3) | 2144.8 (1758.0 to 2579.1)  | 959.5 (720.2 to 1247.8)       | 177.8 (88.8 to 313.3)           | 0.0 (0.0 to 0.5)                  |
| China    | 2047 | 1841.7 (1565.6 to 2132.1)  | 1209.2 (991.8 to 1456.4)   | 532.2 (399.4 to 691.7)        | 100.3 (50.0 to 177.4)           | 0.0 (0.0 to 0.3)                  | 3410.4 (2899.2 to 3948.2) | 2239.1 (1836.6 to 2697.0)  | 985.5 (739.6 to 1280.9)       | 185.8 (92.6 to 328.5)           | 0.0 (0.0 to 0.5)                  |
| China    | 2048 | 1911.6 (1640.2 to 2240.3)  | 1260.5 (1034.5 to 1518.9)  | 546.4 (410.2 to 710.0)        | 104.7 (52.1 to 185.6)           | 0.0 (0.0 to 0.3)                  | 3539.9 (3037.3 to 4148.6) | 2334.2 (1915.7 to 2812.6)  | 1011.8 (759.5 to 1314.8)      | 193.9 (96.5 to 343.7)           | 0.0 (0.0 to 0.5)                  |
| China    | 2049 | 1982.3 (1668.6 to 2331.0)  | 1313.0 (1074.5 to 1587.4)  | 560.3 (421.4 to 729.4)        | 109.0 (54.1 to 193.2)           | 0.0 (0.0 to 0.3)                  | 3670.8 (3090.0 to 4316.5) | 2431.4 (1989.7 to 2939.5)  | 1037.6 (780.4 to 1350.6)      | 201.8 (100.2 to 357.8)          | 0.0 (0.0 to 0.5)                  |
| China    | 2050 | 2053.9 (1728.1 to 2407.5)  | 1366.8 (1116.4 to 1652.5)  | 574.0 (432.3 to 748.7)        | 113.1 (56.1 to 200.4)           | 0.0 (0.0 to 0.0)                  | 3803.3 (3200.0 to 4458.1) | 2530.9 (2067.4 to 3060.1)  | 1063.0 (800.5 to 1386.5)      | 209.4 (103.8 to 371.2)          | 0.0 (0.0 to 0.0)                  |
| Colombia | 1995 | 301.9 (267.7 to 337.1)     | 168.0 (145.3 to 192.3)     | 115.7 (92.7 to 143.7)         | 17.6 (10.2 to 28.4)             | 0.7 (0.7 to 0.7)                  | 719.7 (638.1 to 803.5)    | 400.5 (346.3 to 458.4)     | 275.7 (221.0 to 342.4)        | 41.9 (24.2 to 67.8)             | 1.6 (1.6 to 1.6)                  |
| Colombia | 1996 | 319.4 (286.6 to 351.8)     | 183.5 (161.8 to 207.0)     | 115.4 (94.6 to 141.3)         | 18.6 (10.7 to 29.5)             | 1.9 (1.9 to 1.9)                  | 761.4 (683.2 to 838.5)    | 437.5 (385.6 to 493.5)     | 275.1 (225.5 to 336.8)        | 44.4 (25.5 to 70.3)             | 4.4 (4.4 to 4.4)                  |
| Colombia | 1997 | 327.9 (298.7 to 358.7)     | 197.3 (175.2 to 220.4)     | 109.0 (90.1 to 130.7)         | 20.1 (11.5 to 31.9)             | 1.5 (1.5 to 1.5)                  | 781.6 (711.9 to 855.1)    | 470.3 (417.6 to 525.4)     | 259.9 (214.8 to 311.6)        | 47.8 (27.4 to 76.0)             | 3.6 (3.6 to 3.6)                  |
| Colombia | 1998 | 311.1 (284.9 to 339.3)     | 201.7 (179.0 to 224.7)     | 87.3 (72.0 to 105.3)          | 21.2 (12.5 to 33.2)             | 0.9 (0.9 to 0.9)                  | 741.6 (679.2 to 808.9)    | 480.7 (426.6 to 535.7)     | 208.1 (171.6 to 251.0)        | 50.5 (29.8 to 79.0)             | 2.2 (2.2 to 2.2)                  |
| Colombia | 1999 | 278.2 (254.0 to 304.7)     | 192.3 (171.2 to 212.9)     | 63.0 (51.5 to 76.5)           | 21.2 (12.8 to 33.5)             | 1.6 (1.6 to 1.6)                  | 663.0 (605.4 to 726.2)    | 458.5 (408.1 to 507.4)     | 150.2 (122.9 to 182.3)        | 50.5 (30.5 to 79.8)             | 3.9 (3.9 to 3.9)                  |
| Colombia | 2000 | 248.9 (225.9 to 272.6)     | 184.5 (164.4 to 205.1)     | 43.5 (35.0 to 53.0)           | 20.4 (12.3 to 31.9)             | 0.6 (0.6 to 0.6)                  | 593.3 (538.4 to 649.8)    | 439.7 (391.8 to 488.8)     | 103.6 (83.5 to 126.3)         | 48.6 (29.2 to 76.1)             | 1.4 (1.4 to 1.4)                  |
| Colombia | 2001 | 235.7 (213.9 to 259.2)     | 177.9 (158.7 to 198.4)     | 35.7 (28.7 to 43.6)           | 20.1 (12.0 to 31.4)             | 2.1 (2.1 to 2.1)                  | 561.8 (509.8 to 617.9)    | 424.1 (378.2 to 473.0)     | 85.0 (68.3 to 103.9)          | 47.9 (28.7 to 74.8)             | 4.9 (4.9 to 4.9)                  |

| Country  | Year | 2018 US Dollars per capita |                            |                               |                                 |                                   | 2018 PPP per capita     |                            |                               |                                 |                                   |
|----------|------|----------------------------|----------------------------|-------------------------------|---------------------------------|-----------------------------------|-------------------------|----------------------------|-------------------------------|---------------------------------|-----------------------------------|
|          |      | Health spending            | Government health spending | Out-of-pocket health spending | Prepaid private health spending | Development assistance for health | Health spending         | Government health spending | Out-of-pocket health spending | Prepaid private health spending | Development assistance for health |
| Colombia | 2002 | 229.9 (208.6 to 253.5)     | 175.1 (156.8 to 194.4)     | 31.3 (24.9 to 38.9)           | 20.0 (12.0 to 30.9)             | 3.5 (3.5 to 3.5)                  | 548.1 (497.2 to 604.2)  | 417.4 (373.7 to 463.4)     | 74.6 (59.3 to 92.8)           | 47.7 (28.7 to 73.6)             | 8.4 (8.4 to 8.4)                  |
| Colombia | 2003 | 232.4 (212.5 to 255.7)     | 177.0 (158.5 to 196.8)     | 30.3 (23.9 to 38.2)           | 20.8 (12.8 to 31.8)             | 4.3 (4.3 to 4.3)                  | 554.0 (506.5 to 609.4)  | 422.0 (377.8 to 469.1)     | 72.3 (57.0 to 91.1)           | 49.6 (30.4 to 75.9)             | 10.2 (10.2 to 10.2)               |
| Colombia | 2004 | 242.3 (221.0 to 265.9)     | 175.7 (157.4 to 194.9)     | 35.6 (28.0 to 44.5)           | 20.9 (12.7 to 31.6)             | 10.1 (10.1 to 10.1)               | 577.5 (526.8 to 633.8)  | 418.8 (375.2 to 464.6)     | 84.9 (66.6 to 106.0)          | 49.8 (30.3 to 75.3)             | 24.1 (24.1 to 24.1)               |
| Colombia | 2005 | 249.9 (227.4 to 274.8)     | 180.0 (161.0 to 199.7)     | 42.8 (34.0 to 53.2)           | 21.3 (13.2 to 31.9)             | 5.8 (5.8 to 5.8)                  | 595.7 (541.9 to 655.1)  | 429.1 (383.7 to 475.9)     | 102.0 (81.0 to 126.8)         | 50.7 (31.5 to 76.0)             | 13.9 (13.9 to 13.9)               |
| Colombia | 2006 | 266.3 (241.3 to 292.3)     | 190.7 (170.6 to 212.1)     | 50.8 (41.1 to 62.9)           | 21.9 (13.6 to 32.6)             | 2.9 (2.9 to 2.9)                  | 634.6 (575.1 to 696.8)  | 454.5 (406.6 to 505.4)     | 121.1 (98.1 to 149.8)         | 52.1 (32.3 to 77.8)             | 6.9 (6.9 to 6.9)                  |
| Colombia | 2007 | 285.8 (259.2 to 313.4)     | 200.9 (181.0 to 222.7)     | 58.5 (47.8 to 71.4)           | 23.3 (14.3 to 35.4)             | 3.0 (3.0 to 3.0)                  | 681.2 (617.8 to 747.0)  | 478.9 (431.4 to 530.9)     | 139.5 (113.9 to 170.3)        | 55.5 (34.1 to 84.3)             | 7.3 (7.3 to 7.3)                  |
| Colombia | 2008 | 300.0 (272.3 to 329.0)     | 209.0 (189.5 to 231.5)     | 64.5 (52.4 to 78.7)           | 25.0 (15.4 to 37.1)             | 1.5 (1.5 to 1.5)                  | 715.1 (649.0 to 784.3)  | 498.3 (451.8 to 551.8)     | 153.6 (124.9 to 187.5)        | 59.7 (36.8 to 88.4)             | 3.6 (3.6 to 3.6)                  |
| Colombia | 2009 | 311.5 (282.7 to 341.6)     | 214.1 (193.2 to 237.0)     | 66.0 (54.1 to 80.7)           | 26.7 (16.9 to 39.2)             | 4.7 (4.7 to 4.7)                  | 742.6 (673.9 to 814.1)  | 510.3 (460.6 to 564.9)     | 157.3 (128.9 to 192.4)        | 63.7 (40.4 to 93.4)             | 11.3 (11.3 to 11.3)               |
| Colombia | 2010 | 319.9 (291.9 to 349.3)     | 217.5 (198.0 to 240.9)     | 67.2 (55.1 to 82.4)           | 28.3 (17.8 to 40.9)             | 6.9 (6.9 to 6.9)                  | 762.5 (695.7 to 832.7)  | 518.4 (472.1 to 574.3)     | 160.3 (131.3 to 196.5)        | 67.5 (42.5 to 97.6)             | 16.4 (16.4 to 16.4)               |
| Colombia | 2011 | 321.5 (294.0 to 350.6)     | 220.8 (200.5 to 243.9)     | 68.3 (55.9 to 83.0)           | 30.2 (19.4 to 44.7)             | 2.3 (2.3 to 2.3)                  | 766.3 (700.9 to 835.6)  | 526.2 (478.0 to 581.4)     | 162.8 (133.3 to 197.8)        | 71.9 (46.3 to 106.6)            | 5.4 (5.4 to 5.4)                  |
| Colombia | 2012 | 323.0 (296.4 to 351.6)     | 219.6 (198.6 to 241.2)     | 69.0 (55.9 to 83.0)           | 32.6 (21.5 to 47.7)             | 1.9 (1.9 to 1.9)                  | 770.0 (706.4 to 838.1)  | 523.4 (473.3 to 574.9)     | 164.4 (133.2 to 197.9)        | 77.7 (51.4 to 113.6)            | 4.4 (4.4 to 4.4)                  |
| Colombia | 2013 | 338.1 (310.7 to 367.9)     | 221.6 (199.8 to 244.1)     | 70.3 (56.8 to 85.5)           | 37.7 (25.4 to 55.3)             | 8.6 (8.6 to 8.6)                  | 805.9 (740.6 to 876.8)  | 528.1 (476.2 to 581.9)     | 167.6 (135.4 to 203.9)        | 89.7 (60.5 to 131.8)            | 20.5 (20.5 to 20.5)               |
| Colombia | 2014 | 355.0 (323.8 to 387.1)     | 224.8 (200.7 to 248.3)     | 71.3 (57.3 to 87.9)           | 42.3 (27.6 to 63.9)             | 16.6 (16.6 to 16.6)               | 846.2 (771.7 to 922.8)  | 535.8 (478.3 to 591.9)     | 170.1 (136.6 to 209.5)        | 100.7 (65.9 to 152.3)           | 39.6 (39.6 to 39.6)               |
| Colombia | 2015 | 349.8 (313.9 to 386.3)     | 229.7 (203.1 to 255.9)     | 72.6 (57.4 to 89.7)           | 47.1 (29.8 to 70.2)             | 0.4 (0.4 to 0.4)                  | 833.8 (748.1 to 920.9)  | 547.6 (484.0 to 609.9)     | 173.0 (136.7 to 213.8)        | 112.2 (71.0 to 167.4)           | 0.9 (0.9 to 0.9)                  |
| Colombia | 2016 | 357.8 (315.0 to 398.8)     | 232.8 (203.1 to 263.2)     | 73.7 (57.0 to 92.5)           | 51.0 (30.8 to 77.8)             | 0.3 (0.3 to 0.3)                  | 852.8 (750.7 to 950.5)  | 554.9 (484.1 to 627.2)     | 175.6 (135.9 to 220.6)        | 121.6 (73.4 to 185.4)           | 0.7 (0.7 to 0.7)                  |
| Colombia | 2017 | 369.1 (326.3 to 414.5)     | 242.4 (211.0 to 274.9)     | 74.6 (57.6 to 93.6)           | 51.8 (31.2 to 79.1)             | 0.3 (0.3 to 0.3)                  | 879.8 (777.6 to 988.1)  | 577.8 (502.9 to 655.2)     | 177.7 (137.2 to 223.0)        | 123.4 (74.4 to 188.5)           | 0.8 (0.8 to 0.8)                  |
| Colombia | 2018 | 374.9 (329.8 to 421.4)     | 246.5 (214.4 to 279.3)     | 75.3 (58.2 to 95.1)           | 52.7 (31.8 to 80.4)             | 0.3 (0.3 to 0.3)                  | 893.5 (786.1 to 1004.4) | 587.6 (511.1 to 665.7)     | 179.5 (138.6 to 226.8)        | 125.6 (75.8 to 191.7)           | 0.7 (0.7 to 0.7)                  |
| Colombia | 2019 | 380.6 (335.5 to 426.8)     | 250.6 (218.5 to 284.5)     | 76.1 (58.9 to 95.9)           | 53.6 (32.4 to 81.8)             | 0.3 (0.3 to 0.3)                  | 907.2 (799.8 to 1017.4) | 597.2 (520.8 to 678.1)     | 181.4 (140.4 to 228.6)        | 127.8 (77.3 to 195.0)           | 0.8 (0.7 to 0.8)                  |
| Colombia | 2020 | 386.4 (339.5 to 432.9)     | 254.6 (221.8 to 288.6)     | 76.9 (59.5 to 96.9)           | 54.6 (32.9 to 83.3)             | 0.3 (0.3 to 0.3)                  | 920.9 (809.1 to 1031.7) | 606.7 (528.7 to 687.8)     | 183.3 (141.9 to 231.0)        | 130.1 (78.5 to 198.7)           | 0.8 (0.7 to 0.8)                  |
| Colombia | 2021 | 392.4 (344.8 to 440.3)     | 258.7 (225.3 to 293.3)     | 77.8 (60.2 to 97.9)           | 55.6 (33.6 to 84.5)             | 0.3 (0.3 to 0.4)                  | 935.2 (821.9 to 1049.5) | 616.5 (537.0 to 699.0)     | 185.4 (143.5 to 233.4)        | 132.6 (80.0 to 201.4)           | 0.8 (0.7 to 0.9)                  |
| Colombia | 2022 | 398.2 (351.1 to 447.0)     | 262.7 (228.8 to 297.8)     | 78.6 (60.8 to 99.1)           | 56.6 (34.2 to 85.9)             | 0.3 (0.3 to 0.4)                  | 949.1 (836.9 to 1065.5) | 626.1 (545.3 to 709.7)     | 187.3 (144.8 to 236.2)        | 134.9 (81.6 to 204.8)           | 0.8 (0.7 to 0.9)                  |



| Country  | Year | 2018 US Dollars per capita |                            |                               |                                 |                                   | 2018 PPP per capita       |                            |                               |                                 |                                   |
|----------|------|----------------------------|----------------------------|-------------------------------|---------------------------------|-----------------------------------|---------------------------|----------------------------|-------------------------------|---------------------------------|-----------------------------------|
|          |      | Health spending            | Government health spending | Out-of-pocket health spending | Prepaid private health spending | Development assistance for health | Health spending           | Government health spending | Out-of-pocket health spending | Prepaid private health spending | Development assistance for health |
| Colombia | 2023 | 404.6 (357.3 to 454.4)     | 267.2 (233.1 to 303.0)     | 79.5 (61.4 to 100.4)          | 57.6 (34.8 to 87.6)             | 0.3 (0.3 to 0.4)                  | 964.4 (851.6 to 1083.1)   | 636.8 (555.5 to 722.2)     | 189.4 (146.3 to 239.2)        | 137.4 (83.0 to 208.9)           | 0.8 (0.7 to 0.9)                  |
| Colombia | 2024 | 411.2 (361.8 to 462.0)     | 271.8 (236.9 to 308.6)     | 80.3 (62.0 to 101.4)          | 58.7 (35.5 to 89.2)             | 0.3 (0.3 to 0.4)                  | 980.0 (862.4 to 1101.3)   | 647.9 (564.8 to 735.6)     | 191.4 (147.8 to 241.6)        | 139.9 (84.7 to 212.6)           | 0.8 (0.7 to 1.0)                  |
| Colombia | 2025 | 417.5 (368.6 to 468.1)     | 276.3 (240.4 to 313.8)     | 81.1 (62.7 to 102.2)          | 59.7 (36.2 to 90.8)             | 0.4 (0.3 to 0.4)                  | 995.1 (878.5 to 1115.7)   | 658.6 (573.1 to 747.9)     | 193.3 (149.3 to 243.6)        | 142.3 (86.3 to 216.5)           | 0.8 (0.7 to 1.0)                  |
| Colombia | 2026 | 423.3 (373.0 to 477.3)     | 280.3 (244.0 to 318.6)     | 81.9 (63.3 to 103.1)          | 60.8 (36.9 to 92.4)             | 0.4 (0.3 to 0.4)                  | 1008.9 (889.0 to 1137.7)  | 668.0 (581.5 to 759.3)     | 195.2 (150.8 to 245.7)        | 144.8 (87.9 to 220.3)           | 0.9 (0.7 to 1.0)                  |
| Colombia | 2027 | 428.9 (378.4 to 480.5)     | 284.1 (247.4 to 323.1)     | 82.7 (63.9 to 104.1)          | 61.8 (37.5 to 94.0)             | 0.4 (0.3 to 0.4)                  | 1022.3 (902.0 to 1145.2)  | 677.1 (589.7 to 770.2)     | 197.0 (152.2 to 248.0)        | 147.3 (89.4 to 224.1)           | 0.9 (0.7 to 1.1)                  |
| Colombia | 2028 | 435.0 (385.1 to 488.2)     | 288.5 (251.6 to 328.4)     | 83.4 (64.3 to 105.6)          | 62.8 (38.1 to 95.7)             | 0.4 (0.3 to 0.5)                  | 1036.9 (918.0 to 1163.7)  | 687.5 (599.7 to 782.7)     | 198.7 (153.3 to 251.8)        | 149.7 (90.9 to 228.0)           | 0.9 (0.8 to 1.1)                  |
| Colombia | 2029 | 441.0 (388.2 to 495.9)     | 292.7 (255.1 to 333.8)     | 84.1 (64.7 to 106.4)          | 63.8 (38.7 to 97.5)             | 0.4 (0.3 to 0.5)                  | 1051.1 (925.2 to 1181.9)  | 697.8 (608.1 to 795.6)     | 200.3 (154.2 to 253.7)        | 152.0 (92.3 to 232.5)           | 0.9 (0.8 to 1.2)                  |
| Colombia | 2030 | 447.0 (393.3 to 502.8)     | 297.1 (258.3 to 339.2)     | 84.7 (65.1 to 107.2)          | 64.8 (39.3 to 99.5)             | 0.4 (0.3 to 0.5)                  | 1065.5 (937.5 to 1198.5)  | 708.2 (615.7 to 808.6)     | 202.0 (155.2 to 255.6)        | 154.4 (93.7 to 237.1)           | 1.0 (0.8 to 1.2)                  |
| Colombia | 2031 | 453.0 (398.7 to 509.7)     | 301.4 (261.8 to 344.6)     | 85.4 (65.5 to 108.0)          | 65.8 (39.8 to 101.4)            | 0.4 (0.3 to 0.5)                  | 1079.9 (950.3 to 1214.9)  | 718.5 (624.0 to 821.4)     | 203.6 (156.1 to 257.4)        | 156.8 (94.8 to 241.8)           | 1.0 (0.8 to 1.2)                  |
| Colombia | 2032 | 459.1 (405.6 to 518.9)     | 305.8 (265.1 to 350.1)     | 86.1 (66.0 to 108.7)          | 66.8 (40.2 to 103.4)            | 0.4 (0.3 to 0.5)                  | 1094.2 (966.7 to 1236.8)  | 728.9 (631.9 to 834.4)     | 205.1 (157.3 to 259.2)        | 159.2 (95.8 to 246.4)           | 1.0 (0.8 to 1.3)                  |
| Colombia | 2033 | 465.2 (409.2 to 527.4)     | 310.2 (268.5 to 356.3)     | 86.7 (66.5 to 109.7)          | 67.8 (40.7 to 105.1)            | 0.4 (0.3 to 0.6)                  | 1108.9 (975.4 to 1257.1)  | 739.5 (640.0 to 849.1)     | 206.7 (158.4 to 261.4)        | 161.6 (97.1 to 250.6)           | 1.0 (0.8 to 1.4)                  |
| Colombia | 2034 | 471.5 (417.0 to 533.1)     | 314.8 (272.0 to 361.6)     | 87.4 (66.9 to 110.4)          | 68.9 (41.4 to 106.9)            | 0.5 (0.4 to 0.6)                  | 1123.9 (993.9 to 1270.7)  | 750.3 (648.2 to 862.0)     | 208.4 (159.6 to 263.2)        | 164.2 (98.7 to 254.7)           | 1.1 (0.8 to 1.4)                  |
| Colombia | 2035 | 477.8 (420.3 to 543.0)     | 319.3 (275.4 to 368.3)     | 88.1 (67.4 to 111.1)          | 69.9 (42.0 to 108.6)            | 0.5 (0.4 to 0.6)                  | 1138.8 (1001.8 to 1294.3) | 761.0 (656.3 to 877.9)     | 210.0 (160.7 to 264.9)        | 166.7 (100.2 to 258.9)          | 1.1 (0.9 to 1.5)                  |
| Colombia | 2036 | 484.7 (424.5 to 549.5)     | 324.3 (279.6 to 374.8)     | 88.9 (68.0 to 112.4)          | 71.1 (42.8 to 110.5)            | 0.5 (0.4 to 0.6)                  | 1155.3 (1011.8 to 1309.9) | 772.9 (666.3 to 893.4)     | 211.9 (162.2 to 268.0)        | 169.4 (101.9 to 263.4)          | 1.1 (0.9 to 1.5)                  |
| Colombia | 2037 | 491.8 (429.4 to 559.4)     | 329.4 (283.6 to 381.0)     | 89.7 (68.6 to 113.2)          | 72.3 (43.5 to 112.5)            | 0.5 (0.4 to 0.7)                  | 1172.2 (1023.4 to 1333.4) | 785.1 (676.0 to 908.0)     | 213.8 (163.4 to 269.9)        | 172.2 (103.7 to 268.1)          | 1.2 (0.9 to 1.6)                  |
| Colombia | 2038 | 499.2 (436.1 to 570.9)     | 334.7 (287.6 to 387.7)     | 90.5 (69.4 to 114.1)          | 73.5 (44.3 to 114.5)            | 0.5 (0.4 to 0.7)                  | 1189.9 (1039.6 to 1360.6) | 797.8 (685.4 to 924.2)     | 215.8 (165.3 to 272.0)        | 175.2 (105.5 to 272.9)          | 1.2 (0.9 to 1.7)                  |
| Colombia | 2039 | 506.6 (441.7 to 581.6)     | 340.0 (291.4 to 393.9)     | 91.4 (70.0 to 115.3)          | 74.7 (45.0 to 116.8)            | 0.5 (0.4 to 0.7)                  | 1207.6 (1052.9 to 1386.2) | 810.4 (694.5 to 938.8)     | 217.8 (166.9 to 274.8)        | 178.1 (107.3 to 278.4)          | 1.2 (0.9 to 1.7)                  |
| Colombia | 2040 | 514.0 (448.2 to 588.6)     | 345.3 (295.3 to 400.7)     | 92.2 (70.7 to 116.5)          | 75.9 (45.7 to 119.0)            | 0.5 (0.4 to 0.7)                  | 1225.0 (1068.4 to 1403.0) | 823.0 (703.8 to 955.1)     | 219.7 (168.4 to 277.7)        | 181.0 (108.9 to 283.7)          | 1.3 (1.0 to 1.8)                  |
| Colombia | 2041 | 521.5 (453.8 to 598.4)     | 350.7 (299.3 to 407.3)     | 93.0 (71.2 to 117.7)          | 77.2 (46.4 to 120.7)            | 0.6 (0.4 to 0.8)                  | 1242.9 (1081.6 to 1426.3) | 835.9 (713.5 to 970.8)     | 221.7 (169.8 to 280.6)        | 184.0 (110.6 to 287.7)          | 1.3 (1.0 to 1.8)                  |
| Colombia | 2042 | 528.7 (459.4 to 604.8)     | 355.9 (303.3 to 414.0)     | 93.8 (71.7 to 118.7)          | 78.4 (47.1 to 122.9)            | 0.6 (0.4 to 0.8)                  | 1260.2 (1095.0 to 1441.5) | 848.4 (722.8 to 986.8)     | 223.5 (171.0 to 283.0)        | 186.9 (112.4 to 293.0)          | 1.4 (1.0 to 2.0)                  |
| Colombia | 2043 | 535.8 (465.6 to 615.9)     | 361.1 (307.1 to 421.2)     | 94.5 (72.2 to 119.5)          | 79.6 (47.9 to 124.9)            | 0.6 (0.4 to 0.9)                  | 1277.1 (1109.9 to 1468.1) | 860.6 (732.0 to 1004.0)    | 225.3 (172.1 to 284.7)        | 189.8 (114.1 to 297.7)          | 1.4 (1.0 to 2.1)                  |

| Country  | Year | 2018 US Dollars per capita |                            |                               |                                 |                                   | 2018 PPP per capita       |                            |                               |                                 |                                   |
|----------|------|----------------------------|----------------------------|-------------------------------|---------------------------------|-----------------------------------|---------------------------|----------------------------|-------------------------------|---------------------------------|-----------------------------------|
|          |      | Health spending            | Government health spending | Out-of-pocket health spending | Prepaid private health spending | Development assistance for health | Health spending           | Government health spending | Out-of-pocket health spending | Prepaid private health spending | Development assistance for health |
| Colombia | 2044 | 542.8 (468.0 to 624.9)     | 366.1 (310.9 to 427.9)     | 95.2 (72.7 to 120.3)          | 80.8 (48.6 to 126.7)            | 0.6 (0.5 to 0.9)                  | 1293.8 (1115.5 to 1489.4) | 872.7 (741.0 to 1019.9)    | 226.9 (173.2 to 286.7)        | 192.7 (115.8 to 301.9)          | 1.4 (1.1 to 2.1)                  |
| Colombia | 2045 | 549.8 (475.5 to 631.2)     | 371.2 (314.6 to 435.0)     | 95.9 (73.2 to 121.7)          | 82.0 (49.3 to 128.8)            | 0.6 (0.5 to 0.9)                  | 1310.5 (1133.5 to 1504.4) | 884.8 (749.9 to 1036.9)    | 228.6 (174.4 to 290.1)        | 195.5 (117.6 to 307.1)          | 1.5 (1.1 to 2.2)                  |
| Colombia | 2046 | 556.6 (481.0 to 640.3)     | 376.1 (318.2 to 442.0)     | 96.6 (73.6 to 122.8)          | 83.2 (50.1 to 131.0)            | 0.6 (0.5 to 1.0)                  | 1326.6 (1146.6 to 1526.1) | 896.5 (758.5 to 1053.5)    | 230.2 (175.5 to 292.8)        | 198.3 (119.5 to 312.2)          | 1.5 (1.1 to 2.4)                  |
| Colombia | 2047 | 563.6 (484.5 to 649.3)     | 381.2 (321.5 to 449.8)     | 97.3 (74.2 to 123.7)          | 84.4 (50.8 to 132.7)            | 0.7 (0.5 to 1.0)                  | 1343.3 (1154.8 to 1547.5) | 908.6 (766.2 to 1072.1)    | 231.8 (176.8 to 294.8)        | 201.3 (121.0 to 316.3)          | 1.6 (1.2 to 2.5)                  |
| Colombia | 2048 | 570.6 (488.6 to 658.7)     | 386.3 (324.7 to 458.0)     | 97.9 (74.7 to 124.5)          | 85.7 (51.4 to 134.6)            | 0.7 (0.5 to 1.1)                  | 1360.0 (1164.7 to 1570.1) | 920.7 (773.9 to 1091.6)    | 233.5 (177.9 to 296.8)        | 204.2 (122.5 to 320.9)          | 1.7 (1.2 to 2.6)                  |
| Colombia | 2049 | 577.3 (493.5 to 667.9)     | 391.1 (328.0 to 465.2)     | 98.6 (75.0 to 125.6)          | 86.9 (52.0 to 136.4)            | 0.7 (0.5 to 1.2)                  | 1376.0 (1176.3 to 1592.0) | 932.3 (781.9 to 1108.9)    | 235.0 (178.8 to 299.3)        | 207.0 (124.0 to 325.1)          | 1.7 (1.2 to 2.8)                  |
| Colombia | 2050 | 584.2 (499.9 to 675.2)     | 396.2 (331.6 to 472.4)     | 99.2 (75.5 to 126.4)          | 88.1 (52.7 to 138.2)            | 0.7 (0.5 to 1.2)                  | 1392.5 (1191.5 to 1609.4) | 944.3 (790.4 to 1125.9)    | 236.5 (180.0 to 301.3)        | 209.9 (125.6 to 329.5)          | 1.8 (1.2 to 2.9)                  |
| Comoros  | 1995 | 112.0 (94.4 to 132.3)      | 11.6 (8.9 to 14.8)         | 75.7 (58.2 to 95.8)           | 1.6 (0.7 to 3.3)                | 23.1 (23.1 to 23.1)               | 219.4 (185.0 to 259.1)    | 22.7 (17.5 to 28.9)        | 148.4 (114.0 to 187.7)        | 3.1 (1.4 to 6.4)                | 45.2 (45.2 to 45.2)               |
| Comoros  | 1996 | 97.2 (80.9 to 116.0)       | 11.1 (8.6 to 14.0)         | 73.9 (58.1 to 92.0)           | 1.5 (0.7 to 3.1)                | 10.7 (10.7 to 10.7)               | 190.5 (158.4 to 227.3)    | 21.8 (16.8 to 27.5)        | 144.8 (113.8 to 180.3)        | 3.0 (1.4 to 6.0)                | 21.0 (21.0 to 21.0)               |
| Comoros  | 1997 | 102.8 (87.3 to 120.6)      | 11.2 (8.7 to 14.2)         | 73.5 (57.7 to 90.6)           | 1.5 (0.7 to 2.9)                | 16.6 (16.6 to 16.6)               | 201.4 (171.0 to 236.2)    | 22.0 (17.1 to 27.9)        | 144.0 (113.1 to 177.5)        | 2.9 (1.4 to 5.7)                | 32.5 (32.5 to 32.5)               |
| Comoros  | 1998 | 106.6 (91.5 to 123.5)      | 11.0 (8.6 to 13.8)         | 72.8 (57.7 to 89.8)           | 1.4 (0.7 to 2.7)                | 21.3 (21.3 to 21.3)               | 208.8 (179.2 to 242.0)    | 21.6 (16.8 to 27.0)        | 142.7 (113.0 to 175.9)        | 2.8 (1.3 to 5.3)                | 41.7 (41.7 to 41.7)               |
| Comoros  | 1999 | 90.0 (75.3 to 107.6)       | 11.3 (8.8 to 14.1)         | 74.1 (59.9 to 91.0)           | 1.4 (0.7 to 2.7)                | 3.2 (3.2 to 3.2)                  | 176.4 (147.6 to 210.9)    | 22.1 (17.3 to 27.7)        | 145.2 (117.4 to 178.3)        | 2.8 (1.3 to 5.2)                | 6.3 (6.3 to 6.3)                  |
| Comoros  | 2000 | 95.5 (80.1 to 113.4)       | 12.0 (9.4 to 15.0)         | 77.5 (62.5 to 94.6)           | 1.4 (0.7 to 2.7)                | 4.5 (4.5 to 4.5)                  | 187.0 (157.0 to 222.1)    | 23.6 (18.4 to 29.4)        | 151.9 (122.4 to 185.2)        | 2.8 (1.3 to 5.3)                | 8.7 (8.7 to 8.7)                  |
| Comoros  | 2001 | 95.7 (80.7 to 113.1)       | 12.3 (9.6 to 15.4)         | 77.1 (62.0 to 93.5)           | 1.4 (0.7 to 2.7)                | 4.8 (4.8 to 4.8)                  | 187.5 (158.0 to 221.7)    | 24.1 (18.7 to 30.2)        | 151.1 (121.4 to 183.3)        | 2.8 (1.3 to 5.2)                | 9.5 (9.5 to 9.5)                  |
| Comoros  | 2002 | 100.7 (85.8 to 118.1)      | 13.6 (10.4 to 17.1)        | 77.5 (62.7 to 94.2)           | 1.5 (0.7 to 2.9)                | 8.0 (8.0 to 8.0)                  | 197.2 (168.1 to 231.4)    | 26.6 (20.4 to 33.5)        | 151.9 (122.9 to 184.6)        | 3.0 (1.4 to 5.7)                | 15.7 (15.7 to 15.7)               |
| Comoros  | 2003 | 100.5 (86.3 to 118.2)      | 13.2 (10.1 to 16.5)        | 74.6 (60.5 to 91.0)           | 1.5 (0.7 to 2.8)                | 11.2 (11.2 to 11.2)               | 196.8 (169.2 to 231.5)    | 25.9 (19.8 to 32.3)        | 146.1 (118.5 to 178.4)        | 2.9 (1.4 to 5.4)                | 22.0 (22.0 to 22.0)               |
| Comoros  | 2004 | 93.3 (79.9 to 109.0)       | 12.4 (9.5 to 15.6)         | 71.8 (58.3 to 87.9)           | 1.4 (0.7 to 2.6)                | 7.7 (7.7 to 7.7)                  | 182.8 (156.5 to 213.5)    | 24.3 (18.6 to 30.5)        | 140.8 (114.3 to 172.2)        | 2.7 (1.3 to 5.1)                | 15.1 (15.1 to 15.1)               |
| Comoros  | 2005 | 88.3 (74.7 to 104.0)       | 11.7 (8.9 to 14.8)         | 70.5 (57.5 to 85.7)           | 1.3 (0.6 to 2.4)                | 4.8 (4.8 to 4.8)                  | 172.9 (146.4 to 203.8)    | 22.9 (17.5 to 29.0)        | 138.1 (112.6 to 168.0)        | 2.5 (1.2 to 4.8)                | 9.4 (9.4 to 9.4)                  |
| Comoros  | 2006 | 85.3 (72.1 to 100.1)       | 11.0 (8.4 to 14.0)         | 69.2 (56.5 to 84.1)           | 1.2 (0.6 to 2.3)                | 3.9 (3.9 to 3.9)                  | 167.2 (141.3 to 196.1)    | 21.6 (16.5 to 27.4)        | 135.6 (110.6 to 164.7)        | 2.4 (1.1 to 4.5)                | 7.6 (7.6 to 7.6)                  |
| Comoros  | 2007 | 81.2 (68.5 to 96.3)        | 9.9 (7.6 to 12.6)          | 66.6 (54.4 to 81.1)           | 1.1 (0.5 to 2.1)                | 3.6 (3.6 to 3.6)                  | 159.2 (134.2 to 188.7)    | 19.5 (14.9 to 24.8)        | 130.4 (106.5 to 158.9)        | 2.2 (1.1 to 4.1)                | 7.1 (7.1 to 7.1)                  |
| Comoros  | 2008 | 76.8 (64.6 to 91.2)        | 9.0 (6.8 to 11.4)          | 63.7 (51.7 to 77.6)           | 1.0 (0.5 to 1.8)                | 3.1 (3.1 to 3.1)                  | 150.4 (126.6 to 178.7)    | 17.6 (13.4 to 22.3)        | 124.8 (101.3 to 152.1)        | 2.0 (1.0 to 3.6)                | 6.0 (6.0 to 6.0)                  |

| Country | Year | 2018 US Dollars per capita |                            |                               |                                 |                                   | 2018 PPP per capita    |                            |                               |                                 |                                   |
|---------|------|----------------------------|----------------------------|-------------------------------|---------------------------------|-----------------------------------|------------------------|----------------------------|-------------------------------|---------------------------------|-----------------------------------|
|         |      | Health spending            | Government health spending | Out-of-pocket health spending | Prepaid private health spending | Development assistance for health | Health spending        | Government health spending | Out-of-pocket health spending | Prepaid private health spending | Development assistance for health |
| Comoros | 2009 | 77.0 (65.4 to 91.0)        | 8.5 (6.4 to 10.8)          | 61.4 (49.8 to 75.6)           | 0.9 (0.5 to 1.7)                | 6.2 (6.2 to 6.2)                  | 150.9 (128.2 to 178.2) | 16.6 (12.6 to 21.1)        | 120.3 (97.5 to 148.0)         | 1.8 (0.9 to 3.4)                | 12.2 (12.2 to 12.2)               |
| Comoros | 2010 | 86.8 (74.9 to 100.6)       | 8.7 (6.6 to 11.0)          | 60.0 (48.3 to 74.2)           | 0.9 (0.4 to 1.6)                | 17.2 (17.2 to 17.2)               | 170.0 (146.8 to 197.2) | 17.0 (13.0 to 21.6)        | 117.6 (94.6 to 145.4)         | 1.7 (0.9 to 3.2)                | 33.7 (33.7 to 33.7)               |
| Comoros | 2011 | 81.9 (69.5 to 96.5)        | 10.0 (7.6 to 12.8)         | 60.6 (48.3 to 75.2)           | 1.0 (0.5 to 1.8)                | 10.4 (10.4 to 10.4)               | 160.5 (136.1 to 189.1) | 19.6 (15.0 to 25.0)        | 118.6 (94.6 to 147.3)         | 1.9 (0.9 to 3.5)                | 20.4 (20.4 to 20.4)               |
| Comoros | 2012 | 87.5 (75.0 to 102.3)       | 9.4 (7.1 to 12.1)          | 58.3 (45.9 to 72.8)           | 0.9 (0.4 to 1.7)                | 19.0 (19.0 to 19.0)               | 171.4 (147.0 to 200.3) | 18.3 (13.9 to 23.7)        | 114.2 (90.0 to 142.7)         | 1.7 (0.9 to 3.2)                | 37.2 (37.2 to 37.2)               |
| Comoros | 2013 | 84.4 (71.7 to 99.4)        | 9.4 (7.2 to 12.2)          | 57.6 (44.9 to 72.7)           | 0.9 (0.4 to 1.6)                | 16.5 (16.5 to 16.5)               | 165.3 (140.5 to 194.8) | 18.5 (14.1 to 24.0)        | 112.8 (88.0 to 142.4)         | 1.7 (0.8 to 3.1)                | 32.4 (32.4 to 32.4)               |
| Comoros | 2014 | 77.2 (64.4 to 92.4)        | 9.5 (7.2 to 12.4)          | 56.6 (43.9 to 72.1)           | 0.8 (0.4 to 1.5)                | 10.3 (10.3 to 10.3)               | 151.3 (126.2 to 181.1) | 18.6 (14.2 to 24.2)        | 110.9 (85.9 to 141.3)         | 1.6 (0.8 to 3.0)                | 20.1 (20.1 to 20.1)               |
| Comoros | 2015 | 72.5 (59.1 to 87.8)        | 9.8 (7.4 to 12.9)          | 55.7 (42.9 to 71.0)           | 0.8 (0.4 to 1.5)                | 6.1 (6.1 to 6.1)                  | 142.1 (115.7 to 172.0) | 19.3 (14.5 to 25.3)        | 109.2 (84.0 to 139.1)         | 1.6 (0.8 to 3.0)                | 12.0 (12.0 to 12.0)               |
| Comoros | 2016 | 80.3 (66.3 to 96.2)        | 10.2 (7.7 to 13.4)         | 55.1 (41.6 to 71.0)           | 0.8 (0.4 to 1.6)                | 14.1 (14.1 to 14.1)               | 157.3 (130.0 to 188.5) | 20.0 (15.0 to 26.2)        | 108.0 (81.6 to 139.2)         | 1.7 (0.8 to 3.1)                | 27.6 (27.6 to 27.6)               |
| Comoros | 2017 | 74.6 (60.7 to 91.0)        | 10.5 (7.9 to 13.8)         | 55.3 (41.7 to 71.0)           | 0.9 (0.4 to 1.6)                | 8.0 (8.0 to 8.0)                  | 146.3 (118.9 to 178.3) | 20.6 (15.5 to 27.0)        | 108.2 (81.6 to 139.2)         | 1.7 (0.8 to 3.1)                | 15.7 (15.7 to 15.7)               |
| Comoros | 2018 | 74.5 (60.3 to 90.5)        | 10.7 (8.0 to 14.0)         | 55.4 (41.9 to 71.4)           | 0.9 (0.4 to 1.6)                | 7.5 (7.5 to 7.5)                  | 145.9 (118.1 to 177.3) | 20.9 (15.8 to 27.4)        | 108.6 (82.0 to 139.8)         | 1.7 (0.8 to 3.2)                | 14.7 (14.7 to 14.8)               |
| Comoros | 2019 | 74.8 (60.8 to 91.1)        | 10.8 (8.1 to 14.2)         | 55.5 (41.8 to 71.4)           | 0.9 (0.4 to 1.6)                | 7.6 (7.1 to 8.0)                  | 146.6 (119.1 to 178.4) | 21.2 (15.9 to 27.8)        | 108.8 (81.9 to 140.0)         | 1.7 (0.8 to 3.2)                | 14.9 (13.8 to 15.7)               |
| Comoros | 2020 | 75.2 (60.9 to 91.1)        | 10.9 (8.2 to 14.4)         | 55.6 (41.8 to 71.5)           | 0.9 (0.4 to 1.7)                | 7.8 (7.1 to 8.4)                  | 147.4 (119.3 to 178.5) | 21.4 (16.1 to 28.1)        | 109.0 (82.0 to 140.1)         | 1.8 (0.8 to 3.2)                | 15.2 (13.9 to 16.5)               |
| Comoros | 2021 | 75.8 (62.0 to 92.2)        | 11.1 (8.4 to 14.6)         | 55.8 (41.9 to 71.8)           | 0.9 (0.4 to 1.7)                | 8.0 (7.2 to 8.8)                  | 148.4 (121.4 to 180.6) | 21.8 (16.4 to 28.5)        | 109.3 (82.0 to 140.6)         | 1.8 (0.8 to 3.3)                | 15.6 (14.0 to 17.3)               |
| Comoros | 2022 | 76.3 (62.2 to 92.8)        | 11.3 (8.5 to 14.8)         | 55.9 (42.0 to 71.9)           | 0.9 (0.4 to 1.7)                | 8.3 (7.3 to 9.3)                  | 149.6 (121.9 to 181.9) | 22.1 (16.6 to 29.0)        | 109.5 (82.2 to 140.8)         | 1.8 (0.8 to 3.3)                | 16.2 (14.3 to 18.2)               |
| Comoros | 2023 | 76.9 (63.2 to 93.3)        | 11.4 (8.5 to 15.0)         | 56.0 (42.1 to 72.0)           | 0.9 (0.4 to 1.7)                | 8.5 (7.4 to 9.7)                  | 150.7 (123.9 to 182.9) | 22.4 (16.7 to 29.4)        | 109.7 (82.4 to 141.0)         | 1.8 (0.8 to 3.4)                | 16.7 (14.5 to 19.0)               |
| Comoros | 2024 | 77.5 (63.2 to 93.9)        | 11.6 (8.6 to 15.2)         | 56.1 (42.2 to 72.2)           | 0.9 (0.4 to 1.7)                | 8.9 (7.6 to 10.2)                 | 151.8 (123.8 to 183.9) | 22.7 (16.9 to 29.8)        | 109.9 (82.6 to 141.5)         | 1.8 (0.9 to 3.4)                | 17.4 (14.9 to 20.0)               |
| Comoros | 2025 | 78.0 (63.5 to 94.7)        | 11.8 (8.8 to 15.5)         | 56.2 (42.2 to 72.5)           | 1.0 (0.4 to 1.8)                | 9.1 (7.8 to 10.7)                 | 152.9 (124.4 to 185.6) | 23.0 (17.2 to 30.4)        | 110.1 (82.7 to 142.0)         | 1.9 (0.9 to 3.4)                | 17.9 (15.2 to 20.9)               |
| Comoros | 2026 | 78.6 (64.4 to 95.4)        | 11.9 (9.0 to 15.8)         | 56.3 (42.3 to 72.5)           | 1.0 (0.4 to 1.8)                | 9.4 (7.9 to 11.0)                 | 154.1 (126.1 to 187.0) | 23.4 (17.6 to 30.9)        | 110.3 (82.9 to 142.0)         | 1.9 (0.9 to 3.5)                | 18.4 (15.4 to 21.6)               |
| Comoros | 2027 | 79.3 (65.0 to 96.0)        | 12.1 (9.1 to 16.0)         | 56.5 (42.5 to 73.0)           | 1.0 (0.5 to 1.8)                | 9.7 (8.0 to 11.6)                 | 155.3 (127.3 to 188.2) | 23.8 (17.8 to 31.4)        | 110.7 (83.2 to 143.0)         | 1.9 (0.9 to 3.5)                | 18.9 (15.7 to 22.7)               |
| Comoros | 2028 | 80.0 (65.1 to 97.0)        | 12.3 (9.2 to 16.3)         | 56.7 (42.6 to 73.3)           | 1.0 (0.5 to 1.8)                | 9.9 (8.3 to 12.1)                 | 156.7 (127.6 to 190.0) | 24.2 (18.1 to 32.0)        | 111.1 (83.5 to 143.6)         | 1.9 (0.9 to 3.6)                | 19.5 (16.2 to 23.8)               |
| Comoros | 2029 | 80.7 (66.0 to 97.9)        | 12.5 (9.4 to 16.6)         | 56.9 (42.5 to 73.9)           | 1.0 (0.5 to 1.9)                | 10.2 (8.3 to 12.6)                | 158.1 (129.3 to 191.8) | 24.6 (18.4 to 32.6)        | 111.5 (83.4 to 144.9)         | 2.0 (0.9 to 3.6)                | 20.1 (16.3 to 24.6)               |

| Country | Year | 2018 US Dollars per capita |                            |                               |                                 |                                   | 2018 PPP per capita    |                            |                               |                                 |                                   |
|---------|------|----------------------------|----------------------------|-------------------------------|---------------------------------|-----------------------------------|------------------------|----------------------------|-------------------------------|---------------------------------|-----------------------------------|
|         |      | Health spending            | Government health spending | Out-of-pocket health spending | Prepaid private health spending | Development assistance for health | Health spending        | Government health spending | Out-of-pocket health spending | Prepaid private health spending | Development assistance for health |
| Comoros | 2030 | 81.4 (66.6 to 98.8)        | 12.7 (9.5 to 16.9)         | 57.1 (42.7 to 74.2)           | 1.0 (0.5 to 1.9)                | 10.5 (8.5 to 13.0)                | 159.4 (130.4 to 193.6) | 25.0 (18.7 to 33.1)        | 111.9 (83.6 to 145.4)         | 2.0 (0.9 to 3.7)                | 20.6 (16.7 to 25.5)               |
| Comoros | 2031 | 82.1 (67.6 to 99.8)        | 13.0 (9.7 to 17.1)         | 57.3 (42.7 to 74.5)           | 1.0 (0.5 to 1.9)                | 10.8 (8.6 to 13.6)                | 160.9 (132.4 to 195.6) | 25.4 (19.0 to 33.6)        | 112.3 (83.7 to 146.1)         | 2.0 (0.9 to 3.7)                | 21.1 (16.9 to 26.6)               |
| Comoros | 2032 | 82.9 (67.4 to 100.8)       | 13.2 (9.9 to 17.5)         | 57.6 (42.9 to 75.0)           | 1.0 (0.5 to 1.9)                | 11.1 (8.7 to 14.2)                | 162.4 (132.0 to 197.5) | 25.8 (19.4 to 34.2)        | 112.8 (84.0 to 146.9)         | 2.1 (0.9 to 3.8)                | 21.7 (17.0 to 27.9)               |
| Comoros | 2033 | 83.7 (68.8 to 101.4)       | 13.4 (10.1 to 17.6)        | 57.8 (43.0 to 75.2)           | 1.1 (0.5 to 2.0)                | 11.4 (8.8 to 14.6)                | 163.9 (134.8 to 198.7) | 26.2 (19.7 to 34.6)        | 113.3 (84.3 to 147.4)         | 2.1 (1.0 to 3.8)                | 22.3 (17.2 to 28.5)               |
| Comoros | 2034 | 84.5 (68.2 to 102.6)       | 13.6 (10.2 to 18.0)        | 58.1 (43.2 to 75.9)           | 1.1 (0.5 to 2.0)                | 11.7 (8.9 to 15.4)                | 165.5 (133.7 to 201.0) | 26.7 (20.0 to 35.3)        | 113.8 (84.6 to 148.6)         | 2.1 (1.0 to 3.9)                | 22.9 (17.4 to 30.1)               |
| Comoros | 2035 | 85.3 (70.0 to 103.4)       | 13.8 (10.4 to 18.3)        | 58.3 (43.3 to 76.3)           | 1.1 (0.5 to 2.0)                | 12.0 (9.0 to 16.1)                | 167.1 (137.2 to 202.5) | 27.1 (20.4 to 35.9)        | 114.3 (84.9 to 149.6)         | 2.1 (1.0 to 3.9)                | 23.6 (17.7 to 31.5)               |
| Comoros | 2036 | 86.1 (70.1 to 104.2)       | 14.1 (10.6 to 18.6)        | 58.6 (43.5 to 76.8)           | 1.1 (0.5 to 2.0)                | 12.4 (9.3 to 17.1)                | 168.8 (137.4 to 204.2) | 27.6 (20.7 to 36.5)        | 114.8 (85.2 to 150.4)         | 2.2 (1.0 to 4.0)                | 24.2 (18.1 to 33.6)               |
| Comoros | 2037 | 87.0 (70.9 to 105.1)       | 14.3 (10.7 to 18.9)        | 58.8 (43.7 to 77.0)           | 1.1 (0.5 to 2.1)                | 12.7 (9.4 to 17.9)                | 170.4 (139.0 to 206.0) | 28.0 (21.0 to 37.0)        | 115.3 (85.5 to 150.9)         | 2.2 (1.0 to 4.1)                | 24.8 (18.4 to 35.0)               |
| Comoros | 2038 | 87.8 (71.4 to 107.0)       | 14.5 (10.9 to 19.2)        | 59.1 (43.8 to 77.5)           | 1.1 (0.5 to 2.1)                | 13.0 (9.5 to 18.5)                | 172.0 (139.8 to 209.6) | 28.5 (21.3 to 37.6)        | 115.7 (85.9 to 151.9)         | 2.2 (1.0 to 4.1)                | 25.6 (18.6 to 36.3)               |
| Comoros | 2039 | 88.6 (72.0 to 107.7)       | 14.8 (11.0 to 19.5)        | 59.3 (43.9 to 78.0)           | 1.2 (0.5 to 2.1)                | 13.4 (9.7 to 19.4)                | 173.6 (141.1 to 211.0) | 28.9 (21.6 to 38.3)        | 116.2 (86.0 to 152.8)         | 2.3 (1.0 to 4.2)                | 26.2 (19.0 to 38.0)               |
| Comoros | 2040 | 89.5 (73.0 to 108.5)       | 15.0 (11.2 to 19.9)        | 59.5 (43.9 to 78.4)           | 1.2 (0.5 to 2.2)                | 13.8 (10.0 to 19.9)               | 175.3 (143.0 to 212.6) | 29.4 (22.0 to 38.9)        | 116.6 (86.0 to 153.6)         | 2.3 (1.0 to 4.2)                | 27.0 (19.6 to 39.0)               |
| Comoros | 2041 | 90.4 (73.4 to 110.4)       | 15.3 (11.4 to 20.2)        | 59.8 (43.9 to 78.7)           | 1.2 (0.5 to 2.2)                | 14.2 (10.2 to 20.7)               | 177.1 (143.8 to 216.3) | 29.9 (22.3 to 39.6)        | 117.1 (86.1 to 154.1)         | 2.3 (1.1 to 4.3)                | 27.8 (19.9 to 40.6)               |
| Comoros | 2042 | 91.3 (74.0 to 110.6)       | 15.5 (11.6 to 20.6)        | 60.0 (44.0 to 79.0)           | 1.2 (0.5 to 2.2)                | 14.6 (10.2 to 21.6)               | 178.9 (144.9 to 216.7) | 30.4 (22.7 to 40.4)        | 117.5 (86.3 to 154.8)         | 2.4 (1.1 to 4.3)                | 28.7 (20.1 to 42.4)               |
| Comoros | 2043 | 92.3 (75.2 to 111.8)       | 15.8 (11.7 to 21.1)        | 60.2 (44.3 to 79.3)           | 1.2 (0.6 to 2.2)                | 15.1 (10.5 to 22.3)               | 180.7 (147.4 to 219.1) | 30.9 (23.0 to 41.2)        | 118.0 (86.8 to 155.4)         | 2.4 (1.1 to 4.4)                | 29.5 (20.6 to 43.7)               |
| Comoros | 2044 | 93.2 (75.1 to 112.7)       | 16.0 (11.9 to 21.4)        | 60.4 (44.4 to 79.6)           | 1.2 (0.6 to 2.3)                | 15.6 (10.7 to 23.7)               | 182.7 (147.1 to 220.7) | 31.4 (23.4 to 42.0)        | 118.4 (87.0 to 155.9)         | 2.4 (1.1 to 4.4)                | 30.5 (21.0 to 46.5)               |
| Comoros | 2045 | 94.3 (76.0 to 115.6)       | 16.3 (12.1 to 21.9)        | 60.6 (44.6 to 79.9)           | 1.3 (0.6 to 2.3)                | 16.1 (11.0 to 24.8)               | 184.7 (148.9 to 226.4) | 31.9 (23.7 to 42.9)        | 118.8 (87.3 to 156.6)         | 2.5 (1.1 to 4.5)                | 31.5 (21.5 to 48.7)               |
| Comoros | 2046 | 95.4 (76.9 to 116.3)       | 16.6 (12.3 to 22.3)        | 60.9 (44.8 to 80.3)           | 1.3 (0.6 to 2.3)                | 16.6 (11.2 to 26.0)               | 186.8 (150.6 to 227.8) | 32.5 (24.1 to 43.8)        | 119.3 (87.8 to 157.2)         | 2.5 (1.1 to 4.6)                | 32.5 (21.9 to 51.0)               |
| Comoros | 2047 | 96.5 (78.0 to 118.0)       | 16.9 (12.5 to 22.6)        | 61.1 (45.1 to 80.6)           | 1.3 (0.6 to 2.4)                | 17.2 (11.6 to 27.4)               | 189.0 (152.8 to 231.3) | 33.1 (24.6 to 44.3)        | 119.7 (88.3 to 157.9)         | 2.5 (1.1 to 4.6)                | 33.7 (22.7 to 53.6)               |
| Comoros | 2048 | 97.7 (78.4 to 118.9)       | 17.2 (12.7 to 23.0)        | 61.3 (45.2 to 81.0)           | 1.3 (0.6 to 2.4)                | 17.8 (11.8 to 28.5)               | 191.4 (153.5 to 232.9) | 33.7 (25.0 to 45.1)        | 120.2 (88.5 to 158.7)         | 2.6 (1.2 to 4.7)                | 34.9 (23.1 to 55.8)               |
| Comoros | 2049 | 98.9 (79.9 to 121.1)       | 17.5 (12.9 to 23.5)        | 61.6 (45.4 to 81.3)           | 1.3 (0.6 to 2.4)                | 18.4 (12.1 to 30.1)               | 193.7 (156.5 to 237.3) | 34.3 (25.3 to 46.1)        | 120.7 (88.9 to 159.3)         | 2.6 (1.2 to 4.8)                | 36.1 (23.8 to 58.9)               |
| Comoros | 2050 | 100.2 (80.0 to 123.9)      | 17.8 (13.1 to 24.0)        | 61.8 (45.6 to 81.6)           | 1.4 (0.6 to 2.5)                | 19.2 (12.4 to 31.6)               | 196.3 (156.7 to 242.8) | 34.9 (25.7 to 47.0)        | 121.2 (89.3 to 159.9)         | 2.7 (1.2 to 4.8)                | 37.5 (24.4 to 61.8)               |

| Country | Year | 2018 US Dollars per capita |                            |                               |                                 |                                   | 2018 PPP per capita    |                            |                               |                                 |                                   |
|---------|------|----------------------------|----------------------------|-------------------------------|---------------------------------|-----------------------------------|------------------------|----------------------------|-------------------------------|---------------------------------|-----------------------------------|
|         |      | Health spending            | Government health spending | Out-of-pocket health spending | Prepaid private health spending | Development assistance for health | Health spending        | Government health spending | Out-of-pocket health spending | Prepaid private health spending | Development assistance for health |
| Congo   | 1995 | 41.9 (34.7 to 50.9)        | 15.5 (11.8 to 20.1)        | 21.5 (15.7 to 29.3)           | 0.6 (0.3 to 1.2)                | 4.3 (4.3 to 4.3)                  | 124.7 (103.3 to 151.3) | 46.0 (35.1 to 59.6)        | 64.0 (46.6 to 87.0)           | 1.8 (0.9 to 3.4)                | 12.9 (12.9 to 12.9)               |
| Congo   | 1996 | 37.4 (30.3 to 46.4)        | 15.4 (11.7 to 19.8)        | 21.1 (15.4 to 28.7)           | 0.6 (0.3 to 1.1)                | 0.2 (0.2 to 0.2)                  | 111.1 (90.1 to 137.9)  | 45.8 (34.8 to 58.7)        | 62.8 (45.9 to 85.4)           | 1.8 (0.9 to 3.3)                | 0.6 (0.6 to 0.6)                  |
| Congo   | 1997 | 38.3 (31.5 to 47.2)        | 15.0 (11.4 to 19.2)        | 21.1 (15.5 to 28.4)           | 0.6 (0.3 to 1.1)                | 1.6 (1.6 to 1.6)                  | 113.8 (93.7 to 140.3)  | 44.6 (33.9 to 57.0)        | 62.7 (46.2 to 84.4)           | 1.8 (0.9 to 3.3)                | 4.8 (4.8 to 4.8)                  |
| Congo   | 1998 | 39.0 (32.2 to 47.4)        | 14.7 (11.2 to 18.7)        | 21.7 (16.0 to 29.3)           | 0.6 (0.3 to 1.1)                | 2.1 (2.1 to 2.1)                  | 116.0 (95.9 to 141.0)  | 43.6 (33.3 to 55.7)        | 64.4 (47.6 to 87.2)           | 1.8 (0.8 to 3.3)                | 6.2 (6.2 to 6.2)                  |
| Congo   | 1999 | 34.7 (28.6 to 42.7)        | 13.3 (10.2 to 17.0)        | 20.3 (14.9 to 27.1)           | 0.6 (0.3 to 1.1)                | 0.6 (0.6 to 0.6)                  | 103.3 (84.9 to 126.8)  | 39.6 (30.4 to 50.7)        | 60.2 (44.2 to 80.5)           | 1.7 (0.8 to 3.2)                | 1.7 (1.7 to 1.7)                  |
| Congo   | 2000 | 33.5 (27.6 to 41.1)        | 13.1 (10.1 to 16.7)        | 19.5 (14.5 to 26.1)           | 0.6 (0.3 to 1.1)                | 0.4 (0.4 to 0.4)                  | 99.7 (82.0 to 122.1)   | 38.9 (30.0 to 49.8)        | 58.1 (43.3 to 77.5)           | 1.7 (0.8 to 3.2)                | 1.1 (1.1 to 1.1)                  |
| Congo   | 2001 | 34.5 (28.1 to 42.6)        | 13.1 (10.1 to 16.8)        | 20.4 (15.2 to 27.4)           | 0.6 (0.3 to 1.1)                | 0.4 (0.4 to 0.4)                  | 102.5 (83.6 to 126.7)  | 39.0 (30.1 to 50.0)        | 60.6 (45.3 to 81.4)           | 1.8 (0.8 to 3.4)                | 1.2 (1.2 to 1.2)                  |
| Congo   | 2002 | 33.2 (26.9 to 40.7)        | 11.1 (8.6 to 14.2)         | 20.6 (15.1 to 27.5)           | 0.6 (0.3 to 1.1)                | 0.9 (0.9 to 0.9)                  | 98.6 (80.1 to 121.0)   | 33.0 (25.7 to 42.2)        | 61.2 (45.0 to 81.9)           | 1.7 (0.8 to 3.1)                | 2.8 (2.8 to 2.8)                  |
| Congo   | 2003 | 32.3 (26.0 to 40.0)        | 10.2 (7.9 to 13.0)         | 20.6 (15.2 to 27.2)           | 0.5 (0.3 to 1.0)                | 0.9 (0.9 to 0.9)                  | 95.9 (77.4 to 118.8)   | 30.2 (23.4 to 38.6)        | 61.3 (45.1 to 80.7)           | 1.6 (0.8 to 2.9)                | 2.8 (2.8 to 2.8)                  |
| Congo   | 2004 | 32.6 (26.5 to 40.0)        | 9.8 (7.6 to 12.4)          | 19.8 (14.5 to 26.5)           | 0.6 (0.3 to 1.0)                | 2.5 (2.5 to 2.5)                  | 97.0 (78.9 to 118.9)   | 29.1 (22.5 to 36.9)        | 58.8 (43.2 to 78.8)           | 1.6 (0.8 to 3.0)                | 7.5 (7.5 to 7.5)                  |
| Congo   | 2005 | 32.2 (26.1 to 39.2)        | 10.4 (7.9 to 13.3)         | 19.0 (13.8 to 25.1)           | 0.6 (0.3 to 1.1)                | 2.3 (2.3 to 2.3)                  | 95.8 (77.7 to 116.6)   | 31.0 (23.6 to 39.4)        | 56.4 (41.0 to 74.7)           | 1.7 (0.8 to 3.2)                | 6.7 (6.7 to 6.7)                  |
| Congo   | 2006 | 33.5 (27.3 to 40.7)        | 11.7 (8.9 to 14.9)         | 18.5 (13.4 to 24.7)           | 0.6 (0.3 to 1.1)                | 2.7 (2.7 to 2.7)                  | 99.8 (81.1 to 121.0)   | 34.8 (26.6 to 44.2)        | 55.1 (39.7 to 73.4)           | 1.8 (0.9 to 3.3)                | 8.0 (8.0 to 8.0)                  |
| Congo   | 2007 | 33.3 (27.2 to 40.2)        | 12.2 (9.3 to 15.7)         | 18.0 (12.8 to 23.9)           | 0.6 (0.3 to 1.1)                | 2.5 (2.5 to 2.5)                  | 99.0 (80.9 to 119.6)   | 36.4 (27.7 to 46.8)        | 53.4 (38.2 to 70.9)           | 1.8 (0.9 to 3.4)                | 7.4 (7.4 to 7.4)                  |
| Congo   | 2008 | 38.0 (31.6 to 45.4)        | 14.6 (11.2 to 18.8)        | 18.2 (13.1 to 24.3)           | 0.7 (0.3 to 1.3)                | 4.6 (4.6 to 4.6)                  | 113.0 (94.1 to 135.0)  | 43.4 (33.3 to 56.0)        | 54.1 (38.9 to 72.2)           | 2.0 (0.9 to 3.8)                | 13.6 (13.6 to 13.6)               |
| Congo   | 2009 | 36.7 (30.3 to 44.0)        | 14.6 (11.2 to 18.9)        | 18.5 (13.5 to 24.7)           | 0.6 (0.3 to 1.2)                | 3.0 (3.0 to 3.0)                  | 109.2 (90.0 to 130.9)  | 43.4 (33.5 to 56.1)        | 55.1 (40.1 to 73.3)           | 1.9 (0.9 to 3.5)                | 8.8 (8.8 to 8.8)                  |
| Congo   | 2010 | 44.7 (37.6 to 52.5)        | 17.7 (13.8 to 22.9)        | 18.7 (13.8 to 25.1)           | 0.6 (0.3 to 1.1)                | 7.6 (7.6 to 7.6)                  | 132.9 (111.8 to 156.2) | 52.7 (40.9 to 68.0)        | 55.6 (40.9 to 74.6)           | 1.9 (0.9 to 3.4)                | 22.7 (22.7 to 22.7)               |
| Congo   | 2011 | 44.3 (37.2 to 52.1)        | 18.9 (14.5 to 24.4)        | 17.9 (13.0 to 24.0)           | 0.6 (0.3 to 1.0)                | 7.0 (7.0 to 7.0)                  | 131.7 (110.6 to 154.8) | 56.2 (43.1 to 72.5)        | 53.1 (38.7 to 71.5)           | 1.7 (0.8 to 3.0)                | 20.7 (20.7 to 20.7)               |
| Congo   | 2012 | 48.7 (40.8 to 57.2)        | 22.3 (17.0 to 28.7)        | 18.1 (13.0 to 24.7)           | 0.7 (0.3 to 1.3)                | 7.6 (7.6 to 7.6)                  | 144.7 (121.4 to 170.2) | 66.2 (50.4 to 85.4)        | 53.7 (38.6 to 73.4)           | 2.1 (1.0 to 3.8)                | 22.6 (22.6 to 22.6)               |
| Congo   | 2013 | 52.2 (43.6 to 61.8)        | 25.8 (19.8 to 33.3)        | 19.2 (14.0 to 26.2)           | 1.0 (0.4 to 1.8)                | 6.2 (6.2 to 6.2)                  | 155.1 (129.8 to 183.9) | 76.8 (58.8 to 98.9)        | 57.1 (41.5 to 77.9)           | 2.8 (1.3 to 5.3)                | 18.3 (18.3 to 18.3)               |
| Congo   | 2014 | 54.8 (45.0 to 65.2)        | 29.3 (22.4 to 37.8)        | 21.6 (15.5 to 29.5)           | 1.5 (0.7 to 2.8)                | 2.5 (2.5 to 2.5)                  | 163.0 (134.0 to 193.9) | 87.0 (66.7 to 112.3)       | 64.3 (46.2 to 87.7)           | 4.3 (2.0 to 8.3)                | 7.5 (7.5 to 7.5)                  |
| Congo   | 2015 | 66.3 (54.4 to 79.7)        | 34.1 (25.9 to 44.1)        | 27.1 (19.7 to 36.4)           | 2.2 (1.1 to 4.3)                | 2.9 (2.9 to 2.9)                  | 197.2 (161.8 to 236.9) | 101.4 (76.9 to 131.1)      | 80.6 (58.5 to 108.4)          | 6.7 (3.2 to 12.7)               | 8.6 (8.6 to 8.6)                  |

| Country | Year | 2018 US Dollars per capita |                            |                               |                                 |                                   | 2018 PPP per capita    |                            |                               |                                 |                                   |
|---------|------|----------------------------|----------------------------|-------------------------------|---------------------------------|-----------------------------------|------------------------|----------------------------|-------------------------------|---------------------------------|-----------------------------------|
|         |      | Health spending            | Government health spending | Out-of-pocket health spending | Prepaid private health spending | Development assistance for health | Health spending        | Government health spending | Out-of-pocket health spending | Prepaid private health spending | Development assistance for health |
| Congo   | 2016 | 79.0 (65.4 to 94.4)        | 37.1 (28.4 to 48.2)        | 35.3 (25.1 to 47.5)           | 3.2 (1.6 to 6.0)                | 3.4 (3.4 to 3.4)                  | 235.0 (194.5 to 280.6) | 110.2 (84.5 to 143.2)      | 105.1 (74.6 to 141.3)         | 9.5 (4.6 to 17.8)               | 10.2 (10.2 to 10.2)               |
| Congo   | 2017 | 63.4 (52.1 to 77.0)        | 24.3 (18.6 to 31.6)        | 32.6 (22.7 to 44.3)           | 2.5 (1.2 to 4.6)                | 4.1 (4.1 to 4.1)                  | 188.7 (154.8 to 229.0) | 72.2 (55.4 to 93.9)        | 96.8 (67.5 to 131.9)          | 7.4 (3.6 to 13.8)               | 12.3 (12.3 to 12.3)               |
| Congo   | 2018 | 62.9 (51.6 to 76.0)        | 23.8 (18.2 to 31.0)        | 32.8 (23.0 to 45.0)           | 2.5 (1.2 to 4.8)                | 3.8 (3.8 to 3.8)                  | 187.1 (153.3 to 225.9) | 70.7 (54.2 to 92.0)        | 97.6 (68.3 to 133.7)          | 7.5 (3.6 to 14.1)               | 11.3 (11.3 to 11.4)               |
| Congo   | 2019 | 63.2 (51.7 to 77.0)        | 23.3 (17.8 to 30.3)        | 33.5 (23.6 to 45.7)           | 2.5 (1.2 to 4.8)                | 3.9 (3.6 to 4.1)                  | 188.0 (153.7 to 229.0) | 69.3 (53.1 to 90.2)        | 99.6 (70.1 to 136.0)          | 7.6 (3.6 to 14.2)               | 11.5 (10.8 to 12.2)               |
| Congo   | 2020 | 63.8 (52.2 to 77.3)        | 23.0 (17.6 to 29.9)        | 34.3 (24.3 to 46.4)           | 2.6 (1.2 to 4.8)                | 4.0 (3.6 to 4.3)                  | 189.7 (155.1 to 229.8) | 68.3 (52.3 to 88.9)        | 101.9 (72.2 to 138.0)         | 7.6 (3.7 to 14.3)               | 11.8 (10.8 to 12.8)               |
| Congo   | 2021 | 64.5 (52.6 to 78.0)        | 22.7 (17.4 to 29.6)        | 35.1 (24.8 to 47.8)           | 2.6 (1.3 to 4.8)                | 4.1 (3.7 to 4.5)                  | 191.8 (156.4 to 232.0) | 67.6 (51.7 to 88.0)        | 104.3 (73.7 to 142.2)         | 7.7 (3.7 to 14.4)               | 12.2 (11.0 to 13.5)               |
| Congo   | 2022 | 65.2 (53.3 to 79.3)        | 22.5 (17.2 to 29.3)        | 35.9 (25.3 to 48.8)           | 2.6 (1.3 to 4.9)                | 4.3 (3.8 to 4.8)                  | 194.0 (158.4 to 235.8) | 66.9 (51.2 to 87.2)        | 106.7 (75.3 to 145.2)         | 7.8 (3.8 to 14.4)               | 12.7 (11.3 to 14.3)               |
| Congo   | 2023 | 65.9 (53.7 to 80.2)        | 22.3 (17.1 to 29.1)        | 36.6 (25.9 to 50.0)           | 2.6 (1.3 to 4.9)                | 4.4 (3.8 to 5.1)                  | 196.1 (159.7 to 238.5) | 66.3 (50.8 to 86.5)        | 108.8 (77.0 to 148.6)         | 7.8 (3.8 to 14.5)               | 13.2 (11.4 to 15.0)               |
| Congo   | 2024 | 66.3 (53.8 to 80.3)        | 22.2 (17.0 to 29.0)        | 36.9 (26.0 to 50.4)           | 2.6 (1.3 to 4.9)                | 4.5 (3.9 to 5.2)                  | 197.1 (159.9 to 238.9) | 66.1 (50.6 to 86.3)        | 109.7 (77.4 to 150.0)         | 7.8 (3.8 to 14.6)               | 13.5 (11.6 to 15.6)               |
| Congo   | 2025 | 66.5 (54.3 to 81.0)        | 22.2 (17.0 to 29.1)        | 37.0 (26.2 to 50.7)           | 2.7 (1.3 to 5.0)                | 4.6 (3.9 to 5.4)                  | 197.7 (161.4 to 240.8) | 66.1 (50.4 to 86.5)        | 110.0 (77.8 to 150.7)         | 7.9 (3.8 to 14.8)               | 13.7 (11.7 to 16.1)               |
| Congo   | 2026 | 66.7 (54.2 to 81.1)        | 22.2 (17.0 to 29.1)        | 37.1 (26.2 to 51.0)           | 2.7 (1.3 to 5.0)                | 4.7 (3.9 to 5.5)                  | 198.4 (161.0 to 241.2) | 66.1 (50.5 to 86.6)        | 110.4 (77.8 to 151.5)         | 8.0 (3.9 to 14.9)               | 13.9 (11.7 to 16.4)               |
| Congo   | 2027 | 67.5 (54.8 to 82.1)        | 22.6 (17.2 to 29.5)        | 37.5 (26.4 to 51.3)           | 2.7 (1.3 to 5.1)                | 4.8 (4.0 to 5.7)                  | 200.7 (163.1 to 244.1) | 67.1 (51.1 to 87.7)        | 111.4 (78.4 to 152.6)         | 8.1 (3.9 to 15.2)               | 14.2 (11.8 to 17.0)               |
| Congo   | 2028 | 67.9 (54.9 to 82.5)        | 22.6 (17.2 to 29.6)        | 37.7 (26.5 to 51.5)           | 2.8 (1.3 to 5.2)                | 4.9 (4.1 to 5.9)                  | 201.9 (163.2 to 245.5) | 67.3 (51.3 to 88.0)        | 112.0 (78.8 to 153.2)         | 8.2 (4.0 to 15.4)               | 14.4 (12.1 to 17.5)               |
| Congo   | 2029 | 68.4 (55.9 to 83.2)        | 22.8 (17.4 to 29.7)        | 37.9 (26.6 to 51.9)           | 2.8 (1.3 to 5.3)                | 4.9 (4.1 to 6.0)                  | 203.4 (166.2 to 247.5) | 67.7 (51.6 to 88.3)        | 112.7 (79.1 to 154.5)         | 8.3 (4.0 to 15.6)               | 14.7 (12.1 to 17.9)               |
| Congo   | 2030 | 68.9 (55.7 to 84.1)        | 22.9 (17.4 to 29.8)        | 38.2 (26.8 to 52.7)           | 2.8 (1.4 to 5.3)                | 5.0 (4.1 to 6.2)                  | 204.8 (165.6 to 250.2) | 68.0 (51.8 to 88.7)        | 113.5 (79.6 to 156.8)         | 8.4 (4.1 to 15.9)               | 15.0 (12.2 to 18.4)               |
| Congo   | 2031 | 69.4 (56.5 to 84.8)        | 23.0 (17.5 to 30.1)        | 38.4 (27.0 to 53.1)           | 2.9 (1.4 to 5.4)                | 5.1 (4.1 to 6.4)                  | 206.5 (168.0 to 252.1) | 68.5 (52.0 to 89.6)        | 114.3 (80.2 to 157.9)         | 8.5 (4.1 to 16.1)               | 15.2 (12.3 to 19.0)               |
| Congo   | 2032 | 70.0 (56.6 to 85.9)        | 23.2 (17.6 to 30.5)        | 38.7 (27.1 to 53.6)           | 2.9 (1.4 to 5.5)                | 5.2 (4.2 to 6.6)                  | 208.2 (168.2 to 255.4) | 69.0 (52.3 to 90.7)        | 115.1 (80.6 to 159.3)         | 8.6 (4.1 to 16.3)               | 15.5 (12.4 to 19.5)               |
| Congo   | 2033 | 70.6 (56.8 to 86.7)        | 23.4 (17.7 to 30.8)        | 39.0 (27.2 to 54.0)           | 2.9 (1.4 to 5.5)                | 5.3 (4.2 to 6.8)                  | 209.9 (169.0 to 257.7) | 69.5 (52.7 to 91.6)        | 115.9 (80.8 to 160.5)         | 8.7 (4.2 to 16.5)               | 15.8 (12.5 to 20.3)               |
| Congo   | 2034 | 71.1 (57.5 to 87.1)        | 23.5 (17.8 to 31.1)        | 39.2 (27.2 to 54.4)           | 3.0 (1.4 to 5.6)                | 5.4 (4.3 to 7.0)                  | 211.5 (171.0 to 259.0) | 70.0 (53.0 to 92.6)        | 116.6 (81.0 to 161.6)         | 8.8 (4.3 to 16.6)               | 16.1 (12.7 to 20.7)               |
| Congo   | 2035 | 71.6 (57.5 to 88.8)        | 23.7 (17.9 to 31.4)        | 39.4 (27.3 to 54.7)           | 3.0 (1.4 to 5.7)                | 5.5 (4.3 to 7.2)                  | 213.0 (170.9 to 264.1) | 70.4 (53.3 to 93.4)        | 117.3 (81.3 to 162.6)         | 8.9 (4.3 to 16.8)               | 16.4 (12.8 to 21.4)               |
| Congo   | 2036 | 72.2 (58.2 to 89.3)        | 23.8 (18.0 to 31.6)        | 39.7 (27.5 to 55.0)           | 3.0 (1.5 to 5.7)                | 5.6 (4.3 to 7.5)                  | 214.6 (173.2 to 265.5) | 70.9 (53.7 to 93.9)        | 117.9 (81.6 to 163.5)         | 9.0 (4.4 to 17.0)               | 16.7 (12.9 to 22.4)               |

| Country    | Year | 2018 US Dollars per capita |                            |                               |                                 |                                   | 2018 PPP per capita    |                            |                               |                                 |                                   |
|------------|------|----------------------------|----------------------------|-------------------------------|---------------------------------|-----------------------------------|------------------------|----------------------------|-------------------------------|---------------------------------|-----------------------------------|
|            |      | Health spending            | Government health spending | Out-of-pocket health spending | Prepaid private health spending | Development assistance for health | Health spending        | Government health spending | Out-of-pocket health spending | Prepaid private health spending | Development assistance for health |
| Congo      | 2037 | 72.7 (58.5 to 89.4)        | 24.0 (18.2 to 31.8)        | 39.9 (27.5 to 55.6)           | 3.1 (1.5 to 5.8)                | 5.7 (4.4 to 7.7)                  | 216.1 (173.9 to 266.0) | 71.4 (54.0 to 94.6)        | 118.6 (81.9 to 165.3)         | 9.2 (4.4 to 17.2)               | 17.0 (13.1 to 22.8)               |
| Congo      | 2038 | 73.2 (59.1 to 90.2)        | 24.2 (18.3 to 32.0)        | 40.1 (27.6 to 55.9)           | 3.1 (1.5 to 5.8)                | 5.8 (4.4 to 8.0)                  | 217.7 (175.7 to 268.1) | 71.8 (54.4 to 95.3)        | 119.2 (82.2 to 166.3)         | 9.3 (4.5 to 17.4)               | 17.3 (13.2 to 23.7)               |
| Congo      | 2039 | 73.7 (59.2 to 90.6)        | 24.3 (18.3 to 32.3)        | 40.3 (27.7 to 56.3)           | 3.2 (1.5 to 5.9)                | 5.9 (4.5 to 8.1)                  | 219.1 (176.0 to 269.5) | 72.3 (54.5 to 96.1)        | 119.8 (82.4 to 167.5)         | 9.4 (4.5 to 17.5)               | 17.6 (13.4 to 24.2)               |
| Congo      | 2040 | 74.2 (59.9 to 91.4)        | 24.5 (18.5 to 32.6)        | 40.5 (27.9 to 56.8)           | 3.2 (1.6 to 5.9)                | 6.0 (4.6 to 8.3)                  | 220.6 (178.1 to 271.7) | 72.7 (54.9 to 97.1)        | 120.5 (82.9 to 168.9)         | 9.5 (4.6 to 17.7)               | 18.0 (13.7 to 24.7)               |
| Congo      | 2041 | 74.6 (59.8 to 91.9)        | 24.6 (18.6 to 32.9)        | 40.7 (27.9 to 57.0)           | 3.2 (1.6 to 6.0)                | 6.2 (4.6 to 8.6)                  | 222.0 (178.0 to 273.4) | 73.1 (55.2 to 97.9)        | 120.9 (83.0 to 169.6)         | 9.6 (4.7 to 17.8)               | 18.3 (13.8 to 25.5)               |
| Congo      | 2042 | 75.0 (60.1 to 92.7)        | 24.7 (18.6 to 33.2)        | 40.8 (28.0 to 57.5)           | 3.3 (1.6 to 6.0)                | 6.3 (4.7 to 9.1)                  | 223.2 (178.8 to 275.8) | 73.5 (55.3 to 98.7)        | 121.3 (83.2 to 171.1)         | 9.7 (4.7 to 18.0)               | 18.7 (14.0 to 26.9)               |
| Congo      | 2043 | 75.5 (60.4 to 93.3)        | 24.8 (18.7 to 33.5)        | 41.0 (28.1 to 57.9)           | 3.3 (1.6 to 6.1)                | 6.4 (4.8 to 9.4)                  | 224.5 (179.5 to 277.5) | 73.8 (55.5 to 99.6)        | 121.8 (83.5 to 172.2)         | 9.8 (4.8 to 18.1)               | 19.0 (14.1 to 27.8)               |
| Congo      | 2044 | 76.0 (60.9 to 94.9)        | 25.0 (18.7 to 33.8)        | 41.1 (28.2 to 58.3)           | 3.3 (1.6 to 6.1)                | 6.5 (4.8 to 9.5)                  | 225.9 (181.2 to 282.3) | 74.2 (55.8 to 100.5)       | 122.3 (83.9 to 173.2)         | 9.9 (4.8 to 18.3)               | 19.5 (14.3 to 28.3)               |
| Congo      | 2045 | 76.5 (60.9 to 94.5)        | 25.1 (18.8 to 34.1)        | 41.3 (28.3 to 58.6)           | 3.4 (1.6 to 6.2)                | 6.7 (4.8 to 10.0)                 | 227.4 (181.2 to 281.0) | 74.7 (55.9 to 101.4)       | 122.9 (84.2 to 174.3)         | 10.0 (4.9 to 18.5)              | 19.9 (14.3 to 29.8)               |
| Congo      | 2046 | 77.0 (61.8 to 95.4)        | 25.3 (18.9 to 34.4)        | 41.5 (28.5 to 59.0)           | 3.4 (1.7 to 6.3)                | 6.8 (4.9 to 10.4)                 | 229.1 (183.7 to 283.6) | 75.3 (56.1 to 102.2)       | 123.4 (84.6 to 175.4)         | 10.1 (4.9 to 18.7)              | 20.3 (14.7 to 30.8)               |
| Congo      | 2047 | 77.7 (62.3 to 96.5)        | 25.5 (18.9 to 34.6)        | 41.7 (28.6 to 59.3)           | 3.5 (1.7 to 6.3)                | 7.0 (5.0 to 10.9)                 | 231.0 (185.3 to 287.0) | 75.9 (56.3 to 103.0)       | 124.1 (85.1 to 176.2)         | 10.3 (5.0 to 18.9)              | 20.7 (14.9 to 32.3)               |
| Congo      | 2048 | 78.3 (62.6 to 97.2)        | 25.7 (19.0 to 35.1)        | 42.0 (28.8 to 59.5)           | 3.5 (1.7 to 6.5)                | 7.1 (5.1 to 11.2)                 | 233.0 (186.1 to 289.1) | 76.6 (56.6 to 104.4)       | 124.8 (85.7 to 177.0)         | 10.4 (5.1 to 19.2)              | 21.2 (15.2 to 33.4)               |
| Congo      | 2049 | 79.0 (63.5 to 98.2)        | 26.0 (19.2 to 35.5)        | 42.2 (29.0 to 60.1)           | 3.5 (1.7 to 6.6)                | 7.3 (5.2 to 11.7)                 | 235.1 (188.8 to 292.1) | 77.3 (57.0 to 105.5)       | 125.6 (86.2 to 178.7)         | 10.5 (5.1 to 19.6)              | 21.7 (15.5 to 34.9)               |
| Congo      | 2050 | 79.8 (63.8 to 98.9)        | 26.2 (19.3 to 35.9)        | 42.5 (29.2 to 60.5)           | 3.6 (1.7 to 6.7)                | 7.5 (5.3 to 12.2)                 | 237.3 (189.7 to 294.0) | 78.0 (57.5 to 106.8)       | 126.4 (86.8 to 180.0)         | 10.7 (5.2 to 19.9)              | 22.2 (15.8 to 36.4)               |
| Costa Rica | 1995 | 407.2 (371.6 to 445.6)     | 254.7 (228.4 to 281.0)     | 144.1 (121.9 to 169.5)        | 6.1 (2.9 to 11.3)               | 2.4 (2.4 to 2.4)                  | 608.5 (555.2 to 665.9) | 380.6 (341.2 to 419.9)     | 215.3 (182.2 to 253.2)        | 9.2 (4.3 to 17.0)               | 3.5 (3.5 to 3.5)                  |
| Costa Rica | 1996 | 406.3 (375.8 to 438.2)     | 254.6 (233.9 to 276.1)     | 142.9 (123.2 to 165.0)        | 6.1 (3.0 to 11.2)               | 2.6 (2.6 to 2.6)                  | 607.1 (561.6 to 654.7) | 380.5 (349.5 to 412.5)     | 213.6 (184.0 to 246.5)        | 9.2 (4.4 to 16.8)               | 3.8 (3.8 to 3.8)                  |
| Costa Rica | 1997 | 419.5 (392.1 to 448.6)     | 266.2 (247.6 to 286.2)     | 143.7 (126.0 to 164.4)        | 6.2 (3.0 to 11.3)               | 3.3 (3.3 to 3.3)                  | 626.8 (586.0 to 670.3) | 397.8 (370.1 to 427.6)     | 214.7 (188.2 to 245.7)        | 9.3 (4.5 to 16.9)               | 5.0 (5.0 to 5.0)                  |
| Costa Rica | 1998 | 452.7 (426.5 to 482.2)     | 294.3 (275.6 to 313.9)     | 147.7 (130.1 to 166.8)        | 6.4 (3.3 to 11.7)               | 4.3 (4.3 to 4.3)                  | 676.4 (637.4 to 720.6) | 439.8 (411.8 to 469.0)     | 220.7 (194.4 to 249.2)        | 9.5 (4.9 to 17.6)               | 6.4 (6.4 to 6.4)                  |
| Costa Rica | 1999 | 473.2 (444.8 to 503.9)     | 310.7 (291.3 to 331.4)     | 150.8 (132.9 to 169.9)        | 6.5 (3.3 to 11.5)               | 5.2 (5.2 to 5.2)                  | 707.1 (664.7 to 753.0) | 464.2 (435.2 to 495.2)     | 225.4 (198.5 to 253.9)        | 9.8 (5.0 to 17.2)               | 7.7 (7.7 to 7.7)                  |
| Costa Rica | 2000 | 493.8 (464.0 to 523.0)     | 324.7 (304.2 to 346.9)     | 155.2 (137.2 to 175.6)        | 6.8 (3.4 to 11.9)               | 7.1 (7.1 to 7.1)                  | 737.9 (693.4 to 781.6) | 485.2 (454.6 to 518.4)     | 231.9 (205.0 to 262.4)        | 10.2 (5.0 to 17.7)              | 10.6 (10.6 to 10.6)               |
| Costa Rica | 2001 | 502.0 (473.7 to 530.9)     | 335.3 (314.4 to 356.2)     | 157.8 (140.1 to 176.8)        | 6.2 (3.2 to 11.0)               | 2.7 (2.7 to 2.7)                  | 750.1 (707.8 to 793.4) | 501.0 (469.7 to 532.3)     | 235.7 (209.3 to 264.2)        | 9.3 (4.8 to 16.4)               | 4.1 (4.1 to 4.1)                  |

| Country    | Year | 2018 US Dollars per capita |                            |                               |                                 |                                   | 2018 PPP per capita       |                            |                               |                                 |                                   |
|------------|------|----------------------------|----------------------------|-------------------------------|---------------------------------|-----------------------------------|---------------------------|----------------------------|-------------------------------|---------------------------------|-----------------------------------|
|            |      | Health spending            | Government health spending | Out-of-pocket health spending | Prepaid private health spending | Development assistance for health | Health spending           | Government health spending | Out-of-pocket health spending | Prepaid private health spending | Development assistance for health |
| Costa Rica | 2002 | 526.6 (499.5 to 556.2)     | 351.6 (330.9 to 371.9)     | 164.6 (146.4 to 183.8)        | 7.2 (3.7 to 12.7)               | 3.2 (3.2 to 3.2)                  | 786.9 (746.4 to 831.2)    | 525.4 (494.4 to 555.7)     | 246.0 (218.7 to 274.6)        | 10.7 (5.5 to 19.0)              | 4.8 (4.8 to 4.8)                  |
| Costa Rica | 2003 | 549.0 (521.3 to 581.0)     | 365.5 (344.6 to 386.5)     | 172.1 (153.7 to 192.0)        | 8.2 (4.2 to 14.2)               | 3.3 (3.3 to 3.3)                  | 820.4 (779.0 to 868.1)    | 546.2 (514.9 to 577.5)     | 257.1 (229.7 to 286.9)        | 12.2 (6.3 to 21.2)              | 4.9 (4.9 to 4.9)                  |
| Costa Rica | 2004 | 558.9 (529.1 to 589.2)     | 371.7 (349.2 to 393.4)     | 177.0 (158.3 to 198.7)        | 8.2 (4.3 to 14.1)               | 2.0 (2.0 to 2.0)                  | 835.1 (790.7 to 880.5)    | 555.5 (521.8 to 587.8)     | 264.4 (236.5 to 297.0)        | 12.2 (6.4 to 21.1)              | 3.0 (3.0 to 3.0)                  |
| Costa Rica | 2005 | 578.3 (547.7 to 611.3)     | 382.5 (360.4 to 405.2)     | 184.5 (165.0 to 206.8)        | 10.3 (5.4 to 18.1)              | 1.0 (1.0 to 1.0)                  | 864.2 (818.5 to 913.4)    | 571.5 (538.6 to 605.5)     | 275.7 (246.5 to 309.0)        | 15.5 (8.1 to 27.0)              | 1.5 (1.5 to 1.5)                  |
| Costa Rica | 2006 | 625.4 (592.5 to 660.2)     | 417.2 (394.5 to 442.8)     | 194.7 (173.7 to 218.5)        | 11.8 (6.4 to 20.3)              | 1.7 (1.7 to 1.7)                  | 934.5 (885.3 to 986.5)    | 623.4 (589.5 to 661.7)     | 290.9 (259.5 to 326.6)        | 17.6 (9.5 to 30.4)              | 2.6 (2.6 to 2.6)                  |
| Costa Rica | 2007 | 683.6 (647.8 to 722.4)     | 462.9 (437.6 to 488.7)     | 206.1 (183.8 to 230.6)        | 12.9 (7.0 to 22.2)              | 1.7 (1.7 to 1.7)                  | 1021.5 (968.0 to 1079.4)  | 691.7 (653.9 to 730.2)     | 307.9 (274.6 to 344.6)        | 19.3 (10.5 to 33.2)             | 2.6 (2.6 to 2.6)                  |
| Costa Rica | 2008 | 737.8 (700.7 to 774.5)     | 509.2 (480.7 to 534.5)     | 212.7 (190.3 to 238.4)        | 13.3 (7.3 to 22.8)              | 2.5 (2.5 to 2.5)                  | 1102.5 (1047.1 to 1157.4) | 761.0 (718.3 to 798.7)     | 317.9 (284.3 to 356.2)        | 19.9 (10.9 to 34.0)             | 3.7 (3.7 to 3.7)                  |
| Costa Rica | 2009 | 767.7 (731.4 to 802.7)     | 542.8 (513.6 to 568.8)     | 210.1 (187.6 to 233.3)        | 12.9 (7.1 to 22.5)              | 1.8 (1.8 to 1.8)                  | 1147.2 (1093.0 to 1199.4) | 811.1 (767.5 to 849.9)     | 314.0 (280.3 to 348.6)        | 19.3 (10.6 to 33.6)             | 2.7 (2.7 to 2.7)                  |
| Costa Rica | 2010 | 813.8 (776.2 to 849.4)     | 587.0 (557.1 to 615.4)     | 212.9 (191.7 to 236.6)        | 12.8 (7.1 to 21.7)              | 1.0 (1.0 to 1.0)                  | 1216.0 (1159.8 to 1269.3) | 877.2 (832.4 to 919.5)     | 318.1 (286.4 to 353.6)        | 19.2 (10.6 to 32.4)             | 1.5 (1.5 to 1.5)                  |
| Costa Rica | 2011 | 839.2 (804.0 to 878.2)     | 610.7 (582.1 to 641.5)     | 214.9 (192.7 to 238.4)        | 13.2 (7.2 to 22.7)              | 0.4 (0.4 to 0.4)                  | 1254.0 (1201.4 to 1312.3) | 912.6 (869.9 to 958.5)     | 321.1 (288.0 to 356.3)        | 19.8 (10.8 to 33.9)             | 0.6 (0.6 to 0.6)                  |
| Costa Rica | 2012 | 855.4 (821.1 to 894.2)     | 627.5 (598.7 to 657.0)     | 212.8 (192.0 to 236.9)        | 14.9 (8.1 to 26.6)              | 0.3 (0.3 to 0.3)                  | 1278.3 (1227.0 to 1336.2) | 937.6 (894.7 to 981.8)     | 317.9 (286.9 to 354.1)        | 22.3 (12.1 to 39.7)             | 0.4 (0.4 to 0.4)                  |
| Costa Rica | 2013 | 861.9 (825.9 to 902.4)     | 634.2 (605.4 to 664.9)     | 209.6 (188.9 to 233.2)        | 17.8 (9.7 to 30.6)              | 0.4 (0.4 to 0.4)                  | 1287.9 (1234.2 to 1348.5) | 947.6 (904.7 to 993.6)     | 313.2 (282.2 to 348.5)        | 26.6 (14.5 to 45.7)             | 0.5 (0.5 to 0.5)                  |
| Costa Rica | 2014 | 880.2 (839.6 to 920.3)     | 646.9 (616.0 to 679.5)     | 211.4 (188.9 to 236.4)        | 21.4 (11.9 to 37.2)             | 0.4 (0.4 to 0.4)                  | 1315.2 (1254.7 to 1375.2) | 966.7 (920.4 to 1015.4)    | 315.9 (282.3 to 353.2)        | 32.0 (17.8 to 55.7)             | 0.6 (0.6 to 0.6)                  |
| Costa Rica | 2015 | 904.5 (859.9 to 951.6)     | 670.0 (634.3 to 707.1)     | 210.1 (184.6 to 239.2)        | 23.9 (13.1 to 41.0)             | 0.5 (0.5 to 0.5)                  | 1351.6 (1285.0 to 1421.9) | 1001.2 (947.8 to 1056.6)   | 313.9 (275.9 to 357.4)        | 35.7 (19.6 to 61.3)             | 0.8 (0.8 to 0.8)                  |
| Costa Rica | 2016 | 947.8 (890.5 to 1002.2)    | 689.4 (644.4 to 736.3)     | 209.4 (180.4 to 241.8)        | 25.7 (13.8 to 45.2)             | 23.3 (23.3 to 23.3)               | 1416.2 (1330.7 to 1497.6) | 1030.1 (962.9 to 1100.2)   | 312.9 (269.6 to 361.4)        | 38.4 (20.6 to 67.6)             | 34.8 (34.8 to 34.8)               |
| Costa Rica | 2017 | 968.6 (909.7 to 1030.9)    | 729.8 (681.6 to 779.2)     | 212.0 (181.8 to 244.7)        | 26.3 (14.3 to 46.5)             | 0.4 (0.4 to 0.4)                  | 1447.4 (1359.4 to 1540.5) | 1090.6 (1018.5 to 1164.4)  | 316.8 (271.7 to 365.7)        | 39.3 (21.3 to 69.5)             | 0.6 (0.6 to 0.6)                  |
| Costa Rica | 2018 | 989.1 (927.3 to 1049.2)    | 746.8 (696.8 to 798.1)     | 215.0 (184.7 to 248.4)        | 27.0 (14.6 to 47.5)             | 0.4 (0.4 to 0.4)                  | 1478.1 (1385.7 to 1567.8) | 1115.9 (1041.2 to 1192.6)  | 321.3 (275.9 to 371.2)        | 40.3 (21.8 to 71.0)             | 0.6 (0.6 to 0.6)                  |
| Costa Rica | 2019 | 1010.4 (950.2 to 1077.5)   | 764.5 (712.5 to 818.9)     | 217.9 (187.1 to 251.5)        | 27.6 (14.9 to 48.5)             | 0.4 (0.4 to 0.4)                  | 1509.8 (1419.8 to 1610.1) | 1142.4 (1064.7 to 1223.7)  | 325.6 (279.7 to 375.8)        | 41.2 (22.2 to 72.5)             | 0.6 (0.5 to 0.6)                  |
| Costa Rica | 2020 | 1032.0 (966.9 to 1098.2)   | 782.8 (730.4 to 839.2)     | 220.6 (189.4 to 254.4)        | 28.1 (15.1 to 49.6)             | 0.4 (0.4 to 0.4)                  | 1542.1 (1444.8 to 1641.1) | 1169.8 (1091.4 to 1253.9)  | 329.7 (283.0 to 380.2)        | 42.1 (22.6 to 74.1)             | 0.6 (0.5 to 0.6)                  |
| Costa Rica | 2021 | 1053.0 (988.6 to 1125.2)   | 800.7 (744.0 to 860.1)     | 223.2 (191.6 to 257.5)        | 28.7 (15.4 to 50.6)             | 0.4 (0.4 to 0.4)                  | 1573.5 (1477.3 to 1681.3) | 1196.4 (1111.8 to 1285.3)  | 333.5 (286.3 to 384.8)        | 42.9 (23.1 to 75.7)             | 0.6 (0.5 to 0.7)                  |
| Costa Rica | 2022 | 1075.5 (1004.9 to 1146.6)  | 820.0 (761.5 to 881.4)     | 225.8 (193.8 to 260.4)        | 29.3 (15.7 to 51.7)             | 0.4 (0.4 to 0.5)                  | 1607.0 (1501.7 to 1713.3) | 1225.3 (1137.9 to 1317.1)  | 337.4 (289.6 to 389.1)        | 43.8 (23.5 to 77.3)             | 0.6 (0.5 to 0.7)                  |



| Country    | Year | 2018 US Dollars per capita |                            |                               |                                 |                                   | 2018 PPP per capita       |                            |                               |                                 |                                   |
|------------|------|----------------------------|----------------------------|-------------------------------|---------------------------------|-----------------------------------|---------------------------|----------------------------|-------------------------------|---------------------------------|-----------------------------------|
|            |      | Health spending            | Government health spending | Out-of-pocket health spending | Prepaid private health spending | Development assistance for health | Health spending           | Government health spending | Out-of-pocket health spending | Prepaid private health spending | Development assistance for health |
| Costa Rica | 2023 | 1092.2 (1023.2 to 1168.3)  | 833.8 (775.5 to 897.1)     | 228.1 (195.7 to 263.1)        | 29.8 (16.0 to 52.7)             | 0.4 (0.4 to 0.5)                  | 1632.0 (1528.9 to 1745.8) | 1245.9 (1158.8 to 1340.6)  | 340.9 (292.5 to 393.2)        | 44.6 (24.0 to 78.8)             | 0.6 (0.5 to 0.7)                  |
| Costa Rica | 2024 | 1109.5 (1037.2 to 1182.4)  | 848.1 (788.8 to 913.0)     | 230.5 (198.1 to 265.9)        | 30.4 (16.3 to 53.6)             | 0.4 (0.4 to 0.5)                  | 1657.9 (1549.9 to 1766.9) | 1267.4 (1178.8 to 1364.3)  | 344.5 (296.0 to 397.4)        | 45.4 (24.4 to 80.1)             | 0.6 (0.6 to 0.7)                  |
| Costa Rica | 2025 | 1127.0 (1055.8 to 1204.7)  | 862.7 (802.6 to 928.4)     | 232.9 (199.9 to 269.0)        | 30.9 (16.6 to 54.5)             | 0.4 (0.4 to 0.5)                  | 1684.1 (1577.7 to 1800.2) | 1289.2 (1199.3 to 1387.4)  | 348.0 (298.8 to 401.9)        | 46.2 (24.9 to 81.4)             | 0.7 (0.6 to 0.8)                  |
| Costa Rica | 2026 | 1144.5 (1069.5 to 1221.0)  | 877.4 (816.4 to 943.5)     | 235.2 (201.7 to 271.3)        | 31.5 (16.9 to 55.4)             | 0.5 (0.4 to 0.5)                  | 1710.3 (1598.2 to 1824.5) | 1311.1 (1219.9 to 1409.9)  | 351.5 (301.4 to 405.4)        | 47.0 (25.3 to 82.7)             | 0.7 (0.6 to 0.8)                  |
| Costa Rica | 2027 | 1162.3 (1088.6 to 1244.1)  | 892.2 (829.9 to 959.7)     | 237.5 (203.6 to 274.2)        | 32.0 (17.2 to 56.3)             | 0.5 (0.4 to 0.6)                  | 1736.8 (1626.7 to 1859.0) | 1333.2 (1240.0 to 1434.1)  | 355.0 (304.2 to 409.7)        | 47.9 (25.7 to 84.2)             | 0.7 (0.6 to 0.8)                  |
| Costa Rica | 2028 | 1179.8 (1103.4 to 1259.7)  | 906.9 (843.2 to 975.8)     | 239.8 (205.2 to 276.6)        | 32.6 (17.4 to 57.2)             | 0.5 (0.4 to 0.6)                  | 1762.9 (1648.9 to 1882.4) | 1355.2 (1260.0 to 1458.2)  | 358.3 (306.7 to 413.4)        | 48.7 (26.1 to 85.5)             | 0.7 (0.6 to 0.9)                  |
| Costa Rica | 2029 | 1197.9 (1121.8 to 1282.5)  | 922.2 (856.9 to 995.0)     | 242.0 (207.2 to 279.0)        | 33.2 (17.8 to 58.2)             | 0.5 (0.4 to 0.6)                  | 1790.0 (1676.3 to 1916.4) | 1378.1 (1280.4 to 1486.9)  | 361.7 (309.7 to 417.0)        | 49.5 (26.5 to 87.0)             | 0.7 (0.6 to 0.9)                  |
| Costa Rica | 2030 | 1216.3 (1136.5 to 1299.1)  | 937.7 (871.1 to 1013.9)    | 244.3 (209.4 to 281.3)        | 33.7 (18.0 to 59.2)             | 0.5 (0.4 to 0.6)                  | 1817.5 (1698.3 to 1941.2) | 1401.3 (1301.7 to 1515.1)  | 365.1 (312.9 to 420.4)        | 50.4 (27.0 to 88.5)             | 0.7 (0.6 to 0.9)                  |
| Costa Rica | 2031 | 1235.1 (1155.1 to 1323.1)  | 953.7 (885.4 to 1031.8)    | 246.6 (211.3 to 283.9)        | 34.3 (18.3 to 60.2)             | 0.5 (0.4 to 0.6)                  | 1845.6 (1726.0 to 1977.2) | 1425.0 (1323.1 to 1541.8)  | 368.5 (315.8 to 424.3)        | 51.3 (27.4 to 89.9)             | 0.8 (0.6 to 1.0)                  |
| Costa Rica | 2032 | 1254.6 (1171.0 to 1339.7)  | 970.1 (899.2 to 1051.0)    | 249.0 (213.1 to 286.8)        | 34.9 (18.7 to 61.2)             | 0.5 (0.4 to 0.7)                  | 1874.7 (1749.9 to 2001.9) | 1449.6 (1343.7 to 1570.5)  | 372.1 (318.5 to 428.6)        | 52.2 (27.9 to 91.4)             | 0.8 (0.6 to 1.0)                  |
| Costa Rica | 2033 | 1274.0 (1190.1 to 1368.5)  | 986.5 (913.0 to 1071.7)    | 251.4 (215.4 to 290.0)        | 35.5 (19.0 to 62.1)             | 0.5 (0.4 to 0.7)                  | 1903.7 (1778.4 to 2044.9) | 1474.1 (1364.2 to 1601.5)  | 375.6 (321.8 to 433.3)        | 53.1 (28.5 to 92.8)             | 0.8 (0.6 to 1.0)                  |
| Costa Rica | 2034 | 1294.5 (1206.5 to 1386.1)  | 1003.8 (927.5 to 1093.2)   | 253.9 (217.7 to 293.2)        | 36.2 (19.4 to 63.2)             | 0.5 (0.4 to 0.7)                  | 1934.3 (1802.9 to 2071.2) | 1500.0 (1385.9 to 1633.6)  | 379.4 (325.2 to 438.1)        | 54.1 (29.0 to 94.4)             | 0.8 (0.6 to 1.1)                  |
| Costa Rica | 2035 | 1315.9 (1226.9 to 1416.0)  | 1021.9 (943.4 to 1113.2)   | 256.5 (220.0 to 296.4)        | 36.8 (19.8 to 64.3)             | 0.6 (0.0 to 0.7)                  | 1966.3 (1833.3 to 2115.9) | 1527.0 (1409.8 to 1663.4)  | 383.4 (328.7 to 443.0)        | 55.1 (29.6 to 96.0)             | 0.8 (0.0 to 1.1)                  |
| Costa Rica | 2036 | 1338.5 (1246.1 to 1435.2)  | 1041.0 (958.6 to 1134.2)   | 259.4 (222.1 to 300.0)        | 37.5 (20.2 to 65.4)             | 0.6 (0.0 to 0.8)                  | 2000.1 (1862.0 to 2144.6) | 1555.5 (1432.5 to 1694.8)  | 387.6 (331.8 to 448.2)        | 56.1 (30.2 to 97.7)             | 0.8 (0.0 to 1.2)                  |
| Costa Rica | 2037 | 1361.8 (1268.4 to 1469.0)  | 1060.6 (975.5 to 1157.2)   | 262.3 (224.3 to 303.6)        | 38.3 (20.6 to 66.6)             | 0.6 (0.0 to 0.8)                  | 2034.9 (1895.4 to 2195.1) | 1584.8 (1457.7 to 1729.2)  | 392.0 (335.2 to 453.7)        | 57.2 (30.8 to 99.5)             | 0.9 (0.0 to 1.2)                  |
| Costa Rica | 2038 | 1385.9 (1287.6 to 1489.7)  | 1081.0 (994.0 to 1181.6)   | 265.4 (227.0 to 307.5)        | 39.0 (21.0 to 67.9)             | 0.6 (0.0 to 0.9)                  | 2071.0 (1924.0 to 2226.1) | 1615.3 (1485.3 to 1765.6)  | 396.5 (339.2 to 459.5)        | 58.3 (31.4 to 101.5)            | 0.9 (0.0 to 1.3)                  |
| Costa Rica | 2039 | 1409.9 (1311.0 to 1524.3)  | 1101.2 (1009.4 to 1206.8)  | 268.3 (229.6 to 311.1)        | 39.8 (21.4 to 69.3)             | 0.6 (0.0 to 0.9)                  | 2106.8 (1959.0 to 2277.8) | 1645.5 (1508.4 to 1803.3)  | 401.0 (343.1 to 464.9)        | 59.4 (32.0 to 103.5)            | 0.9 (0.0 to 1.3)                  |
| Costa Rica | 2040 | 1433.6 (1328.8 to 1545.3)  | 1121.4 (1026.7 to 1230.1)  | 271.2 (232.1 to 314.5)        | 40.5 (21.8 to 70.5)             | 0.6 (0.0 to 0.9)                  | 2142.2 (1985.7 to 2309.1) | 1675.6 (1534.1 to 1838.2)  | 405.2 (346.9 to 469.9)        | 60.5 (32.6 to 105.4)            | 0.9 (0.0 to 1.4)                  |
| Costa Rica | 2041 | 1458.4 (1352.2 to 1579.7)  | 1142.5 (1044.1 to 1254.9)  | 274.1 (234.7 to 318.1)        | 41.3 (22.2 to 71.8)             | 0.6 (0.0 to 0.9)                  | 2179.3 (2020.5 to 2360.5) | 1707.2 (1560.2 to 1875.2)  | 409.6 (350.8 to 475.4)        | 61.7 (33.2 to 107.3)            | 0.8 (0.0 to 1.4)                  |
| Costa Rica | 2042 | 1482.4 (1370.5 to 1600.7)  | 1162.8 (1060.4 to 1277.0)  | 276.9 (237.0 to 321.7)        | 42.0 (22.6 to 73.1)             | 0.6 (0.0 to 1.0)                  | 2215.1 (2047.9 to 2391.9) | 1737.6 (1584.5 to 1908.2)  | 413.8 (354.1 to 480.6)        | 62.8 (33.8 to 109.2)            | 0.8 (0.0 to 1.5)                  |
| Costa Rica | 2043 | 1506.0 (1391.3 to 1637.7)  | 1183.1 (1076.7 to 1303.2)  | 279.6 (239.4 to 325.2)        | 42.8 (23.0 to 74.3)             | 0.6 (0.0 to 1.0)                  | 2250.5 (2079.0 to 2447.1) | 1767.8 (1608.9 to 1947.4)  | 417.9 (357.7 to 485.9)        | 63.9 (34.4 to 111.1)            | 0.8 (0.0 to 1.5)                  |

|               |      | 2018 US Dollars per capita |                            |                               |                                 |                                   | 2018 PPP per capita       |                            |                               |                                 |                                   |
|---------------|------|----------------------------|----------------------------|-------------------------------|---------------------------------|-----------------------------------|---------------------------|----------------------------|-------------------------------|---------------------------------|-----------------------------------|
| Country       | Year | Health spending            | Government health spending | Out-of-pocket health spending | Prepaid private health spending | Development assistance for health | Health spending           | Government health spending | Out-of-pocket health spending | Prepaid private health spending | Development assistance for health |
| Costa Rica    | 2044 | 1528.7 (1407.6 to 1657.2)  | 1202.5 (1092.2 to 1326.8)  | 282.1 (241.4 to 328.7)        | 43.5 (23.4 to 75.5)             | 0.6 (0.0 to 1.1)                  | 2284.3 (2103.4 to 2476.3) | 1796.9 (1632.0 to 1982.6)  | 421.6 (360.7 to 491.2)        | 65.0 (35.0 to 112.8)            | 0.8 (0.0 to 1.6)                  |
| Costa Rica    | 2045 | 1551.1 (1430.8 to 1692.3)  | 1221.9 (1107.4 to 1351.4)  | 284.5 (243.2 to 331.4)        | 44.2 (23.8 to 76.8)             | 0.6 (0.0 to 1.1)                  | 2317.9 (2138.0 to 2528.7) | 1825.8 (1654.8 to 2019.4)  | 425.1 (363.5 to 495.2)        | 66.1 (35.6 to 114.8)            | 0.8 (0.0 to 1.7)                  |
| Costa Rica    | 2046 | 1573.8 (1446.1 to 1712.7)  | 1241.3 (1122.7 to 1374.2)  | 287.0 (245.0 to 334.3)        | 45.0 (24.2 to 78.2)             | 0.6 (0.0 to 1.2)                  | 2351.7 (2160.9 to 2559.3) | 1854.9 (1677.7 to 2053.5)  | 428.8 (366.2 to 499.6)        | 67.2 (36.2 to 116.8)            | 0.8 (0.0 to 1.8)                  |
| Costa Rica    | 2047 | 1596.2 (1466.3 to 1747.5)  | 1260.6 (1136.5 to 1396.8)  | 289.4 (246.8 to 337.3)        | 45.7 (24.6 to 79.4)             | 0.6 (0.0 to 1.2)                  | 2385.2 (2191.0 to 2611.2) | 1883.7 (1698.2 to 2087.3)  | 432.4 (368.8 to 504.1)        | 68.3 (36.7 to 118.7)            | 0.8 (0.0 to 1.8)                  |
| Costa Rica    | 2048 | 1617.7 (1479.3 to 1768.0)  | 1279.2 (1150.5 to 1420.4)  | 291.6 (248.5 to 340.1)        | 46.4 (25.0 to 80.6)             | 0.6 (0.0 to 1.3)                  | 2417.3 (2210.4 to 2641.9) | 1911.5 (1719.1 to 2122.5)  | 435.7 (371.3 to 508.3)        | 69.3 (37.3 to 120.4)            | 0.8 (0.0 to 2.0)                  |
| Costa Rica    | 2049 | 1638.9 (1499.4 to 1797.9)  | 1297.5 (1165.4 to 1443.9)  | 293.7 (250.4 to 343.0)        | 47.1 (25.3 to 81.7)             | 0.6 (0.0 to 1.4)                  | 2448.9 (2240.6 to 2686.6) | 1938.8 (1741.4 to 2157.7)  | 438.9 (374.2 to 512.5)        | 70.4 (37.9 to 122.1)            | 0.9 (0.0 to 2.0)                  |
| Costa Rica    | 2050 | 1658.8 (1511.0 to 1817.9)  | 1314.8 (1179.0 to 1466.0)  | 295.6 (252.1 to 345.8)        | 47.8 (25.7 to 82.8)             | 0.6 (0.0 to 1.4)                  | 2478.7 (2257.9 to 2716.5) | 1964.7 (1761.7 to 2190.6)  | 441.7 (376.7 to 516.7)        | 71.4 (38.4 to 123.7)            | 0.9 (0.0 to 2.1)                  |
| Cote d'Ivoire | 1995 | 80.0 (65.4 to 96.9)        | 11.1 (8.3 to 14.5)         | 51.7 (39.1 to 66.8)           | 9.6 (4.9 to 17.4)               | 7.6 (7.6 to 7.6)                  | 185.1 (151.4 to 224.2)    | 25.6 (19.2 to 33.5)        | 119.6 (90.5 to 154.4)         | 22.2 (11.3 to 40.2)             | 17.6 (17.6 to 17.6)               |
| Cote d'Ivoire | 1996 | 82.0 (66.3 to 100.4)       | 12.6 (9.5 to 16.3)         | 54.6 (41.5 to 69.5)           | 10.3 (5.2 to 18.3)              | 4.5 (4.5 to 4.5)                  | 189.6 (153.4 to 232.2)    | 29.2 (21.9 to 37.7)        | 126.2 (96.0 to 160.8)         | 23.8 (12.1 to 42.3)             | 10.5 (10.5 to 10.5)               |
| Cote d'Ivoire | 1997 | 82.6 (66.6 to 100.9)       | 13.4 (10.1 to 17.6)        | 56.2 (42.8 to 72.3)           | 10.5 (5.4 to 18.6)              | 2.4 (2.4 to 2.4)                  | 191.1 (154.2 to 233.4)    | 31.0 (23.3 to 40.7)        | 130.0 (98.9 to 167.4)         | 24.4 (12.5 to 43.0)             | 5.7 (5.7 to 5.7)                  |
| Cote d'Ivoire | 1998 | 82.5 (67.1 to 100.2)       | 13.4 (10.1 to 17.5)        | 55.6 (42.6 to 71.4)           | 10.6 (5.5 to 19.3)              | 2.9 (2.9 to 2.9)                  | 190.9 (155.2 to 231.8)    | 30.9 (23.3 to 40.6)        | 128.7 (98.5 to 165.2)         | 24.6 (12.8 to 44.7)             | 6.7 (6.7 to 6.7)                  |
| Cote d'Ivoire | 1999 | 75.8 (61.6 to 93.9)        | 12.5 (9.5 to 16.5)         | 50.0 (38.1 to 64.0)           | 10.6 (5.5 to 19.5)              | 2.7 (2.7 to 2.7)                  | 175.2 (142.5 to 217.3)    | 28.9 (21.9 to 38.1)        | 115.6 (88.1 to 148.1)         | 24.6 (12.6 to 45.0)             | 6.2 (6.2 to 6.2)                  |
| Cote d'Ivoire | 2000 | 63.5 (51.1 to 78.6)        | 10.5 (8.1 to 13.9)         | 41.7 (31.7 to 53.6)           | 10.3 (5.3 to 18.7)              | 1.0 (1.0 to 1.0)                  | 147.0 (118.3 to 181.8)    | 24.4 (18.8 to 32.1)        | 96.6 (73.4 to 124.0)          | 23.8 (12.3 to 43.4)             | 2.3 (2.3 to 2.3)                  |
| Cote d'Ivoire | 2001 | 56.8 (46.1 to 69.9)        | 9.7 (7.4 to 12.8)          | 35.9 (27.5 to 45.4)           | 10.1 (5.2 to 18.4)              | 1.1 (1.1 to 1.1)                  | 131.5 (106.6 to 161.7)    | 22.4 (17.2 to 29.7)        | 83.1 (63.6 to 105.1)          | 23.5 (12.1 to 42.6)             | 2.6 (2.6 to 2.6)                  |
| Cote d'Ivoire | 2002 | 54.0 (44.5 to 65.9)        | 9.2 (7.0 to 11.9)          | 32.1 (24.6 to 40.9)           | 10.0 (5.1 to 18.4)              | 2.8 (2.8 to 2.8)                  | 125.0 (102.8 to 152.4)    | 21.2 (16.2 to 27.6)        | 74.4 (57.0 to 94.6)           | 23.1 (11.8 to 42.7)             | 6.4 (6.4 to 6.4)                  |
| Cote d'Ivoire | 2003 | 52.3 (42.9 to 64.0)        | 8.7 (6.6 to 11.4)          | 31.6 (24.1 to 39.7)           | 9.7 (5.0 to 17.9)               | 2.4 (2.4 to 2.4)                  | 120.9 (99.2 to 148.1)     | 20.0 (15.4 to 26.3)        | 73.0 (55.8 to 91.9)           | 22.3 (11.5 to 41.4)             | 5.5 (5.5 to 5.5)                  |
| Cote d'Ivoire | 2004 | 54.9 (45.2 to 66.8)        | 8.6 (6.6 to 11.3)          | 33.5 (25.8 to 42.5)           | 9.7 (5.0 to 18.3)               | 3.0 (3.0 to 3.0)                  | 127.0 (104.6 to 154.5)    | 20.0 (15.3 to 26.1)        | 77.5 (59.6 to 98.4)           | 22.5 (11.5 to 42.3)             | 7.0 (7.0 to 7.0)                  |
| Cote d'Ivoire | 2005 | 57.4 (46.7 to 70.2)        | 8.6 (6.6 to 11.2)          | 36.1 (27.6 to 46.2)           | 9.7 (4.9 to 17.8)               | 3.0 (3.0 to 3.0)                  | 132.8 (108.0 to 162.4)    | 20.0 (15.3 to 25.8)        | 83.5 (63.9 to 106.8)          | 22.5 (11.2 to 41.2)             | 6.9 (6.9 to 6.9)                  |
| Cote d'Ivoire | 2006 | 62.6 (51.2 to 76.6)        | 8.9 (6.8 to 11.5)          | 39.3 (29.9 to 50.8)           | 10.0 (4.9 to 18.1)              | 4.4 (4.4 to 4.4)                  | 144.7 (118.4 to 177.3)    | 20.6 (15.8 to 26.5)        | 90.8 (69.2 to 117.5)          | 23.2 (11.3 to 41.9)             | 10.1 (10.1 to 10.1)               |
| Cote d'Ivoire | 2007 | 64.9 (52.9 to 80.1)        | 9.2 (7.0 to 11.9)          | 41.4 (31.4 to 53.5)           | 10.2 (5.0 to 18.1)              | 4.1 (4.1 to 4.1)                  | 150.2 (122.4 to 185.2)    | 21.3 (16.3 to 27.5)        | 95.8 (72.6 to 123.7)          | 23.6 (11.6 to 42.0)             | 9.6 (9.6 to 9.6)                  |
| Cote d'Ivoire | 2008 | 70.1 (58.0 to 85.8)        | 9.7 (7.5 to 12.5)          | 42.2 (32.4 to 54.5)           | 10.4 (5.3 to 18.7)              | 7.8 (7.8 to 7.8)                  | 162.3 (134.3 to 198.6)    | 22.4 (17.2 to 29.0)        | 97.6 (74.9 to 126.0)          | 24.1 (12.2 to 43.3)             | 18.1 (18.1 to 18.1)               |

| Country       | Year | 2018 US Dollars per capita |                            |                               |                                 |                                   | 2018 PPP per capita    |                            |                               |                                 |                                   |
|---------------|------|----------------------------|----------------------------|-------------------------------|---------------------------------|-----------------------------------|------------------------|----------------------------|-------------------------------|---------------------------------|-----------------------------------|
|               |      | Health spending            | Government health spending | Out-of-pocket health spending | Prepaid private health spending | Development assistance for health | Health spending        | Government health spending | Out-of-pocket health spending | Prepaid private health spending | Development assistance for health |
| Cote d'Ivoire | 2009 | 69.2 (57.1 to 85.3)        | 10.2 (7.8 to 13.2)         | 42.5 (32.5 to 54.9)           | 10.6 (5.2 to 19.5)              | 5.9 (5.9 to 5.9)                  | 160.1 (132.0 to 197.4) | 23.7 (18.0 to 30.6)        | 98.3 (75.2 to 126.9)          | 24.5 (12.1 to 45.2)             | 13.6 (13.6 to 13.6)               |
| Cote d'Ivoire | 2010 | 72.3 (60.4 to 87.7)        | 10.5 (8.0 to 13.5)         | 41.8 (31.6 to 54.0)           | 10.4 (5.1 to 18.7)              | 9.6 (9.6 to 9.6)                  | 167.2 (139.7 to 203.0) | 24.2 (18.5 to 31.1)        | 96.7 (73.2 to 125.0)          | 24.1 (11.9 to 43.4)             | 22.3 (22.3 to 22.3)               |
| Cote d'Ivoire | 2011 | 64.2 (53.1 to 78.3)        | 10.3 (7.8 to 13.2)         | 38.9 (29.2 to 50.5)           | 9.4 (4.7 to 16.6)               | 5.6 (5.6 to 5.6)                  | 148.5 (122.8 to 181.1) | 23.7 (18.0 to 30.5)        | 90.1 (67.6 to 116.8)          | 21.8 (11.0 to 38.3)             | 12.9 (12.9 to 12.9)               |
| Cote d'Ivoire | 2012 | 67.6 (56.3 to 81.9)        | 12.1 (9.1 to 15.5)         | 39.0 (29.4 to 50.7)           | 10.0 (5.1 to 17.5)              | 6.5 (6.5 to 6.5)                  | 156.4 (130.2 to 189.4) | 28.0 (21.1 to 35.9)        | 90.3 (67.9 to 117.2)          | 23.1 (11.8 to 40.5)             | 15.0 (15.0 to 15.0)               |
| Cote d'Ivoire | 2013 | 69.4 (58.1 to 83.9)        | 13.5 (10.1 to 17.3)        | 38.0 (28.8 to 49.9)           | 10.1 (5.2 to 17.5)              | 7.8 (7.8 to 7.8)                  | 160.5 (134.4 to 194.1) | 31.2 (23.4 to 39.9)        | 88.0 (66.6 to 115.5)          | 23.4 (12.1 to 40.6)             | 18.0 (18.0 to 18.0)               |
| Cote d'Ivoire | 2014 | 71.7 (60.5 to 86.0)        | 14.4 (11.0 to 18.5)        | 36.5 (27.1 to 47.6)           | 10.6 (5.4 to 17.9)              | 10.2 (10.2 to 10.2)               | 165.9 (140.0 to 198.9) | 33.3 (25.4 to 42.7)        | 84.3 (62.7 to 110.2)          | 24.6 (12.5 to 41.5)             | 23.7 (23.7 to 23.7)               |
| Cote d'Ivoire | 2015 | 70.4 (58.3 to 85.2)        | 16.5 (12.6 to 21.5)        | 34.2 (25.7 to 44.4)           | 12.9 (6.5 to 22.0)              | 6.8 (6.8 to 6.8)                  | 162.9 (134.8 to 197.2) | 38.3 (29.1 to 49.7)        | 79.2 (59.4 to 102.8)          | 29.8 (15.0 to 51.0)             | 15.7 (15.7 to 15.7)               |
| Cote d'Ivoire | 2016 | 76.7 (63.4 to 92.4)        | 18.1 (13.8 to 23.4)        | 33.3 (24.9 to 43.6)           | 14.4 (7.2 to 25.2)              | 11.0 (11.0 to 11.0)               | 177.5 (146.6 to 213.9) | 41.8 (31.8 to 54.1)        | 77.0 (57.5 to 100.9)          | 33.3 (16.7 to 58.4)             | 25.5 (25.5 to 25.5)               |
| Cote d'Ivoire | 2017 | 79.5 (66.8 to 95.5)        | 19.2 (14.6 to 24.8)        | 33.9 (25.3 to 44.7)           | 15.1 (7.6 to 26.6)              | 11.3 (11.3 to 11.3)               | 183.9 (154.5 to 220.9) | 44.4 (33.9 to 57.4)        | 78.4 (58.5 to 103.4)          | 35.0 (17.5 to 61.5)             | 26.1 (26.1 to 26.1)               |
| Cote d'Ivoire | 2018 | 79.5 (65.7 to 95.3)        | 19.8 (15.1 to 25.5)        | 34.1 (25.4 to 44.8)           | 15.6 (7.9 to 27.4)              | 10.0 (9.9 to 10.0)                | 183.8 (152.1 to 220.6) | 45.8 (34.9 to 59.1)        | 78.8 (58.8 to 103.7)          | 36.1 (18.2 to 63.3)             | 23.1 (23.0 to 23.3)               |
| Cote d'Ivoire | 2019 | 80.5 (66.8 to 97.6)        | 20.3 (15.5 to 26.3)        | 34.2 (25.5 to 45.5)           | 16.0 (8.1 to 28.1)              | 9.9 (9.2 to 10.4)                 | 186.2 (154.6 to 225.7) | 47.0 (35.9 to 60.9)        | 79.2 (58.9 to 105.3)          | 37.1 (18.6 to 64.9)             | 22.8 (21.3 to 24.1)               |
| Cote d'Ivoire | 2020 | 81.6 (67.5 to 99.5)        | 20.9 (15.9 to 27.1)        | 34.4 (25.5 to 45.4)           | 16.5 (8.3 to 28.9)              | 9.8 (9.0 to 10.6)                 | 188.8 (156.1 to 230.3) | 48.3 (36.9 to 62.7)        | 79.6 (59.0 to 105.1)          | 38.1 (19.1 to 66.9)             | 22.7 (20.7 to 24.5)               |
| Cote d'Ivoire | 2021 | 82.7 (68.8 to 100.6)       | 21.4 (16.4 to 27.8)        | 34.6 (25.6 to 45.5)           | 16.9 (8.5 to 29.7)              | 9.8 (8.8 to 10.8)                 | 191.4 (159.1 to 232.8) | 49.6 (37.9 to 64.4)        | 80.0 (59.3 to 105.3)          | 39.2 (19.6 to 68.8)             | 22.6 (20.3 to 25.0)               |
| Cote d'Ivoire | 2022 | 83.9 (68.7 to 101.1)       | 22.0 (16.8 to 28.6)        | 34.7 (25.6 to 45.6)           | 17.4 (8.7 to 30.5)              | 9.8 (8.7 to 10.9)                 | 194.0 (158.9 to 233.9) | 50.9 (38.9 to 66.1)        | 80.2 (59.3 to 105.4)          | 40.3 (20.2 to 70.6)             | 22.7 (20.1 to 25.3)               |
| Cote d'Ivoire | 2023 | 85.1 (69.9 to 104.7)       | 22.6 (17.3 to 29.3)        | 34.7 (25.7 to 46.0)           | 17.9 (9.0 to 31.3)              | 9.8 (8.5 to 11.2)                 | 196.8 (161.6 to 242.2) | 52.3 (39.9 to 67.8)        | 80.4 (59.5 to 106.4)          | 41.4 (20.8 to 72.5)             | 22.8 (19.8 to 25.9)               |
| Cote d'Ivoire | 2024 | 86.3 (71.2 to 104.3)       | 23.2 (17.7 to 30.1)        | 34.8 (25.8 to 46.2)           | 18.4 (9.2 to 32.1)              | 9.9 (8.6 to 11.4)                 | 199.6 (164.7 to 241.4) | 53.6 (41.0 to 69.5)        | 80.6 (59.6 to 106.9)          | 42.5 (21.3 to 74.3)             | 23.0 (19.8 to 26.4)               |
| Cote d'Ivoire | 2025 | 87.6 (72.4 to 107.1)       | 23.8 (18.2 to 30.9)        | 34.9 (25.8 to 46.5)           | 18.9 (9.5 to 33.0)              | 10.0 (8.5 to 11.7)                | 202.6 (167.4 to 247.9) | 55.0 (42.0 to 71.4)        | 80.7 (59.7 to 107.5)          | 43.6 (22.0 to 76.4)             | 23.2 (19.8 to 27.1)               |
| Cote d'Ivoire | 2026 | 88.9 (73.0 to 108.1)       | 24.4 (18.7 to 31.7)        | 35.0 (26.0 to 47.1)           | 19.4 (9.8 to 33.7)              | 10.1 (8.6 to 11.9)                | 205.7 (169.0 to 250.1) | 56.5 (43.2 to 73.3)        | 81.0 (60.1 to 109.0)          | 44.8 (22.6 to 78.1)             | 23.5 (19.8 to 27.6)               |
| Cote d'Ivoire | 2027 | 90.1 (74.5 to 111.8)       | 25.0 (19.1 to 32.5)        | 35.1 (25.8 to 47.1)           | 19.8 (10.0 to 34.4)             | 10.3 (8.6 to 12.3)                | 208.5 (172.4 to 258.6) | 57.8 (44.1 to 75.1)        | 81.1 (59.7 to 109.0)          | 45.9 (23.2 to 79.5)             | 23.8 (19.9 to 28.5)               |
| Cote d'Ivoire | 2028 | 91.1 (74.3 to 111.9)       | 25.4 (19.3 to 33.0)        | 35.0 (25.8 to 47.4)           | 20.2 (10.2 to 34.8)             | 10.5 (8.8 to 12.8)                | 210.8 (171.9 to 259.0) | 58.7 (44.7 to 76.4)        | 81.0 (59.7 to 109.6)          | 46.7 (23.6 to 80.6)             | 24.4 (20.3 to 29.5)               |
| Cote d'Ivoire | 2029 | 92.1 (75.5 to 113.6)       | 25.8 (19.6 to 33.6)        | 35.0 (25.5 to 47.5)           | 20.5 (10.4 to 35.3)             | 10.8 (8.9 to 13.3)                | 213.1 (174.7 to 262.7) | 59.7 (45.3 to 77.6)        | 81.0 (59.1 to 109.8)          | 47.4 (24.0 to 81.7)             | 24.9 (20.5 to 30.9)               |

| Country       | Year | 2018 US Dollars per capita |                            |                               |                                 |                                   | 2018 PPP per capita    |                            |                               |                                 |                                   |
|---------------|------|----------------------------|----------------------------|-------------------------------|---------------------------------|-----------------------------------|------------------------|----------------------------|-------------------------------|---------------------------------|-----------------------------------|
|               |      | Health spending            | Government health spending | Out-of-pocket health spending | Prepaid private health spending | Development assistance for health | Health spending        | Government health spending | Out-of-pocket health spending | Prepaid private health spending | Development assistance for health |
| Cote d'Ivoire | 2030 | 93.2 (76.4 to 112.6)       | 26.2 (19.9 to 34.2)        | 35.1 (25.5 to 47.5)           | 20.9 (10.6 to 35.9)             | 11.0 (9.0 to 13.5)                | 215.5 (176.7 to 260.4) | 60.7 (46.0 to 79.0)        | 81.1 (59.0 to 110.0)          | 48.3 (24.4 to 83.1)             | 25.4 (20.8 to 31.3)               |
| Cote d'Ivoire | 2031 | 94.2 (77.0 to 114.5)       | 26.6 (20.2 to 34.8)        | 35.1 (25.3 to 47.6)           | 21.2 (10.7 to 36.6)             | 11.2 (9.1 to 14.1)                | 218.0 (178.2 to 265.0) | 61.6 (46.7 to 80.5)        | 81.3 (58.6 to 110.2)          | 49.1 (24.8 to 84.7)             | 26.0 (21.1 to 32.7)               |
| Cote d'Ivoire | 2032 | 95.4 (78.3 to 118.3)       | 27.1 (20.5 to 35.4)        | 35.2 (25.3 to 47.9)           | 21.6 (10.9 to 37.3)             | 11.5 (9.3 to 14.5)                | 220.7 (181.1 to 273.8) | 62.6 (47.5 to 82.0)        | 81.5 (58.5 to 110.8)          | 49.9 (25.3 to 86.3)             | 26.6 (21.5 to 33.5)               |
| Cote d'Ivoire | 2033 | 96.6 (78.5 to 118.2)       | 27.5 (20.9 to 36.0)        | 35.4 (25.1 to 48.4)           | 22.0 (11.1 to 38.1)             | 11.8 (9.3 to 15.1)                | 223.5 (181.6 to 273.4) | 63.7 (48.3 to 83.3)        | 81.8 (58.2 to 111.9)          | 50.8 (25.7 to 88.1)             | 27.2 (21.5 to 35.0)               |
| Cote d'Ivoire | 2034 | 97.9 (79.6 to 120.9)       | 28.0 (21.2 to 36.7)        | 35.5 (25.1 to 48.5)           | 22.4 (11.3 to 38.7)             | 12.1 (9.5 to 15.5)                | 226.5 (184.2 to 279.6) | 64.7 (49.1 to 84.9)        | 82.2 (58.1 to 112.3)          | 51.7 (26.1 to 89.6)             | 27.9 (22.0 to 36.0)               |
| Cote d'Ivoire | 2035 | 99.3 (80.3 to 122.7)       | 28.5 (21.6 to 37.3)        | 35.7 (25.1 to 48.9)           | 22.8 (11.5 to 39.4)             | 12.4 (9.5 to 16.3)                | 229.8 (185.7 to 283.9) | 65.9 (50.0 to 86.4)        | 82.6 (58.2 to 113.2)          | 52.7 (26.5 to 91.2)             | 28.6 (22.1 to 37.7)               |
| Cote d'Ivoire | 2036 | 100.8 (82.3 to 125.6)      | 29.0 (22.0 to 38.0)        | 36.0 (25.2 to 49.4)           | 23.2 (11.7 to 40.3)             | 12.7 (9.7 to 17.0)                | 233.1 (190.3 to 290.5) | 67.0 (50.9 to 88.0)        | 83.2 (58.3 to 114.3)          | 53.6 (27.0 to 93.2)             | 29.3 (22.5 to 39.3)               |
| Cote d'Ivoire | 2037 | 102.2 (81.7 to 126.6)      | 29.5 (22.4 to 38.7)        | 36.2 (25.4 to 49.9)           | 23.6 (11.9 to 41.0)             | 12.9 (9.9 to 17.3)                | 236.5 (189.1 to 292.9) | 68.1 (51.8 to 89.5)        | 83.8 (58.7 to 115.5)          | 54.6 (27.5 to 94.9)             | 29.9 (22.8 to 40.1)               |
| Cote d'Ivoire | 2038 | 103.8 (84.4 to 129.9)      | 30.0 (22.8 to 39.4)        | 36.5 (25.5 to 50.6)           | 24.0 (12.1 to 41.8)             | 13.3 (10.1 to 18.4)               | 240.1 (195.3 to 300.6) | 69.3 (52.6 to 91.2)        | 84.5 (58.9 to 117.0)          | 55.6 (27.9 to 96.6)             | 30.7 (23.3 to 42.5)               |
| Cote d'Ivoire | 2039 | 105.4 (86.4 to 131.2)      | 30.5 (23.1 to 40.1)        | 36.9 (25.4 to 51.2)           | 24.5 (12.3 to 42.4)             | 13.5 (10.1 to 18.6)               | 243.8 (199.9 to 303.4) | 70.5 (53.5 to 92.9)        | 85.3 (58.8 to 118.5)          | 56.7 (28.4 to 98.2)             | 31.3 (23.4 to 43.1)               |
| Cote d'Ivoire | 2040 | 107.1 (86.3 to 132.7)      | 31.0 (23.5 to 40.9)        | 37.2 (25.5 to 51.9)           | 24.9 (12.5 to 43.2)             | 13.9 (10.5 to 19.3)               | 247.7 (199.6 to 307.1) | 71.8 (54.3 to 94.5)        | 86.1 (59.1 to 120.1)          | 57.7 (28.8 to 99.9)             | 32.1 (24.4 to 44.7)               |
| Cote d'Ivoire | 2041 | 108.7 (88.0 to 135.7)      | 31.5 (23.8 to 41.5)        | 37.6 (25.7 to 52.6)           | 25.3 (12.7 to 44.0)             | 14.3 (10.7 to 20.3)               | 251.6 (203.7 to 314.0) | 72.9 (55.1 to 96.1)        | 87.0 (59.6 to 121.6)          | 58.6 (29.3 to 101.7)            | 33.0 (24.7 to 47.1)               |
| Cote d'Ivoire | 2042 | 110.6 (89.2 to 136.0)      | 32.0 (24.2 to 42.3)        | 38.0 (26.0 to 53.2)           | 25.8 (12.9 to 44.8)             | 14.7 (10.9 to 21.2)               | 255.8 (206.3 to 314.6) | 74.1 (55.9 to 97.9)        | 88.0 (60.2 to 123.2)          | 59.7 (29.8 to 103.6)            | 34.0 (25.2 to 49.0)               |
| Cote d'Ivoire | 2043 | 112.4 (89.3 to 140.9)      | 32.6 (24.6 to 43.1)        | 38.5 (26.3 to 54.0)           | 26.3 (13.1 to 45.7)             | 15.1 (11.1 to 21.9)               | 260.1 (206.5 to 326.0) | 75.4 (56.8 to 99.7)        | 89.1 (60.9 to 124.8)          | 60.8 (30.3 to 105.7)            | 34.9 (25.6 to 50.7)               |
| Cote d'Ivoire | 2044 | 114.5 (92.4 to 140.7)      | 33.1 (25.0 to 43.9)        | 39.0 (26.6 to 54.7)           | 26.8 (13.4 to 46.6)             | 15.5 (11.4 to 22.7)               | 264.8 (213.9 to 325.5) | 76.7 (57.7 to 101.5)       | 90.3 (61.6 to 126.5)          | 61.9 (30.9 to 107.8)            | 35.9 (26.3 to 52.6)               |
| Cote d'Ivoire | 2045 | 116.5 (93.3 to 145.4)      | 33.7 (25.4 to 44.7)        | 39.6 (27.0 to 55.4)           | 27.2 (13.6 to 47.4)             | 16.0 (11.5 to 23.8)               | 269.5 (215.9 to 336.4) | 78.0 (58.7 to 103.4)       | 91.6 (62.4 to 128.2)          | 63.0 (31.5 to 109.6)            | 37.0 (26.7 to 55.0)               |
| Cote d'Ivoire | 2046 | 118.6 (96.3 to 147.1)      | 34.2 (25.8 to 45.5)        | 40.1 (27.3 to 56.1)           | 27.7 (13.9 to 48.1)             | 16.5 (11.7 to 25.2)               | 274.3 (222.7 to 340.2) | 79.2 (59.6 to 105.2)       | 92.9 (63.2 to 129.9)          | 64.1 (32.1 to 111.4)            | 38.1 (27.2 to 58.4)               |
| Cote d'Ivoire | 2047 | 120.8 (96.5 to 151.7)      | 34.8 (26.1 to 46.3)        | 40.8 (27.7 to 56.9)           | 28.2 (14.1 to 48.9)             | 17.0 (12.1 to 27.0)               | 279.5 (223.3 to 350.9) | 80.6 (60.5 to 107.1)       | 94.3 (64.2 to 131.7)          | 65.3 (32.7 to 113.2)            | 39.4 (28.1 to 62.5)               |
| Cote d'Ivoire | 2048 | 123.2 (99.4 to 153.2)      | 35.4 (26.6 to 47.2)        | 41.4 (28.2 to 57.7)           | 28.7 (14.4 to 49.8)             | 17.6 (12.4 to 28.5)               | 285.0 (229.9 to 354.4) | 82.0 (61.4 to 109.1)       | 95.8 (65.2 to 133.5)          | 66.5 (33.3 to 115.2)            | 40.7 (28.7 to 65.9)               |
| Cote d'Ivoire | 2049 | 125.5 (99.8 to 157.3)      | 36.0 (27.0 to 48.0)        | 42.1 (28.6 to 58.6)           | 29.3 (14.7 to 50.6)             | 18.2 (12.8 to 29.6)               | 290.4 (230.9 to 363.9) | 83.3 (62.4 to 111.0)       | 97.3 (66.1 to 135.5)          | 67.7 (33.9 to 117.1)            | 42.1 (29.7 to 68.4)               |
| Cote d'Ivoire | 2050 | 128.0 (101.5 to 161.3)     | 36.7 (27.4 to 48.9)        | 42.7 (29.1 to 59.6)           | 29.8 (14.9 to 51.5)             | 18.8 (13.1 to 30.9)               | 296.2 (234.7 to 373.1) | 84.8 (63.4 to 113.2)       | 98.8 (67.2 to 138.0)          | 69.0 (34.6 to 119.2)            | 43.6 (30.4 to 71.6)               |

| Country | Year | 2018 US Dollars per capita |                            |                               |                                 |                                   | 2018 PPP per capita       |                            |                               |                                 |                                   |
|---------|------|----------------------------|----------------------------|-------------------------------|---------------------------------|-----------------------------------|---------------------------|----------------------------|-------------------------------|---------------------------------|-----------------------------------|
|         |      | Health spending            | Government health spending | Out-of-pocket health spending | Prepaid private health spending | Development assistance for health | Health spending           | Government health spending | Out-of-pocket health spending | Prepaid private health spending | Development assistance for health |
| Croatia | 1995 | 528.5 (483.6 to 578.8)     | 440.1 (402.1 to 483.9)     | 74.2 (58.7 to 92.4)           | 9.8 (4.9 to 18.1)               | 4.4 (4.4 to 4.4)                  | 961.2 (879.5 to 1052.7)   | 800.4 (731.3 to 880.2)     | 134.9 (106.7 to 168.0)        | 17.8 (9.0 to 32.9)              | 8.1 (8.1 to 8.1)                  |
| Croatia | 1996 | 564.5 (523.7 to 605.9)     | 471.4 (435.7 to 508.4)     | 77.5 (63.4 to 93.4)           | 10.4 (5.3 to 18.5)              | 5.2 (5.2 to 5.2)                  | 1026.7 (952.6 to 1102.0)  | 857.3 (792.5 to 924.7)     | 140.9 (115.2 to 169.9)        | 18.9 (9.6 to 33.7)              | 9.5 (9.5 to 9.5)                  |
| Croatia | 1997 | 579.9 (541.4 to 617.0)     | 484.1 (448.9 to 515.2)     | 81.1 (67.7 to 97.0)           | 10.8 (5.4 to 18.9)              | 4.0 (4.0 to 4.0)                  | 1054.7 (984.7 to 1122.2)  | 880.4 (816.5 to 937.0)     | 147.5 (123.1 to 176.4)        | 19.6 (9.8 to 34.3)              | 7.2 (7.2 to 7.2)                  |
| Croatia | 1998 | 624.8 (586.5 to 665.3)     | 525.6 (489.7 to 558.5)     | 85.4 (72.0 to 100.8)          | 11.7 (5.9 to 20.2)              | 2.0 (2.0 to 2.0)                  | 1136.3 (1066.7 to 1210.0) | 956.0 (890.7 to 1015.8)    | 155.3 (131.0 to 183.3)        | 21.3 (10.8 to 36.8)             | 3.7 (3.7 to 3.7)                  |
| Croatia | 1999 | 647.7 (611.2 to 689.4)     | 544.6 (511.4 to 579.2)     | 89.9 (75.9 to 106.1)          | 12.3 (6.3 to 20.8)              | 0.8 (0.8 to 0.8)                  | 1178.0 (1111.7 to 1254.0) | 990.6 (930.1 to 1053.4)    | 163.6 (138.0 to 192.9)        | 22.4 (11.4 to 37.9)             | 1.5 (1.5 to 1.5)                  |
| Croatia | 2000 | 689.1 (650.9 to 728.1)     | 575.1 (541.9 to 609.6)     | 98.8 (84.2 to 116.2)          | 13.2 (7.1 to 22.0)              | 1.9 (1.9 to 1.9)                  | 1253.4 (1183.8 to 1324.4) | 1046.1 (985.6 to 1108.8)   | 179.7 (153.2 to 211.3)        | 24.1 (13.0 to 40.1)             | 3.5 (3.5 to 3.5)                  |
| Croatia | 2001 | 690.9 (654.8 to 729.0)     | 566.3 (532.9 to 601.5)     | 105.6 (90.6 to 124.3)         | 17.4 (9.6 to 28.6)              | 1.6 (1.6 to 1.6)                  | 1256.6 (1191.0 to 1326.0) | 1030.0 (969.3 to 1094.0)   | 192.1 (164.7 to 226.0)        | 31.6 (17.4 to 52.0)             | 2.9 (2.9 to 2.9)                  |
| Croatia | 2002 | 688.4 (652.2 to 726.7)     | 557.0 (525.0 to 592.3)     | 113.0 (97.3 to 131.5)         | 16.6 (9.4 to 26.3)              | 1.8 (1.8 to 1.8)                  | 1252.1 (1186.2 to 1321.8) | 1013.1 (954.9 to 1077.2)   | 205.6 (177.0 to 239.2)        | 30.2 (17.1 to 47.8)             | 3.3 (3.3 to 3.3)                  |
| Croatia | 2003 | 724.0 (684.8 to 761.3)     | 586.6 (552.3 to 620.5)     | 118.8 (102.9 to 137.1)        | 16.2 (9.5 to 25.5)              | 2.4 (2.4 to 2.4)                  | 1316.8 (1245.5 to 1384.7) | 1067.0 (1004.6 to 1128.5)  | 216.0 (187.1 to 249.5)        | 29.4 (17.2 to 46.4)             | 4.4 (4.4 to 4.4)                  |
| Croatia | 2004 | 768.2 (727.4 to 807.4)     | 626.0 (590.3 to 661.7)     | 124.3 (107.0 to 143.5)        | 16.3 (9.9 to 25.1)              | 1.5 (1.5 to 1.5)                  | 1397.2 (1323.0 to 1468.5) | 1138.7 (1073.6 to 1203.6)  | 226.1 (194.7 to 261.1)        | 29.7 (17.9 to 45.7)             | 2.8 (2.8 to 2.8)                  |
| Croatia | 2005 | 831.9 (790.3 to 872.7)     | 688.6 (652.7 to 728.5)     | 122.9 (105.9 to 140.3)        | 16.6 (10.4 to 25.7)             | 3.9 (3.9 to 3.9)                  | 1513.1 (1437.5 to 1587.3) | 1252.4 (1187.2 to 1325.0)  | 223.4 (192.6 to 255.2)        | 30.2 (18.9 to 46.8)             | 7.1 (7.1 to 7.1)                  |
| Croatia | 2006 | 909.4 (867.3 to 951.7)     | 758.9 (721.0 to 797.8)     | 126.6 (109.7 to 144.3)        | 18.0 (11.5 to 27.0)             | 5.8 (5.8 to 5.8)                  | 1654.0 (1577.4 to 1730.9) | 1380.4 (1311.3 to 1451.0)  | 230.3 (199.5 to 262.4)        | 32.8 (20.8 to 49.1)             | 10.5 (10.5 to 10.5)               |
| Croatia | 2007 | 1000.0 (956.5 to 1043.4)   | 846.5 (807.2 to 885.6)     | 134.1 (116.4 to 152.4)        | 19.2 (12.3 to 28.0)             | 0.2 (0.2 to 0.2)                  | 1818.9 (1739.7 to 1897.7) | 1539.7 (1468.2 to 1610.7)  | 244.0 (211.7 to 277.2)        | 34.8 (22.4 to 51.0)             | 0.4 (0.4 to 0.4)                  |
| Croatia | 2008 | 1060.8 (1016.7 to 1102.7)  | 893.3 (856.2 to 931.8)     | 143.6 (125.0 to 162.9)        | 23.9 (15.8 to 33.9)             | 0.0 (0.0 to 0.0)                  | 1929.5 (1849.3 to 2005.7) | 1624.8 (1557.3 to 1694.9)  | 261.1 (227.4 to 296.3)        | 43.5 (28.8 to 61.6)             | 0.0 (0.0 to 0.0)                  |
| Croatia | 2009 | 1031.4 (991.3 to 1073.5)   | 860.1 (824.8 to 897.4)     | 140.3 (123.0 to 158.2)        | 31.1 (21.3 to 43.7)             | 0.0 (0.0 to 0.0)                  | 1876.0 (1803.0 to 1952.6) | 1564.4 (1500.2 to 1632.3)  | 255.2 (223.8 to 287.8)        | 56.5 (38.7 to 79.5)             | 0.0 (0.0 to 0.0)                  |
| Croatia | 2010 | 1006.1 (966.8 to 1046.9)   | 835.0 (799.0 to 871.4)     | 134.8 (119.4 to 151.2)        | 36.3 (26.2 to 50.2)             | 0.0 (0.0 to 0.0)                  | 1830.0 (1758.4 to 1904.2) | 1518.7 (1453.2 to 1584.9)  | 245.2 (217.1 to 275.1)        | 66.1 (47.7 to 91.3)             | 0.0 (0.0 to 0.0)                  |
| Croatia | 2011 | 991.0 (949.8 to 1033.5)    | 816.4 (781.8 to 851.6)     | 127.1 (112.8 to 142.6)        | 47.5 (35.1 to 63.8)             | 0.0 (0.0 to 0.0)                  | 1802.5 (1727.6 to 1879.8) | 1484.9 (1422.0 to 1549.0)  | 231.2 (205.1 to 259.4)        | 86.5 (63.8 to 116.0)            | 0.0 (0.0 to 0.0)                  |
| Croatia | 2012 | 943.8 (901.9 to 987.7)     | 771.4 (735.0 to 808.6)     | 120.9 (107.2 to 136.1)        | 51.5 (38.4 to 67.6)             | 0.0 (0.0 to 0.0)                  | 1716.6 (1640.4 to 1796.4) | 1403.0 (1336.8 to 1470.8)  | 219.9 (195.0 to 247.6)        | 93.6 (69.8 to 123.0)            | 0.0 (0.0 to 0.0)                  |
| Croatia | 2013 | 887.9 (848.5 to 932.0)     | 718.1 (686.1 to 755.6)     | 119.9 (105.7 to 134.9)        | 49.9 (36.7 to 65.9)             | 0.0 (0.0 to 0.0)                  | 1615.0 (1543.3 to 1695.1) | 1306.1 (1247.9 to 1374.3)  | 218.0 (192.2 to 245.4)        | 90.8 (66.7 to 119.8)            | 0.0 (0.0 to 0.0)                  |
| Croatia | 2014 | 873.2 (830.9 to 917.3)     | 697.1 (662.0 to 731.4)     | 127.9 (112.5 to 144.9)        | 48.2 (34.3 to 64.5)             | 0.0 (0.0 to 0.0)                  | 1588.2 (1511.4 to 1668.5) | 1267.8 (1204.1 to 1330.3)  | 232.7 (204.7 to 263.6)        | 87.7 (62.4 to 117.3)            | 0.0 (0.0 to 0.0)                  |
| Croatia | 2015 | 893.5 (846.5 to 945.6)     | 705.6 (665.1 to 746.2)     | 135.5 (115.9 to 155.1)        | 52.5 (36.1 to 71.4)             | 0.0 (0.0 to 0.0)                  | 1625.2 (1539.7 to 1719.8) | 1283.3 (1209.7 to 1357.2)  | 246.4 (210.8 to 282.1)        | 95.5 (65.6 to 129.9)            | 0.0 (0.0 to 0.0)                  |

| Country | Year | 2018 US Dollars per capita |                            |                               |                                 |                                   | 2018 PPP per capita       |                            |                               |                                 |                                   |
|---------|------|----------------------------|----------------------------|-------------------------------|---------------------------------|-----------------------------------|---------------------------|----------------------------|-------------------------------|---------------------------------|-----------------------------------|
|         |      | Health spending            | Government health spending | Out-of-pocket health spending | Prepaid private health spending | Development assistance for health | Health spending           | Government health spending | Out-of-pocket health spending | Prepaid private health spending | Development assistance for health |
| Croatia | 2016 | 938.6 (884.9 to 1005.0)    | 729.0 (679.9 to 786.4)     | 142.2 (118.9 to 167.1)        | 57.9 (37.9 to 81.0)             | 9.5 (9.5 to 9.5)                  | 1707.2 (1609.5 to 1828.0) | 1326.0 (1236.6 to 1430.4)  | 258.7 (216.3 to 303.9)        | 105.3 (69.0 to 147.2)           | 17.2 (17.2 to 17.2)               |
| Croatia | 2017 | 960.4 (899.3 to 1030.8)    | 754.7 (704.1 to 813.4)     | 146.5 (122.2 to 172.7)        | 59.2 (39.1 to 83.6)             | 0.0 (0.0 to 0.0)                  | 1746.9 (1635.6 to 1874.9) | 1372.8 (1280.6 to 1479.5)  | 266.5 (222.3 to 314.1)        | 107.6 (71.1 to 152.1)           | 0.0 (0.0 to 0.0)                  |
| Croatia | 2018 | 978.7 (919.2 to 1050.9)    | 768.8 (716.9 to 828.5)     | 149.4 (124.7 to 175.9)        | 60.5 (39.8 to 85.4)             | 0.0 (0.0 to 0.0)                  | 1780.0 (1671.9 to 1911.4) | 1398.3 (1303.9 to 1506.9)  | 271.7 (226.8 to 319.9)        | 110.1 (72.5 to 155.4)           | 0.0 (0.0 to 0.0)                  |
| Croatia | 2019 | 992.0 (928.4 to 1065.6)    | 778.6 (725.6 to 839.6)     | 152.0 (127.0 to 180.2)        | 61.4 (40.3 to 86.5)             | 0.0 (0.0 to 0.0)                  | 1804.3 (1688.5 to 1938.1) | 1416.2 (1319.7 to 1527.2)  | 276.4 (231.1 to 327.8)        | 111.7 (73.4 to 157.3)           | 0.0 (0.0 to 0.0)                  |
| Croatia | 2020 | 1004.7 (943.4 to 1081.0)   | 788.7 (734.2 to 850.8)     | 153.6 (127.7 to 182.3)        | 62.4 (41.0 to 87.8)             | 0.0 (0.0 to 0.0)                  | 1827.4 (1716.0 to 1966.2) | 1434.6 (1335.4 to 1547.4)  | 279.3 (232.3 to 331.5)        | 113.5 (74.6 to 159.8)           | 0.0 (0.0 to 0.0)                  |
| Croatia | 2021 | 1015.2 (947.8 to 1090.8)   | 797.2 (740.1 to 860.9)     | 154.7 (128.6 to 183.3)        | 63.3 (41.5 to 89.1)             | 0.0 (0.0 to 0.0)                  | 1846.5 (1723.8 to 1984.1) | 1450.0 (1346.1 to 1565.8)  | 281.3 (233.9 to 333.4)        | 115.1 (75.5 to 162.1)           | 0.0 (0.0 to 0.0)                  |
| Croatia | 2022 | 1029.3 (965.6 to 1110.1)   | 809.0 (751.5 to 872.6)     | 156.0 (129.5 to 185.0)        | 64.3 (42.1 to 90.6)             | 0.0 (0.0 to 0.0)                  | 1872.2 (1756.3 to 2019.2) | 1471.5 (1366.9 to 1587.1)  | 283.7 (235.6 to 336.5)        | 117.0 (76.6 to 164.8)           | 0.0 (0.0 to 0.0)                  |
| Croatia | 2023 | 1045.5 (974.8 to 1125.9)   | 822.8 (762.2 to 889.5)     | 157.3 (130.7 to 186.6)        | 65.4 (42.9 to 91.9)             | 0.0 (0.0 to 0.0)                  | 1901.6 (1773.0 to 2047.9) | 1496.5 (1386.3 to 1617.9)  | 286.1 (237.7 to 339.4)        | 118.9 (78.0 to 167.2)           | 0.0 (0.0 to 0.0)                  |
| Croatia | 2024 | 1062.0 (994.5 to 1145.8)   | 836.9 (774.1 to 905.3)     | 158.7 (131.7 to 188.2)        | 66.4 (43.7 to 93.3)             | 0.0 (0.0 to 0.0)                  | 1931.6 (1808.8 to 2084.1) | 1522.1 (1408.0 to 1646.5)  | 288.6 (239.6 to 342.3)        | 120.9 (79.5 to 169.8)           | 0.0 (0.0 to 0.0)                  |
| Croatia | 2025 | 1078.2 (1004.2 to 1161.2)  | 850.5 (784.7 to 920.3)     | 160.1 (133.0 to 190.2)        | 67.6 (44.6 to 95.2)             | 0.0 (0.0 to 0.0)                  | 1961.0 (1826.5 to 2112.0) | 1546.8 (1427.2 to 1673.9)  | 291.2 (241.9 to 345.9)        | 122.9 (81.1 to 173.1)           | 0.0 (0.0 to 0.0)                  |
| Croatia | 2026 | 1094.5 (1023.3 to 1181.0)  | 864.2 (796.9 to 937.1)     | 161.5 (134.1 to 192.1)        | 68.7 (45.3 to 96.9)             | 0.0 (0.0 to 0.0)                  | 1990.7 (1861.2 to 2148.0) | 1571.9 (1449.5 to 1704.4)  | 293.8 (243.9 to 349.4)        | 125.0 (82.5 to 176.2)           | 0.0 (0.0 to 0.0)                  |
| Croatia | 2027 | 1110.7 (1034.0 to 1200.6)  | 877.9 (807.8 to 953.6)     | 162.9 (135.2 to 193.9)        | 69.9 (46.1 to 98.2)             | 0.0 (0.0 to 0.0)                  | 2020.2 (1880.6 to 2183.7) | 1596.8 (1469.2 to 1734.4)  | 296.3 (246.0 to 352.7)        | 127.1 (83.9 to 178.6)           | 0.0 (0.0 to 0.0)                  |
| Croatia | 2028 | 1126.9 (1051.4 to 1211.5)  | 891.6 (819.4 to 969.0)     | 164.3 (136.5 to 195.4)        | 71.1 (46.8 to 99.4)             | 0.0 (0.0 to 0.0)                  | 2049.7 (1912.3 to 2203.5) | 1621.6 (1490.3 to 1762.4)  | 298.8 (248.2 to 355.3)        | 129.3 (85.1 to 180.8)           | 0.0 (0.0 to 0.0)                  |
| Croatia | 2029 | 1143.9 (1062.7 to 1237.2)  | 905.8 (832.3 to 987.4)     | 165.8 (137.8 to 197.3)        | 72.3 (47.5 to 101.1)            | 0.0 (0.0 to 0.0)                  | 2080.6 (1932.8 to 2250.2) | 1647.4 (1513.7 to 1795.9)  | 301.7 (250.7 to 358.8)        | 131.5 (86.5 to 183.9)           | 0.0 (0.0 to 0.0)                  |
| Croatia | 2030 | 1161.7 (1080.7 to 1254.0)  | 920.5 (847.5 to 1005.0)    | 167.6 (139.2 to 199.9)        | 73.7 (48.3 to 103.2)            | 0.0 (0.0 to 0.0)                  | 2113.0 (1965.7 to 2280.8) | 1674.2 (1541.5 to 1827.9)  | 304.8 (253.2 to 363.6)        | 134.0 (87.9 to 187.6)           | 0.0 (0.0 to 0.0)                  |
| Croatia | 2031 | 1181.0 (1095.3 to 1283.4)  | 936.3 (859.6 to 1026.2)    | 169.5 (140.9 to 202.7)        | 75.1 (49.3 to 105.3)            | 0.0 (0.0 to 0.0)                  | 2148.0 (1992.1 to 2334.2) | 1703.0 (1563.6 to 1866.5)  | 308.3 (256.3 to 368.7)        | 136.6 (89.6 to 191.5)           | 0.0 (0.0 to 0.0)                  |
| Croatia | 2032 | 1201.0 (1114.4 to 1298.4)  | 952.6 (874.7 to 1044.9)    | 171.7 (142.8 to 205.2)        | 76.7 (50.4 to 107.5)            | 0.0 (0.0 to 0.0)                  | 2184.3 (2026.8 to 2361.6) | 1732.6 (1590.9 to 1900.4)  | 312.2 (259.7 to 373.2)        | 139.5 (91.6 to 195.5)           | 0.0 (0.0 to 0.0)                  |
| Croatia | 2033 | 1222.2 (1131.2 to 1328.3)  | 969.9 (888.1 to 1065.6)    | 174.0 (144.9 to 207.9)        | 78.4 (51.5 to 109.5)            | 0.0 (0.0 to 0.0)                  | 2223.0 (2057.4 to 2416.0) | 1764.1 (1615.3 to 1938.2)  | 316.4 (263.6 to 378.1)        | 142.5 (93.6 to 199.2)           | 0.0 (0.0 to 0.0)                  |
| Croatia | 2034 | 1243.9 (1151.2 to 1349.0)  | 987.5 (902.0 to 1085.5)    | 176.3 (146.8 to 210.6)        | 80.0 (52.6 to 112.0)            | 0.0 (0.0 to 0.0)                  | 2262.4 (2093.8 to 2453.6) | 1796.2 (1640.6 to 1974.3)  | 320.6 (266.9 to 383.0)        | 145.6 (95.7 to 203.8)           | 0.0 (0.0 to 0.0)                  |
| Croatia | 2035 | 1264.9 (1167.0 to 1378.9)  | 1004.7 (914.6 to 1104.0)   | 178.5 (148.7 to 213.2)        | 81.7 (53.6 to 114.4)            | 0.0 (0.0 to 0.0)                  | 2300.7 (2122.6 to 2508.0) | 1827.5 (1663.6 to 2007.9)  | 324.6 (270.5 to 387.7)        | 148.6 (97.6 to 208.1)           | 0.0 (0.0 to 0.0)                  |
| Croatia | 2036 | 1285.5 (1184.9 to 1398.3)  | 1021.6 (928.7 to 1125.2)   | 180.6 (150.6 to 215.6)        | 83.3 (54.5 to 117.1)            | 0.0 (0.0 to 0.0)                  | 2338.2 (2155.1 to 2543.4) | 1858.2 (1689.1 to 2046.5)  | 328.4 (273.9 to 392.2)        | 151.6 (99.1 to 213.0)           | 0.0 (0.0 to 0.0)                  |

| Country | Year | 2018 US Dollars per capita |                            |                               |                                 |                                   | 2018 PPP per capita       |                            |                               |                                 |                                   |
|---------|------|----------------------------|----------------------------|-------------------------------|---------------------------------|-----------------------------------|---------------------------|----------------------------|-------------------------------|---------------------------------|-----------------------------------|
|         |      | Health spending            | Government health spending | Out-of-pocket health spending | Prepaid private health spending | Development assistance for health | Health spending           | Government health spending | Out-of-pocket health spending | Prepaid private health spending | Development assistance for health |
| Croatia | 2037 | 1305.9 (1201.2 to 1425.1)  | 1038.4 (942.0 to 1146.2)   | 182.6 (152.2 to 217.9)        | 84.9 (55.4 to 119.4)            | 0.0 (0.0 to 0.0)                  | 2375.2 (2184.8 to 2592.0) | 1888.7 (1713.3 to 2084.7)  | 332.1 (276.8 to 396.3)        | 154.5 (100.7 to 217.2)          | 0.0 (0.0 to 0.0)                  |
| Croatia | 2038 | 1325.8 (1219.2 to 1446.8)  | 1054.9 (954.4 to 1166.8)   | 184.4 (153.7 to 220.2)        | 86.5 (56.3 to 121.5)            | 0.0 (0.0 to 0.0)                  | 2411.4 (2217.5 to 2631.4) | 1918.6 (1736.0 to 2122.2)  | 335.5 (279.6 to 400.5)        | 157.4 (102.4 to 221.0)          | 0.0 (0.0 to 0.0)                  |
| Croatia | 2039 | 1346.7 (1232.4 to 1474.2)  | 1072.2 (966.7 to 1185.8)   | 186.4 (155.5 to 222.8)        | 88.1 (57.3 to 123.9)            | 0.0 (0.0 to 0.0)                  | 2449.4 (2241.6 to 2681.3) | 1950.1 (1758.3 to 2156.7)  | 339.0 (282.9 to 405.3)        | 160.3 (104.1 to 225.4)          | 0.0 (0.0 to 0.0)                  |
| Croatia | 2040 | 1366.6 (1250.4 to 1497.6)  | 1088.7 (979.3 to 1207.5)   | 188.2 (157.2 to 225.1)        | 89.7 (58.2 to 126.4)            | 0.0 (0.0 to 0.0)                  | 2485.6 (2274.2 to 2723.9) | 1980.1 (1781.2 to 2196.3)  | 342.3 (286.0 to 409.4)        | 163.2 (105.8 to 229.9)          | 0.0 (0.0 to 0.0)                  |
| Croatia | 2041 | 1386.9 (1264.7 to 1524.0)  | 1105.5 (993.1 to 1230.5)   | 190.0 (159.0 to 227.6)        | 91.3 (59.2 to 128.9)            | 0.0 (0.0 to 0.0)                  | 2522.5 (2300.3 to 2771.8) | 2010.7 (1806.3 to 2238.1)  | 345.7 (289.2 to 413.9)        | 166.1 (107.8 to 234.5)          | 0.0 (0.0 to 0.0)                  |
| Croatia | 2042 | 1408.0 (1284.3 to 1543.6)  | 1122.9 (1007.6 to 1252.1)  | 192.0 (160.9 to 230.2)        | 93.0 (60.4 to 131.6)            | 0.0 (0.0 to 0.0)                  | 2560.9 (2335.9 to 2807.5) | 2042.4 (1832.7 to 2277.3)  | 349.3 (292.6 to 418.6)        | 169.2 (109.8 to 239.3)          | 0.0 (0.0 to 0.0)                  |
| Croatia | 2043 | 1428.6 (1297.4 to 1579.3)  | 1139.9 (1019.3 to 1275.1)  | 193.9 (162.3 to 232.5)        | 94.7 (61.6 to 134.2)            | 0.0 (0.0 to 0.0)                  | 2598.4 (2359.7 to 2872.4) | 2073.4 (1853.9 to 2319.1)  | 352.7 (295.2 to 422.9)        | 172.3 (112.0 to 244.1)          | 0.0 (0.0 to 0.0)                  |
| Croatia | 2044 | 1449.1 (1317.7 to 1594.8)  | 1156.9 (1032.3 to 1294.1)  | 195.8 (163.7 to 234.6)        | 96.4 (62.9 to 136.4)            | 0.0 (0.0 to 0.0)                  | 2635.6 (2396.6 to 2900.7) | 2104.2 (1877.6 to 2353.8)  | 356.1 (297.8 to 426.6)        | 175.4 (114.4 to 248.1)          | 0.0 (0.0 to 0.0)                  |
| Croatia | 2045 | 1469.7 (1331.0 to 1628.6)  | 1173.9 (1044.8 to 1318.4)  | 197.6 (165.2 to 236.8)        | 98.1 (64.3 to 138.7)            | 0.0 (0.0 to 0.0)                  | 2673.1 (2420.9 to 2962.2) | 2135.2 (1900.4 to 2398.0)  | 359.4 (300.5 to 430.7)        | 178.4 (116.9 to 252.3)          | 0.0 (0.0 to 0.0)                  |
| Croatia | 2046 | 1489.7 (1350.0 to 1645.2)  | 1190.6 (1056.9 to 1342.3)  | 199.3 (166.5 to 239.3)        | 99.8 (65.6 to 141.7)            | 0.0 (0.0 to 0.0)                  | 2709.4 (2455.4 to 2992.4) | 2165.5 (1922.3 to 2441.4)  | 362.5 (302.8 to 435.3)        | 181.5 (119.4 to 257.7)          | 0.0 (0.0 to 0.0)                  |
| Croatia | 2047 | 1509.2 (1361.7 to 1677.5)  | 1206.9 (1068.9 to 1363.0)  | 201.0 (167.7 to 241.7)        | 101.4 (66.6 to 144.6)           | 0.0 (0.0 to 0.0)                  | 2745.0 (2476.7 to 3051.1) | 2195.1 (1944.2 to 2479.0)  | 365.5 (305.0 to 439.7)        | 184.4 (121.1 to 263.0)          | 0.0 (0.0 to 0.0)                  |
| Croatia | 2048 | 1528.4 (1375.0 to 1695.8)  | 1222.8 (1079.8 to 1386.1)  | 202.6 (168.9 to 243.8)        | 103.0 (67.5 to 146.8)           | 0.0 (0.0 to 0.0)                  | 2780.0 (2500.9 to 3084.4) | 2224.1 (1963.9 to 2521.1)  | 368.4 (307.2 to 443.4)        | 187.4 (122.7 to 267.1)          | 0.0 (0.0 to 0.0)                  |
| Croatia | 2049 | 1548.7 (1391.9 to 1729.5)  | 1239.6 (1089.0 to 1408.1)  | 204.3 (170.4 to 245.9)        | 104.8 (68.4 to 149.7)           | 0.0 (0.0 to 0.0)                  | 2816.9 (2531.6 to 3145.7) | 2254.7 (1980.7 to 2561.2)  | 371.6 (310.0 to 447.3)        | 190.6 (124.4 to 272.2)          | 0.0 (0.0 to 0.0)                  |
| Croatia | 2050 | 1569.7 (1407.0 to 1748.1)  | 1257.0 (1103.3 to 1430.1)  | 206.1 (172.0 to 248.0)        | 106.6 (69.4 to 152.8)           | 0.0 (0.0 to 0.0)                  | 2855.0 (2559.0 to 3179.5) | 2286.3 (2006.8 to 2601.1)  | 374.8 (312.8 to 451.0)        | 193.8 (126.2 to 277.9)          | 0.0 (0.0 to 0.0)                  |
| Cuba    | 1995 | 218.3 (191.1 to 248.5)     | 172.5 (148.6 to 200.6)     | 32.8 (24.3 to 42.4)           | 13.0 (6.1 to 24.5)              | 0.0 (0.0 to 0.0)                  | 478.0 (418.5 to 544.2)    | 377.7 (325.4 to 439.2)     | 71.8 (53.1 to 92.8)           | 28.5 (13.3 to 53.6)             | 0.0 (0.0 to 0.0)                  |
| Cuba    | 1996 | 229.5 (202.7 to 257.6)     | 181.8 (159.0 to 207.6)     | 34.4 (26.0 to 44.3)           | 13.3 (6.2 to 25.5)              | 0.1 (0.1 to 0.1)                  | 502.6 (443.9 to 564.1)    | 398.0 (348.2 to 454.6)     | 75.4 (56.9 to 97.0)           | 29.0 (13.7 to 55.9)             | 0.2 (0.2 to 0.2)                  |
| Cuba    | 1997 | 238.9 (212.7 to 265.9)     | 189.3 (167.4 to 213.6)     | 36.3 (27.6 to 46.3)           | 13.2 (6.3 to 25.8)              | 0.2 (0.2 to 0.2)                  | 523.2 (465.7 to 582.3)    | 414.4 (366.6 to 467.6)     | 79.4 (60.4 to 101.4)          | 28.9 (13.8 to 56.4)             | 0.5 (0.5 to 0.5)                  |
| Cuba    | 1998 | 246.9 (222.4 to 272.7)     | 195.5 (174.4 to 218.1)     | 38.4 (30.0 to 48.4)           | 13.0 (6.0 to 25.1)              | 0.1 (0.1 to 0.1)                  | 540.7 (486.9 to 597.2)    | 428.0 (381.9 to 477.5)     | 84.0 (65.8 to 106.0)          | 28.4 (13.2 to 54.9)             | 0.3 (0.3 to 0.3)                  |
| Cuba    | 1999 | 268.8 (243.6 to 296.2)     | 212.8 (191.0 to 235.6)     | 42.0 (33.3 to 51.8)           | 13.5 (6.2 to 26.2)              | 0.5 (0.5 to 0.5)                  | 588.7 (533.3 to 648.6)    | 466.0 (418.2 to 515.9)     | 92.0 (72.8 to 113.4)          | 29.5 (13.6 to 57.4)             | 1.2 (1.2 to 1.2)                  |
| Cuba    | 2000 | 292.2 (267.1 to 319.3)     | 230.3 (207.7 to 254.8)     | 47.5 (38.3 to 58.2)           | 14.1 (6.7 to 27.4)              | 0.4 (0.4 to 0.4)                  | 639.9 (584.8 to 699.1)    | 504.2 (454.8 to 558.0)     | 104.0 (83.9 to 127.4)         | 30.9 (14.6 to 60.0)             | 0.9 (0.9 to 0.9)                  |
| Cuba    | 2001 | 312.0 (285.9 to 339.7)     | 243.3 (221.0 to 268.4)     | 53.8 (43.6 to 65.6)           | 14.3 (6.8 to 27.3)              | 0.5 (0.5 to 0.5)                  | 683.1 (626.0 to 743.9)    | 532.8 (484.0 to 587.7)     | 117.9 (95.4 to 143.6)         | 31.4 (15.0 to 59.8)             | 1.0 (1.0 to 1.0)                  |

| Country | Year | 2018 US Dollars per capita |                            |                               |                                 |                                   | 2018 PPP per capita       |                            |                               |                                 |                                   |
|---------|------|----------------------------|----------------------------|-------------------------------|---------------------------------|-----------------------------------|---------------------------|----------------------------|-------------------------------|---------------------------------|-----------------------------------|
|         |      | Health spending            | Government health spending | Out-of-pocket health spending | Prepaid private health spending | Development assistance for health | Health spending           | Government health spending | Out-of-pocket health spending | Prepaid private health spending | Development assistance for health |
| Cuba    | 2002 | 327.3 (300.6 to 356.5)     | 253.3 (230.4 to 278.4)     | 58.3 (47.3 to 71.0)           | 15.1 (7.1 to 28.9)              | 0.5 (0.5 to 0.5)                  | 716.6 (658.2 to 780.7)    | 554.8 (504.6 to 609.5)     | 127.6 (103.6 to 155.4)        | 33.1 (15.6 to 63.4)             | 1.2 (1.2 to 1.2)                  |
| Cuba    | 2003 | 351.8 (321.7 to 382.9)     | 271.5 (247.2 to 296.1)     | 61.9 (49.9 to 75.3)           | 17.0 (7.9 to 32.9)              | 1.4 (1.4 to 1.4)                  | 770.3 (704.5 to 838.5)    | 594.5 (541.3 to 648.3)     | 135.5 (109.3 to 165.0)        | 37.3 (17.4 to 72.1)             | 3.0 (3.0 to 3.0)                  |
| Cuba    | 2004 | 392.4 (360.2 to 426.9)     | 306.1 (281.5 to 330.7)     | 64.2 (52.2 to 77.6)           | 20.8 (9.6 to 39.8)              | 1.4 (1.4 to 1.4)                  | 859.3 (788.8 to 934.9)    | 670.2 (616.5 to 724.0)     | 140.5 (114.3 to 170.0)        | 45.5 (20.9 to 87.1)             | 3.0 (3.0 to 3.0)                  |
| Cuba    | 2005 | 486.0 (448.9 to 530.3)     | 388.8 (360.4 to 419.1)     | 68.6 (56.1 to 83.1)           | 27.6 (13.0 to 51.6)             | 0.9 (0.9 to 0.9)                  | 1064.1 (983.0 to 1161.2)  | 851.4 (789.1 to 917.6)     | 150.2 (122.9 to 181.9)        | 60.5 (28.5 to 113.1)            | 2.0 (2.0 to 2.0)                  |
| Cuba    | 2006 | 594.8 (551.5 to 643.3)     | 486.3 (453.8 to 518.8)     | 71.7 (58.6 to 86.6)           | 35.8 (16.7 to 67.2)             | 1.0 (1.0 to 1.0)                  | 1302.4 (1207.6 to 1408.7) | 1064.8 (993.7 to 1135.9)   | 157.0 (128.2 to 189.6)        | 78.4 (36.6 to 147.1)            | 2.2 (2.2 to 2.2)                  |
| Cuba    | 2007 | 733.7 (684.8 to 790.9)     | 612.1 (574.8 to 648.6)     | 73.9 (60.5 to 88.6)           | 46.1 (21.8 to 86.3)             | 1.6 (1.6 to 1.6)                  | 1606.6 (1499.4 to 1731.8) | 1340.2 (1258.6 to 1420.2)  | 161.8 (132.4 to 194.1)        | 100.9 (47.8 to 189.1)           | 3.6 (3.6 to 3.6)                  |
| Cuba    | 2008 | 831.4 (777.2 to 895.3)     | 701.1 (663.6 to 740.5)     | 74.8 (61.1 to 89.1)           | 54.4 (25.1 to 100.9)            | 1.1 (1.1 to 1.1)                  | 1820.6 (1701.8 to 1960.4) | 1535.2 (1453.1 to 1621.4)  | 163.8 (133.8 to 195.0)        | 119.1 (55.1 to 221.0)           | 2.5 (2.5 to 2.5)                  |
| Cuba    | 2009 | 877.7 (821.7 to 948.7)     | 740.6 (705.8 to 780.2)     | 75.9 (62.2 to 90.3)           | 59.3 (27.2 to 110.8)            | 2.0 (2.0 to 2.0)                  | 1922.0 (1799.4 to 2077.3) | 1621.6 (1545.4 to 1708.4)  | 166.1 (136.2 to 197.8)        | 129.9 (59.5 to 242.7)           | 4.4 (4.4 to 4.4)                  |
| Cuba    | 2010 | 869.1 (815.5 to 937.5)     | 728.2 (694.1 to 768.0)     | 78.3 (63.9 to 93.6)           | 60.7 (27.8 to 114.2)            | 1.9 (1.9 to 1.9)                  | 1903.0 (1785.6 to 2052.8) | 1594.5 (1519.9 to 1681.7)  | 171.4 (140.0 to 205.0)        | 133.0 (60.8 to 250.0)           | 4.1 (4.1 to 4.1)                  |
| Cuba    | 2011 | 866.7 (813.2 to 934.6)     | 718.5 (684.5 to 758.8)     | 85.0 (69.4 to 101.7)          | 61.7 (28.6 to 117.6)            | 1.5 (1.5 to 1.5)                  | 1897.8 (1780.7 to 2046.5) | 1573.2 (1498.8 to 1661.4)  | 186.2 (151.9 to 222.6)        | 135.2 (62.6 to 257.5)           | 3.2 (3.2 to 3.2)                  |
| Cuba    | 2012 | 854.8 (801.6 to 919.3)     | 702.0 (666.1 to 739.3)     | 89.4 (72.9 to 106.4)          | 62.2 (29.3 to 118.1)            | 1.2 (1.2 to 1.2)                  | 1871.8 (1755.3 to 2013.0) | 1537.2 (1458.6 to 1618.8)  | 195.7 (159.6 to 233.1)        | 136.3 (64.1 to 258.6)           | 2.7 (2.7 to 2.7)                  |
| Cuba    | 2013 | 911.5 (854.2 to 977.3)     | 749.1 (711.6 to 786.0)     | 94.3 (77.2 to 113.0)          | 66.8 (32.1 to 125.9)            | 1.3 (1.3 to 1.3)                  | 1996.0 (1870.3 to 2140.1) | 1640.4 (1558.1 to 1721.0)  | 206.4 (169.2 to 247.5)        | 146.3 (70.3 to 275.8)           | 2.9 (2.9 to 2.9)                  |
| Cuba    | 2014 | 995.9 (936.7 to 1065.8)    | 825.4 (784.9 to 865.2)     | 96.8 (78.8 to 117.3)          | 73.0 (34.0 to 138.1)            | 0.8 (0.8 to 0.8)                  | 2180.7 (2051.0 to 2333.7) | 1807.3 (1718.8 to 1894.6)  | 211.9 (172.6 to 256.8)        | 159.8 (74.4 to 302.4)           | 1.7 (1.7 to 1.7)                  |
| Cuba    | 2015 | 1093.1 (1027.5 to 1170.0)  | 910.1 (864.9 to 955.8)     | 102.2 (82.5 to 125.9)         | 79.6 (36.9 to 151.3)            | 1.1 (1.1 to 1.1)                  | 2393.5 (2250.0 to 2561.9) | 1992.9 (1893.8 to 2092.9)  | 223.9 (180.6 to 275.6)        | 174.2 (80.8 to 331.3)           | 2.5 (2.5 to 2.5)                  |
| Cuba    | 2016 | 1128.1 (1046.7 to 1228.1)  | 939.5 (881.6 to 999.4)     | 105.2 (82.9 to 131.4)         | 82.4 (38.4 to 158.7)            | 1.0 (1.0 to 1.0)                  | 2470.1 (2291.9 to 2689.1) | 2057.1 (1930.4 to 2188.4)  | 230.3 (181.5 to 287.7)        | 180.5 (84.1 to 347.5)           | 2.2 (2.2 to 2.2)                  |
| Cuba    | 2017 | 1145.8 (1063.9 to 1250.5)  | 953.4 (894.5 to 1016.1)    | 107.8 (84.9 to 135.1)         | 83.5 (38.8 to 161.0)            | 1.0 (1.0 to 1.0)                  | 2508.8 (2329.6 to 2738.3) | 2087.6 (1958.7 to 2224.8)  | 236.1 (185.8 to 295.9)        | 182.9 (85.0 to 352.6)           | 2.3 (2.3 to 2.3)                  |
| Cuba    | 2018 | 1171.3 (1090.2 to 1273.9)  | 974.9 (912.8 to 1038.8)    | 110.1 (86.7 to 138.0)         | 85.3 (39.6 to 164.3)            | 1.0 (1.0 to 1.0)                  | 2564.8 (2387.2 to 2789.4) | 2134.7 (1998.8 to 2274.6)  | 241.0 (189.8 to 302.1)        | 186.9 (86.7 to 359.8)           | 2.2 (2.2 to 2.2)                  |
| Cuba    | 2019 | 1197.2 (1110.3 to 1302.5)  | 996.8 (933.8 to 1063.0)    | 112.2 (88.7 to 139.9)         | 87.1 (40.4 to 167.5)            | 1.0 (0.9 to 1.1)                  | 2621.4 (2431.3 to 2852.0) | 2182.8 (2044.8 to 2327.7)  | 245.7 (194.2 to 306.3)        | 190.8 (88.5 to 366.7)           | 2.2 (2.1 to 2.3)                  |
| Cuba    | 2020 | 1221.0 (1135.2 to 1326.5)  | 1017.4 (952.4 to 1085.3)   | 113.8 (89.9 to 141.7)         | 88.8 (41.1 to 170.6)            | 1.0 (0.9 to 1.1)                  | 2673.6 (2485.8 to 2904.5) | 2227.7 (2085.4 to 2376.5)  | 249.1 (196.9 to 310.2)        | 194.5 (90.1 to 373.6)           | 2.3 (2.1 to 2.4)                  |
| Cuba    | 2021 | 1244.5 (1155.0 to 1349.7)  | 1037.6 (969.0 to 1106.8)   | 115.2 (90.9 to 143.9)         | 90.6 (42.0 to 174.3)            | 1.1 (1.0 to 1.2)                  | 2725.1 (2529.1 to 2955.5) | 2272.1 (2121.8 to 2423.5)  | 252.3 (199.1 to 315.1)        | 198.4 (91.9 to 381.6)           | 2.3 (2.1 to 2.6)                  |
| Cuba    | 2022 | 1267.8 (1178.2 to 1375.9)  | 1056.0 (985.8 to 1129.5)   | 118.3 (93.4 to 147.7)         | 92.3 (42.8 to 177.6)            | 1.1 (1.0 to 1.2)                  | 2776.0 (2579.8 to 3012.8) | 2312.4 (2158.5 to 2473.3)  | 259.1 (204.6 to 323.4)        | 202.1 (93.6 to 388.9)           | 2.4 (2.1 to 2.7)                  |



| Country | Year | 2018 US Dollars per capita |                            |                               |                                 |                                   | 2018 PPP per capita       |                            |                               |                                 |                                   |
|---------|------|----------------------------|----------------------------|-------------------------------|---------------------------------|-----------------------------------|---------------------------|----------------------------|-------------------------------|---------------------------------|-----------------------------------|
|         |      | Health spending            | Government health spending | Out-of-pocket health spending | Prepaid private health spending | Development assistance for health | Health spending           | Government health spending | Out-of-pocket health spending | Prepaid private health spending | Development assistance for health |
| Cuba    | 2023 | 1288.0 (1197.1 to 1398.6)  | 1072.8 (1001.5 to 1148.5)  | 120.2 (94.3 to 150.0)         | 93.8 (43.5 to 180.6)            | 1.1 (1.0 to 1.3)                  | 2820.4 (2621.3 to 3062.6) | 2349.2 (2192.9 to 2514.8)  | 263.2 (206.5 to 328.4)        | 205.5 (95.3 to 395.5)           | 2.5 (2.2 to 2.8)                  |
| Cuba    | 2024 | 1308.3 (1212.5 to 1418.7)  | 1089.9 (1015.4 to 1166.7)  | 122.0 (95.6 to 153.0)         | 95.3 (44.3 to 183.4)            | 1.2 (1.0 to 1.4)                  | 2864.8 (2655.0 to 3106.6) | 2386.5 (2223.5 to 2554.7)  | 267.1 (209.4 to 335.1)        | 208.7 (96.9 to 401.7)           | 2.6 (2.2 to 3.0)                  |
| Cuba    | 2025 | 1330.4 (1235.8 to 1441.4)  | 1108.1 (1031.6 to 1188.6)  | 124.5 (97.7 to 155.6)         | 96.7 (44.9 to 186.1)            | 1.2 (1.1 to 1.4)                  | 2913.2 (2706.0 to 3156.3) | 2426.3 (2258.8 to 2602.7)  | 272.6 (214.0 to 340.7)        | 211.7 (98.4 to 407.5)           | 2.7 (2.3 to 3.2)                  |
| Cuba    | 2026 | 1352.6 (1247.2 to 1471.7)  | 1126.4 (1044.8 to 1210.1)  | 127.0 (99.3 to 160.0)         | 97.9 (45.6 to 188.5)            | 1.3 (1.1 to 1.5)                  | 2961.8 (2731.0 to 3222.6) | 2466.5 (2287.7 to 2649.7)  | 278.1 (217.5 to 350.3)        | 214.4 (99.8 to 412.9)           | 2.8 (2.4 to 3.3)                  |
| Cuba    | 2027 | 1374.9 (1266.6 to 1500.9)  | 1144.9 (1057.5 to 1233.7)  | 129.6 (100.7 to 163.9)        | 99.1 (46.2 to 190.8)            | 1.3 (1.1 to 1.6)                  | 3010.5 (2773.5 to 3286.6) | 2507.0 (2315.6 to 2701.3)  | 283.7 (220.5 to 358.9)        | 216.9 (101.2 to 417.7)          | 2.9 (2.4 to 3.4)                  |
| Cuba    | 2028 | 1396.4 (1283.1 to 1527.8)  | 1162.9 (1069.1 to 1255.7)  | 132.1 (102.3 to 168.5)        | 100.1 (46.7 to 192.7)           | 1.4 (1.1 to 1.7)                  | 3057.8 (2809.5 to 3345.3) | 2546.4 (2341.0 to 2749.5)  | 289.2 (224.0 to 368.9)        | 219.1 (102.3 to 422.0)          | 3.0 (2.5 to 3.6)                  |
| Cuba    | 2029 | 1419.0 (1298.7 to 1549.9)  | 1181.8 (1079.4 to 1278.2)  | 134.6 (104.5 to 170.8)        | 101.2 (47.3 to 194.7)           | 1.4 (1.2 to 1.7)                  | 3107.2 (2843.8 to 3393.9) | 2587.7 (2363.6 to 2798.8)  | 294.8 (228.7 to 374.0)        | 221.5 (103.6 to 426.4)          | 3.1 (2.6 to 3.8)                  |
| Cuba    | 2030 | 1440.2 (1313.3 to 1579.3)  | 1199.4 (1090.5 to 1304.1)  | 137.1 (105.8 to 175.6)        | 102.2 (47.9 to 196.6)           | 1.5 (1.2 to 1.8)                  | 3153.6 (2875.7 to 3458.1) | 2626.3 (2387.9 to 2855.6)  | 300.3 (231.6 to 384.6)        | 223.8 (104.8 to 430.5)          | 3.2 (2.7 to 4.0)                  |
| Cuba    | 2031 | 1460.9 (1325.9 to 1606.5)  | 1216.5 (1101.2 to 1329.7)  | 139.6 (106.3 to 180.0)        | 103.2 (48.4 to 198.6)           | 1.5 (1.2 to 1.9)                  | 3198.8 (2903.2 to 3517.7) | 2663.7 (2411.3 to 2911.7)  | 305.7 (232.9 to 394.2)        | 226.1 (105.9 to 434.8)          | 3.4 (2.7 to 4.2)                  |
| Cuba    | 2032 | 1481.3 (1337.1 to 1634.3)  | 1233.4 (1113.8 to 1353.7)  | 142.1 (106.8 to 184.6)        | 104.3 (48.9 to 200.6)           | 1.6 (1.3 to 2.0)                  | 3243.6 (2927.7 to 3578.5) | 2700.7 (2438.9 to 2964.3)  | 311.1 (233.8 to 404.3)        | 228.4 (107.2 to 439.3)          | 3.5 (2.8 to 4.4)                  |
| Cuba    | 2033 | 1503.3 (1363.2 to 1669.8)  | 1251.5 (1127.4 to 1379.1)  | 144.6 (107.0 to 189.3)        | 105.6 (49.5 to 203.0)           | 1.7 (1.3 to 2.1)                  | 3291.7 (2985.0 to 3656.4) | 2740.3 (2468.7 to 3019.8)  | 316.6 (234.4 to 414.4)        | 231.1 (108.4 to 444.4)          | 3.6 (2.9 to 4.7)                  |
| Cuba    | 2034 | 1524.3 (1377.5 to 1694.1)  | 1268.8 (1139.0 to 1402.3)  | 147.1 (107.2 to 193.7)        | 106.7 (50.1 to 205.2)           | 1.7 (1.4 to 2.2)                  | 3337.8 (3016.3 to 3709.6) | 2778.3 (2494.0 to 3070.5)  | 322.0 (234.7 to 424.1)        | 233.7 (109.6 to 449.4)          | 3.8 (3.0 to 4.9)                  |
| Cuba    | 2035 | 1544.9 (1385.9 to 1724.3)  | 1285.8 (1148.9 to 1425.6)  | 149.5 (107.3 to 198.4)        | 107.9 (50.6 to 207.4)           | 1.8 (1.4 to 2.4)                  | 3382.9 (3034.7 to 3775.7) | 2815.4 (2515.8 to 3121.7)  | 327.3 (235.0 to 434.4)        | 236.2 (110.8 to 454.1)          | 3.9 (3.1 to 5.1)                  |
| Cuba    | 2036 | 1565.0 (1397.8 to 1751.0)  | 1302.2 (1154.2 to 1450.0)  | 151.9 (107.6 to 202.5)        | 109.0 (51.2 to 209.0)           | 1.9 (1.4 to 2.5)                  | 3426.9 (3060.7 to 3834.1) | 2851.5 (2527.3 to 3175.1)  | 332.5 (235.7 to 443.3)        | 238.8 (112.0 to 457.7)          | 4.1 (3.2 to 5.5)                  |
| Cuba    | 2037 | 1584.5 (1413.2 to 1770.3)  | 1318.2 (1163.8 to 1472.9)  | 154.2 (108.1 to 207.2)        | 110.2 (51.7 to 211.5)           | 1.9 (1.5 to 2.6)                  | 3469.5 (3094.4 to 3876.4) | 2886.3 (2548.4 to 3225.2)  | 337.6 (236.7 to 453.7)        | 241.3 (113.2 to 463.2)          | 4.2 (3.3 to 5.7)                  |
| Cuba    | 2038 | 1605.2 (1426.6 to 1804.8)  | 1335.2 (1175.1 to 1497.6)  | 156.6 (108.8 to 211.9)        | 111.5 (52.3 to 214.2)           | 2.0 (1.5 to 2.8)                  | 3515.0 (3123.7 to 3952.0) | 2923.6 (2573.2 to 3279.3)  | 342.9 (238.3 to 464.0)        | 244.1 (114.5 to 469.1)          | 4.4 (3.4 to 6.1)                  |
| Cuba    | 2039 | 1626.7 (1436.8 to 1821.2)  | 1352.7 (1187.1 to 1519.6)  | 159.0 (109.3 to 216.4)        | 112.9 (53.0 to 216.7)           | 2.1 (1.6 to 2.9)                  | 3561.9 (3146.1 to 3987.8) | 2962.0 (2599.3 to 3327.5)  | 348.1 (239.4 to 473.9)        | 247.2 (116.0 to 474.6)          | 4.6 (3.5 to 6.4)                  |
| Cuba    | 2040 | 1648.6 (1453.6 to 1859.9)  | 1370.6 (1200.3 to 1546.6)  | 161.4 (110.2 to 220.6)        | 114.5 (53.8 to 219.3)           | 2.2 (1.7 to 3.0)                  | 3610.0 (3182.9 to 4072.7) | 3001.3 (2628.3 to 3386.6)  | 353.5 (241.2 to 482.9)        | 250.6 (117.7 to 480.3)          | 4.8 (3.6 to 6.6)                  |
| Cuba    | 2041 | 1672.7 (1481.3 to 1889.6)  | 1390.1 (1216.3 to 1570.6)  | 164.0 (111.1 to 224.8)        | 116.4 (54.6 to 223.1)           | 2.3 (1.7 to 3.1)                  | 3662.6 (3243.5 to 4137.5) | 3043.8 (2663.3 to 3439.1)  | 359.0 (243.2 to 492.3)        | 254.8 (119.6 to 488.6)          | 5.0 (3.7 to 6.9)                  |
| Cuba    | 2042 | 1698.8 (1504.0 to 1923.6)  | 1411.3 (1234.9 to 1597.9)  | 166.6 (112.2 to 229.2)        | 118.6 (55.6 to 227.6)           | 2.4 (1.8 to 3.4)                  | 3719.9 (3293.2 to 4212.2) | 3090.3 (2704.1 to 3498.9)  | 364.8 (245.7 to 501.9)        | 259.6 (121.8 to 498.3)          | 5.2 (3.9 to 7.4)                  |
| Cuba    | 2043 | 1727.1 (1530.7 to 1951.2)  | 1434.3 (1254.8 to 1628.2)  | 169.3 (113.5 to 233.8)        | 121.0 (56.7 to 232.5)           | 2.4 (1.8 to 3.5)                  | 3781.9 (3351.8 to 4272.5) | 3140.8 (2747.7 to 3565.2)  | 370.8 (248.6 to 512.0)        | 265.0 (124.2 to 509.1)          | 5.4 (4.0 to 7.8)                  |

| Country | Year | 2018 US Dollars per capita |                            |                               |                                 |                                   | 2018 PPP per capita       |                            |                               |                                 |                                   |
|---------|------|----------------------------|----------------------------|-------------------------------|---------------------------------|-----------------------------------|---------------------------|----------------------------|-------------------------------|---------------------------------|-----------------------------------|
|         |      | Health spending            | Government health spending | Out-of-pocket health spending | Prepaid private health spending | Development assistance for health | Health spending           | Government health spending | Out-of-pocket health spending | Prepaid private health spending | Development assistance for health |
| Cuba    | 2044 | 1754.5 (1547.7 to 1981.5)  | 1456.5 (1273.1 to 1651.7)  | 172.0 (114.8 to 237.9)        | 123.4 (57.8 to 237.4)           | 2.5 (1.9 to 3.7)                  | 3841.7 (3389.0 to 4338.9) | 3189.3 (2787.6 to 3616.7)  | 376.6 (251.5 to 520.9)        | 270.3 (126.6 to 519.8)          | 5.6 (4.1 to 8.1)                  |
| Cuba    | 2045 | 1783.3 (1570.9 to 2006.8)  | 1480.0 (1295.8 to 1680.8)  | 174.7 (116.2 to 241.6)        | 126.0 (59.0 to 241.0)           | 2.6 (1.9 to 4.0)                  | 3904.8 (3439.9 to 4394.3) | 3240.8 (2837.3 to 3680.3)  | 382.4 (254.5 to 529.1)        | 275.8 (129.2 to 527.7)          | 5.8 (4.2 to 8.7)                  |
| Cuba    | 2046 | 1810.8 (1603.9 to 2039.9)  | 1502.4 (1316.6 to 1708.7)  | 177.2 (117.8 to 245.3)        | 128.5 (60.2 to 245.7)           | 2.7 (2.0 to 4.2)                  | 3965.1 (3512.1 to 4466.6) | 3289.7 (2883.0 to 3741.4)  | 388.0 (257.9 to 537.2)        | 281.3 (131.7 to 537.9)          | 6.0 (4.4 to 9.2)                  |
| Cuba    | 2047 | 1839.5 (1627.0 to 2076.0)  | 1525.8 (1337.4 to 1734.0)  | 179.8 (119.4 to 248.6)        | 131.1 (61.4 to 249.7)           | 2.9 (2.1 to 4.5)                  | 4028.0 (3562.5 to 4545.7) | 3341.0 (2928.5 to 3796.9)  | 393.7 (261.5 to 544.3)        | 287.0 (134.4 to 546.7)          | 6.3 (4.5 to 9.9)                  |
| Cuba    | 2048 | 1868.3 (1642.4 to 2112.6)  | 1549.2 (1359.9 to 1762.3)  | 182.4 (120.6 to 252.2)        | 133.7 (62.6 to 253.7)           | 3.0 (2.1 to 4.8)                  | 4090.9 (3596.2 to 4626.0) | 3392.4 (2977.7 to 3858.8)  | 399.3 (264.0 to 552.2)        | 292.7 (137.0 to 555.4)          | 6.5 (4.7 to 10.5)                 |
| Cuba    | 2049 | 1897.2 (1669.1 to 2144.0)  | 1572.9 (1379.4 to 1791.6)  | 185.0 (122.1 to 255.7)        | 136.2 (63.8 to 257.5)           | 3.1 (2.2 to 5.0)                  | 4154.3 (3654.8 to 4694.7) | 3444.2 (3020.5 to 3923.0)  | 405.0 (267.3 to 559.8)        | 298.3 (139.6 to 563.9)          | 6.8 (4.9 to 11.0)                 |
| Cuba    | 2050 | 1925.1 (1686.7 to 2180.1)  | 1595.7 (1395.1 to 1819.4)  | 187.5 (123.9 to 259.3)        | 138.7 (64.9 to 261.1)           | 3.3 (2.3 to 5.3)                  | 4215.4 (3693.4 to 4773.6) | 3494.0 (3054.8 to 3983.8)  | 410.5 (271.4 to 567.9)        | 303.7 (142.1 to 571.7)          | 7.1 (5.0 to 11.7)                 |
| Cyprus  | 1995 | 773.2 (722.8 to 833.6)     | 268.5 (240.1 to 298.7)     | 490.4 (443.4 to 541.1)        | 14.3 (8.5 to 22.2)              | 0.0 (0.0 to 0.0)                  | 1079.8 (1009.5 to 1164.2) | 375.0 (335.3 to 417.1)     | 684.8 (619.3 to 755.7)        | 20.0 (11.9 to 31.0)             | 0.0 (0.0 to 0.0)                  |
| Cyprus  | 1996 | 811.3 (768.4 to 858.3)     | 284.2 (259.5 to 310.5)     | 510.7 (471.6 to 549.9)        | 16.4 (10.2 to 25.7)             | 0.0 (0.0 to 0.0)                  | 1133.1 (1073.1 to 1198.7) | 396.9 (362.5 to 433.6)     | 713.3 (658.6 to 768.0)        | 22.9 (14.2 to 35.9)             | 0.0 (0.0 to 0.0)                  |
| Cyprus  | 1997 | 855.7 (815.1 to 898.6)     | 311.5 (288.5 to 336.4)     | 525.0 (491.2 to 558.5)        | 19.2 (12.3 to 29.4)             | 0.0 (0.0 to 0.0)                  | 1195.1 (1138.3 to 1255.0) | 435.0 (402.9 to 469.8)     | 733.2 (686.0 to 780.0)        | 26.8 (17.2 to 41.1)             | 0.0 (0.0 to 0.0)                  |
| Cyprus  | 1998 | 905.4 (865.5 to 947.0)     | 351.6 (329.3 to 376.5)     | 530.7 (498.5 to 564.3)        | 23.1 (15.1 to 34.2)             | 0.0 (0.0 to 0.0)                  | 1264.4 (1208.7 to 1322.5) | 491.1 (459.9 to 525.8)     | 741.1 (696.2 to 788.1)        | 32.2 (21.1 to 47.7)             | 0.0 (0.0 to 0.0)                  |
| Cyprus  | 1999 | 957.2 (917.1 to 996.9)     | 386.5 (364.5 to 410.2)     | 540.4 (509.2 to 573.1)        | 30.2 (20.8 to 42.8)             | 0.0 (0.0 to 0.0)                  | 1336.7 (1280.8 to 1392.2) | 539.8 (509.0 to 572.9)     | 754.7 (711.1 to 800.4)        | 42.2 (29.1 to 59.8)             | 0.0 (0.0 to 0.0)                  |
| Cyprus  | 2000 | 1019.7 (980.1 to 1061.3)   | 424.9 (402.8 to 449.1)     | 561.9 (530.1 to 594.2)        | 32.9 (23.6 to 45.0)             | 0.0 (0.0 to 0.0)                  | 1424.1 (1368.9 to 1482.2) | 593.4 (562.6 to 627.2)     | 784.8 (740.4 to 829.9)        | 45.9 (33.0 to 62.8)             | 0.0 (0.0 to 0.0)                  |
| Cyprus  | 2001 | 1069.9 (1029.5 to 1110.7)  | 456.6 (432.7 to 481.9)     | 575.3 (544.7 to 606.9)        | 38.0 (28.5 to 50.2)             | 0.0 (0.0 to 0.0)                  | 1494.2 (1437.8 to 1551.1) | 637.7 (604.4 to 673.1)     | 803.4 (760.8 to 847.6)        | 53.0 (39.8 to 70.2)             | 0.0 (0.0 to 0.0)                  |
| Cyprus  | 2002 | 1098.8 (1056.6 to 1138.5)  | 475.8 (449.7 to 500.4)     | 575.3 (544.1 to 607.9)        | 47.7 (37.3 to 60.7)             | 0.0 (0.0 to 0.0)                  | 1534.6 (1475.6 to 1590.0) | 664.5 (628.1 to 698.8)     | 803.5 (759.9 to 849.0)        | 66.7 (52.1 to 84.8)             | 0.0 (0.0 to 0.0)                  |
| Cyprus  | 2003 | 1097.9 (1056.4 to 1139.7)  | 465.9 (441.5 to 491.0)     | 560.1 (530.3 to 590.3)        | 71.9 (57.8 to 88.3)             | 0.0 (0.0 to 0.0)                  | 1533.3 (1475.3 to 1591.7) | 650.6 (616.6 to 685.7)     | 782.2 (740.6 to 824.3)        | 100.5 (80.7 to 123.3)           | 0.0 (0.0 to 0.0)                  |
| Cyprus  | 2004 | 1103.4 (1061.1 to 1145.6)  | 457.0 (432.2 to 481.7)     | 558.9 (529.5 to 589.1)        | 87.4 (72.1 to 104.8)            | 0.0 (0.0 to 0.0)                  | 1541.0 (1481.8 to 1600.0) | 638.3 (603.6 to 672.8)     | 780.6 (739.5 to 822.7)        | 122.1 (100.7 to 146.4)          | 0.0 (0.0 to 0.0)                  |
| Cyprus  | 2005 | 1112.0 (1070.5 to 1153.1)  | 455.0 (431.5 to 479.4)     | 563.2 (532.0 to 594.7)        | 93.9 (78.2 to 112.0)            | 0.0 (0.0 to 0.0)                  | 1553.1 (1495.0 to 1610.4) | 635.4 (602.6 to 669.5)     | 786.5 (743.0 to 830.6)        | 131.2 (109.2 to 156.4)          | 0.0 (0.0 to 0.0)                  |
| Cyprus  | 2006 | 1145.1 (1103.2 to 1187.3)  | 471.5 (447.5 to 496.8)     | 577.2 (546.0 to 608.2)        | 96.4 (80.8 to 114.2)            | 0.0 (0.0 to 0.0)                  | 1599.2 (1540.7 to 1658.1) | 658.5 (625.0 to 693.8)     | 806.1 (762.5 to 849.5)        | 134.6 (112.8 to 159.5)          | 0.0 (0.0 to 0.0)                  |
| Cyprus  | 2007 | 1202.1 (1160.6 to 1244.2)  | 501.8 (477.6 to 527.9)     | 604.4 (574.6 to 636.6)        | 95.9 (80.3 to 114.0)            | 0.0 (0.0 to 0.0)                  | 1678.9 (1620.9 to 1737.6) | 700.9 (667.0 to 737.3)     | 844.1 (802.4 to 889.1)        | 133.9 (112.1 to 159.3)          | 0.0 (0.0 to 0.0)                  |
| Cyprus  | 2008 | 1313.9 (1268.3 to 1359.5)  | 560.1 (533.6 to 587.4)     | 652.4 (620.1 to 687.2)        | 101.4 (84.3 to 120.6)           | 0.0 (0.0 to 0.0)                  | 1835.0 (1771.3 to 1898.7) | 782.2 (745.2 to 820.3)     | 911.2 (866.0 to 959.7)        | 141.6 (117.7 to 168.4)          | 0.0 (0.0 to 0.0)                  |

| Country | Year | 2018 US Dollars per capita |                            |                               |                                 |                                   | 2018 PPP per capita       |                            |                               |                                 |                                   |
|---------|------|----------------------------|----------------------------|-------------------------------|---------------------------------|-----------------------------------|---------------------------|----------------------------|-------------------------------|---------------------------------|-----------------------------------|
|         |      | Health spending            | Government health spending | Out-of-pocket health spending | Prepaid private health spending | Development assistance for health | Health spending           | Government health spending | Out-of-pocket health spending | Prepaid private health spending | Development assistance for health |
| Cyprus  | 2009 | 1351.2 (1304.1 to 1394.5)  | 594.0 (566.7 to 622.1)     | 648.1 (616.0 to 681.3)        | 109.1 (91.3 to 128.3)           | 0.0 (0.0 to 0.0)                  | 1887.0 (1821.2 to 1947.5) | 829.6 (791.5 to 868.8)     | 905.1 (860.3 to 951.5)        | 152.4 (127.5 to 179.1)          | 0.0 (0.0 to 0.0)                  |
| Cyprus  | 2010 | 1371.0 (1324.4 to 1413.2)  | 633.0 (605.6 to 662.8)     | 613.1 (581.3 to 644.3)        | 124.9 (105.2 to 145.1)          | 0.0 (0.0 to 0.0)                  | 1914.8 (1849.6 to 1973.6) | 884.1 (845.7 to 925.7)     | 856.2 (811.8 to 899.8)        | 174.5 (146.9 to 202.6)          | 0.0 (0.0 to 0.0)                  |
| Cyprus  | 2011 | 1369.5 (1324.4 to 1413.3)  | 640.0 (612.8 to 668.2)     | 597.5 (566.5 to 629.7)        | 131.9 (112.2 to 152.4)          | 0.0 (0.0 to 0.0)                  | 1912.6 (1849.7 to 1973.8) | 893.8 (855.8 to 933.1)     | 834.5 (791.2 to 879.5)        | 184.2 (156.7 to 212.8)          | 0.0 (0.0 to 0.0)                  |
| Cyprus  | 2012 | 1326.5 (1282.8 to 1369.2)  | 615.1 (588.9 to 641.0)     | 578.1 (546.1 to 608.7)        | 133.3 (114.6 to 153.3)          | 0.0 (0.0 to 0.0)                  | 1852.6 (1791.6 to 1912.2) | 859.1 (822.5 to 895.2)     | 807.3 (762.7 to 850.1)        | 186.2 (160.1 to 214.1)          | 0.0 (0.0 to 0.0)                  |
| Cyprus  | 2013 | 1253.9 (1209.8 to 1297.4)  | 571.5 (545.9 to 597.6)     | 551.2 (522.1 to 579.8)        | 131.2 (113.4 to 151.8)          | 0.0 (0.0 to 0.0)                  | 1751.2 (1689.6 to 1812.0) | 798.2 (762.4 to 834.6)     | 769.7 (729.1 to 809.8)        | 183.3 (158.4 to 212.0)          | 0.0 (0.0 to 0.0)                  |
| Cyprus  | 2014 | 1211.1 (1168.0 to 1254.5)  | 538.2 (511.5 to 564.8)     | 540.0 (511.3 to 571.2)        | 132.9 (115.0 to 153.0)          | 0.0 (0.0 to 0.0)                  | 1691.3 (1631.2 to 1752.0) | 751.6 (714.4 to 788.8)     | 754.2 (714.1 to 797.7)        | 185.5 (160.6 to 213.7)          | 0.0 (0.0 to 0.0)                  |
| Cyprus  | 2015 | 1212.8 (1162.6 to 1261.5)  | 527.2 (498.3 to 556.6)     | 544.4 (512.6 to 579.1)        | 141.2 (119.0 to 165.6)          | 0.0 (0.0 to 0.0)                  | 1693.8 (1623.6 to 1761.8) | 736.3 (696.0 to 777.4)     | 760.2 (715.9 to 808.7)        | 197.2 (166.2 to 231.2)          | 0.0 (0.0 to 0.0)                  |
| Cyprus  | 2016 | 1226.1 (1161.3 to 1292.8)  | 524.8 (489.1 to 562.5)     | 555.0 (513.3 to 601.8)        | 146.3 (119.1 to 176.1)          | 0.0 (0.0 to 0.0)                  | 1712.4 (1621.9 to 1805.4) | 732.9 (683.1 to 785.6)     | 775.1 (716.9 to 840.4)        | 204.3 (166.3 to 246.0)          | 0.0 (0.0 to 0.0)                  |
| Cyprus  | 2017 | 1270.1 (1203.0 to 1346.5)  | 546.3 (509.0 to 584.9)     | 571.9 (529.6 to 621.7)        | 152.0 (123.4 to 183.1)          | 0.0 (0.0 to 0.0)                  | 1773.9 (1680.0 to 1880.5) | 763.0 (710.8 to 816.8)     | 798.6 (739.7 to 868.3)        | 212.3 (172.4 to 255.7)          | 0.0 (0.0 to 0.0)                  |
| Cyprus  | 2018 | 1288.8 (1219.3 to 1361.2)  | 556.8 (518.5 to 597.0)     | 577.2 (533.5 to 625.5)        | 154.8 (125.6 to 186.3)          | 0.0 (0.0 to 0.0)                  | 1800.0 (1702.9 to 1901.0) | 777.7 (724.1 to 833.7)     | 806.1 (745.1 to 873.5)        | 216.1 (175.4 to 260.2)          | 0.0 (0.0 to 0.0)                  |
| Cyprus  | 2019 | 1307.0 (1237.2 to 1385.5)  | 567.5 (528.8 to 609.2)     | 582.1 (537.9 to 630.6)        | 157.4 (127.6 to 189.1)          | 0.0 (0.0 to 0.0)                  | 1825.3 (1727.9 to 1934.9) | 792.6 (738.5 to 850.8)     | 812.9 (751.2 to 880.6)        | 219.9 (178.2 to 264.1)          | 0.0 (0.0 to 0.0)                  |
| Cyprus  | 2020 | 1327.2 (1253.1 to 1402.7)  | 579.3 (538.7 to 621.4)     | 587.5 (541.4 to 638.4)        | 160.3 (129.9 to 193.1)          | 0.0 (0.0 to 0.0)                  | 1853.5 (1750.1 to 1959.0) | 809.1 (752.3 to 867.8)     | 820.6 (756.1 to 891.6)        | 223.9 (181.5 to 269.7)          | 0.0 (0.0 to 0.0)                  |
| Cyprus  | 2021 | 1345.2 (1274.2 to 1424.8)  | 590.1 (546.3 to 633.7)     | 592.1 (544.7 to 643.5)        | 163.0 (132.1 to 196.5)          | 0.0 (0.0 to 0.0)                  | 1878.7 (1779.5 to 1989.8) | 824.1 (763.0 to 885.1)     | 827.0 (760.7 to 898.8)        | 227.7 (184.4 to 274.5)          | 0.0 (0.0 to 0.0)                  |
| Cyprus  | 2022 | 1363.1 (1286.3 to 1441.6)  | 601.4 (556.3 to 647.6)     | 596.1 (548.6 to 647.5)        | 165.7 (134.1 to 199.6)          | 0.0 (0.0 to 0.0)                  | 1903.7 (1796.4 to 2013.3) | 839.8 (776.9 to 904.4)     | 832.4 (766.1 to 904.3)        | 231.4 (187.3 to 278.8)          | 0.0 (0.0 to 0.0)                  |
| Cyprus  | 2023 | 1379.9 (1302.2 to 1465.1)  | 611.9 (564.1 to 660.4)     | 599.8 (551.9 to 653.1)        | 168.3 (136.1 to 203.1)          | 0.0 (0.0 to 0.0)                  | 1927.1 (1818.6 to 2046.1) | 854.5 (787.7 to 922.3)     | 837.6 (770.8 to 912.1)        | 235.0 (190.1 to 283.6)          | 0.0 (0.0 to 0.0)                  |
| Cyprus  | 2024 | 1396.7 (1316.3 to 1477.3)  | 622.4 (573.9 to 673.5)     | 603.5 (554.0 to 657.6)        | 170.8 (138.3 to 206.5)          | 0.0 (0.0 to 0.0)                  | 1950.6 (1838.3 to 2063.1) | 869.3 (801.5 to 940.5)     | 842.8 (773.7 to 918.4)        | 238.6 (193.1 to 288.4)          | 0.0 (0.0 to 0.0)                  |
| Cyprus  | 2025 | 1411.2 (1332.3 to 1499.0)  | 632.1 (582.6 to 686.0)     | 606.0 (555.4 to 662.2)        | 173.1 (140.0 to 209.6)          | 0.0 (0.0 to 0.0)                  | 1970.9 (1860.7 to 2093.5) | 882.8 (813.6 to 958.1)     | 846.3 (775.7 to 924.8)        | 241.8 (195.5 to 292.7)          | 0.0 (0.0 to 0.0)                  |
| Cyprus  | 2026 | 1424.5 (1340.0 to 1509.1)  | 641.1 (590.8 to 696.5)     | 608.1 (557.3 to 665.0)        | 175.3 (141.8 to 212.6)          | 0.0 (0.0 to 0.0)                  | 1989.4 (1871.5 to 2107.5) | 895.3 (825.1 to 972.8)     | 849.3 (778.3 to 928.8)        | 244.8 (198.1 to 296.9)          | 0.0 (0.0 to 0.0)                  |
| Cyprus  | 2027 | 1436.3 (1352.4 to 1528.3)  | 649.4 (596.3 to 707.5)     | 609.7 (558.2 to 667.1)        | 177.3 (143.4 to 215.4)          | 0.0 (0.0 to 0.0)                  | 2005.9 (1888.7 to 2134.3) | 906.9 (832.7 to 988.0)     | 851.5 (779.5 to 931.7)        | 247.6 (200.3 to 300.8)          | 0.0 (0.0 to 0.0)                  |
| Cyprus  | 2028 | 1449.1 (1358.0 to 1539.9)  | 658.1 (602.4 to 718.9)     | 611.6 (558.9 to 672.0)        | 179.4 (145.1 to 218.3)          | 0.0 (0.0 to 0.0)                  | 2023.7 (1896.5 to 2150.6) | 919.1 (841.3 to 1004.0)    | 854.1 (780.5 to 938.5)        | 250.5 (202.6 to 304.9)          | 0.0 (0.0 to 0.0)                  |
| Cyprus  | 2029 | 1461.9 (1372.3 to 1559.2)  | 666.9 (608.1 to 731.5)     | 613.5 (558.2 to 674.1)        | 181.5 (146.8 to 220.9)          | 0.0 (0.0 to 0.0)                  | 2041.6 (1916.5 to 2177.5) | 931.3 (849.2 to 1021.6)    | 856.8 (779.6 to 941.4)        | 253.5 (205.0 to 308.5)          | 0.0 (0.0 to 0.0)                  |

| Country | Year | 2018 US Dollars per capita |                            |                               |                                 |                                   | 2018 PPP per capita       |                            |                               |                                 |                                   |
|---------|------|----------------------------|----------------------------|-------------------------------|---------------------------------|-----------------------------------|---------------------------|----------------------------|-------------------------------|---------------------------------|-----------------------------------|
|         |      | Health spending            | Government health spending | Out-of-pocket health spending | Prepaid private health spending | Development assistance for health | Health spending           | Government health spending | Out-of-pocket health spending | Prepaid private health spending | Development assistance for health |
| Cyprus  | 2030 | 1476.2 (1378.9 to 1575.5)  | 676.6 (614.6 to 744.6)     | 615.7 (559.6 to 681.1)        | 183.8 (148.6 to 223.0)          | 0.0 (0.0 to 0.0)                  | 2061.6 (1925.7 to 2200.3) | 945.0 (858.3 to 1039.8)    | 859.9 (781.6 to 951.2)        | 256.7 (207.5 to 311.5)          | 0.0 (0.0 to 0.0)                  |
| Cyprus  | 2031 | 1490.1 (1396.3 to 1597.0)  | 686.1 (622.2 to 758.4)     | 617.9 (560.5 to 685.0)        | 186.1 (150.3 to 226.0)          | 0.0 (0.0 to 0.0)                  | 2081.0 (1950.0 to 2230.4) | 958.2 (868.9 to 1059.1)    | 862.9 (782.8 to 956.6)        | 259.9 (210.0 to 315.6)          | 0.0 (0.0 to 0.0)                  |
| Cyprus  | 2032 | 1505.6 (1403.1 to 1611.4)  | 696.4 (627.6 to 772.7)     | 620.6 (561.4 to 687.9)        | 188.5 (152.3 to 229.2)          | 0.0 (0.0 to 0.0)                  | 2102.7 (1959.5 to 2250.4) | 972.6 (876.5 to 1079.1)    | 866.8 (784.1 to 960.8)        | 263.3 (212.7 to 320.1)          | 0.0 (0.0 to 0.0)                  |
| Cyprus  | 2033 | 1520.1 (1419.3 to 1632.9)  | 706.2 (636.1 to 784.2)     | 623.0 (562.1 to 693.4)        | 190.9 (154.2 to 232.1)          | 0.0 (0.0 to 0.0)                  | 2122.9 (1982.1 to 2280.5) | 986.3 (888.3 to 1095.2)    | 870.0 (785.1 to 968.4)        | 266.6 (215.4 to 324.1)          | 0.0 (0.0 to 0.0)                  |
| Cyprus  | 2034 | 1535.8 (1424.0 to 1644.4)  | 716.7 (642.1 to 796.7)     | 625.7 (562.1 to 698.4)        | 193.4 (156.1 to 234.6)          | 0.0 (0.0 to 0.0)                  | 2144.9 (1988.7 to 2296.5) | 1001.0 (896.8 to 1112.6)   | 873.8 (785.0 to 975.4)        | 270.1 (218.1 to 327.7)          | 0.0 (0.0 to 0.0)                  |
| Cyprus  | 2035 | 1552.7 (1444.1 to 1671.7)  | 727.9 (649.7 to 812.2)     | 628.8 (564.4 to 703.4)        | 196.0 (157.9 to 238.2)          | 0.0 (0.0 to 0.0)                  | 2168.4 (2016.8 to 2334.6) | 1016.5 (907.3 to 1134.3)   | 878.1 (788.3 to 982.3)        | 273.8 (220.5 to 332.7)          | 0.0 (0.0 to 0.0)                  |
| Cyprus  | 2036 | 1567.4 (1447.5 to 1684.9)  | 737.7 (657.6 to 825.2)     | 631.2 (566.3 to 707.4)        | 198.5 (159.7 to 241.5)          | 0.0 (0.0 to 0.0)                  | 2189.1 (2021.5 to 2353.1) | 1030.3 (918.4 to 1152.5)   | 881.6 (790.9 to 988.0)        | 277.2 (223.0 to 337.3)          | 0.0 (0.0 to 0.0)                  |
| Cyprus  | 2037 | 1581.7 (1464.6 to 1713.0)  | 747.3 (662.1 to 837.4)     | 633.5 (568.0 to 710.6)        | 200.9 (161.9 to 244.7)          | 0.0 (0.0 to 0.0)                  | 2209.0 (2045.4 to 2392.4) | 1043.7 (924.6 to 1169.5)   | 884.8 (793.3 to 992.4)        | 280.5 (226.1 to 341.7)          | 0.0 (0.0 to 0.0)                  |
| Cyprus  | 2038 | 1596.3 (1470.1 to 1723.6)  | 757.1 (671.5 to 852.5)     | 635.9 (568.7 to 713.8)        | 203.3 (163.9 to 248.1)          | 0.0 (0.0 to 0.0)                  | 2229.3 (2053.1 to 2407.1) | 1057.4 (937.9 to 1190.6)   | 888.0 (794.2 to 996.8)        | 284.0 (229.0 to 346.5)          | 0.0 (0.0 to 0.0)                  |
| Cyprus  | 2039 | 1610.6 (1480.9 to 1748.4)  | 766.9 (677.1 to 866.7)     | 637.9 (568.9 to 718.6)        | 205.7 (165.6 to 251.5)          | 0.0 (0.0 to 0.0)                  | 2249.3 (2068.2 to 2441.8) | 1071.1 (945.6 to 1210.5)   | 890.9 (794.5 to 1003.6)       | 287.3 (231.3 to 351.2)          | 0.0 (0.0 to 0.0)                  |
| Cyprus  | 2040 | 1624.9 (1491.0 to 1762.2)  | 777.0 (683.9 to 881.4)     | 639.9 (569.4 to 722.3)        | 208.1 (167.2 to 255.0)          | 0.0 (0.0 to 0.0)                  | 2269.3 (2082.2 to 2461.1) | 1085.1 (955.1 to 1231.0)   | 893.6 (795.2 to 1008.8)       | 290.6 (233.5 to 356.1)          | 0.0 (0.0 to 0.0)                  |
| Cyprus  | 2041 | 1637.5 (1509.0 to 1788.2)  | 786.0 (688.0 to 891.6)     | 641.2 (569.6 to 724.5)        | 210.3 (168.9 to 258.2)          | 0.0 (0.0 to 0.0)                  | 2286.9 (2107.5 to 2497.4) | 1097.7 (960.9 to 1245.2)   | 895.5 (795.5 to 1011.8)       | 293.7 (235.9 to 360.7)          | 0.0 (0.0 to 0.0)                  |
| Cyprus  | 2042 | 1649.1 (1508.2 to 1795.1)  | 794.7 (693.9 to 907.5)     | 642.1 (569.4 to 725.7)        | 212.3 (170.4 to 261.4)          | 0.0 (0.0 to 0.0)                  | 2303.2 (2106.4 to 2507.1) | 1109.8 (969.1 to 1267.4)   | 896.8 (795.2 to 1013.4)       | 296.5 (238.0 to 365.0)          | 0.0 (0.0 to 0.0)                  |
| Cyprus  | 2043 | 1660.8 (1524.7 to 1821.4)  | 803.5 (698.7 to 920.4)     | 642.9 (568.8 to 727.6)        | 214.4 (171.8 to 264.4)          | 0.0 (0.0 to 0.0)                  | 2319.4 (2129.4 to 2543.7) | 1122.2 (975.7 to 1285.4)   | 897.8 (794.4 to 1016.2)       | 299.4 (240.0 to 369.2)          | 0.0 (0.0 to 0.0)                  |
| Cyprus  | 2044 | 1673.6 (1523.5 to 1829.4)  | 813.1 (703.8 to 934.0)     | 644.0 (568.7 to 730.0)        | 216.5 (173.3 to 267.2)          | 0.0 (0.0 to 0.0)                  | 2337.4 (2127.7 to 2555.0) | 1135.5 (983.0 to 1304.4)   | 899.4 (794.3 to 1019.5)       | 302.4 (242.0 to 373.2)          | 0.0 (0.0 to 0.0)                  |
| Cyprus  | 2045 | 1686.7 (1544.0 to 1856.9)  | 822.8 (711.3 to 951.0)     | 645.2 (568.9 to 732.6)        | 218.7 (174.8 to 270.1)          | 0.0 (0.0 to 0.0)                  | 2355.7 (2156.3 to 2593.4) | 1149.1 (993.3 to 1328.2)   | 901.1 (794.5 to 1023.1)       | 305.5 (244.2 to 377.2)          | 0.0 (0.0 to 0.0)                  |
| Cyprus  | 2046 | 1698.2 (1540.0 to 1862.2)  | 831.4 (714.5 to 961.1)     | 646.0 (569.2 to 736.4)        | 220.8 (175.9 to 273.5)          | 0.0 (0.0 to 0.0)                  | 2371.7 (2150.7 to 2600.8) | 1161.1 (997.9 to 1342.2)   | 902.3 (794.9 to 1028.5)       | 308.4 (245.7 to 382.0)          | 0.0 (0.0 to 0.0)                  |
| Cyprus  | 2047 | 1709.5 (1557.5 to 1884.3)  | 839.9 (721.3 to 972.4)     | 646.7 (569.0 to 739.2)        | 222.8 (177.2 to 276.3)          | 0.0 (0.0 to 0.0)                  | 2387.4 (2175.1 to 2631.5) | 1173.0 (1007.3 to 1358.0)  | 903.2 (794.6 to 1032.4)       | 311.2 (247.4 to 385.9)          | 0.0 (0.0 to 0.0)                  |
| Cyprus  | 2048 | 1721.1 (1560.5 to 1894.9)  | 848.7 (728.0 to 988.6)     | 647.5 (568.9 to 741.9)        | 224.9 (178.5 to 279.7)          | 0.0 (0.0 to 0.0)                  | 2403.7 (2179.4 to 2646.4) | 1185.3 (1016.7 to 1380.7)  | 904.2 (794.6 to 1036.1)       | 314.1 (249.2 to 390.7)          | 0.0 (0.0 to 0.0)                  |
| Cyprus  | 2049 | 1733.2 (1575.0 to 1921.4)  | 857.9 (731.9 to 1000.6)    | 648.3 (569.0 to 742.7)        | 227.1 (179.8 to 283.6)          | 0.0 (0.0 to 0.0)                  | 2420.6 (2199.7 to 2683.4) | 1198.2 (1022.2 to 1397.5)  | 905.3 (794.6 to 1037.3)       | 317.1 (251.1 to 396.1)          | 0.0 (0.0 to 0.0)                  |
| Cyprus  | 2050 | 1744.1 (1572.7 to 1934.7)  | 866.6 (737.5 to 1015.0)    | 648.6 (568.7 to 747.0)        | 229.0 (180.8 to 287.1)          | 0.0 (0.0 to 0.0)                  | 2435.8 (2196.4 to 2702.0) | 1210.2 (1030.0 to 1417.6)  | 905.8 (794.3 to 1043.3)       | 319.9 (252.5 to 401.0)          | 0.0 (0.0 to 0.0)                  |

| Country        | Year | 2018 US Dollars per capita |                            |                               |                                 |                                   | 2018 PPP per capita       |                            |                               |                                 |                                   |
|----------------|------|----------------------------|----------------------------|-------------------------------|---------------------------------|-----------------------------------|---------------------------|----------------------------|-------------------------------|---------------------------------|-----------------------------------|
|                |      | Health spending            | Government health spending | Out-of-pocket health spending | Prepaid private health spending | Development assistance for health | Health spending           | Government health spending | Out-of-pocket health spending | Prepaid private health spending | Development assistance for health |
| Czech Republic | 1995 | 779.7 (730.1 to 834.1)     | 688.7 (643.2 to 741.2)     | 77.0 (62.8 to 93.6)           | 14.0 (7.3 to 23.6)              | 0.0 (0.0 to 0.0)                  | 1292.0 (1209.8 to 1382.2) | 1141.2 (1065.8 to 1228.2)  | 127.6 (104.1 to 155.1)        | 23.2 (12.2 to 39.1)             | 0.0 (0.0 to 0.0)                  |
| Czech Republic | 1996 | 784.2 (744.2 to 823.8)     | 691.8 (656.8 to 728.9)     | 78.3 (64.3 to 94.3)           | 14.1 (7.4 to 23.1)              | 0.0 (0.0 to 0.0)                  | 1299.3 (1233.1 to 1365.0) | 1146.2 (1088.3 to 1207.8)  | 129.7 (106.6 to 156.3)        | 23.4 (12.3 to 38.2)             | 0.0 (0.0 to 0.0)                  |
| Czech Republic | 1997 | 768.3 (729.7 to 803.5)     | 675.8 (644.7 to 708.3)     | 78.5 (65.2 to 92.6)           | 13.9 (7.5 to 22.3)              | 0.0 (0.0 to 0.0)                  | 1273.0 (1209.1 to 1331.4) | 1119.8 (1068.2 to 1173.6)  | 130.1 (108.1 to 153.5)        | 23.1 (12.5 to 36.9)             | 0.0 (0.0 to 0.0)                  |
| Czech Republic | 1998 | 766.8 (732.4 to 801.9)     | 674.1 (641.5 to 706.6)     | 78.8 (66.1 to 91.7)           | 13.8 (7.7 to 22.4)              | 0.0 (0.0 to 0.0)                  | 1270.5 (1213.5 to 1328.7) | 1117.0 (1062.9 to 1170.9)  | 130.6 (109.6 to 151.9)        | 22.9 (12.8 to 37.1)             | 0.0 (0.0 to 0.0)                  |
| Czech Republic | 1999 | 780.2 (744.8 to 815.5)     | 686.3 (653.2 to 718.6)     | 80.2 (68.1 to 92.8)           | 13.7 (7.8 to 21.7)              | 0.0 (0.0 to 0.0)                  | 1292.8 (1234.2 to 1351.3) | 1137.3 (1082.3 to 1190.7)  | 132.8 (112.8 to 153.8)        | 22.7 (12.9 to 35.9)             | 0.0 (0.0 to 0.0)                  |
| Czech Republic | 2000 | 825.7 (788.2 to 864.0)     | 727.6 (694.3 to 762.6)     | 84.4 (72.1 to 98.0)           | 13.8 (7.9 to 21.5)              | 0.0 (0.0 to 0.0)                  | 1368.2 (1306.0 to 1431.6) | 1205.6 (1150.5 to 1263.6)  | 139.8 (119.4 to 162.4)        | 22.8 (13.1 to 35.6)             | 0.0 (0.0 to 0.0)                  |
| Czech Republic | 2001 | 887.9 (851.0 to 926.6)     | 780.2 (747.1 to 816.1)     | 90.9 (78.2 to 105.2)          | 16.8 (9.7 to 26.6)              | 0.0 (0.0 to 0.0)                  | 1471.3 (1410.0 to 1535.4) | 1292.8 (1237.9 to 1352.2)  | 150.7 (129.7 to 174.3)        | 27.8 (16.0 to 44.0)             | 0.0 (0.0 to 0.0)                  |
| Czech Republic | 2002 | 943.0 (906.7 to 982.1)     | 827.1 (795.2 to 863.0)     | 96.5 (83.4 to 111.0)          | 19.4 (11.7 to 30.1)             | 0.0 (0.0 to 0.0)                  | 1562.5 (1502.3 to 1627.3) | 1370.4 (1317.7 to 1429.9)  | 159.9 (138.2 to 183.9)        | 32.1 (19.3 to 49.9)             | 0.0 (0.0 to 0.0)                  |
| Czech Republic | 2003 | 1003.5 (966.9 to 1041.6)   | 876.2 (843.3 to 911.9)     | 105.0 (91.1 to 120.3)         | 22.3 (14.0 to 33.5)             | 0.0 (0.0 to 0.0)                  | 1662.8 (1602.1 to 1725.9) | 1451.8 (1397.3 to 1511.1)  | 174.0 (150.9 to 199.3)        | 37.0 (23.2 to 55.6)             | 0.0 (0.0 to 0.0)                  |
| Czech Republic | 2004 | 1050.2 (1012.2 to 1090.8)  | 911.4 (877.7 to 948.1)     | 114.2 (100.1 to 129.7)        | 24.6 (16.0 to 36.2)             | 0.0 (0.0 to 0.0)                  | 1740.2 (1677.2 to 1807.5) | 1510.2 (1454.3 to 1570.9)  | 189.2 (165.8 to 214.9)        | 40.8 (26.5 to 59.9)             | 0.0 (0.0 to 0.0)                  |
| Czech Republic | 2005 | 1093.4 (1052.5 to 1134.9)  | 936.2 (900.3 to 971.3)     | 126.5 (112.1 to 142.4)        | 30.6 (20.8 to 44.0)             | 0.0 (0.0 to 0.0)                  | 1811.7 (1744.1 to 1880.5) | 1551.3 (1491.8 to 1609.5)  | 209.6 (185.7 to 236.0)        | 50.8 (34.4 to 72.9)             | 0.0 (0.0 to 0.0)                  |
| Czech Republic | 2006 | 1142.8 (1100.5 to 1180.5)  | 968.5 (933.9 to 1002.5)    | 142.1 (127.2 to 157.8)        | 32.1 (21.6 to 46.8)             | 0.0 (0.0 to 0.0)                  | 1893.6 (1823.4 to 1956.1) | 1604.8 (1547.5 to 1661.2)  | 235.5 (210.7 to 261.5)        | 53.2 (35.8 to 77.5)             | 0.0 (0.0 to 0.0)                  |
| Czech Republic | 2007 | 1208.6 (1169.1 to 1247.5)  | 1011.4 (978.5 to 1044.8)   | 164.7 (149.0 to 181.0)        | 32.5 (21.3 to 46.2)             | 0.0 (0.0 to 0.0)                  | 2002.6 (1937.2 to 2067.1) | 1675.9 (1621.4 to 1731.3)  | 272.9 (246.8 to 300.0)        | 53.8 (35.4 to 76.6)             | 0.0 (0.0 to 0.0)                  |
| Czech Republic | 2008 | 1275.2 (1235.0 to 1314.4)  | 1053.3 (1019.5 to 1086.7)  | 189.3 (172.3 to 206.2)        | 32.6 (21.5 to 45.7)             | 0.0 (0.0 to 0.0)                  | 2113.0 (2046.5 to 2177.9) | 1745.3 (1689.3 to 1800.6)  | 313.6 (285.6 to 341.7)        | 54.0 (35.7 to 75.7)             | 0.0 (0.0 to 0.0)                  |
| Czech Republic | 2009 | 1310.7 (1270.2 to 1351.3)  | 1081.1 (1047.3 to 1116.7)  | 200.2 (183.1 to 217.3)        | 29.4 (19.7 to 41.4)             | 0.0 (0.0 to 0.0)                  | 2171.9 (2104.7 to 2239.1) | 1791.3 (1735.3 to 1850.4)  | 331.7 (303.5 to 360.1)        | 48.8 (32.6 to 68.6)             | 0.0 (0.0 to 0.0)                  |
| Czech Republic | 2010 | 1341.4 (1301.4 to 1383.1)  | 1110.9 (1078.0 to 1146.0)  | 204.4 (188.5 to 221.6)        | 26.1 (17.8 to 36.8)             | 0.0 (0.0 to 0.0)                  | 2222.7 (2156.3 to 2291.7) | 1840.7 (1786.3 to 1898.9)  | 338.7 (312.3 to 367.2)        | 43.2 (29.6 to 60.9)             | 0.0 (0.0 to 0.0)                  |
| Czech Republic | 2011 | 1386.4 (1345.1 to 1426.9)  | 1154.0 (1119.2 to 1188.4)  | 207.5 (191.5 to 225.0)        | 24.9 (17.1 to 35.3)             | 0.0 (0.0 to 0.0)                  | 2297.2 (2228.8 to 2364.3) | 1912.1 (1854.5 to 1969.2)  | 343.8 (317.4 to 372.8)        | 41.3 (28.3 to 58.5)             | 0.0 (0.0 to 0.0)                  |
| Czech Republic | 2012 | 1404.6 (1361.9 to 1445.8)  | 1170.5 (1134.3 to 1206.6)  | 207.5 (190.6 to 225.0)        | 26.7 (18.4 to 37.1)             | 0.0 (0.0 to 0.0)                  | 2327.5 (2256.6 to 2395.7) | 1939.4 (1879.6 to 1999.4)  | 343.8 (315.9 to 372.8)        | 44.3 (30.5 to 61.4)             | 0.0 (0.0 to 0.0)                  |
| Czech Republic | 2013 | 1455.4 (1414.8 to 1499.3)  | 1208.7 (1173.0 to 1248.3)  | 209.8 (192.7 to 227.1)        | 36.9 (25.2 to 51.2)             | 0.0 (0.0 to 0.0)                  | 2411.5 (2344.3 to 2484.4) | 2002.9 (1943.6 to 2068.5)  | 347.6 (319.4 to 376.4)        | 61.1 (41.8 to 84.9)             | 0.0 (0.0 to 0.0)                  |
| Czech Republic | 2014 | 1488.8 (1447.0 to 1532.4)  | 1230.7 (1194.2 to 1266.9)  | 214.3 (196.9 to 233.9)        | 43.8 (30.0 to 60.8)             | 0.0 (0.0 to 0.0)                  | 2467.0 (2397.6 to 2539.2) | 2039.3 (1978.7 to 2099.2)  | 355.1 (326.3 to 387.6)        | 72.6 (49.7 to 100.8)            | 0.0 (0.0 to 0.0)                  |
| Czech Republic | 2015 | 1515.1 (1471.0 to 1565.0)  | 1247.8 (1209.3 to 1285.8)  | 220.8 (201.6 to 243.6)        | 46.5 (31.7 to 65.0)             | 0.0 (0.0 to 0.0)                  | 2510.4 (2437.5 to 2593.2) | 2067.6 (2003.9 to 2130.6)  | 365.9 (334.0 to 403.6)        | 77.0 (52.6 to 107.7)            | 0.0 (0.0 to 0.0)                  |

| Country        | Year | 2018 US Dollars per capita |                            |                               |                                 |                                   | 2018 PPP per capita       |                            |                               |                                 |                                   |
|----------------|------|----------------------------|----------------------------|-------------------------------|---------------------------------|-----------------------------------|---------------------------|----------------------------|-------------------------------|---------------------------------|-----------------------------------|
|                |      | Health spending            | Government health spending | Out-of-pocket health spending | Prepaid private health spending | Development assistance for health | Health spending           | Government health spending | Out-of-pocket health spending | Prepaid private health spending | Development assistance for health |
| Czech Republic | 2016 | 1515.1 (1456.6 to 1578.5)  | 1242.3 (1192.9 to 1298.0)  | 224.9 (201.0 to 252.1)        | 47.9 (31.6 to 69.5)             | 0.0 (0.0 to 0.0)                  | 2510.6 (2413.5 to 2615.5) | 2058.5 (1976.7 to 2150.8)  | 372.7 (333.0 to 417.8)        | 79.4 (52.4 to 115.1)            | 0.0 (0.0 to 0.0)                  |
| Czech Republic | 2017 | 1586.5 (1524.8 to 1654.2)  | 1302.1 (1248.9 to 1360.0)  | 234.2 (208.9 to 262.3)        | 50.2 (33.1 to 72.7)             | 0.0 (0.0 to 0.0)                  | 2628.7 (2526.6 to 2741.0) | 2157.6 (2069.4 to 2253.5)  | 388.0 (346.2 to 434.7)        | 83.1 (54.9 to 120.5)            | 0.0 (0.0 to 0.0)                  |
| Czech Republic | 2018 | 1616.8 (1551.8 to 1687.5)  | 1325.6 (1267.9 to 1385.2)  | 240.2 (214.3 to 268.7)        | 51.0 (33.7 to 74.0)             | 0.0 (0.0 to 0.0)                  | 2679.1 (2571.3 to 2796.2) | 2196.5 (2100.9 to 2295.3)  | 398.0 (355.0 to 445.3)        | 84.6 (55.9 to 122.6)            | 0.0 (0.0 to 0.0)                  |
| Czech Republic | 2019 | 1640.6 (1574.0 to 1716.5)  | 1342.9 (1281.7 to 1407.7)  | 245.9 (219.4 to 276.7)        | 51.8 (34.2 to 75.1)             | 0.0 (0.0 to 0.0)                  | 2718.4 (2608.1 to 2844.2) | 2225.1 (2123.8 to 2332.6)  | 407.5 (363.5 to 458.5)        | 85.8 (56.6 to 124.4)            | 0.0 (0.0 to 0.0)                  |
| Czech Republic | 2020 | 1668.2 (1596.2 to 1748.8)  | 1363.5 (1300.5 to 1432.1)  | 252.1 (223.2 to 283.7)        | 52.7 (34.7 to 76.3)             | 0.0 (0.0 to 0.0)                  | 2764.2 (2644.9 to 2897.7) | 2259.3 (2154.9 to 2372.9)  | 417.6 (369.9 to 470.1)        | 87.2 (57.5 to 126.4)            | 0.0 (0.0 to 0.0)                  |
| Czech Republic | 2021 | 1695.2 (1619.3 to 1778.9)  | 1383.4 (1316.7 to 1456.8)  | 258.3 (228.7 to 290.7)        | 53.6 (35.2 to 77.6)             | 0.0 (0.0 to 0.0)                  | 2808.9 (2683.1 to 2947.7) | 2292.3 (2181.8 to 2414.0)  | 427.9 (378.9 to 481.7)        | 88.7 (58.4 to 128.6)            | 0.0 (0.0 to 0.0)                  |
| Czech Republic | 2022 | 1724.6 (1642.6 to 1814.7)  | 1405.1 (1333.3 to 1483.8)  | 264.8 (233.3 to 299.1)        | 54.6 (35.9 to 79.1)             | 0.0 (0.0 to 0.0)                  | 2857.6 (2721.7 to 3006.9) | 2328.3 (2209.3 to 2458.6)  | 438.8 (386.5 to 495.6)        | 90.5 (59.5 to 131.0)            | 0.0 (0.0 to 0.0)                  |
| Czech Republic | 2023 | 1755.3 (1669.8 to 1848.9)  | 1427.8 (1353.6 to 1510.0)  | 271.7 (240.0 to 308.1)        | 55.8 (36.6 to 80.7)             | 0.0 (0.0 to 0.0)                  | 2908.5 (2766.8 to 3063.7) | 2365.8 (2242.9 to 2502.0)  | 450.3 (397.7 to 510.5)        | 92.4 (60.7 to 133.8)            | 0.0 (0.0 to 0.0)                  |
| Czech Republic | 2024 | 1788.6 (1698.7 to 1887.5)  | 1452.8 (1371.3 to 1543.4)  | 278.9 (247.4 to 315.5)        | 56.9 (37.4 to 82.4)             | 0.0 (0.0 to 0.0)                  | 2963.7 (2814.7 to 3127.5) | 2407.2 (2272.2 to 2557.4)  | 462.1 (410.0 to 522.7)        | 94.4 (62.0 to 136.5)            | 0.0 (0.0 to 0.0)                  |
| Czech Republic | 2025 | 1824.1 (1726.3 to 1930.5)  | 1479.6 (1394.0 to 1574.4)  | 286.3 (254.0 to 324.5)        | 58.2 (38.3 to 84.1)             | 0.0 (0.0 to 0.0)                  | 3022.5 (2860.5 to 3198.8) | 2451.8 (2309.8 to 2608.8)  | 474.4 (420.8 to 537.7)        | 96.4 (63.5 to 139.4)            | 0.0 (0.0 to 0.0)                  |
| Czech Republic | 2026 | 1861.4 (1759.0 to 1975.0)  | 1508.0 (1413.7 to 1610.5)  | 294.0 (260.8 to 335.4)        | 59.4 (39.1 to 85.9)             | 0.0 (0.0 to 0.0)                  | 3084.2 (2914.7 to 3272.6) | 2498.7 (2342.6 to 2668.7)  | 487.1 (432.1 to 555.8)        | 98.5 (64.9 to 142.3)            | 0.0 (0.0 to 0.0)                  |
| Czech Republic | 2027 | 1902.0 (1791.5 to 2021.6)  | 1539.2 (1439.2 to 1646.9)  | 302.0 (265.7 to 344.9)        | 60.8 (40.1 to 87.7)             | 0.0 (0.0 to 0.0)                  | 3151.7 (2968.5 to 3349.8) | 2550.5 (2384.8 to 2728.8)  | 500.5 (440.3 to 571.5)        | 100.7 (66.4 to 145.3)           | 0.0 (0.0 to 0.0)                  |
| Czech Republic | 2028 | 1942.2 (1827.7 to 2068.1)  | 1569.8 (1462.3 to 1684.7)  | 310.2 (270.8 to 355.7)        | 62.2 (41.1 to 89.7)             | 0.0 (0.0 to 0.0)                  | 3218.2 (3028.6 to 3426.9) | 2601.2 (2423.0 to 2791.5)  | 514.0 (448.7 to 589.4)        | 103.0 (68.1 to 148.6)           | 0.0 (0.0 to 0.0)                  |
| Czech Republic | 2029 | 1981.9 (1857.3 to 2116.5)  | 1599.9 (1488.5 to 1720.7)  | 318.4 (276.2 to 367.9)        | 63.6 (42.2 to 91.8)             | 0.0 (0.0 to 0.0)                  | 3284.1 (3077.6 to 3507.1) | 2651.1 (2466.5 to 2851.3)  | 527.6 (457.7 to 609.6)        | 105.4 (69.9 to 152.1)           | 0.0 (0.0 to 0.0)                  |
| Czech Republic | 2030 | 2021.6 (1891.1 to 2161.7)  | 1629.9 (1506.5 to 1757.0)  | 326.6 (282.4 to 380.1)        | 65.1 (43.2 to 93.9)             | 0.0 (0.0 to 0.0)                  | 3349.8 (3133.5 to 3582.0) | 2700.8 (2496.3 to 2911.3)  | 541.2 (467.9 to 629.8)        | 107.8 (71.6 to 155.6)           | 0.0 (0.0 to 0.0)                  |
| Czech Republic | 2031 | 2062.1 (1923.4 to 2212.0)  | 1660.6 (1530.4 to 1794.0)  | 334.9 (287.3 to 391.8)        | 66.5 (44.1 to 96.1)             | 0.0 (0.0 to 0.0)                  | 3416.9 (3187.1 to 3665.2) | 2751.6 (2535.8 to 2972.7)  | 555.0 (476.0 to 649.1)        | 110.3 (73.1 to 159.2)           | 0.0 (0.0 to 0.0)                  |
| Czech Republic | 2032 | 2103.0 (1958.1 to 2261.0)  | 1691.6 (1558.5 to 1831.9)  | 343.3 (292.2 to 403.0)        | 68.1 (45.2 to 98.3)             | 0.0 (0.0 to 0.0)                  | 3484.6 (3244.5 to 3746.5) | 2803.0 (2582.5 to 3035.4)  | 568.8 (484.2 to 667.8)        | 112.8 (74.8 to 163.0)           | 0.0 (0.0 to 0.0)                  |
| Czech Republic | 2033 | 2143.2 (1988.9 to 2312.7)  | 1722.1 (1576.1 to 1876.6)  | 351.6 (297.6 to 416.1)        | 69.6 (46.1 to 100.6)            | 0.0 (0.0 to 0.0)                  | 3551.3 (3295.6 to 3832.1) | 2853.4 (2611.6 to 3109.4)  | 582.6 (493.2 to 689.4)        | 115.3 (76.3 to 166.7)           | 0.0 (0.0 to 0.0)                  |
| Czech Republic | 2034 | 2183.2 (2018.6 to 2359.5)  | 1752.3 (1599.7 to 1912.2)  | 359.8 (303.1 to 428.6)        | 71.1 (47.1 to 102.8)            | 0.0 (0.0 to 0.0)                  | 3617.5 (3344.8 to 3909.6) | 2903.5 (2650.6 to 3168.4)  | 596.2 (502.2 to 710.1)        | 117.8 (78.0 to 170.3)           | 0.0 (0.0 to 0.0)                  |
| Czech Republic | 2035 | 2225.2 (2050.8 to 2407.9)  | 1784.5 (1619.4 to 1953.0)  | 368.2 (307.5 to 441.9)        | 72.6 (48.2 to 105.0)            | 0.0 (0.0 to 0.0)                  | 3687.1 (3398.2 to 3989.8) | 2956.8 (2683.4 to 3236.1)  | 610.1 (509.5 to 732.2)        | 120.3 (79.8 to 173.9)           | 0.0 (0.0 to 0.0)                  |
| Czech Republic | 2036 | 2266.9 (2083.0 to 2458.5)  | 1816.5 (1647.9 to 1991.9)  | 376.4 (312.0 to 453.1)        | 74.0 (49.2 to 107.1)            | 0.0 (0.0 to 0.0)                  | 3756.3 (3451.4 to 4073.6) | 3009.9 (2730.6 to 3300.6)  | 623.7 (517.0 to 750.8)        | 122.6 (81.5 to 177.4)           | 0.0 (0.0 to 0.0)                  |

| Country                          | Year | 2018 US Dollars per capita |                            |                               |                                 |                                   | 2018 PPP per capita       |                            |                               |                                 |                                   |
|----------------------------------|------|----------------------------|----------------------------|-------------------------------|---------------------------------|-----------------------------------|---------------------------|----------------------------|-------------------------------|---------------------------------|-----------------------------------|
|                                  |      | Health spending            | Government health spending | Out-of-pocket health spending | Prepaid private health spending | Development assistance for health | Health spending           | Government health spending | Out-of-pocket health spending | Prepaid private health spending | Development assistance for health |
| Czech Republic                   | 2037 | 2309.1 (2120.6 to 2515.3)  | 1849.0 (1671.9 to 2031.2)  | 384.6 (316.8 to 466.3)        | 75.4 (50.2 to 109.4)            | 0.0 (0.0 to 0.0)                  | 3826.1 (3513.9 to 4167.8) | 3063.8 (2770.3 to 3365.6)  | 637.3 (524.9 to 772.6)        | 125.0 (83.2 to 181.2)           | 0.0 (0.0 to 0.0)                  |
| Czech Republic                   | 2038 | 2351.3 (2151.3 to 2560.5)  | 1881.7 (1694.8 to 2068.6)  | 392.7 (321.5 to 477.6)        | 76.9 (51.1 to 111.4)            | 0.0 (0.0 to 0.0)                  | 3896.1 (3564.8 to 4242.7) | 3118.0 (2808.2 to 3427.6)  | 650.7 (532.7 to 791.4)        | 127.3 (84.7 to 184.6)           | 0.0 (0.0 to 0.0)                  |
| Czech Republic                   | 2039 | 2393.3 (2177.6 to 2621.3)  | 1914.4 (1716.1 to 2115.0)  | 400.8 (326.6 to 489.5)        | 78.2 (52.0 to 113.2)            | 0.0 (0.0 to 0.0)                  | 3965.7 (3608.2 to 4343.4) | 3172.1 (2843.6 to 3504.5)  | 664.0 (541.2 to 811.0)        | 129.6 (86.2 to 187.6)           | 0.0 (0.0 to 0.0)                  |
| Czech Republic                   | 2040 | 2434.7 (2208.9 to 2678.4)  | 1946.5 (1744.2 to 2162.5)  | 408.7 (330.5 to 501.3)        | 79.6 (52.9 to 115.2)            | 0.0 (0.0 to 0.0)                  | 4034.3 (3660.1 to 4438.0) | 3225.3 (2890.1 to 3583.2)  | 677.1 (547.6 to 830.6)        | 131.9 (87.6 to 190.9)           | 0.0 (0.0 to 0.0)                  |
| Czech Republic                   | 2041 | 2476.5 (2243.9 to 2744.1)  | 1979.2 (1766.7 to 2200.1)  | 416.4 (335.3 to 512.8)        | 80.9 (53.9 to 117.1)            | 0.0 (0.0 to 0.0)                  | 4103.5 (3718.0 to 4547.0) | 3279.4 (2927.4 to 3645.5)  | 690.0 (555.6 to 849.7)        | 134.1 (89.2 to 194.1)           | 0.0 (0.0 to 0.0)                  |
| Czech Republic                   | 2042 | 2518.0 (2284.2 to 2785.5)  | 2011.7 (1783.9 to 2245.5)  | 424.1 (340.5 to 524.0)        | 82.2 (54.8 to 119.1)            | 0.0 (0.0 to 0.0)                  | 4172.3 (3784.9 to 4615.6) | 3333.4 (2955.8 to 3720.8)  | 702.7 (564.2 to 868.3)        | 136.2 (90.8 to 197.3)           | 0.0 (0.0 to 0.0)                  |
| Czech Republic                   | 2043 | 2558.9 (2308.4 to 2846.6)  | 2043.8 (1802.5 to 2294.8)  | 431.6 (346.3 to 534.8)        | 83.5 (55.7 to 121.0)            | 0.0 (0.0 to 0.0)                  | 4240.0 (3825.0 to 4716.8) | 3386.5 (2986.7 to 3802.4)  | 715.1 (573.8 to 886.1)        | 138.4 (92.3 to 200.5)           | 0.0 (0.0 to 0.0)                  |
| Czech Republic                   | 2044 | 2600.6 (2334.3 to 2876.4)  | 2076.6 (1822.1 to 2332.1)  | 439.0 (352.5 to 545.5)        | 84.9 (56.7 to 123.0)            | 0.0 (0.0 to 0.0)                  | 4309.1 (3867.9 to 4766.2) | 3441.0 (3019.1 to 3864.2)  | 727.5 (584.1 to 903.9)        | 140.7 (93.9 to 203.8)           | 0.0 (0.0 to 0.0)                  |
| Czech Republic                   | 2045 | 2642.8 (2371.0 to 2928.5)  | 2110.0 (1852.4 to 2379.0)  | 446.4 (358.2 to 556.4)        | 86.4 (57.8 to 125.2)            | 0.0 (0.0 to 0.0)                  | 4379.1 (3928.7 to 4852.5) | 3496.2 (3069.4 to 3941.9)  | 739.7 (593.5 to 922.0)        | 143.2 (95.7 to 207.4)           | 0.0 (0.0 to 0.0)                  |
| Czech Republic                   | 2046 | 2683.7 (2408.3 to 2990.1)  | 2142.2 (1868.3 to 2421.2)  | 453.6 (364.0 to 566.5)        | 87.9 (58.9 to 127.5)            | 0.0 (0.0 to 0.0)                  | 4446.9 (3990.5 to 4954.5) | 3549.6 (3095.8 to 4011.8)  | 751.6 (603.1 to 938.7)        | 145.7 (97.6 to 211.3)           | 0.0 (0.0 to 0.0)                  |
| Czech Republic                   | 2047 | 2724.6 (2440.2 to 3053.7)  | 2174.4 (1886.9 to 2463.1)  | 460.6 (369.8 to 575.3)        | 89.5 (60.0 to 129.7)            | 0.0 (0.0 to 0.0)                  | 4514.6 (4043.4 to 5059.9) | 3603.0 (3126.6 to 4081.4)  | 763.3 (612.7 to 953.3)        | 148.3 (99.4 to 215.0)           | 0.0 (0.0 to 0.0)                  |
| Czech Republic                   | 2048 | 2765.5 (2464.3 to 3086.3)  | 2206.6 (1916.2 to 2510.4)  | 467.7 (375.8 to 584.0)        | 91.2 (61.0 to 132.4)            | 0.0 (0.0 to 0.0)                  | 4582.4 (4083.4 to 5113.9) | 3656.3 (3175.1 to 4159.6)  | 775.0 (622.8 to 967.6)        | 151.0 (101.1 to 219.3)          | 0.0 (0.0 to 0.0)                  |
| Czech Republic                   | 2049 | 2807.4 (2480.7 to 3135.7)  | 2239.7 (1930.2 to 2558.7)  | 474.9 (381.6 to 592.7)        | 92.8 (62.1 to 134.7)            | 0.0 (0.0 to 0.0)                  | 4651.9 (4110.6 to 5195.8) | 3711.2 (3198.4 to 4239.8)  | 786.9 (632.3 to 982.1)        | 153.8 (102.9 to 223.1)          | 0.0 (0.0 to 0.0)                  |
| Czech Republic                   | 2050 | 2847.8 (2506.4 to 3188.0)  | 2271.3 (1952.5 to 2604.2)  | 482.0 (387.5 to 601.9)        | 94.5 (63.2 to 137.1)            | 0.0 (0.0 to 0.0)                  | 4718.7 (4153.1 to 5282.4) | 3763.6 (3235.3 to 4315.0)  | 798.6 (642.1 to 997.3)        | 156.5 (104.8 to 227.2)          | 0.0 (0.0 to 0.0)                  |
| Democratic Republic of the Congo | 1995 | 12.9 (9.6 to 17.0)         | 0.9 (0.7 to 1.1)           | 10.0 (6.8 to 14.0)            | 1.6 (0.8 to 3.0)                | 0.4 (0.4 to 0.4)                  | 20.1 (15.0 to 26.6)       | 1.4 (1.0 to 1.8)           | 15.7 (10.6 to 21.8)           | 2.5 (1.2 to 4.6)                | 0.6 (0.6 to 0.6)                  |
| Democratic Republic of the Congo | 1996 | 12.9 (9.6 to 16.9)         | 0.8 (0.6 to 1.1)           | 9.7 (6.6 to 13.6)             | 1.5 (0.7 to 2.9)                | 0.8 (0.8 to 0.8)                  | 20.1 (15.0 to 26.4)       | 1.3 (1.0 to 1.6)           | 15.1 (10.4 to 21.2)           | 2.4 (1.2 to 4.5)                | 1.3 (1.3 to 1.3)                  |
| Democratic Republic of the Congo | 1997 | 12.4 (9.2 to 16.4)         | 0.8 (0.6 to 1.0)           | 9.5 (6.5 to 13.3)             | 1.6 (0.8 to 2.9)                | 0.5 (0.5 to 0.5)                  | 19.3 (14.4 to 25.6)       | 1.2 (0.9 to 1.6)           | 14.9 (10.1 to 20.7)           | 2.4 (1.2 to 4.5)                | 0.8 (0.8 to 0.8)                  |
| Democratic Republic of the Congo | 1998 | 12.1 (8.9 to 16.0)         | 0.7 (0.6 to 1.0)           | 9.3 (6.4 to 13.0)             | 1.6 (0.8 to 3.0)                | 0.5 (0.5 to 0.5)                  | 18.8 (13.9 to 25.0)       | 1.2 (0.9 to 1.5)           | 14.4 (9.9 to 20.2)            | 2.5 (1.2 to 4.6)                | 0.8 (0.8 to 0.8)                  |
| Democratic Republic of the Congo | 1999 | 11.7 (8.7 to 15.4)         | 0.7 (0.5 to 0.9)           | 8.8 (6.2 to 12.2)             | 1.7 (0.8 to 3.1)                | 0.5 (0.5 to 0.5)                  | 18.3 (13.6 to 24.1)       | 1.1 (0.8 to 1.4)           | 13.8 (9.6 to 19.1)            | 2.6 (1.2 to 4.8)                | 0.8 (0.8 to 0.8)                  |
| Democratic Republic of the Congo | 2000 | 10.5 (8.0 to 13.9)         | 0.6 (0.4 to 0.7)           | 7.8 (5.4 to 10.5)             | 1.6 (0.8 to 3.0)                | 0.6 (0.6 to 0.6)                  | 16.4 (12.5 to 21.8)       | 0.9 (0.7 to 1.1)           | 12.1 (8.4 to 16.5)            | 2.6 (1.2 to 4.7)                | 0.9 (0.9 to 0.9)                  |
| Democratic Republic of the Congo | 2001 | 9.4 (7.3 to 12.4)          | 0.5 (0.4 to 0.6)           | 7.0 (5.0 to 9.5)              | 1.2 (0.6 to 2.2)                | 0.8 (0.8 to 0.8)                  | 14.7 (11.3 to 19.3)       | 0.7 (0.6 to 1.0)           | 10.9 (7.8 to 14.9)            | 1.9 (0.9 to 3.4)                | 1.2 (1.2 to 1.2)                  |

| Country                          | Year | 2018 US Dollars per capita |                            |                               |                                 |                                   | 2018 PPP per capita |                            |                               |                                 |                                   |
|----------------------------------|------|----------------------------|----------------------------|-------------------------------|---------------------------------|-----------------------------------|---------------------|----------------------------|-------------------------------|---------------------------------|-----------------------------------|
|                                  |      | Health spending            | Government health spending | Out-of-pocket health spending | Prepaid private health spending | Development assistance for health | Health spending     | Government health spending | Out-of-pocket health spending | Prepaid private health spending | Development assistance for health |
| Democratic Republic of the Congo | 2002 | 9.5 (7.3 to 12.3)          | 0.5 (0.4 to 0.6)           | 7.1 (5.0 to 9.6)              | 1.1 (0.5 to 2.0)                | 0.8 (0.8 to 0.8)                  | 14.8 (11.4 to 19.2) | 0.8 (0.6 to 1.0)           | 11.1 (7.8 to 15.0)            | 1.7 (0.8 to 3.2)                | 1.3 (1.3 to 1.3)                  |
| Democratic Republic of the Congo | 2003 | 11.5 (8.9 to 14.9)         | 0.6 (0.5 to 0.8)           | 8.4 (5.9 to 11.5)             | 1.2 (0.5 to 2.2)                | 1.4 (1.4 to 1.4)                  | 18.0 (13.9 to 23.3) | 1.0 (0.7 to 1.3)           | 13.1 (9.2 to 17.9)            | 1.8 (0.9 to 3.4)                | 2.1 (2.1 to 2.1)                  |
| Democratic Republic of the Congo | 2004 | 13.1 (10.1 to 16.8)        | 0.7 (0.6 to 0.9)           | 9.6 (6.8 to 13.1)             | 1.2 (0.6 to 2.2)                | 1.6 (1.6 to 1.6)                  | 20.4 (15.8 to 26.2) | 1.1 (0.9 to 1.5)           | 14.9 (10.6 to 20.5)           | 1.9 (0.9 to 3.5)                | 2.4 (2.4 to 2.4)                  |
| Democratic Republic of the Congo | 2005 | 15.1 (11.9 to 19.0)        | 0.8 (0.6 to 1.1)           | 10.2 (7.2 to 14.0)            | 1.2 (0.6 to 2.4)                | 2.8 (2.8 to 2.8)                  | 23.5 (18.5 to 29.6) | 1.3 (1.0 to 1.7)           | 15.9 (11.2 to 21.8)           | 1.9 (0.9 to 3.7)                | 4.4 (4.4 to 4.4)                  |
| Democratic Republic of the Congo | 2006 | 14.7 (11.4 to 18.5)        | 0.9 (0.7 to 1.1)           | 10.1 (7.0 to 13.9)            | 1.2 (0.6 to 2.3)                | 2.6 (2.6 to 2.6)                  | 22.9 (17.9 to 28.8) | 1.3 (1.0 to 1.7)           | 15.7 (11.0 to 21.7)           | 1.9 (0.9 to 3.6)                | 4.0 (4.0 to 4.0)                  |
| Democratic Republic of the Congo | 2007 | 14.6 (11.6 to 18.6)        | 1.0 (0.7 to 1.3)           | 9.8 (6.9 to 13.8)             | 1.2 (0.6 to 2.3)                | 2.6 (2.6 to 2.6)                  | 22.8 (18.1 to 29.1) | 1.5 (1.1 to 2.0)           | 15.3 (10.7 to 21.5)           | 1.9 (0.9 to 3.6)                | 4.1 (4.1 to 4.1)                  |
| Democratic Republic of the Congo | 2008 | 17.9 (15.0 to 21.7)        | 1.1 (0.9 to 1.5)           | 9.2 (6.4 to 13.1)             | 1.3 (0.6 to 2.5)                | 6.3 (6.3 to 6.3)                  | 27.9 (23.4 to 33.8) | 1.8 (1.3 to 2.3)           | 14.4 (10.0 to 20.4)           | 2.0 (0.9 to 3.8)                | 9.8 (9.8 to 9.8)                  |
| Democratic Republic of the Congo | 2009 | 16.7 (14.2 to 20.0)        | 1.3 (1.0 to 1.6)           | 7.9 (5.5 to 11.2)             | 1.2 (0.6 to 2.3)                | 6.4 (6.4 to 6.4)                  | 26.1 (22.1 to 31.2) | 2.0 (1.5 to 2.5)           | 12.3 (8.5 to 17.4)            | 1.9 (0.9 to 3.6)                | 9.9 (9.9 to 9.9)                  |
| Democratic Republic of the Congo | 2010 | 16.1 (13.8 to 19.0)        | 1.6 (1.2 to 2.0)           | 7.0 (4.8 to 9.8)              | 1.2 (0.6 to 2.3)                | 6.2 (6.2 to 6.2)                  | 25.1 (21.5 to 29.7) | 2.5 (1.9 to 3.2)           | 11.0 (7.6 to 15.3)            | 1.9 (0.9 to 3.7)                | 9.7 (9.7 to 9.7)                  |
| Democratic Republic of the Congo | 2011 | 16.0 (14.0 to 18.8)        | 1.8 (1.4 to 2.3)           | 6.5 (4.5 to 9.0)              | 1.1 (0.5 to 2.0)                | 6.7 (6.7 to 6.7)                  | 25.0 (21.8 to 29.3) | 2.8 (2.1 to 3.6)           | 10.1 (7.0 to 14.1)            | 1.7 (0.8 to 3.1)                | 10.5 (10.5 to 10.5)               |
| Democratic Republic of the Congo | 2012 | 17.0 (15.0 to 19.9)        | 2.1 (1.6 to 2.7)           | 6.6 (4.6 to 9.1)              | 1.1 (0.5 to 2.1)                | 7.2 (7.2 to 7.2)                  | 26.6 (23.4 to 31.0) | 3.3 (2.5 to 4.3)           | 10.3 (7.2 to 14.2)            | 1.7 (0.8 to 3.2)                | 11.3 (11.3 to 11.3)               |
| Democratic Republic of the Congo | 2013 | 18.3 (16.0 to 21.3)        | 2.6 (1.9 to 3.3)           | 7.2 (5.1 to 10.0)             | 1.3 (0.6 to 2.5)                | 7.2 (7.2 to 7.2)                  | 28.5 (24.9 to 33.2) | 4.0 (3.0 to 5.2)           | 11.3 (7.9 to 15.5)            | 2.0 (1.0 to 3.8)                | 11.2 (11.2 to 11.2)               |
| Democratic Republic of the Congo | 2014 | 18.9 (16.4 to 22.1)        | 2.8 (2.1 to 3.6)           | 7.7 (5.4 to 10.8)             | 1.5 (0.7 to 2.8)                | 6.9 (6.9 to 6.9)                  | 29.5 (25.6 to 34.5) | 4.4 (3.3 to 5.6)           | 12.0 (8.5 to 16.8)            | 2.3 (1.1 to 4.3)                | 10.8 (10.8 to 10.8)               |
| Democratic Republic of the Congo | 2015 | 19.7 (17.1 to 23.0)        | 3.1 (2.3 to 3.9)           | 8.1 (5.7 to 11.4)             | 1.6 (0.8 to 3.0)                | 7.0 (7.0 to 7.0)                  | 30.7 (26.7 to 35.9) | 4.8 (3.6 to 6.1)           | 12.6 (8.8 to 17.7)            | 2.5 (1.2 to 4.7)                | 10.9 (10.9 to 10.9)               |
| Democratic Republic of the Congo | 2016 | 19.4 (16.7 to 22.8)        | 2.8 (2.1 to 3.7)           | 8.0 (5.6 to 11.2)             | 1.6 (0.7 to 2.8)                | 6.9 (6.9 to 6.9)                  | 30.2 (26.1 to 35.6) | 4.4 (3.3 to 5.7)           | 12.5 (8.8 to 17.4)            | 2.4 (1.2 to 4.4)                | 10.8 (10.8 to 10.8)               |
| Democratic Republic of the Congo | 2017 | 20.2 (17.4 to 23.5)        | 2.8 (2.1 to 3.6)           | 8.0 (5.6 to 11.2)             | 1.6 (0.8 to 2.9)                | 7.7 (7.7 to 7.7)                  | 31.5 (27.2 to 36.7) | 4.4 (3.3 to 5.6)           | 12.6 (8.8 to 17.4)            | 2.5 (1.2 to 4.5)                | 12.0 (12.0 to 12.0)               |
| Democratic Republic of the Congo | 2018 | 19.5 (16.7 to 23.0)        | 2.9 (2.1 to 3.7)           | 8.1 (5.6 to 11.3)             | 1.6 (0.8 to 2.9)                | 6.9 (6.9 to 6.9)                  | 30.3 (26.0 to 35.8) | 4.5 (3.3 to 5.8)           | 12.6 (8.8 to 17.6)            | 2.5 (1.2 to 4.6)                | 10.8 (10.7 to 10.8)               |
| Democratic Republic of the Congo | 2019 | 19.6 (16.8 to 23.0)        | 2.9 (2.2 to 3.8)           | 8.1 (5.6 to 11.3)             | 1.6 (0.8 to 3.0)                | 6.9 (6.4 to 7.3)                  | 30.5 (26.2 to 35.9) | 4.6 (3.4 to 5.9)           | 12.6 (8.8 to 17.6)            | 2.6 (1.2 to 4.6)                | 10.8 (10.1 to 11.4)               |
| Democratic Republic of the Congo | 2020 | 19.8 (16.9 to 23.5)        | 3.0 (2.2 to 3.8)           | 8.1 (5.7 to 11.5)             | 1.7 (0.8 to 3.0)                | 7.0 (6.4 to 7.5)                  | 30.8 (26.4 to 36.7) | 4.6 (3.5 to 6.0)           | 12.7 (8.8 to 17.9)            | 2.6 (1.2 to 4.7)                | 10.9 (10.0 to 11.7)               |
| Democratic Republic of the Congo | 2021 | 20.0 (17.1 to 23.5)        | 3.0 (2.3 to 3.9)           | 8.2 (5.7 to 11.5)             | 1.7 (0.8 to 3.1)                | 7.1 (6.4 to 7.8)                  | 31.2 (26.6 to 36.6) | 4.7 (3.6 to 6.1)           | 12.7 (8.9 to 17.9)            | 2.6 (1.3 to 4.8)                | 11.1 (10.0 to 12.2)               |
| Democratic Republic of the Congo | 2022 | 20.3 (17.3 to 24.0)        | 3.1 (2.4 to 4.0)           | 8.2 (5.7 to 11.6)             | 1.7 (0.8 to 3.1)                | 7.3 (6.4 to 8.1)                  | 31.6 (27.0 to 37.4) | 4.8 (3.7 to 6.2)           | 12.8 (8.9 to 18.0)            | 2.7 (1.3 to 4.8)                | 11.3 (10.1 to 12.6)               |



| Country                          | Year | 2018 US Dollars per capita |                            |                               |                                 |                                   | 2018 PPP per capita |                            |                               |                                 |                                   |
|----------------------------------|------|----------------------------|----------------------------|-------------------------------|---------------------------------|-----------------------------------|---------------------|----------------------------|-------------------------------|---------------------------------|-----------------------------------|
|                                  |      | Health spending            | Government health spending | Out-of-pocket health spending | Prepaid private health spending | Development assistance for health | Health spending     | Government health spending | Out-of-pocket health spending | Prepaid private health spending | Development assistance for health |
| Democratic Republic of the Congo | 2023 | 20.5 (17.5 to 24.4)        | 3.2 (2.4 to 4.1)           | 8.2 (5.7 to 11.6)             | 1.7 (0.8 to 3.1)                | 7.4 (6.4 to 8.4)                  | 32.0 (27.3 to 38.1) | 4.9 (3.8 to 6.4)           | 12.8 (8.9 to 18.1)            | 2.7 (1.3 to 4.9)                | 11.6 (10.0 to 13.1)               |
| Democratic Republic of the Congo | 2024 | 20.8 (17.5 to 24.7)        | 3.2 (2.5 to 4.2)           | 8.3 (5.7 to 11.7)             | 1.8 (0.8 to 3.2)                | 7.6 (6.5 to 8.7)                  | 32.5 (27.3 to 38.5) | 5.1 (3.8 to 6.5)           | 12.9 (9.0 to 18.2)            | 2.7 (1.3 to 5.0)                | 11.8 (10.2 to 13.6)               |
| Democratic Republic of the Congo | 2025 | 21.1 (17.8 to 25.0)        | 3.3 (2.5 to 4.3)           | 8.3 (5.8 to 11.7)             | 1.8 (0.8 to 3.2)                | 7.7 (6.6 to 9.1)                  | 33.0 (27.8 to 39.0) | 5.2 (3.9 to 6.7)           | 12.9 (9.0 to 18.3)            | 2.8 (1.3 to 5.0)                | 12.1 (10.3 to 14.1)               |
| Democratic Republic of the Congo | 2026 | 21.4 (18.1 to 25.5)        | 3.4 (2.6 to 4.4)           | 8.3 (5.8 to 11.7)             | 1.8 (0.9 to 3.3)                | 7.9 (6.6 to 9.3)                  | 33.4 (28.2 to 39.8) | 5.3 (4.0 to 6.8)           | 13.0 (9.0 to 18.3)            | 2.8 (1.3 to 5.1)                | 12.3 (10.4 to 14.5)               |
| Democratic Republic of the Congo | 2027 | 21.7 (18.1 to 25.7)        | 3.4 (2.6 to 4.5)           | 8.4 (5.8 to 11.8)             | 1.8 (0.9 to 3.3)                | 8.0 (6.8 to 9.6)                  | 33.8 (28.2 to 40.1) | 5.4 (4.1 to 7.0)           | 13.1 (9.0 to 18.5)            | 2.9 (1.4 to 5.2)                | 12.5 (10.5 to 14.9)               |
| Democratic Republic of the Congo | 2028 | 22.0 (18.2 to 26.2)        | 3.5 (2.7 to 4.6)           | 8.4 (5.8 to 11.9)             | 1.9 (0.9 to 3.4)                | 8.2 (6.9 to 9.9)                  | 34.3 (28.4 to 40.8) | 5.5 (4.2 to 7.1)           | 13.1 (9.1 to 18.5)            | 2.9 (1.4 to 5.3)                | 12.8 (10.7 to 15.5)               |
| Democratic Republic of the Congo | 2029 | 22.3 (18.9 to 26.6)        | 3.6 (2.7 to 4.7)           | 8.5 (5.8 to 12.0)             | 1.9 (0.9 to 3.5)                | 8.4 (6.9 to 10.3)                 | 34.8 (29.4 to 41.4) | 5.6 (4.2 to 7.3)           | 13.2 (9.1 to 18.7)            | 3.0 (1.4 to 5.4)                | 13.1 (10.8 to 16.0)               |
| Democratic Republic of the Congo | 2030 | 22.7 (18.9 to 27.0)        | 3.7 (2.8 to 4.8)           | 8.5 (5.8 to 12.1)             | 1.9 (0.9 to 3.5)                | 8.5 (7.0 to 10.5)                 | 35.3 (29.6 to 42.1) | 5.7 (4.3 to 7.5)           | 13.3 (9.1 to 18.8)            | 3.0 (1.4 to 5.5)                | 13.3 (10.9 to 16.3)               |
| Democratic Republic of the Congo | 2031 | 23.0 (19.2 to 27.8)        | 3.7 (2.8 to 4.9)           | 8.6 (5.8 to 12.3)             | 2.0 (0.9 to 3.6)                | 8.7 (6.9 to 11.0)                 | 35.9 (29.9 to 43.4) | 5.8 (4.4 to 7.6)           | 13.4 (9.0 to 19.1)            | 3.1 (1.5 to 5.6)                | 13.5 (10.8 to 17.1)               |
| Democratic Republic of the Congo | 2032 | 23.3 (19.2 to 28.2)        | 3.8 (2.9 to 5.0)           | 8.7 (5.8 to 12.4)             | 2.0 (0.9 to 3.7)                | 8.8 (7.0 to 11.2)                 | 36.4 (30.0 to 44.0) | 6.0 (4.5 to 7.8)           | 13.5 (9.1 to 19.3)            | 3.1 (1.5 to 5.7)                | 13.8 (11.0 to 17.5)               |
| Democratic Republic of the Congo | 2033 | 23.7 (19.8 to 28.7)        | 3.9 (3.0 to 5.1)           | 8.8 (5.9 to 12.6)             | 2.0 (1.0 to 3.8)                | 9.0 (7.0 to 11.7)                 | 37.0 (30.8 to 44.8) | 6.1 (4.6 to 7.9)           | 13.7 (9.2 to 19.6)            | 3.2 (1.5 to 5.9)                | 14.0 (11.0 to 18.2)               |
| Democratic Republic of the Congo | 2034 | 24.1 (19.8 to 29.2)        | 4.0 (3.1 to 5.2)           | 8.8 (5.9 to 12.8)             | 2.1 (1.0 to 3.8)                | 9.2 (7.1 to 12.0)                 | 37.6 (30.8 to 45.5) | 6.2 (4.8 to 8.1)           | 13.8 (9.2 to 19.9)            | 3.3 (1.5 to 6.0)                | 14.3 (11.1 to 18.7)               |
| Democratic Republic of the Congo | 2035 | 24.5 (20.3 to 29.7)        | 4.1 (3.1 to 5.3)           | 8.9 (5.9 to 12.9)             | 2.1 (1.0 to 3.9)                | 9.4 (7.2 to 12.4)                 | 38.2 (31.6 to 46.3) | 6.4 (4.9 to 8.3)           | 13.9 (9.3 to 20.2)            | 3.3 (1.6 to 6.1)                | 14.6 (11.2 to 19.3)               |
| Democratic Republic of the Congo | 2036 | 24.9 (20.6 to 30.3)        | 4.2 (3.2 to 5.4)           | 9.0 (6.0 to 13.1)             | 2.2 (1.0 to 4.0)                | 9.6 (7.3 to 13.1)                 | 38.9 (32.1 to 47.2) | 6.5 (5.0 to 8.5)           | 14.1 (9.3 to 20.4)            | 3.4 (1.6 to 6.2)                | 14.9 (11.4 to 20.5)               |
| Democratic Republic of the Congo | 2037 | 25.3 (20.6 to 30.7)        | 4.3 (3.2 to 5.6)           | 9.1 (6.0 to 13.3)             | 2.2 (1.0 to 4.1)                | 9.8 (7.3 to 13.4)                 | 39.5 (32.2 to 47.9) | 6.6 (5.1 to 8.7)           | 14.2 (9.4 to 20.7)            | 3.4 (1.6 to 6.4)                | 15.2 (11.4 to 20.9)               |
| Democratic Republic of the Congo | 2038 | 25.8 (21.3 to 31.5)        | 4.3 (3.3 to 5.7)           | 9.2 (6.1 to 13.5)             | 2.2 (1.1 to 4.2)                | 10.0 (7.5 to 14.1)                | 40.2 (33.2 to 49.2) | 6.8 (5.2 to 8.9)           | 14.4 (9.5 to 21.0)            | 3.5 (1.7 to 6.5)                | 15.5 (11.6 to 22.0)               |
| Democratic Republic of the Congo | 2039 | 26.2 (21.5 to 32.1)        | 4.4 (3.4 to 5.8)           | 9.3 (6.1 to 13.7)             | 2.3 (1.1 to 4.2)                | 10.2 (7.5 to 14.5)                | 40.9 (33.5 to 50.1) | 6.9 (5.3 to 9.1)           | 14.6 (9.6 to 21.3)            | 3.6 (1.7 to 6.6)                | 15.8 (11.7 to 22.5)               |
| Democratic Republic of the Congo | 2040 | 26.7 (22.0 to 32.9)        | 4.5 (3.4 to 5.9)           | 9.4 (6.2 to 13.9)             | 2.3 (1.1 to 4.3)                | 10.4 (7.7 to 14.9)                | 41.6 (34.3 to 51.3) | 7.0 (5.3 to 9.3)           | 14.7 (9.6 to 21.6)            | 3.6 (1.7 to 6.7)                | 16.2 (12.0 to 23.3)               |
| Democratic Republic of the Congo | 2041 | 27.2 (21.9 to 33.5)        | 4.6 (3.5 to 6.1)           | 9.6 (6.2 to 14.0)             | 2.4 (1.1 to 4.4)                | 10.6 (7.7 to 15.1)                | 42.4 (34.2 to 52.3) | 7.2 (5.4 to 9.5)           | 14.9 (9.7 to 21.9)            | 3.7 (1.8 to 6.9)                | 16.6 (12.0 to 23.6)               |
| Democratic Republic of the Congo | 2042 | 27.7 (22.0 to 34.3)        | 4.7 (3.6 to 6.2)           | 9.7 (6.3 to 14.2)             | 2.4 (1.1 to 4.5)                | 10.9 (7.8 to 15.8)                | 43.2 (34.4 to 53.4) | 7.3 (5.6 to 9.7)           | 15.1 (9.8 to 22.2)            | 3.8 (1.8 to 7.0)                | 17.0 (12.2 to 24.7)               |
| Democratic Republic of the Congo | 2043 | 28.2 (22.5 to 35.6)        | 4.8 (3.6 to 6.3)           | 9.8 (6.4 to 14.5)             | 2.4 (1.2 to 4.6)                | 11.1 (7.9 to 16.3)                | 44.0 (35.1 to 55.6) | 7.5 (5.7 to 9.8)           | 15.3 (9.9 to 22.6)            | 3.8 (1.8 to 7.2)                | 17.4 (12.3 to 25.5)               |

| Country                          | Year | 2018 US Dollars per capita |                            |                               |                                 |                                   | 2018 PPP per capita       |                            |                               |                                 |                                   |
|----------------------------------|------|----------------------------|----------------------------|-------------------------------|---------------------------------|-----------------------------------|---------------------------|----------------------------|-------------------------------|---------------------------------|-----------------------------------|
|                                  |      | Health spending            | Government health spending | Out-of-pocket health spending | Prepaid private health spending | Development assistance for health | Health spending           | Government health spending | Out-of-pocket health spending | Prepaid private health spending | Development assistance for health |
| Democratic Republic of the Congo | 2044 | 28.8 (23.2 to 36.1)        | 4.9 (3.7 to 6.5)           | 10.0 (6.5 to 14.7)            | 2.5 (1.2 to 4.7)                | 11.4 (8.0 to 17.1)                | 44.9 (36.2 to 56.3)       | 7.6 (5.8 to 10.1)          | 15.5 (10.1 to 23.0)           | 3.9 (1.8 to 7.3)                | 17.8 (12.5 to 26.7)               |
| Democratic Republic of the Congo | 2045 | 29.4 (23.4 to 36.9)        | 5.0 (3.8 to 6.6)           | 10.1 (6.5 to 15.0)            | 2.5 (1.2 to 4.8)                | 11.7 (8.1 to 18.1)                | 45.8 (36.5 to 57.5)       | 7.8 (5.9 to 10.3)          | 15.8 (10.2 to 23.4)           | 4.0 (1.9 to 7.5)                | 18.3 (12.6 to 28.2)               |
| Democratic Republic of the Congo | 2046 | 30.0 (23.9 to 38.2)        | 5.1 (3.9 to 6.8)           | 10.3 (6.6 to 15.2)            | 2.6 (1.2 to 4.9)                | 12.1 (8.2 to 19.1)                | 46.8 (37.3 to 59.6)       | 7.9 (6.0 to 10.5)          | 16.0 (10.3 to 23.7)           | 4.0 (1.9 to 7.6)                | 18.8 (12.7 to 29.8)               |
| Democratic Republic of the Congo | 2047 | 30.7 (24.2 to 39.8)        | 5.2 (3.9 to 6.9)           | 10.4 (6.7 to 15.5)            | 2.6 (1.2 to 5.0)                | 12.4 (8.4 to 19.5)                | 47.9 (37.7 to 62.0)       | 8.2 (6.2 to 10.8)          | 16.2 (10.5 to 24.1)           | 4.1 (1.9 to 7.8)                | 19.4 (13.1 to 30.5)               |
| Democratic Republic of the Congo | 2048 | 31.4 (24.8 to 40.9)        | 5.4 (4.0 to 7.1)           | 10.6 (6.8 to 15.7)            | 2.7 (1.3 to 5.1)                | 12.8 (8.6 to 20.3)                | 49.0 (38.7 to 63.8)       | 8.4 (6.3 to 11.1)          | 16.5 (10.7 to 24.5)           | 4.2 (2.0 to 7.9)                | 20.0 (13.4 to 31.7)               |
| Democratic Republic of the Congo | 2049 | 32.2 (25.3 to 41.8)        | 5.5 (4.1 to 7.4)           | 10.7 (7.0 to 16.0)            | 2.7 (1.3 to 5.2)                | 13.2 (8.8 to 21.2)                | 50.2 (39.5 to 65.3)       | 8.6 (6.5 to 11.5)          | 16.8 (10.8 to 25.0)           | 4.3 (2.0 to 8.0)                | 20.5 (13.7 to 33.1)               |
| Democratic Republic of the Congo | 2050 | 33.0 (25.7 to 43.7)        | 5.7 (4.3 to 7.6)           | 10.9 (7.1 to 16.3)            | 2.8 (1.3 to 5.3)                | 13.6 (9.0 to 22.9)                | 51.5 (40.1 to 68.1)       | 8.9 (6.7 to 11.9)          | 17.0 (11.0 to 25.4)           | 4.3 (2.1 to 8.2)                | 21.2 (14.0 to 35.7)               |
| Denmark                          | 1995 | 3730.8 (3588.3 to 3884.3)  | 3044.1 (2904.4 to 3189.5)  | 636.6 (596.0 to 679.4)        | 50.1 (34.6 to 69.7)             | 0.0 (0.0 to 0.0)                  | 3155.7 (3035.1 to 3285.5) | 2574.8 (2456.6 to 2697.8)  | 538.5 (504.1 to 574.7)        | 42.4 (29.2 to 59.0)             | 0.0 (0.0 to 0.0)                  |
| Denmark                          | 1996 | 3807.7 (3700.5 to 3925.2)  | 3103.3 (3003.5 to 3212.7)  | 650.8 (619.7 to 684.1)        | 53.6 (39.5 to 71.7)             | 0.0 (0.0 to 0.0)                  | 3220.8 (3130.0 to 3320.1) | 2624.9 (2540.5 to 2717.5)  | 550.5 (524.1 to 578.7)        | 45.4 (33.4 to 60.6)             | 0.0 (0.0 to 0.0)                  |
| Denmark                          | 1997 | 3937.4 (3832.9 to 4047.1)  | 3213.7 (3109.9 to 3317.5)  | 666.3 (636.1 to 697.2)        | 57.4 (44.0 to 73.6)             | 0.0 (0.0 to 0.0)                  | 3330.4 (3242.0 to 3423.3) | 2718.3 (2630.5 to 2806.1)  | 563.6 (538.1 to 589.7)        | 48.5 (37.2 to 62.3)             | 0.0 (0.0 to 0.0)                  |
| Denmark                          | 1998 | 4089.4 (3989.0 to 4191.8)  | 3351.5 (3257.5 to 3453.0)  | 676.3 (646.3 to 705.4)        | 61.7 (48.5 to 77.3)             | 0.0 (0.0 to 0.0)                  | 3459.0 (3374.1 to 3545.6) | 2834.8 (2755.4 to 2920.7)  | 572.1 (546.7 to 596.6)        | 52.2 (41.0 to 65.4)             | 0.0 (0.0 to 0.0)                  |
| Denmark                          | 1999 | 4328.5 (4229.0 to 4431.7)  | 3578.0 (3482.3 to 3680.3)  | 684.8 (657.6 to 712.7)        | 65.7 (52.8 to 80.8)             | 0.0 (0.0 to 0.0)                  | 3661.3 (3577.1 to 3748.6) | 3026.5 (2945.5 to 3113.0)  | 579.2 (556.3 to 602.8)        | 55.5 (44.7 to 68.3)             | 0.0 (0.0 to 0.0)                  |
| Denmark                          | 2000 | 4543.9 (4443.3 to 4647.9)  | 3780.8 (3682.7 to 3878.1)  | 694.6 (670.7 to 720.3)        | 68.5 (55.8 to 82.7)             | 0.0 (0.0 to 0.0)                  | 3843.5 (3758.3 to 3931.4) | 3197.9 (3115.0 to 3280.3)  | 587.6 (567.3 to 609.2)        | 58.0 (47.2 to 69.9)             | 0.0 (0.0 to 0.0)                  |
| Denmark                          | 2001 | 4687.6 (4583.1 to 4788.9)  | 3914.1 (3810.5 to 4012.9)  | 703.3 (679.3 to 728.3)        | 70.2 (57.9 to 84.7)             | 0.0 (0.0 to 0.0)                  | 3965.0 (3876.6 to 4050.6) | 3310.7 (3223.1 to 3394.3)  | 594.9 (574.6 to 616.0)        | 59.4 (49.0 to 71.7)             | 0.0 (0.0 to 0.0)                  |
| Denmark                          | 2002 | 4847.2 (4742.6 to 4961.0)  | 4059.5 (3957.3 to 4166.0)  | 715.0 (691.2 to 739.0)        | 72.8 (61.0 to 87.0)             | 0.0 (0.0 to 0.0)                  | 4100.0 (4011.5 to 4196.2) | 3433.7 (3347.3 to 3523.8)  | 604.8 (584.6 to 625.1)        | 61.5 (51.6 to 73.6)             | 0.0 (0.0 to 0.0)                  |
| Denmark                          | 2003 | 4933.0 (4826.2 to 5037.6)  | 4130.4 (4030.8 to 4233.3)  | 726.9 (704.7 to 750.0)        | 75.7 (63.8 to 89.6)             | 0.0 (0.0 to 0.0)                  | 4172.5 (4082.2 to 4261.0) | 3493.7 (3409.5 to 3580.8)  | 614.8 (596.0 to 634.4)        | 64.0 (54.0 to 75.8)             | 0.0 (0.0 to 0.0)                  |
| Denmark                          | 2004 | 5135.7 (5038.2 to 5238.9)  | 4299.1 (4201.7 to 4398.6)  | 756.3 (731.6 to 781.0)        | 80.3 (67.6 to 94.0)             | 0.0 (0.0 to 0.0)                  | 4344.0 (4261.5 to 4431.3) | 3636.4 (3553.9 to 3720.5)  | 639.7 (618.8 to 660.6)        | 68.0 (57.1 to 79.5)             | 0.0 (0.0 to 0.0)                  |
| Denmark                          | 2005 | 5261.1 (5152.2 to 5373.3)  | 4402.5 (4300.5 to 4501.9)  | 774.8 (750.4 to 799.6)        | 83.9 (71.0 to 97.8)             | 0.0 (0.0 to 0.0)                  | 4450.1 (4357.9 to 4545.0) | 3723.8 (3637.6 to 3807.9)  | 655.3 (634.7 to 676.4)        | 71.0 (60.1 to 82.7)             | 0.0 (0.0 to 0.0)                  |
| Denmark                          | 2006 | 5500.5 (5388.8 to 5607.2)  | 4610.2 (4499.7 to 4713.2)  | 799.7 (776.1 to 825.1)        | 90.6 (76.9 to 105.4)            | 0.0 (0.0 to 0.0)                  | 4652.6 (4558.1 to 4742.8) | 3899.5 (3806.1 to 3986.6)  | 676.4 (656.4 to 697.9)        | 76.6 (65.0 to 89.2)             | 0.0 (0.0 to 0.0)                  |
| Denmark                          | 2007 | 5659.3 (5556.3 to 5765.1)  | 4749.3 (4648.0 to 4855.5)  | 812.5 (787.8 to 838.4)        | 97.4 (83.2 to 112.6)            | 0.0 (0.0 to 0.0)                  | 4786.9 (4699.8 to 4876.4) | 4017.2 (3931.5 to 4107.0)  | 687.3 (666.3 to 709.2)        | 82.4 (70.4 to 95.2)             | 0.0 (0.0 to 0.0)                  |
| Denmark                          | 2008 | 5837.8 (5722.3 to 5955.1)  | 4911.4 (4803.1 to 5022.9)  | 821.9 (796.4 to 847.9)        | 104.4 (89.9 to 120.0)           | 0.0 (0.0 to 0.0)                  | 4937.8 (4840.1 to 5037.1) | 4154.3 (4062.7 to 4248.6)  | 695.2 (673.6 to 717.2)        | 88.3 (76.0 to 101.5)            | 0.0 (0.0 to 0.0)                  |

| Country | Year | 2018 US Dollars per capita |                            |                               |                                 |                                   | 2018 PPP per capita       |                            |                               |                                 |                                   |
|---------|------|----------------------------|----------------------------|-------------------------------|---------------------------------|-----------------------------------|---------------------------|----------------------------|-------------------------------|---------------------------------|-----------------------------------|
|         |      | Health spending            | Government health spending | Out-of-pocket health spending | Prepaid private health spending | Development assistance for health | Health spending           | Government health spending | Out-of-pocket health spending | Prepaid private health spending | Development assistance for health |
| Denmark | 2009 | 5854.3 (5748.4 to 5971.2)  | 4920.2 (4814.8 to 5027.6)  | 827.3 (802.0 to 853.7)        | 106.8 (93.2 to 123.9)           | 0.0 (0.0 to 0.0)                  | 4951.8 (4862.3 to 5050.7) | 4161.7 (4072.5 to 4252.6)  | 699.8 (678.4 to 722.1)        | 90.3 (78.8 to 104.8)            | 0.0 (0.0 to 0.0)                  |
| Denmark | 2010 | 5960.6 (5848.1 to 6070.6)  | 5005.0 (4904.5 to 5111.5)  | 847.7 (821.8 to 873.9)        | 107.9 (93.8 to 125.5)           | 0.0 (0.0 to 0.0)                  | 5041.7 (4946.6 to 5134.8) | 4233.4 (4148.5 to 4323.6)  | 717.0 (695.1 to 739.2)        | 91.3 (79.3 to 106.2)            | 0.0 (0.0 to 0.0)                  |
| Denmark | 2011 | 5948.7 (5839.7 to 6058.6)  | 4988.8 (4883.5 to 5098.3)  | 850.4 (824.3 to 876.5)        | 109.6 (94.0 to 126.4)           | 0.0 (0.0 to 0.0)                  | 5031.7 (4939.5 to 5124.7) | 4219.7 (4130.7 to 4312.4)  | 719.3 (697.3 to 741.4)        | 92.7 (79.5 to 106.9)            | 0.0 (0.0 to 0.0)                  |
| Denmark | 2012 | 5914.7 (5801.3 to 6028.1)  | 4965.4 (4854.6 to 5073.3)  | 837.8 (812.3 to 863.6)        | 111.4 (95.7 to 128.8)           | 0.0 (0.0 to 0.0)                  | 5002.9 (4907.0 to 5098.8) | 4200.0 (4106.2 to 4291.2)  | 708.7 (687.1 to 730.4)        | 94.3 (81.0 to 109.0)            | 0.0 (0.0 to 0.0)                  |
| Denmark | 2013 | 5918.5 (5808.8 to 6024.7)  | 4977.9 (4873.7 to 5078.9)  | 825.2 (799.6 to 850.4)        | 115.5 (100.1 to 133.0)          | 0.0 (0.0 to 0.0)                  | 5006.2 (4913.4 to 5096.0) | 4210.5 (4122.4 to 4296.0)  | 698.0 (676.3 to 719.3)        | 97.7 (84.7 to 112.5)            | 0.0 (0.0 to 0.0)                  |
| Denmark | 2014 | 5981.3 (5874.4 to 6094.9)  | 5034.3 (4923.6 to 5146.3)  | 825.3 (799.7 to 850.1)        | 121.7 (104.0 to 141.0)          | 0.0 (0.0 to 0.0)                  | 5059.3 (4968.8 to 5155.4) | 4258.2 (4164.6 to 4352.9)  | 698.1 (676.4 to 719.0)        | 103.0 (87.9 to 119.2)           | 0.0 (0.0 to 0.0)                  |
| Denmark | 2015 | 6090.7 (5979.4 to 6211.8)  | 5126.9 (5016.4 to 5244.2)  | 835.0 (808.1 to 861.8)        | 128.9 (109.5 to 153.5)          | 0.0 (0.0 to 0.0)                  | 5151.8 (5057.7 to 5254.3) | 4336.5 (4243.1 to 4435.8)  | 706.2 (683.5 to 729.0)        | 109.0 (92.6 to 129.8)           | 0.0 (0.0 to 0.0)                  |
| Denmark | 2016 | 6195.3 (6033.2 to 6363.2)  | 5212.6 (5063.0 to 5375.9)  | 848.4 (813.9 to 884.6)        | 134.3 (109.7 to 168.3)          | 0.0 (0.0 to 0.0)                  | 5240.3 (5103.2 to 5382.3) | 4409.1 (4282.5 to 4547.2)  | 717.6 (688.4 to 748.2)        | 113.6 (92.8 to 142.4)           | 0.0 (0.0 to 0.0)                  |
| Denmark | 2017 | 6207.7 (6034.9 to 6385.9)  | 5214.5 (5047.9 to 5388.8)  | 857.5 (820.3 to 896.7)        | 135.7 (110.7 to 170.3)          | 0.0 (0.0 to 0.0)                  | 5250.8 (5104.6 to 5401.5) | 4410.7 (4269.7 to 4558.1)  | 725.3 (693.8 to 758.4)        | 114.8 (93.7 to 144.0)           | 0.0 (0.0 to 0.0)                  |
| Denmark | 2018 | 6274.2 (6094.4 to 6470.7)  | 5271.8 (5088.5 to 5458.0)  | 864.7 (824.3 to 908.3)        | 137.8 (112.4 to 172.8)          | 0.0 (0.0 to 0.0)                  | 5307.0 (5154.9 to 5473.2) | 4459.1 (4304.0 to 4616.6)  | 731.4 (697.3 to 768.3)        | 116.5 (95.0 to 146.2)           | 0.0 (0.0 to 0.0)                  |
| Denmark | 2019 | 6323.6 (6122.0 to 6532.3)  | 5312.7 (5122.8 to 5518.3)  | 871.5 (829.3 to 919.4)        | 139.4 (113.6 to 174.4)          | 0.0 (0.0 to 0.0)                  | 5348.8 (5178.2 to 5525.3) | 4493.7 (4333.1 to 4667.6)  | 737.2 (701.4 to 777.7)        | 117.9 (96.1 to 147.5)           | 0.0 (0.0 to 0.0)                  |
| Denmark | 2020 | 6381.1 (6175.3 to 6587.3)  | 5360.7 (5169.6 to 5568.1)  | 879.3 (834.7 to 928.2)        | 141.1 (114.8 to 176.5)          | 0.0 (0.0 to 0.0)                  | 5397.4 (5223.4 to 5571.9) | 4534.3 (4372.7 to 4709.7)  | 743.7 (706.0 to 785.1)        | 119.4 (97.1 to 149.3)           | 0.0 (0.0 to 0.0)                  |
| Denmark | 2021 | 6433.5 (6222.6 to 6646.0)  | 5404.4 (5210.1 to 5613.0)  | 886.3 (837.2 to 940.6)        | 142.8 (116.0 to 178.6)          | 0.0 (0.0 to 0.0)                  | 5441.7 (5263.3 to 5621.5) | 4571.3 (4406.9 to 4747.8)  | 749.6 (708.1 to 795.6)        | 120.8 (98.2 to 151.1)           | 0.0 (0.0 to 0.0)                  |
| Denmark | 2022 | 6493.9 (6291.8 to 6713.2)  | 5455.3 (5256.1 to 5663.6)  | 893.9 (842.7 to 948.6)        | 144.6 (117.4 to 180.6)          | 0.0 (0.0 to 0.0)                  | 5492.8 (5321.9 to 5678.4) | 4614.4 (4445.9 to 4790.5)  | 756.1 (712.8 to 802.4)        | 122.3 (99.3 to 152.7)           | 0.0 (0.0 to 0.0)                  |
| Denmark | 2023 | 6566.9 (6347.4 to 6788.6)  | 5517.7 (5305.2 to 5732.5)  | 902.5 (849.3 to 959.5)        | 146.7 (119.1 to 182.8)          | 0.0 (0.0 to 0.0)                  | 5554.6 (5368.9 to 5742.1) | 4667.1 (4487.4 to 4848.8)  | 763.4 (718.3 to 811.6)        | 124.1 (100.7 to 154.6)          | 0.0 (0.0 to 0.0)                  |
| Denmark | 2024 | 6648.6 (6415.3 to 6875.2)  | 5588.1 (5368.3 to 5811.5)  | 911.5 (856.1 to 969.8)        | 148.9 (120.8 to 185.8)          | 0.0 (0.0 to 0.0)                  | 5623.7 (5426.4 to 5815.4) | 4726.7 (4540.7 to 4915.6)  | 771.0 (724.1 to 820.3)        | 126.0 (102.2 to 157.2)          | 0.0 (0.0 to 0.0)                  |
| Denmark | 2025 | 6729.7 (6473.1 to 6967.8)  | 5658.8 (5426.0 to 5904.5)  | 919.8 (861.6 to 980.8)        | 151.1 (122.5 to 188.9)          | 0.0 (0.0 to 0.0)                  | 5692.3 (5475.3 to 5893.7) | 4786.5 (4589.5 to 4994.3)  | 778.0 (728.8 to 829.6)        | 127.8 (103.7 to 159.8)          | 0.0 (0.0 to 0.0)                  |
| Denmark | 2026 | 6805.7 (6538.6 to 7079.9)  | 5724.7 (5478.9 to 5986.4)  | 927.8 (865.5 to 994.7)        | 153.3 (124.5 to 191.8)          | 0.0 (0.0 to 0.0)                  | 5756.6 (5530.7 to 5988.5) | 4842.2 (4634.3 to 5063.6)  | 784.8 (732.0 to 841.3)        | 129.6 (105.3 to 162.3)          | 0.0 (0.0 to 0.0)                  |
| Denmark | 2027 | 6887.2 (6590.9 to 7170.2)  | 5795.6 (5527.4 to 6074.7)  | 936.1 (867.1 to 1011.4)       | 155.5 (126.3 to 194.9)          | 0.0 (0.0 to 0.0)                  | 5825.5 (5574.9 to 6064.9) | 4902.2 (4675.3 to 5138.3)  | 791.8 (733.5 to 855.5)        | 131.5 (106.8 to 164.9)          | 0.0 (0.0 to 0.0)                  |
| Denmark | 2028 | 6965.5 (6677.6 to 7257.9)  | 5863.5 (5578.6 to 6159.0)  | 944.4 (865.6 to 1026.7)       | 157.7 (128.1 to 197.9)          | 0.0 (0.0 to 0.0)                  | 5891.8 (5648.3 to 6139.0) | 4959.6 (4718.6 to 5209.6)  | 798.8 (732.2 to 868.5)        | 133.3 (108.3 to 167.4)          | 0.0 (0.0 to 0.0)                  |
| Denmark | 2029 | 7041.9 (6716.9 to 7379.4)  | 5929.5 (5612.9 to 6255.8)  | 952.6 (864.6 to 1048.2)       | 159.8 (129.8 to 200.9)          | 0.0 (0.0 to 0.0)                  | 5956.3 (5681.4 to 6241.8) | 5015.5 (4747.7 to 5291.4)  | 805.8 (731.3 to 886.6)        | 135.1 (109.8 to 169.9)          | 0.0 (0.0 to 0.0)                  |

| Country | Year | 2018 US Dollars per capita |                            |                               |                                 |                                   | 2018 PPP per capita       |                            |                               |                                 |                                   |
|---------|------|----------------------------|----------------------------|-------------------------------|---------------------------------|-----------------------------------|---------------------------|----------------------------|-------------------------------|---------------------------------|-----------------------------------|
|         |      | Health spending            | Government health spending | Out-of-pocket health spending | Prepaid private health spending | Development assistance for health | Health spending           | Government health spending | Out-of-pocket health spending | Prepaid private health spending | Development assistance for health |
| Denmark | 2030 | 7114.2 (6766.1 to 7483.5)  | 5992.0 (5657.3 to 6340.5)  | 960.5 (861.9 to 1068.1)       | 161.8 (131.4 to 203.3)          | 0.0 (0.0 to 0.0)                  | 6017.5 (5723.1 to 6329.9) | 5068.3 (4785.2 to 5363.0)  | 812.4 (729.0 to 903.5)        | 136.8 (111.2 to 172.0)          | 0.0 (0.0 to 0.0)                  |
| Denmark | 2031 | 7180.5 (6818.0 to 7555.7)  | 6048.9 (5692.5 to 6420.6)  | 968.0 (859.5 to 1086.2)       | 163.6 (132.8 to 205.5)          | 0.0 (0.0 to 0.0)                  | 6073.6 (5766.9 to 6390.9) | 5116.4 (4815.0 to 5430.8)  | 818.8 (727.0 to 918.8)        | 138.4 (112.3 to 173.8)          | 0.0 (0.0 to 0.0)                  |
| Denmark | 2032 | 7241.9 (6858.8 to 7643.3)  | 6101.3 (5741.9 to 6479.0)  | 975.2 (858.4 to 1104.3)       | 165.4 (134.4 to 207.6)          | 0.0 (0.0 to 0.0)                  | 6125.5 (5801.5 to 6465.1) | 5160.8 (4856.8 to 5480.2)  | 824.9 (726.0 to 934.1)        | 139.9 (113.7 to 175.6)          | 0.0 (0.0 to 0.0)                  |
| Denmark | 2033 | 7300.6 (6885.6 to 7708.5)  | 6151.1 (5768.0 to 6555.3)  | 982.5 (856.9 to 1122.8)       | 167.1 (135.7 to 209.6)          | 0.0 (0.0 to 0.0)                  | 6175.2 (5824.2 to 6520.2) | 5202.8 (4878.9 to 5544.8)  | 831.0 (724.8 to 949.7)        | 141.4 (114.7 to 177.3)          | 0.0 (0.0 to 0.0)                  |
| Denmark | 2034 | 7360.4 (6924.3 to 7791.6)  | 6201.7 (5789.6 to 6614.4)  | 989.9 (857.2 to 1141.4)       | 168.9 (136.8 to 211.7)          | 0.0 (0.0 to 0.0)                  | 6225.8 (5856.9 to 6590.5) | 5245.7 (4897.1 to 5594.8)  | 837.3 (725.1 to 965.5)        | 142.8 (115.7 to 179.0)          | 0.0 (0.0 to 0.0)                  |
| Denmark | 2035 | 7424.7 (6997.6 to 7875.7)  | 6255.9 (5829.7 to 6681.4)  | 998.1 (858.9 to 1160.7)       | 170.8 (138.1 to 213.9)          | 0.0 (0.0 to 0.0)                  | 6280.1 (5918.9 to 6661.6) | 5291.5 (4931.0 to 5651.5)  | 844.2 (726.5 to 981.8)        | 144.5 (116.8 to 180.9)          | 0.0 (0.0 to 0.0)                  |
| Denmark | 2036 | 7490.4 (7009.9 to 7972.3)  | 6310.7 (5865.9 to 6759.4)  | 1006.8 (862.7 to 1180.5)      | 172.8 (139.4 to 216.2)          | 0.0 (0.0 to 0.0)                  | 6335.7 (5929.3 to 6743.3) | 5337.9 (4961.6 to 5717.4)  | 851.6 (729.7 to 998.5)        | 146.2 (117.9 to 182.9)          | 0.0 (0.0 to 0.0)                  |
| Denmark | 2037 | 7561.5 (7047.7 to 8068.2)  | 6369.9 (5884.5 to 6823.7)  | 1016.5 (864.3 to 1203.7)      | 175.1 (140.9 to 218.9)          | 0.0 (0.0 to 0.0)                  | 6395.9 (5961.2 to 6824.5) | 5387.9 (4977.3 to 5771.8)  | 859.8 (731.1 to 1018.1)       | 148.1 (119.1 to 185.2)          | 0.0 (0.0 to 0.0)                  |
| Denmark | 2038 | 7635.7 (7113.9 to 8154.5)  | 6431.3 (5895.3 to 6909.6)  | 1026.9 (868.3 to 1223.4)      | 177.5 (142.5 to 221.9)          | 0.0 (0.0 to 0.0)                  | 6458.6 (6017.3 to 6897.5) | 5439.8 (4986.5 to 5844.5)  | 868.6 (734.4 to 1034.8)       | 150.2 (120.6 to 187.7)          | 0.0 (0.0 to 0.0)                  |
| Denmark | 2039 | 7718.4 (7146.0 to 8256.5)  | 6500.3 (5944.3 to 7009.7)  | 1038.0 (873.9 to 1242.1)      | 180.1 (144.2 to 224.8)          | 0.0 (0.0 to 0.0)                  | 6528.6 (6044.4 to 6983.7) | 5498.3 (5027.9 to 5929.1)  | 878.0 (739.2 to 1050.6)       | 152.4 (122.0 to 190.2)          | 0.0 (0.0 to 0.0)                  |
| Denmark | 2040 | 7804.1 (7189.6 to 8407.9)  | 6571.8 (5982.7 to 7116.4)  | 1049.4 (879.1 to 1265.6)      | 182.8 (146.1 to 228.0)          | 0.0 (0.0 to 0.0)                  | 6601.1 (6081.3 to 7111.8) | 5558.8 (5060.4 to 6019.4)  | 887.7 (743.6 to 1070.5)       | 154.6 (123.5 to 192.8)          | 0.0 (0.0 to 0.0)                  |
| Denmark | 2041 | 7889.1 (7261.7 to 8536.5)  | 6642.4 (5998.9 to 7230.6)  | 1061.2 (887.0 to 1285.3)      | 185.5 (148.1 to 231.2)          | 0.0 (0.0 to 0.0)                  | 6672.9 (6142.3 to 7220.6) | 5618.4 (5074.2 to 6115.9)  | 897.6 (750.3 to 1087.2)       | 156.9 (125.3 to 195.5)          | 0.0 (0.0 to 0.0)                  |
| Denmark | 2042 | 7980.8 (7270.7 to 8604.7)  | 6718.9 (6036.6 to 7337.8)  | 1073.5 (896.0 to 1304.8)      | 188.4 (149.9 to 234.8)          | 0.0 (0.0 to 0.0)                  | 6750.5 (6149.9 to 7278.3) | 5683.1 (5106.0 to 6206.7)  | 908.0 (757.9 to 1103.7)       | 159.4 (126.8 to 198.6)          | 0.0 (0.0 to 0.0)                  |
| Denmark | 2043 | 8071.3 (7339.2 to 8762.1)  | 6793.9 (6099.2 to 7458.0)  | 1086.1 (904.4 to 1323.7)      | 191.3 (151.9 to 238.6)          | 0.0 (0.0 to 0.0)                  | 6827.1 (6207.9 to 7411.4) | 5746.6 (5159.0 to 6308.3)  | 918.7 (765.0 to 1119.7)       | 161.8 (128.5 to 201.8)          | 0.0 (0.0 to 0.0)                  |
| Denmark | 2044 | 8170.3 (7417.6 to 8874.1)  | 6876.1 (6125.7 to 7594.3)  | 1099.7 (914.1 to 1342.8)      | 194.5 (153.9 to 242.4)          | 0.0 (0.0 to 0.0)                  | 6910.9 (6274.1 to 7506.1) | 5816.1 (5181.4 to 6423.6)  | 930.2 (773.2 to 1135.8)       | 164.5 (130.2 to 205.0)          | 0.0 (0.0 to 0.0)                  |
| Denmark | 2045 | 8277.5 (7461.0 to 9078.5)  | 6965.3 (6148.9 to 7725.2)  | 1114.2 (922.8 to 1361.8)      | 197.9 (156.2 to 246.4)          | 0.0 (0.0 to 0.0)                  | 7001.5 (6310.9 to 7679.0) | 5891.6 (5201.1 to 6534.3)  | 942.5 (780.5 to 1151.9)       | 167.4 (132.1 to 208.4)          | 0.0 (0.0 to 0.0)                  |
| Denmark | 2046 | 8383.1 (7532.6 to 9258.1)  | 7052.4 (6212.2 to 7874.6)  | 1129.3 (935.6 to 1380.3)      | 201.4 (158.7 to 251.4)          | 0.0 (0.0 to 0.0)                  | 7090.8 (6371.4 to 7831.0) | 5965.3 (5254.5 to 6660.7)  | 955.2 (791.3 to 1167.6)       | 170.4 (134.3 to 212.6)          | 0.0 (0.0 to 0.0)                  |
| Denmark | 2047 | 8496.6 (7580.0 to 9433.0)  | 7146.1 (6229.1 to 8019.7)  | 1145.3 (947.6 to 1398.9)      | 205.2 (161.6 to 257.0)          | 0.0 (0.0 to 0.0)                  | 7186.8 (6411.5 to 7978.9) | 6044.5 (5268.8 to 6783.4)  | 968.7 (801.5 to 1183.3)       | 173.6 (136.7 to 217.4)          | 0.0 (0.0 to 0.0)                  |
| Denmark | 2048 | 8612.2 (7576.6 to 9578.7)  | 7241.5 (6261.9 to 8182.3)  | 1161.7 (960.4 to 1418.6)      | 209.1 (164.4 to 262.6)          | 0.0 (0.0 to 0.0)                  | 7284.6 (6408.6 to 8102.1) | 6125.2 (5296.6 to 6920.9)  | 982.6 (812.3 to 1199.9)       | 176.8 (139.1 to 222.1)          | 0.0 (0.0 to 0.0)                  |
| Denmark | 2049 | 8727.4 (7672.4 to 9736.7)  | 7336.4 (6297.8 to 8344.3)  | 1178.0 (974.4 to 1437.7)      | 213.0 (167.3 to 267.8)          | 0.0 (0.0 to 0.0)                  | 7382.0 (6489.6 to 8235.8) | 6205.4 (5326.9 to 7058.0)  | 996.4 (824.2 to 1216.1)       | 180.1 (141.5 to 226.6)          | 0.0 (0.0 to 0.0)                  |
| Denmark | 2050 | 8845.5 (7697.2 to 9960.1)  | 7434.4 (6337.1 to 8500.8)  | 1194.3 (987.2 to 1459.9)      | 216.8 (170.1 to 272.5)          | 0.0 (0.0 to 0.0)                  | 7482.0 (6510.6 to 8424.7) | 6288.4 (5360.2 to 7190.4)  | 1010.2 (835.0 to 1234.9)      | 183.4 (143.9 to 230.5)          | 0.0 (0.0 to 0.0)                  |

| Country  | Year | 2018 US Dollars per capita |                            |                               |                                 |                                   | 2018 PPP per capita    |                            |                               |                                 |                                   |
|----------|------|----------------------------|----------------------------|-------------------------------|---------------------------------|-----------------------------------|------------------------|----------------------------|-------------------------------|---------------------------------|-----------------------------------|
|          |      | Health spending            | Government health spending | Out-of-pocket health spending | Prepaid private health spending | Development assistance for health | Health spending        | Government health spending | Out-of-pocket health spending | Prepaid private health spending | Development assistance for health |
| Djibouti | 1995 | 69.0 (57.6 to 82.5)        | 25.8 (19.7 to 32.2)        | 31.6 (22.7 to 43.5)           | 0.4 (0.2 to 0.7)                | 11.1 (11.1 to 11.1)               | 129.1 (107.9 to 154.4) | 48.3 (36.9 to 60.2)        | 59.2 (42.5 to 81.4)           | 0.7 (0.3 to 1.3)                | 20.8 (20.8 to 20.8)               |
| Djibouti | 1996 | 58.8 (47.7 to 71.2)        | 24.6 (19.0 to 30.6)        | 30.5 (22.1 to 41.6)           | 0.3 (0.2 to 0.6)                | 3.3 (3.3 to 3.3)                  | 110.1 (89.3 to 133.2)  | 46.1 (35.6 to 57.3)        | 57.2 (41.5 to 77.8)           | 0.6 (0.3 to 1.2)                | 6.2 (6.2 to 6.2)                  |
| Djibouti | 1997 | 75.6 (64.9 to 88.5)        | 26.1 (20.2 to 32.6)        | 30.5 (22.1 to 41.0)           | 0.4 (0.2 to 0.6)                | 18.7 (18.7 to 18.7)               | 141.6 (121.5 to 165.6) | 48.9 (37.8 to 61.0)        | 57.0 (41.3 to 76.7)           | 0.7 (0.3 to 1.2)                | 34.9 (34.9 to 34.9)               |
| Djibouti | 1998 | 78.6 (67.8 to 91.7)        | 27.3 (21.0 to 34.1)        | 30.2 (22.0 to 40.9)           | 0.4 (0.2 to 0.7)                | 20.7 (20.7 to 20.7)               | 147.1 (126.9 to 171.6) | 51.2 (39.4 to 63.9)        | 56.6 (41.1 to 76.5)           | 0.7 (0.3 to 1.3)                | 38.7 (38.7 to 38.7)               |
| Djibouti | 1999 | 67.5 (56.3 to 80.7)        | 29.2 (22.4 to 36.9)        | 30.8 (22.3 to 41.5)           | 0.4 (0.2 to 0.7)                | 7.2 (7.2 to 7.2)                  | 126.4 (105.3 to 151.1) | 54.6 (42.0 to 69.1)        | 57.7 (41.7 to 77.7)           | 0.7 (0.4 to 1.4)                | 13.4 (13.4 to 13.4)               |
| Djibouti | 2000 | 69.8 (58.7 to 82.9)        | 27.9 (21.5 to 35.3)        | 30.3 (21.7 to 41.2)           | 0.4 (0.2 to 0.7)                | 11.2 (11.2 to 11.2)               | 130.6 (109.9 to 155.2) | 52.2 (40.2 to 66.0)        | 56.7 (40.6 to 77.1)           | 0.7 (0.3 to 1.4)                | 20.9 (20.9 to 20.9)               |
| Djibouti | 2001 | 61.5 (50.9 to 73.8)        | 26.7 (20.5 to 33.6)        | 29.6 (21.2 to 39.7)           | 0.4 (0.2 to 0.7)                | 4.8 (4.8 to 4.8)                  | 115.0 (95.2 to 138.1)  | 50.0 (38.4 to 62.8)        | 55.4 (39.7 to 74.2)           | 0.7 (0.3 to 1.3)                | 9.0 (9.0 to 9.0)                  |
| Djibouti | 2002 | 59.5 (49.1 to 71.5)        | 26.5 (20.6 to 33.2)        | 28.7 (20.7 to 38.7)           | 0.4 (0.2 to 0.7)                | 4.0 (4.0 to 4.0)                  | 111.4 (91.9 to 133.8)  | 49.6 (38.5 to 62.1)        | 53.7 (38.8 to 72.3)           | 0.7 (0.3 to 1.2)                | 7.4 (7.4 to 7.4)                  |
| Djibouti | 2003 | 59.8 (49.1 to 71.8)        | 27.8 (21.4 to 35.0)        | 28.0 (20.1 to 37.2)           | 0.4 (0.2 to 0.7)                | 3.6 (3.6 to 3.6)                  | 111.9 (91.9 to 134.3)  | 52.1 (40.1 to 65.5)        | 52.4 (37.7 to 69.7)           | 0.7 (0.3 to 1.3)                | 6.7 (6.7 to 6.7)                  |
| Djibouti | 2004 | 66.2 (55.8 to 77.8)        | 28.6 (22.3 to 35.8)        | 26.8 (19.3 to 36.2)           | 0.4 (0.2 to 0.7)                | 10.4 (10.4 to 10.4)               | 124.0 (104.4 to 145.6) | 53.6 (41.8 to 67.0)        | 50.2 (36.0 to 67.8)           | 0.7 (0.3 to 1.3)                | 19.5 (19.5 to 19.5)               |
| Djibouti | 2005 | 72.5 (62.3 to 83.6)        | 29.8 (23.2 to 37.4)        | 25.9 (18.7 to 34.7)           | 0.4 (0.2 to 0.7)                | 16.4 (16.4 to 16.4)               | 135.8 (116.6 to 156.5) | 55.8 (43.4 to 70.1)        | 48.5 (35.0 to 65.0)           | 0.7 (0.3 to 1.3)                | 30.8 (30.8 to 30.8)               |
| Djibouti | 2006 | 75.6 (65.3 to 87.6)        | 32.8 (25.3 to 40.9)        | 25.2 (18.1 to 33.7)           | 0.3 (0.2 to 0.6)                | 17.2 (17.2 to 17.2)               | 141.5 (122.2 to 163.9) | 61.4 (47.3 to 76.6)        | 47.2 (33.9 to 63.0)           | 0.6 (0.3 to 1.2)                | 32.3 (32.3 to 32.3)               |
| Djibouti | 2007 | 79.4 (69.2 to 91.3)        | 34.4 (26.5 to 42.8)        | 23.6 (17.2 to 31.6)           | 0.4 (0.2 to 0.6)                | 21.1 (21.1 to 21.1)               | 148.6 (129.6 to 170.8) | 64.3 (49.6 to 80.2)        | 44.2 (32.2 to 59.2)           | 0.7 (0.3 to 1.2)                | 39.5 (39.5 to 39.5)               |
| Djibouti | 2008 | 78.6 (68.3 to 89.9)        | 36.7 (28.6 to 46.2)        | 21.8 (15.8 to 29.0)           | 0.4 (0.2 to 0.7)                | 19.7 (19.7 to 19.7)               | 147.0 (127.8 to 168.3) | 68.7 (53.5 to 86.4)        | 40.7 (29.5 to 54.2)           | 0.7 (0.3 to 1.3)                | 37.0 (37.0 to 37.0)               |
| Djibouti | 2009 | 74.3 (64.0 to 85.0)        | 37.7 (29.1 to 47.0)        | 20.1 (14.6 to 26.9)           | 0.4 (0.2 to 0.7)                | 16.0 (16.0 to 16.0)               | 139.0 (119.9 to 159.2) | 70.6 (54.5 to 87.9)        | 37.7 (27.3 to 50.3)           | 0.7 (0.4 to 1.4)                | 30.0 (30.0 to 30.0)               |
| Djibouti | 2010 | 66.3 (56.3 to 77.3)        | 38.5 (29.7 to 47.9)        | 18.7 (13.5 to 25.1)           | 0.4 (0.2 to 0.8)                | 8.7 (8.7 to 8.7)                  | 124.2 (105.3 to 144.7) | 72.0 (55.5 to 89.7)        | 35.1 (25.3 to 47.1)           | 0.8 (0.4 to 1.6)                | 16.2 (16.2 to 16.2)               |
| Djibouti | 2011 | 69.5 (59.0 to 80.5)        | 40.0 (30.8 to 50.0)        | 17.9 (12.9 to 24.1)           | 0.6 (0.3 to 1.1)                | 11.0 (11.0 to 11.0)               | 130.0 (110.4 to 150.6) | 74.9 (57.7 to 93.6)        | 33.4 (24.2 to 45.1)           | 1.1 (0.5 to 2.1)                | 20.5 (20.5 to 20.5)               |
| Djibouti | 2012 | 75.9 (66.0 to 87.3)        | 39.8 (30.3 to 49.7)        | 16.9 (12.1 to 23.0)           | 0.7 (0.3 to 1.3)                | 18.4 (18.4 to 18.4)               | 142.0 (123.6 to 163.4) | 74.5 (56.7 to 93.0)        | 31.7 (22.6 to 43.1)           | 1.3 (0.6 to 2.5)                | 34.5 (34.5 to 34.5)               |
| Djibouti | 2013 | 68.2 (58.1 to 79.2)        | 39.2 (29.8 to 49.6)        | 16.2 (11.4 to 21.9)           | 0.7 (0.3 to 1.3)                | 12.1 (12.1 to 12.1)               | 127.7 (108.7 to 148.2) | 73.4 (55.8 to 92.9)        | 30.3 (21.4 to 41.0)           | 1.3 (0.6 to 2.4)                | 22.6 (22.6 to 22.6)               |
| Djibouti | 2014 | 66.5 (56.0 to 77.7)        | 39.5 (30.2 to 50.0)        | 16.0 (11.3 to 21.6)           | 0.8 (0.4 to 1.4)                | 10.3 (10.3 to 10.3)               | 124.4 (104.8 to 145.4) | 73.8 (56.4 to 93.5)        | 29.9 (21.1 to 40.5)           | 1.4 (0.7 to 2.7)                | 19.2 (19.2 to 19.2)               |
| Djibouti | 2015 | 69.1 (59.0 to 80.8)        | 38.5 (29.3 to 49.1)        | 15.8 (11.2 to 21.4)           | 0.7 (0.3 to 1.4)                | 14.0 (14.0 to 14.0)               | 129.3 (110.4 to 151.3) | 72.1 (54.9 to 91.9)        | 29.6 (20.9 to 40.1)           | 1.4 (0.7 to 2.6)                | 26.3 (26.3 to 26.3)               |

| Country  | Year | 2018 US Dollars per capita |                            |                               |                                 |                                   | 2018 PPP per capita    |                            |                               |                                 |                                   |
|----------|------|----------------------------|----------------------------|-------------------------------|---------------------------------|-----------------------------------|------------------------|----------------------------|-------------------------------|---------------------------------|-----------------------------------|
|          |      | Health spending            | Government health spending | Out-of-pocket health spending | Prepaid private health spending | Development assistance for health | Health spending        | Government health spending | Out-of-pocket health spending | Prepaid private health spending | Development assistance for health |
| Djibouti | 2016 | 66.4 (57.0 to 77.1)        | 35.1 (27.1 to 44.9)        | 15.6 (11.2 to 21.5)           | 0.6 (0.3 to 1.1)                | 15.1 (15.1 to 15.1)               | 124.3 (106.8 to 144.3) | 65.7 (50.7 to 84.0)        | 29.3 (20.9 to 40.3)           | 1.1 (0.5 to 2.0)                | 28.3 (28.3 to 28.3)               |
| Djibouti | 2017 | 57.9 (49.5 to 67.1)        | 29.4 (22.7 to 37.7)        | 15.8 (11.2 to 21.7)           | 0.6 (0.3 to 1.2)                | 12.1 (12.1 to 12.1)               | 108.3 (92.7 to 125.5)  | 55.1 (42.6 to 70.6)        | 29.5 (21.0 to 40.6)           | 1.2 (0.6 to 2.2)                | 22.6 (22.6 to 22.6)               |
| Djibouti | 2018 | 57.6 (49.1 to 67.5)        | 30.0 (23.2 to 38.4)        | 15.8 (11.2 to 21.8)           | 0.6 (0.3 to 1.2)                | 11.2 (11.2 to 11.3)               | 107.9 (91.9 to 126.4)  | 56.2 (43.4 to 71.9)        | 29.5 (21.0 to 40.8)           | 1.2 (0.6 to 2.2)                | 21.0 (21.0 to 21.1)               |
| Djibouti | 2019 | 58.2 (49.5 to 68.2)        | 30.6 (23.6 to 39.1)        | 15.8 (11.2 to 21.8)           | 0.6 (0.3 to 1.2)                | 11.2 (10.4 to 11.8)               | 108.9 (92.6 to 127.6)  | 57.2 (44.2 to 73.2)        | 29.5 (20.9 to 40.8)           | 1.2 (0.6 to 2.2)                | 21.0 (19.5 to 22.2)               |
| Djibouti | 2020 | 58.8 (49.7 to 69.5)        | 31.2 (24.0 to 39.8)        | 15.8 (11.1 to 21.8)           | 0.7 (0.3 to 1.2)                | 11.2 (10.3 to 12.1)               | 110.1 (93.1 to 130.1)  | 58.3 (45.0 to 74.5)        | 29.5 (20.8 to 40.8)           | 1.2 (0.6 to 2.3)                | 21.0 (19.3 to 22.7)               |
| Djibouti | 2021 | 59.6 (50.6 to 70.0)        | 31.8 (24.5 to 40.6)        | 15.8 (11.2 to 22.0)           | 0.7 (0.3 to 1.3)                | 11.3 (10.2 to 12.5)               | 111.5 (94.7 to 131.0)  | 59.5 (45.9 to 76.1)        | 29.5 (20.9 to 41.2)           | 1.2 (0.6 to 2.3)                | 21.2 (19.1 to 23.4)               |
| Djibouti | 2022 | 60.2 (51.2 to 71.3)        | 32.3 (24.9 to 41.3)        | 15.8 (11.1 to 21.9)           | 0.7 (0.3 to 1.3)                | 11.5 (10.2 to 12.8)               | 112.8 (95.9 to 133.5)  | 60.5 (46.6 to 77.3)        | 29.5 (20.8 to 40.9)           | 1.3 (0.6 to 2.4)                | 21.5 (19.1 to 24.0)               |
| Djibouti | 2023 | 60.9 (51.7 to 71.4)        | 32.8 (25.3 to 42.0)        | 15.8 (11.2 to 22.1)           | 0.7 (0.3 to 1.3)                | 11.6 (10.1 to 13.2)               | 114.0 (96.8 to 133.6)  | 61.4 (47.3 to 78.6)        | 29.5 (20.9 to 41.3)           | 1.3 (0.6 to 2.4)                | 21.8 (19.0 to 24.7)               |
| Djibouti | 2024 | 61.6 (52.9 to 73.4)        | 33.3 (25.7 to 42.7)        | 15.8 (11.1 to 22.0)           | 0.7 (0.3 to 1.3)                | 11.8 (10.2 to 13.6)               | 115.3 (99.0 to 137.3)  | 62.4 (48.1 to 79.9)        | 29.5 (20.9 to 41.2)           | 1.3 (0.6 to 2.5)                | 22.1 (19.1 to 25.4)               |
| Djibouti | 2025 | 62.3 (52.3 to 73.7)        | 33.9 (26.1 to 43.3)        | 15.7 (11.1 to 21.9)           | 0.7 (0.3 to 1.3)                | 12.0 (10.2 to 14.0)               | 116.6 (98.0 to 138.0)  | 63.4 (48.8 to 81.1)        | 29.5 (20.7 to 40.9)           | 1.3 (0.6 to 2.5)                | 22.4 (19.2 to 26.3)               |
| Djibouti | 2026 | 62.9 (53.0 to 74.2)        | 34.3 (26.4 to 44.0)        | 15.7 (11.1 to 21.7)           | 0.7 (0.4 to 1.4)                | 12.2 (10.3 to 14.2)               | 117.8 (99.2 to 138.8)  | 64.3 (49.5 to 82.3)        | 29.4 (20.7 to 40.5)           | 1.4 (0.7 to 2.6)                | 22.7 (19.2 to 26.7)               |
| Djibouti | 2027 | 63.6 (53.2 to 75.3)        | 34.9 (26.8 to 44.6)        | 15.7 (11.0 to 21.5)           | 0.7 (0.4 to 1.4)                | 12.3 (10.4 to 14.7)               | 119.1 (99.5 to 140.8)  | 65.2 (50.1 to 83.5)        | 29.4 (20.6 to 40.2)           | 1.4 (0.7 to 2.6)                | 23.1 (19.4 to 27.4)               |
| Djibouti | 2028 | 64.4 (54.6 to 75.6)        | 35.3 (27.2 to 45.2)        | 15.7 (10.9 to 21.4)           | 0.7 (0.4 to 1.4)                | 12.6 (10.5 to 15.2)               | 120.5 (102.3 to 141.6) | 66.2 (50.8 to 84.5)        | 29.4 (20.5 to 40.1)           | 1.4 (0.7 to 2.6)                | 23.5 (19.7 to 28.4)               |
| Djibouti | 2029 | 65.1 (54.4 to 76.5)        | 35.9 (27.6 to 45.8)        | 15.7 (10.9 to 21.5)           | 0.8 (0.4 to 1.4)                | 12.8 (10.6 to 15.7)               | 121.9 (101.9 to 143.2) | 67.1 (51.7 to 85.8)        | 29.4 (20.4 to 40.2)           | 1.4 (0.7 to 2.7)                | 24.0 (19.8 to 29.4)               |
| Djibouti | 2030 | 65.9 (55.9 to 78.1)        | 36.4 (27.9 to 46.6)        | 15.7 (10.9 to 21.6)           | 0.8 (0.4 to 1.5)                | 13.0 (10.7 to 16.0)               | 123.4 (104.6 to 146.2) | 68.1 (52.3 to 87.2)        | 29.4 (20.4 to 40.4)           | 1.4 (0.7 to 2.7)                | 24.4 (20.0 to 29.9)               |
| Djibouti | 2031 | 66.7 (55.4 to 79.6)        | 36.9 (28.4 to 47.4)        | 15.8 (10.9 to 21.7)           | 0.8 (0.4 to 1.5)                | 13.3 (10.8 to 16.6)               | 124.9 (103.7 to 149.0) | 69.1 (53.2 to 88.7)        | 29.5 (20.4 to 40.7)           | 1.5 (0.7 to 2.8)                | 24.8 (20.1 to 31.1)               |
| Djibouti | 2032 | 67.5 (56.2 to 79.7)        | 37.4 (28.8 to 48.3)        | 15.8 (10.8 to 21.8)           | 0.8 (0.4 to 1.5)                | 13.5 (10.9 to 17.0)               | 126.4 (105.2 to 149.2) | 70.0 (53.9 to 90.4)        | 29.6 (20.2 to 40.8)           | 1.5 (0.7 to 2.8)                | 25.3 (20.3 to 31.9)               |
| Djibouti | 2033 | 68.4 (57.3 to 81.2)        | 37.9 (29.2 to 49.1)        | 15.9 (10.8 to 21.9)           | 0.8 (0.4 to 1.5)                | 13.8 (11.0 to 17.7)               | 128.0 (107.2 to 152.0) | 71.0 (54.6 to 91.8)        | 29.7 (20.3 to 41.1)           | 1.5 (0.7 to 2.9)                | 25.8 (20.5 to 33.1)               |
| Djibouti | 2034 | 69.3 (57.6 to 82.2)        | 38.5 (29.6 to 49.9)        | 15.9 (10.8 to 22.1)           | 0.8 (0.4 to 1.5)                | 14.1 (11.1 to 18.2)               | 129.7 (107.7 to 153.9) | 72.0 (55.4 to 93.4)        | 29.8 (20.3 to 41.4)           | 1.5 (0.7 to 2.9)                | 26.4 (20.7 to 34.0)               |
| Djibouti | 2035 | 70.2 (59.0 to 83.9)        | 39.0 (29.9 to 50.5)        | 16.0 (10.8 to 22.3)           | 0.8 (0.4 to 1.6)                | 14.4 (11.2 to 18.8)               | 131.4 (110.5 to 157.1) | 73.0 (56.0 to 94.5)        | 30.0 (20.2 to 41.7)           | 1.6 (0.8 to 2.9)                | 26.9 (20.9 to 35.1)               |
| Djibouti | 2036 | 71.2 (58.9 to 86.3)        | 39.5 (30.3 to 51.4)        | 16.1 (10.8 to 22.4)           | 0.9 (0.4 to 1.6)                | 14.6 (11.3 to 19.7)               | 133.2 (110.2 to 161.5) | 74.0 (56.6 to 96.1)        | 30.2 (20.3 to 41.9)           | 1.6 (0.8 to 3.0)                | 27.4 (21.2 to 36.8)               |

| Country  | Year | 2018 US Dollars per capita |                            |                               |                                 |                                   | 2018 PPP per capita    |                            |                               |                                 |                                   |
|----------|------|----------------------------|----------------------------|-------------------------------|---------------------------------|-----------------------------------|------------------------|----------------------------|-------------------------------|---------------------------------|-----------------------------------|
|          |      | Health spending            | Government health spending | Out-of-pocket health spending | Prepaid private health spending | Development assistance for health | Health spending        | Government health spending | Out-of-pocket health spending | Prepaid private health spending | Development assistance for health |
| Djibouti | 2037 | 72.1 (59.8 to 87.0)        | 40.1 (30.6 to 52.3)        | 16.2 (10.8 to 22.7)           | 0.9 (0.4 to 1.6)                | 14.9 (11.4 to 20.0)               | 134.9 (112.0 to 162.8) | 75.0 (57.3 to 97.9)        | 30.4 (20.3 to 42.4)           | 1.6 (0.8 to 3.0)                | 27.9 (21.4 to 37.4)               |
| Djibouti | 2038 | 73.0 (60.9 to 87.5)        | 40.6 (31.0 to 53.2)        | 16.4 (10.9 to 22.9)           | 0.9 (0.4 to 1.6)                | 15.2 (11.6 to 21.1)               | 136.7 (113.9 to 163.7) | 76.0 (58.0 to 99.6)        | 30.6 (20.3 to 42.8)           | 1.6 (0.8 to 3.1)                | 28.5 (21.7 to 39.5)               |
| Djibouti | 2039 | 74.1 (61.5 to 90.0)        | 41.2 (31.3 to 54.1)        | 16.5 (10.9 to 23.1)           | 0.9 (0.4 to 1.7)                | 15.5 (11.8 to 21.5)               | 138.6 (115.1 to 168.4) | 77.1 (58.6 to 101.3)       | 30.9 (20.4 to 43.3)           | 1.7 (0.8 to 3.1)                | 28.9 (22.1 to 40.2)               |
| Djibouti | 2040 | 75.0 (62.2 to 89.7)        | 41.7 (31.6 to 55.0)        | 16.6 (10.9 to 23.4)           | 0.9 (0.4 to 1.7)                | 15.8 (12.0 to 21.8)               | 140.5 (116.5 to 167.8) | 78.1 (59.1 to 102.9)       | 31.2 (20.5 to 43.9)           | 1.7 (0.8 to 3.2)                | 29.5 (22.4 to 40.9)               |
| Djibouti | 2041 | 76.1 (62.9 to 92.0)        | 42.3 (31.9 to 55.7)        | 16.8 (11.0 to 23.8)           | 0.9 (0.4 to 1.7)                | 16.1 (12.1 to 22.3)               | 142.4 (117.7 to 172.3) | 79.1 (59.7 to 104.2)       | 31.5 (20.6 to 44.5)           | 1.7 (0.8 to 3.2)                | 30.1 (22.7 to 41.8)               |
| Djibouti | 2042 | 77.1 (62.9 to 94.0)        | 42.8 (32.2 to 56.4)        | 17.0 (11.1 to 24.1)           | 0.9 (0.5 to 1.7)                | 16.4 (12.3 to 23.4)               | 144.4 (117.7 to 175.9) | 80.1 (60.3 to 105.5)       | 31.8 (20.8 to 45.1)           | 1.7 (0.8 to 3.3)                | 30.7 (23.0 to 43.7)               |
| Djibouti | 2043 | 78.2 (64.7 to 94.6)        | 43.4 (32.6 to 57.1)        | 17.2 (11.2 to 24.5)           | 0.9 (0.5 to 1.8)                | 16.7 (12.4 to 24.2)               | 146.4 (121.1 to 177.0) | 81.2 (61.0 to 106.9)       | 32.2 (21.0 to 45.8)           | 1.8 (0.9 to 3.3)                | 31.3 (23.2 to 45.2)               |
| Djibouti | 2044 | 79.4 (65.5 to 97.4)        | 44.0 (32.9 to 58.2)        | 17.4 (11.3 to 24.8)           | 1.0 (0.5 to 1.8)                | 17.0 (12.6 to 24.6)               | 148.5 (122.6 to 182.3) | 82.3 (61.5 to 109.0)       | 32.6 (21.2 to 46.4)           | 1.8 (0.9 to 3.3)                | 31.9 (23.5 to 46.1)               |
| Djibouti | 2045 | 80.5 (65.4 to 99.6)        | 44.5 (33.2 to 59.4)        | 17.6 (11.5 to 25.2)           | 1.0 (0.5 to 1.8)                | 17.4 (12.5 to 26.2)               | 150.7 (122.3 to 186.5) | 83.3 (62.1 to 111.2)       | 33.0 (21.5 to 47.1)           | 1.8 (0.9 to 3.4)                | 32.5 (23.4 to 49.1)               |
| Djibouti | 2046 | 81.7 (66.7 to 100.3)       | 45.1 (33.5 to 60.2)        | 17.9 (11.7 to 25.5)           | 1.0 (0.5 to 1.8)                | 17.7 (12.8 to 27.2)               | 152.9 (124.9 to 187.7) | 84.4 (62.8 to 112.7)       | 33.5 (21.9 to 47.8)           | 1.9 (0.9 to 3.5)                | 33.1 (23.9 to 50.9)               |
| Djibouti | 2047 | 82.9 (67.1 to 101.8)       | 45.7 (33.9 to 61.0)        | 18.1 (11.9 to 26.0)           | 1.0 (0.5 to 1.9)                | 18.0 (12.9 to 28.4)               | 155.1 (125.5 to 190.6) | 85.5 (63.5 to 114.2)       | 34.0 (22.3 to 48.6)           | 1.9 (0.9 to 3.5)                | 33.8 (24.2 to 53.2)               |
| Djibouti | 2048 | 84.2 (68.7 to 103.0)       | 46.3 (34.3 to 61.8)        | 18.4 (12.1 to 26.4)           | 1.0 (0.5 to 1.9)                | 18.4 (13.2 to 29.5)               | 157.5 (128.7 to 192.8) | 86.7 (64.2 to 115.7)       | 34.5 (22.6 to 49.3)           | 1.9 (0.9 to 3.6)                | 34.5 (24.7 to 55.2)               |
| Djibouti | 2049 | 85.4 (69.7 to 105.3)       | 46.9 (34.6 to 62.9)        | 18.7 (12.3 to 26.7)           | 1.0 (0.5 to 1.9)                | 18.8 (13.4 to 30.2)               | 159.8 (130.4 to 197.1) | 87.8 (64.8 to 117.7)       | 35.0 (23.0 to 50.0)           | 1.9 (0.9 to 3.6)                | 35.2 (25.1 to 56.6)               |
| Djibouti | 2050 | 86.8 (69.9 to 107.5)       | 47.5 (35.0 to 64.1)        | 19.0 (12.5 to 27.1)           | 1.1 (0.5 to 2.0)                | 19.2 (13.5 to 31.4)               | 162.4 (130.8 to 201.3) | 89.0 (65.5 to 120.0)       | 35.5 (23.3 to 50.7)           | 2.0 (1.0 to 3.7)                | 36.0 (25.3 to 58.8)               |
| Dominica | 1995 | 346.1 (313.4 to 382.7)     | 218.0 (192.7 to 246.1)     | 126.4 (104.3 to 151.7)        | 1.6 (0.8 to 3.1)                | 0.0 (0.0 to 0.0)                  | 504.7 (457.0 to 558.1) | 318.0 (281.0 to 359.0)     | 184.4 (152.1 to 221.3)        | 2.4 (1.1 to 4.5)                | 0.0 (0.0 to 0.0)                  |
| Dominica | 1996 | 355.2 (325.8 to 386.8)     | 224.8 (201.6 to 251.0)     | 128.5 (108.4 to 151.0)        | 1.5 (0.7 to 2.8)                | 0.3 (0.3 to 0.3)                  | 518.0 (475.2 to 564.1) | 327.9 (294.1 to 366.0)     | 187.4 (158.1 to 220.2)        | 2.2 (1.0 to 4.2)                | 0.5 (0.5 to 0.5)                  |
| Dominica | 1997 | 373.2 (345.6 to 404.0)     | 227.4 (206.6 to 251.4)     | 129.5 (110.5 to 150.7)        | 1.3 (0.6 to 2.4)                | 15.0 (15.0 to 15.0)               | 544.3 (504.0 to 589.2) | 331.6 (301.3 to 366.6)     | 188.9 (161.1 to 219.7)        | 1.8 (0.9 to 3.5)                | 21.9 (21.9 to 21.9)               |
| Dominica | 1998 | 380.5 (355.0 to 409.8)     | 235.1 (213.5 to 257.8)     | 133.0 (114.1 to 154.1)        | 0.9 (0.4 to 1.7)                | 11.5 (11.5 to 11.5)               | 554.9 (517.7 to 597.7) | 342.9 (311.4 to 376.0)     | 194.0 (166.5 to 224.8)        | 1.3 (0.6 to 2.5)                | 16.7 (16.7 to 16.7)               |
| Dominica | 1999 | 360.8 (335.6 to 389.3)     | 228.6 (208.8 to 250.7)     | 131.1 (112.7 to 150.9)        | 0.4 (0.2 to 0.8)                | 0.6 (0.6 to 0.6)                  | 526.2 (489.5 to 567.8) | 333.4 (304.5 to 365.6)     | 191.2 (164.4 to 220.0)        | 0.6 (0.3 to 1.2)                | 0.8 (0.8 to 0.8)                  |
| Dominica | 2000 | 333.7 (309.2 to 358.6)     | 212.9 (193.2 to 233.5)     | 120.5 (103.6 to 137.8)        | 0.1 (0.0 to 0.2)                | 0.2 (0.2 to 0.2)                  | 486.6 (451.0 to 523.0) | 310.4 (281.7 to 340.5)     | 175.8 (151.1 to 200.9)        | 0.2 (0.1 to 0.3)                | 0.2 (0.2 to 0.2)                  |
| Dominica | 2001 | 313.2 (288.7 to 337.9)     | 201.4 (181.9 to 221.1)     | 111.1 (96.3 to 127.5)         | 0.0 (0.0 to 0.0)                | 0.7 (0.7 to 0.7)                  | 456.8 (421.0 to 492.8) | 293.7 (265.2 to 322.4)     | 162.1 (140.5 to 186.0)        | 0.0 (0.0 to 0.0)                | 1.1 (1.1 to 1.1)                  |

| Country  | Year | 2018 US Dollars per capita |                            |                               |                                 |                                   | 2018 PPP per capita    |                            |                               |                                 |                                   |
|----------|------|----------------------------|----------------------------|-------------------------------|---------------------------------|-----------------------------------|------------------------|----------------------------|-------------------------------|---------------------------------|-----------------------------------|
|          |      | Health spending            | Government health spending | Out-of-pocket health spending | Prepaid private health spending | Development assistance for health | Health spending        | Government health spending | Out-of-pocket health spending | Prepaid private health spending | Development assistance for health |
| Dominica | 2002 | 304.8 (279.9 to 329.3)     | 194.4 (176.2 to 212.5)     | 110.0 (95.6 to 126.7)         | 0.0 (0.0 to 0.0)                | 0.3 (0.3 to 0.3)                  | 444.5 (408.3 to 480.3) | 283.5 (256.9 to 310.0)     | 160.5 (139.5 to 184.9)        | 0.0 (0.0 to 0.0)                | 0.5 (0.5 to 0.5)                  |
| Dominica | 2003 | 317.1 (291.1 to 343.5)     | 196.4 (177.6 to 216.2)     | 116.6 (101.0 to 133.7)        | 0.0 (0.0 to 0.0)                | 4.1 (4.1 to 4.1)                  | 462.4 (424.6 to 501.0) | 286.5 (259.1 to 315.4)     | 170.0 (147.3 to 195.0)        | 0.0 (0.0 to 0.0)                | 6.0 (6.0 to 6.0)                  |
| Dominica | 2004 | 337.4 (310.5 to 365.2)     | 197.9 (179.1 to 217.7)     | 133.6 (115.3 to 154.5)        | 0.3 (0.1 to 0.5)                | 5.6 (5.6 to 5.6)                  | 492.1 (452.8 to 532.6) | 288.6 (261.3 to 317.5)     | 194.9 (168.2 to 225.3)        | 0.4 (0.2 to 0.7)                | 8.2 (8.2 to 8.2)                  |
| Dominica | 2005 | 347.0 (321.0 to 377.1)     | 197.7 (179.6 to 217.0)     | 141.8 (122.2 to 162.6)        | 1.4 (0.6 to 2.5)                | 6.2 (6.2 to 6.2)                  | 506.1 (468.2 to 549.9) | 288.4 (262.0 to 316.5)     | 206.8 (178.3 to 237.1)        | 2.0 (0.9 to 3.6)                | 9.0 (9.0 to 9.0)                  |
| Dominica | 2006 | 370.9 (342.4 to 401.1)     | 207.7 (188.8 to 228.0)     | 150.0 (129.7 to 172.2)        | 3.0 (1.5 to 5.6)                | 10.1 (10.1 to 10.1)               | 541.0 (499.4 to 584.9) | 303.0 (275.4 to 332.6)     | 218.8 (189.1 to 251.1)        | 4.4 (2.1 to 8.2)                | 14.7 (14.7 to 14.7)               |
| Dominica | 2007 | 392.2 (364.5 to 421.6)     | 220.7 (202.1 to 241.9)     | 161.0 (140.1 to 183.8)        | 4.5 (2.2 to 8.2)                | 5.9 (5.9 to 5.9)                  | 572.0 (531.5 to 614.9) | 321.9 (294.7 to 352.7)     | 234.8 (204.3 to 268.0)        | 6.6 (3.3 to 12.0)               | 8.7 (8.7 to 8.7)                  |
| Dominica | 2008 | 426.0 (396.0 to 459.0)     | 237.0 (217.0 to 257.7)     | 172.5 (150.5 to 195.5)        | 5.5 (2.7 to 10.0)               | 11.0 (11.0 to 11.0)               | 621.3 (577.6 to 669.5) | 345.7 (316.4 to 375.8)     | 251.6 (219.4 to 285.1)        | 8.0 (4.0 to 14.6)               | 16.0 (16.0 to 16.0)               |
| Dominica | 2009 | 431.0 (400.2 to 464.2)     | 242.9 (223.2 to 263.9)     | 169.1 (147.5 to 191.6)        | 5.8 (2.9 to 10.7)               | 13.1 (13.1 to 13.1)               | 628.5 (583.7 to 677.0) | 354.3 (325.5 to 384.9)     | 246.6 (215.2 to 279.5)        | 8.5 (4.2 to 15.6)               | 19.1 (19.1 to 19.1)               |
| Dominica | 2010 | 431.1 (399.9 to 461.1)     | 251.8 (230.5 to 274.2)     | 162.3 (141.1 to 184.1)        | 6.0 (3.0 to 11.1)               | 11.0 (11.0 to 11.0)               | 628.8 (583.2 to 672.4) | 367.3 (336.2 to 399.9)     | 236.8 (205.8 to 268.5)        | 8.8 (4.3 to 16.2)               | 16.0 (16.0 to 16.0)               |
| Dominica | 2011 | 430.6 (401.3 to 460.4)     | 256.9 (235.6 to 280.5)     | 156.5 (136.3 to 176.5)        | 6.0 (3.0 to 11.3)               | 11.2 (11.2 to 11.2)               | 628.1 (585.2 to 671.5) | 374.7 (343.7 to 409.1)     | 228.2 (198.8 to 257.4)        | 8.8 (4.3 to 16.4)               | 16.3 (16.3 to 16.3)               |
| Dominica | 2012 | 422.9 (395.6 to 453.4)     | 257.2 (236.1 to 280.6)     | 153.7 (133.7 to 173.9)        | 6.0 (2.9 to 11.0)               | 6.0 (6.0 to 6.0)                  | 616.7 (576.9 to 661.3) | 375.1 (344.4 to 409.3)     | 224.1 (194.9 to 253.6)        | 8.7 (4.2 to 16.1)               | 8.8 (8.8 to 8.8)                  |
| Dominica | 2013 | 424.6 (396.3 to 456.4)     | 258.3 (236.3 to 281.2)     | 149.7 (130.0 to 170.8)        | 5.9 (2.9 to 10.8)               | 10.8 (10.8 to 10.8)               | 619.3 (577.9 to 665.7) | 376.7 (344.6 to 410.1)     | 218.3 (189.5 to 249.2)        | 8.6 (4.2 to 15.7)               | 15.7 (15.7 to 15.7)               |
| Dominica | 2014 | 430.1 (396.7 to 462.5)     | 272.6 (248.2 to 297.4)     | 148.2 (128.9 to 171.0)        | 6.0 (2.9 to 10.6)               | 3.2 (3.2 to 3.2)                  | 627.3 (578.6 to 674.6) | 397.6 (362.0 to 433.7)     | 216.2 (187.9 to 249.4)        | 8.8 (4.3 to 15.5)               | 4.7 (4.7 to 4.7)                  |
| Dominica | 2015 | 438.9 (401.9 to 475.1)     | 282.7 (255.8 to 309.4)     | 142.7 (120.9 to 166.7)        | 6.1 (2.8 to 10.9)               | 7.4 (7.4 to 7.4)                  | 640.1 (586.1 to 693.0) | 412.2 (373.1 to 451.2)     | 208.2 (176.4 to 243.1)        | 8.8 (4.2 to 15.9)               | 10.8 (10.8 to 10.8)               |
| Dominica | 2016 | 437.6 (397.5 to 478.7)     | 290.7 (260.6 to 323.6)     | 137.5 (114.2 to 163.0)        | 6.0 (2.8 to 11.1)               | 3.5 (3.5 to 3.5)                  | 638.2 (579.7 to 698.1) | 424.0 (380.1 to 471.9)     | 200.5 (166.5 to 237.7)        | 8.7 (4.1 to 16.2)               | 5.0 (5.0 to 5.0)                  |
| Dominica | 2017 | 420.9 (384.0 to 460.6)     | 277.0 (248.2 to 308.2)     | 131.3 (108.8 to 154.7)        | 5.8 (2.8 to 10.8)               | 6.8 (6.8 to 6.8)                  | 613.9 (560.1 to 671.7) | 404.0 (362.0 to 449.5)     | 191.5 (158.7 to 225.6)        | 8.5 (4.0 to 15.8)               | 10.0 (10.0 to 10.0)               |
| Dominica | 2018 | 425.7 (387.6 to 465.3)     | 281.6 (252.3 to 313.9)     | 131.9 (109.5 to 155.5)        | 5.9 (2.8 to 11.0)               | 6.2 (6.1 to 6.3)                  | 620.9 (565.3 to 678.6) | 410.8 (368.0 to 457.8)     | 192.4 (159.7 to 226.8)        | 8.6 (4.1 to 16.0)               | 9.1 (9.0 to 9.2)                  |
| Dominica | 2019 | 433.0 (394.0 to 473.1)     | 287.5 (257.3 to 320.3)     | 133.1 (110.6 to 157.1)        | 6.0 (2.8 to 11.2)               | 6.3 (5.9 to 6.7)                  | 631.4 (574.6 to 690.0) | 419.3 (375.3 to 467.2)     | 194.2 (161.2 to 229.0)        | 8.7 (4.1 to 16.3)               | 9.2 (8.6 to 9.8)                  |
| Dominica | 2020 | 440.2 (400.8 to 482.5)     | 293.4 (261.1 to 327.3)     | 134.3 (110.8 to 158.6)        | 6.1 (2.9 to 11.4)               | 6.4 (5.9 to 7.0)                  | 642.0 (584.5 to 703.7) | 428.0 (380.8 to 477.3)     | 195.8 (161.6 to 231.3)        | 8.9 (4.2 to 16.6)               | 9.4 (8.5 to 10.2)                 |
| Dominica | 2021 | 447.6 (408.1 to 490.1)     | 299.5 (267.6 to 333.4)     | 135.3 (112.7 to 159.8)        | 6.2 (3.0 to 11.6)               | 6.6 (5.9 to 7.3)                  | 652.8 (595.2 to 714.8) | 436.8 (390.3 to 486.3)     | 197.4 (164.4 to 233.1)        | 9.1 (4.3 to 16.9)               | 9.6 (8.6 to 10.6)                 |
| Dominica | 2022 | 455.4 (414.2 to 498.0)     | 305.7 (273.2 to 341.5)     | 136.6 (113.8 to 161.3)        | 6.3 (3.0 to 11.7)               | 6.8 (5.9 to 7.6)                  | 664.1 (604.0 to 726.3) | 445.9 (398.4 to 498.1)     | 199.2 (165.9 to 235.2)        | 9.2 (4.4 to 17.1)               | 9.9 (8.7 to 11.1)                 |



| Country  | Year | 2018 US Dollars per capita |                            |                               |                                 |                                   | 2018 PPP per capita     |                            |                               |                                 |                                   |
|----------|------|----------------------------|----------------------------|-------------------------------|---------------------------------|-----------------------------------|-------------------------|----------------------------|-------------------------------|---------------------------------|-----------------------------------|
|          |      | Health spending            | Government health spending | Out-of-pocket health spending | Prepaid private health spending | Development assistance for health | Health spending         | Government health spending | Out-of-pocket health spending | Prepaid private health spending | Development assistance for health |
| Dominica | 2023 | 463.2 (422.0 to 506.3)     | 312.0 (278.2 to 348.7)     | 137.8 (114.8 to 162.9)        | 6.4 (3.1 to 12.0)               | 7.0 (6.0 to 8.0)                  | 675.6 (615.5 to 738.4)  | 455.0 (405.8 to 508.6)     | 201.0 (167.5 to 237.6)        | 9.4 (4.5 to 17.5)               | 10.2 (8.8 to 11.7)                |
| Dominica | 2024 | 469.7 (425.9 to 514.3)     | 316.9 (282.9 to 353.8)     | 139.1 (115.8 to 164.4)        | 6.5 (3.1 to 12.1)               | 7.2 (6.1 to 8.3)                  | 685.0 (621.2 to 750.1)  | 462.2 (412.6 to 516.0)     | 202.8 (168.9 to 239.8)        | 9.5 (4.5 to 17.7)               | 10.5 (8.9 to 12.2)                |
| Dominica | 2025 | 477.3 (434.3 to 521.9)     | 322.9 (287.9 to 361.7)     | 140.3 (116.9 to 166.1)        | 6.7 (3.2 to 12.4)               | 7.4 (6.2 to 8.7)                  | 696.1 (633.4 to 761.2)  | 470.9 (419.9 to 527.5)     | 204.7 (170.4 to 242.2)        | 9.7 (4.6 to 18.0)               | 10.8 (9.1 to 12.7)                |
| Dominica | 2026 | 484.7 (439.7 to 530.9)     | 328.9 (293.1 to 368.6)     | 141.4 (117.8 to 167.6)        | 6.8 (3.2 to 12.6)               | 7.6 (6.4 to 8.9)                  | 706.9 (641.3 to 774.3)  | 479.7 (427.5 to 537.6)     | 206.3 (171.8 to 244.4)        | 9.9 (4.7 to 18.3)               | 11.1 (9.3 to 13.0)                |
| Dominica | 2027 | 492.3 (446.8 to 539.4)     | 335.1 (297.3 to 375.6)     | 142.5 (118.6 to 169.0)        | 6.9 (3.3 to 12.8)               | 7.8 (6.5 to 9.3)                  | 718.0 (651.7 to 786.7)  | 488.7 (433.6 to 547.8)     | 207.8 (172.9 to 246.5)        | 10.0 (4.8 to 18.6)              | 11.4 (9.5 to 13.6)                |
| Dominica | 2028 | 499.9 (453.8 to 548.7)     | 341.3 (302.6 to 383.1)     | 143.6 (119.2 to 170.4)        | 7.0 (3.3 to 13.0)               | 8.1 (6.7 to 9.8)                  | 729.0 (661.9 to 800.2)  | 497.7 (441.4 to 558.7)     | 209.4 (173.9 to 248.5)        | 10.2 (4.8 to 18.9)              | 11.7 (9.8 to 14.2)                |
| Dominica | 2029 | 507.6 (458.8 to 559.4)     | 347.7 (308.4 to 390.9)     | 144.5 (119.8 to 171.5)        | 7.1 (3.4 to 13.2)               | 8.3 (6.8 to 10.2)                 | 740.3 (669.2 to 815.8)  | 507.1 (449.7 to 570.1)     | 210.8 (174.8 to 250.2)        | 10.4 (4.9 to 19.2)              | 12.1 (9.9 to 14.9)                |
| Dominica | 2030 | 515.4 (466.8 to 567.1)     | 354.4 (313.5 to 399.4)     | 145.3 (120.5 to 172.4)        | 7.2 (3.4 to 13.3)               | 8.5 (7.0 to 10.5)                 | 751.7 (680.7 to 827.1)  | 516.8 (457.2 to 582.5)     | 211.8 (175.7 to 251.4)        | 10.5 (5.0 to 19.4)              | 12.5 (10.2 to 15.3)               |
| Dominica | 2031 | 522.9 (470.2 to 577.7)     | 361.0 (316.5 to 408.7)     | 145.8 (121.0 to 172.9)        | 7.3 (3.5 to 13.5)               | 8.8 (7.1 to 11.0)                 | 762.7 (685.7 to 842.5)  | 526.5 (461.7 to 596.1)     | 212.7 (176.5 to 252.2)        | 10.7 (5.1 to 19.6)              | 12.9 (10.3 to 16.1)               |
| Dominica | 2032 | 530.5 (476.7 to 583.9)     | 367.8 (320.0 to 418.8)     | 146.2 (121.4 to 173.3)        | 7.4 (3.5 to 13.6)               | 9.1 (7.3 to 11.5)                 | 773.7 (695.2 to 851.5)  | 536.4 (466.7 to 610.7)     | 213.2 (177.0 to 252.7)        | 10.8 (5.1 to 19.8)              | 13.3 (10.6 to 16.8)               |
| Dominica | 2033 | 537.8 (478.6 to 599.0)     | 374.6 (322.7 to 427.6)     | 146.3 (121.5 to 173.4)        | 7.5 (3.6 to 13.7)               | 9.4 (7.5 to 12.0)                 | 784.4 (698.0 to 873.6)  | 546.4 (470.6 to 623.6)     | 213.4 (177.2 to 252.8)        | 10.9 (5.2 to 20.0)              | 13.7 (10.9 to 17.5)               |
| Dominica | 2034 | 545.1 (487.2 to 606.8)     | 381.4 (325.3 to 438.0)     | 146.5 (121.6 to 173.6)        | 7.6 (3.6 to 13.9)               | 9.7 (7.6 to 12.6)                 | 795.1 (710.5 to 885.0)  | 556.2 (474.4 to 638.7)     | 213.6 (177.4 to 253.2)        | 11.1 (5.2 to 20.2)              | 14.2 (11.1 to 18.3)               |
| Dominica | 2035 | 552.9 (489.8 to 618.3)     | 388.2 (328.6 to 447.6)     | 146.9 (122.1 to 174.3)        | 7.7 (3.6 to 14.0)               | 10.0 (7.8 to 13.2)                | 806.3 (714.4 to 901.8)  | 566.2 (479.2 to 652.8)     | 214.3 (178.1 to 254.2)        | 11.2 (5.3 to 20.4)              | 14.6 (11.3 to 19.2)               |
| Dominica | 2036 | 561.0 (496.1 to 629.6)     | 395.1 (332.2 to 457.1)     | 147.7 (122.9 to 175.3)        | 7.8 (3.7 to 14.2)               | 10.4 (8.0 to 14.1)                | 818.2 (723.5 to 918.2)  | 576.2 (484.6 to 666.7)     | 215.5 (179.2 to 255.7)        | 11.4 (5.4 to 20.7)              | 15.1 (11.7 to 20.5)               |
| Dominica | 2037 | 569.5 (497.7 to 640.5)     | 402.0 (336.5 to 465.9)     | 149.0 (123.9 to 176.9)        | 7.9 (3.7 to 14.4)               | 10.7 (8.2 to 14.5)                | 830.6 (725.8 to 934.1)  | 586.2 (490.8 to 679.5)     | 217.3 (180.7 to 257.9)        | 11.5 (5.5 to 21.1)              | 15.6 (11.9 to 21.1)               |
| Dominica | 2038 | 578.6 (511.0 to 652.2)     | 408.9 (341.7 to 475.6)     | 150.6 (125.3 to 178.7)        | 8.1 (3.8 to 14.7)               | 11.0 (8.4 to 15.3)                | 843.9 (745.3 to 951.2)  | 596.4 (498.3 to 693.6)     | 219.6 (182.7 to 260.6)        | 11.8 (5.5 to 21.5)              | 16.1 (12.2 to 22.3)               |
| Dominica | 2039 | 588.6 (515.0 to 664.1)     | 416.3 (347.9 to 484.1)     | 152.7 (126.8 to 181.1)        | 8.2 (3.9 to 15.0)               | 11.3 (8.6 to 15.6)                | 858.4 (751.1 to 968.5)  | 607.2 (507.5 to 706.0)     | 222.7 (185.0 to 264.2)        | 12.0 (5.6 to 21.9)              | 16.5 (12.5 to 22.8)               |
| Dominica | 2040 | 598.7 (529.7 to 680.0)     | 423.9 (354.4 to 493.4)     | 154.7 (128.4 to 183.4)        | 8.4 (3.9 to 15.3)               | 11.7 (8.9 to 16.2)                | 873.2 (772.6 to 991.8)  | 618.2 (516.8 to 719.7)     | 225.6 (187.3 to 267.5)        | 12.3 (5.7 to 22.4)              | 17.1 (13.0 to 23.6)               |
| Dominica | 2041 | 608.9 (534.1 to 687.6)     | 431.4 (361.0 to 504.0)     | 156.8 (130.0 to 185.8)        | 8.6 (4.0 to 15.7)               | 12.1 (9.1 to 17.0)                | 888.1 (778.9 to 1002.8) | 629.2 (526.5 to 735.0)     | 228.8 (189.6 to 271.0)        | 12.5 (5.8 to 22.9)              | 17.6 (13.3 to 24.8)               |
| Dominica | 2042 | 619.1 (546.1 to 699.7)     | 439.0 (367.3 to 513.8)     | 158.9 (131.6 to 188.1)        | 8.7 (4.1 to 16.0)               | 12.5 (9.3 to 18.0)                | 903.0 (796.5 to 1020.5) | 640.3 (535.7 to 749.3)     | 231.7 (191.9 to 274.4)        | 12.8 (5.9 to 23.4)              | 18.2 (13.6 to 26.2)               |
| Dominica | 2043 | 629.0 (551.6 to 712.8)     | 446.6 (372.4 to 524.7)     | 160.6 (132.9 to 190.1)        | 8.9 (4.1 to 16.4)               | 12.9 (9.5 to 18.8)                | 917.3 (804.5 to 1039.6) | 651.4 (543.2 to 765.2)     | 234.2 (193.8 to 277.2)        | 13.0 (6.0 to 23.9)              | 18.8 (13.9 to 27.4)               |

| Country            | Year | 2018 US Dollars per capita |                            |                               |                                 |                                   | 2018 PPP per capita      |                            |                               |                                 |                                   |
|--------------------|------|----------------------------|----------------------------|-------------------------------|---------------------------------|-----------------------------------|--------------------------|----------------------------|-------------------------------|---------------------------------|-----------------------------------|
|                    |      | Health spending            | Government health spending | Out-of-pocket health spending | Prepaid private health spending | Development assistance for health | Health spending          | Government health spending | Out-of-pocket health spending | Prepaid private health spending | Development assistance for health |
| Dominica           | 2044 | 638.9 (556.2 to 722.9)     | 454.5 (377.7 to 534.0)     | 162.0 (134.1 to 191.9)        | 9.1 (4.2 to 16.7)               | 13.3 (9.8 to 19.4)                | 931.8 (811.2 to 1054.4)  | 662.9 (550.9 to 778.8)     | 236.3 (195.6 to 279.9)        | 13.2 (6.1 to 24.3)              | 19.4 (14.3 to 28.4)               |
| Dominica           | 2045 | 648.4 (566.2 to 737.8)     | 462.2 (382.3 to 545.6)     | 163.2 (135.1 to 193.4)        | 9.2 (4.2 to 16.9)               | 13.8 (10.0 to 20.7)               | 945.7 (825.7 to 1076.1)  | 674.1 (557.5 to 795.7)     | 238.0 (197.0 to 282.1)        | 13.4 (6.2 to 24.6)              | 20.1 (14.6 to 30.2)               |
| Dominica           | 2046 | 657.8 (570.5 to 747.8)     | 469.9 (387.1 to 557.1)     | 164.3 (135.8 to 194.9)        | 9.3 (4.3 to 17.1)               | 14.3 (10.3 to 22.0)               | 959.4 (832.1 to 1090.5)  | 685.3 (564.6 to 812.6)     | 239.6 (198.0 to 284.3)        | 13.6 (6.3 to 25.0)              | 20.9 (15.0 to 32.1)               |
| Dominica           | 2047 | 667.7 (579.2 to 765.1)     | 477.8 (392.7 to 567.7)     | 165.6 (136.6 to 196.4)        | 9.5 (4.4 to 17.4)               | 14.8 (10.7 to 23.1)               | 973.8 (844.7 to 1115.9)  | 696.8 (572.7 to 827.9)     | 241.4 (199.2 to 286.4)        | 13.8 (6.4 to 25.4)              | 21.6 (15.6 to 33.7)               |
| Dominica           | 2048 | 677.9 (585.3 to 775.4)     | 485.8 (397.9 to 579.0)     | 167.0 (137.6 to 198.2)        | 9.7 (4.4 to 17.8)               | 15.4 (11.0 to 24.5)               | 988.6 (853.6 to 1130.9)  | 708.5 (580.3 to 844.4)     | 243.6 (200.7 to 289.1)        | 14.1 (6.5 to 25.9)              | 22.4 (16.0 to 35.7)               |
| Dominica           | 2049 | 687.4 (593.6 to 788.4)     | 493.5 (402.5 to 587.9)     | 168.1 (138.6 to 199.7)        | 9.8 (4.5 to 18.1)               | 16.0 (11.4 to 25.7)               | 1002.6 (865.7 to 1149.8) | 719.8 (587.1 to 857.4)     | 245.2 (202.1 to 291.2)        | 14.3 (6.6 to 26.4)              | 23.3 (16.6 to 37.4)               |
| Dominica           | 2050 | 697.1 (599.6 to 800.6)     | 501.2 (407.5 to 600.3)     | 169.4 (139.4 to 201.3)        | 10.0 (4.6 to 18.4)              | 16.6 (11.7 to 27.2)               | 1016.7 (874.5 to 1167.6) | 731.0 (594.3 to 875.4)     | 247.0 (203.3 to 293.6)        | 14.5 (6.7 to 26.8)              | 24.2 (17.1 to 39.7)               |
| Dominican Republic | 1995 | 151.7 (129.9 to 176.1)     | 29.5 (23.9 to 35.9)        | 104.0 (85.1 to 126.9)         | 16.9 (9.3 to 29.1)              | 1.2 (1.2 to 1.2)                  | 359.1 (307.5 to 417.0)   | 69.8 (56.6 to 85.0)        | 246.3 (201.5 to 300.5)        | 40.0 (21.9 to 68.9)             | 2.9 (2.9 to 2.9)                  |
| Dominican Republic | 1996 | 162.2 (142.2 to 185.4)     | 33.9 (27.9 to 40.9)        | 104.8 (88.2 to 126.0)         | 18.0 (10.0 to 30.0)             | 5.6 (5.6 to 5.6)                  | 384.0 (336.6 to 438.9)   | 80.2 (66.2 to 96.9)        | 248.0 (208.8 to 298.3)        | 42.6 (23.6 to 71.1)             | 13.2 (13.2 to 13.2)               |
| Dominican Republic | 1997 | 170.0 (149.7 to 192.4)     | 42.1 (35.2 to 50.0)        | 107.4 (91.4 to 127.1)         | 18.0 (10.2 to 29.4)             | 2.6 (2.6 to 2.6)                  | 402.5 (354.4 to 455.6)   | 99.6 (83.2 to 118.3)       | 254.2 (216.4 to 301.0)        | 42.5 (24.2 to 69.7)             | 6.2 (6.2 to 6.2)                  |
| Dominican Republic | 1998 | 184.2 (163.1 to 206.1)     | 51.2 (43.0 to 60.7)        | 108.7 (93.4 to 126.6)         | 18.1 (10.3 to 29.3)             | 6.2 (6.2 to 6.2)                  | 436.0 (386.1 to 488.0)   | 121.2 (101.8 to 143.6)     | 257.4 (221.2 to 299.7)        | 42.8 (24.4 to 69.3)             | 14.7 (14.7 to 14.7)               |
| Dominican Republic | 1999 | 192.6 (170.7 to 215.4)     | 58.8 (49.1 to 69.5)        | 108.3 (92.9 to 126.0)         | 17.8 (10.1 to 28.8)             | 7.7 (7.7 to 7.7)                  | 456.1 (404.0 to 510.0)   | 139.1 (116.3 to 164.5)     | 256.4 (219.9 to 298.2)        | 42.3 (23.8 to 68.3)             | 18.3 (18.3 to 18.3)               |
| Dominican Republic | 2000 | 191.1 (171.3 to 213.2)     | 62.5 (52.2 to 73.3)        | 107.4 (92.2 to 125.4)         | 17.0 (9.8 to 27.5)              | 4.3 (4.3 to 4.3)                  | 452.5 (405.5 to 504.8)   | 147.9 (123.6 to 173.5)     | 254.2 (218.3 to 296.8)        | 40.3 (23.2 to 65.1)             | 10.2 (10.2 to 10.2)               |
| Dominican Republic | 2001 | 190.2 (170.4 to 211.5)     | 63.0 (53.1 to 73.4)        | 106.8 (91.4 to 123.6)         | 16.4 (9.9 to 26.7)              | 4.0 (4.0 to 4.0)                  | 450.3 (403.4 to 500.7)   | 149.1 (125.7 to 173.7)     | 252.8 (216.4 to 292.7)        | 38.9 (23.3 to 63.3)             | 9.5 (9.5 to 9.5)                  |
| Dominican Republic | 2002 | 190.0 (170.6 to 210.6)     | 62.2 (52.7 to 72.5)        | 107.7 (92.9 to 124.4)         | 16.4 (9.9 to 27.2)              | 3.7 (3.7 to 3.7)                  | 449.9 (403.9 to 498.6)   | 147.2 (124.7 to 171.5)     | 255.0 (219.8 to 294.5)        | 38.8 (23.5 to 64.3)             | 8.8 (8.8 to 8.8)                  |
| Dominican Republic | 2003 | 178.2 (160.1 to 196.9)     | 55.2 (47.1 to 64.9)        | 103.4 (89.8 to 118.6)         | 15.4 (9.2 to 25.2)              | 4.2 (4.2 to 4.2)                  | 421.8 (379.1 to 466.1)   | 130.6 (111.6 to 153.8)     | 244.8 (212.5 to 280.9)        | 36.5 (21.7 to 59.5)             | 9.9 (9.9 to 9.9)                  |
| Dominican Republic | 2004 | 179.0 (161.7 to 198.7)     | 55.2 (47.2 to 64.3)        | 101.6 (88.8 to 116.6)         | 15.9 (9.3 to 26.0)              | 6.3 (6.3 to 6.3)                  | 423.8 (382.8 to 470.4)   | 130.6 (111.7 to 152.3)     | 240.6 (210.3 to 276.0)        | 37.7 (22.0 to 61.6)             | 14.9 (14.9 to 14.9)               |
| Dominican Republic | 2005 | 193.3 (175.3 to 213.8)     | 63.3 (54.6 to 73.9)        | 103.0 (89.6 to 117.8)         | 18.8 (11.0 to 30.0)             | 8.2 (8.2 to 8.2)                  | 457.7 (415.0 to 506.2)   | 149.9 (129.2 to 175.1)     | 243.7 (212.2 to 278.8)        | 44.5 (26.0 to 71.0)             | 19.5 (19.5 to 19.5)               |
| Dominican Republic | 2006 | 203.3 (184.0 to 223.4)     | 74.0 (63.7 to 86.1)        | 104.2 (90.4 to 119.5)         | 19.7 (11.7 to 31.1)             | 5.4 (5.4 to 5.4)                  | 481.4 (435.6 to 528.9)   | 175.2 (150.7 to 203.8)     | 246.7 (214.0 to 282.9)        | 46.6 (27.7 to 73.7)             | 12.8 (12.8 to 12.8)               |
| Dominican Republic | 2007 | 221.7 (200.7 to 243.3)     | 88.6 (76.3 to 102.7)       | 105.7 (91.9 to 120.6)         | 21.9 (12.8 to 34.6)             | 5.5 (5.5 to 5.5)                  | 524.9 (475.2 to 575.9)   | 209.7 (180.7 to 243.1)     | 250.3 (217.5 to 285.6)        | 51.8 (30.4 to 82.0)             | 13.1 (13.1 to 13.1)               |
| Dominican Republic | 2008 | 241.6 (218.1 to 264.9)     | 103.4 (89.6 to 118.4)      | 109.2 (94.6 to 125.2)         | 23.4 (13.8 to 36.8)             | 5.7 (5.7 to 5.7)                  | 572.0 (516.3 to 627.2)   | 244.7 (212.1 to 280.3)     | 258.5 (223.9 to 296.3)        | 55.4 (32.7 to 87.1)             | 13.4 (13.4 to 13.4)               |

| Country            | Year | 2018 US Dollars per capita |                            |                               |                                 |                                   | 2018 PPP per capita       |                            |                               |                                 |                                   |
|--------------------|------|----------------------------|----------------------------|-------------------------------|---------------------------------|-----------------------------------|---------------------------|----------------------------|-------------------------------|---------------------------------|-----------------------------------|
|                    |      | Health spending            | Government health spending | Out-of-pocket health spending | Prepaid private health spending | Development assistance for health | Health spending           | Government health spending | Out-of-pocket health spending | Prepaid private health spending | Development assistance for health |
| Dominican Republic | 2009 | 268.4 (243.4 to 295.5)     | 116.4 (101.5 to 132.8)     | 115.0 (99.8 to 131.9)         | 24.5 (14.8 to 38.5)             | 12.4 (12.4 to 12.4)               | 635.3 (576.2 to 699.5)    | 275.6 (240.3 to 314.4)     | 272.2 (236.3 to 312.3)        | 58.1 (35.1 to 91.2)             | 29.4 (29.4 to 29.4)               |
| Dominican Republic | 2010 | 299.0 (271.4 to 329.5)     | 133.9 (117.1 to 151.8)     | 126.8 (110.8 to 145.5)        | 26.5 (15.9 to 40.3)             | 11.9 (11.9 to 11.9)               | 707.8 (642.6 to 780.1)    | 317.0 (277.2 to 359.5)     | 300.1 (262.4 to 344.5)        | 62.6 (37.7 to 95.4)             | 28.1 (28.1 to 28.1)               |
| Dominican Republic | 2011 | 311.0 (282.4 to 340.8)     | 144.6 (127.1 to 164.2)     | 133.4 (116.7 to 152.3)        | 27.3 (16.6 to 41.7)             | 5.7 (5.7 to 5.7)                  | 736.2 (668.5 to 806.8)    | 342.3 (300.9 to 388.7)     | 315.8 (276.2 to 360.6)        | 64.7 (39.4 to 98.8)             | 13.5 (13.5 to 13.5)               |
| Dominican Republic | 2012 | 329.2 (299.9 to 359.6)     | 152.1 (134.5 to 172.5)     | 140.4 (122.8 to 160.1)        | 28.8 (17.7 to 44.8)             | 7.9 (7.9 to 7.9)                  | 779.3 (709.9 to 851.4)    | 360.0 (318.4 to 408.4)     | 332.4 (290.6 to 378.9)        | 68.3 (41.9 to 105.9)            | 18.6 (18.6 to 18.6)               |
| Dominican Republic | 2013 | 343.5 (313.6 to 375.0)     | 158.3 (139.5 to 178.7)     | 147.1 (128.5 to 166.8)        | 30.2 (18.5 to 46.8)             | 7.9 (7.9 to 7.9)                  | 813.2 (742.5 to 887.7)    | 374.8 (330.2 to 423.1)     | 348.3 (304.1 to 394.9)        | 71.4 (43.9 to 110.7)            | 18.7 (18.7 to 18.7)               |
| Dominican Republic | 2014 | 364.8 (333.0 to 399.5)     | 164.4 (145.0 to 186.0)     | 157.4 (136.0 to 179.1)        | 31.9 (19.4 to 50.2)             | 11.0 (11.0 to 11.0)               | 863.6 (788.3 to 945.7)    | 389.3 (343.2 to 440.3)     | 372.7 (322.0 to 424.0)        | 75.6 (45.9 to 118.7)            | 26.1 (26.1 to 26.1)               |
| Dominican Republic | 2015 | 405.9 (370.6 to 447.1)     | 173.9 (152.2 to 199.2)     | 170.1 (145.8 to 196.1)        | 34.8 (20.8 to 54.6)             | 27.1 (27.1 to 27.1)               | 960.9 (877.4 to 1058.5)   | 411.8 (360.2 to 471.5)     | 402.6 (345.1 to 464.2)        | 82.3 (49.1 to 129.3)            | 64.2 (64.2 to 64.2)               |
| Dominican Republic | 2016 | 420.3 (377.5 to 467.5)     | 190.3 (165.0 to 220.5)     | 185.2 (156.1 to 218.8)        | 38.7 (22.6 to 63.7)             | 6.2 (6.2 to 6.2)                  | 995.0 (893.6 to 1106.7)   | 450.4 (390.7 to 522.1)     | 438.4 (369.4 to 518.0)        | 91.6 (53.6 to 150.7)            | 14.6 (14.6 to 14.6)               |
| Dominican Republic | 2017 | 441.5 (397.5 to 489.3)     | 204.6 (177.5 to 237.8)     | 191.4 (161.7 to 226.8)        | 40.5 (23.6 to 66.7)             | 5.0 (5.0 to 5.0)                  | 1045.1 (941.1 to 1158.4)  | 484.4 (420.2 to 562.9)     | 453.1 (382.8 to 537.0)        | 95.8 (55.8 to 158.0)            | 11.8 (11.8 to 11.8)               |
| Dominican Republic | 2018 | 452.4 (407.5 to 502.0)     | 210.6 (182.8 to 244.4)     | 195.9 (165.4 to 232.1)        | 41.4 (24.1 to 68.1)             | 4.5 (4.5 to 4.5)                  | 1071.0 (964.7 to 1188.3)  | 498.6 (432.8 to 578.6)     | 463.8 (391.5 to 549.4)        | 98.0 (57.2 to 161.3)            | 10.7 (10.6 to 10.8)               |
| Dominican Republic | 2019 | 462.7 (416.2 to 512.7)     | 216.3 (187.6 to 251.5)     | 199.6 (167.2 to 235.8)        | 42.2 (24.6 to 69.5)             | 4.5 (4.2 to 4.8)                  | 1095.4 (985.3 to 1213.7)  | 512.1 (444.1 to 595.4)     | 472.5 (395.9 to 558.3)        | 100.0 (58.2 to 164.4)           | 10.7 (10.0 to 11.4)               |
| Dominican Republic | 2020 | 477.5 (430.5 to 529.3)     | 224.9 (195.0 to 261.2)     | 204.4 (170.9 to 241.3)        | 43.6 (25.4 to 71.5)             | 4.6 (4.2 to 4.9)                  | 1130.4 (1019.1 to 1253.2) | 532.4 (461.7 to 618.3)     | 484.0 (404.5 to 571.4)        | 103.3 (60.1 to 169.4)           | 10.8 (9.9 to 11.7)                |
| Dominican Republic | 2021 | 492.6 (443.4 to 546.9)     | 233.7 (202.2 to 270.8)     | 209.2 (175.1 to 246.7)        | 45.0 (26.2 to 74.0)             | 4.6 (4.1 to 5.1)                  | 1166.1 (1049.6 to 1294.7) | 553.3 (478.6 to 641.0)     | 495.2 (414.5 to 584.1)        | 106.7 (62.1 to 175.2)           | 10.9 (9.8 to 12.0)                |
| Dominican Republic | 2022 | 508.4 (457.2 to 565.7)     | 243.1 (210.4 to 281.1)     | 214.1 (179.3 to 252.5)        | 46.5 (27.1 to 76.4)             | 4.7 (4.2 to 5.3)                  | 1203.7 (1082.4 to 1339.2) | 575.5 (498.1 to 665.6)     | 506.9 (424.5 to 597.8)        | 110.2 (64.1 to 180.9)           | 11.1 (9.9 to 12.4)                |
| Dominican Republic | 2023 | 524.7 (470.5 to 584.9)     | 252.7 (218.7 to 292.2)     | 219.1 (183.9 to 258.9)        | 48.1 (28.1 to 79.2)             | 4.8 (4.1 to 5.4)                  | 1242.1 (1113.8 to 1384.8) | 598.3 (517.7 to 691.9)     | 518.7 (435.3 to 612.8)        | 113.8 (66.4 to 187.4)           | 11.3 (9.8 to 12.7)                |
| Dominican Republic | 2024 | 540.9 (485.3 to 602.4)     | 262.4 (227.0 to 304.3)     | 224.1 (188.1 to 264.5)        | 49.6 (29.0 to 81.6)             | 4.8 (4.2 to 5.6)                  | 1280.6 (1148.9 to 1426.2) | 621.2 (537.5 to 720.4)     | 530.4 (445.3 to 626.2)        | 117.5 (68.7 to 193.2)           | 11.5 (9.9 to 13.2)                |
| Dominican Republic | 2025 | 557.9 (499.2 to 623.7)     | 272.6 (235.8 to 316.6)     | 229.2 (192.4 to 270.3)        | 51.2 (29.9 to 84.1)             | 4.9 (4.2 to 5.8)                  | 1320.8 (1181.8 to 1476.6) | 645.3 (558.3 to 749.5)     | 542.5 (455.5 to 639.9)        | 121.3 (70.8 to 199.1)           | 11.7 (10.0 to 13.7)               |
| Dominican Republic | 2026 | 575.7 (513.5 to 642.2)     | 283.2 (244.3 to 329.3)     | 234.6 (196.8 to 277.0)        | 52.9 (30.9 to 87.0)             | 5.0 (4.2 to 5.9)                  | 1362.9 (1215.6 to 1520.4) | 670.5 (578.4 to 779.7)     | 555.3 (466.0 to 655.8)        | 125.3 (73.2 to 206.0)           | 11.8 (10.0 to 13.9)               |
| Dominican Republic | 2027 | 593.8 (530.2 to 661.1)     | 294.2 (252.6 to 343.2)     | 240.0 (201.3 to 284.1)        | 54.7 (32.0 to 89.5)             | 5.0 (4.2 to 6.0)                  | 1405.9 (1255.3 to 1565.0) | 696.4 (598.0 to 812.4)     | 568.2 (476.6 to 672.6)        | 129.4 (75.7 to 212.0)           | 11.9 (10.0 to 14.2)               |
| Dominican Republic | 2028 | 613.0 (546.8 to 684.2)     | 305.7 (261.2 to 356.4)     | 245.7 (206.2 to 291.3)        | 56.5 (33.0 to 92.3)             | 5.1 (4.3 to 6.2)                  | 1451.2 (1294.5 to 1619.8) | 723.8 (618.4 to 843.7)     | 581.6 (488.1 to 689.6)        | 133.7 (78.1 to 218.4)           | 12.1 (10.1 to 14.7)               |
| Dominican Republic | 2029 | 632.7 (564.1 to 707.8)     | 317.8 (271.5 to 371.8)     | 251.4 (210.9 to 298.0)        | 58.3 (34.0 to 95.0)             | 5.2 (4.2 to 6.4)                  | 1497.9 (1335.4 to 1675.6) | 752.3 (642.8 to 880.3)     | 595.2 (499.3 to 705.6)        | 138.1 (80.6 to 224.9)           | 12.3 (10.0 to 15.1)               |

| Country            | Year | 2018 US Dollars per capita |                            |                               |                                 |                                   | 2018 PPP per capita       |                            |                               |                                 |                                   |
|--------------------|------|----------------------------|----------------------------|-------------------------------|---------------------------------|-----------------------------------|---------------------------|----------------------------|-------------------------------|---------------------------------|-----------------------------------|
|                    |      | Health spending            | Government health spending | Out-of-pocket health spending | Prepaid private health spending | Development assistance for health | Health spending           | Government health spending | Out-of-pocket health spending | Prepaid private health spending | Development assistance for health |
| Dominican Republic | 2030 | 652.9 (582.7 to 730.4)     | 330.3 (281.8 to 387.3)     | 257.2 (215.4 to 305.3)        | 60.2 (35.1 to 97.8)             | 5.2 (4.2 to 6.5)                  | 1545.7 (1379.4 to 1729.0) | 781.9 (667.2 to 916.9)     | 608.8 (509.9 to 722.7)        | 142.6 (83.1 to 231.6)           | 12.4 (10.0 to 15.4)               |
| Dominican Republic | 2031 | 673.7 (598.5 to 753.8)     | 343.2 (291.8 to 402.4)     | 263.1 (219.5 to 312.4)        | 62.2 (36.2 to 101.3)            | 5.3 (4.2 to 6.7)                  | 1595.0 (1416.8 to 1784.7) | 812.4 (690.7 to 952.6)     | 622.9 (519.6 to 739.6)        | 147.2 (85.6 to 239.9)           | 12.6 (10.0 to 15.9)               |
| Dominican Republic | 2032 | 695.7 (617.3 to 780.7)     | 356.8 (303.1 to 419.7)     | 269.3 (224.6 to 320.4)        | 64.3 (37.3 to 104.6)            | 5.4 (4.2 to 6.9)                  | 1647.0 (1461.4 to 1848.3) | 844.6 (717.5 to 993.6)     | 637.6 (531.7 to 758.6)        | 152.1 (88.3 to 247.7)           | 12.7 (10.0 to 16.3)               |
| Dominican Republic | 2033 | 717.6 (636.5 to 806.6)     | 370.4 (314.9 to 437.1)     | 275.4 (229.5 to 327.8)        | 66.3 (38.5 to 107.9)            | 5.5 (4.2 to 7.0)                  | 1698.8 (1506.9 to 1909.5) | 876.8 (745.6 to 1034.8)    | 652.1 (543.4 to 776.0)        | 157.0 (91.0 to 255.4)           | 12.9 (9.9 to 16.7)                |
| Dominican Republic | 2034 | 741.1 (656.6 to 835.9)     | 385.1 (326.4 to 455.5)     | 282.0 (235.3 to 336.2)        | 68.5 (39.8 to 111.7)            | 5.5 (4.2 to 7.3)                  | 1754.6 (1554.4 to 1979.0) | 911.7 (772.7 to 1078.2)    | 667.5 (557.1 to 796.0)        | 162.3 (94.3 to 264.4)           | 13.1 (9.9 to 17.4)                |
| Dominican Republic | 2035 | 764.9 (675.7 to 860.5)     | 400.0 (336.6 to 473.3)     | 288.5 (240.8 to 344.2)        | 70.8 (41.2 to 115.3)            | 5.6 (4.2 to 7.5)                  | 1810.9 (1599.7 to 2037.3) | 946.9 (796.8 to 1120.5)    | 683.1 (570.0 to 814.7)        | 167.6 (97.5 to 272.9)           | 13.3 (9.8 to 17.7)                |
| Dominican Republic | 2036 | 789.1 (698.6 to 887.2)     | 415.2 (348.3 to 492.3)     | 295.1 (245.6 to 352.9)        | 73.1 (42.4 to 118.8)            | 5.7 (4.1 to 7.8)                  | 1868.1 (1653.9 to 2100.3) | 983.0 (824.6 to 1165.6)    | 698.7 (581.4 to 835.6)        | 173.0 (100.4 to 281.2)          | 13.4 (9.8 to 18.4)                |
| Dominican Republic | 2037 | 813.7 (718.1 to 916.4)     | 430.8 (360.6 to 509.2)     | 301.8 (250.4 to 362.0)        | 75.4 (43.7 to 122.8)            | 5.7 (3.9 to 8.0)                  | 1926.3 (1700.1 to 2169.4) | 1019.8 (853.6 to 1205.5)   | 714.5 (592.7 to 857.0)        | 178.5 (103.4 to 290.6)          | 13.4 (9.3 to 18.9)                |
| Dominican Republic | 2038 | 839.3 (740.2 to 945.3)     | 447.1 (374.3 to 530.8)     | 308.7 (255.5 to 370.8)        | 77.8 (44.9 to 127.1)            | 5.8 (3.9 to 8.3)                  | 1987.1 (1752.3 to 2237.9) | 1058.4 (886.1 to 1256.7)   | 730.8 (605.0 to 877.7)        | 184.3 (106.3 to 300.9)          | 13.7 (9.2 to 19.6)                |
| Dominican Republic | 2039 | 865.7 (760.7 to 975.1)     | 464.0 (387.9 to 552.2)     | 315.7 (261.4 to 378.8)        | 80.3 (46.2 to 131.6)            | 5.7 (0.0 to 8.7)                  | 2049.6 (1800.8 to 2308.4) | 1098.4 (918.4 to 1307.3)   | 747.4 (618.8 to 896.9)        | 190.2 (109.5 to 311.5)          | 13.5 (0.0 to 20.6)                |
| Dominican Republic | 2040 | 892.6 (785.8 to 1010.6)    | 481.3 (401.1 to 573.9)     | 322.8 (267.2 to 387.0)        | 82.9 (47.7 to 136.2)            | 5.6 (0.0 to 8.8)                  | 2113.3 (1860.2 to 2392.5) | 1139.5 (949.7 to 1358.6)   | 764.3 (632.6 to 916.2)        | 196.3 (112.9 to 322.4)          | 13.2 (0.0 to 20.8)                |
| Dominican Republic | 2041 | 920.5 (810.0 to 1045.7)    | 499.1 (414.9 to 596.0)     | 330.1 (272.9 to 395.6)        | 85.6 (49.3 to 141.0)            | 5.6 (0.0 to 9.1)                  | 2179.1 (1917.7 to 2475.7) | 1181.7 (982.3 to 1411.0)   | 781.5 (646.2 to 936.7)        | 202.5 (116.7 to 333.7)          | 13.3 (0.0 to 21.5)                |
| Dominican Republic | 2042 | 948.9 (838.3 to 1077.8)    | 517.6 (429.4 to 620.3)     | 337.6 (278.9 to 404.9)        | 88.3 (50.9 to 145.8)            | 5.5 (0.0 to 9.4)                  | 2246.5 (1984.7 to 2551.7) | 1225.3 (1016.5 to 1468.6)  | 799.2 (660.2 to 958.5)        | 209.0 (120.4 to 345.2)          | 13.1 (0.0 to 22.4)                |
| Dominican Republic | 2043 | 978.3 (862.4 to 1113.0)    | 536.6 (444.3 to 643.5)     | 345.1 (284.9 to 414.6)        | 91.1 (52.5 to 150.2)            | 5.5 (0.0 to 9.9)                  | 2316.0 (2041.7 to 2634.9) | 1270.4 (1051.8 to 1523.4)  | 817.0 (674.5 to 981.4)        | 215.6 (124.3 to 355.6)          | 13.0 (0.0 to 23.4)                |
| Dominican Republic | 2044 | 1008.4 (885.7 to 1149.9)   | 556.3 (458.6 to 669.0)     | 352.7 (290.4 to 424.2)        | 94.0 (54.2 to 154.7)            | 5.4 (0.0 to 10.0)                 | 2387.3 (2096.9 to 2722.2) | 1317.0 (1085.8 to 1583.9)  | 835.1 (687.5 to 1004.2)       | 222.4 (128.3 to 366.2)          | 12.8 (0.0 to 23.7)                |
| Dominican Republic | 2045 | 1038.3 (908.3 to 1185.2)   | 576.0 (472.8 to 694.5)     | 360.2 (296.6 to 433.4)        | 96.8 (55.8 to 159.1)            | 5.4 (0.0 to 10.4)                 | 2458.2 (2150.3 to 2805.8) | 1363.5 (1119.2 to 1644.1)  | 852.7 (702.1 to 1026.1)       | 229.2 (132.2 to 376.7)          | 12.8 (0.0 to 24.7)                |
| Dominican Republic | 2046 | 1069.0 (936.9 to 1219.3)   | 596.3 (488.7 to 718.9)     | 367.7 (302.9 to 442.6)        | 99.7 (57.5 to 163.7)            | 5.3 (0.0 to 10.8)                 | 2530.8 (2218.1 to 2886.6) | 1411.6 (1157.0 to 1702.0)  | 870.5 (717.1 to 1047.8)       | 236.1 (136.2 to 387.5)          | 12.6 (0.0 to 25.6)                |
| Dominican Republic | 2047 | 1099.8 (964.6 to 1260.8)   | 616.7 (503.6 to 746.8)     | 375.2 (309.3 to 451.6)        | 102.7 (59.3 to 168.2)           | 5.2 (0.0 to 11.1)                 | 2603.7 (2283.7 to 2984.9) | 1459.9 (1192.1 to 1768.1)  | 888.2 (732.1 to 1069.2)       | 243.1 (140.3 to 398.1)          | 12.4 (0.0 to 26.2)                |
| Dominican Republic | 2048 | 1131.1 (986.8 to 1299.1)   | 637.6 (518.7 to 772.4)     | 382.6 (315.4 to 460.9)        | 105.7 (61.0 to 172.9)           | 5.2 (0.0 to 11.4)                 | 2677.7 (2336.2 to 3075.4) | 1509.4 (1228.0 to 1828.7)  | 905.8 (746.7 to 1091.1)       | 250.2 (144.5 to 409.3)          | 12.4 (0.0 to 27.1)                |
| Dominican Republic | 2049 | 1162.0 (1012.2 to 1340.6)  | 658.3 (533.7 to 798.7)     | 390.0 (321.6 to 470.0)        | 108.7 (62.8 to 177.5)           | 5.1 (0.0 to 11.7)                 | 2751.0 (2396.4 to 3173.6) | 1558.5 (1263.5 to 1890.9)  | 923.2 (761.3 to 1112.8)       | 257.3 (148.6 to 420.3)          | 12.0 (0.0 to 27.8)                |
| Dominican Republic | 2050 | 1193.2 (1033.2 to 1375.7)  | 679.3 (550.2 to 826.8)     | 397.3 (327.6 to 479.0)        | 111.7 (64.3 to 182.8)           | 4.9 (0.0 to 12.8)                 | 2824.8 (2446.1 to 3256.8) | 1608.1 (1302.6 to 1957.4)  | 940.6 (775.6 to 1133.9)       | 264.5 (152.3 to 432.7)          | 11.6 (0.0 to 30.4)                |

| Country | Year | 2018 US Dollars per capita |                            |                               |                                 |                                   | 2018 PPP per capita      |                            |                               |                                 |                                   |
|---------|------|----------------------------|----------------------------|-------------------------------|---------------------------------|-----------------------------------|--------------------------|----------------------------|-------------------------------|---------------------------------|-----------------------------------|
|         |      | Health spending            | Government health spending | Out-of-pocket health spending | Prepaid private health spending | Development assistance for health | Health spending          | Government health spending | Out-of-pocket health spending | Prepaid private health spending | Development assistance for health |
| Ecuador | 1995 | 204.7 (179.6 to 231.2)     | 113.9 (96.3 to 133.0)      | 66.8 (53.9 to 81.1)           | 20.7 (11.3 to 35.6)             | 3.4 (3.4 to 3.4)                  | 387.7 (340.2 to 437.8)   | 215.7 (182.3 to 251.8)     | 126.5 (102.1 to 153.6)        | 39.2 (21.4 to 67.5)             | 6.4 (6.4 to 6.4)                  |
| Ecuador | 1996 | 207.0 (182.6 to 232.8)     | 112.7 (96.8 to 129.4)      | 70.9 (58.5 to 84.6)           | 20.9 (11.6 to 35.1)             | 2.5 (2.5 to 2.5)                  | 392.0 (345.8 to 440.9)   | 213.5 (183.4 to 245.1)     | 134.3 (110.8 to 160.2)        | 39.6 (21.9 to 66.6)             | 4.7 (4.7 to 4.7)                  |
| Ecuador | 1997 | 205.0 (182.5 to 229.9)     | 103.4 (89.9 to 117.8)      | 79.3 (66.4 to 93.9)           | 20.1 (11.3 to 32.6)             | 2.1 (2.1 to 2.1)                  | 388.2 (345.7 to 435.4)   | 195.9 (170.2 to 223.2)     | 150.2 (125.8 to 177.8)        | 38.1 (21.3 to 61.7)             | 4.0 (4.0 to 4.0)                  |
| Ecuador | 1998 | 198.8 (178.1 to 221.3)     | 86.8 (75.1 to 99.7)        | 90.0 (77.0 to 105.0)          | 17.7 (10.0 to 28.6)             | 4.3 (4.3 to 4.3)                  | 376.5 (337.2 to 419.1)   | 164.4 (142.3 to 188.8)     | 170.4 (145.8 to 198.8)        | 33.4 (18.9 to 54.1)             | 8.2 (8.2 to 8.2)                  |
| Ecuador | 1999 | 184.7 (166.6 to 204.1)     | 71.7 (62.5 to 83.2)        | 96.4 (83.2 to 111.5)          | 14.0 (8.1 to 22.9)              | 2.5 (2.5 to 2.5)                  | 349.8 (315.5 to 386.6)   | 135.9 (118.3 to 157.5)     | 182.7 (157.6 to 211.2)        | 26.4 (15.3 to 43.3)             | 4.8 (4.8 to 4.8)                  |
| Ecuador | 2000 | 172.9 (155.9 to 190.5)     | 61.0 (53.1 to 71.0)        | 100.0 (86.7 to 114.9)         | 9.5 (5.5 to 15.4)               | 2.3 (2.3 to 2.3)                  | 327.4 (295.2 to 360.8)   | 115.5 (100.6 to 134.5)     | 189.5 (164.2 to 217.7)        | 18.0 (10.3 to 29.2)             | 4.4 (4.4 to 4.4)                  |
| Ecuador | 2001 | 186.4 (169.3 to 205.4)     | 62.3 (54.3 to 72.6)        | 111.9 (97.8 to 127.6)         | 8.9 (5.1 to 14.4)               | 3.2 (3.2 to 3.2)                  | 353.0 (320.6 to 389.0)   | 118.0 (102.8 to 137.6)     | 212.0 (185.2 to 241.6)        | 16.9 (9.6 to 27.2)              | 6.1 (6.1 to 6.1)                  |
| Ecuador | 2002 | 211.1 (190.9 to 231.5)     | 67.7 (58.8 to 78.2)        | 131.3 (114.6 to 149.2)        | 10.9 (6.0 to 17.3)              | 1.1 (1.1 to 1.1)                  | 399.7 (361.6 to 438.5)   | 128.2 (111.4 to 148.0)     | 248.8 (217.0 to 282.6)        | 20.6 (11.4 to 32.7)             | 2.1 (2.1 to 2.1)                  |
| Ecuador | 2003 | 242.1 (218.2 to 265.1)     | 74.5 (64.5 to 85.6)        | 151.3 (133.1 to 171.0)        | 14.1 (7.8 to 22.1)              | 2.2 (2.2 to 2.2)                  | 458.5 (413.2 to 502.1)   | 141.1 (122.2 to 162.1)     | 286.5 (252.0 to 323.8)        | 26.8 (14.8 to 41.9)             | 4.1 (4.1 to 4.1)                  |
| Ecuador | 2004 | 270.4 (244.7 to 295.9)     | 83.7 (72.7 to 95.6)        | 167.4 (148.3 to 189.0)        | 16.8 (9.5 to 25.8)              | 2.5 (2.5 to 2.5)                  | 512.2 (463.4 to 560.5)   | 158.5 (137.8 to 181.1)     | 317.0 (281.0 to 357.9)        | 31.9 (17.9 to 48.9)             | 4.7 (4.7 to 4.7)                  |
| Ecuador | 2005 | 290.1 (263.1 to 315.4)     | 92.0 (80.1 to 105.5)       | 176.8 (157.9 to 199.0)        | 18.4 (10.4 to 28.4)             | 2.8 (2.8 to 2.8)                  | 549.4 (498.3 to 597.4)   | 174.3 (151.7 to 199.7)     | 334.9 (299.0 to 376.9)        | 34.8 (19.7 to 53.7)             | 5.4 (5.4 to 5.4)                  |
| Ecuador | 2006 | 306.1 (278.1 to 333.7)     | 103.0 (90.2 to 118.2)      | 179.8 (160.3 to 201.3)        | 19.9 (11.6 to 31.1)             | 3.4 (3.4 to 3.4)                  | 579.8 (526.7 to 631.9)   | 195.0 (170.9 to 223.8)     | 340.6 (303.6 to 381.2)        | 37.7 (21.9 to 58.9)             | 6.4 (6.4 to 6.4)                  |
| Ecuador | 2007 | 321.0 (294.1 to 350.5)     | 117.0 (102.9 to 131.7)     | 177.2 (158.3 to 198.6)        | 22.5 (13.3 to 34.6)             | 4.3 (4.3 to 4.3)                  | 607.9 (556.9 to 663.9)   | 221.5 (194.8 to 249.4)     | 335.6 (299.8 to 376.2)        | 42.6 (25.2 to 65.6)             | 8.2 (8.2 to 8.2)                  |
| Ecuador | 2008 | 346.4 (318.8 to 376.9)     | 136.3 (120.2 to 153.3)     | 180.9 (161.8 to 201.5)        | 25.2 (15.3 to 39.5)             | 4.1 (4.1 to 4.1)                  | 656.1 (603.8 to 713.9)   | 258.2 (227.7 to 290.3)     | 342.5 (306.4 to 381.6)        | 47.7 (29.1 to 74.9)             | 7.7 (7.7 to 7.7)                  |
| Ecuador | 2009 | 368.2 (339.2 to 397.6)     | 153.5 (137.1 to 169.9)     | 184.8 (165.6 to 205.6)        | 26.7 (16.2 to 42.7)             | 3.1 (3.1 to 3.1)                  | 697.3 (642.5 to 753.0)   | 290.7 (259.6 to 321.8)     | 350.1 (313.6 to 389.4)        | 50.6 (30.7 to 80.9)             | 5.9 (5.9 to 5.9)                  |
| Ecuador | 2010 | 408.4 (378.0 to 440.7)     | 181.1 (163.6 to 199.7)     | 195.1 (174.5 to 217.1)        | 29.4 (18.0 to 46.5)             | 2.9 (2.9 to 2.9)                  | 773.5 (716.0 to 834.6)   | 343.0 (309.8 to 378.3)     | 369.5 (330.4 to 411.2)        | 55.6 (34.2 to 88.1)             | 5.4 (5.4 to 5.4)                  |
| Ecuador | 2011 | 466.5 (431.5 to 501.9)     | 218.2 (198.3 to 239.1)     | 212.0 (189.4 to 236.6)        | 33.2 (20.7 to 51.8)             | 3.2 (3.2 to 3.2)                  | 883.6 (817.2 to 950.6)   | 413.3 (375.6 to 452.8)     | 401.5 (358.7 to 448.1)        | 62.8 (39.2 to 98.1)             | 6.0 (6.0 to 6.0)                  |
| Ecuador | 2012 | 512.3 (474.8 to 547.8)     | 249.6 (229.2 to 273.0)     | 224.7 (202.0 to 249.3)        | 35.8 (22.1 to 56.3)             | 2.3 (2.3 to 2.3)                  | 970.3 (899.3 to 1037.5)  | 472.8 (434.1 to 517.0)     | 425.5 (382.5 to 472.1)        | 67.8 (41.9 to 106.6)            | 4.3 (4.3 to 4.3)                  |
| Ecuador | 2013 | 543.3 (507.4 to 580.5)     | 272.6 (249.5 to 295.9)     | 231.8 (207.3 to 258.1)        | 36.7 (23.1 to 57.4)             | 2.2 (2.2 to 2.2)                  | 1028.9 (961.0 to 1099.4) | 516.2 (472.6 to 560.5)     | 439.0 (392.7 to 488.8)        | 69.6 (43.7 to 108.8)            | 4.1 (4.1 to 4.1)                  |
| Ecuador | 2014 | 561.1 (520.6 to 603.0)     | 285.1 (258.7 to 311.2)     | 235.3 (209.4 to 262.6)        | 37.4 (23.4 to 57.8)             | 3.3 (3.3 to 3.3)                  | 1062.7 (985.9 to 1142.0) | 539.9 (490.0 to 589.5)     | 445.6 (396.6 to 497.3)        | 70.9 (44.4 to 109.5)            | 6.2 (6.2 to 6.2)                  |
| Ecuador | 2015 | 551.8 (507.6 to 595.6)     | 280.8 (252.2 to 310.7)     | 232.3 (204.0 to 261.7)        | 37.7 (23.1 to 59.4)             | 0.9 (0.9 to 0.9)                  | 1045.0 (961.3 to 1128.1) | 531.8 (477.7 to 588.4)     | 439.9 (386.3 to 495.7)        | 71.5 (43.8 to 112.5)            | 1.7 (1.7 to 1.7)                  |

| Country | Year | 2018 US Dollars per capita |                            |                               |                                 |                                   | 2018 PPP per capita       |                            |                               |                                 |                                   |
|---------|------|----------------------------|----------------------------|-------------------------------|---------------------------------|-----------------------------------|---------------------------|----------------------------|-------------------------------|---------------------------------|-----------------------------------|
|         |      | Health spending            | Government health spending | Out-of-pocket health spending | Prepaid private health spending | Development assistance for health | Health spending           | Government health spending | Out-of-pocket health spending | Prepaid private health spending | Development assistance for health |
| Ecuador | 2016 | 535.7 (488.6 to 586.2)     | 273.7 (240.4 to 309.1)     | 221.6 (191.5 to 254.6)        | 39.5 (23.5 to 63.3)             | 1.0 (1.0 to 1.0)                  | 1014.6 (925.4 to 1110.2)  | 518.3 (455.4 to 585.4)     | 419.7 (362.7 to 482.2)        | 74.8 (44.6 to 119.9)            | 1.8 (1.8 to 1.8)                  |
| Ecuador | 2017 | 534.9 (487.4 to 586.3)     | 270.4 (237.8 to 305.0)     | 224.2 (193.7 to 257.9)        | 39.4 (23.5 to 63.3)             | 0.8 (0.8 to 0.8)                  | 1013.0 (923.1 to 1110.4)  | 512.2 (450.3 to 577.7)     | 424.6 (366.9 to 488.5)        | 74.7 (44.5 to 119.9)            | 1.5 (1.5 to 1.5)                  |
| Ecuador | 2018 | 543.1 (494.9 to 594.6)     | 275.9 (243.6 to 312.2)     | 226.2 (195.3 to 260.3)        | 40.3 (24.0 to 64.7)             | 0.8 (0.8 to 0.8)                  | 1028.6 (937.3 to 1126.1)  | 522.6 (461.3 to 591.3)     | 428.3 (370.0 to 492.9)        | 76.3 (45.5 to 122.5)            | 1.4 (1.4 to 1.4)                  |
| Ecuador | 2019 | 551.8 (503.8 to 604.1)     | 282.1 (248.9 to 319.4)     | 227.9 (196.9 to 262.0)        | 41.0 (24.4 to 65.7)             | 0.8 (0.7 to 0.8)                  | 1045.1 (954.1 to 1144.2)  | 534.4 (471.3 to 604.9)     | 431.6 (373.0 to 496.1)        | 77.7 (46.2 to 124.4)            | 1.5 (1.4 to 1.5)                  |
| Ecuador | 2020 | 560.7 (510.8 to 614.5)     | 288.4 (254.0 to 326.9)     | 229.7 (198.9 to 264.1)        | 41.7 (24.8 to 66.7)             | 0.8 (0.7 to 0.8)                  | 1061.9 (967.3 to 1163.8)  | 546.3 (481.1 to 619.1)     | 435.1 (376.8 to 500.2)        | 79.1 (47.0 to 126.4)            | 1.5 (1.4 to 1.6)                  |
| Ecuador | 2021 | 572.0 (521.4 to 628.6)     | 294.7 (259.7 to 334.0)     | 234.0 (202.4 to 269.7)        | 42.5 (25.3 to 67.8)             | 0.8 (0.7 to 0.9)                  | 1083.2 (987.5 to 1190.5)  | 558.1 (491.9 to 632.6)     | 443.2 (383.3 to 510.7)        | 80.5 (47.9 to 128.5)            | 1.5 (1.4 to 1.7)                  |
| Ecuador | 2022 | 583.3 (531.4 to 640.5)     | 300.8 (265.2 to 340.5)     | 238.5 (205.3 to 275.3)        | 43.2 (25.8 to 69.1)             | 0.8 (0.7 to 0.9)                  | 1104.7 (1006.4 to 1213.1) | 569.7 (502.3 to 644.8)     | 451.6 (388.8 to 521.4)        | 81.9 (48.9 to 130.9)            | 1.5 (1.4 to 1.7)                  |
| Ecuador | 2023 | 594.8 (542.0 to 653.0)     | 307.0 (271.2 to 347.3)     | 243.0 (209.7 to 279.4)        | 44.0 (26.3 to 70.5)             | 0.8 (0.7 to 0.9)                  | 1126.5 (1026.6 to 1236.8) | 581.4 (513.7 to 657.7)     | 460.2 (397.1 to 529.1)        | 83.3 (49.8 to 133.5)            | 1.6 (1.4 to 1.8)                  |
| Ecuador | 2024 | 606.4 (552.9 to 666.2)     | 313.3 (277.0 to 355.1)     | 247.5 (212.0 to 284.5)        | 44.7 (26.6 to 71.9)             | 0.8 (0.7 to 1.0)                  | 1148.5 (1047.2 to 1261.7) | 593.4 (524.6 to 672.5)     | 468.7 (401.6 to 538.9)        | 84.7 (50.4 to 136.2)            | 1.6 (1.4 to 1.8)                  |
| Ecuador | 2025 | 616.9 (562.0 to 679.4)     | 319.7 (282.4 to 361.7)     | 250.9 (216.7 to 290.2)        | 45.5 (26.9 to 73.1)             | 0.9 (0.7 to 1.0)                  | 1168.4 (1064.3 to 1286.7) | 605.5 (534.8 to 685.1)     | 475.2 (410.5 to 549.5)        | 86.1 (51.0 to 138.4)            | 1.6 (1.4 to 1.9)                  |
| Ecuador | 2026 | 627.7 (570.6 to 690.9)     | 326.1 (287.5 to 370.0)     | 254.5 (218.8 to 295.2)        | 46.2 (27.4 to 74.2)             | 0.9 (0.7 to 1.0)                  | 1188.8 (1080.6 to 1308.5) | 617.6 (544.5 to 700.7)     | 481.9 (414.4 to 559.0)        | 87.6 (51.8 to 140.6)            | 1.7 (1.4 to 2.0)                  |
| Ecuador | 2027 | 639.0 (580.2 to 701.8)     | 332.8 (293.3 to 378.2)     | 258.2 (221.3 to 301.8)        | 47.1 (27.9 to 75.6)             | 0.9 (0.8 to 1.1)                  | 1210.2 (1098.8 to 1329.1) | 630.4 (555.4 to 716.2)     | 489.0 (419.2 to 571.6)        | 89.1 (52.9 to 143.1)            | 1.7 (1.4 to 2.0)                  |
| Ecuador | 2028 | 650.4 (590.8 to 716.9)     | 339.7 (298.5 to 385.4)     | 261.9 (223.3 to 307.4)        | 47.9 (28.5 to 77.0)             | 0.9 (0.8 to 1.1)                  | 1231.9 (1119.0 to 1357.7) | 643.4 (565.4 to 730.0)     | 496.1 (422.9 to 582.3)        | 90.7 (53.9 to 145.9)            | 1.7 (1.5 to 2.1)                  |
| Ecuador | 2029 | 662.0 (599.6 to 728.2)     | 346.7 (304.2 to 393.1)     | 265.6 (225.1 to 312.9)        | 48.7 (29.0 to 78.5)             | 0.9 (0.8 to 1.2)                  | 1253.7 (1135.7 to 1379.2) | 656.5 (576.0 to 744.4)     | 503.1 (426.4 to 592.5)        | 92.3 (55.0 to 148.6)            | 1.8 (1.5 to 2.2)                  |
| Ecuador | 2030 | 673.6 (609.4 to 744.3)     | 353.7 (309.8 to 401.9)     | 269.3 (227.1 to 318.3)        | 49.6 (29.6 to 79.7)             | 1.0 (0.8 to 1.2)                  | 1275.8 (1154.2 to 1409.6) | 669.9 (586.7 to 761.2)     | 510.1 (430.1 to 602.9)        | 93.9 (56.1 to 150.9)            | 1.8 (1.5 to 2.2)                  |
| Ecuador | 2031 | 685.0 (618.5 to 759.5)     | 360.6 (314.8 to 411.2)     | 273.0 (228.8 to 326.8)        | 50.4 (30.2 to 80.8)             | 1.0 (0.8 to 1.2)                  | 1297.3 (1171.5 to 1438.4) | 683.0 (596.2 to 778.9)     | 517.0 (433.3 to 619.0)        | 95.5 (57.1 to 153.1)            | 1.9 (1.5 to 2.3)                  |
| Ecuador | 2032 | 696.8 (626.0 to 776.5)     | 367.8 (320.3 to 421.1)     | 276.7 (230.5 to 333.7)        | 51.3 (30.7 to 82.2)             | 1.0 (0.8 to 1.3)                  | 1319.7 (1185.7 to 1470.7) | 696.6 (606.7 to 797.6)     | 524.1 (436.6 to 632.0)        | 97.1 (58.1 to 155.7)            | 1.9 (1.5 to 2.4)                  |
| Ecuador | 2033 | 708.6 (637.9 to 794.3)     | 375.1 (325.9 to 429.8)     | 280.4 (232.3 to 341.7)        | 52.1 (31.1 to 83.7)             | 1.0 (0.8 to 1.3)                  | 1342.1 (1208.2 to 1504.3) | 710.4 (617.3 to 814.0)     | 531.0 (440.0 to 647.2)        | 98.8 (58.9 to 158.5)            | 2.0 (1.6 to 2.5)                  |
| Ecuador | 2034 | 720.6 (647.1 to 808.2)     | 382.5 (332.0 to 439.9)     | 284.0 (233.8 to 349.5)        | 53.0 (31.5 to 85.1)             | 1.1 (0.8 to 1.4)                  | 1364.8 (1225.6 to 1530.7) | 724.4 (628.8 to 833.2)     | 537.9 (442.7 to 662.0)        | 100.4 (59.7 to 161.2)           | 2.0 (1.6 to 2.6)                  |
| Ecuador | 2035 | 732.6 (655.6 to 823.0)     | 390.0 (338.1 to 450.0)     | 287.6 (235.5 to 356.7)        | 53.9 (32.0 to 86.6)             | 1.1 (0.8 to 1.4)                  | 1387.5 (1241.7 to 1558.8) | 738.6 (640.3 to 852.2)     | 544.8 (446.0 to 675.6)        | 102.1 (60.6 to 164.0)           | 2.1 (1.6 to 2.7)                  |
| Ecuador | 2036 | 744.5 (665.2 to 841.2)     | 397.3 (343.5 to 459.6)     | 291.3 (237.4 to 364.0)        | 54.8 (32.5 to 88.2)             | 1.1 (0.9 to 1.5)                  | 1410.1 (1259.9 to 1593.3) | 752.5 (650.6 to 870.5)     | 551.6 (449.6 to 689.3)        | 103.8 (61.6 to 167.1)           | 2.1 (1.6 to 2.8)                  |

| Country | Year | 2018 US Dollars per capita |                            |                               |                                 |                                   | 2018 PPP per capita       |                            |                               |                                 |                                   |
|---------|------|----------------------------|----------------------------|-------------------------------|---------------------------------|-----------------------------------|---------------------------|----------------------------|-------------------------------|---------------------------------|-----------------------------------|
|         |      | Health spending            | Government health spending | Out-of-pocket health spending | Prepaid private health spending | Development assistance for health | Health spending           | Government health spending | Out-of-pocket health spending | Prepaid private health spending | Development assistance for health |
| Ecuador | 2037 | 756.4 (674.0 to 852.8)     | 404.7 (349.9 to 468.9)     | 294.8 (239.1 to 371.6)        | 55.7 (33.1 to 89.9)             | 1.1 (0.9 to 1.5)                  | 1432.5 (1276.4 to 1615.1) | 766.5 (662.6 to 888.1)     | 558.3 (452.9 to 703.8)        | 105.5 (62.6 to 170.2)           | 2.2 (1.7 to 2.9)                  |
| Ecuador | 2038 | 768.5 (683.2 to 870.1)     | 412.3 (355.1 to 478.1)     | 298.4 (241.0 to 380.2)        | 56.6 (33.6 to 91.4)             | 1.2 (0.9 to 1.6)                  | 1455.5 (1294.0 to 1648.0) | 780.9 (672.5 to 905.4)     | 565.1 (456.4 to 720.1)        | 107.2 (63.6 to 173.2)           | 2.2 (1.7 to 3.1)                  |
| Ecuador | 2039 | 780.9 (692.3 to 880.9)     | 420.2 (361.1 to 488.2)     | 302.0 (242.8 to 387.2)        | 57.6 (34.1 to 93.3)             | 1.2 (0.9 to 1.7)                  | 1479.0 (1311.2 to 1668.4) | 795.8 (683.8 to 924.5)     | 571.9 (459.8 to 733.4)        | 109.0 (64.5 to 176.8)           | 2.3 (1.7 to 3.2)                  |
| Ecuador | 2040 | 793.1 (700.2 to 901.9)     | 427.9 (367.5 to 498.8)     | 305.4 (244.4 to 393.7)        | 58.5 (34.6 to 95.1)             | 1.2 (0.9 to 1.7)                  | 1502.1 (1326.2 to 1708.2) | 810.5 (696.1 to 944.6)     | 578.4 (462.9 to 745.6)        | 110.8 (65.4 to 180.0)           | 2.3 (1.8 to 3.2)                  |
| Ecuador | 2041 | 805.3 (708.2 to 919.4)     | 435.6 (373.1 to 508.2)     | 308.9 (246.6 to 399.8)        | 59.5 (35.0 to 96.8)             | 1.3 (1.0 to 1.8)                  | 1525.1 (1341.4 to 1741.3) | 825.0 (706.7 to 962.4)     | 585.1 (467.0 to 757.2)        | 112.6 (66.4 to 183.4)           | 2.4 (1.8 to 3.3)                  |
| Ecuador | 2042 | 817.5 (717.7 to 930.2)     | 443.4 (378.8 to 517.9)     | 312.4 (248.5 to 405.8)        | 60.4 (35.5 to 98.6)             | 1.3 (1.0 to 1.9)                  | 1548.3 (1359.4 to 1761.7) | 839.8 (717.5 to 980.8)     | 591.7 (470.6 to 768.6)        | 114.4 (67.3 to 186.8)           | 2.5 (1.8 to 3.5)                  |
| Ecuador | 2043 | 829.8 (728.9 to 952.4)     | 451.3 (384.6 to 527.3)     | 315.8 (250.1 to 411.9)        | 61.4 (36.0 to 100.3)            | 1.3 (1.0 to 1.9)                  | 1571.7 (1380.5 to 1803.9) | 854.7 (728.5 to 998.6)     | 598.1 (473.7 to 780.1)        | 116.3 (68.2 to 190.0)           | 2.5 (1.9 to 3.7)                  |
| Ecuador | 2044 | 842.1 (736.8 to 963.4)     | 459.2 (390.6 to 537.4)     | 319.1 (251.5 to 419.2)        | 62.4 (36.5 to 101.9)            | 1.4 (1.0 to 2.0)                  | 1594.9 (1395.4 to 1824.5) | 869.7 (739.8 to 1017.8)    | 604.4 (476.4 to 793.9)        | 118.1 (69.0 to 193.1)           | 2.6 (1.9 to 3.8)                  |
| Ecuador | 2045 | 854.6 (746.6 to 985.3)     | 467.3 (395.7 to 550.3)     | 322.4 (252.9 to 425.8)        | 63.4 (36.9 to 103.6)            | 1.4 (1.0 to 2.1)                  | 1618.5 (1414.0 to 1866.2) | 885.1 (749.4 to 1042.2)    | 610.7 (479.0 to 806.4)        | 120.0 (69.9 to 196.1)           | 2.7 (1.9 to 4.0)                  |
| Ecuador | 2046 | 867.1 (758.3 to 1002.9)    | 475.5 (402.1 to 560.8)     | 325.8 (254.4 to 428.8)        | 64.4 (37.4 to 105.3)            | 1.5 (1.0 to 2.2)                  | 1642.2 (1436.2 to 1899.4) | 900.5 (761.6 to 1062.2)    | 617.0 (481.9 to 812.1)        | 122.0 (70.8 to 199.4)           | 2.8 (2.0 to 4.2)                  |
| Ecuador | 2047 | 879.4 (766.6 to 1014.6)    | 483.5 (407.6 to 572.1)     | 329.0 (255.9 to 434.6)        | 65.4 (37.8 to 107.2)            | 1.5 (1.1 to 2.4)                  | 1665.6 (1452.0 to 1921.5) | 915.8 (771.9 to 1083.5)    | 623.1 (484.6 to 823.1)        | 123.9 (71.7 to 203.0)           | 2.8 (2.0 to 4.5)                  |
| Ecuador | 2048 | 891.9 (776.1 to 1034.2)    | 491.7 (413.2 to 584.2)     | 332.3 (257.3 to 440.2)        | 66.4 (38.4 to 109.1)            | 1.5 (1.1 to 2.5)                  | 1689.2 (1469.8 to 1958.8) | 931.2 (782.7 to 1106.5)    | 629.3 (487.3 to 833.7)        | 125.8 (72.7 to 206.7)           | 2.9 (2.1 to 4.7)                  |
| Ecuador | 2049 | 904.6 (787.8 to 1047.9)    | 500.0 (418.7 to 595.9)     | 335.5 (259.5 to 447.2)        | 67.5 (38.9 to 111.0)            | 1.6 (1.1 to 2.6)                  | 1713.2 (1492.1 to 1984.6) | 947.0 (792.9 to 1128.7)    | 635.5 (491.6 to 847.1)        | 127.8 (73.7 to 210.3)           | 3.0 (2.1 to 4.8)                  |
| Ecuador | 2050 | 917.3 (798.0 to 1066.5)    | 508.4 (424.4 to 607.5)     | 338.7 (261.3 to 454.4)        | 68.5 (39.5 to 112.7)            | 1.6 (1.2 to 2.7)                  | 1737.3 (1511.3 to 2019.8) | 962.9 (803.8 to 1150.5)    | 641.5 (494.8 to 860.6)        | 129.7 (74.8 to 213.4)           | 3.1 (2.2 to 5.1)                  |
| Egypt   | 1995 | 90.5 (74.5 to 108.6)       | 30.3 (23.4 to 38.4)        | 56.1 (42.6 to 73.0)           | 1.7 (0.8 to 3.1)                | 2.3 (2.3 to 2.3)                  | 418.7 (344.6 to 502.5)    | 140.4 (108.4 to 177.7)     | 259.8 (197.2 to 337.7)        | 7.8 (3.6 to 14.6)               | 10.6 (10.6 to 10.6)               |
| Egypt   | 1996 | 94.0 (78.3 to 112.9)       | 31.3 (24.2 to 39.9)        | 58.8 (45.1 to 75.5)           | 1.8 (0.9 to 3.4)                | 2.1 (2.1 to 2.1)                  | 434.9 (362.5 to 522.2)    | 144.8 (112.0 to 184.5)     | 271.9 (208.9 to 349.2)        | 8.4 (4.0 to 15.7)               | 9.7 (9.7 to 9.7)                  |
| Egypt   | 1997 | 97.2 (81.8 to 116.5)       | 32.2 (24.9 to 40.7)        | 61.2 (47.4 to 78.0)           | 1.8 (0.8 to 3.4)                | 2.0 (2.0 to 2.0)                  | 450.0 (378.5 to 539.3)    | 149.1 (115.3 to 188.2)     | 283.3 (219.4 to 360.7)        | 8.4 (3.9 to 15.9)               | 9.2 (9.2 to 9.2)                  |
| Egypt   | 1998 | 100.7 (85.3 to 118.7)      | 33.2 (25.8 to 42.1)        | 63.3 (50.0 to 79.0)           | 2.0 (0.9 to 3.7)                | 2.2 (2.2 to 2.2)                  | 465.8 (394.9 to 549.2)    | 153.9 (119.5 to 194.8)     | 292.8 (231.5 to 365.4)        | 9.2 (4.3 to 16.9)               | 10.0 (10.0 to 10.0)               |
| Egypt   | 1999 | 103.6 (88.0 to 121.4)      | 34.7 (26.8 to 44.0)        | 65.4 (52.1 to 80.7)           | 2.1 (1.0 to 4.0)                | 1.4 (1.4 to 1.4)                  | 479.6 (407.4 to 561.9)    | 160.8 (124.2 to 203.5)     | 302.4 (241.2 to 373.5)        | 9.9 (4.6 to 18.7)               | 6.5 (6.5 to 6.5)                  |
| Egypt   | 2000 | 106.8 (91.4 to 124.7)      | 36.0 (28.1 to 45.3)        | 66.9 (53.4 to 82.1)           | 2.3 (1.0 to 4.1)                | 1.5 (1.5 to 1.5)                  | 494.4 (422.9 to 577.1)    | 166.8 (129.8 to 209.8)     | 309.8 (246.9 to 379.9)        | 10.6 (4.8 to 19.1)              | 7.2 (7.2 to 7.2)                  |
| Egypt   | 2001 | 110.7 (94.4 to 128.5)      | 37.2 (28.9 to 46.5)        | 69.9 (55.6 to 85.7)           | 2.3 (1.0 to 4.3)                | 1.3 (1.3 to 1.3)                  | 512.5 (436.9 to 594.4)    | 172.3 (133.5 to 215.3)     | 323.6 (257.5 to 396.7)        | 10.8 (4.8 to 20.0)              | 5.9 (5.9 to 5.9)                  |

| Country | Year | 2018 US Dollars per capita |                            |                               |                                 |                                   | 2018 PPP per capita    |                            |                               |                                 |                                   |
|---------|------|----------------------------|----------------------------|-------------------------------|---------------------------------|-----------------------------------|------------------------|----------------------------|-------------------------------|---------------------------------|-----------------------------------|
|         |      | Health spending            | Government health spending | Out-of-pocket health spending | Prepaid private health spending | Development assistance for health | Health spending        | Government health spending | Out-of-pocket health spending | Prepaid private health spending | Development assistance for health |
| Egypt   | 2002 | 111.7 (94.8 to 129.3)      | 37.4 (28.8 to 47.0)        | 71.1 (56.9 to 87.4)           | 2.3 (1.0 to 4.1)                | 1.0 (1.0 to 1.0)                  | 517.0 (438.8 to 598.5) | 172.9 (133.3 to 217.5)     | 328.8 (263.5 to 404.3)        | 10.5 (4.8 to 19.0)              | 4.8 (4.8 to 4.8)                  |
| Egypt   | 2003 | 109.6 (94.2 to 127.4)      | 36.4 (28.0 to 45.3)        | 70.2 (56.1 to 86.8)           | 2.2 (1.0 to 4.0)                | 0.8 (0.8 to 0.8)                  | 507.1 (435.7 to 589.7) | 168.3 (129.6 to 209.6)     | 324.9 (259.4 to 401.4)        | 10.3 (4.7 to 18.7)              | 3.7 (3.7 to 3.7)                  |
| Egypt   | 2004 | 108.1 (91.8 to 126.5)      | 35.9 (27.8 to 44.4)        | 68.7 (55.1 to 85.1)           | 2.2 (1.0 to 4.0)                | 1.3 (1.3 to 1.3)                  | 500.1 (424.9 to 585.2) | 166.1 (128.8 to 205.4)     | 317.9 (254.8 to 393.7)        | 10.2 (4.7 to 18.7)              | 5.9 (5.9 to 5.9)                  |
| Egypt   | 2005 | 108.1 (92.1 to 127.7)      | 36.1 (28.1 to 45.2)        | 68.1 (54.6 to 85.6)           | 2.3 (1.0 to 4.3)                | 1.5 (1.5 to 1.5)                  | 500.1 (426.2 to 590.8) | 167.2 (129.9 to 209.2)     | 315.2 (252.6 to 396.2)        | 10.7 (4.8 to 19.9)              | 7.0 (7.0 to 7.0)                  |
| Egypt   | 2006 | 110.2 (93.8 to 128.8)      | 37.7 (29.4 to 47.3)        | 67.8 (53.7 to 84.2)           | 2.5 (1.1 to 4.7)                | 2.1 (2.1 to 2.1)                  | 510.1 (434.2 to 595.8) | 174.7 (136.0 to 219.1)     | 314.0 (248.6 to 389.5)        | 11.7 (5.0 to 21.8)              | 9.8 (9.8 to 9.8)                  |
| Egypt   | 2007 | 109.9 (93.6 to 127.3)      | 38.2 (30.1 to 48.1)        | 67.5 (53.2 to 83.3)           | 2.8 (1.2 to 5.2)                | 1.4 (1.4 to 1.4)                  | 508.6 (433.3 to 589.2) | 176.9 (139.3 to 222.7)     | 312.2 (246.2 to 385.3)        | 12.9 (5.6 to 23.9)              | 6.6 (6.6 to 6.6)                  |
| Egypt   | 2008 | 112.9 (96.6 to 130.7)      | 38.8 (30.5 to 49.0)        | 68.8 (54.7 to 84.0)           | 3.2 (1.4 to 6.1)                | 2.1 (2.1 to 2.1)                  | 522.2 (446.8 to 604.7) | 179.7 (141.3 to 226.9)     | 318.1 (252.9 to 388.8)        | 14.8 (6.6 to 28.2)              | 9.6 (9.6 to 9.6)                  |
| Egypt   | 2009 | 112.3 (95.3 to 130.4)      | 38.7 (30.3 to 48.5)        | 69.0 (54.3 to 84.7)           | 3.8 (1.7 to 7.2)                | 0.7 (0.7 to 0.7)                  | 519.5 (441.1 to 603.2) | 179.2 (140.3 to 224.2)     | 319.5 (251.4 to 391.9)        | 17.5 (7.9 to 33.3)              | 3.3 (3.3 to 3.3)                  |
| Egypt   | 2010 | 114.0 (96.9 to 133.3)      | 38.5 (30.1 to 48.0)        | 69.9 (54.7 to 86.1)           | 4.7 (2.1 to 8.9)                | 1.0 (1.0 to 1.0)                  | 527.6 (448.5 to 616.9) | 178.1 (139.4 to 222.0)     | 323.4 (253.3 to 398.2)        | 21.7 (9.8 to 41.0)              | 4.4 (4.4 to 4.4)                  |
| Egypt   | 2011 | 116.2 (98.8 to 135.5)      | 38.6 (29.9 to 48.3)        | 71.0 (55.7 to 87.1)           | 5.9 (2.8 to 11.3)               | 0.7 (0.7 to 0.7)                  | 537.9 (457.2 to 627.0) | 178.5 (138.5 to 223.7)     | 328.5 (257.8 to 402.9)        | 27.5 (12.9 to 52.1)             | 3.4 (3.4 to 3.4)                  |
| Egypt   | 2012 | 116.4 (98.0 to 136.0)      | 37.3 (28.4 to 46.7)        | 71.5 (56.5 to 88.4)           | 7.2 (3.4 to 13.9)               | 0.4 (0.4 to 0.4)                  | 538.8 (453.7 to 629.1) | 172.8 (131.5 to 216.2)     | 330.9 (261.3 to 408.9)        | 33.3 (15.5 to 64.3)             | 1.8 (1.8 to 1.8)                  |
| Egypt   | 2013 | 118.6 (99.5 to 139.0)      | 37.8 (28.8 to 47.0)        | 72.1 (56.8 to 90.4)           | 8.3 (4.0 to 15.4)               | 0.4 (0.4 to 0.4)                  | 548.7 (460.4 to 643.0) | 174.7 (133.3 to 217.4)     | 333.6 (262.7 to 418.4)        | 38.6 (18.3 to 71.4)             | 1.9 (1.9 to 1.9)                  |
| Egypt   | 2014 | 120.6 (101.5 to 143.1)     | 38.5 (29.7 to 48.1)        | 72.5 (56.6 to 91.7)           | 9.1 (4.4 to 17.1)               | 0.5 (0.5 to 0.5)                  | 558.2 (469.5 to 662.2) | 178.4 (137.3 to 222.4)     | 335.3 (262.1 to 424.4)        | 42.1 (20.4 to 79.0)             | 2.4 (2.4 to 2.4)                  |
| Egypt   | 2015 | 124.2 (103.6 to 147.5)     | 39.9 (31.2 to 49.7)        | 74.2 (57.0 to 94.7)           | 9.6 (4.7 to 18.0)               | 0.5 (0.5 to 0.5)                  | 575.0 (479.4 to 682.7) | 184.5 (144.4 to 229.9)     | 343.6 (264.0 to 438.2)        | 44.5 (21.6 to 83.2)             | 2.4 (2.4 to 2.4)                  |
| Egypt   | 2016 | 124.6 (103.0 to 150.3)     | 39.1 (30.5 to 49.1)        | 75.2 (57.4 to 97.0)           | 9.7 (4.7 to 17.9)               | 0.6 (0.6 to 0.6)                  | 576.6 (476.9 to 695.5) | 180.9 (141.0 to 227.3)     | 348.0 (265.7 to 448.8)        | 44.9 (21.9 to 82.6)             | 2.8 (2.8 to 2.8)                  |
| Egypt   | 2017 | 126.4 (105.4 to 151.1)     | 39.5 (30.8 to 49.6)        | 76.0 (58.2 to 98.3)           | 9.9 (4.8 to 18.2)               | 0.9 (0.9 to 0.9)                  | 584.8 (487.9 to 699.0) | 182.9 (142.6 to 229.4)     | 351.8 (269.3 to 454.9)        | 45.8 (22.3 to 84.4)             | 4.2 (4.2 to 4.2)                  |
| Egypt   | 2018 | 128.6 (105.8 to 154.3)     | 40.3 (31.3 to 50.7)        | 77.3 (59.1 to 99.9)           | 10.1 (4.9 to 18.7)              | 0.9 (0.9 to 0.9)                  | 595.2 (489.4 to 713.9) | 186.6 (144.9 to 234.8)     | 357.7 (273.3 to 462.2)        | 47.0 (22.8 to 86.4)             | 4.0 (4.0 to 4.0)                  |
| Egypt   | 2019 | 131.0 (108.5 to 156.6)     | 41.1 (32.0 to 51.7)        | 78.6 (60.1 to 102.1)          | 10.4 (5.1 to 19.2)              | 0.9 (0.8 to 0.9)                  | 606.4 (502.0 to 724.8) | 190.4 (148.1 to 239.3)     | 363.8 (278.0 to 472.5)        | 48.2 (23.5 to 88.7)             | 4.0 (3.7 to 4.2)                  |
| Egypt   | 2020 | 133.4 (110.0 to 158.2)     | 42.0 (32.7 to 52.8)        | 79.9 (61.2 to 103.7)          | 10.7 (5.2 to 19.6)              | 0.9 (0.8 to 0.9)                  | 617.2 (509.2 to 732.3) | 194.3 (151.2 to 244.5)     | 369.6 (283.4 to 480.0)        | 49.3 (24.0 to 90.7)             | 4.0 (3.7 to 4.3)                  |
| Egypt   | 2021 | 136.0 (112.7 to 163.2)     | 43.0 (33.4 to 54.3)        | 81.2 (62.3 to 105.6)          | 10.9 (5.3 to 20.0)              | 0.9 (0.8 to 1.0)                  | 629.3 (521.6 to 755.4) | 199.0 (154.7 to 251.2)     | 375.7 (288.1 to 488.8)        | 50.5 (24.5 to 92.7)             | 4.1 (3.7 to 4.5)                  |
| Egypt   | 2022 | 138.0 (114.1 to 164.7)     | 43.8 (34.1 to 55.2)        | 82.2 (62.9 to 106.9)          | 11.1 (5.4 to 20.4)              | 0.9 (0.8 to 1.0)                  | 638.5 (527.9 to 762.0) | 202.6 (158.0 to 255.3)     | 380.3 (291.1 to 494.6)        | 51.4 (25.0 to 94.4)             | 4.1 (3.7 to 4.6)                  |



| Country | Year | 2018 US Dollars per capita |                            |                               |                                 |                                   | 2018 PPP per capita     |                            |                               |                                 |                                   |
|---------|------|----------------------------|----------------------------|-------------------------------|---------------------------------|-----------------------------------|-------------------------|----------------------------|-------------------------------|---------------------------------|-----------------------------------|
|         |      | Health spending            | Government health spending | Out-of-pocket health spending | Prepaid private health spending | Development assistance for health | Health spending         | Government health spending | Out-of-pocket health spending | Prepaid private health spending | Development assistance for health |
| Egypt   | 2023 | 139.4 (115.6 to 167.5)     | 44.4 (34.6 to 55.9)        | 82.8 (63.5 to 108.2)          | 11.3 (5.5 to 20.7)              | 0.9 (0.8 to 1.0)                  | 645.1 (535.1 to 775.1)  | 205.5 (160.2 to 258.8)     | 383.2 (293.8 to 500.7)        | 52.2 (25.3 to 95.7)             | 4.2 (3.7 to 4.8)                  |
| Egypt   | 2024 | 140.7 (117.2 to 167.6)     | 45.0 (35.0 to 56.7)        | 83.3 (64.0 to 108.9)          | 11.4 (5.5 to 20.9)              | 0.9 (0.8 to 1.1)                  | 651.0 (542.1 to 775.5)  | 208.3 (162.1 to 262.5)     | 385.5 (296.1 to 503.7)        | 52.9 (25.6 to 96.9)             | 4.3 (3.7 to 5.0)                  |
| Egypt   | 2025 | 142.2 (118.6 to 169.9)     | 45.7 (35.6 to 57.5)        | 83.9 (64.5 to 109.3)          | 11.6 (5.6 to 21.2)              | 1.0 (0.8 to 1.1)                  | 658.0 (548.9 to 786.1)  | 211.4 (164.9 to 266.3)     | 388.4 (298.4 to 505.7)        | 53.7 (26.0 to 98.3)             | 4.4 (3.8 to 5.2)                  |
| Egypt   | 2026 | 143.9 (119.9 to 172.0)     | 46.5 (36.1 to 58.6)        | 84.6 (65.0 to 110.3)          | 11.8 (5.7 to 21.6)              | 1.0 (0.8 to 1.1)                  | 665.8 (554.8 to 795.7)  | 215.0 (167.3 to 271.0)     | 391.7 (300.9 to 510.5)        | 54.6 (26.4 to 99.8)             | 4.5 (3.8 to 5.3)                  |
| Egypt   | 2027 | 145.8 (121.5 to 174.7)     | 47.3 (36.8 to 59.6)        | 85.5 (65.5 to 111.2)          | 12.0 (5.8 to 21.9)              | 1.0 (0.8 to 1.2)                  | 674.7 (562.0 to 808.6)  | 219.0 (170.2 to 275.7)     | 395.6 (303.3 to 514.8)        | 55.5 (26.8 to 101.4)            | 4.6 (3.9 to 5.5)                  |
| Egypt   | 2028 | 147.9 (122.5 to 176.0)     | 48.3 (37.5 to 60.8)        | 86.4 (66.1 to 112.3)          | 12.2 (5.9 to 22.3)              | 1.0 (0.9 to 1.2)                  | 684.5 (567.1 to 814.3)  | 223.3 (173.7 to 281.1)     | 400.0 (306.1 to 519.7)        | 56.6 (27.3 to 103.2)            | 4.7 (3.9 to 5.7)                  |
| Egypt   | 2029 | 150.3 (125.4 to 179.1)     | 49.3 (38.0 to 62.2)        | 87.5 (66.9 to 113.5)          | 12.5 (6.0 to 22.8)              | 1.0 (0.9 to 1.3)                  | 695.7 (580.5 to 828.6)  | 228.1 (175.8 to 288.0)     | 405.0 (309.7 to 525.3)        | 57.7 (27.9 to 105.3)            | 4.8 (4.0 to 5.9)                  |
| Egypt   | 2030 | 153.0 (126.7 to 183.8)     | 50.4 (38.9 to 63.4)        | 88.7 (67.8 to 115.0)          | 12.8 (6.2 to 23.2)              | 1.1 (0.9 to 1.3)                  | 707.8 (586.2 to 850.4)  | 233.2 (179.9 to 293.4)     | 410.7 (314.0 to 532.3)        | 59.0 (28.5 to 107.5)            | 4.9 (4.0 to 6.0)                  |
| Egypt   | 2031 | 155.8 (129.2 to 185.3)     | 51.6 (39.8 to 65.1)        | 90.0 (68.9 to 116.6)          | 13.0 (6.3 to 23.7)              | 1.1 (0.9 to 1.4)                  | 720.8 (597.7 to 857.3)  | 238.8 (184.3 to 301.3)     | 416.6 (318.8 to 539.8)        | 60.4 (29.2 to 109.9)            | 5.0 (4.1 to 6.3)                  |
| Egypt   | 2032 | 158.8 (131.5 to 190.9)     | 52.9 (40.6 to 66.8)        | 91.5 (69.9 to 118.3)          | 13.4 (6.5 to 24.3)              | 1.1 (0.9 to 1.4)                  | 735.0 (608.3 to 883.3)  | 244.7 (188.1 to 309.0)     | 423.3 (323.6 to 547.6)        | 61.8 (30.0 to 112.7)            | 5.1 (4.1 to 6.4)                  |
| Egypt   | 2033 | 162.1 (135.2 to 194.3)     | 54.3 (41.7 to 68.5)        | 93.0 (71.2 to 120.4)          | 13.7 (6.7 to 25.0)              | 1.1 (0.9 to 1.4)                  | 750.3 (625.5 to 899.3)  | 251.1 (193.0 to 316.9)     | 430.5 (329.4 to 557.3)        | 63.4 (30.8 to 115.7)            | 5.2 (4.1 to 6.7)                  |
| Egypt   | 2034 | 165.5 (136.3 to 198.8)     | 55.7 (43.0 to 70.4)        | 94.6 (72.3 to 122.6)          | 14.1 (6.8 to 25.7)              | 1.2 (0.9 to 1.5)                  | 765.8 (630.9 to 920.1)  | 257.6 (199.1 to 325.8)     | 437.8 (334.4 to 567.5)        | 65.0 (31.6 to 118.8)            | 5.3 (4.2 to 6.9)                  |
| Egypt   | 2035 | 168.8 (138.9 to 202.1)     | 57.1 (44.0 to 71.9)        | 96.1 (73.3 to 124.7)          | 14.4 (7.0 to 26.3)              | 1.2 (0.9 to 1.5)                  | 780.9 (642.6 to 935.3)  | 264.0 (203.7 to 332.7)     | 444.8 (339.2 to 577.0)        | 66.7 (32.3 to 121.9)            | 5.5 (4.2 to 7.1)                  |
| Egypt   | 2036 | 172.0 (141.4 to 208.4)     | 58.4 (45.1 to 73.7)        | 97.6 (74.2 to 126.6)          | 14.7 (7.1 to 27.0)              | 1.2 (0.9 to 1.6)                  | 795.9 (654.2 to 964.2)  | 270.4 (208.8 to 341.3)     | 451.6 (343.3 to 586.0)        | 68.3 (33.0 to 124.9)            | 5.6 (4.3 to 7.5)                  |
| Egypt   | 2037 | 175.2 (144.9 to 209.8)     | 59.8 (46.1 to 75.6)        | 99.1 (75.2 to 128.7)          | 15.1 (7.3 to 27.7)              | 1.2 (0.9 to 1.7)                  | 810.9 (670.7 to 970.7)  | 276.9 (213.3 to 349.9)     | 458.5 (348.1 to 595.3)        | 69.9 (33.8 to 128.0)            | 5.7 (4.4 to 7.7)                  |
| Egypt   | 2038 | 178.5 (147.4 to 215.3)     | 61.2 (47.0 to 77.5)        | 100.5 (76.2 to 130.7)         | 15.4 (7.5 to 28.3)              | 1.3 (1.0 to 1.8)                  | 825.9 (681.9 to 996.1)  | 283.4 (217.5 to 358.8)     | 465.2 (352.6 to 604.9)        | 71.5 (34.7 to 131.1)            | 5.8 (4.5 to 8.1)                  |
| Egypt   | 2039 | 181.8 (149.9 to 217.6)     | 62.7 (48.1 to 79.7)        | 102.0 (77.0 to 132.8)         | 15.8 (7.7 to 29.0)              | 1.3 (1.0 to 1.8)                  | 841.2 (693.8 to 1007.1) | 290.1 (222.5 to 368.8)     | 472.0 (356.5 to 614.3)        | 73.1 (35.6 to 134.3)            | 6.0 (4.6 to 8.3)                  |
| Egypt   | 2040 | 185.1 (151.8 to 221.9)     | 64.2 (49.4 to 81.8)        | 103.4 (78.0 to 134.7)         | 16.2 (7.9 to 29.7)              | 1.3 (1.0 to 1.8)                  | 856.4 (702.4 to 1026.8) | 297.0 (228.4 to 378.6)     | 478.6 (360.7 to 623.5)        | 74.8 (36.4 to 137.4)            | 6.1 (4.6 to 8.5)                  |
| Egypt   | 2041 | 188.4 (155.4 to 226.7)     | 65.7 (50.9 to 83.6)        | 104.8 (78.9 to 136.7)         | 16.5 (8.1 to 30.4)              | 1.4 (1.0 to 1.9)                  | 871.7 (719.1 to 1049.1) | 304.0 (235.7 to 386.8)     | 485.1 (365.1 to 632.5)        | 76.4 (37.3 to 140.5)            | 6.3 (4.7 to 8.7)                  |
| Egypt   | 2042 | 191.7 (157.2 to 229.9)     | 67.2 (52.1 to 85.7)        | 106.2 (79.8 to 138.9)         | 16.9 (8.3 to 31.0)              | 1.4 (1.0 to 2.0)                  | 887.0 (727.5 to 1064.1) | 311.1 (240.9 to 396.7)     | 491.5 (369.4 to 642.9)        | 78.0 (38.2 to 143.7)            | 6.4 (4.8 to 9.2)                  |
| Egypt   | 2043 | 195.0 (162.6 to 234.3)     | 68.8 (53.1 to 88.0)        | 107.6 (80.8 to 140.8)         | 17.2 (8.4 to 31.7)              | 1.4 (1.1 to 2.1)                  | 902.5 (752.3 to 1084.4) | 318.4 (245.8 to 407.3)     | 497.8 (373.7 to 651.6)        | 79.6 (39.1 to 146.8)            | 6.6 (4.9 to 9.5)                  |

| Country     | Year | 2018 US Dollars per capita |                            |                               |                                 |                                   | 2018 PPP per capita      |                            |                               |                                 |                                   |
|-------------|------|----------------------------|----------------------------|-------------------------------|---------------------------------|-----------------------------------|--------------------------|----------------------------|-------------------------------|---------------------------------|-----------------------------------|
|             |      | Health spending            | Government health spending | Out-of-pocket health spending | Prepaid private health spending | Development assistance for health | Health spending          | Government health spending | Out-of-pocket health spending | Prepaid private health spending | Development assistance for health |
| Egypt       | 2044 | 198.4 (163.4 to 237.1)     | 70.4 (54.2 to 90.2)        | 108.9 (81.6 to 142.6)         | 17.5 (8.6 to 32.4)              | 1.5 (1.1 to 2.1)                  | 917.9 (756.2 to 1097.3)  | 325.9 (250.9 to 417.3)     | 504.0 (377.8 to 659.7)        | 81.2 (39.9 to 150.0)            | 6.8 (5.0 to 9.8)                  |
| Egypt       | 2045 | 201.6 (167.0 to 243.6)     | 72.0 (55.1 to 92.4)        | 110.2 (82.6 to 144.5)         | 17.9 (8.8 to 33.1)              | 1.5 (1.1 to 2.3)                  | 933.0 (773.0 to 1127.4)  | 333.2 (255.2 to 427.5)     | 510.0 (382.4 to 668.9)        | 82.8 (40.8 to 153.4)            | 7.0 (5.0 to 10.5)                 |
| Egypt       | 2046 | 205.0 (168.8 to 245.8)     | 73.7 (56.4 to 94.7)        | 111.5 (83.7 to 146.1)         | 18.2 (9.0 to 33.8)              | 1.5 (1.1 to 2.4)                  | 948.5 (781.0 to 1137.6)  | 340.9 (261.2 to 438.2)     | 516.1 (387.3 to 676.3)        | 84.4 (41.7 to 156.6)            | 7.2 (5.2 to 11.0)                 |
| Egypt       | 2047 | 208.2 (170.8 to 249.7)     | 75.3 (57.4 to 96.5)        | 112.8 (84.7 to 147.8)         | 18.6 (9.2 to 34.4)              | 1.6 (1.1 to 2.5)                  | 963.4 (790.4 to 1155.6)  | 348.3 (265.7 to 446.7)     | 521.8 (392.1 to 684.1)        | 86.0 (42.4 to 159.3)            | 7.4 (5.3 to 11.6)                 |
| Egypt       | 2048 | 211.5 (176.7 to 253.6)     | 76.9 (58.4 to 99.2)        | 114.0 (85.8 to 149.5)         | 18.9 (9.3 to 35.1)              | 1.6 (1.2 to 2.6)                  | 978.9 (817.8 to 1173.6)  | 356.1 (270.5 to 459.1)     | 527.6 (397.2 to 691.6)        | 87.6 (43.2 to 162.4)            | 7.6 (5.4 to 12.2)                 |
| Egypt       | 2049 | 214.8 (176.8 to 262.3)     | 78.6 (59.7 to 101.6)       | 115.2 (86.9 to 151.1)         | 19.3 (9.5 to 35.8)              | 1.7 (1.2 to 2.7)                  | 993.8 (818.0 to 1213.7)  | 363.7 (276.5 to 470.0)     | 533.2 (402.0 to 699.2)        | 89.1 (44.0 to 165.5)            | 7.8 (5.6 to 12.6)                 |
| Egypt       | 2050 | 218.2 (180.6 to 262.8)     | 80.3 (61.0 to 104.1)       | 116.5 (87.7 to 152.8)         | 19.6 (9.7 to 36.5)              | 1.7 (1.2 to 2.8)                  | 1009.5 (835.6 to 1216.2) | 371.7 (282.2 to 481.6)     | 539.0 (405.7 to 707.3)        | 90.8 (44.7 to 168.7)            | 8.1 (5.7 to 13.1)                 |
| El Salvador | 1995 | 214.5 (189.4 to 243.5)     | 72.9 (60.7 to 85.7)        | 129.7 (107.1 to 157.6)        | 3.9 (1.9 to 7.3)                | 7.9 (7.9 to 7.9)                  | 449.3 (396.7 to 510.2)   | 152.8 (127.1 to 179.6)     | 271.8 (224.3 to 330.2)        | 8.1 (4.0 to 15.4)               | 16.6 (16.6 to 16.6)               |
| El Salvador | 1996 | 236.8 (212.1 to 265.8)     | 82.7 (70.7 to 96.4)        | 139.8 (117.3 to 166.4)        | 5.2 (2.6 to 9.7)                | 9.1 (9.1 to 9.1)                  | 496.0 (444.4 to 556.7)   | 173.2 (148.0 to 201.9)     | 292.9 (245.7 to 348.6)        | 10.9 (5.5 to 20.4)              | 19.1 (19.1 to 19.1)               |
| El Salvador | 1997 | 254.6 (229.7 to 282.8)     | 94.5 (81.7 to 109.2)       | 149.3 (126.6 to 174.8)        | 6.4 (3.3 to 11.5)               | 4.5 (4.5 to 4.5)                  | 533.4 (481.1 to 592.5)   | 198.0 (171.2 to 228.8)     | 312.7 (265.2 to 366.1)        | 13.3 (6.9 to 24.2)              | 9.4 (9.4 to 9.4)                  |
| El Salvador | 1998 | 271.7 (245.8 to 299.0)     | 106.7 (93.2 to 121.9)      | 151.5 (129.5 to 175.0)        | 7.5 (3.9 to 13.2)               | 6.0 (6.0 to 6.0)                  | 569.2 (514.8 to 626.3)   | 223.5 (195.3 to 255.5)     | 317.4 (271.3 to 366.6)        | 15.7 (8.2 to 27.6)              | 12.6 (12.6 to 12.6)               |
| El Salvador | 1999 | 278.4 (252.6 to 306.0)     | 114.7 (99.9 to 130.7)      | 149.4 (128.0 to 172.8)        | 8.9 (4.7 to 15.7)               | 5.3 (5.3 to 5.3)                  | 583.2 (529.2 to 640.9)   | 240.3 (209.3 to 273.8)     | 313.0 (268.1 to 362.0)        | 18.7 (9.8 to 32.9)              | 11.2 (11.2 to 11.2)               |
| El Salvador | 2000 | 279.1 (254.2 to 305.6)     | 119.9 (105.5 to 135.4)     | 145.1 (124.6 to 167.9)        | 9.4 (4.9 to 16.2)               | 4.7 (4.7 to 4.7)                  | 584.7 (532.4 to 640.2)   | 251.2 (221.1 to 283.7)     | 304.0 (261.0 to 351.6)        | 19.6 (10.4 to 33.9)             | 9.9 (9.9 to 9.9)                  |
| El Salvador | 2001 | 280.5 (255.6 to 307.1)     | 122.6 (108.5 to 138.7)     | 140.2 (121.2 to 163.1)        | 10.0 (5.4 to 17.3)              | 7.7 (7.7 to 7.7)                  | 587.6 (535.4 to 643.4)   | 256.9 (227.2 to 290.6)     | 293.7 (253.9 to 341.6)        | 20.9 (11.2 to 36.2)             | 16.1 (16.1 to 16.1)               |
| El Salvador | 2002 | 276.4 (251.6 to 302.2)     | 126.2 (111.9 to 142.6)     | 135.2 (116.6 to 157.0)        | 10.2 (5.4 to 17.8)              | 4.9 (4.9 to 4.9)                  | 579.1 (527.1 to 633.1)   | 264.3 (234.5 to 298.6)     | 283.2 (244.2 to 328.9)        | 21.4 (11.4 to 37.3)             | 10.2 (10.2 to 10.2)               |
| El Salvador | 2003 | 271.2 (247.5 to 295.4)     | 128.2 (113.8 to 144.2)     | 128.4 (110.4 to 148.9)        | 10.3 (5.4 to 17.6)              | 4.2 (4.2 to 4.2)                  | 568.1 (518.4 to 618.9)   | 268.6 (238.5 to 302.1)     | 269.0 (231.2 to 311.9)        | 21.6 (11.3 to 36.9)             | 8.9 (8.9 to 8.9)                  |
| El Salvador | 2004 | 267.6 (244.1 to 290.7)     | 131.2 (116.1 to 147.7)     | 120.5 (102.7 to 139.6)        | 10.6 (5.7 to 18.1)              | 5.2 (5.2 to 5.2)                  | 560.6 (511.4 to 609.0)   | 274.9 (243.1 to 309.4)     | 252.5 (215.1 to 292.4)        | 22.3 (11.8 to 38.0)             | 11.0 (11.0 to 11.0)               |
| El Salvador | 2005 | 267.1 (242.3 to 291.3)     | 137.3 (121.9 to 154.8)     | 111.9 (95.1 to 129.8)         | 11.2 (5.9 to 19.2)              | 6.6 (6.6 to 6.6)                  | 559.5 (507.6 to 610.3)   | 287.7 (255.4 to 324.3)     | 234.4 (199.1 to 271.9)        | 23.5 (12.3 to 40.2)             | 13.9 (13.9 to 13.9)               |
| El Salvador | 2006 | 262.6 (238.4 to 288.0)     | 143.8 (127.8 to 161.3)     | 101.2 (85.9 to 118.3)         | 11.8 (6.0 to 20.5)              | 5.8 (5.8 to 5.8)                  | 550.1 (499.3 to 603.2)   | 301.2 (267.7 to 338.0)     | 212.0 (180.0 to 247.7)        | 24.7 (12.7 to 42.9)             | 12.1 (12.1 to 12.1)               |
| El Salvador | 2007 | 261.4 (237.4 to 286.0)     | 146.2 (129.4 to 163.6)     | 97.3 (82.5 to 114.1)          | 12.2 (6.2 to 21.1)              | 5.8 (5.8 to 5.8)                  | 547.7 (497.3 to 599.1)   | 306.2 (271.0 to 342.7)     | 203.9 (172.8 to 239.1)        | 25.5 (13.0 to 44.2)             | 12.1 (12.1 to 12.1)               |
| El Salvador | 2008 | 261.4 (237.8 to 288.4)     | 148.2 (131.4 to 165.6)     | 95.0 (80.1 to 111.8)          | 12.5 (6.5 to 21.6)              | 5.7 (5.7 to 5.7)                  | 547.7 (498.1 to 604.2)   | 310.4 (275.2 to 346.8)     | 199.1 (167.9 to 234.1)        | 26.2 (13.6 to 45.3)             | 12.0 (12.0 to 12.0)               |

| Country     | Year | 2018 US Dollars per capita |                            |                               |                                 |                                   | 2018 PPP per capita    |                            |                               |                                 |                                   |
|-------------|------|----------------------------|----------------------------|-------------------------------|---------------------------------|-----------------------------------|------------------------|----------------------------|-------------------------------|---------------------------------|-----------------------------------|
|             |      | Health spending            | Government health spending | Out-of-pocket health spending | Prepaid private health spending | Development assistance for health | Health spending        | Government health spending | Out-of-pocket health spending | Prepaid private health spending | Development assistance for health |
| El Salvador | 2009 | 260.1 (236.4 to 287.1)     | 148.1 (132.1 to 166.7)     | 93.0 (78.9 to 109.1)          | 12.7 (6.6 to 22.6)              | 6.3 (6.3 to 6.3)                  | 545.0 (495.2 to 601.4) | 310.2 (276.8 to 349.2)     | 194.9 (165.3 to 228.6)        | 26.6 (13.8 to 47.3)             | 13.2 (13.2 to 13.2)               |
| El Salvador | 2010 | 274.8 (252.0 to 302.1)     | 157.0 (140.7 to 176.3)     | 92.3 (78.8 to 109.4)          | 13.1 (6.9 to 22.8)              | 12.4 (12.4 to 12.4)               | 575.7 (527.8 to 632.9) | 328.9 (294.7 to 369.4)     | 193.4 (165.1 to 229.1)        | 27.4 (14.4 to 47.8)             | 26.0 (26.0 to 26.0)               |
| El Salvador | 2011 | 281.1 (256.5 to 307.8)     | 169.6 (152.1 to 190.2)     | 91.5 (77.9 to 108.3)          | 13.8 (7.3 to 24.0)              | 6.1 (6.1 to 6.1)                  | 588.9 (537.3 to 644.8) | 355.3 (318.6 to 398.4)     | 191.7 (163.3 to 226.8)        | 29.0 (15.2 to 50.3)             | 12.9 (12.9 to 12.9)               |
| El Salvador | 2012 | 283.3 (258.5 to 309.9)     | 174.1 (155.8 to 192.8)     | 89.2 (75.7 to 105.5)          | 14.4 (7.5 to 24.4)              | 5.5 (5.5 to 5.5)                  | 593.4 (541.6 to 649.1) | 364.8 (326.5 to 404.0)     | 186.8 (158.5 to 221.1)        | 30.2 (15.7 to 51.0)             | 11.6 (11.6 to 11.6)               |
| El Salvador | 2013 | 290.1 (264.8 to 316.9)     | 180.9 (160.8 to 200.6)     | 86.5 (73.0 to 102.5)          | 15.3 (7.8 to 26.0)              | 7.3 (7.3 to 7.3)                  | 607.7 (554.7 to 663.8) | 379.0 (336.8 to 420.3)     | 181.2 (153.0 to 214.8)        | 32.1 (16.4 to 54.5)             | 15.4 (15.4 to 15.4)               |
| El Salvador | 2014 | 292.0 (265.0 to 320.9)     | 186.2 (165.4 to 207.7)     | 85.4 (71.6 to 102.3)          | 16.4 (8.4 to 27.6)              | 4.0 (4.0 to 4.0)                  | 611.7 (555.1 to 672.2) | 390.2 (346.5 to 435.1)     | 178.9 (150.0 to 214.2)        | 34.4 (17.6 to 57.8)             | 8.3 (8.3 to 8.3)                  |
| El Salvador | 2015 | 302.6 (272.5 to 334.4)     | 194.0 (169.5 to 219.2)     | 85.5 (71.0 to 103.2)          | 17.9 (9.3 to 31.8)              | 5.2 (5.2 to 5.2)                  | 633.8 (570.8 to 700.4) | 406.3 (355.1 to 459.3)     | 179.1 (148.8 to 216.3)        | 37.4 (19.4 to 66.6)             | 10.9 (10.9 to 10.9)               |
| El Salvador | 2016 | 313.2 (279.3 to 349.4)     | 201.6 (173.3 to 231.5)     | 86.4 (70.5 to 106.5)          | 19.3 (10.0 to 35.2)             | 5.9 (5.9 to 5.9)                  | 656.1 (585.0 to 732.0) | 422.4 (363.1 to 484.9)     | 180.9 (147.7 to 223.2)        | 40.4 (20.9 to 73.7)             | 12.4 (12.4 to 12.4)               |
| El Salvador | 2017 | 321.0 (285.9 to 359.5)     | 207.0 (178.7 to 237.9)     | 86.5 (70.3 to 106.7)          | 19.7 (10.2 to 35.9)             | 7.8 (7.8 to 7.8)                  | 672.3 (598.9 to 753.2) | 433.7 (374.3 to 498.4)     | 181.1 (147.4 to 223.5)        | 41.2 (21.4 to 75.2)             | 16.4 (16.4 to 16.4)               |
| El Salvador | 2018 | 326.2 (290.5 to 363.8)     | 212.2 (183.1 to 244.1)     | 86.4 (70.3 to 106.4)          | 20.1 (10.5 to 36.7)             | 7.4 (7.4 to 7.4)                  | 683.3 (608.5 to 762.1) | 444.5 (383.5 to 511.4)     | 181.1 (147.2 to 222.9)        | 42.2 (21.9 to 76.9)             | 15.5 (15.5 to 15.5)               |
| El Salvador | 2019 | 331.7 (296.4 to 375.0)     | 217.3 (187.5 to 249.9)     | 86.4 (70.2 to 106.4)          | 20.6 (10.7 to 37.4)             | 7.5 (7.0 to 7.9)                  | 694.9 (620.8 to 785.5) | 455.1 (392.7 to 523.4)     | 180.9 (147.2 to 222.8)        | 43.1 (22.4 to 78.4)             | 15.7 (14.7 to 16.6)               |
| El Salvador | 2020 | 336.4 (300.7 to 375.7)     | 221.5 (191.3 to 254.9)     | 86.2 (70.0 to 106.9)          | 21.0 (10.9 to 38.1)             | 7.7 (7.0 to 8.3)                  | 704.8 (629.9 to 787.1) | 464.0 (400.8 to 534.1)     | 180.6 (146.6 to 223.9)        | 44.0 (22.9 to 79.8)             | 16.1 (14.8 to 17.4)               |
| El Salvador | 2021 | 341.2 (306.1 to 382.3)     | 225.8 (195.5 to 259.5)     | 86.1 (69.7 to 106.8)          | 21.4 (11.1 to 38.8)             | 7.9 (7.1 to 8.7)                  | 714.7 (641.3 to 800.8) | 473.0 (409.4 to 543.6)     | 180.4 (146.1 to 223.8)        | 44.9 (23.3 to 81.2)             | 16.5 (14.8 to 18.2)               |
| El Salvador | 2022 | 346.2 (309.5 to 384.3)     | 230.2 (199.5 to 264.7)     | 86.0 (69.4 to 106.8)          | 21.9 (11.4 to 39.5)             | 8.1 (7.2 to 9.0)                  | 725.2 (648.3 to 805.1) | 482.2 (417.9 to 554.6)     | 180.2 (145.4 to 223.6)        | 45.8 (23.8 to 82.7)             | 17.0 (15.1 to 19.0)               |
| El Salvador | 2023 | 351.6 (313.0 to 392.8)     | 235.1 (203.3 to 270.7)     | 85.9 (69.0 to 106.6)          | 22.3 (11.6 to 40.3)             | 8.3 (7.3 to 9.5)                  | 736.7 (655.7 to 822.8) | 492.6 (425.9 to 567.1)     | 179.9 (144.6 to 223.4)        | 46.7 (24.2 to 84.3)             | 17.5 (15.2 to 19.8)               |
| El Salvador | 2024 | 357.1 (319.4 to 398.6)     | 240.0 (207.6 to 276.8)     | 85.7 (68.7 to 106.4)          | 22.7 (11.8 to 41.2)             | 8.6 (7.4 to 9.9)                  | 748.0 (669.1 to 835.1) | 502.8 (434.9 to 579.9)     | 179.6 (143.9 to 222.9)        | 47.6 (24.7 to 86.2)             | 18.0 (15.5 to 20.7)               |
| El Salvador | 2025 | 362.5 (324.4 to 402.7)     | 244.9 (212.1 to 282.8)     | 85.6 (68.5 to 106.8)          | 23.2 (12.0 to 42.1)             | 8.8 (7.6 to 10.4)                 | 759.4 (679.6 to 843.5) | 513.1 (444.4 to 592.4)     | 179.3 (143.5 to 223.6)        | 48.5 (25.1 to 88.1)             | 18.5 (15.8 to 21.7)               |
| El Salvador | 2026 | 368.2 (329.2 to 411.8)     | 250.0 (216.5 to 288.6)     | 85.4 (68.4 to 106.7)          | 23.6 (12.2 to 43.0)             | 9.1 (7.7 to 10.6)                 | 771.2 (689.7 to 862.7) | 523.8 (453.6 to 604.5)     | 179.0 (143.4 to 223.5)        | 49.4 (25.6 to 90.1)             | 19.0 (16.1 to 22.3)               |
| El Salvador | 2027 | 373.8 (334.4 to 421.4)     | 255.1 (220.7 to 294.9)     | 85.3 (68.6 to 107.0)          | 24.0 (12.4 to 43.9)             | 9.4 (7.8 to 11.1)                 | 783.0 (700.5 to 882.7) | 534.4 (462.3 to 617.7)     | 178.7 (143.8 to 224.2)        | 50.3 (26.0 to 92.0)             | 19.6 (16.4 to 23.3)               |
| El Salvador | 2028 | 379.4 (339.3 to 426.4)     | 260.1 (224.9 to 300.6)     | 85.2 (68.2 to 107.3)          | 24.5 (12.7 to 44.9)             | 9.6 (8.1 to 11.6)                 | 794.8 (710.7 to 893.3) | 545.0 (471.1 to 629.7)     | 178.5 (142.8 to 224.8)        | 51.2 (26.5 to 94.0)             | 20.2 (16.9 to 24.4)               |
| El Salvador | 2029 | 385.2 (342.8 to 431.8)     | 265.2 (229.1 to 306.3)     | 85.1 (68.0 to 107.5)          | 24.9 (12.9 to 45.8)             | 9.9 (8.2 to 12.2)                 | 806.8 (718.0 to 904.5) | 555.5 (480.0 to 641.6)     | 178.4 (142.3 to 225.3)        | 52.1 (27.0 to 95.9)             | 20.8 (17.2 to 25.5)               |

| Country     | Year | 2018 US Dollars per capita |                            |                               |                                 |                                   | 2018 PPP per capita       |                            |                               |                                 |                                   |
|-------------|------|----------------------------|----------------------------|-------------------------------|---------------------------------|-----------------------------------|---------------------------|----------------------------|-------------------------------|---------------------------------|-----------------------------------|
|             |      | Health spending            | Government health spending | Out-of-pocket health spending | Prepaid private health spending | Development assistance for health | Health spending           | Government health spending | Out-of-pocket health spending | Prepaid private health spending | Development assistance for health |
| El Salvador | 2030 | 391.0 (348.8 to 437.6)     | 270.3 (233.8 to 311.9)     | 85.2 (67.7 to 108.3)          | 25.3 (13.1 to 46.5)             | 10.2 (8.4 to 12.5)                | 819.1 (730.6 to 916.6)    | 566.2 (489.8 to 653.3)     | 178.4 (141.9 to 226.8)        | 53.0 (27.4 to 97.3)             | 21.4 (17.5 to 26.3)               |
| El Salvador | 2031 | 397.3 (353.4 to 448.7)     | 275.6 (238.5 to 318.0)     | 85.3 (67.6 to 109.0)          | 25.8 (13.3 to 47.1)             | 10.6 (8.6 to 13.2)                | 832.2 (740.4 to 940.0)    | 577.4 (499.7 to 666.2)     | 178.7 (141.5 to 228.3)        | 54.0 (27.9 to 98.7)             | 22.1 (17.9 to 27.7)               |
| El Salvador | 2032 | 403.6 (359.1 to 451.2)     | 281.0 (243.2 to 324.2)     | 85.5 (67.3 to 109.7)          | 26.2 (13.6 to 47.7)             | 10.9 (8.7 to 13.7)                | 845.5 (752.4 to 945.3)    | 588.7 (509.4 to 679.1)     | 179.1 (140.9 to 229.7)        | 54.9 (28.4 to 100.0)            | 22.8 (18.3 to 28.7)               |
| El Salvador | 2033 | 410.3 (362.8 to 462.4)     | 286.6 (247.3 to 330.3)     | 85.8 (67.2 to 110.3)          | 26.7 (13.8 to 48.4)             | 11.2 (8.9 to 14.4)                | 859.4 (760.0 to 968.6)    | 600.3 (518.0 to 692.0)     | 179.7 (140.8 to 231.1)        | 55.9 (28.9 to 101.4)            | 23.5 (18.7 to 30.2)               |
| El Salvador | 2034 | 417.0 (372.7 to 467.8)     | 292.2 (252.1 to 336.8)     | 86.1 (67.2 to 111.1)          | 27.1 (14.0 to 49.0)             | 11.6 (9.1 to 15.0)                | 873.6 (780.8 to 980.0)    | 612.0 (528.1 to 705.5)     | 180.4 (140.7 to 232.8)        | 56.9 (29.4 to 102.7)            | 24.3 (19.1 to 31.4)               |
| El Salvador | 2035 | 424.1 (375.2 to 479.5)     | 297.9 (256.6 to 343.2)     | 86.6 (67.1 to 112.0)          | 27.6 (14.3 to 49.8)             | 12.0 (9.3 to 15.7)                | 888.4 (786.0 to 1004.6)   | 624.1 (537.5 to 718.9)     | 181.3 (140.6 to 234.6)        | 57.9 (29.9 to 104.4)            | 25.1 (19.5 to 32.9)               |
| El Salvador | 2036 | 431.5 (382.3 to 486.3)     | 303.9 (261.2 to 350.4)     | 87.1 (67.1 to 113.2)          | 28.1 (14.5 to 50.8)             | 12.4 (9.6 to 16.6)                | 903.9 (800.8 to 1018.8)   | 636.6 (547.2 to 734.0)     | 182.4 (140.5 to 237.1)        | 58.9 (30.4 to 106.4)            | 26.0 (20.0 to 34.8)               |
| El Salvador | 2037 | 439.2 (388.9 to 498.5)     | 310.1 (266.5 to 357.6)     | 87.7 (67.4 to 114.4)          | 28.6 (14.8 to 51.8)             | 12.8 (9.8 to 17.1)                | 920.1 (814.4 to 1044.4)   | 649.6 (558.2 to 749.1)     | 183.7 (141.1 to 239.7)        | 60.0 (31.0 to 108.5)            | 26.8 (20.6 to 35.9)               |
| El Salvador | 2038 | 447.2 (395.2 to 508.7)     | 316.4 (271.3 to 364.9)     | 88.4 (67.7 to 116.0)          | 29.2 (15.0 to 52.8)             | 13.2 (10.1 to 18.3)               | 936.8 (827.8 to 1065.7)   | 662.9 (568.4 to 764.4)     | 185.1 (141.8 to 243.0)        | 61.1 (31.5 to 110.7)            | 27.7 (21.1 to 38.4)               |
| El Salvador | 2039 | 455.3 (402.7 to 518.8)     | 322.9 (276.8 to 373.1)     | 89.1 (68.1 to 117.7)          | 29.7 (15.3 to 53.7)             | 13.6 (10.4 to 18.9)               | 953.8 (843.5 to 1086.9)   | 676.4 (579.8 to 781.6)     | 186.7 (142.6 to 246.5)        | 62.2 (32.0 to 112.6)            | 28.5 (21.8 to 39.6)               |
| El Salvador | 2040 | 463.6 (406.7 to 533.3)     | 329.3 (282.0 to 381.1)     | 90.0 (68.3 to 119.4)          | 30.2 (15.5 to 54.6)             | 14.1 (10.7 to 19.5)               | 971.2 (852.0 to 1117.1)   | 689.9 (590.8 to 798.4)     | 188.4 (143.1 to 250.1)        | 63.3 (32.5 to 114.3)            | 29.5 (22.4 to 40.8)               |
| El Salvador | 2041 | 472.2 (417.0 to 535.6)     | 336.0 (288.2 to 389.5)     | 90.9 (68.7 to 120.9)          | 30.8 (15.8 to 55.5)             | 14.5 (11.0 to 20.2)               | 989.2 (873.6 to 1122.1)   | 703.9 (603.8 to 815.9)     | 190.4 (143.9 to 253.3)        | 64.5 (33.0 to 116.2)            | 30.5 (22.9 to 42.3)               |
| El Salvador | 2042 | 481.0 (420.7 to 547.0)     | 342.8 (294.3 to 397.6)     | 91.9 (69.2 to 122.5)          | 31.3 (16.0 to 56.4)             | 15.1 (11.3 to 21.5)               | 1007.7 (881.4 to 1145.9)  | 718.1 (616.5 to 832.9)     | 192.5 (145.0 to 256.5)        | 65.6 (33.6 to 118.1)            | 31.5 (23.6 to 44.9)               |
| El Salvador | 2043 | 490.1 (429.6 to 556.2)     | 349.6 (299.5 to 406.4)     | 93.0 (69.8 to 124.1)          | 31.9 (16.3 to 57.5)             | 15.6 (11.6 to 22.5)               | 1026.6 (900.1 to 1165.1)  | 732.4 (627.4 to 851.3)     | 194.7 (146.3 to 259.9)        | 66.8 (34.1 to 120.4)            | 32.6 (24.2 to 47.2)               |
| El Salvador | 2044 | 499.2 (439.5 to 564.7)     | 356.5 (304.8 to 414.1)     | 94.1 (70.6 to 125.7)          | 32.5 (16.6 to 58.5)             | 16.1 (11.9 to 23.3)               | 1045.8 (920.7 to 1182.9)  | 746.9 (638.5 to 867.5)     | 197.2 (147.9 to 263.4)        | 68.0 (34.7 to 122.5)            | 33.8 (24.9 to 48.9)               |
| El Salvador | 2045 | 508.6 (447.0 to 575.7)     | 363.5 (310.6 to 423.2)     | 95.4 (71.5 to 127.3)          | 33.0 (16.9 to 59.3)             | 16.7 (12.0 to 25.2)               | 1065.5 (936.3 to 1206.0)  | 761.5 (650.6 to 886.6)     | 199.8 (149.8 to 266.7)        | 69.2 (35.4 to 124.3)            | 35.0 (25.2 to 52.8)               |
| El Salvador | 2046 | 518.1 (455.4 to 589.2)     | 370.5 (316.3 to 432.0)     | 96.7 (72.5 to 129.0)          | 33.6 (17.2 to 60.2)             | 17.3 (12.5 to 26.6)               | 1085.4 (954.0 to 1234.2)  | 776.2 (662.5 to 905.0)     | 202.6 (151.9 to 270.2)        | 70.4 (36.0 to 126.2)            | 36.2 (26.2 to 55.6)               |
| El Salvador | 2047 | 528.0 (466.0 to 601.7)     | 377.6 (322.6 to 441.0)     | 98.1 (73.7 to 130.8)          | 34.2 (17.5 to 61.2)             | 17.9 (12.9 to 28.2)               | 1106.0 (976.3 to 1260.6)  | 791.1 (675.8 to 923.8)     | 205.6 (154.4 to 274.0)        | 71.7 (36.7 to 128.1)            | 37.5 (27.0 to 59.2)               |
| El Salvador | 2048 | 537.9 (471.7 to 609.1)     | 384.9 (328.5 to 449.3)     | 99.6 (74.9 to 132.6)          | 34.8 (17.8 to 62.1)             | 18.6 (13.3 to 29.8)               | 1126.9 (988.2 to 1276.0)  | 806.3 (688.2 to 941.3)     | 208.7 (156.9 to 277.7)        | 73.0 (37.3 to 130.1)            | 39.0 (27.9 to 62.4)               |
| El Salvador | 2049 | 547.7 (479.3 to 622.3)     | 391.9 (334.3 to 457.8)     | 101.0 (76.1 to 134.8)         | 35.4 (18.1 to 63.0)             | 19.3 (13.8 to 31.0)               | 1147.4 (1004.2 to 1303.7) | 821.1 (700.3 to 959.1)     | 211.7 (159.4 to 282.3)        | 74.2 (38.0 to 131.9)            | 40.5 (28.9 to 65.0)               |
| El Salvador | 2050 | 557.8 (485.9 to 633.4)     | 399.2 (339.9 to 467.6)     | 102.5 (77.2 to 136.8)         | 36.0 (18.4 to 63.9)             | 20.1 (14.1 to 32.9)               | 1168.6 (1017.9 to 1326.9) | 836.3 (712.1 to 979.5)     | 214.7 (161.7 to 286.6)        | 75.5 (38.5 to 133.8)            | 42.1 (29.6 to 68.8)               |

| Country           | Year | 2018 US Dollars per capita |                            |                               |                                 |                                   | 2018 PPP per capita    |                            |                               |                                 |                                   |
|-------------------|------|----------------------------|----------------------------|-------------------------------|---------------------------------|-----------------------------------|------------------------|----------------------------|-------------------------------|---------------------------------|-----------------------------------|
|                   |      | Health spending            | Government health spending | Out-of-pocket health spending | Prepaid private health spending | Development assistance for health | Health spending        | Government health spending | Out-of-pocket health spending | Prepaid private health spending | Development assistance for health |
| Equatorial Guinea | 1995 | 96.3 (81.0 to 114.8)       | 15.6 (12.1 to 19.7)        | 76.7 (61.5 to 95.1)           | 1.8 (0.8 to 3.4)                | 2.2 (2.2 to 2.2)                  | 247.7 (208.3 to 295.3) | 40.0 (31.3 to 50.6)        | 197.5 (158.2 to 244.6)        | 4.7 (2.1 to 8.8)                | 5.6 (5.6 to 5.6)                  |
| Equatorial Guinea | 1996 | 116.5 (100.9 to 134.5)     | 17.6 (13.7 to 22.3)        | 82.5 (67.4 to 100.0)          | 2.1 (0.9 to 4.0)                | 14.4 (14.4 to 14.4)               | 299.8 (259.5 to 346.2) | 45.2 (35.3 to 57.3)        | 212.2 (173.5 to 257.3)        | 5.3 (2.4 to 10.2)               | 37.1 (37.1 to 37.1)               |
| Equatorial Guinea | 1997 | 139.4 (121.0 to 159.7)     | 27.8 (21.9 to 35.0)        | 104.8 (87.5 to 125.1)         | 3.4 (1.5 to 6.5)                | 3.3 (3.3 to 3.3)                  | 358.5 (311.4 to 410.9) | 71.6 (56.3 to 90.0)        | 269.6 (225.2 to 321.9)        | 8.8 (3.9 to 16.7)               | 8.6 (8.6 to 8.6)                  |
| Equatorial Guinea | 1998 | 137.0 (120.0 to 155.6)     | 26.7 (21.0 to 33.3)        | 103.6 (87.3 to 121.8)         | 3.5 (1.6 to 6.4)                | 3.2 (3.2 to 3.2)                  | 352.4 (308.6 to 400.3) | 68.7 (53.9 to 85.7)        | 266.6 (224.7 to 313.5)        | 9.0 (4.0 to 16.5)               | 8.2 (8.2 to 8.2)                  |
| Equatorial Guinea | 1999 | 134.2 (118.6 to 151.5)     | 25.5 (20.0 to 32.0)        | 100.0 (85.5 to 117.1)         | 3.5 (1.6 to 6.5)                | 5.2 (5.2 to 5.2)                  | 345.4 (305.2 to 389.8) | 65.6 (51.5 to 82.3)        | 257.3 (220.0 to 301.3)        | 9.1 (4.1 to 16.7)               | 13.4 (13.4 to 13.4)               |
| Equatorial Guinea | 2000 | 146.7 (130.7 to 164.0)     | 28.1 (22.0 to 35.4)        | 104.9 (90.3 to 121.6)         | 4.1 (1.9 to 7.7)                | 9.5 (9.5 to 9.5)                  | 377.5 (336.4 to 422.0) | 72.4 (56.6 to 91.1)        | 269.9 (232.2 to 312.7)        | 10.6 (4.8 to 19.9)              | 24.6 (24.6 to 24.6)               |
| Equatorial Guinea | 2001 | 172.7 (152.9 to 193.8)     | 31.5 (24.7 to 39.1)        | 128.5 (110.3 to 148.6)        | 4.9 (2.3 to 9.5)                | 7.8 (7.8 to 7.8)                  | 444.2 (393.5 to 498.7) | 80.9 (63.5 to 100.6)       | 330.5 (283.8 to 382.2)        | 12.6 (5.9 to 24.5)              | 20.1 (20.1 to 20.1)               |
| Equatorial Guinea | 2002 | 190.9 (169.5 to 213.9)     | 32.7 (26.0 to 40.2)        | 147.3 (127.5 to 169.8)        | 5.4 (2.5 to 10.3)               | 5.5 (5.5 to 5.5)                  | 491.3 (436.2 to 550.5) | 84.1 (66.8 to 103.4)       | 379.0 (328.1 to 436.9)        | 13.9 (6.4 to 26.4)              | 14.3 (14.3 to 14.3)               |
| Equatorial Guinea | 2003 | 202.6 (180.1 to 227.2)     | 35.1 (28.2 to 42.9)        | 154.7 (134.3 to 178.3)        | 5.9 (2.7 to 11.2)               | 6.9 (6.9 to 6.9)                  | 521.2 (463.3 to 584.5) | 90.3 (72.7 to 110.5)       | 398.0 (345.5 to 458.7)        | 15.2 (6.9 to 28.8)              | 17.7 (17.7 to 17.7)               |
| Equatorial Guinea | 2004 | 222.1 (198.3 to 247.7)     | 44.5 (36.4 to 54.4)        | 160.8 (139.3 to 184.2)        | 7.6 (3.5 to 14.6)               | 9.2 (9.2 to 9.2)                  | 571.4 (510.3 to 637.4) | 114.6 (93.7 to 139.9)      | 413.7 (358.4 to 473.9)        | 19.5 (9.0 to 37.6)              | 23.6 (23.6 to 23.6)               |
| Equatorial Guinea | 2005 | 214.7 (193.8 to 237.4)     | 46.5 (38.4 to 56.6)        | 141.7 (123.1 to 162.5)        | 8.2 (3.6 to 15.8)               | 18.4 (18.4 to 18.4)               | 552.4 (498.5 to 610.9) | 119.7 (98.7 to 145.5)      | 364.5 (316.7 to 418.1)        | 21.0 (9.3 to 40.7)              | 47.2 (47.2 to 47.2)               |
| Equatorial Guinea | 2006 | 212.2 (191.6 to 233.6)     | 50.0 (41.5 to 60.3)        | 130.7 (114.1 to 150.7)        | 8.8 (3.9 to 16.7)               | 22.7 (22.7 to 22.7)               | 546.0 (492.9 to 601.0) | 128.6 (106.8 to 155.2)     | 336.4 (293.6 to 387.7)        | 22.7 (10.1 to 43.1)             | 58.3 (58.3 to 58.3)               |
| Equatorial Guinea | 2007 | 200.5 (180.8 to 222.1)     | 57.6 (48.0 to 68.2)        | 132.3 (116.9 to 152.2)        | 10.1 (4.6 to 19.5)              | 0.5 (0.5 to 0.5)                  | 515.9 (465.3 to 571.5) | 148.1 (123.4 to 175.5)     | 340.5 (300.9 to 391.5)        | 26.1 (11.9 to 50.1)             | 1.3 (1.3 to 1.3)                  |
| Equatorial Guinea | 2008 | 223.5 (201.5 to 246.7)     | 68.4 (57.5 to 80.4)        | 142.0 (125.4 to 161.5)        | 12.0 (5.6 to 23.6)              | 1.0 (1.0 to 1.0)                  | 574.9 (518.4 to 634.8) | 175.9 (147.9 to 207.0)     | 365.4 (322.6 to 415.5)        | 31.0 (14.5 to 60.7)             | 2.6 (2.6 to 2.6)                  |
| Equatorial Guinea | 2009 | 216.5 (195.9 to 239.2)     | 61.0 (51.5 to 71.8)        | 144.0 (128.1 to 161.7)        | 11.0 (5.1 to 21.0)              | 0.5 (0.5 to 0.5)                  | 556.9 (504.1 to 615.3) | 157.0 (132.4 to 184.9)     | 370.4 (329.5 to 416.1)        | 28.2 (13.1 to 54.1)             | 1.3 (1.3 to 1.3)                  |
| Equatorial Guinea | 2010 | 200.0 (180.7 to 219.6)     | 52.6 (44.4 to 61.7)        | 137.5 (122.0 to 153.3)        | 9.6 (4.4 to 18.5)               | 0.3 (0.3 to 0.3)                  | 514.6 (464.8 to 564.9) | 135.2 (114.1 to 158.6)     | 353.9 (313.8 to 394.4)        | 24.7 (11.3 to 47.7)             | 0.8 (0.8 to 0.8)                  |
| Equatorial Guinea | 2011 | 203.7 (184.9 to 223.8)     | 54.3 (45.8 to 63.9)        | 139.3 (123.8 to 156.3)        | 9.8 (4.5 to 18.9)               | 0.3 (0.3 to 0.3)                  | 524.1 (475.8 to 575.8) | 139.7 (117.8 to 164.4)     | 358.4 (318.6 to 402.2)        | 25.2 (11.6 to 48.7)             | 0.8 (0.8 to 0.8)                  |
| Equatorial Guinea | 2012 | 218.0 (198.2 to 239.8)     | 59.5 (49.7 to 70.9)        | 147.5 (131.8 to 164.2)        | 10.6 (4.7 to 20.0)              | 0.3 (0.3 to 0.3)                  | 560.8 (510.1 to 617.1) | 153.1 (127.9 to 182.3)     | 379.5 (339.2 to 422.5)        | 27.3 (12.2 to 51.5)             | 0.9 (0.9 to 0.9)                  |
| Equatorial Guinea | 2013 | 234.5 (215.0 to 258.4)     | 61.6 (50.9 to 73.5)        | 161.7 (145.7 to 179.9)        | 11.0 (4.9 to 20.7)              | 0.3 (0.3 to 0.3)                  | 603.4 (553.2 to 664.9) | 158.4 (130.9 to 189.0)     | 416.0 (374.8 to 462.9)        | 28.4 (12.5 to 53.2)             | 0.7 (0.7 to 0.7)                  |
| Equatorial Guinea | 2014 | 254.3 (232.0 to 279.5)     | 62.9 (51.7 to 75.7)        | 179.3 (159.4 to 200.6)        | 11.6 (5.1 to 21.7)              | 0.5 (0.5 to 0.5)                  | 654.2 (597.0 to 719.2) | 161.7 (133.0 to 194.8)     | 461.3 (410.1 to 516.2)        | 29.9 (13.2 to 55.8)             | 1.3 (1.3 to 1.3)                  |
| Equatorial Guinea | 2015 | 288.6 (260.3 to 320.0)     | 65.8 (53.4 to 79.8)        | 206.1 (179.0 to 232.4)        | 12.5 (5.6 to 22.6)              | 4.1 (4.1 to 4.1)                  | 742.5 (669.7 to 823.2) | 169.4 (137.3 to 205.3)     | 530.4 (460.7 to 597.9)        | 32.0 (14.4 to 58.2)             | 10.7 (10.7 to 10.7)               |

| Country           | Year | 2018 US Dollars per capita |                            |                               |                                 |                                   | 2018 PPP per capita       |                            |                               |                                 |                                   |
|-------------------|------|----------------------------|----------------------------|-------------------------------|---------------------------------|-----------------------------------|---------------------------|----------------------------|-------------------------------|---------------------------------|-----------------------------------|
|                   |      | Health spending            | Government health spending | Out-of-pocket health spending | Prepaid private health spending | Development assistance for health | Health spending           | Government health spending | Out-of-pocket health spending | Prepaid private health spending | Development assistance for health |
| Equatorial Guinea | 2016 | 309.9 (275.1 to 351.0)     | 66.6 (53.8 to 81.1)        | 222.1 (190.3 to 257.8)        | 12.8 (5.8 to 22.8)              | 8.5 (8.5 to 8.5)                  | 797.4 (707.9 to 903.1)    | 171.3 (138.5 to 208.8)     | 571.3 (489.5 to 663.3)        | 32.9 (15.0 to 58.6)             | 21.9 (21.9 to 21.9)               |
| Equatorial Guinea | 2017 | 290.4 (255.0 to 328.5)     | 51.4 (41.5 to 62.4)        | 218.0 (185.4 to 252.9)        | 11.0 (5.0 to 19.6)              | 10.0 (10.0 to 10.0)               | 747.1 (656.0 to 845.3)    | 132.3 (106.8 to 160.6)     | 560.8 (477.0 to 650.8)        | 28.3 (12.9 to 50.4)             | 25.8 (25.8 to 25.8)               |
| Equatorial Guinea | 2018 | 291.9 (256.0 to 331.1)     | 51.6 (41.7 to 62.5)        | 223.2 (189.5 to 259.9)        | 11.2 (5.1 to 20.0)              | 5.8 (0.0 to 9.0)                  | 751.0 (658.6 to 851.8)    | 132.9 (107.2 to 160.7)     | 574.4 (487.6 to 668.7)        | 28.7 (13.1 to 51.4)             | 15.0 (0.0 to 23.3)                |
| Equatorial Guinea | 2019 | 298.0 (262.3 to 338.9)     | 51.9 (41.9 to 62.8)        | 229.2 (195.0 to 266.3)        | 11.2 (5.1 to 20.1)              | 5.6 (0.0 to 9.3)                  | 766.7 (674.8 to 871.9)    | 133.6 (107.8 to 161.6)     | 589.8 (501.6 to 685.1)        | 28.9 (13.2 to 51.7)             | 14.4 (0.0 to 23.9)                |
| Equatorial Guinea | 2020 | 299.0 (262.5 to 339.6)     | 52.2 (42.1 to 63.1)        | 230.0 (195.6 to 267.9)        | 11.4 (5.2 to 20.4)              | 5.4 (0.0 to 9.3)                  | 769.2 (675.4 to 873.7)    | 134.3 (108.4 to 162.4)     | 591.7 (503.2 to 689.2)        | 29.3 (13.4 to 52.4)             | 14.0 (0.0 to 24.0)                |
| Equatorial Guinea | 2021 | 297.0 (261.0 to 336.3)     | 52.1 (42.1 to 63.1)        | 228.2 (194.2 to 265.2)        | 11.4 (5.2 to 20.3)              | 5.3 (0.0 to 9.5)                  | 764.1 (671.4 to 865.2)    | 134.0 (108.2 to 162.3)     | 587.1 (499.6 to 682.3)        | 29.3 (13.3 to 52.3)             | 13.7 (0.0 to 24.5)                |
| Equatorial Guinea | 2022 | 298.5 (258.6 to 338.5)     | 51.9 (42.0 to 63.0)        | 229.9 (194.0 to 266.6)        | 11.4 (5.2 to 20.3)              | 5.3 (0.0 to 9.7)                  | 767.9 (665.3 to 870.8)    | 133.6 (108.0 to 162.0)     | 591.4 (499.3 to 686.0)        | 29.3 (13.4 to 52.3)             | 13.6 (0.0 to 24.8)                |
| Equatorial Guinea | 2023 | 305.3 (264.0 to 348.4)     | 52.3 (42.1 to 63.5)        | 236.3 (198.7 to 274.7)        | 11.5 (5.2 to 20.5)              | 5.3 (0.0 to 9.7)                  | 785.4 (679.3 to 896.4)    | 134.5 (108.4 to 163.5)     | 607.9 (511.2 to 706.8)        | 29.5 (13.5 to 52.7)             | 13.6 (0.0 to 25.1)                |
| Equatorial Guinea | 2024 | 314.6 (271.3 to 358.1)     | 52.7 (42.3 to 64.1)        | 245.2 (207.4 to 286.4)        | 11.6 (5.3 to 20.7)              | 5.2 (0.0 to 10.0)                 | 809.4 (698.1 to 921.5)    | 135.6 (108.8 to 164.9)     | 630.8 (533.6 to 736.8)        | 29.8 (13.6 to 53.3)             | 13.3 (0.0 to 25.6)                |
| Equatorial Guinea | 2025 | 325.9 (280.3 to 371.9)     | 53.6 (42.9 to 65.1)        | 255.3 (216.0 to 298.6)        | 11.8 (5.4 to 21.1)              | 5.2 (0.0 to 10.1)                 | 838.4 (721.3 to 957.0)    | 138.0 (110.3 to 167.4)     | 656.8 (555.7 to 768.4)        | 30.3 (13.9 to 54.4)             | 13.3 (0.0 to 26.1)                |
| Equatorial Guinea | 2026 | 337.8 (291.9 to 389.1)     | 54.7 (43.6 to 66.3)        | 265.9 (224.6 to 312.2)        | 12.0 (5.5 to 21.5)              | 5.1 (0.0 to 10.3)                 | 869.0 (751.0 to 1001.1)   | 140.8 (112.1 to 170.6)     | 684.2 (577.8 to 803.3)        | 30.9 (14.1 to 55.4)             | 13.2 (0.0 to 26.5)                |
| Equatorial Guinea | 2027 | 350.0 (301.8 to 403.0)     | 55.7 (44.2 to 67.4)        | 277.1 (233.8 to 326.6)        | 12.2 (5.6 to 22.0)              | 5.0 (0.0 to 10.6)                 | 900.5 (776.4 to 1036.9)   | 143.2 (113.6 to 173.5)     | 713.0 (601.5 to 840.2)        | 31.4 (14.4 to 56.6)             | 12.9 (0.0 to 27.2)                |
| Equatorial Guinea | 2028 | 363.9 (310.6 to 423.2)     | 57.1 (45.2 to 69.3)        | 289.4 (242.0 to 344.7)        | 12.5 (5.7 to 22.6)              | 5.0 (0.0 to 10.9)                 | 936.4 (799.2 to 1088.9)   | 146.8 (116.2 to 178.4)     | 744.5 (622.6 to 886.9)        | 32.2 (14.7 to 58.2)             | 12.8 (0.0 to 28.0)                |
| Equatorial Guinea | 2029 | 378.0 (323.2 to 440.6)     | 58.4 (46.2 to 71.2)        | 301.9 (251.3 to 361.1)        | 12.9 (5.8 to 23.3)              | 4.8 (0.0 to 11.1)                 | 972.6 (831.7 to 1133.5)   | 150.3 (118.8 to 183.2)     | 776.7 (646.6 to 929.2)        | 33.1 (15.0 to 59.9)             | 12.4 (0.0 to 28.7)                |
| Equatorial Guinea | 2030 | 392.3 (333.8 to 459.3)     | 59.9 (47.3 to 73.3)        | 314.5 (259.0 to 379.1)        | 13.2 (6.0 to 23.9)              | 4.7 (0.0 to 11.2)                 | 1009.2 (858.7 to 1181.7)  | 154.1 (121.8 to 188.5)     | 809.1 (666.4 to 975.4)        | 33.9 (15.4 to 61.6)             | 12.2 (0.0 to 28.9)                |
| Equatorial Guinea | 2031 | 406.3 (344.2 to 475.1)     | 61.3 (48.5 to 75.2)        | 326.9 (266.5 to 395.4)        | 13.5 (6.1 to 24.4)              | 4.7 (0.0 to 11.5)                 | 1045.3 (885.5 to 1222.5)  | 157.6 (124.8 to 193.5)     | 841.0 (685.6 to 1017.3)       | 34.7 (15.7 to 62.9)             | 12.0 (0.0 to 29.7)                |
| Equatorial Guinea | 2032 | 420.3 (352.6 to 496.2)     | 62.6 (49.6 to 76.7)        | 339.3 (274.0 to 412.6)        | 13.8 (6.2 to 25.0)              | 4.6 (0.0 to 11.6)                 | 1081.5 (907.3 to 1276.6)  | 161.1 (127.6 to 197.4)     | 873.1 (705.0 to 1061.6)       | 35.5 (16.0 to 64.3)             | 11.7 (0.0 to 29.8)                |
| Equatorial Guinea | 2033 | 435.2 (361.2 to 520.1)     | 64.4 (50.9 to 78.9)        | 352.1 (283.9 to 431.3)        | 14.1 (6.4 to 25.7)              | 4.5 (0.0 to 12.2)                 | 1119.6 (929.3 to 1338.1)  | 165.6 (131.1 to 203.0)     | 906.0 (730.3 to 1109.7)       | 36.4 (16.3 to 66.1)             | 11.7 (0.0 to 31.3)                |
| Equatorial Guinea | 2034 | 448.6 (371.3 to 534.9)     | 65.5 (51.8 to 80.3)        | 364.2 (290.6 to 449.8)        | 14.4 (6.5 to 26.2)              | 4.5 (0.0 to 12.2)                 | 1154.1 (955.3 to 1376.3)  | 168.5 (133.2 to 206.7)     | 936.9 (747.8 to 1157.3)       | 37.1 (16.6 to 67.5)             | 11.6 (0.0 to 31.3)                |
| Equatorial Guinea | 2035 | 463.0 (381.9 to 554.2)     | 67.1 (52.9 to 82.5)        | 376.7 (299.1 to 468.7)        | 14.8 (6.6 to 26.9)              | 4.5 (0.0 to 12.4)                 | 1191.3 (982.5 to 1425.8)  | 172.7 (136.2 to 212.2)     | 969.1 (769.4 to 1205.9)       | 38.0 (17.1 to 69.2)             | 11.5 (0.0 to 32.0)                |
| Equatorial Guinea | 2036 | 476.6 (392.7 to 574.3)     | 68.6 (54.1 to 84.5)        | 388.4 (305.4 to 486.6)        | 15.1 (6.8 to 27.4)              | 4.4 (0.0 to 13.0)                 | 1226.2 (1010.3 to 1477.5) | 176.6 (139.3 to 217.4)     | 999.3 (785.7 to 1251.9)       | 38.8 (17.5 to 70.5)             | 11.4 (0.0 to 33.5)                |

| Country           | Year | 2018 US Dollars per capita |                            |                               |                                 |                                   | 2018 PPP per capita       |                            |                               |                                 |                                   |
|-------------------|------|----------------------------|----------------------------|-------------------------------|---------------------------------|-----------------------------------|---------------------------|----------------------------|-------------------------------|---------------------------------|-----------------------------------|
|                   |      | Health spending            | Government health spending | Out-of-pocket health spending | Prepaid private health spending | Development assistance for health | Health spending           | Government health spending | Out-of-pocket health spending | Prepaid private health spending | Development assistance for health |
| Equatorial Guinea | 2037 | 490.8 (400.7 to 593.6)     | 70.3 (55.2 to 86.5)        | 400.6 (311.9 to 503.0)        | 15.5 (7.0 to 28.1)              | 4.4 (0.0 to 13.1)                 | 1262.9 (1031.0 to 1527.3) | 181.0 (142.1 to 222.6)     | 1030.8 (802.6 to 1294.3)      | 39.8 (18.0 to 72.3)             | 11.3 (0.0 to 33.7)                |
| Equatorial Guinea | 2038 | 504.1 (406.0 to 610.7)     | 71.7 (56.4 to 88.3)        | 412.1 (319.1 to 520.2)        | 15.8 (7.2 to 28.7)              | 4.4 (0.0 to 13.4)                 | 1296.9 (1044.7 to 1571.2) | 184.5 (145.0 to 227.3)     | 1060.3 (820.9 to 1338.5)      | 40.7 (18.4 to 73.7)             | 11.3 (0.0 to 34.5)                |
| Equatorial Guinea | 2039 | 516.7 (416.3 to 628.5)     | 73.1 (57.0 to 90.1)        | 423.1 (326.3 to 537.6)        | 16.2 (7.3 to 29.3)              | 4.4 (0.0 to 13.8)                 | 1329.4 (1071.2 to 1617.0) | 188.0 (146.7 to 231.9)     | 1088.6 (839.4 to 1383.1)      | 41.6 (18.9 to 75.5)             | 11.3 (0.0 to 35.5)                |
| Equatorial Guinea | 2040 | 529.4 (426.6 to 653.0)     | 74.4 (57.9 to 91.9)        | 434.1 (333.3 to 554.1)        | 16.5 (7.5 to 30.1)              | 4.4 (0.0 to 14.1)                 | 1362.1 (1097.7 to 1680.2) | 191.5 (149.0 to 236.4)     | 1116.8 (857.6 to 1425.6)      | 42.5 (19.3 to 77.6)             | 11.3 (0.0 to 36.4)                |
| Equatorial Guinea | 2041 | 542.1 (438.1 to 668.8)     | 76.0 (59.0 to 94.0)        | 444.9 (341.0 to 569.0)        | 16.9 (7.7 to 31.0)              | 4.3 (0.0 to 14.5)                 | 1394.8 (1127.3 to 1720.8) | 195.6 (151.8 to 242.0)     | 1144.7 (877.4 to 1464.0)      | 43.5 (19.8 to 79.7)             | 11.0 (0.0 to 37.4)                |
| Equatorial Guinea | 2042 | 554.7 (444.5 to 689.1)     | 77.7 (60.1 to 96.2)        | 455.4 (348.5 to 584.7)        | 17.3 (7.9 to 31.8)              | 4.3 (0.0 to 15.3)                 | 1427.3 (1143.8 to 1772.9) | 200.0 (154.6 to 247.5)     | 1171.7 (896.7 to 1504.5)      | 44.6 (20.4 to 81.9)             | 11.0 (0.0 to 39.4)                |
| Equatorial Guinea | 2043 | 567.3 (456.3 to 704.5)     | 79.5 (61.3 to 98.6)        | 465.8 (356.4 to 599.1)        | 17.8 (8.1 to 32.8)              | 4.2 (0.0 to 15.5)                 | 1459.5 (1174.0 to 1812.5) | 204.6 (157.8 to 253.6)     | 1198.3 (916.9 to 1541.5)      | 45.7 (20.9 to 84.3)             | 10.9 (0.0 to 39.9)                |
| Equatorial Guinea | 2044 | 578.9 (464.6 to 723.2)     | 81.1 (62.3 to 100.8)       | 475.5 (363.2 to 612.5)        | 18.2 (8.3 to 33.6)              | 4.2 (0.0 to 15.8)                 | 1489.5 (1195.3 to 1860.8) | 208.6 (160.2 to 259.4)     | 1223.3 (934.4 to 1575.9)      | 46.7 (21.4 to 86.5)             | 10.8 (0.0 to 40.5)                |
| Equatorial Guinea | 2045 | 591.1 (475.9 to 734.1)     | 83.0 (63.8 to 103.4)       | 485.2 (370.6 to 625.6)        | 18.6 (8.6 to 34.6)              | 4.2 (0.0 to 15.7)                 | 1520.7 (1224.5 to 1888.7) | 213.6 (164.0 to 265.9)     | 1248.4 (953.4 to 1609.5)      | 47.9 (22.0 to 89.0)             | 10.8 (0.0 to 40.4)                |
| Equatorial Guinea | 2046 | 603.6 (487.0 to 752.1)     | 85.5 (65.5 to 106.7)       | 494.8 (377.9 to 638.1)        | 19.1 (8.8 to 35.6)              | 4.2 (0.0 to 16.4)                 | 1552.9 (1252.9 to 1935.1) | 219.9 (168.5 to 274.6)     | 1273.0 (972.3 to 1641.6)      | 49.2 (22.7 to 91.5)             | 10.8 (0.0 to 42.1)                |
| Equatorial Guinea | 2047 | 614.3 (493.2 to 757.6)     | 87.3 (66.6 to 109.1)       | 503.3 (384.2 to 650.7)        | 19.5 (9.0 to 36.3)              | 4.1 (0.0 to 17.4)                 | 1580.6 (1269.0 to 1949.1) | 224.7 (171.2 to 280.7)     | 1294.9 (988.6 to 1674.2)      | 50.3 (23.1 to 93.5)             | 10.6 (0.0 to 44.7)                |
| Equatorial Guinea | 2048 | 627.1 (503.0 to 781.4)     | 90.1 (69.1 to 112.6)       | 512.8 (390.7 to 662.6)        | 20.1 (9.2 to 37.2)              | 4.2 (0.0 to 16.7)                 | 1613.5 (1294.3 to 2010.4) | 231.7 (177.8 to 289.8)     | 1319.3 (1005.1 to 1704.7)     | 51.6 (23.7 to 95.8)             | 10.9 (0.0 to 42.9)                |
| Equatorial Guinea | 2049 | 640.9 (513.9 to 802.5)     | 93.2 (71.3 to 117.3)       | 522.9 (398.4 to 672.7)        | 20.6 (9.4 to 38.2)              | 4.3 (0.0 to 17.6)                 | 1649.0 (1322.2 to 2064.8) | 239.7 (183.6 to 301.7)     | 1345.3 (1025.0 to 1730.9)     | 53.0 (24.3 to 98.2)             | 11.0 (0.0 to 45.3)                |
| Equatorial Guinea | 2050 | 655.3 (523.4 to 823.8)     | 96.6 (73.6 to 121.8)       | 533.3 (405.9 to 685.4)        | 21.1 (9.7 to 39.2)              | 4.3 (0.0 to 18.3)                 | 1686.1 (1346.7 to 2119.6) | 248.5 (189.3 to 313.3)     | 1372.0 (1044.3 to 1763.3)     | 54.4 (24.9 to 100.9)            | 11.2 (0.0 to 47.2)                |
| Eritrea           | 1995 | 47.9 (39.0 to 59.2)        | 14.2 (10.9 to 18.2)        | 28.9 (20.6 to 38.6)           | 1.2 (0.5 to 2.1)                | 3.6 (3.6 to 3.6)                  | 72.8 (59.2 to 89.9)       | 21.6 (16.5 to 27.6)        | 43.9 (31.3 to 58.6)           | 1.7 (0.8 to 3.2)                | 5.5 (5.5 to 5.5)                  |
| Eritrea           | 1996 | 50.4 (41.3 to 61.9)        | 14.2 (10.8 to 18.3)        | 30.2 (22.1 to 40.5)           | 1.2 (0.5 to 2.2)                | 4.8 (4.8 to 4.8)                  | 76.5 (62.8 to 94.0)       | 21.6 (16.5 to 27.8)        | 45.9 (33.6 to 61.4)           | 1.8 (0.8 to 3.3)                | 7.3 (7.3 to 7.3)                  |
| Eritrea           | 1997 | 51.9 (41.8 to 64.1)        | 15.3 (11.7 to 19.8)        | 33.4 (24.3 to 44.7)           | 1.3 (0.6 to 2.4)                | 1.8 (1.8 to 1.8)                  | 78.8 (63.5 to 97.3)       | 23.3 (17.8 to 30.1)        | 50.8 (36.8 to 67.8)           | 2.0 (0.9 to 3.6)                | 2.8 (2.8 to 2.8)                  |
| Eritrea           | 1998 | 58.7 (47.2 to 71.7)        | 16.2 (12.4 to 20.8)        | 36.5 (26.1 to 49.2)           | 1.4 (0.6 to 2.6)                | 4.6 (4.6 to 4.6)                  | 89.1 (71.7 to 108.8)      | 24.6 (18.8 to 31.5)        | 55.4 (39.6 to 74.7)           | 2.1 (1.0 to 3.9)                | 7.0 (7.0 to 7.0)                  |
| Eritrea           | 1999 | 63.0 (51.1 to 76.7)        | 17.1 (13.0 to 21.8)        | 38.3 (27.8 to 51.0)           | 1.5 (0.7 to 2.7)                | 6.1 (6.1 to 6.1)                  | 95.6 (77.6 to 116.4)      | 25.9 (19.7 to 33.1)        | 58.2 (42.2 to 77.4)           | 2.3 (1.0 to 4.2)                | 9.3 (9.3 to 9.3)                  |
| Eritrea           | 2000 | 65.2 (53.8 to 78.5)        | 18.1 (13.6 to 23.1)        | 37.1 (26.8 to 49.4)           | 1.5 (0.7 to 2.9)                | 8.4 (8.4 to 8.4)                  | 99.0 (81.7 to 119.3)      | 27.4 (20.7 to 35.0)        | 56.4 (40.7 to 75.0)           | 2.4 (1.1 to 4.4)                | 12.8 (12.8 to 12.8)               |
| Eritrea           | 2001 | 55.0 (45.0 to 66.7)        | 16.7 (12.6 to 21.3)        | 32.4 (23.4 to 42.8)           | 1.5 (0.7 to 2.7)                | 4.5 (4.5 to 4.5)                  | 83.5 (68.3 to 101.4)      | 25.3 (19.1 to 32.4)        | 49.1 (35.5 to 65.0)           | 2.2 (1.0 to 4.1)                | 6.9 (6.9 to 6.9)                  |

| Country | Year | 2018 US Dollars per capita |                            |                               |                                 |                                   | 2018 PPP per capita |                            |                               |                                 |                                   |
|---------|------|----------------------------|----------------------------|-------------------------------|---------------------------------|-----------------------------------|---------------------|----------------------------|-------------------------------|---------------------------------|-----------------------------------|
|         |      | Health spending            | Government health spending | Out-of-pocket health spending | Prepaid private health spending | Development assistance for health | Health spending     | Government health spending | Out-of-pocket health spending | Prepaid private health spending | Development assistance for health |
| Eritrea | 2002 | 54.4 (45.3 to 65.7)        | 16.3 (12.2 to 21.2)        | 29.7 (21.5 to 39.2)           | 1.4 (0.7 to 2.8)                | 7.0 (7.0 to 7.0)                  | 82.7 (68.8 to 99.8) | 24.8 (18.6 to 32.2)        | 45.1 (32.7 to 59.5)           | 2.2 (1.0 to 4.2)                | 10.6 (10.6 to 10.6)               |
| Eritrea | 2003 | 52.4 (44.3 to 61.9)        | 13.9 (10.4 to 18.1)        | 26.1 (18.9 to 34.5)           | 1.3 (0.6 to 2.4)                | 11.1 (11.1 to 11.1)               | 79.6 (67.2 to 94.0) | 21.1 (15.8 to 27.4)        | 39.7 (28.6 to 52.4)           | 1.9 (0.9 to 3.7)                | 16.9 (16.9 to 16.9)               |
| Eritrea | 2004 | 45.6 (38.5 to 54.1)        | 11.4 (8.6 to 15.0)         | 22.9 (16.6 to 30.3)           | 1.1 (0.5 to 2.1)                | 10.3 (10.3 to 10.3)               | 69.3 (58.5 to 82.2) | 17.3 (13.0 to 22.8)        | 34.7 (25.3 to 46.1)           | 1.6 (0.8 to 3.2)                | 15.6 (15.6 to 15.6)               |
| Eritrea | 2005 | 40.0 (33.5 to 47.6)        | 8.9 (6.7 to 11.6)          | 20.7 (15.0 to 27.5)           | 0.9 (0.4 to 1.7)                | 9.6 (9.6 to 9.6)                  | 60.7 (50.9 to 72.2) | 13.5 (10.2 to 17.6)        | 31.4 (22.7 to 41.8)           | 1.3 (0.6 to 2.6)                | 14.5 (14.5 to 14.5)               |
| Eritrea | 2006 | 32.4 (26.8 to 39.4)        | 7.6 (5.7 to 9.9)           | 19.3 (14.0 to 26.0)           | 0.8 (0.4 to 1.5)                | 4.8 (4.8 to 4.8)                  | 49.3 (40.6 to 59.8) | 11.5 (8.6 to 15.0)         | 29.3 (21.2 to 39.4)           | 1.2 (0.5 to 2.3)                | 7.3 (7.3 to 7.3)                  |
| Eritrea | 2007 | 32.3 (26.6 to 38.9)        | 7.1 (5.3 to 9.2)           | 18.7 (13.5 to 25.1)           | 0.7 (0.3 to 1.4)                | 5.8 (5.8 to 5.8)                  | 49.0 (40.4 to 59.1) | 10.8 (8.0 to 13.9)         | 28.4 (20.4 to 38.1)           | 1.1 (0.5 to 2.1)                | 8.8 (8.8 to 8.8)                  |
| Eritrea | 2008 | 28.7 (23.9 to 34.5)        | 5.1 (3.8 to 6.6)           | 16.4 (11.9 to 22.0)           | 0.5 (0.3 to 1.0)                | 6.7 (6.7 to 6.7)                  | 43.6 (36.3 to 52.4) | 7.8 (5.8 to 10.1)          | 24.9 (18.1 to 33.5)           | 0.8 (0.4 to 1.6)                | 10.1 (10.1 to 10.1)               |
| Eritrea | 2009 | 28.6 (23.5 to 34.9)        | 6.1 (4.6 to 7.8)           | 17.3 (12.6 to 23.2)           | 0.6 (0.3 to 1.1)                | 4.7 (4.7 to 4.7)                  | 43.5 (35.8 to 53.0) | 9.2 (6.9 to 11.9)          | 26.2 (19.1 to 35.3)           | 0.9 (0.4 to 1.7)                | 7.1 (7.1 to 7.1)                  |
| Eritrea | 2010 | 34.1 (29.4 to 40.1)        | 5.4 (4.0 to 6.9)           | 16.6 (12.1 to 22.5)           | 0.5 (0.3 to 1.0)                | 11.6 (11.6 to 11.6)               | 51.8 (44.7 to 60.8) | 8.2 (6.1 to 10.5)          | 25.2 (18.4 to 34.2)           | 0.8 (0.4 to 1.5)                | 17.6 (17.6 to 17.6)               |
| Eritrea | 2011 | 27.2 (22.7 to 33.3)        | 5.3 (4.0 to 6.8)           | 16.8 (12.2 to 22.5)           | 0.5 (0.2 to 1.0)                | 4.7 (4.7 to 4.7)                  | 41.4 (34.4 to 50.6) | 8.1 (6.1 to 10.4)          | 25.4 (18.5 to 34.1)           | 0.8 (0.4 to 1.4)                | 7.1 (7.1 to 7.1)                  |
| Eritrea | 2012 | 29.5 (24.9 to 35.6)        | 5.1 (3.9 to 6.5)           | 17.0 (12.2 to 23.0)           | 0.5 (0.2 to 0.9)                | 6.9 (6.9 to 6.9)                  | 44.9 (37.8 to 54.1) | 7.8 (5.9 to 9.9)           | 25.8 (18.6 to 34.9)           | 0.7 (0.4 to 1.4)                | 10.5 (10.5 to 10.5)               |
| Eritrea | 2013 | 28.4 (23.8 to 34.4)        | 4.3 (3.2 to 5.4)           | 16.7 (11.9 to 22.8)           | 0.4 (0.2 to 0.8)                | 7.0 (7.0 to 7.0)                  | 43.1 (36.2 to 52.3) | 6.5 (4.9 to 8.3)           | 25.4 (18.1 to 34.6)           | 0.6 (0.3 to 1.2)                | 10.6 (10.6 to 10.6)               |
| Eritrea | 2014 | 29.4 (24.5 to 35.5)        | 4.2 (3.2 to 5.4)           | 17.2 (12.3 to 23.4)           | 0.4 (0.2 to 0.8)                | 7.5 (7.5 to 7.5)                  | 44.6 (37.3 to 53.9) | 6.4 (4.9 to 8.3)           | 26.1 (18.6 to 35.5)           | 0.6 (0.3 to 1.2)                | 11.4 (11.4 to 11.4)               |
| Eritrea | 2015 | 26.2 (20.9 to 32.8)        | 4.6 (3.5 to 6.0)           | 17.9 (12.7 to 24.4)           | 0.4 (0.2 to 0.8)                | 3.2 (3.2 to 3.2)                  | 39.9 (31.8 to 49.8) | 7.1 (5.4 to 9.1)           | 27.2 (19.3 to 37.0)           | 0.7 (0.3 to 1.3)                | 4.9 (4.9 to 4.9)                  |
| Eritrea | 2016 | 30.0 (24.3 to 37.3)        | 6.1 (4.6 to 7.8)           | 19.0 (13.4 to 26.3)           | 0.5 (0.3 to 1.0)                | 4.4 (4.4 to 4.4)                  | 45.6 (36.8 to 56.6) | 9.2 (6.9 to 11.9)          | 28.9 (20.3 to 39.9)           | 0.8 (0.4 to 1.5)                | 6.7 (6.7 to 6.7)                  |
| Eritrea | 2017 | 32.9 (26.9 to 40.5)        | 6.1 (4.6 to 7.9)           | 19.3 (13.5 to 26.5)           | 0.5 (0.3 to 1.0)                | 7.0 (7.0 to 7.0)                  | 49.9 (40.9 to 61.5) | 9.3 (7.0 to 12.0)          | 29.3 (20.5 to 40.3)           | 0.8 (0.4 to 1.5)                | 10.6 (10.6 to 10.6)               |
| Eritrea | 2018 | 32.6 (26.4 to 39.9)        | 6.2 (4.7 to 8.0)           | 19.4 (13.6 to 26.7)           | 0.6 (0.3 to 1.0)                | 6.5 (6.5 to 6.5)                  | 49.5 (40.1 to 60.6) | 9.4 (7.1 to 12.2)          | 29.4 (20.6 to 40.6)           | 0.8 (0.4 to 1.6)                | 9.9 (9.9 to 9.9)                  |
| Eritrea | 2019 | 32.8 (26.8 to 40.4)        | 6.3 (4.7 to 8.1)           | 19.4 (13.6 to 26.8)           | 0.6 (0.3 to 1.1)                | 6.5 (6.1 to 6.8)                  | 49.7 (40.7 to 61.3) | 9.6 (7.2 to 12.3)          | 29.5 (20.7 to 40.7)           | 0.8 (0.4 to 1.6)                | 9.8 (9.2 to 10.4)                 |
| Eritrea | 2020 | 32.9 (26.6 to 40.6)        | 6.4 (4.8 to 8.2)           | 19.5 (13.6 to 26.9)           | 0.6 (0.3 to 1.1)                | 6.5 (6.0 to 7.0)                  | 50.0 (40.4 to 61.7) | 9.7 (7.3 to 12.5)          | 29.6 (20.7 to 40.9)           | 0.9 (0.4 to 1.6)                | 9.9 (9.1 to 10.7)                 |
| Eritrea | 2021 | 33.2 (27.2 to 40.8)        | 6.5 (4.8 to 8.3)           | 19.6 (13.6 to 27.1)           | 0.6 (0.3 to 1.1)                | 6.6 (5.9 to 7.2)                  | 50.4 (41.3 to 61.9) | 9.8 (7.3 to 12.6)          | 29.8 (20.7 to 41.1)           | 0.9 (0.4 to 1.7)                | 10.0 (9.0 to 11.0)                |
| Eritrea | 2022 | 33.6 (27.1 to 41.2)        | 6.6 (4.9 to 8.5)           | 19.8 (13.8 to 27.3)           | 0.6 (0.3 to 1.1)                | 6.6 (5.9 to 7.4)                  | 51.0 (41.2 to 62.6) | 10.0 (7.5 to 12.9)         | 30.1 (20.9 to 41.5)           | 0.9 (0.4 to 1.7)                | 10.1 (8.9 to 11.3)                |



| Country | Year | 2018 US Dollars per capita |                            |                               |                                 |                                   | 2018 PPP per capita |                            |                               |                                 |                                   |
|---------|------|----------------------------|----------------------------|-------------------------------|---------------------------------|-----------------------------------|---------------------|----------------------------|-------------------------------|---------------------------------|-----------------------------------|
|         |      | Health spending            | Government health spending | Out-of-pocket health spending | Prepaid private health spending | Development assistance for health | Health spending     | Government health spending | Out-of-pocket health spending | Prepaid private health spending | Development assistance for health |
| Eritrea | 2023 | 34.0 (27.5 to 41.7)        | 6.7 (5.0 to 8.6)           | 20.0 (13.9 to 27.6)           | 0.6 (0.3 to 1.1)                | 6.7 (5.8 to 7.6)                  | 51.6 (41.7 to 63.4) | 10.2 (7.6 to 13.1)         | 30.4 (21.0 to 41.9)           | 0.9 (0.4 to 1.7)                | 10.2 (8.9 to 11.6)                |
| Eritrea | 2024 | 34.4 (27.9 to 42.4)        | 6.8 (5.1 to 8.8)           | 20.2 (13.9 to 27.8)           | 0.6 (0.3 to 1.2)                | 6.8 (5.9 to 7.9)                  | 52.2 (42.4 to 64.4) | 10.3 (7.7 to 13.3)         | 30.6 (21.2 to 42.3)           | 0.9 (0.4 to 1.8)                | 10.3 (8.9 to 11.9)                |
| Eritrea | 2025 | 34.9 (28.4 to 42.7)        | 6.9 (5.1 to 8.9)           | 20.4 (14.2 to 28.2)           | 0.6 (0.3 to 1.2)                | 6.9 (5.9 to 8.1)                  | 52.9 (43.1 to 64.9) | 10.5 (7.8 to 13.6)         | 31.0 (21.5 to 42.8)           | 1.0 (0.4 to 1.8)                | 10.5 (8.9 to 12.3)                |
| Eritrea | 2026 | 35.4 (28.7 to 43.6)        | 7.0 (5.2 to 9.1)           | 20.7 (14.4 to 28.6)           | 0.6 (0.3 to 1.2)                | 7.0 (5.9 to 8.2)                  | 53.7 (43.7 to 66.3) | 10.7 (7.9 to 13.8)         | 31.5 (21.9 to 43.4)           | 1.0 (0.5 to 1.8)                | 10.6 (8.9 to 12.4)                |
| Eritrea | 2027 | 35.9 (29.0 to 44.3)        | 7.1 (5.3 to 9.2)           | 21.0 (14.6 to 29.0)           | 0.7 (0.3 to 1.2)                | 7.1 (5.9 to 8.4)                  | 54.5 (44.0 to 67.2) | 10.9 (8.1 to 14.0)         | 31.9 (22.2 to 44.0)           | 1.0 (0.5 to 1.9)                | 10.7 (9.0 to 12.8)                |
| Eritrea | 2028 | 36.5 (29.3 to 45.2)        | 7.3 (5.4 to 9.4)           | 21.3 (14.9 to 29.4)           | 0.7 (0.3 to 1.3)                | 7.2 (6.0 to 8.7)                  | 55.4 (44.5 to 68.6) | 11.0 (8.2 to 14.3)         | 32.4 (22.6 to 44.6)           | 1.0 (0.5 to 1.9)                | 10.9 (9.1 to 13.2)                |
| Eritrea | 2029 | 37.0 (29.9 to 45.5)        | 7.4 (5.5 to 9.6)           | 21.6 (15.1 to 29.8)           | 0.7 (0.3 to 1.3)                | 7.3 (6.0 to 8.9)                  | 56.2 (45.5 to 69.1) | 11.2 (8.4 to 14.6)         | 32.9 (22.9 to 45.3)           | 1.0 (0.5 to 2.0)                | 11.1 (9.1 to 13.5)                |
| Eritrea | 2030 | 37.5 (30.1 to 46.3)        | 7.5 (5.6 to 9.7)           | 21.9 (15.3 to 30.3)           | 0.7 (0.3 to 1.3)                | 7.4 (6.1 to 9.1)                  | 57.0 (45.8 to 70.3) | 11.4 (8.5 to 14.8)         | 33.3 (23.2 to 46.1)           | 1.1 (0.5 to 2.0)                | 11.3 (9.2 to 13.8)                |
| Eritrea | 2031 | 38.1 (30.3 to 47.0)        | 7.6 (5.7 to 9.9)           | 22.2 (15.4 to 30.7)           | 0.7 (0.3 to 1.3)                | 7.5 (6.1 to 9.4)                  | 57.9 (46.0 to 71.4) | 11.6 (8.6 to 15.0)         | 33.8 (23.5 to 46.7)           | 1.1 (0.5 to 2.0)                | 11.4 (9.3 to 14.3)                |
| Eritrea | 2032 | 38.6 (31.3 to 47.2)        | 7.7 (5.7 to 10.0)          | 22.5 (15.6 to 31.1)           | 0.7 (0.3 to 1.4)                | 7.7 (6.1 to 9.6)                  | 58.7 (47.5 to 71.7) | 11.7 (8.7 to 15.2)         | 34.2 (23.7 to 47.3)           | 1.1 (0.5 to 2.1)                | 11.6 (9.3 to 14.6)                |
| Eritrea | 2033 | 39.2 (31.4 to 48.2)        | 7.9 (5.8 to 10.2)          | 22.8 (15.8 to 31.5)           | 0.7 (0.3 to 1.4)                | 7.8 (6.2 to 10.0)                 | 59.5 (47.7 to 73.2) | 11.9 (8.8 to 15.5)         | 34.6 (24.1 to 47.9)           | 1.1 (0.5 to 2.2)                | 11.8 (9.4 to 15.2)                |
| Eritrea | 2034 | 39.8 (32.2 to 49.0)        | 8.0 (5.8 to 10.4)          | 23.1 (16.1 to 32.0)           | 0.8 (0.4 to 1.5)                | 8.0 (6.3 to 10.2)                 | 60.4 (48.9 to 74.4) | 12.1 (8.9 to 15.7)         | 35.1 (24.4 to 48.6)           | 1.2 (0.5 to 2.2)                | 12.1 (9.5 to 15.6)                |
| Eritrea | 2035 | 40.4 (32.4 to 49.7)        | 8.1 (5.9 to 10.5)          | 23.4 (16.3 to 32.4)           | 0.8 (0.4 to 1.5)                | 8.1 (6.3 to 10.6)                 | 61.3 (49.2 to 75.4) | 12.3 (9.0 to 16.0)         | 35.5 (24.7 to 49.2)           | 1.2 (0.5 to 2.2)                | 12.3 (9.6 to 16.1)                |
| Eritrea | 2036 | 41.0 (32.9 to 50.9)        | 8.2 (6.0 to 10.7)          | 23.7 (16.5 to 32.8)           | 0.8 (0.4 to 1.5)                | 8.3 (6.4 to 11.1)                 | 62.2 (49.9 to 77.3) | 12.5 (9.2 to 16.3)         | 36.0 (25.0 to 49.8)           | 1.2 (0.6 to 2.3)                | 12.5 (9.7 to 16.8)                |
| Eritrea | 2037 | 41.6 (33.1 to 50.8)        | 8.4 (6.1 to 10.9)          | 24.0 (16.6 to 33.2)           | 0.8 (0.4 to 1.5)                | 8.4 (6.5 to 11.2)                 | 63.2 (50.3 to 77.1) | 12.7 (9.3 to 16.6)         | 36.5 (25.3 to 50.5)           | 1.2 (0.6 to 2.3)                | 12.8 (9.8 to 17.1)                |
| Eritrea | 2038 | 42.2 (34.0 to 52.1)        | 8.5 (6.2 to 11.1)          | 24.3 (16.9 to 33.8)           | 0.8 (0.4 to 1.6)                | 8.6 (6.5 to 11.9)                 | 64.1 (51.6 to 79.1) | 12.9 (9.5 to 16.9)         | 36.9 (25.6 to 51.3)           | 1.2 (0.6 to 2.4)                | 13.0 (9.9 to 18.0)                |
| Eritrea | 2039 | 42.8 (34.4 to 52.5)        | 8.7 (6.3 to 11.3)          | 24.6 (17.1 to 34.2)           | 0.8 (0.4 to 1.6)                | 8.7 (6.7 to 12.1)                 | 65.0 (52.3 to 79.7) | 13.2 (9.6 to 17.2)         | 37.3 (25.9 to 52.0)           | 1.3 (0.6 to 2.4)                | 13.2 (10.1 to 18.4)               |
| Eritrea | 2040 | 43.5 (34.9 to 53.7)        | 8.9 (6.5 to 11.6)          | 24.9 (17.3 to 34.6)           | 0.9 (0.4 to 1.6)                | 8.9 (6.8 to 12.3)                 | 66.0 (53.0 to 81.6) | 13.5 (9.8 to 17.6)         | 37.8 (26.2 to 52.6)           | 1.3 (0.6 to 2.4)                | 13.5 (10.3 to 18.6)               |
| Eritrea | 2041 | 44.2 (35.2 to 54.4)        | 9.1 (6.6 to 11.8)          | 25.2 (17.5 to 35.0)           | 0.9 (0.4 to 1.6)                | 9.1 (6.8 to 12.6)                 | 67.1 (53.5 to 82.6) | 13.8 (10.1 to 17.9)        | 38.2 (26.6 to 53.2)           | 1.3 (0.6 to 2.5)                | 13.7 (10.3 to 19.1)               |
| Eritrea | 2042 | 44.9 (35.9 to 55.5)        | 9.3 (6.8 to 12.0)          | 25.5 (17.7 to 35.4)           | 0.9 (0.4 to 1.7)                | 9.2 (6.9 to 13.2)                 | 68.1 (54.6 to 84.3) | 14.1 (10.3 to 18.3)        | 38.7 (26.9 to 53.8)           | 1.4 (0.6 to 2.5)                | 14.0 (10.5 to 20.0)               |
| Eritrea | 2043 | 45.6 (36.8 to 56.4)        | 9.5 (6.9 to 12.3)          | 25.8 (17.9 to 35.8)           | 0.9 (0.4 to 1.7)                | 9.4 (7.0 to 13.6)                 | 69.2 (55.9 to 85.7) | 14.4 (10.5 to 18.7)        | 39.1 (27.2 to 54.4)           | 1.4 (0.6 to 2.6)                | 14.3 (10.6 to 20.7)               |

| Country | Year | 2018 US Dollars per capita |                            |                               |                                 |                                   | 2018 PPP per capita       |                            |                               |                                 |                                   |
|---------|------|----------------------------|----------------------------|-------------------------------|---------------------------------|-----------------------------------|---------------------------|----------------------------|-------------------------------|---------------------------------|-----------------------------------|
|         |      | Health spending            | Government health spending | Out-of-pocket health spending | Prepaid private health spending | Development assistance for health | Health spending           | Government health spending | Out-of-pocket health spending | Prepaid private health spending | Development assistance for health |
| Eritrea | 2044 | 46.3 (37.3 to 58.0)        | 9.7 (7.0 to 12.6)          | 26.0 (18.1 to 36.1)           | 0.9 (0.4 to 1.7)                | 9.6 (7.1 to 13.9)                 | 70.3 (56.7 to 88.1)       | 14.8 (10.7 to 19.2)        | 39.5 (27.5 to 54.8)           | 1.4 (0.7 to 2.6)                | 14.6 (10.8 to 21.1)               |
| Eritrea | 2045 | 47.0 (38.1 to 58.5)        | 10.0 (7.3 to 13.0)         | 26.3 (18.3 to 36.5)           | 0.9 (0.4 to 1.8)                | 9.8 (7.1 to 14.8)                 | 71.4 (57.8 to 88.8)       | 15.1 (11.0 to 19.7)        | 40.0 (27.7 to 55.5)           | 1.4 (0.7 to 2.7)                | 14.9 (10.7 to 22.5)               |
| Eritrea | 2046 | 47.8 (38.1 to 59.4)        | 10.2 (7.5 to 13.3)         | 26.6 (18.4 to 36.9)           | 1.0 (0.4 to 1.8)                | 10.0 (7.2 to 15.4)                | 72.6 (57.8 to 90.2)       | 15.5 (11.4 to 20.2)        | 40.4 (28.0 to 56.0)           | 1.5 (0.7 to 2.8)                | 15.2 (11.0 to 23.4)               |
| Eritrea | 2047 | 48.6 (38.5 to 60.3)        | 10.5 (7.7 to 13.7)         | 26.9 (18.6 to 37.3)           | 1.0 (0.5 to 1.9)                | 10.2 (7.4 to 16.1)                | 73.7 (58.5 to 91.5)       | 15.9 (11.7 to 20.8)        | 40.8 (28.3 to 56.6)           | 1.5 (0.7 to 2.8)                | 15.6 (11.2 to 24.5)               |
| Eritrea | 2048 | 49.4 (39.3 to 61.9)        | 10.7 (7.9 to 14.0)         | 27.1 (18.8 to 37.6)           | 1.0 (0.5 to 1.9)                | 10.5 (7.5 to 16.8)                | 75.0 (59.7 to 94.0)       | 16.3 (11.9 to 21.3)        | 41.2 (28.5 to 57.1)           | 1.5 (0.7 to 2.9)                | 15.9 (11.4 to 25.5)               |
| Eritrea | 2049 | 50.1 (39.6 to 62.4)        | 11.0 (8.0 to 14.4)         | 27.4 (18.9 to 38.0)           | 1.0 (0.5 to 1.9)                | 10.7 (7.7 to 17.2)                | 76.1 (60.1 to 94.7)       | 16.7 (12.2 to 21.8)        | 41.6 (28.8 to 57.7)           | 1.6 (0.7 to 2.9)                | 16.3 (11.6 to 26.2)               |
| Eritrea | 2050 | 50.9 (41.4 to 62.9)        | 11.2 (8.2 to 14.7)         | 27.7 (19.1 to 38.3)           | 1.0 (0.5 to 2.0)                | 11.0 (7.7 to 18.0)                | 77.3 (62.8 to 95.6)       | 17.0 (12.5 to 22.3)        | 42.0 (29.0 to 58.2)           | 1.6 (0.7 to 3.0)                | 16.7 (11.7 to 27.3)               |
| Estonia | 1995 | 577.1 (535.1 to 624.5)     | 495.2 (455.4 to 538.4)     | 61.4 (49.7 to 74.5)           | 20.5 (11.1 to 34.5)             | 0.0 (0.0 to 0.0)                  | 850.4 (788.4 to 920.2)    | 729.7 (671.0 to 793.3)     | 90.5 (73.3 to 109.8)          | 30.2 (16.4 to 50.8)             | 0.0 (0.0 to 0.0)                  |
| Estonia | 1996 | 594.3 (556.2 to 632.4)     | 506.3 (473.4 to 541.5)     | 67.2 (55.9 to 80.3)           | 20.7 (11.4 to 34.8)             | 0.0 (0.0 to 0.0)                  | 875.6 (819.5 to 931.9)    | 746.1 (697.5 to 797.8)     | 99.0 (82.3 to 118.4)          | 30.5 (16.9 to 51.3)             | 0.1 (0.1 to 0.1)                  |
| Estonia | 1997 | 628.2 (591.5 to 664.7)     | 532.6 (500.7 to 565.0)     | 74.0 (63.1 to 86.6)           | 21.5 (12.1 to 35.3)             | 0.1 (0.1 to 0.1)                  | 925.7 (871.6 to 979.4)    | 784.7 (737.7 to 832.5)     | 109.1 (93.0 to 127.6)         | 31.7 (17.8 to 52.0)             | 0.1 (0.1 to 0.1)                  |
| Estonia | 1998 | 621.8 (587.7 to 658.1)     | 517.0 (486.6 to 550.5)     | 83.1 (71.9 to 95.6)           | 21.3 (12.1 to 34.7)             | 0.4 (0.4 to 0.4)                  | 916.3 (865.9 to 969.8)    | 761.8 (717.0 to 811.2)     | 122.4 (105.9 to 140.9)        | 31.4 (17.8 to 51.1)             | 0.6 (0.6 to 0.6)                  |
| Estonia | 1999 | 595.4 (562.1 to 629.3)     | 480.6 (452.2 to 511.6)     | 92.9 (80.9 to 106.8)          | 20.5 (11.6 to 32.4)             | 1.5 (1.5 to 1.5)                  | 877.4 (828.3 to 927.3)    | 708.2 (666.4 to 753.8)     | 136.9 (119.3 to 157.3)        | 30.1 (17.1 to 47.7)             | 2.1 (2.1 to 2.1)                  |
| Estonia | 2000 | 608.2 (575.3 to 641.6)     | 477.8 (450.3 to 507.4)     | 109.6 (95.9 to 124.4)         | 20.7 (11.7 to 32.7)             | 0.1 (0.1 to 0.1)                  | 896.2 (847.7 to 945.4)    | 704.0 (663.5 to 747.6)     | 161.5 (141.4 to 183.4)        | 30.5 (17.2 to 48.1)             | 0.2 (0.2 to 0.2)                  |
| Estonia | 2001 | 618.5 (585.9 to 652.4)     | 479.2 (452.1 to 509.2)     | 119.7 (104.9 to 135.5)        | 19.5 (11.3 to 31.0)             | 0.0 (0.0 to 0.0)                  | 911.3 (863.4 to 961.3)    | 706.1 (666.1 to 750.2)     | 176.4 (154.5 to 199.7)        | 28.8 (16.6 to 45.7)             | 0.0 (0.0 to 0.0)                  |
| Estonia | 2002 | 650.2 (616.1 to 686.0)     | 496.0 (468.4 to 526.0)     | 133.7 (118.4 to 151.5)        | 20.4 (11.7 to 32.0)             | 0.0 (0.0 to 0.0)                  | 958.1 (907.8 to 1010.8)   | 730.9 (690.2 to 775.1)     | 197.1 (174.4 to 223.3)        | 30.1 (17.3 to 47.1)             | 0.0 (0.0 to 0.0)                  |
| Estonia | 2003 | 705.3 (669.5 to 739.8)     | 532.5 (504.2 to 560.5)     | 150.5 (134.2 to 168.6)        | 21.3 (12.2 to 33.9)             | 1.0 (1.0 to 1.0)                  | 1039.2 (986.4 to 1090.0)  | 784.6 (743.0 to 825.9)     | 221.7 (197.8 to 248.5)        | 31.5 (17.9 to 49.9)             | 1.4 (1.4 to 1.4)                  |
| Estonia | 2004 | 767.8 (731.7 to 802.6)     | 574.0 (543.9 to 603.5)     | 169.5 (152.7 to 187.2)        | 22.6 (13.1 to 35.8)             | 1.7 (1.7 to 1.7)                  | 1131.3 (1078.2 to 1182.6) | 845.7 (801.5 to 889.3)     | 249.7 (225.0 to 275.8)        | 33.3 (19.3 to 52.8)             | 2.5 (2.5 to 2.5)                  |
| Estonia | 2005 | 843.1 (807.4 to 879.4)     | 629.3 (599.1 to 660.8)     | 188.9 (172.4 to 206.8)        | 22.5 (13.0 to 34.9)             | 2.3 (2.3 to 2.3)                  | 1242.2 (1189.7 to 1295.8) | 927.3 (882.7 to 973.6)     | 278.4 (254.0 to 304.7)        | 33.2 (19.2 to 51.5)             | 3.4 (3.4 to 3.4)                  |
| Estonia | 2006 | 939.3 (903.9 to 976.6)     | 703.0 (672.8 to 735.3)     | 215.9 (198.8 to 234.3)        | 20.3 (11.9 to 31.2)             | 0.0 (0.0 to 0.0)                  | 1384.0 (1331.8 to 1439.0) | 1035.9 (991.4 to 1083.5)   | 318.1 (292.9 to 345.2)        | 30.0 (17.5 to 45.9)             | 0.0 (0.0 to 0.0)                  |
| Estonia | 2007 | 1061.6 (1023.7 to 1100.5)  | 805.8 (773.0 to 838.8)     | 233.4 (216.9 to 251.2)        | 22.4 (13.3 to 33.9)             | 0.0 (0.0 to 0.0)                  | 1564.3 (1508.5 to 1621.5) | 1187.3 (1139.0 to 1236.0)  | 344.0 (319.6 to 370.2)        | 33.0 (19.7 to 50.0)             | 0.0 (0.0 to 0.0)                  |
| Estonia | 2008 | 1107.6 (1067.8 to 1146.2)  | 845.3 (811.5 to 877.9)     | 237.2 (220.9 to 255.4)        | 25.0 (15.3 to 37.2)             | 0.0 (0.0 to 0.0)                  | 1632.0 (1573.4 to 1688.9) | 1245.6 (1195.7 to 1293.5)  | 349.6 (325.5 to 376.3)        | 36.9 (22.6 to 54.8)             | 0.0 (0.0 to 0.0)                  |

| Country | Year | 2018 US Dollars per capita |                            |                               |                                 |                                   | 2018 PPP per capita       |                            |                               |                                 |                                   |
|---------|------|----------------------------|----------------------------|-------------------------------|---------------------------------|-----------------------------------|---------------------------|----------------------------|-------------------------------|---------------------------------|-----------------------------------|
|         |      | Health spending            | Government health spending | Out-of-pocket health spending | Prepaid private health spending | Development assistance for health | Health spending           | Government health spending | Out-of-pocket health spending | Prepaid private health spending | Development assistance for health |
| Estonia | 2009 | 1041.0 (1006.2 to 1077.6)  | 792.1 (762.8 to 822.5)     | 225.9 (210.3 to 243.7)        | 23.0 (14.4 to 33.7)             | 0.0 (0.0 to 0.0)                  | 1533.9 (1482.5 to 1587.8) | 1167.1 (1123.9 to 1212.0)  | 332.9 (309.8 to 359.1)        | 33.9 (21.2 to 49.7)             | 0.0 (0.0 to 0.0)                  |
| Estonia | 2010 | 1049.1 (1016.0 to 1085.0)  | 797.7 (768.6 to 829.1)     | 229.2 (213.5 to 246.1)        | 22.3 (14.1 to 32.8)             | 0.0 (0.0 to 0.0)                  | 1545.9 (1497.0 to 1598.8) | 1175.3 (1132.5 to 1221.7)  | 337.8 (314.6 to 362.7)        | 32.8 (20.7 to 48.3)             | 0.0 (0.0 to 0.0)                  |
| Estonia | 2011 | 1090.1 (1054.7 to 1126.5)  | 831.5 (801.2 to 861.2)     | 236.3 (220.6 to 253.1)        | 22.3 (14.2 to 33.3)             | 0.0 (0.0 to 0.0)                  | 1606.3 (1554.1 to 1659.9) | 1225.2 (1180.6 to 1269.0)  | 348.2 (325.1 to 372.9)        | 32.9 (21.0 to 49.1)             | 0.0 (0.0 to 0.0)                  |
| Estonia | 2012 | 1134.8 (1096.0 to 1172.0)  | 864.9 (832.5 to 896.9)     | 247.6 (232.0 to 264.3)        | 22.3 (14.1 to 34.6)             | 0.0 (0.0 to 0.0)                  | 1672.1 (1615.0 to 1727.0) | 1274.4 (1226.7 to 1321.6)  | 364.8 (341.9 to 389.4)        | 32.9 (20.8 to 51.0)             | 0.0 (0.0 to 0.0)                  |
| Estonia | 2013 | 1180.6 (1143.0 to 1222.8)  | 894.8 (863.8 to 928.1)     | 263.4 (246.5 to 281.7)        | 22.4 (14.1 to 34.6)             | 0.0 (0.0 to 0.0)                  | 1739.5 (1684.2 to 1801.8) | 1318.4 (1272.8 to 1367.5)  | 388.1 (363.2 to 415.1)        | 33.0 (20.7 to 50.9)             | 0.0 (0.0 to 0.0)                  |
| Estonia | 2014 | 1253.3 (1215.9 to 1294.6)  | 947.6 (915.5 to 980.3)     | 282.6 (263.6 to 301.6)        | 23.1 (14.3 to 36.4)             | 0.0 (0.0 to 0.0)                  | 1846.7 (1791.6 to 1907.6) | 1396.3 (1349.0 to 1444.4)  | 416.4 (388.4 to 444.4)        | 34.0 (21.1 to 53.6)             | 0.0 (0.0 to 0.0)                  |
| Estonia | 2015 | 1328.0 (1285.7 to 1368.8)  | 1002.8 (967.9 to 1037.5)   | 301.4 (279.5 to 323.8)        | 23.8 (14.1 to 38.0)             | 0.0 (0.0 to 0.0)                  | 1956.8 (1894.5 to 2016.9) | 1477.6 (1426.1 to 1528.7)  | 444.2 (411.9 to 477.1)        | 35.0 (20.7 to 56.0)             | 0.0 (0.0 to 0.0)                  |
| Estonia | 2016 | 1392.0 (1338.1 to 1450.6)  | 1050.8 (1006.9 to 1097.9)  | 316.5 (288.4 to 346.9)        | 24.7 (14.0 to 40.0)             | 0.0 (0.0 to 0.0)                  | 2051.0 (1971.6 to 2137.4) | 1548.3 (1483.7 to 1617.7)  | 466.3 (425.0 to 511.1)        | 36.4 (20.7 to 58.9)             | 0.0 (0.0 to 0.0)                  |
| Estonia | 2017 | 1448.7 (1391.1 to 1510.7)  | 1091.4 (1045.2 to 1140.8)  | 331.5 (301.4 to 363.3)        | 25.8 (14.6 to 41.6)             | 0.0 (0.0 to 0.0)                  | 2134.6 (2049.8 to 2226.0) | 1608.1 (1540.1 to 1681.0)  | 488.5 (444.1 to 535.4)        | 38.0 (21.6 to 61.3)             | 0.0 (0.0 to 0.0)                  |
| Estonia | 2018 | 1470.2 (1408.0 to 1535.8)  | 1101.6 (1055.5 to 1152.2)  | 342.5 (311.3 to 376.6)        | 26.2 (14.9 to 42.1)             | 0.0 (0.0 to 0.0)                  | 2166.4 (2074.6 to 2263.0) | 1623.2 (1555.2 to 1697.7)  | 504.6 (458.6 to 554.9)        | 38.6 (21.9 to 62.0)             | 0.0 (0.0 to 0.0)                  |
| Estonia | 2019 | 1490.5 (1429.9 to 1556.8)  | 1110.9 (1064.2 to 1161.9)  | 353.1 (319.2 to 388.8)        | 26.5 (15.1 to 42.4)             | 0.0 (0.0 to 0.0)                  | 2196.2 (2106.9 to 2293.9) | 1636.9 (1568.1 to 1712.0)  | 520.2 (470.3 to 573.0)        | 39.1 (22.3 to 62.5)             | 0.0 (0.0 to 0.0)                  |
| Estonia | 2020 | 1514.1 (1450.2 to 1581.8)  | 1123.0 (1075.4 to 1174.7)  | 364.2 (328.3 to 401.6)        | 26.9 (15.4 to 42.9)             | 0.0 (0.0 to 0.0)                  | 2231.0 (2136.8 to 2330.7) | 1654.7 (1584.5 to 1730.8)  | 536.6 (483.7 to 591.7)        | 39.7 (22.6 to 63.1)             | 0.0 (0.0 to 0.0)                  |
| Estonia | 2021 | 1539.1 (1471.7 to 1607.9)  | 1136.9 (1087.5 to 1189.8)  | 374.9 (338.1 to 415.5)        | 27.3 (15.6 to 43.4)             | 0.0 (0.0 to 0.0)                  | 2267.9 (2168.5 to 2369.2) | 1675.1 (1602.5 to 1753.1)  | 552.5 (498.1 to 612.3)        | 40.3 (23.0 to 64.0)             | 0.0 (0.0 to 0.0)                  |
| Estonia | 2022 | 1570.1 (1501.9 to 1643.2)  | 1157.4 (1107.7 to 1212.6)  | 384.9 (346.9 to 426.8)        | 27.8 (15.9 to 44.4)             | 0.0 (0.0 to 0.0)                  | 2313.4 (2213.1 to 2421.2) | 1705.4 (1632.1 to 1786.7)  | 567.1 (511.1 to 628.8)        | 41.0 (23.4 to 65.4)             | 0.0 (0.0 to 0.0)                  |
| Estonia | 2023 | 1609.2 (1539.2 to 1682.8)  | 1183.0 (1131.3 to 1240.3)  | 397.8 (358.1 to 441.2)        | 28.4 (16.2 to 45.4)             | 0.0 (0.0 to 0.0)                  | 2371.2 (2268.0 to 2479.6) | 1743.1 (1667.0 to 1827.5)  | 586.2 (527.7 to 650.0)        | 41.9 (23.9 to 66.9)             | 0.0 (0.0 to 0.0)                  |
| Estonia | 2024 | 1650.4 (1576.4 to 1728.1)  | 1210.0 (1157.7 to 1269.9)  | 411.3 (370.2 to 458.0)        | 29.1 (16.6 to 46.4)             | 0.0 (0.0 to 0.0)                  | 2431.9 (2322.7 to 2546.3) | 1782.9 (1705.9 to 1871.1)  | 606.1 (545.5 to 674.8)        | 42.8 (24.5 to 68.4)             | 0.0 (0.0 to 0.0)                  |
| Estonia | 2025 | 1693.2 (1616.0 to 1774.7)  | 1238.0 (1183.1 to 1301.1)  | 425.4 (381.6 to 474.1)        | 29.7 (16.9 to 47.4)             | 0.0 (0.0 to 0.0)                  | 2494.9 (2381.2 to 2614.9) | 1824.2 (1743.2 to 1917.2)  | 626.9 (562.3 to 698.6)        | 43.8 (24.9 to 69.9)             | 0.0 (0.0 to 0.0)                  |
| Estonia | 2026 | 1738.3 (1661.0 to 1827.9)  | 1267.7 (1211.2 to 1332.9)  | 440.1 (394.4 to 490.7)        | 30.4 (17.3 to 48.5)             | 0.0 (0.0 to 0.0)                  | 2561.3 (2447.4 to 2693.3) | 1867.9 (1784.7 to 1964.0)  | 648.5 (581.2 to 723.0)        | 44.8 (25.5 to 71.4)             | 0.0 (0.0 to 0.0)                  |
| Estonia | 2027 | 1785.4 (1697.9 to 1875.0)  | 1298.7 (1239.4 to 1366.5)  | 455.5 (406.8 to 512.3)        | 31.2 (17.8 to 49.7)             | 0.0 (0.0 to 0.0)                  | 2630.7 (2501.7 to 2762.8) | 1913.6 (1826.2 to 2013.5)  | 671.2 (599.5 to 754.9)        | 45.9 (26.2 to 73.2)             | 0.0 (0.0 to 0.0)                  |
| Estonia | 2028 | 1834.4 (1742.5 to 1932.6)  | 1331.2 (1267.2 to 1402.4)  | 471.2 (418.2 to 532.1)        | 32.0 (18.2 to 50.8)             | 0.0 (0.0 to 0.0)                  | 2703.0 (2567.5 to 2847.7) | 1961.6 (1867.1 to 2066.4)  | 694.4 (616.3 to 784.1)        | 47.1 (26.9 to 74.9)             | 0.0 (0.0 to 0.0)                  |
| Estonia | 2029 | 1883.0 (1783.8 to 1986.2)  | 1363.3 (1293.5 to 1439.8)  | 487.0 (428.2 to 554.5)        | 32.8 (18.7 to 52.0)             | 0.0 (0.0 to 0.0)                  | 2774.5 (2628.4 to 2926.7) | 2008.7 (1905.9 to 2121.4)  | 717.5 (630.9 to 817.1)        | 48.3 (27.6 to 76.6)             | 0.0 (0.0 to 0.0)                  |

| Country | Year | 2018 US Dollars per capita |                            |                               |                                 |                                   | 2018 PPP per capita       |                            |                               |                                 |                                   |
|---------|------|----------------------------|----------------------------|-------------------------------|---------------------------------|-----------------------------------|---------------------------|----------------------------|-------------------------------|---------------------------------|-----------------------------------|
|         |      | Health spending            | Government health spending | Out-of-pocket health spending | Prepaid private health spending | Development assistance for health | Health spending           | Government health spending | Out-of-pocket health spending | Prepaid private health spending | Development assistance for health |
| Estonia | 2030 | 1932.0 (1824.6 to 2038.1)  | 1395.7 (1322.5 to 1475.3)  | 502.8 (438.0 to 576.8)        | 33.6 (19.2 to 53.3)             | 0.0 (0.0 to 0.0)                  | 2846.8 (2688.5 to 3003.1) | 2056.5 (1948.7 to 2173.8)  | 740.9 (645.3 to 849.9)        | 49.5 (28.4 to 78.5)             | 0.0 (0.0 to 0.0)                  |
| Estonia | 2031 | 1981.9 (1868.6 to 2101.5)  | 1428.7 (1349.9 to 1515.2)  | 518.8 (449.7 to 598.2)        | 34.4 (19.8 to 54.5)             | 0.0 (0.0 to 0.0)                  | 2920.3 (2753.4 to 3096.6) | 2105.1 (1989.0 to 2232.6)  | 764.4 (662.6 to 881.4)        | 50.8 (29.1 to 80.4)             | 0.0 (0.0 to 0.0)                  |
| Estonia | 2032 | 2031.2 (1908.4 to 2152.3)  | 1461.1 (1377.2 to 1553.2)  | 534.7 (459.7 to 621.8)        | 35.3 (20.2 to 56.0)             | 0.0 (0.0 to 0.0)                  | 2992.9 (2811.9 to 3171.3) | 2152.9 (2029.3 to 2288.6)  | 787.9 (677.4 to 916.2)        | 52.0 (29.8 to 82.5)             | 0.0 (0.0 to 0.0)                  |
| Estonia | 2033 | 2080.5 (1950.7 to 2216.5)  | 1493.7 (1405.5 to 1589.2)  | 550.6 (468.7 to 644.3)        | 36.2 (20.7 to 57.5)             | 0.0 (0.0 to 0.0)                  | 3065.6 (2874.3 to 3266.0) | 2200.9 (2071.0 to 2341.7)  | 811.3 (690.6 to 949.3)        | 53.4 (30.6 to 84.8)             | 0.0 (0.0 to 0.0)                  |
| Estonia | 2034 | 2130.4 (1993.6 to 2275.0)  | 1526.8 (1433.4 to 1624.5)  | 566.5 (477.6 to 668.4)        | 37.1 (21.3 to 59.1)             | 0.0 (0.0 to 0.0)                  | 3139.1 (2937.6 to 3352.1) | 2249.7 (2112.1 to 2393.7)  | 834.7 (703.8 to 984.8)        | 54.7 (31.4 to 87.1)             | 0.0 (0.0 to 0.0)                  |
| Estonia | 2035 | 2180.9 (2033.5 to 2333.9)  | 1560.7 (1463.2 to 1664.8)  | 582.2 (487.3 to 692.1)        | 38.0 (21.8 to 60.6)             | 0.0 (0.0 to 0.0)                  | 3213.5 (2996.3 to 3438.9) | 2299.7 (2156.0 to 2453.0)  | 857.8 (718.1 to 1019.8)       | 56.0 (32.2 to 89.3)             | 0.0 (0.0 to 0.0)                  |
| Estonia | 2036 | 2232.3 (2075.6 to 2393.5)  | 1595.7 (1491.7 to 1705.2)  | 597.7 (497.0 to 715.6)        | 38.9 (22.4 to 62.1)             | 0.0 (0.0 to 0.0)                  | 3289.3 (3058.4 to 3526.7) | 2351.2 (2198.0 to 2512.6)  | 880.7 (732.3 to 1054.4)       | 57.3 (33.0 to 91.4)             | 0.0 (0.0 to 0.0)                  |
| Estonia | 2037 | 2284.3 (2120.1 to 2455.2)  | 1631.5 (1517.1 to 1752.2)  | 613.1 (506.5 to 738.7)        | 39.8 (22.9 to 63.4)             | 0.0 (0.0 to 0.0)                  | 3365.9 (3123.9 to 3617.6) | 2404.0 (2235.4 to 2581.8)  | 903.3 (746.4 to 1088.4)       | 58.7 (33.8 to 93.4)             | 0.0 (0.0 to 0.0)                  |
| Estonia | 2038 | 2337.9 (2166.0 to 2525.4)  | 1668.8 (1548.2 to 1795.1)  | 628.3 (515.9 to 761.7)        | 40.7 (23.5 to 65.0)             | 0.0 (0.0 to 0.0)                  | 3444.8 (3191.5 to 3721.1) | 2458.9 (2281.3 to 2645.1)  | 925.9 (760.2 to 1122.4)       | 60.0 (34.6 to 95.8)             | 0.0 (0.0 to 0.0)                  |
| Estonia | 2039 | 2392.2 (2207.5 to 2580.6)  | 1707.0 (1579.0 to 1846.6)  | 643.5 (525.2 to 783.6)        | 41.7 (24.1 to 66.5)             | 0.0 (0.0 to 0.0)                  | 3524.9 (3252.7 to 3802.5) | 2515.3 (2326.7 to 2721.0)  | 948.2 (773.8 to 1154.6)       | 61.4 (35.4 to 98.0)             | 0.0 (0.0 to 0.0)                  |
| Estonia | 2040 | 2446.6 (2259.6 to 2644.8)  | 1745.5 (1606.9 to 1892.6)  | 658.4 (533.6 to 805.5)        | 42.7 (24.6 to 68.1)             | 0.0 (0.0 to 0.0)                  | 3605.0 (3329.4 to 3897.0) | 2572.0 (2367.7 to 2788.7)  | 970.1 (786.2 to 1186.8)       | 62.9 (36.2 to 100.3)            | 0.0 (0.0 to 0.0)                  |
| Estonia | 2041 | 2501.2 (2298.0 to 2712.6)  | 1784.3 (1635.8 to 1941.0)  | 673.1 (543.0 to 827.5)        | 43.7 (25.1 to 69.7)             | 0.0 (0.0 to 0.0)                  | 3685.4 (3386.1 to 3996.9) | 2629.2 (2410.4 to 2860.1)  | 991.8 (800.1 to 1219.3)       | 64.4 (37.0 to 102.8)            | 0.0 (0.0 to 0.0)                  |
| Estonia | 2042 | 2556.1 (2342.9 to 2784.9)  | 1823.7 (1667.1 to 1989.5)  | 687.6 (552.8 to 846.6)        | 44.8 (25.7 to 71.5)             | 0.0 (0.0 to 0.0)                  | 3766.3 (3452.2 to 4103.4) | 2687.1 (2456.5 to 2931.4)  | 1013.2 (814.5 to 1247.4)      | 66.0 (37.9 to 105.4)            | 0.0 (0.0 to 0.0)                  |
| Estonia | 2043 | 2611.7 (2391.4 to 2858.8)  | 1863.9 (1695.8 to 2037.6)  | 701.9 (562.5 to 866.1)        | 45.9 (26.3 to 73.4)             | 0.0 (0.0 to 0.0)                  | 3848.2 (3523.6 to 4212.4) | 2746.4 (2498.7 to 3002.3)  | 1034.2 (828.9 to 1276.2)      | 67.6 (38.7 to 108.1)            | 0.0 (0.0 to 0.0)                  |
| Estonia | 2044 | 2667.0 (2437.0 to 2920.8)  | 1904.3 (1726.2 to 2086.4)  | 715.7 (572.1 to 884.7)        | 47.0 (26.8 to 75.3)             | 0.0 (0.0 to 0.0)                  | 3929.7 (3590.9 to 4303.7) | 2806.0 (2543.5 to 3074.3)  | 1054.6 (843.0 to 1303.5)      | 69.2 (39.5 to 111.0)            | 0.0 (0.0 to 0.0)                  |
| Estonia | 2045 | 2721.2 (2478.9 to 2965.7)  | 1944.2 (1759.4 to 2138.2)  | 728.9 (581.4 to 901.9)        | 48.0 (27.3 to 77.2)             | 0.0 (0.0 to 0.0)                  | 4009.6 (3652.6 to 4369.9) | 2864.8 (2592.4 to 3150.6)  | 1074.0 (856.6 to 1328.9)      | 70.8 (40.3 to 113.7)            | 0.0 (0.0 to 0.0)                  |
| Estonia | 2046 | 2773.1 (2533.5 to 3039.5)  | 1982.8 (1786.9 to 2187.8)  | 741.3 (590.3 to 918.0)        | 49.1 (27.8 to 78.8)             | 0.0 (0.0 to 0.0)                  | 4086.1 (3733.0 to 4478.6) | 2921.6 (2632.9 to 3223.6)  | 1092.2 (869.7 to 1352.7)      | 72.3 (41.0 to 116.1)            | 0.0 (0.0 to 0.0)                  |
| Estonia | 2047 | 2826.0 (2571.8 to 3107.1)  | 2022.5 (1818.3 to 2236.6)  | 753.3 (599.1 to 934.1)        | 50.2 (28.4 to 80.6)             | 0.0 (0.0 to 0.0)                  | 4164.0 (3789.5 to 4578.2) | 2980.2 (2679.2 to 3295.5)  | 1109.9 (882.8 to 1376.3)      | 73.9 (41.8 to 118.8)            | 0.0 (0.0 to 0.0)                  |
| Estonia | 2048 | 2876.7 (2614.1 to 3153.2)  | 2060.5 (1844.1 to 2285.0)  | 765.1 (607.8 to 949.9)        | 51.2 (28.9 to 82.4)             | 0.0 (0.0 to 0.0)                  | 4238.8 (3851.9 to 4646.2) | 3036.1 (2717.3 to 3367.0)  | 1127.3 (895.6 to 1399.6)      | 75.4 (42.6 to 121.4)            | 0.0 (0.0 to 0.0)                  |
| Estonia | 2049 | 2926.2 (2658.5 to 3219.9)  | 2097.5 (1872.3 to 2333.8)  | 776.5 (616.6 to 965.2)        | 52.2 (29.5 to 84.1)             | 0.0 (0.0 to 0.0)                  | 4311.7 (3917.2 to 4744.5) | 3090.6 (2758.8 to 3438.8)  | 1144.2 (908.5 to 1422.3)      | 76.9 (43.4 to 123.9)            | 0.0 (0.0 to 0.0)                  |
| Estonia | 2050 | 2975.4 (2693.5 to 3280.3)  | 2134.4 (1902.6 to 2379.0)  | 787.9 (624.8 to 980.3)        | 53.1 (30.1 to 85.7)             | 0.0 (0.0 to 0.0)                  | 4384.2 (3968.8 to 4833.5) | 3145.0 (2803.4 to 3505.3)  | 1160.9 (920.7 to 1444.4)      | 78.3 (44.3 to 126.3)            | 0.0 (0.0 to 0.0)                  |

| Country  | Year | 2018 US Dollars per capita |                            |                               |                                 |                                   | 2018 PPP per capita |                            |                               |                                 |                                   |
|----------|------|----------------------------|----------------------------|-------------------------------|---------------------------------|-----------------------------------|---------------------|----------------------------|-------------------------------|---------------------------------|-----------------------------------|
|          |      | Health spending            | Government health spending | Out-of-pocket health spending | Prepaid private health spending | Development assistance for health | Health spending     | Government health spending | Out-of-pocket health spending | Prepaid private health spending | Development assistance for health |
| Ethiopia | 1995 | 9.4 (7.8 to 11.2)          | 4.0 (3.0 to 5.2)           | 3.4 (2.4 to 4.7)              | 0.7 (0.3 to 1.2)                | 1.2 (1.2 to 1.2)                  | 25.1 (20.9 to 30.0) | 10.8 (8.1 to 14.1)         | 9.2 (6.4 to 12.7)             | 1.8 (0.8 to 3.3)                | 3.3 (3.3 to 3.3)                  |
| Ethiopia | 1996 | 10.1 (8.5 to 11.9)         | 4.2 (3.1 to 5.4)           | 3.6 (2.5 to 5.0)              | 0.7 (0.3 to 1.2)                | 1.6 (1.6 to 1.6)                  | 27.0 (22.8 to 31.9) | 11.2 (8.4 to 14.5)         | 9.8 (6.7 to 13.3)             | 1.8 (0.8 to 3.3)                | 4.3 (4.3 to 4.3)                  |
| Ethiopia | 1997 | 10.0 (8.4 to 11.8)         | 4.3 (3.2 to 5.6)           | 3.8 (2.6 to 5.2)              | 0.7 (0.3 to 1.3)                | 1.3 (1.3 to 1.3)                  | 26.8 (22.5 to 31.6) | 11.4 (8.5 to 14.9)         | 10.2 (7.0 to 14.1)            | 1.8 (0.8 to 3.4)                | 3.4 (3.4 to 3.4)                  |
| Ethiopia | 1998 | 9.7 (8.1 to 11.5)          | 4.1 (3.0 to 5.3)           | 3.8 (2.6 to 5.2)              | 0.7 (0.3 to 1.3)                | 1.1 (1.1 to 1.1)                  | 26.1 (21.7 to 31.0) | 11.0 (8.1 to 14.3)         | 10.2 (7.1 to 14.1)            | 1.9 (0.8 to 3.5)                | 3.0 (3.0 to 3.0)                  |
| Ethiopia | 1999 | 10.7 (9.0 to 12.6)         | 4.2 (3.2 to 5.5)           | 3.9 (2.7 to 5.4)              | 0.8 (0.3 to 1.5)                | 1.8 (1.8 to 1.8)                  | 28.8 (24.1 to 33.9) | 11.4 (8.5 to 14.8)         | 10.6 (7.3 to 14.6)            | 2.0 (0.9 to 3.9)                | 4.7 (4.7 to 4.7)                  |
| Ethiopia | 2000 | 10.9 (9.1 to 12.8)         | 4.5 (3.4 to 5.8)           | 4.0 (2.8 to 5.6)              | 0.8 (0.4 to 1.4)                | 1.6 (1.6 to 1.6)                  | 29.2 (24.4 to 34.4) | 12.1 (9.0 to 15.6)         | 10.8 (7.5 to 15.0)            | 2.0 (0.9 to 3.9)                | 4.3 (4.3 to 4.3)                  |
| Ethiopia | 2001 | 12.2 (10.2 to 14.3)        | 4.9 (3.7 to 6.4)           | 4.3 (3.0 to 5.9)              | 0.8 (0.4 to 1.5)                | 2.2 (2.2 to 2.2)                  | 32.7 (27.5 to 38.5) | 13.3 (9.9 to 17.1)         | 11.4 (8.0 to 15.8)            | 2.1 (0.9 to 4.0)                | 5.9 (5.9 to 5.9)                  |
| Ethiopia | 2002 | 11.7 (9.8 to 13.9)         | 4.8 (3.6 to 6.2)           | 4.3 (3.0 to 6.0)              | 0.7 (0.3 to 1.4)                | 1.9 (1.9 to 1.9)                  | 31.5 (26.4 to 37.3) | 13.0 (9.7 to 16.7)         | 11.5 (8.1 to 16.0)            | 2.0 (0.9 to 3.7)                | 5.0 (5.0 to 5.0)                  |
| Ethiopia | 2003 | 12.4 (10.6 to 14.4)        | 4.5 (3.4 to 5.7)           | 4.1 (2.9 to 5.6)              | 0.6 (0.3 to 1.2)                | 3.2 (3.2 to 3.2)                  | 33.3 (28.4 to 38.8) | 12.0 (9.1 to 15.3)         | 11.1 (7.9 to 15.0)            | 1.7 (0.8 to 3.3)                | 8.5 (8.5 to 8.5)                  |
| Ethiopia | 2004 | 12.1 (10.3 to 14.1)        | 4.2 (3.1 to 5.4)           | 4.2 (2.9 to 5.7)              | 0.6 (0.3 to 1.1)                | 3.1 (3.1 to 3.1)                  | 32.6 (27.7 to 37.9) | 11.2 (8.5 to 14.4)         | 11.3 (7.9 to 15.4)            | 1.6 (0.7 to 3.0)                | 8.4 (8.4 to 8.4)                  |
| Ethiopia | 2005 | 13.0 (11.1 to 15.1)        | 4.2 (3.2 to 5.5)           | 4.4 (3.0 to 6.1)              | 0.6 (0.3 to 1.1)                | 3.7 (3.7 to 3.7)                  | 35.0 (29.8 to 40.5) | 11.4 (8.6 to 14.6)         | 11.9 (8.1 to 16.3)            | 1.6 (0.8 to 3.0)                | 10.0 (10.0 to 10.0)               |
| Ethiopia | 2006 | 15.1 (13.2 to 17.3)        | 3.8 (2.9 to 4.9)           | 4.9 (3.3 to 6.8)              | 0.6 (0.3 to 1.1)                | 5.8 (5.8 to 5.8)                  | 40.6 (35.4 to 46.5) | 10.3 (7.7 to 13.2)         | 13.2 (8.9 to 18.2)            | 1.6 (0.7 to 3.0)                | 15.5 (15.5 to 15.5)               |
| Ethiopia | 2007 | 17.3 (15.0 to 19.7)        | 3.7 (2.8 to 4.8)           | 5.6 (3.8 to 7.8)              | 0.6 (0.3 to 1.2)                | 7.3 (7.3 to 7.3)                  | 46.4 (40.4 to 53.0) | 10.0 (7.6 to 12.9)         | 15.1 (10.2 to 21.1)           | 1.7 (0.8 to 3.1)                | 19.7 (19.7 to 19.7)               |
| Ethiopia | 2008 | 17.3 (15.1 to 20.1)        | 3.2 (2.4 to 4.1)           | 6.1 (4.2 to 8.5)              | 0.6 (0.3 to 1.2)                | 7.4 (7.4 to 7.4)                  | 46.6 (40.5 to 54.0) | 8.5 (6.4 to 11.0)          | 16.5 (11.3 to 22.8)           | 1.7 (0.8 to 3.2)                | 19.9 (19.9 to 19.9)               |
| Ethiopia | 2009 | 18.5 (15.9 to 21.5)        | 3.3 (2.5 to 4.3)           | 7.1 (4.8 to 9.8)              | 0.9 (0.4 to 1.7)                | 7.2 (7.2 to 7.2)                  | 49.7 (42.8 to 57.7) | 9.0 (6.7 to 11.6)          | 19.0 (12.9 to 26.2)           | 2.5 (1.2 to 4.7)                | 19.3 (19.3 to 19.3)               |
| Ethiopia | 2010 | 22.2 (19.3 to 25.7)        | 3.5 (2.6 to 4.5)           | 8.4 (5.7 to 11.6)             | 1.2 (0.6 to 2.3)                | 9.1 (9.1 to 9.1)                  | 59.6 (51.7 to 69.1) | 9.4 (7.0 to 12.2)          | 22.4 (15.4 to 31.1)           | 3.3 (1.6 to 6.2)                | 24.6 (24.6 to 24.6)               |
| Ethiopia | 2011 | 24.0 (20.9 to 27.6)        | 3.4 (2.5 to 4.4)           | 8.8 (6.1 to 12.1)             | 1.4 (0.7 to 2.6)                | 10.5 (10.5 to 10.5)               | 64.4 (56.1 to 74.3) | 9.0 (6.7 to 11.8)          | 23.5 (16.4 to 32.5)           | 3.7 (1.8 to 7.1)                | 28.1 (28.1 to 28.1)               |
| Ethiopia | 2012 | 24.7 (21.2 to 28.6)        | 4.3 (3.3 to 5.7)           | 9.3 (6.5 to 12.9)             | 1.8 (0.9 to 3.4)                | 9.2 (9.2 to 9.2)                  | 66.3 (57.1 to 76.9) | 11.6 (8.8 to 15.2)         | 25.0 (17.5 to 34.8)           | 4.8 (2.4 to 9.2)                | 24.8 (24.8 to 24.8)               |
| Ethiopia | 2013 | 28.8 (25.1 to 33.0)        | 5.0 (3.8 to 6.5)           | 9.5 (6.6 to 13.3)             | 2.3 (1.1 to 4.4)                | 12.0 (12.0 to 12.0)               | 77.3 (67.5 to 88.6) | 13.4 (10.1 to 17.5)        | 25.5 (17.7 to 35.7)           | 6.3 (3.0 to 11.7)               | 32.2 (32.2 to 32.2)               |
| Ethiopia | 2014 | 27.1 (23.2 to 32.0)        | 5.2 (3.9 to 6.7)           | 9.5 (6.6 to 13.2)             | 3.4 (1.6 to 6.3)                | 9.0 (9.0 to 9.0)                  | 72.9 (62.4 to 86.0) | 14.0 (10.6 to 18.1)        | 25.6 (17.8 to 35.5)           | 9.1 (4.3 to 17.0)               | 24.3 (24.3 to 24.3)               |
| Ethiopia | 2015 | 29.0 (24.4 to 34.4)        | 6.2 (4.7 to 8.0)           | 10.1 (7.0 to 14.1)            | 4.5 (2.1 to 8.3)                | 8.2 (8.2 to 8.2)                  | 77.8 (65.5 to 92.3) | 16.6 (12.6 to 21.6)        | 27.2 (18.9 to 37.9)           | 12.1 (5.6 to 22.3)              | 22.0 (22.0 to 22.0)               |

| Country  | Year | 2018 US Dollars per capita |                            |                               |                                 |                                   | 2018 PPP per capita    |                            |                               |                                 |                                   |
|----------|------|----------------------------|----------------------------|-------------------------------|---------------------------------|-----------------------------------|------------------------|----------------------------|-------------------------------|---------------------------------|-----------------------------------|
|          |      | Health spending            | Government health spending | Out-of-pocket health spending | Prepaid private health spending | Development assistance for health | Health spending        | Government health spending | Out-of-pocket health spending | Prepaid private health spending | Development assistance for health |
| Ethiopia | 2016 | 30.7 (26.1 to 36.9)        | 6.9 (5.2 to 9.0)           | 10.5 (7.4 to 14.8)            | 5.2 (2.4 to 9.7)                | 8.0 (8.0 to 8.0)                  | 82.5 (70.0 to 99.1)    | 18.6 (14.1 to 24.2)        | 28.3 (19.8 to 39.7)           | 14.1 (6.6 to 26.1)              | 21.5 (21.5 to 21.5)               |
| Ethiopia | 2017 | 33.0 (27.8 to 39.7)        | 7.6 (5.7 to 9.9)           | 11.4 (8.0 to 16.0)            | 5.6 (2.6 to 10.4)               | 8.4 (8.4 to 8.4)                  | 88.7 (74.8 to 106.6)   | 20.4 (15.4 to 26.5)        | 30.6 (21.4 to 42.9)           | 15.1 (7.1 to 28.1)              | 22.6 (22.6 to 22.6)               |
| Ethiopia | 2018 | 33.5 (28.3 to 40.5)        | 8.0 (6.0 to 10.4)          | 11.8 (8.3 to 16.6)            | 5.9 (2.8 to 11.0)               | 7.7 (7.7 to 7.7)                  | 90.0 (76.0 to 108.8)   | 21.5 (16.2 to 28.1)        | 31.8 (22.2 to 44.7)           | 15.9 (7.4 to 29.4)              | 20.7 (20.7 to 20.8)               |
| Ethiopia | 2019 | 34.2 (28.5 to 41.1)        | 8.3 (6.3 to 10.9)          | 12.1 (8.5 to 17.0)            | 6.1 (2.9 to 11.3)               | 7.6 (7.1 to 8.1)                  | 91.8 (76.6 to 110.4)   | 22.4 (16.8 to 29.2)        | 32.6 (22.8 to 45.7)           | 16.4 (7.7 to 30.4)              | 20.4 (19.1 to 21.6)               |
| Ethiopia | 2020 | 34.9 (29.2 to 42.5)        | 8.6 (6.5 to 11.3)          | 12.4 (8.7 to 17.4)            | 6.3 (3.0 to 11.7)               | 7.5 (6.9 to 8.1)                  | 93.8 (78.4 to 114.2)   | 23.2 (17.5 to 30.2)        | 33.4 (23.3 to 46.8)           | 17.0 (7.9 to 31.5)              | 20.2 (18.6 to 21.8)               |
| Ethiopia | 2021 | 35.7 (29.4 to 43.2)        | 9.0 (6.7 to 11.7)          | 12.7 (8.9 to 17.8)            | 6.5 (3.0 to 12.1)               | 7.5 (6.7 to 8.3)                  | 95.8 (79.1 to 115.9)   | 24.1 (18.1 to 31.3)        | 34.1 (23.8 to 47.9)           | 17.5 (8.2 to 32.4)              | 20.1 (18.1 to 22.2)               |
| Ethiopia | 2022 | 36.4 (30.3 to 44.4)        | 9.3 (7.0 to 12.0)          | 13.0 (9.1 to 18.2)            | 6.7 (3.1 to 12.4)               | 7.4 (6.6 to 8.3)                  | 97.8 (81.4 to 119.3)   | 24.9 (18.7 to 32.4)        | 34.9 (24.4 to 48.9)           | 18.0 (8.4 to 33.4)              | 19.9 (17.6 to 22.3)               |
| Ethiopia | 2023 | 37.1 (30.9 to 45.2)        | 9.6 (7.2 to 12.4)          | 13.3 (9.3 to 18.6)            | 6.9 (3.2 to 12.8)               | 7.4 (6.4 to 8.4)                  | 99.7 (82.9 to 121.5)   | 25.7 (19.3 to 33.4)        | 35.7 (24.9 to 50.0)           | 18.6 (8.7 to 34.4)              | 19.8 (17.1 to 22.5)               |
| Ethiopia | 2024 | 37.9 (31.3 to 46.4)        | 9.9 (7.4 to 12.8)          | 13.6 (9.5 to 19.0)            | 7.1 (3.3 to 13.2)               | 7.3 (6.3 to 8.5)                  | 101.8 (84.1 to 124.6)  | 26.5 (20.0 to 34.4)        | 36.5 (25.4 to 51.0)           | 19.2 (8.9 to 35.5)              | 19.6 (16.9 to 22.9)               |
| Ethiopia | 2025 | 38.7 (32.2 to 47.1)        | 10.2 (7.7 to 13.2)         | 13.9 (9.7 to 19.4)            | 7.4 (3.4 to 13.6)               | 7.3 (6.2 to 8.6)                  | 103.9 (86.5 to 126.6)  | 27.3 (20.6 to 35.5)        | 37.3 (26.0 to 52.1)           | 19.8 (9.2 to 36.5)              | 19.6 (16.6 to 23.0)               |
| Ethiopia | 2026 | 39.4 (32.6 to 48.3)        | 10.5 (7.9 to 13.6)         | 14.1 (9.8 to 19.8)            | 7.6 (3.5 to 14.0)               | 7.2 (6.1 to 8.6)                  | 106.0 (87.7 to 129.9)  | 28.1 (21.2 to 36.5)        | 38.0 (26.5 to 53.1)           | 20.3 (9.4 to 37.5)              | 19.5 (16.3 to 23.0)               |
| Ethiopia | 2027 | 40.2 (33.2 to 49.1)        | 10.8 (8.1 to 14.0)         | 14.4 (10.1 to 20.1)           | 7.8 (3.6 to 14.4)               | 7.2 (6.0 to 8.7)                  | 108.1 (89.2 to 131.9)  | 28.9 (21.8 to 37.6)        | 38.8 (27.0 to 54.1)           | 20.9 (9.7 to 38.6)              | 19.4 (16.1 to 23.5)               |
| Ethiopia | 2028 | 41.1 (33.7 to 50.7)        | 11.1 (8.3 to 14.4)         | 14.7 (10.3 to 20.5)           | 8.0 (3.7 to 14.8)               | 7.2 (6.0 to 8.8)                  | 110.3 (90.6 to 136.3)  | 29.7 (22.4 to 38.6)        | 39.6 (27.6 to 55.2)           | 21.6 (10.0 to 39.6)             | 19.4 (16.2 to 23.5)               |
| Ethiopia | 2029 | 41.9 (34.5 to 51.1)        | 11.4 (8.6 to 14.8)         | 15.1 (10.5 to 20.9)           | 8.3 (3.8 to 15.2)               | 7.2 (5.9 to 8.9)                  | 112.6 (92.6 to 137.2)  | 30.6 (23.1 to 39.7)        | 40.4 (28.2 to 56.3)           | 22.2 (10.3 to 40.8)             | 19.4 (15.9 to 23.9)               |
| Ethiopia | 2030 | 42.8 (35.0 to 52.7)        | 11.7 (8.8 to 15.2)         | 15.4 (10.7 to 21.3)           | 8.5 (4.0 to 15.6)               | 7.2 (5.9 to 8.9)                  | 115.0 (94.0 to 141.5)  | 31.4 (23.7 to 40.9)        | 41.3 (28.8 to 57.3)           | 22.8 (10.6 to 41.9)             | 19.4 (15.8 to 23.8)               |
| Ethiopia | 2031 | 43.7 (35.7 to 53.6)        | 12.0 (9.1 to 15.7)         | 15.7 (10.9 to 21.8)           | 8.8 (4.1 to 16.1)               | 7.2 (5.8 to 9.1)                  | 117.4 (95.9 to 144.0)  | 32.3 (24.3 to 42.1)        | 42.1 (29.4 to 58.5)           | 23.5 (10.9 to 43.1)             | 19.4 (15.6 to 24.4)               |
| Ethiopia | 2032 | 44.6 (36.4 to 55.1)        | 12.3 (9.3 to 16.1)         | 16.0 (11.2 to 22.2)           | 9.0 (4.2 to 16.5)               | 7.2 (5.8 to 9.1)                  | 119.8 (97.7 to 148.0)  | 33.2 (24.9 to 43.3)        | 43.0 (30.0 to 59.7)           | 24.2 (11.2 to 44.3)             | 19.5 (15.5 to 24.4)               |
| Ethiopia | 2033 | 45.5 (37.1 to 56.0)        | 12.7 (9.5 to 16.5)         | 16.3 (11.4 to 22.7)           | 9.3 (4.3 to 16.9)               | 7.3 (5.7 to 9.3)                  | 122.2 (99.7 to 150.4)  | 34.0 (25.6 to 44.4)        | 43.8 (30.5 to 60.9)           | 24.9 (11.5 to 45.4)             | 19.5 (15.4 to 25.0)               |
| Ethiopia | 2034 | 46.5 (37.9 to 57.2)        | 13.0 (9.8 to 16.9)         | 16.6 (11.6 to 23.1)           | 9.5 (4.4 to 17.3)               | 7.3 (5.7 to 9.5)                  | 124.9 (101.9 to 153.7) | 34.9 (26.2 to 45.5)        | 44.7 (31.2 to 62.2)           | 25.6 (11.8 to 46.6)             | 19.6 (15.3 to 25.7)               |
| Ethiopia | 2035 | 47.5 (38.7 to 58.4)        | 13.3 (10.0 to 17.4)        | 17.0 (11.8 to 23.6)           | 9.8 (4.5 to 17.8)               | 7.3 (5.7 to 9.7)                  | 127.6 (103.9 to 156.9) | 35.9 (26.9 to 46.8)        | 45.6 (31.8 to 63.5)           | 26.4 (12.1 to 47.8)             | 19.7 (15.3 to 26.0)               |
| Ethiopia | 2036 | 48.5 (39.2 to 60.3)        | 13.7 (10.3 to 17.9)        | 17.3 (12.0 to 24.1)           | 10.1 (4.6 to 18.2)              | 7.4 (5.7 to 10.0)                 | 130.2 (105.2 to 162.0) | 36.8 (27.6 to 48.0)        | 46.5 (32.4 to 64.7)           | 27.1 (12.4 to 49.0)             | 19.8 (15.2 to 26.8)               |

| Country                        | Year | 2018 US Dollars per capita |                            |                               |                                 |                                   | 2018 PPP per capita    |                            |                               |                                 |                                   |
|--------------------------------|------|----------------------------|----------------------------|-------------------------------|---------------------------------|-----------------------------------|------------------------|----------------------------|-------------------------------|---------------------------------|-----------------------------------|
|                                |      | Health spending            | Government health spending | Out-of-pocket health spending | Prepaid private health spending | Development assistance for health | Health spending        | Government health spending | Out-of-pocket health spending | Prepaid private health spending | Development assistance for health |
| Ethiopia                       | 2037 | 49.5 (40.3 to 61.2)        | 14.1 (10.5 to 18.3)        | 17.6 (12.3 to 24.5)           | 10.4 (4.8 to 18.7)              | 7.4 (5.6 to 10.1)                 | 132.9 (108.3 to 164.4) | 37.8 (28.2 to 49.2)        | 47.4 (33.0 to 65.9)           | 27.9 (12.8 to 50.3)             | 19.9 (15.0 to 27.1)               |
| Ethiopia                       | 2038 | 50.6 (40.9 to 63.0)        | 14.4 (10.8 to 18.8)        | 18.0 (12.5 to 25.0)           | 10.7 (4.9 to 19.2)              | 7.5 (5.6 to 10.4)                 | 135.8 (109.8 to 169.2) | 38.8 (29.0 to 50.4)        | 48.3 (33.7 to 67.3)           | 28.7 (13.1 to 51.6)             | 20.0 (14.9 to 27.8)               |
| Ethiopia                       | 2039 | 51.7 (42.0 to 63.9)        | 14.8 (11.1 to 19.3)        | 18.4 (12.8 to 25.6)           | 11.0 (5.0 to 19.7)              | 7.5 (5.5 to 10.4)                 | 138.8 (113.0 to 171.6) | 39.8 (29.8 to 51.8)        | 49.3 (34.4 to 68.7)           | 29.5 (13.5 to 53.0)             | 20.1 (14.8 to 27.9)               |
| Ethiopia                       | 2040 | 52.7 (42.6 to 65.6)        | 15.2 (11.3 to 19.7)        | 18.7 (13.1 to 26.1)           | 11.3 (5.2 to 20.2)              | 7.5 (5.5 to 10.8)                 | 141.7 (114.3 to 176.2) | 40.8 (30.5 to 53.0)        | 50.2 (35.1 to 70.0)           | 30.3 (13.9 to 54.4)             | 20.3 (14.9 to 29.1)               |
| Ethiopia                       | 2041 | 53.9 (43.7 to 67.0)        | 15.6 (11.6 to 20.2)        | 19.1 (13.3 to 26.6)           | 11.6 (5.3 to 20.8)              | 7.6 (5.5 to 11.0)                 | 144.8 (117.3 to 179.9) | 41.9 (31.2 to 54.4)        | 51.3 (35.8 to 71.4)           | 31.2 (14.4 to 56.0)             | 20.4 (14.7 to 29.6)               |
| Ethiopia                       | 2042 | 55.1 (44.3 to 69.1)        | 16.0 (12.0 to 20.8)        | 19.5 (13.6 to 27.2)           | 12.0 (5.5 to 21.5)              | 7.7 (5.4 to 11.3)                 | 148.0 (119.1 to 185.5) | 43.0 (32.1 to 55.8)        | 52.3 (36.6 to 73.0)           | 32.1 (14.8 to 57.7)             | 20.6 (14.6 to 30.4)               |
| Ethiopia                       | 2043 | 56.3 (45.6 to 70.3)        | 16.4 (12.3 to 21.3)        | 19.8 (13.9 to 27.7)           | 12.3 (5.6 to 22.2)              | 7.7 (5.5 to 11.6)                 | 151.3 (122.5 to 188.7) | 44.1 (32.9 to 57.2)        | 53.3 (37.3 to 74.4)           | 33.1 (15.2 to 59.5)             | 20.8 (14.7 to 31.1)               |
| Ethiopia                       | 2044 | 57.5 (45.9 to 72.0)        | 16.8 (12.6 to 21.9)        | 20.2 (14.1 to 28.3)           | 12.6 (5.8 to 22.8)              | 7.8 (5.4 to 11.9)                 | 154.6 (123.3 to 193.3) | 45.3 (33.7 to 59.0)        | 54.4 (38.0 to 76.0)           | 34.0 (15.6 to 61.4)             | 21.0 (14.4 to 32.0)               |
| Ethiopia                       | 2045 | 58.9 (47.5 to 73.5)        | 17.3 (12.9 to 22.7)        | 20.6 (14.4 to 28.9)           | 13.0 (5.9 to 23.5)              | 7.9 (5.3 to 12.2)                 | 158.2 (127.6 to 197.4) | 46.6 (34.8 to 61.0)        | 55.4 (38.7 to 77.6)           | 34.9 (16.0 to 63.1)             | 21.2 (14.2 to 32.9)               |
| Ethiopia                       | 2046 | 60.2 (48.0 to 75.2)        | 17.8 (13.3 to 23.3)        | 21.0 (14.7 to 29.4)           | 13.4 (6.1 to 24.2)              | 8.0 (5.2 to 12.4)                 | 161.7 (128.9 to 201.9) | 47.9 (35.7 to 62.7)        | 56.4 (39.4 to 79.0)           | 35.9 (16.4 to 64.9)             | 21.5 (14.1 to 33.4)               |
| Ethiopia                       | 2047 | 61.6 (49.8 to 76.8)        | 18.4 (13.6 to 24.1)        | 21.4 (14.9 to 29.9)           | 13.7 (6.2 to 24.9)              | 8.1 (5.3 to 13.0)                 | 165.5 (133.7 to 206.3) | 49.4 (36.6 to 64.8)        | 57.4 (40.1 to 80.4)           | 36.8 (16.8 to 66.8)             | 21.7 (14.3 to 35.0)               |
| Ethiopia                       | 2048 | 63.1 (49.9 to 78.7)        | 19.0 (14.1 to 24.9)        | 21.8 (15.2 to 30.5)           | 14.1 (6.4 to 25.6)              | 8.2 (5.3 to 13.3)                 | 169.5 (134.2 to 211.5) | 51.1 (37.9 to 66.9)        | 58.5 (40.8 to 81.9)           | 37.8 (17.2 to 68.7)             | 22.0 (14.3 to 35.7)               |
| Ethiopia                       | 2049 | 64.6 (51.9 to 81.2)        | 19.7 (14.5 to 25.9)        | 22.2 (15.4 to 31.1)           | 14.5 (6.6 to 26.3)              | 8.3 (5.4 to 13.8)                 | 173.6 (139.5 to 218.2) | 52.9 (39.1 to 69.5)        | 59.6 (41.5 to 83.4)           | 38.9 (17.6 to 70.6)             | 22.3 (14.4 to 37.0)               |
| Ethiopia                       | 2050 | 66.2 (53.0 to 83.6)        | 20.4 (15.0 to 26.8)        | 22.6 (15.7 to 31.6)           | 14.8 (6.7 to 27.0)              | 8.4 (5.3 to 14.1)                 | 177.9 (142.4 to 224.6) | 54.7 (40.3 to 71.9)        | 60.6 (42.2 to 85.0)           | 39.9 (18.0 to 72.6)             | 22.7 (14.3 to 37.9)               |
| Federated States of Micronesia | 1995 | 89.7 (75.1 to 106.3)       | 73.9 (60.3 to 90.0)        | 13.9 (9.9 to 19.2)            | 0.0 (0.0 to 0.0)                | 1.9 (1.9 to 1.9)                  | 99.5 (83.3 to 118.0)   | 82.0 (66.9 to 99.8)        | 15.4 (11.0 to 21.4)           | 0.0 (0.0 to 0.0)                | 2.1 (2.1 to 2.1)                  |
| Federated States of Micronesia | 1996 | 84.9 (71.4 to 100.6)       | 71.2 (58.9 to 86.3)        | 13.7 (9.8 to 19.1)            | 0.0 (0.0 to 0.0)                | 0.0 (0.0 to 0.0)                  | 94.2 (79.2 to 111.6)   | 79.0 (65.3 to 95.8)        | 15.2 (10.8 to 21.2)           | 0.0 (0.0 to 0.0)                | 0.0 (0.0 to 0.0)                  |
| Federated States of Micronesia | 1997 | 81.8 (69.1 to 95.9)        | 67.3 (56.0 to 81.1)        | 13.4 (9.6 to 18.8)            | 0.0 (0.0 to 0.0)                | 1.1 (1.1 to 1.1)                  | 90.7 (76.7 to 106.3)   | 74.6 (62.1 to 89.9)        | 14.8 (10.7 to 20.9)           | 0.0 (0.0 to 0.0)                | 1.3 (1.3 to 1.3)                  |
| Federated States of Micronesia | 1998 | 82.3 (69.7 to 95.8)        | 67.9 (55.8 to 81.3)        | 13.5 (9.5 to 18.8)            | 0.0 (0.0 to 0.0)                | 0.8 (0.8 to 0.8)                  | 91.3 (77.3 to 106.3)   | 75.4 (61.9 to 90.2)        | 15.0 (10.5 to 20.9)           | 0.0 (0.0 to 0.0)                | 0.9 (0.9 to 0.9)                  |
| Federated States of Micronesia | 1999 | 173.2 (161.1 to 186.6)     | 65.3 (53.6 to 78.0)        | 13.2 (9.3 to 18.3)            | 0.0 (0.0 to 0.0)                | 94.6 (94.6 to 94.6)               | 192.1 (178.7 to 207.0) | 72.4 (59.5 to 86.6)        | 14.7 (10.3 to 20.3)           | 0.0 (0.0 to 0.0)                | 105.0 (105.0 to 105.0)            |
| Federated States of Micronesia | 2000 | 74.4 (63.4 to 86.1)        | 60.0 (49.3 to 71.4)        | 12.7 (8.9 to 17.5)            | 0.0 (0.0 to 0.0)                | 1.8 (1.8 to 1.8)                  | 82.6 (70.3 to 95.5)    | 66.5 (54.7 to 79.2)        | 14.1 (9.8 to 19.4)            | 0.0 (0.0 to 0.0)                | 2.0 (2.0 to 2.0)                  |
| Federated States of Micronesia | 2001 | 75.7 (65.0 to 87.3)        | 59.7 (49.1 to 71.2)        | 12.5 (8.7 to 17.2)            | 0.0 (0.0 to 0.0)                | 3.5 (3.5 to 3.5)                  | 84.0 (72.1 to 96.8)    | 66.3 (54.5 to 79.0)        | 13.9 (9.7 to 19.1)            | 0.0 (0.0 to 0.0)                | 3.8 (3.8 to 3.8)                  |

| Country                        | Year | 2018 US Dollars per capita |                            |                               |                                 |                                   | 2018 PPP per capita    |                            |                               |                                 |                                   |
|--------------------------------|------|----------------------------|----------------------------|-------------------------------|---------------------------------|-----------------------------------|------------------------|----------------------------|-------------------------------|---------------------------------|-----------------------------------|
|                                |      | Health spending            | Government health spending | Out-of-pocket health spending | Prepaid private health spending | Development assistance for health | Health spending        | Government health spending | Out-of-pocket health spending | Prepaid private health spending | Development assistance for health |
| Federated States of Micronesia | 2002 | 74.0 (63.5 to 85.8)        | 58.8 (48.5 to 69.8)        | 12.3 (8.6 to 17.0)            | 0.0 (0.0 to 0.0)                | 2.9 (2.9 to 2.9)                  | 82.1 (70.4 to 95.2)    | 65.2 (53.8 to 77.4)        | 13.6 (9.6 to 18.9)            | 0.0 (0.0 to 0.0)                | 3.2 (3.2 to 3.2)                  |
| Federated States of Micronesia | 2003 | 131.1 (119.8 to 143.5)     | 64.8 (53.8 to 77.5)        | 12.5 (8.7 to 17.3)            | 0.0 (0.0 to 0.0)                | 53.8 (53.8 to 53.8)               | 145.4 (132.9 to 159.2) | 71.9 (59.7 to 86.0)        | 13.8 (9.7 to 19.2)            | 0.0 (0.0 to 0.0)                | 59.7 (59.7 to 59.7)               |
| Federated States of Micronesia | 2004 | 310.8 (299.5 to 324.7)     | 69.3 (57.7 to 82.7)        | 12.4 (8.6 to 17.2)            | 0.0 (0.0 to 0.0)                | 229.2 (229.2 to 229.2)            | 344.8 (332.2 to 360.2) | 76.8 (64.0 to 91.7)        | 13.7 (9.6 to 19.1)            | 0.0 (0.0 to 0.0)                | 254.2 (254.2 to 254.2)            |
| Federated States of Micronesia | 2005 | 335.5 (323.6 to 350.5)     | 73.0 (61.3 to 87.4)        | 12.2 (8.6 to 17.2)            | 0.0 (0.0 to 0.0)                | 250.2 (250.2 to 250.2)            | 372.1 (358.9 to 388.8) | 81.0 (68.0 to 97.0)        | 13.6 (9.5 to 19.1)            | 0.0 (0.0 to 0.0)                | 277.5 (277.5 to 277.5)            |
| Federated States of Micronesia | 2006 | 298.4 (285.9 to 312.8)     | 75.5 (63.7 to 90.0)        | 12.0 (8.4 to 16.9)            | 0.0 (0.0 to 0.0)                | 210.8 (210.8 to 210.8)            | 331.0 (317.2 to 347.0) | 83.8 (70.6 to 99.9)        | 13.3 (9.3 to 18.8)            | 0.0 (0.0 to 0.0)                | 233.8 (233.8 to 233.8)            |
| Federated States of Micronesia | 2007 | 298.9 (286.4 to 313.1)     | 74.4 (62.4 to 87.8)        | 11.6 (7.9 to 16.3)            | 0.0 (0.0 to 0.0)                | 212.9 (212.9 to 212.9)            | 331.6 (317.7 to 347.3) | 82.6 (69.3 to 97.4)        | 12.8 (8.8 to 18.1)            | 0.0 (0.0 to 0.0)                | 236.2 (236.2 to 236.2)            |
| Federated States of Micronesia | 2008 | 319.6 (306.7 to 334.0)     | 76.9 (64.6 to 90.8)        | 11.2 (7.8 to 15.8)            | 0.0 (0.0 to 0.0)                | 231.5 (231.5 to 231.5)            | 354.6 (340.3 to 370.6) | 85.3 (71.6 to 100.7)       | 12.4 (8.7 to 17.5)            | 0.0 (0.0 to 0.0)                | 256.9 (256.9 to 256.9)            |
| Federated States of Micronesia | 2009 | 376.3 (363.8 to 391.2)     | 76.5 (64.8 to 90.4)        | 10.8 (7.5 to 15.1)            | 0.0 (0.0 to 0.0)                | 289.0 (289.0 to 289.0)            | 417.4 (403.6 to 434.0) | 84.8 (71.9 to 100.3)       | 12.0 (8.3 to 16.7)            | 0.0 (0.0 to 0.0)                | 320.6 (320.6 to 320.6)            |
| Federated States of Micronesia | 2010 | 117.7 (103.6 to 133.1)     | 82.8 (69.7 to 97.5)        | 10.7 (7.5 to 14.9)            | 0.0 (0.0 to 0.0)                | 24.2 (24.2 to 24.2)               | 130.6 (115.0 to 147.7) | 91.9 (77.3 to 108.2)       | 11.9 (8.4 to 16.6)            | 0.0 (0.0 to 0.0)                | 26.9 (26.9 to 26.9)               |
| Federated States of Micronesia | 2011 | 128.4 (113.6 to 145.0)     | 90.4 (76.0 to 105.5)       | 10.5 (7.4 to 14.6)            | 0.0 (0.0 to 0.0)                | 27.5 (27.5 to 27.5)               | 142.5 (126.1 to 160.8) | 100.2 (84.3 to 117.0)      | 11.7 (8.2 to 16.2)            | 0.0 (0.0 to 0.0)                | 30.5 (30.5 to 30.5)               |
| Federated States of Micronesia | 2012 | 354.0 (339.6 to 369.6)     | 88.0 (73.4 to 103.0)       | 10.1 (7.0 to 13.9)            | 0.0 (0.0 to 0.0)                | 255.9 (255.9 to 255.9)            | 392.7 (376.7 to 410.0) | 97.6 (81.5 to 114.2)       | 11.2 (7.8 to 15.5)            | 0.0 (0.0 to 0.0)                | 283.9 (283.9 to 283.9)            |
| Federated States of Micronesia | 2013 | 114.3 (99.2 to 130.4)      | 87.8 (72.5 to 103.9)       | 9.8 (6.7 to 13.5)             | 0.0 (0.0 to 0.0)                | 16.7 (16.7 to 16.7)               | 126.8 (110.0 to 144.6) | 97.4 (80.4 to 115.2)       | 10.8 (7.5 to 14.9)            | 0.0 (0.0 to 0.0)                | 18.6 (18.6 to 18.6)               |
| Federated States of Micronesia | 2014 | 397.8 (381.7 to 414.8)     | 89.8 (73.8 to 106.5)       | 9.5 (6.6 to 13.1)             | 0.0 (0.0 to 0.0)                | 298.5 (298.5 to 298.5)            | 441.3 (423.4 to 460.2) | 99.6 (81.9 to 118.2)       | 10.6 (7.3 to 14.5)            | 0.0 (0.0 to 0.0)                | 331.1 (331.1 to 331.1)            |
| Federated States of Micronesia | 2015 | 203.3 (185.3 to 223.5)     | 98.2 (80.4 to 118.3)       | 9.8 (6.7 to 13.6)             | 0.0 (0.0 to 0.0)                | 95.3 (95.3 to 95.3)               | 225.5 (205.6 to 247.9) | 108.9 (89.2 to 131.3)      | 10.8 (7.5 to 15.0)            | 0.0 (0.0 to 0.0)                | 105.7 (105.7 to 105.7)            |
| Federated States of Micronesia | 2016 | 130.1 (109.1 to 153.8)     | 109.6 (88.7 to 133.0)      | 10.0 (6.9 to 13.8)            | 0.0 (0.0 to 0.0)                | 10.5 (10.5 to 10.5)               | 144.3 (121.1 to 170.6) | 121.6 (98.4 to 147.5)      | 11.1 (7.6 to 15.3)            | 0.0 (0.0 to 0.0)                | 11.6 (11.6 to 11.6)               |
| Federated States of Micronesia | 2017 | 131.0 (109.4 to 155.0)     | 110.6 (89.5 to 134.2)      | 10.2 (7.0 to 14.1)            | 0.0 (0.0 to 0.0)                | 10.2 (10.2 to 10.2)               | 145.3 (121.3 to 172.0) | 122.7 (99.3 to 148.9)      | 11.3 (7.8 to 15.6)            | 0.0 (0.0 to 0.0)                | 11.3 (11.3 to 11.3)               |
| Federated States of Micronesia | 2018 | 132.4 (110.4 to 157.5)     | 112.6 (91.3 to 136.7)      | 10.3 (7.1 to 14.3)            | 0.0 (0.0 to 0.0)                | 9.5 (9.5 to 9.5)                  | 146.9 (122.5 to 174.7) | 124.9 (101.3 to 151.7)     | 11.4 (7.9 to 15.8)            | 0.0 (0.0 to 0.0)                | 10.6 (10.6 to 10.6)               |
| Federated States of Micronesia | 2019 | 135.8 (113.9 to 160.7)     | 115.8 (93.4 to 140.7)      | 10.4 (7.2 to 14.4)            | 0.0 (0.0 to 0.0)                | 9.6 (8.9 to 10.1)                 | 150.6 (126.3 to 178.3) | 128.5 (103.6 to 156.1)     | 11.5 (7.9 to 16.0)            | 0.0 (0.0 to 0.0)                | 10.6 (9.9 to 11.2)                |
| Federated States of Micronesia | 2020 | 139.0 (115.7 to 164.5)     | 118.8 (96.4 to 143.9)      | 10.5 (7.2 to 14.6)            | 0.0 (0.0 to 0.0)                | 9.7 (8.9 to 10.4)                 | 154.2 (128.4 to 182.5) | 131.8 (106.9 to 159.7)     | 11.6 (8.0 to 16.1)            | 0.0 (0.0 to 0.0)                | 10.7 (9.8 to 11.6)                |
| Federated States of Micronesia | 2021 | 141.3 (117.8 to 167.7)     | 120.9 (98.2 to 146.8)      | 10.6 (7.3 to 14.7)            | 0.0 (0.0 to 0.0)                | 9.8 (8.8 to 10.8)                 | 156.7 (130.6 to 186.0) | 134.1 (108.9 to 162.9)     | 11.7 (8.1 to 16.3)            | 0.0 (0.0 to 0.0)                | 10.9 (9.8 to 12.0)                |
| Federated States of Micronesia | 2022 | 143.7 (120.3 to 171.7)     | 123.0 (99.9 to 149.8)      | 10.7 (7.4 to 14.9)            | 0.0 (0.0 to 0.0)                | 10.0 (8.9 to 11.1)                | 159.4 (133.4 to 190.4) | 136.4 (110.8 to 166.1)     | 11.9 (8.2 to 16.5)            | 0.0 (0.0 to 0.0)                | 11.1 (9.8 to 12.4)                |



| Country                        | Year | 2018 US Dollars per capita |                            |                               |                                 |                                   | 2018 PPP per capita    |                            |                               |                                 |                                   |
|--------------------------------|------|----------------------------|----------------------------|-------------------------------|---------------------------------|-----------------------------------|------------------------|----------------------------|-------------------------------|---------------------------------|-----------------------------------|
|                                |      | Health spending            | Government health spending | Out-of-pocket health spending | Prepaid private health spending | Development assistance for health | Health spending        | Government health spending | Out-of-pocket health spending | Prepaid private health spending | Development assistance for health |
| Federated States of Micronesia | 2023 | 146.2 (121.7 to 173.5)     | 125.2 (101.6 to 152.5)     | 10.8 (7.5 to 15.0)            | 0.0 (0.0 to 0.0)                | 10.1 (8.8 to 11.5)                | 162.2 (135.0 to 192.4) | 138.9 (112.7 to 169.2)     | 12.0 (8.3 to 16.7)            | 0.0 (0.0 to 0.0)                | 11.2 (9.8 to 12.8)                |
| Federated States of Micronesia | 2024 | 148.7 (123.8 to 177.0)     | 127.4 (103.3 to 155.2)     | 11.0 (7.5 to 15.2)            | 0.0 (0.0 to 0.0)                | 10.3 (8.9 to 11.9)                | 165.0 (137.4 to 196.4) | 141.3 (114.6 to 172.2)     | 12.2 (8.4 to 16.9)            | 0.0 (0.0 to 0.0)                | 11.5 (9.9 to 13.2)                |
| Federated States of Micronesia | 2025 | 151.3 (126.4 to 180.2)     | 129.7 (104.9 to 158.2)     | 11.1 (7.6 to 15.4)            | 0.0 (0.0 to 0.0)                | 10.5 (9.0 to 12.3)                | 167.8 (140.2 to 199.9) | 143.9 (116.4 to 175.4)     | 12.3 (8.5 to 17.1)            | 0.0 (0.0 to 0.0)                | 11.6 (9.9 to 13.6)                |
| Federated States of Micronesia | 2026 | 153.9 (128.2 to 182.9)     | 132.0 (106.7 to 160.7)     | 11.2 (7.7 to 15.6)            | 0.0 (0.0 to 0.0)                | 10.7 (9.0 to 12.5)                | 170.7 (142.2 to 202.9) | 146.5 (118.3 to 178.2)     | 12.4 (8.6 to 17.3)            | 0.0 (0.0 to 0.0)                | 11.8 (10.0 to 13.9)               |
| Federated States of Micronesia | 2027 | 156.4 (129.6 to 185.7)     | 134.2 (108.3 to 163.2)     | 11.3 (7.8 to 15.8)            | 0.0 (0.0 to 0.0)                | 10.9 (9.1 to 12.9)                | 173.5 (143.8 to 206.0) | 148.9 (120.2 to 181.0)     | 12.5 (8.6 to 17.5)            | 0.0 (0.0 to 0.1)                | 12.0 (10.1 to 14.3)               |
| Federated States of Micronesia | 2028 | 158.7 (132.0 to 188.9)     | 136.2 (109.8 to 165.7)     | 11.4 (7.9 to 15.9)            | 0.0 (0.0 to 0.0)                | 11.1 (9.3 to 13.3)                | 176.1 (146.4 to 209.6) | 151.1 (121.8 to 183.8)     | 12.7 (8.7 to 17.6)            | 0.0 (0.0 to 0.1)                | 12.3 (10.3 to 14.8)               |
| Federated States of Micronesia | 2029 | 160.9 (133.6 to 191.1)     | 138.0 (111.4 to 168.2)     | 11.5 (7.9 to 16.0)            | 0.0 (0.0 to 0.0)                | 11.3 (9.3 to 13.8)                | 178.4 (148.3 to 212.0) | 153.1 (123.6 to 186.6)     | 12.8 (8.8 to 17.8)            | 0.0 (0.0 to 0.1)                | 12.5 (10.3 to 15.3)               |
| Federated States of Micronesia | 2030 | 163.0 (135.6 to 194.2)     | 139.9 (112.7 to 170.5)     | 11.6 (8.0 to 16.2)            | 0.0 (0.0 to 0.0)                | 11.5 (9.4 to 14.1)                | 180.8 (150.4 to 215.4) | 155.2 (125.1 to 189.1)     | 12.9 (8.9 to 17.9)            | 0.0 (0.0 to 0.1)                | 12.8 (10.4 to 15.6)               |
| Federated States of Micronesia | 2031 | 165.3 (138.3 to 196.2)     | 141.8 (113.9 to 172.3)     | 11.7 (8.1 to 16.3)            | 0.0 (0.0 to 0.1)                | 11.7 (9.5 to 14.7)                | 183.4 (153.5 to 217.6) | 157.3 (126.4 to 191.1)     | 13.0 (9.0 to 18.1)            | 0.0 (0.0 to 0.1)                | 13.0 (10.6 to 16.3)               |
| Federated States of Micronesia | 2032 | 167.5 (138.4 to 198.2)     | 143.6 (115.2 to 174.5)     | 11.8 (8.2 to 16.5)            | 0.0 (0.0 to 0.1)                | 12.0 (9.6 to 15.1)                | 185.8 (153.6 to 219.9) | 159.3 (127.8 to 193.6)     | 13.1 (9.1 to 18.3)            | 0.0 (0.0 to 0.1)                | 13.3 (10.7 to 16.7)               |
| Federated States of Micronesia | 2033 | 169.7 (140.6 to 201.5)     | 145.5 (116.8 to 176.6)     | 12.0 (8.3 to 16.6)            | 0.0 (0.0 to 0.1)                | 12.2 (9.7 to 15.7)                | 188.3 (156.0 to 223.6) | 161.4 (129.6 to 195.9)     | 13.3 (9.2 to 18.5)            | 0.0 (0.0 to 0.1)                | 13.6 (10.8 to 17.4)               |
| Federated States of Micronesia | 2034 | 171.8 (143.3 to 204.4)     | 147.2 (118.3 to 178.9)     | 12.1 (8.3 to 16.8)            | 0.0 (0.0 to 0.1)                | 12.5 (9.9 to 16.2)                | 190.6 (158.9 to 226.7) | 163.3 (131.3 to 198.4)     | 13.4 (9.3 to 18.7)            | 0.0 (0.0 to 0.1)                | 13.9 (10.9 to 17.9)               |
| Federated States of Micronesia | 2035 | 174.0 (143.7 to 208.3)     | 148.9 (119.9 to 181.6)     | 12.2 (8.4 to 17.0)            | 0.0 (0.0 to 0.1)                | 12.8 (10.0 to 16.8)               | 193.0 (159.4 to 231.1) | 165.2 (133.1 to 201.4)     | 13.5 (9.4 to 18.9)            | 0.0 (0.0 to 0.1)                | 14.2 (11.1 to 18.6)               |
| Federated States of Micronesia | 2036 | 176.3 (145.9 to 209.7)     | 150.8 (121.5 to 184.2)     | 12.4 (8.5 to 17.2)            | 0.0 (0.0 to 0.1)                | 13.1 (10.1 to 17.6)               | 195.6 (161.8 to 232.7) | 167.3 (134.8 to 204.3)     | 13.7 (9.5 to 19.1)            | 0.0 (0.0 to 0.1)                | 14.6 (11.2 to 19.6)               |
| Federated States of Micronesia | 2037 | 178.6 (147.2 to 214.0)     | 152.6 (122.9 to 187.5)     | 12.5 (8.6 to 17.5)            | 0.0 (0.0 to 0.1)                | 13.4 (10.3 to 18.0)               | 198.1 (163.3 to 237.4) | 169.3 (136.4 to 208.0)     | 13.9 (9.6 to 19.4)            | 0.0 (0.0 to 0.1)                | 14.9 (11.4 to 20.0)               |
| Federated States of Micronesia | 2038 | 180.9 (148.6 to 216.6)     | 154.4 (123.8 to 191.0)     | 12.7 (8.7 to 17.7)            | 0.0 (0.0 to 0.1)                | 13.7 (10.5 to 19.1)               | 200.6 (164.8 to 240.2) | 171.3 (137.3 to 211.8)     | 14.1 (9.7 to 19.7)            | 0.0 (0.0 to 0.1)                | 15.2 (11.6 to 21.2)               |
| Federated States of Micronesia | 2039 | 183.2 (151.1 to 218.5)     | 156.2 (124.6 to 192.9)     | 12.9 (8.9 to 18.0)            | 0.0 (0.0 to 0.1)                | 14.1 (10.7 to 19.5)               | 203.2 (167.6 to 242.4) | 173.3 (138.2 to 214.0)     | 14.3 (9.8 to 20.0)            | 0.0 (0.0 to 0.1)                | 15.6 (11.9 to 21.6)               |
| Federated States of Micronesia | 2040 | 185.5 (151.3 to 224.0)     | 158.1 (126.1 to 196.6)     | 13.0 (9.0 to 18.3)            | 0.0 (0.0 to 0.1)                | 14.4 (10.9 to 19.9)               | 205.8 (167.8 to 248.5) | 175.3 (139.9 to 218.1)     | 14.5 (10.0 to 20.2)           | 0.0 (0.0 to 0.1)                | 16.0 (12.1 to 22.1)               |
| Federated States of Micronesia | 2041 | 188.2 (153.5 to 229.5)     | 160.2 (127.2 to 199.7)     | 13.2 (9.1 to 18.5)            | 0.0 (0.0 to 0.1)                | 14.8 (11.1 to 20.5)               | 208.8 (170.3 to 254.6) | 177.8 (141.2 to 221.5)     | 14.7 (10.1 to 20.5)           | 0.0 (0.0 to 0.1)                | 16.4 (12.3 to 22.7)               |
| Federated States of Micronesia | 2042 | 191.1 (154.7 to 233.9)     | 162.5 (127.9 to 203.5)     | 13.4 (9.2 to 18.7)            | 0.0 (0.0 to 0.1)                | 15.1 (11.4 to 21.5)               | 211.9 (171.6 to 259.5) | 180.3 (141.8 to 225.8)     | 14.9 (10.2 to 20.8)           | 0.0 (0.0 to 0.1)                | 16.8 (12.6 to 23.9)               |
| Federated States of Micronesia | 2043 | 193.9 (156.6 to 235.2)     | 164.8 (129.0 to 207.8)     | 13.6 (9.3 to 19.0)            | 0.0 (0.0 to 0.1)                | 15.5 (11.5 to 22.4)               | 215.1 (173.8 to 260.9) | 182.8 (143.1 to 230.5)     | 15.0 (10.3 to 21.1)           | 0.0 (0.0 to 0.1)                | 17.2 (12.8 to 24.9)               |

| Country                        | Year | 2018 US Dollars per capita |                            |                               |                                 |                                   | 2018 PPP per capita    |                            |                               |                                 |                                   |
|--------------------------------|------|----------------------------|----------------------------|-------------------------------|---------------------------------|-----------------------------------|------------------------|----------------------------|-------------------------------|---------------------------------|-----------------------------------|
|                                |      | Health spending            | Government health spending | Out-of-pocket health spending | Prepaid private health spending | Development assistance for health | Health spending        | Government health spending | Out-of-pocket health spending | Prepaid private health spending | Development assistance for health |
| Federated States of Micronesia | 2044 | 197.1 (159.1 to 242.4)     | 167.4 (130.4 to 211.9)     | 13.7 (9.4 to 19.2)            | 0.0 (0.0 to 0.1)                | 15.9 (11.7 to 23.1)               | 218.6 (176.4 to 268.9) | 185.7 (144.7 to 235.1)     | 15.2 (10.4 to 21.3)           | 0.0 (0.0 to 0.1)                | 17.7 (13.0 to 25.6)               |
| Federated States of Micronesia | 2045 | 200.5 (159.9 to 245.6)     | 170.3 (132.9 to 215.7)     | 13.9 (9.5 to 19.4)            | 0.0 (0.0 to 0.1)                | 16.4 (11.8 to 24.7)               | 222.5 (177.4 to 272.4) | 188.9 (147.4 to 239.3)     | 15.4 (10.5 to 21.5)           | 0.0 (0.0 to 0.1)                | 18.2 (13.1 to 27.4)               |
| Federated States of Micronesia | 2046 | 204.6 (165.8 to 249.7)     | 173.7 (136.4 to 219.6)     | 14.0 (9.6 to 19.5)            | 0.0 (0.0 to 0.1)                | 16.8 (12.2 to 25.9)               | 226.9 (183.9 to 277.0) | 192.7 (151.3 to 243.6)     | 15.5 (10.6 to 21.6)           | 0.0 (0.0 to 0.1)                | 18.6 (13.5 to 28.7)               |
| Federated States of Micronesia | 2047 | 209.0 (169.1 to 256.0)     | 177.5 (139.3 to 223.5)     | 14.1 (9.7 to 19.7)            | 0.0 (0.0 to 0.1)                | 17.3 (12.4 to 27.2)               | 231.8 (187.6 to 283.9) | 196.9 (154.5 to 247.9)     | 15.7 (10.7 to 21.8)           | 0.0 (0.0 to 0.1)                | 19.2 (13.8 to 30.2)               |
| Federated States of Micronesia | 2048 | 213.6 (173.3 to 260.9)     | 181.6 (143.7 to 228.0)     | 14.2 (9.8 to 19.9)            | 0.0 (0.0 to 0.1)                | 17.8 (12.7 to 28.5)               | 237.0 (192.2 to 289.4) | 201.4 (159.4 to 253.0)     | 15.8 (10.8 to 22.1)           | 0.0 (0.0 to 0.1)                | 19.8 (14.1 to 31.7)               |
| Federated States of Micronesia | 2049 | 218.1 (177.4 to 265.6)     | 185.4 (146.8 to 231.9)     | 14.3 (9.8 to 20.1)            | 0.0 (0.0 to 0.1)                | 18.3 (13.1 to 29.5)               | 242.0 (196.8 to 294.6) | 205.7 (162.9 to 257.3)     | 15.9 (10.9 to 22.3)           | 0.0 (0.0 to 0.1)                | 20.3 (14.5 to 32.7)               |
| Federated States of Micronesia | 2050 | 222.7 (179.8 to 270.7)     | 189.3 (149.2 to 236.6)     | 14.4 (9.9 to 20.2)            | 0.0 (0.0 to 0.1)                | 18.9 (13.3 to 30.9)               | 247.1 (199.4 to 300.3) | 210.0 (165.5 to 262.5)     | 16.0 (11.0 to 22.4)           | 0.0 (0.0 to 0.1)                | 21.0 (14.7 to 34.2)               |
| Fiji                           | 1995 | 119.9 (101.5 to 141.5)     | 91.5 (75.0 to 110.7)       | 16.6 (11.4 to 22.7)           | 10.9 (5.6 to 19.6)              | 0.9 (0.9 to 0.9)                  | 209.4 (177.4 to 247.2) | 159.8 (131.1 to 193.4)     | 29.0 (20.0 to 39.6)           | 19.1 (9.7 to 34.3)              | 1.6 (1.6 to 1.6)                  |
| Fiji                           | 1996 | 126.7 (107.9 to 147.9)     | 98.4 (81.5 to 118.2)       | 17.1 (11.9 to 23.2)           | 11.1 (5.7 to 19.7)              | 0.1 (0.1 to 0.1)                  | 221.5 (188.6 to 258.4) | 172.0 (142.3 to 206.6)     | 29.8 (20.7 to 40.6)           | 19.5 (10.0 to 34.3)             | 0.1 (0.1 to 0.1)                  |
| Fiji                           | 1997 | 126.9 (109.1 to 146.6)     | 99.0 (82.8 to 118.3)       | 16.9 (11.8 to 23.0)           | 10.3 (5.4 to 18.5)              | 0.6 (0.6 to 0.6)                  | 221.7 (190.6 to 256.1) | 173.1 (144.7 to 206.7)     | 29.5 (20.7 to 40.2)           | 18.1 (9.4 to 32.4)              | 1.1 (1.1 to 1.1)                  |
| Fiji                           | 1998 | 134.4 (117.9 to 153.5)     | 97.4 (82.0 to 114.9)       | 16.6 (11.6 to 22.8)           | 8.7 (4.5 to 15.7)               | 11.7 (11.7 to 11.7)               | 234.9 (205.9 to 268.3) | 170.1 (143.3 to 200.8)     | 29.0 (20.3 to 39.8)           | 15.3 (7.9 to 27.4)              | 20.4 (20.4 to 20.4)               |
| Fiji                           | 1999 | 143.5 (126.4 to 162.8)     | 102.3 (86.3 to 120.5)      | 17.3 (12.2 to 23.9)           | 6.8 (3.5 to 11.6)               | 17.3 (17.3 to 17.3)               | 250.8 (220.9 to 284.5) | 178.7 (150.8 to 210.5)     | 30.2 (21.3 to 41.8)           | 11.8 (6.1 to 20.3)              | 30.2 (30.2 to 30.2)               |
| Fiji                           | 2000 | 141.0 (124.0 to 159.8)     | 103.7 (88.0 to 120.4)      | 17.3 (12.2 to 24.0)           | 7.2 (3.7 to 12.5)               | 12.9 (12.9 to 12.9)               | 246.4 (216.7 to 279.3) | 181.2 (153.8 to 210.4)     | 30.3 (21.3 to 41.9)           | 12.5 (6.5 to 21.9)              | 22.5 (22.5 to 22.5)               |
| Fiji                           | 2001 | 133.9 (117.8 to 152.3)     | 102.5 (87.3 to 118.5)      | 17.8 (12.7 to 24.8)           | 7.3 (3.8 to 12.8)               | 6.3 (6.3 to 6.3)                  | 233.9 (205.8 to 266.1) | 179.1 (152.5 to 207.0)     | 31.1 (22.2 to 43.3)           | 12.7 (6.6 to 22.4)              | 11.0 (11.0 to 11.0)               |
| Fiji                           | 2002 | 139.9 (124.1 to 158.1)     | 105.8 (91.1 to 121.5)      | 18.4 (13.2 to 25.3)           | 7.8 (4.0 to 14.1)               | 7.9 (7.9 to 7.9)                  | 244.4 (216.9 to 276.2) | 184.9 (159.2 to 212.4)     | 32.1 (23.1 to 44.2)           | 13.6 (7.0 to 24.6)              | 13.8 (13.8 to 13.8)               |
| Fiji                           | 2003 | 154.7 (138.8 to 173.2)     | 107.1 (92.5 to 123.2)      | 19.1 (13.7 to 25.9)           | 8.0 (4.1 to 14.4)               | 20.5 (20.5 to 20.5)               | 270.4 (242.5 to 302.7) | 187.2 (161.6 to 215.2)     | 33.4 (24.0 to 45.3)           | 14.0 (7.2 to 25.2)              | 35.8 (35.8 to 35.8)               |
| Fiji                           | 2004 | 154.2 (138.1 to 173.4)     | 112.8 (97.7 to 129.3)      | 20.9 (14.9 to 27.9)           | 9.1 (4.6 to 16.1)               | 11.5 (11.5 to 11.5)               | 269.5 (241.3 to 302.9) | 197.0 (170.7 to 225.9)     | 36.4 (26.1 to 48.7)           | 15.8 (8.0 to 28.1)              | 20.1 (20.1 to 20.1)               |
| Fiji                           | 2005 | 155.2 (137.9 to 175.0)     | 116.4 (101.5 to 134.2)     | 22.1 (15.9 to 29.2)           | 10.0 (5.0 to 17.9)              | 6.7 (6.7 to 6.7)                  | 271.2 (240.9 to 305.8) | 203.5 (177.4 to 234.5)     | 38.6 (27.7 to 51.0)           | 17.5 (8.7 to 31.2)              | 11.7 (11.7 to 11.7)               |
| Fiji                           | 2006 | 166.7 (148.5 to 188.5)     | 120.0 (104.7 to 139.0)     | 24.7 (17.8 to 32.6)           | 11.9 (6.0 to 21.1)              | 10.2 (10.2 to 10.2)               | 291.3 (259.5 to 329.4) | 209.6 (183.0 to 242.9)     | 43.1 (31.1 to 56.9)           | 20.8 (10.4 to 36.9)             | 17.8 (17.8 to 17.8)               |
| Fiji                           | 2007 | 169.4 (150.7 to 191.5)     | 116.4 (100.8 to 135.2)     | 27.0 (19.7 to 34.9)           | 13.0 (6.7 to 22.8)              | 13.0 (13.0 to 13.0)               | 296.0 (263.3 to 334.7) | 203.4 (176.2 to 236.2)     | 47.2 (34.5 to 61.0)           | 22.6 (11.7 to 39.9)             | 22.8 (22.8 to 22.8)               |
| Fiji                           | 2008 | 163.6 (145.1 to 184.5)     | 110.9 (95.7 to 128.7)      | 29.6 (21.6 to 37.8)           | 13.1 (6.9 to 23.1)              | 10.1 (10.1 to 10.1)               | 285.8 (253.6 to 322.5) | 193.8 (167.2 to 224.9)     | 51.7 (37.8 to 66.1)           | 22.8 (12.1 to 40.3)             | 17.6 (17.6 to 17.6)               |

| Country | Year | 2018 US Dollars per capita |                            |                               |                                 |                                   | 2018 PPP per capita    |                            |                               |                                 |                                   |
|---------|------|----------------------------|----------------------------|-------------------------------|---------------------------------|-----------------------------------|------------------------|----------------------------|-------------------------------|---------------------------------|-----------------------------------|
|         |      | Health spending            | Government health spending | Out-of-pocket health spending | Prepaid private health spending | Development assistance for health | Health spending        | Government health spending | Out-of-pocket health spending | Prepaid private health spending | Development assistance for health |
| Fiji    | 2009 | 162.2 (142.1 to 182.9)     | 104.9 (90.3 to 121.7)      | 34.2 (25.1 to 44.3)           | 13.1 (7.0 to 22.7)              | 10.0 (10.0 to 10.0)               | 283.5 (248.3 to 319.7) | 183.4 (157.9 to 212.7)     | 59.8 (43.8 to 77.5)           | 22.9 (12.2 to 39.8)             | 17.4 (17.4 to 17.4)               |
| Fiji    | 2010 | 170.1 (149.5 to 190.7)     | 102.5 (87.7 to 118.4)      | 36.3 (27.2 to 47.3)           | 14.3 (7.7 to 24.1)              | 17.0 (17.0 to 17.0)               | 297.2 (261.2 to 333.3) | 179.0 (153.2 to 206.8)     | 63.5 (47.6 to 82.6)           | 25.0 (13.4 to 42.2)             | 29.7 (29.7 to 29.7)               |
| Fiji    | 2011 | 169.7 (149.1 to 191.3)     | 99.6 (84.9 to 116.2)       | 37.8 (27.7 to 49.6)           | 15.9 (8.6 to 26.5)              | 16.3 (16.3 to 16.3)               | 296.5 (260.6 to 334.3) | 174.1 (148.4 to 203.1)     | 66.1 (48.4 to 86.6)           | 27.9 (15.0 to 46.3)             | 28.5 (28.5 to 28.5)               |
| Fiji    | 2012 | 165.7 (144.4 to 188.1)     | 99.7 (84.9 to 116.3)       | 38.6 (28.3 to 51.2)           | 18.1 (9.8 to 30.1)              | 9.4 (9.4 to 9.4)                  | 289.6 (252.3 to 328.6) | 174.1 (148.3 to 203.2)     | 67.4 (49.5 to 89.5)           | 31.6 (17.2 to 52.6)             | 16.5 (16.5 to 16.5)               |
| Fiji    | 2013 | 178.1 (155.1 to 202.8)     | 105.5 (90.1 to 123.7)      | 39.1 (28.6 to 52.2)           | 22.0 (11.8 to 36.2)             | 11.4 (11.4 to 11.4)               | 311.2 (271.0 to 354.3) | 184.4 (157.4 to 216.1)     | 68.3 (49.9 to 91.2)           | 38.5 (20.7 to 63.2)             | 20.0 (20.0 to 20.0)               |
| Fiji    | 2014 | 191.7 (167.1 to 221.2)     | 114.6 (97.6 to 135.7)      | 39.8 (29.1 to 53.1)           | 25.6 (13.6 to 43.2)             | 11.7 (11.7 to 11.7)               | 335.0 (291.9 to 386.6) | 200.3 (170.6 to 237.1)     | 69.5 (50.8 to 92.9)           | 44.8 (23.8 to 75.5)             | 20.4 (20.4 to 20.4)               |
| Fiji    | 2015 | 199.4 (173.7 to 231.2)     | 121.6 (102.7 to 143.1)     | 40.9 (29.3 to 54.7)           | 27.0 (14.4 to 46.5)             | 9.8 (9.8 to 9.8)                  | 348.4 (303.5 to 404.0) | 212.5 (179.5 to 250.0)     | 71.5 (51.2 to 95.6)           | 47.2 (25.2 to 81.2)             | 17.1 (17.1 to 17.1)               |
| Fiji    | 2016 | 200.4 (173.1 to 233.6)     | 123.7 (103.1 to 146.3)     | 40.7 (29.1 to 55.4)           | 27.0 (14.1 to 46.6)             | 9.0 (9.0 to 9.0)                  | 350.2 (302.5 to 408.2) | 216.2 (180.2 to 255.7)     | 71.1 (50.8 to 96.8)           | 47.1 (24.7 to 81.4)             | 15.7 (15.7 to 15.7)               |
| Fiji    | 2017 | 213.9 (184.7 to 248.9)     | 137.5 (114.6 to 163.1)     | 42.0 (29.9 to 56.9)           | 28.0 (14.6 to 48.2)             | 6.4 (6.4 to 6.4)                  | 373.7 (322.8 to 435.0) | 240.3 (200.3 to 285.0)     | 73.4 (52.2 to 99.5)           | 48.8 (25.6 to 84.2)             | 11.2 (11.2 to 11.2)               |
| Fiji    | 2018 | 217.1 (187.0 to 252.5)     | 139.6 (116.5 to 165.8)     | 43.0 (30.7 to 58.1)           | 28.5 (15.0 to 49.3)             | 6.1 (6.1 to 6.1)                  | 379.4 (326.8 to 441.2) | 244.0 (203.6 to 289.7)     | 75.1 (53.6 to 101.5)          | 49.7 (26.1 to 86.1)             | 10.6 (10.6 to 10.6)               |
| Fiji    | 2019 | 220.6 (189.9 to 256.7)     | 141.6 (117.9 to 168.3)     | 43.9 (31.3 to 59.4)           | 28.9 (15.2 to 50.2)             | 6.1 (5.7 to 6.5)                  | 385.5 (331.8 to 448.6) | 247.4 (206.0 to 294.0)     | 76.8 (54.7 to 103.7)          | 50.6 (26.5 to 87.7)             | 10.7 (10.0 to 11.3)               |
| Fiji    | 2020 | 224.1 (192.5 to 260.2)     | 143.5 (119.5 to 170.5)     | 44.9 (32.2 to 60.5)           | 29.4 (15.4 to 50.7)             | 6.3 (5.7 to 6.7)                  | 391.6 (336.3 to 454.7) | 250.8 (208.8 to 297.9)     | 78.5 (56.3 to 105.8)          | 51.4 (27.0 to 88.6)             | 10.9 (10.0 to 11.8)               |
| Fiji    | 2021 | 227.0 (195.3 to 263.7)     | 145.0 (121.0 to 172.2)     | 45.9 (32.9 to 62.2)           | 29.8 (15.6 to 51.2)             | 6.4 (5.8 to 7.1)                  | 396.7 (341.3 to 460.8) | 253.4 (211.4 to 300.9)     | 80.1 (57.4 to 108.7)          | 52.0 (27.3 to 89.5)             | 11.2 (10.1 to 12.4)               |
| Fiji    | 2022 | 230.0 (197.8 to 266.6)     | 146.4 (122.3 to 173.8)     | 46.8 (33.4 to 63.3)           | 30.1 (15.8 to 51.9)             | 6.6 (5.9 to 7.4)                  | 401.8 (345.7 to 465.8) | 255.8 (213.8 to 303.6)     | 81.8 (58.4 to 110.6)          | 52.7 (27.6 to 90.7)             | 11.5 (10.2 to 12.9)               |
| Fiji    | 2023 | 233.0 (200.5 to 270.7)     | 147.9 (123.7 to 175.7)     | 47.8 (34.2 to 64.6)           | 30.5 (16.1 to 52.6)             | 6.8 (5.9 to 7.7)                  | 407.1 (350.4 to 473.1) | 258.4 (216.1 to 307.0)     | 83.5 (59.8 to 113.0)          | 53.3 (28.0 to 91.8)             | 11.9 (10.3 to 13.5)               |
| Fiji    | 2024 | 236.0 (202.9 to 273.9)     | 149.3 (124.9 to 177.6)     | 48.8 (35.0 to 66.0)           | 30.9 (16.3 to 53.2)             | 7.0 (6.1 to 8.1)                  | 412.4 (354.5 to 478.6) | 260.9 (218.2 to 310.4)     | 85.2 (61.1 to 115.3)          | 54.0 (28.4 to 93.0)             | 12.3 (10.6 to 14.2)               |
| Fiji    | 2025 | 239.1 (206.2 to 277.3)     | 150.8 (126.3 to 179.7)     | 49.8 (35.8 to 67.6)           | 31.3 (16.5 to 54.0)             | 7.2 (6.2 to 8.5)                  | 417.8 (360.3 to 484.5) | 263.4 (220.6 to 314.0)     | 87.0 (62.6 to 118.1)          | 54.8 (28.8 to 94.3)             | 12.6 (10.8 to 14.8)               |
| Fiji    | 2026 | 242.4 (209.0 to 281.4)     | 152.3 (127.6 to 182.1)     | 50.8 (36.5 to 69.0)           | 31.8 (16.8 to 54.8)             | 7.4 (6.3 to 8.7)                  | 423.5 (365.2 to 491.7) | 266.2 (222.9 to 318.1)     | 88.8 (63.7 to 120.6)          | 55.5 (29.3 to 95.7)             | 13.0 (11.0 to 15.2)               |
| Fiji    | 2027 | 245.9 (211.9 to 285.9)     | 154.1 (128.9 to 184.2)     | 51.9 (37.1 to 70.9)           | 32.2 (17.0 to 55.6)             | 7.7 (6.4 to 9.1)                  | 429.7 (370.2 to 499.6) | 269.2 (225.3 to 321.9)     | 90.7 (64.8 to 123.9)          | 56.3 (29.7 to 97.2)             | 13.4 (11.2 to 15.9)               |
| Fiji    | 2028 | 250.2 (215.1 to 292.3)     | 156.5 (130.9 to 187.4)     | 53.1 (37.7 to 72.9)           | 32.8 (17.3 to 56.6)             | 7.9 (6.6 to 9.5)                  | 437.2 (375.9 to 510.7) | 273.4 (228.8 to 327.4)     | 92.7 (65.9 to 127.4)          | 57.3 (30.2 to 98.9)             | 13.8 (11.5 to 16.7)               |
| Fiji    | 2029 | 255.3 (218.9 to 297.6)     | 159.5 (133.4 to 191.2)     | 54.3 (38.8 to 74.4)           | 33.4 (17.7 to 57.8)             | 8.1 (6.7 to 9.9)                  | 446.2 (382.5 to 520.0) | 278.7 (233.1 to 334.1)     | 94.9 (67.7 to 130.0)          | 58.4 (30.9 to 101.0)            | 14.2 (11.7 to 17.3)               |

| Country | Year | 2018 US Dollars per capita |                            |                               |                                 |                                   | 2018 PPP per capita    |                            |                               |                                 |                                   |
|---------|------|----------------------------|----------------------------|-------------------------------|---------------------------------|-----------------------------------|------------------------|----------------------------|-------------------------------|---------------------------------|-----------------------------------|
|         |      | Health spending            | Government health spending | Out-of-pocket health spending | Prepaid private health spending | Development assistance for health | Health spending        | Government health spending | Out-of-pocket health spending | Prepaid private health spending | Development assistance for health |
| Fiji    | 2030 | 260.6 (223.3 to 303.8)     | 162.6 (135.6 to 195.0)     | 55.5 (39.7 to 76.3)           | 34.1 (18.1 to 59.0)             | 8.4 (6.8 to 10.2)                 | 455.4 (390.2 to 530.8) | 284.2 (237.0 to 340.8)     | 97.0 (69.3 to 133.3)          | 59.6 (31.6 to 103.1)            | 14.6 (11.9 to 17.9)               |
| Fiji    | 2031 | 266.0 (227.3 to 310.9)     | 165.8 (138.2 to 199.1)     | 56.8 (40.4 to 78.5)           | 34.8 (18.5 to 60.3)             | 8.6 (7.0 to 10.8)                 | 464.8 (397.2 to 543.3) | 289.8 (241.5 to 348.0)     | 99.2 (70.7 to 137.2)          | 60.8 (32.2 to 105.3)            | 15.0 (12.2 to 18.9)               |
| Fiji    | 2032 | 271.8 (233.4 to 319.1)     | 169.3 (141.0 to 203.5)     | 58.0 (41.2 to 80.6)           | 35.6 (18.9 to 61.6)             | 8.8 (7.1 to 11.1)                 | 474.9 (407.9 to 557.6) | 295.8 (246.4 to 355.6)     | 101.4 (71.9 to 140.8)         | 62.1 (33.0 to 107.7)            | 15.5 (12.4 to 19.4)               |
| Fiji    | 2033 | 277.5 (238.7 to 325.1)     | 172.8 (143.9 to 208.3)     | 59.3 (42.1 to 82.7)           | 36.3 (19.2 to 63.0)             | 9.1 (7.2 to 11.7)                 | 485.0 (417.0 to 568.0) | 301.9 (251.5 to 363.9)     | 103.7 (73.5 to 144.5)         | 63.5 (33.6 to 110.1)            | 15.9 (12.6 to 20.4)               |
| Fiji    | 2034 | 283.5 (243.0 to 331.8)     | 176.4 (146.7 to 213.0)     | 60.6 (42.8 to 84.9)           | 37.1 (19.6 to 64.4)             | 9.4 (7.4 to 12.1)                 | 495.5 (424.7 to 579.7) | 308.3 (256.3 to 372.1)     | 105.9 (74.8 to 148.4)         | 64.8 (34.3 to 112.5)            | 16.4 (13.0 to 21.2)               |
| Fiji    | 2035 | 289.6 (247.3 to 340.3)     | 180.1 (149.6 to 217.9)     | 61.9 (43.4 to 86.7)           | 37.9 (20.0 to 65.9)             | 9.7 (7.6 to 12.7)                 | 506.1 (432.2 to 594.7) | 314.7 (261.3 to 380.8)     | 108.1 (75.8 to 151.6)         | 66.3 (35.0 to 115.1)            | 17.0 (13.2 to 22.2)               |
| Fiji    | 2036 | 295.8 (252.3 to 348.3)     | 183.9 (152.4 to 223.0)     | 63.2 (44.0 to 88.8)           | 38.7 (20.5 to 67.3)             | 10.0 (7.7 to 13.5)                | 517.0 (440.8 to 608.7) | 321.3 (266.3 to 389.6)     | 110.4 (76.8 to 155.1)         | 67.7 (35.7 to 117.7)            | 17.5 (13.5 to 23.5)               |
| Fiji    | 2037 | 302.1 (257.7 to 354.9)     | 187.7 (155.4 to 227.6)     | 64.5 (44.9 to 91.1)           | 39.6 (20.9 to 68.8)             | 10.3 (8.0 to 13.8)                | 527.9 (450.3 to 620.1) | 328.0 (271.5 to 397.8)     | 112.7 (78.4 to 159.3)         | 69.2 (36.5 to 120.3)            | 18.1 (13.9 to 24.2)               |
| Fiji    | 2038 | 308.5 (263.2 to 363.6)     | 191.6 (158.3 to 233.1)     | 65.8 (45.5 to 93.5)           | 40.4 (21.3 to 70.4)             | 10.7 (8.1 to 14.8)                | 539.1 (459.9 to 635.3) | 334.9 (276.6 to 407.3)     | 115.0 (79.6 to 163.5)         | 70.7 (37.2 to 123.0)            | 18.6 (14.2 to 25.8)               |
| Fiji    | 2039 | 314.9 (267.7 to 371.9)     | 195.5 (161.5 to 238.2)     | 67.1 (46.3 to 95.5)           | 41.3 (21.7 to 71.9)             | 11.0 (8.4 to 15.2)                | 550.3 (467.8 to 649.9) | 341.7 (282.2 to 416.2)     | 117.2 (80.9 to 167.0)         | 72.2 (37.9 to 125.7)            | 19.2 (14.7 to 26.6)               |
| Fiji    | 2040 | 321.3 (272.5 to 379.2)     | 199.4 (164.5 to 243.3)     | 68.4 (47.2 to 97.5)           | 42.1 (22.0 to 73.2)             | 11.4 (8.7 to 15.7)                | 561.4 (476.1 to 662.7) | 348.5 (287.4 to 425.2)     | 119.5 (82.5 to 170.4)         | 73.6 (38.5 to 127.9)            | 19.9 (15.1 to 27.4)               |
| Fiji    | 2041 | 327.8 (279.9 to 387.7)     | 203.4 (167.5 to 248.1)     | 69.7 (48.0 to 99.5)           | 43.0 (22.4 to 74.4)             | 11.7 (8.9 to 16.3)                | 572.8 (489.0 to 677.4) | 355.4 (292.8 to 433.5)     | 121.8 (83.9 to 173.9)         | 75.2 (39.2 to 130.1)            | 20.5 (15.5 to 28.5)               |
| Fiji    | 2042 | 334.3 (284.2 to 396.0)     | 207.3 (170.6 to 253.1)     | 71.0 (48.8 to 101.5)          | 43.9 (22.8 to 75.6)             | 12.1 (9.1 to 17.3)                | 584.1 (496.6 to 692.0) | 362.2 (298.1 to 442.2)     | 124.0 (85.2 to 177.3)         | 76.7 (39.8 to 132.2)            | 21.2 (15.9 to 30.3)               |
| Fiji    | 2043 | 340.7 (289.6 to 403.8)     | 211.1 (173.5 to 258.4)     | 72.3 (49.6 to 103.4)          | 44.7 (23.2 to 77.0)             | 12.6 (9.3 to 18.2)                | 595.3 (506.1 to 705.6) | 368.9 (303.1 to 451.6)     | 126.3 (86.6 to 180.7)         | 78.2 (40.6 to 134.6)            | 21.9 (16.3 to 31.8)               |
| Fiji    | 2044 | 347.1 (294.5 to 411.7)     | 215.0 (176.1 to 263.6)     | 73.6 (50.4 to 105.3)          | 45.6 (23.6 to 78.5)             | 13.0 (9.6 to 18.8)                | 606.5 (514.6 to 719.3) | 375.6 (307.7 to 460.6)     | 128.5 (88.0 to 184.0)         | 79.6 (41.3 to 137.2)            | 22.7 (16.8 to 32.9)               |
| Fiji    | 2045 | 353.5 (299.0 to 419.9)     | 218.8 (178.6 to 269.0)     | 74.8 (51.2 to 107.2)          | 46.4 (24.1 to 80.0)             | 13.5 (9.7 to 20.3)                | 617.7 (522.4 to 733.8) | 382.3 (312.0 to 470.0)     | 130.7 (89.5 to 187.3)         | 81.1 (42.1 to 139.8)            | 23.5 (17.0 to 35.5)               |
| Fiji    | 2046 | 359.9 (304.3 to 427.9)     | 222.6 (181.3 to 274.3)     | 76.1 (52.1 to 109.2)          | 47.3 (24.5 to 81.5)             | 13.9 (10.1 to 21.4)               | 628.9 (531.8 to 747.7) | 388.9 (316.8 to 479.4)     | 133.0 (91.0 to 190.9)         | 82.6 (42.8 to 142.4)            | 24.4 (17.6 to 37.4)               |
| Fiji    | 2047 | 366.4 (310.1 to 435.8)     | 226.4 (183.9 to 279.6)     | 77.4 (53.0 to 111.3)          | 48.1 (24.9 to 82.8)             | 14.4 (10.4 to 22.8)               | 640.3 (541.9 to 761.5) | 395.7 (321.4 to 488.5)     | 135.2 (92.7 to 194.5)         | 84.1 (43.6 to 144.6)            | 25.2 (18.1 to 39.8)               |
| Fiji    | 2048 | 372.9 (315.1 to 443.4)     | 230.3 (186.5 to 284.2)     | 78.6 (54.0 to 113.3)          | 49.0 (25.4 to 84.1)             | 15.0 (10.8 to 24.0)               | 651.6 (550.6 to 774.8) | 402.4 (325.8 to 496.5)     | 137.4 (94.4 to 198.1)         | 85.6 (44.3 to 146.9)            | 26.2 (18.8 to 41.9)               |
| Fiji    | 2049 | 379.6 (320.3 to 453.1)     | 234.2 (189.1 to 289.4)     | 79.9 (54.9 to 115.1)          | 49.9 (25.8 to 85.4)             | 15.5 (11.1 to 25.0)               | 663.3 (559.7 to 791.8) | 409.3 (330.5 to 505.8)     | 139.7 (96.0 to 201.1)         | 87.2 (45.1 to 149.2)            | 27.2 (19.4 to 43.6)               |
| Fiji    | 2050 | 386.4 (324.4 to 462.2)     | 238.3 (191.8 to 295.1)     | 81.2 (55.8 to 116.8)          | 50.8 (26.3 to 86.9)             | 16.1 (11.4 to 26.4)               | 675.3 (566.8 to 807.7) | 416.3 (335.2 to 515.6)     | 142.0 (97.5 to 204.1)         | 88.8 (46.0 to 151.9)            | 28.2 (19.9 to 46.2)               |

| Country | Year | 2018 US Dollars per capita |                            |                               |                                 |                                   | 2018 PPP per capita       |                            |                               |                                 |                                   |
|---------|------|----------------------------|----------------------------|-------------------------------|---------------------------------|-----------------------------------|---------------------------|----------------------------|-------------------------------|---------------------------------|-----------------------------------|
|         |      | Health spending            | Government health spending | Out-of-pocket health spending | Prepaid private health spending | Development assistance for health | Health spending           | Government health spending | Out-of-pocket health spending | Prepaid private health spending | Development assistance for health |
| Finland | 1995 | 2501.5 (2404.6 to 2600.8)  | 1881.9 (1789.5 to 1968.7)  | 559.1 (520.7 to 603.8)        | 60.5 (43.8 to 83.6)             | 0.0 (0.0 to 0.0)                  | 2275.4 (2187.2 to 2365.7) | 1711.8 (1627.7 to 1790.8)  | 508.6 (473.6 to 549.2)        | 55.0 (39.9 to 76.0)             | 0.0 (0.0 to 0.0)                  |
| Finland | 1996 | 2563.0 (2488.9 to 2640.8)  | 1925.6 (1862.7 to 1993.9)  | 573.3 (541.7 to 607.1)        | 64.1 (47.7 to 83.7)             | 0.0 (0.0 to 0.0)                  | 2331.3 (2264.0 to 2402.1) | 1751.5 (1694.3 to 1813.7)  | 521.5 (492.8 to 552.2)        | 58.3 (43.4 to 76.1)             | 0.0 (0.0 to 0.0)                  |
| Finland | 1997 | 2650.4 (2578.3 to 2721.1)  | 1997.6 (1936.4 to 2064.6)  | 585.4 (556.9 to 615.7)        | 67.3 (52.8 to 84.8)             | 0.0 (0.0 to 0.0)                  | 2410.8 (2345.2 to 2475.1) | 1817.1 (1761.4 to 1878.0)  | 532.5 (506.6 to 560.1)        | 61.2 (48.1 to 77.1)             | 0.0 (0.0 to 0.0)                  |
| Finland | 1998 | 2713.7 (2645.6 to 2783.4)  | 2045.7 (1982.8 to 2110.9)  | 598.5 (570.3 to 628.9)        | 69.5 (55.8 to 86.2)             | 0.0 (0.0 to 0.0)                  | 2468.4 (2406.4 to 2531.8) | 1860.8 (1803.6 to 1920.1)  | 544.4 (518.8 to 572.1)        | 63.2 (50.8 to 78.4)             | 0.0 (0.0 to 0.0)                  |
| Finland | 1999 | 2794.5 (2728.9 to 2860.9)  | 2090.5 (2032.1 to 2151.8)  | 630.9 (603.7 to 659.5)        | 73.1 (59.8 to 89.5)             | 0.0 (0.0 to 0.0)                  | 2541.9 (2482.3 to 2602.3) | 1901.5 (1848.4 to 1957.3)  | 573.9 (549.1 to 599.9)        | 66.5 (54.4 to 81.4)             | 0.0 (0.0 to 0.0)                  |
| Finland | 2000 | 2946.2 (2878.9 to 3015.7)  | 2196.2 (2138.0 to 2259.4)  | 672.0 (644.9 to 700.6)        | 78.0 (65.0 to 93.7)             | 0.0 (0.0 to 0.0)                  | 2679.9 (2618.7 to 2743.2) | 1997.7 (1944.8 to 2055.2)  | 611.3 (586.6 to 637.3)        | 70.9 (59.1 to 85.2)             | 0.0 (0.0 to 0.0)                  |
| Finland | 2001 | 3095.8 (3025.3 to 3165.7)  | 2320.5 (2261.3 to 2383.7)  | 694.7 (667.8 to 721.6)        | 80.5 (68.0 to 95.5)             | 0.0 (0.0 to 0.0)                  | 2816.0 (2751.8 to 2879.6) | 2110.8 (2056.9 to 2168.3)  | 631.9 (607.4 to 656.4)        | 73.2 (61.9 to 86.8)             | 0.0 (0.0 to 0.0)                  |
| Finland | 2002 | 3275.0 (3209.0 to 3349.8)  | 2487.6 (2430.1 to 2553.8)  | 703.9 (677.4 to 728.8)        | 83.4 (70.9 to 98.6)             | 0.0 (0.0 to 0.0)                  | 2978.9 (2918.9 to 3047.0) | 2262.8 (2210.4 to 2322.9)  | 640.3 (616.2 to 663.0)        | 75.9 (64.5 to 89.7)             | 0.0 (0.0 to 0.0)                  |
| Finland | 2003 | 3458.3 (3392.1 to 3526.8)  | 2673.3 (2611.6 to 2732.8)  | 698.1 (670.7 to 724.9)        | 86.9 (74.1 to 102.4)            | 0.0 (0.0 to 0.0)                  | 3145.7 (3085.5 to 3208.0) | 2431.6 (2375.5 to 2485.8)  | 635.0 (610.0 to 659.4)        | 79.0 (67.4 to 93.2)             | 0.0 (0.0 to 0.0)                  |
| Finland | 2004 | 3690.9 (3619.9 to 3756.9)  | 2884.5 (2820.3 to 2947.3)  | 714.3 (686.1 to 742.8)        | 92.1 (78.8 to 108.1)            | 0.0 (0.0 to 0.0)                  | 3357.3 (3292.7 to 3417.4) | 2623.8 (2565.4 to 2680.9)  | 649.7 (624.1 to 675.7)        | 83.7 (71.7 to 98.3)             | 0.0 (0.0 to 0.0)                  |
| Finland | 2005 | 3826.8 (3757.4 to 3901.1)  | 2993.6 (2928.4 to 3064.2)  | 736.5 (709.3 to 763.8)        | 96.7 (82.4 to 112.6)            | 0.0 (0.0 to 0.0)                  | 3480.9 (3417.8 to 3548.5) | 2723.0 (2663.7 to 2787.2)  | 670.0 (645.2 to 694.8)        | 87.9 (75.0 to 102.4)            | 0.0 (0.0 to 0.0)                  |
| Finland | 2006 | 3962.5 (3887.6 to 4041.1)  | 3088.1 (3022.7 to 3161.0)  | 772.7 (744.7 to 802.9)        | 101.7 (86.8 to 117.8)           | 0.0 (0.0 to 0.0)                  | 3604.3 (3536.2 to 3675.8) | 2809.0 (2749.5 to 2875.2)  | 702.8 (677.4 to 730.3)        | 92.5 (79.0 to 107.2)            | 0.0 (0.0 to 0.0)                  |
| Finland | 2007 | 4142.4 (4065.1 to 4218.1)  | 3224.3 (3159.5 to 3291.7)  | 810.1 (783.2 to 839.0)        | 107.9 (92.5 to 125.8)           | 0.0 (0.0 to 0.0)                  | 3768.0 (3697.7 to 3836.8) | 2932.9 (2873.9 to 2994.1)  | 736.9 (712.4 to 763.1)        | 98.2 (84.1 to 114.4)            | 0.0 (0.0 to 0.0)                  |
| Finland | 2008 | 4274.0 (4198.6 to 4348.3)  | 3322.9 (3256.6 to 3391.6)  | 835.7 (807.7 to 865.0)        | 115.4 (99.7 to 133.2)           | 0.0 (0.0 to 0.0)                  | 3887.7 (3819.1 to 3955.3) | 3022.5 (2962.3 to 3085.0)  | 760.1 (734.7 to 786.8)        | 105.0 (90.7 to 121.2)           | 0.0 (0.0 to 0.0)                  |
| Finland | 2009 | 4187.6 (4115.7 to 4260.7)  | 3240.1 (3175.2 to 3305.9)  | 830.7 (801.9 to 857.3)        | 116.8 (101.2 to 134.7)          | 0.0 (0.0 to 0.0)                  | 3809.1 (3743.7 to 3875.6) | 2947.3 (2888.2 to 3007.1)  | 755.6 (729.4 to 779.8)        | 106.2 (92.1 to 122.5)           | 0.0 (0.0 to 0.0)                  |
| Finland | 2010 | 4345.0 (4267.3 to 4424.1)  | 3366.8 (3300.1 to 3437.4)  | 855.2 (826.9 to 884.0)        | 123.1 (106.4 to 141.8)          | 0.0 (0.0 to 0.0)                  | 3952.2 (3881.6 to 4024.2) | 3062.4 (3001.8 to 3126.7)  | 777.9 (752.2 to 804.1)        | 111.9 (96.8 to 128.9)           | 0.0 (0.0 to 0.0)                  |
| Finland | 2011 | 4509.0 (4429.1 to 4583.1)  | 3511.8 (3445.1 to 3587.0)  | 867.5 (838.7 to 898.6)        | 129.6 (111.5 to 147.6)          | 0.0 (0.0 to 0.0)                  | 4101.4 (4028.8 to 4168.9) | 3194.4 (3133.7 to 3262.8)  | 789.1 (762.9 to 817.4)        | 117.9 (101.5 to 134.3)          | 0.0 (0.0 to 0.0)                  |
| Finland | 2012 | 4561.0 (4479.7 to 4637.3)  | 3564.6 (3495.3 to 3633.9)  | 863.7 (835.2 to 893.1)        | 132.7 (114.5 to 152.3)          | 0.0 (0.0 to 0.0)                  | 4148.8 (4074.8 to 4218.1) | 3242.4 (3179.4 to 3305.5)  | 785.7 (759.7 to 812.3)        | 120.7 (104.1 to 138.5)          | 0.0 (0.0 to 0.0)                  |
| Finland | 2013 | 4591.5 (4512.8 to 4673.7)  | 3588.9 (3519.3 to 3660.8)  | 869.1 (840.9 to 899.6)        | 133.4 (116.3 to 151.9)          | 0.0 (0.0 to 0.0)                  | 4176.5 (4104.9 to 4251.3) | 3264.6 (3201.2 to 3329.9)  | 790.6 (764.9 to 818.3)        | 121.4 (105.7 to 138.2)          | 0.0 (0.0 to 0.0)                  |
| Finland | 2014 | 4593.6 (4515.8 to 4673.3)  | 3581.6 (3507.4 to 3648.5)  | 880.4 (851.6 to 912.3)        | 131.6 (113.8 to 151.2)          | 0.0 (0.0 to 0.0)                  | 4178.4 (4107.6 to 4250.9) | 3257.9 (3190.3 to 3318.7)  | 800.8 (774.6 to 829.9)        | 119.7 (103.5 to 137.5)          | 0.0 (0.0 to 0.0)                  |
| Finland | 2015 | 4632.8 (4553.5 to 4708.9)  | 3598.4 (3528.2 to 3670.0)  | 912.5 (882.1 to 944.3)        | 121.9 (103.2 to 143.8)          | 0.0 (0.0 to 0.0)                  | 4214.0 (4142.0 to 4283.3) | 3273.1 (3209.3 to 3338.3)  | 830.0 (802.4 to 858.9)        | 110.9 (93.9 to 130.8)           | 0.0 (0.0 to 0.0)                  |

| Country | Year | 2018 US Dollars per capita |                            |                               |                                 |                                   | 2018 PPP per capita       |                            |                               |                                 |                                   |
|---------|------|----------------------------|----------------------------|-------------------------------|---------------------------------|-----------------------------------|---------------------------|----------------------------|-------------------------------|---------------------------------|-----------------------------------|
|         |      | Health spending            | Government health spending | Out-of-pocket health spending | Prepaid private health spending | Development assistance for health | Health spending           | Government health spending | Out-of-pocket health spending | Prepaid private health spending | Development assistance for health |
| Finland | 2016 | 4656.2 (4550.3 to 4763.9)  | 3601.6 (3506.8 to 3701.7)  | 940.8 (897.4 to 984.9)        | 113.7 (91.5 to 137.9)           | 0.0 (0.0 to 0.0)                  | 4235.4 (4139.1 to 4333.3) | 3276.1 (3189.8 to 3367.1)  | 855.8 (816.3 to 895.9)        | 103.5 (83.3 to 125.4)           | 0.0 (0.0 to 0.0)                  |
| Finland | 2017 | 4713.7 (4602.0 to 4830.1)  | 3633.8 (3540.7 to 3733.5)  | 961.9 (915.0 to 1009.0)       | 118.1 (94.8 to 143.3)           | 0.0 (0.0 to 0.0)                  | 4287.7 (4186.1 to 4393.6) | 3305.3 (3220.7 to 3396.0)  | 874.9 (832.3 to 917.8)        | 107.4 (86.2 to 130.3)           | 0.0 (0.0 to 0.0)                  |
| Finland | 2018 | 4769.5 (4653.5 to 4886.3)  | 3674.9 (3579.0 to 3778.7)  | 975.1 (926.1 to 1023.0)       | 119.5 (96.1 to 144.9)           | 0.0 (0.0 to 0.0)                  | 4338.4 (4232.9 to 4444.7) | 3342.7 (3255.5 to 3437.2)  | 886.9 (842.4 to 930.5)        | 108.7 (87.5 to 131.8)           | 0.0 (0.0 to 0.0)                  |
| Finland | 2019 | 4823.2 (4705.2 to 4945.3)  | 3714.0 (3617.3 to 3822.6)  | 988.1 (935.3 to 1039.3)       | 121.0 (97.1 to 146.6)           | 0.0 (0.0 to 0.0)                  | 4387.2 (4279.9 to 4498.4) | 3378.3 (3290.4 to 3477.1)  | 898.8 (850.8 to 945.3)        | 110.0 (88.3 to 133.3)           | 0.0 (0.0 to 0.0)                  |
| Finland | 2020 | 4878.9 (4756.5 to 5006.1)  | 3754.8 (3653.9 to 3866.0)  | 1001.6 (947.9 to 1057.4)      | 122.5 (98.4 to 148.4)           | 0.0 (0.0 to 0.0)                  | 4437.9 (4326.6 to 4553.6) | 3415.4 (3323.6 to 3516.5)  | 911.0 (862.2 to 961.8)        | 111.4 (89.5 to 135.0)           | 0.0 (0.0 to 0.0)                  |
| Finland | 2021 | 4935.3 (4808.3 to 5064.2)  | 3796.0 (3690.0 to 3904.8)  | 1015.3 (959.9 to 1074.0)      | 124.1 (99.8 to 150.2)           | 0.0 (0.0 to 0.0)                  | 4489.3 (4373.7 to 4606.4) | 3452.9 (3356.5 to 3551.9)  | 923.5 (873.1 to 977.0)        | 112.9 (90.8 to 136.6)           | 0.0 (0.0 to 0.0)                  |
| Finland | 2022 | 4994.9 (4862.4 to 5133.1)  | 3839.6 (3730.6 to 3954.8)  | 1029.5 (974.5 to 1091.1)      | 125.7 (101.2 to 152.2)          | 0.0 (0.0 to 0.0)                  | 4543.4 (4422.9 to 4669.2) | 3492.6 (3393.4 to 3597.4)  | 936.5 (886.4 to 992.5)        | 114.4 (92.0 to 138.5)           | 0.0 (0.0 to 0.0)                  |
| Finland | 2023 | 5059.4 (4921.1 to 5200.3)  | 3887.5 (3771.5 to 4008.0)  | 1044.4 (984.5 to 1108.8)      | 127.5 (102.2 to 154.8)          | 0.0 (0.0 to 0.0)                  | 4602.1 (4476.3 to 4730.3) | 3536.1 (3430.6 to 3645.7)  | 950.0 (895.5 to 1008.6)       | 116.0 (93.0 to 140.8)           | 0.0 (0.0 to 0.0)                  |
| Finland | 2024 | 5127.6 (4984.9 to 5278.3)  | 3938.2 (3816.4 to 4069.4)  | 1059.9 (999.0 to 1129.0)      | 129.4 (103.3 to 157.4)          | 0.0 (0.0 to 0.0)                  | 4664.1 (4534.3 to 4801.2) | 3582.3 (3471.5 to 3701.5)  | 964.1 (908.7 to 1026.9)       | 117.7 (94.0 to 143.2)           | 0.0 (0.0 to 0.0)                  |
| Finland | 2025 | 5195.3 (5046.5 to 5353.0)  | 3988.1 (3866.4 to 4124.1)  | 1075.9 (1007.1 to 1149.5)     | 131.3 (104.6 to 159.6)          | 0.0 (0.0 to 0.0)                  | 4725.7 (4590.4 to 4869.2) | 3627.7 (3516.9 to 3751.4)  | 978.6 (916.0 to 1045.6)       | 119.4 (95.2 to 145.2)           | 0.0 (0.0 to 0.0)                  |
| Finland | 2026 | 5265.1 (5106.8 to 5431.4)  | 4039.9 (3917.1 to 4177.3)  | 1092.0 (1016.2 to 1174.6)     | 133.3 (106.2 to 162.3)          | 0.0 (0.0 to 0.0)                  | 4789.2 (4645.2 to 4940.5) | 3674.7 (3563.0 to 3799.8)  | 993.3 (924.3 to 1068.5)       | 121.2 (96.6 to 147.6)           | 0.0 (0.0 to 0.0)                  |
| Finland | 2027 | 5337.6 (5171.7 to 5512.0)  | 4093.7 (3961.1 to 4235.2)  | 1108.7 (1025.0 to 1204.1)     | 135.3 (107.9 to 164.7)          | 0.0 (0.0 to 0.0)                  | 4855.2 (4704.3 to 5013.8) | 3723.7 (3603.1 to 3852.4)  | 1008.5 (932.4 to 1095.2)      | 123.1 (98.1 to 149.8)           | 0.0 (0.0 to 0.0)                  |
| Finland | 2028 | 5404.4 (5225.6 to 5594.2)  | 4142.5 (3999.0 to 4291.8)  | 1124.7 (1029.2 to 1233.1)     | 137.2 (109.6 to 166.8)          | 0.0 (0.0 to 0.0)                  | 4915.9 (4753.3 to 5088.6) | 3768.1 (3637.6 to 3903.8)  | 1023.1 (936.1 to 1121.7)      | 124.8 (99.7 to 151.7)           | 0.0 (0.0 to 0.0)                  |
| Finland | 2029 | 5467.6 (5267.8 to 5671.4)  | 4188.2 (4034.2 to 4347.6)  | 1140.5 (1031.2 to 1261.9)     | 138.9 (111.0 to 169.6)          | 0.0 (0.0 to 0.0)                  | 4973.4 (4791.7 to 5158.8) | 3809.7 (3669.5 to 3954.7)  | 1037.4 (938.0 to 1147.8)      | 126.4 (101.0 to 154.3)          | 0.0 (0.0 to 0.0)                  |
| Finland | 2030 | 5533.9 (5323.8 to 5758.6)  | 4236.5 (4075.1 to 4404.4)  | 1156.6 (1033.2 to 1295.2)     | 140.8 (112.6 to 172.0)          | 0.0 (0.0 to 0.0)                  | 5033.7 (4842.6 to 5238.1) | 3853.6 (3706.8 to 4006.3)  | 1052.0 (939.8 to 1178.1)      | 128.1 (102.5 to 156.5)          | 0.0 (0.0 to 0.0)                  |
| Finland | 2031 | 5605.7 (5381.6 to 5845.5)  | 4289.9 (4115.8 to 4470.1)  | 1173.0 (1037.6 to 1332.0)     | 142.8 (114.5 to 174.7)          | 0.0 (0.0 to 0.0)                  | 5099.0 (4895.2 to 5317.2) | 3902.1 (3743.8 to 4066.1)  | 1067.0 (943.8 to 1211.6)      | 129.9 (104.1 to 158.9)          | 0.0 (0.0 to 0.0)                  |
| Finland | 2032 | 5680.8 (5435.9 to 5944.7)  | 4346.0 (4159.2 to 4538.7)  | 1189.7 (1041.2 to 1359.6)     | 145.0 (116.3 to 177.8)          | 0.0 (0.0 to 0.0)                  | 5167.3 (4944.5 to 5407.4) | 3953.2 (3783.3 to 4128.4)  | 1082.2 (947.0 to 1236.7)      | 131.9 (105.8 to 161.7)          | 0.0 (0.0 to 0.0)                  |
| Finland | 2033 | 5759.8 (5497.6 to 6046.2)  | 4405.7 (4206.3 to 4613.8)  | 1206.9 (1045.5 to 1392.8)     | 147.2 (118.3 to 181.2)          | 0.0 (0.0 to 0.0)                  | 5239.2 (5000.7 to 5499.7) | 4007.5 (3826.1 to 4196.7)  | 1097.8 (951.0 to 1266.9)      | 133.9 (107.6 to 164.8)          | 0.0 (0.0 to 0.0)                  |
| Finland | 2034 | 5841.2 (5569.6 to 6136.4)  | 4467.5 (4254.3 to 4693.8)  | 1224.1 (1050.5 to 1426.3)     | 149.6 (120.0 to 184.0)          | 0.0 (0.0 to 0.0)                  | 5313.3 (5066.2 to 5581.8) | 4063.7 (3869.8 to 4269.5)  | 1113.5 (955.5 to 1297.4)      | 136.1 (109.2 to 167.4)          | 0.0 (0.0 to 0.0)                  |
| Finland | 2035 | 5928.2 (5625.6 to 6258.6)  | 4534.2 (4307.2 to 4779.2)  | 1241.9 (1055.1 to 1458.8)     | 152.1 (121.7 to 187.1)          | 0.0 (0.0 to 0.0)                  | 5392.4 (5117.1 to 5692.9) | 4124.3 (3917.9 to 4347.2)  | 1129.6 (959.8 to 1326.9)      | 138.4 (110.7 to 170.1)          | 0.0 (0.0 to 0.0)                  |
| Finland | 2036 | 6022.2 (5699.7 to 6370.4)  | 4607.4 (4362.1 to 4868.4)  | 1259.9 (1061.9 to 1490.8)     | 154.9 (123.6 to 190.6)          | 0.0 (0.0 to 0.0)                  | 5477.9 (5184.5 to 5794.6) | 4191.0 (3967.9 to 4428.4)  | 1146.0 (965.9 to 1356.0)      | 140.9 (112.5 to 173.4)          | 0.0 (0.0 to 0.0)                  |

| Country | Year | 2018 US Dollars per capita |                            |                               |                                 |                                   | 2018 PPP per capita       |                            |                               |                                 |                                   |
|---------|------|----------------------------|----------------------------|-------------------------------|---------------------------------|-----------------------------------|---------------------------|----------------------------|-------------------------------|---------------------------------|-----------------------------------|
|         |      | Health spending            | Government health spending | Out-of-pocket health spending | Prepaid private health spending | Development assistance for health | Health spending           | Government health spending | Out-of-pocket health spending | Prepaid private health spending | Development assistance for health |
| Finland | 2037 | 6121.0 (5772.9 to 6477.4)  | 4685.0 (4427.5 to 4963.6)  | 1278.2 (1067.4 to 1519.6)     | 157.8 (125.9 to 194.0)          | 0.0 (0.0 to 0.0)                  | 5567.7 (5251.1 to 5891.9) | 4261.5 (4027.3 to 4515.0)  | 1162.7 (970.9 to 1382.3)      | 143.5 (114.5 to 176.4)          | 0.0 (0.0 to 0.0)                  |
| Finland | 2038 | 6225.9 (5859.9 to 6627.6)  | 4767.9 (4489.1 to 5068.3)  | 1297.1 (1077.0 to 1554.9)     | 160.9 (128.1 to 198.0)          | 0.0 (0.0 to 0.0)                  | 5663.2 (5330.2 to 6028.6) | 4336.9 (4083.3 to 4610.1)  | 1179.9 (979.6 to 1414.3)      | 146.3 (116.5 to 180.1)          | 0.0 (0.0 to 0.0)                  |
| Finland | 2039 | 6329.7 (5945.3 to 6748.5)  | 4849.8 (4555.1 to 5168.1)  | 1316.0 (1085.6 to 1584.9)     | 164.0 (130.5 to 202.1)          | 0.0 (0.0 to 0.0)                  | 5757.6 (5407.9 to 6138.6) | 4411.4 (4143.3 to 4701.0)  | 1197.1 (987.5 to 1441.6)      | 149.1 (118.7 to 183.8)          | 0.0 (0.0 to 0.0)                  |
| Finland | 2040 | 6433.2 (6023.1 to 6874.7)  | 4931.1 (4618.0 to 5262.2)  | 1335.1 (1095.1 to 1614.0)     | 167.0 (133.0 to 206.4)          | 0.0 (0.0 to 0.0)                  | 5851.7 (5478.7 to 6253.3) | 4485.4 (4200.6 to 4786.6)  | 1214.4 (996.1 to 1468.1)      | 151.9 (121.0 to 187.7)          | 0.0 (0.0 to 0.0)                  |
| Finland | 2041 | 6534.6 (6095.8 to 6989.9)  | 5010.7 (4675.3 to 5358.1)  | 1353.9 (1105.7 to 1641.7)     | 170.1 (135.0 to 210.3)          | 0.0 (0.0 to 0.0)                  | 5944.0 (5544.9 to 6358.1) | 4557.8 (4252.7 to 4873.8)  | 1231.5 (1005.7 to 1493.3)     | 154.7 (122.8 to 191.3)          | 0.0 (0.0 to 0.0)                  |
| Finland | 2042 | 6633.3 (6179.7 to 7102.7)  | 5087.8 (4732.0 to 5459.8)  | 1372.5 (1117.8 to 1668.0)     | 173.0 (137.4 to 214.1)          | 0.0 (0.0 to 0.0)                  | 6033.8 (5621.2 to 6460.7) | 4627.9 (4304.3 to 4966.3)  | 1248.5 (1016.7 to 1517.3)     | 157.4 (125.0 to 194.8)          | 0.0 (0.0 to 0.0)                  |
| Finland | 2043 | 6729.9 (6242.1 to 7239.9)  | 5162.9 (4788.4 to 5562.8)  | 1391.1 (1129.7 to 1695.7)     | 175.9 (139.2 to 217.8)          | 0.0 (0.0 to 0.0)                  | 6121.6 (5677.9 to 6585.5) | 4696.2 (4355.6 to 5060.0)  | 1265.3 (1027.6 to 1542.5)     | 160.0 (126.6 to 198.2)          | 0.0 (0.0 to 0.0)                  |
| Finland | 2044 | 6832.0 (6322.3 to 7355.7)  | 5242.7 (4848.4 to 5666.4)  | 1410.3 (1142.7 to 1717.7)     | 179.0 (141.7 to 222.4)          | 0.0 (0.0 to 0.0)                  | 6214.5 (5750.9 to 6690.8) | 4768.8 (4410.2 to 5154.3)  | 1282.8 (1039.5 to 1562.4)     | 162.8 (128.9 to 202.3)          | 0.0 (0.0 to 0.0)                  |
| Finland | 2045 | 6928.1 (6400.6 to 7477.7)  | 5317.2 (4902.9 to 5771.2)  | 1429.0 (1156.4 to 1747.2)     | 181.9 (144.1 to 226.2)          | 0.0 (0.0 to 0.0)                  | 6301.9 (5822.0 to 6801.8) | 4836.6 (4459.8 to 5249.5)  | 1299.8 (1051.9 to 1589.3)     | 165.5 (131.1 to 205.7)          | 0.0 (0.0 to 0.0)                  |
| Finland | 2046 | 7025.1 (6475.8 to 7588.7)  | 5392.6 (4957.0 to 5870.1)  | 1447.7 (1170.2 to 1776.4)     | 184.9 (146.5 to 229.5)          | 0.0 (0.0 to 0.0)                  | 6390.1 (5890.5 to 6902.8) | 4905.2 (4508.9 to 5339.5)  | 1316.8 (1064.4 to 1615.8)     | 168.1 (133.3 to 208.7)          | 0.0 (0.0 to 0.0)                  |
| Finland | 2047 | 7124.6 (6568.9 to 7710.9)  | 5470.1 (5011.2 to 5970.7)  | 1466.7 (1186.0 to 1803.2)     | 187.9 (148.6 to 234.2)          | 0.0 (0.0 to 0.0)                  | 6480.7 (5975.2 to 7014.0) | 4975.7 (4558.3 to 5431.0)  | 1334.1 (1078.8 to 1640.2)     | 170.9 (135.2 to 213.0)          | 0.0 (0.0 to 0.0)                  |
| Finland | 2048 | 7220.7 (6625.9 to 7835.1)  | 5544.4 (5067.9 to 6071.8)  | 1485.5 (1199.9 to 1829.7)     | 190.8 (150.9 to 239.2)          | 0.0 (0.0 to 0.0)                  | 6568.0 (6027.0 to 7126.9) | 5043.2 (4609.8 to 5523.0)  | 1351.2 (1091.4 to 1664.3)     | 173.6 (137.3 to 217.6)          | 0.0 (0.0 to 0.0)                  |
| Finland | 2049 | 7315.7 (6699.8 to 7955.4)  | 5617.6 (5125.9 to 6175.4)  | 1504.4 (1213.9 to 1858.9)     | 193.7 (153.3 to 244.0)          | 0.0 (0.0 to 0.0)                  | 6654.5 (6094.2 to 7236.4) | 5109.8 (4662.6 to 5617.2)  | 1368.4 (1104.2 to 1690.9)     | 176.2 (139.5 to 221.9)          | 0.0 (0.0 to 0.0)                  |
| Finland | 2050 | 7409.7 (6781.3 to 8067.1)  | 5689.8 (5175.3 to 6279.2)  | 1523.4 (1229.3 to 1886.1)     | 196.6 (155.2 to 247.8)          | 0.0 (0.0 to 0.0)                  | 6740.0 (6168.3 to 7337.9) | 5175.5 (4707.5 to 5711.7)  | 1385.7 (1118.2 to 1715.6)     | 178.8 (141.2 to 225.4)          | 0.0 (0.0 to 0.0)                  |
| France  | 1995 | 3341.6 (3232.0 to 3456.4)  | 2650.2 (2564.5 to 2732.9)  | 246.3 (218.2 to 276.9)        | 445.1 (380.5 to 524.7)          | 0.0 (0.0 to 0.0)                  | 3478.1 (3364.1 to 3597.6) | 2758.5 (2669.2 to 2844.6)  | 256.3 (227.1 to 288.2)        | 463.3 (396.1 to 546.2)          | 0.0 (0.0 to 0.0)                  |
| France  | 1996 | 3355.9 (3274.1 to 3438.6)  | 2661.6 (2597.9 to 2720.6)  | 240.1 (216.9 to 265.0)        | 454.2 (401.8 to 513.1)          | 0.0 (0.0 to 0.0)                  | 3493.0 (3407.9 to 3579.1) | 2770.3 (2704.0 to 2831.8)  | 249.9 (225.8 to 275.8)        | 472.8 (418.2 to 534.1)          | 0.0 (0.0 to 0.0)                  |
| France  | 1997 | 3394.2 (3310.6 to 3479.5)  | 2692.3 (2628.2 to 2753.8)  | 238.4 (218.8 to 259.9)        | 463.5 (414.1 to 516.0)          | 0.0 (0.0 to 0.0)                  | 3532.9 (3445.9 to 3621.7) | 2802.3 (2735.6 to 2866.3)  | 248.1 (227.8 to 270.5)        | 482.4 (431.0 to 537.1)          | 0.0 (0.0 to 0.0)                  |
| France  | 1998 | 3473.0 (3383.9 to 3559.7)  | 2751.8 (2686.3 to 2820.8)  | 243.7 (225.0 to 265.2)        | 477.5 (424.1 to 531.3)          | 0.0 (0.0 to 0.0)                  | 3614.9 (3522.2 to 3705.1) | 2864.2 (2796.0 to 2936.0)  | 253.7 (234.1 to 276.0)        | 497.0 (441.4 to 553.0)          | 0.0 (0.0 to 0.0)                  |
| France  | 1999 | 3551.5 (3466.1 to 3637.4)  | 2807.9 (2747.1 to 2871.8)  | 253.6 (235.8 to 274.9)        | 490.0 (437.1 to 545.1)          | 0.0 (0.0 to 0.0)                  | 3696.7 (3607.8 to 3786.0) | 2922.6 (2859.3 to 2989.1)  | 264.0 (245.4 to 286.1)        | 510.0 (454.9 to 567.4)          | 0.0 (0.0 to 0.0)                  |
| France  | 2000 | 3668.4 (3590.0 to 3747.6)  | 2898.6 (2837.1 to 2958.4)  | 264.0 (246.8 to 285.1)        | 505.8 (455.1 to 559.9)          | 0.0 (0.0 to 0.0)                  | 3818.3 (3736.7 to 3900.7) | 3017.0 (2953.0 to 3079.3)  | 274.8 (256.9 to 296.7)        | 526.5 (473.7 to 582.7)          | 0.0 (0.0 to 0.0)                  |
| France  | 2001 | 3777.3 (3697.8 to 3854.3)  | 2984.6 (2924.4 to 3045.1)  | 272.5 (254.6 to 291.9)        | 520.2 (473.0 to 572.3)          | 0.0 (0.0 to 0.0)                  | 3931.7 (3848.9 to 4011.8) | 3106.6 (3043.9 to 3169.5)  | 283.6 (265.1 to 303.8)        | 541.5 (492.3 to 595.7)          | 0.0 (0.0 to 0.0)                  |

| Country | Year | 2018 US Dollars per capita |                            |                               |                                 |                                   | 2018 PPP per capita       |                            |                               |                                 |                                   |
|---------|------|----------------------------|----------------------------|-------------------------------|---------------------------------|-----------------------------------|---------------------------|----------------------------|-------------------------------|---------------------------------|-----------------------------------|
|         |      | Health spending            | Government health spending | Out-of-pocket health spending | Prepaid private health spending | Development assistance for health | Health spending           | Government health spending | Out-of-pocket health spending | Prepaid private health spending | Development assistance for health |
| France  | 2002 | 3891.0 (3813.4 to 3973.9)  | 3074.0 (3010.9 to 3138.6)  | 279.7 (261.6 to 298.5)        | 537.3 (488.8 to 591.8)          | 0.0 (0.0 to 0.0)                  | 4050.0 (3969.2 to 4136.3) | 3199.6 (3133.9 to 3266.8)  | 291.2 (272.2 to 310.7)        | 559.3 (508.8 to 616.0)          | 0.0 (0.0 to 0.0)                  |
| France  | 2003 | 3928.5 (3848.5 to 4008.8)  | 3095.9 (3038.9 to 3162.2)  | 287.1 (269.4 to 306.0)        | 545.5 (496.9 to 600.4)          | 0.0 (0.0 to 0.0)                  | 4089.0 (4005.7 to 4172.6) | 3222.4 (3163.0 to 3291.4)  | 298.8 (280.4 to 318.5)        | 567.8 (517.2 to 625.0)          | 0.0 (0.0 to 0.0)                  |
| France  | 2004 | 4053.5 (3972.8 to 4133.5)  | 3188.0 (3132.6 to 3245.0)  | 301.9 (283.4 to 321.4)        | 563.6 (515.1 to 618.3)          | 0.0 (0.0 to 0.0)                  | 4219.1 (4135.1 to 4302.4) | 3318.2 (3260.6 to 3377.6)  | 314.2 (295.0 to 334.5)        | 586.7 (536.2 to 643.6)          | 0.0 (0.0 to 0.0)                  |
| France  | 2005 | 4120.9 (4039.7 to 4208.1)  | 3225.9 (3163.4 to 3286.7)  | 324.9 (306.1 to 344.7)        | 570.1 (522.1 to 629.2)          | 0.0 (0.0 to 0.0)                  | 4289.3 (4204.8 to 4380.0) | 3357.7 (3292.6 to 3421.0)  | 338.2 (318.6 to 358.8)        | 593.4 (543.4 to 654.9)          | 0.0 (0.0 to 0.0)                  |
| France  | 2006 | 4201.2 (4113.5 to 4286.3)  | 3262.6 (3202.3 to 3325.5)  | 366.2 (345.6 to 387.8)        | 572.4 (521.5 to 628.6)          | 0.0 (0.0 to 0.0)                  | 4372.9 (4281.6 to 4461.5) | 3395.9 (3333.1 to 3461.4)  | 381.1 (359.7 to 403.6)        | 595.8 (542.8 to 654.3)          | 0.0 (0.0 to 0.0)                  |
| France  | 2007 | 4306.6 (4222.6 to 4387.5)  | 3325.7 (3262.0 to 3389.0)  | 400.6 (377.3 to 423.7)        | 580.4 (531.6 to 636.5)          | 0.0 (0.0 to 0.0)                  | 4482.6 (4395.1 to 4566.8) | 3461.6 (3395.3 to 3527.5)  | 416.9 (392.8 to 441.0)        | 604.1 (553.3 to 662.5)          | 0.0 (0.0 to 0.0)                  |
| France  | 2008 | 4394.2 (4309.7 to 4479.3)  | 3374.4 (3313.2 to 3437.9)  | 430.2 (406.6 to 454.3)        | 589.6 (539.6 to 644.0)          | 0.0 (0.0 to 0.0)                  | 4573.7 (4485.8 to 4662.3) | 3512.3 (3448.6 to 3578.4)  | 447.8 (423.2 to 472.8)        | 613.7 (561.7 to 670.3)          | 0.0 (0.0 to 0.0)                  |
| France  | 2009 | 4442.6 (4358.0 to 4525.3)  | 3395.7 (3335.1 to 3457.3)  | 449.0 (427.4 to 471.0)        | 597.9 (547.9 to 648.7)          | 0.0 (0.0 to 0.0)                  | 4624.1 (4536.1 to 4710.2) | 3534.4 (3471.4 to 3598.5)  | 467.4 (444.9 to 490.3)        | 622.3 (570.3 to 675.2)          | 0.0 (0.0 to 0.0)                  |
| France  | 2010 | 4559.7 (4475.8 to 4643.9)  | 3477.4 (3414.0 to 3541.3)  | 463.6 (441.5 to 487.3)        | 618.7 (568.1 to 670.2)          | 0.0 (0.0 to 0.0)                  | 4746.0 (4658.7 to 4833.6) | 3619.5 (3553.5 to 3686.0)  | 482.5 (459.6 to 507.3)        | 644.0 (591.3 to 697.5)          | 0.0 (0.0 to 0.0)                  |
| France  | 2011 | 4649.7 (4566.6 to 4735.1)  | 3537.0 (3470.6 to 3604.6)  | 472.1 (448.2 to 495.8)        | 640.6 (586.8 to 695.3)          | 0.0 (0.0 to 0.0)                  | 4839.7 (4753.2 to 4928.6) | 3681.5 (3612.4 to 3751.9)  | 491.4 (466.5 to 516.0)        | 666.7 (610.8 to 723.7)          | 0.0 (0.0 to 0.0)                  |
| France  | 2012 | 4670.5 (4579.2 to 4755.3)  | 3546.5 (3486.2 to 3605.9)  | 472.5 (449.4 to 497.5)        | 651.4 (595.6 to 705.2)          | 0.0 (0.0 to 0.0)                  | 4861.3 (4766.3 to 4949.6) | 3691.5 (3628.6 to 3753.2)  | 491.8 (467.8 to 517.8)        | 678.1 (620.0 to 734.0)          | 0.0 (0.0 to 0.0)                  |
| France  | 2013 | 4732.9 (4643.5 to 4822.9)  | 3600.0 (3538.3 to 3665.0)  | 473.4 (450.6 to 497.8)        | 659.5 (602.1 to 717.2)          | 0.0 (0.0 to 0.0)                  | 4926.3 (4833.3 to 5019.9) | 3747.1 (3682.9 to 3814.8)  | 492.7 (469.0 to 518.1)        | 686.5 (626.7 to 746.5)          | 0.0 (0.0 to 0.0)                  |
| France  | 2014 | 4773.9 (4682.7 to 4862.2)  | 3656.0 (3596.2 to 3719.9)  | 473.1 (451.3 to 497.7)        | 644.8 (589.3 to 703.9)          | 0.0 (0.0 to 0.0)                  | 4969.0 (4879.2 to 5060.9) | 3805.4 (3743.1 to 3871.9)  | 492.5 (469.7 to 518.0)        | 671.2 (613.3 to 732.7)          | 0.0 (0.0 to 0.0)                  |
| France  | 2015 | 4831.8 (4739.4 to 4929.0)  | 3764.4 (3695.2 to 3831.6)  | 472.4 (449.0 to 499.3)        | 595.0 (538.5 to 656.1)          | 0.0 (0.0 to 0.0)                  | 5029.2 (4933.0 to 5130.4) | 3918.2 (3846.2 to 3988.2)  | 491.7 (467.3 to 519.7)        | 619.3 (560.5 to 682.9)          | 0.0 (0.0 to 0.0)                  |
| France  | 2016 | 4945.5 (4825.5 to 5063.2)  | 3984.6 (3891.9 to 4069.7)  | 474.0 (443.5 to 507.4)        | 486.9 (419.6 to 560.3)          | 0.0 (0.0 to 0.0)                  | 5147.6 (5022.7 to 5270.1) | 4147.4 (4051.0 to 4236.0)  | 493.4 (461.7 to 528.1)        | 506.8 (436.7 to 583.2)          | 0.0 (0.0 to 0.0)                  |
| France  | 2017 | 5050.7 (4931.3 to 5169.7)  | 4053.5 (3960.9 to 4143.0)  | 483.8 (450.5 to 519.1)        | 513.4 (442.7 to 591.7)          | 0.0 (0.0 to 0.0)                  | 5257.1 (5132.8 to 5380.9) | 4219.2 (4122.8 to 4312.3)  | 503.5 (468.9 to 540.3)        | 534.4 (460.8 to 615.9)          | 0.0 (0.0 to 0.0)                  |
| France  | 2018 | 5114.5 (4992.4 to 5234.5)  | 4105.4 (4007.8 to 4199.1)  | 491.6 (457.6 to 529.0)        | 517.5 (446.1 to 596.6)          | 0.0 (0.0 to 0.0)                  | 5323.5 (5196.4 to 5448.4) | 4273.2 (4171.6 to 4370.7)  | 511.7 (476.3 to 550.6)        | 538.6 (464.4 to 621.0)          | 0.0 (0.0 to 0.0)                  |
| France  | 2019 | 5180.7 (5049.5 to 5306.7)  | 4156.5 (4049.9 to 4261.7)  | 499.7 (465.7 to 537.3)        | 524.5 (451.8 to 605.8)          | 0.0 (0.0 to 0.0)                  | 5392.4 (5255.8 to 5523.5) | 4326.3 (4215.4 to 4435.8)  | 520.2 (484.8 to 559.2)        | 545.9 (470.2 to 630.6)          | 0.0 (0.0 to 0.0)                  |
| France  | 2020 | 5249.3 (5110.1 to 5390.6)  | 4210.0 (4094.2 to 4331.0)  | 508.0 (473.0 to 547.0)        | 531.3 (457.3 to 613.9)          | 0.0 (0.0 to 0.0)                  | 5463.8 (5319.0 to 5610.9) | 4382.0 (4261.5 to 4508.0)  | 528.8 (492.3 to 569.3)        | 553.0 (475.9 to 639.0)          | 0.0 (0.0 to 0.0)                  |
| France  | 2021 | 5310.8 (5165.1 to 5457.4)  | 4256.7 (4134.5 to 4379.9)  | 516.2 (480.1 to 555.6)        | 537.9 (462.0 to 621.7)          | 0.0 (0.0 to 0.0)                  | 5527.8 (5376.2 to 5680.4) | 4430.6 (4303.4 to 4558.8)  | 537.3 (499.7 to 578.3)        | 559.9 (480.9 to 647.1)          | 0.0 (0.0 to 0.0)                  |
| France  | 2022 | 5374.0 (5223.3 to 5528.2)  | 4304.3 (4179.0 to 4432.9)  | 524.7 (486.4 to 567.2)        | 545.0 (467.8 to 628.3)          | 0.0 (0.0 to 0.0)                  | 5593.6 (5436.8 to 5754.1) | 4480.2 (4349.7 to 4614.1)  | 546.1 (506.2 to 590.4)        | 567.2 (486.9 to 654.0)          | 0.0 (0.0 to 0.0)                  |



| Country | Year | 2018 US Dollars per capita |                            |                               |                                 |                                   | 2018 PPP per capita       |                            |                               |                                 |                                   |
|---------|------|----------------------------|----------------------------|-------------------------------|---------------------------------|-----------------------------------|---------------------------|----------------------------|-------------------------------|---------------------------------|-----------------------------------|
|         |      | Health spending            | Government health spending | Out-of-pocket health spending | Prepaid private health spending | Development assistance for health | Health spending           | Government health spending | Out-of-pocket health spending | Prepaid private health spending | Development assistance for health |
| France  | 2023 | 5425.7 (5258.9 to 5581.0)  | 4342.2 (4218.8 to 4476.0)  | 532.8 (493.3 to 578.9)        | 550.8 (472.8 to 635.6)          | 0.0 (0.0 to 0.0)                  | 5647.4 (5473.8 to 5809.0) | 4519.6 (4391.2 to 4658.9)  | 554.5 (513.4 to 602.6)        | 573.3 (492.1 to 661.5)          | 0.0 (0.0 to 0.0)                  |
| France  | 2024 | 5475.6 (5312.9 to 5642.4)  | 4379.2 (4247.4 to 4514.3)  | 540.6 (499.6 to 587.8)        | 555.8 (477.1 to 641.3)          | 0.0 (0.0 to 0.0)                  | 5699.4 (5530.0 to 5873.0) | 4558.1 (4421.0 to 4698.8)  | 562.7 (520.0 to 611.8)        | 578.5 (496.6 to 667.5)          | 0.0 (0.0 to 0.0)                  |
| France  | 2025 | 5525.5 (5359.9 to 5694.0)  | 4416.0 (4271.2 to 4562.2)  | 548.5 (506.1 to 595.6)        | 560.9 (480.2 to 647.6)          | 0.0 (0.0 to 0.0)                  | 5751.2 (5578.9 to 5926.7) | 4596.4 (4445.7 to 4748.6)  | 571.0 (526.8 to 619.9)        | 583.9 (499.8 to 674.0)          | 0.0 (0.0 to 0.0)                  |
| France  | 2026 | 5579.1 (5404.8 to 5755.5)  | 4455.6 (4305.5 to 4611.1)  | 556.8 (511.2 to 606.3)        | 566.7 (485.3 to 655.8)          | 0.0 (0.0 to 0.0)                  | 5807.1 (5625.6 to 5990.7) | 4637.7 (4481.4 to 4799.5)  | 579.6 (532.1 to 631.1)        | 589.8 (505.1 to 682.6)          | 0.0 (0.0 to 0.0)                  |
| France  | 2027 | 5635.0 (5447.7 to 5821.3)  | 4497.1 (4329.7 to 4658.2)  | 565.3 (516.4 to 620.3)        | 572.6 (491.2 to 663.1)          | 0.0 (0.0 to 0.0)                  | 5865.3 (5670.3 to 6059.2) | 4680.9 (4506.6 to 4848.5)  | 588.4 (537.5 to 645.7)        | 596.0 (511.3 to 690.1)          | 0.0 (0.0 to 0.0)                  |
| France  | 2028 | 5690.8 (5486.0 to 5884.3)  | 4538.5 (4369.4 to 4707.9)  | 573.8 (520.2 to 635.9)        | 578.6 (495.2 to 671.4)          | 0.0 (0.0 to 0.0)                  | 5923.4 (5710.2 to 6124.8) | 4723.9 (4548.0 to 4900.2)  | 597.3 (541.4 to 661.9)        | 602.2 (515.4 to 698.8)          | 0.0 (0.0 to 0.0)                  |
| France  | 2029 | 5748.8 (5521.1 to 5963.9)  | 4581.6 (4396.2 to 4759.6)  | 582.5 (522.6 to 650.0)        | 584.8 (501.5 to 678.9)          | 0.0 (0.0 to 0.0)                  | 5983.7 (5746.7 to 6207.6) | 4768.8 (4575.8 to 4954.1)  | 606.3 (544.0 to 676.6)        | 608.7 (522.0 to 706.6)          | 0.0 (0.0 to 0.0)                  |
| France  | 2030 | 5809.9 (5568.3 to 6038.0)  | 4627.1 (4435.3 to 4821.1)  | 591.3 (525.6 to 666.8)        | 591.4 (507.6 to 688.5)          | 0.0 (0.0 to 0.0)                  | 6047.3 (5795.8 to 6284.8) | 4816.2 (4616.5 to 5018.0)  | 615.5 (547.1 to 694.1)        | 615.6 (528.3 to 716.6)          | 0.0 (0.0 to 0.0)                  |
| France  | 2031 | 5873.3 (5623.8 to 6122.1)  | 4674.1 (4464.1 to 4879.6)  | 600.4 (528.8 to 684.2)        | 598.9 (514.3 to 699.1)          | 0.0 (0.0 to 0.0)                  | 6113.3 (5853.6 to 6372.2) | 4865.1 (4646.5 to 5079.0)  | 624.9 (550.4 to 712.2)        | 623.3 (535.3 to 727.7)          | 0.0 (0.0 to 0.0)                  |
| France  | 2032 | 5937.8 (5678.3 to 6199.3)  | 4721.8 (4491.8 to 4941.2)  | 609.5 (530.3 to 699.1)        | 606.5 (521.2 to 708.1)          | 0.0 (0.0 to 0.0)                  | 6180.5 (5910.3 to 6452.6) | 4914.7 (4675.3 to 5143.1)  | 634.4 (552.0 to 727.7)        | 631.3 (542.5 to 737.1)          | 0.0 (0.0 to 0.0)                  |
| France  | 2033 | 6002.2 (5728.8 to 6280.1)  | 4769.4 (4533.4 to 5010.3)  | 618.6 (532.9 to 716.6)        | 614.3 (527.8 to 717.9)          | 0.0 (0.0 to 0.0)                  | 6247.5 (5962.8 to 6536.7) | 4964.2 (4718.6 to 5215.0)  | 643.9 (554.7 to 745.9)        | 639.4 (549.4 to 747.2)          | 0.0 (0.0 to 0.0)                  |
| France  | 2034 | 6068.1 (5776.1 to 6364.0)  | 4818.3 (4566.3 to 5075.0)  | 627.8 (537.3 to 733.0)        | 622.1 (534.1 to 728.2)          | 0.0 (0.0 to 0.0)                  | 6316.1 (6012.1 to 6624.1) | 5015.2 (4752.9 to 5282.3)  | 653.4 (559.2 to 763.0)        | 647.5 (556.0 to 758.0)          | 0.0 (0.0 to 0.0)                  |
| France  | 2035 | 6134.1 (5830.4 to 6467.0)  | 4867.3 (4604.0 to 5141.0)  | 636.9 (540.9 to 749.5)        | 629.9 (540.3 to 738.1)          | 0.0 (0.0 to 0.0)                  | 6384.8 (6068.7 to 6731.3) | 5066.2 (4792.2 to 5351.1)  | 662.9 (563.0 to 780.1)        | 655.6 (562.4 to 768.3)          | 0.0 (0.0 to 0.0)                  |
| France  | 2036 | 6198.1 (5878.3 to 6545.6)  | 4913.9 (4634.3 to 5222.0)  | 646.0 (542.7 to 767.9)        | 638.2 (546.0 to 748.3)          | 0.0 (0.0 to 0.0)                  | 6451.3 (6118.5 to 6813.1) | 5114.7 (4823.7 to 5435.3)  | 672.4 (564.9 to 799.3)        | 664.3 (568.3 to 778.9)          | 0.0 (0.0 to 0.0)                  |
| France  | 2037 | 6261.7 (5934.2 to 6633.6)  | 4960.2 (4662.1 to 5275.3)  | 655.0 (545.9 to 784.4)        | 646.4 (551.6 to 758.7)          | 0.0 (0.0 to 0.0)                  | 6517.6 (6176.7 to 6904.6) | 5162.9 (4852.6 to 5490.9)  | 681.8 (568.3 to 816.5)        | 672.8 (574.1 to 789.7)          | 0.0 (0.0 to 0.0)                  |
| France  | 2038 | 6325.6 (5977.8 to 6721.4)  | 5006.8 (4700.1 to 5350.8)  | 664.0 (549.6 to 799.9)        | 654.7 (558.8 to 769.2)          | 0.0 (0.0 to 0.0)                  | 6584.0 (6222.0 to 6996.1) | 5211.4 (4892.1 to 5569.4)  | 691.2 (572.1 to 832.6)        | 681.5 (581.6 to 800.6)          | 0.0 (0.0 to 0.0)                  |
| France  | 2039 | 6392.8 (6030.0 to 6792.7)  | 5056.1 (4730.0 to 5413.9)  | 673.2 (552.5 to 815.8)        | 663.6 (565.2 to 780.4)          | 0.0 (0.0 to 0.0)                  | 6654.1 (6276.4 to 7070.3) | 5262.7 (4923.3 to 5635.1)  | 700.7 (575.1 to 849.1)        | 690.7 (588.3 to 812.3)          | 0.0 (0.0 to 0.0)                  |
| France  | 2040 | 6459.0 (6076.0 to 6857.9)  | 5104.0 (4767.5 to 5483.7)  | 682.3 (557.8 to 830.5)        | 672.7 (572.3 to 792.6)          | 0.0 (0.0 to 0.0)                  | 6722.9 (6324.3 to 7138.1) | 5312.5 (4962.3 to 5707.8)  | 710.2 (580.6 to 864.4)        | 700.2 (595.6 to 825.0)          | 0.0 (0.0 to 0.0)                  |
| France  | 2041 | 6526.4 (6137.0 to 6927.5)  | 5152.1 (4799.1 to 5543.5)  | 691.5 (564.1 to 845.1)        | 682.8 (578.9 to 806.2)          | 0.0 (0.0 to 0.0)                  | 6793.1 (6387.7 to 7210.6) | 5362.7 (4995.2 to 5770.1)  | 719.8 (587.2 to 879.7)        | 710.7 (602.6 to 839.2)          | 0.0 (0.0 to 0.0)                  |
| France  | 2042 | 6595.2 (6193.6 to 7031.0)  | 5201.1 (4825.2 to 5615.1)  | 700.7 (570.8 to 858.2)        | 693.4 (586.0 to 820.5)          | 0.0 (0.0 to 0.0)                  | 6864.7 (6446.7 to 7318.3) | 5413.6 (5022.3 to 5844.6)  | 729.3 (594.2 to 893.3)        | 721.8 (610.0 to 854.0)          | 0.0 (0.0 to 0.0)                  |
| France  | 2043 | 6664.3 (6219.3 to 7131.5)  | 5249.9 (4862.4 to 5680.2)  | 709.9 (576.1 to 870.3)        | 704.5 (593.8 to 835.1)          | 0.0 (0.0 to 0.0)                  | 6936.7 (6473.5 to 7423.0) | 5464.4 (5061.1 to 5912.3)  | 738.9 (599.6 to 905.9)        | 733.3 (618.1 to 869.2)          | 0.0 (0.0 to 0.0)                  |

| Country | Year | 2018 US Dollars per capita |                            |                               |                                 |                                   | 2018 PPP per capita       |                            |                               |                                 |                                   |
|---------|------|----------------------------|----------------------------|-------------------------------|---------------------------------|-----------------------------------|---------------------------|----------------------------|-------------------------------|---------------------------------|-----------------------------------|
|         |      | Health spending            | Government health spending | Out-of-pocket health spending | Prepaid private health spending | Development assistance for health | Health spending           | Government health spending | Out-of-pocket health spending | Prepaid private health spending | Development assistance for health |
| France  | 2044 | 6734.4 (6258.8 to 7210.0)  | 5299.6 (4881.7 to 5761.2)  | 719.1 (582.6 to 882.3)        | 715.7 (601.8 to 847.9)          | 0.0 (0.0 to 0.0)                  | 7009.6 (6514.6 to 7504.6) | 5516.2 (5081.2 to 5996.6)  | 748.5 (606.4 to 918.4)        | 745.0 (626.4 to 882.5)          | 0.0 (0.0 to 0.0)                  |
| France  | 2045 | 6804.1 (6335.6 to 7287.8)  | 5349.2 (4908.5 to 5823.3)  | 728.2 (588.5 to 895.5)        | 726.7 (610.1 to 861.8)          | 0.0 (0.0 to 0.0)                  | 7082.1 (6594.5 to 7585.6) | 5567.8 (5109.1 to 6061.3)  | 757.9 (612.6 to 932.1)        | 756.4 (635.0 to 897.0)          | 0.0 (0.0 to 0.0)                  |
| France  | 2046 | 6874.2 (6375.4 to 7400.8)  | 5398.8 (4944.7 to 5917.6)  | 737.2 (594.8 to 908.0)        | 738.2 (620.0 to 877.2)          | 0.0 (0.0 to 0.0)                  | 7155.1 (6635.9 to 7703.2) | 5619.4 (5146.8 to 6159.4)  | 767.4 (619.1 to 945.1)        | 768.3 (645.4 to 913.0)          | 0.0 (0.0 to 0.0)                  |
| France  | 2047 | 6943.2 (6415.8 to 7501.0)  | 5447.5 (4983.5 to 5992.1)  | 746.2 (601.4 to 917.1)        | 749.5 (626.6 to 893.5)          | 0.0 (0.0 to 0.0)                  | 7226.9 (6678.0 to 7807.6) | 5670.1 (5187.1 to 6237.0)  | 776.6 (626.0 to 954.6)        | 780.1 (652.2 to 930.0)          | 0.0 (0.0 to 0.0)                  |
| France  | 2048 | 7011.7 (6458.7 to 7578.2)  | 5495.7 (4989.5 to 6065.6)  | 755.1 (609.8 to 925.5)        | 760.8 (632.7 to 909.8)          | 0.0 (0.0 to 0.0)                  | 7298.2 (6722.6 to 7887.9) | 5720.3 (5193.4 to 6313.4)  | 786.0 (634.8 to 963.3)        | 791.9 (658.5 to 947.0)          | 0.0 (0.0 to 0.0)                  |
| France  | 2049 | 7081.8 (6512.6 to 7685.3)  | 5545.4 (5025.5 to 6121.2)  | 764.3 (616.0 to 935.0)        | 772.2 (641.0 to 925.8)          | 0.0 (0.0 to 0.0)                  | 7371.2 (6778.7 to 7999.3) | 5772.0 (5230.8 to 6371.3)  | 795.5 (641.1 to 973.2)        | 803.7 (667.2 to 963.7)          | 0.0 (0.0 to 0.0)                  |
| France  | 2050 | 7153.6 (6557.9 to 7776.3)  | 5596.5 (5061.2 to 6190.5)  | 773.5 (623.3 to 945.9)        | 783.6 (649.6 to 941.3)          | 0.0 (0.0 to 0.0)                  | 7445.9 (6825.8 to 8094.0) | 5825.1 (5268.0 to 6443.4)  | 805.1 (648.7 to 984.6)        | 815.6 (676.2 to 979.8)          | 0.0 (0.0 to 0.0)                  |
| Gabon   | 1995 | 334.4 (297.2 to 373.7)     | 110.0 (92.9 to 129.4)      | 198.2 (167.2 to 232.0)        | 26.0 (14.3 to 43.1)             | 0.2 (0.2 to 0.2)                  | 772.1 (686.2 to 862.7)    | 254.0 (214.5 to 298.7)     | 457.7 (386.0 to 535.7)        | 59.9 (33.0 to 99.6)             | 0.4 (0.4 to 0.4)                  |
| Gabon   | 1996 | 342.7 (308.3 to 379.5)     | 115.7 (98.9 to 134.3)      | 198.0 (170.2 to 226.7)        | 26.4 (15.0 to 43.2)             | 2.6 (2.6 to 2.6)                  | 791.2 (711.8 to 876.2)    | 267.1 (228.2 to 310.1)     | 457.1 (393.0 to 523.4)        | 61.0 (34.6 to 99.8)             | 6.0 (6.0 to 6.0)                  |
| Gabon   | 1997 | 350.1 (318.1 to 383.7)     | 120.2 (103.4 to 137.4)     | 197.1 (172.6 to 223.0)        | 26.7 (15.4 to 43.9)             | 6.1 (6.1 to 6.1)                  | 808.4 (734.5 to 886.0)    | 277.5 (238.7 to 317.2)     | 455.1 (398.5 to 514.8)        | 61.7 (35.5 to 101.3)            | 14.1 (14.1 to 14.1)               |
| Gabon   | 1998 | 369.6 (338.5 to 406.6)     | 125.8 (109.8 to 142.6)     | 207.3 (183.6 to 233.4)        | 28.0 (16.5 to 44.7)             | 8.5 (8.5 to 8.5)                  | 853.4 (781.6 to 938.8)    | 290.5 (253.6 to 329.2)     | 478.6 (424.0 to 538.9)        | 64.6 (38.2 to 103.1)            | 19.7 (19.7 to 19.7)               |
| Gabon   | 1999 | 323.9 (295.7 to 356.6)     | 112.6 (99.0 to 127.6)      | 184.2 (162.6 to 207.2)        | 25.1 (14.9 to 40.4)             | 2.0 (2.0 to 2.0)                  | 747.8 (682.7 to 823.3)    | 260.0 (228.5 to 294.6)     | 425.2 (375.4 to 478.3)        | 58.0 (34.4 to 93.3)             | 4.6 (4.6 to 4.6)                  |
| Gabon   | 2000 | 296.2 (269.3 to 325.0)     | 108.5 (94.6 to 123.9)      | 162.1 (143.3 to 184.0)        | 23.4 (13.8 to 37.6)             | 2.2 (2.2 to 2.2)                  | 683.9 (621.7 to 750.5)    | 250.6 (218.5 to 286.0)     | 374.2 (330.8 to 424.9)        | 54.1 (31.8 to 86.9)             | 5.0 (5.0 to 5.0)                  |
| Gabon   | 2001 | 284.9 (258.1 to 315.3)     | 107.5 (93.4 to 123.3)      | 152.2 (133.9 to 174.7)        | 22.8 (13.5 to 36.6)             | 2.4 (2.4 to 2.4)                  | 657.8 (596.0 to 727.9)    | 248.2 (215.6 to 284.6)     | 351.5 (309.1 to 403.3)        | 52.7 (31.2 to 84.5)             | 5.5 (5.5 to 5.5)                  |
| Gabon   | 2002 | 281.0 (254.2 to 313.1)     | 104.8 (91.0 to 120.4)      | 148.9 (129.7 to 171.5)        | 22.5 (13.3 to 35.4)             | 4.8 (4.8 to 4.8)                  | 648.9 (586.9 to 722.8)    | 242.0 (210.1 to 278.0)     | 343.8 (299.6 to 396.0)        | 51.9 (30.8 to 81.7)             | 11.1 (11.1 to 11.1)               |
| Gabon   | 2003 | 280.5 (253.8 to 314.0)     | 107.3 (93.1 to 123.9)      | 146.9 (127.8 to 170.0)        | 22.6 (13.2 to 35.0)             | 3.7 (3.7 to 3.7)                  | 647.6 (586.1 to 725.0)    | 247.8 (214.9 to 286.0)     | 339.1 (295.0 to 392.4)        | 52.1 (30.5 to 80.9)             | 8.5 (8.5 to 8.5)                  |
| Gabon   | 2004 | 273.8 (248.2 to 304.1)     | 104.8 (90.3 to 121.3)      | 141.1 (121.3 to 163.2)        | 21.5 (12.5 to 32.9)             | 6.3 (6.3 to 6.3)                  | 632.1 (573.0 to 702.1)    | 241.9 (208.5 to 280.2)     | 325.8 (280.2 to 376.8)        | 49.7 (28.8 to 76.1)             | 14.6 (14.6 to 14.6)               |
| Gabon   | 2005 | 269.8 (244.3 to 301.1)     | 104.1 (88.6 to 121.0)      | 138.5 (119.1 to 161.2)        | 21.0 (12.4 to 32.3)             | 6.2 (6.2 to 6.2)                  | 623.0 (564.0 to 695.2)    | 240.4 (204.7 to 279.3)     | 319.7 (275.0 to 372.2)        | 48.5 (28.6 to 74.6)             | 14.4 (14.4 to 14.4)               |
| Gabon   | 2006 | 261.1 (236.4 to 289.9)     | 99.1 (84.8 to 115.7)       | 131.8 (114.0 to 152.0)        | 19.9 (11.7 to 30.4)             | 10.3 (10.3 to 10.3)               | 602.9 (545.9 to 669.4)    | 228.9 (195.8 to 267.0)     | 304.4 (263.3 to 350.8)        | 45.8 (27.1 to 70.3)             | 23.8 (23.8 to 23.8)               |
| Gabon   | 2007 | 257.8 (232.4 to 287.1)     | 101.9 (87.5 to 118.8)      | 128.7 (110.9 to 149.4)        | 20.0 (11.7 to 30.4)             | 7.3 (7.3 to 7.3)                  | 595.3 (536.5 to 662.8)    | 235.3 (202.0 to 274.3)     | 297.1 (256.0 to 345.0)        | 46.1 (27.0 to 70.3)             | 16.8 (16.8 to 16.8)               |
| Gabon   | 2008 | 246.5 (220.9 to 272.8)     | 103.0 (88.8 to 120.4)      | 118.6 (101.5 to 138.6)        | 19.5 (11.4 to 30.5)             | 5.3 (5.3 to 5.3)                  | 569.0 (510.0 to 629.7)    | 237.8 (205.1 to 277.9)     | 273.9 (234.4 to 320.1)        | 45.1 (26.4 to 70.4)             | 12.3 (12.3 to 12.3)               |

| Country | Year | 2018 US Dollars per capita |                            |                               |                                 |                                   | 2018 PPP per capita    |                            |                               |                                 |                                   |
|---------|------|----------------------------|----------------------------|-------------------------------|---------------------------------|-----------------------------------|------------------------|----------------------------|-------------------------------|---------------------------------|-----------------------------------|
|         |      | Health spending            | Government health spending | Out-of-pocket health spending | Prepaid private health spending | Development assistance for health | Health spending        | Government health spending | Out-of-pocket health spending | Prepaid private health spending | Development assistance for health |
| Gabon   | 2009 | 240.9 (215.6 to 266.0)     | 107.4 (92.5 to 124.8)      | 105.7 (90.0 to 124.6)         | 20.2 (12.0 to 31.2)             | 7.6 (7.6 to 7.6)                  | 556.2 (497.7 to 614.2) | 248.0 (213.5 to 288.1)     | 244.0 (207.7 to 287.6)        | 46.7 (27.7 to 71.9)             | 17.5 (17.5 to 17.5)               |
| Gabon   | 2010 | 224.5 (201.6 to 248.2)     | 120.3 (104.9 to 138.6)     | 79.5 (67.1 to 94.8)           | 20.8 (12.5 to 32.4)             | 3.8 (3.8 to 3.8)                  | 518.2 (465.4 to 573.0) | 277.7 (242.2 to 320.0)     | 183.5 (154.9 to 218.8)        | 48.1 (28.8 to 74.8)             | 8.8 (8.8 to 8.8)                  |
| Gabon   | 2011 | 233.7 (209.5 to 258.7)     | 134.4 (118.0 to 153.1)     | 73.0 (61.0 to 87.6)           | 21.8 (13.3 to 34.3)             | 4.4 (4.4 to 4.4)                  | 539.5 (483.6 to 597.3) | 310.4 (272.5 to 353.5)     | 168.5 (140.9 to 202.2)        | 50.4 (30.8 to 79.2)             | 10.3 (10.3 to 10.3)               |
| Gabon   | 2012 | 238.4 (214.5 to 264.7)     | 142.2 (125.5 to 161.4)     | 69.9 (57.7 to 84.3)           | 22.5 (13.6 to 35.3)             | 3.7 (3.7 to 3.7)                  | 550.4 (495.3 to 611.1) | 328.4 (289.7 to 372.6)     | 161.4 (133.3 to 194.6)        | 52.0 (31.4 to 81.4)             | 8.6 (8.6 to 8.6)                  |
| Gabon   | 2013 | 252.7 (227.9 to 280.7)     | 152.6 (133.8 to 172.5)     | 71.2 (57.8 to 85.8)           | 23.4 (14.1 to 36.7)             | 5.5 (5.5 to 5.5)                  | 583.4 (526.2 to 648.2) | 352.3 (308.9 to 398.4)     | 164.3 (133.4 to 198.1)        | 54.1 (32.5 to 84.8)             | 12.7 (12.7 to 12.7)               |
| Gabon   | 2014 | 254.8 (227.7 to 284.6)     | 153.8 (133.5 to 176.0)     | 68.9 (55.4 to 84.8)           | 26.5 (15.6 to 41.9)             | 5.4 (5.4 to 5.4)                  | 588.2 (525.7 to 657.0) | 355.2 (308.3 to 406.2)     | 159.2 (127.8 to 195.8)        | 61.3 (36.0 to 96.7)             | 12.6 (12.6 to 12.6)               |
| Gabon   | 2015 | 264.7 (233.7 to 298.1)     | 161.9 (139.3 to 187.3)     | 68.5 (54.7 to 85.4)           | 31.5 (17.9 to 50.1)             | 2.8 (2.8 to 2.8)                  | 611.2 (539.6 to 688.4) | 373.7 (321.6 to 432.5)     | 158.1 (126.4 to 197.2)        | 72.8 (41.3 to 115.7)            | 6.5 (6.5 to 6.5)                  |
| Gabon   | 2016 | 281.1 (245.0 to 321.4)     | 174.6 (145.8 to 205.5)     | 68.6 (54.2 to 86.4)           | 34.8 (19.4 to 54.8)             | 3.2 (3.2 to 3.2)                  | 649.1 (565.7 to 742.0) | 403.0 (336.6 to 474.4)     | 158.3 (125.1 to 199.5)        | 80.3 (44.8 to 126.5)            | 7.4 (7.4 to 7.4)                  |
| Gabon   | 2017 | 290.5 (258.3 to 325.7)     | 158.7 (133.0 to 187.0)     | 67.2 (53.0 to 84.4)           | 34.0 (19.0 to 53.6)             | 30.5 (30.5 to 30.5)               | 670.7 (596.4 to 751.9) | 366.5 (307.1 to 431.6)     | 155.2 (122.5 to 194.8)        | 78.6 (44.0 to 123.7)            | 70.4 (70.4 to 70.4)               |
| Gabon   | 2018 | 289.8 (256.4 to 326.3)     | 159.3 (133.4 to 187.4)     | 67.3 (53.0 to 84.7)           | 34.5 (19.3 to 54.4)             | 28.7 (28.7 to 28.7)               | 669.1 (592.1 to 753.3) | 367.8 (307.9 to 432.7)     | 155.3 (122.4 to 195.5)        | 79.8 (44.6 to 125.7)            | 66.2 (66.2 to 66.3)               |
| Gabon   | 2019 | 290.3 (257.9 to 328.6)     | 159.8 (134.0 to 188.0)     | 66.8 (52.5 to 83.7)           | 34.8 (19.5 to 54.7)             | 28.8 (27.0 to 30.5)               | 670.2 (595.4 to 758.7) | 369.0 (309.3 to 434.1)     | 154.2 (121.3 to 193.3)        | 80.4 (45.0 to 126.3)            | 66.6 (62.2 to 70.4)               |
| Gabon   | 2020 | 290.5 (256.3 to 330.5)     | 160.2 (134.5 to 188.3)     | 66.0 (51.8 to 82.7)           | 35.1 (19.7 to 55.3)             | 29.2 (26.8 to 31.5)               | 670.8 (591.8 to 763.2) | 370.0 (310.5 to 434.8)     | 152.3 (119.5 to 191.0)        | 81.0 (45.4 to 127.8)            | 67.5 (61.9 to 72.8)               |
| Gabon   | 2021 | 290.6 (257.2 to 330.0)     | 160.3 (134.7 to 188.5)     | 65.2 (51.1 to 82.1)           | 35.3 (19.8 to 55.7)             | 29.7 (26.7 to 32.8)               | 670.9 (593.8 to 761.9) | 370.2 (311.1 to 435.3)     | 150.5 (117.9 to 189.6)        | 81.6 (45.8 to 128.6)            | 68.6 (61.7 to 75.8)               |
| Gabon   | 2022 | 290.5 (256.1 to 327.8)     | 160.3 (134.8 to 188.3)     | 64.3 (50.1 to 81.4)           | 35.5 (20.0 to 56.0)             | 30.4 (26.9 to 33.9)               | 670.8 (591.2 to 756.7) | 370.1 (311.3 to 434.8)     | 148.6 (115.6 to 188.1)        | 82.0 (46.1 to 129.2)            | 70.1 (62.2 to 78.2)               |
| Gabon   | 2023 | 290.7 (256.9 to 327.9)     | 160.5 (135.3 to 188.4)     | 63.5 (49.3 to 80.6)           | 35.7 (20.1 to 56.3)             | 31.0 (27.0 to 35.2)               | 671.2 (593.1 to 757.0) | 370.5 (312.3 to 434.9)     | 146.6 (113.7 to 186.2)        | 82.5 (46.4 to 129.9)            | 71.6 (62.2 to 81.3)               |
| Gabon   | 2024 | 291.6 (256.4 to 328.8)     | 161.2 (135.8 to 189.2)     | 62.7 (48.6 to 79.4)           | 36.0 (20.2 to 56.5)             | 31.7 (27.3 to 36.6)               | 673.2 (592.1 to 759.2) | 372.3 (313.4 to 436.8)     | 144.7 (112.3 to 183.2)        | 83.0 (46.7 to 130.4)            | 73.2 (63.1 to 84.4)               |
| Gabon   | 2025 | 293.1 (259.0 to 330.4)     | 162.6 (137.0 to 191.1)     | 61.9 (48.0 to 78.3)           | 36.2 (20.4 to 56.8)             | 32.4 (27.6 to 37.9)               | 676.8 (598.0 to 762.8) | 375.4 (316.3 to 441.1)     | 142.9 (110.8 to 180.9)        | 83.7 (47.2 to 131.2)            | 74.8 (63.7 to 87.5)               |
| Gabon   | 2026 | 294.6 (261.2 to 334.0)     | 163.8 (137.8 to 192.4)     | 61.2 (47.1 to 77.3)           | 36.5 (20.6 to 57.3)             | 33.1 (27.9 to 38.8)               | 680.1 (603.1 to 771.2) | 378.3 (318.3 to 444.3)     | 141.2 (108.8 to 178.4)        | 84.3 (47.6 to 132.3)            | 76.3 (64.5 to 89.5)               |
| Gabon   | 2027 | 295.9 (262.5 to 335.5)     | 164.9 (138.6 to 193.7)     | 60.5 (46.2 to 76.6)           | 36.8 (20.8 to 57.7)             | 33.8 (28.3 to 40.3)               | 683.2 (606.0 to 774.5) | 380.7 (319.9 to 447.2)     | 139.6 (106.6 to 176.9)        | 84.9 (47.9 to 133.2)            | 78.0 (65.3 to 93.0)               |
| Gabon   | 2028 | 297.5 (261.5 to 336.9)     | 166.0 (139.3 to 195.2)     | 59.9 (45.5 to 76.0)           | 37.1 (20.9 to 58.0)             | 34.6 (28.9 to 41.8)               | 687.0 (603.9 to 777.9) | 383.3 (321.7 to 450.7)     | 138.3 (105.1 to 175.5)        | 85.7 (48.3 to 134.0)            | 79.8 (66.6 to 96.4)               |
| Gabon   | 2029 | 299.0 (263.3 to 340.6)     | 166.8 (139.6 to 196.5)     | 59.4 (44.9 to 75.8)           | 37.4 (21.1 to 58.4)             | 35.4 (29.1 to 43.2)               | 690.3 (608.0 to 786.4) | 385.1 (322.3 to 453.7)     | 137.1 (103.8 to 174.9)        | 86.3 (48.7 to 134.9)            | 81.7 (67.2 to 99.7)               |

| Country | Year | 2018 US Dollars per capita |                            |                               |                                 |                                   | 2018 PPP per capita    |                            |                               |                                 |                                   |
|---------|------|----------------------------|----------------------------|-------------------------------|---------------------------------|-----------------------------------|------------------------|----------------------------|-------------------------------|---------------------------------|-----------------------------------|
|         |      | Health spending            | Government health spending | Out-of-pocket health spending | Prepaid private health spending | Development assistance for health | Health spending        | Government health spending | Out-of-pocket health spending | Prepaid private health spending | Development assistance for health |
| Gabon   | 2030 | 301.1 (265.5 to 343.3)     | 168.2 (140.5 to 198.5)     | 59.0 (44.4 to 75.7)           | 37.8 (21.3 to 59.3)             | 36.1 (29.6 to 44.3)               | 695.3 (613.0 to 792.7) | 388.4 (324.4 to 458.4)     | 136.3 (102.6 to 174.7)        | 87.2 (49.1 to 136.9)            | 83.4 (68.2 to 102.3)              |
| Gabon   | 2031 | 303.6 (265.3 to 347.4)     | 169.8 (141.5 to 200.8)     | 58.8 (43.6 to 75.5)           | 38.1 (21.5 to 60.0)             | 36.9 (29.9 to 46.4)               | 700.9 (612.5 to 802.1) | 392.0 (326.7 to 463.6)     | 135.7 (100.8 to 174.4)        | 88.0 (49.5 to 138.6)            | 85.3 (69.1 to 107.1)              |
| Gabon   | 2032 | 306.2 (270.3 to 346.5)     | 171.4 (142.5 to 202.8)     | 58.6 (43.2 to 75.8)           | 38.5 (21.7 to 60.7)             | 37.7 (30.2 to 47.5)               | 707.0 (624.2 to 800.1) | 395.8 (329.1 to 468.3)     | 135.3 (99.6 to 175.0)         | 88.9 (50.0 to 140.1)            | 87.0 (69.8 to 109.8)              |
| Gabon   | 2033 | 309.2 (269.2 to 351.0)     | 173.2 (143.9 to 204.7)     | 58.5 (42.9 to 76.1)           | 39.0 (21.9 to 61.3)             | 38.5 (30.6 to 49.5)               | 713.9 (621.6 to 810.5) | 399.9 (332.2 to 472.6)     | 135.1 (99.1 to 175.7)         | 90.0 (50.5 to 141.6)            | 88.9 (70.6 to 114.3)              |
| Gabon   | 2034 | 312.1 (274.8 to 355.9)     | 174.8 (145.1 to 206.5)     | 58.5 (42.8 to 76.5)           | 39.4 (22.1 to 61.9)             | 39.4 (31.0 to 50.8)               | 720.7 (634.4 to 821.8) | 403.6 (334.9 to 476.8)     | 135.1 (98.9 to 176.5)         | 90.9 (51.0 to 142.9)            | 91.0 (71.7 to 117.2)              |
| Gabon   | 2035 | 314.7 (273.6 to 360.2)     | 176.2 (145.9 to 208.3)     | 58.6 (42.6 to 77.0)           | 39.8 (22.3 to 62.4)             | 40.1 (31.0 to 52.9)               | 726.7 (631.7 to 831.6) | 406.9 (336.8 to 481.0)     | 135.3 (98.5 to 177.8)         | 91.8 (51.5 to 144.0)            | 92.6 (71.6 to 122.2)              |
| Gabon   | 2036 | 317.2 (275.0 to 363.6)     | 177.6 (146.6 to 210.1)     | 58.7 (42.7 to 77.4)           | 40.2 (22.5 to 62.9)             | 40.7 (31.3 to 55.6)               | 732.5 (634.9 to 839.5) | 410.1 (338.4 to 485.2)     | 135.6 (98.5 to 178.8)         | 92.7 (52.0 to 145.2)            | 94.0 (72.3 to 128.5)              |
| Gabon   | 2037 | 320.2 (278.0 to 368.3)     | 179.2 (147.6 to 212.2)     | 58.9 (42.8 to 77.9)           | 40.6 (22.7 to 63.4)             | 41.5 (31.1 to 56.6)               | 739.2 (641.9 to 850.4) | 413.7 (340.7 to 489.8)     | 136.0 (98.8 to 180.0)         | 93.7 (52.5 to 146.4)            | 95.8 (71.8 to 130.6)              |
| Gabon   | 2038 | 322.7 (275.4 to 370.2)     | 180.7 (148.4 to 214.1)     | 59.2 (42.9 to 78.6)           | 41.0 (22.9 to 64.1)             | 41.9 (0.0 to 59.1)                | 745.2 (635.9 to 854.7) | 417.2 (342.6 to 494.3)     | 136.7 (99.2 to 181.5)         | 94.6 (53.0 to 148.0)            | 96.6 (0.0 to 136.4)               |
| Gabon   | 2039 | 325.2 (276.8 to 375.5)     | 182.0 (149.2 to 215.9)     | 59.5 (43.0 to 79.1)           | 41.3 (23.2 to 64.9)             | 42.4 (0.0 to 60.9)                | 750.9 (639.1 to 867.0) | 420.1 (344.5 to 498.5)     | 137.4 (99.3 to 182.6)         | 95.5 (53.5 to 149.8)            | 97.9 (0.0 to 140.7)               |
| Gabon   | 2040 | 327.6 (272.8 to 377.4)     | 183.2 (149.8 to 217.8)     | 59.9 (43.1 to 79.8)           | 41.7 (23.4 to 65.6)             | 42.8 (0.0 to 62.2)                | 756.4 (629.8 to 871.5) | 423.0 (345.8 to 502.9)     | 138.4 (99.5 to 184.2)         | 96.3 (54.1 to 151.5)            | 98.7 (0.0 to 143.6)               |
| Gabon   | 2041 | 330.4 (276.2 to 384.3)     | 184.3 (150.4 to 219.6)     | 60.4 (43.2 to 80.3)           | 42.1 (23.7 to 66.3)             | 43.6 (0.0 to 64.1)                | 762.8 (637.7 to 887.2) | 425.6 (347.3 to 507.1)     | 139.4 (99.8 to 185.5)         | 97.1 (54.6 to 153.0)            | 100.7 (0.0 to 148.1)              |
| Gabon   | 2042 | 333.1 (274.8 to 389.9)     | 185.4 (151.1 to 221.6)     | 60.9 (43.5 to 81.2)           | 42.4 (23.9 to 66.8)             | 44.5 (0.0 to 67.7)                | 769.1 (634.4 to 900.3) | 428.0 (348.8 to 511.6)     | 140.6 (100.3 to 187.4)        | 97.9 (55.2 to 154.3)            | 102.6 (0.0 to 156.4)              |
| Gabon   | 2043 | 335.8 (275.6 to 394.2)     | 186.6 (151.8 to 223.9)     | 61.5 (43.7 to 82.3)           | 42.8 (24.1 to 67.5)             | 45.0 (0.0 to 70.5)                | 775.3 (636.3 to 910.1) | 430.7 (350.5 to 517.0)     | 142.0 (101.0 to 189.9)        | 98.7 (55.8 to 155.9)            | 103.8 (0.0 to 162.8)              |
| Gabon   | 2044 | 338.5 (274.1 to 399.2)     | 187.5 (152.3 to 225.9)     | 62.2 (44.1 to 83.6)           | 43.1 (24.4 to 68.2)             | 45.8 (0.0 to 72.1)                | 781.6 (633.0 to 921.6) | 432.9 (351.6 to 521.6)     | 143.5 (101.8 to 193.1)        | 99.5 (56.3 to 157.4)            | 105.7 (0.0 to 166.4)              |
| Gabon   | 2045 | 341.4 (277.4 to 399.7)     | 188.6 (152.6 to 228.1)     | 62.9 (44.4 to 84.6)           | 43.4 (24.6 to 68.7)             | 46.5 (0.0 to 76.4)                | 788.3 (640.5 to 922.9) | 435.5 (352.4 to 526.8)     | 145.3 (102.6 to 195.4)        | 100.3 (56.8 to 158.7)           | 107.3 (0.0 to 176.4)              |
| Gabon   | 2046 | 344.4 (278.3 to 405.7)     | 189.9 (153.4 to 230.6)     | 63.7 (44.9 to 85.9)           | 43.8 (24.8 to 69.2)             | 47.0 (0.0 to 79.1)                | 795.3 (642.5 to 936.8) | 438.5 (354.1 to 532.4)     | 147.2 (103.6 to 198.4)        | 101.1 (57.3 to 159.7)           | 108.5 (0.0 to 182.7)              |
| Gabon   | 2047 | 348.1 (278.3 to 413.8)     | 191.5 (154.5 to 233.3)     | 64.7 (45.4 to 87.2)           | 44.2 (25.0 to 69.6)             | 47.8 (0.0 to 82.7)                | 803.8 (642.5 to 955.5) | 442.1 (356.6 to 538.6)     | 149.3 (104.9 to 201.3)        | 102.0 (57.7 to 160.8)           | 110.4 (0.0 to 190.9)              |
| Gabon   | 2048 | 351.7 (277.2 to 416.6)     | 193.2 (155.6 to 236.3)     | 65.6 (45.9 to 88.6)           | 44.6 (25.2 to 70.3)             | 48.4 (0.0 to 87.4)                | 812.1 (640.0 to 961.8) | 446.0 (359.2 to 545.6)     | 151.5 (106.1 to 204.5)        | 102.9 (58.1 to 162.2)           | 111.7 (0.0 to 201.7)              |
| Gabon   | 2049 | 355.4 (283.0 to 422.9)     | 194.9 (156.4 to 238.4)     | 66.5 (46.3 to 89.9)           | 45.0 (25.3 to 71.0)             | 49.0 (0.0 to 89.8)                | 820.6 (653.4 to 976.5) | 450.0 (361.0 to 550.5)     | 153.6 (107.0 to 207.5)        | 103.8 (58.5 to 163.9)           | 113.2 (0.0 to 207.3)              |
| Gabon   | 2050 | 358.8 (283.2 to 431.2)     | 196.9 (157.4 to 241.6)     | 67.5 (46.7 to 91.1)           | 45.4 (25.5 to 71.8)             | 49.0 (0.0 to 91.7)                | 828.5 (653.9 to 995.5) | 454.7 (363.5 to 557.8)     | 155.8 (107.9 to 210.3)        | 104.8 (59.0 to 165.8)           | 113.1 (0.0 to 211.7)              |

| Country | Year | 2018 US Dollars per capita |                            |                               |                                 |                                   | 2018 PPP per capita    |                            |                               |                                 |                                   |
|---------|------|----------------------------|----------------------------|-------------------------------|---------------------------------|-----------------------------------|------------------------|----------------------------|-------------------------------|---------------------------------|-----------------------------------|
|         |      | Health spending            | Government health spending | Out-of-pocket health spending | Prepaid private health spending | Development assistance for health | Health spending        | Government health spending | Out-of-pocket health spending | Prepaid private health spending | Development assistance for health |
| Georgia | 1995 | 49.6 (40.1 to 60.7)        | 2.0 (1.5 to 2.5)           | 47.5 (37.9 to 58.8)           | 0.0 (0.0 to 0.0)                | 0.1 (0.1 to 0.1)                  | 132.3 (106.9 to 161.9) | 5.2 (4.0 to 6.6)           | 126.8 (101.2 to 156.7)        | 0.0 (0.0 to 0.0)                | 0.3 (0.3 to 0.3)                  |
| Georgia | 1996 | 69.7 (57.3 to 83.4)        | 4.8 (3.7 to 6.1)           | 64.3 (51.6 to 77.7)           | 0.0 (0.0 to 0.0)                | 0.6 (0.6 to 0.6)                  | 185.9 (152.6 to 222.4) | 12.8 (9.9 to 16.2)         | 171.4 (137.4 to 207.1)        | 0.0 (0.0 to 0.0)                | 1.7 (1.7 to 1.7)                  |
| Georgia | 1997 | 87.1 (73.7 to 102.4)       | 8.3 (6.4 to 10.5)          | 75.9 (61.8 to 90.9)           | 0.0 (0.0 to 0.0)                | 3.0 (3.0 to 3.0)                  | 232.3 (196.4 to 273.0) | 22.2 (17.1 to 27.9)        | 202.2 (164.9 to 242.2)        | 0.0 (0.0 to 0.0)                | 7.9 (7.9 to 7.9)                  |
| Georgia | 1998 | 81.4 (69.3 to 95.2)        | 9.4 (7.3 to 11.8)          | 69.9 (57.7 to 83.0)           | 0.0 (0.0 to 0.0)                | 2.1 (2.1 to 2.1)                  | 217.0 (184.7 to 253.8) | 25.1 (19.4 to 31.6)        | 186.2 (153.8 to 221.3)        | 0.0 (0.0 to 0.0)                | 5.7 (5.7 to 5.7)                  |
| Georgia | 1999 | 85.6 (74.3 to 98.1)        | 9.8 (7.6 to 12.4)          | 69.3 (57.9 to 81.8)           | 0.0 (0.0 to 0.0)                | 6.5 (6.5 to 6.5)                  | 228.3 (198.1 to 261.4) | 26.2 (20.3 to 33.0)        | 184.8 (154.5 to 218.2)        | 0.0 (0.0 to 0.0)                | 17.3 (17.3 to 17.3)               |
| Georgia | 2000 | 93.8 (81.4 to 107.7)       | 10.8 (8.4 to 13.5)         | 78.2 (65.8 to 92.3)           | 0.1 (0.0 to 0.1)                | 4.8 (4.8 to 4.8)                  | 250.1 (217.1 to 287.0) | 28.8 (22.4 to 36.1)        | 208.3 (175.4 to 246.1)        | 0.1 (0.1 to 0.3)                | 12.8 (12.8 to 12.8)               |
| Georgia | 2001 | 103.4 (89.9 to 118.0)      | 12.2 (9.6 to 15.3)         | 86.1 (72.8 to 100.6)          | 0.2 (0.1 to 0.5)                | 4.8 (4.8 to 4.8)                  | 275.7 (239.8 to 314.5) | 32.6 (25.5 to 40.8)        | 229.6 (194.0 to 268.1)        | 0.7 (0.3 to 1.2)                | 12.9 (12.9 to 12.9)               |
| Georgia | 2002 | 115.2 (100.1 to 130.9)     | 14.4 (11.3 to 17.7)        | 95.6 (81.4 to 111.1)          | 0.5 (0.2 to 1.0)                | 4.7 (4.7 to 4.7)                  | 307.0 (266.8 to 349.1) | 38.3 (30.2 to 47.2)        | 254.9 (217.0 to 296.2)        | 1.4 (0.6 to 2.6)                | 12.5 (12.5 to 12.5)               |
| Georgia | 2003 | 130.9 (114.6 to 147.1)     | 18.3 (14.6 to 22.6)        | 109.1 (93.9 to 125.6)         | 0.9 (0.4 to 1.6)                | 2.7 (2.7 to 2.7)                  | 349.1 (305.4 to 392.1) | 48.8 (38.9 to 60.2)        | 290.8 (250.4 to 335.0)        | 2.3 (1.1 to 4.3)                | 7.1 (7.1 to 7.1)                  |
| Georgia | 2004 | 145.7 (129.6 to 161.7)     | 21.5 (17.3 to 26.2)        | 119.4 (104.0 to 135.5)        | 1.4 (0.7 to 2.7)                | 3.4 (3.4 to 3.4)                  | 388.3 (345.5 to 431.2) | 57.2 (46.2 to 69.9)        | 318.3 (277.1 to 361.2)        | 3.8 (1.8 to 7.1)                | 9.0 (9.0 to 9.0)                  |
| Georgia | 2005 | 164.9 (147.5 to 182.8)     | 25.1 (20.2 to 30.5)        | 129.9 (114.3 to 146.8)        | 2.1 (1.0 to 4.0)                | 7.7 (7.7 to 7.7)                  | 439.5 (393.2 to 487.3) | 66.9 (53.9 to 81.2)        | 346.4 (304.8 to 391.3)        | 5.7 (2.8 to 10.6)               | 20.5 (20.5 to 20.5)               |
| Georgia | 2006 | 180.6 (161.9 to 201.5)     | 29.3 (23.6 to 35.6)        | 138.9 (121.9 to 158.0)        | 3.1 (1.6 to 5.7)                | 9.2 (9.2 to 9.2)                  | 481.4 (431.6 to 537.3) | 78.0 (62.9 to 94.8)        | 370.4 (325.1 to 421.3)        | 8.4 (4.2 to 15.2)               | 24.6 (24.6 to 24.6)               |
| Georgia | 2007 | 202.9 (183.5 to 224.9)     | 35.3 (28.6 to 42.6)        | 152.6 (134.8 to 172.3)        | 5.2 (2.6 to 9.7)                | 9.8 (9.8 to 9.8)                  | 540.9 (489.1 to 599.5) | 94.0 (76.4 to 113.5)       | 406.9 (359.4 to 459.5)        | 13.9 (7.0 to 25.8)              | 26.0 (26.0 to 26.0)               |
| Georgia | 2008 | 223.1 (201.3 to 246.3)     | 42.8 (35.1 to 51.5)        | 165.8 (145.3 to 187.8)        | 7.9 (3.9 to 14.7)               | 6.7 (6.7 to 6.7)                  | 594.8 (536.7 to 656.5) | 114.1 (93.5 to 137.3)      | 441.9 (387.4 to 500.8)        | 21.0 (10.4 to 39.2)             | 17.8 (17.8 to 17.8)               |
| Georgia | 2009 | 244.3 (221.4 to 268.3)     | 48.4 (39.2 to 58.0)        | 176.9 (156.5 to 200.1)        | 8.8 (4.5 to 16.2)               | 10.3 (10.3 to 10.3)               | 651.4 (590.1 to 715.3) | 129.0 (104.4 to 154.6)     | 471.6 (417.3 to 533.5)        | 23.4 (12.0 to 43.2)             | 27.3 (27.3 to 27.3)               |
| Georgia | 2010 | 258.0 (234.2 to 285.0)     | 52.8 (42.9 to 63.2)        | 186.8 (166.0 to 210.8)        | 8.4 (4.4 to 15.6)               | 10.0 (10.0 to 10.0)               | 687.9 (624.4 to 759.7) | 140.6 (114.4 to 168.6)     | 498.1 (442.7 to 562.0)        | 22.5 (11.6 to 41.5)             | 26.7 (26.7 to 26.7)               |
| Georgia | 2011 | 264.8 (240.8 to 290.5)     | 54.7 (45.1 to 66.0)        | 190.4 (169.3 to 213.1)        | 8.8 (4.5 to 15.8)               | 11.0 (11.0 to 11.0)               | 706.0 (642.1 to 774.4) | 145.8 (120.2 to 176.0)     | 507.5 (451.3 to 568.2)        | 23.5 (12.0 to 42.2)             | 29.2 (29.2 to 29.2)               |
| Georgia | 2012 | 276.3 (250.5 to 302.0)     | 61.2 (50.0 to 73.3)        | 194.7 (173.7 to 217.9)        | 9.3 (4.8 to 17.1)               | 11.1 (11.1 to 11.1)               | 736.6 (667.9 to 805.1) | 163.1 (133.4 to 195.4)     | 518.9 (463.1 to 581.0)        | 24.9 (12.8 to 45.5)             | 29.6 (29.6 to 29.6)               |
| Georgia | 2013 | 284.4 (257.1 to 310.9)     | 71.2 (58.6 to 84.8)        | 195.8 (174.6 to 219.7)        | 11.0 (5.6 to 20.1)              | 6.4 (6.4 to 6.4)                  | 758.2 (685.3 to 828.9) | 189.9 (156.2 to 226.0)     | 522.1 (465.4 to 585.7)        | 29.3 (14.8 to 53.5)             | 17.0 (17.0 to 17.0)               |
| Georgia | 2014 | 298.3 (269.0 to 328.8)     | 84.3 (69.4 to 100.4)       | 195.1 (172.6 to 222.0)        | 12.9 (6.4 to 23.1)              | 5.9 (5.9 to 5.9)                  | 795.2 (717.2 to 876.6) | 224.6 (185.0 to 267.6)     | 520.2 (460.2 to 591.8)        | 34.5 (17.1 to 61.5)             | 15.8 (15.8 to 15.8)               |
| Georgia | 2015 | 308.5 (276.8 to 341.9)     | 97.5 (80.4 to 116.5)       | 187.7 (165.1 to 216.8)        | 15.0 (7.4 to 26.6)              | 8.2 (8.2 to 8.2)                  | 822.3 (738.0 to 911.5) | 260.0 (214.4 to 310.6)     | 500.4 (440.1 to 578.1)        | 40.1 (19.8 to 70.9)             | 21.9 (21.9 to 21.9)               |

| Country | Year | 2018 US Dollars per capita |                            |                               |                                 |                                   | 2018 PPP per capita       |                            |                               |                                 |                                   |
|---------|------|----------------------------|----------------------------|-------------------------------|---------------------------------|-----------------------------------|---------------------------|----------------------------|-------------------------------|---------------------------------|-----------------------------------|
|         |      | Health spending            | Government health spending | Out-of-pocket health spending | Prepaid private health spending | Development assistance for health | Health spending           | Government health spending | Out-of-pocket health spending | Prepaid private health spending | Development assistance for health |
| Georgia | 2016 | 319.1 (281.6 to 359.8)     | 108.5 (88.1 to 129.6)      | 188.8 (162.1 to 221.6)        | 17.6 (8.7 to 30.8)              | 4.2 (4.2 to 4.2)                  | 850.8 (750.8 to 959.3)    | 289.3 (234.8 to 345.5)     | 503.4 (432.1 to 590.7)        | 47.0 (23.2 to 82.1)             | 11.2 (11.2 to 11.2)               |
| Georgia | 2017 | 329.9 (290.1 to 371.4)     | 111.6 (90.7 to 132.9)      | 194.0 (166.1 to 228.0)        | 18.0 (8.8 to 31.4)              | 6.3 (6.3 to 6.3)                  | 879.5 (773.5 to 990.1)    | 297.4 (241.7 to 354.4)     | 517.2 (442.8 to 607.8)        | 48.0 (23.6 to 83.8)             | 16.9 (16.9 to 16.9)               |
| Georgia | 2018 | 337.6 (297.8 to 386.1)     | 114.8 (93.3 to 137.7)      | 198.1 (169.8 to 232.6)        | 18.6 (9.1 to 32.4)              | 6.0 (6.0 to 6.0)                  | 900.0 (793.9 to 1029.2)   | 306.2 (248.6 to 367.1)     | 528.2 (452.6 to 620.0)        | 49.6 (24.4 to 86.4)             | 16.1 (16.1 to 16.1)               |
| Georgia | 2019 | 345.0 (304.1 to 390.3)     | 118.0 (95.9 to 141.3)      | 201.8 (172.7 to 237.5)        | 19.1 (9.4 to 33.3)              | 6.1 (5.7 to 6.5)                  | 919.7 (810.7 to 1040.5)   | 314.5 (255.8 to 376.7)     | 537.9 (460.4 to 633.2)        | 50.9 (25.1 to 88.8)             | 16.4 (15.3 to 17.3)               |
| Georgia | 2020 | 351.6 (312.4 to 400.3)     | 121.0 (98.2 to 144.9)      | 204.8 (174.4 to 242.0)        | 19.5 (9.7 to 34.2)              | 6.3 (5.8 to 6.8)                  | 937.4 (832.8 to 1067.1)   | 322.6 (261.7 to 386.2)     | 545.9 (464.8 to 645.0)        | 52.1 (25.8 to 91.1)             | 16.8 (15.4 to 18.1)               |
| Georgia | 2021 | 358.9 (315.6 to 407.3)     | 124.0 (100.6 to 148.4)     | 208.4 (177.3 to 244.9)        | 20.0 (9.9 to 35.0)              | 6.5 (5.8 to 7.1)                  | 956.9 (841.5 to 1085.7)   | 330.7 (268.2 to 395.7)     | 555.6 (472.8 to 652.8)        | 53.4 (26.4 to 93.2)             | 17.2 (15.5 to 19.0)               |
| Georgia | 2022 | 366.3 (323.7 to 416.6)     | 126.8 (102.9 to 151.7)     | 212.4 (180.9 to 250.9)        | 20.4 (10.1 to 35.7)             | 6.7 (5.9 to 7.5)                  | 976.6 (863.0 to 1110.6)   | 338.1 (274.3 to 404.5)     | 566.2 (482.1 to 668.9)        | 54.5 (27.0 to 95.2)             | 17.8 (15.8 to 19.9)               |
| Georgia | 2023 | 374.1 (328.6 to 423.1)     | 129.5 (105.1 to 155.2)     | 216.8 (183.8 to 256.3)        | 20.8 (10.3 to 36.4)             | 6.9 (6.0 to 7.8)                  | 997.3 (876.1 to 1128.1)   | 345.3 (280.3 to 413.8)     | 578.0 (490.0 to 683.4)        | 55.6 (27.4 to 97.1)             | 18.4 (16.0 to 20.9)               |
| Georgia | 2024 | 381.8 (335.6 to 429.9)     | 132.2 (107.3 to 158.8)     | 221.1 (187.4 to 261.3)        | 21.3 (10.5 to 37.2)             | 7.2 (6.2 to 8.2)                  | 1017.8 (894.6 to 1146.0)  | 352.5 (286.2 to 423.3)     | 589.5 (499.5 to 696.6)        | 56.7 (28.0 to 99.1)             | 19.1 (16.5 to 21.9)               |
| Georgia | 2025 | 389.9 (343.6 to 443.1)     | 135.2 (109.8 to 162.6)     | 225.7 (191.0 to 267.9)        | 21.7 (10.7 to 38.0)             | 7.4 (6.3 to 8.7)                  | 1039.5 (916.1 to 1181.2)  | 360.3 (292.8 to 433.4)     | 601.6 (509.3 to 714.3)        | 57.8 (28.6 to 101.2)            | 19.7 (16.9 to 23.1)               |
| Georgia | 2026 | 398.4 (350.1 to 453.8)     | 138.2 (112.2 to 166.1)     | 230.4 (194.4 to 273.3)        | 22.1 (10.9 to 38.8)             | 7.7 (6.5 to 9.0)                  | 1062.1 (933.3 to 1209.7)  | 368.3 (299.2 to 442.8)     | 614.3 (518.2 to 728.7)        | 59.0 (29.2 to 103.4)            | 20.4 (17.2 to 23.9)               |
| Georgia | 2027 | 407.4 (357.4 to 465.6)     | 141.4 (114.8 to 170.4)     | 235.4 (198.2 to 282.1)        | 22.6 (11.2 to 39.7)             | 7.9 (6.6 to 9.4)                  | 1086.1 (952.9 to 1241.1)  | 376.9 (306.1 to 454.2)     | 627.7 (528.4 to 752.0)        | 60.3 (29.9 to 105.8)            | 21.1 (17.7 to 25.1)               |
| Georgia | 2028 | 417.0 (363.9 to 479.8)     | 144.9 (117.7 to 175.3)     | 240.7 (200.8 to 289.3)        | 23.2 (11.5 to 40.6)             | 8.2 (6.9 to 9.9)                  | 1111.8 (970.2 to 1279.2)  | 386.4 (313.8 to 467.4)     | 641.7 (535.4 to 771.3)        | 61.8 (30.6 to 108.2)            | 21.9 (18.4 to 26.5)               |
| Georgia | 2029 | 427.5 (372.8 to 489.7)     | 149.0 (121.0 to 180.7)     | 246.2 (204.0 to 298.7)        | 23.8 (11.8 to 41.7)             | 8.5 (7.0 to 10.4)                 | 1139.7 (994.0 to 1305.4)  | 397.2 (322.5 to 481.7)     | 656.4 (543.8 to 796.3)        | 63.4 (31.5 to 111.1)            | 22.7 (18.7 to 27.7)               |
| Georgia | 2030 | 438.1 (380.1 to 504.2)     | 153.2 (124.4 to 186.1)     | 251.8 (206.5 to 307.4)        | 24.4 (12.1 to 42.8)             | 8.8 (7.2 to 10.8)                 | 1168.1 (1013.3 to 1344.1) | 408.3 (331.6 to 496.1)     | 671.2 (550.5 to 819.5)        | 65.1 (32.3 to 114.0)            | 23.4 (19.2 to 28.8)               |
| Georgia | 2031 | 449.6 (392.7 to 523.2)     | 157.8 (128.0 to 191.4)     | 257.6 (209.2 to 315.4)        | 25.1 (12.5 to 44.0)             | 9.1 (7.4 to 11.4)                 | 1198.5 (1046.8 to 1394.8) | 420.6 (341.3 to 510.3)     | 686.8 (557.8 to 840.9)        | 67.0 (33.2 to 117.2)            | 24.2 (19.6 to 30.4)               |
| Georgia | 2032 | 461.8 (394.7 to 529.7)     | 162.8 (132.0 to 197.4)     | 263.7 (212.4 to 325.7)        | 25.9 (12.8 to 45.3)             | 9.4 (7.5 to 11.8)                 | 1231.0 (1052.2 to 1412.0) | 434.0 (352.0 to 526.3)     | 702.9 (566.2 to 868.2)        | 69.1 (34.2 to 120.8)            | 25.0 (20.1 to 31.6)               |
| Georgia | 2033 | 474.3 (404.0 to 554.2)     | 168.1 (136.3 to 203.5)     | 269.8 (215.6 to 335.9)        | 26.7 (13.2 to 46.7)             | 9.7 (7.7 to 12.4)                 | 1264.5 (1077.1 to 1477.4) | 448.2 (363.5 to 542.5)     | 719.2 (574.8 to 895.4)        | 71.2 (35.3 to 124.5)            | 25.9 (20.5 to 33.2)               |
| Georgia | 2034 | 487.2 (419.6 to 569.6)     | 173.6 (140.7 to 210.5)     | 276.0 (218.5 to 346.0)        | 27.6 (13.6 to 48.2)             | 10.0 (7.9 to 12.9)                | 1298.9 (1118.6 to 1518.4) | 462.9 (375.0 to 561.1)     | 735.8 (582.5 to 922.4)        | 73.5 (36.3 to 128.4)            | 26.8 (21.1 to 34.5)               |
| Georgia | 2035 | 500.1 (424.1 to 588.8)     | 179.2 (145.3 to 217.4)     | 282.1 (221.4 to 356.0)        | 28.4 (14.0 to 49.6)             | 10.4 (8.1 to 13.5)                | 1333.2 (1130.6 to 1569.6) | 477.6 (387.4 to 579.7)     | 752.1 (590.3 to 949.0)        | 75.7 (37.4 to 132.3)            | 27.7 (21.5 to 36.1)               |
| Georgia | 2036 | 513.1 (436.7 to 604.5)     | 184.8 (150.0 to 224.5)     | 288.3 (224.2 to 365.7)        | 29.3 (14.4 to 51.1)             | 10.7 (8.3 to 14.4)                | 1367.8 (1164.2 to 1611.7) | 492.6 (399.9 to 598.6)     | 768.6 (597.8 to 975.0)        | 78.0 (38.5 to 136.2)            | 28.6 (22.2 to 38.5)               |

| Country | Year | 2018 US Dollars per capita |                            |                               |                                 |                                   | 2018 PPP per capita       |                            |                               |                                 |                                   |
|---------|------|----------------------------|----------------------------|-------------------------------|---------------------------------|-----------------------------------|---------------------------|----------------------------|-------------------------------|---------------------------------|-----------------------------------|
|         |      | Health spending            | Government health spending | Out-of-pocket health spending | Prepaid private health spending | Development assistance for health | Health spending           | Government health spending | Out-of-pocket health spending | Prepaid private health spending | Development assistance for health |
| Georgia | 2037 | 526.2 (444.9 to 621.9)     | 190.5 (154.6 to 232.4)     | 294.5 (226.7 to 376.1)        | 30.1 (14.9 to 52.6)             | 11.1 (8.5 to 14.9)                | 1402.9 (1186.1 to 1657.9) | 507.9 (412.2 to 619.6)     | 785.1 (604.4 to 1002.7)       | 80.3 (39.6 to 140.2)            | 29.5 (22.6 to 39.7)               |
| Georgia | 2038 | 539.6 (458.7 to 641.4)     | 196.4 (159.1 to 240.5)     | 300.7 (229.6 to 386.7)        | 31.0 (15.3 to 54.1)             | 11.4 (8.7 to 15.9)                | 1438.5 (1223.0 to 1709.8) | 523.6 (424.2 to 641.1)     | 801.7 (612.2 to 1030.9)       | 82.7 (40.8 to 144.3)            | 30.5 (23.1 to 42.4)               |
| Georgia | 2039 | 552.9 (461.6 to 659.4)     | 202.4 (163.9 to 248.0)     | 306.8 (232.8 to 396.2)        | 31.9 (15.7 to 55.7)             | 11.8 (9.0 to 16.4)                | 1474.1 (1230.6 to 1758.0) | 539.5 (437.0 to 661.1)     | 818.0 (620.6 to 1056.2)       | 85.1 (42.0 to 148.5)            | 31.5 (24.1 to 43.6)               |
| Georgia | 2040 | 566.5 (477.3 to 673.9)     | 208.5 (169.2 to 255.7)     | 313.0 (235.9 to 405.0)        | 32.9 (16.2 to 57.3)             | 12.2 (9.2 to 17.0)                | 1510.2 (1272.4 to 1796.7) | 555.7 (451.1 to 681.7)     | 834.4 (628.9 to 1079.6)       | 87.6 (43.1 to 152.7)            | 32.6 (24.6 to 45.3)               |
| Georgia | 2041 | 580.1 (485.0 to 688.8)     | 214.6 (173.6 to 263.5)     | 319.1 (238.7 to 413.4)        | 33.8 (16.6 to 58.9)             | 12.6 (9.5 to 17.6)                | 1546.6 (1293.0 to 1836.2) | 572.1 (462.7 to 702.4)     | 850.7 (636.4 to 1102.0)       | 90.1 (44.2 to 157.1)            | 33.7 (25.3 to 46.8)               |
| Georgia | 2042 | 594.3 (494.0 to 711.5)     | 221.1 (178.2 to 271.7)     | 325.3 (242.6 to 422.8)        | 34.8 (17.0 to 60.7)             | 13.1 (9.7 to 18.7)                | 1584.2 (1316.8 to 1896.9) | 589.4 (475.0 to 724.3)     | 867.3 (646.9 to 1127.1)       | 92.7 (45.4 to 161.9)            | 34.8 (25.9 to 49.8)               |
| Georgia | 2043 | 608.2 (508.7 to 722.8)     | 227.6 (183.0 to 279.7)     | 331.4 (246.5 to 432.5)        | 35.8 (17.5 to 62.5)             | 13.5 (10.0 to 19.5)               | 1621.5 (1356.3 to 1926.9) | 606.7 (487.9 to 745.6)     | 883.5 (657.2 to 1153.1)       | 95.3 (46.6 to 166.6)            | 36.0 (26.6 to 52.0)               |
| Georgia | 2044 | 622.2 (522.5 to 753.0)     | 234.1 (188.3 to 288.0)     | 337.3 (250.7 to 441.3)        | 36.7 (17.9 to 64.2)             | 14.0 (10.3 to 20.2)               | 1658.7 (1392.9 to 2007.6) | 624.1 (502.0 to 767.7)     | 899.3 (668.4 to 1176.5)       | 97.9 (47.8 to 171.1)            | 37.4 (27.4 to 54.0)               |
| Georgia | 2045 | 636.3 (536.2 to 764.9)     | 240.8 (193.8 to 296.6)     | 343.3 (254.8 to 450.2)        | 37.7 (18.4 to 66.0)             | 14.5 (10.4 to 21.9)               | 1696.3 (1429.5 to 2039.3) | 641.9 (516.5 to 790.8)     | 915.2 (679.3 to 1200.3)       | 100.6 (49.0 to 175.9)           | 38.6 (27.7 to 58.3)               |
| Georgia | 2046 | 650.3 (538.6 to 775.6)     | 247.4 (199.1 to 305.2)     | 349.1 (259.0 to 459.1)        | 38.8 (18.8 to 67.8)             | 15.0 (10.8 to 23.2)               | 1733.7 (1436.0 to 2067.8) | 659.6 (530.9 to 813.7)     | 930.8 (690.5 to 1224.0)       | 103.3 (50.2 to 180.6)           | 40.1 (28.9 to 61.9)               |
| Georgia | 2047 | 664.5 (552.6 to 800.1)     | 254.2 (204.4 to 313.8)     | 355.0 (264.0 to 467.7)        | 39.8 (19.3 to 69.6)             | 15.6 (11.1 to 24.6)               | 1771.6 (1473.1 to 2133.1) | 677.7 (545.0 to 836.5)     | 946.3 (703.8 to 1246.8)       | 106.1 (51.4 to 185.6)           | 41.5 (29.5 to 65.6)               |
| Georgia | 2048 | 678.8 (561.4 to 807.6)     | 261.0 (209.6 to 322.4)     | 360.7 (268.0 to 476.4)        | 40.8 (19.8 to 71.5)             | 16.2 (11.4 to 26.1)               | 1809.5 (1496.8 to 2152.9) | 695.8 (558.7 to 859.6)     | 961.7 (714.5 to 1270.0)       | 108.8 (52.7 to 190.6)           | 43.1 (30.5 to 69.6)               |
| Georgia | 2049 | 693.0 (574.8 to 837.5)     | 267.8 (214.2 to 331.4)     | 366.6 (271.4 to 484.9)        | 41.9 (20.2 to 73.3)             | 16.7 (11.9 to 27.4)               | 1847.5 (1532.5 to 2232.8) | 714.0 (571.0 to 883.5)     | 977.2 (723.6 to 1292.7)       | 111.6 (54.0 to 195.5)           | 44.6 (31.8 to 72.9)               |
| Georgia | 2050 | 707.2 (589.2 to 849.8)     | 274.6 (219.5 to 340.6)     | 372.4 (275.9 to 493.5)        | 42.9 (20.8 to 75.2)             | 17.3 (11.9 to 28.6)               | 1885.4 (1570.8 to 2265.5) | 732.1 (585.0 to 908.0)     | 992.8 (735.4 to 1315.7)       | 114.4 (55.3 to 200.4)           | 46.1 (31.8 to 76.2)               |
| Germany | 1995 | 4097.3 (3921.8 to 4276.1)  | 2529.7 (2397.6 to 2676.1)  | 349.4 (319.3 to 380.9)        | 1218.2 (1122.4 to 1323.7)       | 0.0 (0.0 to 0.0)                  | 4374.5 (4187.1 to 4565.4) | 2700.8 (2559.8 to 2857.2)  | 373.0 (340.9 to 406.7)        | 1300.6 (1198.3 to 1413.3)       | 0.0 (0.0 to 0.0)                  |
| Germany | 1996 | 4102.6 (3969.3 to 4239.0)  | 2639.2 (2537.6 to 2757.3)  | 367.0 (344.1 to 394.4)        | 1096.4 (1025.8 to 1170.2)       | 0.0 (0.0 to 0.0)                  | 4380.1 (4237.9 to 4525.8) | 2817.8 (2709.3 to 2943.8)  | 391.8 (367.4 to 421.1)        | 1170.5 (1095.2 to 1249.3)       | 0.0 (0.0 to 0.0)                  |
| Germany | 1997 | 4020.2 (3890.9 to 4148.9)  | 2736.4 (2638.7 to 2835.4)  | 392.7 (370.2 to 416.2)        | 891.1 (824.3 to 962.7)          | 0.0 (0.0 to 0.0)                  | 4292.1 (4154.1 to 4429.6) | 2921.6 (2817.2 to 3027.3)  | 419.2 (395.2 to 444.4)        | 951.3 (880.0 to 1027.8)         | 0.0 (0.0 to 0.0)                  |
| Germany | 1998 | 3967.2 (3844.9 to 4086.0)  | 2821.0 (2725.4 to 2918.7)  | 418.2 (395.3 to 442.5)        | 728.0 (667.3 to 794.6)          | 0.0 (0.0 to 0.0)                  | 4235.6 (4105.0 to 4362.4) | 3011.9 (2909.8 to 3116.1)  | 446.5 (422.0 to 472.5)        | 777.2 (712.4 to 848.4)          | 0.0 (0.0 to 0.0)                  |
| Germany | 1999 | 3936.4 (3821.7 to 4045.0)  | 2913.5 (2816.2 to 3011.5)  | 440.5 (417.2 to 465.0)        | 582.4 (529.6 to 642.6)          | 0.0 (0.0 to 0.0)                  | 4202.7 (4080.3 to 4318.7) | 3110.6 (3006.8 to 3215.2)  | 470.3 (445.4 to 496.4)        | 621.8 (565.4 to 686.1)          | 0.0 (0.0 to 0.0)                  |
| Germany | 2000 | 3948.1 (3837.7 to 4066.3)  | 3031.7 (2939.4 to 3135.1)  | 463.8 (441.7 to 486.7)        | 452.6 (402.0 to 507.4)          | 0.0 (0.0 to 0.0)                  | 4215.2 (4097.3 to 4341.4) | 3236.8 (3138.3 to 3347.2)  | 495.2 (471.6 to 519.6)        | 483.2 (429.2 to 541.7)          | 0.0 (0.0 to 0.0)                  |
| Germany | 2001 | 4011.3 (3904.7 to 4128.0)  | 3122.8 (3029.6 to 3219.6)  | 484.0 (462.0 to 505.9)        | 404.4 (356.1 to 456.5)          | 0.0 (0.0 to 0.0)                  | 4282.6 (4168.8 to 4407.3) | 3334.0 (3234.6 to 3437.5)  | 516.8 (493.3 to 540.1)        | 431.8 (380.2 to 487.4)          | 0.0 (0.0 to 0.0)                  |

| Country | Year | 2018 US Dollars per capita |                            |                               |                                 |                                   | 2018 PPP per capita       |                            |                               |                                 |                                   |
|---------|------|----------------------------|----------------------------|-------------------------------|---------------------------------|-----------------------------------|---------------------------|----------------------------|-------------------------------|---------------------------------|-----------------------------------|
|         |      | Health spending            | Government health spending | Out-of-pocket health spending | Prepaid private health spending | Development assistance for health | Health spending           | Government health spending | Out-of-pocket health spending | Prepaid private health spending | Development assistance for health |
| Germany | 2002 | 4052.6 (3939.9 to 4165.5)  | 3155.7 (3057.3 to 3255.8)  | 504.8 (481.7 to 525.8)        | 392.1 (346.5 to 444.8)          | 0.0 (0.0 to 0.0)                  | 4326.7 (4206.5 to 4447.3) | 3369.2 (3264.1 to 3476.1)  | 538.9 (514.3 to 561.4)        | 418.6 (369.9 to 474.9)          | 0.0 (0.0 to 0.0)                  |
| Germany | 2003 | 4067.8 (3953.5 to 4182.7)  | 3142.0 (3039.4 to 3242.6)  | 526.8 (504.9 to 548.4)        | 399.0 (352.6 to 452.6)          | 0.0 (0.0 to 0.0)                  | 4343.0 (4220.9 to 4465.6) | 3354.6 (3245.0 to 3461.9)  | 562.4 (539.1 to 585.5)        | 426.0 (376.4 to 483.3)          | 0.0 (0.0 to 0.0)                  |
| Germany | 2004 | 4096.0 (3977.3 to 4210.4)  | 3124.0 (3026.3 to 3219.8)  | 555.2 (533.5 to 578.2)        | 416.9 (365.6 to 472.2)          | 0.0 (0.0 to 0.0)                  | 4373.1 (4246.3 to 4495.2) | 3335.3 (3231.0 to 3437.7)  | 592.7 (569.6 to 617.3)        | 445.1 (390.3 to 504.2)          | 0.0 (0.0 to 0.0)                  |
| Germany | 2005 | 4131.9 (4018.7 to 4250.9)  | 3115.9 (3020.6 to 3216.0)  | 578.5 (555.2 to 601.5)        | 437.4 (387.2 to 491.1)          | 0.0 (0.0 to 0.0)                  | 4411.4 (4290.6 to 4538.5) | 3326.7 (3225.0 to 3433.5)  | 617.7 (592.8 to 642.2)        | 467.0 (413.4 to 524.3)          | 0.0 (0.0 to 0.0)                  |
| Germany | 2006 | 4263.6 (4148.7 to 4381.6)  | 3201.7 (3094.8 to 3302.0)  | 604.9 (583.5 to 629.0)        | 457.0 (401.8 to 514.9)          | 0.0 (0.0 to 0.0)                  | 4552.1 (4429.4 to 4678.0) | 3418.3 (3304.1 to 3525.4)  | 645.8 (623.0 to 671.5)        | 487.9 (429.0 to 549.7)          | 0.0 (0.0 to 0.0)                  |
| Germany | 2007 | 4423.0 (4306.9 to 4546.2)  | 3349.2 (3238.6 to 3457.2)  | 624.5 (601.1 to 647.1)        | 449.3 (395.4 to 508.9)          | 0.0 (0.0 to 0.0)                  | 4722.2 (4598.3 to 4853.7) | 3575.8 (3457.7 to 3691.1)  | 666.8 (641.8 to 690.9)        | 479.7 (422.2 to 543.3)          | 0.0 (0.0 to 0.0)                  |
| Germany | 2008 | 4579.8 (4459.8 to 4695.1)  | 3554.4 (3456.2 to 3655.1)  | 639.7 (614.9 to 663.1)        | 385.7 (332.0 to 444.6)          | 0.0 (0.0 to 0.0)                  | 4889.6 (4761.5 to 5012.7) | 3794.8 (3690.0 to 3902.3)  | 683.0 (656.5 to 707.9)        | 411.8 (354.5 to 474.6)          | 0.0 (0.0 to 0.0)                  |
| Germany | 2009 | 4585.6 (4477.8 to 4696.2)  | 3695.5 (3594.8 to 3793.8)  | 640.6 (616.2 to 665.7)        | 249.5 (207.4 to 298.0)          | 0.0 (0.0 to 0.0)                  | 4895.9 (4780.8 to 5013.9) | 3945.5 (3838.0 to 4050.5)  | 684.0 (657.9 to 710.8)        | 266.4 (221.4 to 318.2)          | 0.0 (0.0 to 0.0)                  |
| Germany | 2010 | 4802.4 (4691.4 to 4926.2)  | 3941.2 (3840.8 to 4040.6)  | 661.5 (636.3 to 686.7)        | 199.7 (160.2 to 243.4)          | 0.0 (0.0 to 0.0)                  | 5127.3 (5008.8 to 5259.5) | 4207.9 (4100.6 to 4314.0)  | 706.3 (679.3 to 733.2)        | 213.2 (171.0 to 259.9)          | 0.0 (0.0 to 0.0)                  |
| Germany | 2011 | 4945.8 (4837.0 to 5070.4)  | 4093.8 (3997.0 to 4195.6)  | 674.2 (651.0 to 698.6)        | 177.8 (138.3 to 223.0)          | 0.0 (0.0 to 0.0)                  | 5280.4 (5164.3 to 5413.4) | 4370.8 (4267.4 to 4479.5)  | 719.8 (695.0 to 745.8)        | 189.8 (147.7 to 238.1)          | 0.0 (0.0 to 0.0)                  |
| Germany | 2012 | 4947.2 (4838.4 to 5061.1)  | 4114.2 (4011.4 to 4224.9)  | 669.1 (644.5 to 693.6)        | 163.8 (127.1 to 207.2)          | 0.0 (0.0 to 0.0)                  | 5281.9 (5165.7 to 5403.5) | 4392.6 (4282.8 to 4510.7)  | 714.4 (688.1 to 740.5)        | 174.9 (135.7 to 221.3)          | 0.0 (0.0 to 0.0)                  |
| Germany | 2013 | 4982.6 (4865.3 to 5100.5)  | 4170.2 (4062.3 to 4276.1)  | 655.1 (632.2 to 681.3)        | 157.4 (122.1 to 200.9)          | 0.0 (0.0 to 0.0)                  | 5319.7 (5194.5 to 5445.6) | 4452.3 (4337.1 to 4565.4)  | 699.4 (674.9 to 727.4)        | 168.0 (130.4 to 214.5)          | 0.0 (0.0 to 0.0)                  |
| Germany | 2014 | 5085.6 (4972.6 to 5206.0)  | 4281.2 (4180.8 to 4390.0)  | 649.1 (626.3 to 672.2)        | 155.3 (119.7 to 199.5)          | 0.0 (0.0 to 0.0)                  | 5429.6 (5309.0 to 5558.2) | 4570.8 (4463.6 to 4687.0)  | 693.0 (668.7 to 717.7)        | 165.8 (127.8 to 213.0)          | 0.0 (0.0 to 0.0)                  |
| Germany | 2015 | 5176.6 (5059.5 to 5298.4)  | 4370.2 (4264.5 to 4482.6)  | 651.3 (626.8 to 675.3)        | 155.0 (115.0 to 203.1)          | 0.0 (0.0 to 0.0)                  | 5526.8 (5401.8 to 5656.8) | 4665.9 (4553.0 to 4785.8)  | 695.4 (669.2 to 721.0)        | 165.5 (122.8 to 216.8)          | 0.0 (0.0 to 0.0)                  |
| Germany | 2016 | 5262.7 (5094.8 to 5434.8)  | 4454.0 (4299.4 to 4609.3)  | 652.9 (618.9 to 687.0)        | 155.8 (108.6 to 210.8)          | 0.0 (0.0 to 0.0)                  | 5618.8 (5439.5 to 5802.5) | 4755.3 (4590.3 to 4921.2)  | 697.1 (660.8 to 733.5)        | 166.3 (115.9 to 225.1)          | 0.0 (0.0 to 0.0)                  |
| Germany | 2017 | 5374.5 (5203.6 to 5545.8)  | 4549.5 (4386.6 to 4704.3)  | 664.7 (630.8 to 701.7)        | 160.3 (112.0 to 216.6)          | 0.0 (0.0 to 0.0)                  | 5738.1 (5555.7 to 5921.0) | 4857.3 (4683.4 to 5022.5)  | 709.7 (673.5 to 749.2)        | 171.1 (119.6 to 231.3)          | 0.0 (0.0 to 0.0)                  |
| Germany | 2018 | 5419.4 (5239.1 to 5618.8)  | 4584.3 (4421.9 to 4747.0)  | 673.0 (636.8 to 711.0)        | 162.1 (113.0 to 219.0)          | 0.0 (0.0 to 0.0)                  | 5786.0 (5593.6 to 5999.0) | 4894.4 (4721.0 to 5068.2)  | 718.5 (679.9 to 759.1)        | 173.1 (120.6 to 233.8)          | 0.0 (0.0 to 0.0)                  |
| Germany | 2019 | 5469.9 (5289.3 to 5647.9)  | 4623.9 (4455.4 to 4805.2)  | 681.8 (642.9 to 723.8)        | 164.2 (114.8 to 221.5)          | 0.0 (0.0 to 0.0)                  | 5840.0 (5647.2 to 6030.0) | 4936.7 (4756.8 to 5130.2)  | 727.9 (686.4 to 772.7)        | 175.4 (122.5 to 236.4)          | 0.0 (0.0 to 0.0)                  |
| Germany | 2020 | 5541.1 (5344.3 to 5739.8)  | 4682.2 (4507.2 to 4874.1)  | 691.9 (650.6 to 735.8)        | 166.9 (117.1 to 225.2)          | 0.0 (0.0 to 0.0)                  | 5916.0 (5705.9 to 6128.1) | 4999.0 (4812.1 to 5203.9)  | 738.7 (694.6 to 785.6)        | 178.2 (125.0 to 240.4)          | 0.0 (0.0 to 0.0)                  |
| Germany | 2021 | 5601.7 (5408.6 to 5802.9)  | 4736.3 (4552.9 to 4935.0)  | 696.0 (654.0 to 739.7)        | 169.4 (119.0 to 228.4)          | 0.0 (0.0 to 0.0)                  | 5980.6 (5774.5 to 6195.5) | 5056.7 (4860.9 to 5268.9)  | 743.1 (698.2 to 789.7)        | 180.8 (127.1 to 243.9)          | 0.0 (0.0 to 0.0)                  |
| Germany | 2022 | 5660.1 (5441.6 to 5898.4)  | 4788.9 (4593.7 to 5000.3)  | 699.6 (658.2 to 745.0)        | 171.6 (120.7 to 231.7)          | 0.0 (0.0 to 0.0)                  | 6043.1 (5809.7 to 6297.4) | 5112.9 (4904.5 to 5338.6)  | 746.9 (702.7 to 795.4)        | 183.2 (128.9 to 247.3)          | 0.0 (0.0 to 0.0)                  |



| Country | Year | 2018 US Dollars per capita |                            |                               |                                 |                                   | 2018 PPP per capita       |                            |                               |                                 |                                   |
|---------|------|----------------------------|----------------------------|-------------------------------|---------------------------------|-----------------------------------|---------------------------|----------------------------|-------------------------------|---------------------------------|-----------------------------------|
|         |      | Health spending            | Government health spending | Out-of-pocket health spending | Prepaid private health spending | Development assistance for health | Health spending           | Government health spending | Out-of-pocket health spending | Prepaid private health spending | Development assistance for health |
| Germany | 2023 | 5718.1 (5483.5 to 5949.8)  | 4841.3 (4631.4 to 5065.1)  | 703.1 (661.4 to 747.7)        | 173.8 (122.1 to 235.1)          | 0.0 (0.0 to 0.0)                  | 6105.0 (5854.4 to 6352.4) | 5168.8 (4944.7 to 5407.8)  | 750.6 (706.2 to 798.3)        | 185.6 (130.4 to 251.0)          | 0.0 (0.0 to 0.0)                  |
| Germany | 2024 | 5775.5 (5529.3 to 6030.2)  | 4893.7 (4671.5 to 5121.6)  | 706.0 (663.1 to 751.4)        | 175.9 (123.4 to 237.7)          | 0.0 (0.0 to 0.0)                  | 6166.2 (5903.3 to 6438.2) | 5224.8 (4987.5 to 5468.1)  | 753.7 (707.9 to 802.2)        | 187.8 (131.7 to 253.8)          | 0.0 (0.0 to 0.0)                  |
| Germany | 2025 | 5830.5 (5578.9 to 6081.0)  | 4944.4 (4713.8 to 5182.9)  | 708.3 (666.4 to 754.1)        | 177.8 (124.4 to 240.3)          | 0.0 (0.0 to 0.0)                  | 6224.9 (5956.3 to 6492.4) | 5278.9 (5032.7 to 5533.5)  | 756.2 (711.5 to 805.1)        | 189.8 (132.9 to 256.5)          | 0.0 (0.0 to 0.0)                  |
| Germany | 2026 | 5882.5 (5617.9 to 6145.3)  | 4992.9 (4749.7 to 5246.3)  | 710.1 (667.3 to 755.4)        | 179.6 (125.4 to 242.4)          | 0.0 (0.0 to 0.0)                  | 6280.5 (5997.9 to 6561.0) | 5330.6 (5071.1 to 5601.2)  | 758.1 (712.5 to 806.6)        | 191.7 (133.9 to 258.8)          | 0.0 (0.0 to 0.0)                  |
| Germany | 2027 | 5930.7 (5653.3 to 6208.8)  | 5038.4 (4778.9 to 5299.9)  | 711.1 (667.6 to 758.6)        | 181.2 (126.7 to 244.5)          | 0.0 (0.0 to 0.0)                  | 6331.9 (6035.7 to 6628.9) | 5379.3 (5102.2 to 5658.4)  | 759.2 (712.8 to 809.9)        | 193.4 (135.3 to 261.1)          | 0.0 (0.0 to 0.0)                  |
| Germany | 2028 | 5980.2 (5689.5 to 6272.5)  | 5085.2 (4812.6 to 5362.8)  | 712.2 (667.2 to 759.4)        | 182.8 (128.2 to 246.7)          | 0.0 (0.0 to 0.0)                  | 6384.8 (6074.4 to 6696.8) | 5429.2 (5138.2 to 5725.6)  | 760.4 (712.3 to 810.8)        | 195.2 (136.9 to 263.4)          | 0.0 (0.0 to 0.0)                  |
| Germany | 2029 | 6029.8 (5736.8 to 6340.0)  | 5132.3 (4844.6 to 5427.2)  | 713.0 (667.1 to 761.4)        | 184.4 (129.3 to 248.7)          | 0.0 (0.0 to 0.0)                  | 6437.7 (6125.0 to 6768.9) | 5479.5 (5172.3 to 5794.3)  | 761.3 (712.2 to 812.9)        | 196.9 (138.0 to 265.6)          | 0.0 (0.0 to 0.0)                  |
| Germany | 2030 | 6076.9 (5762.7 to 6398.3)  | 5177.2 (4875.2 to 5496.7)  | 713.7 (667.1 to 763.8)        | 186.0 (130.2 to 251.1)          | 0.0 (0.0 to 0.0)                  | 6488.0 (6152.5 to 6831.2) | 5527.4 (5205.0 to 5868.6)  | 762.0 (712.2 to 815.5)        | 198.6 (139.0 to 268.1)          | 0.0 (0.0 to 0.0)                  |
| Germany | 2031 | 6122.5 (5802.8 to 6482.1)  | 5220.7 (4903.1 to 5561.2)  | 714.2 (667.1 to 765.3)        | 187.5 (131.1 to 253.6)          | 0.0 (0.0 to 0.0)                  | 6536.7 (6195.4 to 6920.6) | 5573.9 (5234.8 to 5937.4)  | 762.5 (712.3 to 817.1)        | 200.2 (140.0 to 270.8)          | 0.0 (0.0 to 0.0)                  |
| Germany | 2032 | 6169.3 (5821.7 to 6531.0)  | 5265.4 (4930.8 to 5624.7)  | 714.8 (666.6 to 766.7)        | 189.1 (132.3 to 256.8)          | 0.0 (0.0 to 0.0)                  | 6586.6 (6215.5 to 6972.8) | 5621.6 (5264.4 to 6005.2)  | 763.2 (711.7 to 818.6)        | 201.9 (141.2 to 274.1)          | 0.0 (0.0 to 0.0)                  |
| Germany | 2033 | 6218.1 (5844.1 to 6608.7)  | 5311.4 (4952.2 to 5693.0)  | 715.9 (665.5 to 769.1)        | 190.8 (133.0 to 259.8)          | 0.0 (0.0 to 0.0)                  | 6638.7 (6239.5 to 7055.8) | 5670.7 (5287.2 to 6078.1)  | 764.3 (710.5 to 821.1)        | 203.7 (142.0 to 277.4)          | 0.0 (0.0 to 0.0)                  |
| Germany | 2034 | 6269.3 (5883.0 to 6681.0)  | 5358.7 (4986.5 to 5757.8)  | 717.8 (665.1 to 771.6)        | 192.8 (134.3 to 263.4)          | 0.0 (0.0 to 0.0)                  | 6693.5 (6281.0 to 7133.0) | 5721.2 (5323.9 to 6147.3)  | 766.4 (710.1 to 823.8)        | 205.9 (143.4 to 281.2)          | 0.0 (0.0 to 0.0)                  |
| Germany | 2035 | 6327.5 (5924.8 to 6775.4)  | 5411.4 (5022.3 to 5826.1)  | 721.0 (666.4 to 775.7)        | 195.2 (136.1 to 266.6)          | 0.0 (0.0 to 0.0)                  | 6755.6 (6325.7 to 7233.8) | 5777.5 (5362.1 to 6220.2)  | 769.8 (711.5 to 828.2)        | 208.4 (145.3 to 284.6)          | 0.0 (0.0 to 0.0)                  |
| Germany | 2036 | 6389.2 (5985.7 to 6839.7)  | 5466.1 (5065.5 to 5901.4)  | 725.3 (668.8 to 781.3)        | 197.8 (138.0 to 270.1)          | 0.0 (0.0 to 0.0)                  | 6821.4 (6390.7 to 7302.5) | 5835.9 (5408.2 to 6300.7)  | 774.3 (714.0 to 834.1)        | 211.2 (147.4 to 288.4)          | 0.0 (0.0 to 0.0)                  |
| Germany | 2037 | 6460.2 (6043.7 to 6943.0)  | 5527.9 (5122.1 to 5981.9)  | 731.2 (672.7 to 788.8)        | 201.0 (140.2 to 274.7)          | 0.0 (0.0 to 0.0)                  | 6897.2 (6452.6 to 7412.7) | 5901.9 (5468.6 to 6386.5)  | 780.7 (718.2 to 842.2)        | 214.6 (149.7 to 293.3)          | 0.0 (0.0 to 0.0)                  |
| Germany | 2038 | 6535.8 (6101.8 to 7003.1)  | 5593.0 (5178.4 to 6058.3)  | 738.2 (677.6 to 797.0)        | 204.6 (142.9 to 280.3)          | 0.0 (0.0 to 0.0)                  | 6977.9 (6514.6 to 7476.9) | 5971.4 (5528.8 to 6468.2)  | 788.2 (723.4 to 851.0)        | 218.4 (152.5 to 299.3)          | 0.0 (0.0 to 0.0)                  |
| Germany | 2039 | 6616.8 (6169.9 to 7118.4)  | 5662.7 (5232.2 to 6159.4)  | 745.8 (683.1 to 805.2)        | 208.3 (145.6 to 286.0)          | 0.0 (0.0 to 0.0)                  | 7064.4 (6587.3 to 7600.0) | 6045.8 (5586.2 to 6576.1)  | 796.2 (729.3 to 859.7)        | 222.4 (155.4 to 305.3)          | 0.0 (0.0 to 0.0)                  |
| Germany | 2040 | 6700.0 (6231.8 to 7204.2)  | 5734.4 (5266.7 to 6233.3)  | 753.5 (688.8 to 814.1)        | 212.1 (148.0 to 291.1)          | 0.0 (0.0 to 0.0)                  | 7153.3 (6653.4 to 7691.6) | 6122.3 (5623.0 to 6655.0)  | 804.5 (735.4 to 869.2)        | 226.5 (158.0 to 310.8)          | 0.0 (0.0 to 0.0)                  |
| Germany | 2041 | 6784.5 (6307.3 to 7313.2)  | 5806.4 (5324.9 to 6348.8)  | 761.9 (695.0 to 823.3)        | 216.2 (150.6 to 296.2)          | 0.0 (0.0 to 0.0)                  | 7243.5 (6734.0 to 7808.0) | 6199.2 (5685.2 to 6778.3)  | 813.4 (742.0 to 879.0)        | 230.8 (160.8 to 316.2)          | 0.0 (0.0 to 0.0)                  |
| Germany | 2042 | 6871.6 (6386.1 to 7415.3)  | 5880.6 (5380.6 to 6427.1)  | 770.6 (700.8 to 834.6)        | 220.4 (153.1 to 302.1)          | 0.0 (0.0 to 0.0)                  | 7336.4 (6818.1 to 7916.9) | 6278.4 (5744.6 to 6861.9)  | 822.7 (748.3 to 891.1)        | 235.3 (163.5 to 322.5)          | 0.0 (0.0 to 0.0)                  |
| Germany | 2043 | 6962.7 (6434.1 to 7526.3)  | 5958.4 (5432.8 to 6515.9)  | 779.5 (707.5 to 846.2)        | 224.8 (156.0 to 308.7)          | 0.0 (0.0 to 0.0)                  | 7433.7 (6869.4 to 8035.4) | 6361.5 (5800.4 to 6956.7)  | 832.2 (755.3 to 903.5)        | 240.0 (166.6 to 329.5)          | 0.0 (0.0 to 0.0)                  |

| Country | Year | 2018 US Dollars per capita |                            |                               |                                 |                                   | 2018 PPP per capita       |                            |                               |                                 |                                   |
|---------|------|----------------------------|----------------------------|-------------------------------|---------------------------------|-----------------------------------|---------------------------|----------------------------|-------------------------------|---------------------------------|-----------------------------------|
|         |      | Health spending            | Government health spending | Out-of-pocket health spending | Prepaid private health spending | Development assistance for health | Health spending           | Government health spending | Out-of-pocket health spending | Prepaid private health spending | Development assistance for health |
| Germany | 2044 | 7055.0 (6539.9 to 7633.9)  | 6037.5 (5493.4 to 6601.8)  | 788.3 (713.5 to 857.1)        | 229.1 (158.9 to 314.5)          | 0.0 (0.0 to 0.0)                  | 7532.3 (6982.3 to 8150.4) | 6446.0 (5865.1 to 7048.4)  | 841.7 (761.8 to 915.1)        | 244.6 (169.7 to 335.8)          | 0.0 (0.0 to 0.0)                  |
| Germany | 2045 | 7147.9 (6591.6 to 7722.8)  | 6117.4 (5558.2 to 6689.9)  | 797.0 (719.6 to 866.8)        | 233.5 (161.7 to 321.1)          | 0.0 (0.0 to 0.0)                  | 7631.5 (7037.5 to 8245.3) | 6531.3 (5934.2 to 7142.5)  | 850.9 (768.2 to 925.4)        | 249.3 (172.6 to 342.8)          | 0.0 (0.0 to 0.0)                  |
| Germany | 2046 | 7240.7 (6645.7 to 7843.1)  | 6196.8 (5611.6 to 6796.0)  | 805.9 (725.9 to 878.7)        | 238.0 (164.6 to 328.4)          | 0.0 (0.0 to 0.0)                  | 7730.5 (7095.3 to 8373.7) | 6616.1 (5991.2 to 7255.8)  | 860.4 (775.0 to 938.2)        | 254.1 (175.7 to 350.6)          | 0.0 (0.0 to 0.0)                  |
| Germany | 2047 | 7333.6 (6718.0 to 7955.9)  | 6276.8 (5672.1 to 6897.7)  | 814.4 (731.4 to 888.4)        | 242.4 (167.8 to 334.3)          | 0.0 (0.0 to 0.0)                  | 7829.8 (7172.5 to 8494.1) | 6701.4 (6055.8 to 7364.3)  | 869.5 (780.9 to 948.5)        | 258.8 (179.1 to 356.9)          | 0.0 (0.0 to 0.0)                  |
| Germany | 2048 | 7425.7 (6775.1 to 8073.9)  | 6356.1 (5730.2 to 6997.6)  | 822.7 (736.8 to 897.3)        | 246.9 (170.7 to 340.0)          | 0.0 (0.0 to 0.0)                  | 7928.1 (7233.4 to 8620.1) | 6786.1 (6117.9 to 7471.0)  | 878.4 (786.7 to 958.0)        | 263.6 (182.3 to 363.0)          | 0.0 (0.0 to 0.0)                  |
| Germany | 2049 | 7515.4 (6829.8 to 8191.8)  | 6433.8 (5779.0 to 7113.6)  | 830.4 (742.7 to 907.2)        | 251.2 (173.2 to 346.8)          | 0.0 (0.0 to 0.0)                  | 8023.8 (7291.8 to 8745.9) | 6869.1 (6170.0 to 7594.9)  | 886.6 (792.9 to 968.5)        | 268.2 (185.0 to 370.3)          | 0.0 (0.0 to 0.0)                  |
| Germany | 2050 | 7605.6 (6915.9 to 8317.2)  | 6512.3 (5818.6 to 7214.1)  | 837.9 (748.3 to 916.0)        | 255.5 (175.6 to 352.9)          | 0.0 (0.0 to 0.0)                  | 8120.2 (7383.8 to 8879.9) | 6952.9 (6212.3 to 7702.2)  | 894.6 (798.9 to 978.0)        | 272.7 (187.5 to 376.7)          | 0.0 (0.0 to 0.0)                  |
| Ghana   | 1995 | 34.6 (28.4 to 42.6)        | 10.8 (8.2 to 13.8)         | 18.4 (13.2 to 25.2)           | 3.2 (1.5 to 6.2)                | 2.2 (2.2 to 2.2)                  | 97.2 (79.8 to 119.8)      | 30.3 (23.1 to 38.7)        | 51.6 (37.1 to 70.9)           | 9.0 (4.1 to 17.3)               | 6.3 (6.3 to 6.3)                  |
| Ghana   | 1996 | 35.8 (29.3 to 43.5)        | 11.4 (8.6 to 14.7)         | 18.7 (13.4 to 25.2)           | 3.3 (1.5 to 6.4)                | 2.3 (2.3 to 2.3)                  | 100.6 (82.3 to 122.2)     | 32.0 (24.3 to 41.2)        | 52.7 (37.8 to 71.0)           | 9.3 (4.3 to 18.0)               | 6.6 (6.6 to 6.6)                  |
| Ghana   | 1997 | 39.0 (32.4 to 46.3)        | 11.0 (8.4 to 14.1)         | 19.1 (13.7 to 25.3)           | 3.2 (1.5 to 6.2)                | 5.7 (5.7 to 5.7)                  | 109.6 (91.2 to 130.2)     | 30.9 (23.5 to 39.6)        | 53.6 (38.6 to 71.0)           | 9.0 (4.1 to 17.4)               | 16.1 (16.1 to 16.1)               |
| Ghana   | 1998 | 36.2 (29.9 to 43.4)        | 11.3 (8.7 to 14.6)         | 19.2 (13.9 to 25.6)           | 3.2 (1.5 to 6.1)                | 2.5 (2.5 to 2.5)                  | 101.7 (84.0 to 122.0)     | 31.9 (24.5 to 40.9)        | 53.9 (39.2 to 71.8)           | 8.9 (4.1 to 17.0)               | 7.0 (7.0 to 7.0)                  |
| Ghana   | 1999 | 37.7 (31.6 to 45.4)        | 11.4 (8.8 to 14.6)         | 19.5 (14.3 to 26.0)           | 3.0 (1.4 to 5.8)                | 3.7 (3.7 to 3.7)                  | 106.0 (88.7 to 127.5)     | 32.1 (24.8 to 41.0)        | 54.9 (40.3 to 73.2)           | 8.5 (4.0 to 16.2)               | 10.5 (10.5 to 10.5)               |
| Ghana   | 2000 | 37.1 (31.1 to 45.1)        | 11.3 (8.8 to 14.4)         | 19.7 (14.5 to 26.5)           | 2.7 (1.3 to 5.1)                | 3.3 (3.3 to 3.3)                  | 104.4 (87.4 to 126.7)     | 31.9 (24.7 to 40.4)        | 55.4 (40.8 to 74.5)           | 7.7 (3.7 to 14.3)               | 9.4 (9.4 to 9.4)                  |
| Ghana   | 2001 | 39.9 (33.8 to 47.5)        | 11.8 (9.1 to 15.0)         | 20.1 (14.7 to 26.9)           | 2.7 (1.3 to 5.1)                | 5.4 (5.4 to 5.4)                  | 112.2 (94.9 to 133.6)     | 33.1 (25.7 to 42.0)        | 56.4 (41.3 to 75.5)           | 7.6 (3.6 to 14.2)               | 15.1 (15.1 to 15.1)               |
| Ghana   | 2002 | 38.4 (32.2 to 46.0)        | 11.4 (8.9 to 14.6)         | 20.0 (14.6 to 26.6)           | 2.6 (1.2 to 4.9)                | 4.4 (4.4 to 4.4)                  | 108.1 (90.5 to 129.4)     | 32.2 (25.1 to 41.0)        | 56.3 (41.0 to 74.9)           | 7.3 (3.4 to 13.7)               | 12.3 (12.3 to 12.3)               |
| Ghana   | 2003 | 42.9 (36.7 to 50.8)        | 12.3 (9.6 to 15.7)         | 20.4 (14.7 to 27.4)           | 2.7 (1.2 to 5.2)                | 7.5 (7.5 to 7.5)                  | 120.6 (103.1 to 142.7)    | 34.6 (27.1 to 44.1)        | 57.3 (41.4 to 77.0)           | 7.6 (3.4 to 14.6)               | 21.1 (21.1 to 21.1)               |
| Ghana   | 2004 | 48.7 (42.2 to 57.1)        | 13.8 (10.8 to 17.5)        | 21.0 (15.5 to 28.2)           | 2.9 (1.3 to 5.5)                | 11.0 (11.0 to 11.0)               | 136.9 (118.5 to 160.6)    | 38.7 (30.4 to 49.2)        | 59.1 (43.7 to 79.1)           | 8.2 (3.8 to 15.6)               | 30.9 (30.9 to 30.9)               |
| Ghana   | 2005 | 54.6 (47.2 to 64.1)        | 17.6 (13.7 to 22.6)        | 22.4 (16.3 to 29.7)           | 3.6 (1.7 to 6.8)                | 10.9 (10.9 to 10.9)               | 153.4 (132.8 to 180.1)    | 49.6 (38.6 to 63.4)        | 63.0 (45.9 to 83.5)           | 10.2 (4.7 to 19.0)              | 30.6 (30.6 to 30.6)               |
| Ghana   | 2006 | 56.8 (48.7 to 66.6)        | 20.5 (15.7 to 26.1)        | 23.1 (16.9 to 30.5)           | 3.8 (1.8 to 7.3)                | 9.5 (9.5 to 9.5)                  | 159.6 (136.9 to 187.3)    | 57.5 (44.1 to 73.3)        | 64.8 (47.6 to 85.6)           | 10.7 (5.0 to 20.5)              | 26.6 (26.6 to 26.6)               |
| Ghana   | 2007 | 60.5 (51.8 to 71.2)        | 23.2 (17.9 to 29.3)        | 23.7 (17.7 to 31.2)           | 4.0 (1.8 to 7.6)                | 9.6 (9.6 to 9.6)                  | 170.0 (145.6 to 200.1)    | 65.3 (50.3 to 82.3)        | 66.5 (49.7 to 87.6)           | 11.2 (5.1 to 21.4)              | 27.0 (27.0 to 27.0)               |
| Ghana   | 2008 | 67.2 (57.8 to 78.5)        | 26.9 (20.9 to 33.8)        | 24.9 (18.1 to 32.7)           | 4.3 (2.0 to 8.2)                | 11.1 (11.1 to 11.1)               | 188.9 (162.5 to 220.6)    | 75.7 (58.6 to 95.1)        | 69.9 (50.9 to 92.0)           | 12.2 (5.5 to 23.1)              | 31.1 (31.1 to 31.1)               |

| Country | Year | 2018 US Dollars per capita |                            |                               |                                 |                                   | 2018 PPP per capita    |                            |                               |                                 |                                   |
|---------|------|----------------------------|----------------------------|-------------------------------|---------------------------------|-----------------------------------|------------------------|----------------------------|-------------------------------|---------------------------------|-----------------------------------|
|         |      | Health spending            | Government health spending | Out-of-pocket health spending | Prepaid private health spending | Development assistance for health | Health spending        | Government health spending | Out-of-pocket health spending | Prepaid private health spending | Development assistance for health |
| Ghana   | 2009 | 71.7 (62.1 to 83.9)        | 30.5 (23.7 to 38.7)        | 25.5 (18.7 to 33.9)           | 4.7 (2.1 to 8.8)                | 11.1 (11.1 to 11.1)               | 201.7 (174.4 to 235.7) | 85.9 (66.7 to 108.9)       | 71.6 (52.7 to 95.4)           | 13.2 (6.0 to 24.7)              | 31.1 (31.1 to 31.1)               |
| Ghana   | 2010 | 76.2 (65.5 to 88.8)        | 34.1 (26.7 to 43.3)        | 26.8 (19.5 to 35.3)           | 4.6 (2.1 to 8.6)                | 10.7 (10.7 to 10.7)               | 214.2 (184.2 to 249.7) | 95.9 (74.9 to 121.6)       | 75.4 (54.9 to 99.3)           | 12.9 (5.8 to 24.1)              | 30.0 (30.0 to 30.0)               |
| Ghana   | 2011 | 84.0 (72.4 to 97.7)        | 38.6 (30.0 to 48.6)        | 30.1 (21.6 to 39.6)           | 4.4 (2.0 to 8.1)                | 10.9 (10.9 to 10.9)               | 236.1 (203.4 to 274.6) | 108.5 (84.3 to 136.5)      | 84.6 (60.8 to 111.2)          | 12.3 (5.6 to 22.8)              | 30.6 (30.6 to 30.6)               |
| Ghana   | 2012 | 88.4 (75.9 to 102.6)       | 38.8 (30.3 to 49.3)        | 32.2 (23.2 to 43.0)           | 3.9 (1.8 to 7.5)                | 13.4 (13.4 to 13.4)               | 248.5 (213.4 to 288.4) | 109.2 (85.1 to 138.6)      | 90.4 (65.2 to 120.7)          | 11.1 (5.2 to 21.1)              | 37.8 (37.8 to 37.8)               |
| Ghana   | 2013 | 87.0 (74.1 to 101.4)       | 37.0 (28.7 to 46.6)        | 33.8 (24.3 to 45.4)           | 3.6 (1.7 to 6.9)                | 12.6 (12.6 to 12.6)               | 244.5 (208.2 to 284.9) | 103.9 (80.6 to 130.9)      | 95.0 (68.3 to 127.5)          | 10.2 (4.9 to 19.3)              | 35.4 (35.4 to 35.4)               |
| Ghana   | 2014 | 80.4 (67.8 to 94.5)        | 33.6 (26.2 to 42.7)        | 34.0 (24.9 to 45.6)           | 3.8 (1.8 to 7.4)                | 9.0 (9.0 to 9.0)                  | 226.0 (190.5 to 265.5) | 94.4 (73.7 to 120.0)       | 95.5 (69.9 to 128.1)          | 10.7 (5.1 to 20.7)              | 25.3 (25.3 to 25.3)               |
| Ghana   | 2015 | 80.0 (67.8 to 93.4)        | 32.1 (25.2 to 40.5)        | 32.3 (23.2 to 43.3)           | 4.3 (2.1 to 8.4)                | 11.2 (11.2 to 11.2)               | 224.8 (190.7 to 262.6) | 90.4 (70.7 to 113.7)       | 90.8 (65.1 to 121.6)          | 12.1 (5.9 to 23.6)              | 31.4 (31.4 to 31.4)               |
| Ghana   | 2016 | 74.7 (62.6 to 87.9)        | 29.8 (23.4 to 37.5)        | 29.5 (20.8 to 39.6)           | 5.3 (2.6 to 10.2)               | 10.1 (10.1 to 10.1)               | 210.1 (175.9 to 246.9) | 83.7 (65.7 to 105.5)       | 83.0 (58.5 to 111.3)          | 14.8 (7.3 to 28.8)              | 28.5 (28.5 to 28.5)               |
| Ghana   | 2017 | 74.3 (62.8 to 86.7)        | 29.0 (22.7 to 36.5)        | 31.0 (21.8 to 41.9)           | 5.3 (2.6 to 10.3)               | 9.0 (9.0 to 9.0)                  | 208.8 (176.5 to 243.7) | 81.5 (63.9 to 102.7)       | 87.0 (61.3 to 117.6)          | 14.9 (7.3 to 28.9)              | 25.3 (25.3 to 25.3)               |
| Ghana   | 2018 | 75.9 (63.9 to 90.6)        | 30.2 (23.7 to 38.0)        | 31.8 (22.4 to 43.0)           | 5.6 (2.7 to 10.8)               | 8.4 (8.3 to 8.4)                  | 213.3 (179.6 to 254.6) | 84.9 (66.6 to 106.7)       | 89.4 (63.0 to 120.8)          | 15.6 (7.6 to 30.3)              | 23.5 (23.4 to 23.5)               |
| Ghana   | 2019 | 77.8 (64.9 to 91.9)        | 31.2 (24.4 to 39.3)        | 32.5 (23.0 to 44.0)           | 5.7 (2.8 to 11.1)               | 8.3 (7.8 to 8.8)                  | 218.6 (182.4 to 258.4) | 87.6 (68.6 to 110.4)       | 91.5 (64.5 to 123.8)          | 16.1 (7.9 to 31.3)              | 23.4 (21.8 to 24.7)               |
| Ghana   | 2020 | 79.8 (67.2 to 94.6)        | 32.2 (25.2 to 40.7)        | 33.3 (23.5 to 45.0)           | 5.9 (2.9 to 11.5)               | 8.3 (7.7 to 9.0)                  | 224.2 (188.8 to 266.0) | 90.6 (70.8 to 114.3)       | 93.6 (66.0 to 126.4)          | 16.6 (8.1 to 32.2)              | 23.5 (21.5 to 25.3)               |
| Ghana   | 2021 | 81.8 (68.6 to 96.9)        | 33.3 (26.0 to 42.1)        | 34.0 (24.0 to 46.0)           | 6.1 (3.0 to 11.8)               | 8.4 (7.5 to 9.3)                  | 229.9 (192.8 to 272.3) | 93.6 (73.1 to 118.4)       | 95.7 (67.5 to 129.2)          | 17.1 (8.4 to 33.2)              | 23.5 (21.2 to 26.0)               |
| Ghana   | 2022 | 83.9 (70.3 to 99.9)        | 34.4 (26.9 to 43.3)        | 34.8 (24.5 to 46.9)           | 6.3 (3.1 to 12.2)               | 8.5 (7.5 to 9.5)                  | 235.8 (197.6 to 280.7) | 96.7 (75.7 to 121.6)       | 97.7 (68.9 to 131.9)          | 17.6 (8.6 to 34.3)              | 23.8 (21.0 to 26.6)               |
| Ghana   | 2023 | 86.0 (72.6 to 102.0)       | 35.5 (27.8 to 44.9)        | 35.5 (25.0 to 47.9)           | 6.4 (3.2 to 12.6)               | 8.5 (7.4 to 9.7)                  | 241.6 (204.1 to 286.8) | 99.9 (78.1 to 126.1)       | 99.7 (70.3 to 134.5)          | 18.1 (8.9 to 35.4)              | 24.0 (20.8 to 27.3)               |
| Ghana   | 2024 | 88.1 (73.8 to 105.7)       | 36.7 (28.7 to 46.3)        | 36.2 (25.4 to 48.7)           | 6.6 (3.2 to 13.0)               | 8.6 (7.4 to 10.0)                 | 247.7 (207.4 to 297.2) | 103.2 (80.6 to 130.3)      | 101.6 (71.5 to 137.0)         | 18.6 (9.1 to 36.4)              | 24.2 (20.8 to 28.0)               |
| Ghana   | 2025 | 90.4 (76.3 to 106.9)       | 38.0 (29.6 to 47.9)        | 36.9 (26.0 to 49.8)           | 6.8 (3.3 to 13.4)               | 8.7 (7.4 to 10.2)                 | 254.1 (214.5 to 300.6) | 106.7 (83.3 to 134.6)      | 103.7 (73.1 to 139.9)         | 19.2 (9.4 to 37.5)              | 24.5 (20.9 to 28.8)               |
| Ghana   | 2026 | 92.8 (77.7 to 110.7)       | 39.3 (30.7 to 49.6)        | 37.6 (26.6 to 50.8)           | 7.0 (3.4 to 13.8)               | 8.8 (7.5 to 10.3)                 | 260.7 (218.5 to 311.1) | 110.4 (86.2 to 139.5)      | 105.8 (74.7 to 142.9)         | 19.7 (9.6 to 38.7)              | 24.8 (21.0 to 29.0)               |
| Ghana   | 2027 | 95.3 (79.4 to 115.3)       | 40.7 (31.7 to 51.7)        | 38.4 (27.1 to 51.8)           | 7.2 (3.5 to 14.2)               | 8.9 (7.5 to 10.6)                 | 267.9 (223.3 to 324.2) | 114.4 (89.1 to 145.2)      | 108.0 (76.3 to 145.6)         | 20.3 (9.9 to 39.9)              | 25.1 (21.0 to 29.9)               |
| Ghana   | 2028 | 98.0 (82.3 to 116.3)       | 42.2 (32.9 to 53.5)        | 39.3 (27.8 to 52.9)           | 7.5 (3.6 to 14.6)               | 9.1 (7.6 to 11.0)                 | 275.4 (231.3 to 326.9) | 118.5 (92.4 to 150.4)      | 110.4 (78.0 to 148.8)         | 21.0 (10.2 to 41.1)             | 25.5 (21.3 to 30.8)               |
| Ghana   | 2029 | 100.8 (83.7 to 120.2)      | 43.7 (34.1 to 55.4)        | 40.2 (28.4 to 54.5)           | 7.7 (3.7 to 15.1)               | 9.2 (7.6 to 11.2)                 | 283.3 (235.3 to 337.9) | 122.9 (95.7 to 155.8)      | 112.9 (79.8 to 153.2)         | 21.6 (10.5 to 42.4)             | 25.8 (21.2 to 31.5)               |

| Country | Year | 2018 US Dollars per capita |                            |                               |                                 |                                   | 2018 PPP per capita    |                            |                               |                                 |                                   |
|---------|------|----------------------------|----------------------------|-------------------------------|---------------------------------|-----------------------------------|------------------------|----------------------------|-------------------------------|---------------------------------|-----------------------------------|
|         |      | Health spending            | Government health spending | Out-of-pocket health spending | Prepaid private health spending | Development assistance for health | Health spending        | Government health spending | Out-of-pocket health spending | Prepaid private health spending | Development assistance for health |
| Ghana   | 2030 | 103.7 (86.2 to 122.2)      | 45.4 (35.3 to 57.8)        | 41.1 (29.0 to 56.0)           | 7.9 (3.8 to 15.5)               | 9.3 (7.6 to 11.4)                 | 291.5 (242.2 to 343.4) | 127.5 (99.3 to 162.4)      | 115.5 (81.5 to 157.4)         | 22.3 (10.8 to 43.7)             | 26.2 (21.4 to 32.1)               |
| Ghana   | 2031 | 106.8 (88.1 to 127.8)      | 47.1 (36.6 to 60.1)        | 42.0 (29.6 to 57.3)           | 8.2 (4.0 to 16.0)               | 9.4 (7.7 to 11.9)                 | 300.2 (247.6 to 359.2) | 132.5 (102.8 to 168.9)     | 118.2 (83.1 to 161.1)         | 23.0 (11.1 to 45.1)             | 26.5 (21.6 to 33.3)               |
| Ghana   | 2032 | 110.0 (92.0 to 130.6)      | 49.0 (38.1 to 62.5)        | 43.0 (30.2 to 58.6)           | 8.4 (4.1 to 16.6)               | 9.6 (7.7 to 12.0)                 | 309.2 (258.7 to 367.0) | 137.6 (107.0 to 175.6)     | 120.9 (84.9 to 164.6)         | 23.7 (11.5 to 46.6)             | 26.9 (21.7 to 33.9)               |
| Ghana   | 2033 | 113.4 (93.3 to 135.4)      | 50.9 (39.5 to 64.8)        | 44.1 (31.0 to 59.9)           | 8.7 (4.2 to 17.1)               | 9.7 (7.7 to 12.5)                 | 318.7 (262.4 to 380.5) | 143.0 (110.9 to 182.2)     | 123.8 (87.1 to 168.4)         | 24.5 (11.8 to 48.2)             | 27.3 (21.7 to 35.0)               |
| Ghana   | 2034 | 116.9 (97.0 to 139.2)      | 52.9 (40.9 to 67.6)        | 45.1 (31.8 to 61.6)           | 9.0 (4.3 to 17.6)               | 9.9 (7.8 to 12.7)                 | 328.4 (272.7 to 391.3) | 148.6 (115.0 to 189.9)     | 126.8 (89.3 to 173.0)         | 25.3 (12.2 to 49.6)             | 27.8 (21.8 to 35.8)               |
| Ghana   | 2035 | 120.4 (100.2 to 143.1)     | 54.9 (42.6 to 70.2)        | 46.2 (32.5 to 63.0)           | 9.3 (4.5 to 18.2)               | 10.0 (7.8 to 13.1)                | 338.5 (281.8 to 402.3) | 154.4 (119.6 to 197.4)     | 129.8 (91.5 to 177.0)         | 26.1 (12.6 to 51.1)             | 28.2 (22.0 to 36.9)               |
| Ghana   | 2036 | 124.1 (103.2 to 149.8)     | 57.1 (44.0 to 73.0)        | 47.3 (33.3 to 64.5)           | 9.6 (4.6 to 18.8)               | 10.2 (7.9 to 13.6)                | 348.8 (290.1 to 420.9) | 160.4 (123.7 to 205.1)     | 132.9 (93.6 to 181.3)         | 26.9 (13.0 to 52.9)             | 28.6 (22.2 to 38.3)               |
| Ghana   | 2037 | 127.9 (106.2 to 152.6)     | 59.3 (45.7 to 76.0)        | 48.4 (34.1 to 66.0)           | 9.9 (4.8 to 19.4)               | 10.3 (8.0 to 13.9)                | 359.4 (298.5 to 428.8) | 166.6 (128.5 to 213.5)     | 136.0 (95.9 to 185.6)         | 27.8 (13.4 to 54.6)             | 29.0 (22.4 to 39.1)               |
| Ghana   | 2038 | 131.7 (107.9 to 159.2)     | 61.5 (47.3 to 79.1)        | 49.5 (34.9 to 67.7)           | 10.2 (4.9 to 20.0)              | 10.5 (8.0 to 14.4)                | 370.2 (303.1 to 447.6) | 172.9 (133.1 to 222.2)     | 139.2 (98.1 to 190.3)         | 28.7 (13.8 to 56.3)             | 29.5 (22.6 to 40.5)               |
| Ghana   | 2039 | 135.6 (113.1 to 161.4)     | 63.8 (48.9 to 82.5)        | 50.7 (35.7 to 69.3)           | 10.5 (5.1 to 20.7)              | 10.6 (8.1 to 14.6)                | 381.3 (317.8 to 453.7) | 179.4 (137.5 to 232.0)     | 142.5 (100.3 to 194.8)        | 29.6 (14.3 to 58.1)             | 29.9 (22.8 to 41.1)               |
| Ghana   | 2040 | 139.7 (115.4 to 167.2)     | 66.2 (50.8 to 85.9)        | 51.9 (36.5 to 71.0)           | 10.8 (5.2 to 21.2)              | 10.8 (8.2 to 14.9)                | 392.8 (324.2 to 470.1) | 186.2 (142.8 to 241.4)     | 145.8 (102.5 to 199.5)        | 30.5 (14.7 to 59.6)             | 30.3 (23.2 to 41.8)               |
| Ghana   | 2041 | 143.9 (119.7 to 172.8)     | 68.7 (52.8 to 89.1)        | 53.1 (37.3 to 72.6)           | 11.2 (5.4 to 21.8)              | 11.0 (8.2 to 15.6)                | 404.5 (336.4 to 485.6) | 193.2 (148.4 to 250.4)     | 149.1 (104.9 to 204.0)        | 31.4 (15.1 to 61.2)             | 30.8 (23.1 to 43.7)               |
| Ghana   | 2042 | 148.2 (122.1 to 177.9)     | 71.3 (54.8 to 92.5)        | 54.3 (38.1 to 74.2)           | 11.5 (5.5 to 22.5)              | 11.1 (8.3 to 16.2)                | 416.6 (343.1 to 500.1) | 200.4 (154.0 to 260.0)     | 152.5 (107.2 to 208.6)        | 32.4 (15.6 to 63.2)             | 31.3 (23.3 to 45.7)               |
| Ghana   | 2043 | 152.6 (127.2 to 182.6)     | 74.0 (57.0 to 96.2)        | 55.5 (39.0 to 75.8)           | 11.9 (5.7 to 23.3)              | 11.3 (8.4 to 16.6)                | 429.0 (357.4 to 513.3) | 207.9 (160.2 to 270.3)     | 156.0 (109.6 to 213.2)        | 33.3 (16.0 to 65.4)             | 31.8 (23.5 to 46.5)               |
| Ghana   | 2044 | 157.2 (130.7 to 190.0)     | 76.7 (58.9 to 99.9)        | 56.8 (39.9 to 77.6)           | 12.2 (5.9 to 24.0)              | 11.5 (8.5 to 16.8)                | 441.9 (367.4 to 534.1) | 215.6 (165.5 to 280.8)     | 159.5 (112.1 to 218.2)        | 34.3 (16.4 to 67.5)             | 32.4 (23.9 to 47.2)               |
| Ghana   | 2045 | 161.9 (133.1 to 194.4)     | 79.5 (60.9 to 104.0)       | 58.0 (40.8 to 79.5)           | 12.6 (6.0 to 24.8)              | 11.7 (8.5 to 17.7)                | 455.0 (374.1 to 546.3) | 223.5 (171.2 to 292.4)     | 163.1 (114.6 to 223.3)        | 35.4 (16.9 to 69.6)             | 32.9 (23.8 to 49.7)               |
| Ghana   | 2046 | 166.6 (137.4 to 201.8)     | 82.4 (63.0 to 107.7)       | 59.3 (41.8 to 81.3)           | 13.0 (6.2 to 25.5)              | 11.9 (8.6 to 18.2)                | 468.3 (386.1 to 567.2) | 231.6 (176.9 to 302.8)     | 166.7 (117.4 to 228.5)        | 36.4 (17.3 to 71.6)             | 33.5 (24.2 to 51.1)               |
| Ghana   | 2047 | 171.4 (140.6 to 210.2)     | 85.3 (65.0 to 111.5)       | 60.6 (42.8 to 83.1)           | 13.3 (6.3 to 26.2)              | 12.1 (8.8 to 19.0)                | 481.8 (395.3 to 590.8) | 239.8 (182.6 to 313.4)     | 170.3 (120.2 to 233.6)        | 37.5 (17.8 to 73.7)             | 34.1 (24.7 to 53.3)               |
| Ghana   | 2048 | 176.3 (144.7 to 213.2)     | 88.3 (66.9 to 115.5)       | 61.9 (43.7 to 84.9)           | 13.7 (6.5 to 27.0)              | 12.4 (8.9 to 19.7)                | 495.5 (406.7 to 599.2) | 248.1 (188.1 to 324.6)     | 174.0 (122.9 to 238.6)        | 38.6 (18.2 to 75.9)             | 34.8 (24.9 to 55.3)               |
| Ghana   | 2049 | 181.2 (147.2 to 221.7)     | 91.3 (69.5 to 119.8)       | 63.2 (44.6 to 86.7)           | 14.1 (6.7 to 27.8)              | 12.6 (8.9 to 20.4)                | 509.4 (413.8 to 623.2) | 256.6 (195.2 to 336.8)     | 177.7 (125.4 to 243.6)        | 39.7 (18.7 to 78.1)             | 35.4 (25.0 to 57.3)               |
| Ghana   | 2050 | 186.3 (153.9 to 227.5)     | 94.3 (71.5 to 124.5)       | 64.5 (45.5 to 88.5)           | 14.5 (6.8 to 28.6)              | 12.9 (9.1 to 21.0)                | 523.6 (432.6 to 639.5) | 265.1 (201.0 to 350.0)     | 181.4 (128.0 to 248.6)        | 40.8 (19.2 to 80.3)             | 36.2 (25.5 to 59.0)               |

| Country | Year | 2018 US Dollars per capita |                            |                               |                                 |                                   | 2018 PPP per capita       |                            |                               |                                 |                                   |
|---------|------|----------------------------|----------------------------|-------------------------------|---------------------------------|-----------------------------------|---------------------------|----------------------------|-------------------------------|---------------------------------|-----------------------------------|
|         |      | Health spending            | Government health spending | Out-of-pocket health spending | Prepaid private health spending | Development assistance for health | Health spending           | Government health spending | Out-of-pocket health spending | Prepaid private health spending | Development assistance for health |
| Greece  | 1995 | 1355.6 (1270.7 to 1447.1)  | 689.7 (628.7 to 753.5)     | 633.2 (572.5 to 699.0)        | 32.7 (21.0 to 49.6)             | 0.0 (0.0 to 0.0)                  | 1915.8 (1795.9 to 2045.0) | 974.6 (888.5 to 1064.9)    | 894.9 (809.0 to 987.8)        | 46.2 (29.6 to 70.0)             | 0.0 (0.0 to 0.0)                  |
| Greece  | 1996 | 1376.4 (1305.7 to 1452.6)  | 708.8 (657.4 to 761.4)     | 634.2 (584.3 to 686.4)        | 33.5 (22.3 to 48.8)             | 0.0 (0.0 to 0.0)                  | 1945.2 (1845.3 to 2052.9) | 1001.6 (929.0 to 1076.0)   | 896.3 (825.8 to 970.1)        | 47.3 (31.4 to 68.9)             | 0.0 (0.0 to 0.0)                  |
| Greece  | 1997 | 1412.1 (1343.6 to 1482.9)  | 738.9 (690.3 to 790.0)     | 638.8 (594.2 to 684.7)        | 34.4 (23.8 to 48.7)             | 0.0 (0.0 to 0.0)                  | 1995.6 (1898.8 to 2095.7) | 1044.2 (975.5 to 1116.5)   | 902.8 (839.8 to 967.7)        | 48.7 (33.6 to 68.8)             | 0.0 (0.0 to 0.0)                  |
| Greece  | 1998 | 1441.6 (1374.1 to 1509.8)  | 770.8 (723.5 to 820.0)     | 635.4 (589.6 to 685.6)        | 35.4 (24.9 to 48.4)             | 0.0 (0.0 to 0.0)                  | 2037.3 (1942.0 to 2133.6) | 1089.4 (1022.5 to 1158.8)  | 897.9 (833.2 to 968.9)        | 50.0 (35.1 to 68.4)             | 0.0 (0.0 to 0.0)                  |
| Greece  | 1999 | 1477.0 (1410.3 to 1546.1)  | 820.7 (771.4 to 874.3)     | 619.1 (575.6 to 664.5)        | 37.2 (26.9 to 49.4)             | 0.0 (0.0 to 0.0)                  | 2087.3 (1993.1 to 2185.0) | 1159.9 (1090.1 to 1235.6)  | 874.9 (813.4 to 939.1)        | 52.6 (38.0 to 69.8)             | 0.0 (0.0 to 0.0)                  |
| Greece  | 2000 | 1524.2 (1459.7 to 1592.1)  | 895.0 (846.9 to 947.5)     | 588.3 (545.0 to 630.4)        | 40.9 (30.3 to 53.5)             | 0.0 (0.0 to 0.0)                  | 2154.1 (2062.8 to 2250.0) | 1264.8 (1196.9 to 1339.1)  | 831.5 (770.3 to 890.9)        | 57.8 (42.8 to 75.6)             | 0.0 (0.0 to 0.0)                  |
| Greece  | 2001 | 1635.1 (1567.2 to 1702.8)  | 987.0 (937.9 to 1039.2)    | 602.8 (561.5 to 645.0)        | 45.3 (34.3 to 58.3)             | 0.0 (0.0 to 0.0)                  | 2310.8 (2214.8 to 2406.4) | 1394.8 (1325.5 to 1468.7)  | 851.9 (793.5 to 911.6)        | 64.1 (48.4 to 82.4)             | 0.0 (0.0 to 0.0)                  |
| Greece  | 2002 | 1747.7 (1681.8 to 1824.9)  | 1059.6 (1004.8 to 1115.8)  | 639.0 (598.8 to 681.1)        | 49.1 (37.9 to 61.6)             | 0.0 (0.0 to 0.0)                  | 2469.9 (2376.8 to 2578.9) | 1497.5 (1420.0 to 1576.9)  | 903.1 (846.3 to 962.5)        | 69.4 (53.6 to 87.0)             | 0.0 (0.0 to 0.0)                  |
| Greece  | 2003 | 1863.0 (1794.5 to 1937.3)  | 1135.0 (1080.6 to 1189.2)  | 675.6 (632.6 to 720.7)        | 52.4 (41.2 to 65.2)             | 0.0 (0.0 to 0.0)                  | 2632.8 (2536.0 to 2737.9) | 1604.0 (1527.1 to 1680.6)  | 954.8 (894.0 to 1018.5)       | 74.1 (58.2 to 92.2)             | 0.0 (0.0 to 0.0)                  |
| Greece  | 2004 | 1998.5 (1929.1 to 2070.2)  | 1219.2 (1166.1 to 1272.5)  | 723.5 (676.4 to 769.9)        | 55.8 (44.0 to 69.1)             | 0.0 (0.0 to 0.0)                  | 2824.3 (2726.2 to 2925.7) | 1723.0 (1647.9 to 1798.3)  | 1022.4 (956.0 to 1088.0)      | 78.9 (62.1 to 97.6)             | 0.0 (0.0 to 0.0)                  |
| Greece  | 2005 | 2116.3 (2046.9 to 2189.9)  | 1285.7 (1234.3 to 1338.4)  | 771.7 (725.8 to 819.6)        | 58.9 (46.5 to 72.2)             | 0.0 (0.0 to 0.0)                  | 2990.8 (2892.8 to 3094.8) | 1817.0 (1744.4 to 1891.5)  | 1090.6 (1025.8 to 1158.3)     | 83.2 (65.8 to 102.1)            | 0.0 (0.0 to 0.0)                  |
| Greece  | 2006 | 2295.6 (2222.7 to 2368.1)  | 1406.8 (1351.8 to 1462.8)  | 825.3 (780.0 to 875.9)        | 63.5 (50.4 to 77.6)             | 0.0 (0.0 to 0.0)                  | 3244.2 (3141.2 to 3346.6) | 1988.1 (1910.5 to 2067.3)  | 1166.3 (1102.4 to 1237.9)     | 89.8 (71.3 to 109.7)            | 0.0 (0.0 to 0.0)                  |
| Greece  | 2007 | 2414.4 (2335.9 to 2487.3)  | 1480.3 (1426.9 to 1535.8)  | 866.5 (820.1 to 918.1)        | 67.6 (54.7 to 82.2)             | 0.0 (0.0 to 0.0)                  | 3412.1 (3301.2 to 3515.1) | 2092.0 (2016.6 to 2170.5)  | 1224.6 (1159.0 to 1297.4)     | 95.5 (77.3 to 116.2)            | 0.0 (0.0 to 0.0)                  |
| Greece  | 2008 | 2469.0 (2393.2 to 2546.1)  | 1531.2 (1472.6 to 1586.9)  | 865.8 (818.9 to 913.3)        | 72.1 (58.7 to 87.9)             | 0.0 (0.0 to 0.0)                  | 3489.3 (3382.1 to 3598.2) | 2163.9 (2081.1 to 2242.7)  | 1223.5 (1157.3 to 1290.7)     | 101.9 (82.9 to 124.3)           | 0.0 (0.0 to 0.0)                  |
| Greece  | 2009 | 2412.0 (2335.7 to 2485.8)  | 1565.9 (1504.6 to 1624.5)  | 770.0 (726.5 to 817.6)        | 76.1 (61.8 to 92.7)             | 0.0 (0.0 to 0.0)                  | 3408.7 (3300.9 to 3513.0) | 2212.9 (2126.3 to 2295.7)  | 1088.2 (1026.8 to 1155.5)     | 107.6 (87.4 to 131.0)           | 0.0 (0.0 to 0.0)                  |
| Greece  | 2010 | 2264.5 (2188.9 to 2338.4)  | 1498.2 (1440.2 to 1558.6)  | 687.3 (646.2 to 731.9)        | 79.0 (64.7 to 96.9)             | 0.0 (0.0 to 0.0)                  | 3200.3 (3093.4 to 3304.7) | 2117.2 (2035.3 to 2202.7)  | 971.4 (913.3 to 1034.3)       | 111.7 (91.4 to 136.9)           | 0.0 (0.0 to 0.0)                  |
| Greece  | 2011 | 2009.5 (1939.0 to 2080.6)  | 1317.0 (1265.1 to 1376.1)  | 617.2 (578.2 to 662.8)        | 75.3 (61.5 to 91.2)             | 0.0 (0.0 to 0.0)                  | 2839.9 (2740.2 to 2940.3) | 1861.3 (1787.9 to 1944.8)  | 872.2 (817.1 to 936.7)        | 106.4 (87.0 to 128.8)           | 0.0 (0.0 to 0.0)                  |
| Greece  | 2012 | 1819.7 (1749.1 to 1890.2)  | 1173.8 (1121.1 to 1230.5)  | 573.5 (535.3 to 615.5)        | 72.4 (59.2 to 88.1)             | 0.0 (0.0 to 0.0)                  | 2571.7 (2471.9 to 2671.4) | 1658.9 (1584.4 to 1738.9)  | 810.5 (756.5 to 869.8)        | 102.3 (83.6 to 124.5)           | 0.0 (0.0 to 0.0)                  |
| Greece  | 2013 | 1700.9 (1633.3 to 1771.7)  | 1064.0 (1014.3 to 1119.3)  | 566.4 (529.6 to 606.0)        | 70.5 (57.3 to 85.9)             | 0.0 (0.0 to 0.0)                  | 2403.8 (2308.3 to 2503.8) | 1503.7 (1433.5 to 1581.9)  | 800.5 (748.5 to 856.4)        | 99.7 (80.9 to 121.4)            | 0.0 (0.0 to 0.0)                  |
| Greece  | 2014 | 1647.6 (1583.8 to 1710.8)  | 998.1 (945.8 to 1051.6)    | 577.4 (538.3 to 619.6)        | 72.1 (58.0 to 87.7)             | 0.0 (0.0 to 0.0)                  | 2328.4 (2238.3 to 2417.7) | 1410.5 (1336.6 to 1486.1)  | 816.0 (760.8 to 875.6)        | 101.9 (81.9 to 123.9)           | 0.0 (0.0 to 0.0)                  |
| Greece  | 2015 | 1658.8 (1581.0 to 1729.7)  | 989.4 (931.7 to 1048.5)    | 593.2 (548.4 to 639.9)        | 76.2 (58.7 to 94.7)             | 0.0 (0.0 to 0.0)                  | 2344.2 (2234.3 to 2444.5) | 1398.2 (1316.8 to 1481.7)  | 838.3 (775.0 to 904.4)        | 107.7 (82.9 to 133.9)           | 0.0 (0.0 to 0.0)                  |

| Country | Year | 2018 US Dollars per capita |                            |                               |                                 |                                   | 2018 PPP per capita       |                            |                               |                                 |                                   |
|---------|------|----------------------------|----------------------------|-------------------------------|---------------------------------|-----------------------------------|---------------------------|----------------------------|-------------------------------|---------------------------------|-----------------------------------|
|         |      | Health spending            | Government health spending | Out-of-pocket health spending | Prepaid private health spending | Development assistance for health | Health spending           | Government health spending | Out-of-pocket health spending | Prepaid private health spending | Development assistance for health |
| Greece  | 2016 | 1692.7 (1601.3 to 1789.7)  | 1010.0 (945.5 to 1087.3)   | 602.2 (542.8 to 664.7)        | 80.5 (58.9 to 105.0)            | 0.0 (0.0 to 0.0)                  | 2392.2 (2263.0 to 2529.3) | 1427.4 (1336.2 to 1536.5)  | 851.0 (767.0 to 939.4)        | 113.8 (83.2 to 148.4)           | 0.0 (0.0 to 0.0)                  |
| Greece  | 2017 | 1704.2 (1606.2 to 1809.5)  | 1016.3 (950.5 to 1095.0)   | 606.6 (547.2 to 670.6)        | 81.3 (59.5 to 105.8)            | 0.0 (0.0 to 0.0)                  | 2408.4 (2270.0 to 2557.3) | 1436.2 (1343.3 to 1547.4)  | 857.3 (773.4 to 947.7)        | 114.9 (84.2 to 149.5)           | 0.0 (0.0 to 0.0)                  |
| Greece  | 2018 | 1714.0 (1620.6 to 1814.6)  | 1024.5 (957.2 to 1105.0)   | 607.3 (547.8 to 671.0)        | 82.2 (60.0 to 107.1)            | 0.0 (0.0 to 0.0)                  | 2422.3 (2290.3 to 2564.4) | 1447.9 (1352.7 to 1561.6)  | 858.3 (774.2 to 948.3)        | 116.1 (84.7 to 151.4)           | 0.0 (0.0 to 0.0)                  |
| Greece  | 2019 | 1720.8 (1623.1 to 1829.1)  | 1030.8 (961.4 to 1110.9)   | 607.2 (547.4 to 671.0)        | 82.7 (60.4 to 107.9)            | 0.0 (0.0 to 0.0)                  | 2431.8 (2293.8 to 2584.9) | 1456.8 (1358.7 to 1570.0)  | 858.1 (773.7 to 948.3)        | 116.9 (85.3 to 152.5)           | 0.0 (0.0 to 0.0)                  |
| Greece  | 2020 | 1728.3 (1632.5 to 1830.5)  | 1037.8 (967.3 to 1117.6)   | 607.0 (547.9 to 670.1)        | 83.4 (60.8 to 109.1)            | 0.0 (0.0 to 0.0)                  | 2442.4 (2307.2 to 2586.9) | 1466.7 (1367.0 to 1579.4)  | 857.9 (774.3 to 947.0)        | 117.8 (86.0 to 154.2)           | 0.0 (0.0 to 0.0)                  |
| Greece  | 2021 | 1735.2 (1635.3 to 1846.7)  | 1044.9 (974.2 to 1128.2)   | 606.3 (547.5 to 669.5)        | 84.0 (61.3 to 109.9)            | 0.0 (0.0 to 0.0)                  | 2452.3 (2311.1 to 2609.8) | 1476.7 (1376.8 to 1594.3)  | 856.9 (773.8 to 946.1)        | 118.7 (86.6 to 155.3)           | 0.0 (0.0 to 0.0)                  |
| Greece  | 2022 | 1744.4 (1646.6 to 1846.2)  | 1054.0 (981.0 to 1139.0)   | 605.8 (546.8 to 668.9)        | 84.6 (61.7 to 110.7)            | 0.0 (0.0 to 0.0)                  | 2465.3 (2327.1 to 2609.1) | 1489.5 (1386.4 to 1609.7)  | 856.1 (772.8 to 945.3)        | 119.6 (87.2 to 156.4)           | 0.0 (0.0 to 0.0)                  |
| Greece  | 2023 | 1752.3 (1650.5 to 1863.8)  | 1062.0 (987.9 to 1145.5)   | 605.1 (542.9 to 667.1)        | 85.3 (62.1 to 111.5)            | 0.0 (0.0 to 0.0)                  | 2476.4 (2332.6 to 2633.9) | 1500.8 (1396.2 to 1618.8)  | 855.1 (767.3 to 942.7)        | 120.5 (87.8 to 157.5)           | 0.0 (0.0 to 0.0)                  |
| Greece  | 2024 | 1760.5 (1661.1 to 1862.4)  | 1070.1 (995.4 to 1154.2)   | 604.5 (544.3 to 666.2)        | 85.9 (62.5 to 112.3)            | 0.0 (0.0 to 0.0)                  | 2488.0 (2347.5 to 2632.0) | 1512.4 (1406.8 to 1631.1)  | 854.2 (769.3 to 941.5)        | 121.5 (88.3 to 158.7)           | 0.0 (0.0 to 0.0)                  |
| Greece  | 2025 | 1772.6 (1668.1 to 1886.7)  | 1080.7 (1003.7 to 1167.6)  | 605.2 (545.0 to 668.0)        | 86.8 (63.1 to 113.5)            | 0.0 (0.0 to 0.0)                  | 2505.1 (2357.4 to 2666.3) | 1527.2 (1418.5 to 1650.1)  | 855.2 (770.3 to 944.0)        | 122.7 (89.2 to 160.4)           | 0.0 (0.0 to 0.0)                  |
| Greece  | 2026 | 1783.2 (1682.3 to 1894.8)  | 1090.3 (1008.8 to 1181.0)  | 605.3 (544.2 to 667.7)        | 87.6 (63.6 to 114.4)            | 0.0 (0.0 to 0.0)                  | 2520.1 (2377.5 to 2677.8) | 1540.8 (1425.7 to 1669.1)  | 855.4 (769.1 to 943.6)        | 123.8 (89.9 to 161.7)           | 0.0 (0.0 to 0.0)                  |
| Greece  | 2027 | 1796.3 (1687.9 to 1914.8)  | 1101.5 (1019.4 to 1195.2)  | 606.2 (545.0 to 668.2)        | 88.5 (64.3 to 115.6)            | 0.0 (0.0 to 0.0)                  | 2538.5 (2385.4 to 2706.0) | 1556.7 (1440.7 to 1689.0)  | 856.7 (770.2 to 944.3)        | 125.1 (90.9 to 163.4)           | 0.0 (0.0 to 0.0)                  |
| Greece  | 2028 | 1808.6 (1704.0 to 1929.6)  | 1112.4 (1027.8 to 1210.8)  | 606.8 (544.9 to 669.5)        | 89.4 (64.9 to 116.5)            | 0.0 (0.0 to 0.0)                  | 2555.9 (2408.1 to 2727.0) | 1572.1 (1452.5 to 1711.2)  | 857.5 (770.1 to 946.2)        | 126.3 (91.7 to 164.6)           | 0.0 (0.0 to 0.0)                  |
| Greece  | 2029 | 1821.4 (1709.5 to 1943.4)  | 1123.7 (1035.5 to 1226.6)  | 607.5 (544.6 to 672.3)        | 90.3 (65.5 to 117.5)            | 0.0 (0.0 to 0.0)                  | 2574.0 (2415.9 to 2746.5) | 1588.0 (1463.4 to 1733.5)  | 858.5 (769.6 to 950.1)        | 127.6 (92.6 to 166.1)           | 0.0 (0.0 to 0.0)                  |
| Greece  | 2030 | 1832.7 (1723.8 to 1954.1)  | 1134.2 (1043.5 to 1240.6)  | 607.5 (542.4 to 675.0)        | 91.1 (66.1 to 118.5)            | 0.0 (0.0 to 0.0)                  | 2590.1 (2436.1 to 2761.7) | 1602.8 (1474.6 to 1753.3)  | 858.5 (766.6 to 953.9)        | 128.7 (93.4 to 167.5)           | 0.0 (0.0 to 0.0)                  |
| Greece  | 2031 | 1841.7 (1722.3 to 1975.8)  | 1143.3 (1049.1 to 1257.1)  | 606.7 (539.5 to 675.8)        | 91.7 (66.5 to 119.4)            | 0.0 (0.0 to 0.0)                  | 2602.8 (2434.0 to 2792.2) | 1615.8 (1482.6 to 1776.6)  | 857.4 (762.5 to 955.0)        | 129.6 (94.0 to 168.7)           | 0.0 (0.0 to 0.0)                  |
| Greece  | 2032 | 1850.6 (1732.6 to 1982.0)  | 1152.5 (1054.0 to 1270.5)  | 605.7 (536.4 to 675.3)        | 92.4 (67.0 to 120.3)            | 0.0 (0.0 to 0.0)                  | 2615.3 (2448.6 to 2801.0) | 1628.7 (1489.5 to 1795.5)  | 856.0 (758.0 to 954.4)        | 130.5 (94.7 to 170.0)           | 0.0 (0.0 to 0.0)                  |
| Greece  | 2033 | 1856.7 (1728.2 to 2001.7)  | 1160.0 (1058.7 to 1285.8)  | 603.8 (530.7 to 675.0)        | 92.9 (67.4 to 121.3)            | 0.0 (0.0 to 0.0)                  | 2624.0 (2442.3 to 2828.9) | 1639.4 (1496.2 to 1817.1)  | 853.4 (750.0 to 954.0)        | 131.2 (95.2 to 171.4)           | 0.0 (0.0 to 0.0)                  |
| Greece  | 2034 | 1863.4 (1738.0 to 2013.6)  | 1167.9 (1060.3 to 1297.8)  | 602.1 (527.8 to 674.8)        | 93.4 (67.7 to 122.3)            | 0.0 (0.0 to 0.0)                  | 2633.4 (2456.2 to 2845.7) | 1650.6 (1498.5 to 1834.2)  | 850.9 (745.9 to 953.6)        | 132.0 (95.7 to 172.9)           | 0.0 (0.0 to 0.0)                  |
| Greece  | 2035 | 1868.1 (1732.8 to 2016.6)  | 1174.6 (1064.6 to 1310.0)  | 599.7 (525.1 to 674.0)        | 93.8 (67.9 to 122.6)            | 0.0 (0.0 to 0.0)                  | 2640.1 (2448.8 to 2849.9) | 1659.9 (1504.6 to 1851.4)  | 847.6 (742.1 to 952.5)        | 132.6 (96.0 to 173.3)           | 0.0 (0.0 to 0.0)                  |
| Greece  | 2036 | 1872.3 (1742.5 to 2032.4)  | 1180.6 (1066.4 to 1321.2)  | 597.4 (521.6 to 672.0)        | 94.3 (68.3 to 123.0)            | 0.0 (0.0 to 0.0)                  | 2646.0 (2462.6 to 2872.3) | 1668.5 (1507.1 to 1867.1)  | 844.3 (737.1 to 949.7)        | 133.3 (96.5 to 173.8)           | 0.0 (0.0 to 0.0)                  |

| Country   | Year | 2018 US Dollars per capita |                            |                               |                                 |                                   | 2018 PPP per capita       |                            |                               |                                 |                                   |
|-----------|------|----------------------------|----------------------------|-------------------------------|---------------------------------|-----------------------------------|---------------------------|----------------------------|-------------------------------|---------------------------------|-----------------------------------|
|           |      | Health spending            | Government health spending | Out-of-pocket health spending | Prepaid private health spending | Development assistance for health | Health spending           | Government health spending | Out-of-pocket health spending | Prepaid private health spending | Development assistance for health |
| Greece    | 2037 | 1874.9 (1730.5 to 2036.4)  | 1185.7 (1066.9 to 1331.0)  | 594.5 (519.2 to 669.7)        | 94.7 (68.6 to 123.5)            | 0.0 (0.0 to 0.0)                  | 2649.7 (2445.6 to 2877.9) | 1675.6 (1507.8 to 1880.9)  | 840.2 (733.8 to 946.4)        | 133.8 (96.9 to 174.6)           | 0.0 (0.0 to 0.0)                  |
| Greece    | 2038 | 1878.4 (1739.0 to 2045.5)  | 1191.3 (1068.6 to 1344.8)  | 592.0 (516.8 to 667.8)        | 95.1 (68.9 to 124.1)            | 0.0 (0.0 to 0.0)                  | 2654.7 (2457.7 to 2890.7) | 1683.6 (1510.1 to 1900.5)  | 836.7 (730.3 to 943.7)        | 134.4 (97.3 to 175.4)           | 0.0 (0.0 to 0.0)                  |
| Greece    | 2039 | 1880.8 (1726.3 to 2055.3)  | 1196.3 (1068.9 to 1357.0)  | 589.0 (513.5 to 665.3)        | 95.5 (69.2 to 124.6)            | 0.0 (0.0 to 0.0)                  | 2658.0 (2439.6 to 2904.7) | 1690.6 (1510.6 to 1917.8)  | 832.4 (725.7 to 940.2)        | 134.9 (97.9 to 176.2)           | 0.0 (0.0 to 0.0)                  |
| Greece    | 2040 | 1881.7 (1732.6 to 2068.4)  | 1200.3 (1068.5 to 1367.2)  | 585.6 (509.0 to 662.2)        | 95.7 (69.6 to 125.1)            | 0.0 (0.0 to 0.0)                  | 2659.3 (2448.6 to 2923.1) | 1696.4 (1510.1 to 1932.2)  | 827.7 (719.3 to 935.8)        | 135.3 (98.3 to 176.7)           | 0.0 (0.0 to 0.0)                  |
| Greece    | 2041 | 1883.6 (1721.5 to 2069.0)  | 1204.8 (1068.9 to 1378.4)  | 582.7 (505.6 to 659.8)        | 96.1 (70.0 to 125.6)            | 0.0 (0.0 to 0.0)                  | 2661.9 (2432.9 to 2924.0) | 1702.7 (1510.6 to 1948.0)  | 823.4 (714.5 to 932.4)        | 135.8 (98.9 to 177.5)           | 0.0 (0.0 to 0.0)                  |
| Greece    | 2042 | 1883.4 (1727.8 to 2083.3)  | 1208.0 (1067.4 to 1385.6)  | 579.0 (502.2 to 656.1)        | 96.4 (70.2 to 126.1)            | 0.0 (0.0 to 0.0)                  | 2661.7 (2441.7 to 2944.2) | 1707.2 (1508.4 to 1958.2)  | 818.3 (709.7 to 927.3)        | 136.2 (99.1 to 178.2)           | 0.0 (0.0 to 0.0)                  |
| Greece    | 2043 | 1883.5 (1712.4 to 2084.2)  | 1211.3 (1067.3 to 1394.9)  | 575.5 (498.9 to 652.4)        | 96.6 (70.4 to 126.5)            | 0.0 (0.0 to 0.0)                  | 2661.8 (2420.0 to 2945.5) | 1711.9 (1508.3 to 1971.4)  | 813.4 (705.1 to 922.0)        | 136.6 (99.5 to 178.8)           | 0.0 (0.0 to 0.0)                  |
| Greece    | 2044 | 1883.5 (1720.5 to 2091.8)  | 1214.6 (1066.7 to 1401.2)  | 572.1 (495.1 to 648.9)        | 96.9 (70.6 to 127.1)            | 0.0 (0.0 to 0.0)                  | 2661.9 (2431.5 to 2956.1) | 1716.4 (1507.5 to 1980.3)  | 808.4 (699.7 to 917.0)        | 137.0 (99.7 to 179.6)           | 0.0 (0.0 to 0.0)                  |
| Greece    | 2045 | 1884.4 (1709.8 to 2100.5)  | 1218.3 (1066.6 to 1410.6)  | 568.8 (491.7 to 645.5)        | 97.2 (70.5 to 127.6)            | 0.0 (0.0 to 0.0)                  | 2663.0 (2416.3 to 2968.5) | 1721.7 (1507.4 to 1993.5)  | 803.9 (694.8 to 912.3)        | 137.4 (99.7 to 180.4)           | 0.0 (0.0 to 0.0)                  |
| Greece    | 2046 | 1885.0 (1709.8 to 2096.0)  | 1221.6 (1066.8 to 1423.4)  | 565.8 (488.5 to 642.5)        | 97.6 (70.8 to 128.0)            | 0.0 (0.0 to 0.0)                  | 2664.0 (2416.3 to 2962.1) | 1726.4 (1507.6 to 2011.6)  | 799.6 (690.4 to 908.0)        | 138.0 (100.1 to 181.0)          | 0.0 (0.0 to 0.0)                  |
| Greece    | 2047 | 1887.7 (1707.2 to 2115.7)  | 1226.1 (1068.1 to 1435.0)  | 563.5 (486.1 to 639.8)        | 98.1 (71.3 to 128.6)            | 0.0 (0.0 to 0.0)                  | 2667.8 (2412.7 to 2989.9) | 1732.8 (1509.4 to 2027.9)  | 796.3 (687.0 to 904.1)        | 138.7 (100.7 to 181.8)          | 0.0 (0.0 to 0.0)                  |
| Greece    | 2048 | 1891.6 (1708.8 to 2106.9)  | 1231.4 (1070.2 to 1444.1)  | 561.5 (484.1 to 637.4)        | 98.7 (71.4 to 129.3)            | 0.0 (0.0 to 0.0)                  | 2673.2 (2414.9 to 2977.6) | 1740.2 (1512.4 to 2040.8)  | 793.5 (684.1 to 900.8)        | 139.5 (100.9 to 182.8)          | 0.0 (0.0 to 0.0)                  |
| Greece    | 2049 | 1896.6 (1712.4 to 2127.7)  | 1237.2 (1071.3 to 1452.6)  | 560.0 (482.8 to 635.2)        | 99.4 (71.7 to 130.4)            | 0.0 (0.0 to 0.0)                  | 2680.4 (2420.0 to 3006.9) | 1748.5 (1514.0 to 2052.8)  | 791.5 (682.3 to 897.7)        | 140.4 (101.3 to 184.2)          | 0.0 (0.0 to 0.0)                  |
| Greece    | 2050 | 1902.0 (1713.1 to 2133.9)  | 1243.2 (1073.7 to 1459.5)  | 558.8 (481.3 to 634.0)        | 100.1 (72.2 to 131.4)           | 0.0 (0.0 to 0.0)                  | 2688.0 (2421.1 to 3015.7) | 1756.9 (1517.4 to 2062.6)  | 789.7 (680.2 to 896.0)        | 141.5 (102.0 to 185.8)          | 0.0 (0.0 to 0.0)                  |
| Greenland | 1995 | 2663.0 (2099.6 to 3341.1)  | 2662.4 (2098.9 to 3340.4)  | 0.3 (0.0 to 0.3)              | 0.3 (0.0 to 0.3)                | 0.0 (0.0 to 0.0)                  | 2101.0 (1656.5 to 2635.9) | 2100.5 (1655.9 to 2635.4)  | 0.2 (0.0 to 0.3)              | 0.2 (0.0 to 0.3)                | 0.0 (0.0 to 0.0)                  |
| Greenland | 1996 | 2760.6 (2198.5 to 3474.5)  | 2760.0 (2198.2 to 3473.8)  | 0.3 (0.0 to 0.3)              | 0.3 (0.0 to 0.3)                | 0.0 (0.0 to 0.0)                  | 2178.0 (1734.5 to 2741.2) | 2177.5 (1734.3 to 2740.7)  | 0.2 (0.0 to 0.3)              | 0.2 (0.0 to 0.3)                | 0.0 (0.0 to 0.0)                  |
| Greenland | 1997 | 2863.2 (2329.2 to 3554.6)  | 2862.6 (2328.5 to 3554.2)  | 0.3 (0.0 to 0.3)              | 0.3 (0.0 to 0.3)                | 0.0 (0.0 to 0.0)                  | 2258.9 (1837.6 to 2804.4) | 2258.4 (1837.1 to 2804.1)  | 0.2 (0.0 to 0.3)              | 0.2 (0.0 to 0.3)                | 0.0 (0.0 to 0.0)                  |
| Greenland | 1998 | 3095.7 (2585.5 to 3763.9)  | 3095.1 (2584.8 to 3763.2)  | 0.3 (0.0 to 0.4)              | 0.3 (0.0 to 0.4)                | 0.0 (0.0 to 0.0)                  | 2442.3 (2039.8 to 2969.5) | 2441.9 (2039.2 to 2968.9)  | 0.2 (0.0 to 0.3)              | 0.2 (0.0 to 0.3)                | 0.0 (0.0 to 0.0)                  |
| Greenland | 1999 | 3219.3 (2747.1 to 3813.7)  | 3218.7 (2746.4 to 3813.0)  | 0.3 (0.0 to 0.4)              | 0.3 (0.0 to 0.4)                | 0.0 (0.0 to 0.0)                  | 2539.8 (2167.3 to 3008.8) | 2539.4 (2166.7 to 3008.3)  | 0.2 (0.0 to 0.3)              | 0.2 (0.0 to 0.3)                | 0.0 (0.0 to 0.0)                  |
| Greenland | 2000 | 3453.4 (3039.2 to 3952.3)  | 3452.9 (3038.4 to 3951.5)  | 0.3 (0.0 to 0.4)              | 0.3 (0.0 to 0.4)                | 0.0 (0.0 to 0.0)                  | 2724.6 (2397.7 to 3118.2) | 2724.2 (2397.1 to 3117.6)  | 0.2 (0.0 to 0.3)              | 0.2 (0.0 to 0.3)                | 0.0 (0.0 to 0.0)                  |
| Greenland | 2001 | 3542.7 (3238.0 to 3901.7)  | 3542.3 (3237.3 to 3900.9)  | 0.2 (0.0 to 0.4)              | 0.2 (0.0 to 0.4)                | 0.0 (0.0 to 0.0)                  | 2795.0 (2554.6 to 3078.2) | 2794.6 (2554.0 to 3077.6)  | 0.2 (0.0 to 0.3)              | 0.2 (0.0 to 0.3)                | 0.0 (0.0 to 0.0)                  |

| Country   | Year | 2018 US Dollars per capita |                            |                               |                                 |                                   | 2018 PPP per capita       |                            |                               |                                 |                                   |
|-----------|------|----------------------------|----------------------------|-------------------------------|---------------------------------|-----------------------------------|---------------------------|----------------------------|-------------------------------|---------------------------------|-----------------------------------|
|           |      | Health spending            | Government health spending | Out-of-pocket health spending | Prepaid private health spending | Development assistance for health | Health spending           | Government health spending | Out-of-pocket health spending | Prepaid private health spending | Development assistance for health |
| Greenland | 2002 | 3556.5 (3360.0 to 3791.8)  | 3556.1 (3359.6 to 3791.6)  | 0.2 (0.0 to 0.4)              | 0.2 (0.0 to 0.4)                | 0.0 (0.0 to 0.0)                  | 2805.9 (2650.8 to 2991.5) | 2805.6 (2650.5 to 2991.3)  | 0.2 (0.0 to 0.3)              | 0.2 (0.0 to 0.3)                | 0.0 (0.0 to 0.0)                  |
| Greenland | 2003 | 3581.6 (3455.8 to 3708.3)  | 3581.2 (3455.4 to 3707.7)  | 0.2 (0.0 to 0.4)              | 0.2 (0.0 to 0.4)                | 0.0 (0.0 to 0.0)                  | 2825.7 (2726.4 to 2925.6) | 2825.4 (2726.1 to 2925.2)  | 0.2 (0.0 to 0.3)              | 0.2 (0.0 to 0.3)                | 0.0 (0.0 to 0.0)                  |
| Greenland | 2004 | 3696.8 (3604.2 to 3795.3)  | 3696.3 (3603.7 to 3794.5)  | 0.2 (0.0 to 0.4)              | 0.2 (0.0 to 0.4)                | 0.0 (0.0 to 0.0)                  | 2916.5 (2843.5 to 2994.3) | 2916.2 (2843.2 to 2993.6)  | 0.2 (0.0 to 0.3)              | 0.2 (0.0 to 0.3)                | 0.0 (0.0 to 0.0)                  |
| Greenland | 2005 | 3751.9 (3662.4 to 3846.1)  | 3751.5 (3662.4 to 3845.7)  | 0.2 (0.0 to 0.4)              | 0.2 (0.0 to 0.4)                | 0.0 (0.0 to 0.0)                  | 2960.1 (2889.5 to 3034.4) | 2959.7 (2889.5 to 3034.0)  | 0.2 (0.0 to 0.3)              | 0.2 (0.0 to 0.3)                | 0.0 (0.0 to 0.0)                  |
| Greenland | 2006 | 3978.7 (3883.1 to 4072.2)  | 3978.2 (3882.6 to 4072.2)  | 0.2 (0.0 to 0.5)              | 0.2 (0.0 to 0.5)                | 0.0 (0.0 to 0.0)                  | 3138.9 (3063.5 to 3212.7) | 3138.6 (3063.2 to 3212.7)  | 0.2 (0.0 to 0.4)              | 0.2 (0.0 to 0.4)                | 0.0 (0.0 to 0.0)                  |
| Greenland | 2007 | 4178.5 (4086.8 to 4273.5)  | 4178.1 (4086.2 to 4273.1)  | 0.2 (0.0 to 0.5)              | 0.2 (0.0 to 0.5)                | 0.0 (0.0 to 0.0)                  | 3296.6 (3224.3 to 3371.5) | 3296.3 (3223.8 to 3371.2)  | 0.2 (0.0 to 0.4)              | 0.2 (0.0 to 0.4)                | 0.0 (0.0 to 0.0)                  |
| Greenland | 2008 | 4523.9 (4427.3 to 4625.0)  | 4523.4 (4427.3 to 4624.9)  | 0.2 (0.0 to 0.5)              | 0.2 (0.0 to 0.5)                | 0.0 (0.0 to 0.0)                  | 3569.1 (3492.9 to 3648.8) | 3568.7 (3492.9 to 3648.8)  | 0.2 (0.0 to 0.4)              | 0.2 (0.0 to 0.4)                | 0.0 (0.0 to 0.0)                  |
| Greenland | 2009 | 4648.7 (4555.9 to 4743.4)  | 4648.2 (4555.4 to 4742.9)  | 0.2 (0.0 to 0.5)              | 0.2 (0.0 to 0.5)                | 0.0 (0.0 to 0.0)                  | 3667.6 (3594.3 to 3742.3) | 3667.2 (3594.0 to 3741.9)  | 0.2 (0.0 to 0.4)              | 0.2 (0.0 to 0.4)                | 0.0 (0.0 to 0.0)                  |
| Greenland | 2010 | 4737.4 (4640.9 to 4832.2)  | 4736.9 (4640.3 to 4832.2)  | 0.2 (0.0 to 0.5)              | 0.2 (0.0 to 0.5)                | 0.0 (0.0 to 0.0)                  | 3737.5 (3661.4 to 3812.4) | 3737.2 (3661.0 to 3812.3)  | 0.2 (0.0 to 0.4)              | 0.2 (0.0 to 0.4)                | 0.0 (0.0 to 0.0)                  |
| Greenland | 2011 | 4766.3 (4668.7 to 4868.2)  | 4765.8 (4667.8 to 4867.7)  | 0.2 (0.0 to 0.5)              | 0.2 (0.0 to 0.5)                | 0.0 (0.0 to 0.0)                  | 3760.4 (3683.3 to 3840.7) | 3760.0 (3682.6 to 3840.3)  | 0.2 (0.0 to 0.4)              | 0.2 (0.0 to 0.4)                | 0.0 (0.0 to 0.0)                  |
| Greenland | 2012 | 4827.4 (4723.5 to 4931.5)  | 4826.9 (4722.5 to 4931.3)  | 0.2 (0.0 to 0.5)              | 0.2 (0.0 to 0.5)                | 0.0 (0.0 to 0.0)                  | 3808.5 (3726.6 to 3890.6) | 3808.2 (3725.8 to 3890.5)  | 0.2 (0.0 to 0.4)              | 0.2 (0.0 to 0.4)                | 0.0 (0.0 to 0.0)                  |
| Greenland | 2013 | 4709.4 (4613.6 to 4808.0)  | 4708.9 (4613.5 to 4808.0)  | 0.2 (0.0 to 0.5)              | 0.2 (0.0 to 0.5)                | 0.0 (0.0 to 0.0)                  | 3715.5 (3639.9 to 3793.3) | 3715.1 (3639.8 to 3793.2)  | 0.2 (0.0 to 0.4)              | 0.2 (0.0 to 0.4)                | 0.0 (0.0 to 0.0)                  |
| Greenland | 2014 | 4569.4 (4474.0 to 4670.2)  | 4568.9 (4474.0 to 4669.9)  | 0.3 (0.0 to 0.5)              | 0.3 (0.0 to 0.5)                | 0.0 (0.0 to 0.0)                  | 3605.0 (3529.7 to 3684.5) | 3604.6 (3529.7 to 3684.3)  | 0.2 (0.0 to 0.4)              | 0.2 (0.0 to 0.4)                | 0.0 (0.0 to 0.0)                  |
| Greenland | 2015 | 4437.8 (4298.4 to 4579.1)  | 4437.3 (4297.9 to 4578.1)  | 0.3 (0.0 to 0.5)              | 0.3 (0.0 to 0.5)                | 0.0 (0.0 to 0.0)                  | 3501.2 (3391.2 to 3612.7) | 3500.8 (3390.8 to 3611.9)  | 0.2 (0.0 to 0.4)              | 0.2 (0.0 to 0.4)                | 0.0 (0.0 to 0.0)                  |
| Greenland | 2016 | 4456.8 (4203.5 to 4731.0)  | 4456.2 (4202.9 to 4730.4)  | 0.3 (0.0 to 0.6)              | 0.3 (0.0 to 0.6)                | 0.0 (0.0 to 0.0)                  | 3516.1 (3316.3 to 3732.5) | 3515.7 (3315.9 to 3732.0)  | 0.2 (0.0 to 0.4)              | 0.2 (0.0 to 0.4)                | 0.0 (0.0 to 0.0)                  |
| Greenland | 2017 | 4575.2 (4324.1 to 4867.3)  | 4574.6 (4323.4 to 4866.1)  | 0.3 (0.0 to 0.6)              | 0.3 (0.0 to 0.6)                | 0.0 (0.0 to 0.0)                  | 3609.6 (3411.5 to 3840.0) | 3609.1 (3411.0 to 3839.1)  | 0.2 (0.0 to 0.5)              | 0.2 (0.0 to 0.5)                | 0.0 (0.0 to 0.0)                  |
| Greenland | 2018 | 4680.8 (4411.3 to 4982.3)  | 4680.3 (4410.8 to 4981.7)  | 0.3 (0.0 to 0.6)              | 0.3 (0.0 to 0.6)                | 0.0 (0.0 to 0.0)                  | 3692.9 (3480.3 to 3930.8) | 3692.5 (3479.8 to 3930.3)  | 0.2 (0.0 to 0.5)              | 0.2 (0.0 to 0.5)                | 0.0 (0.0 to 0.0)                  |
| Greenland | 2019 | 4776.9 (4492.1 to 5100.4)  | 4776.3 (4491.1 to 5099.2)  | 0.3 (0.0 to 0.6)              | 0.3 (0.0 to 0.6)                | 0.0 (0.0 to 0.0)                  | 3768.7 (3544.0 to 4024.0) | 3768.2 (3543.2 to 4023.0)  | 0.2 (0.0 to 0.5)              | 0.2 (0.0 to 0.5)                | 0.0 (0.0 to 0.0)                  |
| Greenland | 2020 | 4877.1 (4583.1 to 5214.9)  | 4876.5 (4582.5 to 5214.3)  | 0.3 (0.0 to 0.6)              | 0.3 (0.0 to 0.6)                | 0.0 (0.0 to 0.0)                  | 3847.8 (3615.8 to 4114.3) | 3847.3 (3615.4 to 4113.8)  | 0.2 (0.0 to 0.5)              | 0.2 (0.0 to 0.5)                | 0.0 (0.0 to 0.0)                  |
| Greenland | 2021 | 4978.4 (4661.1 to 5329.0)  | 4977.8 (4659.9 to 5327.7)  | 0.3 (0.0 to 0.6)              | 0.3 (0.0 to 0.7)                | 0.0 (0.0 to 0.0)                  | 3927.7 (3677.4 to 4204.3) | 3927.2 (3676.4 to 4203.3)  | 0.2 (0.0 to 0.5)              | 0.3 (0.0 to 0.5)                | 0.0 (0.0 to 0.0)                  |
| Greenland | 2022 | 5087.3 (4758.7 to 5444.5)  | 5086.7 (4758.1 to 5443.8)  | 0.3 (0.0 to 0.6)              | 0.3 (0.0 to 0.7)                | 0.0 (0.0 to 0.0)                  | 4013.6 (3754.4 to 4295.4) | 4013.1 (3753.8 to 4294.8)  | 0.2 (0.0 to 0.5)              | 0.3 (0.0 to 0.5)                | 0.0 (0.0 to 0.0)                  |



| Country   | Year | 2018 US Dollars per capita |                            |                               |                                 |                                   | 2018 PPP per capita       |                            |                               |                                 |                                   |
|-----------|------|----------------------------|----------------------------|-------------------------------|---------------------------------|-----------------------------------|---------------------------|----------------------------|-------------------------------|---------------------------------|-----------------------------------|
|           |      | Health spending            | Government health spending | Out-of-pocket health spending | Prepaid private health spending | Development assistance for health | Health spending           | Government health spending | Out-of-pocket health spending | Prepaid private health spending | Development assistance for health |
| Greenland | 2023 | 5196.0 (4864.3 to 5559.4)  | 5195.4 (4863.0 to 5558.0)  | 0.3 (0.0 to 0.6)              | 0.3 (0.0 to 0.7)                | 0.0 (0.0 to 0.0)                  | 4099.4 (3837.6 to 4386.0) | 4098.9 (3836.6 to 4385.0)  | 0.2 (0.0 to 0.5)              | 0.3 (0.0 to 0.5)                | 0.0 (0.0 to 0.0)                  |
| Greenland | 2024 | 5244.6 (4907.6 to 5609.1)  | 5244.0 (4906.9 to 5608.3)  | 0.3 (0.0 to 0.6)              | 0.3 (0.0 to 0.7)                | 0.0 (0.0 to 0.0)                  | 4137.7 (3871.8 to 4425.2) | 4137.2 (3871.3 to 4424.7)  | 0.2 (0.0 to 0.5)              | 0.3 (0.0 to 0.6)                | 0.0 (0.0 to 0.0)                  |
| Greenland | 2025 | 5288.3 (4951.4 to 5656.4)  | 5287.7 (4951.3 to 5655.1)  | 0.3 (0.0 to 0.6)              | 0.4 (0.0 to 0.7)                | 0.0 (0.0 to 0.0)                  | 4172.2 (3906.3 to 4462.6) | 4171.7 (3906.3 to 4461.5)  | 0.2 (0.0 to 0.5)              | 0.3 (0.0 to 0.6)                | 0.0 (0.0 to 0.0)                  |
| Greenland | 2026 | 5325.5 (4983.6 to 5697.0)  | 5324.9 (4982.9 to 5695.8)  | 0.3 (0.0 to 0.6)              | 0.4 (0.0 to 0.7)                | 0.0 (0.0 to 0.0)                  | 4201.5 (3931.8 to 4494.6) | 4201.0 (3931.2 to 4493.7)  | 0.2 (0.0 to 0.5)              | 0.3 (0.0 to 0.6)                | 0.0 (0.0 to 0.0)                  |
| Greenland | 2027 | 5368.7 (5021.1 to 5750.4)  | 5368.0 (5019.9 to 5749.0)  | 0.3 (0.0 to 0.6)              | 0.4 (0.0 to 0.7)                | 0.0 (0.0 to 0.0)                  | 4235.6 (3961.4 to 4536.7) | 4235.0 (3960.4 to 4535.6)  | 0.2 (0.0 to 0.5)              | 0.3 (0.0 to 0.6)                | 0.0 (0.0 to 0.0)                  |
| Greenland | 2028 | 5412.6 (5058.2 to 5797.6)  | 5411.9 (5057.5 to 5796.9)  | 0.3 (0.0 to 0.6)              | 0.4 (0.0 to 0.8)                | 0.0 (0.0 to 0.0)                  | 4270.3 (3990.6 to 4574.0) | 4269.7 (3990.1 to 4573.4)  | 0.2 (0.0 to 0.5)              | 0.3 (0.0 to 0.6)                | 0.0 (0.0 to 0.0)                  |
| Greenland | 2029 | 5448.5 (5086.2 to 5844.6)  | 5447.8 (5084.9 to 5843.2)  | 0.3 (0.0 to 0.6)              | 0.4 (0.0 to 0.8)                | 0.0 (0.0 to 0.0)                  | 4298.5 (4012.7 to 4611.0) | 4298.0 (4011.7 to 4609.9)  | 0.2 (0.0 to 0.5)              | 0.3 (0.0 to 0.6)                | 0.0 (0.0 to 0.0)                  |
| Greenland | 2030 | 5485.3 (5112.6 to 5885.4)  | 5484.7 (5111.9 to 5885.0)  | 0.3 (0.0 to 0.6)              | 0.4 (0.0 to 0.8)                | 0.0 (0.0 to 0.0)                  | 4327.6 (4033.6 to 4643.3) | 4327.1 (4033.0 to 4642.9)  | 0.2 (0.0 to 0.5)              | 0.3 (0.0 to 0.6)                | 0.0 (0.0 to 0.0)                  |
| Greenland | 2031 | 5527.2 (5140.6 to 5937.9)  | 5526.5 (5139.3 to 5936.6)  | 0.3 (0.0 to 0.6)              | 0.4 (0.0 to 0.8)                | 0.0 (0.0 to 0.0)                  | 4360.6 (4055.7 to 4684.6) | 4360.1 (4054.6 to 4683.6)  | 0.2 (0.0 to 0.5)              | 0.3 (0.0 to 0.6)                | 0.0 (0.0 to 0.0)                  |
| Greenland | 2032 | 5573.7 (5178.5 to 5996.4)  | 5573.0 (5177.2 to 5996.3)  | 0.3 (0.0 to 0.6)              | 0.4 (0.0 to 0.8)                | 0.0 (0.0 to 0.0)                  | 4397.4 (4085.5 to 4730.8) | 4396.8 (4084.5 to 4730.7)  | 0.2 (0.0 to 0.5)              | 0.3 (0.0 to 0.6)                | 0.0 (0.0 to 0.0)                  |
| Greenland | 2033 | 5629.3 (5220.8 to 6070.5)  | 5628.6 (5220.0 to 6069.0)  | 0.3 (0.0 to 0.7)              | 0.4 (0.1 to 0.8)                | 0.0 (0.0 to 0.0)                  | 4441.2 (4118.9 to 4789.3) | 4440.7 (4118.3 to 4788.1)  | 0.2 (0.0 to 0.5)              | 0.3 (0.0 to 0.7)                | 0.0 (0.0 to 0.0)                  |
| Greenland | 2034 | 5702.0 (5279.9 to 6153.2)  | 5701.2 (5278.6 to 6152.3)  | 0.3 (0.0 to 0.7)              | 0.4 (0.1 to 0.9)                | 0.0 (0.0 to 0.0)                  | 4498.5 (4165.6 to 4854.5) | 4497.9 (4164.5 to 4853.8)  | 0.2 (0.0 to 0.5)              | 0.3 (0.0 to 0.7)                | 0.0 (0.0 to 0.0)                  |
| Greenland | 2035 | 5797.1 (5361.6 to 6260.0)  | 5796.3 (5360.8 to 6258.4)  | 0.3 (0.0 to 0.7)              | 0.4 (0.1 to 0.9)                | 0.0 (0.0 to 0.0)                  | 4573.6 (4230.0 to 4938.8) | 4573.0 (4229.4 to 4937.6)  | 0.2 (0.0 to 0.5)              | 0.3 (0.0 to 0.7)                | 0.0 (0.0 to 0.0)                  |
| Greenland | 2036 | 5914.3 (5463.1 to 6397.6)  | 5913.5 (5461.7 to 6396.6)  | 0.3 (0.0 to 0.7)              | 0.5 (0.1 to 0.9)                | 0.0 (0.0 to 0.0)                  | 4666.1 (4310.1 to 5047.3) | 4665.5 (4309.0 to 5046.6)  | 0.3 (0.0 to 0.5)              | 0.4 (0.0 to 0.7)                | 0.0 (0.0 to 0.0)                  |
| Greenland | 2037 | 6042.9 (5572.2 to 6540.8)  | 6042.1 (5570.8 to 6539.7)  | 0.3 (0.0 to 0.7)              | 0.5 (0.1 to 0.9)                | 0.0 (0.0 to 0.0)                  | 4767.5 (4396.2 to 5160.3) | 4766.9 (4395.0 to 5159.5)  | 0.3 (0.0 to 0.5)              | 0.4 (0.1 to 0.7)                | 0.0 (0.0 to 0.0)                  |
| Greenland | 2038 | 6182.5 (5690.6 to 6695.9)  | 6181.7 (5689.7 to 6694.9)  | 0.3 (0.0 to 0.7)              | 0.5 (0.1 to 1.0)                | 0.0 (0.0 to 0.0)                  | 4877.7 (4489.6 to 5282.7) | 4877.0 (4488.9 to 5281.9)  | 0.3 (0.0 to 0.6)              | 0.4 (0.1 to 0.8)                | 0.0 (0.0 to 0.0)                  |
| Greenland | 2039 | 6337.3 (5825.5 to 6871.2)  | 6336.5 (5824.8 to 6869.4)  | 0.3 (0.0 to 0.7)              | 0.5 (0.1 to 1.0)                | 0.0 (0.0 to 0.0)                  | 4999.8 (4596.0 to 5421.0) | 4999.1 (4595.4 to 5419.6)  | 0.3 (0.0 to 0.6)              | 0.4 (0.1 to 0.8)                | 0.0 (0.0 to 0.0)                  |
| Greenland | 2040 | 6487.2 (5949.8 to 7043.7)  | 6486.3 (5948.9 to 7043.5)  | 0.3 (0.0 to 0.7)              | 0.5 (0.1 to 1.0)                | 0.0 (0.0 to 0.0)                  | 5118.0 (4694.1 to 5557.1) | 5117.3 (4693.4 to 5556.9)  | 0.3 (0.0 to 0.6)              | 0.4 (0.1 to 0.8)                | 0.0 (0.0 to 0.0)                  |
| Greenland | 2041 | 6629.4 (6068.0 to 7211.0)  | 6628.5 (6066.5 to 7209.1)  | 0.3 (0.0 to 0.7)              | 0.5 (0.1 to 1.1)                | 0.0 (0.0 to 0.0)                  | 5230.2 (4787.3 to 5689.1) | 5229.5 (4786.1 to 5687.6)  | 0.3 (0.0 to 0.6)              | 0.4 (0.1 to 0.9)                | 0.0 (0.0 to 0.0)                  |
| Greenland | 2042 | 6778.7 (6196.2 to 7387.7)  | 6777.8 (6195.3 to 7387.5)  | 0.4 (0.0 to 0.8)              | 0.6 (0.1 to 1.1)                | 0.0 (0.0 to 0.0)                  | 5348.0 (4888.5 to 5828.5) | 5347.3 (4887.7 to 5828.3)  | 0.3 (0.0 to 0.6)              | 0.4 (0.1 to 0.9)                | 0.0 (0.0 to 0.0)                  |
| Greenland | 2043 | 6936.6 (6329.7 to 7588.6)  | 6935.7 (6328.9 to 7587.6)  | 0.4 (0.0 to 0.8)              | 0.6 (0.1 to 1.2)                | 0.0 (0.0 to 0.0)                  | 5472.6 (4993.8 to 5986.9) | 5471.9 (4993.1 to 5986.2)  | 0.3 (0.0 to 0.6)              | 0.5 (0.1 to 0.9)                | 0.0 (0.0 to 0.0)                  |

| Country   | Year | 2018 US Dollars per capita |                            |                               |                                 |                                   | 2018 PPP per capita       |                            |                               |                                 |                                   |
|-----------|------|----------------------------|----------------------------|-------------------------------|---------------------------------|-----------------------------------|---------------------------|----------------------------|-------------------------------|---------------------------------|-----------------------------------|
|           |      | Health spending            | Government health spending | Out-of-pocket health spending | Prepaid private health spending | Development assistance for health | Health spending           | Government health spending | Out-of-pocket health spending | Prepaid private health spending | Development assistance for health |
| Greenland | 2044 | 7104.2 (6477.4 to 7782.1)  | 7103.2 (6475.7 to 7781.1)  | 0.4 (0.0 to 0.8)              | 0.6 (0.1 to 1.2)                | 0.0 (0.0 to 0.0)                  | 5604.8 (5110.3 to 6139.7) | 5604.1 (5108.9 to 6138.9)  | 0.3 (0.0 to 0.6)              | 0.5 (0.1 to 0.9)                | 0.0 (0.0 to 0.0)                  |
| Greenland | 2045 | 7262.3 (6606.8 to 7978.5)  | 7261.3 (6605.7 to 7976.4)  | 0.4 (0.0 to 0.8)              | 0.6 (0.1 to 1.2)                | 0.0 (0.0 to 0.0)                  | 5729.5 (5212.4 to 6294.6) | 5728.7 (5211.6 to 6292.9)  | 0.3 (0.0 to 0.6)              | 0.5 (0.1 to 1.0)                | 0.0 (0.0 to 0.0)                  |
| Greenland | 2046 | 7417.4 (6733.1 to 8170.9)  | 7416.4 (6731.3 to 8170.6)  | 0.4 (0.0 to 0.8)              | 0.6 (0.1 to 1.3)                | 0.0 (0.0 to 0.0)                  | 5851.9 (5312.0 to 6446.4) | 5851.1 (5310.6 to 6446.2)  | 0.3 (0.0 to 0.6)              | 0.5 (0.1 to 1.0)                | 0.0 (0.0 to 0.0)                  |
| Greenland | 2047 | 7571.2 (6854.9 to 8364.8)  | 7570.2 (6853.8 to 8363.4)  | 0.4 (0.0 to 0.8)              | 0.7 (0.1 to 1.3)                | 0.0 (0.0 to 0.0)                  | 5973.3 (5408.2 to 6599.3) | 5972.4 (5407.3 to 6598.3)  | 0.3 (0.0 to 0.7)              | 0.5 (0.1 to 1.0)                | 0.0 (0.0 to 0.0)                  |
| Greenland | 2048 | 7734.9 (6991.1 to 8550.9)  | 7733.9 (6990.9 to 8548.9)  | 0.4 (0.0 to 0.8)              | 0.7 (0.1 to 1.4)                | 0.0 (0.0 to 0.0)                  | 6102.4 (5515.6 to 6746.2) | 6101.6 (5515.4 to 6744.6)  | 0.3 (0.0 to 0.7)              | 0.5 (0.1 to 1.1)                | 0.0 (0.0 to 0.0)                  |
| Greenland | 2049 | 7894.6 (7121.3 to 8740.3)  | 7893.5 (7120.1 to 8738.9)  | 0.4 (0.0 to 0.9)              | 0.7 (0.1 to 1.4)                | 0.0 (0.0 to 0.0)                  | 6228.4 (5618.3 to 6895.6) | 6227.5 (5617.3 to 6894.5)  | 0.3 (0.0 to 0.7)              | 0.5 (0.1 to 1.1)                | 0.0 (0.0 to 0.0)                  |
| Greenland | 2050 | 8046.6 (7244.4 to 8937.9)  | 8045.5 (7244.2 to 8935.6)  | 0.4 (0.0 to 0.9)              | 0.7 (0.1 to 1.5)                | 0.0 (0.0 to 0.0)                  | 6348.3 (5715.4 to 7051.5) | 6347.4 (5715.3 to 7049.7)  | 0.3 (0.0 to 0.7)              | 0.6 (0.1 to 1.1)                | 0.0 (0.0 to 0.0)                  |
| Grenada   | 1995 | 431.7 (392.4 to 474.0)     | 225.0 (196.3 to 257.9)     | 206.7 (178.9 to 239.4)        | 0.0 (0.0 to 0.1)                | 0.0 (0.0 to 0.0)                  | 642.7 (584.2 to 705.8)    | 334.9 (292.3 to 384.0)     | 307.7 (266.3 to 356.4)        | 0.0 (0.0 to 0.1)                | 0.0 (0.0 to 0.0)                  |
| Grenada   | 1996 | 443.0 (408.9 to 480.7)     | 224.5 (198.9 to 253.8)     | 218.1 (193.1 to 246.8)        | 0.0 (0.0 to 0.1)                | 0.4 (0.4 to 0.4)                  | 659.6 (608.7 to 715.7)    | 334.3 (296.1 to 377.8)     | 324.8 (287.6 to 367.5)        | 0.0 (0.0 to 0.1)                | 0.5 (0.5 to 0.5)                  |
| Grenada   | 1997 | 448.1 (417.8 to 482.6)     | 213.1 (190.4 to 238.4)     | 230.5 (206.0 to 257.6)        | 0.0 (0.0 to 0.1)                | 4.5 (4.5 to 4.5)                  | 667.2 (622.0 to 718.6)    | 317.3 (283.4 to 354.9)     | 343.2 (306.7 to 383.5)        | 0.0 (0.0 to 0.1)                | 6.7 (6.7 to 6.7)                  |
| Grenada   | 1998 | 454.9 (423.6 to 491.6)     | 204.2 (182.9 to 227.9)     | 247.1 (222.2 to 272.6)        | 0.0 (0.0 to 0.1)                | 3.6 (3.6 to 3.6)                  | 677.3 (630.7 to 731.9)    | 304.1 (272.4 to 339.4)     | 367.9 (330.8 to 405.9)        | 0.0 (0.0 to 0.1)                | 5.3 (5.3 to 5.3)                  |
| Grenada   | 1999 | 432.0 (400.1 to 466.0)     | 183.9 (163.4 to 206.0)     | 247.9 (224.8 to 273.6)        | 0.0 (0.0 to 0.1)                | 0.2 (0.2 to 0.2)                  | 643.3 (595.7 to 693.9)    | 273.8 (243.3 to 306.6)     | 369.1 (334.6 to 407.3)        | 0.0 (0.0 to 0.1)                | 0.3 (0.3 to 0.3)                  |
| Grenada   | 2000 | 394.7 (366.1 to 424.8)     | 161.8 (144.4 to 181.1)     | 232.8 (211.3 to 257.3)        | 0.0 (0.0 to 0.1)                | 0.2 (0.2 to 0.2)                  | 587.7 (545.1 to 632.4)    | 240.8 (215.0 to 269.6)     | 346.6 (314.6 to 383.1)        | 0.1 (0.0 to 0.1)                | 0.2 (0.2 to 0.2)                  |
| Grenada   | 2001 | 375.9 (348.9 to 404.0)     | 155.9 (139.6 to 174.4)     | 219.7 (198.6 to 242.6)        | 0.0 (0.0 to 0.1)                | 0.3 (0.3 to 0.3)                  | 559.7 (519.5 to 601.5)    | 232.1 (207.8 to 259.6)     | 327.1 (295.7 to 361.2)        | 0.1 (0.0 to 0.1)                | 0.4 (0.4 to 0.4)                  |
| Grenada   | 2002 | 382.6 (355.3 to 410.2)     | 166.2 (148.7 to 184.9)     | 216.0 (194.5 to 238.6)        | 0.0 (0.0 to 0.1)                | 0.3 (0.3 to 0.3)                  | 569.7 (529.1 to 610.8)    | 247.5 (221.3 to 275.2)     | 321.6 (289.6 to 355.2)        | 0.1 (0.0 to 0.1)                | 0.5 (0.5 to 0.5)                  |
| Grenada   | 2003 | 398.4 (369.4 to 427.3)     | 181.4 (161.8 to 202.2)     | 213.1 (191.5 to 235.5)        | 0.0 (0.0 to 0.1)                | 3.8 (3.8 to 3.8)                  | 593.1 (550.0 to 636.3)    | 270.0 (240.9 to 301.1)     | 317.3 (285.1 to 350.7)        | 0.1 (0.0 to 0.1)                | 5.7 (5.7 to 5.7)                  |
| Grenada   | 2004 | 399.4 (369.5 to 430.4)     | 189.9 (169.2 to 211.9)     | 204.2 (183.2 to 226.4)        | 0.0 (0.0 to 0.1)                | 5.2 (5.2 to 5.2)                  | 594.6 (550.1 to 640.8)    | 282.8 (251.9 to 315.4)     | 304.0 (272.8 to 337.0)        | 0.1 (0.0 to 0.1)                | 7.8 (7.8 to 7.8)                  |
| Grenada   | 2005 | 441.9 (408.9 to 476.0)     | 220.0 (197.3 to 244.4)     | 217.7 (196.7 to 241.7)        | 0.0 (0.0 to 0.1)                | 4.1 (4.1 to 4.1)                  | 657.9 (608.8 to 708.8)    | 327.5 (293.7 to 363.9)     | 324.2 (292.9 to 359.9)        | 0.1 (0.0 to 0.1)                | 6.1 (6.1 to 6.1)                  |
| Grenada   | 2006 | 450.8 (417.4 to 484.3)     | 220.3 (196.9 to 244.1)     | 222.1 (201.5 to 243.7)        | 0.0 (0.0 to 0.1)                | 8.3 (8.3 to 8.3)                  | 671.2 (621.5 to 721.1)    | 328.0 (293.1 to 363.5)     | 330.8 (300.0 to 362.9)        | 0.1 (0.0 to 0.1)                | 12.4 (12.4 to 12.4)               |
| Grenada   | 2007 | 476.5 (442.1 to 512.5)     | 228.1 (204.5 to 253.2)     | 239.0 (216.6 to 264.1)        | 0.0 (0.0 to 0.1)                | 9.3 (9.3 to 9.3)                  | 709.4 (658.3 to 763.1)    | 339.7 (304.4 to 376.9)     | 355.8 (322.6 to 393.3)        | 0.1 (0.0 to 0.1)                | 13.8 (13.8 to 13.8)               |
| Grenada   | 2008 | 487.3 (453.4 to 522.8)     | 227.4 (204.5 to 251.8)     | 250.0 (228.1 to 276.3)        | 0.0 (0.0 to 0.1)                | 9.8 (9.8 to 9.8)                  | 725.5 (675.0 to 778.3)    | 338.5 (304.5 to 374.9)     | 372.2 (339.6 to 411.3)        | 0.1 (0.0 to 0.1)                | 14.6 (14.6 to 14.6)               |

| Country | Year | 2018 US Dollars per capita |                            |                               |                                 |                                   | 2018 PPP per capita     |                            |                               |                                 |                                   |
|---------|------|----------------------------|----------------------------|-------------------------------|---------------------------------|-----------------------------------|-------------------------|----------------------------|-------------------------------|---------------------------------|-----------------------------------|
|         |      | Health spending            | Government health spending | Out-of-pocket health spending | Prepaid private health spending | Development assistance for health | Health spending         | Government health spending | Out-of-pocket health spending | Prepaid private health spending | Development assistance for health |
| Grenada | 2009 | 479.0 (447.0 to 514.5)     | 218.8 (197.0 to 243.3)     | 250.3 (228.6 to 276.2)        | 0.0 (0.0 to 0.1)                | 9.9 (9.9 to 9.9)                  | 713.2 (665.5 to 766.1)  | 325.7 (293.3 to 362.2)     | 372.7 (340.4 to 411.3)        | 0.1 (0.0 to 0.1)                | 14.8 (14.8 to 14.8)               |
| Grenada | 2010 | 474.9 (442.0 to 510.4)     | 215.1 (194.0 to 239.6)     | 254.6 (231.2 to 279.8)        | 0.0 (0.0 to 0.1)                | 5.1 (5.1 to 5.1)                  | 707.1 (658.1 to 760.0)  | 320.2 (288.9 to 356.8)     | 379.1 (344.3 to 416.7)        | 0.1 (0.0 to 0.1)                | 7.6 (7.6 to 7.6)                  |
| Grenada | 2011 | 472.7 (439.3 to 509.2)     | 208.6 (186.3 to 232.3)     | 256.9 (233.6 to 283.1)        | 0.0 (0.0 to 0.1)                | 7.2 (7.2 to 7.2)                  | 703.9 (654.1 to 758.2)  | 310.5 (277.4 to 345.9)     | 382.5 (347.9 to 421.5)        | 0.1 (0.0 to 0.1)                | 10.7 (10.7 to 10.7)               |
| Grenada | 2012 | 457.8 (425.1 to 490.8)     | 193.8 (172.9 to 216.4)     | 255.0 (231.0 to 281.4)        | 0.0 (0.0 to 0.1)                | 8.9 (8.9 to 8.9)                  | 681.6 (632.9 to 730.8)  | 288.6 (257.5 to 322.2)     | 379.6 (344.0 to 419.0)        | 0.1 (0.0 to 0.1)                | 13.3 (13.3 to 13.3)               |
| Grenada | 2013 | 452.0 (418.7 to 484.7)     | 186.1 (165.0 to 207.8)     | 257.8 (232.2 to 284.1)        | 0.0 (0.0 to 0.1)                | 8.1 (8.1 to 8.1)                  | 673.0 (623.4 to 721.7)  | 277.1 (245.6 to 309.4)     | 383.8 (345.8 to 423.0)        | 0.1 (0.0 to 0.1)                | 12.0 (12.0 to 12.0)               |
| Grenada | 2014 | 451.8 (415.8 to 488.4)     | 185.4 (163.9 to 207.8)     | 263.5 (237.7 to 293.0)        | 0.0 (0.0 to 0.1)                | 2.8 (2.8 to 2.8)                  | 672.6 (619.1 to 727.2)  | 276.0 (244.0 to 309.5)     | 392.3 (353.8 to 436.2)        | 0.1 (0.0 to 0.1)                | 4.2 (4.2 to 4.2)                  |
| Grenada | 2015 | 466.7 (427.8 to 506.1)     | 188.9 (165.6 to 214.5)     | 270.8 (243.8 to 303.1)        | 0.0 (0.0 to 0.1)                | 7.0 (7.0 to 7.0)                  | 694.9 (636.9 to 753.6)  | 281.3 (246.6 to 319.4)     | 403.1 (363.0 to 451.3)        | 0.1 (0.0 to 0.1)                | 10.4 (10.4 to 10.4)               |
| Grenada | 2016 | 485.8 (437.8 to 535.5)     | 198.8 (170.6 to 229.6)     | 284.6 (249.9 to 323.1)        | 0.0 (0.0 to 0.1)                | 2.4 (2.4 to 2.4)                  | 723.3 (651.8 to 797.4)  | 296.0 (254.0 to 341.9)     | 423.7 (372.1 to 481.0)        | 0.1 (0.0 to 0.1)                | 3.5 (3.5 to 3.5)                  |
| Grenada | 2017 | 507.9 (459.6 to 559.0)     | 194.9 (167.2 to 225.7)     | 294.2 (258.2 to 335.0)        | 0.0 (0.0 to 0.1)                | 18.7 (18.7 to 18.7)               | 756.2 (684.3 to 832.4)  | 290.2 (248.9 to 336.0)     | 438.1 (384.4 to 498.8)        | 0.1 (0.0 to 0.1)                | 27.8 (27.8 to 27.8)               |
| Grenada | 2018 | 517.8 (470.9 to 569.3)     | 199.8 (171.4 to 231.6)     | 300.2 (263.8 to 343.0)        | 0.0 (0.0 to 0.1)                | 17.7 (17.7 to 17.7)               | 771.0 (701.1 to 847.6)  | 297.6 (255.2 to 344.8)     | 447.0 (392.8 to 510.7)        | 0.1 (0.0 to 0.2)                | 26.3 (26.3 to 26.4)               |
| Grenada | 2019 | 527.5 (479.9 to 580.0)     | 203.8 (174.7 to 236.1)     | 305.8 (267.9 to 348.0)        | 0.0 (0.0 to 0.1)                | 17.9 (16.7 to 19.0)               | 785.5 (714.5 to 863.5)  | 303.4 (260.1 to 351.6)     | 455.3 (398.8 to 518.2)        | 0.1 (0.0 to 0.2)                | 26.7 (24.9 to 28.2)               |
| Grenada | 2020 | 537.1 (487.6 to 590.5)     | 207.6 (177.9 to 240.4)     | 311.2 (271.9 to 354.1)        | 0.1 (0.0 to 0.1)                | 18.3 (16.8 to 19.8)               | 799.8 (725.9 to 879.2)  | 309.1 (264.9 to 357.9)     | 463.3 (404.8 to 527.2)        | 0.1 (0.0 to 0.2)                | 27.3 (25.0 to 29.5)               |
| Grenada | 2021 | 547.1 (496.6 to 602.3)     | 211.7 (181.4 to 245.4)     | 316.6 (276.6 to 361.2)        | 0.1 (0.0 to 0.1)                | 18.8 (16.9 to 20.7)               | 814.6 (739.4 to 896.7)  | 315.2 (270.1 to 365.3)     | 471.4 (411.8 to 537.7)        | 0.1 (0.0 to 0.2)                | 27.9 (25.1 to 30.9)               |
| Grenada | 2022 | 556.9 (505.0 to 611.6)     | 215.7 (185.4 to 250.4)     | 321.9 (280.2 to 366.8)        | 0.1 (0.0 to 0.1)                | 19.3 (17.1 to 21.7)               | 829.2 (751.9 to 910.6)  | 321.1 (276.0 to 372.9)     | 479.3 (417.1 to 546.2)        | 0.1 (0.0 to 0.2)                | 28.7 (25.4 to 32.2)               |
| Grenada | 2023 | 567.3 (514.2 to 621.9)     | 220.4 (189.5 to 256.8)     | 327.0 (284.4 to 374.8)        | 0.1 (0.0 to 0.1)                | 19.9 (17.2 to 22.7)               | 844.7 (765.6 to 926.0)  | 328.1 (282.1 to 382.3)     | 486.9 (423.5 to 558.1)        | 0.1 (0.0 to 0.2)                | 29.6 (25.6 to 33.7)               |
| Grenada | 2024 | 577.3 (522.6 to 635.1)     | 225.0 (192.5 to 262.0)     | 331.8 (288.3 to 381.2)        | 0.1 (0.0 to 0.1)                | 20.5 (17.6 to 23.7)               | 859.6 (778.1 to 945.6)  | 335.0 (286.7 to 390.1)     | 494.0 (429.3 to 567.5)        | 0.1 (0.0 to 0.2)                | 30.5 (26.3 to 35.3)               |
| Grenada | 2025 | 586.9 (527.5 to 644.9)     | 229.3 (196.8 to 266.1)     | 336.3 (290.9 to 385.8)        | 0.1 (0.0 to 0.1)                | 21.2 (18.0 to 24.8)               | 873.8 (785.3 to 960.2)  | 341.4 (293.0 to 396.2)     | 500.8 (433.1 to 574.4)        | 0.1 (0.0 to 0.2)                | 31.5 (26.8 to 37.0)               |
| Grenada | 2026 | 597.4 (538.2 to 658.5)     | 234.3 (200.9 to 271.4)     | 341.1 (293.5 to 390.4)        | 0.1 (0.0 to 0.1)                | 21.8 (18.4 to 25.6)               | 889.4 (801.4 to 980.4)  | 348.9 (299.1 to 404.1)     | 507.9 (437.0 to 581.3)        | 0.1 (0.0 to 0.2)                | 32.5 (27.4 to 38.2)               |
| Grenada | 2027 | 608.0 (545.5 to 673.2)     | 239.5 (204.0 to 278.8)     | 345.9 (295.4 to 398.0)        | 0.1 (0.0 to 0.1)                | 22.5 (18.8 to 26.8)               | 905.2 (812.3 to 1002.3) | 356.6 (303.7 to 415.1)     | 515.0 (439.8 to 592.6)        | 0.1 (0.0 to 0.2)                | 33.6 (28.0 to 39.9)               |
| Grenada | 2028 | 619.3 (551.2 to 686.0)     | 245.2 (208.8 to 285.1)     | 350.8 (297.1 to 406.3)        | 0.1 (0.0 to 0.1)                | 23.3 (19.5 to 28.2)               | 922.1 (820.7 to 1021.5) | 365.1 (310.8 to 424.4)     | 522.3 (442.4 to 604.9)        | 0.1 (0.0 to 0.2)                | 34.7 (29.0 to 42.0)               |
| Grenada | 2029 | 630.3 (560.9 to 702.1)     | 250.4 (212.7 to 291.4)     | 355.8 (298.1 to 413.3)        | 0.1 (0.0 to 0.1)                | 24.1 (19.8 to 29.5)               | 938.5 (835.1 to 1045.4) | 372.8 (316.6 to 433.8)     | 529.7 (443.9 to 615.4)        | 0.1 (0.0 to 0.2)                | 35.9 (29.5 to 43.9)               |

| Country | Year | 2018 US Dollars per capita |                            |                               |                                 |                                   | 2018 PPP per capita       |                            |                               |                                 |                                   |
|---------|------|----------------------------|----------------------------|-------------------------------|---------------------------------|-----------------------------------|---------------------------|----------------------------|-------------------------------|---------------------------------|-----------------------------------|
|         |      | Health spending            | Government health spending | Out-of-pocket health spending | Prepaid private health spending | Development assistance for health | Health spending           | Government health spending | Out-of-pocket health spending | Prepaid private health spending | Development assistance for health |
| Grenada | 2030 | 641.4 (568.0 to 715.2)     | 255.3 (217.4 to 298.3)     | 361.2 (300.9 to 421.9)        | 0.1 (0.0 to 0.1)                | 24.9 (20.3 to 30.6)               | 955.0 (845.8 to 1064.9)   | 380.1 (323.8 to 444.2)     | 537.7 (448.0 to 628.1)        | 0.1 (0.0 to 0.2)                | 37.1 (30.3 to 45.5)               |
| Grenada | 2031 | 653.1 (575.4 to 730.9)     | 260.3 (221.5 to 304.5)     | 367.1 (302.6 to 430.7)        | 0.1 (0.0 to 0.1)                | 25.7 (20.8 to 32.3)               | 972.4 (856.7 to 1088.2)   | 387.5 (329.7 to 453.4)     | 546.5 (450.6 to 641.2)        | 0.1 (0.0 to 0.2)                | 38.2 (31.0 to 48.0)               |
| Grenada | 2032 | 664.7 (582.2 to 742.5)     | 265.0 (225.1 to 309.8)     | 373.2 (304.8 to 439.5)        | 0.1 (0.0 to 0.2)                | 26.5 (21.3 to 33.5)               | 989.8 (866.9 to 1105.6)   | 394.5 (335.2 to 461.2)     | 555.7 (453.8 to 654.3)        | 0.1 (0.0 to 0.2)                | 39.5 (31.8 to 49.9)               |
| Grenada | 2033 | 677.1 (589.5 to 761.1)     | 269.9 (229.2 to 315.4)     | 379.7 (307.6 to 448.2)        | 0.1 (0.0 to 0.2)                | 27.4 (21.7 to 35.2)               | 1008.1 (877.7 to 1133.2)  | 401.9 (341.3 to 469.6)     | 565.4 (458.0 to 667.3)        | 0.1 (0.0 to 0.2)                | 40.7 (32.3 to 52.3)               |
| Grenada | 2034 | 689.3 (597.1 to 775.9)     | 274.7 (232.2 to 320.2)     | 386.2 (309.5 to 457.6)        | 0.1 (0.0 to 0.2)                | 28.3 (22.3 to 36.2)               | 1026.3 (889.1 to 1155.3)  | 409.0 (345.7 to 476.7)     | 575.1 (460.9 to 681.3)        | 0.1 (0.0 to 0.2)                | 42.1 (33.2 to 53.9)               |
| Grenada | 2035 | 701.8 (606.2 to 794.0)     | 279.7 (237.0 to 327.4)     | 392.8 (312.8 to 467.8)        | 0.1 (0.0 to 0.2)                | 29.2 (22.8 to 38.2)               | 1044.9 (902.6 to 1182.2)  | 416.4 (352.8 to 487.5)     | 584.9 (465.7 to 696.5)        | 0.1 (0.0 to 0.2)                | 43.5 (33.9 to 56.9)               |
| Grenada | 2036 | 714.9 (616.6 to 811.6)     | 285.1 (241.0 to 334.2)     | 399.5 (316.5 to 478.4)        | 0.1 (0.0 to 0.2)                | 30.2 (23.4 to 40.5)               | 1064.4 (918.0 to 1208.4)  | 424.4 (358.8 to 497.5)     | 594.8 (471.2 to 712.3)        | 0.1 (0.0 to 0.3)                | 45.0 (34.8 to 60.2)               |
| Grenada | 2037 | 728.0 (626.7 to 830.1)     | 290.5 (245.4 to 340.7)     | 406.2 (319.7 to 488.8)        | 0.1 (0.0 to 0.2)                | 31.2 (24.0 to 41.9)               | 1083.9 (933.0 to 1235.9)  | 432.5 (365.4 to 507.2)     | 604.8 (476.0 to 727.7)        | 0.1 (0.0 to 0.3)                | 46.4 (35.7 to 62.4)               |
| Grenada | 2038 | 741.8 (640.4 to 845.9)     | 296.3 (250.0 to 347.0)     | 413.1 (323.3 to 499.2)        | 0.1 (0.0 to 0.2)                | 32.3 (24.5 to 44.5)               | 1104.4 (953.5 to 1259.5)  | 441.2 (372.3 to 516.6)     | 615.0 (481.3 to 743.2)        | 0.1 (0.0 to 0.3)                | 48.0 (36.5 to 66.2)               |
| Grenada | 2039 | 755.5 (644.6 to 858.3)     | 302.1 (254.0 to 355.3)     | 419.9 (326.4 to 509.4)        | 0.1 (0.0 to 0.2)                | 33.3 (25.4 to 45.8)               | 1124.9 (959.8 to 1278.0)  | 449.9 (378.1 to 529.0)     | 625.2 (486.0 to 758.4)        | 0.1 (0.0 to 0.3)                | 49.6 (37.8 to 68.3)               |
| Grenada | 2040 | 769.5 (656.7 to 883.8)     | 308.2 (258.0 to 362.6)     | 426.8 (330.0 to 520.7)        | 0.1 (0.0 to 0.2)                | 34.4 (26.2 to 47.5)               | 1145.7 (977.8 to 1315.8)  | 458.9 (384.2 to 540.0)     | 635.5 (491.4 to 775.3)        | 0.1 (0.0 to 0.3)                | 51.2 (39.0 to 70.7)               |
| Grenada | 2041 | 783.6 (664.9 to 903.3)     | 314.2 (262.4 to 369.5)     | 433.7 (334.2 to 532.2)        | 0.1 (0.0 to 0.2)                | 35.5 (26.7 to 49.6)               | 1166.7 (990.0 to 1344.9)  | 467.9 (390.7 to 550.1)     | 645.8 (497.5 to 792.4)        | 0.1 (0.0 to 0.3)                | 52.9 (39.7 to 73.8)               |
| Grenada | 2042 | 798.2 (675.9 to 917.5)     | 320.5 (267.0 to 378.8)     | 440.8 (338.4 to 542.7)        | 0.1 (0.0 to 0.2)                | 36.8 (27.4 to 53.0)               | 1188.5 (1006.4 to 1366.0) | 477.2 (397.5 to 564.0)     | 656.3 (503.9 to 808.1)        | 0.1 (0.0 to 0.3)                | 54.8 (40.8 to 78.9)               |
| Grenada | 2043 | 812.3 (686.7 to 935.9)     | 326.6 (271.2 to 386.6)     | 447.6 (342.4 to 552.5)        | 0.1 (0.0 to 0.2)                | 38.0 (28.0 to 55.8)               | 1209.5 (1022.4 to 1393.5) | 486.3 (403.9 to 575.6)     | 666.4 (509.9 to 822.7)        | 0.2 (0.0 to 0.3)                | 56.6 (41.6 to 83.1)               |
| Grenada | 2044 | 826.1 (697.8 to 959.0)     | 332.9 (275.2 to 394.9)     | 454.1 (346.5 to 562.0)        | 0.1 (0.0 to 0.2)                | 39.0 (27.7 to 57.8)               | 1230.0 (1038.9 to 1427.9) | 495.6 (409.7 to 587.9)     | 676.1 (515.9 to 836.8)        | 0.2 (0.0 to 0.3)                | 58.1 (41.3 to 86.0)               |
| Grenada | 2045 | 840.8 (710.4 to 981.3)     | 339.8 (280.1 to 403.4)     | 460.6 (351.4 to 573.0)        | 0.1 (0.0 to 0.2)                | 40.3 (0.0 to 62.2)                | 1251.8 (1057.7 to 1461.0) | 505.9 (417.1 to 600.6)     | 685.8 (523.3 to 853.2)        | 0.2 (0.0 to 0.3)                | 59.9 (0.0 to 92.6)                |
| Grenada | 2046 | 856.2 (725.9 to 994.1)     | 347.5 (286.0 to 413.6)     | 467.1 (355.5 to 581.6)        | 0.1 (0.0 to 0.2)                | 41.4 (0.0 to 65.5)                | 1274.8 (1080.8 to 1480.1) | 517.4 (425.8 to 615.9)     | 695.5 (529.4 to 866.0)        | 0.2 (0.0 to 0.3)                | 61.7 (0.0 to 97.5)                |
| Grenada | 2047 | 871.8 (742.7 to 1015.1)    | 355.6 (291.2 to 424.0)     | 473.4 (359.7 to 590.3)        | 0.1 (0.0 to 0.2)                | 42.6 (0.0 to 69.0)                | 1298.0 (1105.8 to 1511.4) | 529.5 (433.5 to 631.3)     | 704.9 (535.6 to 879.0)        | 0.2 (0.0 to 0.4)                | 63.5 (0.0 to 102.8)               |
| Grenada | 2048 | 887.8 (753.0 to 1035.8)    | 364.3 (298.2 to 435.4)     | 479.6 (363.6 to 599.0)        | 0.1 (0.0 to 0.2)                | 43.8 (0.0 to 73.7)                | 1321.9 (1121.1 to 1542.2) | 542.4 (443.9 to 648.2)     | 714.0 (541.4 to 891.9)        | 0.2 (0.0 to 0.4)                | 65.2 (0.0 to 109.7)               |
| Grenada | 2049 | 903.8 (766.3 to 1059.0)    | 373.3 (304.9 to 447.6)     | 485.5 (367.3 to 607.6)        | 0.1 (0.0 to 0.2)                | 44.9 (0.0 to 77.8)                | 1345.7 (1141.0 to 1576.7) | 555.8 (454.0 to 666.5)     | 722.9 (546.9 to 904.6)        | 0.2 (0.0 to 0.4)                | 66.9 (0.0 to 115.8)               |
| Grenada | 2050 | 920.6 (778.0 to 1076.4)    | 382.7 (312.3 to 461.1)     | 491.1 (370.4 to 614.6)        | 0.1 (0.0 to 0.3)                | 46.7 (0.0 to 82.4)                | 1370.7 (1158.4 to 1602.6) | 569.8 (465.0 to 686.6)     | 731.2 (551.5 to 915.2)        | 0.2 (0.0 to 0.4)                | 69.5 (0.0 to 122.7)               |

| Country | Year | 2018 US Dollars per capita |                            |                               |                                 |                                   | 2018 PPP per capita       |                            |                               |                                 |                                   |
|---------|------|----------------------------|----------------------------|-------------------------------|---------------------------------|-----------------------------------|---------------------------|----------------------------|-------------------------------|---------------------------------|-----------------------------------|
|         |      | Health spending            | Government health spending | Out-of-pocket health spending | Prepaid private health spending | Development assistance for health | Health spending           | Government health spending | Out-of-pocket health spending | Prepaid private health spending | Development assistance for health |
| Guam    | 1995 | 1312.7 (1016.6 to 1659.0)  | 1189.2 (896.8 to 1534.1)   | 108.4 (76.6 to 150.1)         | 15.1 (7.1 to 27.7)              | 0.0 (0.0 to 0.0)                  | 1312.7 (1016.6 to 1659.0) | 1189.2 (896.8 to 1534.1)   | 108.4 (76.6 to 150.1)         | 15.1 (7.1 to 27.7)              | 0.0 (0.0 to 0.0)                  |
| Guam    | 1996 | 1325.3 (1031.3 to 1667.5)  | 1201.2 (914.7 to 1548.2)   | 108.9 (75.9 to 151.8)         | 15.2 (7.2 to 28.3)              | 0.0 (0.0 to 0.0)                  | 1325.3 (1031.3 to 1667.5) | 1201.2 (914.7 to 1548.2)   | 108.9 (75.9 to 151.8)         | 15.2 (7.2 to 28.3)              | 0.0 (0.0 to 0.0)                  |
| Guam    | 1997 | 1340.0 (1044.4 to 1694.0)  | 1215.6 (923.6 to 1559.0)   | 109.6 (75.7 to 153.8)         | 14.8 (6.9 to 28.0)              | 0.0 (0.0 to 0.0)                  | 1340.0 (1044.4 to 1694.0) | 1215.6 (923.6 to 1559.0)   | 109.6 (75.7 to 153.8)         | 14.8 (6.9 to 28.0)              | 0.0 (0.0 to 0.0)                  |
| Guam    | 1998 | 1344.9 (1046.8 to 1697.1)  | 1221.1 (924.2 to 1563.0)   | 110.1 (76.0 to 154.1)         | 13.8 (6.5 to 27.0)              | 0.0 (0.0 to 0.0)                  | 1344.9 (1046.8 to 1697.1) | 1221.1 (924.2 to 1563.0)   | 110.1 (76.0 to 154.1)         | 13.8 (6.5 to 27.0)              | 0.0 (0.0 to 0.0)                  |
| Guam    | 1999 | 1351.2 (1051.6 to 1713.4)  | 1228.2 (932.0 to 1571.5)   | 110.6 (76.4 to 155.2)         | 12.3 (5.8 to 23.8)              | 0.0 (0.0 to 0.0)                  | 1351.2 (1051.6 to 1713.4) | 1228.2 (932.0 to 1571.5)   | 110.6 (76.4 to 155.2)         | 12.3 (5.8 to 23.8)              | 0.0 (0.0 to 0.0)                  |
| Guam    | 2000 | 1371.9 (1065.7 to 1727.0)  | 1249.3 (942.3 to 1586.1)   | 111.9 (76.5 to 158.0)         | 10.7 (5.1 to 20.6)              | 0.0 (0.0 to 0.0)                  | 1371.9 (1065.7 to 1727.0) | 1249.3 (942.3 to 1586.1)   | 111.9 (76.5 to 158.0)         | 10.7 (5.1 to 20.6)              | 0.0 (0.0 to 0.0)                  |
| Guam    | 2001 | 1403.6 (1090.1 to 1778.5)  | 1280.4 (963.6 to 1661.8)   | 114.4 (79.2 to 160.5)         | 8.9 (4.2 to 17.7)               | 0.0 (0.0 to 0.0)                  | 1403.6 (1090.1 to 1778.5) | 1280.4 (963.6 to 1661.8)   | 114.4 (79.2 to 160.5)         | 8.9 (4.2 to 17.7)               | 0.0 (0.0 to 0.0)                  |
| Guam    | 2002 | 1443.7 (1124.4 to 1825.8)  | 1316.2 (995.0 to 1679.4)   | 118.6 (82.0 to 166.9)         | 9.0 (4.2 to 17.2)               | 0.0 (0.0 to 0.0)                  | 1443.7 (1124.4 to 1825.8) | 1316.2 (995.0 to 1679.4)   | 118.6 (82.0 to 166.9)         | 9.0 (4.2 to 17.2)               | 0.0 (0.0 to 0.0)                  |
| Guam    | 2003 | 1478.6 (1158.7 to 1859.0)  | 1346.3 (1017.5 to 1724.7)  | 123.0 (85.7 to 172.6)         | 9.3 (4.4 to 17.7)               | 0.0 (0.0 to 0.0)                  | 1478.6 (1158.7 to 1859.0) | 1346.3 (1017.5 to 1724.7)  | 123.0 (85.7 to 172.6)         | 9.3 (4.4 to 17.7)               | 0.0 (0.0 to 0.0)                  |
| Guam    | 2004 | 1579.5 (1229.7 to 1985.4)  | 1438.2 (1097.8 to 1843.2)  | 130.7 (91.5 to 181.6)         | 10.6 (5.0 to 20.2)              | 0.0 (0.0 to 0.0)                  | 1579.5 (1229.7 to 1985.4) | 1438.2 (1097.8 to 1843.2)  | 130.7 (91.5 to 181.6)         | 10.6 (5.0 to 20.2)              | 0.0 (0.0 to 0.0)                  |
| Guam    | 2005 | 1647.7 (1297.0 to 2087.9)  | 1498.8 (1144.5 to 1921.5)  | 136.6 (95.4 to 188.1)         | 12.3 (5.9 to 23.8)              | 0.0 (0.0 to 0.0)                  | 1647.7 (1297.0 to 2087.9) | 1498.8 (1144.5 to 1921.5)  | 136.6 (95.4 to 188.1)         | 12.3 (5.9 to 23.8)              | 0.0 (0.0 to 0.0)                  |
| Guam    | 2006 | 1617.6 (1258.1 to 2038.5)  | 1465.6 (1115.6 to 1869.4)  | 137.6 (96.4 to 189.0)         | 14.5 (7.0 to 28.1)              | 0.0 (0.0 to 0.0)                  | 1617.6 (1258.1 to 2038.5) | 1465.6 (1115.6 to 1869.4)  | 137.6 (96.4 to 189.0)         | 14.5 (7.0 to 28.1)              | 0.0 (0.0 to 0.0)                  |
| Guam    | 2007 | 1638.9 (1274.5 to 2052.0)  | 1478.6 (1110.1 to 1885.0)  | 141.5 (99.5 to 196.7)         | 18.7 (9.1 to 36.5)              | 0.0 (0.0 to 0.0)                  | 1638.9 (1274.5 to 2052.0) | 1478.6 (1110.1 to 1885.0)  | 141.5 (99.5 to 196.7)         | 18.7 (9.1 to 36.5)              | 0.0 (0.0 to 0.0)                  |
| Guam    | 2008 | 1675.6 (1302.6 to 2122.4)  | 1501.6 (1116.8 to 1931.1)  | 147.0 (102.5 to 205.3)        | 27.1 (13.0 to 52.3)             | 0.0 (0.0 to 0.0)                  | 1675.6 (1302.6 to 2122.4) | 1501.6 (1116.8 to 1931.1)  | 147.0 (102.5 to 205.3)        | 27.1 (13.0 to 52.3)             | 0.0 (0.0 to 0.0)                  |
| Guam    | 2009 | 1690.1 (1312.4 to 2136.5)  | 1503.4 (1125.4 to 1941.1)  | 151.3 (103.8 to 209.0)        | 35.4 (16.9 to 67.1)             | 0.0 (0.0 to 0.0)                  | 1690.1 (1312.4 to 2136.5) | 1503.4 (1125.4 to 1941.1)  | 151.3 (103.8 to 209.0)        | 35.4 (16.9 to 67.1)             | 0.0 (0.0 to 0.0)                  |
| Guam    | 2010 | 1727.9 (1346.0 to 2166.8)  | 1527.9 (1154.2 to 1963.2)  | 156.0 (107.3 to 218.4)        | 44.1 (20.7 to 83.5)             | 0.0 (0.0 to 0.0)                  | 1727.9 (1346.0 to 2166.8) | 1527.9 (1154.2 to 1963.2)  | 156.0 (107.3 to 218.4)        | 44.1 (20.7 to 83.5)             | 0.0 (0.0 to 0.0)                  |
| Guam    | 2011 | 1742.0 (1356.1 to 2173.3)  | 1532.7 (1155.9 to 1943.7)  | 158.2 (109.8 to 224.2)        | 51.1 (24.5 to 98.6)             | 0.0 (0.0 to 0.0)                  | 1742.0 (1356.1 to 2173.3) | 1532.7 (1155.9 to 1943.7)  | 158.2 (109.8 to 224.2)        | 51.1 (24.5 to 98.6)             | 0.0 (0.0 to 0.0)                  |
| Guam    | 2012 | 1789.0 (1394.2 to 2246.7)  | 1569.1 (1186.7 to 2006.6)  | 161.4 (110.6 to 226.5)        | 58.5 (28.2 to 109.2)            | 0.0 (0.0 to 0.0)                  | 1789.0 (1394.2 to 2246.7) | 1569.1 (1186.7 to 2006.6)  | 161.4 (110.6 to 226.5)        | 58.5 (28.2 to 109.2)            | 0.0 (0.0 to 0.0)                  |
| Guam    | 2013 | 1845.5 (1429.2 to 2303.0)  | 1615.0 (1211.5 to 2068.4)  | 165.0 (113.0 to 230.6)        | 65.5 (31.2 to 121.3)            | 0.0 (0.0 to 0.0)                  | 1845.5 (1429.2 to 2303.0) | 1615.0 (1211.5 to 2068.4)  | 165.0 (113.0 to 230.6)        | 65.5 (31.2 to 121.3)            | 0.0 (0.0 to 0.0)                  |
| Guam    | 2014 | 1892.6 (1460.0 to 2389.1)  | 1653.5 (1230.0 to 2133.7)  | 167.7 (114.7 to 234.9)        | 71.4 (33.3 to 132.2)            | 0.0 (0.0 to 0.0)                  | 1892.6 (1460.0 to 2389.1) | 1653.5 (1230.0 to 2133.7)  | 167.7 (114.7 to 234.9)        | 71.4 (33.3 to 132.2)            | 0.0 (0.0 to 0.0)                  |
| Guam    | 2015 | 1944.2 (1499.9 to 2450.9)  | 1698.9 (1263.1 to 2186.6)  | 170.2 (116.5 to 238.2)        | 75.0 (34.4 to 139.0)            | 0.0 (0.0 to 0.0)                  | 1944.2 (1499.9 to 2450.9) | 1698.9 (1263.1 to 2186.6)  | 170.2 (116.5 to 238.2)        | 75.0 (34.4 to 139.0)            | 0.0 (0.0 to 0.0)                  |

| Country | Year | 2018 US Dollars per capita |                            |                               |                                 |                                   | 2018 PPP per capita       |                            |                               |                                 |                                   |
|---------|------|----------------------------|----------------------------|-------------------------------|---------------------------------|-----------------------------------|---------------------------|----------------------------|-------------------------------|---------------------------------|-----------------------------------|
|         |      | Health spending            | Government health spending | Out-of-pocket health spending | Prepaid private health spending | Development assistance for health | Health spending           | Government health spending | Out-of-pocket health spending | Prepaid private health spending | Development assistance for health |
| Guam    | 2016 | 1990.0 (1548.2 to 2479.8)  | 1742.1 (1299.0 to 2226.7)  | 172.4 (118.4 to 238.8)        | 75.6 (35.4 to 138.3)            | 0.0 (0.0 to 0.0)                  | 1990.0 (1548.2 to 2479.8) | 1742.1 (1299.0 to 2226.7)  | 172.4 (118.4 to 238.8)        | 75.6 (35.4 to 138.3)            | 0.0 (0.0 to 0.0)                  |
| Guam    | 2017 | 2017.4 (1565.7 to 2515.4)  | 1766.3 (1318.8 to 2256.8)  | 174.5 (120.1 to 241.1)        | 76.6 (35.9 to 140.1)            | 0.0 (0.0 to 0.0)                  | 2017.4 (1565.7 to 2515.4) | 1766.3 (1318.8 to 2256.8)  | 174.5 (120.1 to 241.1)        | 76.6 (35.9 to 140.1)            | 0.0 (0.0 to 0.0)                  |
| Guam    | 2018 | 2043.8 (1586.5 to 2555.8)  | 1789.3 (1337.6 to 2285.1)  | 176.9 (121.3 to 246.0)        | 77.7 (36.5 to 142.0)            | 0.0 (0.0 to 0.0)                  | 2043.8 (1586.5 to 2555.8) | 1789.3 (1337.6 to 2285.1)  | 176.9 (121.3 to 246.0)        | 77.7 (36.5 to 142.0)            | 0.0 (0.0 to 0.0)                  |
| Guam    | 2019 | 2071.3 (1606.8 to 2587.2)  | 1813.1 (1356.6 to 2314.6)  | 179.3 (123.3 to 248.9)        | 78.8 (37.0 to 144.1)            | 0.0 (0.0 to 0.0)                  | 2071.3 (1606.8 to 2587.2) | 1813.1 (1356.6 to 2314.6)  | 179.3 (123.3 to 248.9)        | 78.8 (37.0 to 144.1)            | 0.0 (0.0 to 0.0)                  |
| Guam    | 2020 | 2097.6 (1623.9 to 2624.5)  | 1835.9 (1372.7 to 2344.0)  | 181.6 (124.4 to 251.5)        | 80.0 (37.5 to 146.1)            | 0.0 (0.0 to 0.0)                  | 2097.6 (1623.9 to 2624.5) | 1835.9 (1372.7 to 2344.0)  | 181.6 (124.4 to 251.5)        | 80.0 (37.5 to 146.1)            | 0.0 (0.0 to 0.0)                  |
| Guam    | 2021 | 2124.5 (1645.8 to 2656.1)  | 1859.3 (1390.6 to 2375.1)  | 184.0 (126.4 to 254.6)        | 81.1 (38.0 to 148.2)            | 0.0 (0.0 to 0.0)                  | 2124.5 (1645.8 to 2656.1) | 1859.3 (1390.6 to 2375.1)  | 184.0 (126.4 to 254.6)        | 81.1 (38.0 to 148.2)            | 0.0 (0.0 to 0.0)                  |
| Guam    | 2022 | 2151.7 (1666.4 to 2687.9)  | 1883.0 (1409.8 to 2410.8)  | 186.4 (127.3 to 258.8)        | 82.3 (38.4 to 150.2)            | 0.0 (0.0 to 0.0)                  | 2151.7 (1666.4 to 2687.9) | 1883.0 (1409.8 to 2410.8)  | 186.4 (127.3 to 258.8)        | 82.3 (38.4 to 150.2)            | 0.0 (0.0 to 0.0)                  |
| Guam    | 2023 | 2177.6 (1687.0 to 2725.1)  | 1905.5 (1425.2 to 2446.8)  | 188.8 (129.6 to 263.6)        | 83.3 (38.9 to 152.3)            | 0.0 (0.0 to 0.0)                  | 2177.6 (1687.0 to 2725.1) | 1905.5 (1425.2 to 2446.8)  | 188.8 (129.6 to 263.6)        | 83.3 (38.9 to 152.3)            | 0.0 (0.0 to 0.0)                  |
| Guam    | 2024 | 2202.8 (1703.5 to 2752.9)  | 1927.2 (1438.2 to 2481.6)  | 191.2 (131.3 to 265.6)        | 84.4 (39.3 to 154.6)            | 0.0 (0.0 to 0.0)                  | 2202.8 (1703.5 to 2752.9) | 1927.2 (1438.2 to 2481.6)  | 191.2 (131.3 to 265.6)        | 84.4 (39.3 to 154.6)            | 0.0 (0.0 to 0.0)                  |
| Guam    | 2025 | 2225.9 (1722.4 to 2783.3)  | 1946.9 (1453.5 to 2504.6)  | 193.7 (133.2 to 267.4)        | 85.3 (39.8 to 156.4)            | 0.0 (0.0 to 0.0)                  | 2225.9 (1722.4 to 2783.3) | 1946.9 (1453.5 to 2504.6)  | 193.7 (133.2 to 267.4)        | 85.3 (39.8 to 156.4)            | 0.0 (0.0 to 0.0)                  |
| Guam    | 2026 | 2248.5 (1738.7 to 2810.6)  | 1966.1 (1467.3 to 2526.8)  | 196.1 (135.5 to 269.5)        | 86.3 (40.3 to 158.4)            | 0.0 (0.0 to 0.0)                  | 2248.5 (1738.7 to 2810.6) | 1966.1 (1467.3 to 2526.8)  | 196.1 (135.5 to 269.5)        | 86.3 (40.3 to 158.4)            | 0.0 (0.0 to 0.0)                  |
| Guam    | 2027 | 2269.5 (1756.2 to 2839.3)  | 1983.8 (1478.7 to 2553.4)  | 198.5 (137.5 to 274.2)        | 87.1 (40.8 to 160.2)            | 0.0 (0.0 to 0.0)                  | 2269.5 (1756.2 to 2839.3) | 1983.8 (1478.7 to 2553.4)  | 198.5 (137.5 to 274.2)        | 87.1 (40.8 to 160.2)            | 0.0 (0.0 to 0.0)                  |
| Guam    | 2028 | 2290.0 (1766.7 to 2871.9)  | 2001.1 (1491.2 to 2581.4)  | 200.9 (139.0 to 278.3)        | 88.0 (41.2 to 161.4)            | 0.0 (0.0 to 0.0)                  | 2290.0 (1766.7 to 2871.9) | 2001.1 (1491.2 to 2581.4)  | 200.9 (139.0 to 278.3)        | 88.0 (41.2 to 161.4)            | 0.0 (0.0 to 0.0)                  |
| Guam    | 2029 | 2310.5 (1783.5 to 2899.6)  | 2018.3 (1501.7 to 2609.4)  | 203.4 (140.9 to 280.7)        | 88.9 (41.6 to 163.1)            | 0.0 (0.0 to 0.0)                  | 2310.5 (1783.5 to 2899.6) | 2018.3 (1501.7 to 2609.4)  | 203.4 (140.9 to 280.7)        | 88.9 (41.6 to 163.1)            | 0.0 (0.0 to 0.0)                  |
| Guam    | 2030 | 2331.2 (1798.8 to 2928.2)  | 2035.6 (1511.8 to 2632.6)  | 205.9 (142.6 to 286.1)        | 89.7 (42.0 to 164.9)            | 0.0 (0.0 to 0.0)                  | 2331.2 (1798.8 to 2928.2) | 2035.6 (1511.8 to 2632.6)  | 205.9 (142.6 to 286.1)        | 89.7 (42.0 to 164.9)            | 0.0 (0.0 to 0.0)                  |
| Guam    | 2031 | 2353.9 (1821.2 to 2961.7)  | 2054.7 (1523.9 to 2656.2)  | 208.5 (143.6 to 291.6)        | 90.7 (42.4 to 166.6)            | 0.0 (0.0 to 0.0)                  | 2353.9 (1821.2 to 2961.7) | 2054.7 (1523.9 to 2656.2)  | 208.5 (143.6 to 291.6)        | 90.7 (42.4 to 166.6)            | 0.0 (0.0 to 0.0)                  |
| Guam    | 2032 | 2377.4 (1840.8 to 2993.7)  | 2074.6 (1537.3 to 2680.6)  | 211.1 (144.6 to 295.8)        | 91.7 (42.8 to 168.6)            | 0.0 (0.0 to 0.0)                  | 2377.4 (1840.8 to 2993.7) | 2074.6 (1537.3 to 2680.6)  | 211.1 (144.6 to 295.8)        | 91.7 (42.8 to 168.6)            | 0.0 (0.0 to 0.0)                  |
| Guam    | 2033 | 2401.5 (1858.3 to 3024.7)  | 2095.0 (1551.1 to 2706.0)  | 213.8 (145.8 to 299.0)        | 92.7 (43.2 to 171.0)            | 0.0 (0.0 to 0.0)                  | 2401.5 (1858.3 to 3024.7) | 2095.0 (1551.1 to 2706.0)  | 213.8 (145.8 to 299.0)        | 92.7 (43.2 to 171.0)            | 0.0 (0.0 to 0.0)                  |
| Guam    | 2034 | 2426.1 (1877.7 to 3057.1)  | 2115.8 (1565.2 to 2740.2)  | 216.6 (147.8 to 303.8)        | 93.7 (43.7 to 173.1)            | 0.0 (0.0 to 0.0)                  | 2426.1 (1877.7 to 3057.1) | 2115.8 (1565.2 to 2740.2)  | 216.6 (147.8 to 303.8)        | 93.7 (43.7 to 173.1)            | 0.0 (0.0 to 0.0)                  |
| Guam    | 2035 | 2450.5 (1892.6 to 3093.9)  | 2136.5 (1579.9 to 2767.4)  | 219.4 (149.6 to 308.7)        | 94.7 (44.1 to 175.2)            | 0.0 (0.0 to 0.0)                  | 2450.5 (1892.6 to 3093.9) | 2136.5 (1579.9 to 2767.4)  | 219.4 (149.6 to 308.7)        | 94.7 (44.1 to 175.2)            | 0.0 (0.0 to 0.0)                  |
| Guam    | 2036 | 2477.2 (1911.6 to 3133.0)  | 2159.1 (1594.5 to 2798.7)  | 222.2 (150.8 to 312.9)        | 95.8 (44.6 to 177.5)            | 0.0 (0.0 to 0.0)                  | 2477.2 (1911.6 to 3133.0) | 2159.1 (1594.5 to 2798.7)  | 222.2 (150.8 to 312.9)        | 95.8 (44.6 to 177.5)            | 0.0 (0.0 to 0.0)                  |

| Country   | Year | 2018 US Dollars per capita |                            |                               |                                 |                                   | 2018 PPP per capita       |                            |                               |                                 |                                   |
|-----------|------|----------------------------|----------------------------|-------------------------------|---------------------------------|-----------------------------------|---------------------------|----------------------------|-------------------------------|---------------------------------|-----------------------------------|
|           |      | Health spending            | Government health spending | Out-of-pocket health spending | Prepaid private health spending | Development assistance for health | Health spending           | Government health spending | Out-of-pocket health spending | Prepaid private health spending | Development assistance for health |
| Guam      | 2037 | 2504.0 (1932.1 to 3166.7)  | 2181.9 (1609.9 to 2831.6)  | 225.2 (152.8 to 318.8)        | 97.0 (45.3 to 179.8)            | 0.0 (0.0 to 0.0)                  | 2504.0 (1932.1 to 3166.7) | 2181.9 (1609.9 to 2831.6)  | 225.2 (152.8 to 318.8)        | 97.0 (45.3 to 179.8)            | 0.0 (0.0 to 0.0)                  |
| Guam      | 2038 | 2532.7 (1954.3 to 3206.3)  | 2206.3 (1626.5 to 2866.8)  | 228.2 (154.6 to 324.7)        | 98.2 (46.2 to 182.2)            | 0.0 (0.0 to 0.0)                  | 2532.7 (1954.3 to 3206.3) | 2206.3 (1626.5 to 2866.8)  | 228.2 (154.6 to 324.7)        | 98.2 (46.2 to 182.2)            | 0.0 (0.0 to 0.0)                  |
| Guam      | 2039 | 2562.3 (1978.5 to 3249.5)  | 2231.6 (1643.9 to 2903.3)  | 231.3 (156.4 to 330.6)        | 99.4 (47.0 to 184.8)            | 0.0 (0.0 to 0.0)                  | 2562.3 (1978.5 to 3249.5) | 2231.6 (1643.9 to 2903.3)  | 231.3 (156.4 to 330.6)        | 99.4 (47.0 to 184.8)            | 0.0 (0.0 to 0.0)                  |
| Guam      | 2040 | 2593.6 (2006.8 to 3287.1)  | 2258.3 (1661.9 to 2941.6)  | 234.5 (157.3 to 336.6)        | 100.7 (47.5 to 187.4)           | 0.0 (0.0 to 0.0)                  | 2593.6 (2006.8 to 3287.1) | 2258.3 (1661.9 to 2941.6)  | 234.5 (157.3 to 336.6)        | 100.7 (47.5 to 187.4)           | 0.0 (0.0 to 0.0)                  |
| Guam      | 2041 | 2627.8 (2025.0 to 3332.1)  | 2287.8 (1682.2 to 2983.6)  | 237.9 (159.3 to 342.4)        | 102.1 (48.1 to 190.3)           | 0.0 (0.0 to 0.0)                  | 2627.8 (2025.0 to 3332.1) | 2287.8 (1682.2 to 2983.6)  | 237.9 (159.3 to 342.4)        | 102.1 (48.1 to 190.3)           | 0.0 (0.0 to 0.0)                  |
| Guam      | 2042 | 2664.2 (2047.6 to 3383.3)  | 2319.2 (1703.8 to 3027.4)  | 241.3 (161.5 to 347.9)        | 103.7 (48.7 to 193.6)           | 0.0 (0.0 to 0.0)                  | 2664.2 (2047.6 to 3383.3) | 2319.2 (1703.8 to 3027.4)  | 241.3 (161.5 to 347.9)        | 103.7 (48.7 to 193.6)           | 0.0 (0.0 to 0.0)                  |
| Guam      | 2043 | 2702.7 (2073.5 to 3438.8)  | 2352.5 (1726.9 to 3075.3)  | 244.9 (163.9 to 353.1)        | 105.3 (49.5 to 196.7)           | 0.0 (0.0 to 0.0)                  | 2702.7 (2073.5 to 3438.8) | 2352.5 (1726.9 to 3075.3)  | 244.9 (163.9 to 353.1)        | 105.3 (49.5 to 196.7)           | 0.0 (0.0 to 0.0)                  |
| Guam      | 2044 | 2742.3 (2101.3 to 3485.6)  | 2386.8 (1751.1 to 3123.8)  | 248.6 (166.0 to 358.2)        | 107.0 (50.4 to 200.0)           | 0.0 (0.0 to 0.0)                  | 2742.3 (2101.3 to 3485.6) | 2386.8 (1751.1 to 3123.8)  | 248.6 (166.0 to 358.2)        | 107.0 (50.4 to 200.0)           | 0.0 (0.0 to 0.0)                  |
| Guam      | 2045 | 2781.9 (2125.8 to 3547.3)  | 2421.0 (1774.7 to 3172.4)  | 252.3 (168.1 to 363.1)        | 108.6 (51.3 to 203.4)           | 0.0 (0.0 to 0.0)                  | 2781.9 (2125.8 to 3547.3) | 2421.0 (1774.7 to 3172.4)  | 252.3 (168.1 to 363.1)        | 108.6 (51.3 to 203.4)           | 0.0 (0.0 to 0.0)                  |
| Guam      | 2046 | 2823.1 (2161.6 to 3602.8)  | 2456.6 (1798.4 to 3226.6)  | 256.1 (170.4 to 369.5)        | 110.4 (52.2 to 207.0)           | 0.0 (0.0 to 0.0)                  | 2823.1 (2161.6 to 3602.8) | 2456.6 (1798.4 to 3226.6)  | 256.1 (170.4 to 369.5)        | 110.4 (52.2 to 207.0)           | 0.0 (0.0 to 0.0)                  |
| Guam      | 2047 | 2865.9 (2182.0 to 3666.5)  | 2493.6 (1823.8 to 3282.7)  | 260.1 (172.8 to 376.1)        | 112.2 (53.2 to 210.5)           | 0.0 (0.0 to 0.0)                  | 2865.9 (2182.0 to 3666.5) | 2493.6 (1823.8 to 3282.7)  | 260.1 (172.8 to 376.1)        | 112.2 (53.2 to 210.5)           | 0.0 (0.0 to 0.0)                  |
| Guam      | 2048 | 2907.8 (2212.5 to 3720.5)  | 2529.8 (1848.6 to 3338.4)  | 264.0 (175.1 to 381.8)        | 114.0 (54.0 to 214.2)           | 0.0 (0.0 to 0.0)                  | 2907.8 (2212.5 to 3720.5) | 2529.8 (1848.6 to 3338.4)  | 264.0 (175.1 to 381.8)        | 114.0 (54.0 to 214.2)           | 0.0 (0.0 to 0.0)                  |
| Guam      | 2049 | 2949.5 (2244.5 to 3774.2)  | 2565.7 (1873.2 to 3390.6)  | 268.0 (177.5 to 386.9)        | 115.8 (54.8 to 217.8)           | 0.0 (0.0 to 0.0)                  | 2949.5 (2244.5 to 3774.2) | 2565.7 (1873.2 to 3390.6)  | 268.0 (177.5 to 386.9)        | 115.8 (54.8 to 217.8)           | 0.0 (0.0 to 0.0)                  |
| Guam      | 2050 | 2989.6 (2271.1 to 3838.1)  | 2600.1 (1896.7 to 3441.6)  | 272.0 (180.0 to 393.6)        | 117.5 (55.6 to 221.3)           | 0.0 (0.0 to 0.0)                  | 2989.6 (2271.1 to 3838.1) | 2600.1 (1896.7 to 3441.6)  | 272.0 (180.0 to 393.6)        | 117.5 (55.6 to 221.3)           | 0.0 (0.0 to 0.0)                  |
| Guatemala | 1995 | 147.8 (127.5 to 170.4)     | 59.1 (48.0 to 72.8)        | 82.6 (65.6 to 101.0)          | 2.9 (1.4 to 5.3)                | 3.1 (3.1 to 3.1)                  | 270.3 (233.2 to 311.7)    | 108.2 (87.7 to 133.2)      | 151.1 (120.1 to 184.8)        | 5.4 (2.6 to 9.8)                | 5.7 (5.7 to 5.7)                  |
| Guatemala | 1996 | 148.8 (129.3 to 169.4)     | 59.3 (48.5 to 71.9)        | 83.4 (67.2 to 100.1)          | 3.0 (1.5 to 5.6)                | 3.1 (3.1 to 3.1)                  | 272.3 (236.5 to 309.8)    | 108.5 (88.7 to 131.6)      | 152.5 (122.8 to 183.0)        | 5.6 (2.7 to 10.2)               | 5.8 (5.8 to 5.8)                  |
| Guatemala | 1997 | 163.9 (144.3 to 185.8)     | 62.3 (51.6 to 74.5)        | 85.7 (70.6 to 101.5)          | 3.3 (1.6 to 5.9)                | 12.6 (12.6 to 12.6)               | 299.7 (264.0 to 339.8)    | 114.0 (94.3 to 136.3)      | 156.7 (129.2 to 185.7)        | 6.0 (3.0 to 10.9)               | 23.0 (23.0 to 23.0)               |
| Guatemala | 1998 | 162.8 (143.7 to 184.8)     | 66.0 (55.0 to 79.3)        | 89.3 (75.4 to 104.9)          | 3.7 (1.9 to 6.6)                | 3.7 (3.7 to 3.7)                  | 297.8 (262.8 to 338.0)    | 120.8 (100.6 to 145.0)     | 163.4 (137.9 to 191.9)        | 6.9 (3.5 to 12.1)               | 6.8 (6.8 to 6.8)                  |
| Guatemala | 1999 | 180.5 (160.4 to 202.6)     | 69.7 (58.8 to 83.5)        | 99.2 (84.4 to 116.1)          | 5.1 (2.5 to 9.0)                | 6.5 (6.5 to 6.5)                  | 330.1 (293.5 to 370.5)    | 127.4 (107.5 to 152.7)     | 181.5 (154.3 to 212.4)        | 9.3 (4.6 to 16.5)               | 11.9 (11.9 to 11.9)               |
| Guatemala | 2000 | 202.3 (180.0 to 226.8)     | 73.9 (61.8 to 88.6)        | 118.5 (102.4 to 137.4)        | 6.1 (3.1 to 11.0)               | 3.7 (3.7 to 3.7)                  | 370.0 (329.2 to 414.8)    | 135.2 (113.1 to 162.0)     | 216.7 (187.4 to 251.3)        | 11.2 (5.6 to 20.1)              | 6.8 (6.8 to 6.8)                  |
| Guatemala | 2001 | 230.6 (204.9 to 256.7)     | 78.9 (66.4 to 94.8)        | 139.6 (120.7 to 160.6)        | 7.4 (3.7 to 13.3)               | 4.7 (4.7 to 4.7)                  | 421.8 (374.8 to 469.6)    | 144.3 (121.5 to 173.3)     | 255.3 (220.8 to 293.7)        | 13.6 (6.8 to 24.4)              | 8.6 (8.6 to 8.6)                  |

| Country   | Year | 2018 US Dollars per capita |                            |                               |                                 |                                   | 2018 PPP per capita    |                            |                               |                                 |                                   |
|-----------|------|----------------------------|----------------------------|-------------------------------|---------------------------------|-----------------------------------|------------------------|----------------------------|-------------------------------|---------------------------------|-----------------------------------|
|           |      | Health spending            | Government health spending | Out-of-pocket health spending | Prepaid private health spending | Development assistance for health | Health spending        | Government health spending | Out-of-pocket health spending | Prepaid private health spending | Development assistance for health |
| Guatemala | 2002 | 245.0 (219.3 to 272.0)     | 82.1 (69.1 to 98.0)        | 151.4 (132.0 to 173.0)        | 8.3 (4.1 to 14.6)               | 3.2 (3.2 to 3.2)                  | 448.1 (401.2 to 497.5) | 150.1 (126.4 to 179.3)     | 277.0 (241.4 to 316.4)        | 15.1 (7.5 to 26.7)              | 5.8 (5.8 to 5.8)                  |
| Guatemala | 2003 | 253.5 (227.1 to 281.0)     | 83.4 (70.4 to 100.1)       | 157.0 (136.2 to 176.7)        | 8.6 (4.3 to 15.4)               | 4.5 (4.5 to 4.5)                  | 463.7 (415.4 to 514.0) | 152.5 (128.7 to 183.0)     | 287.1 (249.1 to 323.2)        | 15.8 (8.0 to 28.1)              | 8.3 (8.3 to 8.3)                  |
| Guatemala | 2004 | 255.5 (229.4 to 282.8)     | 83.3 (70.4 to 100.4)       | 159.3 (138.4 to 179.7)        | 9.9 (5.1 to 17.9)               | 3.0 (3.0 to 3.0)                  | 467.3 (419.7 to 517.2) | 152.3 (128.7 to 183.6)     | 291.3 (253.2 to 328.6)        | 18.1 (9.4 to 32.7)              | 5.5 (5.5 to 5.5)                  |
| Guatemala | 2005 | 255.5 (229.1 to 283.6)     | 82.3 (69.2 to 98.6)        | 159.8 (138.9 to 180.1)        | 10.0 (5.3 to 18.0)              | 3.3 (3.3 to 3.3)                  | 467.4 (419.1 to 518.7) | 150.6 (126.7 to 180.4)     | 292.4 (254.0 to 329.3)        | 18.3 (9.6 to 32.9)              | 6.1 (6.1 to 6.1)                  |
| Guatemala | 2006 | 260.5 (234.2 to 289.0)     | 85.2 (71.6 to 101.8)       | 161.9 (140.6 to 184.0)        | 9.6 (5.0 to 16.8)               | 3.8 (3.8 to 3.8)                  | 476.5 (428.4 to 528.6) | 155.9 (131.0 to 186.2)     | 296.2 (257.1 to 336.6)        | 17.5 (9.1 to 30.8)              | 7.0 (7.0 to 7.0)                  |
| Guatemala | 2007 | 265.5 (237.6 to 293.9)     | 88.2 (74.0 to 104.6)       | 162.5 (141.3 to 184.5)        | 10.3 (5.3 to 18.2)              | 4.5 (4.5 to 4.5)                  | 485.7 (434.6 to 537.7) | 161.3 (135.3 to 191.2)     | 297.3 (258.5 to 337.4)        | 18.9 (9.8 to 33.4)              | 8.2 (8.2 to 8.2)                  |
| Guatemala | 2008 | 267.1 (239.3 to 295.4)     | 89.9 (75.5 to 105.3)       | 159.2 (139.2 to 181.2)        | 11.4 (6.0 to 20.1)              | 6.7 (6.7 to 6.7)                  | 488.6 (437.6 to 540.4) | 164.3 (138.1 to 192.7)     | 291.2 (254.7 to 331.5)        | 20.9 (11.0 to 36.8)             | 12.2 (12.2 to 12.2)               |
| Guatemala | 2009 | 260.6 (234.0 to 287.5)     | 89.8 (75.3 to 105.5)       | 154.3 (135.0 to 176.6)        | 11.4 (6.0 to 19.7)              | 5.1 (5.1 to 5.1)                  | 476.6 (428.0 to 526.0) | 164.2 (137.7 to 193.0)     | 282.3 (246.9 to 323.0)        | 20.8 (10.9 to 36.1)             | 9.4 (9.4 to 9.4)                  |
| Guatemala | 2010 | 256.8 (231.4 to 283.4)     | 88.2 (73.7 to 103.4)       | 151.2 (131.4 to 173.0)        | 11.8 (6.1 to 20.5)              | 5.6 (5.6 to 5.6)                  | 469.8 (423.4 to 518.3) | 161.4 (134.9 to 189.1)     | 276.6 (240.3 to 316.4)        | 21.6 (11.1 to 37.5)             | 10.2 (10.2 to 10.2)               |
| Guatemala | 2011 | 256.5 (231.6 to 283.4)     | 88.4 (73.6 to 104.8)       | 149.1 (129.7 to 168.5)        | 12.0 (6.1 to 20.5)              | 7.0 (7.0 to 7.0)                  | 469.1 (423.7 to 518.4) | 161.7 (134.7 to 191.7)     | 272.7 (237.2 to 308.3)        | 22.0 (11.2 to 37.5)             | 12.8 (12.8 to 12.8)               |
| Guatemala | 2012 | 253.1 (227.8 to 280.6)     | 88.9 (73.7 to 106.0)       | 147.1 (127.1 to 167.3)        | 12.5 (6.4 to 21.4)              | 4.7 (4.7 to 4.7)                  | 463.0 (416.7 to 513.2) | 162.6 (134.8 to 193.9)     | 269.0 (232.4 to 306.1)        | 22.8 (11.8 to 39.2)             | 8.6 (8.6 to 8.6)                  |
| Guatemala | 2013 | 259.6 (232.9 to 287.6)     | 92.0 (76.8 to 110.1)       | 145.5 (125.3 to 165.3)        | 13.7 (7.1 to 24.2)              | 8.4 (8.4 to 8.4)                  | 474.8 (426.0 to 526.1) | 168.3 (140.5 to 201.4)     | 266.1 (229.1 to 302.4)        | 25.1 (12.9 to 44.2)             | 15.3 (15.3 to 15.3)               |
| Guatemala | 2014 | 258.8 (230.6 to 288.4)     | 94.0 (78.2 to 112.8)       | 145.0 (123.8 to 165.8)        | 14.8 (7.5 to 26.5)              | 4.9 (4.9 to 4.9)                  | 473.4 (421.8 to 527.5) | 172.0 (143.0 to 206.3)     | 265.2 (226.4 to 303.3)        | 27.1 (13.7 to 48.5)             | 9.0 (9.0 to 9.0)                  |
| Guatemala | 2015 | 275.2 (245.8 to 306.6)     | 93.3 (76.3 to 112.3)       | 143.4 (120.5 to 167.0)        | 16.5 (8.3 to 29.5)              | 21.9 (21.9 to 21.9)               | 503.3 (449.5 to 560.8) | 170.7 (139.6 to 205.5)     | 262.3 (220.3 to 305.5)        | 30.2 (15.2 to 54.0)             | 40.1 (40.1 to 40.1)               |
| Guatemala | 2016 | 262.0 (226.8 to 300.6)     | 95.8 (77.4 to 115.6)       | 143.5 (118.2 to 171.9)        | 19.5 (9.8 to 35.2)              | 3.2 (3.2 to 3.2)                  | 479.3 (414.9 to 549.8) | 175.3 (141.6 to 211.4)     | 262.5 (216.2 to 314.4)        | 35.6 (17.9 to 64.3)             | 5.9 (5.9 to 5.9)                  |
| Guatemala | 2017 | 263.4 (230.2 to 302.0)     | 96.1 (77.7 to 116.0)       | 144.1 (118.4 to 172.7)        | 19.2 (9.7 to 34.9)              | 3.9 (3.9 to 3.9)                  | 481.8 (421.0 to 552.4) | 175.8 (142.1 to 212.1)     | 263.6 (216.6 to 316.0)        | 35.2 (17.7 to 63.9)             | 7.2 (7.2 to 7.2)                  |
| Guatemala | 2018 | 268.0 (232.1 to 307.4)     | 98.6 (79.8 to 119.1)       | 145.9 (119.8 to 174.7)        | 19.8 (9.9 to 35.8)              | 3.7 (3.7 to 3.7)                  | 490.2 (424.5 to 562.3) | 180.4 (146.0 to 217.8)     | 266.9 (219.1 to 319.6)        | 36.2 (18.1 to 65.6)             | 6.7 (6.7 to 6.7)                  |
| Guatemala | 2019 | 272.7 (237.4 to 311.8)     | 101.0 (81.8 to 121.9)      | 147.9 (122.0 to 177.0)        | 20.2 (10.2 to 36.6)             | 3.7 (3.4 to 3.9)                  | 498.8 (434.3 to 570.4) | 184.7 (149.6 to 223.0)     | 270.5 (223.2 to 323.8)        | 37.0 (18.6 to 67.0)             | 6.7 (6.3 to 7.1)                  |
| Guatemala | 2020 | 277.8 (242.1 to 318.7)     | 103.6 (83.9 to 124.9)      | 149.8 (123.8 to 179.5)        | 20.7 (10.4 to 37.5)             | 3.7 (3.4 to 4.0)                  | 508.1 (442.8 to 582.9) | 189.4 (153.5 to 228.5)     | 274.1 (226.4 to 328.4)        | 37.8 (19.0 to 68.6)             | 6.8 (6.2 to 7.3)                  |
| Guatemala | 2021 | 282.4 (246.2 to 322.5)     | 105.7 (85.7 to 127.5)      | 151.8 (125.4 to 181.7)        | 21.1 (10.6 to 38.4)             | 3.7 (3.4 to 4.1)                  | 516.5 (450.3 to 589.9) | 193.4 (156.7 to 233.3)     | 277.6 (229.4 to 332.3)        | 38.7 (19.4 to 70.3)             | 6.8 (6.1 to 7.5)                  |
| Guatemala | 2022 | 288.0 (251.4 to 330.4)     | 108.6 (88.1 to 131.1)      | 153.9 (127.0 to 184.0)        | 21.6 (10.8 to 39.3)             | 3.8 (3.3 to 4.2)                  | 526.7 (459.8 to 604.4) | 198.7 (161.1 to 239.8)     | 281.6 (232.3 to 336.6)        | 39.6 (19.8 to 71.9)             | 6.9 (6.1 to 7.7)                  |



| Country   | Year | 2018 US Dollars per capita |                            |                               |                                 |                                   | 2018 PPP per capita    |                            |                               |                                 |                                   |
|-----------|------|----------------------------|----------------------------|-------------------------------|---------------------------------|-----------------------------------|------------------------|----------------------------|-------------------------------|---------------------------------|-----------------------------------|
|           |      | Health spending            | Government health spending | Out-of-pocket health spending | Prepaid private health spending | Development assistance for health | Health spending        | Government health spending | Out-of-pocket health spending | Prepaid private health spending | Development assistance for health |
| Guatemala | 2023 | 293.2 (255.7 to 334.0)     | 111.2 (90.3 to 134.4)      | 156.0 (128.6 to 186.6)        | 22.1 (11.1 to 40.1)             | 3.8 (3.3 to 4.4)                  | 536.3 (467.7 to 610.9) | 203.5 (165.2 to 245.8)     | 285.4 (235.3 to 341.3)        | 40.5 (20.2 to 73.4)             | 7.0 (6.1 to 8.0)                  |
| Guatemala | 2024 | 298.6 (260.3 to 342.3)     | 114.1 (92.6 to 137.9)      | 158.1 (130.0 to 188.8)        | 22.6 (11.3 to 40.9)             | 3.9 (3.3 to 4.5)                  | 546.2 (476.1 to 626.2) | 208.7 (169.4 to 252.2)     | 289.1 (237.7 to 345.3)        | 41.4 (20.6 to 74.8)             | 7.1 (6.1 to 8.2)                  |
| Guatemala | 2025 | 304.5 (264.9 to 347.3)     | 117.5 (95.4 to 142.1)      | 160.1 (132.3 to 191.0)        | 23.1 (11.5 to 41.8)             | 3.9 (3.3 to 4.6)                  | 557.0 (484.5 to 635.3) | 214.9 (174.5 to 259.9)     | 292.8 (242.1 to 349.4)        | 42.2 (21.0 to 76.4)             | 7.2 (6.1 to 8.4)                  |
| Guatemala | 2026 | 309.9 (270.7 to 355.0)     | 120.5 (97.8 to 145.8)      | 161.9 (133.8 to 193.1)        | 23.6 (11.7 to 42.6)             | 4.0 (3.3 to 4.7)                  | 566.8 (495.1 to 649.4) | 220.3 (179.0 to 266.7)     | 296.1 (244.8 to 353.2)        | 43.1 (21.4 to 77.9)             | 7.2 (6.1 to 8.5)                  |
| Guatemala | 2027 | 314.3 (275.0 to 358.9)     | 122.7 (99.7 to 148.6)      | 163.5 (135.2 to 195.0)        | 24.0 (11.9 to 43.4)             | 4.0 (3.3 to 4.8)                  | 574.8 (503.1 to 656.6) | 224.5 (182.5 to 271.9)     | 299.1 (247.2 to 356.8)        | 43.9 (21.9 to 79.4)             | 7.3 (6.1 to 8.7)                  |
| Guatemala | 2028 | 318.3 (276.3 to 365.0)     | 124.8 (101.4 to 151.2)     | 165.0 (136.3 to 196.8)        | 24.5 (12.2 to 44.2)             | 4.1 (3.4 to 4.9)                  | 582.2 (505.4 to 667.7) | 228.2 (185.5 to 276.6)     | 301.8 (249.3 to 360.0)        | 44.8 (22.2 to 80.9)             | 7.5 (6.2 to 9.0)                  |
| Guatemala | 2029 | 322.3 (280.0 to 367.2)     | 126.7 (102.7 to 153.7)     | 166.5 (137.5 to 198.8)        | 24.9 (12.4 to 45.1)             | 4.1 (3.4 to 5.1)                  | 589.6 (512.2 to 671.7) | 231.8 (187.9 to 281.1)     | 304.6 (251.5 to 363.7)        | 45.6 (22.6 to 82.4)             | 7.6 (6.2 to 9.3)                  |
| Guatemala | 2030 | 326.4 (283.2 to 372.7)     | 128.7 (104.0 to 155.7)     | 168.0 (138.3 to 201.2)        | 25.4 (12.6 to 45.8)             | 4.2 (3.4 to 5.2)                  | 597.0 (518.0 to 681.8) | 235.4 (190.2 to 284.7)     | 307.4 (253.0 to 368.0)        | 46.5 (23.0 to 83.8)             | 7.7 (6.3 to 9.5)                  |
| Guatemala | 2031 | 330.5 (286.8 to 376.6)     | 130.7 (105.7 to 158.2)     | 169.6 (139.4 to 203.0)        | 25.9 (12.9 to 46.6)             | 4.3 (3.4 to 5.4)                  | 604.5 (524.5 to 688.8) | 239.1 (193.3 to 289.3)     | 310.2 (255.0 to 371.4)        | 47.4 (23.5 to 85.3)             | 7.8 (6.3 to 9.8)                  |
| Guatemala | 2032 | 334.7 (290.8 to 384.0)     | 132.8 (107.3 to 160.9)     | 171.1 (140.6 to 204.9)        | 26.4 (13.1 to 47.4)             | 4.3 (3.5 to 5.5)                  | 612.2 (531.9 to 702.4) | 242.9 (196.3 to 294.4)     | 313.0 (257.1 to 374.8)        | 48.3 (24.0 to 86.8)             | 7.9 (6.4 to 10.1)                 |
| Guatemala | 2033 | 338.8 (294.1 to 386.5)     | 134.8 (108.7 to 163.4)     | 172.7 (142.1 to 206.7)        | 26.9 (13.4 to 48.4)             | 4.4 (3.5 to 5.6)                  | 619.7 (537.9 to 707.0) | 246.6 (198.8 to 299.0)     | 315.8 (259.8 to 378.2)        | 49.2 (24.4 to 88.6)             | 8.1 (6.4 to 10.3)                 |
| Guatemala | 2034 | 342.8 (297.1 to 393.3)     | 136.8 (110.0 to 165.9)     | 174.1 (143.2 to 208.4)        | 27.4 (13.6 to 49.5)             | 4.5 (3.5 to 5.8)                  | 627.1 (543.4 to 719.4) | 250.1 (201.3 to 303.5)     | 318.5 (262.0 to 381.3)        | 50.2 (24.9 to 90.5)             | 8.2 (6.5 to 10.6)                 |
| Guatemala | 2035 | 346.9 (302.5 to 396.7)     | 138.8 (111.4 to 168.7)     | 175.6 (144.2 to 210.2)        | 27.9 (13.9 to 50.4)             | 4.6 (3.6 to 6.0)                  | 634.6 (553.4 to 725.6) | 253.8 (203.8 to 308.5)     | 321.3 (263.8 to 384.4)        | 51.1 (25.4 to 92.3)             | 8.4 (6.6 to 11.0)                 |
| Guatemala | 2036 | 351.0 (303.0 to 404.0)     | 140.8 (113.0 to 171.2)     | 177.1 (145.1 to 212.0)        | 28.5 (14.1 to 51.4)             | 4.7 (3.6 to 6.2)                  | 642.1 (554.3 to 739.0) | 257.5 (206.8 to 313.1)     | 324.0 (265.4 to 387.8)        | 52.1 (25.9 to 94.0)             | 8.6 (6.7 to 11.4)                 |
| Guatemala | 2037 | 355.1 (308.4 to 407.4)     | 142.7 (114.4 to 173.7)     | 178.6 (146.2 to 213.7)        | 29.0 (14.4 to 52.3)             | 4.8 (3.7 to 6.4)                  | 649.5 (564.2 to 745.2) | 261.1 (209.3 to 317.6)     | 326.7 (267.5 to 390.9)        | 53.0 (26.4 to 95.6)             | 8.7 (6.7 to 11.8)                 |
| Guatemala | 2038 | 359.2 (308.5 to 412.6)     | 144.7 (115.7 to 176.4)     | 180.0 (147.2 to 215.8)        | 29.5 (14.7 to 53.1)             | 4.9 (3.7 to 6.7)                  | 656.9 (564.3 to 754.8) | 264.8 (211.7 to 322.7)     | 329.3 (269.2 to 394.6)        | 54.0 (26.9 to 97.2)             | 8.9 (6.7 to 12.2)                 |
| Guatemala | 2039 | 363.2 (315.0 to 416.0)     | 146.8 (117.3 to 178.9)     | 181.4 (148.3 to 217.8)        | 30.1 (15.0 to 54.1)             | 4.9 (3.8 to 6.8)                  | 664.4 (576.2 to 760.9) | 268.4 (214.5 to 327.2)     | 331.9 (271.3 to 398.4)        | 55.0 (27.4 to 99.0)             | 9.1 (6.9 to 12.4)                 |
| Guatemala | 2040 | 367.0 (318.1 to 421.1)     | 148.6 (118.6 to 181.0)     | 182.8 (149.1 to 219.8)        | 30.6 (15.3 to 55.2)             | 5.1 (3.8 to 7.0)                  | 671.4 (581.8 to 770.3) | 271.9 (216.9 to 331.2)     | 334.3 (272.8 to 402.0)        | 56.0 (27.9 to 100.9)            | 9.2 (7.0 to 12.7)                 |
| Guatemala | 2041 | 370.9 (323.2 to 424.7)     | 150.5 (120.0 to 183.4)     | 184.1 (150.1 to 221.6)        | 31.1 (15.6 to 56.1)             | 5.2 (3.9 to 7.3)                  | 678.5 (591.2 to 776.8) | 275.4 (219.5 to 335.6)     | 336.7 (274.6 to 405.4)        | 57.0 (28.5 to 102.7)            | 9.4 (7.1 to 13.3)                 |
| Guatemala | 2042 | 374.8 (322.4 to 430.0)     | 152.5 (121.5 to 185.9)     | 185.4 (151.1 to 223.3)        | 31.7 (15.8 to 57.1)             | 5.3 (3.9 to 7.6)                  | 685.6 (589.8 to 786.5) | 278.9 (222.2 to 340.1)     | 339.1 (276.4 to 408.4)        | 58.0 (29.0 to 104.5)            | 9.7 (7.1 to 13.9)                 |
| Guatemala | 2043 | 378.6 (329.7 to 435.1)     | 154.3 (122.7 to 188.4)     | 186.7 (152.1 to 225.3)        | 32.2 (16.1 to 58.1)             | 5.4 (4.0 to 7.9)                  | 692.5 (603.0 to 795.8) | 282.3 (224.5 to 344.7)     | 341.4 (278.1 to 412.1)        | 59.0 (29.5 to 106.2)            | 9.9 (7.3 to 14.5)                 |

| Country   | Year | 2018 US Dollars per capita |                            |                               |                                 |                                   | 2018 PPP per capita    |                            |                               |                                 |                                   |
|-----------|------|----------------------------|----------------------------|-------------------------------|---------------------------------|-----------------------------------|------------------------|----------------------------|-------------------------------|---------------------------------|-----------------------------------|
|           |      | Health spending            | Government health spending | Out-of-pocket health spending | Prepaid private health spending | Development assistance for health | Health spending        | Government health spending | Out-of-pocket health spending | Prepaid private health spending | Development assistance for health |
| Guatemala | 2044 | 382.3 (330.0 to 437.9)     | 156.2 (123.9 to 190.9)     | 187.9 (152.9 to 226.7)        | 32.8 (16.4 to 59.1)             | 5.5 (4.1 to 8.1)                  | 699.4 (603.6 to 800.9) | 285.7 (226.7 to 349.3)     | 343.6 (279.8 to 414.7)        | 60.0 (30.0 to 108.0)            | 10.1 (7.4 to 14.8)                |
| Guatemala | 2045 | 386.9 (335.5 to 443.7)     | 158.7 (125.7 to 194.3)     | 189.2 (153.9 to 228.5)        | 33.3 (16.7 to 60.0)             | 5.7 (4.1 to 8.6)                  | 707.6 (613.7 to 811.6) | 290.3 (230.0 to 355.4)     | 346.0 (281.5 to 417.9)        | 61.0 (30.5 to 109.8)            | 10.3 (7.5 to 15.8)                |
| Guatemala | 2046 | 392.2 (335.8 to 450.2)     | 162.0 (128.3 to 198.6)     | 190.6 (154.8 to 230.3)        | 33.9 (17.0 to 61.0)             | 5.8 (4.2 to 8.8)                  | 717.5 (614.2 to 823.5) | 296.3 (234.7 to 363.2)     | 348.6 (283.2 to 421.3)        | 62.0 (31.1 to 111.6)            | 10.6 (7.6 to 16.1)                |
| Guatemala | 2047 | 398.3 (343.6 to 460.1)     | 165.8 (131.0 to 203.5)     | 192.1 (156.0 to 232.2)        | 34.4 (17.3 to 62.0)             | 5.9 (4.2 to 9.3)                  | 728.5 (628.5 to 841.7) | 303.4 (239.7 to 372.2)     | 351.3 (285.4 to 424.6)        | 63.0 (31.6 to 113.4)            | 10.9 (7.8 to 17.0)                |
| Guatemala | 2048 | 405.0 (346.7 to 466.8)     | 170.3 (134.3 to 209.3)     | 193.6 (157.4 to 234.3)        | 35.0 (17.5 to 63.0)             | 6.1 (4.4 to 9.8)                  | 740.8 (634.2 to 853.8) | 311.6 (245.7 to 382.9)     | 354.1 (288.0 to 428.5)        | 64.0 (32.0 to 115.2)            | 11.1 (8.0 to 17.9)                |
| Guatemala | 2049 | 412.4 (355.2 to 477.7)     | 175.4 (138.2 to 215.8)     | 195.2 (159.0 to 236.3)        | 35.5 (17.7 to 64.0)             | 6.2 (4.4 to 10.0)                 | 754.3 (649.6 to 873.8) | 320.8 (252.8 to 394.8)     | 357.0 (290.8 to 432.2)        | 65.0 (32.3 to 117.1)            | 11.4 (8.0 to 18.3)                |
| Guatemala | 2050 | 420.7 (360.6 to 483.0)     | 181.3 (142.8 to 223.3)     | 196.9 (160.7 to 238.4)        | 36.1 (18.0 to 65.1)             | 6.4 (4.5 to 10.3)                 | 769.6 (659.7 to 883.4) | 331.6 (261.2 to 408.5)     | 360.2 (293.9 to 436.1)        | 66.1 (32.9 to 119.1)            | 11.7 (8.2 to 18.9)                |
| Guinea    | 1995 | 21.5 (17.4 to 26.5)        | 2.4 (1.8 to 3.1)           | 12.9 (8.9 to 17.7)            | 0.1 (0.0 to 0.1)                | 6.2 (6.2 to 6.2)                  | 57.8 (46.8 to 71.0)    | 6.5 (4.8 to 8.4)           | 34.6 (23.8 to 47.5)           | 0.2 (0.1 to 0.3)                | 16.5 (16.5 to 16.5)               |
| Guinea    | 1996 | 18.4 (14.1 to 23.3)        | 2.7 (2.0 to 3.5)           | 13.4 (9.3 to 18.4)            | 0.1 (0.0 to 0.1)                | 2.1 (2.1 to 2.1)                  | 49.2 (37.8 to 62.5)    | 7.3 (5.4 to 9.5)           | 36.0 (25.1 to 49.3)           | 0.2 (0.1 to 0.3)                | 5.8 (5.8 to 5.8)                  |
| Guinea    | 1997 | 20.7 (16.6 to 25.5)        | 2.8 (2.1 to 3.6)           | 13.4 (9.5 to 18.2)            | 0.1 (0.0 to 0.1)                | 4.5 (4.5 to 4.5)                  | 55.6 (44.5 to 68.5)    | 7.4 (5.5 to 9.7)           | 36.0 (25.3 to 48.8)           | 0.2 (0.1 to 0.3)                | 12.0 (12.0 to 12.0)               |
| Guinea    | 1998 | 20.4 (16.0 to 25.5)        | 2.9 (2.2 to 3.8)           | 13.8 (9.4 to 18.7)            | 0.1 (0.0 to 0.1)                | 3.7 (3.7 to 3.7)                  | 54.7 (43.0 to 68.3)    | 7.8 (5.9 to 10.3)          | 36.9 (25.3 to 50.1)           | 0.2 (0.1 to 0.3)                | 9.8 (9.8 to 9.8)                  |
| Guinea    | 1999 | 19.3 (14.9 to 24.5)        | 3.0 (2.3 to 3.9)           | 13.9 (9.5 to 18.9)            | 0.1 (0.0 to 0.1)                | 2.4 (2.4 to 2.4)                  | 51.7 (39.8 to 65.6)    | 8.0 (6.1 to 10.5)          | 37.2 (25.4 to 50.7)           | 0.2 (0.1 to 0.3)                | 6.3 (6.3 to 6.3)                  |
| Guinea    | 2000 | 20.1 (15.8 to 25.3)        | 3.0 (2.3 to 4.0)           | 13.9 (9.6 to 18.9)            | 0.1 (0.0 to 0.1)                | 3.1 (3.1 to 3.1)                  | 53.9 (42.4 to 67.8)    | 8.1 (6.2 to 10.7)          | 37.3 (25.7 to 50.8)           | 0.2 (0.1 to 0.3)                | 8.4 (8.4 to 8.4)                  |
| Guinea    | 2001 | 22.2 (17.8 to 27.7)        | 3.3 (2.6 to 4.4)           | 14.3 (9.9 to 19.6)            | 0.1 (0.0 to 0.1)                | 4.5 (4.5 to 4.5)                  | 59.5 (47.8 to 74.3)    | 8.9 (6.9 to 11.9)          | 38.4 (26.4 to 52.5)           | 0.2 (0.1 to 0.3)                | 12.0 (12.0 to 12.0)               |
| Guinea    | 2002 | 22.0 (17.3 to 27.9)        | 3.8 (2.9 to 5.0)           | 15.1 (10.4 to 20.9)           | 0.1 (0.0 to 0.1)                | 3.0 (3.0 to 3.0)                  | 59.0 (46.4 to 74.9)    | 10.2 (7.9 to 13.5)         | 40.5 (27.8 to 56.0)           | 0.2 (0.1 to 0.4)                | 8.1 (8.1 to 8.1)                  |
| Guinea    | 2003 | 20.6 (16.1 to 26.3)        | 3.4 (2.6 to 4.5)           | 14.4 (10.0 to 20.1)           | 0.1 (0.0 to 0.1)                | 2.8 (2.8 to 2.8)                  | 55.3 (43.1 to 70.6)    | 9.0 (7.0 to 12.0)          | 38.5 (26.7 to 53.8)           | 0.2 (0.1 to 0.4)                | 7.6 (7.6 to 7.6)                  |
| Guinea    | 2004 | 20.2 (15.9 to 25.8)        | 2.8 (2.1 to 3.7)           | 14.0 (9.7 to 19.3)            | 0.1 (0.0 to 0.1)                | 3.4 (3.4 to 3.4)                  | 54.2 (42.5 to 69.1)    | 7.5 (5.7 to 9.9)           | 37.5 (26.0 to 51.9)           | 0.2 (0.1 to 0.3)                | 9.0 (9.0 to 9.0)                  |
| Guinea    | 2005 | 20.5 (16.2 to 26.3)        | 2.6 (2.0 to 3.4)           | 14.1 (9.8 to 19.5)            | 0.1 (0.0 to 0.1)                | 3.7 (3.7 to 3.7)                  | 54.9 (43.5 to 70.6)    | 7.1 (5.4 to 9.2)           | 37.8 (26.3 to 52.2)           | 0.2 (0.1 to 0.4)                | 9.8 (9.8 to 9.8)                  |
| Guinea    | 2006 | 20.8 (16.6 to 26.4)        | 2.5 (1.9 to 3.2)           | 14.1 (9.9 to 19.3)            | 0.1 (0.0 to 0.1)                | 4.2 (4.2 to 4.2)                  | 55.9 (44.4 to 70.8)    | 6.6 (5.1 to 8.7)           | 37.9 (26.7 to 51.7)           | 0.2 (0.1 to 0.4)                | 11.2 (11.2 to 11.2)               |
| Guinea    | 2007 | 20.1 (15.9 to 25.5)        | 2.5 (1.9 to 3.2)           | 14.6 (10.4 to 19.9)           | 0.1 (0.0 to 0.1)                | 2.9 (2.9 to 2.9)                  | 53.8 (42.6 to 68.5)    | 6.6 (5.0 to 8.7)           | 39.2 (27.9 to 53.3)           | 0.2 (0.1 to 0.4)                | 7.8 (7.8 to 7.8)                  |
| Guinea    | 2008 | 21.4 (17.2 to 26.6)        | 2.6 (2.0 to 3.4)           | 14.9 (10.8 to 20.1)           | 0.1 (0.0 to 0.2)                | 3.8 (3.8 to 3.8)                  | 57.4 (46.2 to 71.3)    | 6.9 (5.2 to 9.1)           | 40.0 (28.8 to 53.9)           | 0.3 (0.1 to 0.5)                | 10.2 (10.2 to 10.2)               |

| Country | Year | 2018 US Dollars per capita |                            |                               |                                 |                                   | 2018 PPP per capita    |                            |                               |                                 |                                   |
|---------|------|----------------------------|----------------------------|-------------------------------|---------------------------------|-----------------------------------|------------------------|----------------------------|-------------------------------|---------------------------------|-----------------------------------|
|         |      | Health spending            | Government health spending | Out-of-pocket health spending | Prepaid private health spending | Development assistance for health | Health spending        | Government health spending | Out-of-pocket health spending | Prepaid private health spending | Development assistance for health |
| Guinea  | 2009 | 20.6 (16.5 to 25.9)        | 2.6 (2.0 to 3.4)           | 15.1 (11.0 to 20.3)           | 0.1 (0.1 to 0.2)                | 2.8 (2.8 to 2.8)                  | 55.3 (44.3 to 69.4)    | 7.0 (5.3 to 9.1)           | 40.5 (29.4 to 54.5)           | 0.3 (0.1 to 0.6)                | 7.6 (7.6 to 7.6)                  |
| Guinea  | 2010 | 23.7 (19.3 to 29.4)        | 3.1 (2.3 to 4.0)           | 16.3 (11.8 to 22.1)           | 0.2 (0.1 to 0.3)                | 4.1 (4.1 to 4.1)                  | 63.6 (51.7 to 79.0)    | 8.4 (6.2 to 10.8)          | 43.7 (31.7 to 59.3)           | 0.4 (0.2 to 0.9)                | 11.1 (11.1 to 11.1)               |
| Guinea  | 2011 | 24.7 (19.5 to 31.2)        | 3.6 (2.7 to 4.8)           | 17.7 (12.8 to 23.9)           | 0.3 (0.1 to 0.5)                | 3.1 (3.1 to 3.1)                  | 66.2 (52.4 to 83.6)    | 9.8 (7.3 to 12.8)          | 47.5 (34.2 to 64.1)           | 0.7 (0.3 to 1.3)                | 8.3 (8.3 to 8.3)                  |
| Guinea  | 2012 | 26.4 (20.8 to 33.0)        | 4.0 (3.0 to 5.2)           | 18.9 (13.5 to 25.4)           | 0.4 (0.2 to 0.8)                | 3.1 (3.1 to 3.1)                  | 70.8 (55.8 to 88.6)    | 10.8 (8.1 to 14.1)         | 50.6 (36.1 to 68.1)           | 1.1 (0.5 to 2.1)                | 8.3 (8.3 to 8.3)                  |
| Guinea  | 2013 | 28.0 (22.1 to 35.3)        | 4.3 (3.2 to 5.5)           | 20.0 (14.2 to 27.1)           | 0.8 (0.4 to 1.5)                | 2.9 (2.9 to 2.9)                  | 75.0 (59.3 to 94.6)    | 11.4 (8.5 to 14.8)         | 53.8 (38.1 to 72.6)           | 2.1 (1.0 to 4.0)                | 7.8 (7.8 to 7.8)                  |
| Guinea  | 2014 | 43.9 (37.2 to 51.9)        | 4.5 (3.3 to 5.8)           | 22.3 (16.0 to 30.3)           | 2.0 (1.0 to 4.0)                | 15.1 (15.1 to 15.1)               | 117.8 (99.7 to 139.2)  | 12.1 (9.0 to 15.6)         | 59.8 (43.0 to 81.4)           | 5.4 (2.6 to 10.7)               | 40.5 (40.5 to 40.5)               |
| Guinea  | 2015 | 46.1 (38.9 to 54.9)        | 4.3 (3.2 to 5.6)           | 22.9 (16.3 to 31.0)           | 3.6 (1.7 to 7.2)                | 15.3 (15.3 to 15.3)               | 123.6 (104.3 to 147.3) | 11.6 (8.7 to 15.0)         | 61.4 (43.6 to 83.2)           | 9.7 (4.5 to 19.3)               | 40.9 (40.9 to 40.9)               |
| Guinea  | 2016 | 44.2 (37.0 to 53.5)        | 4.9 (3.6 to 6.3)           | 23.7 (16.9 to 32.0)           | 4.4 (2.1 to 8.9)                | 11.2 (11.2 to 11.2)               | 118.6 (99.1 to 143.4)  | 13.0 (9.8 to 16.9)         | 63.7 (45.2 to 85.7)           | 11.8 (5.5 to 24.0)              | 30.2 (30.2 to 30.2)               |
| Guinea  | 2017 | 42.3 (34.0 to 51.8)        | 5.2 (3.9 to 6.7)           | 24.7 (17.6 to 33.4)           | 4.5 (2.1 to 9.2)                | 7.8 (7.8 to 7.8)                  | 113.4 (91.2 to 139.0)  | 13.9 (10.5 to 18.0)        | 66.3 (47.1 to 89.6)           | 12.2 (5.7 to 24.8)              | 20.9 (20.9 to 20.9)               |
| Guinea  | 2018 | 42.2 (34.5 to 51.7)        | 5.3 (4.0 to 6.8)           | 25.1 (17.8 to 33.9)           | 4.7 (2.2 to 9.4)                | 7.2 (7.2 to 7.3)                  | 113.2 (92.5 to 138.5)  | 14.1 (10.6 to 18.3)        | 67.2 (47.7 to 90.9)           | 12.5 (5.8 to 25.2)              | 19.4 (19.4 to 19.4)               |
| Guinea  | 2019 | 42.6 (34.2 to 52.6)        | 5.3 (4.0 to 6.9)           | 25.4 (18.1 to 34.4)           | 4.7 (2.2 to 9.6)                | 7.2 (6.7 to 7.6)                  | 114.2 (91.7 to 141.1)  | 14.3 (10.8 to 18.5)        | 68.0 (48.5 to 92.1)           | 12.7 (5.9 to 25.7)              | 19.2 (18.0 to 20.4)               |
| Guinea  | 2020 | 43.0 (35.0 to 52.5)        | 5.4 (4.1 to 7.0)           | 25.6 (18.2 to 34.7)           | 4.8 (2.2 to 9.7)                | 7.2 (6.6 to 7.8)                  | 115.4 (94.0 to 140.9)  | 14.5 (10.9 to 18.8)        | 68.8 (48.8 to 93.1)           | 12.9 (6.0 to 26.1)              | 19.3 (17.7 to 20.8)               |
| Guinea  | 2021 | 43.5 (34.8 to 53.5)        | 5.5 (4.1 to 7.1)           | 25.9 (18.4 to 35.1)           | 4.9 (2.3 to 9.9)                | 7.2 (6.5 to 8.0)                  | 116.7 (93.3 to 143.4)  | 14.7 (11.0 to 19.1)        | 69.5 (49.4 to 94.2)           | 13.1 (6.1 to 26.5)              | 19.3 (17.4 to 21.4)               |
| Guinea  | 2022 | 44.0 (35.6 to 54.0)        | 5.5 (4.2 to 7.2)           | 26.2 (18.7 to 35.4)           | 5.0 (2.3 to 10.0)               | 7.3 (6.5 to 8.1)                  | 118.0 (95.5 to 144.7)  | 14.9 (11.2 to 19.3)        | 70.3 (50.1 to 95.0)           | 13.3 (6.2 to 26.9)              | 19.5 (17.3 to 21.8)               |
| Guinea  | 2023 | 44.5 (35.5 to 54.7)        | 5.6 (4.2 to 7.3)           | 26.5 (18.8 to 36.0)           | 5.1 (2.4 to 10.2)               | 7.4 (6.4 to 8.4)                  | 119.4 (95.1 to 146.6)  | 15.1 (11.4 to 19.6)        | 71.0 (50.5 to 96.6)           | 13.6 (6.3 to 27.5)              | 19.7 (17.1 to 22.4)               |
| Guinea  | 2024 | 45.2 (36.5 to 55.4)        | 5.7 (4.3 to 7.4)           | 26.8 (19.0 to 36.4)           | 5.2 (2.4 to 10.4)               | 7.5 (6.5 to 8.7)                  | 121.3 (97.9 to 148.6)  | 15.4 (11.6 to 19.9)        | 71.9 (50.8 to 97.5)           | 13.8 (6.5 to 28.0)              | 20.2 (17.4 to 23.3)               |
| Guinea  | 2025 | 45.9 (36.6 to 56.6)        | 5.8 (4.4 to 7.6)           | 27.1 (19.2 to 36.7)           | 5.3 (2.5 to 10.6)               | 7.7 (6.6 to 9.0)                  | 123.1 (98.0 to 151.7)  | 15.7 (11.8 to 20.3)        | 72.8 (51.4 to 98.4)           | 14.1 (6.6 to 28.5)              | 20.6 (17.6 to 24.0)               |
| Guinea  | 2026 | 46.6 (37.8 to 57.5)        | 5.9 (4.5 to 7.7)           | 27.5 (19.4 to 37.3)           | 5.4 (2.5 to 10.9)               | 7.8 (6.6 to 9.2)                  | 125.0 (101.3 to 154.1) | 16.0 (12.0 to 20.7)        | 73.7 (52.1 to 99.9)           | 14.4 (6.7 to 29.1)              | 21.0 (17.7 to 24.6)               |
| Guinea  | 2027 | 47.4 (37.8 to 58.2)        | 6.1 (4.6 to 7.9)           | 27.9 (19.7 to 37.9)           | 5.5 (2.6 to 11.1)               | 8.0 (6.7 to 9.4)                  | 127.2 (101.3 to 156.1) | 16.3 (12.2 to 21.1)        | 74.8 (52.9 to 101.7)          | 14.7 (6.9 to 29.8)              | 21.3 (17.9 to 25.3)               |
| Guinea  | 2028 | 48.3 (39.2 to 59.8)        | 6.2 (4.7 to 8.1)           | 28.3 (20.0 to 38.7)           | 5.6 (2.6 to 11.4)               | 8.1 (6.8 to 9.8)                  | 129.5 (105.1 to 160.4) | 16.7 (12.5 to 21.6)        | 76.0 (53.7 to 103.8)          | 15.1 (7.0 to 30.6)              | 21.7 (18.2 to 26.3)               |
| Guinea  | 2029 | 49.2 (39.3 to 60.9)        | 6.4 (4.8 to 8.3)           | 28.8 (20.4 to 39.5)           | 5.8 (2.7 to 11.7)               | 8.2 (6.8 to 10.2)                 | 131.9 (105.3 to 163.2) | 17.1 (12.8 to 22.2)        | 77.2 (54.6 to 105.9)          | 15.4 (7.2 to 31.4)              | 22.1 (18.3 to 27.2)               |

| Country | Year | 2018 US Dollars per capita |                            |                               |                                 |                                   | 2018 PPP per capita    |                            |                               |                                 |                                   |
|---------|------|----------------------------|----------------------------|-------------------------------|---------------------------------|-----------------------------------|------------------------|----------------------------|-------------------------------|---------------------------------|-----------------------------------|
|         |      | Health spending            | Government health spending | Out-of-pocket health spending | Prepaid private health spending | Development assistance for health | Health spending        | Government health spending | Out-of-pocket health spending | Prepaid private health spending | Development assistance for health |
| Guinea  | 2030 | 50.1 (40.5 to 62.1)        | 6.5 (4.9 to 8.5)           | 29.3 (20.7 to 40.2)           | 5.9 (2.8 to 12.0)               | 8.4 (6.9 to 10.3)                 | 134.5 (108.6 to 166.5) | 17.6 (13.2 to 22.7)        | 78.6 (55.4 to 107.7)          | 15.9 (7.4 to 32.3)              | 22.4 (18.4 to 27.7)               |
| Guinea  | 2031 | 51.2 (40.9 to 63.6)        | 6.7 (5.0 to 8.7)           | 29.9 (21.0 to 41.1)           | 6.1 (2.8 to 12.4)               | 8.5 (6.8 to 10.7)                 | 137.2 (109.7 to 170.6) | 18.0 (13.5 to 23.4)        | 80.1 (56.3 to 110.1)          | 16.3 (7.6 to 33.2)              | 22.8 (18.3 to 28.8)               |
| Guinea  | 2032 | 52.2 (41.9 to 64.9)        | 6.9 (5.2 to 9.0)           | 30.4 (21.4 to 42.0)           | 6.2 (2.9 to 12.7)               | 8.6 (6.9 to 10.8)                 | 140.0 (112.4 to 174.1) | 18.5 (13.9 to 24.0)        | 81.6 (57.3 to 112.6)          | 16.8 (7.8 to 34.1)              | 23.1 (18.6 to 29.1)               |
| Guinea  | 2033 | 53.3 (42.2 to 66.7)        | 7.1 (5.3 to 9.2)           | 31.0 (21.7 to 42.8)           | 6.4 (3.0 to 13.1)               | 8.8 (7.0 to 11.2)                 | 143.0 (113.1 to 178.9) | 19.0 (14.2 to 24.8)        | 83.2 (58.2 to 114.9)          | 17.2 (8.0 to 35.1)              | 23.5 (18.7 to 30.2)               |
| Guinea  | 2034 | 54.4 (43.4 to 68.5)        | 7.3 (5.4 to 9.5)           | 31.6 (22.0 to 43.9)           | 6.6 (3.0 to 13.5)               | 8.9 (7.0 to 11.7)                 | 146.0 (116.4 to 183.8) | 19.6 (14.6 to 25.5)        | 84.7 (59.1 to 117.6)          | 17.7 (8.2 to 36.1)              | 24.0 (18.8 to 31.3)               |
| Guinea  | 2035 | 55.6 (44.0 to 69.4)        | 7.5 (5.6 to 9.8)           | 32.2 (22.4 to 44.9)           | 6.8 (3.1 to 13.9)               | 9.1 (7.1 to 11.9)                 | 149.2 (118.0 to 186.1) | 20.1 (15.0 to 26.4)        | 86.4 (60.1 to 120.5)          | 18.2 (8.4 to 37.2)              | 24.4 (19.0 to 31.9)               |
| Guinea  | 2036 | 56.8 (45.3 to 71.5)        | 7.7 (5.8 to 10.1)          | 32.8 (22.7 to 45.9)           | 7.0 (3.2 to 14.3)               | 9.3 (7.2 to 12.4)                 | 152.3 (121.4 to 191.7) | 20.7 (15.4 to 27.2)        | 88.0 (60.9 to 123.2)          | 18.7 (8.6 to 38.2)              | 24.9 (19.3 to 33.4)               |
| Guinea  | 2037 | 58.0 (45.6 to 72.7)        | 7.9 (5.9 to 10.4)          | 33.4 (23.1 to 47.0)           | 7.2 (3.3 to 14.7)               | 9.4 (7.3 to 12.7)                 | 155.6 (122.3 to 194.8) | 21.3 (15.8 to 28.0)        | 89.7 (61.9 to 125.9)          | 19.3 (8.8 to 39.3)              | 25.3 (19.5 to 34.1)               |
| Guinea  | 2038 | 59.3 (47.3 to 75.2)        | 8.2 (6.1 to 10.7)          | 34.1 (23.5 to 48.0)           | 7.4 (3.4 to 15.1)               | 9.6 (7.3 to 13.5)                 | 158.9 (126.7 to 201.8) | 21.9 (16.3 to 28.7)        | 91.4 (63.0 to 128.7)          | 19.8 (9.0 to 40.4)              | 25.8 (19.5 to 36.2)               |
| Guinea  | 2039 | 60.5 (47.2 to 75.8)        | 8.4 (6.2 to 11.0)          | 34.8 (23.9 to 49.0)           | 7.6 (3.4 to 15.5)               | 9.8 (7.4 to 13.8)                 | 162.4 (126.5 to 203.4) | 22.5 (16.7 to 29.5)        | 93.2 (64.2 to 131.5)          | 20.4 (9.2 to 41.6)              | 26.3 (19.9 to 37.1)               |
| Guinea  | 2040 | 61.9 (49.0 to 79.3)        | 8.6 (6.4 to 11.3)          | 35.4 (24.4 to 50.1)           | 7.8 (3.5 to 16.0)               | 10.0 (7.5 to 14.1)                | 165.9 (131.4 to 212.5) | 23.1 (17.2 to 30.4)        | 95.0 (65.4 to 134.3)          | 21.0 (9.4 to 42.8)              | 26.8 (20.0 to 37.7)               |
| Guinea  | 2041 | 63.2 (49.3 to 79.2)        | 8.9 (6.6 to 11.6)          | 36.1 (24.9 to 51.1)           | 8.0 (3.6 to 16.4)               | 10.2 (7.6 to 14.5)                | 169.6 (132.2 to 212.3) | 23.8 (17.6 to 31.2)        | 96.8 (66.7 to 137.0)          | 21.6 (9.7 to 44.0)              | 27.5 (20.3 to 38.9)               |
| Guinea  | 2042 | 64.7 (51.1 to 82.0)        | 9.1 (6.8 to 12.0)          | 36.8 (25.3 to 52.2)           | 8.3 (3.7 to 16.9)               | 10.5 (7.6 to 15.2)                | 173.4 (137.1 to 219.9) | 24.4 (18.1 to 32.1)        | 98.7 (67.8 to 139.9)          | 22.2 (9.9 to 45.3)              | 28.1 (20.3 to 40.8)               |
| Guinea  | 2043 | 66.1 (52.0 to 83.5)        | 9.4 (6.9 to 12.4)          | 37.5 (25.7 to 53.3)           | 8.5 (3.8 to 17.4)               | 10.7 (7.8 to 15.6)                | 177.3 (139.3 to 224.0) | 25.1 (18.6 to 33.1)        | 100.6 (68.9 to 142.8)         | 22.8 (10.2 to 46.6)             | 28.7 (20.9 to 41.9)               |
| Guinea  | 2044 | 67.6 (53.1 to 85.7)        | 9.6 (7.1 to 12.7)          | 38.3 (26.1 to 54.4)           | 8.8 (3.9 to 17.9)               | 11.0 (7.9 to 16.1)                | 181.3 (142.3 to 229.8) | 25.8 (19.2 to 34.2)        | 102.6 (69.9 to 145.9)         | 23.5 (10.4 to 47.9)             | 29.5 (21.1 to 43.3)               |
| Guinea  | 2045 | 69.2 (54.2 to 88.0)        | 9.9 (7.3 to 13.1)          | 39.0 (26.5 to 55.6)           | 9.0 (4.0 to 18.4)               | 11.3 (7.9 to 17.3)                | 185.5 (145.4 to 236.0) | 26.6 (19.7 to 35.2)        | 104.6 (71.0 to 149.0)         | 24.2 (10.7 to 49.4)             | 30.2 (21.3 to 46.4)               |
| Guinea  | 2046 | 70.7 (55.3 to 89.6)        | 10.2 (7.5 to 13.5)         | 39.7 (26.9 to 56.7)           | 9.3 (4.1 to 18.9)               | 11.6 (8.1 to 18.2)                | 189.7 (148.3 to 240.4) | 27.3 (20.2 to 36.3)        | 106.6 (72.2 to 152.0)         | 24.8 (11.0 to 50.7)             | 31.0 (21.8 to 48.8)               |
| Guinea  | 2047 | 72.4 (57.0 to 92.3)        | 10.5 (7.7 to 13.9)         | 40.5 (27.5 to 57.9)           | 9.5 (4.2 to 19.4)               | 11.9 (8.4 to 19.1)                | 194.1 (153.0 to 247.4) | 28.0 (20.8 to 37.4)        | 108.6 (73.7 to 155.2)         | 25.5 (11.3 to 52.1)             | 31.9 (22.4 to 51.2)               |
| Guinea  | 2048 | 74.1 (57.8 to 94.4)        | 10.7 (7.9 to 14.4)         | 41.3 (28.0 to 59.1)           | 9.8 (4.3 to 20.0)               | 12.3 (8.6 to 20.1)                | 198.6 (154.9 to 253.3) | 28.8 (21.3 to 38.5)        | 110.7 (75.0 to 158.4)         | 26.2 (11.6 to 53.6)             | 32.9 (23.0 to 53.8)               |
| Guinea  | 2049 | 75.7 (59.5 to 97.8)        | 11.0 (8.1 to 14.7)         | 42.0 (28.5 to 60.3)           | 10.0 (4.5 to 20.5)              | 12.6 (8.8 to 20.7)                | 203.1 (159.4 to 262.4) | 29.6 (21.8 to 39.5)        | 112.8 (76.3 to 161.6)         | 26.9 (12.0 to 55.0)             | 33.8 (23.5 to 55.5)               |
| Guinea  | 2050 | 77.5 (60.1 to 99.9)        | 11.3 (8.3 to 15.1)         | 42.8 (29.0 to 61.5)           | 10.3 (4.6 to 21.0)              | 13.0 (8.8 to 21.6)                | 207.9 (161.3 to 267.9) | 30.4 (22.4 to 40.5)        | 114.9 (77.8 to 164.9)         | 27.7 (12.3 to 56.4)             | 34.9 (23.6 to 58.0)               |

| Country       | Year | 2018 US Dollars per capita |                            |                               |                                 |                                   | 2018 PPP per capita    |                            |                               |                                 |                                   |
|---------------|------|----------------------------|----------------------------|-------------------------------|---------------------------------|-----------------------------------|------------------------|----------------------------|-------------------------------|---------------------------------|-----------------------------------|
|               |      | Health spending            | Government health spending | Out-of-pocket health spending | Prepaid private health spending | Development assistance for health | Health spending        | Government health spending | Out-of-pocket health spending | Prepaid private health spending | Development assistance for health |
| Guinea-Bissau | 1995 | 56.5 (49.9 to 64.4)        | 14.0 (10.8 to 18.4)        | 17.9 (12.5 to 25.1)           | 0.0 (0.0 to 0.0)                | 24.5 (24.5 to 24.5)               | 126.5 (111.8 to 144.2) | 31.4 (24.2 to 41.1)        | 40.1 (28.0 to 56.1)           | 0.0 (0.0 to 0.0)                | 54.9 (54.9 to 54.9)               |
| Guinea-Bissau | 1996 | 38.7 (32.1 to 46.7)        | 14.8 (11.4 to 19.3)        | 18.2 (12.6 to 25.6)           | 0.0 (0.0 to 0.0)                | 5.8 (5.8 to 5.8)                  | 86.7 (71.9 to 104.5)   | 33.0 (25.4 to 43.3)        | 40.7 (28.3 to 57.4)           | 0.0 (0.0 to 0.0)                | 13.0 (13.0 to 13.0)               |
| Guinea-Bissau | 1997 | 41.8 (35.0 to 50.0)        | 16.1 (12.2 to 21.0)        | 18.5 (12.9 to 26.1)           | 0.0 (0.0 to 0.0)                | 7.2 (7.2 to 7.2)                  | 93.7 (78.4 to 112.0)   | 36.0 (27.3 to 47.1)        | 41.4 (28.8 to 58.4)           | 0.0 (0.0 to 0.0)                | 16.2 (16.2 to 16.2)               |
| Guinea-Bissau | 1998 | 38.1 (32.0 to 45.2)        | 14.3 (10.8 to 18.6)        | 16.8 (11.7 to 23.5)           | 0.0 (0.0 to 0.0)                | 7.0 (7.0 to 7.0)                  | 85.3 (71.6 to 101.3)   | 32.0 (24.2 to 41.6)        | 37.6 (26.2 to 52.5)           | 0.0 (0.0 to 0.0)                | 15.7 (15.7 to 15.7)               |
| Guinea-Bissau | 1999 | 34.7 (28.3 to 42.1)        | 16.3 (12.3 to 21.0)        | 17.3 (12.1 to 23.8)           | 0.0 (0.0 to 0.0)                | 1.1 (1.1 to 1.1)                  | 77.6 (63.3 to 94.3)    | 36.5 (27.6 to 47.0)        | 38.7 (27.2 to 53.2)           | 0.0 (0.0 to 0.0)                | 2.4 (2.4 to 2.4)                  |
| Guinea-Bissau | 2000 | 43.1 (36.2 to 51.2)        | 18.2 (13.7 to 23.2)        | 17.8 (12.6 to 24.3)           | 0.0 (0.0 to 0.0)                | 7.0 (7.0 to 7.0)                  | 96.4 (81.1 to 114.7)   | 40.8 (30.7 to 51.9)        | 39.9 (28.2 to 54.3)           | 0.0 (0.0 to 0.0)                | 15.7 (15.7 to 15.7)               |
| Guinea-Bissau | 2001 | 42.2 (35.6 to 50.5)        | 18.2 (13.9 to 23.0)        | 17.4 (12.4 to 24.0)           | 0.0 (0.0 to 0.0)                | 6.7 (6.7 to 6.7)                  | 94.6 (79.7 to 113.1)   | 40.7 (31.1 to 51.5)        | 38.9 (27.8 to 53.6)           | 0.0 (0.0 to 0.0)                | 15.0 (15.0 to 15.0)               |
| Guinea-Bissau | 2002 | 38.2 (32.1 to 45.5)        | 16.4 (12.7 to 20.9)        | 16.3 (11.7 to 22.6)           | 0.0 (0.0 to 0.0)                | 5.5 (5.5 to 5.5)                  | 85.5 (71.9 to 102.0)   | 36.8 (28.4 to 46.8)        | 36.4 (26.2 to 50.7)           | 0.0 (0.0 to 0.0)                | 12.2 (12.2 to 12.2)               |
| Guinea-Bissau | 2003 | 39.0 (32.9 to 46.6)        | 17.1 (13.0 to 21.7)        | 16.1 (11.6 to 22.2)           | 0.0 (0.0 to 0.0)                | 5.8 (5.8 to 5.8)                  | 87.2 (73.6 to 104.2)   | 38.3 (29.0 to 48.7)        | 36.0 (25.9 to 49.7)           | 0.0 (0.0 to 0.0)                | 13.0 (13.0 to 13.0)               |
| Guinea-Bissau | 2004 | 43.3 (37.1 to 51.1)        | 18.5 (14.0 to 23.6)        | 16.8 (12.1 to 23.2)           | 0.0 (0.0 to 0.0)                | 8.0 (8.0 to 8.0)                  | 96.9 (83.0 to 114.4)   | 41.5 (31.4 to 52.9)        | 37.6 (27.1 to 52.0)           | 0.0 (0.0 to 0.0)                | 17.9 (17.9 to 17.9)               |
| Guinea-Bissau | 2005 | 44.4 (38.0 to 52.4)        | 18.2 (14.1 to 23.2)        | 17.3 (12.5 to 23.9)           | 0.0 (0.0 to 0.0)                | 8.9 (8.9 to 8.9)                  | 99.4 (85.1 to 117.4)   | 40.8 (31.5 to 52.0)        | 38.7 (27.9 to 53.5)           | 0.0 (0.0 to 0.0)                | 19.9 (19.9 to 19.9)               |
| Guinea-Bissau | 2006 | 45.1 (38.5 to 53.3)        | 17.2 (13.3 to 21.9)        | 17.7 (12.8 to 24.5)           | 0.0 (0.0 to 0.0)                | 10.2 (10.2 to 10.2)               | 101.0 (86.2 to 119.3)  | 38.5 (29.8 to 49.0)        | 39.6 (28.7 to 54.8)           | 0.0 (0.0 to 0.0)                | 22.9 (22.9 to 22.9)               |
| Guinea-Bissau | 2007 | 48.6 (41.8 to 56.7)        | 16.5 (12.7 to 21.0)        | 18.1 (13.1 to 25.0)           | 0.0 (0.0 to 0.0)                | 14.0 (14.0 to 14.0)               | 108.9 (93.6 to 127.1)  | 36.9 (28.3 to 46.9)        | 40.5 (29.3 to 56.0)           | 0.0 (0.0 to 0.0)                | 31.4 (31.4 to 31.4)               |
| Guinea-Bissau | 2008 | 43.1 (36.2 to 51.1)        | 15.1 (11.6 to 19.3)        | 18.5 (13.1 to 25.7)           | 0.0 (0.0 to 0.0)                | 9.5 (9.5 to 9.5)                  | 96.4 (81.0 to 114.4)   | 33.7 (26.0 to 43.3)        | 41.3 (29.3 to 57.5)           | 0.0 (0.0 to 0.0)                | 21.3 (21.3 to 21.3)               |
| Guinea-Bissau | 2009 | 42.2 (35.6 to 49.9)        | 13.2 (10.2 to 16.8)        | 18.4 (12.8 to 25.4)           | 0.0 (0.0 to 0.0)                | 10.6 (10.6 to 10.6)               | 94.4 (79.6 to 111.8)   | 29.5 (22.9 to 37.7)        | 41.2 (28.6 to 56.8)           | 0.0 (0.0 to 0.0)                | 23.8 (23.8 to 23.8)               |
| Guinea-Bissau | 2010 | 48.2 (42.3 to 55.6)        | 9.7 (7.6 to 12.4)          | 17.3 (11.9 to 24.0)           | 0.0 (0.0 to 0.0)                | 21.2 (21.2 to 21.2)               | 107.9 (94.7 to 124.4)  | 21.8 (17.0 to 27.7)        | 38.7 (26.6 to 53.8)           | 0.0 (0.0 to 0.0)                | 47.4 (47.4 to 47.4)               |
| Guinea-Bissau | 2011 | 34.7 (29.2 to 41.6)        | 8.1 (6.3 to 10.3)          | 16.3 (11.3 to 22.6)           | 0.0 (0.0 to 0.0)                | 10.4 (10.4 to 10.4)               | 77.8 (65.4 to 93.2)    | 18.2 (14.2 to 23.1)        | 36.4 (25.4 to 50.7)           | 0.0 (0.0 to 0.0)                | 23.2 (23.2 to 23.2)               |
| Guinea-Bissau | 2012 | 37.1 (31.8 to 44.2)        | 9.0 (7.0 to 11.6)          | 16.0 (11.0 to 22.3)           | 0.0 (0.0 to 0.0)                | 12.0 (12.0 to 12.0)               | 83.0 (71.2 to 99.0)    | 20.2 (15.7 to 25.9)        | 35.9 (24.7 to 49.9)           | 0.0 (0.0 to 0.0)                | 26.9 (26.9 to 26.9)               |
| Guinea-Bissau | 2013 | 50.5 (44.9 to 57.6)        | 11.0 (8.5 to 14.2)         | 16.2 (11.2 to 22.5)           | 0.0 (0.0 to 0.0)                | 23.3 (23.3 to 23.3)               | 113.1 (100.5 to 129.1) | 24.7 (19.1 to 31.9)        | 36.3 (25.1 to 50.5)           | 0.0 (0.0 to 0.0)                | 52.1 (52.1 to 52.1)               |
| Guinea-Bissau | 2014 | 40.1 (34.2 to 47.8)        | 13.0 (10.1 to 16.9)        | 16.2 (11.5 to 22.6)           | 0.0 (0.0 to 0.0)                | 10.9 (10.9 to 10.9)               | 89.8 (76.7 to 107.0)   | 29.0 (22.6 to 37.9)        | 36.3 (25.8 to 50.7)           | 0.0 (0.0 to 0.0)                | 24.4 (24.4 to 24.4)               |
| Guinea-Bissau | 2015 | 46.8 (40.9 to 54.8)        | 14.8 (11.4 to 19.3)        | 16.4 (11.7 to 22.7)           | 0.0 (0.0 to 0.0)                | 15.7 (15.7 to 15.7)               | 104.8 (91.6 to 122.7)  | 33.1 (25.6 to 43.2)        | 36.6 (26.2 to 50.9)           | 0.0 (0.0 to 0.0)                | 35.1 (35.1 to 35.1)               |

| Country       | Year | 2018 US Dollars per capita |                            |                               |                                 |                                   | 2018 PPP per capita    |                            |                               |                                 |                                   |
|---------------|------|----------------------------|----------------------------|-------------------------------|---------------------------------|-----------------------------------|------------------------|----------------------------|-------------------------------|---------------------------------|-----------------------------------|
|               |      | Health spending            | Government health spending | Out-of-pocket health spending | Prepaid private health spending | Development assistance for health | Health spending        | Government health spending | Out-of-pocket health spending | Prepaid private health spending | Development assistance for health |
| Guinea-Bissau | 2016 | 49.1 (42.5 to 57.0)        | 16.9 (13.0 to 21.9)        | 16.7 (12.0 to 23.1)           | 0.0 (0.0 to 0.0)                | 15.5 (15.5 to 15.5)               | 110.0 (95.3 to 127.6)  | 37.8 (29.0 to 49.0)        | 37.5 (26.9 to 51.8)           | 0.0 (0.0 to 0.0)                | 34.7 (34.7 to 34.7)               |
| Guinea-Bissau | 2017 | 46.7 (40.4 to 54.9)        | 16.3 (12.4 to 21.0)        | 17.1 (12.2 to 23.6)           | 0.0 (0.0 to 0.0)                | 13.4 (13.4 to 13.4)               | 104.6 (90.5 to 123.0)  | 36.4 (27.9 to 47.1)        | 38.2 (27.4 to 52.7)           | 0.0 (0.0 to 0.0)                | 29.9 (29.9 to 29.9)               |
| Guinea-Bissau | 2018 | 46.4 (39.8 to 54.5)        | 16.8 (12.8 to 21.6)        | 17.2 (12.4 to 23.7)           | 0.0 (0.0 to 0.0)                | 12.4 (12.4 to 12.5)               | 104.0 (89.2 to 122.1)  | 37.5 (28.7 to 48.5)        | 38.6 (27.7 to 53.1)           | 0.0 (0.0 to 0.0)                | 27.9 (27.8 to 27.9)               |
| Guinea-Bissau | 2019 | 46.9 (40.5 to 55.1)        | 17.1 (13.1 to 22.0)        | 17.4 (12.4 to 24.0)           | 0.0 (0.0 to 0.0)                | 12.4 (11.5 to 13.1)               | 104.9 (90.7 to 123.5)  | 38.3 (29.3 to 49.4)        | 38.9 (27.7 to 53.6)           | 0.0 (0.0 to 0.0)                | 27.7 (25.8 to 29.3)               |
| Guinea-Bissau | 2020 | 47.3 (40.0 to 56.0)        | 17.4 (13.3 to 22.5)        | 17.5 (12.5 to 24.1)           | 0.0 (0.0 to 0.0)                | 12.4 (11.4 to 13.4)               | 106.0 (89.5 to 125.3)  | 39.0 (29.7 to 50.3)        | 39.2 (27.9 to 53.9)           | 0.0 (0.0 to 0.0)                | 27.7 (25.4 to 30.0)               |
| Guinea-Bissau | 2021 | 47.9 (41.0 to 55.7)        | 17.8 (13.6 to 22.8)        | 17.6 (12.5 to 24.4)           | 0.0 (0.0 to 0.0)                | 12.5 (11.2 to 13.8)               | 107.1 (91.8 to 124.6)  | 39.8 (30.4 to 51.1)        | 39.5 (27.9 to 54.6)           | 0.0 (0.0 to 0.0)                | 27.9 (25.1 to 30.8)               |
| Guinea-Bissau | 2022 | 48.4 (41.4 to 57.1)        | 18.1 (13.8 to 23.3)        | 17.8 (12.6 to 24.5)           | 0.0 (0.0 to 0.0)                | 12.6 (11.2 to 14.1)               | 108.4 (92.6 to 127.7)  | 40.5 (30.9 to 52.1)        | 39.8 (28.2 to 54.9)           | 0.0 (0.0 to 0.0)                | 28.2 (25.0 to 31.5)               |
| Guinea-Bissau | 2023 | 49.0 (41.8 to 57.9)        | 18.3 (14.0 to 23.7)        | 17.9 (12.7 to 24.5)           | 0.0 (0.0 to 0.0)                | 12.7 (11.1 to 14.4)               | 109.6 (93.7 to 129.6)  | 41.1 (31.4 to 53.0)        | 40.1 (28.3 to 55.0)           | 0.0 (0.0 to 0.0)                | 28.5 (24.8 to 32.3)               |
| Guinea-Bissau | 2024 | 49.5 (42.1 to 58.5)        | 18.6 (14.2 to 24.1)        | 18.0 (12.7 to 24.7)           | 0.0 (0.0 to 0.0)                | 12.9 (11.1 to 14.8)               | 111.0 (94.2 to 131.0)  | 41.7 (31.8 to 54.0)        | 40.4 (28.5 to 55.3)           | 0.0 (0.0 to 0.0)                | 28.8 (24.9 to 33.2)               |
| Guinea-Bissau | 2025 | 50.1 (42.9 to 58.9)        | 18.9 (14.4 to 24.4)        | 18.2 (12.8 to 24.9)           | 0.0 (0.0 to 0.0)                | 13.0 (11.1 to 15.2)               | 112.2 (96.1 to 131.8)  | 42.4 (32.2 to 54.7)        | 40.7 (28.8 to 55.8)           | 0.0 (0.0 to 0.0)                | 29.1 (24.9 to 34.1)               |
| Guinea-Bissau | 2026 | 50.7 (42.9 to 59.7)        | 19.2 (14.6 to 24.9)        | 18.3 (13.0 to 25.0)           | 0.0 (0.0 to 0.0)                | 13.1 (11.1 to 15.4)               | 113.5 (96.0 to 133.8)  | 43.1 (32.8 to 55.7)        | 41.0 (29.1 to 56.1)           | 0.0 (0.0 to 0.0)                | 29.4 (24.8 to 34.5)               |
| Guinea-Bissau | 2027 | 51.3 (44.0 to 61.2)        | 19.5 (14.9 to 25.3)        | 18.5 (13.1 to 25.3)           | 0.0 (0.0 to 0.0)                | 13.3 (11.2 to 15.8)               | 114.9 (98.5 to 137.0)  | 43.8 (33.3 to 56.6)        | 41.4 (29.4 to 56.8)           | 0.0 (0.0 to 0.0)                | 29.8 (25.0 to 35.4)               |
| Guinea-Bissau | 2028 | 52.0 (43.9 to 62.1)        | 19.9 (15.1 to 25.7)        | 18.6 (13.2 to 25.5)           | 0.0 (0.0 to 0.0)                | 13.5 (11.3 to 16.3)               | 116.4 (98.3 to 139.1)  | 44.5 (33.8 to 57.5)        | 41.7 (29.6 to 57.1)           | 0.0 (0.0 to 0.0)                | 30.2 (25.3 to 36.4)               |
| Guinea-Bissau | 2029 | 52.7 (44.9 to 62.8)        | 20.2 (15.4 to 26.1)        | 18.8 (13.4 to 25.8)           | 0.0 (0.0 to 0.0)                | 13.7 (11.3 to 16.7)               | 118.0 (100.6 to 140.5) | 45.3 (34.4 to 58.4)        | 42.1 (29.9 to 57.8)           | 0.0 (0.0 to 0.0)                | 30.6 (25.2 to 37.5)               |
| Guinea-Bissau | 2030 | 53.4 (45.0 to 63.4)        | 20.6 (15.6 to 26.6)        | 19.0 (13.5 to 26.2)           | 0.0 (0.0 to 0.0)                | 13.8 (11.3 to 17.0)               | 119.5 (100.8 to 142.1) | 46.0 (34.9 to 59.5)        | 42.5 (30.2 to 58.6)           | 0.0 (0.0 to 0.0)                | 31.0 (25.4 to 38.0)               |
| Guinea-Bissau | 2031 | 54.1 (46.3 to 64.2)        | 20.9 (15.9 to 27.2)        | 19.2 (13.6 to 26.6)           | 0.0 (0.0 to 0.0)                | 14.0 (11.4 to 17.6)               | 121.2 (103.8 to 143.8) | 46.9 (35.6 to 60.8)        | 43.0 (30.5 to 59.5)           | 0.0 (0.0 to 0.0)                | 31.4 (25.4 to 39.4)               |
| Guinea-Bissau | 2032 | 54.9 (45.8 to 65.7)        | 21.3 (16.2 to 27.5)        | 19.4 (13.7 to 27.0)           | 0.0 (0.0 to 0.0)                | 14.2 (11.4 to 17.9)               | 123.0 (102.6 to 147.0) | 47.7 (36.3 to 61.7)        | 43.4 (30.6 to 60.4)           | 0.0 (0.0 to 0.0)                | 31.9 (25.6 to 40.1)               |
| Guinea-Bissau | 2033 | 55.7 (46.9 to 66.8)        | 21.7 (16.4 to 28.1)        | 19.6 (13.8 to 27.3)           | 0.0 (0.0 to 0.0)                | 14.4 (11.5 to 18.5)               | 124.7 (105.1 to 149.6) | 48.5 (36.7 to 62.9)        | 43.9 (30.8 to 61.2)           | 0.0 (0.0 to 0.0)                | 32.3 (25.7 to 41.5)               |
| Guinea-Bissau | 2034 | 56.6 (47.0 to 67.7)        | 22.1 (16.7 to 28.7)        | 19.8 (13.9 to 27.7)           | 0.0 (0.0 to 0.0)                | 14.7 (11.6 to 19.0)               | 126.7 (105.3 to 151.5) | 49.4 (37.5 to 64.2)        | 44.3 (31.2 to 61.9)           | 0.0 (0.0 to 0.0)                | 32.9 (25.9 to 42.4)               |
| Guinea-Bissau | 2035 | 57.5 (48.4 to 68.6)        | 22.5 (17.0 to 29.2)        | 20.0 (14.1 to 28.0)           | 0.0 (0.0 to 0.0)                | 14.9 (11.6 to 19.5)               | 128.7 (108.5 to 153.7) | 50.4 (38.1 to 65.3)        | 44.8 (31.5 to 62.7)           | 0.0 (0.0 to 0.0)                | 33.5 (26.0 to 43.7)               |
| Guinea-Bissau | 2036 | 58.4 (48.7 to 70.1)        | 23.0 (17.3 to 29.8)        | 20.2 (14.2 to 28.3)           | 0.0 (0.0 to 0.0)                | 15.2 (11.8 to 20.4)               | 130.8 (109.0 to 156.9) | 51.4 (38.6 to 66.8)        | 45.3 (31.8 to 63.5)           | 0.0 (0.0 to 0.0)                | 34.0 (26.3 to 45.7)               |

| Country       | Year | 2018 US Dollars per capita |                            |                               |                                 |                                   | 2018 PPP per capita    |                            |                               |                                 |                                   |
|---------------|------|----------------------------|----------------------------|-------------------------------|---------------------------------|-----------------------------------|------------------------|----------------------------|-------------------------------|---------------------------------|-----------------------------------|
|               |      | Health spending            | Government health spending | Out-of-pocket health spending | Prepaid private health spending | Development assistance for health | Health spending        | Government health spending | Out-of-pocket health spending | Prepaid private health spending | Development assistance for health |
| Guinea-Bissau | 2037 | 59.4 (49.3 to 71.1)        | 23.5 (17.6 to 30.4)        | 20.5 (14.3 to 28.8)           | 0.0 (0.0 to 0.0)                | 15.4 (11.9 to 20.7)               | 132.9 (110.5 to 159.3) | 52.5 (39.5 to 68.1)        | 45.8 (32.1 to 64.4)           | 0.0 (0.0 to 0.0)                | 34.6 (26.6 to 46.4)               |
| Guinea-Bissau | 2038 | 60.4 (50.1 to 71.8)        | 24.0 (17.9 to 31.2)        | 20.7 (14.5 to 29.2)           | 0.0 (0.0 to 0.0)                | 15.7 (12.0 to 21.9)               | 135.2 (112.1 to 160.7) | 53.7 (40.2 to 69.9)        | 46.4 (32.4 to 65.3)           | 0.0 (0.0 to 0.0)                | 35.2 (26.8 to 49.0)               |
| Guinea-Bissau | 2039 | 61.4 (51.5 to 74.1)        | 24.5 (18.2 to 31.8)        | 20.9 (14.6 to 29.6)           | 0.0 (0.0 to 0.0)                | 16.0 (12.2 to 22.2)               | 137.5 (115.3 to 166.0) | 54.8 (40.8 to 71.2)        | 46.9 (32.8 to 66.2)           | 0.0 (0.0 to 0.0)                | 35.8 (27.3 to 49.7)               |
| Guinea-Bissau | 2040 | 62.5 (51.8 to 75.3)        | 25.0 (18.6 to 32.5)        | 21.2 (14.8 to 30.0)           | 0.0 (0.0 to 0.0)                | 16.3 (12.4 to 22.6)               | 139.9 (116.1 to 168.7) | 56.0 (41.7 to 72.9)        | 47.4 (33.1 to 67.1)           | 0.0 (0.0 to 0.0)                | 36.5 (27.7 to 50.5)               |
| Guinea-Bissau | 2041 | 63.6 (52.9 to 77.3)        | 25.5 (19.1 to 33.3)        | 21.4 (14.9 to 30.4)           | 0.0 (0.0 to 0.0)                | 16.6 (12.5 to 23.0)               | 142.3 (118.6 to 173.0) | 57.2 (42.7 to 74.6)        | 48.0 (33.3 to 68.1)           | 0.0 (0.0 to 0.0)                | 37.2 (27.9 to 51.6)               |
| Guinea-Bissau | 2042 | 64.7 (53.6 to 78.1)        | 26.1 (19.5 to 34.1)        | 21.7 (15.0 to 30.8)           | 0.0 (0.0 to 0.0)                | 16.9 (12.7 to 24.1)               | 144.8 (120.1 to 175.0) | 58.4 (43.6 to 76.3)        | 48.5 (33.6 to 69.0)           | 0.0 (0.0 to 0.0)                | 38.0 (28.4 to 54.0)               |
| Guinea-Bissau | 2043 | 65.8 (54.8 to 78.5)        | 26.6 (19.8 to 34.9)        | 21.9 (15.2 to 31.2)           | 0.0 (0.0 to 0.0)                | 17.3 (12.8 to 25.0)               | 147.4 (122.7 to 175.8) | 59.6 (44.4 to 78.3)        | 49.1 (34.0 to 69.8)           | 0.0 (0.0 to 0.0)                | 38.7 (28.7 to 55.9)               |
| Guinea-Bissau | 2044 | 67.0 (55.5 to 81.3)        | 27.2 (20.2 to 35.8)        | 22.1 (15.4 to 31.6)           | 0.0 (0.0 to 0.0)                | 17.7 (13.0 to 25.5)               | 150.0 (124.3 to 182.1) | 60.8 (45.2 to 80.1)        | 49.6 (34.5 to 70.7)           | 0.0 (0.0 to 0.0)                | 39.5 (29.1 to 57.2)               |
| Guinea-Bissau | 2045 | 68.2 (56.8 to 83.5)        | 27.8 (20.6 to 36.7)        | 22.4 (15.6 to 32.0)           | 0.0 (0.0 to 0.0)                | 18.0 (13.0 to 27.2)               | 152.8 (127.3 to 187.0) | 62.2 (46.1 to 82.1)        | 50.2 (35.0 to 71.6)           | 0.0 (0.0 to 0.0)                | 40.4 (29.1 to 61.0)               |
| Guinea-Bissau | 2046 | 69.5 (57.1 to 84.6)        | 28.4 (20.9 to 37.5)        | 22.6 (15.8 to 32.3)           | 0.0 (0.0 to 0.0)                | 18.4 (13.3 to 28.4)               | 155.6 (127.9 to 189.5) | 63.6 (46.8 to 83.9)        | 50.7 (35.4 to 72.4)           | 0.0 (0.0 to 0.0)                | 41.3 (29.8 to 63.6)               |
| Guinea-Bissau | 2047 | 70.8 (58.4 to 88.4)        | 29.1 (21.4 to 38.4)        | 22.9 (16.0 to 32.8)           | 0.0 (0.0 to 0.0)                | 18.9 (13.5 to 29.7)               | 158.6 (130.7 to 197.9) | 65.1 (47.9 to 86.0)        | 51.3 (35.8 to 73.4)           | 0.0 (0.0 to 0.0)                | 42.2 (30.3 to 66.5)               |
| Guinea-Bissau | 2048 | 72.2 (59.7 to 89.3)        | 29.8 (21.9 to 39.2)        | 23.2 (16.1 to 33.1)           | 0.0 (0.0 to 0.0)                | 19.3 (13.8 to 30.9)               | 161.8 (133.6 to 200.0) | 66.6 (49.1 to 87.9)        | 51.9 (36.1 to 74.2)           | 0.0 (0.0 to 0.0)                | 43.3 (30.8 to 69.3)               |
| Guinea-Bissau | 2049 | 73.7 (60.3 to 89.9)        | 30.5 (22.5 to 40.3)        | 23.4 (16.3 to 33.4)           | 0.0 (0.0 to 0.0)                | 19.8 (14.1 to 31.8)               | 165.0 (135.1 to 201.2) | 68.3 (50.4 to 90.2)        | 52.4 (36.5 to 74.8)           | 0.0 (0.0 to 0.0)                | 44.2 (31.6 to 71.2)               |
| Guinea-Bissau | 2050 | 75.2 (61.4 to 92.9)        | 31.2 (23.0 to 41.3)        | 23.7 (16.5 to 33.7)           | 0.0 (0.0 to 0.0)                | 20.3 (14.2 to 33.0)               | 168.4 (137.5 to 208.1) | 69.9 (51.6 to 92.6)        | 53.0 (36.9 to 75.5)           | 0.0 (0.0 to 0.0)                | 45.4 (31.8 to 74.0)               |
| Guyana        | 1995 | 111.4 (94.4 to 129.9)      | 84.6 (69.2 to 102.1)       | 19.3 (14.1 to 25.7)           | 0.1 (0.1 to 0.2)                | 7.3 (7.3 to 7.3)                  | 202.0 (171.3 to 235.7) | 153.5 (125.5 to 185.3)     | 35.0 (25.5 to 46.7)           | 0.2 (0.1 to 0.4)                | 13.2 (13.2 to 13.2)               |
| Guyana        | 1996 | 114.1 (97.9 to 132.4)      | 86.9 (72.3 to 104.1)       | 20.0 (14.7 to 26.7)           | 0.1 (0.1 to 0.2)                | 7.1 (7.1 to 7.1)                  | 207.0 (177.5 to 240.2) | 157.7 (131.2 to 188.8)     | 36.2 (26.6 to 48.5)           | 0.2 (0.1 to 0.4)                | 12.8 (12.8 to 12.8)               |
| Guyana        | 1997 | 118.0 (102.2 to 134.9)     | 88.4 (74.5 to 104.4)       | 20.6 (15.2 to 27.2)           | 0.1 (0.1 to 0.2)                | 8.9 (8.9 to 8.9)                  | 214.0 (185.3 to 244.7) | 160.3 (135.1 to 189.3)     | 37.3 (27.7 to 49.4)           | 0.2 (0.1 to 0.4)                | 16.1 (16.1 to 16.1)               |
| Guyana        | 1998 | 114.3 (99.7 to 130.4)      | 87.0 (73.6 to 102.3)       | 20.8 (15.5 to 27.5)           | 0.1 (0.1 to 0.2)                | 6.3 (6.3 to 6.3)                  | 207.3 (180.8 to 236.5) | 157.9 (133.6 to 185.6)     | 37.7 (28.1 to 49.9)           | 0.2 (0.1 to 0.4)                | 11.4 (11.4 to 11.4)               |
| Guyana        | 1999 | 117.7 (102.3 to 134.0)     | 90.7 (76.6 to 105.7)       | 21.1 (15.8 to 27.4)           | 0.1 (0.1 to 0.2)                | 5.8 (5.8 to 5.8)                  | 213.5 (185.6 to 243.1) | 164.5 (139.0 to 191.7)     | 38.2 (28.7 to 49.7)           | 0.2 (0.1 to 0.4)                | 10.6 (10.6 to 10.6)               |
| Guyana        | 2000 | 117.0 (101.6 to 133.8)     | 93.4 (79.1 to 109.0)       | 21.6 (16.2 to 28.0)           | 0.1 (0.0 to 0.2)                | 1.9 (1.9 to 1.9)                  | 212.3 (184.3 to 242.6) | 169.4 (143.5 to 197.6)     | 39.2 (29.5 to 50.8)           | 0.2 (0.1 to 0.3)                | 3.5 (3.5 to 3.5)                  |
| Guyana        | 2001 | 128.2 (112.3 to 145.7)     | 99.8 (84.5 to 116.9)       | 23.2 (17.4 to 29.8)           | 0.1 (0.0 to 0.2)                | 5.2 (5.2 to 5.2)                  | 232.6 (203.8 to 264.2) | 181.0 (153.3 to 212.1)     | 42.1 (31.5 to 54.1)           | 0.2 (0.1 to 0.3)                | 9.4 (9.4 to 9.4)                  |

| Country | Year | 2018 US Dollars per capita |                            |                               |                                 |                                   | 2018 PPP per capita    |                            |                               |                                 |                                   |
|---------|------|----------------------------|----------------------------|-------------------------------|---------------------------------|-----------------------------------|------------------------|----------------------------|-------------------------------|---------------------------------|-----------------------------------|
|         |      | Health spending            | Government health spending | Out-of-pocket health spending | Prepaid private health spending | Development assistance for health | Health spending        | Government health spending | Out-of-pocket health spending | Prepaid private health spending | Development assistance for health |
| Guyana  | 2002 | 134.8 (118.1 to 152.6)     | 104.9 (89.2 to 121.6)      | 25.4 (18.9 to 32.4)           | 0.1 (0.0 to 0.2)                | 4.5 (4.5 to 4.5)                  | 244.6 (214.2 to 276.7) | 190.3 (161.9 to 220.5)     | 46.0 (34.4 to 58.7)           | 0.2 (0.1 to 0.3)                | 8.1 (8.1 to 8.1)                  |
| Guyana  | 2003 | 152.6 (134.3 to 170.8)     | 103.9 (87.7 to 120.6)      | 29.5 (22.2 to 37.7)           | 0.1 (0.0 to 0.2)                | 19.2 (19.2 to 19.2)               | 276.9 (243.6 to 309.8) | 188.4 (159.1 to 218.8)     | 53.5 (40.3 to 68.4)           | 0.2 (0.1 to 0.3)                | 34.9 (34.9 to 34.9)               |
| Guyana  | 2004 | 174.7 (156.2 to 192.8)     | 100.8 (85.5 to 117.9)      | 33.5 (25.8 to 42.7)           | 0.1 (0.0 to 0.2)                | 40.2 (40.2 to 40.2)               | 316.8 (283.2 to 349.7) | 182.9 (155.0 to 213.8)     | 60.8 (46.7 to 77.4)           | 0.2 (0.1 to 0.3)                | 73.0 (73.0 to 73.0)               |
| Guyana  | 2005 | 160.7 (143.4 to 178.0)     | 87.7 (74.1 to 103.1)       | 38.1 (29.5 to 47.8)           | 0.1 (0.1 to 0.2)                | 34.9 (34.9 to 34.9)               | 291.6 (260.2 to 322.9) | 159.0 (134.3 to 187.1)     | 69.0 (53.6 to 86.7)           | 0.2 (0.1 to 0.4)                | 63.3 (63.3 to 63.3)               |
| Guyana  | 2006 | 160.5 (145.1 to 176.7)     | 70.8 (59.3 to 83.4)        | 42.7 (33.5 to 53.6)           | 0.1 (0.1 to 0.2)                | 46.8 (46.8 to 46.8)               | 291.1 (263.2 to 320.4) | 128.4 (107.6 to 151.2)     | 77.5 (60.7 to 97.2)           | 0.2 (0.1 to 0.4)                | 85.0 (85.0 to 85.0)               |
| Guyana  | 2007 | 154.8 (139.5 to 171.0)     | 64.4 (53.7 to 76.3)        | 48.9 (39.0 to 60.9)           | 0.1 (0.1 to 0.2)                | 41.4 (41.4 to 41.4)               | 280.9 (253.0 to 310.2) | 116.7 (97.3 to 138.4)      | 88.8 (70.8 to 110.5)          | 0.2 (0.1 to 0.4)                | 75.2 (75.2 to 75.2)               |
| Guyana  | 2008 | 166.8 (151.5 to 183.2)     | 59.8 (49.5 to 71.1)        | 54.2 (43.6 to 67.2)           | 0.1 (0.1 to 0.2)                | 52.7 (52.7 to 52.7)               | 302.6 (274.9 to 332.3) | 108.4 (89.8 to 129.0)      | 98.3 (79.0 to 121.9)          | 0.2 (0.1 to 0.4)                | 95.7 (95.7 to 95.7)               |
| Guyana  | 2009 | 165.7 (150.3 to 183.6)     | 60.3 (50.2 to 71.5)        | 60.6 (49.0 to 74.8)           | 0.1 (0.1 to 0.2)                | 44.7 (44.7 to 44.7)               | 300.6 (272.6 to 333.1) | 109.4 (91.1 to 129.6)      | 110.0 (88.9 to 135.7)         | 0.2 (0.1 to 0.4)                | 81.0 (81.0 to 81.0)               |
| Guyana  | 2010 | 174.1 (157.1 to 194.2)     | 65.0 (53.9 to 77.1)        | 67.7 (55.0 to 83.4)           | 0.1 (0.1 to 0.3)                | 41.3 (41.3 to 41.3)               | 315.7 (285.0 to 352.2) | 117.8 (97.8 to 139.8)      | 122.7 (99.7 to 151.2)         | 0.3 (0.1 to 0.5)                | 74.9 (74.9 to 74.9)               |
| Guyana  | 2011 | 180.7 (161.9 to 202.4)     | 73.1 (60.7 to 86.3)        | 74.5 (60.2 to 92.0)           | 0.2 (0.1 to 0.3)                | 33.0 (33.0 to 33.0)               | 327.8 (293.6 to 367.1) | 132.6 (110.2 to 156.5)     | 135.0 (109.2 to 166.9)        | 0.3 (0.1 to 0.5)                | 59.9 (59.9 to 59.9)               |
| Guyana  | 2012 | 188.4 (167.2 to 211.2)     | 83.4 (69.9 to 98.0)        | 80.0 (65.3 to 98.5)           | 0.2 (0.1 to 0.3)                | 24.8 (24.8 to 24.8)               | 341.7 (303.2 to 383.0) | 151.3 (126.7 to 177.7)     | 145.1 (118.5 to 178.7)        | 0.3 (0.1 to 0.6)                | 45.0 (45.0 to 45.0)               |
| Guyana  | 2013 | 199.8 (177.3 to 226.2)     | 96.1 (80.4 to 112.7)       | 84.7 (69.3 to 104.8)          | 0.2 (0.1 to 0.3)                | 18.8 (18.8 to 18.8)               | 362.4 (321.6 to 410.3) | 174.3 (145.8 to 204.3)     | 153.7 (125.6 to 190.2)        | 0.3 (0.1 to 0.6)                | 34.1 (34.1 to 34.1)               |
| Guyana  | 2014 | 207.4 (182.9 to 235.0)     | 106.4 (89.1 to 125.6)      | 85.7 (69.3 to 107.2)          | 0.2 (0.1 to 0.3)                | 15.2 (15.2 to 15.2)               | 376.2 (331.8 to 426.3) | 192.9 (161.7 to 227.8)     | 155.4 (125.8 to 194.4)        | 0.3 (0.2 to 0.6)                | 27.6 (27.6 to 27.6)               |
| Guyana  | 2015 | 203.9 (178.9 to 233.3)     | 110.2 (91.1 to 131.2)      | 82.9 (66.1 to 103.5)          | 0.2 (0.1 to 0.3)                | 10.7 (10.7 to 10.7)               | 369.9 (324.6 to 423.1) | 199.8 (165.2 to 237.9)     | 150.3 (119.9 to 187.7)        | 0.3 (0.1 to 0.6)                | 19.5 (19.5 to 19.5)               |
| Guyana  | 2016 | 208.0 (180.3 to 239.3)     | 117.8 (97.1 to 142.1)      | 80.1 (62.4 to 102.3)          | 0.2 (0.1 to 0.4)                | 10.0 (10.0 to 10.0)               | 377.3 (327.0 to 434.1) | 213.7 (176.1 to 257.7)     | 145.2 (113.2 to 185.5)        | 0.4 (0.2 to 0.7)                | 18.1 (18.1 to 18.1)               |
| Guyana  | 2017 | 219.4 (189.8 to 255.3)     | 126.2 (104.0 to 151.9)     | 82.8 (64.6 to 105.0)          | 0.2 (0.1 to 0.4)                | 10.2 (10.2 to 10.2)               | 397.9 (344.3 to 463.0) | 228.8 (188.7 to 275.5)     | 150.2 (117.2 to 190.5)        | 0.4 (0.2 to 0.7)                | 18.5 (18.5 to 18.5)               |
| Guyana  | 2018 | 225.2 (194.1 to 259.0)     | 129.5 (106.8 to 155.9)     | 85.8 (66.7 to 108.2)          | 0.2 (0.1 to 0.4)                | 9.6 (9.6 to 9.6)                  | 408.4 (352.1 to 469.8) | 235.0 (193.7 to 282.7)     | 155.6 (120.9 to 196.2)        | 0.4 (0.2 to 0.7)                | 17.5 (17.5 to 17.5)               |
| Guyana  | 2019 | 232.0 (200.7 to 268.3)     | 133.2 (109.7 to 160.5)     | 88.8 (69.1 to 112.4)          | 0.2 (0.1 to 0.4)                | 9.7 (9.1 to 10.3)                 | 420.8 (364.1 to 486.6) | 241.7 (198.9 to 291.2)     | 161.1 (125.4 to 203.9)        | 0.4 (0.2 to 0.8)                | 17.7 (16.5 to 18.7)               |
| Guyana  | 2020 | 238.7 (205.2 to 276.6)     | 136.7 (112.2 to 165.5)     | 91.9 (72.1 to 116.8)          | 0.2 (0.1 to 0.4)                | 9.9 (9.1 to 10.7)                 | 433.0 (372.2 to 501.7) | 247.9 (203.5 to 300.1)     | 166.8 (130.7 to 211.8)        | 0.4 (0.2 to 0.8)                | 18.0 (16.4 to 19.4)               |
| Guyana  | 2021 | 247.0 (212.1 to 284.7)     | 141.3 (115.9 to 171.0)     | 95.4 (74.3 to 121.1)          | 0.2 (0.1 to 0.4)                | 10.1 (9.1 to 11.2)                | 448.0 (384.7 to 516.4) | 256.3 (210.3 to 310.2)     | 173.0 (134.8 to 219.7)        | 0.4 (0.2 to 0.8)                | 18.3 (16.5 to 20.2)               |
| Guyana  | 2022 | 255.1 (219.3 to 292.0)     | 145.7 (119.7 to 175.3)     | 98.8 (76.8 to 125.1)          | 0.2 (0.1 to 0.4)                | 10.3 (9.2 to 11.6)                | 462.7 (397.8 to 529.6) | 264.3 (217.1 to 318.0)     | 179.2 (139.3 to 226.9)        | 0.4 (0.2 to 0.8)                | 18.7 (16.6 to 21.0)               |



| Country | Year | 2018 US Dollars per capita |                            |                               |                                 |                                   | 2018 PPP per capita    |                            |                               |                                 |                                   |
|---------|------|----------------------------|----------------------------|-------------------------------|---------------------------------|-----------------------------------|------------------------|----------------------------|-------------------------------|---------------------------------|-----------------------------------|
|         |      | Health spending            | Government health spending | Out-of-pocket health spending | Prepaid private health spending | Development assistance for health | Health spending        | Government health spending | Out-of-pocket health spending | Prepaid private health spending | Development assistance for health |
| Guyana  | 2023 | 263.3 (224.3 to 301.3)     | 150.2 (123.1 to 180.1)     | 102.3 (79.6 to 129.9)         | 0.2 (0.1 to 0.5)                | 10.6 (9.2 to 12.0)                | 477.6 (406.9 to 546.6) | 272.5 (223.3 to 326.8)     | 185.5 (144.5 to 235.6)        | 0.4 (0.2 to 0.8)                | 19.2 (16.7 to 21.8)               |
| Guyana  | 2024 | 271.5 (235.2 to 312.6)     | 154.5 (127.0 to 185.0)     | 105.8 (82.2 to 134.5)         | 0.3 (0.1 to 0.5)                | 10.8 (9.4 to 12.5)                | 492.4 (426.6 to 567.0) | 280.3 (230.3 to 335.6)     | 192.0 (149.2 to 244.0)        | 0.5 (0.2 to 0.9)                | 19.7 (17.0 to 22.6)               |
| Guyana  | 2025 | 279.4 (241.9 to 325.8)     | 158.6 (130.6 to 190.1)     | 109.4 (84.8 to 139.2)         | 0.3 (0.1 to 0.5)                | 11.1 (9.5 to 13.0)                | 506.8 (438.8 to 591.0) | 287.8 (236.9 to 344.8)     | 198.5 (153.9 to 252.4)        | 0.5 (0.2 to 0.9)                | 20.1 (17.2 to 23.6)               |
| Guyana  | 2026 | 287.8 (248.0 to 332.7)     | 163.0 (133.8 to 195.5)     | 113.2 (87.2 to 143.6)         | 0.3 (0.1 to 0.5)                | 11.4 (9.6 to 13.3)                | 522.0 (449.9 to 603.4) | 295.6 (242.7 to 354.5)     | 205.3 (158.3 to 260.5)        | 0.5 (0.2 to 0.9)                | 20.6 (17.4 to 24.2)               |
| Guyana  | 2027 | 295.8 (255.4 to 341.8)     | 167.0 (137.0 to 200.7)     | 116.9 (89.8 to 148.4)         | 0.3 (0.1 to 0.5)                | 11.7 (9.8 to 13.8)                | 536.6 (463.3 to 620.0) | 302.9 (248.5 to 364.0)     | 212.1 (162.9 to 269.2)        | 0.5 (0.2 to 0.9)                | 21.1 (17.7 to 25.1)               |
| Guyana  | 2028 | 304.1 (261.7 to 353.7)     | 171.1 (140.4 to 206.1)     | 120.7 (92.4 to 155.0)         | 0.3 (0.1 to 0.5)                | 12.0 (10.0 to 14.5)               | 551.6 (474.6 to 641.5) | 310.4 (254.7 to 373.8)     | 219.0 (167.6 to 281.1)        | 0.5 (0.2 to 0.9)                | 21.7 (18.2 to 26.2)               |
| Guyana  | 2029 | 312.2 (267.9 to 362.0)     | 175.2 (143.4 to 210.6)     | 124.5 (95.0 to 161.5)         | 0.3 (0.1 to 0.5)                | 12.3 (10.1 to 15.0)               | 566.4 (486.0 to 656.6) | 317.8 (260.2 to 382.0)     | 225.8 (172.3 to 293.0)        | 0.5 (0.2 to 1.0)                | 22.3 (18.4 to 27.2)               |
| Guyana  | 2030 | 320.3 (277.1 to 373.6)     | 179.1 (146.4 to 215.9)     | 128.3 (97.5 to 167.1)         | 0.3 (0.1 to 0.5)                | 12.6 (10.3 to 15.5)               | 581.0 (502.6 to 677.7) | 324.9 (265.5 to 391.6)     | 232.6 (176.8 to 303.0)        | 0.5 (0.2 to 1.0)                | 22.9 (18.7 to 28.1)               |
| Guyana  | 2031 | 329.0 (282.5 to 384.7)     | 183.6 (150.0 to 221.4)     | 132.1 (99.9 to 173.0)         | 0.3 (0.1 to 0.6)                | 13.0 (10.5 to 16.3)               | 596.8 (512.4 to 697.8) | 333.1 (272.1 to 401.6)     | 239.7 (181.2 to 313.8)        | 0.5 (0.3 to 1.0)                | 23.5 (19.0 to 29.6)               |
| Guyana  | 2032 | 337.6 (289.4 to 393.3)     | 187.9 (153.4 to 226.6)     | 136.0 (102.1 to 179.1)        | 0.3 (0.1 to 0.6)                | 13.3 (10.7 to 16.8)               | 612.3 (524.9 to 713.4) | 340.9 (278.3 to 411.1)     | 246.7 (185.2 to 324.9)        | 0.5 (0.3 to 1.0)                | 24.2 (19.4 to 30.5)               |
| Guyana  | 2033 | 346.1 (296.9 to 404.2)     | 192.3 (157.0 to 232.5)     | 139.8 (104.3 to 184.7)        | 0.3 (0.1 to 0.6)                | 13.7 (10.9 to 17.6)               | 627.8 (538.5 to 733.2) | 348.7 (284.8 to 421.8)     | 253.6 (189.2 to 335.1)        | 0.6 (0.3 to 1.0)                | 24.9 (19.7 to 31.9)               |
| Guyana  | 2034 | 354.7 (302.6 to 415.4)     | 196.6 (159.8 to 238.6)     | 143.7 (106.5 to 189.8)        | 0.3 (0.2 to 0.6)                | 14.1 (11.1 to 18.3)               | 643.4 (548.8 to 753.5) | 356.6 (289.8 to 432.7)     | 260.6 (193.2 to 344.3)        | 0.6 (0.3 to 1.1)                | 25.7 (20.2 to 33.1)               |
| Guyana  | 2035 | 363.2 (311.7 to 426.1)     | 200.9 (163.4 to 244.1)     | 147.4 (108.6 to 194.7)        | 0.3 (0.2 to 0.6)                | 14.6 (11.3 to 19.0)               | 658.8 (565.3 to 773.0) | 364.4 (296.5 to 442.7)     | 267.4 (197.1 to 353.1)        | 0.6 (0.3 to 1.1)                | 26.4 (20.5 to 34.5)               |
| Guyana  | 2036 | 372.2 (318.2 to 434.1)     | 205.5 (167.3 to 250.0)     | 151.3 (110.4 to 200.6)        | 0.3 (0.2 to 0.6)                | 15.0 (11.6 to 20.2)               | 675.0 (577.2 to 787.4) | 372.8 (303.5 to 453.5)     | 274.4 (200.3 to 363.9)        | 0.6 (0.3 to 1.1)                | 27.2 (21.1 to 36.7)               |
| Guyana  | 2037 | 381.2 (323.7 to 446.7)     | 210.3 (170.9 to 256.0)     | 155.1 (112.8 to 205.7)        | 0.3 (0.2 to 0.6)                | 15.5 (11.9 to 20.8)               | 691.5 (587.2 to 810.3) | 381.5 (310.1 to 464.3)     | 281.3 (204.7 to 373.2)        | 0.6 (0.3 to 1.1)                | 28.0 (21.5 to 37.7)               |
| Guyana  | 2038 | 390.3 (332.6 to 460.2)     | 215.1 (174.2 to 262.4)     | 158.9 (115.1 to 210.8)        | 0.3 (0.2 to 0.6)                | 15.9 (12.1 to 22.2)               | 707.9 (603.2 to 834.7) | 390.2 (316.0 to 475.9)     | 288.2 (208.8 to 382.3)        | 0.6 (0.3 to 1.2)                | 28.9 (22.0 to 40.2)               |
| Guyana  | 2039 | 399.1 (341.4 to 470.1)     | 219.8 (178.2 to 268.8)     | 162.6 (117.3 to 216.2)        | 0.4 (0.2 to 0.7)                | 16.4 (12.6 to 22.7)               | 724.0 (619.2 to 852.7) | 398.7 (323.2 to 487.6)     | 294.9 (212.7 to 392.1)        | 0.6 (0.3 to 1.2)                | 29.8 (22.8 to 41.3)               |
| Guyana  | 2040 | 407.9 (346.6 to 484.1)     | 224.5 (180.4 to 275.5)     | 166.2 (119.7 to 221.6)        | 0.4 (0.2 to 0.7)                | 16.9 (12.8 to 23.5)               | 739.9 (628.7 to 878.1) | 407.1 (327.3 to 499.8)     | 301.4 (217.2 to 401.9)        | 0.7 (0.3 to 1.2)                | 30.7 (23.3 to 42.6)               |
| Guyana  | 2041 | 417.0 (353.3 to 494.6)     | 229.4 (184.3 to 281.5)     | 169.8 (121.6 to 226.4)        | 0.4 (0.2 to 0.7)                | 17.5 (13.1 to 24.3)               | 756.4 (640.8 to 897.1) | 416.1 (334.4 to 510.7)     | 307.9 (220.6 to 410.6)        | 0.7 (0.3 to 1.3)                | 31.7 (23.8 to 44.0)               |
| Guyana  | 2042 | 426.0 (363.2 to 508.7)     | 234.3 (188.0 to 288.0)     | 173.3 (123.4 to 231.0)        | 0.4 (0.2 to 0.7)                | 18.0 (13.4 to 25.7)               | 772.7 (658.9 to 922.8) | 425.0 (341.0 to 522.4)     | 314.3 (223.9 to 419.0)        | 0.7 (0.3 to 1.3)                | 32.7 (24.4 to 46.7)               |
| Guyana  | 2043 | 434.9 (366.0 to 517.8)     | 239.2 (191.0 to 295.3)     | 176.7 (125.6 to 236.0)        | 0.4 (0.2 to 0.7)                | 18.6 (13.7 to 26.8)               | 788.8 (663.9 to 939.2) | 433.8 (346.5 to 535.7)     | 320.5 (227.9 to 428.0)        | 0.7 (0.3 to 1.3)                | 33.8 (24.9 to 48.6)               |

| Country | Year | 2018 US Dollars per capita |                            |                               |                                 |                                   | 2018 PPP per capita     |                            |                               |                                 |                                   |
|---------|------|----------------------------|----------------------------|-------------------------------|---------------------------------|-----------------------------------|-------------------------|----------------------------|-------------------------------|---------------------------------|-----------------------------------|
|         |      | Health spending            | Government health spending | Out-of-pocket health spending | Prepaid private health spending | Development assistance for health | Health spending         | Government health spending | Out-of-pocket health spending | Prepaid private health spending | Development assistance for health |
| Guyana  | 2044 | 443.7 (374.3 to 529.9)     | 244.0 (194.7 to 303.1)     | 180.0 (127.8 to 240.7)        | 0.4 (0.2 to 0.7)                | 19.2 (14.1 to 27.8)               | 804.8 (679.0 to 961.2)  | 442.7 (353.2 to 549.7)     | 326.5 (231.8 to 436.7)        | 0.7 (0.4 to 1.3)                | 34.9 (25.6 to 50.4)               |
| Guyana  | 2045 | 452.0 (380.2 to 538.9)     | 248.6 (197.9 to 308.5)     | 183.2 (129.9 to 245.2)        | 0.4 (0.2 to 0.8)                | 19.9 (14.3 to 30.0)               | 819.9 (689.7 to 977.4)  | 450.9 (358.9 to 559.6)     | 332.3 (235.7 to 444.7)        | 0.7 (0.4 to 1.4)                | 36.0 (26.0 to 54.4)               |
| Guyana  | 2046 | 460.9 (390.2 to 546.8)     | 253.6 (202.2 to 315.1)     | 186.4 (132.0 to 249.6)        | 0.4 (0.2 to 0.8)                | 20.5 (14.8 to 31.6)               | 836.0 (707.7 to 991.8)  | 460.1 (366.8 to 571.5)     | 338.0 (239.5 to 452.7)        | 0.8 (0.4 to 1.4)                | 37.2 (26.9 to 57.3)               |
| Guyana  | 2047 | 469.6 (395.7 to 557.0)     | 258.6 (206.5 to 322.0)     | 189.4 (134.1 to 253.7)        | 0.4 (0.2 to 0.8)                | 21.2 (15.2 to 33.4)               | 851.8 (717.7 to 1010.3) | 469.0 (374.6 to 584.1)     | 343.5 (243.2 to 460.1)        | 0.8 (0.4 to 1.5)                | 38.5 (27.5 to 60.6)               |
| Guyana  | 2048 | 478.0 (401.0 to 565.3)     | 263.3 (209.8 to 329.6)     | 192.4 (136.1 to 257.6)        | 0.4 (0.2 to 0.8)                | 22.0 (15.6 to 35.3)               | 867.1 (727.4 to 1025.3) | 477.5 (380.5 to 597.9)     | 348.9 (246.9 to 467.3)        | 0.8 (0.4 to 1.5)                | 39.8 (28.4 to 64.1)               |
| Guyana  | 2049 | 486.1 (404.7 to 574.3)     | 267.6 (213.5 to 335.0)     | 195.4 (138.4 to 261.4)        | 0.5 (0.2 to 0.8)                | 22.7 (16.2 to 36.7)               | 881.8 (734.1 to 1041.7) | 485.4 (387.3 to 607.7)     | 354.4 (251.1 to 474.1)        | 0.8 (0.4 to 1.5)                | 41.2 (29.3 to 66.5)               |
| Guyana  | 2050 | 493.8 (412.8 to 588.3)     | 271.5 (215.9 to 340.4)     | 198.3 (140.4 to 264.8)        | 0.5 (0.2 to 0.9)                | 23.5 (16.5 to 38.2)               | 895.7 (748.8 to 1067.1) | 492.5 (391.6 to 617.5)     | 359.6 (254.7 to 480.4)        | 0.8 (0.4 to 1.6)                | 42.7 (29.9 to 69.2)               |
| Haiti   | 1995 | 59.8 (51.3 to 69.8)        | 9.4 (7.1 to 12.2)          | 25.6 (18.2 to 35.4)           | 3.4 (1.7 to 6.5)                | 21.4 (21.4 to 21.4)               | 143.9 (123.4 to 167.9)  | 22.5 (17.0 to 29.3)        | 61.7 (43.7 to 85.2)           | 8.3 (4.0 to 15.6)               | 51.4 (51.4 to 51.4)               |
| Haiti   | 1996 | 50.1 (41.5 to 60.5)        | 9.4 (7.1 to 12.3)          | 26.6 (18.8 to 36.9)           | 3.4 (1.6 to 6.4)                | 10.7 (10.7 to 10.7)               | 120.4 (99.7 to 145.5)   | 22.6 (17.2 to 29.7)        | 63.9 (45.2 to 88.7)           | 8.3 (3.9 to 15.5)               | 25.6 (25.6 to 25.6)               |
| Haiti   | 1997 | 43.6 (35.4 to 53.5)        | 9.2 (6.9 to 12.1)          | 26.2 (18.8 to 35.8)           | 3.3 (1.6 to 6.3)                | 4.9 (4.9 to 4.9)                  | 104.8 (85.1 to 128.8)   | 22.0 (16.7 to 29.1)        | 62.9 (45.1 to 86.2)           | 8.0 (3.8 to 15.2)               | 11.9 (11.9 to 11.9)               |
| Haiti   | 1998 | 46.1 (38.5 to 55.1)        | 8.7 (6.7 to 11.6)          | 24.9 (18.1 to 33.8)           | 3.2 (1.5 to 6.3)                | 9.2 (9.2 to 9.2)                  | 110.8 (92.5 to 132.6)   | 21.0 (16.0 to 28.0)        | 59.9 (43.5 to 81.3)           | 7.7 (3.7 to 15.1)               | 22.2 (22.2 to 22.2)               |
| Haiti   | 1999 | 44.2 (36.7 to 53.3)        | 9.1 (6.9 to 12.0)          | 24.8 (18.2 to 33.6)           | 3.3 (1.6 to 6.4)                | 6.9 (6.9 to 6.9)                  | 106.3 (88.4 to 128.2)   | 21.9 (16.7 to 28.8)        | 59.8 (43.7 to 80.7)           | 8.0 (3.8 to 15.4)               | 16.7 (16.7 to 16.7)               |
| Haiti   | 2000 | 44.4 (36.8 to 53.8)        | 9.9 (7.5 to 12.9)          | 25.5 (18.7 to 34.5)           | 3.6 (1.7 to 7.0)                | 5.4 (5.4 to 5.4)                  | 106.8 (88.5 to 129.3)   | 23.8 (18.1 to 31.1)        | 61.4 (45.1 to 83.0)           | 8.7 (4.0 to 16.8)               | 13.0 (13.0 to 13.0)               |
| Haiti   | 2001 | 41.7 (34.7 to 50.1)        | 9.0 (6.9 to 11.7)          | 24.2 (17.8 to 32.7)           | 3.4 (1.6 to 6.2)                | 5.1 (5.1 to 5.1)                  | 100.3 (83.4 to 120.4)   | 21.6 (16.5 to 28.1)        | 58.2 (42.8 to 78.7)           | 8.2 (3.8 to 15.0)               | 12.3 (12.3 to 12.3)               |
| Haiti   | 2002 | 37.1 (30.4 to 44.9)        | 7.7 (5.9 to 10.0)          | 22.5 (16.4 to 30.3)           | 3.1 (1.5 to 5.7)                | 3.8 (3.8 to 3.8)                  | 89.2 (73.1 to 108.0)    | 18.5 (14.1 to 24.1)        | 54.2 (39.4 to 72.9)           | 7.5 (3.6 to 13.8)               | 9.1 (9.1 to 9.1)                  |
| Haiti   | 2003 | 38.6 (32.2 to 46.2)        | 7.1 (5.4 to 9.0)           | 21.1 (15.4 to 28.4)           | 3.0 (1.4 to 5.5)                | 7.5 (7.5 to 7.5)                  | 92.7 (77.3 to 111.1)    | 17.0 (13.0 to 21.7)        | 50.7 (37.0 to 68.2)           | 7.1 (3.4 to 13.2)               | 17.9 (17.9 to 17.9)               |
| Haiti   | 2004 | 37.3 (31.2 to 44.8)        | 6.7 (5.1 to 8.6)           | 19.7 (14.3 to 26.7)           | 2.8 (1.4 to 5.3)                | 8.1 (8.1 to 8.1)                  | 89.8 (74.9 to 107.8)    | 16.1 (12.2 to 20.6)        | 47.3 (34.5 to 64.1)           | 6.8 (3.3 to 12.8)               | 19.5 (19.5 to 19.5)               |
| Haiti   | 2005 | 37.1 (31.4 to 43.8)        | 6.4 (4.9 to 8.2)           | 18.5 (13.6 to 25.0)           | 2.7 (1.3 to 5.1)                | 9.5 (9.5 to 9.5)                  | 89.2 (75.5 to 105.3)    | 15.4 (11.7 to 19.8)        | 44.5 (32.6 to 60.2)           | 6.5 (3.2 to 12.2)               | 22.9 (22.9 to 22.9)               |
| Haiti   | 2006 | 41.2 (35.8 to 47.8)        | 5.9 (4.4 to 7.5)           | 17.3 (12.7 to 23.4)           | 2.4 (1.2 to 4.4)                | 15.6 (15.6 to 15.6)               | 99.0 (86.2 to 114.9)    | 14.1 (10.7 to 18.1)        | 41.5 (30.5 to 56.2)           | 5.8 (2.9 to 10.7)               | 37.5 (37.5 to 37.5)               |
| Haiti   | 2007 | 44.4 (38.9 to 51.3)        | 7.4 (5.6 to 9.4)           | 17.9 (13.2 to 24.5)           | 2.6 (1.2 to 4.8)                | 16.5 (16.5 to 16.5)               | 106.7 (93.6 to 123.4)   | 17.9 (13.5 to 22.7)        | 43.0 (31.7 to 58.9)           | 6.2 (3.0 to 11.4)               | 39.7 (39.7 to 39.7)               |
| Haiti   | 2008 | 47.5 (41.7 to 54.4)        | 8.2 (6.3 to 10.6)          | 18.0 (13.3 to 24.6)           | 2.7 (1.3 to 5.0)                | 18.4 (18.4 to 18.4)               | 114.2 (100.4 to 130.9)  | 19.8 (15.2 to 25.4)        | 43.4 (32.0 to 59.0)           | 6.6 (3.1 to 12.1)               | 44.4 (44.4 to 44.4)               |

| Country | Year | 2018 US Dollars per capita |                            |                               |                                 |                                   | 2018 PPP per capita    |                            |                               |                                 |                                   |
|---------|------|----------------------------|----------------------------|-------------------------------|---------------------------------|-----------------------------------|------------------------|----------------------------|-------------------------------|---------------------------------|-----------------------------------|
|         |      | Health spending            | Government health spending | Out-of-pocket health spending | Prepaid private health spending | Development assistance for health | Health spending        | Government health spending | Out-of-pocket health spending | Prepaid private health spending | Development assistance for health |
| Haiti   | 2009 | 45.5 (39.6 to 52.8)        | 8.7 (6.7 to 11.1)          | 18.8 (13.7 to 25.6)           | 2.9 (1.3 to 5.5)                | 15.2 (15.2 to 15.2)               | 109.5 (95.3 to 127.0)  | 20.8 (16.0 to 26.8)        | 45.1 (32.9 to 61.7)           | 7.0 (3.1 to 13.1)               | 36.6 (36.6 to 36.6)               |
| Haiti   | 2010 | 48.8 (43.2 to 56.2)        | 7.9 (6.0 to 10.1)          | 18.8 (13.6 to 25.6)           | 2.8 (1.2 to 5.2)                | 19.4 (19.4 to 19.4)               | 117.4 (103.8 to 135.1) | 18.9 (14.5 to 24.4)        | 45.1 (32.7 to 61.7)           | 6.7 (2.9 to 12.6)               | 46.7 (46.7 to 46.7)               |
| Haiti   | 2011 | 50.3 (44.9 to 57.3)        | 6.9 (5.3 to 9.0)           | 18.8 (13.6 to 25.7)           | 2.2 (0.9 to 4.2)                | 22.5 (22.5 to 22.5)               | 121.1 (108.1 to 137.9) | 16.6 (12.7 to 21.6)        | 45.2 (32.6 to 61.8)           | 5.3 (2.3 to 10.0)               | 54.0 (54.0 to 54.0)               |
| Haiti   | 2012 | 50.4 (44.8 to 57.6)        | 6.5 (5.0 to 8.5)           | 18.9 (13.6 to 25.4)           | 2.1 (0.9 to 4.1)                | 22.9 (22.9 to 22.9)               | 121.3 (107.9 to 138.4) | 15.6 (12.0 to 20.3)        | 45.5 (32.7 to 61.0)           | 5.1 (2.3 to 9.8)                | 55.1 (55.1 to 55.1)               |
| Haiti   | 2013 | 50.3 (44.6 to 57.6)        | 6.5 (5.0 to 8.4)           | 18.8 (13.5 to 25.3)           | 2.2 (1.0 to 4.4)                | 22.8 (22.8 to 22.8)               | 121.1 (107.3 to 138.6) | 15.6 (11.9 to 20.3)        | 45.2 (32.4 to 60.9)           | 5.4 (2.4 to 10.5)               | 54.9 (54.9 to 54.9)               |
| Haiti   | 2014 | 47.7 (42.1 to 54.7)        | 6.4 (4.8 to 8.4)           | 18.1 (12.9 to 24.5)           | 2.2 (1.0 to 4.2)                | 21.1 (21.1 to 21.1)               | 114.8 (101.3 to 131.6) | 15.3 (11.7 to 20.1)        | 43.5 (31.1 to 59.0)           | 5.3 (2.4 to 10.0)               | 50.8 (50.8 to 50.8)               |
| Haiti   | 2015 | 47.6 (42.3 to 54.4)        | 6.3 (4.8 to 8.2)           | 17.3 (12.3 to 23.8)           | 2.1 (0.9 to 4.0)                | 21.9 (21.9 to 21.9)               | 114.4 (101.6 to 130.9) | 15.1 (11.5 to 19.8)        | 41.6 (29.6 to 57.3)           | 5.1 (2.3 to 9.6)                | 52.6 (52.6 to 52.6)               |
| Haiti   | 2016 | 47.0 (41.7 to 53.9)        | 6.1 (4.6 to 8.0)           | 16.8 (11.9 to 23.1)           | 2.0 (0.9 to 3.8)                | 22.0 (22.0 to 22.0)               | 113.1 (100.2 to 129.7) | 14.8 (11.2 to 19.2)        | 40.5 (28.7 to 55.7)           | 4.9 (2.2 to 9.1)                | 53.0 (53.0 to 53.0)               |
| Haiti   | 2017 | 42.2 (36.8 to 49.1)        | 6.2 (4.6 to 8.0)           | 16.8 (11.8 to 23.2)           | 2.0 (0.9 to 3.8)                | 17.2 (17.2 to 17.2)               | 101.4 (88.5 to 118.1)  | 14.8 (11.2 to 19.3)        | 40.4 (28.4 to 55.7)           | 4.9 (2.2 to 9.2)                | 41.3 (41.3 to 41.3)               |
| Haiti   | 2018 | 41.3 (36.0 to 48.0)        | 6.2 (4.7 to 8.1)           | 16.8 (11.7 to 23.1)           | 2.1 (0.9 to 3.9)                | 16.2 (16.2 to 16.2)               | 99.3 (86.5 to 115.6)   | 15.0 (11.3 to 19.6)        | 40.5 (28.2 to 55.6)           | 5.0 (2.3 to 9.4)                | 38.9 (38.9 to 38.9)               |
| Haiti   | 2019 | 41.5 (35.7 to 48.4)        | 6.3 (4.8 to 8.3)           | 16.9 (11.7 to 23.2)           | 2.1 (1.0 to 3.9)                | 16.3 (15.2 to 17.2)               | 99.9 (85.8 to 116.3)   | 15.2 (11.5 to 19.9)        | 40.5 (28.2 to 55.9)           | 5.0 (2.3 to 9.5)                | 39.1 (36.6 to 41.4)               |
| Haiti   | 2020 | 41.9 (36.3 to 48.8)        | 6.4 (4.8 to 8.4)           | 16.9 (11.9 to 23.4)           | 2.1 (1.0 to 4.0)                | 16.5 (15.1 to 17.8)               | 100.8 (87.2 to 117.4)  | 15.4 (11.6 to 20.1)        | 40.7 (28.6 to 56.2)           | 5.1 (2.3 to 9.6)                | 39.7 (36.4 to 42.8)               |
| Haiti   | 2021 | 42.4 (36.6 to 49.4)        | 6.5 (4.9 to 8.5)           | 17.0 (11.9 to 23.4)           | 2.1 (1.0 to 4.1)                | 16.8 (15.1 to 18.5)               | 101.9 (88.0 to 118.8)  | 15.6 (11.8 to 20.4)        | 40.8 (28.6 to 56.4)           | 5.2 (2.3 to 9.7)                | 40.3 (36.3 to 44.6)               |
| Haiti   | 2022 | 42.9 (37.1 to 50.8)        | 6.6 (5.0 to 8.6)           | 17.0 (12.0 to 23.5)           | 2.2 (1.0 to 4.1)                | 17.1 (15.2 to 19.1)               | 103.2 (89.3 to 122.1)  | 15.8 (11.9 to 20.6)        | 41.0 (28.7 to 56.6)           | 5.2 (2.4 to 9.9)                | 41.2 (36.6 to 46.0)               |
| Haiti   | 2023 | 43.5 (37.0 to 50.9)        | 6.7 (5.0 to 8.7)           | 17.1 (11.9 to 23.6)           | 2.2 (1.0 to 4.2)                | 17.5 (15.2 to 19.9)               | 104.6 (89.1 to 122.3)  | 16.0 (12.1 to 20.9)        | 41.2 (28.7 to 56.8)           | 5.3 (2.4 to 10.0)               | 42.1 (36.6 to 47.8)               |
| Haiti   | 2024 | 44.1 (37.8 to 52.1)        | 6.8 (5.1 to 8.8)           | 17.2 (12.0 to 23.8)           | 2.2 (1.0 to 4.2)                | 17.9 (15.4 to 20.6)               | 106.0 (90.8 to 125.3)  | 16.3 (12.3 to 21.2)        | 41.4 (28.8 to 57.2)           | 5.4 (2.4 to 10.2)               | 43.0 (37.1 to 49.6)               |
| Haiti   | 2025 | 44.6 (38.4 to 52.0)        | 6.9 (5.2 to 8.9)           | 17.3 (12.1 to 23.9)           | 2.3 (1.0 to 4.3)                | 18.2 (15.6 to 21.3)               | 107.4 (92.4 to 125.1)  | 16.5 (12.5 to 21.4)        | 41.5 (29.0 to 57.5)           | 5.4 (2.5 to 10.3)               | 43.9 (37.4 to 51.3)               |
| Haiti   | 2026 | 45.2 (38.9 to 53.1)        | 7.0 (5.3 to 9.0)           | 17.3 (12.2 to 24.0)           | 2.3 (1.0 to 4.3)                | 18.6 (15.7 to 21.8)               | 108.7 (93.6 to 127.6)  | 16.8 (12.7 to 21.8)        | 41.7 (29.3 to 57.8)           | 5.5 (2.5 to 10.4)               | 44.8 (37.8 to 52.5)               |
| Haiti   | 2027 | 45.8 (39.2 to 54.0)        | 7.1 (5.3 to 9.2)           | 17.4 (12.2 to 24.2)           | 2.3 (1.1 to 4.4)                | 19.0 (15.9 to 22.6)               | 110.2 (94.2 to 129.8)  | 17.0 (12.9 to 22.1)        | 41.9 (29.3 to 58.2)           | 5.6 (2.5 to 10.5)               | 45.7 (38.3 to 54.4)               |
| Haiti   | 2028 | 46.5 (39.9 to 55.1)        | 7.2 (5.4 to 9.3)           | 17.5 (12.2 to 24.3)           | 2.3 (1.1 to 4.4)                | 19.5 (16.3 to 23.5)               | 111.7 (96.0 to 132.6)  | 17.3 (13.0 to 22.4)        | 42.0 (29.4 to 58.4)           | 5.6 (2.6 to 10.7)               | 46.8 (39.1 to 56.5)               |
| Haiti   | 2029 | 47.1 (40.2 to 55.8)        | 7.3 (5.5 to 9.5)           | 17.5 (12.3 to 24.5)           | 2.4 (1.1 to 4.5)                | 19.9 (16.4 to 24.3)               | 113.3 (96.6 to 134.3)  | 17.5 (13.2 to 22.7)        | 42.1 (29.5 to 58.9)           | 5.7 (2.6 to 10.8)               | 47.9 (39.4 to 58.4)               |

| Country | Year | 2018 US Dollars per capita |                            |                               |                                 |                                   | 2018 PPP per capita    |                            |                               |                                 |                                   |
|---------|------|----------------------------|----------------------------|-------------------------------|---------------------------------|-----------------------------------|------------------------|----------------------------|-------------------------------|---------------------------------|-----------------------------------|
|         |      | Health spending            | Government health spending | Out-of-pocket health spending | Prepaid private health spending | Development assistance for health | Health spending        | Government health spending | Out-of-pocket health spending | Prepaid private health spending | Development assistance for health |
| Haiti   | 2030 | 47.8 (40.7 to 56.6)        | 7.4 (5.6 to 9.6)           | 17.6 (12.3 to 24.6)           | 2.4 (1.1 to 4.5)                | 20.4 (16.7 to 24.9)               | 114.8 (97.9 to 136.2)  | 17.8 (13.4 to 23.1)        | 42.3 (29.6 to 59.2)           | 5.8 (2.6 to 10.9)               | 49.0 (40.1 to 60.0)               |
| Haiti   | 2031 | 48.4 (40.8 to 57.3)        | 7.5 (5.6 to 9.7)           | 17.6 (12.3 to 24.7)           | 2.4 (1.1 to 4.6)                | 20.8 (16.9 to 26.2)               | 116.4 (98.2 to 137.8)  | 18.0 (13.5 to 23.4)        | 42.4 (29.6 to 59.3)           | 5.9 (2.7 to 11.1)               | 50.1 (40.6 to 62.9)               |
| Haiti   | 2032 | 49.1 (41.5 to 58.6)        | 7.6 (5.7 to 9.9)           | 17.7 (12.3 to 24.8)           | 2.5 (1.1 to 4.7)                | 21.3 (17.1 to 26.8)               | 118.1 (99.9 to 140.9)  | 18.3 (13.7 to 23.7)        | 42.6 (29.7 to 59.7)           | 5.9 (2.7 to 11.2)               | 51.3 (41.1 to 64.6)               |
| Haiti   | 2033 | 49.8 (41.6 to 59.4)        | 7.7 (5.8 to 10.0)          | 17.8 (12.4 to 24.9)           | 2.5 (1.1 to 4.7)                | 21.9 (17.4 to 28.0)               | 119.7 (100.2 to 143.0) | 18.5 (13.9 to 24.1)        | 42.7 (29.7 to 59.9)           | 6.0 (2.7 to 11.3)               | 52.6 (41.7 to 67.4)               |
| Haiti   | 2034 | 50.5 (42.7 to 60.8)        | 7.8 (5.8 to 10.2)          | 17.8 (12.4 to 24.9)           | 2.5 (1.1 to 4.8)                | 22.4 (17.7 to 28.8)               | 121.5 (102.8 to 146.2) | 18.7 (14.1 to 24.4)        | 42.8 (29.7 to 59.9)           | 6.1 (2.8 to 11.5)               | 53.9 (42.5 to 69.3)               |
| Haiti   | 2035 | 51.3 (43.3 to 62.0)        | 7.9 (5.9 to 10.3)          | 17.9 (12.4 to 25.1)           | 2.6 (1.2 to 4.8)                | 23.0 (17.9 to 30.1)               | 123.4 (104.1 to 149.0) | 18.9 (14.3 to 24.7)        | 43.0 (29.8 to 60.4)           | 6.1 (2.8 to 11.7)               | 55.3 (43.0 to 72.4)               |
| Haiti   | 2036 | 52.1 (43.2 to 63.0)        | 8.0 (6.0 to 10.4)          | 17.9 (12.4 to 25.3)           | 2.6 (1.2 to 4.9)                | 23.6 (18.3 to 31.7)               | 125.2 (103.9 to 151.4) | 19.2 (14.3 to 25.1)        | 43.2 (29.8 to 60.8)           | 6.2 (2.8 to 11.8)               | 56.7 (44.0 to 76.2)               |
| Haiti   | 2037 | 52.8 (44.4 to 64.4)        | 8.1 (6.0 to 10.6)          | 18.0 (12.4 to 25.4)           | 2.6 (1.2 to 5.0)                | 24.1 (18.6 to 32.3)               | 127.0 (106.9 to 154.8) | 19.4 (14.5 to 25.4)        | 43.3 (29.8 to 61.1)           | 6.3 (2.9 to 12.0)               | 58.1 (44.7 to 77.7)               |
| Haiti   | 2038 | 53.6 (44.0 to 65.6)        | 8.2 (6.1 to 10.7)          | 18.1 (12.4 to 25.5)           | 2.7 (1.2 to 5.1)                | 24.8 (18.9 to 34.2)               | 129.0 (105.8 to 157.8) | 19.6 (14.7 to 25.6)        | 43.4 (29.8 to 61.4)           | 6.4 (2.9 to 12.1)               | 59.5 (45.4 to 82.4)               |
| Haiti   | 2039 | 54.4 (45.3 to 66.9)        | 8.3 (6.2 to 10.8)          | 18.1 (12.4 to 25.6)           | 2.7 (1.2 to 5.1)                | 25.4 (19.3 to 35.1)               | 130.9 (108.8 to 160.9) | 19.8 (14.9 to 26.0)        | 43.6 (29.9 to 61.6)           | 6.5 (3.0 to 12.3)               | 61.0 (46.5 to 84.3)               |
| Haiti   | 2040 | 55.3 (45.2 to 68.4)        | 8.3 (6.3 to 10.9)          | 18.2 (12.5 to 25.7)           | 2.7 (1.3 to 5.2)                | 26.0 (19.8 to 35.9)               | 132.9 (108.8 to 164.5) | 20.1 (15.1 to 26.3)        | 43.7 (30.0 to 61.8)           | 6.5 (3.0 to 12.4)               | 62.6 (47.7 to 86.3)               |
| Haiti   | 2041 | 56.2 (46.3 to 69.4)        | 8.5 (6.3 to 11.1)          | 18.2 (12.5 to 25.9)           | 2.7 (1.3 to 5.2)                | 26.7 (20.2 to 37.1)               | 135.1 (111.5 to 166.8) | 20.3 (15.3 to 26.8)        | 43.9 (30.1 to 62.3)           | 6.6 (3.1 to 12.5)               | 64.2 (48.5 to 89.2)               |
| Haiti   | 2042 | 57.1 (46.6 to 70.9)        | 8.6 (6.4 to 11.3)          | 18.3 (12.6 to 26.0)           | 2.8 (1.3 to 5.3)                | 27.4 (20.6 to 39.3)               | 137.3 (112.0 to 170.5) | 20.6 (15.4 to 27.2)        | 44.0 (30.2 to 62.6)           | 6.7 (3.1 to 12.6)               | 66.0 (49.5 to 94.5)               |
| Haiti   | 2043 | 58.0 (47.5 to 73.0)        | 8.7 (6.5 to 11.5)          | 18.4 (12.6 to 26.2)           | 2.8 (1.3 to 5.3)                | 28.2 (20.9 to 40.9)               | 139.6 (114.3 to 175.6) | 20.9 (15.6 to 27.6)        | 44.2 (30.3 to 62.9)           | 6.8 (3.1 to 12.7)               | 67.7 (50.2 to 98.3)               |
| Haiti   | 2044 | 59.0 (47.7 to 75.3)        | 8.8 (6.5 to 11.7)          | 18.4 (12.6 to 26.3)           | 2.8 (1.3 to 5.3)                | 28.9 (21.5 to 42.0)               | 142.0 (114.6 to 181.0) | 21.2 (15.7 to 28.0)        | 44.3 (30.4 to 63.2)           | 6.8 (3.2 to 12.8)               | 69.6 (51.6 to 101.1)              |
| Haiti   | 2045 | 60.1 (48.8 to 77.9)        | 9.0 (6.7 to 11.8)          | 18.5 (12.7 to 26.4)           | 2.9 (1.3 to 5.4)                | 29.8 (21.6 to 44.8)               | 144.5 (117.4 to 187.3) | 21.5 (16.0 to 28.4)        | 44.5 (30.5 to 63.4)           | 6.9 (3.2 to 12.9)               | 71.6 (51.9 to 107.7)              |
| Haiti   | 2046 | 61.2 (49.2 to 79.3)        | 9.1 (6.7 to 12.0)          | 18.5 (12.7 to 26.5)           | 2.9 (1.3 to 5.4)                | 30.6 (22.1 to 46.8)               | 147.1 (118.4 to 190.7) | 21.9 (16.2 to 28.9)        | 44.6 (30.5 to 63.8)           | 7.0 (3.2 to 13.1)               | 73.6 (53.2 to 112.5)              |
| Haiti   | 2047 | 62.3 (50.3 to 83.1)        | 9.3 (6.8 to 12.2)          | 18.6 (12.7 to 26.6)           | 2.9 (1.3 to 5.5)                | 31.5 (22.7 to 49.6)               | 149.8 (121.1 to 200.0) | 22.3 (16.4 to 29.3)        | 44.7 (30.6 to 64.1)           | 7.1 (3.2 to 13.2)               | 75.8 (54.6 to 119.4)              |
| Haiti   | 2048 | 63.5 (50.0 to 84.1)        | 9.4 (6.9 to 12.5)          | 18.7 (12.8 to 26.7)           | 3.0 (1.4 to 5.5)                | 32.5 (23.3 to 51.7)               | 152.8 (120.3 to 202.2) | 22.7 (16.7 to 29.9)        | 44.9 (30.7 to 64.2)           | 7.1 (3.3 to 13.3)               | 78.1 (56.0 to 124.3)              |
| Haiti   | 2049 | 64.7 (51.6 to 86.5)        | 9.6 (7.0 to 12.7)          | 18.7 (12.8 to 26.8)           | 3.0 (1.4 to 5.6)                | 33.4 (23.8 to 53.7)               | 155.7 (124.1 to 208.1) | 23.1 (16.9 to 30.6)        | 45.0 (30.9 to 64.4)           | 7.2 (3.3 to 13.5)               | 80.4 (57.2 to 129.2)              |
| Haiti   | 2050 | 66.1 (52.2 to 91.2)        | 9.8 (7.1 to 12.9)          | 18.8 (12.9 to 26.9)           | 3.0 (1.4 to 5.7)                | 34.5 (24.4 to 56.8)               | 158.9 (125.6 to 219.4) | 23.5 (17.2 to 31.1)        | 45.2 (31.0 to 64.6)           | 7.3 (3.3 to 13.7)               | 83.0 (58.7 to 136.6)              |

| Country  | Year | 2018 US Dollars per capita |                            |                               |                                 |                                   | 2018 PPP per capita    |                            |                               |                                 |                                   |
|----------|------|----------------------------|----------------------------|-------------------------------|---------------------------------|-----------------------------------|------------------------|----------------------------|-------------------------------|---------------------------------|-----------------------------------|
|          |      | Health spending            | Government health spending | Out-of-pocket health spending | Prepaid private health spending | Development assistance for health | Health spending        | Government health spending | Out-of-pocket health spending | Prepaid private health spending | Development assistance for health |
| Honduras | 1995 | 100.8 (84.7 to 118.4)      | 39.4 (31.7 to 49.1)        | 44.4 (33.7 to 58.0)           | 10.3 (4.8 to 19.5)              | 6.7 (6.7 to 6.7)                  | 209.7 (176.2 to 246.4) | 82.1 (65.9 to 102.3)       | 92.3 (70.1 to 120.6)          | 21.4 (10.0 to 40.6)             | 13.9 (13.9 to 13.9)               |
| Honduras | 1996 | 101.9 (86.8 to 118.4)      | 37.6 (30.3 to 46.4)        | 44.5 (34.1 to 57.8)           | 9.8 (4.7 to 18.8)               | 9.9 (9.9 to 9.9)                  | 212.0 (180.8 to 246.4) | 78.3 (63.0 to 96.6)        | 92.7 (71.0 to 120.4)          | 20.4 (9.7 to 39.1)              | 20.6 (20.6 to 20.6)               |
| Honduras | 1997 | 105.7 (90.7 to 122.9)      | 39.5 (31.9 to 48.1)        | 46.2 (35.6 to 58.9)           | 9.8 (4.8 to 19.0)               | 10.1 (10.1 to 10.1)               | 220.0 (188.8 to 255.9) | 82.3 (66.5 to 100.1)       | 96.2 (74.2 to 122.7)          | 20.4 (10.0 to 39.5)             | 21.1 (21.1 to 21.1)               |
| Honduras | 1998 | 107.7 (92.0 to 125.8)      | 42.8 (34.7 to 51.8)        | 48.9 (38.0 to 62.2)           | 9.8 (4.8 to 18.3)               | 6.1 (6.1 to 6.1)                  | 224.1 (191.5 to 261.8) | 89.2 (72.2 to 107.9)       | 101.8 (79.1 to 129.5)         | 20.4 (10.1 to 38.1)             | 12.7 (12.7 to 12.7)               |
| Honduras | 1999 | 118.7 (103.4 to 137.1)     | 43.7 (35.6 to 53.4)        | 51.6 (40.4 to 65.1)           | 9.1 (4.6 to 16.7)               | 14.3 (14.3 to 14.3)               | 247.1 (215.3 to 285.4) | 90.9 (74.1 to 111.1)       | 107.4 (84.1 to 135.4)         | 18.9 (9.5 to 34.7)              | 29.8 (29.8 to 29.8)               |
| Honduras | 2000 | 122.1 (106.4 to 141.2)     | 48.8 (39.8 to 59.7)        | 55.4 (43.5 to 69.4)           | 8.7 (4.4 to 15.8)               | 9.3 (9.3 to 9.3)                  | 254.2 (221.5 to 293.8) | 101.5 (82.9 to 124.3)      | 115.2 (90.5 to 144.5)         | 18.1 (9.2 to 32.9)              | 19.3 (19.3 to 19.3)               |
| Honduras | 2001 | 121.7 (105.8 to 140.1)     | 48.7 (39.7 to 59.3)        | 58.0 (46.0 to 71.5)           | 8.5 (4.3 to 15.5)               | 6.5 (6.5 to 6.5)                  | 253.4 (220.2 to 291.6) | 101.4 (82.6 to 123.4)      | 120.8 (95.7 to 148.8)         | 17.7 (8.9 to 32.3)              | 13.5 (13.5 to 13.5)               |
| Honduras | 2002 | 124.5 (107.9 to 143.4)     | 49.7 (40.2 to 61.1)        | 61.2 (48.7 to 75.2)           | 9.0 (4.4 to 16.1)               | 4.5 (4.5 to 4.5)                  | 259.1 (224.6 to 298.5) | 103.5 (83.6 to 127.1)      | 127.5 (101.4 to 156.5)        | 18.8 (9.3 to 33.5)              | 9.3 (9.3 to 9.3)                  |
| Honduras | 2003 | 133.6 (115.7 to 153.3)     | 51.5 (41.7 to 63.1)        | 65.0 (52.2 to 80.5)           | 10.1 (4.9 to 17.9)              | 7.0 (7.0 to 7.0)                  | 278.1 (240.9 to 319.1) | 107.2 (86.8 to 131.4)      | 135.4 (108.6 to 167.6)        | 20.9 (10.2 to 37.2)             | 14.6 (14.6 to 14.6)               |
| Honduras | 2004 | 146.1 (126.5 to 167.1)     | 54.3 (44.4 to 65.9)        | 70.0 (55.6 to 85.3)           | 11.5 (5.9 to 20.5)              | 10.4 (10.4 to 10.4)               | 304.2 (263.4 to 347.8) | 113.0 (92.5 to 137.1)      | 145.6 (115.8 to 177.5)        | 24.0 (12.2 to 42.6)             | 21.6 (21.6 to 21.6)               |
| Honduras | 2005 | 161.6 (139.6 to 184.5)     | 60.2 (49.4 to 72.7)        | 76.6 (62.4 to 93.2)           | 13.1 (6.7 to 23.2)              | 11.7 (11.7 to 11.7)               | 336.3 (290.6 to 384.1) | 125.4 (102.7 to 151.4)     | 159.4 (129.8 to 193.9)        | 27.2 (13.9 to 48.3)             | 24.3 (24.3 to 24.3)               |
| Honduras | 2006 | 171.5 (148.7 to 196.1)     | 67.0 (55.4 to 79.9)        | 83.4 (68.2 to 101.1)          | 13.4 (6.8 to 24.0)              | 7.6 (7.6 to 7.6)                  | 356.9 (309.4 to 408.2) | 139.6 (115.3 to 166.3)     | 173.6 (142.0 to 210.5)        | 27.9 (14.1 to 50.0)             | 15.8 (15.8 to 15.8)               |
| Honduras | 2007 | 182.2 (159.6 to 207.2)     | 72.8 (60.7 to 86.5)        | 88.9 (73.1 to 106.9)          | 12.1 (6.2 to 21.7)              | 8.4 (8.4 to 8.4)                  | 379.3 (332.1 to 431.2) | 151.6 (126.2 to 180.0)     | 185.0 (152.1 to 222.6)        | 25.2 (13.0 to 45.2)             | 17.6 (17.6 to 17.6)               |
| Honduras | 2008 | 188.0 (166.4 to 212.5)     | 76.8 (63.9 to 90.8)        | 92.5 (76.9 to 111.0)          | 10.9 (5.6 to 19.6)              | 7.8 (7.8 to 7.8)                  | 391.2 (346.4 to 442.3) | 159.8 (133.0 to 189.0)     | 192.5 (160.0 to 231.0)        | 22.7 (11.6 to 40.9)             | 16.2 (16.2 to 16.2)               |
| Honduras | 2009 | 186.4 (165.7 to 210.4)     | 78.6 (66.0 to 92.2)        | 90.4 (74.8 to 107.8)          | 10.5 (5.5 to 18.7)              | 7.0 (7.0 to 7.0)                  | 388.0 (344.9 to 438.0) | 163.6 (137.4 to 191.9)     | 188.2 (155.6 to 224.3)        | 21.8 (11.4 to 39.0)             | 14.5 (14.5 to 14.5)               |
| Honduras | 2010 | 188.5 (167.2 to 212.8)     | 79.8 (67.2 to 93.5)        | 90.7 (75.0 to 107.8)          | 10.9 (5.6 to 19.2)              | 7.1 (7.1 to 7.1)                  | 392.3 (348.0 to 443.0) | 166.2 (139.8 to 194.6)     | 188.7 (156.1 to 224.3)        | 22.6 (11.6 to 39.9)             | 14.7 (14.7 to 14.7)               |
| Honduras | 2011 | 191.1 (170.2 to 214.6)     | 80.4 (68.0 to 94.1)        | 91.8 (76.4 to 109.1)          | 11.1 (5.7 to 19.6)              | 7.8 (7.8 to 7.8)                  | 397.8 (354.2 to 446.7) | 167.4 (141.5 to 196.0)     | 191.0 (159.0 to 227.1)        | 23.2 (11.8 to 40.7)             | 16.3 (16.3 to 16.3)               |
| Honduras | 2012 | 192.3 (170.9 to 217.6)     | 77.8 (65.3 to 91.8)        | 93.0 (77.1 to 110.5)          | 11.3 (5.9 to 19.8)              | 10.2 (10.2 to 10.2)               | 400.3 (355.7 to 453.0) | 161.9 (135.9 to 191.1)     | 193.6 (160.5 to 229.9)        | 23.5 (12.2 to 41.2)             | 21.2 (21.2 to 21.2)               |
| Honduras | 2013 | 185.9 (164.3 to 211.3)     | 75.1 (62.5 to 88.6)        | 91.5 (74.8 to 109.9)          | 11.0 (5.6 to 19.6)              | 8.2 (8.2 to 8.2)                  | 386.9 (342.1 to 439.7) | 156.4 (130.1 to 184.4)     | 190.5 (155.8 to 228.7)        | 22.9 (11.7 to 40.8)             | 17.1 (17.1 to 17.1)               |
| Honduras | 2014 | 182.6 (159.4 to 209.4)     | 74.9 (62.3 to 89.7)        | 89.8 (73.1 to 108.5)          | 11.0 (5.7 to 19.8)              | 6.9 (6.9 to 6.9)                  | 380.1 (331.7 to 435.9) | 156.0 (129.6 to 186.7)     | 186.9 (152.1 to 225.8)        | 22.9 (11.8 to 41.1)             | 14.3 (14.3 to 14.3)               |
| Honduras | 2015 | 183.7 (160.3 to 212.2)     | 76.2 (63.2 to 91.7)        | 89.5 (71.4 to 110.5)          | 11.4 (5.8 to 21.2)              | 6.6 (6.6 to 6.6)                  | 382.4 (333.6 to 441.6) | 158.6 (131.5 to 190.9)     | 186.2 (148.6 to 230.0)        | 23.8 (12.2 to 44.2)             | 13.8 (13.8 to 13.8)               |

| Country  | Year | 2018 US Dollars per capita |                            |                               |                                 |                                   | 2018 PPP per capita    |                            |                               |                                 |                                   |
|----------|------|----------------------------|----------------------------|-------------------------------|---------------------------------|-----------------------------------|------------------------|----------------------------|-------------------------------|---------------------------------|-----------------------------------|
|          |      | Health spending            | Government health spending | Out-of-pocket health spending | Prepaid private health spending | Development assistance for health | Health spending        | Government health spending | Out-of-pocket health spending | Prepaid private health spending | Development assistance for health |
| Honduras | 2016 | 192.9 (164.8 to 222.1)     | 83.1 (68.3 to 100.6)       | 91.3 (71.1 to 115.0)          | 12.5 (6.4 to 23.4)              | 6.0 (6.0 to 6.0)                  | 401.4 (342.9 to 462.3) | 172.9 (142.1 to 209.3)     | 190.0 (148.0 to 239.3)        | 26.0 (13.4 to 48.7)             | 12.6 (12.6 to 12.6)               |
| Honduras | 2017 | 196.2 (167.4 to 229.6)     | 86.2 (70.9 to 104.4)       | 93.9 (73.2 to 117.9)          | 12.9 (6.6 to 24.1)              | 3.2 (3.2 to 3.2)                  | 408.4 (348.4 to 477.8) | 179.5 (147.6 to 217.3)     | 195.4 (152.4 to 245.4)        | 26.7 (13.8 to 50.2)             | 6.7 (6.7 to 6.7)                  |
| Honduras | 2018 | 200.7 (170.6 to 231.4)     | 88.7 (72.9 to 107.4)       | 95.8 (75.1 to 120.0)          | 13.2 (6.8 to 24.7)              | 3.0 (3.0 to 3.0)                  | 417.8 (355.1 to 481.7) | 184.6 (151.6 to 223.6)     | 199.5 (156.3 to 249.8)        | 27.4 (14.2 to 51.4)             | 6.3 (6.3 to 6.3)                  |
| Honduras | 2019 | 205.2 (175.7 to 239.9)     | 91.0 (74.7 to 110.2)       | 97.8 (76.5 to 122.3)          | 13.5 (7.0 to 25.2)              | 3.0 (2.8 to 3.2)                  | 427.2 (365.6 to 499.3) | 189.3 (155.6 to 229.3)     | 203.6 (159.3 to 254.6)        | 28.1 (14.5 to 52.5)             | 6.3 (5.8 to 6.6)                  |
| Honduras | 2020 | 209.9 (178.7 to 242.5)     | 93.3 (76.6 to 112.8)       | 99.8 (78.0 to 124.6)          | 13.8 (7.1 to 25.8)              | 3.0 (2.8 to 3.3)                  | 436.9 (372.0 to 504.7) | 194.1 (159.4 to 234.7)     | 207.7 (162.3 to 259.3)        | 28.7 (14.8 to 53.8)             | 6.3 (5.8 to 6.8)                  |
| Honduras | 2021 | 214.1 (183.0 to 250.4)     | 95.3 (78.3 to 115.2)       | 101.6 (79.5 to 127.4)         | 14.1 (7.3 to 26.4)              | 3.1 (2.7 to 3.4)                  | 445.6 (380.8 to 521.1) | 198.3 (162.9 to 239.7)     | 211.5 (165.4 to 265.2)        | 29.4 (15.1 to 54.9)             | 6.4 (5.7 to 7.0)                  |
| Honduras | 2022 | 218.5 (185.9 to 253.1)     | 97.7 (80.2 to 118.2)       | 103.3 (80.8 to 129.0)         | 14.5 (7.4 to 27.0)              | 3.1 (2.7 to 3.5)                  | 454.7 (386.9 to 526.8) | 203.3 (167.0 to 245.9)     | 214.9 (168.2 to 268.6)        | 30.1 (15.5 to 56.1)             | 6.4 (5.7 to 7.2)                  |
| Honduras | 2023 | 223.0 (190.3 to 260.7)     | 100.1 (82.1 to 120.7)      | 104.9 (81.9 to 131.2)         | 14.8 (7.6 to 27.7)              | 3.1 (2.7 to 3.6)                  | 464.1 (396.2 to 542.6) | 208.3 (171.0 to 251.3)     | 218.4 (170.4 to 273.2)        | 30.8 (15.9 to 57.6)             | 6.5 (5.7 to 7.4)                  |
| Honduras | 2024 | 227.4 (193.6 to 263.2)     | 102.5 (84.0 to 123.4)      | 106.5 (83.1 to 133.6)         | 15.2 (7.8 to 28.4)              | 3.2 (2.7 to 3.7)                  | 473.3 (402.9 to 547.9) | 213.4 (174.8 to 256.8)     | 221.7 (172.9 to 278.0)        | 31.6 (16.3 to 59.0)             | 6.6 (5.7 to 7.7)                  |
| Honduras | 2025 | 231.7 (197.9 to 270.8)     | 104.9 (86.2 to 126.5)      | 108.0 (84.1 to 135.3)         | 15.5 (8.0 to 29.0)              | 3.2 (2.8 to 3.8)                  | 482.2 (411.9 to 563.6) | 218.4 (179.5 to 263.3)     | 224.8 (175.0 to 281.7)        | 32.3 (16.7 to 60.3)             | 6.7 (5.7 to 7.9)                  |
| Honduras | 2026 | 236.0 (200.8 to 273.8)     | 107.4 (88.1 to 129.9)      | 109.4 (85.2 to 137.0)         | 15.9 (8.2 to 29.5)              | 3.3 (2.8 to 3.8)                  | 491.1 (418.0 to 569.8) | 223.5 (183.4 to 270.5)     | 227.8 (177.3 to 285.2)        | 33.1 (17.0 to 61.5)             | 6.8 (5.8 to 8.0)                  |
| Honduras | 2027 | 240.1 (204.7 to 280.5)     | 109.7 (90.0 to 133.0)      | 110.8 (86.3 to 138.7)         | 16.2 (8.4 to 30.2)              | 3.3 (2.8 to 4.0)                  | 499.8 (426.2 to 583.9) | 228.3 (187.3 to 276.9)     | 230.7 (179.7 to 288.7)        | 33.8 (17.5 to 62.8)             | 6.9 (5.8 to 8.3)                  |
| Honduras | 2028 | 244.1 (207.1 to 281.6)     | 112.0 (91.5 to 135.9)      | 112.1 (87.3 to 140.4)         | 16.6 (8.6 to 30.8)              | 3.4 (2.8 to 4.1)                  | 508.0 (431.1 to 586.0) | 233.1 (190.4 to 282.8)     | 233.3 (181.7 to 292.2)        | 34.5 (17.9 to 64.0)             | 7.0 (5.9 to 8.5)                  |
| Honduras | 2029 | 247.9 (211.4 to 290.1)     | 114.3 (93.1 to 138.9)      | 113.3 (88.2 to 142.0)         | 16.9 (8.7 to 31.3)              | 3.4 (2.8 to 4.2)                  | 516.1 (440.0 to 603.9) | 237.8 (193.8 to 289.2)     | 235.8 (183.5 to 295.7)        | 35.2 (18.2 to 65.2)             | 7.2 (5.9 to 8.8)                  |
| Honduras | 2030 | 251.9 (214.0 to 291.0)     | 116.7 (95.0 to 142.2)      | 114.5 (89.0 to 143.6)         | 17.3 (8.9 to 31.9)              | 3.5 (2.9 to 4.3)                  | 524.4 (445.5 to 605.6) | 242.8 (197.7 to 296.1)     | 238.3 (185.2 to 298.9)        | 35.9 (18.5 to 66.4)             | 7.3 (6.0 to 9.0)                  |
| Honduras | 2031 | 255.8 (218.5 to 299.3)     | 119.0 (97.1 to 145.7)      | 115.6 (89.8 to 145.2)         | 17.6 (9.0 to 32.5)              | 3.6 (2.9 to 4.5)                  | 532.5 (454.7 to 623.1) | 247.8 (202.2 to 303.2)     | 240.7 (186.9 to 302.1)        | 36.6 (18.8 to 67.7)             | 7.4 (6.0 to 9.3)                  |
| Honduras | 2032 | 259.8 (220.1 to 301.4)     | 121.5 (99.0 to 149.6)      | 116.8 (90.6 to 146.7)         | 17.9 (9.2 to 33.1)              | 3.6 (2.9 to 4.6)                  | 540.8 (458.2 to 627.4) | 252.8 (206.1 to 311.3)     | 243.1 (188.6 to 305.3)        | 37.3 (19.1 to 68.9)             | 7.6 (6.1 to 9.5)                  |
| Honduras | 2033 | 263.8 (224.3 to 308.9)     | 123.9 (100.9 to 152.5)     | 117.9 (91.5 to 148.0)         | 18.3 (9.4 to 33.7)              | 3.7 (2.9 to 4.8)                  | 549.1 (467.0 to 643.0) | 257.9 (209.9 to 317.3)     | 245.4 (190.5 to 308.0)        | 38.0 (19.5 to 70.2)             | 7.7 (6.1 to 9.9)                  |
| Honduras | 2034 | 267.6 (226.3 to 309.7)     | 126.3 (102.7 to 155.8)     | 118.9 (92.4 to 149.1)         | 18.6 (9.6 to 34.3)              | 3.8 (3.0 to 4.9)                  | 557.1 (471.1 to 644.7) | 263.0 (213.8 to 324.3)     | 247.5 (192.4 to 310.3)        | 38.7 (19.9 to 71.5)             | 7.9 (6.2 to 10.2)                 |
| Honduras | 2035 | 271.7 (231.3 to 319.8)     | 128.9 (104.4 to 159.4)     | 120.0 (93.4 to 150.2)         | 18.9 (9.7 to 35.0)              | 3.9 (3.0 to 5.1)                  | 565.4 (481.5 to 665.7) | 268.2 (217.3 to 331.7)     | 249.7 (194.4 to 312.7)        | 39.4 (20.3 to 72.8)             | 8.1 (6.3 to 10.6)                 |
| Honduras | 2036 | 275.7 (232.9 to 319.6)     | 131.4 (106.2 to 162.2)     | 121.1 (94.3 to 151.4)         | 19.3 (9.9 to 35.7)              | 4.0 (3.1 to 5.3)                  | 573.9 (484.7 to 665.2) | 273.5 (221.1 to 337.7)     | 252.0 (196.3 to 315.2)        | 40.2 (20.7 to 74.2)             | 8.2 (6.4 to 11.1)                 |

| Country  | Year | 2018 US Dollars per capita |                            |                               |                                 |                                   | 2018 PPP per capita       |                            |                               |                                 |                                   |
|----------|------|----------------------------|----------------------------|-------------------------------|---------------------------------|-----------------------------------|---------------------------|----------------------------|-------------------------------|---------------------------------|-----------------------------------|
|          |      | Health spending            | Government health spending | Out-of-pocket health spending | Prepaid private health spending | Development assistance for health | Health spending           | Government health spending | Out-of-pocket health spending | Prepaid private health spending | Development assistance for health |
| Honduras | 2037 | 279.8 (237.3 to 330.4)     | 134.0 (107.8 to 166.5)     | 122.2 (95.2 to 152.7)         | 19.7 (10.1 to 36.3)             | 4.0 (3.1 to 5.4)                  | 582.5 (493.8 to 687.8)    | 278.9 (224.3 to 346.6)     | 254.3 (198.1 to 317.8)        | 40.9 (21.1 to 75.6)             | 8.4 (6.5 to 11.3)                 |
| Honduras | 2038 | 284.0 (239.8 to 328.3)     | 136.6 (109.5 to 170.7)     | 123.2 (96.1 to 153.8)         | 20.0 (10.3 to 37.0)             | 4.1 (3.2 to 5.7)                  | 591.1 (499.1 to 683.4)    | 284.4 (227.9 to 355.4)     | 256.5 (200.0 to 320.2)        | 41.7 (21.4 to 77.1)             | 8.6 (6.6 to 11.9)                 |
| Honduras | 2039 | 288.3 (244.4 to 342.2)     | 139.3 (111.6 to 174.8)     | 124.4 (97.0 to 155.2)         | 20.4 (10.5 to 37.7)             | 4.2 (3.2 to 5.8)                  | 600.1 (508.6 to 712.4)    | 290.0 (232.2 to 363.9)     | 258.8 (201.8 to 323.0)        | 42.4 (21.8 to 78.5)             | 8.8 (6.7 to 12.2)                 |
| Honduras | 2040 | 292.5 (246.2 to 339.2)     | 142.1 (113.2 to 180.3)     | 125.4 (97.7 to 156.2)         | 20.7 (10.6 to 38.4)             | 4.3 (3.3 to 6.0)                  | 608.9 (512.4 to 706.0)    | 295.7 (235.5 to 375.4)     | 261.0 (203.3 to 325.2)        | 43.2 (22.2 to 80.0)             | 9.0 (6.8 to 12.4)                 |
| Honduras | 2041 | 296.8 (251.3 to 353.0)     | 144.8 (114.8 to 185.0)     | 126.5 (98.3 to 157.4)         | 21.1 (10.8 to 39.2)             | 4.4 (3.3 to 6.1)                  | 617.7 (523.1 to 734.7)    | 301.4 (238.9 to 385.1)     | 263.2 (204.6 to 327.6)        | 44.0 (22.5 to 81.6)             | 9.2 (6.9 to 12.8)                 |
| Honduras | 2042 | 301.0 (252.8 to 353.4)     | 147.6 (116.7 to 189.3)     | 127.5 (99.2 to 158.8)         | 21.5 (11.0 to 40.0)             | 4.5 (3.4 to 6.5)                  | 626.6 (526.1 to 735.6)    | 307.1 (242.8 to 394.0)     | 265.3 (206.4 to 330.6)        | 44.7 (22.9 to 83.3)             | 9.4 (7.0 to 13.4)                 |
| Honduras | 2043 | 305.4 (257.9 to 364.4)     | 150.4 (118.4 to 194.4)     | 128.5 (100.0 to 160.0)        | 21.9 (11.2 to 40.8)             | 4.6 (3.4 to 6.7)                  | 635.6 (536.8 to 758.4)    | 313.1 (246.5 to 404.7)     | 267.4 (208.1 to 333.0)        | 45.5 (23.3 to 84.9)             | 9.6 (7.2 to 14.0)                 |
| Honduras | 2044 | 309.7 (258.8 to 365.6)     | 153.2 (120.1 to 199.3)     | 129.5 (100.8 to 161.2)        | 22.2 (11.4 to 41.6)             | 4.7 (3.5 to 6.9)                  | 644.5 (538.6 to 760.9)    | 318.9 (250.0 to 414.8)     | 269.5 (209.8 to 335.5)        | 46.3 (23.6 to 86.7)             | 9.9 (7.3 to 14.3)                 |
| Honduras | 2045 | 314.0 (264.1 to 376.1)     | 156.1 (121.7 to 203.5)     | 130.5 (101.7 to 162.6)        | 22.6 (11.5 to 42.5)             | 4.9 (3.5 to 7.3)                  | 653.6 (549.7 to 782.9)    | 324.9 (253.4 to 423.6)     | 271.5 (211.7 to 338.5)        | 47.1 (24.0 to 88.4)             | 10.1 (7.3 to 15.3)                |
| Honduras | 2046 | 318.4 (264.9 to 376.3)     | 159.0 (123.3 to 208.7)     | 131.4 (102.6 to 163.9)        | 23.0 (11.7 to 43.3)             | 5.0 (3.6 to 7.6)                  | 662.6 (551.4 to 783.2)    | 330.9 (256.7 to 434.4)     | 273.5 (213.5 to 341.1)        | 47.9 (24.4 to 90.2)             | 10.4 (7.5 to 15.9)                |
| Honduras | 2047 | 322.8 (271.7 to 388.8)     | 161.9 (125.1 to 214.2)     | 132.4 (103.4 to 165.0)        | 23.4 (11.9 to 44.2)             | 5.1 (3.7 to 8.1)                  | 671.9 (565.5 to 809.3)    | 337.0 (260.4 to 445.9)     | 275.6 (215.1 to 343.5)        | 48.7 (24.8 to 92.0)             | 10.7 (7.7 to 16.8)                |
| Honduras | 2048 | 327.2 (270.5 to 388.8)     | 164.8 (126.8 to 219.2)     | 133.3 (104.0 to 166.2)        | 23.8 (12.1 to 45.0)             | 5.3 (3.8 to 8.4)                  | 681.0 (563.1 to 809.3)    | 343.1 (264.0 to 456.3)     | 277.5 (216.4 to 345.8)        | 49.5 (25.1 to 93.8)             | 11.0 (7.9 to 17.5)                |
| Honduras | 2049 | 331.5 (276.6 to 403.8)     | 167.8 (128.5 to 224.8)     | 134.2 (104.5 to 167.4)        | 24.1 (12.3 to 45.9)             | 5.4 (3.9 to 8.7)                  | 690.0 (575.6 to 840.6)    | 349.2 (267.5 to 467.8)     | 279.3 (217.5 to 348.4)        | 50.2 (25.5 to 95.5)             | 11.3 (8.0 to 18.1)                |
| Honduras | 2050 | 335.9 (276.5 to 401.2)     | 170.7 (130.3 to 230.0)     | 135.1 (105.2 to 168.7)        | 24.5 (12.4 to 46.8)             | 5.6 (3.9 to 9.1)                  | 699.2 (575.6 to 835.1)    | 355.4 (271.1 to 478.7)     | 281.2 (219.0 to 351.2)        | 51.1 (25.9 to 97.3)             | 11.6 (8.2 to 19.0)                |
| Hungary  | 1995 | 607.7 (563.4 to 656.1)     | 476.0 (439.1 to 516.7)     | 103.2 (85.8 to 122.5)         | 28.2 (14.6 to 47.4)             | 0.2 (0.2 to 0.2)                  | 1260.1 (1168.3 to 1360.3) | 987.1 (910.5 to 1071.4)    | 214.1 (177.9 to 253.9)        | 58.4 (30.2 to 98.3)             | 0.5 (0.5 to 0.5)                  |
| Hungary  | 1996 | 590.4 (556.1 to 629.3)     | 452.9 (426.1 to 483.2)     | 109.0 (93.0 to 126.0)         | 27.0 (15.1 to 45.8)             | 1.4 (1.4 to 1.4)                  | 1224.2 (1153.1 to 1304.8) | 939.2 (883.5 to 1002.0)    | 226.0 (192.8 to 261.2)        | 56.1 (31.2 to 95.0)             | 3.0 (3.0 to 3.0)                  |
| Hungary  | 1997 | 594.1 (562.4 to 629.2)     | 446.8 (421.3 to 473.1)     | 119.1 (104.3 to 135.1)        | 26.8 (15.5 to 44.0)             | 1.4 (1.4 to 1.4)                  | 1231.9 (1166.2 to 1304.6) | 926.5 (873.6 to 980.9)     | 247.0 (216.2 to 280.1)        | 55.6 (32.0 to 91.2)             | 2.9 (2.9 to 2.9)                  |
| Hungary  | 1998 | 614.9 (583.4 to 649.1)     | 448.3 (423.1 to 475.1)     | 138.9 (122.8 to 156.3)        | 27.0 (15.8 to 43.4)             | 0.7 (0.7 to 0.7)                  | 1275.0 (1209.6 to 1345.8) | 929.6 (877.2 to 985.1)     | 287.9 (254.6 to 324.1)        | 56.0 (32.8 to 90.0)             | 1.5 (1.5 to 1.5)                  |
| Hungary  | 1999 | 638.5 (607.6 to 673.1)     | 451.9 (425.6 to 477.6)     | 159.2 (141.9 to 179.2)        | 26.9 (16.4 to 42.7)             | 0.3 (0.3 to 0.3)                  | 1323.8 (1259.8 to 1395.6) | 937.1 (882.5 to 990.3)     | 330.2 (294.3 to 371.5)        | 55.8 (34.0 to 88.5)             | 0.7 (0.7 to 0.7)                  |
| Hungary  | 2000 | 667.8 (634.5 to 702.8)     | 462.9 (435.6 to 489.3)     | 177.8 (160.2 to 199.6)        | 26.8 (16.3 to 41.2)             | 0.3 (0.3 to 0.3)                  | 1384.7 (1315.7 to 1457.3) | 959.8 (903.2 to 1014.6)    | 368.6 (332.2 to 413.8)        | 55.7 (33.7 to 85.3)             | 0.7 (0.7 to 0.7)                  |
| Hungary  | 2001 | 719.1 (684.9 to 755.6)     | 493.5 (468.5 to 520.3)     | 197.2 (178.0 to 218.6)        | 28.4 (18.1 to 42.4)             | 0.0 (0.0 to 0.0)                  | 1491.0 (1420.2 to 1566.7) | 1023.2 (971.5 to 1078.8)   | 409.0 (369.1 to 453.3)        | 58.9 (37.5 to 88.0)             | 0.0 (0.0 to 0.0)                  |

| Country | Year | 2018 US Dollars per capita |                            |                               |                                 |                                   | 2018 PPP per capita       |                            |                               |                                 |                                   |
|---------|------|----------------------------|----------------------------|-------------------------------|---------------------------------|-----------------------------------|---------------------------|----------------------------|-------------------------------|---------------------------------|-----------------------------------|
|         |      | Health spending            | Government health spending | Out-of-pocket health spending | Prepaid private health spending | Development assistance for health | Health spending           | Government health spending | Out-of-pocket health spending | Prepaid private health spending | Development assistance for health |
| Hungary | 2002 | 790.5 (752.2 to 829.1)     | 545.7 (518.0 to 576.3)     | 214.9 (194.9 to 236.7)        | 29.9 (19.0 to 43.6)             | 0.0 (0.0 to 0.0)                  | 1639.1 (1559.7 to 1719.2) | 1131.4 (1074.1 to 1195.0)  | 445.6 (404.0 to 490.8)        | 62.0 (39.4 to 90.4)             | 0.1 (0.1 to 0.1)                  |
| Hungary | 2003 | 868.5 (828.5 to 909.1)     | 601.6 (571.8 to 634.5)     | 232.4 (210.8 to 254.7)        | 34.5 (22.5 to 48.9)             | 0.0 (0.0 to 0.0)                  | 1800.9 (1718.0 to 1885.0) | 1247.5 (1185.6 to 1315.5)  | 481.8 (437.0 to 528.2)        | 71.5 (46.7 to 101.4)            | 0.1 (0.1 to 0.1)                  |
| Hungary | 2004 | 923.8 (884.6 to 964.3)     | 642.2 (611.8 to 675.9)     | 242.2 (220.3 to 264.8)        | 39.4 (26.5 to 55.4)             | 0.0 (0.0 to 0.0)                  | 1915.6 (1834.2 to 1999.6) | 1331.6 (1268.6 to 1401.5)  | 502.3 (456.8 to 549.1)        | 81.6 (54.9 to 114.8)            | 0.1 (0.1 to 0.1)                  |
| Hungary | 2005 | 962.9 (924.1 to 1005.4)    | 670.0 (640.8 to 701.3)     | 250.1 (229.3 to 273.0)        | 42.7 (29.3 to 59.0)             | 0.0 (0.0 to 0.0)                  | 1996.5 (1916.1 to 2084.7) | 1389.2 (1328.6 to 1454.1)  | 518.7 (475.4 to 566.1)        | 88.6 (60.8 to 122.3)            | 0.0 (0.0 to 0.0)                  |
| Hungary | 2006 | 976.5 (940.3 to 1017.5)    | 677.3 (648.2 to 708.3)     | 252.6 (232.4 to 276.2)        | 46.6 (32.8 to 64.0)             | 0.0 (0.0 to 0.0)                  | 2024.8 (1949.7 to 2109.7) | 1404.4 (1344.0 to 1468.6)  | 523.8 (481.9 to 572.6)        | 96.6 (68.0 to 132.8)            | 0.0 (0.0 to 0.0)                  |
| Hungary | 2007 | 948.9 (913.5 to 985.6)     | 650.3 (623.8 to 679.9)     | 250.2 (231.8 to 272.4)        | 48.4 (35.1 to 66.1)             | 0.0 (0.0 to 0.0)                  | 1967.4 (1894.1 to 2043.7) | 1348.4 (1293.4 to 1409.8)  | 518.7 (480.6 to 564.8)        | 100.3 (72.8 to 137.1)           | 0.0 (0.0 to 0.0)                  |
| Hungary | 2008 | 938.9 (903.9 to 975.0)     | 639.0 (612.0 to 666.2)     | 249.4 (231.3 to 269.4)        | 50.5 (37.4 to 68.9)             | 0.0 (0.0 to 0.0)                  | 1946.9 (1874.3 to 2021.7) | 1325.1 (1268.9 to 1381.4)  | 517.1 (479.6 to 558.7)        | 104.7 (77.5 to 142.8)           | 0.0 (0.0 to 0.0)                  |
| Hungary | 2009 | 903.4 (869.8 to 938.6)     | 608.6 (583.4 to 633.5)     | 243.9 (226.9 to 261.8)        | 50.9 (38.2 to 67.1)             | 0.0 (0.0 to 0.0)                  | 1873.1 (1803.5 to 1946.1) | 1261.9 (1209.8 to 1313.6)  | 505.8 (470.4 to 542.8)        | 105.5 (79.2 to 139.2)           | 0.0 (0.0 to 0.0)                  |
| Hungary | 2010 | 917.7 (881.7 to 955.1)     | 612.4 (584.3 to 638.0)     | 252.7 (234.5 to 272.2)        | 52.6 (39.8 to 69.2)             | 0.0 (0.0 to 0.0)                  | 1902.8 (1828.1 to 1980.4) | 1269.8 (1211.6 to 1323.0)  | 523.9 (486.1 to 564.4)        | 109.1 (82.5 to 143.4)           | 0.0 (0.0 to 0.0)                  |
| Hungary | 2011 | 934.2 (898.4 to 971.1)     | 619.3 (591.4 to 646.1)     | 262.2 (242.6 to 283.2)        | 52.7 (39.7 to 70.5)             | 0.0 (0.0 to 0.0)                  | 1937.0 (1862.9 to 2013.5) | 1284.0 (1226.3 to 1339.8)  | 543.7 (503.0 to 587.3)        | 109.3 (82.3 to 146.2)           | 0.0 (0.0 to 0.0)                  |
| Hungary | 2012 | 922.2 (886.4 to 959.1)     | 606.4 (579.0 to 633.1)     | 264.6 (245.3 to 285.8)        | 51.0 (38.0 to 69.1)             | 0.2 (0.2 to 0.2)                  | 1912.3 (1837.9 to 1988.8) | 1257.4 (1200.6 to 1312.7)  | 548.7 (508.6 to 592.6)        | 105.7 (78.7 to 143.3)           | 0.5 (0.5 to 0.5)                  |
| Hungary | 2013 | 931.4 (894.7 to 970.0)     | 615.1 (589.0 to 645.0)     | 267.0 (247.1 to 288.9)        | 49.3 (36.4 to 66.8)             | 0.0 (0.0 to 0.0)                  | 1931.2 (1855.2 to 2011.3) | 1275.4 (1221.2 to 1337.3)  | 553.6 (512.3 to 599.0)        | 102.2 (75.4 to 138.6)           | 0.1 (0.1 to 0.1)                  |
| Hungary | 2014 | 956.4 (922.6 to 994.6)     | 634.2 (609.5 to 662.8)     | 274.3 (253.6 to 295.2)        | 47.9 (34.5 to 65.1)             | 0.0 (0.0 to 0.0)                  | 1983.2 (1913.0 to 2062.2) | 1315.1 (1263.8 to 1374.3)  | 568.7 (525.9 to 612.1)        | 99.4 (71.5 to 135.0)            | 0.0 (0.0 to 0.0)                  |
| Hungary | 2015 | 991.3 (956.3 to 1031.0)    | 657.1 (630.2 to 685.2)     | 286.7 (265.5 to 309.7)        | 47.5 (33.2 to 65.9)             | 0.0 (0.0 to 0.0)                  | 2055.4 (1982.9 to 2137.7) | 1362.4 (1306.8 to 1420.8)  | 594.5 (550.4 to 642.2)        | 98.5 (68.7 to 136.6)            | 0.0 (0.0 to 0.0)                  |
| Hungary | 2016 | 1028.6 (976.0 to 1081.2)   | 679.5 (642.0 to 716.6)     | 301.4 (273.3 to 333.0)        | 47.8 (31.7 to 68.8)             | 0.0 (0.0 to 0.0)                  | 2132.9 (2023.6 to 2241.9) | 1408.9 (1331.2 to 1485.9)  | 624.9 (566.6 to 690.5)        | 99.1 (65.7 to 142.7)            | 0.0 (0.0 to 0.0)                  |
| Hungary | 2017 | 1113.4 (1056.8 to 1169.3)  | 745.8 (704.0 to 788.0)     | 317.2 (287.6 to 350.8)        | 50.4 (33.5 to 72.7)             | 0.0 (0.0 to 0.0)                  | 2308.6 (2191.3 to 2424.6) | 1546.4 (1459.8 to 1633.8)  | 657.8 (596.4 to 727.5)        | 104.5 (69.4 to 150.7)           | 0.0 (0.0 to 0.0)                  |
| Hungary | 2018 | 1129.8 (1071.2 to 1190.9)  | 758.0 (714.4 to 804.2)     | 320.5 (290.7 to 355.3)        | 51.3 (34.1 to 73.9)             | 0.0 (0.0 to 0.0)                  | 2342.6 (2221.2 to 2469.3) | 1571.7 (1481.3 to 1667.4)  | 664.5 (602.8 to 736.7)        | 106.4 (70.8 to 153.3)           | 0.0 (0.0 to 0.0)                  |
| Hungary | 2019 | 1148.3 (1088.7 to 1208.1)  | 773.0 (729.0 to 818.1)     | 323.1 (293.0 to 357.8)        | 52.2 (34.8 to 75.1)             | 0.0 (0.0 to 0.0)                  | 2380.9 (2257.3 to 2504.9) | 1602.9 (1511.7 to 1696.3)  | 669.9 (607.6 to 741.9)        | 108.2 (72.1 to 155.7)           | 0.0 (0.0 to 0.0)                  |
| Hungary | 2020 | 1170.6 (1111.6 to 1230.3)  | 788.6 (744.2 to 835.6)     | 328.9 (297.3 to 365.4)        | 53.1 (35.5 to 76.5)             | 0.0 (0.0 to 0.0)                  | 2427.3 (2304.9 to 2550.9) | 1635.1 (1543.1 to 1732.6)  | 682.1 (616.4 to 757.7)        | 110.1 (73.5 to 158.7)           | 0.0 (0.0 to 0.0)                  |
| Hungary | 2021 | 1194.7 (1133.4 to 1256.0)  | 804.4 (758.9 to 853.5)     | 336.2 (303.0 to 373.4)        | 54.1 (36.1 to 78.0)             | 0.0 (0.0 to 0.0)                  | 2477.2 (2350.1 to 2604.4) | 1668.0 (1573.5 to 1769.6)  | 697.2 (628.3 to 774.2)        | 112.1 (74.8 to 161.8)           | 0.0 (0.0 to 0.0)                  |
| Hungary | 2022 | 1218.8 (1157.1 to 1285.4)  | 819.9 (773.7 to 870.2)     | 343.7 (309.5 to 381.6)        | 55.2 (36.8 to 79.6)             | 0.0 (0.0 to 0.0)                  | 2527.2 (2399.2 to 2665.2) | 1700.0 (1604.4 to 1804.3)  | 712.8 (641.8 to 791.3)        | 114.4 (76.3 to 165.0)           | 0.0 (0.0 to 0.0)                  |



| Country | Year | 2018 US Dollars per capita |                            |                               |                                 |                                   | 2018 PPP per capita       |                            |                               |                                 |                                   |
|---------|------|----------------------------|----------------------------|-------------------------------|---------------------------------|-----------------------------------|---------------------------|----------------------------|-------------------------------|---------------------------------|-----------------------------------|
|         |      | Health spending            | Government health spending | Out-of-pocket health spending | Prepaid private health spending | Development assistance for health | Health spending           | Government health spending | Out-of-pocket health spending | Prepaid private health spending | Development assistance for health |
| Hungary | 2023 | 1243.7 (1178.6 to 1310.8)  | 835.7 (787.7 to 887.8)     | 351.6 (317.6 to 391.9)        | 56.4 (37.6 to 81.3)             | 0.0 (0.0 to 0.0)                  | 2578.8 (2443.9 to 2717.8) | 1732.8 (1633.3 to 1840.8)  | 729.0 (658.5 to 812.7)        | 116.9 (78.1 to 168.6)           | 0.0 (0.0 to 0.0)                  |
| Hungary | 2024 | 1269.9 (1203.9 to 1336.7)  | 852.4 (802.5 to 906.2)     | 359.8 (323.9 to 399.6)        | 57.6 (38.4 to 83.1)             | 0.0 (0.0 to 0.0)                  | 2633.0 (2496.2 to 2771.7) | 1767.5 (1664.1 to 1878.9)  | 746.1 (671.5 to 828.5)        | 119.5 (79.7 to 172.3)           | 0.0 (0.0 to 0.0)                  |
| Hungary | 2025 | 1297.4 (1228.9 to 1368.4)  | 870.0 (818.6 to 925.0)     | 368.4 (331.4 to 410.5)        | 59.0 (39.3 to 84.8)             | 0.0 (0.0 to 0.0)                  | 2690.2 (2548.1 to 2837.3) | 1804.0 (1697.4 to 1917.9)  | 763.9 (687.2 to 851.1)        | 122.3 (81.4 to 175.9)           | 0.0 (0.0 to 0.0)                  |
| Hungary | 2026 | 1325.4 (1255.5 to 1398.7)  | 887.8 (834.5 to 944.7)     | 377.2 (337.6 to 422.0)        | 60.3 (40.2 to 86.7)             | 0.0 (0.0 to 0.0)                  | 2748.1 (2603.2 to 2900.3) | 1840.9 (1730.3 to 1958.8)  | 782.2 (699.9 to 875.0)        | 125.1 (83.3 to 179.9)           | 0.0 (0.0 to 0.0)                  |
| Hungary | 2027 | 1354.8 (1280.8 to 1429.3)  | 906.6 (850.6 to 966.1)     | 386.4 (343.7 to 432.4)        | 61.8 (41.1 to 88.8)             | 0.0 (0.0 to 0.0)                  | 2809.2 (2655.7 to 2963.7) | 1879.8 (1763.6 to 2003.2)  | 801.2 (712.7 to 896.6)        | 128.1 (85.3 to 184.0)           | 0.0 (0.0 to 0.0)                  |
| Hungary | 2028 | 1385.1 (1307.4 to 1466.2)  | 926.0 (864.3 to 987.0)     | 395.8 (349.5 to 445.9)        | 63.3 (42.2 to 90.9)             | 0.0 (0.0 to 0.0)                  | 2872.0 (2710.8 to 3040.2) | 1920.0 (1792.2 to 2046.5)  | 820.7 (724.7 to 924.6)        | 131.3 (87.4 to 188.4)           | 0.0 (0.0 to 0.0)                  |
| Hungary | 2029 | 1415.5 (1328.7 to 1505.2)  | 945.4 (880.4 to 1012.4)    | 405.3 (354.9 to 460.0)        | 64.9 (43.2 to 93.0)             | 0.0 (0.0 to 0.0)                  | 2935.1 (2755.1 to 3121.0) | 1960.3 (1825.4 to 2099.3)  | 840.3 (736.0 to 953.9)        | 134.5 (89.5 to 192.9)           | 0.0 (0.0 to 0.0)                  |
| Hungary | 2030 | 1446.3 (1358.8 to 1540.7)  | 965.1 (894.8 to 1036.7)    | 414.7 (361.0 to 475.4)        | 66.4 (44.2 to 95.4)             | 0.0 (0.0 to 0.0)                  | 2998.8 (2817.5 to 3194.6) | 2001.1 (1855.4 to 2149.6)  | 860.0 (748.6 to 985.7)        | 137.7 (91.7 to 197.9)           | 0.0 (0.0 to 0.0)                  |
| Hungary | 2031 | 1476.6 (1380.9 to 1579.3)  | 984.5 (911.9 to 1059.7)    | 424.1 (366.7 to 490.4)        | 68.0 (45.3 to 97.6)             | 0.0 (0.0 to 0.0)                  | 3061.7 (2863.3 to 3274.6) | 2041.4 (1890.9 to 2197.3)  | 879.4 (760.4 to 1016.8)       | 140.9 (93.9 to 202.5)           | 0.0 (0.0 to 0.0)                  |
| Hungary | 2032 | 1506.5 (1404.9 to 1612.9)  | 1003.7 (927.0 to 1082.9)   | 433.3 (371.8 to 504.4)        | 69.5 (46.3 to 99.8)             | 0.0 (0.0 to 0.0)                  | 3123.8 (2913.0 to 3344.2) | 2081.2 (1922.0 to 2245.4)  | 898.5 (771.0 to 1045.8)       | 144.1 (95.9 to 206.9)           | 0.0 (0.0 to 0.0)                  |
| Hungary | 2033 | 1537.0 (1429.3 to 1649.7)  | 1023.4 (940.6 to 1107.4)   | 442.6 (377.1 to 521.7)        | 71.0 (47.2 to 102.0)            | 0.0 (0.0 to 0.0)                  | 3186.9 (2963.6 to 3420.7) | 2121.9 (1950.3 to 2296.2)  | 917.7 (782.0 to 1081.7)       | 147.2 (97.8 to 211.4)           | 0.0 (0.0 to 0.0)                  |
| Hungary | 2034 | 1567.5 (1453.9 to 1687.0)  | 1043.1 (957.5 to 1131.2)   | 451.8 (381.6 to 535.4)        | 72.5 (48.0 to 104.0)            | 0.0 (0.0 to 0.0)                  | 3250.2 (3014.7 to 3497.9) | 2162.9 (1985.5 to 2345.5)  | 936.8 (791.3 to 1110.2)       | 150.4 (99.5 to 215.5)           | 0.0 (0.0 to 0.0)                  |
| Hungary | 2035 | 1597.9 (1475.1 to 1723.2)  | 1062.9 (974.9 to 1154.5)   | 460.9 (386.7 to 549.3)        | 74.1 (48.8 to 105.9)            | 0.0 (0.0 to 0.0)                  | 3313.1 (3058.5 to 3573.0) | 2203.9 (2021.4 to 2393.9)  | 955.7 (801.8 to 1138.9)       | 153.6 (101.3 to 219.5)          | 0.0 (0.0 to 0.0)                  |
| Hungary | 2036 | 1627.7 (1503.9 to 1760.3)  | 1082.4 (991.2 to 1179.1)   | 469.8 (392.2 to 564.5)        | 75.5 (49.8 to 108.2)            | 0.0 (0.0 to 0.0)                  | 3374.9 (3118.4 to 3650.0) | 2244.3 (2055.1 to 2444.8)  | 974.0 (813.3 to 1170.6)       | 156.6 (103.3 to 224.4)          | 0.0 (0.0 to 0.0)                  |
| Hungary | 2037 | 1656.9 (1523.5 to 1795.6)  | 1101.5 (1006.8 to 1201.4)  | 478.4 (396.1 to 577.3)        | 77.0 (51.0 to 110.4)            | 0.0 (0.0 to 0.0)                  | 3435.5 (3159.1 to 3723.2) | 2283.9 (2087.6 to 2491.0)  | 992.1 (821.2 to 1197.0)       | 159.6 (105.6 to 228.9)          | 0.0 (0.0 to 0.0)                  |
| Hungary | 2038 | 1685.9 (1548.0 to 1830.5)  | 1120.5 (1024.7 to 1223.5)  | 487.0 (401.0 to 588.7)        | 78.4 (52.1 to 112.4)            | 0.0 (0.0 to 0.0)                  | 3495.7 (3209.7 to 3795.6) | 2323.3 (2124.6 to 2537.0)  | 1009.8 (831.5 to 1220.7)      | 162.6 (108.0 to 233.1)          | 0.0 (0.0 to 0.0)                  |
| Hungary | 2039 | 1714.8 (1572.0 to 1866.7)  | 1139.5 (1040.1 to 1245.1)  | 495.4 (405.7 to 602.2)        | 79.8 (53.1 to 114.5)            | 0.0 (0.0 to 0.0)                  | 3555.6 (3259.4 to 3870.6) | 2362.7 (2156.7 to 2581.7)  | 1027.3 (841.3 to 1248.7)      | 165.6 (110.0 to 237.5)          | 0.0 (0.0 to 0.0)                  |
| Hungary | 2040 | 1743.6 (1594.6 to 1903.9)  | 1158.6 (1057.4 to 1267.3)  | 503.7 (410.7 to 613.5)        | 81.3 (53.9 to 116.8)            | 0.0 (0.0 to 0.0)                  | 3615.3 (3306.4 to 3947.7) | 2402.3 (2192.5 to 2627.8)  | 1044.5 (851.6 to 1272.1)      | 168.5 (111.7 to 242.2)          | 0.0 (0.0 to 0.0)                  |
| Hungary | 2041 | 1770.5 (1618.3 to 1930.6)  | 1176.3 (1071.5 to 1287.0)  | 511.6 (414.9 to 625.7)        | 82.6 (54.6 to 119.0)            | 0.0 (0.0 to 0.0)                  | 3671.0 (3355.5 to 4003.2) | 2439.1 (2221.7 to 2668.7)  | 1060.7 (860.4 to 1297.4)      | 171.2 (113.2 to 246.7)          | 0.0 (0.0 to 0.0)                  |
| Hungary | 2042 | 1798.5 (1639.4 to 1972.8)  | 1195.1 (1085.7 to 1309.3)  | 519.4 (420.5 to 636.7)        | 84.0 (55.2 to 121.2)            | 0.0 (0.0 to 0.0)                  | 3729.1 (3399.3 to 4090.6) | 2477.9 (2251.1 to 2714.8)  | 1077.1 (871.9 to 1320.2)      | 174.1 (114.4 to 251.4)          | 0.0 (0.0 to 0.0)                  |
| Hungary | 2043 | 1826.4 (1661.3 to 2000.9)  | 1213.9 (1098.4 to 1332.3)  | 527.2 (426.6 to 646.8)        | 85.4 (55.8 to 123.5)            | 0.0 (0.0 to 0.0)                  | 3787.1 (3444.7 to 4148.9) | 2516.9 (2277.5 to 2762.5)  | 1093.2 (884.5 to 1341.2)      | 177.0 (115.7 to 256.1)          | 0.0 (0.0 to 0.0)                  |

| Country | Year | 2018 US Dollars per capita |                            |                               |                                 |                                   | 2018 PPP per capita       |                            |                               |                                 |                                   |
|---------|------|----------------------------|----------------------------|-------------------------------|---------------------------------|-----------------------------------|---------------------------|----------------------------|-------------------------------|---------------------------------|-----------------------------------|
|         |      | Health spending            | Government health spending | Out-of-pocket health spending | Prepaid private health spending | Development assistance for health | Health spending           | Government health spending | Out-of-pocket health spending | Prepaid private health spending | Development assistance for health |
| Hungary | 2044 | 1855.5 (1683.5 to 2031.5)  | 1233.6 (1113.3 to 1357.9)  | 535.1 (432.3 to 657.7)        | 86.8 (56.6 to 125.5)            | 0.0 (0.0 to 0.0)                  | 3847.4 (3490.6 to 4212.2) | 2557.9 (2308.4 to 2815.6)  | 1109.5 (896.3 to 1363.8)      | 180.1 (117.3 to 260.2)          | 0.0 (0.0 to 0.0)                  |
| Hungary | 2045 | 1886.2 (1718.5 to 2071.7)  | 1254.6 (1129.3 to 1384.1)  | 543.2 (437.7 to 668.7)        | 88.5 (57.7 to 127.5)            | 0.0 (0.0 to 0.0)                  | 3911.1 (3563.4 to 4295.6) | 2601.4 (2341.7 to 2870.0)  | 1126.3 (907.6 to 1386.5)      | 183.4 (119.5 to 264.4)          | 0.0 (0.0 to 0.0)                  |
| Hungary | 2046 | 1917.0 (1737.3 to 2104.9)  | 1275.7 (1144.2 to 1411.9)  | 551.2 (443.9 to 678.7)        | 90.1 (58.8 to 129.8)            | 0.0 (0.0 to 0.0)                  | 3974.9 (3602.3 to 4364.4) | 2645.1 (2372.6 to 2927.5)  | 1142.9 (920.5 to 1407.2)      | 186.9 (121.9 to 269.1)          | 0.0 (0.0 to 0.0)                  |
| Hungary | 2047 | 1949.7 (1765.7 to 2143.8)  | 1298.2 (1160.7 to 1441.7)  | 559.5 (451.0 to 687.1)        | 92.0 (60.0 to 132.6)            | 0.0 (0.0 to 0.0)                  | 4042.6 (3661.1 to 4445.1) | 2691.9 (2406.7 to 2989.3)  | 1160.1 (935.2 to 1424.8)      | 190.7 (124.4 to 274.9)          | 0.0 (0.0 to 0.0)                  |
| Hungary | 2048 | 1984.1 (1794.7 to 2188.6)  | 1322.0 (1176.1 to 1473.7)  | 568.2 (457.2 to 697.9)        | 93.9 (61.3 to 135.6)            | 0.0 (0.0 to 0.0)                  | 4114.1 (3721.2 to 4538.1) | 2741.2 (2438.5 to 3055.7)  | 1178.1 (948.1 to 1447.1)      | 194.7 (127.1 to 281.1)          | 0.0 (0.0 to 0.0)                  |
| Hungary | 2049 | 2019.6 (1822.9 to 2229.6)  | 1346.5 (1193.1 to 1507.9)  | 577.1 (463.1 to 709.5)        | 95.9 (62.7 to 138.7)            | 0.0 (0.0 to 0.0)                  | 4187.6 (3779.7 to 4623.0) | 2792.0 (2473.9 to 3126.6)  | 1196.7 (960.2 to 1471.1)      | 198.9 (129.9 to 287.6)          | 0.0 (0.0 to 0.0)                  |
| Hungary | 2050 | 2054.1 (1853.6 to 2272.8)  | 1370.2 (1212.9 to 1538.6)  | 586.0 (470.7 to 720.9)        | 97.9 (63.9 to 141.7)            | 0.0 (0.0 to 0.0)                  | 4259.2 (3843.4 to 4712.7) | 2841.2 (2515.0 to 3190.2)  | 1215.0 (975.9 to 1494.9)      | 203.0 (132.5 to 293.9)          | 0.0 (0.0 to 0.0)                  |
| Iceland | 1995 | 3778.4 (3607.9 to 3939.1)  | 2909.6 (2752.0 to 3069.5)  | 868.7 (806.7 to 933.6)        | 0.0 (0.0 to 0.0)                | 0.0 (0.0 to 0.0)                  | 2604.0 (2486.5 to 2714.8) | 2005.3 (1896.7 to 2115.5)  | 598.7 (556.0 to 643.5)        | 0.0 (0.0 to 0.0)                | 0.0 (0.0 to 0.0)                  |
| Iceland | 1996 | 3924.7 (3793.7 to 4053.9)  | 3030.2 (2908.5 to 3155.5)  | 894.5 (846.5 to 946.6)        | 0.0 (0.0 to 0.0)                | 0.0 (0.0 to 0.0)                  | 2704.9 (2614.6 to 2793.9) | 2088.4 (2004.5 to 2174.7)  | 616.5 (583.4 to 652.4)        | 0.0 (0.0 to 0.0)                | 0.0 (0.0 to 0.0)                  |
| Iceland | 1997 | 4141.4 (4027.1 to 4267.4)  | 3217.4 (3108.6 to 3337.7)  | 924.0 (879.1 to 971.0)        | 0.0 (0.0 to 0.0)                | 0.0 (0.0 to 0.0)                  | 2854.3 (2775.5 to 2941.1) | 2217.4 (2142.4 to 2300.3)  | 636.8 (605.9 to 669.2)        | 0.0 (0.0 to 0.0)                | 0.0 (0.0 to 0.0)                  |
| Iceland | 1998 | 4566.5 (4436.1 to 4697.7)  | 3598.7 (3483.3 to 3720.1)  | 967.8 (919.9 to 1017.8)       | 0.0 (0.0 to 0.0)                | 0.0 (0.0 to 0.0)                  | 3147.2 (3057.4 to 3237.7) | 2480.2 (2400.7 to 2563.9)  | 667.0 (634.0 to 701.5)        | 0.0 (0.0 to 0.0)                | 0.0 (0.0 to 0.0)                  |
| Iceland | 1999 | 4934.5 (4795.4 to 5070.1)  | 3944.5 (3814.5 to 4069.3)  | 989.9 (942.8 to 1040.6)       | 0.0 (0.0 to 0.0)                | 0.0 (0.0 to 0.0)                  | 3400.8 (3305.0 to 3494.3) | 2718.6 (2628.9 to 2804.6)  | 682.3 (649.7 to 717.1)        | 0.0 (0.0 to 0.0)                | 0.0 (0.0 to 0.0)                  |
| Iceland | 2000 | 5153.9 (5017.0 to 5287.1)  | 4156.7 (4029.2 to 4278.2)  | 997.2 (951.3 to 1046.0)       | 0.0 (0.0 to 0.0)                | 0.0 (0.0 to 0.0)                  | 3552.1 (3457.7 to 3643.9) | 2864.8 (2776.9 to 2948.6)  | 687.3 (655.6 to 720.9)        | 0.0 (0.0 to 0.0)                | 0.0 (0.0 to 0.0)                  |
| Iceland | 2001 | 5357.6 (5229.4 to 5486.5)  | 4362.3 (4245.5 to 4478.8)  | 995.3 (950.7 to 1042.8)       | 0.0 (0.0 to 0.0)                | 0.0 (0.0 to 0.0)                  | 3692.5 (3604.1 to 3781.3) | 3006.5 (2926.0 to 3086.8)  | 686.0 (655.2 to 718.7)        | 0.0 (0.0 to 0.0)                | 0.0 (0.0 to 0.0)                  |
| Iceland | 2002 | 5535.8 (5407.3 to 5667.2)  | 4542.1 (4423.4 to 4665.0)  | 993.5 (950.4 to 1038.5)       | 0.1 (0.1 to 0.2)                | 0.0 (0.0 to 0.0)                  | 3815.3 (3726.7 to 3905.8) | 3130.4 (3048.6 to 3215.1)  | 684.7 (655.0 to 715.7)        | 0.1 (0.1 to 0.1)                | 0.0 (0.0 to 0.0)                  |
| Iceland | 2003 | 5758.1 (5624.5 to 5888.1)  | 4690.4 (4575.7 to 4815.7)  | 1057.3 (1007.6 to 1103.5)     | 10.4 (8.0 to 13.2)              | 0.0 (0.0 to 0.0)                  | 3968.5 (3876.4 to 4058.1) | 3232.6 (3153.6 to 3318.9)  | 728.7 (694.5 to 760.5)        | 7.2 (5.5 to 9.1)                | 0.0 (0.0 to 0.0)                  |
| Iceland | 2004 | 6068.1 (5934.0 to 6206.9)  | 4931.1 (4803.6 to 5064.6)  | 1068.4 (1022.7 to 1115.1)     | 68.5 (54.8 to 83.6)             | 0.0 (0.0 to 0.0)                  | 4182.1 (4089.7 to 4277.8) | 3398.5 (3310.6 to 3490.5)  | 736.4 (704.8 to 768.6)        | 47.2 (37.8 to 57.6)             | 0.0 (0.0 to 0.0)                  |
| Iceland | 2005 | 6201.6 (6062.9 to 6340.9)  | 5024.1 (4897.4 to 5153.5)  | 1045.8 (1001.6 to 1092.9)     | 131.7 (107.9 to 157.8)          | 0.0 (0.0 to 0.0)                  | 4274.1 (4178.5 to 4370.1) | 3462.6 (3375.3 to 3551.8)  | 720.8 (690.3 to 753.2)        | 90.8 (74.4 to 108.7)            | 0.0 (0.0 to 0.0)                  |
| Iceland | 2006 | 6207.8 (6079.4 to 6347.5)  | 5050.4 (4927.8 to 5180.5)  | 1014.2 (970.5 to 1059.4)      | 143.2 (119.6 to 170.1)          | 0.0 (0.0 to 0.0)                  | 4278.4 (4189.9 to 4374.7) | 3480.7 (3396.2 to 3570.4)  | 699.0 (668.9 to 730.1)        | 98.7 (82.4 to 117.2)            | 0.0 (0.0 to 0.0)                  |
| Iceland | 2007 | 6411.6 (6273.6 to 6549.3)  | 5259.7 (5130.6 to 5387.3)  | 1021.6 (978.2 to 1068.0)      | 130.3 (109.0 to 156.9)          | 0.0 (0.0 to 0.0)                  | 4418.8 (4323.8 to 4513.8) | 3625.0 (3536.0 to 3712.9)  | 704.1 (674.2 to 736.1)        | 89.8 (75.1 to 108.1)            | 0.0 (0.0 to 0.0)                  |
| Iceland | 2008 | 6378.3 (6243.1 to 6516.7)  | 5243.4 (5113.2 to 5380.5)  | 1025.0 (981.5 to 1071.2)      | 109.9 (91.7 to 132.4)           | 0.0 (0.0 to 0.0)                  | 4395.9 (4302.8 to 4491.3) | 3613.7 (3524.0 to 3708.3)  | 706.5 (676.5 to 738.3)        | 75.8 (63.2 to 91.2)             | 0.0 (0.0 to 0.0)                  |

| Country | Year | 2018 US Dollars per capita |                            |                               |                                 |                                   | 2018 PPP per capita       |                            |                               |                                 |                                   |
|---------|------|----------------------------|----------------------------|-------------------------------|---------------------------------|-----------------------------------|---------------------------|----------------------------|-------------------------------|---------------------------------|-----------------------------------|
|         |      | Health spending            | Government health spending | Out-of-pocket health spending | Prepaid private health spending | Development assistance for health | Health spending           | Government health spending | Out-of-pocket health spending | Prepaid private health spending | Development assistance for health |
| Iceland | 2009 | 6033.6 (5894.8 to 6175.8)  | 4924.9 (4794.8 to 5058.0)  | 1017.3 (974.1 to 1063.8)      | 91.4 (75.9 to 109.7)            | 0.0 (0.0 to 0.0)                  | 4158.3 (4062.7 to 4256.4) | 3394.2 (3304.6 to 3486.0)  | 701.1 (671.3 to 733.2)        | 63.0 (52.3 to 75.6)             | 0.0 (0.0 to 0.0)                  |
| Iceland | 2010 | 5703.5 (5570.2 to 5840.5)  | 4604.3 (4478.3 to 4725.4)  | 1018.7 (974.6 to 1067.0)      | 80.5 (65.8 to 96.3)             | 0.0 (0.0 to 0.0)                  | 3930.9 (3838.9 to 4025.3) | 3173.3 (3086.5 to 3256.8)  | 702.1 (671.7 to 735.4)        | 55.5 (45.4 to 66.4)             | 0.0 (0.0 to 0.0)                  |
| Iceland | 2011 | 5638.8 (5515.6 to 5769.2)  | 4525.7 (4412.6 to 4641.7)  | 1034.5 (988.1 to 1082.5)      | 78.6 (64.7 to 93.9)             | 0.0 (0.0 to 0.0)                  | 3886.2 (3801.3 to 3976.1) | 3119.1 (3041.1 to 3199.1)  | 713.0 (681.0 to 746.0)        | 54.2 (44.6 to 64.7)             | 0.0 (0.0 to 0.0)                  |
| Iceland | 2012 | 5634.5 (5508.9 to 5761.9)  | 4510.5 (4387.9 to 4627.7)  | 1044.3 (999.5 to 1087.7)      | 79.6 (65.9 to 95.4)             | 0.0 (0.0 to 0.0)                  | 3883.3 (3796.8 to 3971.1) | 3108.7 (3024.1 to 3189.4)  | 719.7 (688.9 to 749.6)        | 54.9 (45.4 to 65.8)             | 0.0 (0.0 to 0.0)                  |
| Iceland | 2013 | 5804.1 (5671.2 to 5943.3)  | 4657.0 (4535.9 to 4794.5)  | 1062.8 (1018.2 to 1107.3)     | 84.3 (70.3 to 100.9)            | 0.0 (0.0 to 0.0)                  | 4000.2 (3908.5 to 4096.1) | 3209.6 (3126.1 to 3304.4)  | 732.5 (701.7 to 763.1)        | 58.1 (48.4 to 69.6)             | 0.0 (0.0 to 0.0)                  |
| Iceland | 2014 | 5893.3 (5762.8 to 6031.9)  | 4743.7 (4612.7 to 4877.5)  | 1061.4 (1016.6 to 1106.2)     | 88.2 (73.1 to 105.6)            | 0.0 (0.0 to 0.0)                  | 4061.7 (3971.7 to 4157.2) | 3269.3 (3179.1 to 3361.6)  | 731.5 (700.6 to 762.4)        | 60.8 (50.4 to 72.8)             | 0.0 (0.0 to 0.0)                  |
| Iceland | 2015 | 6038.6 (5908.2 to 6176.4)  | 4885.1 (4762.9 to 5015.7)  | 1060.4 (1015.2 to 1108.6)     | 93.1 (77.3 to 113.9)            | 0.0 (0.0 to 0.0)                  | 4161.8 (4071.9 to 4256.7) | 3366.8 (3282.6 to 3456.8)  | 730.8 (699.6 to 764.0)        | 64.2 (53.3 to 78.5)             | 0.0 (0.0 to 0.0)                  |
| Iceland | 2016 | 6307.2 (6122.7 to 6494.0)  | 5134.3 (4960.1 to 5309.8)  | 1072.6 (1010.0 to 1135.4)     | 100.2 (79.6 to 126.9)           | 0.0 (0.0 to 0.0)                  | 4346.9 (4219.7 to 4475.6) | 3538.6 (3418.5 to 3659.5)  | 739.3 (696.1 to 782.5)        | 69.1 (54.8 to 87.5)             | 0.0 (0.0 to 0.0)                  |
| Iceland | 2017 | 6196.7 (6017.7 to 6381.2)  | 5018.2 (4848.1 to 5188.4)  | 1077.5 (1013.2 to 1143.9)     | 101.0 (80.2 to 127.7)           | 0.0 (0.0 to 0.0)                  | 4270.7 (4147.4 to 4397.9) | 3458.5 (3341.3 to 3575.9)  | 742.6 (698.3 to 788.4)        | 69.6 (55.3 to 88.0)             | 0.0 (0.0 to 0.0)                  |
| Iceland | 2018 | 6305.6 (6114.6 to 6497.2)  | 5113.7 (4929.7 to 5290.2)  | 1088.8 (1023.9 to 1162.8)     | 103.1 (81.8 to 130.3)           | 0.0 (0.0 to 0.0)                  | 4345.8 (4214.2 to 4477.9) | 3524.4 (3397.6 to 3646.0)  | 750.4 (705.7 to 801.4)        | 71.0 (56.4 to 89.8)             | 0.0 (0.0 to 0.0)                  |
| Iceland | 2019 | 6408.6 (6211.7 to 6605.0)  | 5203.8 (5008.2 to 5394.6)  | 1100.2 (1031.4 to 1177.8)     | 104.7 (83.1 to 132.6)           | 0.0 (0.0 to 0.0)                  | 4416.8 (4281.1 to 4552.2) | 3586.4 (3451.7 to 3717.9)  | 758.2 (710.9 to 811.8)        | 72.1 (57.3 to 91.4)             | 0.0 (0.0 to 0.0)                  |
| Iceland | 2020 | 6513.2 (6304.1 to 6717.8)  | 5295.2 (5089.9 to 5501.8)  | 1111.7 (1041.6 to 1194.5)     | 106.3 (84.4 to 134.8)           | 0.0 (0.0 to 0.0)                  | 4488.9 (4344.7 to 4629.9) | 3649.5 (3508.0 to 3791.9)  | 766.2 (717.9 to 823.2)        | 73.3 (58.2 to 92.9)             | 0.0 (0.0 to 0.0)                  |
| Iceland | 2021 | 6614.0 (6385.2 to 6840.6)  | 5383.0 (5161.4 to 5601.2)  | 1123.0 (1045.9 to 1207.1)     | 107.9 (85.8 to 137.1)           | 0.0 (0.0 to 0.0)                  | 4558.3 (4400.7 to 4714.6) | 3709.9 (3557.2 to 3860.3)  | 774.0 (720.8 to 831.9)        | 74.4 (59.1 to 94.5)             | 0.0 (0.0 to 0.0)                  |
| Iceland | 2022 | 6689.9 (6449.8 to 6916.9)  | 5446.1 (5221.9 to 5677.2)  | 1134.5 (1052.0 to 1221.3)     | 109.4 (86.9 to 138.8)           | 0.0 (0.0 to 0.0)                  | 4610.7 (4445.2 to 4767.1) | 3753.4 (3598.9 to 3912.7)  | 781.9 (725.0 to 841.7)        | 75.4 (59.9 to 95.6)             | 0.0 (0.0 to 0.0)                  |
| Iceland | 2023 | 6769.2 (6526.0 to 7025.6)  | 5512.1 (5279.3 to 5755.8)  | 1146.2 (1058.2 to 1235.6)     | 110.9 (88.1 to 140.6)           | 0.0 (0.0 to 0.0)                  | 4665.3 (4497.7 to 4842.0) | 3798.9 (3638.5 to 3966.9)  | 790.0 (729.3 to 851.5)        | 76.4 (60.7 to 96.9)             | 0.0 (0.0 to 0.0)                  |
| Iceland | 2024 | 6853.5 (6591.7 to 7124.8)  | 5583.2 (5329.9 to 5855.9)  | 1157.7 (1069.2 to 1250.2)     | 112.6 (89.4 to 142.9)           | 0.0 (0.0 to 0.0)                  | 4723.4 (4543.0 to 4910.4) | 3847.9 (3673.4 to 4035.9)  | 797.9 (736.9 to 861.7)        | 77.6 (61.6 to 98.5)             | 0.0 (0.0 to 0.0)                  |
| Iceland | 2025 | 6934.2 (6663.8 to 7215.6)  | 5651.1 (5397.9 to 5921.2)  | 1168.8 (1074.0 to 1264.9)     | 114.3 (90.9 to 145.0)           | 0.0 (0.0 to 0.0)                  | 4779.0 (4592.7 to 4973.0) | 3894.7 (3720.3 to 4080.9)  | 805.5 (740.2 to 871.8)        | 78.7 (62.6 to 100.0)            | 0.0 (0.0 to 0.0)                  |
| Iceland | 2026 | 7017.8 (6741.2 to 7301.4)  | 5721.3 (5456.3 to 5991.6)  | 1180.4 (1079.4 to 1286.2)     | 116.0 (92.4 to 147.2)           | 0.0 (0.0 to 0.0)                  | 4836.6 (4646.0 to 5032.1) | 3943.1 (3760.5 to 4129.4)  | 813.5 (744.0 to 886.4)        | 80.0 (63.7 to 101.5)            | 0.0 (0.0 to 0.0)                  |
| Iceland | 2027 | 7123.3 (6832.6 to 7414.1)  | 5812.0 (5546.0 to 6111.2)  | 1193.2 (1086.5 to 1309.7)     | 118.0 (94.0 to 149.8)           | 0.0 (0.0 to 0.0)                  | 4909.3 (4709.0 to 5109.8) | 4005.6 (3822.3 to 4211.8)  | 822.4 (748.8 to 902.6)        | 81.3 (64.8 to 103.2)            | 0.0 (0.0 to 0.0)                  |
| Iceland | 2028 | 7234.1 (6927.2 to 7533.1)  | 5907.2 (5627.0 to 6209.9)  | 1206.8 (1090.0 to 1336.8)     | 120.1 (95.6 to 152.2)           | 0.0 (0.0 to 0.0)                  | 4985.7 (4774.2 to 5191.8) | 4071.2 (3878.1 to 4279.9)  | 831.7 (751.2 to 921.3)        | 82.8 (65.9 to 104.9)            | 0.0 (0.0 to 0.0)                  |
| Iceland | 2029 | 7349.6 (7018.7 to 7684.3)  | 6006.3 (5716.1 to 6320.3)  | 1221.0 (1097.5 to 1363.0)     | 122.3 (97.1 to 154.8)           | 0.0 (0.0 to 0.0)                  | 5065.3 (4837.3 to 5296.0) | 4139.5 (3939.5 to 4355.9)  | 841.5 (756.4 to 939.4)        | 84.3 (66.9 to 106.7)            | 0.0 (0.0 to 0.0)                  |

| Country | Year | 2018 US Dollars per capita  |                            |                               |                                 |                                   | 2018 PPP per capita       |                            |                               |                                 |                                   |
|---------|------|-----------------------------|----------------------------|-------------------------------|---------------------------------|-----------------------------------|---------------------------|----------------------------|-------------------------------|---------------------------------|-----------------------------------|
|         |      | Health spending             | Government health spending | Out-of-pocket health spending | Prepaid private health spending | Development assistance for health | Health spending           | Government health spending | Out-of-pocket health spending | Prepaid private health spending | Development assistance for health |
| Iceland | 2030 | 7463.7 (7123.7 to 7830.2)   | 6104.0 (5797.1 to 6430.7)  | 1235.2 (1100.8 to 1389.3)     | 124.5 (98.6 to 157.4)           | 0.0 (0.0 to 0.0)                  | 5144.0 (4909.6 to 5396.6) | 4206.9 (3995.4 to 4432.0)  | 851.3 (758.6 to 957.5)        | 85.8 (67.9 to 108.5)            | 0.0 (0.0 to 0.0)                  |
| Iceland | 2031 | 7583.7 (7232.7 to 7956.4)   | 6206.7 (5889.5 to 6548.4)  | 1250.2 (1106.9 to 1415.8)     | 126.8 (100.5 to 160.4)          | 0.0 (0.0 to 0.0)                  | 5226.7 (4984.8 to 5483.5) | 4277.7 (4059.0 to 4513.1)  | 861.7 (762.9 to 975.8)        | 87.4 (69.2 to 110.5)            | 0.0 (0.0 to 0.0)                  |
| Iceland | 2032 | 7705.9 (7336.1 to 8100.0)   | 6311.2 (5975.3 to 6676.0)  | 1265.6 (1109.7 to 1448.7)     | 129.1 (102.4 to 163.6)          | 0.0 (0.0 to 0.0)                  | 5310.9 (5056.0 to 5582.5) | 4349.7 (4118.2 to 4601.1)  | 872.3 (764.8 to 998.5)        | 89.0 (70.6 to 112.7)            | 0.0 (0.0 to 0.0)                  |
| Iceland | 2033 | 7836.5 (7451.1 to 8254.2)   | 6422.8 (6071.5 to 6799.0)  | 1282.0 (1114.3 to 1480.8)     | 131.6 (104.4 to 166.8)          | 0.0 (0.0 to 0.0)                  | 5400.9 (5135.3 to 5688.8) | 4426.6 (4184.4 to 4685.8)  | 883.6 (767.9 to 1020.6)       | 90.7 (71.9 to 114.9)            | 0.0 (0.0 to 0.0)                  |
| Iceland | 2034 | 7961.6 (7567.2 to 8399.2)   | 6529.5 (6171.4 to 6919.0)  | 1298.0 (1118.0 to 1515.9)     | 134.1 (106.3 to 169.8)          | 0.0 (0.0 to 0.0)                  | 5487.1 (5215.3 to 5788.7) | 4500.2 (4253.3 to 4768.6)  | 894.6 (770.5 to 1044.7)       | 92.4 (73.2 to 117.0)            | 0.0 (0.0 to 0.0)                  |
| Iceland | 2035 | 8092.8 (7677.2 to 8544.0)   | 6641.4 (6270.4 to 7055.6)  | 1314.8 (1125.2 to 1549.6)     | 136.6 (108.1 to 173.5)          | 0.0 (0.0 to 0.0)                  | 5577.6 (5291.1 to 5888.5) | 4577.2 (4321.6 to 4862.7)  | 906.2 (775.5 to 1068.0)       | 94.1 (74.5 to 119.6)            | 0.0 (0.0 to 0.0)                  |
| Iceland | 2036 | 8226.8 (7796.0 to 8714.7)   | 6755.6 (6370.6 to 7190.6)  | 1332.0 (1132.3 to 1582.5)     | 139.2 (110.0 to 177.0)          | 0.0 (0.0 to 0.0)                  | 5669.9 (5373.0 to 6006.1) | 4655.9 (4390.6 to 4955.7)  | 918.0 (780.4 to 1090.6)       | 96.0 (75.8 to 122.0)            | 0.0 (0.0 to 0.0)                  |
| Iceland | 2037 | 8367.3 (7913.3 to 8859.2)   | 6875.2 (6474.3 to 7326.9)  | 1350.0 (1141.5 to 1611.8)     | 142.0 (111.9 to 180.5)          | 0.0 (0.0 to 0.0)                  | 5766.7 (5453.8 to 6105.7) | 4738.4 (4462.1 to 5049.7)  | 930.5 (786.7 to 1110.9)       | 97.8 (77.2 to 124.4)            | 0.0 (0.0 to 0.0)                  |
| Iceland | 2038 | 8509.8 (8017.0 to 9026.0)   | 6996.6 (6578.7 to 7465.5)  | 1368.4 (1152.8 to 1642.9)     | 144.8 (113.9 to 184.1)          | 0.0 (0.0 to 0.0)                  | 5864.9 (5525.3 to 6220.7) | 4822.0 (4534.0 to 5145.2)  | 943.1 (794.5 to 1132.3)       | 99.8 (78.5 to 126.9)            | 0.0 (0.0 to 0.0)                  |
| Iceland | 2039 | 8653.7 (8138.4 to 9196.1)   | 7119.0 (6685.2 to 7602.9)  | 1387.1 (1164.6 to 1675.7)     | 147.6 (115.9 to 188.0)          | 0.0 (0.0 to 0.0)                  | 5964.1 (5609.0 to 6338.0) | 4906.4 (4607.4 to 5239.9)  | 956.0 (802.6 to 1154.9)       | 101.7 (79.9 to 129.5)           | 0.0 (0.0 to 0.0)                  |
| Iceland | 2040 | 8799.9 (8248.9 to 9355.1)   | 7243.2 (6793.0 to 7750.6)  | 1406.2 (1177.0 to 1708.4)     | 150.5 (117.9 to 191.5)          | 0.0 (0.0 to 0.0)                  | 6064.8 (5685.2 to 6447.5) | 4992.0 (4681.8 to 5341.7)  | 969.1 (811.2 to 1177.5)       | 103.7 (81.3 to 132.0)           | 0.0 (0.0 to 0.0)                  |
| Iceland | 2041 | 8952.9 (8391.1 to 9518.9)   | 7373.3 (6904.3 to 7894.7)  | 1426.1 (1190.4 to 1735.5)     | 153.5 (120.1 to 195.2)          | 0.0 (0.0 to 0.0)                  | 6170.3 (5783.1 to 6560.4) | 5081.7 (4758.5 to 5441.0)  | 982.9 (820.4 to 1196.1)       | 105.8 (82.8 to 134.6)           | 0.0 (0.0 to 0.0)                  |
| Iceland | 2042 | 9109.7 (8509.5 to 9709.7)   | 7506.5 (7017.8 to 8053.7)  | 1446.6 (1203.8 to 1769.6)     | 156.6 (122.3 to 199.3)          | 0.0 (0.0 to 0.0)                  | 6278.4 (5864.8 to 6691.9) | 5173.4 (4836.7 to 5550.6)  | 997.0 (829.7 to 1219.6)       | 107.9 (84.3 to 137.4)           | 0.0 (0.0 to 0.0)                  |
| Iceland | 2043 | 9268.2 (8645.7 to 9897.2)   | 7641.0 (7132.5 to 8208.4)  | 1467.4 (1217.6 to 1798.5)     | 159.7 (124.7 to 203.5)          | 0.0 (0.0 to 0.0)                  | 6387.6 (5958.6 to 6821.1) | 5266.2 (4915.7 to 5657.2)  | 1011.3 (839.2 to 1239.5)      | 110.1 (85.9 to 140.2)           | 0.0 (0.0 to 0.0)                  |
| Iceland | 2044 | 9430.9 (8787.2 to 10094.4)  | 7779.2 (7246.9 to 8368.3)  | 1488.7 (1232.5 to 1826.2)     | 163.0 (127.1 to 207.8)          | 0.0 (0.0 to 0.0)                  | 6499.7 (6056.1 to 6957.1) | 5361.4 (4994.6 to 5767.4)  | 1026.0 (849.5 to 1258.6)      | 112.3 (87.6 to 143.2)           | 0.0 (0.0 to 0.0)                  |
| Iceland | 2045 | 9589.0 (8916.7 to 10299.0)  | 7913.0 (7356.4 to 8539.4)  | 1509.8 (1248.1 to 1854.9)     | 166.1 (129.2 to 212.0)          | 0.0 (0.0 to 0.0)                  | 6608.7 (6145.4 to 7098.0) | 5453.6 (5070.0 to 5885.3)  | 1040.6 (860.2 to 1278.4)      | 114.5 (89.1 to 146.1)           | 0.0 (0.0 to 0.0)                  |
| Iceland | 2046 | 9750.5 (9050.0 to 10508.2)  | 8049.7 (7454.2 to 8703.7)  | 1531.4 (1264.8 to 1881.0)     | 169.4 (131.5 to 216.1)          | 0.0 (0.0 to 0.0)                  | 6720.0 (6237.3 to 7242.3) | 5547.9 (5137.4 to 5998.5)  | 1055.5 (871.7 to 1296.4)      | 116.7 (90.6 to 148.9)           | 0.0 (0.0 to 0.0)                  |
| Iceland | 2047 | 9906.2 (9189.1 to 10660.9)  | 8181.1 (7547.7 to 8871.4)  | 1552.6 (1281.7 to 1911.6)     | 172.5 (134.0 to 220.4)          | 0.0 (0.0 to 0.0)                  | 6827.3 (6333.1 to 7347.5) | 5638.4 (5201.9 to 6114.2)  | 1070.0 (883.4 to 1317.5)      | 118.9 (92.3 to 151.9)           | 0.0 (0.0 to 0.0)                  |
| Iceland | 2048 | 10065.8 (9316.2 to 10872.6) | 8315.9 (7652.5 to 9018.2)  | 1574.2 (1299.2 to 1944.1)     | 175.7 (135.9 to 225.1)          | 0.0 (0.0 to 0.0)                  | 6937.3 (6420.7 to 7493.4) | 5731.3 (5274.1 to 6215.3)  | 1085.0 (895.4 to 1339.9)      | 121.1 (93.7 to 155.1)           | 0.0 (0.0 to 0.0)                  |
| Iceland | 2049 | 10227.2 (9440.2 to 11031.3) | 8452.2 (7755.1 to 9192.0)  | 1596.1 (1316.9 to 1974.7)     | 178.9 (138.4 to 230.0)          | 0.0 (0.0 to 0.0)                  | 7048.6 (6506.2 to 7602.8) | 5825.2 (5344.8 to 6335.1)  | 1100.0 (907.6 to 1360.9)      | 123.3 (95.4 to 158.5)           | 0.0 (0.0 to 0.0)                  |
| Iceland | 2050 | 10390.1 (9576.4 to 11232.9) | 8589.8 (7860.7 to 9365.7)  | 1618.1 (1334.1 to 2005.1)     | 182.2 (141.4 to 234.7)          | 0.0 (0.0 to 0.0)                  | 7160.8 (6600.0 to 7741.7) | 5920.1 (5417.6 to 6454.8)  | 1115.2 (919.4 to 1381.9)      | 125.6 (97.4 to 161.7)           | 0.0 (0.0 to 0.0)                  |

| Country | Year | 2018 US Dollars per capita |                            |                               |                                 |                                   | 2018 PPP per capita    |                            |                               |                                 |                                   |
|---------|------|----------------------------|----------------------------|-------------------------------|---------------------------------|-----------------------------------|------------------------|----------------------------|-------------------------------|---------------------------------|-----------------------------------|
|         |      | Health spending            | Government health spending | Out-of-pocket health spending | Prepaid private health spending | Development assistance for health | Health spending        | Government health spending | Out-of-pocket health spending | Prepaid private health spending | Development assistance for health |
| India   | 1995 | 25.9 (20.0 to 32.9)        | 4.8 (3.7 to 6.3)           | 19.2 (13.8 to 26.1)           | 1.4 (0.6 to 2.5)                | 0.5 (0.5 to 0.5)                  | 98.9 (76.4 to 125.4)   | 18.5 (14.1 to 23.9)        | 73.4 (52.7 to 99.5)           | 5.2 (2.4 to 9.5)                | 1.7 (1.7 to 1.7)                  |
| India   | 1996 | 27.0 (20.8 to 34.1)        | 5.1 (3.9 to 6.5)           | 19.8 (14.1 to 26.8)           | 1.4 (0.7 to 2.6)                | 0.7 (0.7 to 0.7)                  | 103.0 (79.3 to 130.1)  | 19.3 (14.8 to 24.7)        | 75.8 (53.9 to 102.3)          | 5.4 (2.5 to 10.0)               | 2.5 (2.5 to 2.5)                  |
| India   | 1997 | 27.9 (21.6 to 35.3)        | 5.3 (4.1 to 6.8)           | 20.6 (14.9 to 27.7)           | 1.5 (0.7 to 2.7)                | 0.4 (0.4 to 0.4)                  | 106.4 (82.4 to 134.9)  | 20.3 (15.5 to 26.1)        | 78.7 (57.0 to 105.7)          | 5.7 (2.6 to 10.4)               | 1.7 (1.7 to 1.7)                  |
| India   | 1998 | 29.0 (22.8 to 36.7)        | 5.6 (4.3 to 7.3)           | 21.4 (15.4 to 28.6)           | 1.6 (0.7 to 2.9)                | 0.4 (0.4 to 0.4)                  | 110.5 (86.9 to 140.2)  | 21.6 (16.3 to 27.7)        | 81.6 (58.9 to 109.1)          | 6.0 (2.7 to 11.0)               | 1.4 (1.4 to 1.4)                  |
| India   | 1999 | 30.2 (23.9 to 38.3)        | 6.0 (4.6 to 7.7)           | 22.0 (15.9 to 29.8)           | 1.7 (0.8 to 3.0)                | 0.5 (0.5 to 0.5)                  | 115.4 (91.2 to 146.3)  | 23.0 (17.5 to 29.2)        | 84.1 (60.9 to 113.8)          | 6.3 (2.9 to 11.5)               | 2.0 (2.0 to 2.0)                  |
| India   | 2000 | 31.1 (24.8 to 39.2)        | 6.1 (4.6 to 7.9)           | 22.6 (16.6 to 30.4)           | 1.7 (0.8 to 3.1)                | 0.6 (0.6 to 0.6)                  | 118.7 (94.7 to 149.6)  | 23.4 (17.6 to 30.0)        | 86.4 (63.3 to 115.9)          | 6.5 (3.0 to 11.9)               | 2.4 (2.4 to 2.4)                  |
| India   | 2001 | 32.2 (25.6 to 40.8)        | 6.2 (4.7 to 8.0)           | 23.6 (17.3 to 31.9)           | 1.8 (0.8 to 3.4)                | 0.6 (0.6 to 0.6)                  | 123.1 (97.9 to 155.7)  | 23.7 (17.9 to 30.7)        | 90.3 (66.1 to 121.6)          | 6.8 (3.0 to 12.9)               | 2.3 (2.3 to 2.3)                  |
| India   | 2002 | 33.0 (26.2 to 41.5)        | 6.2 (4.7 to 8.1)           | 24.1 (17.6 to 32.6)           | 2.0 (0.9 to 3.7)                | 0.7 (0.7 to 0.7)                  | 125.8 (100.2 to 158.6) | 23.7 (17.8 to 30.9)        | 92.1 (67.2 to 124.4)          | 7.5 (3.3 to 14.2)               | 2.6 (2.6 to 2.6)                  |
| India   | 2003 | 33.7 (26.8 to 42.2)        | 6.4 (4.9 to 8.3)           | 24.7 (17.9 to 32.7)           | 2.1 (0.9 to 4.0)                | 0.5 (0.5 to 0.5)                  | 128.8 (102.2 to 161.2) | 24.5 (18.7 to 31.8)        | 94.4 (68.2 to 124.8)          | 8.1 (3.6 to 15.2)               | 1.8 (1.8 to 1.8)                  |
| India   | 2004 | 34.9 (27.6 to 43.5)        | 6.7 (5.1 to 8.6)           | 25.3 (18.4 to 33.5)           | 2.2 (1.0 to 4.2)                | 0.7 (0.7 to 0.7)                  | 133.2 (105.5 to 166.0) | 25.5 (19.4 to 32.8)        | 96.6 (70.4 to 128.0)          | 8.6 (3.7 to 16.2)               | 2.5 (2.5 to 2.5)                  |
| India   | 2005 | 36.3 (28.8 to 45.2)        | 7.2 (5.5 to 9.3)           | 26.1 (18.9 to 34.5)           | 2.2 (1.0 to 4.3)                | 0.7 (0.7 to 0.7)                  | 138.5 (110.1 to 172.6) | 27.6 (20.8 to 35.6)        | 99.7 (72.3 to 131.8)          | 8.6 (3.8 to 16.6)               | 2.6 (2.6 to 2.6)                  |
| India   | 2006 | 37.5 (29.6 to 46.5)        | 7.8 (6.0 to 10.1)          | 26.8 (19.3 to 35.3)           | 2.4 (1.1 to 4.6)                | 0.5 (0.5 to 0.5)                  | 143.2 (113.1 to 177.6) | 29.8 (22.7 to 38.5)        | 102.4 (73.8 to 134.6)         | 9.1 (4.1 to 17.4)               | 1.9 (1.9 to 1.9)                  |
| India   | 2007 | 39.6 (31.3 to 48.9)        | 8.6 (6.5 to 11.2)          | 27.7 (20.1 to 36.7)           | 2.6 (1.2 to 5.1)                | 0.7 (0.7 to 0.7)                  | 151.3 (119.6 to 186.9) | 32.7 (24.9 to 42.6)        | 105.9 (76.8 to 140.3)         | 10.1 (4.6 to 19.3)              | 2.6 (2.6 to 2.6)                  |
| India   | 2008 | 40.6 (32.3 to 50.1)        | 9.2 (7.0 to 12.0)          | 27.9 (20.3 to 37.1)           | 2.8 (1.3 to 5.3)                | 0.7 (0.7 to 0.7)                  | 155.1 (123.2 to 191.1) | 35.3 (26.7 to 45.7)        | 106.6 (77.5 to 141.5)         | 10.6 (4.9 to 20.1)              | 2.6 (2.6 to 2.6)                  |
| India   | 2009 | 42.8 (34.1 to 52.8)        | 10.3 (7.9 to 13.4)         | 28.6 (20.8 to 38.2)           | 3.1 (1.5 to 5.9)                | 0.7 (0.7 to 0.7)                  | 163.3 (130.3 to 201.5) | 39.4 (30.2 to 51.3)        | 109.3 (79.5 to 145.9)         | 11.8 (5.7 to 22.4)              | 2.9 (2.9 to 2.9)                  |
| India   | 2010 | 45.0 (36.0 to 54.7)        | 11.4 (8.7 to 14.9)         | 29.4 (21.4 to 38.9)           | 3.5 (1.7 to 6.5)                | 0.8 (0.8 to 0.8)                  | 172.0 (137.4 to 208.9) | 43.6 (33.0 to 56.7)        | 112.3 (81.8 to 148.4)         | 13.2 (6.5 to 24.6)              | 2.9 (2.9 to 2.9)                  |
| India   | 2011 | 47.0 (37.9 to 57.0)        | 12.3 (9.2 to 15.9)         | 30.2 (21.9 to 39.6)           | 3.8 (1.8 to 6.9)                | 0.8 (0.8 to 0.8)                  | 179.5 (144.8 to 217.8) | 46.8 (35.1 to 60.6)        | 115.2 (83.7 to 151.3)         | 14.4 (6.9 to 26.3)              | 3.1 (3.1 to 3.1)                  |
| India   | 2012 | 49.4 (39.5 to 60.1)        | 12.7 (9.6 to 16.4)         | 32.0 (23.1 to 41.8)           | 4.1 (2.0 to 7.6)                | 0.6 (0.6 to 0.6)                  | 188.6 (150.7 to 229.3) | 48.6 (36.6 to 62.7)        | 122.0 (88.0 to 159.7)         | 15.5 (7.4 to 29.0)              | 2.4 (2.4 to 2.4)                  |
| India   | 2013 | 53.4 (42.6 to 64.7)        | 13.1 (9.9 to 17.1)         | 35.1 (25.1 to 46.5)           | 4.4 (2.1 to 8.2)                | 0.7 (0.7 to 0.7)                  | 204.0 (162.8 to 247.1) | 50.1 (37.8 to 65.3)        | 134.2 (95.9 to 177.5)         | 16.9 (8.0 to 31.5)              | 2.9 (2.9 to 2.9)                  |
| India   | 2014 | 56.4 (44.9 to 68.3)        | 13.9 (10.5 to 18.0)        | 37.2 (26.7 to 49.4)           | 4.9 (2.3 to 9.3)                | 0.5 (0.5 to 0.5)                  | 215.5 (171.3 to 260.7) | 53.0 (40.0 to 68.8)        | 142.0 (102.0 to 188.5)        | 18.8 (9.0 to 35.6)              | 1.7 (1.7 to 1.7)                  |
| India   | 2015 | 60.7 (48.5 to 74.4)        | 15.1 (11.4 to 19.6)        | 39.3 (28.4 to 52.7)           | 5.6 (2.7 to 10.5)               | 0.7 (0.7 to 0.7)                  | 231.6 (185.1 to 284.0) | 57.7 (43.4 to 74.9)        | 150.2 (108.3 to 201.1)        | 21.2 (10.1 to 40.1)             | 2.5 (2.5 to 2.5)                  |

| Country | Year | 2018 US Dollars per capita |                            |                               |                                 |                                   | 2018 PPP per capita    |                            |                               |                                 |                                   |
|---------|------|----------------------------|----------------------------|-------------------------------|---------------------------------|-----------------------------------|------------------------|----------------------------|-------------------------------|---------------------------------|-----------------------------------|
|         |      | Health spending            | Government health spending | Out-of-pocket health spending | Prepaid private health spending | Development assistance for health | Health spending        | Government health spending | Out-of-pocket health spending | Prepaid private health spending | Development assistance for health |
| India   | 2016 | 64.6 (52.0 to 79.8)        | 16.3 (12.3 to 21.0)        | 41.6 (29.9 to 55.8)           | 6.1 (2.9 to 11.1)               | 0.5 (0.5 to 0.5)                  | 246.7 (198.7 to 304.5) | 62.3 (47.0 to 80.3)        | 158.9 (114.0 to 213.0)        | 23.4 (11.2 to 42.5)             | 2.1 (2.1 to 2.1)                  |
| India   | 2017 | 68.2 (54.6 to 84.5)        | 17.6 (13.2 to 22.5)        | 43.5 (31.2 to 58.0)           | 6.5 (3.1 to 11.8)               | 0.6 (0.6 to 0.6)                  | 260.2 (208.5 to 322.5) | 67.0 (50.4 to 86.1)        | 166.0 (118.9 to 221.5)        | 24.8 (11.9 to 45.1)             | 2.4 (2.4 to 2.4)                  |
| India   | 2018 | 70.7 (57.0 to 87.1)        | 18.3 (13.8 to 23.6)        | 45.0 (32.3 to 60.5)           | 6.8 (3.2 to 12.3)               | 0.6 (0.6 to 0.6)                  | 269.9 (217.6 to 332.6) | 70.0 (52.7 to 90.1)        | 171.8 (123.2 to 230.8)        | 25.9 (12.4 to 46.9)             | 2.2 (2.2 to 2.2)                  |
| India   | 2019 | 73.3 (58.5 to 91.9)        | 19.1 (14.4 to 24.7)        | 46.5 (33.4 to 62.9)           | 7.0 (3.4 to 12.8)               | 0.6 (0.5 to 0.6)                  | 279.7 (223.3 to 350.8) | 73.1 (55.0 to 94.3)        | 177.6 (127.7 to 240.3)        | 26.9 (12.9 to 48.7)             | 2.2 (2.1 to 2.4)                  |
| India   | 2020 | 76.0 (61.9 to 93.4)        | 20.0 (15.1 to 25.8)        | 48.1 (34.6 to 64.8)           | 7.3 (3.5 to 13.3)               | 0.6 (0.5 to 0.6)                  | 290.2 (236.4 to 356.5) | 76.3 (57.5 to 98.6)        | 183.6 (132.1 to 247.5)        | 28.0 (13.3 to 50.7)             | 2.3 (2.1 to 2.4)                  |
| India   | 2021 | 78.8 (62.8 to 97.8)        | 20.9 (15.7 to 27.0)        | 49.7 (35.8 to 67.1)           | 7.6 (3.6 to 13.8)               | 0.6 (0.5 to 0.7)                  | 300.9 (239.8 to 373.4) | 79.6 (59.9 to 102.9)       | 189.9 (136.8 to 256.0)        | 29.1 (13.8 to 52.8)             | 2.3 (2.1 to 2.5)                  |
| India   | 2022 | 81.8 (66.6 to 100.4)       | 21.8 (16.4 to 28.0)        | 51.5 (37.1 to 69.0)           | 7.9 (3.7 to 14.4)               | 0.6 (0.5 to 0.7)                  | 312.2 (254.1 to 383.3) | 83.2 (62.8 to 106.8)       | 196.4 (141.5 to 263.6)        | 30.3 (14.3 to 55.0)             | 2.4 (2.1 to 2.6)                  |
| India   | 2023 | 84.9 (68.6 to 107.2)       | 22.8 (17.1 to 29.4)        | 53.3 (38.3 to 71.6)           | 8.3 (3.9 to 15.0)               | 0.6 (0.5 to 0.7)                  | 324.2 (261.9 to 409.2) | 87.0 (65.3 to 112.1)       | 203.3 (146.4 to 273.4)        | 31.5 (14.9 to 57.4)             | 2.4 (2.1 to 2.7)                  |
| India   | 2024 | 88.2 (72.0 to 108.2)       | 23.8 (17.9 to 30.6)        | 55.1 (39.6 to 74.2)           | 8.6 (4.1 to 15.7)               | 0.6 (0.6 to 0.7)                  | 336.8 (274.9 to 413.2) | 91.0 (68.4 to 117.0)       | 210.5 (151.2 to 283.2)        | 32.9 (15.5 to 59.8)             | 2.4 (2.1 to 2.8)                  |
| India   | 2025 | 91.6 (73.2 to 114.5)       | 24.9 (18.8 to 32.0)        | 57.1 (40.9 to 76.8)           | 9.0 (4.2 to 16.3)               | 0.7 (0.6 to 0.8)                  | 349.8 (279.4 to 437.1) | 95.2 (71.9 to 122.0)       | 217.8 (156.0 to 293.1)        | 34.3 (16.2 to 62.3)             | 2.5 (2.1 to 2.9)                  |
| India   | 2026 | 95.1 (77.1 to 117.4)       | 26.1 (19.7 to 33.5)        | 59.0 (42.5 to 79.3)           | 9.4 (4.4 to 17.0)               | 0.7 (0.6 to 0.8)                  | 363.2 (294.1 to 448.3) | 99.5 (75.1 to 127.7)       | 225.4 (162.2 to 302.8)        | 35.7 (17.0 to 64.9)             | 2.5 (2.1 to 3.0)                  |
| India   | 2027 | 98.8 (78.3 to 123.8)       | 27.2 (20.5 to 34.9)        | 61.1 (44.1 to 82.0)           | 9.7 (4.6 to 17.8)               | 0.7 (0.6 to 0.8)                  | 377.0 (299.0 to 472.7) | 104.0 (78.3 to 133.2)      | 233.2 (168.2 to 313.1)        | 37.2 (17.7 to 67.8)             | 2.6 (2.2 to 3.1)                  |
| India   | 2028 | 102.4 (82.3 to 126.7)      | 28.4 (21.4 to 36.3)        | 63.2 (45.4 to 85.0)           | 10.1 (4.9 to 18.5)              | 0.7 (0.6 to 0.8)                  | 390.9 (314.2 to 483.6) | 108.5 (81.6 to 138.7)      | 241.1 (173.2 to 324.4)        | 38.7 (18.5 to 70.6)             | 2.6 (2.2 to 3.2)                  |
| India   | 2029 | 106.2 (85.5 to 131.6)      | 29.7 (22.3 to 38.1)        | 65.3 (46.9 to 88.0)           | 10.5 (5.1 to 19.3)              | 0.7 (0.6 to 0.9)                  | 405.3 (326.4 to 502.3) | 113.2 (85.0 to 145.3)      | 249.1 (178.9 to 335.8)        | 40.3 (19.4 to 73.6)             | 2.7 (2.2 to 3.3)                  |
| India   | 2030 | 110.0 (88.0 to 136.1)      | 30.9 (23.2 to 39.7)        | 67.4 (48.3 to 90.7)           | 11.0 (5.3 to 20.1)              | 0.7 (0.6 to 0.9)                  | 420.0 (336.0 to 519.7) | 118.1 (88.7 to 151.7)      | 257.3 (184.3 to 346.4)        | 41.9 (20.1 to 76.7)             | 2.8 (2.3 to 3.4)                  |
| India   | 2031 | 113.9 (90.8 to 141.5)      | 32.2 (24.2 to 41.4)        | 69.6 (49.9 to 93.7)           | 11.4 (5.5 to 20.9)              | 0.7 (0.6 to 0.9)                  | 435.0 (346.7 to 540.0) | 123.1 (92.4 to 158.1)      | 265.5 (190.3 to 357.8)        | 43.5 (20.9 to 79.9)             | 2.8 (2.3 to 3.5)                  |
| India   | 2032 | 118.0 (94.5 to 146.5)      | 33.6 (25.2 to 43.3)        | 71.8 (51.2 to 97.1)           | 11.9 (5.7 to 21.8)              | 0.8 (0.6 to 1.0)                  | 450.3 (360.8 to 559.1) | 128.3 (96.2 to 165.3)      | 273.9 (195.4 to 370.8)        | 45.2 (21.6 to 83.2)             | 2.9 (2.3 to 3.7)                  |
| India   | 2033 | 122.1 (96.2 to 151.8)      | 35.0 (26.3 to 45.2)        | 74.0 (52.7 to 100.3)          | 12.3 (5.9 to 22.7)              | 0.8 (0.6 to 1.0)                  | 466.0 (367.2 to 579.5) | 133.7 (100.4 to 172.7)     | 282.4 (201.3 to 382.8)        | 47.0 (22.4 to 86.5)             | 2.9 (2.3 to 3.8)                  |
| India   | 2034 | 126.3 (100.6 to 158.0)     | 36.5 (27.4 to 47.1)        | 76.3 (54.2 to 104.1)          | 12.8 (6.1 to 23.5)              | 0.8 (0.6 to 1.0)                  | 482.2 (384.2 to 603.0) | 139.2 (104.7 to 179.6)     | 291.1 (207.0 to 397.5)        | 48.9 (23.3 to 89.8)             | 3.0 (2.4 to 3.9)                  |
| India   | 2035 | 130.7 (103.6 to 163.0)     | 38.0 (28.6 to 49.0)        | 78.6 (55.3 to 107.7)          | 13.3 (6.3 to 24.4)              | 0.8 (0.6 to 1.1)                  | 498.8 (395.5 to 622.3) | 145.0 (109.1 to 186.9)     | 299.9 (211.3 to 411.2)        | 50.8 (24.2 to 93.1)             | 3.1 (2.4 to 4.0)                  |
| India   | 2036 | 135.1 (106.8 to 169.2)     | 39.6 (29.8 to 50.9)        | 80.9 (56.8 to 111.3)          | 13.8 (6.6 to 25.3)              | 0.8 (0.6 to 1.1)                  | 515.9 (407.6 to 645.8) | 151.2 (113.6 to 194.5)     | 308.8 (216.9 to 424.9)        | 52.8 (25.1 to 96.6)             | 3.2 (2.5 to 4.3)                  |

| Country   | Year | 2018 US Dollars per capita |                            |                               |                                 |                                   | 2018 PPP per capita     |                            |                               |                                 |                                   |
|-----------|------|----------------------------|----------------------------|-------------------------------|---------------------------------|-----------------------------------|-------------------------|----------------------------|-------------------------------|---------------------------------|-----------------------------------|
|           |      | Health spending            | Government health spending | Out-of-pocket health spending | Prepaid private health spending | Development assistance for health | Health spending         | Government health spending | Out-of-pocket health spending | Prepaid private health spending | Development assistance for health |
| India     | 2037 | 139.8 (111.5 to 175.0)     | 41.3 (31.0 to 53.2)        | 83.3 (58.4 to 115.2)          | 14.4 (6.9 to 26.2)              | 0.9 (0.7 to 1.2)                  | 533.5 (425.6 to 667.9)  | 157.6 (118.4 to 203.2)     | 317.9 (223.1 to 439.6)        | 54.8 (26.2 to 100.2)            | 3.3 (2.5 to 4.4)                  |
| India     | 2038 | 144.5 (113.1 to 182.4)     | 43.0 (32.3 to 55.6)        | 85.7 (59.9 to 119.1)          | 14.9 (7.1 to 27.2)              | 0.9 (0.7 to 1.2)                  | 551.5 (431.9 to 696.3)  | 164.2 (123.4 to 212.3)     | 327.0 (228.7 to 454.8)        | 57.0 (27.2 to 103.9)            | 3.3 (2.5 to 4.6)                  |
| India     | 2039 | 149.3 (118.0 to 189.6)     | 44.8 (33.6 to 58.0)        | 88.1 (61.7 to 122.7)          | 15.5 (7.4 to 28.2)              | 0.9 (0.7 to 1.2)                  | 569.9 (450.4 to 723.9)  | 171.0 (128.4 to 221.3)     | 336.3 (235.5 to 468.5)        | 59.2 (28.3 to 107.8)            | 3.4 (2.6 to 4.8)                  |
| India     | 2040 | 154.3 (121.2 to 194.0)     | 46.7 (35.0 to 60.4)        | 90.6 (63.3 to 126.4)          | 16.1 (7.7 to 29.3)              | 0.9 (0.7 to 1.3)                  | 588.9 (462.6 to 740.7)  | 178.2 (133.5 to 230.5)     | 345.7 (241.7 to 482.4)        | 61.5 (29.3 to 111.9)            | 3.5 (2.7 to 4.9)                  |
| India     | 2041 | 159.3 (125.6 to 200.1)     | 48.6 (36.3 to 63.1)        | 93.0 (64.9 to 130.2)          | 16.7 (7.9 to 30.5)              | 0.9 (0.7 to 1.3)                  | 608.2 (479.6 to 763.8)  | 185.6 (138.6 to 240.7)     | 355.1 (247.6 to 497.1)        | 63.9 (30.3 to 116.3)            | 3.6 (2.7 to 5.0)                  |
| India     | 2042 | 164.6 (128.8 to 207.5)     | 50.7 (37.7 to 65.9)        | 95.5 (66.6 to 134.1)          | 17.4 (8.2 to 31.7)              | 1.0 (0.7 to 1.4)                  | 628.2 (491.6 to 792.3)  | 193.4 (143.9 to 251.5)     | 364.7 (254.3 to 511.9)        | 66.4 (31.4 to 121.2)            | 3.7 (2.7 to 5.3)                  |
| India     | 2043 | 169.9 (134.2 to 214.6)     | 52.8 (39.2 to 69.0)        | 98.1 (68.4 to 138.5)          | 18.1 (8.6 to 33.1)              | 1.0 (0.7 to 1.4)                  | 648.7 (512.3 to 819.1)  | 201.5 (149.5 to 263.4)     | 374.4 (261.1 to 528.9)        | 69.0 (32.7 to 126.3)            | 3.8 (2.8 to 5.5)                  |
| India     | 2044 | 175.3 (138.3 to 221.4)     | 55.0 (40.7 to 72.0)        | 100.6 (70.0 to 142.3)         | 18.8 (8.9 to 34.3)              | 1.0 (0.7 to 1.5)                  | 669.4 (527.8 to 845.1)  | 209.8 (155.3 to 274.8)     | 384.0 (267.3 to 543.2)        | 71.7 (33.9 to 131.0)            | 3.9 (2.8 to 5.7)                  |
| India     | 2045 | 181.0 (143.3 to 227.4)     | 57.3 (42.3 to 75.3)        | 103.1 (71.7 to 146.0)         | 19.5 (9.2 to 35.6)              | 1.1 (0.8 to 1.6)                  | 690.8 (547.2 to 868.2)  | 218.6 (161.5 to 287.5)     | 393.8 (273.5 to 557.3)        | 74.4 (35.2 to 135.9)            | 4.0 (2.9 to 6.0)                  |
| India     | 2046 | 186.6 (147.2 to 234.7)     | 59.6 (43.9 to 78.4)        | 105.7 (73.2 to 149.8)         | 20.2 (9.6 to 36.9)              | 1.1 (0.8 to 1.7)                  | 712.2 (561.8 to 895.9)  | 227.5 (167.6 to 299.4)     | 403.3 (279.5 to 571.8)        | 77.2 (36.5 to 141.0)            | 4.1 (3.0 to 6.4)                  |
| India     | 2047 | 192.2 (151.3 to 241.7)     | 62.0 (45.5 to 81.8)        | 108.2 (74.8 to 153.9)         | 21.0 (9.9 to 38.4)              | 1.1 (0.8 to 1.8)                  | 733.8 (577.7 to 922.6)  | 236.7 (173.9 to 312.1)     | 412.9 (285.4 to 587.4)        | 80.0 (37.8 to 146.4)            | 4.3 (3.0 to 6.7)                  |
| India     | 2048 | 198.1 (154.8 to 247.0)     | 64.5 (47.2 to 85.2)        | 110.7 (76.3 to 157.6)         | 21.7 (10.2 to 39.8)             | 1.2 (0.8 to 1.9)                  | 756.1 (591.1 to 943.0)  | 246.1 (180.3 to 325.2)     | 422.6 (291.4 to 601.4)        | 83.0 (39.1 to 152.0)            | 4.4 (3.1 to 7.1)                  |
| India     | 2049 | 204.0 (159.0 to 257.1)     | 67.0 (48.9 to 88.7)        | 113.3 (77.9 to 160.7)         | 22.5 (10.6 to 41.3)             | 1.2 (0.8 to 1.9)                  | 778.7 (607.1 to 981.6)  | 255.8 (186.8 to 338.7)     | 432.4 (297.5 to 613.5)        | 85.9 (40.4 to 157.8)            | 4.6 (3.2 to 7.4)                  |
| India     | 2050 | 210.0 (163.4 to 262.2)     | 69.6 (50.7 to 92.3)        | 115.9 (79.5 to 164.2)         | 23.3 (10.9 to 42.9)             | 1.2 (0.9 to 2.0)                  | 801.6 (623.7 to 1000.8) | 265.6 (193.5 to 352.4)     | 442.3 (303.6 to 627.0)        | 89.0 (41.8 to 163.6)            | 4.7 (3.3 to 7.6)                  |
| Indonesia | 1995 | 45.4 (35.6 to 58.0)        | 13.1 (9.9 to 16.9)         | 18.6 (13.4 to 25.5)           | 12.5 (6.2 to 22.0)              | 1.1 (1.1 to 1.1)                  | 151.6 (119.0 to 193.9)  | 43.7 (33.1 to 56.5)        | 62.3 (44.8 to 85.2)           | 41.9 (20.7 to 73.7)             | 3.7 (3.7 to 3.7)                  |
| Indonesia | 1996 | 47.7 (37.3 to 60.5)        | 14.0 (10.7 to 18.0)        | 19.7 (14.2 to 27.2)           | 13.4 (6.7 to 23.8)              | 0.6 (0.6 to 0.6)                  | 159.5 (124.8 to 202.1)  | 46.8 (35.8 to 60.3)        | 66.0 (47.5 to 90.8)           | 44.7 (22.3 to 79.6)             | 2.1 (2.1 to 2.1)                  |
| Indonesia | 1997 | 48.9 (38.6 to 62.4)        | 14.3 (11.1 to 18.6)        | 20.3 (14.7 to 27.8)           | 13.6 (6.9 to 24.4)              | 0.7 (0.7 to 0.7)                  | 163.6 (128.9 to 208.6)  | 47.9 (37.0 to 62.2)        | 67.9 (49.1 to 92.9)           | 45.6 (22.9 to 81.5)             | 2.2 (2.2 to 2.2)                  |
| Indonesia | 1998 | 45.6 (35.9 to 58.2)        | 13.1 (10.1 to 16.8)        | 19.4 (14.1 to 26.2)           | 12.5 (6.4 to 22.6)              | 0.6 (0.6 to 0.6)                  | 152.4 (119.9 to 194.5)  | 43.7 (33.7 to 56.2)        | 64.8 (47.1 to 87.6)           | 41.7 (21.3 to 75.5)             | 2.1 (2.1 to 2.1)                  |
| Indonesia | 1999 | 45.9 (36.5 to 57.9)        | 13.4 (10.3 to 17.1)        | 19.7 (14.3 to 26.8)           | 12.1 (6.4 to 21.8)              | 0.7 (0.7 to 0.7)                  | 153.4 (122.1 to 193.5)  | 44.8 (34.3 to 57.2)        | 65.8 (47.9 to 89.8)           | 40.4 (21.5 to 72.8)             | 2.4 (2.4 to 2.4)                  |
| Indonesia | 2000 | 47.3 (38.6 to 58.6)        | 14.0 (10.6 to 17.8)        | 19.5 (14.3 to 26.6)           | 11.1 (5.9 to 19.8)              | 2.7 (2.7 to 2.7)                  | 158.3 (129.1 to 196.0)  | 46.8 (35.6 to 59.7)        | 65.3 (47.8 to 88.9)           | 37.0 (19.6 to 66.1)             | 9.2 (9.2 to 9.2)                  |
| Indonesia | 2001 | 47.6 (38.7 to 59.1)        | 15.5 (11.6 to 19.6)        | 20.4 (14.9 to 27.2)           | 10.8 (5.6 to 19.0)              | 0.9 (0.9 to 0.9)                  | 159.1 (129.4 to 197.4)  | 51.7 (38.8 to 65.5)        | 68.2 (49.9 to 91.0)           | 36.0 (18.7 to 63.5)             | 3.1 (3.1 to 3.1)                  |

| Country   | Year | 2018 US Dollars per capita |                            |                               |                                 |                                   | 2018 PPP per capita    |                            |                               |                                 |                                   |
|-----------|------|----------------------------|----------------------------|-------------------------------|---------------------------------|-----------------------------------|------------------------|----------------------------|-------------------------------|---------------------------------|-----------------------------------|
|           |      | Health spending            | Government health spending | Out-of-pocket health spending | Prepaid private health spending | Development assistance for health | Health spending        | Government health spending | Out-of-pocket health spending | Prepaid private health spending | Development assistance for health |
| Indonesia | 2002 | 48.9 (39.5 to 60.1)        | 16.2 (12.2 to 20.7)        | 21.8 (16.0 to 28.5)           | 10.2 (5.4 to 17.7)              | 0.6 (0.6 to 0.6)                  | 163.4 (132.0 to 201.0) | 54.2 (40.9 to 69.2)        | 72.9 (53.5 to 95.1)           | 34.2 (18.2 to 59.1)             | 2.0 (2.0 to 2.0)                  |
| Indonesia | 2003 | 52.9 (42.8 to 64.0)        | 17.6 (13.4 to 22.1)        | 24.2 (18.0 to 31.5)           | 10.3 (5.4 to 18.0)              | 0.8 (0.8 to 0.8)                  | 176.8 (142.9 to 213.9) | 58.7 (44.8 to 74.0)        | 80.8 (60.1 to 105.4)          | 34.5 (18.1 to 60.1)             | 2.8 (2.8 to 2.8)                  |
| Indonesia | 2004 | 56.3 (45.7 to 66.9)        | 18.5 (14.3 to 23.3)        | 26.6 (19.9 to 34.5)           | 10.3 (5.4 to 17.8)              | 0.9 (0.9 to 0.9)                  | 188.1 (152.8 to 223.7) | 61.7 (47.8 to 78.0)        | 88.8 (66.5 to 115.3)          | 34.5 (18.2 to 59.5)             | 3.0 (3.0 to 3.0)                  |
| Indonesia | 2005 | 62.2 (50.8 to 74.3)        | 19.7 (15.2 to 24.8)        | 31.1 (23.4 to 41.0)           | 10.6 (5.6 to 18.4)              | 0.9 (0.9 to 0.9)                  | 208.0 (169.7 to 248.4) | 65.7 (50.7 to 83.0)        | 103.9 (78.1 to 137.1)         | 35.3 (18.7 to 61.7)             | 3.1 (3.1 to 3.1)                  |
| Indonesia | 2006 | 68.9 (56.9 to 82.5)        | 21.8 (16.9 to 27.8)        | 34.5 (26.2 to 45.7)           | 11.2 (6.0 to 19.6)              | 1.3 (1.3 to 1.3)                  | 230.3 (190.0 to 275.7) | 72.9 (56.4 to 92.8)        | 115.5 (87.5 to 152.9)         | 37.5 (20.0 to 65.6)             | 4.4 (4.4 to 4.4)                  |
| Indonesia | 2007 | 74.8 (61.3 to 88.9)        | 24.3 (18.8 to 30.8)        | 37.2 (28.2 to 49.8)           | 12.1 (6.5 to 20.8)              | 1.1 (1.1 to 1.1)                  | 250.1 (205.0 to 297.3) | 81.2 (63.0 to 103.0)       | 124.5 (94.2 to 166.5)         | 40.6 (21.7 to 69.7)             | 3.8 (3.8 to 3.8)                  |
| Indonesia | 2008 | 78.3 (64.3 to 92.8)        | 25.3 (20.1 to 32.1)        | 38.7 (29.3 to 50.8)           | 12.8 (7.0 to 21.6)              | 1.5 (1.5 to 1.5)                  | 261.9 (214.9 to 310.3) | 84.6 (67.1 to 107.2)       | 129.5 (97.8 to 169.7)         | 42.8 (23.3 to 72.0)             | 5.0 (5.0 to 5.0)                  |
| Indonesia | 2009 | 80.4 (66.6 to 96.3)        | 25.4 (20.1 to 32.0)        | 40.6 (30.8 to 52.7)           | 13.1 (7.2 to 21.5)              | 1.3 (1.3 to 1.3)                  | 268.9 (222.5 to 321.9) | 84.9 (67.1 to 107.0)       | 135.8 (103.0 to 176.2)        | 43.8 (24.1 to 71.8)             | 4.3 (4.3 to 4.3)                  |
| Indonesia | 2010 | 83.8 (69.0 to 100.4)       | 25.1 (19.8 to 31.7)        | 44.1 (33.3 to 56.1)           | 13.4 (7.2 to 22.3)              | 1.2 (1.2 to 1.2)                  | 280.0 (230.7 to 335.5) | 83.9 (66.1 to 105.9)       | 147.3 (111.3 to 187.4)        | 44.8 (24.2 to 74.7)             | 3.9 (3.9 to 3.9)                  |
| Indonesia | 2011 | 89.1 (73.9 to 106.7)       | 26.8 (21.0 to 33.6)        | 46.7 (35.1 to 59.5)           | 14.3 (7.5 to 24.0)              | 1.3 (1.3 to 1.3)                  | 297.8 (247.0 to 356.5) | 89.6 (70.3 to 112.3)       | 156.1 (117.5 to 198.9)        | 47.8 (25.1 to 80.3)             | 4.2 (4.2 to 4.2)                  |
| Indonesia | 2012 | 93.2 (77.3 to 112.0)       | 29.1 (22.9 to 36.5)        | 47.2 (36.1 to 60.6)           | 15.7 (8.2 to 27.2)              | 1.3 (1.3 to 1.3)                  | 311.7 (258.5 to 374.4) | 97.1 (76.6 to 121.9)       | 157.9 (120.6 to 202.7)        | 52.4 (27.5 to 91.0)             | 4.3 (4.3 to 4.3)                  |
| Indonesia | 2013 | 98.7 (82.4 to 118.9)       | 32.2 (25.2 to 40.4)        | 47.2 (35.9 to 60.5)           | 17.8 (9.2 to 30.6)              | 1.4 (1.4 to 1.4)                  | 329.9 (275.4 to 397.6) | 107.7 (84.2 to 135.0)      | 157.9 (120.0 to 202.1)        | 59.5 (30.7 to 102.4)            | 4.8 (4.8 to 4.8)                  |
| Indonesia | 2014 | 104.2 (86.4 to 125.6)      | 36.5 (28.6 to 45.9)        | 46.7 (34.9 to 60.8)           | 20.2 (10.3 to 35.4)             | 0.8 (0.8 to 0.8)                  | 348.4 (288.8 to 420.0) | 122.0 (95.6 to 153.6)      | 156.0 (116.8 to 203.4)        | 67.5 (34.4 to 118.3)            | 2.8 (2.8 to 2.8)                  |
| Indonesia | 2015 | 109.3 (90.3 to 131.2)      | 41.4 (32.5 to 52.0)        | 46.1 (34.2 to 60.6)           | 21.0 (10.7 to 36.9)             | 0.8 (0.8 to 0.8)                  | 365.3 (301.9 to 438.7) | 138.4 (108.7 to 173.7)     | 154.2 (114.3 to 202.7)        | 70.1 (35.7 to 123.5)            | 2.6 (2.6 to 2.6)                  |
| Indonesia | 2016 | 116.0 (96.2 to 140.7)      | 46.6 (37.0 to 58.7)        | 46.5 (34.3 to 61.8)           | 22.1 (11.4 to 38.5)             | 0.8 (0.8 to 0.8)                  | 387.6 (321.5 to 470.4) | 155.7 (123.8 to 196.4)     | 155.4 (114.8 to 206.6)        | 73.8 (38.0 to 128.8)            | 2.7 (2.7 to 2.7)                  |
| Indonesia | 2017 | 119.5 (98.8 to 144.6)      | 47.7 (37.9 to 60.2)        | 47.9 (35.5 to 63.7)           | 22.9 (11.8 to 40.0)             | 0.9 (0.9 to 0.9)                  | 399.4 (330.2 to 483.5) | 159.5 (126.7 to 201.1)     | 160.2 (118.7 to 212.8)        | 76.5 (39.4 to 133.8)            | 3.2 (3.2 to 3.2)                  |
| Indonesia | 2018 | 123.2 (101.6 to 149.3)     | 49.5 (39.3 to 62.4)        | 49.2 (36.5 to 65.1)           | 23.7 (12.2 to 41.5)             | 0.9 (0.9 to 0.9)                  | 411.9 (339.8 to 498.9) | 165.4 (131.4 to 208.5)     | 164.3 (122.1 to 217.8)        | 79.3 (40.7 to 138.7)            | 3.0 (2.9 to 3.0)                  |
| Indonesia | 2019 | 127.1 (104.5 to 153.6)     | 51.1 (40.6 to 64.4)        | 50.6 (37.7 to 66.9)           | 24.5 (12.5 to 42.9)             | 0.9 (0.8 to 0.9)                  | 424.9 (349.4 to 513.3) | 170.9 (135.7 to 215.3)     | 169.2 (126.0 to 223.7)        | 81.9 (41.9 to 143.3)            | 3.0 (2.8 to 3.1)                  |
| Indonesia | 2020 | 130.9 (107.8 to 158.8)     | 52.6 (41.7 to 66.4)        | 52.1 (38.6 to 69.2)           | 25.3 (12.9 to 44.2)             | 0.9 (0.8 to 1.0)                  | 437.5 (360.4 to 530.9) | 175.9 (139.5 to 221.9)     | 174.2 (129.1 to 231.3)        | 84.4 (43.2 to 147.8)            | 3.0 (2.8 to 3.3)                  |
| Indonesia | 2021 | 134.7 (111.0 to 163.0)     | 54.1 (42.9 to 68.2)        | 53.6 (39.6 to 71.3)           | 26.0 (13.3 to 45.7)             | 0.9 (0.8 to 1.0)                  | 450.2 (370.9 to 544.8) | 180.9 (143.3 to 227.9)     | 179.2 (132.5 to 238.5)        | 87.0 (44.5 to 152.7)            | 3.1 (2.8 to 3.4)                  |
| Indonesia | 2022 | 138.5 (114.7 to 168.2)     | 55.6 (44.0 to 70.0)        | 55.1 (40.9 to 73.6)           | 26.8 (13.7 to 47.0)             | 0.9 (0.8 to 1.0)                  | 462.9 (383.3 to 562.2) | 185.9 (147.2 to 234.0)     | 184.3 (136.6 to 245.9)        | 89.6 (45.8 to 157.1)            | 3.1 (2.8 to 3.5)                  |



| Country   | Year | 2018 US Dollars per capita |                            |                               |                                 |                                   | 2018 PPP per capita    |                            |                               |                                 |                                   |
|-----------|------|----------------------------|----------------------------|-------------------------------|---------------------------------|-----------------------------------|------------------------|----------------------------|-------------------------------|---------------------------------|-----------------------------------|
|           |      | Health spending            | Government health spending | Out-of-pocket health spending | Prepaid private health spending | Development assistance for health | Health spending        | Government health spending | Out-of-pocket health spending | Prepaid private health spending | Development assistance for health |
| Indonesia | 2023 | 142.2 (116.7 to 171.6)     | 57.1 (45.1 to 71.9)        | 56.5 (41.8 to 75.3)           | 27.6 (14.1 to 48.4)             | 1.0 (0.8 to 1.1)                  | 475.3 (389.9 to 573.5) | 191.0 (150.9 to 240.3)     | 189.0 (139.6 to 251.7)        | 92.2 (47.1 to 161.9)            | 3.2 (2.8 to 3.6)                  |
| Indonesia | 2024 | 146.1 (119.9 to 176.9)     | 58.9 (46.5 to 74.1)        | 57.8 (42.7 to 76.9)           | 28.4 (14.5 to 49.8)             | 1.0 (0.8 to 1.1)                  | 488.4 (400.8 to 591.5) | 197.0 (155.4 to 247.8)     | 193.1 (142.7 to 257.0)        | 95.0 (48.4 to 166.3)            | 3.3 (2.8 to 3.8)                  |
| Indonesia | 2025 | 150.4 (124.1 to 181.8)     | 61.1 (48.1 to 76.8)        | 59.1 (43.6 to 78.5)           | 29.3 (14.9 to 51.3)             | 1.0 (0.9 to 1.2)                  | 502.9 (414.7 to 607.6) | 204.2 (160.9 to 256.6)     | 197.4 (145.8 to 262.5)        | 98.0 (49.8 to 171.4)            | 3.3 (2.9 to 3.9)                  |
| Indonesia | 2026 | 154.7 (128.1 to 187.6)     | 63.2 (49.8 to 79.4)        | 60.3 (44.5 to 80.2)           | 30.2 (15.3 to 52.6)             | 1.0 (0.9 to 1.2)                  | 517.3 (428.2 to 627.0) | 211.2 (166.4 to 265.3)     | 201.7 (148.9 to 268.1)        | 101.0 (51.3 to 175.9)           | 3.4 (2.9 to 4.0)                  |
| Indonesia | 2027 | 158.7 (130.8 to 192.2)     | 65.0 (51.1 to 81.6)        | 61.6 (45.5 to 81.9)           | 31.1 (15.7 to 54.0)             | 1.0 (0.9 to 1.2)                  | 530.5 (437.3 to 642.7) | 217.1 (170.7 to 272.6)     | 206.1 (152.0 to 273.8)        | 103.8 (52.6 to 180.6)           | 3.5 (2.9 to 4.1)                  |
| Indonesia | 2028 | 162.8 (134.8 to 197.6)     | 66.8 (52.4 to 83.8)        | 63.0 (46.5 to 83.7)           | 32.0 (16.2 to 55.6)             | 1.1 (0.9 to 1.3)                  | 544.3 (450.5 to 660.5) | 223.3 (175.3 to 280.2)     | 210.6 (155.4 to 279.8)        | 106.9 (54.1 to 185.8)           | 3.6 (3.0 to 4.3)                  |
| Indonesia | 2029 | 167.2 (137.3 to 202.3)     | 68.8 (54.0 to 86.3)        | 64.4 (47.6 to 85.5)           | 32.9 (16.7 to 57.3)             | 1.1 (0.9 to 1.3)                  | 559.0 (459.1 to 676.4) | 230.0 (180.4 to 288.5)     | 215.2 (159.0 to 285.9)        | 110.1 (55.8 to 191.5)           | 3.7 (3.0 to 4.5)                  |
| Indonesia | 2030 | 172.0 (142.2 to 209.4)     | 71.2 (55.7 to 89.2)        | 65.8 (48.7 to 87.4)           | 34.0 (17.2 to 59.0)             | 1.1 (0.9 to 1.4)                  | 575.1 (475.4 to 700.0) | 237.9 (186.3 to 298.2)     | 220.0 (162.6 to 292.3)        | 113.5 (57.5 to 197.3)           | 3.7 (3.1 to 4.6)                  |
| Indonesia | 2031 | 176.8 (145.7 to 214.0)     | 73.4 (57.1 to 92.0)        | 67.3 (49.7 to 89.4)           | 35.0 (17.7 to 60.7)             | 1.1 (0.9 to 1.4)                  | 590.9 (487.1 to 715.3) | 245.3 (191.0 to 307.7)     | 224.9 (166.2 to 298.8)        | 116.9 (59.2 to 203.1)           | 3.8 (3.1 to 4.8)                  |
| Indonesia | 2032 | 181.7 (149.8 to 219.8)     | 75.7 (58.6 to 94.9)        | 68.8 (50.8 to 91.5)           | 36.0 (18.2 to 62.6)             | 1.2 (0.9 to 1.5)                  | 607.3 (500.9 to 734.7) | 253.1 (195.9 to 317.4)     | 229.9 (169.9 to 305.9)        | 120.4 (61.0 to 209.3)           | 3.9 (3.1 to 4.9)                  |
| Indonesia | 2033 | 186.8 (154.4 to 225.5)     | 78.1 (60.5 to 98.1)        | 70.3 (52.0 to 93.7)           | 37.1 (18.8 to 64.6)             | 1.2 (0.9 to 1.5)                  | 624.3 (516.1 to 753.9) | 261.2 (202.1 to 327.8)     | 235.0 (173.8 to 313.1)        | 124.1 (62.8 to 215.8)           | 4.0 (3.2 to 5.1)                  |
| Indonesia | 2034 | 191.9 (158.1 to 232.6)     | 80.6 (62.2 to 101.1)       | 71.9 (53.1 to 95.9)           | 38.3 (19.4 to 66.5)             | 1.2 (1.0 to 1.6)                  | 641.6 (528.4 to 777.5) | 269.3 (208.0 to 338.0)     | 240.3 (177.6 to 320.5)        | 127.9 (64.7 to 222.4)           | 4.1 (3.2 to 5.3)                  |
| Indonesia | 2035 | 197.2 (162.2 to 238.5)     | 83.1 (64.0 to 104.2)       | 73.5 (54.3 to 98.1)           | 39.4 (19.9 to 68.5)             | 1.3 (1.0 to 1.6)                  | 659.3 (542.3 to 797.3) | 277.7 (213.8 to 348.3)     | 245.7 (181.4 to 328.0)        | 131.7 (66.7 to 229.1)           | 4.2 (3.3 to 5.5)                  |
| Indonesia | 2036 | 202.5 (167.1 to 246.3)     | 85.6 (65.8 to 107.4)       | 75.1 (55.4 to 100.4)          | 40.6 (20.5 to 70.5)             | 1.3 (1.0 to 1.7)                  | 677.0 (558.4 to 823.5) | 286.0 (219.8 to 359.0)     | 251.0 (185.2 to 335.5)        | 135.6 (68.5 to 235.7)           | 4.3 (3.3 to 5.8)                  |
| Indonesia | 2037 | 207.9 (171.3 to 251.7)     | 88.1 (67.6 to 110.8)       | 76.7 (56.6 to 102.7)          | 41.8 (21.1 to 72.7)             | 1.3 (1.0 to 1.8)                  | 695.0 (572.8 to 841.3) | 294.5 (225.9 to 370.4)     | 256.5 (189.2 to 343.2)        | 139.6 (70.4 to 243.0)           | 4.4 (3.4 to 5.9)                  |
| Indonesia | 2038 | 213.4 (175.7 to 259.3)     | 90.7 (69.5 to 113.9)       | 78.4 (57.9 to 104.9)          | 43.0 (21.6 to 74.9)             | 1.3 (1.0 to 1.9)                  | 713.4 (587.5 to 866.9) | 303.1 (232.5 to 380.7)     | 262.0 (193.6 to 350.5)        | 143.7 (72.3 to 250.3)           | 4.5 (3.4 to 6.3)                  |
| Indonesia | 2039 | 219.0 (180.7 to 266.4)     | 93.3 (71.5 to 117.1)       | 80.1 (59.2 to 107.1)          | 44.2 (22.2 to 77.1)             | 1.4 (1.1 to 1.9)                  | 732.1 (604.2 to 890.5) | 311.9 (239.1 to 391.5)     | 267.7 (197.9 to 357.9)        | 147.9 (74.2 to 257.8)           | 4.6 (3.5 to 6.4)                  |
| Indonesia | 2040 | 224.8 (185.0 to 273.2)     | 96.0 (73.4 to 120.7)       | 81.8 (60.5 to 109.3)          | 45.5 (22.8 to 79.4)             | 1.4 (1.1 to 2.0)                  | 751.5 (618.4 to 913.3) | 321.0 (245.2 to 403.5)     | 273.5 (202.2 to 365.5)        | 152.2 (76.3 to 265.4)           | 4.7 (3.6 to 6.6)                  |
| Indonesia | 2041 | 230.7 (189.3 to 279.9)     | 98.8 (75.2 to 124.4)       | 83.6 (61.8 to 111.9)          | 46.9 (23.4 to 81.7)             | 1.4 (1.1 to 2.0)                  | 771.3 (632.7 to 935.8) | 330.3 (251.5 to 416.0)     | 279.4 (206.5 to 374.0)        | 156.7 (78.3 to 273.2)           | 4.8 (3.6 to 6.7)                  |
| Indonesia | 2042 | 236.7 (193.6 to 289.3)     | 101.6 (77.3 to 128.2)      | 85.4 (63.1 to 114.5)          | 48.2 (24.1 to 84.1)             | 1.5 (1.1 to 2.1)                  | 791.3 (647.0 to 967.2) | 339.7 (258.3 to 428.6)     | 285.4 (210.8 to 382.6)        | 161.2 (80.4 to 281.3)           | 5.0 (3.7 to 7.1)                  |
| Indonesia | 2043 | 242.9 (198.9 to 294.6)     | 104.5 (79.4 to 132.3)      | 87.2 (64.4 to 117.0)          | 49.6 (24.7 to 86.6)             | 1.5 (1.1 to 2.2)                  | 812.0 (665.0 to 984.6) | 349.3 (265.6 to 442.2)     | 291.6 (215.1 to 391.0)        | 165.9 (82.6 to 289.6)           | 5.1 (3.8 to 7.3)                  |

| Country   | Year | 2018 US Dollars per capita |                            |                               |                                 |                                   | 2018 PPP per capita      |                            |                               |                                 |                                   |
|-----------|------|----------------------------|----------------------------|-------------------------------|---------------------------------|-----------------------------------|--------------------------|----------------------------|-------------------------------|---------------------------------|-----------------------------------|
|           |      | Health spending            | Government health spending | Out-of-pocket health spending | Prepaid private health spending | Development assistance for health | Health spending          | Government health spending | Out-of-pocket health spending | Prepaid private health spending | Development assistance for health |
| Indonesia | 2044 | 249.2 (203.0 to 305.4)     | 107.4 (81.7 to 136.3)      | 89.1 (65.7 to 119.5)          | 51.1 (25.5 to 89.2)             | 1.6 (1.1 to 2.3)                  | 833.0 (678.7 to 1021.0)  | 359.2 (273.2 to 455.6)     | 297.9 (219.6 to 399.4)        | 170.7 (85.1 to 298.1)           | 5.2 (3.8 to 7.6)                  |
| Indonesia | 2045 | 255.8 (209.7 to 311.2)     | 110.6 (84.2 to 140.7)      | 91.0 (67.1 to 121.9)          | 52.6 (26.3 to 91.8)             | 1.6 (1.2 to 2.4)                  | 855.0 (701.0 to 1040.4)  | 369.6 (281.5 to 470.5)     | 304.3 (224.4 to 407.7)        | 175.7 (88.0 to 306.9)           | 5.4 (3.9 to 8.1)                  |
| Indonesia | 2046 | 262.5 (214.1 to 323.2)     | 113.9 (86.5 to 144.9)      | 92.9 (68.5 to 124.3)          | 54.1 (27.2 to 94.5)             | 1.7 (1.2 to 2.5)                  | 877.5 (715.8 to 1080.5)  | 380.7 (289.1 to 484.3)     | 310.5 (229.0 to 415.6)        | 180.7 (90.9 to 315.8)           | 5.5 (4.0 to 8.5)                  |
| Indonesia | 2047 | 269.4 (220.5 to 328.3)     | 117.3 (89.0 to 149.6)      | 94.8 (69.9 to 126.7)          | 55.6 (28.0 to 97.2)             | 1.7 (1.2 to 2.7)                  | 900.6 (737.1 to 1097.5)  | 392.2 (297.5 to 500.1)     | 316.8 (233.7 to 423.6)        | 185.9 (93.6 to 324.9)           | 5.7 (4.1 to 8.9)                  |
| Indonesia | 2048 | 276.6 (225.1 to 340.7)     | 121.0 (91.6 to 154.7)      | 96.7 (71.3 to 129.1)          | 57.2 (28.8 to 100.0)            | 1.8 (1.2 to 2.8)                  | 924.7 (752.4 to 1138.8)  | 404.5 (306.2 to 517.1)     | 323.1 (238.4 to 431.6)        | 191.2 (96.2 to 334.2)           | 5.9 (4.2 to 9.4)                  |
| Indonesia | 2049 | 284.1 (232.8 to 347.0)     | 124.9 (94.3 to 159.8)      | 98.6 (72.7 to 131.8)          | 58.8 (29.5 to 102.9)            | 1.8 (1.3 to 2.9)                  | 949.7 (778.2 to 1160.1)  | 417.5 (315.2 to 534.0)     | 329.6 (243.1 to 440.5)        | 196.7 (98.6 to 343.9)           | 6.0 (4.3 to 9.8)                  |
| Indonesia | 2050 | 292.1 (239.2 to 360.0)     | 129.1 (97.3 to 165.4)      | 100.6 (74.2 to 134.6)         | 60.6 (30.3 to 106.0)            | 1.8 (1.3 to 3.0)                  | 976.6 (799.7 to 1203.4)  | 431.6 (325.1 to 552.8)     | 336.3 (248.1 to 449.9)        | 202.5 (101.2 to 354.2)          | 6.2 (4.3 to 10.1)                 |
| Iran      | 1995 | 116.4 (100.7 to 134.8)     | 46.2 (38.0 to 56.4)        | 66.6 (53.5 to 81.4)           | 3.5 (1.8 to 6.3)                | 0.1 (0.1 to 0.1)                  | 472.9 (409.3 to 547.6)   | 187.7 (154.3 to 229.3)     | 270.6 (217.4 to 330.6)        | 14.2 (7.4 to 25.4)              | 0.3 (0.3 to 0.3)                  |
| Iran      | 1996 | 123.6 (108.0 to 141.2)     | 50.2 (42.2 to 60.2)        | 69.0 (56.5 to 83.1)           | 3.7 (2.0 to 6.6)                | 0.7 (0.7 to 0.7)                  | 502.2 (438.8 to 573.5)   | 203.9 (171.3 to 244.4)     | 280.4 (229.4 to 337.4)        | 15.2 (8.0 to 26.7)              | 2.7 (2.7 to 2.7)                  |
| Iran      | 1997 | 130.1 (114.6 to 147.2)     | 52.8 (44.5 to 62.7)        | 72.4 (59.8 to 86.2)           | 4.3 (2.2 to 7.5)                | 0.6 (0.6 to 0.6)                  | 528.6 (465.8 to 597.9)   | 214.5 (181.0 to 254.6)     | 294.3 (243.1 to 350.0)        | 17.3 (9.1 to 30.4)              | 2.6 (2.6 to 2.6)                  |
| Iran      | 1998 | 137.5 (122.3 to 153.7)     | 55.0 (46.7 to 64.7)        | 77.5 (65.2 to 91.5)           | 4.7 (2.5 to 8.1)                | 0.4 (0.4 to 0.4)                  | 558.6 (496.7 to 624.6)   | 223.4 (189.6 to 262.7)     | 314.8 (265.0 to 371.7)        | 18.9 (10.0 to 32.9)             | 1.5 (1.5 to 1.5)                  |
| Iran      | 1999 | 143.2 (127.6 to 159.4)     | 55.1 (47.0 to 64.4)        | 82.8 (70.2 to 96.6)           | 5.2 (2.7 to 8.9)                | 0.2 (0.2 to 0.2)                  | 581.9 (518.6 to 647.7)   | 223.9 (190.8 to 261.5)     | 336.4 (285.1 to 392.5)        | 20.9 (11.1 to 36.2)             | 0.8 (0.8 to 0.8)                  |
| Iran      | 2000 | 154.7 (137.9 to 171.5)     | 59.1 (50.6 to 68.9)        | 90.1 (76.2 to 104.1)          | 5.5 (2.9 to 9.4)                | 0.1 (0.1 to 0.1)                  | 628.7 (560.2 to 696.6)   | 240.1 (205.4 to 279.8)     | 365.9 (309.6 to 423.1)        | 22.2 (11.7 to 38.1)             | 0.5 (0.5 to 0.5)                  |
| Iran      | 2001 | 163.5 (147.1 to 181.5)     | 62.2 (53.5 to 72.7)        | 94.8 (80.4 to 109.3)          | 6.3 (3.3 to 10.9)               | 0.2 (0.2 to 0.2)                  | 664.4 (597.6 to 737.2)   | 252.8 (217.3 to 295.2)     | 385.2 (326.8 to 444.0)        | 25.6 (13.4 to 44.3)             | 0.9 (0.9 to 0.9)                  |
| Iran      | 2002 | 175.1 (157.7 to 194.4)     | 67.4 (57.9 to 78.7)        | 98.9 (84.8 to 113.7)          | 8.8 (4.6 to 15.0)               | 0.1 (0.1 to 0.1)                  | 711.5 (640.5 to 789.7)   | 273.7 (235.4 to 319.6)     | 401.8 (344.7 to 461.9)        | 35.8 (18.7 to 61.0)             | 0.2 (0.2 to 0.2)                  |
| Iran      | 2003 | 192.1 (173.4 to 212.0)     | 73.8 (63.5 to 85.9)        | 106.9 (92.0 to 123.4)         | 11.4 (6.1 to 19.1)              | 0.0 (0.0 to 0.0)                  | 780.4 (704.5 to 861.2)   | 299.7 (258.0 to 349.0)     | 434.4 (373.9 to 501.4)        | 46.3 (24.9 to 77.4)             | 0.0 (0.0 to 0.0)                  |
| Iran      | 2004 | 205.1 (185.0 to 226.3)     | 77.6 (66.5 to 90.3)        | 114.2 (98.4 to 131.0)         | 13.2 (7.2 to 21.0)              | 0.1 (0.1 to 0.1)                  | 833.2 (751.4 to 919.4)   | 315.3 (270.3 to 366.8)     | 463.9 (399.9 to 532.3)        | 53.7 (29.4 to 85.5)             | 0.4 (0.4 to 0.4)                  |
| Iran      | 2005 | 222.7 (200.9 to 244.9)     | 84.7 (73.2 to 98.0)        | 122.0 (105.2 to 140.2)        | 15.0 (8.6 to 23.9)              | 1.0 (1.0 to 1.0)                  | 904.6 (816.3 to 994.9)   | 344.0 (297.2 to 398.0)     | 495.5 (427.2 to 569.7)        | 61.0 (34.9 to 97.0)             | 4.1 (4.1 to 4.1)                  |
| Iran      | 2006 | 233.7 (210.1 to 256.7)     | 90.7 (79.1 to 104.3)       | 126.5 (109.8 to 145.2)        | 16.4 (9.7 to 24.9)              | 0.2 (0.2 to 0.2)                  | 949.5 (853.7 to 1042.9)  | 368.3 (321.4 to 423.8)     | 513.9 (446.0 to 590.0)        | 66.5 (39.4 to 101.3)            | 0.8 (0.8 to 0.8)                  |
| Iran      | 2007 | 252.1 (227.6 to 277.3)     | 97.1 (84.6 to 110.3)       | 136.6 (118.1 to 156.4)        | 18.3 (11.1 to 28.0)             | 0.1 (0.1 to 0.1)                  | 1024.4 (924.8 to 1126.6) | 394.6 (343.6 to 448.3)     | 555.0 (479.9 to 635.2)        | 74.3 (45.2 to 113.6)            | 0.5 (0.5 to 0.5)                  |
| Iran      | 2008 | 265.7 (239.9 to 291.4)     | 98.4 (85.3 to 112.0)       | 147.1 (128.1 to 168.2)        | 20.0 (12.4 to 31.0)             | 0.2 (0.2 to 0.2)                  | 1079.6 (974.7 to 1183.8) | 399.8 (346.3 to 455.2)     | 597.5 (520.5 to 683.5)        | 81.4 (50.6 to 125.9)            | 0.9 (0.9 to 0.9)                  |

| Country | Year | 2018 US Dollars per capita |                            |                               |                                 |                                   | 2018 PPP per capita       |                            |                               |                                 |                                   |
|---------|------|----------------------------|----------------------------|-------------------------------|---------------------------------|-----------------------------------|---------------------------|----------------------------|-------------------------------|---------------------------------|-----------------------------------|
|         |      | Health spending            | Government health spending | Out-of-pocket health spending | Prepaid private health spending | Development assistance for health | Health spending           | Government health spending | Out-of-pocket health spending | Prepaid private health spending | Development assistance for health |
| Iran    | 2009 | 292.1 (265.1 to 322.1)     | 104.0 (90.0 to 118.0)      | 164.5 (144.5 to 186.7)        | 23.3 (14.5 to 35.9)             | 0.2 (0.2 to 0.2)                  | 1186.5 (1077.0 to 1308.7) | 422.4 (365.7 to 479.4)     | 668.4 (586.9 to 758.3)        | 94.7 (59.1 to 145.7)            | 1.0 (1.0 to 1.0)                  |
| Iran    | 2010 | 317.3 (288.3 to 348.9)     | 110.5 (96.2 to 125.3)      | 179.3 (159.4 to 203.4)        | 27.4 (17.1 to 41.7)             | 0.1 (0.1 to 0.1)                  | 1289.2 (1171.3 to 1417.4) | 448.8 (390.9 to 509.2)     | 728.5 (647.4 to 826.1)        | 111.3 (69.6 to 169.5)           | 0.6 (0.6 to 0.6)                  |
| Iran    | 2011 | 326.9 (298.0 to 360.0)     | 116.1 (102.2 to 131.1)     | 179.5 (158.3 to 204.4)        | 31.1 (19.5 to 46.8)             | 0.2 (0.2 to 0.2)                  | 1328.0 (1210.6 to 1462.6) | 471.8 (415.1 to 532.6)     | 729.4 (643.1 to 830.5)        | 126.2 (79.3 to 189.9)           | 0.7 (0.7 to 0.7)                  |
| Iran    | 2012 | 306.4 (279.2 to 335.7)     | 112.0 (98.6 to 126.6)      | 161.6 (141.0 to 184.7)        | 32.5 (20.7 to 48.2)             | 0.2 (0.2 to 0.2)                  | 1244.7 (1134.3 to 1363.8) | 455.0 (400.5 to 514.5)     | 656.7 (572.9 to 750.4)        | 132.0 (83.9 to 195.9)           | 1.0 (1.0 to 1.0)                  |
| Iran    | 2013 | 311.3 (283.0 to 340.8)     | 125.2 (109.5 to 141.3)     | 149.6 (130.3 to 172.0)        | 36.5 (23.3 to 53.8)             | 0.1 (0.1 to 0.1)                  | 1264.9 (1149.7 to 1384.6) | 508.5 (444.7 to 574.1)     | 607.7 (529.4 to 698.7)        | 148.1 (94.6 to 218.4)           | 0.5 (0.5 to 0.5)                  |
| Iran    | 2014 | 343.2 (311.0 to 377.2)     | 153.3 (134.4 to 173.2)     | 148.5 (128.2 to 171.6)        | 41.3 (26.3 to 61.7)             | 0.2 (0.2 to 0.2)                  | 1394.4 (1263.4 to 1532.3) | 622.8 (546.1 to 703.4)     | 603.4 (520.9 to 697.1)        | 167.6 (106.8 to 250.5)          | 0.6 (0.6 to 0.6)                  |
| Iran    | 2015 | 373.0 (336.5 to 414.5)     | 177.7 (154.2 to 202.3)     | 150.7 (128.5 to 176.0)        | 44.4 (27.6 to 67.6)             | 0.1 (0.1 to 0.1)                  | 1515.2 (1367.2 to 1683.8) | 721.9 (626.7 to 821.7)     | 612.3 (522.0 to 715.1)        | 180.5 (112.3 to 274.8)          | 0.5 (0.5 to 0.5)                  |
| Iran    | 2016 | 420.2 (375.1 to 471.4)     | 212.3 (181.0 to 243.7)     | 157.7 (131.3 to 188.0)        | 50.1 (29.7 to 79.3)             | 0.1 (0.1 to 0.1)                  | 1707.1 (1524.0 to 1915.1) | 862.4 (735.4 to 990.2)     | 640.7 (533.4 to 763.8)        | 203.6 (120.7 to 322.3)          | 0.4 (0.4 to 0.4)                  |
| Iran    | 2017 | 417.7 (372.4 to 467.7)     | 207.0 (176.5 to 238.2)     | 159.8 (133.2 to 190.4)        | 50.8 (30.1 to 80.3)             | 0.1 (0.1 to 0.1)                  | 1696.9 (1513.0 to 1900.1) | 841.2 (717.0 to 967.8)     | 649.0 (541.3 to 773.5)        | 206.4 (122.2 to 326.4)          | 0.3 (0.3 to 0.3)                  |
| Iran    | 2018 | 425.4 (377.8 to 476.4)     | 211.6 (180.4 to 243.2)     | 161.7 (135.1 to 193.5)        | 52.0 (30.8 to 82.4)             | 0.1 (0.1 to 0.1)                  | 1728.1 (1534.9 to 1935.6) | 859.7 (732.9 to 988.1)     | 656.9 (548.9 to 786.1)        | 211.2 (125.1 to 334.8)          | 0.3 (0.3 to 0.3)                  |
| Iran    | 2019 | 430.3 (382.3 to 481.1)     | 214.2 (182.6 to 246.4)     | 163.3 (135.9 to 195.4)        | 52.7 (31.3 to 83.5)             | 0.1 (0.1 to 0.1)                  | 1748.0 (1553.0 to 1954.4) | 870.2 (742.0 to 1001.2)    | 663.3 (551.9 to 793.8)        | 214.2 (127.0 to 339.2)          | 0.3 (0.3 to 0.3)                  |
| Iran    | 2020 | 435.1 (385.7 to 486.0)     | 216.7 (185.0 to 249.6)     | 164.8 (137.2 to 197.2)        | 53.5 (31.8 to 84.4)             | 0.1 (0.1 to 0.1)                  | 1767.5 (1567.1 to 1974.4) | 880.4 (751.7 to 1013.9)    | 669.6 (557.4 to 801.2)        | 217.2 (129.1 to 343.0)          | 0.3 (0.3 to 0.3)                  |
| Iran    | 2021 | 440.5 (391.2 to 494.0)     | 219.6 (187.6 to 252.9)     | 166.5 (138.2 to 199.1)        | 54.3 (32.2 to 85.5)             | 0.1 (0.1 to 0.1)                  | 1789.4 (1589.2 to 2006.8) | 892.0 (762.1 to 1027.5)    | 676.5 (561.6 to 809.0)        | 220.6 (130.7 to 347.2)          | 0.3 (0.3 to 0.3)                  |
| Iran    | 2022 | 445.4 (395.2 to 497.7)     | 222.1 (189.5 to 256.0)     | 168.1 (139.7 to 201.4)        | 55.1 (32.7 to 86.4)             | 0.1 (0.1 to 0.1)                  | 1809.4 (1605.6 to 2022.1) | 902.5 (769.8 to 1040.1)    | 682.8 (567.6 to 818.0)        | 223.8 (132.7 to 351.1)          | 0.3 (0.3 to 0.4)                  |
| Iran    | 2023 | 450.3 (399.6 to 502.0)     | 224.6 (191.3 to 258.9)     | 169.7 (141.2 to 202.8)        | 55.9 (33.1 to 87.5)             | 0.1 (0.1 to 0.1)                  | 1829.3 (1623.3 to 2039.4) | 912.6 (777.2 to 1052.0)    | 689.5 (573.7 to 824.0)        | 226.9 (134.5 to 355.5)          | 0.3 (0.3 to 0.4)                  |
| Iran    | 2024 | 456.3 (405.2 to 508.8)     | 227.3 (193.8 to 262.3)     | 172.2 (143.2 to 205.3)        | 56.6 (33.6 to 89.1)             | 0.1 (0.1 to 0.1)                  | 1853.6 (1646.1 to 2067.0) | 923.5 (787.2 to 1065.6)    | 699.6 (581.7 to 834.1)        | 230.1 (136.4 to 362.2)          | 0.3 (0.3 to 0.4)                  |
| Iran    | 2025 | 463.9 (412.0 to 518.6)     | 231.3 (197.3 to 267.1)     | 174.9 (145.5 to 208.0)        | 57.6 (34.1 to 91.0)             | 0.1 (0.1 to 0.1)                  | 1884.7 (1673.6 to 2106.8) | 939.8 (801.6 to 1085.1)    | 710.5 (591.0 to 844.9)        | 234.0 (138.5 to 369.6)          | 0.3 (0.3 to 0.4)                  |
| Iran    | 2026 | 470.5 (415.6 to 524.5)     | 234.5 (200.2 to 271.6)     | 177.5 (147.2 to 211.8)        | 58.4 (34.5 to 92.7)             | 0.1 (0.1 to 0.1)                  | 1911.6 (1688.3 to 2130.8) | 952.7 (813.2 to 1103.5)    | 721.2 (597.8 to 860.3)        | 237.3 (140.3 to 376.5)          | 0.3 (0.3 to 0.4)                  |
| Iran    | 2027 | 476.2 (419.4 to 532.1)     | 237.0 (202.4 to 274.2)     | 180.0 (148.6 to 215.3)        | 59.1 (34.9 to 93.9)             | 0.1 (0.1 to 0.1)                  | 1934.5 (1703.8 to 2161.9) | 962.9 (822.3 to 1114.0)    | 731.1 (603.6 to 874.6)        | 240.1 (141.9 to 381.5)          | 0.4 (0.3 to 0.4)                  |
| Iran    | 2028 | 482.1 (424.6 to 540.3)     | 239.7 (204.6 to 277.8)     | 182.5 (149.6 to 219.3)        | 59.8 (35.4 to 94.9)             | 0.1 (0.1 to 0.1)                  | 1958.5 (1725.0 to 2195.1) | 973.7 (831.3 to 1128.7)    | 741.3 (607.7 to 891.0)        | 243.0 (143.7 to 385.5)          | 0.4 (0.3 to 0.4)                  |
| Iran    | 2029 | 488.1 (430.7 to 545.4)     | 242.4 (206.5 to 280.6)     | 185.1 (150.8 to 225.0)        | 60.6 (35.8 to 95.9)             | 0.1 (0.1 to 0.1)                  | 1983.1 (1749.9 to 2215.8) | 984.8 (839.0 to 1139.8)    | 751.8 (612.5 to 913.9)        | 246.0 (145.5 to 389.8)          | 0.4 (0.3 to 0.5)                  |

| Country | Year | 2018 US Dollars per capita |                            |                               |                                 |                                   | 2018 PPP per capita       |                            |                               |                                 |                                   |
|---------|------|----------------------------|----------------------------|-------------------------------|---------------------------------|-----------------------------------|---------------------------|----------------------------|-------------------------------|---------------------------------|-----------------------------------|
|         |      | Health spending            | Government health spending | Out-of-pocket health spending | Prepaid private health spending | Development assistance for health | Health spending           | Government health spending | Out-of-pocket health spending | Prepaid private health spending | Development assistance for health |
| Iran    | 2030 | 494.8 (436.0 to 554.7)     | 245.7 (208.8 to 284.5)     | 187.7 (152.4 to 229.0)        | 61.4 (36.3 to 97.4)             | 0.1 (0.1 to 0.1)                  | 2010.1 (1771.1 to 2253.6) | 998.0 (848.4 to 1155.8)    | 762.4 (619.0 to 930.5)        | 249.3 (147.6 to 395.7)          | 0.4 (0.3 to 0.5)                  |
| Iran    | 2031 | 502.4 (440.6 to 565.4)     | 249.6 (212.1 to 289.1)     | 190.5 (153.3 to 234.5)        | 62.3 (36.9 to 99.1)             | 0.1 (0.1 to 0.1)                  | 2041.1 (1789.9 to 2297.2) | 1013.9 (861.6 to 1174.5)   | 773.8 (622.6 to 952.8)        | 253.1 (149.7 to 402.5)          | 0.4 (0.3 to 0.5)                  |
| Iran    | 2032 | 510.5 (448.4 to 573.8)     | 253.8 (215.5 to 293.9)     | 193.3 (155.0 to 238.7)        | 63.3 (37.4 to 100.8)            | 0.1 (0.1 to 0.1)                  | 2073.9 (1821.9 to 2331.0) | 1031.0 (875.5 to 1193.8)   | 785.5 (629.8 to 969.8)        | 257.0 (152.0 to 409.7)          | 0.4 (0.3 to 0.5)                  |
| Iran    | 2033 | 518.9 (453.0 to 584.7)     | 258.1 (219.7 to 299.5)     | 196.3 (155.9 to 243.6)        | 64.3 (38.0 to 102.7)            | 0.1 (0.1 to 0.1)                  | 2107.9 (1840.3 to 2375.5) | 1048.8 (892.5 to 1216.6)   | 797.5 (633.3 to 989.7)        | 261.2 (154.4 to 417.2)          | 0.4 (0.3 to 0.5)                  |
| Iran    | 2034 | 526.7 (460.7 to 595.5)     | 262.2 (223.2 to 304.4)     | 199.2 (157.1 to 248.1)        | 65.2 (38.6 to 104.3)            | 0.1 (0.1 to 0.1)                  | 2139.6 (1871.8 to 2419.3) | 1065.0 (906.9 to 1236.5)   | 809.1 (638.4 to 1007.8)       | 265.1 (156.8 to 423.5)          | 0.4 (0.3 to 0.6)                  |
| Iran    | 2035 | 534.6 (465.5 to 604.2)     | 266.2 (226.1 to 309.2)     | 202.1 (159.2 to 253.5)        | 66.2 (39.2 to 105.7)            | 0.1 (0.1 to 0.1)                  | 2171.8 (1891.2 to 2454.7) | 1081.4 (918.7 to 1256.3)   | 820.9 (646.8 to 1030.0)       | 269.0 (159.1 to 429.3)          | 0.4 (0.3 to 0.6)                  |
| Iran    | 2036 | 542.7 (472.9 to 616.1)     | 270.3 (229.1 to 314.6)     | 205.0 (160.9 to 259.3)        | 67.2 (39.8 to 107.6)            | 0.1 (0.1 to 0.2)                  | 2204.7 (1921.4 to 2503.1) | 1098.2 (930.6 to 1278.0)   | 832.9 (653.6 to 1053.5)       | 273.2 (161.6 to 437.0)          | 0.5 (0.4 to 0.6)                  |
| Iran    | 2037 | 550.4 (476.4 to 626.2)     | 274.2 (232.2 to 319.4)     | 207.9 (162.8 to 264.4)        | 68.2 (40.4 to 109.2)            | 0.1 (0.1 to 0.2)                  | 2236.2 (1935.5 to 2543.9) | 1113.9 (943.2 to 1297.8)   | 844.7 (661.6 to 1074.1)       | 277.1 (164.0 to 443.7)          | 0.5 (0.4 to 0.6)                  |
| Iran    | 2038 | 557.9 (483.5 to 636.7)     | 277.9 (235.1 to 323.7)     | 210.8 (164.6 to 269.3)        | 69.1 (40.9 to 110.7)            | 0.1 (0.1 to 0.2)                  | 2266.5 (1964.2 to 2586.5) | 1128.8 (955.3 to 1315.1)   | 856.3 (668.8 to 1094.1)       | 280.8 (166.1 to 449.9)          | 0.5 (0.4 to 0.7)                  |
| Iran    | 2039 | 565.0 (489.4 to 645.2)     | 281.3 (237.5 to 328.3)     | 213.6 (166.2 to 274.3)        | 70.0 (41.4 to 112.3)            | 0.1 (0.1 to 0.2)                  | 2295.3 (1988.3 to 2621.1) | 1142.6 (965.0 to 1333.6)   | 867.8 (675.1 to 1114.4)       | 284.4 (168.0 to 456.4)          | 0.5 (0.4 to 0.7)                  |
| Iran    | 2040 | 571.6 (495.4 to 653.9)     | 284.4 (239.5 to 332.5)     | 216.3 (167.7 to 279.0)        | 70.8 (41.8 to 113.8)            | 0.1 (0.1 to 0.2)                  | 2322.3 (2012.6 to 2656.6) | 1155.4 (973.1 to 1350.9)   | 878.7 (681.1 to 1133.4)       | 287.7 (169.9 to 462.2)          | 0.5 (0.4 to 0.7)                  |
| Iran    | 2041 | 577.5 (498.3 to 660.9)     | 287.0 (241.1 to 336.4)     | 218.9 (169.0 to 283.7)        | 71.5 (42.2 to 114.9)            | 0.1 (0.1 to 0.2)                  | 2346.2 (2024.3 to 2684.9) | 1165.9 (979.5 to 1366.6)   | 889.3 (686.5 to 1152.7)       | 290.5 (171.6 to 466.7)          | 0.5 (0.4 to 0.7)                  |
| Iran    | 2042 | 582.9 (504.0 to 668.5)     | 289.3 (242.4 to 339.7)     | 221.3 (170.3 to 287.6)        | 72.1 (42.6 to 115.9)            | 0.1 (0.1 to 0.2)                  | 2367.9 (2047.5 to 2716.1) | 1175.1 (984.9 to 1380.2)   | 899.2 (692.0 to 1168.4)       | 293.0 (173.0 to 470.9)          | 0.5 (0.4 to 0.8)                  |
| Iran    | 2043 | 587.4 (507.3 to 675.5)     | 290.9 (243.3 to 342.3)     | 223.7 (171.7 to 291.4)        | 72.6 (42.9 to 116.6)            | 0.1 (0.1 to 0.2)                  | 2386.2 (2061.0 to 2744.2) | 1181.8 (988.2 to 1390.8)   | 908.8 (697.7 to 1183.9)       | 295.0 (174.2 to 473.7)          | 0.6 (0.4 to 0.8)                  |
| Iran    | 2044 | 591.5 (508.6 to 677.9)     | 292.3 (244.1 to 344.2)     | 225.9 (173.2 to 294.4)        | 73.0 (43.1 to 117.2)            | 0.1 (0.1 to 0.2)                  | 2402.8 (2066.3 to 2753.9) | 1187.7 (991.6 to 1398.3)   | 917.9 (703.5 to 1196.0)       | 296.7 (175.2 to 476.3)          | 0.6 (0.4 to 0.8)                  |
| Iran    | 2045 | 594.7 (511.1 to 685.4)     | 293.3 (244.0 to 345.9)     | 227.9 (174.6 to 298.1)        | 73.3 (43.3 to 117.6)            | 0.1 (0.1 to 0.2)                  | 2415.8 (2076.6 to 2784.5) | 1191.5 (991.3 to 1405.4)   | 925.9 (709.5 to 1211.2)       | 297.8 (175.7 to 477.9)          | 0.6 (0.4 to 0.9)                  |
| Iran    | 2046 | 597.7 (513.2 to 688.0)     | 294.3 (244.0 to 347.9)     | 229.8 (175.9 to 300.9)        | 73.5 (43.3 to 117.9)            | 0.2 (0.1 to 0.2)                  | 2428.1 (2085.0 to 2794.9) | 1195.5 (991.3 to 1413.5)   | 933.4 (714.5 to 1222.3)       | 298.6 (175.9 to 479.0)          | 0.6 (0.5 to 1.0)                  |
| Iran    | 2047 | 599.3 (513.1 to 690.5)     | 294.5 (244.0 to 348.8)     | 231.2 (176.9 to 302.8)        | 73.5 (43.2 to 117.9)            | 0.2 (0.1 to 0.3)                  | 2434.8 (2084.4 to 2805.2) | 1196.3 (991.2 to 1416.9)   | 939.4 (718.6 to 1230.1)       | 298.4 (175.6 to 478.9)          | 0.6 (0.5 to 1.0)                  |
| Iran    | 2048 | 601.6 (513.6 to 695.2)     | 295.1 (244.3 to 350.3)     | 232.8 (178.0 to 305.9)        | 73.5 (43.2 to 117.9)            | 0.2 (0.1 to 0.3)                  | 2444.0 (2086.6 to 2824.2) | 1198.9 (992.5 to 1423.1)   | 945.9 (722.9 to 1242.6)       | 298.6 (175.5 to 478.9)          | 0.7 (0.5 to 1.1)                  |
| Iran    | 2049 | 603.2 (515.7 to 697.5)     | 295.4 (244.0 to 351.1)     | 234.2 (178.9 to 307.4)        | 73.4 (43.2 to 117.7)            | 0.2 (0.1 to 0.3)                  | 2450.7 (2095.2 to 2833.8) | 1200.2 (991.3 to 1426.2)   | 951.5 (726.8 to 1248.7)       | 298.3 (175.4 to 478.3)          | 0.7 (0.5 to 1.1)                  |
| Iran    | 2050 | 605.2 (516.1 to 700.6)     | 296.1 (243.9 to 353.0)     | 235.6 (179.8 to 311.3)        | 73.4 (43.2 to 117.6)            | 0.2 (0.1 to 0.3)                  | 2458.7 (2096.9 to 2846.4) | 1202.8 (990.9 to 1434.2)   | 957.1 (730.4 to 1264.9)       | 298.0 (175.5 to 477.9)          | 0.7 (0.5 to 1.2)                  |

| Country | Year | 2018 US Dollars per capita |                            |                               |                                 |                                   | 2018 PPP per capita    |                            |                               |                                 |                                   |
|---------|------|----------------------------|----------------------------|-------------------------------|---------------------------------|-----------------------------------|------------------------|----------------------------|-------------------------------|---------------------------------|-----------------------------------|
|         |      | Health spending            | Government health spending | Out-of-pocket health spending | Prepaid private health spending | Development assistance for health | Health spending        | Government health spending | Out-of-pocket health spending | Prepaid private health spending | Development assistance for health |
| Iraq    | 1995 | 40.3 (32.3 to 50.0)        | 17.4 (13.0 to 22.5)        | 22.5 (15.8 to 31.1)           | 0.0 (0.0 to 0.0)                | 0.3 (0.3 to 0.3)                  | 129.7 (103.9 to 160.7) | 56.1 (41.8 to 72.3)        | 72.5 (50.8 to 100.1)          | 0.0 (0.0 to 0.1)                | 1.1 (1.1 to 1.1)                  |
| Iraq    | 1996 | 45.1 (36.0 to 55.4)        | 20.7 (15.6 to 27.0)        | 24.1 (17.0 to 33.5)           | 0.0 (0.0 to 0.0)                | 0.2 (0.2 to 0.2)                  | 145.0 (115.9 to 178.4) | 66.7 (50.3 to 87.0)        | 77.7 (54.6 to 107.8)          | 0.0 (0.0 to 0.1)                | 0.6 (0.6 to 0.6)                  |
| Iraq    | 1997 | 51.5 (41.8 to 62.9)        | 25.1 (18.9 to 32.9)        | 26.3 (18.7 to 36.3)           | 0.0 (0.0 to 0.0)                | 0.1 (0.1 to 0.1)                  | 165.6 (134.5 to 202.2) | 80.7 (60.9 to 105.7)       | 84.6 (60.2 to 116.7)          | 0.0 (0.0 to 0.1)                | 0.3 (0.3 to 0.3)                  |
| Iraq    | 1998 | 64.2 (52.3 to 78.4)        | 33.7 (25.9 to 43.6)        | 30.5 (22.0 to 41.1)           | 0.0 (0.0 to 0.0)                | 0.0 (0.0 to 0.0)                  | 206.5 (168.3 to 252.2) | 108.3 (83.4 to 140.2)      | 98.1 (70.9 to 132.4)          | 0.1 (0.0 to 0.1)                | 0.1 (0.1 to 0.1)                  |
| Iraq    | 1999 | 74.4 (61.5 to 91.2)        | 41.1 (31.9 to 52.2)        | 33.2 (24.3 to 44.8)           | 0.0 (0.0 to 0.0)                | 0.1 (0.1 to 0.1)                  | 239.5 (197.8 to 293.4) | 132.2 (102.7 to 168.0)     | 106.8 (78.2 to 144.2)         | 0.1 (0.0 to 0.1)                | 0.4 (0.4 to 0.4)                  |
| Iraq    | 2000 | 80.6 (66.4 to 97.7)        | 45.9 (35.7 to 58.3)        | 34.5 (25.6 to 46.4)           | 0.0 (0.0 to 0.0)                | 0.1 (0.1 to 0.1)                  | 259.2 (213.5 to 314.4) | 147.8 (114.8 to 187.5)     | 111.1 (82.3 to 149.3)         | 0.1 (0.0 to 0.1)                | 0.3 (0.3 to 0.3)                  |
| Iraq    | 2001 | 88.1 (72.8 to 106.2)       | 51.5 (40.3 to 64.7)        | 36.4 (27.1 to 48.7)           | 0.0 (0.0 to 0.0)                | 0.1 (0.1 to 0.1)                  | 283.5 (234.1 to 341.6) | 165.8 (129.6 to 208.0)     | 117.2 (87.3 to 156.8)         | 0.1 (0.0 to 0.1)                | 0.4 (0.4 to 0.4)                  |
| Iraq    | 2002 | 90.8 (75.9 to 108.4)       | 53.7 (42.4 to 66.3)        | 37.1 (27.9 to 49.0)           | 0.0 (0.0 to 0.0)                | 0.0 (0.0 to 0.0)                  | 292.2 (244.2 to 348.9) | 172.7 (136.4 to 213.5)     | 119.3 (89.7 to 157.7)         | 0.1 (0.0 to 0.1)                | 0.1 (0.1 to 0.1)                  |
| Iraq    | 2003 | 76.6 (64.8 to 90.9)        | 43.0 (34.5 to 52.6)        | 32.3 (24.4 to 42.2)           | 0.0 (0.0 to 0.0)                | 1.2 (1.2 to 1.2)                  | 246.4 (208.3 to 292.4) | 138.4 (110.9 to 169.2)     | 104.0 (78.4 to 135.7)         | 0.1 (0.0 to 0.1)                | 4.0 (4.0 to 4.0)                  |
| Iraq    | 2004 | 114.3 (97.8 to 133.4)      | 73.7 (60.0 to 89.4)        | 37.5 (28.7 to 47.9)           | 0.0 (0.0 to 0.1)                | 3.1 (3.1 to 3.1)                  | 367.8 (314.6 to 429.3) | 237.0 (193.0 to 287.6)     | 120.6 (92.2 to 154.0)         | 0.1 (0.0 to 0.2)                | 10.1 (10.1 to 10.1)               |
| Iraq    | 2005 | 126.6 (111.1 to 144.2)     | 73.9 (60.8 to 88.6)        | 34.3 (26.5 to 43.7)           | 0.0 (0.0 to 0.1)                | 18.3 (18.3 to 18.3)               | 407.2 (357.3 to 463.9) | 237.7 (195.5 to 285.0)     | 110.4 (85.3 to 140.7)         | 0.1 (0.0 to 0.2)                | 59.0 (59.0 to 59.0)               |
| Iraq    | 2006 | 124.9 (109.4 to 142.1)     | 76.9 (63.5 to 90.7)        | 34.0 (26.4 to 42.8)           | 0.0 (0.0 to 0.1)                | 13.9 (13.9 to 13.9)               | 401.9 (351.9 to 457.1) | 247.4 (204.3 to 291.8)     | 109.5 (85.1 to 137.7)         | 0.1 (0.1 to 0.2)                | 44.8 (44.8 to 44.8)               |
| Iraq    | 2007 | 125.7 (109.9 to 142.9)     | 82.8 (69.6 to 97.8)        | 34.5 (26.8 to 42.9)           | 0.0 (0.0 to 0.1)                | 8.4 (8.4 to 8.4)                  | 404.4 (353.6 to 459.7) | 266.3 (223.9 to 314.8)     | 111.1 (86.2 to 138.1)         | 0.1 (0.1 to 0.2)                | 26.9 (26.9 to 26.9)               |
| Iraq    | 2008 | 130.3 (113.9 to 148.6)     | 92.8 (78.1 to 109.0)       | 34.4 (26.8 to 42.6)           | 0.0 (0.0 to 0.1)                | 3.1 (3.1 to 3.1)                  | 419.2 (366.5 to 478.1) | 298.6 (251.3 to 350.6)     | 110.6 (86.3 to 137.0)         | 0.1 (0.1 to 0.2)                | 9.9 (9.9 to 9.9)                  |
| Iraq    | 2009 | 136.8 (119.8 to 155.9)     | 96.7 (81.4 to 113.4)       | 37.4 (29.8 to 46.0)           | 0.0 (0.0 to 0.1)                | 2.6 (2.6 to 2.6)                  | 440.2 (385.6 to 501.6) | 311.2 (261.8 to 365.0)     | 120.4 (96.0 to 148.1)         | 0.1 (0.1 to 0.2)                | 8.5 (8.5 to 8.5)                  |
| Iraq    | 2010 | 133.3 (116.3 to 152.1)     | 90.1 (75.6 to 106.4)       | 40.7 (32.5 to 50.1)           | 0.0 (0.0 to 0.1)                | 2.5 (2.5 to 2.5)                  | 428.8 (374.1 to 489.2) | 289.9 (243.1 to 342.3)     | 130.9 (104.6 to 161.1)        | 0.1 (0.0 to 0.2)                | 7.9 (7.9 to 7.9)                  |
| Iraq    | 2011 | 127.4 (110.4 to 145.4)     | 79.9 (66.5 to 95.1)        | 46.5 (37.5 to 56.8)           | 0.0 (0.0 to 0.1)                | 0.9 (0.9 to 0.9)                  | 409.8 (355.3 to 467.8) | 257.2 (214.0 to 306.0)     | 149.5 (120.6 to 182.8)        | 0.1 (0.0 to 0.2)                | 3.0 (3.0 to 3.0)                  |
| Iraq    | 2012 | 129.0 (112.1 to 147.9)     | 65.1 (53.9 to 77.9)        | 63.3 (51.3 to 77.3)           | 0.0 (0.0 to 0.1)                | 0.6 (0.6 to 0.6)                  | 414.9 (360.7 to 475.8) | 209.3 (173.3 to 250.6)     | 203.6 (165.1 to 248.6)        | 0.1 (0.0 to 0.2)                | 1.9 (1.9 to 1.9)                  |
| Iraq    | 2013 | 136.2 (118.6 to 156.9)     | 58.2 (47.5 to 70.7)        | 77.2 (63.0 to 93.1)           | 0.0 (0.0 to 0.1)                | 0.8 (0.8 to 0.8)                  | 438.3 (381.6 to 504.7) | 187.3 (152.7 to 227.5)     | 248.2 (202.6 to 299.4)        | 0.1 (0.0 to 0.2)                | 2.6 (2.6 to 2.6)                  |
| Iraq    | 2014 | 136.6 (118.1 to 157.4)     | 48.8 (39.1 to 59.6)        | 86.7 (71.0 to 104.5)          | 0.0 (0.0 to 0.1)                | 1.0 (1.0 to 1.0)                  | 439.3 (380.1 to 506.4) | 156.9 (125.9 to 191.9)     | 279.0 (228.3 to 336.2)        | 0.1 (0.0 to 0.2)                | 3.4 (3.4 to 3.4)                  |
| Iraq    | 2015 | 143.1 (122.8 to 166.9)     | 41.8 (33.0 to 51.4)        | 100.8 (82.3 to 123.4)         | 0.0 (0.0 to 0.1)                | 0.5 (0.5 to 0.5)                  | 460.4 (395.1 to 537.0) | 134.5 (106.3 to 165.4)     | 324.3 (264.8 to 397.1)        | 0.1 (0.0 to 0.2)                | 1.5 (1.5 to 1.5)                  |

| Country | Year | 2018 US Dollars per capita |                            |                               |                                 |                                   | 2018 PPP per capita    |                            |                               |                                 |                                   |
|---------|------|----------------------------|----------------------------|-------------------------------|---------------------------------|-----------------------------------|------------------------|----------------------------|-------------------------------|---------------------------------|-----------------------------------|
|         |      | Health spending            | Government health spending | Out-of-pocket health spending | Prepaid private health spending | Development assistance for health | Health spending        | Government health spending | Out-of-pocket health spending | Prepaid private health spending | Development assistance for health |
| Iraq    | 2016 | 157.0 (132.8 to 186.7)     | 40.9 (31.8 to 51.0)        | 115.6 (93.7 to 143.2)         | 0.0 (0.0 to 0.1)                | 0.4 (0.4 to 0.4)                  | 505.1 (427.2 to 600.7) | 131.7 (102.4 to 164.1)     | 372.0 (301.6 to 460.9)        | 0.1 (0.0 to 0.2)                | 1.3 (1.3 to 1.3)                  |
| Iraq    | 2017 | 152.1 (126.6 to 181.8)     | 35.6 (27.7 to 44.5)        | 115.9 (92.5 to 145.4)         | 0.0 (0.0 to 0.1)                | 0.5 (0.5 to 0.5)                  | 489.2 (407.4 to 584.8) | 114.5 (89.2 to 143.2)      | 373.0 (297.5 to 467.8)        | 0.1 (0.0 to 0.2)                | 1.6 (1.6 to 1.6)                  |
| Iraq    | 2018 | 156.8 (131.1 to 188.3)     | 36.0 (28.0 to 45.1)        | 120.4 (96.0 to 151.1)         | 0.0 (0.0 to 0.1)                | 0.5 (0.5 to 0.5)                  | 504.5 (421.7 to 605.8) | 115.7 (90.2 to 145.2)      | 387.2 (308.9 to 486.1)        | 0.1 (0.0 to 0.2)                | 1.5 (1.5 to 1.5)                  |
| Iraq    | 2019 | 161.2 (134.1 to 194.2)     | 36.4 (28.4 to 45.7)        | 124.3 (98.9 to 155.2)         | 0.0 (0.0 to 0.1)                | 0.5 (0.4 to 0.5)                  | 518.5 (431.4 to 624.7) | 117.0 (91.2 to 147.2)      | 399.9 (318.2 to 499.2)        | 0.1 (0.0 to 0.2)                | 1.5 (1.4 to 1.5)                  |
| Iraq    | 2020 | 165.1 (137.3 to 198.2)     | 36.8 (28.8 to 46.4)        | 127.7 (101.7 to 159.8)        | 0.0 (0.0 to 0.1)                | 0.5 (0.4 to 0.5)                  | 531.0 (441.6 to 637.5) | 118.5 (92.5 to 149.4)      | 411.0 (327.3 to 514.2)        | 0.1 (0.0 to 0.2)                | 1.5 (1.3 to 1.6)                  |
| Iraq    | 2021 | 166.9 (139.3 to 200.3)     | 37.1 (29.0 to 46.8)        | 129.2 (103.1 to 161.7)        | 0.0 (0.0 to 0.1)                | 0.5 (0.4 to 0.5)                  | 536.8 (448.0 to 644.2) | 119.5 (93.2 to 150.6)      | 415.8 (331.7 to 520.3)        | 0.1 (0.1 to 0.2)                | 1.5 (1.3 to 1.6)                  |
| Iraq    | 2022 | 168.7 (140.6 to 202.1)     | 37.3 (29.2 to 47.1)        | 130.9 (104.3 to 163.9)        | 0.0 (0.0 to 0.1)                | 0.5 (0.4 to 0.5)                  | 542.7 (452.5 to 650.3) | 120.1 (93.8 to 151.5)      | 421.0 (335.5 to 527.2)        | 0.1 (0.1 to 0.2)                | 1.5 (1.3 to 1.7)                  |
| Iraq    | 2023 | 170.7 (141.9 to 204.7)     | 37.7 (29.4 to 47.4)        | 132.5 (105.5 to 165.8)        | 0.0 (0.0 to 0.1)                | 0.5 (0.4 to 0.5)                  | 549.1 (456.5 to 658.5) | 121.2 (94.5 to 152.6)      | 426.2 (339.5 to 533.3)        | 0.1 (0.1 to 0.2)                | 1.5 (1.3 to 1.7)                  |
| Iraq    | 2024 | 172.7 (143.5 to 206.6)     | 38.1 (29.7 to 48.0)        | 134.0 (106.7 to 167.8)        | 0.0 (0.0 to 0.1)                | 0.5 (0.4 to 0.5)                  | 555.5 (461.6 to 664.8) | 122.7 (95.4 to 154.3)      | 431.2 (343.4 to 539.9)        | 0.1 (0.1 to 0.2)                | 1.5 (1.3 to 1.8)                  |
| Iraq    | 2025 | 174.6 (145.7 to 210.4)     | 38.3 (29.8 to 48.4)        | 135.7 (108.0 to 170.0)        | 0.0 (0.0 to 0.1)                | 0.5 (0.4 to 0.6)                  | 561.6 (468.8 to 676.8) | 123.4 (95.9 to 155.7)      | 436.5 (347.5 to 546.9)        | 0.1 (0.1 to 0.2)                | 1.5 (1.3 to 1.8)                  |
| Iraq    | 2026 | 176.5 (146.9 to 211.0)     | 38.7 (30.0 to 48.8)        | 137.3 (109.2 to 172.3)        | 0.0 (0.0 to 0.1)                | 0.5 (0.4 to 0.6)                  | 567.9 (472.5 to 678.7) | 124.5 (96.7 to 157.1)      | 441.8 (351.4 to 554.3)        | 0.1 (0.1 to 0.2)                | 1.6 (1.3 to 1.8)                  |
| Iraq    | 2027 | 179.1 (149.2 to 216.7)     | 39.2 (30.5 to 49.6)        | 139.3 (110.8 to 175.0)        | 0.0 (0.0 to 0.1)                | 0.5 (0.4 to 0.6)                  | 576.1 (480.0 to 697.1) | 126.1 (98.0 to 159.5)      | 448.3 (356.3 to 562.9)        | 0.1 (0.1 to 0.2)                | 1.6 (1.3 to 1.9)                  |
| Iraq    | 2028 | 181.3 (151.2 to 217.3)     | 39.7 (30.8 to 50.2)        | 141.1 (112.1 to 177.4)        | 0.0 (0.0 to 0.1)                | 0.5 (0.4 to 0.6)                  | 583.4 (486.4 to 699.1) | 127.7 (99.0 to 161.4)      | 454.0 (360.6 to 570.8)        | 0.1 (0.1 to 0.2)                | 1.6 (1.3 to 1.9)                  |
| Iraq    | 2029 | 183.5 (152.3 to 221.7)     | 40.2 (31.3 to 50.9)        | 142.7 (113.3 to 179.8)        | 0.0 (0.0 to 0.1)                | 0.5 (0.4 to 0.6)                  | 590.3 (490.1 to 713.4) | 129.4 (100.8 to 163.7)     | 459.2 (364.5 to 578.3)        | 0.1 (0.1 to 0.2)                | 1.6 (1.3 to 2.0)                  |
| Iraq    | 2030 | 186.0 (154.7 to 223.6)     | 40.9 (31.8 to 51.4)        | 144.5 (114.7 to 182.3)        | 0.0 (0.0 to 0.1)                | 0.5 (0.4 to 0.6)                  | 598.3 (497.7 to 719.4) | 131.5 (102.3 to 165.3)     | 465.0 (368.9 to 586.6)        | 0.1 (0.1 to 0.2)                | 1.6 (1.3 to 2.0)                  |
| Iraq    | 2031 | 188.5 (156.1 to 228.5)     | 41.7 (32.3 to 52.6)        | 146.2 (116.0 to 184.6)        | 0.0 (0.0 to 0.1)                | 0.5 (0.4 to 0.6)                  | 606.3 (502.1 to 735.0) | 134.1 (104.1 to 169.1)     | 470.4 (373.1 to 593.7)        | 0.1 (0.1 to 0.2)                | 1.7 (1.3 to 2.1)                  |
| Iraq    | 2032 | 191.1 (158.6 to 230.7)     | 42.5 (33.1 to 53.9)        | 148.0 (117.5 to 186.8)        | 0.0 (0.0 to 0.1)                | 0.5 (0.4 to 0.7)                  | 614.8 (510.3 to 742.2) | 136.8 (106.4 to 173.3)     | 476.2 (377.9 to 601.1)        | 0.1 (0.1 to 0.3)                | 1.7 (1.4 to 2.1)                  |
| Iraq    | 2033 | 193.9 (160.4 to 235.1)     | 43.5 (33.8 to 54.8)        | 149.9 (118.7 to 189.3)        | 0.0 (0.0 to 0.1)                | 0.5 (0.4 to 0.7)                  | 623.8 (516.2 to 756.4) | 139.8 (108.9 to 176.4)     | 482.1 (381.9 to 609.1)        | 0.2 (0.1 to 0.3)                | 1.7 (1.4 to 2.2)                  |
| Iraq    | 2034 | 196.8 (163.7 to 239.1)     | 44.5 (34.5 to 56.5)        | 151.7 (120.0 to 192.8)        | 0.0 (0.0 to 0.1)                | 0.5 (0.4 to 0.7)                  | 633.2 (526.8 to 769.2) | 143.1 (111.0 to 181.8)     | 488.2 (386.1 to 620.2)        | 0.2 (0.1 to 0.3)                | 1.7 (1.4 to 2.2)                  |
| Iraq    | 2035 | 199.4 (164.6 to 241.5)     | 45.4 (35.2 to 57.8)        | 153.4 (121.2 to 194.9)        | 0.1 (0.0 to 0.1)                | 0.5 (0.4 to 0.7)                  | 641.4 (529.7 to 776.9) | 145.9 (113.1 to 186.1)     | 493.5 (390.0 to 626.9)        | 0.2 (0.1 to 0.3)                | 1.8 (1.4 to 2.3)                  |
| Iraq    | 2036 | 202.0 (168.1 to 245.0)     | 46.2 (35.9 to 59.0)        | 155.2 (122.4 to 197.7)        | 0.1 (0.0 to 0.1)                | 0.6 (0.4 to 0.7)                  | 649.9 (540.9 to 788.2) | 148.8 (115.4 to 189.8)     | 499.2 (393.9 to 636.1)        | 0.2 (0.1 to 0.3)                | 1.8 (1.4 to 2.4)                  |

| Country | Year | 2018 US Dollars per capita |                            |                               |                                 |                                   | 2018 PPP per capita       |                            |                               |                                 |                                   |
|---------|------|----------------------------|----------------------------|-------------------------------|---------------------------------|-----------------------------------|---------------------------|----------------------------|-------------------------------|---------------------------------|-----------------------------------|
|         |      | Health spending            | Government health spending | Out-of-pocket health spending | Prepaid private health spending | Development assistance for health | Health spending           | Government health spending | Out-of-pocket health spending | Prepaid private health spending | Development assistance for health |
| Iraq    | 2037 | 204.7 (169.3 to 248.3)     | 47.2 (36.6 to 60.2)        | 157.0 (123.6 to 199.8)        | 0.1 (0.0 to 0.1)                | 0.6 (0.4 to 0.8)                  | 658.7 (544.7 to 799.0)    | 151.7 (117.8 to 193.6)     | 505.0 (397.7 to 642.9)        | 0.2 (0.1 to 0.3)                | 1.8 (1.4 to 2.4)                  |
| Iraq    | 2038 | 207.5 (172.9 to 252.0)     | 48.1 (37.4 to 61.4)        | 158.7 (124.8 to 201.9)        | 0.1 (0.0 to 0.1)                | 0.6 (0.4 to 0.8)                  | 667.5 (556.3 to 810.8)    | 154.8 (120.2 to 197.5)     | 510.7 (401.5 to 649.5)        | 0.2 (0.1 to 0.3)                | 1.8 (1.4 to 2.5)                  |
| Iraq    | 2039 | 210.8 (174.4 to 257.1)     | 49.2 (38.4 to 62.9)        | 160.9 (126.3 to 204.5)        | 0.1 (0.0 to 0.1)                | 0.6 (0.4 to 0.8)                  | 678.1 (560.9 to 827.2)    | 158.4 (123.6 to 202.3)     | 517.6 (406.2 to 657.8)        | 0.2 (0.1 to 0.3)                | 1.8 (1.4 to 2.6)                  |
| Iraq    | 2040 | 213.6 (177.3 to 258.7)     | 50.2 (38.9 to 64.2)        | 162.7 (127.4 to 207.1)        | 0.1 (0.0 to 0.1)                | 0.6 (0.4 to 0.8)                  | 687.0 (570.5 to 832.1)    | 161.5 (125.3 to 206.7)     | 523.5 (410.0 to 666.1)        | 0.2 (0.1 to 0.3)                | 1.9 (1.4 to 2.6)                  |
| Iraq    | 2041 | 216.5 (178.3 to 263.4)     | 51.2 (39.6 to 65.8)        | 164.7 (128.7 to 210.7)        | 0.1 (0.0 to 0.1)                | 0.6 (0.4 to 0.8)                  | 696.5 (573.6 to 847.5)    | 164.7 (127.4 to 211.5)     | 529.7 (414.2 to 677.9)        | 0.2 (0.1 to 0.3)                | 1.9 (1.4 to 2.6)                  |
| Iraq    | 2042 | 219.6 (182.2 to 266.6)     | 52.2 (40.5 to 67.2)        | 166.7 (130.2 to 212.8)        | 0.1 (0.0 to 0.1)                | 0.6 (0.4 to 0.9)                  | 706.5 (586.2 to 857.9)    | 168.1 (130.2 to 216.3)     | 536.3 (419.0 to 684.7)        | 0.2 (0.1 to 0.3)                | 1.9 (1.4 to 2.8)                  |
| Iraq    | 2043 | 222.4 (184.1 to 269.3)     | 53.2 (41.2 to 68.5)        | 168.5 (131.8 to 214.9)        | 0.1 (0.0 to 0.1)                | 0.6 (0.4 to 0.9)                  | 715.5 (592.1 to 866.5)    | 171.1 (132.6 to 220.5)     | 542.2 (423.9 to 691.4)        | 0.2 (0.1 to 0.4)                | 2.0 (1.4 to 2.8)                  |
| Iraq    | 2044 | 225.6 (187.0 to 274.0)     | 54.3 (41.9 to 70.0)        | 170.7 (133.2 to 217.8)        | 0.1 (0.0 to 0.1)                | 0.6 (0.5 to 0.9)                  | 725.9 (601.6 to 881.6)    | 174.7 (134.7 to 225.2)     | 549.1 (428.5 to 700.8)        | 0.2 (0.1 to 0.4)                | 2.0 (1.5 to 2.9)                  |
| Iraq    | 2045 | 228.8 (188.4 to 278.4)     | 55.4 (42.5 to 71.5)        | 172.7 (134.5 to 220.7)        | 0.1 (0.0 to 0.1)                | 0.6 (0.5 to 1.0)                  | 736.0 (606.0 to 895.7)    | 178.1 (136.7 to 230.1)     | 555.7 (432.6 to 709.9)        | 0.2 (0.1 to 0.4)                | 2.0 (1.5 to 3.1)                  |
| Iraq    | 2046 | 231.9 (191.9 to 283.4)     | 56.3 (42.9 to 72.9)        | 174.9 (136.1 to 223.6)        | 0.1 (0.0 to 0.1)                | 0.6 (0.5 to 1.0)                  | 745.9 (617.5 to 911.6)    | 181.1 (138.0 to 234.6)     | 562.6 (437.9 to 719.4)        | 0.2 (0.1 to 0.4)                | 2.1 (1.5 to 3.2)                  |
| Iraq    | 2047 | 234.8 (195.5 to 286.2)     | 57.2 (43.5 to 74.1)        | 176.9 (137.7 to 226.3)        | 0.1 (0.0 to 0.1)                | 0.7 (0.5 to 1.0)                  | 755.5 (628.9 to 920.8)    | 184.1 (139.9 to 238.5)     | 569.1 (443.0 to 728.2)        | 0.2 (0.1 to 0.4)                | 2.1 (1.5 to 3.3)                  |
| Iraq    | 2048 | 237.8 (196.4 to 289.0)     | 58.1 (44.0 to 75.1)        | 178.9 (139.3 to 229.0)        | 0.1 (0.0 to 0.1)                | 0.7 (0.5 to 1.1)                  | 765.0 (631.9 to 929.6)    | 186.9 (141.6 to 241.6)     | 575.6 (448.1 to 736.8)        | 0.2 (0.1 to 0.4)                | 2.1 (1.5 to 3.5)                  |
| Iraq    | 2049 | 240.8 (199.1 to 293.2)     | 59.0 (44.6 to 76.3)        | 181.1 (140.9 to 231.7)        | 0.1 (0.0 to 0.1)                | 0.7 (0.5 to 1.1)                  | 774.9 (640.5 to 943.2)    | 189.9 (143.6 to 245.3)     | 582.5 (453.4 to 745.4)        | 0.2 (0.1 to 0.4)                | 2.2 (1.6 to 3.5)                  |
| Iraq    | 2050 | 243.6 (201.5 to 293.8)     | 59.9 (45.2 to 78.0)        | 183.0 (142.4 to 234.1)        | 0.1 (0.0 to 0.1)                | 0.7 (0.5 to 1.1)                  | 783.8 (648.2 to 945.1)    | 192.8 (145.4 to 250.8)     | 588.6 (458.1 to 753.1)        | 0.3 (0.1 to 0.4)                | 2.2 (1.5 to 3.7)                  |
| Ireland | 1995 | 1715.2 (1576.6 to 1864.7)  | 1289.3 (1165.7 to 1424.4)  | 182.9 (153.6 to 214.8)        | 243.0 (199.4 to 295.3)          | 0.0 (0.0 to 0.0)                  | 1748.0 (1606.8 to 1900.3) | 1314.0 (1188.0 to 1451.6)  | 186.4 (156.5 to 218.9)        | 247.6 (203.3 to 301.0)          | 0.0 (0.0 to 0.0)                  |
| Ireland | 1996 | 1823.7 (1699.8 to 1947.1)  | 1377.8 (1261.0 to 1496.9)  | 195.0 (169.2 to 223.4)        | 250.9 (213.9 to 292.3)          | 0.0 (0.0 to 0.0)                  | 1858.6 (1732.3 to 1984.4) | 1404.1 (1285.1 to 1525.6)  | 198.8 (172.4 to 227.6)        | 255.7 (218.0 to 297.9)          | 0.0 (0.0 to 0.0)                  |
| Ireland | 1997 | 1994.7 (1877.5 to 2111.5)  | 1523.8 (1417.1 to 1631.6)  | 210.0 (185.8 to 235.4)        | 260.8 (227.3 to 298.6)          | 0.0 (0.0 to 0.0)                  | 2032.8 (1913.4 to 2151.9) | 1552.9 (1444.3 to 1662.8)  | 214.0 (189.4 to 239.9)        | 265.8 (231.7 to 304.3)          | 0.0 (0.0 to 0.0)                  |
| Ireland | 1998 | 2155.6 (2044.2 to 2263.6)  | 1662.1 (1556.1 to 1762.9)  | 225.0 (201.2 to 248.8)        | 268.4 (237.2 to 304.4)          | 0.0 (0.0 to 0.0)                  | 2196.8 (2083.3 to 2306.9) | 1693.9 (1585.8 to 1796.6)  | 229.3 (205.0 to 253.6)        | 273.6 (241.7 to 310.3)          | 0.0 (0.0 to 0.0)                  |
| Ireland | 1999 | 2374.2 (2263.2 to 2487.2)  | 1843.6 (1737.0 to 1952.0)  | 254.4 (230.4 to 280.2)        | 276.2 (243.5 to 311.7)          | 0.0 (0.0 to 0.0)                  | 2419.6 (2306.5 to 2534.7) | 1878.8 (1770.2 to 1989.3)  | 259.3 (234.8 to 285.5)        | 281.5 (248.2 to 317.7)          | 0.0 (0.0 to 0.0)                  |
| Ireland | 2000 | 2653.6 (2539.3 to 2782.9)  | 2068.3 (1960.9 to 2189.9)  | 295.2 (269.3 to 321.2)        | 290.0 (256.4 to 324.1)          | 0.0 (0.0 to 0.0)                  | 2704.3 (2587.9 to 2836.1) | 2107.9 (1998.4 to 2231.8)  | 300.8 (274.5 to 327.4)        | 295.6 (261.3 to 330.3)          | 0.0 (0.0 to 0.0)                  |
| Ireland | 2001 | 2923.7 (2805.0 to 3054.8)  | 2287.7 (2178.7 to 2409.4)  | 327.2 (299.7 to 355.2)        | 308.8 (273.4 to 346.3)          | 0.0 (0.0 to 0.0)                  | 2979.7 (2858.7 to 3113.2) | 2331.5 (2220.4 to 2455.5)  | 333.4 (305.4 to 362.0)        | 314.7 (278.7 to 352.9)          | 0.0 (0.0 to 0.0)                  |

| Country | Year | 2018 US Dollars per capita |                            |                               |                                 |                                   | 2018 PPP per capita       |                            |                               |                                 |                                   |
|---------|------|----------------------------|----------------------------|-------------------------------|---------------------------------|-----------------------------------|---------------------------|----------------------------|-------------------------------|---------------------------------|-----------------------------------|
|         |      | Health spending            | Government health spending | Out-of-pocket health spending | Prepaid private health spending | Development assistance for health | Health spending           | Government health spending | Out-of-pocket health spending | Prepaid private health spending | Development assistance for health |
| Ireland | 2002 | 3200.1 (3079.7 to 3327.8)  | 2515.4 (2403.3 to 2635.4)  | 367.8 (340.1 to 394.9)        | 316.9 (280.2 to 355.9)          | 0.0 (0.0 to 0.0)                  | 3261.3 (3138.6 to 3391.5) | 2563.5 (2449.3 to 2685.8)  | 374.9 (346.6 to 402.4)        | 322.9 (285.6 to 362.7)          | 0.0 (0.0 to 0.0)                  |
| Ireland | 2003 | 3406.1 (3283.1 to 3539.2)  | 2678.5 (2566.7 to 2804.6)  | 422.5 (392.9 to 451.6)        | 305.1 (271.4 to 343.4)          | 0.0 (0.0 to 0.0)                  | 3471.2 (3345.9 to 3606.9) | 2729.7 (2615.8 to 2858.2)  | 430.6 (400.4 to 460.3)        | 310.9 (276.6 to 350.0)          | 0.0 (0.0 to 0.0)                  |
| Ireland | 2004 | 3675.8 (3553.9 to 3804.5)  | 2892.2 (2774.1 to 3010.3)  | 469.1 (440.7 to 495.9)        | 314.5 (281.3 to 352.0)          | 0.0 (0.0 to 0.0)                  | 3746.1 (3621.9 to 3877.2) | 2947.5 (2827.2 to 3067.8)  | 478.1 (449.2 to 505.4)        | 320.5 (286.6 to 358.8)          | 0.0 (0.0 to 0.0)                  |
| Ireland | 2005 | 3946.4 (3826.5 to 4086.9)  | 3105.5 (2986.5 to 3238.6)  | 519.1 (489.8 to 549.8)        | 321.7 (286.9 to 359.3)          | 0.0 (0.0 to 0.0)                  | 4021.9 (3899.7 to 4165.0) | 3164.9 (3043.7 to 3300.6)  | 529.1 (499.2 to 560.3)        | 327.9 (292.4 to 366.2)          | 0.0 (0.0 to 0.0)                  |
| Ireland | 2006 | 4203.6 (4073.7 to 4341.2)  | 3312.4 (3191.9 to 3455.2)  | 547.5 (515.5 to 579.8)        | 343.7 (310.9 to 381.3)          | 0.0 (0.0 to 0.0)                  | 4284.0 (4151.6 to 4424.3) | 3375.8 (3252.9 to 3521.3)  | 558.0 (525.4 to 590.9)        | 350.3 (316.8 to 388.6)          | 0.0 (0.0 to 0.0)                  |
| Ireland | 2007 | 4575.7 (4444.0 to 4715.7)  | 3621.4 (3498.5 to 3759.7)  | 563.5 (531.3 to 594.1)        | 390.8 (355.0 to 428.5)          | 0.0 (0.0 to 0.0)                  | 4663.3 (4529.0 to 4805.9) | 3690.7 (3565.4 to 3831.6)  | 574.3 (541.5 to 605.4)        | 398.3 (361.8 to 436.7)          | 0.0 (0.0 to 0.0)                  |
| Ireland | 2008 | 4798.0 (4663.5 to 4931.9)  | 3766.0 (3642.9 to 3893.3)  | 594.7 (561.1 to 628.2)        | 437.3 (400.2 to 475.0)          | 0.0 (0.0 to 0.0)                  | 4889.8 (4752.7 to 5026.2) | 3838.0 (3712.6 to 3967.7)  | 606.1 (571.8 to 640.3)        | 445.7 (407.8 to 484.1)          | 0.0 (0.0 to 0.0)                  |
| Ireland | 2009 | 5027.0 (4897.3 to 5157.9)  | 3866.7 (3741.4 to 3986.6)  | 646.1 (613.5 to 676.6)        | 514.1 (473.9 to 554.8)          | 0.0 (0.0 to 0.0)                  | 5123.1 (4990.9 to 5256.5) | 3940.7 (3812.9 to 4062.8)  | 658.5 (625.2 to 689.5)        | 523.9 (482.9 to 565.4)          | 0.0 (0.0 to 0.0)                  |
| Ireland | 2010 | 5247.7 (5105.9 to 5399.1)  | 3946.7 (3816.9 to 4081.0)  | 696.7 (663.4 to 732.1)        | 604.3 (563.1 to 647.9)          | 0.0 (0.0 to 0.0)                  | 5348.1 (5203.6 to 5502.3) | 4022.2 (3889.9 to 4159.1)  | 710.0 (676.1 to 746.1)        | 615.9 (573.8 to 660.3)          | 0.0 (0.0 to 0.0)                  |
| Ireland | 2011 | 5306.7 (5164.4 to 5457.6)  | 3859.2 (3725.4 to 3993.2)  | 715.9 (681.1 to 752.6)        | 731.6 (686.8 to 779.0)          | 0.0 (0.0 to 0.0)                  | 5408.2 (5263.2 to 5562.0) | 3933.0 (3796.6 to 4069.6)  | 729.6 (694.1 to 767.0)        | 745.5 (699.9 to 793.9)          | 0.0 (0.0 to 0.0)                  |
| Ireland | 2012 | 5183.3 (5048.6 to 5325.5)  | 3682.1 (3554.5 to 3815.2)  | 713.2 (681.4 to 747.5)        | 788.0 (743.8 to 834.4)          | 0.0 (0.0 to 0.0)                  | 5282.5 (5145.1 to 5427.4) | 3752.5 (3622.5 to 3888.1)  | 726.9 (694.5 to 761.8)        | 803.1 (758.0 to 850.3)          | 0.0 (0.0 to 0.0)                  |
| Ireland | 2013 | 4967.3 (4836.7 to 5102.6)  | 3490.2 (3375.6 to 3611.9)  | 698.9 (664.8 to 733.3)        | 778.2 (733.1 to 823.0)          | 0.0 (0.0 to 0.0)                  | 5062.3 (4929.3 to 5200.2) | 3556.9 (3440.2 to 3681.0)  | 712.3 (677.5 to 747.3)        | 793.1 (747.2 to 838.7)          | 0.0 (0.0 to 0.0)                  |
| Ireland | 2014 | 4866.2 (4738.8 to 4991.0)  | 3420.2 (3300.4 to 3536.5)  | 686.3 (652.3 to 718.3)        | 759.7 (717.8 to 802.7)          | 0.0 (0.0 to 0.0)                  | 4959.3 (4829.4 to 5086.4) | 3485.7 (3363.5 to 3604.1)  | 699.4 (664.8 to 732.0)        | 774.2 (731.5 to 818.1)          | 0.0 (0.0 to 0.0)                  |
| Ireland | 2015 | 5195.4 (5056.9 to 5333.7)  | 3713.4 (3582.1 to 3842.5)  | 695.9 (659.6 to 732.2)        | 786.1 (741.3 to 834.2)          | 0.0 (0.0 to 0.0)                  | 5294.8 (5153.6 to 5435.7) | 3784.4 (3650.6 to 3916.0)  | 709.3 (672.2 to 746.2)        | 801.1 (755.4 to 850.2)          | 0.0 (0.0 to 0.0)                  |
| Ireland | 2016 | 5097.0 (4900.8 to 5287.7)  | 3665.3 (3503.9 to 3838.1)  | 673.9 (628.7 to 724.4)        | 757.8 (693.9 to 826.3)          | 0.0 (0.0 to 0.0)                  | 5194.5 (4994.5 to 5388.9) | 3735.4 (3570.9 to 3911.5)  | 686.8 (640.7 to 738.3)        | 772.3 (707.2 to 842.1)          | 0.0 (0.0 to 0.0)                  |
| Ireland | 2017 | 5326.7 (5113.9 to 5525.1)  | 3804.3 (3620.4 to 3988.6)  | 707.9 (658.5 to 760.6)        | 814.5 (746.0 to 887.2)          | 0.0 (0.0 to 0.0)                  | 5428.6 (5211.7 to 5630.7) | 3877.1 (3689.6 to 4064.9)  | 721.4 (671.1 to 775.1)        | 830.1 (760.3 to 904.2)          | 0.0 (0.0 to 0.0)                  |
| Ireland | 2018 | 5474.1 (5246.6 to 5693.7)  | 3907.3 (3700.0 to 4102.1)  | 730.2 (675.7 to 784.5)        | 836.6 (764.4 to 911.1)          | 0.0 (0.0 to 0.0)                  | 5578.8 (5347.0 to 5802.6) | 3982.0 (3770.8 to 4180.6)  | 744.2 (688.6 to 799.6)        | 852.6 (779.0 to 928.5)          | 0.0 (0.0 to 0.0)                  |
| Ireland | 2019 | 5630.7 (5389.7 to 5856.9)  | 4015.2 (3805.7 to 4223.1)  | 754.4 (696.9 to 811.9)        | 861.1 (787.1 to 939.0)          | 0.0 (0.0 to 0.0)                  | 5738.4 (5492.8 to 5969.0) | 4092.0 (3878.5 to 4303.9)  | 768.8 (710.2 to 827.4)        | 877.6 (802.2 to 957.0)          | 0.0 (0.0 to 0.0)                  |
| Ireland | 2020 | 5787.6 (5536.5 to 6030.8)  | 4122.3 (3903.1 to 4356.6)  | 779.2 (716.5 to 841.8)        | 886.1 (810.1 to 965.3)          | 0.0 (0.0 to 0.0)                  | 5898.3 (5642.4 to 6146.2) | 4201.2 (3977.8 to 4439.9)  | 794.1 (730.3 to 857.9)        | 903.1 (825.6 to 983.7)          | 0.0 (0.0 to 0.0)                  |
| Ireland | 2021 | 5953.5 (5697.6 to 6210.8)  | 4235.3 (4002.5 to 4477.9)  | 805.5 (738.2 to 874.9)        | 912.7 (834.2 to 995.0)          | 0.0 (0.0 to 0.0)                  | 6067.4 (5806.6 to 6329.6) | 4316.3 (4079.1 to 4563.6)  | 820.9 (752.4 to 891.7)        | 930.2 (850.1 to 1014.0)         | 0.0 (0.0 to 0.0)                  |
| Ireland | 2022 | 6097.6 (5824.1 to 6370.4)  | 4331.0 (4095.6 to 4588.3)  | 830.7 (764.1 to 901.4)        | 935.9 (853.6 to 1019.4)         | 0.0 (0.0 to 0.0)                  | 6214.2 (5935.5 to 6492.2) | 4413.9 (4173.9 to 4676.1)  | 846.6 (778.7 to 918.7)        | 953.8 (869.9 to 1038.9)         | 0.0 (0.0 to 0.0)                  |



| Country | Year | 2018 US Dollars per capita |                            |                               |                                 |                                   | 2018 PPP per capita       |                            |                               |                                 |                                   |
|---------|------|----------------------------|----------------------------|-------------------------------|---------------------------------|-----------------------------------|---------------------------|----------------------------|-------------------------------|---------------------------------|-----------------------------------|
|         |      | Health spending            | Government health spending | Out-of-pocket health spending | Prepaid private health spending | Development assistance for health | Health spending           | Government health spending | Out-of-pocket health spending | Prepaid private health spending | Development assistance for health |
| Ireland | 2023 | 6162.2 (5890.6 to 6430.4)  | 4365.8 (4123.1 to 4625.2)  | 849.9 (781.2 to 923.1)        | 946.4 (863.6 to 1031.8)         | 0.0 (0.0 to 0.0)                  | 6280.1 (6003.2 to 6553.4) | 4449.3 (4202.0 to 4713.7)  | 866.2 (796.1 to 940.7)        | 964.5 (880.1 to 1051.6)         | 0.0 (0.0 to 0.0)                  |
| Ireland | 2024 | 6206.6 (5926.7 to 6474.4)  | 4384.3 (4132.9 to 4638.1)  | 867.5 (796.2 to 941.7)        | 954.8 (870.9 to 1043.0)         | 0.0 (0.0 to 0.0)                  | 6325.3 (6040.0 to 6598.2) | 4468.2 (4212.0 to 4726.9)  | 884.1 (811.5 to 959.7)        | 973.0 (887.6 to 1063.0)         | 0.0 (0.0 to 0.0)                  |
| Ireland | 2025 | 6237.8 (5960.4 to 6516.3)  | 4403.0 (4150.5 to 4658.9)  | 871.1 (799.4 to 951.1)        | 963.7 (879.8 to 1052.8)         | 0.0 (0.0 to 0.0)                  | 6357.1 (6074.4 to 6641.0) | 4487.2 (4229.9 to 4748.0)  | 887.8 (814.7 to 969.3)        | 982.1 (896.6 to 1072.9)         | 0.0 (0.0 to 0.0)                  |
| Ireland | 2026 | 6271.5 (5982.9 to 6550.1)  | 4423.3 (4166.8 to 4684.0)  | 875.1 (800.0 to 962.2)        | 973.0 (888.6 to 1062.7)         | 0.0 (0.0 to 0.0)                  | 6391.4 (6097.4 to 6675.3) | 4507.9 (4246.5 to 4773.6)  | 891.8 (815.3 to 980.6)        | 991.6 (905.6 to 1083.1)         | 0.0 (0.0 to 0.0)                  |
| Ireland | 2027 | 6302.7 (6012.1 to 6589.0)  | 4441.9 (4177.4 to 4710.3)  | 878.8 (800.2 to 974.9)        | 982.0 (896.9 to 1071.3)         | 0.0 (0.0 to 0.0)                  | 6423.3 (6127.1 to 6715.0) | 4526.8 (4257.3 to 4800.4)  | 895.6 (815.5 to 993.6)        | 1000.8 (914.0 to 1091.8)        | 0.0 (0.0 to 0.0)                  |
| Ireland | 2028 | 6355.5 (6050.5 to 6650.2)  | 4475.7 (4197.0 to 4749.4)  | 885.3 (802.7 to 998.5)        | 994.5 (907.8 to 1085.3)         | 0.0 (0.0 to 0.0)                  | 6477.1 (6166.2 to 6777.4) | 4561.3 (4277.3 to 4840.3)  | 902.2 (818.0 to 1017.6)       | 1013.5 (925.2 to 1106.0)        | 0.0 (0.0 to 0.0)                  |
| Ireland | 2029 | 6501.7 (6200.4 to 6799.9)  | 4576.1 (4285.9 to 4854.3)  | 903.6 (816.9 to 1032.1)       | 1022.0 (932.5 to 1117.6)        | 0.0 (0.0 to 0.0)                  | 6626.1 (6319.0 to 6930.0) | 4663.7 (4367.9 to 4947.1)  | 920.9 (832.5 to 1051.9)       | 1041.5 (950.4 to 1139.0)        | 0.0 (0.0 to 0.0)                  |
| Ireland | 2030 | 6688.9 (6341.9 to 7022.1)  | 4705.6 (4401.3 to 4997.3)  | 927.1 (837.1 to 1072.1)       | 1056.2 (964.0 to 1156.5)        | 0.0 (0.0 to 0.0)                  | 6816.9 (6463.2 to 7156.4) | 4795.6 (4485.5 to 5092.9)  | 944.8 (853.1 to 1092.6)       | 1076.4 (982.4 to 1178.6)        | 0.0 (0.0 to 0.0)                  |
| Ireland | 2031 | 6845.4 (6511.7 to 7175.9)  | 4802.6 (4482.0 to 5104.5)  | 950.4 (855.4 to 1111.2)       | 1092.4 (994.7 to 1197.9)        | 0.0 (0.0 to 0.0)                  | 6976.3 (6636.2 to 7313.1) | 4894.5 (4567.7 to 5202.2)  | 968.5 (871.8 to 1132.5)       | 1113.3 (1013.7 to 1220.8)       | 0.0 (0.0 to 0.0)                  |
| Ireland | 2032 | 7006.1 (6619.9 to 7351.6)  | 4901.8 (4577.5 to 5215.3)  | 974.3 (872.8 to 1147.4)       | 1130.1 (1027.5 to 1243.3)       | 0.0 (0.0 to 0.0)                  | 7140.2 (6746.5 to 7492.2) | 4995.5 (4665.0 to 5315.1)  | 992.9 (889.5 to 1169.3)       | 1151.7 (1047.2 to 1267.1)       | 0.0 (0.0 to 0.0)                  |
| Ireland | 2033 | 7171.3 (6798.1 to 7525.2)  | 5003.6 (4662.8 to 5329.1)  | 998.7 (891.3 to 1182.9)       | 1169.1 (1061.7 to 1288.4)       | 0.0 (0.0 to 0.0)                  | 7308.5 (6928.1 to 7669.2) | 5099.3 (4752.0 to 5431.1)  | 1017.8 (908.4 to 1205.5)      | 1191.4 (1082.0 to 1313.1)       | 0.0 (0.0 to 0.0)                  |
| Ireland | 2034 | 7336.3 (6919.3 to 7733.3)  | 5104.6 (4747.1 to 5442.3)  | 1023.0 (907.5 to 1216.9)      | 1208.6 (1097.5 to 1333.2)       | 0.0 (0.0 to 0.0)                  | 7476.6 (7051.7 to 7881.3) | 5202.3 (4837.9 to 5546.3)  | 1042.6 (924.9 to 1240.2)      | 1231.8 (1118.4 to 1358.7)       | 0.0 (0.0 to 0.0)                  |
| Ireland | 2035 | 7492.1 (7074.4 to 7894.0)  | 5198.6 (4825.6 to 5547.9)  | 1046.2 (925.0 to 1253.5)      | 1247.3 (1129.2 to 1374.3)       | 0.0 (0.0 to 0.0)                  | 7635.4 (7209.7 to 8045.0) | 5298.0 (4917.9 to 5654.0)  | 1066.2 (942.7 to 1277.5)      | 1271.1 (1150.8 to 1400.6)       | 0.0 (0.0 to 0.0)                  |
| Ireland | 2036 | 7643.3 (7187.3 to 8086.5)  | 5289.0 (4901.3 to 5657.4)  | 1068.6 (942.0 to 1290.9)      | 1285.7 (1163.0 to 1419.8)       | 0.0 (0.0 to 0.0)                  | 7789.5 (7324.8 to 8241.2) | 5390.1 (4995.1 to 5765.6)  | 1089.0 (960.0 to 1315.6)      | 1310.3 (1185.2 to 1447.0)       | 0.0 (0.0 to 0.0)                  |
| Ireland | 2037 | 7794.3 (7338.5 to 8241.8)  | 5379.0 (4974.4 to 5762.0)  | 1090.8 (959.2 to 1326.7)      | 1324.5 (1197.3 to 1464.6)       | 0.0 (0.0 to 0.0)                  | 7943.4 (7478.8 to 8399.4) | 5481.9 (5069.6 to 5872.3)  | 1111.7 (977.5 to 1352.0)      | 1349.8 (1220.2 to 1492.6)       | 0.0 (0.0 to 0.0)                  |
| Ireland | 2038 | 7938.9 (7444.2 to 8423.6)  | 5463.5 (5038.6 to 5867.9)  | 1112.4 (973.7 to 1359.8)      | 1363.1 (1232.7 to 1508.5)       | 0.0 (0.0 to 0.0)                  | 8090.8 (7586.6 to 8584.7) | 5568.0 (5134.9 to 5980.1)  | 1133.6 (992.3 to 1385.8)      | 1389.1 (1256.3 to 1537.4)       | 0.0 (0.0 to 0.0)                  |
| Ireland | 2039 | 8089.1 (7579.1 to 8579.4)  | 5552.4 (5108.1 to 5979.9)  | 1134.1 (987.3 to 1393.0)      | 1402.5 (1267.2 to 1553.5)       | 0.0 (0.0 to 0.0)                  | 8243.8 (7724.1 to 8743.5) | 5658.6 (5205.8 to 6094.3)  | 1155.8 (1006.1 to 1419.6)     | 1429.4 (1291.4 to 1583.2)       | 0.0 (0.0 to 0.0)                  |
| Ireland | 2040 | 8233.9 (7691.2 to 8770.1)  | 5636.6 (5170.6 to 6087.3)  | 1155.3 (1002.3 to 1426.4)     | 1442.0 (1299.9 to 1601.1)       | 0.0 (0.0 to 0.0)                  | 8391.4 (7838.3 to 8937.8) | 5744.4 (5269.5 to 6203.8)  | 1177.4 (1021.4 to 1453.7)     | 1469.6 (1324.7 to 1631.8)       | 0.0 (0.0 to 0.0)                  |
| Ireland | 2041 | 8380.9 (7834.5 to 8944.5)  | 5722.0 (5237.7 to 6198.4)  | 1176.6 (1017.2 to 1459.3)     | 1482.3 (1332.0 to 1655.8)       | 0.0 (0.0 to 0.0)                  | 8541.2 (7984.3 to 9115.6) | 5831.5 (5337.9 to 6317.0)  | 1199.1 (1036.6 to 1487.2)     | 1510.6 (1357.4 to 1687.5)       | 0.0 (0.0 to 0.0)                  |
| Ireland | 2042 | 8532.1 (7945.7 to 9135.7)  | 5810.4 (5303.1 to 6313.6)  | 1198.0 (1031.2 to 1491.8)     | 1523.6 (1364.6 to 1707.9)       | 0.0 (0.0 to 0.0)                  | 8695.3 (8097.7 to 9310.5) | 5921.6 (5404.5 to 6434.3)  | 1221.0 (1051.0 to 1520.3)     | 1552.7 (1390.7 to 1740.6)       | 0.0 (0.0 to 0.0)                  |
| Ireland | 2043 | 8683.9 (8095.0 to 9279.3)  | 5898.3 (5361.6 to 6422.5)  | 1219.7 (1045.7 to 1523.5)     | 1566.0 (1398.0 to 1759.2)       | 0.0 (0.0 to 0.0)                  | 8850.0 (8249.8 to 9456.8) | 6011.1 (5464.2 to 6545.3)  | 1243.0 (1065.7 to 1552.6)     | 1595.9 (1424.7 to 1792.9)       | 0.0 (0.0 to 0.0)                  |

| Country | Year | 2018 US Dollars per capita |                            |                               |                                 |                                   | 2018 PPP per capita         |                            |                               |                                 |                                   |
|---------|------|----------------------------|----------------------------|-------------------------------|---------------------------------|-----------------------------------|-----------------------------|----------------------------|-------------------------------|---------------------------------|-----------------------------------|
|         |      | Health spending            | Government health spending | Out-of-pocket health spending | Prepaid private health spending | Development assistance for health | Health spending             | Government health spending | Out-of-pocket health spending | Prepaid private health spending | Development assistance for health |
| Ireland | 2044 | 8837.7 (8199.8 to 9506.5)  | 5987.5 (5421.2 to 6537.5)  | 1241.2 (1060.6 to 1554.4)     | 1609.0 (1437.3 to 1809.9)       | 0.0 (0.0 to 0.0)                  | 9006.8 (8356.6 to 9688.3)   | 6102.0 (5524.9 to 6662.6)  | 1265.0 (1080.8 to 1584.1)     | 1639.8 (1464.8 to 1844.5)       | 0.0 (0.0 to 0.0)                  |
| Ireland | 2045 | 8992.5 (8351.3 to 9628.8)  | 6078.0 (5491.3 to 6654.5)  | 1262.4 (1077.2 to 1584.2)     | 1652.1 (1471.4 to 1864.7)       | 0.0 (0.0 to 0.0)                  | 9164.5 (8511.0 to 9812.9)   | 6194.2 (5596.4 to 6781.8)  | 1286.6 (1097.8 to 1614.5)     | 1683.7 (1499.5 to 1900.4)       | 0.0 (0.0 to 0.0)                  |
| Ireland | 2046 | 9151.8 (8477.7 to 9876.8)  | 6171.7 (5564.4 to 6775.6)  | 1283.8 (1094.2 to 1613.3)     | 1696.3 (1506.1 to 1919.5)       | 0.0 (0.0 to 0.0)                  | 9326.9 (8639.8 to 10065.7)  | 6289.8 (5670.8 to 6905.2)  | 1308.4 (1115.1 to 1644.1)     | 1728.7 (1534.9 to 1956.2)       | 0.0 (0.0 to 0.0)                  |
| Ireland | 2047 | 9310.5 (8614.8 to 10021.4) | 6265.7 (5633.3 to 6902.0)  | 1304.6 (1111.0 to 1641.0)     | 1740.2 (1542.0 to 1973.3)       | 0.0 (0.0 to 0.0)                  | 9488.6 (8779.6 to 10213.1)  | 6385.5 (5741.1 to 7034.0)  | 1329.6 (1132.2 to 1672.4)     | 1773.5 (1571.5 to 2011.0)       | 0.0 (0.0 to 0.0)                  |
| Ireland | 2048 | 9476.3 (8736.5 to 10251.4) | 6365.0 (5702.8 to 7031.4)  | 1325.9 (1127.1 to 1669.4)     | 1785.4 (1577.1 to 2031.3)       | 0.0 (0.0 to 0.0)                  | 9657.6 (8903.6 to 10447.4)  | 6486.8 (5811.9 to 7165.9)  | 1351.3 (1148.7 to 1701.3)     | 1819.5 (1607.3 to 2070.2)       | 0.0 (0.0 to 0.0)                  |
| Ireland | 2049 | 9651.2 (8897.0 to 10442.3) | 6471.5 (5784.7 to 7166.6)  | 1347.8 (1146.1 to 1698.6)     | 1831.9 (1613.2 to 2091.4)       | 0.0 (0.0 to 0.0)                  | 9835.8 (9067.2 to 10642.1)  | 6595.3 (5895.3 to 7303.7)  | 1373.6 (1168.0 to 1731.0)     | 1866.9 (1644.0 to 2131.4)       | 0.0 (0.0 to 0.0)                  |
| Ireland | 2050 | 9838.5 (9036.8 to 10659.2) | 6586.6 (5866.3 to 7314.1)  | 1371.1 (1162.9 to 1729.0)     | 1880.9 (1649.4 to 2152.3)       | 0.0 (0.0 to 0.0)                  | 10026.7 (9209.7 to 10863.1) | 6712.6 (5978.5 to 7454.0)  | 1397.3 (1185.2 to 1762.0)     | 1916.8 (1680.9 to 2193.5)       | 0.0 (0.0 to 0.0)                  |
| Israel  | 1995 | 1953.4 (1882.0 to 2029.2)  | 1319.5 (1264.7 to 1376.1)  | 586.9 (541.0 to 638.7)        | 47.1 (34.3 to 63.1)             | 0.0 (0.0 to 0.0)                  | 1839.9 (1772.6 to 1911.2)   | 1242.8 (1191.1 to 1296.0)  | 552.7 (509.5 to 601.5)        | 44.3 (32.3 to 59.4)             | 0.0 (0.0 to 0.0)                  |
| Israel  | 1996 | 2010.7 (1954.6 to 2066.4)  | 1363.4 (1322.7 to 1400.3)  | 593.5 (556.2 to 633.3)        | 53.9 (41.8 to 68.2)             | 0.0 (0.0 to 0.0)                  | 1893.8 (1840.9 to 1946.3)   | 1284.1 (1245.8 to 1318.9)  | 559.0 (523.8 to 596.5)        | 50.7 (39.4 to 64.3)             | 0.0 (0.0 to 0.0)                  |
| Israel  | 1997 | 2029.5 (1978.5 to 2082.2)  | 1367.1 (1330.0 to 1404.5)  | 598.2 (564.1 to 632.0)        | 64.2 (51.7 to 78.0)             | 0.0 (0.0 to 0.0)                  | 1911.5 (1863.4 to 1961.1)   | 1287.6 (1252.7 to 1322.8)  | 563.5 (531.3 to 595.2)        | 60.5 (48.7 to 73.5)             | 0.0 (0.0 to 0.0)                  |
| Israel  | 1998 | 2011.7 (1959.7 to 2061.9)  | 1335.9 (1301.1 to 1373.9)  | 601.3 (567.6 to 633.2)        | 74.6 (62.2 to 88.6)             | 0.0 (0.0 to 0.0)                  | 1894.7 (1845.8 to 1942.0)   | 1258.2 (1225.4 to 1294.0)  | 566.3 (534.6 to 596.4)        | 70.2 (58.6 to 83.5)             | 0.0 (0.0 to 0.0)                  |
| Israel  | 1999 | 2003.9 (1958.3 to 2052.7)  | 1311.6 (1278.7 to 1346.9)  | 605.5 (572.8 to 638.1)        | 86.8 (74.0 to 100.3)            | 0.0 (0.0 to 0.0)                  | 1887.4 (1844.4 to 1933.3)   | 1235.4 (1204.3 to 1268.6)  | 570.3 (539.5 to 601.0)        | 81.7 (69.7 to 94.4)             | 0.0 (0.0 to 0.0)                  |
| Israel  | 2000 | 2098.6 (2054.6 to 2143.1)  | 1364.6 (1332.4 to 1396.0)  | 630.9 (600.5 to 661.5)        | 103.1 (89.8 to 117.3)           | 0.0 (0.0 to 0.0)                  | 1976.6 (1935.1 to 2018.4)   | 1285.3 (1254.9 to 1314.8)  | 594.2 (565.5 to 623.0)        | 97.1 (84.6 to 110.5)            | 0.0 (0.0 to 0.0)                  |
| Israel  | 2001 | 2113.7 (2070.7 to 2158.7)  | 1363.7 (1332.9 to 1394.2)  | 636.5 (608.1 to 665.2)        | 113.6 (100.4 to 127.8)          | 0.0 (0.0 to 0.0)                  | 1990.8 (1950.3 to 2033.2)   | 1284.4 (1255.4 to 1313.1)  | 599.5 (572.7 to 626.5)        | 107.0 (94.6 to 120.4)           | 0.0 (0.0 to 0.0)                  |
| Israel  | 2002 | 2098.1 (2055.8 to 2140.4)  | 1351.9 (1322.5 to 1382.5)  | 619.7 (592.3 to 646.2)        | 126.5 (112.9 to 140.6)          | 0.0 (0.0 to 0.0)                  | 1976.1 (1936.3 to 2015.9)   | 1273.3 (1245.6 to 1302.1)  | 583.7 (557.9 to 608.6)        | 119.1 (106.4 to 132.5)          | 0.0 (0.0 to 0.0)                  |
| Israel  | 2003 | 2066.7 (2026.5 to 2109.1)  | 1315.7 (1283.7 to 1348.8)  | 611.0 (582.5 to 639.3)        | 140.0 (125.0 to 154.7)          | 0.0 (0.0 to 0.0)                  | 1946.5 (1908.6 to 1986.5)   | 1239.2 (1209.0 to 1270.3)  | 575.4 (548.6 to 602.1)        | 131.9 (117.8 to 145.7)          | 0.0 (0.0 to 0.0)                  |
| Israel  | 2004 | 2098.5 (2055.9 to 2140.4)  | 1321.7 (1290.7 to 1353.5)  | 618.0 (589.5 to 645.7)        | 158.8 (143.2 to 174.4)          | 0.0 (0.0 to 0.0)                  | 1976.5 (1936.3 to 2015.9)   | 1244.9 (1215.6 to 1274.8)  | 582.1 (555.2 to 608.1)        | 149.5 (134.8 to 164.3)          | 0.0 (0.0 to 0.0)                  |
| Israel  | 2005 | 2136.6 (2091.6 to 2184.0)  | 1329.5 (1298.5 to 1361.2)  | 622.9 (595.1 to 652.4)        | 184.2 (167.7 to 202.3)          | 0.0 (0.0 to 0.0)                  | 2012.4 (1970.0 to 2057.0)   | 1252.2 (1223.0 to 1282.0)  | 586.7 (560.5 to 614.4)        | 173.5 (157.9 to 190.6)          | 0.0 (0.0 to 0.0)                  |
| Israel  | 2006 | 2205.6 (2159.8 to 2250.9)  | 1373.2 (1343.9 to 1403.9)  | 607.5 (581.6 to 638.0)        | 224.9 (207.2 to 244.4)          | 0.0 (0.0 to 0.0)                  | 2077.3 (2034.2 to 2120.0)   | 1293.3 (1265.7 to 1322.3)  | 572.2 (547.7 to 600.9)        | 211.8 (195.1 to 230.2)          | 0.0 (0.0 to 0.0)                  |
| Israel  | 2007 | 2286.1 (2241.6 to 2334.0)  | 1417.2 (1383.6 to 1449.3)  | 609.0 (582.7 to 637.6)        | 259.9 (240.7 to 279.3)          | 0.0 (0.0 to 0.0)                  | 2153.2 (2111.3 to 2198.3)   | 1334.8 (1303.2 to 1365.0)  | 573.6 (548.8 to 600.5)        | 244.8 (226.7 to 263.1)          | 0.0 (0.0 to 0.0)                  |
| Israel  | 2008 | 2325.1 (2275.7 to 2373.8)  | 1444.3 (1411.2 to 1480.0)  | 600.4 (573.5 to 628.5)        | 280.4 (261.2 to 303.8)          | 0.0 (0.0 to 0.0)                  | 2189.9 (2143.4 to 2235.8)   | 1360.4 (1329.1 to 1393.9)  | 565.5 (540.2 to 592.0)        | 264.1 (246.0 to 286.2)          | 0.0 (0.0 to 0.0)                  |

| Country | Year | 2018 US Dollars per capita |                            |                               |                                 |                                   | 2018 PPP per capita       |                            |                               |                                 |                                   |
|---------|------|----------------------------|----------------------------|-------------------------------|---------------------------------|-----------------------------------|---------------------------|----------------------------|-------------------------------|---------------------------------|-----------------------------------|
|         |      | Health spending            | Government health spending | Out-of-pocket health spending | Prepaid private health spending | Development assistance for health | Health spending           | Government health spending | Out-of-pocket health spending | Prepaid private health spending | Development assistance for health |
| Israel  | 2009 | 2342.8 (2292.6 to 2394.2)  | 1463.7 (1430.0 to 1496.6)  | 591.3 (564.6 to 620.6)        | 287.8 (267.7 to 309.7)          | 0.0 (0.0 to 0.0)                  | 2206.6 (2159.3 to 2255.0) | 1378.6 (1346.8 to 1409.6)  | 556.9 (531.8 to 584.5)        | 271.1 (252.1 to 291.7)          | 0.0 (0.0 to 0.0)                  |
| Israel  | 2010 | 2417.3 (2370.2 to 2464.3)  | 1528.9 (1495.0 to 1562.6)  | 588.8 (560.1 to 617.0)        | 299.6 (278.5 to 323.0)          | 0.0 (0.0 to 0.0)                  | 2276.7 (2232.4 to 2321.0) | 1440.0 (1408.1 to 1471.7)  | 554.5 (527.6 to 581.1)        | 282.2 (262.4 to 304.3)          | 0.0 (0.0 to 0.0)                  |
| Israel  | 2011 | 2475.0 (2426.4 to 2525.8)  | 1575.6 (1541.9 to 1609.8)  | 590.4 (563.8 to 617.5)        | 309.0 (287.4 to 332.2)          | 0.0 (0.0 to 0.0)                  | 2331.1 (2285.3 to 2378.9) | 1484.0 (1452.2 to 1516.1)  | 556.1 (531.0 to 581.6)        | 291.0 (270.7 to 312.9)          | 0.0 (0.0 to 0.0)                  |
| Israel  | 2012 | 2518.5 (2470.2 to 2568.7)  | 1609.0 (1575.6 to 1643.0)  | 591.3 (565.2 to 619.5)        | 318.2 (296.3 to 341.2)          | 0.0 (0.0 to 0.0)                  | 2372.0 (2326.6 to 2419.4) | 1515.4 (1483.9 to 1547.5)  | 557.0 (532.3 to 583.4)        | 299.7 (279.1 to 321.3)          | 0.0 (0.0 to 0.0)                  |
| Israel  | 2013 | 2585.3 (2536.9 to 2635.6)  | 1659.3 (1625.2 to 1695.0)  | 596.4 (568.0 to 623.7)        | 329.6 (306.9 to 354.4)          | 0.0 (0.0 to 0.0)                  | 2435.0 (2389.4 to 2482.3) | 1562.8 (1530.7 to 1596.4)  | 561.7 (534.9 to 587.4)        | 310.4 (289.0 to 333.8)          | 0.0 (0.0 to 0.0)                  |
| Israel  | 2014 | 2648.9 (2596.4 to 2701.3)  | 1696.8 (1661.6 to 1732.8)  | 609.4 (579.0 to 636.7)        | 342.8 (319.4 to 367.9)          | 0.0 (0.0 to 0.0)                  | 2494.9 (2445.4 to 2544.2) | 1598.1 (1565.0 to 1632.0)  | 573.9 (545.3 to 599.7)        | 322.8 (300.9 to 346.5)          | 0.0 (0.0 to 0.0)                  |
| Israel  | 2015 | 2700.0 (2647.9 to 2750.7)  | 1721.5 (1686.4 to 1754.7)  | 623.3 (593.1 to 651.9)        | 355.2 (330.7 to 379.2)          | 0.0 (0.0 to 0.0)                  | 2542.9 (2493.9 to 2590.7) | 1621.4 (1588.3 to 1652.7)  | 587.1 (558.6 to 614.0)        | 334.5 (311.5 to 357.1)          | 0.0 (0.0 to 0.0)                  |
| Israel  | 2016 | 2756.8 (2683.7 to 2827.5)  | 1752.1 (1706.6 to 1799.0)  | 639.7 (598.7 to 679.1)        | 365.1 (330.5 to 400.7)          | 0.0 (0.0 to 0.0)                  | 2596.5 (2527.6 to 2663.1) | 1650.2 (1607.3 to 1694.4)  | 602.5 (563.9 to 639.6)        | 343.8 (311.3 to 377.4)          | 0.0 (0.0 to 0.0)                  |
| Israel  | 2017 | 2858.6 (2785.6 to 2934.3)  | 1837.1 (1789.2 to 1886.0)  | 648.5 (603.8 to 691.2)        | 372.9 (337.2 to 409.0)          | 0.0 (0.0 to 0.0)                  | 2692.3 (2623.6 to 2763.7) | 1730.3 (1685.2 to 1776.3)  | 610.8 (568.7 to 651.0)        | 351.2 (317.6 to 385.2)          | 0.0 (0.0 to 0.0)                  |
| Israel  | 2018 | 2887.8 (2809.4 to 2965.3)  | 1855.9 (1806.8 to 1906.0)  | 654.6 (609.5 to 699.1)        | 377.4 (341.8 to 413.7)          | 0.0 (0.0 to 0.0)                  | 2719.9 (2646.0 to 2792.9) | 1748.0 (1701.7 to 1795.1)  | 616.5 (574.1 to 658.4)        | 355.4 (321.9 to 389.6)          | 0.0 (0.0 to 0.0)                  |
| Israel  | 2019 | 2922.4 (2841.7 to 3004.2)  | 1878.3 (1827.2 to 1930.9)  | 660.8 (614.6 to 706.0)        | 383.3 (347.4 to 420.2)          | 0.0 (0.0 to 0.0)                  | 2752.5 (2676.5 to 2829.5) | 1769.1 (1720.9 to 1818.6)  | 622.4 (578.8 to 665.0)        | 361.0 (327.2 to 395.8)          | 0.0 (0.0 to 0.0)                  |
| Israel  | 2020 | 2955.4 (2872.9 to 3036.6)  | 1899.6 (1844.3 to 1956.8)  | 666.8 (619.0 to 715.3)        | 389.0 (352.6 to 427.1)          | 0.0 (0.0 to 0.0)                  | 2783.5 (2705.8 to 2860.0) | 1789.1 (1737.1 to 1843.0)  | 628.1 (583.0 to 673.7)        | 366.3 (332.1 to 402.3)          | 0.0 (0.0 to 0.0)                  |
| Israel  | 2021 | 2992.5 (2907.5 to 3079.6)  | 1924.4 (1867.9 to 1982.0)  | 672.9 (624.5 to 721.9)        | 395.2 (358.1 to 433.9)          | 0.0 (0.0 to 0.0)                  | 2818.4 (2738.4 to 2900.5) | 1812.5 (1759.3 to 1866.7)  | 633.8 (588.1 to 679.9)        | 372.2 (337.3 to 408.7)          | 0.0 (0.0 to 0.0)                  |
| Israel  | 2022 | 3024.9 (2936.1 to 3112.0)  | 1945.7 (1886.8 to 2005.2)  | 678.4 (628.2 to 730.3)        | 400.7 (362.4 to 440.5)          | 0.0 (0.0 to 0.0)                  | 2849.0 (2765.3 to 2931.1) | 1832.6 (1777.1 to 1888.5)  | 639.0 (591.6 to 687.8)        | 377.4 (341.3 to 414.8)          | 0.0 (0.0 to 0.0)                  |
| Israel  | 2023 | 3054.6 (2959.7 to 3144.0)  | 1964.9 (1904.1 to 2025.1)  | 683.6 (630.9 to 737.9)        | 406.0 (367.6 to 446.6)          | 0.0 (0.0 to 0.0)                  | 2877.0 (2787.6 to 2961.2) | 1850.7 (1793.3 to 1907.4)  | 643.9 (594.2 to 694.9)        | 382.4 (346.2 to 420.6)          | 0.0 (0.0 to 0.0)                  |
| Israel  | 2024 | 3082.9 (2990.8 to 3179.5)  | 1982.8 (1920.4 to 2044.5)  | 688.9 (634.6 to 746.9)        | 411.3 (371.7 to 453.1)          | 0.0 (0.0 to 0.0)                  | 2903.6 (2816.8 to 2994.6) | 1867.5 (1808.8 to 1925.6)  | 648.8 (597.7 to 703.5)        | 387.3 (350.1 to 426.7)          | 0.0 (0.0 to 0.0)                  |
| Israel  | 2025 | 3115.3 (3014.6 to 3209.9)  | 2003.6 (1938.9 to 2067.9)  | 694.5 (636.2 to 751.2)        | 417.1 (376.7 to 459.4)          | 0.0 (0.0 to 0.0)                  | 2934.1 (2839.3 to 3023.2) | 1887.1 (1826.1 to 1947.6)  | 654.2 (599.2 to 707.5)        | 392.8 (354.8 to 432.7)          | 0.0 (0.0 to 0.0)                  |
| Israel  | 2026 | 3146.6 (3049.0 to 3242.6)  | 2023.4 (1957.2 to 2092.1)  | 700.3 (637.5 to 761.4)        | 422.9 (381.2 to 466.3)          | 0.0 (0.0 to 0.0)                  | 2963.6 (2871.7 to 3054.0) | 1905.7 (1843.4 to 1970.4)  | 659.6 (600.4 to 717.1)        | 398.3 (359.1 to 439.2)          | 0.0 (0.0 to 0.0)                  |
| Israel  | 2027 | 3181.8 (3072.7 to 3287.7)  | 2045.8 (1974.6 to 2119.3)  | 706.6 (637.9 to 773.3)        | 429.4 (386.6 to 474.0)          | 0.0 (0.0 to 0.0)                  | 2996.8 (2894.0 to 3096.5) | 1926.8 (1859.8 to 1996.1)  | 665.5 (600.8 to 728.3)        | 404.4 (364.2 to 446.4)          | 0.0 (0.0 to 0.0)                  |
| Israel  | 2028 | 3221.0 (3106.7 to 3332.5)  | 2071.0 (1995.6 to 2149.3)  | 713.6 (641.7 to 787.2)        | 436.5 (392.9 to 482.3)          | 0.0 (0.0 to 0.0)                  | 3033.7 (2926.0 to 3138.7) | 1950.6 (1879.6 to 2024.3)  | 672.1 (604.4 to 741.4)        | 411.1 (370.1 to 454.3)          | 0.0 (0.0 to 0.0)                  |
| Israel  | 2029 | 3264.0 (3133.6 to 3387.9)  | 2098.9 (2017.2 to 2184.4)  | 721.1 (641.2 to 805.6)        | 444.0 (399.3 to 490.3)          | 0.0 (0.0 to 0.0)                  | 3074.2 (2951.4 to 3190.8) | 1976.8 (1899.9 to 2057.4)  | 679.1 (603.9 to 758.7)        | 418.2 (376.0 to 461.8)          | 0.0 (0.0 to 0.0)                  |

| Country | Year | 2018 US Dollars per capita |                            |                               |                                 |                                   | 2018 PPP per capita       |                            |                               |                                 |                                   |
|---------|------|----------------------------|----------------------------|-------------------------------|---------------------------------|-----------------------------------|---------------------------|----------------------------|-------------------------------|---------------------------------|-----------------------------------|
|         |      | Health spending            | Government health spending | Out-of-pocket health spending | Prepaid private health spending | Development assistance for health | Health spending           | Government health spending | Out-of-pocket health spending | Prepaid private health spending | Development assistance for health |
| Israel  | 2030 | 3308.4 (3168.7 to 3442.2)  | 2127.6 (2039.6 to 2219.2)  | 729.0 (643.0 to 823.5)        | 451.8 (406.3 to 499.4)          | 0.0 (0.0 to 0.0)                  | 3116.0 (2984.4 to 3242.0) | 2003.9 (1921.0 to 2090.1)  | 686.6 (605.6 to 775.7)        | 425.5 (382.7 to 470.4)          | 0.0 (0.0 to 0.0)                  |
| Israel  | 2031 | 3353.6 (3209.6 to 3500.5)  | 2156.3 (2063.0 to 2257.6)  | 737.3 (643.1 to 842.9)        | 459.9 (413.7 to 509.2)          | 0.0 (0.0 to 0.0)                  | 3158.5 (3022.9 to 3297.0) | 2030.9 (1943.0 to 2126.3)  | 694.4 (605.7 to 793.8)        | 433.2 (389.6 to 479.6)          | 0.0 (0.0 to 0.0)                  |
| Israel  | 2032 | 3401.6 (3245.3 to 3554.6)  | 2186.8 (2086.9 to 2295.7)  | 746.2 (646.9 to 860.2)        | 468.5 (421.4 to 519.9)          | 0.0 (0.0 to 0.0)                  | 3203.8 (3056.5 to 3347.9) | 2059.6 (1965.5 to 2162.2)  | 702.8 (609.3 to 810.1)        | 441.3 (396.9 to 489.7)          | 0.0 (0.0 to 0.0)                  |
| Israel  | 2033 | 3449.8 (3281.8 to 3619.9)  | 2217.2 (2110.5 to 2333.2)  | 755.4 (648.5 to 876.2)        | 477.2 (429.2 to 529.4)          | 0.0 (0.0 to 0.0)                  | 3249.2 (3091.0 to 3409.3) | 2088.2 (1987.8 to 2197.5)  | 711.5 (610.8 to 825.2)        | 449.5 (404.3 to 498.6)          | 0.0 (0.0 to 0.0)                  |
| Israel  | 2034 | 3500.0 (3319.4 to 3693.3)  | 2249.2 (2133.3 to 2373.8)  | 764.8 (649.6 to 895.1)        | 486.0 (436.4 to 539.7)          | 0.0 (0.0 to 0.0)                  | 3296.5 (3126.3 to 3478.5) | 2118.4 (2009.2 to 2235.8)  | 720.4 (611.9 to 843.1)        | 457.7 (411.0 to 508.4)          | 0.0 (0.0 to 0.0)                  |
| Israel  | 2035 | 3551.8 (3358.2 to 3740.6)  | 2282.6 (2160.5 to 2416.0)  | 774.4 (653.8 to 913.0)        | 494.8 (442.8 to 550.1)          | 0.0 (0.0 to 0.0)                  | 3345.2 (3162.9 to 3523.1) | 2149.8 (2034.9 to 2275.5)  | 729.4 (615.8 to 859.9)        | 466.0 (417.0 to 518.1)          | 0.0 (0.0 to 0.0)                  |
| Israel  | 2036 | 3600.4 (3395.6 to 3809.5)  | 2313.0 (2180.9 to 2453.3)  | 784.1 (656.2 to 930.0)        | 503.3 (448.9 to 561.3)          | 0.0 (0.0 to 0.0)                  | 3391.0 (3198.1 to 3588.0) | 2178.5 (2054.1 to 2310.6)  | 738.5 (618.0 to 875.9)        | 474.0 (422.8 to 528.6)          | 0.0 (0.0 to 0.0)                  |
| Israel  | 2037 | 3650.4 (3440.7 to 3869.9)  | 2344.6 (2202.6 to 2496.0)  | 793.9 (660.5 to 947.3)        | 511.9 (454.9 to 571.9)          | 0.0 (0.0 to 0.0)                  | 3438.1 (3240.6 to 3644.8) | 2208.2 (2074.5 to 2350.9)  | 747.7 (622.1 to 892.2)        | 482.1 (428.5 to 538.6)          | 0.0 (0.0 to 0.0)                  |
| Israel  | 2038 | 3700.5 (3475.4 to 3923.6)  | 2376.2 (2220.5 to 2536.2)  | 804.0 (665.4 to 965.0)        | 520.4 (461.4 to 581.1)          | 0.0 (0.0 to 0.0)                  | 3485.3 (3273.3 to 3695.5) | 2238.0 (2091.4 to 2388.7)  | 757.2 (626.7 to 908.9)        | 490.1 (434.6 to 547.3)          | 0.0 (0.0 to 0.0)                  |
| Israel  | 2039 | 3750.5 (3507.7 to 3994.4)  | 2407.7 (2239.6 to 2580.6)  | 814.1 (670.9 to 981.2)        | 528.7 (467.8 to 592.2)          | 0.0 (0.0 to 0.0)                  | 3532.4 (3303.8 to 3762.1) | 2267.7 (2109.4 to 2430.6)  | 766.8 (631.9 to 924.2)        | 498.0 (440.6 to 557.7)          | 0.0 (0.0 to 0.0)                  |
| Israel  | 2040 | 3802.4 (3561.9 to 4061.5)  | 2440.5 (2264.3 to 2623.7)  | 824.6 (676.6 to 997.1)        | 537.3 (473.2 to 602.8)          | 0.0 (0.0 to 0.0)                  | 3581.3 (3354.8 to 3825.4) | 2298.6 (2132.7 to 2471.2)  | 776.6 (637.2 to 939.1)        | 506.0 (445.7 to 567.7)          | 0.0 (0.0 to 0.0)                  |
| Israel  | 2041 | 3852.9 (3599.4 to 4142.8)  | 2471.7 (2285.2 to 2667.5)  | 835.3 (681.2 to 1012.6)       | 545.8 (479.7 to 613.0)          | 0.0 (0.0 to 0.0)                  | 3628.8 (3390.1 to 3901.9) | 2328.0 (2152.3 to 2512.4)  | 786.7 (641.6 to 953.7)        | 514.1 (451.8 to 577.3)          | 0.0 (0.0 to 0.0)                  |
| Israel  | 2042 | 3902.5 (3640.0 to 4182.9)  | 2501.9 (2305.1 to 2708.2)  | 846.3 (686.5 to 1027.6)       | 554.3 (486.0 to 625.4)          | 0.0 (0.0 to 0.0)                  | 3675.6 (3428.4 to 3939.6) | 2356.4 (2171.1 to 2550.7)  | 797.1 (646.6 to 967.9)        | 522.1 (457.8 to 589.0)          | 0.0 (0.0 to 0.0)                  |
| Israel  | 2043 | 3953.5 (3693.3 to 4240.5)  | 2532.9 (2329.4 to 2749.0)  | 857.6 (693.7 to 1044.2)       | 563.0 (492.7 to 637.4)          | 0.0 (0.0 to 0.0)                  | 3723.6 (3478.5 to 3993.9) | 2385.6 (2193.9 to 2589.1)  | 807.7 (653.4 to 983.5)        | 530.3 (464.0 to 600.3)          | 0.0 (0.0 to 0.0)                  |
| Israel  | 2044 | 4006.6 (3725.7 to 4318.5)  | 2565.4 (2354.2 to 2794.5)  | 869.3 (702.3 to 1061.5)       | 571.9 (499.0 to 648.4)          | 0.0 (0.0 to 0.0)                  | 3773.6 (3509.1 to 4067.4) | 2416.2 (2217.3 to 2632.0)  | 818.7 (661.5 to 999.8)        | 538.7 (470.0 to 610.7)          | 0.0 (0.0 to 0.0)                  |
| Israel  | 2045 | 4057.3 (3769.6 to 4363.0)  | 2595.3 (2374.0 to 2841.5)  | 881.3 (711.3 to 1078.7)       | 580.7 (505.3 to 660.9)          | 0.0 (0.0 to 0.0)                  | 3821.4 (3550.4 to 4109.3) | 2444.4 (2235.9 to 2676.3)  | 830.0 (669.9 to 1016.0)       | 546.9 (475.9 to 622.5)          | 0.0 (0.0 to 0.0)                  |
| Israel  | 2046 | 4105.2 (3809.8 to 4435.6)  | 2622.2 (2390.4 to 2878.5)  | 893.6 (720.0 to 1095.0)       | 589.4 (511.3 to 673.4)          | 0.0 (0.0 to 0.0)                  | 3866.5 (3588.2 to 4177.6) | 2469.7 (2251.4 to 2711.1)  | 841.6 (678.2 to 1031.4)       | 555.2 (481.6 to 634.3)          | 0.0 (0.0 to 0.0)                  |
| Israel  | 2047 | 4153.9 (3843.9 to 4501.3)  | 2649.1 (2410.5 to 2912.1)  | 906.4 (730.0 to 1113.1)       | 598.4 (517.4 to 686.3)          | 0.0 (0.0 to 0.0)                  | 3912.4 (3620.4 to 4239.5) | 2495.1 (2270.3 to 2742.8)  | 853.7 (687.5 to 1048.3)       | 563.6 (487.3 to 646.4)          | 0.0 (0.0 to 0.0)                  |
| Israel  | 2048 | 4201.7 (3886.0 to 4551.9)  | 2674.8 (2428.5 to 2947.4)  | 919.3 (740.7 to 1129.5)       | 607.5 (523.5 to 699.3)          | 0.0 (0.0 to 0.0)                  | 3957.4 (3660.0 to 4287.2) | 2519.3 (2287.3 to 2776.0)  | 865.9 (697.6 to 1063.9)       | 572.2 (493.0 to 658.6)          | 0.0 (0.0 to 0.0)                  |
| Israel  | 2049 | 4248.8 (3908.7 to 4614.9)  | 2699.8 (2439.2 to 2984.2)  | 932.4 (751.5 to 1146.1)       | 616.6 (529.6 to 710.7)          | 0.0 (0.0 to 0.0)                  | 4001.7 (3681.4 to 4346.5) | 2542.8 (2297.3 to 2810.7)  | 878.2 (707.8 to 1079.4)       | 580.7 (498.8 to 669.4)          | 0.0 (0.0 to 0.0)                  |
| Israel  | 2050 | 4295.5 (3948.1 to 4670.6)  | 2724.3 (2454.8 to 3025.7)  | 945.6 (762.4 to 1162.8)       | 625.6 (536.4 to 723.1)          | 0.0 (0.0 to 0.0)                  | 4045.7 (3718.5 to 4399.0) | 2565.9 (2312.0 to 2849.7)  | 890.6 (718.0 to 1095.2)       | 589.2 (505.2 to 681.0)          | 0.0 (0.0 to 0.0)                  |

| Country | Year | 2018 US Dollars per capita |                            |                               |                                 |                                   | 2018 PPP per capita       |                            |                               |                                 |                                   |
|---------|------|----------------------------|----------------------------|-------------------------------|---------------------------------|-----------------------------------|---------------------------|----------------------------|-------------------------------|---------------------------------|-----------------------------------|
|         |      | Health spending            | Government health spending | Out-of-pocket health spending | Prepaid private health spending | Development assistance for health | Health spending           | Government health spending | Out-of-pocket health spending | Prepaid private health spending | Development assistance for health |
| Italy   | 1995 | 2282.6 (2205.4 to 2375.7)  | 1635.1 (1568.3 to 1708.1)  | 621.9 (579.0 to 667.7)        | 25.6 (15.9 to 40.1)             | 0.0 (0.0 to 0.0)                  | 2583.3 (2495.9 to 2688.7) | 1850.5 (1774.9 to 1933.1)  | 703.8 (655.3 to 755.7)        | 29.0 (18.0 to 45.4)             | 0.0 (0.0 to 0.0)                  |
| Italy   | 1996 | 2344.6 (2282.3 to 2411.6)  | 1675.0 (1623.3 to 1724.8)  | 643.2 (611.4 to 677.6)        | 26.4 (16.8 to 40.3)             | 0.0 (0.0 to 0.0)                  | 2653.5 (2582.9 to 2729.3) | 1895.7 (1837.2 to 1952.0)  | 727.9 (691.9 to 766.9)        | 29.9 (19.0 to 45.6)             | 0.0 (0.0 to 0.0)                  |
| Italy   | 1997 | 2437.4 (2378.7 to 2498.1)  | 1736.4 (1685.7 to 1784.3)  | 674.1 (641.3 to 707.7)        | 26.9 (17.8 to 39.8)             | 0.0 (0.0 to 0.0)                  | 2758.5 (2692.1 to 2827.2) | 1965.1 (1907.8 to 2019.4)  | 762.9 (725.7 to 801.0)        | 30.4 (20.1 to 45.0)             | 0.0 (0.0 to 0.0)                  |
| Italy   | 1998 | 2524.3 (2466.7 to 2590.1)  | 1797.1 (1747.3 to 1846.7)  | 700.7 (669.9 to 732.7)        | 26.6 (17.9 to 38.1)             | 0.0 (0.0 to 0.0)                  | 2856.8 (2791.6 to 2931.3) | 2033.8 (1977.5 to 2090.0)  | 793.0 (758.2 to 829.2)        | 30.1 (20.3 to 43.1)             | 0.0 (0.0 to 0.0)                  |
| Italy   | 1999 | 2605.1 (2549.3 to 2671.2)  | 1865.8 (1816.9 to 1916.2)  | 712.9 (683.4 to 743.0)        | 26.4 (18.4 to 36.9)             | 0.0 (0.0 to 0.0)                  | 2948.3 (2885.2 to 3023.2) | 2111.6 (2056.3 to 2168.6)  | 806.8 (773.5 to 840.9)        | 29.9 (20.8 to 41.7)             | 0.0 (0.0 to 0.0)                  |
| Italy   | 2000 | 2742.3 (2688.0 to 2794.7)  | 1995.8 (1949.7 to 2044.9)  | 720.2 (691.9 to 748.0)        | 26.3 (18.9 to 35.7)             | 0.0 (0.0 to 0.0)                  | 3103.6 (3042.1 to 3162.9) | 2258.7 (2206.6 to 2314.3)  | 815.1 (783.0 to 846.6)        | 29.8 (21.4 to 40.4)             | 0.0 (0.0 to 0.0)                  |
| Italy   | 2001 | 2852.5 (2800.0 to 2906.4)  | 2113.4 (2065.5 to 2160.4)  | 712.3 (685.5 to 739.3)        | 26.8 (19.3 to 36.5)             | 0.0 (0.0 to 0.0)                  | 3228.3 (3168.9 to 3289.3) | 2391.9 (2337.6 to 2445.1)  | 806.1 (775.8 to 836.7)        | 30.3 (21.9 to 41.3)             | 0.0 (0.0 to 0.0)                  |
| Italy   | 2002 | 2887.3 (2830.6 to 2943.9)  | 2162.3 (2114.3 to 2209.2)  | 698.0 (672.3 to 723.7)        | 27.0 (19.3 to 36.5)             | 0.0 (0.0 to 0.0)                  | 3267.6 (3203.5 to 3331.7) | 2447.2 (2392.9 to 2500.3)  | 790.0 (760.8 to 819.1)        | 30.5 (21.8 to 41.3)             | 0.0 (0.0 to 0.0)                  |
| Italy   | 2003 | 2919.2 (2863.2 to 2979.2)  | 2207.1 (2158.0 to 2257.6)  | 684.8 (660.5 to 711.6)        | 27.3 (19.7 to 37.1)             | 0.0 (0.0 to 0.0)                  | 3303.7 (3240.4 to 3371.7) | 2497.8 (2442.3 to 2555.0)  | 775.0 (747.5 to 805.4)        | 30.9 (22.2 to 41.9)             | 0.0 (0.0 to 0.0)                  |
| Italy   | 2004 | 3007.4 (2946.5 to 3059.8)  | 2298.3 (2247.4 to 2345.3)  | 681.0 (656.1 to 705.4)        | 28.0 (20.5 to 38.0)             | 0.0 (0.0 to 0.0)                  | 3403.6 (3334.6 to 3463.0) | 2601.1 (2543.5 to 2654.3)  | 770.8 (742.6 to 798.3)        | 31.7 (23.2 to 43.0)             | 0.0 (0.0 to 0.0)                  |
| Italy   | 2005 | 3065.3 (3010.7 to 3123.5)  | 2364.7 (2316.0 to 2415.2)  | 671.9 (645.9 to 697.5)        | 28.7 (21.1 to 38.4)             | 0.0 (0.0 to 0.0)                  | 3469.1 (3407.3 to 3535.0) | 2676.2 (2621.1 to 2733.4)  | 760.4 (731.0 to 789.4)        | 32.5 (23.8 to 43.5)             | 0.0 (0.0 to 0.0)                  |
| Italy   | 2006 | 3124.3 (3070.2 to 3180.8)  | 2423.9 (2372.5 to 2476.4)  | 670.5 (646.1 to 696.2)        | 29.9 (21.6 to 40.0)             | 0.0 (0.0 to 0.0)                  | 3535.9 (3474.7 to 3599.8) | 2743.2 (2685.0 to 2802.6)  | 758.8 (731.2 to 787.9)        | 33.8 (24.4 to 45.3)             | 0.0 (0.0 to 0.0)                  |
| Italy   | 2007 | 3145.9 (3090.5 to 3203.2)  | 2447.5 (2396.2 to 2496.1)  | 667.4 (643.9 to 694.5)        | 31.1 (22.7 to 41.4)             | 0.0 (0.0 to 0.0)                  | 3560.4 (3497.7 to 3625.2) | 2770.0 (2711.8 to 2825.0)  | 755.3 (728.8 to 786.0)        | 35.1 (25.7 to 46.9)             | 0.0 (0.0 to 0.0)                  |
| Italy   | 2008 | 3168.5 (3107.5 to 3228.3)  | 2469.9 (2419.3 to 2520.3)  | 666.2 (641.8 to 690.9)        | 32.4 (23.7 to 43.7)             | 0.0 (0.0 to 0.0)                  | 3585.9 (3516.9 to 3653.6) | 2795.2 (2738.0 to 2852.3)  | 754.0 (726.4 to 781.9)        | 36.7 (26.9 to 49.4)             | 0.0 (0.0 to 0.0)                  |
| Italy   | 2009 | 3102.4 (3044.2 to 3161.1)  | 2418.3 (2368.6 to 2466.2)  | 650.6 (626.1 to 675.1)        | 33.5 (24.7 to 44.4)             | 0.0 (0.0 to 0.0)                  | 3511.2 (3445.2 to 3577.5) | 2736.8 (2680.7 to 2791.1)  | 736.4 (708.6 to 764.0)        | 38.0 (28.0 to 50.3)             | 0.0 (0.0 to 0.0)                  |
| Italy   | 2010 | 3135.0 (3079.7 to 3191.0)  | 2441.8 (2391.9 to 2491.1)  | 656.8 (633.7 to 680.2)        | 36.4 (26.7 to 48.0)             | 0.0 (0.0 to 0.0)                  | 3548.0 (3485.5 to 3611.4) | 2763.5 (2707.0 to 2819.3)  | 743.3 (717.2 to 769.8)        | 41.2 (30.2 to 54.3)             | 0.0 (0.0 to 0.0)                  |
| Italy   | 2011 | 3123.6 (3069.8 to 3181.0)  | 2414.2 (2365.0 to 2466.4)  | 667.8 (644.5 to 693.0)        | 41.6 (30.8 to 54.0)             | 0.0 (0.0 to 0.0)                  | 3535.1 (3474.2 to 3600.1) | 2732.2 (2676.5 to 2791.3)  | 755.8 (729.4 to 784.3)        | 47.1 (34.9 to 61.1)             | 0.0 (0.0 to 0.0)                  |
| Italy   | 2012 | 3058.5 (3001.6 to 3119.1)  | 2338.9 (2288.8 to 2389.4)  | 665.5 (641.7 to 690.0)        | 54.1 (41.1 to 69.4)             | 0.0 (0.0 to 0.0)                  | 3461.5 (3397.0 to 3530.1) | 2647.0 (2590.3 to 2704.2)  | 753.1 (726.2 to 780.9)        | 61.3 (46.6 to 78.5)             | 0.0 (0.0 to 0.0)                  |
| Italy   | 2013 | 3011.3 (2952.3 to 3066.4)  | 2286.4 (2238.2 to 2333.4)  | 663.1 (637.4 to 688.7)        | 61.9 (47.3 to 79.1)             | 0.0 (0.0 to 0.0)                  | 3408.0 (3341.2 to 3470.3) | 2587.6 (2533.0 to 2640.9)  | 750.4 (721.4 to 779.4)        | 70.0 (53.5 to 89.5)             | 0.0 (0.0 to 0.0)                  |
| Italy   | 2014 | 3011.2 (2954.3 to 3066.8)  | 2270.1 (2222.2 to 2319.0)  | 673.8 (647.6 to 699.3)        | 67.2 (52.5 to 86.7)             | 0.0 (0.0 to 0.0)                  | 3407.9 (3343.5 to 3470.9) | 2569.2 (2514.9 to 2624.5)  | 762.6 (732.9 to 791.4)        | 76.1 (59.4 to 98.1)             | 0.0 (0.0 to 0.0)                  |
| Italy   | 2015 | 3042.3 (2978.8 to 3103.6)  | 2275.9 (2224.4 to 2326.2)  | 695.0 (669.0 to 721.8)        | 71.5 (53.8 to 93.0)             | 0.0 (0.0 to 0.0)                  | 3443.1 (3371.3 to 3512.5) | 2575.8 (2517.5 to 2632.7)  | 786.5 (757.1 to 816.9)        | 80.9 (60.9 to 105.3)            | 0.0 (0.0 to 0.0)                  |

| Country | Year | 2018 US Dollars per capita |                            |                               |                                 |                                   | 2018 PPP per capita       |                            |                               |                                 |                                   |
|---------|------|----------------------------|----------------------------|-------------------------------|---------------------------------|-----------------------------------|---------------------------|----------------------------|-------------------------------|---------------------------------|-----------------------------------|
|         |      | Health spending            | Government health spending | Out-of-pocket health spending | Prepaid private health spending | Development assistance for health | Health spending           | Government health spending | Out-of-pocket health spending | Prepaid private health spending | Development assistance for health |
| Italy   | 2016 | 3058.9 (2976.0 to 3140.8)  | 2276.9 (2208.3 to 2340.4)  | 707.3 (670.1 to 741.5)        | 74.6 (53.5 to 100.3)            | 0.0 (0.0 to 0.0)                  | 3461.9 (3368.0 to 3554.6) | 2576.9 (2499.3 to 2648.8)  | 800.5 (758.4 to 839.2)        | 84.4 (60.5 to 113.5)            | 0.0 (0.0 to 0.0)                  |
| Italy   | 2017 | 3089.1 (3004.9 to 3171.5)  | 2298.6 (2225.9 to 2366.6)  | 714.8 (677.7 to 750.2)        | 75.7 (54.1 to 101.9)            | 0.0 (0.0 to 0.0)                  | 3496.1 (3400.8 to 3589.3) | 2601.5 (2519.1 to 2678.4)  | 809.0 (767.0 to 849.1)        | 85.6 (61.2 to 115.3)            | 0.0 (0.0 to 0.0)                  |
| Italy   | 2018 | 3109.1 (3024.8 to 3198.1)  | 2315.6 (2242.8 to 2384.0)  | 717.1 (677.8 to 754.1)        | 76.5 (54.7 to 103.2)            | 0.0 (0.0 to 0.0)                  | 3518.7 (3423.3 to 3619.4) | 2620.6 (2538.2 to 2698.1)  | 811.5 (767.1 to 853.4)        | 86.5 (62.0 to 116.8)            | 0.0 (0.0 to 0.0)                  |
| Italy   | 2019 | 3128.9 (3045.7 to 3212.7)  | 2332.5 (2258.8 to 2402.6)  | 719.4 (677.9 to 758.4)        | 77.1 (55.4 to 103.9)            | 0.0 (0.0 to 0.0)                  | 3541.1 (3447.0 to 3636.0) | 2639.7 (2556.4 to 2719.1)  | 814.1 (767.2 to 858.3)        | 87.3 (62.7 to 117.6)            | 0.0 (0.0 to 0.0)                  |
| Italy   | 2020 | 3156.3 (3064.6 to 3244.8)  | 2355.4 (2281.1 to 2424.3)  | 722.9 (678.6 to 763.5)        | 77.9 (56.0 to 105.1)            | 0.0 (0.0 to 0.0)                  | 3572.1 (3468.3 to 3672.3) | 2665.7 (2581.6 to 2743.7)  | 818.2 (768.0 to 864.1)        | 88.2 (63.4 to 119.0)            | 0.0 (0.0 to 0.0)                  |
| Italy   | 2021 | 3180.6 (3088.8 to 3267.4)  | 2375.1 (2299.0 to 2448.4)  | 726.8 (682.9 to 770.0)        | 78.7 (56.6 to 105.7)            | 0.0 (0.0 to 0.0)                  | 3599.6 (3495.7 to 3697.9) | 2688.0 (2601.9 to 2771.0)  | 822.6 (772.8 to 871.5)        | 89.1 (64.0 to 119.7)            | 0.0 (0.0 to 0.0)                  |
| Italy   | 2022 | 3205.7 (3109.9 to 3293.9)  | 2395.5 (2315.3 to 2470.9)  | 730.7 (686.2 to 777.7)        | 79.5 (57.2 to 106.8)            | 0.0 (0.0 to 0.0)                  | 3628.1 (3519.6 to 3727.8) | 2711.1 (2620.4 to 2796.4)  | 827.0 (776.6 to 880.2)        | 90.0 (64.7 to 120.9)            | 0.0 (0.0 to 0.0)                  |
| Italy   | 2023 | 3222.1 (3116.6 to 3316.0)  | 2409.3 (2326.2 to 2488.2)  | 732.7 (689.1 to 781.5)        | 80.1 (57.5 to 107.8)            | 0.0 (0.0 to 0.0)                  | 3646.6 (3527.1 to 3752.9) | 2726.8 (2632.7 to 2816.0)  | 829.2 (779.9 to 884.4)        | 90.7 (65.1 to 122.0)            | 0.0 (0.0 to 0.0)                  |
| Italy   | 2024 | 3237.6 (3134.7 to 3335.3)  | 2422.6 (2336.8 to 2503.2)  | 734.4 (688.8 to 781.9)        | 80.7 (57.8 to 108.8)            | 0.0 (0.0 to 0.0)                  | 3664.2 (3547.6 to 3774.7) | 2741.8 (2644.6 to 2833.0)  | 831.1 (779.6 to 884.9)        | 91.3 (65.4 to 123.1)            | 0.0 (0.0 to 0.0)                  |
| Italy   | 2025 | 3252.7 (3147.6 to 3354.9)  | 2435.5 (2343.2 to 2523.2)  | 736.0 (688.6 to 785.1)        | 81.2 (58.4 to 109.6)            | 0.0 (0.0 to 0.0)                  | 3681.2 (3562.3 to 3796.9) | 2756.3 (2651.9 to 2855.6)  | 832.9 (779.3 to 888.6)        | 91.9 (66.1 to 124.1)            | 0.0 (0.0 to 0.0)                  |
| Italy   | 2026 | 3265.2 (3150.9 to 3375.2)  | 2446.3 (2345.2 to 2539.9)  | 737.3 (685.1 to 790.3)        | 81.7 (58.7 to 110.3)            | 0.0 (0.0 to 0.0)                  | 3695.4 (3566.0 to 3819.8) | 2768.5 (2654.2 to 2874.6)  | 834.5 (775.4 to 894.4)        | 92.4 (66.5 to 124.8)            | 0.0 (0.0 to 0.0)                  |
| Italy   | 2027 | 3278.1 (3152.0 to 3400.8)  | 2457.3 (2348.2 to 2564.2)  | 738.7 (680.9 to 799.4)        | 82.1 (59.0 to 110.7)            | 0.0 (0.0 to 0.0)                  | 3710.0 (3567.3 to 3848.8) | 2781.0 (2657.6 to 2902.0)  | 836.0 (770.6 to 904.8)        | 92.9 (66.8 to 125.3)            | 0.0 (0.0 to 0.0)                  |
| Italy   | 2028 | 3289.6 (3155.1 to 3426.6)  | 2466.8 (2349.3 to 2584.7)  | 740.2 (674.4 to 807.6)        | 82.5 (59.3 to 111.1)            | 0.0 (0.0 to 0.0)                  | 3722.9 (3570.8 to 3878.0) | 2791.8 (2658.8 to 2925.2)  | 837.7 (763.3 to 914.0)        | 93.4 (67.1 to 125.7)            | 0.0 (0.0 to 0.0)                  |
| Italy   | 2029 | 3300.6 (3161.0 to 3444.6)  | 2475.8 (2349.4 to 2606.0)  | 741.9 (669.7 to 816.8)        | 82.9 (59.6 to 111.4)            | 0.0 (0.0 to 0.0)                  | 3735.4 (3577.5 to 3898.5) | 2801.9 (2659.0 to 2949.3)  | 839.6 (757.9 to 924.4)        | 93.8 (67.4 to 126.1)            | 0.0 (0.0 to 0.0)                  |
| Italy   | 2030 | 3311.0 (3145.4 to 3478.3)  | 2484.0 (2348.7 to 2628.9)  | 743.8 (665.1 to 830.6)        | 83.2 (59.8 to 112.0)            | 0.0 (0.0 to 0.0)                  | 3747.2 (3559.8 to 3936.5) | 2811.3 (2658.1 to 2975.3)  | 841.8 (752.7 to 940.0)        | 94.2 (67.6 to 126.7)            | 0.0 (0.0 to 0.0)                  |
| Italy   | 2031 | 3320.1 (3152.3 to 3502.1)  | 2490.7 (2345.4 to 2650.5)  | 745.8 (659.5 to 843.5)        | 83.6 (59.9 to 112.2)            | 0.0 (0.0 to 0.0)                  | 3757.5 (3567.6 to 3963.5) | 2818.9 (2654.4 to 2999.7)  | 844.0 (746.4 to 954.6)        | 94.6 (67.8 to 127.0)            | 0.0 (0.0 to 0.0)                  |
| Italy   | 2032 | 3327.5 (3151.5 to 3526.2)  | 2495.9 (2343.1 to 2669.8)  | 747.8 (653.7 to 853.2)        | 83.8 (60.1 to 112.6)            | 0.0 (0.0 to 0.0)                  | 3765.9 (3566.7 to 3990.8) | 2824.7 (2651.7 to 3021.6)  | 846.3 (739.8 to 965.6)        | 94.9 (68.0 to 127.4)            | 0.0 (0.0 to 0.0)                  |
| Italy   | 2033 | 3335.0 (3144.2 to 3541.9)  | 2500.8 (2339.9 to 2684.3)  | 750.1 (650.1 to 862.4)        | 84.1 (60.2 to 112.6)            | 0.0 (0.0 to 0.0)                  | 3774.4 (3558.4 to 4008.5) | 2830.3 (2648.1 to 3037.9)  | 849.0 (735.7 to 976.0)        | 95.2 (68.1 to 127.5)            | 0.0 (0.0 to 0.0)                  |
| Italy   | 2034 | 3342.6 (3140.7 to 3581.2)  | 2505.6 (2333.9 to 2704.6)  | 752.7 (645.2 to 875.1)        | 84.3 (60.3 to 112.6)            | 0.0 (0.0 to 0.0)                  | 3783.0 (3554.5 to 4053.0) | 2835.7 (2641.4 to 3061.0)  | 851.9 (730.2 to 990.4)        | 95.4 (68.3 to 127.5)            | 0.0 (0.0 to 0.0)                  |
| Italy   | 2035 | 3348.9 (3135.5 to 3598.9)  | 2509.0 (2327.7 to 2722.8)  | 755.4 (641.1 to 889.6)        | 84.5 (60.4 to 112.5)            | 0.0 (0.0 to 0.0)                  | 3790.1 (3548.6 to 4073.1) | 2839.5 (2634.3 to 3081.5)  | 854.9 (725.5 to 1006.8)       | 95.7 (68.3 to 127.4)            | 0.0 (0.0 to 0.0)                  |
| Italy   | 2036 | 3355.2 (3131.7 to 3605.9)  | 2512.1 (2323.3 to 2738.1)  | 758.3 (640.1 to 900.9)        | 84.8 (60.4 to 112.6)            | 0.0 (0.0 to 0.0)                  | 3797.3 (3544.3 to 4080.9) | 2843.1 (2629.4 to 3098.8)  | 858.2 (724.4 to 1019.6)       | 95.9 (68.3 to 127.5)            | 0.0 (0.0 to 0.0)                  |

| Country | Year | 2018 US Dollars per capita |                            |                               |                                 |                                   | 2018 PPP per capita       |                            |                               |                                 |                                   |
|---------|------|----------------------------|----------------------------|-------------------------------|---------------------------------|-----------------------------------|---------------------------|----------------------------|-------------------------------|---------------------------------|-----------------------------------|
|         |      | Health spending            | Government health spending | Out-of-pocket health spending | Prepaid private health spending | Development assistance for health | Health spending           | Government health spending | Out-of-pocket health spending | Prepaid private health spending | Development assistance for health |
| Italy   | 2037 | 3362.2 (3132.1 to 3623.6)  | 2515.6 (2319.1 to 2754.4)  | 761.6 (638.3 to 910.6)        | 85.0 (60.4 to 112.9)            | 0.0 (0.0 to 0.0)                  | 3805.2 (3544.8 to 4101.0) | 2847.0 (2624.6 to 3117.2)  | 861.9 (722.4 to 1030.6)       | 96.2 (68.4 to 127.8)            | 0.0 (0.0 to 0.0)                  |
| Italy   | 2038 | 3370.6 (3118.5 to 3651.9)  | 2520.0 (2313.1 to 2771.0)  | 765.3 (637.7 to 921.0)        | 85.3 (60.5 to 113.4)            | 0.0 (0.0 to 0.0)                  | 3814.6 (3529.3 to 4133.0) | 2852.0 (2617.8 to 3136.0)  | 866.1 (721.7 to 1042.4)       | 96.5 (68.5 to 128.4)            | 0.0 (0.0 to 0.0)                  |
| Italy   | 2039 | 3379.3 (3110.5 to 3661.8)  | 2524.3 (2307.6 to 2780.2)  | 769.3 (638.1 to 931.6)        | 85.6 (60.8 to 114.5)            | 0.0 (0.0 to 0.0)                  | 3824.5 (3520.3 to 4144.3) | 2856.9 (2611.6 to 3146.4)  | 870.7 (722.1 to 1054.3)       | 96.9 (68.8 to 129.6)            | 0.0 (0.0 to 0.0)                  |
| Italy   | 2040 | 3390.4 (3113.0 to 3692.4)  | 2530.5 (2305.3 to 2798.3)  | 773.9 (639.3 to 941.1)        | 86.0 (61.1 to 115.0)            | 0.0 (0.0 to 0.0)                  | 3837.1 (3523.1 to 4178.9) | 2863.9 (2609.0 to 3167.0)  | 875.9 (723.6 to 1065.1)       | 97.3 (69.2 to 130.1)            | 0.0 (0.0 to 0.0)                  |
| Italy   | 2041 | 3402.4 (3116.6 to 3712.5)  | 2537.0 (2304.2 to 2812.4)  | 778.9 (641.5 to 951.1)        | 86.4 (61.5 to 115.6)            | 0.0 (0.0 to 0.0)                  | 3850.6 (3527.2 to 4201.6) | 2871.3 (2607.7 to 3182.9)  | 881.6 (726.0 to 1076.4)       | 97.8 (69.6 to 130.8)            | 0.0 (0.0 to 0.0)                  |
| Italy   | 2042 | 3417.2 (3127.0 to 3726.3)  | 2545.7 (2305.1 to 2824.9)  | 784.6 (644.6 to 961.5)        | 86.9 (61.9 to 116.6)            | 0.0 (0.0 to 0.0)                  | 3867.4 (3538.9 to 4217.2) | 2881.0 (2608.7 to 3197.1)  | 888.0 (729.6 to 1088.1)       | 98.4 (70.0 to 132.0)            | 0.0 (0.0 to 0.0)                  |
| Italy   | 2043 | 3433.5 (3143.2 to 3747.9)  | 2555.3 (2309.4 to 2835.7)  | 790.8 (647.8 to 970.4)        | 87.5 (62.3 to 117.6)            | 0.0 (0.0 to 0.0)                  | 3885.9 (3557.3 to 4241.7) | 2891.9 (2613.6 to 3209.3)  | 894.9 (733.2 to 1098.2)       | 99.0 (70.5 to 133.1)            | 0.0 (0.0 to 0.0)                  |
| Italy   | 2044 | 3453.1 (3159.4 to 3773.3)  | 2567.3 (2316.1 to 2843.2)  | 797.6 (651.7 to 979.3)        | 88.2 (62.7 to 118.4)            | 0.0 (0.0 to 0.0)                  | 3908.0 (3575.6 to 4270.4) | 2905.6 (2621.2 to 3217.8)  | 902.6 (737.6 to 1108.3)       | 99.8 (71.0 to 134.0)            | 0.0 (0.0 to 0.0)                  |
| Italy   | 2045 | 3472.8 (3177.8 to 3790.0)  | 2579.2 (2322.0 to 2858.5)  | 804.7 (656.3 to 987.0)        | 88.9 (63.2 to 119.1)            | 0.0 (0.0 to 0.0)                  | 3930.3 (3596.5 to 4289.3) | 2918.9 (2627.9 to 3235.0)  | 910.7 (742.8 to 1117.0)       | 100.6 (71.6 to 134.8)           | 0.0 (0.0 to 0.0)                  |
| Italy   | 2046 | 3494.9 (3179.4 to 3822.9)  | 2592.7 (2329.8 to 2871.7)  | 812.5 (663.3 to 996.4)        | 89.7 (63.9 to 120.4)            | 0.0 (0.0 to 0.0)                  | 3955.3 (3598.2 to 4326.6) | 2934.3 (2636.8 to 3250.0)  | 919.6 (750.7 to 1127.7)       | 101.5 (72.4 to 136.3)           | 0.0 (0.0 to 0.0)                  |
| Italy   | 2047 | 3519.5 (3205.1 to 3856.3)  | 2608.0 (2339.7 to 2889.0)  | 820.9 (671.0 to 1006.4)       | 90.6 (64.4 to 122.0)            | 0.0 (0.0 to 0.0)                  | 3983.2 (3627.3 to 4364.3) | 2951.6 (2647.9 to 3269.6)  | 929.1 (759.4 to 1139.0)       | 102.5 (72.8 to 138.0)           | 0.0 (0.0 to 0.0)                  |
| Italy   | 2048 | 3544.7 (3232.0 to 3879.3)  | 2623.8 (2354.5 to 2913.5)  | 829.5 (676.4 to 1017.5)       | 91.5 (65.0 to 123.5)            | 0.0 (0.0 to 0.0)                  | 4011.7 (3657.8 to 4390.4) | 2969.4 (2664.6 to 3297.3)  | 938.7 (765.5 to 1151.5)       | 103.5 (73.5 to 139.8)           | 0.0 (0.0 to 0.0)                  |
| Italy   | 2049 | 3571.0 (3239.5 to 3920.0)  | 2640.4 (2366.8 to 2936.7)  | 838.2 (682.2 to 1027.6)       | 92.4 (65.6 to 125.1)            | 0.0 (0.0 to 0.0)                  | 4041.5 (3666.2 to 4436.5) | 2988.3 (2678.6 to 3323.6)  | 948.6 (772.1 to 1163.0)       | 104.6 (74.3 to 141.6)           | 0.0 (0.0 to 0.0)                  |
| Italy   | 2050 | 3598.0 (3269.2 to 3964.3)  | 2657.6 (2382.3 to 2961.0)  | 847.1 (689.9 to 1036.7)       | 93.4 (66.4 to 126.7)            | 0.0 (0.0 to 0.0)                  | 4072.0 (3699.9 to 4486.6) | 3007.7 (2696.1 to 3351.1)  | 958.7 (780.8 to 1173.3)       | 105.7 (75.1 to 143.3)           | 0.0 (0.0 to 0.0)                  |
| Jamaica | 1995 | 246.7 (218.0 to 280.4)     | 137.0 (116.7 to 160.5)     | 60.1 (46.0 to 76.4)           | 35.4 (20.7 to 56.0)             | 14.2 (14.2 to 14.2)               | 447.3 (395.3 to 508.5)    | 248.5 (211.5 to 291.0)     | 109.0 (83.4 to 138.5)         | 64.2 (37.6 to 101.6)            | 25.7 (25.7 to 25.7)               |
| Jamaica | 1996 | 262.6 (233.1 to 296.1)     | 152.0 (131.5 to 176.2)     | 63.8 (49.7 to 79.1)           | 37.2 (22.5 to 56.8)             | 9.6 (9.6 to 9.6)                  | 476.1 (422.8 to 536.9)    | 275.6 (238.4 to 319.5)     | 115.7 (90.1 to 143.5)         | 67.5 (40.8 to 103.0)            | 17.4 (17.4 to 17.4)               |
| Jamaica | 1997 | 277.3 (245.8 to 309.1)     | 160.0 (140.7 to 183.4)     | 71.2 (56.3 to 88.0)           | 37.8 (23.9 to 56.6)             | 8.3 (8.3 to 8.3)                  | 502.9 (445.8 to 560.4)    | 290.1 (255.1 to 332.5)     | 129.1 (102.1 to 159.6)        | 68.6 (43.3 to 102.6)            | 15.0 (15.0 to 15.0)               |
| Jamaica | 1998 | 276.0 (247.2 to 307.7)     | 158.7 (140.0 to 181.0)     | 71.6 (56.7 to 88.2)           | 36.4 (22.7 to 53.7)             | 9.4 (9.4 to 9.4)                  | 500.5 (448.3 to 558.0)    | 287.8 (253.8 to 328.2)     | 129.8 (102.8 to 160.0)        | 65.9 (41.2 to 97.3)             | 17.0 (17.0 to 17.0)               |
| Jamaica | 1999 | 272.9 (244.7 to 303.6)     | 152.9 (135.2 to 174.4)     | 75.6 (60.5 to 93.2)           | 36.1 (23.0 to 53.0)             | 8.2 (8.2 to 8.2)                  | 494.9 (443.8 to 550.5)    | 277.3 (245.2 to 316.2)     | 137.2 (109.8 to 168.9)        | 65.4 (41.7 to 96.2)             | 15.0 (15.0 to 15.0)               |
| Jamaica | 2000 | 277.8 (249.3 to 308.3)     | 150.1 (132.3 to 170.9)     | 81.5 (66.4 to 99.3)           | 37.7 (24.6 to 54.7)             | 8.4 (8.4 to 8.4)                  | 503.8 (452.1 to 559.1)    | 272.2 (239.9 to 309.8)     | 147.8 (120.4 to 180.1)        | 68.4 (44.6 to 99.2)             | 15.3 (15.3 to 15.3)               |
| Jamaica | 2001 | 280.1 (252.6 to 310.1)     | 140.4 (123.9 to 158.3)     | 83.1 (67.8 to 101.7)          | 36.5 (23.6 to 52.5)             | 20.1 (20.1 to 20.1)               | 507.9 (458.1 to 562.3)    | 254.5 (224.7 to 287.0)     | 150.8 (123.0 to 184.4)        | 66.2 (42.8 to 95.2)             | 36.4 (36.4 to 36.4)               |

| Country | Year | 2018 US Dollars per capita |                            |                               |                                 |                                   | 2018 PPP per capita    |                            |                               |                                 |                                   |
|---------|------|----------------------------|----------------------------|-------------------------------|---------------------------------|-----------------------------------|------------------------|----------------------------|-------------------------------|---------------------------------|-----------------------------------|
|         |      | Health spending            | Government health spending | Out-of-pocket health spending | Prepaid private health spending | Development assistance for health | Health spending        | Government health spending | Out-of-pocket health spending | Prepaid private health spending | Development assistance for health |
| Jamaica | 2002 | 255.8 (228.7 to 284.9)     | 139.5 (122.7 to 158.7)     | 76.9 (62.4 to 94.5)           | 35.8 (23.5 to 51.5)             | 3.7 (3.7 to 3.7)                  | 463.9 (414.7 to 516.7) | 252.9 (222.6 to 287.7)     | 139.4 (113.1 to 171.4)        | 64.9 (42.6 to 93.3)             | 6.7 (6.7 to 6.7)                  |
| Jamaica | 2003 | 256.4 (228.5 to 285.8)     | 139.3 (122.2 to 158.3)     | 76.6 (62.9 to 94.1)           | 35.7 (23.4 to 51.9)             | 4.8 (4.8 to 4.8)                  | 465.0 (414.3 to 518.3) | 252.7 (221.7 to 287.0)     | 138.9 (114.0 to 170.7)        | 64.8 (42.4 to 94.1)             | 8.7 (8.7 to 8.7)                  |
| Jamaica | 2004 | 263.7 (236.2 to 293.8)     | 146.0 (128.5 to 165.9)     | 75.5 (62.6 to 92.4)           | 36.3 (23.8 to 53.2)             | 5.8 (5.8 to 5.8)                  | 478.1 (428.3 to 532.7) | 264.7 (233.0 to 300.8)     | 137.0 (113.5 to 167.6)        | 65.8 (43.2 to 96.4)             | 10.6 (10.6 to 10.6)               |
| Jamaica | 2005 | 256.0 (231.7 to 285.4)     | 141.1 (124.3 to 159.9)     | 74.2 (60.8 to 90.5)           | 34.7 (22.9 to 51.5)             | 5.9 (5.9 to 5.9)                  | 464.1 (420.1 to 517.5) | 255.8 (225.4 to 289.9)     | 134.6 (110.3 to 164.1)        | 63.0 (41.6 to 93.4)             | 10.7 (10.7 to 10.7)               |
| Jamaica | 2006 | 263.8 (238.4 to 293.5)     | 146.3 (129.1 to 166.1)     | 75.2 (61.1 to 91.8)           | 34.4 (22.4 to 50.5)             | 7.8 (7.8 to 7.8)                  | 478.3 (432.3 to 532.2) | 265.3 (234.1 to 301.1)     | 136.4 (110.8 to 166.5)        | 62.4 (40.7 to 91.6)             | 14.2 (14.2 to 14.2)               |
| Jamaica | 2007 | 275.3 (247.3 to 307.1)     | 153.3 (135.1 to 172.4)     | 79.9 (65.1 to 97.3)           | 34.6 (22.5 to 50.5)             | 7.4 (7.4 to 7.4)                  | 499.2 (448.4 to 556.8) | 278.0 (245.0 to 312.5)     | 145.0 (118.0 to 176.5)        | 62.8 (40.8 to 91.6)             | 13.5 (13.5 to 13.5)               |
| Jamaica | 2008 | 275.8 (247.5 to 307.2)     | 156.5 (137.7 to 177.4)     | 77.0 (63.0 to 92.9)           | 34.7 (22.6 to 50.9)             | 7.6 (7.6 to 7.6)                  | 500.1 (448.9 to 557.1) | 283.8 (249.8 to 321.8)     | 139.6 (114.3 to 168.4)        | 62.9 (41.0 to 92.3)             | 13.7 (13.7 to 13.7)               |
| Jamaica | 2009 | 264.7 (237.0 to 295.3)     | 154.1 (135.4 to 175.0)     | 70.8 (57.2 to 85.4)           | 33.3 (21.6 to 49.2)             | 6.5 (6.5 to 6.5)                  | 480.0 (429.7 to 535.5) | 279.4 (245.5 to 317.4)     | 128.4 (103.7 to 154.9)        | 60.4 (39.2 to 89.2)             | 11.8 (11.8 to 11.8)               |
| Jamaica | 2010 | 269.4 (242.7 to 298.3)     | 154.7 (137.4 to 174.7)     | 65.3 (53.2 to 79.5)           | 34.0 (21.9 to 50.1)             | 15.4 (15.4 to 15.4)               | 488.5 (440.1 to 540.9) | 280.6 (249.2 to 316.7)     | 118.4 (96.4 to 144.2)         | 61.7 (39.7 to 90.9)             | 27.9 (27.9 to 27.9)               |
| Jamaica | 2011 | 265.2 (239.8 to 295.7)     | 157.6 (139.7 to 178.5)     | 61.4 (49.8 to 75.2)           | 37.0 (23.6 to 54.7)             | 9.3 (9.3 to 9.3)                  | 480.9 (434.9 to 536.2) | 285.7 (253.4 to 323.8)     | 111.3 (90.4 to 136.3)         | 67.1 (42.8 to 99.1)             | 16.9 (16.9 to 16.9)               |
| Jamaica | 2012 | 262.9 (236.2 to 294.9)     | 157.3 (138.7 to 177.6)     | 57.9 (46.7 to 71.6)           | 42.0 (27.2 to 61.3)             | 5.7 (5.7 to 5.7)                  | 476.7 (428.3 to 534.7) | 285.3 (251.5 to 322.1)     | 105.0 (84.6 to 129.8)         | 76.2 (49.3 to 111.1)            | 10.3 (10.3 to 10.3)               |
| Jamaica | 2013 | 273.5 (246.4 to 307.7)     | 162.6 (143.2 to 183.7)     | 56.3 (44.9 to 69.8)           | 46.5 (30.0 to 67.4)             | 8.0 (8.0 to 8.0)                  | 496.0 (446.7 to 557.9) | 294.9 (259.6 to 333.1)     | 102.2 (81.4 to 126.5)         | 84.3 (54.5 to 122.2)            | 14.6 (14.6 to 14.6)               |
| Jamaica | 2014 | 277.9 (249.6 to 311.1)     | 166.5 (146.7 to 188.6)     | 57.8 (45.2 to 71.0)           | 48.5 (31.6 to 72.5)             | 5.1 (5.1 to 5.1)                  | 503.9 (452.6 to 564.2) | 301.9 (266.0 to 342.0)     | 104.9 (82.0 to 128.8)         | 87.9 (57.3 to 131.5)            | 9.3 (9.3 to 9.3)                  |
| Jamaica | 2015 | 294.0 (262.4 to 333.3)     | 178.0 (156.0 to 202.2)     | 60.1 (46.8 to 75.5)           | 51.5 (32.7 to 77.0)             | 4.4 (4.4 to 4.4)                  | 533.0 (475.9 to 604.4) | 322.7 (282.8 to 366.7)     | 109.0 (84.8 to 136.9)         | 93.3 (59.2 to 139.7)            | 8.0 (8.0 to 8.0)                  |
| Jamaica | 2016 | 314.1 (273.3 to 356.8)     | 188.2 (162.4 to 217.6)     | 66.0 (50.4 to 84.8)           | 54.4 (33.3 to 83.3)             | 5.5 (5.5 to 5.5)                  | 569.5 (495.6 to 647.1) | 341.3 (294.5 to 394.5)     | 119.6 (91.4 to 153.7)         | 98.7 (60.4 to 151.1)            | 9.9 (9.9 to 9.9)                  |
| Jamaica | 2017 | 323.6 (282.8 to 367.9)     | 194.5 (167.8 to 225.7)     | 66.4 (50.7 to 85.3)           | 54.7 (33.4 to 83.6)             | 7.9 (7.9 to 7.9)                  | 586.7 (512.7 to 667.2) | 352.7 (304.3 to 409.3)     | 120.4 (92.0 to 154.8)         | 99.3 (60.6 to 151.5)            | 14.4 (14.4 to 14.4)               |
| Jamaica | 2018 | 327.4 (284.9 to 371.3)     | 197.3 (169.8 to 228.5)     | 66.9 (51.0 to 86.1)           | 55.6 (33.9 to 85.0)             | 7.6 (7.6 to 7.6)                  | 593.7 (516.7 to 673.2) | 357.8 (307.9 to 414.3)     | 121.2 (92.4 to 156.1)         | 100.9 (61.5 to 154.2)           | 13.8 (13.8 to 13.8)               |
| Jamaica | 2019 | 331.8 (289.1 to 377.1)     | 200.3 (172.6 to 231.9)     | 67.3 (51.3 to 86.6)           | 56.4 (34.5 to 86.2)             | 7.8 (7.2 to 8.2)                  | 601.7 (524.2 to 683.9) | 363.2 (312.9 to 420.5)     | 122.0 (93.1 to 157.1)         | 102.3 (62.5 to 156.2)           | 14.1 (13.1 to 14.9)               |
| Jamaica | 2020 | 336.2 (292.7 to 380.8)     | 203.3 (175.0 to 235.0)     | 67.7 (51.6 to 87.3)           | 57.2 (35.0 to 87.4)             | 8.0 (7.3 to 8.6)                  | 609.7 (530.8 to 690.6) | 368.6 (317.2 to 426.2)     | 122.8 (93.6 to 158.3)         | 103.8 (63.5 to 158.5)           | 14.5 (13.3 to 15.6)               |
| Jamaica | 2021 | 340.7 (296.7 to 387.7)     | 206.3 (177.6 to 237.6)     | 68.2 (51.9 to 87.9)           | 58.1 (35.5 to 88.4)             | 8.2 (7.4 to 9.1)                  | 617.8 (538.0 to 703.0) | 374.0 (322.0 to 430.8)     | 123.6 (94.2 to 159.4)         | 105.3 (64.3 to 160.4)           | 14.9 (13.5 to 16.5)               |
| Jamaica | 2022 | 346.5 (301.0 to 393.5)     | 210.2 (181.1 to 242.6)     | 68.8 (52.5 to 88.7)           | 59.1 (36.0 to 90.2)             | 8.5 (7.6 to 9.5)                  | 628.4 (545.8 to 713.6) | 381.1 (328.5 to 439.8)     | 124.7 (95.2 to 160.8)         | 107.1 (65.2 to 163.6)           | 15.5 (13.7 to 17.3)               |



| Country | Year | 2018 US Dollars per capita |                            |                               |                                 |                                   | 2018 PPP per capita    |                            |                               |                                 |                                   |
|---------|------|----------------------------|----------------------------|-------------------------------|---------------------------------|-----------------------------------|------------------------|----------------------------|-------------------------------|---------------------------------|-----------------------------------|
|         |      | Health spending            | Government health spending | Out-of-pocket health spending | Prepaid private health spending | Development assistance for health | Health spending        | Government health spending | Out-of-pocket health spending | Prepaid private health spending | Development assistance for health |
| Jamaica | 2023 | 352.3 (307.1 to 400.5)     | 214.1 (184.4 to 247.1)     | 69.3 (52.9 to 89.4)           | 60.0 (36.7 to 92.0)             | 8.8 (7.7 to 10.0)                 | 638.8 (556.8 to 726.2) | 388.2 (334.4 to 448.1)     | 125.7 (95.9 to 162.1)         | 108.8 (66.5 to 166.7)           | 16.0 (13.9 to 18.2)               |
| Jamaica | 2024 | 357.1 (310.0 to 405.5)     | 217.5 (186.9 to 251.7)     | 69.7 (53.2 to 89.7)           | 60.8 (37.1 to 92.9)             | 9.2 (7.9 to 10.6)                 | 647.6 (562.2 to 735.2) | 394.4 (338.9 to 456.5)     | 126.3 (96.5 to 162.7)         | 110.3 (67.2 to 168.5)           | 16.6 (14.3 to 19.2)               |
| Jamaica | 2025 | 361.1 (314.1 to 410.9)     | 220.4 (188.8 to 255.0)     | 69.8 (53.2 to 89.9)           | 61.5 (37.4 to 93.9)             | 9.5 (8.1 to 11.1)                 | 654.8 (569.5 to 745.2) | 399.7 (342.3 to 462.3)     | 126.6 (96.5 to 163.0)         | 111.4 (67.8 to 170.2)           | 17.2 (14.6 to 20.2)               |
| Jamaica | 2026 | 365.7 (318.1 to 414.5)     | 223.7 (191.3 to 258.6)     | 70.0 (53.4 to 90.2)           | 62.2 (37.8 to 95.0)             | 9.8 (8.3 to 11.5)                 | 663.2 (576.7 to 751.6) | 405.7 (346.9 to 469.0)     | 127.0 (96.7 to 163.5)         | 112.8 (68.6 to 172.2)           | 17.8 (15.0 to 20.8)               |
| Jamaica | 2027 | 369.0 (320.1 to 421.6)     | 226.2 (193.0 to 260.9)     | 70.0 (53.3 to 90.2)           | 62.7 (38.1 to 95.9)             | 10.1 (8.5 to 12.1)                | 669.1 (580.4 to 764.4) | 410.1 (349.9 to 473.1)     | 126.9 (96.7 to 163.5)         | 113.7 (69.1 to 174.0)           | 18.4 (15.4 to 21.9)               |
| Jamaica | 2028 | 371.1 (321.4 to 421.4)     | 227.8 (193.8 to 263.4)     | 69.8 (53.1 to 89.7)           | 63.0 (38.3 to 96.5)             | 10.5 (8.8 to 12.7)                | 672.9 (582.8 to 764.2) | 413.0 (351.4 to 477.7)     | 126.5 (96.2 to 162.7)         | 114.2 (69.4 to 175.0)           | 19.1 (15.9 to 23.1)               |
| Jamaica | 2029 | 372.8 (323.0 to 425.1)     | 229.2 (194.8 to 266.0)     | 69.4 (52.8 to 89.1)           | 63.2 (38.4 to 97.0)             | 11.0 (9.0 to 13.4)                | 676.0 (585.6 to 770.8) | 415.6 (353.1 to 482.3)     | 125.9 (95.7 to 161.5)         | 114.6 (69.6 to 175.9)           | 19.9 (16.4 to 24.3)               |
| Jamaica | 2030 | 374.4 (323.7 to 425.7)     | 230.5 (195.3 to 267.9)     | 69.1 (52.5 to 88.5)           | 63.4 (38.5 to 97.5)             | 11.4 (9.3 to 14.0)                | 678.9 (587.0 to 771.9) | 418.0 (354.2 to 485.9)     | 125.3 (95.2 to 160.5)         | 115.0 (69.8 to 176.9)           | 20.7 (16.9 to 25.4)               |
| Jamaica | 2031 | 376.4 (325.5 to 428.7)     | 232.0 (196.0 to 270.5)     | 68.8 (52.3 to 88.2)           | 63.7 (38.6 to 98.2)             | 11.8 (9.6 to 14.9)                | 682.6 (590.2 to 777.3) | 420.7 (355.5 to 490.6)     | 124.8 (94.8 to 160.0)         | 115.6 (70.1 to 178.1)           | 21.5 (17.4 to 27.0)               |
| Jamaica | 2032 | 378.4 (329.2 to 431.4)     | 233.5 (196.7 to 272.7)     | 68.6 (52.0 to 87.9)           | 64.0 (38.8 to 98.8)             | 12.3 (9.9 to 15.5)                | 686.2 (596.9 to 782.3) | 423.3 (356.6 to 494.4)     | 124.4 (94.4 to 159.4)         | 116.1 (70.4 to 179.1)           | 22.4 (17.9 to 28.2)               |
| Jamaica | 2033 | 380.6 (329.2 to 435.5)     | 235.0 (197.3 to 273.6)     | 68.4 (51.9 to 87.7)           | 64.4 (39.0 to 99.1)             | 12.8 (10.2 to 16.5)               | 690.1 (597.0 to 789.8) | 426.1 (357.8 to 496.1)     | 124.1 (94.0 to 159.0)         | 116.7 (70.7 to 179.8)           | 23.3 (18.5 to 29.9)               |
| Jamaica | 2034 | 383.1 (333.0 to 437.2)     | 236.7 (198.1 to 276.3)     | 68.3 (51.7 to 87.5)           | 64.7 (39.2 to 99.6)             | 13.4 (10.5 to 17.2)               | 694.6 (603.9 to 792.7) | 429.2 (359.1 to 501.0)     | 123.8 (93.7 to 158.6)         | 117.4 (71.1 to 180.6)           | 24.2 (19.1 to 31.1)               |
| Jamaica | 2035 | 385.8 (332.4 to 441.0)     | 238.6 (199.2 to 278.5)     | 68.1 (51.6 to 87.3)           | 65.1 (39.4 to 100.4)            | 13.9 (10.8 to 18.2)               | 699.5 (602.8 to 799.6) | 432.6 (361.3 to 504.9)     | 123.5 (93.5 to 158.3)         | 118.1 (71.5 to 182.1)           | 25.3 (19.6 to 33.0)               |
| Jamaica | 2036 | 389.0 (337.0 to 445.0)     | 240.7 (200.7 to 281.4)     | 68.1 (51.5 to 87.3)           | 65.6 (39.7 to 101.4)            | 14.5 (11.2 to 19.5)               | 705.3 (611.1 to 806.8) | 436.5 (364.0 to 510.2)     | 123.5 (93.4 to 158.4)         | 119.0 (71.9 to 183.9)           | 26.3 (20.4 to 35.4)               |
| Jamaica | 2037 | 392.5 (337.2 to 450.2)     | 243.1 (202.5 to 284.9)     | 68.2 (51.6 to 87.4)           | 66.2 (40.0 to 102.4)            | 15.0 (11.6 to 20.2)               | 711.8 (611.4 to 816.3) | 440.8 (367.2 to 516.6)     | 123.6 (93.5 to 158.6)         | 120.1 (72.6 to 185.6)           | 27.3 (21.0 to 36.6)               |
| Jamaica | 2038 | 396.5 (341.8 to 453.9)     | 245.7 (204.8 to 288.3)     | 68.3 (51.7 to 87.6)           | 66.8 (40.4 to 103.2)            | 15.6 (11.9 to 21.6)               | 719.0 (619.8 to 823.1) | 445.6 (371.4 to 522.8)     | 123.8 (93.7 to 158.8)         | 121.2 (73.3 to 187.2)           | 28.4 (21.6 to 39.2)               |
| Jamaica | 2039 | 400.4 (342.7 to 461.4)     | 248.3 (206.6 to 292.1)     | 68.4 (51.7 to 87.7)           | 67.5 (40.8 to 104.4)            | 16.3 (12.4 to 22.4)               | 726.0 (621.5 to 836.7) | 450.2 (374.7 to 529.7)     | 124.0 (93.8 to 159.1)         | 122.3 (74.0 to 189.4)           | 29.5 (22.5 to 40.6)               |
| Jamaica | 2040 | 404.0 (348.8 to 464.2)     | 250.5 (208.1 to 295.3)     | 68.5 (51.8 to 87.8)           | 68.0 (41.1 to 105.4)            | 16.9 (12.9 to 23.3)               | 732.5 (632.5 to 841.8) | 454.3 (377.4 to 535.4)     | 124.1 (93.9 to 159.2)         | 123.4 (74.6 to 191.1)           | 30.7 (23.4 to 42.2)               |
| Jamaica | 2041 | 408.0 (348.6 to 470.3)     | 253.1 (209.6 to 298.8)     | 68.6 (51.9 to 88.0)           | 68.7 (41.4 to 106.4)            | 17.6 (13.3 to 24.5)               | 739.8 (632.2 to 852.9) | 458.9 (380.0 to 541.8)     | 124.4 (94.0 to 159.6)         | 124.6 (75.2 to 192.9)           | 32.0 (24.2 to 44.4)               |
| Jamaica | 2042 | 411.8 (354.7 to 473.4)     | 255.3 (210.8 to 302.6)     | 68.8 (51.9 to 88.2)           | 69.3 (41.8 to 107.3)            | 18.4 (13.8 to 26.3)               | 746.7 (643.2 to 858.5) | 463.0 (382.2 to 548.7)     | 124.7 (94.2 to 160.0)         | 125.7 (75.7 to 194.6)           | 33.3 (25.0 to 47.7)               |
| Jamaica | 2043 | 415.7 (354.9 to 480.4)     | 257.7 (212.4 to 306.3)     | 68.9 (51.9 to 88.4)           | 70.0 (42.1 to 108.3)            | 19.1 (14.3 to 27.9)               | 753.8 (643.6 to 871.1) | 467.3 (385.1 to 555.4)     | 124.9 (94.2 to 160.3)         | 126.9 (76.4 to 196.3)           | 34.7 (25.9 to 50.6)               |

| Country | Year | 2018 US Dollars per capita |                            |                               |                                 |                                   | 2018 PPP per capita       |                            |                               |                                 |                                   |
|---------|------|----------------------------|----------------------------|-------------------------------|---------------------------------|-----------------------------------|---------------------------|----------------------------|-------------------------------|---------------------------------|-----------------------------------|
|         |      | Health spending            | Government health spending | Out-of-pocket health spending | Prepaid private health spending | Development assistance for health | Health spending           | Government health spending | Out-of-pocket health spending | Prepaid private health spending | Development assistance for health |
| Jamaica | 2044 | 419.2 (360.0 to 482.7)     | 259.8 (213.6 to 309.5)     | 68.9 (51.9 to 88.4)           | 70.5 (42.4 to 109.1)            | 20.0 (14.8 to 29.0)               | 760.1 (652.8 to 875.3)    | 471.0 (387.3 to 561.3)     | 125.0 (94.1 to 160.3)         | 127.9 (76.9 to 197.8)           | 36.2 (26.8 to 52.6)               |
| Jamaica | 2045 | 422.7 (357.8 to 489.4)     | 261.8 (215.0 to 312.7)     | 68.9 (51.8 to 88.4)           | 71.1 (42.7 to 109.8)            | 20.9 (15.1 to 31.4)               | 766.5 (648.8 to 887.5)    | 474.8 (389.9 to 567.1)     | 125.0 (94.0 to 160.4)         | 128.9 (77.5 to 199.2)           | 37.9 (27.4 to 56.9)               |
| Jamaica | 2046 | 426.5 (366.5 to 492.6)     | 264.1 (216.8 to 315.7)     | 69.0 (51.8 to 88.5)           | 71.7 (43.1 to 110.7)            | 21.8 (15.7 to 33.2)               | 773.4 (664.6 to 893.2)    | 478.8 (393.1 to 572.5)     | 125.1 (94.0 to 160.6)         | 130.0 (78.2 to 200.8)           | 39.5 (28.5 to 60.2)               |
| Jamaica | 2047 | 430.6 (365.9 to 499.1)     | 266.5 (218.4 to 319.8)     | 69.0 (51.8 to 88.6)           | 72.3 (43.6 to 111.6)            | 22.8 (16.5 to 35.9)               | 780.9 (663.5 to 905.0)    | 483.3 (395.9 to 579.8)     | 125.2 (93.9 to 160.7)         | 131.1 (79.0 to 202.4)           | 41.3 (29.9 to 65.1)               |
| Jamaica | 2048 | 434.7 (372.2 to 503.3)     | 268.9 (219.7 to 323.3)     | 69.0 (51.8 to 88.7)           | 72.9 (44.0 to 112.6)            | 23.9 (17.1 to 37.9)               | 788.2 (675.0 to 912.7)    | 487.6 (398.3 to 586.3)     | 125.2 (93.9 to 160.8)         | 132.1 (79.7 to 204.2)           | 43.3 (31.1 to 68.7)               |
| Jamaica | 2049 | 438.6 (370.5 to 508.5)     | 271.2 (220.7 to 326.3)     | 69.0 (51.8 to 88.6)           | 73.4 (44.2 to 113.7)            | 25.0 (17.9 to 40.3)               | 795.3 (671.8 to 922.1)    | 491.7 (400.2 to 591.7)     | 125.1 (93.9 to 160.7)         | 133.1 (80.2 to 206.2)           | 45.3 (32.4 to 73.1)               |
| Jamaica | 2050 | 442.4 (377.6 to 513.4)     | 273.4 (221.5 to 329.9)     | 68.9 (51.7 to 88.5)           | 73.9 (44.4 to 114.8)            | 26.3 (18.6 to 43.0)               | 802.2 (684.6 to 931.0)    | 495.7 (401.6 to 598.2)     | 124.9 (93.7 to 160.4)         | 134.0 (80.6 to 208.1)           | 47.6 (33.7 to 78.0)               |
| Japan   | 1995 | 1873.8 (1782.1 to 1964.3)  | 1518.7 (1440.2 to 1601.0)  | 285.4 (256.7 to 313.9)        | 69.7 (49.4 to 95.5)             | 0.0 (0.0 to 0.0)                  | 2094.5 (1991.9 to 2195.6) | 1697.6 (1609.8 to 1789.5)  | 319.0 (286.9 to 350.9)        | 77.9 (55.2 to 106.8)            | 0.0 (0.0 to 0.0)                  |
| Japan   | 1996 | 1951.7 (1887.8 to 2025.0)  | 1579.4 (1518.8 to 1642.4)  | 300.4 (276.7 to 324.9)        | 72.0 (53.7 to 94.4)             | 0.0 (0.0 to 0.0)                  | 2181.6 (2110.1 to 2263.5) | 1765.4 (1697.7 to 1835.8)  | 335.8 (309.3 to 363.1)        | 80.5 (60.1 to 105.6)            | 0.0 (0.0 to 0.0)                  |
| Japan   | 1997 | 2038.2 (1977.5 to 2103.2)  | 1640.4 (1583.2 to 1697.8)  | 323.9 (302.9 to 346.0)        | 73.9 (57.5 to 95.3)             | 0.0 (0.0 to 0.0)                  | 2278.3 (2210.4 to 2350.9) | 1833.6 (1769.7 to 1897.7)  | 362.0 (338.6 to 386.7)        | 82.7 (64.3 to 106.5)            | 0.0 (0.0 to 0.0)                  |
| Japan   | 1998 | 2107.8 (2039.1 to 2172.2)  | 1688.8 (1628.3 to 1747.4)  | 343.4 (321.9 to 365.1)        | 75.7 (60.2 to 94.6)             | 0.0 (0.0 to 0.0)                  | 2356.1 (2279.2 to 2428.1) | 1887.7 (1820.0 to 1953.2)  | 383.8 (359.8 to 408.1)        | 84.6 (67.3 to 105.7)            | 0.0 (0.0 to 0.0)                  |
| Japan   | 1999 | 2215.5 (2146.2 to 2283.2)  | 1774.2 (1712.8 to 1836.2)  | 362.7 (342.3 to 385.1)        | 78.6 (64.0 to 95.7)             | 0.0 (0.0 to 0.0)                  | 2476.5 (2398.9 to 2552.1) | 1983.2 (1914.5 to 2052.5)  | 405.4 (382.6 to 430.4)        | 87.9 (71.5 to 107.0)            | 0.0 (0.0 to 0.0)                  |
| Japan   | 2000 | 2387.6 (2320.5 to 2457.5)  | 1919.6 (1855.5 to 1987.8)  | 384.2 (365.0 to 405.1)        | 83.7 (68.9 to 100.8)            | 0.0 (0.0 to 0.0)                  | 2668.8 (2593.8 to 2746.9) | 2145.7 (2074.0 to 2221.9)  | 429.5 (407.9 to 452.8)        | 93.6 (77.0 to 112.7)            | 0.0 (0.0 to 0.0)                  |
| Japan   | 2001 | 2490.9 (2425.5 to 2560.6)  | 2008.4 (1946.8 to 2072.4)  | 398.9 (380.0 to 418.6)        | 83.7 (70.0 to 99.7)             | 0.0 (0.0 to 0.0)                  | 2784.3 (2711.1 to 2862.2) | 2244.9 (2176.1 to 2316.5)  | 445.9 (424.8 to 468.0)        | 93.5 (78.3 to 111.4)            | 0.0 (0.0 to 0.0)                  |
| Japan   | 2002 | 2552.6 (2487.5 to 2621.2)  | 2056.3 (1997.6 to 2117.3)  | 413.1 (393.1 to 432.1)        | 83.2 (69.9 to 98.5)             | 0.0 (0.0 to 0.0)                  | 2853.2 (2780.5 to 2929.9) | 2298.4 (2232.8 to 2366.7)  | 461.7 (439.4 to 483.0)        | 93.0 (78.1 to 110.1)            | 0.0 (0.0 to 0.0)                  |
| Japan   | 2003 | 2620.8 (2554.1 to 2690.0)  | 2106.1 (2049.6 to 2167.7)  | 431.2 (410.5 to 450.2)        | 83.5 (70.4 to 98.7)             | 0.0 (0.0 to 0.0)                  | 2929.5 (2854.9 to 3006.8) | 2354.2 (2291.0 to 2423.0)  | 482.0 (458.8 to 503.2)        | 93.4 (78.7 to 110.3)            | 0.0 (0.0 to 0.0)                  |
| Japan   | 2004 | 2692.7 (2628.8 to 2758.5)  | 2165.7 (2101.6 to 2226.8)  | 441.7 (421.9 to 461.0)        | 85.3 (71.4 to 100.0)            | 0.0 (0.0 to 0.0)                  | 3009.9 (2938.4 to 3083.3) | 2420.8 (2349.1 to 2489.1)  | 493.7 (471.6 to 515.3)        | 95.4 (79.8 to 111.8)            | 0.0 (0.0 to 0.0)                  |
| Japan   | 2005 | 2754.0 (2682.9 to 2825.1)  | 2220.0 (2154.5 to 2281.7)  | 445.7 (425.7 to 465.4)        | 88.3 (74.2 to 103.7)            | 0.0 (0.0 to 0.0)                  | 3078.3 (2998.9 to 3157.8) | 2481.4 (2408.2 to 2550.4)  | 498.2 (475.9 to 520.2)        | 98.7 (82.9 to 115.9)            | 0.0 (0.0 to 0.0)                  |
| Japan   | 2006 | 2816.2 (2749.2 to 2887.6)  | 2270.7 (2206.8 to 2331.2)  | 453.2 (432.0 to 473.3)        | 92.3 (77.3 to 107.8)            | 0.0 (0.0 to 0.0)                  | 3147.9 (3073.0 to 3227.7) | 2538.2 (2466.8 to 2605.7)  | 506.5 (482.9 to 529.0)        | 103.2 (86.4 to 120.5)           | 0.0 (0.0 to 0.0)                  |
| Japan   | 2007 | 2911.9 (2844.0 to 2977.8)  | 2357.8 (2296.3 to 2421.8)  | 456.4 (436.9 to 475.6)        | 97.6 (82.6 to 113.5)            | 0.0 (0.0 to 0.0)                  | 3254.8 (3179.0 to 3328.5) | 2635.5 (2566.8 to 2707.0)  | 510.2 (488.4 to 531.6)        | 109.1 (92.4 to 126.8)           | 0.0 (0.0 to 0.0)                  |
| Japan   | 2008 | 2999.7 (2930.7 to 3063.2)  | 2435.6 (2372.4 to 2496.4)  | 460.0 (441.3 to 481.1)        | 104.1 (89.2 to 121.0)           | 0.0 (0.0 to 0.0)                  | 3353.0 (3275.9 to 3424.0) | 2722.5 (2651.8 to 2790.4)  | 514.2 (493.2 to 537.8)        | 116.3 (99.7 to 135.2)           | 0.0 (0.0 to 0.0)                  |

|         |      | 2018 US Dollars per capita |                            |                               |                                 |                                   | 2018 PPP per capita       |                            |                               |                                 |                                   |
|---------|------|----------------------------|----------------------------|-------------------------------|---------------------------------|-----------------------------------|---------------------------|----------------------------|-------------------------------|---------------------------------|-----------------------------------|
| Country | Year | Health spending            | Government health spending | Out-of-pocket health spending | Prepaid private health spending | Development assistance for health | Health spending           | Government health spending | Out-of-pocket health spending | Prepaid private health spending | Development assistance for health |
| Japan   | 2009 | 3076.3 (3010.7 to 3144.4)  | 2506.6 (2444.7 to 2568.3)  | 462.6 (443.5 to 482.7)        | 107.1 (92.1 to 123.2)           | 0.0 (0.0 to 0.0)                  | 3438.6 (3365.3 to 3514.7) | 2801.8 (2732.7 to 2870.8)  | 517.1 (495.7 to 539.6)        | 119.7 (102.9 to 137.7)          | 0.0 (0.0 to 0.0)                  |
| Japan   | 2010 | 3396.8 (3324.7 to 3468.4)  | 2800.8 (2735.2 to 2867.6)  | 481.1 (461.3 to 502.3)        | 114.8 (99.1 to 132.3)           | 0.0 (0.0 to 0.0)                  | 3796.8 (3716.2 to 3876.9) | 3130.7 (3057.4 to 3205.4)  | 537.8 (515.7 to 561.5)        | 128.3 (110.8 to 147.9)          | 0.0 (0.0 to 0.0)                  |
| Japan   | 2011 | 3694.8 (3620.4 to 3766.3)  | 3079.6 (3014.5 to 3148.9)  | 495.3 (474.3 to 517.1)        | 119.9 (103.2 to 138.6)          | 0.0 (0.0 to 0.0)                  | 4129.9 (4046.8 to 4209.8) | 3442.3 (3369.5 to 3519.7)  | 553.6 (530.2 to 578.0)        | 134.1 (115.4 to 155.0)          | 0.0 (0.0 to 0.0)                  |
| Japan   | 2012 | 3915.7 (3839.2 to 3989.0)  | 3286.7 (3217.9 to 3354.9)  | 506.5 (486.0 to 527.8)        | 122.5 (104.7 to 142.0)          | 0.0 (0.0 to 0.0)                  | 4376.8 (4291.4 to 4458.8) | 3673.8 (3596.9 to 3750.1)  | 566.2 (543.3 to 590.0)        | 136.9 (117.0 to 158.7)          | 0.0 (0.0 to 0.0)                  |
| Japan   | 2013 | 4033.3 (3956.1 to 4112.6)  | 3396.4 (3326.4 to 3472.9)  | 514.1 (491.8 to 535.7)        | 122.8 (104.4 to 141.8)          | 0.0 (0.0 to 0.0)                  | 4508.3 (4422.0 to 4597.0) | 3796.4 (3718.2 to 3881.9)  | 574.6 (549.8 to 598.8)        | 137.3 (116.7 to 158.5)          | 0.0 (0.0 to 0.0)                  |
| Japan   | 2014 | 4060.7 (3982.4 to 4133.7)  | 3416.9 (3345.5 to 3489.0)  | 522.2 (499.2 to 545.0)        | 121.6 (103.6 to 141.3)          | 0.0 (0.0 to 0.0)                  | 4539.0 (4451.4 to 4620.6) | 3819.3 (3739.6 to 3899.9)  | 583.7 (558.0 to 609.2)        | 136.0 (115.8 to 157.9)          | 0.0 (0.0 to 0.0)                  |
| Japan   | 2015 | 4119.9 (4039.5 to 4199.3)  | 3459.8 (3390.0 to 3530.4)  | 537.8 (513.7 to 563.2)        | 122.3 (102.6 to 143.7)          | 0.0 (0.0 to 0.0)                  | 4605.1 (4515.2 to 4693.9) | 3867.3 (3789.3 to 3946.2)  | 601.1 (574.2 to 629.5)        | 136.7 (114.7 to 160.6)          | 0.0 (0.0 to 0.0)                  |
| Japan   | 2016 | 4175.1 (4064.6 to 4277.9)  | 3494.0 (3387.6 to 3592.3)  | 556.9 (522.2 to 591.3)        | 124.2 (99.4 to 149.8)           | 0.0 (0.0 to 0.0)                  | 4666.9 (4543.3 to 4781.7) | 3905.5 (3786.6 to 4015.4)  | 622.5 (583.8 to 661.0)        | 138.9 (111.1 to 167.4)          | 0.0 (0.0 to 0.0)                  |
| Japan   | 2017 | 4253.1 (4143.0 to 4361.4)  | 3559.6 (3453.4 to 3661.4)  | 566.3 (532.3 to 601.2)        | 127.2 (101.5 to 153.4)          | 0.0 (0.0 to 0.0)                  | 4754.0 (4631.0 to 4875.1) | 3978.8 (3860.1 to 4092.6)  | 633.0 (595.0 to 672.0)        | 142.2 (113.4 to 171.5)          | 0.0 (0.0 to 0.0)                  |
| Japan   | 2018 | 4296.9 (4181.1 to 4411.0)  | 3593.0 (3487.0 to 3698.2)  | 574.9 (539.0 to 610.4)        | 128.9 (102.7 to 155.6)          | 0.0 (0.0 to 0.0)                  | 4803.0 (4673.5 to 4930.5) | 4016.2 (3897.7 to 4133.7)  | 642.6 (602.5 to 682.3)        | 144.1 (114.8 to 173.9)          | 0.0 (0.0 to 0.0)                  |
| Japan   | 2019 | 4341.0 (4220.5 to 4460.6)  | 3627.3 (3517.1 to 3737.5)  | 583.0 (544.2 to 620.2)        | 130.7 (103.9 to 157.9)          | 0.0 (0.0 to 0.0)                  | 4852.2 (4717.5 to 4985.9) | 4054.5 (3931.3 to 4177.7)  | 651.6 (608.3 to 693.3)        | 146.1 (116.2 to 176.5)          | 0.0 (0.0 to 0.0)                  |
| Japan   | 2020 | 4383.0 (4258.4 to 4507.7)  | 3660.1 (3547.5 to 3774.5)  | 590.4 (549.1 to 629.5)        | 132.4 (105.4 to 160.1)          | 0.0 (0.0 to 0.0)                  | 4899.2 (4760.0 to 5038.6) | 4091.2 (3965.3 to 4219.1)  | 659.9 (613.8 to 703.6)        | 148.0 (117.8 to 178.9)          | 0.0 (0.0 to 0.0)                  |
| Japan   | 2021 | 4424.0 (4292.9 to 4554.0)  | 3692.7 (3572.9 to 3812.8)  | 597.0 (555.8 to 636.5)        | 134.3 (106.7 to 162.5)          | 0.0 (0.0 to 0.0)                  | 4945.0 (4798.6 to 5090.3) | 4127.6 (3993.7 to 4261.8)  | 667.3 (621.2 to 711.4)        | 150.1 (119.2 to 181.6)          | 0.0 (0.0 to 0.0)                  |
| Japan   | 2022 | 4474.2 (4335.0 to 4611.0)  | 3734.6 (3610.4 to 3862.8)  | 603.2 (560.6 to 647.1)        | 136.4 (108.4 to 165.0)          | 0.0 (0.0 to 0.0)                  | 5001.1 (4845.5 to 5154.0) | 4174.4 (4035.6 to 4317.8)  | 674.2 (626.7 to 723.3)        | 152.5 (121.2 to 184.4)          | 0.0 (0.0 to 0.0)                  |
| Japan   | 2023 | 4537.3 (4394.2 to 4683.2)  | 3788.3 (3653.0 to 3924.0)  | 610.2 (565.2 to 655.0)        | 138.7 (110.4 to 167.8)          | 0.0 (0.0 to 0.0)                  | 5071.6 (4911.8 to 5234.8) | 4234.5 (4083.2 to 4386.1)  | 682.1 (631.8 to 732.1)        | 155.1 (123.4 to 187.5)          | 0.0 (0.0 to 0.0)                  |
| Japan   | 2024 | 4604.0 (4450.6 to 4762.3)  | 3844.3 (3701.9 to 3987.1)  | 618.6 (571.8 to 665.6)        | 141.1 (112.5 to 170.8)          | 0.0 (0.0 to 0.0)                  | 5146.3 (4974.8 to 5323.2) | 4297.1 (4137.9 to 4456.7)  | 691.5 (639.2 to 744.0)        | 157.7 (125.7 to 191.0)          | 0.0 (0.0 to 0.0)                  |
| Japan   | 2025 | 4668.6 (4505.6 to 4837.2)  | 3898.7 (3744.9 to 4050.9)  | 626.5 (577.0 to 675.9)        | 143.4 (114.3 to 173.8)          | 0.0 (0.0 to 0.0)                  | 5218.4 (5036.2 to 5406.9) | 4357.9 (4185.9 to 4528.0)  | 700.3 (644.9 to 755.5)        | 160.3 (127.7 to 194.3)          | 0.0 (0.0 to 0.0)                  |
| Japan   | 2026 | 4733.6 (4565.6 to 4910.1)  | 3953.2 (3790.4 to 4115.3)  | 634.6 (583.8 to 689.0)        | 145.8 (116.4 to 176.7)          | 0.0 (0.0 to 0.0)                  | 5291.1 (5103.4 to 5488.3) | 4418.8 (4236.8 to 4600.0)  | 709.3 (652.5 to 770.1)        | 163.0 (130.1 to 197.5)          | 0.0 (0.0 to 0.0)                  |
| Japan   | 2027 | 4799.3 (4623.1 to 4987.2)  | 4008.3 (3838.2 to 4183.4)  | 642.7 (586.3 to 704.4)        | 148.3 (118.2 to 179.8)          | 0.0 (0.0 to 0.0)                  | 5364.6 (5167.6 to 5574.6) | 4480.4 (4290.3 to 4676.1)  | 718.4 (655.3 to 787.4)        | 165.7 (132.2 to 200.9)          | 0.0 (0.0 to 0.0)                  |
| Japan   | 2028 | 4867.9 (4676.9 to 5072.8)  | 4066.0 (3885.4 to 4257.9)  | 651.2 (589.7 to 719.8)        | 150.8 (120.0 to 183.1)          | 0.0 (0.0 to 0.0)                  | 5441.2 (5227.7 to 5670.3) | 4544.9 (4343.0 to 4759.4)  | 727.8 (659.2 to 804.5)        | 168.5 (134.1 to 204.7)          | 0.0 (0.0 to 0.0)                  |
| Japan   | 2029 | 4937.0 (4730.5 to 5148.4)  | 4124.0 (3929.3 to 4329.8)  | 659.7 (593.5 to 734.4)        | 153.3 (121.5 to 186.4)          | 0.0 (0.0 to 0.0)                  | 5518.4 (5287.6 to 5754.7) | 4609.7 (4392.0 to 4839.8)  | 737.4 (663.5 to 820.8)        | 171.3 (135.8 to 208.4)          | 0.0 (0.0 to 0.0)                  |

| Country | Year | 2018 US Dollars per capita |                            |                               |                                 |                                   | 2018 PPP per capita       |                            |                               |                                 |                                   |
|---------|------|----------------------------|----------------------------|-------------------------------|---------------------------------|-----------------------------------|---------------------------|----------------------------|-------------------------------|---------------------------------|-----------------------------------|
|         |      | Health spending            | Government health spending | Out-of-pocket health spending | Prepaid private health spending | Development assistance for health | Health spending           | Government health spending | Out-of-pocket health spending | Prepaid private health spending | Development assistance for health |
| Japan   | 2030 | 5007.8 (4784.5 to 5231.4)  | 4183.8 (3974.0 to 4402.8)  | 668.3 (597.5 to 749.9)        | 155.8 (123.1 to 189.6)          | 0.0 (0.0 to 0.0)                  | 5597.6 (5348.0 to 5847.5) | 4676.5 (4442.1 to 4921.4)  | 747.0 (667.9 to 838.3)        | 174.1 (137.6 to 211.9)          | 0.0 (0.0 to 0.0)                  |
| Japan   | 2031 | 5079.3 (4842.2 to 5338.0)  | 4243.7 (4021.1 to 4480.7)  | 677.2 (599.9 to 765.1)        | 158.3 (125.1 to 192.9)          | 0.0 (0.0 to 0.0)                  | 5677.5 (5412.5 to 5966.7) | 4743.5 (4494.7 to 5008.4)  | 757.0 (670.5 to 855.2)        | 177.0 (139.9 to 215.6)          | 0.0 (0.0 to 0.0)                  |
| Japan   | 2032 | 5150.5 (4891.3 to 5408.4)  | 4303.4 (4068.7 to 4554.1)  | 686.2 (601.2 to 782.6)        | 160.9 (127.0 to 196.1)          | 0.0 (0.0 to 0.0)                  | 5757.1 (5467.4 to 6045.4) | 4810.3 (4547.9 to 5090.4)  | 767.0 (672.0 to 874.7)        | 179.9 (141.9 to 219.2)          | 0.0 (0.0 to 0.0)                  |
| Japan   | 2033 | 5224.0 (4946.6 to 5515.5)  | 4365.2 (4112.3 to 4630.1)  | 695.3 (603.4 to 800.5)        | 163.5 (128.9 to 199.4)          | 0.0 (0.0 to 0.0)                  | 5839.3 (5529.2 to 6165.1) | 4879.3 (4596.6 to 5175.4)  | 777.2 (674.4 to 894.8)        | 182.8 (144.1 to 222.8)          | 0.0 (0.0 to 0.0)                  |
| Japan   | 2034 | 5296.2 (5011.7 to 5598.1)  | 4426.0 (4155.8 to 4708.1)  | 704.2 (606.9 to 817.0)        | 166.0 (130.8 to 202.5)          | 0.0 (0.0 to 0.0)                  | 5920.0 (5602.0 to 6257.4) | 4947.3 (4645.2 to 5262.6)  | 787.2 (678.3 to 913.2)        | 185.5 (146.2 to 226.3)          | 0.0 (0.0 to 0.0)                  |
| Japan   | 2035 | 5367.3 (5062.6 to 5703.0)  | 4486.1 (4201.9 to 4781.7)  | 712.9 (609.6 to 833.7)        | 168.3 (132.4 to 205.4)          | 0.0 (0.0 to 0.0)                  | 5999.5 (5658.8 to 6374.6) | 5014.5 (4696.8 to 5344.8)  | 796.9 (681.4 to 931.9)        | 188.1 (148.0 to 229.6)          | 0.0 (0.0 to 0.0)                  |
| Japan   | 2036 | 5436.4 (5101.5 to 5810.4)  | 4544.3 (4239.3 to 4858.5)  | 721.6 (612.3 to 850.1)        | 170.5 (134.2 to 208.2)          | 0.0 (0.0 to 0.0)                  | 6076.7 (5702.4 to 6494.7) | 5079.5 (4738.6 to 5430.7)  | 806.6 (684.5 to 950.2)        | 190.6 (150.0 to 232.8)          | 0.0 (0.0 to 0.0)                  |
| Japan   | 2037 | 5504.7 (5154.0 to 5882.2)  | 4602.1 (4276.3 to 4931.8)  | 730.1 (615.3 to 865.5)        | 172.6 (135.8 to 210.9)          | 0.0 (0.0 to 0.0)                  | 6153.1 (5761.0 to 6575.0) | 5144.1 (4780.0 to 5512.6)  | 816.1 (687.8 to 967.5)        | 192.9 (151.8 to 235.8)          | 0.0 (0.0 to 0.0)                  |
| Japan   | 2038 | 5571.4 (5209.6 to 5962.8)  | 4658.4 (4314.3 to 5006.5)  | 738.4 (619.1 to 880.7)        | 174.6 (137.3 to 213.5)          | 0.0 (0.0 to 0.0)                  | 6227.6 (5823.2 to 6665.0) | 5207.0 (4822.4 to 5596.1)  | 825.4 (692.1 to 984.4)        | 195.1 (153.4 to 238.6)          | 0.0 (0.0 to 0.0)                  |
| Japan   | 2039 | 5638.5 (5256.7 to 6038.8)  | 4714.9 (4356.6 to 5078.4)  | 746.9 (623.1 to 896.0)        | 176.6 (138.8 to 216.1)          | 0.0 (0.0 to 0.0)                  | 6302.6 (5875.8 to 6750.0) | 5270.2 (4869.7 to 5676.5)  | 834.9 (696.5 to 1001.5)       | 197.4 (155.1 to 241.5)          | 0.0 (0.0 to 0.0)                  |
| Japan   | 2040 | 5708.4 (5302.7 to 6132.1)  | 4773.7 (4397.3 to 5158.7)  | 755.9 (628.0 to 910.2)        | 178.8 (140.3 to 219.1)          | 0.0 (0.0 to 0.0)                  | 6380.7 (5927.3 to 6854.3) | 5335.9 (4915.2 to 5766.2)  | 845.0 (701.9 to 1017.4)       | 199.9 (156.8 to 244.9)          | 0.0 (0.0 to 0.0)                  |
| Japan   | 2041 | 5781.9 (5338.2 to 6231.9)  | 4835.0 (4435.0 to 5243.5)  | 765.6 (633.3 to 925.2)        | 181.3 (142.2 to 223.1)          | 0.0 (0.0 to 0.0)                  | 6462.8 (5966.9 to 6965.9) | 5404.5 (4957.4 to 5861.0)  | 855.7 (707.9 to 1034.1)       | 202.6 (159.0 to 249.4)          | 0.0 (0.0 to 0.0)                  |
| Japan   | 2042 | 5858.6 (5431.8 to 6323.7)  | 4898.8 (4477.5 to 5322.5)  | 775.8 (640.8 to 940.3)        | 184.0 (144.2 to 226.7)          | 0.0 (0.0 to 0.0)                  | 6548.6 (6071.6 to 7068.5) | 5475.8 (5004.8 to 5949.3)  | 867.1 (716.2 to 1051.0)       | 205.6 (161.2 to 253.4)          | 0.0 (0.0 to 0.0)                  |
| Japan   | 2043 | 5936.9 (5467.0 to 6429.6)  | 4963.7 (4521.1 to 5416.5)  | 786.4 (647.8 to 955.1)        | 186.8 (146.5 to 230.3)          | 0.0 (0.0 to 0.0)                  | 6636.1 (6110.9 to 7186.9) | 5548.3 (5053.6 to 6054.4)  | 879.0 (724.1 to 1067.6)       | 208.8 (163.7 to 257.4)          | 0.0 (0.0 to 0.0)                  |
| Japan   | 2044 | 6017.5 (5536.7 to 6524.0)  | 5030.4 (4565.1 to 5502.0)  | 797.3 (654.7 to 970.0)        | 189.8 (148.7 to 234.0)          | 0.0 (0.0 to 0.0)                  | 6726.2 (6188.8 to 7292.4) | 5622.9 (5102.8 to 6150.0)  | 891.2 (731.8 to 1084.3)       | 212.2 (166.2 to 261.5)          | 0.0 (0.0 to 0.0)                  |
| Japan   | 2045 | 6098.0 (5592.6 to 6630.7)  | 5097.0 (4616.1 to 5590.2)  | 808.2 (663.3 to 984.6)        | 192.7 (151.0 to 237.8)          | 0.0 (0.0 to 0.0)                  | 6816.2 (6251.3 to 7411.6) | 5697.3 (5159.8 to 6248.6)  | 903.4 (741.4 to 1100.5)       | 215.4 (168.8 to 265.8)          | 0.0 (0.0 to 0.0)                  |
| Japan   | 2046 | 6179.7 (5630.7 to 6718.1)  | 5164.4 (4663.1 to 5672.8)  | 819.6 (671.7 to 999.6)        | 195.8 (153.2 to 242.2)          | 0.0 (0.0 to 0.0)                  | 6907.6 (6293.9 to 7509.4) | 5772.6 (5212.4 to 6341.0)  | 916.1 (750.8 to 1117.3)       | 218.9 (171.3 to 270.7)          | 0.0 (0.0 to 0.0)                  |
| Japan   | 2047 | 6264.3 (5706.5 to 6833.0)  | 5233.9 (4701.0 to 5767.5)  | 831.3 (680.6 to 1014.5)       | 199.0 (155.6 to 246.8)          | 0.0 (0.0 to 0.0)                  | 7002.1 (6378.6 to 7637.8) | 5850.4 (5254.7 to 6446.7)  | 929.2 (760.8 to 1133.9)       | 222.5 (174.0 to 275.8)          | 0.0 (0.0 to 0.0)                  |
| Japan   | 2048 | 6348.2 (5759.2 to 6945.4)  | 5302.9 (4741.5 to 5860.2)  | 843.1 (689.6 to 1029.4)       | 202.3 (157.9 to 251.5)          | 0.0 (0.0 to 0.0)                  | 7095.9 (6437.5 to 7763.3) | 5927.5 (5300.0 to 6550.4)  | 942.3 (770.9 to 1150.6)       | 226.1 (176.5 to 281.1)          | 0.0 (0.0 to 0.0)                  |
| Japan   | 2049 | 6434.9 (5824.3 to 7067.4)  | 5374.3 (4788.2 to 5955.9)  | 855.1 (698.8 to 1044.8)       | 205.6 (160.2 to 256.2)          | 0.0 (0.0 to 0.0)                  | 7192.8 (6510.3 to 7899.8) | 6007.2 (5352.1 to 6657.4)  | 955.8 (781.1 to 1167.8)       | 229.8 (179.0 to 286.4)          | 0.0 (0.0 to 0.0)                  |
| Japan   | 2050 | 6524.6 (5888.9 to 7183.2)  | 5448.3 (4830.7 to 6052.5)  | 867.3 (708.2 to 1060.2)       | 209.0 (162.5 to 261.2)          | 0.0 (0.0 to 0.0)                  | 7293.1 (6582.5 to 8029.2) | 6090.0 (5399.6 to 6765.3)  | 969.5 (791.6 to 1185.1)       | 233.6 (181.6 to 291.9)          | 0.0 (0.0 to 0.0)                  |

| Country | Year | 2018 US Dollars per capita |                            |                               |                                 |                                   | 2018 PPP per capita    |                            |                               |                                 |                                   |
|---------|------|----------------------------|----------------------------|-------------------------------|---------------------------------|-----------------------------------|------------------------|----------------------------|-------------------------------|---------------------------------|-----------------------------------|
|         |      | Health spending            | Government health spending | Out-of-pocket health spending | Prepaid private health spending | Development assistance for health | Health spending        | Government health spending | Out-of-pocket health spending | Prepaid private health spending | Development assistance for health |
| Jordan  | 1995 | 272.9 (241.8 to 306.2)     | 172.0 (148.6 to 197.1)     | 69.5 (54.5 to 87.5)           | 25.5 (14.7 to 43.0)             | 5.8 (5.8 to 5.8)                  | 619.5 (548.9 to 695.1) | 390.6 (337.4 to 447.4)     | 157.8 (123.7 to 198.6)        | 58.0 (33.3 to 97.7)             | 13.2 (13.2 to 13.2)               |
| Jordan  | 1996 | 274.4 (245.9 to 304.6)     | 169.9 (148.0 to 193.2)     | 75.7 (60.3 to 92.9)           | 25.9 (15.4 to 42.4)             | 2.8 (2.8 to 2.8)                  | 622.9 (558.1 to 691.5) | 385.8 (336.0 to 438.5)     | 171.9 (137.0 to 210.8)        | 58.8 (34.9 to 96.4)             | 6.3 (6.3 to 6.3)                  |
| Jordan  | 1997 | 285.2 (257.6 to 313.8)     | 169.0 (149.1 to 190.3)     | 85.0 (69.6 to 102.8)          | 26.7 (16.7 to 41.9)             | 4.4 (4.4 to 4.4)                  | 647.5 (584.7 to 712.3) | 383.7 (338.5 to 432.1)     | 193.0 (158.0 to 233.5)        | 60.7 (37.8 to 95.2)             | 10.1 (10.1 to 10.1)               |
| Jordan  | 1998 | 299.0 (271.2 to 327.6)     | 168.7 (150.6 to 188.4)     | 95.6 (79.1 to 113.1)          | 28.4 (18.2 to 42.6)             | 6.3 (6.3 to 6.3)                  | 678.8 (615.7 to 743.6) | 383.0 (341.8 to 427.8)     | 217.1 (179.5 to 256.8)        | 64.4 (41.2 to 96.7)             | 14.2 (14.2 to 14.2)               |
| Jordan  | 1999 | 320.8 (290.8 to 350.3)     | 167.0 (149.5 to 185.8)     | 110.5 (92.8 to 129.7)         | 31.3 (19.9 to 46.2)             | 12.0 (12.0 to 12.0)               | 728.3 (660.1 to 795.1) | 379.0 (339.3 to 421.7)     | 250.9 (210.7 to 294.5)        | 71.0 (45.3 to 104.9)            | 27.3 (27.3 to 27.3)               |
| Jordan  | 2000 | 346.8 (316.1 to 380.3)     | 167.8 (150.4 to 186.8)     | 130.3 (110.7 to 151.3)        | 38.7 (24.9 to 56.7)             | 10.0 (10.0 to 10.0)               | 787.2 (717.7 to 863.3) | 380.9 (341.5 to 424.1)     | 295.7 (251.4 to 343.6)        | 87.9 (56.6 to 128.7)            | 22.6 (22.6 to 22.6)               |
| Jordan  | 2001 | 367.5 (335.3 to 402.8)     | 172.6 (154.8 to 191.3)     | 144.5 (124.3 to 167.6)        | 41.6 (26.4 to 61.0)             | 8.8 (8.8 to 8.8)                  | 834.2 (761.2 to 914.4) | 391.8 (351.4 to 434.3)     | 328.0 (282.2 to 380.4)        | 94.5 (59.9 to 138.4)            | 20.0 (20.0 to 20.0)               |
| Jordan  | 2002 | 377.5 (346.4 to 411.3)     | 176.3 (157.9 to 196.3)     | 153.2 (132.8 to 176.5)        | 38.3 (24.7 to 55.5)             | 9.7 (9.7 to 9.7)                  | 856.9 (786.5 to 933.8) | 400.2 (358.6 to 445.6)     | 347.9 (301.4 to 400.6)        | 86.9 (56.0 to 125.9)            | 21.9 (21.9 to 21.9)               |
| Jordan  | 2003 | 368.5 (339.1 to 401.2)     | 172.8 (155.4 to 193.0)     | 154.8 (134.9 to 177.3)        | 30.9 (19.6 to 45.9)             | 10.0 (10.0 to 10.0)               | 836.5 (769.7 to 910.8) | 392.3 (352.9 to 438.2)     | 351.4 (306.3 to 402.4)        | 70.2 (44.6 to 104.3)            | 22.6 (22.6 to 22.6)               |
| Jordan  | 2004 | 361.4 (332.7 to 392.7)     | 174.3 (157.2 to 193.2)     | 153.6 (134.4 to 175.2)        | 25.5 (16.1 to 39.3)             | 8.1 (8.1 to 8.1)                  | 820.5 (755.4 to 891.5) | 395.6 (356.8 to 438.7)     | 348.6 (305.0 to 397.8)        | 57.8 (36.6 to 89.1)             | 18.4 (18.4 to 18.4)               |
| Jordan  | 2005 | 364.2 (335.7 to 395.1)     | 187.6 (169.3 to 208.3)     | 149.0 (128.9 to 171.1)        | 22.7 (14.5 to 35.5)             | 4.9 (4.9 to 4.9)                  | 826.7 (762.0 to 896.8) | 425.9 (384.2 to 472.9)     | 338.2 (292.6 to 388.5)        | 51.5 (32.9 to 80.6)             | 11.0 (11.0 to 11.0)               |
| Jordan  | 2006 | 358.6 (330.4 to 388.8)     | 196.6 (178.1 to 217.3)     | 138.2 (119.6 to 160.1)        | 20.2 (12.7 to 31.8)             | 3.6 (3.6 to 3.6)                  | 814.1 (750.1 to 882.7) | 446.3 (404.3 to 493.3)     | 313.7 (271.4 to 363.3)        | 45.8 (28.9 to 72.2)             | 8.2 (8.2 to 8.2)                  |
| Jordan  | 2007 | 369.0 (340.8 to 400.2)     | 216.0 (195.6 to 237.7)     | 129.5 (111.9 to 150.1)        | 20.5 (12.6 to 31.3)             | 3.0 (3.0 to 3.0)                  | 837.7 (773.7 to 908.6) | 490.4 (444.1 to 539.7)     | 294.0 (254.0 to 340.7)        | 46.6 (28.6 to 71.0)             | 6.7 (6.7 to 6.7)                  |
| Jordan  | 2008 | 394.7 (364.1 to 427.8)     | 243.2 (220.6 to 267.1)     | 120.3 (103.8 to 140.1)        | 24.7 (15.5 to 37.3)             | 6.4 (6.4 to 6.4)                  | 896.0 (826.6 to 971.1) | 552.1 (500.8 to 606.3)     | 273.2 (235.5 to 318.0)        | 56.1 (35.1 to 84.7)             | 14.6 (14.6 to 14.6)               |
| Jordan  | 2009 | 405.2 (373.4 to 438.4)     | 264.3 (241.0 to 289.9)     | 105.8 (90.2 to 123.9)         | 28.3 (17.8 to 41.8)             | 6.8 (6.8 to 6.8)                  | 919.9 (847.6 to 995.2) | 600.1 (547.2 to 658.1)     | 240.1 (204.9 to 281.3)        | 64.2 (40.3 to 94.9)             | 15.5 (15.5 to 15.5)               |
| Jordan  | 2010 | 380.2 (348.5 to 414.1)     | 254.1 (231.2 to 279.7)     | 90.7 (77.0 to 107.1)          | 28.8 (18.0 to 42.5)             | 6.7 (6.7 to 6.7)                  | 863.2 (791.2 to 940.0) | 576.7 (524.9 to 634.9)     | 205.9 (174.7 to 243.2)        | 65.3 (40.9 to 96.4)             | 15.2 (15.2 to 15.2)               |
| Jordan  | 2011 | 359.4 (330.1 to 392.8)     | 241.4 (219.5 to 266.9)     | 81.6 (68.5 to 97.5)           | 29.6 (18.4 to 44.3)             | 6.8 (6.8 to 6.8)                  | 815.9 (749.4 to 891.8) | 548.0 (498.3 to 605.8)     | 185.2 (155.5 to 221.4)        | 67.2 (41.7 to 100.5)            | 15.5 (15.5 to 15.5)               |
| Jordan  | 2012 | 337.9 (310.1 to 369.2)     | 220.5 (199.8 to 245.1)     | 74.7 (61.8 to 89.5)           | 28.9 (17.8 to 43.9)             | 13.8 (13.8 to 13.8)               | 767.0 (703.9 to 838.1) | 500.5 (453.6 to 556.4)     | 169.5 (140.2 to 203.3)        | 65.6 (40.5 to 99.8)             | 31.4 (31.4 to 31.4)               |
| Jordan  | 2013 | 310.5 (282.9 to 338.5)     | 197.6 (178.2 to 221.2)     | 68.7 (56.1 to 82.4)           | 28.1 (16.9 to 44.1)             | 16.1 (16.1 to 16.1)               | 704.9 (642.3 to 768.5) | 448.6 (404.6 to 502.2)     | 156.0 (127.3 to 187.1)        | 63.7 (38.3 to 100.1)            | 36.6 (36.6 to 36.6)               |
| Jordan  | 2014 | 285.6 (259.5 to 315.0)     | 181.9 (161.5 to 203.3)     | 64.9 (52.6 to 78.4)           | 25.8 (15.3 to 41.8)             | 13.0 (13.0 to 13.0)               | 648.3 (589.0 to 715.2) | 413.0 (366.6 to 461.5)     | 147.3 (119.3 to 178.1)        | 58.6 (34.8 to 94.8)             | 29.5 (29.5 to 29.5)               |
| Jordan  | 2015 | 246.2 (221.0 to 274.0)     | 159.5 (140.6 to 181.0)     | 61.8 (49.3 to 76.1)           | 21.3 (12.3 to 35.3)             | 3.6 (3.6 to 3.6)                  | 559.0 (501.7 to 622.0) | 362.1 (319.2 to 410.9)     | 140.3 (112.0 to 172.7)        | 48.4 (27.9 to 80.1)             | 8.3 (8.3 to 8.3)                  |

| Country | Year | 2018 US Dollars per capita |                            |                               |                                 |                                   | 2018 PPP per capita    |                            |                               |                                 |                                   |
|---------|------|----------------------------|----------------------------|-------------------------------|---------------------------------|-----------------------------------|------------------------|----------------------------|-------------------------------|---------------------------------|-----------------------------------|
|         |      | Health spending            | Government health spending | Out-of-pocket health spending | Prepaid private health spending | Development assistance for health | Health spending        | Government health spending | Out-of-pocket health spending | Prepaid private health spending | Development assistance for health |
| Jordan  | 2016 | 224.2 (198.2 to 252.8)     | 147.2 (127.6 to 169.2)     | 58.8 (46.1 to 73.2)           | 13.6 (7.6 to 22.4)              | 4.6 (4.6 to 4.6)                  | 508.9 (450.0 to 573.9) | 334.1 (289.7 to 384.1)     | 133.5 (104.6 to 166.2)        | 30.8 (17.2 to 50.8)             | 10.4 (10.4 to 10.4)               |
| Jordan  | 2017 | 234.2 (207.8 to 261.8)     | 152.3 (131.9 to 175.3)     | 58.5 (46.1 to 72.8)           | 14.8 (8.2 to 24.4)              | 8.7 (8.7 to 8.7)                  | 531.6 (471.7 to 594.4) | 345.6 (299.4 to 397.9)     | 132.7 (104.7 to 165.2)        | 33.6 (18.7 to 55.4)             | 19.7 (19.7 to 19.7)               |
| Jordan  | 2018 | 234.6 (208.7 to 264.4)     | 153.8 (133.6 to 176.1)     | 58.3 (45.8 to 72.6)           | 14.8 (8.2 to 24.5)              | 7.8 (7.7 to 7.8)                  | 532.7 (473.8 to 600.3) | 349.1 (303.2 to 399.7)     | 132.3 (104.0 to 164.8)        | 33.6 (18.7 to 55.6)             | 17.6 (17.5 to 17.8)               |
| Jordan  | 2019 | 236.9 (210.0 to 265.3)     | 155.6 (135.2 to 178.3)     | 58.4 (46.0 to 73.1)           | 15.0 (8.4 to 24.8)              | 7.8 (7.3 to 8.3)                  | 537.7 (476.8 to 602.2) | 353.2 (306.8 to 404.7)     | 132.6 (104.4 to 166.0)        | 34.1 (19.0 to 56.4)             | 17.7 (16.5 to 18.8)               |
| Jordan  | 2020 | 239.5 (213.6 to 269.2)     | 157.5 (136.2 to 180.1)     | 58.8 (46.3 to 73.5)           | 15.2 (8.5 to 25.1)              | 8.0 (7.3 to 8.6)                  | 543.8 (484.9 to 611.2) | 357.5 (309.2 to 409.0)     | 133.5 (105.1 to 166.9)        | 34.6 (19.3 to 57.0)             | 18.1 (16.5 to 19.6)               |
| Jordan  | 2021 | 242.6 (215.5 to 271.2)     | 159.7 (138.0 to 183.0)     | 59.2 (46.6 to 74.2)           | 15.5 (8.6 to 25.4)              | 8.2 (7.4 to 9.1)                  | 550.7 (489.2 to 615.8) | 362.5 (313.3 to 415.4)     | 134.5 (105.7 to 168.4)        | 35.1 (19.6 to 57.7)             | 18.6 (16.7 to 20.6)               |
| Jordan  | 2022 | 245.6 (218.1 to 277.1)     | 161.7 (139.9 to 185.9)     | 59.6 (46.9 to 74.5)           | 15.7 (8.8 to 25.7)              | 8.6 (7.6 to 9.6)                  | 557.4 (495.1 to 629.0) | 367.2 (317.6 to 421.9)     | 135.2 (106.4 to 169.2)        | 35.6 (19.9 to 58.5)             | 19.4 (17.2 to 21.9)               |
| Jordan  | 2023 | 248.5 (220.2 to 278.1)     | 163.8 (141.4 to 187.8)     | 59.8 (47.1 to 74.8)           | 15.9 (8.9 to 26.0)              | 8.9 (7.7 to 10.2)                 | 564.0 (499.9 to 631.4) | 371.9 (321.0 to 426.4)     | 135.8 (106.8 to 169.9)        | 36.1 (20.2 to 59.1)             | 20.3 (17.6 to 23.1)               |
| Jordan  | 2024 | 251.1 (223.3 to 283.3)     | 165.7 (143.0 to 190.9)     | 60.0 (47.0 to 75.0)           | 16.1 (9.0 to 26.3)              | 9.4 (8.1 to 10.9)                 | 570.1 (507.0 to 643.2) | 376.2 (324.5 to 433.4)     | 136.1 (106.8 to 170.3)        | 36.5 (20.4 to 59.8)             | 21.3 (18.4 to 24.8)               |
| Jordan  | 2025 | 254.2 (225.6 to 284.4)     | 168.0 (145.0 to 193.5)     | 60.2 (47.4 to 75.1)           | 16.3 (9.1 to 26.7)              | 9.7 (8.3 to 11.4)                 | 577.0 (512.0 to 645.7) | 381.3 (329.1 to 439.2)     | 136.6 (107.6 to 170.4)        | 37.0 (20.7 to 60.6)             | 22.1 (18.8 to 26.0)               |
| Jordan  | 2026 | 257.0 (227.6 to 289.9)     | 170.1 (146.9 to 196.2)     | 60.4 (47.5 to 75.5)           | 16.5 (9.2 to 27.0)              | 10.0 (8.5 to 11.9)                | 583.4 (516.6 to 658.2) | 386.1 (333.4 to 445.3)     | 137.1 (107.9 to 171.3)        | 37.4 (20.9 to 61.4)             | 22.8 (19.2 to 27.0)               |
| Jordan  | 2027 | 260.6 (230.6 to 292.5)     | 172.9 (149.2 to 199.8)     | 60.7 (47.6 to 75.8)           | 16.7 (9.4 to 27.4)              | 10.4 (8.7 to 12.5)                | 591.7 (523.4 to 664.0) | 392.5 (338.6 to 453.6)     | 137.7 (108.1 to 172.0)        | 38.0 (21.3 to 62.3)             | 23.5 (19.7 to 28.3)               |
| Jordan  | 2028 | 264.5 (232.4 to 298.9)     | 175.9 (151.4 to 203.9)     | 61.0 (47.8 to 76.4)           | 17.0 (9.5 to 27.8)              | 10.7 (8.8 to 13.0)                | 600.3 (527.5 to 678.5) | 399.2 (343.6 to 462.9)     | 138.4 (108.6 to 173.4)        | 38.5 (21.6 to 63.2)             | 24.2 (20.0 to 29.5)               |
| Jordan  | 2029 | 268.6 (237.3 to 302.5)     | 179.1 (153.8 to 207.7)     | 61.3 (47.9 to 77.0)           | 17.2 (9.7 to 28.3)              | 11.0 (8.9 to 13.6)                | 609.8 (538.7 to 686.7) | 406.6 (349.1 to 471.5)     | 139.2 (108.9 to 174.9)        | 39.1 (21.9 to 64.2)             | 24.9 (20.2 to 30.9)               |
| Jordan  | 2030 | 272.5 (240.2 to 309.1)     | 182.2 (155.7 to 212.3)     | 61.6 (48.0 to 77.4)           | 17.5 (9.8 to 28.7)              | 11.2 (8.9 to 14.0)                | 618.7 (545.4 to 701.7) | 413.6 (353.5 to 481.9)     | 139.9 (109.1 to 175.7)        | 39.7 (22.2 to 65.2)             | 25.5 (20.3 to 31.9)               |
| Jordan  | 2031 | 276.0 (242.6 to 312.1)     | 184.9 (157.3 to 216.0)     | 61.9 (48.1 to 78.1)           | 17.7 (9.9 to 29.1)              | 11.5 (9.0 to 14.6)                | 626.6 (550.7 to 708.5) | 419.7 (357.1 to 490.4)     | 140.6 (109.3 to 177.2)        | 40.2 (22.5 to 66.0)             | 26.1 (20.4 to 33.2)               |
| Jordan  | 2032 | 279.6 (245.3 to 317.9)     | 187.7 (158.7 to 219.6)     | 62.2 (48.3 to 78.5)           | 18.0 (10.1 to 29.5)             | 11.8 (9.0 to 15.2)                | 634.8 (556.9 to 721.7) | 426.1 (360.2 to 498.5)     | 141.3 (109.7 to 178.2)        | 40.8 (22.8 to 66.9)             | 26.7 (20.3 to 34.5)               |
| Jordan  | 2033 | 283.2 (246.8 to 323.3)     | 190.5 (160.1 to 223.3)     | 62.5 (48.5 to 78.8)           | 18.2 (10.2 to 29.9)             | 12.0 (9.0 to 15.9)                | 643.0 (560.3 to 734.0) | 432.4 (363.4 to 507.0)     | 142.0 (110.1 to 178.8)        | 41.3 (23.2 to 67.8)             | 27.3 (20.5 to 36.1)               |
| Jordan  | 2034 | 286.8 (250.0 to 328.4)     | 193.2 (161.4 to 227.9)     | 62.8 (48.7 to 79.0)           | 18.4 (10.3 to 30.2)             | 12.3 (9.1 to 16.6)                | 651.0 (567.6 to 745.5) | 438.6 (366.4 to 517.4)     | 142.6 (110.5 to 179.3)        | 41.9 (23.4 to 68.6)             | 28.0 (20.6 to 37.8)               |
| Jordan  | 2035 | 290.3 (250.7 to 332.6)     | 196.0 (163.6 to 231.6)     | 63.1 (48.8 to 79.2)           | 18.7 (10.4 to 30.6)             | 12.6 (9.1 to 17.2)                | 659.1 (569.1 to 755.0) | 444.9 (371.5 to 525.7)     | 143.2 (110.7 to 179.9)        | 42.4 (23.7 to 69.5)             | 28.7 (20.6 to 38.9)               |
| Jordan  | 2036 | 293.9 (252.8 to 337.9)     | 198.7 (165.5 to 235.7)     | 63.3 (48.8 to 79.5)           | 18.9 (10.6 to 31.0)             | 12.9 (9.1 to 17.8)                | 667.3 (573.9 to 767.1) | 451.1 (375.7 to 535.1)     | 143.8 (110.9 to 180.4)        | 43.0 (24.0 to 70.4)             | 29.3 (20.7 to 40.4)               |

| Country    | Year | 2018 US Dollars per capita |                            |                               |                                 |                                   | 2018 PPP per capita    |                            |                               |                                 |                                   |
|------------|------|----------------------------|----------------------------|-------------------------------|---------------------------------|-----------------------------------|------------------------|----------------------------|-------------------------------|---------------------------------|-----------------------------------|
|            |      | Health spending            | Government health spending | Out-of-pocket health spending | Prepaid private health spending | Development assistance for health | Health spending        | Government health spending | Out-of-pocket health spending | Prepaid private health spending | Development assistance for health |
| Jordan     | 2037 | 297.0 (255.4 to 343.1)     | 201.1 (166.1 to 238.9)     | 63.5 (48.8 to 79.7)           | 19.2 (10.7 to 31.4)             | 13.2 (9.1 to 18.7)                | 674.3 (579.8 to 778.9) | 456.6 (377.0 to 542.4)     | 144.2 (110.9 to 180.8)        | 43.5 (24.3 to 71.3)             | 30.0 (20.8 to 42.5)               |
| Jordan     | 2038 | 300.4 (257.4 to 347.2)     | 203.7 (167.0 to 243.6)     | 63.8 (48.9 to 80.0)           | 19.4 (10.9 to 31.8)             | 13.5 (9.2 to 19.5)                | 681.9 (584.2 to 788.3) | 462.4 (379.2 to 552.9)     | 144.8 (111.0 to 181.7)        | 44.0 (24.6 to 72.2)             | 30.7 (20.8 to 44.2)               |
| Jordan     | 2039 | 303.5 (259.0 to 352.0)     | 206.1 (167.9 to 247.4)     | 64.0 (48.9 to 80.2)           | 19.6 (11.0 to 32.2)             | 13.8 (9.3 to 20.4)                | 689.1 (588.1 to 799.1) | 467.8 (381.2 to 561.6)     | 145.3 (111.1 to 182.1)        | 44.6 (25.0 to 73.1)             | 31.4 (21.2 to 46.3)               |
| Jordan     | 2040 | 306.7 (260.5 to 356.7)     | 208.4 (168.5 to 251.2)     | 64.2 (49.0 to 80.9)           | 19.9 (11.1 to 32.7)             | 14.2 (9.4 to 21.5)                | 696.2 (591.4 to 809.7) | 473.2 (382.4 to 570.2)     | 145.7 (111.3 to 183.5)        | 45.1 (25.3 to 74.1)             | 32.2 (21.3 to 48.8)               |
| Jordan     | 2041 | 309.6 (262.6 to 360.2)     | 210.5 (169.1 to 255.3)     | 64.4 (49.2 to 81.4)           | 20.1 (11.3 to 33.0)             | 14.6 (9.5 to 22.5)                | 702.8 (596.1 to 817.6) | 477.9 (383.9 to 579.6)     | 146.2 (111.7 to 184.9)        | 45.6 (25.6 to 75.0)             | 33.1 (21.6 to 51.0)               |
| Jordan     | 2042 | 312.6 (263.7 to 366.6)     | 212.7 (169.8 to 259.6)     | 64.6 (49.4 to 81.9)           | 20.3 (11.4 to 33.4)             | 15.0 (9.6 to 23.6)                | 709.5 (598.5 to 832.3) | 482.8 (385.4 to 589.4)     | 146.7 (112.1 to 186.0)        | 46.1 (25.9 to 75.9)             | 34.0 (21.7 to 53.7)               |
| Jordan     | 2043 | 315.4 (265.7 to 369.4)     | 214.7 (170.3 to 263.0)     | 64.8 (49.4 to 82.3)           | 20.5 (11.5 to 33.9)             | 15.4 (9.6 to 24.9)                | 715.9 (603.2 to 838.6) | 487.3 (386.6 to 597.1)     | 147.1 (112.1 to 186.8)        | 46.6 (26.1 to 76.9)             | 34.9 (21.8 to 56.5)               |
| Jordan     | 2044 | 318.3 (267.2 to 375.2)     | 216.7 (171.0 to 266.7)     | 65.0 (49.4 to 82.6)           | 20.8 (11.6 to 34.3)             | 15.8 (9.8 to 25.6)                | 722.5 (606.6 to 851.8) | 491.9 (388.3 to 605.4)     | 147.5 (112.2 to 187.6)        | 47.2 (26.4 to 77.9)             | 35.9 (22.3 to 58.0)               |
| Jordan     | 2045 | 321.2 (267.6 to 379.9)     | 218.8 (171.8 to 270.0)     | 65.1 (49.5 to 82.9)           | 21.0 (11.7 to 34.7)             | 16.3 (10.0 to 26.8)               | 729.1 (607.5 to 862.5) | 496.6 (390.1 to 613.0)     | 147.8 (112.4 to 188.2)        | 47.7 (26.6 to 78.8)             | 37.0 (22.8 to 60.7)               |
| Jordan     | 2046 | 324.4 (269.3 to 383.5)     | 221.1 (172.7 to 273.7)     | 65.4 (49.7 to 83.2)           | 21.2 (11.9 to 35.1)             | 16.8 (10.1 to 28.3)               | 736.5 (611.5 to 870.7) | 501.9 (392.2 to 621.4)     | 148.4 (112.8 to 188.8)        | 48.2 (26.9 to 79.6)             | 38.0 (23.0 to 64.2)               |
| Jordan     | 2047 | 327.6 (270.7 to 388.1)     | 223.3 (173.3 to 277.6)     | 65.5 (49.8 to 83.4)           | 21.5 (12.0 to 35.4)             | 17.3 (10.4 to 30.6)               | 743.7 (614.6 to 881.0) | 506.8 (393.4 to 630.2)     | 148.8 (113.0 to 189.2)        | 48.8 (27.2 to 80.3)             | 39.3 (23.5 to 69.5)               |
| Jordan     | 2048 | 330.9 (272.4 to 394.9)     | 225.6 (173.9 to 281.1)     | 65.7 (49.9 to 83.5)           | 21.7 (12.1 to 35.8)             | 17.9 (10.6 to 31.8)               | 751.2 (618.4 to 896.5) | 512.0 (394.9 to 638.2)     | 149.2 (113.3 to 189.6)        | 49.3 (27.4 to 81.3)             | 40.6 (24.0 to 72.3)               |
| Jordan     | 2049 | 334.2 (275.4 to 396.1)     | 227.8 (174.5 to 283.4)     | 65.9 (50.0 to 83.7)           | 22.0 (12.2 to 36.2)             | 18.5 (10.6 to 33.4)               | 758.6 (625.3 to 899.2) | 517.1 (396.1 to 643.4)     | 149.6 (113.6 to 190.0)        | 49.9 (27.7 to 82.2)             | 42.0 (24.1 to 75.8)               |
| Jordan     | 2050 | 337.6 (276.3 to 401.1)     | 230.1 (175.3 to 286.6)     | 66.1 (50.2 to 83.9)           | 22.2 (12.3 to 36.6)             | 19.1 (10.8 to 34.7)               | 766.4 (627.3 to 910.5) | 522.4 (398.0 to 650.7)     | 150.1 (113.9 to 190.5)        | 50.4 (28.0 to 83.2)             | 43.5 (24.6 to 78.9)               |
| Kazakhstan | 1995 | 178.7 (154.2 to 205.9)     | 96.4 (79.6 to 115.1)       | 79.4 (61.9 to 100.0)          | 2.6 (1.2 to 4.7)                | 0.4 (0.4 to 0.4)                  | 525.3 (453.3 to 605.1) | 283.3 (233.8 to 338.3)     | 233.4 (181.8 to 293.8)        | 7.6 (3.6 to 14.0)               | 1.1 (1.1 to 1.1)                  |
| Kazakhstan | 1996 | 176.0 (153.5 to 200.9)     | 94.7 (78.7 to 111.0)       | 78.3 (62.3 to 97.5)           | 2.5 (1.2 to 4.7)                | 0.5 (0.5 to 0.5)                  | 517.1 (451.0 to 590.5) | 278.2 (231.4 to 326.3)     | 230.0 (183.1 to 286.7)        | 7.4 (3.4 to 13.8)               | 1.5 (1.5 to 1.5)                  |
| Kazakhstan | 1997 | 174.3 (153.4 to 198.9)     | 94.2 (78.5 to 110.3)       | 77.2 (62.9 to 95.5)           | 2.4 (1.1 to 4.5)                | 0.5 (0.5 to 0.5)                  | 512.3 (450.9 to 584.4) | 276.8 (230.6 to 324.1)     | 227.0 (184.8 to 280.7)        | 7.1 (3.3 to 13.3)               | 1.4 (1.4 to 1.4)                  |
| Kazakhstan | 1998 | 166.2 (146.7 to 188.6)     | 88.5 (74.7 to 102.8)       | 74.6 (60.7 to 91.1)           | 2.2 (1.0 to 4.1)                | 0.9 (0.9 to 0.9)                  | 488.3 (431.1 to 554.1) | 260.1 (219.6 to 302.2)     | 219.2 (178.4 to 267.8)        | 6.3 (2.9 to 12.1)               | 2.7 (2.7 to 2.7)                  |
| Kazakhstan | 1999 | 156.6 (138.7 to 178.0)     | 81.7 (69.6 to 95.1)        | 71.6 (58.7 to 86.8)           | 1.7 (0.8 to 3.2)                | 1.5 (1.5 to 1.5)                  | 460.0 (407.4 to 523.1) | 240.0 (204.7 to 279.6)     | 210.5 (172.4 to 254.9)        | 5.1 (2.3 to 9.5)                | 4.4 (4.4 to 4.4)                  |
| Kazakhstan | 2000 | 155.9 (138.2 to 175.9)     | 82.4 (70.6 to 95.5)        | 70.9 (58.1 to 86.5)           | 1.3 (0.6 to 2.4)                | 1.5 (1.5 to 1.5)                  | 458.2 (406.1 to 516.9) | 242.0 (207.4 to 280.8)     | 208.2 (170.7 to 254.3)        | 3.7 (1.7 to 7.1)                | 4.3 (4.3 to 4.3)                  |
| Kazakhstan | 2001 | 160.4 (142.9 to 181.5)     | 87.4 (74.8 to 101.2)       | 70.4 (57.8 to 85.9)           | 1.1 (0.5 to 2.2)                | 1.6 (1.6 to 1.6)                  | 471.5 (419.9 to 533.3) | 256.7 (219.9 to 297.3)     | 206.8 (169.8 to 252.3)        | 3.4 (1.6 to 6.4)                | 4.6 (4.6 to 4.6)                  |

| Country    | Year | 2018 US Dollars per capita |                            |                               |                                 |                                   | 2018 PPP per capita      |                            |                               |                                 |                                   |
|------------|------|----------------------------|----------------------------|-------------------------------|---------------------------------|-----------------------------------|--------------------------|----------------------------|-------------------------------|---------------------------------|-----------------------------------|
|            |      | Health spending            | Government health spending | Out-of-pocket health spending | Prepaid private health spending | Development assistance for health | Health spending          | Government health spending | Out-of-pocket health spending | Prepaid private health spending | Development assistance for health |
| Kazakhstan | 2002 | 170.9 (152.9 to 193.4)     | 94.4 (81.1 to 109.0)       | 74.6 (60.9 to 91.5)           | 1.2 (0.5 to 2.1)                | 0.7 (0.7 to 0.7)                  | 502.1 (449.3 to 568.3)   | 277.4 (238.4 to 320.3)     | 219.2 (179.1 to 268.9)        | 3.4 (1.5 to 6.3)                | 2.1 (2.1 to 2.1)                  |
| Kazakhstan | 2003 | 188.2 (169.1 to 212.5)     | 106.5 (92.5 to 121.9)      | 79.1 (64.9 to 97.7)           | 1.2 (0.6 to 2.4)                | 1.4 (1.4 to 1.4)                  | 553.0 (496.9 to 624.4)   | 313.0 (271.8 to 358.4)     | 232.3 (190.7 to 287.0)        | 3.7 (1.7 to 7.0)                | 4.0 (4.0 to 4.0)                  |
| Kazakhstan | 2004 | 206.1 (185.9 to 231.8)     | 122.6 (107.2 to 139.9)     | 81.2 (66.8 to 99.5)           | 1.4 (0.6 to 2.7)                | 1.0 (1.0 to 1.0)                  | 605.8 (546.3 to 681.1)   | 360.2 (315.0 to 411.2)     | 238.5 (196.2 to 292.3)        | 4.1 (1.9 to 7.9)                | 3.0 (3.0 to 3.0)                  |
| Kazakhstan | 2005 | 217.7 (195.4 to 243.6)     | 137.7 (120.5 to 156.7)     | 77.7 (64.5 to 95.0)           | 1.5 (0.7 to 3.0)                | 0.8 (0.8 to 0.8)                  | 639.9 (574.1 to 715.8)   | 404.6 (354.0 to 460.3)     | 228.4 (189.6 to 279.3)        | 4.5 (2.0 to 8.8)                | 2.3 (2.3 to 2.3)                  |
| Kazakhstan | 2006 | 222.6 (200.2 to 247.5)     | 147.8 (129.7 to 165.8)     | 71.8 (59.5 to 87.9)           | 1.7 (0.8 to 3.3)                | 1.2 (1.2 to 1.2)                  | 654.1 (588.4 to 727.4)   | 434.4 (381.1 to 487.2)     | 211.1 (174.8 to 258.3)        | 5.1 (2.4 to 9.7)                | 3.6 (3.6 to 3.6)                  |
| Kazakhstan | 2007 | 219.8 (198.3 to 243.3)     | 151.3 (133.2 to 169.8)     | 65.8 (54.6 to 80.1)           | 2.0 (1.0 to 3.8)                | 0.8 (0.8 to 0.8)                  | 645.9 (582.6 to 715.1)   | 444.5 (391.3 to 498.9)     | 193.3 (160.5 to 235.3)        | 5.8 (2.8 to 11.1)               | 2.3 (2.3 to 2.3)                  |
| Kazakhstan | 2008 | 227.1 (205.4 to 251.2)     | 161.4 (143.3 to 181.2)     | 61.6 (50.9 to 74.9)           | 2.6 (1.3 to 4.8)                | 1.5 (1.5 to 1.5)                  | 667.4 (603.6 to 738.2)   | 474.3 (421.1 to 532.5)     | 181.1 (149.7 to 220.2)        | 7.6 (3.7 to 14.2)               | 4.4 (4.4 to 4.4)                  |
| Kazakhstan | 2009 | 225.3 (203.8 to 248.8)     | 159.3 (141.5 to 178.5)     | 59.4 (48.4 to 72.9)           | 3.5 (1.7 to 6.7)                | 3.1 (3.1 to 3.1)                  | 662.1 (598.9 to 731.2)   | 468.2 (415.7 to 524.4)     | 174.6 (142.3 to 214.1)        | 10.3 (5.1 to 19.7)              | 9.0 (9.0 to 9.0)                  |
| Kazakhstan | 2010 | 225.0 (202.9 to 247.2)     | 155.7 (138.3 to 175.1)     | 59.9 (48.7 to 74.0)           | 5.9 (2.9 to 11.0)               | 3.4 (3.4 to 3.4)                  | 661.2 (596.3 to 726.5)   | 457.6 (406.3 to 514.6)     | 176.2 (143.2 to 217.5)        | 17.4 (8.6 to 32.2)              | 10.1 (10.1 to 10.1)               |
| Kazakhstan | 2011 | 236.2 (214.4 to 260.0)     | 162.2 (143.9 to 181.1)     | 62.7 (50.4 to 76.4)           | 8.8 (4.4 to 16.4)               | 2.4 (2.4 to 2.4)                  | 693.9 (630.2 to 764.1)   | 476.5 (422.9 to 532.2)     | 184.3 (148.1 to 224.4)        | 26.0 (12.8 to 48.1)             | 7.2 (7.2 to 7.2)                  |
| Kazakhstan | 2012 | 247.4 (223.0 to 273.1)     | 166.3 (146.7 to 185.8)     | 66.9 (53.4 to 82.3)           | 11.5 (5.5 to 21.0)              | 2.7 (2.7 to 2.7)                  | 727.1 (655.4 to 802.5)   | 488.7 (431.0 to 546.1)     | 196.7 (157.0 to 241.8)        | 33.9 (16.3 to 61.7)             | 7.9 (7.9 to 7.9)                  |
| Kazakhstan | 2013 | 251.5 (226.2 to 279.5)     | 168.2 (147.3 to 188.0)     | 68.1 (54.5 to 84.7)           | 13.5 (6.5 to 24.9)              | 1.7 (1.7 to 1.7)                  | 739.0 (664.7 to 821.3)   | 494.3 (432.9 to 552.6)     | 200.2 (160.1 to 249.0)        | 39.5 (19.1 to 73.1)             | 4.9 (4.9 to 4.9)                  |
| Kazakhstan | 2014 | 261.0 (233.7 to 290.4)     | 171.6 (149.9 to 194.2)     | 73.2 (57.8 to 90.4)           | 15.0 (7.4 to 27.5)              | 1.2 (1.2 to 1.2)                  | 766.9 (686.8 to 853.4)   | 504.2 (440.4 to 570.6)     | 215.0 (169.9 to 265.7)        | 44.1 (21.8 to 80.9)             | 3.6 (3.6 to 3.6)                  |
| Kazakhstan | 2015 | 275.9 (244.8 to 309.2)     | 174.7 (150.4 to 200.2)     | 84.2 (66.6 to 105.5)          | 15.9 (7.5 to 29.4)              | 1.1 (1.1 to 1.1)                  | 810.7 (719.4 to 908.6)   | 513.4 (442.0 to 588.4)     | 247.5 (195.8 to 310.1)        | 46.7 (22.1 to 86.3)             | 3.1 (3.1 to 3.1)                  |
| Kazakhstan | 2016 | 295.4 (259.5 to 334.6)     | 181.0 (153.5 to 208.8)     | 96.3 (75.5 to 121.3)          | 15.9 (7.7 to 30.0)              | 2.2 (2.2 to 2.2)                  | 868.1 (762.6 to 983.3)   | 531.8 (451.1 to 613.7)     | 283.0 (222.0 to 356.4)        | 46.7 (22.5 to 88.1)             | 6.6 (6.6 to 6.6)                  |
| Kazakhstan | 2017 | 326.2 (286.1 to 368.7)     | 207.3 (176.1 to 239.3)     | 100.6 (78.9 to 126.5)         | 16.6 (8.0 to 31.3)              | 1.8 (1.8 to 1.8)                  | 958.5 (840.8 to 1083.4)  | 609.1 (517.4 to 703.2)     | 295.6 (232.0 to 371.9)        | 48.6 (23.5 to 92.1)             | 5.2 (5.2 to 5.2)                  |
| Kazakhstan | 2018 | 333.2 (293.1 to 377.7)     | 211.5 (179.0 to 245.1)     | 103.3 (80.9 to 129.3)         | 16.8 (8.1 to 31.8)              | 1.6 (1.6 to 1.6)                  | 979.1 (861.2 to 1109.9)  | 621.5 (526.1 to 720.1)     | 303.4 (237.8 to 379.8)        | 49.5 (23.9 to 93.6)             | 4.7 (4.7 to 4.7)                  |
| Kazakhstan | 2019 | 340.9 (298.8 to 388.0)     | 216.3 (182.7 to 251.0)     | 105.9 (83.2 to 133.5)         | 17.1 (8.3 to 32.4)              | 1.6 (1.5 to 1.7)                  | 1001.9 (878.1 to 1140.2) | 635.7 (536.8 to 737.4)     | 311.1 (244.4 to 392.3)        | 50.3 (24.3 to 95.3)             | 4.8 (4.5 to 5.0)                  |
| Kazakhstan | 2020 | 348.1 (304.7 to 396.3)     | 220.6 (185.8 to 255.8)     | 108.5 (85.3 to 136.9)         | 17.4 (8.4 to 32.9)              | 1.7 (1.5 to 1.8)                  | 1023.0 (895.5 to 1164.4) | 648.2 (546.1 to 751.7)     | 318.7 (250.7 to 402.4)        | 51.1 (24.7 to 96.6)             | 4.9 (4.5 to 5.4)                  |
| Kazakhstan | 2021 | 356.2 (311.0 to 406.9)     | 225.6 (189.2 to 261.7)     | 111.2 (87.0 to 140.7)         | 17.7 (8.5 to 33.4)              | 1.7 (1.6 to 1.9)                  | 1046.8 (913.9 to 1195.6) | 663.0 (556.0 to 768.9)     | 326.8 (255.6 to 413.4)        | 51.9 (25.1 to 98.1)             | 5.1 (4.6 to 5.7)                  |
| Kazakhstan | 2022 | 362.9 (316.0 to 414.0)     | 229.4 (191.1 to 266.7)     | 113.7 (89.0 to 144.0)         | 17.9 (8.6 to 33.7)              | 1.8 (1.6 to 2.1)                  | 1066.3 (928.5 to 1216.5) | 674.2 (561.5 to 783.8)     | 334.2 (261.5 to 423.0)        | 52.5 (25.3 to 99.0)             | 5.4 (4.8 to 6.1)                  |



| Country    | Year | 2018 US Dollars per capita |                            |                               |                                 |                                   | 2018 PPP per capita       |                            |                               |                                 |                                   |
|------------|------|----------------------------|----------------------------|-------------------------------|---------------------------------|-----------------------------------|---------------------------|----------------------------|-------------------------------|---------------------------------|-----------------------------------|
|            |      | Health spending            | Government health spending | Out-of-pocket health spending | Prepaid private health spending | Development assistance for health | Health spending           | Government health spending | Out-of-pocket health spending | Prepaid private health spending | Development assistance for health |
| Kazakhstan | 2023 | 368.8 (320.7 to 419.6)     | 232.7 (193.5 to 271.1)     | 116.1 (90.1 to 147.0)         | 18.0 (8.7 to 33.9)              | 2.0 (1.7 to 2.3)                  | 1083.8 (942.5 to 1233.1)  | 683.8 (568.7 to 796.8)     | 341.3 (264.9 to 432.1)        | 53.0 (25.6 to 99.7)             | 5.7 (4.9 to 6.7)                  |
| Kazakhstan | 2024 | 375.4 (322.0 to 428.2)     | 236.4 (197.1 to 275.1)     | 118.7 (92.2 to 151.1)         | 18.2 (8.8 to 34.3)              | 2.0 (1.7 to 2.4)                  | 1103.0 (946.3 to 1258.2)  | 694.7 (579.2 to 808.4)     | 348.8 (271.0 to 444.1)        | 53.5 (25.9 to 100.8)            | 6.0 (5.0 to 7.0)                  |
| Kazakhstan | 2025 | 382.8 (329.4 to 435.5)     | 240.8 (200.2 to 280.7)     | 121.4 (94.3 to 153.3)         | 18.4 (8.9 to 34.7)              | 2.1 (1.8 to 2.6)                  | 1124.8 (967.9 to 1279.9)  | 707.7 (588.3 to 824.8)     | 356.6 (277.0 to 450.5)        | 54.2 (26.2 to 101.9)            | 6.3 (5.2 to 7.5)                  |
| Kazakhstan | 2026 | 391.0 (338.2 to 445.5)     | 245.9 (203.2 to 287.9)     | 124.2 (95.8 to 157.3)         | 18.7 (9.0 to 35.1)              | 2.2 (1.8 to 2.7)                  | 1149.0 (993.9 to 1309.1)  | 722.7 (597.1 to 846.0)     | 364.9 (281.6 to 462.3)        | 54.9 (26.4 to 103.1)            | 6.5 (5.3 to 8.0)                  |
| Kazakhstan | 2027 | 400.6 (348.1 to 457.1)     | 252.1 (207.8 to 295.1)     | 127.3 (98.1 to 161.4)         | 19.0 (9.1 to 35.6)              | 2.3 (1.8 to 2.9)                  | 1177.2 (1022.8 to 1343.2) | 740.8 (610.6 to 867.2)     | 374.0 (288.2 to 474.2)        | 55.7 (26.8 to 104.5)            | 6.7 (5.2 to 8.4)                  |
| Kazakhstan | 2028 | 411.6 (357.4 to 472.4)     | 259.4 (213.9 to 304.3)     | 130.6 (99.7 to 165.5)         | 19.3 (9.3 to 36.2)              | 2.3 (0.0 to 3.0)                  | 1209.6 (1050.2 to 1388.3) | 762.2 (628.7 to 894.1)     | 383.9 (292.9 to 486.2)        | 56.8 (27.3 to 106.4)            | 6.7 (0.0 to 8.7)                  |
| Kazakhstan | 2029 | 422.9 (366.0 to 484.3)     | 266.7 (219.5 to 313.0)     | 134.1 (101.4 to 170.8)        | 19.7 (9.5 to 37.0)              | 2.3 (0.0 to 3.1)                  | 1242.7 (1075.4 to 1423.2) | 783.8 (645.2 to 919.8)     | 394.2 (297.8 to 502.0)        | 58.0 (27.9 to 108.6)            | 6.7 (0.0 to 9.0)                  |
| Kazakhstan | 2030 | 434.3 (372.3 to 501.4)     | 274.1 (224.3 to 322.5)     | 137.7 (103.2 to 176.4)        | 20.2 (9.7 to 37.8)              | 2.2 (0.0 to 3.1)                  | 1276.2 (1093.9 to 1473.4) | 805.6 (659.0 to 947.6)     | 404.7 (303.2 to 518.5)        | 59.4 (28.6 to 111.1)            | 6.4 (0.0 to 9.2)                  |
| Kazakhstan | 2031 | 446.3 (381.9 to 515.8)     | 282.1 (231.5 to 332.6)     | 141.4 (105.1 to 181.5)        | 20.7 (10.0 to 38.8)             | 2.1 (0.0 to 3.2)                  | 1311.6 (1122.2 to 1515.7) | 828.9 (680.2 to 977.4)     | 415.6 (308.9 to 533.3)        | 60.9 (29.2 to 114.2)            | 6.1 (0.0 to 9.5)                  |
| Kazakhstan | 2032 | 458.9 (392.5 to 529.7)     | 290.4 (238.2 to 343.4)     | 145.2 (107.2 to 186.6)        | 21.3 (10.2 to 39.9)             | 1.9 (0.0 to 3.3)                  | 1348.4 (1153.3 to 1556.7) | 853.3 (699.9 to 1009.0)    | 426.8 (315.0 to 548.4)        | 62.6 (30.1 to 117.3)            | 5.6 (0.0 to 9.6)                  |
| Kazakhstan | 2033 | 471.5 (403.0 to 544.5)     | 298.7 (244.1 to 353.6)     | 149.1 (108.8 to 192.5)        | 21.9 (10.5 to 41.0)             | 1.7 (0.0 to 3.3)                  | 1385.6 (1184.1 to 1600.0) | 877.9 (717.4 to 1039.2)    | 438.2 (319.6 to 565.6)        | 64.4 (31.0 to 120.5)            | 5.1 (0.0 to 9.6)                  |
| Kazakhstan | 2034 | 484.3 (412.9 to 559.8)     | 307.2 (250.7 to 365.2)     | 153.0 (110.8 to 197.9)        | 22.6 (10.8 to 42.1)             | 1.5 (0.0 to 3.3)                  | 1423.1 (1213.3 to 1645.0) | 902.7 (736.6 to 1073.3)    | 449.7 (325.7 to 581.6)        | 66.3 (31.8 to 123.8)            | 4.4 (0.0 to 9.8)                  |
| Kazakhstan | 2035 | 497.1 (423.5 to 576.5)     | 315.6 (257.4 to 375.3)     | 156.9 (113.0 to 204.4)        | 23.2 (11.1 to 43.2)             | 1.4 (0.0 to 3.4)                  | 1460.7 (1244.6 to 1694.0) | 927.5 (756.4 to 1102.9)    | 461.1 (332.0 to 600.6)        | 68.1 (32.7 to 127.0)            | 4.0 (0.0 to 10.0)                 |
| Kazakhstan | 2036 | 510.1 (432.5 to 589.9)     | 324.3 (264.2 to 386.3)     | 160.8 (115.1 to 210.2)        | 23.8 (11.4 to 44.3)             | 1.2 (0.0 to 3.5)                  | 1499.1 (1270.8 to 1733.5) | 953.1 (776.4 to 1135.3)    | 472.5 (338.3 to 617.8)        | 69.9 (33.6 to 130.1)            | 3.5 (0.0 to 10.4)                 |
| Kazakhstan | 2037 | 523.1 (443.3 to 605.4)     | 333.0 (269.5 to 396.5)     | 164.6 (117.6 to 216.2)        | 24.4 (11.7 to 45.3)             | 1.1 (0.0 to 3.6)                  | 1537.3 (1302.7 to 1779.2) | 978.6 (792.0 to 1165.2)    | 483.8 (345.5 to 635.3)        | 71.7 (34.4 to 133.2)            | 3.2 (0.0 to 10.6)                 |
| Kazakhstan | 2038 | 536.3 (453.7 to 623.6)     | 341.8 (276.0 to 408.4)     | 168.5 (119.9 to 221.2)        | 25.0 (12.0 to 46.4)             | 1.0 (0.0 to 3.7)                  | 1576.0 (1333.3 to 1832.5) | 1004.5 (810.9 to 1200.2)   | 495.0 (352.4 to 649.9)        | 73.5 (35.3 to 136.3)            | 3.0 (0.0 to 10.8)                 |
| Kazakhstan | 2039 | 549.1 (467.0 to 642.5)     | 350.4 (281.4 to 418.3)     | 172.2 (121.9 to 226.4)        | 25.6 (12.3 to 47.4)             | 0.9 (0.0 to 3.7)                  | 1613.7 (1372.3 to 1888.1) | 1029.6 (827.0 to 1229.3)   | 506.1 (358.4 to 665.2)        | 75.3 (36.1 to 139.4)            | 2.7 (0.0 to 11.0)                 |
| Kazakhstan | 2040 | 561.9 (477.4 to 657.6)     | 358.8 (287.9 to 429.0)     | 176.0 (124.1 to 231.7)        | 26.2 (12.6 to 48.5)             | 0.9 (0.0 to 3.9)                  | 1651.2 (1402.9 to 1932.3) | 1054.4 (846.1 to 1260.5)   | 517.2 (364.7 to 680.8)        | 77.1 (37.0 to 142.7)            | 2.5 (0.0 to 11.5)                 |
| Kazakhstan | 2041 | 574.5 (484.8 to 676.0)     | 367.2 (295.0 to 439.6)     | 179.7 (126.3 to 237.0)        | 26.9 (12.9 to 49.6)             | 0.8 (0.0 to 4.0)                  | 1688.3 (1424.6 to 1986.6) | 1079.0 (866.8 to 1291.9)   | 528.0 (371.3 to 696.5)        | 78.9 (37.9 to 145.9)            | 2.4 (0.0 to 11.8)                 |
| Kazakhstan | 2042 | 587.3 (494.7 to 687.5)     | 375.7 (302.4 to 449.5)     | 183.4 (128.7 to 242.7)        | 27.5 (13.2 to 50.9)             | 0.8 (0.0 to 4.1)                  | 1726.0 (1453.7 to 2020.4) | 1104.1 (888.8 to 1320.8)   | 538.8 (378.3 to 713.3)        | 80.8 (38.8 to 149.4)            | 2.3 (0.0 to 12.1)                 |
| Kazakhstan | 2043 | 599.8 (506.5 to 704.3)     | 384.0 (308.3 to 461.3)     | 187.0 (131.2 to 248.1)        | 28.1 (13.5 to 52.2)             | 0.7 (0.0 to 4.1)                  | 1762.7 (1488.5 to 2069.7) | 1128.5 (905.8 to 1355.7)   | 549.4 (385.5 to 729.2)        | 82.6 (39.6 to 153.3)            | 2.1 (0.0 to 12.1)                 |

| Country    | Year | 2018 US Dollars per capita |                            |                               |                                 |                                   | 2018 PPP per capita       |                            |                               |                                 |                                   |
|------------|------|----------------------------|----------------------------|-------------------------------|---------------------------------|-----------------------------------|---------------------------|----------------------------|-------------------------------|---------------------------------|-----------------------------------|
|            |      | Health spending            | Government health spending | Out-of-pocket health spending | Prepaid private health spending | Development assistance for health | Health spending           | Government health spending | Out-of-pocket health spending | Prepaid private health spending | Development assistance for health |
| Kazakhstan | 2044 | 612.5 (514.1 to 717.7)     | 392.5 (312.8 to 471.8)     | 190.6 (133.6 to 252.7)        | 28.8 (13.8 to 53.5)             | 0.6 (0.0 to 4.2)                  | 1799.8 (1510.6 to 2109.0) | 1153.3 (919.2 to 1386.4)   | 560.0 (392.5 to 742.7)        | 84.5 (40.5 to 157.2)            | 1.9 (0.0 to 12.3)                 |
| Kazakhstan | 2045 | 624.9 (525.9 to 734.6)     | 400.7 (319.8 to 482.4)     | 194.1 (136.0 to 257.5)        | 29.4 (14.1 to 54.8)             | 0.6 (0.0 to 4.3)                  | 1836.3 (1545.5 to 2158.8) | 1177.6 (939.7 to 1417.5)   | 570.4 (399.6 to 756.7)        | 86.4 (41.5 to 161.0)            | 1.8 (0.0 to 12.8)                 |
| Kazakhstan | 2046 | 637.5 (535.4 to 747.6)     | 409.2 (324.8 to 492.8)     | 197.6 (138.2 to 262.5)        | 30.0 (14.4 to 55.9)             | 0.6 (0.0 to 4.4)                  | 1873.4 (1573.4 to 2197.0) | 1202.6 (954.5 to 1448.0)   | 580.7 (406.1 to 771.4)        | 88.3 (42.5 to 164.3)            | 1.8 (0.0 to 13.0)                 |
| Kazakhstan | 2047 | 649.8 (544.8 to 760.1)     | 417.5 (329.6 to 503.7)     | 201.0 (140.3 to 267.3)        | 30.7 (14.7 to 57.1)             | 0.6 (0.0 to 4.4)                  | 1909.6 (1601.1 to 2233.7) | 1227.0 (968.7 to 1480.1)   | 590.7 (412.4 to 785.5)        | 90.1 (43.3 to 167.7)            | 1.7 (0.0 to 13.0)                 |
| Kazakhstan | 2048 | 662.3 (554.2 to 781.6)     | 425.9 (332.9 to 515.0)     | 204.5 (143.1 to 271.7)        | 31.3 (15.0 to 58.2)             | 0.6 (0.0 to 4.7)                  | 1946.1 (1628.6 to 2296.8) | 1251.5 (978.2 to 1513.5)   | 600.8 (420.4 to 798.3)        | 92.0 (44.2 to 171.0)            | 1.8 (0.0 to 13.8)                 |
| Kazakhstan | 2049 | 674.9 (559.2 to 789.3)     | 434.5 (338.7 to 527.4)     | 207.9 (145.3 to 276.0)        | 31.9 (15.3 to 59.3)             | 0.6 (0.0 to 4.9)                  | 1983.2 (1643.4 to 2319.3) | 1276.7 (995.2 to 1549.8)   | 610.9 (427.1 to 811.1)        | 93.8 (45.0 to 174.3)            | 1.8 (0.0 to 14.5)                 |
| Kazakhstan | 2050 | 687.9 (569.8 to 806.2)     | 443.4 (344.7 to 541.0)     | 211.4 (148.3 to 280.5)        | 32.5 (15.6 to 60.6)             | 0.6 (0.0 to 5.1)                  | 2021.3 (1674.3 to 2369.2) | 1303.0 (1013.0 to 1589.9)  | 621.1 (435.8 to 824.1)        | 95.5 (45.8 to 178.1)            | 1.7 (0.0 to 14.8)                 |
| Kenya      | 1995 | 59.9 (49.1 to 72.7)        | 21.1 (16.1 to 27.5)        | 27.9 (20.4 to 37.6)           | 7.6 (3.6 to 13.9)               | 3.3 (3.3 to 3.3)                  | 122.6 (100.7 to 149.0)    | 43.2 (33.0 to 56.3)        | 57.2 (41.8 to 77.1)           | 15.5 (7.4 to 28.4)              | 6.8 (6.8 to 6.8)                  |
| Kenya      | 1996 | 60.4 (50.0 to 73.2)        | 20.7 (15.7 to 26.8)        | 27.7 (19.9 to 37.6)           | 7.5 (3.5 to 13.6)               | 4.6 (4.6 to 4.6)                  | 123.8 (102.4 to 149.8)    | 42.4 (32.1 to 54.8)        | 56.7 (40.9 to 77.0)           | 15.3 (7.3 to 27.8)              | 9.4 (9.4 to 9.4)                  |
| Kenya      | 1997 | 57.7 (47.8 to 70.2)        | 20.2 (15.4 to 26.1)        | 27.5 (19.8 to 37.4)           | 7.4 (3.5 to 13.5)               | 2.7 (2.7 to 2.7)                  | 118.2 (97.8 to 143.8)     | 41.3 (31.5 to 53.4)        | 56.3 (40.5 to 76.6)           | 15.2 (7.2 to 27.8)              | 5.5 (5.5 to 5.5)                  |
| Kenya      | 1998 | 59.3 (49.1 to 71.6)        | 20.2 (15.5 to 26.0)        | 27.7 (19.9 to 37.9)           | 7.5 (3.5 to 13.5)               | 4.0 (4.0 to 4.0)                  | 121.6 (100.5 to 146.6)    | 41.3 (31.7 to 53.3)        | 56.8 (40.8 to 77.7)           | 15.3 (7.1 to 27.7)              | 8.2 (8.2 to 8.2)                  |
| Kenya      | 1999 | 58.3 (48.1 to 70.4)        | 19.7 (15.0 to 25.2)        | 28.0 (19.9 to 38.2)           | 7.5 (3.5 to 13.9)               | 3.1 (3.1 to 3.1)                  | 119.3 (98.5 to 144.1)     | 40.3 (30.7 to 51.6)        | 57.3 (40.7 to 78.2)           | 15.3 (7.3 to 28.4)              | 6.4 (6.4 to 6.4)                  |
| Kenya      | 2000 | 58.1 (48.2 to 69.9)        | 18.6 (14.3 to 23.9)        | 28.2 (19.9 to 38.5)           | 7.3 (3.6 to 13.1)               | 4.1 (4.1 to 4.1)                  | 119.0 (98.7 to 143.3)     | 38.0 (29.3 to 49.0)        | 57.8 (40.8 to 79.0)           | 14.9 (7.4 to 26.9)              | 8.3 (8.3 to 8.3)                  |
| Kenya      | 2001 | 59.6 (49.3 to 71.8)        | 18.7 (14.4 to 24.1)        | 28.9 (20.6 to 39.6)           | 7.4 (3.6 to 13.2)               | 4.5 (4.5 to 4.5)                  | 122.0 (101.0 to 147.1)    | 38.3 (29.4 to 49.3)        | 59.2 (42.1 to 81.1)           | 15.2 (7.3 to 27.1)              | 9.3 (9.3 to 9.3)                  |
| Kenya      | 2002 | 59.3 (48.9 to 71.9)        | 18.7 (14.5 to 24.1)        | 29.1 (21.0 to 40.1)           | 7.4 (3.5 to 13.2)               | 4.2 (4.2 to 4.2)                  | 121.5 (100.1 to 147.2)    | 38.4 (29.8 to 49.4)        | 59.6 (43.0 to 82.1)           | 15.1 (7.2 to 27.0)              | 8.6 (8.6 to 8.6)                  |
| Kenya      | 2003 | 61.7 (51.2 to 74.5)        | 18.8 (14.5 to 24.0)        | 29.6 (21.5 to 40.8)           | 7.3 (3.4 to 13.2)               | 6.1 (6.1 to 6.1)                  | 126.5 (104.8 to 152.6)    | 38.4 (29.6 to 49.2)        | 60.7 (44.0 to 83.6)           | 14.9 (7.1 to 27.0)              | 12.4 (12.4 to 12.4)               |
| Kenya      | 2004 | 63.5 (53.0 to 76.7)        | 18.8 (14.5 to 24.0)        | 29.9 (21.9 to 40.5)           | 7.2 (3.5 to 13.0)               | 7.6 (7.6 to 7.6)                  | 130.2 (108.6 to 157.0)    | 38.5 (29.6 to 49.1)        | 61.3 (44.9 to 83.0)           | 14.8 (7.2 to 26.6)              | 15.6 (15.6 to 15.6)               |
| Kenya      | 2005 | 63.8 (53.4 to 76.7)        | 19.1 (14.7 to 24.3)        | 29.8 (21.8 to 40.3)           | 7.3 (3.5 to 12.9)               | 7.6 (7.6 to 7.6)                  | 130.7 (109.3 to 157.1)    | 39.2 (30.1 to 49.8)        | 61.0 (44.6 to 82.5)           | 14.9 (7.1 to 26.4)              | 15.6 (15.6 to 15.6)               |
| Kenya      | 2006 | 66.5 (56.3 to 78.5)        | 19.4 (14.8 to 24.7)        | 28.4 (21.0 to 38.2)           | 7.2 (3.5 to 12.8)               | 11.4 (11.4 to 11.4)               | 136.1 (115.4 to 160.8)    | 39.7 (30.4 to 50.6)        | 58.3 (42.9 to 78.2)           | 14.8 (7.1 to 26.2)              | 23.4 (23.4 to 23.4)               |
| Kenya      | 2007 | 67.1 (56.9 to 79.5)        | 20.3 (15.6 to 26.2)        | 27.6 (20.4 to 36.8)           | 7.9 (3.8 to 14.0)               | 11.2 (11.2 to 11.2)               | 137.4 (116.6 to 162.9)    | 41.7 (31.9 to 53.7)        | 56.5 (41.7 to 75.4)           | 16.1 (7.8 to 28.8)              | 23.0 (23.0 to 23.0)               |
| Kenya      | 2008 | 69.5 (59.6 to 81.9)        | 20.6 (15.9 to 26.6)        | 26.0 (19.2 to 35.2)           | 8.3 (4.1 to 14.5)               | 14.6 (14.6 to 14.6)               | 142.3 (122.0 to 167.7)    | 42.2 (32.6 to 54.5)        | 53.3 (39.3 to 72.2)           | 17.0 (8.3 to 29.6)              | 29.8 (29.8 to 29.8)               |

| Country | Year | 2018 US Dollars per capita |                            |                               |                                 |                                   | 2018 PPP per capita    |                            |                               |                                 |                                   |
|---------|------|----------------------------|----------------------------|-------------------------------|---------------------------------|-----------------------------------|------------------------|----------------------------|-------------------------------|---------------------------------|-----------------------------------|
|         |      | Health spending            | Government health spending | Out-of-pocket health spending | Prepaid private health spending | Development assistance for health | Health spending        | Government health spending | Out-of-pocket health spending | Prepaid private health spending | Development assistance for health |
| Kenya   | 2009 | 71.0 (61.1 to 83.5)        | 21.5 (16.6 to 27.9)        | 25.1 (18.5 to 34.3)           | 8.8 (4.5 to 15.8)               | 15.6 (15.6 to 15.6)               | 145.4 (125.2 to 171.0) | 44.0 (34.0 to 57.1)        | 51.5 (37.9 to 70.2)           | 18.1 (9.3 to 32.3)              | 31.9 (31.9 to 31.9)               |
| Kenya   | 2010 | 76.7 (65.7 to 88.9)        | 23.2 (17.8 to 30.4)        | 25.2 (18.6 to 34.1)           | 9.6 (4.9 to 16.9)               | 18.7 (18.7 to 18.7)               | 157.0 (134.6 to 182.0) | 47.6 (36.5 to 62.2)        | 51.6 (38.0 to 69.8)           | 19.7 (10.0 to 34.6)             | 38.2 (38.2 to 38.2)               |
| Kenya   | 2011 | 79.4 (68.4 to 91.7)        | 24.4 (18.7 to 31.5)        | 25.1 (18.4 to 33.6)           | 9.8 (5.1 to 17.5)               | 20.1 (20.1 to 20.1)               | 162.6 (140.1 to 187.9) | 50.0 (38.3 to 64.5)        | 51.3 (37.8 to 68.9)           | 20.2 (10.4 to 35.9)             | 41.1 (41.1 to 41.1)               |
| Kenya   | 2012 | 81.8 (70.5 to 94.8)        | 25.3 (19.2 to 32.9)        | 24.9 (18.4 to 33.5)           | 10.0 (5.1 to 17.9)              | 21.6 (21.6 to 21.6)               | 167.6 (144.4 to 194.2) | 51.9 (39.2 to 67.3)        | 51.0 (37.7 to 68.5)           | 20.5 (10.4 to 36.7)             | 44.2 (44.2 to 44.2)               |
| Kenya   | 2013 | 85.0 (73.4 to 98.9)        | 26.3 (20.1 to 33.9)        | 24.8 (18.2 to 33.3)           | 10.4 (5.2 to 18.9)              | 23.5 (23.5 to 23.5)               | 174.1 (150.3 to 202.5) | 53.9 (41.2 to 69.5)        | 50.8 (37.3 to 68.1)           | 21.3 (10.7 to 38.7)             | 48.2 (48.2 to 48.2)               |
| Kenya   | 2014 | 82.4 (70.6 to 97.3)        | 26.8 (20.5 to 34.8)        | 23.9 (17.4 to 32.1)           | 11.1 (5.5 to 20.9)              | 20.6 (20.6 to 20.6)               | 168.8 (144.6 to 199.2) | 54.9 (42.1 to 71.3)        | 49.0 (35.6 to 65.7)           | 22.7 (11.3 to 42.8)             | 42.2 (42.2 to 42.2)               |
| Kenya   | 2015 | 80.6 (68.5 to 96.1)        | 27.2 (21.0 to 35.4)        | 22.9 (16.5 to 30.8)           | 11.8 (5.7 to 22.5)              | 18.7 (18.7 to 18.7)               | 165.1 (140.4 to 196.8) | 55.8 (43.0 to 72.5)        | 47.0 (33.7 to 63.0)           | 24.1 (11.7 to 46.0)             | 38.2 (38.2 to 38.2)               |
| Kenya   | 2016 | 81.9 (70.0 to 95.9)        | 27.7 (21.1 to 35.8)        | 22.2 (15.8 to 30.0)           | 12.5 (6.1 to 24.5)              | 19.5 (19.5 to 19.5)               | 167.7 (143.4 to 196.4) | 56.8 (43.3 to 73.3)        | 45.5 (32.4 to 61.5)           | 25.5 (12.5 to 50.1)             | 39.8 (39.8 to 39.8)               |
| Kenya   | 2017 | 84.4 (71.6 to 99.7)        | 28.7 (21.9 to 37.1)        | 22.4 (16.0 to 30.2)           | 12.8 (6.3 to 25.2)              | 20.4 (20.4 to 20.4)               | 172.8 (146.7 to 204.2) | 58.8 (44.8 to 76.0)        | 45.9 (32.9 to 61.8)           | 26.3 (12.9 to 51.6)             | 41.8 (41.8 to 41.8)               |
| Kenya   | 2018 | 83.4 (70.9 to 99.4)        | 29.3 (22.2 to 37.9)        | 22.6 (16.1 to 30.5)           | 13.1 (6.4 to 25.6)              | 18.4 (18.3 to 18.5)               | 170.7 (145.1 to 203.6) | 59.9 (45.5 to 77.6)        | 46.3 (33.0 to 62.5)           | 26.8 (13.1 to 52.5)             | 37.7 (37.4 to 38.0)               |
| Kenya   | 2019 | 84.2 (70.5 to 99.6)        | 29.8 (22.6 to 38.6)        | 22.7 (16.2 to 30.9)           | 13.3 (6.5 to 26.1)              | 18.3 (17.1 to 19.4)               | 172.5 (144.4 to 203.9) | 61.1 (46.4 to 79.1)        | 46.6 (33.2 to 63.3)           | 27.3 (13.4 to 53.5)             | 37.5 (35.0 to 39.6)               |
| Kenya   | 2020 | 85.2 (71.3 to 102.1)       | 30.3 (23.1 to 39.2)        | 22.9 (16.3 to 31.1)           | 13.6 (6.6 to 26.6)              | 18.4 (16.8 to 19.9)               | 174.4 (146.0 to 209.1) | 62.2 (47.3 to 80.3)        | 46.8 (33.4 to 63.6)           | 27.8 (13.6 to 54.4)             | 37.6 (34.5 to 40.7)               |
| Kenya   | 2021 | 86.2 (72.6 to 102.5)       | 30.9 (23.5 to 39.9)        | 23.0 (16.5 to 31.4)           | 13.8 (6.7 to 27.0)              | 18.5 (16.7 to 20.5)               | 176.6 (148.6 to 210.0) | 63.2 (48.0 to 81.8)        | 47.1 (33.7 to 64.3)           | 28.3 (13.8 to 55.4)             | 38.0 (34.1 to 42.0)               |
| Kenya   | 2022 | 87.4 (73.2 to 103.1)       | 31.5 (23.9 to 40.6)        | 23.1 (16.5 to 31.5)           | 14.1 (6.9 to 27.6)              | 18.7 (16.6 to 21.0)               | 179.0 (149.9 to 211.2) | 64.4 (49.0 to 83.2)        | 47.4 (33.7 to 64.5)           | 28.8 (14.1 to 56.5)             | 38.4 (34.1 to 43.1)               |
| Kenya   | 2023 | 88.8 (75.5 to 105.2)       | 32.2 (24.5 to 41.5)        | 23.3 (16.6 to 31.6)           | 14.4 (7.1 to 28.3)              | 18.9 (16.4 to 21.5)               | 181.8 (154.6 to 215.5) | 66.0 (50.2 to 85.1)        | 47.6 (34.0 to 64.7)           | 29.5 (14.5 to 57.9)             | 38.7 (33.6 to 44.1)               |
| Kenya   | 2024 | 90.2 (75.8 to 107.2)       | 33.0 (25.1 to 42.6)        | 23.4 (16.7 to 31.9)           | 14.7 (7.2 to 28.9)              | 19.1 (16.4 to 22.0)               | 184.8 (155.3 to 219.6) | 67.6 (51.5 to 87.3)        | 47.9 (34.1 to 65.3)           | 30.2 (14.8 to 59.3)             | 39.1 (33.7 to 45.1)               |
| Kenya   | 2025 | 91.6 (77.1 to 109.5)       | 33.8 (25.8 to 43.7)        | 23.5 (16.8 to 32.0)           | 15.1 (7.4 to 29.6)              | 19.2 (16.3 to 22.5)               | 187.6 (158.0 to 224.3) | 69.2 (52.9 to 89.5)        | 48.2 (34.5 to 65.5)           | 30.8 (15.2 to 60.7)             | 39.3 (33.5 to 46.1)               |
| Kenya   | 2026 | 93.0 (78.4 to 110.9)       | 34.6 (26.4 to 44.8)        | 23.7 (17.0 to 32.1)           | 15.4 (7.6 to 30.3)              | 19.3 (16.3 to 22.9)               | 190.5 (160.5 to 227.1) | 70.9 (54.1 to 91.8)        | 48.5 (34.7 to 65.7)           | 31.5 (15.6 to 62.1)             | 39.5 (33.3 to 46.9)               |
| Kenya   | 2027 | 94.5 (78.7 to 112.7)       | 35.5 (27.1 to 45.9)        | 23.8 (16.9 to 32.2)           | 15.7 (7.8 to 31.0)              | 19.4 (16.1 to 23.6)               | 193.5 (161.2 to 230.8) | 72.7 (55.5 to 94.1)        | 48.8 (34.6 to 65.9)           | 32.2 (15.9 to 63.6)             | 39.8 (32.9 to 48.3)               |
| Kenya   | 2028 | 96.0 (79.4 to 114.4)       | 36.3 (27.6 to 46.9)        | 24.0 (16.9 to 32.4)           | 16.1 (8.0 to 31.8)              | 19.6 (16.0 to 23.9)               | 196.7 (162.7 to 234.4) | 74.4 (56.6 to 96.1)        | 49.1 (34.6 to 66.4)           | 32.9 (16.3 to 65.0)             | 40.1 (32.9 to 49.0)               |
| Kenya   | 2029 | 97.6 (81.4 to 116.5)       | 37.2 (28.2 to 48.1)        | 24.2 (17.0 to 32.8)           | 16.4 (8.1 to 32.5)              | 19.8 (15.9 to 24.5)               | 199.9 (166.6 to 238.5) | 76.2 (57.8 to 98.4)        | 49.5 (34.8 to 67.1)           | 33.7 (16.6 to 66.5)             | 40.5 (32.5 to 50.3)               |

| Country | Year | 2018 US Dollars per capita |                            |                               |                                 |                                   | 2018 PPP per capita    |                            |                               |                                 |                                   |
|---------|------|----------------------------|----------------------------|-------------------------------|---------------------------------|-----------------------------------|------------------------|----------------------------|-------------------------------|---------------------------------|-----------------------------------|
|         |      | Health spending            | Government health spending | Out-of-pocket health spending | Prepaid private health spending | Development assistance for health | Health spending        | Government health spending | Out-of-pocket health spending | Prepaid private health spending | Development assistance for health |
| Kenya   | 2030 | 99.2 (82.1 to 119.1)       | 38.1 (28.9 to 49.3)        | 24.3 (17.2 to 33.2)           | 16.8 (8.3 to 33.2)              | 20.0 (15.9 to 25.0)               | 203.2 (168.1 to 243.9) | 78.1 (59.2 to 100.9)       | 49.9 (35.2 to 67.9)           | 34.4 (16.9 to 68.0)             | 40.9 (32.6 to 51.1)               |
| Kenya   | 2031 | 100.9 (83.2 to 121.7)      | 39.0 (29.5 to 50.5)        | 24.5 (17.3 to 33.5)           | 17.1 (8.4 to 33.9)              | 20.2 (15.8 to 25.5)               | 206.6 (170.4 to 249.4) | 79.9 (60.4 to 103.4)       | 50.3 (35.3 to 68.7)           | 35.1 (17.2 to 69.5)             | 41.4 (32.3 to 52.3)               |
| Kenya   | 2032 | 102.6 (84.5 to 123.0)      | 39.9 (30.1 to 51.8)        | 24.7 (17.3 to 34.0)           | 17.5 (8.6 to 34.8)              | 20.4 (15.7 to 26.2)               | 210.2 (173.1 to 251.8) | 81.8 (61.7 to 106.2)       | 50.7 (35.4 to 69.6)           | 35.9 (17.5 to 71.2)             | 41.9 (32.2 to 53.6)               |
| Kenya   | 2033 | 104.4 (87.0 to 126.2)      | 40.9 (30.8 to 53.1)        | 25.0 (17.3 to 34.4)           | 17.9 (8.7 to 35.6)              | 20.7 (15.7 to 27.0)               | 213.9 (178.1 to 258.5) | 83.7 (63.1 to 108.8)       | 51.2 (35.4 to 70.4)           | 36.6 (17.9 to 73.0)             | 42.4 (32.3 to 55.3)               |
| Kenya   | 2034 | 106.4 (88.0 to 128.9)      | 41.9 (31.5 to 54.5)        | 25.2 (17.4 to 35.0)           | 18.2 (8.9 to 36.5)              | 21.1 (15.8 to 28.2)               | 217.9 (180.2 to 263.9) | 85.8 (64.6 to 111.6)       | 51.7 (35.6 to 71.8)           | 37.4 (18.2 to 74.8)             | 43.1 (32.4 to 57.7)               |
| Kenya   | 2035 | 108.4 (89.3 to 131.1)      | 42.9 (32.3 to 56.0)        | 25.5 (17.4 to 35.8)           | 18.6 (9.1 to 37.3)              | 21.4 (15.8 to 28.6)               | 222.0 (182.9 to 268.6) | 87.9 (66.1 to 114.6)       | 52.2 (35.7 to 73.2)           | 38.1 (18.6 to 76.4)             | 43.8 (32.3 to 58.6)               |
| Kenya   | 2036 | 110.5 (91.0 to 133.3)      | 44.0 (33.0 to 57.1)        | 25.7 (17.6 to 36.2)           | 19.0 (9.3 to 38.0)              | 21.8 (16.0 to 29.5)               | 226.2 (186.3 to 273.0) | 90.0 (67.6 to 117.0)       | 52.7 (36.0 to 74.1)           | 38.9 (19.0 to 77.9)             | 44.6 (32.7 to 60.5)               |
| Kenya   | 2037 | 112.6 (92.8 to 137.3)      | 45.1 (33.8 to 58.6)        | 26.0 (17.7 to 36.8)           | 19.4 (9.5 to 38.8)              | 22.1 (15.9 to 30.4)               | 230.6 (190.0 to 281.2) | 92.3 (69.3 to 120.0)       | 53.3 (36.3 to 75.4)           | 39.7 (19.5 to 79.4)             | 45.2 (32.6 to 62.2)               |
| Kenya   | 2038 | 114.8 (93.2 to 140.1)      | 46.2 (34.7 to 59.9)        | 26.3 (17.9 to 37.5)           | 19.8 (9.7 to 39.5)              | 22.4 (15.9 to 31.5)               | 235.1 (190.9 to 286.9) | 94.7 (71.1 to 122.7)       | 54.0 (36.6 to 76.8)           | 40.6 (19.9 to 81.0)             | 46.0 (32.6 to 64.5)               |
| Kenya   | 2039 | 117.1 (95.4 to 144.0)      | 47.4 (35.6 to 61.4)        | 26.7 (18.0 to 38.1)           | 20.2 (9.9 to 40.3)              | 22.8 (16.0 to 32.8)               | 239.8 (195.3 to 294.9) | 97.1 (72.8 to 125.7)       | 54.6 (36.9 to 78.0)           | 41.4 (20.3 to 82.6)             | 46.7 (32.8 to 67.3)               |
| Kenya   | 2040 | 119.5 (98.8 to 147.2)      | 48.7 (36.4 to 62.9)        | 27.0 (18.2 to 38.6)           | 20.6 (10.1 to 41.2)             | 23.2 (16.0 to 34.5)               | 244.8 (202.4 to 301.6) | 99.7 (74.6 to 128.9)       | 55.3 (37.2 to 79.2)           | 42.2 (20.8 to 84.4)             | 47.6 (32.8 to 70.7)               |
| Kenya   | 2041 | 122.1 (100.3 to 149.5)     | 49.9 (37.4 to 64.5)        | 27.4 (18.3 to 39.3)           | 21.0 (10.3 to 42.1)             | 23.7 (16.2 to 35.5)               | 250.0 (205.4 to 306.2) | 102.3 (76.6 to 132.1)      | 56.1 (37.5 to 80.4)           | 43.1 (21.2 to 86.2)             | 48.5 (33.2 to 72.7)               |
| Kenya   | 2042 | 124.7 (102.2 to 153.4)     | 51.3 (38.2 to 66.5)        | 27.8 (18.5 to 39.9)           | 21.5 (10.5 to 43.0)             | 24.2 (16.3 to 36.9)               | 255.4 (209.3 to 314.2) | 105.0 (78.2 to 136.2)      | 56.9 (38.0 to 81.8)           | 44.0 (21.6 to 88.1)             | 49.6 (33.4 to 75.5)               |
| Kenya   | 2043 | 127.3 (103.8 to 157.6)     | 52.6 (39.3 to 68.4)        | 28.2 (18.8 to 40.6)           | 21.9 (10.7 to 43.7)             | 24.7 (16.4 to 38.8)               | 260.8 (212.7 to 322.8) | 107.7 (80.4 to 140.2)      | 57.7 (38.4 to 83.2)           | 44.9 (22.0 to 89.6)             | 50.6 (33.5 to 79.4)               |
| Kenya   | 2044 | 130.1 (106.7 to 162.6)     | 54.0 (40.3 to 70.6)        | 28.6 (19.0 to 41.2)           | 22.3 (10.9 to 44.5)             | 25.3 (16.5 to 39.6)               | 266.6 (218.4 to 333.1) | 110.5 (82.5 to 144.5)      | 58.5 (38.9 to 84.4)           | 45.8 (22.4 to 91.2)             | 51.7 (33.8 to 81.1)               |
| Kenya   | 2045 | 133.0 (108.4 to 164.5)     | 55.4 (41.2 to 72.6)        | 29.0 (19.3 to 41.8)           | 22.8 (11.1 to 45.4)             | 25.8 (16.8 to 41.0)               | 272.5 (222.0 to 337.0) | 113.5 (84.4 to 148.7)      | 59.4 (39.5 to 85.6)           | 46.7 (22.8 to 93.1)             | 52.9 (34.5 to 84.1)               |
| Kenya   | 2046 | 136.0 (110.5 to 170.9)     | 56.8 (41.8 to 74.5)        | 29.5 (19.5 to 42.3)           | 23.2 (11.3 to 46.4)             | 26.4 (17.1 to 43.2)               | 278.5 (226.3 to 350.1) | 116.4 (85.7 to 152.6)      | 60.4 (40.0 to 86.7)           | 47.6 (23.2 to 95.1)             | 54.1 (34.9 to 88.4)               |
| Kenya   | 2047 | 139.0 (111.6 to 174.1)     | 58.3 (42.8 to 76.8)        | 29.9 (19.8 to 43.1)           | 23.7 (11.6 to 47.4)             | 27.1 (17.0 to 46.5)               | 284.8 (228.5 to 356.6) | 119.4 (87.8 to 157.2)      | 61.3 (40.6 to 88.2)           | 48.6 (23.7 to 97.2)             | 55.5 (34.8 to 95.3)               |
| Kenya   | 2048 | 142.2 (113.0 to 181.2)     | 59.7 (44.1 to 78.9)        | 30.4 (20.1 to 43.8)           | 24.2 (11.8 to 48.5)             | 27.8 (17.3 to 48.5)               | 291.2 (231.4 to 371.1) | 122.4 (90.2 to 161.6)      | 62.3 (41.2 to 89.7)           | 49.5 (24.1 to 99.3)             | 57.0 (35.4 to 99.4)               |
| Kenya   | 2049 | 145.3 (115.0 to 182.3)     | 61.2 (45.3 to 80.9)        | 30.9 (20.4 to 44.4)           | 24.6 (12.0 to 49.5)             | 28.6 (17.4 to 49.9)               | 297.7 (235.5 to 373.4) | 125.4 (92.8 to 165.8)      | 63.3 (41.9 to 91.0)           | 50.5 (24.6 to 101.4)            | 58.5 (35.7 to 102.1)              |
| Kenya   | 2050 | 148.6 (118.0 to 186.5)     | 62.7 (46.3 to 83.4)        | 31.4 (20.8 to 45.2)           | 25.1 (12.2 to 50.6)             | 29.4 (17.7 to 51.8)               | 304.5 (241.7 to 381.9) | 128.5 (94.8 to 170.9)      | 64.4 (42.6 to 92.5)           | 51.4 (25.0 to 103.5)            | 60.2 (36.2 to 106.2)              |

| Country  | Year | 2018 US Dollars per capita |                            |                               |                                 |                                   | 2018 PPP per capita    |                            |                               |                                 |                                   |
|----------|------|----------------------------|----------------------------|-------------------------------|---------------------------------|-----------------------------------|------------------------|----------------------------|-------------------------------|---------------------------------|-----------------------------------|
|          |      | Health spending            | Government health spending | Out-of-pocket health spending | Prepaid private health spending | Development assistance for health | Health spending        | Government health spending | Out-of-pocket health spending | Prepaid private health spending | Development assistance for health |
| Kiribati | 1995 | 168.7 (146.5 to 192.5)     | 145.0 (124.6 to 167.9)     | 20.1 (13.8 to 28.0)           | 0.5 (0.2 to 1.0)                | 3.1 (3.1 to 3.1)                  | 198.2 (172.1 to 226.1) | 170.3 (146.4 to 197.3)     | 23.6 (16.2 to 32.9)           | 0.6 (0.3 to 1.2)                | 3.6 (3.6 to 3.6)                  |
| Kiribati | 1996 | 164.7 (144.4 to 186.7)     | 144.1 (125.3 to 164.8)     | 20.1 (13.8 to 27.9)           | 0.5 (0.2 to 0.9)                | 0.0 (0.0 to 0.0)                  | 193.5 (169.6 to 219.3) | 169.3 (147.2 to 193.6)     | 23.6 (16.3 to 32.7)           | 0.6 (0.3 to 1.1)                | 0.0 (0.0 to 0.0)                  |
| Kiribati | 1997 | 163.9 (145.1 to 185.7)     | 142.3 (123.7 to 162.0)     | 20.0 (13.9 to 27.5)           | 0.4 (0.2 to 0.8)                | 1.2 (1.2 to 1.2)                  | 192.6 (170.5 to 218.2) | 167.1 (145.3 to 190.2)     | 23.5 (16.3 to 32.4)           | 0.5 (0.2 to 1.0)                | 1.5 (1.5 to 1.5)                  |
| Kiribati | 1998 | 163.0 (144.1 to 184.4)     | 142.1 (124.4 to 161.2)     | 20.0 (13.8 to 27.5)           | 0.3 (0.1 to 0.6)                | 0.5 (0.5 to 0.5)                  | 191.5 (169.3 to 216.6) | 167.0 (146.2 to 189.4)     | 23.5 (16.2 to 32.3)           | 0.4 (0.2 to 0.7)                | 0.6 (0.6 to 0.6)                  |
| Kiribati | 1999 | 164.9 (146.0 to 185.8)     | 143.3 (125.8 to 162.0)     | 19.5 (13.4 to 26.7)           | 0.2 (0.1 to 0.3)                | 1.9 (1.9 to 1.9)                  | 193.8 (171.5 to 218.2) | 168.4 (147.7 to 190.2)     | 23.0 (15.7 to 31.3)           | 0.2 (0.1 to 0.3)                | 2.3 (2.3 to 2.3)                  |
| Kiribati | 2000 | 175.2 (155.8 to 197.2)     | 153.5 (135.4 to 173.8)     | 19.1 (13.2 to 26.3)           | 0.0 (0.0 to 0.1)                | 2.5 (2.5 to 2.5)                  | 205.8 (183.0 to 231.7) | 180.4 (159.0 to 204.2)     | 22.5 (15.5 to 30.9)           | 0.0 (0.0 to 0.1)                | 2.9 (2.9 to 2.9)                  |
| Kiribati | 2001 | 186.4 (166.2 to 209.8)     | 165.1 (145.9 to 186.0)     | 17.5 (12.3 to 24.2)           | 0.0 (0.0 to 0.0)                | 3.8 (3.8 to 3.8)                  | 219.0 (195.2 to 246.5) | 193.9 (171.4 to 218.5)     | 20.6 (14.5 to 28.4)           | 0.0 (0.0 to 0.0)                | 4.4 (4.4 to 4.4)                  |
| Kiribati | 2002 | 195.5 (174.3 to 219.5)     | 174.7 (153.7 to 196.8)     | 17.3 (12.1 to 24.1)           | 0.0 (0.0 to 0.0)                | 3.5 (3.5 to 3.5)                  | 229.7 (204.7 to 257.8) | 205.2 (180.5 to 231.2)     | 20.3 (14.3 to 28.3)           | 0.0 (0.0 to 0.0)                | 4.2 (4.2 to 4.2)                  |
| Kiribati | 2003 | 199.8 (178.5 to 223.2)     | 175.9 (155.1 to 198.2)     | 17.3 (12.2 to 24.3)           | 0.0 (0.0 to 0.0)                | 6.6 (6.6 to 6.6)                  | 234.7 (209.7 to 262.2) | 206.6 (182.2 to 232.8)     | 20.4 (14.3 to 28.6)           | 0.0 (0.0 to 0.0)                | 7.7 (7.7 to 7.7)                  |
| Kiribati | 2004 | 271.4 (250.0 to 294.1)     | 175.2 (155.0 to 195.8)     | 17.3 (12.2 to 24.6)           | 0.0 (0.0 to 0.0)                | 78.9 (78.9 to 78.9)               | 318.8 (293.7 to 345.5) | 205.8 (182.0 to 230.0)     | 20.4 (14.3 to 28.8)           | 0.0 (0.0 to 0.0)                | 92.7 (92.7 to 92.7)               |
| Kiribati | 2005 | 225.2 (204.6 to 246.3)     | 171.9 (152.4 to 192.5)     | 17.6 (12.2 to 24.9)           | 0.0 (0.0 to 0.0)                | 35.7 (35.7 to 35.7)               | 264.6 (240.4 to 289.3) | 202.0 (179.1 to 226.2)     | 20.7 (14.3 to 29.3)           | 0.0 (0.0 to 0.0)                | 41.9 (41.9 to 41.9)               |
| Kiribati | 2006 | 209.4 (190.5 to 229.0)     | 155.4 (137.3 to 174.8)     | 17.4 (12.2 to 24.6)           | 0.0 (0.0 to 0.0)                | 36.5 (36.5 to 36.5)               | 246.0 (223.8 to 269.1) | 182.6 (161.2 to 205.3)     | 20.5 (14.3 to 28.9)           | 0.0 (0.0 to 0.0)                | 42.9 (42.9 to 42.9)               |
| Kiribati | 2007 | 225.1 (206.3 to 245.1)     | 148.2 (130.2 to 167.4)     | 18.4 (12.7 to 26.4)           | 0.0 (0.0 to 0.0)                | 58.4 (58.4 to 58.4)               | 264.4 (242.4 to 288.0) | 174.1 (153.0 to 196.7)     | 21.7 (14.9 to 31.1)           | 0.0 (0.0 to 0.0)                | 68.6 (68.6 to 68.6)               |
| Kiribati | 2008 | 265.5 (247.0 to 285.5)     | 139.2 (122.7 to 157.5)     | 21.2 (14.6 to 30.8)           | 0.2 (0.1 to 0.4)                | 104.9 (104.9 to 104.9)            | 311.8 (290.2 to 335.3) | 163.5 (144.2 to 185.0)     | 24.8 (17.2 to 36.1)           | 0.3 (0.1 to 0.5)                | 123.3 (123.3 to 123.3)            |
| Kiribati | 2009 | 218.0 (200.3 to 237.4)     | 126.6 (111.4 to 144.4)     | 22.3 (15.5 to 32.9)           | 1.5 (0.7 to 2.7)                | 67.6 (67.6 to 67.6)               | 256.1 (235.3 to 278.9) | 148.8 (130.9 to 169.6)     | 26.2 (18.2 to 38.6)           | 1.7 (0.8 to 3.1)                | 79.4 (79.4 to 79.4)               |
| Kiribati | 2010 | 217.9 (201.0 to 235.8)     | 115.1 (100.3 to 131.2)     | 22.5 (16.0 to 32.5)           | 3.5 (1.7 to 6.5)                | 76.7 (76.7 to 76.7)               | 256.0 (236.1 to 277.0) | 135.3 (117.8 to 154.2)     | 26.5 (18.8 to 38.2)           | 4.1 (2.0 to 7.6)                | 90.1 (90.1 to 90.1)               |
| Kiribati | 2011 | 203.9 (187.5 to 222.8)     | 109.9 (95.4 to 126.2)      | 22.8 (16.3 to 32.5)           | 5.4 (2.7 to 9.9)                | 65.8 (65.8 to 65.8)               | 239.5 (220.3 to 261.7) | 129.1 (112.1 to 148.2)     | 26.8 (19.1 to 38.1)           | 6.3 (3.1 to 11.7)               | 77.3 (77.3 to 77.3)               |
| Kiribati | 2012 | 210.6 (192.8 to 230.3)     | 111.1 (96.4 to 127.6)      | 23.6 (16.6 to 33.8)           | 6.7 (3.2 to 12.3)               | 69.3 (69.3 to 69.3)               | 247.4 (226.4 to 270.6) | 130.5 (113.2 to 149.9)     | 27.7 (19.5 to 39.7)           | 7.8 (3.8 to 14.4)               | 81.4 (81.4 to 81.4)               |
| Kiribati | 2013 | 198.2 (179.5 to 218.9)     | 115.7 (100.6 to 132.9)     | 24.6 (17.3 to 35.0)           | 7.5 (3.6 to 13.6)               | 50.5 (50.5 to 50.5)               | 232.9 (210.9 to 257.1) | 135.9 (118.1 to 156.1)     | 28.9 (20.4 to 41.1)           | 8.8 (4.2 to 16.0)               | 59.3 (59.3 to 59.3)               |
| Kiribati | 2014 | 174.6 (155.4 to 197.3)     | 118.3 (102.4 to 137.5)     | 25.3 (17.5 to 35.7)           | 7.7 (3.7 to 14.1)               | 23.4 (23.4 to 23.4)               | 205.1 (182.6 to 231.8) | 139.0 (120.2 to 161.5)     | 29.7 (20.5 to 41.9)           | 9.0 (4.3 to 16.6)               | 27.4 (27.4 to 27.4)               |
| Kiribati | 2015 | 184.5 (164.0 to 208.4)     | 123.1 (105.9 to 144.1)     | 26.2 (18.3 to 36.8)           | 7.8 (3.6 to 14.6)               | 27.3 (27.3 to 27.3)               | 216.7 (192.6 to 244.8) | 144.7 (124.5 to 169.3)     | 30.8 (21.5 to 43.2)           | 9.2 (4.3 to 17.2)               | 32.1 (32.1 to 32.1)               |

| Country  | Year | 2018 US Dollars per capita |                            |                               |                                 |                                   | 2018 PPP per capita    |                            |                               |                                 |                                   |
|----------|------|----------------------------|----------------------------|-------------------------------|---------------------------------|-----------------------------------|------------------------|----------------------------|-------------------------------|---------------------------------|-----------------------------------|
|          |      | Health spending            | Government health spending | Out-of-pocket health spending | Prepaid private health spending | Development assistance for health | Health spending        | Government health spending | Out-of-pocket health spending | Prepaid private health spending | Development assistance for health |
| Kiribati | 2016 | 198.3 (175.9 to 223.6)     | 128.3 (108.4 to 151.8)     | 26.9 (18.8 to 37.5)           | 7.9 (3.7 to 14.6)               | 35.2 (35.2 to 35.2)               | 233.0 (206.7 to 262.7) | 150.7 (127.4 to 178.4)     | 31.7 (22.1 to 44.1)           | 9.3 (4.3 to 17.2)               | 41.4 (41.4 to 41.4)               |
| Kiribati | 2017 | 189.6 (169.6 to 214.1)     | 114.2 (96.7 to 135.2)      | 27.1 (19.0 to 38.0)           | 8.1 (3.7 to 15.0)               | 40.3 (40.3 to 40.3)               | 222.7 (199.2 to 251.5) | 134.1 (113.6 to 158.8)     | 31.8 (22.3 to 44.6)           | 9.5 (4.4 to 17.6)               | 47.3 (47.3 to 47.3)               |
| Kiribati | 2018 | 187.7 (166.8 to 212.2)     | 115.7 (97.5 to 136.8)      | 27.2 (19.1 to 38.1)           | 8.2 (3.8 to 15.2)               | 36.7 (36.5 to 36.9)               | 220.5 (196.0 to 249.3) | 135.9 (114.6 to 160.7)     | 32.0 (22.4 to 44.7)           | 9.6 (4.4 to 17.8)               | 43.1 (42.8 to 43.4)               |
| Kiribati | 2019 | 187.3 (165.6 to 212.2)     | 115.0 (97.0 to 136.0)      | 27.3 (19.0 to 38.0)           | 8.2 (3.8 to 15.2)               | 36.8 (34.3 to 39.0)               | 220.1 (194.6 to 249.3) | 135.1 (114.0 to 159.8)     | 32.1 (22.4 to 44.7)           | 9.6 (4.5 to 17.9)               | 43.2 (40.3 to 45.8)               |
| Kiribati | 2020 | 185.1 (164.2 to 210.5)     | 112.3 (94.3 to 133.4)      | 27.4 (19.0 to 38.1)           | 8.3 (3.8 to 15.3)               | 37.1 (34.0 to 40.2)               | 217.5 (192.9 to 247.2) | 132.0 (110.7 to 156.7)     | 32.2 (22.4 to 44.8)           | 9.7 (4.5 to 18.0)               | 43.6 (39.9 to 47.2)               |
| Kiribati | 2021 | 183.4 (162.4 to 209.2)     | 110.0 (92.0 to 130.6)      | 27.5 (19.0 to 38.5)           | 8.3 (3.8 to 15.3)               | 37.6 (33.9 to 41.7)               | 215.4 (190.8 to 245.7) | 129.2 (108.1 to 153.4)     | 32.3 (22.3 to 45.3)           | 9.7 (4.5 to 18.0)               | 44.2 (39.8 to 49.0)               |
| Kiribati | 2022 | 182.1 (161.5 to 208.2)     | 107.9 (90.6 to 127.9)      | 27.6 (19.0 to 38.7)           | 8.3 (3.8 to 15.4)               | 38.3 (34.0 to 42.8)               | 213.9 (189.7 to 244.6) | 126.8 (106.5 to 150.2)     | 32.4 (22.3 to 45.5)           | 9.7 (4.5 to 18.1)               | 45.0 (39.9 to 50.3)               |
| Kiribati | 2023 | 181.2 (160.9 to 206.1)     | 106.3 (89.0 to 126.0)      | 27.6 (19.1 to 38.8)           | 8.3 (3.9 to 15.4)               | 39.0 (33.9 to 44.4)               | 212.9 (189.0 to 242.1) | 124.9 (104.6 to 148.0)     | 32.4 (22.4 to 45.5)           | 9.8 (4.5 to 18.1)               | 45.8 (39.8 to 52.2)               |
| Kiribati | 2024 | 181.0 (159.8 to 205.5)     | 105.2 (87.6 to 125.0)      | 27.7 (19.1 to 38.7)           | 8.3 (3.8 to 15.5)               | 39.7 (34.2 to 45.7)               | 212.7 (187.7 to 241.4) | 123.6 (102.9 to 146.9)     | 32.6 (22.4 to 45.5)           | 9.8 (4.5 to 18.2)               | 46.7 (40.2 to 53.7)               |
| Kiribati | 2025 | 181.3 (159.6 to 206.1)     | 104.6 (87.0 to 124.2)      | 27.8 (19.1 to 39.2)           | 8.4 (3.9 to 15.6)               | 40.4 (34.4 to 47.3)               | 212.9 (187.4 to 242.1) | 122.9 (102.2 to 145.9)     | 32.7 (22.5 to 46.0)           | 9.9 (4.5 to 18.3)               | 47.5 (40.5 to 55.5)               |
| Kiribati | 2026 | 182.8 (161.9 to 208.7)     | 105.3 (87.4 to 125.1)      | 28.0 (19.1 to 39.4)           | 8.5 (3.9 to 15.7)               | 41.1 (34.6 to 47.9)               | 214.7 (190.2 to 245.2) | 123.7 (102.7 to 146.9)     | 32.9 (22.5 to 46.2)           | 9.9 (4.6 to 18.4)               | 48.3 (40.7 to 56.3)               |
| Kiribati | 2027 | 185.0 (163.3 to 210.2)     | 106.5 (89.1 to 126.6)      | 28.2 (19.2 to 39.5)           | 8.5 (3.9 to 15.9)               | 41.8 (35.0 to 49.8)               | 217.3 (191.8 to 246.9) | 125.1 (104.6 to 148.7)     | 33.1 (22.6 to 46.4)           | 10.0 (4.6 to 18.6)              | 49.1 (41.1 to 58.5)               |
| Kiribati | 2028 | 188.1 (166.3 to 214.8)     | 108.6 (90.2 to 129.3)      | 28.4 (19.2 to 40.0)           | 8.7 (4.0 to 16.1)               | 42.6 (35.5 to 51.3)               | 221.0 (195.4 to 252.3) | 127.5 (106.0 to 151.9)     | 33.3 (22.6 to 47.0)           | 10.2 (4.7 to 18.9)              | 50.0 (41.7 to 60.3)               |
| Kiribati | 2029 | 191.4 (168.3 to 219.6)     | 110.7 (92.0 to 132.5)      | 28.6 (19.3 to 40.5)           | 8.8 (4.0 to 16.3)               | 43.3 (35.7 to 53.1)               | 224.9 (197.8 to 257.9) | 130.1 (108.1 to 155.6)     | 33.6 (22.7 to 47.6)           | 10.3 (4.7 to 19.2)              | 50.9 (42.0 to 62.4)               |
| Kiribati | 2030 | 194.8 (170.1 to 223.1)     | 113.0 (93.8 to 135.3)      | 28.8 (19.4 to 40.9)           | 8.9 (4.1 to 16.6)               | 44.1 (36.0 to 54.0)               | 228.8 (199.8 to 262.1) | 132.7 (110.2 to 158.9)     | 33.9 (22.8 to 48.1)           | 10.4 (4.8 to 19.4)              | 51.8 (42.3 to 63.4)               |
| Kiribati | 2031 | 198.1 (173.7 to 228.1)     | 115.2 (95.7 to 138.3)      | 29.1 (19.5 to 41.5)           | 9.0 (4.1 to 16.8)               | 44.9 (36.3 to 56.4)               | 232.8 (204.0 to 268.0) | 135.3 (112.4 to 162.5)     | 34.2 (22.9 to 48.7)           | 10.6 (4.8 to 19.7)              | 52.7 (42.7 to 66.2)               |
| Kiribati | 2032 | 201.5 (178.3 to 231.1)     | 117.3 (97.5 to 141.6)      | 29.3 (19.6 to 41.9)           | 9.1 (4.2 to 17.0)               | 45.7 (36.7 to 57.8)               | 236.7 (209.4 to 271.5) | 137.8 (114.6 to 166.4)     | 34.5 (23.0 to 49.2)           | 10.7 (4.9 to 19.9)              | 53.7 (43.2 to 67.9)               |
| Kiribati | 2033 | 204.8 (179.6 to 237.4)     | 119.4 (98.8 to 145.0)      | 29.6 (19.6 to 42.4)           | 9.2 (4.2 to 17.2)               | 46.6 (36.9 to 60.1)               | 240.6 (210.9 to 278.9) | 140.3 (116.0 to 170.4)     | 34.8 (23.1 to 49.8)           | 10.8 (4.9 to 20.2)              | 54.7 (43.4 to 70.6)               |
| Kiribati | 2034 | 207.9 (182.0 to 241.4)     | 121.2 (100.1 to 147.2)     | 29.9 (19.7 to 43.0)           | 9.3 (4.3 to 17.4)               | 47.6 (37.4 to 61.4)               | 244.3 (213.8 to 283.6) | 142.3 (117.6 to 172.9)     | 35.1 (23.1 to 50.5)           | 10.9 (5.0 to 20.5)              | 55.9 (43.9 to 72.1)               |
| Kiribati | 2035 | 211.0 (183.8 to 246.2)     | 122.8 (101.5 to 149.4)     | 30.1 (19.8 to 43.6)           | 9.4 (4.3 to 17.7)               | 48.6 (37.7 to 63.4)               | 247.9 (215.9 to 289.2) | 144.3 (119.3 to 175.5)     | 35.4 (23.2 to 51.2)           | 11.1 (5.1 to 20.8)              | 57.1 (44.3 to 74.5)               |
| Kiribati | 2036 | 214.0 (185.1 to 248.8)     | 124.4 (102.8 to 151.4)     | 30.4 (19.9 to 44.2)           | 9.6 (4.4 to 17.9)               | 49.5 (38.4 to 66.3)               | 251.4 (217.5 to 292.3) | 146.2 (120.7 to 177.8)     | 35.8 (23.4 to 51.9)           | 11.3 (5.1 to 21.0)              | 58.2 (45.1 to 77.9)               |

| Country  | Year | 2018 US Dollars per capita |                            |                               |                                 |                                   | 2018 PPP per capita       |                            |                               |                                 |                                   |
|----------|------|----------------------------|----------------------------|-------------------------------|---------------------------------|-----------------------------------|---------------------------|----------------------------|-------------------------------|---------------------------------|-----------------------------------|
|          |      | Health spending            | Government health spending | Out-of-pocket health spending | Prepaid private health spending | Development assistance for health | Health spending           | Government health spending | Out-of-pocket health spending | Prepaid private health spending | Development assistance for health |
| Kiribati | 2037 | 216.7 (188.2 to 252.8)     | 125.8 (103.4 to 152.5)     | 30.8 (20.0 to 44.8)           | 9.7 (4.4 to 18.2)               | 50.5 (38.7 to 67.4)               | 254.6 (221.1 to 297.0)    | 147.7 (121.5 to 179.2)     | 36.1 (23.5 to 52.6)           | 11.4 (5.2 to 21.4)              | 59.3 (45.5 to 79.1)               |
| Kiribati | 2038 | 219.4 (189.3 to 255.7)     | 127.0 (104.2 to 154.2)     | 31.1 (20.0 to 45.4)           | 9.9 (4.5 to 18.5)               | 51.5 (39.1 to 71.6)               | 257.8 (222.4 to 300.3)    | 149.2 (122.4 to 181.1)     | 36.5 (23.6 to 53.3)           | 11.6 (5.3 to 21.7)              | 60.5 (46.0 to 84.2)               |
| Kiribati | 2039 | 222.1 (191.1 to 257.9)     | 128.2 (105.5 to 156.7)     | 31.4 (20.3 to 45.9)           | 10.0 (4.6 to 18.8)              | 52.5 (39.9 to 72.4)               | 260.9 (224.5 to 302.9)    | 150.6 (124.0 to 184.1)     | 36.9 (23.8 to 54.0)           | 11.8 (5.4 to 22.1)              | 61.6 (46.9 to 85.1)               |
| Kiribati | 2040 | 224.9 (194.2 to 263.5)     | 129.4 (106.0 to 158.6)     | 31.7 (20.5 to 46.5)           | 10.2 (4.6 to 19.0)              | 53.6 (40.6 to 73.9)               | 264.2 (228.2 to 309.6)    | 152.0 (124.5 to 186.4)     | 37.3 (24.0 to 54.6)           | 11.9 (5.4 to 22.4)              | 62.9 (47.7 to 86.8)               |
| Kiribati | 2041 | 227.8 (197.3 to 266.9)     | 130.8 (107.5 to 160.5)     | 32.1 (20.6 to 47.0)           | 10.3 (4.7 to 19.3)              | 54.7 (41.2 to 76.4)               | 267.6 (231.7 to 313.5)    | 153.6 (126.3 to 188.6)     | 37.7 (24.2 to 55.3)           | 12.1 (5.5 to 22.7)              | 64.2 (48.4 to 89.8)               |
| Kiribati | 2042 | 230.9 (198.2 to 271.1)     | 132.1 (108.6 to 162.6)     | 32.4 (20.8 to 47.6)           | 10.5 (4.7 to 19.7)              | 55.9 (41.8 to 79.8)               | 271.3 (232.8 to 318.5)    | 155.2 (127.5 to 191.0)     | 38.1 (24.4 to 55.9)           | 12.3 (5.6 to 23.1)              | 65.7 (49.1 to 93.7)               |
| Kiribati | 2043 | 234.1 (200.6 to 275.3)     | 133.6 (108.9 to 164.6)     | 32.8 (21.1 to 48.1)           | 10.6 (4.8 to 20.1)              | 57.1 (42.3 to 83.0)               | 275.0 (235.6 to 323.4)    | 157.0 (128.0 to 193.4)     | 38.5 (24.8 to 56.5)           | 12.5 (5.7 to 23.6)              | 67.0 (49.7 to 97.5)               |
| Kiribati | 2044 | 237.4 (203.0 to 280.0)     | 135.1 (109.8 to 166.1)     | 33.2 (21.4 to 48.7)           | 10.8 (4.9 to 20.4)              | 58.4 (43.2 to 84.6)               | 278.9 (238.4 to 328.9)    | 158.7 (128.9 to 195.2)     | 39.0 (25.1 to 57.2)           | 12.6 (5.7 to 23.9)              | 68.6 (50.7 to 99.3)               |
| Kiribati | 2045 | 240.8 (204.3 to 286.0)     | 136.6 (111.3 to 168.7)     | 33.6 (21.6 to 49.4)           | 10.9 (4.9 to 20.6)              | 59.7 (43.1 to 90.0)               | 282.8 (240.0 to 336.0)    | 160.5 (130.8 to 198.1)     | 39.4 (25.4 to 58.0)           | 12.8 (5.8 to 24.2)              | 70.1 (50.7 to 105.7)              |
| Kiribati | 2046 | 244.5 (206.9 to 292.3)     | 138.4 (111.4 to 170.9)     | 34.0 (21.9 to 50.0)           | 11.1 (5.0 to 20.9)              | 61.1 (44.0 to 93.0)               | 287.2 (243.0 to 343.4)    | 162.6 (130.9 to 200.8)     | 39.9 (25.7 to 58.8)           | 13.0 (5.9 to 24.5)              | 71.7 (51.7 to 109.3)              |
| Kiribati | 2047 | 248.2 (209.9 to 297.8)     | 140.1 (112.4 to 173.2)     | 34.4 (22.2 to 50.8)           | 11.2 (5.1 to 21.1)              | 62.5 (44.9 to 98.0)               | 291.6 (246.6 to 349.8)    | 164.5 (132.0 to 203.5)     | 40.4 (26.1 to 59.6)           | 13.2 (5.9 to 24.8)              | 73.5 (52.7 to 115.1)              |
| Kiribati | 2048 | 252.2 (214.4 to 304.0)     | 141.9 (113.8 to 175.8)     | 34.8 (22.5 to 51.5)           | 11.4 (5.1 to 21.4)              | 64.1 (46.0 to 102.1)              | 296.3 (251.8 to 357.1)    | 166.7 (133.7 to 206.5)     | 40.9 (26.4 to 60.5)           | 13.3 (6.0 to 25.2)              | 75.3 (54.0 to 119.9)              |
| Kiribati | 2049 | 256.2 (216.9 to 309.6)     | 143.7 (115.0 to 177.9)     | 35.3 (22.8 to 52.2)           | 11.5 (5.2 to 21.8)              | 65.7 (46.7 to 105.4)              | 301.0 (254.8 to 363.7)    | 168.8 (135.1 to 209.0)     | 41.4 (26.8 to 61.4)           | 13.5 (6.1 to 25.6)              | 77.2 (54.9 to 123.9)              |
| Kiribati | 2050 | 260.4 (218.9 to 314.7)     | 145.6 (115.6 to 180.4)     | 35.7 (23.1 to 53.0)           | 11.7 (5.2 to 22.1)              | 67.5 (47.6 to 110.9)              | 305.9 (257.1 to 369.6)    | 171.0 (135.7 to 212.0)     | 41.9 (27.1 to 62.2)           | 13.7 (6.2 to 26.0)              | 79.3 (56.0 to 130.2)              |
| Kuwait   | 1995 | 1444.3 (1294.7 to 1613.1)  | 1179.1 (1031.2 to 1344.5)  | 247.9 (214.4 to 282.8)        | 17.4 (9.3 to 30.7)              | 0.0 (0.0 to 0.0)                  | 3340.7 (2994.7 to 3731.0) | 2727.2 (2385.2 to 3109.9)  | 573.3 (495.9 to 654.1)        | 40.2 (21.4 to 70.9)             | 0.0 (0.0 to 0.0)                  |
| Kuwait   | 1996 | 1400.6 (1273.5 to 1532.0)  | 1126.3 (1002.7 to 1255.6)  | 256.7 (228.6 to 286.3)        | 17.7 (9.6 to 30.6)              | 0.0 (0.0 to 0.0)                  | 3239.7 (2945.6 to 3543.5) | 2605.2 (2319.3 to 2904.3)  | 593.7 (528.7 to 662.2)        | 40.8 (22.1 to 70.7)             | 0.0 (0.0 to 0.0)                  |
| Kuwait   | 1997 | 1392.6 (1275.6 to 1514.6)  | 1110.4 (993.9 to 1226.0)   | 263.9 (239.4 to 290.8)        | 18.3 (10.2 to 31.3)             | 0.0 (0.0 to 0.0)                  | 3221.1 (2950.6 to 3503.2) | 2568.5 (2298.9 to 2835.7)  | 610.3 (553.7 to 672.6)        | 42.3 (23.7 to 72.3)             | 0.0 (0.0 to 0.0)                  |
| Kuwait   | 1998 | 1407.4 (1297.1 to 1526.2)  | 1115.0 (1006.6 to 1236.0)  | 272.8 (248.4 to 301.6)        | 19.7 (11.3 to 32.5)             | 0.0 (0.0 to 0.0)                  | 3255.4 (3000.3 to 3530.0) | 2579.0 (2328.3 to 2858.9)  | 630.9 (574.5 to 697.6)        | 45.5 (26.2 to 75.1)             | 0.0 (0.0 to 0.0)                  |
| Kuwait   | 1999 | 1247.1 (1152.0 to 1350.0)  | 986.7 (894.4 to 1091.7)    | 242.4 (221.2 to 267.0)        | 18.0 (10.4 to 28.8)             | 0.0 (0.0 to 0.0)                  | 2884.5 (2664.5 to 3122.6) | 2282.4 (2068.8 to 2525.0)  | 560.7 (511.7 to 617.5)        | 41.5 (24.2 to 66.6)             | 0.0 (0.0 to 0.0)                  |
| Kuwait   | 2000 | 1145.2 (1055.8 to 1243.7)  | 908.1 (820.1 to 1004.3)    | 220.4 (199.9 to 241.4)        | 16.8 (9.7 to 26.3)              | 0.0 (0.0 to 0.0)                  | 2648.9 (2442.1 to 2876.8) | 2100.3 (1897.0 to 2323.0)  | 509.7 (462.5 to 558.5)        | 38.8 (22.4 to 60.7)             | 0.0 (0.0 to 0.0)                  |
| Kuwait   | 2001 | 1142.0 (1048.1 to 1243.9)  | 909.6 (820.0 to 1006.8)    | 215.1 (196.3 to 235.5)        | 17.3 (9.8 to 26.9)              | 0.0 (0.0 to 0.0)                  | 2641.5 (2424.2 to 2877.2) | 2104.0 (1896.7 to 2328.8)  | 497.6 (454.0 to 544.7)        | 40.0 (22.6 to 62.2)             | 0.0 (0.0 to 0.0)                  |

| Country | Year | 2018 US Dollars per capita |                            |                               |                                 |                                   | 2018 PPP per capita       |                            |                               |                                 |                                   |
|---------|------|----------------------------|----------------------------|-------------------------------|---------------------------------|-----------------------------------|---------------------------|----------------------------|-------------------------------|---------------------------------|-----------------------------------|
|         |      | Health spending            | Government health spending | Out-of-pocket health spending | Prepaid private health spending | Development assistance for health | Health spending           | Government health spending | Out-of-pocket health spending | Prepaid private health spending | Development assistance for health |
| Kuwait  | 2002 | 1132.1 (1038.9 to 1239.2)  | 900.0 (810.7 to 1003.2)    | 213.7 (196.2 to 234.5)        | 18.3 (10.5 to 29.1)             | 0.0 (0.0 to 0.0)                  | 2618.5 (2403.0 to 2866.4) | 2081.8 (1875.2 to 2320.4)  | 494.3 (453.9 to 542.3)        | 42.4 (24.2 to 67.2)             | 0.0 (0.0 to 0.0)                  |
| Kuwait  | 2003 | 1187.7 (1091.8 to 1301.5)  | 950.5 (855.4 to 1060.7)    | 216.0 (197.5 to 236.0)        | 21.1 (11.9 to 33.8)             | 0.0 (0.0 to 0.0)                  | 2747.1 (2525.4 to 3010.4) | 2198.5 (1978.6 to 2453.4)  | 499.7 (456.9 to 545.8)        | 48.9 (27.6 to 78.2)             | 0.0 (0.0 to 0.0)                  |
| Kuwait  | 2004 | 1161.1 (1065.1 to 1267.3)  | 933.3 (839.0 to 1039.3)    | 206.6 (189.7 to 225.2)        | 21.1 (11.8 to 34.4)             | 0.0 (0.0 to 0.0)                  | 2685.5 (2463.5 to 2931.2) | 2158.7 (1940.6 to 2404.0)  | 478.0 (438.7 to 521.0)        | 48.9 (27.4 to 79.6)             | 0.0 (0.0 to 0.0)                  |
| Kuwait  | 2005 | 1143.1 (1046.4 to 1249.7)  | 926.5 (829.6 to 1034.5)    | 195.6 (178.9 to 212.9)        | 21.0 (12.0 to 33.3)             | 0.0 (0.0 to 0.0)                  | 2644.0 (2420.2 to 2890.5) | 2143.0 (1918.9 to 2392.7)  | 452.4 (413.9 to 492.4)        | 48.6 (27.9 to 77.0)             | 0.0 (0.0 to 0.0)                  |
| Kuwait  | 2006 | 1105.5 (1010.5 to 1210.0)  | 902.7 (808.0 to 1008.0)    | 183.2 (166.3 to 200.2)        | 19.6 (11.6 to 32.0)             | 0.0 (0.0 to 0.0)                  | 2556.9 (2337.4 to 2798.8) | 2087.9 (1868.9 to 2331.6)  | 423.8 (384.7 to 463.0)        | 45.3 (26.7 to 74.0)             | 0.0 (0.0 to 0.0)                  |
| Kuwait  | 2007 | 1073.7 (982.7 to 1173.1)   | 879.4 (786.1 to 978.8)     | 175.7 (159.5 to 193.7)        | 18.6 (11.0 to 30.0)             | 0.0 (0.0 to 0.0)                  | 2483.5 (2273.0 to 2713.4) | 2034.0 (1818.3 to 2264.0)  | 406.5 (369.0 to 448.0)        | 43.0 (25.5 to 69.3)             | 0.0 (0.0 to 0.0)                  |
| Kuwait  | 2008 | 1104.9 (1011.9 to 1205.0)  | 917.5 (824.7 to 1017.7)    | 169.2 (153.2 to 186.4)        | 18.2 (10.7 to 29.4)             | 0.0 (0.0 to 0.0)                  | 2555.7 (2340.5 to 2787.3) | 2122.3 (1907.6 to 2353.9)  | 391.4 (354.3 to 431.2)        | 42.0 (24.7 to 68.1)             | 0.0 (0.0 to 0.0)                  |
| Kuwait  | 2009 | 1110.3 (1015.9 to 1215.7)  | 936.5 (845.2 to 1040.1)    | 156.7 (141.0 to 173.2)        | 17.1 (10.1 to 28.1)             | 0.0 (0.0 to 0.0)                  | 2568.2 (2349.7 to 2812.0) | 2166.2 (1954.9 to 2405.9)  | 362.5 (326.2 to 400.5)        | 39.6 (23.3 to 64.9)             | 0.0 (0.0 to 0.0)                  |
| Kuwait  | 2010 | 1031.4 (939.3 to 1132.8)   | 877.7 (790.6 to 974.3)     | 138.9 (125.3 to 153.9)        | 14.8 (8.9 to 24.1)              | 0.0 (0.0 to 0.0)                  | 2385.7 (2172.7 to 2620.3) | 2030.1 (1828.7 to 2253.6)  | 321.2 (289.7 to 356.1)        | 34.3 (20.6 to 55.6)             | 0.0 (0.0 to 0.0)                  |
| Kuwait  | 2011 | 1057.4 (963.5 to 1162.3)   | 909.3 (819.3 to 1011.8)    | 133.6 (120.4 to 148.2)        | 14.5 (8.8 to 23.5)              | 0.0 (0.0 to 0.0)                  | 2445.8 (2228.6 to 2688.4) | 2103.1 (1894.9 to 2340.3)  | 309.1 (278.5 to 342.9)        | 33.6 (20.4 to 54.3)             | 0.0 (0.0 to 0.0)                  |
| Kuwait  | 2012 | 1068.8 (977.0 to 1166.7)   | 918.6 (828.1 to 1017.7)    | 135.4 (121.7 to 150.4)        | 14.7 (8.6 to 23.7)              | 0.0 (0.0 to 0.0)                  | 2472.0 (2259.9 to 2698.7) | 2124.8 (1915.4 to 2354.0)  | 313.3 (281.4 to 347.9)        | 33.9 (19.8 to 54.9)             | 0.0 (0.0 to 0.0)                  |
| Kuwait  | 2013 | 1061.3 (967.6 to 1160.5)   | 908.1 (812.1 to 1006.1)    | 138.5 (124.6 to 153.4)        | 14.7 (8.3 to 23.9)              | 0.0 (0.0 to 0.0)                  | 2454.7 (2238.0 to 2684.2) | 2100.4 (1878.3 to 2327.2)  | 320.3 (288.2 to 354.8)        | 34.1 (19.2 to 55.3)             | 0.0 (0.0 to 0.0)                  |
| Kuwait  | 2014 | 1109.5 (1007.2 to 1216.4)  | 943.7 (842.1 to 1053.3)    | 150.0 (134.7 to 167.0)        | 15.7 (8.7 to 25.9)              | 0.0 (0.0 to 0.0)                  | 2566.2 (2329.6 to 2813.4) | 2182.8 (1947.9 to 2436.3)  | 347.0 (311.5 to 386.3)        | 36.4 (20.1 to 59.9)             | 0.0 (0.0 to 0.0)                  |
| Kuwait  | 2015 | 1217.5 (1087.6 to 1340.3)  | 1023.2 (899.2 to 1148.6)   | 176.0 (157.2 to 195.7)        | 18.3 (9.6 to 30.2)              | 0.0 (0.0 to 0.0)                  | 2816.2 (2515.6 to 3100.2) | 2366.7 (2079.9 to 2656.6)  | 407.0 (363.7 to 452.7)        | 42.4 (22.1 to 69.9)             | 0.0 (0.0 to 0.0)                  |
| Kuwait  | 2016 | 1279.1 (1140.0 to 1432.8)  | 1065.4 (923.6 to 1215.8)   | 194.3 (170.4 to 220.8)        | 19.4 (10.0 to 32.7)             | 0.0 (0.0 to 0.0)                  | 2958.6 (2636.9 to 3314.0) | 2464.4 (2136.4 to 2812.2)  | 449.3 (394.1 to 510.8)        | 44.9 (23.2 to 75.6)             | 0.0 (0.0 to 0.0)                  |
| Kuwait  | 2017 | 1204.8 (1071.3 to 1346.1)  | 995.8 (860.7 to 1135.8)    | 190.5 (167.3 to 217.4)        | 18.5 (9.6 to 31.1)              | 0.0 (0.0 to 0.0)                  | 2786.7 (2477.8 to 3113.6) | 2303.2 (1990.7 to 2627.0)  | 440.7 (387.0 to 503.0)        | 42.8 (22.1 to 71.9)             | 0.0 (0.0 to 0.0)                  |
| Kuwait  | 2018 | 1225.2 (1087.4 to 1366.5)  | 1015.8 (874.5 to 1155.5)   | 190.8 (166.9 to 217.5)        | 18.6 (9.6 to 31.3)              | 0.0 (0.0 to 0.0)                  | 2833.9 (2515.2 to 3160.8) | 2349.5 (2022.8 to 2672.6)  | 441.3 (386.1 to 503.2)        | 43.1 (22.2 to 72.4)             | 0.0 (0.0 to 0.0)                  |
| Kuwait  | 2019 | 1248.1 (1103.3 to 1399.4)  | 1038.8 (890.8 to 1190.9)   | 190.5 (166.8 to 217.2)        | 18.8 (9.6 to 31.5)              | 0.0 (0.0 to 0.0)                  | 2886.9 (2551.9 to 3236.9) | 2402.8 (2060.3 to 2754.5)  | 440.7 (385.8 to 502.4)        | 43.4 (22.3 to 72.8)             | 0.0 (0.0 to 0.0)                  |
| Kuwait  | 2020 | 1279.1 (1129.8 to 1438.9)  | 1069.6 (919.8 to 1226.6)   | 190.6 (166.7 to 217.3)        | 18.9 (9.7 to 31.8)              | 0.0 (0.0 to 0.0)                  | 2958.5 (2613.3 to 3328.2) | 2473.9 (2127.6 to 2837.2)  | 440.8 (385.5 to 502.7)        | 43.8 (22.4 to 73.7)             | 0.0 (0.0 to 0.0)                  |
| Kuwait  | 2021 | 1305.4 (1148.6 to 1475.2)  | 1096.4 (941.9 to 1263.0)   | 189.9 (166.1 to 216.3)        | 19.0 (9.8 to 32.1)              | 0.0 (0.0 to 0.0)                  | 3019.3 (2658.8 to 3412.2) | 2536.1 (2178.6 to 2921.3)  | 439.3 (384.2 to 500.4)        | 44.0 (22.6 to 74.2)             | 0.0 (0.0 to 0.0)                  |
| Kuwait  | 2022 | 1338.8 (1181.4 to 1519.9)  | 1129.9 (969.8 to 1311.5)   | 189.7 (165.7 to 216.1)        | 19.1 (9.8 to 32.3)              | 0.0 (0.0 to 0.0)                  | 3096.7 (2732.5 to 3515.6) | 2613.6 (2243.2 to 3033.6)  | 438.8 (383.3 to 499.8)        | 44.3 (22.7 to 74.8)             | 0.0 (0.0 to 0.0)                  |



| Country | Year | 2018 US Dollars per capita |                            |                               |                                 |                                   | 2018 PPP per capita       |                            |                               |                                 |                                   |
|---------|------|----------------------------|----------------------------|-------------------------------|---------------------------------|-----------------------------------|---------------------------|----------------------------|-------------------------------|---------------------------------|-----------------------------------|
|         |      | Health spending            | Government health spending | Out-of-pocket health spending | Prepaid private health spending | Development assistance for health | Health spending           | Government health spending | Out-of-pocket health spending | Prepaid private health spending | Development assistance for health |
| Kuwait  | 2023 | 1374.3 (1206.9 to 1560.7)  | 1165.4 (997.4 to 1345.3)   | 189.7 (165.4 to 216.3)        | 19.3 (9.9 to 32.5)              | 0.0 (0.0 to 0.0)                  | 3178.7 (2791.5 to 3610.0) | 2695.5 (2307.0 to 3111.7)  | 438.7 (382.5 to 500.3)        | 44.5 (22.9 to 75.3)             | 0.0 (0.0 to 0.0)                  |
| Kuwait  | 2024 | 1412.9 (1235.8 to 1612.7)  | 1202.2 (1026.3 to 1406.7)  | 191.2 (166.3 to 218.2)        | 19.4 (10.0 to 32.7)             | 0.0 (0.0 to 0.0)                  | 3268.0 (2858.4 to 3730.2) | 2780.8 (2373.8 to 3253.7)  | 442.3 (384.7 to 504.7)        | 44.8 (23.1 to 75.6)             | 0.0 (0.0 to 0.0)                  |
| Kuwait  | 2025 | 1444.1 (1255.4 to 1662.5)  | 1232.3 (1045.0 to 1446.6)  | 192.2 (166.4 to 220.0)        | 19.6 (10.1 to 33.1)             | 0.0 (0.0 to 0.0)                  | 3340.2 (2903.7 to 3845.4) | 2850.4 (2417.0 to 3346.0)  | 444.5 (384.9 to 508.9)        | 45.4 (23.4 to 76.5)             | 0.0 (0.0 to 0.0)                  |
| Kuwait  | 2026 | 1471.8 (1266.5 to 1697.2)  | 1259.1 (1057.8 to 1494.4)  | 192.8 (166.3 to 221.0)        | 19.8 (10.3 to 33.4)             | 0.0 (0.0 to 0.0)                  | 3404.2 (2929.4 to 3925.7) | 2912.3 (2446.7 to 3456.6)  | 446.0 (384.6 to 511.3)        | 45.8 (23.7 to 77.3)             | 0.0 (0.0 to 0.0)                  |
| Kuwait  | 2027 | 1496.0 (1274.8 to 1744.9)  | 1282.6 (1065.0 to 1531.1)  | 193.4 (166.4 to 221.8)        | 20.0 (10.4 to 33.8)             | 0.0 (0.0 to 0.0)                  | 3460.3 (2948.7 to 4035.9) | 2966.6 (2463.3 to 3541.6)  | 447.4 (384.9 to 513.0)        | 46.3 (24.0 to 78.1)             | 0.0 (0.0 to 0.0)                  |
| Kuwait  | 2028 | 1515.7 (1282.3 to 1775.2)  | 1301.9 (1067.0 to 1566.7)  | 193.8 (166.2 to 223.1)        | 20.1 (10.4 to 33.9)             | 0.0 (0.0 to 0.0)                  | 3505.9 (2966.0 to 4105.9) | 3011.2 (2467.9 to 3623.9)  | 448.2 (384.5 to 516.0)        | 46.5 (24.2 to 78.5)             | 0.0 (0.0 to 0.0)                  |
| Kuwait  | 2029 | 1527.7 (1285.6 to 1811.6)  | 1314.0 (1075.5 to 1592.4)  | 193.6 (164.7 to 223.5)        | 20.1 (10.5 to 33.9)             | 0.0 (0.0 to 0.0)                  | 3533.6 (2973.6 to 4190.3) | 3039.3 (2487.6 to 3683.3)  | 447.7 (380.9 to 517.0)        | 46.5 (24.2 to 78.3)             | 0.0 (0.0 to 0.0)                  |
| Kuwait  | 2030 | 1543.7 (1283.2 to 1840.3)  | 1329.9 (1065.7 to 1624.9)  | 193.7 (163.4 to 225.1)        | 20.1 (10.5 to 33.9)             | 0.0 (0.0 to 0.0)                  | 3570.5 (2968.0 to 4256.7) | 3076.0 (2465.0 to 3758.5)  | 447.9 (378.0 to 520.6)        | 46.5 (24.2 to 78.5)             | 0.0 (0.0 to 0.0)                  |
| Kuwait  | 2031 | 1561.2 (1290.7 to 1890.7)  | 1347.3 (1076.8 to 1667.8)  | 193.8 (162.3 to 227.0)        | 20.1 (10.5 to 34.0)             | 0.0 (0.0 to 0.0)                  | 3611.1 (2985.5 to 4373.2) | 3116.4 (2490.6 to 3857.6)  | 448.2 (375.3 to 525.0)        | 46.5 (24.3 to 78.7)             | 0.0 (0.0 to 0.0)                  |
| Kuwait  | 2032 | 1578.3 (1298.9 to 1916.6)  | 1364.3 (1091.2 to 1698.2)  | 193.9 (162.1 to 228.0)        | 20.1 (10.5 to 34.0)             | 0.0 (0.0 to 0.0)                  | 3650.7 (3004.4 to 4433.2) | 3155.7 (2523.9 to 3928.0)  | 448.5 (374.9 to 527.5)        | 46.5 (24.2 to 78.6)             | 0.0 (0.0 to 0.0)                  |
| Kuwait  | 2033 | 1599.8 (1306.4 to 1952.2)  | 1385.3 (1093.1 to 1736.5)  | 194.4 (160.3 to 230.4)        | 20.1 (10.5 to 33.9)             | 0.0 (0.0 to 0.0)                  | 3700.3 (3021.8 to 4515.3) | 3204.2 (2528.4 to 4016.5)  | 449.5 (370.8 to 532.9)        | 46.5 (24.2 to 78.4)             | 0.0 (0.0 to 0.0)                  |
| Kuwait  | 2034 | 1622.0 (1315.2 to 1999.4)  | 1406.9 (1102.3 to 1781.9)  | 194.9 (158.7 to 232.2)        | 20.1 (10.5 to 33.9)             | 0.0 (0.0 to 0.0)                  | 3751.6 (3042.0 to 4624.6) | 3254.2 (2549.5 to 4121.5)  | 450.8 (367.0 to 537.0)        | 46.6 (24.3 to 78.5)             | 0.0 (0.0 to 0.0)                  |
| Kuwait  | 2035 | 1641.3 (1320.2 to 2022.2)  | 1425.6 (1101.4 to 1811.9)  | 195.5 (157.9 to 234.7)        | 20.2 (10.5 to 34.0)             | 0.0 (0.0 to 0.0)                  | 3796.4 (3053.7 to 4677.4) | 3297.5 (2547.5 to 4191.0)  | 452.2 (365.2 to 542.9)        | 46.6 (24.3 to 78.6)             | 0.0 (0.0 to 0.0)                  |
| Kuwait  | 2036 | 1660.1 (1325.9 to 2067.5)  | 1443.7 (1103.8 to 1847.4)  | 196.1 (158.1 to 237.0)        | 20.2 (10.6 to 34.0)             | 0.0 (0.0 to 0.0)                  | 3839.7 (3066.8 to 4782.2) | 3339.4 (2553.2 to 4273.0)  | 453.7 (365.6 to 548.1)        | 46.7 (24.4 to 78.6)             | 0.0 (0.0 to 0.0)                  |
| Kuwait  | 2037 | 1676.6 (1321.0 to 2082.6)  | 1459.6 (1105.8 to 1867.0)  | 196.8 (157.8 to 239.3)        | 20.2 (10.6 to 33.9)             | 0.0 (0.0 to 0.0)                  | 3878.1 (3055.5 to 4817.0) | 3376.1 (2557.7 to 4318.4)  | 455.3 (365.0 to 553.6)        | 46.7 (24.5 to 78.4)             | 0.0 (0.0 to 0.0)                  |
| Kuwait  | 2038 | 1692.5 (1336.7 to 2114.0)  | 1474.7 (1110.2 to 1898.2)  | 197.7 (157.3 to 241.7)        | 20.2 (10.6 to 33.8)             | 0.0 (0.0 to 0.0)                  | 3914.8 (3091.9 to 4889.7) | 3410.9 (2567.9 to 4390.5)  | 457.2 (363.9 to 558.9)        | 46.7 (24.5 to 78.2)             | 0.0 (0.0 to 0.0)                  |
| Kuwait  | 2039 | 1707.4 (1331.1 to 2139.2)  | 1488.6 (1119.0 to 1933.9)  | 198.5 (157.4 to 244.1)        | 20.2 (10.6 to 33.7)             | 0.0 (0.0 to 0.0)                  | 3949.1 (3078.9 to 4948.0) | 3443.3 (2588.1 to 4473.1)  | 459.2 (364.2 to 564.6)        | 46.7 (24.5 to 78.0)             | 0.0 (0.0 to 0.0)                  |
| Kuwait  | 2040 | 1719.6 (1338.9 to 2164.4)  | 1499.9 (1115.3 to 1953.2)  | 199.5 (157.5 to 246.4)        | 20.2 (10.6 to 33.8)             | 0.0 (0.0 to 0.0)                  | 3977.4 (3096.9 to 5006.2) | 3469.3 (2579.6 to 4517.7)  | 461.4 (364.3 to 569.8)        | 46.7 (24.5 to 78.2)             | 0.0 (0.0 to 0.0)                  |
| Kuwait  | 2041 | 1722.2 (1338.1 to 2193.5)  | 1501.8 (1112.9 to 1952.9)  | 200.3 (157.6 to 248.3)        | 20.1 (10.6 to 33.7)             | 0.0 (0.0 to 0.0)                  | 3983.4 (3095.0 to 5073.7) | 3473.6 (2574.1 to 4517.1)  | 463.2 (364.4 to 574.2)        | 46.6 (24.5 to 77.9)             | 0.0 (0.0 to 0.0)                  |
| Kuwait  | 2042 | 1723.5 (1333.3 to 2219.0)  | 1502.2 (1101.0 to 1982.0)  | 201.2 (157.7 to 250.2)        | 20.1 (10.5 to 33.7)             | 0.0 (0.0 to 0.0)                  | 3986.5 (3084.0 to 5132.7) | 3474.6 (2546.5 to 4584.5)  | 465.3 (364.7 to 578.8)        | 46.5 (24.4 to 77.9)             | 0.0 (0.0 to 0.0)                  |
| Kuwait  | 2043 | 1721.8 (1325.5 to 2216.5)  | 1499.7 (1088.1 to 1985.3)  | 202.1 (158.2 to 252.1)        | 20.1 (10.5 to 33.7)             | 0.0 (0.0 to 0.0)                  | 3982.6 (3066.0 to 5126.8) | 3468.7 (2516.8 to 4592.0)  | 467.5 (365.8 to 583.0)        | 46.4 (24.2 to 78.0)             | 0.0 (0.0 to 0.0)                  |

| Country    | Year | 2018 US Dollars per capita |                            |                               |                                 |                                   | 2018 PPP per capita       |                            |                               |                                 |                                   |
|------------|------|----------------------------|----------------------------|-------------------------------|---------------------------------|-----------------------------------|---------------------------|----------------------------|-------------------------------|---------------------------------|-----------------------------------|
|            |      | Health spending            | Government health spending | Out-of-pocket health spending | Prepaid private health spending | Development assistance for health | Health spending           | Government health spending | Out-of-pocket health spending | Prepaid private health spending | Development assistance for health |
| Kuwait     | 2044 | 1722.6 (1318.3 to 2229.4)  | 1499.4 (1084.5 to 1995.0)  | 203.2 (158.5 to 254.0)        | 20.0 (10.4 to 33.8)             | 0.0 (0.0 to 0.0)                  | 3984.5 (3049.3 to 5156.6) | 3468.1 (2508.5 to 4614.5)  | 470.0 (366.6 to 587.4)        | 46.3 (24.1 to 78.1)             | 0.0 (0.0 to 0.0)                  |
| Kuwait     | 2045 | 1723.9 (1309.7 to 2219.5)  | 1499.4 (1083.3 to 2010.5)  | 204.5 (159.0 to 256.1)        | 20.0 (10.4 to 33.8)             | 0.0 (0.0 to 0.0)                  | 3987.3 (3029.4 to 5133.8) | 3468.1 (2505.8 to 4650.2)  | 472.9 (367.8 to 592.5)        | 46.3 (23.9 to 78.2)             | 0.0 (0.0 to 0.0)                  |
| Kuwait     | 2046 | 1708.0 (1282.3 to 2223.2)  | 1482.9 (1068.7 to 1989.8)  | 205.3 (159.5 to 257.7)        | 19.9 (10.2 to 33.7)             | 0.0 (0.0 to 0.0)                  | 3950.7 (2966.0 to 5142.2) | 3429.9 (2472.0 to 4602.4)  | 474.8 (369.0 to 596.0)        | 46.0 (23.7 to 78.0)             | 0.0 (0.0 to 0.0)                  |
| Kuwait     | 2047 | 1694.7 (1277.9 to 2195.7)  | 1468.4 (1057.0 to 1968.3)  | 206.4 (160.3 to 259.6)        | 19.8 (10.2 to 33.7)             | 0.0 (0.0 to 0.0)                  | 3919.7 (2955.9 to 5078.7) | 3396.5 (2444.8 to 4552.7)  | 477.4 (370.7 to 600.5)        | 45.8 (23.5 to 77.9)             | 0.0 (0.0 to 0.0)                  |
| Kuwait     | 2048 | 1683.9 (1275.9 to 2183.3)  | 1456.5 (1046.6 to 1972.0)  | 207.6 (160.9 to 261.4)        | 19.8 (10.1 to 33.7)             | 0.0 (0.0 to 0.0)                  | 3894.8 (2951.2 to 5050.0) | 3368.9 (2420.8 to 4561.2)  | 480.2 (372.2 to 604.6)        | 45.7 (23.4 to 77.9)             | 0.0 (0.0 to 0.0)                  |
| Kuwait     | 2049 | 1664.4 (1264.2 to 2165.7)  | 1436.0 (1021.2 to 1946.5)  | 208.7 (161.1 to 263.6)        | 19.7 (10.1 to 33.6)             | 0.0 (0.0 to 0.0)                  | 3849.7 (2924.1 to 5009.3) | 3321.5 (2361.9 to 4502.2)  | 482.7 (372.6 to 609.7)        | 45.5 (23.3 to 77.6)             | 0.0 (0.0 to 0.0)                  |
| Kuwait     | 2050 | 1653.2 (1246.5 to 2152.7)  | 1423.5 (1007.0 to 1920.7)  | 210.0 (161.8 to 265.4)        | 19.6 (10.1 to 33.5)             | 0.0 (0.0 to 0.0)                  | 3823.8 (2883.2 to 4979.3) | 3292.6 (2329.1 to 4442.7)  | 485.8 (374.2 to 614.0)        | 45.4 (23.3 to 77.6)             | 0.0 (0.0 to 0.0)                  |
| Kyrgyzstan | 1995 | 41.4 (34.2 to 49.8)        | 20.5 (16.0 to 26.1)        | 16.9 (11.6 to 23.3)           | 0.0 (0.0 to 0.0)                | 3.9 (3.9 to 3.9)                  | 137.0 (113.4 to 164.9)    | 68.1 (53.1 to 86.3)        | 55.9 (38.5 to 77.3)           | 0.0 (0.0 to 0.0)                | 13.0 (13.0 to 13.0)               |
| Kyrgyzstan | 1996 | 41.4 (34.4 to 49.6)        | 19.9 (15.4 to 25.3)        | 17.6 (12.4 to 24.3)           | 0.0 (0.0 to 0.0)                | 3.9 (3.9 to 3.9)                  | 137.1 (113.9 to 164.3)    | 66.0 (51.1 to 83.7)        | 58.3 (41.2 to 80.6)           | 0.0 (0.0 to 0.0)                | 12.8 (12.8 to 12.8)               |
| Kyrgyzstan | 1997 | 42.0 (35.0 to 50.5)        | 19.6 (15.1 to 24.5)        | 17.8 (12.7 to 24.2)           | 0.0 (0.0 to 0.0)                | 4.7 (4.7 to 4.7)                  | 139.2 (115.8 to 167.5)    | 64.8 (50.1 to 81.3)        | 58.9 (42.0 to 80.2)           | 0.0 (0.0 to 0.0)                | 15.4 (15.4 to 15.4)               |
| Kyrgyzstan | 1998 | 45.1 (38.2 to 53.1)        | 18.0 (13.9 to 22.8)        | 18.5 (13.3 to 25.0)           | 0.0 (0.0 to 0.0)                | 8.6 (8.6 to 8.6)                  | 149.5 (126.7 to 176.1)    | 59.8 (46.2 to 75.7)        | 61.3 (44.1 to 82.7)           | 0.0 (0.0 to 0.0)                | 28.4 (28.4 to 28.4)               |
| Kyrgyzstan | 1999 | 37.0 (30.5 to 45.0)        | 17.2 (13.1 to 21.8)        | 17.9 (12.9 to 24.1)           | 0.0 (0.0 to 0.0)                | 1.9 (1.9 to 1.9)                  | 122.7 (101.0 to 149.1)    | 57.1 (43.6 to 72.3)        | 59.3 (42.9 to 80.0)           | 0.0 (0.0 to 0.1)                | 6.2 (6.2 to 6.2)                  |
| Kyrgyzstan | 2000 | 39.3 (33.3 to 47.4)        | 16.3 (12.5 to 20.7)        | 17.2 (12.7 to 23.5)           | 0.0 (0.0 to 0.0)                | 5.8 (5.8 to 5.8)                  | 130.3 (110.5 to 157.1)    | 54.0 (41.3 to 68.6)        | 57.1 (42.0 to 77.7)           | 0.0 (0.0 to 0.1)                | 19.2 (19.2 to 19.2)               |
| Kyrgyzstan | 2001 | 35.3 (29.5 to 43.3)        | 16.2 (12.4 to 20.5)        | 17.5 (12.8 to 24.0)           | 0.0 (0.0 to 0.0)                | 1.5 (1.5 to 1.5)                  | 117.0 (97.7 to 143.6)     | 53.7 (41.0 to 67.9)        | 58.1 (42.4 to 79.4)           | 0.0 (0.0 to 0.1)                | 5.1 (5.1 to 5.1)                  |
| Kyrgyzstan | 2002 | 37.9 (31.4 to 45.9)        | 16.6 (12.7 to 20.8)        | 18.4 (13.4 to 25.0)           | 0.0 (0.0 to 0.0)                | 3.0 (3.0 to 3.0)                  | 125.7 (104.1 to 152.2)    | 54.9 (42.2 to 69.0)        | 60.9 (44.5 to 82.7)           | 0.0 (0.0 to 0.1)                | 9.9 (9.9 to 9.9)                  |
| Kyrgyzstan | 2003 | 45.4 (38.1 to 54.3)        | 18.6 (14.3 to 23.5)        | 21.0 (15.2 to 28.2)           | 0.0 (0.0 to 0.0)                | 5.8 (5.8 to 5.8)                  | 150.4 (126.1 to 179.8)    | 61.6 (47.3 to 77.7)        | 69.6 (50.5 to 93.6)           | 0.0 (0.0 to 0.1)                | 19.1 (19.1 to 19.1)               |
| Kyrgyzstan | 2004 | 48.1 (40.0 to 57.7)        | 21.5 (16.5 to 27.3)        | 23.1 (17.1 to 30.6)           | 0.0 (0.0 to 0.0)                | 3.5 (3.5 to 3.5)                  | 159.5 (132.7 to 191.2)    | 71.1 (54.8 to 90.5)        | 76.6 (56.7 to 101.5)          | 0.1 (0.0 to 0.1)                | 11.7 (11.7 to 11.7)               |
| Kyrgyzstan | 2005 | 55.9 (47.0 to 66.5)        | 24.9 (19.3 to 31.9)        | 24.8 (18.3 to 32.9)           | 0.0 (0.0 to 0.0)                | 6.2 (6.2 to 6.2)                  | 185.1 (155.9 to 220.2)    | 82.6 (64.0 to 105.6)       | 82.0 (60.5 to 109.1)          | 0.1 (0.0 to 0.1)                | 20.4 (20.4 to 20.4)               |
| Kyrgyzstan | 2006 | 60.0 (50.6 to 70.9)        | 27.6 (21.4 to 35.6)        | 26.0 (19.4 to 34.0)           | 0.0 (0.0 to 0.0)                | 6.4 (6.4 to 6.4)                  | 198.7 (167.7 to 235.1)    | 91.4 (70.9 to 117.9)       | 86.2 (64.2 to 112.5)          | 0.1 (0.0 to 0.1)                | 21.1 (21.1 to 21.1)               |
| Kyrgyzstan | 2007 | 62.2 (52.2 to 73.5)        | 28.6 (22.2 to 36.3)        | 26.8 (19.9 to 35.0)           | 0.0 (0.0 to 0.0)                | 6.8 (6.8 to 6.8)                  | 206.0 (172.9 to 243.4)    | 94.7 (73.6 to 120.4)       | 88.7 (65.9 to 115.8)          | 0.1 (0.0 to 0.1)                | 22.7 (22.7 to 22.7)               |
| Kyrgyzstan | 2008 | 66.9 (56.4 to 78.6)        | 30.0 (23.2 to 38.5)        | 27.9 (20.8 to 36.7)           | 0.0 (0.0 to 0.0)                | 9.0 (9.0 to 9.0)                  | 221.7 (186.9 to 260.6)    | 99.5 (76.9 to 127.5)       | 92.5 (68.8 to 121.7)          | 0.1 (0.0 to 0.1)                | 29.7 (29.7 to 29.7)               |

| Country    | Year | 2018 US Dollars per capita |                            |                               |                                 |                                   | 2018 PPP per capita    |                            |                               |                                 |                                   |
|------------|------|----------------------------|----------------------------|-------------------------------|---------------------------------|-----------------------------------|------------------------|----------------------------|-------------------------------|---------------------------------|-----------------------------------|
|            |      | Health spending            | Government health spending | Out-of-pocket health spending | Prepaid private health spending | Development assistance for health | Health spending        | Government health spending | Out-of-pocket health spending | Prepaid private health spending | Development assistance for health |
| Kyrgyzstan | 2009 | 66.9 (56.6 to 79.2)        | 32.1 (24.8 to 41.3)        | 28.0 (21.0 to 36.7)           | 0.0 (0.0 to 0.0)                | 6.8 (6.8 to 6.8)                  | 221.7 (187.4 to 262.5) | 106.3 (82.1 to 137.0)      | 92.9 (69.6 to 121.5)          | 0.1 (0.0 to 0.1)                | 22.4 (22.4 to 22.4)               |
| Kyrgyzstan | 2010 | 70.0 (59.4 to 83.3)        | 32.9 (25.3 to 42.2)        | 29.1 (21.5 to 38.1)           | 0.0 (0.0 to 0.0)                | 7.9 (7.9 to 7.9)                  | 231.8 (196.9 to 276.0) | 109.1 (83.7 to 139.9)      | 96.4 (71.2 to 126.3)          | 0.1 (0.0 to 0.1)                | 26.3 (26.3 to 26.3)               |
| Kyrgyzstan | 2011 | 78.6 (66.9 to 93.0)        | 37.0 (28.7 to 47.4)        | 32.4 (24.1 to 42.2)           | 0.0 (0.0 to 0.1)                | 9.3 (9.3 to 9.3)                  | 260.5 (221.5 to 308.0) | 122.5 (95.1 to 156.9)      | 107.2 (79.8 to 139.8)         | 0.1 (0.0 to 0.2)                | 30.7 (30.7 to 30.7)               |
| Kyrgyzstan | 2012 | 80.2 (68.3 to 94.9)        | 37.2 (28.7 to 47.2)        | 35.0 (26.3 to 45.8)           | 0.0 (0.0 to 0.1)                | 8.0 (8.0 to 8.0)                  | 265.8 (226.2 to 314.3) | 123.3 (95.1 to 156.4)      | 115.9 (87.1 to 151.6)         | 0.1 (0.0 to 0.2)                | 26.5 (26.5 to 26.5)               |
| Kyrgyzstan | 2013 | 85.7 (73.0 to 101.0)       | 38.7 (29.9 to 48.9)        | 38.9 (29.1 to 51.0)           | 0.0 (0.0 to 0.1)                | 8.1 (8.1 to 8.1)                  | 283.9 (241.7 to 334.5) | 128.1 (99.0 to 162.2)      | 128.9 (96.5 to 168.8)         | 0.1 (0.0 to 0.2)                | 26.9 (26.9 to 26.9)               |
| Kyrgyzstan | 2014 | 86.5 (73.3 to 102.3)       | 36.7 (28.7 to 46.0)        | 41.3 (30.6 to 54.6)           | 0.0 (0.0 to 0.0)                | 8.5 (8.5 to 8.5)                  | 286.7 (242.8 to 339.1) | 121.8 (94.9 to 152.5)      | 136.9 (101.3 to 181.0)        | 0.1 (0.0 to 0.2)                | 28.0 (28.0 to 28.0)               |
| Kyrgyzstan | 2015 | 82.1 (69.1 to 97.8)        | 33.1 (25.8 to 41.5)        | 41.7 (30.4 to 55.6)           | 0.0 (0.0 to 0.0)                | 7.2 (7.2 to 7.2)                  | 272.0 (229.0 to 324.1) | 109.8 (85.4 to 137.6)      | 138.2 (100.8 to 184.1)        | 0.1 (0.0 to 0.1)                | 24.0 (24.0 to 24.0)               |
| Kyrgyzstan | 2016 | 79.1 (65.4 to 96.1)        | 31.6 (24.5 to 39.6)        | 41.6 (30.2 to 55.9)           | 0.0 (0.0 to 0.0)                | 5.9 (5.9 to 5.9)                  | 262.2 (216.7 to 318.5) | 104.6 (81.3 to 131.1)      | 137.9 (99.9 to 185.3)         | 0.1 (0.0 to 0.1)                | 19.6 (19.6 to 19.6)               |
| Kyrgyzstan | 2017 | 83.9 (69.4 to 101.4)       | 33.6 (26.1 to 42.6)        | 43.1 (31.2 to 57.9)           | 0.0 (0.0 to 0.0)                | 7.2 (7.2 to 7.2)                  | 278.0 (229.9 to 335.9) | 111.2 (86.5 to 141.3)      | 142.7 (103.4 to 191.9)        | 0.1 (0.0 to 0.1)                | 23.9 (23.9 to 23.9)               |
| Kyrgyzstan | 2018 | 85.2 (70.8 to 102.8)       | 34.2 (26.7 to 43.1)        | 44.2 (32.2 to 59.4)           | 0.0 (0.0 to 0.0)                | 6.8 (6.8 to 6.8)                  | 282.4 (234.4 to 340.5) | 113.2 (88.3 to 142.9)      | 146.6 (106.6 to 196.8)        | 0.1 (0.0 to 0.1)                | 22.5 (22.5 to 22.5)               |
| Kyrgyzstan | 2019 | 87.4 (72.3 to 105.6)       | 35.1 (27.3 to 44.4)        | 45.4 (32.9 to 60.7)           | 0.0 (0.0 to 0.0)                | 6.8 (6.4 to 7.2)                  | 289.4 (239.7 to 349.7) | 116.2 (90.6 to 147.2)      | 150.6 (109.1 to 201.2)        | 0.1 (0.0 to 0.1)                | 22.6 (21.1 to 23.9)               |
| Kyrgyzstan | 2020 | 89.3 (73.8 to 107.4)       | 35.8 (27.7 to 45.5)        | 46.5 (33.8 to 62.1)           | 0.0 (0.0 to 0.0)                | 6.9 (6.3 to 7.5)                  | 295.9 (244.5 to 355.8) | 118.8 (91.9 to 150.7)      | 154.2 (111.9 to 205.9)        | 0.1 (0.0 to 0.1)                | 22.9 (21.0 to 24.7)               |
| Kyrgyzstan | 2021 | 91.3 (75.7 to 109.2)       | 36.8 (28.5 to 46.3)        | 47.4 (34.4 to 63.2)           | 0.0 (0.0 to 0.0)                | 7.0 (6.3 to 7.7)                  | 302.4 (250.8 to 361.8) | 121.9 (94.5 to 153.6)      | 157.2 (113.8 to 209.4)        | 0.1 (0.0 to 0.1)                | 23.2 (20.9 to 25.7)               |
| Kyrgyzstan | 2022 | 92.7 (77.5 to 111.7)       | 37.4 (29.1 to 47.3)        | 48.1 (35.0 to 64.3)           | 0.0 (0.0 to 0.0)                | 7.2 (6.4 to 8.0)                  | 307.3 (256.8 to 370.2) | 124.0 (96.3 to 156.8)      | 159.5 (116.0 to 213.0)        | 0.1 (0.0 to 0.1)                | 23.7 (21.1 to 26.5)               |
| Kyrgyzstan | 2023 | 94.2 (78.5 to 113.0)       | 38.0 (29.6 to 48.1)        | 48.8 (35.5 to 65.4)           | 0.0 (0.0 to 0.0)                | 7.3 (6.4 to 8.3)                  | 312.0 (260.1 to 374.5) | 125.9 (98.0 to 159.3)      | 161.8 (117.7 to 216.6)        | 0.1 (0.0 to 0.2)                | 24.3 (21.2 to 27.6)               |
| Kyrgyzstan | 2024 | 95.7 (79.6 to 114.7)       | 38.5 (30.0 to 48.9)        | 49.6 (36.1 to 66.3)           | 0.0 (0.0 to 0.0)                | 7.5 (6.5 to 8.7)                  | 317.0 (263.7 to 380.0) | 127.7 (99.3 to 162.1)      | 164.3 (119.6 to 219.7)        | 0.1 (0.0 to 0.2)                | 24.9 (21.5 to 28.7)               |
| Kyrgyzstan | 2025 | 97.4 (80.6 to 117.3)       | 39.2 (30.4 to 49.7)        | 50.4 (36.6 to 67.7)           | 0.0 (0.0 to 0.0)                | 7.7 (6.6 to 9.0)                  | 322.6 (267.2 to 388.8) | 129.9 (100.7 to 164.8)     | 167.0 (121.3 to 224.3)        | 0.1 (0.0 to 0.2)                | 25.5 (21.8 to 29.9)               |
| Kyrgyzstan | 2026 | 99.3 (81.9 to 120.6)       | 40.1 (31.1 to 50.8)        | 51.3 (37.0 to 69.0)           | 0.0 (0.0 to 0.0)                | 7.9 (6.7 to 9.3)                  | 328.9 (271.4 to 399.6) | 132.7 (102.9 to 168.4)     | 169.9 (122.6 to 228.7)        | 0.1 (0.0 to 0.2)                | 26.2 (22.1 to 30.7)               |
| Kyrgyzstan | 2027 | 101.4 (83.7 to 122.7)      | 41.0 (31.6 to 52.2)        | 52.2 (37.7 to 70.7)           | 0.0 (0.0 to 0.0)                | 8.1 (6.8 to 9.6)                  | 335.9 (277.2 to 406.7) | 135.9 (104.6 to 172.8)     | 173.1 (124.8 to 234.4)        | 0.1 (0.0 to 0.2)                | 26.8 (22.5 to 32.0)               |
| Kyrgyzstan | 2028 | 103.7 (84.8 to 124.9)      | 42.1 (32.3 to 53.9)        | 53.3 (38.0 to 72.5)           | 0.0 (0.0 to 0.0)                | 8.3 (7.0 to 10.0)                 | 343.5 (280.9 to 413.9) | 139.4 (106.9 to 178.5)     | 176.5 (126.0 to 240.1)        | 0.1 (0.0 to 0.2)                | 27.6 (23.1 to 33.3)               |
| Kyrgyzstan | 2029 | 106.1 (86.5 to 129.7)      | 43.2 (33.0 to 55.2)        | 54.3 (38.5 to 74.1)           | 0.0 (0.0 to 0.1)                | 8.5 (7.0 to 10.4)                 | 351.5 (286.6 to 429.9) | 143.1 (109.3 to 183.0)     | 180.0 (127.6 to 245.4)        | 0.1 (0.0 to 0.2)                | 28.3 (23.3 to 34.5)               |

| Country    | Year | 2018 US Dollars per capita |                            |                               |                                 |                                   | 2018 PPP per capita    |                            |                               |                                 |                                   |
|------------|------|----------------------------|----------------------------|-------------------------------|---------------------------------|-----------------------------------|------------------------|----------------------------|-------------------------------|---------------------------------|-----------------------------------|
|            |      | Health spending            | Government health spending | Out-of-pocket health spending | Prepaid private health spending | Development assistance for health | Health spending        | Government health spending | Out-of-pocket health spending | Prepaid private health spending | Development assistance for health |
| Kyrgyzstan | 2030 | 108.5 (88.6 to 132.4)      | 44.3 (33.7 to 56.7)        | 55.4 (39.1 to 75.7)           | 0.0 (0.0 to 0.1)                | 8.7 (7.1 to 10.7)                 | 359.4 (293.4 to 438.9) | 146.7 (111.6 to 187.8)     | 183.7 (129.6 to 250.9)        | 0.1 (0.0 to 0.2)                | 28.9 (23.7 to 35.5)               |
| Kyrgyzstan | 2031 | 110.9 (89.5 to 134.8)      | 45.4 (34.4 to 58.6)        | 56.6 (39.5 to 77.8)           | 0.0 (0.0 to 0.1)                | 8.9 (7.2 to 11.2)                 | 367.6 (296.6 to 446.7) | 150.4 (113.9 to 194.0)     | 187.5 (131.0 to 257.8)        | 0.1 (0.0 to 0.2)                | 29.6 (24.0 to 37.1)               |
| Kyrgyzstan | 2032 | 113.5 (92.0 to 139.0)      | 46.5 (35.3 to 59.8)        | 57.8 (40.2 to 80.0)           | 0.0 (0.0 to 0.1)                | 9.1 (7.3 to 11.5)                 | 376.0 (304.9 to 460.5) | 154.1 (117.0 to 198.1)     | 191.4 (133.1 to 265.0)        | 0.1 (0.0 to 0.2)                | 30.3 (24.3 to 38.1)               |
| Kyrgyzstan | 2033 | 116.1 (93.9 to 142.4)      | 47.7 (36.1 to 61.1)        | 59.0 (40.9 to 82.2)           | 0.0 (0.0 to 0.1)                | 9.4 (7.4 to 12.0)                 | 384.6 (311.1 to 471.8) | 157.9 (119.7 to 202.4)     | 195.5 (135.6 to 272.5)        | 0.1 (0.1 to 0.2)                | 31.0 (24.6 to 39.8)               |
| Kyrgyzstan | 2034 | 118.8 (95.8 to 145.7)      | 48.9 (36.9 to 62.9)        | 60.3 (41.4 to 84.0)           | 0.0 (0.0 to 0.1)                | 9.6 (7.6 to 12.4)                 | 393.6 (317.5 to 482.8) | 161.9 (122.4 to 208.3)     | 199.7 (137.2 to 278.3)        | 0.1 (0.1 to 0.2)                | 31.8 (25.0 to 40.9)               |
| Kyrgyzstan | 2035 | 121.4 (97.2 to 148.6)      | 50.0 (37.7 to 64.6)        | 61.5 (41.9 to 85.9)           | 0.0 (0.0 to 0.1)                | 9.8 (7.6 to 12.9)                 | 402.1 (322.2 to 492.4) | 165.6 (125.0 to 214.2)     | 203.8 (138.8 to 284.7)        | 0.1 (0.1 to 0.2)                | 32.6 (25.3 to 42.7)               |
| Kyrgyzstan | 2036 | 123.9 (98.8 to 152.5)      | 51.1 (38.4 to 66.3)        | 62.7 (42.5 to 88.1)           | 0.0 (0.0 to 0.1)                | 10.1 (7.8 to 13.5)                | 410.6 (327.3 to 505.2) | 169.3 (127.1 to 219.8)     | 207.9 (141.0 to 291.8)        | 0.1 (0.1 to 0.2)                | 33.3 (25.8 to 44.8)               |
| Kyrgyzstan | 2037 | 126.4 (99.6 to 155.7)      | 52.1 (39.1 to 67.5)        | 63.9 (43.2 to 90.1)           | 0.0 (0.0 to 0.1)                | 10.3 (7.9 to 13.8)                | 418.8 (330.0 to 516.0) | 172.8 (129.4 to 223.5)     | 211.8 (143.2 to 298.7)        | 0.1 (0.1 to 0.2)                | 34.1 (26.2 to 45.7)               |
| Kyrgyzstan | 2038 | 128.8 (102.3 to 159.5)     | 53.2 (39.7 to 69.3)        | 65.1 (43.9 to 91.8)           | 0.0 (0.0 to 0.1)                | 10.5 (8.0 to 14.6)                | 426.9 (339.0 to 528.6) | 176.2 (131.6 to 229.6)     | 215.7 (145.3 to 304.0)        | 0.1 (0.1 to 0.2)                | 34.9 (26.6 to 48.5)               |
| Kyrgyzstan | 2039 | 131.3 (105.2 to 162.0)     | 54.2 (40.2 to 70.7)        | 66.3 (44.4 to 93.3)           | 0.0 (0.0 to 0.1)                | 10.8 (8.2 to 15.0)                | 435.0 (348.5 to 536.8) | 179.6 (133.1 to 234.2)     | 219.5 (147.1 to 309.2)        | 0.1 (0.1 to 0.2)                | 35.7 (27.3 to 49.6)               |
| Kyrgyzstan | 2040 | 133.6 (105.8 to 163.2)     | 55.2 (41.2 to 71.7)        | 67.4 (44.9 to 95.2)           | 0.0 (0.0 to 0.1)                | 11.0 (8.4 to 15.3)                | 442.8 (350.7 to 540.8) | 182.8 (136.4 to 237.5)     | 223.3 (148.8 to 315.5)        | 0.1 (0.1 to 0.2)                | 36.6 (27.9 to 50.6)               |
| Kyrgyzstan | 2041 | 136.0 (108.2 to 167.9)     | 56.1 (41.7 to 73.0)        | 68.5 (45.5 to 96.6)           | 0.0 (0.0 to 0.1)                | 11.3 (8.5 to 15.7)                | 450.6 (358.6 to 556.5) | 185.9 (138.2 to 242.0)     | 227.0 (150.7 to 320.0)        | 0.1 (0.1 to 0.2)                | 37.5 (28.3 to 52.1)               |
| Kyrgyzstan | 2042 | 138.3 (109.7 to 170.8)     | 57.0 (42.3 to 74.3)        | 69.6 (46.1 to 97.9)           | 0.0 (0.0 to 0.1)                | 11.6 (8.7 to 16.6)                | 458.2 (363.6 to 565.8) | 189.0 (140.3 to 246.0)     | 230.6 (152.6 to 324.4)        | 0.1 (0.1 to 0.2)                | 38.5 (28.8 to 54.9)               |
| Kyrgyzstan | 2043 | 140.5 (111.6 to 174.2)     | 57.9 (42.8 to 75.8)        | 70.6 (46.7 to 99.7)           | 0.0 (0.0 to 0.1)                | 11.9 (8.8 to 17.2)                | 465.6 (369.8 to 577.2) | 192.0 (142.0 to 251.3)     | 234.1 (154.6 to 330.4)        | 0.1 (0.1 to 0.2)                | 39.4 (29.3 to 57.0)               |
| Kyrgyzstan | 2044 | 142.8 (113.1 to 175.5)     | 58.9 (43.4 to 77.7)        | 71.7 (47.3 to 101.5)          | 0.0 (0.0 to 0.1)                | 12.2 (9.0 to 17.7)                | 473.2 (374.7 to 581.7) | 195.1 (143.8 to 257.3)     | 237.5 (156.8 to 336.3)        | 0.1 (0.1 to 0.2)                | 40.5 (29.9 to 58.6)               |
| Kyrgyzstan | 2045 | 145.1 (115.3 to 178.0)     | 59.9 (44.1 to 78.9)        | 72.7 (47.9 to 103.2)          | 0.0 (0.0 to 0.1)                | 12.5 (9.0 to 18.9)                | 480.8 (382.0 to 589.9) | 198.4 (146.2 to 261.6)     | 240.8 (158.8 to 342.0)        | 0.1 (0.1 to 0.2)                | 41.5 (29.9 to 62.7)               |
| Kyrgyzstan | 2046 | 147.4 (116.9 to 182.0)     | 60.9 (44.6 to 80.1)        | 73.6 (48.5 to 104.6)          | 0.0 (0.0 to 0.1)                | 12.9 (9.3 to 19.8)                | 488.5 (387.3 to 603.1) | 201.8 (147.8 to 265.4)     | 244.0 (160.6 to 346.8)        | 0.1 (0.1 to 0.2)                | 42.7 (30.8 to 65.5)               |
| Kyrgyzstan | 2047 | 149.7 (117.9 to 185.7)     | 61.9 (45.4 to 81.7)        | 74.5 (49.1 to 105.7)          | 0.0 (0.0 to 0.1)                | 13.2 (9.5 to 20.9)                | 496.0 (390.8 to 615.4) | 205.0 (150.6 to 270.6)     | 247.0 (162.8 to 350.2)        | 0.1 (0.1 to 0.2)                | 43.9 (31.5 to 69.1)               |
| Kyrgyzstan | 2048 | 151.9 (119.0 to 188.6)     | 62.8 (46.1 to 82.5)        | 75.4 (49.7 to 107.2)          | 0.0 (0.0 to 0.1)                | 13.6 (9.8 to 21.8)                | 503.3 (394.2 to 624.8) | 208.0 (152.8 to 273.2)     | 250.0 (164.7 to 355.3)        | 0.1 (0.1 to 0.2)                | 45.2 (32.4 to 72.3)               |
| Kyrgyzstan | 2049 | 154.2 (121.0 to 192.0)     | 63.8 (47.1 to 84.3)        | 76.3 (50.3 to 108.7)          | 0.0 (0.0 to 0.1)                | 14.1 (10.0 to 22.6)               | 511.0 (400.8 to 636.2) | 211.4 (156.1 to 279.3)     | 252.9 (166.6 to 360.3)        | 0.1 (0.1 to 0.2)                | 46.6 (33.2 to 74.8)               |
| Kyrgyzstan | 2050 | 156.6 (122.0 to 194.9)     | 64.9 (47.5 to 85.6)        | 77.2 (50.8 to 110.2)          | 0.0 (0.0 to 0.1)                | 14.5 (10.2 to 23.8)               | 518.9 (404.2 to 645.9) | 215.0 (157.5 to 283.6)     | 255.7 (168.3 to 365.1)        | 0.1 (0.1 to 0.3)                | 48.1 (33.8 to 78.7)               |

| Country | Year | 2018 US Dollars per capita |                            |                               |                                 |                                   | 2018 PPP per capita    |                            |                               |                                 |                                   |
|---------|------|----------------------------|----------------------------|-------------------------------|---------------------------------|-----------------------------------|------------------------|----------------------------|-------------------------------|---------------------------------|-----------------------------------|
|         |      | Health spending            | Government health spending | Out-of-pocket health spending | Prepaid private health spending | Development assistance for health | Health spending        | Government health spending | Out-of-pocket health spending | Prepaid private health spending | Development assistance for health |
| Laos    | 1995 | 31.9 (25.9 to 39.0)        | 11.7 (8.8 to 15.1)         | 16.2 (11.6 to 22.4)           | 1.7 (0.8 to 3.2)                | 2.2 (2.2 to 2.2)                  | 96.9 (78.8 to 118.4)   | 35.7 (26.8 to 45.8)        | 49.2 (35.3 to 68.2)           | 5.3 (2.6 to 9.8)                | 6.7 (6.7 to 6.7)                  |
| Laos    | 1996 | 31.1 (25.0 to 38.3)        | 11.7 (8.8 to 15.0)         | 16.4 (11.7 to 22.6)           | 1.8 (0.9 to 3.3)                | 1.3 (1.3 to 1.3)                  | 94.6 (76.0 to 116.4)   | 35.5 (26.7 to 45.5)        | 49.8 (35.7 to 68.6)           | 5.4 (2.6 to 9.9)                | 3.9 (3.9 to 3.9)                  |
| Laos    | 1997 | 31.8 (25.5 to 39.2)        | 11.7 (8.8 to 15.0)         | 16.7 (11.9 to 23.0)           | 1.9 (0.9 to 3.6)                | 1.5 (1.5 to 1.5)                  | 96.6 (77.5 to 119.0)   | 35.5 (26.7 to 45.5)        | 50.9 (36.0 to 70.0)           | 5.8 (2.8 to 10.9)               | 4.4 (4.4 to 4.4)                  |
| Laos    | 1998 | 32.0 (25.6 to 39.1)        | 11.3 (8.5 to 14.5)         | 16.9 (11.8 to 23.0)           | 2.0 (1.0 to 3.8)                | 1.9 (1.9 to 1.9)                  | 97.4 (77.9 to 118.8)   | 34.3 (25.9 to 44.1)        | 51.2 (35.8 to 69.9)           | 6.2 (3.0 to 11.4)               | 5.7 (5.7 to 5.7)                  |
| Laos    | 1999 | 32.7 (26.1 to 39.6)        | 10.9 (8.2 to 13.8)         | 16.9 (11.9 to 23.3)           | 2.3 (1.1 to 4.1)                | 2.6 (2.6 to 2.6)                  | 99.5 (79.3 to 120.4)   | 33.0 (24.9 to 42.0)        | 51.5 (36.1 to 70.7)           | 7.0 (3.3 to 12.6)               | 8.0 (8.0 to 8.0)                  |
| Laos    | 2000 | 35.9 (29.1 to 43.4)        | 10.7 (8.1 to 13.7)         | 17.2 (11.9 to 23.9)           | 3.0 (1.4 to 5.4)                | 5.0 (5.0 to 5.0)                  | 109.1 (88.5 to 131.7)  | 32.5 (24.7 to 41.6)        | 52.2 (36.3 to 72.6)           | 9.2 (4.3 to 16.5)               | 15.3 (15.3 to 15.3)               |
| Laos    | 2001 | 33.8 (26.8 to 41.2)        | 10.8 (8.2 to 13.8)         | 17.7 (12.5 to 24.5)           | 2.7 (1.3 to 4.9)                | 2.6 (2.6 to 2.6)                  | 102.6 (81.5 to 125.1)  | 32.7 (24.9 to 41.9)        | 53.8 (37.9 to 74.4)           | 8.3 (4.0 to 14.8)               | 7.8 (7.8 to 7.8)                  |
| Laos    | 2002 | 33.9 (27.1 to 41.8)        | 10.3 (7.9 to 13.3)         | 18.4 (13.0 to 25.4)           | 2.9 (1.4 to 5.2)                | 2.3 (2.3 to 2.3)                  | 103.1 (82.4 to 127.0)  | 31.3 (23.9 to 40.3)        | 56.0 (39.4 to 77.1)           | 8.8 (4.2 to 15.7)               | 7.0 (7.0 to 7.0)                  |
| Laos    | 2003 | 38.8 (31.9 to 47.0)        | 10.0 (7.7 to 12.9)         | 19.4 (13.7 to 27.0)           | 3.2 (1.5 to 5.6)                | 6.2 (6.2 to 6.2)                  | 117.9 (97.0 to 142.8)  | 30.4 (23.3 to 39.2)        | 59.0 (41.6 to 81.9)           | 9.6 (4.7 to 17.0)               | 18.8 (18.8 to 18.8)               |
| Laos    | 2004 | 34.9 (28.7 to 42.7)        | 9.3 (7.1 to 12.1)          | 17.8 (12.7 to 24.7)           | 3.4 (1.7 to 6.0)                | 4.4 (4.4 to 4.4)                  | 106.0 (87.1 to 129.7)  | 28.3 (21.7 to 36.7)        | 54.2 (38.5 to 75.0)           | 10.2 (5.1 to 18.1)              | 13.3 (13.3 to 13.3)               |
| Laos    | 2005 | 36.0 (30.2 to 43.5)        | 9.0 (6.9 to 11.6)          | 16.4 (11.7 to 22.5)           | 3.7 (1.8 to 6.7)                | 6.9 (6.9 to 6.9)                  | 109.4 (91.8 to 132.1)  | 27.3 (20.9 to 35.4)        | 49.9 (35.7 to 68.5)           | 11.3 (5.6 to 20.4)              | 21.0 (21.0 to 21.0)               |
| Laos    | 2006 | 33.6 (28.0 to 40.3)        | 8.4 (6.4 to 10.9)          | 15.1 (10.9 to 20.6)           | 4.3 (2.1 to 8.0)                | 5.8 (5.8 to 5.8)                  | 102.0 (85.0 to 122.5)  | 25.5 (19.5 to 33.1)        | 45.8 (33.0 to 62.6)           | 13.0 (6.5 to 24.2)              | 17.7 (17.7 to 17.7)               |
| Laos    | 2007 | 35.4 (29.5 to 42.7)        | 8.2 (6.3 to 10.6)          | 14.3 (10.3 to 19.4)           | 5.9 (3.0 to 11.0)               | 6.9 (6.9 to 6.9)                  | 107.5 (89.7 to 129.8)  | 25.0 (19.0 to 32.1)        | 43.6 (31.2 to 59.1)           | 17.9 (9.0 to 33.4)              | 21.0 (21.0 to 21.0)               |
| Laos    | 2008 | 36.7 (30.8 to 44.0)        | 8.5 (6.4 to 10.9)          | 13.7 (9.8 to 18.7)            | 6.6 (3.3 to 12.3)               | 7.9 (7.9 to 7.9)                  | 111.4 (93.6 to 133.6)  | 25.7 (19.6 to 33.1)        | 41.7 (29.9 to 56.7)           | 20.1 (10.0 to 37.3)             | 23.9 (23.9 to 23.9)               |
| Laos    | 2009 | 39.1 (33.1 to 46.9)        | 9.9 (7.6 to 12.8)          | 14.8 (10.6 to 20.3)           | 6.4 (3.2 to 12.0)               | 7.9 (7.9 to 7.9)                  | 118.8 (100.5 to 142.4) | 30.2 (23.0 to 38.9)        | 44.9 (32.1 to 61.6)           | 19.5 (9.6 to 36.4)              | 24.1 (24.1 to 24.1)               |
| Laos    | 2010 | 37.8 (32.4 to 44.6)        | 9.0 (6.9 to 11.7)          | 15.4 (11.1 to 21.0)           | 4.0 (1.9 to 7.2)                | 9.5 (9.5 to 9.5)                  | 115.0 (98.3 to 135.5)  | 27.3 (20.8 to 35.4)        | 46.7 (33.8 to 63.8)           | 12.2 (5.8 to 22.0)              | 28.8 (28.8 to 28.8)               |
| Laos    | 2011 | 36.2 (31.0 to 42.5)        | 8.4 (6.4 to 10.9)          | 15.8 (11.3 to 22.1)           | 1.5 (0.7 to 2.7)                | 10.5 (10.5 to 10.5)               | 110.0 (94.3 to 129.1)  | 25.5 (19.4 to 33.1)        | 48.2 (34.4 to 67.0)           | 4.4 (2.1 to 8.1)                | 32.0 (32.0 to 32.0)               |
| Laos    | 2012 | 38.3 (32.6 to 45.4)        | 9.3 (7.1 to 12.2)          | 17.5 (12.6 to 24.2)           | 1.3 (0.7 to 2.4)                | 10.1 (10.1 to 10.1)               | 116.4 (99.1 to 137.9)  | 28.3 (21.7 to 37.1)        | 53.3 (38.2 to 73.5)           | 4.1 (2.0 to 7.3)                | 30.7 (30.7 to 30.7)               |
| Laos    | 2013 | 44.7 (38.3 to 52.7)        | 11.5 (8.7 to 15.0)         | 20.1 (14.4 to 27.8)           | 1.4 (0.7 to 2.4)                | 11.7 (11.7 to 11.7)               | 135.8 (116.4 to 160.2) | 35.0 (26.5 to 45.6)        | 61.2 (43.8 to 84.4)           | 4.1 (2.0 to 7.3)                | 35.4 (35.4 to 35.4)               |
| Laos    | 2014 | 48.1 (40.6 to 58.0)        | 13.6 (10.3 to 17.7)        | 22.4 (15.9 to 31.3)           | 1.4 (0.7 to 2.6)                | 10.7 (10.7 to 10.7)               | 146.2 (123.5 to 176.3) | 41.3 (31.3 to 53.7)        | 68.1 (48.2 to 95.1)           | 4.4 (2.2 to 7.8)                | 32.4 (32.4 to 32.4)               |
| Laos    | 2015 | 53.0 (44.8 to 63.9)        | 16.0 (12.3 to 20.8)        | 24.2 (17.1 to 34.0)           | 1.6 (0.8 to 2.8)                | 11.1 (11.1 to 11.1)               | 160.9 (136.3 to 194.2) | 48.7 (37.3 to 63.1)        | 73.7 (52.1 to 103.4)          | 4.8 (2.4 to 8.5)                | 33.7 (33.7 to 33.7)               |

| Country | Year | 2018 US Dollars per capita |                            |                               |                                 |                                   | 2018 PPP per capita    |                            |                               |                                 |                                   |
|---------|------|----------------------------|----------------------------|-------------------------------|---------------------------------|-----------------------------------|------------------------|----------------------------|-------------------------------|---------------------------------|-----------------------------------|
|         |      | Health spending            | Government health spending | Out-of-pocket health spending | Prepaid private health spending | Development assistance for health | Health spending        | Government health spending | Out-of-pocket health spending | Prepaid private health spending | Development assistance for health |
| Laos    | 2016 | 51.7 (42.6 to 62.2)        | 17.2 (13.1 to 22.5)        | 25.4 (18.1 to 35.7)           | 1.7 (0.9 to 3.1)                | 7.4 (7.4 to 7.4)                  | 157.2 (129.6 to 189.1) | 52.4 (39.8 to 68.5)        | 77.2 (54.9 to 108.4)          | 5.3 (2.6 to 9.5)                | 22.4 (22.4 to 22.4)               |
| Laos    | 2017 | 55.5 (45.9 to 67.4)        | 18.7 (14.2 to 24.5)        | 26.6 (19.0 to 37.6)           | 1.8 (0.9 to 3.3)                | 8.4 (8.4 to 8.4)                  | 168.7 (139.6 to 204.7) | 56.8 (43.2 to 74.4)        | 80.8 (57.7 to 114.1)          | 5.6 (2.8 to 10.0)               | 25.4 (25.4 to 25.4)               |
| Laos    | 2018 | 56.7 (47.0 to 68.0)        | 19.5 (14.8 to 25.5)        | 27.5 (19.6 to 38.6)           | 1.9 (1.0 to 3.4)                | 7.8 (7.7 to 7.8)                  | 172.3 (143.0 to 206.5) | 59.3 (45.1 to 77.6)        | 83.5 (59.4 to 117.2)          | 5.9 (2.9 to 10.5)               | 23.6 (23.5 to 23.7)               |
| Laos    | 2019 | 58.4 (48.0 to 71.0)        | 20.3 (15.5 to 26.6)        | 28.4 (20.2 to 39.6)           | 2.0 (1.0 to 3.6)                | 7.7 (7.2 to 8.1)                  | 177.5 (145.9 to 215.9) | 61.8 (47.0 to 80.8)        | 86.3 (61.4 to 120.4)          | 6.1 (3.0 to 10.9)               | 23.4 (21.9 to 24.8)               |
| Laos    | 2020 | 60.3 (49.9 to 72.5)        | 21.1 (16.1 to 27.6)        | 29.3 (20.9 to 41.1)           | 2.1 (1.0 to 3.7)                | 7.7 (7.0 to 8.3)                  | 183.1 (151.6 to 220.2) | 64.2 (49.0 to 84.0)        | 89.2 (63.5 to 125.0)          | 6.3 (3.1 to 11.3)               | 23.4 (21.4 to 25.3)               |
| Laos    | 2021 | 62.3 (51.0 to 75.9)        | 22.1 (16.8 to 28.8)        | 30.4 (21.7 to 42.7)           | 2.2 (1.1 to 3.9)                | 7.7 (6.9 to 8.5)                  | 189.4 (155.0 to 230.7) | 67.0 (51.0 to 87.6)        | 92.3 (66.0 to 129.8)          | 6.6 (3.3 to 11.8)               | 23.5 (21.0 to 25.9)               |
| Laos    | 2022 | 64.5 (53.0 to 77.8)        | 23.0 (17.5 to 30.1)        | 31.4 (22.4 to 44.2)           | 2.3 (1.1 to 4.0)                | 7.7 (6.8 to 8.7)                  | 195.9 (161.1 to 236.3) | 70.0 (53.0 to 91.6)        | 95.6 (68.2 to 134.4)          | 6.9 (3.4 to 12.3)               | 23.5 (20.8 to 26.5)               |
| Laos    | 2023 | 66.6 (54.7 to 81.9)        | 24.0 (18.3 to 31.5)        | 32.5 (23.1 to 45.9)           | 2.3 (1.2 to 4.2)                | 7.7 (6.7 to 8.9)                  | 202.5 (166.1 to 248.9) | 73.0 (55.5 to 95.8)        | 98.8 (70.3 to 139.5)          | 7.1 (3.5 to 12.8)               | 23.5 (20.3 to 26.9)               |
| Laos    | 2024 | 68.8 (56.6 to 83.5)        | 25.1 (19.0 to 32.9)        | 33.5 (23.8 to 47.4)           | 2.4 (1.2 to 4.4)                | 7.8 (6.6 to 9.0)                  | 209.0 (172.1 to 253.6) | 76.1 (57.8 to 99.9)        | 101.8 (72.3 to 143.9)         | 7.4 (3.7 to 13.3)               | 23.6 (20.1 to 27.3)               |
| Laos    | 2025 | 71.0 (58.3 to 86.5)        | 26.1 (19.7 to 34.4)        | 34.6 (24.6 to 48.7)           | 2.5 (1.3 to 4.5)                | 7.8 (6.6 to 9.1)                  | 215.8 (177.1 to 262.9) | 79.4 (59.9 to 104.6)       | 105.0 (74.7 to 148.0)         | 7.7 (3.8 to 13.8)               | 23.6 (20.0 to 27.7)               |
| Laos    | 2026 | 73.4 (60.5 to 89.2)        | 27.3 (20.6 to 35.9)        | 35.6 (25.4 to 50.2)           | 2.6 (1.3 to 4.7)                | 7.8 (6.5 to 9.2)                  | 223.0 (183.8 to 271.1) | 82.9 (62.5 to 109.0)       | 108.3 (77.1 to 152.5)         | 8.0 (3.9 to 14.4)               | 23.8 (19.9 to 28.1)               |
| Laos    | 2027 | 75.9 (62.1 to 93.2)        | 28.5 (21.5 to 37.5)        | 36.8 (26.2 to 51.7)           | 2.7 (1.4 to 4.9)                | 7.9 (6.5 to 9.4)                  | 230.7 (188.8 to 283.1) | 86.6 (65.5 to 113.9)       | 111.7 (79.6 to 157.2)         | 8.3 (4.1 to 15.0)               | 24.0 (19.8 to 28.6)               |
| Laos    | 2028 | 78.5 (64.2 to 94.6)        | 29.8 (22.5 to 39.1)        | 37.9 (27.0 to 53.4)           | 2.9 (1.4 to 5.1)                | 8.0 (6.6 to 9.7)                  | 238.7 (195.1 to 287.6) | 90.5 (68.5 to 118.7)       | 115.3 (82.2 to 162.3)         | 8.7 (4.3 to 15.6)               | 24.3 (20.1 to 29.6)               |
| Laos    | 2029 | 81.2 (65.9 to 100.0)       | 31.1 (23.5 to 40.8)        | 39.1 (27.9 to 55.0)           | 3.0 (1.5 to 5.4)                | 8.1 (6.6 to 9.9)                  | 246.9 (200.4 to 303.8) | 94.5 (71.3 to 124.0)       | 118.9 (84.8 to 167.3)         | 9.0 (4.4 to 16.3)               | 24.5 (19.9 to 30.2)               |
| Laos    | 2030 | 84.0 (68.6 to 101.5)       | 32.4 (24.5 to 42.4)        | 40.4 (28.8 to 56.8)           | 3.1 (1.5 to 5.6)                | 8.1 (6.6 to 10.1)                 | 255.4 (208.3 to 308.4) | 98.6 (74.4 to 128.9)       | 122.6 (87.4 to 172.8)         | 9.4 (4.6 to 17.0)               | 24.7 (20.0 to 30.6)               |
| Laos    | 2031 | 86.9 (70.7 to 107.1)       | 33.9 (25.5 to 44.3)        | 41.6 (29.7 to 58.7)           | 3.2 (1.6 to 5.8)                | 8.2 (6.6 to 10.3)                 | 264.2 (214.9 to 325.6) | 103.0 (77.5 to 134.6)      | 126.5 (90.1 to 178.4)         | 9.8 (4.8 to 17.7)               | 25.0 (20.0 to 31.5)               |
| Laos    | 2032 | 90.0 (73.5 to 108.5)       | 35.4 (26.6 to 46.3)        | 42.9 (30.6 to 60.7)           | 3.3 (1.7 to 6.1)                | 8.3 (6.6 to 10.7)                 | 273.4 (223.2 to 329.6) | 107.5 (80.7 to 140.7)      | 130.4 (92.9 to 184.4)         | 10.2 (5.0 to 18.4)              | 25.3 (20.0 to 32.4)               |
| Laos    | 2033 | 93.1 (75.3 to 114.5)       | 36.9 (27.7 to 48.4)        | 44.3 (31.5 to 62.5)           | 3.5 (1.7 to 6.3)                | 8.4 (6.6 to 10.9)                 | 282.8 (228.7 to 348.1) | 112.2 (84.2 to 146.9)      | 134.5 (95.7 to 190.1)         | 10.6 (5.2 to 19.2)              | 25.6 (20.1 to 33.0)               |
| Laos    | 2034 | 96.3 (79.1 to 115.9)       | 38.5 (28.9 to 50.5)        | 45.6 (32.4 to 64.4)           | 3.6 (1.8 to 6.6)                | 8.5 (6.6 to 11.2)                 | 292.7 (240.4 to 352.3) | 117.1 (87.8 to 153.4)      | 138.7 (98.5 to 195.8)         | 11.0 (5.4 to 19.9)              | 25.9 (20.2 to 34.1)               |
| Laos    | 2035 | 99.7 (81.0 to 123.0)       | 40.2 (30.1 to 52.6)        | 47.0 (33.3 to 66.4)           | 3.8 (1.9 to 6.8)                | 8.6 (6.7 to 11.5)                 | 302.8 (246.1 to 373.7) | 122.3 (91.5 to 159.9)      | 142.9 (101.3 to 201.7)        | 11.4 (5.6 to 20.8)              | 26.2 (20.3 to 34.9)               |
| Laos    | 2036 | 103.2 (84.9 to 124.2)      | 42.0 (31.4 to 55.1)        | 48.5 (34.3 to 68.5)           | 3.9 (1.9 to 7.1)                | 8.7 (6.6 to 11.8)                 | 313.5 (257.9 to 377.3) | 127.8 (95.5 to 167.3)      | 147.4 (104.3 to 208.0)        | 11.9 (5.8 to 21.6)              | 26.6 (20.1 to 35.9)               |

| Country | Year | 2018 US Dollars per capita |                            |                               |                                 |                                   | 2018 PPP per capita    |                            |                               |                                 |                                   |
|---------|------|----------------------------|----------------------------|-------------------------------|---------------------------------|-----------------------------------|------------------------|----------------------------|-------------------------------|---------------------------------|-----------------------------------|
|         |      | Health spending            | Government health spending | Out-of-pocket health spending | Prepaid private health spending | Development assistance for health | Health spending        | Government health spending | Out-of-pocket health spending | Prepaid private health spending | Development assistance for health |
| Laos    | 2037 | 106.8 (86.0 to 132.2)      | 43.9 (32.8 to 57.7)        | 50.0 (35.3 to 70.6)           | 4.1 (2.0 to 7.4)                | 8.8 (6.7 to 12.0)                 | 324.5 (261.3 to 401.7) | 133.4 (99.7 to 175.4)      | 151.9 (107.4 to 214.5)        | 12.3 (6.1 to 22.5)              | 26.9 (20.4 to 36.6)               |
| Laos    | 2038 | 110.6 (90.4 to 133.4)      | 45.9 (34.2 to 60.4)        | 51.5 (36.4 to 72.8)           | 4.2 (2.1 to 7.7)                | 9.0 (6.8 to 12.3)                 | 336.0 (274.7 to 405.4) | 139.4 (103.9 to 183.6)     | 156.6 (110.5 to 221.2)        | 12.8 (6.3 to 23.5)              | 27.2 (20.6 to 37.3)               |
| Laos    | 2039 | 114.4 (92.7 to 140.5)      | 47.9 (35.7 to 63.1)        | 53.1 (37.4 to 75.0)           | 4.4 (2.2 to 8.0)                | 9.1 (6.7 to 12.4)                 | 347.7 (281.7 to 427.1) | 145.5 (108.4 to 191.8)     | 161.4 (113.7 to 228.0)        | 13.3 (6.6 to 24.4)              | 27.5 (20.5 to 37.8)               |
| Laos    | 2040 | 118.4 (96.9 to 143.1)      | 50.0 (37.2 to 66.0)        | 54.7 (38.5 to 77.3)           | 4.5 (2.2 to 8.3)                | 9.2 (6.9 to 12.8)                 | 359.8 (294.3 to 435.0) | 151.8 (113.0 to 200.6)     | 166.3 (117.1 to 234.9)        | 13.8 (6.8 to 25.3)              | 27.9 (20.8 to 39.0)               |
| Laos    | 2041 | 122.6 (99.0 to 149.9)      | 52.2 (38.8 to 68.9)        | 56.4 (39.7 to 79.6)           | 4.7 (2.3 to 8.6)                | 9.3 (6.9 to 13.4)                 | 372.5 (300.8 to 455.6) | 158.5 (117.8 to 209.3)     | 171.3 (120.6 to 242.0)        | 14.4 (7.1 to 26.2)              | 28.3 (21.0 to 40.6)               |
| Laos    | 2042 | 126.8 (103.6 to 154.1)     | 54.4 (40.3 to 72.1)        | 58.1 (40.9 to 82.0)           | 4.9 (2.4 to 8.9)                | 9.5 (6.9 to 13.7)                 | 385.4 (315.0 to 468.2) | 165.4 (122.6 to 219.1)     | 176.4 (124.2 to 249.3)        | 14.9 (7.3 to 27.2)              | 28.7 (21.0 to 41.6)               |
| Laos    | 2043 | 131.3 (105.8 to 160.3)     | 56.8 (42.0 to 75.1)        | 59.8 (42.1 to 84.5)           | 5.1 (2.5 to 9.3)                | 9.6 (7.0 to 14.4)                 | 398.9 (321.6 to 487.2) | 172.5 (127.8 to 228.2)     | 181.7 (128.0 to 256.8)        | 15.5 (7.6 to 28.3)              | 29.2 (21.1 to 43.6)               |
| Laos    | 2044 | 135.8 (110.1 to 164.2)     | 59.2 (43.5 to 78.7)        | 61.6 (43.3 to 87.0)           | 5.3 (2.6 to 9.7)                | 9.8 (7.0 to 14.7)                 | 412.8 (334.7 to 498.9) | 180.0 (132.1 to 239.2)     | 187.1 (131.7 to 264.4)        | 16.1 (7.9 to 29.5)              | 29.7 (21.3 to 44.5)               |
| Laos    | 2045 | 140.5 (113.1 to 172.1)     | 61.8 (45.2 to 82.3)        | 63.3 (44.5 to 89.5)           | 5.5 (2.7 to 10.1)               | 9.9 (7.0 to 14.9)                 | 427.0 (343.6 to 523.1) | 187.7 (137.3 to 250.3)     | 192.4 (135.4 to 272.0)        | 16.7 (8.2 to 30.8)              | 30.2 (21.4 to 45.2)               |
| Laos    | 2046 | 145.3 (118.6 to 176.1)     | 64.4 (46.8 to 85.8)        | 65.1 (45.8 to 92.0)           | 5.7 (2.8 to 10.5)               | 10.1 (7.2 to 15.5)                | 441.6 (360.4 to 535.2) | 195.8 (142.3 to 260.9)     | 197.8 (139.2 to 279.7)        | 17.3 (8.4 to 31.8)              | 30.7 (21.8 to 47.0)               |
| Laos    | 2047 | 150.2 (120.4 to 186.1)     | 67.2 (48.5 to 89.6)        | 66.9 (47.1 to 94.6)           | 5.9 (2.9 to 10.8)               | 10.3 (7.2 to 16.2)                | 456.6 (365.8 to 565.6) | 204.1 (147.3 to 272.2)     | 203.2 (143.1 to 287.4)        | 17.9 (8.7 to 32.8)              | 31.3 (22.0 to 49.3)               |
| Laos    | 2048 | 155.3 (126.5 to 190.0)     | 70.0 (50.5 to 93.1)        | 68.7 (48.4 to 97.1)           | 6.1 (3.0 to 11.1)               | 10.5 (7.3 to 16.9)                | 472.0 (384.4 to 577.4) | 212.8 (153.5 to 282.8)     | 208.6 (147.0 to 295.0)        | 18.5 (9.0 to 33.8)              | 32.0 (22.3 to 51.2)               |
| Laos    | 2049 | 160.4 (128.9 to 198.7)     | 72.9 (52.7 to 97.5)        | 70.4 (49.6 to 99.6)           | 6.3 (3.1 to 11.5)               | 10.7 (7.3 to 17.1)                | 487.5 (391.8 to 603.8) | 221.7 (160.1 to 296.3)     | 214.0 (150.8 to 302.6)        | 19.1 (9.3 to 34.9)              | 32.7 (22.2 to 52.0)               |
| Laos    | 2050 | 165.6 (133.6 to 202.6)     | 76.0 (54.7 to 101.7)       | 72.2 (50.9 to 102.0)          | 6.5 (3.2 to 11.8)               | 11.0 (7.5 to 17.9)                | 503.4 (406.1 to 615.6) | 230.9 (166.2 to 309.1)     | 219.3 (154.7 to 310.1)        | 19.8 (9.6 to 35.9)              | 33.4 (22.8 to 54.4)               |
| Latvia  | 1995 | 329.1 (298.0 to 362.3)     | 188.0 (167.4 to 211.0)     | 137.5 (116.4 to 161.3)        | 3.3 (1.6 to 5.9)                | 0.3 (0.3 to 0.3)                  | 540.7 (489.5 to 595.2) | 308.8 (275.1 to 346.6)     | 225.9 (191.2 to 264.9)        | 5.4 (2.7 to 9.7)                | 0.5 (0.5 to 0.5)                  |
| Latvia  | 1996 | 343.8 (315.8 to 373.4)     | 189.2 (171.3 to 209.0)     | 151.2 (131.9 to 173.0)        | 3.3 (1.6 to 6.0)                | 0.0 (0.0 to 0.0)                  | 564.7 (518.8 to 613.4) | 310.8 (281.3 to 343.4)     | 248.5 (216.7 to 284.2)        | 5.4 (2.7 to 9.8)                | 0.0 (0.0 to 0.0)                  |
| Latvia  | 1997 | 376.0 (347.9 to 403.5)     | 203.0 (185.8 to 222.1)     | 167.6 (149.3 to 189.6)        | 4.0 (2.0 to 7.1)                | 1.4 (1.4 to 1.4)                  | 617.7 (571.5 to 662.8) | 333.5 (305.2 to 364.9)     | 275.2 (245.2 to 311.4)        | 6.6 (3.3 to 11.7)               | 2.3 (2.3 to 2.3)                  |
| Latvia  | 1998 | 404.6 (376.9 to 432.0)     | 217.5 (200.0 to 236.8)     | 179.1 (160.8 to 199.9)        | 5.0 (2.5 to 8.7)                | 3.0 (3.0 to 3.0)                  | 664.6 (619.2 to 709.7) | 357.3 (328.6 to 389.0)     | 294.2 (264.2 to 328.3)        | 8.2 (4.1 to 14.4)               | 4.9 (4.9 to 4.9)                  |
| Latvia  | 1999 | 419.1 (391.6 to 447.1)     | 222.2 (204.2 to 241.4)     | 190.3 (171.0 to 209.6)        | 6.0 (3.1 to 10.5)               | 0.6 (0.6 to 0.6)                  | 688.4 (643.3 to 734.5) | 365.0 (335.4 to 396.6)     | 312.6 (280.9 to 344.3)        | 9.8 (5.0 to 17.3)               | 1.0 (1.0 to 1.0)                  |
| Latvia  | 2000 | 432.8 (405.7 to 461.4)     | 222.2 (203.6 to 240.9)     | 202.3 (182.3 to 222.3)        | 7.3 (3.7 to 13.0)               | 0.9 (0.9 to 0.9)                  | 710.9 (666.4 to 757.9) | 365.0 (334.4 to 395.7)     | 332.4 (299.5 to 365.2)        | 12.0 (6.1 to 21.4)              | 1.5 (1.5 to 1.5)                  |
| Latvia  | 2001 | 469.1 (441.2 to 498.4)     | 235.7 (217.5 to 254.7)     | 222.8 (201.5 to 244.1)        | 9.5 (5.0 to 17.0)               | 1.1 (1.1 to 1.1)                  | 770.6 (724.7 to 818.7) | 387.2 (357.3 to 418.4)     | 365.9 (330.9 to 401.0)        | 15.6 (8.2 to 27.9)              | 1.8 (1.8 to 1.8)                  |

| Country | Year | 2018 US Dollars per capita |                            |                               |                                 |                                   | 2018 PPP per capita       |                            |                               |                                 |                                   |
|---------|------|----------------------------|----------------------------|-------------------------------|---------------------------------|-----------------------------------|---------------------------|----------------------------|-------------------------------|---------------------------------|-----------------------------------|
|         |      | Health spending            | Government health spending | Out-of-pocket health spending | Prepaid private health spending | Development assistance for health | Health spending           | Government health spending | Out-of-pocket health spending | Prepaid private health spending | Development assistance for health |
| Latvia  | 2002 | 514.8 (483.9 to 544.9)     | 259.9 (240.7 to 281.1)     | 241.3 (219.8 to 264.0)        | 11.5 (6.1 to 20.7)              | 2.0 (2.0 to 2.0)                  | 845.6 (794.9 to 895.1)    | 426.9 (395.5 to 461.7)     | 396.4 (361.1 to 433.7)        | 19.0 (10.0 to 34.0)             | 3.3 (3.3 to 3.3)                  |
| Latvia  | 2003 | 560.1 (529.4 to 591.9)     | 291.5 (272.4 to 312.8)     | 256.1 (234.4 to 278.3)        | 12.1 (6.6 to 21.3)              | 0.4 (0.4 to 0.4)                  | 920.1 (869.7 to 972.3)    | 478.8 (447.5 to 513.8)     | 420.8 (385.1 to 457.2)        | 19.9 (10.8 to 34.9)             | 0.6 (0.6 to 0.6)                  |
| Latvia  | 2004 | 635.8 (602.3 to 672.0)     | 345.5 (324.0 to 367.9)     | 273.7 (249.7 to 296.8)        | 15.7 (8.5 to 26.5)              | 0.9 (0.9 to 0.9)                  | 1044.4 (989.4 to 1103.8)  | 567.6 (532.3 to 604.4)     | 449.7 (410.2 to 487.5)        | 25.8 (14.0 to 43.5)             | 1.4 (1.4 to 1.4)                  |
| Latvia  | 2005 | 703.1 (668.5 to 740.6)     | 396.9 (373.9 to 422.5)     | 288.5 (264.5 to 313.6)        | 17.6 (9.7 to 29.3)              | 0.0 (0.0 to 0.0)                  | 1155.0 (1098.2 to 1216.6) | 652.1 (614.2 to 694.1)     | 474.0 (434.5 to 515.1)        | 28.9 (16.0 to 48.1)             | 0.0 (0.0 to 0.0)                  |
| Latvia  | 2006 | 786.0 (749.1 to 825.2)     | 462.3 (435.3 to 489.9)     | 303.4 (279.9 to 329.7)        | 20.3 (11.2 to 33.5)             | 0.0 (0.0 to 0.0)                  | 1291.1 (1230.6 to 1355.6) | 759.4 (715.1 to 804.8)     | 498.4 (459.8 to 541.6)        | 33.4 (18.5 to 55.0)             | 0.0 (0.0 to 0.0)                  |
| Latvia  | 2007 | 866.2 (824.6 to 909.7)     | 518.5 (489.6 to 548.1)     | 327.1 (302.8 to 354.3)        | 20.6 (11.3 to 33.7)             | 0.0 (0.0 to 0.0)                  | 1422.9 (1354.5 to 1494.3) | 851.8 (804.3 to 900.4)     | 537.3 (497.4 to 581.9)        | 33.9 (18.5 to 55.4)             | 0.0 (0.0 to 0.0)                  |
| Latvia  | 2008 | 859.5 (820.6 to 899.0)     | 519.7 (492.2 to 548.4)     | 320.2 (296.5 to 345.4)        | 18.7 (10.4 to 31.0)             | 0.8 (0.8 to 0.8)                  | 1411.9 (1348.0 to 1476.8) | 853.8 (808.5 to 900.8)     | 526.1 (487.1 to 567.5)        | 30.8 (17.2 to 51.0)             | 1.3 (1.3 to 1.3)                  |
| Latvia  | 2009 | 777.9 (744.0 to 811.0)     | 467.7 (443.7 to 493.7)     | 295.3 (273.3 to 319.4)        | 14.9 (8.3 to 24.5)              | 0.0 (0.0 to 0.0)                  | 1277.9 (1222.2 to 1332.3) | 768.3 (728.9 to 811.0)     | 485.1 (449.0 to 524.7)        | 24.4 (13.7 to 40.2)             | 0.0 (0.0 to 0.0)                  |
| Latvia  | 2010 | 777.9 (743.7 to 811.7)     | 456.6 (432.6 to 480.4)     | 283.3 (262.6 to 306.3)        | 15.9 (8.8 to 26.8)              | 22.1 (22.1 to 22.1)               | 1277.9 (1221.7 to 1333.5) | 750.0 (710.7 to 789.1)     | 465.4 (431.4 to 503.1)        | 26.2 (14.5 to 44.0)             | 36.3 (36.3 to 36.3)               |
| Latvia  | 2011 | 794.7 (759.7 to 828.9)     | 473.4 (448.8 to 497.6)     | 281.9 (261.2 to 304.9)        | 15.6 (8.8 to 26.3)              | 23.7 (23.7 to 23.7)               | 1305.4 (1248.0 to 1361.6) | 777.6 (737.3 to 817.4)     | 463.1 (429.0 to 500.8)        | 25.7 (14.4 to 43.2)             | 39.0 (39.0 to 39.0)               |
| Latvia  | 2012 | 785.8 (751.3 to 818.3)     | 477.8 (453.5 to 501.7)     | 293.9 (272.7 to 316.5)        | 14.1 (8.0 to 23.5)              | 0.0 (0.0 to 0.0)                  | 1290.9 (1234.2 to 1344.2) | 785.0 (745.0 to 824.1)     | 482.8 (448.0 to 519.9)        | 23.2 (13.1 to 38.6)             | 0.0 (0.0 to 0.0)                  |
| Latvia  | 2013 | 813.2 (781.3 to 847.0)     | 487.7 (464.3 to 510.3)     | 313.1 (292.1 to 336.2)        | 12.4 (6.9 to 21.0)              | 0.0 (0.0 to 0.0)                  | 1335.9 (1283.4 to 1391.3) | 801.2 (762.7 to 838.3)     | 514.4 (479.8 to 552.3)        | 20.3 (11.3 to 34.5)             | 0.0 (0.0 to 0.0)                  |
| Latvia  | 2014 | 857.3 (827.0 to 891.9)     | 504.0 (482.4 to 528.2)     | 342.4 (321.0 to 366.4)        | 10.9 (6.0 to 18.7)              | 0.0 (0.0 to 0.0)                  | 1408.3 (1358.5 to 1465.1) | 827.9 (792.5 to 867.6)     | 562.5 (527.4 to 601.8)        | 17.9 (9.8 to 30.7)              | 0.0 (0.0 to 0.0)                  |
| Latvia  | 2015 | 921.1 (886.8 to 959.1)     | 524.8 (500.2 to 551.0)     | 386.5 (361.0 to 412.3)        | 9.9 (5.3 to 17.4)               | 0.0 (0.0 to 0.0)                  | 1513.1 (1456.8 to 1575.5) | 862.0 (821.7 to 905.2)     | 634.9 (593.1 to 677.3)        | 16.2 (8.7 to 28.6)              | 0.0 (0.0 to 0.0)                  |
| Latvia  | 2016 | 995.0 (942.8 to 1045.1)    | 548.6 (512.7 to 581.4)     | 436.7 (401.0 to 474.0)        | 9.7 (5.1 to 17.2)               | 0.0 (0.0 to 0.0)                  | 1634.5 (1548.8 to 1716.8) | 901.3 (842.3 to 955.1)     | 717.3 (658.7 to 778.6)        | 16.0 (8.4 to 28.2)              | 0.0 (0.0 to 0.0)                  |
| Latvia  | 2017 | 1048.8 (992.8 to 1102.0)   | 582.0 (543.5 to 618.2)     | 456.4 (418.1 to 495.4)        | 10.3 (5.4 to 18.2)              | 0.0 (0.0 to 0.0)                  | 1722.8 (1630.9 to 1810.2) | 956.1 (892.9 to 1015.6)    | 749.8 (686.9 to 813.9)        | 16.9 (8.9 to 29.9)              | 0.0 (0.0 to 0.0)                  |
| Latvia  | 2018 | 1073.0 (1017.8 to 1127.8)  | 593.4 (553.9 to 631.7)     | 469.1 (429.2 to 508.6)        | 10.5 (5.5 to 18.6)              | 0.0 (0.0 to 0.0)                  | 1762.6 (1671.9 to 1852.6) | 974.7 (909.8 to 1037.7)    | 770.5 (705.0 to 835.5)        | 17.3 (9.1 to 30.5)              | 0.0 (0.0 to 0.0)                  |
| Latvia  | 2019 | 1087.6 (1029.2 to 1142.4)  | 602.9 (562.8 to 641.8)     | 473.9 (432.3 to 513.9)        | 10.7 (5.6 to 18.9)              | 0.0 (0.0 to 0.0)                  | 1786.7 (1690.7 to 1876.6) | 990.5 (924.5 to 1054.2)    | 778.6 (710.2 to 844.2)        | 17.6 (9.3 to 31.0)              | 0.0 (0.0 to 0.0)                  |
| Latvia  | 2020 | 1102.7 (1041.4 to 1156.7)  | 612.9 (571.7 to 651.4)     | 478.9 (438.0 to 519.7)        | 11.0 (5.7 to 19.3)              | 0.0 (0.0 to 0.0)                  | 1811.4 (1710.7 to 1900.0) | 1006.7 (939.2 to 1070.0)   | 786.7 (719.5 to 853.7)        | 18.0 (9.4 to 31.7)              | 0.0 (0.0 to 0.0)                  |
| Latvia  | 2021 | 1118.3 (1055.6 to 1175.2)  | 623.2 (581.3 to 664.5)     | 483.9 (441.7 to 525.5)        | 11.2 (5.8 to 19.7)              | 0.0 (0.0 to 0.0)                  | 1837.0 (1734.0 to 1930.6) | 1023.8 (955.0 to 1091.5)   | 794.8 (725.7 to 863.2)        | 18.3 (9.6 to 32.4)              | 0.0 (0.0 to 0.0)                  |
| Latvia  | 2022 | 1135.0 (1073.1 to 1192.8)  | 634.3 (592.9 to 677.6)     | 489.2 (445.8 to 531.7)        | 11.4 (5.9 to 20.1)              | 0.0 (0.0 to 0.0)                  | 1864.4 (1762.7 to 1959.4) | 1042.0 (974.0 to 1113.1)   | 803.7 (732.4 to 873.5)        | 18.7 (9.8 to 33.0)              | 0.0 (0.0 to 0.0)                  |



| Country | Year | 2018 US Dollars per capita |                            |                               |                                 |                                   | 2018 PPP per capita       |                            |                               |                                 |                                   |
|---------|------|----------------------------|----------------------------|-------------------------------|---------------------------------|-----------------------------------|---------------------------|----------------------------|-------------------------------|---------------------------------|-----------------------------------|
|         |      | Health spending            | Government health spending | Out-of-pocket health spending | Prepaid private health spending | Development assistance for health | Health spending           | Government health spending | Out-of-pocket health spending | Prepaid private health spending | Development assistance for health |
| Latvia  | 2023 | 1151.3 (1089.7 to 1208.6)  | 644.6 (602.5 to 690.4)     | 495.0 (451.6 to 538.5)        | 11.6 (6.1 to 20.5)              | 0.0 (0.0 to 0.0)                  | 1891.2 (1790.0 to 1985.3) | 1059.0 (989.8 to 1134.2)   | 813.2 (741.8 to 884.6)        | 19.1 (10.0 to 33.7)             | 0.0 (0.0 to 0.0)                  |
| Latvia  | 2024 | 1178.8 (1114.9 to 1241.7)  | 657.6 (614.0 to 703.7)     | 509.3 (463.3 to 556.5)        | 11.9 (6.2 to 21.0)              | 0.0 (0.0 to 0.0)                  | 1936.4 (1831.4 to 2039.7) | 1080.3 (1008.6 to 1155.9)  | 836.7 (761.0 to 914.1)        | 19.5 (10.2 to 34.4)             | 0.0 (0.0 to 0.0)                  |
| Latvia  | 2025 | 1208.1 (1139.1 to 1274.2)  | 670.7 (625.4 to 716.3)     | 525.2 (477.4 to 574.4)        | 12.1 (6.3 to 21.4)              | 0.0 (0.0 to 0.0)                  | 1984.5 (1871.2 to 2093.2) | 1101.8 (1027.4 to 1176.7)  | 862.8 (784.2 to 943.5)        | 19.9 (10.4 to 35.2)             | 0.0 (0.0 to 0.0)                  |
| Latvia  | 2026 | 1239.2 (1167.0 to 1306.9)  | 685.0 (638.7 to 731.9)     | 541.7 (491.9 to 595.2)        | 12.4 (6.5 to 21.9)              | 0.0 (0.0 to 0.0)                  | 2035.6 (1917.1 to 2146.8) | 1125.3 (1049.2 to 1202.4)  | 889.9 (808.0 to 977.7)        | 20.4 (10.7 to 36.0)             | 0.0 (0.0 to 0.0)                  |
| Latvia  | 2027 | 1273.5 (1194.8 to 1348.3)  | 701.7 (654.4 to 750.6)     | 559.1 (503.0 to 615.2)        | 12.7 (6.7 to 22.5)              | 0.0 (0.0 to 0.0)                  | 2091.9 (1962.7 to 2214.8) | 1152.6 (1074.9 to 1233.0)  | 918.5 (826.3 to 1010.6)       | 20.8 (11.0 to 36.9)             | 0.0 (0.0 to 0.0)                  |
| Latvia  | 2028 | 1309.1 (1223.2 to 1389.2)  | 719.1 (669.6 to 770.5)     | 577.0 (514.9 to 640.9)        | 13.0 (6.9 to 23.0)              | 0.0 (0.0 to 0.0)                  | 2150.5 (2009.3 to 2282.1) | 1181.3 (1099.9 to 1265.7)  | 947.8 (845.8 to 1052.8)       | 21.4 (11.3 to 37.9)             | 0.0 (0.0 to 0.0)                  |
| Latvia  | 2029 | 1345.6 (1256.8 to 1436.1)  | 737.1 (683.7 to 789.9)     | 595.2 (527.2 to 665.7)        | 13.3 (7.1 to 23.6)              | 0.0 (0.0 to 0.0)                  | 2210.4 (2064.6 to 2359.0) | 1210.8 (1123.1 to 1297.5)  | 977.7 (866.0 to 1093.6)       | 21.9 (11.6 to 38.8)             | 0.0 (0.0 to 0.0)                  |
| Latvia  | 2030 | 1382.9 (1287.7 to 1481.0)  | 755.6 (700.1 to 810.4)     | 613.6 (537.5 to 692.9)        | 13.7 (7.3 to 24.3)              | 0.0 (0.0 to 0.0)                  | 2271.6 (2115.3 to 2432.9) | 1241.2 (1150.1 to 1331.3)  | 1008.0 (882.9 to 1138.2)      | 22.5 (11.9 to 39.9)             | 0.0 (0.0 to 0.0)                  |
| Latvia  | 2031 | 1418.0 (1317.3 to 1522.9)  | 772.0 (713.7 to 828.6)     | 631.9 (548.1 to 718.5)        | 14.0 (7.4 to 24.9)              | 0.0 (0.0 to 0.0)                  | 2329.3 (2163.9 to 2501.7) | 1268.1 (1172.4 to 1361.2)  | 1038.1 (900.3 to 1180.3)      | 23.1 (12.2 to 40.9)             | 0.0 (0.0 to 0.0)                  |
| Latvia  | 2032 | 1452.9 (1339.9 to 1561.6)  | 788.2 (728.8 to 846.5)     | 650.3 (562.4 to 744.0)        | 14.4 (7.6 to 25.5)              | 0.0 (0.0 to 0.0)                  | 2386.7 (2201.1 to 2565.3) | 1294.8 (1197.2 to 1390.5)  | 1068.2 (923.9 to 1222.1)      | 23.6 (12.5 to 41.9)             | 0.0 (0.0 to 0.0)                  |
| Latvia  | 2033 | 1488.4 (1369.5 to 1602.1)  | 804.6 (742.8 to 865.1)     | 669.0 (573.3 to 771.8)        | 14.8 (7.8 to 26.2)              | 0.0 (0.0 to 0.0)                  | 2445.0 (2249.7 to 2631.7) | 1321.8 (1220.2 to 1421.1)  | 1099.0 (941.7 to 1267.8)      | 24.2 (12.9 to 43.0)             | 0.0 (0.0 to 0.0)                  |
| Latvia  | 2034 | 1523.1 (1401.6 to 1647.5)  | 820.6 (756.5 to 882.9)     | 687.3 (582.8 to 801.0)        | 15.1 (8.0 to 26.8)              | 0.0 (0.0 to 0.0)                  | 2501.9 (2302.4 to 2706.3) | 1348.0 (1242.6 to 1450.3)  | 1129.1 (957.4 to 1315.8)      | 24.8 (13.2 to 44.0)             | 0.0 (0.0 to 0.0)                  |
| Latvia  | 2035 | 1558.8 (1427.2 to 1696.6)  | 837.5 (771.0 to 902.2)     | 705.8 (595.1 to 828.8)        | 15.5 (8.2 to 27.4)              | 0.0 (0.0 to 0.0)                  | 2560.7 (2344.5 to 2787.0) | 1375.8 (1266.5 to 1482.1)  | 1159.4 (977.6 to 1361.5)      | 25.5 (13.5 to 45.1)             | 0.0 (0.0 to 0.0)                  |
| Latvia  | 2036 | 1594.5 (1459.6 to 1738.7)  | 854.6 (784.7 to 921.1)     | 724.0 (606.0 to 855.8)        | 15.9 (8.4 to 28.0)              | 0.0 (0.0 to 0.0)                  | 2619.3 (2397.7 to 2856.2) | 1403.9 (1289.0 to 1513.1)  | 1189.3 (995.5 to 1405.9)      | 26.1 (13.8 to 46.1)             | 0.0 (0.0 to 0.0)                  |
| Latvia  | 2037 | 1630.5 (1484.4 to 1784.7)  | 872.2 (799.6 to 943.7)     | 742.0 (615.3 to 883.6)        | 16.3 (8.6 to 28.7)              | 0.0 (0.0 to 0.0)                  | 2678.4 (2438.4 to 2931.8) | 1432.7 (1313.6 to 1550.3)  | 1219.0 (1010.7 to 1451.5)     | 26.7 (14.1 to 47.1)             | 0.0 (0.0 to 0.0)                  |
| Latvia  | 2038 | 1666.3 (1516.9 to 1838.8)  | 889.7 (814.1 to 965.0)     | 760.0 (626.0 to 912.4)        | 16.6 (8.8 to 29.3)              | 0.0 (0.0 to 0.0)                  | 2737.3 (2491.8 to 3020.6) | 1461.5 (1337.3 to 1585.1)  | 1248.4 (1028.3 to 1498.8)     | 27.3 (14.4 to 48.1)             | 0.0 (0.0 to 0.0)                  |
| Latvia  | 2039 | 1701.0 (1540.2 to 1876.3)  | 906.4 (827.7 to 984.3)     | 777.5 (636.2 to 937.5)        | 17.0 (9.0 to 29.9)              | 0.0 (0.0 to 0.0)                  | 2794.2 (2530.1 to 3082.3) | 1489.0 (1359.6 to 1616.9)  | 1277.2 (1045.1 to 1540.1)     | 28.0 (14.7 to 49.2)             | 0.0 (0.0 to 0.0)                  |
| Latvia  | 2040 | 1738.3 (1572.1 to 1933.7)  | 925.5 (843.0 to 1007.7)    | 795.4 (647.9 to 962.5)        | 17.5 (9.2 to 30.7)              | 0.0 (0.0 to 0.0)                  | 2855.5 (2582.6 to 3176.4) | 1520.3 (1384.8 to 1655.3)  | 1306.5 (1064.3 to 1581.2)     | 28.7 (15.1 to 50.4)             | 0.0 (0.0 to 0.0)                  |
| Latvia  | 2041 | 1773.7 (1600.2 to 1972.7)  | 943.2 (855.2 to 1030.0)    | 812.7 (658.0 to 986.1)        | 17.9 (9.4 to 31.4)              | 0.0 (0.0 to 0.0)                  | 2913.7 (2628.7 to 3240.6) | 1549.4 (1404.8 to 1692.0)  | 1335.0 (1080.9 to 1619.9)     | 29.4 (15.4 to 51.6)             | 0.0 (0.0 to 0.0)                  |
| Latvia  | 2042 | 1811.3 (1635.7 to 2022.3)  | 962.7 (871.2 to 1054.0)    | 830.3 (671.6 to 1009.7)       | 18.3 (9.6 to 32.2)              | 0.0 (0.0 to 0.0)                  | 2975.4 (2686.9 to 3322.0) | 1581.4 (1431.0 to 1731.5)  | 1364.0 (1103.2 to 1658.6)     | 30.1 (15.8 to 52.9)             | 0.0 (0.0 to 0.0)                  |
| Latvia  | 2043 | 1848.8 (1668.2 to 2068.2)  | 982.3 (887.3 to 1079.3)    | 847.7 (685.1 to 1032.2)       | 18.8 (9.8 to 33.0)              | 0.0 (0.0 to 0.0)                  | 3037.0 (2740.4 to 3397.5) | 1613.7 (1457.6 to 1772.9)  | 1392.5 (1125.4 to 1695.7)     | 30.9 (16.1 to 54.2)             | 0.0 (0.0 to 0.0)                  |

| Country | Year | 2018 US Dollars per capita |                            |                               |                                 |                                   | 2018 PPP per capita       |                            |                               |                                 |                                   |
|---------|------|----------------------------|----------------------------|-------------------------------|---------------------------------|-----------------------------------|---------------------------|----------------------------|-------------------------------|---------------------------------|-----------------------------------|
|         |      | Health spending            | Government health spending | Out-of-pocket health spending | Prepaid private health spending | Development assistance for health | Health spending           | Government health spending | Out-of-pocket health spending | Prepaid private health spending | Development assistance for health |
| Latvia  | 2044 | 1885.5 (1696.9 to 2110.4)  | 1001.4 (902.3 to 1104.8)   | 864.8 (697.4 to 1053.7)       | 19.3 (10.0 to 33.9)             | 0.0 (0.0 to 0.0)                  | 3097.2 (2787.6 to 3466.8) | 1645.1 (1482.3 to 1814.8)  | 1420.5 (1145.6 to 1730.9)     | 31.6 (16.5 to 55.6)             | 0.0 (0.0 to 0.0)                  |
| Latvia  | 2045 | 1920.6 (1709.9 to 2162.9)  | 1019.8 (916.2 to 1127.3)   | 881.0 (709.3 to 1075.6)       | 19.7 (10.3 to 34.7)             | 0.0 (0.0 to 0.0)                  | 3154.9 (2808.8 to 3552.9) | 1675.3 (1505.1 to 1851.9)  | 1447.3 (1165.1 to 1766.9)     | 32.4 (16.9 to 57.1)             | 0.0 (0.0 to 0.0)                  |
| Latvia  | 2046 | 1954.7 (1740.2 to 2203.4)  | 1038.0 (929.1 to 1149.8)   | 896.5 (721.9 to 1099.3)       | 20.2 (10.5 to 35.6)             | 0.0 (0.0 to 0.0)                  | 3211.0 (2858.6 to 3619.5) | 1705.2 (1526.2 to 1888.7)  | 1472.7 (1185.8 to 1805.8)     | 33.1 (17.3 to 58.5)             | 0.0 (0.0 to 0.0)                  |
| Latvia  | 2047 | 1986.4 (1774.2 to 2239.9)  | 1054.5 (941.7 to 1170.9)   | 911.2 (732.1 to 1119.1)       | 20.6 (10.7 to 36.5)             | 0.0 (0.0 to 0.0)                  | 3263.0 (2914.5 to 3679.5) | 1732.3 (1547.0 to 1923.4)  | 1496.9 (1202.7 to 1838.3)     | 33.8 (17.6 to 59.9)             | 0.0 (0.0 to 0.0)                  |
| Latvia  | 2048 | 2018.6 (1800.1 to 2283.1)  | 1071.6 (955.3 to 1192.2)   | 925.9 (743.0 to 1136.5)       | 21.0 (10.9 to 37.3)             | 0.0 (0.0 to 0.0)                  | 3316.0 (2957.0 to 3750.4) | 1760.4 (1569.3 to 1958.5)  | 1521.0 (1220.5 to 1866.9)     | 34.6 (18.0 to 61.3)             | 0.0 (0.0 to 0.0)                  |
| Latvia  | 2049 | 2048.3 (1826.4 to 2303.7)  | 1086.7 (963.1 to 1210.7)   | 940.1 (754.6 to 1154.1)       | 21.5 (11.2 to 38.1)             | 0.0 (0.0 to 0.0)                  | 3364.7 (3000.2 to 3784.3) | 1785.1 (1582.1 to 1988.7)  | 1544.4 (1239.6 to 1895.8)     | 35.2 (18.4 to 62.7)             | 0.0 (0.0 to 0.0)                  |
| Latvia  | 2050 | 2077.1 (1859.1 to 2351.4)  | 1101.0 (972.0 to 1230.0)   | 954.2 (766.3 to 1175.1)       | 21.8 (11.4 to 38.9)             | 0.0 (0.0 to 0.0)                  | 3412.1 (3053.9 to 3862.7) | 1808.6 (1596.8 to 2020.5)  | 1567.5 (1258.8 to 1930.3)     | 35.9 (18.8 to 64.0)             | 0.0 (0.0 to 0.0)                  |
| Lebanon | 1995 | 629.6 (574.8 to 689.5)     | 237.4 (208.0 to 272.6)     | 311.4 (274.7 to 353.4)        | 73.2 (51.0 to 103.6)            | 7.6 (7.6 to 7.6)                  | 1103.7 (1007.6 to 1208.6) | 416.1 (364.6 to 477.9)     | 545.9 (481.6 to 619.4)        | 128.3 (89.5 to 181.7)           | 13.3 (13.3 to 13.3)               |
| Lebanon | 1996 | 649.6 (603.6 to 701.3)     | 248.7 (220.3 to 279.8)     | 322.3 (292.7 to 354.1)        | 77.8 (55.8 to 104.9)            | 0.8 (0.8 to 0.8)                  | 1138.7 (1058.1 to 1229.3) | 435.9 (386.2 to 490.5)     | 564.9 (513.1 to 620.8)        | 136.4 (97.9 to 183.9)           | 1.5 (1.5 to 1.5)                  |
| Lebanon | 1997 | 635.8 (593.8 to 681.8)     | 234.2 (207.4 to 262.2)     | 323.1 (297.5 to 351.1)        | 76.7 (56.8 to 100.8)            | 1.7 (1.7 to 1.7)                  | 1114.5 (1040.9 to 1195.2) | 410.5 (363.5 to 459.7)     | 566.5 (521.6 to 615.4)        | 134.5 (99.6 to 176.7)           | 3.0 (3.0 to 3.0)                  |
| Lebanon | 1998 | 592.2 (552.9 to 632.9)     | 197.7 (175.0 to 221.5)     | 321.0 (295.2 to 349.3)        | 71.2 (53.6 to 93.0)             | 2.4 (2.4 to 2.4)                  | 1038.1 (969.2 to 1109.4)  | 346.5 (306.8 to 388.3)     | 562.7 (517.6 to 612.3)        | 124.8 (94.0 to 163.0)           | 4.2 (4.2 to 4.2)                  |
| Lebanon | 1999 | 553.5 (517.3 to 590.8)     | 174.4 (153.8 to 196.1)     | 308.5 (283.9 to 336.3)        | 67.0 (49.8 to 88.5)             | 3.6 (3.6 to 3.6)                  | 970.3 (906.8 to 1035.7)   | 305.7 (269.6 to 343.7)     | 540.8 (497.8 to 589.5)        | 117.5 (87.3 to 155.1)           | 6.2 (6.2 to 6.2)                  |
| Lebanon | 2000 | 528.4 (492.0 to 566.4)     | 166.0 (146.3 to 187.4)     | 294.7 (270.2 to 322.8)        | 65.0 (48.8 to 87.0)             | 2.7 (2.7 to 2.7)                  | 926.3 (862.5 to 992.9)    | 291.0 (256.4 to 328.5)     | 516.7 (473.7 to 565.8)        | 113.9 (85.5 to 152.4)           | 4.8 (4.8 to 4.8)                  |
| Lebanon | 2001 | 503.3 (466.7 to 540.4)     | 162.3 (144.3 to 183.5)     | 275.3 (251.5 to 301.5)        | 62.8 (47.2 to 84.5)             | 2.9 (2.9 to 2.9)                  | 882.3 (818.1 to 947.3)    | 284.5 (253.0 to 321.7)     | 482.6 (440.9 to 528.6)        | 110.2 (82.7 to 148.1)           | 5.0 (5.0 to 5.0)                  |
| Lebanon | 2002 | 466.1 (430.6 to 502.0)     | 155.1 (136.8 to 176.5)     | 248.7 (224.9 to 273.7)        | 58.9 (43.5 to 79.1)             | 3.5 (3.5 to 3.5)                  | 817.1 (754.9 to 880.0)    | 271.8 (239.9 to 309.4)     | 435.9 (394.3 to 479.8)        | 103.3 (76.3 to 138.6)           | 6.1 (6.1 to 6.1)                  |
| Lebanon | 2003 | 435.9 (403.6 to 471.1)     | 150.4 (132.3 to 170.2)     | 224.6 (201.4 to 249.1)        | 56.0 (41.3 to 74.2)             | 4.9 (4.9 to 4.9)                  | 764.1 (707.4 to 825.9)    | 263.6 (231.9 to 298.4)     | 393.7 (353.1 to 436.6)        | 98.1 (72.5 to 130.0)            | 8.7 (8.7 to 8.7)                  |
| Lebanon | 2004 | 427.8 (395.9 to 463.7)     | 157.0 (138.2 to 177.9)     | 211.3 (190.1 to 234.6)        | 56.7 (41.9 to 74.6)             | 2.8 (2.8 to 2.8)                  | 750.0 (693.9 to 812.9)    | 275.2 (242.3 to 311.8)     | 370.5 (333.2 to 411.3)        | 99.4 (73.4 to 130.7)            | 4.9 (4.9 to 4.9)                  |
| Lebanon | 2005 | 425.3 (393.7 to 461.8)     | 163.4 (143.6 to 184.3)     | 202.7 (181.6 to 225.1)        | 58.2 (43.0 to 77.6)             | 1.0 (1.0 to 1.0)                  | 745.6 (690.1 to 809.5)    | 286.5 (251.7 to 323.1)     | 355.4 (318.4 to 394.6)        | 102.0 (75.3 to 136.1)           | 1.7 (1.7 to 1.7)                  |
| Lebanon | 2006 | 433.1 (399.7 to 469.8)     | 169.5 (148.9 to 192.0)     | 201.0 (180.8 to 223.0)        | 60.7 (44.7 to 81.2)             | 2.0 (2.0 to 2.0)                  | 759.3 (700.6 to 823.5)    | 297.2 (261.0 to 336.6)     | 352.3 (316.9 to 390.8)        | 106.3 (78.3 to 142.4)           | 3.5 (3.5 to 3.5)                  |
| Lebanon | 2007 | 456.9 (422.0 to 494.3)     | 181.9 (160.6 to 205.9)     | 206.1 (186.5 to 228.1)        | 65.3 (48.3 to 85.9)             | 3.7 (3.7 to 3.7)                  | 801.0 (739.7 to 866.5)    | 318.8 (281.6 to 360.9)     | 361.3 (326.9 to 399.9)        | 114.4 (84.7 to 150.5)           | 6.5 (6.5 to 6.5)                  |
| Lebanon | 2008 | 471.7 (435.0 to 509.6)     | 188.2 (166.5 to 212.6)     | 207.2 (187.6 to 230.0)        | 68.0 (51.2 to 88.1)             | 8.3 (8.3 to 8.3)                  | 827.0 (762.5 to 893.3)    | 330.0 (291.9 to 372.7)     | 363.3 (328.8 to 403.1)        | 119.2 (89.7 to 154.5)           | 14.5 (14.5 to 14.5)               |

| Country | Year | 2018 US Dollars per capita |                            |                               |                                 |                                   | 2018 PPP per capita     |                            |                               |                                 |                                   |
|---------|------|----------------------------|----------------------------|-------------------------------|---------------------------------|-----------------------------------|-------------------------|----------------------------|-------------------------------|---------------------------------|-----------------------------------|
|         |      | Health spending            | Government health spending | Out-of-pocket health spending | Prepaid private health spending | Development assistance for health | Health spending         | Government health spending | Out-of-pocket health spending | Prepaid private health spending | Development assistance for health |
| Lebanon | 2009 | 489.4 (453.0 to 528.5)     | 203.4 (181.3 to 227.4)     | 210.9 (190.3 to 232.9)        | 73.1 (55.0 to 94.5)             | 2.0 (2.0 to 2.0)                  | 857.9 (794.1 to 926.5)  | 356.6 (317.9 to 398.7)     | 369.8 (333.6 to 408.2)        | 128.1 (96.4 to 165.7)           | 3.5 (3.5 to 3.5)                  |
| Lebanon | 2010 | 520.7 (483.0 to 562.1)     | 222.5 (198.4 to 247.6)     | 215.0 (193.3 to 238.4)        | 80.3 (61.4 to 103.7)            | 2.8 (2.8 to 2.8)                  | 912.8 (846.6 to 985.4)  | 390.1 (347.8 to 434.1)     | 376.9 (338.9 to 418.0)        | 140.8 (107.6 to 181.7)          | 5.0 (5.0 to 5.0)                  |
| Lebanon | 2011 | 521.7 (483.5 to 563.3)     | 232.8 (208.7 to 258.2)     | 204.1 (183.1 to 226.3)        | 82.9 (63.3 to 107.7)            | 2.0 (2.0 to 2.0)                  | 914.5 (847.5 to 987.5)  | 408.1 (365.8 to 452.6)     | 357.7 (321.0 to 396.8)        | 145.3 (111.0 to 188.7)          | 3.4 (3.4 to 3.4)                  |
| Lebanon | 2012 | 510.9 (473.4 to 552.7)     | 241.5 (216.5 to 266.9)     | 183.9 (165.1 to 203.8)        | 83.3 (63.5 to 107.4)            | 2.2 (2.2 to 2.2)                  | 895.6 (829.8 to 968.9)  | 423.4 (379.4 to 467.9)     | 322.3 (289.4 to 357.2)        | 146.0 (111.3 to 188.2)          | 3.9 (3.9 to 3.9)                  |
| Lebanon | 2013 | 492.3 (454.9 to 534.2)     | 240.8 (215.3 to 267.3)     | 169.9 (151.1 to 189.8)        | 79.9 (60.3 to 102.6)            | 1.6 (1.6 to 1.6)                  | 863.0 (797.4 to 936.5)  | 422.2 (377.5 to 468.5)     | 297.9 (264.8 to 332.7)        | 140.1 (105.8 to 179.9)          | 2.8 (2.8 to 2.8)                  |
| Lebanon | 2014 | 488.0 (447.9 to 531.4)     | 241.4 (216.0 to 269.0)     | 164.2 (143.8 to 185.5)        | 77.0 (57.7 to 100.8)            | 5.4 (5.4 to 5.4)                  | 855.4 (785.1 to 931.5)  | 423.1 (378.7 to 471.6)     | 287.9 (252.1 to 325.1)        | 135.0 (101.2 to 176.7)          | 9.5 (9.5 to 9.5)                  |
| Lebanon | 2015 | 481.4 (438.5 to 528.2)     | 242.8 (215.6 to 274.5)     | 160.1 (140.1 to 183.6)        | 75.7 (54.7 to 101.1)            | 2.9 (2.9 to 2.9)                  | 843.9 (768.7 to 925.9)  | 425.6 (377.9 to 481.1)     | 280.6 (245.5 to 321.9)        | 132.6 (96.0 to 177.3)           | 5.0 (5.0 to 5.0)                  |
| Lebanon | 2016 | 486.3 (436.9 to 539.9)     | 249.9 (218.1 to 286.1)     | 158.0 (135.7 to 184.2)        | 75.8 (52.3 to 105.1)            | 2.6 (2.6 to 2.6)                  | 852.5 (766.0 to 946.5)  | 438.0 (382.3 to 501.5)     | 276.9 (237.9 to 322.9)        | 132.9 (91.7 to 184.2)           | 4.6 (4.6 to 4.6)                  |
| Lebanon | 2017 | 490.0 (443.3 to 542.8)     | 252.9 (220.8 to 289.6)     | 157.2 (134.4 to 183.6)        | 76.8 (53.1 to 106.4)            | 3.1 (3.1 to 3.1)                  | 858.9 (777.1 to 951.5)  | 443.3 (387.1 to 507.7)     | 275.6 (235.7 to 321.9)        | 134.6 (93.1 to 186.5)           | 5.4 (5.4 to 5.4)                  |
| Lebanon | 2018 | 497.8 (450.3 to 551.8)     | 259.4 (226.8 to 296.5)     | 157.1 (134.0 to 183.2)        | 78.4 (54.3 to 108.6)            | 2.9 (2.9 to 2.9)                  | 872.6 (789.4 to 967.3)  | 454.8 (397.6 to 519.8)     | 275.3 (234.9 to 321.1)        | 137.4 (95.1 to 190.3)           | 5.0 (5.0 to 5.1)                  |
| Lebanon | 2019 | 505.5 (456.0 to 559.9)     | 265.7 (232.0 to 303.5)     | 156.8 (133.9 to 183.4)        | 80.0 (55.3 to 111.2)            | 2.9 (2.7 to 3.1)                  | 886.1 (799.4 to 981.4)  | 465.8 (406.7 to 532.0)     | 274.9 (234.7 to 321.6)        | 140.2 (96.9 to 194.9)           | 5.1 (4.8 to 5.4)                  |
| Lebanon | 2020 | 513.6 (463.1 to 567.8)     | 272.5 (238.2 to 310.9)     | 156.6 (133.9 to 183.6)        | 81.6 (56.2 to 113.4)            | 3.0 (2.7 to 3.2)                  | 900.4 (811.9 to 995.4)  | 477.7 (417.6 to 545.0)     | 274.4 (234.7 to 321.9)        | 143.0 (98.6 to 198.7)           | 5.2 (4.8 to 5.6)                  |
| Lebanon | 2021 | 522.8 (472.0 to 577.4)     | 279.7 (244.7 to 319.2)     | 156.6 (133.8 to 182.9)        | 83.4 (57.6 to 116.0)            | 3.1 (2.8 to 3.4)                  | 916.4 (827.4 to 1012.2) | 490.4 (428.9 to 559.6)     | 274.5 (234.5 to 320.6)        | 146.2 (100.9 to 203.3)          | 5.4 (4.9 to 6.0)                  |
| Lebanon | 2022 | 531.2 (476.7 to 588.3)     | 286.3 (249.2 to 326.8)     | 156.6 (133.7 to 182.8)        | 85.1 (58.8 to 118.4)            | 3.2 (2.8 to 3.6)                  | 931.1 (835.6 to 1031.2) | 501.9 (436.8 to 573.0)     | 274.5 (234.4 to 320.4)        | 149.1 (103.0 to 207.6)          | 5.6 (5.0 to 6.3)                  |
| Lebanon | 2023 | 536.5 (481.2 to 594.0)     | 290.6 (253.3 to 334.1)     | 156.2 (133.0 to 183.2)        | 86.3 (59.6 to 120.0)            | 3.3 (2.9 to 3.8)                  | 940.4 (843.5 to 1041.2) | 509.4 (444.1 to 585.6)     | 273.9 (233.2 to 321.1)        | 151.2 (104.4 to 210.4)          | 5.8 (5.1 to 6.6)                  |
| Lebanon | 2024 | 541.0 (486.7 to 600.5)     | 294.3 (256.3 to 338.1)     | 155.9 (132.1 to 182.7)        | 87.4 (60.3 to 121.6)            | 3.5 (3.0 to 4.0)                  | 948.4 (853.1 to 1052.6) | 515.8 (449.4 to 592.8)     | 273.2 (231.5 to 320.2)        | 153.2 (105.7 to 213.2)          | 6.1 (5.3 to 7.0)                  |
| Lebanon | 2025 | 545.6 (488.6 to 602.4)     | 297.9 (260.4 to 341.8)     | 155.5 (131.7 to 182.6)        | 88.6 (61.2 to 123.2)            | 3.6 (3.1 to 4.3)                  | 956.4 (856.5 to 1056.0) | 522.2 (456.5 to 599.2)     | 272.6 (230.8 to 320.1)        | 155.2 (107.3 to 216.0)          | 6.4 (5.5 to 7.5)                  |
| Lebanon | 2026 | 549.0 (492.5 to 604.7)     | 300.8 (262.7 to 344.9)     | 154.9 (131.0 to 181.8)        | 89.5 (61.9 to 124.5)            | 3.8 (3.2 to 4.5)                  | 962.4 (863.3 to 1060.1) | 527.3 (460.5 to 604.6)     | 271.6 (229.6 to 318.7)        | 156.8 (108.5 to 218.2)          | 6.7 (5.6 to 7.8)                  |
| Lebanon | 2027 | 552.4 (495.5 to 612.2)     | 303.6 (265.6 to 347.7)     | 154.4 (129.5 to 181.8)        | 90.4 (62.5 to 125.9)            | 4.0 (3.3 to 4.7)                  | 968.3 (868.6 to 1073.2) | 532.2 (465.7 to 609.4)     | 270.7 (227.1 to 318.7)        | 158.5 (109.6 to 220.7)          | 6.9 (5.8 to 8.3)                  |
| Lebanon | 2028 | 555.4 (497.1 to 616.8)     | 306.0 (267.0 to 350.6)     | 154.0 (128.2 to 182.3)        | 91.3 (63.0 to 127.0)            | 4.1 (3.5 to 5.0)                  | 973.6 (871.3 to 1081.2) | 536.4 (468.1 to 614.6)     | 269.9 (224.7 to 319.7)        | 160.0 (110.4 to 222.6)          | 7.3 (6.1 to 8.7)                  |
| Lebanon | 2029 | 558.4 (499.3 to 620.4)     | 308.3 (269.1 to 353.1)     | 153.7 (126.4 to 182.2)        | 92.2 (63.5 to 128.1)            | 4.3 (3.6 to 5.3)                  | 978.9 (875.2 to 1087.5) | 540.4 (471.8 to 618.9)     | 269.4 (221.6 to 319.4)        | 161.5 (111.3 to 224.6)          | 7.6 (6.2 to 9.2)                  |

| Country | Year | 2018 US Dollars per capita |                            |                               |                                 |                                   | 2018 PPP per capita      |                            |                               |                                 |                                   |
|---------|------|----------------------------|----------------------------|-------------------------------|---------------------------------|-----------------------------------|--------------------------|----------------------------|-------------------------------|---------------------------------|-----------------------------------|
|         |      | Health spending            | Government health spending | Out-of-pocket health spending | Prepaid private health spending | Development assistance for health | Health spending          | Government health spending | Out-of-pocket health spending | Prepaid private health spending | Development assistance for health |
| Lebanon | 2030 | 561.3 (498.8 to 624.7)     | 310.4 (271.2 to 355.8)     | 153.5 (125.8 to 182.5)        | 93.0 (64.1 to 129.3)            | 4.5 (3.7 to 5.5)                  | 984.0 (874.4 to 1095.1)  | 544.2 (475.4 to 623.6)     | 269.0 (220.5 to 319.9)        | 163.0 (112.3 to 226.6)          | 7.8 (6.4 to 9.6)                  |
| Lebanon | 2031 | 564.4 (501.4 to 629.4)     | 312.6 (273.3 to 358.5)     | 153.3 (124.9 to 183.9)        | 93.9 (64.6 to 130.5)            | 4.6 (3.8 to 5.8)                  | 989.5 (879.0 to 1103.4)  | 548.0 (479.1 to 628.5)     | 268.8 (218.9 to 322.4)        | 164.5 (113.2 to 228.8)          | 8.1 (6.6 to 10.2)                 |
| Lebanon | 2032 | 568.1 (508.3 to 631.5)     | 315.1 (274.5 to 361.6)     | 153.4 (123.5 to 185.6)        | 94.8 (65.2 to 131.8)            | 4.8 (3.9 to 6.1)                  | 995.9 (891.1 to 1107.0)  | 552.4 (481.3 to 633.9)     | 268.9 (216.5 to 325.4)        | 166.2 (114.3 to 231.0)          | 8.4 (6.8 to 10.6)                 |
| Lebanon | 2033 | 571.5 (508.1 to 638.4)     | 317.2 (275.2 to 364.5)     | 153.5 (122.5 to 186.6)        | 95.8 (65.8 to 133.1)            | 5.0 (4.0 to 6.4)                  | 1001.9 (890.6 to 1119.0) | 556.1 (482.5 to 639.0)     | 269.1 (214.7 to 327.0)        | 167.9 (115.4 to 233.3)          | 8.8 (6.9 to 11.2)                 |
| Lebanon | 2034 | 574.6 (511.9 to 643.1)     | 319.1 (275.8 to 366.7)     | 153.7 (121.6 to 188.4)        | 96.6 (66.4 to 134.2)            | 5.2 (4.1 to 6.7)                  | 1007.2 (897.3 to 1127.4) | 559.4 (483.5 to 642.8)     | 269.4 (213.1 to 330.3)        | 169.3 (116.3 to 235.2)          | 9.1 (7.1 to 11.7)                 |
| Lebanon | 2035 | 577.7 (516.4 to 645.4)     | 320.9 (277.3 to 368.8)     | 154.0 (120.8 to 190.4)        | 97.4 (66.9 to 135.4)            | 5.4 (4.2 to 7.0)                  | 1012.7 (905.3 to 1131.3) | 562.5 (486.2 to 646.5)     | 270.0 (211.7 to 333.7)        | 170.8 (117.3 to 237.3)          | 9.4 (7.3 to 12.3)                 |
| Lebanon | 2036 | 581.3 (514.5 to 646.9)     | 322.9 (279.1 to 370.9)     | 154.4 (120.3 to 191.8)        | 98.4 (67.6 to 136.7)            | 5.5 (4.3 to 7.4)                  | 1019.0 (901.8 to 1134.1) | 566.1 (489.2 to 650.2)     | 270.7 (210.9 to 336.2)        | 172.5 (118.5 to 239.6)          | 9.7 (7.5 to 13.0)                 |
| Lebanon | 2037 | 585.1 (518.2 to 652.4)     | 325.0 (280.8 to 373.6)     | 155.0 (119.7 to 193.2)        | 99.4 (68.2 to 138.0)            | 5.7 (4.4 to 7.7)                  | 1025.7 (908.3 to 1143.7) | 569.8 (492.3 to 654.8)     | 271.7 (209.8 to 338.7)        | 174.2 (119.6 to 241.9)          | 10.0 (7.7 to 13.4)                |
| Lebanon | 2038 | 588.9 (521.5 to 662.7)     | 327.0 (282.5 to 376.2)     | 155.7 (119.3 to 195.0)        | 100.4 (68.8 to 139.4)           | 5.9 (4.5 to 8.2)                  | 1032.4 (914.2 to 1161.8) | 573.2 (495.3 to 659.5)     | 272.9 (209.2 to 341.8)        | 175.9 (120.5 to 244.3)          | 10.3 (7.9 to 14.3)                |
| Lebanon | 2039 | 592.5 (523.7 to 666.4)     | 328.7 (283.8 to 378.9)     | 156.4 (119.6 to 197.3)        | 101.3 (69.5 to 140.6)           | 6.1 (4.6 to 8.4)                  | 1038.7 (918.1 to 1168.2) | 576.3 (497.4 to 664.2)     | 274.2 (209.6 to 345.8)        | 177.5 (121.8 to 246.5)          | 10.7 (8.1 to 14.8)                |
| Lebanon | 2040 | 596.7 (527.1 to 670.5)     | 330.8 (285.8 to 381.5)     | 157.4 (120.3 to 199.9)        | 102.2 (70.1 to 141.9)           | 6.3 (4.8 to 8.7)                  | 1046.0 (924.0 to 1175.3) | 579.9 (501.0 to 668.7)     | 275.9 (210.8 to 350.4)        | 179.2 (123.0 to 248.8)          | 11.0 (8.4 to 15.2)                |
| Lebanon | 2041 | 601.6 (533.0 to 677.3)     | 333.2 (287.6 to 384.3)     | 158.6 (120.8 to 202.1)        | 103.3 (70.9 to 143.4)           | 6.5 (4.9 to 9.0)                  | 1054.6 (934.4 to 1187.3) | 584.1 (504.1 to 673.6)     | 278.0 (211.7 to 354.4)        | 181.2 (124.3 to 251.4)          | 11.4 (8.6 to 15.8)                |
| Lebanon | 2042 | 606.3 (536.0 to 684.6)     | 335.3 (288.9 to 386.7)     | 159.9 (121.4 to 204.6)        | 104.4 (71.6 to 144.5)           | 6.7 (5.0 to 9.6)                  | 1062.8 (939.6 to 1200.0) | 587.7 (506.4 to 677.8)     | 280.3 (212.7 to 358.6)        | 183.1 (125.5 to 253.3)          | 11.8 (8.8 to 16.8)                |
| Lebanon | 2043 | 610.9 (539.1 to 685.5)     | 337.2 (290.2 to 389.5)     | 161.3 (122.4 to 206.9)        | 105.5 (72.3 to 146.1)           | 6.9 (5.1 to 10.0)                 | 1071.0 (945.0 to 1201.7) | 591.1 (508.8 to 682.7)     | 282.8 (214.6 to 362.7)        | 184.9 (126.8 to 256.2)          | 12.1 (9.0 to 17.6)                |
| Lebanon | 2044 | 616.4 (542.4 to 693.8)     | 339.6 (291.7 to 392.6)     | 163.0 (123.8 to 208.7)        | 106.6 (73.1 to 147.9)           | 7.2 (5.3 to 10.4)                 | 1080.5 (950.9 to 1216.2) | 595.3 (511.4 to 688.2)     | 285.7 (217.0 to 365.9)        | 186.9 (128.2 to 259.3)          | 12.6 (9.3 to 18.2)                |
| Lebanon | 2045 | 621.5 (545.8 to 705.9)     | 341.7 (293.0 to 395.3)     | 164.8 (125.1 to 211.4)        | 107.7 (73.9 to 149.3)           | 7.4 (5.4 to 11.1)                 | 1089.5 (956.7 to 1237.4) | 599.0 (513.6 to 692.9)     | 288.8 (219.3 to 370.6)        | 188.8 (129.6 to 261.8)          | 13.0 (9.4 to 19.5)                |
| Lebanon | 2046 | 626.1 (542.9 to 713.0)     | 343.2 (293.5 to 397.4)     | 166.6 (126.4 to 214.4)        | 108.6 (74.7 to 150.7)           | 7.7 (5.5 to 11.7)                 | 1097.5 (951.7 to 1249.9) | 601.7 (514.6 to 696.7)     | 292.0 (221.5 to 375.8)        | 190.4 (130.9 to 264.2)          | 13.4 (9.7 to 20.5)                |
| Lebanon | 2047 | 630.9 (550.9 to 715.7)     | 344.8 (294.2 to 400.4)     | 168.6 (127.7 to 217.1)        | 109.6 (75.1 to 151.9)           | 7.9 (5.7 to 12.5)                 | 1105.9 (965.8 to 1254.6) | 604.5 (515.7 to 701.9)     | 295.5 (223.8 to 380.6)        | 192.0 (131.7 to 266.3)          | 13.9 (10.0 to 21.9)               |
| Lebanon | 2048 | 635.7 (559.5 to 722.4)     | 346.4 (294.7 to 403.0)     | 170.6 (129.0 to 220.7)        | 110.5 (75.5 to 153.2)           | 8.2 (5.9 to 13.1)                 | 1114.3 (980.7 to 1266.4) | 607.2 (516.7 to 706.5)     | 299.1 (226.1 to 386.9)        | 193.7 (132.4 to 268.6)          | 14.4 (10.3 to 22.9)               |
| Lebanon | 2049 | 639.8 (564.0 to 730.9)     | 347.4 (294.5 to 404.6)     | 172.6 (130.3 to 222.5)        | 111.3 (75.8 to 154.7)           | 8.5 (6.0 to 13.7)                 | 1121.5 (988.7 to 1281.3) | 609.0 (516.3 to 709.3)     | 302.5 (228.3 to 390.1)        | 195.1 (132.9 to 271.2)          | 14.9 (10.6 to 24.0)               |
| Lebanon | 2050 | 643.9 (567.0 to 737.5)     | 348.5 (294.5 to 406.2)     | 174.5 (131.5 to 225.4)        | 112.0 (76.1 to 155.7)           | 8.8 (6.2 to 14.5)                 | 1128.8 (993.9 to 1292.8) | 611.0 (516.3 to 712.1)     | 306.0 (230.5 to 395.0)        | 196.4 (133.3 to 272.9)          | 15.4 (10.9 to 25.4)               |

| Country | Year | 2018 US Dollars per capita |                            |                               |                                 |                                   | 2018 PPP per capita    |                            |                               |                                 |                                   |
|---------|------|----------------------------|----------------------------|-------------------------------|---------------------------------|-----------------------------------|------------------------|----------------------------|-------------------------------|---------------------------------|-----------------------------------|
|         |      | Health spending            | Government health spending | Out-of-pocket health spending | Prepaid private health spending | Development assistance for health | Health spending        | Government health spending | Out-of-pocket health spending | Prepaid private health spending | Development assistance for health |
| Lesotho | 1995 | 36.9 (30.1 to 44.8)        | 15.7 (12.2 to 20.1)        | 16.0 (11.3 to 22.0)           | 3.4 (1.6 to 6.4)                | 1.9 (1.9 to 1.9)                  | 97.8 (79.8 to 118.5)   | 41.6 (32.4 to 53.2)        | 42.2 (29.8 to 58.1)           | 8.9 (4.2 to 16.9)               | 5.0 (5.0 to 5.0)                  |
| Lesotho | 1996 | 37.9 (31.1 to 45.9)        | 16.5 (12.8 to 21.2)        | 15.9 (11.2 to 21.9)           | 3.7 (1.8 to 6.8)                | 1.8 (1.8 to 1.8)                  | 100.3 (82.3 to 121.4)  | 43.7 (33.9 to 56.0)        | 42.1 (29.8 to 57.9)           | 9.7 (4.7 to 18.1)               | 4.8 (4.8 to 4.8)                  |
| Lesotho | 1997 | 37.6 (31.2 to 44.9)        | 16.3 (12.7 to 20.9)        | 15.2 (10.8 to 20.7)           | 3.8 (1.9 to 6.9)                | 2.2 (2.2 to 2.2)                  | 99.5 (82.6 to 118.9)   | 43.2 (33.6 to 55.3)        | 40.3 (28.6 to 54.8)           | 10.0 (4.9 to 18.3)              | 5.9 (5.9 to 5.9)                  |
| Lesotho | 1998 | 36.2 (30.2 to 43.5)        | 16.8 (13.1 to 21.3)        | 14.2 (10.2 to 19.4)           | 4.0 (2.0 to 7.4)                | 1.2 (1.2 to 1.2)                  | 95.9 (79.9 to 115.1)   | 44.4 (34.7 to 56.2)        | 37.7 (27.1 to 51.4)           | 10.6 (5.2 to 19.7)              | 3.2 (3.2 to 3.2)                  |
| Lesotho | 1999 | 35.8 (29.7 to 43.3)        | 17.5 (13.7 to 22.1)        | 13.6 (9.8 to 18.5)            | 4.2 (2.1 to 7.9)                | 0.5 (0.5 to 0.5)                  | 94.7 (78.5 to 114.6)   | 46.2 (36.2 to 58.4)        | 36.1 (25.8 to 48.9)           | 11.2 (5.5 to 21.0)              | 1.2 (1.2 to 1.2)                  |
| Lesotho | 2000 | 39.2 (32.9 to 46.6)        | 19.0 (14.9 to 24.0)        | 13.3 (9.3 to 18.2)            | 4.6 (2.2 to 8.6)                | 2.3 (2.3 to 2.3)                  | 103.7 (87.2 to 123.2)  | 50.2 (39.6 to 63.4)        | 35.1 (24.7 to 48.2)           | 12.2 (5.8 to 22.6)              | 6.2 (6.2 to 6.2)                  |
| Lesotho | 2001 | 42.1 (35.5 to 49.9)        | 20.9 (16.5 to 26.2)        | 12.9 (9.2 to 17.8)            | 4.6 (2.2 to 8.6)                | 3.7 (3.7 to 3.7)                  | 111.3 (93.9 to 132.1)  | 55.2 (43.7 to 69.3)        | 34.2 (24.4 to 47.1)           | 12.1 (5.7 to 22.8)              | 9.8 (9.8 to 9.8)                  |
| Lesotho | 2002 | 41.4 (35.1 to 48.6)        | 20.8 (16.4 to 26.3)        | 12.4 (9.0 to 17.2)            | 4.1 (2.0 to 7.7)                | 4.2 (4.2 to 4.2)                  | 109.7 (92.8 to 128.6)  | 55.0 (43.5 to 69.7)        | 32.9 (23.7 to 45.6)           | 10.7 (5.2 to 20.3)              | 11.0 (11.0 to 11.0)               |
| Lesotho | 2003 | 43.9 (37.7 to 51.1)        | 21.0 (16.7 to 26.6)        | 12.3 (8.8 to 17.0)            | 3.1 (1.5 to 5.8)                | 7.5 (7.5 to 7.5)                  | 116.3 (99.7 to 135.2)  | 55.7 (44.2 to 70.3)        | 32.6 (23.2 to 44.9)           | 8.3 (4.0 to 15.3)               | 19.8 (19.8 to 19.8)               |
| Lesotho | 2004 | 44.6 (38.4 to 51.6)        | 21.3 (16.9 to 26.9)        | 12.2 (8.6 to 16.8)            | 2.5 (1.2 to 4.7)                | 8.6 (8.6 to 8.6)                  | 118.1 (101.6 to 136.6) | 56.5 (44.8 to 71.3)        | 32.2 (22.7 to 44.4)           | 6.7 (3.3 to 12.5)               | 22.7 (22.7 to 22.7)               |
| Lesotho | 2005 | 44.8 (38.5 to 52.1)        | 21.8 (17.2 to 27.9)        | 12.2 (8.5 to 16.9)            | 2.3 (1.1 to 4.2)                | 8.6 (8.6 to 8.6)                  | 118.5 (102.0 to 137.8) | 57.6 (45.5 to 73.8)        | 32.3 (22.6 to 44.7)           | 6.0 (2.9 to 11.1)               | 22.6 (22.6 to 22.6)               |
| Lesotho | 2006 | 50.0 (43.2 to 57.9)        | 25.3 (19.9 to 31.9)        | 12.7 (8.9 to 17.4)            | 2.3 (1.1 to 4.3)                | 9.7 (9.7 to 9.7)                  | 132.4 (114.3 to 153.1) | 66.8 (52.8 to 84.5)        | 33.7 (23.7 to 46.1)           | 6.1 (3.0 to 11.3)               | 25.7 (25.7 to 25.7)               |
| Lesotho | 2007 | 62.7 (54.7 to 71.7)        | 30.9 (24.7 to 38.4)        | 13.8 (9.7 to 18.7)            | 2.5 (1.2 to 4.5)                | 15.4 (15.4 to 15.4)               | 165.9 (144.8 to 189.7) | 81.8 (65.3 to 101.6)       | 36.5 (25.7 to 49.4)           | 6.6 (3.2 to 12.0)               | 40.8 (40.8 to 40.8)               |
| Lesotho | 2008 | 77.4 (69.0 to 86.8)        | 35.3 (28.3 to 43.4)        | 14.5 (10.2 to 19.7)           | 2.4 (1.2 to 4.4)                | 25.2 (25.2 to 25.2)               | 205.0 (182.6 to 229.6) | 93.4 (74.8 to 114.9)       | 38.5 (27.1 to 52.1)           | 6.4 (3.1 to 11.6)               | 66.8 (66.8 to 66.8)               |
| Lesotho | 2009 | 78.0 (69.1 to 88.4)        | 39.2 (31.6 to 48.2)        | 15.2 (10.7 to 20.6)           | 2.0 (1.0 to 3.7)                | 21.5 (21.5 to 21.5)               | 206.4 (182.8 to 234.1) | 103.7 (83.5 to 127.7)      | 40.3 (28.4 to 54.6)           | 5.4 (2.6 to 9.9)                | 57.0 (57.0 to 57.0)               |
| Lesotho | 2010 | 100.6 (91.2 to 112.2)      | 43.9 (35.5 to 53.8)        | 15.9 (11.3 to 21.7)           | 1.7 (0.8 to 3.1)                | 39.1 (39.1 to 39.1)               | 266.3 (241.4 to 296.9) | 116.2 (93.9 to 142.3)      | 42.1 (29.9 to 57.4)           | 4.4 (2.1 to 8.1)                | 103.6 (103.6 to 103.6)            |
| Lesotho | 2011 | 118.4 (107.7 to 131.1)     | 49.7 (40.4 to 60.7)        | 16.2 (11.6 to 22.0)           | 1.1 (0.5 to 2.0)                | 51.5 (51.5 to 51.5)               | 313.4 (285.0 to 346.9) | 131.4 (106.8 to 160.6)     | 42.8 (30.8 to 58.1)           | 2.8 (1.3 to 5.2)                | 136.4 (136.4 to 136.4)            |
| Lesotho | 2012 | 124.3 (112.9 to 137.6)     | 54.9 (44.8 to 67.1)        | 16.9 (12.2 to 22.9)           | 1.2 (0.6 to 2.2)                | 51.3 (51.3 to 51.3)               | 329.0 (298.8 to 364.1) | 145.3 (118.5 to 177.5)     | 44.7 (32.2 to 60.7)           | 3.1 (1.5 to 5.8)                | 135.9 (135.9 to 135.9)            |
| Lesotho | 2013 | 143.2 (130.7 to 157.0)     | 59.1 (48.2 to 72.1)        | 17.1 (12.2 to 23.2)           | 1.3 (0.6 to 2.4)                | 65.7 (65.7 to 65.7)               | 378.9 (345.9 to 415.5) | 156.5 (127.5 to 190.8)     | 45.1 (32.3 to 61.3)           | 3.3 (1.6 to 6.2)                | 174.0 (174.0 to 174.0)            |
| Lesotho | 2014 | 109.8 (95.9 to 124.1)      | 64.2 (52.2 to 78.8)        | 17.5 (12.5 to 23.5)           | 1.4 (0.7 to 2.6)                | 26.6 (26.6 to 26.6)               | 290.5 (253.9 to 328.4) | 170.0 (138.1 to 208.4)     | 46.3 (33.1 to 62.1)           | 3.7 (1.8 to 6.9)                | 70.5 (70.5 to 70.5)               |
| Lesotho | 2015 | 109.3 (94.8 to 125.1)      | 67.5 (54.5 to 82.9)        | 18.0 (12.8 to 23.9)           | 1.6 (0.7 to 2.9)                | 22.3 (22.3 to 22.3)               | 289.4 (250.8 to 331.1) | 178.6 (144.3 to 219.5)     | 47.6 (34.0 to 63.3)           | 4.1 (1.9 to 7.7)                | 59.0 (59.0 to 59.0)               |

| Country | Year | 2018 US Dollars per capita |                            |                               |                                 |                                   | 2018 PPP per capita    |                            |                               |                                 |                                   |
|---------|------|----------------------------|----------------------------|-------------------------------|---------------------------------|-----------------------------------|------------------------|----------------------------|-------------------------------|---------------------------------|-----------------------------------|
|         |      | Health spending            | Government health spending | Out-of-pocket health spending | Prepaid private health spending | Development assistance for health | Health spending        | Government health spending | Out-of-pocket health spending | Prepaid private health spending | Development assistance for health |
| Lesotho | 2016 | 121.9 (106.6 to 138.6)     | 68.2 (54.7 to 84.3)        | 18.9 (13.3 to 25.6)           | 1.7 (0.8 to 3.2)                | 33.1 (33.1 to 33.1)               | 322.5 (282.1 to 366.9) | 180.4 (144.9 to 223.2)     | 50.1 (35.1 to 67.7)           | 4.5 (2.1 to 8.3)                | 87.6 (87.6 to 87.6)               |
| Lesotho | 2017 | 138.7 (123.4 to 156.8)     | 69.5 (55.9 to 85.8)        | 19.5 (13.7 to 26.3)           | 1.7 (0.8 to 3.3)                | 48.0 (48.0 to 48.0)               | 367.1 (326.7 to 415.0) | 183.9 (148.0 to 227.1)     | 51.5 (36.2 to 69.6)           | 4.6 (2.2 to 8.6)                | 127.1 (127.1 to 127.1)            |
| Lesotho | 2018 | 135.5 (119.6 to 153.1)     | 70.9 (57.3 to 87.5)        | 19.8 (14.0 to 26.9)           | 1.8 (0.8 to 3.4)                | 42.9 (42.3 to 43.5)               | 358.6 (316.5 to 405.2) | 187.7 (151.6 to 231.5)     | 52.5 (37.2 to 71.1)           | 4.8 (2.2 to 8.9)                | 113.7 (111.9 to 115.2)            |
| Lesotho | 2019 | 137.5 (121.3 to 155.5)     | 72.6 (58.6 to 89.6)        | 20.3 (14.4 to 27.4)           | 1.9 (0.9 to 3.5)                | 42.8 (39.9 to 45.3)               | 363.9 (321.0 to 411.6) | 192.2 (155.2 to 237.1)     | 53.6 (38.0 to 72.5)           | 4.9 (2.3 to 9.2)                | 113.2 (105.5 to 119.8)            |
| Lesotho | 2020 | 140.5 (123.2 to 158.0)     | 74.6 (60.2 to 92.0)        | 20.7 (14.7 to 27.9)           | 1.9 (0.9 to 3.6)                | 43.2 (39.6 to 47.0)               | 371.7 (326.0 to 418.2) | 197.5 (159.3 to 243.5)     | 54.7 (38.8 to 73.9)           | 5.1 (2.4 to 9.4)                | 114.5 (104.7 to 124.3)            |
| Lesotho | 2021 | 143.7 (126.4 to 162.9)     | 76.6 (61.8 to 94.5)        | 21.1 (15.0 to 28.5)           | 2.0 (0.9 to 3.7)                | 44.0 (39.5 to 48.5)               | 380.3 (334.4 to 431.2) | 202.9 (163.5 to 250.0)     | 55.8 (39.7 to 75.4)           | 5.2 (2.5 to 9.7)                | 116.5 (104.5 to 128.5)            |
| Lesotho | 2022 | 147.4 (128.9 to 166.8)     | 78.6 (63.4 to 96.8)        | 21.5 (15.3 to 29.0)           | 2.0 (1.0 to 3.8)                | 45.3 (40.2 to 50.9)               | 390.0 (341.1 to 441.4) | 208.0 (167.7 to 256.2)     | 56.8 (40.5 to 76.9)           | 5.4 (2.5 to 10.0)               | 119.8 (106.3 to 134.8)            |
| Lesotho | 2023 | 151.0 (132.5 to 172.7)     | 80.5 (64.7 to 99.1)        | 21.8 (15.6 to 29.6)           | 2.1 (1.0 to 3.9)                | 46.6 (40.6 to 53.1)               | 399.7 (350.7 to 457.0) | 213.0 (171.4 to 262.3)     | 57.8 (41.2 to 78.2)           | 5.5 (2.6 to 10.3)               | 123.4 (107.4 to 140.5)            |
| Lesotho | 2024 | 154.7 (134.4 to 176.5)     | 82.4 (66.2 to 101.5)       | 22.2 (15.8 to 30.2)           | 2.1 (1.0 to 4.0)                | 48.0 (41.4 to 55.8)               | 409.5 (355.8 to 467.1) | 218.2 (175.1 to 268.6)     | 58.8 (41.8 to 79.9)           | 5.7 (2.7 to 10.5)               | 126.9 (109.6 to 147.6)            |
| Lesotho | 2025 | 158.3 (138.1 to 181.0)     | 84.5 (67.6 to 103.9)       | 22.6 (16.1 to 30.6)           | 2.2 (1.0 to 4.1)                | 49.1 (41.9 to 57.8)               | 419.0 (365.4 to 479.0) | 223.5 (178.8 to 274.8)     | 59.8 (42.5 to 80.9)           | 5.8 (2.7 to 10.8)               | 129.9 (110.8 to 153.0)            |
| Lesotho | 2026 | 162.0 (140.5 to 185.0)     | 86.5 (69.0 to 106.5)       | 23.0 (16.3 to 31.1)           | 2.3 (1.1 to 4.2)                | 50.2 (42.5 to 59.2)               | 428.7 (372.0 to 489.6) | 229.0 (182.7 to 281.7)     | 60.8 (43.2 to 82.4)           | 6.0 (2.8 to 11.0)               | 132.8 (112.5 to 156.8)            |
| Lesotho | 2027 | 165.8 (144.3 to 190.8)     | 88.7 (70.7 to 109.4)       | 23.4 (16.6 to 31.7)           | 2.3 (1.1 to 4.3)                | 51.4 (43.1 to 61.8)               | 438.9 (381.8 to 505.0) | 234.7 (187.1 to 289.5)     | 61.9 (43.9 to 84.0)           | 6.1 (2.9 to 11.3)               | 136.2 (114.1 to 163.6)            |
| Lesotho | 2028 | 169.9 (146.6 to 195.0)     | 90.9 (72.6 to 112.4)       | 23.8 (16.9 to 32.4)           | 2.4 (1.1 to 4.4)                | 52.8 (44.1 to 64.2)               | 449.6 (388.0 to 516.0) | 240.6 (192.1 to 297.6)     | 63.0 (44.7 to 85.8)           | 6.3 (3.0 to 11.7)               | 139.8 (116.8 to 169.9)            |
| Lesotho | 2029 | 174.1 (151.0 to 200.9)     | 93.2 (74.5 to 115.4)       | 24.3 (17.1 to 33.1)           | 2.4 (1.2 to 4.5)                | 54.2 (44.7 to 66.8)               | 460.7 (399.5 to 531.7) | 246.7 (197.1 to 305.4)     | 64.2 (45.4 to 87.7)           | 6.5 (3.0 to 12.0)               | 143.4 (118.3 to 176.9)            |
| Lesotho | 2030 | 178.3 (153.7 to 205.4)     | 95.6 (76.1 to 118.2)       | 24.7 (17.4 to 33.8)           | 2.5 (1.2 to 4.6)                | 55.4 (45.6 to 68.4)               | 471.8 (406.7 to 543.6) | 253.1 (201.5 to 312.9)     | 65.4 (46.1 to 89.4)           | 6.6 (3.1 to 12.3)               | 146.6 (120.7 to 181.0)            |
| Lesotho | 2031 | 182.5 (158.3 to 210.9)     | 98.2 (78.0 to 121.5)       | 25.2 (17.8 to 34.4)           | 2.6 (1.2 to 4.8)                | 56.6 (45.9 to 71.0)               | 483.1 (419.0 to 558.0) | 259.8 (206.3 to 321.5)     | 66.7 (47.1 to 91.1)           | 6.8 (3.2 to 12.6)               | 149.7 (121.4 to 187.9)            |
| Lesotho | 2032 | 186.9 (161.0 to 216.3)     | 100.9 (80.0 to 124.7)      | 25.7 (18.2 to 35.1)           | 2.7 (1.3 to 4.9)                | 57.7 (46.6 to 72.6)               | 494.7 (426.2 to 572.4) | 267.0 (211.6 to 330.0)     | 68.1 (48.2 to 92.8)           | 7.0 (3.3 to 13.0)               | 152.7 (123.4 to 192.3)            |
| Lesotho | 2033 | 191.5 (165.2 to 224.1)     | 103.7 (82.0 to 128.0)      | 26.2 (18.6 to 35.8)           | 2.7 (1.3 to 5.1)                | 58.8 (46.9 to 75.2)               | 506.8 (437.1 to 593.1) | 274.4 (216.9 to 338.7)     | 69.5 (49.2 to 94.9)           | 7.3 (3.4 to 13.4)               | 155.7 (124.0 to 199.0)            |
| Lesotho | 2034 | 196.3 (169.3 to 228.1)     | 106.5 (84.0 to 131.4)      | 26.8 (18.9 to 36.6)           | 2.8 (1.3 to 5.2)                | 60.1 (47.3 to 77.8)               | 519.5 (448.1 to 603.6) | 282.0 (222.3 to 347.6)     | 70.9 (50.1 to 96.9)           | 7.5 (3.5 to 13.8)               | 159.2 (125.2 to 205.8)            |
| Lesotho | 2035 | 201.2 (173.3 to 234.9)     | 109.5 (86.1 to 135.1)      | 27.3 (19.2 to 37.5)           | 2.9 (1.4 to 5.4)                | 61.4 (47.5 to 79.8)               | 532.4 (458.8 to 621.5) | 289.8 (227.9 to 357.5)     | 72.4 (50.9 to 99.3)           | 7.7 (3.6 to 14.3)               | 162.5 (125.8 to 211.1)            |
| Lesotho | 2036 | 206.1 (174.5 to 240.5)     | 112.5 (88.6 to 138.8)      | 27.9 (19.5 to 38.3)           | 3.0 (1.4 to 5.6)                | 62.6 (48.6 to 83.9)               | 545.4 (461.7 to 636.5) | 297.8 (234.5 to 367.4)     | 73.9 (51.6 to 101.4)          | 7.9 (3.7 to 14.7)               | 165.8 (128.5 to 222.1)            |

| Country | Year | 2018 US Dollars per capita |                            |                               |                                 |                                   | 2018 PPP per capita    |                            |                               |                                 |                                   |
|---------|------|----------------------------|----------------------------|-------------------------------|---------------------------------|-----------------------------------|------------------------|----------------------------|-------------------------------|---------------------------------|-----------------------------------|
|         |      | Health spending            | Government health spending | Out-of-pocket health spending | Prepaid private health spending | Development assistance for health | Health spending        | Government health spending | Out-of-pocket health spending | Prepaid private health spending | Development assistance for health |
| Lesotho | 2037 | 211.0 (180.9 to 248.4)     | 115.7 (91.2 to 142.7)      | 28.5 (19.8 to 39.2)           | 3.1 (1.4 to 5.7)                | 63.7 (48.5 to 85.8)               | 558.4 (478.7 to 657.4) | 306.2 (241.3 to 377.7)     | 75.4 (52.5 to 103.6)          | 8.2 (3.8 to 15.2)               | 168.6 (128.5 to 226.9)            |
| Lesotho | 2038 | 216.2 (182.7 to 254.3)     | 119.0 (93.9 to 147.1)      | 29.1 (20.3 to 40.1)           | 3.2 (1.5 to 5.9)                | 64.9 (49.6 to 90.8)               | 572.1 (483.6 to 673.1) | 314.8 (248.4 to 389.2)     | 77.0 (53.6 to 106.2)          | 8.4 (3.9 to 15.7)               | 171.9 (131.3 to 240.2)            |
| Lesotho | 2039 | 221.3 (187.9 to 261.7)     | 122.3 (96.6 to 151.6)      | 29.7 (20.6 to 41.1)           | 3.3 (1.5 to 6.1)                | 66.1 (49.8 to 91.8)               | 585.7 (497.2 to 692.6) | 323.6 (255.5 to 401.2)     | 78.7 (54.6 to 108.7)          | 8.7 (4.0 to 16.2)               | 174.8 (131.8 to 242.9)            |
| Lesotho | 2040 | 226.8 (191.5 to 268.3)     | 125.6 (99.1 to 156.2)      | 30.3 (21.1 to 42.1)           | 3.4 (1.6 to 6.3)                | 67.4 (51.3 to 95.2)               | 600.2 (506.7 to 710.0) | 332.5 (262.1 to 413.5)     | 80.3 (55.7 to 111.3)          | 8.9 (4.2 to 16.7)               | 178.4 (135.7 to 251.9)            |
| Lesotho | 2041 | 232.3 (196.1 to 277.0)     | 129.1 (101.5 to 160.8)     | 31.0 (21.5 to 43.1)           | 3.5 (1.6 to 6.5)                | 68.8 (51.8 to 97.7)               | 614.9 (519.1 to 733.0) | 341.6 (268.6 to 425.4)     | 82.0 (56.8 to 114.0)          | 9.2 (4.3 to 17.2)               | 182.2 (137.2 to 258.6)            |
| Lesotho | 2042 | 238.1 (199.0 to 283.9)     | 132.5 (104.1 to 165.3)     | 31.6 (21.8 to 43.9)           | 3.6 (1.7 to 6.7)                | 70.4 (51.8 to 102.7)              | 630.2 (526.8 to 751.4) | 350.8 (275.5 to 437.6)     | 83.7 (57.7 to 116.3)          | 9.4 (4.4 to 17.7)               | 186.4 (137.1 to 271.8)            |
| Lesotho | 2043 | 243.9 (205.2 to 295.5)     | 136.0 (106.8 to 170.0)     | 32.3 (22.2 to 44.9)           | 3.7 (1.7 to 6.9)                | 72.0 (52.3 to 106.2)              | 645.6 (543.1 to 782.1) | 360.0 (282.7 to 449.9)     | 85.4 (58.6 to 118.7)          | 9.7 (4.5 to 18.2)               | 190.5 (138.4 to 281.1)            |
| Lesotho | 2044 | 250.1 (207.8 to 300.6)     | 139.6 (109.6 to 174.7)     | 32.9 (22.6 to 45.8)           | 3.8 (1.8 to 7.1)                | 73.8 (53.1 to 110.7)              | 661.8 (550.0 to 795.6) | 369.4 (290.1 to 462.3)     | 87.1 (59.8 to 121.1)          | 10.0 (4.6 to 18.8)              | 195.4 (140.5 to 293.0)            |
| Lesotho | 2045 | 256.3 (214.1 to 312.8)     | 143.1 (112.4 to 179.4)     | 33.5 (23.1 to 46.6)           | 3.9 (1.8 to 7.3)                | 75.8 (53.6 to 116.8)              | 678.3 (566.7 to 827.8) | 378.7 (297.4 to 474.7)     | 88.8 (61.0 to 123.4)          | 10.3 (4.8 to 19.3)              | 200.6 (141.8 to 309.0)            |
| Lesotho | 2046 | 262.6 (217.8 to 319.1)     | 146.6 (115.1 to 184.0)     | 34.2 (23.5 to 47.5)           | 4.0 (1.9 to 7.5)                | 77.8 (54.5 to 122.6)              | 694.9 (576.4 to 844.5) | 388.0 (304.7 to 486.9)     | 90.5 (62.3 to 125.6)          | 10.5 (4.9 to 19.8)              | 206.0 (144.1 to 324.5)            |
| Lesotho | 2047 | 269.1 (225.1 to 335.1)     | 150.0 (117.6 to 188.6)     | 34.8 (24.0 to 48.3)           | 4.1 (1.9 to 7.7)                | 80.2 (55.8 to 129.1)              | 712.1 (595.7 to 886.9) | 397.0 (311.1 to 499.2)     | 92.1 (63.5 to 127.8)          | 10.8 (5.1 to 20.4)              | 212.2 (147.6 to 341.7)            |
| Lesotho | 2048 | 276.0 (225.5 to 341.9)     | 153.6 (120.3 to 193.5)     | 35.4 (24.4 to 49.1)           | 4.2 (2.0 to 7.9)                | 82.8 (57.0 to 133.4)              | 730.4 (596.7 to 904.8) | 406.4 (318.4 to 512.0)     | 93.8 (64.6 to 129.9)          | 11.1 (5.2 to 20.9)              | 219.1 (151.0 to 353.1)            |
| Lesotho | 2049 | 282.9 (232.3 to 351.7)     | 157.1 (123.0 to 198.3)     | 36.1 (24.8 to 50.0)           | 4.3 (2.0 to 8.1)                | 85.4 (58.0 to 139.0)              | 748.7 (614.7 to 930.9) | 415.9 (325.6 to 524.9)     | 95.5 (65.7 to 132.2)          | 11.4 (5.3 to 21.5)              | 226.0 (153.4 to 367.8)            |
| Lesotho | 2050 | 290.3 (237.9 to 361.0)     | 160.7 (125.6 to 203.1)     | 36.7 (25.3 to 50.8)           | 4.4 (2.1 to 8.3)                | 88.5 (59.9 to 147.9)              | 768.2 (629.5 to 955.4) | 425.2 (332.5 to 537.5)     | 97.2 (66.9 to 134.5)          | 11.7 (5.5 to 22.0)              | 234.1 (158.5 to 391.5)            |
| Liberia | 1995 | 10.2 (7.6 to 13.3)         | 1.6 (1.2 to 2.1)           | 7.9 (5.4 to 11.0)             | 0.3 (0.1 to 0.5)                | 0.4 (0.4 to 0.4)                  | 22.5 (16.7 to 29.4)    | 3.6 (2.7 to 4.7)           | 17.6 (12.0 to 24.2)           | 0.6 (0.3 to 1.0)                | 0.8 (0.8 to 0.8)                  |
| Liberia | 1996 | 10.3 (7.8 to 13.2)         | 1.7 (1.3 to 2.2)           | 7.7 (5.3 to 10.5)             | 0.2 (0.1 to 0.4)                | 0.8 (0.8 to 0.8)                  | 22.9 (17.3 to 29.2)    | 3.7 (2.8 to 4.8)           | 16.9 (11.8 to 23.2)           | 0.5 (0.2 to 0.9)                | 1.7 (1.7 to 1.7)                  |
| Liberia | 1997 | 14.1 (11.1 to 17.6)        | 2.5 (1.9 to 3.3)           | 9.2 (6.4 to 12.7)             | 0.3 (0.1 to 0.6)                | 2.0 (2.0 to 2.0)                  | 31.1 (24.5 to 38.9)    | 5.6 (4.2 to 7.3)           | 20.4 (14.2 to 28.2)           | 0.7 (0.3 to 1.3)                | 4.4 (4.4 to 4.4)                  |
| Liberia | 1998 | 15.6 (12.4 to 19.4)        | 2.8 (2.1 to 3.7)           | 9.5 (6.6 to 13.3)             | 0.3 (0.2 to 0.6)                | 2.9 (2.9 to 2.9)                  | 34.5 (27.5 to 42.8)    | 6.2 (4.7 to 8.1)           | 21.1 (14.6 to 29.4)           | 0.7 (0.3 to 1.3)                | 6.5 (6.5 to 6.5)                  |
| Liberia | 1999 | 15.0 (12.0 to 18.7)        | 2.7 (2.0 to 3.5)           | 9.1 (6.3 to 12.7)             | 0.3 (0.1 to 0.6)                | 2.9 (2.9 to 2.9)                  | 33.1 (26.6 to 41.4)    | 5.9 (4.4 to 7.8)           | 20.2 (14.0 to 28.1)           | 0.7 (0.3 to 1.2)                | 6.4 (6.4 to 6.4)                  |
| Liberia | 2000 | 14.9 (12.4 to 18.3)        | 2.5 (1.8 to 3.3)           | 7.9 (5.5 to 11.2)             | 0.3 (0.1 to 0.5)                | 4.3 (4.3 to 4.3)                  | 33.0 (27.4 to 40.4)    | 5.4 (4.0 to 7.2)           | 17.5 (12.2 to 24.7)           | 0.7 (0.3 to 1.2)                | 9.4 (9.4 to 9.4)                  |
| Liberia | 2001 | 13.3 (10.6 to 16.6)        | 2.5 (1.9 to 3.3)           | 8.0 (5.6 to 11.1)             | 0.3 (0.2 to 0.6)                | 2.5 (2.5 to 2.5)                  | 29.5 (23.5 to 36.8)    | 5.5 (4.2 to 7.3)           | 17.7 (12.4 to 24.6)           | 0.8 (0.3 to 1.4)                | 5.4 (5.4 to 5.4)                  |

| Country | Year | 2018 US Dollars per capita |                            |                               |                                 |                                   | 2018 PPP per capita    |                            |                               |                                 |                                   |
|---------|------|----------------------------|----------------------------|-------------------------------|---------------------------------|-----------------------------------|------------------------|----------------------------|-------------------------------|---------------------------------|-----------------------------------|
|         |      | Health spending            | Government health spending | Out-of-pocket health spending | Prepaid private health spending | Development assistance for health | Health spending        | Government health spending | Out-of-pocket health spending | Prepaid private health spending | Development assistance for health |
| Liberia | 2002 | 14.7 (11.7 to 18.7)        | 2.6 (2.0 to 3.4)           | 9.6 (6.7 to 13.3)             | 0.4 (0.2 to 0.7)                | 2.1 (2.1 to 2.1)                  | 32.4 (25.8 to 41.3)    | 5.8 (4.4 to 7.6)           | 21.1 (14.9 to 29.3)           | 0.9 (0.4 to 1.6)                | 4.6 (4.6 to 4.6)                  |
| Liberia | 2003 | 14.7 (11.8 to 18.5)        | 1.9 (1.4 to 2.5)           | 9.4 (6.5 to 13.2)             | 0.3 (0.1 to 0.5)                | 3.1 (3.1 to 3.1)                  | 32.6 (26.1 to 40.9)    | 4.2 (3.2 to 5.6)           | 20.8 (14.4 to 29.1)           | 0.6 (0.3 to 1.2)                | 6.9 (6.9 to 6.9)                  |
| Liberia | 2004 | 20.4 (16.3 to 25.4)        | 2.0 (1.5 to 2.6)           | 12.9 (9.0 to 17.7)            | 0.3 (0.1 to 0.6)                | 5.3 (5.3 to 5.3)                  | 45.1 (36.2 to 56.1)    | 4.4 (3.3 to 5.8)           | 28.4 (20.0 to 39.1)           | 0.6 (0.3 to 1.2)                | 11.6 (11.6 to 11.6)               |
| Liberia | 2005 | 23.6 (18.9 to 29.4)        | 2.1 (1.5 to 2.8)           | 15.3 (10.6 to 20.9)           | 0.3 (0.1 to 0.6)                | 5.9 (5.9 to 5.9)                  | 52.2 (41.8 to 65.1)    | 4.6 (3.4 to 6.1)           | 33.8 (23.5 to 46.3)           | 0.7 (0.3 to 1.3)                | 13.1 (13.1 to 13.1)               |
| Liberia | 2006 | 27.1 (21.7 to 33.5)        | 2.5 (1.9 to 3.4)           | 17.2 (11.9 to 23.6)           | 0.4 (0.2 to 0.7)                | 7.0 (7.0 to 7.0)                  | 60.1 (48.1 to 74.2)    | 5.6 (4.2 to 7.4)           | 38.0 (26.3 to 52.3)           | 0.8 (0.4 to 1.6)                | 15.6 (15.6 to 15.6)               |
| Liberia | 2007 | 31.4 (25.2 to 39.1)        | 3.3 (2.5 to 4.4)           | 20.5 (14.3 to 27.7)           | 0.6 (0.3 to 1.1)                | 7.0 (7.0 to 7.0)                  | 69.4 (55.7 to 86.6)    | 7.3 (5.5 to 9.6)           | 45.3 (31.5 to 61.4)           | 1.3 (0.6 to 2.4)                | 15.6 (15.6 to 15.6)               |
| Liberia | 2008 | 44.9 (38.0 to 53.4)        | 4.4 (3.3 to 5.8)           | 22.8 (16.0 to 31.1)           | 0.9 (0.5 to 1.8)                | 16.6 (16.6 to 16.6)               | 99.3 (84.2 to 118.1)   | 9.8 (7.3 to 12.9)          | 50.6 (35.4 to 68.7)           | 2.1 (1.0 to 3.9)                | 36.8 (36.8 to 36.8)               |
| Liberia | 2009 | 54.3 (47.1 to 63.4)        | 4.8 (3.6 to 6.4)           | 24.7 (17.5 to 33.6)           | 1.2 (0.6 to 2.3)                | 23.5 (23.5 to 23.5)               | 120.2 (104.3 to 140.2) | 10.7 (8.0 to 14.1)         | 54.7 (38.7 to 74.3)           | 2.7 (1.3 to 5.1)                | 52.1 (52.1 to 52.1)               |
| Liberia | 2010 | 56.8 (49.2 to 65.8)        | 5.1 (3.8 to 6.7)           | 25.9 (18.7 to 35.0)           | 1.4 (0.7 to 2.8)                | 24.4 (24.4 to 24.4)               | 125.8 (109.0 to 145.6) | 11.3 (8.4 to 14.8)         | 57.4 (41.3 to 77.5)           | 3.2 (1.6 to 6.2)                | 53.9 (53.9 to 53.9)               |
| Liberia | 2011 | 56.8 (49.3 to 65.7)        | 5.5 (4.1 to 7.2)           | 25.9 (18.8 to 34.6)           | 1.6 (0.8 to 3.1)                | 23.8 (23.8 to 23.8)               | 125.7 (109.0 to 145.5) | 12.1 (9.1 to 15.8)         | 57.4 (41.6 to 76.5)           | 3.6 (1.7 to 6.9)                | 52.6 (52.6 to 52.6)               |
| Liberia | 2012 | 59.8 (52.3 to 68.8)        | 4.9 (3.6 to 6.3)           | 25.5 (18.4 to 34.0)           | 1.6 (0.7 to 3.1)                | 27.9 (27.9 to 27.9)               | 132.4 (115.8 to 152.2) | 10.8 (8.0 to 14.0)         | 56.5 (40.8 to 75.2)           | 3.5 (1.6 to 6.8)                | 61.6 (61.6 to 61.6)               |
| Liberia | 2013 | 57.7 (50.3 to 67.1)        | 4.3 (3.2 to 5.6)           | 26.5 (19.2 to 35.5)           | 1.6 (0.7 to 3.0)                | 25.2 (25.2 to 25.2)               | 127.6 (111.4 to 148.5) | 9.6 (7.1 to 12.4)          | 58.6 (42.5 to 78.6)           | 3.5 (1.7 to 6.7)                | 55.9 (55.9 to 55.9)               |
| Liberia | 2014 | 99.5 (90.9 to 110.4)       | 5.4 (4.0 to 7.1)           | 30.3 (21.6 to 40.8)           | 2.2 (1.0 to 4.2)                | 61.6 (61.6 to 61.6)               | 220.2 (201.2 to 244.3) | 12.0 (8.9 to 15.7)         | 67.0 (47.9 to 90.2)           | 4.8 (2.2 to 9.2)                | 136.4 (136.4 to 136.4)            |
| Liberia | 2015 | 157.7 (148.0 to 170.1)     | 6.7 (5.0 to 8.7)           | 33.1 (23.8 to 44.8)           | 3.7 (1.7 to 7.2)                | 114.2 (114.2 to 114.2)            | 349.0 (327.5 to 376.3) | 14.7 (11.0 to 19.2)        | 73.3 (52.7 to 99.1)           | 8.2 (3.8 to 16.0)               | 252.8 (252.8 to 252.8)            |
| Liberia | 2016 | 80.9 (70.8 to 94.0)        | 7.7 (5.7 to 10.0)          | 34.5 (24.8 to 46.8)           | 4.8 (2.1 to 9.4)                | 34.0 (34.0 to 34.0)               | 179.1 (156.6 to 208.0) | 17.0 (12.6 to 22.1)        | 76.3 (54.9 to 103.6)          | 10.6 (4.7 to 20.7)              | 75.2 (75.2 to 75.2)               |
| Liberia | 2017 | 72.4 (62.2 to 85.5)        | 7.6 (5.7 to 9.9)           | 34.3 (24.7 to 46.7)           | 4.6 (2.0 to 9.0)                | 25.9 (25.9 to 25.9)               | 160.3 (137.7 to 189.2) | 16.9 (12.6 to 21.9)        | 75.9 (54.6 to 103.4)          | 10.1 (4.5 to 19.9)              | 57.4 (57.4 to 57.4)               |
| Liberia | 2018 | 70.3 (60.1 to 83.1)        | 7.7 (5.7 to 10.0)          | 34.6 (24.8 to 47.2)           | 4.7 (2.1 to 9.1)                | 23.3 (23.2 to 23.4)               | 155.6 (133.1 to 183.8) | 17.0 (12.7 to 22.1)        | 76.6 (55.0 to 104.4)          | 10.3 (4.6 to 20.2)              | 51.6 (51.4 to 51.8)               |
| Liberia | 2019 | 71.2 (60.4 to 84.3)        | 7.8 (5.8 to 10.1)          | 35.2 (25.2 to 48.3)           | 4.7 (2.1 to 9.2)                | 23.4 (21.9 to 24.7)               | 157.5 (133.7 to 186.6) | 17.2 (12.9 to 22.3)        | 78.0 (55.7 to 107.0)          | 10.5 (4.6 to 20.4)              | 51.8 (48.4 to 54.8)               |
| Liberia | 2020 | 72.0 (61.0 to 85.8)        | 7.8 (5.8 to 10.1)          | 35.7 (25.3 to 48.7)           | 4.8 (2.1 to 9.3)                | 23.8 (21.8 to 25.7)               | 159.4 (135.1 to 189.8) | 17.3 (12.9 to 22.4)        | 78.9 (56.1 to 107.7)          | 10.6 (4.7 to 20.6)              | 52.6 (48.2 to 56.9)               |
| Liberia | 2021 | 72.9 (61.7 to 87.6)        | 7.9 (5.9 to 10.2)          | 35.9 (25.6 to 48.9)           | 4.8 (2.1 to 9.4)                | 24.3 (21.9 to 26.8)               | 161.2 (136.5 to 193.8) | 17.4 (13.0 to 22.6)        | 79.3 (56.6 to 108.3)          | 10.7 (4.7 to 20.7)              | 53.8 (48.5 to 59.3)               |
| Liberia | 2022 | 74.1 (63.1 to 88.5)        | 7.9 (5.9 to 10.3)          | 36.3 (25.8 to 49.7)           | 4.9 (2.2 to 9.5)                | 25.0 (22.2 to 27.8)               | 163.9 (139.5 to 195.7) | 17.6 (13.1 to 22.9)        | 80.3 (57.1 to 110.0)          | 10.8 (4.8 to 21.0)              | 55.2 (49.1 to 61.6)               |



| Country | Year | 2018 US Dollars per capita |                            |                               |                                 |                                   | 2018 PPP per capita    |                            |                               |                                 |                                   |
|---------|------|----------------------------|----------------------------|-------------------------------|---------------------------------|-----------------------------------|------------------------|----------------------------|-------------------------------|---------------------------------|-----------------------------------|
|         |      | Health spending            | Government health spending | Out-of-pocket health spending | Prepaid private health spending | Development assistance for health | Health spending        | Government health spending | Out-of-pocket health spending | Prepaid private health spending | Development assistance for health |
| Liberia | 2023 | 75.8 (64.3 to 89.6)        | 8.0 (6.0 to 10.4)          | 37.2 (26.4 to 50.9)           | 5.0 (2.2 to 9.6)                | 25.6 (22.2 to 29.0)               | 167.7 (142.3 to 198.3) | 17.7 (13.2 to 23.0)        | 82.3 (58.5 to 112.6)          | 11.0 (4.9 to 21.2)              | 56.7 (49.1 to 64.2)               |
| Liberia | 2024 | 77.5 (65.3 to 91.9)        | 8.1 (6.0 to 10.5)          | 38.0 (27.1 to 51.6)           | 5.0 (2.2 to 9.7)                | 26.4 (22.7 to 30.4)               | 171.4 (144.4 to 203.3) | 17.9 (13.3 to 23.2)        | 84.0 (60.0 to 114.1)          | 11.1 (4.9 to 21.4)              | 58.4 (50.3 to 67.2)               |
| Liberia | 2025 | 79.5 (67.0 to 94.7)        | 8.1 (6.1 to 10.5)          | 39.1 (27.8 to 53.3)           | 5.1 (2.3 to 9.8)                | 27.1 (23.0 to 31.7)               | 175.8 (148.2 to 209.7) | 18.0 (13.5 to 23.3)        | 86.6 (61.5 to 117.8)          | 11.3 (5.0 to 21.7)              | 59.9 (51.0 to 70.2)               |
| Liberia | 2026 | 81.5 (68.5 to 97.4)        | 8.2 (6.1 to 10.7)          | 40.3 (28.9 to 55.0)           | 5.2 (2.3 to 10.0)               | 27.7 (23.4 to 32.8)               | 180.4 (151.6 to 215.5) | 18.2 (13.6 to 23.7)        | 89.3 (63.9 to 121.6)          | 11.4 (5.1 to 22.1)              | 61.4 (51.7 to 72.6)               |
| Liberia | 2027 | 83.6 (70.2 to 100.3)       | 8.3 (6.2 to 10.8)          | 41.5 (29.7 to 56.4)           | 5.2 (2.3 to 10.1)               | 28.5 (23.7 to 34.3)               | 185.1 (155.3 to 222.0) | 18.4 (13.7 to 24.0)        | 91.9 (65.8 to 124.9)          | 11.6 (5.1 to 22.4)              | 63.2 (52.5 to 75.9)               |
| Liberia | 2028 | 85.9 (72.0 to 103.3)       | 8.4 (6.3 to 10.9)          | 42.8 (30.4 to 58.2)           | 5.3 (2.3 to 10.3)               | 29.4 (24.4 to 35.8)               | 190.0 (159.4 to 228.5) | 18.6 (13.8 to 24.1)        | 94.7 (67.3 to 128.8)          | 11.7 (5.2 to 22.7)              | 65.0 (54.1 to 79.2)               |
| Liberia | 2029 | 88.1 (73.4 to 105.5)       | 8.5 (6.3 to 11.0)          | 44.0 (31.0 to 59.7)           | 5.4 (2.4 to 10.4)               | 30.3 (24.7 to 37.7)               | 195.0 (162.4 to 233.5) | 18.8 (14.0 to 24.4)        | 97.3 (68.5 to 132.0)          | 11.9 (5.2 to 23.1)              | 67.1 (54.6 to 83.3)               |
| Liberia | 2030 | 90.4 (74.8 to 108.5)       | 8.6 (6.4 to 11.2)          | 45.2 (31.8 to 61.4)           | 5.5 (2.4 to 10.6)               | 31.2 (25.3 to 38.6)               | 200.0 (165.5 to 240.0) | 19.0 (14.1 to 24.7)        | 100.0 (70.4 to 135.8)         | 12.1 (5.3 to 23.4)              | 68.9 (56.0 to 85.5)               |
| Liberia | 2031 | 92.7 (76.1 to 112.0)       | 8.7 (6.5 to 11.3)          | 46.4 (32.8 to 63.2)           | 5.5 (2.4 to 10.7)               | 32.1 (25.8 to 40.7)               | 205.2 (168.4 to 247.7) | 19.3 (14.3 to 25.1)        | 102.7 (72.5 to 139.8)         | 12.3 (5.4 to 23.7)              | 70.9 (57.0 to 90.0)               |
| Liberia | 2032 | 95.1 (78.0 to 115.3)       | 8.8 (6.6 to 11.6)          | 47.6 (33.5 to 65.1)           | 5.6 (2.5 to 10.8)               | 33.1 (26.1 to 42.2)               | 210.4 (172.5 to 255.2) | 19.6 (14.5 to 25.6)        | 105.3 (74.0 to 144.0)         | 12.4 (5.5 to 24.0)              | 73.2 (57.7 to 93.3)               |
| Liberia | 2033 | 97.5 (79.6 to 117.9)       | 9.0 (6.6 to 11.7)          | 48.8 (33.8 to 67.1)           | 5.7 (2.5 to 11.0)               | 34.1 (26.5 to 44.4)               | 215.8 (176.2 to 260.9) | 19.8 (14.7 to 25.8)        | 107.9 (74.8 to 148.5)         | 12.6 (5.5 to 24.3)              | 75.4 (58.6 to 98.2)               |
| Liberia | 2034 | 100.1 (81.4 to 122.2)      | 9.1 (6.7 to 12.0)          | 49.9 (34.2 to 69.0)           | 5.8 (2.5 to 11.1)               | 35.3 (27.1 to 46.5)               | 221.5 (180.2 to 270.3) | 20.1 (14.9 to 26.5)        | 110.5 (75.6 to 152.7)         | 12.8 (5.6 to 24.6)              | 78.1 (60.0 to 102.9)              |
| Liberia | 2035 | 102.7 (82.9 to 125.9)      | 9.2 (6.8 to 12.1)          | 51.1 (34.7 to 70.6)           | 5.9 (2.6 to 11.3)               | 36.5 (27.7 to 48.2)               | 227.2 (183.4 to 278.6) | 20.4 (15.1 to 26.8)        | 113.0 (76.8 to 156.3)         | 13.0 (5.7 to 24.9)              | 80.8 (61.2 to 106.7)              |
| Liberia | 2036 | 105.3 (84.9 to 130.4)      | 9.4 (6.9 to 12.3)          | 52.2 (35.2 to 72.6)           | 6.0 (2.6 to 11.5)               | 37.7 (28.4 to 51.5)               | 232.9 (187.8 to 288.6) | 20.7 (15.2 to 27.3)        | 115.5 (77.9 to 160.6)         | 13.2 (5.8 to 25.3)              | 83.5 (62.9 to 114.0)              |
| Liberia | 2037 | 107.8 (85.6 to 133.7)      | 9.5 (7.0 to 12.5)          | 53.2 (35.9 to 74.4)           | 6.1 (2.7 to 11.6)               | 39.0 (29.1 to 53.8)               | 238.5 (189.4 to 295.8) | 21.0 (15.5 to 27.7)        | 117.8 (79.5 to 164.7)         | 13.4 (5.9 to 25.7)              | 86.3 (64.5 to 119.0)              |
| Liberia | 2038 | 110.4 (87.5 to 137.0)      | 9.6 (7.1 to 12.7)          | 54.2 (36.4 to 76.2)           | 6.1 (2.7 to 11.8)               | 40.4 (29.9 to 57.6)               | 244.3 (193.7 to 303.1) | 21.3 (15.7 to 28.2)        | 120.0 (80.6 to 168.7)         | 13.6 (6.0 to 26.0)              | 89.4 (66.1 to 127.4)              |
| Liberia | 2039 | 113.0 (90.0 to 140.3)      | 9.8 (7.2 to 13.0)          | 55.3 (36.9 to 78.1)           | 6.2 (2.8 to 11.9)               | 41.7 (30.6 to 59.4)               | 250.1 (199.0 to 310.5) | 21.7 (15.9 to 28.7)        | 122.3 (81.7 to 172.7)         | 13.8 (6.1 to 26.3)              | 92.4 (67.7 to 131.4)              |
| Liberia | 2040 | 115.7 (92.3 to 143.3)      | 9.9 (7.3 to 13.2)          | 56.2 (37.4 to 79.8)           | 6.3 (2.8 to 12.0)               | 43.3 (31.9 to 63.0)               | 256.1 (204.3 to 317.0) | 22.0 (16.1 to 29.1)        | 124.4 (82.7 to 176.5)         | 14.0 (6.2 to 26.6)              | 95.8 (70.6 to 139.3)              |
| Liberia | 2041 | 118.6 (93.9 to 149.1)      | 10.1 (7.4 to 13.4)         | 57.2 (37.9 to 81.6)           | 6.4 (2.8 to 12.2)               | 44.9 (32.2 to 65.4)               | 262.4 (207.7 to 330.0) | 22.4 (16.4 to 29.6)        | 126.5 (83.9 to 180.5)         | 14.2 (6.3 to 27.1)              | 99.3 (71.3 to 144.8)              |
| Liberia | 2042 | 121.5 (95.7 to 153.0)      | 10.3 (7.5 to 13.6)         | 58.0 (38.4 to 83.2)           | 6.5 (2.9 to 12.4)               | 46.7 (33.2 to 67.4)               | 268.8 (211.9 to 338.5) | 22.7 (16.6 to 30.1)        | 128.3 (84.9 to 184.1)         | 14.4 (6.4 to 27.5)              | 103.3 (73.4 to 149.2)             |
| Liberia | 2043 | 124.3 (97.3 to 159.3)      | 10.4 (7.6 to 13.8)         | 58.8 (38.8 to 84.8)           | 6.6 (2.9 to 12.6)               | 48.4 (34.3 to 70.9)               | 275.1 (215.3 to 352.4) | 23.1 (16.9 to 30.6)        | 130.2 (85.8 to 187.6)         | 14.7 (6.5 to 27.9)              | 107.1 (75.9 to 157.0)             |

| Country | Year | 2018 US Dollars per capita |                            |                               |                                 |                                   | 2018 PPP per capita    |                            |                               |                                 |                                   |
|---------|------|----------------------------|----------------------------|-------------------------------|---------------------------------|-----------------------------------|------------------------|----------------------------|-------------------------------|---------------------------------|-----------------------------------|
|         |      | Health spending            | Government health spending | Out-of-pocket health spending | Prepaid private health spending | Development assistance for health | Health spending        | Government health spending | Out-of-pocket health spending | Prepaid private health spending | Development assistance for health |
| Liberia | 2044 | 127.3 (98.6 to 161.4)      | 10.6 (7.8 to 14.1)         | 59.6 (39.2 to 86.3)           | 6.7 (3.0 to 12.8)               | 50.3 (35.1 to 75.8)               | 281.7 (218.1 to 357.2) | 23.5 (17.2 to 31.1)        | 131.9 (86.8 to 191.1)         | 14.9 (6.6 to 28.4)              | 111.4 (77.6 to 167.7)             |
| Liberia | 2045 | 130.3 (100.5 to 167.3)     | 10.8 (7.9 to 14.3)         | 60.4 (39.8 to 87.7)           | 6.8 (3.0 to 13.0)               | 52.3 (36.3 to 80.2)               | 288.4 (222.3 to 370.2) | 23.9 (17.4 to 31.8)        | 133.6 (88.1 to 194.2)         | 15.1 (6.7 to 28.9)              | 115.7 (80.2 to 177.5)             |
| Liberia | 2046 | 133.4 (101.5 to 171.9)     | 11.0 (8.0 to 14.7)         | 61.1 (40.0 to 88.8)           | 7.0 (3.1 to 13.3)               | 54.4 (36.8 to 86.1)               | 295.1 (224.6 to 380.4) | 24.3 (17.7 to 32.4)        | 135.1 (88.5 to 196.5)         | 15.4 (6.8 to 29.3)              | 120.3 (81.4 to 190.4)             |
| Liberia | 2047 | 136.6 (104.7 to 177.1)     | 11.2 (8.2 to 14.9)         | 61.6 (40.1 to 89.9)           | 7.1 (3.1 to 13.5)               | 56.7 (39.1 to 89.4)               | 302.2 (231.7 to 392.0) | 24.7 (18.1 to 32.9)        | 136.4 (88.8 to 199.0)         | 15.6 (6.9 to 29.8)              | 125.5 (86.5 to 197.7)             |
| Liberia | 2048 | 140.0 (106.4 to 185.0)     | 11.4 (8.3 to 15.2)         | 62.3 (40.5 to 91.4)           | 7.2 (3.2 to 13.7)               | 59.1 (39.7 to 93.5)               | 309.8 (235.5 to 409.4) | 25.2 (18.3 to 33.6)        | 137.9 (89.6 to 202.3)         | 15.9 (7.0 to 30.3)              | 130.8 (87.8 to 206.8)             |
| Liberia | 2049 | 143.4 (109.8 to 194.2)     | 11.6 (8.4 to 15.5)         | 63.0 (40.8 to 92.3)           | 7.3 (3.2 to 13.9)               | 61.6 (41.4 to 100.4)              | 317.2 (243.0 to 429.8) | 25.6 (18.6 to 34.2)        | 139.3 (90.3 to 204.2)         | 16.1 (7.1 to 30.8)              | 136.2 (91.5 to 222.1)             |
| Liberia | 2050 | 147.1 (112.8 to 198.9)     | 11.8 (8.5 to 15.7)         | 63.6 (41.2 to 93.4)           | 7.4 (3.3 to 14.1)               | 64.4 (42.7 to 109.4)              | 325.6 (249.5 to 440.2) | 26.0 (18.9 to 34.8)        | 140.8 (91.1 to 206.6)         | 16.4 (7.2 to 31.3)              | 142.4 (94.6 to 242.2)             |
| Libya   | 1995 | 415.3 (373.8 to 460.5)     | 193.7 (166.7 to 225.1)     | 207.0 (178.2 to 240.8)        | 14.5 (6.8 to 27.3)              | 0.0 (0.0 to 0.0)                  | 756.4 (680.7 to 838.7) | 352.9 (303.6 to 410.0)     | 377.0 (324.5 to 438.6)        | 26.5 (12.3 to 49.7)             | 0.0 (0.0 to 0.0)                  |
| Libya   | 1996 | 429.1 (390.2 to 472.8)     | 205.1 (177.6 to 235.9)     | 208.9 (182.8 to 237.6)        | 15.1 (7.1 to 27.9)              | 0.0 (0.0 to 0.0)                  | 781.5 (710.7 to 861.0) | 373.5 (323.4 to 429.7)     | 380.4 (333.0 to 432.7)        | 27.6 (12.9 to 50.8)             | 0.0 (0.0 to 0.0)                  |
| Libya   | 1997 | 444.5 (405.1 to 484.2)     | 214.9 (187.8 to 243.2)     | 213.6 (189.0 to 239.9)        | 16.0 (7.7 to 29.3)              | 0.0 (0.0 to 0.0)                  | 809.6 (737.8 to 881.8) | 391.4 (342.0 to 443.0)     | 388.9 (344.2 to 436.9)        | 29.2 (14.0 to 53.4)             | 0.0 (0.0 to 0.0)                  |
| Libya   | 1998 | 454.4 (416.9 to 495.1)     | 217.5 (192.0 to 243.6)     | 220.1 (196.0 to 246.4)        | 16.7 (8.0 to 31.4)              | 0.0 (0.0 to 0.0)                  | 827.5 (759.3 to 901.6) | 396.1 (349.6 to 443.6)     | 400.9 (357.0 to 448.8)        | 30.5 (14.6 to 57.2)             | 0.0 (0.0 to 0.0)                  |
| Libya   | 1999 | 453.8 (417.0 to 493.7)     | 219.1 (193.8 to 245.1)     | 217.2 (192.8 to 242.4)        | 17.5 (8.5 to 33.2)              | 0.0 (0.0 to 0.0)                  | 826.5 (759.5 to 899.2) | 399.1 (352.9 to 446.5)     | 395.6 (351.0 to 441.5)        | 31.8 (15.4 to 60.5)             | 0.0 (0.0 to 0.0)                  |
| Libya   | 2000 | 467.4 (427.9 to 505.8)     | 237.3 (211.1 to 264.6)     | 210.8 (186.8 to 234.5)        | 19.4 (9.1 to 37.1)              | 0.0 (0.0 to 0.0)                  | 851.3 (779.3 to 921.1) | 432.1 (384.5 to 482.0)     | 383.9 (340.2 to 427.0)        | 35.3 (16.5 to 67.5)             | 0.0 (0.0 to 0.0)                  |
| Libya   | 2001 | 484.9 (445.5 to 521.8)     | 263.2 (236.8 to 291.0)     | 200.4 (176.9 to 224.6)        | 21.4 (9.9 to 42.0)              | 0.0 (0.0 to 0.0)                  | 883.1 (811.4 to 950.3) | 479.3 (431.3 to 529.9)     | 364.9 (322.2 to 409.0)        | 38.9 (18.1 to 76.4)             | 0.0 (0.0 to 0.0)                  |
| Libya   | 2002 | 494.1 (455.5 to 532.7)     | 288.9 (260.3 to 318.9)     | 182.2 (160.7 to 203.9)        | 23.0 (10.5 to 44.3)             | 0.0 (0.0 to 0.0)                  | 899.9 (829.5 to 970.2) | 526.2 (474.1 to 580.8)     | 331.7 (292.6 to 371.3)        | 42.0 (19.1 to 80.8)             | 0.0 (0.0 to 0.0)                  |
| Libya   | 2003 | 497.2 (459.7 to 538.3)     | 304.2 (275.4 to 337.4)     | 168.8 (148.7 to 190.7)        | 24.2 (11.0 to 46.4)             | 0.0 (0.0 to 0.0)                  | 905.5 (837.1 to 980.4) | 554.0 (501.6 to 614.4)     | 307.5 (270.9 to 347.3)        | 44.0 (20.0 to 84.5)             | 0.0 (0.0 to 0.0)                  |
| Libya   | 2004 | 449.5 (415.4 to 488.4)     | 279.1 (253.6 to 309.1)     | 147.8 (129.3 to 167.0)        | 22.5 (10.3 to 42.7)             | 0.0 (0.0 to 0.0)                  | 818.6 (756.5 to 889.5) | 508.3 (461.8 to 562.9)     | 269.3 (235.4 to 304.1)        | 41.0 (18.8 to 77.7)             | 0.0 (0.0 to 0.0)                  |
| Libya   | 2005 | 417.8 (385.4 to 454.9)     | 262.8 (238.8 to 291.5)     | 133.5 (116.5 to 151.8)        | 21.5 (9.8 to 40.4)              | 0.1 (0.1 to 0.1)                  | 761.0 (702.0 to 828.5) | 478.5 (435.0 to 530.8)     | 243.2 (212.2 to 276.4)        | 39.2 (17.9 to 73.6)             | 0.1 (0.1 to 0.1)                  |
| Libya   | 2006 | 401.3 (368.2 to 437.6)     | 254.3 (229.2 to 283.1)     | 126.0 (109.8 to 142.9)        | 20.9 (9.5 to 40.2)              | 0.1 (0.1 to 0.1)                  | 730.8 (670.7 to 796.9) | 463.1 (417.5 to 515.5)     | 229.4 (199.9 to 260.2)        | 38.1 (17.4 to 73.3)             | 0.2 (0.2 to 0.2)                  |
| Libya   | 2007 | 405.4 (372.0 to 442.4)     | 259.8 (234.0 to 288.0)     | 123.8 (108.0 to 140.1)        | 21.4 (10.0 to 41.9)             | 0.3 (0.3 to 0.3)                  | 738.3 (677.5 to 805.7) | 473.1 (426.2 to 524.5)     | 225.5 (196.6 to 255.2)        | 39.1 (18.3 to 76.3)             | 0.6 (0.6 to 0.6)                  |
| Libya   | 2008 | 428.2 (392.2 to 466.9)     | 274.1 (247.5 to 301.5)     | 125.6 (108.8 to 143.7)        | 22.6 (10.7 to 44.1)             | 5.9 (5.9 to 5.9)                  | 779.9 (714.2 to 850.3) | 499.3 (450.7 to 549.1)     | 228.7 (198.2 to 261.7)        | 41.2 (19.4 to 80.3)             | 10.7 (10.7 to 10.7)               |

| Country | Year | 2018 US Dollars per capita |                            |                               |                                 |                                   | 2018 PPP per capita     |                            |                               |                                 |                                   |
|---------|------|----------------------------|----------------------------|-------------------------------|---------------------------------|-----------------------------------|-------------------------|----------------------------|-------------------------------|---------------------------------|-----------------------------------|
|         |      | Health spending            | Government health spending | Out-of-pocket health spending | Prepaid private health spending | Development assistance for health | Health spending         | Government health spending | Out-of-pocket health spending | Prepaid private health spending | Development assistance for health |
| Libya   | 2009 | 484.1 (445.3 to 525.1)     | 313.9 (282.7 to 345.4)     | 141.4 (122.7 to 161.9)        | 25.3 (12.2 to 49.8)             | 3.5 (3.5 to 3.5)                  | 881.7 (811.0 to 956.2)  | 571.6 (514.8 to 629.0)     | 257.6 (223.5 to 294.8)        | 46.1 (22.1 to 90.8)             | 6.4 (6.4 to 6.4)                  |
| Libya   | 2010 | 548.9 (507.5 to 595.6)     | 364.6 (329.6 to 402.9)     | 155.4 (135.2 to 177.7)        | 28.7 (13.9 to 56.9)             | 0.2 (0.2 to 0.2)                  | 999.6 (924.3 to 1084.7) | 664.1 (600.2 to 733.7)     | 283.0 (246.2 to 323.7)        | 52.2 (25.3 to 103.6)            | 0.3 (0.3 to 0.3)                  |
| Libya   | 2011 | 309.8 (285.3 to 335.7)     | 185.7 (167.9 to 206.2)     | 106.9 (92.4 to 122.8)         | 15.2 (7.2 to 28.5)              | 2.0 (2.0 to 2.0)                  | 564.2 (519.6 to 611.4)  | 338.2 (305.9 to 375.6)     | 194.7 (168.2 to 223.7)        | 27.7 (13.2 to 51.9)             | 3.7 (3.7 to 3.7)                  |
| Libya   | 2012 | 547.9 (501.6 to 597.9)     | 368.2 (332.0 to 411.5)     | 151.7 (128.9 to 175.1)        | 27.6 (12.8 to 52.2)             | 0.3 (0.3 to 0.3)                  | 997.8 (913.5 to 1088.9) | 670.6 (604.6 to 749.4)     | 276.3 (234.8 to 318.9)        | 50.3 (23.4 to 95.1)             | 0.6 (0.6 to 0.6)                  |
| Libya   | 2013 | 414.4 (375.8 to 459.1)     | 275.3 (244.4 to 310.3)     | 117.4 (98.1 to 138.0)         | 21.0 (9.8 to 39.1)              | 0.7 (0.7 to 0.7)                  | 754.8 (684.4 to 836.1)  | 501.5 (445.1 to 565.2)     | 213.8 (178.7 to 251.3)        | 38.2 (17.8 to 71.3)             | 1.3 (1.3 to 1.3)                  |
| Libya   | 2014 | 290.4 (259.7 to 326.0)     | 190.4 (165.2 to 219.4)     | 85.2 (70.0 to 102.6)          | 14.7 (6.9 to 28.1)              | 0.1 (0.1 to 0.1)                  | 528.8 (472.9 to 593.7)  | 346.7 (300.9 to 399.6)     | 155.2 (127.5 to 186.9)        | 26.7 (12.5 to 51.1)             | 0.2 (0.2 to 0.2)                  |
| Libya   | 2015 | 268.5 (236.6 to 305.4)     | 175.9 (149.9 to 205.3)     | 79.0 (62.6 to 97.3)           | 13.3 (6.3 to 25.9)              | 0.3 (0.3 to 0.3)                  | 489.0 (430.9 to 556.2)  | 320.3 (272.9 to 373.9)     | 143.8 (114.0 to 177.2)        | 24.3 (11.4 to 47.1)             | 0.6 (0.6 to 0.6)                  |
| Libya   | 2016 | 256.7 (221.6 to 293.8)     | 168.9 (139.8 to 202.9)     | 74.8 (57.6 to 93.5)           | 12.4 (5.9 to 24.4)              | 0.6 (0.6 to 0.6)                  | 467.5 (403.7 to 535.0)  | 307.5 (254.7 to 369.6)     | 136.2 (104.9 to 170.3)        | 22.6 (10.7 to 44.4)             | 1.2 (1.2 to 1.2)                  |
| Libya   | 2017 | 247.3 (213.7 to 285.3)     | 151.2 (125.4 to 181.7)     | 80.3 (61.4 to 101.6)          | 14.6 (7.0 to 29.1)              | 1.2 (1.2 to 1.2)                  | 450.3 (389.2 to 519.5)  | 275.4 (228.5 to 331.0)     | 146.2 (111.8 to 185.0)        | 26.7 (12.7 to 52.9)             | 2.1 (2.1 to 2.1)                  |
| Libya   | 2018 | 246.7 (212.6 to 284.6)     | 151.3 (125.8 to 182.3)     | 79.0 (60.1 to 99.4)           | 15.4 (7.3 to 30.6)              | 1.0 (1.0 to 1.0)                  | 449.4 (387.1 to 518.2)  | 275.6 (229.1 to 332.1)     | 143.9 (109.4 to 181.1)        | 28.1 (13.3 to 55.7)             | 1.9 (1.8 to 1.9)                  |
| Libya   | 2019 | 241.1 (208.2 to 277.6)     | 146.1 (121.2 to 176.0)     | 78.6 (59.8 to 98.6)           | 15.4 (7.3 to 30.5)              | 1.0 (1.0 to 1.1)                  | 439.0 (379.2 to 505.5)  | 266.1 (220.7 to 320.6)     | 143.1 (108.9 to 179.6)        | 28.0 (13.4 to 55.6)             | 1.9 (1.7 to 2.0)                  |
| Libya   | 2020 | 234.9 (203.5 to 271.8)     | 142.0 (117.8 to 170.5)     | 76.4 (58.4 to 96.0)           | 15.4 (7.3 to 30.7)              | 1.0 (0.9 to 1.1)                  | 427.7 (370.6 to 495.0)  | 258.5 (214.5 to 310.6)     | 139.2 (106.3 to 174.8)        | 28.1 (13.4 to 55.9)             | 1.9 (1.7 to 2.1)                  |
| Libya   | 2021 | 229.9 (197.0 to 264.5)     | 138.8 (115.3 to 167.0)     | 74.5 (56.8 to 93.7)           | 15.5 (7.4 to 30.9)              | 1.1 (0.9 to 1.2)                  | 418.6 (358.7 to 481.7)  | 252.8 (210.0 to 304.1)     | 135.7 (103.5 to 170.6)        | 28.2 (13.4 to 56.3)             | 1.9 (1.7 to 2.1)                  |
| Libya   | 2022 | 225.5 (193.9 to 259.9)     | 136.2 (112.4 to 163.2)     | 72.6 (55.5 to 91.1)           | 15.6 (7.4 to 31.1)              | 1.1 (1.0 to 1.2)                  | 410.7 (353.1 to 473.3)  | 248.1 (204.8 to 297.2)     | 132.3 (101.1 to 166.0)        | 28.3 (13.5 to 56.7)             | 2.0 (1.7 to 2.2)                  |
| Libya   | 2023 | 225.5 (192.7 to 261.8)     | 137.5 (113.8 to 165.0)     | 71.1 (54.3 to 89.9)           | 15.8 (7.5 to 31.5)              | 1.1 (1.0 to 1.3)                  | 410.7 (350.9 to 476.9)  | 250.4 (207.2 to 300.6)     | 129.6 (98.9 to 163.7)         | 28.7 (13.7 to 57.3)             | 2.0 (1.7 to 2.3)                  |
| Libya   | 2024 | 225.3 (193.8 to 258.5)     | 138.6 (114.6 to 166.7)     | 69.6 (52.7 to 88.3)           | 16.0 (7.6 to 31.7)              | 1.1 (1.0 to 1.3)                  | 410.4 (353.0 to 470.7)  | 252.5 (208.6 to 303.6)     | 126.8 (96.0 to 160.8)         | 29.1 (13.9 to 57.7)             | 2.0 (1.8 to 2.4)                  |
| Libya   | 2025 | 229.0 (197.1 to 266.0)     | 142.6 (118.0 to 171.4)     | 68.8 (52.7 to 87.2)           | 16.4 (7.9 to 32.6)              | 1.1 (1.0 to 1.3)                  | 417.0 (358.9 to 484.5)  | 259.6 (214.9 to 312.1)     | 125.3 (96.0 to 158.8)         | 29.9 (14.3 to 59.3)             | 2.1 (1.8 to 2.4)                  |
| Libya   | 2026 | 233.6 (200.2 to 270.8)     | 147.4 (122.3 to 177.2)     | 68.1 (52.1 to 86.7)           | 17.0 (8.1 to 33.6)              | 1.2 (1.0 to 1.4)                  | 425.5 (364.5 to 493.2)  | 268.5 (222.7 to 322.8)     | 124.0 (94.9 to 157.9)         | 30.9 (14.8 to 61.2)             | 2.1 (1.8 to 2.5)                  |
| Libya   | 2027 | 239.0 (203.9 to 279.8)     | 152.8 (126.7 to 183.9)     | 67.5 (51.6 to 85.7)           | 17.6 (8.4 to 34.8)              | 1.2 (1.0 to 1.4)                  | 435.2 (371.3 to 509.5)  | 278.2 (230.7 to 335.0)     | 122.8 (94.0 to 156.1)         | 32.0 (15.3 to 63.5)             | 2.1 (1.8 to 2.5)                  |
| Libya   | 2028 | 244.8 (207.8 to 284.7)     | 158.5 (131.1 to 191.2)     | 67.0 (51.0 to 85.6)           | 18.2 (8.7 to 36.1)              | 1.2 (1.0 to 1.4)                  | 445.8 (378.5 to 518.5)  | 288.6 (238.7 to 348.2)     | 122.0 (92.8 to 155.8)         | 33.1 (15.9 to 65.8)             | 2.1 (1.8 to 2.6)                  |
| Libya   | 2029 | 251.5 (213.4 to 292.0)     | 164.8 (136.2 to 199.1)     | 66.7 (50.8 to 85.6)           | 18.8 (9.1 to 37.4)              | 1.2 (1.0 to 1.5)                  | 458.1 (388.6 to 531.8)  | 300.2 (248.1 to 362.7)     | 121.4 (92.5 to 155.9)         | 34.3 (16.5 to 68.1)             | 2.2 (1.8 to 2.7)                  |

| Country | Year | 2018 US Dollars per capita |                            |                               |                                 |                                   | 2018 PPP per capita     |                            |                               |                                 |                                   |
|---------|------|----------------------------|----------------------------|-------------------------------|---------------------------------|-----------------------------------|-------------------------|----------------------------|-------------------------------|---------------------------------|-----------------------------------|
|         |      | Health spending            | Government health spending | Out-of-pocket health spending | Prepaid private health spending | Development assistance for health | Health spending         | Government health spending | Out-of-pocket health spending | Prepaid private health spending | Development assistance for health |
| Libya   | 2030 | 259.1 (221.0 to 301.4)     | 171.9 (141.7 to 208.0)     | 66.5 (50.2 to 85.9)           | 19.5 (9.4 to 38.7)              | 1.2 (1.0 to 1.5)                  | 471.9 (402.6 to 548.9)  | 313.0 (258.1 to 378.8)     | 121.1 (91.5 to 156.4)         | 35.5 (17.1 to 70.4)             | 2.2 (1.8 to 2.7)                  |
| Libya   | 2031 | 267.1 (226.0 to 313.2)     | 179.2 (147.1 to 217.0)     | 66.5 (49.9 to 86.3)           | 20.2 (9.7 to 40.0)              | 1.2 (1.0 to 1.5)                  | 486.5 (411.5 to 570.5)  | 326.4 (267.9 to 395.1)     | 121.1 (90.8 to 157.3)         | 36.8 (17.7 to 72.9)             | 2.2 (1.8 to 2.8)                  |
| Libya   | 2032 | 275.9 (234.7 to 323.2)     | 187.2 (152.3 to 226.7)     | 66.6 (49.5 to 86.7)           | 21.0 (10.1 to 41.4)             | 1.2 (1.0 to 1.6)                  | 502.6 (427.4 to 588.6)  | 340.9 (277.4 to 413.0)     | 121.2 (90.2 to 157.9)         | 38.2 (18.4 to 75.4)             | 2.2 (1.8 to 2.9)                  |
| Libya   | 2033 | 285.5 (239.6 to 334.5)     | 195.8 (157.8 to 237.6)     | 66.8 (49.1 to 87.1)           | 21.7 (10.5 to 42.9)             | 1.2 (0.9 to 1.6)                  | 520.0 (436.3 to 609.1)  | 356.6 (287.4 to 432.7)     | 121.7 (89.3 to 158.7)         | 39.6 (19.1 to 78.1)             | 2.2 (1.6 to 2.9)                  |
| Libya   | 2034 | 295.5 (248.4 to 346.9)     | 204.6 (163.5 to 249.0)     | 67.1 (48.9 to 87.9)           | 22.5 (10.9 to 44.4)             | 1.2 (0.0 to 1.6)                  | 538.2 (452.3 to 631.8)  | 372.7 (297.7 to 453.4)     | 122.3 (89.0 to 160.1)         | 41.0 (19.8 to 80.8)             | 2.3 (0.0 to 3.0)                  |
| Libya   | 2035 | 305.8 (255.2 to 367.4)     | 213.7 (170.2 to 261.6)     | 67.6 (48.8 to 89.3)           | 23.3 (11.2 to 45.8)             | 1.2 (0.0 to 1.7)                  | 556.9 (464.8 to 669.1)  | 389.2 (309.9 to 476.5)     | 123.0 (88.8 to 162.6)         | 42.4 (20.5 to 83.4)             | 2.3 (0.0 to 3.1)                  |
| Libya   | 2036 | 316.3 (266.3 to 375.0)     | 222.9 (176.3 to 273.7)     | 68.1 (48.8 to 90.2)           | 24.1 (11.6 to 47.3)             | 1.2 (0.0 to 1.8)                  | 576.0 (485.0 to 682.9)  | 405.9 (321.0 to 498.5)     | 124.0 (88.9 to 164.3)         | 43.9 (21.2 to 86.2)             | 2.3 (0.0 to 3.2)                  |
| Libya   | 2037 | 327.2 (270.0 to 392.5)     | 232.4 (182.9 to 287.8)     | 68.7 (48.8 to 91.2)           | 24.9 (12.0 to 48.8)             | 1.2 (0.0 to 1.8)                  | 595.9 (491.8 to 714.7)  | 423.2 (333.1 to 524.1)     | 125.1 (88.9 to 166.0)         | 45.4 (21.9 to 88.9)             | 2.2 (0.0 to 3.2)                  |
| Libya   | 2038 | 338.6 (282.6 to 402.7)     | 242.2 (189.0 to 301.4)     | 69.4 (49.2 to 92.2)           | 25.8 (12.4 to 50.4)             | 1.2 (0.0 to 1.8)                  | 616.6 (514.6 to 733.4)  | 441.0 (344.3 to 548.9)     | 126.5 (89.6 to 167.9)         | 46.9 (22.6 to 91.8)             | 2.2 (0.0 to 3.3)                  |
| Libya   | 2039 | 350.1 (285.5 to 420.1)     | 252.0 (196.0 to 316.2)     | 70.3 (49.9 to 93.8)           | 26.6 (12.8 to 51.9)             | 1.2 (0.0 to 1.9)                  | 637.5 (520.0 to 765.1)  | 458.9 (356.9 to 576.0)     | 128.0 (90.8 to 170.8)         | 48.4 (23.4 to 94.6)             | 2.2 (0.0 to 3.4)                  |
| Libya   | 2040 | 361.8 (298.9 to 434.3)     | 261.9 (202.6 to 331.5)     | 71.2 (50.6 to 95.8)           | 27.5 (13.3 to 53.5)             | 1.2 (0.0 to 1.9)                  | 658.9 (544.3 to 790.9)  | 477.0 (368.9 to 603.6)     | 129.7 (92.1 to 174.4)         | 50.0 (24.2 to 97.5)             | 2.2 (0.0 to 3.5)                  |
| Libya   | 2041 | 373.7 (302.4 to 453.1)     | 272.0 (208.9 to 346.6)     | 72.3 (51.2 to 97.5)           | 28.3 (13.7 to 55.1)             | 1.2 (0.0 to 2.0)                  | 680.6 (550.8 to 825.3)  | 495.3 (380.5 to 631.3)     | 131.6 (93.3 to 177.5)         | 51.6 (24.9 to 100.4)            | 2.2 (0.0 to 3.7)                  |
| Libya   | 2042 | 385.9 (316.7 to 466.3)     | 282.1 (215.5 to 362.5)     | 73.4 (52.0 to 99.8)           | 29.2 (14.1 to 56.7)             | 1.2 (0.0 to 2.1)                  | 702.9 (576.8 to 849.1)  | 513.8 (392.5 to 660.3)     | 133.7 (94.6 to 181.8)         | 53.2 (25.7 to 103.3)            | 2.2 (0.0 to 3.8)                  |
| Libya   | 2043 | 398.7 (321.2 to 491.7)     | 292.7 (222.4 to 378.4)     | 74.7 (52.8 to 102.1)          | 30.1 (14.6 to 58.4)             | 1.2 (0.0 to 2.2)                  | 726.1 (585.0 to 895.4)  | 533.0 (405.1 to 689.1)     | 136.1 (96.1 to 185.9)         | 54.8 (26.5 to 106.3)            | 2.2 (0.0 to 3.9)                  |
| Libya   | 2044 | 411.7 (333.6 to 503.5)     | 303.3 (229.0 to 393.4)     | 76.2 (53.6 to 104.2)          | 31.0 (15.0 to 60.1)             | 1.2 (0.0 to 2.2)                  | 749.8 (607.5 to 917.0)  | 552.3 (417.0 to 716.4)     | 138.8 (97.6 to 189.7)         | 56.5 (27.4 to 109.4)            | 2.2 (0.0 to 4.0)                  |
| Libya   | 2045 | 424.2 (336.9 to 526.3)     | 313.3 (235.2 to 407.2)     | 77.7 (54.5 to 106.7)          | 31.9 (15.5 to 61.7)             | 1.2 (0.0 to 2.3)                  | 772.6 (613.6 to 958.5)  | 570.6 (428.3 to 741.6)     | 141.6 (99.3 to 194.3)         | 58.2 (28.2 to 112.4)            | 2.2 (0.0 to 4.1)                  |
| Libya   | 2046 | 436.4 (352.0 to 535.9)     | 322.9 (241.7 to 422.2)     | 79.4 (55.5 to 109.0)          | 32.8 (15.9 to 63.4)             | 1.2 (0.0 to 2.3)                  | 794.7 (641.1 to 975.9)  | 588.1 (440.2 to 768.9)     | 144.6 (101.1 to 198.6)        | 59.8 (29.0 to 115.4)            | 2.2 (0.0 to 4.2)                  |
| Libya   | 2047 | 449.0 (355.9 to 559.4)     | 332.7 (247.9 to 438.3)     | 81.3 (56.7 to 111.6)          | 33.8 (16.4 to 65.2)             | 1.2 (0.0 to 2.4)                  | 817.7 (648.2 to 1018.7) | 606.0 (451.4 to 798.2)     | 148.0 (103.3 to 203.3)        | 61.6 (29.8 to 118.8)            | 2.2 (0.0 to 4.4)                  |
| Libya   | 2048 | 460.8 (367.7 to 572.8)     | 341.8 (253.5 to 452.0)     | 83.1 (57.8 to 114.1)          | 34.7 (16.8 to 67.1)             | 1.2 (0.0 to 2.5)                  | 839.3 (669.6 to 1043.2) | 622.6 (461.7 to 823.1)     | 151.3 (105.4 to 207.8)        | 63.2 (30.6 to 122.2)            | 2.2 (0.0 to 4.5)                  |
| Libya   | 2049 | 472.8 (371.4 to 597.1)     | 351.0 (260.1 to 465.0)     | 84.9 (59.0 to 116.6)          | 35.7 (17.3 to 68.8)             | 1.2 (0.0 to 2.6)                  | 861.0 (676.4 to 1087.4) | 639.3 (473.7 to 846.9)     | 154.6 (107.5 to 212.3)        | 64.9 (31.5 to 125.2)            | 2.2 (0.0 to 4.7)                  |
| Libya   | 2050 | 485.0 (387.0 to 603.6)     | 360.5 (267.1 to 479.3)     | 86.8 (60.2 to 119.2)          | 36.6 (17.8 to 70.4)             | 1.2 (0.0 to 2.6)                  | 883.4 (704.8 to 1099.2) | 656.5 (486.4 to 872.9)     | 158.0 (109.7 to 217.1)        | 66.7 (32.3 to 128.3)            | 2.1 (0.0 to 4.7)                  |

| Country   | Year | 2018 US Dollars per capita |                            |                               |                                 |                                   | 2018 PPP per capita       |                            |                               |                                 |                                   |
|-----------|------|----------------------------|----------------------------|-------------------------------|---------------------------------|-----------------------------------|---------------------------|----------------------------|-------------------------------|---------------------------------|-----------------------------------|
|           |      | Health spending            | Government health spending | Out-of-pocket health spending | Prepaid private health spending | Development assistance for health | Health spending           | Government health spending | Out-of-pocket health spending | Prepaid private health spending | Development assistance for health |
| Lithuania | 1995 | 291.7 (260.4 to 323.8)     | 200.8 (175.1 to 227.9)     | 75.7 (63.7 to 90.6)           | 13.8 (7.2 to 23.8)              | 1.3 (1.3 to 1.3)                  | 531.8 (474.7 to 590.4)    | 366.2 (319.3 to 415.4)     | 138.1 (116.2 to 165.1)        | 25.2 (13.2 to 43.4)             | 2.3 (2.3 to 2.3)                  |
| Lithuania | 1996 | 319.2 (289.3 to 348.3)     | 219.8 (195.2 to 245.3)     | 84.3 (71.9 to 98.3)           | 15.1 (8.3 to 25.4)              | 0.0 (0.0 to 0.0)                  | 582.0 (527.5 to 635.0)    | 400.7 (355.9 to 447.2)     | 153.6 (131.1 to 179.3)        | 27.6 (15.1 to 46.2)             | 0.0 (0.0 to 0.0)                  |
| Lithuania | 1997 | 360.7 (331.4 to 391.2)     | 251.7 (227.9 to 276.3)     | 92.6 (80.7 to 105.1)          | 16.4 (9.1 to 26.6)              | 0.0 (0.0 to 0.0)                  | 657.7 (604.3 to 713.2)    | 458.9 (415.4 to 503.8)     | 168.9 (147.2 to 191.6)        | 29.9 (16.6 to 48.5)             | 0.0 (0.0 to 0.0)                  |
| Lithuania | 1998 | 406.8 (378.0 to 435.1)     | 286.1 (262.5 to 311.0)     | 102.2 (90.0 to 115.1)         | 17.9 (10.2 to 28.5)             | 0.6 (0.6 to 0.6)                  | 741.7 (689.1 to 793.4)    | 521.7 (478.7 to 567.1)     | 186.4 (164.0 to 209.9)        | 32.6 (18.5 to 51.9)             | 1.0 (1.0 to 1.0)                  |
| Lithuania | 1999 | 424.1 (394.6 to 452.3)     | 296.2 (273.5 to 319.8)     | 109.6 (97.4 to 122.6)         | 18.2 (10.3 to 28.3)             | 0.1 (0.1 to 0.1)                  | 773.3 (719.5 to 824.6)    | 540.1 (498.7 to 583.1)     | 199.8 (177.6 to 223.6)        | 33.2 (18.7 to 51.6)             | 0.1 (0.1 to 0.1)                  |
| Lithuania | 2000 | 452.0 (422.6 to 482.8)     | 313.7 (290.3 to 339.0)     | 119.5 (106.2 to 133.8)        | 18.3 (10.5 to 28.5)             | 0.5 (0.5 to 0.5)                  | 824.1 (770.6 to 880.3)    | 572.0 (529.3 to 618.2)     | 217.8 (193.6 to 243.9)        | 33.4 (19.2 to 52.0)             | 0.9 (0.9 to 0.9)                  |
| Lithuania | 2001 | 483.5 (454.0 to 515.1)     | 339.4 (316.7 to 366.4)     | 128.8 (114.1 to 144.2)        | 15.0 (8.8 to 23.2)              | 0.2 (0.2 to 0.2)                  | 881.6 (827.8 to 939.1)    | 618.8 (577.5 to 668.0)     | 234.9 (208.0 to 262.9)        | 27.4 (16.0 to 42.2)             | 0.4 (0.4 to 0.4)                  |
| Lithuania | 2002 | 521.8 (491.6 to 555.8)     | 367.2 (341.7 to 395.4)     | 139.2 (123.9 to 155.8)        | 13.9 (8.4 to 21.3)              | 1.4 (1.4 to 1.4)                  | 951.4 (896.2 to 1013.3)   | 669.5 (623.1 to 720.9)     | 253.9 (225.9 to 284.0)        | 25.4 (15.3 to 38.9)             | 2.6 (2.6 to 2.6)                  |
| Lithuania | 2003 | 568.0 (536.5 to 602.9)     | 394.7 (368.2 to 423.2)     | 155.9 (140.4 to 173.3)        | 15.9 (9.9 to 24.2)              | 1.5 (1.5 to 1.5)                  | 1035.5 (978.1 to 1099.3)  | 719.6 (671.2 to 771.6)     | 284.2 (256.0 to 316.0)        | 29.0 (18.0 to 44.0)             | 2.7 (2.7 to 2.7)                  |
| Lithuania | 2004 | 593.9 (561.5 to 628.7)     | 390.3 (365.2 to 417.9)     | 178.4 (162.6 to 196.6)        | 22.9 (14.2 to 34.9)             | 2.4 (2.4 to 2.4)                  | 1082.9 (1023.7 to 1146.2) | 711.6 (665.8 to 761.9)     | 325.2 (296.4 to 358.5)        | 41.7 (26.0 to 63.6)             | 4.4 (4.4 to 4.4)                  |
| Lithuania | 2005 | 644.4 (609.6 to 681.9)     | 413.0 (387.4 to 439.8)     | 200.5 (183.1 to 221.2)        | 30.2 (19.0 to 45.1)             | 0.7 (0.7 to 0.7)                  | 1174.9 (1111.4 to 1243.2) | 753.0 (706.3 to 801.8)     | 365.5 (333.9 to 403.4)        | 55.1 (34.7 to 82.3)             | 1.3 (1.3 to 1.3)                  |
| Lithuania | 2006 | 717.3 (680.4 to 754.4)     | 463.8 (435.4 to 489.8)     | 220.2 (201.0 to 241.8)        | 32.7 (20.2 to 48.7)             | 0.7 (0.7 to 0.7)                  | 1307.8 (1240.6 to 1375.4) | 845.5 (793.8 to 893.0)     | 401.4 (366.5 to 440.9)        | 59.6 (36.9 to 88.7)             | 1.2 (1.2 to 1.2)                  |
| Lithuania | 2007 | 822.9 (781.4 to 862.8)     | 553.3 (518.6 to 583.6)     | 239.1 (218.2 to 262.1)        | 30.5 (19.0 to 46.2)             | 0.0 (0.0 to 0.0)                  | 1500.4 (1424.7 to 1573.2) | 1008.7 (945.5 to 1064.0)   | 436.0 (397.9 to 477.9)        | 55.6 (34.6 to 84.3)             | 0.0 (0.0 to 0.0)                  |
| Lithuania | 2008 | 909.4 (867.8 to 951.1)     | 634.0 (598.1 to 669.6)     | 253.7 (232.8 to 277.0)        | 20.3 (12.7 to 30.9)             | 1.4 (1.4 to 1.4)                  | 1658.1 (1582.3 to 1734.0) | 1155.9 (1090.5 to 1220.8)  | 462.6 (424.4 to 505.0)        | 37.1 (23.2 to 56.3)             | 2.5 (2.5 to 2.5)                  |
| Lithuania | 2009 | 868.2 (829.5 to 907.6)     | 604.3 (573.6 to 636.4)     | 244.5 (225.2 to 266.2)        | 15.6 (9.5 to 24.2)              | 3.8 (3.8 to 3.8)                  | 1582.9 (1512.3 to 1654.8) | 1101.7 (1045.8 to 1160.2)  | 445.8 (410.5 to 485.3)        | 28.4 (17.3 to 44.1)             | 6.9 (6.9 to 6.9)                  |
| Lithuania | 2010 | 885.7 (846.9 to 925.9)     | 618.3 (587.7 to 649.0)     | 250.5 (230.2 to 270.8)        | 14.1 (8.6 to 21.9)              | 2.8 (2.8 to 2.8)                  | 1614.8 (1544.1 to 1688.2) | 1127.2 (1071.5 to 1183.4)  | 456.8 (419.8 to 493.8)        | 25.7 (15.7 to 39.9)             | 5.1 (5.1 to 5.1)                  |
| Lithuania | 2011 | 909.9 (872.9 to 950.1)     | 630.8 (601.8 to 662.1)     | 264.9 (246.2 to 286.2)        | 14.1 (8.7 to 21.9)              | 0.2 (0.2 to 0.2)                  | 1658.9 (1591.4 to 1732.3) | 1150.1 (1097.2 to 1207.2)  | 482.9 (448.9 to 521.7)        | 25.7 (15.8 to 39.9)             | 0.3 (0.3 to 0.3)                  |
| Lithuania | 2012 | 926.8 (891.3 to 966.2)     | 627.8 (598.0 to 658.1)     | 284.6 (265.6 to 305.3)        | 14.4 (8.8 to 22.4)              | 0.0 (0.0 to 0.0)                  | 1689.7 (1625.0 to 1761.5) | 1144.5 (1090.2 to 1199.9)  | 519.0 (484.2 to 556.6)        | 26.2 (16.1 to 40.9)             | 0.0 (0.0 to 0.0)                  |
| Lithuania | 2013 | 954.0 (919.3 to 990.6)     | 636.3 (607.5 to 666.6)     | 302.9 (284.7 to 323.5)        | 14.8 (9.0 to 23.4)              | 0.0 (0.0 to 0.0)                  | 1739.4 (1676.0 to 1806.1) | 1160.1 (1107.7 to 1215.4)  | 552.3 (519.2 to 589.8)        | 27.0 (16.5 to 42.6)             | 0.0 (0.0 to 0.0)                  |
| Lithuania | 2014 | 1003.3 (968.5 to 1040.9)   | 665.9 (637.5 to 695.7)     | 321.3 (302.5 to 342.5)        | 16.1 (9.9 to 25.1)              | 0.0 (0.0 to 0.0)                  | 1829.2 (1765.8 to 1897.8) | 1214.0 (1162.3 to 1268.5)  | 585.8 (551.6 to 624.5)        | 29.4 (18.0 to 45.8)             | 0.0 (0.0 to 0.0)                  |
| Lithuania | 2015 | 1062.4 (1023.6 to 1102.9)  | 701.5 (670.9 to 736.0)     | 343.7 (323.3 to 366.9)        | 17.2 (10.2 to 27.3)             | 0.0 (0.0 to 0.0)                  | 1937.1 (1866.3 to 2010.8) | 1279.1 (1223.2 to 1341.9)  | 626.7 (589.5 to 668.9)        | 31.3 (18.7 to 49.8)             | 0.0 (0.0 to 0.0)                  |

| Country   | Year | 2018 US Dollars per capita |                            |                               |                                 |                                   | 2018 PPP per capita       |                            |                               |                                 |                                   |
|-----------|------|----------------------------|----------------------------|-------------------------------|---------------------------------|-----------------------------------|---------------------------|----------------------------|-------------------------------|---------------------------------|-----------------------------------|
|           |      | Health spending            | Government health spending | Out-of-pocket health spending | Prepaid private health spending | Development assistance for health | Health spending           | Government health spending | Out-of-pocket health spending | Prepaid private health spending | Development assistance for health |
| Lithuania | 2016 | 1120.9 (1069.0 to 1175.9)  | 741.0 (699.2 to 788.3)     | 364.2 (336.5 to 394.7)        | 15.8 (9.2 to 25.2)              | 0.0 (0.0 to 0.0)                  | 2043.7 (1949.1 to 2143.9) | 1350.9 (1274.8 to 1437.3)  | 664.0 (613.4 to 719.7)        | 28.8 (16.8 to 45.9)             | 0.0 (0.0 to 0.0)                  |
| Lithuania | 2017 | 1167.0 (1113.5 to 1224.9)  | 768.5 (725.0 to 818.2)     | 381.6 (352.7 to 412.6)        | 16.9 (9.9 to 27.0)              | 0.0 (0.0 to 0.0)                  | 2127.7 (2030.2 to 2233.2) | 1401.2 (1321.8 to 1491.7)  | 695.7 (643.0 to 752.3)        | 30.9 (18.0 to 49.2)             | 0.0 (0.0 to 0.0)                  |
| Lithuania | 2018 | 1201.6 (1145.1 to 1263.8)  | 787.9 (742.2 to 839.6)     | 396.4 (365.7 to 430.3)        | 17.4 (10.2 to 27.6)             | 0.0 (0.0 to 0.0)                  | 2190.8 (2087.8 to 2304.3) | 1436.5 (1353.2 to 1530.8)  | 722.7 (666.8 to 784.5)        | 31.7 (18.6 to 50.4)             | 0.0 (0.0 to 0.0)                  |
| Lithuania | 2019 | 1233.9 (1177.3 to 1297.5)  | 805.2 (758.4 to 859.9)     | 410.8 (378.8 to 446.1)        | 17.9 (10.5 to 28.4)             | 0.0 (0.0 to 0.0)                  | 2249.6 (2146.6 to 2365.7) | 1468.0 (1382.8 to 1567.8)  | 749.0 (690.6 to 813.3)        | 32.6 (19.1 to 51.8)             | 0.0 (0.0 to 0.0)                  |
| Lithuania | 2020 | 1266.4 (1208.6 to 1331.3)  | 822.5 (773.3 to 877.3)     | 425.6 (391.4 to 463.3)        | 18.3 (10.7 to 29.0)             | 0.0 (0.0 to 0.0)                  | 2309.0 (2203.6 to 2427.2) | 1499.7 (1409.8 to 1599.5)  | 775.9 (713.6 to 844.7)        | 33.4 (19.6 to 52.9)             | 0.0 (0.0 to 0.0)                  |
| Lithuania | 2021 | 1300.8 (1235.8 to 1369.7)  | 841.4 (790.6 to 898.3)     | 440.7 (403.7 to 481.1)        | 18.7 (11.0 to 29.8)             | 0.0 (0.0 to 0.0)                  | 2371.7 (2253.2 to 2497.2) | 1534.1 (1441.5 to 1637.8)  | 803.5 (736.1 to 877.1)        | 34.2 (20.1 to 54.3)             | 0.0 (0.0 to 0.0)                  |
| Lithuania | 2022 | 1334.2 (1265.6 to 1406.7)  | 859.1 (805.0 to 918.6)     | 455.9 (417.0 to 496.5)        | 19.1 (11.3 to 30.4)             | 0.0 (0.0 to 0.0)                  | 2432.5 (2307.5 to 2564.8) | 1566.4 (1467.7 to 1674.8)  | 831.2 (760.2 to 905.2)        | 34.9 (20.5 to 55.4)             | 0.0 (0.0 to 0.0)                  |
| Lithuania | 2023 | 1367.2 (1298.7 to 1445.9)  | 876.1 (820.2 to 937.4)     | 471.5 (430.7 to 514.7)        | 19.5 (11.4 to 31.1)             | 0.0 (0.0 to 0.0)                  | 2492.7 (2367.9 to 2636.2) | 1597.4 (1495.5 to 1709.1)  | 859.7 (785.2 to 938.5)        | 35.6 (20.9 to 56.7)             | 0.0 (0.0 to 0.0)                  |
| Lithuania | 2024 | 1400.3 (1328.0 to 1484.7)  | 893.2 (835.4 to 956.6)     | 487.1 (444.0 to 532.8)        | 19.9 (11.7 to 31.7)             | 0.0 (0.0 to 0.0)                  | 2553.0 (2421.3 to 2707.0) | 1628.6 (1523.2 to 1744.0)  | 888.1 (809.6 to 971.4)        | 36.3 (21.3 to 57.8)             | 0.0 (0.0 to 0.0)                  |
| Lithuania | 2025 | 1434.5 (1359.8 to 1519.2)  | 911.0 (849.7 to 975.7)     | 503.2 (457.2 to 549.7)        | 20.3 (11.9 to 32.3)             | 0.0 (0.0 to 0.0)                  | 2615.4 (2479.2 to 2769.8) | 1660.9 (1549.1 to 1778.9)  | 917.5 (833.6 to 1002.2)       | 37.0 (21.7 to 58.9)             | 0.0 (0.0 to 0.0)                  |
| Lithuania | 2026 | 1469.5 (1386.7 to 1559.0)  | 929.2 (865.2 to 997.6)     | 519.7 (472.4 to 569.7)        | 20.7 (12.1 to 33.0)             | 0.0 (0.0 to 0.0)                  | 2679.3 (2528.3 to 2842.4) | 1694.1 (1577.5 to 1818.8)  | 947.6 (861.3 to 1038.7)       | 37.7 (22.1 to 60.2)             | 0.0 (0.0 to 0.0)                  |
| Lithuania | 2027 | 1505.9 (1417.0 to 1593.5)  | 948.0 (883.8 to 1019.7)    | 536.9 (484.8 to 591.4)        | 21.0 (12.3 to 33.6)             | 0.0 (0.0 to 0.0)                  | 2745.6 (2583.5 to 2905.3) | 1728.4 (1611.4 to 1859.2)  | 978.9 (884.0 to 1078.4)       | 38.4 (22.4 to 61.3)             | 0.0 (0.0 to 0.0)                  |
| Lithuania | 2028 | 1544.3 (1447.2 to 1640.1)  | 968.4 (900.8 to 1043.4)    | 554.5 (494.8 to 617.4)        | 21.5 (12.5 to 34.3)             | 0.0 (0.0 to 0.0)                  | 2815.6 (2638.7 to 2990.3) | 1765.6 (1642.5 to 1902.4)  | 1010.9 (902.2 to 1125.6)      | 39.1 (22.9 to 62.5)             | 0.0 (0.0 to 0.0)                  |
| Lithuania | 2029 | 1584.0 (1484.5 to 1683.9)  | 989.6 (918.0 to 1070.6)    | 572.4 (507.2 to 644.2)        | 21.9 (12.8 to 35.0)             | 0.0 (0.0 to 0.0)                  | 2888.0 (2706.6 to 3070.2) | 1804.3 (1673.8 to 1951.9)  | 1043.7 (924.8 to 1174.5)      | 40.0 (23.4 to 63.8)             | 0.0 (0.0 to 0.0)                  |
| Lithuania | 2030 | 1623.7 (1516.0 to 1736.8)  | 1010.7 (935.5 to 1091.7)   | 590.6 (519.7 to 670.0)        | 22.4 (13.1 to 35.7)             | 0.0 (0.0 to 0.0)                  | 2960.4 (2764.0 to 3166.5) | 1842.8 (1705.6 to 1990.5)  | 1076.8 (947.5 to 1221.6)      | 40.9 (23.9 to 65.1)             | 0.0 (0.0 to 0.0)                  |
| Lithuania | 2031 | 1664.5 (1554.9 to 1787.6)  | 1032.7 (952.9 to 1119.3)   | 608.9 (531.2 to 698.6)        | 22.9 (13.4 to 36.7)             | 0.0 (0.0 to 0.0)                  | 3034.8 (2835.0 to 3259.3) | 1882.9 (1737.3 to 2040.7)  | 1110.1 (968.4 to 1273.7)      | 41.8 (24.4 to 66.8)             | 0.0 (0.0 to 0.0)                  |
| Lithuania | 2032 | 1706.0 (1587.0 to 1837.7)  | 1055.1 (969.3 to 1147.6)   | 627.4 (543.3 to 725.6)        | 23.5 (13.7 to 37.6)             | 0.0 (0.0 to 0.0)                  | 3110.4 (2893.5 to 3350.6) | 1923.7 (1767.2 to 2092.3)  | 1143.9 (990.5 to 1323.0)      | 42.8 (25.0 to 68.6)             | 0.0 (0.0 to 0.0)                  |
| Lithuania | 2033 | 1747.2 (1618.0 to 1885.4)  | 1077.3 (987.3 to 1173.5)   | 645.9 (553.7 to 752.6)        | 24.1 (14.1 to 38.5)             | 0.0 (0.0 to 0.0)                  | 3185.6 (2950.0 to 3437.5) | 1964.2 (1800.2 to 2139.6)  | 1177.6 (1009.5 to 1372.1)     | 43.9 (25.6 to 70.2)             | 0.0 (0.0 to 0.0)                  |
| Lithuania | 2034 | 1789.2 (1652.2 to 1943.4)  | 1100.2 (1005.4 to 1201.0)  | 664.4 (564.5 to 780.3)        | 24.6 (14.4 to 39.4)             | 0.0 (0.0 to 0.0)                  | 3262.1 (3012.4 to 3543.4) | 2005.9 (1833.1 to 2189.8)  | 1211.3 (1029.2 to 1422.7)     | 44.9 (26.3 to 71.9)             | 0.0 (0.0 to 0.0)                  |
| Lithuania | 2035 | 1831.4 (1680.0 to 1989.2)  | 1123.5 (1024.0 to 1230.0)  | 682.7 (575.2 to 808.0)        | 25.3 (14.8 to 40.3)             | 0.0 (0.0 to 0.0)                  | 3339.1 (3063.0 to 3626.8) | 2048.3 (1867.0 to 2242.6)  | 1244.8 (1048.7 to 1473.3)     | 46.0 (26.9 to 73.5)             | 0.0 (0.0 to 0.0)                  |
| Lithuania | 2036 | 1875.5 (1723.3 to 2056.4)  | 1148.4 (1043.3 to 1260.2)  | 701.2 (586.4 to 835.8)        | 25.9 (15.1 to 41.4)             | 0.0 (0.0 to 0.0)                  | 3419.5 (3142.0 to 3749.2) | 2093.8 (1902.3 to 2297.6)  | 1278.5 (1069.1 to 1523.9)     | 47.2 (27.5 to 75.5)             | 0.0 (0.0 to 0.0)                  |

| Country    | Year | 2018 US Dollars per capita |                            |                               |                                 |                                   | 2018 PPP per capita       |                            |                               |                                 |                                   |
|------------|------|----------------------------|----------------------------|-------------------------------|---------------------------------|-----------------------------------|---------------------------|----------------------------|-------------------------------|---------------------------------|-----------------------------------|
|            |      | Health spending            | Government health spending | Out-of-pocket health spending | Prepaid private health spending | Development assistance for health | Health spending           | Government health spending | Out-of-pocket health spending | Prepaid private health spending | Development assistance for health |
| Lithuania  | 2037 | 1919.6 (1756.6 to 2119.0)  | 1173.5 (1064.6 to 1293.4)  | 719.5 (597.4 to 863.3)        | 26.5 (15.5 to 42.6)             | 0.0 (0.0 to 0.0)                  | 3499.8 (3202.7 to 3863.5) | 2139.5 (1941.0 to 2358.1)  | 1311.9 (1089.2 to 1574.1)     | 48.4 (28.2 to 77.6)             | 0.0 (0.0 to 0.0)                  |
| Lithuania  | 2038 | 1963.1 (1793.0 to 2167.4)  | 1198.4 (1082.3 to 1320.0)  | 737.5 (609.9 to 889.9)        | 27.2 (15.9 to 43.7)             | 0.0 (0.0 to 0.0)                  | 3579.3 (3269.1 to 3951.8) | 2185.0 (1973.4 to 2406.7)  | 1344.6 (1112.0 to 1622.6)     | 49.6 (28.9 to 79.7)             | 0.0 (0.0 to 0.0)                  |
| Lithuania  | 2039 | 2007.2 (1836.5 to 2223.1)  | 1223.9 (1103.8 to 1351.6)  | 755.4 (623.4 to 916.0)        | 27.9 (16.3 to 44.9)             | 0.0 (0.0 to 0.0)                  | 3659.6 (3348.4 to 4053.2) | 2231.5 (2012.5 to 2464.2)  | 1377.2 (1136.6 to 1670.0)     | 50.8 (29.7 to 81.9)             | 0.0 (0.0 to 0.0)                  |
| Lithuania  | 2040 | 2052.1 (1861.2 to 2255.5)  | 1250.3 (1124.9 to 1381.5)  | 773.2 (634.9 to 943.6)        | 28.6 (16.7 to 46.1)             | 0.0 (0.0 to 0.0)                  | 3741.6 (3393.4 to 4112.4) | 2279.6 (2051.0 to 2518.9)  | 1409.8 (1157.5 to 1720.5)     | 52.2 (30.5 to 84.1)             | 0.0 (0.0 to 0.0)                  |
| Lithuania  | 2041 | 2099.6 (1901.7 to 2328.0)  | 1278.8 (1145.6 to 1413.4)  | 791.4 (646.8 to 969.6)        | 29.4 (17.2 to 47.4)             | 0.0 (0.0 to 0.0)                  | 3828.1 (3467.2 to 4244.4) | 2331.6 (2088.7 to 2576.9)  | 1442.9 (1179.2 to 1767.8)     | 53.7 (31.3 to 86.5)             | 0.0 (0.0 to 0.0)                  |
| Lithuania  | 2042 | 2145.9 (1938.5 to 2362.6)  | 1306.7 (1168.7 to 1449.7)  | 809.0 (660.0 to 997.1)        | 30.3 (17.7 to 48.8)             | 0.0 (0.0 to 0.0)                  | 3912.6 (3534.3 to 4307.6) | 2382.4 (2130.8 to 2643.2)  | 1475.1 (1203.3 to 1818.0)     | 55.2 (32.2 to 88.9)             | 0.0 (0.0 to 0.0)                  |
| Lithuania  | 2043 | 2193.9 (1983.8 to 2442.4)  | 1336.1 (1190.9 to 1486.3)  | 826.7 (673.2 to 1021.8)       | 31.1 (18.2 to 50.2)             | 0.0 (0.0 to 0.0)                  | 4000.0 (3616.9 to 4453.1) | 2436.0 (2171.2 to 2709.8)  | 1507.2 (1227.3 to 1863.1)     | 56.8 (33.1 to 91.6)             | 0.0 (0.0 to 0.0)                  |
| Lithuania  | 2044 | 2242.5 (2022.2 to 2511.5)  | 1366.4 (1211.7 to 1529.0)  | 844.1 (684.1 to 1046.2)       | 32.0 (18.7 to 51.7)             | 0.0 (0.0 to 0.0)                  | 4088.6 (3687.0 to 4579.0) | 2491.2 (2209.2 to 2787.8)  | 1538.9 (1247.3 to 1907.5)     | 58.4 (34.1 to 94.3)             | 0.0 (0.0 to 0.0)                  |
| Lithuania  | 2045 | 2290.6 (2057.5 to 2558.1)  | 1396.7 (1237.0 to 1567.6)  | 860.9 (695.1 to 1071.3)       | 33.0 (19.2 to 53.3)             | 0.0 (0.0 to 0.0)                  | 4176.3 (3751.3 to 4664.1) | 2546.5 (2255.4 to 2858.2)  | 1569.7 (1267.4 to 1953.2)     | 60.1 (35.0 to 97.3)             | 0.0 (0.0 to 0.0)                  |
| Lithuania  | 2046 | 2338.5 (2099.1 to 2621.9)  | 1427.4 (1261.3 to 1604.6)  | 877.2 (707.5 to 1095.1)       | 33.9 (19.7 to 55.0)             | 0.0 (0.0 to 0.0)                  | 4263.7 (3827.2 to 4780.4) | 2602.5 (2299.7 to 2925.6)  | 1599.3 (1289.9 to 1996.6)     | 61.9 (35.9 to 100.3)            | 0.0 (0.0 to 0.0)                  |
| Lithuania  | 2047 | 2387.0 (2145.0 to 2684.9)  | 1459.0 (1286.0 to 1645.9)  | 893.0 (720.0 to 1117.8)       | 34.9 (20.2 to 56.8)             | 0.0 (0.0 to 0.0)                  | 4352.0 (3910.8 to 4895.2) | 2660.1 (2344.6 to 3000.9)  | 1628.2 (1312.8 to 2038.0)     | 63.7 (36.8 to 103.5)            | 0.0 (0.0 to 0.0)                  |
| Lithuania  | 2048 | 2434.9 (2179.5 to 2733.5)  | 1490.2 (1313.3 to 1686.1)  | 908.8 (732.6 to 1140.6)       | 35.9 (20.8 to 58.3)             | 0.0 (0.0 to 0.0)                  | 4439.5 (3973.8 to 4983.8) | 2716.9 (2394.4 to 3074.2)  | 1657.0 (1335.6 to 2079.5)     | 65.5 (37.8 to 106.4)            | 0.0 (0.0 to 0.0)                  |
| Lithuania  | 2049 | 2480.4 (2217.2 to 2780.3)  | 1519.4 (1337.9 to 1725.4)  | 924.1 (744.7 to 1161.8)       | 36.9 (21.2 to 59.8)             | 0.0 (0.0 to 0.0)                  | 4522.3 (4042.4 to 5069.1) | 2770.3 (2439.3 to 3145.8)  | 1684.8 (1357.7 to 2118.2)     | 67.2 (38.7 to 109.1)            | 0.0 (0.0 to 0.0)                  |
| Lithuania  | 2050 | 2527.2 (2246.4 to 2843.1)  | 1549.8 (1357.7 to 1764.9)  | 939.6 (755.0 to 1183.1)       | 37.8 (21.7 to 61.3)             | 0.0 (0.0 to 0.0)                  | 4607.7 (4095.7 to 5183.6) | 2825.6 (2475.4 to 3217.8)  | 1713.1 (1376.5 to 2157.1)     | 69.0 (39.6 to 111.8)            | 0.0 (0.0 to 0.0)                  |
| Luxembourg | 1995 | 3782.2 (3500.1 to 4092.0)  | 3372.3 (3110.8 to 3656.2)  | 263.6 (216.3 to 325.8)        | 146.3 (88.5 to 227.8)           | 0.0 (0.0 to 0.0)                  | 3594.0 (3325.9 to 3888.3) | 3204.5 (2956.0 to 3474.2)  | 250.5 (205.6 to 309.6)        | 139.0 (84.1 to 216.5)           | 0.0 (0.0 to 0.0)                  |
| Luxembourg | 1996 | 3873.0 (3655.3 to 4112.4)  | 3426.5 (3219.7 to 3647.3)  | 293.4 (245.1 to 355.9)        | 153.1 (98.9 to 225.8)           | 0.0 (0.0 to 0.0)                  | 3680.3 (3473.4 to 3907.7) | 3256.0 (3059.5 to 3465.8)  | 278.8 (232.9 to 338.2)        | 145.5 (94.0 to 214.5)           | 0.0 (0.0 to 0.0)                  |
| Luxembourg | 1997 | 4066.1 (3862.9 to 4279.8)  | 3571.3 (3377.9 to 3768.9)  | 332.4 (283.6 to 388.1)        | 162.4 (113.2 to 224.5)          | 0.0 (0.0 to 0.0)                  | 3863.8 (3670.6 to 4066.8) | 3393.5 (3209.8 to 3581.4)  | 315.9 (269.5 to 368.8)        | 154.3 (107.6 to 213.4)          | 0.0 (0.0 to 0.0)                  |
| Luxembourg | 1998 | 4370.7 (4155.9 to 4589.5)  | 3806.1 (3603.2 to 4005.6)  | 390.8 (340.7 to 444.5)        | 173.8 (130.0 to 227.1)          | 0.0 (0.0 to 0.0)                  | 4153.1 (3949.1 to 4361.1) | 3616.6 (3423.9 to 3806.3)  | 371.3 (323.8 to 422.4)        | 165.2 (123.6 to 215.8)          | 0.0 (0.0 to 0.0)                  |
| Luxembourg | 1999 | 4918.4 (4696.0 to 5144.7)  | 4230.8 (4021.5 to 4436.7)  | 495.3 (442.5 to 549.4)        | 192.3 (154.7 to 234.2)          | 0.0 (0.0 to 0.0)                  | 4673.7 (4462.3 to 4888.7) | 4020.3 (3821.3 to 4215.9)  | 470.6 (420.5 to 522.1)        | 182.7 (147.0 to 222.5)          | 0.0 (0.0 to 0.0)                  |
| Luxembourg | 2000 | 5707.9 (5480.5 to 5948.1)  | 4778.0 (4561.8 to 4990.7)  | 709.0 (650.6 to 772.4)        | 220.9 (187.9 to 257.5)          | 0.0 (0.0 to 0.0)                  | 5423.8 (5207.8 to 5652.0) | 4540.2 (4334.7 to 4742.4)  | 673.8 (618.2 to 734.0)        | 209.9 (178.6 to 244.7)          | 0.0 (0.0 to 0.0)                  |
| Luxembourg | 2001 | 6261.1 (6027.3 to 6506.4)  | 5171.4 (4955.4 to 5396.2)  | 851.9 (790.8 to 916.0)        | 237.8 (208.4 to 270.0)          | 0.0 (0.0 to 0.0)                  | 5949.5 (5727.4 to 6182.6) | 4914.0 (4708.8 to 5127.7)  | 809.5 (751.5 to 870.4)        | 226.0 (198.0 to 256.6)          | 0.0 (0.0 to 0.0)                  |

| Country    | Year | 2018 US Dollars per capita |                            |                               |                                 |                                   | 2018 PPP per capita       |                            |                               |                                 |                                   |
|------------|------|----------------------------|----------------------------|-------------------------------|---------------------------------|-----------------------------------|---------------------------|----------------------------|-------------------------------|---------------------------------|-----------------------------------|
|            |      | Health spending            | Government health spending | Out-of-pocket health spending | Prepaid private health spending | Development assistance for health | Health spending           | Government health spending | Out-of-pocket health spending | Prepaid private health spending | Development assistance for health |
| Luxembourg | 2002 | 6866.2 (6629.8 to 7112.0)  | 5651.6 (5441.6 to 5896.7)  | 952.8 (890.2 to 1022.0)       | 261.8 (232.1 to 294.9)          | 0.0 (0.0 to 0.0)                  | 6524.5 (6299.9 to 6758.1) | 5370.3 (5170.8 to 5603.2)  | 905.4 (845.9 to 971.1)        | 248.8 (220.5 to 280.3)          | 0.0 (0.0 to 0.0)                  |
| Luxembourg | 2003 | 7212.1 (6980.9 to 7444.6)  | 5933.8 (5718.4 to 6150.9)  | 987.6 (922.2 to 1058.7)       | 290.7 (260.2 to 326.4)          | 0.0 (0.0 to 0.0)                  | 6853.2 (6633.5 to 7074.1) | 5638.5 (5433.8 to 5844.8)  | 938.4 (876.3 to 1006.0)       | 276.3 (247.2 to 310.2)          | 0.0 (0.0 to 0.0)                  |
| Luxembourg | 2004 | 7568.7 (7334.7 to 7806.0)  | 6246.7 (6024.7 to 6465.4)  | 1003.8 (940.9 to 1066.6)      | 318.2 (287.0 to 354.6)          | 0.0 (0.0 to 0.0)                  | 7192.0 (6969.6 to 7417.5) | 5935.8 (5724.8 to 6143.6)  | 953.8 (894.1 to 1013.5)       | 302.3 (272.7 to 337.0)          | 0.0 (0.0 to 0.0)                  |
| Luxembourg | 2005 | 7531.2 (7299.6 to 7771.7)  | 6229.4 (6008.7 to 6458.3)  | 973.7 (912.1 to 1034.1)       | 328.1 (295.4 to 362.0)          | 0.0 (0.0 to 0.0)                  | 7156.4 (6936.3 to 7384.9) | 5919.3 (5709.7 to 6136.8)  | 925.2 (866.7 to 982.7)        | 311.8 (280.7 to 344.0)          | 0.0 (0.0 to 0.0)                  |
| Luxembourg | 2006 | 7513.0 (7276.1 to 7751.0)  | 6257.3 (6032.7 to 6496.3)  | 921.2 (856.7 to 983.6)        | 334.5 (302.7 to 368.9)          | 0.0 (0.0 to 0.0)                  | 7139.1 (6914.0 to 7365.2) | 5945.9 (5732.5 to 6173.0)  | 875.3 (814.0 to 934.7)        | 317.9 (287.6 to 350.6)          | 0.0 (0.0 to 0.0)                  |
| Luxembourg | 2007 | 7667.1 (7434.1 to 7919.6)  | 6470.1 (6243.3 to 6713.6)  | 842.2 (782.4 to 905.3)        | 354.9 (322.7 to 389.6)          | 0.0 (0.0 to 0.0)                  | 7285.6 (7064.1 to 7525.4) | 6148.1 (5932.6 to 6379.5)  | 800.3 (743.4 to 860.2)        | 337.2 (306.6 to 370.2)          | 0.0 (0.0 to 0.0)                  |
| Luxembourg | 2008 | 7684.0 (7445.0 to 7933.0)  | 6548.7 (6311.0 to 6787.8)  | 796.4 (737.2 to 851.9)        | 339.0 (307.5 to 372.2)          | 0.0 (0.0 to 0.0)                  | 7301.6 (7074.5 to 7538.1) | 6222.7 (5996.9 to 6449.9)  | 756.7 (700.5 to 809.5)        | 322.1 (292.2 to 353.7)          | 0.0 (0.0 to 0.0)                  |
| Luxembourg | 2009 | 7476.7 (7244.8 to 7714.9)  | 6355.6 (6139.5 to 6585.2)  | 768.4 (710.3 to 829.6)        | 352.7 (321.6 to 387.4)          | 0.0 (0.0 to 0.0)                  | 7104.6 (6884.2 to 7330.9) | 6039.3 (5834.0 to 6257.5)  | 730.2 (674.9 to 788.3)        | 335.1 (305.6 to 368.1)          | 0.0 (0.0 to 0.0)                  |
| Luxembourg | 2010 | 7496.1 (7252.3 to 7748.7)  | 6360.0 (6127.4 to 6590.5)  | 767.2 (708.2 to 828.3)        | 368.9 (335.4 to 404.7)          | 0.0 (0.0 to 0.0)                  | 7123.1 (6891.4 to 7363.1) | 6043.5 (5822.5 to 6262.5)  | 729.1 (673.0 to 787.1)        | 350.5 (318.7 to 384.6)          | 0.0 (0.0 to 0.0)                  |
| Luxembourg | 2011 | 7231.9 (7002.4 to 7461.8)  | 6121.2 (5893.5 to 6339.2)  | 750.7 (690.7 to 808.5)        | 360.0 (327.2 to 392.9)          | 0.0 (0.0 to 0.0)                  | 6872.0 (6654.0 to 7090.5) | 5816.6 (5600.2 to 6023.7)  | 713.4 (656.3 to 768.3)        | 342.1 (310.9 to 373.3)          | 0.0 (0.0 to 0.0)                  |
| Luxembourg | 2012 | 7032.3 (6799.6 to 7263.2)  | 5921.4 (5705.9 to 6140.7)  | 742.5 (685.7 to 799.1)        | 368.3 (336.5 to 402.4)          | 0.0 (0.0 to 0.0)                  | 6682.3 (6461.2 to 6901.8) | 5626.7 (5422.0 to 5835.1)  | 705.5 (651.6 to 759.3)        | 350.0 (319.7 to 382.4)          | 0.0 (0.0 to 0.0)                  |
| Luxembourg | 2013 | 7032.6 (6813.6 to 7277.7)  | 5890.8 (5688.7 to 6120.8)  | 750.3 (693.8 to 809.9)        | 391.5 (356.6 to 427.3)          | 0.0 (0.0 to 0.0)                  | 6682.6 (6474.5 to 6915.5) | 5597.6 (5405.6 to 5816.2)  | 712.9 (659.3 to 769.6)        | 372.0 (338.9 to 406.0)          | 0.0 (0.0 to 0.0)                  |
| Luxembourg | 2014 | 7096.7 (6873.0 to 7331.7)  | 5918.5 (5720.4 to 6145.0)  | 772.4 (711.1 to 835.2)        | 405.9 (370.7 to 444.1)          | 0.0 (0.0 to 0.0)                  | 6743.5 (6531.0 to 6966.9) | 5623.9 (5435.7 to 5839.2)  | 734.0 (675.7 to 793.6)        | 385.7 (352.3 to 422.0)          | 0.0 (0.0 to 0.0)                  |
| Luxembourg | 2015 | 7030.4 (6791.6 to 7283.6)  | 5829.4 (5608.3 to 6077.7)  | 781.9 (716.1 to 853.8)        | 419.2 (381.8 to 458.9)          | 0.0 (0.0 to 0.0)                  | 6680.6 (6453.6 to 6921.1) | 5539.3 (5329.2 to 5775.2)  | 743.0 (680.5 to 811.3)        | 398.3 (362.8 to 436.1)          | 0.0 (0.0 to 0.0)                  |
| Luxembourg | 2016 | 7026.8 (6713.2 to 7360.0)  | 5790.0 (5487.3 to 6117.0)  | 794.3 (715.3 to 887.2)        | 442.5 (391.1 to 498.2)          | 0.0 (0.0 to 0.0)                  | 6677.1 (6379.1 to 6993.7) | 5501.9 (5214.2 to 5812.6)  | 754.7 (679.7 to 843.1)        | 420.5 (371.6 to 473.4)          | 0.0 (0.0 to 0.0)                  |
| Luxembourg | 2017 | 7037.3 (6706.2 to 7384.2)  | 5798.5 (5492.6 to 6122.4)  | 794.6 (715.0 to 891.0)        | 444.2 (392.9 to 499.6)          | 0.0 (0.0 to 0.0)                  | 6687.1 (6372.4 to 7016.7) | 5510.0 (5219.3 to 5817.7)  | 755.0 (679.4 to 846.7)        | 422.1 (373.4 to 474.8)          | 0.0 (0.0 to 0.0)                  |
| Luxembourg | 2018 | 7124.0 (6804.5 to 7482.5)  | 5872.2 (5566.4 to 6220.0)  | 800.5 (720.5 to 898.2)        | 451.3 (398.7 to 507.8)          | 0.0 (0.0 to 0.0)                  | 6769.5 (6465.9 to 7110.1) | 5580.0 (5289.4 to 5910.4)  | 760.6 (684.6 to 853.5)        | 428.8 (378.9 to 482.6)          | 0.0 (0.0 to 0.0)                  |
| Luxembourg | 2019 | 7212.6 (6875.0 to 7582.4)  | 5948.3 (5637.3 to 6296.2)  | 806.5 (726.3 to 905.3)        | 457.8 (405.2 to 515.2)          | 0.0 (0.0 to 0.0)                  | 6853.7 (6532.9 to 7205.1) | 5652.3 (5356.7 to 5982.8)  | 766.4 (690.1 to 860.2)        | 435.0 (385.0 to 489.6)          | 0.0 (0.0 to 0.0)                  |
| Luxembourg | 2020 | 7306.6 (6977.7 to 7664.6)  | 6029.1 (5715.1 to 6385.1)  | 812.5 (730.4 to 912.0)        | 464.9 (411.0 to 522.8)          | 0.0 (0.0 to 0.0)                  | 6942.9 (6630.4 to 7283.2) | 5729.1 (5430.7 to 6067.3)  | 772.1 (694.1 to 866.6)        | 441.8 (390.5 to 496.8)          | 0.0 (0.0 to 0.0)                  |
| Luxembourg | 2021 | 7400.2 (7053.2 to 7769.3)  | 6111.1 (5785.4 to 6463.6)  | 817.6 (733.9 to 918.7)        | 471.5 (417.2 to 529.9)          | 0.0 (0.0 to 0.0)                  | 7031.9 (6702.2 to 7382.7) | 5807.0 (5497.5 to 6142.0)  | 776.9 (697.3 to 873.0)        | 448.0 (396.5 to 503.6)          | 0.0 (0.0 to 0.0)                  |
| Luxembourg | 2022 | 7494.2 (7131.5 to 7885.4)  | 6193.6 (5860.8 to 6569.0)  | 822.7 (737.7 to 923.4)        | 478.0 (422.9 to 537.3)          | 0.0 (0.0 to 0.0)                  | 7121.3 (6776.6 to 7493.0) | 5885.3 (5569.2 to 6242.1)  | 781.7 (701.0 to 877.4)        | 454.2 (401.9 to 510.6)          | 0.0 (0.0 to 0.0)                  |



| Country    | Year | 2018 US Dollars per capita |                            |                               |                                 |                                   | 2018 PPP per capita       |                            |                               |                                 |                                   |
|------------|------|----------------------------|----------------------------|-------------------------------|---------------------------------|-----------------------------------|---------------------------|----------------------------|-------------------------------|---------------------------------|-----------------------------------|
|            |      | Health spending            | Government health spending | Out-of-pocket health spending | Prepaid private health spending | Development assistance for health | Health spending           | Government health spending | Out-of-pocket health spending | Prepaid private health spending | Development assistance for health |
| Luxembourg | 2023 | 7592.7 (7243.6 to 7992.5)  | 6280.0 (5933.1 to 6671.8)  | 828.0 (744.5 to 930.2)        | 484.7 (428.5 to 544.7)          | 0.0 (0.0 to 0.0)                  | 7214.9 (6883.1 to 7594.8) | 5967.5 (5637.9 to 6339.8)  | 786.8 (707.4 to 883.9)        | 460.6 (407.2 to 517.6)          | 0.0 (0.0 to 0.0)                  |
| Luxembourg | 2024 | 7662.6 (7260.2 to 8065.7)  | 6342.0 (5977.9 to 6744.8)  | 830.6 (746.8 to 932.5)        | 489.9 (432.4 to 550.5)          | 0.0 (0.0 to 0.0)                  | 7281.2 (6898.9 to 7664.3) | 6026.4 (5680.4 to 6409.1)  | 789.3 (709.6 to 886.1)        | 465.5 (410.8 to 523.1)          | 0.0 (0.0 to 0.0)                  |
| Luxembourg | 2025 | 7714.8 (7328.6 to 8129.1)  | 6390.0 (6006.5 to 6778.0)  | 831.0 (747.3 to 933.6)        | 493.7 (434.9 to 554.6)          | 0.0 (0.0 to 0.0)                  | 7330.8 (6963.9 to 7724.5) | 6072.0 (5707.6 to 6440.7)  | 789.7 (710.1 to 887.1)        | 469.2 (413.2 to 527.0)          | 0.0 (0.0 to 0.0)                  |
| Luxembourg | 2026 | 7755.0 (7328.8 to 8159.7)  | 6429.1 (6033.2 to 6824.3)  | 829.5 (745.6 to 931.7)        | 496.4 (436.9 to 557.3)          | 0.0 (0.0 to 0.0)                  | 7369.1 (6964.1 to 7753.6) | 6109.2 (5733.0 to 6484.7)  | 788.2 (708.5 to 885.3)        | 471.7 (415.1 to 529.6)          | 0.0 (0.0 to 0.0)                  |
| Luxembourg | 2027 | 7787.4 (7371.9 to 8228.7)  | 6461.7 (6042.2 to 6885.9)  | 827.2 (739.7 to 929.2)        | 498.5 (438.8 to 559.9)          | 0.0 (0.0 to 0.0)                  | 7399.8 (7005.0 to 7819.2) | 6140.1 (5741.5 to 6543.2)  | 786.0 (702.9 to 882.9)        | 473.7 (417.0 to 532.1)          | 0.0 (0.0 to 0.0)                  |
| Luxembourg | 2028 | 7816.4 (7358.1 to 8271.8)  | 6491.5 (6049.4 to 6925.8)  | 824.5 (735.6 to 926.6)        | 500.4 (440.1 to 562.7)          | 0.0 (0.0 to 0.0)                  | 7427.4 (6991.9 to 7860.1) | 6168.5 (5748.4 to 6581.1)  | 783.4 (699.0 to 880.5)        | 475.5 (418.2 to 534.7)          | 0.0 (0.0 to 0.0)                  |
| Luxembourg | 2029 | 7855.5 (7376.3 to 8335.4)  | 6531.1 (6068.5 to 6981.9)  | 822.1 (732.1 to 927.3)        | 502.4 (442.0 to 565.7)          | 0.0 (0.0 to 0.0)                  | 7464.6 (7009.2 to 7920.6) | 6206.0 (5766.5 to 6634.4)  | 781.2 (695.6 to 881.2)        | 477.4 (420.0 to 537.6)          | 0.0 (0.0 to 0.0)                  |
| Luxembourg | 2030 | 7903.3 (7420.6 to 8399.0)  | 6578.4 (6096.3 to 7048.2)  | 820.2 (728.3 to 927.6)        | 504.6 (443.6 to 568.5)          | 0.0 (0.0 to 0.0)                  | 7509.9 (7051.3 to 7981.0) | 6251.0 (5792.9 to 6697.4)  | 779.4 (692.0 to 881.4)        | 479.5 (421.5 to 540.2)          | 0.0 (0.0 to 0.0)                  |
| Luxembourg | 2031 | 7933.1 (7410.4 to 8448.8)  | 6610.4 (6102.8 to 7108.0)  | 816.7 (723.8 to 926.8)        | 506.0 (444.4 to 569.3)          | 0.0 (0.0 to 0.0)                  | 7538.3 (7041.6 to 8028.3) | 6281.4 (5799.1 to 6754.2)  | 776.1 (687.8 to 880.7)        | 480.8 (422.3 to 541.0)          | 0.0 (0.0 to 0.0)                  |
| Luxembourg | 2032 | 7974.2 (7469.3 to 8506.9)  | 6652.1 (6136.2 to 7169.6)  | 814.2 (720.5 to 924.4)        | 507.9 (445.8 to 571.8)          | 0.0 (0.0 to 0.0)                  | 7577.3 (7097.6 to 8083.6) | 6321.0 (5830.8 to 6812.8)  | 773.7 (684.7 to 878.4)        | 482.6 (423.6 to 543.3)          | 0.0 (0.0 to 0.0)                  |
| Luxembourg | 2033 | 8013.2 (7461.9 to 8572.1)  | 6691.8 (6151.4 to 7236.9)  | 811.6 (716.6 to 921.8)        | 509.8 (447.1 to 575.5)          | 0.0 (0.0 to 0.0)                  | 7614.4 (7090.5 to 8145.5) | 6358.7 (5845.3 to 6876.7)  | 771.2 (681.0 to 875.9)        | 484.4 (424.8 to 546.9)          | 0.0 (0.0 to 0.0)                  |
| Luxembourg | 2034 | 8060.9 (7499.0 to 8655.0)  | 6738.3 (6167.1 to 7318.5)  | 810.1 (712.1 to 920.2)        | 512.5 (449.8 to 580.3)          | 0.0 (0.0 to 0.0)                  | 7659.7 (7125.8 to 8224.3) | 6402.9 (5860.2 to 6954.3)  | 769.8 (676.7 to 874.5)        | 487.0 (427.4 to 551.5)          | 0.0 (0.0 to 0.0)                  |
| Luxembourg | 2035 | 8109.4 (7491.9 to 8738.4)  | 6784.9 (6190.6 to 7390.2)  | 808.9 (710.1 to 920.3)        | 515.5 (452.4 to 584.1)          | 0.0 (0.0 to 0.0)                  | 7705.8 (7119.0 to 8303.5) | 6447.3 (5882.5 to 7022.4)  | 768.7 (674.8 to 874.5)        | 489.9 (429.9 to 555.0)          | 0.0 (0.0 to 0.0)                  |
| Luxembourg | 2036 | 8145.5 (7524.4 to 8790.1)  | 6819.6 (6209.1 to 7451.2)  | 807.4 (705.8 to 919.8)        | 518.5 (453.7 to 588.1)          | 0.0 (0.0 to 0.0)                  | 7740.1 (7150.0 to 8352.6) | 6480.2 (5900.1 to 7080.3)  | 767.2 (670.7 to 874.0)        | 492.7 (431.1 to 558.8)          | 0.0 (0.0 to 0.0)                  |
| Luxembourg | 2037 | 8186.9 (7537.4 to 8837.9)  | 6858.2 (6220.5 to 7521.7)  | 806.6 (702.7 to 920.2)        | 522.1 (455.9 to 593.6)          | 0.0 (0.0 to 0.0)                  | 7779.4 (7162.2 to 8398.1) | 6516.9 (5911.0 to 7147.4)  | 766.4 (667.7 to 874.4)        | 496.1 (433.2 to 564.1)          | 0.0 (0.0 to 0.0)                  |
| Luxembourg | 2038 | 8232.0 (7570.7 to 8955.0)  | 6899.2 (6229.5 to 7583.4)  | 806.5 (701.3 to 921.1)        | 526.3 (459.1 to 600.0)          | 0.0 (0.0 to 0.0)                  | 7822.3 (7193.9 to 8509.3) | 6555.9 (5919.5 to 7206.0)  | 766.3 (666.4 to 875.2)        | 500.1 (436.3 to 570.2)          | 0.0 (0.0 to 0.0)                  |
| Luxembourg | 2039 | 8280.0 (7595.2 to 8988.3)  | 6942.6 (6260.6 to 7646.2)  | 806.7 (700.5 to 922.8)        | 530.7 (461.5 to 607.2)          | 0.0 (0.0 to 0.0)                  | 7867.9 (7217.2 to 8541.0) | 6597.1 (5949.0 to 7265.7)  | 766.5 (665.6 to 876.8)        | 504.3 (438.5 to 577.0)          | 0.0 (0.0 to 0.0)                  |
| Luxembourg | 2040 | 8329.6 (7595.3 to 9031.0)  | 6986.9 (6260.9 to 7717.4)  | 807.2 (699.5 to 924.9)        | 535.5 (463.7 to 614.2)          | 0.0 (0.0 to 0.0)                  | 7915.1 (7217.3 to 8581.6) | 6639.2 (5949.3 to 7333.3)  | 767.0 (664.7 to 878.8)        | 508.8 (440.6 to 583.6)          | 0.0 (0.0 to 0.0)                  |
| Luxembourg | 2041 | 8366.9 (7622.3 to 9109.3)  | 7019.7 (6269.2 to 7773.9)  | 807.1 (698.1 to 927.0)        | 540.1 (466.5 to 620.5)          | 0.0 (0.0 to 0.0)                  | 7950.5 (7242.9 to 8655.9) | 6670.3 (5957.2 to 7387.0)  | 767.0 (663.3 to 880.9)        | 513.2 (443.3 to 589.6)          | 0.0 (0.0 to 0.0)                  |
| Luxembourg | 2042 | 8406.5 (7663.9 to 9180.1)  | 7054.1 (6289.8 to 7827.0)  | 807.4 (697.2 to 929.5)        | 545.0 (470.4 to 628.9)          | 0.0 (0.0 to 0.0)                  | 7988.2 (7282.5 to 8723.2) | 6703.0 (5976.8 to 7437.5)  | 767.2 (662.5 to 883.2)        | 517.9 (447.0 to 597.6)          | 0.0 (0.0 to 0.0)                  |
| Luxembourg | 2043 | 8449.0 (7674.6 to 9258.5)  | 7090.9 (6325.3 to 7891.7)  | 807.9 (696.7 to 930.4)        | 550.2 (474.4 to 635.3)          | 0.0 (0.0 to 0.0)                  | 8028.5 (7292.7 to 8797.8) | 6738.0 (6010.5 to 7498.9)  | 767.7 (662.0 to 884.1)        | 522.8 (450.8 to 603.7)          | 0.0 (0.0 to 0.0)                  |

| Country    | Year | 2018 US Dollars per capita |                            |                               |                                 |                                   | 2018 PPP per capita       |                            |                               |                                 |                                   |
|------------|------|----------------------------|----------------------------|-------------------------------|---------------------------------|-----------------------------------|---------------------------|----------------------------|-------------------------------|---------------------------------|-----------------------------------|
|            |      | Health spending            | Government health spending | Out-of-pocket health spending | Prepaid private health spending | Development assistance for health | Health spending           | Government health spending | Out-of-pocket health spending | Prepaid private health spending | Development assistance for health |
| Luxembourg | 2044 | 8495.8 (7703.9 to 9309.7)  | 7131.7 (6336.4 to 7964.8)  | 808.6 (696.3 to 931.6)        | 555.5 (478.0 to 642.4)          | 0.0 (0.0 to 0.0)                  | 8073.0 (7320.5 to 8846.4) | 6776.8 (6021.1 to 7568.4)  | 768.4 (661.6 to 885.2)        | 527.8 (454.2 to 610.5)          | 0.0 (0.0 to 0.0)                  |
| Luxembourg | 2045 | 8546.5 (7705.7 to 9415.3)  | 7176.4 (6366.6 to 8031.3)  | 809.3 (696.3 to 932.9)        | 560.7 (481.9 to 650.4)          | 0.0 (0.0 to 0.0)                  | 8121.2 (7322.2 to 8946.7) | 6819.3 (6049.7 to 7631.6)  | 769.0 (661.6 to 886.5)        | 532.8 (457.9 to 618.0)          | 0.0 (0.0 to 0.0)                  |
| Luxembourg | 2046 | 8583.9 (7755.3 to 9467.7)  | 7209.5 (6379.1 to 8082.3)  | 809.0 (695.5 to 933.1)        | 565.4 (485.1 to 657.7)          | 0.0 (0.0 to 0.0)                  | 8156.7 (7369.3 to 8996.5) | 6850.7 (6061.6 to 7680.0)  | 768.7 (660.9 to 886.7)        | 537.3 (461.0 to 624.9)          | 0.0 (0.0 to 0.0)                  |
| Luxembourg | 2047 | 8612.5 (7724.8 to 9497.3)  | 7235.7 (6372.1 to 8137.0)  | 807.5 (693.7 to 932.5)        | 569.3 (487.7 to 663.4)          | 0.0 (0.0 to 0.0)                  | 8183.8 (7340.3 to 9024.7) | 6875.6 (6055.0 to 7732.0)  | 767.3 (659.2 to 886.1)        | 540.9 (463.5 to 630.4)          | 0.0 (0.0 to 0.0)                  |
| Luxembourg | 2048 | 8643.5 (7739.2 to 9555.0)  | 7264.2 (6372.9 to 8179.7)  | 806.0 (692.7 to 931.4)        | 573.2 (489.7 to 670.0)          | 0.0 (0.0 to 0.0)                  | 8213.3 (7354.0 to 9079.5) | 6902.7 (6055.7 to 7772.6)  | 765.9 (658.3 to 885.0)        | 544.6 (465.3 to 636.6)          | 0.0 (0.0 to 0.0)                  |
| Luxembourg | 2049 | 8678.5 (7739.3 to 9637.0)  | 7296.0 (6357.7 to 8225.7)  | 805.1 (692.1 to 930.4)        | 577.4 (491.5 to 676.2)          | 0.0 (0.0 to 0.0)                  | 8246.6 (7354.1 to 9157.4) | 6932.9 (6041.3 to 7816.3)  | 765.0 (657.7 to 884.1)        | 548.7 (467.1 to 642.6)          | 0.0 (0.0 to 0.0)                  |
| Luxembourg | 2050 | 8717.6 (7753.6 to 9667.4)  | 7330.9 (6369.2 to 8286.4)  | 804.6 (692.6 to 930.7)        | 582.1 (494.3 to 683.5)          | 0.0 (0.0 to 0.0)                  | 8283.8 (7367.7 to 9186.3) | 6966.1 (6052.3 to 7874.0)  | 764.6 (658.2 to 884.4)        | 553.2 (469.7 to 649.5)          | 0.0 (0.0 to 0.0)                  |
| Macedonia  | 1995 | 303.3 (270.8 to 339.7)     | 174.3 (150.8 to 202.0)     | 118.7 (97.2 to 142.3)         | 3.2 (1.5 to 5.9)                | 7.2 (7.2 to 7.2)                  | 790.5 (705.7 to 885.3)    | 454.2 (393.1 to 526.4)     | 309.4 (253.3 to 370.9)        | 8.2 (3.9 to 15.5)               | 18.7 (18.7 to 18.7)               |
| Macedonia  | 1996 | 305.5 (276.7 to 338.5)     | 176.9 (155.6 to 201.6)     | 120.1 (100.7 to 141.8)        | 3.2 (1.5 to 6.0)                | 5.3 (5.3 to 5.3)                  | 796.3 (721.1 to 882.0)    | 461.1 (405.4 to 525.3)     | 313.1 (262.6 to 369.5)        | 8.4 (4.0 to 15.7)               | 13.7 (13.7 to 13.7)               |
| Macedonia  | 1997 | 310.7 (284.3 to 341.0)     | 181.7 (161.5 to 204.0)     | 122.5 (104.5 to 142.7)        | 3.3 (1.6 to 6.0)                | 3.1 (3.1 to 3.1)                  | 809.6 (741.0 to 888.7)    | 473.6 (420.9 to 531.6)     | 319.4 (272.3 to 371.8)        | 8.6 (4.1 to 15.8)               | 8.1 (8.1 to 8.1)                  |
| Macedonia  | 1998 | 327.1 (299.9 to 355.0)     | 188.7 (169.7 to 211.5)     | 126.6 (108.2 to 146.8)        | 3.4 (1.6 to 6.2)                | 8.5 (8.5 to 8.5)                  | 852.3 (781.7 to 925.1)    | 491.7 (442.2 to 551.1)     | 329.8 (281.9 to 382.7)        | 8.7 (4.3 to 16.1)               | 22.1 (22.1 to 22.1)               |
| Macedonia  | 1999 | 335.1 (307.3 to 362.3)     | 189.3 (171.0 to 210.9)     | 131.5 (113.3 to 152.3)        | 3.3 (1.6 to 6.1)                | 11.0 (11.0 to 11.0)               | 873.2 (800.9 to 944.2)    | 493.3 (445.8 to 549.5)     | 342.6 (295.2 to 397.0)        | 8.7 (4.3 to 15.9)               | 28.6 (28.6 to 28.6)               |
| Macedonia  | 2000 | 342.4 (315.0 to 369.6)     | 189.9 (171.6 to 210.6)     | 139.0 (119.3 to 161.6)        | 3.3 (1.6 to 6.1)                | 10.1 (10.1 to 10.1)               | 892.2 (820.8 to 963.3)    | 495.0 (447.2 to 548.8)     | 362.1 (310.9 to 421.2)        | 8.7 (4.2 to 16.0)               | 26.4 (26.4 to 26.4)               |
| Macedonia  | 2001 | 335.5 (308.8 to 362.1)     | 183.4 (165.8 to 202.9)     | 139.3 (119.6 to 161.9)        | 3.4 (1.6 to 6.1)                | 9.4 (9.4 to 9.4)                  | 874.3 (804.7 to 943.6)    | 478.0 (432.0 to 528.8)     | 363.0 (311.8 to 422.0)        | 8.8 (4.2 to 16.0)               | 24.6 (24.6 to 24.6)               |
| Macedonia  | 2002 | 329.4 (302.7 to 357.6)     | 181.7 (164.6 to 200.3)     | 141.6 (121.6 to 165.3)        | 3.5 (1.7 to 6.5)                | 2.6 (2.6 to 2.6)                  | 858.4 (788.9 to 931.9)    | 473.4 (429.1 to 521.9)     | 369.0 (316.8 to 430.8)        | 9.2 (4.4 to 17.0)               | 6.7 (6.7 to 6.7)                  |
| Macedonia  | 2003 | 330.7 (304.0 to 358.1)     | 181.9 (165.0 to 200.9)     | 142.0 (123.3 to 165.2)        | 3.7 (1.8 to 7.0)                | 3.1 (3.1 to 3.1)                  | 861.9 (792.4 to 933.3)    | 474.1 (430.0 to 523.7)     | 370.0 (321.3 to 430.4)        | 9.7 (4.6 to 18.1)               | 8.0 (8.0 to 8.0)                  |
| Macedonia  | 2004 | 327.9 (300.8 to 356.6)     | 181.3 (162.8 to 201.1)     | 137.3 (118.6 to 159.9)        | 3.9 (1.8 to 7.2)                | 5.4 (5.4 to 5.4)                  | 854.5 (783.9 to 929.3)    | 472.6 (424.3 to 524.1)     | 357.7 (309.1 to 416.6)        | 10.2 (4.8 to 18.7)              | 14.0 (14.0 to 14.0)               |
| Macedonia  | 2005 | 324.7 (296.8 to 353.7)     | 182.3 (163.5 to 202.1)     | 129.8 (111.8 to 150.2)        | 4.1 (1.8 to 7.5)                | 8.5 (8.5 to 8.5)                  | 846.2 (773.6 to 921.9)    | 475.1 (426.1 to 526.8)     | 338.3 (291.5 to 391.4)        | 10.7 (4.8 to 19.5)              | 22.1 (22.1 to 22.1)               |
| Macedonia  | 2006 | 313.6 (286.4 to 340.7)     | 183.7 (163.7 to 203.7)     | 121.1 (103.9 to 140.6)        | 4.3 (1.9 to 7.8)                | 4.5 (4.5 to 4.5)                  | 817.3 (746.4 to 888.0)    | 478.8 (426.7 to 530.9)     | 315.6 (270.7 to 366.5)        | 11.1 (5.1 to 20.4)              | 11.8 (11.8 to 11.8)               |
| Macedonia  | 2007 | 322.3 (296.0 to 349.5)     | 190.6 (170.8 to 210.7)     | 115.7 (98.9 to 134.2)         | 4.5 (2.1 to 8.3)                | 11.6 (11.6 to 11.6)               | 840.0 (771.5 to 910.8)    | 496.7 (445.1 to 549.1)     | 301.4 (257.8 to 349.9)        | 11.7 (5.4 to 21.7)              | 30.1 (30.1 to 30.1)               |
| Macedonia  | 2008 | 322.8 (297.1 to 349.8)     | 200.3 (180.5 to 222.5)     | 112.5 (96.2 to 130.1)         | 4.8 (2.3 to 9.0)                | 5.2 (5.2 to 5.2)                  | 841.1 (774.3 to 911.6)    | 521.9 (470.3 to 579.8)     | 293.2 (250.7 to 339.1)        | 12.5 (6.0 to 23.4)              | 13.6 (13.6 to 13.6)               |

| Country   | Year | 2018 US Dollars per capita |                            |                               |                                 |                                   | 2018 PPP per capita      |                            |                               |                                 |                                   |
|-----------|------|----------------------------|----------------------------|-------------------------------|---------------------------------|-----------------------------------|--------------------------|----------------------------|-------------------------------|---------------------------------|-----------------------------------|
|           |      | Health spending            | Government health spending | Out-of-pocket health spending | Prepaid private health spending | Development assistance for health | Health spending          | Government health spending | Out-of-pocket health spending | Prepaid private health spending | Development assistance for health |
| Macedonia | 2009 | 320.9 (295.5 to 348.7)     | 201.0 (181.4 to 222.9)     | 113.2 (96.4 to 131.5)         | 4.9 (2.3 to 9.5)                | 1.8 (1.8 to 1.8)                  | 836.3 (770.2 to 908.8)   | 523.8 (472.6 to 580.9)     | 295.1 (251.2 to 342.6)        | 12.7 (6.0 to 24.6)              | 4.7 (4.7 to 4.7)                  |
| Macedonia | 2010 | 334.8 (306.9 to 363.1)     | 205.4 (186.1 to 228.0)     | 117.6 (100.2 to 137.2)        | 5.0 (2.3 to 10.0)               | 6.8 (6.8 to 6.8)                  | 872.5 (799.8 to 946.2)   | 535.2 (484.9 to 594.3)     | 306.4 (261.1 to 357.7)        | 13.1 (5.9 to 26.0)              | 17.7 (17.7 to 17.7)               |
| Macedonia | 2011 | 334.3 (307.9 to 363.0)     | 207.6 (188.0 to 230.6)     | 117.4 (100.2 to 137.0)        | 5.1 (2.3 to 10.1)               | 4.1 (4.1 to 4.1)                  | 871.3 (802.5 to 946.0)   | 541.1 (490.0 to 601.1)     | 306.0 (261.0 to 357.1)        | 13.4 (5.9 to 26.4)              | 10.7 (10.7 to 10.7)               |
| Macedonia | 2012 | 331.9 (305.1 to 360.5)     | 209.0 (189.3 to 232.2)     | 116.6 (99.3 to 136.2)         | 5.2 (2.3 to 10.2)               | 1.1 (1.1 to 1.1)                  | 864.9 (795.2 to 939.5)   | 544.6 (493.4 to 605.1)     | 303.8 (258.8 to 354.9)        | 13.6 (6.0 to 26.6)              | 2.7 (2.7 to 2.7)                  |
| Macedonia | 2013 | 343.1 (314.1 to 373.3)     | 217.0 (195.4 to 240.2)     | 117.7 (99.8 to 138.7)         | 5.5 (2.5 to 10.7)               | 2.9 (2.9 to 2.9)                  | 894.2 (818.5 to 972.9)   | 565.6 (509.2 to 625.9)     | 306.9 (260.2 to 361.6)        | 14.2 (6.5 to 27.8)              | 7.6 (7.6 to 7.6)                  |
| Macedonia | 2014 | 345.4 (315.5 to 377.0)     | 219.8 (196.2 to 242.6)     | 118.9 (100.2 to 141.8)        | 5.6 (2.6 to 11.0)               | 1.1 (1.1 to 1.1)                  | 900.2 (822.3 to 982.6)   | 572.9 (511.4 to 632.4)     | 309.9 (261.2 to 369.4)        | 14.6 (6.7 to 28.5)              | 2.8 (2.8 to 2.8)                  |
| Macedonia | 2015 | 356.2 (323.3 to 392.8)     | 226.2 (200.0 to 253.0)     | 121.8 (102.2 to 146.9)        | 5.9 (2.6 to 11.1)               | 2.2 (2.2 to 2.2)                  | 928.2 (842.6 to 1023.7)  | 589.6 (521.2 to 659.4)     | 317.5 (266.4 to 382.8)        | 15.3 (6.9 to 29.1)              | 5.8 (5.8 to 5.8)                  |
| Macedonia | 2016 | 364.1 (325.9 to 403.9)     | 231.3 (201.6 to 263.8)     | 125.6 (103.4 to 153.8)        | 6.1 (2.8 to 11.4)               | 1.0 (1.0 to 1.0)                  | 948.9 (849.5 to 1052.7)  | 602.8 (525.5 to 687.6)     | 327.3 (269.5 to 400.7)        | 16.0 (7.2 to 29.8)              | 2.7 (2.7 to 2.7)                  |
| Macedonia | 2017 | 369.9 (330.5 to 410.0)     | 236.2 (205.9 to 269.9)     | 126.7 (103.7 to 155.4)        | 6.2 (2.8 to 11.6)               | 0.9 (0.9 to 0.9)                  | 964.1 (861.3 to 1068.5)  | 615.5 (536.6 to 703.3)     | 330.1 (270.4 to 404.9)        | 16.2 (7.2 to 30.1)              | 2.3 (2.3 to 2.3)                  |
| Macedonia | 2018 | 374.3 (333.6 to 415.4)     | 239.1 (208.6 to 273.2)     | 128.0 (104.6 to 156.8)        | 6.3 (2.8 to 11.7)               | 0.8 (0.8 to 0.8)                  | 975.4 (869.5 to 1082.5)  | 623.1 (543.7 to 711.9)     | 333.7 (272.5 to 408.6)        | 16.4 (7.3 to 30.5)              | 2.2 (2.2 to 2.2)                  |
| Macedonia | 2019 | 379.2 (338.6 to 420.8)     | 242.5 (211.6 to 276.5)     | 129.4 (105.2 to 158.3)        | 6.4 (2.9 to 11.9)               | 0.9 (0.8 to 0.9)                  | 988.1 (882.5 to 1096.7)  | 631.9 (551.6 to 720.6)     | 337.4 (274.2 to 412.6)        | 16.6 (7.4 to 30.9)              | 2.2 (2.1 to 2.4)                  |
| Macedonia | 2020 | 383.7 (342.7 to 425.9)     | 245.5 (214.2 to 280.0)     | 130.8 (106.4 to 159.6)        | 6.5 (2.9 to 12.0)               | 0.9 (0.8 to 1.0)                  | 999.9 (893.1 to 1110.0)  | 639.9 (558.1 to 729.7)     | 340.9 (277.4 to 415.8)        | 16.8 (7.5 to 31.4)              | 2.3 (2.1 to 2.5)                  |
| Macedonia | 2021 | 388.0 (345.5 to 430.8)     | 248.4 (216.1 to 282.6)     | 132.1 (107.7 to 161.6)        | 6.6 (2.9 to 12.2)               | 0.9 (0.8 to 1.0)                  | 1011.1 (900.4 to 1122.9) | 647.4 (563.1 to 736.4)     | 344.3 (280.8 to 421.0)        | 17.1 (7.6 to 31.8)              | 2.4 (2.1 to 2.6)                  |
| Macedonia | 2022 | 392.1 (349.5 to 436.4)     | 251.1 (218.4 to 286.5)     | 133.4 (108.2 to 163.5)        | 6.6 (3.0 to 12.3)               | 0.9 (0.8 to 1.1)                  | 1022.0 (910.9 to 1137.4) | 654.5 (569.1 to 746.5)     | 347.7 (282.1 to 426.1)        | 17.3 (7.8 to 32.1)              | 2.5 (2.2 to 2.8)                  |
| Macedonia | 2023 | 396.5 (353.3 to 440.9)     | 254.1 (220.7 to 289.7)     | 134.7 (109.9 to 165.2)        | 6.7 (3.0 to 12.4)               | 1.0 (0.9 to 1.1)                  | 1033.4 (920.9 to 1149.1) | 662.2 (575.2 to 755.0)     | 351.1 (286.4 to 430.5)        | 17.5 (7.9 to 32.4)              | 2.6 (2.2 to 2.9)                  |
| Macedonia | 2024 | 400.5 (356.2 to 445.6)     | 256.7 (222.8 to 293.2)     | 136.0 (110.7 to 166.5)        | 6.8 (3.1 to 12.6)               | 1.0 (0.9 to 1.2)                  | 1043.7 (928.4 to 1161.3) | 669.0 (580.5 to 764.2)     | 354.3 (288.5 to 433.8)        | 17.8 (8.0 to 32.8)              | 2.6 (2.3 to 3.0)                  |
| Macedonia | 2025 | 404.4 (360.5 to 450.9)     | 259.2 (224.7 to 296.7)     | 137.2 (111.5 to 167.8)        | 6.9 (3.1 to 12.7)               | 1.1 (0.9 to 1.2)                  | 1053.9 (939.6 to 1175.0) | 675.6 (585.7 to 773.2)     | 357.6 (290.7 to 437.3)        | 18.0 (8.1 to 33.2)              | 2.7 (2.3 to 3.2)                  |
| Macedonia | 2026 | 408.2 (363.3 to 456.0)     | 261.7 (226.4 to 300.2)     | 138.4 (112.4 to 169.4)        | 7.0 (3.1 to 12.9)               | 1.1 (0.9 to 1.3)                  | 1063.8 (946.9 to 1188.4) | 682.0 (590.1 to 782.5)     | 360.8 (293.0 to 441.5)        | 18.2 (8.1 to 33.6)              | 2.8 (2.4 to 3.3)                  |
| Macedonia | 2027 | 412.0 (366.1 to 460.3)     | 264.1 (228.8 to 303.6)     | 139.7 (113.3 to 172.0)        | 7.1 (3.2 to 13.1)               | 1.1 (0.9 to 1.3)                  | 1073.8 (954.0 to 1199.7) | 688.4 (596.4 to 791.2)     | 364.1 (295.3 to 448.2)        | 18.4 (8.2 to 34.0)              | 2.9 (2.5 to 3.5)                  |
| Macedonia | 2028 | 415.9 (369.1 to 465.8)     | 266.6 (230.4 to 307.8)     | 141.0 (113.7 to 174.0)        | 7.2 (3.2 to 13.2)               | 1.2 (1.0 to 1.4)                  | 1083.8 (961.8 to 1214.0) | 694.7 (600.4 to 802.2)     | 367.4 (296.2 to 453.6)        | 18.6 (8.3 to 34.5)              | 3.0 (2.5 to 3.7)                  |
| Macedonia | 2029 | 419.7 (373.6 to 470.9)     | 268.9 (232.3 to 310.6)     | 142.3 (114.6 to 176.9)        | 7.2 (3.3 to 13.4)               | 1.2 (1.0 to 1.5)                  | 1093.8 (973.7 to 1227.1) | 700.9 (605.4 to 809.5)     | 370.8 (298.7 to 460.9)        | 18.9 (8.5 to 34.9)              | 3.1 (2.6 to 3.9)                  |

| Country   | Year | 2018 US Dollars per capita |                            |                               |                                 |                                   | 2018 PPP per capita       |                            |                               |                                 |                                   |
|-----------|------|----------------------------|----------------------------|-------------------------------|---------------------------------|-----------------------------------|---------------------------|----------------------------|-------------------------------|---------------------------------|-----------------------------------|
|           |      | Health spending            | Government health spending | Out-of-pocket health spending | Prepaid private health spending | Development assistance for health | Health spending           | Government health spending | Out-of-pocket health spending | Prepaid private health spending | Development assistance for health |
| Macedonia | 2030 | 423.6 (375.6 to 474.3)     | 271.4 (233.9 to 314.2)     | 143.6 (115.0 to 178.9)        | 7.3 (3.3 to 13.5)               | 1.3 (1.0 to 1.5)                  | 1103.9 (978.9 to 1236.1)  | 707.2 (609.6 to 818.8)     | 374.3 (299.6 to 466.3)        | 19.1 (8.6 to 35.3)              | 3.3 (2.7 to 4.0)                  |
| Macedonia | 2031 | 427.6 (379.1 to 481.1)     | 273.8 (236.4 to 318.3)     | 145.0 (115.4 to 181.2)        | 7.4 (3.4 to 13.7)               | 1.3 (1.1 to 1.6)                  | 1114.4 (988.1 to 1253.9)  | 713.7 (616.0 to 829.5)     | 378.0 (300.8 to 472.4)        | 19.3 (8.7 to 35.8)              | 3.4 (2.7 to 4.2)                  |
| Macedonia | 2032 | 431.6 (381.5 to 485.8)     | 276.3 (237.8 to 321.5)     | 146.5 (115.6 to 184.3)        | 7.5 (3.4 to 13.9)               | 1.3 (1.1 to 1.7)                  | 1124.9 (994.2 to 1266.0)  | 720.0 (619.7 to 837.8)     | 381.8 (301.3 to 480.3)        | 19.6 (8.9 to 36.2)              | 3.5 (2.8 to 4.4)                  |
| Macedonia | 2033 | 435.9 (385.2 to 492.9)     | 278.9 (239.3 to 325.3)     | 148.0 (115.9 to 187.1)        | 7.6 (3.5 to 14.1)               | 1.4 (1.1 to 1.8)                  | 1136.1 (1004.0 to 1284.5) | 727.0 (623.7 to 847.8)     | 385.7 (302.1 to 487.5)        | 19.8 (9.0 to 36.7)              | 3.6 (2.9 to 4.7)                  |
| Macedonia | 2034 | 440.3 (388.9 to 499.0)     | 281.6 (240.8 to 329.3)     | 149.5 (116.5 to 190.5)        | 7.7 (3.5 to 14.3)               | 1.4 (1.1 to 1.9)                  | 1147.5 (1013.6 to 1300.4) | 733.9 (627.7 to 858.3)     | 389.7 (303.5 to 496.5)        | 20.1 (9.1 to 37.2)              | 3.8 (3.0 to 4.9)                  |
| Macedonia | 2035 | 444.9 (390.9 to 506.2)     | 284.4 (243.7 to 333.5)     | 151.2 (116.9 to 193.4)        | 7.8 (3.5 to 14.5)               | 1.5 (1.2 to 2.0)                  | 1159.5 (1018.7 to 1319.2) | 741.2 (635.1 to 869.2)     | 394.0 (304.7 to 504.1)        | 20.4 (9.2 to 37.7)              | 3.9 (3.0 to 5.1)                  |
| Macedonia | 2036 | 449.6 (394.1 to 510.9)     | 287.2 (245.6 to 337.9)     | 152.9 (117.9 to 196.9)        | 7.9 (3.6 to 14.7)               | 1.6 (1.2 to 2.1)                  | 1171.7 (1027.0 to 1331.5) | 748.6 (640.2 to 880.7)     | 398.4 (307.2 to 513.1)        | 20.7 (9.3 to 38.2)              | 4.1 (3.1 to 5.4)                  |
| Macedonia | 2037 | 454.4 (396.8 to 516.3)     | 290.2 (247.5 to 342.0)     | 154.6 (118.7 to 199.2)        | 8.1 (3.6 to 14.8)               | 1.6 (1.2 to 2.2)                  | 1184.3 (1034.1 to 1345.7) | 756.2 (644.9 to 891.2)     | 402.9 (309.3 to 519.2)        | 21.0 (9.4 to 38.7)              | 4.2 (3.2 to 5.6)                  |
| Macedonia | 2038 | 459.1 (400.5 to 524.4)     | 292.9 (249.8 to 345.5)     | 156.3 (119.6 to 201.6)        | 8.2 (3.7 to 15.0)               | 1.7 (1.3 to 2.3)                  | 1196.4 (1043.8 to 1366.7) | 763.4 (651.0 to 900.5)     | 407.3 (311.7 to 525.5)        | 21.3 (9.6 to 39.2)              | 4.4 (3.3 to 6.0)                  |
| Macedonia | 2039 | 464.2 (405.1 to 529.8)     | 296.0 (252.4 to 349.7)     | 158.1 (120.5 to 205.3)        | 8.3 (3.7 to 15.3)               | 1.7 (1.3 to 2.4)                  | 1209.7 (1055.8 to 1380.8) | 771.5 (657.8 to 911.3)     | 412.1 (313.9 to 535.2)        | 21.6 (9.7 to 39.8)              | 4.5 (3.4 to 6.3)                  |
| Macedonia | 2040 | 468.9 (408.6 to 536.8)     | 298.8 (254.4 to 351.8)     | 159.9 (121.4 to 208.3)        | 8.4 (3.8 to 15.5)               | 1.8 (1.4 to 2.5)                  | 1222.0 (1064.9 to 1398.9) | 778.6 (663.0 to 916.9)     | 416.8 (316.5 to 542.9)        | 21.9 (9.8 to 40.3)              | 4.7 (3.6 to 6.5)                  |
| Macedonia | 2041 | 473.6 (412.8 to 542.9)     | 301.5 (256.3 to 357.2)     | 161.8 (122.4 to 212.0)        | 8.5 (3.8 to 15.6)               | 1.9 (1.4 to 2.6)                  | 1234.3 (1075.9 to 1414.8) | 785.7 (667.9 to 931.0)     | 421.5 (319.0 to 552.4)        | 22.2 (9.9 to 40.7)              | 4.9 (3.7 to 6.8)                  |
| Macedonia | 2042 | 478.5 (415.1 to 549.5)     | 304.3 (258.2 to 361.8)     | 163.6 (123.3 to 215.2)        | 8.6 (3.9 to 15.8)               | 1.9 (1.5 to 2.8)                  | 1247.1 (1081.9 to 1432.1) | 793.1 (672.8 to 943.0)     | 426.5 (321.3 to 560.9)        | 22.5 (10.0 to 41.2)             | 5.1 (3.8 to 7.2)                  |
| Macedonia | 2043 | 483.4 (419.5 to 555.1)     | 307.1 (260.7 to 365.0)     | 165.5 (124.3 to 217.7)        | 8.8 (3.9 to 16.0)               | 2.0 (1.5 to 2.9)                  | 1259.8 (1093.3 to 1446.7) | 800.3 (679.5 to 951.4)     | 431.4 (324.1 to 567.4)        | 22.9 (10.2 to 41.7)             | 5.2 (3.9 to 7.6)                  |
| Macedonia | 2044 | 488.3 (423.7 to 561.7)     | 309.8 (263.0 to 368.4)     | 167.5 (125.3 to 220.6)        | 8.9 (3.9 to 16.2)               | 2.1 (1.6 to 3.0)                  | 1272.5 (1104.2 to 1464.0) | 807.4 (685.4 to 960.0)     | 436.4 (326.6 to 575.0)        | 23.2 (10.3 to 42.3)             | 5.5 (4.0 to 7.9)                  |
| Macedonia | 2045 | 493.3 (425.9 to 568.2)     | 312.7 (264.6 to 372.5)     | 169.4 (126.5 to 223.2)        | 9.0 (4.0 to 16.5)               | 2.2 (1.6 to 3.3)                  | 1285.6 (1109.8 to 1480.9) | 814.9 (689.6 to 970.7)     | 441.5 (329.7 to 581.6)        | 23.5 (10.4 to 42.9)             | 5.7 (4.1 to 8.5)                  |
| Macedonia | 2046 | 498.0 (431.3 to 575.2)     | 315.2 (266.4 to 376.8)     | 171.4 (127.9 to 225.1)        | 9.1 (4.0 to 16.7)               | 2.3 (1.6 to 3.5)                  | 1297.8 (1124.0 to 1499.2) | 821.5 (694.2 to 981.9)     | 446.6 (333.2 to 586.7)        | 23.8 (10.5 to 43.4)             | 5.9 (4.3 to 9.0)                  |
| Macedonia | 2047 | 502.8 (434.5 to 580.8)     | 317.9 (268.8 to 381.1)     | 173.3 (129.5 to 227.2)        | 9.2 (4.1 to 16.9)               | 2.4 (1.7 to 3.7)                  | 1310.3 (1132.4 to 1513.6) | 828.4 (700.6 to 993.1)     | 451.7 (337.6 to 592.0)        | 24.1 (10.6 to 44.0)             | 6.1 (4.4 to 9.7)                  |
| Macedonia | 2048 | 507.2 (437.2 to 583.7)     | 320.2 (270.8 to 384.4)     | 175.2 (130.9 to 229.9)        | 9.3 (4.1 to 17.1)               | 2.5 (1.8 to 3.9)                  | 1321.9 (1139.5 to 1521.2) | 834.4 (705.6 to 1001.7)    | 456.7 (341.3 to 599.1)        | 24.3 (10.7 to 44.6)             | 6.4 (4.6 to 10.2)                 |
| Macedonia | 2049 | 511.7 (441.0 to 590.1)     | 322.5 (271.2 to 387.7)     | 177.2 (132.3 to 232.5)        | 9.4 (4.1 to 17.3)               | 2.6 (1.8 to 4.1)                  | 1333.5 (1149.2 to 1537.8) | 840.5 (706.7 to 1010.5)    | 461.7 (344.7 to 605.9)        | 24.6 (10.8 to 45.1)             | 6.7 (4.8 to 10.7)                 |
| Macedonia | 2050 | 516.2 (444.4 to 596.7)     | 324.8 (271.8 to 390.9)     | 179.1 (133.5 to 235.8)        | 9.6 (4.2 to 17.5)               | 2.7 (1.9 to 4.4)                  | 1345.2 (1158.1 to 1555.1) | 846.5 (708.4 to 1018.7)    | 466.8 (348.0 to 614.5)        | 24.9 (10.9 to 45.7)             | 7.0 (4.9 to 11.4)                 |

| Country    | Year | 2018 US Dollars per capita |                            |                               |                                 |                                   | 2018 PPP per capita |                            |                               |                                 |                                   |
|------------|------|----------------------------|----------------------------|-------------------------------|---------------------------------|-----------------------------------|---------------------|----------------------------|-------------------------------|---------------------------------|-----------------------------------|
|            |      | Health spending            | Government health spending | Out-of-pocket health spending | Prepaid private health spending | Development assistance for health | Health spending     | Government health spending | Out-of-pocket health spending | Prepaid private health spending | Development assistance for health |
| Madagascar | 1995 | 20.9 (17.3 to 24.9)        | 7.2 (5.5 to 9.3)           | 8.8 (6.1 to 12.2)             | 1.9 (0.9 to 3.5)                | 3.0 (3.0 to 3.0)                  | 73.3 (60.6 to 87.4) | 25.2 (19.4 to 32.5)        | 30.9 (21.3 to 42.7)           | 6.6 (3.1 to 12.1)               | 10.6 (10.6 to 10.6)               |
| Madagascar | 1996 | 21.7 (18.2 to 25.6)        | 7.5 (5.8 to 9.7)           | 8.8 (6.0 to 12.0)             | 1.9 (0.9 to 3.6)                | 3.5 (3.5 to 3.5)                  | 76.0 (63.7 to 89.9) | 26.3 (20.2 to 34.0)        | 30.8 (21.1 to 42.1)           | 6.6 (3.1 to 12.5)               | 12.3 (12.3 to 12.3)               |
| Madagascar | 1997 | 21.0 (17.4 to 24.9)        | 7.9 (6.0 to 10.1)          | 8.8 (6.1 to 11.9)             | 1.9 (0.9 to 3.6)                | 2.4 (2.4 to 2.4)                  | 73.6 (60.9 to 87.3) | 27.6 (21.1 to 35.2)        | 30.7 (21.4 to 41.9)           | 6.7 (3.2 to 12.8)               | 8.6 (8.6 to 8.6)                  |
| Madagascar | 1998 | 22.5 (19.1 to 26.8)        | 8.1 (6.2 to 10.5)          | 8.7 (6.0 to 12.2)             | 1.9 (0.9 to 3.7)                | 3.8 (3.8 to 3.8)                  | 78.9 (66.9 to 93.9) | 28.4 (21.9 to 36.8)        | 30.4 (21.1 to 42.6)           | 6.7 (3.3 to 13.1)               | 13.3 (13.3 to 13.3)               |
| Madagascar | 1999 | 21.4 (18.0 to 25.5)        | 8.6 (6.6 to 11.0)          | 8.7 (6.0 to 12.0)             | 1.9 (0.9 to 3.8)                | 2.2 (2.2 to 2.2)                  | 74.9 (62.9 to 89.5) | 30.0 (23.1 to 38.5)        | 30.4 (21.2 to 42.2)           | 6.8 (3.2 to 13.3)               | 7.7 (7.7 to 7.7)                  |
| Madagascar | 2000 | 22.4 (18.6 to 26.7)        | 9.4 (7.2 to 12.1)          | 8.8 (6.0 to 12.3)             | 2.0 (1.0 to 3.9)                | 2.1 (2.1 to 2.1)                  | 78.4 (65.2 to 93.5) | 33.0 (25.3 to 42.3)        | 30.9 (21.2 to 43.1)           | 7.1 (3.4 to 13.8)               | 7.4 (7.4 to 7.4)                  |
| Madagascar | 2001 | 23.2 (19.3 to 27.7)        | 9.9 (7.6 to 12.6)          | 8.8 (6.2 to 12.4)             | 2.1 (1.0 to 4.0)                | 2.3 (2.3 to 2.3)                  | 81.2 (67.7 to 97.0) | 34.8 (26.7 to 44.3)        | 30.9 (21.6 to 43.4)           | 7.2 (3.4 to 14.0)               | 8.2 (8.2 to 8.2)                  |
| Madagascar | 2002 | 20.4 (16.9 to 24.6)        | 8.5 (6.5 to 10.8)          | 8.2 (5.7 to 11.5)             | 1.8 (0.8 to 3.4)                | 2.0 (2.0 to 2.0)                  | 71.6 (59.3 to 86.1) | 29.9 (22.8 to 37.8)        | 28.6 (20.0 to 40.3)           | 6.3 (2.9 to 12.1)               | 6.9 (6.9 to 6.9)                  |
| Madagascar | 2003 | 21.9 (18.4 to 26.0)        | 8.4 (6.4 to 10.6)          | 8.3 (5.8 to 11.9)             | 1.8 (0.9 to 3.5)                | 3.4 (3.4 to 3.4)                  | 76.9 (64.6 to 91.1) | 29.3 (22.4 to 37.2)        | 29.2 (20.4 to 41.7)           | 6.4 (3.0 to 12.3)               | 12.0 (12.0 to 12.0)               |
| Madagascar | 2004 | 23.1 (19.5 to 27.3)        | 8.3 (6.4 to 10.7)          | 8.4 (5.9 to 12.0)             | 1.8 (0.9 to 3.6)                | 4.6 (4.6 to 4.6)                  | 81.0 (68.3 to 95.8) | 29.2 (22.3 to 37.4)        | 29.3 (20.6 to 42.1)           | 6.5 (3.0 to 12.6)               | 16.0 (16.0 to 16.0)               |
| Madagascar | 2005 | 23.7 (20.0 to 28.0)        | 8.4 (6.4 to 10.7)          | 8.5 (6.0 to 12.1)             | 1.9 (0.9 to 3.8)                | 4.9 (4.9 to 4.9)                  | 83.0 (70.0 to 98.1) | 29.3 (22.3 to 37.5)        | 29.9 (21.0 to 42.3)           | 6.6 (3.1 to 13.3)               | 17.2 (17.2 to 17.2)               |
| Madagascar | 2006 | 22.2 (18.6 to 26.3)        | 8.1 (6.2 to 10.2)          | 8.3 (5.8 to 11.7)             | 1.9 (0.9 to 3.8)                | 3.9 (3.9 to 3.9)                  | 77.8 (65.1 to 92.1) | 28.3 (21.6 to 35.8)        | 29.2 (20.2 to 41.1)           | 6.6 (3.1 to 13.3)               | 13.6 (13.6 to 13.6)               |
| Madagascar | 2007 | 22.9 (19.2 to 27.0)        | 8.1 (6.2 to 10.3)          | 8.3 (5.8 to 11.8)             | 2.0 (0.9 to 3.9)                | 4.5 (4.5 to 4.5)                  | 80.3 (67.5 to 94.8) | 28.4 (21.7 to 36.0)        | 29.3 (20.2 to 41.3)           | 6.9 (3.2 to 13.5)               | 15.7 (15.7 to 15.7)               |
| Madagascar | 2008 | 22.7 (19.2 to 26.8)        | 7.5 (5.7 to 9.6)           | 8.3 (5.7 to 11.7)             | 2.0 (0.9 to 3.7)                | 4.9 (4.9 to 4.9)                  | 79.5 (67.3 to 93.9) | 26.2 (19.9 to 33.5)        | 29.1 (20.0 to 41.1)           | 6.8 (3.3 to 12.8)               | 17.3 (17.3 to 17.3)               |
| Madagascar | 2009 | 19.7 (16.3 to 23.5)        | 6.7 (5.2 to 8.6)           | 7.9 (5.5 to 11.1)             | 1.8 (0.9 to 3.3)                | 3.3 (3.3 to 3.3)                  | 68.9 (57.1 to 82.3) | 23.5 (18.2 to 30.1)        | 27.6 (19.1 to 38.8)           | 6.3 (3.1 to 11.6)               | 11.4 (11.4 to 11.4)               |
| Madagascar | 2010 | 23.0 (19.8 to 26.9)        | 7.3 (5.6 to 9.3)           | 7.6 (5.3 to 10.7)             | 1.8 (0.9 to 3.3)                | 6.3 (6.3 to 6.3)                  | 80.7 (69.3 to 94.2) | 25.5 (19.5 to 32.7)        | 26.8 (18.6 to 37.4)           | 6.3 (3.0 to 11.7)               | 22.1 (22.1 to 22.1)               |
| Madagascar | 2011 | 20.5 (17.2 to 24.1)        | 7.7 (5.9 to 9.9)           | 7.1 (4.9 to 10.0)             | 1.8 (0.9 to 3.3)                | 3.8 (3.8 to 3.8)                  | 71.8 (60.3 to 84.4) | 27.0 (20.8 to 34.6)        | 25.1 (17.3 to 34.9)           | 6.3 (3.0 to 11.6)               | 13.5 (13.5 to 13.5)               |
| Madagascar | 2012 | 19.1 (16.1 to 22.5)        | 7.1 (5.4 to 9.1)           | 6.5 (4.4 to 9.1)              | 1.6 (0.8 to 3.0)                | 3.9 (3.9 to 3.9)                  | 67.1 (56.4 to 78.8) | 24.8 (18.9 to 31.8)        | 22.8 (15.5 to 32.0)           | 5.7 (2.7 to 10.5)               | 13.8 (13.8 to 13.8)               |
| Madagascar | 2013 | 20.1 (17.1 to 23.4)        | 7.3 (5.6 to 9.5)           | 6.2 (4.2 to 8.7)              | 1.6 (0.8 to 2.9)                | 4.9 (4.9 to 4.9)                  | 70.4 (59.9 to 81.9) | 25.7 (19.5 to 33.3)        | 21.8 (14.9 to 30.4)           | 5.6 (2.7 to 10.2)               | 17.3 (17.3 to 17.3)               |
| Madagascar | 2014 | 20.9 (17.9 to 24.6)        | 8.5 (6.5 to 11.1)          | 6.2 (4.2 to 8.5)              | 1.6 (0.8 to 3.1)                | 4.5 (4.5 to 4.5)                  | 73.3 (62.8 to 86.2) | 29.9 (22.7 to 38.8)        | 21.8 (14.7 to 29.9)           | 5.8 (2.7 to 10.9)               | 15.8 (15.8 to 15.8)               |
| Madagascar | 2015 | 21.6 (18.5 to 25.4)        | 9.6 (7.3 to 12.4)          | 6.2 (4.2 to 8.5)              | 1.7 (0.8 to 3.1)                | 4.2 (4.2 to 4.2)                  | 75.7 (64.8 to 89.0) | 33.5 (25.4 to 43.6)        | 21.7 (14.6 to 29.9)           | 5.8 (2.7 to 11.0)               | 14.6 (14.6 to 14.6)               |

| Country    | Year | 2018 US Dollars per capita |                            |                               |                                 |                                   | 2018 PPP per capita   |                            |                               |                                 |                                   |
|------------|------|----------------------------|----------------------------|-------------------------------|---------------------------------|-----------------------------------|-----------------------|----------------------------|-------------------------------|---------------------------------|-----------------------------------|
|            |      | Health spending            | Government health spending | Out-of-pocket health spending | Prepaid private health spending | Development assistance for health | Health spending       | Government health spending | Out-of-pocket health spending | Prepaid private health spending | Development assistance for health |
| Madagascar | 2016 | 23.0 (19.5 to 26.9)        | 10.7 (8.1 to 14.0)         | 6.2 (4.2 to 8.7)              | 1.7 (0.8 to 3.0)                | 4.4 (4.4 to 4.4)                  | 80.5 (68.4 to 94.2)   | 37.6 (28.4 to 49.0)        | 21.9 (14.6 to 30.4)           | 5.8 (2.7 to 10.6)               | 15.3 (15.3 to 15.3)               |
| Madagascar | 2017 | 23.4 (19.4 to 28.2)        | 12.1 (9.1 to 15.8)         | 6.4 (4.3 to 8.8)              | 1.8 (0.8 to 3.2)                | 3.1 (3.1 to 3.1)                  | 81.9 (68.1 to 98.8)   | 42.4 (32.0 to 55.3)        | 22.3 (14.9 to 31.0)           | 6.1 (2.8 to 11.3)               | 11.0 (11.0 to 11.0)               |
| Madagascar | 2018 | 23.4 (19.5 to 27.8)        | 12.3 (9.3 to 16.1)         | 6.4 (4.3 to 8.9)              | 1.8 (0.8 to 3.2)                | 2.9 (2.9 to 2.9)                  | 82.0 (68.4 to 97.3)   | 43.2 (32.6 to 56.3)        | 22.4 (14.9 to 31.2)           | 6.2 (2.9 to 11.4)               | 10.2 (10.1 to 10.2)               |
| Madagascar | 2019 | 23.7 (19.7 to 28.7)        | 12.6 (9.5 to 16.4)         | 6.4 (4.3 to 9.0)              | 1.8 (0.8 to 3.3)                | 2.9 (2.7 to 3.0)                  | 83.1 (69.0 to 100.5)  | 44.2 (33.4 to 57.6)        | 22.6 (15.0 to 31.5)           | 6.3 (2.9 to 11.6)               | 10.0 (9.4 to 10.6)                |
| Madagascar | 2020 | 24.1 (20.1 to 28.6)        | 12.9 (9.7 to 16.8)         | 6.5 (4.3 to 9.0)              | 1.8 (0.8 to 3.4)                | 2.8 (2.6 to 3.1)                  | 84.3 (70.5 to 100.1)  | 45.1 (34.1 to 58.8)        | 22.8 (15.1 to 31.7)           | 6.4 (3.0 to 11.8)               | 10.0 (9.2 to 10.8)                |
| Madagascar | 2021 | 24.4 (20.3 to 29.4)        | 13.1 (9.9 to 17.0)         | 6.6 (4.4 to 9.1)              | 1.9 (0.9 to 3.4)                | 2.8 (2.6 to 3.1)                  | 85.5 (71.0 to 103.1)  | 46.0 (34.8 to 59.8)        | 23.0 (15.3 to 32.0)           | 6.6 (3.0 to 12.0)               | 10.0 (9.0 to 11.0)                |
| Madagascar | 2022 | 24.8 (20.7 to 29.5)        | 13.4 (10.1 to 17.4)        | 6.6 (4.4 to 9.2)              | 1.9 (0.9 to 3.5)                | 2.9 (2.5 to 3.2)                  | 86.8 (72.5 to 103.3)  | 46.9 (35.5 to 60.9)        | 23.2 (15.5 to 32.2)           | 6.7 (3.1 to 12.3)               | 10.0 (8.9 to 11.2)                |
| Madagascar | 2023 | 25.1 (20.9 to 30.4)        | 13.6 (10.3 to 17.7)        | 6.7 (4.5 to 9.3)              | 1.9 (0.9 to 3.6)                | 2.9 (2.5 to 3.3)                  | 88.1 (73.3 to 106.7)  | 47.8 (36.2 to 61.9)        | 23.4 (15.7 to 32.5)           | 6.8 (3.1 to 12.5)               | 10.0 (8.7 to 11.4)                |
| Madagascar | 2024 | 25.5 (21.3 to 30.4)        | 13.9 (10.5 to 18.0)        | 6.7 (4.5 to 9.4)              | 2.0 (0.9 to 3.6)                | 2.9 (2.5 to 3.3)                  | 89.4 (74.6 to 106.4)  | 48.8 (36.9 to 63.0)        | 23.7 (15.8 to 32.9)           | 6.9 (3.2 to 12.7)               | 10.1 (8.7 to 11.6)                |
| Madagascar | 2025 | 25.9 (21.7 to 31.4)        | 14.2 (10.7 to 18.3)        | 6.8 (4.5 to 9.5)              | 2.0 (0.9 to 3.7)                | 2.9 (2.4 to 3.4)                  | 90.6 (75.9 to 110.2)  | 49.6 (37.6 to 64.2)        | 23.9 (15.9 to 33.2)           | 7.0 (3.3 to 12.9)               | 10.1 (8.6 to 11.8)                |
| Madagascar | 2026 | 26.2 (21.8 to 31.2)        | 14.4 (10.9 to 18.6)        | 6.9 (4.6 to 9.6)              | 2.0 (0.9 to 3.8)                | 2.9 (2.4 to 3.4)                  | 91.7 (76.3 to 109.3)  | 50.4 (38.2 to 65.3)        | 24.1 (16.1 to 33.6)           | 7.2 (3.3 to 13.2)               | 10.1 (8.5 to 11.9)                |
| Madagascar | 2027 | 26.5 (22.1 to 32.2)        | 14.6 (11.1 to 18.9)        | 6.9 (4.6 to 9.7)              | 2.1 (1.0 to 3.8)                | 2.9 (2.4 to 3.4)                  | 92.9 (77.4 to 112.9)  | 51.2 (38.8 to 66.4)        | 24.3 (16.2 to 33.9)           | 7.3 (3.4 to 13.4)               | 10.1 (8.5 to 12.1)                |
| Madagascar | 2028 | 26.9 (22.4 to 32.1)        | 14.9 (11.3 to 19.3)        | 7.0 (4.7 to 9.8)              | 2.1 (1.0 to 3.9)                | 2.9 (2.4 to 3.5)                  | 94.2 (78.4 to 112.5)  | 52.1 (39.5 to 67.7)        | 24.5 (16.3 to 34.2)           | 7.4 (3.4 to 13.6)               | 10.2 (8.5 to 12.4)                |
| Madagascar | 2029 | 27.2 (22.7 to 33.0)        | 15.1 (11.5 to 19.7)        | 7.1 (4.7 to 9.9)              | 2.1 (1.0 to 4.0)                | 2.9 (2.4 to 3.6)                  | 95.5 (79.7 to 115.8)  | 53.0 (40.2 to 69.0)        | 24.7 (16.5 to 34.5)           | 7.5 (3.5 to 13.9)               | 10.3 (8.4 to 12.6)                |
| Madagascar | 2030 | 27.6 (23.0 to 33.1)        | 15.4 (11.7 to 20.0)        | 7.1 (4.7 to 9.9)              | 2.2 (1.0 to 4.0)                | 2.9 (2.4 to 3.6)                  | 96.8 (80.6 to 116.0)  | 53.9 (40.9 to 70.3)        | 24.9 (16.6 to 34.8)           | 7.7 (3.6 to 14.2)               | 10.3 (8.4 to 12.7)                |
| Madagascar | 2031 | 28.0 (23.3 to 34.0)        | 15.6 (11.9 to 20.4)        | 7.2 (4.8 to 10.0)             | 2.2 (1.0 to 4.1)                | 3.0 (2.4 to 3.7)                  | 98.1 (81.7 to 119.1)  | 54.8 (41.5 to 71.5)        | 25.1 (16.8 to 35.2)           | 7.8 (3.6 to 14.4)               | 10.4 (8.4 to 13.0)                |
| Madagascar | 2032 | 28.3 (23.6 to 34.0)        | 15.9 (12.1 to 20.7)        | 7.2 (4.8 to 10.1)             | 2.3 (1.1 to 4.2)                | 3.0 (2.4 to 3.8)                  | 99.4 (82.7 to 119.1)  | 55.7 (42.3 to 72.6)        | 25.3 (16.9 to 35.4)           | 7.9 (3.7 to 14.7)               | 10.4 (8.4 to 13.2)                |
| Madagascar | 2033 | 28.7 (23.7 to 35.2)        | 16.2 (12.3 to 21.1)        | 7.3 (4.9 to 10.2)             | 2.3 (1.1 to 4.3)                | 3.0 (2.4 to 3.9)                  | 100.7 (83.2 to 123.4) | 56.6 (43.0 to 73.9)        | 25.5 (17.0 to 35.7)           | 8.0 (3.7 to 15.0)               | 10.5 (8.4 to 13.5)                |
| Madagascar | 2034 | 29.1 (24.0 to 34.8)        | 16.4 (12.5 to 21.5)        | 7.3 (4.9 to 10.3)             | 2.3 (1.1 to 4.4)                | 3.0 (2.4 to 3.9)                  | 102.1 (84.1 to 122.2) | 57.6 (43.7 to 75.2)        | 25.8 (17.1 to 36.0)           | 8.2 (3.8 to 15.3)               | 10.6 (8.3 to 13.6)                |
| Madagascar | 2035 | 29.5 (24.4 to 36.2)        | 16.7 (12.6 to 21.9)        | 7.4 (4.9 to 10.3)             | 2.4 (1.1 to 4.4)                | 3.0 (2.4 to 4.0)                  | 103.5 (85.5 to 127.0) | 58.5 (44.3 to 76.6)        | 26.0 (17.3 to 36.3)           | 8.3 (3.9 to 15.5)               | 10.7 (8.3 to 14.0)                |
| Madagascar | 2036 | 29.9 (24.6 to 35.7)        | 17.0 (12.8 to 22.2)        | 7.5 (5.0 to 10.4)             | 2.4 (1.1 to 4.5)                | 3.1 (2.4 to 4.1)                  | 104.9 (86.2 to 125.3) | 59.5 (44.9 to 77.7)        | 26.2 (17.4 to 36.5)           | 8.4 (3.9 to 15.8)               | 10.8 (8.3 to 14.5)                |

| Country    | Year | 2018 US Dollars per capita |                            |                               |                                 |                                   | 2018 PPP per capita    |                            |                               |                                 |                                   |
|------------|------|----------------------------|----------------------------|-------------------------------|---------------------------------|-----------------------------------|------------------------|----------------------------|-------------------------------|---------------------------------|-----------------------------------|
|            |      | Health spending            | Government health spending | Out-of-pocket health spending | Prepaid private health spending | Development assistance for health | Health spending        | Government health spending | Out-of-pocket health spending | Prepaid private health spending | Development assistance for health |
| Madagascar | 2037 | 30.3 (24.9 to 37.2)        | 17.2 (13.0 to 22.5)        | 7.5 (5.0 to 10.5)             | 2.4 (1.1 to 4.6)                | 3.1 (2.4 to 4.1)                  | 106.2 (87.4 to 130.6)  | 60.4 (45.7 to 79.0)        | 26.4 (17.5 to 36.7)           | 8.6 (4.0 to 16.1)               | 10.8 (8.3 to 14.5)                |
| Madagascar | 2038 | 30.7 (25.3 to 36.9)        | 17.5 (13.2 to 22.9)        | 7.6 (5.0 to 10.6)             | 2.5 (1.1 to 4.7)                | 3.1 (2.4 to 4.3)                  | 107.6 (88.5 to 129.2)  | 61.4 (46.3 to 80.3)        | 26.6 (17.7 to 37.1)           | 8.7 (4.0 to 16.4)               | 10.9 (8.3 to 14.9)                |
| Madagascar | 2039 | 31.1 (25.6 to 38.3)        | 17.8 (13.4 to 23.3)        | 7.7 (5.1 to 10.7)             | 2.5 (1.2 to 4.8)                | 3.1 (2.4 to 4.3)                  | 109.1 (89.9 to 134.2)  | 62.4 (47.1 to 81.7)        | 26.8 (17.8 to 37.4)           | 8.9 (4.1 to 16.7)               | 11.0 (8.4 to 15.0)                |
| Madagascar | 2040 | 31.5 (26.0 to 37.8)        | 18.1 (13.7 to 23.7)        | 7.7 (5.1 to 10.7)             | 2.6 (1.2 to 4.9)                | 3.2 (2.4 to 4.3)                  | 110.6 (91.0 to 132.6)  | 63.4 (47.9 to 83.0)        | 27.1 (18.0 to 37.7)           | 9.0 (4.1 to 17.0)               | 11.1 (8.5 to 15.2)                |
| Madagascar | 2041 | 32.0 (26.3 to 39.2)        | 18.4 (13.9 to 24.1)        | 7.8 (5.2 to 10.8)             | 2.6 (1.2 to 4.9)                | 3.2 (2.4 to 4.5)                  | 112.0 (92.2 to 137.5)  | 64.4 (48.7 to 84.4)        | 27.3 (18.1 to 37.9)           | 9.2 (4.2 to 17.3)               | 11.2 (8.4 to 15.8)                |
| Madagascar | 2042 | 32.4 (26.6 to 39.1)        | 18.7 (14.1 to 24.5)        | 7.8 (5.2 to 10.9)             | 2.7 (1.2 to 5.0)                | 3.2 (2.4 to 4.7)                  | 113.6 (93.2 to 136.9)  | 65.4 (49.5 to 85.9)        | 27.5 (18.3 to 38.2)           | 9.3 (4.3 to 17.7)               | 11.4 (8.4 to 16.5)                |
| Madagascar | 2043 | 32.9 (27.1 to 40.3)        | 19.0 (14.3 to 24.9)        | 7.9 (5.3 to 11.0)             | 2.7 (1.2 to 5.1)                | 3.3 (2.4 to 4.8)                  | 115.2 (94.9 to 141.3)  | 66.5 (50.3 to 87.4)        | 27.7 (18.4 to 38.5)           | 9.5 (4.4 to 17.9)               | 11.5 (8.5 to 16.9)                |
| Madagascar | 2044 | 33.3 (27.3 to 40.2)        | 19.3 (14.5 to 25.3)        | 8.0 (5.3 to 11.1)             | 2.7 (1.3 to 5.2)                | 3.3 (2.4 to 4.8)                  | 116.7 (95.8 to 141.1)  | 67.5 (51.0 to 88.7)        | 28.0 (18.6 to 38.9)           | 9.6 (4.4 to 18.2)               | 11.6 (8.6 to 17.0)                |
| Madagascar | 2045 | 33.8 (27.7 to 41.7)        | 19.6 (14.7 to 25.8)        | 8.0 (5.3 to 11.2)             | 2.8 (1.3 to 5.3)                | 3.4 (2.4 to 5.1)                  | 118.4 (97.0 to 146.1)  | 68.6 (51.7 to 90.3)        | 28.2 (18.7 to 39.2)           | 9.8 (4.5 to 18.4)               | 11.7 (8.5 to 17.7)                |
| Madagascar | 2046 | 34.2 (28.1 to 41.5)        | 19.9 (14.9 to 26.2)        | 8.1 (5.4 to 11.3)             | 2.8 (1.3 to 5.4)                | 3.4 (2.4 to 5.1)                  | 120.0 (98.5 to 145.6)  | 69.7 (52.3 to 91.9)        | 28.4 (18.8 to 39.6)           | 9.9 (4.5 to 18.8)               | 11.9 (8.6 to 18.0)                |
| Madagascar | 2047 | 34.7 (28.4 to 42.9)        | 20.2 (15.1 to 26.7)        | 8.2 (5.4 to 11.4)             | 2.9 (1.3 to 5.5)                | 3.4 (2.5 to 5.4)                  | 121.7 (99.7 to 150.5)  | 70.9 (53.0 to 93.6)        | 28.7 (19.0 to 39.9)           | 10.1 (4.6 to 19.1)              | 12.1 (8.7 to 19.0)                |
| Madagascar | 2048 | 35.3 (28.9 to 43.0)        | 20.6 (15.4 to 27.3)        | 8.3 (5.5 to 11.5)             | 2.9 (1.3 to 5.6)                | 3.5 (2.5 to 5.6)                  | 123.7 (101.4 to 150.6) | 72.2 (53.8 to 95.5)        | 28.9 (19.2 to 40.3)           | 10.3 (4.7 to 19.5)              | 12.2 (8.8 to 19.7)                |
| Madagascar | 2049 | 35.8 (29.2 to 44.9)        | 21.0 (15.6 to 27.8)        | 8.3 (5.5 to 11.6)             | 3.0 (1.4 to 5.7)                | 3.5 (2.5 to 5.7)                  | 125.6 (102.4 to 157.2) | 73.5 (54.7 to 97.4)        | 29.2 (19.3 to 40.7)           | 10.5 (4.8 to 19.9)              | 12.4 (8.8 to 19.9)                |
| Madagascar | 2050 | 36.4 (29.7 to 44.5)        | 21.4 (15.9 to 28.3)        | 8.4 (5.6 to 11.7)             | 3.0 (1.4 to 5.8)                | 3.6 (2.5 to 5.8)                  | 127.6 (104.0 to 155.8) | 74.9 (55.7 to 99.3)        | 29.5 (19.5 to 41.1)           | 10.6 (4.8 to 20.3)              | 12.6 (8.9 to 20.4)                |
| Malawi     | 1995 | 13.0 (11.5 to 14.9)        | 4.2 (3.2 to 5.5)           | 3.0 (2.1 to 4.2)              | 1.0 (0.5 to 1.9)                | 4.8 (4.8 to 4.8)                  | 47.1 (41.5 to 54.0)    | 15.2 (11.5 to 20.0)        | 10.9 (7.5 to 15.3)            | 3.6 (1.7 to 6.8)                | 17.4 (17.4 to 17.4)               |
| Malawi     | 1996 | 14.6 (13.0 to 16.5)        | 4.1 (3.2 to 5.5)           | 3.1 (2.1 to 4.4)              | 1.0 (0.5 to 1.8)                | 6.4 (6.4 to 6.4)                  | 53.0 (47.2 to 59.6)    | 15.0 (11.5 to 20.0)        | 11.2 (7.7 to 15.9)            | 3.6 (1.7 to 6.7)                | 23.2 (23.2 to 23.2)               |
| Malawi     | 1997 | 16.5 (14.9 to 18.4)        | 4.3 (3.2 to 5.6)           | 3.1 (2.2 to 4.5)              | 1.0 (0.5 to 1.8)                | 8.2 (8.2 to 8.2)                  | 59.9 (54.1 to 66.5)    | 15.4 (11.7 to 20.2)        | 11.3 (7.9 to 16.2)            | 3.6 (1.7 to 6.6)                | 29.6 (29.6 to 29.6)               |
| Malawi     | 1998 | 14.3 (12.8 to 16.0)        | 4.2 (3.2 to 5.4)           | 3.0 (2.1 to 4.3)              | 0.9 (0.4 to 1.7)                | 6.2 (6.2 to 6.2)                  | 51.8 (46.4 to 57.8)    | 15.2 (11.5 to 19.7)        | 10.8 (7.6 to 15.6)            | 3.3 (1.6 to 6.2)                | 22.5 (22.5 to 22.5)               |
| Malawi     | 1999 | 19.1 (17.6 to 20.8)        | 4.3 (3.3 to 5.6)           | 2.9 (2.0 to 4.2)              | 0.8 (0.4 to 1.6)                | 11.0 (11.0 to 11.0)               | 69.2 (63.7 to 75.4)    | 15.7 (11.9 to 20.2)        | 10.5 (7.4 to 15.2)            | 3.0 (1.4 to 5.7)                | 40.0 (40.0 to 40.0)               |
| Malawi     | 2000 | 17.9 (16.5 to 19.7)        | 4.6 (3.5 to 6.0)           | 2.6 (1.8 to 3.8)              | 0.7 (0.3 to 1.3)                | 10.0 (10.0 to 10.0)               | 65.0 (59.6 to 71.2)    | 16.8 (12.6 to 21.9)        | 9.5 (6.6 to 13.8)             | 2.6 (1.2 to 4.8)                | 36.1 (36.1 to 36.1)               |
| Malawi     | 2001 | 14.7 (13.5 to 16.2)        | 4.2 (3.1 to 5.4)           | 2.2 (1.5 to 3.1)              | 0.6 (0.3 to 1.1)                | 7.8 (7.8 to 7.8)                  | 53.3 (48.7 to 58.6)    | 15.0 (11.4 to 19.6)        | 7.9 (5.5 to 11.4)             | 2.1 (1.0 to 3.9)                | 28.2 (28.2 to 28.2)               |

| Country | Year | 2018 US Dollars per capita |                            |                               |                                 |                                   | 2018 PPP per capita    |                            |                               |                                 |                                   |
|---------|------|----------------------------|----------------------------|-------------------------------|---------------------------------|-----------------------------------|------------------------|----------------------------|-------------------------------|---------------------------------|-----------------------------------|
|         |      | Health spending            | Government health spending | Out-of-pocket health spending | Prepaid private health spending | Development assistance for health | Health spending        | Government health spending | Out-of-pocket health spending | Prepaid private health spending | Development assistance for health |
| Malawi  | 2002 | 12.9 (11.7 to 14.2)        | 3.9 (3.0 to 5.1)           | 1.8 (1.2 to 2.5)              | 0.5 (0.2 to 1.0)                | 6.7 (6.7 to 6.7)                  | 46.7 (42.5 to 51.4)    | 14.2 (10.8 to 18.4)        | 6.4 (4.5 to 9.2)              | 1.9 (0.9 to 3.6)                | 24.2 (24.2 to 24.2)               |
| Malawi  | 2003 | 14.6 (13.4 to 15.9)        | 3.9 (2.9 to 5.0)           | 1.7 (1.1 to 2.4)              | 0.6 (0.3 to 1.3)                | 8.4 (8.4 to 8.4)                  | 52.8 (48.5 to 57.6)    | 14.0 (10.5 to 18.3)        | 6.0 (4.1 to 8.7)              | 2.3 (1.1 to 4.5)                | 30.5 (30.5 to 30.5)               |
| Malawi  | 2004 | 17.2 (16.0 to 18.5)        | 3.7 (2.8 to 4.9)           | 1.6 (1.1 to 2.3)              | 0.7 (0.3 to 1.4)                | 11.1 (11.1 to 11.1)               | 62.2 (58.0 to 67.1)    | 13.5 (10.1 to 17.7)        | 5.9 (4.0 to 8.5)              | 2.5 (1.2 to 4.9)                | 40.3 (40.3 to 40.3)               |
| Malawi  | 2005 | 17.9 (16.6 to 19.3)        | 3.8 (2.8 to 4.9)           | 1.7 (1.2 to 2.4)              | 0.9 (0.4 to 1.7)                | 11.5 (11.5 to 11.5)               | 64.8 (60.2 to 70.0)    | 13.6 (10.2 to 17.7)        | 6.1 (4.3 to 8.8)              | 3.2 (1.5 to 6.3)                | 41.8 (41.8 to 41.8)               |
| Malawi  | 2006 | 22.8 (21.4 to 24.5)        | 3.7 (2.8 to 4.9)           | 1.9 (1.3 to 2.7)              | 1.3 (0.6 to 2.6)                | 15.9 (15.9 to 15.9)               | 82.7 (77.7 to 88.8)    | 13.5 (10.2 to 17.7)        | 6.8 (4.7 to 9.8)              | 4.7 (2.2 to 9.2)                | 57.6 (57.6 to 57.6)               |
| Malawi  | 2007 | 28.6 (27.0 to 30.7)        | 4.0 (3.0 to 5.3)           | 2.3 (1.6 to 3.2)              | 1.7 (0.8 to 3.5)                | 20.6 (20.6 to 20.6)               | 103.7 (97.8 to 111.1)  | 14.6 (11.0 to 19.1)        | 8.3 (5.8 to 11.6)             | 6.1 (2.9 to 12.6)               | 74.7 (74.7 to 74.7)               |
| Malawi  | 2008 | 33.1 (31.1 to 35.5)        | 4.8 (3.6 to 6.3)           | 2.6 (1.8 to 3.7)              | 2.0 (0.9 to 4.1)                | 23.7 (23.7 to 23.7)               | 120.0 (112.8 to 128.5) | 17.3 (13.2 to 22.8)        | 9.4 (6.5 to 13.3)             | 7.4 (3.4 to 14.7)               | 85.8 (85.8 to 85.8)               |
| Malawi  | 2009 | 30.0 (28.1 to 32.3)        | 4.9 (3.7 to 6.4)           | 2.7 (1.9 to 3.8)              | 1.9 (0.9 to 3.6)                | 20.5 (20.5 to 20.5)               | 108.5 (101.7 to 117.0) | 17.8 (13.5 to 23.2)        | 9.8 (6.8 to 13.8)             | 6.7 (3.1 to 13.1)               | 74.2 (74.2 to 74.2)               |
| Malawi  | 2010 | 26.4 (24.5 to 28.7)        | 5.3 (4.0 to 6.9)           | 2.7 (1.9 to 3.7)              | 1.5 (0.7 to 2.9)                | 16.9 (16.9 to 16.9)               | 95.5 (88.9 to 103.8)   | 19.1 (14.5 to 25.1)        | 9.7 (6.7 to 13.5)             | 5.4 (2.5 to 10.6)               | 61.3 (61.3 to 61.3)               |
| Malawi  | 2011 | 33.4 (31.6 to 35.7)        | 5.6 (4.2 to 7.4)           | 2.7 (1.8 to 3.7)              | 1.4 (0.6 to 2.7)                | 23.7 (23.7 to 23.7)               | 121.0 (114.4 to 129.2) | 20.3 (15.4 to 26.9)        | 9.7 (6.7 to 13.4)             | 5.0 (2.3 to 9.9)                | 86.0 (86.0 to 86.0)               |
| Malawi  | 2012 | 34.8 (32.9 to 36.9)        | 5.7 (4.4 to 7.5)           | 2.8 (1.9 to 3.9)              | 1.2 (0.6 to 2.4)                | 25.0 (25.0 to 25.0)               | 125.8 (119.2 to 133.6) | 20.8 (15.9 to 27.3)        | 10.1 (7.0 to 14.0)            | 4.4 (2.1 to 8.6)                | 90.6 (90.6 to 90.6)               |
| Malawi  | 2013 | 36.4 (34.4 to 38.9)        | 6.6 (5.1 to 8.6)           | 2.9 (2.0 to 4.0)              | 1.3 (0.6 to 2.5)                | 25.6 (25.6 to 25.6)               | 131.9 (124.5 to 140.9) | 24.0 (18.4 to 31.0)        | 10.5 (7.3 to 14.5)            | 4.8 (2.2 to 9.0)                | 92.6 (92.6 to 92.6)               |
| Malawi  | 2014 | 34.7 (32.3 to 37.5)        | 7.7 (5.9 to 9.8)           | 3.1 (2.2 to 4.3)              | 1.6 (0.8 to 3.0)                | 22.2 (22.2 to 22.2)               | 125.5 (117.1 to 135.7) | 27.8 (21.3 to 35.6)        | 11.4 (8.0 to 15.7)            | 5.8 (2.8 to 10.7)               | 80.5 (80.5 to 80.5)               |
| Malawi  | 2015 | 37.6 (34.9 to 40.8)        | 8.6 (6.5 to 10.9)          | 3.5 (2.5 to 4.9)              | 2.0 (1.0 to 3.9)                | 23.4 (23.4 to 23.4)               | 136.1 (126.4 to 147.8) | 31.1 (23.5 to 39.4)        | 12.8 (8.9 to 17.7)            | 7.3 (3.5 to 14.0)               | 84.9 (84.9 to 84.9)               |
| Malawi  | 2016 | 38.9 (35.8 to 42.2)        | 9.1 (6.9 to 11.6)          | 3.8 (2.6 to 5.3)              | 2.3 (1.1 to 4.4)                | 23.7 (23.7 to 23.7)               | 140.7 (129.7 to 152.8) | 33.1 (24.9 to 42.1)        | 13.7 (9.6 to 19.1)            | 8.3 (4.0 to 16.1)               | 85.6 (85.6 to 85.6)               |
| Malawi  | 2017 | 42.4 (39.3 to 45.7)        | 9.5 (7.1 to 12.0)          | 3.9 (2.7 to 5.4)              | 2.3 (1.1 to 4.5)                | 26.8 (26.8 to 26.8)               | 153.5 (142.4 to 165.4) | 34.3 (25.9 to 43.6)        | 14.0 (9.7 to 19.4)            | 8.3 (4.0 to 16.2)               | 97.0 (97.0 to 97.0)               |
| Malawi  | 2018 | 40.7 (37.6 to 44.3)        | 9.6 (7.3 to 12.2)          | 3.9 (2.7 to 5.4)              | 2.3 (1.1 to 4.6)                | 24.9 (24.9 to 24.9)               | 147.5 (136.0 to 160.3) | 34.8 (26.3 to 44.2)        | 14.1 (9.8 to 19.4)            | 8.4 (4.1 to 16.5)               | 90.2 (90.1 to 90.3)               |
| Malawi  | 2019 | 40.8 (37.1 to 44.7)        | 9.7 (7.4 to 12.4)          | 3.9 (2.7 to 5.4)              | 2.4 (1.2 to 4.6)                | 24.8 (23.1 to 26.2)               | 147.7 (134.3 to 162.0) | 35.3 (26.7 to 44.7)        | 14.2 (9.8 to 19.7)            | 8.6 (4.2 to 16.7)               | 89.6 (83.6 to 94.8)               |
| Malawi  | 2020 | 41.0 (37.3 to 45.5)        | 9.9 (7.5 to 12.6)          | 4.0 (2.7 to 5.5)              | 2.4 (1.2 to 4.7)                | 24.8 (22.7 to 26.8)               | 148.6 (135.1 to 164.9) | 35.8 (27.0 to 45.5)        | 14.3 (9.9 to 19.9)            | 8.7 (4.2 to 17.0)               | 89.7 (82.3 to 96.9)               |
| Malawi  | 2021 | 41.4 (37.3 to 46.0)        | 10.1 (7.6 to 12.8)         | 4.0 (2.8 to 5.6)              | 2.5 (1.2 to 4.8)                | 24.9 (22.4 to 27.5)               | 150.0 (135.0 to 166.4) | 36.4 (27.5 to 46.3)        | 14.5 (10.0 to 20.2)           | 8.9 (4.3 to 17.3)               | 90.2 (81.2 to 99.6)               |
| Malawi  | 2022 | 41.9 (37.4 to 46.8)        | 10.2 (7.7 to 13.1)         | 4.1 (2.8 to 5.6)              | 2.5 (1.2 to 4.9)                | 25.1 (22.3 to 28.0)               | 151.8 (135.3 to 169.6) | 37.1 (28.0 to 47.3)        | 14.7 (10.2 to 20.4)           | 9.1 (4.4 to 17.7)               | 90.9 (80.7 to 101.5)              |



|         |      | 2018 US Dollars per capita |                            |                               |                                 |                                   | 2018 PPP per capita    |                            |                               |                                 |                                   |
|---------|------|----------------------------|----------------------------|-------------------------------|---------------------------------|-----------------------------------|------------------------|----------------------------|-------------------------------|---------------------------------|-----------------------------------|
| Country | Year | Health spending            | Government health spending | Out-of-pocket health spending | Prepaid private health spending | Development assistance for health | Health spending        | Government health spending | Out-of-pocket health spending | Prepaid private health spending | Development assistance for health |
| Malawi  | 2023 | 42.4 (37.5 to 47.5)        | 10.4 (7.9 to 13.3)         | 4.1 (2.9 to 5.7)              | 2.6 (1.2 to 5.0)                | 25.3 (22.0 to 28.7)               | 153.6 (135.9 to 171.9) | 37.8 (28.5 to 48.3)        | 14.9 (10.4 to 20.7)           | 9.3 (4.5 to 18.1)               | 91.6 (79.8 to 104.0)              |
| Malawi  | 2024 | 42.9 (37.8 to 48.1)        | 10.7 (8.0 to 13.6)         | 4.2 (2.9 to 5.8)              | 2.6 (1.3 to 5.1)                | 25.5 (22.0 to 29.3)               | 155.4 (136.9 to 174.1) | 38.6 (29.0 to 49.3)        | 15.1 (10.5 to 21.1)           | 9.5 (4.6 to 18.5)               | 92.2 (79.6 to 106.0)              |
| Malawi  | 2025 | 43.3 (37.7 to 48.9)        | 10.9 (8.2 to 13.9)         | 4.2 (2.9 to 5.9)              | 2.7 (1.3 to 5.2)                | 25.5 (21.8 to 29.9)               | 156.9 (136.6 to 177.2) | 39.4 (29.6 to 50.3)        | 15.3 (10.6 to 21.4)           | 9.7 (4.7 to 18.9)               | 92.5 (79.0 to 108.4)              |
| Malawi  | 2026 | 43.8 (38.2 to 49.4)        | 11.1 (8.3 to 14.2)         | 4.3 (3.0 to 6.0)              | 2.7 (1.3 to 5.3)                | 25.6 (21.6 to 30.0)               | 158.5 (138.5 to 178.9) | 40.2 (30.2 to 51.5)        | 15.6 (10.8 to 21.7)           | 9.9 (4.8 to 19.3)               | 92.7 (78.3 to 108.8)              |
| Malawi  | 2027 | 44.2 (38.1 to 50.4)        | 11.3 (8.5 to 14.5)         | 4.4 (3.0 to 6.1)              | 2.8 (1.4 to 5.5)                | 25.7 (21.5 to 30.7)               | 160.1 (138.1 to 182.4) | 41.0 (30.9 to 52.6)        | 15.8 (10.9 to 22.1)           | 10.1 (4.9 to 19.8)              | 93.1 (79.9 to 111.0)              |
| Malawi  | 2028 | 44.7 (38.7 to 51.2)        | 11.6 (8.7 to 14.8)         | 4.4 (3.1 to 6.2)              | 2.9 (1.4 to 5.6)                | 25.8 (21.5 to 31.2)               | 161.8 (140.1 to 185.4) | 41.9 (31.5 to 53.6)        | 16.0 (11.1 to 22.4)           | 10.4 (5.0 to 20.2)              | 93.6 (78.0 to 112.9)              |
| Malawi  | 2029 | 45.2 (38.9 to 51.9)        | 11.8 (8.8 to 15.1)         | 4.5 (3.1 to 6.3)              | 2.9 (1.4 to 5.7)                | 26.0 (21.4 to 31.8)               | 163.6 (140.7 to 187.8) | 42.7 (32.0 to 54.7)        | 16.3 (11.3 to 22.7)           | 10.6 (5.1 to 20.6)              | 94.1 (77.5 to 115.1)              |
| Malawi  | 2030 | 45.7 (39.3 to 53.2)        | 12.0 (9.0 to 15.4)         | 4.6 (3.2 to 6.4)              | 3.0 (1.4 to 5.8)                | 26.1 (21.3 to 32.0)               | 165.4 (142.3 to 192.8) | 43.5 (32.6 to 55.9)        | 16.5 (11.4 to 23.1)           | 10.8 (5.3 to 21.0)              | 94.6 (77.3 to 116.0)              |
| Malawi  | 2031 | 46.2 (39.5 to 53.9)        | 12.2 (9.2 to 15.7)         | 4.6 (3.2 to 6.5)              | 3.0 (1.5 to 5.9)                | 26.3 (21.3 to 33.0)               | 167.1 (143.0 to 195.3) | 44.3 (33.2 to 56.9)        | 16.7 (11.6 to 23.4)           | 11.0 (5.4 to 21.5)              | 95.1 (77.2 to 119.6)              |
| Malawi  | 2032 | 46.7 (39.9 to 55.1)        | 12.5 (9.4 to 16.0)         | 4.7 (3.2 to 6.6)              | 3.1 (1.5 to 6.0)                | 26.4 (21.3 to 33.4)               | 169.0 (144.3 to 199.6) | 45.1 (33.9 to 58.0)        | 16.9 (11.8 to 23.7)           | 11.2 (5.5 to 21.9)              | 95.7 (77.0 to 121.0)              |
| Malawi  | 2033 | 47.2 (40.0 to 56.2)        | 12.7 (9.5 to 16.3)         | 4.7 (3.3 to 6.7)              | 3.2 (1.5 to 6.2)                | 26.6 (21.1 to 34.2)               | 171.0 (144.9 to 203.7) | 45.9 (34.6 to 59.0)        | 17.1 (11.9 to 24.1)           | 11.5 (5.6 to 22.3)              | 96.4 (76.5 to 124.0)              |
| Malawi  | 2034 | 47.8 (40.4 to 56.8)        | 12.9 (9.7 to 16.7)         | 4.8 (3.3 to 6.8)              | 3.2 (1.6 to 6.3)                | 26.9 (21.2 to 34.6)               | 173.1 (146.3 to 205.6) | 46.8 (35.2 to 60.3)        | 17.4 (12.0 to 24.5)           | 11.7 (5.7 to 22.7)              | 97.3 (76.7 to 125.2)              |
| Malawi  | 2035 | 48.4 (40.5 to 58.4)        | 13.1 (9.9 to 17.0)         | 4.9 (3.4 to 6.9)              | 3.3 (1.6 to 6.4)                | 27.1 (21.1 to 35.5)               | 175.3 (146.8 to 211.5) | 47.6 (35.8 to 61.5)        | 17.6 (12.2 to 24.9)           | 11.9 (5.8 to 23.2)              | 98.2 (76.3 to 128.5)              |
| Malawi  | 2036 | 49.0 (41.1 to 59.3)        | 13.4 (10.1 to 17.3)        | 4.9 (3.4 to 7.0)              | 3.4 (1.6 to 6.5)                | 27.4 (21.2 to 36.9)               | 177.4 (148.9 to 214.9) | 48.4 (36.4 to 62.6)        | 17.8 (12.3 to 25.3)           | 12.1 (5.9 to 23.6)              | 99.1 (76.8 to 133.5)              |
| Malawi  | 2037 | 49.6 (41.2 to 60.4)        | 13.6 (10.2 to 17.6)        | 5.0 (3.4 to 7.1)              | 3.4 (1.7 to 6.6)                | 27.6 (21.3 to 37.0)               | 179.5 (149.2 to 218.7) | 49.2 (37.1 to 63.8)        | 18.0 (12.5 to 25.6)           | 12.4 (6.1 to 24.1)              | 99.9 (77.1 to 134.2)              |
| Malawi  | 2038 | 50.2 (41.8 to 61.2)        | 13.8 (10.4 to 18.0)        | 5.0 (3.5 to 7.2)              | 3.5 (1.7 to 6.8)                | 27.8 (21.2 to 38.1)               | 181.8 (151.5 to 221.8) | 50.1 (37.7 to 65.0)        | 18.2 (12.6 to 25.9)           | 12.6 (6.2 to 24.5)              | 100.8 (76.8 to 138.0)             |
| Malawi  | 2039 | 50.8 (42.0 to 62.3)        | 14.1 (10.6 to 18.3)        | 5.1 (3.5 to 7.2)              | 3.6 (1.7 to 6.9)                | 28.1 (21.3 to 38.3)               | 184.0 (152.1 to 225.6) | 51.0 (38.3 to 66.2)        | 18.5 (12.8 to 26.2)           | 12.9 (6.3 to 25.0)              | 101.7 (77.2 to 138.9)             |
| Malawi  | 2040 | 51.5 (42.9 to 63.7)        | 14.3 (10.8 to 18.6)        | 5.2 (3.6 to 7.3)              | 3.6 (1.8 to 7.0)                | 28.4 (21.5 to 38.8)               | 186.5 (155.3 to 230.6) | 51.9 (38.9 to 67.4)        | 18.7 (12.9 to 26.6)           | 13.1 (6.4 to 25.4)              | 102.7 (78.0 to 140.5)             |
| Malawi  | 2041 | 52.2 (43.3 to 64.2)        | 14.6 (10.9 to 18.9)        | 5.2 (3.6 to 7.4)              | 3.7 (1.8 to 7.1)                | 28.7 (21.5 to 40.3)               | 189.0 (156.9 to 232.4) | 52.8 (39.5 to 68.6)        | 18.9 (13.1 to 26.8)           | 13.4 (6.6 to 25.9)              | 103.9 (78.0 to 145.9)             |
| Malawi  | 2042 | 52.9 (43.7 to 66.9)        | 14.8 (11.1 to 19.3)        | 5.3 (3.6 to 7.5)              | 3.8 (1.8 to 7.3)                | 29.1 (21.6 to 42.1)               | 191.6 (158.2 to 242.2) | 53.7 (40.1 to 69.8)        | 19.1 (13.2 to 27.1)           | 13.6 (6.7 to 26.3)              | 105.3 (78.3 to 152.5)             |
| Malawi  | 2043 | 53.7 (44.3 to 67.7)        | 15.1 (11.3 to 19.6)        | 5.3 (3.7 to 7.6)              | 3.8 (1.9 to 7.4)                | 29.4 (21.8 to 43.2)               | 194.3 (160.4 to 245.1) | 54.6 (40.8 to 71.1)        | 19.3 (13.4 to 27.5)           | 13.9 (6.8 to 26.8)              | 106.5 (79.1 to 156.6)             |

| Country  | Year | 2018 US Dollars per capita |                            |                               |                                 |                                   | 2018 PPP per capita    |                            |                               |                                 |                                   |
|----------|------|----------------------------|----------------------------|-------------------------------|---------------------------------|-----------------------------------|------------------------|----------------------------|-------------------------------|---------------------------------|-----------------------------------|
|          |      | Health spending            | Government health spending | Out-of-pocket health spending | Prepaid private health spending | Development assistance for health | Health spending        | Government health spending | Out-of-pocket health spending | Prepaid private health spending | Development assistance for health |
| Malawi   | 2044 | 54.4 (44.7 to 69.0)        | 15.3 (11.4 to 20.0)        | 5.4 (3.7 to 7.7)              | 3.9 (1.9 to 7.6)                | 29.8 (22.0 to 43.6)               | 197.2 (161.7 to 250.0) | 55.5 (41.3 to 72.5)        | 19.6 (13.5 to 27.8)           | 14.1 (6.9 to 27.3)              | 108.0 (79.7 to 158.0)             |
| Malawi   | 2045 | 55.3 (45.2 to 71.4)        | 15.6 (11.6 to 20.4)        | 5.5 (3.8 to 7.8)              | 4.0 (1.9 to 7.7)                | 30.3 (21.9 to 45.6)               | 200.1 (163.7 to 258.5) | 56.4 (41.9 to 73.9)        | 19.8 (13.7 to 28.1)           | 14.4 (7.0 to 27.9)              | 109.6 (79.3 to 165.2)             |
| Malawi   | 2046 | 56.1 (45.8 to 72.9)        | 15.8 (11.7 to 20.8)        | 5.5 (3.8 to 7.8)              | 4.0 (2.0 to 7.8)                | 30.7 (22.1 to 46.5)               | 203.1 (166.0 to 264.0) | 57.3 (42.5 to 75.2)        | 20.0 (13.9 to 28.4)           | 14.6 (7.1 to 28.4)              | 111.2 (80.2 to 168.5)             |
| Malawi   | 2047 | 57.0 (46.1 to 74.5)        | 16.1 (11.9 to 21.1)        | 5.6 (3.9 to 7.9)              | 4.1 (2.0 to 8.0)                | 31.2 (22.4 to 49.2)               | 206.4 (167.0 to 269.7) | 58.3 (43.2 to 76.5)        | 20.2 (14.0 to 28.7)           | 14.9 (7.3 to 28.9)              | 112.9 (81.2 to 178.1)             |
| Malawi   | 2048 | 58.0 (46.8 to 78.0)        | 16.4 (12.1 to 21.5)        | 5.7 (3.9 to 8.0)              | 4.2 (2.0 to 8.1)                | 31.7 (22.7 to 51.2)               | 209.9 (169.6 to 282.6) | 59.4 (44.0 to 77.9)        | 20.5 (14.2 to 29.1)           | 15.2 (7.4 to 29.5)              | 114.9 (82.2 to 185.3)             |
| Malawi   | 2049 | 58.9 (47.7 to 79.4)        | 16.7 (12.3 to 21.9)        | 5.7 (4.0 to 8.1)              | 4.3 (2.1 to 8.3)                | 32.3 (22.9 to 51.9)               | 213.4 (172.8 to 287.6) | 60.4 (44.7 to 79.4)        | 20.7 (14.3 to 29.5)           | 15.5 (7.5 to 30.1)              | 116.8 (83.0 to 187.9)             |
| Malawi   | 2050 | 60.0 (48.1 to 82.0)        | 17.0 (12.5 to 22.3)        | 5.8 (4.0 to 8.2)              | 4.3 (2.1 to 8.5)                | 32.9 (23.3 to 53.1)               | 217.2 (174.2 to 296.9) | 61.4 (45.4 to 80.8)        | 20.9 (14.5 to 29.8)           | 15.7 (7.6 to 30.7)              | 119.1 (84.2 to 192.4)             |
| Malaysia | 1995 | 147.5 (128.5 to 170.4)     | 70.5 (58.0 to 83.8)        | 56.3 (43.8 to 69.3)           | 18.3 (10.2 to 29.9)             | 2.4 (2.4 to 2.4)                  | 416.5 (362.9 to 481.3) | 199.2 (163.9 to 236.5)     | 158.9 (123.8 to 195.8)        | 51.7 (28.8 to 84.5)             | 6.7 (6.7 to 6.7)                  |
| Malaysia | 1996 | 155.7 (137.3 to 177.5)     | 74.7 (63.1 to 87.8)        | 58.4 (46.5 to 71.5)           | 19.3 (11.1 to 30.8)             | 3.2 (3.2 to 3.2)                  | 439.7 (387.6 to 501.1) | 211.0 (178.2 to 248.1)     | 164.9 (131.4 to 202.0)        | 54.5 (31.5 to 86.9)             | 9.1 (9.1 to 9.1)                  |
| Malaysia | 1997 | 159.6 (141.7 to 180.5)     | 75.8 (64.6 to 88.3)        | 59.9 (47.9 to 72.9)           | 19.9 (11.7 to 30.8)             | 4.0 (4.0 to 4.0)                  | 450.7 (400.1 to 509.7) | 214.2 (182.5 to 249.2)     | 169.1 (135.4 to 206.0)        | 56.1 (33.0 to 86.9)             | 11.3 (11.3 to 11.3)               |
| Malaysia | 1998 | 153.0 (135.9 to 173.3)     | 71.7 (61.1 to 83.7)        | 58.4 (47.2 to 69.7)           | 19.3 (11.7 to 29.8)             | 3.6 (3.6 to 3.6)                  | 432.0 (383.7 to 489.5) | 202.4 (172.6 to 236.3)     | 165.0 (133.3 to 196.9)        | 54.6 (33.0 to 84.3)             | 10.1 (10.1 to 10.1)               |
| Malaysia | 1999 | 159.4 (141.9 to 180.5)     | 76.6 (65.8 to 88.9)        | 61.4 (50.7 to 73.6)           | 20.6 (12.7 to 31.8)             | 0.9 (0.9 to 0.9)                  | 450.0 (400.8 to 509.8) | 216.2 (185.8 to 251.1)     | 173.3 (143.2 to 207.9)        | 58.1 (35.9 to 89.9)             | 2.5 (2.5 to 2.5)                  |
| Malaysia | 2000 | 174.3 (155.1 to 196.9)     | 84.8 (73.2 to 98.6)        | 66.5 (54.9 to 79.4)           | 22.4 (14.1 to 35.1)             | 0.7 (0.7 to 0.7)                  | 492.1 (437.8 to 555.9) | 239.3 (206.6 to 278.3)     | 187.7 (155.1 to 224.2)        | 63.2 (40.0 to 99.2)             | 1.9 (1.9 to 1.9)                  |
| Malaysia | 2001 | 181.7 (161.9 to 204.1)     | 90.0 (78.1 to 103.9)       | 67.4 (55.5 to 80.8)           | 23.9 (15.1 to 36.6)             | 0.5 (0.5 to 0.5)                  | 513.2 (457.3 to 576.3) | 254.2 (220.7 to 293.5)     | 190.2 (156.8 to 228.1)        | 67.4 (42.7 to 103.2)            | 1.3 (1.3 to 1.3)                  |
| Malaysia | 2002 | 193.1 (172.5 to 215.3)     | 97.5 (85.0 to 111.5)       | 69.9 (57.9 to 84.0)           | 25.7 (16.0 to 38.5)             | 0.1 (0.1 to 0.1)                  | 545.2 (487.1 to 608.1) | 275.3 (240.1 to 314.8)     | 197.3 (163.5 to 237.2)        | 72.4 (45.2 to 108.8)            | 0.3 (0.3 to 0.3)                  |
| Malaysia | 2003 | 208.1 (187.5 to 231.2)     | 105.9 (92.3 to 120.0)      | 74.6 (62.6 to 89.5)           | 27.4 (17.3 to 41.9)             | 0.2 (0.2 to 0.2)                  | 587.5 (529.5 to 652.9) | 299.0 (260.7 to 338.9)     | 210.6 (176.7 to 252.6)        | 77.5 (48.9 to 118.3)            | 0.4 (0.4 to 0.4)                  |
| Malaysia | 2004 | 218.7 (198.0 to 242.1)     | 111.8 (97.8 to 126.3)      | 78.9 (66.8 to 93.3)           | 27.9 (17.8 to 42.5)             | 0.1 (0.1 to 0.1)                  | 617.5 (559.0 to 683.8) | 315.8 (276.1 to 356.6)     | 222.7 (188.7 to 263.5)        | 78.8 (50.4 to 119.9)            | 0.2 (0.2 to 0.2)                  |
| Malaysia | 2005 | 226.6 (205.3 to 249.5)     | 116.4 (102.6 to 130.3)     | 82.2 (69.2 to 95.6)           | 28.0 (17.8 to 42.9)             | 0.1 (0.1 to 0.1)                  | 639.9 (579.8 to 704.7) | 328.6 (289.8 to 367.9)     | 232.0 (195.4 to 270.1)        | 79.0 (50.2 to 121.1)            | 0.2 (0.2 to 0.2)                  |
| Malaysia | 2006 | 243.4 (220.7 to 267.0)     | 127.3 (112.8 to 142.7)     | 86.7 (73.2 to 100.1)          | 29.3 (18.6 to 43.8)             | 0.0 (0.0 to 0.0)                  | 687.2 (623.2 to 754.0) | 359.4 (318.4 to 403.1)     | 244.9 (206.7 to 282.5)        | 82.7 (52.4 to 123.7)            | 0.1 (0.1 to 0.1)                  |
| Malaysia | 2007 | 260.1 (235.6 to 284.4)     | 137.5 (122.3 to 153.5)     | 91.5 (76.7 to 106.1)          | 31.0 (19.9 to 45.7)             | 0.0 (0.0 to 0.0)                  | 734.5 (665.4 to 803.2) | 388.4 (345.3 to 433.6)     | 258.3 (216.7 to 299.7)        | 87.7 (56.2 to 129.2)            | 0.1 (0.1 to 0.1)                  |
| Malaysia | 2008 | 272.2 (247.0 to 297.6)     | 145.6 (129.1 to 162.2)     | 94.4 (79.2 to 110.0)          | 32.1 (20.3 to 47.2)             | 0.0 (0.0 to 0.0)                  | 768.6 (697.6 to 840.4) | 411.2 (364.6 to 458.0)     | 266.7 (223.5 to 310.7)        | 90.6 (57.3 to 133.3)            | 0.1 (0.1 to 0.1)                  |

| Country  | Year | 2018 US Dollars per capita |                            |                               |                                 |                                   | 2018 PPP per capita       |                            |                               |                                 |                                   |
|----------|------|----------------------------|----------------------------|-------------------------------|---------------------------------|-----------------------------------|---------------------------|----------------------------|-------------------------------|---------------------------------|-----------------------------------|
|          |      | Health spending            | Government health spending | Out-of-pocket health spending | Prepaid private health spending | Development assistance for health | Health spending           | Government health spending | Out-of-pocket health spending | Prepaid private health spending | Development assistance for health |
| Malaysia | 2009 | 271.1 (247.2 to 296.6)     | 145.2 (128.1 to 162.6)     | 93.5 (78.9 to 108.6)          | 32.4 (21.0 to 47.3)             | 0.0 (0.0 to 0.0)                  | 765.7 (698.0 to 837.7)    | 410.0 (361.7 to 459.2)     | 264.0 (222.9 to 306.7)        | 91.6 (59.4 to 133.7)            | 0.1 (0.1 to 0.1)                  |
| Malaysia | 2010 | 283.2 (257.9 to 309.7)     | 151.6 (134.4 to 168.8)     | 97.8 (82.7 to 113.8)          | 33.8 (22.2 to 49.1)             | 0.0 (0.0 to 0.0)                  | 799.6 (728.4 to 874.5)    | 428.1 (379.6 to 476.8)     | 276.1 (233.6 to 321.4)        | 95.4 (62.6 to 138.7)            | 0.1 (0.1 to 0.1)                  |
| Malaysia | 2011 | 302.0 (275.7 to 330.6)     | 161.7 (143.7 to 181.5)     | 104.8 (89.4 to 122.0)         | 35.4 (23.5 to 51.9)             | 0.1 (0.1 to 0.1)                  | 852.8 (778.6 to 933.7)    | 456.6 (405.8 to 512.6)     | 296.0 (252.5 to 344.6)        | 99.9 (66.3 to 146.6)            | 0.2 (0.2 to 0.2)                  |
| Malaysia | 2012 | 323.4 (295.7 to 356.3)     | 173.5 (154.8 to 194.6)     | 112.6 (96.8 to 130.8)         | 37.2 (24.1 to 55.4)             | 0.1 (0.1 to 0.1)                  | 913.3 (834.9 to 1006.0)   | 489.9 (437.2 to 549.7)     | 318.0 (273.3 to 369.4)        | 105.0 (68.1 to 156.3)           | 0.4 (0.4 to 0.4)                  |
| Malaysia | 2013 | 342.7 (313.9 to 377.7)     | 183.9 (163.9 to 205.2)     | 120.6 (103.7 to 141.4)        | 38.2 (24.7 to 57.0)             | 0.1 (0.1 to 0.1)                  | 967.9 (886.3 to 1066.6)   | 519.2 (463.0 to 579.5)     | 340.5 (292.8 to 399.3)        | 107.8 (69.8 to 161.0)           | 0.4 (0.4 to 0.4)                  |
| Malaysia | 2014 | 370.0 (336.7 to 408.2)     | 198.2 (177.0 to 222.2)     | 130.8 (111.3 to 153.7)        | 40.8 (26.5 to 61.2)             | 0.1 (0.1 to 0.1)                  | 1045.0 (950.9 to 1152.8)  | 559.8 (500.0 to 627.5)     | 369.5 (314.4 to 434.1)        | 115.3 (74.8 to 172.8)           | 0.4 (0.4 to 0.4)                  |
| Malaysia | 2015 | 393.3 (354.7 to 437.0)     | 208.2 (183.8 to 234.3)     | 140.3 (117.8 to 166.0)        | 44.8 (28.3 to 69.2)             | 0.1 (0.1 to 0.1)                  | 1110.8 (1001.6 to 1234.0) | 587.8 (519.0 to 661.6)     | 396.2 (332.8 to 468.8)        | 126.4 (80.0 to 195.4)           | 0.3 (0.3 to 0.3)                  |
| Malaysia | 2016 | 407.4 (365.5 to 454.8)     | 212.4 (185.4 to 240.6)     | 147.5 (121.6 to 177.9)        | 47.3 (29.1 to 74.2)             | 0.2 (0.2 to 0.2)                  | 1150.5 (1032.2 to 1284.3) | 599.8 (523.5 to 679.4)     | 416.5 (343.3 to 502.3)        | 133.7 (82.0 to 209.4)           | 0.5 (0.5 to 0.5)                  |
| Malaysia | 2017 | 421.6 (376.3 to 472.2)     | 218.8 (190.5 to 248.7)     | 153.1 (126.4 to 184.4)        | 49.5 (30.4 to 77.6)             | 0.1 (0.1 to 0.1)                  | 1190.4 (1062.7 to 1333.5) | 617.8 (538.0 to 702.3)     | 432.4 (356.8 to 520.7)        | 139.8 (86.0 to 219.2)           | 0.4 (0.4 to 0.4)                  |
| Malaysia | 2018 | 433.0 (386.6 to 487.2)     | 224.5 (195.4 to 254.9)     | 157.4 (129.7 to 190.0)        | 51.1 (31.4 to 80.2)             | 0.1 (0.1 to 0.1)                  | 1222.8 (1091.7 to 1375.9) | 633.9 (551.7 to 719.9)     | 444.3 (366.3 to 536.5)        | 144.2 (88.7 to 226.4)           | 0.4 (0.4 to 0.4)                  |
| Malaysia | 2019 | 447.0 (397.5 to 500.4)     | 231.9 (202.1 to 263.3)     | 162.3 (134.2 to 194.9)        | 52.7 (32.4 to 82.6)             | 0.1 (0.1 to 0.1)                  | 1262.3 (1122.6 to 1413.1) | 655.0 (570.7 to 743.6)     | 458.2 (379.0 to 550.4)        | 148.8 (91.5 to 233.2)           | 0.4 (0.3 to 0.4)                  |
| Malaysia | 2020 | 461.9 (410.4 to 516.9)     | 239.9 (208.6 to 273.6)     | 167.5 (138.5 to 202.6)        | 54.3 (33.4 to 85.1)             | 0.1 (0.1 to 0.1)                  | 1304.3 (1158.9 to 1459.6) | 677.4 (589.0 to 772.6)     | 473.1 (391.1 to 572.1)        | 153.4 (94.4 to 240.3)           | 0.4 (0.3 to 0.4)                  |
| Malaysia | 2021 | 476.9 (424.0 to 532.9)     | 248.2 (216.1 to 282.5)     | 172.6 (142.1 to 209.1)        | 56.0 (34.5 to 87.7)             | 0.1 (0.1 to 0.1)                  | 1346.7 (1197.3 to 1504.9) | 700.8 (610.4 to 797.6)     | 487.4 (401.4 to 590.3)        | 158.1 (97.3 to 247.7)           | 0.4 (0.3 to 0.4)                  |
| Malaysia | 2022 | 490.8 (436.0 to 548.9)     | 255.6 (222.4 to 290.9)     | 177.6 (145.5 to 214.2)        | 57.5 (35.5 to 90.2)             | 0.1 (0.1 to 0.1)                  | 1386.0 (1231.3 to 1550.1) | 721.7 (628.1 to 821.5)     | 501.5 (411.0 to 604.9)        | 162.5 (100.2 to 254.7)          | 0.4 (0.3 to 0.4)                  |
| Malaysia | 2023 | 505.5 (450.2 to 567.5)     | 263.7 (229.5 to 300.1)     | 182.5 (150.2 to 220.3)        | 59.2 (36.6 to 92.8)             | 0.1 (0.1 to 0.2)                  | 1427.6 (1271.5 to 1602.4) | 744.6 (648.0 to 847.5)     | 515.4 (424.2 to 622.0)        | 167.1 (103.3 to 262.1)          | 0.4 (0.3 to 0.4)                  |
| Malaysia | 2024 | 520.5 (463.0 to 583.1)     | 272.0 (236.3 to 310.2)     | 187.5 (154.2 to 227.7)        | 60.8 (37.7 to 95.6)             | 0.1 (0.0 to 0.2)                  | 1469.7 (1307.5 to 1646.6) | 768.1 (667.4 to 876.1)     | 529.4 (435.3 to 643.0)        | 171.8 (106.3 to 270.1)          | 0.4 (0.0 to 0.5)                  |
| Malaysia | 2025 | 535.7 (476.9 to 600.8)     | 280.4 (242.5 to 319.9)     | 192.6 (158.1 to 234.1)        | 62.5 (38.7 to 98.3)             | 0.1 (0.0 to 0.2)                  | 1512.8 (1346.8 to 1696.6) | 791.9 (684.8 to 903.4)     | 544.0 (446.4 to 661.2)        | 176.6 (109.4 to 277.7)          | 0.3 (0.0 to 0.5)                  |
| Malaysia | 2026 | 550.8 (488.8 to 620.2)     | 288.6 (249.7 to 329.5)     | 197.8 (161.6 to 240.8)        | 64.2 (39.8 to 101.0)            | 0.1 (0.0 to 0.2)                  | 1555.3 (1380.3 to 1751.4) | 815.1 (705.0 to 930.5)     | 558.6 (456.4 to 680.0)        | 181.3 (112.5 to 285.2)          | 0.3 (0.0 to 0.5)                  |
| Malaysia | 2027 | 566.0 (503.9 to 637.2)     | 296.9 (255.8 to 339.3)     | 203.1 (165.1 to 248.3)        | 65.9 (41.0 to 103.7)            | 0.1 (0.0 to 0.2)                  | 1598.3 (1423.1 to 1799.3) | 838.5 (722.3 to 958.2)     | 573.4 (466.3 to 701.2)        | 186.0 (115.7 to 292.8)          | 0.3 (0.0 to 0.5)                  |
| Malaysia | 2028 | 581.6 (515.3 to 656.0)     | 305.5 (262.7 to 348.8)     | 208.4 (168.4 to 258.3)        | 67.6 (42.2 to 106.5)            | 0.1 (0.0 to 0.2)                  | 1642.5 (1455.2 to 1852.4) | 862.8 (741.9 to 984.8)     | 588.6 (475.5 to 729.5)        | 190.9 (119.1 to 300.7)          | 0.2 (0.0 to 0.5)                  |
| Malaysia | 2029 | 597.5 (528.6 to 677.9)     | 314.2 (269.9 to 359.6)     | 213.8 (171.5 to 266.9)        | 69.4 (43.3 to 109.3)            | 0.1 (0.0 to 0.2)                  | 1687.3 (1492.8 to 1914.2) | 887.4 (762.1 to 1015.6)    | 603.8 (484.3 to 753.6)        | 195.9 (122.3 to 308.7)          | 0.2 (0.0 to 0.5)                  |

| Country  | Year | 2018 US Dollars per capita |                            |                               |                                 |                                   | 2018 PPP per capita       |                            |                               |                                 |                                   |
|----------|------|----------------------------|----------------------------|-------------------------------|---------------------------------|-----------------------------------|---------------------------|----------------------------|-------------------------------|---------------------------------|-----------------------------------|
|          |      | Health spending            | Government health spending | Out-of-pocket health spending | Prepaid private health spending | Development assistance for health | Health spending           | Government health spending | Out-of-pocket health spending | Prepaid private health spending | Development assistance for health |
| Malaysia | 2030 | 612.6 (540.9 to 693.2)     | 322.2 (276.5 to 371.4)     | 219.2 (174.7 to 274.9)        | 71.1 (44.5 to 112.1)            | 0.1 (0.0 to 0.2)                  | 1729.8 (1527.4 to 1957.5) | 909.9 (780.9 to 1048.7)    | 619.0 (493.4 to 776.2)        | 200.8 (125.5 to 316.5)          | 0.2 (0.0 to 0.5)                  |
| Malaysia | 2031 | 627.1 (551.4 to 712.4)     | 329.7 (282.0 to 380.8)     | 224.5 (177.5 to 282.5)        | 72.9 (45.5 to 114.9)            | 0.1 (0.0 to 0.2)                  | 1770.9 (1557.2 to 2011.8) | 931.0 (796.3 to 1075.4)    | 634.1 (501.2 to 797.7)        | 205.7 (128.5 to 324.4)          | 0.1 (0.0 to 0.5)                  |
| Malaysia | 2032 | 641.9 (564.0 to 731.8)     | 337.2 (288.1 to 389.8)     | 229.9 (181.0 to 291.0)        | 74.6 (46.6 to 117.8)            | 0.0 (0.0 to 0.2)                  | 1812.5 (1592.6 to 2066.5) | 952.3 (813.6 to 1100.6)    | 649.3 (511.1 to 821.7)        | 210.8 (131.7 to 332.5)          | 0.1 (0.0 to 0.5)                  |
| Malaysia | 2033 | 657.2 (577.2 to 752.2)     | 345.2 (294.6 to 401.2)     | 235.4 (183.3 to 298.2)        | 76.5 (47.8 to 120.9)            | 0.0 (0.0 to 0.2)                  | 1855.9 (1629.9 to 2124.1) | 974.9 (831.9 to 1133.0)    | 664.8 (517.5 to 842.1)        | 216.1 (135.1 to 341.3)          | 0.1 (0.0 to 0.6)                  |
| Malaysia | 2034 | 672.7 (585.0 to 775.1)     | 353.3 (300.8 to 411.3)     | 241.0 (186.2 to 308.7)        | 78.4 (49.0 to 124.1)            | 0.0 (0.0 to 0.2)                  | 1899.6 (1651.9 to 2188.9) | 997.6 (849.3 to 1161.6)    | 680.4 (525.8 to 871.8)        | 221.4 (138.3 to 350.3)          | 0.1 (0.0 to 0.6)                  |
| Malaysia | 2035 | 688.9 (602.0 to 796.8)     | 361.8 (308.3 to 423.3)     | 246.6 (190.0 to 319.5)        | 80.4 (50.2 to 127.4)            | 0.0 (0.0 to 0.2)                  | 1945.3 (1700.0 to 2249.9) | 1021.8 (870.5 to 1195.2)   | 696.4 (536.5 to 902.1)        | 227.0 (141.9 to 359.8)          | 0.1 (0.0 to 0.6)                  |
| Malaysia | 2036 | 705.0 (615.8 to 814.5)     | 370.3 (315.2 to 433.8)     | 252.3 (193.8 to 327.9)        | 82.4 (51.4 to 130.8)            | 0.0 (0.0 to 0.2)                  | 1990.8 (1739.0 to 2299.9) | 1045.7 (890.0 to 1225.0)   | 712.4 (547.4 to 925.9)        | 232.7 (145.2 to 369.3)          | 0.1 (0.0 to 0.6)                  |
| Malaysia | 2037 | 721.6 (627.3 to 832.8)     | 379.1 (321.0 to 446.3)     | 258.0 (197.8 to 336.3)        | 84.5 (52.6 to 134.3)            | 0.0 (0.0 to 0.2)                  | 2037.7 (1771.5 to 2351.6) | 1070.5 (906.4 to 1260.4)   | 728.6 (558.5 to 949.8)        | 238.5 (148.5 to 379.2)          | 0.1 (0.0 to 0.6)                  |
| Malaysia | 2038 | 738.4 (639.2 to 854.3)     | 388.1 (327.3 to 456.8)     | 263.8 (201.0 to 345.9)        | 86.6 (53.9 to 137.9)            | 0.0 (0.0 to 0.2)                  | 2085.3 (1805.1 to 2412.3) | 1095.8 (924.2 to 1289.8)   | 744.9 (567.6 to 976.7)        | 244.5 (152.2 to 389.3)          | 0.1 (0.0 to 0.6)                  |
| Malaysia | 2039 | 755.5 (655.5 to 882.5)     | 397.2 (334.0 to 468.9)     | 269.6 (204.6 to 353.6)        | 88.7 (55.2 to 141.5)            | 0.0 (0.0 to 0.2)                  | 2133.5 (1851.0 to 2492.1) | 1121.5 (943.2 to 1324.1)   | 761.3 (577.7 to 998.5)        | 250.6 (155.9 to 399.7)          | 0.1 (0.0 to 0.6)                  |
| Malaysia | 2040 | 773.6 (668.6 to 901.7)     | 406.9 (340.4 to 483.9)     | 275.6 (208.5 to 362.5)        | 91.1 (56.6 to 145.4)            | 0.0 (0.0 to 0.2)                  | 2184.6 (1888.0 to 2546.4) | 1149.2 (961.1 to 1366.4)   | 778.3 (588.8 to 1023.6)       | 257.1 (159.9 to 410.7)          | 0.1 (0.0 to 0.6)                  |
| Malaysia | 2041 | 791.4 (680.0 to 922.1)     | 416.5 (347.1 to 496.0)     | 281.5 (212.6 to 372.1)        | 93.4 (58.0 to 149.3)            | 0.0 (0.0 to 0.2)                  | 2234.8 (1920.2 to 2604.0) | 1176.1 (980.1 to 1400.7)   | 795.0 (600.2 to 1050.7)       | 263.6 (163.7 to 421.7)          | 0.1 (0.0 to 0.7)                  |
| Malaysia | 2042 | 809.7 (694.2 to 944.7)     | 426.4 (353.1 to 509.1)     | 287.5 (216.5 to 381.0)        | 95.8 (59.3 to 153.4)            | 0.0 (0.0 to 0.2)                  | 2286.5 (1960.2 to 2667.8) | 1204.1 (997.0 to 1437.7)   | 811.9 (611.3 to 1075.8)       | 270.4 (167.5 to 433.3)          | 0.1 (0.0 to 0.7)                  |
| Malaysia | 2043 | 828.3 (709.0 to 973.8)     | 436.5 (361.0 to 520.4)     | 293.5 (220.2 to 390.1)        | 98.2 (60.6 to 157.2)            | 0.0 (0.0 to 0.2)                  | 2338.9 (2002.3 to 2749.9) | 1232.7 (1019.6 to 1469.5)  | 828.8 (621.8 to 1101.5)       | 277.3 (171.2 to 444.1)          | 0.1 (0.0 to 0.7)                  |
| Malaysia | 2044 | 847.3 (721.7 to 1003.5)    | 447.0 (368.1 to 536.1)     | 299.5 (224.0 to 398.7)        | 100.7 (62.0 to 161.1)           | 0.0 (0.0 to 0.2)                  | 2392.6 (2037.9 to 2833.7) | 1262.3 (1039.5 to 1513.8)  | 845.9 (632.4 to 1126.0)       | 284.3 (175.1 to 454.9)          | 0.1 (0.0 to 0.7)                  |
| Malaysia | 2045 | 867.1 (741.8 to 1030.3)    | 458.2 (376.1 to 549.3)     | 305.6 (227.7 to 408.2)        | 103.2 (63.4 to 165.0)           | 0.0 (0.0 to 0.3)                  | 2448.5 (2094.7 to 2909.4) | 1293.9 (1062.0 to 1551.2)  | 863.1 (643.1 to 1152.6)       | 291.5 (179.0 to 465.9)          | 0.1 (0.0 to 0.7)                  |
| Malaysia | 2046 | 886.6 (754.9 to 1045.2)    | 469.3 (385.3 to 563.8)     | 311.6 (231.5 to 416.9)        | 105.7 (64.7 to 168.8)           | 0.0 (0.0 to 0.3)                  | 2503.5 (2131.9 to 2951.6) | 1325.2 (1088.1 to 1592.2)  | 879.8 (653.8 to 1177.1)       | 298.5 (182.7 to 476.6)          | 0.1 (0.0 to 0.7)                  |
| Malaysia | 2047 | 906.0 (770.7 to 1069.2)    | 480.5 (390.5 to 578.2)     | 317.4 (235.9 to 425.2)        | 108.1 (66.1 to 172.5)           | 0.0 (0.0 to 0.3)                  | 2558.5 (2176.3 to 3019.2) | 1356.8 (1102.8 to 1632.8)  | 896.3 (666.2 to 1200.8)       | 305.4 (186.6 to 487.2)          | 0.1 (0.0 to 0.7)                  |
| Malaysia | 2048 | 926.5 (785.9 to 1091.2)    | 492.5 (399.3 to 595.4)     | 323.4 (240.1 to 433.9)        | 110.6 (67.5 to 176.8)           | 0.0 (0.0 to 0.3)                  | 2616.3 (2219.3 to 3081.4) | 1390.7 (1127.5 to 1681.4)  | 913.1 (677.9 to 1225.2)       | 312.4 (190.6 to 499.2)          | 0.1 (0.0 to 0.8)                  |
| Malaysia | 2049 | 946.8 (801.3 to 1120.1)    | 504.4 (406.8 to 611.8)     | 329.3 (244.9 to 442.3)        | 113.1 (68.7 to 180.6)           | 0.0 (0.0 to 0.3)                  | 2673.7 (2262.9 to 3163.2) | 1424.4 (1148.7 to 1727.5)  | 929.8 (691.5 to 1249.0)       | 319.4 (194.1 to 509.9)          | 0.1 (0.0 to 0.8)                  |
| Malaysia | 2050 | 967.6 (818.3 to 1146.3)    | 516.8 (415.7 to 629.5)     | 335.2 (248.9 to 451.1)        | 115.5 (70.0 to 184.3)           | 0.0 (0.0 to 0.3)                  | 2732.3 (2310.9 to 3237.1) | 1459.3 (1173.8 to 1777.6)  | 946.6 (702.8 to 1274.0)       | 326.3 (197.6 to 520.5)          | 0.1 (0.0 to 0.8)                  |

| Country  | Year | 2018 US Dollars per capita |                            |                               |                                 |                                   | 2018 PPP per capita       |                            |                               |                                 |                                   |
|----------|------|----------------------------|----------------------------|-------------------------------|---------------------------------|-----------------------------------|---------------------------|----------------------------|-------------------------------|---------------------------------|-----------------------------------|
|          |      | Health spending            | Government health spending | Out-of-pocket health spending | Prepaid private health spending | Development assistance for health | Health spending           | Government health spending | Out-of-pocket health spending | Prepaid private health spending | Development assistance for health |
| Maldives | 1995 | 391.7 (350.1 to 434.3)     | 98.9 (81.5 to 118.3)       | 239.8 (207.3 to 272.0)        | 53.0 (36.1 to 75.4)             | 0.0 (0.0 to 0.0)                  | 618.6 (553.0 to 685.9)    | 156.2 (128.8 to 186.9)     | 378.7 (327.4 to 429.6)        | 83.7 (57.0 to 119.2)            | 0.0 (0.0 to 0.0)                  |
| Maldives | 1996 | 407.5 (369.6 to 446.6)     | 106.6 (89.0 to 126.2)      | 245.6 (217.8 to 273.6)        | 55.3 (38.6 to 76.5)             | 0.0 (0.0 to 0.0)                  | 643.6 (583.8 to 705.5)    | 168.4 (140.5 to 199.4)     | 387.9 (344.1 to 432.1)        | 87.3 (61.0 to 120.9)            | 0.0 (0.0 to 0.0)                  |
| Maldives | 1997 | 427.0 (391.1 to 465.8)     | 117.5 (99.1 to 138.9)      | 248.5 (223.1 to 276.4)        | 57.4 (41.1 to 77.8)             | 3.7 (3.7 to 3.7)                  | 674.5 (617.7 to 735.7)    | 185.5 (156.5 to 219.5)     | 392.5 (352.4 to 436.6)        | 90.7 (64.9 to 122.8)            | 5.8 (5.8 to 5.8)                  |
| Maldives | 1998 | 445.6 (408.8 to 483.6)     | 134.9 (114.4 to 158.5)     | 251.7 (226.9 to 279.9)        | 59.0 (42.0 to 79.7)             | 0.1 (0.1 to 0.1)                  | 703.8 (645.8 to 763.9)    | 213.0 (180.7 to 250.4)     | 397.5 (358.3 to 442.0)        | 93.1 (66.3 to 125.9)            | 0.1 (0.1 to 0.1)                  |
| Maldives | 1999 | 436.6 (401.4 to 473.1)     | 139.1 (119.4 to 162.2)     | 243.7 (218.6 to 270.7)        | 52.6 (37.2 to 71.6)             | 1.1 (1.1 to 1.1)                  | 689.6 (634.0 to 747.2)    | 219.7 (188.5 to 256.3)     | 385.0 (345.3 to 427.5)        | 83.1 (58.8 to 113.0)            | 1.7 (1.7 to 1.7)                  |
| Maldives | 2000 | 400.1 (366.9 to 431.7)     | 132.3 (114.7 to 152.5)     | 227.8 (205.9 to 250.2)        | 38.5 (27.0 to 52.8)             | 1.5 (1.5 to 1.5)                  | 631.9 (579.5 to 681.9)    | 208.9 (181.2 to 240.8)     | 359.9 (325.1 to 395.2)        | 60.8 (42.6 to 83.4)             | 2.4 (2.4 to 2.4)                  |
| Maldives | 2001 | 398.7 (365.3 to 429.8)     | 130.0 (113.5 to 148.7)     | 223.2 (201.4 to 244.9)        | 45.0 (31.5 to 61.0)             | 0.6 (0.6 to 0.6)                  | 629.8 (577.0 to 678.9)    | 205.3 (179.3 to 234.8)     | 352.5 (318.1 to 386.9)        | 71.1 (49.7 to 96.3)             | 0.9 (0.9 to 0.9)                  |
| Maldives | 2002 | 415.3 (382.3 to 449.0)     | 133.1 (116.7 to 152.2)     | 226.3 (203.5 to 251.1)        | 55.5 (39.2 to 75.8)             | 0.4 (0.4 to 0.4)                  | 656.0 (603.9 to 709.3)    | 210.2 (184.3 to 240.4)     | 357.5 (321.4 to 396.6)        | 87.6 (61.9 to 119.7)            | 0.7 (0.7 to 0.7)                  |
| Maldives | 2003 | 457.9 (422.7 to 494.9)     | 153.3 (135.3 to 174.0)     | 245.4 (221.9 to 272.1)        | 58.7 (41.8 to 79.6)             | 0.4 (0.4 to 0.4)                  | 723.2 (667.6 to 781.6)    | 242.2 (213.7 to 274.8)     | 387.6 (350.5 to 429.7)        | 92.7 (66.0 to 125.8)            | 0.7 (0.7 to 0.7)                  |
| Maldives | 2004 | 524.9 (487.1 to 566.9)     | 183.9 (163.4 to 205.7)     | 280.8 (255.8 to 309.2)        | 59.5 (42.6 to 80.1)             | 0.7 (0.7 to 0.7)                  | 829.1 (769.3 to 895.5)    | 290.5 (258.1 to 324.9)     | 443.5 (404.0 to 488.4)        | 94.0 (67.2 to 126.5)            | 1.1 (1.1 to 1.1)                  |
| Maldives | 2005 | 532.4 (497.8 to 573.2)     | 195.4 (175.4 to 217.0)     | 280.1 (255.0 to 309.0)        | 55.0 (39.4 to 74.3)             | 1.9 (1.9 to 1.9)                  | 840.8 (786.3 to 905.4)    | 308.6 (277.0 to 342.8)     | 442.4 (402.8 to 488.0)        | 86.8 (62.3 to 117.3)            | 3.0 (3.0 to 3.0)                  |
| Maldives | 2006 | 635.0 (595.5 to 680.9)     | 266.8 (242.0 to 294.8)     | 305.0 (278.5 to 335.0)        | 62.5 (44.6 to 83.4)             | 0.6 (0.6 to 0.6)                  | 1002.9 (940.6 to 1075.5)  | 421.4 (382.2 to 465.6)     | 481.8 (439.8 to 529.1)        | 98.8 (70.4 to 131.7)            | 1.0 (1.0 to 1.0)                  |
| Maldives | 2007 | 734.3 (691.0 to 783.7)     | 351.3 (321.5 to 383.7)     | 318.7 (292.6 to 348.0)        | 58.3 (41.7 to 79.1)             | 5.9 (5.9 to 5.9)                  | 1159.8 (1091.5 to 1237.8) | 554.9 (507.8 to 606.0)     | 503.4 (462.2 to 549.7)        | 92.1 (65.9 to 124.9)            | 9.4 (9.4 to 9.4)                  |
| Maldives | 2008 | 858.7 (809.9 to 913.9)     | 454.2 (418.5 to 491.8)     | 332.9 (304.8 to 361.6)        | 69.3 (49.8 to 93.8)             | 2.2 (2.2 to 2.2)                  | 1356.3 (1279.3 to 1443.4) | 717.4 (661.0 to 776.8)     | 525.8 (481.4 to 571.2)        | 109.5 (78.7 to 148.2)           | 3.6 (3.6 to 3.6)                  |
| Maldives | 2009 | 794.5 (748.3 to 843.5)     | 436.6 (403.5 to 469.4)     | 301.0 (274.1 to 327.8)        | 52.3 (38.6 to 69.3)             | 4.6 (4.6 to 4.6)                  | 1254.9 (1181.9 to 1332.4) | 689.6 (637.3 to 741.4)     | 475.4 (433.0 to 517.8)        | 82.6 (60.9 to 109.5)            | 7.3 (7.3 to 7.3)                  |
| Maldives | 2010 | 760.9 (716.6 to 807.7)     | 415.2 (383.1 to 448.1)     | 287.6 (260.5 to 315.5)        | 54.2 (40.5 to 71.8)             | 4.0 (4.0 to 4.0)                  | 1201.9 (1131.9 to 1275.8) | 655.8 (605.2 to 707.8)     | 454.2 (411.4 to 498.4)        | 85.5 (64.0 to 113.4)            | 6.3 (6.3 to 6.3)                  |
| Maldives | 2011 | 761.0 (717.0 to 804.7)     | 402.5 (369.7 to 433.7)     | 274.9 (249.1 to 302.9)        | 72.9 (55.3 to 96.7)             | 10.6 (10.6 to 10.6)               | 1201.9 (1132.4 to 1271.0) | 635.8 (584.0 to 684.9)     | 434.3 (393.5 to 478.4)        | 115.2 (87.3 to 152.7)           | 16.7 (16.7 to 16.7)               |
| Maldives | 2012 | 760.8 (719.5 to 804.4)     | 407.8 (375.8 to 438.5)     | 253.8 (229.6 to 280.3)        | 91.9 (70.8 to 118.9)            | 7.3 (7.3 to 7.3)                  | 1201.6 (1136.4 to 1270.5) | 644.1 (593.6 to 692.5)     | 400.8 (362.6 to 442.8)        | 145.1 (111.8 to 187.8)          | 11.6 (11.6 to 11.6)               |
| Maldives | 2013 | 773.1 (732.6 to 818.1)     | 440.3 (408.4 to 473.5)     | 235.4 (212.6 to 261.2)        | 94.6 (72.4 to 121.1)            | 2.8 (2.8 to 2.8)                  | 1221.0 (1157.1 to 1292.1) | 695.4 (645.0 to 747.9)     | 371.8 (335.8 to 412.6)        | 149.4 (114.3 to 191.3)          | 4.5 (4.5 to 4.5)                  |
| Maldives | 2014 | 813.2 (766.9 to 862.1)     | 508.5 (474.7 to 544.8)     | 215.0 (192.3 to 240.4)        | 88.1 (66.3 to 113.8)            | 1.6 (1.6 to 1.6)                  | 1284.4 (1211.3 to 1361.7) | 803.1 (749.8 to 860.6)     | 339.5 (303.7 to 379.7)        | 139.1 (104.7 to 179.7)          | 2.6 (2.6 to 2.6)                  |
| Maldives | 2015 | 876.2 (822.5 to 931.3)     | 594.2 (553.9 to 635.2)     | 194.1 (171.4 to 220.6)        | 85.4 (62.6 to 114.9)            | 2.4 (2.4 to 2.4)                  | 1383.9 (1299.0 to 1470.9) | 938.5 (874.9 to 1003.4)    | 306.6 (270.7 to 348.4)        | 134.9 (98.9 to 181.5)           | 3.9 (3.9 to 3.9)                  |

| Country  | Year | 2018 US Dollars per capita |                            |                               |                                 |                                   | 2018 PPP per capita       |                            |                               |                                 |                                   |
|----------|------|----------------------------|----------------------------|-------------------------------|---------------------------------|-----------------------------------|---------------------------|----------------------------|-------------------------------|---------------------------------|-----------------------------------|
|          |      | Health spending            | Government health spending | Out-of-pocket health spending | Prepaid private health spending | Development assistance for health | Health spending           | Government health spending | Out-of-pocket health spending | Prepaid private health spending | Development assistance for health |
| Maldives | 2016 | 974.4 (903.0 to 1046.8)    | 686.6 (632.9 to 741.5)     | 195.7 (168.7 to 227.2)        | 90.1 (62.6 to 125.2)            | 2.0 (2.0 to 2.0)                  | 1539.1 (1426.2 to 1653.3) | 1084.5 (999.6 to 1171.1)   | 309.2 (266.4 to 358.9)        | 142.3 (98.9 to 197.7)           | 3.1 (3.1 to 3.1)                  |
| Maldives | 2017 | 960.2 (893.3 to 1032.6)    | 666.3 (613.7 to 720.7)     | 199.9 (171.4 to 232.1)        | 93.6 (65.3 to 129.4)            | 0.3 (0.3 to 0.3)                  | 1516.6 (1410.9 to 1631.0) | 1052.4 (969.3 to 1138.3)   | 315.8 (270.7 to 366.6)        | 147.9 (103.1 to 204.4)          | 0.5 (0.5 to 0.5)                  |
| Maldives | 2018 | 982.9 (912.7 to 1059.8)    | 681.2 (626.6 to 738.1)     | 204.5 (175.5 to 237.4)        | 96.9 (67.6 to 134.0)            | 0.3 (0.3 to 0.3)                  | 1552.4 (1441.6 to 1673.9) | 1076.0 (989.7 to 1165.9)   | 323.0 (277.3 to 375.0)        | 153.0 (106.9 to 211.7)          | 0.4 (0.4 to 0.4)                  |
| Maldives | 2019 | 1009.6 (937.1 to 1091.5)   | 701.1 (645.7 to 758.8)     | 208.4 (178.3 to 242.6)        | 99.8 (69.7 to 138.3)            | 0.3 (0.3 to 0.3)                  | 1594.7 (1480.1 to 1724.1) | 1107.4 (1019.9 to 1198.6)  | 329.2 (281.6 to 383.3)        | 157.7 (110.1 to 218.4)          | 0.4 (0.4 to 0.5)                  |
| Maldives | 2020 | 1034.9 (960.2 to 1116.5)   | 720.3 (663.0 to 779.8)     | 211.5 (180.6 to 245.9)        | 102.7 (71.6 to 142.2)           | 0.3 (0.3 to 0.3)                  | 1634.5 (1516.6 to 1763.4) | 1137.7 (1047.1 to 1231.7)  | 334.1 (285.3 to 388.4)        | 162.3 (113.1 to 224.6)          | 0.4 (0.4 to 0.5)                  |
| Maldives | 2021 | 1058.0 (981.1 to 1143.7)   | 737.8 (678.7 to 799.4)     | 214.5 (183.3 to 249.2)        | 105.4 (73.6 to 145.7)           | 0.3 (0.3 to 0.3)                  | 1671.0 (1549.6 to 1806.4) | 1165.4 (1071.9 to 1262.6)  | 338.7 (289.5 to 393.7)        | 166.5 (116.2 to 230.2)          | 0.4 (0.4 to 0.5)                  |
| Maldives | 2022 | 1079.7 (1004.4 to 1163.4)  | 754.6 (694.5 to 817.2)     | 216.9 (185.6 to 252.8)        | 107.9 (75.3 to 149.1)           | 0.3 (0.3 to 0.3)                  | 1705.4 (1586.4 to 1837.5) | 1191.9 (1096.9 to 1290.7)  | 342.6 (293.1 to 399.2)        | 170.5 (118.9 to 235.5)          | 0.4 (0.4 to 0.5)                  |
| Maldives | 2023 | 1100.1 (1021.7 to 1185.5)  | 770.4 (708.5 to 835.6)     | 219.2 (187.2 to 255.6)        | 110.3 (76.8 to 152.7)           | 0.3 (0.3 to 0.3)                  | 1737.7 (1613.8 to 1872.5) | 1216.7 (1119.0 to 1319.8)  | 346.2 (295.7 to 403.7)        | 174.2 (121.2 to 241.2)          | 0.5 (0.4 to 0.5)                  |
| Maldives | 2024 | 1120.7 (1045.1 to 1207.4)  | 786.1 (722.2 to 853.8)     | 221.7 (189.7 to 258.6)        | 112.7 (78.3 to 156.0)           | 0.3 (0.3 to 0.3)                  | 1770.1 (1650.7 to 1907.1) | 1241.6 (1140.7 to 1348.6)  | 350.1 (299.7 to 408.4)        | 178.0 (123.6 to 246.5)          | 0.5 (0.4 to 0.5)                  |
| Maldives | 2025 | 1143.2 (1061.5 to 1231.7)  | 803.2 (738.0 to 873.1)     | 224.4 (192.2 to 261.8)        | 115.3 (80.0 to 159.6)           | 0.3 (0.3 to 0.4)                  | 1805.6 (1676.6 to 1945.5) | 1268.6 (1165.6 to 1379.0)  | 354.4 (303.5 to 413.6)        | 182.1 (126.3 to 252.0)          | 0.5 (0.4 to 0.6)                  |
| Maldives | 2026 | 1165.2 (1081.7 to 1260.2)  | 819.9 (753.5 to 891.9)     | 227.1 (193.8 to 265.6)        | 117.8 (81.8 to 163.0)           | 0.3 (0.3 to 0.4)                  | 1840.4 (1708.5 to 1990.4) | 1295.1 (1190.1 to 1408.8)  | 358.8 (306.1 to 419.5)        | 186.1 (129.2 to 257.5)          | 0.5 (0.4 to 0.6)                  |
| Maldives | 2027 | 1188.5 (1101.6 to 1282.9)  | 837.7 (769.2 to 912.2)     | 230.0 (195.1 to 270.5)        | 120.5 (83.7 to 166.8)           | 0.3 (0.3 to 0.4)                  | 1877.2 (1739.9 to 2026.3) | 1323.0 (1215.0 to 1440.9)  | 363.3 (308.1 to 427.3)        | 190.4 (132.2 to 263.4)          | 0.5 (0.4 to 0.6)                  |
| Maldives | 2028 | 1213.0 (1122.6 to 1310.4)  | 856.2 (785.7 to 934.0)     | 233.1 (196.6 to 275.3)        | 123.4 (85.7 to 170.8)           | 0.3 (0.3 to 0.4)                  | 1915.9 (1773.1 to 2069.8) | 1352.3 (1241.0 to 1475.2)  | 368.2 (310.6 to 434.9)        | 194.9 (135.4 to 269.7)          | 0.5 (0.4 to 0.6)                  |
| Maldives | 2029 | 1238.8 (1136.6 to 1338.9)  | 875.7 (803.1 to 957.0)     | 236.4 (197.5 to 281.5)        | 126.4 (87.8 to 174.9)           | 0.3 (0.3 to 0.4)                  | 1956.6 (1795.2 to 2114.7) | 1383.1 (1268.5 to 1511.5)  | 373.4 (312.0 to 444.6)        | 199.6 (138.8 to 276.3)          | 0.5 (0.4 to 0.6)                  |
| Maldives | 2030 | 1266.0 (1167.2 to 1369.7)  | 896.3 (821.3 to 981.1)     | 239.9 (198.3 to 286.4)        | 129.5 (90.1 to 179.1)           | 0.3 (0.3 to 0.4)                  | 1999.7 (1843.6 to 2163.4) | 1415.7 (1297.2 to 1549.5)  | 379.0 (313.2 to 452.3)        | 204.5 (142.2 to 282.9)          | 0.5 (0.4 to 0.6)                  |
| Maldives | 2031 | 1293.6 (1190.8 to 1402.5)  | 917.0 (839.5 to 1005.5)    | 243.5 (199.4 to 293.0)        | 132.7 (92.3 to 182.9)           | 0.3 (0.3 to 0.4)                  | 2043.2 (1880.9 to 2215.3) | 1448.4 (1326.0 to 1588.2)  | 384.7 (315.0 to 462.8)        | 209.6 (145.8 to 288.9)          | 0.5 (0.4 to 0.7)                  |
| Maldives | 2032 | 1323.0 (1217.2 to 1429.8)  | 939.2 (858.6 to 1032.1)    | 247.4 (200.7 to 299.7)        | 136.1 (94.7 to 187.4)           | 0.3 (0.3 to 0.4)                  | 2089.6 (1922.6 to 2258.3) | 1483.4 (1356.2 to 1630.2)  | 390.8 (317.0 to 473.3)        | 214.9 (149.5 to 296.0)          | 0.5 (0.4 to 0.7)                  |
| Maldives | 2033 | 1354.1 (1238.6 to 1469.0)  | 962.6 (879.1 to 1058.4)    | 251.5 (202.1 to 307.8)        | 139.6 (97.1 to 192.2)           | 0.4 (0.3 to 0.5)                  | 2138.7 (1956.4 to 2320.3) | 1520.3 (1388.4 to 1671.8)  | 397.3 (319.3 to 486.2)        | 220.6 (153.4 to 303.6)          | 0.6 (0.4 to 0.7)                  |
| Maldives | 2034 | 1386.3 (1268.4 to 1509.5)  | 986.7 (899.9 to 1086.1)    | 255.8 (204.0 to 316.8)        | 143.3 (99.6 to 197.2)           | 0.4 (0.3 to 0.5)                  | 2189.6 (2003.4 to 2384.2) | 1558.5 (1421.3 to 1715.4)  | 404.1 (322.2 to 500.4)        | 226.4 (157.4 to 311.5)          | 0.6 (0.4 to 0.7)                  |
| Maldives | 2035 | 1419.5 (1301.5 to 1553.8)  | 1011.6 (920.5 to 1113.9)   | 260.3 (205.8 to 324.5)        | 147.2 (102.3 to 202.4)          | 0.4 (0.0 to 0.5)                  | 2242.1 (2055.7 to 2454.2) | 1597.9 (1453.9 to 1759.3)  | 411.2 (325.1 to 512.5)        | 232.5 (161.6 to 319.7)          | 0.6 (0.0 to 0.8)                  |
| Maldives | 2036 | 1452.5 (1326.2 to 1579.5)  | 1036.3 (942.5 to 1142.1)   | 264.8 (207.4 to 331.8)        | 151.0 (104.9 to 208.1)          | 0.4 (0.0 to 0.5)                  | 2294.1 (2094.6 to 2494.8) | 1636.8 (1488.6 to 1804.0)  | 418.3 (327.5 to 524.1)        | 238.5 (165.6 to 328.6)          | 0.6 (0.0 to 0.8)                  |

| Country  | Year | 2018 US Dollars per capita |                            |                               |                                 |                                   | 2018 PPP per capita       |                            |                               |                                 |                                   |
|----------|------|----------------------------|----------------------------|-------------------------------|---------------------------------|-----------------------------------|---------------------------|----------------------------|-------------------------------|---------------------------------|-----------------------------------|
|          |      | Health spending            | Government health spending | Out-of-pocket health spending | Prepaid private health spending | Development assistance for health | Health spending           | Government health spending | Out-of-pocket health spending | Prepaid private health spending | Development assistance for health |
| Maldives | 2037 | 1486.7 (1364.6 to 1622.0)  | 1061.8 (963.0 to 1172.0)   | 269.6 (209.7 to 339.5)        | 154.9 (107.5 to 213.7)          | 0.4 (0.0 to 0.5)                  | 2348.2 (2155.3 to 2561.8) | 1677.1 (1521.0 to 1851.1)  | 425.8 (331.3 to 536.2)        | 244.7 (169.9 to 337.5)          | 0.6 (0.0 to 0.8)                  |
| Maldives | 2038 | 1521.8 (1392.3 to 1662.4)  | 1087.9 (985.1 to 1204.2)   | 274.5 (212.8 to 347.3)        | 158.9 (110.3 to 219.7)          | 0.4 (0.0 to 0.5)                  | 2403.6 (2199.1 to 2625.8) | 1718.4 (1556.0 to 1901.9)  | 433.6 (336.1 to 548.5)        | 251.0 (174.2 to 347.1)          | 0.6 (0.0 to 0.9)                  |
| Maldives | 2039 | 1557.6 (1415.8 to 1702.5)  | 1114.6 (1007.1 to 1237.0)  | 279.6 (215.2 to 355.1)        | 163.1 (113.1 to 225.9)          | 0.4 (0.0 to 0.6)                  | 2460.2 (2236.2 to 2689.1) | 1760.4 (1590.7 to 1953.8)  | 441.7 (339.9 to 560.9)        | 257.6 (178.7 to 356.9)          | 0.6 (0.0 to 0.9)                  |
| Maldives | 2040 | 1592.8 (1444.6 to 1751.5)  | 1140.6 (1029.0 to 1268.9)  | 284.7 (217.5 to 361.9)        | 167.1 (115.9 to 231.9)          | 0.3 (0.0 to 0.6)                  | 2515.8 (2281.7 to 2766.4) | 1801.5 (1625.3 to 2004.2)  | 449.8 (343.5 to 571.6)        | 263.9 (183.0 to 366.3)          | 0.6 (0.0 to 0.9)                  |
| Maldives | 2041 | 1627.3 (1476.9 to 1793.2)  | 1166.0 (1049.7 to 1300.4)  | 289.8 (220.5 to 369.0)        | 171.1 (118.6 to 237.2)          | 0.3 (0.0 to 0.6)                  | 2570.2 (2332.7 to 2832.3) | 1841.7 (1658.0 to 2053.9)  | 457.8 (348.3 to 582.8)        | 270.2 (187.3 to 374.6)          | 0.5 (0.0 to 0.9)                  |
| Maldives | 2042 | 1663.1 (1505.4 to 1831.9)  | 1192.4 (1071.0 to 1331.5)  | 295.1 (224.0 to 377.8)        | 175.2 (121.3 to 242.6)          | 0.3 (0.0 to 0.6)                  | 2626.8 (2377.8 to 2893.4) | 1883.4 (1691.7 to 2103.1)  | 466.1 (353.8 to 596.8)        | 276.7 (191.5 to 383.2)          | 0.5 (0.0 to 1.0)                  |
| Maldives | 2043 | 1699.2 (1547.9 to 1875.2)  | 1218.8 (1091.9 to 1365.1)  | 300.6 (227.7 to 385.9)        | 179.3 (124.2 to 249.0)          | 0.3 (0.0 to 0.6)                  | 2683.8 (2444.8 to 2961.8) | 1925.1 (1724.5 to 2156.1)  | 474.9 (359.7 to 609.5)        | 283.3 (196.1 to 393.3)          | 0.5 (0.0 to 1.0)                  |
| Maldives | 2044 | 1733.1 (1574.8 to 1928.0)  | 1243.3 (1112.0 to 1396.1)  | 306.3 (232.0 to 393.9)        | 183.2 (126.8 to 255.2)          | 0.3 (0.0 to 0.7)                  | 2737.3 (2487.4 to 3045.2) | 1963.7 (1756.3 to 2205.1)  | 483.8 (366.4 to 622.2)        | 289.4 (200.3 to 403.2)          | 0.5 (0.0 to 1.0)                  |
| Maldives | 2045 | 1765.7 (1594.8 to 1964.9)  | 1266.3 (1130.8 to 1423.3)  | 312.2 (236.4 to 402.0)        | 186.9 (129.3 to 260.7)          | 0.3 (0.0 to 0.7)                  | 2788.9 (2518.9 to 3103.6) | 2000.1 (1786.0 to 2248.0)  | 493.1 (373.4 to 635.0)        | 295.2 (204.2 to 411.8)          | 0.5 (0.0 to 1.1)                  |
| Maldives | 2046 | 1794.2 (1611.2 to 1992.6)  | 1285.9 (1147.4 to 1449.0)  | 317.9 (240.3 to 409.5)        | 190.1 (131.3 to 265.3)          | 0.3 (0.0 to 0.7)                  | 2833.9 (2544.9 to 3147.3) | 2031.1 (1812.2 to 2288.6)  | 502.1 (379.5 to 646.8)        | 300.2 (207.5 to 419.0)          | 0.5 (0.0 to 1.1)                  |
| Maldives | 2047 | 1820.5 (1630.3 to 2031.1)  | 1303.5 (1159.4 to 1471.2)  | 323.8 (243.2 to 417.0)        | 192.9 (133.0 to 269.4)          | 0.3 (0.0 to 0.7)                  | 2875.4 (2575.0 to 3208.1) | 2058.8 (1831.2 to 2323.6)  | 511.4 (384.2 to 658.6)        | 304.8 (210.1 to 425.5)          | 0.5 (0.0 to 1.2)                  |
| Maldives | 2048 | 1843.0 (1653.6 to 2048.4)  | 1317.8 (1169.5 to 1492.0)  | 329.5 (246.5 to 424.3)        | 195.4 (134.4 to 272.9)          | 0.3 (0.0 to 0.8)                  | 2911.0 (2611.7 to 3235.4) | 2081.5 (1847.1 to 2356.5)  | 520.4 (389.3 to 670.2)        | 308.6 (212.3 to 431.1)          | 0.5 (0.0 to 1.3)                  |
| Maldives | 2049 | 1863.1 (1662.5 to 2087.1)  | 1330.1 (1176.5 to 1508.3)  | 335.1 (250.1 to 431.4)        | 197.5 (135.6 to 277.0)          | 0.3 (0.0 to 0.8)                  | 2942.6 (2625.9 to 3296.5) | 2100.9 (1858.3 to 2382.4)  | 529.3 (395.0 to 681.4)        | 312.0 (214.2 to 437.5)          | 0.5 (0.0 to 1.3)                  |
| Maldives | 2050 | 1881.6 (1687.6 to 2116.2)  | 1341.1 (1183.9 to 1523.8)  | 340.7 (253.7 to 439.1)        | 199.5 (136.7 to 281.3)          | 0.3 (0.0 to 0.8)                  | 2971.9 (2665.6 to 3342.5) | 2118.2 (1869.9 to 2406.8)  | 538.1 (400.7 to 693.5)        | 315.0 (215.9 to 444.3)          | 0.5 (0.0 to 1.3)                  |
| Mali     | 1995 | 20.2 (17.1 to 24.2)        | 5.8 (4.5 to 7.5)           | 8.8 (6.0 to 12.4)             | 0.2 (0.1 to 0.3)                | 5.5 (5.5 to 5.5)                  | 52.1 (44.0 to 62.3)       | 15.0 (11.5 to 19.3)        | 22.6 (15.5 to 31.9)           | 0.5 (0.2 to 0.9)                | 14.1 (14.1 to 14.1)               |
| Mali     | 1996 | 22.0 (18.0 to 27.3)        | 5.8 (4.5 to 7.5)           | 11.9 (8.1 to 16.7)            | 0.2 (0.1 to 0.3)                | 4.1 (4.1 to 4.1)                  | 56.6 (46.4 to 70.2)       | 15.0 (11.6 to 19.2)        | 30.7 (21.0 to 43.0)           | 0.5 (0.2 to 0.9)                | 10.4 (10.4 to 10.4)               |
| Mali     | 1997 | 23.1 (18.8 to 28.6)        | 5.6 (4.3 to 7.2)           | 13.1 (9.1 to 18.3)            | 0.2 (0.1 to 0.3)                | 4.1 (4.1 to 4.1)                  | 59.4 (48.5 to 73.6)       | 14.5 (11.0 to 18.6)        | 33.8 (23.3 to 47.1)           | 0.5 (0.2 to 0.9)                | 10.6 (10.6 to 10.6)               |
| Mali     | 1998 | 20.8 (16.4 to 26.1)        | 5.4 (4.1 to 7.0)           | 13.6 (9.4 to 18.8)            | 0.2 (0.1 to 0.3)                | 1.6 (1.6 to 1.6)                  | 53.5 (42.2 to 67.1)       | 13.9 (10.7 to 17.9)        | 35.0 (24.1 to 48.4)           | 0.4 (0.2 to 0.8)                | 4.1 (4.1 to 4.1)                  |
| Mali     | 1999 | 22.5 (18.1 to 28.0)        | 5.1 (3.9 to 6.7)           | 14.0 (9.6 to 19.3)            | 0.2 (0.1 to 0.3)                | 3.2 (3.2 to 3.2)                  | 57.8 (46.5 to 72.1)       | 13.2 (10.1 to 17.2)        | 35.9 (24.8 to 49.6)           | 0.4 (0.2 to 0.8)                | 8.3 (8.3 to 8.3)                  |
| Mali     | 2000 | 21.3 (16.9 to 26.4)        | 4.6 (3.5 to 6.0)           | 13.3 (9.2 to 18.2)            | 0.1 (0.1 to 0.2)                | 3.3 (3.3 to 3.3)                  | 54.7 (43.6 to 68.0)       | 11.8 (9.0 to 15.3)         | 34.2 (23.7 to 46.9)           | 0.3 (0.1 to 0.6)                | 8.5 (8.5 to 8.5)                  |
| Mali     | 2001 | 23.5 (19.2 to 28.9)        | 5.0 (3.8 to 6.5)           | 13.4 (9.3 to 18.6)            | 0.1 (0.1 to 0.2)                | 5.1 (5.1 to 5.1)                  | 60.6 (49.3 to 74.3)       | 12.8 (9.9 to 16.9)         | 34.5 (24.0 to 47.9)           | 0.3 (0.1 to 0.6)                | 13.0 (13.0 to 13.0)               |

| Country | Year | 2018 US Dollars per capita |                            |                               |                                 |                                   | 2018 PPP per capita  |                            |                               |                                 |                                   |
|---------|------|----------------------------|----------------------------|-------------------------------|---------------------------------|-----------------------------------|----------------------|----------------------------|-------------------------------|---------------------------------|-----------------------------------|
|         |      | Health spending            | Government health spending | Out-of-pocket health spending | Prepaid private health spending | Development assistance for health | Health spending      | Government health spending | Out-of-pocket health spending | Prepaid private health spending | Development assistance for health |
| Mali    | 2002 | 21.2 (16.7 to 26.5)        | 5.3 (4.1 to 6.9)           | 13.4 (9.3 to 18.4)            | 0.1 (0.1 to 0.2)                | 2.3 (2.3 to 2.3)                  | 54.6 (43.1 to 68.3)  | 13.7 (10.5 to 17.7)        | 34.6 (24.0 to 47.4)           | 0.3 (0.1 to 0.6)                | 6.0 (6.0 to 6.0)                  |
| Mali    | 2003 | 25.9 (21.4 to 31.1)        | 6.3 (4.8 to 8.1)           | 14.0 (9.8 to 19.0)            | 0.1 (0.1 to 0.3)                | 5.4 (5.4 to 5.4)                  | 66.6 (55.1 to 80.1)  | 16.3 (12.5 to 20.9)        | 36.0 (25.3 to 48.9)           | 0.4 (0.2 to 0.7)                | 13.9 (13.9 to 13.9)               |
| Mali    | 2004 | 26.6 (22.1 to 31.9)        | 7.1 (5.5 to 9.4)           | 13.9 (9.7 to 18.9)            | 0.1 (0.1 to 0.3)                | 5.5 (5.5 to 5.5)                  | 68.6 (56.7 to 82.1)  | 18.3 (14.0 to 24.1)        | 35.7 (25.1 to 48.8)           | 0.4 (0.2 to 0.7)                | 14.1 (14.1 to 14.1)               |
| Mali    | 2005 | 29.2 (24.7 to 34.7)        | 7.5 (5.7 to 9.8)           | 14.4 (10.1 to 19.6)           | 0.2 (0.1 to 0.3)                | 7.2 (7.2 to 7.2)                  | 75.2 (63.5 to 89.4)  | 19.3 (14.8 to 25.2)        | 36.9 (26.1 to 50.6)           | 0.4 (0.2 to 0.8)                | 18.6 (18.6 to 18.6)               |
| Mali    | 2006 | 30.5 (25.6 to 36.6)        | 7.6 (5.8 to 10.0)          | 15.5 (10.8 to 21.2)           | 0.2 (0.1 to 0.3)                | 7.2 (7.2 to 7.2)                  | 78.5 (65.9 to 94.1)  | 19.7 (15.0 to 25.7)        | 39.8 (27.9 to 54.6)           | 0.5 (0.2 to 0.8)                | 18.6 (18.6 to 18.6)               |
| Mali    | 2007 | 31.9 (26.7 to 38.4)        | 7.0 (5.3 to 9.1)           | 16.3 (11.6 to 22.4)           | 0.2 (0.1 to 0.4)                | 8.4 (8.4 to 8.4)                  | 82.0 (68.8 to 98.8)  | 17.9 (13.6 to 23.4)        | 42.1 (30.0 to 57.7)           | 0.5 (0.2 to 0.9)                | 21.5 (21.5 to 21.5)               |
| Mali    | 2008 | 33.9 (28.6 to 40.5)        | 6.1 (4.6 to 7.9)           | 17.1 (12.2 to 23.2)           | 0.2 (0.1 to 0.4)                | 10.5 (10.5 to 10.5)               | 87.2 (73.7 to 104.1) | 15.6 (11.9 to 20.3)        | 44.1 (31.3 to 59.8)           | 0.5 (0.2 to 1.0)                | 27.1 (27.1 to 27.1)               |
| Mali    | 2009 | 33.3 (27.9 to 40.2)        | 5.4 (4.1 to 7.1)           | 17.8 (12.8 to 24.2)           | 0.2 (0.1 to 0.4)                | 9.8 (9.8 to 9.8)                  | 85.6 (71.7 to 103.4) | 13.8 (10.5 to 18.2)        | 45.8 (33.0 to 62.3)           | 0.6 (0.3 to 1.1)                | 25.3 (25.3 to 25.3)               |
| Mali    | 2010 | 36.9 (31.6 to 44.1)        | 4.9 (3.7 to 6.4)           | 18.0 (12.9 to 24.8)           | 0.3 (0.1 to 0.5)                | 13.8 (13.8 to 13.8)               | 95.0 (81.2 to 113.4) | 12.5 (9.6 to 16.5)         | 46.4 (33.2 to 63.7)           | 0.7 (0.3 to 1.3)                | 35.4 (35.4 to 35.4)               |
| Mali    | 2011 | 36.0 (30.7 to 43.1)        | 4.7 (3.6 to 6.1)           | 17.9 (12.5 to 24.8)           | 0.4 (0.2 to 0.7)                | 13.0 (13.0 to 13.0)               | 92.6 (78.9 to 111.0) | 12.2 (9.4 to 15.8)         | 46.0 (32.3 to 63.8)           | 0.9 (0.4 to 1.7)                | 33.4 (33.4 to 33.4)               |
| Mali    | 2012 | 34.0 (28.8 to 41.0)        | 4.5 (3.5 to 5.9)           | 17.3 (12.2 to 24.3)           | 0.5 (0.2 to 0.9)                | 11.7 (11.7 to 11.7)               | 87.5 (74.0 to 105.6) | 11.6 (8.9 to 15.2)         | 44.6 (31.4 to 62.4)           | 1.3 (0.6 to 2.4)                | 30.0 (30.0 to 30.0)               |
| Mali    | 2013 | 33.1 (27.9 to 39.7)        | 5.2 (4.0 to 6.8)           | 16.5 (11.6 to 23.2)           | 0.7 (0.3 to 1.3)                | 10.7 (10.7 to 10.7)               | 85.2 (71.8 to 102.3) | 13.3 (10.2 to 17.4)        | 42.5 (30.0 to 59.7)           | 1.7 (0.8 to 3.2)                | 27.6 (27.6 to 27.6)               |
| Mali    | 2014 | 32.0 (27.4 to 37.9)        | 6.2 (4.7 to 8.0)           | 13.9 (9.9 to 19.5)            | 0.6 (0.3 to 1.1)                | 11.3 (11.3 to 11.3)               | 82.4 (70.6 to 97.5)  | 15.9 (12.2 to 20.6)        | 35.9 (25.4 to 50.1)           | 1.5 (0.7 to 2.8)                | 29.1 (29.1 to 29.1)               |
| Mali    | 2015 | 31.8 (27.4 to 37.3)        | 7.1 (5.4 to 9.3)           | 12.7 (9.0 to 17.8)            | 0.5 (0.2 to 1.0)                | 11.5 (11.5 to 11.5)               | 81.9 (70.6 to 95.9)  | 18.3 (13.9 to 23.8)        | 32.8 (23.3 to 45.9)           | 1.3 (0.6 to 2.5)                | 29.5 (29.5 to 29.5)               |
| Mali    | 2016 | 32.8 (28.4 to 37.8)        | 8.1 (6.1 to 10.5)          | 12.3 (8.7 to 17.2)            | 0.4 (0.2 to 0.9)                | 12.0 (12.0 to 12.0)               | 84.5 (73.1 to 97.2)  | 20.8 (15.6 to 27.0)        | 31.6 (22.3 to 44.2)           | 1.1 (0.5 to 2.2)                | 31.0 (31.0 to 31.0)               |
| Mali    | 2017 | 32.6 (27.9 to 37.8)        | 8.5 (6.4 to 11.0)          | 12.4 (8.8 to 17.4)            | 0.5 (0.2 to 0.9)                | 11.2 (11.2 to 11.2)               | 83.9 (71.9 to 97.3)  | 21.8 (16.4 to 28.4)        | 32.0 (22.6 to 44.7)           | 1.2 (0.6 to 2.3)                | 28.9 (28.9 to 28.9)               |
| Mali    | 2018 | 32.0 (27.5 to 37.5)        | 8.6 (6.5 to 11.2)          | 12.5 (8.8 to 17.5)            | 0.5 (0.2 to 0.9)                | 10.3 (10.3 to 10.4)               | 82.3 (70.8 to 96.6)  | 22.2 (16.7 to 28.8)        | 32.2 (22.7 to 45.0)           | 1.2 (0.6 to 2.4)                | 26.6 (26.6 to 26.6)               |
| Mali    | 2019 | 32.1 (27.4 to 37.6)        | 8.8 (6.6 to 11.3)          | 12.6 (8.9 to 17.7)            | 0.5 (0.2 to 0.9)                | 10.2 (9.5 to 10.8)                | 82.6 (70.5 to 96.6)  | 22.6 (17.0 to 29.2)        | 32.5 (22.9 to 45.5)           | 1.2 (0.6 to 2.4)                | 26.3 (24.5 to 27.7)               |
| Mali    | 2020 | 32.3 (27.5 to 37.8)        | 8.9 (6.7 to 11.5)          | 12.7 (9.0 to 17.8)            | 0.5 (0.2 to 1.0)                | 10.1 (9.3 to 11.0)                | 83.2 (70.8 to 97.3)  | 23.0 (17.3 to 29.7)        | 32.8 (23.1 to 45.7)           | 1.3 (0.6 to 2.5)                | 26.1 (23.9 to 28.2)               |
| Mali    | 2021 | 32.6 (27.7 to 38.6)        | 9.1 (6.9 to 11.8)          | 13.0 (9.1 to 18.0)            | 0.5 (0.2 to 1.0)                | 10.1 (9.1 to 11.1)                | 84.0 (71.3 to 99.3)  | 23.4 (17.7 to 30.3)        | 33.3 (23.5 to 46.4)           | 1.3 (0.6 to 2.6)                | 26.0 (23.4 to 28.6)               |
| Mali    | 2022 | 33.0 (28.1 to 38.9)        | 9.3 (7.0 to 12.0)          | 13.2 (9.3 to 18.3)            | 0.5 (0.2 to 1.0)                | 10.0 (8.9 to 11.2)                | 85.0 (72.3 to 100.0) | 23.8 (18.0 to 30.8)        | 33.9 (23.9 to 47.0)           | 1.3 (0.6 to 2.6)                | 25.9 (23.0 to 28.9)               |



| Country | Year | 2018 US Dollars per capita |                            |                               |                                 |                                   | 2018 PPP per capita   |                            |                               |                                 |                                   |
|---------|------|----------------------------|----------------------------|-------------------------------|---------------------------------|-----------------------------------|-----------------------|----------------------------|-------------------------------|---------------------------------|-----------------------------------|
|         |      | Health spending            | Government health spending | Out-of-pocket health spending | Prepaid private health spending | Development assistance for health | Health spending       | Government health spending | Out-of-pocket health spending | Prepaid private health spending | Development assistance for health |
| Mali    | 2023 | 33.3 (28.5 to 39.1)        | 9.4 (7.2 to 12.2)          | 13.3 (9.3 to 18.5)            | 0.5 (0.3 to 1.0)                | 10.0 (8.7 to 11.4)                | 85.7 (73.3 to 100.7)  | 24.3 (18.5 to 31.4)        | 34.3 (24.0 to 47.7)           | 1.4 (0.6 to 2.7)                | 25.7 (22.3 to 29.2)               |
| Mali    | 2024 | 33.7 (28.5 to 39.8)        | 9.6 (7.3 to 12.4)          | 13.5 (9.5 to 18.8)            | 0.6 (0.3 to 1.1)                | 10.0 (8.6 to 11.5)                | 86.7 (73.4 to 102.5)  | 24.8 (18.8 to 32.0)        | 34.9 (24.4 to 48.5)           | 1.4 (0.7 to 2.8)                | 25.6 (22.0 to 29.6)               |
| Mali    | 2025 | 34.1 (28.8 to 39.7)        | 9.8 (7.5 to 12.7)          | 13.8 (9.6 to 19.1)            | 0.6 (0.3 to 1.1)                | 9.9 (8.5 to 11.7)                 | 87.7 (74.2 to 102.1)  | 25.3 (19.3 to 32.8)        | 35.4 (24.8 to 49.2)           | 1.5 (0.7 to 2.8)                | 25.5 (21.8 to 30.0)               |
| Mali    | 2026 | 34.5 (29.1 to 41.0)        | 10.1 (7.7 to 13.1)         | 14.0 (9.8 to 19.4)            | 0.6 (0.3 to 1.1)                | 9.8 (8.3 to 11.6)                 | 88.9 (75.0 to 105.6)  | 25.9 (19.8 to 33.7)        | 36.1 (25.2 to 49.8)           | 1.5 (0.7 to 2.9)                | 25.3 (21.4 to 29.9)               |
| Mali    | 2027 | 35.0 (29.4 to 41.8)        | 10.3 (7.9 to 13.5)         | 14.3 (10.0 to 19.8)           | 0.6 (0.3 to 1.2)                | 9.8 (8.2 to 11.7)                 | 90.1 (75.8 to 107.6)  | 26.6 (20.4 to 34.7)        | 36.8 (25.7 to 51.1)           | 1.6 (0.7 to 3.0)                | 25.1 (21.0 to 30.1)               |
| Mali    | 2028 | 35.5 (29.7 to 41.8)        | 10.6 (8.1 to 13.8)         | 14.6 (10.2 to 20.3)           | 0.6 (0.3 to 1.2)                | 9.7 (8.1 to 11.7)                 | 91.4 (76.3 to 107.7)  | 27.3 (20.8 to 35.6)        | 37.5 (26.1 to 52.2)           | 1.6 (0.7 to 3.1)                | 25.0 (20.9 to 30.1)               |
| Mali    | 2029 | 36.0 (29.9 to 43.1)        | 10.9 (8.3 to 14.2)         | 14.8 (10.4 to 20.7)           | 0.6 (0.3 to 1.2)                | 9.6 (7.9 to 11.9)                 | 92.7 (77.1 to 110.9)  | 28.0 (21.3 to 36.5)        | 38.2 (26.6 to 53.3)           | 1.6 (0.8 to 3.2)                | 24.8 (20.5 to 30.5)               |
| Mali    | 2030 | 36.5 (30.4 to 43.6)        | 11.2 (8.5 to 14.6)         | 15.1 (10.5 to 21.2)           | 0.7 (0.3 to 1.3)                | 9.6 (7.8 to 11.8)                 | 94.0 (78.2 to 112.2)  | 28.7 (21.9 to 37.5)        | 39.0 (27.1 to 54.5)           | 1.7 (0.8 to 3.3)                | 24.6 (20.2 to 30.3)               |
| Mali    | 2031 | 37.1 (30.8 to 44.2)        | 11.5 (8.7 to 15.0)         | 15.4 (10.8 to 21.6)           | 0.7 (0.3 to 1.3)                | 9.5 (7.7 to 12.0)                 | 95.5 (79.2 to 113.7)  | 29.5 (22.4 to 38.6)        | 39.7 (27.7 to 55.7)           | 1.7 (0.8 to 3.4)                | 24.5 (19.8 to 30.9)               |
| Mali    | 2032 | 37.7 (31.3 to 45.2)        | 11.8 (8.9 to 15.4)         | 15.8 (11.0 to 22.1)           | 0.7 (0.3 to 1.4)                | 9.5 (7.7 to 12.0)                 | 97.1 (80.6 to 116.3)  | 30.4 (23.0 to 39.6)        | 40.5 (28.2 to 56.9)           | 1.8 (0.8 to 3.5)                | 24.4 (19.7 to 30.8)               |
| Mali    | 2033 | 38.4 (31.9 to 46.4)        | 12.1 (9.2 to 15.9)         | 16.1 (11.1 to 22.5)           | 0.7 (0.3 to 1.4)                | 9.4 (7.5 to 12.1)                 | 98.7 (82.1 to 119.5)  | 31.3 (23.7 to 40.9)        | 41.4 (28.6 to 57.9)           | 1.9 (0.9 to 3.6)                | 24.2 (19.3 to 31.2)               |
| Mali    | 2034 | 39.0 (32.5 to 47.1)        | 12.5 (9.4 to 16.4)         | 16.4 (11.3 to 22.9)           | 0.7 (0.3 to 1.4)                | 9.4 (7.4 to 12.2)                 | 100.5 (83.6 to 121.2) | 32.2 (24.3 to 42.2)        | 42.2 (29.2 to 59.1)           | 1.9 (0.9 to 3.7)                | 24.2 (19.0 to 31.5)               |
| Mali    | 2035 | 39.8 (32.8 to 48.0)        | 12.9 (9.7 to 16.9)         | 16.7 (11.6 to 23.5)           | 0.8 (0.4 to 1.5)                | 9.4 (7.3 to 12.4)                 | 102.3 (84.3 to 123.6) | 33.1 (25.0 to 43.4)        | 43.1 (29.8 to 60.4)           | 2.0 (0.9 to 3.8)                | 24.1 (18.8 to 31.9)               |
| Mali    | 2036 | 40.5 (33.7 to 48.8)        | 13.3 (10.0 to 17.4)        | 17.1 (11.8 to 24.0)           | 0.8 (0.4 to 1.5)                | 9.4 (7.2 to 12.5)                 | 104.2 (86.6 to 125.6) | 34.2 (25.8 to 44.7)        | 43.9 (30.4 to 61.8)           | 2.0 (0.9 to 3.9)                | 24.1 (18.6 to 32.1)               |
| Mali    | 2037 | 41.3 (34.0 to 49.8)        | 13.7 (10.3 to 18.0)        | 17.4 (12.0 to 24.6)           | 0.8 (0.4 to 1.6)                | 9.3 (7.1 to 12.7)                 | 106.2 (87.4 to 128.1) | 35.2 (26.6 to 46.2)        | 44.8 (31.0 to 63.3)           | 2.1 (1.0 to 4.0)                | 24.0 (18.3 to 32.6)               |
| Mali    | 2038 | 42.1 (34.7 to 50.1)        | 14.1 (10.7 to 18.6)        | 17.8 (12.3 to 25.2)           | 0.8 (0.4 to 1.6)                | 9.3 (7.1 to 12.8)                 | 108.3 (89.2 to 129.0) | 36.4 (27.4 to 47.9)        | 45.8 (31.6 to 64.9)           | 2.1 (1.0 to 4.2)                | 24.0 (18.3 to 33.1)               |
| Mali    | 2039 | 42.9 (35.4 to 52.1)        | 14.6 (11.0 to 19.2)        | 18.2 (12.5 to 25.8)           | 0.9 (0.4 to 1.7)                | 9.3 (7.0 to 12.7)                 | 110.4 (91.2 to 134.1) | 37.5 (28.4 to 49.5)        | 46.7 (32.2 to 66.3)           | 2.2 (1.0 to 4.3)                | 24.0 (18.1 to 32.7)               |
| Mali    | 2040 | 43.8 (36.3 to 52.7)        | 15.0 (11.4 to 19.8)        | 18.5 (12.7 to 26.3)           | 0.9 (0.4 to 1.7)                | 9.3 (7.0 to 12.9)                 | 112.7 (93.4 to 135.7) | 38.7 (29.4 to 51.1)        | 47.7 (32.8 to 67.6)           | 2.3 (1.1 to 4.4)                | 24.0 (18.0 to 33.2)               |
| Mali    | 2041 | 44.7 (36.5 to 54.3)        | 15.5 (11.8 to 20.5)        | 18.9 (13.0 to 26.8)           | 0.9 (0.4 to 1.8)                | 9.3 (7.0 to 13.4)                 | 115.0 (93.9 to 139.6) | 40.0 (30.4 to 52.7)        | 48.7 (33.4 to 69.1)           | 2.3 (1.1 to 4.5)                | 24.0 (17.9 to 34.4)               |
| Mali    | 2042 | 45.6 (38.1 to 55.2)        | 16.0 (12.1 to 21.1)        | 19.3 (13.3 to 27.4)           | 0.9 (0.4 to 1.8)                | 9.4 (6.8 to 13.7)                 | 117.4 (98.0 to 142.2) | 41.2 (31.3 to 54.3)        | 49.7 (34.1 to 70.6)           | 2.4 (1.1 to 4.7)                | 24.1 (17.6 to 35.1)               |
| Mali    | 2043 | 46.6 (38.6 to 57.5)        | 16.5 (12.5 to 21.8)        | 19.7 (13.5 to 28.1)           | 1.0 (0.5 to 1.9)                | 9.4 (6.8 to 13.8)                 | 120.0 (99.3 to 147.9) | 42.6 (32.2 to 56.0)        | 50.8 (34.8 to 72.3)           | 2.5 (1.2 to 4.8)                | 24.1 (17.5 to 35.5)               |

| Country | Year | 2018 US Dollars per capita |                            |                               |                                 |                                   | 2018 PPP per capita       |                            |                               |                                 |                                   |
|---------|------|----------------------------|----------------------------|-------------------------------|---------------------------------|-----------------------------------|---------------------------|----------------------------|-------------------------------|---------------------------------|-----------------------------------|
|         |      | Health spending            | Government health spending | Out-of-pocket health spending | Prepaid private health spending | Development assistance for health | Health spending           | Government health spending | Out-of-pocket health spending | Prepaid private health spending | Development assistance for health |
| Mali    | 2044 | 47.7 (39.0 to 57.9)        | 17.1 (12.9 to 22.5)        | 20.2 (13.8 to 28.8)           | 1.0 (0.5 to 1.9)                | 9.4 (6.8 to 14.0)                 | 122.6 (100.2 to 149.1)    | 44.0 (33.3 to 58.0)        | 51.9 (35.6 to 74.0)           | 2.5 (1.2 to 4.9)                | 24.2 (17.4 to 36.1)               |
| Mali    | 2045 | 48.7 (39.5 to 60.4)        | 17.6 (13.3 to 23.3)        | 20.6 (14.1 to 29.4)           | 1.0 (0.5 to 2.0)                | 9.4 (6.7 to 14.4)                 | 125.3 (101.7 to 155.4)    | 45.4 (34.3 to 60.0)        | 53.0 (36.3 to 75.7)           | 2.6 (1.2 to 5.1)                | 24.3 (17.3 to 37.0)               |
| Mali    | 2046 | 49.8 (40.6 to 60.9)        | 18.2 (13.7 to 24.1)        | 21.0 (14.4 to 30.1)           | 1.0 (0.5 to 2.0)                | 9.5 (6.7 to 14.7)                 | 128.1 (104.5 to 156.8)    | 46.8 (35.3 to 61.9)        | 54.2 (37.0 to 77.4)           | 2.7 (1.3 to 5.2)                | 24.4 (17.3 to 38.0)               |
| Mali    | 2047 | 50.9 (41.4 to 63.5)        | 18.8 (14.1 to 24.9)        | 21.5 (14.7 to 30.7)           | 1.1 (0.5 to 2.1)                | 9.5 (6.7 to 15.3)                 | 131.0 (106.4 to 163.3)    | 48.3 (36.3 to 64.2)        | 55.3 (37.9 to 79.1)           | 2.8 (1.3 to 5.4)                | 24.5 (17.3 to 39.4)               |
| Mali    | 2048 | 52.1 (42.2 to 64.5)        | 19.4 (14.5 to 25.7)        | 22.0 (15.0 to 31.4)           | 1.1 (0.5 to 2.2)                | 9.6 (6.7 to 15.7)                 | 134.0 (108.5 to 166.1)    | 49.8 (37.4 to 66.2)        | 56.5 (38.7 to 80.8)           | 2.9 (1.3 to 5.6)                | 24.8 (17.3 to 40.5)               |
| Mali    | 2049 | 53.2 (43.4 to 65.9)        | 20.0 (14.9 to 26.6)        | 22.4 (15.3 to 32.1)           | 1.1 (0.5 to 2.2)                | 9.7 (6.7 to 16.3)                 | 137.0 (111.7 to 169.5)    | 51.3 (38.4 to 68.6)        | 57.8 (39.5 to 82.5)           | 2.9 (1.4 to 5.7)                | 24.9 (17.2 to 41.9)               |
| Mali    | 2050 | 54.4 (43.9 to 68.3)        | 20.6 (15.3 to 27.5)        | 22.9 (15.7 to 32.8)           | 1.2 (0.6 to 2.3)                | 9.8 (6.7 to 16.6)                 | 140.1 (113.1 to 175.6)    | 52.9 (39.4 to 70.8)        | 59.0 (40.3 to 84.3)           | 3.0 (1.4 to 5.9)                | 25.2 (17.2 to 42.7)               |
| Malta   | 1995 | 980.9 (926.2 to 1036.8)    | 720.6 (677.0 to 766.0)     | 232.5 (204.5 to 263.4)        | 27.8 (16.7 to 42.9)             | 0.0 (0.0 to 0.0)                  | 1415.2 (1336.2 to 1495.7) | 1039.6 (976.7 to 1105.1)   | 335.4 (295.0 to 380.0)        | 40.1 (24.1 to 61.9)             | 0.0 (0.0 to 0.0)                  |
| Malta   | 1996 | 1035.4 (989.1 to 1080.3)   | 759.5 (727.0 to 796.7)     | 247.9 (224.6 to 273.2)        | 28.0 (17.4 to 42.1)             | 0.0 (0.0 to 0.0)                  | 1493.8 (1426.9 to 1558.5) | 1095.7 (1048.8 to 1149.3)  | 357.7 (324.1 to 394.1)        | 40.4 (25.1 to 60.7)             | 0.0 (0.0 to 0.0)                  |
| Malta   | 1997 | 1103.7 (1060.9 to 1148.4)  | 811.3 (778.6 to 847.7)     | 265.0 (243.2 to 289.0)        | 27.5 (17.4 to 41.1)             | 0.0 (0.0 to 0.0)                  | 1592.3 (1530.5 to 1656.8) | 1170.4 (1123.2 to 1223.0)  | 382.2 (350.8 to 416.9)        | 39.6 (25.1 to 59.3)             | 0.0 (0.0 to 0.0)                  |
| Malta   | 1998 | 1167.3 (1125.4 to 1214.3)  | 849.9 (816.7 to 888.2)     | 291.9 (270.1 to 315.0)        | 25.5 (16.1 to 38.3)             | 0.0 (0.0 to 0.0)                  | 1684.1 (1623.6 to 1751.9) | 1226.2 (1178.3 to 1281.3)  | 421.1 (389.7 to 454.5)        | 36.8 (23.2 to 55.3)             | 0.0 (0.0 to 0.0)                  |
| Malta   | 1999 | 1222.0 (1177.7 to 1269.8)  | 880.4 (848.1 to 918.8)     | 320.1 (297.5 to 344.3)        | 21.4 (13.7 to 32.5)             | 0.0 (0.0 to 0.0)                  | 1762.9 (1699.1 to 1831.9) | 1270.2 (1223.5 to 1325.6)  | 461.8 (429.1 to 496.7)        | 30.9 (19.8 to 46.8)             | 0.0 (0.0 to 0.0)                  |
| Malta   | 2000 | 1298.7 (1253.4 to 1343.8)  | 931.1 (897.8 to 968.4)     | 350.9 (328.4 to 375.8)        | 16.7 (10.7 to 24.9)             | 0.0 (0.0 to 0.0)                  | 1873.6 (1808.2 to 1938.7) | 1343.2 (1295.3 to 1397.1)  | 506.3 (473.7 to 542.1)        | 24.1 (15.4 to 35.9)             | 0.0 (0.0 to 0.0)                  |
| Malta   | 2001 | 1367.4 (1323.1 to 1410.0)  | 962.2 (928.2 to 997.3)     | 388.4 (364.6 to 413.2)        | 16.8 (11.0 to 24.7)             | 0.0 (0.0 to 0.0)                  | 1972.8 (1908.8 to 2034.2) | 1388.2 (1339.2 to 1438.8)  | 560.4 (525.9 to 596.1)        | 24.2 (15.9 to 35.6)             | 0.0 (0.0 to 0.0)                  |
| Malta   | 2002 | 1497.0 (1450.9 to 1542.1)  | 1049.7 (1013.9 to 1085.9)  | 428.0 (404.6 to 453.0)        | 19.3 (12.7 to 27.8)             | 0.0 (0.0 to 0.0)                  | 2159.7 (2093.2 to 2224.8) | 1514.4 (1462.8 to 1566.6)  | 617.5 (583.8 to 653.5)        | 27.8 (18.3 to 40.1)             | 0.0 (0.0 to 0.0)                  |
| Malta   | 2003 | 1606.2 (1560.7 to 1650.2)  | 1120.8 (1085.7 to 1157.9)  | 459.7 (435.4 to 486.3)        | 25.7 (17.6 to 36.3)             | 0.0 (0.0 to 0.0)                  | 2317.3 (2251.7 to 2380.7) | 1616.9 (1566.3 to 1670.5)  | 663.2 (628.2 to 701.5)        | 37.1 (25.5 to 52.4)             | 0.0 (0.0 to 0.0)                  |
| Malta   | 2004 | 1682.9 (1637.1 to 1729.2)  | 1167.8 (1134.2 to 1206.8)  | 482.4 (457.2 to 507.8)        | 32.8 (23.1 to 44.9)             | 0.0 (0.0 to 0.0)                  | 2427.9 (2361.8 to 2494.7) | 1684.7 (1636.2 to 1741.0)  | 695.9 (659.5 to 732.6)        | 47.3 (33.3 to 64.8)             | 0.0 (0.0 to 0.0)                  |
| Malta   | 2005 | 1792.9 (1747.7 to 1838.7)  | 1234.4 (1199.4 to 1271.9)  | 520.1 (494.1 to 544.5)        | 38.3 (27.2 to 50.4)             | 0.0 (0.0 to 0.0)                  | 2586.6 (2521.3 to 2652.6) | 1780.9 (1730.3 to 1834.9)  | 750.4 (712.9 to 785.6)        | 55.3 (39.2 to 72.6)             | 0.0 (0.0 to 0.0)                  |
| Malta   | 2006 | 1819.4 (1775.0 to 1865.9)  | 1234.9 (1199.1 to 1270.8)  | 544.5 (518.2 to 570.6)        | 40.0 (28.9 to 51.7)             | 0.0 (0.0 to 0.0)                  | 2624.8 (2560.8 to 2691.8) | 1781.6 (1729.9 to 1833.3)  | 785.5 (747.7 to 823.2)        | 57.7 (41.7 to 74.6)             | 0.0 (0.0 to 0.0)                  |
| Malta   | 2007 | 1813.2 (1765.1 to 1861.5)  | 1210.4 (1175.4 to 1247.3)  | 562.1 (535.6 to 589.6)        | 40.7 (29.9 to 52.5)             | 0.0 (0.0 to 0.0)                  | 2615.9 (2546.5 to 2685.6) | 1746.2 (1695.7 to 1799.5)  | 811.0 (772.7 to 850.5)        | 58.7 (43.2 to 75.8)             | 0.0 (0.0 to 0.0)                  |
| Malta   | 2008 | 1799.5 (1752.0 to 1843.9)  | 1180.5 (1143.5 to 1217.7)  | 577.4 (550.4 to 604.9)        | 41.7 (31.2 to 53.8)             | 0.0 (0.0 to 0.0)                  | 2596.1 (2527.6 to 2660.1) | 1703.0 (1649.7 to 1756.8)  | 832.9 (794.0 to 872.6)        | 60.2 (45.0 to 77.7)             | 0.0 (0.0 to 0.0)                  |

| Country | Year | 2018 US Dollars per capita |                            |                               |                                 |                                   | 2018 PPP per capita       |                            |                               |                                 |                                   |
|---------|------|----------------------------|----------------------------|-------------------------------|---------------------------------|-----------------------------------|---------------------------|----------------------------|-------------------------------|---------------------------------|-----------------------------------|
|         |      | Health spending            | Government health spending | Out-of-pocket health spending | Prepaid private health spending | Development assistance for health | Health spending           | Government health spending | Out-of-pocket health spending | Prepaid private health spending | Development assistance for health |
| Malta   | 2009 | 1767.1 (1720.1 to 1813.4)  | 1146.1 (1111.3 to 1180.6)  | 578.4 (552.3 to 605.0)        | 42.7 (32.4 to 54.9)             | 0.0 (0.0 to 0.0)                  | 2549.4 (2481.5 to 2616.1) | 1653.4 (1603.2 to 1703.2)  | 834.4 (796.8 to 872.9)        | 61.5 (46.7 to 79.2)             | 0.0 (0.0 to 0.0)                  |
| Malta   | 2010 | 1845.6 (1795.4 to 1891.7)  | 1196.7 (1161.1 to 1232.9)  | 604.4 (577.8 to 631.4)        | 44.5 (33.8 to 57.4)             | 0.0 (0.0 to 0.0)                  | 2662.6 (2590.3 to 2729.2) | 1726.5 (1675.1 to 1778.7)  | 872.0 (833.6 to 910.9)        | 64.2 (48.7 to 82.8)             | 0.0 (0.0 to 0.0)                  |
| Malta   | 2011 | 1919.0 (1868.5 to 1963.7)  | 1242.6 (1203.9 to 1279.3)  | 631.0 (603.5 to 658.4)        | 45.4 (34.6 to 58.1)             | 0.0 (0.0 to 0.0)                  | 2768.5 (2695.6 to 2833.0) | 1792.6 (1736.8 to 1845.5)  | 910.3 (870.6 to 949.8)        | 65.5 (49.9 to 83.9)             | 0.0 (0.0 to 0.0)                  |
| Malta   | 2012 | 2036.5 (1985.7 to 2085.2)  | 1317.9 (1279.0 to 1355.1)  | 672.1 (644.0 to 701.5)        | 46.5 (35.7 to 59.7)             | 0.0 (0.0 to 0.0)                  | 2938.0 (2864.7 to 3008.3) | 1901.4 (1845.2 to 1955.0)  | 969.6 (929.2 to 1012.1)       | 67.1 (51.5 to 86.1)             | 0.0 (0.0 to 0.0)                  |
| Malta   | 2013 | 2218.7 (2167.7 to 2272.8)  | 1415.2 (1377.4 to 1455.8)  | 755.1 (725.4 to 787.5)        | 48.4 (36.9 to 63.1)             | 0.0 (0.0 to 0.0)                  | 3200.9 (3127.3 to 3279.0) | 2041.7 (1987.2 to 2100.3)  | 1089.4 (1046.6 to 1136.2)     | 69.8 (53.3 to 91.0)             | 0.0 (0.0 to 0.0)                  |
| Malta   | 2014 | 2437.6 (2380.1 to 2493.4)  | 1517.6 (1477.6 to 1557.5)  | 867.6 (833.4 to 899.6)        | 52.4 (39.1 to 69.9)             | 0.0 (0.0 to 0.0)                  | 3516.6 (3433.7 to 3597.2) | 2189.4 (2131.7 to 2246.9)  | 1251.6 (1202.3 to 1297.8)     | 75.6 (56.4 to 100.9)            | 0.0 (0.0 to 0.0)                  |
| Malta   | 2015 | 2651.5 (2595.9 to 2708.7)  | 1634.9 (1593.0 to 1679.3)  | 959.7 (926.5 to 993.3)        | 56.9 (42.1 to 77.0)             | 0.0 (0.0 to 0.0)                  | 3825.3 (3745.0 to 3907.8) | 2358.7 (2298.2 to 2422.7)  | 1384.5 (1336.7 to 1433.0)     | 82.1 (60.7 to 111.0)            | 0.0 (0.0 to 0.0)                  |
| Malta   | 2016 | 2798.6 (2725.4 to 2879.0)  | 1742.9 (1682.8 to 1802.0)  | 994.9 (947.0 to 1037.3)       | 60.8 (42.9 to 85.1)             | 0.0 (0.0 to 0.0)                  | 4037.5 (3931.8 to 4153.5) | 2514.5 (2427.8 to 2599.8)  | 1435.3 (1366.2 to 1496.4)     | 87.7 (62.0 to 122.7)            | 0.0 (0.0 to 0.0)                  |
| Malta   | 2017 | 2944.3 (2865.4 to 3030.4)  | 1842.7 (1779.1 to 1904.8)  | 1037.8 (987.0 to 1085.6)      | 63.7 (45.0 to 89.3)             | 0.0 (0.0 to 0.0)                  | 4247.7 (4133.9 to 4371.9) | 2658.5 (2566.7 to 2748.0)  | 1497.3 (1423.9 to 1566.1)     | 91.9 (65.0 to 128.9)            | 0.0 (0.0 to 0.0)                  |
| Malta   | 2018 | 2996.6 (2911.6 to 3085.2)  | 1865.2 (1799.9 to 1927.7)  | 1066.6 (1011.3 to 1118.2)     | 64.9 (45.9 to 90.6)             | 0.0 (0.0 to 0.0)                  | 4323.2 (4200.5 to 4451.0) | 2690.8 (2596.6 to 2781.0)  | 1538.8 (1459.0 to 1613.2)     | 93.6 (66.2 to 130.7)            | 0.0 (0.0 to 0.0)                  |
| Malta   | 2019 | 3056.2 (2966.7 to 3151.2)  | 1892.5 (1824.7 to 1957.4)  | 1097.7 (1037.8 to 1156.1)     | 66.1 (46.6 to 92.2)             | 0.0 (0.0 to 0.0)                  | 4409.2 (4280.0 to 4546.2) | 2730.3 (2632.5 to 2823.9)  | 1583.6 (1497.1 to 1667.8)     | 95.3 (67.2 to 133.0)            | 0.0 (0.0 to 0.0)                  |
| Malta   | 2020 | 3116.8 (3021.4 to 3213.3)  | 1920.3 (1847.9 to 1990.0)  | 1129.2 (1067.8 to 1189.0)     | 67.3 (47.3 to 93.7)             | 0.0 (0.0 to 0.0)                  | 4496.5 (4358.9 to 4635.8) | 2770.4 (2665.9 to 2871.0)  | 1629.1 (1540.4 to 1715.3)     | 97.0 (68.3 to 135.1)            | 0.0 (0.0 to 0.0)                  |
| Malta   | 2021 | 3196.2 (3092.5 to 3299.4)  | 1961.1 (1886.0 to 2035.6)  | 1166.3 (1097.5 to 1233.6)     | 68.9 (48.6 to 95.9)             | 0.0 (0.0 to 0.0)                  | 4611.1 (4461.5 to 4759.9) | 2829.2 (2720.9 to 2936.8)  | 1682.5 (1583.3 to 1779.7)     | 99.4 (70.1 to 138.4)            | 0.0 (0.0 to 0.0)                  |
| Malta   | 2022 | 3277.6 (3162.0 to 3391.0)  | 2002.2 (1922.6 to 2081.7)  | 1204.9 (1132.8 to 1279.0)     | 70.6 (49.8 to 98.4)             | 0.0 (0.0 to 0.0)                  | 4728.6 (4561.8 to 4892.2) | 2888.5 (2773.6 to 3003.2)  | 1738.2 (1634.2 to 1845.2)     | 101.8 (71.9 to 141.9)           | 0.0 (0.0 to 0.0)                  |
| Malta   | 2023 | 3355.2 (3234.0 to 3471.9)  | 2039.9 (1956.5 to 2123.5)  | 1243.3 (1165.2 to 1320.8)     | 72.0 (50.8 to 100.6)            | 0.0 (0.0 to 0.0)                  | 4840.5 (4665.6 to 5008.8) | 2942.9 (2822.6 to 3063.5)  | 1793.6 (1681.0 to 1905.4)     | 103.9 (73.3 to 145.1)           | 0.0 (0.0 to 0.0)                  |
| Malta   | 2024 | 3443.7 (3320.2 to 3561.4)  | 2086.6 (1998.7 to 2171.6)  | 1283.4 (1197.5 to 1364.9)     | 73.7 (51.8 to 103.2)            | 0.0 (0.0 to 0.0)                  | 4968.1 (4789.9 to 5137.9) | 3010.3 (2883.5 to 3133.0)  | 1851.5 (1727.5 to 1969.1)     | 106.3 (74.8 to 148.8)           | 0.0 (0.0 to 0.0)                  |
| Malta   | 2025 | 3524.8 (3394.5 to 3653.5)  | 2127.4 (2034.0 to 2216.6)  | 1322.2 (1231.5 to 1407.6)     | 75.1 (52.8 to 105.1)            | 0.0 (0.0 to 0.0)                  | 5085.1 (4897.1 to 5270.9) | 3069.2 (2934.4 to 3197.9)  | 1907.6 (1776.6 to 2030.7)     | 108.3 (76.2 to 151.6)           | 0.0 (0.0 to 0.0)                  |
| Malta   | 2026 | 3614.2 (3469.0 to 3744.2)  | 2173.3 (2075.4 to 2267.4)  | 1364.1 (1258.4 to 1458.3)     | 76.7 (54.0 to 107.4)            | 0.0 (0.0 to 0.0)                  | 5214.1 (5004.6 to 5401.6) | 3135.4 (2994.2 to 3271.1)  | 1968.0 (1815.4 to 2103.8)     | 110.7 (77.9 to 154.9)           | 0.0 (0.0 to 0.0)                  |
| Malta   | 2027 | 3710.0 (3560.2 to 3865.8)  | 2223.1 (2120.4 to 2324.2)  | 1408.3 (1292.1 to 1518.8)     | 78.6 (55.3 to 109.9)            | 0.0 (0.0 to 0.0)                  | 5352.3 (5136.3 to 5577.1) | 3207.2 (3059.1 to 3353.0)  | 2031.7 (1864.0 to 2191.2)     | 113.4 (79.7 to 158.6)           | 0.0 (0.0 to 0.0)                  |
| Malta   | 2028 | 3810.7 (3649.1 to 3984.1)  | 2276.7 (2169.7 to 2378.4)  | 1453.5 (1322.9 to 1578.1)     | 80.6 (56.5 to 112.7)            | 0.0 (0.0 to 0.0)                  | 5497.6 (5264.6 to 5747.8) | 3284.5 (3130.2 to 3431.3)  | 2096.9 (1908.5 to 2276.7)     | 116.2 (81.5 to 162.5)           | 0.0 (0.0 to 0.0)                  |
| Malta   | 2029 | 3913.1 (3731.4 to 4103.6)  | 2331.3 (2222.5 to 2441.4)  | 1499.2 (1347.9 to 1644.8)     | 82.6 (57.9 to 115.5)            | 0.0 (0.0 to 0.0)                  | 5645.4 (5383.3 to 5920.2) | 3363.3 (3206.3 to 3522.1)  | 2162.9 (1944.6 to 2372.9)     | 119.2 (83.5 to 166.6)           | 0.0 (0.0 to 0.0)                  |

| Country | Year | 2018 US Dollars per capita |                            |                               |                                 |                                   | 2018 PPP per capita        |                            |                               |                                 |                                   |
|---------|------|----------------------------|----------------------------|-------------------------------|---------------------------------|-----------------------------------|----------------------------|----------------------------|-------------------------------|---------------------------------|-----------------------------------|
|         |      | Health spending            | Government health spending | Out-of-pocket health spending | Prepaid private health spending | Development assistance for health | Health spending            | Government health spending | Out-of-pocket health spending | Prepaid private health spending | Development assistance for health |
| Malta   | 2030 | 4018.6 (3810.8 to 4232.0)  | 2387.9 (2271.9 to 2506.8)  | 1545.8 (1378.9 to 1712.4)     | 84.8 (59.4 to 118.6)            | 0.0 (0.0 to 0.0)                  | 5797.6 (5497.8 to 6105.5)  | 3445.0 (3277.7 to 3616.5)  | 2230.2 (1989.3 to 2470.5)     | 122.4 (85.7 to 171.1)           | 0.0 (0.0 to 0.0)                  |
| Malta   | 2031 | 4124.7 (3885.7 to 4365.1)  | 2445.0 (2327.3 to 2568.9)  | 1592.6 (1407.9 to 1783.9)     | 87.2 (61.0 to 121.8)            | 0.0 (0.0 to 0.0)                  | 5950.6 (5605.9 to 6297.5)  | 3527.3 (3357.5 to 3706.1)  | 2297.6 (2031.1 to 2573.5)     | 125.7 (88.0 to 175.7)           | 0.0 (0.0 to 0.0)                  |
| Malta   | 2032 | 4232.8 (3978.8 to 4488.0)  | 2503.5 (2370.9 to 2634.5)  | 1639.7 (1435.8 to 1857.7)     | 89.6 (62.6 to 125.1)            | 0.0 (0.0 to 0.0)                  | 6106.6 (5740.2 to 6474.8)  | 3611.8 (3420.5 to 3800.7)  | 2365.5 (2071.4 to 2680.0)     | 129.3 (90.4 to 180.5)           | 0.0 (0.0 to 0.0)                  |
| Malta   | 2033 | 4343.7 (4055.7 to 4635.1)  | 2564.3 (2427.4 to 2705.1)  | 1687.2 (1461.0 to 1923.7)     | 92.2 (64.4 to 128.7)            | 0.0 (0.0 to 0.0)                  | 6266.6 (5851.1 to 6686.9)  | 3699.5 (3501.9 to 3902.6)  | 2434.1 (2107.7 to 2775.3)     | 133.0 (92.9 to 185.7)           | 0.0 (0.0 to 0.0)                  |
| Malta   | 2034 | 4456.4 (4155.0 to 4774.1)  | 2626.9 (2478.9 to 2773.7)  | 1734.7 (1491.4 to 1995.4)     | 94.8 (66.2 to 132.3)            | 0.0 (0.0 to 0.0)                  | 6429.2 (5994.3 to 6887.5)  | 3789.8 (3576.2 to 4001.5)  | 2502.6 (2151.6 to 2878.7)     | 136.8 (95.5 to 190.9)           | 0.0 (0.0 to 0.0)                  |
| Malta   | 2035 | 4570.0 (4244.9 to 4904.4)  | 2690.3 (2531.6 to 2849.7)  | 1782.2 (1524.5 to 2073.7)     | 97.5 (68.0 to 136.0)            | 0.0 (0.0 to 0.0)                  | 6593.0 (6124.0 to 7075.5)  | 3881.3 (3652.3 to 4111.2)  | 2571.1 (2199.4 to 2991.7)     | 140.6 (98.2 to 196.2)           | 0.0 (0.0 to 0.0)                  |
| Malta   | 2036 | 4686.0 (4340.3 to 5048.3)  | 2756.3 (2586.8 to 2924.5)  | 1829.5 (1552.3 to 2139.8)     | 100.2 (70.1 to 140.0)           | 0.0 (0.0 to 0.0)                  | 6760.5 (6261.6 to 7283.0)  | 3976.4 (3731.9 to 4219.1)  | 2639.4 (2239.4 to 3087.0)     | 144.6 (101.1 to 202.0)          | 0.0 (0.0 to 0.0)                  |
| Malta   | 2037 | 4804.8 (4435.1 to 5195.9)  | 2824.9 (2639.1 to 3006.0)  | 1876.8 (1580.0 to 2213.6)     | 103.0 (72.2 to 144.5)           | 0.0 (0.0 to 0.0)                  | 6931.7 (6398.4 to 7496.0)  | 4075.4 (3807.4 to 4336.6)  | 2707.7 (2279.4 to 3193.5)     | 148.6 (104.1 to 208.5)          | 0.0 (0.0 to 0.0)                  |
| Malta   | 2038 | 4923.1 (4536.3 to 5343.2)  | 2894.0 (2695.1 to 3091.0)  | 1923.3 (1606.2 to 2285.3)     | 105.8 (74.2 to 148.3)           | 0.0 (0.0 to 0.0)                  | 7102.5 (6544.5 to 7708.5)  | 4175.0 (3888.1 to 4459.4)  | 2774.8 (2317.2 to 3296.9)     | 152.7 (107.1 to 213.9)          | 0.0 (0.0 to 0.0)                  |
| Malta   | 2039 | 5041.8 (4628.2 to 5483.2)  | 2964.0 (2753.1 to 3183.5)  | 1969.2 (1635.6 to 2356.7)     | 108.6 (76.3 to 152.2)           | 0.0 (0.0 to 0.0)                  | 7273.7 (6677.0 to 7910.6)  | 4276.1 (3971.8 to 4592.8)  | 2841.0 (2359.6 to 3400.0)     | 156.7 (110.1 to 219.6)          | 0.0 (0.0 to 0.0)                  |
| Malta   | 2040 | 5162.6 (4717.3 to 5616.1)  | 3036.3 (2810.9 to 3271.0)  | 2014.8 (1663.3 to 2427.3)     | 111.5 (78.4 to 156.4)           | 0.0 (0.0 to 0.0)                  | 7448.0 (6805.5 to 8102.3)  | 4380.4 (4055.2 to 4719.0)  | 2906.7 (2399.6 to 3501.9)     | 160.9 (113.2 to 225.7)          | 0.0 (0.0 to 0.0)                  |
| Malta   | 2041 | 5284.5 (4823.4 to 5766.1)  | 3110.2 (2868.1 to 3358.0)  | 2059.8 (1691.0 to 2496.8)     | 114.4 (80.3 to 160.7)           | 0.0 (0.0 to 0.0)                  | 7623.8 (6958.6 to 8318.7)  | 4487.1 (4137.8 to 4844.5)  | 2971.6 (2439.6 to 3602.0)     | 165.1 (115.8 to 231.9)          | 0.0 (0.0 to 0.0)                  |
| Malta   | 2042 | 5405.4 (4929.0 to 5898.0)  | 3184.3 (2929.7 to 3441.8)  | 2103.7 (1719.6 to 2562.1)     | 117.4 (82.1 to 164.8)           | 0.0 (0.0 to 0.0)                  | 7798.3 (7111.0 to 8508.9)  | 4594.0 (4226.7 to 4965.5)  | 3035.0 (2480.8 to 3696.3)     | 169.3 (118.4 to 237.8)          | 0.0 (0.0 to 0.0)                  |
| Malta   | 2043 | 5530.5 (5035.3 to 6038.4)  | 3262.8 (2987.9 to 3540.2)  | 2147.4 (1753.2 to 2630.4)     | 120.4 (83.9 to 169.0)           | 0.0 (0.0 to 0.0)                  | 7978.8 (7264.4 to 8711.4)  | 4707.1 (4310.6 to 5107.4)  | 3098.0 (2529.3 to 3794.8)     | 173.7 (121.1 to 243.9)          | 0.0 (0.0 to 0.0)                  |
| Malta   | 2044 | 5656.8 (5149.2 to 6210.7)  | 3342.9 (3052.5 to 3637.1)  | 2190.4 (1787.9 to 2691.4)     | 123.5 (86.2 to 173.3)           | 0.0 (0.0 to 0.0)                  | 8160.9 (7428.7 to 8960.1)  | 4822.7 (4403.7 to 5247.1)  | 3160.0 (2579.3 to 3882.9)     | 178.2 (124.4 to 250.0)          | 0.0 (0.0 to 0.0)                  |
| Malta   | 2045 | 5782.7 (5228.9 to 6402.9)  | 3424.2 (3124.9 to 3739.5)  | 2231.9 (1813.9 to 2748.7)     | 126.7 (88.5 to 177.1)           | 0.0 (0.0 to 0.0)                  | 8342.6 (7543.6 to 9237.4)  | 4940.0 (4508.2 to 5394.9)  | 3219.9 (2616.9 to 3965.4)     | 182.7 (127.7 to 255.5)          | 0.0 (0.0 to 0.0)                  |
| Malta   | 2046 | 5901.1 (5341.1 to 6500.9)  | 3500.8 (3171.3 to 3835.0)  | 2270.6 (1837.7 to 2801.0)     | 129.7 (90.7 to 181.1)           | 0.0 (0.0 to 0.0)                  | 8513.4 (7705.4 to 9378.7)  | 5050.6 (4575.2 to 5532.7)  | 3275.7 (2651.2 to 4040.9)     | 187.1 (130.9 to 261.3)          | 0.0 (0.0 to 0.0)                  |
| Malta   | 2047 | 6021.4 (5473.5 to 6645.2)  | 3580.3 (3232.8 to 3920.9)  | 2308.4 (1863.8 to 2856.9)     | 132.8 (92.9 to 185.6)           | 0.0 (0.0 to 0.0)                  | 8687.0 (7896.5 to 9586.9)  | 5165.2 (4663.9 to 5656.6)  | 3330.3 (2688.9 to 4121.6)     | 191.5 (134.0 to 267.7)          | 0.0 (0.0 to 0.0)                  |
| Malta   | 2048 | 6141.0 (5553.6 to 6777.4)  | 3659.2 (3308.1 to 4020.9)  | 2346.0 (1897.0 to 2912.5)     | 135.8 (94.9 to 190.0)           | 0.0 (0.0 to 0.0)                  | 8859.5 (8012.0 to 9777.6)  | 5279.1 (4772.6 to 5800.8)  | 3384.5 (2736.7 to 4201.8)     | 195.9 (137.0 to 274.1)          | 0.0 (0.0 to 0.0)                  |
| Malta   | 2049 | 6259.9 (5695.5 to 6954.2)  | 3737.5 (3364.2 to 4116.5)  | 2383.5 (1927.6 to 2968.1)     | 138.8 (96.9 to 194.4)           | 0.0 (0.0 to 0.0)                  | 9031.0 (8216.7 to 10032.7) | 5392.0 (4853.5 to 5938.7)  | 3438.6 (2780.9 to 4282.0)     | 200.3 (139.8 to 280.5)          | 0.0 (0.0 to 0.0)                  |
| Malta   | 2050 | 6377.3 (5766.6 to 7083.0)  | 3815.0 (3422.0 to 4213.0)  | 2420.5 (1949.5 to 3022.8)     | 141.8 (98.8 to 198.6)           | 0.0 (0.0 to 0.0)                  | 9200.4 (8319.3 to 10218.5) | 5503.9 (4936.8 to 6078.1)  | 3492.0 (2812.4 to 4360.9)     | 204.6 (142.5 to 286.5)          | 0.0 (0.0 to 0.0)                  |

| Country          | Year | 2018 US Dollars per capita |                            |                               |                                 |                                   | 2018 PPP per capita    |                            |                               |                                 |                                   |
|------------------|------|----------------------------|----------------------------|-------------------------------|---------------------------------|-----------------------------------|------------------------|----------------------------|-------------------------------|---------------------------------|-----------------------------------|
|                  |      | Health spending            | Government health spending | Out-of-pocket health spending | Prepaid private health spending | Development assistance for health | Health spending        | Government health spending | Out-of-pocket health spending | Prepaid private health spending | Development assistance for health |
| Marshall Islands | 1995 | 498.3 (447.3 to 552.6)     | 398.0 (351.9 to 448.4)     | 66.3 (49.7 to 84.8)           | 24.1 (12.4 to 42.8)             | 10.0 (10.0 to 10.0)               | 488.3 (438.3 to 541.5) | 390.0 (344.8 to 439.4)     | 64.9 (48.7 to 83.1)           | 23.6 (12.2 to 41.9)             | 9.8 (9.8 to 9.8)                  |
| Marshall Islands | 1996 | 435.7 (396.1 to 476.2)     | 338.4 (303.4 to 375.5)     | 57.7 (44.1 to 73.7)           | 22.0 (11.8 to 37.2)             | 17.5 (17.5 to 17.5)               | 426.9 (388.1 to 466.6) | 331.6 (297.3 to 367.9)     | 56.6 (43.2 to 72.2)           | 21.6 (11.5 to 36.5)             | 17.2 (17.2 to 17.2)               |
| Marshall Islands | 1997 | 411.6 (375.9 to 446.5)     | 317.2 (286.8 to 347.1)     | 52.5 (40.9 to 66.9)           | 21.5 (12.0 to 35.8)             | 20.4 (20.4 to 20.4)               | 403.3 (368.4 to 437.5) | 310.8 (281.0 to 340.1)     | 51.4 (40.1 to 65.5)           | 21.1 (11.7 to 35.1)             | 20.0 (20.0 to 20.0)               |
| Marshall Islands | 1998 | 415.5 (381.9 to 450.4)     | 313.3 (286.1 to 341.7)     | 49.7 (38.9 to 62.8)           | 21.6 (12.2 to 36.2)             | 30.9 (30.9 to 30.9)               | 407.2 (374.2 to 441.4) | 307.0 (280.4 to 334.8)     | 48.8 (38.1 to 61.5)           | 21.2 (11.9 to 35.4)             | 30.3 (30.3 to 30.3)               |
| Marshall Islands | 1999 | 508.8 (475.1 to 543.8)     | 324.2 (296.1 to 351.9)     | 49.2 (38.6 to 62.3)           | 22.4 (12.7 to 37.9)             | 113.0 (113.0 to 113.0)            | 498.6 (465.5 to 532.9) | 317.6 (290.2 to 344.9)     | 48.2 (37.8 to 61.1)           | 22.0 (12.4 to 37.1)             | 110.8 (110.8 to 110.8)            |
| Marshall Islands | 2000 | 459.5 (424.5 to 497.2)     | 352.5 (322.2 to 382.5)     | 51.2 (39.9 to 65.0)           | 24.8 (13.9 to 41.3)             | 30.9 (30.9 to 30.9)               | 450.2 (416.0 to 487.2) | 345.5 (315.7 to 374.8)     | 50.2 (39.1 to 63.7)           | 24.3 (13.6 to 40.4)             | 30.3 (30.3 to 30.3)               |
| Marshall Islands | 2001 | 443.2 (409.3 to 481.8)     | 355.3 (324.7 to 387.0)     | 52.9 (41.2 to 66.5)           | 25.3 (14.4 to 41.6)             | 9.7 (9.7 to 9.7)                  | 434.3 (401.0 to 472.1) | 348.2 (318.2 to 379.2)     | 51.9 (40.4 to 65.2)           | 24.8 (14.1 to 40.7)             | 9.5 (9.5 to 9.5)                  |
| Marshall Islands | 2002 | 436.0 (402.4 to 474.9)     | 334.9 (306.2 to 364.5)     | 54.8 (42.8 to 68.3)           | 24.3 (13.9 to 39.9)             | 22.0 (22.0 to 22.0)               | 427.2 (394.3 to 465.4) | 328.2 (300.0 to 357.2)     | 53.7 (42.0 to 66.9)           | 23.8 (13.7 to 39.1)             | 21.5 (21.5 to 21.5)               |
| Marshall Islands | 2003 | 461.5 (430.7 to 499.1)     | 317.9 (290.6 to 347.0)     | 60.8 (47.9 to 75.6)           | 23.3 (13.2 to 38.0)             | 59.5 (59.5 to 59.5)               | 452.2 (422.1 to 489.1) | 311.5 (284.7 to 340.0)     | 59.6 (46.9 to 74.1)           | 22.8 (13.0 to 37.2)             | 58.3 (58.3 to 58.3)               |
| Marshall Islands | 2004 | 634.1 (603.5 to 670.6)     | 309.8 (283.9 to 338.6)     | 63.3 (50.4 to 78.6)           | 22.5 (12.6 to 36.6)             | 238.5 (238.5 to 238.5)            | 621.4 (591.4 to 657.1) | 303.6 (278.2 to 331.8)     | 62.0 (49.4 to 77.0)           | 22.1 (12.3 to 35.8)             | 233.8 (233.8 to 233.8)            |
| Marshall Islands | 2005 | 729.1 (698.1 to 766.0)     | 311.3 (285.8 to 339.7)     | 64.1 (51.1 to 80.1)           | 22.1 (12.4 to 36.0)             | 331.6 (331.6 to 331.6)            | 714.5 (684.0 to 750.6) | 305.1 (280.1 to 332.9)     | 62.8 (50.1 to 78.5)           | 21.7 (12.1 to 35.3)             | 324.9 (324.9 to 324.9)            |
| Marshall Islands | 2006 | 559.2 (528.4 to 598.1)     | 317.3 (289.5 to 345.0)     | 64.2 (51.5 to 80.7)           | 21.9 (12.2 to 35.2)             | 155.8 (155.8 to 155.8)            | 548.0 (517.8 to 586.1) | 310.9 (283.7 to 338.1)     | 63.0 (50.5 to 79.1)           | 21.4 (12.0 to 34.5)             | 152.7 (152.7 to 152.7)            |
| Marshall Islands | 2007 | 575.0 (542.1 to 612.3)     | 330.4 (301.5 to 361.4)     | 64.6 (51.8 to 80.8)           | 22.0 (12.1 to 35.5)             | 158.0 (158.0 to 158.0)            | 563.5 (531.2 to 600.0) | 323.8 (295.5 to 354.1)     | 63.3 (50.7 to 79.2)           | 21.6 (11.8 to 34.8)             | 154.8 (154.8 to 154.8)            |
| Marshall Islands | 2008 | 581.6 (549.8 to 617.4)     | 313.3 (285.3 to 342.8)     | 63.6 (51.1 to 78.9)           | 20.8 (11.4 to 33.9)             | 183.8 (183.8 to 183.8)            | 569.9 (538.7 to 605.0) | 307.0 (279.5 to 335.9)     | 62.3 (50.1 to 77.3)           | 20.4 (11.2 to 33.2)             | 180.1 (180.1 to 180.1)            |
| Marshall Islands | 2009 | 581.2 (549.2 to 615.4)     | 303.0 (275.8 to 332.1)     | 64.9 (52.1 to 80.1)           | 20.0 (11.5 to 32.2)             | 193.2 (193.2 to 193.2)            | 569.5 (538.2 to 603.0) | 297.0 (270.3 to 325.4)     | 63.6 (51.1 to 78.5)           | 19.6 (11.2 to 31.6)             | 189.3 (189.3 to 189.3)            |
| Marshall Islands | 2010 | 416.2 (383.6 to 450.3)     | 301.1 (272.9 to 329.8)     | 69.8 (55.9 to 86.0)           | 19.4 (11.0 to 32.0)             | 25.8 (25.8 to 25.8)               | 407.9 (375.9 to 441.3) | 295.1 (267.4 to 323.2)     | 68.4 (54.8 to 84.3)           | 19.0 (10.8 to 31.4)             | 25.3 (25.3 to 25.3)               |
| Marshall Islands | 2011 | 435.8 (403.1 to 472.1)     | 314.9 (285.9 to 345.8)     | 71.8 (57.7 to 88.0)           | 19.2 (10.6 to 32.0)             | 30.0 (30.0 to 30.0)               | 427.1 (395.0 to 462.6) | 308.5 (280.2 to 338.8)     | 70.3 (56.6 to 86.3)           | 18.8 (10.4 to 31.4)             | 29.4 (29.4 to 29.4)               |
| Marshall Islands | 2012 | 585.2 (549.8 to 622.0)     | 334.2 (305.4 to 366.8)     | 72.5 (58.4 to 89.0)           | 19.2 (10.3 to 32.7)             | 159.2 (159.2 to 159.2)            | 573.4 (538.8 to 609.5) | 327.5 (299.3 to 359.4)     | 71.1 (57.2 to 87.2)           | 18.8 (10.1 to 32.1)             | 156.0 (156.0 to 156.0)            |
| Marshall Islands | 2013 | 459.4 (423.7 to 495.3)     | 348.8 (317.5 to 381.7)     | 72.8 (58.0 to 89.9)           | 19.2 (10.2 to 33.5)             | 18.6 (18.6 to 18.6)               | 450.1 (415.2 to 485.4) | 341.8 (311.1 to 374.1)     | 71.3 (56.9 to 88.1)           | 18.8 (10.0 to 32.9)             | 18.2 (18.2 to 18.2)               |
| Marshall Islands | 2014 | 540.6 (504.1 to 578.7)     | 349.8 (318.7 to 381.9)     | 72.7 (57.3 to 91.3)           | 18.9 (9.8 to 33.6)              | 99.1 (99.1 to 99.1)               | 529.7 (494.0 to 567.1) | 342.8 (312.3 to 374.3)     | 71.2 (56.1 to 89.5)           | 18.5 (9.6 to 32.9)              | 97.1 (97.1 to 97.1)               |
| Marshall Islands | 2015 | 540.0 (499.4 to 586.1)     | 383.4 (346.8 to 422.0)     | 74.4 (57.4 to 94.6)           | 19.8 (10.3 to 34.8)             | 62.4 (62.4 to 62.4)               | 529.2 (489.4 to 574.3) | 375.7 (339.8 to 413.5)     | 72.9 (56.2 to 92.7)           | 19.4 (10.1 to 34.1)             | 61.2 (61.2 to 61.2)               |

| Country          | Year | 2018 US Dollars per capita |                            |                               |                                 |                                   | 2018 PPP per capita     |                            |                               |                                 |                                   |
|------------------|------|----------------------------|----------------------------|-------------------------------|---------------------------------|-----------------------------------|-------------------------|----------------------------|-------------------------------|---------------------------------|-----------------------------------|
|                  |      | Health spending            | Government health spending | Out-of-pocket health spending | Prepaid private health spending | Development assistance for health | Health spending         | Government health spending | Out-of-pocket health spending | Prepaid private health spending | Development assistance for health |
| Marshall Islands | 2016 | 528.9 (479.6 to 585.8)     | 419.7 (374.3 to 469.9)     | 75.4 (57.2 to 96.8)           | 20.6 (10.5 to 37.1)             | 13.3 (13.3 to 13.3)               | 518.3 (470.0 to 574.0)  | 411.3 (366.8 to 460.5)     | 73.9 (56.1 to 94.8)           | 20.2 (10.3 to 36.4)             | 13.0 (13.0 to 13.0)               |
| Marshall Islands | 2017 | 628.0 (568.5 to 691.4)     | 489.2 (435.8 to 546.8)     | 76.7 (58.3 to 98.6)           | 21.5 (10.8 to 39.1)             | 40.7 (40.7 to 40.7)               | 615.4 (557.1 to 677.5)  | 479.3 (427.0 to 535.8)     | 75.1 (57.1 to 96.6)           | 21.1 (10.6 to 38.3)             | 39.9 (39.9 to 39.9)               |
| Marshall Islands | 2018 | 624.8 (564.7 to 687.9)     | 488.5 (434.9 to 550.7)     | 76.5 (58.2 to 98.3)           | 21.4 (10.7 to 38.9)             | 38.4 (38.4 to 38.4)               | 612.3 (553.4 to 674.0)  | 478.7 (426.2 to 539.7)     | 75.0 (57.0 to 96.3)           | 21.0 (10.5 to 38.2)             | 37.6 (37.6 to 37.7)               |
| Marshall Islands | 2019 | 636.9 (572.8 to 704.6)     | 499.2 (442.4 to 564.8)     | 77.3 (58.9 to 98.5)           | 21.7 (10.9 to 39.5)             | 38.7 (36.1 to 40.9)               | 624.1 (561.3 to 690.5)  | 489.2 (433.5 to 553.5)     | 75.8 (57.7 to 96.6)           | 21.3 (10.7 to 38.7)             | 37.9 (35.4 to 40.1)               |
| Marshall Islands | 2020 | 647.7 (579.9 to 719.3)     | 508.2 (445.8 to 578.0)     | 78.4 (59.6 to 100.4)          | 21.9 (11.0 to 40.0)             | 39.2 (36.0 to 42.4)               | 634.7 (568.2 to 704.8)  | 498.0 (436.9 to 566.4)     | 76.8 (58.5 to 98.4)           | 21.5 (10.8 to 39.2)             | 38.5 (35.3 to 41.5)               |
| Marshall Islands | 2021 | 664.3 (596.4 to 740.2)     | 522.6 (458.3 to 593.3)     | 79.5 (60.3 to 102.1)          | 22.2 (11.2 to 40.5)             | 39.9 (35.9 to 44.1)               | 650.9 (584.4 to 725.4)  | 512.1 (449.1 to 581.4)     | 77.9 (59.1 to 100.1)          | 21.8 (10.9 to 39.7)             | 39.1 (35.2 to 43.2)               |
| Marshall Islands | 2022 | 680.2 (609.7 to 760.2)     | 536.3 (471.1 to 609.1)     | 80.5 (61.2 to 102.8)          | 22.6 (11.3 to 41.2)             | 40.8 (36.2 to 45.5)               | 666.5 (597.4 to 744.9)  | 525.6 (461.7 to 596.9)     | 78.9 (60.0 to 100.7)          | 22.1 (11.1 to 40.4)             | 40.0 (35.5 to 44.6)               |
| Marshall Islands | 2023 | 694.7 (621.7 to 774.5)     | 548.7 (482.0 to 624.7)     | 81.5 (61.7 to 104.5)          | 22.8 (11.5 to 41.9)             | 41.6 (36.2 to 47.2)               | 680.7 (609.2 to 759.0)  | 537.7 (472.3 to 612.2)     | 79.9 (60.5 to 102.4)          | 22.4 (11.2 to 41.0)             | 40.7 (35.5 to 46.2)               |
| Marshall Islands | 2024 | 713.1 (637.2 to 796.5)     | 564.6 (495.0 to 643.0)     | 82.8 (62.7 to 106.2)          | 23.2 (11.7 to 42.6)             | 42.4 (36.6 to 48.8)               | 698.7 (624.4 to 780.5)  | 553.3 (485.0 to 630.1)     | 81.1 (61.5 to 104.1)          | 22.8 (11.4 to 41.8)             | 41.5 (35.8 to 47.8)               |
| Marshall Islands | 2025 | 733.4 (654.0 to 819.2)     | 582.4 (509.5 to 663.3)     | 84.2 (63.7 to 108.1)          | 23.7 (11.9 to 43.4)             | 43.1 (36.8 to 50.5)               | 718.7 (640.9 to 802.8)  | 570.7 (499.3 to 650.0)     | 82.5 (62.4 to 106.0)          | 23.2 (11.7 to 42.6)             | 42.2 (36.1 to 49.5)               |
| Marshall Islands | 2026 | 753.2 (676.1 to 840.9)     | 599.4 (523.0 to 685.3)     | 85.8 (65.1 to 110.5)          | 24.3 (12.2 to 44.4)             | 43.8 (36.9 to 51.3)               | 738.1 (662.5 to 824.0)  | 587.4 (512.4 to 671.5)     | 84.0 (63.8 to 108.3)          | 23.8 (12.0 to 43.5)             | 42.9 (36.2 to 50.2)               |
| Marshall Islands | 2027 | 776.2 (692.1 to 870.8)     | 619.4 (539.2 to 711.6)     | 87.5 (66.4 to 112.5)          | 24.9 (12.6 to 45.5)             | 44.4 (37.3 to 52.9)               | 760.6 (678.2 to 853.3)  | 607.0 (528.3 to 697.3)     | 85.7 (65.0 to 110.3)          | 24.4 (12.3 to 44.6)             | 43.5 (36.5 to 51.8)               |
| Marshall Islands | 2028 | 800.1 (714.3 to 902.6)     | 640.1 (555.4 to 735.4)     | 89.2 (67.8 to 114.5)          | 25.6 (13.0 to 46.6)             | 45.2 (37.8 to 54.5)               | 784.0 (700.0 to 884.5)  | 627.2 (544.3 to 720.6)     | 87.4 (66.4 to 112.2)          | 25.1 (12.7 to 45.7)             | 44.3 (37.1 to 53.4)               |
| Marshall Islands | 2029 | 825.2 (735.6 to 932.2)     | 661.9 (576.3 to 761.2)     | 91.1 (68.9 to 117.7)          | 26.4 (13.4 to 47.9)             | 45.9 (37.9 to 56.2)               | 808.6 (720.8 to 913.5)  | 648.6 (564.7 to 745.9)     | 89.2 (67.5 to 115.3)          | 25.8 (13.1 to 46.9)             | 45.0 (37.1 to 55.1)               |
| Marshall Islands | 2030 | 849.7 (752.3 to 956.1)     | 683.0 (593.1 to 787.5)     | 93.0 (70.3 to 121.0)          | 27.1 (13.8 to 49.1)             | 46.6 (38.2 to 57.1)               | 832.7 (737.2 to 936.9)  | 669.3 (581.2 to 771.7)     | 91.1 (68.9 to 118.5)          | 26.6 (13.5 to 48.2)             | 45.7 (37.4 to 56.0)               |
| Marshall Islands | 2031 | 877.8 (777.5 to 993.5)     | 707.6 (614.1 to 818.5)     | 94.9 (71.7 to 124.1)          | 27.9 (14.2 to 50.5)             | 47.4 (38.4 to 59.4)               | 860.2 (761.9 to 973.5)  | 693.4 (601.7 to 802.1)     | 93.0 (70.2 to 121.6)          | 27.4 (13.9 to 49.5)             | 46.4 (37.6 to 58.2)               |
| Marshall Islands | 2032 | 906.8 (802.9 to 1032.7)    | 732.9 (633.8 to 848.1)     | 96.9 (72.8 to 127.7)          | 28.8 (14.7 to 51.9)             | 48.1 (38.7 to 60.6)               | 888.5 (786.7 to 1011.9) | 718.2 (621.1 to 831.1)     | 95.0 (71.4 to 125.2)          | 28.2 (14.4 to 50.8)             | 47.2 (37.9 to 59.4)               |
| Marshall Islands | 2033 | 933.7 (824.7 to 1061.8)    | 756.2 (653.4 to 878.1)     | 98.9 (74.2 to 131.4)          | 29.6 (15.1 to 53.4)             | 49.0 (38.9 to 62.8)               | 914.9 (808.1 to 1040.4) | 741.0 (640.3 to 860.5)     | 97.0 (72.7 to 128.7)          | 29.0 (14.8 to 52.3)             | 48.0 (38.1 to 61.6)               |
| Marshall Islands | 2034 | 960.5 (848.8 to 1095.8)    | 779.3 (670.9 to 906.8)     | 100.9 (75.6 to 134.7)         | 30.4 (15.5 to 55.0)             | 49.9 (39.3 to 64.4)               | 941.2 (831.8 to 1073.7) | 763.6 (657.5 to 888.5)     | 98.9 (74.0 to 132.0)          | 29.8 (15.2 to 53.9)             | 48.9 (38.5 to 63.1)               |
| Marshall Islands | 2035 | 987.0 (870.6 to 1122.6)    | 801.9 (690.2 to 934.2)     | 103.0 (76.7 to 137.8)         | 31.3 (15.9 to 56.7)             | 50.8 (39.5 to 66.3)               | 967.1 (853.1 to 1100.0) | 785.8 (676.3 to 915.4)     | 100.9 (75.2 to 135.1)         | 30.6 (15.6 to 55.5)             | 49.8 (38.7 to 65.0)               |
| Marshall Islands | 2036 | 1013.5 (889.8 to 1152.7)   | 824.6 (704.8 to 962.4)     | 105.0 (78.0 to 141.2)         | 32.1 (16.3 to 58.1)             | 51.8 (40.1 to 69.6)               | 993.1 (871.9 to 1129.6) | 808.0 (690.6 to 943.1)     | 102.9 (76.4 to 138.4)         | 31.5 (16.0 to 57.0)             | 50.7 (39.3 to 68.2)               |

| Country          | Year | 2018 US Dollars per capita |                            |                               |                                 |                                   | 2018 PPP per capita       |                            |                               |                                 |                                   |
|------------------|------|----------------------------|----------------------------|-------------------------------|---------------------------------|-----------------------------------|---------------------------|----------------------------|-------------------------------|---------------------------------|-----------------------------------|
|                  |      | Health spending            | Government health spending | Out-of-pocket health spending | Prepaid private health spending | Development assistance for health | Health spending           | Government health spending | Out-of-pocket health spending | Prepaid private health spending | Development assistance for health |
| Marshall Islands | 2037 | 1041.6 (911.7 to 1190.8)   | 848.8 (724.5 to 993.3)     | 107.1 (79.2 to 143.5)         | 33.0 (16.8 to 60.0)             | 52.7 (40.5 to 70.8)               | 1020.6 (893.4 to 1166.9)  | 831.8 (710.0 to 973.3)     | 104.9 (77.6 to 140.6)         | 32.3 (16.4 to 58.8)             | 51.6 (39.7 to 69.3)               |
| Marshall Islands | 2038 | 1069.1 (926.3 to 1228.9)   | 872.4 (743.7 to 1023.2)    | 109.1 (80.6 to 147.0)         | 33.9 (17.2 to 61.8)             | 53.7 (40.9 to 74.7)               | 1047.6 (907.7 to 1204.2)  | 854.9 (728.8 to 1002.7)    | 106.9 (78.9 to 144.0)         | 33.2 (16.8 to 60.6)             | 52.6 (40.1 to 73.2)               |
| Marshall Islands | 2039 | 1093.6 (952.6 to 1255.9)   | 893.0 (759.7 to 1049.6)    | 111.2 (82.0 to 150.1)         | 34.7 (17.6 to 63.6)             | 54.7 (41.8 to 75.9)               | 1071.6 (933.5 to 1230.6)  | 875.1 (744.5 to 1028.5)    | 109.0 (80.4 to 147.1)         | 34.0 (17.3 to 62.3)             | 53.6 (41.0 to 74.4)               |
| Marshall Islands | 2040 | 1118.5 (973.7 to 1282.2)   | 913.8 (775.2 to 1076.0)    | 113.3 (83.4 to 152.6)         | 35.6 (18.0 to 65.2)             | 55.8 (42.3 to 77.4)               | 1096.0 (954.1 to 1256.4)  | 895.4 (759.6 to 1054.4)    | 111.0 (81.7 to 149.5)         | 34.9 (17.7 to 63.9)             | 54.7 (41.5 to 75.9)               |
| Marshall Islands | 2041 | 1144.1 (990.9 to 1314.3)   | 935.3 (789.0 to 1101.0)    | 115.3 (84.9 to 155.8)         | 36.5 (18.4 to 66.7)             | 57.0 (42.8 to 79.1)               | 1121.1 (971.0 to 1287.9)  | 916.5 (773.1 to 1078.9)    | 113.0 (83.2 to 152.7)         | 35.7 (18.0 to 65.3)             | 55.9 (42.0 to 77.5)               |
| Marshall Islands | 2042 | 1171.8 (1004.4 to 1351.5)  | 958.8 (805.8 to 1129.0)    | 117.3 (86.3 to 158.9)         | 37.3 (18.8 to 68.2)             | 58.3 (43.6 to 83.1)               | 1148.2 (984.2 to 1324.3)  | 939.6 (789.6 to 1106.3)    | 114.9 (84.6 to 155.7)         | 36.6 (18.4 to 66.8)             | 57.1 (42.7 to 81.4)               |
| Marshall Islands | 2043 | 1199.3 (1034.4 to 1399.1)  | 982.4 (821.4 to 1159.0)    | 119.2 (87.7 to 161.7)         | 38.1 (19.1 to 69.5)             | 59.6 (44.1 to 86.0)               | 1175.2 (1013.6 to 1371.0) | 962.7 (804.9 to 1135.7)    | 116.8 (85.9 to 158.4)         | 37.3 (18.7 to 68.1)             | 58.4 (43.2 to 84.3)               |
| Marshall Islands | 2044 | 1220.7 (1049.6 to 1415.5)  | 999.8 (836.3 to 1182.4)    | 120.9 (88.9 to 164.3)         | 38.8 (19.4 to 70.6)             | 61.1 (45.0 to 88.4)               | 1196.2 (1028.5 to 1387.1) | 979.8 (819.5 to 1158.7)    | 118.5 (87.2 to 161.0)         | 38.0 (19.0 to 69.2)             | 59.9 (44.1 to 86.6)               |
| Marshall Islands | 2045 | 1241.2 (1066.0 to 1432.2)  | 1016.5 (843.8 to 1203.5)   | 122.6 (90.0 to 167.0)         | 39.4 (19.7 to 71.7)             | 62.7 (45.2 to 94.7)               | 1216.2 (1044.6 to 1403.5) | 996.1 (826.8 to 1179.3)    | 120.1 (88.2 to 163.6)         | 38.6 (19.3 to 70.2)             | 61.5 (44.3 to 92.8)               |
| Marshall Islands | 2046 | 1258.2 (1078.0 to 1458.3)  | 1029.8 (853.2 to 1226.0)   | 124.2 (90.9 to 169.4)         | 39.9 (19.9 to 73.0)             | 64.4 (46.5 to 99.2)               | 1232.9 (1056.4 to 1429.0) | 1009.1 (836.0 to 1201.3)   | 121.7 (89.1 to 166.0)         | 39.1 (19.5 to 71.5)             | 63.1 (45.6 to 97.2)               |
| Marshall Islands | 2047 | 1265.4 (1076.5 to 1475.9)  | 1033.3 (849.9 to 1235.6)   | 125.5 (91.6 to 170.8)         | 40.3 (20.0 to 74.0)             | 66.2 (47.5 to 104.3)              | 1240.0 (1054.9 to 1446.2) | 1012.6 (832.8 to 1210.8)   | 123.0 (89.8 to 167.4)         | 39.5 (19.6 to 72.5)             | 64.9 (46.5 to 102.2)              |
| Marshall Islands | 2048 | 1273.1 (1074.9 to 1487.6)  | 1037.3 (852.2 to 1242.5)   | 126.8 (92.4 to 172.5)         | 40.7 (20.1 to 75.0)             | 68.2 (48.6 to 109.4)              | 1247.5 (1053.3 to 1457.8) | 1016.5 (835.1 to 1217.6)   | 124.3 (90.5 to 169.0)         | 39.9 (19.7 to 73.5)             | 66.9 (47.6 to 107.2)              |
| Marshall Islands | 2049 | 1278.4 (1084.3 to 1498.5)  | 1039.0 (845.6 to 1248.8)   | 128.1 (93.1 to 173.8)         | 41.0 (20.2 to 75.6)             | 70.2 (50.1 to 113.1)              | 1252.7 (1062.5 to 1468.4) | 1018.1 (828.6 to 1223.7)   | 125.5 (91.2 to 170.3)         | 40.2 (19.8 to 74.0)             | 68.8 (49.1 to 110.9)              |
| Marshall Islands | 2050 | 1286.8 (1083.4 to 1507.3)  | 1043.7 (843.7 to 1262.0)   | 129.3 (94.0 to 175.0)         | 41.3 (20.3 to 76.0)             | 72.5 (50.9 to 118.2)              | 1261.0 (1061.6 to 1477.0) | 1022.7 (826.8 to 1236.6)   | 126.7 (92.1 to 171.5)         | 40.5 (19.9 to 74.4)             | 71.1 (49.9 to 115.8)              |
| Mauritania       | 1995 | 54.5 (45.1 to 66.3)        | 11.4 (8.7 to 14.8)         | 34.3 (25.1 to 45.9)           | 0.6 (0.3 to 1.1)                | 8.1 (8.1 to 8.1)                  | 187.0 (154.8 to 227.6)    | 39.2 (29.9 to 50.8)        | 117.8 (86.2 to 157.6)         | 2.1 (0.9 to 3.8)                | 27.9 (27.9 to 27.9)               |
| Mauritania       | 1996 | 56.7 (47.0 to 68.5)        | 12.1 (9.1 to 15.7)         | 35.4 (25.9 to 47.3)           | 0.6 (0.3 to 1.1)                | 8.7 (8.7 to 8.7)                  | 194.7 (161.4 to 235.2)    | 41.4 (31.3 to 53.8)        | 121.5 (88.9 to 162.4)         | 2.1 (0.9 to 3.9)                | 29.8 (29.8 to 29.8)               |
| Mauritania       | 1997 | 50.6 (41.0 to 61.7)        | 11.2 (8.5 to 14.6)         | 34.1 (25.0 to 45.5)           | 0.6 (0.2 to 1.0)                | 4.6 (4.6 to 4.6)                  | 173.7 (140.8 to 211.7)    | 38.6 (29.2 to 50.1)        | 117.2 (85.8 to 156.1)         | 1.9 (0.9 to 3.5)                | 16.0 (16.0 to 16.0)               |
| Mauritania       | 1998 | 50.0 (40.9 to 61.0)        | 10.5 (8.0 to 13.6)         | 34.3 (25.3 to 45.0)           | 0.5 (0.2 to 0.9)                | 4.8 (4.8 to 4.8)                  | 171.8 (140.4 to 209.5)    | 35.9 (27.5 to 46.5)        | 117.9 (86.7 to 154.6)         | 1.6 (0.7 to 3.0)                | 16.4 (16.4 to 16.4)               |
| Mauritania       | 1999 | 48.4 (39.1 to 59.9)        | 9.8 (7.4 to 12.6)          | 34.6 (25.6 to 45.6)           | 0.4 (0.2 to 0.7)                | 3.6 (3.6 to 3.6)                  | 166.0 (134.3 to 205.5)    | 33.5 (25.4 to 43.3)        | 118.9 (88.0 to 156.6)         | 1.2 (0.6 to 2.3)                | 12.4 (12.4 to 12.4)               |
| Mauritania       | 2000 | 47.8 (38.7 to 59.1)        | 8.4 (6.3 to 10.8)          | 33.3 (24.5 to 44.6)           | 0.2 (0.1 to 0.3)                | 5.9 (5.9 to 5.9)                  | 164.0 (132.9 to 203.0)    | 28.9 (21.7 to 37.1)        | 114.2 (84.2 to 153.0)         | 0.6 (0.3 to 1.2)                | 20.2 (20.2 to 20.2)               |
| Mauritania       | 2001 | 47.1 (38.0 to 58.5)        | 8.6 (6.5 to 11.1)          | 33.6 (24.9 to 44.8)           | 0.2 (0.1 to 0.4)                | 4.7 (4.7 to 4.7)                  | 161.5 (130.6 to 200.9)    | 29.4 (22.2 to 38.1)        | 115.4 (85.6 to 153.7)         | 0.6 (0.3 to 1.2)                | 16.1 (16.1 to 16.1)               |

| Country    | Year | 2018 US Dollars per capita |                            |                               |                                 |                                   | 2018 PPP per capita    |                            |                               |                                 |                                   |
|------------|------|----------------------------|----------------------------|-------------------------------|---------------------------------|-----------------------------------|------------------------|----------------------------|-------------------------------|---------------------------------|-----------------------------------|
|            |      | Health spending            | Government health spending | Out-of-pocket health spending | Prepaid private health spending | Development assistance for health | Health spending        | Government health spending | Out-of-pocket health spending | Prepaid private health spending | Development assistance for health |
| Mauritania | 2002 | 50.0 (40.8 to 61.9)        | 9.6 (7.2 to 12.3)          | 34.7 (25.9 to 46.7)           | 0.4 (0.2 to 0.7)                | 5.3 (5.3 to 5.3)                  | 171.5 (140.2 to 212.5) | 32.9 (24.9 to 42.1)        | 119.2 (89.1 to 160.4)         | 1.2 (0.6 to 2.3)                | 18.2 (18.2 to 18.2)               |
| Mauritania | 2003 | 52.5 (43.3 to 65.0)        | 10.0 (7.6 to 12.8)         | 34.5 (25.7 to 46.4)           | 0.5 (0.2 to 0.9)                | 7.5 (7.5 to 7.5)                  | 180.3 (148.8 to 223.2) | 34.4 (26.3 to 43.9)        | 118.4 (88.4 to 159.2)         | 1.7 (0.8 to 3.1)                | 25.8 (25.8 to 25.8)               |
| Mauritania | 2004 | 50.0 (41.3 to 62.0)        | 10.1 (7.7 to 13.1)         | 33.0 (24.5 to 45.2)           | 0.5 (0.3 to 1.0)                | 6.3 (6.3 to 6.3)                  | 171.6 (141.6 to 212.8) | 34.7 (26.4 to 44.8)        | 113.4 (84.2 to 155.1)         | 1.9 (0.9 to 3.5)                | 21.6 (21.6 to 21.6)               |
| Mauritania | 2005 | 45.9 (37.5 to 57.8)        | 10.8 (8.2 to 13.9)         | 31.7 (23.5 to 43.8)           | 0.6 (0.3 to 1.1)                | 2.7 (2.7 to 2.7)                  | 157.6 (128.8 to 198.3) | 37.1 (28.3 to 47.7)        | 109.0 (80.8 to 150.5)         | 2.1 (1.0 to 3.9)                | 9.4 (9.4 to 9.4)                  |
| Mauritania | 2006 | 48.4 (39.8 to 60.4)        | 12.4 (9.5 to 16.0)         | 31.8 (23.8 to 44.0)           | 0.7 (0.3 to 1.4)                | 3.5 (3.5 to 3.5)                  | 166.0 (136.5 to 207.5) | 42.4 (32.6 to 55.0)        | 109.0 (81.7 to 151.1)         | 2.5 (1.2 to 4.7)                | 12.2 (12.2 to 12.2)               |
| Mauritania | 2007 | 49.4 (40.9 to 61.5)        | 12.6 (9.8 to 16.3)         | 30.5 (22.5 to 42.0)           | 0.7 (0.4 to 1.4)                | 5.6 (5.6 to 5.6)                  | 169.7 (140.3 to 211.2) | 43.4 (33.5 to 56.1)        | 104.7 (77.3 to 144.3)         | 2.5 (1.2 to 4.8)                | 19.1 (19.1 to 19.1)               |
| Mauritania | 2008 | 48.7 (40.2 to 60.5)        | 12.8 (10.0 to 16.9)        | 29.2 (21.1 to 40.3)           | 0.8 (0.4 to 1.5)                | 5.8 (5.8 to 5.8)                  | 167.2 (137.9 to 207.8) | 44.1 (34.2 to 58.0)        | 100.4 (72.4 to 138.3)         | 2.7 (1.3 to 5.1)                | 20.0 (20.0 to 20.0)               |
| Mauritania | 2009 | 45.1 (36.7 to 56.0)        | 12.4 (9.6 to 16.1)         | 27.5 (20.3 to 38.0)           | 0.7 (0.4 to 1.4)                | 4.4 (4.4 to 4.4)                  | 154.8 (125.9 to 192.3) | 42.7 (33.0 to 55.4)        | 94.6 (69.7 to 130.6)          | 2.5 (1.2 to 4.7)                | 15.0 (15.0 to 15.0)               |
| Mauritania | 2010 | 43.2 (35.1 to 53.0)        | 12.6 (9.7 to 16.5)         | 25.9 (18.9 to 35.2)           | 0.8 (0.4 to 1.4)                | 3.9 (3.9 to 3.9)                  | 148.4 (120.7 to 182.0) | 43.2 (33.4 to 56.6)        | 88.9 (64.8 to 120.7)          | 2.7 (1.3 to 5.0)                | 13.5 (13.5 to 13.5)               |
| Mauritania | 2011 | 42.9 (35.1 to 52.4)        | 13.3 (10.3 to 17.4)        | 24.9 (18.0 to 33.7)           | 1.1 (0.5 to 2.0)                | 3.6 (3.6 to 3.6)                  | 147.4 (120.6 to 179.9) | 45.8 (35.4 to 59.9)        | 85.5 (61.9 to 115.6)          | 3.8 (1.8 to 6.9)                | 12.3 (12.3 to 12.3)               |
| Mauritania | 2012 | 43.1 (35.3 to 53.0)        | 14.6 (11.2 to 19.2)        | 24.6 (17.6 to 33.4)           | 1.3 (0.6 to 2.4)                | 2.5 (2.5 to 2.5)                  | 147.9 (121.2 to 182.1) | 50.2 (38.5 to 65.9)        | 84.5 (60.3 to 114.5)          | 4.6 (2.2 to 8.3)                | 8.7 (8.7 to 8.7)                  |
| Mauritania | 2013 | 47.2 (39.2 to 57.6)        | 16.4 (12.4 to 21.6)        | 24.8 (17.8 to 33.8)           | 1.5 (0.7 to 2.8)                | 4.5 (4.5 to 4.5)                  | 162.0 (134.6 to 197.6) | 56.2 (42.5 to 74.1)        | 85.2 (61.1 to 116.0)          | 5.3 (2.5 to 9.6)                | 15.3 (15.3 to 15.3)               |
| Mauritania | 2014 | 52.4 (43.6 to 63.3)        | 19.0 (14.3 to 24.8)        | 26.8 (19.3 to 35.8)           | 2.1 (1.0 to 3.9)                | 4.6 (4.6 to 4.6)                  | 180.0 (149.8 to 217.3) | 65.1 (49.0 to 85.2)        | 91.8 (66.1 to 122.9)          | 7.2 (3.4 to 13.3)               | 15.9 (15.9 to 15.9)               |
| Mauritania | 2015 | 55.5 (45.9 to 67.1)        | 20.4 (15.4 to 26.6)        | 28.0 (20.1 to 37.8)           | 2.4 (1.1 to 4.4)                | 4.6 (4.6 to 4.6)                  | 190.4 (157.6 to 230.4) | 70.1 (52.9 to 91.2)        | 96.2 (69.0 to 129.6)          | 8.1 (3.8 to 15.1)               | 15.9 (15.9 to 15.9)               |
| Mauritania | 2016 | 55.5 (46.4 to 66.6)        | 20.4 (15.6 to 26.4)        | 28.1 (20.3 to 38.2)           | 2.4 (1.1 to 4.6)                | 4.6 (4.6 to 4.6)                  | 190.6 (159.4 to 228.5) | 70.2 (53.4 to 90.7)        | 96.3 (69.8 to 131.0)          | 8.3 (3.8 to 15.7)               | 15.8 (15.8 to 15.8)               |
| Mauritania | 2017 | 57.6 (48.1 to 68.9)        | 20.3 (15.5 to 26.3)        | 28.3 (20.5 to 38.4)           | 2.4 (1.1 to 4.6)                | 6.6 (6.6 to 6.6)                  | 197.7 (165.2 to 236.4) | 69.7 (53.1 to 90.1)        | 97.1 (70.2 to 131.9)          | 8.3 (3.8 to 15.8)               | 22.7 (22.7 to 22.7)               |
| Mauritania | 2018 | 57.8 (47.9 to 69.2)        | 20.6 (15.7 to 26.7)        | 28.6 (20.7 to 38.8)           | 2.5 (1.1 to 4.7)                | 6.1 (6.1 to 6.1)                  | 198.4 (164.3 to 237.5) | 70.8 (54.0 to 91.5)        | 98.1 (70.9 to 133.3)          | 8.5 (3.9 to 16.1)               | 21.0 (21.0 to 21.0)               |
| Mauritania | 2019 | 58.4 (48.6 to 70.5)        | 20.9 (16.0 to 27.0)        | 28.9 (20.8 to 39.1)           | 2.5 (1.2 to 4.8)                | 6.0 (5.6 to 6.4)                  | 200.3 (166.9 to 241.9) | 71.9 (54.8 to 92.8)        | 99.1 (71.5 to 134.4)          | 8.6 (4.0 to 16.4)               | 20.8 (19.4 to 21.9)               |
| Mauritania | 2020 | 58.9 (49.2 to 70.9)        | 21.2 (16.1 to 27.3)        | 29.1 (21.0 to 39.6)           | 2.6 (1.2 to 4.8)                | 6.0 (5.5 to 6.5)                  | 202.2 (169.1 to 243.4) | 72.7 (55.3 to 93.9)        | 100.0 (72.1 to 135.8)         | 8.8 (4.0 to 16.6)               | 20.7 (19.0 to 22.3)               |
| Mauritania | 2021 | 59.4 (49.5 to 71.5)        | 21.4 (16.3 to 27.7)        | 29.4 (21.2 to 39.9)           | 2.6 (1.2 to 4.9)                | 6.0 (5.4 to 6.7)                  | 204.0 (169.9 to 245.6) | 73.5 (55.9 to 95.0)        | 100.9 (72.8 to 137.1)         | 8.9 (4.1 to 16.9)               | 20.7 (18.6 to 22.9)               |
| Mauritania | 2022 | 59.9 (49.9 to 72.5)        | 21.6 (16.4 to 28.1)        | 29.6 (21.5 to 40.1)           | 2.6 (1.2 to 5.0)                | 6.1 (5.4 to 6.8)                  | 205.8 (171.2 to 248.9) | 74.3 (56.4 to 96.3)        | 101.6 (73.8 to 137.8)         | 9.0 (4.2 to 17.2)               | 20.9 (18.5 to 23.3)               |



| Country    | Year | 2018 US Dollars per capita |                            |                               |                                 |                                   | 2018 PPP per capita    |                            |                               |                                 |                                   |
|------------|------|----------------------------|----------------------------|-------------------------------|---------------------------------|-----------------------------------|------------------------|----------------------------|-------------------------------|---------------------------------|-----------------------------------|
|            |      | Health spending            | Government health spending | Out-of-pocket health spending | Prepaid private health spending | Development assistance for health | Health spending        | Government health spending | Out-of-pocket health spending | Prepaid private health spending | Development assistance for health |
| Mauritania | 2023 | 60.5 (50.5 to 73.2)        | 21.9 (16.6 to 28.4)        | 29.8 (21.5 to 40.2)           | 2.7 (1.2 to 5.1)                | 6.1 (5.3 to 7.0)                  | 207.6 (173.4 to 251.4) | 75.1 (57.0 to 97.5)        | 102.3 (73.8 to 137.8)         | 9.2 (4.2 to 17.5)               | 21.0 (18.3 to 23.9)               |
| Mauritania | 2024 | 61.0 (50.4 to 73.8)        | 22.1 (16.8 to 28.7)        | 30.0 (21.7 to 40.5)           | 2.7 (1.2 to 5.2)                | 6.2 (5.3 to 7.1)                  | 209.4 (172.9 to 253.3) | 75.9 (57.6 to 98.4)        | 103.0 (74.5 to 139.2)         | 9.3 (4.3 to 17.7)               | 21.2 (18.3 to 24.5)               |
| Mauritania | 2025 | 61.5 (50.8 to 74.8)        | 22.4 (16.9 to 29.0)        | 30.2 (21.8 to 40.7)           | 2.7 (1.3 to 5.2)                | 6.2 (5.3 to 7.3)                  | 211.3 (174.5 to 256.7) | 76.8 (58.1 to 99.4)        | 103.7 (74.9 to 139.6)         | 9.4 (4.3 to 17.9)               | 21.3 (18.2 to 25.0)               |
| Mauritania | 2026 | 62.1 (50.7 to 75.5)        | 22.6 (17.1 to 29.3)        | 30.4 (22.0 to 40.9)           | 2.8 (1.3 to 5.3)                | 6.3 (5.3 to 7.3)                  | 213.1 (173.9 to 259.1) | 77.7 (58.8 to 100.5)       | 104.4 (75.4 to 140.5)         | 9.6 (4.4 to 18.1)               | 21.5 (18.2 to 25.2)               |
| Mauritania | 2027 | 62.7 (51.7 to 76.0)        | 22.9 (17.4 to 29.7)        | 30.6 (22.0 to 41.3)           | 2.8 (1.3 to 5.3)                | 6.3 (5.3 to 7.5)                  | 215.2 (177.5 to 260.9) | 78.7 (59.6 to 101.9)       | 105.1 (75.4 to 141.8)         | 9.7 (4.5 to 18.3)               | 21.7 (18.1 to 25.8)               |
| Mauritania | 2028 | 63.3 (52.4 to 76.4)        | 23.2 (17.6 to 30.1)        | 30.9 (22.1 to 41.7)           | 2.9 (1.3 to 5.4)                | 6.4 (5.3 to 7.7)                  | 217.5 (180.0 to 262.4) | 79.8 (60.4 to 103.4)       | 105.9 (75.7 to 143.2)         | 9.9 (4.5 to 18.6)               | 21.9 (18.3 to 26.4)               |
| Mauritania | 2029 | 64.1 (53.1 to 77.1)        | 23.6 (17.9 to 30.6)        | 31.1 (22.1 to 42.2)           | 2.9 (1.3 to 5.5)                | 6.4 (5.3 to 7.9)                  | 220.0 (182.2 to 264.5) | 81.0 (61.4 to 105.0)       | 106.8 (76.0 to 144.9)         | 10.1 (4.6 to 18.9)              | 22.1 (18.2 to 27.0)               |
| Mauritania | 2030 | 64.9 (52.9 to 78.5)        | 24.0 (18.2 to 31.2)        | 31.4 (22.2 to 42.9)           | 3.0 (1.4 to 5.6)                | 6.5 (5.3 to 8.0)                  | 222.7 (181.5 to 269.5) | 82.4 (62.5 to 107.1)       | 107.8 (76.3 to 147.2)         | 10.2 (4.7 to 19.2)              | 22.3 (18.2 to 27.4)               |
| Mauritania | 2031 | 65.6 (53.6 to 79.3)        | 24.4 (18.5 to 31.8)        | 31.7 (22.4 to 43.4)           | 3.0 (1.4 to 5.7)                | 6.6 (5.3 to 8.2)                  | 225.4 (184.1 to 272.4) | 83.6 (63.5 to 109.1)       | 108.8 (77.0 to 149.0)         | 10.4 (4.8 to 19.5)              | 22.5 (18.3 to 28.3)               |
| Mauritania | 2032 | 66.5 (54.2 to 81.1)        | 24.8 (18.8 to 32.3)        | 32.0 (22.6 to 44.0)           | 3.1 (1.4 to 5.8)                | 6.6 (5.3 to 8.4)                  | 228.2 (186.1 to 278.2) | 85.0 (64.6 to 110.8)       | 109.8 (77.4 to 151.1)         | 10.6 (4.9 to 19.9)              | 22.8 (18.2 to 28.7)               |
| Mauritania | 2033 | 67.3 (56.0 to 82.3)        | 25.1 (19.1 to 32.8)        | 32.3 (22.7 to 44.7)           | 3.1 (1.4 to 5.9)                | 6.7 (5.3 to 8.6)                  | 231.1 (192.1 to 282.6) | 86.3 (65.6 to 112.5)       | 110.9 (78.0 to 153.3)         | 10.8 (5.0 to 20.2)              | 23.1 (18.3 to 29.6)               |
| Mauritania | 2034 | 68.2 (56.2 to 82.4)        | 25.6 (19.4 to 33.3)        | 32.7 (22.9 to 45.3)           | 3.2 (1.5 to 6.0)                | 6.8 (5.4 to 8.7)                  | 234.2 (192.8 to 283.0) | 87.8 (66.7 to 114.4)       | 112.1 (78.6 to 155.5)         | 11.0 (5.0 to 20.5)              | 23.4 (18.4 to 30.0)               |
| Mauritania | 2035 | 69.2 (55.6 to 83.7)        | 26.0 (19.7 to 34.0)        | 33.0 (23.1 to 45.8)           | 3.3 (1.5 to 6.1)                | 6.9 (5.4 to 9.0)                  | 237.4 (191.0 to 287.2) | 89.2 (67.6 to 116.6)       | 113.4 (79.2 to 157.1)         | 11.2 (5.1 to 20.9)              | 23.7 (18.4 to 31.0)               |
| Mauritania | 2036 | 70.1 (56.8 to 84.8)        | 26.4 (20.0 to 34.5)        | 33.4 (23.2 to 46.4)           | 3.3 (1.5 to 6.2)                | 7.0 (5.4 to 9.4)                  | 240.7 (194.9 to 291.2) | 90.6 (68.8 to 118.5)       | 114.7 (79.8 to 159.3)         | 11.4 (5.2 to 21.2)              | 24.0 (18.6 to 32.3)               |
| Mauritania | 2037 | 71.1 (57.4 to 86.5)        | 26.8 (20.4 to 35.0)        | 33.8 (23.4 to 47.0)           | 3.4 (1.5 to 6.3)                | 7.1 (5.5 to 9.5)                  | 244.0 (197.1 to 297.1) | 92.1 (69.9 to 120.3)       | 116.0 (80.4 to 161.3)         | 11.6 (5.3 to 21.6)              | 24.3 (18.7 to 32.6)               |
| Mauritania | 2038 | 72.1 (59.2 to 87.8)        | 27.2 (20.6 to 35.5)        | 34.2 (23.6 to 47.5)           | 3.4 (1.6 to 6.4)                | 7.2 (5.5 to 9.9)                  | 247.4 (203.1 to 301.4) | 93.5 (70.9 to 122.0)       | 117.4 (81.1 to 162.9)         | 11.7 (5.4 to 22.0)              | 24.7 (18.8 to 34.2)               |
| Mauritania | 2039 | 73.0 (59.5 to 89.9)        | 27.7 (20.9 to 36.1)        | 34.6 (23.9 to 48.2)           | 3.5 (1.6 to 6.5)                | 7.3 (5.6 to 10.1)                 | 250.8 (204.4 to 308.5) | 95.0 (71.8 to 124.0)       | 118.9 (81.9 to 165.3)         | 11.9 (5.5 to 22.3)              | 25.0 (19.1 to 34.6)               |
| Mauritania | 2040 | 74.1 (60.4 to 89.9)        | 28.1 (21.2 to 36.8)        | 35.1 (24.1 to 48.9)           | 3.5 (1.6 to 6.6)                | 7.4 (5.6 to 10.2)                 | 254.5 (207.5 to 308.5) | 96.5 (72.9 to 126.2)       | 120.4 (82.6 to 167.8)         | 12.2 (5.6 to 22.7)              | 25.4 (19.3 to 35.0)               |
| Mauritania | 2041 | 75.2 (60.9 to 92.0)        | 28.6 (21.5 to 37.4)        | 35.5 (24.3 to 49.6)           | 3.6 (1.6 to 6.7)                | 7.5 (5.7 to 10.4)                 | 258.2 (208.9 to 315.7) | 98.0 (74.0 to 128.5)       | 122.0 (83.3 to 170.1)         | 12.4 (5.7 to 23.0)              | 25.8 (19.5 to 35.9)               |
| Mauritania | 2042 | 76.3 (61.8 to 93.6)        | 29.0 (21.9 to 38.2)        | 36.0 (24.5 to 50.3)           | 3.7 (1.7 to 6.8)                | 7.6 (5.7 to 10.9)                 | 262.0 (212.1 to 321.2) | 99.5 (75.1 to 131.0)       | 123.6 (84.1 to 172.5)         | 12.6 (5.7 to 23.4)              | 26.2 (19.6 to 37.5)               |
| Mauritania | 2043 | 77.4 (61.8 to 94.9)        | 29.4 (22.2 to 38.8)        | 36.5 (24.8 to 51.0)           | 3.7 (1.7 to 6.9)                | 7.8 (5.8 to 11.3)                 | 265.8 (212.2 to 325.9) | 101.1 (76.1 to 133.3)      | 125.3 (85.1 to 175.1)         | 12.8 (5.8 to 23.8)              | 26.7 (19.8 to 38.7)               |

| Country    | Year | 2018 US Dollars per capita |                            |                               |                                 |                                   | 2018 PPP per capita    |                            |                               |                                 |                                   |
|------------|------|----------------------------|----------------------------|-------------------------------|---------------------------------|-----------------------------------|------------------------|----------------------------|-------------------------------|---------------------------------|-----------------------------------|
|            |      | Health spending            | Government health spending | Out-of-pocket health spending | Prepaid private health spending | Development assistance for health | Health spending        | Government health spending | Out-of-pocket health spending | Prepaid private health spending | Development assistance for health |
| Mauritania | 2044 | 78.6 (63.2 to 95.4)        | 29.9 (22.5 to 39.5)        | 37.0 (25.1 to 51.9)           | 3.8 (1.7 to 7.0)                | 7.9 (5.9 to 11.5)                 | 269.9 (217.1 to 327.5) | 102.6 (77.2 to 135.6)      | 127.1 (86.3 to 178.1)         | 13.0 (5.9 to 24.1)              | 27.1 (20.1 to 39.3)               |
| Mauritania | 2045 | 79.8 (63.7 to 98.5)        | 30.4 (22.8 to 40.2)        | 37.6 (25.5 to 52.8)           | 3.9 (1.8 to 7.1)                | 8.0 (5.8 to 12.1)                 | 274.1 (218.6 to 338.3) | 104.3 (78.2 to 138.1)      | 129.0 (87.5 to 181.2)         | 13.2 (6.1 to 24.5)              | 27.6 (20.0 to 41.6)               |
| Mauritania | 2046 | 81.1 (65.6 to 99.2)        | 30.8 (23.1 to 41.0)        | 38.1 (25.8 to 53.7)           | 3.9 (1.8 to 7.3)                | 8.2 (5.9 to 12.5)                 | 278.3 (225.2 to 340.7) | 105.9 (79.3 to 140.7)      | 130.8 (88.7 to 184.4)         | 13.4 (6.2 to 25.0)              | 28.1 (20.3 to 43.0)               |
| Mauritania | 2047 | 82.3 (66.9 to 100.8)       | 31.3 (23.4 to 41.8)        | 38.7 (26.2 to 54.6)           | 4.0 (1.8 to 7.4)                | 8.3 (6.0 to 13.2)                 | 282.7 (229.7 to 346.2) | 107.5 (80.4 to 143.4)      | 132.8 (89.9 to 187.4)         | 13.7 (6.3 to 25.5)              | 28.6 (20.6 to 45.2)               |
| Mauritania | 2048 | 83.6 (67.9 to 102.6)       | 31.8 (23.8 to 42.6)        | 39.3 (26.5 to 55.5)           | 4.0 (1.9 to 7.6)                | 8.5 (6.1 to 13.6)                 | 287.1 (233.1 to 352.4) | 109.2 (81.6 to 146.1)      | 134.8 (91.1 to 190.5)         | 13.9 (6.4 to 25.9)              | 29.2 (21.0 to 46.6)               |
| Mauritania | 2049 | 85.0 (68.3 to 104.2)       | 32.3 (24.2 to 43.2)        | 39.9 (26.9 to 56.2)           | 4.1 (1.9 to 7.7)                | 8.7 (6.2 to 13.9)                 | 291.7 (234.4 to 357.8) | 111.0 (83.0 to 148.3)      | 136.8 (92.3 to 193.0)         | 14.1 (6.6 to 26.4)              | 29.8 (21.2 to 47.8)               |
| Mauritania | 2050 | 86.3 (69.2 to 105.6)       | 32.9 (24.6 to 43.8)        | 40.5 (27.3 to 57.1)           | 4.2 (1.9 to 7.8)                | 8.9 (6.2 to 14.5)                 | 296.4 (237.7 to 362.7) | 112.8 (84.4 to 150.4)      | 138.9 (93.8 to 196.2)         | 14.4 (6.7 to 26.8)              | 30.4 (21.4 to 49.9)               |
| Mauritius  | 1995 | 122.5 (106.5 to 140.3)     | 66.3 (54.9 to 78.5)        | 50.2 (40.3 to 61.8)           | 6.0 (2.9 to 10.8)               | 0.1 (0.1 to 0.1)                  | 272.2 (236.7 to 311.6) | 147.2 (121.9 to 174.4)     | 111.5 (89.4 to 137.3)         | 13.4 (6.5 to 24.1)              | 0.1 (0.1 to 0.1)                  |
| Mauritius  | 1996 | 131.4 (115.8 to 148.8)     | 70.4 (59.4 to 82.4)        | 52.6 (43.0 to 64.1)           | 6.1 (3.0 to 11.1)               | 2.3 (2.3 to 2.3)                  | 291.8 (257.2 to 330.5) | 156.4 (131.9 to 183.0)     | 116.9 (95.5 to 142.3)         | 13.6 (6.6 to 24.7)              | 5.0 (5.0 to 5.0)                  |
| Mauritius  | 1997 | 134.6 (119.5 to 151.4)     | 73.3 (62.8 to 84.8)        | 54.9 (45.5 to 65.2)           | 5.9 (3.0 to 10.5)               | 0.5 (0.5 to 0.5)                  | 299.0 (265.5 to 336.3) | 162.9 (139.6 to 188.4)     | 121.9 (101.0 to 144.8)        | 13.1 (6.6 to 23.3)              | 1.0 (1.0 to 1.0)                  |
| Mauritius  | 1998 | 143.1 (128.2 to 159.4)     | 78.6 (67.9 to 90.0)        | 58.5 (49.1 to 68.6)           | 5.7 (2.9 to 10.3)               | 0.3 (0.3 to 0.3)                  | 318.0 (284.7 to 354.1) | 174.7 (150.8 to 199.9)     | 130.0 (109.1 to 152.4)        | 12.6 (6.5 to 22.8)              | 0.7 (0.7 to 0.7)                  |
| Mauritius  | 1999 | 148.3 (133.6 to 164.3)     | 81.1 (70.8 to 92.7)        | 61.9 (52.3 to 72.3)           | 5.1 (2.6 to 9.2)                | 0.2 (0.2 to 0.2)                  | 329.3 (296.9 to 364.9) | 180.1 (157.2 to 205.9)     | 137.5 (116.2 to 160.7)        | 11.3 (5.8 to 20.4)              | 0.4 (0.4 to 0.4)                  |
| Mauritius  | 2000 | 165.1 (149.5 to 181.6)     | 89.8 (78.0 to 102.6)       | 70.6 (60.5 to 82.5)           | 4.5 (2.3 to 8.2)                | 0.2 (0.2 to 0.2)                  | 366.8 (332.1 to 403.4) | 199.5 (173.3 to 228.0)     | 156.8 (134.3 to 183.2)        | 10.0 (5.2 to 18.1)              | 0.5 (0.5 to 0.5)                  |
| Mauritius  | 2001 | 175.8 (159.2 to 194.0)     | 94.6 (82.7 to 107.7)       | 76.9 (66.4 to 89.6)           | 4.1 (2.2 to 7.5)                | 0.2 (0.2 to 0.2)                  | 390.5 (353.6 to 431.0) | 210.0 (183.7 to 239.3)     | 170.9 (147.6 to 198.9)        | 9.1 (4.8 to 16.6)               | 0.4 (0.4 to 0.4)                  |
| Mauritius  | 2002 | 189.7 (173.0 to 207.1)     | 100.4 (87.8 to 114.5)      | 85.0 (74.2 to 98.1)           | 4.2 (2.2 to 7.5)                | 0.0 (0.0 to 0.0)                  | 421.3 (384.2 to 460.0) | 223.0 (194.9 to 254.2)     | 188.8 (164.9 to 217.8)        | 9.4 (4.9 to 16.7)               | 0.1 (0.1 to 0.1)                  |
| Mauritius  | 2003 | 204.1 (186.4 to 223.3)     | 106.0 (93.0 to 120.7)      | 93.4 (82.2 to 107.6)          | 4.6 (2.3 to 8.2)                | 0.2 (0.2 to 0.2)                  | 453.4 (414.0 to 496.0) | 235.4 (206.7 to 268.2)     | 207.4 (182.7 to 238.9)        | 10.1 (5.2 to 18.1)              | 0.5 (0.5 to 0.5)                  |
| Mauritius  | 2004 | 220.8 (200.9 to 240.8)     | 111.9 (98.6 to 125.9)      | 103.7 (90.5 to 118.6)         | 5.0 (2.6 to 8.9)                | 0.2 (0.2 to 0.2)                  | 490.5 (446.2 to 534.9) | 248.6 (218.9 to 279.7)     | 230.3 (201.1 to 263.4)        | 11.1 (5.9 to 19.8)              | 0.5 (0.5 to 0.5)                  |
| Mauritius  | 2005 | 229.3 (209.3 to 248.7)     | 108.7 (95.8 to 121.6)      | 115.2 (101.2 to 130.3)        | 5.1 (2.7 to 8.9)                | 0.2 (0.2 to 0.2)                  | 509.4 (464.9 to 552.4) | 241.5 (212.8 to 270.1)     | 256.0 (224.9 to 289.5)        | 11.4 (6.1 to 19.8)              | 0.5 (0.5 to 0.5)                  |
| Mauritius  | 2006 | 245.2 (224.0 to 266.4)     | 109.6 (96.9 to 122.5)      | 129.7 (114.2 to 146.0)        | 5.4 (2.8 to 9.1)                | 0.6 (0.6 to 0.6)                  | 544.7 (497.6 to 591.8) | 243.4 (215.2 to 272.0)     | 288.0 (253.6 to 324.4)        | 11.9 (6.2 to 20.2)              | 1.3 (1.3 to 1.3)                  |
| Mauritius  | 2007 | 263.9 (242.1 to 285.9)     | 111.4 (98.6 to 125.1)      | 146.0 (128.4 to 162.6)        | 5.7 (2.9 to 9.7)                | 0.8 (0.8 to 0.8)                  | 586.2 (537.7 to 635.1) | 247.5 (219.1 to 277.8)     | 324.3 (285.3 to 361.2)        | 12.6 (6.5 to 21.5)              | 1.9 (1.9 to 1.9)                  |
| Mauritius  | 2008 | 287.6 (265.2 to 311.7)     | 115.6 (102.6 to 129.7)     | 166.0 (147.8 to 184.7)        | 5.9 (3.2 to 10.3)               | 0.1 (0.1 to 0.1)                  | 638.8 (589.2 to 692.3) | 256.7 (227.8 to 288.2)     | 368.7 (328.3 to 410.3)        | 13.2 (7.1 to 22.9)              | 0.2 (0.2 to 0.2)                  |

| Country   | Year | 2018 US Dollars per capita |                            |                               |                                 |                                   | 2018 PPP per capita       |                            |                               |                                 |                                   |
|-----------|------|----------------------------|----------------------------|-------------------------------|---------------------------------|-----------------------------------|---------------------------|----------------------------|-------------------------------|---------------------------------|-----------------------------------|
|           |      | Health spending            | Government health spending | Out-of-pocket health spending | Prepaid private health spending | Development assistance for health | Health spending           | Government health spending | Out-of-pocket health spending | Prepaid private health spending | Development assistance for health |
| Mauritius | 2009 | 313.7 (289.9 to 338.8)     | 126.5 (112.4 to 141.9)     | 179.9 (161.3 to 199.4)        | 6.5 (3.5 to 11.3)               | 0.8 (0.8 to 0.8)                  | 696.8 (643.9 to 752.5)    | 281.1 (249.6 to 315.1)     | 399.5 (358.4 to 443.0)        | 14.4 (7.8 to 25.2)              | 1.8 (1.8 to 1.8)                  |
| Mauritius | 2010 | 340.8 (314.1 to 368.4)     | 142.5 (127.0 to 159.6)     | 189.2 (170.0 to 210.9)        | 7.1 (3.9 to 12.1)               | 2.1 (2.1 to 2.1)                  | 757.0 (697.6 to 818.3)    | 316.4 (282.1 to 354.5)     | 420.2 (377.7 to 468.6)        | 15.8 (8.6 to 26.8)              | 4.6 (4.6 to 4.6)                  |
| Mauritius | 2011 | 355.8 (329.7 to 385.1)     | 152.2 (136.8 to 170.3)     | 194.0 (175.7 to 216.1)        | 7.9 (4.3 to 13.2)               | 1.6 (1.6 to 1.6)                  | 790.2 (732.4 to 855.3)    | 338.2 (304.0 to 378.2)     | 430.8 (390.2 to 480.1)        | 17.7 (9.6 to 29.2)              | 3.6 (3.6 to 3.6)                  |
| Mauritius | 2012 | 378.9 (350.8 to 408.1)     | 165.4 (149.1 to 184.2)     | 201.9 (182.3 to 224.4)        | 9.6 (5.4 to 15.9)               | 2.0 (2.0 to 2.0)                  | 841.6 (779.3 to 906.6)    | 367.3 (331.2 to 409.1)     | 448.5 (404.9 to 498.4)        | 21.4 (12.1 to 35.3)             | 4.5 (4.5 to 4.5)                  |
| Mauritius | 2013 | 419.4 (388.8 to 450.8)     | 182.6 (164.4 to 203.5)     | 220.8 (199.1 to 245.4)        | 14.2 (8.0 to 23.2)              | 1.8 (1.8 to 1.8)                  | 931.5 (863.6 to 1001.3)   | 405.6 (365.2 to 451.9)     | 490.5 (442.3 to 545.2)        | 31.6 (17.7 to 51.5)             | 3.9 (3.9 to 3.9)                  |
| Mauritius | 2014 | 476.1 (441.0 to 511.4)     | 208.8 (186.9 to 231.1)     | 244.8 (219.8 to 272.7)        | 20.9 (11.7 to 35.1)             | 1.7 (1.7 to 1.7)                  | 1057.6 (979.5 to 1136.0)  | 463.7 (415.1 to 513.4)     | 543.7 (488.3 to 605.7)        | 46.4 (26.1 to 78.1)             | 3.7 (3.7 to 3.7)                  |
| Mauritius | 2015 | 517.8 (476.9 to 560.1)     | 226.5 (201.5 to 252.8)     | 262.0 (235.1 to 295.5)        | 28.8 (16.2 to 47.9)             | 0.5 (0.5 to 0.5)                  | 1150.3 (1059.4 to 1244.0) | 503.2 (447.6 to 561.4)     | 582.1 (522.3 to 656.4)        | 63.9 (36.0 to 106.3)            | 1.1 (1.1 to 1.1)                  |
| Mauritius | 2016 | 556.9 (509.7 to 609.5)     | 245.3 (213.9 to 277.3)     | 274.4 (241.5 to 314.9)        | 36.2 (20.2 to 60.0)             | 0.9 (0.9 to 0.9)                  | 1237.1 (1132.1 to 1353.9) | 545.0 (475.2 to 615.8)     | 609.6 (536.4 to 699.4)        | 80.5 (45.0 to 133.3)            | 2.0 (2.0 to 2.0)                  |
| Mauritius | 2017 | 599.2 (548.7 to 656.0)     | 271.1 (236.6 to 306.4)     | 288.0 (252.7 to 330.9)        | 37.2 (20.8 to 61.8)             | 2.9 (2.9 to 2.9)                  | 1330.9 (1218.9 to 1457.1) | 602.2 (525.4 to 680.6)     | 639.7 (561.4 to 735.0)        | 82.6 (46.1 to 137.2)            | 6.4 (6.4 to 6.4)                  |
| Mauritius | 2018 | 618.5 (562.6 to 679.9)     | 278.1 (242.9 to 314.8)     | 299.4 (262.8 to 344.1)        | 38.2 (21.4 to 63.7)             | 2.7 (2.7 to 2.7)                  | 1373.9 (1249.6 to 1510.2) | 617.8 (539.5 to 699.3)     | 665.1 (583.7 to 764.3)        | 84.9 (47.5 to 141.6)            | 6.1 (6.1 to 6.1)                  |
| Mauritius | 2019 | 638.2 (581.7 to 702.3)     | 285.2 (249.3 to 323.2)     | 310.9 (273.0 to 358.8)        | 39.3 (22.0 to 65.4)             | 2.8 (2.6 to 2.9)                  | 1417.5 (1292.1 to 1559.9) | 633.5 (553.7 to 718.0)     | 690.6 (606.5 to 797.1)        | 87.2 (48.8 to 145.4)            | 6.2 (5.8 to 6.6)                  |
| Mauritius | 2020 | 659.1 (601.6 to 726.9)     | 293.1 (256.4 to 332.9)     | 322.8 (282.0 to 371.9)        | 40.4 (22.6 to 67.5)             | 2.8 (2.6 to 3.0)                  | 1464.1 (1336.2 to 1614.6) | 651.1 (569.6 to 739.3)     | 717.1 (626.4 to 826.1)        | 89.6 (50.2 to 149.8)            | 6.2 (5.7 to 6.8)                  |
| Mauritius | 2021 | 684.3 (622.4 to 754.3)     | 304.3 (265.4 to 344.7)     | 335.5 (292.0 to 386.8)        | 41.6 (23.3 to 69.3)             | 2.9 (2.6 to 3.2)                  | 1519.9 (1382.4 to 1675.5) | 675.9 (589.6 to 765.6)     | 745.2 (648.7 to 859.3)        | 92.4 (51.8 to 154.0)            | 6.3 (5.7 to 7.1)                  |
| Mauritius | 2022 | 710.6 (645.8 to 780.2)     | 316.0 (275.4 to 357.6)     | 348.8 (303.8 to 401.2)        | 42.9 (24.1 to 71.5)             | 2.9 (2.5 to 3.3)                  | 1578.5 (1434.5 to 1732.9) | 702.0 (611.8 to 794.3)     | 774.7 (674.8 to 891.1)        | 95.4 (53.5 to 158.7)            | 6.4 (5.6 to 7.3)                  |
| Mauritius | 2023 | 738.4 (668.3 to 810.5)     | 328.5 (285.9 to 370.3)     | 362.6 (315.6 to 419.4)        | 44.4 (24.9 to 73.8)             | 2.9 (2.5 to 3.4)                  | 1640.1 (1484.5 to 1800.3) | 729.6 (635.1 to 822.6)     | 805.5 (701.1 to 931.6)        | 98.5 (55.4 to 163.9)            | 6.5 (5.6 to 7.5)                  |
| Mauritius | 2024 | 767.0 (693.6 to 843.1)     | 341.3 (295.1 to 386.7)     | 376.9 (326.6 to 439.2)        | 45.8 (25.8 to 76.1)             | 3.0 (2.6 to 3.5)                  | 1703.8 (1540.6 to 1872.8) | 758.2 (655.5 to 859.0)     | 837.2 (725.4 to 975.5)        | 101.7 (57.3 to 169.1)           | 6.7 (5.7 to 7.8)                  |
| Mauritius | 2025 | 796.0 (718.4 to 876.7)     | 354.3 (306.2 to 401.2)     | 391.5 (339.2 to 455.7)        | 47.2 (26.6 to 78.4)             | 3.1 (2.6 to 3.6)                  | 1768.2 (1595.8 to 1947.3) | 787.0 (680.1 to 891.2)     | 869.6 (753.5 to 1012.2)       | 104.8 (59.0 to 174.0)           | 6.9 (5.8 to 8.1)                  |
| Mauritius | 2026 | 825.6 (748.1 to 904.5)     | 367.5 (317.3 to 419.0)     | 406.4 (350.6 to 473.2)        | 48.6 (27.3 to 80.7)             | 3.1 (2.6 to 3.8)                  | 1833.9 (1661.6 to 2009.2) | 816.2 (704.8 to 930.8)     | 902.7 (778.7 to 1051.2)       | 108.0 (60.7 to 179.2)           | 7.0 (5.8 to 8.4)                  |
| Mauritius | 2027 | 855.5 (771.0 to 945.6)     | 380.7 (329.3 to 434.9)     | 421.6 (362.4 to 494.3)        | 50.0 (28.1 to 83.0)             | 3.2 (2.6 to 3.9)                  | 1900.2 (1712.6 to 2100.4) | 845.6 (731.4 to 965.9)     | 936.5 (805.1 to 1098.0)       | 111.0 (62.4 to 184.4)           | 7.1 (5.8 to 8.7)                  |
| Mauritius | 2028 | 885.2 (797.0 to 982.0)     | 393.8 (340.2 to 452.4)     | 436.8 (374.3 to 515.6)        | 51.4 (28.8 to 85.3)             | 3.2 (0.0 to 4.1)                  | 1966.2 (1770.4 to 2181.2) | 874.8 (755.6 to 1004.8)    | 970.3 (831.4 to 1145.3)       | 114.1 (64.0 to 189.4)           | 7.1 (0.0 to 9.1)                  |
| Mauritius | 2029 | 915.1 (819.3 to 1015.0)    | 407.1 (348.3 to 468.2)     | 452.1 (385.4 to 539.1)        | 52.8 (29.7 to 87.6)             | 3.2 (0.0 to 4.3)                  | 2032.7 (1819.8 to 2254.6) | 904.2 (773.6 to 1039.9)    | 1004.2 (856.1 to 1197.4)      | 117.2 (65.9 to 194.5)           | 7.1 (0.0 to 9.5)                  |

| Country   | Year | 2018 US Dollars per capita |                            |                               |                                 |                                   | 2018 PPP per capita       |                            |                               |                                 |                                   |
|-----------|------|----------------------------|----------------------------|-------------------------------|---------------------------------|-----------------------------------|---------------------------|----------------------------|-------------------------------|---------------------------------|-----------------------------------|
|           |      | Health spending            | Government health spending | Out-of-pocket health spending | Prepaid private health spending | Development assistance for health | Health spending           | Government health spending | Out-of-pocket health spending | Prepaid private health spending | Development assistance for health |
| Mauritius | 2030 | 944.6 (842.1 to 1059.1)    | 420.1 (360.0 to 485.3)     | 467.3 (396.2 to 561.4)        | 54.2 (30.5 to 89.9)             | 3.1 (0.0 to 4.3)                  | 2098.2 (1870.6 to 2352.6) | 933.2 (799.7 to 1078.0)    | 1037.9 (880.0 to 1247.1)      | 120.3 (67.8 to 199.7)           | 6.8 (0.0 to 9.6)                  |
| Mauritius | 2031 | 974.1 (863.8 to 1094.9)    | 433.0 (369.2 to 499.2)     | 482.4 (406.2 to 583.4)        | 55.6 (31.5 to 92.3)             | 3.0 (0.0 to 4.5)                  | 2163.6 (1918.6 to 2432.0) | 961.9 (820.0 to 1108.8)    | 1071.6 (902.2 to 1295.8)      | 123.6 (69.9 to 205.0)           | 6.6 (0.0 to 9.9)                  |
| Mauritius | 2032 | 1003.4 (884.6 to 1141.4)   | 446.0 (379.7 to 516.4)     | 497.5 (417.7 to 607.2)        | 57.1 (32.4 to 94.7)             | 2.8 (0.0 to 4.6)                  | 2228.8 (1964.8 to 2535.4) | 990.6 (843.3 to 1147.0)    | 1105.2 (927.7 to 1348.7)      | 126.9 (71.9 to 210.4)           | 6.2 (0.0 to 10.2)                 |
| Mauritius | 2033 | 1032.9 (906.0 to 1171.5)   | 459.0 (388.6 to 531.2)     | 512.6 (426.7 to 633.7)        | 58.6 (33.3 to 97.2)             | 2.6 (0.0 to 4.8)                  | 2294.4 (2012.4 to 2602.2) | 1019.6 (863.1 to 1179.9)   | 1138.7 (947.8 to 1407.7)      | 130.3 (74.1 to 216.0)           | 5.8 (0.0 to 10.6)                 |
| Mauritius | 2034 | 1062.4 (927.2 to 1212.9)   | 472.1 (399.8 to 547.2)     | 527.6 (436.4 to 654.8)        | 60.2 (34.3 to 99.8)             | 2.4 (0.0 to 5.0)                  | 2359.8 (2059.5 to 2694.0) | 1048.7 (888.0 to 1215.5)   | 1172.0 (969.3 to 1454.4)      | 133.8 (76.3 to 221.7)           | 5.3 (0.0 to 11.0)                 |
| Mauritius | 2035 | 1092.4 (958.8 to 1248.0)   | 485.6 (408.9 to 563.8)     | 542.7 (445.6 to 674.9)        | 61.9 (35.2 to 102.5)            | 2.2 (0.0 to 5.1)                  | 2426.4 (2129.7 to 2772.1) | 1078.7 (908.3 to 1252.3)   | 1205.5 (989.9 to 1499.2)      | 137.4 (78.3 to 227.7)           | 4.9 (0.0 to 11.3)                 |
| Mauritius | 2036 | 1122.2 (986.5 to 1287.8)   | 499.0 (420.3 to 582.7)     | 557.6 (455.8 to 697.7)        | 63.5 (36.3 to 105.3)            | 2.0 (0.0 to 5.3)                  | 2492.6 (2191.2 to 2860.5) | 1108.4 (933.6 to 1294.4)   | 1238.6 (1012.4 to 1549.7)     | 141.1 (80.6 to 233.9)           | 4.5 (0.0 to 11.8)                 |
| Mauritius | 2037 | 1152.0 (1010.1 to 1318.0)  | 512.4 (430.4 to 599.9)     | 572.4 (465.1 to 718.5)        | 65.3 (37.4 to 108.2)            | 1.8 (0.0 to 5.3)                  | 2558.8 (2243.6 to 2927.6) | 1138.3 (956.1 to 1332.5)   | 1271.5 (1033.0 to 1595.9)     | 145.0 (83.0 to 240.3)           | 4.1 (0.0 to 11.9)                 |
| Mauritius | 2038 | 1182.1 (1029.5 to 1357.5)  | 526.2 (442.2 to 616.6)     | 587.1 (474.5 to 740.8)        | 67.1 (38.4 to 111.1)            | 1.7 (0.0 to 5.5)                  | 2625.7 (2286.8 to 3015.3) | 1168.9 (982.2 to 1369.6)   | 1304.2 (1054.0 to 1645.4)     | 149.0 (85.4 to 246.8)           | 3.7 (0.0 to 12.2)                 |
| Mauritius | 2039 | 1213.0 (1054.8 to 1397.9)  | 540.8 (453.1 to 634.9)     | 601.8 (484.4 to 764.3)        | 68.9 (39.4 to 114.1)            | 1.5 (0.0 to 5.7)                  | 2694.3 (2342.9 to 3105.1) | 1201.3 (1006.5 to 1410.4)  | 1336.6 (1075.9 to 1697.6)     | 153.0 (87.6 to 253.5)           | 3.3 (0.0 to 12.7)                 |
| Mauritius | 2040 | 1243.8 (1076.8 to 1431.3)  | 555.7 (466.2 to 653.5)     | 616.0 (493.6 to 787.0)        | 70.7 (40.4 to 117.1)            | 1.4 (0.0 to 5.8)                  | 2762.8 (2391.9 to 3179.3) | 1234.3 (1035.6 to 1451.6)  | 1368.4 (1096.3 to 1748.1)     | 157.1 (89.7 to 260.2)           | 3.0 (0.0 to 13.0)                 |
| Mauritius | 2041 | 1275.3 (1102.6 to 1483.2)  | 571.3 (476.4 to 674.7)     | 630.2 (502.5 to 809.1)        | 72.5 (41.3 to 120.2)            | 1.3 (0.0 to 6.1)                  | 2832.9 (2449.1 to 3294.6) | 1269.0 (1058.3 to 1498.6)  | 1399.8 (1116.3 to 1797.2)     | 161.1 (91.7 to 267.1)           | 2.9 (0.0 to 13.5)                 |
| Mauritius | 2042 | 1307.2 (1129.6 to 1523.0)  | 587.5 (490.5 to 696.1)     | 644.0 (511.8 to 831.4)        | 74.4 (42.2 to 123.4)            | 1.3 (0.0 to 6.5)                  | 2903.6 (2509.2 to 3382.9) | 1305.0 (1089.5 to 1546.2)  | 1430.5 (1136.9 to 1846.8)     | 165.2 (93.7 to 274.1)           | 2.9 (0.0 to 14.4)                 |
| Mauritius | 2043 | 1339.0 (1153.7 to 1557.4)  | 604.0 (503.6 to 718.7)     | 657.5 (519.6 to 849.3)        | 76.2 (43.1 to 126.6)            | 1.3 (0.0 to 6.7)                  | 2974.3 (2562.6 to 3459.4) | 1341.7 (1118.5 to 1596.5)  | 1460.4 (1154.2 to 1886.6)     | 169.4 (95.7 to 281.1)           | 2.8 (0.0 to 14.8)                 |
| Mauritius | 2044 | 1371.0 (1175.9 to 1587.6)  | 620.9 (515.2 to 739.3)     | 670.7 (528.8 to 868.9)        | 78.2 (44.1 to 129.9)            | 1.2 (0.0 to 7.0)                  | 3045.3 (2612.0 to 3526.4) | 1379.1 (1144.4 to 1642.1)  | 1489.9 (1174.5 to 1930.0)     | 173.6 (97.9 to 288.5)           | 2.6 (0.0 to 15.4)                 |
| Mauritius | 2045 | 1403.1 (1203.4 to 1622.4)  | 637.9 (529.2 to 763.2)     | 683.8 (537.6 to 888.0)        | 80.2 (45.1 to 133.4)            | 1.1 (0.0 to 7.0)                  | 3116.6 (2673.0 to 3603.6) | 1417.0 (1175.4 to 1695.3)  | 1518.9 (1194.1 to 1972.4)     | 178.2 (100.1 to 296.3)          | 2.5 (0.0 to 15.6)                 |
| Mauritius | 2046 | 1434.6 (1228.7 to 1674.9)  | 654.9 (540.8 to 783.8)     | 696.4 (546.5 to 904.2)        | 82.3 (46.1 to 137.0)            | 1.1 (0.0 to 7.1)                  | 3186.7 (2729.2 to 3720.4) | 1454.7 (1201.2 to 1741.0)  | 1546.8 (1214.0 to 2008.4)     | 182.8 (102.3 to 304.3)          | 2.4 (0.0 to 15.8)                 |
| Mauritius | 2047 | 1466.5 (1248.3 to 1721.8)  | 672.2 (557.7 to 808.6)     | 708.7 (555.7 to 920.7)        | 84.5 (47.3 to 140.9)            | 1.0 (0.0 to 7.4)                  | 3257.4 (2772.9 to 3824.4) | 1493.2 (1238.7 to 1796.0)  | 1574.1 (1234.4 to 2045.2)     | 187.7 (105.0 to 312.9)          | 2.3 (0.0 to 16.4)                 |
| Mauritius | 2048 | 1499.0 (1269.2 to 1753.5)  | 689.9 (568.8 to 831.7)     | 721.2 (563.2 to 939.4)        | 86.8 (48.6 to 144.9)            | 1.0 (0.0 to 7.5)                  | 3329.6 (2819.2 to 3895.1) | 1532.5 (1263.5 to 1847.5)  | 1602.1 (1251.1 to 2086.7)     | 192.8 (107.8 to 321.8)          | 2.2 (0.0 to 16.6)                 |
| Mauritius | 2049 | 1531.8 (1305.7 to 1802.9)  | 707.7 (584.6 to 854.9)     | 733.9 (571.2 to 958.0)        | 89.2 (49.9 to 148.7)            | 1.0 (0.0 to 7.2)                  | 3402.4 (2900.2 to 4004.7) | 1572.0 (1298.6 to 1898.9)  | 1630.2 (1268.7 to 2127.9)     | 198.1 (110.8 to 330.4)          | 2.1 (0.0 to 16.1)                 |
| Mauritius | 2050 | 1564.8 (1331.8 to 1830.1)  | 725.6 (595.4 to 880.3)     | 746.7 (581.6 to 976.2)        | 91.5 (51.2 to 152.6)            | 0.9 (0.0 to 7.5)                  | 3475.7 (2958.3 to 4065.2) | 1611.8 (1322.5 to 1955.4)  | 1658.5 (1291.8 to 2168.4)     | 203.3 (113.7 to 338.9)          | 2.0 (0.0 to 16.6)                 |

| Country | Year | 2018 US Dollars per capita |                            |                               |                                 |                                   | 2018 PPP per capita       |                            |                               |                                 |                                   |
|---------|------|----------------------------|----------------------------|-------------------------------|---------------------------------|-----------------------------------|---------------------------|----------------------------|-------------------------------|---------------------------------|-----------------------------------|
|         |      | Health spending            | Government health spending | Out-of-pocket health spending | Prepaid private health spending | Development assistance for health | Health spending           | Government health spending | Out-of-pocket health spending | Prepaid private health spending | Development assistance for health |
| Mexico  | 1995 | 292.0 (261.4 to 326.4)     | 123.5 (106.2 to 141.9)     | 162.8 (138.2 to 192.4)        | 4.1 (1.9 to 7.9)                | 1.6 (1.6 to 1.6)                  | 637.1 (570.3 to 712.1)    | 269.5 (231.8 to 309.5)     | 355.3 (301.6 to 419.8)        | 8.9 (4.2 to 17.2)               | 3.4 (3.4 to 3.4)                  |
| Mexico  | 1996 | 296.8 (270.2 to 325.0)     | 128.2 (112.7 to 145.7)     | 162.6 (141.3 to 185.9)        | 4.6 (2.2 to 8.8)                | 1.4 (1.4 to 1.4)                  | 647.5 (589.6 to 709.0)    | 279.6 (245.9 to 317.9)     | 354.7 (308.2 to 405.5)        | 10.1 (4.7 to 19.2)              | 3.1 (3.1 to 3.1)                  |
| Mexico  | 1997 | 315.4 (290.6 to 343.7)     | 140.7 (125.0 to 157.9)     | 167.4 (147.5 to 188.6)        | 5.6 (2.7 to 10.7)               | 1.7 (1.7 to 1.7)                  | 688.1 (633.9 to 749.9)    | 307.0 (272.7 to 344.6)     | 365.1 (321.9 to 411.5)        | 12.3 (5.9 to 23.3)              | 3.7 (3.7 to 3.7)                  |
| Mexico  | 1998 | 337.1 (312.4 to 363.8)     | 151.4 (135.3 to 169.1)     | 173.2 (152.9 to 193.7)        | 6.5 (3.2 to 11.9)               | 5.9 (5.9 to 5.9)                  | 735.3 (681.6 to 793.7)    | 330.3 (295.1 to 368.9)     | 377.8 (333.5 to 422.5)        | 14.2 (6.9 to 25.9)              | 13.0 (13.0 to 13.0)               |
| Mexico  | 1999 | 352.2 (326.1 to 378.9)     | 161.7 (145.0 to 179.4)     | 181.7 (161.2 to 202.1)        | 7.7 (3.8 to 13.4)               | 1.2 (1.2 to 1.2)                  | 768.5 (711.5 to 826.5)    | 352.9 (316.4 to 391.3)     | 396.3 (351.7 to 440.9)        | 16.7 (8.4 to 29.1)              | 2.6 (2.6 to 2.6)                  |
| Mexico  | 2000 | 381.5 (353.7 to 409.3)     | 170.8 (153.8 to 189.4)     | 197.1 (176.3 to 218.9)        | 9.5 (5.0 to 16.5)               | 4.0 (4.0 to 4.0)                  | 832.2 (771.6 to 893.0)    | 372.6 (335.5 to 413.1)     | 430.0 (384.7 to 477.5)        | 20.8 (10.9 to 35.9)             | 8.8 (8.8 to 8.8)                  |
| Mexico  | 2001 | 395.5 (366.8 to 423.9)     | 172.8 (155.4 to 190.3)     | 210.4 (187.8 to 233.8)        | 11.0 (5.9 to 18.6)              | 1.3 (1.3 to 1.3)                  | 862.9 (800.2 to 924.8)    | 377.1 (339.1 to 415.1)     | 458.9 (409.8 to 510.1)        | 24.1 (12.9 to 40.6)             | 2.8 (2.8 to 2.8)                  |
| Mexico  | 2002 | 412.8 (383.5 to 442.7)     | 175.3 (156.6 to 192.6)     | 223.1 (200.6 to 247.0)        | 12.3 (6.8 to 20.1)              | 2.1 (2.1 to 2.1)                  | 900.6 (836.6 to 965.8)    | 382.4 (341.6 to 420.2)     | 486.8 (437.6 to 538.9)        | 26.9 (14.9 to 44.0)             | 4.6 (4.6 to 4.6)                  |
| Mexico  | 2003 | 434.0 (404.6 to 466.0)     | 181.5 (163.2 to 199.7)     | 238.3 (214.6 to 262.6)        | 13.8 (7.8 to 22.6)              | 0.4 (0.4 to 0.4)                  | 946.8 (882.8 to 1016.6)   | 396.0 (356.0 to 435.7)     | 519.9 (468.2 to 572.9)        | 30.0 (17.0 to 49.2)             | 1.0 (1.0 to 1.0)                  |
| Mexico  | 2004 | 455.0 (423.8 to 487.5)     | 191.1 (173.0 to 211.7)     | 248.2 (223.6 to 273.1)        | 15.3 (8.8 to 25.3)              | 0.4 (0.4 to 0.4)                  | 992.7 (924.6 to 1063.6)   | 417.0 (377.4 to 461.9)     | 541.6 (487.8 to 595.8)        | 33.4 (19.2 to 55.2)             | 0.8 (0.8 to 0.8)                  |
| Mexico  | 2005 | 461.6 (430.9 to 494.7)     | 194.6 (175.3 to 216.0)     | 249.5 (225.1 to 273.5)        | 16.7 (10.0 to 27.1)             | 0.9 (0.9 to 0.9)                  | 1007.0 (940.1 to 1079.4)  | 424.5 (382.4 to 471.1)     | 544.2 (491.1 to 596.7)        | 36.3 (21.7 to 59.1)             | 1.9 (1.9 to 1.9)                  |
| Mexico  | 2006 | 469.5 (438.6 to 503.3)     | 202.8 (183.4 to 223.8)     | 246.9 (222.4 to 272.3)        | 18.5 (11.3 to 29.3)             | 1.3 (1.3 to 1.3)                  | 1024.2 (956.8 to 1098.1)  | 442.4 (400.2 to 488.3)     | 538.6 (485.1 to 594.0)        | 40.4 (24.5 to 63.9)             | 2.8 (2.8 to 2.8)                  |
| Mexico  | 2007 | 473.2 (440.8 to 507.7)     | 212.2 (192.7 to 234.6)     | 238.8 (215.4 to 264.5)        | 21.3 (13.1 to 33.3)             | 1.0 (1.0 to 1.0)                  | 1032.5 (961.6 to 1107.7)  | 462.9 (420.4 to 511.7)     | 520.9 (470.0 to 577.0)        | 46.5 (28.5 to 72.7)             | 2.2 (2.2 to 2.2)                  |
| Mexico  | 2008 | 469.2 (435.2 to 505.7)     | 221.1 (200.4 to 242.9)     | 221.5 (199.1 to 246.2)        | 25.5 (15.5 to 40.0)             | 1.0 (1.0 to 1.0)                  | 1023.6 (949.5 to 1103.2)  | 482.4 (437.2 to 529.8)     | 483.3 (434.4 to 537.1)        | 55.6 (33.8 to 87.3)             | 2.2 (2.2 to 2.2)                  |
| Mexico  | 2009 | 453.7 (420.9 to 488.3)     | 220.2 (200.2 to 242.1)     | 205.7 (184.8 to 229.5)        | 27.3 (16.3 to 42.1)             | 0.5 (0.5 to 0.5)                  | 989.8 (918.2 to 1065.3)   | 480.5 (436.7 to 528.1)     | 448.7 (403.3 to 500.8)        | 59.6 (35.6 to 91.8)             | 1.0 (1.0 to 1.0)                  |
| Mexico  | 2010 | 472.1 (438.7 to 507.1)     | 235.4 (215.0 to 258.3)     | 201.9 (180.8 to 226.7)        | 29.6 (17.9 to 45.5)             | 5.2 (5.2 to 5.2)                  | 1030.1 (957.2 to 1106.2)  | 513.6 (469.1 to 563.4)     | 440.5 (394.5 to 494.7)        | 64.5 (39.1 to 99.3)             | 11.4 (11.4 to 11.4)               |
| Mexico  | 2011 | 480.7 (445.2 to 518.1)     | 247.5 (224.6 to 272.6)     | 197.3 (177.0 to 222.0)        | 31.1 (19.1 to 48.0)             | 4.8 (4.8 to 4.8)                  | 1048.8 (971.3 to 1130.4)  | 540.0 (490.0 to 594.8)     | 430.5 (386.1 to 484.2)        | 67.9 (41.7 to 104.7)            | 10.4 (10.4 to 10.4)               |
| Mexico  | 2012 | 490.8 (456.0 to 528.6)     | 257.4 (234.6 to 282.3)     | 198.2 (176.7 to 223.4)        | 32.5 (20.0 to 50.8)             | 2.7 (2.7 to 2.7)                  | 1070.8 (994.8 to 1153.1)  | 561.6 (511.8 to 615.8)     | 432.5 (385.5 to 487.3)        | 71.0 (43.6 to 110.9)            | 5.8 (5.8 to 5.8)                  |
| Mexico  | 2013 | 492.3 (457.8 to 530.6)     | 260.1 (238.1 to 283.4)     | 197.8 (175.9 to 221.5)        | 33.6 (20.6 to 52.5)             | 0.8 (0.8 to 0.8)                  | 1074.0 (998.7 to 1157.6)  | 567.4 (519.5 to 618.2)     | 431.6 (383.7 to 483.2)        | 73.2 (44.9 to 114.5)            | 1.8 (1.8 to 1.8)                  |
| Mexico  | 2014 | 492.9 (457.1 to 532.4)     | 259.8 (236.0 to 284.8)     | 197.8 (176.5 to 221.4)        | 34.8 (21.3 to 54.1)             | 0.6 (0.6 to 0.6)                  | 1075.4 (997.1 to 1161.5)  | 566.9 (514.9 to 621.3)     | 431.5 (385.0 to 483.0)        | 75.9 (46.4 to 118.1)            | 1.2 (1.2 to 1.2)                  |
| Mexico  | 2015 | 501.0 (460.8 to 546.1)     | 263.6 (237.1 to 290.4)     | 200.3 (175.9 to 225.6)        | 36.2 (21.6 to 58.0)             | 0.8 (0.8 to 0.8)                  | 1092.9 (1005.3 to 1191.5) | 575.1 (517.3 to 633.6)     | 437.1 (383.7 to 492.2)        | 79.0 (47.0 to 126.4)            | 1.8 (1.8 to 1.8)                  |

| Country | Year | 2018 US Dollars per capita |                            |                               |                                 |                                   | 2018 PPP per capita       |                            |                               |                                 |                                   |
|---------|------|----------------------------|----------------------------|-------------------------------|---------------------------------|-----------------------------------|---------------------------|----------------------------|-------------------------------|---------------------------------|-----------------------------------|
|         |      | Health spending            | Government health spending | Out-of-pocket health spending | Prepaid private health spending | Development assistance for health | Health spending           | Government health spending | Out-of-pocket health spending | Prepaid private health spending | Development assistance for health |
| Mexico  | 2016 | 504.6 (458.5 to 554.0)     | 264.6 (232.8 to 298.3)     | 201.6 (174.3 to 230.8)        | 37.7 (22.3 to 63.8)             | 0.7 (0.7 to 0.7)                  | 1100.8 (1000.2 to 1208.7) | 577.2 (507.9 to 650.9)     | 439.8 (380.2 to 503.6)        | 82.4 (48.5 to 139.1)            | 1.4 (1.4 to 1.4)                  |
| Mexico  | 2017 | 499.2 (455.5 to 548.5)     | 257.7 (226.8 to 291.0)     | 203.1 (175.4 to 232.7)        | 37.7 (22.2 to 63.7)             | 0.7 (0.7 to 0.7)                  | 1089.1 (993.6 to 1196.5)  | 562.2 (494.8 to 634.8)     | 443.1 (382.7 to 507.7)        | 82.2 (48.5 to 139.0)            | 1.6 (1.6 to 1.6)                  |
| Mexico  | 2018 | 506.8 (460.7 to 556.9)     | 262.3 (231.1 to 295.6)     | 205.4 (177.2 to 235.2)        | 38.5 (22.7 to 65.1)             | 0.7 (0.7 to 0.7)                  | 1105.7 (1005.2 to 1214.9) | 572.1 (504.2 to 644.8)     | 448.0 (386.7 to 513.1)        | 84.0 (49.6 to 142.0)            | 1.5 (1.5 to 1.5)                  |
| Mexico  | 2019 | 514.4 (469.4 to 565.7)     | 266.9 (235.6 to 300.5)     | 207.7 (179.2 to 238.2)        | 39.2 (23.2 to 66.2)             | 0.7 (0.6 to 0.7)                  | 1122.3 (1024.0 to 1234.2) | 582.2 (513.9 to 655.6)     | 453.1 (390.9 to 519.7)        | 85.5 (50.5 to 144.4)            | 1.5 (1.4 to 1.6)                  |
| Mexico  | 2020 | 521.9 (473.8 to 573.6)     | 271.4 (239.5 to 305.2)     | 209.9 (181.1 to 240.6)        | 39.9 (23.5 to 67.3)             | 0.7 (0.6 to 0.8)                  | 1138.5 (1033.7 to 1251.3) | 592.1 (522.5 to 665.9)     | 457.9 (395.1 to 524.9)        | 87.0 (51.2 to 146.9)            | 1.5 (1.4 to 1.7)                  |
| Mexico  | 2021 | 531.2 (483.8 to 584.6)     | 277.7 (245.2 to 312.5)     | 212.1 (183.2 to 243.0)        | 40.7 (23.8 to 68.6)             | 0.7 (0.6 to 0.8)                  | 1158.9 (1055.6 to 1275.4) | 605.9 (534.9 to 681.8)     | 462.6 (399.6 to 530.1)        | 88.8 (52.0 to 149.7)            | 1.6 (1.4 to 1.8)                  |
| Mexico  | 2022 | 540.4 (491.1 to 593.2)     | 284.0 (251.1 to 320.2)     | 214.2 (185.0 to 245.2)        | 41.5 (24.2 to 69.9)             | 0.7 (0.6 to 0.8)                  | 1179.0 (1071.4 to 1294.1) | 619.6 (547.7 to 698.6)     | 467.3 (403.6 to 535.0)        | 90.5 (52.8 to 152.5)            | 1.6 (1.4 to 1.8)                  |
| Mexico  | 2023 | 548.7 (500.2 to 604.2)     | 289.9 (255.8 to 326.4)     | 215.9 (186.6 to 247.2)        | 42.2 (24.6 to 71.1)             | 0.7 (0.6 to 0.9)                  | 1197.1 (1091.3 to 1318.2) | 632.4 (558.1 to 712.2)     | 471.0 (407.1 to 539.3)        | 92.0 (53.7 to 155.1)            | 1.6 (1.4 to 1.9)                  |
| Mexico  | 2024 | 556.6 (505.1 to 611.7)     | 295.6 (260.6 to 332.6)     | 217.4 (188.0 to 248.9)        | 42.9 (25.0 to 72.2)             | 0.8 (0.7 to 0.9)                  | 1214.3 (1101.9 to 1334.6) | 644.8 (568.6 to 725.7)     | 474.4 (410.1 to 543.0)        | 93.5 (54.6 to 157.5)            | 1.7 (1.4 to 1.9)                  |
| Mexico  | 2025 | 563.3 (513.1 to 620.5)     | 300.1 (263.8 to 337.6)     | 218.9 (189.0 to 251.0)        | 43.5 (25.4 to 73.2)             | 0.8 (0.7 to 0.9)                  | 1228.9 (1119.3 to 1353.7) | 654.7 (575.5 to 736.4)     | 477.6 (412.4 to 547.5)        | 94.9 (55.5 to 159.7)            | 1.7 (1.4 to 2.0)                  |
| Mexico  | 2026 | 570.2 (516.7 to 627.5)     | 304.7 (267.8 to 342.9)     | 220.5 (190.5 to 253.0)        | 44.2 (25.9 to 74.1)             | 0.8 (0.7 to 0.9)                  | 1243.9 (1127.3 to 1368.9) | 664.9 (584.1 to 748.1)     | 481.0 (415.6 to 552.0)        | 96.3 (56.4 to 161.7)            | 1.7 (1.5 to 2.1)                  |
| Mexico  | 2027 | 577.1 (524.5 to 635.7)     | 309.5 (271.7 to 349.1)     | 222.0 (191.9 to 255.0)        | 44.8 (26.3 to 74.8)             | 0.8 (0.7 to 1.0)                  | 1259.0 (1144.3 to 1387.0) | 675.1 (592.7 to 761.5)     | 484.3 (418.7 to 556.3)        | 97.8 (57.3 to 163.3)            | 1.8 (1.5 to 2.2)                  |
| Mexico  | 2028 | 584.1 (528.9 to 644.2)     | 314.2 (275.4 to 355.0)     | 223.5 (193.4 to 256.6)        | 45.5 (26.7 to 75.6)             | 0.8 (0.7 to 1.0)                  | 1274.3 (1153.9 to 1405.5) | 685.5 (600.7 to 774.5)     | 487.7 (421.9 to 559.8)        | 99.2 (58.3 to 164.8)            | 1.8 (1.5 to 2.2)                  |
| Mexico  | 2029 | 591.1 (536.5 to 649.8)     | 319.1 (279.1 to 361.8)     | 225.1 (194.7 to 258.1)        | 46.2 (27.2 to 76.9)             | 0.9 (0.7 to 1.1)                  | 1289.7 (1170.4 to 1417.7) | 696.1 (609.0 to 789.2)     | 491.0 (424.7 to 563.2)        | 100.7 (59.3 to 167.8)           | 1.9 (1.5 to 2.3)                  |
| Mexico  | 2030 | 598.3 (542.1 to 659.5)     | 324.0 (282.8 to 367.9)     | 226.6 (195.7 to 259.8)        | 46.8 (27.7 to 78.4)             | 0.9 (0.7 to 1.1)                  | 1305.2 (1182.7 to 1438.8) | 706.9 (616.9 to 802.7)     | 494.3 (426.9 to 566.7)        | 102.2 (60.4 to 171.0)           | 1.9 (1.6 to 2.4)                  |
| Mexico  | 2031 | 605.6 (548.8 to 668.5)     | 329.1 (286.9 to 375.5)     | 228.1 (196.9 to 261.9)        | 47.5 (28.1 to 79.8)             | 0.9 (0.7 to 1.1)                  | 1321.3 (1197.2 to 1458.4) | 717.9 (626.0 to 819.2)     | 497.7 (429.6 to 571.4)        | 103.7 (61.4 to 174.1)           | 2.0 (1.6 to 2.5)                  |
| Mexico  | 2032 | 613.2 (554.1 to 677.4)     | 334.2 (290.6 to 382.1)     | 229.8 (198.3 to 263.7)        | 48.3 (28.6 to 81.0)             | 0.9 (0.7 to 1.2)                  | 1337.7 (1208.9 to 1477.8) | 729.2 (634.0 to 833.6)     | 501.3 (432.7 to 575.3)        | 105.3 (62.4 to 176.6)           | 2.0 (1.6 to 2.5)                  |
| Mexico  | 2033 | 620.5 (561.2 to 688.7)     | 339.3 (295.3 to 389.2)     | 231.3 (199.7 to 265.4)        | 49.0 (28.9 to 82.1)             | 0.9 (0.7 to 1.2)                  | 1353.7 (1224.2 to 1502.4) | 740.3 (644.2 to 849.1)     | 504.5 (435.6 to 579.0)        | 106.8 (63.1 to 179.1)           | 2.1 (1.6 to 2.7)                  |
| Mexico  | 2034 | 627.5 (565.7 to 696.8)     | 344.3 (298.4 to 395.5)     | 232.5 (200.8 to 266.9)        | 49.6 (29.4 to 83.2)             | 1.0 (0.8 to 1.3)                  | 1368.9 (1234.1 to 1520.2) | 751.2 (651.0 to 862.9)     | 507.3 (438.1 to 582.3)        | 108.3 (64.0 to 181.5)           | 2.1 (1.6 to 2.7)                  |
| Mexico  | 2035 | 634.7 (572.3 to 708.4)     | 349.6 (301.9 to 404.6)     | 233.8 (201.8 to 268.5)        | 50.3 (29.8 to 84.3)             | 1.0 (0.8 to 1.3)                  | 1384.8 (1248.6 to 1545.4) | 762.7 (658.7 to 882.7)     | 510.1 (440.3 to 585.7)        | 109.8 (65.0 to 184.0)           | 2.2 (1.7 to 2.8)                  |
| Mexico  | 2036 | 641.6 (575.1 to 715.4)     | 354.7 (305.0 to 412.2)     | 235.0 (202.7 to 269.9)        | 51.0 (30.2 to 85.4)             | 1.0 (0.8 to 1.4)                  | 1399.8 (1254.6 to 1560.8) | 773.7 (665.4 to 899.2)     | 512.6 (442.2 to 588.8)        | 111.2 (65.8 to 186.3)           | 2.2 (1.7 to 3.0)                  |

| Country | Year | 2018 US Dollars per capita |                            |                               |                                 |                                   | 2018 PPP per capita       |                            |                               |                                 |                                   |
|---------|------|----------------------------|----------------------------|-------------------------------|---------------------------------|-----------------------------------|---------------------------|----------------------------|-------------------------------|---------------------------------|-----------------------------------|
|         |      | Health spending            | Government health spending | Out-of-pocket health spending | Prepaid private health spending | Development assistance for health | Health spending           | Government health spending | Out-of-pocket health spending | Prepaid private health spending | Development assistance for health |
| Mexico  | 2037 | 648.2 (583.0 to 729.5)     | 359.7 (307.8 to 419.7)     | 235.9 (203.4 to 270.8)        | 51.6 (30.5 to 86.4)             | 1.0 (0.8 to 1.4)                  | 1414.2 (1272.0 to 1591.6) | 784.6 (671.5 to 915.7)     | 514.7 (443.7 to 590.8)        | 112.6 (66.6 to 188.5)           | 2.3 (1.7 to 3.1)                  |
| Mexico  | 2038 | 654.6 (585.1 to 734.6)     | 364.6 (310.5 to 429.6)     | 236.7 (204.0 to 271.6)        | 52.2 (30.8 to 87.7)             | 1.1 (0.8 to 1.5)                  | 1428.1 (1276.5 to 1602.6) | 795.3 (677.5 to 937.1)     | 516.4 (445.0 to 592.5)        | 114.0 (67.2 to 191.2)           | 2.4 (1.8 to 3.3)                  |
| Mexico  | 2039 | 661.1 (591.2 to 750.5)     | 369.5 (313.4 to 437.0)     | 237.6 (204.6 to 272.7)        | 52.9 (31.1 to 88.7)             | 1.1 (0.8 to 1.6)                  | 1442.3 (1289.7 to 1637.2) | 806.2 (683.7 to 953.4)     | 518.3 (446.4 to 595.0)        | 115.4 (67.9 to 193.5)           | 2.4 (1.8 to 3.4)                  |
| Mexico  | 2040 | 667.5 (594.1 to 755.2)     | 374.5 (316.5 to 445.8)     | 238.4 (205.3 to 273.8)        | 53.5 (31.3 to 89.4)             | 1.1 (0.9 to 1.6)                  | 1456.3 (1296.2 to 1647.5) | 817.0 (690.4 to 972.6)     | 520.1 (448.0 to 597.4)        | 116.7 (68.4 to 195.0)           | 2.5 (1.9 to 3.5)                  |
| Mexico  | 2041 | 674.0 (599.3 to 768.6)     | 379.4 (319.6 to 455.7)     | 239.3 (206.0 to 275.2)        | 54.1 (31.7 to 90.4)             | 1.2 (0.9 to 1.6)                  | 1470.4 (1307.4 to 1676.8) | 827.6 (697.3 to 994.3)     | 522.1 (449.5 to 600.4)        | 118.1 (69.2 to 197.3)           | 2.5 (1.9 to 3.6)                  |
| Mexico  | 2042 | 680.4 (603.2 to 776.9)     | 384.2 (322.1 to 466.7)     | 240.2 (206.7 to 276.5)        | 54.8 (32.1 to 91.6)             | 1.2 (0.9 to 1.7)                  | 1484.3 (1316.0 to 1694.9) | 838.1 (702.8 to 1018.1)    | 524.1 (450.9 to 603.2)        | 119.5 (70.0 to 199.8)           | 2.6 (1.9 to 3.8)                  |
| Mexico  | 2043 | 686.8 (609.9 to 791.2)     | 389.0 (324.7 to 473.7)     | 241.2 (207.4 to 277.7)        | 55.4 (32.4 to 92.8)             | 1.2 (0.9 to 1.8)                  | 1498.5 (1330.6 to 1726.2) | 848.6 (708.4 to 1033.4)    | 526.2 (452.5 to 605.8)        | 121.0 (70.6 to 202.5)           | 2.7 (2.0 to 3.9)                  |
| Mexico  | 2044 | 693.6 (612.9 to 797.1)     | 394.0 (327.5 to 482.7)     | 242.2 (208.0 to 278.9)        | 56.1 (32.7 to 94.1)             | 1.3 (0.9 to 1.9)                  | 1513.1 (1337.2 to 1738.9) | 859.5 (714.4 to 1053.1)    | 528.4 (453.9 to 608.6)        | 122.5 (71.4 to 205.3)           | 2.8 (2.0 to 4.1)                  |
| Mexico  | 2045 | 700.3 (619.1 to 810.3)     | 399.0 (330.1 to 492.9)     | 243.2 (208.8 to 280.2)        | 56.8 (33.1 to 95.5)             | 1.3 (0.9 to 2.0)                  | 1527.9 (1350.6 to 1767.7) | 870.5 (720.2 to 1075.4)    | 530.6 (455.4 to 611.3)        | 124.0 (72.2 to 208.3)           | 2.8 (2.0 to 4.3)                  |
| Mexico  | 2046 | 706.9 (622.5 to 816.6)     | 403.8 (332.6 to 499.5)     | 244.2 (209.6 to 281.4)        | 57.5 (33.4 to 96.9)             | 1.3 (0.0 to 2.1)                  | 1542.2 (1358.1 to 1781.5) | 881.1 (725.6 to 1089.8)    | 532.8 (457.3 to 614.0)        | 125.4 (73.0 to 211.3)           | 2.9 (0.0 to 4.5)                  |
| Mexico  | 2047 | 713.6 (627.6 to 829.8)     | 408.8 (335.9 to 508.4)     | 245.3 (210.3 to 282.9)        | 58.2 (33.8 to 98.3)             | 1.3 (0.0 to 2.2)                  | 1556.8 (1369.2 to 1810.4) | 891.8 (732.7 to 1109.2)    | 535.1 (458.9 to 617.1)        | 127.0 (73.7 to 214.4)           | 2.9 (0.0 to 4.7)                  |
| Mexico  | 2048 | 720.2 (631.5 to 838.6)     | 413.7 (338.7 to 517.8)     | 246.3 (211.0 to 284.6)        | 58.9 (34.1 to 99.7)             | 1.4 (0.0 to 2.3)                  | 1571.3 (1377.7 to 1829.5) | 902.5 (738.9 to 1129.8)    | 537.3 (460.4 to 620.8)        | 128.5 (74.5 to 217.5)           | 3.0 (0.0 to 5.1)                  |
| Mexico  | 2049 | 726.8 (637.0 to 848.9)     | 418.6 (341.9 to 525.7)     | 247.3 (211.7 to 285.8)        | 59.6 (34.5 to 100.6)            | 1.4 (0.0 to 2.4)                  | 1585.7 (1389.7 to 1852.1) | 913.2 (745.9 to 1146.9)    | 539.4 (461.9 to 623.6)        | 130.0 (75.2 to 219.5)           | 3.1 (0.0 to 5.3)                  |
| Mexico  | 2050 | 733.3 (640.7 to 858.3)     | 423.5 (344.9 to 534.1)     | 248.2 (212.3 to 287.4)        | 60.3 (34.8 to 101.9)            | 1.4 (0.0 to 2.5)                  | 1599.9 (1397.8 to 1872.4) | 923.9 (752.5 to 1165.2)    | 541.4 (463.2 to 627.1)        | 131.5 (76.0 to 222.3)           | 3.1 (0.0 to 5.5)                  |
| Moldova | 1995 | 99.1 (82.9 to 117.3)       | 68.6 (55.2 to 85.2)        | 28.7 (20.3 to 38.8)           | 0.0 (0.0 to 0.1)                | 1.8 (1.8 to 1.8)                  | 242.1 (202.5 to 286.6)    | 167.7 (134.8 to 208.1)     | 70.1 (49.7 to 94.8)           | 0.1 (0.0 to 0.2)                | 4.3 (4.3 to 4.3)                  |
| Moldova | 1996 | 92.1 (77.4 to 109.9)       | 63.6 (51.7 to 78.5)        | 28.4 (20.7 to 37.3)           | 0.0 (0.0 to 0.1)                | 0.0 (0.0 to 0.0)                  | 224.9 (189.2 to 268.4)    | 155.4 (126.4 to 191.7)     | 69.3 (50.7 to 91.2)           | 0.1 (0.0 to 0.1)                | 0.1 (0.1 to 0.1)                  |
| Moldova | 1997 | 84.5 (71.9 to 100.7)       | 56.3 (45.8 to 69.7)        | 27.9 (20.7 to 36.8)           | 0.0 (0.0 to 0.0)                | 0.3 (0.3 to 0.3)                  | 206.4 (175.5 to 245.9)    | 137.4 (111.8 to 170.2)     | 68.1 (50.5 to 89.8)           | 0.1 (0.0 to 0.1)                | 0.8 (0.8 to 0.8)                  |
| Moldova | 1998 | 68.4 (58.0 to 80.9)        | 41.8 (34.1 to 51.6)        | 26.0 (19.5 to 33.9)           | 0.0 (0.0 to 0.0)                | 0.6 (0.6 to 0.6)                  | 167.1 (141.7 to 197.7)    | 102.1 (83.2 to 126.0)      | 63.5 (47.6 to 82.7)           | 0.0 (0.0 to 0.1)                | 1.4 (1.4 to 1.4)                  |
| Moldova | 1999 | 61.0 (52.4 to 71.8)        | 32.2 (26.3 to 39.9)        | 24.6 (18.6 to 32.2)           | 0.0 (0.0 to 0.0)                | 4.2 (4.2 to 4.2)                  | 149.0 (128.1 to 175.4)    | 78.5 (64.1 to 97.6)        | 60.0 (45.5 to 78.7)           | 0.0 (0.0 to 0.0)                | 10.3 (10.3 to 10.3)               |
| Moldova | 2000 | 60.6 (52.2 to 70.8)        | 31.0 (25.2 to 38.2)        | 26.2 (20.1 to 34.2)           | 0.0 (0.0 to 0.0)                | 3.4 (3.4 to 3.4)                  | 148.0 (127.4 to 172.8)    | 75.7 (61.6 to 93.4)        | 64.1 (49.1 to 83.4)           | 0.0 (0.0 to 0.0)                | 8.3 (8.3 to 8.3)                  |
| Moldova | 2001 | 64.7 (55.7 to 74.9)        | 32.9 (26.8 to 40.3)        | 29.2 (22.6 to 37.2)           | 0.0 (0.0 to 0.0)                | 2.6 (2.6 to 2.6)                  | 158.0 (136.1 to 183.1)    | 80.3 (65.4 to 98.4)        | 71.4 (55.2 to 91.0)           | 0.0 (0.0 to 0.0)                | 6.4 (6.4 to 6.4)                  |

| Country | Year | 2018 US Dollars per capita |                            |                               |                                 |                                   | 2018 PPP per capita    |                            |                               |                                 |                                   |
|---------|------|----------------------------|----------------------------|-------------------------------|---------------------------------|-----------------------------------|------------------------|----------------------------|-------------------------------|---------------------------------|-----------------------------------|
|         |      | Health spending            | Government health spending | Out-of-pocket health spending | Prepaid private health spending | Development assistance for health | Health spending        | Government health spending | Out-of-pocket health spending | Prepaid private health spending | Development assistance for health |
| Moldova | 2002 | 76.3 (66.1 to 88.0)        | 38.3 (31.4 to 47.0)        | 36.5 (28.6 to 46.2)           | 0.1 (0.1 to 0.3)                | 1.4 (1.4 to 1.4)                  | 186.5 (161.5 to 214.9) | 93.6 (76.7 to 114.9)       | 89.2 (69.8 to 113.0)          | 0.3 (0.2 to 0.7)                | 3.4 (3.4 to 3.4)                  |
| Moldova | 2003 | 88.5 (77.4 to 101.5)       | 44.5 (36.6 to 54.0)        | 41.5 (32.7 to 52.7)           | 0.3 (0.2 to 0.6)                | 2.2 (2.2 to 2.2)                  | 216.3 (189.1 to 247.9) | 108.7 (89.5 to 131.8)      | 101.3 (80.0 to 128.7)         | 0.8 (0.4 to 1.5)                | 5.4 (5.4 to 5.4)                  |
| Moldova | 2004 | 109.0 (95.2 to 124.8)      | 56.6 (46.9 to 67.9)        | 47.9 (38.2 to 60.2)           | 0.3 (0.2 to 0.7)                | 4.2 (4.2 to 4.2)                  | 266.2 (232.5 to 304.9) | 138.2 (114.5 to 165.8)     | 116.9 (93.2 to 147.1)         | 0.8 (0.4 to 1.6)                | 10.3 (10.3 to 10.3)               |
| Moldova | 2005 | 128.9 (112.6 to 147.5)     | 65.8 (54.6 to 78.9)        | 56.2 (45.2 to 70.5)           | 0.3 (0.1 to 0.5)                | 6.6 (6.6 to 6.6)                  | 314.8 (274.9 to 360.4) | 160.7 (133.5 to 192.6)     | 137.3 (110.4 to 172.2)        | 0.7 (0.3 to 1.3)                | 16.1 (16.1 to 16.1)               |
| Moldova | 2006 | 143.0 (124.0 to 164.5)     | 73.8 (61.7 to 87.7)        | 65.8 (52.9 to 82.1)           | 0.3 (0.1 to 0.6)                | 3.1 (3.1 to 3.1)                  | 349.4 (303.0 to 401.7) | 180.3 (150.6 to 214.2)     | 160.8 (129.3 to 200.7)        | 0.7 (0.3 to 1.4)                | 7.6 (7.6 to 7.6)                  |
| Moldova | 2007 | 159.4 (139.4 to 181.3)     | 80.5 (67.6 to 95.6)        | 73.5 (59.9 to 91.6)           | 0.3 (0.2 to 0.7)                | 5.0 (5.0 to 5.0)                  | 389.2 (340.4 to 442.8) | 196.6 (165.1 to 233.5)     | 179.5 (146.2 to 223.7)        | 0.8 (0.4 to 1.6)                | 12.3 (12.3 to 12.3)               |
| Moldova | 2008 | 175.4 (154.3 to 198.3)     | 87.4 (73.6 to 103.0)       | 82.1 (66.6 to 100.7)          | 0.5 (0.2 to 0.9)                | 5.4 (5.4 to 5.4)                  | 428.5 (377.0 to 484.3) | 213.6 (179.7 to 251.6)     | 200.5 (162.8 to 246.0)        | 1.2 (0.5 to 2.2)                | 13.2 (13.2 to 13.2)               |
| Moldova | 2009 | 185.7 (164.4 to 208.0)     | 86.9 (73.7 to 102.1)       | 86.2 (70.2 to 104.8)          | 1.1 (0.5 to 2.0)                | 11.5 (11.5 to 11.5)               | 453.5 (401.7 to 508.2) | 212.3 (179.9 to 249.3)     | 210.6 (171.6 to 256.1)        | 2.6 (1.2 to 5.0)                | 28.0 (28.0 to 28.0)               |
| Moldova | 2010 | 193.6 (172.3 to 216.4)     | 91.6 (78.1 to 107.0)       | 87.0 (71.2 to 105.8)          | 1.8 (0.8 to 3.3)                | 13.2 (13.2 to 13.2)               | 472.8 (420.8 to 528.5) | 223.9 (190.7 to 261.3)     | 212.5 (174.0 to 258.5)        | 4.4 (2.0 to 8.1)                | 32.1 (32.1 to 32.1)               |
| Moldova | 2011 | 194.9 (172.9 to 217.8)     | 95.4 (80.9 to 111.8)       | 88.1 (71.8 to 106.6)          | 2.1 (1.0 to 3.8)                | 9.3 (9.3 to 9.3)                  | 476.1 (422.3 to 531.9) | 233.1 (197.6 to 273.1)     | 215.3 (175.3 to 260.4)        | 5.1 (2.4 to 9.3)                | 22.6 (22.6 to 22.6)               |
| Moldova | 2012 | 191.4 (169.1 to 214.3)     | 93.9 (79.8 to 109.7)       | 85.6 (69.5 to 104.7)          | 2.1 (1.0 to 3.8)                | 9.7 (9.7 to 9.7)                  | 467.5 (413.0 to 523.4) | 229.5 (195.0 to 268.0)     | 209.2 (169.9 to 255.8)        | 5.1 (2.4 to 9.2)                | 23.7 (23.7 to 23.7)               |
| Moldova | 2013 | 195.6 (173.0 to 220.8)     | 97.9 (82.2 to 115.4)       | 87.1 (70.7 to 106.8)          | 2.0 (0.9 to 3.6)                | 8.6 (8.6 to 8.6)                  | 477.9 (422.7 to 539.2) | 239.2 (200.7 to 281.8)     | 212.8 (172.6 to 261.0)        | 4.9 (2.3 to 8.9)                | 21.1 (21.1 to 21.1)               |
| Moldova | 2014 | 203.2 (179.8 to 230.1)     | 100.8 (84.7 to 120.1)      | 88.1 (71.2 to 108.7)          | 2.1 (1.0 to 3.9)                | 12.3 (12.3 to 12.3)               | 496.4 (439.1 to 562.1) | 246.3 (206.8 to 293.3)     | 215.2 (173.8 to 265.4)        | 5.0 (2.3 to 9.5)                | 29.9 (29.9 to 29.9)               |
| Moldova | 2015 | 205.3 (180.0 to 234.8)     | 98.9 (81.7 to 118.6)       | 91.1 (72.9 to 114.2)          | 2.1 (1.0 to 4.0)                | 13.1 (13.1 to 13.1)               | 501.5 (439.8 to 573.5) | 241.6 (199.6 to 289.6)     | 222.6 (178.1 to 279.0)        | 5.2 (2.5 to 9.7)                | 32.1 (32.1 to 32.1)               |
| Moldova | 2016 | 203.9 (176.7 to 235.1)     | 102.3 (84.0 to 124.2)      | 92.7 (73.0 to 118.7)          | 2.3 (1.1 to 4.4)                | 6.6 (6.6 to 6.6)                  | 498.2 (431.7 to 574.2) | 249.8 (205.2 to 303.5)     | 226.6 (178.3 to 289.9)        | 5.7 (2.8 to 10.7)               | 16.1 (16.1 to 16.1)               |
| Moldova | 2017 | 211.8 (182.6 to 246.6)     | 107.2 (88.2 to 130.3)      | 96.6 (75.8 to 124.1)          | 2.4 (1.2 to 4.5)                | 5.6 (5.6 to 5.6)                  | 517.3 (446.0 to 602.2) | 261.8 (215.5 to 318.4)     | 235.9 (185.2 to 303.2)        | 5.9 (2.9 to 11.0)               | 13.6 (13.6 to 13.6)               |
| Moldova | 2018 | 215.4 (186.3 to 248.3)     | 108.7 (89.4 to 132.3)      | 99.1 (78.1 to 126.4)          | 2.5 (1.2 to 4.6)                | 5.1 (5.1 to 5.1)                  | 526.2 (455.0 to 606.4) | 265.6 (218.5 to 323.2)     | 242.1 (190.9 to 308.8)        | 6.0 (2.9 to 11.2)               | 12.5 (12.3 to 12.6)               |
| Moldova | 2019 | 219.4 (189.5 to 255.1)     | 110.1 (90.5 to 134.0)      | 101.6 (80.1 to 129.9)         | 2.5 (1.2 to 4.6)                | 5.3 (4.9 to 5.6)                  | 535.9 (462.8 to 623.0) | 268.8 (221.0 to 327.3)     | 248.1 (195.7 to 317.2)        | 6.1 (2.9 to 11.3)               | 12.9 (12.0 to 13.6)               |
| Moldova | 2020 | 223.4 (192.4 to 258.2)     | 111.4 (91.6 to 135.6)      | 104.0 (81.8 to 132.6)         | 2.5 (1.2 to 4.7)                | 5.5 (5.0 to 5.9)                  | 545.7 (470.1 to 630.6) | 272.1 (223.8 to 331.2)     | 254.1 (199.9 to 323.8)        | 6.2 (3.0 to 11.5)               | 13.3 (12.2 to 14.4)               |
| Moldova | 2021 | 227.8 (196.6 to 265.2)     | 112.8 (92.7 to 137.4)      | 106.7 (83.9 to 136.3)         | 2.6 (1.2 to 4.8)                | 5.7 (5.1 to 6.3)                  | 556.4 (480.1 to 647.9) | 275.6 (226.3 to 335.5)     | 260.8 (204.9 to 332.9)        | 6.3 (3.0 to 11.7)               | 13.8 (12.4 to 15.3)               |
| Moldova | 2022 | 229.9 (197.7 to 265.2)     | 114.1 (93.6 to 139.0)      | 107.3 (84.6 to 136.5)         | 2.6 (1.3 to 4.8)                | 5.9 (5.2 to 6.6)                  | 561.5 (482.8 to 647.8) | 278.7 (228.7 to 339.4)     | 262.0 (206.6 to 333.4)        | 6.4 (3.1 to 11.8)               | 14.4 (12.7 to 16.1)               |



| Country | Year | 2018 US Dollars per capita |                            |                               |                                 |                                   | 2018 PPP per capita    |                            |                               |                                 |                                   |
|---------|------|----------------------------|----------------------------|-------------------------------|---------------------------------|-----------------------------------|------------------------|----------------------------|-------------------------------|---------------------------------|-----------------------------------|
|         |      | Health spending            | Government health spending | Out-of-pocket health spending | Prepaid private health spending | Development assistance for health | Health spending        | Government health spending | Out-of-pocket health spending | Prepaid private health spending | Development assistance for health |
| Moldova | 2023 | 231.9 (200.7 to 269.9)     | 115.4 (94.6 to 140.9)      | 107.7 (85.1 to 136.8)         | 2.6 (1.3 to 4.9)                | 6.2 (5.4 to 7.1)                  | 566.5 (490.4 to 659.2) | 281.9 (231.1 to 344.1)     | 263.1 (207.8 to 334.1)        | 6.5 (3.1 to 12.0)               | 15.1 (13.2 to 17.2)               |
| Moldova | 2024 | 234.0 (201.9 to 271.2)     | 116.6 (95.6 to 142.6)      | 108.2 (85.4 to 137.8)         | 2.7 (1.3 to 5.0)                | 6.5 (5.6 to 7.6)                  | 571.6 (493.1 to 662.4) | 284.9 (233.4 to 348.2)     | 264.2 (208.5 to 336.7)        | 6.5 (3.2 to 12.1)               | 16.0 (13.8 to 18.5)               |
| Moldova | 2025 | 236.4 (204.7 to 275.8)     | 118.0 (96.6 to 144.3)      | 108.8 (85.9 to 138.2)         | 2.7 (1.3 to 5.0)                | 6.9 (5.8 to 8.1)                  | 577.4 (500.1 to 673.6) | 288.3 (236.1 to 352.4)     | 265.7 (209.8 to 337.6)        | 6.6 (3.2 to 12.3)               | 16.8 (14.2 to 19.7)               |
| Moldova | 2026 | 238.5 (205.5 to 276.1)     | 119.4 (97.5 to 146.2)      | 109.3 (86.3 to 138.6)         | 2.8 (1.3 to 5.1)                | 7.1 (6.0 to 8.3)                  | 582.6 (501.9 to 674.5) | 291.5 (238.2 to 357.2)     | 266.9 (210.8 to 338.5)        | 6.7 (3.2 to 12.5)               | 17.4 (14.6 to 20.4)               |
| Moldova | 2027 | 240.8 (208.5 to 280.9)     | 120.8 (98.5 to 148.2)      | 109.9 (86.7 to 138.7)         | 2.8 (1.3 to 5.2)                | 7.4 (6.2 to 8.8)                  | 588.1 (509.4 to 686.2) | 295.0 (240.5 to 362.0)     | 268.3 (211.8 to 338.7)        | 6.8 (3.3 to 12.6)               | 18.0 (15.1 to 21.6)               |
| Moldova | 2028 | 243.3 (210.7 to 282.5)     | 122.3 (99.7 to 150.3)      | 110.5 (87.2 to 139.1)         | 2.8 (1.4 to 5.3)                | 7.6 (6.4 to 9.3)                  | 594.3 (514.7 to 690.0) | 298.7 (243.4 to 367.1)     | 270.0 (213.1 to 339.8)        | 6.9 (3.3 to 12.9)               | 18.7 (15.6 to 22.6)               |
| Moldova | 2029 | 246.5 (213.5 to 286.7)     | 124.2 (101.1 to 152.5)     | 111.5 (88.0 to 140.3)         | 2.9 (1.4 to 5.4)                | 7.9 (6.5 to 9.8)                  | 602.0 (521.5 to 700.2) | 303.3 (247.0 to 372.6)     | 272.4 (214.9 to 342.7)        | 7.0 (3.4 to 13.1)               | 19.4 (15.9 to 23.8)               |
| Moldova | 2030 | 250.1 (216.0 to 290.5)     | 126.3 (102.8 to 155.3)     | 112.7 (88.9 to 142.0)         | 2.9 (1.4 to 5.5)                | 8.2 (6.7 to 10.1)                 | 610.8 (527.6 to 709.5) | 308.4 (251.1 to 379.2)     | 275.2 (217.1 to 346.9)        | 7.2 (3.4 to 13.4)               | 20.0 (16.4 to 24.6)               |
| Moldova | 2031 | 254.1 (219.1 to 295.8)     | 128.6 (104.6 to 158.3)     | 114.0 (89.8 to 144.0)         | 3.0 (1.4 to 5.6)                | 8.5 (6.9 to 10.6)                 | 620.7 (535.3 to 722.5) | 314.2 (255.5 to 386.6)     | 278.5 (219.4 to 351.8)        | 7.3 (3.5 to 13.7)               | 20.7 (16.8 to 25.9)               |
| Moldova | 2032 | 258.7 (222.7 to 301.0)     | 131.2 (106.5 to 161.6)     | 115.6 (90.8 to 146.2)         | 3.1 (1.5 to 5.7)                | 8.8 (7.1 to 11.1)                 | 631.8 (544.0 to 735.2) | 320.5 (260.2 to 394.8)     | 282.3 (221.9 to 357.2)        | 7.5 (3.6 to 14.0)               | 21.5 (17.3 to 27.2)               |
| Moldova | 2033 | 263.6 (227.5 to 307.7)     | 134.1 (108.7 to 165.0)     | 117.3 (92.0 to 148.7)         | 3.1 (1.5 to 5.9)                | 9.1 (7.2 to 11.6)                 | 644.0 (555.7 to 751.6) | 327.5 (265.5 to 403.1)     | 286.6 (224.7 to 363.3)        | 7.7 (3.6 to 14.3)               | 22.2 (17.7 to 28.4)               |
| Moldova | 2034 | 268.8 (231.7 to 312.3)     | 137.0 (110.9 to 169.0)     | 119.1 (93.2 to 151.3)         | 3.2 (1.5 to 6.0)                | 9.4 (7.4 to 12.0)                 | 656.6 (565.9 to 762.9) | 334.8 (270.9 to 412.8)     | 291.0 (227.7 to 369.6)        | 7.9 (3.7 to 14.7)               | 23.0 (18.1 to 29.4)               |
| Moldova | 2035 | 273.9 (235.3 to 319.2)     | 140.0 (113.1 to 172.8)     | 120.9 (94.4 to 153.8)         | 3.3 (1.6 to 6.1)                | 9.8 (7.6 to 12.7)                 | 669.1 (574.7 to 779.7) | 341.9 (276.2 to 422.1)     | 295.3 (230.6 to 375.6)        | 8.1 (3.8 to 15.0)               | 23.8 (18.6 to 31.1)               |
| Moldova | 2036 | 278.7 (240.1 to 326.1)     | 142.8 (115.1 to 176.6)     | 122.5 (95.2 to 156.1)         | 3.4 (1.6 to 6.3)                | 10.1 (7.8 to 13.6)                | 680.8 (586.5 to 796.5) | 348.7 (281.2 to 431.3)     | 299.2 (232.5 to 381.2)        | 8.3 (3.9 to 15.3)               | 24.7 (19.1 to 33.3)               |
| Moldova | 2037 | 283.4 (242.9 to 331.5)     | 145.5 (117.1 to 180.7)     | 124.0 (96.1 to 158.1)         | 3.5 (1.6 to 6.4)                | 10.5 (8.1 to 14.1)                | 692.4 (593.2 to 809.7) | 355.4 (286.2 to 441.4)     | 302.9 (234.8 to 386.3)        | 8.4 (4.0 to 15.7)               | 25.6 (19.7 to 34.5)               |
| Moldova | 2038 | 288.2 (248.1 to 337.3)     | 148.3 (119.2 to 184.0)     | 125.5 (97.4 to 160.1)         | 3.5 (1.7 to 6.5)                | 10.9 (8.3 to 14.9)                | 704.0 (606.0 to 824.0) | 362.2 (291.1 to 449.5)     | 306.6 (237.8 to 391.1)        | 8.6 (4.1 to 16.0)               | 26.5 (20.2 to 36.4)               |
| Moldova | 2039 | 292.8 (250.6 to 342.3)     | 151.0 (121.1 to 187.5)     | 127.0 (98.4 to 161.8)         | 3.6 (1.7 to 6.7)                | 11.2 (8.5 to 15.3)                | 715.2 (612.2 to 836.1) | 368.8 (295.9 to 457.9)     | 310.1 (240.3 to 395.2)        | 8.8 (4.2 to 16.3)               | 27.5 (20.8 to 37.4)               |
| Moldova | 2040 | 297.4 (255.7 to 347.2)     | 153.7 (123.1 to 191.4)     | 128.4 (99.5 to 163.7)         | 3.7 (1.7 to 6.8)                | 11.7 (8.9 to 16.0)                | 726.5 (624.7 to 848.2) | 375.4 (300.6 to 467.4)     | 313.6 (243.1 to 399.8)        | 9.0 (4.2 to 16.6)               | 28.5 (21.7 to 39.2)               |
| Moldova | 2041 | 301.6 (258.0 to 353.8)     | 156.2 (124.9 to 194.9)     | 129.6 (100.6 to 165.4)        | 3.7 (1.8 to 6.9)                | 12.1 (9.1 to 17.2)                | 736.7 (630.3 to 864.2) | 381.4 (305.0 to 476.1)     | 316.5 (245.7 to 404.1)        | 9.1 (4.3 to 16.9)               | 29.6 (22.3 to 41.9)               |
| Moldova | 2042 | 305.7 (262.9 to 357.7)     | 158.6 (126.6 to 198.3)     | 130.7 (101.5 to 167.0)        | 3.8 (1.8 to 7.0)                | 12.6 (9.4 to 18.3)                | 746.8 (642.2 to 873.7) | 387.4 (309.2 to 484.3)     | 319.2 (247.9 to 408.0)        | 9.3 (4.4 to 17.2)               | 30.8 (22.9 to 44.7)               |
| Moldova | 2043 | 309.8 (264.9 to 364.1)     | 161.0 (128.3 to 202.0)     | 131.8 (102.1 to 168.6)        | 3.9 (1.8 to 7.2)                | 13.1 (9.7 to 19.4)                | 756.8 (647.0 to 889.4) | 393.3 (313.4 to 493.3)     | 322.0 (249.3 to 411.7)        | 9.5 (4.5 to 17.5)               | 32.1 (23.6 to 47.3)               |

| Country  | Year | 2018 US Dollars per capita |                            |                               |                                 |                                   | 2018 PPP per capita    |                            |                               |                                 |                                   |
|----------|------|----------------------------|----------------------------|-------------------------------|---------------------------------|-----------------------------------|------------------------|----------------------------|-------------------------------|---------------------------------|-----------------------------------|
|          |      | Health spending            | Government health spending | Out-of-pocket health spending | Prepaid private health spending | Development assistance for health | Health spending        | Government health spending | Out-of-pocket health spending | Prepaid private health spending | Development assistance for health |
| Moldova  | 2044 | 313.9 (269.6 to 366.8)     | 163.4 (129.8 to 205.2)     | 132.8 (102.5 to 170.0)        | 3.9 (1.9 to 7.3)                | 13.7 (10.0 to 20.0)               | 766.7 (658.5 to 896.1) | 399.2 (317.2 to 501.3)     | 324.5 (250.4 to 415.3)        | 9.6 (4.5 to 17.8)               | 33.4 (24.5 to 48.9)               |
| Moldova  | 2045 | 317.8 (270.5 to 374.3)     | 165.7 (131.6 to 208.1)     | 133.8 (102.9 to 171.4)        | 4.0 (1.9 to 7.4)                | 14.2 (10.3 to 21.6)               | 776.3 (660.8 to 914.2) | 404.8 (321.5 to 508.3)     | 326.9 (251.4 to 418.6)        | 9.8 (4.6 to 18.1)               | 34.8 (25.2 to 52.7)               |
| Moldova  | 2046 | 321.2 (275.6 to 379.4)     | 167.8 (133.0 to 210.6)     | 134.5 (103.3 to 172.4)        | 4.1 (1.9 to 7.5)                | 14.9 (10.8 to 22.7)               | 784.6 (673.3 to 926.8) | 409.8 (324.8 to 514.5)     | 328.6 (252.2 to 421.1)        | 10.0 (4.7 to 18.4)              | 36.3 (26.3 to 55.5)               |
| Moldova  | 2047 | 324.5 (275.4 to 383.3)     | 169.7 (134.0 to 213.9)     | 135.1 (103.6 to 173.3)        | 4.1 (1.9 to 7.6)                | 15.5 (11.2 to 24.6)               | 792.7 (672.6 to 936.3) | 414.6 (327.4 to 522.4)     | 330.1 (253.1 to 423.4)        | 10.1 (4.7 to 18.7)              | 37.9 (27.4 to 60.1)               |
| Moldova  | 2048 | 327.8 (281.1 to 385.0)     | 171.7 (135.5 to 217.2)     | 135.8 (104.0 to 174.3)        | 4.2 (2.0 to 7.8)                | 16.2 (11.5 to 26.0)               | 800.8 (686.6 to 940.5) | 419.3 (331.0 to 530.4)     | 331.6 (254.1 to 425.7)        | 10.2 (4.8 to 19.0)              | 39.7 (28.2 to 63.4)               |
| Moldova  | 2049 | 330.5 (280.2 to 390.6)     | 173.2 (136.6 to 220.0)     | 136.1 (104.3 to 174.8)        | 4.2 (2.0 to 7.8)                | 17.0 (12.0 to 27.5)               | 807.3 (684.5 to 954.2) | 423.2 (333.6 to 537.3)     | 332.3 (254.7 to 426.9)        | 10.4 (4.8 to 19.2)              | 41.5 (29.4 to 67.1)               |
| Moldova  | 2050 | 332.9 (284.6 to 392.4)     | 174.6 (137.5 to 222.2)     | 136.2 (104.4 to 174.9)        | 4.3 (2.0 to 7.9)                | 17.8 (12.5 to 28.6)               | 813.1 (695.2 to 958.5) | 426.5 (335.8 to 542.7)     | 332.6 (255.1 to 427.2)        | 10.5 (4.9 to 19.3)              | 43.5 (30.5 to 69.9)               |
| Mongolia | 1995 | 57.0 (46.8 to 68.5)        | 43.3 (33.9 to 54.3)        | 8.9 (6.2 to 12.6)             | 2.3 (1.1 to 4.3)                | 2.4 (2.4 to 2.4)                  | 192.8 (158.2 to 231.5) | 146.5 (114.6 to 183.7)     | 30.2 (21.1 to 42.5)           | 7.8 (3.6 to 14.5)               | 8.3 (8.3 to 8.3)                  |
| Mongolia | 1996 | 57.8 (47.7 to 69.4)        | 44.5 (35.0 to 55.3)        | 9.1 (6.4 to 12.7)             | 2.0 (0.9 to 3.8)                | 2.3 (2.3 to 2.3)                  | 195.6 (161.2 to 234.5) | 150.5 (118.3 to 186.9)     | 30.7 (21.7 to 42.9)           | 6.7 (3.1 to 12.8)               | 7.7 (7.7 to 7.7)                  |
| Mongolia | 1997 | 60.1 (49.5 to 71.9)        | 47.1 (37.5 to 57.8)        | 9.5 (6.6 to 13.1)             | 2.1 (0.9 to 3.9)                | 1.4 (1.4 to 1.4)                  | 203.0 (167.5 to 243.0) | 159.2 (126.7 to 195.3)     | 32.0 (22.5 to 44.2)           | 7.0 (3.1 to 13.3)               | 4.8 (4.8 to 4.8)                  |
| Mongolia | 1998 | 64.9 (53.8 to 76.8)        | 49.6 (39.7 to 60.5)        | 10.1 (7.1 to 13.9)            | 1.6 (0.8 to 3.1)                | 3.6 (3.6 to 3.6)                  | 219.4 (181.8 to 259.7) | 167.6 (134.2 to 204.6)     | 34.0 (23.9 to 47.1)           | 5.5 (2.5 to 10.6)               | 12.3 (12.3 to 12.3)               |
| Mongolia | 1999 | 70.7 (59.7 to 83.6)        | 52.0 (41.6 to 63.9)        | 11.6 (8.1 to 15.9)            | 2.5 (1.2 to 4.8)                | 4.7 (4.7 to 4.7)                  | 239.2 (201.8 to 282.6) | 175.7 (140.6 to 216.0)     | 39.1 (27.5 to 53.6)           | 8.4 (3.9 to 16.1)               | 16.0 (16.0 to 16.0)               |
| Mongolia | 2000 | 76.2 (64.3 to 90.3)        | 55.8 (45.2 to 68.2)        | 14.7 (10.4 to 20.1)           | 3.3 (1.5 to 6.1)                | 2.4 (2.4 to 2.4)                  | 257.7 (217.4 to 305.2) | 188.8 (152.8 to 230.7)     | 49.8 (35.0 to 67.8)           | 11.0 (5.0 to 20.6)              | 8.1 (8.1 to 8.1)                  |
| Mongolia | 2001 | 81.9 (70.4 to 96.2)        | 55.1 (45.1 to 67.0)        | 16.7 (11.9 to 22.5)           | 3.4 (1.6 to 6.3)                | 6.8 (6.8 to 6.8)                  | 277.0 (238.0 to 325.4) | 186.3 (152.4 to 226.6)     | 56.3 (40.2 to 76.1)           | 11.5 (5.3 to 21.3)              | 22.9 (22.9 to 22.9)               |
| Mongolia | 2002 | 75.6 (64.1 to 89.2)        | 53.8 (44.2 to 65.2)        | 17.9 (13.0 to 24.0)           | 3.3 (1.5 to 6.0)                | 0.7 (0.7 to 0.7)                  | 255.6 (216.6 to 301.5) | 181.8 (149.3 to 220.5)     | 60.7 (44.0 to 81.2)           | 11.0 (5.2 to 20.3)              | 2.2 (2.2 to 2.2)                  |
| Mongolia | 2003 | 73.9 (62.5 to 86.4)        | 50.5 (41.4 to 61.3)        | 18.6 (13.7 to 24.6)           | 2.9 (1.3 to 5.4)                | 1.9 (1.9 to 1.9)                  | 249.7 (211.4 to 292.2) | 170.8 (140.0 to 207.2)     | 62.8 (46.3 to 83.1)           | 9.7 (4.5 to 18.3)               | 6.4 (6.4 to 6.4)                  |
| Mongolia | 2004 | 74.5 (63.1 to 87.5)        | 50.0 (40.4 to 60.6)        | 20.1 (14.8 to 26.7)           | 2.9 (1.3 to 5.4)                | 1.5 (1.5 to 1.5)                  | 252.0 (213.4 to 295.7) | 169.1 (136.7 to 205.0)     | 68.0 (50.2 to 90.2)           | 9.9 (4.5 to 18.3)               | 5.1 (5.1 to 5.1)                  |
| Mongolia | 2005 | 75.5 (64.0 to 87.8)        | 48.7 (39.7 to 59.2)        | 21.4 (15.8 to 28.3)           | 2.7 (1.3 to 5.1)                | 2.6 (2.6 to 2.6)                  | 255.3 (216.4 to 296.8) | 164.8 (134.2 to 200.3)     | 72.5 (53.6 to 95.6)           | 9.3 (4.3 to 17.2)               | 8.8 (8.8 to 8.8)                  |
| Mongolia | 2006 | 77.3 (65.2 to 89.9)        | 50.6 (41.2 to 61.8)        | 22.0 (16.2 to 28.8)           | 2.8 (1.3 to 5.3)                | 2.0 (2.0 to 2.0)                  | 261.3 (220.4 to 303.9) | 170.9 (139.5 to 209.1)     | 74.2 (54.8 to 97.5)           | 9.6 (4.5 to 18.1)               | 6.6 (6.6 to 6.6)                  |
| Mongolia | 2007 | 87.4 (74.4 to 101.4)       | 55.4 (45.0 to 67.8)        | 23.4 (17.1 to 30.6)           | 2.9 (1.4 to 5.5)                | 5.8 (5.8 to 5.8)                  | 295.6 (251.5 to 342.8) | 187.3 (152.3 to 229.1)     | 79.0 (57.9 to 103.6)          | 9.8 (4.6 to 18.5)               | 19.4 (19.4 to 19.4)               |
| Mongolia | 2008 | 91.8 (78.5 to 106.3)       | 59.0 (48.3 to 73.2)        | 25.1 (18.4 to 32.7)           | 2.8 (1.3 to 5.2)                | 5.0 (5.0 to 5.0)                  | 310.4 (265.5 to 359.3) | 199.5 (163.3 to 247.6)     | 84.7 (62.3 to 110.6)          | 9.4 (4.5 to 17.7)               | 16.8 (16.8 to 16.8)               |

| Country  | Year | 2018 US Dollars per capita |                            |                               |                                 |                                   | 2018 PPP per capita    |                            |                               |                                 |                                   |
|----------|------|----------------------------|----------------------------|-------------------------------|---------------------------------|-----------------------------------|------------------------|----------------------------|-------------------------------|---------------------------------|-----------------------------------|
|          |      | Health spending            | Government health spending | Out-of-pocket health spending | Prepaid private health spending | Development assistance for health | Health spending        | Government health spending | Out-of-pocket health spending | Prepaid private health spending | Development assistance for health |
| Mongolia | 2009 | 89.4 (76.6 to 102.8)       | 55.2 (45.6 to 68.6)        | 25.7 (18.9 to 33.6)           | 2.5 (1.2 to 4.5)                | 6.1 (6.1 to 6.1)                  | 302.3 (258.8 to 347.6) | 186.7 (154.3 to 231.8)     | 86.7 (64.0 to 113.5)          | 8.3 (4.0 to 15.3)               | 20.5 (20.5 to 20.5)               |
| Mongolia | 2010 | 97.9 (85.1 to 111.7)       | 54.1 (44.6 to 66.5)        | 28.0 (20.7 to 36.4)           | 2.4 (1.1 to 4.3)                | 13.4 (13.4 to 13.4)               | 330.9 (287.8 to 377.5) | 183.0 (150.6 to 224.9)     | 94.7 (70.1 to 123.1)          | 8.1 (3.9 to 14.7)               | 45.1 (45.1 to 45.1)               |
| Mongolia | 2011 | 104.4 (91.0 to 119.2)      | 57.9 (47.4 to 71.0)        | 33.1 (24.8 to 42.7)           | 2.6 (1.3 to 4.6)                | 10.9 (10.9 to 10.9)               | 353.1 (307.5 to 402.9) | 195.8 (160.4 to 240.2)     | 111.9 (83.9 to 144.4)         | 8.7 (4.2 to 15.6)               | 36.7 (36.7 to 36.7)               |
| Mongolia | 2012 | 115.1 (99.9 to 131.2)      | 63.4 (52.1 to 76.9)        | 39.0 (29.3 to 50.5)           | 2.8 (1.3 to 5.0)                | 9.8 (9.8 to 9.8)                  | 389.0 (337.8 to 443.6) | 214.3 (176.3 to 259.9)     | 132.0 (99.0 to 170.8)         | 9.5 (4.5 to 16.7)               | 33.2 (33.2 to 33.2)               |
| Mongolia | 2013 | 129.7 (113.0 to 148.7)     | 68.5 (57.0 to 83.8)        | 46.3 (35.0 to 59.2)           | 3.2 (1.5 to 5.7)                | 11.8 (11.8 to 11.8)               | 438.6 (382.1 to 502.7) | 231.6 (192.8 to 283.2)     | 156.5 (118.5 to 200.1)        | 10.8 (5.1 to 19.2)              | 39.8 (39.8 to 39.8)               |
| Mongolia | 2014 | 135.8 (116.9 to 156.7)     | 72.8 (60.4 to 90.1)        | 50.9 (38.4 to 64.9)           | 3.7 (1.8 to 6.7)                | 8.3 (8.3 to 8.3)                  | 459.3 (395.1 to 529.9) | 246.2 (204.1 to 304.6)     | 172.3 (129.8 to 219.3)        | 12.6 (6.0 to 22.6)              | 28.2 (28.2 to 28.2)               |
| Mongolia | 2015 | 142.0 (122.1 to 164.8)     | 75.4 (61.7 to 93.5)        | 53.4 (40.2 to 68.6)           | 4.5 (2.1 to 8.0)                | 8.7 (8.7 to 8.7)                  | 480.2 (412.9 to 557.1) | 255.0 (208.6 to 316.3)     | 180.5 (136.0 to 231.9)        | 15.2 (7.1 to 27.1)              | 29.5 (29.5 to 29.5)               |
| Mongolia | 2016 | 149.7 (129.0 to 174.5)     | 78.1 (63.2 to 96.9)        | 53.2 (39.5 to 69.3)           | 4.9 (2.3 to 8.7)                | 13.5 (13.5 to 13.5)               | 506.1 (436.0 to 590.1) | 264.0 (213.6 to 327.8)     | 179.9 (133.4 to 234.1)        | 16.6 (7.8 to 29.3)              | 45.7 (45.7 to 45.7)               |
| Mongolia | 2017 | 148.3 (128.6 to 172.2)     | 67.3 (54.3 to 83.3)        | 55.6 (41.6 to 73.0)           | 5.1 (2.4 to 9.0)                | 20.4 (20.4 to 20.4)               | 501.4 (434.8 to 582.3) | 227.4 (183.6 to 281.6)     | 188.1 (140.6 to 246.7)        | 17.1 (8.1 to 30.4)              | 68.8 (68.8 to 68.8)               |
| Mongolia | 2018 | 151.6 (130.4 to 175.7)     | 69.0 (55.5 to 85.7)        | 58.3 (43.5 to 76.5)           | 5.3 (2.5 to 9.4)                | 19.1 (19.0 to 19.1)               | 512.7 (440.9 to 594.1) | 233.4 (187.6 to 289.9)     | 197.0 (146.9 to 258.7)        | 17.9 (8.4 to 31.6)              | 64.5 (64.3 to 64.6)               |
| Mongolia | 2019 | 155.9 (134.4 to 182.4)     | 70.6 (56.6 to 87.8)        | 61.0 (45.4 to 80.1)           | 5.4 (2.6 to 9.6)                | 18.9 (17.6 to 20.0)               | 527.1 (454.5 to 616.7) | 238.7 (191.5 to 296.8)     | 206.3 (153.6 to 270.7)        | 18.3 (8.7 to 32.5)              | 63.8 (59.5 to 67.5)               |
| Mongolia | 2020 | 159.7 (138.1 to 185.3)     | 72.1 (58.1 to 89.2)        | 63.0 (46.6 to 82.7)           | 5.6 (2.6 to 9.9)                | 19.1 (17.4 to 20.6)               | 539.8 (467.0 to 626.5) | 243.7 (196.5 to 301.7)     | 212.9 (157.5 to 279.5)        | 18.8 (8.9 to 33.3)              | 64.4 (59.0 to 69.7)               |
| Mongolia | 2021 | 163.6 (141.1 to 191.2)     | 74.0 (59.7 to 91.8)        | 64.5 (47.4 to 84.4)           | 5.7 (2.7 to 10.1)               | 19.3 (17.4 to 21.4)               | 553.0 (477.0 to 646.3) | 250.3 (201.7 to 310.3)     | 218.1 (160.4 to 285.4)        | 19.3 (9.1 to 34.2)              | 65.3 (58.8 to 72.3)               |
| Mongolia | 2022 | 167.2 (144.7 to 194.2)     | 75.9 (61.0 to 94.4)        | 65.4 (48.1 to 85.5)           | 5.8 (2.8 to 10.4)               | 20.1 (17.8 to 22.6)               | 565.4 (489.2 to 656.7) | 256.7 (206.4 to 319.0)     | 221.1 (162.6 to 289.2)        | 19.7 (9.3 to 35.0)              | 67.8 (60.1 to 76.2)               |
| Mongolia | 2023 | 170.8 (146.8 to 199.0)     | 77.8 (62.6 to 96.9)        | 66.0 (48.5 to 86.5)           | 5.9 (2.8 to 10.6)               | 21.1 (18.2 to 24.4)               | 577.6 (496.2 to 672.8) | 263.0 (211.6 to 327.5)     | 223.2 (164.1 to 292.4)        | 20.1 (9.5 to 35.7)              | 71.3 (61.4 to 82.5)               |
| Mongolia | 2024 | 174.7 (150.2 to 203.5)     | 79.6 (64.1 to 99.1)        | 66.7 (48.9 to 87.1)           | 6.0 (2.9 to 10.8)               | 22.2 (18.8 to 26.2)               | 590.6 (508.0 to 688.0) | 269.3 (216.6 to 335.2)     | 225.6 (165.3 to 294.6)        | 20.4 (9.7 to 36.4)              | 75.2 (63.4 to 88.7)               |
| Mongolia | 2025 | 179.6 (153.0 to 209.6)     | 81.6 (65.6 to 102.3)       | 68.5 (50.3 to 90.0)           | 6.2 (2.9 to 11.0)               | 23.3 (19.5 to 27.9)               | 607.2 (517.4 to 708.5) | 275.8 (221.8 to 345.7)     | 231.7 (169.9 to 304.3)        | 20.8 (9.9 to 37.1)              | 78.9 (65.8 to 94.4)               |
| Mongolia | 2026 | 184.8 (157.8 to 217.8)     | 83.8 (67.1 to 105.1)       | 70.5 (51.4 to 93.8)           | 6.3 (3.0 to 11.2)               | 24.2 (20.2 to 28.9)               | 624.9 (533.5 to 736.3) | 283.4 (227.0 to 355.4)     | 238.3 (173.7 to 317.0)        | 21.3 (10.1 to 37.9)             | 81.9 (68.1 to 97.7)               |
| Mongolia | 2027 | 190.5 (163.0 to 224.4)     | 86.3 (69.0 to 108.8)       | 72.6 (52.6 to 97.9)           | 6.4 (3.1 to 11.5)               | 25.1 (20.7 to 30.6)               | 644.2 (551.1 to 758.6) | 291.8 (233.3 to 367.7)     | 245.6 (177.8 to 331.0)        | 21.8 (10.3 to 38.8)             | 85.0 (69.9 to 103.6)              |
| Mongolia | 2028 | 196.7 (166.9 to 231.8)     | 89.1 (71.1 to 112.5)       | 75.0 (53.9 to 102.6)          | 6.6 (3.1 to 11.8)               | 26.0 (21.4 to 31.7)               | 665.1 (564.3 to 783.8) | 301.4 (240.5 to 380.2)     | 253.4 (182.1 to 346.9)        | 22.4 (10.6 to 39.8)             | 88.0 (72.5 to 107.2)              |
| Mongolia | 2029 | 203.2 (171.4 to 240.8)     | 92.1 (73.2 to 116.5)       | 77.4 (54.9 to 107.3)          | 6.8 (3.2 to 12.1)               | 26.9 (21.8 to 33.3)               | 686.8 (579.6 to 814.2) | 311.3 (247.5 to 394.0)     | 261.7 (185.7 to 362.6)        | 23.0 (10.9 to 41.0)             | 90.8 (73.8 to 112.7)              |

| Country  | Year | 2018 US Dollars per capita |                            |                               |                                 |                                   | 2018 PPP per capita      |                            |                               |                                 |                                   |
|----------|------|----------------------------|----------------------------|-------------------------------|---------------------------------|-----------------------------------|--------------------------|----------------------------|-------------------------------|---------------------------------|-----------------------------------|
|          |      | Health spending            | Government health spending | Out-of-pocket health spending | Prepaid private health spending | Development assistance for health | Health spending          | Government health spending | Out-of-pocket health spending | Prepaid private health spending | Development assistance for health |
| Mongolia | 2030 | 209.7 (177.0 to 247.8)     | 95.2 (75.6 to 120.3)       | 80.0 (56.1 to 112.4)          | 7.0 (3.3 to 12.5)               | 27.6 (22.3 to 34.3)               | 709.1 (598.3 to 837.9)   | 321.7 (255.7 to 406.8)     | 270.4 (189.6 to 379.9)        | 23.7 (11.2 to 42.2)             | 93.3 (75.4 to 115.9)              |
| Mongolia | 2031 | 216.5 (181.5 to 256.8)     | 98.3 (77.9 to 124.6)       | 82.7 (57.3 to 118.1)          | 7.2 (3.4 to 12.9)               | 28.3 (22.6 to 35.9)               | 731.8 (613.8 to 868.2)   | 332.3 (263.2 to 421.3)     | 279.4 (193.7 to 399.4)        | 24.4 (11.5 to 43.5)             | 95.7 (76.3 to 121.5)              |
| Mongolia | 2032 | 223.4 (185.8 to 265.7)     | 101.6 (80.6 to 128.9)      | 85.5 (58.6 to 123.6)          | 7.4 (3.5 to 13.3)               | 29.0 (22.9 to 37.0)               | 755.4 (628.1 to 898.3)   | 343.4 (272.6 to 435.9)     | 288.9 (198.2 to 417.7)        | 25.1 (11.9 to 44.9)             | 97.9 (77.3 to 125.0)              |
| Mongolia | 2033 | 230.7 (191.5 to 279.6)     | 105.0 (83.1 to 133.2)      | 88.4 (60.0 to 128.9)          | 7.7 (3.6 to 13.7)               | 29.6 (23.1 to 38.5)               | 779.8 (647.3 to 945.2)   | 355.0 (281.0 to 450.5)     | 298.8 (202.9 to 435.9)        | 26.0 (12.3 to 46.4)             | 100.1 (78.2 to 130.1)             |
| Mongolia | 2034 | 238.2 (195.4 to 290.8)     | 108.6 (85.8 to 138.9)      | 91.3 (61.6 to 134.6)          | 7.9 (3.8 to 14.1)               | 30.3 (23.3 to 40.0)               | 805.4 (660.7 to 983.2)   | 367.1 (290.2 to 469.7)     | 308.8 (208.2 to 455.1)        | 26.8 (12.7 to 47.8)             | 102.6 (78.8 to 135.1)             |
| Mongolia | 2035 | 245.8 (201.4 to 301.4)     | 112.2 (88.5 to 144.3)      | 94.3 (63.1 to 140.1)          | 8.2 (3.9 to 14.5)               | 31.1 (23.6 to 41.6)               | 830.9 (680.8 to 1019.1)  | 379.3 (299.4 to 487.7)     | 318.8 (213.5 to 473.7)        | 27.7 (13.1 to 49.2)             | 105.1 (79.7 to 140.7)             |
| Mongolia | 2036 | 253.3 (207.9 to 314.4)     | 115.8 (90.3 to 149.2)      | 97.2 (64.7 to 145.8)          | 8.4 (4.0 to 15.0)               | 31.9 (23.8 to 42.9)               | 856.3 (703.0 to 1062.9)  | 391.4 (305.4 to 504.4)     | 328.6 (218.6 to 492.9)        | 28.5 (13.5 to 50.6)             | 107.7 (80.4 to 144.9)             |
| Mongolia | 2037 | 260.8 (212.1 to 319.3)     | 119.4 (93.3 to 154.8)      | 100.1 (66.2 to 152.1)         | 8.7 (4.1 to 15.4)               | 32.6 (24.0 to 44.7)               | 881.8 (717.1 to 1079.6)  | 403.8 (315.5 to 523.3)     | 338.4 (223.9 to 514.1)        | 29.4 (14.0 to 52.2)             | 110.2 (81.2 to 151.1)             |
| Mongolia | 2038 | 268.4 (217.6 to 333.6)     | 123.0 (95.8 to 159.4)      | 102.9 (67.7 to 157.6)         | 9.0 (4.2 to 15.9)               | 33.5 (24.2 to 47.9)               | 907.4 (735.6 to 1128.0)  | 415.9 (323.9 to 538.8)     | 348.0 (228.9 to 533.0)        | 30.3 (14.3 to 53.7)             | 113.2 (81.9 to 161.8)             |
| Mongolia | 2039 | 275.9 (221.4 to 346.1)     | 126.6 (98.1 to 164.1)      | 105.7 (69.1 to 163.0)         | 9.2 (4.4 to 16.3)               | 34.3 (24.5 to 48.5)               | 932.6 (748.5 to 1170.3)  | 428.0 (331.6 to 554.8)     | 357.5 (233.8 to 550.9)        | 31.2 (14.7 to 55.3)             | 116.0 (82.9 to 163.9)             |
| Mongolia | 2040 | 283.4 (227.9 to 358.6)     | 130.2 (100.6 to 169.5)     | 108.5 (70.6 to 168.1)         | 9.5 (4.5 to 16.8)               | 35.3 (25.3 to 50.7)               | 958.3 (770.5 to 1212.3)  | 440.1 (340.1 to 573.2)     | 366.8 (238.7 to 568.2)        | 32.0 (15.1 to 56.9)             | 119.3 (85.5 to 171.3)             |
| Mongolia | 2041 | 290.9 (231.3 to 368.6)     | 133.6 (102.8 to 174.3)     | 111.2 (72.0 to 173.0)         | 9.7 (4.6 to 17.3)               | 36.3 (25.7 to 52.0)               | 983.5 (782.1 to 1246.1)  | 451.8 (347.4 to 589.3)     | 375.9 (243.5 to 584.8)        | 32.9 (15.5 to 58.6)             | 122.9 (87.1 to 175.9)             |
| Mongolia | 2042 | 298.5 (236.3 to 380.8)     | 137.1 (104.9 to 179.7)     | 113.8 (73.5 to 177.7)         | 10.0 (4.7 to 17.8)              | 37.5 (26.0 to 54.8)               | 1009.2 (799.0 to 1287.5) | 463.7 (354.7 to 607.5)     | 384.9 (248.4 to 600.7)        | 33.8 (15.9 to 60.2)             | 126.7 (88.0 to 185.2)             |
| Mongolia | 2043 | 306.0 (240.9 to 392.4)     | 140.6 (107.6 to 184.4)     | 116.4 (74.9 to 182.1)         | 10.3 (4.8 to 18.3)              | 38.6 (26.5 to 57.6)               | 1034.4 (814.4 to 1326.8) | 475.5 (363.6 to 623.5)     | 393.6 (253.1 to 615.7)        | 34.8 (16.3 to 61.9)             | 130.6 (89.7 to 194.6)             |
| Mongolia | 2044 | 313.4 (246.5 to 400.8)     | 144.0 (109.8 to 188.6)     | 118.9 (76.3 to 186.7)         | 10.5 (4.9 to 18.8)              | 39.9 (27.0 to 59.9)               | 1059.7 (833.5 to 1355.0) | 486.9 (371.2 to 637.8)     | 402.1 (257.8 to 631.1)        | 35.7 (16.7 to 63.5)             | 135.0 (91.4 to 202.6)             |
| Mongolia | 2045 | 321.0 (252.7 to 404.5)     | 147.4 (112.6 to 194.5)     | 121.4 (77.6 to 191.3)         | 10.8 (5.1 to 19.3)              | 41.3 (27.8 to 65.0)               | 1085.1 (854.3 to 1367.6) | 498.5 (380.6 to 657.5)     | 410.3 (262.5 to 646.7)        | 36.6 (17.2 to 65.2)             | 139.8 (94.0 to 219.9)             |
| Mongolia | 2046 | 328.5 (259.7 to 413.9)     | 150.9 (114.8 to 199.5)     | 123.7 (79.0 to 195.1)         | 11.1 (5.2 to 19.8)              | 42.8 (28.4 to 67.2)               | 1110.5 (878.1 to 1399.3) | 510.1 (388.2 to 674.6)     | 418.1 (267.1 to 659.5)        | 37.5 (17.6 to 66.9)             | 144.8 (96.1 to 227.1)             |
| Mongolia | 2047 | 335.9 (264.7 to 425.9)     | 154.2 (117.4 to 205.3)     | 125.9 (80.4 to 198.2)         | 11.4 (5.3 to 20.4)              | 44.5 (29.7 to 71.1)               | 1135.6 (894.9 to 1440.1) | 521.3 (397.0 to 694.2)     | 425.5 (272.0 to 670.1)        | 38.4 (18.0 to 68.8)             | 150.3 (100.5 to 240.3)            |
| Mongolia | 2048 | 343.7 (271.6 to 435.8)     | 157.7 (119.9 to 210.7)     | 128.1 (81.9 to 202.1)         | 11.6 (5.5 to 20.9)              | 46.3 (31.2 to 75.6)               | 1162.2 (918.2 to 1473.5) | 533.2 (405.4 to 712.4)     | 433.1 (276.9 to 683.4)        | 39.4 (18.5 to 70.5)             | 156.6 (105.4 to 255.4)            |
| Mongolia | 2049 | 351.6 (277.9 to 440.9)     | 161.3 (122.0 to 215.3)     | 130.3 (83.2 to 206.1)         | 11.9 (5.6 to 21.3)              | 48.1 (32.2 to 79.7)               | 1188.7 (939.5 to 1490.6) | 545.2 (412.4 to 728.1)     | 440.5 (281.3 to 697.0)        | 40.3 (18.9 to 72.0)             | 162.8 (108.8 to 269.3)            |
| Mongolia | 2050 | 359.8 (283.2 to 452.8)     | 165.1 (124.8 to 222.0)     | 132.4 (84.4 to 210.2)         | 12.2 (5.7 to 21.8)              | 50.1 (31.9 to 85.9)               | 1216.4 (957.4 to 1530.8) | 558.1 (421.8 to 750.5)     | 447.7 (285.4 to 710.8)        | 41.2 (19.3 to 73.7)             | 169.4 (107.8 to 290.4)            |

| Country    | Year | 2018 US Dollars per capita |                            |                               |                                 |                                   | 2018 PPP per capita       |                            |                               |                                 |                                   |
|------------|------|----------------------------|----------------------------|-------------------------------|---------------------------------|-----------------------------------|---------------------------|----------------------------|-------------------------------|---------------------------------|-----------------------------------|
|            |      | Health spending            | Government health spending | Out-of-pocket health spending | Prepaid private health spending | Development assistance for health | Health spending           | Government health spending | Out-of-pocket health spending | Prepaid private health spending | Development assistance for health |
| Montenegro | 1995 | 560.3 (512.7 to 606.9)     | 402.7 (367.8 to 441.3)     | 154.8 (127.5 to 186.4)        | 1.9 (0.9 to 3.7)                | 0.8 (0.8 to 0.8)                  | 1231.8 (1127.1 to 1334.3) | 885.4 (808.6 to 970.2)     | 340.4 (280.3 to 409.8)        | 4.2 (2.0 to 8.2)                | 1.8 (1.8 to 1.8)                  |
| Montenegro | 1996 | 588.3 (547.2 to 629.5)     | 428.2 (394.6 to 460.9)     | 158.0 (133.7 to 186.6)        | 2.0 (0.9 to 4.0)                | 0.1 (0.1 to 0.1)                  | 1293.4 (1203.1 to 1384.1) | 941.4 (867.5 to 1013.4)    | 347.4 (293.9 to 410.3)        | 4.4 (2.1 to 8.8)                | 0.2 (0.2 to 0.2)                  |
| Montenegro | 1997 | 578.6 (542.8 to 617.3)     | 420.4 (390.0 to 450.6)     | 156.0 (134.5 to 182.3)        | 2.0 (0.9 to 3.8)                | 0.2 (0.2 to 0.2)                  | 1272.0 (1193.3 to 1357.1) | 924.3 (857.3 to 990.7)     | 343.0 (295.7 to 400.8)        | 4.3 (2.0 to 8.4)                | 0.4 (0.4 to 0.4)                  |
| Montenegro | 1998 | 580.0 (545.3 to 618.9)     | 421.5 (394.0 to 453.3)     | 156.5 (134.9 to 180.9)        | 1.9 (0.9 to 3.7)                | 0.1 (0.1 to 0.1)                  | 1275.3 (1198.9 to 1360.7) | 926.7 (866.3 to 996.5)     | 344.1 (296.6 to 397.8)        | 4.1 (1.9 to 8.2)                | 0.3 (0.3 to 0.3)                  |
| Montenegro | 1999 | 544.1 (511.6 to 578.3)     | 391.2 (364.3 to 419.9)     | 151.1 (131.1 to 174.1)        | 1.7 (0.8 to 3.4)                | 0.2 (0.2 to 0.2)                  | 1196.3 (1124.7 to 1271.4) | 860.1 (801.0 to 923.3)     | 332.2 (288.3 to 382.7)        | 3.7 (1.7 to 7.4)                | 0.3 (0.3 to 0.3)                  |
| Montenegro | 2000 | 546.5 (512.3 to 583.7)     | 392.4 (365.7 to 422.4)     | 152.2 (132.4 to 174.7)        | 1.7 (0.8 to 3.2)                | 0.3 (0.3 to 0.3)                  | 1201.6 (1126.4 to 1283.3) | 862.7 (804.1 to 928.7)     | 334.6 (291.1 to 384.1)        | 3.7 (1.7 to 7.1)                | 0.7 (0.7 to 0.7)                  |
| Montenegro | 2001 | 539.2 (505.8 to 576.4)     | 385.0 (358.3 to 413.8)     | 152.1 (132.0 to 175.6)        | 1.9 (0.9 to 3.6)                | 0.2 (0.2 to 0.2)                  | 1185.5 (1112.1 to 1267.1) | 846.5 (787.7 to 909.8)     | 334.5 (290.2 to 386.0)        | 4.1 (1.9 to 7.9)                | 0.4 (0.4 to 0.4)                  |
| Montenegro | 2002 | 526.7 (493.9 to 565.2)     | 372.7 (347.3 to 403.1)     | 150.5 (130.7 to 172.8)        | 2.0 (0.9 to 3.8)                | 1.4 (1.4 to 1.4)                  | 1158.0 (1086.0 to 1242.6) | 819.5 (763.5 to 886.3)     | 330.9 (287.3 to 379.9)        | 4.5 (2.0 to 8.4)                | 3.2 (3.2 to 3.2)                  |
| Montenegro | 2003 | 516.3 (483.6 to 552.1)     | 364.0 (339.3 to 394.1)     | 149.7 (130.4 to 173.1)        | 2.2 (1.0 to 4.1)                | 0.4 (0.4 to 0.4)                  | 1135.0 (1063.3 to 1213.9) | 800.2 (746.0 to 866.6)     | 329.2 (286.6 to 380.7)        | 4.7 (2.2 to 9.0)                | 0.9 (0.9 to 0.9)                  |
| Montenegro | 2004 | 519.6 (485.2 to 553.6)     | 361.1 (334.6 to 388.7)     | 148.8 (129.9 to 172.4)        | 2.2 (1.0 to 4.4)                | 7.5 (7.5 to 7.5)                  | 1142.4 (1066.7 to 1217.1) | 794.0 (735.6 to 854.5)     | 327.0 (285.6 to 379.1)        | 4.9 (2.3 to 9.6)                | 16.4 (16.4 to 16.4)               |
| Montenegro | 2005 | 507.7 (473.1 to 540.4)     | 356.8 (330.7 to 384.1)     | 146.0 (127.2 to 168.2)        | 2.3 (1.1 to 4.5)                | 2.6 (2.6 to 2.6)                  | 1116.2 (1040.2 to 1188.1) | 784.4 (727.0 to 844.5)     | 321.1 (279.6 to 369.7)        | 5.0 (2.4 to 9.8)                | 5.7 (5.7 to 5.7)                  |
| Montenegro | 2006 | 525.8 (492.0 to 558.7)     | 363.1 (336.7 to 391.1)     | 145.2 (127.0 to 165.4)        | 2.4 (1.1 to 4.6)                | 15.2 (15.2 to 15.2)               | 1156.1 (1081.8 to 1228.4) | 798.4 (740.3 to 859.9)     | 319.2 (279.2 to 363.7)        | 5.2 (2.4 to 10.1)               | 33.3 (33.3 to 33.3)               |
| Montenegro | 2007 | 537.2 (502.4 to 572.2)     | 375.5 (348.3 to 405.3)     | 145.7 (127.4 to 165.9)        | 2.5 (1.1 to 4.8)                | 13.5 (13.5 to 13.5)               | 1181.0 (1104.5 to 1257.9) | 825.6 (765.8 to 891.2)     | 320.3 (280.0 to 364.8)        | 5.4 (2.4 to 10.5)               | 29.7 (29.7 to 29.7)               |
| Montenegro | 2008 | 562.7 (527.9 to 601.2)     | 395.9 (367.1 to 425.8)     | 147.7 (128.6 to 169.4)        | 2.5 (1.1 to 4.8)                | 16.6 (16.6 to 16.6)               | 1237.1 (1160.5 to 1321.7) | 870.4 (807.2 to 936.2)     | 324.7 (282.7 to 372.5)        | 5.4 (2.5 to 10.6)               | 36.6 (36.6 to 36.6)               |
| Montenegro | 2009 | 542.5 (506.5 to 581.1)     | 394.9 (365.6 to 425.7)     | 140.4 (122.2 to 161.4)        | 2.4 (1.1 to 4.6)                | 4.8 (4.8 to 4.8)                  | 1192.7 (1113.5 to 1277.7) | 868.3 (803.8 to 936.0)     | 308.8 (268.7 to 354.9)        | 5.2 (2.5 to 10.1)               | 10.5 (10.5 to 10.5)               |
| Montenegro | 2010 | 546.6 (512.1 to 583.1)     | 400.0 (371.5 to 430.2)     | 138.8 (120.5 to 160.5)        | 2.3 (1.1 to 4.5)                | 5.4 (5.4 to 5.4)                  | 1201.6 (1125.8 to 1282.0) | 879.5 (816.7 to 945.8)     | 305.2 (264.9 to 352.9)        | 5.2 (2.5 to 9.8)                | 11.8 (11.8 to 11.8)               |
| Montenegro | 2011 | 552.3 (517.1 to 588.0)     | 402.9 (375.5 to 432.6)     | 139.8 (121.7 to 161.5)        | 2.3 (1.1 to 4.3)                | 7.3 (7.3 to 7.3)                  | 1214.3 (1136.9 to 1292.7) | 885.7 (825.5 to 951.1)     | 307.5 (267.5 to 355.1)        | 5.1 (2.4 to 9.4)                | 16.1 (16.1 to 16.1)               |
| Montenegro | 2012 | 534.5 (499.5 to 567.5)     | 389.7 (361.8 to 418.2)     | 137.4 (119.4 to 157.9)        | 2.2 (1.1 to 4.2)                | 5.2 (5.2 to 5.2)                  | 1175.2 (1098.1 to 1247.7) | 856.7 (795.3 to 919.4)     | 302.1 (262.5 to 347.1)        | 4.9 (2.3 to 9.2)                | 11.5 (11.5 to 11.5)               |
| Montenegro | 2013 | 538.3 (503.5 to 572.5)     | 393.1 (363.9 to 420.8)     | 138.9 (121.1 to 158.9)        | 2.2 (1.1 to 4.1)                | 4.1 (4.1 to 4.1)                  | 1183.4 (1107.1 to 1258.6) | 864.3 (800.1 to 925.2)     | 305.4 (266.2 to 349.3)        | 4.8 (2.4 to 9.1)                | 9.0 (9.0 to 9.0)                  |
| Montenegro | 2014 | 546.2 (510.6 to 583.3)     | 400.4 (370.6 to 431.2)     | 140.8 (122.3 to 162.4)        | 2.2 (1.0 to 4.0)                | 2.8 (2.8 to 2.8)                  | 1200.9 (1122.6 to 1282.3) | 880.4 (814.8 to 947.9)     | 309.6 (268.8 to 357.0)        | 4.8 (2.3 to 8.7)                | 6.2 (6.2 to 6.2)                  |
| Montenegro | 2015 | 573.7 (533.9 to 615.9)     | 424.7 (391.2 to 460.8)     | 144.8 (123.1 to 169.7)        | 2.2 (1.1 to 4.1)                | 2.0 (2.0 to 2.0)                  | 1261.3 (1173.7 to 1354.0) | 933.8 (860.0 to 1013.2)    | 318.3 (270.7 to 373.1)        | 4.9 (2.4 to 9.0)                | 4.3 (4.3 to 4.3)                  |

| Country    | Year | 2018 US Dollars per capita |                            |                               |                                 |                                   | 2018 PPP per capita       |                            |                               |                                 |                                   |
|------------|------|----------------------------|----------------------------|-------------------------------|---------------------------------|-----------------------------------|---------------------------|----------------------------|-------------------------------|---------------------------------|-----------------------------------|
|            |      | Health spending            | Government health spending | Out-of-pocket health spending | Prepaid private health spending | Development assistance for health | Health spending           | Government health spending | Out-of-pocket health spending | Prepaid private health spending | Development assistance for health |
| Montenegro | 2016 | 602.8 (553.9 to 656.1)     | 448.5 (407.8 to 494.6)     | 148.3 (123.3 to 177.4)        | 2.3 (1.1 to 4.2)                | 3.8 (3.8 to 3.8)                  | 1325.3 (1217.9 to 1442.5) | 986.0 (896.7 to 1087.4)    | 326.0 (271.1 to 390.0)        | 5.0 (2.4 to 9.2)                | 8.3 (8.3 to 8.3)                  |
| Montenegro | 2017 | 629.9 (577.5 to 687.0)     | 474.7 (431.0 to 524.2)     | 152.5 (127.7 to 183.1)        | 2.4 (1.2 to 4.4)                | 0.3 (0.3 to 0.3)                  | 1385.0 (1269.6 to 1510.4) | 1043.7 (947.6 to 1152.5)   | 335.2 (280.6 to 402.6)        | 5.3 (2.6 to 9.8)                | 0.7 (0.7 to 0.7)                  |
| Montenegro | 2018 | 645.5 (592.2 to 702.9)     | 488.2 (441.2 to 541.1)     | 154.5 (129.0 to 185.4)        | 2.5 (1.2 to 4.5)                | 0.3 (0.3 to 0.3)                  | 1419.3 (1302.0 to 1545.3) | 1073.4 (970.1 to 1189.7)   | 339.8 (283.6 to 407.7)        | 5.4 (2.6 to 10.0)               | 0.7 (0.7 to 0.7)                  |
| Montenegro | 2019 | 659.7 (606.2 to 720.0)     | 500.5 (453.6 to 554.6)     | 156.4 (130.1 to 187.5)        | 2.5 (1.2 to 4.6)                | 0.3 (0.3 to 0.3)                  | 1450.5 (1332.7 to 1582.8) | 1100.4 (997.3 to 1219.3)   | 343.8 (286.0 to 412.2)        | 5.5 (2.7 to 10.2)               | 0.7 (0.7 to 0.8)                  |
| Montenegro | 2020 | 674.1 (617.5 to 736.5)     | 512.9 (465.4 to 568.9)     | 158.3 (130.7 to 189.6)        | 2.6 (1.2 to 4.7)                | 0.3 (0.3 to 0.4)                  | 1482.0 (1357.6 to 1619.3) | 1127.7 (1023.1 to 1250.7)  | 348.0 (287.4 to 417.0)        | 5.6 (2.7 to 10.4)               | 0.7 (0.7 to 0.8)                  |
| Montenegro | 2021 | 688.7 (628.8 to 752.7)     | 525.6 (475.3 to 585.2)     | 160.2 (132.8 to 192.3)        | 2.6 (1.3 to 4.8)                | 0.3 (0.3 to 0.4)                  | 1514.2 (1382.4 to 1654.8) | 1155.5 (1045.0 to 1286.7)  | 352.2 (292.1 to 422.7)        | 5.7 (2.8 to 10.7)               | 0.8 (0.7 to 0.8)                  |
| Montenegro | 2022 | 703.4 (641.7 to 768.3)     | 538.3 (486.3 to 599.7)     | 162.1 (134.2 to 194.9)        | 2.7 (1.3 to 5.0)                | 0.4 (0.3 to 0.4)                  | 1546.4 (1410.9 to 1689.1) | 1183.4 (1069.2 to 1318.5)  | 356.3 (295.1 to 428.5)        | 5.9 (2.9 to 10.9)               | 0.8 (0.7 to 0.9)                  |
| Montenegro | 2023 | 717.9 (658.9 to 787.9)     | 550.8 (497.5 to 613.5)     | 164.0 (136.4 to 197.8)        | 2.7 (1.3 to 5.1)                | 0.4 (0.3 to 0.4)                  | 1578.3 (1448.7 to 1732.2) | 1211.0 (1093.7 to 1348.7)  | 360.6 (299.8 to 435.0)        | 6.0 (2.9 to 11.1)               | 0.8 (0.7 to 0.9)                  |
| Montenegro | 2024 | 732.4 (669.2 to 803.5)     | 563.3 (508.2 to 626.1)     | 165.9 (137.5 to 201.3)        | 2.8 (1.4 to 5.1)                | 0.4 (0.3 to 0.4)                  | 1610.1 (1471.3 to 1766.6) | 1238.4 (1117.3 to 1376.6)  | 364.8 (302.3 to 442.5)        | 6.1 (3.0 to 11.3)               | 0.8 (0.7 to 1.0)                  |
| Montenegro | 2025 | 747.9 (680.4 to 822.6)     | 576.7 (521.4 to 643.3)     | 168.0 (139.7 to 203.4)        | 2.8 (1.4 to 5.2)                | 0.4 (0.3 to 0.5)                  | 1644.2 (1495.8 to 1808.6) | 1267.8 (1146.4 to 1414.4)  | 369.3 (307.1 to 447.1)        | 6.2 (3.0 to 11.5)               | 0.9 (0.7 to 1.0)                  |
| Montenegro | 2026 | 764.2 (693.7 to 840.6)     | 590.8 (530.9 to 657.8)     | 170.1 (140.6 to 205.3)        | 2.9 (1.4 to 5.4)                | 0.4 (0.3 to 0.5)                  | 1680.0 (1525.2 to 1848.1) | 1298.9 (1167.2 to 1446.2)  | 373.9 (309.1 to 451.3)        | 6.4 (3.1 to 11.8)               | 0.9 (0.8 to 1.0)                  |
| Montenegro | 2027 | 780.0 (707.0 to 858.5)     | 604.5 (543.5 to 674.4)     | 172.1 (141.4 to 208.8)        | 3.0 (1.4 to 5.5)                | 0.4 (0.4 to 0.5)                  | 1714.8 (1554.3 to 1887.4) | 1329.0 (1194.9 to 1482.8)  | 378.4 (310.8 to 459.1)        | 6.5 (3.2 to 12.1)               | 0.9 (0.8 to 1.1)                  |
| Montenegro | 2028 | 796.1 (723.2 to 878.5)     | 618.4 (556.3 to 690.6)     | 174.3 (142.0 to 213.4)        | 3.0 (1.5 to 5.6)                | 0.4 (0.4 to 0.5)                  | 1750.3 (1590.1 to 1931.4) | 1359.6 (1223.0 to 1518.4)  | 383.2 (312.2 to 469.1)        | 6.6 (3.3 to 12.3)               | 1.0 (0.8 to 1.1)                  |
| Montenegro | 2029 | 812.7 (733.4 to 903.1)     | 632.6 (567.4 to 705.7)     | 176.5 (143.2 to 216.5)        | 3.1 (1.5 to 5.7)                | 0.4 (0.4 to 0.5)                  | 1786.7 (1612.3 to 1985.4) | 1390.8 (1247.5 to 1551.6)  | 388.1 (314.8 to 476.0)        | 6.8 (3.3 to 12.6)               | 1.0 (0.8 to 1.2)                  |
| Montenegro | 2030 | 829.6 (748.7 to 920.4)     | 647.1 (580.0 to 722.5)     | 178.9 (145.1 to 220.7)        | 3.1 (1.5 to 5.9)                | 0.5 (0.4 to 0.6)                  | 1823.9 (1646.0 to 2023.5) | 1422.6 (1275.2 to 1588.5)  | 393.3 (319.0 to 485.2)        | 6.9 (3.4 to 12.9)               | 1.0 (0.8 to 1.2)                  |
| Montenegro | 2031 | 846.4 (763.6 to 935.6)     | 661.4 (593.4 to 739.6)     | 181.3 (145.7 to 224.6)        | 3.2 (1.6 to 6.0)                | 0.5 (0.4 to 0.6)                  | 1860.9 (1678.7 to 2057.0) | 1454.1 (1304.6 to 1626.1)  | 398.7 (320.3 to 493.8)        | 7.1 (3.5 to 13.2)               | 1.0 (0.8 to 1.3)                  |
| Montenegro | 2032 | 863.6 (778.2 to 955.8)     | 675.9 (603.3 to 755.1)     | 183.9 (148.0 to 228.9)        | 3.3 (1.6 to 6.1)                | 0.5 (0.4 to 0.6)                  | 1898.7 (1711.0 to 2101.3) | 1486.1 (1326.5 to 1660.2)  | 404.3 (325.4 to 503.2)        | 7.2 (3.6 to 13.5)               | 1.1 (0.9 to 1.4)                  |
| Montenegro | 2033 | 881.4 (793.6 to 973.5)     | 691.0 (617.6 to 772.2)     | 186.6 (148.3 to 233.9)        | 3.4 (1.7 to 6.3)                | 0.5 (0.4 to 0.6)                  | 1937.8 (1744.9 to 2140.2) | 1519.1 (1357.8 to 1697.8)  | 410.2 (326.0 to 514.3)        | 7.4 (3.6 to 13.8)               | 1.1 (0.9 to 1.4)                  |
| Montenegro | 2034 | 899.8 (813.5 to 998.8)     | 706.5 (630.3 to 792.1)     | 189.3 (149.3 to 238.5)        | 3.5 (1.7 to 6.4)                | 0.5 (0.4 to 0.7)                  | 1978.2 (1788.6 to 2195.9) | 1553.2 (1385.8 to 1741.5)  | 416.2 (328.3 to 524.4)        | 7.6 (3.7 to 14.2)               | 1.1 (0.9 to 1.5)                  |
| Montenegro | 2035 | 917.9 (823.8 to 1020.1)    | 721.8 (643.9 to 809.5)     | 192.1 (150.3 to 243.2)        | 3.5 (1.7 to 6.6)                | 0.5 (0.4 to 0.7)                  | 2018.1 (1811.2 to 2242.7) | 1586.9 (1415.7 to 1779.7)  | 422.3 (330.5 to 534.7)        | 7.8 (3.8 to 14.5)               | 1.2 (0.9 to 1.5)                  |
| Montenegro | 2036 | 936.6 (839.8 to 1037.3)    | 737.5 (653.3 to 829.1)     | 194.9 (152.0 to 248.0)        | 3.6 (1.8 to 6.7)                | 0.6 (0.4 to 0.7)                  | 2059.1 (1846.3 to 2280.6) | 1621.4 (1436.4 to 1822.8)  | 428.5 (334.2 to 545.3)        | 7.9 (3.9 to 14.8)               | 1.2 (0.9 to 1.6)                  |

| Country    | Year | 2018 US Dollars per capita |                            |                               |                                 |                                   | 2018 PPP per capita       |                            |                               |                                 |                                   |
|------------|------|----------------------------|----------------------------|-------------------------------|---------------------------------|-----------------------------------|---------------------------|----------------------------|-------------------------------|---------------------------------|-----------------------------------|
|            |      | Health spending            | Government health spending | Out-of-pocket health spending | Prepaid private health spending | Development assistance for health | Health spending           | Government health spending | Out-of-pocket health spending | Prepaid private health spending | Development assistance for health |
| Montenegro | 2037 | 955.4 (855.7 to 1062.7)    | 753.3 (667.6 to 845.6)     | 197.8 (153.3 to 252.9)        | 3.7 (1.8 to 6.9)                | 0.6 (0.4 to 0.8)                  | 2100.5 (1881.3 to 2336.4) | 1656.2 (1467.8 to 1859.2)  | 434.9 (336.9 to 556.0)        | 8.1 (4.0 to 15.1)               | 1.2 (1.0 to 1.7)                  |
| Montenegro | 2038 | 974.5 (874.8 to 1085.7)    | 769.4 (680.8 to 864.9)     | 200.8 (154.6 to 257.6)        | 3.8 (1.8 to 7.0)                | 0.6 (0.4 to 0.8)                  | 2142.6 (1923.4 to 2387.1) | 1691.5 (1496.7 to 1901.6)  | 441.5 (340.0 to 566.3)        | 8.3 (4.1 to 15.4)               | 1.3 (1.0 to 1.8)                  |
| Montenegro | 2039 | 994.0 (887.8 to 1110.9)    | 785.7 (692.1 to 883.6)     | 203.8 (156.1 to 261.7)        | 3.9 (1.9 to 7.2)                | 0.6 (0.5 to 0.8)                  | 2185.3 (1951.9 to 2442.3) | 1727.4 (1521.6 to 1942.7)  | 448.1 (343.3 to 575.5)        | 8.5 (4.1 to 15.8)               | 1.3 (1.0 to 1.9)                  |
| Montenegro | 2040 | 1013.3 (905.0 to 1133.6)   | 801.9 (705.1 to 903.7)     | 206.9 (157.8 to 266.0)        | 3.9 (1.9 to 7.3)                | 0.6 (0.5 to 0.9)                  | 2227.9 (1989.8 to 2492.4) | 1763.0 (1550.3 to 1986.8)  | 454.8 (346.9 to 584.8)        | 8.7 (4.2 to 16.1)               | 1.4 (1.0 to 1.9)                  |
| Montenegro | 2041 | 1032.3 (916.7 to 1152.5)   | 817.7 (716.1 to 923.0)     | 210.0 (159.6 to 270.8)        | 4.0 (2.0 to 7.5)                | 0.6 (0.0 to 0.9)                  | 2269.6 (2015.4 to 2533.9) | 1797.8 (1574.4 to 2029.2)  | 461.6 (350.8 to 595.3)        | 8.8 (4.3 to 16.4)               | 1.4 (0.0 to 2.0)                  |
| Montenegro | 2042 | 1052.4 (934.8 to 1185.8)   | 834.4 (732.1 to 945.6)     | 213.2 (161.6 to 276.1)        | 4.1 (2.0 to 7.6)                | 0.7 (0.0 to 1.0)                  | 2313.7 (2055.2 to 2607.0) | 1834.4 (1609.6 to 2078.9)  | 468.8 (355.4 to 607.1)        | 9.0 (4.4 to 16.8)               | 1.4 (0.0 to 2.1)                  |
| Montenegro | 2043 | 1073.1 (945.1 to 1205.1)   | 851.7 (744.8 to 969.6)     | 216.6 (163.8 to 280.5)        | 4.2 (2.0 to 7.8)                | 0.7 (0.0 to 1.0)                  | 2359.2 (2077.8 to 2649.4) | 1872.4 (1637.6 to 2131.8)  | 476.1 (360.1 to 616.8)        | 9.2 (4.5 to 17.1)               | 1.5 (0.0 to 2.2)                  |
| Montenegro | 2044 | 1094.5 (959.9 to 1226.1)   | 869.5 (757.9 to 994.8)     | 220.0 (166.1 to 285.4)        | 4.3 (2.1 to 8.0)                | 0.7 (0.0 to 1.0)                  | 2406.3 (2110.4 to 2695.6) | 1911.7 (1666.2 to 2187.0)  | 483.7 (365.2 to 627.4)        | 9.4 (4.6 to 17.5)               | 1.5 (0.0 to 2.3)                  |
| Montenegro | 2045 | 1116.0 (979.5 to 1261.2)   | 887.4 (768.5 to 1015.8)    | 223.5 (168.6 to 290.6)        | 4.4 (2.1 to 8.1)                | 0.7 (0.0 to 1.1)                  | 2453.5 (2153.5 to 2772.9) | 1951.0 (1689.6 to 2233.3)  | 491.4 (370.6 to 638.9)        | 9.6 (4.7 to 17.8)               | 1.5 (0.0 to 2.5)                  |
| Montenegro | 2046 | 1137.1 (995.0 to 1285.2)   | 904.9 (782.5 to 1036.6)    | 227.0 (171.1 to 295.2)        | 4.5 (2.2 to 8.3)                | 0.7 (0.0 to 1.2)                  | 2500.0 (2187.5 to 2825.5) | 1989.5 (1720.5 to 2279.0)  | 499.1 (376.2 to 649.1)        | 9.8 (4.7 to 18.2)               | 1.6 (0.0 to 2.6)                  |
| Montenegro | 2047 | 1158.4 (1013.1 to 1300.3)  | 922.6 (793.7 to 1061.3)    | 230.5 (173.9 to 300.1)        | 4.5 (2.2 to 8.4)                | 0.7 (0.0 to 1.2)                  | 2546.8 (2227.4 to 2858.7) | 2028.4 (1744.9 to 2333.2)  | 506.8 (382.3 to 659.7)        | 10.0 (4.8 to 18.5)              | 1.6 (0.0 to 2.7)                  |
| Montenegro | 2048 | 1178.9 (1025.4 to 1332.0)  | 939.5 (806.0 to 1085.7)    | 234.0 (176.6 to 304.9)        | 4.6 (2.2 to 8.6)                | 0.7 (0.0 to 1.3)                  | 2591.9 (2254.5 to 2928.4) | 2065.5 (1772.0 to 2386.9)  | 514.6 (388.3 to 670.3)        | 10.2 (4.9 to 18.9)              | 1.6 (0.0 to 2.9)                  |
| Montenegro | 2049 | 1200.5 (1044.0 to 1356.4)  | 957.3 (817.4 to 1107.3)    | 237.7 (179.6 to 309.9)        | 4.7 (2.3 to 8.7)                | 0.8 (0.0 to 1.4)                  | 2639.3 (2295.2 to 2982.0) | 2104.8 (1797.0 to 2434.5)  | 522.5 (394.8 to 681.2)        | 10.4 (5.0 to 19.2)              | 1.7 (0.0 to 3.0)                  |
| Montenegro | 2050 | 1221.9 (1070.9 to 1394.4)  | 975.0 (827.8 to 1132.6)    | 241.3 (182.4 to 314.9)        | 4.8 (2.3 to 8.9)                | 0.8 (0.0 to 1.4)                  | 2686.4 (2354.5 to 3065.7) | 2143.6 (1819.9 to 2490.1)  | 530.6 (400.9 to 692.2)        | 10.6 (5.1 to 19.6)              | 1.7 (0.0 to 3.1)                  |
| Morocco    | 1995 | 46.4 (38.1 to 56.1)        | 13.8 (10.7 to 17.5)        | 28.8 (21.3 to 37.9)           | 2.4 (1.1 to 4.3)                | 1.5 (1.5 to 1.5)                  | 125.5 (103.0 to 151.7)    | 37.3 (28.9 to 47.4)        | 77.9 (57.7 to 102.7)          | 6.4 (3.0 to 11.8)               | 3.9 (3.9 to 3.9)                  |
| Morocco    | 1996 | 51.6 (42.7 to 61.4)        | 15.0 (11.7 to 19.1)        | 31.3 (23.6 to 40.1)           | 3.3 (1.5 to 5.9)                | 2.0 (2.0 to 2.0)                  | 139.6 (115.5 to 166.2)    | 40.6 (31.7 to 51.6)        | 84.8 (63.9 to 108.5)          | 8.8 (4.2 to 16.1)               | 5.5 (5.5 to 5.5)                  |
| Morocco    | 1997 | 52.5 (43.4 to 62.1)        | 14.7 (11.5 to 18.8)        | 32.5 (24.4 to 41.2)           | 4.3 (2.1 to 8.0)                | 1.0 (1.0 to 1.0)                  | 142.1 (117.4 to 168.1)    | 39.8 (31.2 to 50.9)        | 88.0 (66.0 to 111.6)          | 11.8 (5.6 to 21.6)              | 2.7 (2.7 to 2.7)                  |
| Morocco    | 1998 | 60.8 (50.7 to 72.1)        | 16.3 (12.7 to 21.1)        | 35.5 (27.1 to 44.5)           | 6.4 (3.0 to 11.4)               | 2.6 (2.6 to 2.6)                  | 164.6 (137.2 to 195.1)    | 44.2 (34.5 to 57.2)        | 96.0 (73.3 to 120.4)          | 17.2 (8.2 to 30.8)              | 7.1 (7.1 to 7.1)                  |
| Morocco    | 1999 | 64.5 (53.3 to 76.8)        | 17.0 (13.4 to 22.0)        | 37.3 (29.0 to 46.5)           | 8.4 (3.9 to 14.9)               | 1.8 (1.8 to 1.8)                  | 174.5 (144.3 to 207.8)    | 46.1 (36.1 to 59.5)        | 100.8 (78.5 to 125.8)         | 22.7 (10.7 to 40.5)             | 4.9 (4.9 to 4.9)                  |
| Morocco    | 2000 | 72.6 (60.1 to 86.4)        | 18.5 (14.6 to 23.8)        | 40.0 (31.2 to 49.4)           | 11.6 (5.6 to 20.4)              | 2.6 (2.6 to 2.6)                  | 196.6 (162.7 to 233.8)    | 50.1 (39.4 to 64.3)        | 108.1 (84.4 to 133.7)         | 31.5 (15.1 to 55.3)             | 6.9 (6.9 to 6.9)                  |
| Morocco    | 2001 | 80.4 (66.4 to 95.5)        | 21.2 (16.8 to 27.1)        | 43.9 (34.7 to 53.9)           | 14.1 (6.9 to 23.9)              | 1.1 (1.1 to 1.1)                  | 217.5 (179.7 to 258.6)    | 57.5 (45.5 to 73.5)        | 118.7 (93.9 to 146.0)         | 38.3 (18.8 to 64.8)             | 3.0 (3.0 to 3.0)                  |

| Country | Year | 2018 US Dollars per capita |                            |                               |                                 |                                   | 2018 PPP per capita    |                            |                               |                                 |                                   |
|---------|------|----------------------------|----------------------------|-------------------------------|---------------------------------|-----------------------------------|------------------------|----------------------------|-------------------------------|---------------------------------|-----------------------------------|
|         |      | Health spending            | Government health spending | Out-of-pocket health spending | Prepaid private health spending | Development assistance for health | Health spending        | Government health spending | Out-of-pocket health spending | Prepaid private health spending | Development assistance for health |
| Morocco | 2002 | 87.5 (73.0 to 103.8)       | 23.6 (18.6 to 29.9)        | 47.6 (37.5 to 58.6)           | 15.1 (7.5 to 25.3)              | 1.1 (1.1 to 1.1)                  | 236.8 (197.6 to 281.1) | 64.0 (50.2 to 80.8)        | 128.9 (101.5 to 158.6)        | 40.9 (20.4 to 68.4)             | 3.0 (3.0 to 3.0)                  |
| Morocco | 2003 | 95.6 (80.7 to 112.5)       | 26.5 (21.0 to 33.2)        | 52.2 (41.8 to 64.4)           | 15.2 (7.7 to 25.5)              | 1.6 (1.6 to 1.6)                  | 258.7 (218.3 to 304.6) | 71.8 (56.7 to 89.9)        | 141.4 (113.2 to 174.4)        | 41.2 (20.8 to 69.0)             | 4.3 (4.3 to 4.3)                  |
| Morocco | 2004 | 101.0 (85.9 to 118.5)      | 29.3 (23.3 to 36.3)        | 56.7 (45.6 to 69.7)           | 13.9 (7.1 to 23.4)              | 1.1 (1.1 to 1.1)                  | 273.3 (232.5 to 320.7) | 79.4 (63.1 to 98.3)        | 153.4 (123.5 to 188.7)        | 37.6 (19.3 to 63.4)             | 2.9 (2.9 to 2.9)                  |
| Morocco | 2005 | 109.0 (94.1 to 126.1)      | 32.5 (26.0 to 39.9)        | 60.6 (48.6 to 74.6)           | 11.0 (5.6 to 18.9)              | 4.9 (4.9 to 4.9)                  | 294.9 (254.7 to 341.3) | 87.9 (70.5 to 108.0)       | 164.1 (131.4 to 202.0)        | 29.8 (15.3 to 51.3)             | 13.2 (13.2 to 13.2)               |
| Morocco | 2006 | 118.0 (101.9 to 136.3)     | 40.6 (32.8 to 49.5)        | 66.5 (53.4 to 82.3)           | 7.9 (4.1 to 13.8)               | 3.0 (3.0 to 3.0)                  | 319.5 (275.8 to 369.0) | 110.0 (88.9 to 134.1)      | 179.9 (144.4 to 222.7)        | 21.5 (11.1 to 37.2)             | 8.2 (8.2 to 8.2)                  |
| Morocco | 2007 | 127.3 (110.9 to 146.5)     | 47.7 (38.9 to 57.8)        | 70.9 (57.3 to 86.7)           | 6.8 (3.4 to 12.3)               | 1.9 (1.9 to 1.9)                  | 344.7 (300.3 to 396.6) | 129.2 (105.4 to 156.6)     | 191.9 (155.0 to 234.7)        | 18.4 (9.3 to 33.4)              | 5.2 (5.2 to 5.2)                  |
| Morocco | 2008 | 140.6 (123.1 to 160.2)     | 54.0 (44.7 to 65.4)        | 75.4 (61.2 to 91.8)           | 6.4 (3.2 to 11.6)               | 4.9 (4.9 to 4.9)                  | 380.6 (333.2 to 433.8) | 146.2 (121.0 to 177.0)     | 204.0 (165.7 to 248.5)        | 17.2 (8.6 to 31.3)              | 13.2 (13.2 to 13.2)               |
| Morocco | 2009 | 152.4 (133.6 to 174.0)     | 60.2 (49.8 to 72.0)        | 80.3 (65.7 to 97.8)           | 6.4 (3.2 to 11.7)               | 5.5 (5.5 to 5.5)                  | 412.5 (361.5 to 471.0) | 162.9 (134.8 to 194.9)     | 217.5 (177.8 to 264.7)        | 17.2 (8.7 to 31.6)              | 14.9 (14.9 to 14.9)               |
| Morocco | 2010 | 156.2 (137.0 to 178.3)     | 63.4 (52.9 to 75.7)        | 83.9 (68.6 to 102.1)          | 6.4 (3.2 to 11.6)               | 2.6 (2.6 to 2.6)                  | 422.9 (370.9 to 482.7) | 171.5 (143.1 to 204.9)     | 227.1 (185.7 to 276.3)        | 17.3 (8.7 to 31.3)              | 7.1 (7.1 to 7.1)                  |
| Morocco | 2011 | 162.5 (142.1 to 185.6)     | 67.1 (55.8 to 81.3)        | 86.1 (70.0 to 104.3)          | 6.2 (3.1 to 11.0)               | 3.0 (3.0 to 3.0)                  | 439.7 (384.6 to 502.5) | 181.7 (150.9 to 219.9)     | 233.1 (189.5 to 282.4)        | 16.8 (8.3 to 29.9)              | 8.1 (8.1 to 8.1)                  |
| Morocco | 2012 | 164.1 (142.4 to 188.8)     | 69.5 (57.8 to 84.8)        | 86.5 (70.2 to 104.2)          | 6.2 (3.0 to 11.3)               | 1.8 (1.8 to 1.8)                  | 444.1 (385.4 to 511.0) | 188.2 (156.3 to 229.6)     | 234.1 (190.1 to 282.1)        | 16.9 (8.1 to 30.7)              | 4.8 (4.8 to 4.8)                  |
| Morocco | 2013 | 172.9 (150.8 to 197.5)     | 72.8 (60.2 to 88.9)        | 87.2 (71.0 to 105.7)          | 6.6 (3.1 to 12.1)               | 6.4 (6.4 to 6.4)                  | 468.0 (408.2 to 534.7) | 197.0 (163.0 to 240.6)     | 235.9 (192.1 to 286.2)        | 17.8 (8.5 to 32.7)              | 17.3 (17.3 to 17.3)               |
| Morocco | 2014 | 174.4 (152.0 to 200.5)     | 74.3 (61.4 to 90.8)        | 87.4 (70.5 to 106.4)          | 6.7 (3.2 to 12.5)               | 5.9 (5.9 to 5.9)                  | 472.1 (411.3 to 542.8) | 201.2 (166.3 to 245.8)     | 236.7 (190.8 to 287.9)        | 18.2 (8.6 to 33.8)              | 16.0 (16.0 to 16.0)               |
| Morocco | 2015 | 174.1 (149.6 to 201.6)     | 77.0 (63.1 to 93.2)        | 88.5 (69.9 to 109.5)          | 7.0 (3.3 to 12.8)               | 1.6 (1.6 to 1.6)                  | 471.3 (405.0 to 545.7) | 208.5 (170.7 to 252.4)     | 239.5 (189.2 to 296.4)        | 18.9 (8.9 to 34.5)              | 4.3 (4.3 to 4.3)                  |
| Morocco | 2016 | 184.6 (159.1 to 215.7)     | 80.6 (65.4 to 98.6)        | 89.8 (69.2 to 114.0)          | 7.4 (3.4 to 14.1)               | 6.8 (6.8 to 6.8)                  | 499.6 (430.7 to 583.9) | 218.2 (177.1 to 266.9)     | 242.9 (187.4 to 308.5)        | 20.1 (9.3 to 38.1)              | 18.4 (18.4 to 18.4)               |
| Morocco | 2017 | 187.5 (160.3 to 219.6)     | 83.0 (67.4 to 101.3)       | 92.0 (71.2 to 116.8)          | 7.6 (3.5 to 14.5)               | 4.8 (4.8 to 4.8)                  | 507.6 (434.0 to 594.5) | 224.8 (182.4 to 274.3)     | 249.1 (192.8 to 316.1)        | 20.7 (9.6 to 39.4)              | 13.0 (13.0 to 13.0)               |
| Morocco | 2018 | 190.9 (163.8 to 223.3)     | 85.2 (68.9 to 103.9)       | 93.5 (72.4 to 118.6)          | 7.8 (3.6 to 15.0)               | 4.3 (4.3 to 4.3)                  | 516.7 (443.3 to 604.5) | 230.6 (186.6 to 281.3)     | 253.2 (195.9 to 321.0)        | 21.2 (9.8 to 40.6)              | 11.6 (11.5 to 11.7)               |
| Morocco | 2019 | 195.4 (167.8 to 228.1)     | 87.9 (71.2 to 107.0)       | 95.1 (73.2 to 120.5)          | 8.0 (3.7 to 15.3)               | 4.3 (4.0 to 4.6)                  | 528.9 (454.2 to 617.5) | 237.9 (192.6 to 289.5)     | 257.5 (198.2 to 326.2)        | 21.8 (10.1 to 41.4)             | 11.7 (10.9 to 12.4)               |
| Morocco | 2020 | 199.8 (172.0 to 233.3)     | 90.6 (73.3 to 110.0)       | 96.7 (74.4 to 122.5)          | 8.2 (3.8 to 15.6)               | 4.4 (4.0 to 4.7)                  | 540.8 (465.5 to 631.5) | 245.2 (198.4 to 297.8)     | 261.6 (201.4 to 331.6)        | 22.3 (10.3 to 42.3)             | 11.8 (10.8 to 12.7)               |
| Morocco | 2021 | 204.3 (175.0 to 238.6)     | 93.2 (75.5 to 113.3)       | 98.2 (75.4 to 124.5)          | 8.4 (3.9 to 16.0)               | 4.4 (4.0 to 4.9)                  | 552.9 (473.7 to 645.8) | 252.3 (204.3 to 306.7)     | 265.8 (204.0 to 336.9)        | 22.8 (10.5 to 43.4)             | 12.0 (10.8 to 13.3)               |
| Morocco | 2022 | 207.8 (178.2 to 243.5)     | 95.3 (76.9 to 116.1)       | 99.5 (76.3 to 125.6)          | 8.6 (4.0 to 16.4)               | 4.5 (4.0 to 5.1)                  | 562.6 (482.3 to 659.2) | 257.9 (208.2 to 314.4)     | 269.2 (206.6 to 340.0)        | 23.2 (10.7 to 44.3)             | 12.2 (10.8 to 13.7)               |



| Country | Year | 2018 US Dollars per capita |                            |                               |                                 |                                   | 2018 PPP per capita     |                            |                               |                                 |                                   |
|---------|------|----------------------------|----------------------------|-------------------------------|---------------------------------|-----------------------------------|-------------------------|----------------------------|-------------------------------|---------------------------------|-----------------------------------|
|         |      | Health spending            | Government health spending | Out-of-pocket health spending | Prepaid private health spending | Development assistance for health | Health spending         | Government health spending | Out-of-pocket health spending | Prepaid private health spending | Development assistance for health |
| Morocco | 2023 | 210.9 (180.9 to 246.9)     | 97.0 (78.4 to 118.2)       | 100.5 (77.3 to 127.4)         | 8.7 (4.0 to 16.6)               | 4.6 (4.0 to 5.3)                  | 570.9 (489.7 to 668.3)  | 262.7 (212.2 to 320.1)     | 271.9 (209.2 to 344.9)        | 23.7 (10.9 to 45.0)             | 12.6 (10.9 to 14.3)               |
| Morocco | 2024 | 214.1 (184.0 to 251.0)     | 98.9 (80.4 to 120.6)       | 101.4 (78.2 to 128.8)         | 8.9 (4.1 to 16.9)               | 4.8 (4.1 to 5.5)                  | 579.4 (498.2 to 679.4)  | 267.8 (217.5 to 326.5)     | 274.5 (211.8 to 348.8)        | 24.1 (11.1 to 45.6)             | 13.0 (11.2 to 15.0)               |
| Morocco | 2025 | 217.8 (186.5 to 254.9)     | 101.2 (82.1 to 123.6)      | 102.5 (79.3 to 130.0)         | 9.1 (4.2 to 17.1)               | 4.9 (4.2 to 5.8)                  | 589.5 (504.8 to 690.0)  | 274.0 (222.2 to 334.6)     | 277.6 (214.6 to 352.0)        | 24.6 (11.3 to 46.4)             | 13.4 (11.4 to 15.6)               |
| Morocco | 2026 | 221.6 (190.9 to 259.8)     | 103.5 (83.7 to 126.8)      | 103.7 (80.2 to 132.3)         | 9.3 (4.3 to 17.5)               | 5.1 (4.3 to 5.9)                  | 599.7 (516.6 to 703.1)  | 280.2 (226.5 to 343.2)     | 280.7 (217.0 to 358.2)        | 25.1 (11.6 to 47.3)             | 13.7 (11.5 to 16.0)               |
| Morocco | 2027 | 225.4 (192.3 to 264.9)     | 105.9 (85.3 to 130.0)      | 104.9 (80.9 to 133.7)         | 9.4 (4.3 to 17.8)               | 5.2 (4.3 to 6.1)                  | 610.2 (520.5 to 716.9)  | 286.6 (231.0 to 351.9)     | 284.0 (218.9 to 362.0)        | 25.6 (11.8 to 48.2)             | 14.0 (11.7 to 16.6)               |
| Morocco | 2028 | 229.6 (197.5 to 269.7)     | 108.4 (87.2 to 133.0)      | 106.2 (81.6 to 136.4)         | 9.6 (4.4 to 18.2)               | 5.3 (4.4 to 6.4)                  | 621.4 (534.6 to 730.1)  | 293.4 (236.1 to 360.1)     | 287.5 (221.0 to 369.2)        | 26.1 (12.0 to 49.2)             | 14.4 (12.0 to 17.4)               |
| Morocco | 2029 | 233.9 (198.8 to 275.1)     | 111.0 (88.9 to 137.1)      | 107.6 (82.5 to 138.2)         | 9.8 (4.5 to 18.5)               | 5.4 (4.5 to 6.7)                  | 633.1 (538.2 to 744.6)  | 300.5 (240.7 to 371.1)     | 291.3 (223.2 to 374.2)        | 26.6 (12.2 to 50.2)             | 14.7 (12.1 to 18.1)               |
| Morocco | 2030 | 238.4 (205.0 to 280.6)     | 113.7 (90.9 to 141.0)      | 109.1 (83.6 to 139.6)         | 10.1 (4.6 to 18.9)              | 5.5 (4.5 to 6.8)                  | 645.2 (554.9 to 759.6)  | 307.8 (246.1 to 381.7)     | 295.2 (226.2 to 378.0)        | 27.2 (12.5 to 51.2)             | 15.0 (12.2 to 18.5)               |
| Morocco | 2031 | 243.2 (206.8 to 286.3)     | 116.6 (93.0 to 145.2)      | 110.6 (85.0 to 142.4)         | 10.3 (4.7 to 19.3)              | 5.6 (4.5 to 7.1)                  | 658.2 (559.8 to 775.0)  | 315.6 (251.8 to 393.0)     | 299.5 (230.0 to 385.4)        | 27.8 (12.8 to 52.4)             | 15.3 (12.1 to 19.2)               |
| Morocco | 2032 | 248.2 (212.5 to 293.9)     | 119.6 (95.4 to 149.0)      | 112.3 (86.4 to 145.7)         | 10.5 (4.8 to 19.8)              | 5.7 (4.5 to 7.3)                  | 671.9 (575.1 to 795.5)  | 323.8 (258.2 to 403.2)     | 304.1 (233.8 to 394.4)        | 28.5 (13.0 to 53.6)             | 15.5 (12.1 to 19.8)               |
| Morocco | 2033 | 253.5 (214.0 to 300.8)     | 122.8 (97.9 to 153.6)      | 114.1 (87.8 to 149.1)         | 10.8 (4.9 to 20.3)              | 5.8 (4.4 to 7.5)                  | 686.3 (579.1 to 814.2)  | 332.4 (264.9 to 415.9)     | 308.9 (237.5 to 403.7)        | 29.2 (13.3 to 54.9)             | 15.8 (12.0 to 20.4)               |
| Morocco | 2034 | 258.9 (220.9 to 306.5)     | 126.0 (100.1 to 157.9)     | 115.9 (88.7 to 151.5)         | 11.1 (5.0 to 20.7)              | 5.9 (4.5 to 7.9)                  | 700.7 (598.0 to 829.7)  | 341.0 (271.0 to 427.5)     | 313.7 (240.2 to 410.2)        | 29.9 (13.6 to 56.1)             | 16.1 (12.1 to 21.4)               |
| Morocco | 2035 | 264.2 (222.3 to 315.3)     | 129.2 (102.3 to 162.5)     | 117.6 (89.7 to 154.2)         | 11.3 (5.1 to 21.2)              | 6.0 (4.4 to 8.2)                  | 715.2 (601.7 to 853.5)  | 349.7 (277.0 to 439.7)     | 318.4 (242.9 to 417.4)        | 30.6 (13.9 to 57.4)             | 16.4 (12.0 to 22.3)               |
| Morocco | 2036 | 269.8 (229.2 to 321.4)     | 132.5 (104.9 to 166.7)     | 119.5 (91.0 to 157.0)         | 11.6 (5.3 to 21.7)              | 6.2 (4.5 to 8.7)                  | 730.2 (620.4 to 869.8)  | 358.7 (283.8 to 451.3)     | 323.5 (246.4 to 425.0)        | 31.4 (14.2 to 58.8)             | 16.7 (12.1 to 23.5)               |
| Morocco | 2037 | 275.3 (231.6 to 329.1)     | 135.8 (107.4 to 171.0)     | 121.3 (92.5 to 159.8)         | 11.9 (5.4 to 22.2)              | 6.3 (4.5 to 8.8)                  | 745.2 (626.9 to 890.7)  | 367.7 (290.7 to 462.7)     | 328.4 (250.4 to 432.7)        | 32.2 (14.6 to 60.2)             | 16.9 (12.1 to 23.7)               |
| Morocco | 2038 | 280.9 (239.1 to 335.2)     | 139.2 (109.9 to 175.9)     | 123.1 (93.7 to 162.8)         | 12.2 (5.5 to 22.7)              | 6.4 (4.5 to 9.1)                  | 760.4 (647.2 to 907.3)  | 376.9 (297.5 to 476.1)     | 333.3 (253.5 to 440.7)        | 32.9 (14.9 to 61.6)             | 17.3 (12.2 to 24.5)               |
| Morocco | 2039 | 286.5 (240.4 to 344.5)     | 142.6 (112.3 to 180.6)     | 124.9 (94.7 to 165.8)         | 12.5 (5.6 to 23.3)              | 6.5 (4.5 to 9.4)                  | 775.5 (650.8 to 932.5)  | 386.1 (304.1 to 488.9)     | 338.1 (256.4 to 448.7)        | 33.7 (15.2 to 63.0)             | 17.6 (12.2 to 25.6)               |
| Morocco | 2040 | 292.1 (247.6 to 350.3)     | 146.1 (115.0 to 185.9)     | 126.7 (96.0 to 168.8)         | 12.7 (5.7 to 23.8)              | 6.6 (4.6 to 9.8)                  | 790.7 (670.1 to 948.2)  | 395.4 (311.2 to 503.2)     | 342.8 (259.7 to 457.0)        | 34.5 (15.5 to 64.4)             | 18.0 (12.5 to 26.5)               |
| Morocco | 2041 | 297.8 (249.3 to 355.1)     | 149.6 (117.3 to 191.3)     | 128.5 (97.3 to 171.6)         | 13.0 (5.9 to 24.3)              | 6.8 (4.7 to 10.0)                 | 806.2 (674.9 to 961.2)  | 404.8 (317.6 to 517.8)     | 347.7 (263.4 to 464.5)        | 35.3 (15.9 to 65.9)             | 18.4 (12.6 to 27.2)               |
| Morocco | 2042 | 303.7 (256.9 to 367.0)     | 153.1 (119.9 to 195.9)     | 130.2 (98.7 to 174.6)         | 13.3 (6.0 to 25.0)              | 7.0 (4.6 to 10.5)                 | 821.9 (695.4 to 993.4)  | 414.4 (324.5 to 530.3)     | 352.6 (267.3 to 472.5)        | 36.1 (16.2 to 67.6)             | 18.9 (12.6 to 28.4)               |
| Morocco | 2043 | 309.4 (259.7 to 371.0)     | 156.7 (122.4 to 200.6)     | 132.0 (99.8 to 177.4)         | 13.6 (6.1 to 25.7)              | 7.1 (4.7 to 11.1)                 | 837.6 (703.1 to 1004.1) | 424.1 (331.4 to 543.1)     | 357.3 (270.3 to 480.2)        | 36.9 (16.6 to 69.5)             | 19.3 (12.7 to 30.0)               |

| Country    | Year | 2018 US Dollars per capita |                            |                               |                                 |                                   | 2018 PPP per capita     |                            |                               |                                 |                                   |
|------------|------|----------------------------|----------------------------|-------------------------------|---------------------------------|-----------------------------------|-------------------------|----------------------------|-------------------------------|---------------------------------|-----------------------------------|
|            |      | Health spending            | Government health spending | Out-of-pocket health spending | Prepaid private health spending | Development assistance for health | Health spending         | Government health spending | Out-of-pocket health spending | Prepaid private health spending | Development assistance for health |
| Morocco    | 2044 | 315.3 (265.7 to 381.8)     | 160.3 (125.1 to 206.0)     | 133.7 (100.9 to 180.2)        | 13.9 (6.3 to 26.3)              | 7.3 (4.7 to 11.5)                 | 853.5 (719.3 to 1033.6) | 434.0 (338.6 to 557.7)     | 362.0 (273.2 to 487.7)        | 37.7 (17.0 to 71.3)             | 19.8 (12.8 to 31.2)               |
| Morocco    | 2045 | 321.1 (268.0 to 388.3)     | 164.0 (127.6 to 211.5)     | 135.3 (102.0 to 183.0)        | 14.2 (6.4 to 27.0)              | 7.5 (4.9 to 12.0)                 | 869.1 (725.5 to 1051.1) | 443.8 (345.4 to 572.5)     | 366.3 (276.1 to 495.4)        | 38.5 (17.3 to 73.0)             | 20.4 (13.2 to 32.4)               |
| Morocco    | 2046 | 326.9 (275.6 to 397.1)     | 167.6 (130.2 to 217.5)     | 136.9 (103.1 to 185.7)        | 14.5 (6.5 to 27.5)              | 7.8 (4.9 to 12.5)                 | 884.7 (746.1 to 1074.9) | 453.7 (352.4 to 588.9)     | 370.7 (279.0 to 502.6)        | 39.3 (17.7 to 74.4)             | 21.0 (13.3 to 33.9)               |
| Morocco    | 2047 | 332.6 (276.4 to 402.7)     | 171.3 (132.7 to 222.7)     | 138.5 (104.1 to 188.0)        | 14.8 (6.7 to 28.0)              | 8.0 (5.1 to 12.9)                 | 900.3 (748.0 to 1089.9) | 463.7 (359.1 to 602.9)     | 374.9 (281.9 to 509.0)        | 40.1 (18.1 to 75.7)             | 21.6 (13.7 to 35.0)               |
| Morocco    | 2048 | 338.3 (284.3 to 409.8)     | 175.0 (135.1 to 228.9)     | 140.0 (105.2 to 190.3)        | 15.1 (6.8 to 28.4)              | 8.3 (5.2 to 13.7)                 | 915.8 (769.7 to 1109.3) | 473.6 (365.7 to 619.6)     | 378.9 (284.7 to 515.2)        | 40.9 (18.4 to 76.8)             | 22.4 (14.0 to 37.0)               |
| Morocco    | 2049 | 344.0 (283.7 to 419.3)     | 178.7 (137.5 to 233.5)     | 141.4 (106.3 to 192.6)        | 15.4 (6.9 to 28.9)              | 8.5 (5.3 to 14.6)                 | 931.2 (768.0 to 1135.1) | 483.6 (372.2 to 632.1)     | 382.8 (287.6 to 521.2)        | 41.7 (18.8 to 78.1)             | 23.1 (14.4 to 39.4)               |
| Morocco    | 2050 | 349.8 (293.6 to 424.9)     | 182.3 (139.6 to 238.2)     | 142.9 (107.2 to 194.8)        | 15.7 (7.1 to 29.4)              | 8.8 (5.5 to 15.5)                 | 946.7 (794.8 to 1150.0) | 493.6 (377.9 to 644.7)     | 386.7 (290.3 to 527.2)        | 42.5 (19.2 to 79.7)             | 24.0 (14.8 to 41.9)               |
| Mozambique | 1995 | 10.8 (9.7 to 12.0)         | 3.5 (2.6 to 4.6)           | 1.5 (1.0 to 2.2)              | 0.4 (0.2 to 0.7)                | 5.3 (5.3 to 5.3)                  | 30.5 (27.6 to 34.0)     | 10.0 (7.5 to 13.0)         | 4.4 (3.0 to 6.2)              | 1.0 (0.5 to 1.9)                | 15.1 (15.1 to 15.1)               |
| Mozambique | 1996 | 13.5 (12.4 to 14.9)        | 3.9 (2.9 to 5.0)           | 1.6 (1.1 to 2.2)              | 0.4 (0.2 to 0.7)                | 7.7 (7.7 to 7.7)                  | 38.4 (35.3 to 42.4)     | 11.0 (8.3 to 14.2)         | 4.5 (3.1 to 6.3)              | 1.1 (0.5 to 2.1)                | 21.8 (21.8 to 21.8)               |
| Mozambique | 1997 | 12.5 (11.3 to 14.1)        | 4.4 (3.3 to 5.7)           | 1.6 (1.1 to 2.2)              | 0.4 (0.2 to 0.8)                | 6.1 (6.1 to 6.1)                  | 35.4 (32.0 to 40.0)     | 12.4 (9.3 to 16.1)         | 4.6 (3.1 to 6.3)              | 1.3 (0.6 to 2.3)                | 17.2 (17.2 to 17.2)               |
| Mozambique | 1998 | 12.7 (11.4 to 14.4)        | 5.0 (3.8 to 6.5)           | 1.6 (1.1 to 2.3)              | 0.5 (0.2 to 0.9)                | 5.6 (5.6 to 5.6)                  | 36.0 (32.3 to 40.9)     | 14.1 (10.8 to 18.5)        | 4.6 (3.1 to 6.4)              | 1.4 (0.6 to 2.6)                | 15.8 (15.8 to 15.8)               |
| Mozambique | 1999 | 13.9 (12.5 to 15.8)        | 5.6 (4.3 to 7.3)           | 1.6 (1.1 to 2.2)              | 0.5 (0.2 to 1.0)                | 6.2 (6.2 to 6.2)                  | 39.5 (35.5 to 44.8)     | 15.8 (12.1 to 20.8)        | 4.5 (3.1 to 6.3)              | 1.5 (0.7 to 2.9)                | 17.7 (17.7 to 17.7)               |
| Mozambique | 2000 | 15.5 (13.9 to 17.7)        | 6.3 (4.9 to 8.3)           | 1.6 (1.1 to 2.2)              | 0.6 (0.3 to 1.1)                | 7.0 (7.0 to 7.0)                  | 44.1 (39.5 to 50.1)     | 18.0 (13.8 to 23.5)        | 4.4 (3.0 to 6.1)              | 1.7 (0.7 to 3.2)                | 20.0 (20.0 to 20.0)               |
| Mozambique | 2001 | 16.7 (14.8 to 19.2)        | 7.4 (5.7 to 9.6)           | 1.6 (1.1 to 2.3)              | 0.7 (0.3 to 1.3)                | 7.0 (7.0 to 7.0)                  | 47.5 (42.0 to 54.6)     | 21.0 (16.1 to 27.3)        | 4.6 (3.2 to 6.4)              | 1.9 (0.9 to 3.6)                | 19.9 (19.9 to 19.9)               |
| Mozambique | 2002 | 19.0 (17.0 to 21.6)        | 7.8 (5.9 to 10.2)          | 1.7 (1.2 to 2.5)              | 0.7 (0.3 to 1.4)                | 8.8 (8.8 to 8.8)                  | 54.1 (48.3 to 61.4)     | 22.2 (16.9 to 29.0)        | 4.9 (3.4 to 7.0)              | 2.1 (1.0 to 3.9)                | 24.8 (24.8 to 24.8)               |
| Mozambique | 2003 | 19.8 (17.8 to 22.3)        | 7.7 (5.8 to 10.0)          | 1.8 (1.2 to 2.6)              | 0.7 (0.3 to 1.4)                | 9.6 (9.6 to 9.6)                  | 56.3 (50.4 to 63.4)     | 21.9 (16.5 to 28.5)        | 5.1 (3.5 to 7.3)              | 2.1 (1.0 to 3.9)                | 27.2 (27.2 to 27.2)               |
| Mozambique | 2004 | 22.5 (20.3 to 25.0)        | 7.7 (5.8 to 10.0)          | 1.8 (1.3 to 2.6)              | 0.7 (0.3 to 1.3)                | 12.1 (12.1 to 12.1)               | 63.7 (57.7 to 71.0)     | 22.0 (16.6 to 28.5)        | 5.2 (3.6 to 7.4)              | 2.1 (1.0 to 3.8)                | 34.4 (34.4 to 34.4)               |
| Mozambique | 2005 | 22.6 (20.5 to 25.0)        | 7.8 (5.9 to 10.1)          | 1.9 (1.3 to 2.7)              | 0.7 (0.4 to 1.4)                | 12.1 (12.1 to 12.1)               | 64.2 (58.1 to 71.1)     | 22.2 (16.6 to 28.7)        | 5.4 (3.8 to 7.6)              | 2.1 (1.0 to 3.9)                | 34.4 (34.4 to 34.4)               |
| Mozambique | 2006 | 23.2 (21.2 to 25.5)        | 7.2 (5.4 to 9.2)           | 1.9 (1.3 to 2.7)              | 0.7 (0.3 to 1.3)                | 13.4 (13.4 to 13.4)               | 65.9 (60.1 to 72.3)     | 20.5 (15.3 to 26.2)        | 5.4 (3.8 to 7.6)              | 2.0 (1.0 to 3.8)                | 38.0 (38.0 to 38.0)               |
| Mozambique | 2007 | 26.0 (24.3 to 27.8)        | 5.7 (4.3 to 7.4)           | 1.8 (1.3 to 2.6)              | 0.6 (0.3 to 1.1)                | 17.8 (17.8 to 17.8)               | 73.7 (68.9 to 79.0)     | 16.3 (12.1 to 21.0)        | 5.2 (3.6 to 7.3)              | 1.7 (0.8 to 3.3)                | 50.4 (50.4 to 50.4)               |
| Mozambique | 2008 | 28.1 (26.9 to 29.4)        | 4.0 (3.0 to 5.2)           | 1.7 (1.2 to 2.4)              | 0.5 (0.2 to 0.9)                | 21.9 (21.9 to 21.9)               | 79.7 (76.4 to 83.4)     | 11.3 (8.4 to 14.7)         | 4.9 (3.5 to 6.8)              | 1.3 (0.6 to 2.6)                | 62.1 (62.1 to 62.1)               |

| Country    | Year | 2018 US Dollars per capita |                            |                               |                                 |                                   | 2018 PPP per capita   |                            |                               |                                 |                                   |
|------------|------|----------------------------|----------------------------|-------------------------------|---------------------------------|-----------------------------------|-----------------------|----------------------------|-------------------------------|---------------------------------|-----------------------------------|
|            |      | Health spending            | Government health spending | Out-of-pocket health spending | Prepaid private health spending | Development assistance for health | Health spending       | Government health spending | Out-of-pocket health spending | Prepaid private health spending | Development assistance for health |
| Mozambique | 2009 | 23.7 (22.9 to 24.7)        | 2.7 (2.0 to 3.5)           | 1.6 (1.1 to 2.2)              | 0.4 (0.2 to 0.7)                | 19.1 (19.1 to 19.1)               | 67.4 (64.9 to 70.2)   | 7.7 (5.8 to 10.1)          | 4.5 (3.2 to 6.3)              | 1.0 (0.5 to 1.9)                | 54.1 (54.1 to 54.1)               |
| Mozambique | 2010 | 26.3 (25.6 to 27.2)        | 2.2 (1.6 to 2.9)           | 1.5 (1.1 to 2.1)              | 0.3 (0.1 to 0.6)                | 22.3 (22.3 to 22.3)               | 74.6 (72.6 to 77.1)   | 6.2 (4.7 to 8.2)           | 4.3 (3.1 to 6.1)              | 0.9 (0.4 to 1.6)                | 63.2 (63.2 to 63.2)               |
| Mozambique | 2011 | 24.8 (24.1 to 25.7)        | 2.1 (1.6 to 2.7)           | 1.5 (1.1 to 2.1)              | 0.3 (0.1 to 0.6)                | 21.0 (21.0 to 21.0)               | 70.4 (68.4 to 72.8)   | 5.9 (4.4 to 7.7)           | 4.2 (3.0 to 5.9)              | 0.8 (0.4 to 1.6)                | 59.5 (59.5 to 59.5)               |
| Mozambique | 2012 | 27.3 (26.3 to 28.4)        | 3.3 (2.5 to 4.4)           | 1.7 (1.2 to 2.4)              | 0.4 (0.2 to 0.8)                | 21.9 (21.9 to 21.9)               | 77.4 (74.6 to 80.6)   | 9.4 (7.1 to 12.4)          | 4.7 (3.3 to 6.7)              | 1.3 (0.6 to 2.4)                | 62.0 (62.0 to 62.0)               |
| Mozambique | 2013 | 29.1 (28.0 to 30.5)        | 4.1 (3.1 to 5.3)           | 1.7 (1.2 to 2.4)              | 0.6 (0.3 to 1.1)                | 22.8 (22.8 to 22.8)               | 82.7 (79.3 to 86.6)   | 11.6 (8.7 to 15.2)         | 4.8 (3.4 to 6.9)              | 1.6 (0.8 to 3.0)                | 64.7 (64.7 to 64.7)               |
| Mozambique | 2014 | 33.8 (32.4 to 35.4)        | 4.9 (3.7 to 6.3)           | 1.7 (1.2 to 2.5)              | 0.6 (0.3 to 1.1)                | 26.6 (26.6 to 26.6)               | 95.9 (91.9 to 100.4)  | 13.8 (10.4 to 18.0)        | 4.9 (3.5 to 7.0)              | 1.6 (0.8 to 3.2)                | 75.6 (75.6 to 75.6)               |
| Mozambique | 2015 | 26.6 (25.4 to 28.0)        | 4.3 (3.2 to 5.6)           | 1.6 (1.2 to 2.3)              | 0.4 (0.2 to 0.8)                | 20.2 (20.2 to 20.2)               | 75.4 (72.1 to 79.3)   | 12.1 (9.2 to 15.8)         | 4.6 (3.3 to 6.5)              | 1.2 (0.6 to 2.4)                | 57.5 (57.5 to 57.5)               |
| Mozambique | 2016 | 32.4 (30.7 to 34.5)        | 6.3 (4.8 to 8.3)           | 1.8 (1.3 to 2.5)              | 0.5 (0.3 to 1.1)                | 23.7 (23.7 to 23.7)               | 92.0 (87.2 to 98.0)   | 18.0 (13.6 to 23.6)        | 5.1 (3.6 to 7.2)              | 1.5 (0.7 to 3.0)                | 67.4 (67.4 to 67.4)               |
| Mozambique | 2017 | 33.8 (32.1 to 35.9)        | 6.3 (4.8 to 8.3)           | 1.8 (1.3 to 2.5)              | 0.5 (0.2 to 1.0)                | 25.2 (25.2 to 25.2)               | 96.0 (91.1 to 102.0)  | 18.0 (13.6 to 23.6)        | 5.1 (3.6 to 7.2)              | 1.5 (0.7 to 2.9)                | 71.4 (71.4 to 71.4)               |
| Mozambique | 2018 | 32.1 (30.4 to 34.2)        | 6.4 (4.9 to 8.4)           | 1.8 (1.3 to 2.6)              | 0.5 (0.3 to 1.1)                | 23.4 (23.3 to 23.4)               | 91.2 (86.4 to 97.1)   | 18.2 (13.8 to 23.9)        | 5.2 (3.7 to 7.3)              | 1.5 (0.7 to 3.0)                | 66.3 (66.2 to 66.4)               |
| Mozambique | 2019 | 32.1 (29.6 to 34.5)        | 6.5 (4.9 to 8.5)           | 1.8 (1.3 to 2.6)              | 0.6 (0.3 to 1.1)                | 23.2 (21.6 to 24.5)               | 91.0 (84.1 to 98.0)   | 18.5 (14.0 to 24.2)        | 5.2 (3.7 to 7.4)              | 1.6 (0.7 to 3.1)                | 65.7 (61.4 to 69.5)               |
| Mozambique | 2020 | 32.2 (29.5 to 35.1)        | 6.6 (5.0 to 8.7)           | 1.9 (1.3 to 2.7)              | 0.6 (0.3 to 1.1)                | 23.2 (21.3 to 25.0)               | 91.5 (83.8 to 99.6)   | 18.7 (14.2 to 24.6)        | 5.3 (3.8 to 7.5)              | 1.6 (0.8 to 3.1)                | 65.8 (60.4 to 71.0)               |
| Mozambique | 2021 | 32.5 (29.4 to 35.7)        | 6.8 (5.1 to 8.9)           | 1.9 (1.4 to 2.7)              | 0.6 (0.3 to 1.1)                | 23.2 (20.9 to 25.6)               | 92.2 (83.4 to 101.3)  | 19.2 (14.5 to 25.2)        | 5.4 (3.9 to 7.7)              | 1.6 (0.8 to 3.2)                | 65.9 (59.4 to 72.8)               |
| Mozambique | 2022 | 32.8 (29.3 to 36.4)        | 6.9 (5.2 to 9.1)           | 1.9 (1.4 to 2.8)              | 0.6 (0.3 to 1.2)                | 23.4 (20.7 to 26.1)               | 93.1 (83.2 to 103.3)  | 19.6 (14.8 to 25.7)        | 5.5 (3.9 to 7.8)              | 1.7 (0.8 to 3.3)                | 66.3 (58.8 to 74.1)               |
| Mozambique | 2023 | 33.1 (29.4 to 36.9)        | 7.1 (5.3 to 9.3)           | 2.0 (1.4 to 2.8)              | 0.6 (0.3 to 1.2)                | 23.5 (20.4 to 26.7)               | 94.1 (83.3 to 104.8)  | 20.0 (15.1 to 26.4)        | 5.6 (4.0 to 7.9)              | 1.7 (0.8 to 3.4)                | 66.7 (58.0 to 75.9)               |
| Mozambique | 2024 | 33.5 (29.6 to 38.0)        | 7.2 (5.4 to 9.5)           | 2.0 (1.4 to 2.8)              | 0.6 (0.3 to 1.2)                | 23.7 (20.4 to 27.3)               | 95.1 (83.9 to 107.9)  | 20.5 (15.4 to 26.9)        | 5.7 (4.0 to 8.0)              | 1.8 (0.8 to 3.5)                | 67.1 (57.8 to 77.6)               |
| Mozambique | 2025 | 33.9 (29.7 to 38.2)        | 7.4 (5.6 to 9.7)           | 2.1 (1.5 to 2.9)              | 0.6 (0.3 to 1.3)                | 23.8 (20.2 to 27.9)               | 96.1 (84.4 to 108.4)  | 21.0 (15.8 to 27.6)        | 5.8 (4.1 to 8.2)              | 1.8 (0.9 to 3.6)                | 67.4 (57.3 to 79.2)               |
| Mozambique | 2026 | 34.2 (29.8 to 39.2)        | 7.6 (5.7 to 9.9)           | 2.1 (1.5 to 2.9)              | 0.7 (0.3 to 1.3)                | 23.9 (20.2 to 28.1)               | 97.1 (84.7 to 111.4)  | 21.5 (16.2 to 28.2)        | 6.0 (4.2 to 8.3)              | 1.9 (0.9 to 3.7)                | 67.7 (57.2 to 79.8)               |
| Mozambique | 2027 | 34.6 (29.9 to 39.7)        | 7.8 (5.9 to 10.2)          | 2.1 (1.5 to 3.0)              | 0.7 (0.3 to 1.3)                | 24.0 (20.0 to 28.6)               | 98.1 (84.7 to 112.7)  | 22.0 (16.6 to 29.0)        | 6.1 (4.3 to 8.5)              | 1.9 (0.9 to 3.8)                | 68.1 (56.8 to 81.1)               |
| Mozambique | 2028 | 35.0 (30.4 to 40.5)        | 7.9 (6.0 to 10.4)          | 2.2 (1.5 to 3.1)              | 0.7 (0.3 to 1.4)                | 24.2 (20.1 to 29.3)               | 99.3 (86.3 to 114.8)  | 22.5 (17.0 to 29.6)        | 6.2 (4.4 to 8.7)              | 2.0 (0.9 to 3.9)                | 68.6 (57.0 to 83.3)               |
| Mozambique | 2029 | 35.4 (30.4 to 41.2)        | 8.1 (6.1 to 10.7)          | 2.2 (1.6 to 3.1)              | 0.7 (0.3 to 1.4)                | 24.3 (20.0 to 29.8)               | 100.5 (86.3 to 116.8) | 23.1 (17.3 to 30.4)        | 6.3 (4.5 to 8.8)              | 2.0 (1.0 to 4.0)                | 69.1 (56.6 to 84.6)               |

| Country    | Year | 2018 US Dollars per capita |                            |                               |                                 |                                   | 2018 PPP per capita    |                            |                               |                                 |                                   |
|------------|------|----------------------------|----------------------------|-------------------------------|---------------------------------|-----------------------------------|------------------------|----------------------------|-------------------------------|---------------------------------|-----------------------------------|
|            |      | Health spending            | Government health spending | Out-of-pocket health spending | Prepaid private health spending | Development assistance for health | Health spending        | Government health spending | Out-of-pocket health spending | Prepaid private health spending | Development assistance for health |
| Mozambique | 2030 | 35.8 (30.8 to 42.2)        | 8.3 (6.2 to 11.0)          | 2.3 (1.6 to 3.2)              | 0.7 (0.3 to 1.4)                | 24.5 (20.0 to 30.2)               | 101.6 (87.4 to 119.7)  | 23.6 (17.7 to 31.1)        | 6.5 (4.5 to 9.0)              | 2.1 (1.0 to 4.1)                | 69.5 (56.7 to 85.8)               |
| Mozambique | 2031 | 36.3 (30.8 to 42.8)        | 8.5 (6.4 to 11.2)          | 2.3 (1.6 to 3.2)              | 0.8 (0.4 to 1.5)                | 24.7 (19.9 to 30.8)               | 102.9 (87.4 to 121.5)  | 24.2 (18.2 to 31.8)        | 6.6 (4.6 to 9.2)              | 2.1 (1.0 to 4.2)                | 70.0 (56.5 to 87.5)               |
| Mozambique | 2032 | 36.7 (31.2 to 43.7)        | 8.7 (6.6 to 11.5)          | 2.4 (1.6 to 3.3)              | 0.8 (0.4 to 1.5)                | 24.9 (19.9 to 31.5)               | 104.2 (88.6 to 124.1)  | 24.7 (18.6 to 32.5)        | 6.7 (4.7 to 9.4)              | 2.2 (1.0 to 4.3)                | 70.6 (56.6 to 89.5)               |
| Mozambique | 2033 | 37.2 (31.5 to 44.9)        | 8.9 (6.7 to 11.7)          | 2.4 (1.7 to 3.4)              | 0.8 (0.4 to 1.6)                | 25.1 (19.8 to 32.2)               | 105.7 (89.3 to 127.4)  | 25.4 (19.1 to 33.3)        | 6.9 (4.8 to 9.6)              | 2.3 (1.1 to 4.5)                | 71.2 (56.1 to 91.4)               |
| Mozambique | 2034 | 37.8 (31.9 to 46.0)        | 9.2 (6.9 to 12.0)          | 2.5 (1.7 to 3.4)              | 0.8 (0.4 to 1.6)                | 25.4 (19.9 to 32.7)               | 107.3 (90.5 to 130.5)  | 26.0 (19.6 to 34.1)        | 7.0 (4.9 to 9.8)              | 2.3 (1.1 to 4.6)                | 72.0 (56.5 to 92.8)               |
| Mozambique | 2035 | 38.4 (32.1 to 46.7)        | 9.4 (7.1 to 12.4)          | 2.5 (1.7 to 3.5)              | 0.8 (0.4 to 1.7)                | 25.6 (20.0 to 33.7)               | 108.9 (91.0 to 132.4)  | 26.7 (20.2 to 35.1)        | 7.1 (5.0 to 10.0)             | 2.4 (1.1 to 4.7)                | 72.7 (56.9 to 95.6)               |
| Mozambique | 2036 | 39.0 (32.4 to 48.2)        | 9.7 (7.3 to 12.7)          | 2.6 (1.8 to 3.6)              | 0.9 (0.4 to 1.7)                | 25.9 (20.1 to 35.0)               | 110.6 (92.1 to 136.8)  | 27.4 (20.7 to 36.0)        | 7.3 (5.1 to 10.2)             | 2.4 (1.2 to 4.8)                | 73.5 (56.9 to 99.4)               |
| Mozambique | 2037 | 39.6 (32.7 to 49.3)        | 9.9 (7.5 to 13.0)          | 2.6 (1.8 to 3.6)              | 0.9 (0.4 to 1.8)                | 26.2 (20.1 to 35.3)               | 112.3 (92.9 to 139.9)  | 28.1 (21.2 to 37.0)        | 7.4 (5.2 to 10.4)             | 2.5 (1.2 to 5.0)                | 74.3 (57.0 to 100.3)              |
| Mozambique | 2038 | 40.2 (33.2 to 50.6)        | 10.2 (7.7 to 13.4)         | 2.7 (1.8 to 3.7)              | 0.9 (0.4 to 1.8)                | 26.5 (20.1 to 36.4)               | 114.2 (94.2 to 143.6)  | 28.9 (21.7 to 38.1)        | 7.6 (5.2 to 10.6)             | 2.6 (1.2 to 5.1)                | 75.2 (57.0 to 103.3)              |
| Mozambique | 2039 | 40.9 (33.4 to 51.0)        | 10.5 (7.9 to 13.8)         | 2.7 (1.9 to 3.8)              | 0.9 (0.4 to 1.9)                | 26.8 (20.3 to 36.7)               | 116.0 (94.7 to 144.6)  | 29.7 (22.4 to 39.2)        | 7.7 (5.3 to 10.8)             | 2.7 (1.3 to 5.3)                | 76.0 (57.6 to 104.0)              |
| Mozambique | 2040 | 41.6 (34.2 to 52.8)        | 10.7 (8.0 to 14.2)         | 2.8 (1.9 to 3.9)              | 1.0 (0.5 to 1.9)                | 27.1 (20.5 to 37.5)               | 118.1 (97.2 to 149.9)  | 30.5 (22.8 to 40.2)        | 7.9 (5.4 to 11.0)             | 2.7 (1.3 to 5.4)                | 77.0 (58.2 to 106.6)              |
| Mozambique | 2041 | 42.4 (34.6 to 55.0)        | 11.0 (8.3 to 14.6)         | 2.8 (2.0 to 4.0)              | 1.0 (0.5 to 2.0)                | 27.5 (20.6 to 38.9)               | 120.3 (98.1 to 156.0)  | 31.3 (23.4 to 41.4)        | 8.0 (5.6 to 11.2)             | 2.8 (1.3 to 5.6)                | 78.1 (58.5 to 110.4)              |
| Mozambique | 2042 | 43.2 (35.1 to 56.3)        | 11.4 (8.5 to 15.0)         | 2.9 (2.0 to 4.0)              | 1.0 (0.5 to 2.0)                | 27.9 (20.6 to 40.5)               | 122.6 (99.5 to 159.7)  | 32.2 (24.1 to 42.7)        | 8.2 (5.7 to 11.5)             | 2.9 (1.4 to 5.7)                | 79.2 (58.5 to 115.0)              |
| Mozambique | 2043 | 44.0 (35.4 to 58.2)        | 11.7 (8.8 to 15.5)         | 2.9 (2.0 to 4.1)              | 1.0 (0.5 to 2.1)                | 28.3 (21.0 to 42.1)               | 124.8 (100.5 to 165.2) | 33.1 (24.9 to 44.0)        | 8.4 (5.8 to 11.7)             | 3.0 (1.4 to 5.9)                | 80.4 (59.7 to 119.5)              |
| Mozambique | 2044 | 44.9 (36.0 to 58.6)        | 12.0 (9.0 to 15.9)         | 3.0 (2.1 to 4.2)              | 1.1 (0.5 to 2.1)                | 28.8 (21.1 to 42.4)               | 127.3 (102.2 to 166.2) | 34.1 (25.6 to 45.2)        | 8.5 (5.9 to 12.0)             | 3.0 (1.4 to 6.0)                | 81.6 (60.0 to 120.3)              |
| Mozambique | 2045 | 45.7 (36.9 to 61.4)        | 12.4 (9.3 to 16.4)         | 3.1 (2.1 to 4.3)              | 1.1 (0.5 to 2.2)                | 29.2 (21.1 to 44.7)               | 129.8 (104.7 to 174.4) | 35.1 (26.4 to 46.6)        | 8.7 (6.0 to 12.2)             | 3.1 (1.5 to 6.2)                | 82.9 (59.9 to 126.9)              |
| Mozambique | 2046 | 46.7 (37.1 to 61.9)        | 12.7 (9.6 to 16.9)         | 3.1 (2.2 to 4.4)              | 1.1 (0.5 to 2.3)                | 29.7 (21.4 to 45.2)               | 132.4 (105.4 to 175.6) | 36.2 (27.2 to 48.0)        | 8.9 (6.1 to 12.5)             | 3.2 (1.5 to 6.4)                | 84.2 (60.7 to 128.3)              |
| Mozambique | 2047 | 47.7 (38.1 to 65.2)        | 13.1 (9.8 to 17.4)         | 3.2 (2.2 to 4.5)              | 1.2 (0.5 to 2.3)                | 30.2 (21.5 to 47.5)               | 135.2 (108.0 to 184.9) | 37.3 (27.9 to 49.5)        | 9.1 (6.2 to 12.7)             | 3.3 (1.6 to 6.6)                | 85.6 (61.1 to 134.8)              |
| Mozambique | 2048 | 48.7 (38.3 to 67.6)        | 13.5 (10.1 to 17.9)        | 3.3 (2.2 to 4.6)              | 1.2 (0.6 to 2.4)                | 30.7 (21.9 to 49.9)               | 138.2 (108.7 to 192.0) | 38.3 (28.8 to 50.9)        | 9.2 (6.4 to 13.0)             | 3.4 (1.6 to 6.8)                | 87.2 (62.2 to 141.7)              |
| Mozambique | 2049 | 49.7 (38.9 to 69.4)        | 13.9 (10.4 to 18.5)        | 3.3 (2.3 to 4.7)              | 1.2 (0.6 to 2.5)                | 31.2 (21.9 to 50.2)               | 141.1 (110.5 to 196.9) | 39.5 (29.5 to 52.6)        | 9.4 (6.5 to 13.2)             | 3.5 (1.6 to 7.0)                | 88.7 (62.3 to 142.4)              |
| Mozambique | 2050 | 50.9 (39.8 to 71.0)        | 14.3 (10.6 to 19.0)        | 3.4 (2.3 to 4.8)              | 1.3 (0.6 to 2.5)                | 31.9 (22.3 to 51.4)               | 144.3 (113.0 to 201.4) | 40.7 (30.2 to 54.0)        | 9.6 (6.6 to 13.6)             | 3.6 (1.7 to 7.2)                | 90.4 (63.2 to 145.8)              |

| Country | Year | 2018 US Dollars per capita |                            |                               |                                 |                                   | 2018 PPP per capita    |                            |                               |                                 |                                   |
|---------|------|----------------------------|----------------------------|-------------------------------|---------------------------------|-----------------------------------|------------------------|----------------------------|-------------------------------|---------------------------------|-----------------------------------|
|         |      | Health spending            | Government health spending | Out-of-pocket health spending | Prepaid private health spending | Development assistance for health | Health spending        | Government health spending | Out-of-pocket health spending | Prepaid private health spending | Development assistance for health |
| Myanmar | 1995 | 5.1 (3.7 to 6.7)           | 0.8 (0.6 to 1.1)           | 4.2 (2.9 to 5.9)              | 0.0 (0.0 to 0.0)                | 0.0 (0.0 to 0.0)                  | 25.7 (18.8 to 34.0)    | 4.2 (3.2 to 5.5)           | 21.4 (14.6 to 29.7)           | 0.0 (0.0 to 0.0)                | 0.0 (0.0 to 0.0)                  |
| Myanmar | 1996 | 5.0 (3.7 to 6.7)           | 0.8 (0.6 to 1.0)           | 4.2 (2.9 to 5.9)              | 0.0 (0.0 to 0.0)                | 0.0 (0.0 to 0.0)                  | 25.6 (18.6 to 33.9)    | 4.0 (3.0 to 5.2)           | 21.5 (14.7 to 29.7)           | 0.0 (0.0 to 0.0)                | 0.1 (0.1 to 0.1)                  |
| Myanmar | 1997 | 4.9 (3.6 to 6.4)           | 0.7 (0.5 to 0.9)           | 4.1 (2.8 to 5.6)              | 0.0 (0.0 to 0.0)                | 0.0 (0.0 to 0.0)                  | 24.6 (18.1 to 32.4)    | 3.6 (2.7 to 4.7)           | 20.8 (14.3 to 28.3)           | 0.0 (0.0 to 0.0)                | 0.2 (0.2 to 0.2)                  |
| Myanmar | 1998 | 4.8 (3.5 to 6.3)           | 0.6 (0.5 to 0.8)           | 4.1 (2.8 to 5.6)              | 0.0 (0.0 to 0.0)                | 0.1 (0.1 to 0.1)                  | 24.3 (17.8 to 32.0)    | 3.2 (2.4 to 4.2)           | 20.8 (14.2 to 28.7)           | 0.0 (0.0 to 0.0)                | 0.3 (0.3 to 0.3)                  |
| Myanmar | 1999 | 5.3 (3.9 to 7.0)           | 0.7 (0.5 to 0.9)           | 4.5 (3.0 to 6.2)              | 0.0 (0.0 to 0.0)                | 0.1 (0.1 to 0.1)                  | 26.8 (19.7 to 35.6)    | 3.4 (2.6 to 4.4)           | 22.7 (15.5 to 31.3)           | 0.0 (0.0 to 0.0)                | 0.7 (0.7 to 0.7)                  |
| Myanmar | 2000 | 6.3 (4.6 to 8.3)           | 0.8 (0.6 to 1.0)           | 5.3 (3.7 to 7.4)              | 0.0 (0.0 to 0.0)                | 0.2 (0.2 to 0.2)                  | 31.8 (23.5 to 42.1)    | 3.9 (3.0 to 5.1)           | 27.0 (18.8 to 37.3)           | 0.0 (0.0 to 0.0)                | 0.9 (0.9 to 0.9)                  |
| Myanmar | 2001 | 7.1 (5.2 to 9.3)           | 0.8 (0.6 to 1.1)           | 6.1 (4.3 to 8.4)              | 0.0 (0.0 to 0.0)                | 0.1 (0.1 to 0.1)                  | 35.9 (26.3 to 47.4)    | 4.3 (3.3 to 5.6)           | 30.8 (21.6 to 42.4)           | 0.0 (0.0 to 0.0)                | 0.7 (0.7 to 0.7)                  |
| Myanmar | 2002 | 8.4 (6.3 to 11.2)          | 1.0 (0.7 to 1.3)           | 7.1 (5.0 to 9.7)              | 0.0 (0.0 to 0.0)                | 0.3 (0.3 to 0.3)                  | 42.5 (31.9 to 56.6)    | 4.9 (3.7 to 6.4)           | 35.8 (25.4 to 49.4)           | 0.0 (0.0 to 0.0)                | 1.7 (1.7 to 1.7)                  |
| Myanmar | 2003 | 9.6 (7.3 to 12.7)          | 1.0 (0.8 to 1.3)           | 7.9 (5.7 to 10.9)             | 0.0 (0.0 to 0.0)                | 0.7 (0.7 to 0.7)                  | 48.8 (37.2 to 64.3)    | 5.2 (3.9 to 6.7)           | 40.1 (28.8 to 55.5)           | 0.0 (0.0 to 0.0)                | 3.5 (3.5 to 3.5)                  |
| Myanmar | 2004 | 10.6 (8.0 to 13.8)         | 1.1 (0.8 to 1.4)           | 8.8 (6.3 to 12.0)             | 0.0 (0.0 to 0.0)                | 0.7 (0.7 to 0.7)                  | 53.7 (40.6 to 69.9)    | 5.6 (4.2 to 7.2)           | 44.7 (31.8 to 60.7)           | 0.0 (0.0 to 0.0)                | 3.4 (3.4 to 3.4)                  |
| Myanmar | 2005 | 11.7 (9.0 to 14.9)         | 1.1 (0.8 to 1.5)           | 9.5 (6.8 to 12.7)             | 0.0 (0.0 to 0.0)                | 1.1 (1.1 to 1.1)                  | 59.4 (45.6 to 75.4)    | 5.7 (4.3 to 7.4)           | 48.4 (34.7 to 64.6)           | 0.0 (0.0 to 0.0)                | 5.3 (5.3 to 5.3)                  |
| Myanmar | 2006 | 12.2 (9.2 to 15.7)         | 1.3 (1.0 to 1.7)           | 10.3 (7.4 to 13.9)            | 0.0 (0.0 to 0.0)                | 0.5 (0.5 to 0.5)                  | 61.7 (46.5 to 79.7)    | 6.6 (4.9 to 8.6)           | 52.5 (37.4 to 70.5)           | 0.0 (0.0 to 0.0)                | 2.6 (2.6 to 2.6)                  |
| Myanmar | 2007 | 13.4 (10.3 to 17.4)        | 1.3 (1.0 to 1.7)           | 11.1 (8.0 to 14.9)            | 0.0 (0.0 to 0.0)                | 1.0 (1.0 to 1.0)                  | 68.1 (52.1 to 88.0)    | 6.8 (5.1 to 8.8)           | 56.2 (40.4 to 75.5)           | 0.0 (0.0 to 0.1)                | 5.1 (5.1 to 5.1)                  |
| Myanmar | 2008 | 14.3 (10.9 to 18.4)        | 1.4 (1.0 to 1.8)           | 11.8 (8.5 to 16.0)            | 0.0 (0.0 to 0.0)                | 1.1 (1.1 to 1.1)                  | 72.6 (55.1 to 93.5)    | 7.0 (5.2 to 9.0)           | 60.0 (43.1 to 81.1)           | 0.0 (0.0 to 0.1)                | 5.5 (5.5 to 5.5)                  |
| Myanmar | 2009 | 15.3 (11.8 to 19.6)        | 1.6 (1.2 to 2.0)           | 12.6 (9.1 to 16.8)            | 0.0 (0.0 to 0.0)                | 1.2 (1.2 to 1.2)                  | 77.8 (59.6 to 99.5)    | 7.9 (5.9 to 10.2)          | 63.9 (46.0 to 85.3)           | 0.0 (0.0 to 0.1)                | 6.0 (6.0 to 6.0)                  |
| Myanmar | 2010 | 16.9 (13.2 to 21.3)        | 1.9 (1.4 to 2.4)           | 13.1 (9.3 to 17.4)            | 0.0 (0.0 to 0.0)                | 1.9 (1.9 to 1.9)                  | 85.8 (66.8 to 107.9)   | 9.5 (7.3 to 12.2)          | 66.5 (47.1 to 88.2)           | 0.0 (0.0 to 0.1)                | 9.7 (9.7 to 9.7)                  |
| Myanmar | 2011 | 17.5 (13.6 to 22.4)        | 2.4 (1.9 to 3.1)           | 13.8 (9.9 to 18.6)            | 0.0 (0.0 to 0.0)                | 1.3 (1.3 to 1.3)                  | 89.0 (69.2 to 113.4)   | 12.3 (9.4 to 15.7)         | 69.9 (50.1 to 94.2)           | 0.0 (0.0 to 0.1)                | 6.7 (6.7 to 6.7)                  |
| Myanmar | 2012 | 22.5 (18.1 to 28.0)        | 3.7 (2.8 to 4.7)           | 15.8 (11.6 to 21.2)           | 0.0 (0.0 to 0.0)                | 3.0 (3.0 to 3.0)                  | 114.2 (91.8 to 142.0)  | 18.8 (14.3 to 24.1)        | 80.2 (58.8 to 107.4)          | 0.0 (0.0 to 0.1)                | 15.3 (15.3 to 15.3)               |
| Myanmar | 2013 | 29.1 (23.6 to 35.7)        | 5.5 (4.2 to 7.1)           | 19.5 (14.4 to 26.0)           | 0.0 (0.0 to 0.0)                | 4.1 (4.1 to 4.1)                  | 147.6 (119.6 to 181.2) | 27.8 (21.4 to 35.9)        | 99.1 (73.3 to 132.1)          | 0.0 (0.0 to 0.1)                | 20.7 (20.7 to 20.7)               |
| Myanmar | 2014 | 42.9 (34.5 to 53.6)        | 8.1 (6.2 to 10.4)          | 29.8 (22.0 to 40.3)           | 0.0 (0.0 to 0.0)                | 5.0 (5.0 to 5.0)                  | 217.4 (175.2 to 271.9) | 41.0 (31.3 to 52.8)        | 151.3 (111.5 to 204.4)        | 0.0 (0.0 to 0.1)                | 25.1 (25.1 to 25.1)               |
| Myanmar | 2015 | 51.7 (41.4 to 65.6)        | 10.3 (7.9 to 13.2)         | 37.5 (27.5 to 51.0)           | 0.0 (0.0 to 0.0)                | 3.9 (3.9 to 3.9)                  | 262.2 (210.0 to 332.5) | 52.2 (39.9 to 67.0)        | 190.1 (139.3 to 258.7)        | 0.0 (0.0 to 0.1)                | 19.8 (19.8 to 19.8)               |

| Country | Year | 2018 US Dollars per capita |                            |                               |                                 |                                   | 2018 PPP per capita    |                            |                               |                                 |                                   |
|---------|------|----------------------------|----------------------------|-------------------------------|---------------------------------|-----------------------------------|------------------------|----------------------------|-------------------------------|---------------------------------|-----------------------------------|
|         |      | Health spending            | Government health spending | Out-of-pocket health spending | Prepaid private health spending | Development assistance for health | Health spending        | Government health spending | Out-of-pocket health spending | Prepaid private health spending | Development assistance for health |
| Myanmar | 2016 | 59.5 (47.9 to 75.5)        | 11.5 (8.8 to 15.1)         | 42.4 (31.2 to 58.1)           | 0.0 (0.0 to 0.0)                | 5.5 (5.5 to 5.5)                  | 301.6 (243.0 to 382.8) | 58.6 (44.6 to 76.4)        | 215.1 (158.0 to 294.9)        | 0.0 (0.0 to 0.1)                | 27.9 (27.9 to 27.9)               |
| Myanmar | 2017 | 62.3 (49.9 to 78.8)        | 12.4 (9.5 to 16.3)         | 45.1 (32.9 to 61.5)           | 0.0 (0.0 to 0.0)                | 4.8 (4.8 to 4.8)                  | 316.1 (252.9 to 399.8) | 63.0 (47.9 to 82.4)        | 228.8 (167.1 to 312.0)        | 0.0 (0.0 to 0.1)                | 24.3 (24.3 to 24.3)               |
| Myanmar | 2018 | 64.6 (51.3 to 82.1)        | 13.0 (9.9 to 17.0)         | 47.1 (34.7 to 64.6)           | 0.0 (0.0 to 0.0)                | 4.5 (4.4 to 4.5)                  | 327.6 (260.4 to 416.7) | 65.9 (50.1 to 86.3)        | 239.0 (176.0 to 327.5)        | 0.0 (0.0 to 0.1)                | 22.7 (22.5 to 22.7)               |
| Myanmar | 2019 | 68.4 (54.9 to 87.4)        | 13.6 (10.3 to 17.8)        | 50.4 (37.0 to 69.1)           | 0.0 (0.0 to 0.0)                | 4.4 (4.1 to 4.6)                  | 346.9 (278.4 to 443.3) | 68.9 (52.4 to 90.2)        | 255.8 (187.9 to 350.5)        | 0.0 (0.0 to 0.1)                | 22.3 (20.7 to 23.6)               |
| Myanmar | 2020 | 72.5 (57.4 to 92.4)        | 14.2 (10.8 to 18.6)        | 53.9 (39.4 to 73.2)           | 0.0 (0.0 to 0.0)                | 4.4 (4.0 to 4.8)                  | 367.6 (290.9 to 468.7) | 72.0 (54.6 to 94.4)        | 273.2 (200.0 to 371.5)        | 0.0 (0.0 to 0.1)                | 22.3 (20.3 to 24.2)               |
| Myanmar | 2021 | 76.6 (60.7 to 97.5)        | 14.8 (11.2 to 19.5)        | 57.3 (41.5 to 77.9)           | 0.0 (0.0 to 0.0)                | 4.4 (3.9 to 4.9)                  | 388.3 (307.7 to 494.4) | 75.3 (57.1 to 98.7)        | 290.7 (210.7 to 395.3)        | 0.0 (0.0 to 0.1)                | 22.3 (19.9 to 24.7)               |
| Myanmar | 2022 | 80.3 (63.9 to 103.2)       | 15.5 (11.8 to 20.4)        | 60.4 (44.0 to 83.1)           | 0.0 (0.0 to 0.0)                | 4.4 (3.9 to 5.0)                  | 407.5 (324.1 to 523.7) | 78.7 (59.7 to 103.2)       | 306.2 (223.0 to 421.5)        | 0.0 (0.0 to 0.1)                | 22.5 (19.9 to 25.5)               |
| Myanmar | 2023 | 83.4 (66.1 to 107.2)       | 16.2 (12.3 to 21.3)        | 62.7 (45.7 to 86.2)           | 0.0 (0.0 to 0.0)                | 4.5 (3.9 to 5.1)                  | 423.3 (335.2 to 543.6) | 82.4 (62.4 to 108.1)       | 318.1 (231.8 to 437.2)        | 0.0 (0.0 to 0.1)                | 22.7 (19.7 to 25.9)               |
| Myanmar | 2024 | 86.8 (68.5 to 111.1)       | 17.0 (12.8 to 22.3)        | 65.2 (47.5 to 89.2)           | 0.0 (0.0 to 0.0)                | 4.5 (3.9 to 5.2)                  | 440.1 (347.5 to 563.7) | 86.4 (65.2 to 113.2)       | 330.7 (241.0 to 452.6)        | 0.0 (0.0 to 0.1)                | 23.0 (19.9 to 26.6)               |
| Myanmar | 2025 | 90.4 (71.0 to 116.0)       | 17.9 (13.5 to 23.4)        | 67.9 (49.3 to 93.0)           | 0.0 (0.0 to 0.0)                | 4.6 (3.9 to 5.4)                  | 458.4 (360.0 to 588.2) | 90.8 (68.6 to 118.9)       | 344.4 (250.2 to 471.6)        | 0.0 (0.0 to 0.2)                | 23.2 (19.7 to 27.3)               |
| Myanmar | 2026 | 94.0 (74.5 to 120.6)       | 18.8 (14.2 to 24.8)        | 70.6 (51.3 to 96.5)           | 0.0 (0.0 to 0.0)                | 4.6 (3.9 to 5.4)                  | 476.9 (378.0 to 611.7) | 95.3 (72.0 to 125.6)       | 358.2 (260.2 to 489.4)        | 0.1 (0.0 to 0.2)                | 23.3 (19.7 to 27.6)               |
| Myanmar | 2027 | 97.8 (77.1 to 126.3)       | 19.7 (14.8 to 25.9)        | 73.4 (53.2 to 100.7)          | 0.0 (0.0 to 0.0)                | 4.7 (3.9 to 5.6)                  | 495.9 (391.0 to 640.4) | 100.0 (75.3 to 131.2)      | 372.3 (270.0 to 510.7)        | 0.1 (0.0 to 0.2)                | 23.6 (19.8 to 28.4)               |
| Myanmar | 2028 | 101.6 (79.8 to 131.1)      | 20.6 (15.5 to 27.0)        | 76.2 (55.2 to 105.2)          | 0.0 (0.0 to 0.0)                | 4.7 (3.9 to 5.8)                  | 515.2 (404.6 to 665.0) | 104.6 (78.8 to 136.9)      | 386.5 (279.8 to 533.4)        | 0.1 (0.0 to 0.2)                | 23.9 (19.9 to 29.2)               |
| Myanmar | 2029 | 105.6 (82.8 to 137.1)      | 21.6 (16.3 to 28.3)        | 79.2 (57.2 to 110.2)          | 0.0 (0.0 to 0.0)                | 4.8 (3.9 to 5.9)                  | 535.4 (420.2 to 695.6) | 109.6 (82.6 to 143.4)      | 401.5 (290.1 to 559.0)        | 0.1 (0.0 to 0.2)                | 24.3 (20.0 to 29.8)               |
| Myanmar | 2030 | 109.7 (85.7 to 141.8)      | 22.6 (17.1 to 29.6)        | 82.2 (59.2 to 115.7)          | 0.0 (0.0 to 0.0)                | 4.8 (4.0 to 6.0)                  | 556.2 (434.7 to 719.5) | 114.8 (86.5 to 150.2)      | 416.8 (300.3 to 586.8)        | 0.1 (0.0 to 0.2)                | 24.6 (20.1 to 30.5)               |
| Myanmar | 2031 | 113.8 (88.9 to 148.4)      | 23.7 (17.8 to 31.0)        | 85.2 (61.2 to 120.8)          | 0.0 (0.0 to 0.0)                | 4.9 (4.0 to 6.2)                  | 577.3 (451.2 to 752.7) | 120.1 (90.3 to 157.3)      | 432.2 (310.5 to 612.7)        | 0.1 (0.0 to 0.2)                | 24.9 (20.0 to 31.5)               |
| Myanmar | 2032 | 118.1 (92.3 to 155.1)      | 24.8 (18.6 to 32.4)        | 88.3 (63.3 to 126.0)          | 0.0 (0.0 to 0.0)                | 5.0 (4.0 to 6.4)                  | 599.0 (468.4 to 786.5) | 125.6 (94.2 to 164.5)      | 448.1 (320.9 to 639.3)        | 0.1 (0.0 to 0.2)                | 25.3 (20.2 to 32.3)               |
| Myanmar | 2033 | 122.4 (95.9 to 162.8)      | 25.9 (19.4 to 33.8)        | 91.5 (65.4 to 130.8)          | 0.0 (0.0 to 0.0)                | 5.1 (4.0 to 6.6)                  | 621.1 (486.4 to 826.0) | 131.2 (98.3 to 171.7)      | 464.1 (331.5 to 663.5)        | 0.1 (0.0 to 0.2)                | 25.7 (20.3 to 33.4)               |
| Myanmar | 2034 | 127.0 (99.6 to 167.9)      | 27.0 (20.3 to 35.4)        | 94.8 (67.6 to 136.1)          | 0.0 (0.0 to 0.0)                | 5.2 (4.0 to 6.8)                  | 644.1 (505.2 to 851.5) | 137.0 (102.7 to 179.7)     | 480.8 (342.7 to 690.1)        | 0.1 (0.0 to 0.2)                | 26.2 (20.5 to 34.5)               |
| Myanmar | 2035 | 131.5 (101.8 to 173.3)     | 28.2 (21.1 to 37.0)        | 98.1 (69.8 to 142.2)          | 0.0 (0.0 to 0.1)                | 5.3 (4.1 to 6.9)                  | 667.3 (516.5 to 879.0) | 143.0 (107.2 to 187.9)     | 497.5 (353.9 to 721.3)        | 0.1 (0.0 to 0.3)                | 26.7 (20.6 to 35.0)               |
| Myanmar | 2036 | 136.4 (106.3 to 180.8)     | 29.5 (22.1 to 38.7)        | 101.6 (72.1 to 147.1)         | 0.0 (0.0 to 0.1)                | 5.4 (4.1 to 7.2)                  | 692.1 (539.4 to 917.3) | 149.5 (111.9 to 196.1)     | 515.3 (365.9 to 746.4)        | 0.1 (0.0 to 0.3)                | 27.2 (20.8 to 36.4)               |

| Country | Year | 2018 US Dollars per capita |                            |                               |                                 |                                   | 2018 PPP per capita      |                            |                               |                                 |                                   |
|---------|------|----------------------------|----------------------------|-------------------------------|---------------------------------|-----------------------------------|--------------------------|----------------------------|-------------------------------|---------------------------------|-----------------------------------|
|         |      | Health spending            | Government health spending | Out-of-pocket health spending | Prepaid private health spending | Development assistance for health | Health spending          | Government health spending | Out-of-pocket health spending | Prepaid private health spending | Development assistance for health |
| Myanmar | 2037 | 141.3 (108.6 to 188.6)     | 30.7 (23.0 to 40.4)        | 105.1 (74.5 to 152.0)         | 0.0 (0.0 to 0.1)                | 5.5 (4.1 to 7.3)                  | 716.7 (550.8 to 956.7)   | 155.9 (116.7 to 205.0)     | 533.0 (377.7 to 771.1)        | 0.1 (0.0 to 0.3)                | 27.7 (20.9 to 37.2)               |
| Myanmar | 2038 | 146.4 (112.9 to 196.4)     | 32.1 (24.0 to 42.2)        | 108.8 (77.0 to 157.6)         | 0.0 (0.0 to 0.1)                | 5.6 (4.2 to 7.8)                  | 742.7 (572.8 to 996.3)   | 162.8 (121.7 to 214.3)     | 551.7 (390.5 to 799.5)        | 0.1 (0.0 to 0.3)                | 28.2 (21.2 to 39.5)               |
| Myanmar | 2039 | 151.7 (117.5 to 201.9)     | 33.5 (25.0 to 44.1)        | 112.5 (79.6 to 163.9)         | 0.0 (0.0 to 0.1)                | 5.6 (4.2 to 8.0)                  | 769.2 (595.9 to 1024.2)  | 169.9 (127.0 to 223.8)     | 570.6 (403.8 to 831.6)        | 0.1 (0.0 to 0.3)                | 28.6 (21.5 to 40.3)               |
| Myanmar | 2040 | 157.0 (121.3 to 211.3)     | 34.9 (26.1 to 46.0)        | 116.3 (82.3 to 169.9)         | 0.0 (0.0 to 0.1)                | 5.7 (4.3 to 8.1)                  | 796.6 (615.0 to 1071.8)  | 177.2 (132.6 to 233.3)     | 590.1 (417.4 to 861.8)        | 0.1 (0.0 to 0.3)                | 29.2 (21.7 to 41.3)               |
| Myanmar | 2041 | 162.6 (126.2 to 217.2)     | 36.5 (27.3 to 48.2)        | 120.3 (85.1 to 175.7)         | 0.0 (0.0 to 0.1)                | 5.9 (4.3 to 8.2)                  | 825.0 (640.0 to 1101.7)  | 185.0 (138.6 to 244.3)     | 610.1 (431.5 to 891.2)        | 0.1 (0.0 to 0.4)                | 29.7 (21.7 to 41.8)               |
| Myanmar | 2042 | 168.4 (130.7 to 225.9)     | 38.1 (28.5 to 50.6)        | 124.4 (87.9 to 181.7)         | 0.0 (0.0 to 0.1)                | 6.0 (4.4 to 8.7)                  | 854.4 (662.8 to 1146.1)  | 193.0 (144.4 to 256.5)     | 630.9 (446.0 to 921.6)        | 0.1 (0.0 to 0.4)                | 30.4 (22.1 to 44.3)               |
| Myanmar | 2043 | 174.4 (133.7 to 233.3)     | 39.7 (29.6 to 53.0)        | 128.6 (90.8 to 187.8)         | 0.0 (0.0 to 0.1)                | 6.1 (4.4 to 9.0)                  | 884.6 (678.3 to 1183.3)  | 201.4 (150.1 to 268.7)     | 652.1 (460.8 to 952.8)        | 0.1 (0.0 to 0.4)                | 30.9 (22.5 to 45.5)               |
| Myanmar | 2044 | 180.5 (139.2 to 243.2)     | 41.4 (30.7 to 55.4)        | 132.9 (93.9 to 193.8)         | 0.0 (0.0 to 0.1)                | 6.2 (4.5 to 9.2)                  | 915.6 (706.0 to 1233.4)  | 209.9 (155.9 to 280.9)     | 673.9 (476.1 to 983.2)        | 0.1 (0.0 to 0.4)                | 31.6 (22.7 to 46.6)               |
| Myanmar | 2045 | 186.8 (145.2 to 249.5)     | 43.2 (32.0 to 58.0)        | 137.2 (96.9 to 200.4)         | 0.0 (0.0 to 0.1)                | 6.4 (4.5 to 9.7)                  | 947.5 (736.5 to 1265.6)  | 218.9 (162.4 to 294.4)     | 696.1 (491.7 to 1016.7)       | 0.2 (0.0 to 0.4)                | 32.3 (22.8 to 49.4)               |
| Myanmar | 2046 | 193.1 (148.5 to 260.4)     | 45.0 (33.3 to 60.5)        | 141.5 (100.0 to 206.9)        | 0.0 (0.0 to 0.1)                | 6.5 (4.6 to 10.2)                 | 979.3 (753.4 to 1320.8)  | 228.2 (168.9 to 306.7)     | 717.9 (507.1 to 1049.5)       | 0.2 (0.0 to 0.5)                | 33.1 (23.3 to 51.8)               |
| Myanmar | 2047 | 199.6 (156.0 to 268.4)     | 46.9 (34.7 to 63.1)        | 146.0 (103.2 to 213.5)        | 0.0 (0.0 to 0.1)                | 6.7 (4.7 to 10.6)                 | 1012.7 (791.5 to 1361.4) | 238.0 (175.8 to 320.1)     | 740.6 (523.6 to 1083.1)       | 0.2 (0.0 to 0.5)                | 33.9 (24.1 to 54.0)               |
| Myanmar | 2048 | 206.4 (160.0 to 273.9)     | 48.9 (36.1 to 65.9)        | 150.6 (106.6 to 220.2)        | 0.0 (0.0 to 0.1)                | 6.9 (4.8 to 11.2)                 | 1047.2 (811.7 to 1389.4) | 248.2 (183.4 to 334.3)     | 764.0 (540.8 to 1116.7)       | 0.2 (0.0 to 0.5)                | 34.8 (24.4 to 56.6)               |
| Myanmar | 2049 | 213.4 (165.4 to 284.0)     | 51.0 (37.6 to 68.8)        | 155.3 (110.1 to 226.0)        | 0.0 (0.0 to 0.1)                | 7.0 (4.9 to 11.6)                 | 1082.6 (839.0 to 1440.4) | 258.8 (190.6 to 348.9)     | 787.9 (558.5 to 1146.3)       | 0.2 (0.0 to 0.5)                | 35.7 (25.0 to 58.9)               |
| Myanmar | 2050 | 220.6 (170.1 to 291.7)     | 53.2 (39.2 to 72.0)        | 160.1 (113.7 to 233.6)        | 0.0 (0.0 to 0.1)                | 7.3 (5.0 to 12.0)                 | 1119.2 (862.8 to 1479.4) | 269.8 (198.9 to 365.3)     | 812.3 (576.6 to 1184.9)       | 0.2 (0.1 to 0.6)                | 36.8 (25.2 to 61.1)               |
| Namibia | 1995 | 346.2 (306.9 to 388.5)     | 227.0 (199.2 to 257.1)     | 19.1 (14.0 to 26.0)           | 92.9 (66.7 to 122.6)            | 7.2 (7.2 to 7.2)                  | 756.1 (670.2 to 848.5)   | 495.8 (435.1 to 561.5)     | 41.6 (30.6 to 56.7)           | 202.9 (145.8 to 267.8)          | 15.8 (15.8 to 15.8)               |
| Namibia | 1996 | 346.2 (311.3 to 381.7)     | 228.9 (203.5 to 254.8)     | 19.2 (14.0 to 26.3)           | 93.5 (70.9 to 116.5)            | 4.7 (4.7 to 4.7)                  | 756.3 (680.0 to 833.8)   | 499.9 (444.4 to 556.6)     | 41.9 (30.7 to 57.4)           | 204.2 (154.8 to 254.5)          | 10.3 (10.3 to 10.3)               |
| Namibia | 1997 | 350.2 (319.7 to 381.0)     | 228.9 (207.0 to 252.3)     | 19.1 (14.1 to 25.8)           | 94.3 (74.0 to 116.5)            | 7.9 (7.9 to 7.9)                  | 765.0 (698.3 to 832.2)   | 500.0 (452.2 to 551.1)     | 41.7 (30.7 to 56.3)           | 206.1 (161.6 to 254.5)          | 17.3 (17.3 to 17.3)               |
| Namibia | 1998 | 345.8 (315.0 to 375.0)     | 227.1 (204.7 to 248.7)     | 18.3 (13.3 to 24.6)           | 95.5 (76.3 to 118.4)            | 4.8 (4.8 to 4.8)                  | 755.2 (688.0 to 819.1)   | 496.1 (447.1 to 543.3)     | 40.0 (29.2 to 53.6)           | 208.6 (166.6 to 258.5)          | 10.5 (10.5 to 10.5)               |
| Namibia | 1999 | 340.1 (310.6 to 369.9)     | 221.9 (201.3 to 243.4)     | 16.6 (12.2 to 22.1)           | 97.1 (77.7 to 121.2)            | 4.4 (4.4 to 4.4)                  | 742.8 (678.4 to 807.9)   | 484.7 (439.8 to 531.6)     | 36.3 (26.7 to 48.4)           | 212.1 (169.7 to 264.8)          | 9.7 (9.7 to 9.7)                  |
| Namibia | 2000 | 334.7 (304.6 to 366.4)     | 215.3 (195.2 to 236.5)     | 14.0 (10.3 to 18.5)           | 100.6 (80.4 to 124.8)           | 4.8 (4.8 to 4.8)                  | 731.0 (665.4 to 800.4)   | 470.3 (426.4 to 516.5)     | 30.5 (22.5 to 40.3)           | 219.7 (175.7 to 272.6)          | 10.5 (10.5 to 10.5)               |
| Namibia | 2001 | 336.0 (306.2 to 368.4)     | 213.9 (193.8 to 234.8)     | 13.4 (9.8 to 17.5)            | 102.4 (82.5 to 126.7)           | 6.4 (6.4 to 6.4)                  | 734.0 (668.8 to 804.6)   | 467.3 (423.3 to 512.8)     | 29.2 (21.3 to 38.3)           | 223.6 (180.2 to 276.7)          | 13.9 (13.9 to 13.9)               |

| Country | Year | 2018 US Dollars per capita |                            |                               |                                 |                                   | 2018 PPP per capita       |                            |                               |                                 |                                   |
|---------|------|----------------------------|----------------------------|-------------------------------|---------------------------------|-----------------------------------|---------------------------|----------------------------|-------------------------------|---------------------------------|-----------------------------------|
|         |      | Health spending            | Government health spending | Out-of-pocket health spending | Prepaid private health spending | Development assistance for health | Health spending           | Government health spending | Out-of-pocket health spending | Prepaid private health spending | Development assistance for health |
| Namibia | 2002 | 351.3 (320.1 to 385.2)     | 221.1 (199.5 to 242.3)     | 14.9 (10.9 to 19.7)           | 108.3 (87.7 to 132.6)           | 7.0 (7.0 to 7.0)                  | 767.4 (699.1 to 841.4)    | 483.0 (435.7 to 529.2)     | 32.5 (23.7 to 43.0)           | 236.5 (191.6 to 289.6)          | 15.3 (15.3 to 15.3)               |
| Namibia | 2003 | 366.5 (335.3 to 400.0)     | 223.7 (202.8 to 243.6)     | 16.8 (12.2 to 22.5)           | 115.5 (94.2 to 141.5)           | 10.5 (10.5 to 10.5)               | 800.6 (732.4 to 873.8)    | 488.7 (442.9 to 532.2)     | 36.8 (26.6 to 49.2)           | 252.3 (205.7 to 309.0)          | 22.9 (22.9 to 22.9)               |
| Namibia | 2004 | 396.8 (364.2 to 431.5)     | 233.3 (213.1 to 254.1)     | 18.1 (13.2 to 24.4)           | 127.0 (104.3 to 154.6)          | 18.4 (18.4 to 18.4)               | 866.7 (795.6 to 942.6)    | 509.6 (465.5 to 555.0)     | 39.5 (28.8 to 53.3)           | 277.5 (227.8 to 337.8)          | 40.2 (40.2 to 40.2)               |
| Namibia | 2005 | 400.2 (367.7 to 434.9)     | 227.7 (208.2 to 249.2)     | 19.4 (14.2 to 26.0)           | 132.5 (108.7 to 158.6)          | 20.6 (20.6 to 20.6)               | 874.1 (803.1 to 950.0)    | 497.4 (454.9 to 544.2)     | 42.4 (31.0 to 56.8)           | 289.4 (237.5 to 346.4)          | 44.9 (44.9 to 44.9)               |
| Namibia | 2006 | 423.7 (390.3 to 456.3)     | 229.9 (209.6 to 252.3)     | 20.9 (15.4 to 28.0)           | 128.2 (104.7 to 153.7)          | 44.7 (44.7 to 44.7)               | 925.5 (852.4 to 996.7)    | 502.1 (457.7 to 551.1)     | 45.7 (33.6 to 61.1)           | 280.1 (228.6 to 335.7)          | 97.6 (97.6 to 97.6)               |
| Namibia | 2007 | 423.2 (391.1 to 454.0)     | 235.5 (214.8 to 258.1)     | 26.4 (19.5 to 34.5)           | 107.9 (87.8 to 130.1)           | 53.4 (53.4 to 53.4)               | 924.3 (854.2 to 991.7)    | 514.3 (469.2 to 563.8)     | 57.6 (42.6 to 75.3)           | 235.7 (191.8 to 284.1)          | 116.7 (116.7 to 116.7)            |
| Namibia | 2008 | 400.3 (370.1 to 429.8)     | 229.2 (208.9 to 251.5)     | 28.9 (21.3 to 37.7)           | 95.9 (77.1 to 116.2)            | 46.3 (46.3 to 46.3)               | 874.4 (808.4 to 938.8)    | 500.7 (456.4 to 549.4)     | 63.2 (46.6 to 82.3)           | 209.4 (168.4 to 253.7)          | 101.1 (101.1 to 101.1)            |
| Namibia | 2009 | 411.7 (381.5 to 439.6)     | 216.5 (197.0 to 236.1)     | 32.9 (24.6 to 43.1)           | 92.9 (73.9 to 114.2)            | 69.5 (69.5 to 69.5)               | 899.2 (833.2 to 960.2)    | 472.8 (430.4 to 515.7)     | 71.8 (53.8 to 94.2)           | 202.9 (161.3 to 249.5)          | 151.7 (151.7 to 151.7)            |
| Namibia | 2010 | 433.4 (403.4 to 465.7)     | 226.4 (205.2 to 247.0)     | 38.2 (28.4 to 49.6)           | 101.1 (80.0 to 123.9)           | 67.7 (67.7 to 67.7)               | 946.7 (881.0 to 1017.2)   | 494.5 (448.3 to 539.4)     | 83.4 (61.9 to 108.4)          | 220.9 (174.8 to 270.6)          | 147.8 (147.8 to 147.8)            |
| Namibia | 2011 | 436.5 (404.1 to 469.9)     | 237.7 (216.7 to 258.7)     | 42.6 (31.4 to 55.1)           | 109.2 (87.8 to 132.9)           | 47.1 (47.1 to 47.1)               | 953.5 (882.6 to 1026.5)   | 519.1 (473.2 to 565.0)     | 93.0 (68.5 to 120.3)          | 238.5 (191.8 to 290.3)          | 102.8 (102.8 to 102.8)            |
| Namibia | 2012 | 465.0 (429.6 to 498.1)     | 246.6 (225.6 to 268.9)     | 44.2 (32.3 to 56.7)           | 113.4 (91.7 to 136.9)           | 60.8 (60.8 to 60.8)               | 1015.7 (938.4 to 1088.0)  | 538.7 (492.7 to 587.3)     | 96.6 (70.5 to 123.8)          | 247.6 (200.2 to 299.0)          | 132.7 (132.7 to 132.7)            |
| Namibia | 2013 | 461.7 (425.4 to 496.8)     | 258.6 (236.8 to 283.7)     | 43.1 (31.9 to 55.6)           | 113.3 (92.2 to 136.3)           | 46.7 (46.7 to 46.7)               | 1008.4 (929.2 to 1085.1)  | 564.9 (517.3 to 619.7)     | 94.1 (69.6 to 121.5)          | 247.4 (201.5 to 297.6)          | 101.9 (101.9 to 101.9)            |
| Namibia | 2014 | 477.6 (439.8 to 515.7)     | 276.7 (253.1 to 301.8)     | 41.8 (30.8 to 55.0)           | 118.9 (97.3 to 145.8)           | 40.1 (40.1 to 40.1)               | 1043.1 (960.6 to 1126.4)  | 604.3 (552.9 to 659.3)     | 91.4 (67.4 to 120.1)          | 259.7 (212.6 to 318.5)          | 87.7 (87.7 to 87.7)               |
| Namibia | 2015 | 505.2 (460.9 to 552.8)     | 293.1 (266.5 to 321.5)     | 41.7 (30.7 to 55.4)           | 141.9 (112.7 to 176.2)          | 28.5 (28.5 to 28.5)               | 1103.5 (1006.7 to 1207.4) | 640.3 (582.1 to 702.3)     | 91.2 (67.1 to 121.0)          | 309.9 (246.1 to 384.9)          | 62.2 (62.2 to 62.2)               |
| Namibia | 2016 | 512.2 (462.1 to 568.5)     | 300.3 (267.6 to 334.8)     | 40.8 (30.1 to 54.7)           | 137.1 (104.6 to 177.1)          | 34.0 (34.0 to 34.0)               | 1118.9 (1009.3 to 1241.7) | 656.0 (584.5 to 731.2)     | 89.2 (65.8 to 119.6)          | 299.4 (228.6 to 386.8)          | 74.3 (74.3 to 74.3)               |
| Namibia | 2017 | 506.4 (457.1 to 560.2)     | 289.0 (257.6 to 322.2)     | 40.6 (29.9 to 54.9)           | 134.4 (102.6 to 173.3)          | 42.3 (42.3 to 42.3)               | 1106.0 (998.5 to 1223.7)  | 631.3 (562.7 to 703.8)     | 88.6 (65.3 to 120.0)          | 293.6 (224.1 to 378.5)          | 92.5 (92.5 to 92.5)               |
| Namibia | 2018 | 510.7 (461.8 to 566.0)     | 293.0 (261.2 to 326.4)     | 41.4 (30.4 to 55.7)           | 136.6 (104.2 to 176.6)          | 39.7 (39.6 to 39.7)               | 1115.6 (1008.7 to 1236.2) | 639.9 (570.6 to 712.9)     | 90.5 (66.4 to 121.6)          | 298.4 (227.7 to 385.7)          | 86.7 (86.6 to 86.8)               |
| Namibia | 2019 | 516.6 (466.9 to 571.5)     | 295.8 (263.5 to 329.9)     | 42.4 (31.2 to 56.9)           | 138.7 (105.8 to 179.8)          | 39.7 (37.0 to 42.0)               | 1128.3 (1019.8 to 1248.3) | 646.1 (575.5 to 720.6)     | 92.5 (68.1 to 124.2)          | 303.0 (231.0 to 392.8)          | 86.7 (80.9 to 91.7)               |
| Namibia | 2020 | 521.5 (471.0 to 577.7)     | 297.7 (265.1 to 331.9)     | 43.2 (31.8 to 58.1)           | 140.6 (107.3 to 182.3)          | 40.0 (36.7 to 43.2)               | 1139.0 (1028.8 to 1261.9) | 650.2 (579.0 to 724.9)     | 94.4 (69.5 to 126.8)          | 307.0 (234.4 to 398.2)          | 87.4 (80.1 to 94.4)               |
| Namibia | 2021 | 527.4 (476.4 to 584.6)     | 300.3 (267.3 to 334.8)     | 44.1 (32.4 to 59.3)           | 142.5 (108.9 to 184.8)          | 40.5 (36.4 to 44.7)               | 1151.9 (1040.6 to 1276.9) | 655.8 (583.9 to 731.3)     | 96.4 (70.8 to 129.6)          | 311.3 (237.8 to 403.6)          | 88.4 (79.6 to 97.7)               |
| Namibia | 2022 | 532.3 (480.7 to 588.9)     | 302.1 (269.3 to 336.8)     | 45.0 (32.9 to 60.8)           | 144.1 (110.1 to 186.8)          | 41.1 (36.5 to 45.9)               | 1162.6 (1050.0 to 1286.3) | 659.8 (588.2 to 735.8)     | 98.3 (71.9 to 132.8)          | 314.6 (240.5 to 408.0)          | 89.9 (79.8 to 100.3)              |



| Country | Year | 2018 US Dollars per capita |                            |                               |                                 |                                   | 2018 PPP per capita       |                            |                               |                                 |                                   |
|---------|------|----------------------------|----------------------------|-------------------------------|---------------------------------|-----------------------------------|---------------------------|----------------------------|-------------------------------|---------------------------------|-----------------------------------|
|         |      | Health spending            | Government health spending | Out-of-pocket health spending | Prepaid private health spending | Development assistance for health | Health spending           | Government health spending | Out-of-pocket health spending | Prepaid private health spending | Development assistance for health |
| Namibia | 2023 | 539.2 (487.8 to 597.0)     | 305.8 (272.0 to 341.1)     | 45.8 (33.6 to 61.5)           | 145.8 (111.5 to 189.1)          | 41.8 (36.4 to 47.4)               | 1177.8 (1065.5 to 1304.0) | 667.9 (594.2 to 745.1)     | 100.1 (73.4 to 134.3)         | 318.5 (243.5 to 413.0)          | 91.3 (79.6 to 103.6)              |
| Namibia | 2024 | 546.3 (492.7 to 604.9)     | 309.6 (275.2 to 345.8)     | 46.7 (34.2 to 63.7)           | 147.5 (112.8 to 191.1)          | 42.6 (36.7 to 49.0)               | 1193.3 (1076.2 to 1321.2) | 676.2 (601.0 to 755.4)     | 101.9 (74.8 to 139.1)         | 322.1 (246.4 to 417.3)          | 93.0 (80.2 to 107.0)              |
| Namibia | 2025 | 553.9 (499.3 to 612.7)     | 313.8 (278.8 to 350.3)     | 47.5 (34.7 to 64.7)           | 149.3 (114.1 to 193.1)          | 43.3 (37.0 to 50.7)               | 1209.9 (1090.7 to 1338.4) | 685.4 (609.0 to 765.2)     | 103.8 (75.8 to 141.4)         | 326.1 (249.2 to 421.8)          | 94.5 (80.8 to 110.7)              |
| Namibia | 2026 | 561.9 (507.2 to 622.5)     | 318.3 (282.3 to 355.5)     | 48.4 (35.1 to 65.9)           | 151.2 (115.5 to 195.2)          | 44.0 (37.1 to 51.6)               | 1227.2 (1107.8 to 1359.7) | 695.3 (616.5 to 776.5)     | 105.7 (76.6 to 143.9)         | 330.2 (252.3 to 426.4)          | 96.1 (81.0 to 112.6)              |
| Namibia | 2027 | 570.2 (513.4 to 630.7)     | 323.0 (286.1 to 360.9)     | 49.3 (35.5 to 67.0)           | 153.1 (116.7 to 198.2)          | 44.8 (37.5 to 53.2)               | 1245.4 (1121.3 to 1377.6) | 705.5 (624.9 to 788.4)     | 107.7 (77.6 to 146.3)         | 334.4 (254.8 to 432.8)          | 97.7 (82.0 to 116.3)              |
| Namibia | 2028 | 579.1 (520.5 to 641.3)     | 328.1 (290.7 to 367.4)     | 50.3 (36.2 to 68.7)           | 155.2 (117.9 to 201.1)          | 45.6 (38.2 to 55.0)               | 1264.9 (1136.8 to 1400.8) | 716.6 (635.0 to 802.6)     | 109.8 (79.1 to 150.1)         | 338.9 (257.5 to 439.2)          | 99.6 (83.4 to 120.1)              |
| Namibia | 2029 | 588.2 (526.8 to 652.8)     | 333.2 (295.0 to 373.9)     | 51.2 (36.8 to 70.2)           | 157.3 (119.1 to 203.7)          | 46.4 (38.3 to 56.8)               | 1284.7 (1150.7 to 1425.9) | 727.8 (644.4 to 816.6)     | 111.9 (80.3 to 153.3)         | 343.5 (260.2 to 444.9)          | 101.4 (83.6 to 124.1)             |
| Namibia | 2030 | 597.5 (536.6 to 663.6)     | 338.6 (299.4 to 380.4)     | 52.2 (37.3 to 72.3)           | 159.5 (120.5 to 206.6)          | 47.3 (38.7 to 57.9)               | 1305.1 (1172.0 to 1449.5) | 739.5 (654.0 to 831.0)     | 114.0 (81.5 to 158.0)         | 348.4 (263.2 to 451.2)          | 103.2 (84.5 to 126.6)             |
| Namibia | 2031 | 607.6 (545.2 to 674.2)     | 344.4 (303.6 to 387.5)     | 53.2 (38.0 to 74.2)           | 161.9 (122.2 to 209.9)          | 48.1 (39.0 to 60.3)               | 1327.1 (1190.8 to 1472.6) | 752.2 (663.1 to 846.4)     | 116.2 (83.1 to 162.2)         | 353.7 (266.9 to 458.4)          | 105.1 (85.2 to 131.6)             |
| Namibia | 2032 | 617.9 (552.3 to 685.9)     | 350.3 (308.0 to 394.6)     | 54.2 (38.5 to 76.3)           | 164.4 (124.3 to 213.0)          | 49.0 (39.3 to 61.6)               | 1349.7 (1206.3 to 1498.1) | 765.2 (672.8 to 861.8)     | 118.4 (84.1 to 166.7)         | 359.1 (271.4 to 465.2)          | 107.0 (85.8 to 134.6)             |
| Namibia | 2033 | 629.1 (561.2 to 698.9)     | 356.8 (314.0 to 402.3)     | 55.3 (39.2 to 78.6)           | 167.1 (126.2 to 216.3)          | 49.9 (39.6 to 64.0)               | 1374.1 (1225.8 to 1526.6) | 779.3 (685.9 to 878.7)     | 120.7 (85.5 to 171.6)         | 365.1 (275.6 to 472.6)          | 109.0 (86.6 to 139.8)             |
| Namibia | 2034 | 640.4 (573.1 to 715.1)     | 363.3 (318.8 to 410.3)     | 56.3 (39.8 to 80.6)           | 169.9 (128.0 to 219.9)          | 51.0 (40.1 to 65.6)               | 1398.8 (1251.8 to 1561.9) | 793.4 (696.3 to 896.2)     | 123.0 (86.8 to 176.0)         | 371.0 (279.6 to 480.3)          | 111.3 (87.6 to 143.4)             |
| Namibia | 2035 | 651.7 (583.9 to 729.3)     | 369.8 (323.4 to 418.4)     | 57.4 (40.3 to 82.7)           | 172.6 (129.7 to 223.6)          | 52.0 (40.4 to 68.1)               | 1423.5 (1275.4 to 1593.0) | 807.7 (706.4 to 913.9)     | 125.3 (88.0 to 180.6)         | 377.0 (283.4 to 488.5)          | 113.6 (88.2 to 148.8)             |
| Namibia | 2036 | 662.9 (591.8 to 741.3)     | 376.3 (328.5 to 426.7)     | 58.4 (40.8 to 84.8)           | 175.2 (131.6 to 227.4)          | 53.0 (40.9 to 71.2)               | 1448.0 (1292.7 to 1619.1) | 821.9 (717.5 to 932.0)     | 127.5 (89.1 to 185.2)         | 382.7 (287.4 to 496.7)          | 115.9 (89.4 to 155.6)             |
| Namibia | 2037 | 674.4 (600.6 to 752.3)     | 383.0 (334.2 to 435.5)     | 59.4 (41.3 to 87.0)           | 177.9 (133.6 to 230.9)          | 54.1 (41.6 to 72.4)               | 1473.0 (1311.8 to 1643.3) | 836.6 (730.0 to 951.2)     | 129.8 (90.3 to 190.1)         | 388.6 (291.9 to 504.2)          | 118.1 (90.9 to 158.1)             |
| Namibia | 2038 | 686.3 (611.6 to 767.0)     | 389.9 (339.6 to 444.6)     | 60.4 (41.8 to 89.3)           | 180.7 (135.8 to 234.7)          | 55.2 (42.1 to 76.6)               | 1499.0 (1335.8 to 1675.3) | 851.7 (741.8 to 971.0)     | 132.0 (91.3 to 195.1)         | 394.7 (296.5 to 512.6)          | 120.5 (91.9 to 167.2)             |
| Namibia | 2039 | 698.1 (622.2 to 781.9)     | 396.9 (344.1 to 453.4)     | 61.5 (42.2 to 91.6)           | 183.5 (137.9 to 239.0)          | 56.3 (42.9 to 78.1)               | 1524.8 (1359.0 to 1707.9) | 866.8 (751.6 to 990.3)     | 134.3 (92.2 to 200.0)         | 400.8 (301.3 to 522.0)          | 122.9 (93.8 to 170.6)             |
| Namibia | 2040 | 710.5 (630.4 to 797.9)     | 404.1 (350.1 to 462.2)     | 62.5 (42.7 to 93.2)           | 186.4 (139.9 to 242.8)          | 57.5 (43.8 to 79.4)               | 1551.8 (1377.0 to 1742.9) | 882.7 (764.7 to 1009.4)    | 136.5 (93.3 to 203.5)         | 407.1 (305.6 to 530.4)          | 125.5 (95.6 to 173.5)             |
| Namibia | 2041 | 723.1 (641.5 to 810.3)     | 411.6 (354.7 to 470.7)     | 63.5 (43.1 to 94.8)           | 189.3 (141.8 to 246.7)          | 58.7 (44.3 to 81.5)               | 1579.4 (1401.1 to 1770.0) | 899.0 (774.8 to 1028.1)    | 138.7 (94.1 to 207.1)         | 413.5 (309.7 to 538.7)          | 128.2 (96.7 to 178.1)             |
| Namibia | 2042 | 735.8 (651.4 to 827.7)     | 419.1 (362.1 to 479.6)     | 64.5 (43.5 to 96.4)           | 192.2 (143.7 to 250.5)          | 60.0 (45.0 to 85.7)               | 1607.3 (1422.8 to 1807.8) | 915.3 (790.9 to 1047.5)    | 140.9 (95.0 to 210.6)         | 419.8 (313.8 to 547.1)          | 131.2 (98.3 to 187.3)             |
| Namibia | 2043 | 748.7 (660.2 to 845.0)     | 426.7 (368.1 to 489.0)     | 65.5 (44.0 to 98.0)           | 195.2 (145.9 to 254.3)          | 61.4 (45.6 to 88.8)               | 1635.4 (1442.0 to 1845.6) | 932.0 (804.1 to 1068.1)    | 143.1 (96.1 to 214.1)         | 426.3 (318.7 to 555.4)          | 134.0 (99.6 to 194.0)             |

| Country | Year | 2018 US Dollars per capita |                            |                               |                                 |                                   | 2018 PPP per capita       |                            |                               |                                 |                                   |
|---------|------|----------------------------|----------------------------|-------------------------------|---------------------------------|-----------------------------------|---------------------------|----------------------------|-------------------------------|---------------------------------|-----------------------------------|
|         |      | Health spending            | Government health spending | Out-of-pocket health spending | Prepaid private health spending | Development assistance for health | Health spending           | Government health spending | Out-of-pocket health spending | Prepaid private health spending | Development assistance for health |
| Namibia | 2044 | 762.1 (673.8 to 860.1)     | 434.5 (372.9 to 499.7)     | 66.5 (44.4 to 99.7)           | 198.2 (147.7 to 257.9)          | 62.8 (46.4 to 90.9)               | 1664.6 (1471.7 to 1878.7) | 949.2 (814.6 to 1091.4)    | 145.3 (96.9 to 217.7)         | 433.0 (322.6 to 563.3)          | 137.1 (101.4 to 198.5)            |
| Namibia | 2045 | 775.4 (683.1 to 876.9)     | 442.4 (378.4 to 510.1)     | 67.5 (44.8 to 101.5)          | 201.3 (149.4 to 261.9)          | 64.3 (46.4 to 96.8)               | 1693.7 (1492.1 to 1915.4) | 966.3 (826.4 to 1114.1)    | 147.5 (97.8 to 221.8)         | 439.6 (326.4 to 572.0)          | 140.3 (101.3 to 211.5)            |
| Namibia | 2046 | 788.9 (692.4 to 895.3)     | 450.3 (383.4 to 520.5)     | 68.5 (45.2 to 103.4)          | 204.3 (151.4 to 266.4)          | 65.8 (47.5 to 100.9)              | 1723.2 (1512.3 to 1955.6) | 983.6 (837.4 to 1137.0)    | 149.6 (98.8 to 225.8)         | 446.3 (330.7 to 581.9)          | 143.6 (103.9 to 220.4)            |
| Namibia | 2047 | 802.6 (702.9 to 911.6)     | 458.3 (389.6 to 531.4)     | 69.5 (45.8 to 105.2)          | 207.4 (153.3 to 270.8)          | 67.4 (48.4 to 106.1)              | 1753.0 (1535.3 to 1991.2) | 1001.1 (850.9 to 1160.7)   | 151.7 (99.9 to 229.8)         | 453.1 (334.9 to 591.5)          | 147.2 (105.7 to 231.8)            |
| Namibia | 2048 | 816.9 (716.1 to 925.7)     | 466.7 (394.5 to 541.2)     | 70.5 (46.1 to 106.9)          | 210.6 (155.4 to 275.0)          | 69.1 (49.6 to 110.5)              | 1784.3 (1564.0 to 2021.9) | 1019.3 (861.8 to 1182.1)   | 153.9 (100.8 to 233.4)        | 460.1 (339.4 to 600.7)          | 151.0 (108.2 to 241.3)            |
| Namibia | 2049 | 831.2 (729.2 to 941.1)     | 475.1 (398.7 to 553.5)     | 71.4 (46.6 to 108.9)          | 213.8 (157.2 to 279.7)          | 70.8 (50.5 to 113.7)              | 1815.6 (1592.7 to 2055.6) | 1037.8 (870.8 to 1209.1)   | 156.1 (101.7 to 237.8)        | 467.1 (343.4 to 611.0)          | 154.7 (110.3 to 248.4)            |
| Namibia | 2050 | 846.1 (737.9 to 962.4)     | 483.9 (405.8 to 565.1)     | 72.4 (46.9 to 110.9)          | 217.0 (159.2 to 284.5)          | 72.8 (51.2 to 119.3)              | 1848.2 (1611.8 to 2102.0) | 1056.9 (886.3 to 1234.3)   | 158.2 (102.5 to 242.2)        | 474.1 (347.8 to 621.3)          | 158.9 (111.9 to 260.5)            |
| Nepal   | 1995 | 19.2 (15.1 to 24.4)        | 3.9 (3.0 to 5.1)           | 12.8 (8.9 to 17.3)            | 1.7 (0.9 to 3.2)                | 0.8 (0.8 to 0.8)                  | 61.6 (48.4 to 78.4)       | 12.6 (9.6 to 16.3)         | 40.9 (28.6 to 55.6)           | 5.6 (2.7 to 10.3)               | 2.5 (2.5 to 2.5)                  |
| Nepal   | 1996 | 20.3 (15.9 to 25.8)        | 4.1 (3.0 to 5.2)           | 13.6 (9.4 to 18.6)            | 1.8 (0.9 to 3.3)                | 0.9 (0.9 to 0.9)                  | 65.0 (51.0 to 82.6)       | 13.0 (9.7 to 16.6)         | 43.6 (30.2 to 59.8)           | 5.7 (2.8 to 10.6)               | 2.7 (2.7 to 2.7)                  |
| Nepal   | 1997 | 22.1 (17.5 to 27.6)        | 4.2 (3.1 to 5.4)           | 14.2 (9.9 to 19.8)            | 1.8 (0.9 to 3.4)                | 1.9 (1.9 to 1.9)                  | 70.8 (56.0 to 88.6)       | 13.4 (10.0 to 17.2)        | 45.7 (31.8 to 63.5)           | 5.8 (2.8 to 10.8)               | 6.0 (6.0 to 6.0)                  |
| Nepal   | 1998 | 23.1 (18.3 to 29.1)        | 4.4 (3.3 to 5.7)           | 14.6 (10.2 to 20.4)           | 1.9 (0.9 to 3.4)                | 2.2 (2.2 to 2.2)                  | 74.1 (58.8 to 93.2)       | 14.1 (10.5 to 18.1)        | 46.9 (32.8 to 65.3)           | 6.0 (2.8 to 10.8)               | 7.1 (7.1 to 7.1)                  |
| Nepal   | 1999 | 22.3 (17.8 to 28.0)        | 4.2 (3.1 to 5.4)           | 14.3 (10.0 to 20.0)           | 1.8 (0.8 to 3.3)                | 2.1 (2.1 to 2.1)                  | 71.6 (56.9 to 89.7)       | 13.3 (9.9 to 17.2)         | 45.9 (32.2 to 64.2)           | 5.7 (2.6 to 10.5)               | 6.7 (6.7 to 6.7)                  |
| Nepal   | 2000 | 20.3 (16.1 to 25.6)        | 3.9 (2.9 to 5.0)           | 13.0 (9.2 to 17.9)            | 1.6 (0.8 to 3.1)                | 1.8 (1.8 to 1.8)                  | 65.0 (51.6 to 81.9)       | 12.5 (9.3 to 16.0)         | 41.6 (29.4 to 57.5)           | 5.2 (2.5 to 10.0)               | 5.6 (5.6 to 5.6)                  |
| Nepal   | 2001 | 21.2 (17.0 to 26.5)        | 4.1 (3.0 to 5.2)           | 12.9 (9.0 to 17.8)            | 1.7 (0.8 to 3.2)                | 2.5 (2.5 to 2.5)                  | 67.9 (54.6 to 84.9)       | 13.1 (9.8 to 16.8)         | 41.5 (28.8 to 57.1)           | 5.4 (2.5 to 10.3)               | 8.0 (8.0 to 8.0)                  |
| Nepal   | 2002 | 21.0 (16.7 to 26.3)        | 4.3 (3.2 to 5.5)           | 13.0 (9.0 to 18.0)            | 1.7 (0.8 to 3.3)                | 2.0 (2.0 to 2.0)                  | 67.5 (53.5 to 84.3)       | 13.8 (10.3 to 17.7)        | 41.7 (28.8 to 57.8)           | 5.5 (2.6 to 10.6)               | 6.5 (6.5 to 6.5)                  |
| Nepal   | 2003 | 22.2 (17.7 to 27.4)        | 4.3 (3.2 to 5.6)           | 13.1 (9.0 to 18.0)            | 1.7 (0.8 to 3.3)                | 3.0 (3.0 to 3.0)                  | 71.2 (56.9 to 87.9)       | 13.9 (10.4 to 17.9)        | 42.1 (28.8 to 57.8)           | 5.6 (2.6 to 10.6)               | 9.6 (9.6 to 9.6)                  |
| Nepal   | 2004 | 22.2 (17.6 to 27.7)        | 4.5 (3.4 to 5.8)           | 13.3 (9.1 to 18.1)            | 1.9 (0.9 to 3.4)                | 2.6 (2.6 to 2.6)                  | 71.3 (56.6 to 88.7)       | 14.5 (10.8 to 18.7)        | 42.7 (29.0 to 58.1)           | 6.0 (2.8 to 10.9)               | 8.2 (8.2 to 8.2)                  |
| Nepal   | 2005 | 23.1 (18.4 to 28.4)        | 4.8 (3.6 to 6.3)           | 13.3 (9.2 to 18.1)            | 2.0 (0.9 to 3.6)                | 3.0 (3.0 to 3.0)                  | 73.9 (59.0 to 91.0)       | 15.5 (11.5 to 20.3)        | 42.6 (29.5 to 58.2)           | 6.3 (3.0 to 11.6)               | 9.5 (9.5 to 9.5)                  |
| Nepal   | 2006 | 23.7 (19.2 to 29.0)        | 5.1 (3.8 to 6.7)           | 13.2 (9.2 to 18.0)            | 1.9 (0.9 to 3.7)                | 3.4 (3.4 to 3.4)                  | 75.9 (61.6 to 93.1)       | 16.4 (12.3 to 21.3)        | 42.4 (29.6 to 57.8)           | 6.2 (2.9 to 11.8)               | 11.0 (11.0 to 11.0)               |
| Nepal   | 2007 | 24.7 (20.0 to 30.3)        | 5.1 (3.8 to 6.6)           | 14.7 (10.3 to 20.0)           | 1.8 (0.9 to 3.6)                | 3.1 (3.1 to 3.1)                  | 79.2 (64.0 to 97.3)       | 16.3 (12.3 to 21.3)        | 47.1 (33.1 to 64.1)           | 5.9 (2.8 to 11.7)               | 9.9 (9.9 to 9.9)                  |
| Nepal   | 2008 | 28.2 (23.0 to 34.2)        | 5.4 (4.1 to 7.0)           | 16.2 (11.5 to 22.1)           | 1.9 (0.9 to 3.7)                | 4.6 (4.6 to 4.6)                  | 90.3 (73.6 to 109.7)      | 17.3 (13.0 to 22.5)        | 52.0 (36.8 to 70.9)           | 6.2 (3.0 to 11.9)               | 14.8 (14.8 to 14.8)               |

| Country | Year | 2018 US Dollars per capita |                            |                               |                                 |                                   | 2018 PPP per capita    |                            |                               |                                 |                                   |
|---------|------|----------------------------|----------------------------|-------------------------------|---------------------------------|-----------------------------------|------------------------|----------------------------|-------------------------------|---------------------------------|-----------------------------------|
|         |      | Health spending            | Government health spending | Out-of-pocket health spending | Prepaid private health spending | Development assistance for health | Health spending        | Government health spending | Out-of-pocket health spending | Prepaid private health spending | Development assistance for health |
| Nepal   | 2009 | 29.5 (23.8 to 36.2)        | 5.8 (4.3 to 7.6)           | 17.5 (12.4 to 23.5)           | 2.4 (1.2 to 4.6)                | 3.8 (3.8 to 3.8)                  | 94.5 (76.4 to 115.9)   | 18.5 (13.9 to 24.5)        | 56.1 (39.9 to 75.4)           | 7.8 (3.7 to 14.9)               | 12.1 (12.1 to 12.1)               |
| Nepal   | 2010 | 34.3 (28.0 to 41.6)        | 6.2 (4.6 to 8.0)           | 19.2 (13.6 to 26.1)           | 3.4 (1.6 to 6.3)                | 5.5 (5.5 to 5.5)                  | 109.8 (89.9 to 133.5)  | 19.7 (14.9 to 25.8)        | 61.7 (43.7 to 83.8)           | 10.7 (5.2 to 20.1)              | 17.7 (17.7 to 17.7)               |
| Nepal   | 2011 | 35.4 (28.6 to 43.7)        | 6.4 (4.8 to 8.3)           | 20.7 (14.8 to 28.2)           | 4.0 (1.9 to 7.5)                | 4.4 (4.4 to 4.4)                  | 113.6 (91.7 to 140.3)  | 20.5 (15.5 to 26.5)        | 66.3 (47.3 to 90.4)           | 12.7 (6.1 to 24.0)              | 14.0 (14.0 to 14.0)               |
| Nepal   | 2012 | 37.2 (29.9 to 46.1)        | 6.7 (5.0 to 8.5)           | 22.2 (15.8 to 30.1)           | 4.3 (2.1 to 7.8)                | 4.2 (4.2 to 4.2)                  | 119.4 (95.8 to 147.9)  | 21.4 (16.0 to 27.4)        | 71.1 (50.8 to 96.6)           | 13.6 (6.6 to 25.0)              | 13.3 (13.3 to 13.3)               |
| Nepal   | 2013 | 40.5 (32.6 to 50.2)        | 6.9 (5.3 to 8.9)           | 24.2 (17.2 to 33.2)           | 4.1 (2.0 to 7.4)                | 5.3 (5.3 to 5.3)                  | 130.0 (104.6 to 160.9) | 22.3 (17.0 to 28.6)        | 77.6 (55.1 to 106.3)          | 13.2 (6.3 to 23.8)              | 16.9 (16.9 to 16.9)               |
| Nepal   | 2014 | 44.8 (36.1 to 55.4)        | 7.7 (5.8 to 9.9)           | 26.5 (18.9 to 36.7)           | 4.6 (2.1 to 8.3)                | 6.1 (6.1 to 6.1)                  | 143.7 (115.8 to 177.7) | 24.5 (18.7 to 31.6)        | 84.9 (60.7 to 117.5)          | 14.7 (6.8 to 26.7)              | 19.5 (19.5 to 19.5)               |
| Nepal   | 2015 | 47.0 (37.6 to 58.5)        | 8.2 (6.3 to 10.7)          | 28.2 (19.9 to 38.8)           | 5.3 (2.5 to 9.8)                | 5.3 (5.3 to 5.3)                  | 150.7 (120.5 to 187.5) | 26.4 (20.1 to 34.4)        | 90.4 (63.9 to 124.4)          | 16.9 (7.9 to 31.3)              | 17.0 (17.0 to 17.0)               |
| Nepal   | 2016 | 47.6 (37.6 to 60.0)        | 8.7 (6.6 to 11.4)          | 28.7 (20.1 to 39.6)           | 6.3 (2.9 to 11.8)               | 3.8 (3.8 to 3.8)                  | 152.6 (120.4 to 192.5) | 28.0 (21.3 to 36.6)        | 92.1 (64.6 to 127.0)          | 20.2 (9.2 to 37.7)              | 12.3 (12.3 to 12.3)               |
| Nepal   | 2017 | 52.2 (42.4 to 65.3)        | 11.0 (8.3 to 14.3)         | 30.8 (21.6 to 42.4)           | 6.9 (3.2 to 13.0)               | 3.6 (3.6 to 3.6)                  | 167.5 (135.8 to 209.3) | 35.1 (26.7 to 45.8)        | 98.7 (69.4 to 135.9)          | 22.3 (10.2 to 41.7)             | 11.4 (11.4 to 11.4)               |
| Nepal   | 2018 | 53.2 (42.2 to 66.8)        | 11.4 (8.7 to 15.0)         | 31.5 (22.1 to 43.4)           | 7.2 (3.3 to 13.4)               | 3.2 (3.1 to 3.2)                  | 170.7 (135.2 to 214.3) | 36.7 (27.8 to 48.0)        | 100.9 (71.0 to 139.1)         | 22.9 (10.5 to 42.9)             | 10.2 (10.0 to 10.4)               |
| Nepal   | 2019 | 54.5 (44.2 to 68.3)        | 11.9 (9.0 to 15.6)         | 32.1 (22.6 to 44.2)           | 7.4 (3.4 to 13.8)               | 3.1 (2.9 to 3.4)                  | 174.9 (141.6 to 219.0) | 38.2 (28.9 to 50.0)        | 103.0 (72.3 to 141.9)         | 23.6 (10.8 to 44.3)             | 10.1 (9.3 to 10.9)                |
| Nepal   | 2020 | 56.0 (44.3 to 70.3)        | 12.4 (9.4 to 16.2)         | 32.8 (23.0 to 45.2)           | 7.6 (3.5 to 14.3)               | 3.2 (2.9 to 3.5)                  | 179.5 (141.9 to 225.2) | 39.8 (30.0 to 51.9)        | 105.2 (73.8 to 144.8)         | 24.4 (11.2 to 45.8)             | 10.2 (9.2 to 11.1)                |
| Nepal   | 2021 | 57.4 (46.5 to 71.7)        | 12.9 (9.8 to 16.8)         | 33.5 (23.5 to 46.1)           | 7.8 (3.6 to 14.7)               | 3.2 (2.8 to 3.6)                  | 184.1 (149.2 to 230.0) | 41.3 (31.3 to 53.7)        | 107.4 (75.4 to 147.9)         | 25.1 (11.5 to 47.2)             | 10.3 (9.1 to 11.6)                |
| Nepal   | 2022 | 59.1 (46.9 to 74.1)        | 13.4 (10.1 to 17.4)        | 34.3 (24.1 to 47.2)           | 8.1 (3.7 to 15.2)               | 3.3 (2.9 to 3.7)                  | 189.4 (150.3 to 237.5) | 42.9 (32.4 to 55.8)        | 110.0 (77.3 to 151.3)         | 26.0 (11.9 to 48.8)             | 10.5 (9.2 to 11.9)                |
| Nepal   | 2023 | 60.7 (49.1 to 75.7)        | 13.8 (10.5 to 18.0)        | 35.2 (24.7 to 48.4)           | 8.4 (3.8 to 15.7)               | 3.3 (2.8 to 3.8)                  | 194.5 (157.5 to 242.6) | 44.4 (33.6 to 57.8)        | 112.7 (79.2 to 155.3)         | 26.9 (12.3 to 50.3)             | 10.5 (9.0 to 12.1)                |
| Nepal   | 2024 | 62.3 (49.5 to 78.1)        | 14.3 (10.9 to 18.7)        | 36.0 (25.3 to 49.6)           | 8.7 (4.0 to 16.2)               | 3.3 (2.8 to 3.8)                  | 199.7 (158.7 to 250.3) | 45.9 (34.8 to 59.9)        | 115.5 (81.3 to 158.9)         | 27.8 (12.7 to 52.1)             | 10.5 (8.9 to 12.2)                |
| Nepal   | 2025 | 63.9 (51.9 to 79.9)        | 14.8 (11.2 to 19.3)        | 36.9 (25.9 to 50.9)           | 8.9 (4.1 to 16.7)               | 3.3 (2.7 to 3.8)                  | 204.8 (166.3 to 256.2) | 47.5 (36.0 to 61.9)        | 118.2 (83.1 to 163.2)         | 28.7 (13.2 to 53.7)             | 10.5 (8.8 to 12.3)                |
| Nepal   | 2026 | 65.5 (52.1 to 82.5)        | 15.3 (11.6 to 20.0)        | 37.7 (26.5 to 51.8)           | 9.2 (4.2 to 17.2)               | 3.3 (2.8 to 3.9)                  | 210.1 (167.2 to 264.5) | 49.1 (37.3 to 64.0)        | 120.8 (85.1 to 166.1)         | 29.6 (13.6 to 55.3)             | 10.6 (8.8 to 12.6)                |
| Nepal   | 2027 | 67.2 (54.5 to 83.9)        | 15.8 (12.0 to 20.6)        | 38.5 (27.0 to 52.7)           | 9.5 (4.4 to 17.8)               | 3.4 (2.8 to 4.0)                  | 215.3 (174.8 to 268.9) | 50.6 (38.6 to 66.0)        | 123.4 (86.7 to 169.0)         | 30.5 (14.0 to 57.0)             | 10.8 (8.9 to 13.0)                |
| Nepal   | 2028 | 68.7 (54.6 to 86.6)        | 16.3 (12.4 to 21.2)        | 39.3 (27.6 to 53.6)           | 9.8 (4.5 to 18.3)               | 3.4 (2.8 to 4.2)                  | 220.4 (174.9 to 277.6) | 52.2 (39.8 to 68.1)        | 125.9 (88.4 to 171.8)         | 31.3 (14.5 to 58.8)             | 11.0 (9.1 to 13.5)                |
| Nepal   | 2029 | 70.3 (57.4 to 88.1)        | 16.7 (12.8 to 21.9)        | 40.0 (28.1 to 54.6)           | 10.0 (4.6 to 18.9)              | 3.5 (2.8 to 4.3)                  | 225.3 (183.9 to 282.4) | 53.7 (40.9 to 70.2)        | 128.2 (90.2 to 175.0)         | 32.2 (14.9 to 60.5)             | 11.2 (9.1 to 13.8)                |

| Country | Year | 2018 US Dollars per capita |                            |                               |                                 |                                   | 2018 PPP per capita    |                            |                               |                                 |                                   |
|---------|------|----------------------------|----------------------------|-------------------------------|---------------------------------|-----------------------------------|------------------------|----------------------------|-------------------------------|---------------------------------|-----------------------------------|
|         |      | Health spending            | Government health spending | Out-of-pocket health spending | Prepaid private health spending | Development assistance for health | Health spending        | Government health spending | Out-of-pocket health spending | Prepaid private health spending | Development assistance for health |
| Nepal   | 2030 | 71.8 (56.8 to 90.4)        | 17.2 (13.1 to 22.5)        | 40.7 (28.8 to 55.6)           | 10.3 (4.8 to 19.3)              | 3.6 (2.9 to 4.4)                  | 230.2 (182.3 to 289.8) | 55.2 (42.0 to 72.2)        | 130.5 (92.2 to 178.2)         | 33.1 (15.3 to 62.0)             | 11.5 (9.2 to 14.2)                |
| Nepal   | 2031 | 73.3 (59.7 to 91.8)        | 17.7 (13.4 to 23.1)        | 41.4 (29.4 to 56.4)           | 10.6 (4.9 to 19.8)              | 3.7 (2.9 to 4.6)                  | 235.1 (191.3 to 294.4) | 56.7 (43.1 to 74.1)        | 132.8 (94.3 to 180.9)         | 34.0 (15.7 to 63.4)             | 11.7 (9.4 to 14.7)                |
| Nepal   | 2032 | 74.8 (59.4 to 94.3)        | 18.2 (13.8 to 23.7)        | 42.1 (29.8 to 57.4)           | 10.9 (5.0 to 20.2)              | 3.7 (3.0 to 4.8)                  | 240.0 (190.3 to 302.3) | 58.2 (44.1 to 76.1)        | 134.9 (95.5 to 183.9)         | 34.8 (16.1 to 64.8)             | 12.0 (9.5 to 15.2)                |
| Nepal   | 2033 | 76.3 (61.9 to 95.3)        | 18.6 (14.1 to 24.4)        | 42.7 (30.3 to 58.3)           | 11.1 (5.2 to 20.6)              | 3.8 (3.0 to 5.0)                  | 244.7 (198.6 to 305.5) | 59.7 (45.3 to 78.1)        | 137.1 (97.2 to 186.9)         | 35.7 (16.5 to 66.2)             | 12.2 (9.6 to 15.9)                |
| Nepal   | 2034 | 77.9 (61.8 to 97.9)        | 19.1 (14.5 to 25.0)        | 43.4 (30.7 to 59.3)           | 11.4 (5.3 to 21.1)              | 3.9 (3.0 to 5.1)                  | 249.6 (198.2 to 313.8) | 61.3 (46.6 to 80.2)        | 139.2 (98.4 to 190.2)         | 36.6 (17.0 to 67.8)             | 12.6 (9.7 to 16.3)                |
| Nepal   | 2035 | 79.4 (64.5 to 99.3)        | 19.6 (14.9 to 25.6)        | 44.1 (31.1 to 60.5)           | 11.7 (5.4 to 21.7)              | 4.0 (3.1 to 5.3)                  | 254.5 (206.8 to 318.4) | 62.9 (47.7 to 82.1)        | 141.3 (99.7 to 193.8)         | 37.4 (17.4 to 69.4)             | 12.9 (9.9 to 16.9)                |
| Nepal   | 2036 | 81.0 (64.5 to 102.0)       | 20.1 (15.3 to 26.2)        | 44.8 (31.6 to 61.5)           | 12.0 (5.6 to 22.2)              | 4.1 (3.1 to 5.5)                  | 259.6 (206.9 to 326.9) | 64.5 (48.9 to 84.2)        | 143.5 (101.4 to 197.1)        | 38.4 (17.8 to 71.1)             | 13.2 (10.0 to 17.7)               |
| Nepal   | 2037 | 82.6 (67.2 to 103.5)       | 20.6 (15.6 to 26.9)        | 45.5 (32.1 to 62.6)           | 12.3 (5.7 to 22.7)              | 4.2 (3.2 to 5.7)                  | 264.8 (215.3 to 331.9) | 66.2 (50.1 to 86.4)        | 145.8 (102.8 to 200.6)        | 39.3 (18.3 to 72.9)             | 13.5 (10.3 to 18.3)               |
| Nepal   | 2038 | 84.3 (66.7 to 106.6)       | 21.2 (16.0 to 27.7)        | 46.2 (32.6 to 63.6)           | 12.6 (5.8 to 23.3)              | 4.3 (3.3 to 6.0)                  | 270.2 (213.8 to 341.8) | 67.9 (51.3 to 88.8)        | 148.1 (104.5 to 204.0)        | 40.3 (18.7 to 74.7)             | 13.8 (10.5 to 19.2)               |
| Nepal   | 2039 | 85.9 (69.7 to 108.3)       | 21.7 (16.4 to 28.4)        | 46.9 (33.1 to 64.7)           | 12.9 (6.0 to 23.9)              | 4.4 (3.3 to 6.1)                  | 275.5 (223.6 to 347.1) | 69.7 (52.6 to 91.1)        | 150.4 (106.2 to 207.4)        | 41.3 (19.2 to 76.7)             | 14.1 (10.6 to 19.5)               |
| Nepal   | 2040 | 87.6 (69.6 to 111.0)       | 22.3 (16.8 to 29.1)        | 47.6 (33.6 to 65.8)           | 13.2 (6.2 to 24.5)              | 4.5 (3.4 to 6.3)                  | 281.0 (223.1 to 356.0) | 71.4 (53.9 to 93.4)        | 152.7 (107.7 to 210.9)        | 42.3 (19.8 to 78.7)             | 14.5 (10.9 to 20.2)               |
| Nepal   | 2041 | 89.4 (72.4 to 112.7)       | 22.8 (17.2 to 29.8)        | 48.4 (34.1 to 66.9)           | 13.5 (6.3 to 25.2)              | 4.6 (3.5 to 6.6)                  | 286.6 (232.2 to 361.3) | 73.2 (55.1 to 95.7)        | 155.1 (109.3 to 214.4)        | 43.3 (20.3 to 80.8)             | 14.9 (11.1 to 21.0)               |
| Nepal   | 2042 | 91.2 (72.4 to 115.2)       | 23.4 (17.6 to 30.6)        | 49.1 (34.6 to 67.9)           | 13.8 (6.5 to 25.9)              | 4.8 (3.5 to 6.8)                  | 292.3 (232.1 to 369.4) | 75.1 (56.5 to 98.0)        | 157.5 (110.9 to 217.6)        | 44.4 (20.9 to 83.0)             | 15.3 (11.2 to 21.9)               |
| Nepal   | 2043 | 93.0 (75.3 to 117.0)       | 24.0 (18.0 to 31.3)        | 49.9 (35.1 to 68.9)           | 14.2 (6.7 to 26.6)              | 4.9 (3.6 to 7.3)                  | 298.1 (241.5 to 375.2) | 77.0 (57.8 to 100.3)       | 159.9 (112.4 to 221.0)        | 45.5 (21.4 to 85.2)             | 15.7 (11.5 to 23.5)               |
| Nepal   | 2044 | 94.8 (75.2 to 120.0)       | 24.6 (18.5 to 32.0)        | 50.6 (35.5 to 70.0)           | 14.5 (6.9 to 27.3)              | 5.0 (3.6 to 7.4)                  | 304.0 (241.1 to 384.9) | 79.0 (59.2 to 102.5)       | 162.3 (113.9 to 224.3)        | 46.6 (22.0 to 87.5)             | 16.1 (11.6 to 23.7)               |
| Nepal   | 2045 | 96.6 (78.1 to 121.4)       | 25.2 (18.9 to 32.7)        | 51.3 (36.0 to 71.0)           | 14.9 (7.0 to 28.0)              | 5.2 (3.7 to 7.8)                  | 309.8 (250.4 to 389.1) | 80.9 (60.6 to 105.0)       | 164.6 (115.3 to 227.6)        | 47.7 (22.4 to 89.7)             | 16.6 (12.0 to 25.1)               |
| Nepal   | 2046 | 98.5 (78.2 to 124.7)       | 25.8 (19.4 to 33.5)        | 52.1 (36.5 to 72.1)           | 15.2 (7.1 to 28.7)              | 5.3 (3.8 to 8.0)                  | 315.7 (250.8 to 399.9) | 82.9 (62.1 to 107.6)       | 167.0 (116.9 to 231.2)        | 48.8 (22.9 to 92.0)             | 17.1 (12.3 to 25.8)               |
| Nepal   | 2047 | 100.4 (81.3 to 125.5)      | 26.5 (19.8 to 34.4)        | 52.8 (37.0 to 73.4)           | 15.6 (7.3 to 29.4)              | 5.5 (3.9 to 8.6)                  | 321.8 (260.7 to 402.4) | 84.9 (63.5 to 110.3)       | 169.4 (118.6 to 235.2)        | 49.9 (23.4 to 94.4)             | 17.6 (12.6 to 27.6)               |
| Nepal   | 2048 | 102.2 (81.0 to 129.2)      | 27.1 (20.2 to 35.3)        | 53.6 (37.5 to 74.6)           | 15.9 (7.4 to 30.2)              | 5.7 (4.0 to 9.1)                  | 327.8 (259.6 to 414.3) | 86.9 (64.9 to 113.1)       | 171.8 (120.3 to 239.2)        | 51.1 (23.9 to 96.7)             | 18.1 (12.8 to 29.2)               |
| Nepal   | 2049 | 104.1 (84.3 to 130.0)      | 27.7 (20.7 to 36.1)        | 54.3 (38.0 to 75.8)           | 16.3 (7.6 to 30.9)              | 5.8 (4.0 to 9.3)                  | 333.8 (270.3 to 417.0) | 88.8 (66.3 to 115.8)       | 174.0 (121.9 to 243.1)        | 52.2 (24.3 to 99.1)             | 18.7 (13.0 to 29.9)               |
| Nepal   | 2050 | 105.9 (83.7 to 133.8)      | 28.3 (21.1 to 36.9)        | 55.0 (38.6 to 77.0)           | 16.6 (7.8 to 31.6)              | 6.0 (4.2 to 9.7)                  | 339.7 (268.4 to 429.0) | 90.8 (67.6 to 118.3)       | 176.2 (123.8 to 246.9)        | 53.4 (24.9 to 101.4)            | 19.3 (13.5 to 31.0)               |

| Country     | Year | 2018 US Dollars per capita |                            |                               |                                 |                                   | 2018 PPP per capita       |                            |                               |                                 |                                   |
|-------------|------|----------------------------|----------------------------|-------------------------------|---------------------------------|-----------------------------------|---------------------------|----------------------------|-------------------------------|---------------------------------|-----------------------------------|
|             |      | Health spending            | Government health spending | Out-of-pocket health spending | Prepaid private health spending | Development assistance for health | Health spending           | Government health spending | Out-of-pocket health spending | Prepaid private health spending | Development assistance for health |
| Netherlands | 1995 | 3108.8 (2940.9 to 3296.1)  | 1993.2 (1861.0 to 2132.1)  | 583.4 (527.6 to 644.7)        | 532.2 (428.4 to 658.4)          | 0.0 (0.0 to 0.0)                  | 3268.6 (3092.2 to 3465.6) | 2095.7 (1956.7 to 2241.8)  | 613.4 (554.7 to 677.9)        | 559.5 (450.5 to 692.3)          | 0.0 (0.0 to 0.0)                  |
| Netherlands | 1996 | 3212.9 (3066.5 to 3363.5)  | 1984.9 (1878.4 to 2084.4)  | 621.3 (574.3 to 674.3)        | 606.7 (516.6 to 704.4)          | 0.0 (0.0 to 0.0)                  | 3378.1 (3224.2 to 3536.4) | 2086.9 (1975.0 to 2191.6)  | 653.3 (603.8 to 709.0)        | 637.9 (543.1 to 740.6)          | 0.0 (0.0 to 0.0)                  |
| Netherlands | 1997 | 3296.3 (3164.7 to 3429.6)  | 2019.8 (1926.6 to 2120.8)  | 603.0 (559.9 to 649.3)        | 673.5 (588.7 to 763.3)          | 0.0 (0.0 to 0.0)                  | 3465.8 (3327.4 to 3605.9) | 2123.6 (2025.6 to 2229.8)  | 634.0 (588.6 to 682.7)        | 708.2 (618.9 to 802.5)          | 0.0 (0.0 to 0.0)                  |
| Netherlands | 1998 | 3312.4 (3183.2 to 3450.5)  | 2041.2 (1947.8 to 2136.4)  | 519.2 (478.9 to 561.0)        | 752.0 (669.2 to 844.6)          | 0.0 (0.0 to 0.0)                  | 3482.8 (3346.9 to 3627.9) | 2146.2 (2048.0 to 2246.2)  | 545.9 (503.5 to 589.9)        | 790.7 (703.6 to 888.1)          | 0.0 (0.0 to 0.0)                  |
| Netherlands | 1999 | 3313.5 (3176.9 to 3454.5)  | 2079.1 (1990.5 to 2178.6)  | 432.7 (395.5 to 471.2)        | 801.6 (716.1 to 897.8)          | 0.0 (0.0 to 0.0)                  | 3483.8 (3340.3 to 3632.1) | 2186.0 (2092.9 to 2290.7)  | 455.0 (415.8 to 495.4)        | 842.8 (752.9 to 944.0)          | 0.0 (0.0 to 0.0)                  |
| Netherlands | 2000 | 3345.0 (3215.5 to 3482.7)  | 2153.3 (2059.3 to 2254.0)  | 360.4 (327.4 to 394.4)        | 831.3 (744.3 to 925.7)          | 0.0 (0.0 to 0.0)                  | 3517.0 (3380.8 to 3661.7) | 2264.0 (2165.2 to 2369.9)  | 378.9 (344.2 to 414.7)        | 874.1 (782.6 to 973.3)          | 0.0 (0.0 to 0.0)                  |
| Netherlands | 2001 | 3473.0 (3340.0 to 3604.8)  | 2247.8 (2155.5 to 2342.4)  | 331.3 (300.1 to 364.3)        | 894.0 (808.8 to 985.3)          | 0.0 (0.0 to 0.0)                  | 3651.6 (3511.7 to 3790.2) | 2363.3 (2266.4 to 2462.8)  | 348.3 (315.6 to 383.1)        | 939.9 (850.4 to 1036.0)         | 0.0 (0.0 to 0.0)                  |
| Netherlands | 2002 | 3657.9 (3524.0 to 3796.8)  | 2367.8 (2268.9 to 2459.0)  | 320.7 (290.2 to 353.0)        | 969.4 (883.9 to 1067.5)         | 0.0 (0.0 to 0.0)                  | 3846.0 (3705.2 to 3992.0) | 2489.6 (2385.6 to 2585.5)  | 337.2 (305.1 to 371.2)        | 1019.2 (929.3 to 1122.4)        | 0.0 (0.0 to 0.0)                  |
| Netherlands | 2003 | 3830.0 (3693.5 to 3966.2)  | 2496.5 (2403.0 to 2594.4)  | 324.1 (295.2 to 357.2)        | 1009.4 (918.0 to 1105.5)        | 0.0 (0.0 to 0.0)                  | 4026.9 (3883.4 to 4170.1) | 2624.8 (2526.6 to 2727.8)  | 340.8 (310.3 to 375.5)        | 1061.3 (965.2 to 1162.4)        | 0.0 (0.0 to 0.0)                  |
| Netherlands | 2004 | 4039.9 (3910.5 to 4177.8)  | 2706.3 (2609.1 to 2804.1)  | 347.1 (317.4 to 381.1)        | 986.5 (889.7 to 1084.5)         | 0.0 (0.0 to 0.0)                  | 4247.7 (4111.6 to 4392.6) | 2845.5 (2743.3 to 2948.3)  | 364.9 (333.7 to 400.7)        | 1037.3 (935.5 to 1140.3)        | 0.0 (0.0 to 0.0)                  |
| Netherlands | 2005 | 4269.7 (4135.7 to 4419.2)  | 3032.7 (2934.4 to 3136.9)  | 397.1 (363.2 to 431.6)        | 839.9 (744.2 to 941.6)          | 0.0 (0.0 to 0.0)                  | 4489.2 (4348.3 to 4646.4) | 3188.6 (3085.3 to 3298.2)  | 417.5 (381.9 to 453.8)        | 883.1 (782.5 to 990.0)          | 0.0 (0.0 to 0.0)                  |
| Netherlands | 2006 | 4513.8 (4380.1 to 4647.2)  | 3493.2 (3390.9 to 3601.6)  | 420.1 (383.7 to 452.9)        | 600.6 (517.9 to 691.0)          | 0.0 (0.0 to 0.0)                  | 4745.9 (4605.3 to 4886.2) | 3672.8 (3565.3 to 3786.8)  | 441.7 (403.5 to 476.2)        | 631.4 (544.5 to 726.6)          | 0.0 (0.0 to 0.0)                  |
| Netherlands | 2007 | 4773.2 (4632.7 to 4912.6)  | 3837.2 (3736.8 to 3941.4)  | 444.4 (410.2 to 479.3)        | 491.6 (413.4 to 582.4)          | 0.0 (0.0 to 0.0)                  | 5018.6 (4870.9 to 5165.2) | 4034.5 (3929.0 to 4144.1)  | 467.2 (431.3 to 503.9)        | 516.9 (434.7 to 612.3)          | 0.0 (0.0 to 0.0)                  |
| Netherlands | 2008 | 4966.0 (4830.1 to 5106.5)  | 4051.5 (3950.4 to 4162.3)  | 483.6 (448.3 to 521.2)        | 430.9 (358.7 to 518.2)          | 0.0 (0.0 to 0.0)                  | 5221.4 (5078.4 to 5369.0) | 4259.9 (4153.5 to 4376.4)  | 508.4 (471.4 to 548.0)        | 453.1 (377.2 to 544.8)          | 0.0 (0.0 to 0.0)                  |
| Netherlands | 2009 | 4975.5 (4847.8 to 5101.7)  | 4084.9 (3980.6 to 4191.2)  | 492.2 (457.6 to 529.5)        | 398.4 (331.8 to 478.2)          | 0.0 (0.0 to 0.0)                  | 5231.4 (5097.1 to 5364.0) | 4294.9 (4185.3 to 4406.7)  | 517.5 (481.1 to 556.7)        | 418.9 (348.8 to 502.8)          | 0.0 (0.0 to 0.0)                  |
| Netherlands | 2010 | 5116.4 (4981.5 to 5244.0)  | 4214.1 (4108.6 to 4320.8)  | 511.5 (473.2 to 549.5)        | 390.7 (320.7 to 468.9)          | 0.0 (0.0 to 0.0)                  | 5379.4 (5237.6 to 5513.7) | 4430.8 (4319.9 to 4543.0)  | 537.8 (497.6 to 577.8)        | 410.8 (337.2 to 493.1)          | 0.0 (0.0 to 0.0)                  |
| Netherlands | 2011 | 5271.2 (5128.7 to 5406.4)  | 4337.1 (4229.5 to 4446.2)  | 538.5 (498.9 to 577.9)        | 395.6 (324.1 to 471.6)          | 0.0 (0.0 to 0.0)                  | 5542.2 (5392.5 to 5684.3) | 4560.1 (4447.0 to 4674.8)  | 566.2 (524.6 to 607.6)        | 415.9 (340.7 to 495.8)          | 0.0 (0.0 to 0.0)                  |
| Netherlands | 2012 | 5307.9 (5171.0 to 5448.4)  | 4345.8 (4234.9 to 4460.4)  | 569.1 (528.7 to 609.5)        | 393.0 (322.3 to 464.4)          | 0.0 (0.0 to 0.0)                  | 5580.8 (5436.9 to 5728.5) | 4569.3 (4452.7 to 4689.8)  | 598.3 (555.9 to 640.8)        | 413.2 (338.9 to 488.3)          | 0.0 (0.0 to 0.0)                  |
| Netherlands | 2013 | 5315.9 (5181.2 to 5451.2)  | 4323.4 (4222.6 to 4438.5)  | 604.8 (564.6 to 644.6)        | 387.7 (323.8 to 460.8)          | 0.0 (0.0 to 0.0)                  | 5589.2 (5447.6 to 5731.5) | 4545.7 (4439.7 to 4666.7)  | 635.9 (593.6 to 677.7)        | 407.6 (340.4 to 484.5)          | 0.0 (0.0 to 0.0)                  |
| Netherlands | 2014 | 5306.7 (5162.7 to 5447.1)  | 4293.4 (4190.0 to 4399.1)  | 625.7 (585.1 to 665.5)        | 387.6 (319.2 to 469.7)          | 0.0 (0.0 to 0.0)                  | 5579.6 (5428.2 to 5727.1) | 4514.2 (4405.5 to 4625.3)  | 657.9 (615.2 to 699.8)        | 407.5 (335.7 to 493.8)          | 0.0 (0.0 to 0.0)                  |
| Netherlands | 2015 | 5297.1 (5154.1 to 5443.0)  | 4278.5 (4169.2 to 4387.8)  | 623.8 (580.3 to 668.2)        | 394.8 (316.5 to 486.9)          | 0.0 (0.0 to 0.0)                  | 5569.5 (5419.1 to 5722.8) | 4498.5 (4383.6 to 4613.4)  | 655.9 (610.1 to 702.6)        | 415.1 (332.8 to 511.9)          | 0.0 (0.0 to 0.0)                  |

| Country     | Year | 2018 US Dollars per capita |                            |                               |                                 |                                   | 2018 PPP per capita       |                            |                               |                                 |                                   |
|-------------|------|----------------------------|----------------------------|-------------------------------|---------------------------------|-----------------------------------|---------------------------|----------------------------|-------------------------------|---------------------------------|-----------------------------------|
|             |      | Health spending            | Government health spending | Out-of-pocket health spending | Prepaid private health spending | Development assistance for health | Health spending           | Government health spending | Out-of-pocket health spending | Prepaid private health spending | Development assistance for health |
| Netherlands | 2016 | 5329.1 (5132.0 to 5527.4)  | 4302.0 (4154.8 to 4456.5)  | 622.5 (565.3 to 681.7)        | 404.6 (310.3 to 526.6)          | 0.0 (0.0 to 0.0)                  | 5603.1 (5395.9 to 5811.6) | 4523.2 (4368.5 to 4685.6)  | 654.5 (594.3 to 716.8)        | 425.4 (326.3 to 553.7)          | 0.0 (0.0 to 0.0)                  |
| Netherlands | 2017 | 5496.2 (5291.4 to 5700.9)  | 4439.6 (4281.6 to 4605.5)  | 638.1 (579.2 to 698.7)        | 418.5 (320.9 to 545.2)          | 0.0 (0.0 to 0.0)                  | 5778.8 (5563.4 to 5994.0) | 4667.9 (4501.8 to 4842.3)  | 670.9 (608.9 to 734.6)        | 440.0 (337.4 to 573.2)          | 0.0 (0.0 to 0.0)                  |
| Netherlands | 2018 | 5578.3 (5366.9 to 5792.1)  | 4510.1 (4345.2 to 4678.6)  | 643.1 (582.9 to 704.7)        | 425.1 (325.9 to 553.8)          | 0.0 (0.0 to 0.0)                  | 5865.2 (5642.8 to 6089.9) | 4742.0 (4568.6 to 4919.2)  | 676.2 (612.9 to 741.0)        | 447.0 (342.6 to 582.3)          | 0.0 (0.0 to 0.0)                  |
| Netherlands | 2019 | 5655.8 (5438.9 to 5873.1)  | 4575.2 (4404.6 to 4750.7)  | 648.7 (586.7 to 712.9)        | 431.9 (330.9 to 561.1)          | 0.0 (0.0 to 0.0)                  | 5946.6 (5718.5 to 6175.1) | 4810.4 (4631.1 to 4994.9)  | 682.1 (616.9 to 749.5)        | 454.1 (348.0 to 589.9)          | 0.0 (0.0 to 0.0)                  |
| Netherlands | 2020 | 5734.4 (5505.8 to 5963.1)  | 4640.8 (4459.5 to 4827.0)  | 655.0 (592.5 to 718.0)        | 438.6 (336.8 to 570.5)          | 0.0 (0.0 to 0.0)                  | 6029.3 (5788.9 to 6269.7) | 4879.4 (4688.8 to 5075.2)  | 688.7 (623.0 to 755.0)        | 461.2 (354.1 to 599.8)          | 0.0 (0.0 to 0.0)                  |
| Netherlands | 2021 | 5813.0 (5574.5 to 6062.3)  | 4705.2 (4519.1 to 4901.7)  | 662.2 (599.4 to 728.3)        | 445.6 (341.2 to 580.1)          | 0.0 (0.0 to 0.0)                  | 6111.9 (5861.2 to 6374.0) | 4947.2 (4751.4 to 5153.8)  | 696.2 (630.3 to 765.7)        | 468.5 (358.7 to 610.0)          | 0.0 (0.0 to 0.0)                  |
| Netherlands | 2022 | 5902.0 (5651.3 to 6163.8)  | 4778.3 (4583.9 to 4985.4)  | 670.7 (605.1 to 740.3)        | 452.9 (345.8 to 588.2)          | 0.0 (0.0 to 0.0)                  | 6205.4 (5941.9 to 6480.7) | 5024.0 (4819.6 to 5241.8)  | 705.2 (636.2 to 778.3)        | 476.2 (363.6 to 618.5)          | 0.0 (0.0 to 0.0)                  |
| Netherlands | 2023 | 5997.3 (5729.8 to 6272.1)  | 4856.9 (4649.6 to 5078.7)  | 680.0 (614.2 to 752.5)        | 460.4 (350.5 to 595.7)          | 0.0 (0.0 to 0.0)                  | 6305.7 (6024.5 to 6594.6) | 5106.6 (4888.6 to 5339.9)  | 715.0 (645.8 to 791.2)        | 484.0 (368.5 to 626.3)          | 0.0 (0.0 to 0.0)                  |
| Netherlands | 2024 | 6093.2 (5819.5 to 6386.4)  | 4935.9 (4708.8 to 5183.8)  | 689.5 (620.4 to 759.5)        | 467.7 (356.0 to 607.7)          | 0.0 (0.0 to 0.0)                  | 6406.5 (6118.8 to 6714.8) | 5189.7 (4950.9 to 5450.4)  | 725.0 (652.3 to 798.6)        | 491.8 (374.3 to 638.9)          | 0.0 (0.0 to 0.0)                  |
| Netherlands | 2025 | 6185.6 (5904.1 to 6499.2)  | 5012.1 (4763.8 to 5281.2)  | 698.9 (628.1 to 773.0)        | 474.7 (361.8 to 617.5)          | 0.0 (0.0 to 0.0)                  | 6503.7 (6207.7 to 6833.4) | 5269.8 (5008.8 to 5552.8)  | 734.8 (660.4 to 812.8)        | 499.1 (380.4 to 649.2)          | 0.0 (0.0 to 0.0)                  |
| Netherlands | 2026 | 6275.7 (5963.0 to 6611.2)  | 5085.8 (4820.1 to 5368.1)  | 708.2 (633.8 to 786.8)        | 481.7 (367.6 to 626.5)          | 0.0 (0.0 to 0.0)                  | 6598.4 (6269.6 to 6951.2) | 5347.3 (5067.9 to 5644.1)  | 744.6 (666.4 to 827.2)        | 506.5 (386.5 to 658.7)          | 0.0 (0.0 to 0.0)                  |
| Netherlands | 2027 | 6366.1 (6032.7 to 6726.2)  | 5160.0 (4873.3 to 5475.1)  | 717.6 (636.8 to 801.1)        | 488.6 (373.4 to 635.3)          | 0.0 (0.0 to 0.0)                  | 6693.5 (6342.9 to 7072.0) | 5425.3 (5123.9 to 5756.7)  | 754.5 (669.5 to 842.3)        | 513.7 (392.6 to 668.0)          | 0.0 (0.0 to 0.0)                  |
| Netherlands | 2028 | 6454.6 (6098.6 to 6815.7)  | 5232.4 (4918.8 to 5567.9)  | 726.9 (642.0 to 818.3)        | 495.3 (378.6 to 643.0)          | 0.0 (0.0 to 0.0)                  | 6786.4 (6412.2 to 7166.1) | 5501.4 (5171.7 to 5854.2)  | 764.3 (675.0 to 860.3)        | 520.7 (398.1 to 676.1)          | 0.0 (0.0 to 0.0)                  |
| Netherlands | 2029 | 6542.2 (6178.6 to 6919.2)  | 5303.9 (4979.5 to 5651.9)  | 736.3 (644.8 to 836.7)        | 501.9 (383.2 to 650.2)          | 0.0 (0.0 to 0.0)                  | 6878.5 (6496.3 to 7275.0) | 5576.6 (5235.5 to 5942.5)  | 774.2 (677.9 to 879.7)        | 527.7 (402.9 to 683.6)          | 0.0 (0.0 to 0.0)                  |
| Netherlands | 2030 | 6630.8 (6267.9 to 7038.1)  | 5376.3 (5032.2 to 5743.9)  | 745.9 (644.6 to 855.1)        | 508.6 (388.5 to 658.7)          | 0.0 (0.0 to 0.0)                  | 6971.7 (6590.2 to 7400.0) | 5652.8 (5290.9 to 6039.2)  | 784.2 (677.7 to 899.0)        | 534.7 (408.5 to 692.6)          | 0.0 (0.0 to 0.0)                  |
| Netherlands | 2031 | 6716.2 (6312.4 to 7159.5)  | 5445.3 (5079.8 to 5823.2)  | 755.5 (643.4 to 872.0)        | 515.4 (395.0 to 668.0)          | 0.0 (0.0 to 0.0)                  | 7061.6 (6637.0 to 7527.6) | 5725.3 (5340.9 to 6122.6)  | 794.4 (676.5 to 916.8)        | 541.9 (415.3 to 702.3)          | 0.0 (0.0 to 0.0)                  |
| Netherlands | 2032 | 6803.0 (6374.8 to 7259.1)  | 5515.3 (5137.5 to 5915.9)  | 765.3 (647.5 to 891.3)        | 522.4 (401.6 to 676.5)          | 0.0 (0.0 to 0.0)                  | 7152.8 (6702.5 to 7632.3) | 5798.9 (5401.6 to 6220.1)  | 804.7 (680.8 to 937.2)        | 549.2 (422.2 to 711.3)          | 0.0 (0.0 to 0.0)                  |
| Netherlands | 2033 | 6887.7 (6424.6 to 7368.2)  | 5583.1 (5176.9 to 6010.3)  | 775.2 (650.3 to 908.4)        | 529.4 (407.3 to 687.0)          | 0.0 (0.0 to 0.0)                  | 7241.8 (6755.0 to 7747.1) | 5870.1 (5443.0 to 6319.4)  | 815.1 (683.8 to 955.1)        | 556.6 (428.2 to 722.3)          | 0.0 (0.0 to 0.0)                  |
| Netherlands | 2034 | 6974.3 (6501.2 to 7469.5)  | 5652.3 (5224.2 to 6097.2)  | 785.3 (651.6 to 925.7)        | 536.7 (412.8 to 696.7)          | 0.0 (0.0 to 0.0)                  | 7332.9 (6835.4 to 7853.5) | 5943.0 (5492.8 to 6410.7)  | 825.7 (685.1 to 973.2)        | 564.2 (434.0 to 732.6)          | 0.0 (0.0 to 0.0)                  |
| Netherlands | 2035 | 7063.5 (6561.8 to 7609.6)  | 5723.2 (5267.0 to 6204.0)  | 795.8 (657.1 to 945.3)        | 544.5 (418.3 to 707.4)          | 0.0 (0.0 to 0.0)                  | 7426.7 (6899.2 to 8000.9) | 6017.5 (5537.9 to 6523.0)  | 836.7 (690.8 to 993.9)        | 572.5 (439.8 to 743.8)          | 0.0 (0.0 to 0.0)                  |
| Netherlands | 2036 | 7155.8 (6634.0 to 7726.6)  | 5795.9 (5327.7 to 6294.2)  | 806.8 (663.7 to 964.0)        | 553.2 (422.7 to 718.6)          | 0.0 (0.0 to 0.0)                  | 7523.7 (6975.1 to 8123.9) | 6093.9 (5601.6 to 6617.8)  | 848.2 (697.8 to 1013.5)       | 581.6 (444.5 to 755.5)          | 0.0 (0.0 to 0.0)                  |

| Country     | Year | 2018 US Dollars per capita |                            |                               |                                 |                                   | 2018 PPP per capita        |                            |                               |                                 |                                   |
|-------------|------|----------------------------|----------------------------|-------------------------------|---------------------------------|-----------------------------------|----------------------------|----------------------------|-------------------------------|---------------------------------|-----------------------------------|
|             |      | Health spending            | Government health spending | Out-of-pocket health spending | Prepaid private health spending | Development assistance for health | Health spending            | Government health spending | Out-of-pocket health spending | Prepaid private health spending | Development assistance for health |
| Netherlands | 2037 | 7252.3 (6709.9 to 7842.3)  | 5871.7 (5386.1 to 6385.4)  | 818.2 (667.9 to 984.0)        | 562.5 (430.2 to 730.6)          | 0.0 (0.0 to 0.0)                  | 7625.2 (7054.9 to 8245.5)  | 6173.6 (5663.1 to 6713.8)  | 860.2 (702.3 to 1034.6)       | 591.4 (452.4 to 768.1)          | 0.0 (0.0 to 0.0)                  |
| Netherlands | 2038 | 7352.1 (6769.4 to 7964.8)  | 5949.8 (5450.5 to 6482.5)  | 830.0 (673.0 to 1004.7)       | 572.4 (438.3 to 743.3)          | 0.0 (0.0 to 0.0)                  | 7730.1 (7117.5 to 8374.4)  | 6255.7 (5730.7 to 6815.8)  | 872.7 (707.6 to 1056.3)       | 601.8 (460.8 to 781.6)          | 0.0 (0.0 to 0.0)                  |
| Netherlands | 2039 | 7457.2 (6870.7 to 8073.1)  | 6031.8 (5510.8 to 6581.8)  | 842.3 (679.2 to 1025.3)       | 583.1 (445.6 to 757.1)          | 0.0 (0.0 to 0.0)                  | 7840.7 (7224.0 to 8488.2)  | 6341.9 (5794.1 to 6920.2)  | 885.7 (714.1 to 1078.0)       | 613.1 (468.5 to 796.1)          | 0.0 (0.0 to 0.0)                  |
| Netherlands | 2040 | 7565.3 (6938.2 to 8233.2)  | 6115.9 (5568.9 to 6670.9)  | 855.1 (686.2 to 1044.1)       | 594.3 (453.3 to 771.6)          | 0.0 (0.0 to 0.0)                  | 7954.3 (7295.0 to 8656.5)  | 6430.4 (5855.2 to 7013.9)  | 899.1 (721.5 to 1097.7)       | 624.9 (476.6 to 811.3)          | 0.0 (0.0 to 0.0)                  |
| Netherlands | 2041 | 7676.2 (7001.6 to 8349.1)  | 6201.5 (5629.9 to 6797.4)  | 868.3 (694.4 to 1066.3)       | 606.4 (461.6 to 787.3)          | 0.0 (0.0 to 0.0)                  | 8070.9 (7361.6 to 8778.4)  | 6520.4 (5919.3 to 7146.9)  | 912.9 (730.1 to 1121.1)       | 637.6 (485.3 to 827.7)          | 0.0 (0.0 to 0.0)                  |
| Netherlands | 2042 | 7788.7 (7116.2 to 8506.3)  | 6287.6 (5682.4 to 6915.3)  | 881.8 (703.5 to 1087.9)       | 619.2 (470.4 to 805.3)          | 0.0 (0.0 to 0.0)                  | 8189.1 (7482.1 to 8943.7)  | 6610.9 (5974.6 to 7270.8)  | 927.2 (739.7 to 1143.9)       | 651.0 (494.5 to 846.7)          | 0.0 (0.0 to 0.0)                  |
| Netherlands | 2043 | 7908.5 (7213.2 to 8636.7)  | 6379.7 (5764.9 to 7037.9)  | 896.0 (713.7 to 1109.0)       | 632.8 (480.8 to 825.3)          | 0.0 (0.0 to 0.0)                  | 8315.2 (7584.1 to 9080.8)  | 6707.7 (6061.3 to 7399.8)  | 942.1 (750.4 to 1166.1)       | 665.4 (505.6 to 867.7)          | 0.0 (0.0 to 0.0)                  |
| Netherlands | 2044 | 8031.1 (7318.4 to 8782.4)  | 6473.8 (5851.5 to 7162.1)  | 910.5 (724.2 to 1129.8)       | 646.9 (491.8 to 845.5)          | 0.0 (0.0 to 0.0)                  | 8444.1 (7694.7 to 9234.0)  | 6806.6 (6152.4 to 7530.3)  | 957.3 (761.4 to 1187.9)       | 680.1 (517.1 to 889.0)          | 0.0 (0.0 to 0.0)                  |
| Netherlands | 2045 | 8155.6 (7433.9 to 8929.2)  | 6569.3 (5914.1 to 7269.7)  | 925.2 (734.4 to 1149.9)       | 661.1 (501.7 to 863.4)          | 0.0 (0.0 to 0.0)                  | 8575.0 (7816.1 to 9388.4)  | 6907.1 (6218.2 to 7643.4)  | 972.8 (772.2 to 1209.1)       | 695.1 (527.5 to 907.8)          | 0.0 (0.0 to 0.0)                  |
| Netherlands | 2046 | 8284.0 (7569.1 to 9044.3)  | 6667.7 (5984.3 to 7392.9)  | 940.3 (748.0 to 1169.9)       | 676.0 (512.3 to 884.7)          | 0.0 (0.0 to 0.0)                  | 8709.9 (7958.3 to 9509.4)  | 7010.5 (6292.0 to 7773.0)  | 988.7 (786.4 to 1230.0)       | 710.8 (538.6 to 930.2)          | 0.0 (0.0 to 0.0)                  |
| Netherlands | 2047 | 8413.2 (7641.0 to 9238.0)  | 6766.7 (6056.3 to 7512.6)  | 955.5 (760.6 to 1189.0)       | 691.0 (523.7 to 904.9)          | 0.0 (0.0 to 0.0)                  | 8845.8 (8033.9 to 9713.0)  | 7114.6 (6367.7 to 7898.9)  | 1004.7 (799.7 to 1250.2)      | 726.5 (550.6 to 951.4)          | 0.0 (0.0 to 0.0)                  |
| Netherlands | 2048 | 8542.7 (7706.5 to 9382.4)  | 6865.9 (6130.6 to 7645.6)  | 970.8 (771.9 to 1208.3)       | 706.0 (534.3 to 925.1)          | 0.0 (0.0 to 0.0)                  | 8982.0 (8102.8 to 9864.8)  | 7218.9 (6445.8 to 8038.7)  | 1020.8 (811.6 to 1270.5)      | 742.3 (561.8 to 972.7)          | 0.0 (0.0 to 0.0)                  |
| Netherlands | 2049 | 8673.1 (7783.7 to 9499.3)  | 6966.0 (6211.2 to 7775.9)  | 986.2 (782.3 to 1227.5)       | 720.9 (544.4 to 944.6)          | 0.0 (0.0 to 0.0)                  | 9119.1 (8183.9 to 9987.8)  | 7324.2 (6530.6 to 8175.7)  | 1036.9 (822.5 to 1290.6)      | 758.0 (572.4 to 993.2)          | 0.0 (0.0 to 0.0)                  |
| Netherlands | 2050 | 8805.5 (7934.9 to 9710.4)  | 7067.9 (6276.0 to 7911.8)  | 1001.7 (794.8 to 1246.8)      | 735.9 (554.5 to 965.4)          | 0.0 (0.0 to 0.0)                  | 9258.2 (8342.9 to 10209.6) | 7431.3 (6598.6 to 8318.7)  | 1053.2 (835.7 to 1310.9)      | 773.7 (583.0 to 1015.0)         | 0.0 (0.0 to 0.0)                  |
| New Zealand | 1995 | 2388.0 (2295.9 to 2485.3)  | 1875.6 (1797.4 to 1952.4)  | 360.5 (324.9 to 401.5)        | 151.9 (125.9 to 180.8)          | 0.0 (0.0 to 0.0)                  | 2235.1 (2148.9 to 2326.2)  | 1755.5 (1682.3 to 1827.4)  | 337.4 (304.1 to 375.8)        | 142.2 (117.8 to 169.2)          | 0.0 (0.0 to 0.0)                  |
| New Zealand | 1996 | 2438.1 (2371.7 to 2512.9)  | 1913.1 (1857.4 to 1971.8)  | 367.4 (338.5 to 400.1)        | 157.6 (137.0 to 181.0)          | 0.0 (0.0 to 0.0)                  | 2282.0 (2219.9 to 2352.0)  | 1790.7 (1738.5 to 1845.6)  | 343.8 (316.8 to 374.5)        | 147.5 (128.3 to 169.4)          | 0.0 (0.0 to 0.0)                  |
| New Zealand | 1997 | 2507.5 (2442.2 to 2572.2)  | 1966.2 (1910.5 to 2022.6)  | 377.5 (351.1 to 406.3)        | 163.9 (143.6 to 185.5)          | 0.0 (0.0 to 0.0)                  | 2347.0 (2285.9 to 2407.6)  | 1840.3 (1788.2 to 1893.2)  | 353.3 (328.7 to 380.3)        | 153.4 (134.4 to 173.6)          | 0.0 (0.0 to 0.0)                  |
| New Zealand | 1998 | 2543.9 (2478.5 to 2614.1)  | 1987.3 (1935.4 to 2045.3)  | 390.7 (364.8 to 419.1)        | 166.0 (147.0 to 186.5)          | 0.0 (0.0 to 0.0)                  | 2381.1 (2319.9 to 2446.7)  | 1860.1 (1811.6 to 1914.4)  | 365.7 (341.4 to 392.2)        | 155.4 (137.6 to 174.6)          | 0.0 (0.0 to 0.0)                  |
| New Zealand | 1999 | 2616.3 (2551.3 to 2684.6)  | 2040.7 (1986.9 to 2098.6)  | 405.4 (380.9 to 433.4)        | 170.2 (152.4 to 189.6)          | 0.0 (0.0 to 0.0)                  | 2448.8 (2388.0 to 2512.7)  | 1910.1 (1859.7 to 1964.3)  | 379.5 (356.5 to 405.7)        | 159.3 (142.7 to 177.5)          | 0.0 (0.0 to 0.0)                  |
| New Zealand | 2000 | 2629.8 (2565.6 to 2696.6)  | 2042.2 (1986.9 to 2096.3)  | 416.7 (391.5 to 443.5)        | 170.9 (154.0 to 188.0)          | 0.0 (0.0 to 0.0)                  | 2461.5 (2401.4 to 2524.0)  | 1911.5 (1859.7 to 1962.1)  | 390.1 (366.5 to 415.1)        | 160.0 (144.2 to 176.0)          | 0.0 (0.0 to 0.0)                  |
| New Zealand | 2001 | 2708.0 (2647.9 to 2770.7)  | 2093.4 (2041.6 to 2144.2)  | 440.5 (414.4 to 468.2)        | 174.2 (157.0 to 190.6)          | 0.0 (0.0 to 0.0)                  | 2534.7 (2478.4 to 2593.4)  | 1959.4 (1910.9 to 2006.9)  | 412.3 (387.9 to 438.2)        | 163.0 (146.9 to 178.4)          | 0.0 (0.0 to 0.0)                  |

| Country     | Year | 2018 US Dollars per capita |                            |                               |                                 |                                   | 2018 PPP per capita       |                            |                               |                                 |                                   |
|-------------|------|----------------------------|----------------------------|-------------------------------|---------------------------------|-----------------------------------|---------------------------|----------------------------|-------------------------------|---------------------------------|-----------------------------------|
|             |      | Health spending            | Government health spending | Out-of-pocket health spending | Prepaid private health spending | Development assistance for health | Health spending           | Government health spending | Out-of-pocket health spending | Prepaid private health spending | Development assistance for health |
| New Zealand | 2002 | 2839.5 (2778.1 to 2905.3)  | 2206.7 (2151.3 to 2265.8)  | 454.1 (427.8 to 480.1)        | 178.7 (162.4 to 195.9)          | 0.0 (0.0 to 0.0)                  | 2657.7 (2600.2 to 2719.3) | 2065.4 (2013.6 to 2120.8)  | 425.0 (400.4 to 449.4)        | 167.3 (152.0 to 183.4)          | 0.0 (0.0 to 0.0)                  |
| New Zealand | 2003 | 2948.1 (2887.8 to 3008.0)  | 2311.4 (2257.8 to 2370.4)  | 452.9 (428.3 to 480.1)        | 183.8 (167.8 to 201.7)          | 0.0 (0.0 to 0.0)                  | 2759.4 (2703.0 to 2815.5) | 2163.5 (2113.3 to 2218.7)  | 423.9 (400.9 to 449.4)        | 172.0 (157.0 to 188.8)          | 0.0 (0.0 to 0.0)                  |
| New Zealand | 2004 | 3079.0 (3017.0 to 3141.8)  | 2439.5 (2384.5 to 2497.8)  | 448.3 (422.8 to 474.3)        | 191.2 (175.0 to 210.0)          | 0.0 (0.0 to 0.0)                  | 2881.9 (2823.9 to 2940.7) | 2283.3 (2231.9 to 2337.9)  | 419.6 (395.8 to 444.0)        | 179.0 (163.8 to 196.5)          | 0.0 (0.0 to 0.0)                  |
| New Zealand | 2005 | 3220.1 (3153.5 to 3284.5)  | 2570.0 (2512.4 to 2625.5)  | 451.0 (425.4 to 478.1)        | 199.1 (182.7 to 217.5)          | 0.0 (0.0 to 0.0)                  | 3014.0 (2951.6 to 3074.3) | 2405.5 (2351.6 to 2457.5)  | 422.1 (398.2 to 447.5)        | 186.4 (171.0 to 203.6)          | 0.0 (0.0 to 0.0)                  |
| New Zealand | 2006 | 3358.4 (3292.1 to 3423.0)  | 2702.1 (2645.5 to 2763.1)  | 450.6 (424.5 to 477.1)        | 205.6 (189.0 to 223.8)          | 0.0 (0.0 to 0.0)                  | 3143.4 (3081.4 to 3203.9) | 2529.2 (2476.2 to 2586.2)  | 421.8 (397.3 to 446.5)        | 192.4 (176.9 to 209.5)          | 0.0 (0.0 to 0.0)                  |
| New Zealand | 2007 | 3511.8 (3447.0 to 3580.2)  | 2856.0 (2798.1 to 2920.9)  | 442.1 (415.8 to 468.1)        | 213.7 (196.0 to 233.4)          | 0.0 (0.0 to 0.0)                  | 3287.0 (3226.4 to 3351.1) | 2673.2 (2619.0 to 2733.9)  | 413.8 (389.2 to 438.1)        | 200.1 (183.4 to 218.5)          | 0.0 (0.0 to 0.0)                  |
| New Zealand | 2008 | 3621.1 (3556.7 to 3689.4)  | 2940.5 (2883.5 to 2998.0)  | 457.2 (429.9 to 485.1)        | 223.4 (205.5 to 241.9)          | 0.0 (0.0 to 0.0)                  | 3389.3 (3329.0 to 3453.3) | 2752.3 (2698.9 to 2806.1)  | 427.9 (402.4 to 454.0)        | 209.1 (192.4 to 226.4)          | 0.0 (0.0 to 0.0)                  |
| New Zealand | 2009 | 3768.3 (3704.6 to 3835.6)  | 3057.7 (2999.4 to 3113.4)  | 465.5 (439.5 to 493.9)        | 245.1 (227.7 to 265.1)          | 0.0 (0.0 to 0.0)                  | 3527.1 (3467.5 to 3590.1) | 2862.0 (2807.4 to 2914.1)  | 435.7 (411.4 to 462.3)        | 229.4 (213.1 to 248.2)          | 0.0 (0.0 to 0.0)                  |
| New Zealand | 2010 | 3863.2 (3797.2 to 3929.9)  | 3132.8 (3073.2 to 3194.1)  | 468.0 (440.3 to 496.1)        | 262.4 (244.0 to 283.3)          | 0.0 (0.0 to 0.0)                  | 3615.9 (3554.1 to 3678.3) | 2932.2 (2876.5 to 2989.6)  | 438.1 (412.1 to 464.3)        | 245.6 (228.4 to 265.2)          | 0.0 (0.0 to 0.0)                  |
| New Zealand | 2011 | 3924.2 (3854.0 to 3990.4)  | 3172.4 (3109.5 to 3230.2)  | 475.5 (449.4 to 502.2)        | 276.3 (256.2 to 297.6)          | 0.0 (0.0 to 0.0)                  | 3673.0 (3607.3 to 3735.0) | 2969.3 (2910.5 to 3023.4)  | 445.0 (420.6 to 470.1)        | 258.6 (239.8 to 278.6)          | 0.0 (0.0 to 0.0)                  |
| New Zealand | 2012 | 3967.4 (3899.3 to 4040.9)  | 3190.8 (3131.4 to 3251.0)  | 487.5 (462.6 to 513.6)        | 289.2 (267.2 to 309.1)          | 0.0 (0.0 to 0.0)                  | 3713.4 (3649.7 to 3782.2) | 2986.5 (2931.0 to 3042.9)  | 456.3 (433.0 to 480.7)        | 270.7 (250.1 to 289.3)          | 0.0 (0.0 to 0.0)                  |
| New Zealand | 2013 | 4004.2 (3936.1 to 4073.3)  | 3203.9 (3142.8 to 3265.6)  | 500.9 (475.2 to 529.5)        | 299.4 (278.8 to 321.9)          | 0.0 (0.0 to 0.0)                  | 3747.9 (3684.2 to 3812.6) | 2998.8 (2941.6 to 3056.5)  | 468.9 (444.8 to 495.6)        | 280.2 (261.0 to 301.3)          | 0.0 (0.0 to 0.0)                  |
| New Zealand | 2014 | 4075.8 (4009.1 to 4147.9)  | 3240.9 (3182.3 to 3306.6)  | 525.1 (499.4 to 552.2)        | 309.7 (290.4 to 332.3)          | 0.0 (0.0 to 0.0)                  | 3814.9 (3752.4 to 3882.4) | 3033.5 (2978.6 to 3095.0)  | 491.5 (467.4 to 516.9)        | 289.9 (271.8 to 311.1)          | 0.0 (0.0 to 0.0)                  |
| New Zealand | 2015 | 4167.8 (4097.1 to 4240.7)  | 3293.6 (3235.2 to 3358.0)  | 553.5 (523.9 to 585.0)        | 320.8 (296.4 to 346.6)          | 0.0 (0.0 to 0.0)                  | 3901.0 (3834.8 to 3969.2) | 3082.8 (3028.1 to 3143.0)  | 518.0 (490.3 to 547.5)        | 300.2 (277.4 to 324.4)          | 0.0 (0.0 to 0.0)                  |
| New Zealand | 2016 | 4275.8 (4167.9 to 4375.9)  | 3364.3 (3278.7 to 3445.0)  | 579.0 (538.3 to 621.8)        | 332.5 (301.3 to 370.1)          | 0.0 (0.0 to 0.0)                  | 4002.1 (3901.1 to 4095.8) | 3149.0 (3068.9 to 3224.5)  | 541.9 (503.8 to 582.0)        | 311.2 (282.0 to 346.4)          | 0.0 (0.0 to 0.0)                  |
| New Zealand | 2017 | 4297.7 (4188.3 to 4403.9)  | 3375.6 (3288.6 to 3467.0)  | 586.3 (542.9 to 629.5)        | 335.8 (303.9 to 373.6)          | 0.0 (0.0 to 0.0)                  | 4022.6 (3920.2 to 4122.0) | 3159.5 (3078.1 to 3245.1)  | 548.8 (508.1 to 589.2)        | 314.3 (284.4 to 349.7)          | 0.0 (0.0 to 0.0)                  |
| New Zealand | 2018 | 4348.9 (4233.2 to 4458.3)  | 3413.8 (3321.2 to 3509.9)  | 594.8 (551.9 to 641.6)        | 340.3 (307.8 to 378.4)          | 0.0 (0.0 to 0.0)                  | 4070.5 (3962.2 to 4172.9) | 3195.3 (3108.6 to 3285.2)  | 556.8 (516.6 to 600.5)        | 318.5 (288.1 to 354.2)          | 0.0 (0.0 to 0.0)                  |
| New Zealand | 2019 | 4399.3 (4284.1 to 4519.8)  | 3456.6 (3356.3 to 3559.7)  | 598.2 (554.6 to 645.4)        | 344.5 (312.0 to 383.6)          | 0.0 (0.0 to 0.0)                  | 4117.7 (4009.8 to 4230.5) | 3235.3 (3141.5 to 3331.9)  | 559.9 (519.1 to 604.1)        | 322.5 (292.0 to 359.1)          | 0.0 (0.0 to 0.0)                  |
| New Zealand | 2020 | 4435.9 (4315.5 to 4554.0)  | 3487.3 (3385.9 to 3593.4)  | 600.3 (555.9 to 647.9)        | 348.3 (315.2 to 387.2)          | 0.0 (0.0 to 0.0)                  | 4151.9 (4039.3 to 4262.5) | 3264.1 (3169.2 to 3363.4)  | 561.9 (520.3 to 606.5)        | 326.0 (295.0 to 362.4)          | 0.0 (0.0 to 0.0)                  |
| New Zealand | 2021 | 4487.9 (4354.5 to 4611.5)  | 3530.7 (3419.4 to 3644.8)  | 604.7 (559.7 to 654.3)        | 352.5 (319.2 to 392.3)          | 0.0 (0.0 to 0.0)                  | 4200.6 (4075.8 to 4316.3) | 3304.7 (3200.6 to 3411.5)  | 566.0 (523.9 to 612.4)        | 330.0 (298.7 to 367.1)          | 0.0 (0.0 to 0.0)                  |
| New Zealand | 2022 | 4544.0 (4404.7 to 4684.4)  | 3574.3 (3450.3 to 3696.2)  | 613.0 (567.1 to 664.3)        | 356.7 (322.9 to 397.0)          | 0.0 (0.0 to 0.0)                  | 4253.1 (4122.7 to 4384.5) | 3345.5 (3229.4 to 3459.7)  | 573.8 (530.8 to 621.8)        | 333.8 (302.2 to 371.6)          | 0.0 (0.0 to 0.0)                  |



| Country     | Year | 2018 US Dollars per capita |                            |                               |                                 |                                   | 2018 PPP per capita       |                            |                               |                                 |                                   |
|-------------|------|----------------------------|----------------------------|-------------------------------|---------------------------------|-----------------------------------|---------------------------|----------------------------|-------------------------------|---------------------------------|-----------------------------------|
|             |      | Health spending            | Government health spending | Out-of-pocket health spending | Prepaid private health spending | Development assistance for health | Health spending           | Government health spending | Out-of-pocket health spending | Prepaid private health spending | Development assistance for health |
| New Zealand | 2023 | 4603.4 (4450.9 to 4752.5)  | 3620.4 (3486.7 to 3758.9)  | 622.0 (575.1 to 674.7)        | 361.0 (327.3 to 401.7)          | 0.0 (0.0 to 0.0)                  | 4308.7 (4166.0 to 4448.3) | 3388.7 (3263.5 to 3518.3)  | 582.2 (538.3 to 631.6)        | 337.9 (306.3 to 376.0)          | 0.0 (0.0 to 0.0)                  |
| New Zealand | 2024 | 4664.8 (4502.8 to 4825.0)  | 3668.1 (3524.4 to 3824.4)  | 631.3 (583.0 to 685.7)        | 365.4 (331.6 to 406.5)          | 0.0 (0.0 to 0.0)                  | 4366.2 (4214.6 to 4516.2) | 3433.3 (3298.8 to 3579.6)  | 590.9 (545.7 to 641.8)        | 342.0 (310.3 to 380.5)          | 0.0 (0.0 to 0.0)                  |
| New Zealand | 2025 | 4726.9 (4558.3 to 4902.3)  | 3716.4 (3559.0 to 3881.7)  | 640.7 (589.3 to 696.8)        | 369.8 (334.9 to 411.7)          | 0.0 (0.0 to 0.0)                  | 4424.3 (4266.5 to 4588.5) | 3478.5 (3331.2 to 3633.3)  | 599.7 (551.6 to 652.2)        | 346.2 (313.5 to 385.3)          | 0.0 (0.0 to 0.0)                  |
| New Zealand | 2026 | 4786.5 (4602.4 to 4980.2)  | 3762.3 (3590.7 to 3940.5)  | 650.0 (595.7 to 708.9)        | 374.2 (338.6 to 416.8)          | 0.0 (0.0 to 0.0)                  | 4480.1 (4307.8 to 4661.4) | 3521.5 (3360.9 to 3688.3)  | 608.4 (557.5 to 663.5)        | 350.2 (317.0 to 390.1)          | 0.0 (0.0 to 0.0)                  |
| New Zealand | 2027 | 4850.8 (4648.9 to 5063.0)  | 3812.2 (3630.9 to 4013.3)  | 659.7 (600.7 to 726.4)        | 378.9 (342.0 to 422.7)          | 0.0 (0.0 to 0.0)                  | 4540.3 (4351.3 to 4738.9) | 3568.2 (3398.5 to 3756.4)  | 617.5 (562.2 to 679.9)        | 354.6 (320.1 to 395.6)          | 0.0 (0.0 to 0.0)                  |
| New Zealand | 2028 | 4916.1 (4696.1 to 5150.7)  | 3862.8 (3667.9 to 4084.7)  | 669.6 (603.4 to 744.8)        | 383.6 (345.5 to 429.1)          | 0.0 (0.0 to 0.0)                  | 4601.4 (4395.5 to 4821.1) | 3615.5 (3433.1 to 3823.2)  | 626.8 (564.8 to 697.1)        | 359.1 (323.4 to 401.7)          | 0.0 (0.0 to 0.0)                  |
| New Zealand | 2029 | 4982.5 (4751.0 to 5236.5)  | 3914.3 (3706.2 to 4146.2)  | 679.7 (607.7 to 764.1)        | 388.5 (349.5 to 434.7)          | 0.0 (0.0 to 0.0)                  | 4663.6 (4446.9 to 4901.3) | 3663.8 (3468.9 to 3880.8)  | 636.2 (568.8 to 715.2)        | 363.7 (327.2 to 406.9)          | 0.0 (0.0 to 0.0)                  |
| New Zealand | 2030 | 5046.9 (4797.1 to 5310.0)  | 3963.9 (3737.9 to 4201.9)  | 689.7 (610.3 to 782.7)        | 393.3 (353.8 to 440.6)          | 0.0 (0.0 to 0.0)                  | 4723.8 (4490.1 to 4970.1) | 3710.2 (3498.6 to 3933.0)  | 645.5 (571.2 to 732.6)        | 368.1 (331.1 to 412.4)          | 0.0 (0.0 to 0.0)                  |
| New Zealand | 2031 | 5110.7 (4850.2 to 5394.9)  | 4012.5 (3780.6 to 4275.6)  | 699.8 (613.2 to 801.7)        | 398.4 (358.3 to 446.9)          | 0.0 (0.0 to 0.0)                  | 4783.6 (4539.8 to 5049.6) | 3755.7 (3538.6 to 4001.9)  | 655.0 (573.9 to 750.4)        | 372.9 (335.4 to 418.3)          | 0.0 (0.0 to 0.0)                  |
| New Zealand | 2032 | 5174.1 (4894.8 to 5470.6)  | 4060.6 (3811.5 to 4339.4)  | 709.9 (616.7 to 820.8)        | 403.6 (362.8 to 454.0)          | 0.0 (0.0 to 0.0)                  | 4842.9 (4581.4 to 5120.4) | 3800.7 (3567.5 to 4061.7)  | 664.4 (577.2 to 768.2)        | 377.8 (339.5 to 425.0)          | 0.0 (0.0 to 0.0)                  |
| New Zealand | 2033 | 5238.9 (4933.3 to 5553.9)  | 4109.8 (3848.8 to 4404.0)  | 720.1 (621.0 to 839.2)        | 409.0 (367.1 to 461.0)          | 0.0 (0.0 to 0.0)                  | 4903.5 (4617.5 to 5198.4) | 3846.7 (3602.5 to 4122.1)  | 674.0 (581.2 to 785.5)        | 382.8 (343.6 to 431.5)          | 0.0 (0.0 to 0.0)                  |
| New Zealand | 2034 | 5302.7 (4989.6 to 5633.5)  | 4158.2 (3872.3 to 4466.8)  | 730.3 (625.6 to 857.1)        | 414.3 (371.8 to 467.4)          | 0.0 (0.0 to 0.0)                  | 4963.3 (4670.2 to 5272.9) | 3892.0 (3624.5 to 4180.9)  | 683.6 (585.6 to 802.2)        | 387.8 (348.0 to 437.5)          | 0.0 (0.0 to 0.0)                  |
| New Zealand | 2035 | 5366.5 (5032.8 to 5710.7)  | 4206.3 (3912.7 to 4524.8)  | 740.6 (630.0 to 876.3)        | 419.6 (376.5 to 473.5)          | 0.0 (0.0 to 0.0)                  | 5023.0 (4710.6 to 5345.2) | 3937.0 (3662.3 to 4235.1)  | 693.2 (589.7 to 820.2)        | 392.7 (352.4 to 443.2)          | 0.0 (0.0 to 0.0)                  |
| New Zealand | 2036 | 5433.0 (5097.4 to 5792.9)  | 4256.5 (3961.2 to 4595.1)  | 751.1 (634.1 to 896.3)        | 425.4 (380.9 to 480.4)          | 0.0 (0.0 to 0.0)                  | 5085.2 (4771.1 to 5422.1) | 3984.0 (3707.6 to 4301.0)  | 703.1 (593.5 to 838.9)        | 398.1 (356.5 to 449.6)          | 0.0 (0.0 to 0.0)                  |
| New Zealand | 2037 | 5499.2 (5160.1 to 5879.9)  | 4306.2 (3992.7 to 4661.0)  | 761.7 (637.9 to 915.6)        | 431.2 (385.3 to 487.3)          | 0.0 (0.0 to 0.0)                  | 5147.2 (4829.8 to 5503.5) | 4030.6 (3737.1 to 4362.7)  | 713.0 (597.0 to 857.0)        | 403.6 (360.7 to 456.1)          | 0.0 (0.0 to 0.0)                  |
| New Zealand | 2038 | 5566.5 (5194.1 to 5964.9)  | 4357.1 (4031.8 to 4720.8)  | 772.3 (640.9 to 934.3)        | 437.0 (389.8 to 494.3)          | 0.0 (0.0 to 0.0)                  | 5210.2 (4861.7 to 5583.1) | 4078.2 (3773.8 to 4418.6)  | 722.9 (599.9 to 874.5)        | 409.1 (364.8 to 462.6)          | 0.0 (0.0 to 0.0)                  |
| New Zealand | 2039 | 5635.8 (5241.3 to 6078.6)  | 4409.4 (4065.1 to 4788.7)  | 783.2 (644.5 to 952.3)        | 443.2 (395.2 to 501.6)          | 0.0 (0.0 to 0.0)                  | 5275.0 (4905.8 to 5689.5) | 4127.1 (3804.9 to 4482.1)  | 733.1 (603.3 to 891.3)        | 414.9 (369.9 to 469.5)          | 0.0 (0.0 to 0.0)                  |
| New Zealand | 2040 | 5706.5 (5288.2 to 6154.0)  | 4462.7 (4103.4 to 4883.8)  | 794.1 (648.8 to 968.7)        | 449.7 (399.4 to 510.3)          | 0.0 (0.0 to 0.0)                  | 5341.2 (4949.7 to 5760.1) | 4177.0 (3840.8 to 4571.2)  | 743.3 (607.3 to 906.7)        | 420.9 (373.9 to 477.6)          | 0.0 (0.0 to 0.0)                  |
| New Zealand | 2041 | 5775.9 (5344.4 to 6214.8)  | 4514.4 (4133.5 to 4932.4)  | 805.0 (655.1 to 984.5)        | 456.5 (404.8 to 518.6)          | 0.0 (0.0 to 0.0)                  | 5406.2 (5002.3 to 5817.0) | 4225.4 (3868.9 to 4616.7)  | 753.5 (613.1 to 921.5)        | 427.3 (378.9 to 485.4)          | 0.0 (0.0 to 0.0)                  |
| New Zealand | 2042 | 5850.4 (5405.8 to 6323.2)  | 4570.0 (4185.2 to 4985.2)  | 816.4 (660.8 to 1000.6)       | 464.0 (410.4 to 526.2)          | 0.0 (0.0 to 0.0)                  | 5475.9 (5059.7 to 5918.5) | 4277.5 (3917.3 to 4666.1)  | 764.1 (618.5 to 936.6)        | 434.3 (384.2 to 492.5)          | 0.0 (0.0 to 0.0)                  |
| New Zealand | 2043 | 5927.0 (5479.9 to 6407.1)  | 4627.5 (4226.5 to 5062.3)  | 827.8 (667.1 to 1016.2)       | 471.7 (416.4 to 536.6)          | 0.0 (0.0 to 0.0)                  | 5547.6 (5129.1 to 5997.0) | 4331.3 (3956.0 to 4738.3)  | 774.8 (624.4 to 951.1)        | 441.5 (389.8 to 502.2)          | 0.0 (0.0 to 0.0)                  |

| Country     | Year | 2018 US Dollars per capita |                            |                               |                                 |                                   | 2018 PPP per capita       |                            |                               |                                 |                                   |
|-------------|------|----------------------------|----------------------------|-------------------------------|---------------------------------|-----------------------------------|---------------------------|----------------------------|-------------------------------|---------------------------------|-----------------------------------|
|             |      | Health spending            | Government health spending | Out-of-pocket health spending | Prepaid private health spending | Development assistance for health | Health spending           | Government health spending | Out-of-pocket health spending | Prepaid private health spending | Development assistance for health |
| New Zealand | 2044 | 6003.7 (5562.3 to 6489.8)  | 4685.0 (4273.3 to 5127.9)  | 839.2 (676.0 to 1032.7)       | 479.5 (422.4 to 546.2)          | 0.0 (0.0 to 0.0)                  | 5619.4 (5206.2 to 6074.4) | 4385.1 (3999.8 to 4799.7)  | 785.5 (632.7 to 966.6)        | 448.8 (395.4 to 511.3)          | 0.0 (0.0 to 0.0)                  |
| New Zealand | 2045 | 6079.3 (5598.9 to 6577.4)  | 4741.6 (4308.0 to 5199.0)  | 850.6 (685.6 to 1048.6)       | 487.1 (428.1 to 555.4)          | 0.0 (0.0 to 0.0)                  | 5690.2 (5240.5 to 6156.4) | 4438.0 (4032.2 to 4866.2)  | 796.2 (641.7 to 981.5)        | 455.9 (400.7 to 519.8)          | 0.0 (0.0 to 0.0)                  |
| New Zealand | 2046 | 6155.3 (5669.7 to 6649.1)  | 4798.2 (4352.5 to 5262.1)  | 862.1 (695.7 to 1063.7)       | 495.0 (433.9 to 565.3)          | 0.0 (0.0 to 0.0)                  | 5761.3 (5306.8 to 6223.5) | 4491.1 (4073.9 to 4925.3)  | 806.9 (651.2 to 995.6)        | 463.3 (406.1 to 529.1)          | 0.0 (0.0 to 0.0)                  |
| New Zealand | 2047 | 6231.7 (5731.5 to 6784.2)  | 4855.2 (4406.7 to 5352.3)  | 873.6 (704.5 to 1077.9)       | 502.9 (439.3 to 575.8)          | 0.0 (0.0 to 0.0)                  | 5832.8 (5364.6 to 6349.9) | 4544.4 (4124.6 to 5009.7)  | 817.7 (659.4 to 1008.9)       | 470.7 (411.2 to 539.0)          | 0.0 (0.0 to 0.0)                  |
| New Zealand | 2048 | 6309.7 (5772.5 to 6897.6)  | 4913.5 (4428.6 to 5431.7)  | 885.3 (712.3 to 1092.5)       | 510.9 (444.7 to 586.5)          | 0.0 (0.0 to 0.0)                  | 5905.8 (5403.0 to 6456.1) | 4599.0 (4145.2 to 5084.0)  | 828.7 (666.7 to 1022.5)       | 478.2 (416.3 to 549.0)          | 0.0 (0.0 to 0.0)                  |
| New Zealand | 2049 | 6388.1 (5841.9 to 6981.1)  | 4972.3 (4477.1 to 5505.6)  | 897.1 (720.3 to 1109.1)       | 518.7 (450.4 to 597.1)          | 0.0 (0.0 to 0.0)                  | 5979.2 (5468.0 to 6534.2) | 4654.0 (4190.5 to 5153.2)  | 839.7 (674.2 to 1038.1)       | 485.5 (421.6 to 558.9)          | 0.0 (0.0 to 0.0)                  |
| New Zealand | 2050 | 6466.6 (5905.9 to 7064.9)  | 5031.3 (4524.2 to 5583.0)  | 909.0 (728.5 to 1123.9)       | 526.3 (455.8 to 607.3)          | 0.0 (0.0 to 0.0)                  | 6052.6 (5527.9 to 6612.7) | 4709.2 (4234.6 to 5225.6)  | 850.8 (681.9 to 1052.0)       | 492.7 (426.7 to 568.5)          | 0.0 (0.0 to 0.0)                  |
| Nicaragua   | 1995 | 93.9 (80.2 to 110.1)       | 41.2 (32.5 to 51.4)        | 38.9 (29.2 to 52.5)           | 2.9 (1.4 to 5.5)                | 10.9 (10.9 to 10.9)               | 255.6 (218.3 to 299.8)    | 112.2 (88.6 to 139.9)      | 105.9 (79.4 to 142.9)         | 7.8 (3.8 to 15.0)               | 29.6 (29.6 to 29.6)               |
| Nicaragua   | 1996 | 94.7 (81.8 to 110.2)       | 37.5 (29.9 to 46.5)        | 39.4 (29.5 to 52.5)           | 2.8 (1.3 to 5.0)                | 14.9 (14.9 to 14.9)               | 257.8 (222.7 to 300.0)    | 102.2 (81.4 to 126.8)      | 107.4 (80.4 to 143.0)         | 7.5 (3.6 to 13.8)               | 40.7 (40.7 to 40.7)               |
| Nicaragua   | 1997 | 86.4 (74.5 to 100.6)       | 32.2 (25.9 to 39.9)        | 38.9 (29.4 to 51.2)           | 2.6 (1.3 to 4.8)                | 12.7 (12.7 to 12.7)               | 235.4 (202.8 to 273.9)    | 87.8 (70.4 to 108.6)       | 106.1 (80.1 to 139.4)         | 7.0 (3.4 to 13.1)               | 34.5 (34.5 to 34.5)               |
| Nicaragua   | 1998 | 84.1 (72.6 to 98.6)        | 31.0 (24.7 to 38.3)        | 39.1 (29.7 to 52.1)           | 2.6 (1.3 to 4.8)                | 11.4 (11.4 to 11.4)               | 229.0 (197.7 to 268.5)    | 84.3 (67.3 to 104.3)       | 106.6 (80.9 to 141.7)         | 7.0 (3.4 to 13.1)               | 31.1 (31.1 to 31.1)               |
| Nicaragua   | 1999 | 97.3 (85.6 to 112.3)       | 30.9 (24.8 to 38.0)        | 38.6 (29.4 to 51.0)           | 2.7 (1.3 to 5.0)                | 25.1 (25.1 to 25.1)               | 264.9 (233.1 to 305.7)    | 84.2 (67.6 to 103.5)       | 105.2 (80.0 to 138.9)         | 7.3 (3.5 to 13.5)               | 68.3 (68.3 to 68.3)               |
| Nicaragua   | 2000 | 87.6 (75.9 to 102.4)       | 34.1 (27.5 to 41.8)        | 37.3 (28.4 to 49.1)           | 3.0 (1.4 to 5.7)                | 13.2 (13.2 to 13.2)               | 238.6 (206.7 to 278.9)    | 92.9 (74.8 to 113.9)       | 101.7 (77.3 to 133.7)         | 8.1 (3.9 to 15.6)               | 35.9 (35.9 to 35.9)               |
| Nicaragua   | 2001 | 86.2 (74.4 to 101.0)       | 35.4 (28.6 to 43.4)        | 36.9 (28.0 to 48.8)           | 3.2 (1.6 to 6.2)                | 10.6 (10.6 to 10.6)               | 234.7 (202.5 to 275.1)    | 96.4 (77.8 to 118.2)       | 100.6 (76.3 to 132.9)         | 8.8 (4.2 to 16.9)               | 28.8 (28.8 to 28.8)               |
| Nicaragua   | 2002 | 86.7 (75.3 to 100.5)       | 35.0 (28.3 to 42.3)        | 37.6 (28.6 to 49.2)           | 3.2 (1.5 to 6.0)                | 11.0 (11.0 to 11.0)               | 236.1 (205.1 to 273.8)    | 95.4 (77.0 to 115.2)       | 102.3 (77.8 to 133.9)         | 8.6 (4.1 to 16.4)               | 29.8 (29.8 to 29.8)               |
| Nicaragua   | 2003 | 88.3 (76.9 to 101.6)       | 34.5 (28.3 to 41.6)        | 37.6 (28.7 to 48.5)           | 3.2 (1.5 to 6.1)                | 13.1 (13.1 to 13.1)               | 240.6 (209.5 to 276.6)    | 93.9 (77.0 to 113.3)       | 102.3 (78.0 to 132.2)         | 8.8 (4.2 to 16.6)               | 35.6 (35.6 to 35.6)               |
| Nicaragua   | 2004 | 94.2 (82.3 to 107.4)       | 37.9 (31.0 to 45.9)        | 39.5 (30.4 to 50.7)           | 2.8 (1.3 to 5.2)                | 13.9 (13.9 to 13.9)               | 256.4 (224.1 to 292.4)    | 103.3 (84.4 to 125.0)      | 107.7 (82.7 to 138.2)         | 7.5 (3.6 to 14.1)               | 38.0 (38.0 to 38.0)               |
| Nicaragua   | 2005 | 100.8 (88.1 to 114.5)      | 41.3 (33.7 to 50.1)        | 41.5 (31.9 to 53.1)           | 2.5 (1.2 to 4.8)                | 15.5 (15.5 to 15.5)               | 274.4 (239.8 to 311.7)    | 112.4 (91.8 to 136.3)      | 112.9 (86.8 to 144.7)         | 6.9 (3.2 to 13.0)               | 42.2 (42.2 to 42.2)               |
| Nicaragua   | 2006 | 106.4 (93.6 to 120.5)      | 44.2 (36.3 to 53.9)        | 44.2 (34.0 to 57.1)           | 2.4 (1.1 to 4.5)                | 15.6 (15.6 to 15.6)               | 289.8 (255.0 to 328.0)    | 120.4 (99.0 to 146.9)      | 120.4 (92.5 to 155.5)         | 6.7 (3.1 to 12.3)               | 42.4 (42.4 to 42.4)               |
| Nicaragua   | 2007 | 115.7 (101.8 to 130.7)     | 49.0 (40.4 to 59.1)        | 47.7 (36.8 to 61.1)           | 2.5 (1.2 to 4.7)                | 16.6 (16.6 to 16.6)               | 315.0 (277.1 to 356.0)    | 133.4 (110.0 to 160.9)     | 129.8 (100.2 to 166.3)        | 6.8 (3.2 to 12.9)               | 45.1 (45.1 to 45.1)               |
| Nicaragua   | 2008 | 123.0 (108.3 to 138.8)     | 53.4 (44.1 to 63.8)        | 49.7 (38.8 to 63.2)           | 2.6 (1.2 to 5.0)                | 17.4 (17.4 to 17.4)               | 335.1 (294.9 to 378.1)    | 145.3 (120.2 to 173.8)     | 135.2 (105.5 to 172.0)        | 7.2 (3.3 to 13.5)               | 47.3 (47.3 to 47.3)               |

| Country   | Year | 2018 US Dollars per capita |                            |                               |                                 |                                   | 2018 PPP per capita    |                            |                               |                                 |                                   |
|-----------|------|----------------------------|----------------------------|-------------------------------|---------------------------------|-----------------------------------|------------------------|----------------------------|-------------------------------|---------------------------------|-----------------------------------|
|           |      | Health spending            | Government health spending | Out-of-pocket health spending | Prepaid private health spending | Development assistance for health | Health spending        | Government health spending | Out-of-pocket health spending | Prepaid private health spending | Development assistance for health |
| Nicaragua | 2009 | 124.0 (108.4 to 140.5)     | 55.0 (45.4 to 65.3)        | 49.3 (38.3 to 62.4)           | 2.8 (1.3 to 5.3)                | 16.9 (16.9 to 16.9)               | 337.6 (295.3 to 382.6) | 149.7 (123.8 to 177.9)     | 134.3 (104.3 to 170.0)        | 7.6 (3.5 to 14.4)               | 46.0 (46.0 to 46.0)               |
| Nicaragua | 2010 | 122.6 (106.4 to 139.6)     | 57.2 (47.1 to 68.0)        | 49.6 (38.5 to 63.1)           | 2.9 (1.3 to 5.5)                | 12.9 (12.9 to 12.9)               | 333.9 (289.6 to 380.1) | 155.9 (128.3 to 185.1)     | 135.1 (104.9 to 171.8)        | 7.9 (3.6 to 15.0)               | 35.1 (35.1 to 35.1)               |
| Nicaragua | 2011 | 130.0 (112.7 to 149.0)     | 64.3 (52.6 to 76.7)        | 51.1 (39.4 to 65.4)           | 3.1 (1.4 to 6.0)                | 11.5 (11.5 to 11.5)               | 354.1 (307.0 to 405.8) | 175.1 (143.3 to 208.8)     | 139.2 (107.3 to 178.2)        | 8.4 (3.9 to 16.2)               | 31.4 (31.4 to 31.4)               |
| Nicaragua | 2012 | 139.6 (121.3 to 160.8)     | 71.4 (59.1 to 85.1)        | 52.9 (40.5 to 68.3)           | 3.3 (1.5 to 6.2)                | 12.0 (12.0 to 12.0)               | 380.0 (330.4 to 437.8) | 194.3 (160.9 to 231.8)     | 144.1 (110.4 to 186.1)        | 9.0 (4.1 to 16.9)               | 32.6 (32.6 to 32.6)               |
| Nicaragua | 2013 | 147.8 (128.4 to 169.4)     | 77.1 (63.7 to 92.1)        | 54.3 (41.6 to 70.5)           | 3.5 (1.6 to 6.4)                | 13.0 (13.0 to 13.0)               | 402.6 (349.6 to 461.2) | 209.8 (173.3 to 250.9)     | 147.8 (113.4 to 192.0)        | 9.5 (4.4 to 17.3)               | 35.4 (35.4 to 35.4)               |
| Nicaragua | 2014 | 156.5 (136.2 to 180.6)     | 84.9 (70.5 to 102.6)       | 56.1 (42.8 to 72.6)           | 3.7 (1.7 to 6.7)                | 11.8 (11.8 to 11.8)               | 426.2 (370.8 to 491.9) | 231.3 (191.9 to 279.3)     | 152.7 (116.7 to 197.6)        | 10.1 (4.7 to 18.3)              | 32.1 (32.1 to 32.1)               |
| Nicaragua | 2015 | 168.6 (145.8 to 194.6)     | 92.9 (76.8 to 111.7)       | 57.9 (43.7 to 75.4)           | 3.9 (1.7 to 7.0)                | 13.8 (13.8 to 13.8)               | 459.0 (397.0 to 530.0) | 253.0 (209.1 to 304.2)     | 157.8 (118.9 to 205.3)        | 10.5 (4.8 to 19.1)              | 37.7 (37.7 to 37.7)               |
| Nicaragua | 2016 | 184.4 (159.4 to 212.1)     | 103.6 (84.7 to 124.9)      | 60.3 (44.5 to 78.7)           | 4.0 (1.9 to 7.3)                | 16.5 (16.5 to 16.5)               | 502.1 (434.1 to 577.7) | 282.1 (230.7 to 340.2)     | 164.2 (121.3 to 214.3)        | 11.0 (5.1 to 19.8)              | 44.8 (44.8 to 44.8)               |
| Nicaragua | 2017 | 189.4 (163.1 to 218.4)     | 109.8 (89.7 to 132.4)      | 62.6 (46.1 to 81.8)           | 4.2 (1.9 to 7.6)                | 12.8 (12.8 to 12.8)               | 515.7 (444.2 to 594.8) | 298.9 (244.4 to 360.6)     | 170.5 (125.7 to 222.7)        | 11.5 (5.3 to 20.7)              | 34.8 (34.8 to 34.8)               |
| Nicaragua | 2018 | 192.8 (166.2 to 222.9)     | 112.8 (92.0 to 136.0)      | 63.7 (47.0 to 83.3)           | 4.3 (2.0 to 7.8)                | 12.0 (12.0 to 12.0)               | 524.9 (452.5 to 607.0) | 307.1 (250.6 to 370.3)     | 173.4 (128.1 to 226.7)        | 11.7 (5.4 to 21.1)              | 32.7 (32.6 to 32.7)               |
| Nicaragua | 2019 | 196.8 (169.3 to 227.4)     | 115.7 (94.4 to 139.7)      | 64.7 (47.7 to 84.6)           | 4.4 (2.0 to 7.9)                | 12.1 (11.3 to 12.8)               | 536.0 (461.0 to 619.2) | 315.0 (257.0 to 380.5)     | 176.2 (129.8 to 230.3)        | 12.0 (5.5 to 21.5)              | 32.9 (30.7 to 34.7)               |
| Nicaragua | 2020 | 201.1 (173.4 to 232.2)     | 118.6 (96.9 to 143.4)      | 65.7 (48.3 to 85.9)           | 4.5 (2.1 to 8.1)                | 12.2 (11.2 to 13.2)               | 547.6 (472.2 to 632.2) | 323.1 (263.8 to 390.4)     | 179.0 (131.6 to 234.0)        | 12.2 (5.6 to 22.0)              | 33.3 (30.6 to 36.0)               |
| Nicaragua | 2021 | 205.3 (176.9 to 236.7)     | 121.5 (99.2 to 146.6)      | 66.7 (49.0 to 87.5)           | 4.6 (2.1 to 8.2)                | 12.4 (11.2 to 13.8)               | 559.0 (481.8 to 644.6) | 331.0 (270.2 to 399.2)     | 181.7 (133.4 to 238.1)        | 12.4 (5.7 to 22.4)              | 33.9 (30.5 to 37.5)               |
| Nicaragua | 2022 | 209.7 (180.8 to 242.3)     | 124.5 (101.7 to 150.3)     | 67.8 (50.0 to 88.7)           | 4.7 (2.1 to 8.4)                | 12.7 (11.3 to 14.2)               | 571.0 (492.3 to 659.7) | 339.2 (276.9 to 409.2)     | 184.5 (136.1 to 241.6)        | 12.7 (5.8 to 22.7)              | 34.6 (30.7 to 38.6)               |
| Nicaragua | 2023 | 214.3 (184.5 to 247.4)     | 127.6 (104.1 to 153.7)     | 69.0 (50.8 to 90.2)           | 4.7 (2.2 to 8.5)                | 13.0 (11.3 to 14.7)               | 583.6 (502.4 to 673.6) | 347.5 (283.4 to 418.6)     | 187.8 (138.3 to 245.6)        | 12.9 (5.9 to 23.1)              | 35.3 (30.8 to 40.1)               |
| Nicaragua | 2024 | 219.0 (188.9 to 253.1)     | 130.7 (106.4 to 157.4)     | 70.2 (51.9 to 92.4)           | 4.8 (2.2 to 8.7)                | 13.3 (11.5 to 15.3)               | 596.4 (514.4 to 689.2) | 355.9 (289.7 to 428.6)     | 191.2 (141.2 to 251.6)        | 13.2 (6.1 to 23.6)              | 36.1 (31.2 to 41.6)               |
| Nicaragua | 2025 | 223.7 (192.8 to 257.6)     | 133.8 (108.8 to 161.0)     | 71.5 (52.8 to 94.2)           | 4.9 (2.3 to 8.9)                | 13.5 (11.6 to 15.9)               | 609.3 (525.0 to 701.4) | 364.3 (296.4 to 438.3)     | 194.7 (143.6 to 256.6)        | 13.4 (6.2 to 24.1)              | 36.9 (31.5 to 43.2)               |
| Nicaragua | 2026 | 228.5 (197.3 to 263.5)     | 136.9 (111.1 to 165.0)     | 72.8 (53.7 to 96.3)           | 5.0 (2.3 to 9.1)                | 13.8 (11.6 to 16.2)               | 622.2 (537.2 to 717.6) | 372.7 (302.4 to 449.3)     | 198.3 (146.3 to 262.1)        | 13.7 (6.3 to 24.7)              | 37.6 (31.7 to 44.0)               |
| Nicaragua | 2027 | 233.2 (201.0 to 268.6)     | 139.9 (113.5 to 169.0)     | 74.1 (54.6 to 98.6)           | 5.1 (2.4 to 9.3)                | 14.1 (11.8 to 16.8)               | 635.0 (547.2 to 731.4) | 380.8 (309.2 to 460.2)     | 201.8 (148.8 to 268.4)        | 13.9 (6.5 to 25.2)              | 38.4 (32.2 to 45.7)               |
| Nicaragua | 2028 | 238.0 (204.7 to 275.6)     | 142.9 (115.4 to 172.8)     | 75.4 (55.6 to 100.7)          | 5.2 (2.4 to 9.5)                | 14.4 (12.1 to 17.4)               | 648.0 (557.5 to 750.5) | 389.1 (314.2 to 470.5)     | 205.4 (151.4 to 274.3)        | 14.2 (6.6 to 25.8)              | 39.3 (32.9 to 47.4)               |
| Nicaragua | 2029 | 242.8 (208.8 to 280.6)     | 146.0 (118.2 to 176.4)     | 76.8 (56.6 to 102.8)          | 5.3 (2.5 to 9.6)                | 14.7 (12.2 to 18.0)               | 661.1 (568.5 to 764.2) | 397.4 (321.9 to 480.4)     | 209.0 (154.1 to 280.0)        | 14.5 (6.7 to 26.3)              | 40.2 (33.1 to 49.1)               |

| Country   | Year | 2018 US Dollars per capita |                            |                               |                                 |                                   | 2018 PPP per capita     |                            |                               |                                 |                                   |
|-----------|------|----------------------------|----------------------------|-------------------------------|---------------------------------|-----------------------------------|-------------------------|----------------------------|-------------------------------|---------------------------------|-----------------------------------|
|           |      | Health spending            | Government health spending | Out-of-pocket health spending | Prepaid private health spending | Development assistance for health | Health spending         | Government health spending | Out-of-pocket health spending | Prepaid private health spending | Development assistance for health |
| Nicaragua | 2030 | 247.7 (212.5 to 286.1)     | 149.1 (120.5 to 180.0)     | 78.1 (57.1 to 105.3)          | 5.4 (2.5 to 9.8)                | 15.1 (12.3 to 18.5)               | 674.5 (578.6 to 779.2)  | 406.0 (328.0 to 490.1)     | 212.7 (155.5 to 286.7)        | 14.7 (6.8 to 26.7)              | 41.0 (33.6 to 50.3)               |
| Nicaragua | 2031 | 252.6 (216.8 to 293.3)     | 152.3 (123.0 to 183.9)     | 79.5 (57.8 to 107.3)          | 5.5 (2.5 to 10.0)               | 15.4 (12.5 to 19.3)               | 688.0 (590.5 to 798.7)  | 414.6 (335.0 to 500.8)     | 216.4 (157.3 to 292.2)        | 15.0 (6.9 to 27.2)              | 42.0 (34.0 to 52.6)               |
| Nicaragua | 2032 | 257.6 (221.2 to 299.7)     | 155.4 (125.6 to 188.0)     | 80.8 (58.6 to 109.2)          | 5.6 (2.6 to 10.2)               | 15.8 (12.6 to 19.8)               | 701.6 (602.3 to 816.0)  | 423.3 (341.9 to 511.8)     | 220.1 (159.6 to 297.4)        | 15.3 (7.0 to 27.7)              | 43.0 (34.4 to 54.0)               |
| Nicaragua | 2033 | 262.9 (224.7 to 306.6)     | 158.8 (128.4 to 192.3)     | 82.2 (59.2 to 111.4)          | 5.7 (2.6 to 10.4)               | 16.2 (12.8 to 20.7)               | 715.8 (611.9 to 835.0)  | 432.4 (349.5 to 523.7)     | 223.8 (161.3 to 303.3)        | 15.6 (7.2 to 28.3)              | 44.0 (34.9 to 56.5)               |
| Nicaragua | 2034 | 268.1 (229.3 to 312.7)     | 162.1 (131.1 to 196.6)     | 83.6 (60.0 to 113.8)          | 5.8 (2.7 to 10.6)               | 16.6 (13.0 to 21.4)               | 729.9 (624.4 to 851.4)  | 441.4 (356.9 to 535.4)     | 227.5 (163.4 to 310.0)        | 15.8 (7.3 to 28.9)              | 45.2 (35.5 to 58.2)               |
| Nicaragua | 2035 | 273.4 (232.9 to 320.1)     | 165.5 (133.3 to 200.9)     | 84.9 (60.3 to 116.5)          | 5.9 (2.7 to 10.8)               | 17.0 (13.2 to 22.3)               | 744.4 (634.3 to 871.6)  | 450.7 (363.0 to 547.0)     | 231.2 (164.3 to 317.2)        | 16.1 (7.4 to 29.4)              | 46.3 (36.0 to 60.7)               |
| Nicaragua | 2036 | 278.8 (237.2 to 327.0)     | 169.0 (135.6 to 205.4)     | 86.3 (60.9 to 118.9)          | 6.0 (2.8 to 11.0)               | 17.4 (13.5 to 23.4)               | 759.2 (645.9 to 890.5)  | 460.3 (369.2 to 559.3)     | 235.0 (166.0 to 323.9)        | 16.4 (7.5 to 30.0)              | 47.5 (36.6 to 63.8)               |
| Nicaragua | 2037 | 284.1 (241.4 to 333.6)     | 172.5 (137.9 to 210.0)     | 87.6 (61.8 to 121.4)          | 6.1 (2.8 to 11.2)               | 17.9 (13.8 to 23.9)               | 773.7 (657.3 to 908.5)  | 469.6 (375.5 to 571.7)     | 238.6 (168.2 to 330.5)        | 16.7 (7.7 to 30.6)              | 48.7 (37.5 to 65.2)               |
| Nicaragua | 2038 | 289.5 (245.0 to 340.7)     | 175.9 (140.2 to 214.3)     | 89.0 (62.3 to 123.4)          | 6.2 (2.9 to 11.4)               | 18.4 (14.0 to 25.5)               | 788.3 (667.2 to 927.8)  | 479.0 (381.9 to 583.7)     | 242.3 (169.6 to 336.0)        | 17.0 (7.8 to 31.2)              | 50.0 (38.1 to 69.4)               |
| Nicaragua | 2039 | 294.9 (249.5 to 347.7)     | 179.5 (142.2 to 219.1)     | 90.3 (62.8 to 125.5)          | 6.3 (2.9 to 11.7)               | 18.8 (14.4 to 26.1)               | 803.1 (679.4 to 946.7)  | 488.7 (387.3 to 596.6)     | 245.9 (171.0 to 341.6)        | 17.3 (7.9 to 31.8)              | 51.3 (39.1 to 71.2)               |
| Nicaragua | 2040 | 300.4 (254.6 to 355.7)     | 183.0 (144.8 to 223.6)     | 91.6 (63.5 to 127.8)          | 6.4 (3.0 to 11.9)               | 19.3 (14.7 to 26.7)               | 818.1 (693.3 to 968.5)  | 498.4 (394.3 to 608.8)     | 249.4 (172.8 to 348.1)        | 17.5 (8.1 to 32.3)              | 52.7 (40.1 to 72.8)               |
| Nicaragua | 2041 | 305.9 (257.7 to 361.8)     | 186.6 (146.9 to 228.6)     | 92.9 (64.1 to 130.7)          | 6.5 (3.0 to 12.1)               | 19.9 (15.0 to 27.6)               | 832.9 (701.8 to 985.3)  | 508.0 (400.0 to 622.5)     | 253.0 (174.5 to 355.9)        | 17.8 (8.2 to 32.9)              | 54.2 (40.8 to 75.3)               |
| Nicaragua | 2042 | 311.4 (261.9 to 368.3)     | 190.1 (149.3 to 233.5)     | 94.2 (64.6 to 132.6)          | 6.6 (3.1 to 12.3)               | 20.5 (15.3 to 29.2)               | 847.9 (713.1 to 1003.0) | 517.7 (406.5 to 635.7)     | 256.5 (175.8 to 361.2)        | 18.1 (8.3 to 33.4)              | 55.7 (41.8 to 79.5)               |
| Nicaragua | 2043 | 316.9 (266.2 to 374.5)     | 193.6 (152.2 to 238.3)     | 95.4 (65.0 to 134.5)          | 6.7 (3.1 to 12.4)               | 21.0 (15.6 to 30.5)               | 862.8 (724.9 to 1019.8) | 527.3 (414.3 to 648.8)     | 259.9 (177.1 to 366.2)        | 18.4 (8.5 to 33.9)              | 57.3 (42.6 to 82.9)               |
| Nicaragua | 2044 | 322.5 (269.6 to 381.9)     | 197.3 (154.8 to 242.8)     | 96.7 (65.6 to 136.6)          | 6.8 (3.2 to 12.6)               | 21.7 (16.0 to 31.4)               | 878.1 (734.1 to 1040.0) | 537.2 (421.6 to 661.3)     | 263.3 (178.5 to 372.0)        | 18.6 (8.6 to 34.4)              | 59.0 (43.7 to 85.5)               |
| Nicaragua | 2045 | 328.1 (274.2 to 387.8)     | 201.0 (157.1 to 247.9)     | 97.9 (66.2 to 139.2)          | 6.9 (3.2 to 12.8)               | 22.3 (16.1 to 33.7)               | 893.5 (746.7 to 1056.1) | 547.2 (427.9 to 674.9)     | 266.6 (180.2 to 379.1)        | 18.9 (8.7 to 34.9)              | 60.8 (43.9 to 91.6)               |
| Nicaragua | 2046 | 333.7 (278.3 to 394.6)     | 204.5 (159.8 to 252.7)     | 99.1 (66.8 to 140.8)          | 7.0 (3.2 to 13.0)               | 23.0 (16.6 to 35.3)               | 908.6 (757.7 to 1074.5) | 557.0 (435.1 to 688.2)     | 269.9 (181.9 to 383.4)        | 19.1 (8.8 to 35.4)              | 62.6 (45.3 to 96.1)               |
| Nicaragua | 2047 | 339.3 (283.0 to 402.7)     | 208.1 (162.3 to 257.5)     | 100.3 (67.6 to 143.2)         | 7.1 (3.3 to 13.2)               | 23.7 (17.0 to 37.4)               | 923.8 (770.5 to 1096.6) | 566.7 (442.1 to 701.3)     | 273.1 (183.9 to 390.1)        | 19.4 (8.9 to 35.9)              | 64.6 (46.4 to 101.8)              |
| Nicaragua | 2048 | 344.9 (287.1 to 410.6)     | 211.7 (164.9 to 262.9)     | 101.5 (68.2 to 145.6)         | 7.2 (3.3 to 13.4)               | 24.5 (17.6 to 39.2)               | 939.1 (781.7 to 1118.1) | 576.4 (449.0 to 715.9)     | 276.3 (185.8 to 396.5)        | 19.7 (9.0 to 36.4)              | 66.8 (47.9 to 106.7)              |
| Nicaragua | 2049 | 350.3 (290.8 to 418.1)     | 215.1 (167.0 to 268.4)     | 102.6 (68.7 to 147.7)         | 7.3 (3.4 to 13.6)               | 25.3 (18.1 to 40.6)               | 953.9 (791.9 to 1138.5) | 585.7 (454.9 to 730.8)     | 279.3 (187.2 to 402.2)        | 19.9 (9.1 to 36.9)              | 68.9 (49.2 to 110.6)              |
| Nicaragua | 2050 | 355.9 (295.4 to 424.7)     | 218.5 (169.7 to 273.5)     | 103.7 (69.1 to 149.3)         | 7.4 (3.4 to 13.7)               | 26.2 (18.4 to 43.0)               | 969.0 (804.4 to 1156.5) | 595.1 (462.1 to 744.8)     | 282.5 (188.2 to 406.6)        | 20.1 (9.2 to 37.4)              | 71.3 (50.2 to 117.0)              |

| Country | Year | 2018 US Dollars per capita |                            |                               |                                 |                                   | 2018 PPP per capita |                            |                               |                                 |                                   |
|---------|------|----------------------------|----------------------------|-------------------------------|---------------------------------|-----------------------------------|---------------------|----------------------------|-------------------------------|---------------------------------|-----------------------------------|
|         |      | Health spending            | Government health spending | Out-of-pocket health spending | Prepaid private health spending | Development assistance for health | Health spending     | Government health spending | Out-of-pocket health spending | Prepaid private health spending | Development assistance for health |
| Niger   | 1995 | 23.2 (18.9 to 28.6)        | 5.5 (4.2 to 7.1)           | 13.4 (9.2 to 18.6)            | 1.5 (0.7 to 2.8)                | 2.8 (2.8 to 2.8)                  | 57.8 (46.9 to 71.3) | 13.7 (10.5 to 17.6)        | 33.4 (23.0 to 46.2)           | 3.8 (1.8 to 7.0)                | 6.9 (6.9 to 6.9)                  |
| Niger   | 1996 | 23.3 (18.8 to 28.7)        | 5.5 (4.2 to 7.1)           | 13.3 (9.2 to 18.5)            | 1.5 (0.7 to 2.9)                | 2.9 (2.9 to 2.9)                  | 57.9 (46.7 to 71.5) | 13.8 (10.6 to 17.7)        | 33.1 (22.8 to 46.0)           | 3.8 (1.8 to 7.1)                | 7.3 (7.3 to 7.3)                  |
| Niger   | 1997 | 22.6 (18.3 to 28.4)        | 5.6 (4.3 to 7.3)           | 13.1 (9.1 to 18.4)            | 1.5 (0.7 to 2.8)                | 2.4 (2.4 to 2.4)                  | 56.3 (45.5 to 70.7) | 14.0 (10.7 to 18.1)        | 32.7 (22.7 to 45.7)           | 3.7 (1.8 to 7.0)                | 5.9 (5.9 to 5.9)                  |
| Niger   | 1998 | 24.3 (19.9 to 29.9)        | 6.1 (4.7 to 7.7)           | 13.4 (9.4 to 18.5)            | 1.6 (0.8 to 2.9)                | 3.3 (3.3 to 3.3)                  | 60.6 (49.6 to 74.5) | 15.1 (11.6 to 19.2)        | 33.3 (23.4 to 46.0)           | 3.9 (1.9 to 7.3)                | 8.3 (8.3 to 8.3)                  |
| Niger   | 1999 | 22.4 (18.1 to 27.7)        | 6.0 (4.6 to 7.5)           | 13.1 (9.4 to 18.2)            | 1.5 (0.7 to 3.0)                | 1.8 (1.8 to 1.8)                  | 55.7 (45.0 to 69.0) | 14.8 (11.4 to 18.8)        | 32.6 (23.3 to 45.2)           | 3.8 (1.8 to 7.3)                | 4.5 (4.5 to 4.5)                  |
| Niger   | 2000 | 22.3 (18.1 to 27.4)        | 5.6 (4.3 to 7.0)           | 12.5 (9.0 to 17.4)            | 1.4 (0.7 to 2.8)                | 2.7 (2.7 to 2.7)                  | 55.4 (45.2 to 68.1) | 13.9 (10.6 to 17.5)        | 31.2 (22.3 to 43.3)           | 3.6 (1.7 to 6.9)                | 6.8 (6.8 to 6.8)                  |
| Niger   | 2001 | 22.7 (18.5 to 27.7)        | 5.9 (4.5 to 7.6)           | 12.8 (9.1 to 17.5)            | 1.5 (0.7 to 2.9)                | 2.5 (2.5 to 2.5)                  | 56.6 (45.9 to 68.8) | 14.8 (11.3 to 18.8)        | 31.8 (22.6 to 43.6)           | 3.7 (1.7 to 7.2)                | 6.3 (6.3 to 6.3)                  |
| Niger   | 2002 | 22.9 (18.7 to 28.1)        | 6.0 (4.6 to 7.6)           | 12.9 (9.2 to 17.7)            | 1.5 (0.7 to 2.8)                | 2.5 (2.5 to 2.5)                  | 57.1 (46.5 to 70.0) | 14.9 (11.5 to 19.0)        | 32.2 (22.9 to 43.9)           | 3.7 (1.7 to 7.1)                | 6.3 (6.3 to 6.3)                  |
| Niger   | 2003 | 24.6 (20.3 to 29.8)        | 5.9 (4.5 to 7.5)           | 13.1 (9.3 to 17.9)            | 1.5 (0.7 to 2.8)                | 4.2 (4.2 to 4.2)                  | 61.3 (50.6 to 74.2) | 14.6 (11.2 to 18.6)        | 32.7 (23.1 to 44.5)           | 3.6 (1.6 to 7.1)                | 10.4 (10.4 to 10.4)               |
| Niger   | 2004 | 24.2 (19.8 to 29.6)        | 6.1 (4.6 to 7.7)           | 13.2 (9.4 to 18.0)            | 1.4 (0.7 to 2.8)                | 3.5 (3.5 to 3.5)                  | 60.4 (49.3 to 73.6) | 15.1 (11.5 to 19.3)        | 33.0 (23.5 to 44.9)           | 3.6 (1.6 to 7.0)                | 8.7 (8.7 to 8.7)                  |
| Niger   | 2005 | 25.7 (21.1 to 31.4)        | 7.1 (5.5 to 9.1)           | 13.7 (9.6 to 18.8)            | 1.6 (0.7 to 3.1)                | 3.3 (3.3 to 3.3)                  | 64.1 (52.4 to 78.1) | 17.7 (13.6 to 22.7)        | 34.2 (23.8 to 46.8)           | 3.9 (1.8 to 7.6)                | 8.2 (8.2 to 8.2)                  |
| Niger   | 2006 | 29.1 (24.2 to 34.8)        | 7.7 (5.9 to 9.8)           | 14.1 (9.9 to 19.1)            | 1.6 (0.7 to 3.1)                | 5.7 (5.7 to 5.7)                  | 72.3 (60.3 to 86.6) | 19.1 (14.8 to 24.5)        | 35.0 (24.7 to 47.6)           | 3.9 (1.8 to 7.7)                | 14.3 (14.3 to 14.3)               |
| Niger   | 2007 | 27.6 (22.8 to 33.0)        | 7.3 (5.6 to 9.3)           | 13.9 (9.7 to 18.9)            | 1.5 (0.7 to 2.9)                | 4.9 (4.9 to 4.9)                  | 68.6 (56.7 to 82.3) | 18.2 (14.0 to 23.2)        | 34.6 (24.2 to 47.1)           | 3.7 (1.6 to 7.2)                | 12.2 (12.2 to 12.2)               |
| Niger   | 2008 | 29.5 (24.7 to 35.3)        | 7.4 (5.7 to 9.5)           | 14.0 (9.9 to 19.4)            | 1.5 (0.7 to 2.8)                | 6.5 (6.5 to 6.5)                  | 73.4 (61.4 to 87.8) | 18.5 (14.3 to 23.7)        | 34.9 (24.5 to 48.3)           | 3.7 (1.7 to 7.0)                | 16.3 (16.3 to 16.3)               |
| Niger   | 2009 | 26.3 (21.7 to 31.9)        | 6.8 (5.3 to 8.8)           | 13.7 (9.7 to 19.0)            | 1.3 (0.6 to 2.5)                | 4.4 (4.4 to 4.4)                  | 65.5 (54.0 to 79.5) | 17.0 (13.2 to 21.8)        | 34.0 (24.1 to 47.3)           | 3.4 (1.5 to 6.3)                | 11.0 (11.0 to 11.0)               |
| Niger   | 2010 | 26.2 (21.5 to 31.7)        | 6.5 (5.1 to 8.3)           | 13.7 (9.7 to 18.9)            | 1.2 (0.5 to 2.3)                | 4.7 (4.7 to 4.7)                  | 65.1 (53.6 to 79.0) | 16.3 (12.6 to 20.7)        | 34.1 (24.2 to 47.0)           | 3.0 (1.4 to 5.6)                | 11.8 (11.8 to 11.8)               |
| Niger   | 2011 | 25.6 (21.1 to 31.4)        | 6.4 (4.9 to 8.2)           | 13.6 (9.5 to 18.7)            | 1.0 (0.5 to 1.8)                | 4.7 (4.7 to 4.7)                  | 63.6 (52.6 to 78.2) | 15.8 (12.1 to 20.4)        | 33.8 (23.7 to 46.6)           | 2.4 (1.1 to 4.5)                | 11.6 (11.6 to 11.6)               |
| Niger   | 2012 | 23.5 (19.1 to 29.3)        | 6.6 (5.0 to 8.4)           | 13.7 (9.8 to 18.7)            | 0.7 (0.3 to 1.3)                | 2.6 (2.6 to 2.6)                  | 58.6 (47.6 to 72.9) | 16.3 (12.5 to 21.0)        | 34.1 (24.3 to 46.5)           | 1.8 (0.9 to 3.4)                | 6.4 (6.4 to 6.4)                  |
| Niger   | 2013 | 25.1 (20.7 to 30.8)        | 6.8 (5.1 to 8.9)           | 13.7 (9.8 to 19.0)            | 0.8 (0.4 to 1.4)                | 3.7 (3.7 to 3.7)                  | 62.4 (51.4 to 76.8) | 17.0 (12.7 to 22.0)        | 34.2 (24.4 to 47.2)           | 1.9 (0.9 to 3.5)                | 9.3 (9.3 to 9.3)                  |
| Niger   | 2014 | 26.7 (22.2 to 32.6)        | 6.9 (5.2 to 8.8)           | 14.1 (10.0 to 19.7)           | 1.2 (0.6 to 2.1)                | 4.5 (4.5 to 4.5)                  | 66.5 (55.2 to 81.1) | 17.2 (12.9 to 22.0)        | 35.1 (25.0 to 49.0)           | 2.9 (1.4 to 5.3)                | 11.3 (11.3 to 11.3)               |
| Niger   | 2015 | 27.3 (22.6 to 33.6)        | 6.7 (5.1 to 8.7)           | 14.8 (10.5 to 20.2)           | 1.7 (0.8 to 3.1)                | 4.1 (4.1 to 4.1)                  | 67.9 (56.2 to 83.5) | 16.8 (12.6 to 21.6)        | 36.8 (26.1 to 50.2)           | 4.2 (1.9 to 7.7)                | 10.1 (10.1 to 10.1)               |

| Country | Year | 2018 US Dollars per capita |                            |                               |                                 |                                   | 2018 PPP per capita |                            |                               |                                 |                                   |
|---------|------|----------------------------|----------------------------|-------------------------------|---------------------------------|-----------------------------------|---------------------|----------------------------|-------------------------------|---------------------------------|-----------------------------------|
|         |      | Health spending            | Government health spending | Out-of-pocket health spending | Prepaid private health spending | Development assistance for health | Health spending     | Government health spending | Out-of-pocket health spending | Prepaid private health spending | Development assistance for health |
| Niger   | 2016 | 27.1 (22.3 to 32.9)        | 6.7 (5.0 to 8.6)           | 14.9 (10.6 to 20.3)           | 1.5 (0.7 to 2.8)                | 4.0 (4.0 to 4.0)                  | 67.5 (55.4 to 81.9) | 16.7 (12.5 to 21.5)        | 37.1 (26.5 to 50.6)           | 3.7 (1.7 to 6.9)                | 10.0 (10.0 to 10.0)               |
| Niger   | 2017 | 27.4 (22.6 to 33.3)        | 6.8 (5.1 to 8.6)           | 15.1 (10.8 to 20.6)           | 1.5 (0.7 to 2.9)                | 4.1 (4.1 to 4.1)                  | 68.3 (56.2 to 83.0) | 16.8 (12.7 to 21.5)        | 37.5 (26.8 to 51.2)           | 3.8 (1.8 to 7.2)                | 10.2 (10.2 to 10.2)               |
| Niger   | 2018 | 27.3 (22.3 to 33.6)        | 6.8 (5.2 to 8.7)           | 15.2 (10.9 to 20.7)           | 1.6 (0.7 to 2.9)                | 3.7 (3.7 to 3.7)                  | 68.1 (55.5 to 83.6) | 17.0 (12.9 to 21.7)        | 37.8 (27.0 to 51.6)           | 3.9 (1.8 to 7.3)                | 9.3 (9.3 to 9.3)                  |
| Niger   | 2019 | 27.5 (22.4 to 33.7)        | 6.9 (5.2 to 8.9)           | 15.3 (10.9 to 20.8)           | 1.6 (0.7 to 3.0)                | 3.7 (3.4 to 3.9)                  | 68.4 (55.8 to 84.0) | 17.3 (13.1 to 22.1)        | 38.1 (27.1 to 51.9)           | 4.0 (1.8 to 7.4)                | 9.1 (8.5 to 9.6)                  |
| Niger   | 2020 | 27.7 (22.7 to 34.0)        | 7.0 (5.3 to 9.0)           | 15.4 (11.0 to 21.0)           | 1.6 (0.7 to 3.0)                | 3.6 (3.3 to 3.9)                  | 68.8 (56.5 to 84.6) | 17.5 (13.2 to 22.3)        | 38.3 (27.3 to 52.3)           | 4.0 (1.8 to 7.5)                | 9.0 (8.3 to 9.7)                  |
| Niger   | 2021 | 27.9 (22.7 to 34.1)        | 7.1 (5.4 to 9.1)           | 15.5 (11.0 to 21.2)           | 1.6 (0.8 to 3.1)                | 3.6 (3.2 to 4.0)                  | 69.3 (56.5 to 84.8) | 17.8 (13.4 to 22.6)        | 38.6 (27.4 to 52.7)           | 4.1 (1.9 to 7.7)                | 8.9 (8.0 to 9.9)                  |
| Niger   | 2022 | 28.1 (22.8 to 34.1)        | 7.2 (5.4 to 9.2)           | 15.6 (11.1 to 21.4)           | 1.7 (0.8 to 3.1)                | 3.6 (3.2 to 4.0)                  | 69.9 (56.8 to 84.8) | 18.0 (13.6 to 23.0)        | 38.9 (27.7 to 53.2)           | 4.1 (1.9 to 7.8)                | 8.9 (7.9 to 9.9)                  |
| Niger   | 2023 | 28.3 (23.0 to 34.7)        | 7.3 (5.5 to 9.4)           | 15.8 (11.2 to 21.6)           | 1.7 (0.8 to 3.2)                | 3.5 (3.1 to 4.0)                  | 70.5 (57.3 to 86.3) | 18.3 (13.8 to 23.4)        | 39.2 (27.9 to 53.7)           | 4.2 (1.9 to 7.9)                | 8.8 (7.7 to 10.0)                 |
| Niger   | 2024 | 28.6 (23.1 to 34.5)        | 7.5 (5.6 to 9.6)           | 15.9 (11.3 to 21.7)           | 1.7 (0.8 to 3.2)                | 3.5 (3.0 to 4.1)                  | 71.2 (57.6 to 86.0) | 18.6 (14.0 to 23.8)        | 39.6 (28.2 to 54.0)           | 4.3 (2.0 to 8.0)                | 8.8 (7.6 to 10.1)                 |
| Niger   | 2025 | 28.9 (23.3 to 35.2)        | 7.6 (5.7 to 9.7)           | 16.0 (11.4 to 21.9)           | 1.7 (0.8 to 3.3)                | 3.5 (3.0 to 4.1)                  | 71.8 (58.0 to 87.7) | 18.9 (14.2 to 24.2)        | 39.9 (28.3 to 54.5)           | 4.3 (2.0 to 8.1)                | 8.7 (7.4 to 10.2)                 |
| Niger   | 2026 | 29.1 (23.8 to 35.6)        | 7.7 (5.8 to 9.9)           | 16.2 (11.5 to 22.1)           | 1.8 (0.8 to 3.3)                | 3.5 (2.9 to 4.1)                  | 72.5 (59.1 to 88.6) | 19.2 (14.4 to 24.6)        | 40.3 (28.6 to 55.1)           | 4.4 (2.0 to 8.2)                | 8.6 (7.3 to 10.1)                 |
| Niger   | 2027 | 29.4 (24.0 to 36.2)        | 7.9 (5.9 to 10.1)          | 16.3 (11.5 to 22.4)           | 1.8 (0.8 to 3.4)                | 3.4 (2.9 to 4.1)                  | 73.3 (59.8 to 90.2) | 19.6 (14.7 to 25.0)        | 40.6 (28.7 to 55.7)           | 4.5 (2.1 to 8.4)                | 8.6 (7.2 to 10.2)                 |
| Niger   | 2028 | 29.7 (24.3 to 36.4)        | 8.0 (6.0 to 10.3)          | 16.5 (11.5 to 22.6)           | 1.8 (0.8 to 3.4)                | 3.4 (2.9 to 4.1)                  | 74.1 (60.4 to 90.7) | 19.9 (15.0 to 25.5)        | 41.0 (28.7 to 56.2)           | 4.6 (2.1 to 8.5)                | 8.5 (7.1 to 10.3)                 |
| Niger   | 2029 | 30.0 (24.3 to 36.9)        | 8.1 (6.1 to 10.4)          | 16.6 (11.6 to 22.7)           | 1.9 (0.9 to 3.5)                | 3.4 (2.8 to 4.2)                  | 74.8 (60.5 to 91.8) | 20.3 (15.2 to 26.0)        | 41.4 (28.9 to 56.6)           | 4.6 (2.1 to 8.7)                | 8.5 (7.0 to 10.4)                 |
| Niger   | 2030 | 30.3 (24.7 to 37.2)        | 8.3 (6.2 to 10.6)          | 16.8 (11.7 to 23.1)           | 1.9 (0.9 to 3.5)                | 3.4 (2.8 to 4.1)                  | 75.5 (61.5 to 92.6) | 20.6 (15.5 to 26.3)        | 41.8 (29.2 to 57.4)           | 4.7 (2.2 to 8.8)                | 8.4 (6.9 to 10.3)                 |
| Niger   | 2031 | 30.6 (24.7 to 37.6)        | 8.4 (6.3 to 10.7)          | 16.9 (11.8 to 23.4)           | 1.9 (0.9 to 3.6)                | 3.4 (2.7 to 4.2)                  | 76.2 (61.4 to 93.7) | 20.8 (15.6 to 26.7)        | 42.2 (29.3 to 58.2)           | 4.8 (2.2 to 8.9)                | 8.4 (6.8 to 10.5)                 |
| Niger   | 2032 | 30.9 (25.1 to 38.0)        | 8.5 (6.3 to 10.9)          | 17.1 (11.9 to 23.7)           | 2.0 (0.9 to 3.7)                | 3.3 (2.7 to 4.2)                  | 76.9 (62.4 to 94.6) | 21.1 (15.8 to 27.1)        | 42.6 (29.6 to 58.9)           | 4.9 (2.2 to 9.1)                | 8.3 (6.7 to 10.5)                 |
| Niger   | 2033 | 31.2 (25.0 to 38.4)        | 8.6 (6.4 to 11.1)          | 17.3 (12.0 to 23.9)           | 2.0 (0.9 to 3.7)                | 3.3 (2.6 to 4.3)                  | 77.6 (62.3 to 95.5) | 21.4 (16.0 to 27.6)        | 43.0 (29.8 to 59.5)           | 5.0 (2.3 to 9.3)                | 8.3 (6.6 to 10.6)                 |
| Niger   | 2034 | 31.5 (25.4 to 38.8)        | 8.7 (6.5 to 11.2)          | 17.4 (12.0 to 24.1)           | 2.0 (0.9 to 3.8)                | 3.3 (2.6 to 4.3)                  | 78.3 (63.3 to 96.5) | 21.7 (16.2 to 28.0)        | 43.3 (30.0 to 59.9)           | 5.1 (2.3 to 9.4)                | 8.3 (6.5 to 10.6)                 |
| Niger   | 2035 | 31.8 (25.8 to 39.3)        | 8.8 (6.6 to 11.4)          | 17.6 (12.1 to 24.2)           | 2.1 (0.9 to 3.8)                | 3.3 (2.6 to 4.3)                  | 79.1 (64.2 to 97.8) | 21.9 (16.4 to 28.4)        | 43.8 (30.1 to 60.3)           | 5.1 (2.3 to 9.6)                | 8.2 (6.4 to 10.8)                 |
| Niger   | 2036 | 32.1 (26.0 to 40.1)        | 8.9 (6.7 to 11.6)          | 17.7 (12.2 to 24.5)           | 2.1 (1.0 to 3.9)                | 3.3 (2.5 to 4.4)                  | 79.8 (64.7 to 99.9) | 22.2 (16.7 to 28.9)        | 44.2 (30.3 to 60.9)           | 5.2 (2.4 to 9.7)                | 8.2 (6.3 to 11.0)                 |

| Country | Year | 2018 US Dollars per capita |                            |                               |                                 |                                   | 2018 PPP per capita  |                            |                               |                                 |                                   |
|---------|------|----------------------------|----------------------------|-------------------------------|---------------------------------|-----------------------------------|----------------------|----------------------------|-------------------------------|---------------------------------|-----------------------------------|
|         |      | Health spending            | Government health spending | Out-of-pocket health spending | Prepaid private health spending | Development assistance for health | Health spending      | Government health spending | Out-of-pocket health spending | Prepaid private health spending | Development assistance for health |
| Niger   | 2037 | 32.4 (26.1 to 40.3)        | 9.1 (6.8 to 11.8)          | 17.9 (12.3 to 24.7)           | 2.1 (1.0 to 4.0)                | 3.3 (2.5 to 4.4)                  | 80.6 (65.0 to 100.3) | 22.6 (16.9 to 29.4)        | 44.6 (30.6 to 61.6)           | 5.3 (2.4 to 9.9)                | 8.2 (6.3 to 10.9)                 |
| Niger   | 2038 | 32.7 (26.2 to 40.8)        | 9.2 (6.8 to 12.0)          | 18.1 (12.4 to 25.0)           | 2.2 (1.0 to 4.1)                | 3.3 (2.5 to 4.5)                  | 81.5 (65.3 to 101.6) | 22.9 (17.0 to 29.9)        | 45.0 (30.8 to 62.3)           | 5.4 (2.5 to 10.1)               | 8.2 (6.2 to 11.3)                 |
| Niger   | 2039 | 33.1 (26.7 to 41.2)        | 9.3 (6.9 to 12.2)          | 18.3 (12.5 to 25.3)           | 2.2 (1.0 to 4.1)                | 3.3 (2.5 to 4.5)                  | 82.3 (66.6 to 102.5) | 23.2 (17.3 to 30.3)        | 45.5 (31.1 to 62.9)           | 5.5 (2.5 to 10.3)               | 8.1 (6.2 to 11.3)                 |
| Niger   | 2040 | 33.4 (26.6 to 41.6)        | 9.5 (7.0 to 12.4)          | 18.4 (12.6 to 25.6)           | 2.3 (1.0 to 4.2)                | 3.3 (2.5 to 4.5)                  | 83.2 (66.3 to 103.6) | 23.6 (17.5 to 30.8)        | 45.9 (31.3 to 63.7)           | 5.6 (2.6 to 10.5)               | 8.1 (6.2 to 11.2)                 |
| Niger   | 2041 | 33.8 (27.1 to 41.9)        | 9.6 (7.1 to 12.6)          | 18.6 (12.7 to 25.9)           | 2.3 (1.0 to 4.3)                | 3.3 (2.4 to 4.5)                  | 84.2 (67.4 to 104.4) | 24.0 (17.8 to 31.5)        | 46.4 (31.5 to 64.5)           | 5.7 (2.6 to 10.7)               | 8.1 (6.1 to 11.2)                 |
| Niger   | 2042 | 34.2 (27.1 to 42.4)        | 9.8 (7.3 to 12.9)          | 18.8 (12.8 to 26.2)           | 2.3 (1.1 to 4.4)                | 3.3 (2.4 to 4.6)                  | 85.1 (67.5 to 105.7) | 24.4 (18.0 to 32.1)        | 46.8 (31.8 to 65.3)           | 5.8 (2.7 to 10.9)               | 8.1 (6.1 to 11.5)                 |
| Niger   | 2043 | 34.6 (27.6 to 43.1)        | 10.0 (7.3 to 13.2)         | 19.0 (12.9 to 26.5)           | 2.4 (1.1 to 4.5)                | 3.3 (2.4 to 4.7)                  | 86.1 (68.6 to 107.3) | 24.8 (18.3 to 32.7)        | 47.3 (32.1 to 66.0)           | 5.9 (2.7 to 11.1)               | 8.1 (6.0 to 11.7)                 |
| Niger   | 2044 | 35.0 (27.6 to 43.4)        | 10.1 (7.5 to 13.4)         | 19.2 (13.0 to 26.8)           | 2.4 (1.1 to 4.6)                | 3.3 (2.4 to 4.7)                  | 87.2 (68.6 to 107.9) | 25.3 (18.6 to 33.3)        | 47.8 (32.4 to 66.8)           | 6.0 (2.8 to 11.3)               | 8.1 (6.0 to 11.7)                 |
| Niger   | 2045 | 35.5 (28.4 to 44.8)        | 10.3 (7.6 to 13.6)         | 19.4 (13.1 to 27.2)           | 2.5 (1.1 to 4.7)                | 3.3 (2.3 to 4.9)                  | 88.3 (70.8 to 111.5) | 25.7 (19.0 to 34.0)        | 48.3 (32.7 to 67.6)           | 6.2 (2.8 to 11.6)               | 8.1 (5.8 to 12.2)                 |
| Niger   | 2046 | 35.9 (28.5 to 44.7)        | 10.5 (7.7 to 13.9)         | 19.6 (13.2 to 27.4)           | 2.5 (1.1 to 4.8)                | 3.3 (2.4 to 5.0)                  | 89.4 (70.9 to 111.4) | 26.2 (19.3 to 34.6)        | 48.8 (33.0 to 68.3)           | 6.3 (2.9 to 11.9)               | 8.1 (5.9 to 12.5)                 |
| Niger   | 2047 | 36.4 (29.3 to 45.6)        | 10.7 (7.9 to 14.1)         | 19.8 (13.4 to 27.7)           | 2.6 (1.2 to 4.9)                | 3.3 (2.3 to 5.2)                  | 90.5 (72.9 to 113.5) | 26.6 (19.6 to 35.2)        | 49.4 (33.3 to 68.9)           | 6.4 (2.9 to 12.1)               | 8.1 (5.8 to 12.8)                 |
| Niger   | 2048 | 36.9 (29.1 to 46.1)        | 10.9 (8.0 to 14.5)         | 20.0 (13.5 to 27.9)           | 2.6 (1.2 to 4.9)                | 3.3 (2.4 to 5.3)                  | 91.7 (72.4 to 114.7) | 27.1 (20.0 to 36.0)        | 49.9 (33.6 to 69.4)           | 6.5 (3.0 to 12.3)               | 8.2 (5.9 to 13.1)                 |
| Niger   | 2049 | 37.3 (29.9 to 47.2)        | 11.1 (8.2 to 14.7)         | 20.3 (13.6 to 28.1)           | 2.7 (1.2 to 5.0)                | 3.3 (2.4 to 5.3)                  | 92.9 (74.3 to 117.5) | 27.6 (20.3 to 36.6)        | 50.4 (33.9 to 70.0)           | 6.7 (3.0 to 12.5)               | 8.2 (5.9 to 13.2)                 |
| Niger   | 2050 | 37.8 (29.9 to 47.5)        | 11.3 (8.3 to 15.0)         | 20.5 (13.8 to 28.5)           | 2.7 (1.2 to 5.1)                | 3.3 (2.3 to 5.4)                  | 94.1 (74.4 to 118.3) | 28.1 (20.5 to 37.3)        | 51.0 (34.3 to 70.8)           | 6.8 (3.1 to 12.8)               | 8.3 (5.8 to 13.5)                 |
| Nigeria | 1995 | 31.2 (23.9 to 40.2)        | 4.4 (3.3 to 5.6)           | 25.6 (18.5 to 34.4)           | 0.9 (0.5 to 1.8)                | 0.3 (0.3 to 0.3)                  | 87.4 (66.8 to 112.5) | 12.3 (9.3 to 15.7)         | 71.7 (51.9 to 96.4)           | 2.6 (1.3 to 4.9)                | 0.8 (0.8 to 0.8)                  |
| Nigeria | 1996 | 32.1 (24.6 to 40.9)        | 4.5 (3.4 to 5.8)           | 26.4 (19.1 to 35.1)           | 0.9 (0.4 to 1.8)                | 0.3 (0.3 to 0.3)                  | 89.9 (68.9 to 114.6) | 12.7 (9.6 to 16.2)         | 73.8 (53.4 to 98.2)           | 2.6 (1.2 to 5.0)                | 0.8 (0.8 to 0.8)                  |
| Nigeria | 1997 | 33.0 (25.5 to 42.2)        | 5.0 (3.7 to 6.4)           | 26.8 (19.3 to 35.6)           | 0.9 (0.4 to 1.8)                | 0.3 (0.3 to 0.3)                  | 92.5 (71.4 to 118.0) | 14.0 (10.5 to 17.9)        | 75.2 (54.2 to 99.8)           | 2.6 (1.2 to 5.0)                | 0.8 (0.8 to 0.8)                  |
| Nigeria | 1998 | 34.5 (26.9 to 44.1)        | 5.5 (4.1 to 7.0)           | 27.6 (20.1 to 36.6)           | 0.9 (0.4 to 1.7)                | 0.5 (0.5 to 0.5)                  | 96.7 (75.2 to 123.4) | 15.3 (11.6 to 19.6)        | 77.3 (56.4 to 102.6)          | 2.6 (1.3 to 4.9)                | 1.4 (1.4 to 1.4)                  |
| Nigeria | 1999 | 33.9 (26.7 to 42.5)        | 5.7 (4.3 to 7.3)           | 26.6 (19.6 to 35.2)           | 0.9 (0.4 to 1.6)                | 0.7 (0.7 to 0.7)                  | 94.9 (74.7 to 119.0) | 15.9 (12.0 to 20.3)        | 74.5 (54.8 to 98.5)           | 2.5 (1.2 to 4.6)                | 1.9 (1.9 to 1.9)                  |
| Nigeria | 2000 | 33.9 (27.1 to 42.4)        | 5.9 (4.5 to 7.5)           | 25.4 (18.7 to 33.4)           | 0.8 (0.4 to 1.5)                | 1.8 (1.8 to 1.8)                  | 94.8 (75.8 to 118.7) | 16.5 (12.5 to 21.0)        | 71.1 (52.5 to 93.6)           | 2.3 (1.1 to 4.2)                | 5.0 (5.0 to 5.0)                  |
| Nigeria | 2001 | 34.5 (27.7 to 43.3)        | 6.1 (4.6 to 7.8)           | 26.7 (19.9 to 35.2)           | 0.8 (0.4 to 1.5)                | 1.0 (1.0 to 1.0)                  | 96.7 (77.7 to 121.1) | 17.1 (13.0 to 22.0)        | 74.7 (55.7 to 98.5)           | 2.2 (1.0 to 4.2)                | 2.7 (2.7 to 2.7)                  |

| Country | Year | 2018 US Dollars per capita |                            |                               |                                 |                                   | 2018 PPP per capita    |                            |                               |                                 |                                   |
|---------|------|----------------------------|----------------------------|-------------------------------|---------------------------------|-----------------------------------|------------------------|----------------------------|-------------------------------|---------------------------------|-----------------------------------|
|         |      | Health spending            | Government health spending | Out-of-pocket health spending | Prepaid private health spending | Development assistance for health | Health spending        | Government health spending | Out-of-pocket health spending | Prepaid private health spending | Development assistance for health |
| Nigeria | 2002 | 37.6 (30.3 to 46.9)        | 6.3 (4.8 to 8.1)           | 29.3 (21.9 to 38.3)           | 0.8 (0.4 to 1.5)                | 1.2 (1.2 to 1.2)                  | 105.2 (84.9 to 131.4)  | 17.6 (13.5 to 22.6)        | 81.9 (61.3 to 107.2)          | 2.3 (1.1 to 4.3)                | 3.5 (3.5 to 3.5)                  |
| Nigeria | 2003 | 48.2 (38.7 to 60.1)        | 7.8 (5.9 to 10.0)          | 38.2 (28.9 to 49.7)           | 0.9 (0.5 to 1.7)                | 1.4 (1.4 to 1.4)                  | 135.1 (108.5 to 168.3) | 21.7 (16.6 to 28.1)        | 106.9 (81.0 to 139.1)         | 2.6 (1.3 to 4.8)                | 3.8 (3.8 to 3.8)                  |
| Nigeria | 2004 | 57.3 (46.5 to 71.1)        | 10.0 (7.6 to 13.0)         | 44.0 (33.6 to 57.5)           | 1.1 (0.6 to 2.1)                | 2.2 (2.2 to 2.2)                  | 160.5 (130.1 to 199.0) | 28.1 (21.4 to 36.5)        | 123.1 (94.0 to 161.1)         | 3.2 (1.6 to 5.8)                | 6.1 (6.1 to 6.1)                  |
| Nigeria | 2005 | 61.8 (50.8 to 76.0)        | 11.1 (8.4 to 14.3)         | 46.8 (36.1 to 60.4)           | 1.2 (0.6 to 2.2)                | 2.7 (2.7 to 2.7)                  | 172.9 (142.2 to 212.8) | 31.1 (23.4 to 40.2)        | 131.0 (101.0 to 169.1)        | 3.3 (1.6 to 6.0)                | 7.5 (7.5 to 7.5)                  |
| Nigeria | 2006 | 64.8 (53.7 to 79.8)        | 11.7 (8.8 to 15.2)         | 48.2 (37.4 to 62.5)           | 1.2 (0.6 to 2.3)                | 3.7 (3.7 to 3.7)                  | 181.4 (150.4 to 223.4) | 32.8 (24.6 to 42.7)        | 134.9 (104.6 to 174.9)        | 3.4 (1.7 to 6.3)                | 10.3 (10.3 to 10.3)               |
| Nigeria | 2007 | 68.7 (57.2 to 83.8)        | 13.1 (9.8 to 16.9)         | 50.4 (39.2 to 65.2)           | 1.4 (0.7 to 2.5)                | 3.8 (3.8 to 3.8)                  | 192.3 (160.3 to 234.6) | 36.6 (27.6 to 47.4)        | 141.1 (109.7 to 182.4)        | 3.8 (1.8 to 7.0)                | 10.7 (10.7 to 10.7)               |
| Nigeria | 2008 | 70.5 (58.9 to 85.6)        | 12.9 (9.8 to 16.5)         | 51.0 (39.7 to 65.7)           | 1.4 (0.7 to 2.6)                | 5.1 (5.1 to 5.1)                  | 197.4 (165.0 to 239.8) | 36.2 (27.3 to 46.3)        | 142.9 (111.0 to 183.8)        | 3.9 (1.8 to 7.2)                | 14.3 (14.3 to 14.3)               |
| Nigeria | 2009 | 72.3 (60.0 to 88.0)        | 12.2 (9.1 to 15.6)         | 52.2 (40.8 to 68.4)           | 1.4 (0.7 to 2.6)                | 6.5 (6.5 to 6.5)                  | 202.5 (167.9 to 246.3) | 34.1 (25.6 to 43.6)        | 146.2 (114.1 to 191.4)        | 4.0 (1.8 to 7.2)                | 18.2 (18.2 to 18.2)               |
| Nigeria | 2010 | 68.5 (56.5 to 83.1)        | 11.0 (8.3 to 14.1)         | 51.1 (39.7 to 66.2)           | 1.4 (0.6 to 2.5)                | 5.0 (5.0 to 5.0)                  | 191.7 (158.1 to 232.6) | 30.7 (23.2 to 39.4)        | 143.1 (111.2 to 185.3)        | 3.9 (1.8 to 6.9)                | 14.0 (14.0 to 14.0)               |
| Nigeria | 2011 | 67.5 (55.9 to 81.6)        | 10.5 (7.9 to 13.5)         | 50.5 (39.3 to 64.6)           | 1.3 (0.6 to 2.4)                | 5.2 (5.2 to 5.2)                  | 189.0 (156.4 to 228.4) | 29.4 (22.1 to 37.8)        | 141.3 (110.0 to 180.8)        | 3.8 (1.8 to 6.8)                | 14.5 (14.5 to 14.5)               |
| Nigeria | 2012 | 68.8 (56.7 to 83.3)        | 10.7 (8.1 to 13.7)         | 50.9 (39.1 to 65.5)           | 1.3 (0.6 to 2.4)                | 5.9 (5.9 to 5.9)                  | 192.8 (158.7 to 233.2) | 29.8 (22.6 to 38.4)        | 142.6 (109.4 to 183.3)        | 3.7 (1.8 to 6.7)                | 16.6 (16.6 to 16.6)               |
| Nigeria | 2013 | 70.6 (58.4 to 85.6)        | 10.4 (8.0 to 13.3)         | 51.0 (39.0 to 65.8)           | 1.3 (0.6 to 2.3)                | 8.0 (8.0 to 8.0)                  | 197.8 (163.6 to 239.6) | 29.1 (22.3 to 37.4)        | 142.8 (109.2 to 184.2)        | 3.6 (1.7 to 6.5)                | 22.4 (22.4 to 22.4)               |
| Nigeria | 2014 | 70.2 (57.6 to 85.5)        | 10.5 (8.0 to 13.4)         | 52.2 (39.8 to 67.4)           | 1.3 (0.6 to 2.4)                | 6.2 (6.2 to 6.2)                  | 196.7 (161.4 to 239.5) | 29.3 (22.5 to 37.4)        | 146.3 (111.3 to 188.7)        | 3.7 (1.7 to 6.8)                | 17.4 (17.4 to 17.4)               |
| Nigeria | 2015 | 73.6 (60.1 to 89.8)        | 10.9 (8.5 to 13.8)         | 54.1 (40.9 to 70.1)           | 1.3 (0.6 to 2.4)                | 7.4 (7.4 to 7.4)                  | 206.2 (168.3 to 251.4) | 30.6 (23.8 to 38.7)        | 151.4 (114.5 to 196.3)        | 3.6 (1.7 to 6.6)                | 20.6 (20.6 to 20.6)               |
| Nigeria | 2016 | 71.2 (56.6 to 88.7)        | 10.2 (7.9 to 13.1)         | 53.7 (40.0 to 71.0)           | 1.2 (0.6 to 2.2)                | 6.0 (6.0 to 6.0)                  | 199.3 (158.4 to 248.4) | 28.6 (22.1 to 36.8)        | 150.4 (112.1 to 198.8)        | 3.4 (1.6 to 6.2)                | 16.9 (16.9 to 16.9)               |
| Nigeria | 2017 | 72.6 (58.7 to 88.6)        | 12.0 (9.2 to 15.3)         | 53.2 (39.5 to 69.9)           | 1.3 (0.6 to 2.3)                | 6.1 (6.1 to 6.1)                  | 203.3 (164.5 to 248.2) | 33.6 (25.7 to 42.9)        | 149.0 (110.6 to 195.8)        | 3.5 (1.7 to 6.5)                | 17.2 (17.2 to 17.2)               |
| Nigeria | 2018 | 72.4 (57.3 to 90.5)        | 12.0 (9.2 to 15.4)         | 53.6 (39.7 to 70.3)           | 1.3 (0.6 to 2.3)                | 5.5 (5.5 to 5.5)                  | 202.7 (160.4 to 253.3) | 33.7 (25.8 to 43.0)        | 150.0 (111.3 to 196.8)        | 3.6 (1.7 to 6.6)                | 15.4 (15.3 to 15.5)               |
| Nigeria | 2019 | 73.1 (58.9 to 90.7)        | 12.3 (9.4 to 15.7)         | 54.1 (40.1 to 71.1)           | 1.3 (0.6 to 2.4)                | 5.5 (5.1 to 5.8)                  | 204.7 (164.9 to 254.0) | 34.3 (26.3 to 43.9)        | 151.4 (112.4 to 199.1)        | 3.6 (1.7 to 6.7)                | 15.3 (14.3 to 16.2)               |
| Nigeria | 2020 | 73.6 (58.8 to 92.1)        | 12.5 (9.5 to 16.0)         | 54.4 (40.4 to 71.8)           | 1.3 (0.6 to 2.4)                | 5.4 (5.0 to 5.9)                  | 206.1 (164.7 to 257.8) | 34.9 (26.6 to 44.7)        | 152.3 (113.0 to 201.2)        | 3.7 (1.7 to 6.8)                | 15.2 (14.0 to 16.5)               |
| Nigeria | 2021 | 74.2 (59.4 to 91.7)        | 12.7 (9.7 to 16.2)         | 54.7 (40.6 to 71.8)           | 1.3 (0.6 to 2.5)                | 5.4 (4.9 to 6.0)                  | 207.7 (166.3 to 256.7) | 35.5 (27.0 to 45.5)        | 153.3 (113.6 to 200.9)        | 3.7 (1.8 to 6.9)                | 15.2 (13.7 to 16.8)               |
| Nigeria | 2022 | 74.9 (59.9 to 93.1)        | 12.9 (9.8 to 16.5)         | 55.1 (40.8 to 72.1)           | 1.4 (0.6 to 2.5)                | 5.5 (4.9 to 6.2)                  | 209.7 (167.7 to 260.7) | 36.1 (27.4 to 46.2)        | 154.4 (114.3 to 201.9)        | 3.8 (1.8 to 7.0)                | 15.4 (13.7 to 17.2)               |



| Country | Year | 2018 US Dollars per capita |                            |                               |                                 |                                   | 2018 PPP per capita    |                            |                               |                                 |                                   |
|---------|------|----------------------------|----------------------------|-------------------------------|---------------------------------|-----------------------------------|------------------------|----------------------------|-------------------------------|---------------------------------|-----------------------------------|
|         |      | Health spending            | Government health spending | Out-of-pocket health spending | Prepaid private health spending | Development assistance for health | Health spending        | Government health spending | Out-of-pocket health spending | Prepaid private health spending | Development assistance for health |
| Nigeria | 2023 | 75.5 (60.8 to 93.2)        | 13.1 (10.0 to 16.8)        | 55.5 (41.1 to 72.8)           | 1.4 (0.7 to 2.5)                | 5.6 (4.9 to 6.3)                  | 211.4 (170.2 to 261.0) | 36.6 (27.9 to 47.0)        | 155.3 (115.2 to 203.9)        | 3.9 (1.8 to 7.1)                | 15.6 (13.6 to 17.8)               |
| Nigeria | 2024 | 76.1 (60.8 to 94.3)        | 13.2 (10.2 to 17.1)        | 55.8 (41.3 to 73.2)           | 1.4 (0.7 to 2.6)                | 5.7 (4.9 to 6.6)                  | 213.1 (170.3 to 264.0) | 37.1 (28.4 to 47.8)        | 156.2 (115.7 to 205.1)        | 3.9 (1.9 to 7.2)                | 15.9 (13.7 to 18.4)               |
| Nigeria | 2025 | 76.7 (61.4 to 95.3)        | 13.4 (10.2 to 17.3)        | 56.1 (41.6 to 73.7)           | 1.4 (0.7 to 2.6)                | 5.7 (4.9 to 6.7)                  | 214.7 (172.0 to 266.8) | 37.5 (28.6 to 48.3)        | 157.1 (116.5 to 206.3)        | 4.0 (1.9 to 7.3)                | 16.1 (13.7 to 18.9)               |
| Nigeria | 2026 | 77.4 (61.9 to 95.5)        | 13.7 (10.4 to 17.7)        | 56.5 (41.9 to 74.3)           | 1.4 (0.7 to 2.6)                | 5.8 (4.9 to 6.8)                  | 216.7 (173.3 to 267.5) | 38.2 (29.2 to 49.5)        | 158.2 (117.3 to 207.9)        | 4.0 (1.9 to 7.4)                | 16.2 (13.7 to 19.0)               |
| Nigeria | 2027 | 78.1 (62.7 to 96.6)        | 13.9 (10.5 to 18.0)        | 56.9 (42.0 to 75.0)           | 1.5 (0.7 to 2.7)                | 5.8 (4.9 to 7.0)                  | 218.7 (175.6 to 270.6) | 38.9 (29.5 to 50.3)        | 159.4 (117.5 to 209.9)        | 4.1 (2.0 to 7.5)                | 16.4 (13.7 to 19.5)               |
| Nigeria | 2028 | 78.8 (63.3 to 96.9)        | 14.1 (10.7 to 18.3)        | 57.4 (42.4 to 75.6)           | 1.5 (0.7 to 2.7)                | 5.9 (4.9 to 7.2)                  | 220.8 (177.4 to 271.3) | 39.5 (30.0 to 51.1)        | 160.6 (118.8 to 211.6)        | 4.2 (2.0 to 7.6)                | 16.5 (13.8 to 20.1)               |
| Nigeria | 2029 | 79.6 (63.8 to 99.1)        | 14.3 (10.9 to 18.5)        | 57.8 (42.6 to 76.1)           | 1.5 (0.7 to 2.7)                | 6.0 (4.9 to 7.3)                  | 222.8 (178.7 to 277.6) | 40.1 (30.4 to 51.7)        | 161.8 (119.2 to 213.0)        | 4.2 (2.0 to 7.7)                | 16.7 (13.7 to 20.4)               |
| Nigeria | 2030 | 80.3 (64.1 to 99.7)        | 14.5 (11.1 to 18.8)        | 58.2 (42.7 to 76.7)           | 1.5 (0.7 to 2.8)                | 6.0 (4.9 to 7.4)                  | 224.9 (179.6 to 279.1) | 40.7 (31.0 to 52.7)        | 163.1 (119.6 to 214.7)        | 4.3 (2.1 to 7.8)                | 16.8 (13.8 to 20.8)               |
| Nigeria | 2031 | 81.1 (65.0 to 100.7)       | 14.8 (11.2 to 19.2)        | 58.7 (43.0 to 77.6)           | 1.6 (0.7 to 2.8)                | 6.1 (4.9 to 7.6)                  | 227.1 (182.1 to 282.0) | 41.4 (31.4 to 53.6)        | 164.4 (120.4 to 217.2)        | 4.4 (2.1 to 7.9)                | 17.0 (13.7 to 21.2)               |
| Nigeria | 2032 | 82.0 (65.3 to 101.5)       | 15.0 (11.4 to 19.5)        | 59.2 (43.3 to 78.3)           | 1.6 (0.8 to 2.9)                | 6.1 (4.9 to 7.8)                  | 229.5 (182.9 to 284.1) | 42.1 (32.0 to 54.6)        | 165.9 (121.2 to 219.4)        | 4.4 (2.1 to 8.0)                | 17.1 (13.7 to 21.8)               |
| Nigeria | 2033 | 82.8 (66.7 to 103.2)       | 15.3 (11.5 to 19.9)        | 59.7 (43.5 to 79.1)           | 1.6 (0.8 to 2.9)                | 6.2 (4.9 to 7.9)                  | 231.8 (186.9 to 288.9) | 42.7 (32.3 to 55.7)        | 167.3 (121.9 to 221.5)        | 4.5 (2.2 to 8.2)                | 17.3 (13.7 to 22.0)               |
| Nigeria | 2034 | 83.6 (67.1 to 103.5)       | 15.5 (11.7 to 20.1)        | 60.2 (43.8 to 79.9)           | 1.6 (0.8 to 3.0)                | 6.2 (4.9 to 8.1)                  | 234.0 (187.8 to 289.8) | 43.4 (32.7 to 56.4)        | 168.6 (122.6 to 223.6)        | 4.6 (2.2 to 8.3)                | 17.4 (13.6 to 22.6)               |
| Nigeria | 2035 | 84.4 (67.7 to 104.1)       | 15.7 (11.8 to 20.4)        | 60.7 (44.1 to 80.7)           | 1.7 (0.8 to 3.0)                | 6.3 (4.9 to 8.3)                  | 236.3 (189.6 to 291.4) | 44.0 (33.1 to 57.2)        | 170.0 (123.4 to 226.1)        | 4.7 (2.2 to 8.4)                | 17.6 (13.6 to 23.2)               |
| Nigeria | 2036 | 85.2 (67.4 to 105.8)       | 16.0 (12.0 to 20.8)        | 61.2 (44.4 to 81.4)           | 1.7 (0.8 to 3.1)                | 6.4 (4.9 to 8.5)                  | 238.6 (188.8 to 296.1) | 44.8 (33.7 to 58.3)        | 171.3 (124.2 to 227.9)        | 4.7 (2.3 to 8.6)                | 17.8 (13.7 to 23.9)               |
| Nigeria | 2037 | 86.0 (68.6 to 107.1)       | 16.2 (12.2 to 21.2)        | 61.6 (44.6 to 82.1)           | 1.7 (0.8 to 3.1)                | 6.4 (4.9 to 8.7)                  | 240.9 (192.1 to 300.0) | 45.5 (34.2 to 59.2)        | 172.6 (125.0 to 229.8)        | 4.8 (2.3 to 8.7)                | 18.0 (13.6 to 24.4)               |
| Nigeria | 2038 | 86.9 (68.4 to 106.9)       | 16.5 (12.4 to 21.6)        | 62.1 (45.0 to 82.6)           | 1.7 (0.8 to 3.2)                | 6.5 (4.9 to 8.9)                  | 243.2 (191.6 to 299.2) | 46.2 (34.8 to 60.5)        | 173.9 (125.9 to 231.4)        | 4.9 (2.3 to 8.9)                | 18.2 (13.7 to 25.0)               |
| Nigeria | 2039 | 87.7 (69.4 to 108.9)       | 16.7 (12.6 to 21.9)        | 62.6 (45.3 to 83.2)           | 1.8 (0.8 to 3.2)                | 6.5 (4.9 to 9.0)                  | 245.4 (194.3 to 304.9) | 46.9 (35.3 to 61.4)        | 175.2 (126.8 to 233.1)        | 5.0 (2.4 to 9.0)                | 18.3 (13.6 to 25.1)               |
| Nigeria | 2040 | 88.5 (70.1 to 109.5)       | 17.0 (12.8 to 22.3)        | 63.0 (45.6 to 83.9)           | 1.8 (0.9 to 3.3)                | 6.6 (4.9 to 9.3)                  | 247.8 (196.1 to 306.6) | 47.7 (35.8 to 62.6)        | 176.5 (127.7 to 234.9)        | 5.1 (2.4 to 9.1)                | 18.5 (13.8 to 25.9)               |
| Nigeria | 2041 | 89.4 (70.7 to 111.3)       | 17.3 (12.9 to 22.7)        | 63.5 (46.0 to 84.6)           | 1.8 (0.9 to 3.3)                | 6.7 (5.0 to 9.6)                  | 250.3 (198.0 to 311.7) | 48.4 (36.2 to 63.5)        | 177.9 (128.8 to 236.8)        | 5.1 (2.5 to 9.3)                | 18.8 (14.0 to 26.9)               |
| Nigeria | 2042 | 90.3 (71.0 to 111.9)       | 17.6 (13.2 to 23.0)        | 64.0 (46.4 to 85.2)           | 1.9 (0.9 to 3.4)                | 6.8 (4.9 to 9.9)                  | 252.8 (198.9 to 313.3) | 49.2 (36.8 to 64.3)        | 179.3 (129.8 to 238.5)        | 5.2 (2.5 to 9.4)                | 19.0 (13.9 to 27.7)               |
| Nigeria | 2043 | 91.1 (72.4 to 113.1)       | 17.9 (13.3 to 23.4)        | 64.5 (46.7 to 85.8)           | 1.9 (0.9 to 3.4)                | 6.9 (5.0 to 10.1)                 | 255.2 (202.8 to 316.7) | 50.0 (37.3 to 65.5)        | 180.6 (130.8 to 240.2)        | 5.3 (2.5 to 9.6)                | 19.3 (13.9 to 28.2)               |

| Country     | Year | 2018 US Dollars per capita |                            |                               |                                 |                                   | 2018 PPP per capita    |                            |                               |                                 |                                   |
|-------------|------|----------------------------|----------------------------|-------------------------------|---------------------------------|-----------------------------------|------------------------|----------------------------|-------------------------------|---------------------------------|-----------------------------------|
|             |      | Health spending            | Government health spending | Out-of-pocket health spending | Prepaid private health spending | Development assistance for health | Health spending        | Government health spending | Out-of-pocket health spending | Prepaid private health spending | Development assistance for health |
| Nigeria     | 2044 | 92.1 (73.0 to 114.3)       | 18.2 (13.5 to 23.7)        | 65.0 (47.0 to 86.5)           | 1.9 (0.9 to 3.5)                | 7.0 (5.0 to 10.4)                 | 257.9 (204.5 to 320.1) | 50.9 (37.8 to 66.5)        | 182.1 (131.7 to 242.1)        | 5.4 (2.6 to 9.7)                | 19.6 (13.9 to 29.2)               |
| Nigeria     | 2045 | 93.2 (73.8 to 115.9)       | 18.5 (13.7 to 24.3)        | 65.6 (47.4 to 87.2)           | 2.0 (0.9 to 3.5)                | 7.1 (5.0 to 10.7)                 | 261.0 (206.7 to 324.4) | 51.9 (38.4 to 68.0)        | 183.7 (132.7 to 244.2)        | 5.5 (2.6 to 9.9)                | 19.8 (13.9 to 29.9)               |
| Nigeria     | 2046 | 94.4 (73.9 to 117.5)       | 19.0 (14.0 to 24.8)        | 66.2 (47.8 to 88.0)           | 2.0 (1.0 to 3.6)                | 7.2 (5.0 to 11.2)                 | 264.5 (207.0 to 329.0) | 53.2 (39.3 to 69.5)        | 185.5 (133.8 to 246.5)        | 5.6 (2.7 to 10.1)               | 20.1 (14.1 to 31.3)               |
| Nigeria     | 2047 | 95.9 (76.6 to 118.7)       | 19.6 (14.4 to 25.6)        | 67.0 (48.3 to 89.0)           | 2.0 (1.0 to 3.7)                | 7.3 (5.1 to 11.6)                 | 268.5 (214.4 to 332.4) | 54.8 (40.3 to 71.8)        | 187.5 (135.2 to 249.2)        | 5.7 (2.7 to 10.3)               | 20.5 (14.3 to 32.4)               |
| Nigeria     | 2048 | 97.4 (77.7 to 121.3)       | 20.2 (14.8 to 26.5)        | 67.7 (48.8 to 90.0)           | 2.1 (1.0 to 3.8)                | 7.4 (5.2 to 12.0)                 | 272.8 (217.5 to 339.6) | 56.4 (41.3 to 74.2)        | 189.7 (136.6 to 252.0)        | 5.8 (2.8 to 10.6)               | 20.8 (14.4 to 33.6)               |
| Nigeria     | 2049 | 99.1 (79.4 to 123.6)       | 20.8 (15.3 to 27.4)        | 68.6 (49.3 to 91.1)           | 2.1 (1.0 to 3.9)                | 7.6 (5.2 to 12.5)                 | 277.4 (222.3 to 346.2) | 58.3 (42.8 to 76.7)        | 192.0 (138.1 to 255.1)        | 6.0 (2.8 to 10.8)               | 21.2 (14.5 to 34.9)               |
| Nigeria     | 2050 | 100.9 (80.1 to 125.4)      | 21.6 (15.8 to 28.4)        | 69.5 (49.9 to 92.4)           | 2.2 (1.0 to 4.0)                | 7.7 (5.2 to 12.8)                 | 282.6 (224.2 to 351.1) | 60.4 (44.4 to 79.5)        | 194.5 (139.8 to 258.6)        | 6.1 (2.9 to 11.1)               | 21.6 (14.5 to 35.8)               |
| North Korea | 1995 | 62.4 (49.7 to 77.5)        | 34.2 (26.0 to 43.6)        | 27.2 (18.6 to 38.7)           | 1.0 (0.5 to 2.0)                | 0.0 (0.0 to 0.0)                  | 41.3 (32.9 to 51.2)    | 22.6 (17.2 to 28.9)        | 18.0 (12.3 to 25.6)           | 0.7 (0.3 to 1.3)                | 0.0 (0.0 to 0.0)                  |
| North Korea | 1996 | 55.7 (44.4 to 68.9)        | 29.7 (22.7 to 37.9)        | 25.1 (17.2 to 35.7)           | 0.9 (0.4 to 1.6)                | 0.0 (0.0 to 0.0)                  | 36.9 (29.4 to 45.6)    | 19.7 (15.0 to 25.1)        | 16.6 (11.4 to 23.6)           | 0.6 (0.3 to 1.1)                | 0.0 (0.0 to 0.0)                  |
| North Korea | 1997 | 54.2 (43.0 to 67.0)        | 28.8 (22.1 to 36.5)        | 24.5 (16.8 to 35.0)           | 0.8 (0.4 to 1.5)                | 0.0 (0.0 to 0.0)                  | 35.8 (28.4 to 44.3)    | 19.0 (14.6 to 24.1)        | 16.2 (11.1 to 23.1)           | 0.5 (0.3 to 1.0)                | 0.0 (0.0 to 0.0)                  |
| North Korea | 1998 | 55.8 (44.2 to 68.5)        | 30.1 (23.0 to 38.0)        | 24.9 (16.8 to 36.0)           | 0.8 (0.4 to 1.5)                | 0.0 (0.0 to 0.0)                  | 36.9 (29.2 to 45.3)    | 19.9 (15.2 to 25.2)        | 16.5 (11.1 to 23.8)           | 0.5 (0.3 to 1.0)                | 0.0 (0.0 to 0.0)                  |
| North Korea | 1999 | 57.5 (46.3 to 70.2)        | 31.4 (24.0 to 39.1)        | 25.3 (17.4 to 36.1)           | 0.8 (0.4 to 1.4)                | 0.0 (0.0 to 0.0)                  | 38.1 (30.6 to 46.4)    | 20.8 (15.9 to 25.9)        | 16.8 (11.5 to 23.9)           | 0.5 (0.3 to 0.9)                | 0.0 (0.0 to 0.0)                  |
| North Korea | 2000 | 58.5 (47.4 to 70.8)        | 32.2 (24.8 to 40.2)        | 25.6 (17.7 to 36.1)           | 0.7 (0.4 to 1.4)                | 0.0 (0.0 to 0.0)                  | 38.7 (31.3 to 46.9)    | 21.3 (16.4 to 26.6)        | 16.9 (11.7 to 23.9)           | 0.5 (0.2 to 0.9)                | 0.0 (0.0 to 0.0)                  |
| North Korea | 2001 | 59.0 (47.5 to 72.0)        | 32.7 (25.5 to 41.5)        | 25.7 (17.7 to 36.2)           | 0.7 (0.3 to 1.2)                | 0.0 (0.0 to 0.0)                  | 39.1 (31.4 to 47.6)    | 21.6 (16.9 to 27.4)        | 17.0 (11.7 to 24.0)           | 0.5 (0.2 to 0.8)                | 0.0 (0.0 to 0.0)                  |
| North Korea | 2002 | 59.6 (48.1 to 73.1)        | 33.1 (25.8 to 41.9)        | 25.8 (17.7 to 36.1)           | 0.7 (0.3 to 1.2)                | 0.1 (0.1 to 0.1)                  | 39.4 (31.8 to 48.4)    | 21.9 (17.1 to 27.8)        | 17.1 (11.7 to 23.9)           | 0.4 (0.2 to 0.8)                | 0.0 (0.0 to 0.0)                  |
| North Korea | 2003 | 60.1 (48.7 to 73.3)        | 33.5 (26.1 to 42.4)        | 25.9 (17.8 to 36.2)           | 0.6 (0.3 to 1.2)                | 0.1 (0.1 to 0.1)                  | 39.8 (32.2 to 48.5)    | 22.2 (17.3 to 28.0)        | 17.1 (11.8 to 23.9)           | 0.4 (0.2 to 0.8)                | 0.0 (0.0 to 0.0)                  |
| North Korea | 2004 | 60.7 (49.3 to 75.0)        | 34.0 (26.9 to 43.2)        | 25.9 (17.7 to 36.4)           | 0.6 (0.3 to 1.2)                | 0.1 (0.1 to 0.1)                  | 40.1 (32.6 to 49.6)    | 22.5 (17.8 to 28.6)        | 17.1 (11.7 to 24.1)           | 0.4 (0.2 to 0.8)                | 0.1 (0.1 to 0.1)                  |
| North Korea | 2005 | 61.3 (50.0 to 75.2)        | 34.6 (26.9 to 44.4)        | 25.8 (17.5 to 36.3)           | 0.6 (0.3 to 1.2)                | 0.2 (0.2 to 0.2)                  | 40.5 (33.1 to 49.7)    | 22.9 (17.8 to 29.4)        | 17.1 (11.5 to 24.0)           | 0.4 (0.2 to 0.8)                | 0.1 (0.1 to 0.1)                  |
| North Korea | 2006 | 60.9 (49.7 to 75.0)        | 34.7 (27.0 to 44.6)        | 25.5 (17.1 to 36.4)           | 0.6 (0.3 to 1.1)                | 0.1 (0.1 to 0.1)                  | 40.3 (32.8 to 49.6)    | 22.9 (17.9 to 29.5)        | 16.9 (11.3 to 24.1)           | 0.4 (0.2 to 0.8)                | 0.1 (0.1 to 0.1)                  |
| North Korea | 2007 | 60.5 (49.2 to 74.8)        | 34.7 (27.0 to 44.5)        | 25.0 (17.0 to 35.9)           | 0.6 (0.3 to 1.2)                | 0.1 (0.1 to 0.1)                  | 40.0 (32.5 to 49.5)    | 22.9 (17.8 to 29.5)        | 16.6 (11.3 to 23.7)           | 0.4 (0.2 to 0.8)                | 0.1 (0.1 to 0.1)                  |
| North Korea | 2008 | 60.5 (49.2 to 74.3)        | 35.0 (26.8 to 45.1)        | 24.7 (17.0 to 35.5)           | 0.6 (0.3 to 1.2)                | 0.1 (0.1 to 0.1)                  | 40.0 (32.6 to 49.2)    | 23.1 (17.8 to 29.8)        | 16.4 (11.3 to 23.5)           | 0.4 (0.2 to 0.8)                | 0.1 (0.1 to 0.1)                  |

| Country     | Year | 2018 US Dollars per capita |                            |                               |                                 |                                   | 2018 PPP per capita |                            |                               |                                 |                                   |
|-------------|------|----------------------------|----------------------------|-------------------------------|---------------------------------|-----------------------------------|---------------------|----------------------------|-------------------------------|---------------------------------|-----------------------------------|
|             |      | Health spending            | Government health spending | Out-of-pocket health spending | Prepaid private health spending | Development assistance for health | Health spending     | Government health spending | Out-of-pocket health spending | Prepaid private health spending | Development assistance for health |
| North Korea | 2009 | 59.8 (48.3 to 74.1)        | 34.7 (26.1 to 44.7)        | 24.2 (16.7 to 34.4)           | 0.6 (0.3 to 1.2)                | 0.3 (0.3 to 0.3)                  | 39.6 (31.9 to 49.0) | 22.9 (17.3 to 29.6)        | 16.0 (11.0 to 22.8)           | 0.4 (0.2 to 0.8)                | 0.2 (0.2 to 0.2)                  |
| North Korea | 2010 | 60.7 (48.9 to 75.0)        | 35.6 (27.1 to 46.0)        | 24.2 (16.6 to 33.6)           | 0.6 (0.3 to 1.2)                | 0.2 (0.2 to 0.2)                  | 40.2 (32.4 to 49.6) | 23.6 (17.9 to 30.5)        | 16.0 (11.0 to 22.2)           | 0.4 (0.2 to 0.8)                | 0.1 (0.1 to 0.1)                  |
| North Korea | 2011 | 61.4 (49.1 to 76.1)        | 36.5 (27.8 to 47.4)        | 24.2 (16.5 to 33.5)           | 0.6 (0.3 to 1.2)                | 0.1 (0.1 to 0.1)                  | 40.7 (32.5 to 50.4) | 24.1 (18.4 to 31.4)        | 16.0 (10.9 to 22.2)           | 0.4 (0.2 to 0.8)                | 0.1 (0.1 to 0.1)                  |
| North Korea | 2012 | 62.5 (50.2 to 77.1)        | 37.4 (28.2 to 48.6)        | 24.2 (16.3 to 34.0)           | 0.6 (0.3 to 1.2)                | 0.3 (0.3 to 0.3)                  | 41.3 (33.2 to 51.0) | 24.7 (18.7 to 32.2)        | 16.0 (10.8 to 22.5)           | 0.4 (0.2 to 0.8)                | 0.2 (0.2 to 0.2)                  |
| North Korea | 2013 | 63.2 (50.9 to 78.5)        | 38.2 (28.6 to 49.7)        | 24.2 (16.5 to 33.7)           | 0.6 (0.3 to 1.2)                | 0.2 (0.2 to 0.2)                  | 41.8 (33.7 to 51.9) | 25.3 (18.9 to 32.9)        | 16.0 (10.9 to 22.3)           | 0.4 (0.2 to 0.8)                | 0.1 (0.1 to 0.1)                  |
| North Korea | 2014 | 64.2 (51.7 to 79.3)        | 39.1 (29.0 to 50.5)        | 24.2 (16.5 to 33.9)           | 0.7 (0.3 to 1.2)                | 0.2 (0.2 to 0.2)                  | 42.5 (34.2 to 52.5) | 25.8 (19.2 to 33.4)        | 16.0 (10.9 to 22.4)           | 0.4 (0.2 to 0.8)                | 0.2 (0.2 to 0.2)                  |
| North Korea | 2015 | 65.3 (52.7 to 80.3)        | 40.0 (29.5 to 51.6)        | 24.2 (16.5 to 33.8)           | 0.7 (0.3 to 1.2)                | 0.4 (0.4 to 0.4)                  | 43.2 (34.9 to 53.2) | 26.4 (19.5 to 34.1)        | 16.0 (10.9 to 22.4)           | 0.4 (0.2 to 0.8)                | 0.3 (0.3 to 0.3)                  |
| North Korea | 2016 | 65.8 (53.5 to 79.9)        | 40.8 (30.2 to 52.6)        | 24.2 (16.6 to 33.6)           | 0.6 (0.3 to 1.2)                | 0.2 (0.2 to 0.2)                  | 43.6 (35.4 to 52.9) | 27.0 (20.0 to 34.8)        | 16.0 (11.0 to 22.3)           | 0.4 (0.2 to 0.8)                | 0.1 (0.1 to 0.1)                  |
| North Korea | 2017 | 67.2 (54.1 to 82.7)        | 41.5 (30.7 to 53.5)        | 24.5 (16.9 to 34.0)           | 0.7 (0.3 to 1.2)                | 0.5 (0.5 to 0.5)                  | 44.5 (35.8 to 54.7) | 27.4 (20.3 to 35.4)        | 16.2 (11.2 to 22.5)           | 0.4 (0.2 to 0.8)                | 0.3 (0.3 to 0.3)                  |
| North Korea | 2018 | 68.3 (55.3 to 83.1)        | 42.3 (31.3 to 54.7)        | 24.8 (17.0 to 34.3)           | 0.7 (0.3 to 1.2)                | 0.5 (0.5 to 0.5)                  | 45.2 (36.6 to 55.0) | 28.0 (20.7 to 36.2)        | 16.4 (11.3 to 22.7)           | 0.4 (0.2 to 0.8)                | 0.3 (0.3 to 0.3)                  |
| North Korea | 2019 | 69.0 (55.4 to 85.6)        | 42.7 (31.7 to 55.3)        | 25.1 (17.2 to 34.7)           | 0.7 (0.3 to 1.2)                | 0.5 (0.4 to 0.5)                  | 45.6 (36.7 to 56.6) | 28.3 (21.0 to 36.6)        | 16.6 (11.4 to 23.0)           | 0.5 (0.2 to 0.8)                | 0.3 (0.3 to 0.3)                  |
| North Korea | 2020 | 69.9 (56.6 to 85.8)        | 43.4 (32.3 to 56.3)        | 25.3 (17.3 to 35.0)           | 0.7 (0.3 to 1.3)                | 0.5 (0.4 to 0.5)                  | 46.2 (37.5 to 56.8) | 28.7 (21.3 to 37.3)        | 16.7 (11.5 to 23.2)           | 0.5 (0.2 to 0.8)                | 0.3 (0.3 to 0.3)                  |
| North Korea | 2021 | 70.8 (57.1 to 86.8)        | 44.2 (32.9 to 57.2)        | 25.4 (17.4 to 35.2)           | 0.7 (0.3 to 1.3)                | 0.5 (0.4 to 0.5)                  | 46.9 (37.7 to 57.4) | 29.2 (21.8 to 37.9)        | 16.8 (11.5 to 23.3)           | 0.5 (0.2 to 0.8)                | 0.3 (0.3 to 0.4)                  |
| North Korea | 2022 | 71.9 (58.4 to 88.3)        | 45.1 (33.6 to 58.2)        | 25.5 (17.5 to 35.4)           | 0.7 (0.3 to 1.3)                | 0.5 (0.5 to 0.6)                  | 47.6 (38.6 to 58.5) | 29.9 (22.3 to 38.5)        | 16.9 (11.6 to 23.4)           | 0.5 (0.2 to 0.9)                | 0.3 (0.3 to 0.4)                  |
| North Korea | 2023 | 72.9 (59.0 to 88.9)        | 46.0 (34.2 to 59.3)        | 25.6 (17.5 to 35.5)           | 0.7 (0.3 to 1.3)                | 0.5 (0.5 to 0.6)                  | 48.2 (39.0 to 58.8) | 30.5 (22.7 to 39.3)        | 16.9 (11.6 to 23.5)           | 0.5 (0.2 to 0.9)                | 0.4 (0.3 to 0.4)                  |
| North Korea | 2024 | 73.9 (59.7 to 90.0)        | 46.9 (35.0 to 60.0)        | 25.7 (17.5 to 35.5)           | 0.7 (0.3 to 1.3)                | 0.6 (0.5 to 0.6)                  | 48.9 (39.5 to 59.5) | 31.0 (23.2 to 39.7)        | 17.0 (11.6 to 23.5)           | 0.5 (0.2 to 0.9)                | 0.4 (0.3 to 0.4)                  |
| North Korea | 2025 | 74.7 (59.5 to 91.2)        | 47.7 (35.5 to 61.3)        | 25.7 (17.6 to 35.7)           | 0.8 (0.3 to 1.3)                | 0.6 (0.5 to 0.7)                  | 49.4 (39.3 to 60.4) | 31.5 (23.5 to 40.6)        | 17.0 (11.6 to 23.6)           | 0.5 (0.2 to 0.9)                | 0.4 (0.3 to 0.4)                  |
| North Korea | 2026 | 75.5 (61.7 to 92.2)        | 48.4 (36.0 to 62.0)        | 25.8 (17.7 to 35.8)           | 0.8 (0.3 to 1.4)                | 0.6 (0.5 to 0.7)                  | 50.0 (40.8 to 61.0) | 32.0 (23.8 to 41.0)        | 17.1 (11.7 to 23.7)           | 0.5 (0.2 to 0.9)                | 0.4 (0.3 to 0.5)                  |
| North Korea | 2027 | 76.3 (60.4 to 93.7)        | 49.0 (36.3 to 62.9)        | 25.9 (17.7 to 35.9)           | 0.8 (0.3 to 1.4)                | 0.6 (0.5 to 0.8)                  | 50.5 (40.0 to 62.0) | 32.4 (24.0 to 41.6)        | 17.1 (11.7 to 23.8)           | 0.5 (0.2 to 0.9)                | 0.4 (0.3 to 0.5)                  |
| North Korea | 2028 | 77.0 (62.6 to 94.0)        | 49.6 (36.7 to 63.8)        | 26.0 (17.8 to 36.1)           | 0.8 (0.3 to 1.4)                | 0.7 (0.6 to 0.8)                  | 50.9 (41.4 to 62.2) | 32.8 (24.3 to 42.2)        | 17.2 (11.8 to 23.9)           | 0.5 (0.2 to 0.9)                | 0.4 (0.4 to 0.5)                  |
| North Korea | 2029 | 77.6 (61.1 to 95.0)        | 50.1 (37.1 to 64.3)        | 26.0 (17.8 to 36.2)           | 0.8 (0.4 to 1.4)                | 0.7 (0.6 to 0.9)                  | 51.4 (40.4 to 62.9) | 33.2 (24.6 to 42.6)        | 17.2 (11.8 to 23.9)           | 0.5 (0.2 to 0.9)                | 0.5 (0.4 to 0.6)                  |

| Country     | Year | 2018 US Dollars per capita |                            |                               |                                 |                                   | 2018 PPP per capita |                            |                               |                                 |                                   |
|-------------|------|----------------------------|----------------------------|-------------------------------|---------------------------------|-----------------------------------|---------------------|----------------------------|-------------------------------|---------------------------------|-----------------------------------|
|             |      | Health spending            | Government health spending | Out-of-pocket health spending | Prepaid private health spending | Development assistance for health | Health spending     | Government health spending | Out-of-pocket health spending | Prepaid private health spending | Development assistance for health |
| North Korea | 2030 | 78.3 (62.8 to 95.4)        | 50.8 (37.6 to 65.4)        | 26.0 (17.8 to 36.2)           | 0.8 (0.4 to 1.4)                | 0.7 (0.6 to 0.9)                  | 51.8 (41.5 to 63.1) | 33.6 (24.9 to 43.2)        | 17.2 (11.8 to 23.9)           | 0.5 (0.2 to 0.9)                | 0.5 (0.4 to 0.6)                  |
| North Korea | 2031 | 78.9 (63.0 to 97.5)        | 51.5 (38.2 to 66.1)        | 25.9 (17.8 to 36.1)           | 0.8 (0.4 to 1.4)                | 0.8 (0.6 to 1.0)                  | 52.2 (41.7 to 64.5) | 34.0 (25.2 to 43.8)        | 17.1 (11.8 to 23.9)           | 0.5 (0.2 to 0.9)                | 0.5 (0.4 to 0.6)                  |
| North Korea | 2032 | 79.6 (64.0 to 96.2)        | 52.1 (38.7 to 67.0)        | 25.8 (17.7 to 35.9)           | 0.8 (0.4 to 1.4)                | 0.8 (0.7 to 1.0)                  | 52.6 (42.3 to 63.7) | 34.5 (25.6 to 44.3)        | 17.1 (11.7 to 23.8)           | 0.5 (0.2 to 0.9)                | 0.5 (0.4 to 0.7)                  |
| North Korea | 2033 | 80.1 (64.2 to 99.1)        | 52.8 (39.2 to 68.0)        | 25.6 (17.6 to 35.7)           | 0.8 (0.4 to 1.4)                | 0.9 (0.7 to 1.1)                  | 53.0 (42.4 to 65.5) | 34.9 (25.9 to 45.0)        | 17.0 (11.7 to 23.6)           | 0.5 (0.2 to 0.9)                | 0.6 (0.5 to 0.7)                  |
| North Korea | 2034 | 80.7 (64.7 to 97.2)        | 53.5 (39.6 to 69.1)        | 25.5 (17.5 to 35.5)           | 0.8 (0.4 to 1.4)                | 0.9 (0.7 to 1.2)                  | 53.4 (42.8 to 64.3) | 35.4 (26.2 to 45.7)        | 16.9 (11.6 to 23.5)           | 0.5 (0.2 to 0.9)                | 0.6 (0.5 to 0.8)                  |
| North Korea | 2035 | 81.3 (65.1 to 100.7)       | 54.1 (40.0 to 69.9)        | 25.4 (17.4 to 35.3)           | 0.8 (0.4 to 1.4)                | 1.0 (0.8 to 1.3)                  | 53.8 (43.0 to 66.6) | 35.8 (26.4 to 46.3)        | 16.8 (11.5 to 23.3)           | 0.5 (0.2 to 0.9)                | 0.7 (0.5 to 0.9)                  |
| North Korea | 2036 | 81.8 (65.2 to 99.2)        | 54.7 (40.4 to 70.8)        | 25.2 (17.3 to 35.1)           | 0.8 (0.4 to 1.4)                | 1.1 (0.8 to 1.4)                  | 54.1 (43.2 to 65.6) | 36.2 (26.7 to 46.8)        | 16.7 (11.5 to 23.2)           | 0.5 (0.2 to 1.0)                | 0.7 (0.5 to 0.9)                  |
| North Korea | 2037 | 82.4 (65.6 to 101.9)       | 55.3 (41.0 to 71.8)        | 25.1 (17.2 to 35.0)           | 0.8 (0.4 to 1.4)                | 1.1 (0.9 to 1.5)                  | 54.5 (43.4 to 67.4) | 36.6 (27.2 to 47.5)        | 16.6 (11.4 to 23.1)           | 0.5 (0.2 to 1.0)                | 0.7 (0.6 to 1.0)                  |
| North Korea | 2038 | 82.9 (65.6 to 101.1)       | 55.9 (41.3 to 72.5)        | 25.0 (17.1 to 34.9)           | 0.8 (0.4 to 1.4)                | 1.2 (0.9 to 1.6)                  | 54.8 (43.4 to 66.9) | 37.0 (27.3 to 48.0)        | 16.5 (11.3 to 23.1)           | 0.5 (0.2 to 1.0)                | 0.8 (0.6 to 1.1)                  |
| North Korea | 2039 | 83.5 (66.5 to 103.6)       | 56.5 (41.5 to 73.5)        | 24.9 (17.1 to 34.9)           | 0.8 (0.4 to 1.5)                | 1.2 (0.9 to 1.7)                  | 55.2 (44.0 to 68.6) | 37.4 (27.5 to 48.7)        | 16.5 (11.3 to 23.1)           | 0.5 (0.2 to 1.0)                | 0.8 (0.6 to 1.1)                  |
| North Korea | 2040 | 84.1 (66.6 to 101.8)       | 57.0 (41.8 to 74.2)        | 24.9 (17.1 to 34.9)           | 0.8 (0.4 to 1.5)                | 1.3 (1.0 to 1.8)                  | 55.6 (44.0 to 67.3) | 37.7 (27.7 to 49.1)        | 16.5 (11.3 to 23.1)           | 0.5 (0.2 to 1.0)                | 0.9 (0.7 to 1.2)                  |
| North Korea | 2041 | 84.7 (66.8 to 105.5)       | 57.5 (42.2 to 75.0)        | 25.0 (17.1 to 35.0)           | 0.8 (0.4 to 1.5)                | 1.4 (1.0 to 1.9)                  | 56.0 (44.2 to 69.8) | 38.0 (27.9 to 49.6)        | 16.5 (11.3 to 23.2)           | 0.6 (0.2 to 1.0)                | 0.9 (0.7 to 1.3)                  |
| North Korea | 2042 | 85.4 (68.0 to 104.8)       | 58.0 (42.6 to 75.5)        | 25.1 (17.2 to 35.2)           | 0.8 (0.4 to 1.5)                | 1.5 (1.1 to 2.1)                  | 56.5 (45.0 to 69.3) | 38.4 (28.2 to 50.0)        | 16.6 (11.4 to 23.3)           | 0.6 (0.3 to 1.0)                | 1.0 (0.7 to 1.4)                  |
| North Korea | 2043 | 86.1 (68.6 to 106.5)       | 58.5 (43.1 to 76.2)        | 25.2 (17.3 to 35.4)           | 0.9 (0.4 to 1.5)                | 1.5 (1.1 to 2.2)                  | 57.0 (45.4 to 70.4) | 38.7 (28.5 to 50.4)        | 16.7 (11.5 to 23.5)           | 0.6 (0.3 to 1.0)                | 1.0 (0.7 to 1.5)                  |
| North Korea | 2044 | 86.9 (68.3 to 106.2)       | 59.0 (43.3 to 76.9)        | 25.4 (17.4 to 35.6)           | 0.9 (0.4 to 1.6)                | 1.6 (1.2 to 2.4)                  | 57.5 (45.2 to 70.3) | 39.0 (28.7 to 50.9)        | 16.8 (11.5 to 23.6)           | 0.6 (0.3 to 1.0)                | 1.1 (0.8 to 1.6)                  |
| North Korea | 2045 | 87.6 (69.4 to 109.1)       | 59.5 (43.7 to 77.7)        | 25.5 (17.5 to 35.8)           | 0.9 (0.4 to 1.6)                | 1.7 (1.2 to 2.5)                  | 57.9 (45.9 to 72.2) | 39.4 (28.9 to 51.4)        | 16.9 (11.6 to 23.7)           | 0.6 (0.3 to 1.0)                | 1.1 (0.8 to 1.7)                  |
| North Korea | 2046 | 88.3 (69.8 to 108.2)       | 60.1 (44.2 to 78.6)        | 25.6 (17.6 to 36.0)           | 0.9 (0.4 to 1.6)                | 1.8 (1.3 to 2.7)                  | 58.4 (46.2 to 71.6) | 39.7 (29.2 to 52.0)        | 16.9 (11.6 to 23.8)           | 0.6 (0.3 to 1.1)                | 1.2 (0.8 to 1.8)                  |
| North Korea | 2047 | 89.1 (70.5 to 111.6)       | 60.6 (44.6 to 79.3)        | 25.7 (17.6 to 36.1)           | 0.9 (0.4 to 1.6)                | 1.9 (1.3 to 3.0)                  | 58.9 (46.6 to 73.8) | 40.1 (29.5 to 52.5)        | 17.0 (11.7 to 23.9)           | 0.6 (0.3 to 1.1)                | 1.2 (0.9 to 2.0)                  |
| North Korea | 2048 | 89.8 (70.9 to 110.6)       | 61.2 (44.9 to 80.0)        | 25.7 (17.7 to 36.2)           | 0.9 (0.4 to 1.6)                | 2.0 (1.4 to 3.2)                  | 59.4 (46.9 to 73.2) | 40.5 (29.7 to 52.9)        | 17.0 (11.7 to 23.9)           | 0.6 (0.3 to 1.1)                | 1.3 (0.9 to 2.1)                  |
| North Korea | 2049 | 90.7 (71.2 to 112.9)       | 61.8 (45.3 to 80.6)        | 25.8 (17.7 to 36.3)           | 0.9 (0.4 to 1.7)                | 2.1 (1.5 to 3.4)                  | 60.0 (47.1 to 74.7) | 40.9 (30.0 to 53.4)        | 17.1 (11.7 to 24.0)           | 0.6 (0.3 to 1.1)                | 1.4 (1.0 to 2.3)                  |
| North Korea | 2050 | 91.5 (72.8 to 113.0)       | 62.4 (45.7 to 81.5)        | 25.9 (17.8 to 36.4)           | 0.9 (0.4 to 1.7)                | 2.2 (1.5 to 3.6)                  | 60.6 (48.2 to 74.8) | 41.3 (30.2 to 54.0)        | 17.2 (11.8 to 24.1)           | 0.6 (0.3 to 1.1)                | 1.5 (1.0 to 2.4)                  |

| Country                  | Year | 2018 US Dollars per capita |                            |                               |                                 |                                   | 2018 PPP per capita    |                            |                               |                                 |                                   |
|--------------------------|------|----------------------------|----------------------------|-------------------------------|---------------------------------|-----------------------------------|------------------------|----------------------------|-------------------------------|---------------------------------|-----------------------------------|
|                          |      | Health spending            | Government health spending | Out-of-pocket health spending | Prepaid private health spending | Development assistance for health | Health spending        | Government health spending | Out-of-pocket health spending | Prepaid private health spending | Development assistance for health |
| Northern Mariana Islands | 1995 | 649.6 (499.8 to 837.2)     | 578.5 (433.7 to 761.8)     | 66.9 (46.1 to 95.1)           | 4.1 (2.0 to 7.9)                | 0.0 (0.0 to 0.0)                  | 649.6 (499.8 to 837.2) | 578.5 (433.7 to 761.8)     | 66.9 (46.1 to 95.1)           | 4.1 (2.0 to 7.9)                | 0.0 (0.0 to 0.0)                  |
| Northern Mariana Islands | 1996 | 622.6 (483.0 to 806.9)     | 554.2 (414.8 to 730.6)     | 64.6 (44.7 to 91.0)           | 3.8 (1.8 to 7.2)                | 0.0 (0.0 to 0.0)                  | 622.6 (483.0 to 806.9) | 554.2 (414.8 to 730.6)     | 64.6 (44.7 to 91.0)           | 3.8 (1.8 to 7.2)                | 0.0 (0.0 to 0.0)                  |
| Northern Mariana Islands | 1997 | 599.3 (465.8 to 770.6)     | 533.3 (399.1 to 700.1)     | 62.6 (43.0 to 88.6)           | 3.5 (1.6 to 6.6)                | 0.0 (0.0 to 0.0)                  | 599.3 (465.8 to 770.6) | 533.3 (399.1 to 700.1)     | 62.6 (43.0 to 88.6)           | 3.5 (1.6 to 6.6)                | 0.0 (0.0 to 0.0)                  |
| Northern Mariana Islands | 1998 | 571.3 (444.1 to 726.2)     | 507.9 (384.1 to 662.0)     | 60.4 (41.3 to 85.6)           | 3.0 (1.4 to 5.8)                | 0.0 (0.0 to 0.0)                  | 571.3 (444.1 to 726.2) | 507.9 (384.1 to 662.0)     | 60.4 (41.3 to 85.6)           | 3.0 (1.4 to 5.8)                | 0.0 (0.0 to 0.0)                  |
| Northern Mariana Islands | 1999 | 547.1 (426.7 to 691.9)     | 486.2 (366.6 to 629.5)     | 58.4 (40.8 to 82.0)           | 2.5 (1.2 to 5.0)                | 0.0 (0.0 to 0.0)                  | 547.1 (426.7 to 691.9) | 486.2 (366.6 to 629.5)     | 58.4 (40.8 to 82.0)           | 2.5 (1.2 to 5.0)                | 0.0 (0.0 to 0.0)                  |
| Northern Mariana Islands | 2000 | 529.4 (415.9 to 663.6)     | 470.4 (353.6 to 600.4)     | 56.9 (39.2 to 80.2)           | 2.1 (1.0 to 4.0)                | 0.0 (0.0 to 0.0)                  | 529.4 (415.9 to 663.6) | 470.4 (353.6 to 600.4)     | 56.9 (39.2 to 80.2)           | 2.1 (1.0 to 4.0)                | 0.0 (0.0 to 0.0)                  |
| Northern Mariana Islands | 2001 | 509.5 (396.3 to 640.3)     | 452.3 (342.5 to 582.7)     | 55.6 (37.6 to 79.2)           | 1.6 (0.7 to 3.0)                | 0.0 (0.0 to 0.0)                  | 509.5 (396.3 to 640.3) | 452.3 (342.5 to 582.7)     | 55.6 (37.6 to 79.2)           | 1.6 (0.7 to 3.0)                | 0.0 (0.0 to 0.0)                  |
| Northern Mariana Islands | 2002 | 490.9 (381.9 to 624.3)     | 434.6 (326.8 to 565.4)     | 54.9 (38.4 to 77.3)           | 1.4 (0.7 to 2.7)                | 0.0 (0.0 to 0.0)                  | 490.9 (381.9 to 624.3) | 434.6 (326.8 to 565.4)     | 54.9 (38.4 to 77.3)           | 1.4 (0.7 to 2.7)                | 0.0 (0.0 to 0.0)                  |
| Northern Mariana Islands | 2003 | 488.5 (382.2 to 622.0)     | 431.7 (323.4 to 567.2)     | 55.4 (38.7 to 77.4)           | 1.4 (0.6 to 2.6)                | 0.0 (0.0 to 0.0)                  | 488.5 (382.2 to 622.0) | 431.7 (323.4 to 567.2)     | 55.4 (38.7 to 77.4)           | 1.4 (0.6 to 2.6)                | 0.0 (0.0 to 0.0)                  |
| Northern Mariana Islands | 2004 | 477.3 (374.3 to 608.2)     | 420.7 (313.5 to 546.6)     | 55.2 (38.8 to 76.8)           | 1.4 (0.7 to 2.6)                | 0.0 (0.0 to 0.0)                  | 477.3 (374.3 to 608.2) | 420.7 (313.5 to 546.6)     | 55.2 (38.8 to 76.8)           | 1.4 (0.7 to 2.6)                | 0.0 (0.0 to 0.0)                  |
| Northern Mariana Islands | 2005 | 430.4 (336.8 to 550.1)     | 376.9 (282.5 to 496.1)     | 52.2 (36.6 to 72.7)           | 1.4 (0.6 to 2.6)                | 0.0 (0.0 to 0.0)                  | 430.4 (336.8 to 550.1) | 376.9 (282.5 to 496.1)     | 52.2 (36.6 to 72.7)           | 1.4 (0.6 to 2.6)                | 0.0 (0.0 to 0.0)                  |
| Northern Mariana Islands | 2006 | 407.7 (319.6 to 518.7)     | 355.5 (268.5 to 468.3)     | 50.7 (35.5 to 70.9)           | 1.5 (0.7 to 2.8)                | 0.0 (0.0 to 0.0)                  | 407.7 (319.6 to 518.7) | 355.5 (268.5 to 468.3)     | 50.7 (35.5 to 70.9)           | 1.5 (0.7 to 2.8)                | 0.0 (0.0 to 0.0)                  |
| Northern Mariana Islands | 2007 | 387.2 (304.9 to 492.0)     | 336.0 (255.9 to 441.2)     | 49.5 (34.2 to 69.7)           | 1.8 (0.8 to 3.3)                | 0.0 (0.0 to 0.0)                  | 387.2 (304.9 to 492.0) | 336.0 (255.9 to 441.2)     | 49.5 (34.2 to 69.7)           | 1.8 (0.8 to 3.3)                | 0.0 (0.0 to 0.0)                  |
| Northern Mariana Islands | 2008 | 354.5 (279.7 to 443.5)     | 304.9 (231.5 to 394.1)     | 47.4 (33.0 to 67.5)           | 2.3 (1.0 to 4.1)                | 0.0 (0.0 to 0.0)                  | 354.5 (279.7 to 443.5) | 304.9 (231.5 to 394.1)     | 47.4 (33.0 to 67.5)           | 2.3 (1.0 to 4.1)                | 0.0 (0.0 to 0.0)                  |
| Northern Mariana Islands | 2009 | 303.0 (239.4 to 378.7)     | 257.2 (197.8 to 332.7)     | 43.4 (30.6 to 60.9)           | 2.4 (1.1 to 4.4)                | 0.0 (0.0 to 0.0)                  | 303.0 (239.4 to 378.7) | 257.2 (197.8 to 332.7)     | 43.4 (30.6 to 60.9)           | 2.4 (1.1 to 4.4)                | 0.0 (0.0 to 0.0)                  |
| Northern Mariana Islands | 2010 | 299.7 (238.3 to 372.7)     | 253.8 (194.0 to 327.1)     | 43.2 (30.9 to 60.7)           | 2.8 (1.3 to 5.0)                | 0.0 (0.0 to 0.0)                  | 299.7 (238.3 to 372.7) | 253.8 (194.0 to 327.1)     | 43.2 (30.9 to 60.7)           | 2.8 (1.3 to 5.0)                | 0.0 (0.0 to 0.0)                  |
| Northern Mariana Islands | 2011 | 275.5 (219.7 to 340.9)     | 231.8 (178.3 to 295.5)     | 40.9 (29.5 to 57.3)           | 2.9 (1.3 to 5.1)                | 0.0 (0.0 to 0.0)                  | 275.5 (219.7 to 340.9) | 231.8 (178.3 to 295.5)     | 40.9 (29.5 to 57.3)           | 2.9 (1.3 to 5.1)                | 0.0 (0.0 to 0.0)                  |
| Northern Mariana Islands | 2012 | 268.9 (213.9 to 335.1)     | 225.9 (174.2 to 291.0)     | 40.0 (28.7 to 56.3)           | 3.0 (1.4 to 5.5)                | 0.0 (0.0 to 0.0)                  | 268.9 (213.9 to 335.1) | 225.9 (174.2 to 291.0)     | 40.0 (28.7 to 56.3)           | 3.0 (1.4 to 5.5)                | 0.0 (0.0 to 0.0)                  |
| Northern Mariana Islands | 2013 | 265.3 (211.5 to 331.8)     | 222.9 (171.4 to 288.7)     | 39.3 (28.2 to 55.1)           | 3.1 (1.4 to 5.7)                | 0.0 (0.0 to 0.0)                  | 265.3 (211.5 to 331.8) | 222.9 (171.4 to 288.7)     | 39.3 (28.2 to 55.1)           | 3.1 (1.4 to 5.7)                | 0.0 (0.0 to 0.0)                  |
| Northern Mariana Islands | 2014 | 262.8 (209.5 to 330.7)     | 221.0 (171.0 to 286.8)     | 38.7 (27.5 to 54.5)           | 3.1 (1.4 to 5.7)                | 0.0 (0.0 to 0.0)                  | 262.8 (209.5 to 330.7) | 221.0 (171.0 to 286.8)     | 38.7 (27.5 to 54.5)           | 3.1 (1.4 to 5.7)                | 0.0 (0.0 to 0.0)                  |
| Northern Mariana Islands | 2015 | 265.0 (209.8 to 332.4)     | 223.3 (170.3 to 287.7)     | 38.6 (27.3 to 54.5)           | 3.1 (1.4 to 5.8)                | 0.0 (0.0 to 0.0)                  | 265.0 (209.8 to 332.4) | 223.3 (170.3 to 287.7)     | 38.6 (27.3 to 54.5)           | 3.1 (1.4 to 5.8)                | 0.0 (0.0 to 0.0)                  |

| Country                  | Year | 2018 US Dollars per capita |                            |                               |                                 |                                   | 2018 PPP per capita    |                            |                               |                                 |                                   |
|--------------------------|------|----------------------------|----------------------------|-------------------------------|---------------------------------|-----------------------------------|------------------------|----------------------------|-------------------------------|---------------------------------|-----------------------------------|
|                          |      | Health spending            | Government health spending | Out-of-pocket health spending | Prepaid private health spending | Development assistance for health | Health spending        | Government health spending | Out-of-pocket health spending | Prepaid private health spending | Development assistance for health |
| Northern Mariana Islands | 2016 | 261.0 (207.7 to 326.0)     | 220.1 (167.8 to 282.5)     | 37.9 (26.4 to 53.2)           | 3.0 (1.4 to 5.6)                | 0.0 (0.0 to 0.0)                  | 261.0 (207.7 to 326.0) | 220.1 (167.8 to 282.5)     | 37.9 (26.4 to 53.2)           | 3.0 (1.4 to 5.6)                | 0.0 (0.0 to 0.0)                  |
| Northern Mariana Islands | 2017 | 260.0 (205.3 to 319.3)     | 219.3 (166.9 to 281.5)     | 37.6 (26.1 to 53.1)           | 3.1 (1.5 to 5.8)                | 0.0 (0.0 to 0.0)                  | 260.0 (205.3 to 319.3) | 219.3 (166.9 to 281.5)     | 37.6 (26.1 to 53.1)           | 3.1 (1.5 to 5.8)                | 0.0 (0.0 to 0.0)                  |
| Northern Mariana Islands | 2018 | 259.6 (206.2 to 324.0)     | 219.3 (166.8 to 281.6)     | 37.3 (26.1 to 52.2)           | 3.1 (1.5 to 5.8)                | 0.0 (0.0 to 0.0)                  | 259.6 (206.2 to 324.0) | 219.3 (166.8 to 281.6)     | 37.3 (26.1 to 52.2)           | 3.1 (1.5 to 5.8)                | 0.0 (0.0 to 0.0)                  |
| Northern Mariana Islands | 2019 | 259.7 (204.4 to 319.8)     | 219.5 (166.8 to 281.7)     | 37.0 (25.9 to 51.9)           | 3.1 (1.5 to 5.8)                | 0.0 (0.0 to 0.0)                  | 259.7 (204.4 to 319.8) | 219.5 (166.8 to 281.7)     | 37.0 (25.9 to 51.9)           | 3.1 (1.5 to 5.8)                | 0.0 (0.0 to 0.0)                  |
| Northern Mariana Islands | 2020 | 260.4 (206.0 to 325.4)     | 220.4 (167.3 to 282.7)     | 36.8 (25.7 to 51.9)           | 3.1 (1.5 to 5.9)                | 0.0 (0.0 to 0.0)                  | 260.4 (206.0 to 325.4) | 220.4 (167.3 to 282.7)     | 36.8 (25.7 to 51.9)           | 3.1 (1.5 to 5.9)                | 0.0 (0.0 to 0.0)                  |
| Northern Mariana Islands | 2021 | 263.4 (207.6 to 323.2)     | 223.2 (169.3 to 286.1)     | 37.0 (25.9 to 52.3)           | 3.2 (1.5 to 6.0)                | 0.0 (0.0 to 0.0)                  | 263.4 (207.6 to 323.2) | 223.2 (169.3 to 286.1)     | 37.0 (25.9 to 52.3)           | 3.2 (1.5 to 6.0)                | 0.0 (0.0 to 0.0)                  |
| Northern Mariana Islands | 2022 | 266.5 (210.8 to 332.6)     | 226.0 (171.2 to 289.6)     | 37.3 (26.0 to 52.6)           | 3.2 (1.5 to 6.1)                | 0.0 (0.0 to 0.0)                  | 266.5 (210.8 to 332.6) | 226.0 (171.2 to 289.6)     | 37.3 (26.0 to 52.6)           | 3.2 (1.5 to 6.1)                | 0.0 (0.0 to 0.0)                  |
| Northern Mariana Islands | 2023 | 269.7 (211.9 to 331.3)     | 228.8 (173.2 to 293.0)     | 37.6 (26.2 to 53.2)           | 3.3 (1.6 to 6.2)                | 0.0 (0.0 to 0.0)                  | 269.7 (211.9 to 331.3) | 228.8 (173.2 to 293.0)     | 37.6 (26.2 to 53.2)           | 3.3 (1.6 to 6.2)                | 0.0 (0.0 to 0.0)                  |
| Northern Mariana Islands | 2024 | 273.1 (215.7 to 341.3)     | 231.9 (175.3 to 297.2)     | 37.9 (26.5 to 53.6)           | 3.3 (1.6 to 6.3)                | 0.0 (0.0 to 0.0)                  | 273.1 (215.7 to 341.3) | 231.9 (175.3 to 297.2)     | 37.9 (26.5 to 53.6)           | 3.3 (1.6 to 6.3)                | 0.0 (0.0 to 0.0)                  |
| Northern Mariana Islands | 2025 | 276.9 (217.8 to 341.4)     | 235.3 (177.6 to 301.8)     | 38.1 (26.6 to 53.8)           | 3.4 (1.6 to 6.4)                | 0.0 (0.0 to 0.0)                  | 276.9 (217.8 to 341.4) | 235.3 (177.6 to 301.8)     | 38.1 (26.6 to 53.8)           | 3.4 (1.6 to 6.4)                | 0.0 (0.0 to 0.0)                  |
| Northern Mariana Islands | 2026 | 281.9 (222.1 to 352.9)     | 239.8 (180.7 to 307.9)     | 38.6 (27.0 to 54.5)           | 3.5 (1.6 to 6.5)                | 0.0 (0.0 to 0.0)                  | 281.9 (222.1 to 352.9) | 239.8 (180.7 to 307.9)     | 38.6 (27.0 to 54.5)           | 3.5 (1.6 to 6.5)                | 0.0 (0.0 to 0.0)                  |
| Northern Mariana Islands | 2027 | 287.4 (225.1 to 353.8)     | 244.7 (184.2 to 314.5)     | 39.1 (27.3 to 55.3)           | 3.6 (1.7 to 6.7)                | 0.0 (0.0 to 0.0)                  | 287.4 (225.1 to 353.8) | 244.7 (184.2 to 314.5)     | 39.1 (27.3 to 55.3)           | 3.6 (1.7 to 6.7)                | 0.0 (0.0 to 0.0)                  |
| Northern Mariana Islands | 2028 | 292.2 (230.6 to 367.2)     | 249.1 (187.1 to 319.9)     | 39.5 (27.6 to 55.8)           | 3.6 (1.7 to 6.8)                | 0.0 (0.0 to 0.0)                  | 292.2 (230.6 to 367.2) | 249.1 (187.1 to 319.9)     | 39.5 (27.6 to 55.8)           | 3.6 (1.7 to 6.8)                | 0.0 (0.0 to 0.0)                  |
| Northern Mariana Islands | 2029 | 296.7 (232.1 to 368.5)     | 253.1 (189.8 to 324.9)     | 39.9 (27.9 to 56.4)           | 3.7 (1.7 to 7.0)                | 0.0 (0.0 to 0.0)                  | 296.7 (232.1 to 368.5) | 253.1 (189.8 to 324.9)     | 39.9 (27.9 to 56.4)           | 3.7 (1.7 to 7.0)                | 0.0 (0.0 to 0.0)                  |
| Northern Mariana Islands | 2030 | 300.2 (236.0 to 377.8)     | 256.4 (192.1 to 329.7)     | 40.1 (28.1 to 57.0)           | 3.8 (1.8 to 7.1)                | 0.0 (0.0 to 0.0)                  | 300.2 (236.0 to 377.8) | 256.4 (192.1 to 329.7)     | 40.1 (28.1 to 57.0)           | 3.8 (1.8 to 7.1)                | 0.0 (0.0 to 0.0)                  |
| Northern Mariana Islands | 2031 | 303.8 (237.0 to 374.2)     | 259.7 (194.4 to 334.2)     | 40.4 (28.2 to 57.4)           | 3.8 (1.8 to 7.2)                | 0.0 (0.0 to 0.0)                  | 303.8 (237.0 to 374.2) | 259.7 (194.4 to 334.2)     | 40.4 (28.2 to 57.4)           | 3.8 (1.8 to 7.2)                | 0.0 (0.0 to 0.0)                  |
| Northern Mariana Islands | 2032 | 307.5 (241.9 to 387.6)     | 263.0 (196.7 to 338.5)     | 40.6 (28.4 to 57.9)           | 3.9 (1.8 to 7.3)                | 0.0 (0.0 to 0.0)                  | 307.5 (241.9 to 387.6) | 263.0 (196.7 to 338.5)     | 40.6 (28.4 to 57.9)           | 3.9 (1.8 to 7.3)                | 0.0 (0.0 to 0.0)                  |
| Northern Mariana Islands | 2033 | 311.1 (240.9 to 383.8)     | 266.3 (199.3 to 343.4)     | 40.9 (28.5 to 58.4)           | 3.9 (1.8 to 7.4)                | 0.0 (0.0 to 0.0)                  | 311.1 (240.9 to 383.8) | 266.3 (199.3 to 343.4)     | 40.9 (28.5 to 58.4)           | 3.9 (1.8 to 7.4)                | 0.0 (0.0 to 0.0)                  |
| Northern Mariana Islands | 2034 | 313.8 (245.8 to 395.3)     | 268.9 (200.9 to 347.2)     | 41.0 (28.6 to 58.7)           | 4.0 (1.9 to 7.5)                | 0.0 (0.0 to 0.0)                  | 313.8 (245.8 to 395.3) | 268.9 (200.9 to 347.2)     | 41.0 (28.6 to 58.7)           | 4.0 (1.9 to 7.5)                | 0.0 (0.0 to 0.0)                  |
| Northern Mariana Islands | 2035 | 316.2 (245.2 to 391.0)     | 271.1 (202.3 to 350.7)     | 41.1 (28.6 to 58.9)           | 4.0 (1.9 to 7.6)                | 0.0 (0.0 to 0.0)                  | 316.2 (245.2 to 391.0) | 271.1 (202.3 to 350.7)     | 41.1 (28.6 to 58.9)           | 4.0 (1.9 to 7.6)                | 0.0 (0.0 to 0.0)                  |
| Northern Mariana Islands | 2036 | 319.2 (249.3 to 402.7)     | 273.9 (203.5 to 354.9)     | 41.2 (28.7 to 58.8)           | 4.1 (1.9 to 7.6)                | 0.0 (0.0 to 0.0)                  | 319.2 (249.3 to 402.7) | 273.9 (203.5 to 354.9)     | 41.2 (28.7 to 58.8)           | 4.1 (1.9 to 7.6)                | 0.0 (0.0 to 0.0)                  |

| Country                  | Year | 2018 US Dollars per capita |                            |                               |                                 |                                   | 2018 PPP per capita       |                            |                               |                                 |                                   |
|--------------------------|------|----------------------------|----------------------------|-------------------------------|---------------------------------|-----------------------------------|---------------------------|----------------------------|-------------------------------|---------------------------------|-----------------------------------|
|                          |      | Health spending            | Government health spending | Out-of-pocket health spending | Prepaid private health spending | Development assistance for health | Health spending           | Government health spending | Out-of-pocket health spending | Prepaid private health spending | Development assistance for health |
| Northern Mariana Islands | 2037 | 322.8 (249.5 to 401.0)     | 277.2 (205.2 to 359.7)     | 41.4 (28.8 to 58.9)           | 4.1 (1.9 to 7.8)                | 0.0 (0.0 to 0.0)                  | 322.8 (249.5 to 401.0)    | 277.2 (205.2 to 359.7)     | 41.4 (28.8 to 58.9)           | 4.1 (1.9 to 7.8)                | 0.0 (0.0 to 0.0)                  |
| Northern Mariana Islands | 2038 | 326.7 (254.1 to 413.0)     | 280.8 (207.3 to 364.7)     | 41.7 (29.0 to 58.9)           | 4.2 (2.0 to 7.9)                | 0.0 (0.0 to 0.0)                  | 326.7 (254.1 to 413.0)    | 280.8 (207.3 to 364.7)     | 41.7 (29.0 to 58.9)           | 4.2 (2.0 to 7.9)                | 0.0 (0.0 to 0.0)                  |
| Northern Mariana Islands | 2039 | 332.0 (255.8 to 413.7)     | 285.6 (210.8 to 371.8)     | 42.2 (29.4 to 59.4)           | 4.3 (2.0 to 8.1)                | 0.0 (0.0 to 0.0)                  | 332.0 (255.8 to 413.7)    | 285.6 (210.8 to 371.8)     | 42.2 (29.4 to 59.4)           | 4.3 (2.0 to 8.1)                | 0.0 (0.0 to 0.0)                  |
| Northern Mariana Islands | 2040 | 337.6 (262.5 to 428.5)     | 290.6 (214.3 to 379.1)     | 42.6 (29.7 to 60.1)           | 4.4 (2.0 to 8.2)                | 0.0 (0.0 to 0.0)                  | 337.6 (262.5 to 428.5)    | 290.6 (214.3 to 379.1)     | 42.6 (29.7 to 60.1)           | 4.4 (2.0 to 8.2)                | 0.0 (0.0 to 0.0)                  |
| Northern Mariana Islands | 2041 | 343.9 (264.0 to 430.4)     | 296.2 (218.5 to 386.4)     | 43.2 (30.0 to 61.0)           | 4.5 (2.1 to 8.4)                | 0.0 (0.0 to 0.0)                  | 343.9 (264.0 to 430.4)    | 296.2 (218.5 to 386.4)     | 43.2 (30.0 to 61.0)           | 4.5 (2.1 to 8.4)                | 0.0 (0.0 to 0.0)                  |
| Northern Mariana Islands | 2042 | 349.5 (271.0 to 444.7)     | 301.2 (222.3 to 392.8)     | 43.7 (30.3 to 61.7)           | 4.6 (2.1 to 8.5)                | 0.0 (0.0 to 0.0)                  | 349.5 (271.0 to 444.7)    | 301.2 (222.3 to 392.8)     | 43.7 (30.3 to 61.7)           | 4.6 (2.1 to 8.5)                | 0.0 (0.0 to 0.0)                  |
| Northern Mariana Islands | 2043 | 355.5 (271.7 to 447.5)     | 306.7 (225.9 to 400.3)     | 44.2 (30.6 to 62.3)           | 4.7 (2.2 to 8.7)                | 0.0 (0.0 to 0.0)                  | 355.5 (271.7 to 447.5)    | 306.7 (225.9 to 400.3)     | 44.2 (30.6 to 62.3)           | 4.7 (2.2 to 8.7)                | 0.0 (0.0 to 0.0)                  |
| Northern Mariana Islands | 2044 | 362.4 (280.4 to 460.9)     | 312.8 (229.8 to 409.6)     | 44.8 (30.9 to 63.0)           | 4.8 (2.2 to 8.9)                | 0.0 (0.0 to 0.0)                  | 362.4 (280.4 to 460.9)    | 312.8 (229.8 to 409.6)     | 44.8 (30.9 to 63.0)           | 4.8 (2.2 to 8.9)                | 0.0 (0.0 to 0.0)                  |
| Northern Mariana Islands | 2045 | 369.6 (281.7 to 465.8)     | 319.3 (233.7 to 419.1)     | 45.5 (31.3 to 63.8)           | 4.9 (2.3 to 9.1)                | 0.0 (0.0 to 0.0)                  | 369.6 (281.7 to 465.8)    | 319.3 (233.7 to 419.1)     | 45.5 (31.3 to 63.8)           | 4.9 (2.3 to 9.1)                | 0.0 (0.0 to 0.0)                  |
| Northern Mariana Islands | 2046 | 377.8 (291.9 to 481.3)     | 326.6 (238.7 to 429.0)     | 46.2 (31.9 to 64.9)           | 5.0 (2.3 to 9.4)                | 0.0 (0.0 to 0.0)                  | 377.8 (291.9 to 481.3)    | 326.6 (238.7 to 429.0)     | 46.2 (31.9 to 64.9)           | 5.0 (2.3 to 9.4)                | 0.0 (0.0 to 0.0)                  |
| Northern Mariana Islands | 2047 | 386.7 (294.4 to 489.7)     | 334.5 (244.0 to 439.6)     | 47.1 (32.5 to 65.9)           | 5.1 (2.4 to 9.6)                | 0.0 (0.0 to 0.0)                  | 386.7 (294.4 to 489.7)    | 334.5 (244.0 to 439.6)     | 47.1 (32.5 to 65.9)           | 5.1 (2.4 to 9.6)                | 0.0 (0.0 to 0.0)                  |
| Northern Mariana Islands | 2048 | 395.7 (304.1 to 506.1)     | 342.5 (249.3 to 450.4)     | 47.9 (33.1 to 67.3)           | 5.3 (2.5 to 9.9)                | 0.0 (0.0 to 0.0)                  | 395.7 (304.1 to 506.1)    | 342.5 (249.3 to 450.4)     | 47.9 (33.1 to 67.3)           | 5.3 (2.5 to 9.9)                | 0.0 (0.0 to 0.0)                  |
| Northern Mariana Islands | 2049 | 404.9 (307.0 to 512.3)     | 350.8 (254.2 to 461.8)     | 48.8 (33.8 to 68.6)           | 5.4 (2.5 to 10.2)               | 0.0 (0.0 to 0.0)                  | 404.9 (307.0 to 512.3)    | 350.8 (254.2 to 461.8)     | 48.8 (33.8 to 68.6)           | 5.4 (2.5 to 10.2)               | 0.0 (0.0 to 0.0)                  |
| Northern Mariana Islands | 2050 | 414.5 (317.2 to 530.8)     | 359.3 (259.5 to 473.4)     | 49.6 (34.4 to 69.9)           | 5.6 (2.6 to 10.5)               | 0.0 (0.0 to 0.0)                  | 414.5 (317.2 to 530.8)    | 359.3 (259.5 to 473.4)     | 49.6 (34.4 to 69.9)           | 5.6 (2.6 to 10.5)               | 0.0 (0.0 to 0.0)                  |
| Norway                   | 1995 | 4355.5 (4080.6 to 4639.0)  | 3598.4 (3334.2 to 3881.5)  | 745.5 (686.9 to 803.7)        | 11.7 (5.7 to 21.1)              | 0.0 (0.0 to 0.0)                  | 4060.0 (3803.7 to 4324.2) | 3354.2 (3107.9 to 3618.1)  | 694.9 (640.3 to 749.2)        | 10.9 (5.4 to 19.6)              | 0.0 (0.0 to 0.0)                  |
| Norway                   | 1996 | 4677.5 (4451.8 to 4910.4)  | 3842.0 (3623.8 to 4066.5)  | 822.4 (777.4 to 867.7)        | 13.2 (6.6 to 23.5)              | 0.0 (0.0 to 0.0)                  | 4360.1 (4149.7 to 4577.2) | 3581.2 (3377.9 to 3790.6)  | 766.6 (724.7 to 808.9)        | 12.3 (6.1 to 21.9)              | 0.0 (0.0 to 0.0)                  |
| Norway                   | 1997 | 5178.0 (4962.5 to 5395.3)  | 4211.3 (4003.2 to 4427.4)  | 951.6 (909.4 to 997.4)        | 15.0 (7.5 to 27.0)              | 0.0 (0.0 to 0.0)                  | 4826.6 (4625.7 to 5029.1) | 3925.5 (3731.6 to 4127.0)  | 887.1 (847.7 to 929.8)        | 14.0 (7.0 to 25.2)              | 0.0 (0.0 to 0.0)                  |
| Norway                   | 1998 | 5561.8 (5353.2 to 5784.4)  | 4519.2 (4306.0 to 4747.4)  | 1026.1 (979.7 to 1072.0)      | 16.5 (8.4 to 28.5)              | 0.0 (0.0 to 0.0)                  | 5184.3 (4989.9 to 5391.9) | 4212.9 (4013.8 to 4425.2)  | 956.5 (913.2 to 999.2)        | 15.4 (7.9 to 26.6)              | 0.0 (0.0 to 0.0)                  |
| Norway                   | 1999 | 5760.4 (5542.3 to 5989.8)  | 4702.1 (4485.1 to 4917.0)  | 1040.8 (992.0 to 1088.1)      | 17.4 (9.2 to 29.2)              | 0.0 (0.0 to 0.0)                  | 5369.5 (5166.2 to 5583.3) | 4383.1 (4180.8 to 4583.3)  | 970.2 (924.7 to 1014.2)       | 16.2 (8.6 to 27.2)              | 0.0 (0.0 to 0.0)                  |
| Norway                   | 2000 | 5929.1 (5712.0 to 6151.3)  | 4878.0 (4662.8 to 5097.1)  | 1033.0 (989.2 to 1078.4)      | 18.1 (10.2 to 29.8)             | 0.0 (0.0 to 0.0)                  | 5526.8 (5324.3 to 5733.9) | 4546.9 (4346.4 to 4751.2)  | 962.9 (922.1 to 1005.2)       | 16.9 (9.5 to 27.8)              | 0.0 (0.0 to 0.0)                  |
| Norway                   | 2001 | 6142.6 (5936.0 to 6358.1)  | 5085.7 (4880.6 to 5297.0)  | 1040.0 (996.1 to 1085.5)      | 16.9 (10.2 to 27.6)             | 0.0 (0.0 to 0.0)                  | 5725.8 (5533.2 to 5926.6) | 4740.6 (4549.4 to 4937.6)  | 969.4 (928.5 to 1011.8)       | 15.8 (9.5 to 25.7)              | 0.0 (0.0 to 0.0)                  |

| Country | Year | 2018 US Dollars per capita |                            |                               |                                 |                                   | 2018 PPP per capita       |                            |                               |                                 |                                   |
|---------|------|----------------------------|----------------------------|-------------------------------|---------------------------------|-----------------------------------|---------------------------|----------------------------|-------------------------------|---------------------------------|-----------------------------------|
|         |      | Health spending            | Government health spending | Out-of-pocket health spending | Prepaid private health spending | Development assistance for health | Health spending           | Government health spending | Out-of-pocket health spending | Prepaid private health spending | Development assistance for health |
| Norway  | 2002 | 6455.0 (6245.7 to 6670.1)  | 5347.6 (5149.3 to 5553.5)  | 1089.8 (1046.8 to 1135.4)     | 17.6 (10.8 to 27.7)             | 0.0 (0.0 to 0.0)                  | 6017.0 (5821.9 to 6217.4) | 4984.7 (4799.8 to 5176.6)  | 1015.9 (975.8 to 1058.4)      | 16.4 (10.0 to 25.8)             | 0.0 (0.0 to 0.0)                  |
| Norway  | 2003 | 6587.3 (6374.5 to 6796.5)  | 5458.3 (5254.7 to 5666.6)  | 1112.3 (1068.3 to 1155.5)     | 16.7 (10.2 to 25.8)             | 0.0 (0.0 to 0.0)                  | 6140.2 (5941.9 to 6335.3) | 5087.9 (4898.1 to 5282.1)  | 1036.8 (995.8 to 1077.1)      | 15.6 (9.5 to 24.1)              | 0.0 (0.0 to 0.0)                  |
| Norway  | 2004 | 6657.1 (6451.6 to 6869.4)  | 5524.9 (5317.9 to 5736.9)  | 1116.3 (1073.9 to 1159.0)     | 16.0 (9.7 to 24.6)              | 0.0 (0.0 to 0.0)                  | 6205.4 (6013.8 to 6403.3) | 5150.0 (4957.1 to 5347.6)  | 1040.5 (1001.1 to 1080.3)     | 14.9 (9.0 to 22.9)              | 0.0 (0.0 to 0.0)                  |
| Norway  | 2005 | 6525.9 (6321.1 to 6761.4)  | 5426.4 (5223.6 to 5660.9)  | 1084.2 (1037.4 to 1128.5)     | 15.3 (9.1 to 23.3)              | 0.0 (0.0 to 0.0)                  | 6083.0 (5892.1 to 6302.6) | 5058.2 (4869.1 to 5276.8)  | 1010.6 (967.0 to 1051.9)      | 14.2 (8.5 to 21.8)              | 0.0 (0.0 to 0.0)                  |
| Norway  | 2006 | 6433.8 (6206.7 to 6659.3)  | 5371.3 (5153.2 to 5594.3)  | 1048.0 (1004.2 to 1091.5)     | 14.5 (8.5 to 22.6)              | 0.0 (0.0 to 0.0)                  | 5997.2 (5785.5 to 6207.4) | 5006.8 (4803.5 to 5214.7)  | 976.9 (936.0 to 1017.4)       | 13.5 (7.9 to 21.1)              | 0.0 (0.0 to 0.0)                  |
| Norway  | 2007 | 6500.6 (6279.6 to 6711.0)  | 5450.8 (5235.8 to 5659.1)  | 1035.2 (994.0 to 1076.8)      | 14.6 (8.8 to 22.7)              | 0.0 (0.0 to 0.0)                  | 6059.5 (5853.4 to 6255.6) | 5080.9 (4880.4 to 5275.1)  | 965.0 (926.5 to 1003.8)       | 13.6 (8.2 to 21.2)              | 0.0 (0.0 to 0.0)                  |
| Norway  | 2008 | 6647.5 (6429.3 to 6863.1)  | 5601.7 (5379.1 to 5810.0)  | 1031.2 (989.5 to 1071.3)      | 14.6 (8.8 to 22.5)              | 0.0 (0.0 to 0.0)                  | 6196.4 (5993.0 to 6397.4) | 5221.5 (5014.0 to 5415.7)  | 961.2 (922.4 to 998.6)        | 13.6 (8.2 to 21.0)              | 0.0 (0.0 to 0.0)                  |
| Norway  | 2009 | 6709.5 (6491.4 to 6940.3)  | 5653.3 (5441.5 to 5878.5)  | 1039.1 (999.8 to 1078.3)      | 17.1 (10.5 to 26.3)             | 0.0 (0.0 to 0.0)                  | 6254.2 (6050.9 to 6469.3) | 5269.7 (5072.2 to 5479.5)  | 968.6 (931.9 to 1005.1)       | 15.9 (9.8 to 24.5)              | 0.0 (0.0 to 0.0)                  |
| Norway  | 2010 | 6789.6 (6579.1 to 7026.5)  | 5736.8 (5528.0 to 5965.2)  | 1033.7 (996.0 to 1074.6)      | 19.1 (11.8 to 28.6)             | 0.0 (0.0 to 0.0)                  | 6328.8 (6132.6 to 6549.6) | 5347.5 (5152.9 to 5560.4)  | 963.6 (928.5 to 1001.7)       | 17.8 (11.0 to 26.6)             | 0.0 (0.0 to 0.0)                  |
| Norway  | 2011 | 6810.5 (6599.0 to 7026.8)  | 5762.3 (5558.8 to 5982.1)  | 1025.2 (988.2 to 1067.4)      | 23.0 (14.4 to 34.6)             | 0.0 (0.0 to 0.0)                  | 6348.3 (6151.2 to 6549.9) | 5371.3 (5181.6 to 5576.1)  | 955.6 (921.2 to 995.0)        | 21.4 (13.4 to 32.2)             | 0.0 (0.0 to 0.0)                  |
| Norway  | 2012 | 6934.3 (6724.6 to 7160.9)  | 5885.4 (5675.5 to 6105.3)  | 1022.6 (984.1 to 1063.5)      | 26.2 (16.4 to 38.9)             | 0.0 (0.0 to 0.0)                  | 6463.7 (6268.3 to 6674.9) | 5486.0 (5290.3 to 5690.9)  | 953.2 (917.3 to 991.3)        | 24.5 (15.3 to 36.3)             | 0.0 (0.0 to 0.0)                  |
| Norway  | 2013 | 7091.6 (6878.4 to 7320.2)  | 6035.7 (5822.6 to 6278.0)  | 1028.9 (987.8 to 1070.1)      | 27.0 (16.9 to 41.2)             | 0.0 (0.0 to 0.0)                  | 6610.4 (6411.6 to 6823.4) | 5626.1 (5427.5 to 5851.9)  | 959.1 (920.8 to 997.5)        | 25.1 (15.8 to 38.4)             | 0.0 (0.0 to 0.0)                  |
| Norway  | 2014 | 7412.1 (7186.4 to 7633.8)  | 6320.6 (6098.2 to 6544.9)  | 1064.1 (1021.7 to 1107.2)     | 27.4 (16.6 to 41.5)             | 0.0 (0.0 to 0.0)                  | 6909.1 (6698.7 to 7115.8) | 5891.7 (5684.4 to 6100.7)  | 991.9 (952.4 to 1032.1)       | 25.5 (15.4 to 38.7)             | 0.0 (0.0 to 0.0)                  |
| Norway  | 2015 | 7904.8 (7670.9 to 8164.8)  | 6744.7 (6516.0 to 6994.4)  | 1131.0 (1086.0 to 1178.7)     | 29.1 (17.2 to 44.9)             | 0.0 (0.0 to 0.0)                  | 7368.4 (7150.3 to 7610.7) | 6287.0 (6073.9 to 6519.8)  | 1054.2 (1012.3 to 1098.7)     | 27.1 (16.0 to 41.9)             | 0.0 (0.0 to 0.0)                  |
| Norway  | 2016 | 8268.9 (7946.1 to 8607.8)  | 7043.7 (6724.0 to 7384.9)  | 1194.9 (1132.5 to 1261.9)     | 30.3 (17.4 to 47.7)             | 0.0 (0.0 to 0.0)                  | 7707.7 (7406.9 to 8023.7) | 6565.7 (6267.7 to 6883.7)  | 1113.8 (1055.6 to 1176.3)     | 28.3 (16.2 to 44.5)             | 0.0 (0.0 to 0.0)                  |
| Norway  | 2017 | 8306.6 (7987.1 to 8649.7)  | 7071.4 (6764.0 to 7414.1)  | 1204.4 (1139.6 to 1270.1)     | 30.7 (17.6 to 48.4)             | 0.0 (0.0 to 0.0)                  | 7742.9 (7445.1 to 8062.7) | 6591.6 (6305.0 to 6910.9)  | 1122.7 (1062.3 to 1183.9)     | 28.6 (16.4 to 45.1)             | 0.0 (0.0 to 0.0)                  |
| Norway  | 2018 | 8410.6 (8079.0 to 8781.1)  | 7167.3 (6835.9 to 7533.1)  | 1212.1 (1146.1 to 1279.2)     | 31.2 (17.8 to 49.1)             | 0.0 (0.0 to 0.0)                  | 7839.8 (7530.7 to 8185.2) | 6680.9 (6372.1 to 7021.9)  | 1129.9 (1068.3 to 1192.4)     | 29.1 (16.6 to 45.8)             | 0.0 (0.0 to 0.0)                  |
| Norway  | 2019 | 8439.7 (8104.8 to 8843.3)  | 7189.2 (6853.2 to 7579.5)  | 1219.0 (1152.5 to 1286.3)     | 31.5 (18.0 to 49.5)             | 0.0 (0.0 to 0.0)                  | 7867.0 (7554.8 to 8243.2) | 6701.3 (6388.2 to 7065.1)  | 1136.3 (1074.3 to 1199.0)     | 29.4 (16.8 to 46.1)             | 0.0 (0.0 to 0.0)                  |
| Norway  | 2020 | 8476.9 (8114.9 to 8903.5)  | 7220.4 (6854.2 to 7630.9)  | 1224.6 (1158.0 to 1291.0)     | 31.9 (18.2 to 49.9)             | 0.0 (0.0 to 0.0)                  | 7901.6 (7564.2 to 8299.3) | 6730.4 (6389.1 to 7113.1)  | 1141.5 (1079.4 to 1203.4)     | 29.7 (17.0 to 46.5)             | 0.0 (0.0 to 0.0)                  |
| Norway  | 2021 | 8506.8 (8141.6 to 8938.8)  | 7244.6 (6876.2 to 7661.3)  | 1230.0 (1162.9 to 1297.6)     | 32.2 (18.4 to 50.3)             | 0.0 (0.0 to 0.0)                  | 7929.5 (7589.1 to 8332.2) | 6753.0 (6409.6 to 7141.4)  | 1146.5 (1084.0 to 1209.5)     | 30.0 (17.1 to 46.9)             | 0.0 (0.0 to 0.0)                  |
| Norway  | 2022 | 8547.2 (8171.9 to 8975.0)  | 7277.4 (6903.7 to 7695.8)  | 1237.3 (1171.7 to 1307.0)     | 32.5 (18.6 to 51.0)             | 0.0 (0.0 to 0.0)                  | 7967.2 (7617.4 to 8365.9) | 6783.5 (6435.2 to 7173.6)  | 1153.3 (1092.2 to 1218.3)     | 30.3 (17.3 to 47.6)             | 0.0 (0.0 to 0.0)                  |



| Country | Year | 2018 US Dollars per capita  |                            |                               |                                 |                                   | 2018 PPP per capita        |                            |                               |                                 |                                   |
|---------|------|-----------------------------|----------------------------|-------------------------------|---------------------------------|-----------------------------------|----------------------------|----------------------------|-------------------------------|---------------------------------|-----------------------------------|
|         |      | Health spending             | Government health spending | Out-of-pocket health spending | Prepaid private health spending | Development assistance for health | Health spending            | Government health spending | Out-of-pocket health spending | Prepaid private health spending | Development assistance for health |
| Norway  | 2023 | 8645.9 (8271.5 to 9086.5)   | 7367.8 (6989.5 to 7786.9)  | 1245.1 (1178.2 to 1316.0)     | 33.0 (18.9 to 51.9)             | 0.0 (0.0 to 0.0)                  | 8059.2 (7710.2 to 8469.9)  | 6867.8 (6515.2 to 7258.5)  | 1160.6 (1098.3 to 1226.7)     | 30.8 (17.6 to 48.4)             | 0.0 (0.0 to 0.0)                  |
| Norway  | 2024 | 8765.9 (8366.4 to 9198.5)   | 7479.1 (7082.1 to 7912.1)  | 1253.3 (1187.9 to 1323.3)     | 33.5 (19.1 to 52.7)             | 0.0 (0.0 to 0.0)                  | 8171.0 (7798.7 to 8574.3)  | 6971.6 (6601.5 to 7375.1)  | 1168.3 (1107.3 to 1233.5)     | 31.2 (17.8 to 49.1)             | 0.0 (0.0 to 0.0)                  |
| Norway  | 2025 | 8855.9 (8453.2 to 9284.6)   | 7559.9 (7161.0 to 8000.0)  | 1262.1 (1192.2 to 1336.9)     | 33.9 (19.3 to 53.2)             | 0.0 (0.0 to 0.0)                  | 8255.0 (7879.5 to 8654.6)  | 7046.9 (6675.0 to 7457.1)  | 1176.5 (1111.3 to 1246.2)     | 31.6 (18.0 to 49.6)             | 0.0 (0.0 to 0.0)                  |
| Norway  | 2026 | 8927.4 (8525.7 to 9384.7)   | 7623.6 (7233.8 to 8081.2)  | 1269.6 (1191.6 to 1351.9)     | 34.2 (19.4 to 53.6)             | 0.0 (0.0 to 0.0)                  | 8321.6 (7947.1 to 8747.9)  | 7106.3 (6742.9 to 7532.8)  | 1183.5 (1110.8 to 1260.2)     | 31.8 (18.1 to 50.0)             | 0.0 (0.0 to 0.0)                  |
| Norway  | 2027 | 9001.9 (8577.3 to 9456.6)   | 7690.1 (7287.3 to 8150.4)  | 1277.4 (1188.8 to 1375.0)     | 34.5 (19.6 to 54.1)             | 0.0 (0.0 to 0.0)                  | 8391.1 (7995.3 to 8814.8)  | 7168.2 (6792.8 to 7597.3)  | 1190.7 (1108.2 to 1281.7)     | 32.1 (18.3 to 50.4)             | 0.0 (0.0 to 0.0)                  |
| Norway  | 2028 | 9074.8 (8655.7 to 9548.4)   | 7754.6 (7343.6 to 8217.6)  | 1285.5 (1185.1 to 1400.3)     | 34.8 (19.7 to 54.5)             | 0.0 (0.0 to 0.0)                  | 8459.0 (8068.3 to 8900.4)  | 7228.4 (6845.2 to 7660.0)  | 1198.2 (1104.7 to 1305.3)     | 32.4 (18.4 to 50.8)             | 0.0 (0.0 to 0.0)                  |
| Norway  | 2029 | 9153.4 (8704.4 to 9636.4)   | 7824.3 (7395.2 to 8314.1)  | 1294.0 (1181.4 to 1425.1)     | 35.1 (19.9 to 55.0)             | 0.0 (0.0 to 0.0)                  | 8532.2 (8113.7 to 8982.5)  | 7293.3 (6893.3 to 7749.9)  | 1206.2 (1101.2 to 1328.4)     | 32.7 (18.6 to 51.3)             | 0.0 (0.0 to 0.0)                  |
| Norway  | 2030 | 9222.9 (8759.9 to 9737.7)   | 7885.0 (7444.0 to 8379.2)  | 1302.5 (1176.4 to 1448.8)     | 35.4 (20.0 to 55.4)             | 0.0 (0.0 to 0.0)                  | 8597.0 (8165.5 to 9076.9)  | 7349.9 (6938.8 to 7810.6)  | 1214.1 (1096.6 to 1350.5)     | 33.0 (18.7 to 51.7)             | 0.0 (0.0 to 0.0)                  |
| Norway  | 2031 | 9286.9 (8791.8 to 9816.6)   | 7940.2 (7476.9 to 8444.3)  | 1310.9 (1172.4 to 1473.5)     | 35.7 (20.2 to 55.8)             | 0.0 (0.0 to 0.0)                  | 8656.6 (8195.1 to 9150.5)  | 7401.4 (6969.5 to 7871.3)  | 1222.0 (1092.9 to 1373.5)     | 33.3 (18.8 to 52.0)             | 0.0 (0.0 to 0.0)                  |
| Norway  | 2032 | 9346.2 (8854.5 to 9885.2)   | 7991.0 (7524.0 to 8506.1)  | 1319.3 (1168.0 to 1496.3)     | 35.9 (20.3 to 56.2)             | 0.0 (0.0 to 0.0)                  | 8712.0 (8253.7 to 9214.4)  | 7448.7 (7013.4 to 7928.8)  | 1229.8 (1088.8 to 1394.8)     | 33.5 (18.9 to 52.4)             | 0.0 (0.0 to 0.0)                  |
| Norway  | 2033 | 9412.1 (8878.7 to 9973.4)   | 8047.5 (7555.3 to 8589.8)  | 1328.4 (1164.1 to 1522.9)     | 36.2 (20.5 to 56.6)             | 0.0 (0.0 to 0.0)                  | 8773.4 (8276.2 to 9296.6)  | 7501.4 (7042.6 to 8006.9)  | 1238.2 (1085.1 to 1419.5)     | 33.7 (19.1 to 52.8)             | 0.0 (0.0 to 0.0)                  |
| Norway  | 2034 | 9475.3 (8945.4 to 10059.1)  | 8101.2 (7589.9 to 8676.3)  | 1337.6 (1160.3 to 1548.3)     | 36.5 (20.7 to 57.1)             | 0.0 (0.0 to 0.0)                  | 8832.3 (8338.3 to 9376.5)  | 7551.5 (7074.9 to 8087.5)  | 1246.8 (1081.6 to 1443.2)     | 34.0 (19.3 to 53.2)             | 0.0 (0.0 to 0.0)                  |
| Norway  | 2035 | 9547.1 (8960.8 to 10193.7)  | 8162.5 (7626.5 to 8748.2)  | 1347.8 (1158.1 to 1574.3)     | 36.8 (20.8 to 57.6)             | 0.0 (0.0 to 0.0)                  | 8899.2 (8352.7 to 9501.9)  | 7608.5 (7109.0 to 8154.5)  | 1256.4 (1079.5 to 1467.5)     | 34.3 (19.4 to 53.7)             | 0.0 (0.0 to 0.0)                  |
| Norway  | 2036 | 9614.6 (9014.8 to 10277.9)  | 8219.2 (7666.5 to 8830.7)  | 1358.3 (1157.6 to 1600.8)     | 37.1 (21.0 to 58.2)             | 0.0 (0.0 to 0.0)                  | 8962.1 (8403.0 to 9580.5)  | 7661.4 (7146.3 to 8231.4)  | 1266.1 (1079.1 to 1492.2)     | 34.6 (19.6 to 54.2)             | 0.0 (0.0 to 0.0)                  |
| Norway  | 2037 | 9682.3 (9063.2 to 10376.2)  | 8275.7 (7698.4 to 8885.4)  | 1369.2 (1161.2 to 1624.2)     | 37.4 (21.2 to 58.6)             | 0.0 (0.0 to 0.0)                  | 9025.2 (8448.2 to 9672.1)  | 7714.1 (7176.0 to 8282.4)  | 1276.3 (1082.4 to 1514.0)     | 34.9 (19.7 to 54.6)             | 0.0 (0.0 to 0.0)                  |
| Norway  | 2038 | 9754.6 (9098.6 to 10473.4)  | 8336.2 (7731.5 to 8984.0)  | 1380.7 (1163.4 to 1649.4)     | 37.7 (21.4 to 59.0)             | 0.0 (0.0 to 0.0)                  | 9092.7 (8481.2 to 9762.7)  | 7770.5 (7206.9 to 8374.4)  | 1287.0 (1084.4 to 1537.5)     | 35.2 (19.9 to 55.0)             | 0.0 (0.0 to 0.0)                  |
| Norway  | 2039 | 9829.8 (9145.6 to 10573.6)  | 8398.8 (7769.5 to 9061.5)  | 1392.9 (1165.0 to 1673.4)     | 38.1 (21.6 to 59.8)             | 0.0 (0.0 to 0.0)                  | 9162.7 (8525.0 to 9856.0)  | 7828.9 (7242.2 to 8446.5)  | 1298.3 (1085.9 to 1559.8)     | 35.5 (20.1 to 55.7)             | 0.0 (0.0 to 0.0)                  |
| Norway  | 2040 | 9912.7 (9208.9 to 10633.7)  | 8468.2 (7813.4 to 9147.3)  | 1406.0 (1170.1 to 1698.1)     | 38.5 (21.8 to 60.5)             | 0.0 (0.0 to 0.0)                  | 9240.0 (8584.0 to 9912.1)  | 7893.5 (7283.2 to 8526.6)  | 1310.6 (1090.7 to 1582.9)     | 35.9 (20.3 to 56.4)             | 0.0 (0.0 to 0.0)                  |
| Norway  | 2041 | 9981.0 (9244.4 to 10746.7)  | 8523.3 (7856.9 to 9216.4)  | 1418.9 (1176.5 to 1721.6)     | 38.8 (22.0 to 61.0)             | 0.0 (0.0 to 0.0)                  | 9303.7 (8617.1 to 10017.4) | 7944.9 (7323.7 to 8591.0)  | 1322.6 (1096.7 to 1604.8)     | 36.2 (20.5 to 56.9)             | 0.0 (0.0 to 0.0)                  |
| Norway  | 2042 | 10050.3 (9309.9 to 10866.2) | 8578.9 (7904.9 to 9331.4)  | 1432.2 (1182.2 to 1743.8)     | 39.2 (22.1 to 61.7)             | 0.0 (0.0 to 0.0)                  | 9368.3 (8678.1 to 10128.8) | 7996.8 (7368.5 to 8698.2)  | 1335.0 (1102.0 to 1625.4)     | 36.6 (20.6 to 57.5)             | 0.0 (0.0 to 0.0)                  |
| Norway  | 2043 | 10130.0 (9349.8 to 10984.3) | 8643.7 (7928.6 to 9415.0)  | 1446.7 (1189.9 to 1763.3)     | 39.7 (22.2 to 62.3)             | 0.0 (0.0 to 0.0)                  | 9442.6 (8715.3 to 10238.9) | 8057.1 (7390.6 to 8776.1)  | 1348.5 (1109.1 to 1643.7)     | 37.0 (20.7 to 58.1)             | 0.0 (0.0 to 0.0)                  |

| Country | Year | 2018 US Dollars per capita  |                            |                               |                                 |                                   | 2018 PPP per capita        |                            |                               |                                 |                                   |
|---------|------|-----------------------------|----------------------------|-------------------------------|---------------------------------|-----------------------------------|----------------------------|----------------------------|-------------------------------|---------------------------------|-----------------------------------|
|         |      | Health spending             | Government health spending | Out-of-pocket health spending | Prepaid private health spending | Development assistance for health | Health spending            | Government health spending | Out-of-pocket health spending | Prepaid private health spending | Development assistance for health |
| Norway  | 2044 | 10210.5 (9435.8 to 11034.7) | 8708.8 (7940.1 to 9500.3)  | 1461.6 (1201.4 to 1790.8)     | 40.1 (22.4 to 63.0)             | 0.0 (0.0 to 0.0)                  | 9517.6 (8795.5 to 10285.8) | 8117.8 (7401.3 to 8855.6)  | 1362.5 (1119.8 to 1669.3)     | 37.4 (20.9 to 58.8)             | 0.0 (0.0 to 0.0)                  |
| Norway  | 2045 | 10294.7 (9497.0 to 11155.1) | 8777.1 (7992.1 to 9594.0)  | 1477.1 (1208.3 to 1811.2)     | 40.6 (22.6 to 63.8)             | 0.0 (0.0 to 0.0)                  | 9596.1 (8852.5 to 10398.1) | 8181.5 (7449.7 to 8943.0)  | 1376.8 (1126.3 to 1688.3)     | 37.8 (21.1 to 59.5)             | 0.0 (0.0 to 0.0)                  |
| Norway  | 2046 | 10367.1 (9533.2 to 11274.1) | 8834.0 (8026.7 to 9672.5)  | 1492.1 (1217.1 to 1829.3)     | 41.0 (22.8 to 64.5)             | 0.0 (0.0 to 0.0)                  | 9663.6 (8886.3 to 10509.1) | 8234.5 (7482.0 to 9016.1)  | 1390.9 (1134.5 to 1705.2)     | 38.2 (21.3 to 60.2)             | 0.0 (0.0 to 0.0)                  |
| Norway  | 2047 | 10443.0 (9568.6 to 11324.9) | 8893.9 (8055.2 to 9745.7)  | 1507.7 (1226.7 to 1847.0)     | 41.4 (23.1 to 65.0)             | 0.0 (0.0 to 0.0)                  | 9734.3 (8919.3 to 10556.4) | 8290.3 (7508.6 to 9084.4)  | 1405.4 (1143.5 to 1721.6)     | 38.6 (21.5 to 60.6)             | 0.0 (0.0 to 0.0)                  |
| Norway  | 2048 | 10517.6 (9604.5 to 11441.5) | 8952.5 (8072.7 to 9834.4)  | 1523.3 (1234.0 to 1871.1)     | 41.8 (23.4 to 65.7)             | 0.0 (0.0 to 0.0)                  | 9803.9 (8952.8 to 10665.1) | 8345.0 (7524.8 to 9167.0)  | 1419.9 (1150.2 to 1744.1)     | 39.0 (21.8 to 61.2)             | 0.0 (0.0 to 0.0)                  |
| Norway  | 2049 | 10591.5 (9625.2 to 11549.1) | 9010.5 (8090.9 to 9915.9)  | 1538.8 (1245.9 to 1889.0)     | 42.2 (23.7 to 66.4)             | 0.0 (0.0 to 0.0)                  | 9872.7 (8972.0 to 10765.4) | 8399.0 (7541.8 to 9243.0)  | 1434.3 (1161.4 to 1760.9)     | 39.3 (22.1 to 61.9)             | 0.0 (0.0 to 0.0)                  |
| Norway  | 2050 | 10668.4 (9682.2 to 11626.3) | 9071.4 (8127.6 to 10019.5) | 1554.4 (1253.6 to 1907.0)     | 42.6 (23.9 to 67.0)             | 0.0 (0.0 to 0.0)                  | 9944.4 (9025.2 to 10837.4) | 8455.8 (7576.0 to 9339.6)  | 1448.9 (1168.5 to 1777.6)     | 39.7 (22.3 to 62.5)             | 0.0 (0.0 to 0.0)                  |
| Oman    | 1995 | 625.0 (563.1 to 691.0)      | 517.1 (461.0 to 582.2)     | 67.7 (52.5 to 87.8)           | 40.2 (24.9 to 62.4)             | 0.0 (0.0 to 0.0)                  | 1522.6 (1371.8 to 1683.5)  | 1259.7 (1123.1 to 1418.3)  | 165.0 (127.8 to 214.0)        | 97.9 (60.6 to 152.0)            | 0.0 (0.0 to 0.0)                  |
| Oman    | 1996 | 623.1 (570.6 to 680.1)      | 514.2 (466.5 to 566.2)     | 68.5 (54.0 to 87.7)           | 40.3 (25.3 to 61.0)             | 0.0 (0.0 to 0.0)                  | 1517.9 (1390.1 to 1656.9)  | 1252.8 (1136.4 to 1379.3)  | 166.8 (131.6 to 213.6)        | 98.3 (61.7 to 148.6)            | 0.0 (0.0 to 0.0)                  |
| Oman    | 1997 | 638.8 (589.0 to 690.7)      | 524.6 (480.7 to 571.1)     | 72.2 (57.3 to 91.1)           | 42.0 (27.1 to 61.9)             | 0.0 (0.0 to 0.0)                  | 1556.1 (1434.9 to 1682.7)  | 1278.0 (1171.1 to 1391.2)  | 175.8 (139.7 to 222.0)        | 102.3 (66.0 to 150.8)           | 0.0 (0.0 to 0.0)                  |
| Oman    | 1998 | 646.7 (599.5 to 695.4)      | 526.4 (482.6 to 571.0)     | 76.7 (61.5 to 95.2)           | 43.6 (28.4 to 62.8)             | 0.0 (0.0 to 0.0)                  | 1575.5 (1460.5 to 1694.1)  | 1282.4 (1175.6 to 1391.1)  | 186.8 (149.8 to 232.0)        | 106.3 (69.2 to 153.0)           | 0.0 (0.0 to 0.0)                  |
| Oman    | 1999 | 631.3 (584.2 to 681.5)      | 513.4 (471.6 to 556.0)     | 75.4 (60.6 to 93.4)           | 42.4 (27.4 to 59.8)             | 0.0 (0.0 to 0.0)                  | 1538.0 (1423.3 to 1660.3)  | 1250.8 (1148.8 to 1354.5)  | 183.7 (147.6 to 227.5)        | 103.4 (66.7 to 145.8)           | 0.0 (0.0 to 0.0)                  |
| Oman    | 2000 | 632.1 (586.1 to 682.7)      | 517.6 (475.3 to 561.5)     | 72.6 (59.0 to 89.4)           | 41.9 (27.7 to 59.3)             | 0.0 (0.0 to 0.0)                  | 1539.9 (1427.8 to 1663.0)  | 1260.9 (1157.8 to 1367.8)  | 176.9 (143.7 to 217.7)        | 102.0 (67.6 to 144.5)           | 0.0 (0.0 to 0.0)                  |
| Oman    | 2001 | 625.3 (579.5 to 674.8)      | 513.8 (472.4 to 559.9)     | 69.8 (56.4 to 86.1)           | 41.7 (27.2 to 59.4)             | 0.0 (0.0 to 0.0)                  | 1523.4 (1411.7 to 1644.0)  | 1251.8 (1150.9 to 1363.9)  | 170.1 (137.5 to 209.7)        | 101.6 (66.3 to 144.7)           | 0.0 (0.0 to 0.0)                  |
| Oman    | 2002 | 603.8 (558.6 to 651.8)      | 496.7 (455.1 to 541.0)     | 65.9 (53.3 to 80.9)           | 41.1 (27.5 to 59.4)             | 0.0 (0.0 to 0.0)                  | 1470.9 (1361.0 to 1587.9)  | 1210.1 (1108.6 to 1318.0)  | 160.6 (129.8 to 197.2)        | 100.2 (66.9 to 144.7)           | 0.0 (0.0 to 0.0)                  |
| Oman    | 2003 | 567.6 (525.7 to 610.3)      | 464.9 (428.2 to 503.8)     | 62.8 (50.6 to 76.6)           | 39.9 (26.8 to 58.1)             | 0.0 (0.0 to 0.0)                  | 1382.8 (1280.7 to 1486.7)  | 1132.5 (1043.3 to 1227.4)  | 153.1 (123.3 to 186.6)        | 97.1 (65.4 to 141.5)            | 0.1 (0.1 to 0.1)                  |
| Oman    | 2004 | 544.8 (503.0 to 588.9)      | 444.7 (408.4 to 482.5)     | 61.0 (49.4 to 74.2)           | 39.1 (26.8 to 56.3)             | 0.0 (0.0 to 0.0)                  | 1327.1 (1225.5 to 1434.6)  | 1083.3 (995.0 to 1175.5)   | 148.5 (120.4 to 180.8)        | 95.3 (65.3 to 137.1)            | 0.1 (0.1 to 0.1)                  |
| Oman    | 2005 | 497.1 (460.5 to 538.2)      | 404.7 (371.8 to 440.1)     | 56.3 (46.2 to 68.0)           | 36.2 (24.8 to 51.0)             | 0.0 (0.0 to 0.0)                  | 1211.1 (1121.8 to 1311.1)  | 985.8 (905.7 to 1072.0)    | 137.1 (112.5 to 165.6)        | 88.1 (60.5 to 124.1)            | 0.0 (0.0 to 0.0)                  |
| Oman    | 2006 | 497.2 (460.7 to 538.8)      | 404.4 (369.6 to 441.9)     | 56.2 (45.9 to 67.5)           | 36.7 (25.6 to 51.1)             | 0.0 (0.0 to 0.0)                  | 1211.3 (1122.2 to 1312.5)  | 985.1 (900.3 to 1076.4)    | 136.9 (111.7 to 164.5)        | 89.3 (62.3 to 124.6)            | 0.0 (0.0 to 0.0)                  |
| Oman    | 2007 | 491.0 (456.2 to 533.4)      | 397.7 (365.7 to 434.5)     | 56.2 (46.0 to 67.9)           | 37.1 (26.2 to 51.2)             | 0.0 (0.0 to 0.0)                  | 1196.1 (1111.3 to 1299.4)  | 968.9 (890.8 to 1058.5)    | 136.8 (112.2 to 165.5)        | 90.4 (63.7 to 124.8)            | 0.0 (0.0 to 0.0)                  |
| Oman    | 2008 | 511.7 (474.0 to 553.6)      | 414.4 (380.1 to 452.2)     | 58.2 (47.9 to 70.2)           | 39.0 (27.5 to 53.1)             | 0.0 (0.0 to 0.0)                  | 1246.6 (1154.6 to 1348.6)  | 1009.7 (926.0 to 1101.6)   | 141.9 (116.6 to 171.1)        | 95.0 (67.0 to 129.3)            | 0.0 (0.0 to 0.0)                  |

| Country | Year | 2018 US Dollars per capita |                            |                               |                                 |                                   | 2018 PPP per capita       |                            |                               |                                 |                                   |
|---------|------|----------------------------|----------------------------|-------------------------------|---------------------------------|-----------------------------------|---------------------------|----------------------------|-------------------------------|---------------------------------|-----------------------------------|
|         |      | Health spending            | Government health spending | Out-of-pocket health spending | Prepaid private health spending | Development assistance for health | Health spending           | Government health spending | Out-of-pocket health spending | Prepaid private health spending | Development assistance for health |
| Oman    | 2009 | 537.3 (500.0 to 579.6)     | 435.4 (400.4 to 474.8)     | 60.9 (50.0 to 73.1)           | 41.1 (29.2 to 54.9)             | 0.0 (0.0 to 0.0)                  | 1309.1 (1218.0 to 1412.0) | 1060.6 (975.5 to 1156.7)   | 148.3 (121.8 to 178.0)        | 100.1 (71.0 to 133.8)           | 0.0 (0.0 to 0.0)                  |
| Oman    | 2010 | 558.6 (519.5 to 604.5)     | 458.5 (419.8 to 499.5)     | 59.0 (48.7 to 71.4)           | 41.0 (29.5 to 56.4)             | 0.0 (0.0 to 0.0)                  | 1360.7 (1265.6 to 1472.6) | 1116.9 (1022.8 to 1216.8)  | 143.8 (118.6 to 173.9)        | 100.0 (71.9 to 137.3)           | 0.0 (0.0 to 0.0)                  |
| Oman    | 2011 | 521.6 (484.0 to 563.6)     | 433.6 (398.3 to 472.6)     | 52.3 (43.2 to 64.0)           | 35.6 (25.9 to 49.3)             | 0.0 (0.0 to 0.0)                  | 1270.7 (1179.0 to 1373.0) | 1056.4 (970.3 to 1151.3)   | 127.5 (105.1 to 155.9)        | 86.8 (63.1 to 120.1)            | 0.0 (0.0 to 0.0)                  |
| Oman    | 2012 | 527.1 (488.1 to 568.6)     | 446.8 (410.1 to 486.1)     | 47.4 (38.9 to 58.5)           | 32.9 (23.3 to 45.2)             | 0.0 (0.0 to 0.0)                  | 1284.2 (1189.2 to 1385.3) | 1088.4 (999.0 to 1184.1)   | 115.5 (94.9 to 142.6)         | 80.2 (56.8 to 110.0)            | 0.0 (0.0 to 0.0)                  |
| Oman    | 2013 | 551.7 (512.5 to 592.9)     | 479.0 (441.9 to 518.2)     | 42.0 (33.8 to 52.0)           | 30.8 (21.6 to 42.3)             | 0.0 (0.0 to 0.0)                  | 1344.0 (1248.4 to 1444.3) | 1166.8 (1076.6 to 1262.5)  | 102.2 (82.3 to 126.6)         | 74.9 (52.5 to 103.0)            | 0.0 (0.0 to 0.0)                  |
| Oman    | 2014 | 619.4 (577.2 to 664.5)     | 546.6 (508.2 to 590.3)     | 41.1 (32.9 to 51.1)           | 31.7 (22.2 to 44.2)             | 0.0 (0.0 to 0.0)                  | 1508.9 (1406.2 to 1618.8) | 1331.6 (1238.0 to 1437.9)  | 100.1 (80.1 to 124.5)         | 77.2 (54.2 to 107.7)            | 0.0 (0.0 to 0.0)                  |
| Oman    | 2015 | 716.9 (667.9 to 768.9)     | 637.1 (592.3 to 689.1)     | 43.6 (34.4 to 54.8)           | 36.1 (24.7 to 50.7)             | 0.0 (0.0 to 0.0)                  | 1746.4 (1627.2 to 1873.2) | 1552.2 (1443.0 to 1678.9)  | 106.3 (83.8 to 133.4)         | 88.0 (60.2 to 123.5)            | 0.0 (0.0 to 0.0)                  |
| Oman    | 2016 | 764.0 (704.3 to 832.8)     | 680.8 (625.9 to 744.1)     | 44.7 (34.7 to 56.1)           | 38.5 (25.3 to 57.0)             | 0.0 (0.0 to 0.0)                  | 1861.3 (1715.9 to 2028.9) | 1658.6 (1524.8 to 1812.8)  | 109.0 (84.6 to 136.8)         | 93.7 (61.6 to 138.8)            | 0.0 (0.0 to 0.0)                  |
| Oman    | 2017 | 625.4 (576.1 to 683.1)     | 548.6 (501.6 to 598.7)     | 42.3 (32.6 to 53.4)           | 34.5 (22.7 to 51.0)             | 0.0 (0.0 to 0.0)                  | 1523.5 (1403.4 to 1664.0) | 1336.4 (1221.9 to 1458.6)  | 103.0 (79.5 to 130.0)         | 84.2 (55.2 to 124.2)            | 0.0 (0.0 to 0.0)                  |
| Oman    | 2018 | 632.7 (580.7 to 692.6)     | 555.4 (509.4 to 607.8)     | 42.3 (32.7 to 53.5)           | 35.0 (22.9 to 51.7)             | 0.0 (0.0 to 0.0)                  | 1541.4 (1414.8 to 1687.3) | 1353.1 (1241.0 to 1480.8)  | 103.0 (79.7 to 130.2)         | 85.3 (55.8 to 126.0)            | 0.0 (0.0 to 0.0)                  |
| Oman    | 2019 | 634.3 (581.3 to 693.7)     | 556.7 (507.9 to 610.9)     | 42.3 (32.9 to 53.5)           | 35.3 (23.1 to 52.2)             | 0.0 (0.0 to 0.0)                  | 1545.1 (1416.2 to 1690.1) | 1356.2 (1237.3 to 1488.2)  | 102.9 (80.1 to 130.4)         | 86.0 (56.3 to 127.1)            | 0.0 (0.0 to 0.0)                  |
| Oman    | 2020 | 635.6 (582.1 to 696.3)     | 557.8 (506.5 to 614.4)     | 42.2 (32.3 to 53.4)           | 35.6 (23.3 to 52.6)             | 0.0 (0.0 to 0.0)                  | 1548.3 (1418.0 to 1696.4) | 1358.9 (1234.0 to 1496.7)  | 102.7 (78.7 to 130.1)         | 86.8 (56.8 to 128.2)            | 0.0 (0.0 to 0.0)                  |
| Oman    | 2021 | 636.9 (582.1 to 698.8)     | 559.4 (504.9 to 615.4)     | 41.9 (32.2 to 53.1)           | 35.6 (23.3 to 52.6)             | 0.0 (0.0 to 0.0)                  | 1551.7 (1418.1 to 1702.3) | 1362.9 (1230.1 to 1499.3)  | 102.2 (78.4 to 129.3)         | 86.6 (56.7 to 128.0)            | 0.0 (0.0 to 0.0)                  |
| Oman    | 2022 | 637.2 (580.7 to 700.1)     | 560.0 (506.3 to 616.9)     | 41.7 (31.9 to 52.8)           | 35.5 (23.2 to 52.4)             | 0.0 (0.0 to 0.0)                  | 1552.3 (1414.8 to 1705.5) | 1364.2 (1233.5 to 1502.8)  | 101.6 (77.7 to 128.7)         | 86.5 (56.6 to 127.7)            | 0.0 (0.0 to 0.0)                  |
| Oman    | 2023 | 639.6 (580.6 to 703.5)     | 562.7 (506.5 to 622.8)     | 41.5 (31.9 to 52.5)           | 35.4 (23.2 to 52.3)             | 0.0 (0.0 to 0.0)                  | 1558.1 (1414.5 to 1713.7) | 1370.7 (1233.9 to 1517.2)  | 101.1 (77.8 to 128.0)         | 86.3 (56.6 to 127.4)            | 0.0 (0.0 to 0.0)                  |
| Oman    | 2024 | 634.6 (575.9 to 698.0)     | 557.9 (502.4 to 616.5)     | 41.3 (31.8 to 52.4)           | 35.4 (23.2 to 52.3)             | 0.0 (0.0 to 0.0)                  | 1545.9 (1403.0 to 1700.4) | 1359.1 (1223.9 to 1502.0)  | 100.6 (77.5 to 127.6)         | 86.2 (56.6 to 127.3)            | 0.0 (0.0 to 0.0)                  |
| Oman    | 2025 | 632.2 (573.8 to 696.7)     | 555.7 (500.9 to 614.7)     | 41.1 (31.6 to 52.3)           | 35.4 (23.3 to 52.3)             | 0.0 (0.0 to 0.0)                  | 1540.2 (1397.8 to 1697.2) | 1353.7 (1220.3 to 1497.4)  | 100.2 (77.0 to 127.4)         | 86.3 (56.7 to 127.3)            | 0.0 (0.0 to 0.0)                  |
| Oman    | 2026 | 628.9 (571.2 to 693.7)     | 552.6 (498.0 to 612.0)     | 40.9 (31.3 to 52.0)           | 35.4 (23.2 to 52.1)             | 0.0 (0.0 to 0.0)                  | 1532.0 (1391.6 to 1689.9) | 1346.3 (1213.1 to 1491.0)  | 99.6 (76.4 to 126.6)          | 86.1 (56.6 to 126.9)            | 0.0 (0.0 to 0.0)                  |
| Oman    | 2027 | 626.9 (569.2 to 690.9)     | 550.8 (495.9 to 609.9)     | 40.7 (31.2 to 51.9)           | 35.4 (23.3 to 52.2)             | 0.0 (0.0 to 0.0)                  | 1527.3 (1386.7 to 1683.2) | 1341.9 (1208.1 to 1485.9)  | 99.2 (76.1 to 126.6)          | 86.2 (56.7 to 127.2)            | 0.0 (0.0 to 0.0)                  |
| Oman    | 2028 | 626.1 (568.7 to 691.5)     | 550.0 (495.0 to 608.6)     | 40.6 (31.1 to 52.0)           | 35.5 (23.3 to 52.4)             | 0.0 (0.0 to 0.0)                  | 1525.3 (1385.4 to 1684.6) | 1339.9 (1205.9 to 1482.7)  | 99.0 (75.8 to 126.8)          | 86.4 (56.9 to 127.6)            | 0.0 (0.0 to 0.0)                  |
| Oman    | 2029 | 626.3 (567.7 to 692.5)     | 550.1 (493.9 to 609.1)     | 40.6 (31.1 to 52.3)           | 35.6 (23.4 to 52.6)             | 0.0 (0.0 to 0.0)                  | 1525.7 (1383.1 to 1687.1) | 1340.0 (1203.2 to 1483.8)  | 98.9 (75.7 to 127.4)          | 86.7 (57.1 to 128.1)            | 0.0 (0.0 to 0.0)                  |

| Country | Year | 2018 US Dollars per capita |                            |                               |                                 |                                   | 2018 PPP per capita       |                            |                               |                                 |                                   |
|---------|------|----------------------------|----------------------------|-------------------------------|---------------------------------|-----------------------------------|---------------------------|----------------------------|-------------------------------|---------------------------------|-----------------------------------|
|         |      | Health spending            | Government health spending | Out-of-pocket health spending | Prepaid private health spending | Development assistance for health | Health spending           | Government health spending | Out-of-pocket health spending | Prepaid private health spending | Development assistance for health |
| Oman    | 2030 | 626.9 (567.9 to 694.1)     | 550.6 (494.3 to 611.6)     | 40.6 (31.0 to 52.5)           | 35.8 (23.5 to 52.8)             | 0.0 (0.0 to 0.0)                  | 1527.3 (1383.4 to 1691.0) | 1341.2 (1204.3 to 1489.9)  | 98.9 (75.5 to 127.8)          | 87.1 (57.3 to 128.7)            | 0.0 (0.0 to 0.0)                  |
| Oman    | 2031 | 626.7 (567.1 to 693.7)     | 550.2 (493.9 to 612.5)     | 40.6 (30.9 to 52.7)           | 35.9 (23.6 to 53.0)             | 0.0 (0.0 to 0.0)                  | 1526.8 (1381.6 to 1689.9) | 1340.5 (1203.2 to 1492.1)  | 98.9 (75.4 to 128.4)          | 87.4 (57.4 to 129.1)            | 0.0 (0.0 to 0.0)                  |
| Oman    | 2032 | 626.9 (566.7 to 694.2)     | 550.3 (493.3 to 613.5)     | 40.6 (30.8 to 52.9)           | 36.0 (23.7 to 53.2)             | 0.0 (0.0 to 0.0)                  | 1527.2 (1380.6 to 1691.1) | 1340.6 (1201.7 to 1494.6)  | 99.0 (75.0 to 128.9)          | 87.7 (57.7 to 129.6)            | 0.0 (0.0 to 0.0)                  |
| Oman    | 2033 | 627.2 (566.1 to 694.1)     | 550.4 (493.3 to 614.6)     | 40.7 (30.6 to 53.3)           | 36.1 (23.7 to 53.4)             | 0.0 (0.0 to 0.0)                  | 1527.9 (1379.1 to 1691.1) | 1340.8 (1201.8 to 1497.3)  | 99.1 (74.5 to 129.8)          | 88.1 (57.8 to 130.2)            | 0.0 (0.0 to 0.0)                  |
| Oman    | 2034 | 628.0 (566.8 to 697.9)     | 550.9 (493.7 to 616.3)     | 40.8 (30.5 to 53.7)           | 36.3 (23.9 to 53.7)             | 0.0 (0.0 to 0.0)                  | 1529.8 (1380.9 to 1700.2) | 1342.0 (1202.9 to 1501.5)  | 99.3 (74.4 to 130.8)          | 88.5 (58.1 to 130.8)            | 0.0 (0.0 to 0.0)                  |
| Oman    | 2035 | 629.1 (567.2 to 698.0)     | 551.7 (494.1 to 617.8)     | 40.9 (30.5 to 54.3)           | 36.5 (24.0 to 54.0)             | 0.0 (0.0 to 0.0)                  | 1532.5 (1381.9 to 1700.4) | 1343.9 (1203.8 to 1505.1)  | 99.7 (74.2 to 132.3)          | 88.9 (58.5 to 131.4)            | 0.0 (0.0 to 0.0)                  |
| Oman    | 2036 | 629.0 (566.7 to 699.5)     | 551.3 (493.6 to 619.3)     | 41.0 (30.4 to 54.9)           | 36.6 (24.1 to 54.2)             | 0.0 (0.0 to 0.0)                  | 1532.2 (1380.5 to 1704.2) | 1343.1 (1202.6 to 1508.7)  | 99.9 (74.0 to 133.7)          | 89.2 (58.7 to 132.1)            | 0.0 (0.0 to 0.0)                  |
| Oman    | 2037 | 629.1 (565.9 to 700.7)     | 551.2 (492.3 to 619.5)     | 41.2 (30.3 to 55.6)           | 36.8 (24.2 to 54.6)             | 0.0 (0.0 to 0.0)                  | 1532.7 (1378.7 to 1707.0) | 1342.9 (1199.4 to 1509.2)  | 100.3 (73.8 to 135.4)         | 89.5 (59.0 to 132.9)            | 0.0 (0.0 to 0.0)                  |
| Oman    | 2038 | 629.3 (565.1 to 701.3)     | 551.1 (491.2 to 619.9)     | 41.3 (30.2 to 56.4)           | 36.9 (24.3 to 54.9)             | 0.0 (0.0 to 0.0)                  | 1533.0 (1376.7 to 1708.4) | 1342.5 (1196.5 to 1510.1)  | 100.7 (73.6 to 137.4)         | 89.9 (59.2 to 133.7)            | 0.0 (0.0 to 0.0)                  |
| Oman    | 2039 | 629.5 (563.0 to 703.3)     | 551.0 (490.1 to 619.1)     | 41.5 (30.1 to 57.1)           | 37.0 (24.3 to 55.2)             | 0.0 (0.0 to 0.0)                  | 1533.7 (1371.6 to 1713.5) | 1342.3 (1193.9 to 1508.2)  | 101.1 (73.4 to 139.1)         | 90.2 (59.3 to 134.5)            | 0.0 (0.0 to 0.0)                  |
| Oman    | 2040 | 629.9 (563.6 to 705.3)     | 551.0 (489.0 to 620.3)     | 41.7 (30.2 to 57.9)           | 37.1 (24.4 to 55.6)             | 0.0 (0.0 to 0.0)                  | 1534.4 (1372.9 to 1718.3) | 1342.3 (1191.3 to 1511.1)  | 101.7 (73.6 to 141.0)         | 90.5 (59.4 to 135.3)            | 0.0 (0.0 to 0.0)                  |
| Oman    | 2041 | 628.8 (561.7 to 705.1)     | 549.7 (486.8 to 620.3)     | 41.9 (30.3 to 58.5)           | 37.2 (24.4 to 55.8)             | 0.0 (0.0 to 0.0)                  | 1531.9 (1368.5 to 1717.8) | 1339.2 (1186.0 to 1511.1)  | 102.1 (73.7 to 142.4)         | 90.6 (59.4 to 135.9)            | 0.0 (0.0 to 0.0)                  |
| Oman    | 2042 | 628.3 (559.8 to 704.3)     | 548.9 (485.1 to 620.7)     | 42.1 (30.2 to 59.2)           | 37.3 (24.4 to 56.0)             | 0.0 (0.0 to 0.0)                  | 1530.6 (1363.7 to 1715.7) | 1337.1 (1181.7 to 1512.2)  | 102.6 (73.5 to 144.2)         | 90.8 (59.3 to 136.4)            | 0.0 (0.0 to 0.0)                  |
| Oman    | 2043 | 627.6 (558.7 to 704.7)     | 547.9 (483.0 to 620.1)     | 42.4 (30.0 to 59.9)           | 37.4 (24.3 to 56.1)             | 0.0 (0.0 to 0.0)                  | 1529.0 (1361.2 to 1716.8) | 1334.8 (1176.8 to 1510.6)  | 103.2 (73.1 to 146.0)         | 91.0 (59.2 to 136.7)            | 0.0 (0.0 to 0.0)                  |
| Oman    | 2044 | 627.0 (556.8 to 704.0)     | 546.9 (481.2 to 620.1)     | 42.6 (29.8 to 60.8)           | 37.4 (24.3 to 56.3)             | 0.0 (0.0 to 0.0)                  | 1527.4 (1356.6 to 1715.0) | 1332.4 (1172.2 to 1510.7)  | 103.8 (72.6 to 148.1)         | 91.2 (59.1 to 137.2)            | 0.0 (0.0 to 0.0)                  |
| Oman    | 2045 | 626.3 (554.6 to 707.0)     | 545.9 (479.1 to 620.1)     | 42.9 (29.9 to 61.8)           | 37.5 (24.3 to 56.3)             | 0.0 (0.0 to 0.0)                  | 1525.8 (1351.1 to 1722.3) | 1330.0 (1167.2 to 1510.6)  | 104.5 (72.7 to 150.6)         | 91.3 (59.1 to 137.3)            | 0.0 (0.0 to 0.0)                  |
| Oman    | 2046 | 625.2 (552.5 to 708.3)     | 544.5 (476.9 to 619.5)     | 43.2 (29.6 to 62.6)           | 37.5 (24.3 to 56.4)             | 0.0 (0.0 to 0.0)                  | 1523.1 (1346.0 to 1725.5) | 1326.5 (1161.8 to 1509.3)  | 105.2 (72.2 to 152.5)         | 91.4 (59.1 to 137.4)            | 0.0 (0.0 to 0.0)                  |
| Oman    | 2047 | 624.2 (549.5 to 707.2)     | 543.2 (474.8 to 619.1)     | 43.5 (29.5 to 63.3)           | 37.6 (24.3 to 56.5)             | 0.0 (0.0 to 0.0)                  | 1520.7 (1338.6 to 1722.9) | 1323.2 (1156.7 to 1508.3)  | 105.9 (71.9 to 154.2)         | 91.5 (59.1 to 137.6)            | 0.0 (0.0 to 0.0)                  |
| Oman    | 2048 | 622.8 (547.6 to 707.0)     | 541.4 (472.0 to 619.1)     | 43.7 (29.2 to 64.1)           | 37.6 (24.2 to 56.4)             | 0.0 (0.0 to 0.0)                  | 1517.1 (1334.0 to 1722.4) | 1319.0 (1149.8 to 1508.3)  | 106.6 (71.2 to 156.3)         | 91.6 (59.0 to 137.5)            | 0.0 (0.0 to 0.0)                  |
| Oman    | 2049 | 621.3 (544.5 to 707.7)     | 539.7 (468.9 to 617.4)     | 44.0 (29.0 to 65.1)           | 37.6 (24.2 to 56.4)             | 0.0 (0.0 to 0.0)                  | 1513.7 (1326.6 to 1724.1) | 1314.8 (1142.3 to 1504.1)  | 107.3 (70.5 to 158.5)         | 91.6 (59.0 to 137.3)            | 0.0 (0.0 to 0.0)                  |
| Oman    | 2050 | 619.4 (541.1 to 706.7)     | 537.5 (465.1 to 615.9)     | 44.3 (28.7 to 66.0)           | 37.6 (24.1 to 56.3)             | 0.0 (0.0 to 0.0)                  | 1508.9 (1318.1 to 1721.7) | 1309.4 (1133.1 to 1500.6)  | 108.0 (69.8 to 160.8)         | 91.5 (58.7 to 137.1)            | 0.0 (0.0 to 0.0)                  |

| Country  | Year | 2018 US Dollars per capita |                            |                               |                                 |                                   | 2018 PPP per capita    |                            |                               |                                 |                                   |
|----------|------|----------------------------|----------------------------|-------------------------------|---------------------------------|-----------------------------------|------------------------|----------------------------|-------------------------------|---------------------------------|-----------------------------------|
|          |      | Health spending            | Government health spending | Out-of-pocket health spending | Prepaid private health spending | Development assistance for health | Health spending        | Government health spending | Out-of-pocket health spending | Prepaid private health spending | Development assistance for health |
| Pakistan | 1995 | 31.6 (25.3 to 39.2)        | 9.6 (7.4 to 12.5)          | 20.1 (14.4 to 27.5)           | 0.5 (0.2 to 1.0)                | 1.3 (1.3 to 1.3)                  | 109.7 (87.8 to 136.2)  | 33.5 (25.8 to 43.2)        | 69.8 (50.0 to 95.5)           | 1.9 (0.9 to 3.4)                | 4.6 (4.6 to 4.6)                  |
| Pakistan | 1996 | 32.3 (26.0 to 40.5)        | 9.7 (7.4 to 12.6)          | 20.4 (14.8 to 27.9)           | 0.6 (0.3 to 1.0)                | 1.6 (1.6 to 1.6)                  | 112.1 (90.3 to 140.7)  | 33.7 (25.7 to 43.8)        | 70.8 (51.4 to 96.9)           | 2.0 (0.9 to 3.5)                | 5.7 (5.7 to 5.7)                  |
| Pakistan | 1997 | 31.9 (25.4 to 39.8)        | 9.7 (7.3 to 12.5)          | 20.4 (14.8 to 27.9)           | 0.6 (0.3 to 1.1)                | 1.1 (1.1 to 1.1)                  | 110.7 (88.3 to 138.1)  | 33.7 (25.5 to 43.4)        | 70.8 (51.2 to 96.9)           | 2.2 (1.0 to 4.0)                | 4.0 (4.0 to 4.0)                  |
| Pakistan | 1998 | 32.0 (25.3 to 39.8)        | 10.0 (7.6 to 12.6)         | 20.6 (15.0 to 28.2)           | 0.8 (0.4 to 1.5)                | 0.6 (0.6 to 0.6)                  | 111.2 (88.0 to 138.2)  | 34.6 (26.4 to 43.9)        | 71.6 (51.9 to 98.0)           | 2.8 (1.3 to 5.1)                | 2.2 (2.2 to 2.2)                  |
| Pakistan | 1999 | 32.6 (26.0 to 40.6)        | 10.2 (7.8 to 13.0)         | 20.8 (15.0 to 28.6)           | 0.9 (0.4 to 1.7)                | 0.6 (0.6 to 0.6)                  | 113.2 (90.3 to 140.9)  | 35.5 (27.2 to 45.1)        | 72.3 (52.2 to 99.3)           | 3.1 (1.5 to 5.9)                | 2.2 (2.2 to 2.2)                  |
| Pakistan | 2000 | 33.1 (26.5 to 41.3)        | 10.7 (8.2 to 13.7)         | 20.9 (15.0 to 29.0)           | 1.0 (0.4 to 1.8)                | 0.5 (0.5 to 0.5)                  | 115.0 (92.1 to 143.2)  | 37.3 (28.4 to 47.6)        | 72.5 (52.1 to 100.8)          | 3.3 (1.5 to 6.4)                | 1.8 (1.8 to 1.8)                  |
| Pakistan | 2001 | 32.7 (26.5 to 40.6)        | 10.5 (8.0 to 13.5)         | 20.2 (14.5 to 27.5)           | 1.0 (0.5 to 1.8)                | 1.1 (1.1 to 1.1)                  | 113.7 (91.9 to 141.1)  | 36.3 (27.9 to 46.8)        | 70.3 (50.3 to 95.6)           | 3.4 (1.6 to 6.3)                | 3.8 (3.8 to 3.8)                  |
| Pakistan | 2002 | 32.6 (26.3 to 40.5)        | 10.0 (7.7 to 12.9)         | 20.1 (14.4 to 27.5)           | 1.0 (0.5 to 1.9)                | 1.4 (1.4 to 1.4)                  | 113.0 (91.3 to 140.7)  | 34.8 (26.8 to 44.8)        | 69.8 (50.0 to 95.6)           | 3.4 (1.6 to 6.5)                | 5.0 (5.0 to 5.0)                  |
| Pakistan | 2003 | 30.6 (24.5 to 38.3)        | 8.6 (6.6 to 11.1)          | 20.3 (14.6 to 27.9)           | 0.9 (0.4 to 1.8)                | 0.8 (0.8 to 0.8)                  | 106.4 (85.0 to 132.8)  | 29.9 (22.8 to 38.4)        | 70.4 (50.6 to 96.9)           | 3.3 (1.5 to 6.2)                | 2.8 (2.8 to 2.8)                  |
| Pakistan | 2004 | 32.3 (25.5 to 40.3)        | 8.2 (6.2 to 10.6)          | 21.7 (15.6 to 29.4)           | 1.0 (0.5 to 1.8)                | 1.5 (1.5 to 1.5)                  | 112.3 (88.6 to 139.7)  | 28.6 (21.5 to 37.0)        | 75.2 (54.2 to 102.1)          | 3.4 (1.6 to 6.3)                | 5.1 (5.1 to 5.1)                  |
| Pakistan | 2005 | 34.6 (26.9 to 43.6)        | 7.9 (5.9 to 10.3)          | 24.3 (17.4 to 32.9)           | 1.0 (0.5 to 1.8)                | 1.4 (1.4 to 1.4)                  | 120.1 (93.5 to 151.2)  | 27.5 (20.5 to 35.6)        | 84.4 (60.6 to 114.4)          | 3.4 (1.7 to 6.4)                | 4.8 (4.8 to 4.8)                  |
| Pakistan | 2006 | 36.6 (28.3 to 46.2)        | 7.5 (5.6 to 9.8)           | 26.3 (18.7 to 35.7)           | 1.0 (0.5 to 1.8)                | 1.8 (1.8 to 1.8)                  | 126.9 (98.2 to 160.3)  | 26.1 (19.6 to 33.9)        | 91.2 (65.0 to 123.8)          | 3.4 (1.6 to 6.4)                | 6.1 (6.1 to 6.1)                  |
| Pakistan | 2007 | 38.5 (30.3 to 48.7)        | 7.9 (5.8 to 10.2)          | 27.2 (19.5 to 36.8)           | 1.0 (0.5 to 2.0)                | 2.3 (2.3 to 2.3)                  | 133.6 (105.3 to 169.2) | 27.3 (20.3 to 35.5)        | 94.6 (67.7 to 127.9)          | 3.6 (1.8 to 6.9)                | 8.1 (8.1 to 8.1)                  |
| Pakistan | 2008 | 37.6 (29.9 to 47.3)        | 7.7 (5.6 to 10.0)          | 26.3 (18.7 to 35.4)           | 1.0 (0.5 to 1.9)                | 2.6 (2.6 to 2.6)                  | 130.4 (103.9 to 164.1) | 26.6 (19.6 to 34.8)        | 91.3 (64.9 to 122.9)          | 3.5 (1.7 to 6.7)                | 9.0 (9.0 to 9.0)                  |
| Pakistan | 2009 | 36.1 (28.6 to 44.6)        | 7.7 (5.7 to 9.9)           | 24.8 (17.6 to 33.2)           | 1.0 (0.5 to 1.8)                | 2.6 (2.6 to 2.6)                  | 125.2 (99.2 to 155.0)  | 26.7 (19.7 to 34.4)        | 86.1 (61.2 to 115.1)          | 3.3 (1.6 to 6.2)                | 9.1 (9.1 to 9.1)                  |
| Pakistan | 2010 | 35.0 (27.8 to 43.2)        | 7.8 (5.8 to 10.1)          | 23.5 (16.8 to 31.5)           | 0.9 (0.5 to 1.7)                | 2.8 (2.8 to 2.8)                  | 121.5 (96.3 to 149.9)  | 27.1 (20.3 to 35.0)        | 81.5 (58.2 to 109.2)          | 3.2 (1.6 to 6.0)                | 9.7 (9.7 to 9.7)                  |
| Pakistan | 2011 | 33.1 (26.0 to 41.1)        | 8.2 (6.2 to 10.7)          | 22.3 (15.9 to 29.8)           | 0.9 (0.4 to 1.7)                | 1.7 (1.7 to 1.7)                  | 115.0 (90.2 to 142.9)  | 28.6 (21.4 to 37.2)        | 77.4 (55.4 to 103.6)          | 3.1 (1.5 to 5.8)                | 5.9 (5.9 to 5.9)                  |
| Pakistan | 2012 | 34.4 (27.3 to 42.5)        | 8.7 (6.6 to 11.2)          | 22.1 (15.7 to 29.6)           | 0.9 (0.4 to 1.7)                | 2.7 (2.7 to 2.7)                  | 119.4 (94.9 to 147.7)  | 30.2 (22.8 to 38.9)        | 76.6 (54.5 to 102.7)          | 3.1 (1.5 to 5.9)                | 9.5 (9.5 to 9.5)                  |
| Pakistan | 2013 | 36.4 (29.3 to 45.1)        | 9.2 (6.9 to 11.8)          | 23.0 (16.5 to 31.4)           | 0.9 (0.5 to 1.7)                | 3.3 (3.3 to 3.3)                  | 126.5 (101.6 to 156.7) | 31.8 (24.0 to 41.1)        | 80.0 (57.3 to 108.9)          | 3.2 (1.6 to 5.9)                | 11.4 (11.4 to 11.4)               |
| Pakistan | 2014 | 37.1 (29.9 to 46.5)        | 9.6 (7.2 to 12.4)          | 24.3 (17.6 to 33.1)           | 0.9 (0.5 to 1.8)                | 2.3 (2.3 to 2.3)                  | 128.8 (103.7 to 161.6) | 33.5 (25.0 to 43.2)        | 84.2 (61.2 to 114.9)          | 3.3 (1.6 to 6.2)                | 7.8 (7.8 to 7.8)                  |
| Pakistan | 2015 | 39.1 (31.6 to 48.6)        | 10.2 (7.6 to 13.1)         | 25.1 (18.0 to 34.3)           | 1.0 (0.5 to 1.9)                | 2.9 (2.9 to 2.9)                  | 135.8 (109.9 to 168.8) | 35.3 (26.5 to 45.5)        | 87.1 (62.6 to 118.9)          | 3.5 (1.7 to 6.6)                | 9.9 (9.9 to 9.9)                  |

| Country  | Year | 2018 US Dollars per capita |                            |                               |                                 |                                   | 2018 PPP per capita    |                            |                               |                                 |                                   |
|----------|------|----------------------------|----------------------------|-------------------------------|---------------------------------|-----------------------------------|------------------------|----------------------------|-------------------------------|---------------------------------|-----------------------------------|
|          |      | Health spending            | Government health spending | Out-of-pocket health spending | Prepaid private health spending | Development assistance for health | Health spending        | Government health spending | Out-of-pocket health spending | Prepaid private health spending | Development assistance for health |
| Pakistan | 2016 | 41.0 (33.2 to 51.1)        | 10.7 (8.1 to 13.7)         | 25.8 (18.5 to 35.4)           | 1.1 (0.5 to 2.0)                | 3.4 (3.4 to 3.4)                  | 142.3 (115.4 to 177.3) | 37.0 (28.0 to 47.7)        | 89.7 (64.2 to 122.9)          | 3.8 (1.8 to 7.0)                | 11.7 (11.7 to 11.7)               |
| Pakistan | 2017 | 42.6 (34.5 to 53.4)        | 11.6 (8.8 to 14.9)         | 26.9 (19.2 to 36.8)           | 1.2 (0.5 to 2.1)                | 3.0 (3.0 to 3.0)                  | 148.0 (119.9 to 185.3) | 40.2 (30.4 to 51.8)        | 93.4 (66.6 to 127.8)          | 4.0 (1.9 to 7.3)                | 10.4 (10.4 to 10.4)               |
| Pakistan | 2018 | 43.3 (35.0 to 54.0)        | 11.9 (9.0 to 15.3)         | 27.4 (19.5 to 37.5)           | 1.2 (0.6 to 2.2)                | 2.8 (2.8 to 2.8)                  | 150.2 (121.4 to 187.4) | 41.3 (31.3 to 53.2)        | 95.2 (67.7 to 130.2)          | 4.1 (1.9 to 7.5)                | 9.7 (9.7 to 9.7)                  |
| Pakistan | 2019 | 44.1 (35.6 to 55.1)        | 12.2 (9.3 to 15.7)         | 27.9 (19.8 to 38.1)           | 1.2 (0.6 to 2.2)                | 2.8 (2.6 to 2.9)                  | 153.0 (123.7 to 191.1) | 42.3 (32.1 to 54.5)        | 96.8 (68.9 to 132.4)          | 4.2 (2.0 to 7.7)                | 9.6 (9.0 to 10.2)                 |
| Pakistan | 2020 | 44.8 (36.4 to 55.8)        | 12.5 (9.5 to 16.1)         | 28.3 (20.1 to 38.7)           | 1.2 (0.6 to 2.3)                | 2.8 (2.6 to 3.0)                  | 155.6 (126.2 to 193.9) | 43.4 (32.9 to 56.0)        | 98.3 (69.9 to 134.4)          | 4.3 (2.0 to 7.9)                | 9.7 (8.9 to 10.5)                 |
| Pakistan | 2021 | 45.6 (37.0 to 57.0)        | 12.8 (9.7 to 16.6)         | 28.7 (20.4 to 39.3)           | 1.3 (0.6 to 2.3)                | 2.8 (2.5 to 3.1)                  | 158.5 (128.3 to 197.9) | 44.6 (33.8 to 57.6)        | 99.7 (71.0 to 136.4)          | 4.4 (2.1 to 8.1)                | 9.8 (8.8 to 10.8)                 |
| Pakistan | 2022 | 46.4 (37.5 to 57.8)        | 13.1 (9.9 to 16.9)         | 29.1 (20.7 to 39.8)           | 1.3 (0.6 to 2.4)                | 2.9 (2.5 to 3.2)                  | 161.0 (130.2 to 200.7) | 45.5 (34.5 to 58.7)        | 101.1 (72.0 to 138.2)         | 4.5 (2.1 to 8.3)                | 9.9 (8.8 to 11.1)                 |
| Pakistan | 2023 | 47.1 (38.2 to 58.9)        | 13.4 (10.2 to 17.2)        | 29.5 (21.0 to 40.3)           | 1.3 (0.6 to 2.4)                | 2.9 (2.5 to 3.3)                  | 163.6 (132.7 to 204.6) | 46.6 (35.3 to 59.8)        | 102.3 (72.9 to 140.0)         | 4.6 (2.2 to 8.4)                | 10.1 (8.7 to 11.4)                |
| Pakistan | 2024 | 47.9 (38.6 to 59.8)        | 13.7 (10.4 to 17.6)        | 29.9 (21.3 to 40.8)           | 1.4 (0.6 to 2.5)                | 2.9 (2.5 to 3.4)                  | 166.1 (134.1 to 207.5) | 47.5 (36.0 to 61.2)        | 103.6 (73.8 to 141.8)         | 4.7 (2.2 to 8.6)                | 10.2 (8.8 to 11.8)                |
| Pakistan | 2025 | 48.6 (39.3 to 61.0)        | 14.0 (10.6 to 18.0)        | 30.2 (21.5 to 41.4)           | 1.4 (0.7 to 2.5)                | 3.0 (2.5 to 3.5)                  | 168.7 (136.6 to 211.9) | 48.5 (36.8 to 62.5)        | 105.0 (74.6 to 143.6)         | 4.8 (2.3 to 8.8)                | 10.4 (8.8 to 12.1)                |
| Pakistan | 2026 | 49.4 (40.0 to 61.6)        | 14.3 (10.8 to 18.4)        | 30.6 (21.8 to 41.9)           | 1.4 (0.7 to 2.6)                | 3.0 (2.6 to 3.5)                  | 171.4 (139.0 to 214.0) | 49.6 (37.6 to 63.9)        | 106.4 (75.7 to 145.6)         | 4.9 (2.3 to 9.0)                | 10.5 (8.9 to 12.3)                |
| Pakistan | 2027 | 50.2 (40.7 to 62.9)        | 14.6 (11.1 to 18.8)        | 31.1 (22.1 to 42.5)           | 1.5 (0.7 to 2.7)                | 3.1 (2.6 to 3.6)                  | 174.3 (141.3 to 218.5) | 50.7 (38.5 to 65.3)        | 107.9 (76.9 to 147.7)         | 5.0 (2.4 to 9.3)                | 10.6 (8.9 to 12.6)                |
| Pakistan | 2028 | 51.1 (41.5 to 63.8)        | 15.0 (11.4 to 19.2)        | 31.6 (22.5 to 43.2)           | 1.5 (0.7 to 2.7)                | 3.1 (2.6 to 3.8)                  | 177.5 (144.0 to 221.5) | 51.9 (39.4 to 66.8)        | 109.6 (78.0 to 150.1)         | 5.2 (2.4 to 9.5)                | 10.8 (9.0 to 13.0)                |
| Pakistan | 2029 | 52.0 (42.2 to 65.2)        | 15.3 (11.6 to 19.7)        | 32.0 (22.8 to 43.9)           | 1.5 (0.7 to 2.8)                | 3.2 (2.6 to 3.9)                  | 180.6 (146.5 to 226.3) | 53.2 (40.3 to 68.4)        | 111.2 (79.2 to 152.5)         | 5.3 (2.5 to 9.7)                | 11.0 (9.0 to 13.4)                |
| Pakistan | 2030 | 53.0 (43.0 to 66.1)        | 15.7 (11.9 to 20.2)        | 32.5 (23.2 to 44.6)           | 1.6 (0.7 to 2.9)                | 3.2 (2.6 to 3.9)                  | 183.9 (149.4 to 229.5) | 54.4 (41.3 to 70.0)        | 113.0 (80.5 to 155.0)         | 5.4 (2.6 to 9.9)                | 11.1 (9.1 to 13.7)                |
| Pakistan | 2031 | 53.9 (43.5 to 67.5)        | 16.0 (12.1 to 20.6)        | 33.0 (23.6 to 45.4)           | 1.6 (0.8 to 2.9)                | 3.3 (2.6 to 4.1)                  | 187.2 (151.2 to 234.3) | 55.7 (42.2 to 71.7)        | 114.7 (81.8 to 157.5)         | 5.6 (2.6 to 10.1)               | 11.3 (9.1 to 14.2)                |
| Pakistan | 2032 | 54.9 (44.6 to 68.6)        | 16.4 (12.4 to 21.1)        | 33.6 (23.9 to 46.1)           | 1.6 (0.8 to 3.0)                | 3.3 (2.7 to 4.2)                  | 190.7 (154.9 to 238.1) | 57.0 (43.2 to 73.4)        | 116.5 (83.1 to 160.2)         | 5.7 (2.7 to 10.4)               | 11.5 (9.2 to 14.5)                |
| Pakistan | 2033 | 56.0 (45.4 to 70.3)        | 16.8 (12.7 to 21.7)        | 34.1 (24.4 to 46.9)           | 1.7 (0.8 to 3.1)                | 3.4 (2.7 to 4.3)                  | 194.4 (157.7 to 244.2) | 58.4 (44.2 to 75.3)        | 118.5 (84.6 to 163.0)         | 5.8 (2.8 to 10.7)               | 11.7 (9.3 to 15.0)                |
| Pakistan | 2034 | 57.1 (46.3 to 71.3)        | 17.2 (13.0 to 22.3)        | 34.7 (24.8 to 47.8)           | 1.7 (0.8 to 3.1)                | 3.4 (2.7 to 4.4)                  | 198.2 (160.8 to 247.4) | 59.8 (45.2 to 77.3)        | 120.5 (86.1 to 165.8)         | 6.0 (2.8 to 10.9)               | 11.9 (9.4 to 15.3)                |
| Pakistan | 2035 | 58.2 (47.3 to 73.2)        | 17.7 (13.3 to 22.8)        | 35.3 (25.2 to 48.6)           | 1.8 (0.8 to 3.2)                | 3.5 (2.7 to 4.6)                  | 202.1 (164.1 to 254.2) | 61.3 (46.2 to 79.3)        | 122.5 (87.6 to 168.6)         | 6.1 (2.9 to 11.2)               | 12.1 (9.4 to 15.9)                |
| Pakistan | 2036 | 59.3 (48.1 to 73.9)        | 18.1 (13.6 to 23.4)        | 35.9 (25.7 to 49.4)           | 1.8 (0.9 to 3.3)                | 3.5 (2.7 to 4.8)                  | 206.0 (167.1 to 256.7) | 62.8 (47.2 to 81.3)        | 124.5 (89.1 to 171.4)         | 6.3 (3.0 to 11.5)               | 12.3 (9.5 to 16.6)                |

| Country   | Year | 2018 US Dollars per capita |                            |                               |                                 |                                   | 2018 PPP per capita    |                            |                               |                                 |                                   |
|-----------|------|----------------------------|----------------------------|-------------------------------|---------------------------------|-----------------------------------|------------------------|----------------------------|-------------------------------|---------------------------------|-----------------------------------|
|           |      | Health spending            | Government health spending | Out-of-pocket health spending | Prepaid private health spending | Development assistance for health | Health spending        | Government health spending | Out-of-pocket health spending | Prepaid private health spending | Development assistance for health |
| Pakistan  | 2037 | 60.5 (48.9 to 75.9)        | 18.5 (13.9 to 24.0)        | 36.5 (26.1 to 50.2)           | 1.9 (0.9 to 3.4)                | 3.6 (2.8 to 4.8)                  | 209.9 (169.6 to 263.4) | 64.4 (48.4 to 83.3)        | 126.6 (90.5 to 174.4)         | 6.5 (3.1 to 11.8)               | 12.5 (9.6 to 16.8)                |
| Pakistan  | 2038 | 61.6 (50.1 to 76.9)        | 19.0 (14.3 to 24.6)        | 37.1 (26.5 to 51.1)           | 1.9 (0.9 to 3.5)                | 3.7 (2.8 to 5.0)                  | 214.0 (173.9 to 267.1) | 65.9 (49.5 to 85.4)        | 128.7 (92.1 to 177.3)         | 6.6 (3.1 to 12.0)               | 12.8 (9.7 to 17.4)                |
| Pakistan  | 2039 | 62.8 (50.9 to 78.7)        | 19.5 (14.6 to 25.2)        | 37.7 (26.9 to 51.9)           | 2.0 (0.9 to 3.6)                | 3.7 (2.8 to 5.1)                  | 218.1 (176.6 to 273.2) | 67.5 (50.6 to 87.4)        | 130.8 (93.4 to 180.2)         | 6.8 (3.2 to 12.3)               | 13.0 (9.8 to 17.7)                |
| Pakistan  | 2040 | 64.0 (51.8 to 79.6)        | 19.9 (14.9 to 25.8)        | 38.3 (27.3 to 52.8)           | 2.0 (0.9 to 3.7)                | 3.8 (2.9 to 5.2)                  | 222.3 (179.9 to 276.2) | 69.2 (51.8 to 89.6)        | 132.9 (94.9 to 183.2)         | 7.0 (3.3 to 12.7)               | 13.2 (10.0 to 18.2)               |
| Pakistan  | 2041 | 65.2 (52.7 to 82.1)        | 20.4 (15.3 to 26.4)        | 38.9 (27.8 to 53.6)           | 2.1 (1.0 to 3.7)                | 3.9 (2.9 to 5.5)                  | 226.5 (183.0 to 284.9) | 70.8 (53.0 to 91.7)        | 135.0 (96.4 to 186.1)         | 7.1 (3.3 to 13.0)               | 13.5 (10.1 to 19.0)               |
| Pakistan  | 2042 | 66.4 (53.8 to 83.0)        | 20.9 (15.6 to 27.1)        | 39.5 (28.2 to 54.4)           | 2.1 (1.0 to 3.8)                | 4.0 (2.9 to 5.7)                  | 230.7 (186.6 to 288.2) | 72.5 (54.2 to 94.0)        | 137.1 (97.8 to 189.0)         | 7.3 (3.4 to 13.3)               | 13.7 (10.2 to 19.9)               |
| Pakistan  | 2043 | 67.7 (54.7 to 84.9)        | 21.4 (15.9 to 27.8)        | 40.1 (28.6 to 55.3)           | 2.2 (1.0 to 3.9)                | 4.0 (3.0 to 5.9)                  | 234.9 (189.9 to 294.9) | 74.2 (55.3 to 96.4)        | 139.2 (99.1 to 192.0)         | 7.5 (3.5 to 13.6)               | 14.0 (10.4 to 20.7)               |
| Pakistan  | 2044 | 68.9 (55.7 to 86.2)        | 21.9 (16.3 to 28.4)        | 40.7 (29.0 to 56.1)           | 2.2 (1.0 to 4.0)                | 4.1 (3.0 to 6.1)                  | 239.2 (193.3 to 299.4) | 75.9 (56.5 to 98.5)        | 141.4 (100.6 to 194.9)        | 7.7 (3.6 to 14.0)               | 14.3 (10.5 to 21.1)               |
| Pakistan  | 2045 | 70.2 (56.7 to 88.3)        | 22.4 (16.6 to 29.0)        | 41.3 (29.4 to 57.0)           | 2.3 (1.1 to 4.1)                | 4.2 (3.0 to 6.3)                  | 243.6 (196.9 to 306.5) | 77.7 (57.6 to 100.8)       | 143.5 (102.0 to 197.8)        | 7.8 (3.7 to 14.3)               | 14.6 (10.6 to 22.0)               |
| Pakistan  | 2046 | 71.4 (57.7 to 89.2)        | 22.9 (17.0 to 29.7)        | 41.9 (29.8 to 57.8)           | 2.3 (1.1 to 4.2)                | 4.3 (3.1 to 6.5)                  | 247.8 (200.2 to 309.7) | 79.4 (58.9 to 103.1)       | 145.5 (103.3 to 200.7)        | 8.0 (3.8 to 14.7)               | 14.9 (10.8 to 22.6)               |
| Pakistan  | 2047 | 72.6 (58.4 to 91.5)        | 23.4 (17.3 to 30.4)        | 42.5 (30.2 to 58.6)           | 2.4 (1.1 to 4.3)                | 4.4 (3.1 to 6.9)                  | 252.2 (202.8 to 317.7) | 81.2 (60.2 to 105.5)       | 147.6 (104.7 to 203.6)        | 8.2 (3.8 to 15.0)               | 15.2 (10.9 to 24.0)               |
| Pakistan  | 2048 | 73.9 (59.6 to 92.2)        | 23.9 (17.6 to 31.0)        | 43.1 (30.5 to 59.5)           | 2.4 (1.1 to 4.4)                | 4.5 (3.2 to 7.2)                  | 256.5 (207.0 to 320.1) | 82.9 (61.2 to 107.8)       | 149.7 (106.0 to 206.4)        | 8.4 (3.9 to 15.4)               | 15.6 (11.1 to 25.1)               |
| Pakistan  | 2049 | 75.1 (60.4 to 94.9)        | 24.4 (18.0 to 31.7)        | 43.7 (30.9 to 60.3)           | 2.5 (1.2 to 4.5)                | 4.6 (3.2 to 7.4)                  | 260.8 (209.8 to 329.4) | 84.7 (62.5 to 110.1)       | 151.7 (107.3 to 209.2)        | 8.6 (4.0 to 15.7)               | 15.9 (11.2 to 25.6)               |
| Pakistan  | 2050 | 76.4 (62.1 to 95.4)        | 24.9 (18.4 to 32.4)        | 44.3 (31.3 to 61.1)           | 2.5 (1.2 to 4.6)                | 4.7 (3.3 to 7.5)                  | 265.2 (215.5 to 331.1) | 86.4 (63.9 to 112.5)       | 153.7 (108.6 to 212.0)        | 8.8 (4.1 to 16.1)               | 16.3 (11.4 to 26.2)               |
| Palestine | 1995 | 193.6 (158.4 to 233.1)     | 61.6 (48.1 to 77.4)        | 83.1 (60.3 to 110.5)          | 41.6 (23.7 to 70.2)             | 7.3 (7.3 to 7.3)                  | 68.2 (55.8 to 82.1)    | 21.7 (16.9 to 27.3)        | 29.3 (21.2 to 38.9)           | 14.6 (8.3 to 24.7)              | 2.6 (2.6 to 2.6)                  |
| Palestine | 1996 | 198.2 (165.6 to 233.7)     | 61.2 (48.1 to 75.7)        | 81.9 (60.8 to 108.3)          | 42.4 (24.9 to 68.4)             | 12.7 (12.7 to 12.7)               | 69.8 (58.3 to 82.3)    | 21.6 (16.9 to 26.7)        | 28.9 (21.4 to 38.2)           | 14.9 (8.8 to 24.1)              | 4.5 (4.5 to 4.5)                  |
| Palestine | 1997 | 217.4 (184.8 to 256.0)     | 66.5 (52.4 to 81.4)        | 85.2 (65.0 to 109.6)          | 47.9 (29.8 to 75.7)             | 17.7 (17.7 to 17.7)               | 76.5 (65.1 to 90.1)    | 23.4 (18.5 to 28.7)        | 30.0 (22.9 to 38.6)           | 16.9 (10.5 to 26.7)             | 6.2 (6.2 to 6.2)                  |
| Palestine | 1998 | 231.4 (198.9 to 272.0)     | 73.5 (58.7 to 89.2)        | 89.8 (70.7 to 113.2)          | 54.9 (36.8 to 83.3)             | 13.1 (13.1 to 13.1)               | 81.5 (70.0 to 95.8)    | 25.9 (20.7 to 31.4)        | 31.6 (24.9 to 39.8)           | 19.3 (12.9 to 29.3)             | 4.6 (4.6 to 4.6)                  |
| Palestine | 1999 | 245.7 (214.1 to 282.1)     | 79.3 (64.6 to 94.8)        | 93.4 (75.9 to 114.0)          | 60.8 (42.5 to 86.6)             | 12.3 (12.3 to 12.3)               | 86.5 (75.4 to 99.4)    | 27.9 (22.7 to 33.4)        | 32.9 (26.7 to 40.1)           | 21.4 (15.0 to 30.5)             | 4.3 (4.3 to 4.3)                  |
| Palestine | 2000 | 245.6 (218.4 to 277.8)     | 77.9 (65.3 to 92.2)        | 92.1 (76.7 to 109.5)          | 61.2 (45.3 to 82.1)             | 14.5 (14.5 to 14.5)               | 86.5 (76.9 to 97.8)    | 27.4 (23.0 to 32.5)        | 32.4 (27.0 to 38.5)           | 21.5 (16.0 to 28.9)             | 5.1 (5.1 to 5.1)                  |
| Palestine | 2001 | 230.8 (208.8 to 256.4)     | 74.7 (63.8 to 86.5)        | 88.3 (74.8 to 103.1)          | 58.7 (45.5 to 75.3)             | 9.1 (9.1 to 9.1)                  | 81.3 (73.5 to 90.3)    | 26.3 (22.5 to 30.5)        | 31.1 (26.3 to 36.3)           | 20.7 (16.0 to 26.5)             | 3.2 (3.2 to 3.2)                  |

| Country   | Year | 2018 US Dollars per capita |                            |                               |                                 |                                   | 2018 PPP per capita    |                            |                               |                                 |                                   |
|-----------|------|----------------------------|----------------------------|-------------------------------|---------------------------------|-----------------------------------|------------------------|----------------------------|-------------------------------|---------------------------------|-----------------------------------|
|           |      | Health spending            | Government health spending | Out-of-pocket health spending | Prepaid private health spending | Development assistance for health | Health spending        | Government health spending | Out-of-pocket health spending | Prepaid private health spending | Development assistance for health |
| Palestine | 2002 | 226.3 (206.6 to 248.5)     | 74.4 (64.8 to 85.2)        | 83.9 (71.9 to 96.4)           | 57.6 (45.3 to 71.8)             | 10.4 (10.4 to 10.4)               | 79.7 (72.8 to 87.5)    | 26.2 (22.8 to 30.0)        | 29.6 (25.3 to 33.9)           | 20.3 (15.9 to 25.3)             | 3.7 (3.7 to 3.7)                  |
| Palestine | 2003 | 259.9 (238.7 to 282.3)     | 87.1 (75.7 to 99.0)        | 90.3 (77.8 to 103.0)          | 61.4 (48.9 to 75.6)             | 21.1 (21.1 to 21.1)               | 91.5 (84.1 to 99.4)    | 30.7 (26.7 to 34.9)        | 31.8 (27.4 to 36.3)           | 21.6 (17.2 to 26.6)             | 7.4 (7.4 to 7.4)                  |
| Palestine | 2004 | 292.7 (269.8 to 317.0)     | 102.7 (90.2 to 116.1)      | 101.5 (88.1 to 115.0)         | 67.8 (53.9 to 82.6)             | 20.7 (20.7 to 20.7)               | 103.1 (95.0 to 111.6)  | 36.2 (31.8 to 40.9)        | 35.8 (31.0 to 40.5)           | 23.9 (19.0 to 29.1)             | 7.3 (7.3 to 7.3)                  |
| Palestine | 2005 | 318.6 (294.5 to 344.3)     | 115.1 (101.6 to 129.6)     | 111.3 (98.1 to 125.6)         | 74.1 (59.8 to 89.1)             | 18.1 (18.1 to 18.1)               | 112.2 (103.7 to 121.2) | 40.5 (35.8 to 45.6)        | 39.2 (34.5 to 44.2)           | 26.1 (21.0 to 31.4)             | 6.4 (6.4 to 6.4)                  |
| Palestine | 2006 | 323.9 (300.0 to 349.5)     | 115.9 (102.4 to 129.4)     | 118.8 (104.8 to 133.0)        | 73.6 (59.8 to 88.8)             | 15.6 (15.6 to 15.6)               | 114.0 (105.6 to 123.1) | 40.8 (36.1 to 45.6)        | 41.8 (36.9 to 46.8)           | 25.9 (21.1 to 31.3)             | 5.5 (5.5 to 5.5)                  |
| Palestine | 2007 | 345.3 (321.3 to 370.4)     | 121.1 (108.0 to 135.0)     | 132.6 (117.5 to 148.7)        | 73.0 (59.3 to 88.2)             | 18.6 (18.6 to 18.6)               | 121.6 (113.2 to 130.4) | 42.6 (38.0 to 47.5)        | 46.7 (41.4 to 52.4)           | 25.7 (20.9 to 31.1)             | 6.6 (6.6 to 6.6)                  |
| Palestine | 2008 | 373.1 (346.8 to 400.4)     | 129.8 (116.0 to 144.8)     | 143.7 (128.6 to 159.5)        | 79.9 (65.5 to 97.4)             | 19.8 (19.8 to 19.8)               | 131.4 (122.1 to 141.0) | 45.7 (40.9 to 51.0)        | 50.6 (45.3 to 56.2)           | 28.1 (23.1 to 34.3)             | 7.0 (7.0 to 7.0)                  |
| Palestine | 2009 | 379.6 (352.4 to 409.6)     | 134.7 (120.2 to 150.5)     | 153.5 (137.5 to 170.8)        | 78.6 (65.0 to 97.1)             | 12.9 (12.9 to 12.9)               | 133.7 (124.1 to 144.3) | 47.4 (42.3 to 53.0)        | 54.1 (48.4 to 60.2)           | 27.7 (22.9 to 34.2)             | 4.5 (4.5 to 4.5)                  |
| Palestine | 2010 | 379.4 (353.0 to 408.9)     | 134.3 (119.7 to 149.8)     | 153.4 (136.8 to 171.7)        | 76.5 (62.3 to 94.6)             | 15.2 (15.2 to 15.2)               | 133.6 (124.3 to 144.0) | 47.3 (42.2 to 52.8)        | 54.0 (48.2 to 60.4)           | 26.9 (21.9 to 33.3)             | 5.3 (5.3 to 5.3)                  |
| Palestine | 2011 | 381.9 (354.8 to 411.3)     | 136.6 (121.5 to 152.9)     | 152.9 (135.9 to 171.5)        | 75.2 (61.1 to 92.0)             | 17.2 (17.2 to 17.2)               | 134.5 (124.9 to 144.9) | 48.1 (42.8 to 53.9)        | 53.8 (47.9 to 60.4)           | 26.5 (21.5 to 32.4)             | 6.1 (6.1 to 6.1)                  |
| Palestine | 2012 | 368.3 (339.8 to 399.5)     | 137.6 (121.7 to 154.4)     | 144.6 (127.8 to 162.5)        | 72.6 (57.6 to 89.1)             | 13.5 (13.5 to 13.5)               | 129.7 (119.7 to 140.7) | 48.5 (42.8 to 54.4)        | 50.9 (45.0 to 57.2)           | 25.6 (20.3 to 31.4)             | 4.8 (4.8 to 4.8)                  |
| Palestine | 2013 | 339.9 (310.7 to 372.5)     | 132.2 (115.3 to 150.7)     | 132.4 (115.3 to 150.7)        | 66.3 (51.0 to 83.3)             | 9.1 (9.1 to 9.1)                  | 119.7 (109.4 to 131.2) | 46.6 (40.6 to 53.1)        | 46.6 (40.6 to 53.1)           | 23.3 (18.0 to 29.3)             | 3.2 (3.2 to 3.2)                  |
| Palestine | 2014 | 312.9 (281.7 to 347.5)     | 119.2 (102.1 to 138.8)     | 122.4 (104.3 to 142.4)        | 61.2 (44.5 to 80.3)             | 10.1 (10.1 to 10.1)               | 110.2 (99.2 to 122.4)  | 42.0 (36.0 to 48.9)        | 43.1 (36.7 to 50.2)           | 21.6 (15.7 to 28.3)             | 3.5 (3.5 to 3.5)                  |
| Palestine | 2015 | 312.9 (276.9 to 354.3)     | 121.1 (102.0 to 142.9)     | 123.5 (101.9 to 147.0)        | 63.2 (43.2 to 88.2)             | 5.0 (5.0 to 5.0)                  | 110.2 (97.5 to 124.8)  | 42.7 (35.9 to 50.3)        | 43.5 (35.9 to 51.8)           | 22.3 (15.2 to 31.0)             | 1.8 (1.8 to 1.8)                  |
| Palestine | 2016 | 320.3 (277.1 to 373.2)     | 123.6 (102.3 to 148.5)     | 125.1 (100.0 to 154.1)        | 65.8 (42.8 to 97.9)             | 5.8 (5.8 to 5.8)                  | 112.8 (97.6 to 131.4)  | 43.5 (36.0 to 52.3)        | 44.1 (35.2 to 54.3)           | 23.2 (15.1 to 34.5)             | 2.0 (2.0 to 2.0)                  |
| Palestine | 2017 | 333.2 (292.0 to 380.2)     | 124.1 (102.4 to 149.0)     | 125.8 (100.2 to 154.9)        | 66.6 (43.2 to 98.8)             | 16.7 (16.7 to 16.7)               | 117.3 (102.8 to 133.9) | 43.7 (36.0 to 52.5)        | 44.3 (35.3 to 54.6)           | 23.4 (15.2 to 34.8)             | 5.9 (5.9 to 5.9)                  |
| Palestine | 2018 | 337.7 (292.0 to 391.4)     | 126.5 (104.3 to 152.3)     | 127.6 (101.8 to 157.7)        | 68.0 (44.2 to 101.1)            | 15.6 (15.6 to 15.6)               | 118.9 (102.8 to 137.8) | 44.5 (36.7 to 53.6)        | 44.9 (35.8 to 55.5)           | 24.0 (15.6 to 35.6)             | 5.5 (5.5 to 5.5)                  |
| Palestine | 2019 | 343.8 (300.7 to 391.7)     | 129.1 (106.5 to 155.3)     | 129.6 (103.9 to 160.8)        | 69.5 (45.2 to 103.5)            | 15.5 (14.5 to 16.4)               | 121.1 (105.9 to 137.9) | 45.5 (37.5 to 54.7)        | 45.7 (36.6 to 56.6)           | 24.5 (15.9 to 36.5)             | 5.5 (5.1 to 5.8)                  |
| Palestine | 2020 | 349.7 (303.2 to 404.2)     | 131.6 (108.6 to 158.2)     | 131.6 (105.2 to 163.0)        | 71.0 (46.1 to 105.9)            | 15.6 (14.3 to 16.8)               | 123.2 (106.8 to 142.3) | 46.3 (38.2 to 55.7)        | 46.4 (37.0 to 57.4)           | 25.0 (16.3 to 37.3)             | 5.5 (5.0 to 5.9)                  |
| Palestine | 2021 | 355.9 (311.1 to 405.3)     | 134.1 (110.8 to 161.0)     | 133.6 (106.7 to 165.5)        | 72.5 (47.1 to 108.3)            | 15.7 (14.1 to 17.3)               | 125.3 (109.5 to 142.7) | 47.2 (39.0 to 56.7)        | 47.1 (37.6 to 58.3)           | 25.5 (16.6 to 38.1)             | 5.5 (5.0 to 6.1)                  |
| Palestine | 2022 | 361.3 (313.7 to 418.5)     | 136.5 (112.7 to 164.2)     | 135.1 (107.9 to 167.4)        | 73.9 (48.1 to 110.6)            | 15.9 (14.1 to 17.7)               | 127.2 (110.5 to 147.4) | 48.1 (39.7 to 57.8)        | 47.6 (38.0 to 59.0)           | 26.0 (16.9 to 39.0)             | 5.6 (5.0 to 6.2)                  |



| Country   | Year | 2018 US Dollars per capita |                            |                               |                                 |                                   | 2018 PPP per capita    |                            |                               |                                 |                                   |
|-----------|------|----------------------------|----------------------------|-------------------------------|---------------------------------|-----------------------------------|------------------------|----------------------------|-------------------------------|---------------------------------|-----------------------------------|
|           |      | Health spending            | Government health spending | Out-of-pocket health spending | Prepaid private health spending | Development assistance for health | Health spending        | Government health spending | Out-of-pocket health spending | Prepaid private health spending | Development assistance for health |
| Palestine | 2023 | 366.6 (319.5 to 416.9)     | 138.8 (114.5 to 166.6)     | 136.5 (108.9 to 169.1)        | 75.2 (49.0 to 112.5)            | 16.1 (14.0 to 18.2)               | 129.1 (112.5 to 146.8) | 48.9 (40.3 to 58.7)        | 48.1 (38.3 to 59.6)           | 26.5 (17.3 to 39.6)             | 5.7 (4.9 to 6.4)                  |
| Palestine | 2024 | 371.6 (322.9 to 432.2)     | 141.1 (116.2 to 169.7)     | 137.7 (109.8 to 170.9)        | 76.6 (49.8 to 114.3)            | 16.3 (14.0 to 18.7)               | 130.9 (113.7 to 152.2) | 49.7 (40.9 to 59.7)        | 48.5 (38.7 to 60.2)           | 27.0 (17.5 to 40.2)             | 5.7 (4.9 to 6.6)                  |
| Palestine | 2025 | 377.0 (328.3 to 429.7)     | 143.6 (118.1 to 172.8)     | 139.0 (110.6 to 172.7)        | 78.0 (50.8 to 116.1)            | 16.5 (14.1 to 19.3)               | 132.8 (115.6 to 151.3) | 50.6 (41.6 to 60.9)        | 48.9 (39.0 to 60.8)           | 27.5 (17.9 to 40.9)             | 5.8 (5.0 to 6.8)                  |
| Palestine | 2026 | 383.2 (331.9 to 445.2)     | 146.5 (120.6 to 176.7)     | 140.5 (112.0 to 174.7)        | 79.5 (51.9 to 118.5)            | 16.7 (14.1 to 19.5)               | 134.9 (116.9 to 156.8) | 51.6 (42.5 to 62.2)        | 49.5 (39.4 to 61.5)           | 28.0 (18.3 to 41.7)             | 5.9 (4.9 to 6.9)                  |
| Palestine | 2027 | 388.9 (338.9 to 444.7)     | 149.2 (122.8 to 180.3)     | 141.8 (113.0 to 176.6)        | 81.0 (53.0 to 120.7)            | 16.9 (14.1 to 20.0)               | 137.0 (119.3 to 156.6) | 52.6 (43.2 to 63.5)        | 49.9 (39.8 to 62.2)           | 28.5 (18.7 to 42.5)             | 5.9 (5.0 to 7.0)                  |
| Palestine | 2028 | 395.2 (341.4 to 458.9)     | 152.2 (125.2 to 183.4)     | 143.3 (114.1 to 178.4)        | 82.6 (54.1 to 123.2)            | 17.1 (14.3 to 20.7)               | 139.2 (120.2 to 161.6) | 53.6 (44.1 to 64.6)        | 50.4 (40.2 to 62.8)           | 29.1 (19.0 to 43.4)             | 6.0 (5.1 to 7.3)                  |
| Palestine | 2029 | 401.7 (349.2 to 458.2)     | 155.4 (127.7 to 187.3)     | 144.8 (115.3 to 180.2)        | 84.2 (55.2 to 125.9)            | 17.3 (14.3 to 21.2)               | 141.4 (123.0 to 161.3) | 54.7 (45.0 to 65.9)        | 51.0 (40.6 to 63.4)           | 29.7 (19.4 to 44.3)             | 6.1 (5.0 to 7.5)                  |
| Palestine | 2030 | 408.0 (352.7 to 475.0)     | 158.4 (130.2 to 191.6)     | 146.2 (116.2 to 182.5)        | 85.8 (56.3 to 128.4)            | 17.6 (14.4 to 21.5)               | 143.7 (124.2 to 167.3) | 55.8 (45.8 to 67.5)        | 51.5 (40.9 to 64.3)           | 30.2 (19.8 to 45.2)             | 6.2 (5.1 to 7.6)                  |
| Palestine | 2031 | 414.4 (360.6 to 473.0)     | 161.5 (132.9 to 195.7)     | 147.6 (117.1 to 184.2)        | 87.4 (57.4 to 131.0)            | 17.8 (14.4 to 22.3)               | 145.9 (127.0 to 166.6) | 56.9 (46.8 to 68.9)        | 52.0 (41.2 to 64.9)           | 30.8 (20.2 to 46.1)             | 6.3 (5.1 to 7.9)                  |
| Palestine | 2032 | 421.3 (363.8 to 492.6)     | 164.9 (135.5 to 199.6)     | 149.2 (118.2 to 186.5)        | 89.2 (58.6 to 133.9)            | 18.1 (14.5 to 22.7)               | 148.4 (128.1 to 173.5) | 58.1 (47.7 to 70.3)        | 52.6 (41.6 to 65.7)           | 31.4 (20.6 to 47.1)             | 6.4 (5.1 to 8.0)                  |
| Palestine | 2033 | 427.8 (372.7 to 490.4)     | 168.0 (137.7 to 203.7)     | 150.6 (119.4 to 188.2)        | 90.8 (59.7 to 136.3)            | 18.3 (14.5 to 23.5)               | 150.6 (131.2 to 172.7) | 59.2 (48.5 to 71.7)        | 53.0 (42.1 to 66.3)           | 32.0 (21.0 to 48.0)             | 6.4 (5.1 to 8.3)                  |
| Palestine | 2034 | 434.5 (374.7 to 507.4)     | 171.3 (139.9 to 208.6)     | 152.1 (120.8 to 190.1)        | 92.5 (60.9 to 138.5)            | 18.6 (14.6 to 24.0)               | 153.0 (131.9 to 178.7) | 60.3 (49.3 to 73.5)        | 53.6 (42.5 to 66.9)           | 32.6 (21.4 to 48.8)             | 6.5 (5.2 to 8.5)                  |
| Palestine | 2035 | 441.6 (382.3 to 506.0)     | 174.8 (142.3 to 213.5)     | 153.6 (121.8 to 192.0)        | 94.4 (62.0 to 140.8)            | 18.9 (14.7 to 24.6)               | 155.5 (134.6 to 178.2) | 61.5 (50.1 to 75.2)        | 54.1 (42.9 to 67.6)           | 33.2 (21.8 to 49.6)             | 6.6 (5.2 to 8.7)                  |
| Palestine | 2036 | 448.7 (384.9 to 526.5)     | 178.2 (144.8 to 218.1)     | 155.2 (123.0 to 193.9)        | 96.2 (63.0 to 143.2)            | 19.1 (14.8 to 25.7)               | 158.0 (135.5 to 185.4) | 62.8 (51.0 to 76.8)        | 54.7 (43.3 to 68.3)           | 33.9 (22.2 to 50.4)             | 6.7 (5.2 to 9.1)                  |
| Palestine | 2037 | 456.4 (395.1 to 523.0)     | 181.9 (147.5 to 223.2)     | 156.9 (123.8 to 196.4)        | 98.2 (64.1 to 146.5)            | 19.4 (14.9 to 26.0)               | 160.7 (139.1 to 184.2) | 64.1 (51.9 to 78.6)        | 55.3 (43.6 to 69.2)           | 34.6 (22.6 to 51.6)             | 6.8 (5.2 to 9.2)                  |
| Palestine | 2038 | 463.6 (398.1 to 545.7)     | 185.4 (150.0 to 227.6)     | 158.5 (124.8 to 199.1)        | 100.0 (65.1 to 149.3)           | 19.7 (15.0 to 27.4)               | 163.3 (140.2 to 192.2) | 65.3 (52.8 to 80.1)        | 55.8 (43.9 to 70.1)           | 35.2 (22.9 to 52.6)             | 6.9 (5.3 to 9.6)                  |
| Palestine | 2039 | 471.7 (407.9 to 543.5)     | 189.4 (152.8 to 233.5)     | 160.3 (126.0 to 201.8)        | 102.1 (66.5 to 152.5)           | 19.9 (15.2 to 27.7)               | 166.1 (143.7 to 191.4) | 66.7 (53.8 to 82.2)        | 56.4 (44.4 to 71.1)           | 36.0 (23.4 to 53.7)             | 7.0 (5.4 to 9.7)                  |
| Palestine | 2040 | 479.8 (411.8 to 566.8)     | 193.3 (155.6 to 238.9)     | 162.0 (127.3 to 204.2)        | 104.2 (68.1 to 155.6)           | 20.2 (15.4 to 28.0)               | 168.9 (145.0 to 199.6) | 68.1 (54.8 to 84.1)        | 57.1 (44.8 to 71.9)           | 36.7 (24.0 to 54.8)             | 7.1 (5.4 to 9.9)                  |
| Palestine | 2041 | 487.5 (420.3 to 561.8)     | 197.1 (158.3 to 244.3)     | 163.6 (128.4 to 206.3)        | 106.2 (69.6 to 158.7)           | 20.6 (15.5 to 28.5)               | 171.7 (148.0 to 197.8) | 69.4 (55.7 to 86.0)        | 57.6 (45.2 to 72.6)           | 37.4 (24.5 to 55.9)             | 7.2 (5.4 to 10.0)                 |
| Palestine | 2042 | 495.0 (422.7 to 588.5)     | 200.8 (160.8 to 250.5)     | 165.1 (129.5 to 208.2)        | 108.2 (71.2 to 161.6)           | 20.9 (15.7 to 29.8)               | 174.3 (148.9 to 207.2) | 70.7 (56.6 to 88.2)        | 58.1 (45.6 to 73.3)           | 38.1 (25.1 to 56.9)             | 7.4 (5.5 to 10.5)                 |
| Palestine | 2043 | 503.8 (433.2 to 580.5)     | 205.1 (163.6 to 257.2)     | 167.0 (130.9 to 210.6)        | 110.5 (72.6 to 165.0)           | 21.3 (15.8 to 30.7)               | 177.4 (152.5 to 204.4) | 72.2 (57.6 to 90.6)        | 58.8 (46.1 to 74.2)           | 38.9 (25.6 to 58.1)             | 7.5 (5.6 to 10.8)                 |

| Country   | Year | 2018 US Dollars per capita |                            |                               |                                 |                                   | 2018 PPP per capita       |                            |                               |                                 |                                   |
|-----------|------|----------------------------|----------------------------|-------------------------------|---------------------------------|-----------------------------------|---------------------------|----------------------------|-------------------------------|---------------------------------|-----------------------------------|
|           |      | Health spending            | Government health spending | Out-of-pocket health spending | Prepaid private health spending | Development assistance for health | Health spending           | Government health spending | Out-of-pocket health spending | Prepaid private health spending | Development assistance for health |
| Palestine | 2044 | 512.8 (437.6 to 609.0)     | 209.5 (166.7 to 263.4)     | 168.8 (132.3 to 213.0)        | 112.8 (74.1 to 168.5)           | 21.7 (16.0 to 31.3)               | 180.6 (154.1 to 214.5)    | 73.8 (58.7 to 92.7)        | 59.5 (46.6 to 75.0)           | 39.7 (26.1 to 59.3)             | 7.6 (5.6 to 11.0)                 |
| Palestine | 2045 | 520.8 (446.7 to 605.2)     | 213.5 (169.5 to 269.7)     | 170.4 (133.4 to 215.0)        | 114.9 (75.3 to 171.6)           | 22.1 (15.9 to 33.4)               | 183.4 (157.3 to 213.1)    | 75.2 (59.7 to 95.0)        | 60.0 (47.0 to 75.7)           | 40.5 (26.5 to 60.4)             | 7.8 (5.6 to 11.7)                 |
| Palestine | 2046 | 529.6 (452.7 to 629.7)     | 217.7 (172.0 to 275.2)     | 172.1 (134.8 to 217.5)        | 117.2 (76.7 to 175.1)           | 22.5 (16.3 to 34.7)               | 186.5 (159.4 to 221.8)    | 76.7 (60.6 to 96.9)        | 60.6 (47.5 to 76.6)           | 41.3 (27.0 to 61.7)             | 7.9 (5.7 to 12.2)                 |
| Palestine | 2047 | 538.4 (461.1 to 624.1)     | 222.1 (175.2 to 282.0)     | 173.9 (136.2 to 219.9)        | 119.5 (78.3 to 178.6)           | 23.0 (16.5 to 36.2)               | 189.6 (162.4 to 219.8)    | 78.2 (61.7 to 99.3)        | 61.2 (48.0 to 77.4)           | 42.1 (27.6 to 62.9)             | 8.1 (5.8 to 12.8)                 |
| Palestine | 2048 | 547.2 (466.7 to 652.1)     | 226.3 (178.1 to 288.2)     | 175.5 (137.4 to 222.3)        | 121.8 (79.7 to 181.9)           | 23.5 (16.8 to 37.7)               | 192.7 (164.3 to 229.6)    | 79.7 (62.7 to 101.5)       | 61.8 (48.4 to 78.3)           | 42.9 (28.1 to 64.1)             | 8.3 (5.9 to 13.3)                 |
| Palestine | 2049 | 556.2 (473.7 to 647.6)     | 230.8 (180.8 to 294.3)     | 177.2 (138.8 to 224.8)        | 124.2 (81.1 to 185.5)           | 24.0 (17.1 to 38.7)               | 195.9 (166.8 to 228.0)    | 81.3 (63.7 to 103.6)       | 62.4 (48.9 to 79.2)           | 43.7 (28.5 to 65.3)             | 8.5 (6.0 to 13.6)                 |
| Palestine | 2050 | 564.8 (480.7 to 672.2)     | 235.0 (183.5 to 300.9)     | 178.7 (139.7 to 227.0)        | 126.4 (82.3 to 189.0)           | 24.6 (17.3 to 40.2)               | 198.9 (169.3 to 236.7)    | 82.8 (64.6 to 106.0)       | 62.9 (49.2 to 79.9)           | 44.5 (29.0 to 66.5)             | 8.7 (6.1 to 14.1)                 |
| Panama    | 1995 | 451.7 (415.0 to 489.5)     | 299.5 (269.4 to 329.6)     | 132.2 (113.1 to 151.7)        | 17.2 (10.0 to 28.1)             | 2.8 (2.8 to 2.8)                  | 784.0 (720.3 to 849.7)    | 519.8 (467.6 to 572.1)     | 229.5 (196.3 to 263.3)        | 29.9 (17.4 to 48.8)             | 4.8 (4.8 to 4.8)                  |
| Panama    | 1996 | 455.8 (426.5 to 485.8)     | 294.8 (270.5 to 319.2)     | 133.5 (116.8 to 150.6)        | 17.0 (10.1 to 26.8)             | 10.5 (10.5 to 10.5)               | 791.1 (740.3 to 843.1)    | 511.7 (469.5 to 554.0)     | 231.7 (202.8 to 261.4)        | 29.5 (17.5 to 46.4)             | 18.1 (18.1 to 18.1)               |
| Panama    | 1997 | 461.7 (435.2 to 489.5)     | 304.5 (283.6 to 327.9)     | 131.9 (116.5 to 147.9)        | 18.2 (10.9 to 28.7)             | 7.1 (7.1 to 7.1)                  | 801.5 (755.4 to 849.7)    | 528.5 (492.3 to 569.2)     | 229.0 (202.2 to 256.8)        | 31.7 (18.9 to 49.8)             | 12.3 (12.3 to 12.3)               |
| Panama    | 1998 | 483.9 (457.2 to 514.6)     | 315.5 (293.4 to 338.2)     | 136.4 (120.7 to 152.9)        | 20.1 (12.1 to 31.1)             | 12.0 (12.0 to 12.0)               | 839.9 (793.6 to 893.2)    | 547.5 (509.2 to 586.9)     | 236.8 (209.4 to 265.4)        | 34.8 (21.0 to 53.9)             | 20.7 (20.7 to 20.7)               |
| Panama    | 1999 | 485.0 (456.6 to 517.3)     | 320.1 (296.6 to 343.7)     | 137.7 (122.7 to 154.0)        | 21.5 (13.3 to 33.4)             | 5.6 (5.6 to 5.6)                  | 841.8 (792.5 to 897.8)    | 555.7 (514.9 to 596.5)     | 239.1 (213.0 to 267.3)        | 37.3 (23.1 to 58.0)             | 9.7 (9.7 to 9.7)                  |
| Panama    | 2000 | 498.6 (469.0 to 531.8)     | 329.4 (305.6 to 353.4)     | 140.3 (125.4 to 156.8)        | 22.9 (14.2 to 34.7)             | 6.1 (6.1 to 6.1)                  | 865.5 (814.0 to 923.0)    | 571.8 (530.5 to 613.4)     | 243.5 (217.7 to 272.2)        | 39.7 (24.7 to 60.3)             | 10.5 (10.5 to 10.5)               |
| Panama    | 2001 | 498.2 (469.7 to 531.5)     | 328.2 (305.0 to 353.0)     | 142.0 (126.7 to 158.7)        | 22.9 (14.5 to 34.7)             | 5.1 (5.1 to 5.1)                  | 864.8 (815.3 to 922.5)    | 569.6 (529.4 to 612.7)     | 246.5 (219.9 to 275.4)        | 39.7 (25.2 to 60.2)             | 8.9 (8.9 to 8.9)                  |
| Panama    | 2002 | 501.9 (474.1 to 532.7)     | 328.4 (307.0 to 351.8)     | 145.1 (130.9 to 161.8)        | 23.0 (14.3 to 34.9)             | 5.5 (5.5 to 5.5)                  | 871.2 (823.0 to 924.6)    | 570.0 (532.8 to 610.6)     | 251.8 (227.2 to 280.8)        | 40.0 (24.8 to 60.5)             | 9.5 (9.5 to 9.5)                  |
| Panama    | 2003 | 508.4 (478.3 to 537.6)     | 333.1 (311.6 to 355.3)     | 148.8 (133.7 to 165.5)        | 23.4 (14.9 to 34.8)             | 3.1 (3.1 to 3.1)                  | 882.4 (830.3 to 933.2)    | 578.2 (540.8 to 616.7)     | 258.3 (232.1 to 287.2)        | 40.7 (25.8 to 60.4)             | 5.3 (5.3 to 5.3)                  |
| Panama    | 2004 | 527.8 (498.0 to 557.4)     | 344.9 (322.2 to 366.6)     | 155.7 (139.8 to 172.1)        | 24.0 (15.6 to 35.3)             | 3.1 (3.1 to 3.1)                  | 916.1 (864.3 to 967.6)    | 598.6 (559.2 to 636.4)     | 270.3 (242.7 to 298.8)        | 41.7 (27.0 to 61.2)             | 5.5 (5.5 to 5.5)                  |
| Panama    | 2005 | 543.0 (513.1 to 574.1)     | 353.7 (331.6 to 377.2)     | 162.1 (146.5 to 178.8)        | 24.3 (15.8 to 35.6)             | 2.8 (2.8 to 2.8)                  | 942.5 (890.5 to 996.5)    | 614.0 (575.5 to 654.7)     | 281.4 (254.3 to 310.4)        | 42.1 (27.4 to 61.7)             | 4.9 (4.9 to 4.9)                  |
| Panama    | 2006 | 587.4 (553.8 to 620.7)     | 386.9 (361.7 to 412.2)     | 172.5 (155.5 to 190.6)        | 25.6 (17.1 to 37.2)             | 2.4 (2.4 to 2.4)                  | 1019.6 (961.3 to 1077.5)  | 671.6 (627.8 to 715.5)     | 299.4 (269.9 to 330.8)        | 44.5 (29.7 to 64.6)             | 4.1 (4.1 to 4.1)                  |
| Panama    | 2007 | 645.0 (608.3 to 680.2)     | 430.1 (404.1 to 456.5)     | 185.9 (168.2 to 205.2)        | 26.8 (17.8 to 39.5)             | 2.1 (2.1 to 2.1)                  | 1119.6 (1055.9 to 1180.7) | 746.6 (701.5 to 792.4)     | 322.7 (292.0 to 356.2)        | 46.6 (30.9 to 68.6)             | 3.7 (3.7 to 3.7)                  |
| Panama    | 2008 | 699.3 (661.6 to 736.2)     | 469.6 (442.4 to 498.5)     | 199.7 (180.9 to 220.7)        | 27.7 (18.5 to 40.5)             | 2.2 (2.2 to 2.2)                  | 1213.7 (1148.3 to 1277.9) | 815.1 (767.9 to 865.2)     | 346.7 (313.9 to 383.0)        | 48.0 (32.0 to 70.4)             | 3.9 (3.9 to 3.9)                  |

| Country | Year | 2018 US Dollars per capita |                            |                               |                                 |                                   | 2018 PPP per capita       |                            |                               |                                 |                                   |
|---------|------|----------------------------|----------------------------|-------------------------------|---------------------------------|-----------------------------------|---------------------------|----------------------------|-------------------------------|---------------------------------|-----------------------------------|
|         |      | Health spending            | Government health spending | Out-of-pocket health spending | Prepaid private health spending | Development assistance for health | Health spending           | Government health spending | Out-of-pocket health spending | Prepaid private health spending | Development assistance for health |
| Panama  | 2009 | 728.1 (694.1 to 766.9)     | 481.9 (455.5 to 511.5)     | 209.1 (190.0 to 230.1)        | 28.0 (18.6 to 41.2)             | 9.1 (9.1 to 9.1)                  | 1263.8 (1204.8 to 1331.2) | 836.5 (790.6 to 887.8)     | 362.9 (329.8 to 399.4)        | 48.6 (32.2 to 71.5)             | 15.8 (15.8 to 15.8)               |
| Panama  | 2010 | 744.1 (708.4 to 780.5)     | 491.0 (464.3 to 519.6)     | 221.7 (201.8 to 242.9)        | 29.6 (19.9 to 42.6)             | 1.9 (1.9 to 1.9)                  | 1291.6 (1229.5 to 1354.8) | 852.2 (805.8 to 902.0)     | 384.8 (350.3 to 421.7)        | 51.4 (34.5 to 74.0)             | 3.2 (3.2 to 3.2)                  |
| Panama  | 2011 | 785.4 (748.0 to 822.9)     | 508.6 (482.2 to 537.4)     | 241.4 (220.9 to 264.8)        | 33.1 (22.6 to 46.7)             | 2.2 (2.2 to 2.2)                  | 1363.2 (1298.3 to 1428.3) | 882.7 (836.9 to 932.8)     | 419.1 (383.4 to 459.6)        | 57.5 (39.2 to 81.0)             | 3.9 (3.9 to 3.9)                  |
| Panama  | 2012 | 828.9 (789.6 to 868.1)     | 520.8 (493.1 to 548.6)     | 264.3 (242.9 to 289.7)        | 39.3 (26.9 to 55.5)             | 4.5 (4.5 to 4.5)                  | 1438.8 (1370.5 to 1506.9) | 903.9 (855.9 to 952.3)     | 458.8 (421.5 to 502.8)        | 68.3 (46.7 to 96.3)             | 7.9 (7.9 to 7.9)                  |
| Panama  | 2013 | 893.9 (853.4 to 940.0)     | 558.3 (529.5 to 589.6)     | 281.9 (258.9 to 307.8)        | 47.0 (32.9 to 65.8)             | 6.7 (6.7 to 6.7)                  | 1551.5 (1481.3 to 1631.5) | 969.0 (919.1 to 1023.3)    | 489.2 (449.3 to 534.3)        | 81.6 (57.1 to 114.2)            | 11.6 (11.6 to 11.6)               |
| Panama  | 2014 | 938.8 (894.8 to 987.9)     | 587.0 (555.3 to 620.4)     | 290.7 (265.1 to 319.7)        | 56.3 (39.6 to 79.7)             | 4.7 (4.7 to 4.7)                  | 1629.4 (1553.2 to 1714.8) | 1019.0 (963.8 to 1076.8)   | 504.5 (460.2 to 554.8)        | 97.8 (68.7 to 138.3)            | 8.2 (8.2 to 8.2)                  |
| Panama  | 2015 | 1004.8 (951.5 to 1059.0)   | 634.7 (598.9 to 672.0)     | 300.5 (270.8 to 332.9)        | 63.8 (44.5 to 89.4)             | 5.8 (5.8 to 5.8)                  | 1744.0 (1651.5 to 1838.1) | 1101.7 (1039.6 to 1166.4)  | 521.5 (470.0 to 577.9)        | 110.7 (77.3 to 155.1)           | 10.1 (10.1 to 10.1)               |
| Panama  | 2016 | 1078.4 (1013.5 to 1141.9)  | 696.8 (650.9 to 751.6)     | 308.9 (272.8 to 349.7)        | 71.2 (48.4 to 101.8)            | 1.4 (1.4 to 1.4)                  | 1871.8 (1759.3 to 1982.0) | 1209.5 (1129.8 to 1304.6)  | 536.3 (473.5 to 607.0)        | 123.7 (84.0 to 176.7)           | 2.4 (2.4 to 2.4)                  |
| Panama  | 2017 | 1124.4 (1055.7 to 1200.8)  | 732.1 (683.5 to 790.5)     | 318.5 (281.6 to 359.9)        | 73.6 (50.1 to 105.1)            | 0.1 (0.1 to 0.1)                  | 1951.7 (1832.4 to 2084.3) | 1270.8 (1186.4 to 1372.1)  | 552.9 (488.8 to 624.8)        | 127.8 (87.0 to 182.5)           | 0.2 (0.2 to 0.2)                  |
| Panama  | 2018 | 1151.6 (1082.3 to 1221.2)  | 751.7 (702.9 to 811.1)     | 324.1 (286.3 to 367.5)        | 75.7 (51.6 to 108.0)            | 0.1 (0.1 to 0.1)                  | 1998.9 (1878.6 to 2119.7) | 1304.8 (1220.1 to 1407.9)  | 562.5 (496.9 to 637.9)        | 131.4 (89.6 to 187.4)           | 0.2 (0.2 to 0.2)                  |
| Panama  | 2019 | 1177.1 (1103.5 to 1255.4)  | 770.4 (720.4 to 832.1)     | 329.1 (291.0 to 372.8)        | 77.4 (52.8 to 110.5)            | 0.1 (0.1 to 0.1)                  | 2043.1 (1915.4 to 2179.0) | 1337.2 (1250.4 to 1444.3)  | 571.3 (505.1 to 647.1)        | 134.4 (91.7 to 191.8)           | 0.2 (0.2 to 0.2)                  |
| Panama  | 2020 | 1202.4 (1129.3 to 1276.7)  | 789.2 (738.1 to 852.3)     | 333.9 (295.1 to 378.4)        | 79.2 (54.0 to 112.9)            | 0.1 (0.1 to 0.1)                  | 2087.0 (1960.2 to 2216.0) | 1369.8 (1281.2 to 1479.4)  | 579.6 (512.2 to 656.7)        | 137.4 (93.7 to 196.0)           | 0.2 (0.2 to 0.2)                  |
| Panama  | 2021 | 1224.9 (1149.3 to 1308.5)  | 805.4 (752.4 to 869.8)     | 338.6 (299.0 to 383.5)        | 80.9 (55.2 to 115.1)            | 0.1 (0.1 to 0.1)                  | 2126.2 (1994.8 to 2271.1) | 1397.9 (1305.9 to 1509.8)  | 587.7 (519.1 to 665.6)        | 140.4 (95.8 to 199.8)           | 0.2 (0.2 to 0.2)                  |
| Panama  | 2022 | 1247.0 (1171.6 to 1324.4)  | 821.4 (767.0 to 887.2)     | 342.9 (302.9 to 388.3)        | 82.6 (56.3 to 117.6)            | 0.1 (0.1 to 0.1)                  | 2164.4 (2033.6 to 2298.8) | 1425.7 (1331.2 to 1540.0)  | 595.2 (525.7 to 674.1)        | 143.4 (97.7 to 204.2)           | 0.2 (0.2 to 0.2)                  |
| Panama  | 2023 | 1269.1 (1188.5 to 1355.6)  | 837.3 (781.3 to 903.6)     | 347.3 (306.5 to 393.2)        | 84.4 (57.4 to 120.4)            | 0.1 (0.1 to 0.1)                  | 2202.8 (2063.0 to 2352.9) | 1453.4 (1356.1 to 1568.3)  | 602.8 (532.1 to 682.6)        | 146.5 (99.6 to 208.9)           | 0.2 (0.2 to 0.2)                  |
| Panama  | 2024 | 1293.9 (1214.8 to 1374.9)  | 856.2 (798.5 to 923.3)     | 351.4 (310.1 to 397.8)        | 86.1 (58.5 to 123.0)            | 0.1 (0.1 to 0.1)                  | 2245.8 (2108.6 to 2386.5) | 1486.2 (1386.1 to 1602.6)  | 610.0 (538.2 to 690.5)        | 149.5 (101.6 to 213.6)          | 0.2 (0.2 to 0.2)                  |
| Panama  | 2025 | 1319.6 (1236.6 to 1409.7)  | 875.7 (816.8 to 945.7)     | 355.8 (314.0 to 403.4)        | 87.9 (59.8 to 125.6)            | 0.1 (0.1 to 0.1)                  | 2290.4 (2146.4 to 2446.9) | 1520.0 (1417.8 to 1641.5)  | 617.6 (545.0 to 700.3)        | 152.6 (103.7 to 218.0)          | 0.2 (0.2 to 0.2)                  |
| Panama  | 2026 | 1344.8 (1263.0 to 1429.5)  | 894.8 (834.0 to 966.8)     | 360.2 (317.7 to 408.9)        | 89.7 (61.0 to 128.4)            | 0.1 (0.0 to 0.1)                  | 2334.3 (2192.2 to 2481.3) | 1553.2 (1447.5 to 1678.1)  | 625.2 (551.5 to 709.7)        | 155.8 (105.9 to 222.9)          | 0.2 (0.0 to 0.2)                  |
| Panama  | 2027 | 1370.7 (1283.3 to 1468.5)  | 914.4 (850.5 to 988.3)     | 364.6 (321.4 to 414.8)        | 91.6 (62.3 to 131.1)            | 0.1 (0.0 to 0.1)                  | 2379.2 (2227.4 to 2548.8) | 1587.1 (1476.3 to 1715.5)  | 632.9 (557.8 to 720.0)        | 159.0 (108.1 to 227.5)          | 0.2 (0.0 to 0.3)                  |
| Panama  | 2028 | 1397.8 (1307.9 to 1487.2)  | 935.0 (869.1 to 1010.4)    | 369.2 (325.1 to 421.7)        | 93.5 (63.7 to 133.8)            | 0.1 (0.0 to 0.2)                  | 2426.2 (2270.1 to 2581.5) | 1622.9 (1508.6 to 1753.8)  | 640.8 (564.2 to 731.9)        | 162.4 (110.6 to 232.3)          | 0.2 (0.0 to 0.3)                  |
| Panama  | 2029 | 1425.1 (1335.6 to 1526.5)  | 955.7 (888.4 to 1034.0)    | 373.7 (327.9 to 426.5)        | 95.5 (65.0 to 136.6)            | 0.1 (0.0 to 0.2)                  | 2473.5 (2318.2 to 2649.7) | 1658.9 (1542.0 to 1794.8)  | 648.7 (569.2 to 740.4)        | 165.8 (112.8 to 237.1)          | 0.2 (0.0 to 0.3)                  |

| Country | Year | 2018 US Dollars per capita |                            |                               |                                 |                                   | 2018 PPP per capita       |                            |                               |                                 |                                   |
|---------|------|----------------------------|----------------------------|-------------------------------|---------------------------------|-----------------------------------|---------------------------|----------------------------|-------------------------------|---------------------------------|-----------------------------------|
|         |      | Health spending            | Government health spending | Out-of-pocket health spending | Prepaid private health spending | Development assistance for health | Health spending           | Government health spending | Out-of-pocket health spending | Prepaid private health spending | Development assistance for health |
| Panama  | 2030 | 1453.6 (1358.9 to 1550.9)  | 977.6 (907.0 to 1059.5)    | 378.4 (331.3 to 431.3)        | 97.5 (66.3 to 139.5)            | 0.1 (0.0 to 0.2)                  | 2523.0 (2358.7 to 2691.9) | 1696.8 (1574.3 to 1839.1)  | 656.8 (575.1 to 748.6)        | 169.3 (115.1 to 242.1)          | 0.2 (0.0 to 0.3)                  |
| Panama  | 2031 | 1483.0 (1385.3 to 1591.6)  | 999.9 (926.0 to 1084.7)    | 383.4 (335.1 to 437.1)        | 99.6 (67.7 to 142.5)            | 0.1 (0.0 to 0.2)                  | 2574.0 (2404.5 to 2762.6) | 1735.5 (1607.4 to 1882.8)  | 665.4 (581.6 to 758.7)        | 172.9 (117.5 to 247.3)          | 0.2 (0.0 to 0.3)                  |
| Panama  | 2032 | 1511.5 (1408.8 to 1617.4)  | 1021.6 (944.7 to 1111.0)   | 388.1 (338.2 to 443.4)        | 101.7 (69.1 to 145.3)           | 0.1 (0.0 to 0.2)                  | 2623.5 (2445.3 to 2807.3) | 1773.2 (1639.7 to 1928.4)  | 673.6 (587.0 to 769.5)        | 176.5 (119.9 to 252.1)          | 0.2 (0.0 to 0.3)                  |
| Panama  | 2033 | 1541.1 (1429.9 to 1660.3)  | 1044.1 (962.9 to 1137.3)   | 393.0 (343.1 to 449.9)        | 103.9 (70.5 to 148.2)           | 0.1 (0.0 to 0.2)                  | 2675.0 (2481.9 to 2881.9) | 1812.4 (1671.4 to 1974.1)  | 682.2 (595.5 to 780.9)        | 180.3 (122.4 to 257.2)          | 0.2 (0.0 to 0.3)                  |
| Panama  | 2034 | 1571.7 (1459.8 to 1686.0)  | 1067.4 (980.1 to 1163.2)   | 398.1 (346.8 to 456.6)        | 106.1 (72.1 to 151.4)           | 0.1 (0.0 to 0.2)                  | 2728.0 (2533.8 to 2926.5) | 1852.7 (1701.2 to 2019.1)  | 691.0 (602.0 to 792.5)        | 184.1 (125.2 to 262.7)          | 0.1 (0.0 to 0.3)                  |
| Panama  | 2035 | 1602.3 (1483.5 to 1726.4)  | 1090.8 (997.7 to 1191.4)   | 403.0 (351.7 to 463.1)        | 108.3 (73.8 to 154.6)           | 0.1 (0.0 to 0.2)                  | 2781.1 (2574.9 to 2996.5) | 1893.4 (1731.8 to 2067.9)  | 699.6 (610.4 to 803.8)        | 188.0 (128.1 to 268.4)          | 0.1 (0.0 to 0.3)                  |
| Panama  | 2036 | 1631.6 (1510.1 to 1756.6)  | 1113.2 (1014.1 to 1217.2)  | 407.8 (354.4 to 469.4)        | 110.5 (75.2 to 158.0)           | 0.1 (0.0 to 0.2)                  | 2832.1 (2621.2 to 3048.9) | 1932.3 (1760.2 to 2112.8)  | 707.8 (615.1 to 814.8)        | 191.8 (130.6 to 274.2)          | 0.1 (0.0 to 0.3)                  |
| Panama  | 2037 | 1661.0 (1537.2 to 1796.8)  | 1135.7 (1032.0 to 1245.2)  | 412.5 (357.2 to 475.3)        | 112.7 (76.7 to 161.1)           | 0.1 (0.0 to 0.2)                  | 2883.1 (2668.2 to 3118.9) | 1971.3 (1791.3 to 2161.3)  | 716.0 (620.0 to 825.0)        | 195.6 (133.2 to 279.6)          | 0.1 (0.0 to 0.3)                  |
| Panama  | 2038 | 1692.2 (1563.0 to 1828.5)  | 1159.6 (1049.2 to 1275.1)  | 417.5 (361.5 to 482.4)        | 115.0 (78.3 to 164.4)           | 0.1 (0.0 to 0.2)                  | 2937.2 (2713.0 to 3173.8) | 2012.7 (1821.2 to 2213.3)  | 724.7 (627.4 to 837.3)        | 199.6 (135.8 to 285.4)          | 0.1 (0.0 to 0.3)                  |
| Panama  | 2039 | 1722.1 (1587.5 to 1872.9)  | 1182.5 (1065.1 to 1304.0)  | 422.2 (364.7 to 488.7)        | 117.3 (79.7 to 168.1)           | 0.1 (0.0 to 0.2)                  | 2989.1 (2755.5 to 3250.9) | 2052.6 (1848.7 to 2263.5)  | 732.9 (633.0 to 848.2)        | 203.6 (138.4 to 291.7)          | 0.1 (0.0 to 0.4)                  |
| Panama  | 2040 | 1752.4 (1612.0 to 1899.9)  | 1205.9 (1082.2 to 1333.4)  | 426.9 (367.9 to 494.9)        | 119.6 (81.2 to 171.7)           | 0.1 (0.0 to 0.2)                  | 3041.6 (2797.9 to 3297.6) | 2093.1 (1878.4 to 2314.4)  | 740.9 (638.6 to 859.0)        | 207.5 (141.0 to 298.0)          | 0.1 (0.0 to 0.4)                  |
| Panama  | 2041 | 1782.3 (1630.0 to 1945.1)  | 1228.7 (1099.8 to 1361.7)  | 431.6 (371.4 to 501.1)        | 121.9 (82.7 to 175.2)           | 0.1 (0.0 to 0.2)                  | 3093.6 (2829.3 to 3376.2) | 2132.8 (1909.0 to 2363.6)  | 749.2 (644.6 to 869.7)        | 211.6 (143.5 to 304.1)          | 0.1 (0.0 to 0.4)                  |
| Panama  | 2042 | 1813.2 (1665.3 to 1972.6)  | 1252.3 (1117.6 to 1390.6)  | 436.6 (375.3 to 507.5)        | 124.3 (84.3 to 179.2)           | 0.1 (0.0 to 0.2)                  | 3147.3 (2890.5 to 3423.9) | 2173.6 (1939.9 to 2413.8)  | 757.9 (651.4 to 880.8)        | 215.8 (146.3 to 311.1)          | 0.1 (0.0 to 0.4)                  |
| Panama  | 2043 | 1844.6 (1688.4 to 2020.5)  | 1276.1 (1136.8 to 1421.3)  | 441.7 (378.9 to 513.2)        | 126.8 (86.0 to 182.6)           | 0.1 (0.0 to 0.2)                  | 3201.8 (2930.6 to 3507.1) | 2215.0 (1973.2 to 2466.9)  | 766.7 (657.8 to 890.8)        | 220.0 (149.2 to 317.0)          | 0.1 (0.0 to 0.4)                  |
| Panama  | 2044 | 1875.6 (1717.6 to 2048.3)  | 1299.6 (1155.2 to 1451.5)  | 446.7 (382.9 to 518.7)        | 129.2 (87.6 to 185.8)           | 0.1 (0.0 to 0.2)                  | 3255.5 (2981.4 to 3555.2) | 2255.7 (2005.2 to 2519.5)  | 775.4 (664.5 to 900.2)        | 224.3 (152.0 to 322.6)          | 0.1 (0.0 to 0.4)                  |
| Panama  | 2045 | 1906.6 (1735.6 to 2094.9)  | 1323.4 (1173.2 to 1481.7)  | 451.5 (386.6 to 525.1)        | 131.7 (89.3 to 189.5)           | 0.1 (0.0 to 0.2)                  | 3309.4 (3012.5 to 3636.3) | 2297.1 (2036.3 to 2571.8)  | 783.6 (671.1 to 911.4)        | 228.6 (155.1 to 328.9)          | 0.1 (0.0 to 0.4)                  |
| Panama  | 2046 | 1937.9 (1768.3 to 2125.2)  | 1347.0 (1190.4 to 1512.4)  | 456.6 (390.5 to 531.0)        | 134.3 (90.8 to 193.4)           | 0.0 (0.0 to 0.2)                  | 3363.7 (3069.2 to 3688.7) | 2338.1 (2066.2 to 2625.1)  | 792.5 (677.9 to 921.6)        | 233.0 (157.7 to 335.7)          | 0.1 (0.0 to 0.4)                  |
| Panama  | 2047 | 1970.1 (1785.0 to 2166.4)  | 1371.5 (1207.9 to 1545.1)  | 461.7 (394.8 to 537.3)        | 136.9 (92.5 to 197.2)           | 0.0 (0.0 to 0.3)                  | 3419.7 (3098.2 to 3760.2) | 2380.6 (2096.5 to 2681.8)  | 801.4 (685.2 to 932.5)        | 237.6 (160.6 to 342.3)          | 0.1 (0.0 to 0.5)                  |
| Panama  | 2048 | 2002.2 (1819.9 to 2198.7)  | 1395.9 (1226.8 to 1576.6)  | 466.8 (398.4 to 542.8)        | 139.5 (94.2 to 201.0)           | 0.0 (0.0 to 0.3)                  | 3475.3 (3158.9 to 3816.3) | 2422.8 (2129.4 to 2736.6)  | 810.3 (691.6 to 942.2)        | 242.1 (163.6 to 348.9)          | 0.1 (0.0 to 0.5)                  |
| Panama  | 2049 | 2034.5 (1840.3 to 2246.7)  | 1420.5 (1245.3 to 1608.5)  | 471.8 (401.4 to 548.3)        | 142.1 (95.9 to 204.8)           | 0.0 (0.0 to 0.3)                  | 3531.3 (3194.2 to 3899.6) | 2465.6 (2161.5 to 2792.0)  | 818.9 (696.8 to 951.7)        | 246.7 (166.5 to 355.4)          | 0.1 (0.0 to 0.5)                  |
| Panama  | 2050 | 2066.7 (1870.0 to 2283.4)  | 1445.2 (1263.1 to 1641.5)  | 476.6 (404.9 to 553.6)        | 144.8 (97.7 to 208.6)           | 0.0 (0.0 to 0.3)                  | 3587.3 (3245.8 to 3963.3) | 2508.6 (2192.5 to 2849.2)  | 827.3 (702.8 to 960.9)        | 251.3 (169.5 to 362.0)          | 0.1 (0.0 to 0.5)                  |

| Country          | Year | 2018 US Dollars per capita |                            |                               |                                 |                                   | 2018 PPP per capita  |                            |                               |                                 |                                   |
|------------------|------|----------------------------|----------------------------|-------------------------------|---------------------------------|-----------------------------------|----------------------|----------------------------|-------------------------------|---------------------------------|-----------------------------------|
|                  |      | Health spending            | Government health spending | Out-of-pocket health spending | Prepaid private health spending | Development assistance for health | Health spending      | Government health spending | Out-of-pocket health spending | Prepaid private health spending | Development assistance for health |
| Papua New Guinea | 1995 | 41.3 (32.8 to 51.3)        | 35.9 (27.4 to 46.0)        | 3.3 (2.3 to 4.5)              | 0.2 (0.1 to 0.4)                | 1.9 (1.9 to 1.9)                  | 51.2 (40.8 to 63.7)  | 44.5 (34.1 to 57.2)        | 4.1 (2.8 to 5.6)              | 0.3 (0.1 to 0.5)                | 2.3 (2.3 to 2.3)                  |
| Papua New Guinea | 1996 | 49.3 (40.8 to 59.6)        | 36.5 (28.0 to 46.6)        | 3.4 (2.4 to 4.7)              | 0.2 (0.1 to 0.4)                | 9.1 (9.1 to 9.1)                  | 61.2 (50.6 to 74.0)  | 45.4 (34.7 to 57.9)        | 4.3 (2.9 to 5.9)              | 0.3 (0.1 to 0.6)                | 11.3 (11.3 to 11.3)               |
| Papua New Guinea | 1997 | 46.9 (38.7 to 56.5)        | 34.9 (26.9 to 44.5)        | 3.5 (2.4 to 4.9)              | 0.2 (0.1 to 0.4)                | 8.3 (8.3 to 8.3)                  | 58.2 (48.0 to 70.2)  | 43.3 (33.4 to 55.2)        | 4.3 (3.0 to 6.1)              | 0.3 (0.1 to 0.5)                | 10.3 (10.3 to 10.3)               |
| Papua New Guinea | 1998 | 45.5 (37.2 to 55.0)        | 35.2 (27.3 to 45.0)        | 3.6 (2.5 to 5.1)              | 0.2 (0.1 to 0.4)                | 6.5 (6.5 to 6.5)                  | 56.4 (46.2 to 68.3)  | 43.7 (33.9 to 55.8)        | 4.5 (3.1 to 6.4)              | 0.3 (0.1 to 0.5)                | 8.0 (8.0 to 8.0)                  |
| Papua New Guinea | 1999 | 57.2 (49.0 to 66.9)        | 35.8 (27.9 to 45.4)        | 3.8 (2.7 to 5.4)              | 0.2 (0.1 to 0.3)                | 17.4 (17.4 to 17.4)               | 71.0 (60.9 to 83.1)  | 44.4 (34.7 to 56.4)        | 4.7 (3.3 to 6.7)              | 0.2 (0.1 to 0.4)                | 21.6 (21.6 to 21.6)               |
| Papua New Guinea | 2000 | 56.1 (48.6 to 65.3)        | 34.9 (27.7 to 44.0)        | 4.0 (2.8 to 5.6)              | 0.2 (0.1 to 0.3)                | 17.1 (17.1 to 17.1)               | 69.7 (60.3 to 81.1)  | 43.3 (34.3 to 54.6)        | 4.9 (3.4 to 6.9)              | 0.2 (0.1 to 0.3)                | 21.3 (21.3 to 21.3)               |
| Papua New Guinea | 2001 | 46.5 (39.4 to 55.3)        | 33.7 (26.7 to 42.2)        | 4.1 (2.8 to 5.7)              | 0.1 (0.1 to 0.2)                | 8.6 (8.6 to 8.6)                  | 57.8 (48.9 to 68.6)  | 41.8 (33.2 to 52.4)        | 5.1 (3.5 to 7.1)              | 0.1 (0.1 to 0.3)                | 10.7 (10.7 to 10.7)               |
| Papua New Guinea | 2002 | 47.5 (40.6 to 55.5)        | 32.2 (25.7 to 39.8)        | 4.2 (2.9 to 5.9)              | 0.1 (0.1 to 0.2)                | 11.0 (11.0 to 11.0)               | 59.0 (50.5 to 69.0)  | 40.0 (31.9 to 49.4)        | 5.2 (3.6 to 7.4)              | 0.1 (0.1 to 0.3)                | 13.6 (13.6 to 13.6)               |
| Papua New Guinea | 2003 | 46.1 (39.5 to 53.5)        | 31.0 (24.5 to 37.9)        | 4.2 (2.9 to 6.0)              | 0.1 (0.0 to 0.2)                | 10.8 (10.8 to 10.8)               | 57.2 (49.1 to 66.4)  | 38.5 (30.5 to 47.1)        | 5.2 (3.6 to 7.4)              | 0.1 (0.1 to 0.2)                | 13.4 (13.4 to 13.4)               |
| Papua New Guinea | 2004 | 47.0 (40.2 to 54.5)        | 31.6 (25.1 to 39.0)        | 4.2 (2.9 to 5.9)              | 0.1 (0.1 to 0.2)                | 11.1 (11.1 to 11.1)               | 58.3 (49.9 to 67.7)  | 39.2 (31.1 to 48.4)        | 5.2 (3.6 to 7.4)              | 0.1 (0.1 to 0.3)                | 13.7 (13.7 to 13.7)               |
| Papua New Guinea | 2005 | 48.5 (41.3 to 56.3)        | 32.6 (25.8 to 40.1)        | 4.2 (2.9 to 5.9)              | 0.1 (0.1 to 0.2)                | 11.6 (11.6 to 11.6)               | 60.2 (51.3 to 69.9)  | 40.4 (32.0 to 49.8)        | 5.2 (3.6 to 7.3)              | 0.2 (0.1 to 0.3)                | 14.4 (14.4 to 14.4)               |
| Papua New Guinea | 2006 | 48.7 (41.5 to 56.4)        | 32.7 (25.7 to 40.2)        | 4.1 (2.9 to 5.9)              | 0.2 (0.1 to 0.3)                | 11.8 (11.8 to 11.8)               | 60.5 (51.6 to 70.0)  | 40.5 (31.9 to 49.9)        | 5.1 (3.6 to 7.3)              | 0.2 (0.1 to 0.4)                | 14.6 (14.6 to 14.6)               |
| Papua New Guinea | 2007 | 49.0 (41.6 to 57.2)        | 33.8 (26.7 to 41.6)        | 4.2 (2.9 to 6.0)              | 0.2 (0.1 to 0.4)                | 10.8 (10.8 to 10.8)               | 60.8 (51.7 to 71.0)  | 42.0 (33.1 to 51.7)        | 5.3 (3.6 to 7.4)              | 0.2 (0.1 to 0.5)                | 13.3 (13.3 to 13.3)               |
| Papua New Guinea | 2008 | 50.2 (43.3 to 57.9)        | 32.3 (25.7 to 40.0)        | 4.4 (3.0 to 6.1)              | 0.3 (0.1 to 0.5)                | 13.2 (13.2 to 13.2)               | 62.4 (53.8 to 71.9)  | 40.2 (31.9 to 49.6)        | 5.4 (3.7 to 7.6)              | 0.3 (0.2 to 0.6)                | 16.4 (16.4 to 16.4)               |
| Papua New Guinea | 2009 | 52.4 (45.4 to 60.0)        | 32.2 (25.4 to 39.6)        | 4.8 (3.3 to 6.7)              | 0.3 (0.2 to 0.6)                | 15.1 (15.1 to 15.1)               | 65.1 (56.4 to 74.5)  | 39.9 (31.5 to 49.1)        | 6.0 (4.1 to 8.4)              | 0.4 (0.2 to 0.8)                | 18.7 (18.7 to 18.7)               |
| Papua New Guinea | 2010 | 55.2 (48.2 to 63.1)        | 32.6 (25.9 to 40.3)        | 5.2 (3.5 to 7.4)              | 0.4 (0.2 to 0.8)                | 16.9 (16.9 to 16.9)               | 68.5 (59.8 to 78.3)  | 40.5 (32.2 to 50.0)        | 6.5 (4.4 to 9.2)              | 0.5 (0.2 to 1.0)                | 20.9 (20.9 to 20.9)               |
| Papua New Guinea | 2011 | 67.1 (59.7 to 75.6)        | 35.1 (27.6 to 43.8)        | 5.4 (3.7 to 7.6)              | 0.5 (0.2 to 1.0)                | 26.0 (26.0 to 26.0)               | 83.3 (74.1 to 93.9)  | 43.6 (34.3 to 54.4)        | 6.7 (4.6 to 9.4)              | 0.6 (0.3 to 1.2)                | 32.3 (32.3 to 32.3)               |
| Papua New Guinea | 2012 | 70.7 (62.3 to 80.9)        | 39.8 (31.4 to 49.6)        | 5.3 (3.6 to 7.4)              | 0.6 (0.3 to 1.2)                | 25.1 (25.1 to 25.1)               | 87.8 (77.4 to 100.4) | 49.4 (39.0 to 61.5)        | 6.5 (4.5 to 9.1)              | 0.8 (0.4 to 1.5)                | 31.1 (31.1 to 31.1)               |
| Papua New Guinea | 2013 | 71.6 (62.4 to 82.8)        | 44.0 (34.9 to 54.8)        | 4.8 (3.3 to 6.7)              | 0.8 (0.4 to 1.4)                | 22.0 (22.0 to 22.0)               | 88.9 (77.5 to 102.8) | 54.7 (43.3 to 68.1)        | 6.0 (4.1 to 8.3)              | 0.9 (0.4 to 1.8)                | 27.3 (27.3 to 27.3)               |
| Papua New Guinea | 2014 | 71.7 (61.7 to 84.1)        | 48.6 (38.2 to 60.5)        | 4.5 (3.1 to 6.2)              | 0.9 (0.4 to 1.6)                | 17.8 (17.8 to 17.8)               | 89.1 (76.6 to 104.4) | 60.4 (47.4 to 75.1)        | 5.6 (3.8 to 7.7)              | 1.1 (0.5 to 2.0)                | 22.1 (22.1 to 22.1)               |
| Papua New Guinea | 2015 | 68.6 (58.2 to 81.2)        | 47.2 (36.8 to 59.9)        | 4.4 (3.0 to 6.1)              | 0.9 (0.4 to 1.7)                | 16.0 (16.0 to 16.0)               | 85.1 (72.2 to 100.8) | 58.6 (45.7 to 74.3)        | 5.5 (3.8 to 7.6)              | 1.1 (0.5 to 2.1)                | 19.9 (19.9 to 19.9)               |

| Country          | Year | 2018 US Dollars per capita |                            |                               |                                 |                                   | 2018 PPP per capita  |                            |                               |                                 |                                   |
|------------------|------|----------------------------|----------------------------|-------------------------------|---------------------------------|-----------------------------------|----------------------|----------------------------|-------------------------------|---------------------------------|-----------------------------------|
|                  |      | Health spending            | Government health spending | Out-of-pocket health spending | Prepaid private health spending | Development assistance for health | Health spending      | Government health spending | Out-of-pocket health spending | Prepaid private health spending | Development assistance for health |
| Papua New Guinea | 2016 | 58.6 (49.1 to 70.9)        | 42.8 (33.2 to 55.0)        | 4.3 (3.0 to 5.9)              | 0.8 (0.4 to 1.5)                | 10.7 (10.7 to 10.7)               | 72.8 (61.0 to 88.1)  | 53.2 (41.2 to 68.2)        | 5.4 (3.7 to 7.4)              | 1.0 (0.4 to 1.8)                | 13.3 (13.3 to 13.3)               |
| Papua New Guinea | 2017 | 54.2 (45.5 to 65.4)        | 38.9 (30.3 to 50.0)        | 4.3 (3.0 to 6.0)              | 0.8 (0.4 to 1.5)                | 10.2 (10.2 to 10.2)               | 67.3 (56.5 to 81.2)  | 48.4 (37.6 to 62.1)        | 5.3 (3.7 to 7.4)              | 1.0 (0.5 to 1.9)                | 12.6 (12.6 to 12.6)               |
| Papua New Guinea | 2018 | 54.2 (45.4 to 65.7)        | 39.9 (31.1 to 51.4)        | 4.4 (3.0 to 6.0)              | 0.8 (0.4 to 1.5)                | 9.1 (9.1 to 9.2)                  | 67.3 (56.3 to 81.6)  | 49.5 (38.6 to 63.8)        | 5.4 (3.7 to 7.5)              | 1.0 (0.5 to 1.9)                | 11.3 (11.3 to 11.5)               |
| Papua New Guinea | 2019 | 54.9 (45.6 to 66.7)        | 40.6 (31.7 to 52.3)        | 4.4 (3.0 to 6.1)              | 0.8 (0.4 to 1.6)                | 9.1 (8.4 to 9.7)                  | 68.2 (56.6 to 82.8)  | 50.4 (39.3 to 64.9)        | 5.5 (3.8 to 7.6)              | 1.0 (0.5 to 1.9)                | 11.3 (10.5 to 12.0)               |
| Papua New Guinea | 2020 | 55.7 (46.3 to 67.6)        | 41.3 (32.2 to 53.2)        | 4.5 (3.1 to 6.2)              | 0.9 (0.4 to 1.6)                | 9.1 (8.3 to 9.8)                  | 69.1 (57.4 to 83.9)  | 51.3 (40.0 to 66.1)        | 5.5 (3.8 to 7.7)              | 1.1 (0.5 to 2.0)                | 11.3 (10.2 to 12.2)               |
| Papua New Guinea | 2021 | 56.7 (47.1 to 68.9)        | 42.2 (32.9 to 54.3)        | 4.5 (3.1 to 6.3)              | 0.9 (0.4 to 1.6)                | 9.1 (8.1 to 10.1)                 | 70.5 (58.5 to 85.5)  | 52.4 (40.9 to 67.4)        | 5.6 (3.8 to 7.8)              | 1.1 (0.5 to 2.0)                | 11.4 (10.1 to 12.6)               |
| Papua New Guinea | 2022 | 57.9 (48.0 to 69.8)        | 43.2 (33.7 to 55.4)        | 4.6 (3.1 to 6.3)              | 0.9 (0.4 to 1.7)                | 9.3 (8.2 to 10.4)                 | 71.9 (59.6 to 86.7)  | 53.6 (41.8 to 68.8)        | 5.7 (3.9 to 7.9)              | 1.1 (0.5 to 2.1)                | 11.5 (10.2 to 13.0)               |
| Papua New Guinea | 2023 | 58.6 (48.6 to 71.1)        | 43.7 (34.1 to 56.1)        | 4.6 (3.2 to 6.4)              | 0.9 (0.4 to 1.7)                | 9.4 (8.0 to 10.7)                 | 72.7 (60.4 to 88.3)  | 54.3 (42.3 to 69.6)        | 5.7 (3.9 to 8.0)              | 1.1 (0.5 to 2.1)                | 11.6 (10.0 to 13.3)               |
| Papua New Guinea | 2024 | 59.3 (49.0 to 71.9)        | 44.2 (34.5 to 56.7)        | 4.7 (3.2 to 6.5)              | 0.9 (0.4 to 1.7)                | 9.5 (8.0 to 11.0)                 | 73.6 (60.8 to 89.3)  | 54.9 (42.8 to 70.4)        | 5.8 (4.0 to 8.0)              | 1.1 (0.5 to 2.1)                | 11.8 (9.9 to 13.6)                |
| Papua New Guinea | 2025 | 60.0 (49.8 to 72.7)        | 44.8 (35.0 to 57.4)        | 4.7 (3.2 to 6.6)              | 0.9 (0.4 to 1.7)                | 9.5 (8.0 to 11.2)                 | 74.5 (61.8 to 90.2)  | 55.7 (43.4 to 71.2)        | 5.9 (4.0 to 8.2)              | 1.2 (0.5 to 2.2)                | 11.8 (9.9 to 14.0)                |
| Papua New Guinea | 2026 | 60.8 (50.7 to 73.4)        | 45.5 (35.5 to 58.2)        | 4.8 (3.3 to 6.7)              | 1.0 (0.4 to 1.8)                | 9.6 (8.0 to 11.4)                 | 75.5 (62.9 to 91.2)  | 56.5 (44.0 to 72.3)        | 5.9 (4.1 to 8.3)              | 1.2 (0.5 to 2.2)                | 12.0 (9.9 to 14.1)                |
| Papua New Guinea | 2027 | 61.5 (51.0 to 74.3)        | 45.9 (35.7 to 58.8)        | 4.8 (3.3 to 6.7)              | 1.0 (0.4 to 1.8)                | 9.7 (8.0 to 11.6)                 | 76.3 (63.3 to 92.2)  | 57.0 (44.4 to 72.9)        | 6.0 (4.1 to 8.4)              | 1.2 (0.5 to 2.2)                | 12.1 (10.0 to 14.5)               |
| Papua New Guinea | 2028 | 62.2 (51.6 to 75.0)        | 46.4 (36.2 to 59.3)        | 4.9 (3.3 to 6.8)              | 1.0 (0.4 to 1.8)                | 9.9 (8.1 to 12.1)                 | 77.2 (64.1 to 93.1)  | 57.7 (44.9 to 73.6)        | 6.1 (4.1 to 8.5)              | 1.2 (0.6 to 2.3)                | 12.2 (10.1 to 15.1)               |
| Papua New Guinea | 2029 | 62.9 (52.3 to 75.9)        | 47.0 (36.5 to 59.9)        | 4.9 (3.3 to 6.9)              | 1.0 (0.5 to 1.9)                | 10.0 (8.1 to 12.3)                | 78.1 (64.9 to 94.3)  | 58.4 (45.3 to 74.4)        | 6.1 (4.1 to 8.6)              | 1.2 (0.6 to 2.3)                | 12.4 (10.1 to 15.3)               |
| Papua New Guinea | 2030 | 63.6 (52.9 to 77.0)        | 47.5 (36.9 to 60.5)        | 5.0 (3.4 to 7.0)              | 1.0 (0.5 to 1.9)                | 10.1 (8.2 to 12.4)                | 79.0 (65.7 to 95.6)  | 59.0 (45.9 to 75.1)        | 6.2 (4.2 to 8.7)              | 1.3 (0.6 to 2.4)                | 12.5 (10.1 to 15.4)               |
| Papua New Guinea | 2031 | 64.5 (53.6 to 78.1)        | 48.2 (37.4 to 61.3)        | 5.1 (3.4 to 7.2)              | 1.0 (0.5 to 1.9)                | 10.2 (8.1 to 12.9)                | 80.0 (66.5 to 96.9)  | 59.8 (46.4 to 76.1)        | 6.3 (4.2 to 8.9)              | 1.3 (0.6 to 2.4)                | 12.7 (10.1 to 16.0)               |
| Papua New Guinea | 2032 | 65.3 (54.3 to 78.9)        | 48.8 (37.9 to 62.3)        | 5.1 (3.4 to 7.3)              | 1.1 (0.5 to 2.0)                | 10.3 (8.2 to 13.2)                | 81.1 (67.5 to 98.0)  | 60.6 (47.0 to 77.3)        | 6.4 (4.2 to 9.0)              | 1.3 (0.6 to 2.4)                | 12.8 (10.2 to 16.4)               |
| Papua New Guinea | 2033 | 66.2 (54.9 to 79.9)        | 49.5 (38.4 to 63.2)        | 5.2 (3.4 to 7.3)              | 1.1 (0.5 to 2.0)                | 10.5 (8.2 to 13.4)                | 82.2 (68.1 to 99.2)  | 61.4 (47.6 to 78.4)        | 6.4 (4.3 to 9.1)              | 1.3 (0.6 to 2.5)                | 13.0 (10.2 to 16.6)               |
| Papua New Guinea | 2034 | 67.1 (55.7 to 80.9)        | 50.1 (38.8 to 64.0)        | 5.3 (3.5 to 7.4)              | 1.1 (0.5 to 2.0)                | 10.6 (8.3 to 13.8)                | 83.3 (69.1 to 100.5) | 62.2 (48.2 to 79.5)        | 6.5 (4.3 to 9.2)              | 1.4 (0.6 to 2.5)                | 13.2 (10.3 to 17.2)               |
| Papua New Guinea | 2035 | 67.9 (56.4 to 81.8)        | 50.7 (39.2 to 64.8)        | 5.3 (3.5 to 7.6)              | 1.1 (0.5 to 2.1)                | 10.8 (8.4 to 14.2)                | 84.4 (70.0 to 101.5) | 63.0 (48.7 to 80.5)        | 6.6 (4.3 to 9.4)              | 1.4 (0.6 to 2.6)                | 13.4 (10.4 to 17.6)               |
| Papua New Guinea | 2036 | 68.9 (57.0 to 83.1)        | 51.4 (39.6 to 65.6)        | 5.4 (3.5 to 7.7)              | 1.1 (0.5 to 2.1)                | 10.9 (8.4 to 14.9)                | 85.5 (70.7 to 103.2) | 63.8 (49.2 to 81.4)        | 6.7 (4.4 to 9.6)              | 1.4 (0.6 to 2.6)                | 13.6 (10.5 to 18.5)               |

| Country          | Year | 2018 US Dollars per capita |                            |                               |                                 |                                   | 2018 PPP per capita    |                            |                               |                                 |                                   |
|------------------|------|----------------------------|----------------------------|-------------------------------|---------------------------------|-----------------------------------|------------------------|----------------------------|-------------------------------|---------------------------------|-----------------------------------|
|                  |      | Health spending            | Government health spending | Out-of-pocket health spending | Prepaid private health spending | Development assistance for health | Health spending        | Government health spending | Out-of-pocket health spending | Prepaid private health spending | Development assistance for health |
| Papua New Guinea | 2037 | 69.8 (57.7 to 83.7)        | 52.0 (40.0 to 66.4)        | 5.5 (3.6 to 7.8)              | 1.1 (0.5 to 2.1)                | 11.1 (8.4 to 15.1)                | 86.6 (71.6 to 103.9)   | 64.6 (49.7 to 82.4)        | 6.8 (4.4 to 9.7)              | 1.4 (0.6 to 2.7)                | 13.8 (10.4 to 18.7)               |
| Papua New Guinea | 2038 | 70.7 (58.1 to 84.8)        | 52.7 (40.5 to 67.2)        | 5.6 (3.6 to 8.0)              | 1.2 (0.5 to 2.2)                | 11.3 (8.5 to 15.8)                | 87.8 (72.2 to 105.3)   | 65.5 (50.2 to 83.5)        | 6.9 (4.5 to 9.9)              | 1.4 (0.6 to 2.7)                | 14.0 (10.5 to 19.7)               |
| Papua New Guinea | 2039 | 71.7 (58.7 to 86.1)        | 53.5 (41.1 to 68.2)        | 5.6 (3.7 to 8.1)              | 1.2 (0.5 to 2.2)                | 11.4 (8.6 to 15.7)                | 89.0 (72.9 to 106.9)   | 66.4 (51.0 to 84.7)        | 7.0 (4.5 to 10.1)             | 1.5 (0.7 to 2.8)                | 14.2 (10.7 to 19.4)               |
| Papua New Guinea | 2040 | 72.7 (59.7 to 88.4)        | 54.2 (41.6 to 69.4)        | 5.7 (3.7 to 8.3)              | 1.2 (0.5 to 2.3)                | 11.6 (8.7 to 16.0)                | 90.3 (74.1 to 109.7)   | 67.3 (51.7 to 86.2)        | 7.1 (4.6 to 10.3)             | 1.5 (0.7 to 2.8)                | 14.4 (10.9 to 19.9)               |
| Papua New Guinea | 2041 | 73.7 (60.3 to 89.9)        | 54.9 (42.2 to 70.4)        | 5.8 (3.7 to 8.4)              | 1.2 (0.5 to 2.3)                | 11.8 (8.8 to 16.6)                | 91.6 (74.8 to 111.6)   | 68.2 (52.3 to 87.4)        | 7.2 (4.6 to 10.5)             | 1.5 (0.7 to 2.9)                | 14.6 (10.9 to 20.7)               |
| Papua New Guinea | 2042 | 74.8 (61.3 to 91.3)        | 55.7 (42.7 to 71.4)        | 5.9 (3.8 to 8.6)              | 1.2 (0.5 to 2.3)                | 12.0 (8.8 to 17.3)                | 92.9 (76.1 to 113.4)   | 69.1 (53.0 to 88.6)        | 7.3 (4.7 to 10.6)             | 1.5 (0.7 to 2.9)                | 14.9 (11.0 to 21.5)               |
| Papua New Guinea | 2043 | 75.8 (61.9 to 92.1)        | 56.4 (43.2 to 72.3)        | 6.0 (3.8 to 8.7)              | 1.3 (0.6 to 2.4)                | 12.2 (9.0 to 17.7)                | 94.1 (76.9 to 114.4)   | 70.0 (53.6 to 89.8)        | 7.4 (4.7 to 10.8)             | 1.6 (0.7 to 3.0)                | 15.1 (11.2 to 22.0)               |
| Papua New Guinea | 2044 | 76.9 (62.6 to 93.4)        | 57.1 (43.6 to 73.3)        | 6.1 (3.9 to 8.9)              | 1.3 (0.6 to 2.4)                | 12.4 (9.1 to 18.2)                | 95.4 (77.8 to 116.0)   | 70.9 (54.2 to 91.0)        | 7.6 (4.8 to 11.0)             | 1.6 (0.7 to 3.0)                | 15.4 (11.3 to 22.6)               |
| Papua New Guinea | 2045 | 77.9 (63.7 to 94.1)        | 57.8 (44.1 to 74.2)        | 6.2 (3.9 to 9.0)              | 1.3 (0.6 to 2.4)                | 12.6 (9.1 to 19.0)                | 96.7 (79.1 to 116.8)   | 71.8 (54.8 to 92.1)        | 7.7 (4.8 to 11.2)             | 1.6 (0.7 to 3.0)                | 15.7 (11.3 to 23.6)               |
| Papua New Guinea | 2046 | 79.0 (64.7 to 95.6)        | 58.6 (44.8 to 75.3)        | 6.3 (4.0 to 9.1)              | 1.3 (0.6 to 2.5)                | 12.8 (9.2 to 20.0)                | 98.1 (80.4 to 118.7)   | 72.7 (55.6 to 93.4)        | 7.8 (4.9 to 11.4)             | 1.6 (0.7 to 3.1)                | 15.9 (11.4 to 24.8)               |
| Papua New Guinea | 2047 | 80.2 (65.7 to 97.5)        | 59.4 (45.3 to 76.3)        | 6.4 (4.0 to 9.4)              | 1.3 (0.6 to 2.5)                | 13.1 (9.4 to 20.3)                | 99.6 (81.5 to 121.0)   | 73.7 (56.2 to 94.8)        | 8.0 (5.0 to 11.7)             | 1.7 (0.7 to 3.2)                | 16.2 (11.6 to 25.2)               |
| Papua New Guinea | 2048 | 81.5 (66.7 to 99.6)        | 60.2 (45.8 to 77.6)        | 6.5 (4.1 to 9.6)              | 1.4 (0.6 to 2.6)                | 13.3 (9.5 to 21.5)                | 101.1 (82.8 to 123.7)  | 74.8 (56.9 to 96.3)        | 8.1 (5.0 to 11.9)             | 1.7 (0.7 to 3.2)                | 16.6 (11.8 to 26.6)               |
| Papua New Guinea | 2049 | 82.7 (67.5 to 101.3)       | 61.0 (46.4 to 78.7)        | 6.6 (4.1 to 9.8)              | 1.4 (0.6 to 2.6)                | 13.6 (9.7 to 21.4)                | 102.6 (83.7 to 125.8)  | 75.8 (57.6 to 97.7)        | 8.2 (5.1 to 12.1)             | 1.7 (0.7 to 3.3)                | 16.9 (12.0 to 26.6)               |
| Papua New Guinea | 2050 | 83.9 (68.4 to 103.2)       | 61.9 (47.1 to 79.9)        | 6.7 (4.2 to 10.0)             | 1.4 (0.6 to 2.7)                | 13.9 (9.7 to 22.3)                | 104.2 (84.9 to 128.1)  | 76.8 (58.5 to 99.2)        | 8.4 (5.2 to 12.4)             | 1.7 (0.8 to 3.3)                | 17.3 (12.1 to 27.6)               |
| Paraguay         | 1995 | 153.7 (133.1 to 177.9)     | 63.9 (52.0 to 76.2)        | 77.0 (60.6 to 95.7)           | 12.6 (6.6 to 22.2)              | 0.2 (0.2 to 0.2)                  | 359.7 (311.4 to 416.4) | 149.5 (121.6 to 178.3)     | 180.3 (141.9 to 223.9)        | 29.5 (15.4 to 51.9)             | 0.4 (0.4 to 0.4)                  |
| Paraguay         | 1996 | 157.4 (137.8 to 179.1)     | 66.8 (55.0 to 78.6)        | 76.5 (61.1 to 93.9)           | 13.9 (7.4 to 23.8)              | 0.2 (0.2 to 0.2)                  | 368.3 (322.5 to 419.3) | 156.2 (128.8 to 183.9)     | 179.1 (142.9 to 219.7)        | 32.6 (17.4 to 55.6)             | 0.4 (0.4 to 0.4)                  |
| Paraguay         | 1997 | 165.8 (145.9 to 187.3)     | 70.3 (58.5 to 82.6)        | 77.4 (62.5 to 93.7)           | 16.5 (8.9 to 27.8)              | 1.6 (1.6 to 1.6)                  | 388.1 (341.4 to 438.4) | 164.5 (137.0 to 193.3)     | 181.2 (146.2 to 219.2)        | 38.7 (20.7 to 65.0)             | 3.8 (3.8 to 3.8)                  |
| Paraguay         | 1998 | 172.9 (153.3 to 195.3)     | 73.1 (61.5 to 85.7)        | 77.1 (63.6 to 93.0)           | 17.2 (9.6 to 28.0)              | 5.5 (5.5 to 5.5)                  | 404.7 (358.7 to 457.0) | 171.1 (143.9 to 200.7)     | 180.6 (148.9 to 217.7)        | 40.3 (22.4 to 65.5)             | 12.8 (12.8 to 12.8)               |
| Paraguay         | 1999 | 175.1 (156.3 to 197.3)     | 72.6 (61.7 to 84.7)        | 77.4 (63.9 to 92.9)           | 18.5 (10.4 to 30.4)             | 6.7 (6.7 to 6.7)                  | 409.9 (365.8 to 461.7) | 170.0 (144.5 to 198.3)     | 181.0 (149.6 to 217.4)        | 43.3 (24.4 to 71.3)             | 15.6 (15.6 to 15.6)               |
| Paraguay         | 2000 | 169.6 (150.6 to 192.0)     | 68.1 (57.6 to 79.8)        | 77.3 (63.6 to 93.2)           | 19.1 (11.0 to 31.2)             | 5.1 (5.1 to 5.1)                  | 397.0 (352.4 to 449.3) | 159.4 (134.8 to 186.8)     | 181.0 (148.9 to 218.2)        | 44.7 (25.8 to 73.1)             | 11.8 (11.8 to 11.8)               |
| Paraguay         | 2001 | 158.3 (139.6 to 179.6)     | 61.4 (52.2 to 72.0)        | 75.0 (61.8 to 90.5)           | 18.9 (10.9 to 30.8)             | 3.0 (3.0 to 3.0)                  | 370.4 (326.7 to 420.3) | 143.6 (122.2 to 168.5)     | 175.6 (144.7 to 211.7)        | 44.1 (25.4 to 72.2)             | 7.0 (7.0 to 7.0)                  |

| Country  | Year | 2018 US Dollars per capita |                            |                               |                                 |                                   | 2018 PPP per capita     |                            |                               |                                 |                                   |
|----------|------|----------------------------|----------------------------|-------------------------------|---------------------------------|-----------------------------------|-------------------------|----------------------------|-------------------------------|---------------------------------|-----------------------------------|
|          |      | Health spending            | Government health spending | Out-of-pocket health spending | Prepaid private health spending | Development assistance for health | Health spending         | Government health spending | Out-of-pocket health spending | Prepaid private health spending | Development assistance for health |
| Paraguay | 2002 | 149.8 (132.3 to 168.4)     | 57.1 (48.5 to 66.6)        | 72.8 (60.3 to 87.3)           | 17.9 (10.1 to 29.3)             | 2.1 (2.1 to 2.1)                  | 350.6 (309.6 to 394.2)  | 133.6 (113.5 to 155.9)     | 170.3 (141.1 to 204.2)        | 41.8 (23.7 to 68.5)             | 4.9 (4.9 to 4.9)                  |
| Paraguay | 2003 | 151.5 (134.3 to 170.8)     | 57.6 (49.1 to 67.3)        | 73.8 (61.5 to 88.7)           | 17.6 (9.8 to 28.5)              | 2.4 (2.4 to 2.4)                  | 354.5 (314.3 to 399.8)  | 134.8 (114.9 to 157.4)     | 172.8 (143.8 to 207.6)        | 41.2 (23.0 to 66.6)             | 5.6 (5.6 to 5.6)                  |
| Paraguay | 2004 | 154.2 (136.2 to 173.7)     | 59.0 (50.4 to 68.9)        | 76.1 (63.5 to 91.5)           | 16.9 (9.4 to 27.2)              | 2.2 (2.2 to 2.2)                  | 360.9 (318.8 to 406.6)  | 138.1 (117.9 to 161.2)     | 178.1 (148.5 to 214.2)        | 39.6 (21.9 to 63.6)             | 5.1 (5.1 to 5.1)                  |
| Paraguay | 2005 | 156.8 (138.7 to 175.1)     | 60.9 (51.8 to 71.0)        | 77.8 (65.1 to 92.8)           | 16.0 (9.0 to 25.9)              | 2.1 (2.1 to 2.1)                  | 367.0 (324.6 to 409.8)  | 142.6 (121.2 to 166.1)     | 182.1 (152.4 to 217.1)        | 37.4 (21.1 to 60.6)             | 4.9 (4.9 to 4.9)                  |
| Paraguay | 2006 | 166.3 (147.2 to 186.4)     | 66.6 (56.5 to 77.6)        | 81.9 (68.1 to 97.2)           | 15.8 (9.2 to 25.1)              | 2.1 (2.1 to 2.1)                  | 389.3 (344.6 to 436.2)  | 155.8 (132.3 to 181.7)     | 191.6 (159.3 to 227.5)        | 37.0 (21.5 to 58.8)             | 4.8 (4.8 to 4.8)                  |
| Paraguay | 2007 | 178.9 (158.2 to 200.2)     | 73.2 (62.7 to 85.7)        | 86.9 (72.5 to 103.2)          | 15.7 (9.1 to 25.0)              | 3.1 (3.1 to 3.1)                  | 418.7 (370.1 to 468.6)  | 171.3 (146.8 to 200.7)     | 203.3 (169.6 to 241.5)        | 36.8 (21.3 to 58.6)             | 7.2 (7.2 to 7.2)                  |
| Paraguay | 2008 | 194.6 (172.4 to 218.1)     | 81.6 (70.1 to 95.4)        | 92.7 (76.8 to 110.3)          | 16.0 (9.0 to 25.5)              | 4.3 (4.3 to 4.3)                  | 455.4 (403.6 to 510.4)  | 191.1 (164.1 to 223.3)     | 216.8 (179.7 to 258.2)        | 37.5 (21.1 to 59.8)             | 10.0 (10.0 to 10.0)               |
| Paraguay | 2009 | 203.4 (181.0 to 227.4)     | 90.0 (77.8 to 105.1)       | 93.4 (77.5 to 110.8)          | 15.9 (8.8 to 25.3)              | 4.1 (4.1 to 4.1)                  | 476.1 (423.6 to 532.1)  | 210.7 (182.1 to 246.0)     | 218.6 (181.3 to 259.3)        | 37.2 (20.6 to 59.2)             | 9.6 (9.6 to 9.6)                  |
| Paraguay | 2010 | 232.4 (208.0 to 258.7)     | 107.7 (93.6 to 124.2)      | 101.1 (84.3 to 118.8)         | 18.4 (10.4 to 29.3)             | 5.2 (5.2 to 5.2)                  | 543.8 (486.7 to 605.4)  | 252.0 (219.1 to 290.7)     | 236.7 (197.3 to 278.0)        | 43.0 (24.2 to 68.6)             | 12.1 (12.1 to 12.1)               |
| Paraguay | 2011 | 252.4 (225.4 to 280.0)     | 123.1 (107.8 to 140.9)     | 105.4 (87.4 to 124.3)         | 21.0 (11.7 to 34.2)             | 3.0 (3.0 to 3.0)                  | 590.8 (527.5 to 655.3)  | 288.1 (252.4 to 329.7)     | 246.6 (204.6 to 290.9)        | 49.1 (27.5 to 80.0)             | 7.0 (7.0 to 7.0)                  |
| Paraguay | 2012 | 265.9 (237.5 to 296.3)     | 133.6 (117.4 to 152.5)     | 106.1 (88.1 to 124.4)         | 23.0 (12.9 to 38.1)             | 3.3 (3.3 to 3.3)                  | 622.3 (555.8 to 693.4)  | 312.6 (274.7 to 357.0)     | 248.3 (206.3 to 291.1)        | 53.7 (30.2 to 89.1)             | 7.7 (7.7 to 7.7)                  |
| Paraguay | 2013 | 292.5 (262.6 to 325.4)     | 150.9 (132.1 to 172.6)     | 112.5 (93.8 to 132.2)         | 26.7 (14.9 to 44.9)             | 2.3 (2.3 to 2.3)                  | 684.5 (614.5 to 761.5)  | 353.2 (309.1 to 404.0)     | 263.2 (219.5 to 309.4)        | 62.6 (34.8 to 105.0)            | 5.4 (5.4 to 5.4)                  |
| Paraguay | 2014 | 313.2 (280.3 to 350.3)     | 164.5 (143.6 to 188.4)     | 117.3 (97.9 to 139.4)         | 29.6 (16.6 to 49.5)             | 1.8 (1.8 to 1.8)                  | 733.0 (656.0 to 819.9)  | 385.0 (336.1 to 441.0)     | 274.5 (229.1 to 326.3)        | 69.2 (38.8 to 115.8)            | 4.3 (4.3 to 4.3)                  |
| Paraguay | 2015 | 328.4 (293.4 to 369.8)     | 172.5 (149.4 to 198.3)     | 121.4 (100.7 to 146.4)        | 32.8 (18.1 to 55.9)             | 1.8 (1.8 to 1.8)                  | 768.6 (686.7 to 865.5)  | 403.6 (349.6 to 464.1)     | 284.1 (235.6 to 342.6)        | 76.7 (42.3 to 130.9)            | 4.1 (4.1 to 4.1)                  |
| Paraguay | 2016 | 343.4 (301.6 to 391.5)     | 178.7 (153.1 to 206.7)     | 127.0 (103.7 to 155.0)        | 35.8 (19.8 to 61.4)             | 1.9 (1.9 to 1.9)                  | 803.6 (705.9 to 916.3)  | 418.1 (358.3 to 483.8)     | 297.3 (242.7 to 362.7)        | 83.7 (46.4 to 143.8)            | 4.5 (4.5 to 4.5)                  |
| Paraguay | 2017 | 355.6 (313.5 to 405.9)     | 187.7 (161.1 to 217.3)     | 129.4 (105.8 to 157.6)        | 36.3 (20.0 to 62.4)             | 2.2 (2.2 to 2.2)                  | 832.2 (733.8 to 950.0)  | 439.4 (377.0 to 508.5)     | 302.8 (247.7 to 368.9)        | 84.9 (46.9 to 146.1)            | 5.2 (5.2 to 5.2)                  |
| Paraguay | 2018 | 360.6 (317.7 to 410.9)     | 190.9 (163.5 to 221.2)     | 130.8 (106.9 to 159.3)        | 37.0 (20.4 to 63.7)             | 2.0 (2.0 to 2.0)                  | 844.0 (743.6 to 961.6)  | 446.7 (382.6 to 517.6)     | 306.0 (250.2 to 372.7)        | 86.6 (47.7 to 149.2)            | 4.7 (4.6 to 4.7)                  |
| Paraguay | 2019 | 366.4 (322.3 to 417.1)     | 194.4 (166.0 to 224.8)     | 132.3 (108.1 to 161.1)        | 37.8 (20.7 to 65.1)             | 2.0 (1.8 to 2.1)                  | 857.6 (754.4 to 976.1)  | 454.9 (388.5 to 526.1)     | 309.6 (253.1 to 377.0)        | 88.4 (48.4 to 152.4)            | 4.6 (4.3 to 4.9)                  |
| Paraguay | 2020 | 372.4 (325.9 to 424.4)     | 198.0 (169.0 to 228.7)     | 133.8 (109.2 to 163.4)        | 38.6 (21.1 to 66.5)             | 2.0 (1.8 to 2.2)                  | 871.5 (762.7 to 993.2)  | 463.4 (395.6 to 535.2)     | 313.2 (255.6 to 382.3)        | 90.3 (49.5 to 155.6)            | 4.7 (4.3 to 5.1)                  |
| Paraguay | 2021 | 378.0 (332.0 to 430.9)     | 201.4 (171.8 to 232.4)     | 135.2 (109.5 to 164.9)        | 39.3 (21.5 to 67.8)             | 2.0 (1.8 to 2.3)                  | 884.7 (777.0 to 1008.3) | 471.4 (402.0 to 543.9)     | 316.5 (256.4 to 385.9)        | 92.0 (50.4 to 158.6)            | 4.8 (4.3 to 5.3)                  |
| Paraguay | 2022 | 384.4 (336.3 to 438.2)     | 204.8 (174.7 to 236.2)     | 137.4 (111.4 to 167.3)        | 40.1 (21.9 to 69.0)             | 2.1 (1.8 to 2.3)                  | 899.5 (786.9 to 1025.5) | 479.3 (408.8 to 552.7)     | 321.6 (260.8 to 391.4)        | 93.8 (51.3 to 161.4)            | 4.9 (4.3 to 5.5)                  |



| Country  | Year | 2018 US Dollars per capita |                            |                               |                                 |                                   | 2018 PPP per capita       |                            |                               |                                 |                                   |
|----------|------|----------------------------|----------------------------|-------------------------------|---------------------------------|-----------------------------------|---------------------------|----------------------------|-------------------------------|---------------------------------|-----------------------------------|
|          |      | Health spending            | Government health spending | Out-of-pocket health spending | Prepaid private health spending | Development assistance for health | Health spending           | Government health spending | Out-of-pocket health spending | Prepaid private health spending | Development assistance for health |
| Paraguay | 2023 | 391.5 (343.3 to 446.7)     | 208.8 (177.8 to 242.0)     | 139.7 (113.2 to 170.3)        | 40.9 (22.4 to 70.2)             | 2.1 (1.8 to 2.4)                  | 916.3 (803.3 to 1045.5)   | 488.8 (416.0 to 566.5)     | 326.9 (264.9 to 398.6)        | 95.7 (52.5 to 164.3)            | 5.0 (4.3 to 5.6)                  |
| Paraguay | 2024 | 399.0 (349.6 to 454.5)     | 213.1 (181.6 to 247.0)     | 142.0 (114.9 to 171.8)        | 41.7 (22.9 to 71.7)             | 2.2 (1.9 to 2.5)                  | 933.8 (818.2 to 1063.6)   | 498.8 (425.1 to 577.9)     | 332.3 (268.9 to 402.0)        | 97.6 (53.6 to 167.8)            | 5.1 (4.4 to 5.9)                  |
| Paraguay | 2025 | 406.7 (354.2 to 462.9)     | 217.6 (185.5 to 252.1)     | 144.3 (116.1 to 175.5)        | 42.6 (23.4 to 73.0)             | 2.2 (1.9 to 2.6)                  | 951.8 (829.0 to 1083.4)   | 509.3 (434.1 to 590.1)     | 337.7 (271.7 to 410.7)        | 99.6 (54.8 to 170.9)            | 5.2 (4.4 to 6.1)                  |
| Paraguay | 2026 | 415.1 (361.7 to 473.0)     | 222.7 (189.3 to 258.6)     | 146.7 (117.7 to 178.1)        | 43.5 (24.0 to 74.3)             | 2.3 (1.9 to 2.6)                  | 971.5 (846.4 to 1106.9)   | 521.2 (443.1 to 605.2)     | 343.3 (275.4 to 416.9)        | 101.7 (56.1 to 174.0)           | 5.3 (4.5 to 6.2)                  |
| Paraguay | 2027 | 423.9 (368.8 to 483.7)     | 228.0 (193.8 to 265.5)     | 149.2 (119.5 to 182.1)        | 44.4 (24.5 to 75.7)             | 2.3 (1.9 to 2.8)                  | 992.1 (863.0 to 1131.9)   | 533.6 (453.5 to 621.3)     | 349.1 (279.8 to 426.2)        | 103.9 (57.4 to 177.1)           | 5.4 (4.5 to 6.4)                  |
| Paraguay | 2028 | 432.6 (376.2 to 495.6)     | 233.3 (198.0 to 271.9)     | 151.7 (121.3 to 186.4)        | 45.3 (25.1 to 77.0)             | 2.4 (2.0 to 2.9)                  | 1012.5 (880.4 to 1159.8)  | 546.0 (463.3 to 636.4)     | 354.9 (283.8 to 436.3)        | 106.0 (58.7 to 180.2)           | 5.5 (4.6 to 6.7)                  |
| Paraguay | 2029 | 441.3 (383.4 to 505.3)     | 238.5 (202.8 to 277.9)     | 154.1 (122.9 to 191.1)        | 46.2 (25.7 to 78.3)             | 2.4 (2.0 to 2.9)                  | 1032.8 (897.3 to 1182.5)  | 558.3 (474.6 to 650.5)     | 360.7 (287.5 to 447.3)        | 108.2 (60.1 to 183.2)           | 5.6 (4.6 to 6.9)                  |
| Paraguay | 2030 | 450.2 (391.4 to 515.8)     | 244.0 (207.8 to 283.9)     | 156.7 (124.6 to 196.0)        | 47.2 (26.3 to 80.1)             | 2.5 (2.0 to 3.0)                  | 1053.7 (915.9 to 1207.1)  | 570.9 (486.2 to 664.5)     | 366.6 (291.5 to 458.7)        | 110.4 (61.5 to 187.5)           | 5.8 (4.7 to 7.1)                  |
| Paraguay | 2031 | 459.1 (398.4 to 526.4)     | 249.3 (211.9 to 289.5)     | 159.2 (126.0 to 200.5)        | 48.1 (26.8 to 81.9)             | 2.5 (2.0 to 3.1)                  | 1074.4 (932.3 to 1231.8)  | 583.4 (496.0 to 677.6)     | 372.5 (294.8 to 469.3)        | 112.6 (62.8 to 191.7)           | 5.9 (4.8 to 7.4)                  |
| Paraguay | 2032 | 468.3 (403.8 to 540.5)     | 254.9 (216.2 to 296.1)     | 161.7 (127.4 to 205.3)        | 49.1 (27.4 to 83.8)             | 2.6 (2.1 to 3.2)                  | 1095.9 (945.1 to 1265.0)  | 596.4 (505.9 to 692.9)     | 378.5 (298.2 to 480.4)        | 114.9 (64.1 to 196.1)           | 6.0 (4.8 to 7.6)                  |
| Paraguay | 2033 | 477.6 (412.1 to 550.1)     | 260.5 (220.8 to 302.2)     | 164.3 (128.6 to 210.0)        | 50.1 (28.0 to 85.7)             | 2.6 (2.1 to 3.4)                  | 1117.6 (964.4 to 1287.5)  | 609.6 (516.8 to 707.3)     | 384.6 (301.0 to 491.4)        | 117.2 (65.5 to 200.6)           | 6.2 (4.9 to 7.9)                  |
| Paraguay | 2034 | 486.8 (421.4 to 562.1)     | 266.0 (225.4 to 309.3)     | 166.9 (129.7 to 214.5)        | 51.1 (28.5 to 87.6)             | 2.7 (2.1 to 3.5)                  | 1139.1 (986.1 to 1315.4)  | 622.6 (527.4 to 723.9)     | 390.7 (303.5 to 502.1)        | 119.6 (66.8 to 205.1)           | 6.3 (5.0 to 8.2)                  |
| Paraguay | 2035 | 496.5 (429.0 to 573.1)     | 271.9 (230.2 to 316.9)     | 169.6 (131.1 to 218.3)        | 52.2 (29.1 to 89.4)             | 2.8 (2.2 to 3.6)                  | 1161.9 (1004.1 to 1341.3) | 636.4 (538.6 to 741.7)     | 397.0 (306.9 to 510.9)        | 122.1 (68.2 to 209.3)           | 6.5 (5.0 to 8.5)                  |
| Paraguay | 2036 | 506.2 (436.1 to 586.5)     | 277.8 (234.3 to 324.7)     | 172.3 (133.2 to 222.1)        | 53.2 (29.7 to 91.2)             | 2.8 (2.2 to 3.8)                  | 1184.8 (1020.6 to 1372.7) | 650.2 (548.4 to 760.0)     | 403.3 (311.6 to 519.8)        | 124.6 (69.6 to 213.3)           | 6.6 (5.2 to 8.9)                  |
| Paraguay | 2037 | 516.0 (446.3 to 597.9)     | 283.7 (238.6 to 332.2)     | 175.1 (134.7 to 226.3)        | 54.3 (30.4 to 92.9)             | 2.9 (2.3 to 3.9)                  | 1207.7 (1044.4 to 1399.3) | 664.0 (558.4 to 777.4)     | 409.7 (315.4 to 529.7)        | 127.2 (71.0 to 217.3)           | 6.8 (5.3 to 9.1)                  |
| Paraguay | 2038 | 526.2 (450.7 to 608.3)     | 289.9 (243.5 to 340.3)     | 177.9 (136.6 to 230.7)        | 55.5 (31.0 to 94.6)             | 3.0 (2.3 to 4.1)                  | 1231.5 (1054.9 to 1423.6) | 678.4 (569.8 to 796.3)     | 416.3 (319.7 to 539.9)        | 129.9 (72.6 to 221.4)           | 7.0 (5.3 to 9.7)                  |
| Paraguay | 2039 | 536.5 (459.9 to 618.2)     | 296.1 (248.1 to 348.4)     | 180.7 (138.0 to 235.3)        | 56.6 (31.7 to 96.4)             | 3.1 (2.3 to 4.3)                  | 1255.6 (1076.3 to 1446.8) | 693.1 (580.7 to 815.4)     | 422.9 (322.9 to 550.7)        | 132.6 (74.1 to 225.5)           | 7.1 (5.5 to 10.0)                 |
| Paraguay | 2040 | 547.2 (467.5 to 631.0)     | 302.7 (253.1 to 356.4)     | 183.6 (139.6 to 240.7)        | 57.8 (32.3 to 98.1)             | 3.1 (2.4 to 4.4)                  | 1280.7 (1094.0 to 1476.7) | 708.4 (592.4 to 834.1)     | 429.6 (326.7 to 563.2)        | 135.3 (75.6 to 229.7)           | 7.3 (5.6 to 10.2)                 |
| Paraguay | 2041 | 558.1 (477.8 to 647.3)     | 309.5 (258.7 to 364.3)     | 186.5 (141.2 to 245.9)        | 59.0 (32.9 to 99.9)             | 3.2 (2.4 to 4.5)                  | 1306.2 (1118.1 to 1515.0) | 724.2 (605.3 to 852.6)     | 436.4 (330.4 to 575.6)        | 138.1 (77.1 to 233.8)           | 7.5 (5.7 to 10.5)                 |
| Paraguay | 2042 | 569.4 (486.3 to 660.7)     | 316.5 (264.0 to 373.7)     | 189.4 (142.9 to 250.6)        | 60.2 (33.6 to 101.9)            | 3.3 (2.5 to 4.7)                  | 1332.7 (1138.1 to 1546.3) | 740.7 (617.8 to 874.5)     | 443.3 (334.4 to 586.5)        | 140.9 (78.6 to 238.5)           | 7.7 (5.8 to 11.1)                 |
| Paraguay | 2043 | 581.3 (493.8 to 676.4)     | 324.0 (269.6 to 382.5)     | 192.5 (144.7 to 255.0)        | 61.5 (34.3 to 103.7)            | 3.4 (2.5 to 4.9)                  | 1360.5 (1155.6 to 1582.9) | 758.3 (631.1 to 895.3)     | 450.4 (338.7 to 596.8)        | 143.9 (80.2 to 242.8)           | 7.9 (5.8 to 11.5)                 |

| Country  | Year | 2018 US Dollars per capita |                            |                               |                                 |                                   | 2018 PPP per capita       |                            |                               |                                 |                                   |
|----------|------|----------------------------|----------------------------|-------------------------------|---------------------------------|-----------------------------------|---------------------------|----------------------------|-------------------------------|---------------------------------|-----------------------------------|
|          |      | Health spending            | Government health spending | Out-of-pocket health spending | Prepaid private health spending | Development assistance for health | Health spending           | Government health spending | Out-of-pocket health spending | Prepaid private health spending | Development assistance for health |
| Paraguay | 2044 | 593.2 (500.5 to 690.7)     | 331.5 (276.4 to 392.5)     | 195.5 (146.7 to 259.3)        | 62.7 (34.9 to 105.5)            | 3.5 (2.6 to 5.1)                  | 1388.2 (1171.4 to 1616.3) | 775.8 (646.8 to 918.7)     | 457.5 (343.2 to 606.8)        | 146.8 (81.8 to 247.0)           | 8.1 (6.0 to 11.9)                 |
| Paraguay | 2045 | 605.1 (512.5 to 702.9)     | 339.1 (281.9 to 402.3)     | 198.5 (148.9 to 263.4)        | 63.9 (35.6 to 107.3)            | 3.6 (2.6 to 5.4)                  | 1416.0 (1199.4 to 1645.0) | 793.6 (659.7 to 941.5)     | 464.5 (348.5 to 616.5)        | 149.6 (83.4 to 251.1)           | 8.4 (6.0 to 12.6)                 |
| Paraguay | 2046 | 617.4 (522.0 to 716.7)     | 347.0 (287.5 to 411.9)     | 201.5 (150.9 to 268.1)        | 65.2 (36.3 to 109.6)            | 3.7 (2.7 to 5.6)                  | 1444.8 (1221.6 to 1677.2) | 812.1 (672.9 to 963.9)     | 471.7 (353.2 to 627.4)        | 152.5 (85.0 to 256.4)           | 8.6 (6.2 to 13.1)                 |
| Paraguay | 2047 | 630.1 (535.1 to 733.2)     | 355.2 (293.7 to 423.5)     | 204.7 (153.2 to 272.9)        | 66.4 (37.0 to 112.0)            | 3.8 (2.7 to 6.0)                  | 1474.5 (1252.3 to 1715.9) | 831.3 (687.3 to 991.1)     | 479.0 (358.5 to 638.6)        | 155.5 (86.6 to 262.0)           | 8.8 (6.3 to 14.0)                 |
| Paraguay | 2048 | 642.8 (545.4 to 748.7)     | 363.4 (299.4 to 434.3)     | 207.8 (155.5 to 277.7)        | 67.7 (37.6 to 114.2)            | 3.9 (2.8 to 6.2)                  | 1504.4 (1276.3 to 1752.3) | 850.6 (700.7 to 1016.5)    | 486.3 (363.8 to 649.8)        | 158.4 (88.1 to 267.2)           | 9.1 (6.5 to 14.6)                 |
| Paraguay | 2049 | 655.6 (556.6 to 765.5)     | 371.7 (305.3 to 445.7)     | 210.9 (157.4 to 282.5)        | 68.9 (38.3 to 116.5)            | 4.0 (2.9 to 6.5)                  | 1534.3 (1302.6 to 1791.6) | 870.0 (714.5 to 1043.0)    | 493.6 (368.3 to 661.2)        | 161.3 (89.6 to 272.6)           | 9.4 (6.7 to 15.2)                 |
| Paraguay | 2050 | 668.3 (566.6 to 777.7)     | 380.0 (311.4 to 457.1)     | 214.0 (159.3 to 287.4)        | 70.2 (39.0 to 118.8)            | 4.1 (2.9 to 6.8)                  | 1564.1 (1326.0 to 1820.1) | 889.3 (728.9 to 1069.8)    | 500.9 (372.7 to 672.6)        | 164.2 (91.2 to 277.9)           | 9.7 (6.8 to 15.9)                 |
| Peru     | 1995 | 160.9 (140.0 to 184.9)     | 79.4 (66.2 to 94.5)        | 60.3 (46.8 to 77.6)           | 14.0 (7.4 to 24.6)              | 7.2 (7.2 to 7.2)                  | 326.0 (283.8 to 374.7)    | 160.9 (134.1 to 191.5)     | 122.2 (94.9 to 157.2)         | 28.3 (15.1 to 49.9)             | 14.7 (14.7 to 14.7)               |
| Peru     | 1996 | 162.5 (142.6 to 184.9)     | 81.4 (68.4 to 95.4)        | 61.0 (47.8 to 76.9)           | 14.8 (7.8 to 26.7)              | 5.3 (5.3 to 5.3)                  | 329.3 (288.9 to 374.8)    | 164.9 (138.7 to 193.3)     | 123.6 (96.8 to 155.8)         | 30.0 (15.9 to 54.0)             | 10.8 (10.8 to 10.8)               |
| Peru     | 1997 | 168.1 (148.0 to 190.4)     | 85.6 (73.3 to 99.2)        | 62.5 (50.0 to 77.8)           | 15.8 (8.3 to 28.1)              | 4.2 (4.2 to 4.2)                  | 340.7 (300.0 to 386.0)    | 173.5 (148.6 to 201.1)     | 126.7 (101.2 to 157.7)        | 32.0 (16.9 to 56.9)             | 8.5 (8.5 to 8.5)                  |
| Peru     | 1998 | 170.3 (150.8 to 192.2)     | 87.8 (75.8 to 101.2)       | 61.1 (48.9 to 75.3)           | 16.3 (8.7 to 28.5)              | 5.0 (5.0 to 5.0)                  | 345.1 (305.6 to 389.5)    | 178.0 (153.7 to 205.1)     | 123.9 (99.0 to 152.5)         | 33.1 (17.6 to 57.7)             | 10.1 (10.1 to 10.1)               |
| Peru     | 1999 | 175.0 (155.8 to 197.2)     | 90.8 (78.3 to 104.2)       | 61.4 (49.3 to 75.0)           | 17.1 (9.3 to 30.4)              | 5.7 (5.7 to 5.7)                  | 354.6 (315.8 to 399.7)    | 184.0 (158.7 to 211.1)     | 124.4 (99.9 to 152.1)         | 34.6 (18.9 to 61.5)             | 11.6 (11.6 to 11.6)               |
| Peru     | 2000 | 176.1 (156.8 to 197.2)     | 91.8 (79.8 to 105.4)       | 61.5 (49.7 to 74.0)           | 16.9 (9.1 to 29.6)              | 5.9 (5.9 to 5.9)                  | 356.8 (317.9 to 399.6)    | 186.0 (161.7 to 213.6)     | 124.6 (100.6 to 149.9)        | 34.3 (18.3 to 59.9)             | 11.9 (11.9 to 11.9)               |
| Peru     | 2001 | 177.9 (158.6 to 199.5)     | 94.5 (82.4 to 108.1)       | 61.7 (49.7 to 74.6)           | 18.0 (9.9 to 30.6)              | 3.7 (3.7 to 3.7)                  | 360.5 (321.4 to 404.3)    | 191.5 (167.1 to 219.1)     | 125.0 (100.8 to 151.1)        | 36.6 (20.0 to 62.1)             | 7.5 (7.5 to 7.5)                  |
| Peru     | 2002 | 187.2 (167.6 to 209.2)     | 100.4 (87.6 to 115.3)      | 62.8 (50.3 to 76.3)           | 19.8 (10.9 to 33.7)             | 4.2 (4.2 to 4.2)                  | 379.4 (339.8 to 424.0)    | 203.5 (177.6 to 233.7)     | 127.2 (101.9 to 154.7)        | 40.2 (22.1 to 68.2)             | 8.6 (8.6 to 8.6)                  |
| Peru     | 2003 | 190.2 (170.6 to 213.6)     | 102.7 (89.3 to 117.6)      | 62.7 (50.7 to 76.2)           | 20.3 (11.1 to 34.8)             | 4.5 (4.5 to 4.5)                  | 385.5 (345.7 to 432.9)    | 208.1 (181.0 to 238.3)     | 127.0 (102.7 to 154.4)        | 41.1 (22.5 to 70.5)             | 9.2 (9.2 to 9.2)                  |
| Peru     | 2004 | 190.2 (170.8 to 214.0)     | 102.4 (89.6 to 116.6)      | 65.2 (53.4 to 79.8)           | 18.0 (9.8 to 30.6)              | 4.6 (4.6 to 4.6)                  | 385.6 (346.2 to 433.7)    | 207.6 (181.5 to 236.3)     | 132.2 (108.3 to 161.7)        | 36.4 (19.9 to 62.0)             | 9.4 (9.4 to 9.4)                  |
| Peru     | 2005 | 191.9 (171.5 to 215.1)     | 101.2 (88.7 to 114.5)      | 69.1 (56.6 to 84.9)           | 17.3 (9.6 to 28.1)              | 4.2 (4.2 to 4.2)                  | 388.9 (347.5 to 436.0)    | 205.2 (179.8 to 232.0)     | 140.1 (114.7 to 172.0)        | 35.0 (19.4 to 56.9)             | 8.6 (8.6 to 8.6)                  |
| Peru     | 2006 | 199.4 (178.3 to 223.4)     | 101.8 (89.3 to 115.8)      | 76.9 (62.6 to 94.2)           | 17.6 (9.7 to 27.9)              | 3.1 (3.1 to 3.1)                  | 404.1 (361.3 to 452.7)    | 206.3 (181.0 to 234.7)     | 155.9 (126.9 to 190.9)        | 35.6 (19.6 to 56.6)             | 6.3 (6.3 to 6.3)                  |
| Peru     | 2007 | 211.5 (189.6 to 237.5)     | 105.1 (91.8 to 119.2)      | 85.8 (71.2 to 103.1)          | 17.7 (9.5 to 28.5)              | 2.9 (2.9 to 2.9)                  | 428.6 (384.3 to 481.4)    | 213.0 (186.0 to 241.6)     | 173.9 (144.4 to 209.0)        | 35.8 (19.3 to 57.7)             | 5.9 (5.9 to 5.9)                  |
| Peru     | 2008 | 231.7 (208.2 to 258.4)     | 113.7 (99.7 to 129.2)      | 94.8 (79.5 to 112.9)          | 17.9 (9.6 to 29.4)              | 5.3 (5.3 to 5.3)                  | 469.6 (421.9 to 523.7)    | 230.5 (202.1 to 261.9)     | 192.2 (161.1 to 228.8)        | 36.3 (19.4 to 59.5)             | 10.7 (10.7 to 10.7)               |

| Country | Year | 2018 US Dollars per capita |                            |                               |                                 |                                   | 2018 PPP per capita     |                            |                               |                                 |                                   |
|---------|------|----------------------------|----------------------------|-------------------------------|---------------------------------|-----------------------------------|-------------------------|----------------------------|-------------------------------|---------------------------------|-----------------------------------|
|         |      | Health spending            | Government health spending | Out-of-pocket health spending | Prepaid private health spending | Development assistance for health | Health spending         | Government health spending | Out-of-pocket health spending | Prepaid private health spending | Development assistance for health |
| Peru    | 2009 | 242.1 (217.6 to 270.3)     | 120.1 (106.6 to 135.4)     | 98.8 (82.0 to 118.0)          | 18.4 (9.9 to 30.6)              | 4.9 (4.9 to 4.9)                  | 490.7 (441.1 to 547.7)  | 243.4 (216.0 to 274.5)     | 200.2 (166.2 to 239.1)        | 37.4 (20.0 to 61.9)             | 9.8 (9.8 to 9.8)                  |
| Peru    | 2010 | 257.9 (233.5 to 287.9)     | 132.6 (117.7 to 150.3)     | 102.6 (85.5 to 122.0)         | 18.9 (10.4 to 31.3)             | 3.8 (3.8 to 3.8)                  | 522.7 (473.2 to 583.4)  | 268.8 (238.6 to 304.7)     | 207.9 (173.2 to 247.2)        | 38.3 (21.0 to 63.4)             | 7.8 (7.8 to 7.8)                  |
| Peru    | 2011 | 267.9 (242.4 to 298.2)     | 142.6 (127.0 to 161.0)     | 104.1 (86.3 to 123.8)         | 19.3 (10.8 to 32.5)             | 1.9 (1.9 to 1.9)                  | 543.0 (491.3 to 604.4)  | 289.1 (257.5 to 326.3)     | 211.0 (174.9 to 250.9)        | 39.2 (22.0 to 65.8)             | 3.8 (3.8 to 3.8)                  |
| Peru    | 2012 | 283.0 (256.0 to 316.3)     | 155.2 (138.0 to 175.1)     | 104.9 (87.5 to 124.9)         | 20.5 (11.0 to 34.3)             | 2.4 (2.4 to 2.4)                  | 573.6 (518.9 to 641.0)  | 314.6 (279.7 to 354.9)     | 212.6 (177.4 to 253.1)        | 41.5 (22.4 to 69.6)             | 4.8 (4.8 to 4.8)                  |
| Peru    | 2013 | 299.2 (269.2 to 333.2)     | 171.4 (152.0 to 192.9)     | 103.2 (84.9 to 123.6)         | 22.3 (11.9 to 37.9)             | 2.3 (2.3 to 2.3)                  | 606.4 (545.6 to 675.2)  | 347.4 (308.0 to 391.0)     | 209.1 (172.0 to 250.6)        | 45.2 (24.1 to 76.8)             | 4.7 (4.7 to 4.7)                  |
| Peru    | 2014 | 310.8 (278.9 to 347.2)     | 185.9 (164.7 to 209.1)     | 100.0 (81.9 to 120.8)         | 23.8 (12.7 to 40.9)             | 1.2 (1.2 to 1.2)                  | 630.0 (565.3 to 703.7)  | 376.7 (333.7 to 423.7)     | 202.7 (166.1 to 244.8)        | 48.3 (25.8 to 83.0)             | 2.4 (2.4 to 2.4)                  |
| Peru    | 2015 | 331.6 (297.2 to 369.6)     | 199.5 (176.1 to 225.4)     | 98.1 (78.7 to 120.5)          | 25.5 (13.5 to 44.4)             | 8.6 (8.6 to 8.6)                  | 672.1 (602.3 to 749.1)  | 404.3 (356.8 to 456.8)     | 198.7 (159.5 to 244.3)        | 51.6 (27.4 to 89.9)             | 17.4 (17.4 to 17.4)               |
| Peru    | 2016 | 337.0 (298.6 to 377.6)     | 211.3 (183.1 to 242.3)     | 98.0 (77.8 to 121.8)          | 26.7 (14.1 to 46.0)             | 0.9 (0.9 to 0.9)                  | 683.0 (605.2 to 765.3)  | 428.2 (371.0 to 491.0)     | 198.7 (157.6 to 246.9)        | 54.2 (28.6 to 93.3)             | 1.9 (1.9 to 1.9)                  |
| Peru    | 2017 | 344.6 (305.7 to 385.6)     | 217.3 (188.5 to 249.0)     | 99.3 (78.7 to 123.1)          | 27.3 (14.4 to 47.1)             | 0.7 (0.7 to 0.7)                  | 698.3 (619.7 to 781.5)  | 440.4 (382.0 to 504.6)     | 201.3 (159.6 to 249.5)        | 55.3 (29.2 to 95.4)             | 1.4 (1.4 to 1.4)                  |
| Peru    | 2018 | 351.5 (311.1 to 394.7)     | 222.2 (192.6 to 254.7)     | 100.8 (80.0 to 125.0)         | 27.9 (14.7 to 48.2)             | 0.6 (0.6 to 0.6)                  | 712.3 (630.6 to 800.0)  | 450.3 (390.3 to 516.2)     | 204.2 (162.2 to 253.2)        | 56.6 (29.8 to 97.8)             | 1.2 (1.2 to 1.2)                  |
| Peru    | 2019 | 358.9 (317.8 to 402.5)     | 227.4 (197.5 to 261.1)     | 102.3 (81.2 to 126.7)         | 28.6 (15.0 to 49.4)             | 0.6 (0.6 to 0.6)                  | 727.3 (644.1 to 815.7)  | 461.0 (400.3 to 529.2)     | 207.3 (164.5 to 256.9)        | 57.9 (30.5 to 100.1)            | 1.2 (1.1 to 1.3)                  |
| Peru    | 2020 | 366.1 (323.7 to 410.3)     | 232.6 (201.7 to 267.0)     | 103.7 (82.0 to 128.4)         | 29.2 (15.3 to 50.6)             | 0.6 (0.5 to 0.7)                  | 741.9 (656.1 to 831.6)  | 471.4 (408.8 to 541.1)     | 210.1 (166.2 to 260.3)        | 59.2 (31.1 to 102.5)            | 1.2 (1.1 to 1.3)                  |
| Peru    | 2021 | 374.1 (331.1 to 419.0)     | 238.4 (206.4 to 274.0)     | 105.1 (83.2 to 131.1)         | 29.9 (15.7 to 51.8)             | 0.6 (0.5 to 0.7)                  | 758.1 (671.1 to 849.1)  | 483.3 (418.3 to 555.4)     | 213.1 (168.6 to 265.7)        | 60.5 (31.7 to 104.9)            | 1.2 (1.1 to 1.4)                  |
| Peru    | 2022 | 382.2 (338.3 to 428.1)     | 244.5 (212.1 to 281.4)     | 106.6 (84.3 to 132.9)         | 30.5 (16.0 to 53.0)             | 0.6 (0.5 to 0.7)                  | 774.6 (685.7 to 867.7)  | 495.4 (429.8 to 570.3)     | 216.1 (170.8 to 269.3)        | 61.9 (32.4 to 107.4)            | 1.3 (1.1 to 1.4)                  |
| Peru    | 2023 | 390.7 (345.8 to 438.4)     | 250.5 (217.3 to 288.1)     | 108.3 (85.4 to 135.3)         | 31.2 (16.3 to 54.2)             | 0.6 (0.5 to 0.7)                  | 791.8 (700.9 to 888.4)  | 507.7 (440.5 to 584.0)     | 219.6 (173.1 to 274.1)        | 63.2 (33.0 to 109.8)            | 1.3 (1.1 to 1.4)                  |
| Peru    | 2024 | 399.7 (354.1 to 448.0)     | 256.8 (222.4 to 295.2)     | 110.4 (87.0 to 138.5)         | 31.8 (16.6 to 55.4)             | 0.6 (0.6 to 0.7)                  | 810.1 (717.7 to 907.9)  | 520.4 (450.7 to 598.3)     | 223.8 (176.3 to 280.7)        | 64.5 (33.7 to 112.2)            | 1.3 (1.1 to 1.5)                  |
| Peru    | 2025 | 409.0 (361.9 to 458.9)     | 263.3 (227.2 to 302.7)     | 112.6 (89.0 to 141.4)         | 32.5 (16.9 to 56.6)             | 0.6 (0.6 to 0.8)                  | 828.9 (733.4 to 930.2)  | 533.5 (460.4 to 613.5)     | 228.2 (180.3 to 286.6)        | 65.9 (34.3 to 114.7)            | 1.3 (1.1 to 1.5)                  |
| Peru    | 2026 | 418.2 (370.0 to 469.1)     | 269.7 (232.0 to 310.3)     | 114.7 (90.5 to 144.3)         | 33.2 (17.3 to 57.8)             | 0.7 (0.6 to 0.8)                  | 847.7 (749.8 to 950.8)  | 546.6 (470.2 to 628.9)     | 232.5 (183.4 to 292.5)        | 67.2 (35.1 to 117.1)            | 1.3 (1.1 to 1.6)                  |
| Peru    | 2027 | 428.0 (378.3 to 481.4)     | 276.5 (237.4 to 318.0)     | 116.9 (92.0 to 147.1)         | 33.8 (17.7 to 58.9)             | 0.7 (0.6 to 0.8)                  | 867.4 (766.7 to 975.7)  | 560.4 (481.1 to 644.6)     | 237.0 (186.5 to 298.0)        | 68.6 (35.9 to 119.4)            | 1.4 (1.1 to 1.6)                  |
| Peru    | 2028 | 438.1 (386.4 to 493.0)     | 283.6 (243.0 to 326.0)     | 119.2 (93.6 to 149.7)         | 34.5 (18.1 to 60.1)             | 0.7 (0.6 to 0.8)                  | 887.8 (783.2 to 999.1)  | 574.8 (492.5 to 660.7)     | 241.6 (189.7 to 303.4)        | 70.0 (36.7 to 121.8)            | 1.4 (1.2 to 1.7)                  |
| Peru    | 2029 | 448.6 (395.6 to 505.3)     | 291.1 (249.4 to 335.5)     | 121.6 (95.3 to 153.0)         | 35.3 (18.5 to 61.3)             | 0.7 (0.6 to 0.9)                  | 909.2 (801.7 to 1024.1) | 589.9 (505.4 to 680.0)     | 246.4 (193.1 to 310.1)        | 71.5 (37.6 to 124.3)            | 1.4 (1.2 to 1.7)                  |

| Country | Year | 2018 US Dollars per capita |                            |                               |                                 |                                   | 2018 PPP per capita       |                            |                               |                                 |                                   |
|---------|------|----------------------------|----------------------------|-------------------------------|---------------------------------|-----------------------------------|---------------------------|----------------------------|-------------------------------|---------------------------------|-----------------------------------|
|         |      | Health spending            | Government health spending | Out-of-pocket health spending | Prepaid private health spending | Development assistance for health | Health spending           | Government health spending | Out-of-pocket health spending | Prepaid private health spending | Development assistance for health |
| Peru    | 2030 | 459.2 (404.3 to 517.8)     | 298.6 (255.4 to 344.5)     | 123.9 (96.7 to 156.8)         | 36.0 (19.0 to 62.6)             | 0.7 (0.6 to 0.9)                  | 930.7 (819.5 to 1049.5)   | 605.2 (517.6 to 698.1)     | 251.1 (196.0 to 317.9)        | 73.0 (38.4 to 126.8)            | 1.4 (1.2 to 1.8)                  |
| Peru    | 2031 | 470.1 (413.4 to 531.1)     | 306.3 (262.0 to 354.0)     | 126.3 (98.2 to 160.9)         | 36.8 (19.4 to 63.8)             | 0.7 (0.6 to 0.9)                  | 952.8 (837.8 to 1076.3)   | 620.8 (531.1 to 717.4)     | 256.0 (199.1 to 326.0)        | 74.6 (39.3 to 129.4)            | 1.5 (1.2 to 1.8)                  |
| Peru    | 2032 | 481.3 (422.7 to 543.8)     | 314.2 (269.2 to 363.0)     | 128.8 (99.7 to 165.1)         | 37.6 (19.8 to 65.2)             | 0.7 (0.6 to 0.9)                  | 975.4 (856.6 to 1102.1)   | 636.8 (545.5 to 735.8)     | 261.0 (202.0 to 334.6)        | 76.1 (40.2 to 132.1)            | 1.5 (1.2 to 1.9)                  |
| Peru    | 2033 | 492.9 (432.0 to 557.8)     | 322.5 (276.1 to 374.7)     | 131.3 (100.7 to 169.4)        | 38.4 (20.3 to 66.5)             | 0.8 (0.6 to 1.0)                  | 998.9 (875.5 to 1130.4)   | 653.6 (559.5 to 759.4)     | 266.0 (204.1 to 343.3)        | 77.8 (41.1 to 134.8)            | 1.5 (1.2 to 2.0)                  |
| Peru    | 2034 | 504.6 (441.3 to 571.1)     | 330.8 (282.7 to 384.1)     | 133.8 (101.8 to 173.8)        | 39.2 (20.8 to 67.9)             | 0.8 (0.6 to 1.0)                  | 1022.6 (894.3 to 1157.5)  | 670.5 (573.0 to 778.4)     | 271.1 (206.3 to 352.2)        | 79.5 (42.1 to 137.6)            | 1.6 (1.2 to 2.0)                  |
| Peru    | 2035 | 516.5 (451.9 to 585.6)     | 339.3 (288.8 to 394.5)     | 136.3 (103.1 to 177.9)        | 40.0 (21.3 to 69.3)             | 0.8 (0.6 to 1.0)                  | 1046.7 (915.9 to 1186.9)  | 687.7 (585.4 to 799.5)     | 276.3 (208.9 to 360.7)        | 81.1 (43.1 to 140.4)            | 1.6 (1.2 to 2.1)                  |
| Peru    | 2036 | 528.3 (462.2 to 600.6)     | 347.8 (295.7 to 405.1)     | 138.9 (104.4 to 182.2)        | 40.9 (21.7 to 70.7)             | 0.8 (0.6 to 1.1)                  | 1070.8 (936.7 to 1217.2)  | 704.8 (599.4 to 821.0)     | 281.5 (211.6 to 369.2)        | 82.9 (43.9 to 143.3)            | 1.6 (1.3 to 2.2)                  |
| Peru    | 2037 | 540.3 (471.7 to 614.0)     | 356.3 (302.8 to 416.2)     | 141.5 (105.8 to 186.4)        | 41.7 (22.1 to 72.1)             | 0.8 (0.6 to 1.1)                  | 1095.0 (956.0 to 1244.3)  | 722.1 (613.6 to 843.6)     | 286.7 (214.5 to 377.7)        | 84.6 (44.8 to 146.2)            | 1.7 (1.3 to 2.2)                  |
| Peru    | 2038 | 552.5 (481.2 to 629.1)     | 365.0 (309.2 to 427.0)     | 144.1 (107.4 to 190.5)        | 42.6 (22.5 to 73.6)             | 0.8 (0.6 to 1.2)                  | 1119.8 (975.3 to 1275.1)  | 739.8 (626.7 to 865.5)     | 292.0 (217.7 to 386.2)        | 86.4 (45.6 to 149.1)            | 1.7 (1.3 to 2.3)                  |
| Peru    | 2039 | 564.8 (491.2 to 643.9)     | 373.8 (315.9 to 438.7)     | 146.7 (109.2 to 194.6)        | 43.5 (22.9 to 75.0)             | 0.9 (0.6 to 1.2)                  | 1144.7 (995.6 to 1305.1)  | 757.5 (640.3 to 889.2)     | 297.3 (221.3 to 394.5)        | 88.2 (46.5 to 152.1)            | 1.7 (1.3 to 2.4)                  |
| Peru    | 2040 | 577.2 (501.7 to 659.3)     | 382.7 (322.9 to 449.5)     | 149.3 (111.0 to 198.7)        | 44.4 (23.5 to 76.5)             | 0.9 (0.7 to 1.2)                  | 1169.9 (1016.9 to 1336.2) | 775.6 (654.5 to 911.1)     | 302.5 (224.9 to 402.6)        | 89.9 (47.5 to 155.0)            | 1.8 (1.3 to 2.5)                  |
| Peru    | 2041 | 590.0 (511.6 to 674.9)     | 391.9 (329.8 to 461.6)     | 151.9 (112.7 to 202.8)        | 45.3 (23.9 to 78.0)             | 0.9 (0.7 to 1.2)                  | 1195.8 (1037.0 to 1367.8) | 794.3 (668.5 to 935.6)     | 307.9 (228.4 to 411.1)        | 91.8 (48.4 to 158.0)            | 1.8 (1.3 to 2.5)                  |
| Peru    | 2042 | 602.9 (522.8 to 690.8)     | 401.2 (336.8 to 473.4)     | 154.6 (114.5 to 206.9)        | 46.2 (24.3 to 79.5)             | 0.9 (0.7 to 1.3)                  | 1221.9 (1059.5 to 1400.1) | 813.2 (682.7 to 959.5)     | 313.3 (232.0 to 419.3)        | 93.6 (49.2 to 161.0)            | 1.8 (1.4 to 2.6)                  |
| Peru    | 2043 | 615.7 (532.5 to 706.3)     | 410.5 (343.9 to 486.1)     | 157.2 (116.2 to 210.9)        | 47.1 (24.6 to 80.7)             | 0.9 (0.7 to 1.4)                  | 1247.8 (1079.2 to 1431.5) | 831.9 (697.0 to 985.2)     | 318.6 (235.5 to 427.5)        | 95.4 (49.9 to 163.6)            | 1.9 (1.4 to 2.7)                  |
| Peru    | 2044 | 628.7 (542.8 to 720.7)     | 419.9 (350.6 to 497.7)     | 159.9 (117.8 to 214.8)        | 48.0 (25.1 to 82.0)             | 1.0 (0.7 to 1.4)                  | 1274.2 (1100.0 to 1460.7) | 851.0 (710.5 to 1008.6)    | 324.0 (238.7 to 435.3)        | 97.2 (50.9 to 166.2)            | 1.9 (1.4 to 2.8)                  |
| Peru    | 2045 | 641.9 (553.2 to 739.0)     | 429.5 (357.6 to 510.3)     | 162.5 (119.7 to 218.4)        | 48.9 (25.6 to 83.5)             | 1.0 (0.7 to 1.5)                  | 1300.9 (1121.3 to 1497.8) | 870.4 (724.7 to 1034.3)    | 329.4 (242.6 to 442.6)        | 99.1 (51.8 to 169.3)            | 2.0 (1.4 to 3.0)                  |
| Peru    | 2046 | 655.1 (563.8 to 754.5)     | 439.0 (365.4 to 521.9)     | 165.2 (121.8 to 222.1)        | 49.9 (26.1 to 85.0)             | 1.0 (0.7 to 1.5)                  | 1327.6 (1142.6 to 1529.1) | 889.7 (740.5 to 1057.7)    | 334.9 (246.8 to 450.1)        | 101.1 (52.8 to 172.2)           | 2.0 (1.4 to 3.1)                  |
| Peru    | 2047 | 668.3 (574.8 to 770.9)     | 448.5 (372.4 to 533.9)     | 167.9 (123.8 to 225.8)        | 50.8 (26.5 to 86.8)             | 1.0 (0.7 to 1.6)                  | 1354.4 (1165.0 to 1562.4) | 909.0 (754.7 to 1082.0)    | 340.3 (251.0 to 457.6)        | 103.0 (53.7 to 175.9)           | 2.1 (1.5 to 3.3)                  |
| Peru    | 2048 | 681.9 (586.8 to 788.2)     | 458.4 (381.5 to 546.5)     | 170.7 (126.0 to 229.6)        | 51.8 (27.0 to 88.7)             | 1.0 (0.7 to 1.7)                  | 1382.1 (1189.2 to 1597.5) | 929.0 (773.2 to 1107.7)    | 345.9 (255.3 to 465.3)        | 105.0 (54.6 to 179.8)           | 2.1 (1.5 to 3.5)                  |
| Peru    | 2049 | 695.6 (597.2 to 806.2)     | 468.3 (390.1 to 559.7)     | 173.4 (127.7 to 233.2)        | 52.8 (27.4 to 90.7)             | 1.1 (0.7 to 1.7)                  | 1409.9 (1210.3 to 1633.9) | 949.2 (790.6 to 1134.3)    | 351.5 (258.9 to 472.7)        | 107.0 (55.5 to 183.8)           | 2.2 (1.5 to 3.5)                  |
| Peru    | 2050 | 709.1 (606.6 to 820.6)     | 478.1 (397.3 to 572.7)     | 176.2 (129.8 to 237.0)        | 53.7 (27.8 to 92.8)             | 1.1 (0.7 to 1.8)                  | 1437.1 (1229.3 to 1663.2) | 968.9 (805.1 to 1160.6)    | 357.0 (263.1 to 480.3)        | 108.9 (56.3 to 188.2)           | 2.2 (1.5 to 3.7)                  |

| Country     | Year | 2018 US Dollars per capita |                            |                               |                                 |                                   | 2018 PPP per capita    |                            |                               |                                 |                                   |
|-------------|------|----------------------------|----------------------------|-------------------------------|---------------------------------|-----------------------------------|------------------------|----------------------------|-------------------------------|---------------------------------|-----------------------------------|
|             |      | Health spending            | Government health spending | Out-of-pocket health spending | Prepaid private health spending | Development assistance for health | Health spending        | Government health spending | Out-of-pocket health spending | Prepaid private health spending | Development assistance for health |
| Philippines | 1995 | 51.4 (42.5 to 61.9)        | 19.4 (15.0 to 25.3)        | 25.6 (18.1 to 34.1)           | 4.3 (2.2 to 8.1)                | 2.2 (2.2 to 2.2)                  | 149.6 (123.7 to 180.2) | 56.4 (43.6 to 73.8)        | 74.4 (52.8 to 99.4)           | 12.6 (6.4 to 23.6)              | 6.3 (6.3 to 6.3)                  |
| Philippines | 1996 | 52.0 (43.0 to 63.3)        | 20.6 (15.9 to 26.7)        | 25.9 (18.6 to 34.8)           | 4.8 (2.4 to 8.9)                | 0.7 (0.7 to 0.7)                  | 151.3 (125.2 to 184.2) | 59.9 (46.2 to 77.7)        | 75.3 (54.1 to 101.4)          | 13.9 (7.0 to 25.9)              | 2.1 (2.1 to 2.1)                  |
| Philippines | 1997 | 52.7 (43.7 to 64.6)        | 21.2 (16.3 to 27.2)        | 25.5 (18.5 to 34.1)           | 5.1 (2.5 to 9.5)                | 0.8 (0.8 to 0.8)                  | 153.5 (127.2 to 188.1) | 61.8 (47.4 to 79.2)        | 74.3 (53.8 to 99.3)           | 14.9 (7.4 to 27.8)              | 2.4 (2.4 to 2.4)                  |
| Philippines | 1998 | 50.5 (42.1 to 61.3)        | 20.4 (15.7 to 26.0)        | 23.8 (17.4 to 31.5)           | 5.2 (2.6 to 9.5)                | 1.2 (1.2 to 1.2)                  | 147.1 (122.6 to 178.5) | 59.3 (45.8 to 75.8)        | 69.2 (50.8 to 91.7)           | 15.2 (7.5 to 27.8)              | 3.4 (3.4 to 3.4)                  |
| Philippines | 1999 | 50.6 (42.2 to 61.6)        | 20.4 (15.8 to 26.0)        | 23.0 (17.0 to 30.3)           | 5.7 (2.9 to 10.6)               | 1.4 (1.4 to 1.4)                  | 147.3 (122.8 to 179.2) | 59.5 (46.1 to 75.7)        | 66.9 (49.5 to 88.1)           | 16.7 (8.4 to 30.7)              | 4.2 (4.2 to 4.2)                  |
| Philippines | 2000 | 50.8 (42.2 to 61.3)        | 20.8 (16.2 to 26.8)        | 22.8 (16.7 to 29.9)           | 6.0 (2.9 to 11.2)               | 1.3 (1.3 to 1.3)                  | 147.9 (122.9 to 178.4) | 60.5 (47.0 to 78.0)        | 66.2 (48.5 to 86.9)           | 17.4 (8.5 to 32.5)              | 3.8 (3.8 to 3.8)                  |
| Philippines | 2001 | 49.7 (41.3 to 60.0)        | 19.7 (15.4 to 25.3)        | 22.7 (16.7 to 30.1)           | 5.9 (2.9 to 10.9)               | 1.4 (1.4 to 1.4)                  | 144.6 (120.2 to 174.5) | 57.4 (44.8 to 73.6)        | 66.2 (48.6 to 87.5)           | 17.1 (8.6 to 31.6)              | 3.9 (3.9 to 3.9)                  |
| Philippines | 2002 | 49.3 (40.9 to 59.6)        | 19.0 (14.8 to 24.3)        | 23.6 (17.3 to 31.1)           | 6.0 (3.0 to 11.2)               | 0.7 (0.7 to 0.7)                  | 143.4 (119.1 to 173.4) | 55.3 (42.9 to 70.7)        | 68.6 (50.3 to 90.6)           | 17.4 (8.7 to 32.7)              | 2.1 (2.1 to 2.1)                  |
| Philippines | 2003 | 53.7 (44.8 to 64.8)        | 19.7 (15.3 to 25.2)        | 26.1 (19.3 to 34.4)           | 6.6 (3.3 to 12.4)               | 1.2 (1.2 to 1.2)                  | 156.4 (130.4 to 188.5) | 57.5 (44.5 to 73.3)        | 76.1 (56.2 to 100.3)          | 19.3 (9.7 to 36.2)              | 3.6 (3.6 to 3.6)                  |
| Philippines | 2004 | 58.5 (48.9 to 70.5)        | 20.8 (16.2 to 26.4)        | 29.3 (21.9 to 38.4)           | 7.1 (3.6 to 13.5)               | 1.2 (1.2 to 1.2)                  | 170.2 (142.3 to 205.1) | 60.5 (47.1 to 76.8)        | 85.4 (63.7 to 111.9)          | 20.8 (10.6 to 39.3)             | 3.6 (3.6 to 3.6)                  |
| Philippines | 2005 | 66.2 (55.6 to 79.1)        | 22.0 (17.2 to 27.7)        | 34.2 (25.8 to 44.3)           | 7.6 (4.0 to 14.0)               | 2.4 (2.4 to 2.4)                  | 192.8 (161.8 to 230.2) | 64.0 (50.0 to 80.8)        | 99.6 (75.0 to 129.1)          | 22.2 (11.5 to 40.8)             | 7.1 (7.1 to 7.1)                  |
| Philippines | 2006 | 72.1 (60.5 to 86.5)        | 23.1 (18.2 to 29.2)        | 38.5 (29.3 to 49.7)           | 8.1 (4.2 to 14.6)               | 2.4 (2.4 to 2.4)                  | 210.0 (176.2 to 251.7) | 67.3 (52.8 to 85.1)        | 112.0 (85.3 to 144.6)         | 23.6 (12.4 to 42.4)             | 7.1 (7.1 to 7.1)                  |
| Philippines | 2007 | 76.5 (64.2 to 91.8)        | 24.2 (19.0 to 31.0)        | 42.3 (32.4 to 54.1)           | 8.8 (4.5 to 15.5)               | 1.1 (1.1 to 1.1)                  | 222.5 (186.8 to 267.3) | 70.5 (55.2 to 90.2)        | 123.2 (94.3 to 157.5)         | 25.6 (13.2 to 45.3)             | 3.1 (3.1 to 3.1)                  |
| Philippines | 2008 | 81.5 (68.3 to 98.4)        | 25.1 (19.6 to 32.0)        | 45.7 (35.1 to 57.7)           | 9.5 (4.9 to 17.0)               | 1.1 (1.1 to 1.1)                  | 237.2 (198.7 to 286.3) | 73.2 (57.0 to 93.3)        | 133.1 (102.3 to 168.0)        | 27.8 (14.2 to 49.5)             | 3.2 (3.2 to 3.2)                  |
| Philippines | 2009 | 85.9 (72.3 to 102.7)       | 25.9 (20.0 to 32.6)        | 48.3 (37.4 to 60.7)           | 10.4 (5.4 to 18.3)              | 1.3 (1.3 to 1.3)                  | 250.1 (210.5 to 299.0) | 75.4 (58.2 to 94.8)        | 140.7 (109.0 to 176.8)        | 30.4 (15.7 to 53.3)             | 3.7 (3.7 to 3.7)                  |
| Philippines | 2010 | 92.8 (78.7 to 110.6)       | 27.4 (21.0 to 34.8)        | 51.7 (40.6 to 65.0)           | 11.8 (6.2 to 20.4)              | 2.0 (2.0 to 2.0)                  | 270.2 (229.0 to 321.8) | 79.7 (61.0 to 101.3)       | 150.6 (118.1 to 189.2)        | 34.2 (18.0 to 59.5)             | 5.7 (5.7 to 5.7)                  |
| Philippines | 2011 | 95.0 (80.3 to 112.9)       | 26.6 (20.3 to 33.7)        | 53.8 (42.1 to 68.8)           | 12.6 (6.6 to 22.0)              | 2.0 (2.0 to 2.0)                  | 276.6 (233.6 to 328.8) | 77.5 (59.2 to 98.1)        | 156.6 (122.6 to 200.3)        | 36.7 (19.3 to 64.0)             | 5.8 (5.8 to 5.8)                  |
| Philippines | 2012 | 100.0 (84.2 to 119.0)      | 27.5 (20.9 to 35.2)        | 56.8 (44.0 to 72.4)           | 13.9 (7.2 to 24.3)              | 1.8 (1.8 to 1.8)                  | 291.0 (245.1 to 346.5) | 80.0 (60.9 to 102.6)       | 165.3 (128.1 to 210.7)        | 40.4 (21.0 to 70.6)             | 5.2 (5.2 to 5.2)                  |
| Philippines | 2013 | 106.1 (88.1 to 126.6)      | 29.4 (22.5 to 37.7)        | 59.7 (46.4 to 76.5)           | 15.1 (7.8 to 26.4)              | 1.9 (1.9 to 1.9)                  | 308.9 (256.3 to 368.4) | 85.5 (65.3 to 109.8)       | 173.9 (135.1 to 222.7)        | 43.9 (22.6 to 76.9)             | 5.6 (5.6 to 5.6)                  |
| Philippines | 2014 | 109.9 (90.4 to 130.4)      | 31.3 (24.0 to 40.2)        | 61.0 (46.6 to 78.1)           | 15.7 (8.1 to 27.8)              | 1.9 (1.9 to 1.9)                  | 320.0 (263.2 to 379.5) | 91.2 (69.9 to 117.0)       | 177.5 (135.6 to 227.4)        | 45.8 (23.4 to 81.0)             | 5.4 (5.4 to 5.4)                  |
| Philippines | 2015 | 117.9 (97.1 to 140.6)      | 34.9 (26.8 to 44.9)        | 64.1 (48.5 to 82.3)           | 16.2 (7.9 to 29.0)              | 2.6 (2.6 to 2.6)                  | 343.1 (282.6 to 409.3) | 101.6 (77.9 to 130.8)      | 186.7 (141.2 to 239.6)        | 47.2 (22.9 to 84.4)             | 7.6 (7.6 to 7.6)                  |

| Country     | Year | 2018 US Dollars per capita |                            |                               |                                 |                                   | 2018 PPP per capita    |                            |                               |                                 |                                   |
|-------------|------|----------------------------|----------------------------|-------------------------------|---------------------------------|-----------------------------------|------------------------|----------------------------|-------------------------------|---------------------------------|-----------------------------------|
|             |      | Health spending            | Government health spending | Out-of-pocket health spending | Prepaid private health spending | Development assistance for health | Health spending        | Government health spending | Out-of-pocket health spending | Prepaid private health spending | Development assistance for health |
| Philippines | 2016 | 124.0 (101.1 to 151.4)     | 38.2 (29.3 to 49.5)        | 67.5 (50.2 to 88.1)           | 17.1 (8.3 to 30.9)              | 1.2 (1.2 to 1.2)                  | 361.1 (294.3 to 440.7) | 111.2 (85.3 to 144.1)      | 196.5 (146.1 to 256.4)        | 49.8 (24.3 to 90.1)             | 3.6 (3.6 to 3.6)                  |
| Philippines | 2017 | 132.0 (106.6 to 161.7)     | 41.0 (31.4 to 53.1)        | 70.7 (52.5 to 92.2)           | 18.2 (8.9 to 32.9)              | 2.1 (2.1 to 2.1)                  | 384.1 (310.2 to 470.6) | 119.2 (91.5 to 154.6)      | 205.9 (152.7 to 268.3)        | 52.9 (25.9 to 95.7)             | 6.1 (6.1 to 6.1)                  |
| Philippines | 2018 | 136.5 (111.2 to 165.6)     | 42.6 (32.7 to 55.4)        | 73.2 (54.2 to 95.3)           | 18.8 (9.2 to 33.9)              | 2.0 (2.0 to 2.0)                  | 397.3 (323.8 to 482.1) | 123.9 (95.1 to 161.2)      | 213.0 (157.7 to 277.5)        | 54.6 (26.7 to 98.8)             | 5.7 (5.7 to 5.7)                  |
| Philippines | 2019 | 141.1 (114.7 to 172.0)     | 44.2 (33.9 to 57.3)        | 75.7 (55.8 to 98.6)           | 19.4 (9.5 to 35.0)              | 2.0 (1.8 to 2.1)                  | 410.8 (334.0 to 500.8) | 128.6 (98.6 to 166.8)      | 220.2 (162.4 to 286.9)        | 56.4 (27.5 to 101.9)            | 5.7 (5.3 to 6.0)                  |
| Philippines | 2020 | 145.8 (118.5 to 176.2)     | 45.7 (35.1 to 59.5)        | 78.2 (57.9 to 102.0)          | 19.9 (9.8 to 36.1)              | 1.9 (1.8 to 2.1)                  | 424.3 (344.8 to 513.0) | 133.1 (102.3 to 173.3)     | 227.5 (168.4 to 297.0)        | 58.1 (28.4 to 105.0)            | 5.7 (5.2 to 6.1)                  |
| Philippines | 2021 | 150.6 (121.4 to 183.9)     | 47.4 (36.3 to 61.3)        | 80.7 (59.9 to 105.4)          | 20.5 (10.1 to 37.2)             | 2.0 (1.8 to 2.2)                  | 438.3 (353.3 to 535.3) | 137.9 (105.7 to 178.5)     | 235.0 (174.5 to 306.8)        | 59.7 (29.3 to 108.1)            | 5.7 (5.1 to 6.3)                  |
| Philippines | 2022 | 155.4 (126.8 to 190.7)     | 49.0 (37.5 to 63.6)        | 83.4 (61.7 to 108.8)          | 21.1 (10.4 to 38.3)             | 2.0 (1.8 to 2.2)                  | 452.4 (369.1 to 555.2) | 142.6 (109.3 to 185.0)     | 242.7 (179.7 to 316.8)        | 61.4 (30.1 to 111.4)            | 5.8 (5.1 to 6.5)                  |
| Philippines | 2023 | 160.4 (131.7 to 194.8)     | 50.7 (38.8 to 65.7)        | 86.1 (63.5 to 112.7)          | 21.7 (10.6 to 39.4)             | 2.0 (1.7 to 2.3)                  | 466.9 (383.5 to 567.1) | 147.4 (113.0 to 191.1)     | 250.6 (185.0 to 328.1)        | 63.1 (30.9 to 114.6)            | 5.8 (5.1 to 6.6)                  |
| Philippines | 2024 | 165.6 (136.3 to 201.3)     | 52.4 (40.2 to 68.0)        | 88.9 (65.5 to 116.3)          | 22.3 (10.9 to 40.6)             | 2.0 (1.8 to 2.4)                  | 482.0 (396.7 to 586.0) | 152.5 (116.9 to 198.0)     | 258.7 (190.7 to 338.4)        | 64.9 (31.8 to 118.0)            | 5.9 (5.1 to 6.9)                  |
| Philippines | 2025 | 170.8 (140.0 to 207.3)     | 54.1 (41.5 to 69.9)        | 91.8 (67.6 to 120.6)          | 22.9 (11.2 to 41.6)             | 2.1 (1.8 to 2.4)                  | 497.2 (407.4 to 603.3) | 157.3 (120.7 to 203.4)     | 267.1 (196.7 to 351.2)        | 66.7 (32.6 to 121.0)            | 6.0 (5.1 to 7.1)                  |
| Philippines | 2026 | 176.3 (143.9 to 214.5)     | 55.8 (42.9 to 72.3)        | 94.8 (69.8 to 124.6)          | 23.6 (11.5 to 42.6)             | 2.1 (1.8 to 2.5)                  | 513.0 (419.0 to 624.5) | 162.5 (124.8 to 210.3)     | 275.9 (203.2 to 362.8)        | 68.6 (33.4 to 124.0)            | 6.1 (5.1 to 7.2)                  |
| Philippines | 2027 | 181.9 (148.2 to 221.1)     | 57.6 (44.1 to 74.6)        | 97.9 (71.8 to 128.9)          | 24.3 (11.8 to 43.8)             | 2.1 (1.8 to 2.5)                  | 529.4 (431.4 to 643.7) | 167.7 (128.4 to 217.3)     | 285.0 (209.1 to 375.2)        | 70.6 (34.3 to 127.6)            | 6.1 (5.1 to 7.4)                  |
| Philippines | 2028 | 187.5 (153.6 to 227.1)     | 59.4 (45.3 to 76.9)        | 101.0 (74.4 to 132.6)         | 25.0 (12.1 to 45.1)             | 2.1 (1.8 to 2.6)                  | 545.9 (447.1 to 661.0) | 172.9 (131.8 to 223.9)     | 294.1 (216.5 to 386.0)        | 72.6 (35.2 to 131.3)            | 6.2 (5.2 to 7.5)                  |
| Philippines | 2029 | 193.2 (158.5 to 235.2)     | 61.2 (46.6 to 79.1)        | 104.2 (76.2 to 137.1)         | 25.7 (12.4 to 46.4)             | 2.2 (1.8 to 2.7)                  | 562.5 (461.3 to 684.6) | 178.2 (135.6 to 230.3)     | 303.3 (221.7 to 399.0)        | 74.7 (36.2 to 135.1)            | 6.3 (5.2 to 7.8)                  |
| Philippines | 2030 | 199.2 (162.5 to 242.8)     | 63.2 (48.3 to 81.7)        | 107.4 (78.0 to 141.9)         | 26.4 (12.8 to 47.8)             | 2.2 (1.8 to 2.7)                  | 579.8 (472.9 to 706.6) | 183.9 (140.5 to 237.8)     | 312.7 (227.1 to 413.0)        | 76.9 (37.3 to 139.1)            | 6.4 (5.2 to 7.8)                  |
| Philippines | 2031 | 205.5 (166.2 to 253.0)     | 65.4 (49.8 to 84.5)        | 110.7 (80.2 to 146.2)         | 27.2 (13.2 to 49.2)             | 2.2 (1.8 to 2.8)                  | 598.2 (483.9 to 736.4) | 190.3 (145.0 to 246.1)     | 322.3 (233.6 to 425.6)        | 79.1 (38.4 to 143.1)            | 6.5 (5.2 to 8.1)                  |
| Philippines | 2032 | 211.8 (172.0 to 258.4)     | 67.6 (51.4 to 87.6)        | 114.0 (82.3 to 151.3)         | 28.0 (13.6 to 50.7)             | 2.3 (1.8 to 2.9)                  | 616.6 (500.7 to 752.2) | 196.7 (149.5 to 254.9)     | 331.9 (239.6 to 440.4)        | 81.4 (39.5 to 147.6)            | 6.6 (5.3 to 8.3)                  |
| Philippines | 2033 | 218.3 (179.2 to 267.4)     | 69.9 (53.0 to 90.7)        | 117.4 (84.5 to 156.0)         | 28.8 (14.0 to 52.2)             | 2.3 (1.8 to 3.0)                  | 635.5 (521.6 to 778.3) | 203.4 (154.3 to 264.1)     | 341.7 (246.0 to 454.0)        | 83.8 (40.6 to 152.0)            | 6.7 (5.3 to 8.6)                  |
| Philippines | 2034 | 224.9 (182.0 to 278.5)     | 72.2 (54.7 to 94.0)        | 120.7 (86.5 to 160.6)         | 29.6 (14.4 to 53.8)             | 2.3 (1.8 to 3.0)                  | 654.5 (529.6 to 810.6) | 210.0 (159.4 to 273.5)     | 351.4 (251.9 to 467.5)        | 86.3 (41.8 to 156.6)            | 6.8 (5.3 to 8.8)                  |
| Philippines | 2035 | 231.5 (186.0 to 284.8)     | 74.5 (56.5 to 96.8)        | 124.1 (88.5 to 166.2)         | 30.5 (14.8 to 55.4)             | 2.4 (1.8 to 3.1)                  | 673.8 (541.4 to 829.0) | 216.8 (164.4 to 281.8)     | 361.3 (257.6 to 483.8)        | 88.8 (43.0 to 161.3)            | 6.9 (5.3 to 8.9)                  |
| Philippines | 2036 | 238.3 (191.6 to 293.3)     | 76.9 (58.1 to 100.1)       | 127.5 (90.5 to 170.9)         | 31.4 (15.2 to 57.1)             | 2.4 (1.8 to 3.2)                  | 693.6 (557.7 to 853.8) | 223.9 (169.1 to 291.3)     | 371.2 (263.4 to 497.5)        | 91.4 (44.3 to 166.2)            | 7.0 (5.4 to 9.3)                  |

| Country     | Year | 2018 US Dollars per capita |                            |                               |                                 |                                   | 2018 PPP per capita     |                            |                               |                                 |                                   |
|-------------|------|----------------------------|----------------------------|-------------------------------|---------------------------------|-----------------------------------|-------------------------|----------------------------|-------------------------------|---------------------------------|-----------------------------------|
|             |      | Health spending            | Government health spending | Out-of-pocket health spending | Prepaid private health spending | Development assistance for health | Health spending         | Government health spending | Out-of-pocket health spending | Prepaid private health spending | Development assistance for health |
| Philippines | 2037 | 245.0 (197.5 to 301.7)     | 79.3 (60.0 to 103.7)       | 130.9 (92.6 to 175.3)         | 32.3 (15.6 to 58.8)             | 2.4 (1.9 to 3.3)                  | 713.1 (574.8 to 878.2)  | 231.0 (174.6 to 301.9)     | 381.0 (269.5 to 510.1)        | 94.1 (45.5 to 171.1)            | 7.1 (5.4 to 9.6)                  |
| Philippines | 2038 | 251.8 (203.9 to 311.9)     | 81.8 (61.7 to 106.9)       | 134.3 (94.6 to 180.4)         | 33.3 (16.1 to 60.5)             | 2.5 (1.9 to 3.4)                  | 733.0 (593.6 to 907.9)  | 238.1 (179.4 to 311.1)     | 390.8 (275.4 to 525.0)        | 96.8 (46.8 to 176.1)            | 7.2 (5.4 to 10.0)                 |
| Philippines | 2039 | 258.7 (209.3 to 318.8)     | 84.3 (63.7 to 110.0)       | 137.6 (96.8 to 185.6)         | 34.2 (16.5 to 62.2)             | 2.5 (1.9 to 3.5)                  | 753.0 (609.2 to 927.8)  | 245.4 (185.5 to 320.0)     | 400.6 (281.7 to 540.4)        | 99.7 (48.1 to 181.1)            | 7.3 (5.5 to 10.1)                 |
| Philippines | 2040 | 265.6 (212.5 to 326.9)     | 86.9 (65.6 to 113.1)       | 141.0 (98.9 to 190.8)         | 35.2 (17.0 to 64.0)             | 2.5 (1.9 to 3.6)                  | 773.1 (618.6 to 951.4)  | 252.8 (190.9 to 329.2)     | 410.4 (287.8 to 555.4)        | 102.5 (49.4 to 186.3)           | 7.4 (5.5 to 10.4)                 |
| Philippines | 2041 | 272.8 (219.0 to 338.3)     | 89.6 (67.5 to 116.7)       | 144.4 (101.0 to 196.0)        | 36.3 (17.5 to 65.8)             | 2.6 (1.9 to 3.7)                  | 793.9 (637.6 to 984.6)  | 260.7 (196.6 to 339.6)     | 420.2 (293.9 to 570.5)        | 105.5 (50.8 to 191.7)           | 7.5 (5.6 to 10.7)                 |
| Philippines | 2042 | 279.9 (225.2 to 346.7)     | 92.2 (69.5 to 120.3)       | 147.7 (103.0 to 201.1)        | 37.3 (17.9 to 67.7)             | 2.6 (1.9 to 3.8)                  | 814.6 (655.4 to 1009.1) | 268.5 (202.4 to 350.1)     | 429.9 (299.9 to 585.2)        | 108.6 (52.2 to 197.1)           | 7.6 (5.6 to 11.1)                 |
| Philippines | 2043 | 287.0 (231.9 to 354.1)     | 95.0 (71.6 to 123.7)       | 151.0 (105.1 to 206.3)        | 38.4 (18.4 to 69.6)             | 2.7 (1.9 to 3.9)                  | 835.3 (675.0 to 1030.6) | 276.4 (208.4 to 360.0)     | 439.5 (305.8 to 600.4)        | 111.7 (53.7 to 202.7)           | 7.8 (5.6 to 11.5)                 |
| Philippines | 2044 | 294.1 (236.4 to 361.6)     | 97.7 (73.5 to 127.4)       | 154.2 (107.1 to 211.4)        | 39.4 (18.9 to 71.6)             | 2.7 (1.9 to 4.0)                  | 856.1 (688.0 to 1052.6) | 284.4 (213.9 to 370.7)     | 448.9 (311.7 to 615.2)        | 114.8 (55.1 to 208.3)           | 7.9 (5.7 to 11.7)                 |
| Philippines | 2045 | 301.4 (241.0 to 370.9)     | 100.6 (75.5 to 131.2)      | 157.4 (109.2 to 216.3)        | 40.6 (19.5 to 73.6)             | 2.8 (2.0 to 4.2)                  | 877.3 (701.5 to 1079.6) | 292.8 (219.7 to 382.0)     | 458.3 (318.0 to 629.5)        | 118.1 (56.8 to 214.2)           | 8.1 (5.8 to 12.1)                 |
| Philippines | 2046 | 308.8 (249.1 to 381.1)     | 103.6 (77.7 to 135.4)      | 160.6 (111.3 to 221.0)        | 41.7 (20.1 to 75.9)             | 2.8 (2.0 to 4.4)                  | 898.9 (725.0 to 1109.3) | 301.6 (226.1 to 394.1)     | 467.6 (324.0 to 643.3)        | 121.5 (58.5 to 221.0)           | 8.2 (5.8 to 12.7)                 |
| Philippines | 2047 | 316.3 (254.2 to 391.9)     | 106.7 (80.0 to 140.0)      | 163.8 (113.4 to 225.6)        | 42.9 (20.7 to 78.0)             | 2.9 (2.0 to 4.5)                  | 920.7 (739.8 to 1140.8) | 310.7 (232.8 to 407.4)     | 476.7 (329.9 to 656.6)        | 124.9 (60.3 to 227.2)           | 8.4 (5.8 to 13.0)                 |
| Philippines | 2048 | 324.1 (257.3 to 402.5)     | 110.0 (82.3 to 144.3)      | 167.0 (115.4 to 230.3)        | 44.1 (21.4 to 80.2)             | 3.0 (2.1 to 4.8)                  | 943.3 (748.8 to 1171.4) | 320.2 (239.4 to 419.9)     | 486.0 (336.0 to 670.2)        | 128.5 (62.2 to 233.5)           | 8.6 (6.0 to 13.8)                 |
| Philippines | 2049 | 332.0 (263.8 to 415.8)     | 113.4 (84.4 to 149.7)      | 170.2 (117.5 to 235.0)        | 45.4 (22.0 to 82.4)             | 3.0 (2.1 to 4.9)                  | 966.4 (767.7 to 1210.2) | 330.0 (245.7 to 435.9)     | 495.4 (342.1 to 684.0)        | 132.1 (63.9 to 239.9)           | 8.8 (6.0 to 14.2)                 |
| Philippines | 2050 | 340.1 (273.6 to 423.1)     | 116.8 (86.6 to 153.3)      | 173.5 (119.8 to 239.8)        | 46.7 (22.6 to 84.8)             | 3.1 (2.1 to 5.1)                  | 989.9 (796.3 to 1231.6) | 340.1 (252.2 to 446.1)     | 505.0 (348.8 to 697.9)        | 135.8 (65.7 to 246.9)           | 9.0 (6.1 to 14.8)                 |
| Poland      | 1995 | 331.5 (303.5 to 363.5)     | 230.6 (207.7 to 255.2)     | 97.7 (80.9 to 116.6)          | 2.9 (1.5 to 5.3)                | 0.3 (0.3 to 0.3)                  | 678.1 (620.7 to 743.5)  | 471.6 (424.8 to 522.0)     | 199.9 (165.6 to 238.5)        | 6.0 (3.0 to 10.8)               | 0.6 (0.6 to 0.6)                  |
| Poland      | 1996 | 355.2 (329.2 to 383.1)     | 245.7 (225.5 to 267.2)     | 105.8 (89.4 to 123.7)         | 3.0 (1.5 to 5.2)                | 0.6 (0.6 to 0.6)                  | 726.5 (673.3 to 783.5)  | 502.6 (461.2 to 546.6)     | 216.5 (182.9 to 253.1)        | 6.2 (3.1 to 10.7)               | 1.2 (1.2 to 1.2)                  |
| Poland      | 1997 | 375.3 (351.1 to 401.3)     | 256.0 (237.7 to 274.8)     | 115.1 (98.7 to 132.6)         | 3.1 (1.6 to 5.5)                | 1.0 (1.0 to 1.0)                  | 767.6 (718.2 to 820.7)  | 523.7 (486.1 to 562.0)     | 235.5 (201.9 to 271.2)        | 6.3 (3.2 to 11.2)               | 2.1 (2.1 to 2.1)                  |
| Poland      | 1998 | 395.1 (370.7 to 420.3)     | 265.1 (248.0 to 283.2)     | 126.9 (110.2 to 144.0)        | 3.2 (1.7 to 5.7)                | 0.0 (0.0 to 0.0)                  | 808.2 (758.2 to 859.7)  | 542.1 (507.3 to 579.3)     | 259.5 (225.4 to 294.6)        | 6.5 (3.4 to 11.6)               | 0.1 (0.1 to 0.1)                  |
| Poland      | 1999 | 413.4 (387.8 to 439.7)     | 280.6 (262.9 to 300.0)     | 128.6 (112.0 to 145.7)        | 3.4 (1.8 to 5.9)                | 0.9 (0.9 to 0.9)                  | 845.5 (793.2 to 899.5)  | 573.8 (537.8 to 613.5)     | 263.0 (229.2 to 298.0)        | 6.9 (3.6 to 12.0)               | 1.8 (1.8 to 1.8)                  |
| Poland      | 2000 | 435.1 (409.1 to 461.7)     | 297.9 (279.7 to 318.2)     | 131.3 (115.3 to 149.0)        | 3.6 (1.9 to 6.1)                | 2.2 (2.2 to 2.2)                  | 889.9 (836.7 to 944.4)  | 609.3 (572.1 to 650.8)     | 268.6 (235.8 to 304.7)        | 7.3 (3.9 to 12.5)               | 4.6 (4.6 to 4.6)                  |
| Poland      | 2001 | 457.9 (431.8 to 484.9)     | 317.5 (298.0 to 338.6)     | 134.6 (118.1 to 152.0)        | 5.2 (2.8 to 8.7)                | 0.6 (0.6 to 0.6)                  | 936.6 (883.2 to 991.8)  | 649.4 (609.4 to 692.5)     | 275.3 (241.6 to 310.8)        | 10.6 (5.8 to 17.9)              | 1.2 (1.2 to 1.2)                  |

| Country | Year | 2018 US Dollars per capita |                            |                               |                                 |                                   | 2018 PPP per capita       |                            |                               |                                 |                                   |
|---------|------|----------------------------|----------------------------|-------------------------------|---------------------------------|-----------------------------------|---------------------------|----------------------------|-------------------------------|---------------------------------|-----------------------------------|
|         |      | Health spending            | Government health spending | Out-of-pocket health spending | Prepaid private health spending | Development assistance for health | Health spending           | Government health spending | Out-of-pocket health spending | Prepaid private health spending | Development assistance for health |
| Poland  | 2002 | 488.0 (460.8 to 518.0)     | 336.9 (316.4 to 359.0)     | 140.1 (123.4 to 158.7)        | 10.6 (5.9 to 17.3)              | 0.4 (0.4 to 0.4)                  | 998.1 (942.5 to 1059.4)   | 689.1 (647.1 to 734.4)     | 286.6 (252.5 to 324.6)        | 21.6 (12.1 to 35.4)             | 0.9 (0.9 to 0.9)                  |
| Poland  | 2003 | 506.8 (479.4 to 538.7)     | 347.6 (326.9 to 370.4)     | 145.0 (128.1 to 164.2)        | 14.2 (8.3 to 22.6)              | 0.0 (0.0 to 0.0)                  | 1036.6 (980.5 to 1101.8)  | 710.9 (668.6 to 757.6)     | 296.7 (262.1 to 335.8)        | 29.1 (17.0 to 46.2)             | 0.0 (0.0 to 0.0)                  |
| Poland  | 2004 | 530.9 (504.0 to 561.4)     | 363.3 (343.0 to 385.2)     | 151.2 (134.4 to 169.8)        | 16.4 (9.9 to 25.7)              | 0.0 (0.0 to 0.0)                  | 1085.9 (1030.9 to 1148.4) | 743.1 (701.6 to 787.8)     | 309.3 (275.0 to 347.3)        | 33.4 (20.2 to 52.7)             | 0.0 (0.0 to 0.0)                  |
| Poland  | 2005 | 549.5 (521.2 to 579.5)     | 377.2 (355.8 to 399.1)     | 153.4 (136.2 to 172.0)        | 18.9 (11.7 to 29.3)             | 0.0 (0.0 to 0.0)                  | 1123.8 (1066.1 to 1185.4) | 771.5 (727.8 to 816.3)     | 313.8 (278.6 to 351.8)        | 38.6 (24.0 to 60.0)             | 0.0 (0.0 to 0.0)                  |
| Poland  | 2006 | 586.5 (556.2 to 618.8)     | 406.0 (382.8 to 428.3)     | 158.7 (141.2 to 178.1)        | 21.8 (14.1 to 32.2)             | 0.0 (0.0 to 0.0)                  | 1199.6 (1137.6 to 1265.6) | 830.5 (782.9 to 876.0)     | 324.6 (288.8 to 364.3)        | 44.5 (28.9 to 65.9)             | 0.0 (0.0 to 0.0)                  |
| Poland  | 2007 | 643.3 (610.7 to 675.4)     | 450.7 (426.3 to 473.9)     | 167.3 (150.3 to 187.4)        | 25.2 (17.0 to 37.0)             | 0.1 (0.1 to 0.1)                  | 1315.7 (1249.1 to 1381.5) | 921.8 (871.9 to 969.4)     | 342.1 (307.3 to 383.4)        | 51.6 (34.7 to 75.8)             | 0.3 (0.3 to 0.3)                  |
| Poland  | 2008 | 694.7 (663.0 to 726.3)     | 491.0 (467.2 to 513.7)     | 174.1 (157.6 to 193.7)        | 29.4 (20.4 to 41.0)             | 0.2 (0.2 to 0.2)                  | 1420.9 (1356.2 to 1485.6) | 1004.3 (955.5 to 1050.7)   | 356.1 (322.3 to 396.3)        | 60.1 (41.7 to 83.9)             | 0.3 (0.3 to 0.3)                  |
| Poland  | 2009 | 733.2 (703.6 to 764.2)     | 521.4 (498.3 to 542.9)     | 179.7 (162.5 to 198.3)        | 32.1 (23.0 to 44.3)             | 0.0 (0.0 to 0.0)                  | 1499.8 (1439.1 to 1563.1) | 1066.4 (1019.2 to 1110.4)  | 367.6 (332.3 to 405.6)        | 65.7 (47.0 to 90.6)             | 0.0 (0.0 to 0.0)                  |
| Poland  | 2010 | 758.3 (728.7 to 787.8)     | 539.3 (518.9 to 559.1)     | 182.7 (165.6 to 200.1)        | 36.3 (26.9 to 48.6)             | 0.0 (0.0 to 0.0)                  | 1551.0 (1490.6 to 1611.5) | 1103.1 (1061.3 to 1143.6)  | 373.7 (338.7 to 409.3)        | 74.2 (54.9 to 99.3)             | 0.0 (0.0 to 0.0)                  |
| Poland  | 2011 | 778.5 (748.6 to 808.0)     | 552.1 (532.0 to 573.8)     | 186.3 (169.5 to 203.6)        | 40.1 (30.2 to 52.6)             | 0.0 (0.0 to 0.0)                  | 1592.3 (1531.2 to 1652.7) | 1129.3 (1088.1 to 1173.6)  | 381.1 (346.6 to 416.4)        | 81.9 (61.7 to 107.6)            | 0.0 (0.0 to 0.0)                  |
| Poland  | 2012 | 788.9 (758.7 to 820.6)     | 556.1 (535.4 to 577.3)     | 189.1 (172.8 to 205.8)        | 43.7 (33.8 to 56.6)             | 0.0 (0.0 to 0.0)                  | 1613.7 (1551.7 to 1678.5) | 1137.5 (1095.0 to 1180.9)  | 386.7 (353.4 to 420.9)        | 89.4 (69.1 to 115.7)            | 0.0 (0.0 to 0.0)                  |
| Poland  | 2013 | 804.5 (774.3 to 835.6)     | 566.2 (544.1 to 588.4)     | 192.0 (175.0 to 210.1)        | 46.3 (35.5 to 59.5)             | 0.0 (0.0 to 0.0)                  | 1645.6 (1583.7 to 1709.1) | 1158.1 (1112.9 to 1203.6)  | 392.7 (358.0 to 429.6)        | 94.7 (72.6 to 121.7)            | 0.0 (0.0 to 0.0)                  |
| Poland  | 2014 | 828.8 (797.4 to 860.1)     | 582.4 (560.4 to 605.2)     | 195.8 (179.0 to 214.6)        | 50.5 (37.5 to 65.4)             | 0.0 (0.0 to 0.0)                  | 1695.1 (1631.0 to 1759.3) | 1191.3 (1146.2 to 1237.8)  | 400.5 (366.1 to 438.9)        | 103.4 (76.7 to 133.7)           | 0.0 (0.0 to 0.0)                  |
| Poland  | 2015 | 869.1 (835.0 to 905.3)     | 609.0 (585.7 to 633.9)     | 203.6 (183.0 to 224.5)        | 56.5 (41.2 to 75.3)             | 0.0 (0.0 to 0.0)                  | 1777.6 (1707.9 to 1851.7) | 1245.6 (1198.1 to 1296.6)  | 416.4 (374.4 to 459.2)        | 115.7 (84.2 to 154.0)           | 0.0 (0.0 to 0.0)                  |
| Poland  | 2016 | 907.7 (862.7 to 956.0)     | 634.7 (603.1 to 670.4)     | 210.7 (185.4 to 235.7)        | 62.4 (44.2 to 85.5)             | 0.0 (0.0 to 0.0)                  | 1856.7 (1764.6 to 1955.4) | 1298.1 (1233.6 to 1371.2)  | 431.0 (379.3 to 482.2)        | 127.6 (90.5 to 174.9)           | 0.0 (0.0 to 0.0)                  |
| Poland  | 2017 | 952.1 (903.3 to 1003.8)    | 668.8 (635.1 to 704.4)     | 218.2 (192.5 to 244.4)        | 65.0 (46.1 to 89.4)             | 0.0 (0.0 to 0.0)                  | 1947.4 (1847.7 to 2053.3) | 1368.1 (1299.1 to 1440.8)  | 446.3 (393.7 to 499.9)        | 133.0 (94.4 to 182.9)           | 0.0 (0.0 to 0.0)                  |
| Poland  | 2018 | 971.1 (921.9 to 1025.7)    | 681.8 (647.9 to 717.8)     | 222.7 (196.6 to 249.8)        | 66.6 (47.3 to 91.4)             | 0.0 (0.0 to 0.0)                  | 1986.2 (1885.7 to 2098.0) | 1394.5 (1325.3 to 1468.3)  | 455.6 (402.2 to 511.0)        | 136.1 (96.7 to 187.0)           | 0.0 (0.0 to 0.0)                  |
| Poland  | 2019 | 987.4 (939.6 to 1040.5)    | 692.8 (657.6 to 730.1)     | 226.8 (199.6 to 255.0)        | 67.8 (48.3 to 93.2)             | 0.0 (0.0 to 0.0)                  | 2019.6 (1921.8 to 2128.3) | 1417.0 (1345.0 to 1493.4)  | 463.9 (408.2 to 521.6)        | 138.7 (98.8 to 190.7)           | 0.0 (0.0 to 0.0)                  |
| Poland  | 2020 | 1003.4 (952.4 to 1060.3)   | 703.6 (666.5 to 742.7)     | 230.7 (202.6 to 260.1)        | 69.0 (49.2 to 94.9)             | 0.0 (0.0 to 0.0)                  | 2052.3 (1948.1 to 2168.8) | 1439.2 (1363.3 to 1519.0)  | 471.9 (414.4 to 532.0)        | 141.2 (100.5 to 194.2)          | 0.0 (0.0 to 0.0)                  |
| Poland  | 2021 | 1022.8 (971.5 to 1080.4)   | 717.6 (679.5 to 757.1)     | 234.8 (206.9 to 265.7)        | 70.4 (50.0 to 96.8)             | 0.0 (0.0 to 0.0)                  | 2092.0 (1987.1 to 2209.8) | 1467.9 (1389.8 to 1548.7)  | 480.2 (423.3 to 543.5)        | 143.9 (102.3 to 198.0)          | 0.0 (0.0 to 0.0)                  |
| Poland  | 2022 | 1045.5 (990.8 to 1107.3)   | 734.9 (695.7 to 776.0)     | 238.8 (210.1 to 270.5)        | 71.8 (51.0 to 98.9)             | 0.0 (0.0 to 0.0)                  | 2138.6 (2026.6 to 2264.8) | 1503.2 (1422.9 to 1587.2)  | 488.5 (429.7 to 553.2)        | 146.8 (104.4 to 202.3)          | 0.0 (0.0 to 0.0)                  |



| Country | Year | 2018 US Dollars per capita |                            |                               |                                 |                                   | 2018 PPP per capita       |                            |                               |                                 |                                   |
|---------|------|----------------------------|----------------------------|-------------------------------|---------------------------------|-----------------------------------|---------------------------|----------------------------|-------------------------------|---------------------------------|-----------------------------------|
|         |      | Health spending            | Government health spending | Out-of-pocket health spending | Prepaid private health spending | Development assistance for health | Health spending           | Government health spending | Out-of-pocket health spending | Prepaid private health spending | Development assistance for health |
| Poland  | 2023 | 1068.6 (1009.5 to 1129.1)  | 752.4 (710.4 to 795.1)     | 242.9 (213.8 to 275.8)        | 73.2 (52.1 to 101.0)            | 0.0 (0.0 to 0.0)                  | 2185.6 (2064.8 to 2309.4) | 1538.9 (1453.0 to 1626.3)  | 496.9 (437.4 to 564.0)        | 149.8 (106.6 to 206.5)          | 0.0 (0.0 to 0.0)                  |
| Poland  | 2024 | 1092.5 (1031.3 to 1153.0)  | 770.4 (724.8 to 814.9)     | 247.2 (216.9 to 281.7)        | 74.8 (53.3 to 103.1)            | 0.0 (0.0 to 0.0)                  | 2234.5 (2109.4 to 2358.3) | 1575.8 (1482.4 to 1666.7)  | 505.7 (443.7 to 576.2)        | 153.0 (108.9 to 210.9)          | 0.0 (0.0 to 0.0)                  |
| Poland  | 2025 | 1117.2 (1053.4 to 1182.3)  | 789.0 (743.1 to 836.5)     | 251.7 (220.3 to 288.4)        | 76.5 (54.5 to 105.4)            | 0.0 (0.0 to 0.0)                  | 2285.1 (2154.5 to 2418.2) | 1613.8 (1519.9 to 1711.1)  | 514.9 (450.6 to 589.9)        | 156.5 (111.4 to 215.5)          | 0.0 (0.0 to 0.0)                  |
| Poland  | 2026 | 1142.8 (1075.9 to 1215.1)  | 808.0 (759.3 to 859.1)     | 256.5 (224.5 to 294.2)        | 78.3 (55.8 to 107.7)            | 0.0 (0.0 to 0.0)                  | 2337.5 (2200.6 to 2485.3) | 1652.8 (1553.0 to 1757.1)  | 524.6 (459.2 to 601.7)        | 160.2 (114.1 to 220.3)          | 0.0 (0.0 to 0.0)                  |
| Poland  | 2027 | 1170.0 (1101.8 to 1241.6)  | 828.2 (776.3 to 881.2)     | 261.6 (227.3 to 301.5)        | 80.3 (57.2 to 110.3)            | 0.0 (0.0 to 0.0)                  | 2393.2 (2253.7 to 2539.6) | 1693.9 (1587.9 to 1802.4)  | 535.0 (465.0 to 616.7)        | 164.3 (117.0 to 225.6)          | 0.0 (0.0 to 0.0)                  |
| Poland  | 2028 | 1198.4 (1126.7 to 1271.6)  | 849.1 (794.0 to 906.1)     | 266.9 (230.6 to 309.1)        | 82.5 (58.7 to 113.3)            | 0.0 (0.0 to 0.0)                  | 2451.3 (2304.5 to 2600.9) | 1736.7 (1624.1 to 1853.3)  | 546.0 (471.6 to 632.2)        | 168.6 (120.1 to 231.8)          | 0.0 (0.0 to 0.0)                  |
| Poland  | 2029 | 1227.7 (1152.2 to 1308.5)  | 870.5 (812.7 to 928.4)     | 272.5 (233.7 to 317.6)        | 84.7 (60.3 to 116.4)            | 0.0 (0.0 to 0.0)                  | 2511.1 (2356.8 to 2676.5) | 1780.5 (1662.3 to 1898.9)  | 557.3 (478.1 to 649.6)        | 173.3 (123.2 to 238.0)          | 0.0 (0.0 to 0.0)                  |
| Poland  | 2030 | 1257.9 (1174.6 to 1341.4)  | 892.7 (833.3 to 954.9)     | 278.2 (237.0 to 324.3)        | 87.0 (62.1 to 119.5)            | 0.0 (0.0 to 0.0)                  | 2572.9 (2402.5 to 2743.7) | 1825.8 (1704.4 to 1953.2)  | 569.0 (484.8 to 663.4)        | 178.0 (127.0 to 244.4)          | 0.0 (0.0 to 0.0)                  |
| Poland  | 2031 | 1288.5 (1199.4 to 1378.0)  | 915.0 (851.5 to 982.1)     | 284.0 (240.0 to 333.4)        | 89.4 (63.6 to 122.9)            | 0.0 (0.0 to 0.0)                  | 2635.4 (2453.2 to 2818.6) | 1871.6 (1741.6 to 2008.7)  | 580.9 (491.0 to 682.0)        | 183.0 (130.1 to 251.4)          | 0.0 (0.0 to 0.0)                  |
| Poland  | 2032 | 1319.5 (1232.3 to 1415.1)  | 937.7 (870.1 to 1007.1)    | 289.9 (243.3 to 343.1)        | 91.9 (65.3 to 126.5)            | 0.0 (0.0 to 0.0)                  | 2699.0 (2520.6 to 2894.4) | 1918.0 (1779.8 to 2060.0)  | 593.0 (497.6 to 701.8)        | 188.0 (133.6 to 258.7)          | 0.0 (0.0 to 0.0)                  |
| Poland  | 2033 | 1351.8 (1261.7 to 1453.4)  | 961.3 (889.8 to 1036.1)    | 296.0 (246.5 to 352.1)        | 94.5 (67.2 to 130.2)            | 0.0 (0.0 to 0.0)                  | 2764.9 (2580.8 to 2972.7) | 1966.2 (1820.1 to 2119.3)  | 605.5 (504.1 to 720.2)        | 193.3 (137.4 to 266.3)          | 0.0 (0.0 to 0.0)                  |
| Poland  | 2034 | 1384.4 (1285.0 to 1491.9)  | 985.2 (910.0 to 1062.4)    | 302.2 (249.4 to 361.7)        | 97.1 (69.0 to 134.2)            | 0.0 (0.0 to 0.0)                  | 2831.8 (2628.3 to 3051.5) | 2015.1 (1861.3 to 2173.0)  | 618.0 (510.2 to 739.8)        | 198.6 (141.2 to 274.4)          | 0.0 (0.0 to 0.0)                  |
| Poland  | 2035 | 1417.5 (1315.1 to 1523.9)  | 1009.5 (930.5 to 1091.6)   | 308.3 (252.9 to 371.4)        | 99.7 (70.9 to 137.7)            | 0.0 (0.0 to 0.0)                  | 2899.4 (2689.9 to 3117.0) | 2064.8 (1903.2 to 2232.8)  | 630.6 (517.2 to 759.7)        | 203.9 (145.0 to 281.7)          | 0.0 (0.0 to 0.0)                  |
| Poland  | 2036 | 1450.8 (1341.4 to 1568.3)  | 1034.0 (949.4 to 1122.0)   | 314.5 (256.2 to 381.6)        | 102.3 (72.8 to 141.5)           | 0.0 (0.0 to 0.0)                  | 2967.5 (2743.7 to 3207.7) | 2114.9 (1942.0 to 2294.9)  | 643.3 (524.1 to 780.5)        | 209.3 (148.9 to 289.5)          | 0.0 (0.0 to 0.0)                  |
| Poland  | 2037 | 1484.0 (1369.5 to 1606.3)  | 1058.4 (969.9 to 1149.0)   | 320.7 (259.4 to 391.3)        | 104.9 (74.6 to 145.3)           | 0.0 (0.0 to 0.0)                  | 3035.3 (2801.2 to 3285.4) | 2164.9 (1983.7 to 2350.2)  | 655.9 (530.6 to 800.3)        | 214.6 (152.5 to 297.3)          | 0.0 (0.0 to 0.0)                  |
| Poland  | 2038 | 1517.3 (1397.0 to 1647.9)  | 1083.0 (989.4 to 1178.8)   | 326.8 (262.8 to 401.1)        | 107.5 (76.3 to 149.1)           | 0.0 (0.0 to 0.0)                  | 3103.4 (2857.5 to 3370.7) | 2215.2 (2023.8 to 2411.0)  | 668.4 (537.6 to 820.3)        | 219.9 (156.1 to 305.0)          | 0.0 (0.0 to 0.0)                  |
| Poland  | 2039 | 1550.9 (1429.7 to 1689.2)  | 1107.9 (1007.6 to 1206.4)  | 332.9 (266.0 to 410.9)        | 110.1 (78.0 to 152.6)           | 0.0 (0.0 to 0.0)                  | 3172.1 (2924.3 to 3455.1) | 2266.1 (2060.9 to 2467.6)  | 680.9 (544.1 to 840.4)        | 225.1 (159.5 to 312.2)          | 0.0 (0.0 to 0.0)                  |
| Poland  | 2040 | 1584.9 (1453.9 to 1729.9)  | 1133.3 (1028.8 to 1238.3)  | 339.0 (269.3 to 420.5)        | 112.6 (79.8 to 155.8)           | 0.0 (0.0 to 0.0)                  | 3241.8 (2973.8 to 3538.4) | 2318.1 (2104.2 to 2532.9)  | 693.3 (550.9 to 860.1)        | 230.4 (163.3 to 318.8)          | 0.0 (0.0 to 0.0)                  |
| Poland  | 2041 | 1618.6 (1485.4 to 1760.2)  | 1158.4 (1047.3 to 1268.3)  | 345.0 (273.5 to 429.7)        | 115.2 (81.7 to 159.0)           | 0.0 (0.0 to 0.0)                  | 3310.6 (3038.3 to 3600.3) | 2369.5 (2142.2 to 2594.1)  | 705.6 (559.5 to 879.0)        | 235.6 (167.2 to 325.2)          | 0.0 (0.0 to 0.0)                  |
| Poland  | 2042 | 1652.4 (1515.8 to 1803.8)  | 1183.7 (1064.3 to 1301.7)  | 351.0 (277.3 to 439.5)        | 117.7 (83.6 to 162.4)           | 0.0 (0.0 to 0.0)                  | 3379.7 (3100.4 to 3689.6) | 2421.2 (2176.9 to 2662.5)  | 717.9 (567.3 to 899.0)        | 240.7 (171.1 to 332.1)          | 0.0 (0.0 to 0.0)                  |
| Poland  | 2043 | 1686.8 (1540.2 to 1850.8)  | 1209.6 (1086.9 to 1335.1)  | 357.0 (281.2 to 448.0)        | 120.2 (85.3 to 166.3)           | 0.0 (0.0 to 0.0)                  | 3450.1 (3150.3 to 3785.6) | 2474.1 (2223.2 to 2730.8)  | 730.2 (575.2 to 916.3)        | 245.9 (174.4 to 340.1)          | 0.0 (0.0 to 0.0)                  |

| Country  | Year | 2018 US Dollars per capita |                            |                               |                                 |                                   | 2018 PPP per capita       |                            |                               |                                 |                                   |
|----------|------|----------------------------|----------------------------|-------------------------------|---------------------------------|-----------------------------------|---------------------------|----------------------------|-------------------------------|---------------------------------|-----------------------------------|
|          |      | Health spending            | Government health spending | Out-of-pocket health spending | Prepaid private health spending | Development assistance for health | Health spending           | Government health spending | Out-of-pocket health spending | Prepaid private health spending | Development assistance for health |
| Poland   | 2044 | 1721.8 (1574.1 to 1888.6)  | 1236.1 (1104.9 to 1368.9)  | 363.0 (285.3 to 455.9)        | 122.8 (86.8 to 170.2)           | 0.0 (0.0 to 0.0)                  | 3521.8 (3219.8 to 3862.9) | 2528.2 (2260.0 to 2799.9)  | 742.5 (583.5 to 932.5)        | 251.1 (177.6 to 348.2)          | 0.0 (0.0 to 0.0)                  |
| Poland   | 2045 | 1756.0 (1598.4 to 1930.0)  | 1262.0 (1126.1 to 1402.4)  | 368.9 (289.3 to 463.9)        | 125.2 (88.4 to 174.0)           | 0.0 (0.0 to 0.0)                  | 3591.8 (3269.4 to 3947.7) | 2581.3 (2303.2 to 2868.5)  | 754.5 (591.8 to 948.8)        | 256.1 (180.8 to 356.0)          | 0.0 (0.0 to 0.0)                  |
| Poland   | 2046 | 1789.4 (1625.4 to 1968.1)  | 1287.4 (1143.4 to 1434.1)  | 374.5 (293.4 to 471.4)        | 127.5 (90.0 to 177.7)           | 0.0 (0.0 to 0.0)                  | 3660.1 (3324.5 to 4025.5) | 2633.2 (2338.7 to 2933.2)  | 766.1 (600.1 to 964.2)        | 260.9 (184.1 to 363.5)          | 0.0 (0.0 to 0.0)                  |
| Poland   | 2047 | 1822.1 (1648.9 to 2006.6)  | 1312.3 (1158.6 to 1468.8)  | 380.1 (297.9 to 478.4)        | 129.8 (91.5 to 181.2)           | 0.0 (0.0 to 0.0)                  | 3727.0 (3372.8 to 4104.3) | 2684.1 (2369.9 to 3004.4)  | 777.4 (609.4 to 978.4)        | 265.5 (187.2 to 370.5)          | 0.0 (0.0 to 0.0)                  |
| Poland   | 2048 | 1854.6 (1677.5 to 2062.0)  | 1337.0 (1174.0 to 1501.6)  | 385.6 (302.6 to 485.2)        | 132.0 (93.1 to 184.3)           | 0.0 (0.0 to 0.0)                  | 3793.4 (3431.1 to 4217.7) | 2734.7 (2401.4 to 3071.4)  | 788.7 (618.9 to 992.5)        | 270.0 (190.4 to 377.0)          | 0.0 (0.0 to 0.0)                  |
| Poland   | 2049 | 1886.3 (1701.8 to 2088.0)  | 1361.0 (1191.6 to 1534.4)  | 391.1 (307.0 to 492.1)        | 134.2 (94.5 to 187.5)           | 0.0 (0.0 to 0.0)                  | 3858.2 (3480.8 to 4270.7) | 2783.8 (2437.4 to 3138.5)  | 799.9 (627.9 to 1006.5)       | 274.5 (193.3 to 383.4)          | 0.0 (0.0 to 0.0)                  |
| Poland   | 2050 | 1918.0 (1720.0 to 2126.3)  | 1385.0 (1211.0 to 1564.1)  | 396.6 (311.3 to 499.0)        | 136.4 (95.9 to 190.6)           | 0.0 (0.0 to 0.0)                  | 3923.1 (3518.0 to 4349.2) | 2832.9 (2477.0 to 3199.3)  | 811.2 (636.8 to 1020.6)       | 279.0 (196.1 to 389.9)          | 0.0 (0.0 to 0.0)                  |
| Portugal | 1995 | 1157.1 (1095.9 to 1219.9)  | 811.0 (761.1 to 862.4)     | 326.4 (295.6 to 358.9)        | 19.7 (11.9 to 30.2)             | 0.0 (0.0 to 0.0)                  | 1568.4 (1485.5 to 1653.5) | 1099.3 (1031.7 to 1168.9)  | 442.4 (400.7 to 486.4)        | 26.7 (16.2 to 40.9)             | 0.0 (0.0 to 0.0)                  |
| Portugal | 1996 | 1223.6 (1172.8 to 1273.5)  | 863.6 (822.0 to 905.5)     | 337.7 (311.2 to 363.8)        | 22.3 (14.4 to 32.9)             | 0.0 (0.0 to 0.0)                  | 1658.6 (1589.7 to 1726.3) | 1170.6 (1114.3 to 1227.5)  | 457.7 (421.8 to 493.2)        | 30.2 (19.6 to 44.7)             | 0.0 (0.0 to 0.0)                  |
| Portugal | 1997 | 1300.1 (1252.9 to 1344.6)  | 923.6 (883.0 to 963.9)     | 350.6 (325.5 to 373.1)        | 25.8 (17.5 to 36.3)             | 0.0 (0.0 to 0.0)                  | 1762.2 (1698.3 to 1822.6) | 1252.0 (1196.9 to 1306.6)  | 475.2 (441.3 to 505.7)        | 35.0 (23.8 to 49.2)             | 0.0 (0.0 to 0.0)                  |
| Portugal | 1998 | 1395.9 (1347.9 to 1443.9)  | 996.6 (954.9 to 1038.9)    | 368.5 (344.5 to 392.2)        | 30.8 (21.9 to 41.0)             | 0.0 (0.0 to 0.0)                  | 1892.2 (1827.1 to 1957.2) | 1350.9 (1294.3 to 1408.2)  | 499.6 (466.9 to 531.7)        | 41.7 (29.7 to 55.5)             | 0.0 (0.0 to 0.0)                  |
| Portugal | 1999 | 1521.9 (1471.3 to 1570.9)  | 1088.0 (1045.8 to 1129.6)  | 394.1 (369.7 to 420.6)        | 39.9 (29.5 to 51.4)             | 0.0 (0.0 to 0.0)                  | 2063.0 (1994.4 to 2129.3) | 1474.8 (1417.6 to 1531.2)  | 534.2 (501.1 to 570.1)        | 54.0 (40.0 to 69.7)             | 0.0 (0.0 to 0.0)                  |
| Portugal | 2000 | 1693.0 (1641.1 to 1745.1)  | 1203.7 (1164.0 to 1246.1)  | 424.9 (402.5 to 449.6)        | 64.4 (50.6 to 81.0)             | 0.0 (0.0 to 0.0)                  | 2294.9 (2224.6 to 2365.5) | 1631.7 (1577.8 to 1689.1)  | 576.0 (545.5 to 609.4)        | 87.2 (68.6 to 109.8)            | 0.0 (0.0 to 0.0)                  |
| Portugal | 2001 | 1798.1 (1747.5 to 1847.0)  | 1281.2 (1240.4 to 1325.4)  | 433.9 (412.5 to 455.9)        | 83.0 (67.5 to 102.4)            | 0.0 (0.0 to 0.0)                  | 2437.3 (2368.7 to 2503.7) | 1736.6 (1681.4 to 1796.6)  | 588.1 (559.1 to 618.0)        | 112.5 (91.4 to 138.8)           | 0.0 (0.0 to 0.0)                  |
| Portugal | 2002 | 1867.2 (1820.8 to 1915.7)  | 1337.5 (1297.4 to 1378.7)  | 433.3 (412.7 to 454.0)        | 96.4 (80.5 to 115.6)            | 0.0 (0.0 to 0.0)                  | 2531.0 (2468.0 to 2596.8) | 1813.0 (1758.7 to 1868.9)  | 587.3 (559.4 to 615.4)        | 130.7 (109.2 to 156.6)          | 0.0 (0.0 to 0.0)                  |
| Portugal | 2003 | 1908.4 (1860.1 to 1960.8)  | 1360.2 (1321.9 to 1403.3)  | 440.7 (420.3 to 460.9)        | 107.5 (90.8 to 125.8)           | 0.0 (0.0 to 0.0)                  | 2586.8 (2521.4 to 2657.9) | 1843.7 (1791.8 to 1902.2)  | 597.4 (569.7 to 624.7)        | 145.7 (123.1 to 170.5)          | 0.0 (0.0 to 0.0)                  |
| Portugal | 2004 | 1978.2 (1929.4 to 2034.1)  | 1403.7 (1362.0 to 1449.0)  | 459.1 (438.8 to 480.1)        | 115.5 (98.3 to 135.7)           | 0.0 (0.0 to 0.0)                  | 2681.5 (2615.3 to 2757.2) | 1902.7 (1846.2 to 1964.2)  | 622.4 (594.8 to 650.7)        | 156.5 (133.2 to 184.0)          | 0.0 (0.0 to 0.0)                  |
| Portugal | 2005 | 2012.3 (1961.4 to 2064.3)  | 1417.5 (1374.8 to 1460.7)  | 478.6 (457.3 to 500.2)        | 116.1 (99.3 to 136.2)           | 0.0 (0.0 to 0.0)                  | 2727.7 (2658.7 to 2798.2) | 1921.5 (1863.6 to 1980.0)  | 648.8 (619.8 to 678.1)        | 157.4 (134.6 to 184.7)          | 0.0 (0.0 to 0.0)                  |
| Portugal | 2006 | 2023.0 (1974.3 to 2073.9)  | 1407.7 (1368.1 to 1446.4)  | 499.6 (478.0 to 522.5)        | 115.7 (98.5 to 135.3)           | 0.0 (0.0 to 0.0)                  | 2742.2 (2676.2 to 2811.1) | 1908.2 (1854.5 to 1960.6)  | 677.2 (647.9 to 708.3)        | 156.8 (133.6 to 183.5)          | 0.0 (0.0 to 0.0)                  |
| Portugal | 2007 | 2067.6 (2018.7 to 2118.7)  | 1430.0 (1387.8 to 1468.5)  | 520.8 (499.2 to 545.6)        | 116.8 (98.9 to 135.2)           | 0.0 (0.0 to 0.0)                  | 2802.7 (2736.4 to 2872.0) | 1938.4 (1881.2 to 1990.5)  | 706.0 (676.7 to 739.6)        | 158.3 (134.1 to 183.3)          | 0.0 (0.0 to 0.0)                  |
| Portugal | 2008 | 2112.3 (2060.7 to 2163.9)  | 1458.1 (1413.5 to 1500.4)  | 534.6 (512.0 to 559.2)        | 119.7 (103.1 to 138.8)          | 0.0 (0.0 to 0.0)                  | 2863.2 (2793.3 to 2933.1) | 1976.4 (1916.1 to 2033.8)  | 724.6 (694.1 to 758.0)        | 162.2 (139.7 to 188.2)          | 0.0 (0.0 to 0.0)                  |

| Country  | Year | 2018 US Dollars per capita |                            |                               |                                 |                                   | 2018 PPP per capita       |                            |                               |                                 |                                   |
|----------|------|----------------------------|----------------------------|-------------------------------|---------------------------------|-----------------------------------|---------------------------|----------------------------|-------------------------------|---------------------------------|-----------------------------------|
|          |      | Health spending            | Government health spending | Out-of-pocket health spending | Prepaid private health spending | Development assistance for health | Health spending           | Government health spending | Out-of-pocket health spending | Prepaid private health spending | Development assistance for health |
| Portugal | 2009 | 2132.0 (2079.5 to 2186.4)  | 1474.5 (1433.6 to 1515.3)  | 536.3 (512.4 to 558.9)        | 121.2 (103.8 to 140.8)          | 0.0 (0.0 to 0.0)                  | 2889.9 (2818.8 to 2963.7) | 1998.7 (1943.3 to 2054.0)  | 727.0 (694.6 to 757.6)        | 164.3 (140.8 to 190.9)          | 0.0 (0.0 to 0.0)                  |
| Portugal | 2010 | 2157.6 (2100.2 to 2210.4)  | 1487.8 (1443.2 to 1528.9)  | 544.7 (521.2 to 568.4)        | 125.2 (107.2 to 145.6)          | 0.0 (0.0 to 0.0)                  | 2924.7 (2846.8 to 2996.2) | 2016.6 (1956.2 to 2072.4)  | 738.3 (706.5 to 770.5)        | 169.7 (145.3 to 197.4)          | 0.0 (0.0 to 0.0)                  |
| Portugal | 2011 | 2072.5 (2018.1 to 2122.1)  | 1406.1 (1362.7 to 1448.5)  | 543.0 (520.0 to 568.9)        | 123.4 (106.9 to 142.9)          | 0.0 (0.0 to 0.0)                  | 2809.3 (2735.5 to 2876.6) | 1905.9 (1847.1 to 1963.4)  | 736.1 (704.9 to 771.2)        | 167.3 (144.9 to 193.7)          | 0.0 (0.0 to 0.0)                  |
| Portugal | 2012 | 1961.7 (1911.4 to 2012.7)  | 1309.0 (1267.7 to 1351.8)  | 533.6 (510.9 to 557.9)        | 119.2 (103.4 to 138.9)          | 0.0 (0.0 to 0.0)                  | 2659.1 (2590.9 to 2728.2) | 1774.3 (1718.4 to 1832.4)  | 723.3 (692.5 to 756.2)        | 161.5 (140.1 to 188.2)          | 0.0 (0.0 to 0.0)                  |
| Portugal | 2013 | 1900.4 (1850.6 to 1949.6)  | 1262.7 (1221.2 to 1303.2)  | 521.3 (499.6 to 545.6)        | 116.3 (99.8 to 136.1)           | 0.0 (0.0 to 0.0)                  | 2576.0 (2508.5 to 2642.7) | 1711.6 (1655.3 to 1766.4)  | 706.7 (677.3 to 739.5)        | 157.7 (135.2 to 184.5)          | 0.0 (0.0 to 0.0)                  |
| Portugal | 2014 | 1893.0 (1843.7 to 1942.2)  | 1253.1 (1212.2 to 1293.3)  | 523.6 (500.5 to 546.5)        | 116.3 (98.3 to 137.6)           | 0.0 (0.0 to 0.0)                  | 2566.0 (2499.2 to 2632.7) | 1698.6 (1643.1 to 1753.1)  | 709.7 (678.5 to 740.8)        | 157.7 (133.3 to 186.5)          | 0.0 (0.0 to 0.0)                  |
| Portugal | 2015 | 1916.4 (1863.5 to 1968.8)  | 1267.7 (1226.3 to 1307.7)  | 531.7 (507.1 to 557.6)        | 117.0 (96.9 to 140.1)           | 0.0 (0.0 to 0.0)                  | 2597.7 (2526.0 to 2668.8) | 1718.3 (1662.3 to 1772.5)  | 720.7 (687.4 to 755.8)        | 158.7 (131.4 to 189.9)          | 0.0 (0.0 to 0.0)                  |
| Portugal | 2016 | 1954.1 (1882.5 to 2029.4)  | 1293.5 (1236.8 to 1355.9)  | 542.6 (508.0 to 577.7)        | 118.0 (93.9 to 147.0)           | 0.0 (0.0 to 0.0)                  | 2648.8 (2551.7 to 2750.8) | 1753.4 (1676.4 to 1837.9)  | 735.5 (688.6 to 783.1)        | 159.9 (127.3 to 199.3)          | 0.0 (0.0 to 0.0)                  |
| Portugal | 2017 | 2003.1 (1928.7 to 2080.9)  | 1325.9 (1268.1 to 1388.4)  | 555.1 (517.9 to 593.6)        | 122.1 (97.1 to 152.4)           | 0.0 (0.0 to 0.0)                  | 2715.2 (2614.3 to 2820.7) | 1797.3 (1718.9 to 1881.9)  | 752.4 (702.1 to 804.6)        | 165.6 (131.6 to 206.6)          | 0.0 (0.0 to 0.0)                  |
| Portugal | 2018 | 2025.0 (1950.8 to 2104.3)  | 1339.3 (1280.2 to 1402.0)  | 562.0 (524.9 to 601.7)        | 123.7 (98.2 to 154.2)           | 0.0 (0.0 to 0.0)                  | 2744.9 (2644.4 to 2852.4) | 1815.5 (1735.4 to 1900.5)  | 761.8 (711.6 to 815.6)        | 167.7 (133.1 to 209.0)          | 0.0 (0.0 to 0.0)                  |
| Portugal | 2019 | 2042.8 (1966.9 to 2124.0)  | 1349.3 (1290.0 to 1414.6)  | 568.5 (530.4 to 609.9)        | 125.0 (99.1 to 155.8)           | 0.0 (0.0 to 0.0)                  | 2769.0 (2666.1 to 2879.1) | 1828.9 (1748.6 to 1917.5)  | 770.6 (719.0 to 826.7)        | 169.4 (134.3 to 211.2)          | 0.0 (0.0 to 0.0)                  |
| Portugal | 2020 | 2060.8 (1982.6 to 2143.2)  | 1359.4 (1298.0 to 1422.2)  | 575.1 (534.4 to 616.5)        | 126.3 (100.0 to 157.2)          | 0.0 (0.0 to 0.0)                  | 2793.4 (2687.5 to 2905.1) | 1842.7 (1759.4 to 1927.7)  | 779.5 (724.4 to 835.7)        | 171.2 (135.6 to 213.0)          | 0.0 (0.0 to 0.0)                  |
| Portugal | 2021 | 2078.0 (1997.4 to 2162.5)  | 1368.8 (1307.2 to 1433.7)  | 581.6 (540.1 to 627.7)        | 127.7 (101.3 to 158.9)          | 0.0 (0.0 to 0.0)                  | 2816.8 (2707.4 to 2931.2) | 1855.4 (1771.9 to 1943.4)  | 788.3 (732.1 to 850.9)        | 173.1 (137.3 to 215.4)          | 0.0 (0.0 to 0.0)                  |
| Portugal | 2022 | 2096.0 (2013.5 to 2182.7)  | 1378.9 (1317.1 to 1444.9)  | 587.8 (543.6 to 633.8)        | 129.2 (102.4 to 161.4)          | 0.0 (0.0 to 0.0)                  | 2841.1 (2729.3 to 2958.7) | 1869.2 (1785.3 to 1958.5)  | 796.7 (736.9 to 859.2)        | 175.2 (138.8 to 218.7)          | 0.0 (0.0 to 0.0)                  |
| Portugal | 2023 | 2113.4 (2031.0 to 2201.8)  | 1388.7 (1325.7 to 1454.6)  | 593.9 (548.6 to 641.0)        | 130.7 (103.6 to 163.2)          | 0.0 (0.0 to 0.0)                  | 2864.7 (2753.0 to 2984.5) | 1882.4 (1797.0 to 1971.8)  | 805.1 (743.6 to 868.8)        | 177.2 (140.5 to 221.2)          | 0.0 (0.0 to 0.0)                  |
| Portugal | 2024 | 2130.0 (2045.1 to 2220.9)  | 1397.8 (1333.1 to 1467.3)  | 600.1 (553.0 to 649.3)        | 132.2 (104.8 to 165.0)          | 0.0 (0.0 to 0.0)                  | 2887.2 (2772.2 to 3010.5) | 1894.7 (1807.0 to 1988.9)  | 813.4 (749.5 to 880.1)        | 179.1 (142.0 to 223.6)          | 0.0 (0.0 to 0.0)                  |
| Portugal | 2025 | 2145.7 (2058.5 to 2239.9)  | 1406.2 (1339.4 to 1479.8)  | 606.0 (557.1 to 656.1)        | 133.5 (105.9 to 166.7)          | 0.0 (0.0 to 0.0)                  | 2908.5 (2790.3 to 3036.2) | 1906.1 (1815.5 to 2005.9)  | 821.4 (755.2 to 889.3)        | 181.0 (143.6 to 226.0)          | 0.0 (0.0 to 0.0)                  |
| Portugal | 2026 | 2160.0 (2070.7 to 2256.1)  | 1413.6 (1343.8 to 1489.6)  | 611.6 (560.4 to 665.3)        | 134.8 (106.8 to 168.2)          | 0.0 (0.0 to 0.0)                  | 2927.9 (2806.8 to 3058.1) | 1916.1 (1821.6 to 2019.1)  | 829.1 (759.6 to 901.8)        | 182.7 (144.8 to 228.0)          | 0.0 (0.0 to 0.0)                  |
| Portugal | 2027 | 2175.2 (2080.9 to 2275.7)  | 1421.5 (1349.3 to 1499.5)  | 617.6 (564.0 to 675.4)        | 136.2 (107.8 to 170.1)          | 0.0 (0.0 to 0.0)                  | 2948.5 (2820.7 to 3084.7) | 1926.8 (1828.9 to 2032.6)  | 837.1 (764.5 to 915.6)        | 184.6 (146.2 to 230.6)          | 0.0 (0.0 to 0.0)                  |
| Portugal | 2028 | 2189.1 (2088.3 to 2296.1)  | 1428.3 (1353.3 to 1509.6)  | 623.3 (565.2 to 688.2)        | 137.4 (109.0 to 171.9)          | 0.0 (0.0 to 0.0)                  | 2967.3 (2830.7 to 3112.4) | 1936.1 (1834.4 to 2046.2)  | 844.9 (766.1 to 932.8)        | 186.3 (147.7 to 233.0)          | 0.0 (0.0 to 0.0)                  |
| Portugal | 2029 | 2204.3 (2098.8 to 2318.6)  | 1436.1 (1358.9 to 1521.0)  | 629.4 (565.7 to 699.5)        | 138.8 (110.4 to 173.8)          | 0.0 (0.0 to 0.0)                  | 2987.9 (2845.0 to 3142.9) | 1946.7 (1841.9 to 2061.7)  | 853.1 (766.9 to 948.2)        | 188.1 (149.7 to 235.6)          | 0.0 (0.0 to 0.0)                  |

|          |      | 2018 US Dollars per capita |                            |                               |                                 |                                   | 2018 PPP per capita       |                            |                               |                                 |                                   |
|----------|------|----------------------------|----------------------------|-------------------------------|---------------------------------|-----------------------------------|---------------------------|----------------------------|-------------------------------|---------------------------------|-----------------------------------|
| Country  | Year | Health spending            | Government health spending | Out-of-pocket health spending | Prepaid private health spending | Development assistance for health | Health spending           | Government health spending | Out-of-pocket health spending | Prepaid private health spending | Development assistance for health |
| Portugal | 2030 | 2219.5 (2106.1 to 2344.1)  | 1443.9 (1362.4 to 1532.1)  | 635.4 (564.2 to 713.7)        | 140.1 (111.7 to 175.3)          | 0.0 (0.0 to 0.0)                  | 3008.5 (2854.8 to 3177.5) | 1957.2 (1846.8 to 2076.8)  | 861.3 (764.8 to 967.5)        | 190.0 (151.4 to 237.6)          | 0.0 (0.0 to 0.0)                  |
| Portugal | 2031 | 2233.7 (2114.9 to 2362.9)  | 1450.9 (1366.5 to 1542.7)  | 641.3 (563.7 to 727.3)        | 141.4 (112.4 to 176.8)          | 0.0 (0.0 to 0.0)                  | 3027.8 (2866.7 to 3202.9) | 1966.7 (1852.3 to 2091.1)  | 869.3 (764.1 to 985.8)        | 191.7 (152.4 to 239.6)          | 0.0 (0.0 to 0.0)                  |
| Portugal | 2032 | 2249.4 (2124.7 to 2387.6)  | 1459.0 (1371.5 to 1552.6)  | 647.5 (564.5 to 740.7)        | 142.9 (113.4 to 178.6)          | 0.0 (0.0 to 0.0)                  | 3049.0 (2880.1 to 3236.4) | 1977.7 (1859.0 to 2104.6)  | 877.6 (765.2 to 1004.0)       | 193.6 (153.7 to 242.0)          | 0.0 (0.0 to 0.0)                  |
| Portugal | 2033 | 2264.8 (2132.8 to 2413.7)  | 1467.0 (1375.4 to 1564.2)  | 653.6 (564.6 to 753.7)        | 144.2 (114.2 to 180.3)          | 0.0 (0.0 to 0.0)                  | 3070.0 (2891.0 to 3271.8) | 1988.5 (1864.4 to 2120.3)  | 886.0 (765.4 to 1021.6)       | 195.5 (154.8 to 244.4)          | 0.0 (0.0 to 0.0)                  |
| Portugal | 2034 | 2278.3 (2138.7 to 2434.8)  | 1473.3 (1376.2 to 1574.9)  | 659.5 (565.8 to 765.5)        | 145.5 (115.5 to 181.7)          | 0.0 (0.0 to 0.0)                  | 3088.2 (2899.1 to 3300.4) | 1997.1 (1865.4 to 2134.8)  | 893.9 (767.0 to 1037.7)       | 197.2 (156.5 to 246.3)          | 0.0 (0.0 to 0.0)                  |
| Portugal | 2035 | 2290.8 (2145.8 to 2455.3)  | 1478.9 (1377.5 to 1584.9)  | 665.2 (566.8 to 778.3)        | 146.7 (116.6 to 183.1)          | 0.0 (0.0 to 0.0)                  | 3105.2 (2908.7 to 3328.2) | 2004.6 (1867.3 to 2148.4)  | 901.7 (768.4 to 1055.0)       | 198.8 (158.1 to 248.1)          | 0.0 (0.0 to 0.0)                  |
| Portugal | 2036 | 2300.2 (2148.8 to 2474.5)  | 1482.0 (1379.4 to 1595.0)  | 670.5 (568.2 to 789.7)        | 147.6 (117.3 to 184.7)          | 0.0 (0.0 to 0.0)                  | 3117.9 (2912.7 to 3354.2) | 2008.9 (1869.7 to 2162.0)  | 908.9 (770.2 to 1070.4)       | 200.1 (159.0 to 250.3)          | 0.0 (0.0 to 0.0)                  |
| Portugal | 2037 | 2308.2 (2150.0 to 2484.7)  | 1484.1 (1376.5 to 1600.9)  | 675.6 (567.4 to 800.8)        | 148.5 (117.8 to 185.8)          | 0.0 (0.0 to 0.0)                  | 3128.8 (2914.4 to 3368.0) | 2011.7 (1865.9 to 2170.0)  | 915.7 (769.1 to 1085.5)       | 201.3 (159.7 to 251.8)          | 0.0 (0.0 to 0.0)                  |
| Portugal | 2038 | 2314.1 (2148.8 to 2502.3)  | 1484.6 (1373.5 to 1604.6)  | 680.3 (567.4 to 811.2)        | 149.2 (118.4 to 186.7)          | 0.0 (0.0 to 0.0)                  | 3136.8 (2912.7 to 3391.9) | 2012.4 (1861.8 to 2175.0)  | 922.1 (769.1 to 1099.6)       | 202.3 (160.5 to 253.1)          | 0.0 (0.0 to 0.0)                  |
| Portugal | 2039 | 2320.6 (2150.4 to 2514.3)  | 1485.5 (1370.0 to 1609.9)  | 685.1 (567.7 to 821.0)        | 150.0 (118.8 to 188.0)          | 0.0 (0.0 to 0.0)                  | 3145.5 (2914.9 to 3408.1) | 2013.6 (1857.0 to 2182.2)  | 928.7 (769.5 to 1112.9)       | 203.3 (161.0 to 254.8)          | 0.0 (0.0 to 0.0)                  |
| Portugal | 2040 | 2325.9 (2149.3 to 2526.4)  | 1485.6 (1366.2 to 1614.5)  | 689.7 (570.8 to 830.6)        | 150.6 (119.1 to 189.1)          | 0.0 (0.0 to 0.0)                  | 3152.8 (2913.4 to 3424.5) | 2013.7 (1851.9 to 2188.4)  | 934.9 (773.7 to 1125.9)       | 204.2 (161.4 to 256.4)          | 0.0 (0.0 to 0.0)                  |
| Portugal | 2041 | 2333.8 (2152.3 to 2541.0)  | 1487.6 (1364.4 to 1621.7)  | 694.7 (572.9 to 841.0)        | 151.5 (119.5 to 190.4)          | 0.0 (0.0 to 0.0)                  | 3163.5 (2917.5 to 3444.3) | 2016.5 (1849.4 to 2198.3)  | 941.7 (776.6 to 1139.9)       | 205.3 (162.0 to 258.0)          | 0.0 (0.0 to 0.0)                  |
| Portugal | 2042 | 2340.5 (2153.4 to 2554.1)  | 1488.7 (1361.2 to 1627.7)  | 699.5 (574.6 to 848.4)        | 152.3 (119.9 to 191.9)          | 0.0 (0.0 to 0.0)                  | 3172.6 (2919.0 to 3462.1) | 2018.0 (1845.1 to 2206.3)  | 948.2 (778.9 to 1150.0)       | 206.4 (162.6 to 260.1)          | 0.0 (0.0 to 0.0)                  |
| Portugal | 2043 | 2347.9 (2153.8 to 2559.9)  | 1490.4 (1358.9 to 1634.1)  | 704.4 (576.1 to 857.9)        | 153.1 (120.5 to 193.1)          | 0.0 (0.0 to 0.0)                  | 3182.5 (2919.5 to 3469.9) | 2020.2 (1841.9 to 2215.1)  | 954.8 (780.9 to 1162.9)       | 207.5 (163.4 to 261.8)          | 0.0 (0.0 to 0.0)                  |
| Portugal | 2044 | 2355.9 (2158.4 to 2575.6)  | 1492.6 (1356.1 to 1641.4)  | 709.3 (579.6 to 867.0)        | 154.0 (121.2 to 194.4)          | 0.0 (0.0 to 0.0)                  | 3193.4 (2925.7 to 3491.2) | 2023.2 (1838.2 to 2224.9)  | 961.5 (785.7 to 1175.2)       | 208.7 (164.3 to 263.6)          | 0.0 (0.0 to 0.0)                  |
| Portugal | 2045 | 2366.1 (2158.1 to 2589.5)  | 1496.4 (1354.7 to 1651.2)  | 714.7 (582.1 to 875.7)        | 155.0 (121.9 to 196.3)          | 0.0 (0.0 to 0.0)                  | 3207.2 (2925.3 to 3510.1) | 2028.3 (1836.3 to 2238.1)  | 968.7 (789.1 to 1187.0)       | 210.2 (165.2 to 266.1)          | 0.0 (0.0 to 0.0)                  |
| Portugal | 2046 | 2378.8 (2170.3 to 2608.3)  | 1502.1 (1356.3 to 1663.2)  | 720.4 (585.0 to 883.4)        | 156.3 (122.7 to 198.3)          | 0.0 (0.0 to 0.0)                  | 3224.5 (2941.9 to 3535.6) | 2036.2 (1838.5 to 2254.4)  | 976.5 (793.0 to 1197.5)       | 211.9 (166.3 to 268.8)          | 0.0 (0.0 to 0.0)                  |
| Portugal | 2047 | 2394.4 (2186.1 to 2631.2)  | 1510.1 (1359.4 to 1677.7)  | 726.5 (590.4 to 892.0)        | 157.8 (123.7 to 200.5)          | 0.0 (0.0 to 0.0)                  | 3245.6 (2963.3 to 3566.7) | 2047.0 (1842.6 to 2274.1)  | 984.8 (800.4 to 1209.2)       | 213.8 (167.7 to 271.8)          | 0.0 (0.0 to 0.0)                  |
| Portugal | 2048 | 2410.8 (2195.8 to 2661.9)  | 1518.7 (1362.8 to 1692.8)  | 732.8 (596.6 to 901.2)        | 159.3 (124.7 to 202.9)          | 0.0 (0.0 to 0.0)                  | 3267.8 (2976.4 to 3608.3) | 2058.6 (1847.3 to 2294.6)  | 993.3 (808.7 to 1221.6)       | 215.9 (169.1 to 275.0)          | 0.0 (0.0 to 0.0)                  |
| Portugal | 2049 | 2429.5 (2209.6 to 2684.8)  | 1529.0 (1367.7 to 1708.8)  | 739.5 (602.0 to 907.6)        | 161.0 (125.7 to 205.3)          | 0.0 (0.0 to 0.0)                  | 3293.2 (2995.1 to 3639.3) | 2072.5 (1853.9 to 2316.3)  | 1002.4 (816.0 to 1230.2)      | 218.3 (170.4 to 278.3)          | 0.0 (0.0 to 0.0)                  |
| Portugal | 2050 | 2448.7 (2223.9 to 2708.8)  | 1539.6 (1372.6 to 1725.3)  | 746.3 (607.0 to 916.1)        | 162.8 (126.5 to 207.9)          | 0.0 (0.0 to 0.0)                  | 3319.2 (3014.6 to 3671.8) | 2087.0 (1860.5 to 2338.7)  | 1011.6 (822.8 to 1241.8)      | 220.6 (171.5 to 281.8)          | 0.0 (0.0 to 0.0)                  |

| Country     | Year | 2018 US Dollars per capita |                            |                               |                                 |                                   | 2018 PPP per capita       |                            |                               |                                 |                                   |
|-------------|------|----------------------------|----------------------------|-------------------------------|---------------------------------|-----------------------------------|---------------------------|----------------------------|-------------------------------|---------------------------------|-----------------------------------|
|             |      | Health spending            | Government health spending | Out-of-pocket health spending | Prepaid private health spending | Development assistance for health | Health spending           | Government health spending | Out-of-pocket health spending | Prepaid private health spending | Development assistance for health |
| Puerto Rico | 1995 | 1010.2 (820.9 to 1232.5)   | 659.6 (494.1 to 849.3)     | 281.8 (196.1 to 394.8)        | 68.7 (32.7 to 129.1)            | 0.0 (0.0 to 0.0)                  | 1238.0 (1005.9 to 1510.5) | 808.4 (605.5 to 1040.8)    | 345.4 (240.3 to 483.8)        | 84.2 (40.1 to 158.2)            | 0.0 (0.0 to 0.0)                  |
| Puerto Rico | 1996 | 1027.9 (829.2 to 1256.0)   | 672.1 (501.7 to 868.1)     | 286.4 (198.3 to 398.4)        | 69.4 (32.8 to 132.2)            | 0.0 (0.0 to 0.0)                  | 1259.7 (1016.2 to 1539.2) | 823.7 (614.9 to 1063.8)    | 351.0 (243.1 to 488.3)        | 85.0 (40.2 to 162.0)            | 0.0 (0.0 to 0.0)                  |
| Puerto Rico | 1997 | 1048.2 (852.4 to 1272.5)   | 687.2 (509.0 to 883.7)     | 291.7 (201.9 to 403.7)        | 69.3 (33.3 to 131.1)            | 0.0 (0.0 to 0.0)                  | 1284.5 (1044.5 to 1559.5) | 842.2 (623.8 to 1082.9)    | 357.5 (247.4 to 494.7)        | 84.9 (40.8 to 160.6)            | 0.0 (0.0 to 0.0)                  |
| Puerto Rico | 1998 | 1076.5 (869.6 to 1301.4)   | 708.3 (529.1 to 913.4)     | 298.8 (204.8 to 415.5)        | 69.3 (33.2 to 130.6)            | 0.0 (0.0 to 0.0)                  | 1319.2 (1065.7 to 1594.8) | 868.0 (648.4 to 1119.4)    | 366.2 (250.9 to 509.2)        | 85.0 (40.7 to 160.0)            | 0.0 (0.0 to 0.0)                  |
| Puerto Rico | 1999 | 1080.2 (869.1 to 1317.5)   | 710.0 (528.0 to 914.1)     | 302.4 (206.8 to 421.5)        | 67.9 (32.9 to 124.8)            | 0.0 (0.0 to 0.0)                  | 1323.8 (1065.1 to 1614.5) | 870.1 (647.0 to 1120.2)    | 370.6 (253.4 to 516.6)        | 83.2 (40.3 to 153.0)            | 0.0 (0.0 to 0.0)                  |
| Puerto Rico | 2000 | 1079.0 (863.6 to 1313.0)   | 707.9 (533.0 to 916.1)     | 305.1 (209.8 to 436.8)        | 66.1 (31.8 to 119.1)            | 0.0 (0.0 to 0.0)                  | 1322.4 (1058.3 to 1609.1) | 867.5 (653.2 to 1122.7)    | 373.9 (257.0 to 535.3)        | 81.0 (38.9 to 145.9)            | 0.0 (0.0 to 0.0)                  |
| Puerto Rico | 2001 | 1136.8 (908.9 to 1394.3)   | 750.0 (567.0 to 959.8)     | 319.6 (219.6 to 456.8)        | 67.3 (31.6 to 118.4)            | 0.0 (0.0 to 0.0)                  | 1393.1 (1113.9 to 1708.7) | 919.1 (694.9 to 1176.2)    | 391.6 (269.1 to 559.8)        | 82.4 (38.7 to 145.1)            | 0.0 (0.0 to 0.0)                  |
| Puerto Rico | 2002 | 1161.5 (935.9 to 1412.7)   | 764.4 (582.2 to 970.0)     | 327.7 (223.9 to 458.0)        | 69.3 (32.1 to 122.1)            | 0.0 (0.0 to 0.0)                  | 1423.4 (1146.9 to 1731.3) | 936.8 (713.5 to 1188.7)    | 401.6 (274.4 to 561.3)        | 85.0 (39.4 to 149.7)            | 0.0 (0.0 to 0.0)                  |
| Puerto Rico | 2003 | 1200.1 (972.1 to 1453.6)   | 786.5 (603.6 to 982.2)     | 338.6 (228.2 to 469.8)        | 75.0 (35.0 to 132.4)            | 0.0 (0.0 to 0.0)                  | 1470.7 (1191.3 to 1781.4) | 963.8 (739.7 to 1203.7)    | 415.0 (279.6 to 575.7)        | 91.9 (42.9 to 162.2)            | 0.0 (0.0 to 0.0)                  |
| Puerto Rico | 2004 | 1255.3 (1023.0 to 1500.6)  | 818.1 (633.8 to 1018.0)    | 352.3 (234.6 to 493.0)        | 85.0 (40.9 to 148.2)            | 0.0 (0.0 to 0.0)                  | 1538.4 (1253.7 to 1838.9) | 1002.5 (776.7 to 1247.6)   | 431.7 (287.4 to 604.2)        | 104.1 (50.2 to 181.6)           | 0.0 (0.0 to 0.0)                  |
| Puerto Rico | 2005 | 1287.2 (1062.9 to 1529.9)  | 834.3 (654.9 to 1035.5)    | 360.1 (243.4 to 503.2)        | 92.8 (44.8 to 164.5)            | 0.0 (0.0 to 0.0)                  | 1577.5 (1302.6 to 1874.9) | 1022.5 (802.5 to 1269.0)   | 441.3 (298.3 to 616.6)        | 113.7 (54.9 to 201.6)           | 0.0 (0.0 to 0.0)                  |
| Puerto Rico | 2006 | 1303.0 (1086.8 to 1544.5)  | 841.5 (672.7 to 1029.6)    | 363.2 (248.3 to 503.6)        | 98.3 (47.9 to 179.0)            | 0.0 (0.0 to 0.0)                  | 1596.9 (1331.8 to 1892.7) | 1031.3 (824.4 to 1261.8)   | 445.1 (304.3 to 617.1)        | 120.5 (58.7 to 219.3)           | 0.0 (0.0 to 0.0)                  |
| Puerto Rico | 2007 | 1298.1 (1100.4 to 1523.5)  | 836.1 (684.5 to 1002.3)    | 360.4 (244.5 to 501.8)        | 101.5 (48.1 to 183.9)           | 0.0 (0.0 to 0.0)                  | 1590.8 (1348.6 to 1867.0) | 1024.7 (838.9 to 1228.3)   | 441.7 (299.6 to 614.9)        | 124.4 (58.9 to 225.3)           | 0.0 (0.0 to 0.0)                  |
| Puerto Rico | 2008 | 1284.4 (1100.0 to 1506.8)  | 825.6 (697.9 to 972.0)     | 355.7 (244.7 to 490.2)        | 103.0 (47.8 to 192.9)           | 0.0 (0.0 to 0.0)                  | 1574.0 (1348.0 to 1846.6) | 1011.8 (855.2 to 1191.2)   | 436.0 (299.9 to 600.7)        | 126.2 (58.6 to 236.3)           | 0.0 (0.0 to 0.0)                  |
| Puerto Rico | 2009 | 1263.2 (1088.1 to 1461.5)  | 809.9 (703.4 to 933.1)     | 350.1 (243.5 to 481.7)        | 103.2 (49.1 to 192.5)           | 0.0 (0.0 to 0.0)                  | 1548.0 (1333.5 to 1791.0) | 992.6 (862.0 to 1143.5)    | 429.0 (298.5 to 590.3)        | 126.4 (60.1 to 236.0)           | 0.0 (0.0 to 0.0)                  |
| Puerto Rico | 2010 | 1247.2 (1090.7 to 1429.4)  | 797.7 (716.4 to 892.6)     | 346.1 (241.1 to 476.4)        | 103.5 (49.5 to 192.5)           | 0.0 (0.0 to 0.0)                  | 1528.4 (1336.7 to 1751.8) | 977.5 (877.9 to 1093.9)    | 424.1 (295.5 to 583.8)        | 126.8 (60.7 to 235.9)           | 0.0 (0.0 to 0.0)                  |
| Puerto Rico | 2011 | 1245.7 (1102.1 to 1418.8)  | 795.6 (736.7 to 864.8)     | 345.4 (238.2 to 473.1)        | 104.8 (49.5 to 200.2)           | 0.0 (0.0 to 0.0)                  | 1526.6 (1350.7 to 1738.8) | 975.0 (902.8 to 1059.8)    | 423.3 (291.9 to 579.8)        | 128.4 (60.6 to 245.3)           | 0.0 (0.0 to 0.0)                  |
| Puerto Rico | 2012 | 1247.4 (1109.0 to 1405.5)  | 795.1 (745.4 to 848.7)     | 345.8 (238.3 to 477.6)        | 106.6 (49.6 to 200.1)           | 0.0 (0.0 to 0.0)                  | 1528.7 (1359.1 to 1722.5) | 974.4 (913.4 to 1040.1)    | 423.8 (292.0 to 585.3)        | 130.6 (60.8 to 245.2)           | 0.0 (0.0 to 0.0)                  |
| Puerto Rico | 2013 | 1283.5 (1144.6 to 1449.4)  | 821.8 (774.4 to 872.8)     | 350.8 (243.3 to 486.0)        | 111.0 (52.6 to 214.5)           | 0.0 (0.0 to 0.0)                  | 1572.9 (1402.6 to 1776.3) | 1007.0 (949.0 to 1069.6)   | 429.8 (298.2 to 595.6)        | 136.0 (64.4 to 262.9)           | 0.0 (0.0 to 0.0)                  |
| Puerto Rico | 2014 | 1313.1 (1170.6 to 1486.6)  | 844.0 (792.3 to 898.4)     | 354.7 (244.3 to 485.6)        | 114.4 (54.3 to 219.9)           | 0.0 (0.0 to 0.0)                  | 1609.1 (1434.6 to 1821.8) | 1034.3 (970.9 to 1101.0)   | 434.7 (299.4 to 595.1)        | 140.2 (66.5 to 269.5)           | 0.0 (0.0 to 0.0)                  |
| Puerto Rico | 2015 | 1344.1 (1192.9 to 1530.4)  | 868.1 (804.8 to 934.9)     | 358.6 (245.7 to 496.4)        | 117.4 (55.9 to 227.1)           | 0.0 (0.0 to 0.0)                  | 1647.2 (1461.8 to 1875.5) | 1063.8 (986.3 to 1145.7)   | 439.5 (301.1 to 608.4)        | 143.8 (68.5 to 278.3)           | 0.0 (0.0 to 0.0)                  |

|             |      | 2018 US Dollars per capita |                            |                               |                                 |                                   | 2018 PPP per capita       |                            |                               |                                 |                                   |
|-------------|------|----------------------------|----------------------------|-------------------------------|---------------------------------|-----------------------------------|---------------------------|----------------------------|-------------------------------|---------------------------------|-----------------------------------|
| Country     | Year | Health spending            | Government health spending | Out-of-pocket health spending | Prepaid private health spending | Development assistance for health | Health spending           | Government health spending | Out-of-pocket health spending | Prepaid private health spending | Development assistance for health |
| Puerto Rico | 2016 | 1363.5 (1209.9 to 1561.3)  | 881.9 (799.1 to 972.7)     | 362.7 (250.6 to 508.9)        | 118.9 (55.8 to 224.1)           | 0.0 (0.0 to 0.0)                  | 1671.0 (1482.7 to 1913.4) | 1080.8 (979.3 to 1192.0)   | 444.5 (307.1 to 623.6)        | 145.8 (68.4 to 274.6)           | 0.0 (0.0 to 0.0)                  |
| Puerto Rico | 2017 | 1434.0 (1260.0 to 1626.0)  | 955.6 (865.2 to 1052.2)    | 359.7 (248.0 to 507.3)        | 118.7 (54.9 to 222.1)           | 0.0 (0.0 to 0.0)                  | 1757.4 (1544.2 to 1992.6) | 1171.1 (1060.3 to 1289.4)  | 440.9 (303.9 to 621.7)        | 145.4 (67.3 to 272.2)           | 0.0 (0.0 to 0.0)                  |
| Puerto Rico | 2018 | 1438.3 (1275.3 to 1642.3)  | 959.5 (869.6 to 1055.8)    | 359.4 (248.3 to 508.1)        | 119.4 (55.3 to 223.6)           | 0.0 (0.0 to 0.0)                  | 1762.6 (1562.9 to 2012.7) | 1175.8 (1065.7 to 1293.8)  | 440.4 (304.3 to 622.7)        | 146.4 (67.8 to 274.0)           | 0.0 (0.0 to 0.0)                  |
| Puerto Rico | 2019 | 1445.7 (1265.5 to 1643.7)  | 966.1 (875.5 to 1064.8)    | 359.3 (247.0 to 506.6)        | 120.4 (55.8 to 225.7)           | 0.0 (0.0 to 0.0)                  | 1771.8 (1550.9 to 2014.3) | 1183.9 (1072.9 to 1304.9)  | 440.3 (302.7 to 620.9)        | 147.5 (68.4 to 276.6)           | 0.0 (0.0 to 0.0)                  |
| Puerto Rico | 2020 | 1459.2 (1295.3 to 1660.0)  | 976.7 (885.2 to 1076.7)    | 360.6 (247.4 to 508.2)        | 121.8 (56.5 to 228.9)           | 0.0 (0.0 to 0.0)                  | 1788.2 (1587.3 to 2034.3) | 1196.9 (1084.9 to 1319.5)  | 442.0 (303.1 to 622.8)        | 149.3 (69.3 to 280.5)           | 0.0 (0.0 to 0.0)                  |
| Puerto Rico | 2021 | 1474.7 (1298.2 to 1678.6)  | 988.8 (895.6 to 1091.0)    | 362.4 (249.6 to 510.8)        | 123.4 (57.4 to 232.2)           | 0.0 (0.0 to 0.0)                  | 1807.2 (1590.9 to 2057.1) | 1211.8 (1097.5 to 1337.0)  | 444.1 (305.9 to 626.0)        | 151.3 (70.3 to 284.6)           | 0.0 (0.0 to 0.0)                  |
| Puerto Rico | 2022 | 1491.6 (1319.5 to 1690.1)  | 1002.0 (906.2 to 1106.9)   | 364.4 (250.6 to 512.5)        | 125.2 (58.3 to 235.9)           | 0.0 (0.0 to 0.0)                  | 1827.9 (1617.1 to 2071.2) | 1227.9 (1110.5 to 1356.4)  | 446.6 (307.1 to 628.1)        | 153.4 (71.4 to 289.0)           | 0.0 (0.0 to 0.0)                  |
| Puerto Rico | 2023 | 1508.6 (1326.2 to 1716.1)  | 1015.2 (916.9 to 1120.9)   | 366.5 (252.0 to 514.4)        | 126.9 (59.2 to 239.5)           | 0.0 (0.0 to 0.0)                  | 1848.7 (1625.3 to 2103.1) | 1244.1 (1123.6 to 1373.6)  | 449.1 (308.8 to 630.4)        | 155.5 (72.6 to 293.5)           | 0.0 (0.0 to 0.0)                  |
| Puerto Rico | 2024 | 1527.5 (1347.6 to 1739.6)  | 1030.5 (930.6 to 1135.4)   | 368.5 (253.4 to 520.4)        | 128.6 (60.1 to 242.8)           | 0.0 (0.0 to 0.0)                  | 1872.0 (1651.4 to 2131.9) | 1262.8 (1140.4 to 1391.4)  | 451.6 (310.5 to 637.7)        | 157.6 (73.7 to 297.6)           | 0.0 (0.0 to 0.0)                  |
| Puerto Rico | 2025 | 1547.6 (1368.8 to 1760.0)  | 1046.5 (943.6 to 1153.9)   | 370.7 (254.9 to 522.1)        | 130.4 (61.0 to 245.9)           | 0.0 (0.0 to 0.0)                  | 1896.6 (1677.4 to 2156.9) | 1282.5 (1156.4 to 1414.1)  | 454.3 (312.4 to 639.8)        | 159.8 (74.7 to 301.3)           | 0.0 (0.0 to 0.0)                  |
| Puerto Rico | 2026 | 1567.5 (1383.5 to 1792.5)  | 1062.4 (956.4 to 1173.6)   | 372.9 (256.2 to 522.1)        | 132.1 (61.9 to 249.5)           | 0.0 (0.0 to 0.0)                  | 1920.9 (1695.4 to 2196.7) | 1302.0 (1172.0 to 1438.2)  | 456.9 (314.0 to 639.9)        | 161.9 (75.8 to 305.7)           | 0.0 (0.0 to 0.0)                  |
| Puerto Rico | 2027 | 1585.8 (1401.8 to 1808.0)  | 1077.4 (968.3 to 1192.7)   | 374.7 (257.5 to 523.9)        | 133.8 (62.7 to 252.8)           | 0.0 (0.0 to 0.0)                  | 1943.4 (1717.9 to 2215.7) | 1320.3 (1186.6 to 1461.7)  | 459.1 (315.5 to 642.0)        | 164.0 (76.8 to 309.8)           | 0.0 (0.0 to 0.0)                  |
| Puerto Rico | 2028 | 1603.6 (1413.4 to 1823.6)  | 1091.9 (978.5 to 1212.8)   | 376.2 (259.3 to 528.6)        | 135.4 (63.5 to 256.1)           | 0.0 (0.0 to 0.0)                  | 1965.2 (1732.1 to 2234.8) | 1338.2 (1199.1 to 1486.3)  | 461.1 (317.8 to 647.8)        | 165.9 (77.8 to 313.9)           | 0.0 (0.0 to 0.0)                  |
| Puerto Rico | 2029 | 1620.7 (1429.6 to 1848.0)  | 1106.1 (989.3 to 1230.2)   | 377.7 (260.3 to 533.0)        | 137.0 (64.3 to 259.3)           | 0.0 (0.0 to 0.0)                  | 1986.2 (1752.0 to 2264.8) | 1355.5 (1212.4 to 1507.6)  | 462.9 (318.9 to 653.2)        | 167.9 (78.8 to 317.8)           | 0.0 (0.0 to 0.0)                  |
| Puerto Rico | 2030 | 1638.5 (1440.9 to 1868.8)  | 1120.8 (1003.8 to 1247.5)  | 379.1 (261.2 to 536.7)        | 138.6 (65.1 to 262.6)           | 0.0 (0.0 to 0.0)                  | 2008.0 (1765.8 to 2290.2) | 1373.6 (1230.1 to 1528.8)  | 464.6 (320.1 to 657.7)        | 169.8 (79.7 to 321.9)           | 0.0 (0.0 to 0.0)                  |
| Puerto Rico | 2031 | 1654.9 (1456.6 to 1903.2)  | 1134.6 (1014.3 to 1268.6)  | 380.3 (262.7 to 537.9)        | 140.1 (65.8 to 265.7)           | 0.0 (0.0 to 0.0)                  | 2028.1 (1785.0 to 2332.3) | 1390.4 (1243.0 to 1554.6)  | 466.1 (322.0 to 659.2)        | 171.6 (80.7 to 325.7)           | 0.0 (0.0 to 0.0)                  |
| Puerto Rico | 2032 | 1670.3 (1469.1 to 1900.8)  | 1147.6 (1024.0 to 1282.5)  | 381.2 (263.3 to 542.7)        | 141.5 (66.6 to 268.7)           | 0.0 (0.0 to 0.0)                  | 2047.0 (1800.4 to 2329.4) | 1406.4 (1254.9 to 1571.7)  | 467.2 (322.6 to 665.1)        | 173.4 (81.6 to 329.3)           | 0.0 (0.0 to 0.0)                  |
| Puerto Rico | 2033 | 1686.3 (1489.2 to 1931.3)  | 1161.0 (1035.7 to 1304.1)  | 382.3 (263.5 to 543.4)        | 143.0 (67.3 to 271.8)           | 0.0 (0.0 to 0.0)                  | 2066.5 (1825.0 to 2366.8) | 1422.8 (1269.3 to 1598.2)  | 468.5 (323.0 to 665.9)        | 175.2 (82.5 to 333.1)           | 0.0 (0.0 to 0.0)                  |
| Puerto Rico | 2034 | 1700.8 (1499.8 to 1945.6)  | 1173.5 (1045.4 to 1320.4)  | 383.0 (263.5 to 543.4)        | 144.3 (68.0 to 274.7)           | 0.0 (0.0 to 0.0)                  | 2084.3 (1838.0 to 2384.3) | 1438.1 (1281.1 to 1618.2)  | 469.4 (322.9 to 666.0)        | 176.9 (83.3 to 336.7)           | 0.0 (0.0 to 0.0)                  |
| Puerto Rico | 2035 | 1716.4 (1510.7 to 1969.0)  | 1186.7 (1057.0 to 1340.3)  | 383.9 (264.0 to 544.5)        | 145.8 (68.7 to 277.8)           | 0.0 (0.0 to 0.0)                  | 2103.4 (1851.3 to 2413.0) | 1454.3 (1295.3 to 1642.6)  | 470.4 (323.6 to 667.3)        | 178.7 (84.2 to 340.4)           | 0.0 (0.0 to 0.0)                  |
| Puerto Rico | 2036 | 1731.7 (1526.0 to 1985.1)  | 1199.6 (1067.7 to 1357.7)  | 384.8 (264.5 to 546.4)        | 147.3 (69.5 to 280.8)           | 0.0 (0.0 to 0.0)                  | 2122.1 (1870.1 to 2432.7) | 1470.1 (1308.4 to 1663.8)  | 471.5 (324.2 to 669.6)        | 180.5 (85.2 to 344.2)           | 0.0 (0.0 to 0.0)                  |

|             |      | 2018 US Dollars per capita |                            |                               |                                 |                                   | 2018 PPP per capita       |                            |                               |                                 |                                   |
|-------------|------|----------------------------|----------------------------|-------------------------------|---------------------------------|-----------------------------------|---------------------------|----------------------------|-------------------------------|---------------------------------|-----------------------------------|
| Country     | Year | Health spending            | Government health spending | Out-of-pocket health spending | Prepaid private health spending | Development assistance for health | Health spending           | Government health spending | Out-of-pocket health spending | Prepaid private health spending | Development assistance for health |
| Puerto Rico | 2037 | 1747.0 (1525.5 to 2014.1)  | 1212.6 (1077.9 to 1372.9)  | 385.7 (265.1 to 548.7)        | 148.8 (70.3 to 284.0)           | 0.0 (0.0 to 0.0)                  | 2140.9 (1869.5 to 2468.3) | 1486.0 (1320.9 to 1682.5)  | 472.6 (324.8 to 672.4)        | 182.3 (86.1 to 348.0)           | 0.0 (0.0 to 0.0)                  |
| Puerto Rico | 2038 | 1762.5 (1550.9 to 2028.7)  | 1225.6 (1085.8 to 1386.3)  | 386.6 (265.6 to 549.8)        | 150.3 (71.0 to 287.1)           | 0.0 (0.0 to 0.0)                  | 2159.9 (1900.6 to 2486.1) | 1502.0 (1330.6 to 1698.9)  | 473.7 (325.5 to 673.8)        | 184.2 (87.0 to 351.9)           | 0.0 (0.0 to 0.0)                  |
| Puerto Rico | 2039 | 1777.8 (1552.3 to 2041.9)  | 1238.7 (1095.4 to 1403.9)  | 387.3 (266.0 to 550.8)        | 151.7 (71.8 to 290.2)           | 0.0 (0.0 to 0.0)                  | 2178.6 (1902.3 to 2502.3) | 1518.0 (1342.4 to 1720.4)  | 474.7 (326.0 to 675.0)        | 186.0 (88.0 to 355.7)           | 0.0 (0.0 to 0.0)                  |
| Puerto Rico | 2040 | 1792.8 (1580.3 to 2065.8)  | 1251.7 (1104.1 to 1422.1)  | 387.9 (266.1 to 551.6)        | 153.2 (72.6 to 293.3)           | 0.0 (0.0 to 0.0)                  | 2197.1 (1936.6 to 2531.6) | 1533.9 (1353.0 to 1742.7)  | 475.4 (326.1 to 676.0)        | 187.7 (88.9 to 359.4)           | 0.0 (0.0 to 0.0)                  |
| Puerto Rico | 2041 | 1808.6 (1581.5 to 2086.0)  | 1265.2 (1115.3 to 1440.9)  | 388.7 (266.0 to 552.7)        | 154.7 (73.3 to 296.5)           | 0.0 (0.0 to 0.0)                  | 2216.4 (1938.1 to 2556.4) | 1550.5 (1366.7 to 1765.9)  | 476.4 (326.0 to 677.4)        | 189.6 (89.8 to 363.3)           | 0.0 (0.0 to 0.0)                  |
| Puerto Rico | 2042 | 1822.1 (1603.9 to 2104.4)  | 1277.2 (1121.8 to 1461.4)  | 388.9 (265.7 to 553.0)        | 156.0 (74.0 to 299.3)           | 0.0 (0.0 to 0.0)                  | 2233.0 (1965.6 to 2579.0) | 1565.2 (1374.8 to 1790.9)  | 476.6 (325.6 to 677.7)        | 191.2 (90.7 to 366.7)           | 0.0 (0.0 to 0.0)                  |
| Puerto Rico | 2043 | 1837.0 (1595.1 to 2123.4)  | 1290.2 (1129.2 to 1481.5)  | 389.4 (265.7 to 553.7)        | 157.4 (74.9 to 302.3)           | 0.0 (0.0 to 0.0)                  | 2251.2 (1954.8 to 2602.2) | 1581.1 (1383.8 to 1815.6)  | 477.2 (325.6 to 678.6)        | 193.0 (91.7 to 370.5)           | 0.0 (0.0 to 0.0)                  |
| Puerto Rico | 2044 | 1851.1 (1623.0 to 2124.5)  | 1302.7 (1136.9 to 1502.7)  | 389.7 (265.7 to 553.6)        | 158.8 (75.6 to 305.2)           | 0.0 (0.0 to 0.0)                  | 2268.6 (1989.0 to 2603.5) | 1596.4 (1393.2 to 1841.5)  | 477.5 (325.6 to 678.5)        | 194.6 (92.6 to 374.0)           | 0.0 (0.0 to 0.0)                  |
| Puerto Rico | 2045 | 1864.3 (1612.2 to 2157.1)  | 1314.6 (1146.3 to 1523.6)  | 389.7 (265.6 to 553.8)        | 160.1 (76.3 to 307.9)           | 0.0 (0.0 to 0.0)                  | 2284.7 (1975.8 to 2643.5) | 1611.0 (1404.8 to 1867.2)  | 477.5 (325.5 to 678.7)        | 196.2 (93.5 to 377.3)           | 0.0 (0.0 to 0.0)                  |
| Puerto Rico | 2046 | 1878.7 (1643.0 to 2161.2)  | 1327.2 (1155.2 to 1540.2)  | 390.0 (265.8 to 554.5)        | 161.5 (76.8 to 310.9)           | 0.0 (0.0 to 0.0)                  | 2302.3 (2013.4 to 2648.6) | 1626.5 (1415.7 to 1887.4)  | 477.9 (325.7 to 679.6)        | 197.9 (94.1 to 381.0)           | 0.0 (0.0 to 0.0)                  |
| Puerto Rico | 2047 | 1893.6 (1638.8 to 2205.0)  | 1340.1 (1163.3 to 1559.6)  | 390.5 (265.6 to 555.5)        | 163.0 (77.5 to 314.0)           | 0.0 (0.0 to 0.0)                  | 2320.6 (2008.4 to 2702.2) | 1642.3 (1425.6 to 1911.2)  | 478.5 (325.5 to 680.7)        | 199.7 (95.0 to 384.8)           | 0.0 (0.0 to 0.0)                  |
| Puerto Rico | 2048 | 1908.2 (1665.2 to 2203.1)  | 1352.9 (1172.0 to 1576.9)  | 390.8 (265.4 to 556.3)        | 164.5 (78.3 to 317.1)           | 0.0 (0.0 to 0.0)                  | 2338.5 (2040.7 to 2699.9) | 1658.0 (1436.2 to 1932.5)  | 478.9 (325.3 to 681.8)        | 201.5 (95.9 to 388.6)           | 0.0 (0.0 to 0.0)                  |
| Puerto Rico | 2049 | 1921.8 (1647.8 to 2249.7)  | 1365.1 (1179.0 to 1591.4)  | 390.9 (265.1 to 556.7)        | 165.8 (79.0 to 320.0)           | 0.0 (0.0 to 0.0)                  | 2355.2 (2019.4 to 2756.9) | 1672.9 (1444.9 to 1950.2)  | 479.1 (324.8 to 682.2)        | 203.2 (96.8 to 392.2)           | 0.0 (0.0 to 0.0)                  |
| Puerto Rico | 2050 | 1935.8 (1680.5 to 2233.9)  | 1377.5 (1187.8 to 1606.4)  | 391.1 (265.0 to 557.0)        | 167.2 (79.7 to 323.6)           | 0.0 (0.0 to 0.0)                  | 2372.3 (2059.4 to 2737.6) | 1688.2 (1455.6 to 1968.6)  | 479.2 (324.8 to 682.6)        | 204.9 (97.7 to 396.5)           | 0.0 (0.0 to 0.0)                  |
| Qatar       | 1995 | 1477.1 (1336.8 to 1616.7)  | 844.9 (728.0 to 969.1)     | 531.9 (483.2 to 586.1)        | 100.3 (58.8 to 165.4)           | 0.0 (0.0 to 0.0)                  | 2966.2 (2684.4 to 3246.6) | 1696.7 (1461.9 to 1946.1)  | 1068.1 (970.3 to 1176.9)      | 201.5 (118.1 to 332.1)          | 0.0 (0.0 to 0.0)                  |
| Qatar       | 1996 | 1463.8 (1339.9 to 1587.0)  | 856.0 (755.0 to 969.8)     | 505.8 (468.3 to 548.3)        | 102.0 (62.3 to 159.8)           | 0.0 (0.0 to 0.0)                  | 2939.5 (2690.7 to 3187.0) | 1719.0 (1516.1 to 1947.5)  | 1015.6 (940.5 to 1101.0)      | 204.8 (125.2 to 320.9)          | 0.0 (0.0 to 0.0)                  |
| Qatar       | 1997 | 1625.5 (1508.2 to 1755.6)  | 974.7 (867.2 to 1093.1)    | 531.4 (497.6 to 569.3)        | 119.3 (78.1 to 178.4)           | 0.0 (0.0 to 0.0)                  | 3264.2 (3028.7 to 3525.5) | 1957.4 (1741.6 to 2195.1)  | 1067.2 (999.2 to 1143.2)      | 239.6 (156.9 to 358.2)          | 0.0 (0.0 to 0.0)                  |
| Qatar       | 1998 | 1636.5 (1522.2 to 1756.6)  | 981.8 (877.9 to 1092.1)    | 529.4 (494.3 to 566.6)        | 125.3 (89.2 to 176.7)           | 0.0 (0.0 to 0.0)                  | 3286.4 (3056.9 to 3527.6) | 1971.6 (1763.0 to 2193.2)  | 1063.1 (992.7 to 1137.9)      | 251.6 (179.2 to 354.9)          | 0.0 (0.0 to 0.0)                  |
| Qatar       | 1999 | 1549.4 (1435.7 to 1659.0)  | 946.8 (851.0 to 1047.1)    | 476.6 (442.7 to 510.3)        | 126.0 (96.5 to 163.4)           | 0.0 (0.0 to 0.0)                  | 3111.4 (2883.1 to 3331.5) | 1901.3 (1708.9 to 2102.8)  | 957.1 (889.0 to 1024.8)       | 253.0 (193.9 to 328.2)          | 0.0 (0.0 to 0.0)                  |
| Qatar       | 2000 | 1537.1 (1432.7 to 1640.1)  | 973.5 (881.3 to 1065.9)    | 430.1 (398.8 to 463.2)        | 133.5 (108.9 to 160.7)          | 0.0 (0.0 to 0.0)                  | 3086.7 (2877.2 to 3293.6) | 1954.9 (1769.9 to 2140.4)  | 863.7 (800.8 to 930.3)        | 268.0 (218.7 to 322.8)          | 0.0 (0.0 to 0.0)                  |
| Qatar       | 2001 | 1552.9 (1450.0 to 1661.9)  | 1016.0 (925.6 to 1116.8)   | 403.5 (374.4 to 432.5)        | 133.5 (112.9 to 155.5)          | 0.0 (0.0 to 0.0)                  | 3118.5 (2911.8 to 3337.4) | 2040.2 (1858.7 to 2242.8)  | 810.2 (751.8 to 868.6)        | 268.1 (226.7 to 312.2)          | 0.0 (0.0 to 0.0)                  |

| Country | Year | 2018 US Dollars per capita |                            |                               |                                 |                                   | 2018 PPP per capita       |                            |                               |                                 |                                   |
|---------|------|----------------------------|----------------------------|-------------------------------|---------------------------------|-----------------------------------|---------------------------|----------------------------|-------------------------------|---------------------------------|-----------------------------------|
|         |      | Health spending            | Government health spending | Out-of-pocket health spending | Prepaid private health spending | Development assistance for health | Health spending           | Government health spending | Out-of-pocket health spending | Prepaid private health spending | Development assistance for health |
| Qatar   | 2002 | 1652.1 (1552.0 to 1761.7)  | 1122.3 (1028.2 to 1224.8)  | 394.5 (367.2 to 423.8)        | 135.3 (116.5 to 154.9)          | 0.0 (0.0 to 0.0)                  | 3317.7 (3116.7 to 3537.7) | 2253.7 (2064.7 to 2459.7)  | 792.2 (737.3 to 851.0)        | 271.8 (234.0 to 311.1)          | 0.0 (0.0 to 0.0)                  |
| Qatar   | 2003 | 1867.0 (1760.7 to 1985.4)  | 1341.0 (1235.0 to 1453.8)  | 386.9 (359.1 to 415.4)        | 139.1 (120.1 to 159.3)          | 0.0 (0.0 to 0.0)                  | 3749.3 (3535.7 to 3986.9) | 2693.0 (2480.1 to 2919.4)  | 776.9 (721.2 to 834.2)        | 279.4 (241.2 to 319.9)          | 0.0 (0.0 to 0.0)                  |
| Qatar   | 2004 | 1926.2 (1814.8 to 2056.4)  | 1426.3 (1318.8 to 1549.9)  | 366.9 (339.5 to 395.7)        | 132.9 (114.7 to 152.3)          | 0.0 (0.0 to 0.0)                  | 3868.0 (3644.4 to 4129.6) | 2864.3 (2648.4 to 3112.5)  | 736.9 (681.8 to 794.6)        | 266.9 (230.4 to 305.8)          | 0.0 (0.0 to 0.0)                  |
| Qatar   | 2005 | 1682.9 (1580.7 to 1801.8)  | 1255.8 (1156.7 to 1365.6)  | 316.5 (293.4 to 343.7)        | 110.6 (94.4 to 128.1)           | 0.0 (0.0 to 0.0)                  | 3379.5 (3174.4 to 3618.2) | 2521.8 (2322.9 to 2742.3)  | 635.7 (589.1 to 690.2)        | 222.1 (189.5 to 257.3)          | 0.0 (0.0 to 0.0)                  |
| Qatar   | 2006 | 1608.8 (1500.3 to 1717.0)  | 1206.1 (1107.3 to 1316.3)  | 297.2 (273.0 to 324.1)        | 105.5 (89.0 to 123.2)           | 0.0 (0.0 to 0.0)                  | 3230.7 (3012.8 to 3448.1) | 2422.1 (2223.6 to 2643.4)  | 596.7 (548.2 to 650.8)        | 211.9 (178.7 to 247.5)          | 0.0 (0.0 to 0.0)                  |
| Qatar   | 2007 | 1474.6 (1373.8 to 1582.6)  | 1098.4 (1004.8 to 1201.9)  | 274.9 (251.2 to 299.9)        | 101.3 (86.1 to 118.9)           | 0.0 (0.0 to 0.0)                  | 2961.1 (2758.8 to 3178.2) | 2205.8 (2017.8 to 2413.7)  | 552.0 (504.5 to 602.2)        | 203.3 (172.9 to 238.7)          | 0.0 (0.0 to 0.0)                  |
| Qatar   | 2008 | 1317.8 (1225.3 to 1417.3)  | 968.8 (880.1 to 1061.9)    | 250.2 (227.7 to 273.5)        | 98.8 (83.7 to 114.8)            | 0.0 (0.0 to 0.0)                  | 2646.3 (2460.6 to 2846.2) | 1945.5 (1767.5 to 2132.5)  | 502.5 (457.3 to 549.3)        | 198.3 (168.0 to 230.6)          | 0.0 (0.0 to 0.0)                  |
| Qatar   | 2009 | 1326.8 (1236.6 to 1428.7)  | 958.5 (870.0 to 1049.9)    | 250.7 (226.8 to 276.3)        | 117.6 (100.7 to 136.1)          | 0.0 (0.0 to 0.0)                  | 2664.5 (2483.3 to 2869.0) | 1924.9 (1747.2 to 2108.5)  | 503.4 (455.5 to 554.9)        | 236.2 (202.3 to 273.2)          | 0.0 (0.0 to 0.0)                  |
| Qatar   | 2010 | 1312.6 (1220.4 to 1405.8)  | 962.9 (873.1 to 1054.1)    | 227.6 (203.3 to 254.9)        | 122.1 (105.0 to 141.3)          | 0.0 (0.0 to 0.0)                  | 2635.9 (2450.7 to 2823.0) | 1933.7 (1753.3 to 2116.7)  | 457.1 (408.2 to 511.8)        | 245.1 (210.9 to 283.7)          | 0.0 (0.0 to 0.0)                  |
| Qatar   | 2011 | 1341.0 (1239.8 to 1437.1)  | 1021.2 (923.3 to 1116.2)   | 196.1 (172.7 to 221.9)        | 123.7 (106.3 to 142.3)          | 0.0 (0.0 to 0.0)                  | 2692.9 (2489.7 to 2885.9) | 2050.6 (1854.2 to 2241.4)  | 393.8 (346.9 to 445.6)        | 248.4 (213.5 to 285.7)          | 0.0 (0.0 to 0.0)                  |
| Qatar   | 2012 | 1394.7 (1292.3 to 1490.1)  | 1108.2 (1004.8 to 1205.3)  | 158.7 (139.2 to 181.3)        | 127.8 (109.5 to 146.6)          | 0.0 (0.0 to 0.0)                  | 2800.9 (2595.1 to 2992.4) | 2225.4 (2017.7 to 2420.3)  | 318.7 (279.5 to 364.1)        | 256.7 (220.0 to 294.4)          | 0.0 (0.0 to 0.0)                  |
| Qatar   | 2013 | 1539.2 (1432.7 to 1645.5)  | 1267.4 (1162.9 to 1375.0)  | 135.4 (117.2 to 155.0)        | 136.4 (118.1 to 156.0)          | 0.0 (0.0 to 0.0)                  | 3091.0 (2877.0 to 3304.3) | 2545.1 (2335.3 to 2761.2)  | 272.0 (235.3 to 311.3)        | 274.0 (237.3 to 313.2)          | 0.0 (0.0 to 0.0)                  |
| Qatar   | 2014 | 1732.8 (1615.1 to 1851.5)  | 1453.6 (1339.0 to 1572.5)  | 130.8 (112.3 to 150.6)        | 148.4 (129.7 to 170.4)          | 0.0 (0.0 to 0.0)                  | 3479.7 (3243.3 to 3718.0) | 2919.1 (2688.9 to 3157.9)  | 262.6 (225.6 to 302.3)        | 298.0 (260.5 to 342.2)          | 0.0 (0.0 to 0.0)                  |
| Qatar   | 2015 | 1952.5 (1819.8 to 2090.9)  | 1631.7 (1502.2 to 1763.3)  | 147.5 (124.2 to 173.5)        | 173.3 (150.7 to 198.2)          | 0.0 (0.0 to 0.0)                  | 3921.0 (3654.5 to 4198.9) | 3276.8 (3016.8 to 3541.0)  | 296.1 (249.4 to 348.4)        | 348.1 (302.6 to 398.0)          | 0.0 (0.0 to 0.0)                  |
| Qatar   | 2016 | 2064.1 (1899.6 to 2218.8)  | 1710.2 (1551.5 to 1865.9)  | 160.5 (132.8 to 192.8)        | 193.4 (162.0 to 228.8)          | 0.0 (0.0 to 0.0)                  | 4145.0 (3814.6 to 4455.6) | 3434.3 (3115.7 to 3747.1)  | 322.3 (266.8 to 387.2)        | 388.5 (325.3 to 459.4)          | 0.0 (0.0 to 0.0)                  |
| Qatar   | 2017 | 1782.2 (1638.4 to 1932.3)  | 1453.2 (1310.1 to 1598.3)  | 151.4 (125.4 to 182.0)        | 177.6 (149.1 to 210.0)          | 0.0 (0.0 to 0.0)                  | 3579.0 (3290.2 to 3880.4) | 2918.3 (2630.9 to 3209.7)  | 304.1 (251.8 to 365.5)        | 356.6 (299.5 to 421.7)          | 0.0 (0.0 to 0.0)                  |
| Qatar   | 2018 | 1830.1 (1666.8 to 2010.5)  | 1499.3 (1334.2 to 1678.4)  | 151.4 (125.0 to 182.5)        | 179.5 (150.9 to 212.6)          | 0.0 (0.0 to 0.0)                  | 3675.2 (3347.2 to 4037.5) | 3010.9 (2679.2 to 3370.5)  | 303.9 (251.0 to 366.4)        | 360.4 (303.0 to 426.9)          | 0.0 (0.0 to 0.0)                  |
| Qatar   | 2019 | 1877.3 (1683.4 to 2085.2)  | 1546.3 (1365.4 to 1753.0)  | 150.6 (124.4 to 181.4)        | 180.4 (151.6 to 214.1)          | 0.0 (0.0 to 0.0)                  | 3769.9 (3380.5 to 4187.4) | 3105.2 (2742.0 to 3520.3)  | 302.4 (249.8 to 364.2)        | 362.2 (304.4 to 429.8)          | 0.0 (0.0 to 0.0)                  |
| Qatar   | 2020 | 1932.2 (1718.4 to 2169.7)  | 1600.1 (1387.3 to 1845.9)  | 150.1 (123.3 to 180.0)        | 182.1 (153.0 to 216.7)          | 0.0 (0.0 to 0.0)                  | 3880.2 (3450.8 to 4357.1) | 3213.2 (2785.9 to 3707.0)  | 301.4 (247.5 to 361.4)        | 365.6 (307.3 to 435.2)          | 0.0 (0.0 to 0.0)                  |
| Qatar   | 2021 | 1972.6 (1741.7 to 2239.0)  | 1641.8 (1410.7 to 1902.2)  | 148.9 (122.4 to 179.4)        | 181.9 (153.0 to 215.7)          | 0.0 (0.0 to 0.0)                  | 3961.2 (3497.7 to 4496.2) | 3297.0 (2832.8 to 3819.9)  | 299.0 (245.8 to 360.2)        | 365.2 (307.3 to 433.1)          | 0.0 (0.0 to 0.0)                  |
| Qatar   | 2022 | 2012.7 (1761.6 to 2311.1)  | 1683.2 (1430.8 to 1977.8)  | 147.6 (121.3 to 178.5)        | 181.8 (152.8 to 215.5)          | 0.0 (0.0 to 0.0)                  | 4041.9 (3537.7 to 4641.1) | 3380.2 (2873.4 to 3971.7)  | 296.5 (243.6 to 358.5)        | 365.2 (306.9 to 432.7)          | 0.0 (0.0 to 0.0)                  |



| Country | Year | 2018 US Dollars per capita |                            |                               |                                 |                                   | 2018 PPP per capita       |                            |                               |                                 |                                   |
|---------|------|----------------------------|----------------------------|-------------------------------|---------------------------------|-----------------------------------|---------------------------|----------------------------|-------------------------------|---------------------------------|-----------------------------------|
|         |      | Health spending            | Government health spending | Out-of-pocket health spending | Prepaid private health spending | Development assistance for health | Health spending           | Government health spending | Out-of-pocket health spending | Prepaid private health spending | Development assistance for health |
| Qatar   | 2023 | 2063.7 (1779.4 to 2381.1)  | 1733.3 (1446.5 to 2054.4)  | 146.6 (120.6 to 177.8)        | 183.8 (154.4 to 217.2)          | 0.0 (0.0 to 0.0)                  | 4144.2 (3573.4 to 4781.6) | 3480.8 (2904.8 to 4125.6)  | 294.4 (242.2 to 357.1)        | 369.0 (310.0 to 436.2)          | 0.0 (0.0 to 0.0)                  |
| Qatar   | 2024 | 2110.6 (1808.9 to 2469.0)  | 1779.7 (1479.5 to 2133.7)  | 145.4 (119.8 to 175.9)        | 185.6 (155.9 to 219.3)          | 0.0 (0.0 to 0.0)                  | 4238.5 (3632.5 to 4958.2) | 3573.9 (2971.1 to 4284.8)  | 291.9 (240.5 to 353.3)        | 372.6 (313.1 to 440.3)          | 0.0 (0.0 to 0.0)                  |
| Qatar   | 2025 | 2168.6 (1843.9 to 2537.4)  | 1836.1 (1514.3 to 2207.9)  | 144.4 (118.5 to 173.6)        | 188.1 (157.9 to 222.7)          | 0.0 (0.0 to 0.0)                  | 4355.0 (3702.8 to 5095.5) | 3687.2 (3041.0 to 4433.7)  | 290.0 (237.9 to 348.6)        | 377.8 (317.1 to 447.2)          | 0.0 (0.0 to 0.0)                  |
| Qatar   | 2026 | 2218.6 (1877.4 to 2613.9)  | 1885.9 (1548.6 to 2274.3)  | 143.1 (116.6 to 172.9)        | 189.7 (159.1 to 224.8)          | 0.0 (0.0 to 0.0)                  | 4455.3 (3770.1 to 5249.0) | 3787.2 (3109.8 to 4567.1)  | 287.3 (234.2 to 347.2)        | 380.9 (319.4 to 451.4)          | 0.0 (0.0 to 0.0)                  |
| Qatar   | 2027 | 2273.9 (1894.3 to 2684.7)  | 1940.3 (1570.8 to 2359.1)  | 141.9 (114.7 to 172.3)        | 191.6 (160.9 to 227.4)          | 0.0 (0.0 to 0.0)                  | 4566.3 (3804.0 to 5391.2) | 3896.5 (3154.4 to 4737.5)  | 284.9 (230.3 to 346.0)        | 384.9 (323.1 to 456.6)          | 0.0 (0.0 to 0.0)                  |
| Qatar   | 2028 | 2328.9 (1922.2 to 2768.1)  | 1994.5 (1591.6 to 2436.9)  | 140.9 (113.3 to 171.8)        | 193.5 (162.5 to 229.9)          | 0.0 (0.0 to 0.0)                  | 4676.8 (3860.2 to 5558.8) | 4005.3 (3196.1 to 4893.8)  | 282.9 (227.6 to 345.1)        | 388.6 (326.4 to 461.6)          | 0.0 (0.0 to 0.0)                  |
| Qatar   | 2029 | 2387.1 (1957.6 to 2851.7)  | 2051.6 (1636.4 to 2511.5)  | 140.0 (112.5 to 171.8)        | 195.5 (163.9 to 232.1)          | 0.0 (0.0 to 0.0)                  | 4793.8 (3931.2 to 5726.8) | 4119.9 (3286.1 to 5043.4)  | 281.2 (225.9 to 345.0)        | 392.7 (329.1 to 466.2)          | 0.0 (0.0 to 0.0)                  |
| Qatar   | 2030 | 2452.0 (1991.1 to 2988.9)  | 2114.6 (1659.5 to 2639.8)  | 139.5 (111.8 to 172.9)        | 197.9 (165.6 to 234.8)          | 0.0 (0.0 to 0.0)                  | 4924.1 (3998.5 to 6002.3) | 4246.5 (3332.5 to 5301.2)  | 280.1 (224.5 to 347.2)        | 397.4 (332.5 to 471.5)          | 0.0 (0.0 to 0.0)                  |
| Qatar   | 2031 | 2508.3 (2019.6 to 3068.3)  | 2170.1 (1693.9 to 2733.5)  | 138.8 (111.0 to 172.9)        | 199.4 (166.5 to 236.6)          | 0.0 (0.0 to 0.0)                  | 5037.0 (4055.7 to 6161.6) | 4357.9 (3401.6 to 5489.4)  | 278.8 (222.9 to 347.1)        | 400.4 (334.3 to 475.2)          | 0.0 (0.0 to 0.0)                  |
| Qatar   | 2032 | 2560.9 (2030.8 to 3153.1)  | 2222.0 (1700.8 to 2830.7)  | 138.2 (109.2 to 173.8)        | 200.7 (167.2 to 238.4)          | 0.0 (0.0 to 0.0)                  | 5142.7 (4078.1 to 6331.9) | 4462.1 (3415.4 to 5684.4)  | 277.6 (219.4 to 349.1)        | 403.0 (335.8 to 478.7)          | 0.0 (0.0 to 0.0)                  |
| Qatar   | 2033 | 2619.2 (2069.8 to 3245.9)  | 2279.1 (1730.1 to 2907.4)  | 137.8 (108.0 to 174.9)        | 202.2 (167.9 to 240.4)          | 0.0 (0.0 to 0.0)                  | 5259.8 (4156.5 to 6518.2) | 4576.9 (3474.2 to 5838.5)  | 276.8 (216.9 to 351.2)        | 406.1 (337.2 to 482.7)          | 0.0 (0.0 to 0.0)                  |
| Qatar   | 2034 | 2673.7 (2090.5 to 3349.3)  | 2332.3 (1743.3 to 3021.1)  | 137.6 (107.3 to 177.5)        | 203.8 (168.7 to 241.9)          | 0.0 (0.0 to 0.0)                  | 5369.2 (4198.1 to 6725.9) | 4683.6 (3500.9 to 6066.8)  | 276.4 (215.4 to 356.5)        | 409.3 (338.7 to 485.8)          | 0.0 (0.0 to 0.0)                  |
| Qatar   | 2035 | 2726.9 (2105.6 to 3463.3)  | 2383.9 (1765.8 to 3128.8)  | 137.6 (106.9 to 179.3)        | 205.4 (169.9 to 243.6)          | 0.0 (0.0 to 0.0)                  | 5476.1 (4228.5 to 6955.0) | 4787.2 (3546.0 to 6283.1)  | 276.3 (214.6 to 360.1)        | 412.6 (341.3 to 489.3)          | 0.0 (0.0 to 0.0)                  |
| Qatar   | 2036 | 2767.1 (2112.7 to 3539.1)  | 2423.2 (1760.8 to 3201.6)  | 137.5 (105.7 to 179.3)        | 206.4 (170.2 to 245.3)          | 0.0 (0.0 to 0.0)                  | 5556.7 (4242.7 to 7107.1) | 4866.2 (3536.0 to 6429.3)  | 276.0 (212.3 to 360.0)        | 414.5 (341.9 to 492.7)          | 0.0 (0.0 to 0.0)                  |
| Qatar   | 2037 | 2803.8 (2110.1 to 3589.7)  | 2459.1 (1775.9 to 3244.7)  | 137.4 (105.2 to 180.6)        | 207.3 (170.5 to 246.7)          | 0.0 (0.0 to 0.0)                  | 5630.4 (4237.4 to 7208.8) | 4938.2 (3566.4 to 6515.9)  | 276.0 (211.3 to 362.7)        | 416.3 (342.4 to 495.5)          | 0.0 (0.0 to 0.0)                  |
| Qatar   | 2038 | 2841.5 (2123.7 to 3636.8)  | 2495.2 (1778.4 to 3286.4)  | 137.7 (104.9 to 182.6)        | 208.6 (171.1 to 248.6)          | 0.0 (0.0 to 0.0)                  | 5706.3 (4264.7 to 7303.3) | 5010.8 (3571.3 to 6599.7)  | 276.6 (210.7 to 366.7)        | 418.9 (343.6 to 499.1)          | 0.0 (0.0 to 0.0)                  |
| Qatar   | 2039 | 2878.1 (2137.1 to 3736.3)  | 2530.0 (1795.8 to 3373.4)  | 138.1 (104.8 to 184.6)        | 209.9 (171.7 to 250.1)          | 0.0 (0.0 to 0.0)                  | 5779.6 (4291.7 to 7503.0) | 5080.7 (3606.3 to 6774.3)  | 277.4 (210.6 to 370.7)        | 421.5 (344.8 to 502.2)          | 0.0 (0.0 to 0.0)                  |
| Qatar   | 2040 | 2914.0 (2157.9 to 3796.2)  | 2564.0 (1809.5 to 3465.4)  | 138.7 (104.5 to 186.1)        | 211.3 (172.4 to 252.3)          | 0.0 (0.0 to 0.0)                  | 5851.9 (4333.5 to 7623.3) | 5148.9 (3633.7 to 6959.0)  | 278.6 (209.8 to 373.6)        | 424.4 (346.1 to 506.6)          | 0.0 (0.0 to 0.0)                  |
| Qatar   | 2041 | 2938.6 (2148.2 to 3855.7)  | 2587.3 (1787.2 to 3496.8)  | 139.2 (104.2 to 187.7)        | 212.0 (172.5 to 253.2)          | 0.0 (0.0 to 0.0)                  | 5901.1 (4314.0 to 7742.8) | 5195.8 (3589.0 to 7022.1)  | 279.6 (209.2 to 377.0)        | 425.8 (346.3 to 508.4)          | 0.0 (0.0 to 0.0)                  |
| Qatar   | 2042 | 2959.7 (2149.5 to 3934.8)  | 2607.1 (1801.1 to 3574.8)  | 139.9 (104.2 to 188.8)        | 212.8 (172.6 to 254.5)          | 0.0 (0.0 to 0.0)                  | 5943.6 (4316.5 to 7901.8) | 5235.4 (3616.8 to 7178.7)  | 280.9 (209.3 to 379.1)        | 427.3 (346.5 to 511.0)          | 0.0 (0.0 to 0.0)                  |
| Qatar   | 2043 | 2981.7 (2164.2 to 3973.2)  | 2627.2 (1792.9 to 3627.1)  | 140.7 (104.3 to 190.3)        | 213.7 (172.9 to 255.7)          | 0.0 (0.0 to 0.0)                  | 5987.7 (4346.1 to 7978.8) | 5275.9 (3600.5 to 7283.7)  | 282.6 (209.5 to 382.2)        | 429.2 (347.1 to 513.5)          | 0.0 (0.0 to 0.0)                  |

| Country | Year | 2018 US Dollars per capita |                            |                               |                                 |                                   | 2018 PPP per capita       |                            |                               |                                 |                                   |
|---------|------|----------------------------|----------------------------|-------------------------------|---------------------------------|-----------------------------------|---------------------------|----------------------------|-------------------------------|---------------------------------|-----------------------------------|
|         |      | Health spending            | Government health spending | Out-of-pocket health spending | Prepaid private health spending | Development assistance for health | Health spending           | Government health spending | Out-of-pocket health spending | Prepaid private health spending | Development assistance for health |
| Qatar   | 2044 | 3007.0 (2165.2 to 4027.1)  | 2650.1 (1794.6 to 3673.5)  | 141.9 (104.7 to 192.4)        | 215.0 (174.0 to 257.7)          | 0.0 (0.0 to 0.0)                  | 6038.6 (4348.1 to 8087.1) | 5321.9 (3603.8 to 7377.0)  | 284.9 (210.3 to 386.3)        | 431.8 (349.4 to 517.5)          | 0.0 (0.0 to 0.0)                  |
| Qatar   | 2045 | 3035.0 (2167.5 to 4075.9)  | 2675.3 (1823.0 to 3688.3)  | 143.2 (105.5 to 194.8)        | 216.5 (174.8 to 260.0)          | 0.0 (0.0 to 0.0)                  | 6094.9 (4352.7 to 8185.2) | 5372.4 (3660.9 to 7406.7)  | 287.6 (211.8 to 391.3)        | 434.8 (351.0 to 522.1)          | 0.0 (0.0 to 0.0)                  |
| Qatar   | 2046 | 3048.3 (2173.1 to 4092.4)  | 2686.8 (1806.2 to 3714.6)  | 144.4 (106.2 to 196.9)        | 217.1 (175.1 to 261.2)          | 0.0 (0.0 to 0.0)                  | 6121.6 (4363.9 to 8218.2) | 5395.6 (3627.1 to 7459.4)  | 290.1 (213.2 to 395.5)        | 435.9 (351.7 to 524.5)          | 0.0 (0.0 to 0.0)                  |
| Qatar   | 2047 | 3071.6 (2181.3 to 4173.5)  | 2707.4 (1821.2 to 3798.6)  | 146.0 (106.9 to 199.2)        | 218.2 (175.7 to 262.8)          | 0.0 (0.0 to 0.0)                  | 6168.3 (4380.5 to 8381.1) | 5437.0 (3657.3 to 7628.2)  | 293.1 (214.8 to 400.1)        | 438.2 (352.9 to 527.7)          | 0.0 (0.0 to 0.0)                  |
| Qatar   | 2048 | 3089.5 (2179.8 to 4171.2)  | 2722.8 (1824.8 to 3806.2)  | 147.5 (107.7 to 201.5)        | 219.2 (176.3 to 264.9)          | 0.0 (0.0 to 0.0)                  | 6204.3 (4377.4 to 8376.5) | 5467.9 (3664.4 to 7643.4)  | 296.2 (216.3 to 404.7)        | 440.2 (354.0 to 532.1)          | 0.0 (0.0 to 0.0)                  |
| Qatar   | 2049 | 3112.3 (2188.4 to 4256.6)  | 2742.8 (1822.2 to 3892.5)  | 149.1 (109.0 to 204.0)        | 220.4 (177.2 to 266.7)          | 0.0 (0.0 to 0.0)                  | 6250.0 (4394.6 to 8547.9) | 5507.9 (3659.2 to 7816.7)  | 299.4 (218.8 to 409.6)        | 442.7 (355.8 to 535.5)          | 0.0 (0.0 to 0.0)                  |
| Qatar   | 2050 | 3133.6 (2187.6 to 4225.7)  | 2761.5 (1830.0 to 3856.0)  | 150.7 (110.3 to 206.7)        | 221.5 (177.9 to 268.1)          | 0.0 (0.0 to 0.0)                  | 6292.7 (4393.1 to 8485.9) | 5545.5 (3675.0 to 7743.4)  | 302.5 (221.5 to 415.1)        | 444.7 (357.2 to 538.3)          | 0.0 (0.0 to 0.0)                  |
| Romania | 1995 | 177.9 (156.6 to 201.9)     | 130.6 (113.1 to 151.1)     | 43.1 (32.2 to 57.2)           | 2.2 (1.1 to 4.1)                | 2.0 (2.0 to 2.0)                  | 391.4 (344.5 to 444.3)    | 287.3 (248.7 to 332.5)     | 94.8 (70.8 to 125.9)          | 4.8 (2.4 to 9.1)                | 4.5 (4.5 to 4.5)                  |
| Romania | 1996 | 189.4 (169.8 to 212.9)     | 140.9 (123.5 to 160.1)     | 44.8 (34.3 to 58.6)           | 2.4 (1.2 to 4.4)                | 1.3 (1.3 to 1.3)                  | 416.7 (373.5 to 468.5)    | 310.0 (271.8 to 352.2)     | 98.7 (75.5 to 128.9)          | 5.3 (2.5 to 9.7)                | 2.8 (2.8 to 2.8)                  |
| Romania | 1997 | 201.5 (181.8 to 223.7)     | 150.8 (133.9 to 168.7)     | 44.8 (34.7 to 57.1)           | 2.6 (1.2 to 4.7)                | 3.3 (3.3 to 3.3)                  | 443.3 (400.1 to 492.2)    | 331.7 (294.7 to 371.2)     | 98.6 (76.4 to 125.6)          | 5.7 (2.7 to 10.3)               | 7.3 (7.3 to 7.3)                  |
| Romania | 1998 | 202.8 (183.5 to 224.4)     | 153.7 (138.3 to 170.9)     | 44.6 (35.0 to 55.8)           | 2.7 (1.3 to 4.9)                | 1.9 (1.9 to 1.9)                  | 446.2 (403.7 to 493.7)    | 338.1 (304.3 to 376.0)     | 98.1 (77.1 to 122.8)          | 5.9 (2.8 to 10.8)               | 4.1 (4.1 to 4.1)                  |
| Romania | 1999 | 215.0 (195.1 to 235.7)     | 165.6 (149.5 to 182.9)     | 44.4 (35.5 to 55.0)           | 2.9 (1.4 to 5.5)                | 2.1 (2.1 to 2.1)                  | 473.0 (429.3 to 518.5)    | 364.3 (328.9 to 402.5)     | 97.6 (78.2 to 121.0)          | 6.4 (3.0 to 12.0)               | 4.7 (4.7 to 4.7)                  |
| Romania | 2000 | 227.6 (208.0 to 249.2)     | 178.2 (161.2 to 197.1)     | 44.9 (35.9 to 55.2)           | 3.2 (1.5 to 5.9)                | 1.3 (1.3 to 1.3)                  | 500.7 (457.5 to 548.2)    | 392.2 (354.7 to 433.6)     | 98.8 (78.9 to 121.4)          | 7.0 (3.3 to 12.9)               | 2.8 (2.8 to 2.8)                  |
| Romania | 2001 | 251.0 (231.6 to 273.8)     | 198.8 (180.2 to 218.3)     | 47.6 (38.1 to 58.3)           | 3.6 (1.7 to 6.7)                | 1.0 (1.0 to 1.0)                  | 552.2 (509.5 to 602.4)    | 437.4 (396.5 to 480.2)     | 104.7 (83.9 to 128.4)         | 8.0 (3.8 to 14.7)               | 2.1 (2.1 to 2.1)                  |
| Romania | 2002 | 280.2 (257.7 to 303.1)     | 223.2 (203.2 to 243.8)     | 51.7 (41.6 to 63.1)           | 4.3 (2.0 to 8.1)                | 1.0 (1.0 to 1.0)                  | 616.4 (566.9 to 666.8)    | 491.0 (447.1 to 536.5)     | 113.7 (91.5 to 138.8)         | 9.5 (4.5 to 17.8)               | 2.2 (2.2 to 2.2)                  |
| Romania | 2003 | 314.9 (289.8 to 338.9)     | 251.5 (230.0 to 273.5)     | 58.0 (46.7 to 70.3)           | 4.8 (2.3 to 8.8)                | 0.5 (0.5 to 0.5)                  | 692.8 (637.6 to 745.7)    | 553.5 (506.1 to 601.8)     | 127.6 (102.7 to 154.8)        | 10.6 (5.0 to 19.4)              | 1.1 (1.1 to 1.1)                  |
| Romania | 2004 | 353.8 (327.0 to 380.4)     | 277.5 (254.1 to 300.6)     | 70.2 (56.8 to 85.5)           | 4.7 (2.3 to 8.5)                | 1.4 (1.4 to 1.4)                  | 778.5 (719.6 to 837.0)    | 610.5 (559.0 to 661.4)     | 154.5 (125.0 to 188.2)        | 10.4 (5.0 to 18.7)              | 3.1 (3.1 to 3.1)                  |
| Romania | 2005 | 374.2 (347.5 to 401.1)     | 296.2 (272.2 to 320.1)     | 73.2 (59.4 to 88.6)           | 4.2 (2.0 to 7.6)                | 0.6 (0.6 to 0.6)                  | 823.3 (764.6 to 882.4)    | 651.6 (598.8 to 704.2)     | 161.1 (130.6 to 195.0)        | 9.2 (4.3 to 16.8)               | 1.4 (1.4 to 1.4)                  |
| Romania | 2006 | 401.7 (374.9 to 431.2)     | 320.6 (295.7 to 345.5)     | 77.3 (63.8 to 92.9)           | 3.4 (1.6 to 6.2)                | 0.4 (0.4 to 0.4)                  | 883.8 (824.9 to 948.7)    | 705.4 (650.6 to 760.2)     | 170.1 (140.3 to 204.4)        | 7.4 (3.4 to 13.6)               | 0.9 (0.9 to 0.9)                  |
| Romania | 2007 | 437.3 (407.8 to 467.6)     | 350.4 (325.3 to 376.0)     | 81.9 (68.0 to 98.2)           | 3.4 (1.6 to 6.2)                | 1.6 (1.6 to 1.6)                  | 962.2 (897.3 to 1028.8)   | 771.0 (715.7 to 827.3)     | 180.2 (149.6 to 216.1)        | 7.5 (3.5 to 13.6)               | 3.5 (3.5 to 3.5)                  |
| Romania | 2008 | 481.8 (451.0 to 514.3)     | 386.5 (359.2 to 415.0)     | 90.4 (74.8 to 109.1)          | 3.3 (1.6 to 6.1)                | 1.5 (1.5 to 1.5)                  | 1060.0 (992.3 to 1131.5)  | 850.5 (790.3 to 913.0)     | 198.9 (164.5 to 240.1)        | 7.4 (3.4 to 13.3)               | 3.3 (3.3 to 3.3)                  |

| Country | Year | 2018 US Dollars per capita |                            |                               |                                 |                                   | 2018 PPP per capita       |                            |                               |                                 |                                   |
|---------|------|----------------------------|----------------------------|-------------------------------|---------------------------------|-----------------------------------|---------------------------|----------------------------|-------------------------------|---------------------------------|-----------------------------------|
|         |      | Health spending            | Government health spending | Out-of-pocket health spending | Prepaid private health spending | Development assistance for health | Health spending           | Government health spending | Out-of-pocket health spending | Prepaid private health spending | Development assistance for health |
| Romania | 2009 | 468.1 (439.4 to 502.4)     | 370.6 (345.6 to 397.8)     | 93.5 (77.7 to 112.7)          | 2.9 (1.3 to 5.3)                | 1.0 (1.0 to 1.0)                  | 1029.9 (966.8 to 1105.3)  | 815.5 (760.5 to 875.3)     | 205.8 (171.0 to 248.0)        | 6.4 (2.9 to 11.6)               | 2.2 (2.2 to 2.2)                  |
| Romania | 2010 | 463.3 (434.3 to 496.5)     | 363.9 (339.3 to 390.7)     | 95.4 (79.4 to 114.4)          | 2.7 (1.2 to 5.0)                | 1.2 (1.2 to 1.2)                  | 1019.4 (955.5 to 1092.5)  | 800.7 (746.5 to 859.6)     | 210.0 (174.6 to 251.7)        | 6.0 (2.7 to 10.9)               | 2.7 (2.7 to 2.7)                  |
| Romania | 2011 | 451.1 (422.6 to 482.6)     | 343.5 (321.3 to 368.0)     | 96.0 (80.3 to 114.5)          | 2.9 (1.3 to 5.2)                | 8.8 (8.8 to 8.8)                  | 992.6 (929.8 to 1061.7)   | 755.8 (706.9 to 809.6)     | 211.1 (176.6 to 252.0)        | 6.3 (2.9 to 11.4)               | 19.4 (19.4 to 19.4)               |
| Romania | 2012 | 445.8 (417.4 to 476.8)     | 345.9 (322.3 to 372.7)     | 96.2 (80.2 to 114.6)          | 3.1 (1.4 to 5.6)                | 0.7 (0.7 to 0.7)                  | 980.8 (918.4 to 1049.0)   | 761.0 (709.2 to 820.0)     | 211.6 (176.4 to 252.2)        | 6.7 (3.1 to 12.2)               | 1.5 (1.5 to 1.5)                  |
| Romania | 2013 | 483.2 (453.7 to 515.5)     | 363.5 (339.1 to 390.8)     | 98.4 (81.4 to 117.7)          | 3.4 (1.5 to 6.3)                | 17.9 (17.9 to 17.9)               | 1063.2 (998.3 to 1134.1)  | 799.8 (746.0 to 859.9)     | 216.5 (179.2 to 258.9)        | 7.4 (3.3 to 13.8)               | 39.5 (39.5 to 39.5)               |
| Romania | 2014 | 490.2 (458.0 to 526.2)     | 377.4 (349.9 to 404.7)     | 101.1 (83.5 to 121.6)         | 3.8 (1.7 to 7.1)                | 7.8 (7.8 to 7.8)                  | 1078.4 (1007.8 to 1157.8) | 830.4 (769.8 to 890.4)     | 222.5 (183.8 to 267.6)        | 8.3 (3.7 to 15.5)               | 17.2 (17.2 to 17.2)               |
| Romania | 2015 | 505.0 (468.8 to 543.9)     | 394.2 (364.1 to 425.8)     | 105.8 (86.6 to 129.0)         | 4.2 (1.9 to 7.9)                | 0.7 (0.7 to 0.7)                  | 1111.0 (1031.4 to 1196.7) | 867.2 (801.2 to 936.8)     | 232.9 (190.5 to 283.8)        | 9.3 (4.2 to 17.4)               | 1.6 (1.6 to 1.6)                  |
| Romania | 2016 | 536.7 (489.6 to 586.8)     | 419.6 (381.1 to 459.9)     | 111.5 (89.7 to 137.7)         | 5.1 (2.3 to 9.7)                | 0.6 (0.6 to 0.6)                  | 1180.9 (1077.1 to 1291.2) | 923.1 (838.6 to 1012.0)    | 245.3 (197.3 to 303.0)        | 11.1 (5.0 to 21.3)              | 1.4 (1.4 to 1.4)                  |
| Romania | 2017 | 580.9 (529.7 to 634.3)     | 451.9 (410.0 to 496.5)     | 119.8 (96.1 to 148.6)         | 5.4 (2.4 to 10.3)               | 3.7 (3.7 to 3.7)                  | 1278.1 (1165.5 to 1395.6) | 994.3 (902.1 to 1092.4)    | 263.6 (211.5 to 327.0)        | 11.9 (5.3 to 22.6)              | 8.2 (8.2 to 8.2)                  |
| Romania | 2018 | 599.1 (547.6 to 654.6)     | 466.6 (422.3 to 512.3)     | 123.4 (98.3 to 152.8)         | 5.6 (2.5 to 10.6)               | 3.6 (3.6 to 3.6)                  | 1318.2 (1204.8 to 1440.2) | 1026.5 (929.1 to 1127.2)   | 271.5 (216.3 to 336.3)        | 12.3 (5.5 to 23.4)              | 7.8 (7.8 to 7.9)                  |
| Romania | 2019 | 616.8 (562.8 to 676.1)     | 480.1 (434.4 to 527.4)     | 127.2 (102.1 to 157.8)        | 5.8 (2.6 to 11.0)               | 3.6 (3.4 to 3.9)                  | 1357.1 (1238.2 to 1487.6) | 1056.4 (955.8 to 1160.4)   | 280.0 (224.7 to 347.2)        | 12.7 (5.7 to 24.1)              | 8.0 (7.5 to 8.5)                  |
| Romania | 2020 | 635.7 (579.6 to 696.7)     | 494.8 (447.3 to 545.0)     | 131.2 (105.0 to 162.9)        | 5.9 (2.7 to 11.3)               | 3.7 (3.4 to 4.0)                  | 1398.6 (1275.3 to 1532.9) | 1088.6 (984.1 to 1199.2)   | 288.7 (231.0 to 358.3)        | 13.1 (5.9 to 24.9)              | 8.2 (7.6 to 8.9)                  |
| Romania | 2021 | 655.1 (597.4 to 716.9)     | 509.7 (460.0 to 561.3)     | 135.3 (107.9 to 168.3)        | 6.1 (2.8 to 11.7)               | 3.9 (3.5 to 4.3)                  | 1441.3 (1314.4 to 1577.4) | 1121.5 (1012.0 to 1235.0)  | 297.7 (237.4 to 370.2)        | 13.5 (6.1 to 25.6)              | 8.5 (7.7 to 9.4)                  |
| Romania | 2022 | 675.7 (616.9 to 737.6)     | 525.7 (473.4 to 580.0)     | 139.6 (111.2 to 173.3)        | 6.3 (2.8 to 12.0)               | 4.0 (3.6 to 4.5)                  | 1486.6 (1357.3 to 1623.0) | 1156.7 (1041.6 to 1276.1)  | 307.2 (244.6 to 381.3)        | 13.9 (6.3 to 26.5)              | 8.9 (7.9 to 9.9)                  |
| Romania | 2023 | 696.4 (635.4 to 759.6)     | 541.7 (487.5 to 598.1)     | 144.0 (114.8 to 179.0)        | 6.5 (2.9 to 12.4)               | 4.2 (3.7 to 4.8)                  | 1532.2 (1398.0 to 1671.3) | 1191.8 (1072.6 to 1316.0)  | 316.9 (252.5 to 393.8)        | 14.3 (6.4 to 27.2)              | 9.2 (8.1 to 10.5)                 |
| Romania | 2024 | 717.6 (653.8 to 782.0)     | 557.9 (502.0 to 617.4)     | 148.7 (117.6 to 184.7)        | 6.7 (3.0 to 12.7)               | 4.3 (3.7 to 5.0)                  | 1578.9 (1438.4 to 1720.5) | 1227.5 (1104.4 to 1358.4)  | 327.1 (258.8 to 406.3)        | 14.7 (6.7 to 28.0)              | 9.6 (8.2 to 11.1)                 |
| Romania | 2025 | 739.8 (673.2 to 807.8)     | 574.9 (516.9 to 636.8)     | 153.6 (121.7 to 191.0)        | 6.9 (3.1 to 13.1)               | 4.3 (0.0 to 5.3)                  | 1627.7 (1481.2 to 1777.3) | 1264.9 (1137.4 to 1401.0)  | 338.0 (267.7 to 420.2)        | 15.2 (6.9 to 28.9)              | 9.5 (0.0 to 11.6)                 |
| Romania | 2026 | 763.2 (694.4 to 834.1)     | 593.0 (534.1 to 655.4)     | 158.8 (126.0 to 198.0)        | 7.2 (3.3 to 13.5)               | 4.2 (0.0 to 5.4)                  | 1679.1 (1527.8 to 1835.2) | 1304.7 (1175.1 to 1442.1)  | 349.5 (277.3 to 435.7)        | 15.7 (7.2 to 29.8)              | 9.2 (0.0 to 11.9)                 |
| Romania | 2027 | 788.4 (716.0 to 863.5)     | 612.8 (552.5 to 677.3)     | 164.4 (130.2 to 205.6)        | 7.4 (3.4 to 14.0)               | 3.8 (0.0 to 5.7)                  | 1734.7 (1575.3 to 1900.0) | 1348.4 (1215.6 to 1490.1)  | 361.7 (286.6 to 452.3)        | 16.3 (7.5 to 30.8)              | 8.3 (0.0 to 12.4)                 |
| Romania | 2028 | 814.3 (738.3 to 892.2)     | 633.3 (568.2 to 700.8)     | 170.1 (134.4 to 213.9)        | 7.7 (3.5 to 14.5)               | 3.2 (0.0 to 5.9)                  | 1791.6 (1624.4 to 1963.1) | 1393.4 (1250.1 to 1541.8)  | 374.3 (295.6 to 470.7)        | 16.9 (7.8 to 31.9)              | 7.1 (0.0 to 12.9)                 |
| Romania | 2029 | 840.6 (759.4 to 919.0)     | 654.2 (585.5 to 726.0)     | 175.9 (138.7 to 221.2)        | 8.0 (3.7 to 15.0)               | 2.6 (0.0 to 6.1)                  | 1849.5 (1670.8 to 2022.0) | 1439.3 (1288.3 to 1597.3)  | 387.0 (305.2 to 486.8)        | 17.5 (8.1 to 33.0)              | 5.7 (0.0 to 13.3)                 |

| Country | Year | 2018 US Dollars per capita |                            |                               |                                 |                                   | 2018 PPP per capita       |                            |                               |                                 |                                   |
|---------|------|----------------------------|----------------------------|-------------------------------|---------------------------------|-----------------------------------|---------------------------|----------------------------|-------------------------------|---------------------------------|-----------------------------------|
|         |      | Health spending            | Government health spending | Out-of-pocket health spending | Prepaid private health spending | Development assistance for health | Health spending           | Government health spending | Out-of-pocket health spending | Prepaid private health spending | Development assistance for health |
| Romania | 2030 | 866.3 (784.3 to 950.7)     | 674.4 (601.8 to 752.0)     | 181.5 (142.9 to 229.9)        | 8.2 (3.8 to 15.5)               | 2.1 (0.0 to 6.2)                  | 1906.0 (1725.6 to 2091.8) | 1483.9 (1324.2 to 1654.5)  | 399.4 (314.3 to 505.8)        | 18.1 (8.4 to 34.2)              | 4.6 (0.0 to 13.6)                 |
| Romania | 2031 | 891.3 (804.9 to 978.8)     | 693.9 (619.4 to 773.9)     | 187.1 (145.1 to 237.4)        | 8.5 (3.9 to 16.0)               | 1.8 (0.0 to 6.4)                  | 1961.1 (1771.0 to 2153.6) | 1526.8 (1362.8 to 1702.7)  | 411.6 (319.2 to 522.4)        | 18.7 (8.6 to 35.3)              | 4.0 (0.0 to 14.2)                 |
| Romania | 2032 | 916.0 (826.6 to 1009.2)    | 713.2 (636.9 to 795.5)     | 192.5 (149.1 to 244.4)        | 8.7 (4.0 to 16.5)               | 1.5 (0.0 to 6.6)                  | 2015.4 (1818.6 to 2220.4) | 1569.3 (1401.4 to 1750.2)  | 423.5 (328.0 to 537.7)        | 19.2 (8.9 to 36.3)              | 3.4 (0.0 to 14.6)                 |
| Romania | 2033 | 940.7 (848.5 to 1036.8)    | 732.5 (654.5 to 816.1)     | 197.9 (151.7 to 251.9)        | 9.0 (4.1 to 16.9)               | 1.3 (0.0 to 6.9)                  | 2069.6 (1867.0 to 2281.3) | 1611.6 (1440.0 to 1795.6)  | 435.4 (333.8 to 554.3)        | 19.7 (9.1 to 37.2)              | 2.9 (0.0 to 15.1)                 |
| Romania | 2034 | 965.6 (872.1 to 1071.3)    | 751.9 (671.1 to 838.1)     | 203.3 (154.9 to 260.2)        | 9.2 (4.2 to 17.3)               | 1.1 (0.0 to 6.9)                  | 2124.5 (1918.8 to 2357.0) | 1654.4 (1476.6 to 1844.0)  | 447.4 (340.8 to 572.4)        | 20.2 (9.3 to 38.1)              | 2.5 (0.0 to 15.2)                 |
| Romania | 2035 | 991.9 (887.9 to 1099.5)    | 772.5 (690.0 to 863.5)     | 208.9 (158.3 to 269.3)        | 9.5 (4.4 to 17.7)               | 1.0 (0.0 to 7.2)                  | 2182.3 (1953.7 to 2419.2) | 1699.7 (1518.1 to 1899.8)  | 459.6 (348.3 to 592.5)        | 20.8 (9.6 to 39.0)              | 2.2 (0.0 to 15.7)                 |
| Romania | 2036 | 1018.5 (908.6 to 1128.8)   | 793.3 (707.3 to 886.8)     | 214.5 (161.7 to 278.1)        | 9.7 (4.5 to 18.2)               | 0.9 (0.0 to 7.5)                  | 2240.8 (1999.1 to 2483.6) | 1745.5 (1556.3 to 1951.2)  | 471.9 (355.8 to 611.8)        | 21.4 (9.8 to 40.1)              | 2.0 (0.0 to 16.5)                 |
| Romania | 2037 | 1046.9 (934.9 to 1164.3)   | 815.8 (724.5 to 917.2)     | 220.3 (165.3 to 287.0)        | 10.0 (4.6 to 18.9)              | 0.8 (0.0 to 7.6)                  | 2303.4 (2056.9 to 2561.6) | 1794.9 (1594.1 to 2018.1)  | 484.6 (363.7 to 631.5)        | 22.0 (10.1 to 41.5)             | 1.9 (0.0 to 16.8)                 |
| Romania | 2038 | 1075.3 (957.6 to 1195.7)   | 838.2 (743.0 to 944.8)     | 226.0 (169.2 to 295.9)        | 10.3 (4.7 to 19.5)              | 0.8 (0.0 to 7.8)                  | 2365.9 (2106.9 to 2630.8) | 1844.2 (1634.7 to 2078.7)  | 497.3 (372.2 to 651.0)        | 22.7 (10.4 to 42.9)             | 1.8 (0.0 to 17.1)                 |
| Romania | 2039 | 1104.6 (980.3 to 1232.1)   | 861.4 (759.2 to 972.1)     | 231.9 (172.9 to 304.7)        | 10.6 (4.9 to 20.1)              | 0.8 (0.0 to 8.1)                  | 2430.4 (2156.8 to 2710.8) | 1895.2 (1670.3 to 2138.7)  | 510.1 (380.5 to 670.5)        | 23.3 (10.7 to 44.3)             | 1.7 (0.0 to 17.8)                 |
| Romania | 2040 | 1134.3 (1003.9 to 1264.6)  | 885.0 (779.7 to 1000.4)    | 237.6 (176.5 to 313.4)        | 10.9 (5.0 to 20.6)              | 0.8 (0.0 to 8.3)                  | 2495.7 (2208.8 to 2782.4) | 1947.2 (1715.5 to 2201.1)  | 522.9 (388.2 to 689.5)        | 24.0 (11.0 to 45.4)             | 1.7 (0.0 to 18.3)                 |
| Romania | 2041 | 1163.5 (1036.0 to 1301.0)  | 908.2 (797.6 to 1026.6)    | 243.3 (180.0 to 321.8)        | 11.2 (5.1 to 21.1)              | 0.8 (0.0 to 8.5)                  | 2559.9 (2279.5 to 2862.4) | 1998.1 (1754.8 to 2258.7)  | 535.4 (396.0 to 708.0)        | 24.7 (11.3 to 46.5)             | 1.7 (0.0 to 18.7)                 |
| Romania | 2042 | 1193.6 (1059.7 to 1340.2)  | 932.3 (819.6 to 1054.5)    | 249.0 (183.9 to 330.6)        | 11.5 (5.3 to 21.7)              | 0.7 (0.0 to 8.7)                  | 2626.1 (2331.5 to 2948.7) | 2051.2 (1803.4 to 2320.0)  | 547.9 (404.5 to 727.4)        | 25.3 (11.6 to 47.7)             | 1.6 (0.0 to 19.1)                 |
| Romania | 2043 | 1223.8 (1083.7 to 1368.6)  | 956.6 (841.1 to 1086.4)    | 254.7 (187.8 to 339.8)        | 11.8 (5.4 to 22.3)              | 0.7 (0.0 to 8.7)                  | 2692.7 (2384.4 to 3011.2) | 2104.7 (1850.7 to 2390.3)  | 560.4 (413.3 to 747.6)        | 26.0 (11.8 to 49.0)             | 1.6 (0.0 to 19.2)                 |
| Romania | 2044 | 1255.3 (1108.1 to 1407.8)  | 982.1 (861.3 to 1116.2)    | 260.4 (191.7 to 348.6)        | 12.2 (5.5 to 22.9)              | 0.7 (0.0 to 9.1)                  | 2762.0 (2438.0 to 3097.5) | 2160.7 (1895.0 to 2455.8)  | 573.0 (421.9 to 767.0)        | 26.8 (12.1 to 50.3)             | 1.5 (0.0 to 20.0)                 |
| Romania | 2045 | 1287.7 (1138.8 to 1445.3)  | 1008.3 (883.9 to 1149.3)   | 266.2 (195.5 to 356.8)        | 12.5 (5.6 to 23.5)              | 0.6 (0.0 to 8.9)                  | 2833.3 (2505.6 to 3179.9) | 2218.5 (1944.9 to 2528.7)  | 585.8 (430.1 to 785.0)        | 27.5 (12.4 to 51.7)             | 1.4 (0.0 to 19.6)                 |
| Romania | 2046 | 1321.5 (1164.8 to 1481.8)  | 1035.9 (906.8 to 1179.3)   | 272.1 (199.7 to 364.9)        | 12.9 (5.8 to 24.1)              | 0.6 (0.0 to 9.4)                  | 2907.6 (2562.9 to 3260.3) | 2279.2 (1995.2 to 2594.8)  | 598.7 (439.4 to 802.8)        | 28.3 (12.8 to 53.1)             | 1.3 (0.0 to 20.7)                 |
| Romania | 2047 | 1355.9 (1199.0 to 1520.1)  | 1064.0 (928.6 to 1216.8)   | 278.1 (204.1 to 372.7)        | 13.3 (6.0 to 24.8)              | 0.5 (0.0 to 9.5)                  | 2983.1 (2638.1 to 3344.5) | 2341.0 (2043.2 to 2677.1)  | 611.8 (449.1 to 820.0)        | 29.2 (13.2 to 54.6)             | 1.2 (0.0 to 20.8)                 |
| Romania | 2048 | 1391.4 (1228.5 to 1567.3)  | 1093.1 (953.0 to 1250.0)   | 284.1 (208.4 to 380.6)        | 13.7 (6.2 to 25.6)              | 0.5 (0.0 to 9.5)                  | 3061.3 (2703.0 to 3448.4) | 2405.1 (2096.8 to 2750.3)  | 625.2 (458.6 to 837.3)        | 30.1 (13.5 to 56.3)             | 1.0 (0.0 to 21.0)                 |
| Romania | 2049 | 1426.8 (1253.6 to 1618.2)  | 1122.1 (974.0 to 1287.4)   | 290.2 (212.8 to 388.4)        | 14.1 (6.3 to 26.5)              | 0.4 (0.0 to 9.3)                  | 3139.3 (2758.1 to 3560.3) | 2468.8 (2143.0 to 2832.5)  | 638.6 (468.1 to 854.6)        | 31.0 (14.0 to 58.2)             | 1.0 (0.0 to 20.6)                 |
| Romania | 2050 | 1460.9 (1279.2 to 1657.7)  | 1149.9 (993.4 to 1324.0)   | 296.2 (216.9 to 395.9)        | 14.4 (6.5 to 27.3)              | 0.4 (0.0 to 9.1)                  | 3214.3 (2814.5 to 3647.3) | 2530.1 (2185.7 to 2913.1)  | 651.6 (477.2 to 871.1)        | 31.8 (14.4 to 60.1)             | 0.8 (0.0 to 20.0)                 |

| Country            | Year | 2018 US Dollars per capita |                            |                               |                                 |                                   | 2018 PPP per capita       |                            |                               |                                 |                                   |
|--------------------|------|----------------------------|----------------------------|-------------------------------|---------------------------------|-----------------------------------|---------------------------|----------------------------|-------------------------------|---------------------------------|-----------------------------------|
|                    |      | Health spending            | Government health spending | Out-of-pocket health spending | Prepaid private health spending | Development assistance for health | Health spending           | Government health spending | Out-of-pocket health spending | Prepaid private health spending | Development assistance for health |
| Russian Federation | 1995 | 338.8 (302.6 to 378.0)     | 231.3 (203.7 to 260.2)     | 88.3 (72.9 to 107.2)          | 19.2 (10.5 to 31.7)             | 0.0 (0.0 to 0.0)                  | 868.4 (775.7 to 968.8)    | 592.9 (522.0 to 666.8)     | 226.3 (186.7 to 274.8)        | 49.2 (26.9 to 81.1)             | 0.0 (0.0 to 0.0)                  |
| Russian Federation | 1996 | 330.9 (297.8 to 363.8)     | 221.0 (196.9 to 243.9)     | 89.0 (75.3 to 106.0)          | 20.2 (11.1 to 32.9)             | 0.7 (0.7 to 0.7)                  | 848.2 (763.3 to 932.3)    | 566.6 (504.6 to 625.1)     | 228.1 (193.0 to 271.8)        | 51.7 (28.6 to 84.4)             | 1.9 (1.9 to 1.9)                  |
| Russian Federation | 1997 | 353.2 (323.2 to 384.5)     | 230.2 (208.5 to 252.1)     | 96.1 (82.1 to 112.3)          | 23.1 (13.4 to 37.1)             | 3.8 (3.8 to 3.8)                  | 905.4 (828.4 to 985.6)    | 590.1 (534.3 to 646.2)     | 246.2 (210.3 to 287.9)        | 59.3 (34.4 to 95.2)             | 9.8 (9.8 to 9.8)                  |
| Russian Federation | 1998 | 330.8 (305.0 to 359.3)     | 210.1 (191.4 to 229.7)     | 97.5 (83.5 to 113.0)          | 22.5 (13.4 to 35.9)             | 0.7 (0.7 to 0.7)                  | 848.0 (781.8 to 920.9)    | 538.6 (490.7 to 588.8)     | 249.9 (214.0 to 289.6)        | 57.7 (34.2 to 91.9)             | 1.8 (1.8 to 1.8)                  |
| Russian Federation | 1999 | 328.3 (302.7 to 355.2)     | 203.1 (184.3 to 222.8)     | 100.7 (86.8 to 115.9)         | 23.5 (14.0 to 38.2)             | 0.9 (0.9 to 0.9)                  | 841.5 (775.9 to 910.4)    | 520.7 (472.4 to 571.0)     | 258.2 (222.5 to 297.1)        | 60.3 (35.8 to 97.8)             | 2.2 (2.2 to 2.2)                  |
| Russian Federation | 2000 | 344.8 (318.0 to 375.6)     | 208.2 (188.9 to 227.4)     | 105.5 (91.3 to 120.8)         | 29.8 (18.0 to 47.2)             | 1.3 (1.3 to 1.3)                  | 883.9 (815.0 to 962.8)    | 533.8 (484.1 to 582.9)     | 270.4 (234.1 to 309.7)        | 76.4 (46.1 to 121.0)            | 3.4 (3.4 to 3.4)                  |
| Russian Federation | 2001 | 356.8 (327.3 to 387.9)     | 210.5 (190.5 to 230.2)     | 111.9 (97.6 to 128.1)         | 34.0 (21.0 to 52.3)             | 0.4 (0.4 to 0.4)                  | 914.4 (838.9 to 994.2)    | 539.6 (488.2 to 590.1)     | 286.9 (250.2 to 328.3)        | 87.0 (53.7 to 134.0)            | 1.0 (1.0 to 1.0)                  |
| Russian Federation | 2002 | 375.7 (346.9 to 408.3)     | 219.1 (199.5 to 238.9)     | 120.5 (104.9 to 137.5)        | 35.9 (22.4 to 54.1)             | 0.2 (0.2 to 0.2)                  | 962.9 (889.2 to 1046.5)   | 561.6 (511.2 to 612.4)     | 308.8 (268.9 to 352.5)        | 91.9 (57.4 to 138.7)            | 0.6 (0.6 to 0.6)                  |
| Russian Federation | 2003 | 391.2 (362.8 to 422.4)     | 228.9 (209.2 to 248.7)     | 127.8 (111.7 to 144.9)        | 34.4 (21.7 to 52.1)             | 0.1 (0.1 to 0.1)                  | 1002.6 (929.9 to 1082.7)  | 586.6 (536.3 to 637.6)     | 327.6 (286.4 to 371.3)        | 88.2 (55.5 to 133.7)            | 0.2 (0.2 to 0.2)                  |
| Russian Federation | 2004 | 407.4 (378.8 to 438.3)     | 241.6 (222.2 to 262.3)     | 133.2 (117.7 to 150.2)        | 32.5 (20.9 to 49.2)             | 0.1 (0.1 to 0.1)                  | 1044.2 (970.9 to 1123.4)  | 619.2 (569.5 to 672.4)     | 341.4 (301.6 to 385.1)        | 83.3 (53.5 to 126.2)            | 0.4 (0.4 to 0.4)                  |
| Russian Federation | 2005 | 432.2 (403.3 to 462.6)     | 260.8 (240.6 to 282.4)     | 139.1 (122.4 to 156.7)        | 32.0 (20.3 to 47.8)             | 0.3 (0.3 to 0.3)                  | 1107.7 (1033.6 to 1185.8) | 668.5 (616.7 to 723.9)     | 356.5 (313.8 to 401.8)        | 81.9 (51.9 to 122.6)            | 0.8 (0.8 to 0.8)                  |
| Russian Federation | 2006 | 469.9 (439.0 to 502.2)     | 287.8 (266.8 to 310.4)     | 148.9 (131.5 to 166.9)        | 32.5 (20.6 to 48.5)             | 0.8 (0.8 to 0.8)                  | 1204.4 (1125.3 to 1287.3) | 737.5 (683.8 to 795.5)     | 381.6 (337.1 to 427.9)        | 83.3 (52.7 to 124.4)            | 2.0 (2.0 to 2.0)                  |
| Russian Federation | 2007 | 513.8 (479.3 to 548.6)     | 318.6 (295.4 to 343.8)     | 162.3 (143.8 to 182.0)        | 31.9 (19.4 to 48.3)             | 1.0 (1.0 to 1.0)                  | 1316.8 (1228.6 to 1406.0) | 816.5 (757.3 to 881.2)     | 416.0 (368.6 to 466.6)        | 81.7 (49.8 to 123.7)            | 2.6 (2.6 to 2.6)                  |
| Russian Federation | 2008 | 551.3 (515.3 to 587.2)     | 344.3 (320.0 to 370.5)     | 176.6 (155.7 to 197.4)        | 29.3 (17.4 to 44.3)             | 1.0 (1.0 to 1.0)                  | 1413.1 (1320.8 to 1505.0) | 882.6 (820.1 to 949.6)     | 452.7 (399.2 to 506.0)        | 75.2 (44.6 to 113.5)            | 2.6 (2.6 to 2.6)                  |
| Russian Federation | 2009 | 527.8 (493.7 to 563.5)     | 325.8 (301.5 to 350.3)     | 179.1 (158.8 to 199.1)        | 22.4 (13.3 to 33.9)             | 0.5 (0.5 to 0.5)                  | 1352.9 (1265.4 to 1444.4) | 835.0 (772.7 to 897.8)     | 459.0 (407.0 to 510.4)        | 57.5 (34.1 to 86.9)             | 1.4 (1.4 to 1.4)                  |
| Russian Federation | 2010 | 529.2 (497.9 to 562.4)     | 328.7 (305.7 to 353.4)     | 180.9 (162.0 to 200.0)        | 19.3 (11.5 to 29.0)             | 0.3 (0.3 to 0.3)                  | 1356.4 (1276.3 to 1441.6) | 842.5 (783.5 to 905.9)     | 463.7 (415.2 to 512.7)        | 49.5 (29.4 to 74.4)             | 0.7 (0.7 to 0.7)                  |
| Russian Federation | 2011 | 536.2 (506.4 to 568.2)     | 336.4 (313.1 to 361.6)     | 182.0 (164.3 to 201.3)        | 17.7 (10.6 to 27.4)             | 0.1 (0.1 to 0.1)                  | 1374.3 (1297.9 to 1456.5) | 862.3 (802.6 to 926.7)     | 466.5 (421.0 to 515.9)        | 45.2 (27.1 to 70.2)             | 0.3 (0.3 to 0.3)                  |
| Russian Federation | 2012 | 551.0 (521.6 to 583.4)     | 345.7 (324.3 to 369.6)     | 188.4 (170.8 to 206.6)        | 16.9 (10.1 to 26.4)             | 0.0 (0.0 to 0.0)                  | 1412.2 (1336.8 to 1495.4) | 886.2 (831.1 to 947.4)     | 482.8 (437.7 to 529.4)        | 43.2 (25.9 to 67.6)             | 0.0 (0.0 to 0.0)                  |
| Russian Federation | 2013 | 563.7 (534.0 to 596.3)     | 349.3 (328.8 to 374.2)     | 198.2 (180.7 to 216.6)        | 16.3 (9.9 to 25.5)              | 0.0 (0.0 to 0.0)                  | 1445.0 (1368.7 to 1528.3) | 895.2 (842.7 to 959.2)     | 507.9 (463.0 to 555.2)        | 41.8 (25.3 to 65.4)             | 0.0 (0.0 to 0.0)                  |
| Russian Federation | 2014 | 571.7 (539.3 to 604.3)     | 348.3 (326.4 to 372.9)     | 207.8 (187.2 to 227.4)        | 15.6 (9.3 to 25.6)              | 0.0 (0.0 to 0.0)                  | 1465.5 (1382.3 to 1549.0) | 892.8 (836.6 to 955.9)     | 532.6 (479.8 to 582.8)        | 40.1 (24.0 to 65.5)             | 0.0 (0.0 to 0.0)                  |
| Russian Federation | 2015 | 570.5 (530.8 to 611.0)     | 338.1 (311.9 to 367.4)     | 216.8 (192.5 to 243.4)        | 15.5 (8.8 to 26.2)              | 0.0 (0.0 to 0.0)                  | 1462.2 (1360.4 to 1566.1) | 866.6 (799.3 to 941.7)     | 555.7 (493.5 to 623.8)        | 39.8 (22.7 to 67.0)             | 0.1 (0.1 to 0.1)                  |

| Country            | Year | 2018 US Dollars per capita |                            |                               |                                 |                                   | 2018 PPP per capita       |                            |                               |                                 |                                   |
|--------------------|------|----------------------------|----------------------------|-------------------------------|---------------------------------|-----------------------------------|---------------------------|----------------------------|-------------------------------|---------------------------------|-----------------------------------|
|                    |      | Health spending            | Government health spending | Out-of-pocket health spending | Prepaid private health spending | Development assistance for health | Health spending           | Government health spending | Out-of-pocket health spending | Prepaid private health spending | Development assistance for health |
| Russian Federation | 2016 | 573.7 (526.8 to 621.1)     | 333.4 (301.3 to 370.5)     | 224.8 (191.9 to 256.7)        | 15.5 (8.6 to 26.1)              | 0.0 (0.0 to 0.0)                  | 1470.4 (1350.3 to 1591.9) | 854.4 (772.2 to 949.8)     | 576.2 (491.9 to 658.0)        | 39.7 (22.0 to 66.9)             | 0.1 (0.1 to 0.1)                  |
| Russian Federation | 2017 | 572.7 (526.7 to 622.7)     | 330.4 (298.0 to 366.8)     | 226.3 (192.9 to 258.7)        | 15.8 (8.8 to 26.8)              | 0.0 (0.0 to 0.0)                  | 1467.8 (1349.9 to 1595.9) | 847.0 (763.7 to 940.3)     | 580.1 (494.4 to 663.2)        | 40.6 (22.5 to 68.8)             | 0.1 (0.1 to 0.1)                  |
| Russian Federation | 2018 | 581.9 (535.9 to 633.6)     | 334.6 (301.5 to 371.7)     | 231.2 (195.9 to 265.4)        | 16.0 (8.9 to 27.2)              | 0.0 (0.0 to 0.0)                  | 1491.5 (1373.5 to 1623.9) | 857.7 (772.8 to 952.7)     | 592.6 (502.2 to 680.4)        | 41.0 (22.7 to 69.6)             | 0.1 (0.1 to 0.1)                  |
| Russian Federation | 2019 | 590.4 (540.1 to 640.5)     | 338.0 (304.2 to 375.0)     | 236.2 (200.5 to 272.2)        | 16.2 (9.0 to 27.4)              | 0.0 (0.0 to 0.0)                  | 1513.3 (1384.5 to 1641.6) | 866.2 (779.7 to 961.1)     | 605.5 (514.0 to 697.7)        | 41.4 (23.0 to 70.2)             | 0.1 (0.1 to 0.1)                  |
| Russian Federation | 2020 | 598.4 (549.2 to 648.5)     | 340.7 (306.5 to 377.5)     | 241.3 (205.3 to 278.6)        | 16.3 (9.1 to 27.6)              | 0.0 (0.0 to 0.0)                  | 1533.8 (1407.6 to 1662.2) | 873.4 (785.7 to 967.5)     | 618.6 (526.3 to 714.0)        | 41.8 (23.2 to 70.8)             | 0.1 (0.1 to 0.1)                  |
| Russian Federation | 2021 | 608.1 (558.8 to 660.2)     | 345.1 (310.2 to 383.5)     | 246.5 (209.5 to 283.8)        | 16.5 (9.2 to 27.8)              | 0.0 (0.0 to 0.0)                  | 1558.6 (1432.2 to 1692.1) | 884.6 (795.1 to 982.9)     | 631.7 (537.0 to 727.3)        | 42.2 (23.5 to 71.3)             | 0.1 (0.1 to 0.1)                  |
| Russian Federation | 2022 | 616.4 (567.7 to 672.0)     | 348.4 (312.8 to 388.1)     | 251.4 (213.7 to 290.4)        | 16.6 (9.3 to 28.0)              | 0.0 (0.0 to 0.0)                  | 1579.8 (1455.0 to 1722.3) | 892.9 (801.6 to 994.7)     | 644.3 (547.7 to 744.3)        | 42.5 (23.7 to 71.8)             | 0.1 (0.0 to 0.1)                  |
| Russian Federation | 2023 | 625.0 (570.8 to 683.6)     | 351.8 (314.4 to 392.4)     | 256.5 (217.3 to 295.7)        | 16.7 (9.3 to 28.2)              | 0.0 (0.0 to 0.1)                  | 1601.9 (1462.9 to 1752.1) | 901.7 (805.8 to 1005.8)    | 657.3 (557.1 to 758.0)        | 42.8 (23.9 to 72.3)             | 0.1 (0.0 to 0.1)                  |
| Russian Federation | 2024 | 633.3 (577.1 to 694.4)     | 354.9 (316.3 to 395.1)     | 261.5 (222.5 to 302.2)        | 16.8 (9.4 to 28.4)              | 0.0 (0.0 to 0.1)                  | 1623.2 (1479.3 to 1779.8) | 909.7 (810.8 to 1012.7)    | 670.3 (570.3 to 774.7)        | 43.1 (24.0 to 72.8)             | 0.1 (0.0 to 0.1)                  |
| Russian Federation | 2025 | 642.2 (586.8 to 702.8)     | 358.4 (318.7 to 400.0)     | 266.8 (225.9 to 309.1)        | 17.0 (9.4 to 28.6)              | 0.0 (0.0 to 0.1)                  | 1646.1 (1504.0 to 1801.3) | 918.7 (816.9 to 1025.3)    | 683.8 (578.9 to 792.2)        | 43.5 (24.2 to 73.3)             | 0.1 (0.0 to 0.1)                  |
| Russian Federation | 2026 | 651.4 (590.1 to 712.9)     | 362.1 (321.7 to 404.8)     | 272.1 (229.6 to 317.8)        | 17.1 (9.5 to 28.8)              | 0.0 (0.0 to 0.1)                  | 1669.5 (1512.6 to 1827.2) | 928.1 (824.6 to 1037.5)    | 697.5 (588.4 to 814.5)        | 43.8 (24.4 to 73.9)             | 0.1 (0.0 to 0.2)                  |
| Russian Federation | 2027 | 661.2 (595.1 to 720.9)     | 366.2 (324.7 to 411.9)     | 277.7 (232.0 to 325.7)        | 17.2 (9.6 to 29.1)              | 0.0 (0.0 to 0.1)                  | 1694.9 (1525.2 to 1847.7) | 938.6 (832.1 to 1055.8)    | 711.9 (594.7 to 834.8)        | 44.2 (24.6 to 74.5)             | 0.1 (0.0 to 0.2)                  |
| Russian Federation | 2028 | 671.8 (602.7 to 742.4)     | 370.7 (328.0 to 417.1)     | 283.6 (235.1 to 334.2)        | 17.4 (9.7 to 29.4)              | 0.0 (0.0 to 0.1)                  | 1721.8 (1544.7 to 1902.9) | 950.2 (840.7 to 1069.0)    | 726.8 (602.6 to 856.7)        | 44.7 (24.8 to 75.3)             | 0.1 (0.0 to 0.2)                  |
| Russian Federation | 2029 | 682.7 (614.0 to 754.8)     | 375.4 (332.2 to 422.9)     | 289.7 (238.8 to 343.5)        | 17.6 (9.8 to 29.7)              | 0.0 (0.0 to 0.1)                  | 1749.9 (1573.7 to 1934.7) | 962.1 (851.5 to 1083.8)    | 742.4 (612.1 to 880.4)        | 45.2 (25.1 to 76.2)             | 0.1 (0.0 to 0.2)                  |
| Russian Federation | 2030 | 693.8 (622.8 to 771.2)     | 379.9 (335.3 to 429.7)     | 295.9 (243.0 to 353.9)        | 17.9 (9.9 to 30.1)              | 0.0 (0.0 to 0.1)                  | 1778.2 (1596.4 to 1976.8) | 973.7 (859.4 to 1101.3)    | 758.5 (622.8 to 907.1)        | 45.9 (25.4 to 77.2)             | 0.1 (0.0 to 0.2)                  |
| Russian Federation | 2031 | 705.6 (632.3 to 779.8)     | 384.8 (339.5 to 435.7)     | 302.5 (247.5 to 363.3)        | 18.2 (10.1 to 30.6)             | 0.0 (0.0 to 0.1)                  | 1808.4 (1620.6 to 1998.8) | 986.4 (870.2 to 1116.8)    | 775.3 (634.3 to 931.3)        | 46.6 (25.8 to 78.4)             | 0.1 (0.0 to 0.2)                  |
| Russian Federation | 2032 | 717.7 (639.4 to 794.4)     | 389.8 (343.1 to 441.5)     | 309.3 (252.3 to 375.2)        | 18.5 (10.2 to 31.1)             | 0.0 (0.0 to 0.1)                  | 1839.5 (1638.8 to 2036.1) | 999.2 (879.5 to 1131.7)    | 792.8 (646.8 to 961.7)        | 47.4 (26.3 to 79.7)             | 0.1 (0.0 to 0.2)                  |
| Russian Federation | 2033 | 729.9 (650.6 to 817.2)     | 394.8 (346.5 to 446.9)     | 316.2 (255.8 to 386.4)        | 18.8 (10.4 to 31.7)             | 0.0 (0.0 to 0.1)                  | 1870.8 (1667.5 to 2094.5) | 1011.9 (888.2 to 1145.5)   | 810.6 (655.7 to 990.4)        | 48.3 (26.7 to 81.2)             | 0.1 (0.0 to 0.2)                  |
| Russian Federation | 2034 | 742.4 (663.4 to 827.7)     | 400.0 (350.8 to 454.1)     | 323.2 (260.7 to 397.2)        | 19.2 (10.6 to 32.3)             | 0.0 (0.0 to 0.1)                  | 1902.9 (1700.4 to 2121.5) | 1025.1 (899.0 to 1163.8)   | 828.4 (668.1 to 1018.0)       | 49.2 (27.2 to 82.7)             | 0.1 (0.0 to 0.2)                  |
| Russian Federation | 2035 | 754.6 (669.6 to 844.6)     | 405.0 (354.9 to 462.0)     | 330.0 (264.1 to 407.0)        | 19.5 (10.8 to 32.8)             | 0.0 (0.0 to 0.1)                  | 1934.1 (1716.3 to 2164.7) | 1038.1 (909.8 to 1184.1)   | 845.8 (676.8 to 1043.2)       | 50.1 (27.7 to 84.0)             | 0.1 (0.0 to 0.2)                  |
| Russian Federation | 2036 | 766.5 (681.5 to 862.4)     | 410.1 (358.5 to 466.6)     | 336.5 (266.4 to 417.2)        | 19.9 (11.0 to 33.3)             | 0.0 (0.0 to 0.1)                  | 1964.6 (1746.7 to 2210.5) | 1051.1 (919.0 to 1195.9)   | 862.5 (682.9 to 1069.3)       | 50.9 (28.2 to 85.2)             | 0.1 (0.0 to 0.2)                  |

| Country            | Year | 2018 US Dollars per capita |                            |                               |                                 |                                   | 2018 PPP per capita       |                            |                               |                                 |                                   |
|--------------------|------|----------------------------|----------------------------|-------------------------------|---------------------------------|-----------------------------------|---------------------------|----------------------------|-------------------------------|---------------------------------|-----------------------------------|
|                    |      | Health spending            | Government health spending | Out-of-pocket health spending | Prepaid private health spending | Development assistance for health | Health spending           | Government health spending | Out-of-pocket health spending | Prepaid private health spending | Development assistance for health |
| Russian Federation | 2037 | 778.6 (690.4 to 877.4)     | 415.4 (362.4 to 474.9)     | 342.9 (271.1 to 426.3)        | 20.2 (11.2 to 33.8)             | 0.0 (0.0 to 0.1)                  | 1995.6 (1769.5 to 2248.8) | 1064.8 (928.8 to 1217.3)   | 879.0 (695.0 to 1092.7)       | 51.8 (28.6 to 86.6)             | 0.1 (0.0 to 0.2)                  |
| Russian Federation | 2038 | 791.0 (701.0 to 895.9)     | 421.1 (365.6 to 480.7)     | 349.3 (274.7 to 435.4)        | 20.5 (11.3 to 34.4)             | 0.0 (0.0 to 0.1)                  | 2027.5 (1796.7 to 2296.3) | 1079.4 (937.1 to 1232.1)   | 895.4 (704.0 to 1116.0)       | 52.6 (29.1 to 88.2)             | 0.1 (0.0 to 0.2)                  |
| Russian Federation | 2039 | 803.1 (705.3 to 912.2)     | 426.6 (368.7 to 488.9)     | 355.6 (278.6 to 444.1)        | 20.9 (11.5 to 35.0)             | 0.0 (0.0 to 0.1)                  | 2058.5 (1807.8 to 2338.2) | 1093.5 (945.1 to 1253.0)   | 911.5 (714.1 to 1138.3)       | 53.5 (29.5 to 89.7)             | 0.1 (0.0 to 0.3)                  |
| Russian Federation | 2040 | 815.0 (715.8 to 927.6)     | 432.0 (373.5 to 500.1)     | 361.8 (282.2 to 452.1)        | 21.2 (11.7 to 35.6)             | 0.0 (0.0 to 0.1)                  | 2088.9 (1834.6 to 2377.5) | 1107.3 (957.4 to 1281.8)   | 927.2 (723.3 to 1158.9)       | 54.3 (30.0 to 91.2)             | 0.1 (0.0 to 0.3)                  |
| Russian Federation | 2041 | 826.5 (724.5 to 941.9)     | 437.3 (375.5 to 507.9)     | 367.6 (285.5 to 461.0)        | 21.5 (11.9 to 36.1)             | 0.0 (0.0 to 0.1)                  | 2118.4 (1857.1 to 2414.1) | 1120.9 (962.4 to 1301.7)   | 942.3 (731.9 to 1181.6)       | 55.2 (30.4 to 92.5)             | 0.1 (0.0 to 0.3)                  |
| Russian Federation | 2042 | 837.7 (727.5 to 954.6)     | 442.4 (379.3 to 513.7)     | 373.4 (289.3 to 470.4)        | 21.8 (12.1 to 36.6)             | 0.0 (0.0 to 0.1)                  | 2147.0 (1864.6 to 2446.7) | 1134.0 (972.2 to 1316.8)   | 957.0 (741.4 to 1205.8)       | 56.0 (30.9 to 93.8)             | 0.1 (0.0 to 0.3)                  |
| Russian Federation | 2043 | 848.9 (732.8 to 968.6)     | 447.7 (382.8 to 520.2)     | 379.0 (293.1 to 477.9)        | 22.2 (12.2 to 37.2)             | 0.0 (0.0 to 0.1)                  | 2175.9 (1878.3 to 2482.6) | 1147.5 (981.2 to 1333.5)   | 971.5 (751.1 to 1225.0)       | 56.8 (31.3 to 95.3)             | 0.1 (0.0 to 0.3)                  |
| Russian Federation | 2044 | 860.2 (743.2 to 984.5)     | 453.1 (386.3 to 529.0)     | 384.6 (297.0 to 485.3)        | 22.5 (12.4 to 37.8)             | 0.0 (0.0 to 0.1)                  | 2204.9 (1905.0 to 2523.5) | 1161.4 (990.0 to 1356.0)   | 985.7 (761.2 to 1244.0)       | 57.7 (31.7 to 96.9)             | 0.1 (0.0 to 0.3)                  |
| Russian Federation | 2045 | 871.3 (744.6 to 1001.0)    | 458.6 (388.5 to 536.2)     | 389.9 (301.2 to 491.5)        | 22.8 (12.6 to 38.4)             | 0.0 (0.0 to 0.1)                  | 2233.3 (1908.4 to 2565.6) | 1175.4 (995.8 to 1374.4)   | 999.3 (772.1 to 1259.8)       | 58.5 (32.2 to 98.5)             | 0.1 (0.0 to 0.3)                  |
| Russian Federation | 2046 | 881.6 (758.5 to 1015.1)    | 463.8 (392.5 to 542.0)     | 394.7 (304.7 to 496.6)        | 23.1 (12.7 to 39.0)             | 0.0 (0.0 to 0.1)                  | 2259.7 (1944.0 to 2601.8) | 1188.8 (1006.1 to 1389.2)  | 1011.6 (781.0 to 1273.0)      | 59.3 (32.6 to 99.9)             | 0.1 (0.0 to 0.3)                  |
| Russian Federation | 2047 | 891.5 (765.7 to 1021.4)    | 468.9 (394.7 to 551.3)     | 399.2 (308.0 to 502.3)        | 23.4 (12.9 to 39.4)             | 0.0 (0.0 to 0.1)                  | 2285.1 (1962.5 to 2617.9) | 1201.8 (1011.7 to 1413.2)  | 1023.3 (789.4 to 1287.5)      | 60.0 (32.9 to 101.1)            | 0.1 (0.0 to 0.3)                  |
| Russian Federation | 2048 | 901.2 (776.3 to 1029.8)    | 473.8 (398.1 to 558.9)     | 403.7 (311.5 to 507.9)        | 23.7 (13.0 to 39.9)             | 0.0 (0.0 to 0.1)                  | 2309.9 (1989.6 to 2639.5) | 1214.5 (1020.3 to 1432.5)  | 1034.6 (798.5 to 1301.8)      | 60.7 (33.3 to 102.4)            | 0.1 (0.0 to 0.4)                  |
| Russian Federation | 2049 | 910.8 (785.5 to 1040.0)    | 478.8 (400.0 to 565.9)     | 408.1 (314.5 to 514.1)        | 23.9 (13.1 to 40.4)             | 0.0 (0.0 to 0.1)                  | 2334.6 (2013.3 to 2665.6) | 1227.2 (1025.2 to 1450.5)  | 1046.0 (806.2 to 1317.6)      | 61.3 (33.6 to 103.6)            | 0.1 (0.0 to 0.4)                  |
| Russian Federation | 2050 | 920.0 (793.7 to 1060.1)    | 483.5 (403.2 to 575.2)     | 412.3 (317.4 to 519.7)        | 24.2 (13.3 to 40.9)             | 0.0 (0.0 to 0.1)                  | 2358.1 (2034.4 to 2717.3) | 1239.3 (1033.4 to 1474.4)  | 1056.8 (813.7 to 1332.0)      | 62.0 (34.0 to 104.7)            | 0.1 (0.0 to 0.4)                  |
| Rwanda             | 1995 | 17.5 (14.7 to 21.3)        | 6.6 (5.0 to 8.6)           | 5.0 (3.4 to 6.8)              | 2.7 (1.2 to 5.1)                | 3.3 (3.3 to 3.3)                  | 48.4 (40.6 to 58.7)       | 18.1 (13.8 to 23.8)        | 13.7 (9.5 to 18.8)            | 7.6 (3.4 to 13.9)               | 9.0 (9.0 to 9.0)                  |
| Rwanda             | 1996 | 18.7 (15.8 to 22.4)        | 6.7 (5.1 to 8.8)           | 5.1 (3.5 to 7.0)              | 2.9 (1.3 to 5.4)                | 4.1 (4.1 to 4.1)                  | 51.7 (43.7 to 61.9)       | 18.6 (14.2 to 24.3)        | 14.0 (9.7 to 19.2)            | 7.9 (3.6 to 14.8)               | 11.2 (11.2 to 11.2)               |
| Rwanda             | 1997 | 21.6 (18.7 to 25.1)        | 6.8 (5.2 to 8.8)           | 5.1 (3.6 to 7.1)              | 2.9 (1.3 to 5.6)                | 6.7 (6.7 to 6.7)                  | 59.6 (51.6 to 69.3)       | 18.7 (14.2 to 24.4)        | 14.2 (9.9 to 19.6)            | 8.0 (3.7 to 15.5)               | 18.6 (18.6 to 18.6)               |
| Rwanda             | 1998 | 19.6 (16.8 to 22.9)        | 6.3 (4.8 to 8.2)           | 5.1 (3.5 to 7.0)              | 2.8 (1.3 to 5.2)                | 5.4 (5.4 to 5.4)                  | 54.0 (46.3 to 63.3)       | 17.4 (13.2 to 22.6)        | 14.0 (9.7 to 19.3)            | 7.7 (3.5 to 14.5)               | 15.0 (15.0 to 15.0)               |
| Rwanda             | 1999 | 18.4 (15.8 to 21.4)        | 5.4 (4.1 to 7.1)           | 4.8 (3.3 to 6.6)              | 2.4 (1.1 to 4.5)                | 5.8 (5.8 to 5.8)                  | 50.7 (43.7 to 59.0)       | 15.0 (11.4 to 19.6)        | 13.2 (9.1 to 18.3)            | 6.6 (3.1 to 12.3)               | 15.9 (15.9 to 15.9)               |
| Rwanda             | 2000 | 15.1 (13.1 to 17.5)        | 4.3 (3.2 to 5.5)           | 4.2 (2.9 to 5.9)              | 1.7 (0.8 to 3.1)                | 4.9 (4.9 to 4.9)                  | 41.8 (36.1 to 48.4)       | 11.7 (8.8 to 15.3)         | 11.7 (8.1 to 16.2)            | 4.7 (2.2 to 8.6)                | 13.6 (13.6 to 13.6)               |
| Rwanda             | 2001 | 16.2 (14.1 to 18.5)        | 4.1 (3.1 to 5.4)           | 4.2 (2.9 to 5.8)              | 1.6 (0.7 to 3.0)                | 6.2 (6.2 to 6.2)                  | 44.6 (39.1 to 51.1)       | 11.4 (8.6 to 14.9)         | 11.6 (8.0 to 16.0)            | 4.5 (2.0 to 8.2)                | 17.1 (17.1 to 17.1)               |

| Country | Year | 2018 US Dollars per capita |                            |                               |                                 |                                   | 2018 PPP per capita    |                            |                               |                                 |                                   |
|---------|------|----------------------------|----------------------------|-------------------------------|---------------------------------|-----------------------------------|------------------------|----------------------------|-------------------------------|---------------------------------|-----------------------------------|
|         |      | Health spending            | Government health spending | Out-of-pocket health spending | Prepaid private health spending | Development assistance for health | Health spending        | Government health spending | Out-of-pocket health spending | Prepaid private health spending | Development assistance for health |
| Rwanda  | 2002 | 17.1 (14.9 to 19.8)        | 5.0 (3.8 to 6.5)           | 4.7 (3.2 to 6.5)              | 1.9 (0.9 to 3.4)                | 5.6 (5.6 to 5.6)                  | 47.3 (41.1 to 54.6)    | 13.8 (10.4 to 17.9)        | 12.9 (8.9 to 17.9)            | 5.1 (2.3 to 9.3)                | 15.4 (15.4 to 15.4)               |
| Rwanda  | 2003 | 21.1 (18.4 to 24.2)        | 6.6 (5.0 to 8.5)           | 5.6 (3.9 to 7.6)              | 2.2 (1.0 to 4.1)                | 6.7 (6.7 to 6.7)                  | 58.2 (50.8 to 66.9)    | 18.2 (13.9 to 23.5)        | 15.4 (10.7 to 21.1)           | 6.2 (2.8 to 11.2)               | 18.4 (18.4 to 18.4)               |
| Rwanda  | 2004 | 28.8 (25.8 to 32.3)        | 7.3 (5.6 to 9.5)           | 6.6 (4.6 to 9.1)              | 2.4 (1.1 to 4.3)                | 12.5 (12.5 to 12.5)               | 79.5 (71.2 to 89.2)    | 20.2 (15.4 to 26.2)        | 18.3 (12.7 to 25.2)           | 6.5 (3.1 to 12.0)               | 34.5 (34.5 to 34.5)               |
| Rwanda  | 2005 | 31.2 (27.9 to 34.9)        | 7.6 (5.8 to 9.7)           | 7.5 (5.2 to 10.3)             | 2.5 (1.2 to 4.7)                | 13.5 (13.5 to 13.5)               | 86.1 (77.0 to 96.4)    | 21.1 (15.9 to 26.8)        | 20.7 (14.3 to 28.5)           | 7.0 (3.4 to 12.9)               | 37.4 (37.4 to 37.4)               |
| Rwanda  | 2006 | 37.3 (33.8 to 41.3)        | 8.0 (6.0 to 10.3)          | 8.0 (5.6 to 11.0)             | 3.1 (1.5 to 5.9)                | 18.2 (18.2 to 18.2)               | 103.0 (93.3 to 114.0)  | 22.2 (16.6 to 28.6)        | 22.1 (15.3 to 30.4)           | 8.7 (4.2 to 16.2)               | 50.1 (50.1 to 50.1)               |
| Rwanda  | 2007 | 40.1 (36.4 to 44.5)        | 8.7 (6.5 to 11.2)          | 7.6 (5.4 to 10.5)             | 3.8 (1.8 to 7.2)                | 20.1 (20.1 to 20.1)               | 110.8 (100.4 to 122.8) | 24.0 (17.9 to 30.9)        | 21.0 (14.9 to 29.1)           | 10.4 (4.9 to 19.9)              | 55.4 (55.4 to 55.4)               |
| Rwanda  | 2008 | 50.8 (46.5 to 55.6)        | 9.8 (7.3 to 12.7)          | 7.0 (4.9 to 9.6)              | 4.5 (2.2 to 8.6)                | 29.4 (29.4 to 29.4)               | 140.2 (128.3 to 153.6) | 27.2 (20.2 to 35.1)        | 19.4 (13.7 to 26.6)           | 12.5 (5.9 to 23.7)              | 81.2 (81.2 to 81.2)               |
| Rwanda  | 2009 | 51.6 (47.0 to 57.5)        | 10.7 (7.9 to 13.8)         | 6.3 (4.4 to 8.8)              | 5.1 (2.4 to 9.5)                | 29.5 (29.5 to 29.5)               | 142.4 (129.7 to 158.6) | 29.6 (21.9 to 38.2)        | 17.5 (12.2 to 24.3)           | 13.9 (6.5 to 26.1)              | 81.3 (81.3 to 81.3)               |
| Rwanda  | 2010 | 57.3 (52.6 to 63.8)        | 11.7 (8.7 to 15.2)         | 5.7 (4.0 to 8.0)              | 5.5 (2.5 to 10.3)               | 34.4 (34.4 to 34.4)               | 158.2 (145.1 to 176.2) | 32.2 (24.0 to 41.8)        | 15.8 (11.1 to 22.0)           | 15.1 (6.9 to 28.4)              | 95.0 (95.0 to 95.0)               |
| Rwanda  | 2011 | 58.6 (53.5 to 65.1)        | 12.7 (9.4 to 16.4)         | 5.2 (3.7 to 7.2)              | 5.7 (2.7 to 11.1)               | 34.9 (34.9 to 34.9)               | 161.7 (147.6 to 179.8) | 35.1 (25.9 to 45.2)        | 14.3 (10.1 to 19.8)           | 15.9 (7.5 to 30.6)              | 96.4 (96.4 to 96.4)               |
| Rwanda  | 2012 | 55.4 (50.4 to 62.0)        | 13.3 (10.0 to 17.2)        | 4.7 (3.3 to 6.4)              | 5.6 (2.6 to 10.9)               | 31.8 (31.8 to 31.8)               | 152.9 (139.0 to 171.2) | 36.7 (27.7 to 47.5)        | 12.9 (9.1 to 17.7)            | 15.6 (7.2 to 30.0)              | 87.7 (87.7 to 87.7)               |
| Rwanda  | 2013 | 50.1 (45.0 to 56.4)        | 13.7 (10.2 to 17.9)        | 4.2 (3.0 to 5.7)              | 5.3 (2.5 to 10.1)               | 26.8 (26.8 to 26.8)               | 138.2 (124.2 to 155.6) | 38.0 (28.3 to 49.3)        | 11.7 (8.3 to 15.9)            | 14.6 (6.9 to 28.0)              | 74.0 (74.0 to 74.0)               |
| Rwanda  | 2014 | 53.4 (48.3 to 59.5)        | 14.5 (10.8 to 18.7)        | 3.9 (2.8 to 5.3)              | 5.0 (2.3 to 9.6)                | 30.0 (30.0 to 30.0)               | 147.4 (133.3 to 164.3) | 39.9 (29.7 to 51.6)        | 10.8 (7.6 to 14.7)            | 13.8 (6.5 to 26.4)              | 82.9 (82.9 to 82.9)               |
| Rwanda  | 2015 | 44.8 (39.6 to 51.2)        | 15.3 (11.5 to 20.0)        | 3.7 (2.6 to 5.1)              | 4.9 (2.3 to 9.4)                | 20.9 (20.9 to 20.9)               | 123.6 (109.4 to 141.3) | 42.2 (31.6 to 55.3)        | 10.2 (7.3 to 14.1)            | 13.5 (6.4 to 25.8)              | 57.7 (57.7 to 57.7)               |
| Rwanda  | 2016 | 43.7 (38.6 to 50.0)        | 16.2 (12.2 to 21.0)        | 3.5 (2.5 to 4.9)              | 5.0 (2.4 to 9.6)                | 18.9 (18.9 to 18.9)               | 120.5 (106.7 to 138.1) | 44.7 (33.8 to 58.1)        | 9.8 (7.0 to 13.5)             | 13.8 (6.7 to 26.5)              | 52.3 (52.3 to 52.3)               |
| Rwanda  | 2017 | 45.4 (40.0 to 51.8)        | 16.8 (12.6 to 21.9)        | 3.6 (2.6 to 5.0)              | 5.2 (2.5 to 10.0)               | 19.8 (19.8 to 19.8)               | 125.4 (110.3 to 143.0) | 46.3 (34.9 to 60.4)        | 10.0 (7.2 to 13.7)            | 14.4 (6.9 to 27.7)              | 54.8 (54.8 to 54.8)               |
| Rwanda  | 2018 | 43.8 (38.3 to 50.7)        | 17.1 (13.0 to 22.3)        | 3.6 (2.6 to 5.0)              | 5.3 (2.6 to 10.2)               | 17.7 (17.6 to 17.8)               | 120.9 (105.6 to 139.9) | 47.3 (35.8 to 61.7)        | 10.0 (7.2 to 13.9)            | 14.7 (7.1 to 28.2)              | 48.8 (48.6 to 49.1)               |
| Rwanda  | 2019 | 44.1 (38.3 to 50.8)        | 17.6 (13.3 to 23.0)        | 3.7 (2.6 to 5.1)              | 5.5 (2.6 to 10.5)               | 17.4 (16.2 to 18.4)               | 121.9 (105.6 to 140.2) | 48.6 (36.8 to 63.5)        | 10.2 (7.3 to 14.0)            | 15.1 (7.3 to 28.9)              | 48.0 (44.7 to 50.9)               |
| Rwanda  | 2020 | 44.7 (38.5 to 51.7)        | 18.1 (13.7 to 23.7)        | 3.7 (2.6 to 5.2)              | 5.6 (2.7 to 10.8)               | 17.2 (15.8 to 18.6)               | 123.4 (106.2 to 142.8) | 50.0 (37.9 to 65.5)        | 10.3 (7.3 to 14.3)            | 15.5 (7.5 to 29.7)              | 47.6 (43.5 to 51.5)               |
| Rwanda  | 2021 | 45.4 (38.9 to 52.4)        | 18.7 (14.2 to 24.4)        | 3.8 (2.7 to 5.2)              | 5.8 (2.8 to 11.0)               | 17.1 (15.4 to 19.0)               | 125.4 (107.4 to 144.8) | 51.6 (39.1 to 67.4)        | 10.4 (7.4 to 14.4)            | 16.0 (7.7 to 30.5)              | 47.3 (42.5 to 52.3)               |
| Rwanda  | 2022 | 46.3 (39.9 to 53.8)        | 19.4 (14.6 to 25.2)        | 3.8 (2.7 to 5.3)              | 6.0 (2.9 to 11.4)               | 17.1 (15.2 to 19.2)               | 127.8 (110.1 to 148.5) | 53.5 (40.3 to 69.6)        | 10.6 (7.5 to 14.7)            | 16.5 (8.0 to 31.4)              | 47.2 (41.9 to 52.9)               |



| Country | Year | 2018 US Dollars per capita |                            |                               |                                 |                                   | 2018 PPP per capita    |                            |                               |                                 |                                   |
|---------|------|----------------------------|----------------------------|-------------------------------|---------------------------------|-----------------------------------|------------------------|----------------------------|-------------------------------|---------------------------------|-----------------------------------|
|         |      | Health spending            | Government health spending | Out-of-pocket health spending | Prepaid private health spending | Development assistance for health | Health spending        | Government health spending | Out-of-pocket health spending | Prepaid private health spending | Development assistance for health |
| Rwanda  | 2023 | 47.2 (40.4 to 55.0)        | 20.1 (15.2 to 26.2)        | 3.9 (2.8 to 5.4)              | 6.2 (3.0 to 11.7)               | 17.1 (14.8 to 19.5)               | 130.4 (111.5 to 151.9) | 55.4 (41.9 to 72.3)        | 10.7 (7.6 to 14.9)            | 17.1 (8.3 to 32.4)              | 47.2 (40.9 to 53.8)               |
| Rwanda  | 2024 | 48.3 (41.3 to 56.2)        | 20.8 (15.7 to 27.3)        | 3.9 (2.8 to 5.5)              | 6.4 (3.1 to 12.1)               | 17.1 (14.7 to 19.8)               | 133.3 (114.0 to 155.1) | 57.6 (43.4 to 75.4)        | 10.9 (7.7 to 15.1)            | 17.7 (8.5 to 33.5)              | 47.3 (40.6 to 54.6)               |
| Rwanda  | 2025 | 49.4 (41.9 to 57.8)        | 21.7 (16.3 to 28.3)        | 4.0 (2.9 to 5.6)              | 6.6 (3.2 to 12.5)               | 17.1 (14.6 to 20.0)               | 136.4 (115.8 to 159.7) | 59.9 (45.1 to 78.3)        | 11.1 (7.9 to 15.4)            | 18.2 (8.8 to 34.6)              | 47.2 (40.3 to 55.2)               |
| Rwanda  | 2026 | 50.6 (42.9 to 59.1)        | 22.5 (16.8 to 29.6)        | 4.1 (2.9 to 5.7)              | 6.8 (3.3 to 12.9)               | 17.2 (14.4 to 20.1)               | 139.6 (118.3 to 163.1) | 62.2 (46.5 to 81.8)        | 11.2 (8.0 to 15.7)            | 18.8 (9.1 to 35.7)              | 47.4 (39.8 to 55.6)               |
| Rwanda  | 2027 | 51.9 (43.9 to 61.1)        | 23.5 (17.5 to 30.9)        | 4.1 (2.9 to 5.8)              | 7.0 (3.4 to 13.3)               | 17.2 (14.4 to 20.5)               | 143.2 (121.3 to 168.6) | 64.8 (48.4 to 85.3)        | 11.4 (8.1 to 15.9)            | 19.4 (9.4 to 36.8)              | 47.6 (39.8 to 56.5)               |
| Rwanda  | 2028 | 53.2 (45.1 to 62.4)        | 24.4 (18.2 to 32.1)        | 4.2 (2.9 to 5.8)              | 7.3 (3.5 to 13.7)               | 17.3 (14.4 to 21.0)               | 146.9 (124.5 to 172.3) | 67.4 (50.3 to 88.7)        | 11.6 (8.1 to 16.1)            | 20.0 (9.7 to 37.9)              | 47.9 (39.9 to 57.9)               |
| Rwanda  | 2029 | 54.6 (46.0 to 64.8)        | 25.3 (19.1 to 33.5)        | 4.3 (3.0 to 6.0)              | 7.5 (3.6 to 14.2)               | 17.5 (14.3 to 21.3)               | 150.7 (126.9 to 178.9) | 70.0 (52.6 to 92.4)        | 11.8 (8.3 to 16.5)            | 20.7 (10.0 to 39.1)             | 48.2 (39.6 to 58.8)               |
| Rwanda  | 2030 | 55.9 (47.2 to 66.8)        | 26.3 (19.6 to 34.5)        | 4.4 (3.0 to 6.1)              | 7.7 (3.8 to 14.6)               | 17.5 (14.4 to 21.5)               | 154.4 (130.3 to 184.5) | 72.5 (54.2 to 95.3)        | 12.0 (8.4 to 16.8)            | 21.4 (10.4 to 40.4)             | 48.4 (39.7 to 59.5)               |
| Rwanda  | 2031 | 57.3 (48.1 to 68.3)        | 27.2 (20.2 to 35.3)        | 4.4 (3.1 to 6.2)              | 8.0 (3.9 to 15.1)               | 17.7 (14.2 to 22.1)               | 158.1 (132.8 to 188.6) | 75.0 (55.9 to 97.5)        | 12.3 (8.5 to 17.2)            | 22.1 (10.8 to 41.7)             | 48.7 (39.3 to 60.9)               |
| Rwanda  | 2032 | 58.6 (49.5 to 69.4)        | 28.0 (20.8 to 36.6)        | 4.5 (3.1 to 6.4)              | 8.3 (4.0 to 15.6)               | 17.8 (14.2 to 22.4)               | 161.8 (136.7 to 191.7) | 77.4 (57.5 to 100.9)       | 12.5 (8.5 to 17.6)            | 22.9 (11.1 to 43.1)             | 49.1 (39.3 to 61.9)               |
| Rwanda  | 2033 | 60.0 (50.1 to 71.4)        | 28.9 (21.4 to 37.7)        | 4.6 (3.1 to 6.5)              | 8.6 (4.2 to 16.1)               | 17.9 (14.2 to 23.0)               | 165.6 (138.3 to 197.2) | 79.7 (59.1 to 104.2)       | 12.8 (8.7 to 18.0)            | 23.6 (11.5 to 44.5)             | 49.4 (39.2 to 63.6)               |
| Rwanda  | 2034 | 61.4 (51.2 to 72.9)        | 29.8 (22.0 to 39.1)        | 4.7 (3.2 to 6.6)              | 8.9 (4.3 to 16.7)               | 18.1 (14.2 to 23.3)               | 169.6 (141.4 to 201.2) | 82.2 (60.8 to 107.9)       | 13.0 (8.8 to 18.3)            | 24.5 (11.9 to 46.0)             | 49.9 (39.1 to 64.2)               |
| Rwanda  | 2035 | 62.9 (52.5 to 75.1)        | 30.7 (22.7 to 40.2)        | 4.8 (3.2 to 6.8)              | 9.2 (4.5 to 17.2)               | 18.2 (14.2 to 23.8)               | 173.7 (144.9 to 207.4) | 84.8 (62.6 to 111.0)       | 13.3 (9.0 to 18.8)            | 25.3 (12.3 to 47.5)             | 50.3 (39.1 to 65.8)               |
| Rwanda  | 2036 | 64.4 (53.3 to 77.2)        | 31.7 (23.4 to 41.7)        | 4.9 (3.3 to 7.0)              | 9.5 (4.6 to 17.9)               | 18.4 (14.2 to 24.6)               | 177.9 (147.2 to 213.1) | 87.4 (64.5 to 115.3)       | 13.6 (9.1 to 19.3)            | 26.1 (12.8 to 49.3)             | 50.8 (39.1 to 67.9)               |
| Rwanda  | 2037 | 66.1 (54.7 to 79.3)        | 32.7 (23.9 to 43.3)        | 5.0 (3.3 to 7.2)              | 9.8 (4.8 to 18.5)               | 18.5 (14.2 to 24.9)               | 182.3 (151.1 to 218.8) | 90.3 (66.1 to 119.6)       | 13.9 (9.2 to 19.8)            | 27.0 (13.2 to 51.1)             | 51.2 (39.2 to 68.8)               |
| Rwanda  | 2038 | 67.8 (55.4 to 81.1)        | 33.8 (24.8 to 44.2)        | 5.1 (3.4 to 7.3)              | 10.1 (4.9 to 19.2)              | 18.7 (14.3 to 26.1)               | 187.0 (152.9 to 224.0) | 93.3 (68.3 to 122.0)       | 14.2 (9.4 to 20.3)            | 27.9 (13.6 to 52.9)             | 51.7 (39.5 to 72.0)               |
| Rwanda  | 2039 | 69.5 (57.0 to 84.1)        | 34.9 (25.9 to 46.1)        | 5.3 (3.5 to 7.5)              | 10.4 (5.1 to 19.8)              | 18.9 (14.4 to 26.1)               | 191.8 (157.3 to 232.1) | 96.3 (71.4 to 127.2)       | 14.5 (9.5 to 20.8)            | 28.8 (14.0 to 54.6)             | 52.1 (39.6 to 72.1)               |
| Rwanda  | 2040 | 71.3 (58.3 to 86.8)        | 36.1 (26.5 to 47.9)        | 5.4 (3.5 to 7.7)              | 10.8 (5.3 to 20.4)              | 19.1 (14.5 to 26.4)               | 196.8 (160.9 to 239.6) | 99.6 (73.3 to 132.1)       | 14.8 (9.7 to 21.3)            | 29.7 (14.5 to 56.3)             | 52.7 (40.1 to 72.9)               |
| Rwanda  | 2041 | 73.2 (59.9 to 89.0)        | 37.3 (27.5 to 49.6)        | 5.5 (3.6 to 7.9)              | 11.1 (5.4 to 21.0)              | 19.3 (14.5 to 26.9)               | 202.0 (165.3 to 245.6) | 102.9 (75.8 to 136.9)      | 15.2 (9.9 to 21.8)            | 30.7 (15.0 to 58.0)             | 53.2 (40.1 to 74.3)               |
| Rwanda  | 2042 | 75.2 (61.8 to 91.4)        | 38.6 (28.3 to 51.3)        | 5.6 (3.6 to 8.1)              | 11.5 (5.6 to 21.6)              | 19.5 (14.6 to 28.1)               | 207.5 (170.7 to 252.4) | 106.5 (78.0 to 141.7)      | 15.5 (10.1 to 22.4)           | 31.6 (15.4 to 59.7)             | 53.9 (40.3 to 77.5)               |
| Rwanda  | 2043 | 77.2 (62.8 to 95.2)        | 40.0 (29.1 to 52.9)        | 5.7 (3.7 to 8.3)              | 11.8 (5.8 to 22.3)              | 19.7 (14.6 to 28.9)               | 213.2 (173.3 to 262.7) | 110.3 (80.4 to 146.2)      | 15.8 (10.2 to 23.0)           | 32.6 (16.0 to 61.5)             | 54.5 (40.3 to 79.7)               |

| Country     | Year | 2018 US Dollars per capita |                            |                               |                                 |                                   | 2018 PPP per capita    |                            |                               |                                 |                                   |
|-------------|------|----------------------------|----------------------------|-------------------------------|---------------------------------|-----------------------------------|------------------------|----------------------------|-------------------------------|---------------------------------|-----------------------------------|
|             |      | Health spending            | Government health spending | Out-of-pocket health spending | Prepaid private health spending | Development assistance for health | Health spending        | Government health spending | Out-of-pocket health spending | Prepaid private health spending | Development assistance for health |
| Rwanda      | 2044 | 79.4 (64.9 to 98.1)        | 41.4 (30.2 to 54.8)        | 5.9 (3.8 to 8.6)              | 12.2 (6.0 to 22.9)              | 20.0 (14.7 to 29.0)               | 219.3 (179.2 to 270.7) | 114.3 (83.4 to 151.4)      | 16.2 (10.4 to 23.6)           | 33.6 (16.5 to 63.3)             | 55.2 (40.6 to 80.2)               |
| Rwanda      | 2045 | 81.7 (66.8 to 101.8)       | 42.9 (31.2 to 57.2)        | 6.0 (3.8 to 8.8)              | 12.5 (6.1 to 23.6)              | 20.3 (14.6 to 30.3)               | 225.7 (184.4 to 281.1) | 118.6 (86.2 to 157.9)      | 16.6 (10.6 to 24.2)           | 34.6 (17.0 to 65.2)             | 55.9 (40.3 to 83.7)               |
| Rwanda      | 2046 | 84.2 (68.1 to 105.4)       | 44.6 (32.0 to 59.5)        | 6.1 (3.9 to 9.0)              | 12.9 (6.3 to 24.4)              | 20.5 (14.8 to 31.7)               | 232.4 (188.0 to 291.1) | 123.1 (88.4 to 164.3)      | 17.0 (10.8 to 24.7)           | 35.6 (17.4 to 67.2)             | 56.7 (41.0 to 87.4)               |
| Rwanda      | 2047 | 86.7 (70.8 to 108.8)       | 46.3 (33.2 to 62.0)        | 6.3 (4.0 to 9.2)              | 13.3 (6.5 to 25.0)              | 20.9 (15.0 to 32.6)               | 239.4 (195.4 to 300.3) | 127.8 (91.7 to 171.0)      | 17.4 (11.0 to 25.3)           | 36.6 (17.9 to 69.0)             | 57.6 (41.5 to 90.0)               |
| Rwanda      | 2048 | 89.4 (72.3 to 111.9)       | 48.1 (34.2 to 64.6)        | 6.4 (4.1 to 9.4)              | 13.6 (6.7 to 25.6)              | 21.2 (15.1 to 33.7)               | 246.8 (199.7 to 308.8) | 132.8 (94.5 to 178.2)      | 17.8 (11.3 to 25.9)           | 37.7 (18.4 to 70.6)             | 58.6 (41.7 to 93.1)               |
| Rwanda      | 2049 | 92.1 (74.1 to 116.6)       | 49.9 (35.6 to 66.7)        | 6.6 (4.2 to 9.6)              | 14.0 (6.8 to 26.2)              | 21.5 (15.3 to 34.6)               | 254.2 (204.5 to 322.0) | 137.8 (98.1 to 184.2)      | 18.2 (11.5 to 26.5)           | 38.7 (18.8 to 72.4)             | 59.5 (42.4 to 95.4)               |
| Rwanda      | 2050 | 94.9 (75.8 to 120.3)       | 51.8 (36.8 to 69.8)        | 6.7 (4.3 to 9.8)              | 14.4 (7.0 to 26.9)              | 21.9 (15.4 to 35.6)               | 261.8 (209.1 to 332.0) | 143.0 (101.5 to 192.8)     | 18.6 (11.8 to 27.2)           | 39.8 (19.3 to 74.3)             | 60.6 (42.4 to 98.2)               |
| Saint Lucia | 1995 | 452.6 (410.3 to 493.5)     | 156.9 (135.5 to 180.6)     | 258.7 (225.8 to 292.8)        | 37.0 (21.6 to 60.5)             | 0.1 (0.1 to 0.1)                  | 708.2 (642.0 to 772.3) | 245.5 (212.0 to 282.7)     | 404.8 (353.3 to 458.2)        | 57.9 (33.8 to 94.7)             | 0.1 (0.1 to 0.1)                  |
| Saint Lucia | 1996 | 493.3 (455.4 to 532.4)     | 161.9 (141.1 to 184.1)     | 262.9 (235.7 to 290.9)        | 37.6 (22.5 to 60.9)             | 30.9 (30.9 to 30.9)               | 771.9 (712.6 to 833.0) | 253.3 (220.8 to 288.1)     | 411.4 (368.8 to 455.3)        | 58.9 (35.2 to 95.3)             | 48.3 (48.3 to 48.3)               |
| Saint Lucia | 1997 | 457.0 (424.3 to 492.5)     | 157.3 (138.9 to 177.1)     | 254.1 (230.1 to 278.2)        | 36.7 (22.2 to 58.3)             | 8.9 (8.9 to 8.9)                  | 715.1 (664.0 to 770.7) | 246.2 (217.4 to 277.1)     | 397.6 (360.0 to 435.3)        | 57.4 (34.8 to 91.2)             | 13.9 (13.9 to 13.9)               |
| Saint Lucia | 1998 | 448.5 (415.6 to 482.0)     | 159.5 (141.3 to 178.6)     | 246.1 (223.6 to 269.4)        | 36.8 (22.6 to 56.1)             | 6.0 (6.0 to 6.0)                  | 701.8 (650.3 to 754.3) | 249.6 (221.1 to 279.5)     | 385.1 (350.0 to 421.6)        | 57.6 (35.4 to 87.8)             | 9.5 (9.5 to 9.5)                  |
| Saint Lucia | 1999 | 443.3 (411.0 to 476.7)     | 158.1 (140.6 to 177.1)     | 246.2 (224.4 to 271.7)        | 36.3 (22.7 to 54.9)             | 2.7 (2.7 to 2.7)                  | 693.6 (643.1 to 746.0) | 247.4 (220.0 to 277.2)     | 385.3 (351.2 to 425.2)        | 56.7 (35.5 to 85.9)             | 4.2 (4.2 to 4.2)                  |
| Saint Lucia | 2000 | 432.6 (400.2 to 466.5)     | 151.9 (135.2 to 170.6)     | 244.9 (222.7 to 270.4)        | 34.4 (21.8 to 52.4)             | 1.4 (1.4 to 1.4)                  | 677.0 (626.3 to 729.9) | 237.6 (211.5 to 267.0)     | 383.2 (348.5 to 423.2)        | 53.9 (34.0 to 82.0)             | 2.2 (2.2 to 2.2)                  |
| Saint Lucia | 2001 | 429.3 (396.3 to 462.0)     | 146.2 (129.9 to 164.1)     | 245.5 (223.9 to 270.5)        | 35.7 (22.6 to 54.0)             | 2.0 (2.0 to 2.0)                  | 671.8 (620.2 to 722.9) | 228.7 (203.3 to 256.8)     | 384.1 (350.4 to 423.3)        | 55.9 (35.4 to 84.6)             | 3.1 (3.1 to 3.1)                  |
| Saint Lucia | 2002 | 438.8 (405.9 to 472.3)     | 145.9 (129.6 to 163.8)     | 253.2 (231.5 to 277.9)        | 38.2 (24.0 to 57.0)             | 1.5 (1.5 to 1.5)                  | 686.7 (635.1 to 739.0) | 228.3 (202.8 to 256.3)     | 396.2 (362.3 to 434.9)        | 59.8 (37.6 to 89.1)             | 2.4 (2.4 to 2.4)                  |
| Saint Lucia | 2003 | 454.5 (420.4 to 487.6)     | 147.9 (130.9 to 166.2)     | 264.0 (241.8 to 290.2)        | 39.3 (25.0 to 58.5)             | 3.3 (3.3 to 3.3)                  | 711.2 (657.9 to 763.0) | 231.5 (204.8 to 260.1)     | 413.1 (378.4 to 454.1)        | 61.5 (39.1 to 91.5)             | 5.2 (5.2 to 5.2)                  |
| Saint Lucia | 2004 | 461.7 (429.0 to 497.4)     | 149.3 (132.4 to 167.2)     | 268.5 (245.2 to 292.9)        | 39.6 (25.3 to 58.3)             | 4.4 (4.4 to 4.4)                  | 722.6 (671.3 to 778.4) | 233.6 (207.2 to 261.6)     | 420.2 (383.6 to 458.3)        | 62.0 (39.6 to 91.2)             | 6.8 (6.8 to 6.8)                  |
| Saint Lucia | 2005 | 461.5 (430.0 to 495.5)     | 145.2 (129.4 to 162.6)     | 272.7 (248.4 to 297.3)        | 38.3 (24.7 to 58.1)             | 5.3 (5.3 to 5.3)                  | 722.2 (672.9 to 775.3) | 227.2 (202.5 to 254.4)     | 426.7 (388.7 to 465.2)        | 59.9 (38.6 to 91.0)             | 8.4 (8.4 to 8.4)                  |
| Saint Lucia | 2006 | 485.6 (451.3 to 519.8)     | 145.8 (129.9 to 163.2)     | 293.3 (269.1 to 318.6)        | 37.7 (24.3 to 56.5)             | 8.7 (8.7 to 8.7)                  | 759.8 (706.2 to 813.4) | 228.2 (203.2 to 255.4)     | 459.0 (421.1 to 498.5)        | 59.0 (38.0 to 88.5)             | 13.7 (13.7 to 13.7)               |
| Saint Lucia | 2007 | 502.7 (467.1 to 538.0)     | 150.6 (134.4 to 169.1)     | 310.2 (283.7 to 335.9)        | 36.5 (23.6 to 55.2)             | 5.3 (5.3 to 5.3)                  | 786.6 (730.9 to 841.8) | 235.6 (210.3 to 264.6)     | 485.5 (444.0 to 525.7)        | 57.1 (37.0 to 86.5)             | 8.4 (8.4 to 8.4)                  |
| Saint Lucia | 2008 | 520.1 (484.7 to 556.6)     | 161.3 (144.0 to 180.8)     | 311.5 (283.6 to 338.1)        | 35.7 (23.1 to 54.3)             | 11.6 (11.6 to 11.6)               | 813.9 (758.5 to 871.0) | 252.3 (225.3 to 283.0)     | 487.5 (443.8 to 529.0)        | 55.9 (36.2 to 85.0)             | 18.2 (18.2 to 18.2)               |

| Country     | Year | 2018 US Dollars per capita |                            |                               |                                 |                                   | 2018 PPP per capita     |                            |                               |                                 |                                   |
|-------------|------|----------------------------|----------------------------|-------------------------------|---------------------------------|-----------------------------------|-------------------------|----------------------------|-------------------------------|---------------------------------|-----------------------------------|
|             |      | Health spending            | Government health spending | Out-of-pocket health spending | Prepaid private health spending | Development assistance for health | Health spending         | Government health spending | Out-of-pocket health spending | Prepaid private health spending | Development assistance for health |
| Saint Lucia | 2009 | 520.7 (486.7 to 556.8)     | 171.9 (154.0 to 191.1)     | 299.9 (273.8 to 328.2)        | 35.1 (22.7 to 52.9)             | 13.7 (13.7 to 13.7)               | 814.8 (761.6 to 871.3)  | 269.1 (241.0 to 299.1)     | 469.3 (428.5 to 513.7)        | 55.0 (35.6 to 82.7)             | 21.4 (21.4 to 21.4)               |
| Saint Lucia | 2010 | 523.0 (488.4 to 559.7)     | 178.6 (159.5 to 198.4)     | 296.7 (271.6 to 323.2)        | 35.6 (22.9 to 52.5)             | 12.1 (12.1 to 12.1)               | 818.4 (764.2 to 875.9)  | 279.5 (249.5 to 310.4)     | 464.3 (425.1 to 505.7)        | 55.7 (35.9 to 82.2)             | 18.9 (18.9 to 18.9)               |
| Saint Lucia | 2011 | 615.0 (579.3 to 651.9)     | 188.5 (169.0 to 209.2)     | 295.9 (271.0 to 321.8)        | 36.7 (23.1 to 53.7)             | 93.9 (93.9 to 93.9)               | 962.4 (906.5 to 1020.2) | 295.0 (264.5 to 327.3)     | 463.0 (424.0 to 503.6)        | 57.4 (36.2 to 84.1)             | 147.0 (147.0 to 147.0)            |
| Saint Lucia | 2012 | 591.0 (554.0 to 628.0)     | 196.5 (175.4 to 217.8)     | 283.8 (260.1 to 310.1)        | 36.8 (23.1 to 53.7)             | 73.8 (73.8 to 73.8)               | 924.8 (866.9 to 982.7)  | 307.5 (274.5 to 340.7)     | 444.1 (407.0 to 485.3)        | 57.6 (36.1 to 84.1)             | 115.6 (115.6 to 115.6)            |
| Saint Lucia | 2013 | 540.9 (504.9 to 579.1)     | 199.9 (178.2 to 222.4)     | 272.8 (248.6 to 300.9)        | 36.1 (22.4 to 53.3)             | 32.1 (32.1 to 32.1)               | 846.4 (790.1 to 906.2)  | 312.8 (278.8 to 348.0)     | 426.9 (389.1 to 470.8)        | 56.5 (35.0 to 83.3)             | 50.2 (50.2 to 50.2)               |
| Saint Lucia | 2014 | 514.0 (479.1 to 554.9)     | 195.6 (174.1 to 217.8)     | 263.3 (238.0 to 290.7)        | 34.2 (20.7 to 51.5)             | 20.9 (20.9 to 20.9)               | 804.4 (749.7 to 868.3)  | 306.0 (272.4 to 340.9)     | 412.0 (372.5 to 455.0)        | 53.6 (32.3 to 80.6)             | 32.7 (32.7 to 32.7)               |
| Saint Lucia | 2015 | 502.7 (465.1 to 544.9)     | 197.8 (174.3 to 223.5)     | 253.0 (225.3 to 283.4)        | 32.0 (18.9 to 49.9)             | 19.9 (19.9 to 19.9)               | 786.6 (727.7 to 852.7)  | 309.5 (272.7 to 349.8)     | 395.9 (352.5 to 443.5)        | 50.1 (29.6 to 78.1)             | 31.1 (31.1 to 31.1)               |
| Saint Lucia | 2016 | 511.0 (464.2 to 558.9)     | 199.5 (173.1 to 230.3)     | 244.8 (212.4 to 282.4)        | 30.7 (17.7 to 49.5)             | 36.0 (36.0 to 36.0)               | 799.7 (726.4 to 874.5)  | 312.2 (270.8 to 360.4)     | 383.1 (332.3 to 441.8)        | 48.0 (27.7 to 77.5)             | 56.4 (56.4 to 56.4)               |
| Saint Lucia | 2017 | 514.2 (465.1 to 563.6)     | 209.2 (181.6 to 241.2)     | 249.1 (215.4 to 287.9)        | 31.9 (18.4 to 51.5)             | 24.0 (24.0 to 24.0)               | 804.6 (727.9 to 882.0)  | 327.4 (284.2 to 377.4)     | 389.7 (337.1 to 450.6)        | 49.9 (28.8 to 80.6)             | 37.6 (37.6 to 37.6)               |
| Saint Lucia | 2018 | 520.9 (471.0 to 571.8)     | 214.8 (186.2 to 247.2)     | 251.9 (218.0 to 291.0)        | 32.7 (18.9 to 52.9)             | 21.5 (21.0 to 21.8)               | 815.1 (737.0 to 894.7)  | 336.1 (291.4 to 386.8)     | 394.2 (341.1 to 455.3)        | 51.2 (29.5 to 82.8)             | 33.7 (32.9 to 34.2)               |
| Saint Lucia | 2019 | 531.4 (479.9 to 583.1)     | 220.3 (190.2 to 254.4)     | 256.0 (221.7 to 295.8)        | 33.5 (19.4 to 54.3)             | 21.6 (19.8 to 23.3)               | 831.5 (750.9 to 912.4)  | 344.7 (297.6 to 398.1)     | 400.5 (346.9 to 462.8)        | 52.4 (30.3 to 84.9)             | 33.9 (30.9 to 36.5)               |
| Saint Lucia | 2020 | 541.5 (491.1 to 596.3)     | 225.7 (194.9 to 260.7)     | 259.4 (224.5 to 299.5)        | 34.2 (19.7 to 55.4)             | 22.1 (19.6 to 24.3)               | 847.3 (768.4 to 933.1)  | 353.3 (305.0 to 407.9)     | 405.9 (351.4 to 468.7)        | 53.6 (30.9 to 86.7)             | 34.6 (30.7 to 38.0)               |
| Saint Lucia | 2021 | 552.4 (498.6 to 607.1)     | 231.9 (200.6 to 267.7)     | 262.7 (227.2 to 303.4)        | 35.0 (20.2 to 56.6)             | 22.7 (19.8 to 25.5)               | 864.4 (780.2 to 950.0)  | 363.0 (313.8 to 418.8)     | 411.2 (355.5 to 474.8)        | 54.8 (31.6 to 88.6)             | 35.5 (30.9 to 39.9)               |
| Saint Lucia | 2022 | 562.3 (508.8 to 619.2)     | 237.6 (204.2 to 274.5)     | 265.5 (229.6 to 306.7)        | 35.7 (20.6 to 57.7)             | 23.5 (20.3 to 27.0)               | 879.9 (796.1 to 969.0)  | 371.8 (319.5 to 429.5)     | 415.4 (359.3 to 479.9)        | 55.9 (32.3 to 90.2)             | 36.8 (31.8 to 42.3)               |
| Saint Lucia | 2023 | 571.7 (516.1 to 631.0)     | 243.1 (208.7 to 280.9)     | 267.8 (231.6 to 309.5)        | 36.3 (21.0 to 58.9)             | 24.5 (20.6 to 28.3)               | 894.6 (807.6 to 987.4)  | 380.4 (326.6 to 439.6)     | 419.1 (362.5 to 484.3)        | 56.9 (32.8 to 92.1)             | 38.3 (32.3 to 44.4)               |
| Saint Lucia | 2024 | 581.0 (525.8 to 640.8)     | 248.8 (213.2 to 287.2)     | 269.7 (233.3 to 311.7)        | 36.9 (21.4 to 59.9)             | 25.5 (21.4 to 30.4)               | 909.2 (822.8 to 1002.7) | 389.3 (333.7 to 449.5)     | 422.0 (365.0 to 487.8)        | 57.8 (33.4 to 93.8)             | 40.0 (33.4 to 47.5)               |
| Saint Lucia | 2025 | 590.0 (530.7 to 649.9)     | 254.5 (217.6 to 292.9)     | 271.4 (234.6 to 313.7)        | 37.5 (21.7 to 60.9)             | 26.6 (21.9 to 32.1)               | 923.3 (830.5 to 1016.9) | 398.2 (340.5 to 458.4)     | 424.7 (367.2 to 490.9)        | 58.7 (34.0 to 95.3)             | 41.7 (34.3 to 50.2)               |
| Saint Lucia | 2026 | 599.0 (540.3 to 662.1)     | 260.2 (222.1 to 300.4)     | 273.0 (235.9 to 315.5)        | 38.1 (22.1 to 61.8)             | 27.7 (22.6 to 33.5)               | 937.4 (845.5 to 1036.0) | 407.2 (347.5 to 470.1)     | 427.1 (369.2 to 493.8)        | 59.6 (34.6 to 96.7)             | 43.4 (35.3 to 52.4)               |
| Saint Lucia | 2027 | 607.4 (548.0 to 669.2)     | 265.7 (225.8 to 307.4)     | 274.0 (236.8 to 317.0)        | 38.6 (22.5 to 62.6)             | 29.0 (23.3 to 35.8)               | 950.4 (857.5 to 1047.2) | 415.8 (353.3 to 481.0)     | 428.8 (370.5 to 496.0)        | 60.4 (35.1 to 97.9)             | 45.4 (36.5 to 56.0)               |
| Saint Lucia | 2028 | 614.9 (555.0 to 680.3)     | 270.9 (229.6 to 313.0)     | 274.5 (237.1 to 317.4)        | 39.0 (22.7 to 63.3)             | 30.5 (24.2 to 37.9)               | 962.2 (868.5 to 1064.6) | 424.0 (359.3 to 489.7)     | 429.5 (371.0 to 496.7)        | 61.0 (35.6 to 99.0)             | 47.7 (37.9 to 59.3)               |
| Saint Lucia | 2029 | 622.9 (560.8 to 688.2)     | 276.5 (233.0 to 322.6)     | 274.9 (237.6 to 317.9)        | 39.4 (23.0 to 64.1)             | 32.0 (25.2 to 40.3)               | 974.7 (877.5 to 1076.8) | 432.6 (364.6 to 504.8)     | 430.2 (371.9 to 497.5)        | 61.7 (36.0 to 100.3)            | 50.1 (39.4 to 63.1)               |

| Country     | Year | 2018 US Dollars per capita |                            |                               |                                 |                                   | 2018 PPP per capita       |                            |                               |                                 |                                   |
|-------------|------|----------------------------|----------------------------|-------------------------------|---------------------------------|-----------------------------------|---------------------------|----------------------------|-------------------------------|---------------------------------|-----------------------------------|
|             |      | Health spending            | Government health spending | Out-of-pocket health spending | Prepaid private health spending | Development assistance for health | Health spending           | Government health spending | Out-of-pocket health spending | Prepaid private health spending | Development assistance for health |
| Saint Lucia | 2030 | 630.5 (568.3 to 700.4)     | 281.8 (235.8 to 329.2)     | 275.3 (238.1 to 318.3)        | 39.8 (23.2 to 64.8)             | 33.6 (26.3 to 42.7)               | 986.6 (889.4 to 1096.0)   | 440.9 (369.0 to 515.2)     | 430.8 (372.5 to 498.1)        | 62.4 (36.3 to 101.4)            | 52.6 (41.1 to 66.8)               |
| Saint Lucia | 2031 | 638.5 (571.7 to 707.6)     | 287.2 (239.7 to 337.4)     | 275.7 (238.6 to 318.6)        | 40.3 (23.3 to 65.6)             | 35.3 (26.9 to 45.6)               | 999.1 (894.6 to 1107.2)   | 449.4 (375.1 to 527.9)     | 431.5 (373.3 to 498.6)        | 63.0 (36.5 to 102.6)            | 55.2 (42.2 to 71.4)               |
| Saint Lucia | 2032 | 646.7 (582.0 to 718.3)     | 292.7 (244.9 to 343.8)     | 276.3 (239.0 to 319.1)        | 40.7 (23.5 to 66.4)             | 37.0 (27.9 to 48.4)               | 1012.0 (910.7 to 1124.1)  | 458.0 (383.2 to 537.9)     | 432.3 (374.0 to 499.4)        | 63.8 (36.7 to 103.9)            | 57.9 (43.7 to 75.7)               |
| Saint Lucia | 2033 | 655.0 (583.7 to 727.4)     | 298.2 (247.0 to 352.8)     | 276.8 (239.4 to 319.6)        | 41.2 (23.6 to 67.0)             | 38.9 (29.0 to 51.4)               | 1025.0 (913.4 to 1138.2)  | 466.6 (386.6 to 552.1)     | 433.1 (374.7 to 500.1)        | 64.5 (37.0 to 104.9)            | 60.8 (45.4 to 80.4)               |
| Saint Lucia | 2034 | 663.8 (595.9 to 739.8)     | 303.8 (250.8 to 358.5)     | 277.4 (239.9 to 320.2)        | 41.7 (23.8 to 67.7)             | 40.9 (30.1 to 55.1)               | 1038.7 (932.6 to 1157.7)  | 475.4 (392.4 to 561.1)     | 434.0 (375.4 to 501.1)        | 65.2 (37.3 to 106.0)            | 64.0 (47.1 to 86.2)               |
| Saint Lucia | 2035 | 672.2 (599.1 to 749.3)     | 309.1 (255.0 to 367.3)     | 277.8 (240.3 to 320.7)        | 42.1 (24.0 to 68.8)             | 43.1 (31.4 to 58.4)               | 1051.9 (937.6 to 1172.5)  | 483.8 (399.0 to 574.8)     | 434.7 (376.1 to 501.8)        | 65.9 (37.6 to 107.6)            | 67.4 (49.1 to 91.4)               |
| Saint Lucia | 2036 | 680.9 (609.4 to 759.9)     | 314.5 (256.9 to 372.1)     | 278.5 (240.8 to 321.4)        | 42.6 (24.3 to 69.8)             | 45.3 (32.6 to 62.9)               | 1065.4 (953.6 to 1189.1)  | 492.1 (402.1 to 582.3)     | 435.8 (376.8 to 503.0)        | 66.7 (38.0 to 109.2)            | 70.9 (51.0 to 98.5)               |
| Saint Lucia | 2037 | 690.3 (611.1 to 770.0)     | 320.3 (261.4 to 382.1)     | 279.4 (241.6 to 322.9)        | 43.2 (24.6 to 70.7)             | 47.5 (33.6 to 66.2)               | 1080.3 (956.3 to 1204.9)  | 501.2 (409.1 to 598.0)     | 437.3 (378.0 to 505.2)        | 67.5 (38.5 to 110.7)            | 74.3 (52.6 to 103.5)              |
| Saint Lucia | 2038 | 699.6 (625.5 to 783.1)     | 325.8 (264.7 to 390.9)     | 280.2 (242.4 to 324.1)        | 43.7 (24.9 to 71.7)             | 49.9 (34.9 to 72.4)               | 1094.7 (978.9 to 1225.4)  | 509.8 (414.3 to 611.6)     | 438.5 (379.3 to 507.2)        | 68.3 (39.0 to 112.2)            | 78.1 (54.5 to 113.3)              |
| Saint Lucia | 2039 | 708.8 (626.8 to 793.9)     | 331.2 (270.1 to 398.4)     | 281.0 (243.0 to 325.1)        | 44.2 (25.3 to 72.6)             | 52.4 (36.6 to 77.0)               | 1109.2 (980.8 to 1242.3)  | 518.3 (422.6 to 623.5)     | 439.7 (380.3 to 508.7)        | 69.2 (39.5 to 113.7)            | 82.0 (57.3 to 120.5)              |
| Saint Lucia | 2040 | 717.9 (639.4 to 805.0)     | 336.5 (272.2 to 407.4)     | 281.5 (243.6 to 325.8)        | 44.7 (25.6 to 73.5)             | 55.2 (38.4 to 81.1)               | 1123.5 (1000.5 to 1259.7) | 526.6 (426.0 to 637.4)     | 440.5 (381.1 to 509.7)        | 69.9 (40.1 to 115.0)            | 86.4 (60.1 to 126.8)              |
| Saint Lucia | 2041 | 727.7 (640.5 to 813.9)     | 342.0 (275.4 to 417.4)     | 282.4 (244.3 to 326.7)        | 45.2 (26.1 to 74.6)             | 58.2 (39.8 to 85.7)               | 1138.8 (1002.3 to 1273.6) | 535.1 (430.9 to 653.1)     | 441.8 (382.3 to 511.3)        | 70.8 (40.8 to 116.7)            | 91.0 (62.4 to 134.2)              |
| Saint Lucia | 2042 | 738.2 (658.4 to 830.4)     | 347.7 (281.2 to 425.0)     | 283.4 (245.1 to 328.0)        | 45.8 (26.5 to 75.6)             | 61.3 (41.1 to 91.6)               | 1155.1 (1030.3 to 1299.4) | 544.1 (440.0 to 665.1)     | 443.4 (383.5 to 513.3)        | 71.7 (41.5 to 118.2)            | 95.9 (64.3 to 143.4)              |
| Saint Lucia | 2043 | 748.3 (657.0 to 842.5)     | 353.2 (285.0 to 429.9)     | 284.2 (245.8 to 328.9)        | 46.4 (26.9 to 76.6)             | 64.6 (43.2 to 97.8)               | 1170.9 (1028.1 to 1318.4) | 552.7 (446.0 to 672.8)     | 444.6 (384.7 to 514.7)        | 72.6 (42.1 to 119.8)            | 101.0 (67.5 to 153.0)             |
| Saint Lucia | 2044 | 758.6 (676.4 to 857.5)     | 358.6 (286.4 to 436.7)     | 284.8 (246.5 to 329.8)        | 46.9 (27.2 to 77.5)             | 68.2 (44.7 to 104.4)              | 1187.1 (1058.4 to 1341.8) | 561.1 (448.1 to 683.3)     | 445.7 (385.7 to 516.0)        | 73.4 (42.6 to 121.3)            | 106.8 (69.9 to 163.3)             |
| Saint Lucia | 2045 | 768.8 (673.1 to 870.4)     | 363.9 (289.8 to 445.4)     | 285.3 (246.8 to 330.3)        | 47.4 (27.5 to 78.5)             | 72.2 (46.6 to 115.2)              | 1203.0 (1053.3 to 1362.1) | 569.4 (453.5 to 697.0)     | 446.4 (386.2 to 516.9)        | 74.2 (43.0 to 122.8)            | 113.0 (73.0 to 180.3)             |
| Saint Lucia | 2046 | 779.6 (692.3 to 886.6)     | 369.4 (292.9 to 454.5)     | 285.9 (247.3 to 331.1)        | 48.0 (27.7 to 79.5)             | 76.3 (49.0 to 123.6)              | 1219.9 (1083.4 to 1387.3) | 578.0 (458.4 to 711.2)     | 447.4 (387.1 to 518.1)        | 75.1 (43.4 to 124.3)            | 119.4 (76.7 to 193.4)             |
| Saint Lucia | 2047 | 790.9 (689.8 to 898.5)     | 375.1 (297.0 to 462.7)     | 286.5 (247.9 to 331.7)        | 48.5 (28.0 to 80.1)             | 80.8 (51.3 to 132.8)              | 1237.6 (1079.4 to 1406.1) | 586.9 (464.8 to 724.1)     | 448.3 (387.9 to 519.0)        | 75.9 (43.8 to 125.3)            | 126.4 (80.2 to 207.8)             |
| Saint Lucia | 2048 | 802.2 (707.1 to 916.9)     | 380.4 (299.0 to 471.6)     | 286.9 (248.2 to 332.0)        | 49.0 (28.3 to 80.7)             | 85.9 (55.1 to 137.4)              | 1255.3 (1106.4 to 1434.8) | 595.2 (467.9 to 738.0)     | 448.9 (388.5 to 519.5)        | 76.8 (44.3 to 126.2)            | 134.4 (86.2 to 215.0)             |
| Saint Lucia | 2049 | 813.8 (704.9 to 931.8)     | 385.8 (302.0 to 478.5)     | 287.3 (248.7 to 332.6)        | 49.6 (28.6 to 81.5)             | 91.0 (57.0 to 153.5)              | 1273.4 (1103.0 to 1458.1) | 603.7 (472.5 to 748.7)     | 449.6 (389.2 to 520.4)        | 77.6 (44.8 to 127.6)            | 142.5 (89.2 to 240.2)             |
| Saint Lucia | 2050 | 825.8 (723.0 to 947.4)     | 391.0 (304.4 to 487.4)     | 287.6 (249.0 to 333.1)        | 50.1 (29.0 to 82.3)             | 97.0 (59.4 to 168.0)              | 1292.2 (1131.3 to 1482.5) | 611.9 (476.4 to 762.8)     | 450.1 (389.6 to 521.3)        | 78.4 (45.3 to 128.9)            | 151.8 (92.9 to 263.0)             |

| Country                          | Year | 2018 US Dollars per capita |                            |                               |                                 |                                   | 2018 PPP per capita    |                            |                               |                                 |                                   |
|----------------------------------|------|----------------------------|----------------------------|-------------------------------|---------------------------------|-----------------------------------|------------------------|----------------------------|-------------------------------|---------------------------------|-----------------------------------|
|                                  |      | Health spending            | Government health spending | Out-of-pocket health spending | Prepaid private health spending | Development assistance for health | Health spending        | Government health spending | Out-of-pocket health spending | Prepaid private health spending | Development assistance for health |
| Saint Vincent and the Grenadines | 1995 | 203.4 (178.5 to 231.3)     | 145.1 (123.6 to 168.8)     | 50.4 (37.0 to 67.4)           | 4.4 (2.1 to 8.0)                | 3.5 (3.5 to 3.5)                  | 332.4 (291.7 to 378.0) | 237.2 (202.0 to 275.8)     | 82.3 (60.4 to 110.1)          | 7.2 (3.4 to 13.1)               | 5.7 (5.7 to 5.7)                  |
| Saint Vincent and the Grenadines | 1996 | 212.0 (187.2 to 239.4)     | 150.5 (129.1 to 173.4)     | 51.1 (37.7 to 67.0)           | 4.5 (2.1 to 8.4)                | 5.9 (5.9 to 5.9)                  | 346.5 (305.9 to 391.3) | 245.9 (211.0 to 283.3)     | 83.5 (61.6 to 109.4)          | 7.4 (3.5 to 13.7)               | 9.7 (9.7 to 9.7)                  |
| Saint Vincent and the Grenadines | 1997 | 211.5 (188.5 to 237.7)     | 154.5 (134.6 to 175.6)     | 51.3 (38.3 to 67.7)           | 4.6 (2.2 to 8.4)                | 1.1 (1.1 to 1.1)                  | 345.7 (308.0 to 388.5) | 252.5 (220.0 to 287.1)     | 83.9 (62.7 to 110.7)          | 7.6 (3.6 to 13.7)               | 1.8 (1.8 to 1.8)                  |
| Saint Vincent and the Grenadines | 1998 | 208.2 (185.7 to 233.0)     | 153.1 (133.7 to 173.4)     | 49.5 (37.3 to 65.1)           | 4.6 (2.2 to 8.5)                | 1.0 (1.0 to 1.0)                  | 340.4 (303.5 to 380.8) | 250.2 (218.4 to 283.4)     | 80.9 (61.0 to 106.4)          | 7.6 (3.6 to 13.8)               | 1.7 (1.7 to 1.7)                  |
| Saint Vincent and the Grenadines | 1999 | 202.5 (181.4 to 225.4)     | 151.3 (133.3 to 170.7)     | 45.8 (34.9 to 59.7)           | 4.6 (2.2 to 8.6)                | 0.8 (0.8 to 0.8)                  | 331.0 (296.5 to 368.4) | 247.3 (217.8 to 278.9)     | 74.8 (57.0 to 97.6)           | 7.6 (3.6 to 14.0)               | 1.4 (1.4 to 1.4)                  |
| Saint Vincent and the Grenadines | 2000 | 192.1 (172.6 to 213.0)     | 147.8 (130.5 to 166.6)     | 39.3 (30.8 to 50.9)           | 4.6 (2.2 to 8.5)                | 0.4 (0.4 to 0.4)                  | 313.9 (282.2 to 348.1) | 241.5 (213.4 to 272.4)     | 64.2 (50.3 to 83.2)           | 7.6 (3.6 to 13.9)               | 0.6 (0.6 to 0.6)                  |
| Saint Vincent and the Grenadines | 2001 | 186.3 (167.4 to 206.1)     | 144.4 (127.8 to 161.8)     | 37.1 (28.8 to 48.0)           | 4.4 (2.1 to 8.4)                | 0.4 (0.4 to 0.4)                  | 304.5 (273.5 to 336.9) | 235.9 (208.9 to 264.5)     | 60.7 (47.1 to 78.5)           | 7.3 (3.4 to 13.7)               | 0.6 (0.6 to 0.6)                  |
| Saint Vincent and the Grenadines | 2002 | 191.3 (171.1 to 212.0)     | 149.0 (132.2 to 166.5)     | 37.6 (29.3 to 48.4)           | 4.5 (2.1 to 8.6)                | 0.2 (0.2 to 0.2)                  | 312.7 (279.7 to 346.6) | 243.6 (216.0 to 272.1)     | 61.4 (48.0 to 79.1)           | 7.3 (3.4 to 14.1)               | 0.4 (0.4 to 0.4)                  |
| Saint Vincent and the Grenadines | 2003 | 200.0 (179.1 to 221.4)     | 153.7 (135.8 to 172.3)     | 40.1 (31.2 to 51.5)           | 4.5 (2.1 to 8.7)                | 1.7 (1.7 to 1.7)                  | 326.9 (292.8 to 361.9) | 251.2 (221.9 to 281.6)     | 65.6 (51.0 to 84.1)           | 7.4 (3.5 to 14.2)               | 2.8 (2.8 to 2.8)                  |
| Saint Vincent and the Grenadines | 2004 | 206.2 (185.8 to 229.2)     | 155.7 (138.2 to 175.2)     | 42.7 (33.0 to 54.5)           | 4.5 (2.1 to 8.5)                | 3.4 (3.4 to 3.4)                  | 337.0 (303.7 to 374.5) | 254.4 (225.9 to 286.4)     | 69.8 (53.9 to 89.1)           | 7.3 (3.4 to 14.0)               | 5.5 (5.5 to 5.5)                  |
| Saint Vincent and the Grenadines | 2005 | 209.0 (188.4 to 232.6)     | 155.9 (137.6 to 174.8)     | 45.0 (34.5 to 57.2)           | 4.4 (2.0 to 8.3)                | 3.8 (3.8 to 3.8)                  | 341.6 (307.9 to 380.2) | 254.7 (225.0 to 285.6)     | 73.6 (56.4 to 93.5)           | 7.1 (3.2 to 13.6)               | 6.1 (6.1 to 6.1)                  |
| Saint Vincent and the Grenadines | 2006 | 220.5 (199.3 to 244.0)     | 159.1 (141.5 to 179.1)     | 47.6 (36.5 to 61.1)           | 4.3 (2.0 to 8.1)                | 9.6 (9.6 to 9.6)                  | 360.4 (325.8 to 398.8) | 260.0 (231.2 to 292.8)     | 77.9 (59.7 to 99.9)           | 7.0 (3.3 to 13.3)               | 15.6 (15.6 to 15.6)               |
| Saint Vincent and the Grenadines | 2007 | 218.0 (197.0 to 240.7)     | 158.2 (140.9 to 177.3)     | 49.1 (37.9 to 63.0)           | 4.0 (1.9 to 7.7)                | 6.7 (6.7 to 6.7)                  | 356.3 (322.0 to 393.4) | 258.6 (230.2 to 289.8)     | 80.2 (61.9 to 102.9)          | 6.6 (3.0 to 12.6)               | 11.0 (11.0 to 11.0)               |
| Saint Vincent and the Grenadines | 2008 | 232.3 (209.8 to 256.4)     | 167.6 (149.9 to 187.8)     | 50.7 (38.8 to 65.1)           | 4.1 (1.9 to 7.9)                | 10.0 (10.0 to 10.0)               | 379.6 (342.9 to 419.0) | 273.9 (244.9 to 307.0)     | 82.8 (63.5 to 106.4)          | 6.7 (3.1 to 12.9)               | 16.3 (16.3 to 16.3)               |
| Saint Vincent and the Grenadines | 2009 | 237.4 (214.2 to 260.8)     | 170.3 (152.5 to 190.5)     | 50.8 (39.0 to 64.9)           | 4.1 (1.9 to 8.0)                | 12.3 (12.3 to 12.3)               | 388.1 (350.1 to 426.3) | 278.3 (249.2 to 311.4)     | 83.0 (63.7 to 106.1)          | 6.7 (3.2 to 13.0)               | 20.1 (20.1 to 20.1)               |
| Saint Vincent and the Grenadines | 2010 | 233.8 (211.6 to 258.0)     | 168.6 (150.7 to 188.6)     | 49.9 (38.1 to 64.3)           | 4.2 (2.0 to 7.9)                | 11.1 (11.1 to 11.1)               | 382.1 (345.8 to 421.6) | 275.5 (246.2 to 308.2)     | 81.6 (62.2 to 105.1)          | 6.8 (3.2 to 12.9)               | 18.2 (18.2 to 18.2)               |
| Saint Vincent and the Grenadines | 2011 | 231.8 (209.8 to 257.3)     | 168.6 (150.5 to 188.7)     | 50.0 (38.1 to 64.8)           | 4.5 (2.1 to 8.5)                | 8.7 (8.7 to 8.7)                  | 378.8 (342.9 to 420.6) | 275.6 (245.9 to 308.4)     | 81.7 (62.3 to 105.9)          | 7.4 (3.5 to 13.9)               | 14.2 (14.2 to 14.2)               |
| Saint Vincent and the Grenadines | 2012 | 245.3 (222.4 to 272.4)     | 175.3 (156.6 to 195.6)     | 51.4 (39.0 to 66.1)           | 5.7 (2.7 to 10.5)               | 12.9 (12.9 to 12.9)               | 400.9 (363.5 to 445.2) | 286.4 (256.0 to 319.7)     | 84.0 (63.7 to 108.1)          | 9.3 (4.4 to 17.1)               | 21.1 (21.1 to 21.1)               |
| Saint Vincent and the Grenadines | 2013 | 251.9 (227.3 to 279.3)     | 179.5 (160.0 to 200.1)     | 52.5 (39.8 to 68.0)           | 6.4 (3.1 to 11.9)               | 13.6 (13.6 to 13.6)               | 411.7 (371.5 to 456.5) | 293.3 (261.5 to 327.0)     | 85.8 (65.1 to 111.2)          | 10.4 (5.1 to 19.4)              | 22.1 (22.1 to 22.1)               |
| Saint Vincent and the Grenadines | 2014 | 259.7 (233.6 to 287.7)     | 179.8 (159.0 to 202.2)     | 52.4 (39.1 to 68.5)           | 6.7 (3.3 to 12.2)               | 20.8 (20.8 to 20.8)               | 424.4 (381.7 to 470.3) | 293.9 (259.9 to 330.5)     | 85.7 (63.9 to 112.0)          | 10.9 (5.4 to 19.9)              | 34.0 (34.0 to 34.0)               |
| Saint Vincent and the Grenadines | 2015 | 278.9 (252.1 to 308.1)     | 183.0 (159.7 to 207.7)     | 51.7 (38.4 to 67.6)           | 6.9 (3.4 to 12.8)               | 37.3 (37.3 to 37.3)               | 455.9 (412.0 to 503.6) | 299.2 (261.1 to 339.5)     | 84.6 (62.8 to 110.6)          | 11.2 (5.5 to 20.9)              | 60.9 (60.9 to 60.9)               |

| Country                          | Year | 2018 US Dollars per capita |                            |                               |                                 |                                   | 2018 PPP per capita    |                            |                               |                                 |                                   |
|----------------------------------|------|----------------------------|----------------------------|-------------------------------|---------------------------------|-----------------------------------|------------------------|----------------------------|-------------------------------|---------------------------------|-----------------------------------|
|                                  |      | Health spending            | Government health spending | Out-of-pocket health spending | Prepaid private health spending | Development assistance for health | Health spending        | Government health spending | Out-of-pocket health spending | Prepaid private health spending | Development assistance for health |
| Saint Vincent and the Grenadines | 2016 | 277.1 (244.6 to 309.9)     | 189.4 (162.4 to 219.5)     | 51.8 (37.9 to 68.7)           | 7.1 (3.5 to 13.4)               | 28.7 (28.7 to 28.7)               | 452.9 (399.8 to 506.5) | 309.6 (265.4 to 358.7)     | 84.7 (61.9 to 112.3)          | 11.7 (5.7 to 21.9)              | 46.9 (46.9 to 46.9)               |
| Saint Vincent and the Grenadines | 2017 | 274.0 (239.9 to 309.3)     | 203.9 (173.9 to 235.9)     | 52.8 (38.6 to 70.3)           | 7.3 (3.5 to 13.6)               | 10.0 (10.0 to 10.0)               | 447.8 (392.1 to 505.5) | 333.3 (284.2 to 385.6)     | 86.4 (63.0 to 114.9)          | 11.9 (5.8 to 22.2)              | 16.3 (16.3 to 16.3)               |
| Saint Vincent and the Grenadines | 2018 | 277.7 (242.8 to 314.4)     | 207.7 (177.5 to 240.8)     | 53.5 (39.1 to 71.1)           | 7.4 (3.6 to 13.8)               | 9.1 (9.0 to 9.2)                  | 453.9 (396.9 to 513.9) | 339.5 (290.0 to 393.5)     | 87.4 (64.0 to 116.2)          | 12.1 (5.9 to 22.5)              | 14.9 (14.8 to 15.1)               |
| Saint Vincent and the Grenadines | 2019 | 283.3 (247.6 to 320.8)     | 212.3 (180.7 to 246.2)     | 54.2 (39.6 to 72.1)           | 7.5 (3.7 to 14.0)               | 9.2 (8.6 to 9.8)                  | 463.0 (404.7 to 524.3) | 347.0 (295.3 to 402.5)     | 88.5 (64.8 to 117.8)          | 12.3 (6.0 to 22.9)              | 15.1 (14.0 to 16.0)               |
| Saint Vincent and the Grenadines | 2020 | 289.3 (252.8 to 327.3)     | 217.3 (185.7 to 251.8)     | 54.8 (40.0 to 72.9)           | 7.6 (3.7 to 14.2)               | 9.5 (8.6 to 10.3)                 | 472.8 (413.2 to 535.0) | 355.2 (303.5 to 411.5)     | 89.6 (65.4 to 119.2)          | 12.5 (6.1 to 23.2)              | 15.5 (14.1 to 16.9)               |
| Saint Vincent and the Grenadines | 2021 | 295.6 (257.6 to 334.2)     | 222.5 (190.0 to 257.7)     | 55.5 (40.7 to 74.4)           | 7.8 (3.8 to 14.5)               | 9.8 (8.8 to 10.8)                 | 483.1 (421.1 to 546.2) | 363.6 (310.5 to 421.2)     | 90.8 (66.5 to 121.5)          | 12.7 (6.2 to 23.6)              | 16.0 (14.3 to 17.6)               |
| Saint Vincent and the Grenadines | 2022 | 299.9 (261.8 to 339.1)     | 225.7 (192.8 to 261.6)     | 56.2 (41.2 to 75.6)           | 7.9 (3.8 to 14.7)               | 10.1 (8.9 to 11.3)                | 490.2 (427.9 to 554.2) | 368.9 (315.1 to 427.6)     | 91.8 (67.3 to 123.6)          | 12.9 (6.3 to 24.0)              | 16.5 (14.6 to 18.5)               |
| Saint Vincent and the Grenadines | 2023 | 304.2 (265.6 to 343.3)     | 228.8 (195.6 to 265.4)     | 56.9 (41.4 to 76.4)           | 8.0 (3.9 to 14.9)               | 10.4 (9.0 to 11.9)                | 497.1 (434.1 to 561.1) | 374.0 (319.7 to 433.7)     | 92.9 (67.7 to 124.8)          | 13.1 (6.4 to 24.4)              | 17.1 (14.8 to 19.4)               |
| Saint Vincent and the Grenadines | 2024 | 311.2 (272.1 to 350.7)     | 234.5 (200.3 to 271.5)     | 57.6 (42.0 to 76.9)           | 8.2 (4.0 to 15.1)               | 10.9 (9.4 to 12.7)                | 508.5 (444.7 to 573.2) | 383.3 (327.4 to 443.8)     | 94.1 (68.6 to 125.6)          | 13.3 (6.5 to 24.7)              | 17.8 (15.4 to 20.7)               |
| Saint Vincent and the Grenadines | 2025 | 315.8 (276.6 to 356.6)     | 237.9 (203.2 to 275.0)     | 58.2 (42.3 to 77.4)           | 8.3 (4.0 to 15.4)               | 11.4 (9.7 to 13.5)                | 516.1 (452.1 to 582.9) | 388.8 (332.2 to 449.5)     | 95.1 (69.2 to 126.5)          | 13.5 (6.6 to 25.1)              | 18.7 (15.9 to 22.0)               |
| Saint Vincent and the Grenadines | 2026 | 320.2 (279.7 to 362.1)     | 241.2 (205.8 to 279.7)     | 58.9 (42.7 to 78.4)           | 8.4 (4.1 to 15.6)               | 11.8 (10.0 to 14.0)               | 523.4 (457.2 to 591.9) | 394.1 (336.3 to 457.2)     | 96.2 (69.8 to 128.1)          | 13.7 (6.7 to 25.5)              | 19.4 (16.4 to 22.9)               |
| Saint Vincent and the Grenadines | 2027 | 324.9 (282.9 to 369.5)     | 244.5 (208.2 to 284.4)     | 59.5 (43.0 to 79.3)           | 8.5 (4.1 to 15.8)               | 12.3 (10.3 to 14.8)               | 531.0 (462.3 to 603.8) | 399.7 (340.2 to 464.8)     | 97.3 (70.3 to 129.7)          | 13.9 (6.8 to 25.9)              | 20.1 (16.8 to 24.1)               |
| Saint Vincent and the Grenadines | 2028 | 329.5 (286.5 to 374.2)     | 247.9 (210.4 to 288.6)     | 60.2 (43.4 to 80.5)           | 8.6 (4.2 to 16.1)               | 12.8 (10.6 to 15.6)               | 538.6 (468.2 to 611.7) | 405.2 (343.9 to 471.6)     | 98.4 (70.9 to 131.6)          | 14.1 (6.9 to 26.3)              | 20.9 (17.4 to 25.4)               |
| Saint Vincent and the Grenadines | 2029 | 334.3 (290.2 to 381.2)     | 251.3 (213.2 to 293.0)     | 60.9 (43.8 to 81.5)           | 8.7 (4.3 to 16.3)               | 13.3 (11.0 to 16.3)               | 546.3 (474.2 to 623.0) | 410.7 (348.5 to 479.0)     | 99.6 (71.6 to 133.2)          | 14.3 (7.0 to 26.7)              | 21.8 (17.9 to 26.7)               |
| Saint Vincent and the Grenadines | 2030 | 339.1 (293.6 to 385.7)     | 254.8 (215.8 to 297.8)     | 61.7 (44.2 to 83.1)           | 8.8 (4.3 to 16.6)               | 13.9 (11.3 to 17.1)               | 554.3 (479.8 to 630.3) | 416.4 (352.7 to 486.7)     | 100.8 (72.2 to 135.9)         | 14.5 (7.1 to 27.1)              | 22.6 (18.5 to 28.0)               |
| Saint Vincent and the Grenadines | 2031 | 344.4 (298.1 to 391.9)     | 258.6 (218.7 to 303.7)     | 62.4 (44.6 to 84.9)           | 9.0 (4.4 to 16.8)               | 14.4 (11.5 to 18.0)               | 562.9 (487.3 to 640.4) | 422.7 (357.5 to 496.4)     | 102.0 (72.8 to 138.7)         | 14.7 (7.2 to 27.5)              | 23.5 (18.8 to 29.5)               |
| Saint Vincent and the Grenadines | 2032 | 349.9 (302.9 to 399.9)     | 262.6 (221.8 to 309.2)     | 63.2 (44.9 to 86.0)           | 9.1 (4.5 to 17.1)               | 15.0 (11.9 to 18.9)               | 571.8 (495.1 to 653.7) | 429.2 (362.6 to 505.3)     | 103.3 (73.4 to 140.6)         | 14.9 (7.3 to 28.0)              | 24.4 (19.4 to 31.0)               |
| Saint Vincent and the Grenadines | 2033 | 355.5 (307.3 to 407.2)     | 266.6 (224.6 to 314.1)     | 64.0 (45.3 to 87.5)           | 9.3 (4.5 to 17.4)               | 15.5 (12.2 to 20.1)               | 581.0 (502.3 to 665.5) | 435.8 (367.1 to 513.4)     | 104.7 (74.1 to 143.0)         | 15.2 (7.4 to 28.5)              | 25.4 (19.9 to 32.8)               |
| Saint Vincent and the Grenadines | 2034 | 361.1 (312.3 to 414.3)     | 270.6 (228.0 to 319.2)     | 64.9 (45.7 to 88.5)           | 9.4 (4.6 to 17.7)               | 16.2 (12.7 to 21.2)               | 590.2 (510.4 to 677.2) | 442.3 (372.6 to 521.7)     | 106.0 (74.8 to 144.6)         | 15.4 (7.5 to 29.0)              | 26.5 (20.8 to 34.7)               |
| Saint Vincent and the Grenadines | 2035 | 366.9 (317.1 to 420.9)     | 274.7 (231.0 to 325.8)     | 65.7 (46.2 to 89.8)           | 9.6 (4.7 to 18.0)               | 16.9 (12.9 to 22.4)               | 599.6 (518.2 to 688.0) | 448.9 (377.6 to 532.5)     | 107.4 (75.5 to 146.8)         | 15.6 (7.6 to 29.5)              | 27.6 (21.1 to 36.6)               |
| Saint Vincent and the Grenadines | 2036 | 372.9 (321.7 to 429.6)     | 279.0 (234.4 to 332.1)     | 66.6 (46.7 to 91.2)           | 9.7 (4.7 to 18.4)               | 17.6 (13.5 to 23.9)               | 609.5 (525.8 to 702.2) | 456.0 (383.1 to 542.8)     | 108.9 (76.2 to 149.1)         | 15.9 (7.7 to 30.0)              | 28.8 (22.1 to 39.0)               |

| Country                          | Year | 2018 US Dollars per capita |                            |                               |                                 |                                   | 2018 PPP per capita    |                            |                               |                                 |                                   |
|----------------------------------|------|----------------------------|----------------------------|-------------------------------|---------------------------------|-----------------------------------|------------------------|----------------------------|-------------------------------|---------------------------------|-----------------------------------|
|                                  |      | Health spending            | Government health spending | Out-of-pocket health spending | Prepaid private health spending | Development assistance for health | Health spending        | Government health spending | Out-of-pocket health spending | Prepaid private health spending | Development assistance for health |
| Saint Vincent and the Grenadines | 2037 | 379.2 (325.6 to 437.6)     | 283.5 (237.8 to 336.9)     | 67.5 (47.0 to 93.2)           | 9.9 (4.8 to 18.7)               | 18.3 (13.7 to 25.0)               | 619.8 (532.2 to 715.1) | 463.3 (388.6 to 550.7)     | 110.4 (76.9 to 152.3)         | 16.2 (7.8 to 30.6)              | 29.9 (22.4 to 40.8)               |
| Saint Vincent and the Grenadines | 2038 | 385.5 (329.7 to 447.4)     | 287.9 (241.4 to 343.9)     | 68.5 (47.4 to 95.1)           | 10.0 (4.9 to 19.0)              | 19.0 (14.2 to 26.1)               | 630.1 (538.9 to 731.3) | 470.6 (394.5 to 562.0)     | 111.9 (77.5 to 155.5)         | 16.4 (7.9 to 31.1)              | 31.1 (23.3 to 42.7)               |
| Saint Vincent and the Grenadines | 2039 | 391.8 (333.7 to 454.0)     | 292.4 (244.8 to 349.9)     | 69.5 (48.0 to 96.4)           | 10.2 (4.9 to 19.4)              | 19.8 (14.6 to 27.5)               | 640.4 (545.4 to 742.1) | 477.9 (400.1 to 571.9)     | 113.5 (78.4 to 157.6)         | 16.7 (8.1 to 31.7)              | 32.3 (23.9 to 45.0)               |
| Saint Vincent and the Grenadines | 2040 | 398.2 (340.0 to 461.9)     | 296.8 (248.2 to 355.9)     | 70.4 (48.4 to 97.7)           | 10.4 (5.0 to 19.7)              | 20.6 (15.2 to 29.1)               | 650.8 (555.6 to 755.0) | 485.0 (405.7 to 581.6)     | 115.1 (79.1 to 159.7)         | 16.9 (8.2 to 32.1)              | 33.7 (24.8 to 47.5)               |
| Saint Vincent and the Grenadines | 2041 | 404.9 (345.6 to 472.1)     | 301.4 (251.9 to 361.8)     | 71.5 (49.0 to 99.3)           | 10.5 (5.1 to 20.0)              | 21.5 (15.7 to 31.2)               | 661.8 (564.8 to 771.5) | 492.6 (411.6 to 591.3)     | 116.8 (80.1 to 162.2)         | 17.2 (8.3 to 32.7)              | 35.2 (25.7 to 51.0)               |
| Saint Vincent and the Grenadines | 2042 | 411.7 (351.3 to 479.5)     | 306.0 (255.6 to 368.2)     | 72.5 (49.5 to 100.8)          | 10.7 (5.2 to 20.3)              | 22.5 (16.0 to 33.1)               | 672.9 (574.2 to 783.7) | 500.1 (417.7 to 601.8)     | 118.5 (81.0 to 164.8)         | 17.5 (8.5 to 33.2)              | 36.8 (26.2 to 54.2)               |
| Saint Vincent and the Grenadines | 2043 | 418.6 (356.3 to 487.3)     | 310.7 (259.4 to 374.8)     | 73.6 (50.1 to 103.0)          | 10.9 (5.3 to 20.6)              | 23.5 (16.5 to 35.3)               | 684.2 (582.4 to 796.4) | 507.8 (424.0 to 612.6)     | 120.3 (81.9 to 168.4)         | 17.8 (8.6 to 33.7)              | 38.4 (26.9 to 57.7)               |
| Saint Vincent and the Grenadines | 2044 | 425.6 (360.8 to 498.3)     | 315.2 (262.6 to 381.3)     | 74.7 (50.9 to 104.9)          | 11.0 (5.4 to 20.9)              | 24.6 (17.3 to 37.5)               | 695.5 (589.7 to 814.4) | 515.2 (429.1 to 623.1)     | 122.1 (83.2 to 171.4)         | 18.0 (8.8 to 34.2)              | 40.2 (28.2 to 61.3)               |
| Saint Vincent and the Grenadines | 2045 | 432.5 (366.2 to 508.0)     | 319.7 (265.0 to 387.6)     | 75.8 (51.5 to 106.5)          | 11.2 (5.5 to 21.2)              | 25.8 (17.9 to 39.4)               | 706.9 (598.5 to 830.3) | 522.5 (433.1 to 633.5)     | 123.9 (84.2 to 174.1)         | 18.3 (8.9 to 34.6)              | 42.2 (29.3 to 64.3)               |
| Saint Vincent and the Grenadines | 2046 | 439.5 (371.4 to 516.5)     | 324.2 (268.0 to 394.6)     | 76.9 (52.3 to 108.3)          | 11.4 (5.5 to 21.5)              | 27.0 (18.6 to 42.4)               | 718.4 (607.0 to 844.1) | 529.8 (438.1 to 644.9)     | 125.7 (85.5 to 176.9)         | 18.6 (9.1 to 35.1)              | 44.2 (30.5 to 69.3)               |
| Saint Vincent and the Grenadines | 2047 | 446.9 (379.3 to 527.0)     | 328.8 (271.0 to 402.4)     | 78.1 (52.9 to 110.0)          | 11.5 (5.6 to 21.8)              | 28.4 (19.7 to 44.8)               | 730.3 (620.0 to 861.4) | 537.4 (442.8 to 657.6)     | 127.7 (86.4 to 179.8)         | 18.9 (9.2 to 35.6)              | 46.4 (32.2 to 73.2)               |
| Saint Vincent and the Grenadines | 2048 | 454.4 (385.0 to 536.8)     | 333.4 (274.7 to 409.7)     | 79.3 (53.6 to 111.8)          | 11.7 (5.7 to 22.1)              | 29.9 (20.3 to 48.7)               | 742.6 (629.2 to 877.4) | 545.0 (449.0 to 669.6)     | 129.6 (87.7 to 182.7)         | 19.1 (9.3 to 36.1)              | 48.9 (33.2 to 79.5)               |
| Saint Vincent and the Grenadines | 2049 | 462.0 (392.4 to 548.3)     | 338.1 (278.3 to 417.1)     | 80.5 (54.4 to 113.6)          | 11.9 (5.8 to 22.4)              | 31.5 (21.5 to 52.2)               | 755.0 (641.3 to 896.1) | 552.5 (454.9 to 681.8)     | 131.6 (88.9 to 185.6)         | 19.4 (9.4 to 36.5)              | 51.5 (35.2 to 85.3)               |
| Saint Vincent and the Grenadines | 2050 | 469.6 (397.5 to 558.0)     | 342.6 (281.5 to 424.7)     | 81.7 (55.2 to 115.3)          | 12.1 (5.8 to 22.6)              | 33.3 (22.4 to 54.3)               | 767.6 (649.7 to 912.0) | 559.9 (460.1 to 694.0)     | 133.5 (90.2 to 188.5)         | 19.7 (9.6 to 37.0)              | 54.4 (36.7 to 88.8)               |
| Samoa                            | 1995 | 134.9 (115.5 to 156.9)     | 111.7 (93.7 to 133.3)      | 20.1 (14.1 to 27.7)           | 0.0 (0.0 to 0.0)                | 3.1 (3.1 to 3.1)                  | 186.6 (159.7 to 216.9) | 154.4 (129.5 to 184.3)     | 27.8 (19.5 to 38.4)           | 0.0 (0.0 to 0.0)                | 4.3 (4.3 to 4.3)                  |
| Samoa                            | 1996 | 132.5 (115.5 to 152.2)     | 110.9 (94.7 to 129.8)      | 19.9 (14.0 to 27.7)           | 0.0 (0.0 to 0.0)                | 1.7 (1.7 to 1.7)                  | 183.2 (159.7 to 210.5) | 153.3 (130.9 to 179.5)     | 27.6 (19.3 to 38.4)           | 0.0 (0.0 to 0.0)                | 2.3 (2.3 to 2.3)                  |
| Samoa                            | 1997 | 129.2 (113.3 to 147.4)     | 108.8 (93.2 to 125.4)      | 19.3 (13.7 to 26.7)           | 0.0 (0.0 to 0.0)                | 1.0 (1.0 to 1.0)                  | 178.6 (156.6 to 203.9) | 150.4 (128.9 to 173.4)     | 26.7 (18.9 to 36.9)           | 0.0 (0.0 to 0.0)                | 1.4 (1.4 to 1.4)                  |
| Samoa                            | 1998 | 130.9 (115.9 to 148.6)     | 110.4 (95.2 to 126.9)      | 19.0 (13.4 to 26.0)           | 0.0 (0.0 to 0.0)                | 1.4 (1.4 to 1.4)                  | 181.0 (160.3 to 205.5) | 152.7 (131.6 to 175.4)     | 26.3 (18.6 to 36.0)           | 0.0 (0.0 to 0.0)                | 1.9 (1.9 to 1.9)                  |
| Samoa                            | 1999 | 131.5 (117.3 to 149.3)     | 109.6 (95.9 to 125.7)      | 18.4 (12.9 to 25.0)           | 0.0 (0.0 to 0.0)                | 3.5 (3.5 to 3.5)                  | 181.8 (162.2 to 206.4) | 151.6 (132.6 to 173.9)     | 25.4 (17.9 to 34.5)           | 0.0 (0.0 to 0.0)                | 4.8 (4.8 to 4.8)                  |
| Samoa                            | 2000 | 145.9 (131.8 to 162.4)     | 107.7 (94.0 to 123.1)      | 17.6 (12.4 to 24.0)           | 0.0 (0.0 to 0.0)                | 20.6 (20.6 to 20.6)               | 201.7 (182.2 to 224.6) | 148.9 (130.0 to 170.2)     | 24.4 (17.2 to 33.2)           | 0.0 (0.0 to 0.0)                | 28.5 (28.5 to 28.5)               |
| Samoa                            | 2001 | 136.3 (122.0 to 154.1)     | 107.7 (94.2 to 124.6)      | 18.0 (12.8 to 24.4)           | 0.0 (0.0 to 0.0)                | 10.6 (10.6 to 10.6)               | 188.4 (168.7 to 213.1) | 148.9 (130.3 to 172.3)     | 24.9 (17.6 to 33.7)           | 0.0 (0.0 to 0.0)                | 14.6 (14.6 to 14.6)               |

| Country | Year | 2018 US Dollars per capita |                            |                               |                                 |                                   | 2018 PPP per capita    |                            |                               |                                 |                                   |
|---------|------|----------------------------|----------------------------|-------------------------------|---------------------------------|-----------------------------------|------------------------|----------------------------|-------------------------------|---------------------------------|-----------------------------------|
|         |      | Health spending            | Government health spending | Out-of-pocket health spending | Prepaid private health spending | Development assistance for health | Health spending        | Government health spending | Out-of-pocket health spending | Prepaid private health spending | Development assistance for health |
| Samoa   | 2002 | 140.4 (126.4 to 158.4)     | 109.5 (95.2 to 127.2)      | 19.3 (13.9 to 26.1)           | 0.0 (0.0 to 0.0)                | 11.6 (11.6 to 11.6)               | 194.2 (174.7 to 219.0) | 151.5 (131.7 to 175.9)     | 26.7 (19.2 to 36.1)           | 0.0 (0.0 to 0.0)                | 16.0 (16.0 to 16.0)               |
| Samoa   | 2003 | 151.5 (136.7 to 169.6)     | 109.3 (94.9 to 125.4)      | 20.6 (14.8 to 27.8)           | 0.0 (0.0 to 0.0)                | 21.6 (21.6 to 21.6)               | 209.5 (189.0 to 234.5) | 151.1 (131.3 to 173.4)     | 28.4 (20.4 to 38.4)           | 0.0 (0.0 to 0.1)                | 29.9 (29.9 to 29.9)               |
| Samoa   | 2004 | 159.8 (144.1 to 178.3)     | 113.6 (99.0 to 130.5)      | 21.2 (15.4 to 28.7)           | 0.0 (0.0 to 0.0)                | 25.0 (25.0 to 25.0)               | 220.9 (199.3 to 246.5) | 157.0 (136.9 to 180.5)     | 29.3 (21.3 to 39.6)           | 0.0 (0.0 to 0.1)                | 34.5 (34.5 to 34.5)               |
| Samoa   | 2005 | 171.6 (155.0 to 192.1)     | 123.2 (108.3 to 141.1)     | 22.6 (16.4 to 31.0)           | 0.0 (0.0 to 0.0)                | 25.8 (25.8 to 25.8)               | 237.2 (214.4 to 265.6) | 170.4 (149.7 to 195.0)     | 31.2 (22.6 to 42.9)           | 0.0 (0.0 to 0.0)                | 35.7 (35.7 to 35.7)               |
| Samoa   | 2006 | 191.8 (175.2 to 211.6)     | 129.3 (114.4 to 147.9)     | 23.4 (16.9 to 32.5)           | 0.0 (0.0 to 0.0)                | 39.1 (39.1 to 39.1)               | 265.2 (242.2 to 292.6) | 178.8 (158.2 to 204.5)     | 32.3 (23.4 to 44.9)           | 0.0 (0.0 to 0.0)                | 54.0 (54.0 to 54.0)               |
| Samoa   | 2007 | 190.0 (172.7 to 209.8)     | 137.5 (122.2 to 156.9)     | 24.9 (18.1 to 34.8)           | 0.0 (0.0 to 0.0)                | 27.7 (27.7 to 27.7)               | 262.7 (238.7 to 290.0) | 190.1 (168.9 to 216.9)     | 34.4 (25.0 to 48.1)           | 0.0 (0.0 to 0.0)                | 38.2 (38.2 to 38.2)               |
| Samoa   | 2008 | 205.3 (187.1 to 224.8)     | 147.8 (131.3 to 166.8)     | 27.5 (20.2 to 38.0)           | 0.1 (0.0 to 0.2)                | 29.8 (29.8 to 29.8)               | 283.9 (258.7 to 310.8) | 204.4 (181.6 to 230.6)     | 38.1 (27.9 to 52.6)           | 0.1 (0.1 to 0.3)                | 41.2 (41.2 to 41.2)               |
| Samoa   | 2009 | 208.5 (189.7 to 228.2)     | 151.1 (134.4 to 170.8)     | 27.5 (20.2 to 37.9)           | 0.5 (0.2 to 1.0)                | 29.4 (29.4 to 29.4)               | 288.3 (262.3 to 315.6) | 209.0 (185.8 to 236.1)     | 38.0 (27.9 to 52.4)           | 0.7 (0.3 to 1.3)                | 40.6 (40.6 to 40.6)               |
| Samoa   | 2010 | 244.6 (225.3 to 264.0)     | 152.4 (135.5 to 172.0)     | 27.2 (19.7 to 37.4)           | 1.1 (0.5 to 2.1)                | 64.0 (64.0 to 64.0)               | 338.2 (311.6 to 365.1) | 210.8 (187.3 to 237.8)     | 37.5 (27.3 to 51.7)           | 1.5 (0.7 to 2.9)                | 88.4 (88.4 to 88.4)               |
| Samoa   | 2011 | 211.9 (192.2 to 233.5)     | 156.7 (139.2 to 176.3)     | 27.5 (19.8 to 37.6)           | 1.6 (0.7 to 3.0)                | 26.1 (26.1 to 26.1)               | 292.9 (265.8 to 322.9) | 216.7 (192.5 to 243.7)     | 38.0 (27.4 to 52.0)           | 2.2 (1.0 to 4.2)                | 36.1 (36.1 to 36.1)               |
| Samoa   | 2012 | 255.1 (234.9 to 276.9)     | 158.4 (139.9 to 178.3)     | 27.2 (19.8 to 36.6)           | 1.9 (0.9 to 3.6)                | 67.6 (67.6 to 67.6)               | 352.7 (324.9 to 382.8) | 219.0 (193.5 to 246.5)     | 37.6 (27.4 to 50.7)           | 2.6 (1.2 to 5.0)                | 93.5 (93.5 to 93.5)               |
| Samoa   | 2013 | 259.3 (239.1 to 280.5)     | 160.1 (142.0 to 180.3)     | 27.3 (19.9 to 37.0)           | 2.0 (0.9 to 3.8)                | 69.9 (69.9 to 69.9)               | 358.5 (330.7 to 387.8) | 221.4 (196.3 to 249.2)     | 37.7 (27.5 to 51.2)           | 2.8 (1.3 to 5.3)                | 96.6 (96.6 to 96.6)               |
| Samoa   | 2014 | 213.3 (193.1 to 237.2)     | 167.9 (148.0 to 189.7)     | 27.5 (20.0 to 37.4)           | 2.1 (1.0 to 4.0)                | 15.8 (15.8 to 15.8)               | 295.0 (267.1 to 327.9) | 232.2 (204.7 to 262.3)     | 38.0 (27.6 to 51.6)           | 2.9 (1.3 to 5.6)                | 21.9 (21.9 to 21.9)               |
| Samoa   | 2015 | 246.8 (224.7 to 273.5)     | 171.5 (150.4 to 196.3)     | 27.4 (19.7 to 37.3)           | 2.1 (1.0 to 4.1)                | 45.7 (45.7 to 45.7)               | 341.2 (310.7 to 378.2) | 237.2 (208.0 to 271.4)     | 37.9 (27.3 to 51.5)           | 2.9 (1.3 to 5.6)                | 63.2 (63.2 to 63.2)               |
| Samoa   | 2016 | 231.5 (204.8 to 262.2)     | 177.8 (153.3 to 206.4)     | 28.3 (20.0 to 38.8)           | 2.2 (1.0 to 4.1)                | 23.2 (23.2 to 23.2)               | 320.1 (283.2 to 362.5) | 245.8 (211.9 to 285.4)     | 39.2 (27.7 to 53.6)           | 3.0 (1.4 to 5.6)                | 32.1 (32.1 to 32.1)               |
| Samoa   | 2017 | 230.3 (203.9 to 259.8)     | 180.5 (155.4 to 209.4)     | 28.7 (20.4 to 39.2)           | 2.2 (1.0 to 4.2)                | 18.8 (18.8 to 18.8)               | 318.4 (282.0 to 359.3) | 249.6 (214.9 to 289.5)     | 39.7 (28.1 to 54.2)           | 3.1 (1.4 to 5.8)                | 26.0 (26.0 to 26.0)               |
| Samoa   | 2018 | 231.5 (205.3 to 262.4)     | 182.5 (157.0 to 211.6)     | 29.0 (20.4 to 39.7)           | 2.3 (1.0 to 4.2)                | 17.7 (17.7 to 17.7)               | 320.2 (283.8 to 362.8) | 252.4 (217.0 to 292.5)     | 40.2 (28.2 to 54.9)           | 3.1 (1.4 to 5.8)                | 24.5 (24.5 to 24.5)               |
| Samoa   | 2019 | 234.7 (207.9 to 266.8)     | 185.1 (159.4 to 214.4)     | 29.4 (20.7 to 40.2)           | 2.3 (1.0 to 4.3)                | 18.0 (16.7 to 19.0)               | 324.6 (287.4 to 369.0) | 255.9 (220.5 to 296.4)     | 40.6 (28.6 to 55.6)           | 3.2 (1.4 to 6.0)                | 24.8 (23.2 to 26.3)               |
| Samoa   | 2020 | 238.4 (210.9 to 270.1)     | 188.2 (162.1 to 217.4)     | 29.6 (20.8 to 40.3)           | 2.3 (1.1 to 4.4)                | 18.3 (16.7 to 19.7)               | 329.6 (291.6 to 373.5) | 260.2 (224.2 to 300.6)     | 40.9 (28.8 to 55.8)           | 3.2 (1.5 to 6.1)                | 25.2 (23.1 to 27.3)               |
| Samoa   | 2021 | 242.6 (215.2 to 274.9)     | 191.8 (164.9 to 221.6)     | 29.9 (21.1 to 40.9)           | 2.4 (1.1 to 4.5)                | 18.6 (16.7 to 20.5)               | 335.5 (297.5 to 380.1) | 265.2 (227.9 to 306.3)     | 41.3 (29.2 to 56.5)           | 3.3 (1.5 to 6.2)                | 25.7 (23.2 to 28.4)               |
| Samoa   | 2022 | 247.4 (218.3 to 279.4)     | 195.7 (168.5 to 225.8)     | 30.1 (21.3 to 41.3)           | 2.4 (1.1 to 4.6)                | 19.0 (16.9 to 21.3)               | 342.0 (301.9 to 386.3) | 270.7 (233.0 to 312.2)     | 41.7 (29.5 to 57.1)           | 3.4 (1.5 to 6.3)                | 26.3 (23.4 to 29.4)               |



| Country | Year | 2018 US Dollars per capita |                            |                               |                                 |                                   | 2018 PPP per capita    |                            |                               |                                 |                                   |
|---------|------|----------------------------|----------------------------|-------------------------------|---------------------------------|-----------------------------------|------------------------|----------------------------|-------------------------------|---------------------------------|-----------------------------------|
|         |      | Health spending            | Government health spending | Out-of-pocket health spending | Prepaid private health spending | Development assistance for health | Health spending        | Government health spending | Out-of-pocket health spending | Prepaid private health spending | Development assistance for health |
| Samoa   | 2023 | 252.0 (222.5 to 285.8)     | 199.6 (171.9 to 230.1)     | 30.5 (21.5 to 41.9)           | 2.5 (1.1 to 4.6)                | 19.5 (16.9 to 22.1)               | 348.5 (307.6 to 395.2) | 275.9 (237.7 to 318.2)     | 42.2 (29.8 to 57.9)           | 3.4 (1.6 to 6.4)                | 26.9 (23.4 to 30.5)               |
| Samoa   | 2024 | 257.3 (227.2 to 291.2)     | 204.0 (175.2 to 236.1)     | 30.9 (21.7 to 42.1)           | 2.5 (1.1 to 4.7)                | 19.9 (17.2 to 23.0)               | 355.8 (314.1 to 402.7) | 282.1 (242.2 to 326.5)     | 42.7 (30.1 to 58.3)           | 3.5 (1.6 to 6.6)                | 27.5 (23.8 to 31.8)               |
| Samoa   | 2025 | 262.7 (232.1 to 298.3)     | 208.6 (179.3 to 241.9)     | 31.3 (22.1 to 42.7)           | 2.6 (1.2 to 4.8)                | 20.3 (17.2 to 23.9)               | 363.3 (321.0 to 412.4) | 288.4 (247.9 to 334.4)     | 43.3 (30.5 to 59.0)           | 3.6 (1.6 to 6.7)                | 28.0 (23.8 to 33.0)               |
| Samoa   | 2026 | 269.0 (237.1 to 307.2)     | 213.9 (183.7 to 248.8)     | 31.8 (22.5 to 43.4)           | 2.6 (1.2 to 5.0)                | 20.7 (17.5 to 24.2)               | 372.0 (327.8 to 424.8) | 295.8 (254.0 to 344.0)     | 44.0 (31.1 to 60.0)           | 3.6 (1.7 to 6.9)                | 28.6 (24.1 to 33.5)               |
| Samoa   | 2027 | 275.7 (241.6 to 313.0)     | 219.5 (188.2 to 255.2)     | 32.4 (22.9 to 44.1)           | 2.7 (1.2 to 5.1)                | 21.1 (17.7 to 25.1)               | 381.2 (334.1 to 432.8) | 303.6 (260.3 to 352.8)     | 44.7 (31.6 to 61.0)           | 3.7 (1.7 to 7.1)                | 29.1 (24.4 to 34.7)               |
| Samoa   | 2028 | 282.4 (247.2 to 321.4)     | 225.2 (193.0 to 262.1)     | 32.9 (23.3 to 45.0)           | 2.8 (1.3 to 5.2)                | 21.5 (18.0 to 26.0)               | 390.4 (341.8 to 444.5) | 311.4 (266.8 to 362.4)     | 45.5 (32.2 to 62.2)           | 3.8 (1.7 to 7.3)                | 29.7 (24.9 to 35.9)               |
| Samoa   | 2029 | 288.7 (252.9 to 329.5)     | 230.5 (197.5 to 268.6)     | 33.4 (23.6 to 45.9)           | 2.8 (1.3 to 5.4)                | 21.9 (18.2 to 26.8)               | 399.1 (349.7 to 455.6) | 318.7 (273.1 to 371.5)     | 46.2 (32.7 to 63.4)           | 3.9 (1.8 to 7.4)                | 30.4 (25.1 to 37.0)               |
| Samoa   | 2030 | 294.9 (257.9 to 335.5)     | 235.7 (202.0 to 275.2)     | 33.9 (23.9 to 46.9)           | 2.9 (1.3 to 5.5)                | 22.4 (18.3 to 27.5)               | 407.7 (356.6 to 463.9) | 325.9 (279.3 to 380.6)     | 46.9 (33.0 to 64.9)           | 4.0 (1.8 to 7.6)                | 30.9 (25.3 to 38.1)               |
| Samoa   | 2031 | 301.5 (263.9 to 345.4)     | 241.3 (206.6 to 282.4)     | 34.4 (24.5 to 48.2)           | 2.9 (1.3 to 5.6)                | 22.8 (18.4 to 28.5)               | 416.8 (364.8 to 477.6) | 333.7 (285.6 to 390.5)     | 47.6 (33.8 to 66.6)           | 4.1 (1.8 to 7.8)                | 31.5 (25.5 to 39.4)               |
| Samoa   | 2032 | 308.0 (269.6 to 356.0)     | 246.9 (211.1 to 289.8)     | 35.0 (24.8 to 49.1)           | 3.0 (1.4 to 5.7)                | 23.2 (18.6 to 29.0)               | 425.9 (372.8 to 492.2) | 341.4 (291.9 to 400.7)     | 48.3 (34.3 to 67.8)           | 4.1 (1.9 to 7.9)                | 32.1 (25.8 to 40.2)               |
| Samoa   | 2033 | 314.2 (273.6 to 363.7)     | 252.1 (214.9 to 297.4)     | 35.4 (25.1 to 49.8)           | 3.1 (1.4 to 5.9)                | 23.6 (18.7 to 30.2)               | 434.5 (378.4 to 503.0) | 348.6 (297.1 to 411.2)     | 49.0 (34.7 to 68.9)           | 4.2 (1.9 to 8.1)                | 32.6 (25.9 to 41.8)               |
| Samoa   | 2034 | 320.1 (280.1 to 369.5)     | 257.0 (218.0 to 303.0)     | 35.9 (25.4 to 50.6)           | 3.1 (1.4 to 6.0)                | 24.1 (19.0 to 30.9)               | 442.6 (387.3 to 510.9) | 355.3 (301.5 to 418.9)     | 49.7 (35.2 to 70.0)           | 4.3 (2.0 to 8.3)                | 33.3 (26.3 to 42.8)               |
| Samoa   | 2035 | 325.7 (283.9 to 380.4)     | 261.6 (221.9 to 309.2)     | 36.4 (25.7 to 51.6)           | 3.2 (1.4 to 6.1)                | 24.5 (19.1 to 32.0)               | 450.3 (392.6 to 525.9) | 361.7 (306.9 to 427.5)     | 50.3 (35.6 to 71.4)           | 4.4 (2.0 to 8.4)                | 33.9 (26.4 to 44.3)               |
| Samoa   | 2036 | 331.6 (289.3 to 383.2)     | 266.5 (226.1 to 314.9)     | 36.9 (26.1 to 52.8)           | 3.2 (1.5 to 6.2)                | 25.0 (19.4 to 33.5)               | 458.5 (400.0 to 529.8) | 368.5 (312.6 to 435.5)     | 51.0 (36.1 to 73.1)           | 4.5 (2.0 to 8.5)                | 34.5 (26.8 to 46.3)               |
| Samoa   | 2037 | 337.5 (295.5 to 391.5)     | 271.4 (229.7 to 321.6)     | 37.4 (26.6 to 54.0)           | 3.3 (1.5 to 6.3)                | 25.4 (19.5 to 33.8)               | 466.6 (408.6 to 541.3) | 375.3 (317.6 to 444.7)     | 51.7 (36.7 to 74.7)           | 4.5 (2.1 to 8.7)                | 35.1 (27.0 to 46.7)               |
| Samoa   | 2038 | 343.3 (298.4 to 399.2)     | 276.2 (233.5 to 328.4)     | 37.9 (26.9 to 55.0)           | 3.4 (1.5 to 6.4)                | 25.8 (19.7 to 35.7)               | 474.7 (412.6 to 551.9) | 381.9 (322.8 to 454.1)     | 52.4 (37.2 to 76.1)           | 4.6 (2.1 to 8.8)                | 35.7 (27.2 to 49.4)               |
| Samoa   | 2039 | 348.8 (302.9 to 407.4)     | 280.7 (237.4 to 334.2)     | 38.4 (27.2 to 56.0)           | 3.4 (1.5 to 6.5)                | 26.2 (20.1 to 36.4)               | 482.3 (418.9 to 563.3) | 388.2 (328.2 to 462.1)     | 53.1 (37.6 to 77.4)           | 4.7 (2.1 to 9.0)                | 36.3 (27.8 to 50.4)               |
| Samoa   | 2040 | 354.1 (306.8 to 410.9)     | 285.1 (241.1 to 340.0)     | 38.9 (27.4 to 56.9)           | 3.5 (1.6 to 6.6)                | 26.7 (20.3 to 37.0)               | 489.7 (424.2 to 568.2) | 394.2 (333.4 to 470.1)     | 53.8 (37.9 to 78.6)           | 4.8 (2.2 to 9.1)                | 36.9 (28.1 to 51.2)               |
| Samoa   | 2041 | 359.9 (311.6 to 418.9)     | 289.8 (245.1 to 346.2)     | 39.4 (27.7 to 57.8)           | 3.5 (1.6 to 6.7)                | 27.2 (20.4 to 37.7)               | 497.7 (430.9 to 579.3) | 400.7 (338.9 to 478.7)     | 54.5 (38.3 to 80.0)           | 4.9 (2.2 to 9.2)                | 37.6 (28.2 to 52.1)               |
| Samoa   | 2042 | 365.6 (316.6 to 426.0)     | 294.3 (248.4 to 352.8)     | 40.0 (28.1 to 58.8)           | 3.6 (1.6 to 6.8)                | 27.7 (20.7 to 39.4)               | 505.5 (437.8 to 589.1) | 407.0 (343.4 to 487.8)     | 55.3 (38.8 to 81.3)           | 5.0 (2.2 to 9.4)                | 38.2 (28.6 to 54.5)               |
| Samoa   | 2043 | 371.0 (321.5 to 433.3)     | 298.8 (251.5 to 359.0)     | 40.5 (28.3 to 59.7)           | 3.7 (1.7 to 6.9)                | 28.1 (20.8 to 40.6)               | 513.0 (444.5 to 599.1) | 413.1 (347.8 to 496.4)     | 56.0 (39.2 to 82.6)           | 5.1 (2.3 to 9.6)                | 38.9 (28.8 to 56.1)               |

| Country               | Year | 2018 US Dollars per capita |                            |                               |                                 |                                   | 2018 PPP per capita    |                            |                               |                                 |                                   |
|-----------------------|------|----------------------------|----------------------------|-------------------------------|---------------------------------|-----------------------------------|------------------------|----------------------------|-------------------------------|---------------------------------|-----------------------------------|
|                       |      | Health spending            | Government health spending | Out-of-pocket health spending | Prepaid private health spending | Development assistance for health | Health spending        | Government health spending | Out-of-pocket health spending | Prepaid private health spending | Development assistance for health |
| Samoa                 | 2044 | 376.4 (325.5 to 438.4)     | 303.0 (254.7 to 365.0)     | 41.0 (28.6 to 60.7)           | 3.7 (1.7 to 7.1)                | 28.6 (21.1 to 41.5)               | 520.5 (450.0 to 606.1) | 419.0 (352.2 to 504.8)     | 56.7 (39.6 to 83.9)           | 5.1 (2.3 to 9.8)                | 39.6 (29.2 to 57.4)               |
| Samoa                 | 2045 | 381.8 (329.7 to 444.9)     | 307.3 (258.5 to 371.1)     | 41.6 (28.9 to 61.6)           | 3.8 (1.7 to 7.2)                | 29.2 (21.0 to 44.2)               | 528.0 (455.9 to 615.2) | 424.9 (357.4 to 513.1)     | 57.5 (39.9 to 85.1)           | 5.2 (2.4 to 10.0)               | 40.3 (29.0 to 61.2)               |
| Samoa                 | 2046 | 387.9 (336.1 to 453.0)     | 312.2 (262.9 to 376.9)     | 42.2 (29.2 to 62.7)           | 3.9 (1.7 to 7.4)                | 29.7 (21.4 to 45.5)               | 536.4 (464.7 to 626.4) | 431.7 (363.5 to 521.1)     | 58.3 (40.4 to 86.7)           | 5.3 (2.4 to 10.2)               | 41.0 (29.6 to 62.9)               |
| Samoa                 | 2047 | 393.8 (339.8 to 462.3)     | 316.9 (266.2 to 382.6)     | 42.8 (29.6 to 63.7)           | 3.9 (1.8 to 7.5)                | 30.2 (21.7 to 47.7)               | 544.5 (469.8 to 639.2) | 438.1 (368.1 to 529.0)     | 59.2 (40.9 to 88.1)           | 5.4 (2.4 to 10.4)               | 41.8 (30.0 to 66.0)               |
| Samoa                 | 2048 | 399.9 (342.7 to 466.7)     | 321.7 (270.1 to 388.6)     | 43.4 (30.0 to 64.7)           | 4.0 (1.8 to 7.7)                | 30.8 (22.0 to 49.1)               | 553.0 (473.9 to 645.4) | 444.8 (373.4 to 537.3)     | 60.0 (41.4 to 89.5)           | 5.5 (2.5 to 10.6)               | 42.6 (30.5 to 67.9)               |
| Samoa                 | 2049 | 406.1 (349.8 to 475.2)     | 326.5 (273.7 to 394.1)     | 44.0 (30.3 to 65.9)           | 4.1 (1.8 to 7.8)                | 31.4 (22.4 to 50.7)               | 561.5 (483.7 to 657.1) | 451.5 (378.5 to 544.9)     | 60.9 (41.9 to 91.2)           | 5.7 (2.5 to 10.8)               | 43.4 (31.0 to 70.0)               |
| Samoa                 | 2050 | 411.9 (353.7 to 479.5)     | 331.1 (277.3 to 399.6)     | 44.7 (30.6 to 67.0)           | 4.2 (1.9 to 8.0)                | 32.0 (22.6 to 52.2)               | 569.6 (489.0 to 663.0) | 457.8 (383.4 to 552.5)     | 61.7 (42.3 to 92.6)           | 5.8 (2.6 to 11.1)               | 44.3 (31.3 to 72.2)               |
| Sao Tome and Principe | 1995 | 105.6 (91.4 to 122.8)      | 35.5 (28.2 to 44.7)        | 43.6 (32.1 to 58.7)           | 1.2 (0.6 to 2.2)                | 25.4 (25.4 to 25.4)               | 180.2 (155.9 to 209.5) | 60.5 (48.0 to 76.3)        | 74.3 (54.8 to 100.1)          | 2.0 (1.0 to 3.7)                | 43.4 (43.4 to 43.4)               |
| Sao Tome and Principe | 1996 | 104.2 (90.2 to 120.6)      | 35.7 (28.4 to 44.8)        | 43.5 (32.0 to 57.9)           | 1.1 (0.5 to 2.1)                | 23.9 (23.9 to 23.9)               | 177.7 (153.9 to 205.6) | 60.9 (48.4 to 76.5)        | 74.1 (54.6 to 98.8)           | 1.9 (0.9 to 3.6)                | 40.8 (40.8 to 40.8)               |
| Sao Tome and Principe | 1997 | 98.1 (83.8 to 114.5)       | 39.7 (31.8 to 49.1)        | 44.0 (33.0 to 58.6)           | 1.2 (0.5 to 2.1)                | 13.1 (13.1 to 13.1)               | 167.3 (143.0 to 195.3) | 67.7 (54.3 to 83.7)        | 75.1 (56.3 to 99.9)           | 2.0 (0.9 to 3.7)                | 22.4 (22.4 to 22.4)               |
| Sao Tome and Principe | 1998 | 108.1 (93.0 to 123.9)      | 43.2 (34.6 to 53.5)        | 45.2 (33.8 to 59.3)           | 1.2 (0.5 to 2.3)                | 18.5 (18.5 to 18.5)               | 184.3 (158.6 to 211.4) | 73.7 (59.0 to 91.3)        | 77.0 (57.6 to 101.2)          | 2.1 (0.9 to 3.9)                | 31.5 (31.5 to 31.5)               |
| Sao Tome and Principe | 1999 | 158.2 (142.3 to 174.6)     | 46.4 (37.1 to 57.6)        | 47.1 (35.1 to 61.6)           | 1.3 (0.6 to 2.4)                | 63.5 (63.5 to 63.5)               | 269.9 (242.7 to 297.8) | 79.1 (63.3 to 98.3)        | 80.4 (59.9 to 105.1)          | 2.2 (1.0 to 4.1)                | 108.2 (108.2 to 108.2)            |
| Sao Tome and Principe | 2000 | 148.2 (131.2 to 165.6)     | 50.3 (40.5 to 62.8)        | 52.2 (39.0 to 67.4)           | 1.3 (0.6 to 2.6)                | 44.4 (44.4 to 44.4)               | 252.9 (223.7 to 282.5) | 85.8 (69.1 to 107.1)       | 89.1 (66.6 to 115.0)          | 2.3 (1.0 to 4.4)                | 75.7 (75.7 to 75.7)               |
| Sao Tome and Principe | 2001 | 156.2 (138.7 to 174.8)     | 54.5 (44.2 to 67.6)        | 54.4 (41.0 to 69.0)           | 1.3 (0.6 to 2.6)                | 46.0 (46.0 to 46.0)               | 266.4 (236.7 to 298.1) | 92.9 (75.4 to 115.4)       | 92.8 (69.9 to 117.6)          | 2.3 (1.0 to 4.4)                | 78.5 (78.5 to 78.5)               |
| Sao Tome and Principe | 2002 | 149.1 (131.6 to 167.6)     | 58.5 (47.5 to 72.1)        | 54.4 (41.4 to 68.5)           | 1.3 (0.6 to 2.4)                | 35.0 (35.0 to 35.0)               | 254.4 (224.5 to 285.9) | 99.7 (80.9 to 123.0)       | 92.8 (70.6 to 116.9)          | 2.2 (1.0 to 4.2)                | 59.6 (59.6 to 59.6)               |
| Sao Tome and Principe | 2003 | 153.2 (134.7 to 172.7)     | 65.8 (53.6 to 80.3)        | 55.4 (42.2 to 69.7)           | 1.4 (0.6 to 2.6)                | 30.6 (30.6 to 30.6)               | 261.4 (229.8 to 294.7) | 112.3 (91.5 to 137.0)      | 94.6 (71.9 to 118.9)          | 2.4 (1.1 to 4.4)                | 52.2 (52.2 to 52.2)               |
| Sao Tome and Principe | 2004 | 153.0 (135.5 to 172.1)     | 60.9 (49.6 to 74.3)        | 54.5 (41.4 to 69.0)           | 1.4 (0.7 to 2.7)                | 36.2 (36.2 to 36.2)               | 261.0 (231.1 to 293.5) | 103.9 (84.6 to 126.7)      | 92.9 (70.6 to 117.8)          | 2.4 (1.1 to 4.6)                | 61.7 (61.7 to 61.7)               |
| Sao Tome and Principe | 2005 | 135.0 (119.4 to 152.8)     | 48.3 (39.1 to 58.9)        | 50.6 (38.4 to 64.4)           | 1.5 (0.7 to 2.9)                | 34.7 (34.7 to 34.7)               | 230.4 (203.7 to 260.6) | 82.3 (66.6 to 100.4)       | 86.3 (65.6 to 109.9)          | 2.6 (1.2 to 4.9)                | 59.1 (59.1 to 59.1)               |
| Sao Tome and Principe | 2006 | 105.2 (93.5 to 119.0)      | 29.0 (23.2 to 35.4)        | 42.1 (32.0 to 53.8)           | 1.3 (0.6 to 2.6)                | 32.7 (32.7 to 32.7)               | 179.4 (159.5 to 203.0) | 49.4 (39.5 to 60.3)        | 71.9 (54.6 to 91.8)           | 2.3 (1.1 to 4.5)                | 55.8 (55.8 to 55.8)               |
| Sao Tome and Principe | 2007 | 93.6 (82.7 to 105.7)       | 28.6 (22.9 to 34.8)        | 37.6 (28.6 to 48.1)           | 1.5 (0.7 to 2.8)                | 26.0 (26.0 to 26.0)               | 159.7 (141.1 to 180.3) | 48.8 (39.1 to 59.4)        | 64.2 (48.8 to 82.1)           | 2.5 (1.2 to 4.8)                | 44.3 (44.3 to 44.3)               |
| Sao Tome and Principe | 2008 | 105.4 (95.5 to 116.5)      | 28.7 (23.0 to 35.1)        | 32.4 (24.7 to 42.0)           | 1.5 (0.7 to 2.9)                | 42.8 (42.8 to 42.8)               | 179.8 (162.9 to 198.7) | 49.0 (39.2 to 59.9)        | 55.3 (42.2 to 71.7)           | 2.5 (1.2 to 4.9)                | 73.0 (73.0 to 73.0)               |

| Country               | Year | 2018 US Dollars per capita |                            |                               |                                 |                                   | 2018 PPP per capita    |                            |                               |                                 |                                   |
|-----------------------|------|----------------------------|----------------------------|-------------------------------|---------------------------------|-----------------------------------|------------------------|----------------------------|-------------------------------|---------------------------------|-----------------------------------|
|                       |      | Health spending            | Government health spending | Out-of-pocket health spending | Prepaid private health spending | Development assistance for health | Health spending        | Government health spending | Out-of-pocket health spending | Prepaid private health spending | Development assistance for health |
| Sao Tome and Principe | 2009 | 91.6 (82.1 to 103.0)       | 31.6 (25.2 to 38.8)        | 29.1 (22.2 to 38.3)           | 1.6 (0.8 to 3.2)                | 29.3 (29.3 to 29.3)               | 156.3 (140.0 to 175.7) | 53.8 (42.9 to 66.2)        | 49.7 (37.9 to 65.4)           | 2.8 (1.3 to 5.4)                | 50.0 (50.0 to 50.0)               |
| Sao Tome and Principe | 2010 | 96.0 (86.1 to 107.7)       | 36.1 (28.7 to 44.5)        | 26.8 (20.1 to 35.5)           | 1.8 (0.8 to 3.5)                | 31.3 (31.3 to 31.3)               | 163.8 (146.9 to 183.7) | 61.6 (49.0 to 75.8)        | 45.7 (34.3 to 60.6)           | 3.1 (1.4 to 6.0)                | 53.4 (53.4 to 53.4)               |
| Sao Tome and Principe | 2011 | 120.7 (110.6 to 132.3)     | 39.7 (31.6 to 48.8)        | 24.8 (18.5 to 32.7)           | 2.1 (1.0 to 4.0)                | 54.1 (54.1 to 54.1)               | 205.9 (188.6 to 225.6) | 67.7 (53.9 to 83.3)        | 42.3 (31.5 to 55.8)           | 3.6 (1.7 to 6.9)                | 92.3 (92.3 to 92.3)               |
| Sao Tome and Principe | 2012 | 97.9 (87.2 to 109.8)       | 41.6 (33.4 to 51.0)        | 23.0 (16.7 to 30.6)           | 2.6 (1.2 to 5.0)                | 30.7 (30.7 to 30.7)               | 167.0 (148.7 to 187.4) | 71.0 (56.9 to 87.0)        | 39.3 (28.5 to 52.2)           | 4.4 (2.1 to 8.6)                | 52.3 (52.3 to 52.3)               |
| Sao Tome and Principe | 2013 | 124.4 (112.7 to 137.2)     | 44.0 (34.7 to 54.0)        | 21.9 (16.0 to 29.3)           | 2.8 (1.4 to 5.4)                | 55.7 (55.7 to 55.7)               | 212.2 (192.3 to 234.1) | 75.1 (59.2 to 92.1)        | 37.4 (27.3 to 50.0)           | 4.8 (2.3 to 9.1)                | 95.0 (95.0 to 95.0)               |
| Sao Tome and Principe | 2014 | 113.7 (102.3 to 126.5)     | 43.6 (34.5 to 54.1)        | 20.5 (15.0 to 27.8)           | 2.4 (1.1 to 4.6)                | 47.2 (47.2 to 47.2)               | 193.9 (174.6 to 215.8) | 74.4 (58.8 to 92.3)        | 34.9 (25.5 to 47.3)           | 4.1 (2.0 to 7.8)                | 80.5 (80.5 to 80.5)               |
| Sao Tome and Principe | 2015 | 95.8 (85.1 to 108.2)       | 41.0 (32.3 to 50.8)        | 18.8 (13.7 to 25.1)           | 1.8 (0.9 to 3.5)                | 34.2 (34.2 to 34.2)               | 163.5 (145.2 to 184.6) | 69.9 (55.1 to 86.6)        | 32.0 (23.3 to 42.8)           | 3.1 (1.5 to 6.0)                | 58.4 (58.4 to 58.4)               |
| Sao Tome and Principe | 2016 | 101.7 (90.1 to 114.3)      | 43.8 (34.2 to 54.6)        | 18.6 (13.4 to 25.0)           | 1.7 (0.8 to 3.2)                | 37.7 (37.7 to 37.7)               | 173.5 (153.7 to 195.0) | 74.7 (58.4 to 93.1)        | 31.7 (22.9 to 42.6)           | 2.9 (1.4 to 5.5)                | 64.2 (64.2 to 64.2)               |
| Sao Tome and Principe | 2017 | 106.4 (94.6 to 119.2)      | 45.6 (35.4 to 56.6)        | 18.5 (13.4 to 24.9)           | 1.8 (0.8 to 3.3)                | 40.5 (40.5 to 40.5)               | 181.6 (161.4 to 203.4) | 77.8 (60.5 to 96.6)        | 31.6 (22.8 to 42.5)           | 3.0 (1.4 to 5.7)                | 69.1 (69.1 to 69.1)               |
| Sao Tome and Principe | 2018 | 103.0 (91.3 to 116.3)      | 45.9 (35.8 to 56.9)        | 18.4 (13.3 to 25.0)           | 1.8 (0.8 to 3.4)                | 36.9 (36.7 to 37.1)               | 175.8 (155.7 to 198.4) | 78.3 (61.0 to 97.0)        | 31.5 (22.8 to 42.6)           | 3.1 (1.4 to 5.8)                | 63.0 (62.6 to 63.4)               |
| Sao Tome and Principe | 2019 | 103.6 (91.4 to 116.6)      | 46.4 (35.8 to 57.4)        | 18.4 (13.4 to 24.8)           | 1.8 (0.9 to 3.5)                | 37.0 (34.6 to 39.1)               | 176.7 (156.0 to 199.0) | 79.1 (61.1 to 98.0)        | 31.3 (22.8 to 42.3)           | 3.1 (1.5 to 5.9)                | 63.2 (59.0 to 66.8)               |
| Sao Tome and Principe | 2020 | 104.4 (92.4 to 118.8)      | 46.8 (36.4 to 58.1)        | 18.3 (13.4 to 24.6)           | 1.9 (0.9 to 3.5)                | 37.4 (34.3 to 40.4)               | 178.1 (157.5 to 202.6) | 79.9 (62.0 to 99.1)        | 31.2 (22.8 to 42.0)           | 3.2 (1.5 to 6.0)                | 63.8 (58.6 to 69.0)               |
| Sao Tome and Principe | 2021 | 105.6 (92.3 to 120.0)      | 47.6 (36.8 to 58.9)        | 18.3 (13.1 to 24.6)           | 1.9 (0.9 to 3.6)                | 37.9 (34.2 to 41.9)               | 180.1 (157.5 to 204.6) | 81.1 (62.8 to 100.5)       | 31.1 (22.4 to 41.9)           | 3.2 (1.5 to 6.1)                | 64.6 (58.3 to 71.5)               |
| Sao Tome and Principe | 2022 | 107.2 (93.9 to 121.4)      | 48.4 (37.5 to 60.0)        | 18.2 (13.1 to 24.4)           | 1.9 (0.9 to 3.7)                | 38.7 (34.2 to 43.1)               | 182.9 (160.1 to 207.2) | 82.6 (64.0 to 102.3)       | 31.1 (22.4 to 41.7)           | 3.3 (1.5 to 6.2)                | 66.0 (58.4 to 73.6)               |
| Sao Tome and Principe | 2023 | 108.8 (94.8 to 124.6)      | 49.2 (38.1 to 60.9)        | 18.2 (13.1 to 24.4)           | 2.0 (0.9 to 3.7)                | 39.5 (34.3 to 44.8)               | 185.6 (161.8 to 212.5) | 83.9 (65.0 to 103.9)       | 31.0 (22.4 to 41.7)           | 3.3 (1.6 to 6.3)                | 67.3 (58.6 to 76.5)               |
| Sao Tome and Principe | 2024 | 110.6 (96.0 to 125.9)      | 50.1 (38.8 to 62.1)        | 18.2 (13.1 to 24.4)           | 2.0 (0.9 to 3.8)                | 40.4 (34.9 to 46.6)               | 188.7 (163.7 to 214.8) | 85.4 (66.2 to 105.9)       | 31.0 (22.3 to 41.5)           | 3.4 (1.6 to 6.5)                | 68.8 (59.5 to 79.4)               |
| Sao Tome and Principe | 2025 | 112.3 (97.7 to 128.0)      | 51.0 (39.5 to 63.3)        | 18.1 (13.1 to 24.3)           | 2.0 (1.0 to 3.9)                | 41.1 (35.1 to 48.1)               | 191.6 (166.7 to 218.3) | 87.0 (67.4 to 108.0)       | 30.9 (22.3 to 41.5)           | 3.5 (1.6 to 6.6)                | 70.1 (59.8 to 82.0)               |
| Sao Tome and Principe | 2026 | 114.0 (99.0 to 131.3)      | 52.0 (40.2 to 64.7)        | 18.1 (13.0 to 24.5)           | 2.1 (1.0 to 4.0)                | 41.8 (35.2 to 49.0)               | 194.5 (168.9 to 224.0) | 88.7 (68.6 to 110.3)       | 30.9 (22.2 to 41.8)           | 3.5 (1.7 to 6.7)                | 71.3 (60.0 to 83.6)               |
| Sao Tome and Principe | 2027 | 115.6 (100.3 to 132.9)     | 52.9 (40.8 to 65.8)        | 18.1 (13.0 to 24.7)           | 2.1 (1.0 to 4.0)                | 42.5 (35.5 to 50.8)               | 197.2 (171.1 to 226.7) | 90.2 (69.6 to 112.3)       | 30.9 (22.2 to 42.2)           | 3.6 (1.7 to 6.9)                | 72.5 (60.6 to 86.6)               |
| Sao Tome and Principe | 2028 | 117.4 (102.4 to 135.2)     | 53.8 (41.4 to 67.0)        | 18.2 (12.9 to 25.0)           | 2.2 (1.0 to 4.1)                | 43.3 (36.1 to 52.5)               | 200.2 (174.6 to 230.6) | 91.7 (70.6 to 114.3)       | 31.0 (22.1 to 42.6)           | 3.7 (1.7 to 7.0)                | 73.8 (61.6 to 89.5)               |
| Sao Tome and Principe | 2029 | 119.2 (102.5 to 137.0)     | 54.7 (42.0 to 68.2)        | 18.2 (12.9 to 25.1)           | 2.2 (1.0 to 4.2)                | 44.1 (36.2 to 54.4)               | 203.2 (174.8 to 233.6) | 93.3 (71.7 to 116.3)       | 31.0 (22.0 to 42.8)           | 3.7 (1.8 to 7.2)                | 75.2 (61.8 to 92.7)               |

| Country               | Year | 2018 US Dollars per capita |                            |                               |                                 |                                   | 2018 PPP per capita    |                            |                               |                                 |                                   |
|-----------------------|------|----------------------------|----------------------------|-------------------------------|---------------------------------|-----------------------------------|------------------------|----------------------------|-------------------------------|---------------------------------|-----------------------------------|
|                       |      | Health spending            | Government health spending | Out-of-pocket health spending | Prepaid private health spending | Development assistance for health | Health spending        | Government health spending | Out-of-pocket health spending | Prepaid private health spending | Development assistance for health |
| Sao Tome and Principe | 2030 | 120.9 (103.8 to 139.8)     | 55.5 (42.7 to 69.3)        | 18.3 (12.8 to 25.2)           | 2.2 (1.1 to 4.3)                | 44.9 (36.6 to 55.4)               | 206.2 (177.0 to 238.5) | 94.7 (72.8 to 118.2)       | 31.1 (21.9 to 43.0)           | 3.8 (1.8 to 7.3)                | 76.5 (62.4 to 94.5)               |
| Sao Tome and Principe | 2031 | 122.7 (105.2 to 141.8)     | 56.4 (43.4 to 70.6)        | 18.3 (12.8 to 25.7)           | 2.3 (1.1 to 4.4)                | 45.7 (37.1 to 57.2)               | 209.3 (179.5 to 241.8) | 96.2 (74.1 to 120.4)       | 31.3 (21.8 to 43.8)           | 3.9 (1.8 to 7.5)                | 77.9 (63.3 to 97.6)               |
| Sao Tome and Principe | 2032 | 124.6 (106.9 to 144.6)     | 57.3 (44.2 to 71.8)        | 18.4 (12.8 to 26.0)           | 2.3 (1.1 to 4.5)                | 46.6 (37.5 to 58.7)               | 212.5 (182.3 to 246.7) | 97.7 (75.4 to 122.4)       | 31.4 (21.8 to 44.3)           | 4.0 (1.9 to 7.6)                | 79.4 (63.9 to 100.1)              |
| Sao Tome and Principe | 2033 | 126.6 (106.7 to 147.3)     | 58.3 (44.9 to 73.1)        | 18.5 (12.7 to 26.3)           | 2.4 (1.1 to 4.6)                | 47.5 (37.6 to 60.9)               | 216.0 (181.9 to 251.3) | 99.4 (76.5 to 124.6)       | 31.6 (21.7 to 44.8)           | 4.0 (1.9 to 7.8)                | 81.0 (64.1 to 103.9)              |
| Sao Tome and Principe | 2034 | 128.6 (109.1 to 149.7)     | 59.1 (45.4 to 74.3)        | 18.6 (12.7 to 26.5)           | 2.4 (1.1 to 4.7)                | 48.5 (38.2 to 62.3)               | 219.4 (186.1 to 255.4) | 100.9 (77.5 to 126.7)      | 31.8 (21.7 to 45.3)           | 4.1 (1.9 to 7.9)                | 82.7 (65.2 to 106.2)              |
| Sao Tome and Principe | 2035 | 130.7 (108.9 to 153.6)     | 60.0 (46.0 to 75.4)        | 18.7 (12.8 to 26.8)           | 2.5 (1.2 to 4.7)                | 49.5 (38.6 to 65.1)               | 222.9 (185.8 to 262.0) | 102.3 (78.5 to 128.7)      | 32.0 (21.8 to 45.8)           | 4.2 (2.0 to 8.1)                | 84.4 (65.9 to 111.0)              |
| Sao Tome and Principe | 2036 | 132.7 (112.4 to 156.2)     | 60.8 (46.6 to 76.6)        | 18.9 (12.8 to 27.1)           | 2.5 (1.2 to 4.8)                | 50.5 (38.9 to 67.9)               | 226.4 (191.6 to 266.5) | 103.8 (79.4 to 130.6)      | 32.2 (21.9 to 46.2)           | 4.3 (2.0 to 8.2)                | 86.2 (66.4 to 115.9)              |
| Sao Tome and Principe | 2037 | 134.8 (114.0 to 159.0)     | 61.8 (47.2 to 77.6)        | 19.0 (12.9 to 27.3)           | 2.5 (1.2 to 4.9)                | 51.5 (39.6 to 69.3)               | 230.0 (194.5 to 271.3) | 105.4 (80.5 to 132.4)      | 32.5 (22.0 to 46.6)           | 4.3 (2.0 to 8.4)                | 87.8 (67.5 to 118.2)              |
| Sao Tome and Principe | 2038 | 137.0 (115.6 to 162.8)     | 62.7 (47.9 to 78.8)        | 19.2 (13.0 to 27.5)           | 2.6 (1.2 to 5.0)                | 52.5 (40.1 to 71.9)               | 233.7 (197.1 to 277.7) | 106.9 (81.7 to 134.4)      | 32.8 (22.2 to 47.0)           | 4.4 (2.1 to 8.5)                | 89.6 (68.5 to 122.7)              |
| Sao Tome and Principe | 2039 | 139.1 (116.7 to 166.1)     | 63.5 (48.6 to 80.0)        | 19.4 (13.1 to 27.9)           | 2.6 (1.2 to 5.1)                | 53.6 (40.7 to 73.2)               | 237.4 (199.1 to 283.3) | 108.4 (82.8 to 136.4)      | 33.1 (22.3 to 47.5)           | 4.5 (2.1 to 8.7)                | 91.4 (69.5 to 124.9)              |
| Sao Tome and Principe | 2040 | 141.4 (119.0 to 168.2)     | 64.4 (49.2 to 81.1)        | 19.6 (13.2 to 28.5)           | 2.7 (1.2 to 5.2)                | 54.7 (41.6 to 75.0)               | 241.2 (202.9 to 286.9) | 109.8 (83.9 to 138.3)      | 33.5 (22.5 to 48.6)           | 4.6 (2.1 to 8.8)                | 93.4 (71.0 to 128.0)              |
| Sao Tome and Principe | 2041 | 143.7 (119.8 to 173.4)     | 65.1 (49.8 to 82.1)        | 19.9 (13.3 to 28.9)           | 2.7 (1.3 to 5.3)                | 56.0 (42.0 to 78.7)               | 245.1 (204.3 to 295.8) | 111.1 (84.9 to 140.1)      | 33.9 (22.6 to 49.3)           | 4.6 (2.2 to 9.0)                | 95.5 (71.7 to 134.3)              |
| Sao Tome and Principe | 2042 | 146.1 (121.0 to 174.5)     | 65.9 (50.4 to 83.3)        | 20.2 (13.4 to 29.5)           | 2.8 (1.3 to 5.3)                | 57.3 (42.5 to 83.0)               | 249.3 (206.4 to 297.7) | 112.4 (86.0 to 142.0)      | 34.4 (22.9 to 50.3)           | 4.7 (2.2 to 9.1)                | 97.7 (72.5 to 141.5)              |
| Sao Tome and Principe | 2043 | 148.5 (123.6 to 180.7)     | 66.6 (50.8 to 84.3)        | 20.5 (13.5 to 29.9)           | 2.8 (1.3 to 5.4)                | 58.6 (43.4 to 86.0)               | 253.3 (210.9 to 308.2) | 113.6 (86.7 to 143.8)      | 34.9 (23.0 to 51.0)           | 4.8 (2.2 to 9.3)                | 100.0 (74.1 to 146.8)             |
| Sao Tome and Principe | 2044 | 151.0 (126.1 to 184.1)     | 67.4 (51.2 to 85.5)        | 20.8 (13.6 to 30.6)           | 2.8 (1.3 to 5.5)                | 60.0 (44.2 to 88.6)               | 257.6 (215.2 to 314.1) | 115.0 (87.4 to 145.8)      | 35.4 (23.3 to 52.1)           | 4.8 (2.2 to 9.4)                | 102.4 (75.5 to 151.1)             |
| Sao Tome and Principe | 2045 | 153.7 (126.7 to 190.7)     | 68.3 (51.7 to 86.7)        | 21.1 (13.8 to 31.2)           | 2.9 (1.3 to 5.6)                | 61.4 (44.5 to 92.6)               | 262.2 (216.2 to 325.3) | 116.5 (88.2 to 147.9)      | 36.0 (23.5 to 53.2)           | 4.9 (2.3 to 9.6)                | 104.8 (75.9 to 158.0)             |
| Sao Tome and Principe | 2046 | 156.4 (128.3 to 195.4)     | 69.2 (52.1 to 88.0)        | 21.4 (14.0 to 31.7)           | 2.9 (1.4 to 5.7)                | 62.9 (45.5 to 95.8)               | 266.8 (218.9 to 333.3) | 118.0 (88.9 to 150.1)      | 36.6 (23.9 to 54.1)           | 5.0 (2.3 to 9.7)                | 107.2 (77.7 to 163.4)             |
| Sao Tome and Principe | 2047 | 159.2 (131.2 to 201.1)     | 70.1 (52.7 to 89.2)        | 21.8 (14.2 to 32.3)           | 3.0 (1.4 to 5.8)                | 64.4 (46.2 to 102.2)              | 271.6 (223.9 to 343.0) | 119.5 (90.0 to 152.1)      | 37.2 (24.3 to 55.1)           | 5.1 (2.4 to 9.9)                | 109.8 (78.8 to 174.3)             |
| Sao Tome and Principe | 2048 | 162.3 (133.5 to 211.4)     | 71.1 (53.5 to 90.4)        | 22.1 (14.4 to 32.9)           | 3.0 (1.4 to 5.9)                | 66.0 (47.2 to 107.1)              | 276.8 (227.7 to 360.6) | 121.3 (91.2 to 154.2)      | 37.8 (24.6 to 56.1)           | 5.2 (2.4 to 10.1)               | 112.6 (80.5 to 182.7)             |
| Sao Tome and Principe | 2049 | 165.4 (135.7 to 209.5)     | 72.1 (54.2 to 91.8)        | 22.5 (14.7 to 33.5)           | 3.1 (1.4 to 6.0)                | 67.7 (47.9 to 109.4)              | 282.1 (231.4 to 357.3) | 123.0 (92.5 to 156.6)      | 38.4 (25.0 to 57.1)           | 5.3 (2.5 to 10.3)               | 115.4 (81.8 to 186.6)             |
| Sao Tome and Principe | 2050 | 168.6 (137.1 to 216.8)     | 73.1 (55.0 to 93.2)        | 22.9 (14.9 to 34.1)           | 3.1 (1.5 to 6.1)                | 69.5 (48.9 to 111.6)              | 287.6 (233.8 to 369.8) | 124.6 (93.7 to 159.1)      | 39.0 (25.4 to 58.2)           | 5.4 (2.5 to 10.5)               | 118.6 (83.5 to 190.4)             |

| Country      | Year | 2018 US Dollars per capita |                            |                               |                                 |                                   | 2018 PPP per capita       |                            |                               |                                 |                                   |
|--------------|------|----------------------------|----------------------------|-------------------------------|---------------------------------|-----------------------------------|---------------------------|----------------------------|-------------------------------|---------------------------------|-----------------------------------|
|              |      | Health spending            | Government health spending | Out-of-pocket health spending | Prepaid private health spending | Development assistance for health | Health spending           | Government health spending | Out-of-pocket health spending | Prepaid private health spending | Development assistance for health |
| Saudi Arabia | 1995 | 520.0 (470.2 to 572.3)     | 284.1 (246.3 to 324.1)     | 174.5 (146.9 to 206.0)        | 61.5 (45.3 to 82.0)             | 0.0 (0.0 to 0.0)                  | 1324.1 (1197.3 to 1457.3) | 723.3 (627.1 to 825.2)     | 444.2 (374.2 to 524.5)        | 156.6 (115.4 to 208.9)          | 0.0 (0.0 to 0.0)                  |
| Saudi Arabia | 1996 | 533.8 (490.1 to 581.4)     | 303.5 (268.3 to 341.8)     | 169.9 (145.5 to 197.7)        | 60.3 (46.6 to 77.2)             | 0.0 (0.0 to 0.0)                  | 1359.1 (1247.9 to 1480.3) | 772.9 (683.2 to 870.3)     | 432.6 (370.4 to 503.3)        | 153.6 (118.6 to 196.5)          | 0.0 (0.0 to 0.0)                  |
| Saudi Arabia | 1997 | 556.3 (514.0 to 602.4)     | 331.4 (298.3 to 367.8)     | 164.9 (144.2 to 187.8)        | 59.9 (47.2 to 74.5)             | 0.0 (0.0 to 0.0)                  | 1416.4 (1308.8 to 1534.0) | 843.9 (759.6 to 936.5)     | 419.9 (367.1 to 478.2)        | 152.6 (120.1 to 189.7)          | 0.0 (0.0 to 0.0)                  |
| Saudi Arabia | 1998 | 600.4 (555.8 to 648.6)     | 376.0 (341.7 to 413.2)     | 162.1 (141.3 to 183.7)        | 62.3 (50.1 to 76.2)             | 0.0 (0.0 to 0.0)                  | 1528.9 (1415.1 to 1651.4) | 957.5 (870.2 to 1052.2)    | 412.8 (359.7 to 467.9)        | 158.6 (127.5 to 194.0)          | 0.1 (0.1 to 0.1)                  |
| Saudi Arabia | 1999 | 642.9 (597.1 to 691.0)     | 428.8 (392.2 to 468.1)     | 149.9 (130.6 to 170.0)        | 64.2 (52.0 to 78.4)             | 0.0 (0.0 to 0.0)                  | 1637.0 (1520.4 to 1759.5) | 1091.9 (998.8 to 1192.0)   | 381.6 (332.5 to 432.8)        | 163.5 (132.5 to 199.6)          | 0.0 (0.0 to 0.0)                  |
| Saudi Arabia | 2000 | 686.3 (639.5 to 735.0)     | 482.6 (442.9 to 524.7)     | 138.8 (120.8 to 158.0)        | 65.0 (52.2 to 79.9)             | 0.0 (0.0 to 0.0)                  | 1747.6 (1628.2 to 1871.5) | 1228.9 (1127.8 to 1336.0)  | 353.3 (307.6 to 402.3)        | 165.4 (132.9 to 203.5)          | 0.0 (0.0 to 0.0)                  |
| Saudi Arabia | 2001 | 675.1 (630.8 to 721.0)     | 484.4 (448.2 to 526.8)     | 128.6 (111.7 to 146.8)        | 62.1 (49.9 to 77.1)             | 0.0 (0.0 to 0.0)                  | 1719.1 (1606.3 to 1835.9) | 1233.5 (1141.3 to 1341.4)  | 327.4 (284.5 to 373.7)        | 158.1 (127.0 to 196.3)          | 0.0 (0.0 to 0.0)                  |
| Saudi Arabia | 2002 | 641.1 (601.4 to 681.9)     | 464.0 (428.7 to 500.7)     | 119.0 (103.5 to 136.5)        | 58.1 (47.2 to 71.2)             | 0.0 (0.0 to 0.0)                  | 1632.4 (1531.2 to 1736.3) | 1181.6 (1091.6 to 1275.0)  | 302.9 (263.6 to 347.7)        | 147.9 (120.3 to 181.2)          | 0.0 (0.0 to 0.0)                  |
| Saudi Arabia | 2003 | 641.2 (600.2 to 680.0)     | 467.8 (432.4 to 505.1)     | 114.4 (100.0 to 130.7)        | 59.0 (48.4 to 71.1)             | 0.0 (0.0 to 0.0)                  | 1632.6 (1528.2 to 1731.3) | 1191.1 (1101.0 to 1286.1)  | 291.4 (254.6 to 332.9)        | 150.1 (123.3 to 181.0)          | 0.0 (0.0 to 0.0)                  |
| Saudi Arabia | 2004 | 633.7 (593.6 to 672.0)     | 463.1 (427.6 to 500.6)     | 110.3 (96.6 to 124.6)         | 60.3 (49.9 to 71.7)             | 0.0 (0.0 to 0.0)                  | 1613.6 (1511.5 to 1711.1) | 1179.2 (1088.8 to 1274.6)  | 280.9 (245.9 to 317.4)        | 153.5 (126.9 to 182.6)          | 0.0 (0.0 to 0.0)                  |
| Saudi Arabia | 2005 | 633.2 (593.2 to 673.4)     | 462.8 (428.4 to 499.8)     | 107.3 (94.7 to 120.4)         | 63.1 (52.8 to 74.6)             | 0.0 (0.0 to 0.0)                  | 1612.2 (1510.3 to 1714.8) | 1178.4 (1090.9 to 1272.7)  | 273.2 (241.0 to 306.6)        | 160.6 (134.3 to 189.8)          | 0.0 (0.0 to 0.0)                  |
| Saudi Arabia | 2006 | 637.8 (598.4 to 678.2)     | 463.4 (429.1 to 499.2)     | 108.3 (95.3 to 121.6)         | 66.2 (56.5 to 77.7)             | 0.0 (0.0 to 0.0)                  | 1624.0 (1523.7 to 1726.8) | 1179.9 (1092.6 to 1271.0)  | 275.6 (242.6 to 309.7)        | 168.5 (143.8 to 197.9)          | 0.0 (0.0 to 0.0)                  |
| Saudi Arabia | 2007 | 635.5 (594.6 to 677.1)     | 451.7 (413.9 to 488.5)     | 112.6 (100.2 to 125.9)        | 71.2 (60.5 to 83.2)             | 0.0 (0.0 to 0.0)                  | 1618.2 (1513.9 to 1724.2) | 1150.2 (1053.8 to 1243.7)  | 286.6 (255.1 to 320.6)        | 181.4 (154.1 to 211.9)          | 0.0 (0.0 to 0.0)                  |
| Saudi Arabia | 2008 | 663.6 (619.0 to 706.4)     | 460.8 (423.8 to 496.2)     | 121.4 (108.4 to 135.1)        | 81.3 (69.9 to 94.1)             | 0.0 (0.0 to 0.0)                  | 1689.6 (1576.1 to 1798.8) | 1173.4 (1079.2 to 1263.6)  | 309.2 (276.0 to 344.1)        | 207.0 (177.9 to 239.6)          | 0.0 (0.0 to 0.0)                  |
| Saudi Arabia | 2009 | 678.1 (635.8 to 721.1)     | 459.2 (423.8 to 495.2)     | 128.8 (115.2 to 143.0)        | 90.0 (78.0 to 103.6)            | 0.0 (0.0 to 0.0)                  | 1726.7 (1619.0 to 1836.1) | 1169.4 (1079.0 to 1260.9)  | 328.0 (293.4 to 364.1)        | 229.3 (198.6 to 263.8)          | 0.0 (0.0 to 0.0)                  |
| Saudi Arabia | 2010 | 707.2 (665.8 to 751.0)     | 479.1 (443.9 to 514.5)     | 129.8 (115.8 to 145.1)        | 98.3 (85.7 to 112.1)            | 0.0 (0.0 to 0.0)                  | 1800.8 (1695.3 to 1912.3) | 1219.9 (1130.3 to 1310.0)  | 330.4 (294.9 to 369.5)        | 250.4 (218.1 to 285.4)          | 0.0 (0.0 to 0.0)                  |
| Saudi Arabia | 2011 | 794.8 (749.2 to 844.1)     | 550.8 (513.8 to 589.1)     | 132.3 (118.1 to 148.6)        | 111.7 (97.6 to 126.8)           | 0.0 (0.0 to 0.0)                  | 2023.9 (1907.5 to 2149.4) | 1402.5 (1308.3 to 1500.0)  | 336.9 (300.7 to 378.3)        | 284.4 (248.6 to 322.8)          | 0.0 (0.0 to 0.0)                  |
| Saudi Arabia | 2012 | 868.4 (822.1 to 917.1)     | 611.1 (571.2 to 654.7)     | 136.4 (121.7 to 152.5)        | 121.0 (106.1 to 136.8)          | 0.0 (0.0 to 0.0)                  | 2211.1 (2093.3 to 2335.1) | 1555.9 (1454.4 to 1667.1)  | 347.2 (309.9 to 388.3)        | 308.0 (270.1 to 348.2)          | 0.0 (0.0 to 0.0)                  |
| Saudi Arabia | 2013 | 951.6 (903.6 to 1001.1)    | 676.8 (635.2 to 718.2)     | 142.6 (127.3 to 159.2)        | 132.1 (117.1 to 148.9)          | 0.0 (0.0 to 0.0)                  | 2422.9 (2300.8 to 2549.1) | 1723.4 (1617.3 to 1828.8)  | 363.2 (324.2 to 405.4)        | 336.3 (298.0 to 379.1)          | 0.0 (0.0 to 0.0)                  |
| Saudi Arabia | 2014 | 1064.3 (1012.7 to 1114.9)  | 761.3 (719.3 to 805.8)     | 154.0 (137.0 to 172.9)        | 149.0 (132.9 to 165.8)          | 0.0 (0.0 to 0.0)                  | 2710.1 (2578.6 to 2838.8) | 1938.6 (1831.4 to 2051.7)  | 392.2 (349.0 to 440.4)        | 379.3 (338.3 to 422.1)          | 0.0 (0.0 to 0.0)                  |
| Saudi Arabia | 2015 | 1197.4 (1135.8 to 1252.1)  | 848.0 (795.9 to 898.4)     | 172.6 (153.5 to 195.3)        | 176.8 (158.2 to 196.6)          | 0.0 (0.0 to 0.0)                  | 3048.8 (2891.9 to 3188.3) | 2159.3 (2026.5 to 2287.5)  | 439.4 (390.9 to 497.2)        | 450.1 (402.9 to 500.6)          | 0.0 (0.0 to 0.0)                  |

| Country      | Year | 2018 US Dollars per capita |                            |                               |                                 |                                   | 2018 PPP per capita       |                            |                               |                                 |                                   |
|--------------|------|----------------------------|----------------------------|-------------------------------|---------------------------------|-----------------------------------|---------------------------|----------------------------|-------------------------------|---------------------------------|-----------------------------------|
|              |      | Health spending            | Government health spending | Out-of-pocket health spending | Prepaid private health spending | Development assistance for health | Health spending           | Government health spending | Out-of-pocket health spending | Prepaid private health spending | Development assistance for health |
| Saudi Arabia | 2016 | 1256.8 (1185.4 to 1336.0)  | 873.3 (811.9 to 941.3)     | 178.4 (156.0 to 205.6)        | 205.0 (178.6 to 234.7)          | 0.0 (0.0 to 0.0)                  | 3200.2 (3018.4 to 3401.9) | 2223.8 (2067.4 to 2396.9)  | 454.4 (397.1 to 523.5)        | 522.1 (454.7 to 597.5)          | 0.0 (0.0 to 0.0)                  |
| Saudi Arabia | 2017 | 1148.4 (1081.5 to 1217.7)  | 779.7 (722.6 to 839.4)     | 173.0 (151.5 to 199.3)        | 195.6 (170.0 to 223.4)          | 0.0 (0.0 to 0.0)                  | 2924.0 (2753.8 to 3100.7) | 1985.4 (1840.0 to 2137.3)  | 440.6 (385.6 to 507.6)        | 498.1 (432.9 to 568.8)          | 0.0 (0.0 to 0.0)                  |
| Saudi Arabia | 2018 | 1160.8 (1094.7 to 1233.2)  | 787.8 (731.0 to 848.3)     | 174.3 (152.4 to 200.4)        | 198.7 (172.6 to 227.1)          | 0.0 (0.0 to 0.0)                  | 2955.6 (2787.4 to 3140.0) | 2005.9 (1861.3 to 2159.9)  | 443.8 (388.0 to 510.3)        | 506.0 (439.5 to 578.2)          | 0.0 (0.0 to 0.0)                  |
| Saudi Arabia | 2019 | 1174.4 (1104.1 to 1247.9)  | 797.5 (739.6 to 860.3)     | 175.7 (153.2 to 202.2)        | 201.2 (174.9 to 229.8)          | 0.0 (0.0 to 0.0)                  | 2990.3 (2811.2 to 3177.4) | 2030.6 (1883.3 to 2190.5)  | 447.4 (390.1 to 514.8)        | 512.3 (445.4 to 585.2)          | 0.0 (0.0 to 0.0)                  |
| Saudi Arabia | 2020 | 1188.9 (1118.7 to 1266.3)  | 808.0 (746.6 to 871.9)     | 176.9 (154.1 to 204.0)        | 204.1 (177.6 to 233.3)          | 0.0 (0.0 to 0.0)                  | 3027.4 (2848.4 to 3224.2) | 2057.3 (1900.9 to 2220.0)  | 450.5 (392.5 to 519.4)        | 519.6 (452.3 to 594.0)          | 0.0 (0.0 to 0.0)                  |
| Saudi Arabia | 2021 | 1197.3 (1123.7 to 1272.4)  | 814.8 (750.2 to 882.0)     | 176.8 (154.4 to 203.8)        | 205.7 (178.6 to 234.9)          | 0.0 (0.0 to 0.0)                  | 3048.7 (2861.1 to 3239.8) | 2074.8 (1910.1 to 2245.7)  | 450.3 (393.2 to 519.0)        | 523.7 (454.8 to 598.2)          | 0.0 (0.0 to 0.0)                  |
| Saudi Arabia | 2022 | 1208.4 (1133.9 to 1287.0)  | 823.7 (757.7 to 889.1)     | 177.1 (154.7 to 204.4)        | 207.7 (180.3 to 237.3)          | 0.0 (0.0 to 0.0)                  | 3077.0 (2887.2 to 3276.9) | 2097.2 (1929.3 to 2263.8)  | 450.9 (393.8 to 520.5)        | 528.8 (459.0 to 604.2)          | 0.0 (0.0 to 0.0)                  |
| Saudi Arabia | 2023 | 1214.8 (1138.1 to 1292.0)  | 828.1 (762.3 to 893.8)     | 177.2 (154.2 to 204.7)        | 209.5 (181.6 to 239.4)          | 0.0 (0.0 to 0.0)                  | 3093.3 (2898.0 to 3289.7) | 2108.7 (1941.1 to 2276.0)  | 451.3 (392.7 to 521.2)        | 533.4 (462.3 to 609.6)          | 0.0 (0.0 to 0.0)                  |
| Saudi Arabia | 2024 | 1220.8 (1145.1 to 1299.8)  | 832.2 (766.3 to 897.2)     | 177.3 (154.8 to 204.7)        | 211.2 (183.1 to 241.5)          | 0.0 (0.0 to 0.0)                  | 3108.4 (2915.7 to 3309.6) | 2119.0 (1951.1 to 2284.4)  | 451.5 (394.1 to 521.3)        | 537.9 (466.2 to 615.0)          | 0.0 (0.0 to 0.0)                  |
| Saudi Arabia | 2025 | 1229.3 (1151.8 to 1307.7)  | 838.6 (771.7 to 904.7)     | 177.5 (154.0 to 205.0)        | 213.2 (184.8 to 243.8)          | 0.0 (0.0 to 0.0)                  | 3130.2 (2932.8 to 3329.8) | 2135.2 (1965.1 to 2303.7)  | 452.0 (392.2 to 521.9)        | 542.9 (470.7 to 620.8)          | 0.0 (0.0 to 0.0)                  |
| Saudi Arabia | 2026 | 1236.2 (1158.9 to 1318.8)  | 843.8 (776.6 to 910.6)     | 177.5 (153.8 to 205.1)        | 215.0 (186.3 to 245.9)          | 0.0 (0.0 to 0.0)                  | 3147.8 (2950.8 to 3358.0) | 2148.5 (1977.4 to 2318.6)  | 452.0 (391.5 to 522.2)        | 547.3 (474.3 to 626.1)          | 0.0 (0.0 to 0.0)                  |
| Saudi Arabia | 2027 | 1243.3 (1164.8 to 1323.3)  | 849.2 (781.0 to 919.1)     | 177.5 (153.5 to 205.1)        | 216.7 (188.0 to 248.0)          | 0.0 (0.0 to 0.0)                  | 3165.7 (2965.9 to 3369.4) | 2162.2 (1988.7 to 2340.2)  | 451.9 (390.8 to 522.3)        | 551.7 (478.7 to 631.4)          | 0.0 (0.0 to 0.0)                  |
| Saudi Arabia | 2028 | 1251.0 (1170.9 to 1335.7)  | 854.9 (785.9 to 925.9)     | 177.5 (153.2 to 205.7)        | 218.5 (189.8 to 250.3)          | 0.0 (0.0 to 0.0)                  | 3185.3 (2981.3 to 3401.1) | 2176.9 (2001.0 to 2357.7)  | 452.0 (390.0 to 523.7)        | 556.4 (483.3 to 637.3)          | 0.0 (0.0 to 0.0)                  |
| Saudi Arabia | 2029 | 1254.7 (1172.6 to 1338.4)  | 857.6 (787.4 to 931.3)     | 177.2 (152.3 to 205.9)        | 219.8 (190.9 to 252.2)          | 0.0 (0.0 to 0.0)                  | 3194.7 (2985.7 to 3407.8) | 2183.8 (2005.0 to 2371.3)  | 451.2 (387.8 to 524.4)        | 559.8 (486.0 to 642.2)          | 0.0 (0.0 to 0.0)                  |
| Saudi Arabia | 2030 | 1260.7 (1176.2 to 1347.3)  | 861.9 (790.8 to 937.7)     | 177.2 (151.9 to 205.8)        | 221.5 (192.0 to 254.6)          | 0.0 (0.0 to 0.0)                  | 3210.0 (2994.9 to 3430.6) | 2194.7 (2013.5 to 2387.6)  | 451.1 (386.8 to 524.1)        | 564.1 (489.0 to 648.3)          | 0.0 (0.0 to 0.0)                  |
| Saudi Arabia | 2031 | 1265.3 (1181.3 to 1350.5)  | 865.2 (792.9 to 941.1)     | 177.0 (151.6 to 206.1)        | 223.1 (193.2 to 256.8)          | 0.0 (0.0 to 0.0)                  | 3221.8 (3007.8 to 3438.8) | 2203.1 (2019.0 to 2396.2)  | 450.7 (386.1 to 524.8)        | 568.0 (491.8 to 653.9)          | 0.0 (0.0 to 0.0)                  |
| Saudi Arabia | 2032 | 1269.7 (1183.5 to 1358.2)  | 868.3 (794.0 to 946.0)     | 176.8 (150.5 to 205.7)        | 224.5 (194.2 to 259.1)          | 0.0 (0.0 to 0.0)                  | 3232.9 (3013.4 to 3458.2) | 2211.0 (2021.7 to 2408.9)  | 450.2 (383.3 to 523.8)        | 571.7 (494.4 to 659.7)          | 0.0 (0.0 to 0.0)                  |
| Saudi Arabia | 2033 | 1275.1 (1187.8 to 1367.0)  | 872.2 (796.3 to 950.8)     | 176.7 (150.4 to 206.0)        | 226.2 (195.0 to 261.5)          | 0.0 (0.0 to 0.0)                  | 3246.6 (3024.4 to 3480.8) | 2220.8 (2027.5 to 2420.9)  | 449.9 (383.0 to 524.6)        | 575.9 (496.5 to 665.9)          | 0.0 (0.0 to 0.0)                  |
| Saudi Arabia | 2034 | 1280.6 (1193.3 to 1372.9)  | 876.1 (799.7 to 955.8)     | 176.7 (149.9 to 206.3)        | 227.8 (196.3 to 264.0)          | 0.0 (0.0 to 0.0)                  | 3260.8 (3038.5 to 3495.6) | 2230.9 (2036.2 to 2433.7)  | 449.8 (381.6 to 525.4)        | 580.1 (499.9 to 672.3)          | 0.0 (0.0 to 0.0)                  |
| Saudi Arabia | 2035 | 1286.7 (1197.1 to 1382.7)  | 880.4 (801.8 to 962.5)     | 176.7 (149.2 to 206.7)        | 229.6 (197.1 to 266.1)          | 0.0 (0.0 to 0.0)                  | 3276.2 (3048.1 to 3520.6) | 2241.7 (2041.5 to 2450.7)  | 449.9 (380.0 to 526.3)        | 584.6 (501.8 to 677.7)          | 0.0 (0.0 to 0.0)                  |
| Saudi Arabia | 2036 | 1289.9 (1197.9 to 1387.3)  | 882.7 (802.8 to 967.0)     | 176.3 (148.4 to 206.6)        | 230.9 (197.9 to 267.9)          | 0.0 (0.0 to 0.0)                  | 3284.4 (3050.2 to 3532.5) | 2247.5 (2044.0 to 2462.3)  | 449.0 (377.9 to 526.0)        | 587.9 (503.9 to 682.2)          | 0.0 (0.0 to 0.0)                  |

| Country      | Year | 2018 US Dollars per capita |                            |                               |                                 |                                   | 2018 PPP per capita       |                            |                               |                                 |                                   |
|--------------|------|----------------------------|----------------------------|-------------------------------|---------------------------------|-----------------------------------|---------------------------|----------------------------|-------------------------------|---------------------------------|-----------------------------------|
|              |      | Health spending            | Government health spending | Out-of-pocket health spending | Prepaid private health spending | Development assistance for health | Health spending           | Government health spending | Out-of-pocket health spending | Prepaid private health spending | Development assistance for health |
| Saudi Arabia | 2037 | 1294.9 (1202.0 to 1393.7)  | 886.2 (804.9 to 972.4)     | 176.2 (148.2 to 206.7)        | 232.5 (199.0 to 270.0)          | 0.0 (0.0 to 0.0)                  | 3297.0 (3060.6 to 3548.6) | 2256.6 (2049.5 to 2475.9)  | 448.6 (377.3 to 526.2)        | 591.9 (506.6 to 687.4)          | 0.0 (0.0 to 0.0)                  |
| Saudi Arabia | 2038 | 1300.0 (1205.6 to 1401.5)  | 889.9 (806.6 to 978.6)     | 176.1 (147.9 to 206.8)        | 234.1 (199.9 to 271.7)          | 0.0 (0.0 to 0.0)                  | 3310.3 (3069.8 to 3568.6) | 2265.9 (2053.8 to 2491.7)  | 448.4 (376.6 to 526.5)        | 596.0 (508.9 to 691.9)          | 0.0 (0.0 to 0.0)                  |
| Saudi Arabia | 2039 | 1305.8 (1208.3 to 1409.6)  | 894.0 (809.4 to 985.6)     | 176.0 (147.5 to 206.9)        | 235.8 (200.6 to 273.7)          | 0.0 (0.0 to 0.0)                  | 3324.9 (3076.6 to 3589.1) | 2276.3 (2061.1 to 2509.6)  | 448.3 (375.7 to 526.8)        | 600.4 (510.8 to 697.0)          | 0.0 (0.0 to 0.0)                  |
| Saudi Arabia | 2040 | 1309.7 (1209.8 to 1416.3)  | 896.7 (810.5 to 990.3)     | 175.8 (147.0 to 206.7)        | 237.2 (201.4 to 276.2)          | 0.0 (0.0 to 0.0)                  | 3334.8 (3080.6 to 3606.4) | 2283.3 (2063.6 to 2521.6)  | 447.6 (374.2 to 526.3)        | 603.9 (512.8 to 703.3)          | 0.0 (0.0 to 0.0)                  |
| Saudi Arabia | 2041 | 1313.3 (1211.6 to 1422.8)  | 899.3 (809.9 to 993.3)     | 175.5 (146.3 to 206.6)        | 238.5 (201.9 to 278.5)          | 0.0 (0.0 to 0.0)                  | 3344.0 (3085.1 to 3622.9) | 2289.8 (2062.3 to 2529.2)  | 446.8 (372.6 to 526.2)        | 607.4 (514.1 to 709.0)          | 0.0 (0.0 to 0.0)                  |
| Saudi Arabia | 2042 | 1315.8 (1213.9 to 1425.6)  | 901.0 (809.2 to 996.9)     | 175.1 (145.7 to 206.3)        | 239.7 (202.6 to 280.3)          | 0.0 (0.0 to 0.0)                  | 3350.2 (3090.8 to 3629.9) | 2294.1 (2060.6 to 2538.4)  | 445.8 (371.1 to 525.3)        | 610.4 (515.8 to 713.6)          | 0.0 (0.0 to 0.0)                  |
| Saudi Arabia | 2043 | 1320.1 (1214.9 to 1434.8)  | 904.0 (809.5 to 1002.5)    | 174.8 (145.4 to 206.1)        | 241.2 (203.6 to 282.6)          | 0.0 (0.0 to 0.0)                  | 3361.2 (3093.6 to 3653.4) | 2301.9 (2061.2 to 2552.7)  | 445.2 (370.3 to 524.7)        | 614.0 (518.3 to 719.5)          | 0.0 (0.0 to 0.0)                  |
| Saudi Arabia | 2044 | 1323.9 (1217.5 to 1438.1)  | 906.7 (809.7 to 1008.6)    | 174.6 (145.1 to 206.1)        | 242.6 (204.5 to 284.4)          | 0.0 (0.0 to 0.0)                  | 3370.9 (3100.1 to 3661.8) | 2308.8 (2061.8 to 2568.3)  | 444.6 (369.6 to 524.8)        | 617.6 (520.8 to 724.1)          | 0.0 (0.0 to 0.0)                  |
| Saudi Arabia | 2045 | 1328.8 (1219.3 to 1450.9)  | 910.2 (810.5 to 1015.6)    | 174.5 (144.9 to 205.9)        | 244.1 (205.6 to 285.9)          | 0.0 (0.0 to 0.0)                  | 3383.4 (3104.7 to 3694.3) | 2317.5 (2063.7 to 2586.1)  | 444.2 (369.1 to 524.3)        | 621.6 (523.6 to 728.1)          | 0.0 (0.0 to 0.0)                  |
| Saudi Arabia | 2046 | 1333.6 (1222.7 to 1454.9)  | 913.6 (810.8 to 1022.5)    | 174.3 (144.7 to 205.6)        | 245.7 (206.3 to 287.8)          | 0.0 (0.0 to 0.0)                  | 3395.7 (3113.3 to 3704.5) | 2326.3 (2064.5 to 2603.7)  | 443.8 (368.4 to 523.6)        | 625.6 (525.3 to 732.9)          | 0.0 (0.0 to 0.0)                  |
| Saudi Arabia | 2047 | 1340.1 (1224.4 to 1468.0)  | 918.1 (812.1 to 1030.9)    | 174.4 (144.7 to 205.6)        | 247.5 (207.1 to 290.8)          | 0.0 (0.0 to 0.0)                  | 3412.1 (3117.7 to 3737.8) | 2337.8 (2067.7 to 2625.0)  | 444.0 (368.5 to 523.4)        | 630.3 (527.3 to 740.4)          | 0.0 (0.0 to 0.0)                  |
| Saudi Arabia | 2048 | 1345.6 (1230.8 to 1474.7)  | 922.0 (813.3 to 1038.5)    | 174.3 (144.8 to 205.3)        | 249.3 (207.8 to 293.0)          | 0.0 (0.0 to 0.0)                  | 3426.3 (3133.8 to 3754.9) | 2347.7 (2070.8 to 2644.2)  | 443.9 (368.7 to 522.9)        | 634.7 (529.2 to 746.0)          | 0.0 (0.0 to 0.0)                  |
| Saudi Arabia | 2049 | 1351.7 (1231.8 to 1486.6)  | 926.3 (814.8 to 1046.5)    | 174.4 (144.9 to 205.3)        | 251.1 (209.1 to 295.6)          | 0.0 (0.0 to 0.0)                  | 3441.8 (3136.5 to 3785.2) | 2358.6 (2074.7 to 2664.6)  | 444.0 (368.9 to 522.8)        | 639.3 (532.4 to 752.8)          | 0.0 (0.0 to 0.0)                  |
| Saudi Arabia | 2050 | 1357.1 (1236.7 to 1494.7)  | 930.1 (815.7 to 1054.1)    | 174.2 (144.7 to 205.1)        | 252.7 (210.2 to 298.3)          | 0.0 (0.0 to 0.0)                  | 3455.5 (3149.1 to 3805.8) | 2368.3 (2077.0 to 2684.1)  | 443.7 (368.3 to 522.3)        | 643.5 (535.3 to 759.5)          | 0.0 (0.0 to 0.0)                  |
| Senegal      | 1995 | 49.0 (40.7 to 59.3)        | 14.1 (10.7 to 18.5)        | 24.2 (17.2 to 33.2)           | 4.4 (2.0 to 8.0)                | 6.3 (6.3 to 6.3)                  | 123.2 (102.1 to 149.0)    | 35.5 (27.0 to 46.4)        | 60.7 (43.3 to 83.3)           | 11.0 (5.0 to 20.2)              | 15.9 (15.9 to 15.9)               |
| Senegal      | 1996 | 48.7 (40.3 to 58.5)        | 14.0 (10.7 to 18.2)        | 24.0 (17.0 to 32.9)           | 4.3 (2.0 to 7.8)                | 6.4 (6.4 to 6.4)                  | 122.3 (101.2 to 147.0)    | 35.2 (26.8 to 45.7)        | 60.3 (42.6 to 82.8)           | 10.7 (5.0 to 19.6)              | 16.1 (16.1 to 16.1)               |
| Senegal      | 1997 | 48.9 (40.3 to 58.5)        | 13.9 (10.6 to 17.8)        | 23.9 (16.7 to 32.7)           | 4.1 (2.0 to 7.4)                | 7.0 (7.0 to 7.0)                  | 122.8 (101.3 to 147.0)    | 34.9 (26.6 to 44.7)        | 59.9 (42.0 to 82.2)           | 10.3 (5.1 to 18.7)              | 17.6 (17.6 to 17.6)               |
| Senegal      | 1998 | 49.5 (41.1 to 59.1)        | 14.2 (10.7 to 18.2)        | 23.9 (17.1 to 32.8)           | 3.9 (1.9 to 6.9)                | 7.5 (7.5 to 7.5)                  | 124.2 (103.3 to 148.6)    | 35.6 (26.8 to 45.7)        | 60.0 (42.9 to 82.5)           | 9.8 (4.7 to 17.4)               | 18.8 (18.8 to 18.8)               |
| Senegal      | 1999 | 49.1 (41.0 to 58.6)        | 14.7 (11.0 to 18.9)        | 23.9 (17.2 to 32.4)           | 3.6 (1.8 to 6.5)                | 6.9 (6.9 to 6.9)                  | 123.3 (102.9 to 147.3)    | 36.9 (27.7 to 47.5)        | 60.1 (43.2 to 81.3)           | 9.1 (4.4 to 16.3)               | 17.3 (17.3 to 17.3)               |
| Senegal      | 2000 | 46.6 (38.9 to 55.8)        | 14.8 (11.1 to 18.9)        | 23.1 (16.8 to 31.2)           | 3.0 (1.5 to 5.6)                | 5.7 (5.7 to 5.7)                  | 117.0 (97.7 to 140.2)     | 37.1 (27.8 to 47.4)        | 58.1 (42.2 to 78.4)           | 7.5 (3.8 to 14.0)               | 14.3 (14.3 to 14.3)               |
| Senegal      | 2001 | 49.6 (41.8 to 59.0)        | 15.7 (11.8 to 20.0)        | 23.6 (17.5 to 31.5)           | 3.0 (1.5 to 5.5)                | 7.4 (7.4 to 7.4)                  | 124.6 (105.0 to 148.1)    | 39.3 (29.7 to 50.2)        | 59.2 (43.9 to 79.2)           | 7.5 (3.7 to 13.8)               | 18.5 (18.5 to 18.5)               |

| Country | Year | 2018 US Dollars per capita |                            |                               |                                 |                                   | 2018 PPP per capita    |                            |                               |                                 |                                   |
|---------|------|----------------------------|----------------------------|-------------------------------|---------------------------------|-----------------------------------|------------------------|----------------------------|-------------------------------|---------------------------------|-----------------------------------|
|         |      | Health spending            | Government health spending | Out-of-pocket health spending | Prepaid private health spending | Development assistance for health | Health spending        | Government health spending | Out-of-pocket health spending | Prepaid private health spending | Development assistance for health |
| Senegal | 2002 | 48.2 (40.3 to 58.2)        | 15.8 (12.2 to 19.9)        | 23.9 (17.8 to 32.2)           | 3.1 (1.5 to 5.8)                | 5.4 (5.4 to 5.4)                  | 121.1 (101.2 to 146.2) | 39.6 (30.7 to 50.1)        | 60.0 (44.8 to 80.8)           | 7.9 (3.9 to 14.6)               | 13.5 (13.5 to 13.5)               |
| Senegal | 2003 | 56.1 (47.9 to 66.1)        | 16.9 (13.0 to 21.4)        | 24.7 (18.2 to 33.0)           | 3.6 (1.8 to 6.6)                | 11.0 (11.0 to 11.0)               | 141.0 (120.2 to 166.0) | 42.4 (32.8 to 53.8)        | 61.9 (45.7 to 82.9)           | 9.1 (4.4 to 16.6)               | 27.6 (27.6 to 27.6)               |
| Senegal | 2004 | 58.8 (50.3 to 68.7)        | 17.7 (13.7 to 22.6)        | 24.2 (17.5 to 32.3)           | 4.2 (2.1 to 7.8)                | 12.7 (12.7 to 12.7)               | 147.7 (126.3 to 172.5) | 44.4 (34.4 to 56.7)        | 60.7 (44.0 to 81.3)           | 10.6 (5.2 to 19.5)              | 31.9 (31.9 to 31.9)               |
| Senegal | 2005 | 55.9 (47.6 to 65.2)        | 18.0 (13.9 to 23.2)        | 21.2 (15.3 to 28.4)           | 4.9 (2.4 to 9.1)                | 11.8 (11.8 to 11.8)               | 140.5 (119.7 to 163.9) | 45.2 (35.0 to 58.2)        | 53.3 (38.5 to 71.3)           | 12.3 (6.0 to 22.8)              | 29.7 (29.7 to 29.7)               |
| Senegal | 2006 | 56.0 (47.9 to 64.8)        | 17.8 (13.7 to 22.9)        | 19.9 (14.1 to 26.6)           | 5.2 (2.5 to 9.5)                | 13.2 (13.2 to 13.2)               | 140.6 (120.4 to 162.8) | 44.6 (34.4 to 57.6)        | 49.9 (35.5 to 66.8)           | 12.9 (6.3 to 23.9)              | 33.2 (33.2 to 33.2)               |
| Senegal | 2007 | 49.5 (41.8 to 58.4)        | 16.8 (12.9 to 21.7)        | 19.8 (14.3 to 26.2)           | 5.2 (2.5 to 9.5)                | 7.7 (7.7 to 7.7)                  | 124.5 (105.0 to 146.7) | 42.2 (32.4 to 54.5)        | 49.9 (36.0 to 65.8)           | 13.0 (6.2 to 24.0)              | 19.4 (19.4 to 19.4)               |
| Senegal | 2008 | 52.5 (44.8 to 61.1)        | 16.6 (12.7 to 21.3)        | 20.6 (14.7 to 27.2)           | 5.4 (2.5 to 9.7)                | 10.0 (10.0 to 10.0)               | 131.8 (112.6 to 153.5) | 41.7 (31.9 to 53.6)        | 51.6 (37.0 to 68.3)           | 13.5 (6.3 to 24.4)              | 25.0 (25.0 to 25.0)               |
| Senegal | 2009 | 55.3 (47.3 to 64.3)        | 16.4 (12.5 to 21.1)        | 22.5 (16.1 to 29.8)           | 5.3 (2.5 to 9.9)                | 11.0 (11.0 to 11.0)               | 138.9 (118.7 to 161.6) | 41.2 (31.5 to 53.1)        | 56.5 (40.4 to 74.8)           | 13.4 (6.3 to 24.8)              | 27.8 (27.8 to 27.8)               |
| Senegal | 2010 | 55.4 (46.7 to 65.0)        | 16.1 (12.3 to 20.5)        | 24.6 (17.5 to 32.9)           | 5.2 (2.4 to 9.8)                | 9.5 (9.5 to 9.5)                  | 139.2 (117.3 to 163.3) | 40.3 (30.9 to 51.6)        | 61.7 (44.0 to 82.7)           | 13.2 (6.1 to 24.7)              | 24.0 (24.0 to 24.0)               |
| Senegal | 2011 | 58.6 (49.2 to 69.1)        | 16.0 (12.3 to 20.6)        | 26.5 (19.1 to 35.7)           | 5.2 (2.4 to 9.9)                | 10.9 (10.9 to 10.9)               | 147.3 (123.6 to 173.5) | 40.2 (31.0 to 51.8)        | 66.6 (48.1 to 89.8)           | 13.0 (6.0 to 24.8)              | 27.4 (27.4 to 27.4)               |
| Senegal | 2012 | 62.0 (52.2 to 73.0)        | 16.2 (12.4 to 20.7)        | 28.5 (20.6 to 38.7)           | 5.2 (2.3 to 9.8)                | 12.2 (12.2 to 12.2)               | 155.7 (131.1 to 183.3) | 40.6 (31.2 to 52.0)        | 71.5 (51.9 to 97.3)           | 13.0 (5.9 to 24.6)              | 30.6 (30.6 to 30.6)               |
| Senegal | 2013 | 63.0 (52.6 to 74.9)        | 16.7 (12.8 to 21.4)        | 30.4 (22.0 to 41.9)           | 5.2 (2.3 to 9.8)                | 10.7 (10.7 to 10.7)               | 158.3 (132.1 to 188.2) | 42.0 (32.2 to 53.7)        | 76.5 (55.2 to 105.3)          | 13.0 (5.9 to 24.5)              | 26.9 (26.9 to 26.9)               |
| Senegal | 2014 | 66.9 (55.7 to 80.0)        | 18.0 (13.9 to 22.8)        | 31.9 (22.7 to 43.7)           | 5.2 (2.3 to 9.8)                | 11.7 (11.7 to 11.7)               | 168.1 (139.9 to 201.0) | 45.3 (34.8 to 57.3)        | 80.3 (56.9 to 109.8)          | 13.2 (5.8 to 24.6)              | 29.4 (29.4 to 29.4)               |
| Senegal | 2015 | 67.9 (56.3 to 81.8)        | 19.2 (14.9 to 24.5)        | 32.9 (23.6 to 45.0)           | 5.3 (2.4 to 10.1)               | 10.5 (10.5 to 10.5)               | 170.5 (141.3 to 205.5) | 48.2 (37.5 to 61.6)        | 82.6 (59.2 to 113.0)          | 13.3 (6.0 to 25.3)              | 26.4 (26.4 to 26.4)               |
| Senegal | 2016 | 68.6 (57.1 to 82.5)        | 20.5 (15.8 to 26.4)        | 33.5 (24.0 to 45.6)           | 5.4 (2.5 to 10.1)               | 9.1 (9.1 to 9.1)                  | 172.3 (143.4 to 207.3) | 51.5 (39.8 to 66.4)        | 84.3 (60.3 to 114.6)          | 13.6 (6.2 to 25.4)              | 22.9 (22.9 to 22.9)               |
| Senegal | 2017 | 74.6 (62.6 to 89.1)        | 20.2 (15.6 to 25.9)        | 34.8 (24.7 to 47.5)           | 5.7 (2.6 to 10.6)               | 14.0 (14.0 to 14.0)               | 187.5 (157.1 to 224.0) | 50.6 (39.1 to 65.0)        | 87.4 (62.1 to 119.3)          | 14.3 (6.6 to 26.6)              | 35.2 (35.2 to 35.2)               |
| Senegal | 2018 | 74.2 (61.8 to 89.3)        | 20.6 (15.9 to 26.4)        | 35.2 (25.1 to 48.1)           | 5.8 (2.7 to 10.8)               | 12.5 (12.5 to 12.6)               | 186.3 (155.3 to 224.4) | 51.7 (40.0 to 66.3)        | 88.5 (63.0 to 120.8)          | 14.6 (6.7 to 27.1)              | 31.5 (31.3 to 31.8)               |
| Senegal | 2019 | 74.8 (62.2 to 89.8)        | 20.9 (16.2 to 26.7)        | 35.6 (25.3 to 48.6)           | 5.9 (2.7 to 11.0)               | 12.4 (11.6 to 13.2)               | 188.0 (156.2 to 225.5) | 52.4 (40.6 to 67.1)        | 89.5 (63.6 to 122.1)          | 14.9 (6.8 to 27.6)              | 31.2 (29.0 to 33.1)               |
| Senegal | 2020 | 75.6 (62.9 to 90.8)        | 21.1 (16.4 to 27.1)        | 36.0 (25.5 to 49.1)           | 6.0 (2.8 to 11.2)               | 12.4 (11.3 to 13.4)               | 189.8 (158.1 to 228.2) | 53.1 (41.2 to 68.0)        | 90.4 (64.1 to 123.3)          | 15.1 (7.0 to 28.1)              | 31.1 (28.5 to 33.7)               |
| Senegal | 2021 | 76.4 (63.6 to 92.1)        | 21.5 (16.7 to 27.5)        | 36.4 (25.8 to 49.6)           | 6.1 (2.8 to 11.4)               | 12.4 (11.1 to 13.8)               | 191.9 (159.8 to 231.4) | 53.9 (41.9 to 69.2)        | 91.4 (64.8 to 124.6)          | 15.4 (7.1 to 28.5)              | 31.1 (28.0 to 34.5)               |
| Senegal | 2022 | 77.3 (64.5 to 92.8)        | 21.8 (16.9 to 27.9)        | 36.8 (26.0 to 50.2)           | 6.2 (2.9 to 11.5)               | 12.5 (11.1 to 14.0)               | 194.1 (162.1 to 233.2) | 54.7 (42.5 to 70.2)        | 92.4 (65.4 to 126.0)          | 15.7 (7.2 to 29.0)              | 31.3 (27.9 to 35.2)               |



| Country | Year | 2018 US Dollars per capita |                            |                               |                                 |                                   | 2018 PPP per capita    |                            |                               |                                 |                                   |
|---------|------|----------------------------|----------------------------|-------------------------------|---------------------------------|-----------------------------------|------------------------|----------------------------|-------------------------------|---------------------------------|-----------------------------------|
|         |      | Health spending            | Government health spending | Out-of-pocket health spending | Prepaid private health spending | Development assistance for health | Health spending        | Government health spending | Out-of-pocket health spending | Prepaid private health spending | Development assistance for health |
| Senegal | 2023 | 78.1 (64.3 to 93.9)        | 22.1 (17.1 to 28.4)        | 37.1 (26.3 to 50.6)           | 6.3 (2.9 to 11.7)               | 12.6 (10.9 to 14.4)               | 196.1 (161.6 to 236.0) | 55.4 (42.9 to 71.2)        | 93.2 (66.1 to 127.0)          | 15.9 (7.3 to 29.4)              | 31.5 (27.3 to 36.1)               |
| Senegal | 2024 | 78.9 (66.0 to 94.2)        | 22.4 (17.3 to 28.8)        | 37.4 (26.5 to 51.1)           | 6.4 (3.0 to 11.9)               | 12.7 (10.9 to 14.6)               | 198.2 (165.8 to 236.6) | 56.2 (43.5 to 72.3)        | 94.0 (66.5 to 128.4)          | 16.2 (7.4 to 29.9)              | 31.8 (27.3 to 36.6)               |
| Senegal | 2025 | 79.8 (65.7 to 96.2)        | 22.7 (17.6 to 29.2)        | 37.8 (26.7 to 51.6)           | 6.5 (3.0 to 12.1)               | 12.7 (10.9 to 14.9)               | 200.5 (165.1 to 241.6) | 57.1 (44.3 to 73.4)        | 95.0 (67.0 to 129.7)          | 16.5 (7.6 to 30.4)              | 32.0 (27.3 to 37.4)               |
| Senegal | 2026 | 80.8 (67.4 to 96.3)        | 23.1 (17.9 to 29.8)        | 38.2 (27.0 to 52.1)           | 6.7 (3.1 to 12.3)               | 12.8 (10.8 to 15.0)               | 202.9 (169.4 to 241.9) | 58.0 (45.1 to 74.8)        | 95.9 (67.7 to 131.0)          | 16.7 (7.7 to 31.0)              | 32.2 (27.0 to 37.8)               |
| Senegal | 2027 | 81.8 (67.7 to 98.6)        | 23.5 (18.3 to 30.4)        | 38.6 (27.3 to 52.7)           | 6.8 (3.1 to 12.6)               | 12.9 (10.8 to 15.3)               | 205.6 (170.1 to 247.7) | 59.0 (45.9 to 76.3)        | 97.0 (68.5 to 132.5)          | 17.1 (7.9 to 31.6)              | 32.4 (27.0 to 38.4)               |
| Senegal | 2028 | 82.9 (69.0 to 99.1)        | 23.9 (18.6 to 31.0)        | 39.1 (27.6 to 53.3)           | 6.9 (3.2 to 12.8)               | 13.0 (10.9 to 15.8)               | 208.4 (173.3 to 248.9) | 60.1 (46.7 to 77.8)        | 98.1 (69.3 to 134.0)          | 17.4 (8.0 to 32.2)              | 32.7 (27.3 to 39.6)               |
| Senegal | 2029 | 84.1 (69.4 to 101.4)       | 24.4 (19.0 to 31.5)        | 39.5 (27.9 to 54.0)           | 7.1 (3.3 to 13.0)               | 13.1 (10.8 to 16.0)               | 211.4 (174.4 to 254.7) | 61.3 (47.6 to 79.2)        | 99.3 (70.2 to 135.7)          | 17.7 (8.2 to 32.8)              | 33.0 (27.1 to 40.3)               |
| Senegal | 2030 | 85.4 (71.1 to 102.4)       | 24.9 (19.3 to 32.2)        | 40.1 (28.3 to 54.8)           | 7.2 (3.4 to 13.3)               | 13.2 (10.8 to 16.3)               | 214.5 (178.7 to 257.3) | 62.6 (48.4 to 80.9)        | 100.6 (71.1 to 137.5)         | 18.1 (8.4 to 33.4)              | 33.2 (27.1 to 40.9)               |
| Senegal | 2031 | 86.7 (70.7 to 104.7)       | 25.4 (19.6 to 32.9)        | 40.6 (28.7 to 55.5)           | 7.4 (3.4 to 13.5)               | 13.3 (10.8 to 16.7)               | 217.8 (177.7 to 263.0) | 63.9 (49.3 to 82.7)        | 101.9 (72.0 to 139.4)         | 18.5 (8.6 to 34.0)              | 33.5 (27.1 to 42.0)               |
| Senegal | 2032 | 88.0 (73.5 to 105.8)       | 26.0 (20.0 to 33.6)        | 41.1 (29.0 to 56.2)           | 7.5 (3.5 to 13.8)               | 13.5 (10.8 to 17.1)               | 221.1 (184.6 to 265.7) | 65.2 (50.1 to 84.5)        | 103.2 (72.8 to 141.2)         | 18.9 (8.8 to 34.7)              | 33.8 (27.1 to 42.8)               |
| Senegal | 2033 | 89.4 (73.3 to 107.5)       | 26.5 (20.4 to 34.4)        | 41.6 (29.4 to 57.0)           | 7.7 (3.6 to 14.1)               | 13.6 (10.8 to 17.5)               | 224.6 (184.1 to 270.2) | 66.6 (51.2 to 86.5)        | 104.6 (73.7 to 143.1)         | 19.3 (9.0 to 35.5)              | 34.1 (27.0 to 44.0)               |
| Senegal | 2034 | 90.9 (75.0 to 109.4)       | 27.1 (20.8 to 35.3)        | 42.2 (29.8 to 57.7)           | 7.8 (3.7 to 14.5)               | 13.7 (10.8 to 17.8)               | 228.2 (188.5 to 274.9) | 68.1 (52.3 to 88.6)        | 105.9 (74.7 to 145.0)         | 19.7 (9.2 to 36.3)              | 34.5 (27.1 to 44.6)               |
| Senegal | 2035 | 92.3 (76.1 to 111.3)       | 27.7 (21.2 to 36.0)        | 42.7 (30.2 to 58.5)           | 8.0 (3.7 to 14.8)               | 13.9 (10.8 to 18.2)               | 231.9 (191.1 to 279.7) | 69.6 (53.3 to 90.5)        | 107.2 (75.8 to 146.9)         | 20.1 (9.4 to 37.2)              | 34.9 (27.2 to 45.8)               |
| Senegal | 2036 | 93.8 (77.8 to 112.9)       | 28.4 (21.7 to 36.8)        | 43.2 (30.6 to 59.2)           | 8.2 (3.8 to 15.1)               | 14.1 (10.8 to 19.0)               | 235.6 (195.4 to 283.7) | 71.2 (54.6 to 92.4)        | 108.6 (76.9 to 148.7)         | 20.5 (9.6 to 38.0)              | 35.3 (27.2 to 47.6)               |
| Senegal | 2037 | 95.3 (78.4 to 115.3)       | 29.0 (22.2 to 37.7)        | 43.7 (31.0 to 59.9)           | 8.3 (3.9 to 15.5)               | 14.2 (10.9 to 19.0)               | 239.3 (196.9 to 289.7) | 72.8 (55.7 to 94.6)        | 109.9 (77.8 to 150.6)         | 20.9 (9.8 to 38.9)              | 35.7 (27.4 to 47.8)               |
| Senegal | 2038 | 96.8 (79.8 to 116.1)       | 29.7 (22.7 to 38.6)        | 44.2 (31.4 to 60.7)           | 8.5 (4.0 to 15.9)               | 14.4 (11.0 to 19.8)               | 243.1 (200.5 to 291.5) | 74.5 (57.0 to 96.8)        | 111.1 (78.8 to 152.4)         | 21.4 (10.0 to 39.8)             | 36.1 (27.5 to 49.7)               |
| Senegal | 2039 | 98.3 (80.9 to 119.4)       | 30.3 (23.2 to 39.5)        | 44.7 (31.7 to 61.4)           | 8.7 (4.1 to 16.2)               | 14.5 (11.1 to 19.9)               | 246.9 (203.3 to 299.9) | 76.2 (58.2 to 99.3)        | 112.4 (79.7 to 154.2)         | 21.8 (10.2 to 40.8)             | 36.5 (27.8 to 50.0)               |
| Senegal | 2040 | 99.9 (82.4 to 120.6)       | 31.0 (23.7 to 40.4)        | 45.2 (32.1 to 62.1)           | 8.9 (4.2 to 16.6)               | 14.7 (11.2 to 20.2)               | 250.9 (207.0 to 303.0) | 77.9 (59.5 to 101.4)       | 113.7 (80.5 to 156.0)         | 22.3 (10.4 to 41.6)             | 37.0 (28.1 to 50.8)               |
| Senegal | 2041 | 101.5 (82.8 to 123.4)      | 31.7 (24.3 to 41.4)        | 45.7 (32.4 to 62.8)           | 9.0 (4.2 to 16.9)               | 15.0 (11.2 to 21.1)               | 254.9 (208.0 to 309.9) | 79.7 (61.0 to 103.9)       | 114.9 (81.4 to 157.7)         | 22.7 (10.7 to 42.5)             | 37.6 (28.2 to 53.0)               |
| Senegal | 2042 | 103.1 (84.9 to 124.9)      | 32.5 (24.7 to 42.3)        | 46.3 (32.8 to 63.4)           | 9.2 (4.3 to 17.3)               | 15.2 (11.2 to 21.9)               | 259.1 (213.3 to 313.7) | 81.6 (62.1 to 106.2)       | 116.2 (82.3 to 159.3)         | 23.2 (10.9 to 43.4)             | 38.1 (28.2 to 55.0)               |
| Senegal | 2043 | 104.8 (85.8 to 128.7)      | 33.2 (25.2 to 43.2)        | 46.8 (33.1 to 64.0)           | 9.4 (4.4 to 17.6)               | 15.4 (11.4 to 22.7)               | 263.3 (215.5 to 323.4) | 83.5 (63.3 to 108.6)       | 117.4 (83.2 to 160.8)         | 23.6 (11.1 to 44.3)             | 38.7 (28.7 to 57.0)               |

| Country | Year | 2018 US Dollars per capita |                            |                               |                                 |                                   | 2018 PPP per capita       |                            |                               |                                 |                                   |
|---------|------|----------------------------|----------------------------|-------------------------------|---------------------------------|-----------------------------------|---------------------------|----------------------------|-------------------------------|---------------------------------|-----------------------------------|
|         |      | Health spending            | Government health spending | Out-of-pocket health spending | Prepaid private health spending | Development assistance for health | Health spending           | Government health spending | Out-of-pocket health spending | Prepaid private health spending | Development assistance for health |
| Senegal | 2044 | 106.5 (87.9 to 129.3)      | 34.0 (25.7 to 44.3)        | 47.2 (33.5 to 64.8)           | 9.6 (4.5 to 18.0)               | 15.7 (11.5 to 23.1)               | 267.5 (220.9 to 324.9)    | 85.4 (64.6 to 111.3)       | 118.7 (84.0 to 162.7)         | 24.1 (11.3 to 45.1)             | 39.4 (28.9 to 58.0)               |
| Senegal | 2045 | 108.3 (88.0 to 132.8)      | 34.8 (26.2 to 45.4)        | 47.7 (33.8 to 65.5)           | 9.8 (4.6 to 18.3)               | 15.9 (11.6 to 24.2)               | 272.0 (221.0 to 333.6)    | 87.4 (65.8 to 114.1)       | 119.9 (85.0 to 164.6)         | 24.6 (11.5 to 46.0)             | 40.1 (29.1 to 60.9)               |
| Senegal | 2046 | 110.0 (90.8 to 134.2)      | 35.6 (26.7 to 46.6)        | 48.2 (34.2 to 66.3)           | 10.0 (4.6 to 18.6)              | 16.2 (11.7 to 24.6)               | 276.4 (228.0 to 337.2)    | 89.5 (67.0 to 117.1)       | 121.1 (85.9 to 166.5)         | 25.1 (11.7 to 46.8)             | 40.8 (29.3 to 61.8)               |
| Senegal | 2047 | 111.9 (91.2 to 136.3)      | 36.4 (27.2 to 47.9)        | 48.7 (34.6 to 67.0)           | 10.2 (4.7 to 19.0)              | 16.5 (11.8 to 26.0)               | 281.0 (229.0 to 342.4)    | 91.6 (68.4 to 120.4)       | 122.4 (86.8 to 168.3)         | 25.5 (11.8 to 47.7)             | 41.5 (29.7 to 65.3)               |
| Senegal | 2048 | 113.7 (93.4 to 137.2)      | 37.3 (27.8 to 48.9)        | 49.2 (34.9 to 67.7)           | 10.4 (4.8 to 19.4)              | 16.9 (12.0 to 27.1)               | 285.6 (234.7 to 344.7)    | 93.7 (69.8 to 122.8)       | 123.5 (87.7 to 170.0)         | 26.0 (12.1 to 48.7)             | 42.4 (30.3 to 68.0)               |
| Senegal | 2049 | 115.6 (94.3 to 142.3)      | 38.2 (28.4 to 50.1)        | 49.7 (35.3 to 68.4)           | 10.6 (4.9 to 19.8)              | 17.2 (12.1 to 27.5)               | 290.3 (237.0 to 357.5)    | 95.8 (71.2 to 125.9)       | 124.8 (88.7 to 171.8)         | 26.5 (12.3 to 49.7)             | 43.2 (30.5 to 69.1)               |
| Senegal | 2050 | 117.4 (96.3 to 142.2)      | 39.0 (29.1 to 51.5)        | 50.1 (35.6 to 69.1)           | 10.8 (5.0 to 20.2)              | 17.6 (12.3 to 28.1)               | 295.0 (241.8 to 357.1)    | 98.0 (73.0 to 129.3)       | 125.9 (89.6 to 173.5)         | 27.0 (12.5 to 50.7)             | 44.1 (31.0 to 70.5)               |
| Serbia  | 1995 | 148.0 (130.6 to 168.4)     | 96.5 (83.1 to 112.8)       | 45.5 (35.6 to 57.1)           | 6.0 (3.0 to 11.6)               | 0.0 (0.0 to 0.0)                  | 358.9 (316.6 to 408.3)    | 233.9 (201.5 to 273.6)     | 110.3 (86.3 to 138.4)         | 14.6 (7.2 to 28.2)              | 0.1 (0.1 to 0.1)                  |
| Serbia  | 1996 | 160.7 (142.4 to 179.3)     | 105.9 (92.8 to 121.2)      | 48.1 (37.9 to 58.9)           | 6.7 (3.3 to 13.1)               | 0.0 (0.0 to 0.0)                  | 389.6 (345.3 to 434.8)    | 256.7 (225.0 to 293.8)     | 116.6 (92.0 to 142.8)         | 16.3 (7.9 to 31.7)              | 0.0 (0.0 to 0.0)                  |
| Serbia  | 1997 | 170.9 (152.4 to 189.4)     | 112.8 (99.7 to 127.8)      | 50.7 (41.0 to 61.6)           | 7.3 (3.6 to 14.4)               | 0.0 (0.0 to 0.0)                  | 414.3 (369.6 to 459.2)    | 273.6 (241.8 to 309.8)     | 122.8 (99.4 to 149.4)         | 17.8 (8.8 to 35.0)              | 0.1 (0.1 to 0.1)                  |
| Serbia  | 1998 | 179.6 (161.9 to 198.0)     | 118.5 (104.2 to 133.1)     | 53.0 (43.5 to 64.4)           | 7.9 (3.9 to 15.2)               | 0.2 (0.2 to 0.2)                  | 435.4 (392.5 to 480.2)    | 287.2 (252.8 to 322.8)     | 128.5 (105.4 to 156.1)        | 19.3 (9.5 to 36.7)              | 0.4 (0.4 to 0.4)                  |
| Serbia  | 1999 | 177.2 (161.7 to 194.7)     | 115.2 (102.3 to 128.6)     | 52.5 (43.3 to 63.0)           | 8.0 (3.8 to 15.1)               | 1.6 (1.6 to 1.6)                  | 429.7 (392.0 to 472.2)    | 279.3 (248.0 to 311.8)     | 127.3 (105.0 to 152.8)        | 19.3 (9.3 to 36.5)              | 3.9 (3.9 to 3.9)                  |
| Serbia  | 2000 | 196.2 (178.4 to 215.1)     | 129.4 (115.4 to 144.3)     | 55.8 (46.5 to 66.4)           | 9.0 (4.4 to 17.0)               | 1.9 (1.9 to 1.9)                  | 475.7 (432.6 to 521.5)    | 313.9 (279.9 to 350.0)     | 135.3 (112.7 to 161.0)        | 21.9 (10.6 to 41.3)             | 4.6 (4.6 to 4.6)                  |
| Serbia  | 2001 | 215.5 (195.4 to 235.9)     | 144.6 (129.4 to 161.1)     | 59.5 (49.9 to 70.9)           | 9.7 (4.8 to 18.2)               | 1.6 (1.6 to 1.6)                  | 522.5 (473.7 to 572.0)    | 350.5 (313.9 to 390.6)     | 144.4 (121.1 to 171.9)        | 23.6 (11.6 to 44.2)             | 4.0 (4.0 to 4.0)                  |
| Serbia  | 2002 | 253.4 (231.4 to 277.2)     | 173.0 (155.0 to 191.7)     | 66.6 (56.5 to 79.3)           | 11.0 (5.6 to 19.7)              | 2.7 (2.7 to 2.7)                  | 614.4 (561.0 to 672.2)    | 419.6 (375.8 to 464.7)     | 161.5 (137.1 to 192.2)        | 26.7 (13.5 to 47.8)             | 6.7 (6.7 to 6.7)                  |
| Serbia  | 2003 | 284.1 (261.8 to 308.6)     | 192.8 (175.4 to 212.4)     | 75.3 (64.1 to 88.3)           | 11.8 (6.0 to 20.3)              | 4.2 (4.2 to 4.2)                  | 688.9 (634.7 to 748.2)    | 467.6 (425.4 to 515.0)     | 182.5 (155.4 to 214.2)        | 28.6 (14.5 to 49.3)             | 10.1 (10.1 to 10.1)               |
| Serbia  | 2004 | 315.9 (291.7 to 342.3)     | 211.9 (193.8 to 232.0)     | 88.2 (75.3 to 102.7)          | 12.7 (6.6 to 21.7)              | 3.0 (3.0 to 3.0)                  | 766.0 (707.4 to 830.1)    | 513.9 (470.0 to 562.6)     | 214.0 (182.7 to 248.9)        | 30.8 (15.9 to 52.7)             | 7.3 (7.3 to 7.3)                  |
| Serbia  | 2005 | 350.6 (324.8 to 377.7)     | 229.6 (209.6 to 251.0)     | 104.9 (89.7 to 122.2)         | 13.8 (7.2 to 23.6)              | 2.3 (2.3 to 2.3)                  | 850.2 (787.7 to 916.0)    | 556.8 (508.4 to 608.7)     | 254.4 (217.6 to 296.3)        | 33.5 (17.3 to 57.2)             | 5.5 (5.5 to 5.5)                  |
| Serbia  | 2006 | 388.1 (360.4 to 418.6)     | 246.8 (226.3 to 269.7)     | 124.1 (106.5 to 143.2)        | 14.5 (7.6 to 24.6)              | 2.7 (2.7 to 2.7)                  | 941.2 (873.8 to 1015.1)   | 598.3 (548.7 to 653.9)     | 301.0 (258.2 to 347.2)        | 35.3 (18.5 to 59.7)             | 6.5 (6.5 to 6.5)                  |
| Serbia  | 2007 | 429.8 (399.9 to 465.1)     | 268.1 (246.4 to 293.2)     | 145.3 (126.1 to 167.2)        | 14.8 (8.0 to 25.5)              | 1.7 (1.7 to 1.7)                  | 1042.2 (969.8 to 1127.9)  | 650.0 (597.4 to 711.0)     | 352.2 (305.7 to 405.4)        | 35.9 (19.3 to 61.8)             | 4.0 (4.0 to 4.0)                  |
| Serbia  | 2008 | 464.6 (431.5 to 500.3)     | 287.6 (264.1 to 312.6)     | 160.7 (140.6 to 182.7)        | 13.9 (7.6 to 24.1)              | 2.4 (2.4 to 2.4)                  | 1126.5 (1046.4 to 1213.2) | 697.4 (640.4 to 758.0)     | 389.7 (340.9 to 443.1)        | 33.7 (18.5 to 58.4)             | 5.7 (5.7 to 5.7)                  |

| Country | Year | 2018 US Dollars per capita |                            |                               |                                 |                                   | 2018 PPP per capita       |                            |                               |                                 |                                   |
|---------|------|----------------------------|----------------------------|-------------------------------|---------------------------------|-----------------------------------|---------------------------|----------------------------|-------------------------------|---------------------------------|-----------------------------------|
|         |      | Health spending            | Government health spending | Out-of-pocket health spending | Prepaid private health spending | Development assistance for health | Health spending           | Government health spending | Out-of-pocket health spending | Prepaid private health spending | Development assistance for health |
| Serbia  | 2009 | 463.1 (430.4 to 496.2)     | 283.3 (260.5 to 308.0)     | 164.3 (143.2 to 185.3)        | 12.1 (6.6 to 21.0)              | 3.4 (3.4 to 3.4)                  | 1123.0 (1043.7 to 1203.1) | 687.0 (631.6 to 746.8)     | 398.3 (347.3 to 449.4)        | 29.4 (16.0 to 51.0)             | 8.3 (8.3 to 8.3)                  |
| Serbia  | 2010 | 463.2 (428.6 to 496.8)     | 283.1 (260.2 to 308.1)     | 168.3 (146.9 to 188.9)        | 10.0 (5.4 to 17.7)              | 1.8 (1.8 to 1.8)                  | 1123.2 (1039.2 to 1204.8) | 686.4 (630.8 to 747.1)     | 408.1 (356.2 to 458.0)        | 24.3 (13.1 to 42.8)             | 4.5 (4.5 to 4.5)                  |
| Serbia  | 2011 | 469.5 (434.9 to 503.1)     | 284.2 (260.8 to 309.1)     | 170.6 (149.7 to 190.8)        | 9.0 (4.7 to 15.8)               | 5.7 (5.7 to 5.7)                  | 1138.4 (1054.6 to 1219.9) | 689.2 (632.4 to 749.6)     | 413.6 (363.1 to 462.6)        | 21.8 (11.5 to 38.4)             | 13.8 (13.8 to 13.8)               |
| Serbia  | 2012 | 467.0 (433.1 to 498.0)     | 282.1 (258.2 to 306.3)     | 172.6 (151.4 to 192.4)        | 8.4 (4.4 to 15.0)               | 3.9 (3.9 to 3.9)                  | 1132.5 (1050.1 to 1207.6) | 684.1 (626.1 to 742.8)     | 418.5 (367.1 to 466.5)        | 20.4 (10.6 to 36.3)             | 9.5 (9.5 to 9.5)                  |
| Serbia  | 2013 | 471.6 (436.8 to 506.3)     | 282.6 (258.0 to 308.0)     | 179.6 (158.0 to 201.2)        | 7.9 (4.1 to 14.4)               | 1.5 (1.5 to 1.5)                  | 1143.5 (1059.2 to 1227.7) | 685.2 (625.5 to 746.9)     | 435.5 (383.0 to 487.9)        | 19.2 (9.9 to 34.9)              | 3.6 (3.6 to 3.6)                  |
| Serbia  | 2014 | 460.9 (426.3 to 497.3)     | 271.5 (247.5 to 296.4)     | 181.5 (158.7 to 204.6)        | 7.0 (3.6 to 12.9)               | 0.8 (0.8 to 0.8)                  | 1117.6 (1033.8 to 1205.9) | 658.4 (600.2 to 718.6)     | 440.1 (384.8 to 496.1)        | 17.1 (8.6 to 31.2)              | 1.9 (1.9 to 1.9)                  |
| Serbia  | 2015 | 455.6 (420.0 to 496.1)     | 265.8 (241.6 to 292.9)     | 182.4 (156.5 to 209.5)        | 6.8 (3.4 to 12.2)               | 0.6 (0.6 to 0.6)                  | 1104.7 (1018.4 to 1203.0) | 644.6 (585.9 to 710.1)     | 442.2 (379.4 to 508.1)        | 16.4 (8.3 to 29.5)              | 1.6 (1.6 to 1.6)                  |
| Serbia  | 2016 | 462.1 (419.9 to 504.3)     | 268.1 (239.2 to 300.4)     | 184.7 (155.4 to 216.7)        | 6.8 (3.3 to 12.5)               | 2.5 (2.5 to 2.5)                  | 1120.6 (1018.2 to 1222.9) | 650.1 (580.0 to 728.3)     | 447.9 (376.8 to 525.4)        | 16.5 (8.1 to 30.3)              | 6.1 (6.1 to 6.1)                  |
| Serbia  | 2017 | 470.1 (427.7 to 512.4)     | 269.1 (240.2 to 301.7)     | 190.4 (160.4 to 223.2)        | 7.0 (3.5 to 13.0)               | 3.6 (3.6 to 3.6)                  | 1139.9 (1037.2 to 1242.6) | 652.5 (582.5 to 731.6)     | 461.8 (389.0 to 541.3)        | 17.1 (8.4 to 31.4)              | 8.7 (8.7 to 8.7)                  |
| Serbia  | 2018 | 476.3 (432.6 to 522.1)     | 270.4 (241.5 to 303.5)     | 195.4 (163.9 to 228.3)        | 7.1 (3.5 to 13.2)               | 3.3 (3.3 to 3.3)                  | 1155.0 (1049.1 to 1265.9) | 655.8 (585.6 to 736.0)     | 473.8 (397.4 to 553.7)        | 17.3 (8.6 to 32.0)              | 8.0 (7.9 to 8.0)                  |
| Serbia  | 2019 | 483.1 (438.3 to 529.3)     | 271.9 (242.8 to 305.8)     | 200.6 (168.3 to 235.8)        | 7.3 (3.6 to 13.4)               | 3.4 (3.2 to 3.6)                  | 1171.4 (1062.8 to 1283.4) | 659.3 (588.7 to 741.6)     | 486.3 (408.1 to 571.7)        | 17.6 (8.7 to 32.5)              | 8.2 (7.6 to 8.6)                  |
| Serbia  | 2020 | 492.0 (445.9 to 537.9)     | 275.0 (245.4 to 309.4)     | 206.1 (172.3 to 241.7)        | 7.4 (3.7 to 13.6)               | 3.5 (3.2 to 3.8)                  | 1193.1 (1081.2 to 1304.3) | 666.9 (595.1 to 750.2)     | 499.8 (417.7 to 586.2)        | 17.9 (8.9 to 33.1)              | 8.4 (7.7 to 9.1)                  |
| Serbia  | 2021 | 502.7 (455.7 to 550.6)     | 279.6 (249.4 to 314.3)     | 212.0 (177.5 to 248.6)        | 7.5 (3.7 to 13.9)               | 3.6 (3.2 to 4.0)                  | 1219.1 (1105.1 to 1335.2) | 678.1 (604.7 to 762.2)     | 514.0 (430.4 to 602.8)        | 18.3 (9.0 to 33.6)              | 8.7 (7.9 to 9.7)                  |
| Serbia  | 2022 | 514.8 (464.8 to 563.3)     | 285.2 (253.9 to 320.3)     | 218.1 (182.8 to 256.1)        | 7.7 (3.8 to 14.2)               | 3.7 (3.3 to 4.2)                  | 1248.2 (1127.2 to 1365.8) | 691.6 (615.7 to 776.8)     | 528.9 (443.3 to 621.1)        | 18.6 (9.2 to 34.3)              | 9.1 (8.0 to 10.2)                 |
| Serbia  | 2023 | 526.8 (474.7 to 575.5)     | 290.6 (258.6 to 325.8)     | 224.5 (187.7 to 265.1)        | 7.8 (3.9 to 14.4)               | 3.9 (3.4 to 4.4)                  | 1277.5 (1151.1 to 1395.5) | 704.7 (627.2 to 790.0)     | 544.4 (455.1 to 642.9)        | 19.0 (9.4 to 35.0)              | 9.4 (8.2 to 10.7)                 |
| Serbia  | 2024 | 539.2 (486.3 to 589.6)     | 296.1 (263.8 to 331.8)     | 231.1 (193.2 to 272.9)        | 8.0 (4.0 to 14.7)               | 4.0 (3.5 to 4.7)                  | 1307.4 (1179.3 to 1429.7) | 717.9 (639.7 to 804.6)     | 560.3 (468.6 to 661.8)        | 19.4 (9.6 to 35.6)              | 9.8 (8.4 to 11.3)                 |
| Serbia  | 2025 | 551.9 (497.0 to 602.9)     | 301.7 (268.7 to 338.8)     | 237.8 (197.9 to 278.7)        | 8.2 (4.0 to 14.9)               | 4.2 (3.6 to 4.9)                  | 1338.2 (1205.0 to 1461.9) | 731.6 (651.6 to 821.6)     | 576.6 (479.9 to 675.9)        | 19.8 (9.8 to 36.2)              | 10.1 (8.6 to 11.9)                |
| Serbia  | 2026 | 564.7 (507.8 to 617.2)     | 307.3 (273.8 to 346.2)     | 244.7 (204.3 to 287.0)        | 8.3 (4.1 to 15.2)               | 4.3 (3.7 to 5.1)                  | 1369.3 (1231.3 to 1496.6) | 745.2 (664.0 to 839.5)     | 593.4 (495.3 to 696.0)        | 20.2 (10.0 to 36.9)             | 10.5 (8.9 to 12.3)                |
| Serbia  | 2027 | 577.8 (520.7 to 633.6)     | 313.0 (278.8 to 352.4)     | 251.8 (209.7 to 297.0)        | 8.5 (4.2 to 15.5)               | 4.5 (3.8 to 5.4)                  | 1401.1 (1262.6 to 1536.3) | 759.0 (676.0 to 854.5)     | 610.6 (508.4 to 720.1)        | 20.6 (10.2 to 37.7)             | 10.9 (9.1 to 13.0)                |
| Serbia  | 2028 | 591.1 (531.8 to 651.0)     | 318.8 (284.4 to 359.2)     | 259.0 (215.1 to 305.9)        | 8.7 (4.3 to 15.9)               | 4.7 (3.9 to 5.6)                  | 1433.3 (1289.6 to 1578.6) | 773.0 (689.6 to 871.1)     | 628.0 (521.6 to 741.7)        | 21.0 (10.4 to 38.4)             | 11.3 (9.5 to 13.6)                |
| Serbia  | 2029 | 604.6 (542.7 to 667.4)     | 324.7 (289.4 to 366.9)     | 266.2 (220.0 to 316.5)        | 8.8 (4.4 to 16.2)               | 4.9 (4.0 to 6.0)                  | 1465.9 (1316.0 to 1618.3) | 787.4 (701.7 to 889.6)     | 645.4 (533.4 to 767.4)        | 21.4 (10.6 to 39.3)             | 11.8 (9.7 to 14.4)                |

| Country | Year | 2018 US Dollars per capita |                            |                               |                                 |                                   | 2018 PPP per capita       |                            |                               |                                 |                                   |
|---------|------|----------------------------|----------------------------|-------------------------------|---------------------------------|-----------------------------------|---------------------------|----------------------------|-------------------------------|---------------------------------|-----------------------------------|
|         |      | Health spending            | Government health spending | Out-of-pocket health spending | Prepaid private health spending | Development assistance for health | Health spending           | Government health spending | Out-of-pocket health spending | Prepaid private health spending | Development assistance for health |
| Serbia  | 2030 | 618.1 (551.1 to 686.9)     | 330.7 (294.5 to 374.1)     | 273.4 (225.2 to 327.3)        | 9.0 (4.4 to 16.5)               | 5.0 (4.1 to 6.2)                  | 1498.9 (1336.4 to 1665.6) | 802.0 (714.1 to 907.2)     | 662.9 (546.0 to 793.7)        | 21.8 (10.8 to 40.1)             | 12.2 (10.0 to 15.1)               |
| Serbia  | 2031 | 631.4 (564.3 to 702.7)     | 336.5 (299.3 to 381.1)     | 280.5 (229.0 to 336.9)        | 9.2 (4.5 to 16.9)               | 5.2 (4.2 to 6.5)                  | 1531.1 (1368.3 to 1704.0) | 816.1 (725.9 to 924.1)     | 680.1 (555.4 to 817.0)        | 22.3 (11.0 to 40.9)             | 12.7 (10.3 to 15.9)               |
| Serbia  | 2032 | 645.4 (574.9 to 720.6)     | 342.9 (304.5 to 388.1)     | 287.7 (233.6 to 347.6)        | 9.4 (4.6 to 17.2)               | 5.4 (4.4 to 6.8)                  | 1565.1 (1394.1 to 1747.2) | 831.5 (738.4 to 941.1)     | 697.7 (566.6 to 842.8)        | 22.7 (11.2 to 41.8)             | 13.2 (10.6 to 16.5)               |
| Serbia  | 2033 | 659.8 (583.5 to 737.0)     | 349.5 (308.4 to 395.0)     | 295.0 (238.3 to 358.2)        | 9.6 (4.7 to 17.6)               | 5.6 (4.5 to 7.2)                  | 1599.8 (1415.0 to 1787.0) | 847.6 (747.8 to 957.8)     | 715.4 (577.9 to 868.7)        | 23.2 (11.5 to 42.7)             | 13.7 (10.9 to 17.6)               |
| Serbia  | 2034 | 673.8 (596.9 to 752.1)     | 356.0 (313.6 to 403.2)     | 302.2 (242.7 to 368.8)        | 9.8 (4.8 to 17.9)               | 5.9 (4.6 to 7.6)                  | 1634.0 (1447.3 to 1823.7) | 863.3 (760.5 to 977.8)     | 732.7 (588.5 to 894.2)        | 23.7 (11.7 to 43.5)             | 14.2 (11.2 to 18.3)               |
| Serbia  | 2035 | 688.0 (607.3 to 771.2)     | 362.6 (319.3 to 411.2)     | 309.3 (246.6 to 379.1)        | 10.0 (4.9 to 18.3)              | 6.1 (4.7 to 7.9)                  | 1668.3 (1472.7 to 1870.0) | 879.3 (774.2 to 997.2)     | 750.1 (598.0 to 919.3)        | 24.1 (11.9 to 44.4)             | 14.8 (11.5 to 19.3)               |
| Serbia  | 2036 | 702.1 (619.0 to 785.9)     | 369.2 (324.2 to 419.1)     | 316.4 (250.6 to 389.6)        | 10.2 (5.0 to 18.6)              | 6.3 (4.9 to 8.5)                  | 1702.4 (1501.1 to 1905.8) | 895.3 (786.2 to 1016.2)    | 767.1 (607.6 to 944.7)        | 24.6 (12.2 to 45.1)             | 15.4 (12.0 to 20.5)               |
| Serbia  | 2037 | 716.2 (631.3 to 806.2)     | 375.9 (329.7 to 427.4)     | 323.3 (254.6 to 401.1)        | 10.4 (5.1 to 19.0)              | 6.6 (5.1 to 8.7)                  | 1736.6 (1530.9 to 1954.9) | 911.6 (799.4 to 1036.3)    | 783.9 (617.3 to 972.7)        | 25.1 (12.4 to 46.0)             | 16.0 (12.4 to 21.2)               |
| Serbia  | 2038 | 730.6 (642.7 to 824.9)     | 383.0 (334.6 to 437.0)     | 330.2 (258.6 to 412.6)        | 10.6 (5.2 to 19.3)              | 6.9 (5.2 to 9.5)                  | 1771.6 (1558.5 to 2000.2) | 928.6 (811.5 to 1059.7)    | 800.7 (627.2 to 1000.4)       | 25.6 (12.7 to 46.8)             | 16.6 (12.7 to 23.0)               |
| Serbia  | 2039 | 745.0 (652.2 to 841.7)     | 390.0 (340.6 to 445.1)     | 337.1 (263.6 to 422.8)        | 10.8 (5.3 to 19.7)              | 7.1 (5.4 to 9.8)                  | 1806.4 (1581.4 to 2040.9) | 945.7 (825.8 to 1079.4)    | 817.3 (639.2 to 1025.1)       | 26.1 (12.9 to 47.7)             | 17.3 (13.2 to 23.9)               |
| Serbia  | 2040 | 759.1 (665.1 to 866.9)     | 397.0 (344.7 to 453.7)     | 343.7 (268.0 to 431.2)        | 11.0 (5.4 to 20.0)              | 7.4 (5.6 to 10.3)                 | 1840.7 (1612.8 to 2102.1) | 962.7 (835.9 to 1100.2)    | 833.5 (649.9 to 1045.7)       | 26.6 (13.2 to 48.6)             | 18.0 (13.6 to 24.9)               |
| Serbia  | 2041 | 772.9 (674.6 to 877.7)     | 403.9 (348.8 to 461.3)     | 350.1 (271.7 to 439.3)        | 11.2 (5.5 to 20.4)              | 7.7 (5.8 to 10.7)                 | 1874.2 (1635.8 to 2128.4) | 979.3 (845.7 to 1118.7)    | 849.0 (658.9 to 1065.2)       | 27.1 (13.4 to 49.4)             | 18.7 (14.0 to 26.0)               |
| Serbia  | 2042 | 786.8 (686.0 to 894.8)     | 410.9 (355.3 to 469.5)     | 356.5 (275.4 to 447.9)        | 11.4 (5.6 to 20.8)              | 8.0 (6.0 to 11.5)                 | 1907.8 (1663.5 to 2169.8) | 996.4 (861.5 to 1138.4)    | 864.3 (667.7 to 1086.2)       | 27.6 (13.7 to 50.4)             | 19.5 (14.5 to 27.8)               |
| Serbia  | 2043 | 800.6 (697.2 to 912.2)     | 418.1 (360.0 to 479.5)     | 362.6 (279.3 to 457.1)        | 11.6 (5.7 to 21.2)              | 8.3 (6.1 to 12.2)                 | 1941.4 (1690.5 to 2212.0) | 1013.8 (872.9 to 1162.7)   | 879.3 (677.4 to 1108.5)       | 28.1 (13.9 to 51.5)             | 20.2 (14.9 to 29.5)               |
| Serbia  | 2044 | 814.7 (715.0 to 924.0)     | 425.5 (365.2 to 488.7)     | 368.7 (283.7 to 466.7)        | 11.8 (5.8 to 21.6)              | 8.7 (6.3 to 12.7)                 | 1975.6 (1733.8 to 2240.6) | 1031.8 (885.6 to 1185.1)   | 894.1 (687.9 to 1131.7)       | 28.6 (14.2 to 52.5)             | 21.0 (15.3 to 30.7)               |
| Serbia  | 2045 | 829.0 (726.0 to 946.2)     | 433.2 (371.7 to 497.6)     | 374.7 (288.1 to 473.7)        | 12.0 (6.0 to 22.0)              | 9.0 (6.5 to 13.7)                 | 2010.2 (1760.5 to 2294.4) | 1050.4 (901.3 to 1206.6)   | 908.7 (698.7 to 1148.7)       | 29.2 (14.4 to 53.4)             | 21.9 (15.8 to 33.3)               |
| Serbia  | 2046 | 842.8 (731.6 to 965.2)     | 440.7 (376.8 to 508.9)     | 380.4 (292.6 to 481.8)        | 12.3 (6.1 to 22.4)              | 9.4 (6.7 to 14.5)                 | 2043.6 (1773.9 to 2340.3) | 1068.7 (913.7 to 1234.1)   | 922.4 (709.4 to 1168.4)       | 29.7 (14.7 to 54.3)             | 22.7 (16.4 to 35.1)               |
| Serbia  | 2047 | 856.6 (745.6 to 981.3)     | 448.4 (382.7 to 519.0)     | 386.0 (297.2 to 487.8)        | 12.5 (6.2 to 22.8)              | 9.8 (6.9 to 15.5)                 | 2077.2 (1808.1 to 2379.4) | 1087.3 (928.1 to 1258.5)   | 936.0 (720.8 to 1182.8)       | 30.3 (15.0 to 55.3)             | 23.7 (16.8 to 37.5)               |
| Serbia  | 2048 | 870.8 (760.9 to 1002.3)    | 456.2 (388.3 to 529.0)     | 391.6 (301.0 to 495.9)        | 12.7 (6.3 to 23.3)              | 10.2 (7.1 to 16.4)                | 2111.5 (1845.1 to 2430.5) | 1106.3 (941.7 to 1282.8)   | 949.6 (729.8 to 1202.6)       | 30.9 (15.3 to 56.5)             | 24.7 (17.2 to 39.8)               |
| Serbia  | 2049 | 884.6 (770.3 to 1021.6)    | 463.8 (394.4 to 538.7)     | 397.2 (304.1 to 501.0)        | 13.0 (6.4 to 23.8)              | 10.6 (7.5 to 17.4)                | 2145.0 (1867.7 to 2477.3) | 1124.6 (956.4 to 1306.3)   | 963.2 (737.5 to 1214.9)       | 31.4 (15.5 to 57.6)             | 25.7 (18.1 to 42.1)               |
| Serbia  | 2050 | 898.7 (783.8 to 1032.9)    | 471.5 (400.8 to 548.2)     | 403.0 (307.4 to 509.0)        | 13.2 (6.5 to 24.3)              | 11.0 (7.5 to 18.6)                | 2179.2 (1900.7 to 2504.7) | 1143.3 (971.9 to 1329.3)   | 977.1 (745.5 to 1234.4)       | 32.0 (15.8 to 58.9)             | 26.8 (18.2 to 45.1)               |

| Country    | Year | 2018 US Dollars per capita |                            |                               |                                 |                                   | 2018 PPP per capita       |                            |                               |                                 |                                   |
|------------|------|----------------------------|----------------------------|-------------------------------|---------------------------------|-----------------------------------|---------------------------|----------------------------|-------------------------------|---------------------------------|-----------------------------------|
|            |      | Health spending            | Government health spending | Out-of-pocket health spending | Prepaid private health spending | Development assistance for health | Health spending           | Government health spending | Out-of-pocket health spending | Prepaid private health spending | Development assistance for health |
| Seychelles | 1995 | 590.3 (546.9 to 638.2)     | 384.3 (345.5 to 426.9)     | 66.3 (51.6 to 84.4)           | 3.1 (1.4 to 5.8)                | 136.5 (136.5 to 136.5)            | 1107.4 (1026.0 to 1197.4) | 720.9 (648.2 to 800.8)     | 124.5 (96.8 to 158.4)         | 5.9 (2.6 to 10.8)               | 256.2 (256.2 to 256.2)            |
| Seychelles | 1996 | 475.6 (437.4 to 517.4)     | 404.2 (370.7 to 440.6)     | 67.2 (52.5 to 85.0)           | 3.3 (1.5 to 6.1)                | 0.9 (0.9 to 0.9)                  | 892.2 (820.5 to 970.7)    | 758.3 (695.4 to 826.5)     | 126.1 (98.5 to 159.4)         | 6.2 (2.8 to 11.4)               | 1.6 (1.6 to 1.6)                  |
| Seychelles | 1997 | 549.3 (513.0 to 589.1)     | 452.2 (420.4 to 485.7)     | 76.6 (60.9 to 96.4)           | 3.8 (1.8 to 7.1)                | 16.7 (16.7 to 16.7)               | 1030.5 (962.4 to 1105.2)  | 848.4 (788.6 to 911.2)     | 143.7 (114.2 to 180.8)        | 7.1 (3.3 to 13.3)               | 31.3 (31.3 to 31.3)               |
| Seychelles | 1998 | 562.1 (527.3 to 599.2)     | 457.1 (426.5 to 489.2)     | 80.8 (64.6 to 100.9)          | 4.1 (1.9 to 7.8)                | 20.1 (20.1 to 20.1)               | 1054.5 (989.3 to 1124.1)  | 857.5 (800.2 to 917.7)     | 151.7 (121.2 to 189.3)        | 7.6 (3.5 to 14.6)               | 37.7 (37.7 to 37.7)               |
| Seychelles | 1999 | 541.2 (506.7 to 577.3)     | 448.5 (419.8 to 480.4)     | 80.8 (64.9 to 100.7)          | 4.3 (2.1 to 8.4)                | 7.6 (7.6 to 7.6)                  | 1015.4 (950.6 to 1083.1)  | 841.5 (787.6 to 901.3)     | 151.5 (121.8 to 188.9)        | 8.1 (3.9 to 15.7)               | 14.3 (14.3 to 14.3)               |
| Seychelles | 2000 | 539.5 (503.9 to 574.6)     | 437.3 (408.2 to 467.5)     | 79.8 (64.1 to 99.5)           | 4.7 (2.2 to 9.1)                | 17.7 (17.7 to 17.7)               | 1012.0 (945.3 to 1078.1)  | 820.3 (765.8 to 877.2)     | 149.7 (120.3 to 186.6)        | 8.8 (4.1 to 17.0)               | 33.2 (33.2 to 33.2)               |
| Seychelles | 2001 | 488.1 (453.7 to 522.2)     | 410.1 (380.6 to 439.3)     | 69.7 (55.7 to 87.6)           | 4.8 (2.3 to 9.5)                | 3.4 (3.4 to 3.4)                  | 915.7 (851.2 to 979.7)    | 769.5 (714.1 to 824.2)     | 130.7 (104.6 to 164.3)        | 9.1 (4.3 to 17.8)               | 6.4 (6.4 to 6.4)                  |
| Seychelles | 2002 | 478.3 (446.2 to 514.7)     | 407.9 (379.8 to 439.4)     | 59.8 (47.8 to 75.4)           | 5.4 (2.5 to 10.3)               | 5.2 (5.2 to 5.2)                  | 897.3 (837.1 to 965.6)    | 765.3 (712.6 to 824.4)     | 112.1 (89.6 to 141.5)         | 10.1 (4.7 to 19.3)              | 9.8 (9.8 to 9.8)                  |
| Seychelles | 2003 | 464.8 (433.6 to 498.8)     | 388.4 (360.3 to 420.6)     | 47.8 (38.3 to 60.2)           | 5.5 (2.6 to 10.4)               | 23.0 (23.0 to 23.0)               | 871.9 (813.4 to 935.7)    | 728.6 (675.9 to 789.1)     | 89.7 (71.8 to 112.9)          | 10.4 (4.9 to 19.4)              | 43.2 (43.2 to 43.2)               |
| Seychelles | 2004 | 423.6 (394.7 to 456.4)     | 365.1 (338.3 to 395.8)     | 36.9 (29.4 to 47.1)           | 5.5 (2.6 to 10.0)               | 16.1 (16.1 to 16.1)               | 794.7 (740.6 to 856.3)    | 684.9 (634.6 to 742.6)     | 69.2 (55.1 to 88.4)           | 10.3 (4.8 to 18.8)              | 30.2 (30.2 to 30.2)               |
| Seychelles | 2005 | 415.4 (387.1 to 447.4)     | 364.2 (336.9 to 395.5)     | 30.6 (24.2 to 38.8)           | 5.7 (2.7 to 10.4)               | 14.9 (14.9 to 14.9)               | 779.3 (726.2 to 839.4)    | 683.3 (632.1 to 741.9)     | 57.4 (45.3 to 72.8)           | 10.6 (5.0 to 19.5)              | 27.9 (27.9 to 27.9)               |
| Seychelles | 2006 | 401.3 (371.8 to 434.1)     | 366.4 (337.9 to 396.9)     | 26.3 (20.4 to 33.8)           | 5.9 (2.9 to 10.4)               | 2.8 (2.8 to 2.8)                  | 752.9 (697.6 to 814.4)    | 687.3 (634.0 to 744.7)     | 49.4 (38.3 to 63.3)           | 11.0 (5.4 to 19.5)              | 5.2 (5.2 to 5.2)                  |
| Seychelles | 2007 | 392.2 (362.6 to 422.0)     | 361.2 (332.3 to 391.1)     | 23.6 (18.1 to 30.3)           | 5.8 (2.9 to 10.2)               | 1.6 (1.6 to 1.6)                  | 735.7 (680.2 to 791.7)    | 677.6 (623.3 to 733.7)     | 44.2 (33.9 to 56.9)           | 10.9 (5.4 to 19.1)              | 3.0 (3.0 to 3.0)                  |
| Seychelles | 2008 | 346.4 (321.2 to 373.4)     | 319.5 (294.6 to 345.6)     | 20.0 (15.1 to 25.6)           | 5.2 (2.6 to 9.0)                | 1.7 (1.7 to 1.7)                  | 649.8 (602.5 to 700.5)    | 599.4 (552.8 to 648.4)     | 37.5 (28.4 to 48.1)           | 9.7 (4.9 to 16.8)               | 3.2 (3.2 to 3.2)                  |
| Seychelles | 2009 | 339.3 (315.9 to 366.9)     | 314.2 (291.0 to 341.8)     | 17.8 (13.4 to 22.8)           | 4.8 (2.4 to 8.4)                | 2.4 (2.4 to 2.4)                  | 636.6 (592.7 to 688.3)    | 589.5 (545.9 to 641.2)     | 33.5 (25.2 to 42.8)           | 9.0 (4.6 to 15.7)               | 4.5 (4.5 to 4.5)                  |
| Seychelles | 2010 | 383.6 (356.4 to 412.8)     | 349.1 (322.9 to 378.0)     | 17.6 (13.4 to 22.7)           | 10.2 (5.2 to 18.3)              | 6.6 (6.6 to 6.6)                  | 719.7 (668.5 to 774.5)    | 655.0 (605.8 to 709.1)     | 33.0 (25.1 to 42.6)           | 19.2 (9.7 to 34.3)              | 12.4 (12.4 to 12.4)               |
| Seychelles | 2011 | 423.4 (393.8 to 454.8)     | 391.5 (363.2 to 423.3)     | 17.2 (12.9 to 22.3)           | 11.8 (6.1 to 21.5)              | 3.0 (3.0 to 3.0)                  | 794.3 (738.7 to 853.2)    | 734.4 (681.3 to 794.2)     | 32.2 (24.1 to 41.8)           | 22.1 (11.5 to 40.2)             | 5.7 (5.7 to 5.7)                  |
| Seychelles | 2012 | 465.1 (433.1 to 497.3)     | 434.9 (403.8 to 466.7)     | 14.9 (11.2 to 19.7)           | 11.1 (5.7 to 20.1)              | 4.1 (4.1 to 4.1)                  | 872.5 (812.6 to 933.0)    | 815.9 (757.5 to 875.6)     | 28.0 (21.0 to 36.9)           | 20.9 (10.8 to 37.6)             | 7.7 (7.7 to 7.7)                  |
| Seychelles | 2013 | 469.6 (440.3 to 500.8)     | 445.4 (415.9 to 478.0)     | 12.8 (9.6 to 16.6)            | 5.8 (3.0 to 10.3)               | 5.6 (5.6 to 5.6)                  | 880.9 (826.0 to 939.5)    | 835.7 (780.3 to 896.8)     | 24.0 (18.0 to 31.1)           | 10.8 (5.5 to 19.4)              | 10.4 (10.4 to 10.4)               |
| Seychelles | 2014 | 472.7 (443.8 to 502.5)     | 458.1 (429.6 to 487.6)     | 12.1 (9.0 to 15.9)            | 1.9 (0.9 to 3.5)                | 0.7 (0.7 to 0.7)                  | 886.9 (832.6 to 942.8)    | 859.3 (806.0 to 914.7)     | 22.6 (16.9 to 29.8)           | 3.5 (1.8 to 6.5)                | 1.4 (1.4 to 1.4)                  |
| Seychelles | 2015 | 491.0 (459.7 to 521.8)     | 478.2 (447.6 to 509.6)     | 11.7 (8.7 to 15.5)            | 0.2 (0.1 to 0.3)                | 0.9 (0.9 to 0.9)                  | 921.1 (862.4 to 979.0)    | 897.1 (839.8 to 956.1)     | 21.9 (16.2 to 29.1)           | 0.3 (0.2 to 0.6)                | 1.8 (1.8 to 1.8)                  |

| Country    | Year | 2018 US Dollars per capita |                            |                               |                                 |                                   | 2018 PPP per capita       |                            |                               |                                 |                                   |
|------------|------|----------------------------|----------------------------|-------------------------------|---------------------------------|-----------------------------------|---------------------------|----------------------------|-------------------------------|---------------------------------|-----------------------------------|
|            |      | Health spending            | Government health spending | Out-of-pocket health spending | Prepaid private health spending | Development assistance for health | Health spending           | Government health spending | Out-of-pocket health spending | Prepaid private health spending | Development assistance for health |
| Seychelles | 2016 | 534.0 (493.6 to 573.0)     | 522.2 (481.8 to 561.7)     | 11.0 (8.1 to 14.7)            | 0.0 (0.0 to 0.0)                | 0.7 (0.7 to 0.7)                  | 1001.8 (926.0 to 1075.0)  | 979.8 (903.9 to 1053.8)    | 20.7 (15.2 to 27.5)           | 0.0 (0.0 to 0.0)                | 1.3 (1.3 to 1.3)                  |
| Seychelles | 2017 | 574.0 (528.9 to 619.7)     | 562.2 (517.2 to 607.6)     | 11.1 (8.1 to 14.7)            | 0.0 (0.0 to 0.0)                | 0.7 (0.7 to 0.7)                  | 1076.8 (992.2 to 1162.6)  | 1054.7 (970.3 to 1139.8)   | 20.7 (15.2 to 27.6)           | 0.1 (0.0 to 0.1)                | 1.3 (1.3 to 1.3)                  |
| Seychelles | 2018 | 591.9 (544.0 to 639.7)     | 580.3 (533.0 to 628.0)     | 10.9 (8.0 to 14.6)            | 0.0 (0.0 to 0.0)                | 0.6 (0.6 to 0.6)                  | 1110.4 (1020.5 to 1200.1) | 1088.7 (1000.0 to 1178.2)  | 20.4 (15.0 to 27.3)           | 0.1 (0.0 to 0.1)                | 1.2 (1.2 to 1.2)                  |
| Seychelles | 2019 | 609.1 (560.7 to 659.0)     | 597.7 (548.2 to 646.7)     | 10.7 (7.9 to 14.4)            | 0.0 (0.0 to 0.0)                | 0.7 (0.6 to 0.7)                  | 1142.8 (1051.9 to 1236.4) | 1121.4 (1028.5 to 1213.2)  | 20.1 (14.9 to 26.9)           | 0.1 (0.0 to 0.1)                | 1.2 (1.2 to 1.3)                  |
| Seychelles | 2020 | 626.1 (573.5 to 677.9)     | 614.9 (563.5 to 666.3)     | 10.5 (7.8 to 14.2)            | 0.0 (0.0 to 0.0)                | 0.7 (0.6 to 0.7)                  | 1174.6 (1075.9 to 1271.8) | 1153.5 (1057.1 to 1250.0)  | 19.8 (14.7 to 26.6)           | 0.1 (0.0 to 0.1)                | 1.3 (1.2 to 1.4)                  |
| Seychelles | 2021 | 641.9 (586.8 to 695.4)     | 630.9 (574.9 to 684.1)     | 10.3 (7.6 to 13.9)            | 0.0 (0.0 to 0.0)                | 0.7 (0.6 to 0.8)                  | 1204.3 (1100.8 to 1304.6) | 1183.6 (1078.5 to 1283.4)  | 19.4 (14.3 to 26.1)           | 0.1 (0.1 to 0.1)                | 1.3 (1.2 to 1.5)                  |
| Seychelles | 2022 | 656.0 (600.2 to 712.5)     | 645.2 (588.7 to 702.8)     | 10.1 (7.4 to 13.6)            | 0.0 (0.0 to 0.0)                | 0.7 (0.0 to 0.8)                  | 1230.8 (1125.9 to 1336.6) | 1210.4 (1104.4 to 1318.4)  | 19.0 (14.0 to 25.5)           | 0.1 (0.1 to 0.1)                | 1.4 (0.0 to 1.6)                  |
| Seychelles | 2023 | 670.3 (611.5 to 731.8)     | 659.6 (601.4 to 720.3)     | 9.9 (7.3 to 13.3)             | 0.0 (0.0 to 0.0)                | 0.7 (0.0 to 0.9)                  | 1257.5 (1147.1 to 1373.0) | 1237.4 (1128.2 to 1351.3)  | 18.6 (13.8 to 25.0)           | 0.1 (0.1 to 0.1)                | 1.4 (0.0 to 1.6)                  |
| Seychelles | 2024 | 681.3 (620.5 to 742.5)     | 670.8 (609.2 to 731.9)     | 9.8 (7.2 to 13.1)             | 0.0 (0.0 to 0.0)                | 0.7 (0.0 to 0.9)                  | 1278.1 (1164.2 to 1392.9) | 1258.4 (1142.9 to 1373.2)  | 18.3 (13.5 to 24.7)           | 0.1 (0.1 to 0.1)                | 1.4 (0.0 to 1.7)                  |
| Seychelles | 2025 | 694.1 (632.2 to 756.4)     | 683.7 (621.9 to 745.9)     | 9.6 (7.1 to 12.9)             | 0.0 (0.0 to 0.0)                | 0.8 (0.0 to 1.0)                  | 1302.2 (1186.0 to 1419.1) | 1282.7 (1166.8 to 1399.3)  | 18.0 (13.3 to 24.2)           | 0.1 (0.1 to 0.1)                | 1.4 (0.0 to 1.8)                  |
| Seychelles | 2026 | 706.5 (643.4 to 772.8)     | 696.3 (632.6 to 762.4)     | 9.4 (7.0 to 12.6)             | 0.0 (0.0 to 0.0)                | 0.8 (0.0 to 1.0)                  | 1325.4 (1207.1 to 1449.8) | 1306.2 (1186.9 to 1430.4)  | 17.7 (13.1 to 23.7)           | 0.1 (0.1 to 0.1)                | 1.4 (0.0 to 1.8)                  |
| Seychelles | 2027 | 719.7 (653.9 to 789.9)     | 709.6 (642.8 to 779.5)     | 9.3 (6.8 to 12.4)             | 0.0 (0.0 to 0.1)                | 0.7 (0.0 to 1.0)                  | 1350.1 (1226.8 to 1481.9) | 1331.3 (1206.0 to 1462.3)  | 17.4 (12.8 to 23.2)           | 0.1 (0.1 to 0.1)                | 1.4 (0.0 to 1.9)                  |
| Seychelles | 2028 | 733.6 (663.4 to 804.9)     | 723.7 (653.3 to 794.9)     | 9.1 (6.7 to 12.2)             | 0.0 (0.0 to 0.1)                | 0.8 (0.0 to 1.1)                  | 1376.3 (1244.6 to 1510.1) | 1357.7 (1225.7 to 1491.2)  | 17.1 (12.5 to 23.0)           | 0.1 (0.1 to 0.1)                | 1.4 (0.0 to 2.0)                  |
| Seychelles | 2029 | 747.9 (675.6 to 823.5)     | 738.2 (665.9 to 814.4)     | 9.0 (6.5 to 12.2)             | 0.0 (0.0 to 0.1)                | 0.7 (0.0 to 1.1)                  | 1403.2 (1267.5 to 1545.0) | 1384.8 (1249.3 to 1527.9)  | 16.9 (12.3 to 22.8)           | 0.1 (0.1 to 0.1)                | 1.4 (0.0 to 2.1)                  |
| Seychelles | 2030 | 762.9 (685.5 to 845.9)     | 753.2 (676.3 to 837.1)     | 8.9 (6.4 to 12.0)             | 0.0 (0.0 to 0.1)                | 0.7 (0.0 to 1.2)                  | 1431.2 (1286.0 to 1586.9) | 1413.1 (1268.8 to 1570.4)  | 16.7 (12.0 to 22.5)           | 0.1 (0.1 to 0.1)                | 1.3 (0.0 to 2.2)                  |
| Seychelles | 2031 | 777.1 (697.3 to 865.7)     | 767.6 (686.2 to 857.2)     | 8.8 (6.3 to 12.0)             | 0.0 (0.0 to 0.1)                | 0.7 (0.0 to 1.2)                  | 1458.0 (1308.2 to 1624.2) | 1440.0 (1287.3 to 1608.1)  | 16.6 (11.8 to 22.6)           | 0.1 (0.1 to 0.1)                | 1.3 (0.0 to 2.3)                  |
| Seychelles | 2032 | 792.8 (706.5 to 889.1)     | 783.3 (696.3 to 880.0)     | 8.8 (6.2 to 12.0)             | 0.1 (0.0 to 0.1)                | 0.7 (0.0 to 1.3)                  | 1487.4 (1325.5 to 1668.0) | 1469.6 (1306.4 to 1650.9)  | 16.5 (11.7 to 22.5)           | 0.1 (0.1 to 0.1)                | 1.3 (0.0 to 2.4)                  |
| Seychelles | 2033 | 808.9 (716.7 to 908.1)     | 799.4 (707.7 to 899.6)     | 8.7 (6.1 to 12.0)             | 0.1 (0.0 to 0.1)                | 0.7 (0.0 to 1.3)                  | 1517.5 (1344.6 to 1703.7) | 1499.7 (1327.6 to 1687.7)  | 16.4 (11.5 to 22.5)           | 0.1 (0.1 to 0.1)                | 1.3 (0.0 to 2.5)                  |
| Seychelles | 2034 | 824.6 (728.2 to 930.1)     | 815.2 (719.0 to 919.4)     | 8.7 (6.1 to 12.0)             | 0.1 (0.0 to 0.1)                | 0.7 (0.0 to 1.4)                  | 1547.0 (1366.2 to 1744.9) | 1529.3 (1348.8 to 1724.9)  | 16.4 (11.4 to 22.6)           | 0.1 (0.1 to 0.1)                | 1.3 (0.0 to 2.6)                  |
| Seychelles | 2035 | 839.7 (740.6 to 948.1)     | 830.3 (731.0 to 937.4)     | 8.7 (6.1 to 12.1)             | 0.1 (0.0 to 0.1)                | 0.7 (0.0 to 1.4)                  | 1575.4 (1389.4 to 1778.6) | 1557.7 (1371.3 to 1758.6)  | 16.4 (11.4 to 22.7)           | 0.1 (0.1 to 0.1)                | 1.2 (0.0 to 2.7)                  |
| Seychelles | 2036 | 855.7 (752.8 to 969.1)     | 846.3 (742.2 to 958.3)     | 8.7 (6.0 to 12.2)             | 0.1 (0.0 to 0.1)                | 0.6 (0.0 to 1.5)                  | 1605.3 (1412.2 to 1818.1) | 1587.7 (1392.4 to 1797.9)  | 16.4 (11.3 to 22.9)           | 0.1 (0.1 to 0.1)                | 1.2 (0.0 to 2.8)                  |

| Country      | Year | 2018 US Dollars per capita |                            |                               |                                 |                                   | 2018 PPP per capita       |                            |                               |                                 |                                   |
|--------------|------|----------------------------|----------------------------|-------------------------------|---------------------------------|-----------------------------------|---------------------------|----------------------------|-------------------------------|---------------------------------|-----------------------------------|
|              |      | Health spending            | Government health spending | Out-of-pocket health spending | Prepaid private health spending | Development assistance for health | Health spending           | Government health spending | Out-of-pocket health spending | Prepaid private health spending | Development assistance for health |
| Seychelles   | 2037 | 869.2 (759.4 to 992.0)     | 859.8 (751.8 to 982.3)     | 8.7 (6.0 to 12.2)             | 0.1 (0.0 to 0.1)                | 0.6 (0.0 to 1.5)                  | 1630.7 (1424.6 to 1861.1) | 1613.1 (1410.5 to 1842.9)  | 16.4 (11.3 to 22.9)           | 0.1 (0.1 to 0.1)                | 1.1 (0.0 to 2.9)                  |
| Seychelles   | 2038 | 885.2 (770.6 to 1012.2)    | 875.8 (761.3 to 1005.2)    | 8.8 (6.0 to 12.3)             | 0.1 (0.0 to 0.1)                | 0.6 (0.0 to 1.7)                  | 1660.8 (1445.8 to 1898.9) | 1643.1 (1428.2 to 1885.7)  | 16.5 (11.2 to 23.1)           | 0.1 (0.1 to 0.2)                | 1.1 (0.0 to 3.1)                  |
| Seychelles   | 2039 | 900.6 (784.8 to 1036.4)    | 891.1 (773.6 to 1026.9)    | 8.8 (6.0 to 12.5)             | 0.1 (0.1 to 0.1)                | 0.6 (0.0 to 1.7)                  | 1689.6 (1472.2 to 1944.3) | 1671.8 (1451.3 to 1926.4)  | 16.6 (11.2 to 23.4)           | 0.1 (0.1 to 0.2)                | 1.1 (0.0 to 3.2)                  |
| Seychelles   | 2040 | 915.6 (794.2 to 1056.2)    | 906.0 (784.4 to 1046.4)    | 8.9 (6.0 to 12.7)             | 0.1 (0.1 to 0.1)                | 0.6 (0.0 to 1.7)                  | 1717.6 (1490.0 to 1981.5) | 1699.8 (1471.6 to 1963.1)  | 16.7 (11.3 to 23.8)           | 0.1 (0.1 to 0.2)                | 1.0 (0.0 to 3.3)                  |
| Seychelles   | 2041 | 931.3 (803.2 to 1081.8)    | 921.7 (795.0 to 1072.0)    | 9.0 (6.0 to 12.9)             | 0.1 (0.1 to 0.1)                | 0.5 (0.0 to 1.7)                  | 1747.1 (1506.9 to 2029.6) | 1729.1 (1491.4 to 2011.2)  | 16.8 (11.3 to 24.2)           | 0.1 (0.1 to 0.2)                | 1.0 (0.0 to 3.3)                  |
| Seychelles   | 2042 | 944.6 (812.4 to 1097.4)    | 934.9 (803.8 to 1088.4)    | 9.1 (6.1 to 13.1)             | 0.1 (0.1 to 0.1)                | 0.5 (0.0 to 1.8)                  | 1772.2 (1524.1 to 2058.8) | 1754.0 (1508.0 to 2041.8)  | 17.0 (11.4 to 24.5)           | 0.1 (0.1 to 0.2)                | 1.0 (0.0 to 3.4)                  |
| Seychelles   | 2043 | 955.3 (818.9 to 1114.2)    | 945.5 (810.1 to 1104.7)    | 9.2 (6.1 to 13.2)             | 0.1 (0.1 to 0.1)                | 0.5 (0.0 to 1.9)                  | 1792.3 (1536.3 to 2090.3) | 1773.9 (1519.9 to 2072.5)  | 17.2 (11.5 to 24.9)           | 0.1 (0.1 to 0.2)                | 1.0 (0.0 to 3.6)                  |
| Seychelles   | 2044 | 968.1 (830.7 to 1133.6)    | 958.2 (818.5 to 1123.9)    | 9.3 (6.2 to 13.5)             | 0.1 (0.1 to 0.1)                | 0.5 (0.0 to 2.0)                  | 1816.2 (1558.5 to 2126.7) | 1797.6 (1535.6 to 2108.4)  | 17.4 (11.6 to 25.4)           | 0.1 (0.1 to 0.2)                | 1.0 (0.0 to 3.8)                  |
| Seychelles   | 2045 | 980.2 (838.5 to 1150.0)    | 970.2 (829.7 to 1142.7)    | 9.4 (6.2 to 13.8)             | 0.1 (0.1 to 0.1)                | 0.5 (0.0 to 2.1)                  | 1839.0 (1573.1 to 2157.5) | 1820.2 (1556.6 to 2143.7)  | 17.7 (11.7 to 25.9)           | 0.2 (0.1 to 0.2)                | 1.0 (0.0 to 3.8)                  |
| Seychelles   | 2046 | 991.1 (848.6 to 1167.6)    | 980.9 (839.2 to 1156.2)    | 9.6 (6.3 to 14.0)             | 0.1 (0.1 to 0.1)                | 0.5 (0.0 to 2.1)                  | 1859.3 (1591.9 to 2190.5) | 1840.2 (1574.4 to 2169.1)  | 18.0 (11.8 to 26.3)           | 0.2 (0.1 to 0.2)                | 1.0 (0.0 to 4.0)                  |
| Seychelles   | 2047 | 1001.2 (855.2 to 1178.4)   | 990.9 (845.4 to 1168.8)    | 9.7 (6.4 to 14.4)             | 0.1 (0.1 to 0.1)                | 0.5 (0.0 to 2.2)                  | 1878.3 (1604.5 to 2210.7) | 1858.9 (1586.1 to 2192.8)  | 18.3 (12.0 to 27.1)           | 0.2 (0.1 to 0.2)                | 1.0 (0.0 to 4.1)                  |
| Seychelles   | 2048 | 1010.1 (858.1 to 1191.9)   | 999.6 (846.8 to 1180.9)    | 9.9 (6.5 to 14.8)             | 0.1 (0.1 to 0.1)                | 0.5 (0.0 to 2.4)                  | 1895.0 (1609.8 to 2236.1) | 1875.2 (1588.7 to 2215.4)  | 18.6 (12.1 to 27.8)           | 0.2 (0.1 to 0.2)                | 1.0 (0.0 to 4.4)                  |
| Seychelles   | 2049 | 1019.7 (861.9 to 1208.5)   | 1009.0 (851.3 to 1196.0)   | 10.1 (6.5 to 15.2)            | 0.1 (0.1 to 0.1)                | 0.5 (0.0 to 2.5)                  | 1913.0 (1617.0 to 2267.3) | 1892.9 (1597.1 to 2243.9)  | 18.9 (12.3 to 28.6)           | 0.2 (0.1 to 0.2)                | 1.0 (0.0 to 4.6)                  |
| Seychelles   | 2050 | 1026.6 (867.2 to 1216.9)   | 1015.7 (856.3 to 1206.0)   | 10.3 (6.6 to 15.7)            | 0.1 (0.1 to 0.1)                | 0.5 (0.0 to 2.6)                  | 1926.0 (1626.9 to 2283.0) | 1905.5 (1606.4 to 2262.5)  | 19.3 (12.4 to 29.4)           | 0.2 (0.1 to 0.2)                | 1.0 (0.0 to 4.9)                  |
| Sierra Leone | 1995 | 44.8 (34.7 to 57.7)        | 8.2 (6.3 to 10.7)          | 35.2 (25.5 to 47.6)           | 0.3 (0.1 to 0.6)                | 1.1 (1.1 to 1.1)                  | 140.2 (108.6 to 180.3)    | 25.8 (19.7 to 33.5)        | 110.1 (79.7 to 148.9)         | 0.9 (0.4 to 1.7)                | 3.3 (3.3 to 3.3)                  |
| Sierra Leone | 1996 | 40.4 (31.7 to 50.8)        | 7.4 (5.7 to 9.5)           | 30.8 (22.6 to 40.7)           | 0.3 (0.1 to 0.5)                | 1.9 (1.9 to 1.9)                  | 126.3 (99.0 to 158.8)     | 23.2 (17.8 to 29.8)        | 96.2 (70.5 to 127.1)          | 0.8 (0.4 to 1.6)                | 6.0 (6.0 to 6.0)                  |
| Sierra Leone | 1997 | 35.9 (28.2 to 45.0)        | 7.1 (5.3 to 9.0)           | 27.9 (20.4 to 36.4)           | 0.2 (0.1 to 0.5)                | 0.7 (0.7 to 0.7)                  | 112.1 (88.1 to 140.7)     | 22.1 (16.7 to 28.2)        | 87.1 (63.8 to 113.7)          | 0.8 (0.4 to 1.5)                | 2.1 (2.1 to 2.1)                  |
| Sierra Leone | 1998 | 36.2 (28.8 to 44.9)        | 7.0 (5.3 to 9.0)           | 26.7 (19.8 to 35.1)           | 0.2 (0.1 to 0.5)                | 2.2 (2.2 to 2.2)                  | 113.2 (90.0 to 140.3)     | 22.0 (16.7 to 28.2)        | 83.5 (62.0 to 109.8)          | 0.7 (0.3 to 1.5)                | 7.0 (7.0 to 7.0)                  |
| Sierra Leone | 1999 | 34.0 (27.4 to 42.4)        | 6.7 (5.1 to 8.6)           | 25.2 (18.8 to 33.6)           | 0.2 (0.1 to 0.4)                | 1.9 (1.9 to 1.9)                  | 106.4 (85.7 to 132.4)     | 20.9 (15.9 to 26.8)        | 78.9 (58.9 to 104.9)          | 0.7 (0.3 to 1.3)                | 5.9 (5.9 to 5.9)                  |
| Sierra Leone | 2000 | 43.6 (36.3 to 52.2)        | 7.2 (5.4 to 9.3)           | 26.6 (19.9 to 35.2)           | 0.2 (0.1 to 0.4)                | 9.6 (9.6 to 9.6)                  | 136.3 (113.4 to 163.3)    | 22.4 (17.0 to 29.0)        | 83.3 (62.3 to 109.9)          | 0.7 (0.3 to 1.3)                | 30.0 (30.0 to 30.0)               |
| Sierra Leone | 2001 | 40.2 (32.9 to 49.3)        | 7.9 (6.0 to 10.1)          | 27.6 (20.6 to 36.4)           | 0.2 (0.1 to 0.4)                | 4.6 (4.6 to 4.6)                  | 125.7 (102.7 to 154.1)    | 24.6 (18.7 to 31.6)        | 86.2 (64.5 to 113.9)          | 0.7 (0.3 to 1.3)                | 14.3 (14.3 to 14.3)               |

| Country      | Year | 2018 US Dollars per capita |                            |                               |                                 |                                   | 2018 PPP per capita    |                            |                               |                                 |                                   |
|--------------|------|----------------------------|----------------------------|-------------------------------|---------------------------------|-----------------------------------|------------------------|----------------------------|-------------------------------|---------------------------------|-----------------------------------|
|              |      | Health spending            | Government health spending | Out-of-pocket health spending | Prepaid private health spending | Development assistance for health | Health spending        | Government health spending | Out-of-pocket health spending | Prepaid private health spending | Development assistance for health |
| Sierra Leone | 2002 | 43.4 (35.2 to 53.3)        | 9.1 (6.9 to 11.7)          | 30.8 (22.9 to 41.1)           | 0.2 (0.1 to 0.5)                | 3.3 (3.3 to 3.3)                  | 135.8 (110.1 to 166.5) | 28.5 (21.7 to 36.5)        | 96.3 (71.6 to 128.3)          | 0.8 (0.4 to 1.4)                | 10.3 (10.3 to 10.3)               |
| Sierra Leone | 2003 | 45.1 (36.8 to 54.9)        | 8.5 (6.4 to 11.0)          | 31.4 (23.5 to 41.7)           | 0.2 (0.1 to 0.5)                | 4.9 (4.9 to 4.9)                  | 141.1 (115.2 to 171.7) | 26.7 (20.1 to 34.5)        | 98.2 (73.5 to 130.3)          | 0.8 (0.4 to 1.4)                | 15.4 (15.4 to 15.4)               |
| Sierra Leone | 2004 | 45.2 (36.7 to 55.4)        | 7.7 (5.7 to 10.0)          | 31.6 (23.6 to 41.6)           | 0.2 (0.1 to 0.5)                | 5.7 (5.7 to 5.7)                  | 141.2 (114.8 to 173.3) | 24.1 (18.0 to 31.3)        | 98.7 (73.6 to 130.1)          | 0.8 (0.4 to 1.4)                | 17.7 (17.7 to 17.7)               |
| Sierra Leone | 2005 | 46.3 (38.0 to 56.4)        | 6.4 (4.8 to 8.3)           | 31.3 (23.5 to 41.2)           | 0.2 (0.1 to 0.5)                | 8.3 (8.3 to 8.3)                  | 144.7 (118.9 to 176.4) | 20.1 (15.1 to 26.0)        | 97.9 (73.3 to 128.9)          | 0.7 (0.3 to 1.4)                | 25.9 (25.9 to 25.9)               |
| Sierra Leone | 2006 | 44.4 (36.3 to 54.5)        | 5.3 (3.9 to 6.8)           | 31.3 (23.1 to 41.6)           | 0.2 (0.1 to 0.4)                | 7.7 (7.7 to 7.7)                  | 138.9 (113.6 to 170.4) | 16.5 (12.3 to 21.3)        | 97.7 (72.2 to 130.0)          | 0.7 (0.3 to 1.3)                | 24.0 (24.0 to 24.0)               |
| Sierra Leone | 2007 | 45.3 (37.1 to 55.6)        | 4.7 (3.6 to 6.1)           | 32.3 (24.0 to 42.4)           | 0.2 (0.1 to 0.3)                | 8.1 (8.1 to 8.1)                  | 141.5 (115.9 to 173.7) | 14.8 (11.3 to 19.0)        | 100.9 (74.9 to 132.6)         | 0.5 (0.3 to 1.0)                | 25.3 (25.3 to 25.3)               |
| Sierra Leone | 2008 | 49.3 (41.2 to 59.8)        | 4.2 (3.2 to 5.4)           | 32.9 (24.9 to 43.4)           | 0.1 (0.1 to 0.3)                | 12.0 (12.0 to 12.0)               | 154.0 (128.7 to 186.8) | 13.2 (10.1 to 17.0)        | 103.0 (77.9 to 135.7)         | 0.4 (0.2 to 0.8)                | 37.4 (37.4 to 37.4)               |
| Sierra Leone | 2009 | 48.2 (40.1 to 59.4)        | 4.5 (3.4 to 5.8)           | 34.7 (26.4 to 45.8)           | 0.1 (0.1 to 0.3)                | 8.8 (8.8 to 8.8)                  | 150.7 (125.3 to 185.7) | 14.1 (10.7 to 18.0)        | 108.5 (82.5 to 143.3)         | 0.5 (0.2 to 0.8)                | 27.6 (27.6 to 27.6)               |
| Sierra Leone | 2010 | 52.6 (43.7 to 64.3)        | 4.9 (3.8 to 6.3)           | 36.2 (27.3 to 48.4)           | 0.2 (0.1 to 0.3)                | 11.3 (11.3 to 11.3)               | 164.5 (136.5 to 201.0) | 15.4 (11.8 to 19.7)        | 113.2 (85.5 to 151.4)         | 0.5 (0.2 to 0.9)                | 35.4 (35.4 to 35.4)               |
| Sierra Leone | 2011 | 56.5 (46.8 to 69.2)        | 4.9 (3.7 to 6.2)           | 38.6 (29.0 to 51.5)           | 0.2 (0.1 to 0.3)                | 12.9 (12.9 to 12.9)               | 176.7 (146.3 to 216.3) | 15.2 (11.6 to 19.5)        | 120.7 (90.6 to 161.0)         | 0.6 (0.3 to 1.1)                | 40.2 (40.2 to 40.2)               |
| Sierra Leone | 2012 | 59.8 (49.3 to 73.7)        | 5.5 (4.2 to 7.1)           | 40.8 (30.7 to 55.1)           | 0.3 (0.1 to 0.5)                | 13.2 (13.2 to 13.2)               | 186.8 (154.2 to 230.3) | 17.2 (13.2 to 22.2)        | 127.6 (95.8 to 172.3)         | 0.9 (0.4 to 1.6)                | 41.2 (41.2 to 41.2)               |
| Sierra Leone | 2013 | 60.4 (48.8 to 75.7)        | 6.5 (5.0 to 8.4)           | 44.0 (32.4 to 59.3)           | 0.6 (0.3 to 1.1)                | 9.3 (9.3 to 9.3)                  | 189.0 (152.4 to 236.8) | 20.5 (15.7 to 26.4)        | 137.7 (101.4 to 185.5)        | 1.8 (0.8 to 3.3)                | 29.1 (29.1 to 29.1)               |
| Sierra Leone | 2014 | 119.5 (106.8 to 135.7)     | 7.6 (5.8 to 9.8)           | 44.6 (32.2 to 60.9)           | 1.9 (0.9 to 3.7)                | 65.4 (65.4 to 65.4)               | 373.7 (333.9 to 424.1) | 23.6 (18.2 to 30.5)        | 139.5 (100.6 to 190.5)        | 6.0 (2.8 to 11.5)               | 204.6 (204.6 to 204.6)            |
| Sierra Leone | 2015 | 128.9 (117.7 to 142.8)     | 7.1 (5.4 to 9.2)           | 38.8 (28.0 to 52.9)           | 2.9 (1.3 to 5.5)                | 80.1 (80.1 to 80.1)               | 402.8 (367.9 to 446.3) | 22.2 (16.9 to 28.6)        | 121.4 (87.6 to 165.3)         | 8.9 (4.1 to 17.2)               | 250.3 (250.3 to 250.3)            |
| Sierra Leone | 2016 | 82.3 (71.2 to 95.9)        | 8.1 (6.1 to 10.4)          | 38.4 (27.4 to 51.8)           | 3.9 (1.8 to 7.5)                | 32.0 (32.0 to 32.0)               | 257.4 (222.5 to 299.8) | 25.2 (19.2 to 32.4)        | 120.2 (85.8 to 162.1)         | 12.1 (5.7 to 23.4)              | 99.9 (99.9 to 99.9)               |
| Sierra Leone | 2017 | 72.8 (61.2 to 86.5)        | 8.5 (6.5 to 10.9)          | 39.0 (27.8 to 52.1)           | 3.9 (1.8 to 7.4)                | 21.5 (21.5 to 21.5)               | 227.5 (191.5 to 270.3) | 26.5 (20.2 to 34.1)        | 121.9 (86.9 to 162.9)         | 12.1 (5.6 to 23.2)              | 67.1 (67.1 to 67.1)               |
| Sierra Leone | 2018 | 71.9 (60.4 to 85.3)        | 8.6 (6.5 to 11.0)          | 39.4 (27.9 to 52.7)           | 3.9 (1.8 to 7.6)                | 20.0 (20.0 to 20.0)               | 224.7 (188.7 to 266.7) | 26.9 (20.5 to 34.5)        | 123.0 (87.4 to 164.9)         | 12.3 (5.7 to 23.6)              | 62.4 (62.4 to 62.5)               |
| Sierra Leone | 2019 | 72.3 (60.9 to 86.4)        | 8.7 (6.7 to 11.2)          | 39.7 (28.3 to 53.5)           | 4.0 (1.9 to 7.7)                | 19.8 (18.5 to 21.0)               | 226.0 (190.5 to 270.2) | 27.3 (20.8 to 34.9)        | 124.2 (88.5 to 167.4)         | 12.5 (5.8 to 23.9)              | 62.0 (58.0 to 65.6)               |
| Sierra Leone | 2020 | 72.9 (61.3 to 86.9)        | 8.8 (6.7 to 11.3)          | 40.1 (28.5 to 53.9)           | 4.1 (1.9 to 7.8)                | 19.9 (18.2 to 21.5)               | 227.8 (191.7 to 271.5) | 27.6 (21.1 to 35.4)        | 125.4 (89.2 to 168.6)         | 12.7 (5.9 to 24.3)              | 62.1 (57.0 to 67.1)               |
| Sierra Leone | 2021 | 73.6 (61.8 to 87.8)        | 9.0 (6.8 to 11.6)          | 40.5 (28.8 to 54.4)           | 4.1 (1.9 to 7.9)                | 20.0 (18.0 to 22.1)               | 230.0 (193.2 to 274.5) | 28.1 (21.3 to 36.2)        | 126.6 (90.1 to 170.2)         | 12.9 (6.0 to 24.8)              | 62.5 (56.2 to 69.0)               |
| Sierra Leone | 2022 | 74.4 (62.3 to 88.7)        | 9.1 (6.9 to 11.8)          | 40.9 (29.1 to 55.1)           | 4.2 (2.0 to 8.1)                | 20.2 (17.9 to 22.6)               | 232.6 (194.9 to 277.2) | 28.5 (21.6 to 36.8)        | 127.9 (90.9 to 172.2)         | 13.1 (6.1 to 25.2)              | 63.1 (56.0 to 70.5)               |



| Country      | Year | 2018 US Dollars per capita |                            |                               |                                 |                                   | 2018 PPP per capita    |                            |                               |                                 |                                   |
|--------------|------|----------------------------|----------------------------|-------------------------------|---------------------------------|-----------------------------------|------------------------|----------------------------|-------------------------------|---------------------------------|-----------------------------------|
|              |      | Health spending            | Government health spending | Out-of-pocket health spending | Prepaid private health spending | Development assistance for health | Health spending        | Government health spending | Out-of-pocket health spending | Prepaid private health spending | Development assistance for health |
| Sierra Leone | 2023 | 75.5 (63.3 to 90.2)        | 9.2 (7.0 to 11.9)          | 41.4 (29.4 to 55.6)           | 4.3 (2.0 to 8.2)                | 20.6 (17.9 to 23.4)               | 236.2 (198.0 to 281.9) | 28.9 (21.9 to 37.3)        | 129.5 (92.0 to 173.9)         | 13.3 (6.2 to 25.7)              | 64.5 (55.8 to 73.3)               |
| Sierra Leone | 2024 | 76.7 (64.7 to 91.6)        | 9.4 (7.1 to 12.1)          | 41.8 (29.6 to 56.0)           | 4.4 (2.0 to 8.4)                | 21.1 (18.2 to 24.4)               | 239.7 (202.2 to 286.3) | 29.3 (22.1 to 37.8)        | 130.8 (92.6 to 175.1)         | 13.6 (6.3 to 26.2)              | 66.1 (57.0 to 76.3)               |
| Sierra Leone | 2025 | 77.9 (65.2 to 93.1)        | 9.6 (7.2 to 12.3)          | 42.3 (30.0 to 56.7)           | 4.4 (2.1 to 8.5)                | 21.6 (18.4 to 25.4)               | 243.5 (203.7 to 291.1) | 29.9 (22.6 to 38.5)        | 132.2 (93.8 to 177.1)         | 13.9 (6.4 to 26.6)              | 67.5 (57.6 to 79.5)               |
| Sierra Leone | 2026 | 79.1 (65.6 to 94.7)        | 9.7 (7.3 to 12.6)          | 42.8 (30.4 to 57.3)           | 4.5 (2.1 to 8.7)                | 22.0 (18.7 to 25.9)               | 247.2 (205.0 to 296.0) | 30.5 (22.9 to 39.5)        | 133.7 (94.9 to 179.0)         | 14.1 (6.5 to 27.1)              | 68.9 (58.3 to 81.1)               |
| Sierra Leone | 2027 | 80.3 (66.9 to 96.2)        | 9.9 (7.5 to 12.8)          | 43.2 (30.8 to 58.4)           | 4.6 (2.1 to 8.8)                | 22.5 (19.0 to 27.0)               | 251.0 (209.2 to 300.8) | 31.0 (23.4 to 40.1)        | 135.1 (96.2 to 182.5)         | 14.4 (6.6 to 27.5)              | 70.5 (59.3 to 84.5)               |
| Sierra Leone | 2028 | 81.5 (67.3 to 98.2)        | 10.1 (7.6 to 13.1)         | 43.7 (31.1 to 58.9)           | 4.7 (2.2 to 9.0)                | 23.1 (19.3 to 28.1)               | 254.8 (210.5 to 307.0) | 31.4 (23.7 to 40.9)        | 136.5 (97.3 to 184.1)         | 14.6 (6.7 to 28.0)              | 72.2 (60.4 to 87.9)               |
| Sierra Leone | 2029 | 82.8 (68.1 to 99.7)        | 10.2 (7.7 to 13.3)         | 44.1 (31.3 to 60.0)           | 4.8 (2.2 to 9.1)                | 23.7 (19.5 to 29.2)               | 258.8 (213.0 to 311.6) | 31.9 (24.0 to 41.7)        | 138.0 (97.9 to 187.6)         | 14.9 (6.9 to 28.5)              | 74.0 (60.9 to 91.4)               |
| Sierra Leone | 2030 | 84.1 (69.3 to 101.3)       | 10.4 (7.8 to 13.6)         | 44.6 (31.6 to 61.0)           | 4.8 (2.2 to 9.3)                | 24.3 (19.9 to 30.0)               | 262.9 (216.5 to 316.7) | 32.5 (24.5 to 42.5)        | 139.4 (98.8 to 190.6)         | 15.1 (7.0 to 29.0)              | 75.8 (62.1 to 93.9)               |
| Sierra Leone | 2031 | 85.5 (70.2 to 103.3)       | 10.6 (8.0 to 13.9)         | 45.1 (31.9 to 61.8)           | 4.9 (2.3 to 9.5)                | 24.9 (19.9 to 31.5)               | 267.4 (219.5 to 323.1) | 33.2 (24.9 to 43.4)        | 141.0 (99.6 to 193.3)         | 15.4 (7.2 to 29.5)              | 77.7 (62.4 to 98.3)               |
| Sierra Leone | 2032 | 87.0 (70.8 to 105.9)       | 10.8 (8.1 to 14.2)         | 45.6 (32.1 to 62.7)           | 5.0 (2.3 to 9.6)                | 25.5 (20.4 to 32.4)               | 272.0 (221.2 to 331.1) | 33.9 (25.4 to 44.4)        | 142.6 (100.5 to 196.0)        | 15.7 (7.3 to 30.1)              | 79.8 (63.8 to 101.4)              |
| Sierra Leone | 2033 | 88.5 (71.6 to 107.2)       | 11.1 (8.3 to 14.5)         | 46.1 (32.4 to 63.9)           | 5.1 (2.4 to 9.8)                | 26.2 (20.6 to 34.2)               | 276.8 (223.9 to 335.1) | 34.6 (25.9 to 45.4)        | 144.2 (101.2 to 199.6)        | 16.0 (7.5 to 30.6)              | 82.0 (64.5 to 107.1)              |
| Sierra Leone | 2034 | 90.2 (74.2 to 110.3)       | 11.3 (8.5 to 14.9)         | 46.7 (32.7 to 64.8)           | 5.2 (2.4 to 10.0)               | 27.0 (21.1 to 35.5)               | 282.1 (232.0 to 344.9) | 35.3 (26.4 to 46.4)        | 145.9 (102.1 to 202.4)        | 16.3 (7.6 to 31.2)              | 84.5 (65.9 to 111.1)              |
| Sierra Leone | 2035 | 91.9 (75.4 to 111.8)       | 11.5 (8.7 to 15.1)         | 47.2 (33.0 to 65.8)           | 5.3 (2.5 to 10.2)               | 27.9 (21.3 to 36.7)               | 287.4 (235.8 to 349.6) | 36.1 (27.1 to 47.1)        | 147.6 (103.0 to 205.8)        | 16.6 (7.7 to 31.8)              | 87.1 (66.6 to 114.7)              |
| Sierra Leone | 2036 | 93.7 (76.8 to 114.9)       | 11.8 (8.8 to 15.5)         | 47.7 (33.2 to 67.0)           | 5.4 (2.5 to 10.4)               | 28.7 (21.7 to 39.0)               | 292.9 (240.0 to 359.2) | 36.9 (27.5 to 48.5)        | 149.2 (103.9 to 209.4)        | 17.0 (7.8 to 32.4)              | 89.8 (67.7 to 122.0)              |
| Sierra Leone | 2037 | 95.5 (77.2 to 117.2)       | 12.1 (9.0 to 15.9)         | 48.3 (33.6 to 67.7)           | 5.5 (2.6 to 10.6)               | 29.5 (21.8 to 39.8)               | 298.5 (241.5 to 366.5) | 37.8 (28.2 to 49.8)        | 151.0 (105.0 to 211.6)        | 17.3 (8.0 to 33.0)              | 92.3 (68.3 to 124.6)              |
| Sierra Leone | 2038 | 97.4 (78.7 to 119.7)       | 12.4 (9.2 to 16.3)         | 48.8 (33.8 to 68.7)           | 5.6 (2.6 to 10.8)               | 30.5 (22.3 to 42.9)               | 304.4 (245.9 to 374.3) | 38.7 (28.8 to 50.8)        | 152.7 (105.7 to 214.7)        | 17.6 (8.1 to 33.6)              | 95.3 (69.6 to 134.2)              |
| Sierra Leone | 2039 | 99.2 (80.3 to 122.2)       | 12.7 (9.4 to 16.6)         | 49.4 (34.3 to 69.7)           | 5.7 (2.6 to 11.0)               | 31.4 (22.9 to 45.0)               | 310.1 (251.1 to 382.0) | 39.6 (29.4 to 52.0)        | 154.4 (107.4 to 217.8)        | 18.0 (8.3 to 34.3)              | 98.1 (71.6 to 140.7)              |
| Sierra Leone | 2040 | 101.2 (81.4 to 126.3)      | 13.0 (9.6 to 17.0)         | 49.9 (34.6 to 71.0)           | 5.9 (2.7 to 11.2)               | 32.4 (23.6 to 46.5)               | 316.4 (254.4 to 394.7) | 40.5 (29.9 to 53.1)        | 156.1 (108.3 to 221.9)        | 18.3 (8.4 to 34.9)              | 101.4 (73.8 to 145.3)             |
| Sierra Leone | 2041 | 103.3 (82.9 to 128.2)      | 13.3 (9.8 to 17.4)         | 50.5 (34.8 to 72.3)           | 6.0 (2.8 to 11.4)               | 33.6 (23.8 to 48.4)               | 323.0 (259.3 to 400.7) | 41.5 (30.7 to 54.4)        | 157.9 (108.9 to 226.1)        | 18.7 (8.6 to 35.6)              | 104.9 (74.4 to 151.4)             |
| Sierra Leone | 2042 | 105.5 (84.5 to 132.4)      | 13.6 (10.1 to 17.8)        | 51.1 (35.1 to 73.7)           | 6.1 (2.8 to 11.6)               | 34.8 (24.2 to 51.2)               | 329.9 (264.1 to 414.0) | 42.5 (31.4 to 55.7)        | 159.7 (109.9 to 230.3)        | 19.0 (8.8 to 36.3)              | 108.7 (75.8 to 160.1)             |
| Sierra Leone | 2043 | 107.7 (85.9 to 135.6)      | 13.9 (10.2 to 18.3)        | 51.7 (35.4 to 75.0)           | 6.2 (2.9 to 11.8)               | 35.9 (24.7 to 53.8)               | 336.8 (268.7 to 423.9) | 43.5 (32.0 to 57.2)        | 161.6 (110.7 to 234.4)        | 19.4 (8.9 to 37.0)              | 112.3 (77.3 to 168.3)             |

| Country      | Year | 2018 US Dollars per capita |                            |                               |                                 |                                   | 2018 PPP per capita       |                            |                               |                                 |                                   |
|--------------|------|----------------------------|----------------------------|-------------------------------|---------------------------------|-----------------------------------|---------------------------|----------------------------|-------------------------------|---------------------------------|-----------------------------------|
|              |      | Health spending            | Government health spending | Out-of-pocket health spending | Prepaid private health spending | Development assistance for health | Health spending           | Government health spending | Out-of-pocket health spending | Prepaid private health spending | Development assistance for health |
| Sierra Leone | 2044 | 110.1 (88.1 to 138.6)      | 14.2 (10.5 to 18.7)        | 52.3 (35.8 to 76.4)           | 6.3 (2.9 to 12.0)               | 37.2 (25.0 to 56.1)               | 344.0 (275.4 to 433.2)    | 44.5 (32.9 to 58.5)        | 163.4 (111.8 to 238.7)        | 19.7 (9.1 to 37.7)              | 116.4 (78.3 to 175.3)             |
| Sierra Leone | 2045 | 112.5 (89.3 to 142.0)      | 14.6 (10.7 to 19.2)        | 52.9 (36.0 to 77.2)           | 6.4 (3.0 to 12.3)               | 38.6 (25.8 to 60.6)               | 351.6 (279.2 to 443.9)    | 45.6 (33.5 to 60.0)        | 165.3 (112.6 to 241.4)        | 20.1 (9.3 to 38.4)              | 120.7 (80.6 to 189.4)             |
| Sierra Leone | 2046 | 115.0 (91.2 to 146.2)      | 15.0 (11.0 to 19.6)        | 53.5 (36.3 to 78.3)           | 6.6 (3.0 to 12.5)               | 40.0 (26.8 to 63.4)               | 359.5 (285.1 to 457.1)    | 46.7 (34.3 to 61.4)        | 167.3 (113.4 to 244.6)        | 20.5 (9.5 to 39.2)              | 125.0 (83.7 to 198.1)             |
| Sierra Leone | 2047 | 117.6 (92.8 to 151.9)      | 15.3 (11.2 to 20.2)        | 54.1 (36.5 to 79.0)           | 6.7 (3.1 to 12.8)               | 41.5 (27.2 to 67.9)               | 367.8 (290.0 to 474.9)    | 47.9 (34.9 to 63.1)        | 169.2 (114.1 to 247.0)        | 20.9 (9.7 to 40.0)              | 129.8 (85.1 to 212.3)             |
| Sierra Leone | 2048 | 120.5 (93.7 to 156.7)      | 15.7 (11.5 to 20.7)        | 54.7 (36.8 to 79.8)           | 6.8 (3.2 to 13.0)               | 43.2 (28.0 to 70.3)               | 376.6 (293.0 to 489.9)    | 49.0 (35.8 to 64.6)        | 171.1 (114.9 to 249.5)        | 21.3 (9.9 to 40.8)              | 135.1 (87.6 to 219.7)             |
| Sierra Leone | 2049 | 123.2 (96.4 to 160.0)      | 16.0 (11.7 to 21.2)        | 55.4 (37.2 to 81.0)           | 7.0 (3.2 to 13.3)               | 44.9 (28.9 to 74.5)               | 385.2 (301.2 to 500.3)    | 50.1 (36.7 to 66.2)        | 173.1 (116.3 to 253.4)        | 21.7 (10.1 to 41.7)             | 140.3 (90.5 to 233.0)             |
| Sierra Leone | 2050 | 126.3 (97.7 to 165.2)      | 16.4 (12.0 to 21.7)        | 56.0 (37.8 to 82.4)           | 7.1 (3.3 to 13.6)               | 46.8 (29.6 to 79.0)               | 394.8 (305.4 to 516.3)    | 51.3 (37.5 to 67.8)        | 175.1 (118.2 to 257.5)        | 22.2 (10.3 to 42.6)             | 146.2 (92.6 to 246.8)             |
| Singapore    | 1995 | 1122.3 (1055.2 to 1193.4)  | 425.3 (380.7 to 474.3)     | 537.0 (496.9 to 583.1)        | 160.1 (133.0 to 191.5)          | 0.0 (0.0 to 0.0)                  | 1844.7 (1734.3 to 1961.4) | 699.0 (625.8 to 779.6)     | 882.6 (816.8 to 958.4)        | 263.1 (218.6 to 314.8)          | 0.0 (0.0 to 0.0)                  |
| Singapore    | 1996 | 1142.6 (1088.5 to 1204.1)  | 439.1 (400.3 to 482.5)     | 541.3 (508.9 to 574.9)        | 162.3 (140.7 to 185.8)          | 0.0 (0.0 to 0.0)                  | 1878.1 (1789.1 to 1979.2) | 721.7 (658.0 to 793.1)     | 889.7 (836.4 to 944.9)        | 266.7 (231.2 to 305.4)          | 0.0 (0.0 to 0.0)                  |
| Singapore    | 1997 | 1180.7 (1129.4 to 1236.8)  | 462.8 (424.8 to 505.1)     | 550.5 (521.9 to 583.2)        | 167.4 (147.6 to 189.1)          | 0.0 (0.0 to 0.0)                  | 1940.6 (1856.4 to 2032.9) | 760.6 (698.3 to 830.2)     | 904.9 (857.8 to 958.5)        | 275.1 (242.6 to 310.8)          | 0.0 (0.0 to 0.0)                  |
| Singapore    | 1998 | 1159.3 (1108.3 to 1211.7)  | 454.2 (417.4 to 495.7)     | 539.3 (512.0 to 568.4)        | 165.7 (147.6 to 186.3)          | 0.0 (0.0 to 0.0)                  | 1905.4 (1821.6 to 1991.6) | 746.6 (686.1 to 814.7)     | 886.5 (841.6 to 934.3)        | 272.4 (242.6 to 306.2)          | 0.0 (0.0 to 0.0)                  |
| Singapore    | 1999 | 1158.5 (1108.9 to 1210.2)  | 444.2 (408.1 to 486.2)     | 545.1 (516.7 to 571.4)        | 169.2 (151.3 to 188.8)          | 0.0 (0.0 to 0.0)                  | 1904.1 (1822.7 to 1989.1) | 730.1 (670.8 to 799.2)     | 896.0 (849.2 to 939.1)        | 278.1 (248.6 to 310.3)          | 0.0 (0.0 to 0.0)                  |
| Singapore    | 2000 | 1168.0 (1116.1 to 1215.6)  | 426.1 (390.1 to 467.1)     | 565.4 (539.3 to 591.8)        | 176.5 (159.1 to 194.7)          | 0.0 (0.0 to 0.0)                  | 1919.8 (1834.4 to 1998.1) | 700.3 (641.2 to 767.7)     | 929.4 (886.4 to 972.7)        | 290.2 (261.4 to 320.1)          | 0.0 (0.0 to 0.0)                  |
| Singapore    | 2001 | 1096.9 (1053.0 to 1144.3)  | 367.1 (335.3 to 403.4)     | 563.7 (540.9 to 590.6)        | 166.1 (150.7 to 183.4)          | 0.0 (0.0 to 0.0)                  | 1803.0 (1730.8 to 1880.7) | 603.4 (551.1 to 663.0)     | 926.5 (889.0 to 970.7)        | 273.0 (247.7 to 301.5)          | 0.0 (0.0 to 0.0)                  |
| Singapore    | 2002 | 1128.0 (1084.3 to 1174.2)  | 372.0 (339.7 to 406.1)     | 583.2 (558.5 to 610.0)        | 172.8 (157.0 to 189.4)          | 0.0 (0.0 to 0.0)                  | 1854.0 (1782.2 to 1930.0) | 611.5 (558.3 to 667.5)     | 958.5 (917.9 to 1002.7)       | 284.0 (258.1 to 311.3)          | 0.0 (0.0 to 0.0)                  |
| Singapore    | 2003 | 1167.4 (1122.1 to 1214.5)  | 391.3 (356.8 to 428.7)     | 593.5 (567.3 to 620.3)        | 182.6 (165.8 to 198.4)          | 0.0 (0.0 to 0.0)                  | 1918.8 (1844.3 to 1996.2) | 643.1 (586.4 to 704.6)     | 975.5 (932.4 to 1019.6)       | 300.2 (272.5 to 326.2)          | 0.0 (0.0 to 0.0)                  |
| Singapore    | 2004 | 1189.5 (1143.5 to 1235.8)  | 400.0 (365.4 to 435.3)     | 596.8 (571.5 to 622.9)        | 192.6 (176.0 to 208.9)          | 0.0 (0.0 to 0.0)                  | 1955.1 (1879.6 to 2031.2) | 657.5 (600.7 to 715.4)     | 980.9 (939.3 to 1023.7)       | 316.6 (289.3 to 343.3)          | 0.0 (0.0 to 0.0)                  |
| Singapore    | 2005 | 1209.1 (1162.9 to 1257.3)  | 411.6 (377.2 to 447.6)     | 596.2 (572.4 to 622.1)        | 201.4 (183.7 to 219.0)          | 0.0 (0.0 to 0.0)                  | 1987.4 (1911.5 to 2066.6) | 676.5 (620.0 to 735.7)     | 979.9 (940.9 to 1022.5)       | 331.0 (301.9 to 359.9)          | 0.0 (0.0 to 0.0)                  |
| Singapore    | 2006 | 1253.7 (1206.5 to 1300.9)  | 435.4 (398.8 to 472.5)     | 605.5 (581.3 to 629.9)        | 212.8 (195.0 to 230.7)          | 0.0 (0.0 to 0.0)                  | 2060.6 (1983.0 to 2138.2) | 715.6 (655.5 to 776.6)     | 995.2 (955.5 to 1035.3)       | 349.7 (320.5 to 379.1)          | 0.0 (0.0 to 0.0)                  |
| Singapore    | 2007 | 1326.3 (1279.9 to 1374.9)  | 474.5 (438.1 to 512.9)     | 626.5 (602.9 to 651.5)        | 225.3 (206.7 to 244.2)          | 0.0 (0.0 to 0.0)                  | 2179.9 (2103.7 to 2259.9) | 780.0 (720.1 to 843.0)     | 1029.7 (991.0 to 1070.9)      | 370.3 (339.7 to 401.4)          | 0.0 (0.0 to 0.0)                  |
| Singapore    | 2008 | 1385.8 (1339.4 to 1434.6)  | 517.0 (478.7 to 554.8)     | 638.5 (612.9 to 664.3)        | 230.3 (209.7 to 249.8)          | 0.0 (0.0 to 0.0)                  | 2277.7 (2201.5 to 2357.9) | 849.7 (786.9 to 911.9)     | 1049.5 (1007.3 to 1091.9)     | 378.5 (344.7 to 410.5)          | 0.0 (0.0 to 0.0)                  |

| Country   | Year | 2018 US Dollars per capita |                            |                               |                                 |                                   | 2018 PPP per capita       |                            |                               |                                 |                                   |
|-----------|------|----------------------------|----------------------------|-------------------------------|---------------------------------|-----------------------------------|---------------------------|----------------------------|-------------------------------|---------------------------------|-----------------------------------|
|           |      | Health spending            | Government health spending | Out-of-pocket health spending | Prepaid private health spending | Development assistance for health | Health spending           | Government health spending | Out-of-pocket health spending | Prepaid private health spending | Development assistance for health |
| Singapore | 2009 | 1422.8 (1375.5 to 1474.0)  | 562.3 (528.1 to 600.0)     | 628.6 (603.3 to 653.6)        | 231.9 (213.6 to 251.7)          | 0.0 (0.0 to 0.0)                  | 2338.6 (2260.8 to 2422.8) | 924.2 (868.0 to 986.1)     | 1033.1 (991.6 to 1074.2)      | 381.2 (351.1 to 413.7)          | 0.0 (0.0 to 0.0)                  |
| Singapore | 2010 | 1574.8 (1522.4 to 1629.9)  | 668.0 (626.6 to 709.1)     | 649.6 (624.1 to 675.5)        | 257.2 (238.1 to 279.7)          | 0.0 (0.0 to 0.0)                  | 2588.5 (2502.3 to 2678.9) | 1098.0 (1029.9 to 1165.5)  | 1067.7 (1025.8 to 1110.3)     | 422.8 (391.3 to 459.7)          | 0.0 (0.0 to 0.0)                  |
| Singapore | 2011 | 1679.4 (1620.3 to 1741.4)  | 748.7 (706.2 to 794.9)     | 652.3 (627.4 to 679.1)        | 278.4 (258.8 to 299.6)          | 0.0 (0.0 to 0.0)                  | 2760.4 (2663.2 to 2862.2) | 1230.7 (1160.8 to 1306.5)  | 1072.2 (1031.1 to 1116.1)     | 457.5 (425.3 to 492.4)          | 0.0 (0.0 to 0.0)                  |
| Singapore | 2012 | 1801.9 (1743.2 to 1864.6)  | 837.4 (791.4 to 886.3)     | 665.1 (638.8 to 693.4)        | 299.4 (278.8 to 321.6)          | 0.0 (0.0 to 0.0)                  | 2961.6 (2865.1 to 3064.7) | 1376.3 (1300.8 to 1456.8)  | 1093.2 (1049.9 to 1139.8)     | 492.1 (458.3 to 528.5)          | 0.0 (0.0 to 0.0)                  |
| Singapore | 2013 | 1996.2 (1938.5 to 2056.8)  | 967.1 (921.3 to 1018.0)    | 699.2 (671.6 to 728.6)        | 329.9 (307.8 to 352.8)          | 0.0 (0.0 to 0.0)                  | 3281.1 (3186.2 to 3380.7) | 1589.5 (1514.3 to 1673.3)  | 1149.3 (1103.8 to 1197.6)     | 542.3 (505.9 to 579.8)          | 0.0 (0.0 to 0.0)                  |
| Singapore | 2014 | 2188.5 (2130.3 to 2250.4)  | 1111.1 (1062.9 to 1162.8)  | 724.4 (696.3 to 754.6)        | 353.0 (329.3 to 376.7)          | 0.0 (0.0 to 0.0)                  | 3597.2 (3501.4 to 3698.9) | 1826.3 (1747.1 to 1911.2)  | 1190.6 (1144.5 to 1240.2)     | 580.2 (541.2 to 619.2)          | 0.0 (0.0 to 0.0)                  |
| Singapore | 2015 | 2394.4 (2329.3 to 2464.3)  | 1261.4 (1208.1 to 1316.6)  | 765.6 (737.3 to 797.3)        | 367.3 (343.6 to 393.8)          | 0.0 (0.0 to 0.0)                  | 3935.5 (3828.5 to 4050.5) | 2073.3 (1985.8 to 2164.0)  | 1258.4 (1211.8 to 1310.5)     | 603.7 (564.7 to 647.3)          | 0.0 (0.0 to 0.0)                  |
| Singapore | 2016 | 2579.9 (2486.5 to 2672.8)  | 1397.0 (1324.5 to 1474.5)  | 805.6 (764.4 to 846.1)        | 377.3 (342.4 to 411.3)          | 0.0 (0.0 to 0.0)                  | 4240.4 (4086.8 to 4393.1) | 2296.2 (2177.0 to 2423.5)  | 1324.1 (1256.5 to 1390.7)     | 620.1 (562.8 to 676.0)          | 0.0 (0.0 to 0.0)                  |
| Singapore | 2017 | 2675.2 (2578.5 to 2774.1)  | 1453.1 (1376.6 to 1534.0)  | 829.9 (783.7 to 873.8)        | 392.2 (356.2 to 426.5)          | 0.0 (0.0 to 0.0)                  | 4397.1 (4238.1 to 4559.6) | 2388.4 (2262.7 to 2521.3)  | 1364.1 (1288.1 to 1436.2)     | 644.6 (585.5 to 701.1)          | 0.0 (0.0 to 0.0)                  |
| Singapore | 2018 | 2762.4 (2663.4 to 2862.1)  | 1510.7 (1432.2 to 1594.7)  | 848.4 (802.1 to 895.1)        | 403.3 (366.1 to 439.2)          | 0.0 (0.0 to 0.0)                  | 4540.3 (4377.6 to 4704.3) | 2483.0 (2354.0 to 2621.2)  | 1394.4 (1318.4 to 1471.2)     | 662.9 (601.7 to 721.9)          | 0.0 (0.0 to 0.0)                  |
| Singapore | 2019 | 2847.2 (2739.9 to 2953.5)  | 1567.2 (1482.2 to 1660.5)  | 866.4 (817.4 to 915.4)        | 413.6 (375.0 to 449.7)          | 0.0 (0.0 to 0.0)                  | 4679.7 (4503.4 to 4854.5) | 2575.9 (2436.2 to 2729.3)  | 1424.1 (1343.5 to 1504.7)     | 679.7 (616.4 to 739.1)          | 0.0 (0.0 to 0.0)                  |
| Singapore | 2020 | 2929.7 (2812.1 to 3045.7)  | 1622.5 (1532.7 to 1725.8)  | 883.7 (830.8 to 935.8)        | 423.4 (383.0 to 460.7)          | 0.0 (0.0 to 0.0)                  | 4815.3 (4622.2 to 5006.0) | 2666.9 (2519.2 to 2836.6)  | 1452.5 (1365.5 to 1538.2)     | 695.9 (629.5 to 757.3)          | 0.0 (0.0 to 0.0)                  |
| Singapore | 2021 | 3012.3 (2882.2 to 3133.3)  | 1678.2 (1575.0 to 1784.9)  | 900.9 (843.3 to 954.9)        | 433.3 (391.7 to 471.7)          | 0.0 (0.0 to 0.0)                  | 4951.2 (4737.4 to 5150.0) | 2758.3 (2588.7 to 2933.8)  | 1480.7 (1386.0 to 1569.5)     | 712.1 (643.8 to 775.3)          | 0.0 (0.0 to 0.0)                  |
| Singapore | 2022 | 3093.1 (2952.7 to 3224.0)  | 1732.8 (1618.7 to 1847.9)  | 917.6 (856.8 to 975.1)        | 442.7 (400.1 to 482.6)          | 0.0 (0.0 to 0.0)                  | 5083.9 (4853.2 to 5299.1) | 2848.1 (2660.6 to 3037.2)  | 1508.2 (1408.3 to 1602.7)     | 727.7 (657.6 to 793.2)          | 0.0 (0.0 to 0.0)                  |
| Singapore | 2023 | 3173.4 (3024.5 to 3317.8)  | 1787.4 (1663.1 to 1917.5)  | 934.0 (868.7 to 997.2)        | 452.0 (408.3 to 493.0)          | 0.0 (0.0 to 0.0)                  | 5215.9 (4971.1 to 5453.3) | 2937.8 (2733.5 to 3151.7)  | 1535.2 (1427.8 to 1639.0)     | 742.9 (671.0 to 810.3)          | 0.0 (0.0 to 0.0)                  |
| Singapore | 2024 | 3258.7 (3098.5 to 3410.9)  | 1846.5 (1711.0 to 1987.8)  | 950.6 (879.3 to 1015.3)       | 461.6 (416.8 to 503.8)          | 0.0 (0.0 to 0.0)                  | 5356.1 (5092.8 to 5606.3) | 3034.9 (2812.3 to 3267.2)  | 1562.5 (1445.2 to 1668.8)     | 758.7 (685.1 to 828.1)          | 0.0 (0.0 to 0.0)                  |
| Singapore | 2025 | 3340.1 (3173.1 to 3510.3)  | 1900.1 (1754.4 to 2057.0)  | 969.3 (897.2 to 1039.3)       | 470.7 (424.4 to 514.0)          | 0.0 (0.0 to 0.0)                  | 5489.9 (5215.5 to 5769.7) | 3123.1 (2883.7 to 3381.0)  | 1593.1 (1474.6 to 1708.2)     | 773.7 (697.6 to 844.8)          | 0.0 (0.0 to 0.0)                  |
| Singapore | 2026 | 3416.0 (3234.5 to 3605.0)  | 1949.0 (1788.5 to 2119.5)  | 987.6 (911.3 to 1063.5)       | 479.4 (431.3 to 523.9)          | 0.0 (0.0 to 0.0)                  | 5614.6 (5316.4 to 5925.3) | 3203.5 (2939.7 to 3483.7)  | 1623.2 (1497.8 to 1748.0)     | 787.9 (709.0 to 861.1)          | 0.0 (0.0 to 0.0)                  |
| Singapore | 2027 | 3491.9 (3304.3 to 3697.5)  | 1997.7 (1834.2 to 2182.7)  | 1006.1 (919.3 to 1091.7)      | 488.1 (438.9 to 534.6)          | 0.0 (0.0 to 0.0)                  | 5739.5 (5431.0 to 6077.3) | 3283.5 (3014.8 to 3587.5)  | 1653.7 (1511.0 to 1794.4)     | 802.3 (721.5 to 878.6)          | 0.0 (0.0 to 0.0)                  |
| Singapore | 2028 | 3568.7 (3354.2 to 3785.8)  | 2047.1 (1868.5 to 2252.1)  | 1024.7 (929.4 to 1124.2)      | 496.9 (445.7 to 545.3)          | 0.0 (0.0 to 0.0)                  | 5865.7 (5513.1 to 6222.5) | 3364.8 (3071.1 to 3701.7)  | 1684.2 (1527.6 to 1847.8)     | 816.8 (732.7 to 896.3)          | 0.0 (0.0 to 0.0)                  |
| Singapore | 2029 | 3651.2 (3417.5 to 3887.2)  | 2101.5 (1908.2 to 2317.4)  | 1043.5 (937.3 to 1156.1)      | 506.3 (453.5 to 556.5)          | 0.0 (0.0 to 0.0)                  | 6001.3 (5617.2 to 6389.2) | 3454.1 (3136.4 to 3809.0)  | 1715.1 (1540.5 to 1900.2)     | 832.1 (745.4 to 914.7)          | 0.0 (0.0 to 0.0)                  |

| Country   | Year | 2018 US Dollars per capita |                            |                               |                                 |                                   | 2018 PPP per capita        |                            |                               |                                 |                                   |
|-----------|------|----------------------------|----------------------------|-------------------------------|---------------------------------|-----------------------------------|----------------------------|----------------------------|-------------------------------|---------------------------------|-----------------------------------|
|           |      | Health spending            | Government health spending | Out-of-pocket health spending | Prepaid private health spending | Development assistance for health | Health spending            | Government health spending | Out-of-pocket health spending | Prepaid private health spending | Development assistance for health |
| Singapore | 2030 | 3738.4 (3492.8 to 3989.0)  | 2160.2 (1949.4 to 2389.3)  | 1062.3 (945.4 to 1191.1)      | 515.8 (461.5 to 567.1)          | 0.0 (0.0 to 0.0)                  | 6144.6 (5740.8 to 6556.5)  | 3550.6 (3204.2 to 3927.2)  | 1746.1 (1553.8 to 1957.7)     | 847.9 (758.6 to 932.0)          | 0.0 (0.0 to 0.0)                  |
| Singapore | 2031 | 3824.0 (3561.7 to 4101.8)  | 2216.8 (1993.1 to 2460.1)  | 1081.5 (956.5 to 1225.5)      | 525.8 (469.9 to 578.7)          | 0.0 (0.0 to 0.0)                  | 6285.3 (5854.1 to 6742.0)  | 3643.6 (3275.9 to 4043.6)  | 1777.5 (1572.2 to 2014.2)     | 864.1 (772.4 to 951.1)          | 0.0 (0.0 to 0.0)                  |
| Singapore | 2032 | 3911.7 (3632.5 to 4208.0)  | 2274.4 (2038.2 to 2540.7)  | 1101.1 (962.2 to 1260.0)      | 536.2 (478.8 to 591.3)          | 0.0 (0.0 to 0.0)                  | 6429.4 (5970.6 to 6916.4)  | 3738.3 (3350.0 to 4176.0)  | 1809.8 (1581.5 to 2071.1)     | 881.3 (787.0 to 971.9)          | 0.0 (0.0 to 0.0)                  |
| Singapore | 2033 | 3999.4 (3715.0 to 4323.3)  | 2331.9 (2087.1 to 2615.7)  | 1120.8 (970.6 to 1295.0)      | 546.7 (487.7 to 603.6)          | 0.0 (0.0 to 0.0)                  | 6573.6 (6106.1 to 7105.9)  | 3832.9 (3430.4 to 4299.4)  | 1842.2 (1595.2 to 2128.5)     | 898.5 (801.6 to 992.1)          | 0.0 (0.0 to 0.0)                  |
| Singapore | 2034 | 4088.3 (3778.8 to 4430.8)  | 2390.3 (2128.0 to 2687.7)  | 1140.7 (980.5 to 1330.7)      | 557.3 (496.8 to 616.4)          | 0.0 (0.0 to 0.0)                  | 6719.7 (6211.0 to 7282.7)  | 3928.8 (3497.7 to 4417.6)  | 1875.0 (1611.5 to 2187.2)     | 916.0 (816.5 to 1013.2)         | 0.0 (0.0 to 0.0)                  |
| Singapore | 2035 | 4177.3 (3862.5 to 4547.9)  | 2448.7 (2169.2 to 2754.2)  | 1160.7 (989.1 to 1365.1)      | 567.8 (505.7 to 628.9)          | 0.0 (0.0 to 0.0)                  | 6865.9 (6348.6 to 7475.1)  | 4024.9 (3565.4 to 4526.9)  | 1907.8 (1625.8 to 2243.7)     | 933.3 (831.2 to 1033.6)         | 0.0 (0.0 to 0.0)                  |
| Singapore | 2036 | 4266.1 (3913.4 to 4630.7)  | 2506.6 (2217.2 to 2832.8)  | 1180.8 (998.4 to 1398.9)      | 578.6 (513.9 to 641.2)          | 0.0 (0.0 to 0.0)                  | 7011.9 (6432.3 to 7611.2)  | 4120.0 (3644.4 to 4656.1)  | 1940.8 (1641.1 to 2299.2)     | 951.0 (844.7 to 1053.8)         | 0.0 (0.0 to 0.0)                  |
| Singapore | 2037 | 4355.0 (3981.5 to 4754.0)  | 2564.6 (2260.0 to 2904.6)  | 1201.0 (1007.0 to 1432.2)     | 589.4 (522.6 to 654.2)          | 0.0 (0.0 to 0.0)                  | 7158.1 (6544.2 to 7813.6)  | 4215.3 (3714.6 to 4774.1)  | 1974.0 (1655.1 to 2354.1)     | 968.8 (858.9 to 1075.3)         | 0.0 (0.0 to 0.0)                  |
| Singapore | 2038 | 4443.9 (4056.2 to 4867.2)  | 2622.4 (2302.3 to 2986.9)  | 1221.2 (1018.0 to 1467.4)     | 600.2 (531.5 to 667.4)          | 0.0 (0.0 to 0.0)                  | 7304.2 (6666.9 to 8000.0)  | 4310.3 (3784.1 to 4909.4)  | 2007.3 (1673.2 to 2411.9)     | 986.6 (873.5 to 1097.0)         | 0.0 (0.0 to 0.0)                  |
| Singapore | 2039 | 4532.7 (4128.5 to 4980.5)  | 2680.1 (2347.4 to 3065.4)  | 1241.5 (1028.2 to 1499.5)     | 611.1 (540.3 to 680.8)          | 0.0 (0.0 to 0.0)                  | 7450.1 (6785.7 to 8186.1)  | 4405.1 (3858.4 to 5038.5)  | 2040.7 (1689.9 to 2464.7)     | 1004.4 (888.1 to 1118.9)        | 0.0 (0.0 to 0.0)                  |
| Singapore | 2040 | 4623.9 (4211.6 to 5100.3)  | 2739.5 (2393.2 to 3136.7)  | 1262.2 (1041.0 to 1531.1)     | 622.3 (549.2 to 695.7)          | 0.0 (0.0 to 0.0)                  | 7600.1 (6922.3 to 8383.1)  | 4502.8 (3933.6 to 5155.6)  | 2074.5 (1711.1 to 2516.6)     | 1022.8 (902.6 to 1143.4)        | 0.0 (0.0 to 0.0)                  |
| Singapore | 2041 | 4712.5 (4290.9 to 5222.6)  | 2796.0 (2439.4 to 3208.7)  | 1282.8 (1053.4 to 1563.6)     | 633.7 (558.7 to 711.2)          | 0.0 (0.0 to 0.0)                  | 7745.7 (7052.7 to 8584.1)  | 4595.7 (4009.6 to 5274.0)  | 2108.5 (1731.5 to 2570.0)     | 1041.6 (918.3 to 1169.0)        | 0.0 (0.0 to 0.0)                  |
| Singapore | 2042 | 4800.9 (4367.6 to 5333.3)  | 2851.6 (2482.3 to 3285.5)  | 1303.8 (1067.1 to 1595.5)     | 645.4 (568.4 to 725.4)          | 0.0 (0.0 to 0.0)                  | 7891.0 (7178.8 to 8766.0)  | 4687.1 (4080.1 to 5400.2)  | 2143.0 (1753.9 to 2622.4)     | 1060.9 (934.2 to 1192.3)        | 0.0 (0.0 to 0.0)                  |
| Singapore | 2043 | 4894.0 (4442.7 to 5425.7)  | 2910.7 (2528.1 to 3361.5)  | 1325.3 (1082.1 to 1627.3)     | 657.9 (577.4 to 741.6)          | 0.0 (0.0 to 0.0)                  | 8043.9 (7302.3 to 8917.9)  | 4784.2 (4155.4 to 5525.1)  | 2178.4 (1778.6 to 2674.7)     | 1081.3 (949.1 to 1219.0)        | 0.0 (0.0 to 0.0)                  |
| Singapore | 2044 | 4989.9 (4517.3 to 5538.6)  | 2971.6 (2574.0 to 3437.8)  | 1347.4 (1097.2 to 1661.1)     | 670.9 (587.0 to 757.9)          | 0.0 (0.0 to 0.0)                  | 8201.6 (7424.8 to 9103.5)  | 4884.2 (4230.7 to 5650.5)  | 2214.7 (1803.5 to 2730.2)     | 1102.7 (964.7 to 1245.7)        | 0.0 (0.0 to 0.0)                  |
| Singapore | 2045 | 5087.5 (4587.8 to 5660.0)  | 3033.9 (2615.3 to 3516.5)  | 1369.5 (1111.2 to 1691.3)     | 684.1 (596.5 to 774.5)          | 0.0 (0.0 to 0.0)                  | 8362.0 (7540.7 to 9303.0)  | 4986.6 (4298.6 to 5779.9)  | 2251.0 (1826.5 to 2779.9)     | 1124.4 (980.5 to 1273.1)        | 0.0 (0.0 to 0.0)                  |
| Singapore | 2046 | 5187.6 (4685.6 to 5780.8)  | 3097.9 (2659.9 to 3603.3)  | 1391.8 (1125.9 to 1717.8)     | 697.9 (606.6 to 793.3)          | 0.0 (0.0 to 0.0)                  | 8526.5 (7701.4 to 9501.5)  | 5091.9 (4371.9 to 5922.6)  | 2287.5 (1850.7 to 2823.5)     | 1147.1 (997.0 to 1303.9)        | 0.0 (0.0 to 0.0)                  |
| Singapore | 2047 | 5290.6 (4760.2 to 5905.5)  | 3164.0 (2719.1 to 3694.2)  | 1414.3 (1143.0 to 1743.8)     | 712.2 (617.2 to 812.3)          | 0.0 (0.0 to 0.0)                  | 8695.8 (7824.1 to 9706.5)  | 5200.6 (4469.2 to 6071.9)  | 2324.6 (1878.6 to 2866.2)     | 1170.6 (1014.5 to 1335.1)       | 0.0 (0.0 to 0.0)                  |
| Singapore | 2048 | 5396.6 (4857.9 to 6047.6)  | 3232.5 (2785.2 to 3777.0)  | 1437.2 (1159.4 to 1772.0)     | 726.9 (628.3 to 830.7)          | 0.0 (0.0 to 0.0)                  | 8870.1 (7984.7 to 9940.1)  | 5313.1 (4577.9 to 6208.0)  | 2362.2 (1905.6 to 2912.5)     | 1194.7 (1032.6 to 1365.3)       | 0.0 (0.0 to 0.0)                  |
| Singapore | 2049 | 5503.0 (4958.1 to 6133.0)  | 3301.4 (2833.0 to 3860.9)  | 1460.1 (1178.4 to 1800.1)     | 741.6 (639.2 to 849.1)          | 0.0 (0.0 to 0.0)                  | 9045.0 (8149.3 to 10080.4) | 5426.3 (4656.5 to 6345.9)  | 2399.8 (1936.9 to 2958.7)     | 1218.9 (1050.6 to 1395.7)       | 0.0 (0.0 to 0.0)                  |
| Singapore | 2050 | 5616.8 (5040.4 to 6277.1)  | 3375.7 (2895.8 to 3959.3)  | 1483.8 (1197.7 to 1829.3)     | 757.2 (649.9 to 868.7)          | 0.0 (0.0 to 0.0)                  | 9232.0 (8284.5 to 10317.2) | 5548.5 (4759.7 to 6507.7)  | 2438.9 (1968.7 to 3006.7)     | 1244.6 (1068.3 to 1427.8)       | 0.0 (0.0 to 0.0)                  |

| Country  | Year | 2018 US Dollars per capita |                            |                               |                                 |                                   | 2018 PPP per capita       |                            |                               |                                 |                                   |
|----------|------|----------------------------|----------------------------|-------------------------------|---------------------------------|-----------------------------------|---------------------------|----------------------------|-------------------------------|---------------------------------|-----------------------------------|
|          |      | Health spending            | Government health spending | Out-of-pocket health spending | Prepaid private health spending | Development assistance for health | Health spending           | Government health spending | Out-of-pocket health spending | Prepaid private health spending | Development assistance for health |
| Slovakia | 1995 | 508.1 (471.3 to 543.7)     | 444.7 (412.5 to 474.9)     | 58.4 (45.4 to 74.5)           | 4.9 (2.4 to 9.1)                | 0.0 (0.0 to 0.0)                  | 894.9 (830.1 to 957.6)    | 783.3 (726.5 to 836.5)     | 102.9 (80.0 to 131.2)         | 8.6 (4.2 to 16.0)               | 0.1 (0.1 to 0.1)                  |
| Slovakia | 1996 | 534.4 (504.8 to 564.5)     | 470.7 (445.8 to 497.9)     | 58.7 (46.2 to 73.9)           | 5.0 (2.4 to 9.2)                | 0.0 (0.0 to 0.0)                  | 941.2 (889.1 to 994.2)    | 829.1 (785.2 to 877.0)     | 103.3 (81.4 to 130.2)         | 8.8 (4.2 to 16.2)               | 0.0 (0.0 to 0.0)                  |
| Slovakia | 1997 | 542.2 (515.2 to 569.5)     | 482.3 (458.6 to 508.3)     | 54.9 (44.2 to 67.9)           | 5.0 (2.5 to 9.0)                | 0.0 (0.0 to 0.0)                  | 955.0 (907.5 to 1003.0)   | 849.5 (807.7 to 895.3)     | 96.7 (77.8 to 119.6)          | 8.8 (4.4 to 15.9)               | 0.0 (0.0 to 0.0)                  |
| Slovakia | 1998 | 548.0 (521.0 to 574.5)     | 487.4 (462.9 to 513.6)     | 55.5 (45.0 to 67.8)           | 5.0 (2.6 to 9.0)                | 0.0 (0.0 to 0.0)                  | 965.1 (917.6 to 1011.9)   | 858.5 (815.2 to 904.6)     | 97.8 (79.3 to 119.5)          | 8.9 (4.5 to 15.8)               | 0.0 (0.0 to 0.0)                  |
| Slovakia | 1999 | 542.8 (514.5 to 571.4)     | 479.0 (454.4 to 503.9)     | 58.9 (47.9 to 71.2)           | 5.0 (2.6 to 8.4)                | 0.0 (0.0 to 0.0)                  | 956.0 (906.1 to 1006.5)   | 843.6 (800.3 to 887.6)     | 103.7 (84.4 to 125.5)         | 8.7 (4.6 to 14.8)               | 0.0 (0.0 to 0.0)                  |
| Slovakia | 2000 | 548.7 (520.9 to 575.6)     | 481.3 (456.7 to 505.9)     | 62.3 (51.2 to 75.0)           | 5.0 (2.7 to 8.6)                | 0.0 (0.0 to 0.0)                  | 966.4 (917.4 to 1013.8)   | 847.7 (804.4 to 891.0)     | 109.8 (90.2 to 132.2)         | 8.8 (4.8 to 15.1)               | 0.0 (0.0 to 0.0)                  |
| Slovakia | 2001 | 571.4 (543.8 to 599.8)     | 497.0 (472.2 to 521.6)     | 68.9 (56.8 to 82.3)           | 5.5 (3.1 to 9.3)                | 0.0 (0.0 to 0.0)                  | 1006.5 (957.9 to 1056.4)  | 875.4 (831.7 to 918.7)     | 121.4 (100.1 to 144.9)        | 9.7 (5.4 to 16.4)               | 0.0 (0.0 to 0.0)                  |
| Slovakia | 2002 | 609.8 (581.0 to 638.2)     | 522.4 (496.5 to 547.4)     | 80.8 (67.7 to 95.0)           | 6.6 (3.8 to 10.7)               | 0.0 (0.0 to 0.0)                  | 1074.1 (1023.3 to 1124.0) | 920.2 (874.5 to 964.2)     | 142.3 (119.3 to 167.3)        | 11.5 (6.7 to 18.8)              | 0.0 (0.0 to 0.0)                  |
| Slovakia | 2003 | 660.3 (632.5 to 689.2)     | 549.1 (524.0 to 572.8)     | 102.6 (87.7 to 118.4)         | 8.6 (5.2 to 13.9)               | 0.0 (0.0 to 0.0)                  | 1163.0 (1113.9 to 1213.9) | 967.1 (922.9 to 1008.9)    | 180.7 (154.4 to 208.6)        | 15.2 (9.2 to 24.4)              | 0.0 (0.0 to 0.0)                  |
| Slovakia | 2004 | 748.9 (716.2 to 782.8)     | 582.9 (557.2 to 607.6)     | 147.8 (129.1 to 167.0)        | 14.6 (9.1 to 22.7)              | 3.6 (3.6 to 3.6)                  | 1319.0 (1261.5 to 1378.7) | 1026.7 (981.4 to 1070.2)   | 260.3 (227.4 to 294.1)        | 25.7 (16.1 to 39.9)             | 6.3 (6.3 to 6.3)                  |
| Slovakia | 2005 | 838.0 (805.4 to 876.4)     | 620.1 (595.7 to 646.9)     | 192.8 (170.6 to 214.4)        | 21.3 (14.0 to 31.6)             | 3.8 (3.8 to 3.8)                  | 1476.0 (1418.5 to 1543.6) | 1092.2 (1049.2 to 1139.4)  | 339.6 (300.4 to 377.6)        | 37.5 (24.6 to 55.7)             | 6.7 (6.7 to 6.7)                  |
| Slovakia | 2006 | 944.4 (908.4 to 982.8)     | 673.6 (648.2 to 699.7)     | 237.5 (214.7 to 263.1)        | 32.9 (22.8 to 47.0)             | 0.4 (0.4 to 0.4)                  | 1663.3 (1599.9 to 1731.1) | 1186.4 (1141.7 to 1232.3)  | 418.3 (378.1 to 463.5)        | 57.9 (40.2 to 82.7)             | 0.7 (0.7 to 0.7)                  |
| Slovakia | 2007 | 1083.5 (1045.7 to 1122.8)  | 766.8 (741.0 to 793.9)     | 272.6 (247.9 to 300.7)        | 44.1 (31.5 to 60.5)             | 0.0 (0.0 to 0.0)                  | 1908.4 (1841.9 to 1977.6) | 1350.6 (1305.2 to 1398.4)  | 480.2 (436.6 to 529.7)        | 77.7 (55.5 to 106.5)            | 0.0 (0.0 to 0.0)                  |
| Slovakia | 2008 | 1182.5 (1143.5 to 1223.4)  | 852.0 (825.5 to 880.3)     | 277.9 (253.3 to 304.7)        | 52.5 (38.8 to 69.5)             | 0.0 (0.0 to 0.0)                  | 2082.7 (2014.1 to 2154.8) | 1500.7 (1453.9 to 1550.5)  | 489.5 (446.1 to 536.7)        | 92.5 (68.3 to 122.4)            | 0.0 (0.0 to 0.0)                  |
| Slovakia | 2009 | 1201.9 (1162.9 to 1242.1)  | 863.6 (839.4 to 890.1)     | 281.6 (259.1 to 308.8)        | 56.7 (42.6 to 73.7)             | 0.0 (0.0 to 0.0)                  | 2117.0 (2048.2 to 2187.7) | 1521.0 (1478.5 to 1567.7)  | 496.1 (456.3 to 543.8)        | 99.9 (74.9 to 129.7)            | 0.0 (0.0 to 0.0)                  |
| Slovakia | 2010 | 1254.0 (1216.7 to 1293.2)  | 903.2 (877.8 to 929.2)     | 290.9 (268.0 to 315.2)        | 59.9 (45.7 to 76.4)             | 0.0 (0.0 to 0.0)                  | 2208.6 (2143.0 to 2277.7) | 1590.7 (1546.1 to 1636.6)  | 512.4 (472.0 to 555.2)        | 105.5 (80.6 to 134.6)           | 0.0 (0.0 to 0.0)                  |
| Slovakia | 2011 | 1256.0 (1219.0 to 1293.4)  | 912.2 (885.2 to 939.2)     | 290.8 (269.6 to 314.3)        | 53.0 (40.3 to 68.6)             | 0.0 (0.0 to 0.0)                  | 2212.3 (2147.0 to 2278.1) | 1606.7 (1559.2 to 1654.3)  | 512.3 (474.8 to 553.5)        | 93.3 (71.0 to 120.9)            | 0.0 (0.0 to 0.0)                  |
| Slovakia | 2012 | 1264.2 (1228.0 to 1302.5)  | 924.2 (896.8 to 952.9)     | 287.9 (265.3 to 311.1)        | 52.1 (39.3 to 69.2)             | 0.0 (0.0 to 0.0)                  | 2226.7 (2163.0 to 2294.1) | 1627.7 (1579.6 to 1678.3)  | 507.2 (467.3 to 548.0)        | 91.7 (69.3 to 121.8)            | 0.0 (0.0 to 0.0)                  |
| Slovakia | 2013 | 1255.8 (1218.9 to 1295.8)  | 939.3 (912.3 to 966.7)     | 273.3 (251.7 to 296.9)        | 43.2 (31.7 to 57.0)             | 0.0 (0.0 to 0.0)                  | 2211.9 (2146.9 to 2282.2) | 1654.3 (1606.8 to 1702.6)  | 481.5 (443.3 to 522.9)        | 76.1 (55.9 to 100.3)            | 0.0 (0.0 to 0.0)                  |
| Slovakia | 2014 | 1243.2 (1205.3 to 1282.3)  | 961.1 (933.4 to 988.1)     | 245.3 (224.3 to 267.6)        | 36.8 (26.1 to 50.1)             | 0.0 (0.0 to 0.0)                  | 2189.7 (2122.9 to 2258.5) | 1692.8 (1644.0 to 1740.4)  | 432.1 (395.0 to 471.3)        | 64.8 (46.0 to 88.3)             | 0.0 (0.0 to 0.0)                  |
| Slovakia | 2015 | 1273.3 (1232.0 to 1312.7)  | 1000.3 (971.6 to 1029.8)   | 237.6 (215.5 to 262.9)        | 35.4 (24.3 to 50.1)             | 0.0 (0.0 to 0.0)                  | 2242.6 (2170.0 to 2312.2) | 1761.8 (1711.3 to 1813.9)  | 418.5 (379.6 to 463.1)        | 62.4 (42.8 to 88.2)             | 0.0 (0.0 to 0.0)                  |

| Country  | Year | 2018 US Dollars per capita |                            |                               |                                 |                                   | 2018 PPP per capita       |                            |                               |                                 |                                   |
|----------|------|----------------------------|----------------------------|-------------------------------|---------------------------------|-----------------------------------|---------------------------|----------------------------|-------------------------------|---------------------------------|-----------------------------------|
|          |      | Health spending            | Government health spending | Out-of-pocket health spending | Prepaid private health spending | Development assistance for health | Health spending           | Government health spending | Out-of-pocket health spending | Prepaid private health spending | Development assistance for health |
| Slovakia | 2016 | 1325.3 (1275.0 to 1378.6)  | 1053.6 (1013.0 to 1093.1)  | 237.2 (210.4 to 266.5)        | 34.6 (22.9 to 50.2)             | 0.0 (0.0 to 0.0)                  | 2334.3 (2245.6 to 2428.1) | 1855.7 (1784.1 to 1925.3)  | 417.7 (370.6 to 469.5)        | 60.9 (40.4 to 88.4)             | 0.0 (0.0 to 0.0)                  |
| Slovakia | 2017 | 1373.3 (1320.7 to 1430.1)  | 1092.3 (1047.2 to 1136.0)  | 244.8 (217.0 to 275.6)        | 36.2 (24.0 to 52.7)             | 0.0 (0.0 to 0.0)                  | 2418.9 (2326.1 to 2518.8) | 1923.9 (1844.5 to 2000.9)  | 431.2 (382.2 to 485.3)        | 63.8 (42.2 to 92.7)             | 0.0 (0.0 to 0.0)                  |
| Slovakia | 2018 | 1400.1 (1345.9 to 1458.7)  | 1115.2 (1068.0 to 1161.8)  | 248.0 (220.0 to 279.4)        | 36.9 (24.3 to 53.6)             | 0.0 (0.0 to 0.0)                  | 2466.0 (2370.6 to 2569.2) | 1964.2 (1881.2 to 2046.4)  | 436.9 (387.5 to 492.1)        | 65.0 (42.9 to 94.5)             | 0.0 (0.0 to 0.0)                  |
| Slovakia | 2019 | 1424.9 (1368.6 to 1485.2)  | 1136.6 (1089.0 to 1185.7)  | 250.8 (222.6 to 282.4)        | 37.6 (24.8 to 54.7)             | 0.0 (0.0 to 0.0)                  | 2509.7 (2410.6 to 2616.0) | 2001.8 (1918.1 to 2088.5)  | 441.7 (392.1 to 497.4)        | 66.2 (43.6 to 96.3)             | 0.0 (0.0 to 0.0)                  |
| Slovakia | 2020 | 1448.1 (1390.5 to 1510.9)  | 1156.4 (1105.0 to 1206.6)  | 253.5 (224.3 to 286.0)        | 38.2 (25.2 to 55.6)             | 0.0 (0.0 to 0.0)                  | 2550.6 (2449.1 to 2661.1) | 2036.7 (1946.2 to 2125.1)  | 446.6 (395.1 to 503.7)        | 67.3 (44.4 to 97.9)             | 0.0 (0.0 to 0.0)                  |
| Slovakia | 2021 | 1470.9 (1412.2 to 1540.0)  | 1175.9 (1123.2 to 1229.4)  | 256.1 (226.9 to 289.2)        | 38.9 (25.6 to 56.5)             | 0.0 (0.0 to 0.0)                  | 2590.7 (2487.4 to 2712.4) | 2071.2 (1978.3 to 2165.4)  | 451.0 (399.6 to 509.3)        | 68.5 (45.0 to 99.5)             | 0.0 (0.0 to 0.0)                  |
| Slovakia | 2022 | 1494.2 (1429.7 to 1565.8)  | 1196.1 (1138.0 to 1255.7)  | 258.5 (229.2 to 291.6)        | 39.6 (26.0 to 57.5)             | 0.0 (0.0 to 0.0)                  | 2631.8 (2518.1 to 2757.8) | 2106.7 (2004.4 to 2211.6)  | 455.3 (403.7 to 513.5)        | 69.7 (45.7 to 101.3)            | 0.0 (0.0 to 0.0)                  |
| Slovakia | 2023 | 1518.6 (1453.3 to 1592.8)  | 1217.2 (1156.9 to 1279.6)  | 261.1 (231.6 to 294.6)        | 40.3 (26.4 to 58.6)             | 0.0 (0.0 to 0.0)                  | 2674.8 (2559.7 to 2805.4) | 2143.9 (2037.7 to 2253.8)  | 460.0 (408.0 to 518.8)        | 71.0 (46.6 to 103.3)            | 0.0 (0.0 to 0.0)                  |
| Slovakia | 2024 | 1540.1 (1470.6 to 1615.8)  | 1235.1 (1175.2 to 1298.0)  | 263.9 (234.0 to 297.7)        | 41.1 (27.0 to 59.9)             | 0.0 (0.0 to 0.0)                  | 2712.6 (2590.2 to 2846.0) | 2175.4 (2069.9 to 2286.2)  | 464.9 (412.2 to 524.4)        | 72.3 (45.7 to 105.6)            | 0.0 (0.0 to 0.0)                  |
| Slovakia | 2025 | 1564.9 (1495.9 to 1642.0)  | 1256.1 (1193.3 to 1325.1)  | 266.9 (236.6 to 300.9)        | 41.9 (27.6 to 61.2)             | 0.0 (0.0 to 0.0)                  | 2756.3 (2634.8 to 2892.1) | 2212.4 (2101.8 to 2333.9)  | 470.1 (416.7 to 529.9)        | 73.7 (48.6 to 107.8)            | 0.0 (0.0 to 0.0)                  |
| Slovakia | 2026 | 1591.3 (1517.4 to 1669.7)  | 1278.4 (1212.1 to 1349.3)  | 270.1 (239.4 to 304.3)        | 42.7 (28.3 to 62.4)             | 0.0 (0.0 to 0.0)                  | 2802.7 (2672.7 to 2940.8) | 2251.7 (2134.9 to 2376.5)  | 475.8 (421.7 to 535.9)        | 75.2 (49.8 to 109.9)            | 0.0 (0.0 to 0.0)                  |
| Slovakia | 2027 | 1619.0 (1545.5 to 1702.0)  | 1301.8 (1232.1 to 1378.4)  | 273.6 (242.1 to 308.0)        | 43.6 (28.8 to 63.7)             | 0.0 (0.0 to 0.0)                  | 2851.5 (2722.1 to 2997.8) | 2292.8 (2170.1 to 2427.8)  | 481.8 (426.5 to 542.5)        | 76.8 (50.7 to 112.2)            | 0.0 (0.0 to 0.0)                  |
| Slovakia | 2028 | 1648.3 (1566.1 to 1732.9)  | 1326.4 (1252.4 to 1403.1)  | 277.3 (245.6 to 312.2)        | 44.6 (29.3 to 65.1)             | 0.0 (0.0 to 0.0)                  | 2903.1 (2758.3 to 3052.2) | 2336.2 (2205.9 to 2471.4)  | 488.4 (432.6 to 549.9)        | 78.5 (51.6 to 114.7)            | 0.0 (0.0 to 0.0)                  |
| Slovakia | 2029 | 1678.7 (1598.6 to 1765.6)  | 1351.9 (1273.8 to 1435.4)  | 281.2 (248.8 to 316.8)        | 45.6 (29.9 to 66.7)             | 0.0 (0.0 to 0.0)                  | 2956.6 (2815.6 to 3109.7) | 2381.1 (2243.6 to 2528.3)  | 495.2 (438.3 to 557.9)        | 80.3 (52.7 to 117.5)            | 0.0 (0.0 to 0.0)                  |
| Slovakia | 2030 | 1710.3 (1622.8 to 1801.2)  | 1378.3 (1299.5 to 1463.5)  | 285.4 (252.2 to 321.6)        | 46.7 (30.7 to 68.3)             | 0.0 (0.0 to 0.0)                  | 3012.4 (2858.3 to 3172.5) | 2427.6 (2288.9 to 2577.7)  | 502.7 (444.2 to 566.5)        | 82.2 (54.0 to 120.3)            | 0.0 (0.0 to 0.0)                  |
| Slovakia | 2031 | 1742.6 (1655.8 to 1837.0)  | 1405.2 (1321.1 to 1491.3)  | 289.7 (255.9 to 326.4)        | 47.8 (31.4 to 69.9)             | 0.0 (0.0 to 0.0)                  | 3069.3 (2916.4 to 3235.5) | 2474.9 (2327.0 to 2626.6)  | 510.2 (450.6 to 574.9)        | 84.1 (55.3 to 123.2)            | 0.0 (0.0 to 0.0)                  |
| Slovakia | 2032 | 1776.8 (1678.1 to 1875.2)  | 1433.5 (1344.9 to 1524.1)  | 294.3 (259.9 to 331.6)        | 48.9 (32.0 to 71.7)             | 0.0 (0.0 to 0.0)                  | 3129.5 (2955.7 to 3302.7) | 2524.9 (2368.8 to 2684.4)  | 518.4 (457.8 to 584.0)        | 86.2 (56.4 to 126.3)            | 0.0 (0.0 to 0.0)                  |
| Slovakia | 2033 | 1811.7 (1715.4 to 1913.7)  | 1462.4 (1371.1 to 1557.2)  | 299.1 (264.0 to 336.9)        | 50.1 (32.8 to 73.2)             | 0.0 (0.0 to 0.0)                  | 3190.9 (3021.3 to 3370.7) | 2575.8 (2414.9 to 2742.8)  | 526.9 (465.0 to 593.5)        | 88.3 (57.7 to 129.0)            | 0.0 (0.0 to 0.0)                  |
| Slovakia | 2034 | 1847.2 (1743.3 to 1954.5)  | 1491.9 (1391.9 to 1589.3)  | 303.9 (268.1 to 342.5)        | 51.4 (33.6 to 75.0)             | 0.0 (0.0 to 0.0)                  | 3253.5 (3070.4 to 3442.4) | 2627.7 (2451.5 to 2799.3)  | 535.3 (472.1 to 603.2)        | 90.5 (59.2 to 132.0)            | 0.0 (0.0 to 0.0)                  |
| Slovakia | 2035 | 1882.5 (1774.0 to 1993.6)  | 1521.4 (1414.4 to 1623.2)  | 308.5 (272.1 to 347.9)        | 52.6 (34.4 to 76.9)             | 0.0 (0.0 to 0.0)                  | 3315.6 (3124.5 to 3511.3) | 2679.6 (2491.2 to 2859.0)  | 543.4 (479.3 to 612.7)        | 92.6 (60.6 to 135.5)            | 0.0 (0.0 to 0.0)                  |
| Slovakia | 2036 | 1918.5 (1804.2 to 2038.1)  | 1551.5 (1440.6 to 1657.8)  | 313.2 (276.2 to 353.3)        | 53.8 (35.2 to 78.9)             | 0.0 (0.0 to 0.0)                  | 3379.0 (3177.7 to 3589.7) | 2732.7 (2537.3 to 2920.0)  | 551.6 (486.5 to 622.2)        | 94.8 (62.0 to 139.0)            | 0.0 (0.0 to 0.0)                  |

| Country  | Year | 2018 US Dollars per capita |                            |                               |                                 |                                   | 2018 PPP per capita       |                            |                               |                                 |                                   |
|----------|------|----------------------------|----------------------------|-------------------------------|---------------------------------|-----------------------------------|---------------------------|----------------------------|-------------------------------|---------------------------------|-----------------------------------|
|          |      | Health spending            | Government health spending | Out-of-pocket health spending | Prepaid private health spending | Development assistance for health | Health spending           | Government health spending | Out-of-pocket health spending | Prepaid private health spending | Development assistance for health |
| Slovakia | 2037 | 1953.4 (1838.4 to 2073.6)  | 1580.8 (1462.6 to 1692.2)  | 317.6 (280.0 to 358.2)        | 55.0 (36.0 to 80.7)             | 0.0 (0.0 to 0.0)                  | 3440.6 (3238.1 to 3652.3) | 2784.3 (2576.2 to 2980.4)  | 559.4 (493.1 to 630.9)        | 96.9 (63.4 to 142.2)            | 0.0 (0.0 to 0.0)                  |
| Slovakia | 2038 | 1989.4 (1863.6 to 2117.9)  | 1611.2 (1487.8 to 1726.5)  | 322.0 (284.0 to 363.6)        | 56.3 (36.7 to 82.5)             | 0.0 (0.0 to 0.0)                  | 3504.0 (3282.4 to 3730.2) | 2837.8 (2620.5 to 3040.9)  | 567.2 (500.3 to 640.4)        | 99.1 (64.7 to 145.3)            | 0.0 (0.0 to 0.0)                  |
| Slovakia | 2039 | 2024.9 (1898.6 to 2154.3)  | 1641.1 (1513.0 to 1764.3)  | 326.3 (287.7 to 368.8)        | 57.5 (37.5 to 84.2)             | 0.0 (0.0 to 0.0)                  | 3566.5 (3343.9 to 3794.4) | 2890.6 (2664.8 to 3107.5)  | 574.7 (506.7 to 649.5)        | 101.2 (66.0 to 148.3)           | 0.0 (0.0 to 0.0)                  |
| Slovakia | 2040 | 2058.5 (1917.6 to 2198.6)  | 1669.7 (1533.5 to 1802.7)  | 330.2 (291.0 to 373.9)        | 58.7 (38.3 to 86.0)             | 0.0 (0.0 to 0.0)                  | 3625.7 (3377.5 to 3872.3) | 2940.8 (2700.9 to 3175.1)  | 581.6 (512.5 to 658.6)        | 103.3 (67.4 to 151.5)           | 0.0 (0.0 to 0.0)                  |
| Slovakia | 2041 | 2092.8 (1951.1 to 2242.6)  | 1698.9 (1557.1 to 1839.7)  | 334.1 (294.1 to 378.6)        | 59.8 (38.9 to 87.9)             | 0.0 (0.0 to 0.0)                  | 3686.0 (3436.5 to 3950.0) | 2992.3 (2742.6 to 3240.2)  | 588.4 (518.0 to 666.8)        | 105.4 (68.6 to 154.9)           | 0.0 (0.0 to 0.0)                  |
| Slovakia | 2042 | 2126.0 (1972.1 to 2280.9)  | 1727.4 (1578.8 to 1874.8)  | 337.6 (296.8 to 382.6)        | 61.0 (39.6 to 89.6)             | 0.0 (0.0 to 0.0)                  | 3744.5 (3473.5 to 4017.3) | 3042.5 (2780.7 to 3302.1)  | 594.6 (522.8 to 673.9)        | 107.4 (69.7 to 157.9)           | 0.0 (0.0 to 0.0)                  |
| Slovakia | 2043 | 2159.0 (2004.1 to 2322.0)  | 1755.8 (1602.5 to 1912.5)  | 341.1 (299.5 to 386.8)        | 62.1 (40.2 to 91.3)             | 0.0 (0.0 to 0.0)                  | 3802.7 (3529.8 to 4089.7) | 3092.5 (2822.5 to 3368.6)  | 600.7 (527.5 to 681.2)        | 109.4 (70.8 to 160.8)           | 0.0 (0.0 to 0.0)                  |
| Slovakia | 2044 | 2192.6 (2023.2 to 2366.5)  | 1784.8 (1621.6 to 1950.6)  | 344.6 (302.1 to 391.4)        | 63.3 (40.9 to 93.0)             | 0.0 (0.0 to 0.0)                  | 3861.9 (3563.6 to 4168.2) | 3143.6 (2856.1 to 3435.6)  | 606.9 (532.1 to 689.4)        | 111.5 (72.0 to 163.9)           | 0.0 (0.0 to 0.0)                  |
| Slovakia | 2045 | 2226.3 (2050.3 to 2407.0)  | 1813.7 (1642.1 to 1995.4)  | 348.1 (304.8 to 395.7)        | 64.5 (41.5 to 94.7)             | 0.0 (0.0 to 0.0)                  | 3921.2 (3611.1 to 4239.5) | 3194.6 (2892.2 to 3514.5)  | 613.1 (536.8 to 697.0)        | 113.5 (73.2 to 166.9)           | 0.0 (0.0 to 0.0)                  |
| Slovakia | 2046 | 2259.9 (2079.1 to 2457.0)  | 1842.6 (1663.2 to 2037.6)  | 351.6 (307.3 to 400.1)        | 65.7 (42.2 to 96.6)             | 0.0 (0.0 to 0.0)                  | 3980.4 (3662.0 to 4327.5) | 3245.5 (2929.4 to 3588.8)  | 619.3 (541.3 to 704.7)        | 115.6 (74.4 to 170.2)           | 0.0 (0.0 to 0.0)                  |
| Slovakia | 2047 | 2294.1 (2108.9 to 2494.0)  | 1872.0 (1683.7 to 2072.8)  | 355.2 (310.0 to 404.4)        | 66.9 (42.9 to 98.5)             | 0.0 (0.0 to 0.0)                  | 4040.6 (3714.4 to 4392.8) | 3297.1 (2965.5 to 3650.8)  | 625.6 (546.0 to 712.3)        | 117.8 (75.6 to 173.4)           | 0.0 (0.0 to 0.0)                  |
| Slovakia | 2048 | 2328.0 (2131.3 to 2545.4)  | 1901.1 (1703.8 to 2114.6)  | 358.8 (312.8 to 408.8)        | 68.1 (43.7 to 100.3)            | 0.0 (0.0 to 0.0)                  | 4100.3 (3753.9 to 4483.2) | 3348.4 (3001.0 to 3724.5)  | 631.9 (550.9 to 719.9)        | 120.0 (76.9 to 176.6)           | 0.0 (0.0 to 0.0)                  |
| Slovakia | 2049 | 2362.0 (2157.2 to 2593.3)  | 1930.4 (1724.5 to 2154.4)  | 362.3 (315.4 to 413.1)        | 69.4 (44.4 to 102.1)            | 0.0 (0.0 to 0.0)                  | 4160.3 (3799.4 to 4567.6) | 3400.1 (3037.4 to 3794.5)  | 638.0 (555.5 to 727.5)        | 122.2 (78.1 to 179.9)           | 0.0 (0.0 to 0.0)                  |
| Slovakia | 2050 | 2395.6 (2180.8 to 2628.8)  | 1959.3 (1745.6 to 2194.0)  | 365.7 (318.2 to 417.3)        | 70.6 (45.2 to 104.2)            | 0.0 (0.0 to 0.0)                  | 4219.4 (3841.1 to 4630.1) | 3450.9 (3074.6 to 3864.2)  | 644.1 (560.5 to 735.0)        | 124.3 (79.6 to 183.5)           | 0.0 (0.0 to 0.0)                  |
| Slovenia | 1995 | 1057.0 (1005.0 to 1110.2)  | 791.3 (749.5 to 836.8)     | 150.4 (127.4 to 175.0)        | 115.0 (91.0 to 140.7)           | 0.3 (0.3 to 0.3)                  | 1444.5 (1373.4 to 1517.2) | 1081.5 (1024.3 to 1143.6)  | 205.5 (174.2 to 239.1)        | 157.2 (124.4 to 192.3)          | 0.4 (0.4 to 0.4)                  |
| Slovenia | 1996 | 1103.0 (1058.4 to 1147.2)  | 817.6 (784.6 to 854.2)     | 157.3 (137.1 to 178.6)        | 128.2 (106.9 to 150.0)          | 0.0 (0.0 to 0.0)                  | 1507.5 (1446.4 to 1567.9) | 1117.4 (1072.3 to 1167.4)  | 214.9 (187.4 to 244.2)        | 175.1 (146.2 to 205.0)          | 0.0 (0.0 to 0.0)                  |
| Slovenia | 1997 | 1168.8 (1125.5 to 1209.3)  | 858.7 (826.4 to 891.4)     | 165.1 (146.8 to 185.6)        | 145.0 (125.2 to 165.8)          | 0.0 (0.0 to 0.0)                  | 1597.4 (1538.1 to 1652.7) | 1173.6 (1129.4 to 1218.3)  | 225.6 (200.6 to 253.6)        | 198.2 (171.2 to 226.6)          | 0.0 (0.0 to 0.0)                  |
| Slovenia | 1998 | 1234.7 (1192.5 to 1277.1)  | 901.3 (868.2 to 935.0)     | 172.7 (156.1 to 191.9)        | 160.7 (142.0 to 182.2)          | 0.0 (0.0 to 0.0)                  | 1687.4 (1629.8 to 1745.4) | 1231.8 (1186.5 to 1277.9)  | 236.0 (213.3 to 262.3)        | 219.7 (194.0 to 248.9)          | 0.0 (0.0 to 0.0)                  |
| Slovenia | 1999 | 1331.4 (1289.4 to 1376.2)  | 965.4 (932.1 to 999.4)     | 182.5 (165.4 to 201.8)        | 183.5 (162.5 to 206.3)          | 0.0 (0.0 to 0.0)                  | 1819.5 (1762.1 to 1880.8) | 1319.3 (1273.8 to 1365.8)  | 249.5 (226.0 to 275.8)        | 250.7 (222.0 to 281.9)          | 0.0 (0.0 to 0.0)                  |
| Slovenia | 2000 | 1435.7 (1394.8 to 1478.3)  | 1029.4 (995.7 to 1062.4)   | 190.5 (174.5 to 208.4)        | 215.8 (194.6 to 237.3)          | 0.0 (0.0 to 0.0)                  | 1962.2 (1906.2 to 2020.4) | 1406.8 (1360.8 to 1451.9)  | 260.3 (238.4 to 284.8)        | 295.0 (265.9 to 324.3)          | 0.0 (0.0 to 0.0)                  |
| Slovenia | 2001 | 1515.3 (1473.1 to 1556.9)  | 1082.0 (1050.6 to 1115.2)  | 195.4 (179.4 to 212.1)        | 237.9 (217.4 to 259.4)          | 0.0 (0.0 to 0.0)                  | 2070.9 (2013.2 to 2127.8) | 1478.7 (1435.8 to 1524.1)  | 267.1 (245.2 to 289.9)        | 325.2 (297.1 to 354.5)          | 0.0 (0.0 to 0.0)                  |

| Country  | Year | 2018 US Dollars per capita |                            |                               |                                 |                                   | 2018 PPP per capita       |                            |                               |                                 |                                   |
|----------|------|----------------------------|----------------------------|-------------------------------|---------------------------------|-----------------------------------|---------------------------|----------------------------|-------------------------------|---------------------------------|-----------------------------------|
|          |      | Health spending            | Government health spending | Out-of-pocket health spending | Prepaid private health spending | Development assistance for health | Health spending           | Government health spending | Out-of-pocket health spending | Prepaid private health spending | Development assistance for health |
| Slovenia | 2002 | 1593.9 (1551.5 to 1635.8)  | 1144.6 (1112.8 to 1177.4)  | 200.9 (184.3 to 216.0)        | 248.5 (228.4 to 271.6)          | 0.0 (0.0 to 0.0)                  | 2178.4 (2120.4 to 2235.6) | 1564.3 (1520.8 to 1609.2)  | 274.5 (251.9 to 295.3)        | 339.6 (312.1 to 371.1)          | 0.0 (0.0 to 0.0)                  |
| Slovenia | 2003 | 1643.7 (1602.8 to 1682.9)  | 1181.7 (1151.5 to 1212.3)  | 205.6 (188.5 to 222.5)        | 256.3 (234.7 to 278.7)          | 0.0 (0.0 to 0.0)                  | 2246.3 (2190.5 to 2300.0) | 1615.0 (1573.8 to 1656.8)  | 281.0 (257.6 to 304.1)        | 350.3 (320.7 to 380.9)          | 0.0 (0.0 to 0.0)                  |
| Slovenia | 2004 | 1705.0 (1664.7 to 1747.7)  | 1227.2 (1195.1 to 1259.2)  | 212.5 (195.9 to 230.6)        | 265.3 (243.1 to 286.2)          | 0.0 (0.0 to 0.0)                  | 2330.2 (2275.1 to 2388.5) | 1677.2 (1633.3 to 1720.9)  | 290.5 (267.7 to 315.1)        | 362.5 (332.3 to 391.2)          | 0.0 (0.0 to 0.0)                  |
| Slovenia | 2005 | 1747.3 (1702.5 to 1789.9)  | 1254.5 (1224.4 to 1285.6)  | 222.5 (204.6 to 240.3)        | 270.4 (250.2 to 291.5)          | 0.0 (0.0 to 0.0)                  | 2388.0 (2326.7 to 2446.2) | 1714.4 (1673.4 to 1756.9)  | 304.0 (279.6 to 328.5)        | 369.5 (341.9 to 398.4)          | 0.0 (0.0 to 0.0)                  |
| Slovenia | 2006 | 1802.0 (1761.0 to 1847.2)  | 1288.3 (1257.9 to 1318.2)  | 230.8 (213.6 to 249.0)        | 282.9 (263.0 to 304.8)          | 0.0 (0.0 to 0.0)                  | 2462.7 (2406.7 to 2524.5) | 1760.6 (1719.2 to 1801.5)  | 315.5 (291.9 to 340.3)        | 386.6 (359.4 to 416.6)          | 0.0 (0.0 to 0.0)                  |
| Slovenia | 2007 | 1893.4 (1852.6 to 1939.1)  | 1351.8 (1319.7 to 1385.1)  | 246.0 (228.4 to 265.1)        | 295.6 (274.0 to 319.1)          | 0.0 (0.0 to 0.0)                  | 2587.7 (2531.9 to 2650.1) | 1847.5 (1803.6 to 1892.9)  | 336.1 (312.1 to 362.3)        | 404.0 (374.5 to 436.1)          | 0.0 (0.0 to 0.0)                  |
| Slovenia | 2008 | 2015.5 (1969.5 to 2066.4)  | 1448.6 (1414.9 to 1485.6)  | 257.1 (238.4 to 275.6)        | 309.7 (287.5 to 332.6)          | 0.0 (0.0 to 0.0)                  | 2754.5 (2691.6 to 2824.0) | 1979.8 (1933.7 to 2030.3)  | 351.4 (325.9 to 376.7)        | 423.3 (392.9 to 454.5)          | 0.0 (0.0 to 0.0)                  |
| Slovenia | 2009 | 1980.2 (1935.5 to 2023.8)  | 1423.0 (1389.7 to 1455.2)  | 254.3 (236.6 to 272.9)        | 302.9 (280.6 to 325.6)          | 0.0 (0.0 to 0.0)                  | 2706.3 (2645.2 to 2765.8) | 1944.8 (1899.3 to 1988.8)  | 347.5 (323.4 to 373.0)        | 413.9 (383.5 to 445.0)          | 0.0 (0.0 to 0.0)                  |
| Slovenia | 2010 | 2030.2 (1983.2 to 2076.9)  | 1462.6 (1428.1 to 1496.5)  | 256.2 (238.2 to 275.2)        | 311.5 (287.0 to 336.2)          | 0.0 (0.0 to 0.0)                  | 2774.7 (2710.3 to 2838.4) | 1998.9 (1951.7 to 2045.2)  | 350.1 (325.5 to 376.1)        | 425.7 (392.2 to 459.4)          | 0.0 (0.0 to 0.0)                  |
| Slovenia | 2011 | 2057.6 (2011.9 to 2104.5)  | 1477.0 (1441.1 to 1510.8)  | 255.5 (238.1 to 274.7)        | 325.1 (299.6 to 350.4)          | 0.0 (0.0 to 0.0)                  | 2812.0 (2749.6 to 2876.1) | 2018.6 (1969.5 to 2064.7)  | 349.1 (325.3 to 375.4)        | 444.3 (409.5 to 478.8)          | 0.0 (0.0 to 0.0)                  |
| Slovenia | 2012 | 2025.8 (1981.3 to 2072.5)  | 1438.4 (1403.9 to 1474.2)  | 253.1 (235.3 to 271.4)        | 334.2 (310.1 to 359.7)          | 0.0 (0.0 to 0.0)                  | 2768.5 (2707.8 to 2832.5) | 1965.8 (1918.7 to 2014.7)  | 346.0 (321.6 to 370.9)        | 456.8 (423.9 to 491.6)          | 0.0 (0.0 to 0.0)                  |
| Slovenia | 2013 | 2000.8 (1958.0 to 2045.7)  | 1411.7 (1379.3 to 1445.9)  | 251.9 (233.9 to 270.5)        | 337.3 (313.5 to 364.1)          | 0.0 (0.0 to 0.0)                  | 2734.5 (2676.0 to 2795.8) | 1929.3 (1885.1 to 1976.1)  | 344.2 (319.6 to 369.6)        | 460.9 (428.4 to 497.6)          | 0.0 (0.0 to 0.0)                  |
| Slovenia | 2014 | 2015.3 (1972.8 to 2064.4)  | 1426.7 (1393.9 to 1462.7)  | 254.4 (236.3 to 274.1)        | 334.2 (310.1 to 360.5)          | 0.0 (0.0 to 0.0)                  | 2754.3 (2696.2 to 2821.3) | 1949.8 (1905.0 to 1999.0)  | 347.7 (322.9 to 374.6)        | 456.8 (423.8 to 492.7)          | 0.0 (0.0 to 0.0)                  |
| Slovenia | 2015 | 2040.2 (1992.7 to 2090.9)  | 1455.0 (1420.2 to 1488.0)  | 254.3 (233.3 to 276.8)        | 330.9 (304.8 to 357.6)          | 0.0 (0.0 to 0.0)                  | 2788.3 (2723.4 to 2857.6) | 1988.5 (1940.9 to 2033.6)  | 347.6 (318.8 to 378.3)        | 452.2 (416.5 to 488.7)          | 0.0 (0.0 to 0.0)                  |
| Slovenia | 2016 | 2090.2 (2027.2 to 2156.0)  | 1504.0 (1456.5 to 1551.4)  | 254.7 (229.0 to 282.9)        | 331.5 (298.0 to 367.3)          | 0.0 (0.0 to 0.0)                  | 2856.6 (2770.5 to 2946.5) | 2055.5 (1990.6 to 2120.3)  | 348.1 (313.0 to 386.6)        | 453.0 (407.3 to 501.9)          | 0.0 (0.0 to 0.0)                  |
| Slovenia | 2017 | 2174.2 (2106.8 to 2244.0)  | 1557.9 (1507.8 to 1608.5)  | 265.4 (238.7 to 294.1)        | 350.9 (315.9 to 389.0)          | 0.0 (0.0 to 0.0)                  | 2971.4 (2879.2 to 3066.8) | 2129.1 (2060.7 to 2198.3)  | 362.7 (326.2 to 401.9)        | 479.6 (431.7 to 531.7)          | 0.0 (0.0 to 0.0)                  |
| Slovenia | 2018 | 2217.6 (2144.9 to 2291.1)  | 1590.4 (1536.8 to 1645.3)  | 269.5 (242.1 to 299.3)        | 357.7 (321.1 to 396.7)          | 0.0 (0.0 to 0.0)                  | 3030.8 (2931.4 to 3131.2) | 2173.6 (2100.3 to 2248.6)  | 368.4 (330.8 to 409.0)        | 488.8 (438.9 to 542.2)          | 0.0 (0.0 to 0.0)                  |
| Slovenia | 2019 | 2254.0 (2179.6 to 2329.5)  | 1617.5 (1557.7 to 1677.5)  | 273.4 (244.7 to 304.4)        | 363.1 (325.2 to 402.3)          | 0.0 (0.0 to 0.0)                  | 3080.5 (2978.8 to 3183.7) | 2210.5 (2128.8 to 2292.6)  | 373.6 (334.5 to 416.0)        | 496.3 (444.4 to 549.9)          | 0.0 (0.0 to 0.0)                  |
| Slovenia | 2020 | 2291.4 (2207.9 to 2371.8)  | 1645.3 (1578.8 to 1712.2)  | 277.3 (248.6 to 308.6)        | 368.8 (330.0 to 408.4)          | 0.0 (0.0 to 0.0)                  | 3131.5 (3017.5 to 3241.5) | 2248.6 (2157.8 to 2340.0)  | 378.9 (339.7 to 421.7)        | 504.0 (451.0 to 558.1)          | 0.0 (0.0 to 0.0)                  |
| Slovenia | 2021 | 2328.9 (2239.8 to 2415.9)  | 1673.2 (1599.2 to 1745.6)  | 281.2 (251.5 to 311.7)        | 374.5 (335.4 to 415.0)          | 0.0 (0.0 to 0.0)                  | 3182.8 (3061.1 to 3301.8) | 2286.7 (2185.5 to 2385.6)  | 384.3 (343.7 to 426.0)        | 511.8 (458.4 to 567.2)          | 0.0 (0.0 to 0.0)                  |
| Slovenia | 2022 | 2358.3 (2268.5 to 2445.2)  | 1693.9 (1617.1 to 1768.8)  | 284.8 (253.6 to 316.6)        | 379.7 (339.8 to 420.5)          | 0.0 (0.0 to 0.0)                  | 3223.1 (3100.3 to 3341.7) | 2315.0 (2210.0 to 2417.4)  | 389.2 (346.5 to 432.7)        | 518.9 (464.4 to 574.7)          | 0.0 (0.0 to 0.0)                  |



| Country  | Year | 2018 US Dollars per capita |                            |                               |                                 |                                   | 2018 PPP per capita       |                            |                               |                                 |                                   |
|----------|------|----------------------------|----------------------------|-------------------------------|---------------------------------|-----------------------------------|---------------------------|----------------------------|-------------------------------|---------------------------------|-----------------------------------|
|          |      | Health spending            | Government health spending | Out-of-pocket health spending | Prepaid private health spending | Development assistance for health | Health spending           | Government health spending | Out-of-pocket health spending | Prepaid private health spending | Development assistance for health |
| Slovenia | 2023 | 2391.9 (2298.5 to 2484.2)  | 1718.0 (1638.4 to 1798.0)  | 288.5 (256.8 to 320.4)        | 385.4 (345.0 to 427.2)          | 0.0 (0.0 to 0.0)                  | 3268.9 (3141.2 to 3395.0) | 2347.9 (2239.1 to 2457.3)  | 394.3 (350.9 to 437.9)        | 526.7 (471.5 to 583.8)          | 0.0 (0.0 to 0.0)                  |
| Slovenia | 2024 | 2427.2 (2330.3 to 2521.3)  | 1743.2 (1661.8 to 1831.8)  | 292.4 (260.6 to 325.5)        | 391.6 (349.9 to 434.6)          | 0.0 (0.0 to 0.0)                  | 3317.1 (3184.8 to 3445.8) | 2382.4 (2271.1 to 2503.4)  | 399.6 (356.1 to 444.9)        | 535.2 (478.2 to 593.9)          | 0.0 (0.0 to 0.0)                  |
| Slovenia | 2025 | 2467.4 (2362.7 to 2571.4)  | 1773.2 (1684.1 to 1866.8)  | 296.2 (263.7 to 330.2)        | 398.0 (355.1 to 442.2)          | 0.0 (0.0 to 0.0)                  | 3372.1 (3229.0 to 3514.3) | 2423.4 (2301.7 to 2551.3)  | 404.9 (360.4 to 451.3)        | 543.9 (485.3 to 604.3)          | 0.0 (0.0 to 0.0)                  |
| Slovenia | 2026 | 2510.5 (2398.4 to 2620.6)  | 1805.3 (1708.9 to 1904.9)  | 300.3 (266.0 to 336.9)        | 404.8 (361.0 to 450.5)          | 0.0 (0.0 to 0.0)                  | 3431.0 (3277.8 to 3581.4) | 2467.3 (2335.5 to 2603.3)  | 410.5 (363.5 to 460.5)        | 553.3 (493.4 to 615.7)          | 0.0 (0.0 to 0.0)                  |
| Slovenia | 2027 | 2554.8 (2437.3 to 2671.9)  | 1838.3 (1735.0 to 1943.1)  | 304.6 (268.9 to 342.3)        | 412.0 (366.8 to 458.6)          | 0.0 (0.0 to 0.0)                  | 3491.6 (3330.9 to 3651.6) | 2512.3 (2371.1 to 2655.6)  | 416.2 (367.5 to 467.9)        | 563.0 (501.3 to 626.8)          | 0.0 (0.0 to 0.0)                  |
| Slovenia | 2028 | 2598.1 (2468.9 to 2721.5)  | 1870.3 (1756.8 to 1979.7)  | 308.8 (271.3 to 350.3)        | 419.0 (373.2 to 467.0)          | 0.0 (0.0 to 0.0)                  | 3550.8 (3374.1 to 3719.3) | 2556.1 (2401.0 to 2705.5)  | 422.1 (370.8 to 478.7)        | 572.7 (510.0 to 638.2)          | 0.0 (0.0 to 0.0)                  |
| Slovenia | 2029 | 2643.6 (2510.6 to 2776.5)  | 1904.0 (1782.2 to 2022.5)  | 313.2 (274.3 to 356.6)        | 426.4 (379.6 to 475.7)          | 0.0 (0.0 to 0.0)                  | 3612.9 (3431.1 to 3794.6) | 2602.1 (2435.6 to 2764.1)  | 428.1 (374.8 to 487.3)        | 582.7 (518.7 to 650.1)          | 0.0 (0.0 to 0.0)                  |
| Slovenia | 2030 | 2691.0 (2548.1 to 2834.6)  | 1939.1 (1810.6 to 2066.7)  | 317.8 (276.8 to 365.0)        | 434.1 (386.0 to 485.0)          | 0.0 (0.0 to 0.0)                  | 3677.7 (3482.4 to 3873.9) | 2650.0 (2474.5 to 2824.5)  | 434.4 (378.3 to 498.9)        | 593.3 (527.5 to 662.9)          | 0.0 (0.0 to 0.0)                  |
| Slovenia | 2031 | 2741.1 (2590.9 to 2889.6)  | 1976.1 (1839.3 to 2110.4)  | 322.6 (279.3 to 373.7)        | 442.4 (393.4 to 494.6)          | 0.0 (0.0 to 0.0)                  | 3746.2 (3540.9 to 3949.1) | 2700.6 (2513.6 to 2884.2)  | 441.0 (381.7 to 510.8)        | 604.6 (537.6 to 676.0)          | 0.0 (0.0 to 0.0)                  |
| Slovenia | 2032 | 2790.6 (2634.0 to 2947.3)  | 2012.5 (1867.4 to 2155.7)  | 327.5 (281.2 to 383.3)        | 450.6 (400.0 to 504.9)          | 0.0 (0.0 to 0.0)                  | 3813.8 (3599.8 to 4028.0) | 2750.3 (2552.1 to 2946.2)  | 447.6 (384.3 to 523.8)        | 615.8 (546.7 to 690.1)          | 0.0 (0.0 to 0.0)                  |
| Slovenia | 2033 | 2841.3 (2676.7 to 3011.1)  | 2049.8 (1896.2 to 2203.8)  | 332.5 (284.0 to 393.1)        | 459.1 (407.3 to 515.2)          | 0.0 (0.0 to 0.0)                  | 3883.2 (3658.1 to 4115.2) | 2801.3 (2591.5 to 3011.9)  | 454.4 (388.1 to 537.3)        | 627.4 (556.6 to 704.1)          | 0.0 (0.0 to 0.0)                  |
| Slovenia | 2034 | 2894.0 (2719.5 to 3073.4)  | 2088.4 (1927.8 to 2252.7)  | 337.7 (286.1 to 403.4)        | 467.9 (414.1 to 525.3)          | 0.0 (0.0 to 0.0)                  | 3955.1 (3716.6 to 4200.3) | 2854.1 (2634.6 to 3078.7)  | 461.5 (391.0 to 551.3)        | 639.5 (565.9 to 717.9)          | 0.0 (0.0 to 0.0)                  |
| Slovenia | 2035 | 2947.1 (2766.7 to 3139.1)  | 2127.2 (1956.7 to 2301.4)  | 342.9 (288.4 to 413.0)        | 477.0 (422.0 to 535.5)          | 0.0 (0.0 to 0.0)                  | 4027.7 (3781.2 to 4290.1) | 2907.1 (2674.2 to 3145.3)  | 468.7 (394.2 to 564.4)        | 651.8 (576.7 to 731.9)          | 0.0 (0.0 to 0.0)                  |
| Slovenia | 2036 | 3000.1 (2814.6 to 3198.4)  | 2165.5 (1988.6 to 2347.4)  | 348.4 (291.3 to 422.8)        | 486.3 (429.5 to 548.0)          | 0.0 (0.0 to 0.0)                  | 4100.2 (3846.6 to 4371.2) | 2959.5 (2717.8 to 3208.1)  | 476.1 (398.2 to 577.8)        | 664.6 (587.0 to 748.9)          | 0.0 (0.0 to 0.0)                  |
| Slovenia | 2037 | 3055.0 (2855.0 to 3259.4)  | 2205.0 (2017.6 to 2392.6)  | 354.0 (294.8 to 432.9)        | 496.0 (436.4 to 560.1)          | 0.0 (0.0 to 0.0)                  | 4175.2 (3901.9 to 4454.5) | 3013.5 (2757.4 to 3269.9)  | 483.8 (402.9 to 591.6)        | 677.9 (596.4 to 765.4)          | 0.0 (0.0 to 0.0)                  |
| Slovenia | 2038 | 3112.9 (2900.4 to 3341.1)  | 2246.8 (2048.1 to 2446.5)  | 359.8 (298.4 to 441.4)        | 506.4 (445.4 to 572.8)          | 0.0 (0.0 to 0.0)                  | 4254.4 (3963.9 to 4566.2) | 3070.6 (2799.1 to 3343.6)  | 491.8 (407.8 to 603.3)        | 692.0 (608.7 to 782.8)          | 0.0 (0.0 to 0.0)                  |
| Slovenia | 2039 | 3168.4 (2944.4 to 3395.4)  | 2286.6 (2079.4 to 2492.5)  | 365.6 (301.6 to 450.0)        | 516.2 (453.9 to 584.9)          | 0.0 (0.0 to 0.0)                  | 4330.2 (4024.0 to 4640.4) | 3125.0 (2841.8 to 3406.4)  | 499.6 (412.2 to 615.0)        | 705.5 (620.3 to 799.3)          | 0.0 (0.0 to 0.0)                  |
| Slovenia | 2040 | 3222.4 (2987.8 to 3459.3)  | 2325.5 (2107.4 to 2540.4)  | 371.2 (304.9 to 459.4)        | 525.7 (460.6 to 596.2)          | 0.0 (0.0 to 0.0)                  | 4404.0 (4083.4 to 4727.7) | 3178.3 (2880.1 to 3471.8)  | 507.3 (416.7 to 627.9)        | 718.4 (629.5 to 814.8)          | 0.0 (0.0 to 0.0)                  |
| Slovenia | 2041 | 3277.9 (3035.4 to 3536.6)  | 2365.3 (2139.7 to 2592.7)  | 377.0 (308.6 to 468.9)        | 535.6 (468.0 to 608.7)          | 0.0 (0.0 to 0.0)                  | 4479.8 (4148.4 to 4833.3) | 3232.6 (2924.3 to 3543.4)  | 515.3 (421.7 to 640.8)        | 731.9 (639.7 to 831.8)          | 0.0 (0.0 to 0.0)                  |
| Slovenia | 2042 | 3332.0 (3077.3 to 3605.1)  | 2404.1 (2171.9 to 2640.2)  | 382.8 (312.5 to 477.9)        | 545.1 (475.4 to 620.5)          | 0.0 (0.0 to 0.0)                  | 4553.8 (4205.7 to 4927.0) | 3285.6 (2968.3 to 3608.3)  | 523.1 (427.0 to 653.1)        | 745.0 (649.7 to 848.0)          | 0.0 (0.0 to 0.0)                  |
| Slovenia | 2043 | 3386.3 (3123.0 to 3667.8)  | 2443.1 (2200.9 to 2689.7)  | 388.6 (316.4 to 486.6)        | 554.7 (482.1 to 632.3)          | 0.0 (0.0 to 0.0)                  | 4627.9 (4268.1 to 5012.7) | 3338.9 (3007.9 to 3675.9)  | 531.0 (432.4 to 665.1)        | 758.0 (658.8 to 864.1)          | 0.0 (0.0 to 0.0)                  |

| Country         | Year | 2018 US Dollars per capita |                            |                               |                                 |                                   | 2018 PPP per capita       |                            |                               |                                 |                                   |
|-----------------|------|----------------------------|----------------------------|-------------------------------|---------------------------------|-----------------------------------|---------------------------|----------------------------|-------------------------------|---------------------------------|-----------------------------------|
|                 |      | Health spending            | Government health spending | Out-of-pocket health spending | Prepaid private health spending | Development assistance for health | Health spending           | Government health spending | Out-of-pocket health spending | Prepaid private health spending | Development assistance for health |
| Slovenia        | 2044 | 3441.8 (3161.6 to 3729.5)  | 2483.0 (2228.7 to 2747.0)  | 394.4 (320.8 to 495.8)        | 564.4 (489.3 to 645.1)          | 0.0 (0.0 to 0.0)                  | 4703.8 (4320.8 to 5097.0) | 3393.4 (3045.9 to 3754.2)  | 539.1 (438.4 to 677.6)        | 771.3 (668.7 to 881.7)          | 0.0 (0.0 to 0.0)                  |
| Slovenia        | 2045 | 3496.2 (3208.5 to 3799.8)  | 2522.0 (2257.5 to 2798.2)  | 400.3 (324.9 to 503.7)        | 573.9 (496.0 to 657.2)          | 0.0 (0.0 to 0.0)                  | 4778.2 (4385.0 to 5193.0) | 3446.7 (3085.3 to 3824.2)  | 547.1 (444.0 to 688.3)        | 784.4 (677.9 to 898.2)          | 0.0 (0.0 to 0.0)                  |
| Slovenia        | 2046 | 3548.6 (3250.4 to 3862.3)  | 2559.0 (2280.5 to 2851.6)  | 406.2 (328.7 to 511.4)        | 583.4 (503.5 to 669.8)          | 0.0 (0.0 to 0.0)                  | 4849.7 (4442.2 to 5278.5) | 3497.3 (3116.7 to 3897.2)  | 555.1 (449.3 to 698.9)        | 797.4 (688.1 to 915.4)          | 0.0 (0.0 to 0.0)                  |
| Slovenia        | 2047 | 3601.5 (3289.8 to 3932.6)  | 2596.1 (2305.5 to 2902.1)  | 412.2 (332.8 to 519.1)        | 593.2 (511.1 to 681.5)          | 0.0 (0.0 to 0.0)                  | 4922.0 (4496.1 to 5374.5) | 3548.0 (3150.9 to 3966.2)  | 563.3 (454.8 to 709.4)        | 810.7 (698.5 to 931.4)          | 0.0 (0.0 to 0.0)                  |
| Slovenia        | 2048 | 3655.3 (3332.8 to 3994.9)  | 2633.7 (2334.2 to 2947.2)  | 418.3 (337.7 to 526.6)        | 603.2 (519.5 to 694.6)          | 0.0 (0.0 to 0.0)                  | 4995.5 (4554.8 to 5459.7) | 3599.4 (3190.0 to 4027.8)  | 571.7 (461.6 to 719.7)        | 824.4 (710.0 to 949.3)          | 0.0 (0.0 to 0.0)                  |
| Slovenia        | 2049 | 3708.9 (3372.0 to 4078.5)  | 2671.0 (2360.7 to 3002.0)  | 424.5 (342.5 to 533.7)        | 613.4 (527.3 to 706.9)          | 0.0 (0.0 to 0.0)                  | 5068.8 (4608.5 to 5573.9) | 3650.4 (3226.3 to 4102.8)  | 580.2 (468.1 to 729.4)        | 838.3 (720.7 to 966.1)          | 0.0 (0.0 to 0.0)                  |
| Slovenia        | 2050 | 3761.2 (3414.6 to 4138.9)  | 2707.2 (2387.5 to 3042.2)  | 430.7 (347.1 to 542.3)        | 623.3 (534.9 to 720.4)          | 0.0 (0.0 to 0.0)                  | 5140.3 (4666.6 to 5656.5) | 3699.9 (3262.9 to 4157.6)  | 588.6 (474.3 to 741.1)        | 851.8 (731.0 to 984.5)          | 0.0 (0.0 to 0.0)                  |
| Solomon Islands | 1995 | 91.1 (75.5 to 110.2)       | 84.8 (68.8 to 103.4)       | 3.7 (2.5 to 5.1)              | 0.0 (0.0 to 0.0)                | 2.7 (2.7 to 2.7)                  | 94.7 (78.5 to 114.5)      | 88.1 (71.5 to 107.5)       | 3.8 (2.6 to 5.3)              | 0.0 (0.0 to 0.0)                | 2.8 (2.8 to 2.8)                  |
| Solomon Islands | 1996 | 90.9 (75.9 to 108.4)       | 82.9 (68.2 to 100.3)       | 3.6 (2.5 to 5.1)              | 0.0 (0.0 to 0.0)                | 4.4 (4.4 to 4.4)                  | 94.5 (78.9 to 112.6)      | 86.2 (70.9 to 104.3)       | 3.8 (2.6 to 5.3)              | 0.0 (0.0 to 0.0)                | 4.5 (4.5 to 4.5)                  |
| Solomon Islands | 1997 | 89.2 (75.2 to 105.6)       | 81.2 (67.5 to 97.3)        | 3.6 (2.5 to 5.0)              | 0.0 (0.0 to 0.0)                | 4.5 (4.5 to 4.5)                  | 92.7 (78.2 to 109.7)      | 84.4 (70.1 to 101.1)       | 3.7 (2.6 to 5.2)              | 0.0 (0.0 to 0.0)                | 4.6 (4.6 to 4.6)                  |
| Solomon Islands | 1998 | 89.0 (75.3 to 105.0)       | 82.5 (68.9 to 98.3)        | 3.6 (2.5 to 5.0)              | 0.0 (0.0 to 0.0)                | 2.9 (2.9 to 2.9)                  | 92.5 (78.2 to 109.1)      | 85.8 (71.6 to 102.1)       | 3.7 (2.6 to 5.2)              | 0.0 (0.0 to 0.0)                | 3.0 (3.0 to 3.0)                  |
| Solomon Islands | 1999 | 93.0 (79.4 to 108.8)       | 83.6 (70.1 to 99.4)        | 3.6 (2.5 to 5.0)              | 0.0 (0.0 to 0.0)                | 5.9 (5.9 to 5.9)                  | 96.6 (82.5 to 113.0)      | 86.8 (72.8 to 103.2)       | 3.7 (2.6 to 5.2)              | 0.0 (0.0 to 0.0)                | 6.1 (6.1 to 6.1)                  |
| Solomon Islands | 2000 | 92.4 (79.9 to 106.7)       | 76.0 (63.7 to 90.2)        | 3.3 (2.3 to 4.6)              | 0.0 (0.0 to 0.0)                | 13.2 (13.2 to 13.2)               | 96.1 (83.1 to 110.8)      | 78.9 (66.2 to 93.7)        | 3.4 (2.4 to 4.7)              | 0.0 (0.0 to 0.0)                | 13.7 (13.7 to 13.7)               |
| Solomon Islands | 2001 | 96.5 (83.5 to 110.5)       | 77.4 (64.7 to 91.3)        | 3.3 (2.3 to 4.7)              | 0.0 (0.0 to 0.0)                | 15.8 (15.8 to 15.8)               | 100.2 (86.7 to 114.9)     | 80.4 (67.2 to 94.9)        | 3.5 (2.4 to 4.9)              | 0.0 (0.0 to 0.0)                | 16.4 (16.4 to 16.4)               |
| Solomon Islands | 2002 | 98.2 (85.9 to 111.8)       | 76.6 (64.3 to 90.3)        | 3.3 (2.3 to 4.7)              | 0.0 (0.0 to 0.0)                | 18.3 (18.3 to 18.3)               | 102.1 (89.2 to 116.2)     | 79.6 (66.8 to 93.8)        | 3.4 (2.4 to 4.9)              | 0.0 (0.0 to 0.0)                | 19.0 (19.0 to 19.0)               |
| Solomon Islands | 2003 | 112.5 (99.8 to 126.5)      | 80.0 (67.6 to 93.9)        | 3.6 (2.5 to 5.2)              | 0.0 (0.0 to 0.0)                | 28.9 (28.9 to 28.9)               | 116.9 (103.7 to 131.4)    | 83.1 (70.2 to 97.5)        | 3.7 (2.6 to 5.4)              | 0.0 (0.0 to 0.0)                | 30.0 (30.0 to 30.0)               |
| Solomon Islands | 2004 | 125.5 (112.6 to 140.0)     | 83.9 (71.2 to 98.0)        | 4.4 (3.0 to 6.2)              | 0.0 (0.0 to 0.0)                | 37.1 (37.1 to 37.1)               | 130.4 (117.0 to 145.5)    | 87.2 (74.0 to 101.8)       | 4.6 (3.1 to 6.5)              | 0.0 (0.0 to 0.0)                | 38.6 (38.6 to 38.6)               |
| Solomon Islands | 2005 | 130.9 (116.3 to 146.7)     | 95.0 (80.6 to 110.7)       | 5.1 (3.4 to 7.1)              | 0.0 (0.0 to 0.0)                | 30.8 (30.8 to 30.8)               | 136.0 (120.9 to 152.5)    | 98.7 (83.8 to 115.1)       | 5.3 (3.6 to 7.4)              | 0.0 (0.0 to 0.0)                | 32.0 (32.0 to 32.0)               |
| Solomon Islands | 2006 | 131.4 (116.3 to 148.3)     | 96.5 (81.5 to 113.3)       | 5.5 (3.7 to 7.7)              | 0.0 (0.0 to 0.0)                | 29.4 (29.4 to 29.4)               | 136.5 (120.9 to 154.1)    | 100.2 (84.7 to 117.7)      | 5.7 (3.9 to 8.0)              | 0.0 (0.0 to 0.0)                | 30.6 (30.6 to 30.6)               |
| Solomon Islands | 2007 | 135.3 (119.8 to 153.1)     | 98.3 (82.6 to 116.5)       | 5.8 (4.0 to 8.3)              | 0.0 (0.0 to 0.0)                | 31.2 (31.2 to 31.2)               | 140.6 (124.5 to 159.1)    | 102.1 (85.8 to 121.0)      | 6.0 (4.1 to 8.6)              | 0.0 (0.0 to 0.0)                | 32.4 (32.4 to 32.4)               |
| Solomon Islands | 2008 | 145.6 (130.4 to 163.1)     | 97.4 (82.2 to 115.2)       | 5.9 (4.1 to 8.4)              | 0.0 (0.0 to 0.0)                | 42.3 (42.3 to 42.3)               | 151.3 (135.5 to 169.5)    | 101.2 (85.4 to 119.7)      | 6.2 (4.3 to 8.8)              | 0.0 (0.0 to 0.0)                | 43.9 (43.9 to 43.9)               |

| Country         | Year | 2018 US Dollars per capita |                            |                               |                                 |                                   | 2018 PPP per capita    |                            |                               |                                 |                                   |
|-----------------|------|----------------------------|----------------------------|-------------------------------|---------------------------------|-----------------------------------|------------------------|----------------------------|-------------------------------|---------------------------------|-----------------------------------|
|                 |      | Health spending            | Government health spending | Out-of-pocket health spending | Prepaid private health spending | Development assistance for health | Health spending        | Government health spending | Out-of-pocket health spending | Prepaid private health spending | Development assistance for health |
| Solomon Islands | 2009 | 144.0 (131.0 to 158.9)     | 83.2 (70.7 to 97.7)        | 5.6 (3.9 to 7.9)              | 0.0 (0.0 to 0.0)                | 55.1 (55.1 to 55.1)               | 149.6 (136.1 to 165.1) | 86.5 (73.5 to 101.5)       | 5.8 (4.0 to 8.2)              | 0.0 (0.0 to 0.0)                | 57.3 (57.3 to 57.3)               |
| Solomon Islands | 2010 | 145.4 (133.2 to 159.2)     | 78.1 (66.3 to 91.8)        | 5.6 (3.9 to 7.9)              | 0.0 (0.0 to 0.0)                | 61.7 (61.7 to 61.7)               | 151.1 (138.4 to 165.4) | 81.2 (68.9 to 95.4)        | 5.8 (4.1 to 8.2)              | 0.0 (0.0 to 0.0)                | 64.1 (64.1 to 64.1)               |
| Solomon Islands | 2011 | 159.4 (147.3 to 173.4)     | 77.5 (65.5 to 90.7)        | 5.6 (3.9 to 7.8)              | 0.0 (0.0 to 0.0)                | 76.3 (76.3 to 76.3)               | 165.7 (153.0 to 180.2) | 80.6 (68.0 to 94.2)        | 5.8 (4.1 to 8.1)              | 0.0 (0.0 to 0.0)                | 79.3 (79.3 to 79.3)               |
| Solomon Islands | 2012 | 120.8 (109.0 to 133.5)     | 72.1 (60.3 to 85.1)        | 5.6 (3.8 to 7.8)              | 0.0 (0.0 to 0.0)                | 43.2 (43.2 to 43.2)               | 125.6 (113.2 to 138.7) | 74.9 (62.7 to 88.4)        | 5.8 (4.0 to 8.1)              | 0.0 (0.0 to 0.0)                | 44.8 (44.8 to 44.8)               |
| Solomon Islands | 2013 | 139.3 (127.4 to 151.4)     | 69.7 (57.9 to 81.8)        | 5.6 (3.9 to 7.7)              | 0.0 (0.0 to 0.0)                | 64.1 (64.1 to 64.1)               | 144.8 (132.4 to 157.3) | 72.4 (60.1 to 85.0)        | 5.8 (4.0 to 8.0)              | 0.0 (0.0 to 0.0)                | 66.6 (66.6 to 66.6)               |
| Solomon Islands | 2014 | 94.0 (82.0 to 106.8)       | 68.6 (56.5 to 81.3)        | 5.4 (3.7 to 7.6)              | 0.0 (0.0 to 0.0)                | 19.9 (19.9 to 19.9)               | 97.7 (85.2 to 111.0)   | 71.3 (58.7 to 84.5)        | 5.7 (3.9 to 7.9)              | 0.0 (0.0 to 0.0)                | 20.7 (20.7 to 20.7)               |
| Solomon Islands | 2015 | 117.3 (104.6 to 131.2)     | 69.9 (57.4 to 83.7)        | 5.3 (3.6 to 7.3)              | 0.0 (0.0 to 0.0)                | 42.1 (42.1 to 42.1)               | 121.8 (108.7 to 136.3) | 72.6 (59.7 to 87.0)        | 5.5 (3.7 to 7.6)              | 0.0 (0.0 to 0.0)                | 43.7 (43.7 to 43.7)               |
| Solomon Islands | 2016 | 109.5 (95.7 to 124.4)      | 71.1 (57.4 to 85.9)        | 5.1 (3.6 to 7.1)              | 0.0 (0.0 to 0.0)                | 33.3 (33.3 to 33.3)               | 113.8 (99.4 to 129.2)  | 73.8 (59.6 to 89.2)        | 5.3 (3.7 to 7.4)              | 0.0 (0.0 to 0.0)                | 34.6 (34.6 to 34.6)               |
| Solomon Islands | 2017 | 120.1 (106.3 to 135.3)     | 73.2 (59.1 to 88.4)        | 5.2 (3.6 to 7.2)              | 0.0 (0.0 to 0.0)                | 41.7 (41.7 to 41.7)               | 124.8 (110.5 to 140.5) | 76.0 (61.4 to 91.8)        | 5.4 (3.7 to 7.5)              | 0.0 (0.0 to 0.0)                | 43.4 (43.4 to 43.4)               |
| Solomon Islands | 2018 | 116.8 (102.8 to 132.6)     | 74.0 (59.8 to 89.4)        | 5.3 (3.6 to 7.3)              | 0.0 (0.0 to 0.0)                | 37.6 (37.3 to 37.8)               | 121.4 (106.9 to 137.7) | 76.9 (62.2 to 92.9)        | 5.5 (3.8 to 7.6)              | 0.0 (0.0 to 0.0)                | 39.0 (38.8 to 39.3)               |
| Solomon Islands | 2019 | 117.8 (103.3 to 134.4)     | 74.9 (60.6 to 90.6)        | 5.3 (3.6 to 7.4)              | 0.0 (0.0 to 0.0)                | 37.5 (35.1 to 39.8)               | 122.4 (107.4 to 139.6) | 77.8 (63.0 to 94.1)        | 5.5 (3.8 to 7.7)              | 0.0 (0.0 to 0.0)                | 39.0 (36.5 to 41.4)               |
| Solomon Islands | 2020 | 119.1 (104.4 to 135.3)     | 75.8 (61.4 to 91.7)        | 5.4 (3.7 to 7.5)              | 0.0 (0.0 to 0.0)                | 37.9 (34.8 to 41.1)               | 123.8 (108.5 to 140.6) | 78.8 (63.8 to 95.3)        | 5.6 (3.8 to 7.8)              | 0.0 (0.0 to 0.0)                | 39.4 (36.1 to 42.7)               |
| Solomon Islands | 2021 | 120.6 (105.6 to 137.9)     | 76.9 (62.3 to 93.1)        | 5.4 (3.7 to 7.6)              | 0.0 (0.0 to 0.0)                | 38.3 (34.6 to 42.4)               | 125.3 (109.7 to 143.3) | 79.9 (64.8 to 96.7)        | 5.7 (3.9 to 7.9)              | 0.0 (0.0 to 0.0)                | 39.8 (36.0 to 44.0)               |
| Solomon Islands | 2022 | 122.4 (107.2 to 140.6)     | 77.9 (63.2 to 94.5)        | 5.5 (3.7 to 7.7)              | 0.0 (0.0 to 0.0)                | 38.9 (34.4 to 43.6)               | 127.1 (111.4 to 146.1) | 81.0 (65.7 to 98.2)        | 5.7 (3.9 to 8.0)              | 0.0 (0.0 to 0.0)                | 40.4 (35.7 to 45.4)               |
| Solomon Islands | 2023 | 124.2 (108.5 to 142.3)     | 79.1 (64.3 to 96.1)        | 5.6 (3.8 to 7.7)              | 0.0 (0.0 to 0.0)                | 39.4 (34.1 to 44.9)               | 129.0 (112.7 to 147.9) | 82.2 (66.8 to 99.8)        | 5.8 (3.9 to 8.1)              | 0.0 (0.0 to 0.0)                | 41.0 (35.5 to 46.7)               |
| Solomon Islands | 2024 | 126.1 (109.5 to 144.1)     | 80.4 (65.4 to 97.5)        | 5.6 (3.8 to 7.8)              | 0.0 (0.0 to 0.0)                | 40.0 (34.3 to 46.2)               | 131.0 (113.8 to 149.8) | 83.5 (68.0 to 101.3)       | 5.9 (4.0 to 8.1)              | 0.0 (0.0 to 0.0)                | 41.6 (35.6 to 48.0)               |
| Solomon Islands | 2025 | 127.9 (111.6 to 145.9)     | 81.7 (66.3 to 99.3)        | 5.7 (3.9 to 7.9)              | 0.0 (0.0 to 0.0)                | 40.6 (34.8 to 47.5)               | 132.9 (116.0 to 151.6) | 84.9 (68.9 to 103.2)       | 5.9 (4.1 to 8.2)              | 0.0 (0.0 to 0.0)                | 42.2 (36.2 to 49.4)               |
| Solomon Islands | 2026 | 129.8 (112.9 to 149.2)     | 83.0 (67.2 to 101.1)       | 5.8 (3.9 to 8.0)              | 0.0 (0.0 to 0.0)                | 41.0 (34.6 to 48.2)               | 134.8 (117.3 to 155.0) | 86.2 (69.8 to 105.0)       | 6.0 (4.1 to 8.3)              | 0.0 (0.0 to 0.0)                | 42.6 (36.0 to 50.0)               |
| Solomon Islands | 2027 | 131.9 (114.6 to 151.8)     | 84.6 (68.6 to 103.0)       | 5.8 (4.0 to 8.1)              | 0.0 (0.0 to 0.0)                | 41.5 (34.6 to 49.3)               | 137.1 (119.1 to 157.7) | 87.9 (71.2 to 107.0)       | 6.1 (4.1 to 8.4)              | 0.0 (0.0 to 0.0)                | 43.1 (35.9 to 51.3)               |
| Solomon Islands | 2028 | 134.1 (116.8 to 154.4)     | 86.2 (69.7 to 105.0)       | 5.9 (4.0 to 8.3)              | 0.0 (0.0 to 0.0)                | 42.0 (35.0 to 51.1)               | 139.3 (121.4 to 160.5) | 89.5 (72.5 to 109.1)       | 6.1 (4.2 to 8.6)              | 0.0 (0.0 to 0.0)                | 43.6 (36.4 to 53.1)               |
| Solomon Islands | 2029 | 136.2 (118.2 to 157.7)     | 87.8 (70.8 to 107.2)       | 6.0 (4.1 to 8.3)              | 0.0 (0.0 to 0.0)                | 42.5 (34.8 to 52.2)               | 141.6 (122.8 to 163.9) | 91.2 (73.6 to 111.4)       | 6.2 (4.2 to 8.7)              | 0.0 (0.0 to 0.0)                | 44.1 (36.2 to 54.3)               |

| Country         | Year | 2018 US Dollars per capita |                            |                               |                                 |                                   | 2018 PPP per capita    |                            |                               |                                 |                                   |
|-----------------|------|----------------------------|----------------------------|-------------------------------|---------------------------------|-----------------------------------|------------------------|----------------------------|-------------------------------|---------------------------------|-----------------------------------|
|                 |      | Health spending            | Government health spending | Out-of-pocket health spending | Prepaid private health spending | Development assistance for health | Health spending        | Government health spending | Out-of-pocket health spending | Prepaid private health spending | Development assistance for health |
| Solomon Islands | 2030 | 138.3 (119.9 to 160.2)     | 89.2 (71.9 to 109.0)       | 6.1 (4.1 to 8.4)              | 0.0 (0.0 to 0.0)                | 43.0 (35.2 to 52.7)               | 143.7 (124.6 to 166.5) | 92.7 (74.7 to 113.3)       | 6.3 (4.3 to 8.8)              | 0.0 (0.0 to 0.0)                | 44.7 (36.5 to 54.8)               |
| Solomon Islands | 2031 | 140.4 (120.9 to 163.5)     | 90.8 (73.4 to 110.6)       | 6.1 (4.2 to 8.6)              | 0.0 (0.0 to 0.0)                | 43.5 (35.2 to 54.8)               | 145.9 (125.6 to 169.9) | 94.3 (76.3 to 115.0)       | 6.4 (4.3 to 8.9)              | 0.0 (0.0 to 0.0)                | 45.2 (36.6 to 56.9)               |
| Solomon Islands | 2032 | 142.7 (122.4 to 166.3)     | 92.4 (75.0 to 113.1)       | 6.2 (4.2 to 8.7)              | 0.0 (0.0 to 0.0)                | 44.1 (35.1 to 55.9)               | 148.3 (127.2 to 172.8) | 96.0 (78.0 to 117.5)       | 6.4 (4.4 to 9.0)              | 0.0 (0.0 to 0.0)                | 45.8 (36.5 to 58.0)               |
| Solomon Islands | 2033 | 144.9 (124.8 to 170.0)     | 93.9 (76.0 to 115.4)       | 6.3 (4.3 to 8.8)              | 0.0 (0.0 to 0.0)                | 44.6 (35.3 to 57.5)               | 150.5 (129.7 to 176.6) | 97.6 (79.0 to 119.9)       | 6.5 (4.4 to 9.2)              | 0.0 (0.0 to 0.0)                | 46.4 (36.7 to 59.7)               |
| Solomon Islands | 2034 | 147.3 (125.7 to 172.5)     | 95.7 (77.4 to 117.4)       | 6.3 (4.3 to 8.9)              | 0.0 (0.0 to 0.0)                | 45.3 (35.5 to 58.3)               | 153.1 (130.7 to 179.3) | 99.4 (80.4 to 121.9)       | 6.6 (4.5 to 9.3)              | 0.0 (0.0 to 0.0)                | 47.1 (36.9 to 60.6)               |
| Solomon Islands | 2035 | 149.7 (127.6 to 175.5)     | 97.3 (78.4 to 119.3)       | 6.4 (4.3 to 9.0)              | 0.0 (0.0 to 0.0)                | 46.0 (35.8 to 60.1)               | 155.5 (132.6 to 182.4) | 101.1 (81.5 to 124.0)      | 6.7 (4.5 to 9.4)              | 0.0 (0.0 to 0.0)                | 47.8 (37.2 to 62.5)               |
| Solomon Islands | 2036 | 152.2 (128.2 to 180.0)     | 99.1 (79.7 to 121.9)       | 6.5 (4.4 to 9.2)              | 0.0 (0.0 to 0.0)                | 46.7 (35.8 to 62.4)               | 158.2 (133.2 to 187.0) | 102.9 (82.8 to 126.6)      | 6.7 (4.5 to 9.5)              | 0.0 (0.0 to 0.0)                | 48.5 (37.2 to 64.8)               |
| Solomon Islands | 2037 | 154.7 (130.4 to 182.6)     | 100.9 (80.7 to 125.0)      | 6.5 (4.4 to 9.3)              | 0.0 (0.0 to 0.0)                | 47.3 (36.2 to 63.6)               | 160.8 (135.5 to 189.7) | 104.8 (83.8 to 129.9)      | 6.8 (4.6 to 9.6)              | 0.0 (0.0 to 0.0)                | 49.2 (37.6 to 66.0)               |
| Solomon Islands | 2038 | 157.2 (131.8 to 186.7)     | 102.6 (81.6 to 127.6)      | 6.6 (4.4 to 9.4)              | 0.0 (0.0 to 0.0)                | 48.1 (36.4 to 66.8)               | 163.4 (137.0 to 194.0) | 106.6 (84.8 to 132.6)      | 6.9 (4.6 to 9.7)              | 0.0 (0.0 to 0.0)                | 49.9 (37.8 to 69.4)               |
| Solomon Islands | 2039 | 159.8 (134.6 to 188.4)     | 104.3 (82.7 to 130.6)      | 6.7 (4.5 to 9.5)              | 0.0 (0.0 to 0.0)                | 48.7 (36.9 to 66.9)               | 166.0 (139.8 to 195.7) | 108.4 (85.9 to 135.7)      | 6.9 (4.7 to 9.8)              | 0.0 (0.0 to 0.0)                | 50.7 (38.4 to 69.5)               |
| Solomon Islands | 2040 | 162.3 (135.3 to 192.9)     | 106.0 (83.6 to 133.0)      | 6.7 (4.5 to 9.5)              | 0.0 (0.0 to 0.0)                | 49.6 (37.4 to 68.9)               | 168.6 (140.6 to 200.4) | 110.1 (86.9 to 138.2)      | 7.0 (4.7 to 9.9)              | 0.0 (0.0 to 0.0)                | 51.5 (38.9 to 71.5)               |
| Solomon Islands | 2041 | 164.8 (137.1 to 196.5)     | 107.7 (84.9 to 135.6)      | 6.8 (4.6 to 9.6)              | 0.0 (0.0 to 0.0)                | 50.4 (38.1 to 70.8)               | 171.3 (142.5 to 204.2) | 111.9 (88.2 to 141.0)      | 7.0 (4.7 to 10.0)             | 0.0 (0.0 to 0.0)                | 52.3 (39.6 to 73.5)               |
| Solomon Islands | 2042 | 167.6 (138.7 to 200.7)     | 109.5 (86.1 to 139.0)      | 6.8 (4.6 to 9.7)              | 0.0 (0.0 to 0.0)                | 51.2 (37.9 to 73.9)               | 174.2 (144.2 to 208.6) | 113.8 (89.5 to 144.4)      | 7.1 (4.8 to 10.1)             | 0.0 (0.0 to 0.0)                | 53.3 (39.4 to 76.8)               |
| Solomon Islands | 2043 | 170.3 (139.4 to 205.2)     | 111.3 (87.0 to 141.7)      | 6.9 (4.6 to 9.8)              | 0.0 (0.0 to 0.0)                | 52.1 (38.5 to 76.1)               | 176.9 (144.8 to 213.2) | 115.6 (90.4 to 147.2)      | 7.2 (4.8 to 10.2)             | 0.0 (0.0 to 0.0)                | 54.1 (40.0 to 79.1)               |
| Solomon Islands | 2044 | 173.0 (141.4 to 208.9)     | 113.0 (88.1 to 144.8)      | 7.0 (4.7 to 9.9)              | 0.0 (0.0 to 0.0)                | 53.1 (39.1 to 77.7)               | 179.8 (146.9 to 217.1) | 117.4 (91.5 to 150.4)      | 7.2 (4.8 to 10.3)             | 0.0 (0.0 to 0.0)                | 55.1 (40.6 to 80.8)               |
| Solomon Islands | 2045 | 175.8 (144.9 to 213.7)     | 114.7 (89.2 to 147.8)      | 7.0 (4.7 to 10.0)             | 0.0 (0.0 to 0.0)                | 54.0 (38.9 to 81.3)               | 182.7 (150.6 to 222.1) | 119.2 (92.7 to 153.6)      | 7.3 (4.9 to 10.4)             | 0.0 (0.0 to 0.0)                | 56.1 (40.5 to 84.5)               |
| Solomon Islands | 2046 | 178.6 (145.7 to 220.5)     | 116.5 (90.3 to 150.7)      | 7.1 (4.7 to 10.1)             | 0.0 (0.0 to 0.0)                | 55.0 (39.7 to 84.4)               | 185.5 (151.4 to 229.1) | 121.0 (93.8 to 156.6)      | 7.4 (4.9 to 10.5)             | 0.0 (0.0 to 0.0)                | 57.1 (41.2 to 87.8)               |
| Solomon Islands | 2047 | 181.4 (146.6 to 222.9)     | 118.2 (91.4 to 152.9)      | 7.1 (4.8 to 10.1)             | 0.0 (0.0 to 0.0)                | 56.0 (40.1 to 86.9)               | 188.5 (152.3 to 231.6) | 122.8 (95.0 to 158.9)      | 7.4 (5.0 to 10.5)             | 0.0 (0.0 to 0.0)                | 58.2 (41.7 to 90.3)               |
| Solomon Islands | 2048 | 184.3 (149.2 to 228.7)     | 119.8 (92.4 to 155.8)      | 7.2 (4.8 to 10.2)             | 0.0 (0.0 to 0.0)                | 57.2 (40.8 to 91.9)               | 191.5 (155.0 to 237.7) | 124.5 (96.0 to 161.9)      | 7.5 (5.0 to 10.6)             | 0.0 (0.0 to 0.1)                | 59.4 (42.4 to 95.5)               |
| Solomon Islands | 2049 | 187.2 (151.8 to 233.9)     | 121.6 (93.6 to 158.4)      | 7.3 (4.9 to 10.3)             | 0.0 (0.0 to 0.0)                | 58.3 (41.3 to 93.4)               | 194.5 (157.7 to 243.1) | 126.3 (97.3 to 164.5)      | 7.6 (5.1 to 10.7)             | 0.0 (0.0 to 0.1)                | 60.6 (42.9 to 97.1)               |
| Solomon Islands | 2050 | 190.1 (154.1 to 237.3)     | 123.1 (94.9 to 160.1)      | 7.3 (4.9 to 10.4)             | 0.0 (0.0 to 0.1)                | 59.6 (42.0 to 95.9)               | 197.5 (160.1 to 246.6) | 127.9 (98.6 to 166.4)      | 7.6 (5.1 to 10.8)             | 0.0 (0.0 to 0.1)                | 61.9 (43.7 to 99.7)               |

| Country | Year | 2018 US Dollars per capita |                            |                               |                                 |                                   | 2018 PPP per capita |                            |                               |                                 |                                   |
|---------|------|----------------------------|----------------------------|-------------------------------|---------------------------------|-----------------------------------|---------------------|----------------------------|-------------------------------|---------------------------------|-----------------------------------|
|         |      | Health spending            | Government health spending | Out-of-pocket health spending | Prepaid private health spending | Development assistance for health | Health spending     | Government health spending | Out-of-pocket health spending | Prepaid private health spending | Development assistance for health |
| Somalia | 1995 | 12.1 (9.8 to 14.9)         | 4.0 (3.0 to 5.2)           | 6.9 (4.8 to 9.6)              | 0.5 (0.2 to 0.9)                | 0.7 (0.7 to 0.7)                  | 24.7 (19.9 to 30.2) | 8.2 (6.2 to 10.6)          | 14.1 (9.7 to 19.4)            | 1.0 (0.5 to 1.8)                | 1.4 (1.4 to 1.4)                  |
| Somalia | 1996 | 12.0 (9.7 to 14.7)         | 4.0 (3.0 to 5.2)           | 6.8 (4.7 to 9.3)              | 0.5 (0.2 to 0.9)                | 0.8 (0.8 to 0.8)                  | 24.5 (19.8 to 29.9) | 8.1 (6.1 to 10.6)          | 13.9 (9.5 to 19.0)            | 0.9 (0.4 to 1.7)                | 1.6 (1.6 to 1.6)                  |
| Somalia | 1997 | 11.4 (9.1 to 13.9)         | 3.8 (2.9 to 4.9)           | 6.6 (4.6 to 9.2)              | 0.4 (0.2 to 0.8)                | 0.6 (0.6 to 0.6)                  | 23.1 (18.5 to 28.3) | 7.7 (5.9 to 10.0)          | 13.3 (9.3 to 18.6)            | 0.9 (0.4 to 1.6)                | 1.1 (1.1 to 1.1)                  |
| Somalia | 1998 | 11.2 (9.0 to 13.7)         | 3.7 (2.8 to 4.8)           | 6.4 (4.5 to 9.0)              | 0.4 (0.2 to 0.8)                | 0.7 (0.7 to 0.7)                  | 22.8 (18.3 to 28.0) | 7.5 (5.8 to 9.8)           | 13.0 (9.1 to 18.3)            | 0.8 (0.4 to 1.5)                | 1.4 (1.4 to 1.4)                  |
| Somalia | 1999 | 11.1 (8.9 to 13.6)         | 3.7 (2.8 to 4.7)           | 6.2 (4.3 to 8.7)              | 0.4 (0.2 to 0.7)                | 0.8 (0.8 to 0.8)                  | 22.5 (18.1 to 27.7) | 7.4 (5.6 to 9.5)           | 12.7 (8.8 to 17.6)            | 0.8 (0.4 to 1.5)                | 1.6 (1.6 to 1.6)                  |
| Somalia | 2000 | 10.8 (8.7 to 13.3)         | 3.6 (2.7 to 4.7)           | 6.1 (4.3 to 8.4)              | 0.4 (0.2 to 0.7)                | 0.7 (0.7 to 0.7)                  | 22.1 (17.7 to 27.1) | 7.4 (5.5 to 9.5)           | 12.4 (8.7 to 17.1)            | 0.8 (0.4 to 1.5)                | 1.5 (1.5 to 1.5)                  |
| Somalia | 2001 | 10.7 (8.5 to 13.2)         | 3.6 (2.7 to 4.6)           | 6.0 (4.2 to 8.2)              | 0.4 (0.2 to 0.7)                | 0.8 (0.8 to 0.8)                  | 21.8 (17.4 to 26.9) | 7.3 (5.5 to 9.5)           | 12.1 (8.5 to 16.6)            | 0.8 (0.4 to 1.4)                | 1.6 (1.6 to 1.6)                  |
| Somalia | 2002 | 10.8 (8.6 to 13.3)         | 3.6 (2.7 to 4.7)           | 5.9 (4.1 to 8.3)              | 0.4 (0.2 to 0.7)                | 0.9 (0.9 to 0.9)                  | 22.0 (17.5 to 27.0) | 7.4 (5.6 to 9.5)           | 12.1 (8.4 to 16.8)            | 0.8 (0.4 to 1.4)                | 1.8 (1.8 to 1.8)                  |
| Somalia | 2003 | 10.8 (8.6 to 13.4)         | 3.6 (2.8 to 4.7)           | 5.9 (4.1 to 8.2)              | 0.4 (0.2 to 0.7)                | 0.8 (0.8 to 0.8)                  | 21.9 (17.5 to 27.2) | 7.4 (5.6 to 9.5)           | 12.1 (8.3 to 16.7)            | 0.8 (0.4 to 1.4)                | 1.7 (1.7 to 1.7)                  |
| Somalia | 2004 | 11.4 (9.3 to 14.1)         | 3.6 (2.7 to 4.7)           | 5.9 (4.1 to 8.2)              | 0.4 (0.2 to 0.7)                | 1.5 (1.5 to 1.5)                  | 23.2 (19.0 to 28.6) | 7.3 (5.6 to 9.5)           | 12.1 (8.3 to 16.7)            | 0.7 (0.4 to 1.4)                | 3.1 (3.1 to 3.1)                  |
| Somalia | 2005 | 11.1 (9.0 to 13.7)         | 3.5 (2.7 to 4.6)           | 5.9 (4.0 to 8.2)              | 0.4 (0.2 to 0.7)                | 1.3 (1.3 to 1.3)                  | 22.5 (18.4 to 27.8) | 7.2 (5.4 to 9.3)           | 12.0 (8.2 to 16.7)            | 0.7 (0.3 to 1.4)                | 2.6 (2.6 to 2.6)                  |
| Somalia | 2006 | 11.4 (9.3 to 14.1)         | 3.4 (2.6 to 4.5)           | 5.8 (4.0 to 8.2)              | 0.3 (0.2 to 0.7)                | 1.8 (1.8 to 1.8)                  | 23.2 (19.0 to 28.6) | 7.0 (5.3 to 9.1)           | 11.9 (8.1 to 16.7)            | 0.7 (0.3 to 1.3)                | 3.6 (3.6 to 3.6)                  |
| Somalia | 2007 | 11.1 (9.0 to 13.7)         | 3.3 (2.5 to 4.3)           | 5.7 (3.9 to 8.1)              | 0.3 (0.2 to 0.6)                | 1.7 (1.7 to 1.7)                  | 22.5 (18.4 to 27.8) | 6.8 (5.2 to 8.8)           | 11.7 (7.9 to 16.5)            | 0.7 (0.3 to 1.3)                | 3.4 (3.4 to 3.4)                  |
| Somalia | 2008 | 11.7 (9.8 to 14.3)         | 3.2 (2.4 to 4.2)           | 5.6 (3.8 to 8.0)              | 0.3 (0.1 to 0.6)                | 2.6 (2.6 to 2.6)                  | 23.9 (19.9 to 29.1) | 6.5 (5.0 to 8.5)           | 11.3 (7.7 to 16.2)            | 0.6 (0.3 to 1.3)                | 5.4 (5.4 to 5.4)                  |
| Somalia | 2009 | 10.9 (9.1 to 13.4)         | 3.1 (2.4 to 4.0)           | 5.4 (3.7 to 7.7)              | 0.3 (0.1 to 0.6)                | 2.2 (2.2 to 2.2)                  | 22.2 (18.5 to 27.2) | 6.3 (4.8 to 8.2)           | 10.9 (7.5 to 15.6)            | 0.6 (0.3 to 1.2)                | 4.4 (4.4 to 4.4)                  |
| Somalia | 2010 | 11.3 (9.5 to 13.6)         | 3.0 (2.3 to 3.9)           | 5.2 (3.5 to 7.3)              | 0.3 (0.1 to 0.5)                | 2.8 (2.8 to 2.8)                  | 22.9 (19.2 to 27.7) | 6.1 (4.8 to 8.0)           | 10.5 (7.2 to 14.8)            | 0.6 (0.3 to 1.1)                | 5.7 (5.7 to 5.7)                  |
| Somalia | 2011 | 11.3 (9.5 to 13.5)         | 3.0 (2.3 to 3.8)           | 4.9 (3.4 to 7.0)              | 0.3 (0.1 to 0.5)                | 3.1 (3.1 to 3.1)                  | 22.9 (19.3 to 27.5) | 6.0 (4.7 to 7.8)           | 10.0 (6.9 to 14.2)            | 0.5 (0.3 to 1.0)                | 6.3 (6.3 to 6.3)                  |
| Somalia | 2012 | 14.6 (12.9 to 16.8)        | 2.9 (2.3 to 3.8)           | 4.7 (3.2 to 6.7)              | 0.2 (0.1 to 0.5)                | 6.7 (6.7 to 6.7)                  | 29.7 (26.3 to 34.1) | 6.0 (4.6 to 7.8)           | 9.6 (6.6 to 13.6)             | 0.5 (0.2 to 1.0)                | 13.6 (13.6 to 13.6)               |
| Somalia | 2013 | 13.3 (11.6 to 15.3)        | 2.9 (2.2 to 3.8)           | 4.6 (3.1 to 6.4)              | 0.2 (0.1 to 0.5)                | 5.6 (5.6 to 5.6)                  | 27.0 (23.7 to 31.2) | 5.9 (4.5 to 7.7)           | 9.3 (6.3 to 13.0)             | 0.5 (0.2 to 0.9)                | 11.3 (11.3 to 11.3)               |
| Somalia | 2014 | 12.3 (10.7 to 14.2)        | 2.9 (2.2 to 3.8)           | 4.4 (2.9 to 6.2)              | 0.2 (0.1 to 0.4)                | 4.7 (4.7 to 4.7)                  | 25.0 (21.8 to 29.0) | 6.0 (4.5 to 7.8)           | 9.0 (6.0 to 12.6)             | 0.5 (0.2 to 0.9)                | 9.5 (9.5 to 9.5)                  |
| Somalia | 2015 | 12.5 (10.9 to 14.4)        | 2.9 (2.2 to 3.8)           | 4.4 (2.9 to 6.1)              | 0.2 (0.1 to 0.4)                | 5.0 (5.0 to 5.0)                  | 25.5 (22.2 to 29.3) | 6.0 (4.6 to 7.8)           | 8.9 (5.9 to 12.4)             | 0.5 (0.2 to 0.9)                | 10.2 (10.2 to 10.2)               |

| Country | Year | 2018 US Dollars per capita |                            |                               |                                 |                                   | 2018 PPP per capita |                            |                               |                                 |                                   |
|---------|------|----------------------------|----------------------------|-------------------------------|---------------------------------|-----------------------------------|---------------------|----------------------------|-------------------------------|---------------------------------|-----------------------------------|
|         |      | Health spending            | Government health spending | Out-of-pocket health spending | Prepaid private health spending | Development assistance for health | Health spending     | Government health spending | Out-of-pocket health spending | Prepaid private health spending | Development assistance for health |
| Somalia | 2016 | 14.9 (13.3 to 16.7)        | 3.0 (2.2 to 3.8)           | 4.3 (2.9 to 6.0)              | 0.2 (0.1 to 0.4)                | 7.4 (7.4 to 7.4)                  | 30.2 (27.1 to 34.0) | 6.0 (4.6 to 7.8)           | 8.7 (5.8 to 12.3)             | 0.5 (0.2 to 0.9)                | 15.0 (15.0 to 15.0)               |
| Somalia | 2017 | 12.7 (11.2 to 14.5)        | 3.0 (2.2 to 3.8)           | 4.2 (2.8 to 6.0)              | 0.2 (0.1 to 0.4)                | 5.3 (5.3 to 5.3)                  | 25.8 (22.7 to 29.5) | 6.0 (4.5 to 7.8)           | 8.6 (5.7 to 12.2)             | 0.5 (0.2 to 0.9)                | 10.7 (10.7 to 10.7)               |
| Somalia | 2018 | 12.2 (10.6 to 14.1)        | 3.0 (2.2 to 3.9)           | 4.2 (2.8 to 6.0)              | 0.2 (0.1 to 0.4)                | 4.7 (4.7 to 4.8)                  | 24.7 (21.6 to 28.7) | 6.1 (4.6 to 7.9)           | 8.6 (5.7 to 12.1)             | 0.5 (0.2 to 0.9)                | 9.6 (9.6 to 9.7)                  |
| Somalia | 2019 | 12.2 (10.6 to 14.1)        | 3.0 (2.3 to 3.9)           | 4.2 (2.8 to 6.0)              | 0.2 (0.1 to 0.4)                | 4.7 (4.4 to 5.0)                  | 24.7 (21.5 to 28.7) | 6.1 (4.6 to 8.0)           | 8.6 (5.8 to 12.2)             | 0.5 (0.2 to 0.9)                | 9.5 (8.9 to 10.1)                 |
| Somalia | 2020 | 12.2 (10.5 to 14.3)        | 3.0 (2.3 to 3.9)           | 4.2 (2.8 to 6.0)              | 0.2 (0.1 to 0.4)                | 4.7 (4.3 to 5.1)                  | 24.8 (21.4 to 29.1) | 6.2 (4.6 to 8.0)           | 8.6 (5.8 to 12.2)             | 0.5 (0.2 to 0.9)                | 9.5 (8.7 to 10.3)                 |
| Somalia | 2021 | 12.3 (10.6 to 14.2)        | 3.0 (2.3 to 4.0)           | 4.2 (2.8 to 6.0)              | 0.2 (0.1 to 0.4)                | 4.7 (4.3 to 5.2)                  | 24.9 (21.6 to 28.9) | 6.2 (4.7 to 8.1)           | 8.6 (5.7 to 12.2)             | 0.5 (0.2 to 0.9)                | 9.6 (8.6 to 10.6)                 |
| Somalia | 2022 | 12.4 (10.6 to 14.4)        | 3.1 (2.3 to 4.0)           | 4.2 (2.8 to 6.0)              | 0.2 (0.1 to 0.4)                | 4.8 (4.3 to 5.4)                  | 25.2 (21.5 to 29.3) | 6.2 (4.7 to 8.1)           | 8.6 (5.8 to 12.3)             | 0.5 (0.2 to 0.9)                | 9.8 (8.7 to 11.0)                 |
| Somalia | 2023 | 12.5 (10.7 to 14.6)        | 3.1 (2.3 to 4.0)           | 4.3 (2.9 to 6.0)              | 0.2 (0.1 to 0.5)                | 4.9 (4.3 to 5.6)                  | 25.4 (21.8 to 29.6) | 6.3 (4.7 to 8.2)           | 8.6 (5.8 to 12.3)             | 0.5 (0.2 to 0.9)                | 10.0 (8.7 to 11.4)                |
| Somalia | 2024 | 12.7 (10.8 to 14.9)        | 3.2 (2.4 to 4.1)           | 4.3 (2.9 to 6.1)              | 0.2 (0.1 to 0.5)                | 5.0 (4.3 to 5.8)                  | 25.8 (22.0 to 30.3) | 6.4 (4.8 to 8.3)           | 8.7 (5.8 to 12.3)             | 0.5 (0.2 to 0.9)                | 10.2 (8.8 to 11.8)                |
| Somalia | 2025 | 12.8 (10.9 to 15.1)        | 3.2 (2.4 to 4.2)           | 4.3 (2.9 to 6.1)              | 0.2 (0.1 to 0.5)                | 5.1 (4.3 to 6.0)                  | 26.1 (22.2 to 30.8) | 6.5 (4.9 to 8.5)           | 8.7 (5.9 to 12.3)             | 0.5 (0.2 to 0.9)                | 10.3 (8.8 to 12.2)                |
| Somalia | 2026 | 13.0 (11.0 to 15.1)        | 3.2 (2.4 to 4.2)           | 4.3 (2.9 to 6.1)              | 0.3 (0.1 to 0.5)                | 5.2 (4.4 to 6.1)                  | 26.3 (22.5 to 30.8) | 6.6 (4.9 to 8.6)           | 8.7 (5.9 to 12.3)             | 0.5 (0.2 to 1.0)                | 10.5 (8.9 to 12.4)                |
| Somalia | 2027 | 13.1 (11.1 to 15.3)        | 3.3 (2.4 to 4.3)           | 4.3 (2.9 to 6.1)              | 0.3 (0.1 to 0.5)                | 5.3 (4.4 to 6.3)                  | 26.6 (22.5 to 31.0) | 6.7 (5.0 to 8.7)           | 8.7 (5.9 to 12.3)             | 0.5 (0.2 to 1.0)                | 10.7 (9.0 to 12.8)                |
| Somalia | 2028 | 13.2 (11.2 to 15.4)        | 3.3 (2.4 to 4.3)           | 4.3 (2.9 to 6.1)              | 0.3 (0.1 to 0.5)                | 5.4 (4.5 to 6.5)                  | 26.9 (22.8 to 31.3) | 6.7 (5.0 to 8.8)           | 8.7 (5.9 to 12.4)             | 0.5 (0.3 to 1.0)                | 10.9 (9.2 to 13.2)                |
| Somalia | 2029 | 13.4 (11.2 to 15.6)        | 3.3 (2.5 to 4.3)           | 4.3 (2.9 to 6.1)              | 0.3 (0.1 to 0.5)                | 5.5 (4.5 to 6.7)                  | 27.2 (22.9 to 31.8) | 6.7 (5.0 to 8.8)           | 8.7 (5.9 to 12.3)             | 0.5 (0.3 to 1.0)                | 11.2 (9.2 to 13.7)                |
| Somalia | 2030 | 13.5 (11.5 to 15.8)        | 3.3 (2.5 to 4.4)           | 4.3 (2.9 to 6.1)              | 0.3 (0.1 to 0.5)                | 5.6 (4.6 to 6.9)                  | 27.4 (23.3 to 32.2) | 6.8 (5.0 to 8.9)           | 8.7 (5.8 to 12.4)             | 0.5 (0.3 to 1.0)                | 11.4 (9.4 to 14.1)                |
| Somalia | 2031 | 13.6 (11.5 to 15.9)        | 3.3 (2.5 to 4.4)           | 4.3 (2.9 to 6.1)              | 0.3 (0.1 to 0.5)                | 5.8 (4.6 to 7.3)                  | 27.7 (23.4 to 32.4) | 6.8 (5.1 to 8.9)           | 8.7 (5.8 to 12.3)             | 0.5 (0.3 to 1.0)                | 11.7 (9.4 to 14.8)                |
| Somalia | 2032 | 13.8 (11.6 to 16.3)        | 3.4 (2.5 to 4.4)           | 4.2 (2.8 to 6.0)              | 0.3 (0.1 to 0.5)                | 5.9 (4.8 to 7.4)                  | 28.0 (23.7 to 33.1) | 6.8 (5.1 to 8.9)           | 8.6 (5.8 to 12.3)             | 0.5 (0.3 to 1.0)                | 12.0 (9.7 to 15.1)                |
| Somalia | 2033 | 13.9 (11.8 to 16.3)        | 3.4 (2.5 to 4.4)           | 4.2 (2.8 to 6.0)              | 0.3 (0.1 to 0.5)                | 6.1 (4.8 to 7.8)                  | 28.4 (24.0 to 33.2) | 6.8 (5.1 to 9.0)           | 8.6 (5.8 to 12.2)             | 0.5 (0.3 to 1.0)                | 12.3 (9.8 to 15.8)                |
| Somalia | 2034 | 14.1 (11.8 to 16.7)        | 3.4 (2.5 to 4.4)           | 4.2 (2.8 to 6.0)              | 0.3 (0.1 to 0.5)                | 6.3 (4.9 to 8.1)                  | 28.7 (23.9 to 34.0) | 6.9 (5.1 to 9.0)           | 8.6 (5.7 to 12.2)             | 0.5 (0.3 to 1.0)                | 12.7 (10.0 to 16.5)               |
| Somalia | 2035 | 14.3 (12.0 to 17.1)        | 3.4 (2.5 to 4.5)           | 4.2 (2.8 to 6.0)              | 0.3 (0.1 to 0.5)                | 6.4 (5.0 to 8.4)                  | 29.1 (24.5 to 34.7) | 6.9 (5.1 to 9.1)           | 8.6 (5.7 to 12.3)             | 0.6 (0.3 to 1.0)                | 13.1 (10.1 to 17.1)               |
| Somalia | 2036 | 14.5 (12.0 to 17.5)        | 3.4 (2.5 to 4.5)           | 4.2 (2.8 to 6.0)              | 0.3 (0.1 to 0.5)                | 6.6 (5.1 to 8.9)                  | 29.5 (24.4 to 35.6) | 7.0 (5.1 to 9.1)           | 8.6 (5.7 to 12.2)             | 0.6 (0.3 to 1.0)                | 13.5 (10.4 to 18.1)               |

| Country      | Year | 2018 US Dollars per capita |                            |                               |                                 |                                   | 2018 PPP per capita    |                            |                               |                                 |                                   |
|--------------|------|----------------------------|----------------------------|-------------------------------|---------------------------------|-----------------------------------|------------------------|----------------------------|-------------------------------|---------------------------------|-----------------------------------|
|              |      | Health spending            | Government health spending | Out-of-pocket health spending | Prepaid private health spending | Development assistance for health | Health spending        | Government health spending | Out-of-pocket health spending | Prepaid private health spending | Development assistance for health |
| Somalia      | 2037 | 14.7 (12.2 to 17.5)        | 3.4 (2.5 to 4.5)           | 4.2 (2.8 to 6.0)              | 0.3 (0.1 to 0.5)                | 6.8 (5.2 to 9.1)                  | 29.9 (24.7 to 35.7)    | 7.0 (5.1 to 9.2)           | 8.5 (5.7 to 12.2)             | 0.6 (0.3 to 1.1)                | 13.8 (10.6 to 18.4)               |
| Somalia      | 2038 | 14.9 (12.4 to 18.4)        | 3.5 (2.5 to 4.5)           | 4.2 (2.8 to 6.0)              | 0.3 (0.1 to 0.5)                | 7.0 (5.2 to 9.7)                  | 30.3 (25.2 to 37.3)    | 7.0 (5.2 to 9.2)           | 8.5 (5.7 to 12.2)             | 0.6 (0.3 to 1.1)                | 14.2 (10.6 to 19.8)               |
| Somalia      | 2039 | 15.1 (12.6 to 18.2)        | 3.5 (2.5 to 4.6)           | 4.2 (2.8 to 6.0)              | 0.3 (0.1 to 0.5)                | 7.2 (5.4 to 10.1)                 | 30.8 (25.5 to 37.0)    | 7.1 (5.2 to 9.3)           | 8.5 (5.7 to 12.2)             | 0.6 (0.3 to 1.1)                | 14.6 (11.0 to 20.5)               |
| Somalia      | 2040 | 15.4 (12.6 to 18.9)        | 3.5 (2.6 to 4.6)           | 4.2 (2.8 to 6.0)              | 0.3 (0.1 to 0.5)                | 7.4 (5.5 to 10.4)                 | 31.2 (25.6 to 38.5)    | 7.1 (5.2 to 9.3)           | 8.5 (5.7 to 12.3)             | 0.6 (0.3 to 1.1)                | 15.0 (11.2 to 21.1)               |
| Somalia      | 2041 | 15.6 (12.8 to 19.3)        | 3.5 (2.6 to 4.6)           | 4.2 (2.8 to 6.0)              | 0.3 (0.1 to 0.5)                | 7.6 (5.6 to 10.8)                 | 31.7 (25.9 to 39.3)    | 7.2 (5.3 to 9.4)           | 8.5 (5.7 to 12.2)             | 0.6 (0.3 to 1.1)                | 15.5 (11.4 to 21.9)               |
| Somalia      | 2042 | 15.9 (13.0 to 19.9)        | 3.6 (2.6 to 4.7)           | 4.2 (2.8 to 6.0)              | 0.3 (0.1 to 0.5)                | 7.8 (5.6 to 11.4)                 | 32.3 (26.4 to 40.4)    | 7.2 (5.3 to 9.5)           | 8.5 (5.6 to 12.2)             | 0.6 (0.3 to 1.1)                | 16.0 (11.5 to 23.1)               |
| Somalia      | 2043 | 16.1 (13.1 to 20.7)        | 3.6 (2.6 to 4.7)           | 4.2 (2.8 to 6.0)              | 0.3 (0.1 to 0.5)                | 8.1 (5.8 to 11.8)                 | 32.8 (26.7 to 42.1)    | 7.3 (5.3 to 9.6)           | 8.5 (5.6 to 12.2)             | 0.6 (0.3 to 1.1)                | 16.4 (11.9 to 24.0)               |
| Somalia      | 2044 | 16.4 (13.3 to 21.2)        | 3.6 (2.6 to 4.7)           | 4.2 (2.8 to 6.0)              | 0.3 (0.1 to 0.6)                | 8.3 (5.9 to 12.3)                 | 33.4 (27.0 to 43.1)    | 7.3 (5.3 to 9.7)           | 8.5 (5.6 to 12.2)             | 0.6 (0.3 to 1.1)                | 17.0 (12.1 to 25.0)               |
| Somalia      | 2045 | 16.7 (13.4 to 21.7)        | 3.6 (2.6 to 4.8)           | 4.2 (2.8 to 6.0)              | 0.3 (0.1 to 0.6)                | 8.6 (6.1 to 13.2)                 | 34.0 (27.3 to 44.2)    | 7.4 (5.4 to 9.7)           | 8.5 (5.6 to 12.2)             | 0.6 (0.3 to 1.1)                | 17.5 (12.4 to 26.8)               |
| Somalia      | 2046 | 17.0 (13.6 to 22.5)        | 3.7 (2.7 to 4.8)           | 4.2 (2.8 to 6.0)              | 0.3 (0.1 to 0.6)                | 8.9 (6.2 to 14.0)                 | 34.6 (27.6 to 45.7)    | 7.5 (5.4 to 9.8)           | 8.5 (5.6 to 12.2)             | 0.6 (0.3 to 1.1)                | 18.1 (12.7 to 28.5)               |
| Somalia      | 2047 | 17.4 (13.9 to 23.2)        | 3.7 (2.7 to 4.9)           | 4.2 (2.8 to 6.0)              | 0.3 (0.1 to 0.6)                | 9.2 (6.4 to 14.9)                 | 35.3 (28.2 to 47.1)    | 7.5 (5.5 to 9.9)           | 8.5 (5.6 to 12.2)             | 0.6 (0.3 to 1.2)                | 18.7 (13.0 to 30.3)               |
| Somalia      | 2048 | 17.7 (14.1 to 24.0)        | 3.7 (2.7 to 4.9)           | 4.2 (2.8 to 6.0)              | 0.3 (0.1 to 0.6)                | 9.5 (6.6 to 15.6)                 | 36.1 (28.6 to 48.7)    | 7.6 (5.5 to 10.1)          | 8.5 (5.6 to 12.2)             | 0.6 (0.3 to 1.2)                | 19.4 (13.4 to 31.7)               |
| Somalia      | 2049 | 18.1 (14.3 to 24.4)        | 3.8 (2.7 to 5.0)           | 4.2 (2.8 to 6.0)              | 0.3 (0.1 to 0.6)                | 9.8 (6.8 to 16.3)                 | 36.8 (29.1 to 49.7)    | 7.7 (5.6 to 10.2)          | 8.5 (5.6 to 12.3)             | 0.6 (0.3 to 1.2)                | 20.0 (13.8 to 33.0)               |
| Somalia      | 2050 | 18.5 (14.6 to 25.6)        | 3.8 (2.8 to 5.1)           | 4.2 (2.8 to 6.1)              | 0.3 (0.1 to 0.6)                | 10.2 (6.9 to 17.0)                | 37.7 (29.6 to 52.0)    | 7.8 (5.6 to 10.3)          | 8.5 (5.6 to 12.3)             | 0.6 (0.3 to 1.2)                | 20.7 (14.0 to 34.5)               |
| South Africa | 1995 | 338.3 (297.3 to 385.9)     | 130.3 (112.4 to 151.3)     | 60.0 (44.6 to 79.5)           | 147.5 (116.6 to 185.1)          | 0.5 (0.5 to 0.5)                  | 768.3 (675.2 to 876.5) | 296.0 (255.2 to 343.5)     | 136.2 (101.3 to 180.6)        | 335.0 (264.8 to 420.4)          | 1.1 (1.1 to 1.1)                  |
| South Africa | 1996 | 353.7 (317.6 to 395.3)     | 138.9 (121.2 to 157.6)     | 59.7 (45.5 to 77.8)           | 154.2 (127.4 to 183.5)          | 0.9 (0.9 to 0.9)                  | 803.3 (721.4 to 897.8) | 315.4 (275.3 to 357.9)     | 135.5 (103.3 to 176.7)        | 350.3 (289.4 to 416.8)          | 2.1 (2.1 to 2.1)                  |
| South Africa | 1997 | 353.6 (320.7 to 390.5)     | 138.3 (121.9 to 155.0)     | 58.1 (44.4 to 74.6)           | 156.3 (131.8 to 182.7)          | 0.9 (0.9 to 0.9)                  | 803.2 (728.4 to 886.9) | 314.0 (276.9 to 352.1)     | 132.0 (100.8 to 169.5)        | 355.0 (299.4 to 415.0)          | 2.0 (2.0 to 2.0)                  |
| South Africa | 1998 | 344.9 (313.9 to 379.4)     | 132.0 (117.0 to 147.3)     | 55.9 (42.6 to 71.5)           | 155.8 (132.4 to 182.0)          | 1.2 (1.2 to 1.2)                  | 783.4 (712.9 to 861.6) | 299.7 (265.8 to 334.7)     | 127.0 (96.7 to 162.5)         | 353.9 (300.7 to 413.4)          | 2.8 (2.8 to 2.8)                  |
| South Africa | 1999 | 340.6 (310.5 to 374.1)     | 127.4 (114.1 to 142.5)     | 54.0 (41.3 to 69.3)           | 158.1 (135.6 to 184.4)          | 1.0 (1.0 to 1.0)                  | 773.5 (705.3 to 849.6) | 289.4 (259.2 to 323.8)     | 122.7 (93.9 to 157.3)         | 359.1 (308.0 to 418.8)          | 2.3 (2.3 to 2.3)                  |
| South Africa | 2000 | 344.9 (315.1 to 377.0)     | 126.7 (113.2 to 141.6)     | 52.5 (40.2 to 67.1)           | 164.5 (141.7 to 191.2)          | 1.2 (1.2 to 1.2)                  | 783.5 (715.7 to 856.3) | 287.7 (257.0 to 321.5)     | 119.2 (91.4 to 152.3)         | 373.7 (321.7 to 434.3)          | 2.8 (2.8 to 2.8)                  |
| South Africa | 2001 | 342.8 (314.0 to 375.7)     | 124.0 (110.8 to 139.3)     | 50.1 (38.2 to 64.1)           | 167.0 (143.5 to 193.7)          | 1.8 (1.8 to 1.8)                  | 778.7 (713.2 to 853.4) | 281.6 (251.8 to 316.4)     | 113.7 (86.7 to 145.5)         | 379.3 (325.8 to 440.0)          | 4.0 (4.0 to 4.0)                  |

| Country      | Year | 2018 US Dollars per capita |                            |                               |                                 |                                   | 2018 PPP per capita       |                            |                               |                                 |                                   |
|--------------|------|----------------------------|----------------------------|-------------------------------|---------------------------------|-----------------------------------|---------------------------|----------------------------|-------------------------------|---------------------------------|-----------------------------------|
|              |      | Health spending            | Government health spending | Out-of-pocket health spending | Prepaid private health spending | Development assistance for health | Health spending           | Government health spending | Out-of-pocket health spending | Prepaid private health spending | Development assistance for health |
| South Africa | 2002 | 338.4 (309.9 to 369.9)     | 122.5 (109.3 to 136.5)     | 47.7 (36.5 to 60.7)           | 166.6 (142.3 to 193.0)          | 1.7 (1.7 to 1.7)                  | 768.6 (704.0 to 840.1)    | 278.2 (248.3 to 309.9)     | 108.3 (83.0 to 137.8)         | 378.4 (323.1 to 438.4)          | 3.8 (3.8 to 3.8)                  |
| South Africa | 2003 | 340.6 (311.3 to 372.7)     | 126.8 (112.7 to 141.2)     | 46.0 (35.5 to 58.5)           | 164.4 (140.3 to 191.5)          | 3.3 (3.3 to 3.3)                  | 773.5 (707.1 to 846.4)    | 287.9 (255.9 to 320.8)     | 104.5 (80.7 to 132.8)         | 373.5 (318.6 to 434.9)          | 7.5 (7.5 to 7.5)                  |
| South Africa | 2004 | 348.2 (317.3 to 379.0)     | 139.2 (123.2 to 154.4)     | 45.1 (34.5 to 57.3)           | 160.3 (137.2 to 187.0)          | 3.7 (3.7 to 3.7)                  | 790.9 (720.7 to 860.9)    | 316.1 (279.9 to 350.8)     | 102.3 (78.3 to 130.3)         | 364.0 (311.6 to 424.8)          | 8.5 (8.5 to 8.5)                  |
| South Africa | 2005 | 356.0 (325.6 to 388.3)     | 151.8 (135.7 to 168.7)     | 44.1 (33.8 to 55.7)           | 155.3 (132.7 to 182.6)          | 4.8 (4.8 to 4.8)                  | 808.6 (739.6 to 881.9)    | 344.8 (308.3 to 383.2)     | 100.1 (76.7 to 126.6)         | 352.8 (301.3 to 414.7)          | 11.0 (11.0 to 11.0)               |
| South Africa | 2006 | 368.4 (337.2 to 402.4)     | 170.1 (152.9 to 188.3)     | 43.2 (33.1 to 54.7)           | 149.5 (127.3 to 175.8)          | 5.6 (5.6 to 5.6)                  | 836.8 (765.8 to 914.0)    | 386.3 (347.2 to 427.8)     | 98.0 (75.1 to 124.3)          | 339.7 (289.1 to 399.3)          | 12.8 (12.8 to 12.8)               |
| South Africa | 2007 | 384.2 (354.3 to 417.4)     | 186.5 (169.2 to 205.5)     | 42.0 (31.9 to 52.9)           | 147.0 (124.1 to 173.0)          | 8.6 (8.6 to 8.6)                  | 872.5 (804.6 to 948.0)    | 423.7 (384.4 to 466.7)     | 95.3 (72.5 to 120.1)          | 334.0 (281.8 to 392.9)          | 19.6 (19.6 to 19.6)               |
| South Africa | 2008 | 401.3 (370.9 to 435.0)     | 200.9 (182.4 to 219.5)     | 40.6 (30.9 to 51.8)           | 147.9 (125.1 to 173.3)          | 11.8 (11.8 to 11.8)               | 911.5 (842.5 to 987.9)    | 456.4 (414.3 to 498.4)     | 92.3 (70.2 to 117.6)          | 336.0 (284.1 to 393.5)          | 26.9 (26.9 to 26.9)               |
| South Africa | 2009 | 413.4 (381.6 to 447.6)     | 210.7 (191.5 to 229.9)     | 39.1 (29.6 to 50.4)           | 149.7 (126.9 to 175.2)          | 13.9 (13.9 to 13.9)               | 939.0 (866.8 to 1016.7)   | 478.6 (434.9 to 522.2)     | 88.9 (67.2 to 114.6)          | 340.0 (288.2 to 397.9)          | 31.5 (31.5 to 31.5)               |
| South Africa | 2010 | 437.5 (403.2 to 471.9)     | 229.1 (209.3 to 250.4)     | 38.8 (29.3 to 49.5)           | 155.8 (131.9 to 180.9)          | 13.8 (13.8 to 13.8)               | 993.7 (915.8 to 1071.8)   | 520.3 (475.3 to 568.6)     | 88.2 (66.7 to 112.4)          | 353.8 (299.5 to 410.9)          | 31.4 (31.4 to 31.4)               |
| South Africa | 2011 | 462.2 (425.8 to 497.9)     | 246.2 (225.9 to 268.5)     | 39.0 (29.8 to 49.4)           | 161.8 (137.5 to 188.2)          | 15.2 (15.2 to 15.2)               | 1049.9 (967.0 to 1131.0)  | 559.2 (513.2 to 609.9)     | 88.6 (67.8 to 112.1)          | 367.6 (312.4 to 427.4)          | 34.5 (34.5 to 34.5)               |
| South Africa | 2012 | 478.4 (440.4 to 516.7)     | 257.1 (235.4 to 281.1)     | 39.1 (29.6 to 49.5)           | 167.5 (143.0 to 195.4)          | 14.7 (14.7 to 14.7)               | 1086.6 (1000.2 to 1173.7) | 583.9 (534.7 to 638.5)     | 88.8 (67.2 to 112.4)          | 380.5 (324.8 to 443.7)          | 33.4 (33.4 to 33.4)               |
| South Africa | 2013 | 490.6 (453.0 to 531.0)     | 264.4 (242.1 to 288.9)     | 39.2 (29.7 to 49.9)           | 172.8 (146.8 to 200.4)          | 14.2 (14.2 to 14.2)               | 1114.4 (1029.0 to 1206.0) | 600.5 (550.0 to 656.2)     | 89.1 (67.5 to 113.4)          | 392.6 (333.4 to 455.2)          | 32.3 (32.3 to 32.3)               |
| South Africa | 2014 | 501.0 (462.5 to 542.3)     | 269.4 (245.0 to 294.6)     | 39.4 (29.7 to 50.3)           | 178.6 (153.0 to 209.3)          | 13.5 (13.5 to 13.5)               | 1137.9 (1050.5 to 1231.6) | 612.0 (556.5 to 669.1)     | 89.5 (67.4 to 114.2)          | 405.8 (347.4 to 475.4)          | 30.7 (30.7 to 30.7)               |
| South Africa | 2015 | 509.6 (467.1 to 554.4)     | 274.9 (247.7 to 302.8)     | 39.8 (29.7 to 50.9)           | 185.6 (155.8 to 218.0)          | 9.4 (9.4 to 9.4)                  | 1157.5 (1060.9 to 1259.2) | 624.3 (562.7 to 687.9)     | 90.4 (67.5 to 115.5)          | 421.5 (353.9 to 495.1)          | 21.3 (21.3 to 21.3)               |
| South Africa | 2016 | 511.7 (460.4 to 564.4)     | 273.9 (242.1 to 307.0)     | 39.6 (29.3 to 51.2)           | 186.4 (149.6 to 226.5)          | 11.8 (11.8 to 11.8)               | 1162.3 (1045.8 to 1281.8) | 622.0 (549.9 to 697.3)     | 90.1 (66.6 to 116.2)          | 423.4 (339.7 to 514.3)          | 26.9 (26.9 to 26.9)               |
| South Africa | 2017 | 517.8 (466.6 to 571.9)     | 277.6 (245.4 to 310.8)     | 39.7 (29.4 to 51.1)           | 187.7 (150.7 to 228.0)          | 12.9 (12.9 to 12.9)               | 1176.2 (1059.7 to 1298.9) | 630.5 (557.5 to 705.8)     | 90.1 (66.8 to 116.1)          | 426.2 (342.2 to 517.8)          | 29.4 (29.4 to 29.4)               |
| South Africa | 2018 | 523.9 (471.7 to 578.9)     | 282.3 (249.2 to 315.7)     | 39.8 (29.4 to 51.2)           | 190.1 (152.9 to 231.0)          | 11.8 (11.6 to 11.9)               | 1190.0 (1071.4 to 1314.8) | 641.1 (566.0 to 717.1)     | 90.4 (66.7 to 116.2)          | 431.7 (347.3 to 524.7)          | 26.8 (26.5 to 27.1)               |
| South Africa | 2019 | 531.4 (478.5 to 586.7)     | 287.0 (253.5 to 321.1)     | 39.9 (29.7 to 51.5)           | 192.6 (155.2 to 233.8)          | 11.8 (11.0 to 12.6)               | 1207.0 (1086.9 to 1332.6) | 651.9 (575.8 to 729.2)     | 90.7 (67.3 to 117.0)          | 437.5 (352.5 to 531.0)          | 26.9 (25.1 to 28.6)               |
| South Africa | 2020 | 538.9 (484.7 to 595.1)     | 291.6 (257.8 to 327.2)     | 40.1 (29.7 to 51.6)           | 195.1 (157.3 to 237.0)          | 12.0 (11.0 to 13.0)               | 1223.9 (1100.8 to 1351.6) | 662.3 (585.5 to 743.1)     | 91.0 (67.3 to 117.2)          | 443.2 (357.3 to 538.4)          | 27.3 (25.0 to 29.6)               |
| South Africa | 2021 | 546.6 (490.1 to 602.8)     | 296.5 (261.6 to 333.0)     | 40.2 (29.8 to 52.0)           | 197.6 (159.0 to 240.3)          | 12.3 (11.0 to 13.5)               | 1241.4 (1113.2 to 1369.2) | 673.5 (594.2 to 756.4)     | 91.3 (67.7 to 118.1)          | 448.7 (361.1 to 545.7)          | 27.9 (25.0 to 30.7)               |
| South Africa | 2022 | 553.8 (498.3 to 611.6)     | 301.1 (265.0 to 338.3)     | 40.3 (29.9 to 52.1)           | 199.9 (160.7 to 242.6)          | 12.6 (11.1 to 14.1)               | 1257.9 (1131.8 to 1389.2) | 683.9 (601.9 to 768.3)     | 91.6 (67.8 to 118.4)          | 454.0 (364.9 to 551.1)          | 28.5 (25.3 to 32.0)               |



|              |      | 2018 US Dollars per capita |                            |                               |                                 |                                   | 2018 PPP per capita       |                            |                               |                                 |                                   |
|--------------|------|----------------------------|----------------------------|-------------------------------|---------------------------------|-----------------------------------|---------------------------|----------------------------|-------------------------------|---------------------------------|-----------------------------------|
| Country      | Year | Health spending            | Government health spending | Out-of-pocket health spending | Prepaid private health spending | Development assistance for health | Health spending           | Government health spending | Out-of-pocket health spending | Prepaid private health spending | Development assistance for health |
| South Africa | 2023 | 560.8 (506.7 to 620.9)     | 305.5 (268.1 to 342.7)     | 40.4 (30.0 to 52.2)           | 202.1 (163.0 to 245.2)          | 12.8 (11.2 to 14.6)               | 1273.8 (1150.8 to 1410.2) | 693.9 (608.9 to 778.4)     | 91.8 (68.2 to 118.5)          | 459.0 (370.1 to 556.8)          | 29.2 (25.4 to 33.1)               |
| South Africa | 2024 | 567.7 (512.2 to 629.0)     | 309.7 (271.9 to 347.7)     | 40.5 (29.7 to 52.5)           | 204.3 (164.6 to 247.5)          | 13.2 (11.4 to 15.2)               | 1289.4 (1163.3 to 1428.7) | 703.5 (617.5 to 789.7)     | 92.0 (67.5 to 119.2)          | 464.0 (373.8 to 562.2)          | 29.9 (25.8 to 34.6)               |
| South Africa | 2025 | 574.9 (518.9 to 636.4)     | 314.1 (275.3 to 352.9)     | 40.6 (29.8 to 52.7)           | 206.7 (166.3 to 250.0)          | 13.5 (11.4 to 15.8)               | 1305.8 (1178.5 to 1445.4) | 713.5 (625.2 to 801.5)     | 92.3 (67.6 to 119.7)          | 469.4 (377.8 to 567.8)          | 30.6 (26.0 to 35.8)               |
| South Africa | 2026 | 582.1 (525.1 to 645.2)     | 318.7 (279.0 to 358.0)     | 40.7 (29.7 to 53.1)           | 208.9 (168.2 to 252.8)          | 13.8 (11.6 to 16.2)               | 1322.2 (1192.6 to 1465.3) | 723.9 (633.7 to 813.2)     | 92.5 (67.5 to 120.6)          | 474.4 (382.1 to 574.1)          | 31.3 (26.4 to 36.8)               |
| South Africa | 2027 | 589.7 (530.0 to 653.1)     | 323.4 (282.8 to 363.5)     | 40.9 (29.8 to 53.6)           | 211.3 (170.3 to 256.1)          | 14.1 (11.8 to 16.9)               | 1339.3 (1203.8 to 1483.3) | 734.6 (642.3 to 825.5)     | 92.8 (67.6 to 121.8)          | 479.8 (386.8 to 581.7)          | 32.1 (26.8 to 38.4)               |
| South Africa | 2028 | 597.5 (536.2 to 662.9)     | 328.2 (286.7 to 369.8)     | 41.0 (29.8 to 53.9)           | 213.8 (172.5 to 259.2)          | 14.5 (12.1 to 17.5)               | 1357.1 (1217.9 to 1505.7) | 745.4 (651.2 to 839.9)     | 93.2 (67.8 to 122.5)          | 485.5 (391.8 to 588.7)          | 33.0 (27.5 to 39.8)               |
| South Africa | 2029 | 605.4 (542.9 to 668.7)     | 333.0 (290.7 to 375.4)     | 41.2 (30.1 to 54.1)           | 216.4 (174.7 to 262.1)          | 14.9 (12.3 to 18.1)               | 1375.1 (1233.2 to 1518.7) | 756.2 (660.2 to 852.6)     | 93.6 (68.3 to 123.0)          | 491.4 (396.9 to 595.4)          | 33.8 (27.9 to 41.2)               |
| South Africa | 2030 | 613.7 (550.1 to 678.1)     | 337.9 (294.8 to 382.3)     | 41.4 (30.3 to 54.7)           | 219.1 (177.1 to 265.4)          | 15.3 (12.5 to 18.8)               | 1393.9 (1249.4 to 1540.3) | 767.4 (669.6 to 868.2)     | 94.1 (68.7 to 124.3)          | 497.7 (402.3 to 602.7)          | 34.7 (28.3 to 42.6)               |
| South Africa | 2031 | 622.1 (559.0 to 688.6)     | 343.0 (298.8 to 389.5)     | 41.7 (30.4 to 55.4)           | 221.8 (179.0 to 268.4)          | 15.7 (12.7 to 19.7)               | 1413.0 (1269.6 to 1564.0) | 779.1 (678.7 to 884.8)     | 94.6 (69.0 to 125.7)          | 503.7 (406.6 to 609.7)          | 35.6 (28.8 to 44.7)               |
| South Africa | 2032 | 631.0 (566.7 to 699.3)     | 348.3 (303.3 to 395.8)     | 41.9 (30.4 to 56.3)           | 224.6 (181.8 to 272.0)          | 16.1 (12.8 to 20.3)               | 1433.1 (1287.2 to 1588.3) | 791.1 (688.9 to 898.9)     | 95.3 (69.1 to 127.8)          | 510.2 (413.0 to 617.8)          | 36.5 (29.2 to 46.1)               |
| South Africa | 2033 | 640.0 (574.5 to 709.5)     | 353.7 (306.5 to 401.6)     | 42.2 (30.5 to 57.1)           | 227.6 (184.4 to 275.2)          | 16.5 (13.1 to 21.3)               | 1453.7 (1304.9 to 1611.4) | 803.3 (696.1 to 912.1)     | 95.9 (69.3 to 129.6)          | 516.9 (418.9 to 625.1)          | 37.5 (29.7 to 48.3)               |
| South Africa | 2034 | 649.3 (581.5 to 721.8)     | 359.1 (310.7 to 409.8)     | 42.6 (30.7 to 58.0)           | 230.6 (186.9 to 279.0)          | 17.0 (13.4 to 21.8)               | 1474.7 (1320.8 to 1639.4) | 815.5 (705.6 to 930.8)     | 96.7 (69.7 to 131.6)          | 523.8 (424.6 to 633.7)          | 38.6 (30.4 to 49.4)               |
| South Africa | 2035 | 658.5 (586.8 to 733.3)     | 364.4 (314.2 to 416.7)     | 42.9 (30.9 to 58.7)           | 233.7 (189.1 to 283.0)          | 17.5 (13.6 to 22.9)               | 1495.5 (1332.7 to 1665.4) | 827.6 (713.7 to 946.5)     | 97.5 (70.1 to 133.3)          | 530.7 (429.6 to 642.9)          | 39.7 (30.8 to 52.0)               |
| South Africa | 2036 | 667.8 (595.3 to 744.2)     | 369.9 (318.5 to 424.2)     | 43.3 (30.9 to 59.3)           | 236.5 (191.3 to 286.2)          | 18.0 (13.9 to 24.0)               | 1516.7 (1352.2 to 1690.2) | 840.3 (723.4 to 963.5)     | 98.4 (70.3 to 134.7)          | 537.3 (434.5 to 650.1)          | 40.8 (31.6 to 54.6)               |
| South Africa | 2037 | 677.3 (604.5 to 756.0)     | 375.6 (322.9 to 431.9)     | 43.7 (31.1 to 60.2)           | 239.5 (193.4 to 290.3)          | 18.5 (14.2 to 24.9)               | 1538.3 (1373.0 to 1717.2) | 853.0 (733.4 to 980.9)     | 99.3 (70.6 to 136.8)          | 544.1 (439.3 to 659.5)          | 41.9 (32.3 to 56.5)               |
| South Africa | 2038 | 686.8 (612.5 to 767.7)     | 381.1 (326.9 to 439.1)     | 44.1 (31.3 to 60.9)           | 242.6 (195.6 to 293.9)          | 19.0 (14.5 to 26.3)               | 1559.9 (1391.2 to 1743.7) | 865.6 (742.5 to 997.4)     | 100.3 (71.2 to 138.4)         | 550.9 (444.2 to 667.6)          | 43.1 (32.8 to 59.8)               |
| South Africa | 2039 | 696.4 (618.9 to 780.4)     | 386.7 (331.4 to 446.8)     | 44.6 (31.6 to 61.8)           | 245.6 (197.8 to 298.0)          | 19.5 (14.9 to 26.8)               | 1581.8 (1405.8 to 1772.5) | 878.3 (752.6 to 1014.8)    | 101.3 (71.7 to 140.4)         | 557.9 (449.2 to 676.8)          | 44.3 (33.8 to 60.8)               |
| South Africa | 2040 | 706.1 (626.2 to 790.5)     | 392.3 (334.5 to 453.7)     | 45.1 (31.9 to 62.8)           | 248.7 (200.5 to 302.1)          | 20.1 (15.3 to 27.7)               | 1603.8 (1422.3 to 1795.5) | 890.9 (759.8 to 1030.5)    | 102.4 (72.4 to 142.6)         | 564.9 (455.3 to 686.1)          | 45.6 (34.8 to 62.8)               |
| South Africa | 2041 | 716.2 (632.9 to 802.3)     | 398.3 (338.7 to 461.9)     | 45.6 (32.1 to 63.7)           | 251.7 (203.1 to 305.8)          | 20.7 (15.7 to 28.7)               | 1626.8 (1437.5 to 1822.3) | 904.5 (769.3 to 1049.1)    | 103.6 (72.9 to 144.6)         | 571.7 (461.4 to 694.5)          | 46.9 (35.6 to 65.1)               |
| South Africa | 2042 | 726.6 (643.5 to 814.7)     | 404.3 (343.7 to 469.0)     | 46.2 (32.3 to 64.7)           | 254.9 (205.5 to 309.7)          | 21.3 (15.9 to 30.6)               | 1650.4 (1461.6 to 1850.3) | 918.4 (780.6 to 1065.3)    | 104.8 (73.5 to 146.8)         | 578.9 (466.7 to 703.3)          | 48.3 (36.1 to 69.4)               |
| South Africa | 2043 | 736.7 (651.7 to 826.3)     | 410.2 (347.4 to 476.3)     | 46.7 (32.6 to 65.8)           | 257.9 (207.6 to 313.7)          | 21.9 (16.2 to 31.7)               | 1673.3 (1480.2 to 1876.7) | 931.7 (789.0 to 1081.9)    | 106.1 (74.1 to 149.4)         | 585.8 (471.6 to 712.5)          | 49.7 (36.7 to 72.0)               |

| Country      | Year | 2018 US Dollars per capita |                            |                               |                                 |                                   | 2018 PPP per capita       |                            |                               |                                 |                                   |
|--------------|------|----------------------------|----------------------------|-------------------------------|---------------------------------|-----------------------------------|---------------------------|----------------------------|-------------------------------|---------------------------------|-----------------------------------|
|              |      | Health spending            | Government health spending | Out-of-pocket health spending | Prepaid private health spending | Development assistance for health | Health spending           | Government health spending | Out-of-pocket health spending | Prepaid private health spending | Development assistance for health |
| South Africa | 2044 | 747.2 (660.5 to 841.4)     | 416.3 (352.2 to 484.0)     | 47.3 (33.0 to 66.6)           | 261.0 (209.4 to 317.8)          | 22.6 (16.7 to 32.8)               | 1697.1 (1500.1 to 1911.1) | 945.6 (800.0 to 1099.3)    | 107.5 (74.9 to 151.3)         | 592.8 (475.7 to 721.9)          | 51.2 (37.9 to 74.5)               |
| South Africa | 2045 | 757.6 (667.5 to 855.6)     | 422.4 (356.1 to 492.3)     | 48.0 (33.4 to 67.4)           | 264.0 (210.9 to 321.6)          | 23.3 (16.8 to 34.8)               | 1720.7 (1516.1 to 1943.2) | 959.4 (808.9 to 1118.2)    | 108.9 (75.8 to 153.2)         | 599.5 (479.0 to 730.5)          | 52.8 (38.2 to 79.1)               |
| South Africa | 2046 | 768.6 (677.6 to 867.3)     | 429.2 (360.0 to 501.4)     | 48.6 (33.8 to 68.4)           | 266.9 (212.9 to 325.8)          | 23.9 (17.3 to 36.6)               | 1745.7 (1539.0 to 1969.9) | 974.7 (817.6 to 1138.7)    | 110.4 (76.8 to 155.4)         | 606.1 (483.6 to 739.9)          | 54.4 (39.3 to 83.2)               |
| South Africa | 2047 | 779.9 (687.2 to 882.7)     | 436.1 (363.9 to 510.8)     | 49.3 (34.3 to 69.4)           | 269.8 (215.0 to 329.8)          | 24.7 (17.8 to 38.9)               | 1771.4 (1560.8 to 2004.9) | 990.4 (826.5 to 1160.2)    | 112.0 (78.0 to 157.5)         | 612.9 (488.3 to 749.0)          | 56.1 (40.4 to 88.4)               |
| South Africa | 2048 | 791.4 (695.2 to 894.5)     | 443.0 (368.4 to 519.6)     | 50.0 (34.7 to 70.5)           | 272.8 (217.1 to 334.0)          | 25.5 (18.2 to 40.6)               | 1797.4 (1578.9 to 2031.7) | 1006.2 (836.8 to 1180.2)   | 113.6 (78.8 to 160.2)         | 619.7 (493.1 to 758.6)          | 57.9 (41.4 to 92.1)               |
| South Africa | 2049 | 802.9 (704.6 to 909.2)     | 449.9 (372.7 to 529.3)     | 50.8 (35.1 to 71.6)           | 275.9 (219.0 to 338.3)          | 26.3 (18.8 to 42.8)               | 1823.5 (1600.3 to 2065.0) | 1021.9 (846.5 to 1202.2)   | 115.3 (79.6 to 162.7)         | 626.6 (497.5 to 768.4)          | 59.7 (42.7 to 97.2)               |
| South Africa | 2050 | 814.8 (711.5 to 919.7)     | 457.1 (376.3 to 540.2)     | 51.5 (35.4 to 72.8)           | 279.0 (221.4 to 343.3)          | 27.2 (19.2 to 44.6)               | 1850.6 (1616.0 to 2088.9) | 1038.2 (854.6 to 1226.9)   | 116.9 (80.4 to 165.3)         | 633.8 (502.8 to 779.8)          | 61.8 (43.6 to 101.3)              |
| South Korea  | 1995 | 513.1 (477.0 to 551.2)     | 212.4 (189.3 to 236.3)     | 294.4 (265.6 to 324.6)        | 6.4 (3.7 to 10.3)               | 0.0 (0.0 to 0.0)                  | 676.1 (628.6 to 726.4)    | 279.8 (249.5 to 311.4)     | 387.9 (350.0 to 427.7)        | 8.4 (4.8 to 13.6)               | 0.0 (0.0 to 0.0)                  |
| South Korea  | 1996 | 557.4 (526.7 to 589.9)     | 244.0 (222.7 to 266.4)     | 305.6 (282.8 to 329.8)        | 7.8 (4.6 to 12.0)               | 0.0 (0.0 to 0.0)                  | 734.5 (694.0 to 777.3)    | 321.5 (293.5 to 351.0)     | 402.6 (372.6 to 434.5)        | 10.3 (6.1 to 15.8)              | 0.0 (0.0 to 0.0)                  |
| South Korea  | 1997 | 593.7 (563.3 to 622.7)     | 276.7 (256.8 to 297.2)     | 307.1 (286.6 to 328.6)        | 9.8 (6.2 to 14.6)               | 0.0 (0.0 to 0.0)                  | 782.3 (742.2 to 820.5)    | 364.6 (338.4 to 391.6)     | 404.7 (377.6 to 433.0)        | 12.9 (8.2 to 19.2)              | 0.0 (0.0 to 0.0)                  |
| South Korea  | 1998 | 594.4 (565.8 to 622.7)     | 290.4 (270.5 to 309.7)     | 292.2 (273.9 to 310.5)        | 11.7 (7.7 to 16.7)              | 0.0 (0.0 to 0.0)                  | 783.2 (745.5 to 820.5)    | 382.7 (356.5 to 408.0)     | 385.0 (360.9 to 409.1)        | 15.4 (10.1 to 22.0)             | 0.0 (0.0 to 0.0)                  |
| South Korea  | 1999 | 666.0 (637.8 to 695.8)     | 343.1 (322.3 to 364.9)     | 308.7 (289.7 to 328.2)        | 14.2 (9.7 to 19.7)              | 0.0 (0.0 to 0.0)                  | 877.6 (840.4 to 916.8)    | 452.1 (424.7 to 480.9)     | 406.8 (381.7 to 432.4)        | 18.7 (12.8 to 26.0)             | 0.0 (0.0 to 0.0)                  |
| South Korea  | 2000 | 732.9 (705.1 to 763.0)     | 393.4 (373.7 to 415.4)     | 322.9 (305.5 to 341.6)        | 16.6 (11.8 to 22.4)             | 0.0 (0.0 to 0.0)                  | 965.7 (929.0 to 1005.4)   | 518.4 (492.4 to 547.4)     | 425.4 (402.5 to 450.1)        | 21.9 (15.6 to 29.5)             | 0.0 (0.0 to 0.0)                  |
| South Korea  | 2001 | 817.7 (790.0 to 848.1)     | 455.7 (434.5 to 478.1)     | 343.1 (326.1 to 360.8)        | 18.9 (14.0 to 24.5)             | 0.0 (0.0 to 0.0)                  | 1077.5 (1040.9 to 1117.4) | 600.5 (572.6 to 630.0)     | 452.1 (429.6 to 475.4)        | 24.9 (18.4 to 32.3)             | 0.0 (0.0 to 0.0)                  |
| South Korea  | 2002 | 887.8 (858.8 to 917.4)     | 508.2 (487.5 to 530.3)     | 358.4 (341.8 to 376.3)        | 21.2 (16.1 to 27.3)             | 0.0 (0.0 to 0.0)                  | 1169.9 (1131.6 to 1208.8) | 669.7 (642.4 to 698.8)     | 472.2 (450.4 to 495.8)        | 27.9 (21.3 to 35.9)             | 0.0 (0.0 to 0.0)                  |
| South Korea  | 2003 | 941.7 (914.2 to 970.6)     | 544.0 (523.5 to 565.3)     | 373.8 (357.2 to 391.6)        | 23.9 (18.5 to 30.0)             | 0.0 (0.0 to 0.0)                  | 1240.8 (1204.6 to 1279.0) | 716.8 (689.7 to 744.9)     | 492.5 (470.7 to 516.1)        | 31.5 (24.3 to 39.5)             | 0.0 (0.0 to 0.0)                  |
| South Korea  | 2004 | 1006.2 (975.7 to 1038.7)   | 587.2 (565.3 to 609.3)     | 391.9 (373.9 to 409.0)        | 27.1 (21.1 to 33.5)             | 0.0 (0.0 to 0.0)                  | 1325.9 (1285.6 to 1368.6) | 773.8 (744.9 to 802.8)     | 516.4 (492.7 to 538.9)        | 35.7 (27.8 to 44.1)             | 0.0 (0.0 to 0.0)                  |
| South Korea  | 2005 | 1088.8 (1058.8 to 1120.6)  | 640.6 (616.8 to 665.3)     | 417.2 (397.0 to 436.8)        | 31.1 (24.8 to 38.5)             | 0.0 (0.0 to 0.0)                  | 1434.7 (1395.1 to 1476.6) | 844.0 (812.7 to 876.7)     | 549.7 (523.1 to 575.5)        | 41.0 (32.7 to 50.8)             | 0.0 (0.0 to 0.0)                  |
| South Korea  | 2006 | 1196.6 (1165.2 to 1230.1)  | 711.1 (686.2 to 735.3)     | 448.7 (427.9 to 469.1)        | 36.9 (29.9 to 45.6)             | 0.0 (0.0 to 0.0)                  | 1576.7 (1535.3 to 1620.9) | 936.9 (904.1 to 968.9)     | 591.2 (563.9 to 618.1)        | 48.6 (39.4 to 60.1)             | 0.0 (0.0 to 0.0)                  |
| South Korea  | 2007 | 1317.4 (1284.5 to 1353.4)  | 786.5 (759.6 to 811.5)     | 485.9 (463.6 to 508.0)        | 45.0 (36.9 to 54.4)             | 0.0 (0.0 to 0.0)                  | 1735.9 (1692.6 to 1783.3) | 1036.3 (1000.9 to 1069.3)  | 640.3 (610.9 to 669.4)        | 59.3 (48.7 to 71.6)             | 0.0 (0.0 to 0.0)                  |
| South Korea  | 2008 | 1414.1 (1382.1 to 1451.2)  | 841.4 (814.9 to 867.9)     | 517.2 (493.5 to 540.5)        | 55.5 (46.6 to 66.3)             | 0.0 (0.0 to 0.0)                  | 1863.3 (1821.1 to 1912.2) | 1108.7 (1073.7 to 1143.6)  | 681.5 (650.3 to 712.2)        | 73.2 (61.4 to 87.3)             | 0.0 (0.0 to 0.0)                  |

| Country     | Year | 2018 US Dollars per capita |                            |                               |                                 |                                   | 2018 PPP per capita       |                            |                               |                                 |                                   |
|-------------|------|----------------------------|----------------------------|-------------------------------|---------------------------------|-----------------------------------|---------------------------|----------------------------|-------------------------------|---------------------------------|-----------------------------------|
|             |      | Health spending            | Government health spending | Out-of-pocket health spending | Prepaid private health spending | Development assistance for health | Health spending           | Government health spending | Out-of-pocket health spending | Prepaid private health spending | Development assistance for health |
| South Korea | 2009 | 1502.5 (1469.1 to 1539.8)  | 897.7 (873.1 to 924.3)     | 536.2 (514.0 to 558.1)        | 68.7 (58.2 to 81.2)             | 0.0 (0.0 to 0.0)                  | 1979.8 (1935.7 to 2028.9) | 1182.9 (1150.4 to 1218.0)  | 706.5 (677.3 to 735.3)        | 90.5 (76.7 to 107.0)            | 0.0 (0.0 to 0.0)                  |
| South Korea | 2010 | 1625.8 (1591.0 to 1663.6)  | 975.9 (949.5 to 1003.8)    | 566.7 (544.0 to 588.5)        | 83.2 (71.3 to 96.4)             | 0.0 (0.0 to 0.0)                  | 2142.3 (2096.5 to 2192.0) | 1285.9 (1251.2 to 1322.7)  | 746.7 (716.8 to 775.4)        | 109.7 (93.9 to 127.0)           | 0.0 (0.0 to 0.0)                  |
| South Korea | 2011 | 1692.4 (1654.1 to 1730.5)  | 1009.4 (982.6 to 1037.2)   | 587.3 (565.7 to 609.8)        | 95.7 (83.1 to 110.1)            | 0.0 (0.0 to 0.0)                  | 2230.0 (2179.5 to 2280.3) | 1330.1 (1294.7 to 1366.7)  | 773.8 (745.4 to 803.5)        | 126.1 (109.4 to 145.1)          | 0.0 (0.0 to 0.0)                  |
| South Korea | 2012 | 1749.7 (1711.1 to 1787.1)  | 1035.1 (1007.1 to 1063.7)  | 607.8 (586.3 to 629.6)        | 106.8 (93.3 to 123.0)           | 0.0 (0.0 to 0.0)                  | 2305.5 (2254.7 to 2354.8) | 1363.9 (1327.1 to 1401.6)  | 800.9 (772.6 to 829.6)        | 140.8 (123.0 to 162.1)          | 0.0 (0.0 to 0.0)                  |
| South Korea | 2013 | 1829.5 (1789.9 to 1868.6)  | 1078.5 (1050.1 to 1107.7)  | 632.4 (609.1 to 655.8)        | 118.7 (103.6 to 136.2)          | 0.0 (0.0 to 0.0)                  | 2410.7 (2358.4 to 2462.2) | 1421.0 (1383.7 to 1459.6)  | 833.2 (802.6 to 864.1)        | 156.4 (136.6 to 179.4)          | 0.0 (0.0 to 0.0)                  |
| South Korea | 2014 | 1929.2 (1888.0 to 1969.7)  | 1135.0 (1104.7 to 1163.9)  | 661.4 (638.0 to 686.2)        | 132.8 (116.7 to 151.8)          | 0.0 (0.0 to 0.0)                  | 2542.1 (2487.7 to 2595.5) | 1495.6 (1455.7 to 1533.7)  | 871.5 (840.6 to 904.2)        | 174.9 (153.8 to 200.1)          | 0.0 (0.0 to 0.0)                  |
| South Korea | 2015 | 2035.3 (1991.4 to 2078.7)  | 1198.6 (1167.3 to 1230.4)  | 690.2 (665.5 to 714.4)        | 146.5 (126.4 to 166.9)          | 0.0 (0.0 to 0.0)                  | 2681.9 (2624.0 to 2739.1) | 1579.3 (1538.0 to 1621.2)  | 909.5 (876.9 to 941.3)        | 193.1 (166.5 to 220.0)          | 0.0 (0.0 to 0.0)                  |
| South Korea | 2016 | 2150.2 (2087.5 to 2217.4)  | 1269.9 (1229.0 to 1313.4)  | 718.1 (683.7 to 752.7)        | 162.2 (135.3 to 192.8)          | 0.0 (0.0 to 0.0)                  | 2833.3 (2750.6 to 2921.8) | 1673.3 (1619.4 to 1730.6)  | 946.2 (900.9 to 991.8)        | 213.7 (178.2 to 254.0)          | 0.0 (0.0 to 0.0)                  |
| South Korea | 2017 | 2241.7 (2176.3 to 2316.4)  | 1336.1 (1293.2 to 1382.2)  | 738.7 (702.9 to 773.6)        | 167.0 (139.3 to 198.1)          | 0.0 (0.0 to 0.0)                  | 2953.8 (2867.7 to 3052.2) | 1760.5 (1704.1 to 1821.3)  | 973.3 (926.2 to 1019.4)       | 220.0 (183.5 to 261.1)          | 0.0 (0.0 to 0.0)                  |
| South Korea | 2018 | 2308.4 (2240.5 to 2385.6)  | 1382.8 (1335.8 to 1432.5)  | 753.6 (717.7 to 792.2)        | 172.0 (143.7 to 204.3)          | 0.0 (0.0 to 0.0)                  | 3041.7 (2952.2 to 3143.5) | 1822.1 (1760.2 to 1887.6)  | 993.0 (945.6 to 1043.8)       | 226.7 (189.3 to 269.1)          | 0.0 (0.0 to 0.0)                  |
| South Korea | 2019 | 2375.0 (2302.2 to 2454.9)  | 1430.7 (1377.3 to 1485.7)  | 767.5 (729.3 to 808.8)        | 176.7 (147.6 to 210.0)          | 0.0 (0.0 to 0.0)                  | 3129.5 (3033.6 to 3234.7) | 1885.2 (1814.8 to 1957.7)  | 1011.4 (961.0 to 1065.7)      | 232.9 (194.5 to 276.7)          | 0.0 (0.0 to 0.0)                  |
| South Korea | 2020 | 2444.0 (2365.3 to 2531.5)  | 1480.6 (1421.9 to 1544.6)  | 782.0 (740.4 to 824.7)        | 181.5 (151.6 to 215.3)          | 0.0 (0.0 to 0.0)                  | 3220.4 (3116.7 to 3335.6) | 1951.0 (1873.5 to 2035.2)  | 1030.4 (975.5 to 1086.7)      | 239.1 (199.7 to 283.7)          | 0.0 (0.0 to 0.0)                  |
| South Korea | 2021 | 2513.2 (2427.7 to 2607.6)  | 1530.3 (1462.1 to 1599.6)  | 796.8 (754.2 to 843.8)        | 186.0 (155.5 to 220.3)          | 0.0 (0.0 to 0.0)                  | 3311.5 (3198.9 to 3436.0) | 2016.5 (1926.5 to 2107.7)  | 1049.9 (993.8 to 1111.9)      | 245.1 (204.9 to 290.3)          | 0.0 (0.0 to 0.0)                  |
| South Korea | 2022 | 2582.4 (2492.7 to 2685.6)  | 1579.5 (1501.1 to 1659.2)  | 812.6 (767.1 to 861.7)        | 190.2 (159.3 to 225.5)          | 0.0 (0.0 to 0.0)                  | 3402.7 (3284.5 to 3538.8) | 2081.2 (1977.9 to 2186.2)  | 1070.8 (1010.8 to 1135.5)     | 250.7 (209.8 to 297.2)          | 0.0 (0.0 to 0.0)                  |
| South Korea | 2023 | 2652.9 (2547.6 to 2766.2)  | 1628.7 (1538.0 to 1718.4)  | 829.9 (779.9 to 881.2)        | 194.3 (162.4 to 230.3)          | 0.0 (0.0 to 0.0)                  | 3495.6 (3356.9 to 3644.9) | 2146.1 (2026.6 to 2264.3)  | 1093.5 (1027.7 to 1161.1)     | 256.1 (214.0 to 303.5)          | 0.0 (0.0 to 0.0)                  |
| South Korea | 2024 | 2723.1 (2606.5 to 2851.4)  | 1677.2 (1575.9 to 1778.4)  | 847.6 (794.7 to 901.6)        | 198.3 (165.7 to 234.7)          | 0.0 (0.0 to 0.0)                  | 3588.1 (3434.5 to 3757.2) | 2210.0 (2076.5 to 2343.3)  | 1116.9 (1047.1 to 1188.1)     | 261.3 (218.4 to 309.3)          | 0.0 (0.0 to 0.0)                  |
| South Korea | 2025 | 2793.1 (2666.6 to 2930.7)  | 1725.1 (1615.0 to 1840.9)  | 865.8 (807.0 to 925.6)        | 202.2 (168.9 to 239.6)          | 0.0 (0.0 to 0.0)                  | 3680.4 (3513.7 to 3861.7) | 2273.1 (2128.1 to 2425.6)  | 1140.9 (1063.3 to 1219.6)     | 266.4 (222.5 to 315.7)          | 0.0 (0.0 to 0.0)                  |
| South Korea | 2026 | 2862.2 (2719.8 to 3017.8)  | 1771.9 (1651.5 to 1901.2)  | 884.2 (819.6 to 952.4)        | 206.1 (171.9 to 244.2)          | 0.0 (0.0 to 0.0)                  | 3771.4 (3583.8 to 3976.4) | 2334.7 (2176.2 to 2505.1)  | 1165.1 (1080.0 to 1254.9)     | 271.6 (226.5 to 321.8)          | 0.0 (0.0 to 0.0)                  |
| South Korea | 2027 | 2933.0 (2772.3 to 3103.9)  | 1819.7 (1689.6 to 1961.9)  | 903.2 (829.5 to 982.8)        | 210.2 (175.0 to 249.0)          | 0.0 (0.0 to 0.0)                  | 3864.7 (3652.9 to 4090.0) | 2397.7 (2226.4 to 2585.2)  | 1190.1 (1093.0 to 1295.1)     | 277.0 (230.6 to 328.1)          | 0.0 (0.0 to 0.0)                  |
| South Korea | 2028 | 3001.4 (2823.3 to 3191.5)  | 1865.7 (1724.8 to 2023.5)  | 921.6 (838.6 to 1012.3)       | 214.1 (178.4 to 253.6)          | 0.0 (0.0 to 0.0)                  | 3954.8 (3720.1 to 4205.3) | 2458.3 (2272.6 to 2666.3)  | 1214.4 (1104.9 to 1333.8)     | 282.1 (235.0 to 334.1)          | 0.0 (0.0 to 0.0)                  |
| South Korea | 2029 | 3071.5 (2878.2 to 3275.3)  | 1913.1 (1759.9 to 2085.3)  | 940.3 (845.2 to 1047.7)       | 218.1 (181.9 to 258.3)          | 0.0 (0.0 to 0.0)                  | 4047.1 (3792.5 to 4315.7) | 2520.8 (2318.9 to 2747.7)  | 1239.0 (1113.7 to 1380.5)     | 287.4 (239.6 to 340.3)          | 0.0 (0.0 to 0.0)                  |

|             |      | 2018 US Dollars per capita |                            |                               |                                 |                                   | 2018 PPP per capita       |                            |                               |                                 |                                   |
|-------------|------|----------------------------|----------------------------|-------------------------------|---------------------------------|-----------------------------------|---------------------------|----------------------------|-------------------------------|---------------------------------|-----------------------------------|
| Country     | Year | Health spending            | Government health spending | Out-of-pocket health spending | Prepaid private health spending | Development assistance for health | Health spending           | Government health spending | Out-of-pocket health spending | Prepaid private health spending | Development assistance for health |
| South Korea | 2030 | 3142.0 (2932.5 to 3367.5)  | 1961.0 (1794.5 to 2149.2)  | 958.9 (853.0 to 1079.8)       | 222.1 (184.8 to 263.0)          | 0.0 (0.0 to 0.0)                  | 4140.1 (3864.1 to 4437.3) | 2583.9 (2364.6 to 2831.9)  | 1263.5 (1124.0 to 1422.9)     | 292.7 (243.6 to 346.6)          | 0.0 (0.0 to 0.0)                  |
| South Korea | 2031 | 3211.1 (2989.7 to 3450.6)  | 2007.7 (1825.8 to 2211.0)  | 977.3 (859.6 to 1111.7)       | 226.1 (187.5 to 268.2)          | 0.0 (0.0 to 0.0)                  | 4231.2 (3939.4 to 4546.7) | 2645.5 (2405.8 to 2913.3)  | 1287.7 (1132.7 to 1464.9)     | 298.0 (247.1 to 353.4)          | 0.0 (0.0 to 0.0)                  |
| South Korea | 2032 | 3281.7 (3025.0 to 3536.7)  | 2055.7 (1860.7 to 2271.3)  | 995.8 (865.7 to 1146.6)       | 230.2 (190.6 to 273.2)          | 0.0 (0.0 to 0.0)                  | 4324.2 (3985.9 to 4660.1) | 2708.7 (2451.7 to 2992.8)  | 1312.2 (1140.7 to 1510.8)     | 303.4 (251.1 to 359.9)          | 0.0 (0.0 to 0.0)                  |
| South Korea | 2033 | 3353.6 (3098.5 to 3641.9)  | 2104.7 (1896.9 to 2333.5)  | 1014.5 (872.7 to 1182.4)      | 234.5 (194.5 to 278.6)          | 0.0 (0.0 to 0.0)                  | 4418.9 (4082.8 to 4798.8) | 2773.2 (2499.4 to 3074.8)  | 1336.7 (1149.9 to 1558.0)     | 308.9 (256.2 to 367.1)          | 0.0 (0.0 to 0.0)                  |
| South Korea | 2034 | 3426.7 (3156.6 to 3749.4)  | 2154.8 (1932.8 to 2398.9)  | 1033.2 (880.4 to 1216.5)      | 238.8 (198.6 to 284.3)          | 0.0 (0.0 to 0.0)                  | 4515.3 (4159.4 to 4940.4) | 2839.2 (2546.7 to 3160.9)  | 1361.4 (1160.1 to 1602.9)     | 314.6 (261.7 to 374.6)          | 0.0 (0.0 to 0.0)                  |
| South Korea | 2035 | 3499.5 (3202.5 to 3829.8)  | 2204.7 (1967.8 to 2465.6)  | 1051.7 (887.1 to 1248.8)      | 243.1 (202.0 to 290.3)          | 0.0 (0.0 to 0.0)                  | 4611.2 (4219.9 to 5046.4) | 2905.1 (2592.9 to 3248.8)  | 1385.8 (1168.8 to 1645.5)     | 320.3 (266.1 to 382.5)          | 0.0 (0.0 to 0.0)                  |
| South Korea | 2036 | 3571.7 (3257.0 to 3918.5)  | 2254.0 (2001.2 to 2532.0)  | 1070.2 (893.1 to 1280.7)      | 247.4 (205.4 to 295.8)          | 0.0 (0.0 to 0.0)                  | 4706.2 (4291.6 to 5163.3) | 2970.0 (2636.9 to 3336.3)  | 1410.1 (1176.8 to 1687.6)     | 326.0 (270.6 to 389.8)          | 0.0 (0.0 to 0.0)                  |
| South Korea | 2037 | 3644.6 (3315.5 to 4005.1)  | 2304.1 (2038.7 to 2597.1)  | 1088.6 (899.6 to 1313.9)      | 251.9 (208.8 to 300.9)          | 0.0 (0.0 to 0.0)                  | 4802.3 (4368.8 to 5277.3) | 3036.0 (2686.3 to 3422.0)  | 1434.4 (1185.4 to 1731.3)     | 331.9 (275.1 to 396.5)          | 0.0 (0.0 to 0.0)                  |
| South Korea | 2038 | 3719.8 (3369.3 to 4113.8)  | 2355.8 (2077.1 to 2665.3)  | 1107.3 (908.2 to 1347.3)      | 256.6 (212.4 to 307.1)          | 0.0 (0.0 to 0.0)                  | 4901.4 (4439.6 to 5420.6) | 3104.2 (2736.9 to 3512.0)  | 1459.1 (1196.7 to 1775.3)     | 338.1 (279.8 to 404.7)          | 0.0 (0.0 to 0.0)                  |
| South Korea | 2039 | 3795.9 (3436.3 to 4207.2)  | 2408.5 (2117.6 to 2734.9)  | 1126.0 (917.9 to 1380.5)      | 261.4 (216.0 to 313.8)          | 0.0 (0.0 to 0.0)                  | 5001.7 (4527.9 to 5543.7) | 3173.6 (2790.3 to 3603.7)  | 1483.7 (1209.4 to 1819.0)     | 344.4 (284.7 to 413.4)          | 0.0 (0.0 to 0.0)                  |
| South Korea | 2040 | 3873.2 (3492.7 to 4291.0)  | 2462.0 (2156.7 to 2805.0)  | 1144.8 (927.6 to 1413.5)      | 266.4 (219.8 to 320.0)          | 0.0 (0.0 to 0.0)                  | 5103.5 (4602.2 to 5654.1) | 3244.0 (2841.8 to 3696.0)  | 1508.5 (1222.3 to 1862.5)     | 351.0 (289.7 to 421.7)          | 0.0 (0.0 to 0.0)                  |
| South Korea | 2041 | 3953.1 (3548.2 to 4382.6)  | 2517.1 (2201.3 to 2875.3)  | 1164.2 (938.1 to 1446.0)      | 271.8 (224.0 to 326.8)          | 0.0 (0.0 to 0.0)                  | 5208.9 (4675.3 to 5774.7) | 3316.6 (2900.5 to 3788.7)  | 1534.1 (1236.0 to 1905.4)     | 358.2 (295.2 to 430.6)          | 0.0 (0.0 to 0.0)                  |
| South Korea | 2042 | 4033.2 (3609.5 to 4498.5)  | 2572.1 (2245.6 to 2942.1)  | 1183.6 (948.7 to 1478.0)      | 277.4 (228.3 to 334.4)          | 0.0 (0.0 to 0.0)                  | 5314.4 (4756.2 to 5927.4) | 3389.2 (2959.0 to 3876.7)  | 1559.6 (1250.0 to 1947.6)     | 365.6 (300.8 to 440.6)          | 0.0 (0.0 to 0.0)                  |
| South Korea | 2043 | 4117.4 (3685.6 to 4600.5)  | 2630.4 (2293.3 to 3017.7)  | 1203.5 (960.3 to 1510.3)      | 283.4 (232.9 to 341.8)          | 0.0 (0.0 to 0.0)                  | 5425.3 (4856.4 to 6061.9) | 3465.9 (3021.8 to 3976.3)  | 1585.9 (1265.4 to 1990.1)     | 373.5 (306.8 to 450.3)          | 0.0 (0.0 to 0.0)                  |
| South Korea | 2044 | 4201.6 (3755.7 to 4697.1)  | 2689.0 (2341.5 to 3093.4)  | 1223.1 (971.6 to 1542.1)      | 289.5 (237.2 to 349.2)          | 0.0 (0.0 to 0.0)                  | 5536.3 (4948.8 to 6189.2) | 3543.2 (3085.3 to 4076.1)  | 1611.7 (1280.2 to 2031.9)     | 381.4 (312.5 to 460.1)          | 0.0 (0.0 to 0.0)                  |
| South Korea | 2045 | 4286.0 (3812.0 to 4791.4)  | 2748.1 (2388.8 to 3165.9)  | 1242.4 (982.4 to 1568.0)      | 295.5 (241.8 to 357.1)          | 0.0 (0.0 to 0.0)                  | 5647.5 (5023.0 to 6313.5) | 3621.1 (3147.7 to 4171.6)  | 1637.1 (1294.4 to 2066.1)     | 389.3 (318.6 to 470.5)          | 0.0 (0.0 to 0.0)                  |
| South Korea | 2046 | 4371.3 (3907.5 to 4887.0)  | 2807.8 (2438.9 to 3243.2)  | 1261.8 (994.5 to 1595.1)      | 301.7 (246.4 to 365.3)          | 0.0 (0.0 to 0.0)                  | 5759.9 (5148.7 to 6439.4) | 3699.7 (3213.6 to 4273.4)  | 1662.6 (1310.4 to 2101.8)     | 397.6 (324.6 to 481.3)          | 0.0 (0.0 to 0.0)                  |
| South Korea | 2047 | 4455.3 (3963.0 to 5010.4)  | 2866.8 (2486.7 to 3317.0)  | 1280.7 (1006.5 to 1621.4)     | 307.9 (251.1 to 373.4)          | 0.0 (0.0 to 0.0)                  | 5870.6 (5221.9 to 6602.0) | 3777.4 (3276.7 to 4370.7)  | 1687.5 (1326.2 to 2136.4)     | 405.7 (330.9 to 492.0)          | 0.0 (0.0 to 0.0)                  |
| South Korea | 2048 | 4540.7 (4024.0 to 5100.7)  | 2926.7 (2532.4 to 3396.4)  | 1299.7 (1021.2 to 1650.0)     | 314.2 (255.3 to 381.7)          | 0.0 (0.0 to 0.0)                  | 5983.1 (5302.3 to 6721.0) | 3856.5 (3336.9 to 4475.3)  | 1712.6 (1345.6 to 2174.2)     | 414.0 (336.4 to 502.9)          | 0.0 (0.0 to 0.0)                  |
| South Korea | 2049 | 4629.8 (4107.4 to 5184.2)  | 2989.3 (2575.2 to 3471.8)  | 1319.6 (1033.4 to 1678.5)     | 320.9 (259.6 to 390.9)          | 0.0 (0.0 to 0.0)                  | 6100.4 (5412.2 to 6831.0) | 3938.8 (3393.2 to 4574.6)  | 1738.8 (1361.7 to 2211.7)     | 422.8 (342.1 to 515.1)          | 0.0 (0.0 to 0.0)                  |
| South Korea | 2050 | 4721.6 (4170.2 to 5340.9)  | 3053.4 (2614.7 to 3552.1)  | 1340.3 (1046.5 to 1707.7)     | 327.9 (263.9 to 399.9)          | 0.0 (0.0 to 0.0)                  | 6221.5 (5495.0 to 7037.4) | 4023.3 (3445.3 to 4680.5)  | 1766.1 (1379.0 to 2250.2)     | 432.1 (347.8 to 527.0)          | 0.0 (0.0 to 0.0)                  |

| Country     | Year | 2018 US Dollars per capita |                            |                               |                                 |                                   | 2018 PPP per capita    |                            |                               |                                 |                                   |
|-------------|------|----------------------------|----------------------------|-------------------------------|---------------------------------|-----------------------------------|------------------------|----------------------------|-------------------------------|---------------------------------|-----------------------------------|
|             |      | Health spending            | Government health spending | Out-of-pocket health spending | Prepaid private health spending | Development assistance for health | Health spending        | Government health spending | Out-of-pocket health spending | Prepaid private health spending | Development assistance for health |
| South Sudan | 1995 | 42.1 (33.5 to 51.7)        | 18.0 (13.7 to 23.9)        | 20.3 (14.2 to 28.5)           | 2.4 (1.2 to 4.7)                | 1.4 (1.4 to 1.4)                  | 199.9 (158.9 to 245.2) | 85.5 (65.2 to 113.4)       | 96.4 (67.5 to 135.2)          | 11.6 (5.5 to 22.4)              | 6.5 (6.5 to 6.5)                  |
| South Sudan | 1996 | 42.0 (33.4 to 51.6)        | 18.1 (14.0 to 24.0)        | 20.3 (14.2 to 28.5)           | 2.5 (1.2 to 4.7)                | 1.1 (1.1 to 1.1)                  | 199.1 (158.4 to 244.5) | 86.0 (66.5 to 113.8)       | 96.1 (67.3 to 135.3)          | 11.7 (5.5 to 22.3)              | 5.4 (5.4 to 5.4)                  |
| South Sudan | 1997 | 41.9 (33.3 to 51.7)        | 18.4 (14.0 to 24.1)        | 20.3 (14.1 to 28.2)           | 2.5 (1.2 to 4.6)                | 0.7 (0.7 to 0.7)                  | 198.5 (157.9 to 245.3) | 87.2 (66.6 to 114.4)       | 96.1 (66.9 to 133.7)          | 11.8 (5.7 to 21.9)              | 3.4 (3.4 to 3.4)                  |
| South Sudan | 1998 | 42.3 (34.1 to 52.4)        | 18.6 (14.2 to 24.7)        | 20.2 (14.0 to 27.6)           | 2.5 (1.2 to 4.7)                | 1.0 (1.0 to 1.0)                  | 200.7 (161.5 to 248.3) | 88.1 (67.5 to 117.2)       | 95.9 (66.2 to 131.1)          | 11.9 (5.7 to 22.5)              | 4.8 (4.8 to 4.8)                  |
| South Sudan | 1999 | 42.3 (34.0 to 52.7)        | 18.8 (14.4 to 25.0)        | 20.1 (14.1 to 27.4)           | 2.5 (1.2 to 4.8)                | 0.9 (0.9 to 0.9)                  | 200.7 (161.4 to 249.8) | 89.1 (68.5 to 118.7)       | 95.4 (66.9 to 130.2)          | 11.9 (5.6 to 22.6)              | 4.4 (4.4 to 4.4)                  |
| South Sudan | 2000 | 42.8 (34.2 to 53.0)        | 19.2 (14.7 to 25.2)        | 20.1 (14.2 to 27.5)           | 2.6 (1.2 to 4.8)                | 0.8 (0.8 to 0.8)                  | 202.8 (162.4 to 251.2) | 91.2 (69.6 to 119.6)       | 95.4 (67.2 to 130.6)          | 12.1 (5.9 to 22.7)              | 4.0 (4.0 to 4.0)                  |
| South Sudan | 2001 | 42.8 (34.7 to 52.6)        | 19.4 (14.7 to 25.4)        | 20.1 (14.0 to 27.5)           | 2.6 (1.3 to 5.0)                | 0.7 (0.7 to 0.7)                  | 203.2 (164.6 to 249.2) | 92.2 (69.8 to 120.6)       | 95.3 (66.2 to 130.2)          | 12.2 (6.0 to 23.5)              | 3.5 (3.5 to 3.5)                  |
| South Sudan | 2002 | 43.7 (35.5 to 53.7)        | 19.7 (14.9 to 25.7)        | 20.1 (14.0 to 27.8)           | 2.6 (1.3 to 4.9)                | 1.3 (1.3 to 1.3)                  | 207.2 (168.3 to 254.6) | 93.3 (70.6 to 121.9)       | 95.5 (66.3 to 131.7)          | 12.2 (6.0 to 23.3)              | 6.1 (6.1 to 6.1)                  |
| South Sudan | 2003 | 44.0 (35.8 to 53.7)        | 19.9 (15.1 to 26.0)        | 20.3 (14.3 to 28.2)           | 2.6 (1.2 to 5.0)                | 1.2 (1.2 to 1.2)                  | 208.6 (170.0 to 254.6) | 94.5 (71.7 to 123.3)       | 96.2 (67.7 to 133.6)          | 12.4 (5.9 to 23.9)              | 5.5 (5.5 to 5.5)                  |
| South Sudan | 2004 | 45.9 (37.6 to 55.5)        | 20.4 (15.5 to 26.6)        | 20.7 (14.4 to 28.6)           | 2.6 (1.2 to 5.2)                | 2.2 (2.2 to 2.2)                  | 217.7 (178.5 to 263.4) | 96.6 (73.7 to 126.2)       | 98.0 (68.3 to 135.6)          | 12.5 (5.9 to 24.6)              | 10.6 (10.6 to 10.6)               |
| South Sudan | 2005 | 48.1 (39.8 to 57.5)        | 20.6 (15.7 to 26.6)        | 21.0 (14.5 to 29.4)           | 2.7 (1.2 to 5.3)                | 3.9 (3.9 to 3.9)                  | 228.2 (188.7 to 272.7) | 97.7 (74.5 to 126.2)       | 99.4 (68.9 to 139.4)          | 12.7 (5.9 to 24.9)              | 18.4 (18.4 to 18.4)               |
| South Sudan | 2006 | 49.3 (40.8 to 59.1)        | 20.9 (15.8 to 26.9)        | 21.3 (14.6 to 29.8)           | 2.7 (1.3 to 5.2)                | 4.4 (4.4 to 4.4)                  | 234.0 (193.5 to 280.3) | 99.0 (75.1 to 127.6)       | 101.1 (69.5 to 141.2)         | 12.9 (6.1 to 24.6)              | 20.9 (20.9 to 20.9)               |
| South Sudan | 2007 | 49.6 (40.7 to 59.7)        | 21.1 (15.8 to 27.3)        | 21.6 (14.8 to 29.8)           | 2.8 (1.3 to 5.2)                | 4.1 (4.1 to 4.1)                  | 235.3 (193.2 to 283.0) | 100.2 (75.0 to 129.4)      | 102.6 (70.0 to 141.3)         | 13.2 (6.1 to 24.6)              | 19.3 (19.3 to 19.3)               |
| South Sudan | 2008 | 51.1 (42.3 to 61.2)        | 21.0 (15.9 to 27.3)        | 21.7 (15.1 to 29.7)           | 2.8 (1.3 to 5.1)                | 5.6 (5.6 to 5.6)                  | 242.2 (200.5 to 290.3) | 99.7 (75.3 to 129.6)       | 102.8 (71.7 to 140.9)         | 13.1 (6.1 to 24.3)              | 26.6 (26.6 to 26.6)               |
| South Sudan | 2009 | 52.9 (44.3 to 63.2)        | 21.3 (16.1 to 27.7)        | 21.7 (15.0 to 30.0)           | 2.8 (1.3 to 5.1)                | 7.3 (7.3 to 7.3)                  | 251.1 (210.2 to 299.9) | 100.9 (76.2 to 131.3)      | 102.8 (71.3 to 142.1)         | 13.1 (6.2 to 24.1)              | 34.4 (34.4 to 34.4)               |
| South Sudan | 2010 | 54.3 (45.4 to 64.8)        | 21.8 (16.6 to 28.3)        | 21.6 (14.9 to 29.5)           | 2.7 (1.3 to 5.1)                | 8.2 (8.2 to 8.2)                  | 257.7 (215.3 to 307.5) | 103.4 (78.9 to 134.4)      | 102.4 (70.8 to 140.0)         | 12.8 (6.0 to 24.0)              | 39.0 (39.0 to 39.0)               |
| South Sudan | 2011 | 48.2 (39.8 to 58.4)        | 20.7 (15.8 to 26.8)        | 20.4 (14.0 to 27.7)           | 2.5 (1.2 to 4.7)                | 4.6 (4.6 to 4.6)                  | 228.4 (189.0 to 276.7) | 98.2 (75.0 to 127.3)       | 96.6 (66.6 to 131.6)          | 11.9 (5.6 to 22.1)              | 21.8 (21.8 to 21.8)               |
| South Sudan | 2012 | 56.2 (47.7 to 66.0)        | 21.3 (16.3 to 27.5)        | 20.0 (13.8 to 27.6)           | 2.5 (1.2 to 4.8)                | 12.4 (12.4 to 12.4)               | 266.7 (226.3 to 313.2) | 100.9 (77.3 to 130.3)      | 95.0 (65.5 to 131.0)          | 11.9 (5.6 to 22.8)              | 58.8 (58.8 to 58.8)               |
| South Sudan | 2013 | 57.9 (49.5 to 67.6)        | 21.8 (16.6 to 28.0)        | 19.7 (13.5 to 27.7)           | 2.5 (1.2 to 4.9)                | 13.9 (13.9 to 13.9)               | 274.4 (234.8 to 320.8) | 103.2 (78.6 to 133.0)      | 93.4 (64.1 to 131.4)          | 11.9 (5.5 to 23.1)              | 65.8 (65.8 to 65.8)               |
| South Sudan | 2014 | 55.9 (47.2 to 65.9)        | 22.4 (17.1 to 28.8)        | 19.5 (13.3 to 27.7)           | 2.5 (1.2 to 4.7)                | 11.5 (11.5 to 11.5)               | 264.9 (223.6 to 312.4) | 106.0 (81.1 to 136.8)      | 92.3 (63.2 to 131.2)          | 11.8 (5.5 to 22.4)              | 54.7 (54.7 to 54.7)               |
| South Sudan | 2015 | 58.6 (49.9 to 68.1)        | 22.7 (17.3 to 29.2)        | 19.2 (12.9 to 27.1)           | 2.5 (1.1 to 4.6)                | 14.2 (14.2 to 14.2)               | 277.7 (236.6 to 323.1) | 107.8 (82.0 to 138.7)      | 91.1 (61.4 to 128.4)          | 11.6 (5.3 to 21.6)              | 67.2 (67.2 to 67.2)               |

| Country     | Year | 2018 US Dollars per capita |                            |                               |                                 |                                   | 2018 PPP per capita    |                            |                               |                                 |                                   |
|-------------|------|----------------------------|----------------------------|-------------------------------|---------------------------------|-----------------------------------|------------------------|----------------------------|-------------------------------|---------------------------------|-----------------------------------|
|             |      | Health spending            | Government health spending | Out-of-pocket health spending | Prepaid private health spending | Development assistance for health | Health spending        | Government health spending | Out-of-pocket health spending | Prepaid private health spending | Development assistance for health |
| South Sudan | 2016 | 52.3 (43.8 to 61.8)        | 22.9 (17.4 to 29.2)        | 18.9 (12.9 to 26.2)           | 2.4 (1.1 to 4.6)                | 8.1 (8.1 to 8.1)                  | 248.1 (207.7 to 293.2) | 108.7 (82.5 to 138.6)      | 89.5 (61.0 to 124.1)          | 11.4 (5.1 to 21.6)              | 38.5 (38.5 to 38.5)               |
| South Sudan | 2017 | 52.6 (45.0 to 61.5)        | 18.4 (13.9 to 23.4)        | 17.8 (12.2 to 24.8)           | 2.2 (1.0 to 4.2)                | 14.1 (14.1 to 14.1)               | 249.3 (213.2 to 291.7) | 87.2 (66.1 to 111.2)       | 84.6 (57.8 to 117.7)          | 10.6 (4.7 to 19.9)              | 66.9 (66.9 to 66.9)               |
| South Sudan | 2018 | 51.4 (43.9 to 60.2)        | 18.6 (14.1 to 23.7)        | 18.0 (12.3 to 25.1)           | 2.3 (1.0 to 4.3)                | 12.5 (12.4 to 12.5)               | 243.5 (208.4 to 285.3) | 88.2 (66.8 to 112.4)       | 85.3 (58.1 to 119.0)          | 10.9 (4.9 to 20.3)              | 59.1 (58.8 to 59.4)               |
| South Sudan | 2019 | 51.5 (43.8 to 60.6)        | 18.8 (14.2 to 24.0)        | 18.1 (12.4 to 25.3)           | 2.3 (1.0 to 4.4)                | 12.3 (11.5 to 13.0)               | 244.4 (207.8 to 287.6) | 89.1 (67.4 to 113.8)       | 86.0 (58.6 to 119.8)          | 11.1 (4.9 to 20.7)              | 58.2 (54.4 to 61.7)               |
| South Sudan | 2020 | 51.8 (44.1 to 60.6)        | 19.0 (14.3 to 24.3)        | 18.3 (12.4 to 25.5)           | 2.4 (1.1 to 4.4)                | 12.2 (11.1 to 13.2)               | 245.8 (209.2 to 287.2) | 90.1 (67.8 to 115.2)       | 86.7 (59.0 to 121.0)          | 11.3 (5.0 to 21.0)              | 57.7 (52.8 to 62.5)               |
| South Sudan | 2021 | 52.3 (44.6 to 61.5)        | 19.3 (14.5 to 24.7)        | 18.4 (12.5 to 25.8)           | 2.4 (1.1 to 4.5)                | 12.1 (10.9 to 13.4)               | 247.9 (211.7 to 291.5) | 91.4 (68.7 to 117.0)       | 87.5 (59.5 to 122.2)          | 11.5 (5.1 to 21.4)              | 57.6 (51.7 to 63.7)               |
| South Sudan | 2022 | 52.9 (44.7 to 61.9)        | 19.5 (14.7 to 25.1)        | 18.6 (12.7 to 26.0)           | 2.5 (1.1 to 4.6)                | 12.2 (10.8 to 13.7)               | 250.7 (211.9 to 293.7) | 92.7 (69.7 to 118.9)       | 88.3 (60.0 to 123.4)          | 11.7 (5.2 to 21.8)              | 58.0 (51.4 to 65.2)               |
| South Sudan | 2023 | 53.5 (45.4 to 63.0)        | 19.8 (14.9 to 25.5)        | 18.8 (12.8 to 26.3)           | 2.5 (1.1 to 4.7)                | 12.4 (10.7 to 14.1)               | 253.9 (215.5 to 298.8) | 94.1 (70.7 to 120.9)       | 89.3 (60.7 to 124.8)          | 11.9 (5.3 to 22.2)              | 58.7 (50.9 to 66.8)               |
| South Sudan | 2024 | 54.3 (45.7 to 63.8)        | 20.1 (15.2 to 25.9)        | 19.0 (12.9 to 26.6)           | 2.6 (1.1 to 4.8)                | 12.6 (10.8 to 14.5)               | 257.4 (216.6 to 302.5) | 95.5 (71.9 to 122.8)       | 90.2 (61.4 to 126.1)          | 12.1 (5.4 to 22.7)              | 59.5 (51.2 to 68.7)               |
| South Sudan | 2025 | 55.0 (46.3 to 65.1)        | 20.5 (15.4 to 26.3)        | 19.2 (13.1 to 26.9)           | 2.6 (1.2 to 4.9)                | 12.7 (10.8 to 14.9)               | 260.8 (219.6 to 308.5) | 97.0 (73.1 to 124.7)       | 91.2 (61.9 to 127.6)          | 12.4 (5.5 to 23.1)              | 60.2 (51.4 to 70.5)               |
| South Sudan | 2026 | 55.7 (46.8 to 65.7)        | 20.8 (15.7 to 26.8)        | 19.4 (13.2 to 27.2)           | 2.7 (1.2 to 5.0)                | 12.8 (10.8 to 15.1)               | 264.2 (222.2 to 311.5) | 98.6 (74.3 to 126.9)       | 92.1 (62.5 to 129.0)          | 12.6 (5.6 to 23.5)              | 60.9 (51.2 to 71.6)               |
| South Sudan | 2027 | 56.5 (47.3 to 66.6)        | 21.1 (15.9 to 27.3)        | 19.6 (13.3 to 27.5)           | 2.7 (1.2 to 5.1)                | 13.0 (10.9 to 15.6)               | 267.8 (224.3 to 315.7) | 100.2 (75.4 to 129.4)      | 93.1 (63.1 to 130.5)          | 12.8 (5.7 to 24.0)              | 61.7 (51.6 to 73.9)               |
| South Sudan | 2028 | 57.3 (48.2 to 67.3)        | 21.5 (16.2 to 27.7)        | 19.8 (13.4 to 27.8)           | 2.8 (1.2 to 5.2)                | 13.2 (11.0 to 16.0)               | 271.6 (228.4 to 319.2) | 101.9 (76.7 to 131.2)      | 94.1 (63.8 to 131.9)          | 13.1 (5.9 to 24.4)              | 62.6 (52.3 to 75.8)               |
| South Sudan | 2029 | 58.1 (48.5 to 68.8)        | 21.8 (16.4 to 28.2)        | 20.0 (13.6 to 28.1)           | 2.8 (1.3 to 5.2)                | 13.4 (11.0 to 16.4)               | 275.4 (230.1 to 326.1) | 103.6 (78.0 to 133.7)      | 95.0 (64.5 to 133.4)          | 13.3 (6.0 to 24.9)              | 63.5 (52.2 to 77.9)               |
| South Sudan | 2030 | 58.8 (49.1 to 69.5)        | 22.2 (16.7 to 28.7)        | 20.2 (13.7 to 28.4)           | 2.8 (1.3 to 5.3)                | 13.6 (11.1 to 16.7)               | 278.8 (233.1 to 329.8) | 105.1 (79.1 to 136.0)      | 95.8 (65.0 to 134.6)          | 13.5 (6.1 to 25.3)              | 64.5 (52.8 to 79.2)               |
| South Sudan | 2031 | 59.5 (49.4 to 70.4)        | 22.5 (16.9 to 29.1)        | 20.3 (13.8 to 28.6)           | 2.9 (1.3 to 5.4)                | 13.8 (11.0 to 17.4)               | 282.1 (234.4 to 333.7) | 106.5 (80.1 to 138.1)      | 96.3 (65.4 to 135.4)          | 13.7 (6.2 to 25.7)              | 65.6 (52.4 to 82.8)               |
| South Sudan | 2032 | 60.2 (50.2 to 70.6)        | 22.8 (17.1 to 29.6)        | 20.4 (13.9 to 28.7)           | 2.9 (1.3 to 5.5)                | 14.1 (11.2 to 17.9)               | 285.4 (238.2 to 334.8) | 107.9 (81.1 to 140.2)      | 96.8 (65.8 to 136.3)          | 13.9 (6.2 to 26.0)              | 66.8 (53.2 to 84.8)               |
| South Sudan | 2033 | 60.9 (50.7 to 72.2)        | 23.1 (17.3 to 30.0)        | 20.5 (13.9 to 28.9)           | 3.0 (1.3 to 5.6)                | 14.3 (11.2 to 18.6)               | 288.8 (240.3 to 342.5) | 109.3 (82.2 to 142.1)      | 97.3 (66.1 to 137.2)          | 14.1 (6.3 to 26.4)              | 68.0 (53.3 to 88.2)               |
| South Sudan | 2034 | 61.6 (51.3 to 72.5)        | 23.4 (17.5 to 30.3)        | 20.6 (14.0 to 29.1)           | 3.0 (1.4 to 5.6)                | 14.6 (11.3 to 19.2)               | 292.3 (243.3 to 343.7) | 110.8 (83.2 to 143.9)      | 97.9 (66.5 to 138.0)          | 14.3 (6.4 to 26.7)              | 69.5 (53.7 to 90.8)               |
| South Sudan | 2035 | 62.4 (51.5 to 74.3)        | 23.7 (17.8 to 30.8)        | 20.7 (14.1 to 29.2)           | 3.0 (1.4 to 5.7)                | 14.9 (11.5 to 19.6)               | 295.9 (244.0 to 352.3) | 112.2 (84.3 to 146.0)      | 98.4 (66.8 to 138.6)          | 14.4 (6.5 to 27.1)              | 70.9 (54.7 to 93.1)               |
| South Sudan | 2036 | 63.2 (52.9 to 74.5)        | 24.0 (18.0 to 31.3)        | 20.9 (14.2 to 29.4)           | 3.1 (1.4 to 5.8)                | 15.2 (11.6 to 20.7)               | 299.5 (250.8 to 353.1) | 113.7 (85.4 to 148.4)      | 98.9 (67.2 to 139.6)          | 14.6 (6.6 to 27.5)              | 72.2 (55.1 to 98.4)               |

| Country     | Year | 2018 US Dollars per capita |                            |                               |                                 |                                   | 2018 PPP per capita       |                            |                               |                                 |                                   |
|-------------|------|----------------------------|----------------------------|-------------------------------|---------------------------------|-----------------------------------|---------------------------|----------------------------|-------------------------------|---------------------------------|-----------------------------------|
|             |      | Health spending            | Government health spending | Out-of-pocket health spending | Prepaid private health spending | Development assistance for health | Health spending           | Government health spending | Out-of-pocket health spending | Prepaid private health spending | Development assistance for health |
| South Sudan | 2037 | 63.9 (52.7 to 76.2)        | 24.3 (18.2 to 31.8)        | 21.0 (14.2 to 29.7)           | 3.1 (1.4 to 5.9)                | 15.5 (11.6 to 21.1)               | 303.1 (249.9 to 361.3)    | 115.3 (86.5 to 150.9)      | 99.5 (67.6 to 140.6)          | 14.8 (6.7 to 27.9)              | 73.4 (55.2 to 100.1)              |
| South Sudan | 2038 | 64.7 (53.8 to 76.1)        | 24.6 (18.5 to 32.3)        | 21.1 (14.3 to 29.9)           | 3.2 (1.4 to 6.0)                | 15.8 (11.9 to 22.2)               | 306.9 (255.0 to 360.7)    | 116.9 (87.7 to 153.3)      | 100.1 (67.8 to 141.7)         | 15.1 (6.8 to 28.3)              | 74.8 (56.2 to 105.1)              |
| South Sudan | 2039 | 65.5 (54.0 to 78.2)        | 25.0 (18.7 to 32.8)        | 21.2 (14.3 to 30.1)           | 3.2 (1.4 to 6.0)                | 16.0 (11.8 to 22.8)               | 310.5 (255.9 to 370.8)    | 118.5 (88.7 to 155.7)      | 100.7 (68.0 to 142.6)         | 15.3 (6.9 to 28.7)              | 76.1 (56.0 to 108.1)              |
| South Sudan | 2040 | 66.3 (55.3 to 78.8)        | 25.3 (18.9 to 33.3)        | 21.4 (14.4 to 30.3)           | 3.3 (1.5 to 6.1)                | 16.4 (12.2 to 23.2)               | 314.5 (262.5 to 373.6)    | 120.2 (89.8 to 157.9)      | 101.3 (68.4 to 143.6)         | 15.5 (7.0 to 29.1)              | 77.6 (57.8 to 110.0)              |
| South Sudan | 2041 | 67.2 (55.0 to 80.7)        | 25.7 (19.2 to 33.7)        | 21.5 (14.5 to 30.5)           | 3.3 (1.5 to 6.2)                | 16.7 (12.3 to 23.8)               | 318.7 (261.0 to 382.5)    | 121.9 (91.0 to 160.0)      | 101.9 (68.8 to 144.6)         | 15.7 (7.1 to 29.5)              | 79.2 (58.2 to 112.8)              |
| South Sudan | 2042 | 68.1 (56.9 to 81.0)        | 26.1 (19.4 to 34.3)        | 21.6 (14.6 to 30.7)           | 3.4 (1.5 to 6.3)                | 17.1 (12.3 to 24.8)               | 323.0 (270.0 to 384.4)    | 123.6 (92.2 to 162.7)      | 102.5 (69.2 to 145.6)         | 15.9 (7.2 to 29.8)              | 81.0 (58.5 to 117.6)              |
| South Sudan | 2043 | 69.0 (56.0 to 82.8)        | 26.4 (19.7 to 34.8)        | 21.7 (14.7 to 30.9)           | 3.4 (1.5 to 6.3)                | 17.4 (12.4 to 25.4)               | 327.3 (265.6 to 392.5)    | 125.4 (93.4 to 165.2)      | 103.1 (69.6 to 146.6)         | 16.1 (7.3 to 30.1)              | 82.6 (58.6 to 120.5)              |
| South Sudan | 2044 | 70.0 (57.9 to 83.2)        | 26.8 (20.0 to 35.3)        | 21.9 (14.8 to 31.1)           | 3.5 (1.6 to 6.4)                | 17.8 (12.5 to 26.6)               | 331.8 (274.7 to 394.5)    | 127.1 (94.7 to 167.5)      | 103.7 (70.0 to 147.6)         | 16.4 (7.4 to 30.4)              | 84.6 (59.4 to 126.3)              |
| South Sudan | 2045 | 71.0 (57.7 to 85.7)        | 27.2 (20.2 to 36.0)        | 22.0 (14.9 to 31.3)           | 3.5 (1.6 to 6.5)                | 18.3 (12.5 to 28.1)               | 336.6 (273.5 to 406.5)    | 129.0 (96.0 to 170.5)      | 104.4 (70.5 to 148.7)         | 16.6 (7.5 to 30.8)              | 86.6 (59.3 to 133.4)              |
| South Sudan | 2046 | 72.0 (59.2 to 86.5)        | 27.6 (20.5 to 36.7)        | 22.1 (15.0 to 31.6)           | 3.6 (1.6 to 6.6)                | 18.7 (12.7 to 29.7)               | 341.4 (280.7 to 410.0)    | 130.8 (97.3 to 173.9)      | 105.0 (70.9 to 149.7)         | 16.8 (7.6 to 31.2)              | 88.7 (60.4 to 140.8)              |
| South Sudan | 2047 | 73.1 (58.9 to 88.9)        | 28.0 (20.8 to 37.3)        | 22.3 (15.1 to 31.8)           | 3.6 (1.6 to 6.7)                | 19.2 (13.1 to 30.6)               | 346.5 (279.2 to 421.6)    | 132.7 (98.6 to 176.8)      | 105.7 (71.4 to 150.7)         | 17.1 (7.7 to 31.8)              | 91.0 (62.2 to 144.9)              |
| South Sudan | 2048 | 74.2 (60.8 to 90.3)        | 28.4 (21.1 to 37.8)        | 22.4 (15.2 to 32.0)           | 3.7 (1.6 to 6.8)                | 19.7 (13.3 to 31.3)               | 352.0 (288.5 to 428.3)    | 134.7 (100.0 to 179.1)     | 106.4 (71.9 to 151.9)         | 17.4 (7.8 to 32.4)              | 93.6 (63.2 to 148.5)              |
| South Sudan | 2049 | 75.4 (60.6 to 91.5)        | 28.8 (21.4 to 38.2)        | 22.6 (15.3 to 32.3)           | 3.7 (1.7 to 7.0)                | 20.3 (13.6 to 33.3)               | 357.6 (287.3 to 434.0)    | 136.7 (101.3 to 181.3)     | 107.2 (72.4 to 153.0)         | 17.6 (7.9 to 33.1)              | 96.1 (64.4 to 157.9)              |
| South Sudan | 2050 | 76.7 (62.9 to 94.0)        | 29.3 (21.7 to 38.8)        | 22.8 (15.4 to 32.5)           | 3.8 (1.7 to 7.1)                | 20.9 (13.8 to 35.7)               | 363.7 (298.4 to 445.8)    | 138.8 (102.8 to 183.9)     | 107.9 (72.9 to 154.0)         | 17.9 (8.0 to 33.6)              | 99.1 (65.5 to 169.1)              |
| Spain       | 1995 | 1559.8 (1488.3 to 1634.8)  | 1129.8 (1069.5 to 1193.6)  | 372.4 (340.9 to 405.4)        | 57.7 (40.6 to 78.6)             | 0.0 (0.0 to 0.0)                  | 1984.7 (1893.6 to 2080.0) | 1437.5 (1360.7 to 1518.7)  | 473.8 (433.8 to 515.9)        | 73.4 (51.7 to 100.0)            | 0.0 (0.0 to 0.0)                  |
| Spain       | 1996 | 1591.2 (1537.9 to 1647.9)  | 1152.8 (1105.6 to 1203.6)  | 378.1 (352.6 to 404.9)        | 60.3 (44.4 to 80.3)             | 0.0 (0.0 to 0.0)                  | 2024.5 (1956.8 to 2096.7) | 1466.8 (1406.7 to 1531.4)  | 481.1 (448.6 to 515.1)        | 76.7 (56.5 to 102.2)            | 0.0 (0.0 to 0.0)                  |
| Spain       | 1997 | 1633.8 (1584.2 to 1682.8)  | 1183.2 (1139.4 to 1226.7)  | 387.7 (365.4 to 411.0)        | 63.0 (48.0 to 80.7)             | 0.0 (0.0 to 0.0)                  | 2078.8 (2015.7 to 2141.2) | 1505.4 (1449.7 to 1560.8)  | 493.3 (464.9 to 523.0)        | 80.1 (61.1 to 102.7)            | 0.0 (0.0 to 0.0)                  |
| Spain       | 1998 | 1693.5 (1641.5 to 1744.5)  | 1222.0 (1181.3 to 1264.1)  | 404.3 (380.9 to 427.6)        | 67.2 (53.1 to 85.0)             | 0.0 (0.0 to 0.0)                  | 2154.7 (2088.5 to 2219.7) | 1554.7 (1503.1 to 1608.3)  | 514.4 (484.6 to 544.0)        | 85.6 (67.6 to 108.1)            | 0.0 (0.0 to 0.0)                  |
| Spain       | 1999 | 1749.7 (1698.9 to 1801.2)  | 1255.0 (1213.1 to 1298.7)  | 422.8 (400.5 to 445.8)        | 71.9 (58.3 to 87.6)             | 0.0 (0.0 to 0.0)                  | 2226.3 (2161.6 to 2291.8) | 1596.8 (1543.5 to 1652.4)  | 538.0 (509.5 to 567.3)        | 91.5 (74.1 to 111.5)            | 0.0 (0.0 to 0.0)                  |
| Spain       | 2000 | 1818.1 (1767.9 to 1865.0)  | 1296.8 (1253.2 to 1337.6)  | 443.6 (422.0 to 464.1)        | 77.6 (63.4 to 93.1)             | 0.0 (0.0 to 0.0)                  | 2313.2 (2249.4 to 2373.0) | 1650.0 (1594.5 to 1701.9)  | 564.5 (537.0 to 590.5)        | 98.8 (80.7 to 118.5)            | 0.0 (0.0 to 0.0)                  |
| Spain       | 2001 | 1883.7 (1836.0 to 1930.9)  | 1340.0 (1299.2 to 1381.9)  | 459.8 (438.8 to 480.4)        | 83.9 (69.5 to 98.9)             | 0.0 (0.0 to 0.0)                  | 2396.7 (2336.0 to 2456.7) | 1704.9 (1653.1 to 1758.3)  | 585.1 (558.3 to 611.2)        | 106.7 (88.5 to 125.8)           | 0.0 (0.0 to 0.0)                  |

| Country | Year | 2018 US Dollars per capita |                            |                               |                                 |                                   | 2018 PPP per capita       |                            |                               |                                 |                                   |
|---------|------|----------------------------|----------------------------|-------------------------------|---------------------------------|-----------------------------------|---------------------------|----------------------------|-------------------------------|---------------------------------|-----------------------------------|
|         |      | Health spending            | Government health spending | Out-of-pocket health spending | Prepaid private health spending | Development assistance for health | Health spending           | Government health spending | Out-of-pocket health spending | Prepaid private health spending | Development assistance for health |
| Spain   | 2002 | 1962.9 (1916.2 to 2011.5)  | 1396.9 (1356.3 to 1442.3)  | 470.3 (450.3 to 492.0)        | 95.6 (80.6 to 111.2)            | 0.0 (0.0 to 0.0)                  | 2497.4 (2438.0 to 2559.4) | 1777.4 (1725.7 to 1835.0)  | 598.4 (573.0 to 626.0)        | 121.6 (102.6 to 141.5)          | 0.0 (0.0 to 0.0)                  |
| Spain   | 2003 | 2079.1 (2027.8 to 2129.6)  | 1480.3 (1436.3 to 1524.4)  | 481.3 (459.3 to 501.0)        | 117.5 (101.0 to 135.6)          | 0.0 (0.0 to 0.0)                  | 2645.3 (2580.1 to 2709.6) | 1883.4 (1827.5 to 1939.6)  | 612.4 (584.4 to 637.4)        | 149.5 (128.5 to 172.5)          | 0.0 (0.0 to 0.0)                  |
| Spain   | 2004 | 2175.0 (2121.5 to 2225.2)  | 1554.9 (1508.4 to 1598.0)  | 488.4 (468.0 to 508.2)        | 131.7 (114.0 to 150.2)          | 0.0 (0.0 to 0.0)                  | 2767.4 (2699.3 to 2831.2) | 1978.3 (1919.2 to 2033.3)  | 621.4 (595.4 to 646.6)        | 167.6 (145.0 to 191.1)          | 0.0 (0.0 to 0.0)                  |
| Spain   | 2005 | 2242.1 (2191.0 to 2295.9)  | 1611.3 (1566.6 to 1657.0)  | 491.6 (471.1 to 511.5)        | 139.2 (121.2 to 158.5)          | 0.0 (0.0 to 0.0)                  | 2852.8 (2787.7 to 2921.2) | 2050.1 (1993.2 to 2108.3)  | 625.5 (599.4 to 650.8)        | 177.1 (154.2 to 201.6)          | 0.0 (0.0 to 0.0)                  |
| Spain   | 2006 | 2334.4 (2279.5 to 2388.7)  | 1692.3 (1643.8 to 1741.9)  | 498.0 (477.1 to 519.6)        | 144.1 (125.3 to 164.2)          | 0.0 (0.0 to 0.0)                  | 2970.1 (2900.3 to 3039.3) | 2153.1 (2091.5 to 2216.3)  | 633.6 (607.0 to 661.1)        | 183.4 (159.4 to 208.9)          | 0.0 (0.0 to 0.0)                  |
| Spain   | 2007 | 2446.8 (2393.9 to 2500.8)  | 1792.0 (1746.1 to 1838.6)  | 509.6 (488.6 to 531.2)        | 145.1 (126.7 to 165.7)          | 0.0 (0.0 to 0.0)                  | 3113.2 (3045.9 to 3181.9) | 2280.1 (2221.6 to 2339.4)  | 648.4 (621.7 to 675.9)        | 184.7 (161.2 to 210.8)          | 0.0 (0.0 to 0.0)                  |
| Spain   | 2008 | 2552.1 (2495.6 to 2605.2)  | 1890.0 (1844.2 to 1933.9)  | 521.9 (501.0 to 543.1)        | 140.2 (122.6 to 159.3)          | 0.0 (0.0 to 0.0)                  | 3247.1 (3175.3 to 3314.7) | 2404.7 (2346.4 to 2460.6)  | 664.0 (637.4 to 691.0)        | 178.4 (156.0 to 202.7)          | 0.0 (0.0 to 0.0)                  |
| Spain   | 2009 | 2599.8 (2544.2 to 2653.2)  | 1940.9 (1893.7 to 1987.4)  | 524.4 (503.5 to 545.6)        | 134.6 (117.5 to 152.4)          | 0.0 (0.0 to 0.0)                  | 3307.9 (3237.1 to 3375.8) | 2469.4 (2409.5 to 2528.7)  | 667.2 (640.7 to 694.2)        | 171.2 (149.4 to 194.0)          | 0.0 (0.0 to 0.0)                  |
| Spain   | 2010 | 2624.6 (2567.1 to 2679.4)  | 1956.3 (1906.9 to 2003.5)  | 539.3 (518.5 to 562.1)        | 128.9 (112.1 to 146.1)          | 0.0 (0.0 to 0.0)                  | 3339.4 (3266.2 to 3409.2) | 2489.1 (2426.3 to 2549.1)  | 686.2 (659.7 to 715.2)        | 164.1 (142.6 to 185.9)          | 0.0 (0.0 to 0.0)                  |
| Spain   | 2011 | 2598.3 (2544.4 to 2652.6)  | 1914.1 (1867.3 to 1958.3)  | 555.3 (532.2 to 577.2)        | 128.8 (111.4 to 147.1)          | 0.0 (0.0 to 0.0)                  | 3305.9 (3237.3 to 3375.0) | 2435.4 (2375.8 to 2491.7)  | 706.5 (677.2 to 734.4)        | 163.9 (141.8 to 187.2)          | 0.0 (0.0 to 0.0)                  |
| Spain   | 2012 | 2526.4 (2475.7 to 2578.7)  | 1828.4 (1783.9 to 1872.3)  | 572.3 (551.4 to 597.0)        | 125.6 (108.3 to 144.2)          | 0.0 (0.0 to 0.0)                  | 3214.4 (3149.9 to 3281.0) | 2326.4 (2269.7 to 2382.2)  | 728.2 (701.6 to 759.6)        | 159.8 (137.8 to 183.4)          | 0.0 (0.0 to 0.0)                  |
| Spain   | 2013 | 2486.0 (2433.4 to 2539.1)  | 1772.1 (1727.1 to 1815.0)  | 589.5 (566.9 to 614.5)        | 124.5 (107.1 to 144.8)          | 0.0 (0.0 to 0.0)                  | 3163.1 (3096.1 to 3230.6) | 2254.7 (2197.5 to 2309.4)  | 750.0 (721.3 to 781.9)        | 158.4 (136.2 to 184.2)          | 0.0 (0.0 to 0.0)                  |
| Spain   | 2014 | 2525.2 (2471.9 to 2577.3)  | 1787.6 (1740.7 to 1834.9)  | 609.9 (587.2 to 632.5)        | 127.7 (110.7 to 147.3)          | 0.0 (0.0 to 0.0)                  | 3212.9 (3145.1 to 3279.3) | 2274.5 (2214.8 to 2334.6)  | 776.0 (747.1 to 804.8)        | 162.5 (140.9 to 187.4)          | 0.0 (0.0 to 0.0)                  |
| Spain   | 2015 | 2621.5 (2564.3 to 2681.3)  | 1860.0 (1811.8 to 1908.5)  | 629.5 (605.7 to 656.2)        | 132.0 (113.7 to 154.9)          | 0.0 (0.0 to 0.0)                  | 3335.5 (3262.6 to 3411.6) | 2366.6 (2305.2 to 2428.2)  | 801.0 (770.7 to 834.9)        | 167.9 (144.7 to 197.0)          | 0.0 (0.0 to 0.0)                  |
| Spain   | 2016 | 2687.0 (2607.5 to 2765.7)  | 1911.9 (1847.2 to 1976.0)  | 641.0 (607.2 to 678.8)        | 134.1 (108.4 to 160.9)          | 0.0 (0.0 to 0.0)                  | 3418.8 (3317.7 to 3518.9) | 2432.6 (2350.3 to 2514.1)  | 815.5 (772.5 to 863.7)        | 170.6 (138.0 to 204.7)          | 0.0 (0.0 to 0.0)                  |
| Spain   | 2017 | 2742.0 (2659.6 to 2825.5)  | 1947.1 (1880.8 to 2011.9)  | 655.2 (618.1 to 693.8)        | 139.7 (112.9 to 167.4)          | 0.0 (0.0 to 0.0)                  | 3488.8 (3384.0 to 3595.0) | 2477.4 (2393.1 to 2559.8)  | 833.7 (786.4 to 882.7)        | 177.7 (143.6 to 213.0)          | 0.0 (0.0 to 0.0)                  |
| Spain   | 2018 | 2777.4 (2691.5 to 2859.4)  | 1971.3 (1902.9 to 2036.5)  | 664.4 (625.1 to 708.5)        | 141.7 (114.6 to 170.0)          | 0.0 (0.0 to 0.0)                  | 3533.8 (3424.5 to 3638.1) | 2508.2 (2421.1 to 2591.1)  | 845.3 (795.4 to 901.5)        | 180.3 (145.8 to 216.3)          | 0.0 (0.0 to 0.0)                  |
| Spain   | 2019 | 2811.9 (2724.6 to 2896.6)  | 1994.7 (1928.2 to 2060.1)  | 673.5 (630.2 to 719.4)        | 143.8 (116.2 to 172.4)          | 0.0 (0.0 to 0.0)                  | 3577.8 (3466.6 to 3685.4) | 2537.9 (2453.4 to 2621.2)  | 856.9 (801.8 to 915.4)        | 182.9 (147.9 to 219.4)          | 0.0 (0.0 to 0.0)                  |
| Spain   | 2020 | 2850.2 (2759.6 to 2940.7)  | 2021.4 (1948.7 to 2088.8)  | 682.9 (639.2 to 728.1)        | 145.8 (118.2 to 175.0)          | 0.0 (0.0 to 0.0)                  | 3626.4 (3511.2 to 3741.6) | 2572.0 (2479.5 to 2657.7)  | 868.9 (813.3 to 926.4)        | 185.5 (150.4 to 222.7)          | 0.0 (0.0 to 0.0)                  |
| Spain   | 2021 | 2886.7 (2794.7 to 2983.2)  | 2046.3 (1971.5 to 2116.1)  | 692.5 (648.9 to 740.8)        | 147.9 (120.3 to 177.6)          | 0.0 (0.0 to 0.0)                  | 3672.9 (3555.8 to 3795.6) | 2603.6 (2508.5 to 2692.4)  | 881.2 (825.7 to 942.5)        | 188.2 (153.0 to 226.0)          | 0.0 (0.0 to 0.0)                  |
| Spain   | 2022 | 2928.2 (2829.9 to 3028.7)  | 2075.2 (1997.6 to 2153.3)  | 702.9 (656.5 to 752.4)        | 150.1 (122.0 to 180.4)          | 0.0 (0.0 to 0.0)                  | 3725.6 (3600.6 to 3853.5) | 2640.3 (2541.6 to 2739.7)  | 894.3 (835.3 to 957.3)        | 191.0 (155.2 to 229.6)          | 0.0 (0.0 to 0.0)                  |



| Country | Year | 2018 US Dollars per capita |                            |                               |                                 |                                   | 2018 PPP per capita       |                            |                               |                                 |                                   |
|---------|------|----------------------------|----------------------------|-------------------------------|---------------------------------|-----------------------------------|---------------------------|----------------------------|-------------------------------|---------------------------------|-----------------------------------|
|         |      | Health spending            | Government health spending | Out-of-pocket health spending | Prepaid private health spending | Development assistance for health | Health spending           | Government health spending | Out-of-pocket health spending | Prepaid private health spending | Development assistance for health |
| Spain   | 2023 | 2968.9 (2870.0 to 3078.5)  | 2103.5 (2021.3 to 2191.8)  | 713.2 (666.2 to 764.7)        | 152.3 (123.6 to 183.6)          | 0.0 (0.0 to 0.0)                  | 3777.5 (3651.6 to 3916.9) | 2676.3 (2571.8 to 2788.7)  | 907.5 (847.7 to 973.0)        | 193.7 (157.3 to 233.6)          | 0.0 (0.0 to 0.0)                  |
| Spain   | 2024 | 2999.5 (2888.9 to 3119.9)  | 2123.3 (2035.6 to 2219.2)  | 722.5 (674.5 to 775.6)        | 153.8 (124.8 to 185.6)          | 0.0 (0.0 to 0.0)                  | 3816.4 (3675.7 to 3969.6) | 2701.6 (2590.0 to 2823.6)  | 919.2 (858.2 to 986.9)        | 195.6 (158.7 to 236.1)          | 0.0 (0.0 to 0.0)                  |
| Spain   | 2025 | 3027.5 (2909.6 to 3159.8)  | 2141.0 (2046.1 to 2248.7)  | 731.4 (680.2 to 786.6)        | 155.0 (125.7 to 187.5)          | 0.0 (0.0 to 0.0)                  | 3852.0 (3702.0 to 4020.4) | 2724.1 (2603.4 to 2861.1)  | 930.6 (865.5 to 1000.8)       | 197.3 (159.9 to 238.5)          | 0.0 (0.0 to 0.0)                  |
| Spain   | 2026 | 3056.3 (2931.9 to 3201.9)  | 2159.4 (2055.7 to 2280.9)  | 740.6 (684.0 to 800.6)        | 156.4 (127.0 to 189.6)          | 0.0 (0.0 to 0.0)                  | 3888.7 (3730.4 to 4073.9) | 2747.5 (2615.6 to 2902.2)  | 942.3 (870.2 to 1018.7)       | 199.0 (161.6 to 241.2)          | 0.0 (0.0 to 0.0)                  |
| Spain   | 2027 | 3084.9 (2951.0 to 3249.2)  | 2177.4 (2067.0 to 2311.5)  | 749.8 (685.5 to 815.3)        | 157.7 (127.7 to 191.3)          | 0.0 (0.0 to 0.0)                  | 3925.1 (3754.6 to 4134.2) | 2770.4 (2629.9 to 2941.0)  | 954.0 (872.2 to 1037.3)       | 200.6 (162.5 to 243.3)          | 0.0 (0.0 to 0.0)                  |
| Spain   | 2028 | 3113.2 (2965.9 to 3296.4)  | 2195.1 (2074.7 to 2344.2)  | 759.1 (685.4 to 834.0)        | 159.0 (128.7 to 193.1)          | 0.0 (0.0 to 0.0)                  | 3961.1 (3773.6 to 4194.2) | 2793.0 (2639.8 to 2982.6)  | 965.8 (872.1 to 1061.2)       | 202.3 (163.7 to 245.7)          | 0.0 (0.0 to 0.0)                  |
| Spain   | 2029 | 3141.5 (2979.4 to 3342.4)  | 2212.9 (2081.6 to 2379.6)  | 768.4 (686.5 to 852.9)        | 160.2 (129.9 to 194.7)          | 0.0 (0.0 to 0.0)                  | 3997.1 (3790.9 to 4252.7) | 2815.6 (2648.5 to 3027.6)  | 977.7 (873.4 to 1085.2)       | 203.8 (165.3 to 247.7)          | 0.0 (0.0 to 0.0)                  |
| Spain   | 2030 | 3167.7 (2989.7 to 3382.5)  | 2228.9 (2088.7 to 2410.4)  | 777.6 (687.7 to 869.9)        | 161.3 (131.0 to 195.9)          | 0.0 (0.0 to 0.0)                  | 4030.5 (3803.9 to 4303.7) | 2835.9 (2657.6 to 3066.9)  | 989.3 (874.9 to 1106.8)       | 205.2 (166.7 to 249.2)          | 0.0 (0.0 to 0.0)                  |
| Spain   | 2031 | 3193.9 (3002.2 to 3427.2)  | 2244.7 (2095.7 to 2438.3)  | 786.7 (688.6 to 888.8)        | 162.5 (131.7 to 197.1)          | 0.0 (0.0 to 0.0)                  | 4063.7 (3819.8 to 4360.5) | 2856.0 (2666.5 to 3102.4)  | 1001.0 (876.1 to 1130.9)      | 206.7 (167.6 to 250.8)          | 0.0 (0.0 to 0.0)                  |
| Spain   | 2032 | 3218.8 (3014.5 to 3462.2)  | 2259.4 (2100.7 to 2474.6)  | 795.8 (686.1 to 905.7)        | 163.6 (132.7 to 198.6)          | 0.0 (0.0 to 0.0)                  | 4095.5 (3835.5 to 4405.1) | 2874.8 (2672.8 to 3148.6)  | 1012.5 (872.9 to 1152.3)      | 208.1 (168.8 to 252.7)          | 0.0 (0.0 to 0.0)                  |
| Spain   | 2033 | 3242.7 (3023.7 to 3507.3)  | 2273.3 (2104.3 to 2501.1)  | 804.8 (685.1 to 924.6)        | 164.6 (133.7 to 200.1)          | 0.0 (0.0 to 0.0)                  | 4125.9 (3847.2 to 4462.5) | 2892.5 (2677.4 to 3182.2)  | 1023.9 (871.7 to 1176.5)      | 209.5 (170.1 to 254.5)          | 0.0 (0.0 to 0.0)                  |
| Spain   | 2034 | 3265.2 (3030.7 to 3545.8)  | 2286.0 (2106.3 to 2529.3)  | 813.6 (685.7 to 943.0)        | 165.5 (134.0 to 201.4)          | 0.0 (0.0 to 0.0)                  | 4154.4 (3856.1 to 4511.5) | 2908.6 (2679.9 to 3218.2)  | 1035.2 (872.4 to 1199.9)      | 210.6 (170.6 to 256.2)          | 0.0 (0.0 to 0.0)                  |
| Spain   | 2035 | 3285.2 (3032.7 to 3592.3)  | 2296.8 (2105.8 to 2564.5)  | 822.1 (685.8 to 957.5)        | 166.3 (134.7 to 202.5)          | 0.0 (0.0 to 0.0)                  | 4179.9 (3858.6 to 4570.6) | 2922.3 (2679.3 to 3263.0)  | 1046.0 (872.6 to 1218.3)      | 211.6 (171.3 to 257.7)          | 0.0 (0.0 to 0.0)                  |
| Spain   | 2036 | 3303.9 (3028.1 to 3624.0)  | 2306.5 (2105.3 to 2599.1)  | 830.4 (686.6 to 973.8)        | 167.0 (135.3 to 203.9)          | 0.0 (0.0 to 0.0)                  | 4203.7 (3852.8 to 4611.0) | 2934.6 (2678.6 to 3307.0)  | 1056.6 (873.6 to 1239.0)      | 212.5 (172.2 to 259.5)          | 0.0 (0.0 to 0.0)                  |
| Spain   | 2037 | 3322.2 (3036.4 to 3656.1)  | 2315.8 (2104.1 to 2613.3)  | 838.7 (688.2 to 990.6)        | 167.7 (135.7 to 205.5)          | 0.0 (0.0 to 0.0)                  | 4227.0 (3863.4 to 4651.8) | 2946.5 (2677.1 to 3325.0)  | 1067.2 (875.7 to 1260.4)      | 213.4 (172.7 to 261.4)          | 0.0 (0.0 to 0.0)                  |
| Spain   | 2038 | 3337.8 (3047.0 to 3693.1)  | 2322.9 (2101.1 to 2636.0)  | 846.7 (690.0 to 1006.9)       | 168.2 (135.8 to 206.6)          | 0.0 (0.0 to 0.0)                  | 4246.9 (3876.9 to 4698.8) | 2955.5 (2673.4 to 3353.9)  | 1077.3 (877.9 to 1281.1)      | 214.1 (172.8 to 262.8)          | 0.0 (0.0 to 0.0)                  |
| Spain   | 2039 | 3353.0 (3040.0 to 3734.2)  | 2329.6 (2097.3 to 2655.1)  | 854.6 (692.2 to 1023.2)       | 168.7 (135.8 to 207.9)          | 0.0 (0.0 to 0.0)                  | 4266.2 (3868.0 to 4751.3) | 2964.0 (2668.5 to 3378.2)  | 1087.4 (880.8 to 1301.9)      | 214.7 (172.8 to 264.5)          | 0.0 (0.0 to 0.0)                  |
| Spain   | 2040 | 3366.9 (3051.7 to 3772.9)  | 2335.4 (2088.7 to 2680.4)  | 862.3 (694.8 to 1039.1)       | 169.1 (136.2 to 209.0)          | 0.0 (0.0 to 0.0)                  | 4283.8 (3882.8 to 4800.4) | 2971.4 (2657.6 to 3410.4)  | 1097.2 (884.0 to 1322.1)      | 215.2 (173.3 to 265.9)          | 0.0 (0.0 to 0.0)                  |
| Spain   | 2041 | 3377.5 (3052.2 to 3804.6)  | 2338.4 (2082.2 to 2692.1)  | 869.6 (696.9 to 1054.4)       | 169.5 (136.3 to 209.7)          | 0.0 (0.0 to 0.0)                  | 4297.3 (3883.5 to 4840.7) | 2975.2 (2649.3 to 3425.3)  | 1106.4 (886.6 to 1341.6)      | 215.6 (173.4 to 266.8)          | 0.0 (0.0 to 0.0)                  |
| Spain   | 2042 | 3389.1 (3060.3 to 3828.0)  | 2342.3 (2076.3 to 2724.0)  | 877.0 (697.8 to 1069.3)       | 169.9 (136.4 to 210.4)          | 0.0 (0.0 to 0.0)                  | 4312.2 (3893.7 to 4870.5) | 2980.2 (2641.8 to 3465.8)  | 1115.8 (887.9 to 1360.5)      | 216.1 (173.5 to 267.7)          | 0.0 (0.0 to 0.0)                  |
| Spain   | 2043 | 3400.0 (3046.9 to 3855.0)  | 2345.6 (2071.2 to 2734.4)  | 884.2 (701.4 to 1083.5)       | 170.2 (136.4 to 211.2)          | 0.0 (0.0 to 0.0)                  | 4326.0 (3876.7 to 4904.9) | 2984.4 (2635.3 to 3479.1)  | 1125.0 (892.5 to 1378.6)      | 216.6 (173.6 to 268.7)          | 0.0 (0.0 to 0.0)                  |

| Country   | Year | 2018 US Dollars per capita |                            |                               |                                 |                                   | 2018 PPP per capita       |                            |                               |                                 |                                   |
|-----------|------|----------------------------|----------------------------|-------------------------------|---------------------------------|-----------------------------------|---------------------------|----------------------------|-------------------------------|---------------------------------|-----------------------------------|
|           |      | Health spending            | Government health spending | Out-of-pocket health spending | Prepaid private health spending | Development assistance for health | Health spending           | Government health spending | Out-of-pocket health spending | Prepaid private health spending | Development assistance for health |
| Spain     | 2044 | 3412.7 (3050.6 to 3881.5)  | 2350.3 (2072.0 to 2746.3)  | 891.6 (705.9 to 1092.7)       | 170.8 (136.6 to 211.7)          | 0.0 (0.0 to 0.0)                  | 4342.1 (3881.4 to 4938.6) | 2990.4 (2636.3 to 3494.2)  | 1134.4 (898.1 to 1390.3)      | 217.3 (173.8 to 269.4)          | 0.0 (0.0 to 0.0)                  |
| Spain     | 2045 | 3428.3 (3051.7 to 3907.9)  | 2357.5 (2068.3 to 2766.4)  | 899.3 (711.2 to 1102.4)       | 171.5 (137.0 to 212.5)          | 0.0 (0.0 to 0.0)                  | 4362.0 (3882.8 to 4972.2) | 2999.5 (2631.6 to 3519.8)  | 1144.3 (904.9 to 1402.6)      | 218.2 (174.3 to 270.4)          | 0.0 (0.0 to 0.0)                  |
| Spain     | 2046 | 3446.3 (3069.1 to 3923.3)  | 2366.2 (2071.7 to 2775.5)  | 907.4 (717.5 to 1112.1)       | 172.6 (137.6 to 213.8)          | 0.0 (0.0 to 0.0)                  | 4384.8 (3904.9 to 4991.8) | 3010.6 (2635.9 to 3531.4)  | 1154.6 (912.9 to 1415.0)      | 219.6 (175.0 to 272.0)          | 0.0 (0.0 to 0.0)                  |
| Spain     | 2047 | 3466.7 (3082.2 to 3970.2)  | 2376.9 (2078.0 to 2785.1)  | 915.8 (724.1 to 1125.8)       | 173.9 (138.4 to 215.3)          | 0.0 (0.0 to 0.0)                  | 4410.8 (3921.7 to 5051.5) | 3024.3 (2643.9 to 3543.6)  | 1165.2 (921.3 to 1432.4)      | 221.3 (176.1 to 273.9)          | 0.0 (0.0 to 0.0)                  |
| Spain     | 2048 | 3490.1 (3107.9 to 3993.2)  | 2389.9 (2087.4 to 2809.5)  | 924.7 (731.1 to 1135.5)       | 175.6 (139.5 to 217.7)          | 0.0 (0.0 to 0.0)                  | 4440.6 (3954.3 to 5080.8) | 3040.8 (2655.9 to 3574.7)  | 1176.5 (930.2 to 1444.7)      | 223.4 (177.4 to 276.9)          | 0.0 (0.0 to 0.0)                  |
| Spain     | 2049 | 3516.3 (3129.7 to 4012.5)  | 2404.9 (2099.3 to 2823.8)  | 934.0 (738.4 to 1144.3)       | 177.4 (140.6 to 220.3)          | 0.0 (0.0 to 0.0)                  | 4474.0 (3982.1 to 5105.3) | 3059.9 (2671.0 to 3592.8)  | 1188.4 (939.5 to 1455.9)      | 225.7 (179.0 to 280.3)          | 0.0 (0.0 to 0.0)                  |
| Spain     | 2050 | 3543.5 (3149.9 to 4038.8)  | 2420.7 (2110.5 to 2849.6)  | 943.5 (746.9 to 1156.0)       | 179.3 (141.8 to 222.4)          | 0.0 (0.0 to 0.0)                  | 4508.6 (4007.7 to 5138.8) | 3080.0 (2685.3 to 3625.7)  | 1200.5 (950.4 to 1470.8)      | 228.1 (180.4 to 283.0)          | 0.0 (0.0 to 0.0)                  |
| Sri Lanka | 1995 | 86.6 (71.7 to 103.3)       | 47.4 (37.3 to 59.9)        | 31.8 (23.0 to 42.9)           | 6.6 (3.2 to 12.4)               | 0.8 (0.8 to 0.8)                  | 275.3 (228.0 to 328.5)    | 150.7 (118.5 to 190.5)     | 101.1 (73.3 to 136.3)         | 21.1 (10.0 to 39.4)             | 2.5 (2.5 to 2.5)                  |
| Sri Lanka | 1996 | 90.3 (75.1 to 106.9)       | 49.1 (38.6 to 61.2)        | 33.5 (24.4 to 44.5)           | 6.8 (3.3 to 12.6)               | 1.0 (1.0 to 1.0)                  | 287.1 (238.8 to 340.0)    | 156.0 (122.8 to 194.6)     | 106.4 (77.5 to 141.5)         | 21.6 (10.4 to 40.2)             | 3.2 (3.2 to 3.2)                  |
| Sri Lanka | 1997 | 94.2 (79.7 to 110.2)       | 50.7 (40.7 to 62.9)        | 35.0 (25.7 to 46.2)           | 6.9 (3.3 to 12.5)               | 1.7 (1.7 to 1.7)                  | 299.5 (253.3 to 350.5)    | 161.1 (129.2 to 200.1)     | 111.2 (81.6 to 146.8)         | 21.9 (10.3 to 39.8)             | 5.3 (5.3 to 5.3)                  |
| Sri Lanka | 1998 | 97.2 (82.4 to 113.1)       | 51.4 (41.4 to 64.0)        | 36.2 (27.0 to 47.3)           | 6.8 (3.1 to 12.5)               | 2.8 (2.8 to 2.8)                  | 308.9 (262.0 to 359.6)    | 163.5 (131.6 to 203.3)     | 114.9 (85.8 to 150.3)         | 21.6 (9.9 to 39.7)              | 8.9 (8.9 to 8.9)                  |
| Sri Lanka | 1999 | 96.4 (81.7 to 112.5)       | 51.6 (41.7 to 63.8)        | 37.4 (28.4 to 48.2)           | 6.5 (3.1 to 12.2)               | 0.9 (0.9 to 0.9)                  | 306.6 (259.7 to 357.5)    | 164.0 (132.4 to 202.8)     | 119.0 (90.2 to 153.2)         | 20.7 (9.9 to 38.7)              | 2.9 (2.9 to 2.9)                  |
| Sri Lanka | 2000 | 99.9 (85.3 to 116.4)       | 53.3 (42.9 to 65.1)        | 39.3 (29.8 to 50.5)           | 6.3 (2.9 to 11.6)               | 0.9 (0.9 to 0.9)                  | 317.4 (271.2 to 369.9)    | 169.4 (136.4 to 207.1)     | 125.1 (94.9 to 160.5)         | 20.0 (9.4 to 37.0)              | 3.0 (3.0 to 3.0)                  |
| Sri Lanka | 2001 | 97.7 (83.0 to 113.3)       | 51.7 (42.1 to 63.1)        | 39.2 (29.9 to 50.2)           | 6.0 (2.9 to 11.1)               | 0.8 (0.8 to 0.8)                  | 310.6 (264.0 to 360.2)    | 164.2 (134.0 to 200.5)     | 124.8 (94.9 to 159.4)         | 19.2 (9.2 to 35.1)              | 2.4 (2.4 to 2.4)                  |
| Sri Lanka | 2002 | 98.8 (84.2 to 114.3)       | 52.1 (42.5 to 63.9)        | 39.5 (30.3 to 50.2)           | 6.1 (2.9 to 11.5)               | 1.0 (1.0 to 1.0)                  | 314.0 (267.6 to 363.5)    | 165.7 (135.2 to 203.1)     | 125.7 (96.3 to 159.7)         | 19.4 (9.2 to 36.6)              | 3.2 (3.2 to 3.2)                  |
| Sri Lanka | 2003 | 100.1 (85.2 to 115.4)      | 52.9 (43.1 to 64.9)        | 39.6 (30.3 to 50.2)           | 6.2 (3.0 to 11.5)               | 1.4 (1.4 to 1.4)                  | 318.4 (271.0 to 366.7)    | 168.1 (136.9 to 206.4)     | 126.0 (96.4 to 159.7)         | 19.7 (9.4 to 36.5)              | 4.6 (4.6 to 4.6)                  |
| Sri Lanka | 2004 | 103.8 (88.4 to 119.9)      | 54.2 (44.4 to 67.1)        | 42.6 (32.8 to 53.7)           | 6.4 (3.0 to 12.1)               | 0.6 (0.6 to 0.6)                  | 329.9 (281.1 to 381.2)    | 172.3 (141.0 to 213.3)     | 135.4 (104.4 to 170.6)        | 20.4 (9.6 to 38.6)              | 1.8 (1.8 to 1.8)                  |
| Sri Lanka | 2005 | 108.2 (92.4 to 125.1)      | 55.1 (45.2 to 68.3)        | 45.3 (35.4 to 57.1)           | 6.6 (3.2 to 12.5)               | 1.1 (1.1 to 1.1)                  | 343.9 (293.6 to 397.7)    | 175.2 (143.7 to 217.2)     | 144.1 (112.5 to 181.4)        | 21.1 (10.1 to 39.8)             | 3.5 (3.5 to 3.5)                  |
| Sri Lanka | 2006 | 114.0 (97.8 to 132.1)      | 56.1 (45.9 to 69.0)        | 49.2 (39.1 to 61.9)           | 6.8 (3.2 to 12.4)               | 1.8 (1.8 to 1.8)                  | 362.3 (310.8 to 420.0)    | 178.4 (146.0 to 219.3)     | 156.5 (124.3 to 196.9)        | 21.6 (10.1 to 39.6)             | 5.9 (5.9 to 5.9)                  |
| Sri Lanka | 2007 | 118.9 (102.2 to 137.5)     | 56.0 (45.4 to 68.3)        | 54.5 (43.1 to 68.9)           | 6.9 (3.3 to 12.5)               | 1.6 (1.6 to 1.6)                  | 378.1 (324.9 to 437.2)    | 177.9 (144.5 to 217.2)     | 173.2 (137.2 to 219.2)        | 21.9 (10.3 to 39.7)             | 5.1 (5.1 to 5.1)                  |
| Sri Lanka | 2008 | 123.6 (106.2 to 144.4)     | 54.4 (44.2 to 66.3)        | 60.0 (47.1 to 74.6)           | 6.8 (3.2 to 12.6)               | 2.4 (2.4 to 2.4)                  | 393.0 (337.5 to 458.9)    | 173.0 (140.6 to 210.8)     | 190.7 (149.7 to 237.0)        | 21.8 (10.1 to 40.1)             | 7.5 (7.5 to 7.5)                  |

| Country   | Year | 2018 US Dollars per capita |                            |                               |                                 |                                   | 2018 PPP per capita    |                            |                               |                                 |                                   |
|-----------|------|----------------------------|----------------------------|-------------------------------|---------------------------------|-----------------------------------|------------------------|----------------------------|-------------------------------|---------------------------------|-----------------------------------|
|           |      | Health spending            | Government health spending | Out-of-pocket health spending | Prepaid private health spending | Development assistance for health | Health spending        | Government health spending | Out-of-pocket health spending | Prepaid private health spending | Development assistance for health |
| Sri Lanka | 2009 | 126.2 (108.1 to 147.6)     | 53.2 (43.3 to 64.8)        | 63.7 (50.0 to 78.3)           | 6.8 (3.1 to 12.8)               | 2.5 (2.5 to 2.5)                  | 401.1 (343.5 to 469.2) | 169.0 (137.5 to 205.9)     | 202.6 (158.8 to 248.9)        | 21.5 (10.0 to 40.6)             | 8.0 (8.0 to 8.0)                  |
| Sri Lanka | 2010 | 124.4 (106.9 to 144.8)     | 51.8 (41.9 to 63.6)        | 63.2 (49.3 to 78.0)           | 6.6 (3.1 to 12.3)               | 2.9 (2.9 to 2.9)                  | 395.5 (339.7 to 460.3) | 164.5 (133.2 to 202.2)     | 200.8 (156.9 to 248.0)        | 20.9 (9.7 to 39.1)              | 9.2 (9.2 to 9.2)                  |
| Sri Lanka | 2011 | 126.0 (107.4 to 146.8)     | 53.3 (43.0 to 65.6)        | 63.8 (50.2 to 79.0)           | 6.9 (3.2 to 12.9)               | 2.0 (2.0 to 2.0)                  | 400.6 (341.3 to 466.6) | 169.3 (136.6 to 208.6)     | 203.0 (159.6 to 251.1)        | 22.0 (10.2 to 41.0)             | 6.3 (6.3 to 6.3)                  |
| Sri Lanka | 2012 | 129.6 (111.0 to 151.0)     | 55.6 (44.5 to 67.9)        | 65.3 (51.1 to 80.9)           | 7.2 (3.4 to 13.4)               | 1.6 (1.6 to 1.6)                  | 412.1 (352.8 to 479.9) | 176.9 (141.6 to 215.8)     | 207.4 (162.4 to 257.3)        | 22.7 (10.7 to 42.5)             | 5.1 (5.1 to 5.1)                  |
| Sri Lanka | 2013 | 136.9 (116.0 to 158.3)     | 59.5 (47.5 to 72.6)        | 67.8 (52.8 to 84.6)           | 7.6 (3.6 to 14.3)               | 1.9 (1.9 to 1.9)                  | 435.1 (368.8 to 503.3) | 189.2 (150.9 to 230.8)     | 215.7 (167.7 to 269.0)        | 24.2 (11.5 to 45.5)             | 6.0 (6.0 to 6.0)                  |
| Sri Lanka | 2014 | 142.9 (122.4 to 163.9)     | 62.5 (49.5 to 76.7)        | 69.9 (54.2 to 87.4)           | 8.1 (4.0 to 15.7)               | 2.4 (2.4 to 2.4)                  | 454.2 (389.1 to 521.2) | 198.7 (157.2 to 243.9)     | 222.2 (172.2 to 277.7)        | 25.9 (12.7 to 50.0)             | 7.5 (7.5 to 7.5)                  |
| Sri Lanka | 2015 | 152.1 (130.1 to 175.4)     | 66.0 (52.4 to 81.5)        | 73.9 (57.1 to 93.3)           | 9.0 (4.4 to 16.9)               | 3.3 (3.3 to 3.3)                  | 483.6 (413.7 to 557.5) | 209.7 (166.6 to 259.2)     | 234.8 (181.7 to 296.5)        | 28.5 (13.9 to 53.9)             | 10.6 (10.6 to 10.6)               |
| Sri Lanka | 2016 | 158.7 (134.5 to 187.5)     | 69.0 (55.1 to 85.8)        | 77.7 (59.6 to 99.6)           | 9.7 (4.7 to 18.6)               | 2.3 (2.3 to 2.3)                  | 504.5 (427.5 to 596.2) | 219.4 (175.0 to 272.8)     | 247.0 (189.5 to 316.7)        | 30.8 (14.9 to 59.2)             | 7.3 (7.3 to 7.3)                  |
| Sri Lanka | 2017 | 164.3 (139.5 to 193.8)     | 70.4 (56.3 to 87.5)        | 79.3 (60.8 to 101.9)          | 9.9 (4.8 to 19.0)               | 4.7 (4.7 to 4.7)                  | 522.4 (443.5 to 616.1) | 223.8 (179.0 to 278.1)     | 252.1 (193.4 to 323.9)        | 31.4 (15.1 to 60.5)             | 15.1 (15.1 to 15.1)               |
| Sri Lanka | 2018 | 167.9 (142.4 to 198.5)     | 72.7 (58.2 to 90.3)        | 80.7 (62.0 to 103.8)          | 10.2 (4.9 to 19.6)              | 4.3 (4.3 to 4.3)                  | 533.7 (452.7 to 630.9) | 231.0 (184.9 to 286.9)     | 256.7 (197.0 to 329.8)        | 32.3 (15.6 to 62.4)             | 13.8 (13.7 to 13.8)               |
| Sri Lanka | 2019 | 172.1 (145.5 to 202.0)     | 75.0 (60.1 to 93.2)        | 82.2 (63.0 to 105.6)          | 10.4 (5.1 to 20.2)              | 4.4 (4.1 to 4.6)                  | 547.0 (462.6 to 642.2) | 238.5 (190.9 to 296.1)     | 261.3 (200.4 to 335.7)        | 33.2 (16.1 to 64.1)             | 14.0 (13.0 to 14.8)               |
| Sri Lanka | 2020 | 176.3 (149.2 to 208.0)     | 77.3 (61.8 to 96.4)        | 83.7 (64.2 to 107.6)          | 10.7 (5.2 to 20.7)              | 4.5 (4.1 to 4.8)                  | 560.4 (474.3 to 661.4) | 245.8 (196.6 to 306.3)     | 266.2 (204.2 to 342.1)        | 34.1 (16.5 to 65.7)             | 14.2 (13.1 to 15.3)               |
| Sri Lanka | 2021 | 180.6 (153.0 to 211.5)     | 79.3 (63.4 to 98.8)        | 85.7 (65.5 to 109.8)          | 11.0 (5.3 to 21.2)              | 4.6 (4.1 to 5.1)                  | 574.0 (486.5 to 672.5) | 252.1 (201.5 to 314.0)     | 272.3 (208.3 to 349.1)        | 35.0 (16.9 to 67.5)             | 14.6 (13.1 to 16.1)               |
| Sri Lanka | 2022 | 186.2 (157.2 to 218.4)     | 81.8 (65.3 to 102.1)       | 88.4 (67.5 to 113.8)          | 11.3 (5.5 to 21.8)              | 4.7 (4.2 to 5.3)                  | 592.0 (499.8 to 694.1) | 260.1 (207.5 to 324.5)     | 280.9 (214.5 to 361.8)        | 36.1 (17.4 to 69.3)             | 15.0 (13.3 to 16.8)               |
| Sri Lanka | 2023 | 191.6 (161.5 to 224.9)     | 84.0 (66.9 to 104.8)       | 91.1 (69.5 to 117.2)          | 11.7 (5.6 to 22.3)              | 4.8 (4.2 to 5.5)                  | 609.1 (513.3 to 715.0) | 267.0 (212.7 to 333.3)     | 289.7 (221.0 to 372.5)        | 37.1 (17.9 to 71.0)             | 15.4 (13.4 to 17.5)               |
| Sri Lanka | 2024 | 197.8 (166.9 to 232.2)     | 86.6 (69.0 to 107.9)       | 94.2 (71.9 to 120.8)          | 12.0 (5.8 to 22.9)              | 5.0 (4.3 to 5.7)                  | 628.7 (530.7 to 738.0) | 275.4 (219.3 to 343.0)     | 299.3 (228.5 to 383.9)        | 38.2 (18.4 to 72.9)             | 15.8 (13.6 to 18.2)               |
| Sri Lanka | 2025 | 204.2 (172.4 to 240.6)     | 89.4 (71.1 to 111.2)       | 97.4 (74.5 to 123.9)          | 12.4 (5.9 to 23.5)              | 5.1 (4.3 to 5.9)                  | 649.1 (547.9 to 764.7) | 284.1 (225.9 to 353.7)     | 309.6 (236.9 to 393.8)        | 39.3 (18.9 to 74.8)             | 16.1 (13.7 to 18.8)               |
| Sri Lanka | 2026 | 210.8 (178.2 to 248.0)     | 92.1 (73.3 to 114.8)       | 100.8 (77.3 to 128.6)         | 12.7 (6.1 to 24.2)              | 5.2 (4.3 to 6.1)                  | 670.1 (566.4 to 788.5) | 292.9 (233.1 to 365.0)     | 320.3 (245.6 to 408.9)        | 40.5 (19.4 to 76.9)             | 16.4 (13.8 to 19.3)               |
| Sri Lanka | 2027 | 217.5 (182.9 to 256.0)     | 94.9 (75.4 to 118.4)       | 104.2 (79.7 to 134.1)         | 13.1 (6.3 to 24.9)              | 5.3 (4.4 to 6.3)                  | 691.6 (581.6 to 813.9) | 301.8 (239.8 to 376.3)     | 331.3 (253.4 to 426.3)        | 41.7 (19.9 to 79.3)             | 16.7 (13.9 to 19.9)               |
| Sri Lanka | 2028 | 224.2 (189.0 to 264.2)     | 97.6 (77.5 to 121.6)       | 107.7 (82.2 to 138.9)         | 13.5 (6.4 to 25.7)              | 5.4 (4.5 to 6.6)                  | 712.8 (600.9 to 839.8) | 310.4 (246.3 to 386.7)     | 342.3 (261.3 to 441.4)        | 43.0 (20.5 to 81.7)             | 17.1 (14.2 to 20.9)               |
| Sri Lanka | 2029 | 231.3 (194.4 to 273.4)     | 100.7 (79.9 to 125.3)      | 111.2 (84.7 to 143.2)         | 13.9 (6.6 to 26.5)              | 5.5 (4.5 to 6.8)                  | 735.4 (618.0 to 869.0) | 320.0 (253.9 to 398.3)     | 353.6 (269.2 to 455.1)        | 44.3 (21.0 to 84.2)             | 17.6 (14.3 to 21.8)               |

| Country   | Year | 2018 US Dollars per capita |                            |                               |                                 |                                   | 2018 PPP per capita       |                            |                               |                                 |                                   |
|-----------|------|----------------------------|----------------------------|-------------------------------|---------------------------------|-----------------------------------|---------------------------|----------------------------|-------------------------------|---------------------------------|-----------------------------------|
|           |      | Health spending            | Government health spending | Out-of-pocket health spending | Prepaid private health spending | Development assistance for health | Health spending           | Government health spending | Out-of-pocket health spending | Prepaid private health spending | Development assistance for health |
| Sri Lanka | 2030 | 238.5 (199.9 to 279.8)     | 103.8 (82.5 to 129.0)      | 114.8 (86.8 to 148.5)         | 14.3 (6.8 to 27.3)              | 5.7 (4.6 to 7.1)                  | 758.3 (635.4 to 889.4)    | 329.9 (262.3 to 410.2)     | 364.9 (275.9 to 472.2)        | 45.6 (21.6 to 86.8)             | 18.0 (14.5 to 22.4)               |
| Sri Lanka | 2031 | 245.8 (206.0 to 291.0)     | 106.9 (84.9 to 133.2)      | 118.4 (89.2 to 154.0)         | 14.8 (7.0 to 28.2)              | 5.8 (4.6 to 7.4)                  | 781.4 (654.8 to 925.2)    | 339.7 (269.9 to 423.4)     | 376.4 (283.4 to 489.5)        | 46.9 (22.2 to 89.8)             | 18.4 (14.6 to 23.6)               |
| Sri Lanka | 2032 | 253.1 (211.1 to 299.1)     | 110.0 (87.3 to 137.1)      | 122.0 (91.5 to 159.2)         | 15.2 (7.2 to 29.2)              | 5.9 (4.7 to 7.7)                  | 804.7 (671.0 to 950.7)    | 349.6 (277.4 to 435.8)     | 387.8 (290.9 to 506.1)        | 48.3 (22.9 to 92.9)             | 18.9 (14.9 to 24.3)               |
| Sri Lanka | 2033 | 260.6 (216.1 to 305.4)     | 113.2 (89.4 to 141.5)      | 125.6 (93.5 to 164.9)         | 15.6 (7.5 to 30.2)              | 6.1 (4.7 to 8.0)                  | 828.3 (687.0 to 970.9)    | 359.8 (284.2 to 449.7)     | 399.4 (297.1 to 524.2)        | 49.7 (23.7 to 96.1)             | 19.4 (14.9 to 25.3)               |
| Sri Lanka | 2034 | 268.0 (220.7 to 315.6)     | 116.4 (91.5 to 146.2)      | 129.2 (95.4 to 170.4)         | 16.1 (7.7 to 31.2)              | 6.3 (4.8 to 8.3)                  | 851.9 (701.6 to 1003.3)   | 370.0 (290.9 to 464.7)     | 410.8 (303.4 to 541.5)        | 51.1 (24.4 to 99.3)             | 20.0 (15.2 to 26.4)               |
| Sri Lanka | 2035 | 275.7 (228.6 to 328.5)     | 119.8 (94.0 to 150.7)      | 132.9 (97.8 to 176.1)         | 16.5 (7.9 to 32.2)              | 6.5 (4.9 to 8.6)                  | 876.4 (726.8 to 1044.3)   | 380.8 (298.9 to 479.0)     | 422.4 (310.9 to 559.7)        | 52.6 (25.1 to 102.4)            | 20.6 (15.6 to 27.4)               |
| Sri Lanka | 2036 | 283.3 (234.6 to 338.7)     | 123.1 (96.5 to 155.1)      | 136.5 (99.8 to 181.3)         | 17.0 (8.1 to 33.2)              | 6.7 (4.9 to 9.1)                  | 900.7 (745.7 to 1076.6)   | 391.5 (306.8 to 492.9)     | 434.0 (317.2 to 576.4)        | 54.1 (25.8 to 105.5)            | 21.2 (15.7 to 28.9)               |
| Sri Lanka | 2037 | 291.2 (241.0 to 348.4)     | 126.7 (99.1 to 159.7)      | 140.2 (101.7 to 186.8)        | 17.5 (8.4 to 34.2)              | 6.9 (5.1 to 9.4)                  | 925.8 (766.0 to 1107.5)   | 402.7 (315.1 to 507.7)     | 445.6 (323.3 to 594.0)        | 55.7 (26.6 to 108.6)            | 21.8 (16.1 to 29.9)               |
| Sri Lanka | 2038 | 299.3 (246.0 to 359.2)     | 130.4 (101.8 to 164.5)     | 143.8 (104.3 to 192.3)        | 18.0 (8.6 to 35.1)              | 7.1 (5.2 to 10.0)                 | 951.4 (782.1 to 1141.9)   | 414.4 (323.8 to 522.9)     | 457.2 (331.4 to 611.4)        | 57.3 (27.4 to 111.6)            | 22.4 (16.4 to 31.9)               |
| Sri Lanka | 2039 | 307.2 (253.4 to 365.7)     | 133.9 (104.5 to 169.2)     | 147.5 (106.8 to 197.7)        | 18.5 (8.8 to 36.2)              | 7.3 (5.3 to 10.4)                 | 976.6 (805.6 to 1162.5)   | 425.8 (332.1 to 537.8)     | 468.8 (339.4 to 628.5)        | 59.0 (28.1 to 115.0)            | 23.1 (16.8 to 33.1)               |
| Sri Lanka | 2040 | 315.1 (259.8 to 377.9)     | 137.5 (107.1 to 173.8)     | 151.0 (109.3 to 202.9)        | 19.1 (9.1 to 37.2)              | 7.5 (5.5 to 10.8)                 | 1001.6 (825.8 to 1201.2)  | 437.0 (340.3 to 552.5)     | 480.1 (347.4 to 644.9)        | 60.6 (28.8 to 118.2)            | 23.9 (17.4 to 34.2)               |
| Sri Lanka | 2041 | 322.9 (265.9 to 387.2)     | 141.0 (109.7 to 178.5)     | 154.6 (111.7 to 208.4)        | 19.6 (9.4 to 38.1)              | 7.8 (5.6 to 11.2)                 | 1026.6 (845.3 to 1230.9)  | 448.3 (348.7 to 567.3)     | 491.5 (355.2 to 662.6)        | 62.2 (29.7 to 121.3)            | 24.7 (17.8 to 35.5)               |
| Sri Lanka | 2042 | 330.8 (270.8 to 399.8)     | 144.5 (112.5 to 183.1)     | 158.1 (114.2 to 213.3)        | 20.1 (9.6 to 39.1)              | 8.0 (5.7 to 11.7)                 | 1051.5 (860.8 to 1270.8)  | 459.4 (357.7 to 582.0)     | 502.7 (363.1 to 678.2)        | 63.9 (30.6 to 124.3)            | 25.5 (18.1 to 37.1)               |
| Sri Lanka | 2043 | 338.6 (276.9 to 405.1)     | 148.1 (114.9 to 187.9)     | 161.6 (116.7 to 218.3)        | 20.6 (9.9 to 40.1)              | 8.3 (5.9 to 12.5)                 | 1076.4 (880.2 to 1287.7)  | 470.7 (365.3 to 597.3)     | 513.7 (371.1 to 693.9)        | 65.5 (31.5 to 127.3)            | 26.4 (18.8 to 39.8)               |
| Sri Lanka | 2044 | 346.4 (284.9 to 415.9)     | 151.6 (117.3 to 193.1)     | 165.0 (119.2 to 224.0)        | 21.1 (10.2 to 41.0)             | 8.6 (6.1 to 13.1)                 | 1101.1 (905.8 to 1322.1)  | 481.9 (373.0 to 613.7)     | 524.5 (378.8 to 712.1)        | 67.2 (32.4 to 130.4)            | 27.5 (19.3 to 41.5)               |
| Sri Lanka | 2045 | 354.3 (288.8 to 424.7)     | 155.3 (120.0 to 198.2)     | 168.3 (121.5 to 228.6)        | 21.7 (10.5 to 42.0)             | 9.0 (6.3 to 13.7)                 | 1126.2 (918.2 to 1350.0)  | 493.6 (381.4 to 630.1)     | 535.1 (386.3 to 726.6)        | 68.9 (33.2 to 133.6)            | 28.6 (20.0 to 43.7)               |
| Sri Lanka | 2046 | 362.6 (297.1 to 437.1)     | 159.3 (123.0 to 203.9)     | 171.7 (123.9 to 233.6)        | 22.3 (10.7 to 43.1)             | 9.3 (6.5 to 14.9)                 | 1152.7 (944.5 to 1389.6)  | 506.5 (390.9 to 648.0)     | 545.8 (394.0 to 742.5)        | 70.8 (34.1 to 136.9)            | 29.6 (20.7 to 47.4)               |
| Sri Lanka | 2047 | 371.0 (302.4 to 446.0)     | 163.5 (126.1 to 209.7)     | 174.9 (126.3 to 238.2)        | 22.8 (11.0 to 44.2)             | 9.7 (6.6 to 15.7)                 | 1179.3 (961.1 to 1417.9)  | 519.6 (400.8 to 666.5)     | 556.1 (401.4 to 757.3)        | 72.6 (34.9 to 140.6)            | 30.9 (21.1 to 49.9)               |
| Sri Lanka | 2048 | 379.7 (312.7 to 459.8)     | 167.9 (129.3 to 215.8)     | 178.2 (128.5 to 242.2)        | 23.4 (11.2 to 45.4)             | 10.1 (6.9 to 16.6)                | 1206.9 (994.1 to 1461.8)  | 533.6 (410.9 to 685.8)     | 566.6 (408.3 to 770.0)        | 74.5 (35.8 to 144.4)            | 32.2 (22.0 to 52.7)               |
| Sri Lanka | 2049 | 388.6 (320.4 to 469.9)     | 172.4 (132.5 to 222.1)     | 181.6 (131.1 to 246.0)        | 24.1 (11.5 to 46.7)             | 10.6 (7.0 to 16.9)                | 1235.2 (1018.4 to 1493.8) | 547.9 (421.3 to 705.9)     | 577.2 (416.6 to 782.1)        | 76.5 (36.6 to 148.3)            | 33.6 (22.4 to 53.8)               |
| Sri Lanka | 2050 | 397.8 (327.8 to 479.2)     | 177.1 (135.7 to 228.7)     | 185.0 (133.5 to 250.0)        | 24.7 (11.8 to 48.0)             | 11.0 (7.4 to 18.1)                | 1264.5 (1041.9 to 1523.5) | 562.9 (431.5 to 726.9)     | 588.0 (424.4 to 794.9)        | 78.5 (37.5 to 152.4)            | 35.1 (23.6 to 57.7)               |

| Country | Year | 2018 US Dollars per capita |                            |                               |                                 |                                   | 2018 PPP per capita    |                            |                               |                                 |                                   |
|---------|------|----------------------------|----------------------------|-------------------------------|---------------------------------|-----------------------------------|------------------------|----------------------------|-------------------------------|---------------------------------|-----------------------------------|
|         |      | Health spending            | Government health spending | Out-of-pocket health spending | Prepaid private health spending | Development assistance for health | Health spending        | Government health spending | Out-of-pocket health spending | Prepaid private health spending | Development assistance for health |
| Sudan   | 1995 | 64.4 (51.8 to 78.3)        | 19.4 (14.8 to 25.1)        | 42.3 (30.4 to 55.2)           | 2.3 (1.1 to 4.3)                | 0.5 (0.5 to 0.5)                  | 151.9 (122.0 to 184.5) | 45.6 (35.0 to 59.3)        | 99.7 (71.7 to 130.2)          | 5.5 (2.6 to 10.2)               | 1.1 (1.1 to 1.1)                  |
| Sudan   | 1996 | 65.3 (52.7 to 78.8)        | 19.9 (15.3 to 25.4)        | 42.7 (31.2 to 54.7)           | 2.3 (1.2 to 4.4)                | 0.4 (0.4 to 0.4)                  | 153.9 (124.3 to 185.7) | 46.8 (36.1 to 59.8)        | 100.7 (73.6 to 129.0)         | 5.5 (2.8 to 10.3)               | 0.9 (0.9 to 0.9)                  |
| Sudan   | 1997 | 65.7 (54.0 to 79.2)        | 20.1 (15.5 to 25.8)        | 43.0 (32.2 to 55.4)           | 2.4 (1.2 to 4.4)                | 0.3 (0.3 to 0.3)                  | 154.9 (127.2 to 186.7) | 47.4 (36.6 to 60.9)        | 101.3 (76.0 to 130.6)         | 5.6 (2.7 to 10.3)               | 0.6 (0.6 to 0.6)                  |
| Sudan   | 1998 | 64.0 (53.3 to 77.5)        | 19.7 (15.2 to 25.1)        | 41.7 (31.8 to 53.7)           | 2.3 (1.1 to 4.1)                | 0.4 (0.4 to 0.4)                  | 150.9 (125.6 to 182.6) | 46.3 (35.9 to 59.0)        | 98.2 (75.0 to 126.6)          | 5.4 (2.6 to 9.6)                | 0.9 (0.9 to 0.9)                  |
| Sudan   | 1999 | 61.2 (51.0 to 73.1)        | 19.2 (14.9 to 24.1)        | 39.5 (30.1 to 50.8)           | 2.2 (1.1 to 4.0)                | 0.3 (0.3 to 0.3)                  | 144.2 (120.3 to 172.2) | 45.2 (35.1 to 56.8)        | 93.0 (71.0 to 119.8)          | 5.2 (2.5 to 9.5)                | 0.8 (0.8 to 0.8)                  |
| Sudan   | 2000 | 56.8 (47.6 to 67.5)        | 18.8 (14.5 to 23.5)        | 35.6 (27.9 to 45.4)           | 2.1 (1.0 to 3.8)                | 0.3 (0.3 to 0.3)                  | 133.8 (112.2 to 159.0) | 44.3 (34.2 to 55.3)        | 83.9 (65.7 to 107.0)          | 4.8 (2.3 to 9.0)                | 0.8 (0.8 to 0.8)                  |
| Sudan   | 2001 | 56.9 (47.8 to 67.4)        | 19.3 (15.0 to 24.0)        | 35.3 (27.8 to 45.1)           | 2.1 (1.0 to 3.9)                | 0.3 (0.3 to 0.3)                  | 134.1 (112.6 to 158.9) | 45.4 (35.4 to 56.5)        | 83.2 (65.6 to 106.2)          | 4.9 (2.3 to 9.3)                | 0.6 (0.6 to 0.6)                  |
| Sudan   | 2002 | 60.3 (51.2 to 71.8)        | 20.7 (16.2 to 25.9)        | 36.9 (29.1 to 47.1)           | 2.2 (1.0 to 4.2)                | 0.5 (0.5 to 0.5)                  | 142.0 (120.6 to 169.2) | 48.8 (38.1 to 60.9)        | 86.9 (68.6 to 111.1)          | 5.1 (2.3 to 9.8)                | 1.2 (1.2 to 1.2)                  |
| Sudan   | 2003 | 68.0 (58.0 to 80.8)        | 23.9 (18.6 to 29.9)        | 41.2 (32.7 to 52.1)           | 2.4 (1.1 to 4.5)                | 0.5 (0.5 to 0.5)                  | 160.2 (136.7 to 190.4) | 56.3 (43.8 to 70.5)        | 97.2 (77.2 to 122.7)          | 5.6 (2.6 to 10.6)               | 1.1 (1.1 to 1.1)                  |
| Sudan   | 2004 | 76.6 (65.8 to 90.8)        | 28.0 (22.0 to 35.2)        | 45.2 (35.7 to 58.1)           | 2.6 (1.2 to 5.1)                | 0.8 (0.8 to 0.8)                  | 180.5 (155.0 to 214.0) | 65.9 (51.8 to 82.9)        | 106.4 (84.1 to 136.8)         | 6.2 (2.8 to 12.0)               | 1.9 (1.9 to 1.9)                  |
| Sudan   | 2005 | 86.2 (74.1 to 102.2)       | 31.9 (25.1 to 40.1)        | 49.9 (39.5 to 63.2)           | 2.9 (1.3 to 5.4)                | 1.4 (1.4 to 1.4)                  | 203.1 (174.6 to 240.9) | 75.3 (59.1 to 94.5)        | 117.7 (93.0 to 148.9)         | 6.9 (3.1 to 12.8)               | 3.2 (3.2 to 3.2)                  |
| Sudan   | 2006 | 100.8 (86.4 to 118.7)      | 37.1 (29.2 to 46.7)        | 58.6 (46.3 to 73.6)           | 3.3 (1.5 to 6.3)                | 1.7 (1.7 to 1.7)                  | 237.5 (203.6 to 279.8) | 87.5 (68.9 to 110.0)       | 138.1 (109.1 to 173.4)        | 7.9 (3.6 to 14.8)               | 4.0 (4.0 to 4.0)                  |
| Sudan   | 2007 | 115.1 (98.3 to 135.2)      | 41.5 (32.3 to 51.5)        | 68.4 (54.3 to 85.5)           | 3.7 (1.7 to 7.0)                | 1.5 (1.5 to 1.5)                  | 271.2 (231.7 to 318.6) | 97.7 (76.1 to 121.3)       | 161.1 (128.0 to 201.5)        | 8.8 (4.0 to 16.4)               | 3.6 (3.6 to 3.6)                  |
| Sudan   | 2008 | 118.6 (101.6 to 139.5)     | 41.2 (32.2 to 51.3)        | 71.7 (56.9 to 88.8)           | 3.6 (1.7 to 6.5)                | 2.1 (2.1 to 2.1)                  | 279.5 (239.3 to 328.7) | 97.0 (75.9 to 120.8)       | 168.9 (134.0 to 209.3)        | 8.5 (4.1 to 15.3)               | 5.0 (5.0 to 5.0)                  |
| Sudan   | 2009 | 120.5 (103.4 to 141.8)     | 41.6 (32.7 to 52.0)        | 72.8 (58.2 to 90.8)           | 3.4 (1.6 to 6.2)                | 2.7 (2.7 to 2.7)                  | 284.1 (243.7 to 334.1) | 98.1 (77.0 to 122.5)       | 171.6 (137.1 to 213.9)        | 8.0 (3.9 to 14.5)               | 6.4 (6.4 to 6.4)                  |
| Sudan   | 2010 | 113.7 (97.0 to 132.8)      | 36.2 (28.1 to 45.1)        | 71.7 (57.6 to 89.1)           | 2.8 (1.3 to 5.2)                | 3.1 (3.1 to 3.1)                  | 267.9 (228.6 to 313.0) | 85.2 (66.3 to 106.2)       | 168.9 (135.8 to 210.0)        | 6.6 (3.2 to 12.1)               | 7.3 (7.3 to 7.3)                  |
| Sudan   | 2011 | 113.6 (96.9 to 132.2)      | 32.7 (25.8 to 40.8)        | 74.1 (59.4 to 91.0)           | 2.2 (1.1 to 4.0)                | 4.7 (4.7 to 4.7)                  | 267.8 (228.3 to 311.7) | 77.1 (60.7 to 96.1)        | 174.5 (139.9 to 214.5)        | 5.2 (2.5 to 9.4)                | 11.0 (11.0 to 11.0)               |
| Sudan   | 2012 | 105.5 (89.9 to 122.4)      | 27.7 (21.6 to 34.6)        | 70.9 (56.6 to 86.5)           | 2.6 (1.3 to 4.8)                | 4.4 (4.4 to 4.4)                  | 248.7 (212.0 to 288.4) | 65.2 (51.0 to 81.6)        | 167.0 (133.3 to 203.8)        | 6.1 (3.0 to 11.3)               | 10.3 (10.3 to 10.3)               |
| Sudan   | 2013 | 107.8 (91.0 to 125.2)      | 25.8 (20.1 to 32.1)        | 74.8 (59.2 to 91.0)           | 2.8 (1.4 to 5.1)                | 4.4 (4.4 to 4.4)                  | 254.0 (214.5 to 295.1) | 60.9 (47.3 to 75.6)        | 176.2 (139.4 to 214.5)        | 6.7 (3.2 to 12.1)               | 10.3 (10.3 to 10.3)               |
| Sudan   | 2014 | 106.8 (89.7 to 125.4)      | 26.7 (20.5 to 33.6)        | 73.6 (58.3 to 90.5)           | 3.4 (1.7 to 6.3)                | 3.1 (3.1 to 3.1)                  | 251.6 (211.3 to 295.7) | 62.9 (48.3 to 79.3)        | 173.5 (137.4 to 213.4)        | 8.0 (3.9 to 14.7)               | 7.3 (7.3 to 7.3)                  |
| Sudan   | 2015 | 114.1 (94.8 to 135.5)      | 28.9 (22.1 to 36.6)        | 77.6 (60.7 to 97.4)           | 4.0 (2.0 to 7.5)                | 3.6 (3.6 to 3.6)                  | 268.9 (223.5 to 319.3) | 68.1 (52.1 to 86.3)        | 182.9 (143.1 to 229.6)        | 9.5 (4.6 to 17.6)               | 8.4 (8.4 to 8.4)                  |

| Country | Year | 2018 US Dollars per capita |                            |                               |                                 |                                   | 2018 PPP per capita    |                            |                               |                                 |                                   |
|---------|------|----------------------------|----------------------------|-------------------------------|---------------------------------|-----------------------------------|------------------------|----------------------------|-------------------------------|---------------------------------|-----------------------------------|
|         |      | Health spending            | Government health spending | Out-of-pocket health spending | Prepaid private health spending | Development assistance for health | Health spending        | Government health spending | Out-of-pocket health spending | Prepaid private health spending | Development assistance for health |
| Sudan   | 2016 | 112.6 (93.5 to 136.0)      | 26.0 (19.9 to 33.2)        | 78.2 (59.8 to 100.6)          | 4.1 (2.0 to 7.7)                | 4.3 (4.3 to 4.3)                  | 265.5 (220.3 to 320.5) | 61.4 (46.9 to 78.2)        | 184.3 (140.8 to 237.1)        | 9.6 (4.7 to 18.2)               | 10.2 (10.2 to 10.2)               |
| Sudan   | 2017 | 111.3 (92.2 to 135.4)      | 26.0 (19.9 to 33.1)        | 78.6 (60.3 to 101.1)          | 4.1 (2.0 to 7.8)                | 2.6 (2.6 to 2.6)                  | 262.4 (217.2 to 319.0) | 61.4 (46.9 to 78.0)        | 185.2 (142.0 to 238.2)        | 9.8 (4.7 to 18.4)               | 6.1 (6.1 to 6.1)                  |
| Sudan   | 2018 | 113.4 (94.1 to 137.0)      | 26.6 (20.3 to 33.8)        | 80.2 (61.8 to 102.8)          | 4.2 (2.0 to 7.9)                | 2.3 (2.3 to 2.3)                  | 267.3 (221.9 to 323.0) | 62.8 (47.9 to 79.7)        | 189.1 (145.6 to 242.3)        | 10.0 (4.8 to 18.7)              | 5.4 (5.4 to 5.5)                  |
| Sudan   | 2019 | 115.7 (96.3 to 140.3)      | 27.2 (20.8 to 34.6)        | 81.9 (62.9 to 105.1)          | 4.3 (2.1 to 8.1)                | 2.3 (2.1 to 2.4)                  | 272.8 (226.9 to 330.5) | 64.2 (49.0 to 81.7)        | 193.1 (148.3 to 247.6)        | 10.2 (4.9 to 19.1)              | 5.4 (5.0 to 5.7)                  |
| Sudan   | 2020 | 118.2 (97.8 to 142.3)      | 27.8 (21.3 to 35.4)        | 83.7 (64.3 to 106.8)          | 4.4 (2.1 to 8.3)                | 2.3 (2.1 to 2.5)                  | 278.6 (230.4 to 335.4) | 65.6 (50.3 to 83.4)        | 197.1 (151.5 to 251.8)        | 10.4 (5.0 to 19.5)              | 5.4 (5.0 to 5.9)                  |
| Sudan   | 2021 | 120.8 (100.0 to 146.1)     | 28.5 (21.7 to 36.3)        | 85.4 (65.4 to 109.2)          | 4.5 (2.2 to 8.4)                | 2.3 (2.1 to 2.6)                  | 284.6 (235.6 to 344.4) | 67.2 (51.2 to 85.5)        | 201.3 (154.0 to 257.3)        | 10.6 (5.1 to 19.9)              | 5.5 (4.9 to 6.1)                  |
| Sudan   | 2022 | 123.4 (101.9 to 149.7)     | 29.2 (22.3 to 37.3)        | 87.3 (66.9 to 111.7)          | 4.6 (2.2 to 8.6)                | 2.4 (2.1 to 2.6)                  | 290.8 (240.2 to 352.7) | 68.8 (52.5 to 87.8)        | 205.7 (157.8 to 263.4)        | 10.8 (5.2 to 20.4)              | 5.6 (5.0 to 6.2)                  |
| Sudan   | 2023 | 126.2 (104.0 to 154.1)     | 29.9 (22.8 to 38.1)        | 89.2 (68.1 to 114.3)          | 4.7 (2.3 to 8.8)                | 2.4 (2.1 to 2.7)                  | 297.4 (245.1 to 363.3) | 70.5 (53.8 to 89.7)        | 210.2 (160.5 to 269.3)        | 11.1 (5.4 to 20.8)              | 5.6 (4.9 to 6.4)                  |
| Sudan   | 2024 | 129.0 (106.7 to 155.9)     | 30.7 (23.5 to 39.1)        | 91.1 (69.7 to 116.7)          | 4.8 (2.3 to 9.0)                | 2.4 (2.1 to 2.8)                  | 304.1 (251.5 to 367.4) | 72.3 (55.4 to 92.1)        | 214.8 (164.2 to 274.9)        | 11.3 (5.5 to 21.3)              | 5.7 (4.9 to 6.6)                  |
| Sudan   | 2025 | 131.9 (108.7 to 158.3)     | 31.4 (24.1 to 40.0)        | 93.1 (71.2 to 118.5)          | 4.9 (2.4 to 9.3)                | 2.5 (2.1 to 2.9)                  | 310.8 (256.1 to 373.1) | 74.1 (56.9 to 94.2)        | 219.4 (167.8 to 279.3)        | 11.6 (5.6 to 21.8)              | 5.8 (4.9 to 6.8)                  |
| Sudan   | 2026 | 134.8 (111.2 to 163.0)     | 32.2 (24.7 to 41.0)        | 95.1 (72.6 to 121.7)          | 5.0 (2.4 to 9.5)                | 2.5 (2.1 to 2.9)                  | 317.7 (262.0 to 384.2) | 75.9 (58.3 to 96.6)        | 224.2 (171.2 to 286.7)        | 11.8 (5.7 to 22.3)              | 5.8 (4.9 to 6.9)                  |
| Sudan   | 2027 | 137.8 (113.2 to 165.8)     | 33.0 (25.3 to 42.0)        | 97.2 (74.2 to 124.6)          | 5.1 (2.5 to 9.7)                | 2.5 (2.1 to 3.0)                  | 324.7 (266.8 to 390.8) | 77.7 (59.6 to 98.9)        | 229.1 (174.9 to 293.6)        | 12.1 (5.9 to 22.8)              | 5.9 (4.9 to 7.1)                  |
| Sudan   | 2028 | 140.8 (115.3 to 170.9)     | 33.8 (25.8 to 42.9)        | 99.3 (75.6 to 126.8)          | 5.2 (2.5 to 9.9)                | 2.5 (2.1 to 3.1)                  | 331.8 (271.9 to 402.7) | 79.6 (60.9 to 101.1)       | 234.0 (178.3 to 298.9)        | 12.3 (6.0 to 23.2)              | 6.0 (5.0 to 7.2)                  |
| Sudan   | 2029 | 143.9 (117.6 to 173.7)     | 34.6 (26.4 to 43.9)        | 101.4 (77.0 to 129.8)         | 5.3 (2.6 to 10.1)               | 2.6 (2.1 to 3.2)                  | 339.1 (277.1 to 409.4) | 81.6 (62.3 to 103.6)       | 238.9 (181.6 to 306.0)        | 12.6 (6.1 to 23.7)              | 6.0 (5.0 to 7.4)                  |
| Sudan   | 2030 | 146.9 (119.3 to 178.2)     | 35.4 (27.1 to 44.9)        | 103.5 (78.4 to 132.9)         | 5.4 (2.7 to 10.3)               | 2.6 (2.1 to 3.2)                  | 346.2 (281.1 to 420.0) | 83.4 (63.8 to 105.9)       | 243.9 (184.8 to 313.1)        | 12.8 (6.3 to 24.2)              | 6.1 (5.0 to 7.5)                  |
| Sudan   | 2031 | 149.8 (121.9 to 182.9)     | 36.1 (27.5 to 45.7)        | 105.6 (79.8 to 136.1)         | 5.6 (2.7 to 10.5)               | 2.6 (2.1 to 3.3)                  | 353.1 (287.2 to 431.0) | 85.0 (64.8 to 107.8)       | 248.8 (188.1 to 320.8)        | 13.1 (6.4 to 24.7)              | 6.2 (5.0 to 7.8)                  |
| Sudan   | 2032 | 152.8 (122.6 to 187.1)     | 36.8 (28.0 to 46.7)        | 107.7 (81.2 to 139.7)         | 5.7 (2.8 to 10.7)               | 2.7 (2.2 to 3.4)                  | 360.0 (288.9 to 440.8) | 86.6 (65.9 to 110.1)       | 253.7 (191.4 to 329.1)        | 13.4 (6.5 to 25.2)              | 6.3 (5.1 to 7.9)                  |
| Sudan   | 2033 | 155.7 (125.3 to 191.1)     | 37.5 (28.5 to 47.7)        | 109.8 (82.2 to 142.8)         | 5.8 (2.8 to 10.9)               | 2.7 (2.2 to 3.5)                  | 367.0 (295.3 to 450.3) | 88.3 (67.2 to 112.3)       | 258.7 (193.8 to 336.5)        | 13.6 (6.6 to 25.6)              | 6.4 (5.1 to 8.2)                  |
| Sudan   | 2034 | 158.7 (126.8 to 195.5)     | 38.2 (29.1 to 48.6)        | 111.9 (83.4 to 145.6)         | 5.9 (2.9 to 11.1)               | 2.8 (2.2 to 3.6)                  | 374.0 (298.9 to 460.7) | 89.9 (68.6 to 114.6)       | 263.6 (196.5 to 343.1)        | 13.9 (6.8 to 26.1)              | 6.5 (5.1 to 8.6)                  |
| Sudan   | 2035 | 161.8 (129.6 to 198.8)     | 39.0 (29.6 to 49.6)        | 114.0 (84.3 to 148.8)         | 6.0 (2.9 to 11.3)               | 2.8 (2.2 to 3.7)                  | 381.3 (305.4 to 468.6) | 91.8 (69.8 to 117.0)       | 268.6 (198.7 to 350.8)        | 14.2 (6.9 to 26.7)              | 6.7 (5.2 to 8.8)                  |
| Sudan   | 2036 | 164.8 (132.2 to 203.5)     | 39.7 (30.1 to 50.6)        | 116.1 (85.3 to 151.9)         | 6.1 (3.0 to 11.5)               | 2.9 (2.2 to 3.8)                  | 388.5 (311.6 to 479.7) | 93.6 (71.0 to 119.2)       | 273.6 (201.2 to 358.1)        | 14.5 (7.0 to 27.2)              | 6.8 (5.2 to 9.0)                  |

| Country  | Year | 2018 US Dollars per capita |                            |                               |                                 |                                   | 2018 PPP per capita     |                            |                               |                                 |                                   |
|----------|------|----------------------------|----------------------------|-------------------------------|---------------------------------|-----------------------------------|-------------------------|----------------------------|-------------------------------|---------------------------------|-----------------------------------|
|          |      | Health spending            | Government health spending | Out-of-pocket health spending | Prepaid private health spending | Development assistance for health | Health spending         | Government health spending | Out-of-pocket health spending | Prepaid private health spending | Development assistance for health |
| Sudan    | 2037 | 167.9 (133.8 to 208.6)     | 40.5 (30.6 to 51.5)        | 118.2 (86.7 to 154.5)         | 6.3 (3.0 to 11.8)               | 2.9 (2.2 to 4.0)                  | 395.6 (315.4 to 491.5)  | 95.4 (72.2 to 121.4)       | 278.5 (204.3 to 364.2)        | 14.8 (7.2 to 27.7)              | 6.9 (5.3 to 9.4)                  |
| Sudan    | 2038 | 170.9 (135.2 to 211.9)     | 41.2 (31.2 to 52.4)        | 120.2 (88.1 to 158.2)         | 6.4 (3.1 to 12.0)               | 3.0 (2.3 to 4.2)                  | 402.7 (318.6 to 499.4)  | 97.2 (73.4 to 123.6)       | 283.4 (207.6 to 372.7)        | 15.1 (7.3 to 28.3)              | 7.1 (5.3 to 9.8)                  |
| Sudan    | 2039 | 173.9 (137.8 to 214.4)     | 42.0 (31.7 to 53.4)        | 122.3 (89.2 to 161.3)         | 6.5 (3.2 to 12.2)               | 3.1 (2.3 to 4.3)                  | 409.8 (324.9 to 505.4)  | 99.0 (74.8 to 125.9)       | 288.2 (210.2 to 380.1)        | 15.4 (7.4 to 28.8)              | 7.2 (5.4 to 10.2)                 |
| Sudan    | 2040 | 177.0 (139.7 to 220.2)     | 42.8 (32.3 to 54.4)        | 124.4 (90.4 to 164.5)         | 6.7 (3.2 to 12.5)               | 3.1 (2.3 to 4.5)                  | 417.1 (329.2 to 518.9)  | 100.9 (76.0 to 128.3)      | 293.2 (213.0 to 387.7)        | 15.7 (7.6 to 29.4)              | 7.4 (5.4 to 10.5)                 |
| Sudan    | 2041 | 180.1 (142.6 to 223.5)     | 43.7 (32.9 to 55.6)        | 126.5 (91.6 to 167.6)         | 6.8 (3.3 to 12.7)               | 3.2 (2.3 to 4.6)                  | 424.5 (336.1 to 526.8)  | 102.9 (77.5 to 131.0)      | 298.0 (215.8 to 395.1)        | 16.0 (7.7 to 30.0)              | 7.6 (5.5 to 10.8)                 |
| Sudan    | 2042 | 183.3 (143.8 to 227.6)     | 44.6 (33.6 to 56.7)        | 128.5 (92.7 to 170.9)         | 6.9 (3.3 to 13.0)               | 3.3 (2.4 to 4.9)                  | 432.0 (338.9 to 536.3)  | 105.0 (79.1 to 133.7)      | 302.9 (218.5 to 402.8)        | 16.3 (7.9 to 30.7)              | 7.7 (5.6 to 11.5)                 |
| Sudan    | 2043 | 186.4 (147.0 to 232.1)     | 45.4 (34.3 to 57.8)        | 130.5 (93.8 to 174.2)         | 7.1 (3.4 to 13.3)               | 3.4 (2.4 to 5.0)                  | 439.3 (346.5 to 546.9)  | 107.0 (80.8 to 136.1)      | 307.7 (221.0 to 410.5)        | 16.6 (8.0 to 31.3)              | 7.9 (5.6 to 11.9)                 |
| Sudan    | 2044 | 189.5 (149.2 to 236.0)     | 46.2 (34.9 to 58.9)        | 132.6 (95.1 to 176.7)         | 7.2 (3.5 to 13.6)               | 3.4 (2.4 to 5.2)                  | 446.6 (351.7 to 556.1)  | 109.0 (82.3 to 138.9)      | 312.5 (224.0 to 416.4)        | 17.0 (8.2 to 32.0)              | 8.1 (5.8 to 12.2)                 |
| Sudan    | 2045 | 192.9 (153.1 to 239.0)     | 47.3 (35.7 to 60.3)        | 134.7 (96.6 to 179.8)         | 7.4 (3.5 to 13.9)               | 3.5 (2.5 to 5.4)                  | 454.6 (360.8 to 563.2)  | 111.5 (84.1 to 142.2)      | 317.5 (227.6 to 423.9)        | 17.3 (8.4 to 32.8)              | 8.3 (5.9 to 12.7)                 |
| Sudan    | 2046 | 196.6 (155.8 to 244.7)     | 48.6 (36.6 to 62.1)        | 136.8 (97.8 to 182.6)         | 7.5 (3.6 to 14.2)               | 3.6 (2.5 to 5.7)                  | 463.2 (367.2 to 576.8)  | 114.6 (86.3 to 146.4)      | 322.4 (230.5 to 430.3)        | 17.7 (8.5 to 33.5)              | 8.5 (5.9 to 13.4)                 |
| Sudan    | 2047 | 200.3 (159.3 to 251.5)     | 50.1 (37.7 to 64.1)        | 138.9 (99.4 to 184.8)         | 7.7 (3.7 to 14.5)               | 3.7 (2.5 to 6.0)                  | 472.0 (375.5 to 592.7)  | 118.0 (88.8 to 151.2)      | 327.3 (234.2 to 435.5)        | 18.1 (8.7 to 34.2)              | 8.7 (6.0 to 14.1)                 |
| Sudan    | 2048 | 204.3 (161.6 to 256.1)     | 51.7 (38.9 to 66.6)        | 140.9 (100.9 to 187.4)        | 7.8 (3.8 to 14.8)               | 3.8 (2.6 to 6.3)                  | 481.4 (380.9 to 603.6)  | 121.9 (91.8 to 156.9)      | 332.1 (237.9 to 441.6)        | 18.4 (8.9 to 34.9)              | 9.0 (6.1 to 14.8)                 |
| Sudan    | 2049 | 208.6 (163.9 to 261.5)     | 53.6 (40.3 to 69.1)        | 143.1 (102.4 to 190.4)        | 8.0 (3.8 to 15.1)               | 3.9 (2.6 to 6.4)                  | 491.5 (386.2 to 616.2)  | 126.3 (95.1 to 162.8)      | 337.2 (241.3 to 448.7)        | 18.8 (9.0 to 35.6)              | 9.2 (6.2 to 15.1)                 |
| Sudan    | 2050 | 213.2 (169.3 to 266.3)     | 55.7 (41.9 to 72.0)        | 145.3 (103.8 to 193.7)        | 8.2 (3.9 to 15.4)               | 4.0 (2.7 to 6.7)                  | 502.5 (399.1 to 627.7)  | 131.3 (98.7 to 169.6)      | 342.4 (244.7 to 456.6)        | 19.2 (9.2 to 36.4)              | 9.5 (6.3 to 15.7)                 |
| Suriname | 1995 | 416.0 (370.5 to 467.3)     | 153.2 (130.0 to 175.8)     | 84.8 (66.3 to 108.4)          | 126.7 (93.2 to 168.1)           | 51.4 (51.4 to 51.4)               | 935.8 (833.5 to 1051.3) | 344.6 (292.5 to 395.4)     | 190.7 (149.2 to 243.9)        | 284.9 (209.8 to 378.1)          | 115.6 (115.6 to 115.6)            |
| Suriname | 1996 | 395.0 (354.4 to 440.9)     | 164.1 (143.0 to 187.6)     | 85.4 (68.0 to 106.7)          | 126.4 (97.5 to 160.1)           | 19.0 (19.0 to 19.0)               | 888.4 (797.3 to 991.8)  | 369.1 (321.6 to 422.1)     | 192.1 (153.0 to 240.0)        | 284.4 (219.2 to 360.2)          | 42.8 (42.8 to 42.8)               |
| Suriname | 1997 | 388.1 (349.0 to 430.4)     | 183.4 (160.7 to 208.0)     | 85.6 (69.1 to 105.3)          | 111.2 (87.0 to 139.3)           | 8.0 (8.0 to 8.0)                  | 873.1 (785.1 to 968.1)  | 412.5 (361.4 to 467.8)     | 192.6 (155.5 to 236.9)        | 250.0 (195.7 to 313.5)          | 17.9 (17.9 to 17.9)               |
| Suriname | 1998 | 412.9 (376.6 to 450.3)     | 195.9 (173.2 to 219.0)     | 84.8 (68.7 to 104.5)          | 89.3 (69.9 to 113.1)            | 43.0 (43.0 to 43.0)               | 928.9 (847.1 to 1012.9) | 440.6 (389.6 to 492.6)     | 190.8 (154.6 to 235.1)        | 200.9 (157.2 to 254.5)          | 96.6 (96.6 to 96.6)               |
| Suriname | 1999 | 380.8 (348.6 to 415.4)     | 187.7 (166.2 to 209.5)     | 81.3 (66.2 to 99.9)           | 85.3 (67.2 to 108.2)            | 26.5 (26.5 to 26.5)               | 856.6 (784.2 to 934.5)  | 422.3 (373.9 to 471.2)     | 182.9 (148.9 to 224.8)        | 191.9 (151.1 to 243.5)          | 59.6 (59.6 to 59.6)               |
| Suriname | 2000 | 392.0 (359.1 to 431.3)     | 190.5 (168.8 to 212.9)     | 80.0 (65.3 to 98.1)           | 108.5 (87.4 to 136.1)           | 13.1 (13.1 to 13.1)               | 881.8 (807.8 to 970.2)  | 428.4 (379.8 to 479.0)     | 179.9 (146.8 to 220.8)        | 244.0 (196.6 to 306.2)          | 29.5 (29.5 to 29.5)               |
| Suriname | 2001 | 402.4 (368.4 to 445.0)     | 176.1 (156.9 to 196.5)     | 82.1 (67.1 to 100.3)          | 127.3 (103.5 to 158.5)          | 16.9 (16.9 to 16.9)               | 905.1 (828.7 to 1001.1) | 396.2 (353.0 to 442.0)     | 184.6 (150.8 to 225.6)        | 286.4 (232.7 to 356.6)          | 37.9 (37.9 to 37.9)               |

| Country  | Year | 2018 US Dollars per capita |                            |                               |                                 |                                   | 2018 PPP per capita      |                            |                               |                                 |                                   |
|----------|------|----------------------------|----------------------------|-------------------------------|---------------------------------|-----------------------------------|--------------------------|----------------------------|-------------------------------|---------------------------------|-----------------------------------|
|          |      | Health spending            | Government health spending | Out-of-pocket health spending | Prepaid private health spending | Development assistance for health | Health spending          | Government health spending | Out-of-pocket health spending | Prepaid private health spending | Development assistance for health |
| Suriname | 2002 | 426.3 (388.5 to 469.0)     | 174.6 (155.2 to 195.0)     | 84.2 (69.1 to 102.0)          | 148.1 (120.8 to 181.3)          | 19.4 (19.4 to 19.4)               | 958.8 (874.0 to 1055.0)  | 392.8 (349.1 to 438.7)     | 189.3 (155.5 to 229.5)        | 333.1 (271.8 to 407.8)          | 43.7 (43.7 to 43.7)               |
| Suriname | 2003 | 442.0 (402.0 to 484.2)     | 174.2 (153.6 to 195.3)     | 84.9 (69.8 to 103.2)          | 161.2 (133.4 to 196.3)          | 21.7 (21.7 to 21.7)               | 994.4 (904.2 to 1089.2)  | 391.8 (345.6 to 439.2)     | 191.1 (157.0 to 232.1)        | 362.7 (300.1 to 441.6)          | 48.9 (48.9 to 48.9)               |
| Suriname | 2004 | 466.7 (425.7 to 508.2)     | 181.8 (160.7 to 205.6)     | 86.1 (70.7 to 104.1)          | 174.2 (144.9 to 208.2)          | 24.5 (24.5 to 24.5)               | 1049.9 (957.6 to 1143.3) | 409.0 (361.5 to 462.5)     | 193.7 (158.9 to 234.2)        | 391.9 (325.8 to 468.2)          | 55.2 (55.2 to 55.2)               |
| Suriname | 2005 | 460.9 (420.3 to 504.7)     | 180.1 (160.2 to 203.4)     | 83.4 (68.5 to 101.2)          | 170.2 (140.1 to 203.7)          | 27.1 (27.1 to 27.1)               | 1036.8 (945.5 to 1135.3) | 405.2 (360.3 to 457.5)     | 187.7 (154.1 to 227.6)        | 382.9 (315.2 to 458.3)          | 61.0 (61.0 to 61.0)               |
| Suriname | 2006 | 411.6 (373.7 to 453.3)     | 173.8 (155.0 to 195.4)     | 77.5 (62.8 to 94.5)           | 148.9 (122.5 to 181.6)          | 11.5 (11.5 to 11.5)               | 925.9 (840.6 to 1019.7)  | 390.9 (348.6 to 439.5)     | 174.3 (141.2 to 212.5)        | 334.9 (275.5 to 408.4)          | 25.8 (25.8 to 25.8)               |
| Suriname | 2007 | 400.1 (363.6 to 439.7)     | 166.5 (148.1 to 187.3)     | 76.0 (62.1 to 91.8)           | 138.0 (112.8 to 168.0)          | 19.5 (19.5 to 19.5)               | 899.9 (817.9 to 989.2)   | 374.6 (333.1 to 421.4)     | 171.1 (139.7 to 206.5)        | 310.4 (253.7 to 378.0)          | 43.9 (43.9 to 43.9)               |
| Suriname | 2008 | 390.4 (355.2 to 430.0)     | 157.5 (139.8 to 178.2)     | 78.3 (64.3 to 95.4)           | 134.5 (110.1 to 162.8)          | 20.1 (20.1 to 20.1)               | 878.2 (799.0 to 967.2)   | 354.2 (314.4 to 400.8)     | 176.2 (144.7 to 214.5)        | 302.6 (247.8 to 366.1)          | 45.2 (45.2 to 45.2)               |
| Suriname | 2009 | 409.8 (374.4 to 451.0)     | 154.8 (137.3 to 175.5)     | 80.2 (65.7 to 97.1)           | 134.4 (109.0 to 166.5)          | 40.4 (40.4 to 40.4)               | 921.9 (842.3 to 1014.5)  | 348.2 (308.7 to 394.7)     | 180.4 (147.9 to 218.4)        | 302.3 (245.2 to 374.5)          | 91.0 (91.0 to 91.0)               |
| Suriname | 2010 | 406.5 (369.6 to 449.1)     | 153.4 (135.9 to 173.3)     | 84.0 (69.9 to 100.7)          | 136.8 (111.4 to 171.0)          | 32.3 (32.3 to 32.3)               | 914.5 (831.4 to 1010.3)  | 345.1 (305.8 to 389.8)     | 189.0 (157.1 to 226.5)        | 307.8 (250.5 to 384.7)          | 72.6 (72.6 to 72.6)               |
| Suriname | 2011 | 416.6 (378.0 to 459.7)     | 155.2 (137.2 to 174.9)     | 89.4 (73.8 to 108.1)          | 140.9 (115.3 to 175.6)          | 31.1 (31.1 to 31.1)               | 937.1 (850.4 to 1034.2)  | 349.1 (308.6 to 393.4)     | 201.2 (166.0 to 243.2)        | 316.8 (259.4 to 395.0)          | 70.0 (70.0 to 70.0)               |
| Suriname | 2012 | 409.6 (370.0 to 454.0)     | 163.0 (143.4 to 182.8)     | 93.6 (76.8 to 112.2)          | 142.5 (116.7 to 175.3)          | 10.3 (10.3 to 10.3)               | 921.3 (832.4 to 1021.2)  | 366.7 (322.6 to 411.3)     | 210.7 (172.7 to 252.3)        | 320.6 (262.5 to 394.3)          | 23.2 (23.2 to 23.2)               |
| Suriname | 2013 | 431.0 (389.0 to 474.1)     | 178.9 (159.3 to 200.3)     | 97.9 (80.8 to 117.4)          | 141.8 (114.1 to 174.7)          | 12.4 (12.4 to 12.4)               | 969.4 (875.0 to 1066.5)  | 402.4 (358.3 to 450.6)     | 220.1 (181.8 to 264.0)        | 319.0 (256.7 to 393.0)          | 27.9 (27.9 to 27.9)               |
| Suriname | 2014 | 439.3 (398.3 to 486.0)     | 200.7 (177.7 to 224.6)     | 100.4 (82.6 to 121.9)         | 131.3 (102.0 to 168.4)          | 6.9 (6.9 to 6.9)                  | 988.1 (896.1 to 1093.2)  | 451.4 (399.7 to 505.3)     | 225.9 (185.7 to 274.1)        | 295.3 (229.4 to 378.7)          | 15.5 (15.5 to 15.5)               |
| Suriname | 2015 | 459.9 (415.5 to 509.1)     | 244.2 (216.3 to 275.0)     | 99.6 (80.7 to 123.3)          | 105.6 (78.2 to 138.9)           | 10.4 (10.4 to 10.4)               | 1034.6 (934.7 to 1145.2) | 549.4 (486.5 to 618.6)     | 224.1 (181.6 to 277.3)        | 237.6 (175.8 to 312.5)          | 23.5 (23.5 to 23.5)               |
| Suriname | 2016 | 417.2 (372.1 to 465.6)     | 255.0 (223.2 to 289.9)     | 93.5 (73.6 to 116.5)          | 66.1 (44.7 to 91.0)             | 2.6 (2.6 to 2.6)                  | 938.5 (837.1 to 1047.4)  | 573.6 (502.2 to 652.2)     | 210.3 (165.6 to 262.1)        | 148.7 (100.5 to 204.8)          | 5.9 (5.9 to 5.9)                  |
| Suriname | 2017 | 429.9 (383.8 to 480.0)     | 256.2 (223.6 to 292.3)     | 93.8 (74.0 to 117.2)          | 70.5 (47.7 to 96.7)             | 9.4 (9.4 to 9.4)                  | 967.1 (863.3 to 1079.7)  | 576.3 (503.0 to 657.5)     | 211.1 (166.4 to 263.5)        | 158.5 (107.3 to 217.4)          | 21.2 (21.2 to 21.2)               |
| Suriname | 2018 | 430.2 (383.1 to 479.8)     | 257.0 (224.6 to 293.4)     | 94.4 (74.5 to 117.9)          | 70.2 (47.4 to 96.2)             | 8.6 (8.5 to 8.7)                  | 967.7 (861.7 to 1079.2)  | 578.1 (505.1 to 660.0)     | 212.3 (167.7 to 265.2)        | 157.9 (106.7 to 216.3)          | 19.4 (19.2 to 19.7)               |
| Suriname | 2019 | 432.7 (386.7 to 482.2)     | 258.5 (225.7 to 294.3)     | 94.6 (74.8 to 118.0)          | 70.9 (48.0 to 97.0)             | 8.7 (8.1 to 9.3)                  | 973.4 (869.9 to 1084.8)  | 581.4 (507.7 to 662.1)     | 212.9 (168.2 to 265.4)        | 159.5 (108.0 to 218.3)          | 19.6 (18.3 to 20.9)               |
| Suriname | 2020 | 435.0 (387.6 to 486.2)     | 259.7 (226.5 to 296.1)     | 95.0 (74.8 to 118.6)          | 71.4 (48.3 to 97.5)             | 8.9 (8.1 to 9.7)                  | 978.5 (872.0 to 1093.6)  | 584.1 (509.6 to 666.1)     | 213.7 (168.3 to 266.7)        | 160.6 (108.7 to 219.4)          | 20.1 (18.2 to 21.8)               |
| Suriname | 2021 | 436.9 (390.7 to 487.0)     | 260.8 (227.6 to 297.2)     | 95.0 (74.9 to 118.5)          | 71.9 (48.7 to 98.1)             | 9.1 (8.2 to 10.1)                 | 982.7 (878.8 to 1095.4)  | 586.7 (512.0 to 668.6)     | 213.8 (168.4 to 266.6)        | 161.7 (109.4 to 220.8)          | 20.6 (18.4 to 22.8)               |
| Suriname | 2022 | 438.8 (392.0 to 489.8)     | 262.0 (229.2 to 298.5)     | 95.0 (74.8 to 118.5)          | 72.4 (48.9 to 98.8)             | 9.4 (8.3 to 10.6)                 | 987.0 (881.8 to 1101.8)  | 589.3 (515.5 to 671.4)     | 213.7 (168.3 to 266.6)        | 162.8 (110.1 to 222.1)          | 21.2 (18.6 to 23.9)               |



| Country  | Year | 2018 US Dollars per capita |                            |                               |                                 |                                   | 2018 PPP per capita      |                            |                               |                                 |                                   |
|----------|------|----------------------------|----------------------------|-------------------------------|---------------------------------|-----------------------------------|--------------------------|----------------------------|-------------------------------|---------------------------------|-----------------------------------|
|          |      | Health spending            | Government health spending | Out-of-pocket health spending | Prepaid private health spending | Development assistance for health | Health spending          | Government health spending | Out-of-pocket health spending | Prepaid private health spending | Development assistance for health |
| Suriname | 2023 | 441.3 (396.0 to 493.4)     | 263.7 (230.5 to 300.8)     | 95.0 (74.7 to 118.5)          | 72.9 (49.4 to 99.2)             | 9.7 (8.3 to 11.1)                 | 992.6 (890.8 to 1109.9)  | 593.3 (518.5 to 676.5)     | 213.6 (168.1 to 266.5)        | 163.9 (111.2 to 223.2)          | 21.8 (18.8 to 24.9)               |
| Suriname | 2024 | 443.3 (394.7 to 491.5)     | 265.1 (231.3 to 302.4)     | 94.9 (74.7 to 118.4)          | 73.4 (49.7 to 99.8)             | 10.0 (8.5 to 11.6)                | 997.1 (888.0 to 1105.7)  | 596.3 (520.4 to 680.2)     | 213.4 (168.0 to 266.4)        | 165.0 (111.8 to 224.5)          | 22.4 (19.2 to 26.0)               |
| Suriname | 2025 | 445.2 (397.7 to 494.3)     | 266.6 (232.6 to 305.4)     | 94.6 (74.5 to 118.1)          | 73.8 (49.9 to 100.3)            | 10.3 (8.7 to 12.0)                | 1001.6 (894.6 to 1112.0) | 599.7 (523.1 to 686.9)     | 212.8 (167.6 to 265.6)        | 166.0 (112.3 to 225.6)          | 23.1 (19.6 to 27.1)               |
| Suriname | 2026 | 447.3 (397.8 to 500.1)     | 268.2 (233.5 to 307.3)     | 94.4 (74.3 to 117.5)          | 74.1 (50.4 to 100.7)            | 10.6 (8.9 to 12.5)                | 1006.1 (894.9 to 1124.8) | 603.3 (525.1 to 691.3)     | 212.2 (167.1 to 264.3)        | 166.8 (113.3 to 226.6)          | 23.8 (20.0 to 28.0)               |
| Suriname | 2027 | 449.7 (403.1 to 503.8)     | 270.2 (235.3 to 310.3)     | 94.1 (74.0 to 117.4)          | 74.5 (50.6 to 101.3)            | 10.9 (9.0 to 13.0)                | 1011.5 (906.8 to 1133.3) | 607.9 (529.3 to 697.9)     | 211.6 (166.4 to 264.0)        | 167.5 (113.7 to 228.0)          | 24.5 (20.3 to 29.2)               |
| Suriname | 2028 | 452.3 (402.2 to 503.4)     | 272.4 (236.0 to 314.8)     | 93.8 (73.7 to 117.5)          | 74.8 (50.9 to 101.9)            | 11.2 (9.3 to 13.6)                | 1017.5 (904.7 to 1132.3) | 612.8 (531.0 to 708.2)     | 211.1 (165.9 to 264.3)        | 168.3 (114.5 to 229.2)          | 25.3 (21.0 to 30.6)               |
| Suriname | 2029 | 455.1 (405.1 to 512.7)     | 274.6 (237.2 to 319.0)     | 93.6 (73.6 to 117.5)          | 75.2 (51.3 to 102.5)            | 11.6 (9.5 to 14.2)                | 1023.7 (911.3 to 1153.3) | 617.7 (533.5 to 717.5)     | 210.7 (165.5 to 264.3)        | 169.3 (115.4 to 230.6)          | 26.1 (21.3 to 31.9)               |
| Suriname | 2030 | 457.6 (407.0 to 512.5)     | 276.6 (237.9 to 322.5)     | 93.4 (73.4 to 117.3)          | 75.7 (51.5 to 103.1)            | 11.9 (9.8 to 14.7)                | 1029.4 (915.5 to 1152.7) | 622.1 (535.1 to 725.4)     | 210.2 (165.1 to 263.7)        | 170.2 (115.9 to 232.0)          | 26.9 (21.9 to 33.1)               |
| Suriname | 2031 | 459.6 (407.6 to 521.5)     | 278.0 (238.2 to 326.4)     | 93.2 (73.2 to 116.7)          | 76.1 (51.9 to 103.8)            | 12.3 (9.9 to 15.6)                | 1033.9 (916.9 to 1173.2) | 625.4 (535.8 to 734.2)     | 209.7 (164.6 to 262.6)        | 171.2 (116.7 to 233.5)          | 27.7 (22.3 to 35.0)               |
| Suriname | 2032 | 462.2 (409.8 to 519.9)     | 279.7 (239.3 to 328.7)     | 93.1 (72.9 to 116.7)          | 76.7 (52.4 to 104.8)            | 12.7 (10.1 to 16.1)               | 1039.6 (921.8 to 1169.4) | 629.1 (538.4 to 739.4)     | 209.5 (163.9 to 262.5)        | 172.4 (117.8 to 235.8)          | 28.6 (22.8 to 36.3)               |
| Suriname | 2033 | 464.6 (411.2 to 528.5)     | 281.3 (239.9 to 331.4)     | 93.0 (72.7 to 116.7)          | 77.2 (52.7 to 105.8)            | 13.1 (10.4 to 16.9)               | 1045.0 (925.0 to 1188.9) | 632.7 (539.7 to 745.4)     | 209.2 (163.6 to 262.4)        | 173.6 (118.6 to 238.0)          | 29.5 (23.4 to 38.1)               |
| Suriname | 2034 | 467.0 (412.0 to 527.4)     | 282.8 (240.6 to 333.7)     | 92.9 (72.6 to 116.8)          | 77.7 (53.0 to 106.6)            | 13.6 (10.6 to 17.5)               | 1050.6 (926.9 to 1186.3) | 636.2 (541.2 to 750.7)     | 208.9 (163.2 to 262.7)        | 174.9 (119.3 to 239.7)          | 30.5 (23.8 to 39.3)               |
| Suriname | 2035 | 469.4 (412.7 to 532.3)     | 284.4 (241.3 to 337.3)     | 92.7 (72.4 to 116.8)          | 78.3 (53.4 to 107.1)            | 14.0 (10.8 to 18.3)               | 1055.9 (928.4 to 1197.3) | 639.7 (542.8 to 758.7)     | 208.6 (162.9 to 262.7)        | 176.1 (120.2 to 240.8)          | 31.6 (24.4 to 41.2)               |
| Suriname | 2036 | 471.8 (414.0 to 531.1)     | 285.9 (242.0 to 340.1)     | 92.6 (72.2 to 116.7)          | 78.8 (53.9 to 108.1)            | 14.5 (11.1 to 19.5)               | 1061.3 (931.2 to 1194.8) | 643.2 (544.4 to 765.0)     | 208.2 (162.5 to 262.4)        | 177.2 (121.2 to 243.1)          | 32.6 (24.9 to 43.9)               |
| Suriname | 2037 | 474.2 (415.8 to 541.5)     | 287.5 (242.2 to 343.2)     | 92.4 (72.1 to 116.4)          | 79.3 (54.1 to 109.1)            | 15.0 (11.4 to 20.3)               | 1066.6 (935.3 to 1218.0) | 646.7 (544.9 to 772.0)     | 207.8 (162.1 to 261.9)        | 178.4 (121.7 to 245.4)          | 33.7 (25.7 to 45.7)               |
| Suriname | 2038 | 476.2 (419.5 to 539.0)     | 288.8 (242.3 to 345.9)     | 92.2 (71.9 to 116.1)          | 79.7 (54.3 to 109.7)            | 15.5 (11.8 to 21.5)               | 1071.2 (943.6 to 1212.4) | 649.6 (545.1 to 778.1)     | 207.3 (161.7 to 261.2)        | 179.4 (122.1 to 246.8)          | 34.9 (26.4 to 48.5)               |
| Suriname | 2039 | 478.1 (418.1 to 546.7)     | 290.0 (243.0 to 349.6)     | 91.9 (71.6 to 115.8)          | 80.2 (54.4 to 110.8)            | 16.0 (12.1 to 22.1)               | 1075.5 (940.4 to 1229.7) | 652.2 (546.7 to 786.5)     | 206.8 (161.1 to 260.5)        | 180.4 (122.5 to 249.3)          | 36.0 (27.2 to 49.7)               |
| Suriname | 2040 | 480.7 (421.8 to 546.6)     | 291.5 (243.7 to 352.1)     | 91.8 (71.5 to 116.0)          | 80.8 (54.7 to 111.9)            | 16.6 (12.6 to 22.9)               | 1081.3 (948.9 to 1229.5) | 655.6 (548.1 to 792.0)     | 206.6 (160.8 to 260.9)        | 181.8 (123.1 to 251.6)          | 37.3 (28.4 to 51.5)               |
| Suriname | 2041 | 483.4 (421.6 to 556.3)     | 293.0 (244.0 to 355.0)     | 91.8 (71.5 to 116.2)          | 81.5 (55.2 to 112.7)            | 17.2 (12.9 to 24.0)               | 1087.5 (948.4 to 1251.3) | 659.0 (548.8 to 798.5)     | 206.5 (160.7 to 261.4)        | 183.4 (124.2 to 253.6)          | 38.6 (29.0 to 54.0)               |
| Suriname | 2042 | 486.6 (427.1 to 554.4)     | 294.7 (245.3 to 357.2)     | 91.9 (71.5 to 116.4)          | 82.3 (55.6 to 113.5)            | 17.8 (13.2 to 25.4)               | 1094.6 (960.6 to 1247.1) | 662.9 (551.8 to 803.6)     | 206.6 (160.7 to 261.8)        | 185.1 (125.0 to 255.2)          | 40.0 (29.6 to 57.2)               |
| Suriname | 2043 | 489.5 (426.6 to 562.3)     | 296.2 (246.6 to 359.2)     | 91.9 (71.4 to 116.4)          | 83.0 (56.0 to 114.2)            | 18.4 (13.6 to 26.8)               | 1101.2 (959.7 to 1264.9) | 666.4 (554.7 to 808.0)     | 206.7 (160.6 to 261.7)        | 186.8 (126.0 to 256.8)          | 41.3 (30.5 to 60.4)               |

|           |      | 2018 US Dollars per capita |                            |                               |                                 |                                   | 2018 PPP per capita       |                            |                               |                                 |                                   |
|-----------|------|----------------------------|----------------------------|-------------------------------|---------------------------------|-----------------------------------|---------------------------|----------------------------|-------------------------------|---------------------------------|-----------------------------------|
| Country   | Year | Health spending            | Government health spending | Out-of-pocket health spending | Prepaid private health spending | Development assistance for health | Health spending           | Government health spending | Out-of-pocket health spending | Prepaid private health spending | Development assistance for health |
| Suriname  | 2044 | 492.7 (429.2 to 564.7)     | 297.9 (248.0 to 361.6)     | 91.9 (71.3 to 116.3)          | 83.8 (56.5 to 115.3)            | 19.0 (14.0 to 28.0)               | 1108.4 (965.5 to 1270.2)  | 670.2 (557.9 to 813.4)     | 206.8 (160.5 to 261.7)        | 188.6 (127.0 to 259.4)          | 42.8 (31.5 to 62.9)               |
| Suriname  | 2045 | 496.0 (431.6 to 570.1)     | 299.7 (249.2 to 363.4)     | 92.0 (71.3 to 116.4)          | 84.6 (57.0 to 116.1)            | 19.7 (14.4 to 29.8)               | 1115.7 (970.9 to 1282.5)  | 674.1 (560.6 to 817.3)     | 206.9 (160.4 to 261.9)        | 190.3 (128.2 to 261.1)          | 44.4 (32.3 to 66.9)               |
| Suriname  | 2046 | 499.3 (436.1 to 570.6)     | 301.5 (250.7 to 365.4)     | 92.0 (71.3 to 116.7)          | 85.4 (57.7 to 117.2)            | 20.4 (14.8 to 31.6)               | 1123.2 (980.9 to 1283.6)  | 678.1 (563.8 to 821.9)     | 207.0 (160.4 to 262.6)        | 192.1 (129.7 to 263.6)          | 46.0 (33.4 to 71.2)               |
| Suriname  | 2047 | 502.6 (436.1 to 580.9)     | 303.2 (251.5 to 368.4)     | 92.0 (71.4 to 117.0)          | 86.2 (58.2 to 118.3)            | 21.2 (15.2 to 32.7)               | 1130.6 (981.0 to 1306.7)  | 682.0 (565.8 to 828.6)     | 207.0 (160.5 to 263.1)        | 193.8 (130.9 to 266.2)          | 47.7 (34.2 to 73.5)               |
| Suriname  | 2048 | 505.7 (443.3 to 577.9)     | 304.8 (252.1 to 370.7)     | 92.0 (71.4 to 117.1)          | 86.9 (58.5 to 119.5)            | 22.1 (15.7 to 35.3)               | 1137.6 (997.1 to 1299.8)  | 685.7 (567.2 to 834.0)     | 206.9 (160.6 to 263.5)        | 195.4 (131.6 to 268.7)          | 49.6 (35.3 to 79.3)               |
| Suriname  | 2049 | 509.5 (445.3 to 590.3)     | 306.9 (253.6 to 374.1)     | 92.1 (71.5 to 117.3)          | 87.7 (58.9 to 120.8)            | 22.9 (16.2 to 36.7)               | 1146.2 (1001.7 to 1327.8) | 690.3 (570.4 to 841.6)     | 207.1 (160.9 to 263.9)        | 197.3 (132.5 to 271.6)          | 51.5 (36.4 to 82.6)               |
| Suriname  | 2050 | 513.4 (448.6 to 591.2)     | 308.9 (255.2 to 377.6)     | 92.2 (71.6 to 117.5)          | 88.6 (59.3 to 121.8)            | 23.8 (16.7 to 38.7)               | 1155.0 (1009.2 to 1329.9) | 694.9 (574.0 to 849.4)     | 207.3 (161.1 to 264.2)        | 199.2 (133.4 to 274.0)          | 53.5 (37.5 to 87.0)               |
| Swaziland | 1995 | 127.7 (106.1 to 154.6)     | 66.8 (55.0 to 80.1)        | 19.3 (13.4 to 26.7)           | 38.6 (23.1 to 61.8)             | 3.0 (3.0 to 3.0)                  | 340.0 (282.5 to 411.6)    | 177.9 (146.6 to 213.4)     | 51.4 (35.7 to 71.0)           | 102.7 (61.5 to 164.6)           | 8.0 (8.0 to 8.0)                  |
| Swaziland | 1996 | 133.2 (112.1 to 160.1)     | 70.2 (58.9 to 83.6)        | 20.7 (14.6 to 28.5)           | 40.7 (24.6 to 63.7)             | 1.6 (1.6 to 1.6)                  | 354.6 (298.5 to 426.3)    | 186.9 (156.7 to 222.7)     | 55.0 (38.9 to 76.0)           | 108.5 (65.5 to 169.6)           | 4.2 (4.2 to 4.2)                  |
| Swaziland | 1997 | 132.3 (112.0 to 157.2)     | 68.9 (58.1 to 80.9)        | 21.1 (15.0 to 28.9)           | 40.2 (25.0 to 62.5)             | 2.1 (2.1 to 2.1)                  | 352.3 (298.2 to 418.6)    | 183.4 (154.6 to 215.3)     | 56.2 (40.0 to 77.1)           | 107.1 (66.6 to 166.4)           | 5.5 (5.5 to 5.5)                  |
| Swaziland | 1998 | 137.1 (117.5 to 160.8)     | 69.5 (58.5 to 80.7)        | 22.6 (16.2 to 30.6)           | 39.8 (25.2 to 60.1)             | 5.3 (5.3 to 5.3)                  | 365.1 (313.0 to 428.3)    | 185.0 (155.8 to 214.9)     | 60.1 (43.1 to 81.5)           | 105.9 (67.0 to 160.0)           | 14.2 (14.2 to 14.2)               |
| Swaziland | 1999 | 131.9 (113.4 to 154.2)     | 70.4 (59.6 to 81.9)        | 23.2 (16.8 to 31.6)           | 36.1 (22.9 to 55.2)             | 2.2 (2.2 to 2.2)                  | 351.3 (301.8 to 410.7)    | 187.5 (158.6 to 218.2)     | 61.8 (44.7 to 84.1)           | 96.1 (60.9 to 147.0)            | 5.8 (5.8 to 5.8)                  |
| Swaziland | 2000 | 131.3 (113.5 to 152.5)     | 71.9 (61.4 to 83.1)        | 23.4 (16.9 to 31.7)           | 33.1 (21.1 to 49.9)             | 3.0 (3.0 to 3.0)                  | 349.7 (302.3 to 405.9)    | 191.5 (163.5 to 221.2)     | 62.2 (45.1 to 84.3)           | 88.1 (56.2 to 132.8)            | 7.9 (7.9 to 7.9)                  |
| Swaziland | 2001 | 131.4 (113.6 to 153.1)     | 74.0 (63.3 to 85.0)        | 23.4 (17.2 to 31.6)           | 31.5 (20.1 to 48.2)             | 2.5 (2.5 to 2.5)                  | 349.9 (302.5 to 407.6)    | 196.9 (168.5 to 226.4)     | 62.4 (45.7 to 84.0)           | 83.8 (53.6 to 128.3)            | 6.8 (6.8 to 6.8)                  |
| Swaziland | 2002 | 135.5 (118.3 to 156.7)     | 77.6 (66.6 to 89.1)        | 23.7 (17.2 to 32.1)           | 30.8 (19.8 to 46.8)             | 3.4 (3.4 to 3.4)                  | 360.8 (315.1 to 417.2)    | 206.6 (177.3 to 237.2)     | 63.1 (45.8 to 85.3)           | 82.1 (52.7 to 124.6)            | 9.0 (9.0 to 9.0)                  |
| Swaziland | 2003 | 154.3 (135.9 to 175.6)     | 86.5 (74.5 to 98.5)        | 24.5 (17.7 to 33.2)           | 31.7 (20.3 to 47.8)             | 11.6 (11.6 to 11.6)               | 410.7 (361.9 to 467.6)    | 230.3 (198.3 to 262.2)     | 65.2 (47.1 to 88.5)           | 84.4 (54.0 to 127.3)            | 30.8 (30.8 to 30.8)               |
| Swaziland | 2004 | 160.4 (141.5 to 183.2)     | 95.3 (82.6 to 108.0)       | 25.5 (18.4 to 34.2)           | 32.6 (20.6 to 48.5)             | 7.0 (7.0 to 7.0)                  | 427.2 (376.8 to 487.9)    | 253.8 (219.9 to 287.5)     | 68.0 (49.1 to 91.2)           | 86.7 (54.9 to 129.0)            | 18.6 (18.6 to 18.6)               |
| Swaziland | 2005 | 198.1 (178.1 to 222.7)     | 108.9 (95.2 to 123.5)      | 27.1 (19.6 to 36.3)           | 34.6 (22.2 to 50.9)             | 27.5 (27.5 to 27.5)               | 527.4 (474.3 to 593.1)    | 289.8 (253.4 to 328.8)     | 72.2 (52.2 to 96.5)           | 92.2 (59.2 to 135.6)            | 73.1 (73.1 to 73.1)               |
| Swaziland | 2006 | 203.2 (182.7 to 228.4)     | 120.4 (105.6 to 137.0)     | 28.3 (20.3 to 37.6)           | 35.6 (22.7 to 52.3)             | 19.0 (19.0 to 19.0)               | 541.0 (486.5 to 608.3)    | 320.5 (281.3 to 364.7)     | 75.2 (54.1 to 100.2)          | 94.7 (60.5 to 139.1)            | 50.6 (50.6 to 50.6)               |
| Swaziland | 2007 | 227.0 (204.2 to 254.1)     | 135.0 (118.7 to 153.4)     | 29.4 (21.3 to 38.9)           | 36.7 (23.2 to 54.0)             | 25.9 (25.9 to 25.9)               | 604.4 (543.8 to 676.5)    | 359.5 (316.0 to 408.3)     | 78.3 (56.7 to 103.7)          | 97.7 (61.9 to 143.7)            | 68.9 (68.9 to 68.9)               |
| Swaziland | 2008 | 243.0 (217.7 to 270.2)     | 150.9 (133.3 to 170.0)     | 30.4 (22.0 to 40.3)           | 37.0 (23.6 to 54.2)             | 24.6 (24.6 to 24.6)               | 646.9 (579.7 to 719.4)    | 401.7 (355.0 to 452.7)     | 81.0 (58.5 to 107.2)          | 98.6 (62.7 to 144.3)            | 65.5 (65.5 to 65.5)               |

| Country   | Year | 2018 US Dollars per capita |                            |                               |                                 |                                   | 2018 PPP per capita      |                            |                               |                                 |                                   |
|-----------|------|----------------------------|----------------------------|-------------------------------|---------------------------------|-----------------------------------|--------------------------|----------------------------|-------------------------------|---------------------------------|-----------------------------------|
|           |      | Health spending            | Government health spending | Out-of-pocket health spending | Prepaid private health spending | Development assistance for health | Health spending          | Government health spending | Out-of-pocket health spending | Prepaid private health spending | Development assistance for health |
| Swaziland | 2009 | 267.8 (242.3 to 295.4)     | 164.9 (146.9 to 186.2)     | 31.3 (23.0 to 41.8)           | 35.3 (22.5 to 51.3)             | 36.3 (36.3 to 36.3)               | 713.0 (645.1 to 786.6)   | 439.2 (391.2 to 495.9)     | 83.4 (61.3 to 111.3)          | 93.9 (59.8 to 136.6)            | 96.5 (96.5 to 96.5)               |
| Swaziland | 2010 | 307.8 (281.2 to 336.4)     | 181.0 (161.7 to 202.2)     | 32.6 (23.9 to 43.9)           | 33.9 (21.5 to 49.9)             | 60.4 (60.4 to 60.4)               | 819.7 (748.6 to 895.7)   | 481.8 (430.4 to 538.4)     | 86.8 (63.7 to 117.0)          | 90.3 (57.3 to 133.0)            | 160.7 (160.7 to 160.7)            |
| Swaziland | 2011 | 300.7 (274.6 to 327.6)     | 180.0 (160.9 to 200.2)     | 32.6 (23.9 to 43.9)           | 30.0 (18.7 to 44.7)             | 58.0 (58.0 to 58.0)               | 800.5 (731.1 to 872.2)   | 479.4 (428.5 to 533.0)     | 86.7 (63.7 to 116.9)          | 79.9 (49.9 to 119.1)            | 154.6 (154.6 to 154.6)            |
| Swaziland | 2012 | 286.3 (260.5 to 312.7)     | 181.0 (161.2 to 201.0)     | 33.1 (24.1 to 45.1)           | 26.7 (16.6 to 40.8)             | 45.6 (45.6 to 45.6)               | 762.4 (693.7 to 832.7)   | 481.8 (429.3 to 535.1)     | 88.2 (64.1 to 120.0)          | 71.0 (44.1 to 108.5)            | 121.3 (121.3 to 121.3)            |
| Swaziland | 2013 | 297.9 (271.8 to 324.2)     | 183.9 (163.4 to 204.2)     | 33.5 (24.1 to 45.5)           | 25.3 (15.6 to 39.8)             | 55.2 (55.2 to 55.2)               | 793.2 (723.8 to 863.2)   | 489.6 (435.2 to 543.7)     | 89.1 (64.3 to 121.2)          | 67.4 (41.4 to 105.9)            | 147.0 (147.0 to 147.0)            |
| Swaziland | 2014 | 283.4 (257.3 to 310.5)     | 185.2 (164.1 to 208.1)     | 33.5 (24.1 to 46.0)           | 24.5 (14.7 to 38.8)             | 40.1 (40.1 to 40.1)               | 754.7 (685.2 to 826.8)   | 493.2 (436.9 to 554.0)     | 89.2 (64.3 to 122.6)          | 65.3 (39.1 to 103.2)            | 106.9 (106.9 to 106.9)            |
| Swaziland | 2015 | 289.9 (260.9 to 321.5)     | 193.0 (169.0 to 219.2)     | 33.5 (24.1 to 46.4)           | 24.6 (14.3 to 38.9)             | 38.8 (38.8 to 38.8)               | 771.9 (694.8 to 856.1)   | 513.9 (450.1 to 583.6)     | 89.1 (64.2 to 123.6)          | 65.5 (38.1 to 103.7)            | 103.4 (103.4 to 103.4)            |
| Swaziland | 2016 | 329.1 (297.3 to 365.0)     | 198.7 (173.3 to 230.5)     | 32.3 (23.1 to 44.9)           | 24.1 (13.5 to 38.7)             | 74.0 (74.0 to 74.0)               | 876.3 (791.6 to 971.8)   | 529.2 (461.4 to 613.6)     | 86.0 (61.6 to 119.6)          | 64.2 (35.9 to 103.0)            | 196.9 (196.9 to 196.9)            |
| Swaziland | 2017 | 326.3 (294.7 to 361.7)     | 197.5 (171.6 to 228.8)     | 32.3 (23.1 to 45.2)           | 24.3 (13.6 to 39.0)             | 72.2 (72.2 to 72.2)               | 868.9 (784.7 to 963.0)   | 526.0 (457.0 to 609.1)     | 86.1 (61.5 to 120.2)          | 64.6 (36.1 to 103.8)            | 192.2 (192.2 to 192.2)            |
| Swaziland | 2018 | 326.4 (294.7 to 362.8)     | 201.3 (175.3 to 233.3)     | 32.7 (23.5 to 45.7)           | 24.7 (13.8 to 39.6)             | 67.7 (67.6 to 67.8)               | 869.1 (784.6 to 965.9)   | 536.1 (466.8 to 621.2)     | 87.1 (62.4 to 121.8)          | 65.7 (36.7 to 105.3)            | 180.2 (180.0 to 180.4)            |
| Swaziland | 2019 | 330.8 (299.1 to 368.1)     | 205.2 (178.6 to 237.9)     | 33.0 (23.8 to 46.4)           | 25.1 (14.0 to 40.2)             | 67.6 (62.9 to 71.7)               | 880.9 (796.4 to 980.2)   | 546.3 (475.5 to 633.5)     | 87.9 (63.5 to 123.6)          | 66.8 (37.3 to 107.2)            | 179.9 (167.6 to 190.9)            |
| Swaziland | 2020 | 336.2 (303.6 to 374.5)     | 209.0 (182.2 to 242.5)     | 33.3 (24.0 to 46.9)           | 25.5 (14.2 to 41.0)             | 68.3 (62.5 to 74.1)               | 895.2 (808.4 to 997.1)   | 556.6 (485.2 to 645.8)     | 88.8 (63.9 to 124.9)          | 68.0 (37.9 to 109.2)            | 181.9 (166.5 to 197.3)            |
| Swaziland | 2021 | 341.8 (308.9 to 381.8)     | 212.8 (185.3 to 246.8)     | 33.7 (24.2 to 47.0)           | 26.0 (14.5 to 41.8)             | 69.3 (62.2 to 76.8)               | 910.0 (822.4 to 1016.5)  | 566.7 (493.5 to 657.1)     | 89.6 (64.4 to 125.2)          | 69.1 (38.6 to 111.2)            | 184.6 (165.7 to 204.5)            |
| Swaziland | 2022 | 347.9 (313.6 to 389.6)     | 216.7 (188.6 to 251.0)     | 34.0 (24.7 to 47.7)           | 26.4 (14.7 to 42.5)             | 70.9 (62.6 to 79.6)               | 926.4 (835.0 to 1037.3)  | 576.9 (502.2 to 668.2)     | 90.5 (65.6 to 127.0)          | 70.3 (39.3 to 113.1)            | 188.7 (166.7 to 212.1)            |
| Swaziland | 2023 | 354.0 (318.5 to 397.0)     | 220.6 (191.8 to 255.8)     | 34.3 (24.7 to 48.2)           | 26.8 (15.0 to 43.3)             | 72.3 (62.6 to 82.6)               | 942.6 (848.1 to 1057.1)  | 587.3 (510.7 to 681.2)     | 91.3 (65.8 to 128.4)          | 71.4 (39.9 to 115.4)            | 192.6 (166.7 to 219.9)            |
| Swaziland | 2024 | 360.5 (324.1 to 404.5)     | 224.6 (195.1 to 260.1)     | 34.6 (24.9 to 48.5)           | 27.3 (15.3 to 44.2)             | 74.0 (63.7 to 85.3)               | 959.9 (863.1 to 1077.1)  | 598.0 (519.5 to 692.6)     | 92.2 (66.3 to 129.1)          | 72.7 (40.6 to 117.8)            | 197.0 (169.5 to 227.1)            |
| Swaziland | 2025 | 366.9 (329.9 to 411.8)     | 228.7 (198.8 to 265.2)     | 35.0 (25.2 to 49.0)           | 27.8 (15.5 to 44.9)             | 75.5 (64.3 to 88.1)               | 977.0 (878.5 to 1096.6)  | 609.0 (529.2 to 706.2)     | 93.2 (67.0 to 130.5)          | 73.9 (41.3 to 119.7)            | 200.9 (171.1 to 234.7)            |
| Swaziland | 2026 | 373.0 (334.3 to 419.3)     | 232.5 (202.0 to 270.3)     | 35.4 (25.5 to 49.6)           | 28.2 (15.8 to 45.8)             | 76.9 (64.2 to 90.7)               | 993.3 (890.2 to 1116.4)  | 619.1 (537.8 to 719.7)     | 94.2 (67.9 to 132.2)          | 75.2 (42.0 to 121.9)            | 204.8 (171.0 to 241.5)            |
| Swaziland | 2027 | 379.3 (338.8 to 427.1)     | 236.2 (205.0 to 274.8)     | 35.7 (25.8 to 50.3)           | 28.7 (16.0 to 46.6)             | 78.6 (65.4 to 94.2)               | 1009.8 (902.2 to 1137.1) | 628.9 (545.8 to 731.7)     | 95.2 (68.6 to 133.9)          | 76.4 (42.7 to 124.1)            | 209.3 (174.1 to 250.8)            |
| Swaziland | 2028 | 386.0 (344.7 to 434.4)     | 240.2 (208.1 to 280.1)     | 36.1 (26.0 to 50.8)           | 29.2 (16.3 to 47.5)             | 80.4 (66.9 to 97.8)               | 1027.7 (917.7 to 1156.5) | 639.6 (554.0 to 745.9)     | 96.2 (69.1 to 135.3)          | 77.7 (43.3 to 126.5)            | 214.2 (178.1 to 260.5)            |
| Swaziland | 2029 | 393.3 (350.9 to 442.9)     | 244.8 (211.6 to 285.6)     | 36.5 (26.2 to 51.4)           | 29.7 (16.5 to 48.4)             | 82.3 (67.2 to 101.2)              | 1047.2 (934.4 to 1179.4) | 651.7 (563.5 to 760.5)     | 97.2 (69.8 to 136.9)          | 79.0 (43.9 to 129.0)            | 219.3 (178.9 to 269.5)            |

| Country   | Year | 2018 US Dollars per capita |                            |                               |                                 |                                   | 2018 PPP per capita       |                            |                               |                                 |                                   |
|-----------|------|----------------------------|----------------------------|-------------------------------|---------------------------------|-----------------------------------|---------------------------|----------------------------|-------------------------------|---------------------------------|-----------------------------------|
|           |      | Health spending            | Government health spending | Out-of-pocket health spending | Prepaid private health spending | Development assistance for health | Health spending           | Government health spending | Out-of-pocket health spending | Prepaid private health spending | Development assistance for health |
| Swaziland | 2030 | 400.6 (355.0 to 450.5)     | 249.4 (215.3 to 291.2)     | 36.9 (26.5 to 52.0)           | 30.2 (16.7 to 49.4)             | 84.1 (67.9 to 104.2)              | 1066.7 (945.3 to 1199.4)  | 664.1 (573.1 to 775.5)     | 98.3 (70.4 to 138.5)          | 80.4 (44.6 to 131.5)            | 223.8 (180.9 to 277.5)            |
| Swaziland | 2031 | 407.9 (361.7 to 458.2)     | 254.1 (218.9 to 296.9)     | 37.3 (26.7 to 52.6)           | 30.7 (17.0 to 50.4)             | 85.8 (68.3 to 108.4)              | 1086.2 (963.1 to 1220.1)  | 676.5 (582.8 to 790.4)     | 99.4 (71.1 to 140.1)          | 81.9 (45.2 to 134.2)            | 228.5 (181.9 to 288.6)            |
| Swaziland | 2032 | 415.6 (366.7 to 467.9)     | 259.0 (222.7 to 303.6)     | 37.8 (27.0 to 53.3)           | 31.3 (17.3 to 51.4)             | 87.6 (69.1 to 111.9)              | 1106.7 (976.4 to 1245.8)  | 689.6 (592.9 to 808.5)     | 100.6 (72.0 to 141.9)         | 83.4 (45.9 to 136.9)            | 233.2 (183.9 to 298.0)            |
| Swaziland | 2033 | 423.6 (372.7 to 478.3)     | 264.0 (226.6 to 310.3)     | 38.2 (27.3 to 54.2)           | 31.9 (17.5 to 52.4)             | 89.4 (69.1 to 116.7)              | 1127.8 (992.3 to 1273.5)  | 703.0 (603.3 to 826.2)     | 101.8 (72.8 to 144.2)         | 84.9 (46.7 to 139.4)            | 238.0 (183.9 to 310.8)            |
| Swaziland | 2034 | 431.9 (380.3 to 489.7)     | 269.3 (230.6 to 316.8)     | 38.7 (27.7 to 54.8)           | 32.5 (17.9 to 53.4)             | 91.4 (69.9 to 121.3)              | 1149.9 (1012.6 to 1304.0) | 717.0 (614.0 to 843.4)     | 103.1 (73.7 to 146.0)         | 86.5 (47.6 to 142.1)            | 243.4 (186.2 to 322.9)            |
| Swaziland | 2035 | 440.3 (385.9 to 501.9)     | 274.6 (234.8 to 322.6)     | 39.2 (28.0 to 55.5)           | 33.1 (18.2 to 54.3)             | 93.4 (70.3 to 126.6)              | 1172.3 (1027.4 to 1336.3) | 731.2 (625.2 to 859.0)     | 104.3 (74.5 to 147.9)         | 88.1 (48.6 to 144.7)            | 248.7 (187.3 to 337.1)            |
| Swaziland | 2036 | 448.8 (393.8 to 511.4)     | 280.1 (239.8 to 329.2)     | 39.7 (28.3 to 56.2)           | 33.7 (18.6 to 55.4)             | 95.3 (71.4 to 132.2)              | 1195.0 (1048.5 to 1361.6) | 745.9 (638.6 to 876.6)     | 105.6 (75.4 to 149.7)         | 89.8 (49.5 to 147.4)            | 253.7 (190.2 to 351.9)            |
| Swaziland | 2037 | 457.5 (400.3 to 523.8)     | 285.9 (244.6 to 336.0)     | 40.2 (28.7 to 57.0)           | 34.4 (19.0 to 56.4)             | 97.0 (71.6 to 134.9)              | 1218.1 (1066.0 to 1394.8) | 761.3 (651.2 to 894.6)     | 107.0 (76.4 to 151.7)         | 91.6 (50.5 to 150.2)            | 258.2 (190.8 to 359.2)            |
| Swaziland | 2038 | 466.5 (407.4 to 534.3)     | 291.9 (249.5 to 342.7)     | 40.7 (29.0 to 57.7)           | 35.1 (19.4 to 57.5)             | 98.9 (71.5 to 140.0)              | 1242.2 (1084.8 to 1422.6) | 777.1 (664.3 to 912.4)     | 108.4 (77.3 to 153.7)         | 93.3 (51.6 to 153.2)            | 263.3 (190.4 to 372.7)            |
| Swaziland | 2039 | 475.5 (415.0 to 545.3)     | 297.9 (254.2 to 350.3)     | 41.2 (29.4 to 58.9)           | 35.7 (19.8 to 58.6)             | 100.7 (72.1 to 143.5)             | 1266.1 (1104.9 to 1452.0) | 793.1 (676.8 to 932.6)     | 109.8 (78.3 to 156.7)         | 95.2 (52.7 to 156.1)            | 268.0 (192.0 to 382.1)            |
| Swaziland | 2040 | 484.8 (421.8 to 556.7)     | 303.9 (259.0 to 357.9)     | 41.7 (29.8 to 59.8)           | 36.4 (20.2 to 59.7)             | 102.8 (74.7 to 151.5)             | 1290.9 (1123.2 to 1482.3) | 809.1 (689.6 to 953.0)     | 111.2 (79.2 to 159.1)         | 97.0 (53.7 to 159.0)            | 273.7 (198.8 to 403.5)            |
| Swaziland | 2041 | 494.2 (427.6 to 568.6)     | 309.8 (263.0 to 365.5)     | 42.3 (30.1 to 60.5)           | 37.1 (20.6 to 60.8)             | 105.1 (74.9 to 155.4)             | 1316.0 (1138.5 to 1513.9) | 824.9 (700.2 to 973.3)     | 112.5 (80.1 to 161.1)         | 98.8 (54.8 to 162.0)            | 279.8 (199.4 to 413.7)            |
| Swaziland | 2042 | 504.0 (436.5 to 580.5)     | 315.8 (266.5 to 373.9)     | 42.8 (30.5 to 61.3)           | 37.8 (21.0 to 62.0)             | 107.6 (74.2 to 163.1)             | 1342.0 (1162.3 to 1545.6) | 840.9 (709.7 to 995.7)     | 113.9 (81.1 to 163.1)         | 100.6 (55.9 to 165.0)           | 286.6 (197.5 to 434.3)            |
| Swaziland | 2043 | 513.8 (444.8 to 595.8)     | 322.0 (271.2 to 382.5)     | 43.3 (30.8 to 62.0)           | 38.5 (21.3 to 63.1)             | 110.1 (74.8 to 171.7)             | 1368.2 (1184.3 to 1586.5) | 857.3 (722.1 to 1018.5)    | 115.2 (82.0 to 165.1)         | 102.4 (56.8 to 168.0)           | 293.2 (199.3 to 457.2)            |
| Swaziland | 2044 | 524.1 (453.3 to 613.1)     | 328.1 (275.8 to 390.9)     | 43.8 (31.1 to 62.8)           | 39.2 (21.7 to 64.2)             | 113.1 (76.2 to 178.8)             | 1395.6 (1207.1 to 1632.4) | 873.5 (734.4 to 1040.7)    | 116.5 (82.9 to 167.1)         | 104.3 (57.7 to 170.9)           | 301.3 (203.0 to 476.1)            |
| Swaziland | 2045 | 534.4 (460.7 to 628.3)     | 334.0 (280.2 to 398.4)     | 44.3 (31.4 to 63.7)           | 39.8 (22.0 to 65.3)             | 116.3 (76.9 to 190.4)             | 1423.0 (1226.6 to 1673.0) | 889.4 (746.2 to 1060.8)    | 117.8 (83.7 to 169.5)         | 106.1 (58.6 to 173.8)           | 309.7 (204.6 to 506.9)            |
| Swaziland | 2046 | 544.5 (467.2 to 642.9)     | 339.7 (284.4 to 405.1)     | 44.7 (31.8 to 64.3)           | 40.5 (22.3 to 66.4)             | 119.6 (78.2 to 196.9)             | 1449.8 (1244.0 to 1711.9) | 904.5 (757.1 to 1078.7)    | 119.1 (84.5 to 171.1)         | 107.8 (59.3 to 176.7)           | 318.4 (208.3 to 524.4)            |
| Swaziland | 2047 | 554.9 (471.6 to 657.6)     | 345.4 (288.4 to 413.0)     | 45.2 (32.0 to 65.0)           | 41.2 (22.6 to 67.5)             | 123.2 (80.4 to 207.0)             | 1477.5 (1255.6 to 1750.9) | 919.6 (767.9 to 1099.8)    | 120.3 (85.3 to 173.1)         | 109.6 (60.3 to 179.8)           | 328.0 (214.2 to 551.1)            |
| Swaziland | 2048 | 565.8 (477.1 to 674.8)     | 351.0 (292.7 to 421.5)     | 45.6 (32.3 to 65.8)           | 41.8 (23.0 to 68.5)             | 127.4 (82.2 to 213.9)             | 1506.6 (1270.5 to 1796.7) | 934.6 (779.2 to 1122.2)    | 121.5 (86.1 to 175.1)         | 111.3 (61.1 to 182.5)           | 339.2 (218.8 to 569.6)            |
| Swaziland | 2049 | 576.2 (486.8 to 691.8)     | 356.2 (295.9 to 429.5)     | 46.0 (32.6 to 66.3)           | 42.5 (23.3 to 69.6)             | 131.5 (83.3 to 228.1)             | 1534.3 (1296.2 to 1842.1) | 948.5 (787.9 to 1143.5)    | 122.6 (86.8 to 176.4)         | 113.0 (62.0 to 185.3)           | 350.1 (221.8 to 607.2)            |
| Swaziland | 2050 | 587.7 (494.3 to 715.5)     | 361.7 (300.4 to 437.2)     | 46.5 (32.9 to 67.2)           | 43.1 (23.6 to 70.8)             | 136.4 (84.9 to 239.2)             | 1565.0 (1316.1 to 1905.1) | 963.2 (799.9 to 1164.1)    | 123.8 (87.6 to 179.0)         | 114.8 (62.8 to 188.6)           | 363.2 (226.0 to 636.9)            |

| Country | Year | 2018 US Dollars per capita |                            |                               |                                 |                                   | 2018 PPP per capita       |                            |                               |                                 |                                   |
|---------|------|----------------------------|----------------------------|-------------------------------|---------------------------------|-----------------------------------|---------------------------|----------------------------|-------------------------------|---------------------------------|-----------------------------------|
|         |      | Health spending            | Government health spending | Out-of-pocket health spending | Prepaid private health spending | Development assistance for health | Health spending           | Government health spending | Out-of-pocket health spending | Prepaid private health spending | Development assistance for health |
| Sweden  | 1995 | 2748.4 (2581.8 to 2920.7)  | 2370.7 (2211.1 to 2550.8)  | 350.8 (319.4 to 388.5)        | 27.0 (14.4 to 45.9)             | 0.0 (0.0 to 0.0)                  | 2596.2 (2438.8 to 2758.9) | 2239.4 (2088.6 to 2409.6)  | 331.3 (301.7 to 367.0)        | 25.5 (13.6 to 43.3)             | 0.0 (0.0 to 0.0)                  |
| Sweden  | 1996 | 2791.9 (2646.9 to 2938.2)  | 2402.7 (2269.1 to 2541.9)  | 360.8 (334.7 to 391.3)        | 28.3 (15.6 to 46.2)             | 0.0 (0.0 to 0.0)                  | 2637.2 (2500.3 to 2775.5) | 2269.6 (2143.4 to 2401.1)  | 340.8 (316.2 to 369.6)        | 26.8 (14.8 to 43.6)             | 0.0 (0.0 to 0.0)                  |
| Sweden  | 1997 | 2863.4 (2735.0 to 2993.8)  | 2452.4 (2331.5 to 2578.6)  | 381.1 (355.3 to 408.3)        | 29.9 (17.6 to 47.8)             | 0.0 (0.0 to 0.0)                  | 2704.8 (2583.5 to 2828.0) | 2316.6 (2202.4 to 2435.8)  | 360.0 (335.6 to 385.7)        | 28.2 (16.7 to 45.2)             | 0.0 (0.0 to 0.0)                  |
| Sweden  | 1998 | 2991.9 (2869.0 to 3116.7)  | 2555.2 (2434.8 to 2681.3)  | 405.1 (378.7 to 432.4)        | 31.7 (19.9 to 48.7)             | 0.0 (0.0 to 0.0)                  | 2826.2 (2710.1 to 2944.1) | 2413.7 (2300.0 to 2532.8)  | 382.6 (357.8 to 408.4)        | 29.9 (18.8 to 46.0)             | 0.0 (0.0 to 0.0)                  |
| Sweden  | 1999 | 3163.9 (3038.1 to 3289.8)  | 2687.8 (2568.1 to 2810.7)  | 442.6 (417.0 to 468.8)        | 33.5 (21.8 to 49.6)             | 0.0 (0.0 to 0.0)                  | 2988.7 (2869.9 to 3107.6) | 2538.9 (2425.9 to 2655.0)  | 418.1 (393.9 to 442.8)        | 31.6 (20.6 to 46.8)             | 0.0 (0.0 to 0.0)                  |
| Sweden  | 2000 | 3379.7 (3252.6 to 3516.2)  | 2840.4 (2718.5 to 2972.2)  | 503.9 (478.5 to 530.2)        | 35.5 (24.3 to 50.3)             | 0.0 (0.0 to 0.0)                  | 3192.5 (3072.4 to 3321.4) | 2683.1 (2567.9 to 2807.6)  | 476.0 (452.0 to 500.9)        | 33.5 (22.9 to 47.5)             | 0.0 (0.0 to 0.0)                  |
| Sweden  | 2001 | 3576.6 (3454.4 to 3709.8)  | 2959.8 (2841.9 to 3086.2)  | 579.6 (552.4 to 607.3)        | 37.2 (26.6 to 50.4)             | 0.0 (0.0 to 0.0)                  | 3378.5 (3263.1 to 3504.4) | 2795.8 (2684.5 to 2915.2)  | 547.5 (521.8 to 573.7)        | 35.2 (25.2 to 47.6)             | 0.0 (0.0 to 0.0)                  |
| Sweden  | 2002 | 3765.7 (3639.7 to 3888.8)  | 3096.3 (2977.3 to 3220.4)  | 630.2 (604.8 to 657.1)        | 39.1 (28.8 to 51.8)             | 0.0 (0.0 to 0.0)                  | 3557.1 (3438.2 to 3673.4) | 2924.8 (2812.4 to 3042.0)  | 595.3 (571.3 to 620.7)        | 37.0 (27.2 to 49.0)             | 0.0 (0.0 to 0.0)                  |
| Sweden  | 2003 | 3902.0 (3782.7 to 4029.8)  | 3203.2 (3082.5 to 3329.2)  | 656.9 (630.2 to 685.5)        | 41.8 (31.9 to 54.7)             | 0.0 (0.0 to 0.0)                  | 3685.9 (3573.2 to 3806.7) | 3025.8 (2911.8 to 3144.8)  | 620.5 (595.3 to 647.5)        | 39.5 (30.1 to 51.6)             | 0.0 (0.0 to 0.0)                  |
| Sweden  | 2004 | 4034.3 (3910.5 to 4157.8)  | 3309.1 (3186.1 to 3434.1)  | 680.6 (652.7 to 710.7)        | 44.6 (34.4 to 57.6)             | 0.0 (0.0 to 0.0)                  | 3810.9 (3693.9 to 3927.5) | 3125.8 (3009.6 to 3243.9)  | 642.9 (616.6 to 671.3)        | 42.1 (32.5 to 54.4)             | 0.0 (0.0 to 0.0)                  |
| Sweden  | 2005 | 4053.1 (3924.7 to 4182.3)  | 3313.5 (3189.7 to 3440.6)  | 693.1 (664.4 to 724.4)        | 46.4 (35.9 to 59.7)             | 0.0 (0.0 to 0.0)                  | 3828.6 (3707.3 to 3950.7) | 3130.0 (3013.0 to 3250.0)  | 654.7 (627.6 to 684.3)        | 43.8 (33.9 to 56.4)             | 0.0 (0.0 to 0.0)                  |
| Sweden  | 2006 | 4166.2 (4041.2 to 4302.3)  | 3407.3 (3285.6 to 3539.9)  | 710.2 (681.9 to 738.6)        | 48.8 (37.7 to 61.3)             | 0.0 (0.0 to 0.0)                  | 3935.5 (3817.4 to 4064.0) | 3218.6 (3103.6 to 3343.9)  | 670.8 (644.2 to 697.7)        | 46.1 (35.7 to 57.9)             | 0.0 (0.0 to 0.0)                  |
| Sweden  | 2007 | 4291.7 (4164.7 to 4423.0)  | 3515.5 (3392.4 to 3645.8)  | 725.2 (694.4 to 754.2)        | 51.0 (39.7 to 64.5)             | 0.0 (0.0 to 0.0)                  | 4054.0 (3934.0 to 4178.0) | 3320.8 (3204.6 to 3443.9)  | 685.0 (655.9 to 712.4)        | 48.2 (37.5 to 60.9)             | 0.0 (0.0 to 0.0)                  |
| Sweden  | 2008 | 4353.7 (4218.8 to 4490.0)  | 3569.0 (3435.9 to 3709.5)  | 733.0 (702.0 to 764.6)        | 51.7 (40.1 to 65.8)             | 0.0 (0.0 to 0.0)                  | 4112.6 (3985.2 to 4241.3) | 3371.3 (3245.6 to 3504.0)  | 692.4 (663.1 to 722.2)        | 48.8 (37.9 to 62.2)             | 0.0 (0.0 to 0.0)                  |
| Sweden  | 2009 | 4339.2 (4209.9 to 4475.3)  | 3558.8 (3432.6 to 3698.2)  | 730.3 (700.6 to 761.9)        | 50.1 (38.8 to 63.4)             | 0.0 (0.0 to 0.0)                  | 4098.9 (3976.8 to 4227.5) | 3361.7 (3242.5 to 3493.4)  | 689.9 (661.8 to 719.7)        | 47.3 (36.6 to 59.9)             | 0.0 (0.0 to 0.0)                  |
| Sweden  | 2010 | 4733.8 (4610.4 to 4862.3)  | 3914.1 (3793.9 to 4056.0)  | 767.0 (738.2 to 797.2)        | 52.8 (41.0 to 66.4)             | 0.0 (0.0 to 0.0)                  | 4471.6 (4355.1 to 4593.0) | 3697.3 (3583.8 to 3831.3)  | 724.5 (697.3 to 753.0)        | 49.8 (38.7 to 62.7)             | 0.0 (0.0 to 0.0)                  |
| Sweden  | 2011 | 5336.8 (5206.5 to 5482.3)  | 4447.9 (4321.7 to 4585.3)  | 831.3 (800.8 to 860.6)        | 57.6 (45.0 to 71.8)             | 0.0 (0.0 to 0.0)                  | 5041.2 (4918.1 to 5178.7) | 4201.5 (4082.3 to 4331.4)  | 785.2 (756.4 to 813.0)        | 54.5 (42.5 to 67.8)             | 0.0 (0.0 to 0.0)                  |
| Sweden  | 2012 | 5637.7 (5492.9 to 5781.1)  | 4707.1 (4568.0 to 4839.2)  | 870.1 (839.2 to 902.1)        | 60.5 (47.4 to 76.7)             | 0.0 (0.0 to 0.0)                  | 5325.4 (5188.7 to 5461.0) | 4446.4 (4315.0 to 4571.2)  | 821.9 (792.7 to 852.1)        | 57.2 (44.8 to 72.5)             | 0.0 (0.0 to 0.0)                  |
| Sweden  | 2013 | 5799.6 (5646.6 to 5947.4)  | 4840.9 (4700.3 to 4983.6)  | 894.9 (864.3 to 927.6)        | 63.7 (50.3 to 79.7)             | 0.0 (0.0 to 0.0)                  | 5478.4 (5333.9 to 5618.0) | 4572.8 (4440.0 to 4707.6)  | 845.4 (816.5 to 876.2)        | 60.2 (47.5 to 75.3)             | 0.0 (0.0 to 0.0)                  |
| Sweden  | 2014 | 5896.1 (5746.3 to 6043.9)  | 4918.4 (4781.6 to 5061.9)  | 910.7 (879.5 to 944.3)        | 67.0 (52.5 to 83.3)             | 0.0 (0.0 to 0.0)                  | 5569.6 (5428.1 to 5709.2) | 4646.0 (4516.8 to 4781.5)  | 860.3 (830.8 to 892.0)        | 63.3 (49.6 to 78.7)             | 0.0 (0.0 to 0.0)                  |
| Sweden  | 2015 | 6026.9 (5875.6 to 6175.4)  | 5029.0 (4879.2 to 5179.5)  | 926.7 (893.5 to 962.7)        | 71.1 (55.5 to 91.1)             | 0.0 (0.0 to 0.0)                  | 5693.1 (5550.2 to 5833.4) | 4750.5 (4609.0 to 4892.6)  | 875.4 (844.0 to 909.3)        | 67.2 (52.4 to 86.0)             | 0.0 (0.0 to 0.0)                  |

| Country | Year | 2018 US Dollars per capita |                            |                               |                                 |                                   | 2018 PPP per capita       |                            |                               |                                 |                                   |
|---------|------|----------------------------|----------------------------|-------------------------------|---------------------------------|-----------------------------------|---------------------------|----------------------------|-------------------------------|---------------------------------|-----------------------------------|
|         |      | Health spending            | Government health spending | Out-of-pocket health spending | Prepaid private health spending | Development assistance for health | Health spending           | Government health spending | Out-of-pocket health spending | Prepaid private health spending | Development assistance for health |
| Sweden  | 2016 | 6095.0 (5898.9 to 6299.2)  | 5088.2 (4894.0 to 5286.2)  | 932.2 (883.8 to 981.8)        | 74.7 (55.5 to 100.7)            | 0.0 (0.0 to 0.0)                  | 5757.5 (5572.2 to 5950.3) | 4806.4 (4623.0 to 4993.4)  | 880.6 (834.8 to 927.4)        | 70.5 (52.4 to 95.1)             | 0.0 (0.0 to 0.0)                  |
| Sweden  | 2017 | 6142.4 (5937.2 to 6345.5)  | 5128.7 (4931.1 to 5324.0)  | 938.2 (889.3 to 987.2)        | 75.5 (56.1 to 102.0)            | 0.0 (0.0 to 0.0)                  | 5802.2 (5608.4 to 5994.1) | 4844.7 (4658.0 to 5029.1)  | 886.3 (840.0 to 932.5)        | 71.3 (53.0 to 96.3)             | 0.0 (0.0 to 0.0)                  |
| Sweden  | 2018 | 6197.8 (5983.1 to 6412.6)  | 5165.3 (4967.0 to 5378.9)  | 956.1 (906.8 to 1009.6)       | 76.4 (56.8 to 103.3)            | 0.0 (0.0 to 0.0)                  | 5854.5 (5651.7 to 6057.4) | 4879.2 (4691.9 to 5081.0)  | 903.2 (856.6 to 953.7)        | 72.2 (53.7 to 97.5)             | 0.0 (0.0 to 0.0)                  |
| Sweden  | 2019 | 6246.0 (6035.1 to 6478.2)  | 5194.7 (4995.1 to 5417.8)  | 974.1 (923.9 to 1028.7)       | 77.2 (57.4 to 104.4)            | 0.0 (0.0 to 0.0)                  | 5900.1 (5700.9 to 6119.4) | 4907.0 (4718.5 to 5117.8)  | 920.2 (872.8 to 971.7)        | 72.9 (54.2 to 98.6)             | 0.0 (0.0 to 0.0)                  |
| Sweden  | 2020 | 6297.1 (6075.5 to 6528.5)  | 5228.6 (5017.5 to 5457.4)  | 990.3 (935.3 to 1048.2)       | 78.1 (58.1 to 105.7)            | 0.0 (0.0 to 0.0)                  | 5948.3 (5739.0 to 6166.9) | 4939.1 (4739.6 to 5155.2)  | 935.4 (883.5 to 990.2)        | 73.8 (54.8 to 99.8)             | 0.0 (0.0 to 0.0)                  |
| Sweden  | 2021 | 6349.2 (6105.2 to 6593.2)  | 5263.5 (5033.0 to 5502.8)  | 1006.7 (948.5 to 1067.3)      | 79.0 (58.7 to 106.9)            | 0.0 (0.0 to 0.0)                  | 5997.6 (5767.1 to 6228.1) | 4972.0 (4754.3 to 5198.1)  | 950.9 (896.0 to 1008.2)       | 74.6 (55.4 to 101.0)            | 0.0 (0.0 to 0.0)                  |
| Sweden  | 2022 | 6409.0 (6168.0 to 6648.6)  | 5305.1 (5061.2 to 5548.3)  | 1023.9 (963.2 to 1087.4)      | 80.0 (59.3 to 108.1)            | 0.0 (0.0 to 0.0)                  | 6054.1 (5826.4 to 6280.4) | 5011.3 (4780.9 to 5241.1)  | 967.2 (909.9 to 1027.2)       | 75.6 (56.0 to 102.1)            | 0.0 (0.0 to 0.0)                  |
| Sweden  | 2023 | 6479.1 (6226.7 to 6746.8)  | 5355.8 (5107.1 to 5615.9)  | 1042.2 (973.7 to 1109.7)      | 81.1 (60.1 to 109.4)            | 0.0 (0.0 to 0.0)                  | 6120.3 (5881.8 to 6373.2) | 5059.1 (4824.2 to 5304.9)  | 984.5 (919.8 to 1048.3)       | 76.6 (56.8 to 103.3)            | 0.0 (0.0 to 0.0)                  |
| Sweden  | 2024 | 6556.0 (6296.7 to 6839.8)  | 5412.4 (5152.0 to 5693.6)  | 1061.2 (992.7 to 1133.4)      | 82.3 (61.0 to 111.0)            | 0.0 (0.0 to 0.0)                  | 6192.9 (5947.9 to 6460.9) | 5112.7 (4866.7 to 5378.3)  | 1002.4 (937.7 to 1070.6)      | 77.8 (57.6 to 104.9)            | 0.0 (0.0 to 0.0)                  |
| Sweden  | 2025 | 6635.0 (6352.1 to 6939.8)  | 5471.0 (5200.8 to 5762.8)  | 1080.5 (1007.4 to 1156.4)     | 83.5 (61.8 to 112.8)            | 0.0 (0.0 to 0.0)                  | 6267.6 (6000.3 to 6555.4) | 5168.0 (4912.8 to 5443.6)  | 1020.7 (951.6 to 1092.3)      | 78.9 (58.4 to 106.5)            | 0.0 (0.0 to 0.0)                  |
| Sweden  | 2026 | 6712.0 (6420.3 to 7039.2)  | 5527.1 (5251.8 to 5836.1)  | 1100.2 (1020.7 to 1183.7)     | 84.8 (62.7 to 114.1)            | 0.0 (0.0 to 0.0)                  | 6340.3 (6064.7 to 6649.3) | 5221.0 (4960.9 to 5512.9)  | 1039.2 (964.2 to 1118.1)      | 80.1 (59.2 to 107.8)            | 0.0 (0.0 to 0.0)                  |
| Sweden  | 2027 | 6791.2 (6482.9 to 7144.5)  | 5584.9 (5291.5 to 5914.7)  | 1120.4 (1030.5 to 1211.5)     | 86.0 (63.6 to 115.8)            | 0.0 (0.0 to 0.0)                  | 6415.1 (6123.8 to 6748.8) | 5275.6 (4998.5 to 5587.1)  | 1058.3 (973.4 to 1144.4)      | 81.3 (60.0 to 109.4)            | 0.0 (0.0 to 0.0)                  |
| Sweden  | 2028 | 6879.2 (6547.6 to 7245.2)  | 5650.9 (5345.1 to 6010.6)  | 1141.0 (1038.8 to 1241.6)     | 87.4 (64.6 to 117.7)            | 0.0 (0.0 to 0.0)                  | 6498.2 (6185.0 to 6844.0) | 5337.9 (5049.1 to 5677.7)  | 1077.8 (981.3 to 1172.8)      | 82.5 (61.0 to 111.2)            | 0.0 (0.0 to 0.0)                  |
| Sweden  | 2029 | 6963.3 (6606.9 to 7329.4)  | 5713.3 (5385.5 to 6082.2)  | 1161.4 (1045.3 to 1272.7)     | 88.6 (65.5 to 119.4)            | 0.0 (0.0 to 0.0)                  | 6577.7 (6241.0 to 6923.5) | 5396.9 (5087.2 to 5745.4)  | 1097.1 (987.4 to 1202.2)      | 83.7 (61.9 to 112.8)            | 0.0 (0.0 to 0.0)                  |
| Sweden  | 2030 | 7048.8 (6673.1 to 7454.0)  | 5777.1 (5430.7 to 6166.3)  | 1181.8 (1055.3 to 1311.9)     | 89.9 (66.5 to 121.3)            | 0.0 (0.0 to 0.0)                  | 6658.4 (6303.5 to 7041.1) | 5457.1 (5130.0 to 5824.8)  | 1116.4 (996.9 to 1239.3)      | 85.0 (62.8 to 114.6)            | 0.0 (0.0 to 0.0)                  |
| Sweden  | 2031 | 7131.0 (6735.2 to 7539.5)  | 5837.8 (5470.0 to 6241.2)  | 1202.0 (1062.0 to 1347.9)     | 91.2 (67.5 to 122.7)            | 0.0 (0.0 to 0.0)                  | 6736.1 (6362.2 to 7121.9) | 5514.5 (5167.1 to 5895.5)  | 1135.5 (1003.2 to 1273.2)     | 86.2 (63.7 to 115.9)            | 0.0 (0.0 to 0.0)                  |
| Sweden  | 2032 | 7211.1 (6792.8 to 7646.3)  | 5896.7 (5505.5 to 6326.5)  | 1221.9 (1066.9 to 1382.5)     | 92.5 (68.4 to 124.4)            | 0.0 (0.0 to 0.0)                  | 6811.7 (6416.6 to 7222.8) | 5570.1 (5200.6 to 5976.1)  | 1154.3 (1007.8 to 1306.0)     | 87.4 (64.6 to 117.5)            | 0.0 (0.0 to 0.0)                  |
| Sweden  | 2033 | 7289.7 (6863.5 to 7762.6)  | 5954.3 (5537.1 to 6390.7)  | 1241.6 (1073.6 to 1418.8)     | 93.7 (69.3 to 126.3)            | 0.0 (0.0 to 0.0)                  | 6886.0 (6483.3 to 7332.6) | 5624.6 (5230.4 to 6036.8)  | 1172.9 (1014.1 to 1340.2)     | 88.5 (65.5 to 119.3)            | 0.0 (0.0 to 0.0)                  |
| Sweden  | 2034 | 7370.5 (6926.2 to 7860.7)  | 6014.1 (5570.9 to 6479.5)  | 1261.4 (1080.0 to 1452.1)     | 95.0 (70.2 to 128.3)            | 0.0 (0.0 to 0.0)                  | 6962.3 (6542.6 to 7425.3) | 5681.0 (5262.3 to 6120.6)  | 1191.6 (1020.1 to 1371.7)     | 89.8 (66.3 to 121.2)            | 0.0 (0.0 to 0.0)                  |
| Sweden  | 2035 | 7456.8 (6979.1 to 7964.0)  | 6078.6 (5626.7 to 6572.6)  | 1281.7 (1087.3 to 1485.2)     | 96.4 (71.2 to 130.3)            | 0.0 (0.0 to 0.0)                  | 7043.8 (6592.5 to 7522.9) | 5742.0 (5315.0 to 6208.5)  | 1210.8 (1027.1 to 1403.0)     | 91.1 (67.2 to 123.1)            | 0.0 (0.0 to 0.0)                  |
| Sweden  | 2036 | 7541.4 (7033.2 to 8058.8)  | 6141.5 (5653.0 to 6667.2)  | 1302.1 (1094.9 to 1517.7)     | 97.8 (72.2 to 132.6)            | 0.0 (0.0 to 0.0)                  | 7123.8 (6643.6 to 7612.5) | 5801.4 (5339.9 to 6298.0)  | 1230.0 (1034.2 to 1433.6)     | 92.4 (68.2 to 125.2)            | 0.0 (0.0 to 0.0)                  |

| Country     | Year | 2018 US Dollars per capita |                            |                               |                                 |                                   | 2018 PPP per capita       |                            |                               |                                 |                                   |
|-------------|------|----------------------------|----------------------------|-------------------------------|---------------------------------|-----------------------------------|---------------------------|----------------------------|-------------------------------|---------------------------------|-----------------------------------|
|             |      | Health spending            | Government health spending | Out-of-pocket health spending | Prepaid private health spending | Development assistance for health | Health spending           | Government health spending | Out-of-pocket health spending | Prepaid private health spending | Development assistance for health |
| Sweden      | 2037 | 7628.0 (7090.4 to 8214.3)  | 6206.0 (5696.1 to 6751.6)  | 1322.6 (1105.1 to 1550.4)     | 99.3 (73.3 to 134.7)            | 0.0 (0.0 to 0.0)                  | 7205.5 (6697.7 to 7759.4) | 5862.3 (5380.7 to 6377.6)  | 1249.4 (1043.9 to 1464.5)     | 93.8 (69.2 to 127.2)            | 0.0 (0.0 to 0.0)                  |
| Sweden      | 2038 | 7717.2 (7113.9 to 8312.7)  | 6272.8 (5743.3 to 6832.9)  | 1343.5 (1116.4 to 1582.1)     | 100.9 (74.4 to 136.9)           | 0.0 (0.0 to 0.0)                  | 7289.8 (6719.9 to 7852.3) | 5925.4 (5425.2 to 6454.5)  | 1269.0 (1054.6 to 1494.5)     | 95.3 (70.3 to 129.3)            | 0.0 (0.0 to 0.0)                  |
| Sweden      | 2039 | 7810.5 (7224.0 to 8454.4)  | 6343.3 (5776.4 to 6937.2)  | 1364.6 (1128.9 to 1619.0)     | 102.5 (75.6 to 139.2)           | 0.0 (0.0 to 0.0)                  | 7377.9 (6823.9 to 7986.1) | 5992.0 (5456.5 to 6553.0)  | 1289.0 (1066.3 to 1529.3)     | 96.9 (71.4 to 131.5)            | 0.0 (0.0 to 0.0)                  |
| Sweden      | 2040 | 7907.1 (7279.9 to 8556.2)  | 6416.8 (5832.7 to 7054.2)  | 1386.0 (1142.2 to 1650.2)     | 104.3 (76.9 to 141.7)           | 0.0 (0.0 to 0.0)                  | 7469.2 (6876.7 to 8082.3) | 6061.4 (5509.7 to 6663.5)  | 1309.3 (1079.0 to 1558.8)     | 98.5 (72.6 to 133.8)            | 0.0 (0.0 to 0.0)                  |
| Sweden      | 2041 | 7999.6 (7392.4 to 8680.8)  | 6486.3 (5876.2 to 7140.2)  | 1407.3 (1155.8 to 1682.9)     | 106.0 (78.1 to 144.0)           | 0.0 (0.0 to 0.0)                  | 7556.6 (6983.0 to 8200.0) | 6127.1 (5550.8 to 6744.7)  | 1329.3 (1091.8 to 1589.7)     | 100.2 (73.8 to 136.1)           | 0.0 (0.0 to 0.0)                  |
| Sweden      | 2042 | 8096.8 (7452.6 to 8822.6)  | 6560.1 (5945.1 to 7242.9)  | 1428.9 (1170.2 to 1715.7)     | 107.9 (79.4 to 146.8)           | 0.0 (0.0 to 0.0)                  | 7648.4 (7039.9 to 8334.0) | 6196.7 (5615.9 to 6841.7)  | 1349.7 (1105.4 to 1620.6)     | 101.9 (75.0 to 138.6)           | 0.0 (0.0 to 0.0)                  |
| Sweden      | 2043 | 8195.6 (7492.9 to 8922.1)  | 6635.2 (5973.3 to 7359.3)  | 1450.5 (1185.3 to 1747.5)     | 109.8 (80.7 to 149.5)           | 0.0 (0.0 to 0.0)                  | 7741.7 (7077.9 to 8427.9) | 6267.7 (5642.4 to 6951.7)  | 1370.2 (1119.6 to 1650.8)     | 103.7 (76.2 to 141.3)           | 0.0 (0.0 to 0.0)                  |
| Sweden      | 2044 | 8299.0 (7580.1 to 9104.3)  | 6714.7 (6023.7 to 7443.8)  | 1472.4 (1201.2 to 1778.7)     | 111.8 (82.1 to 152.4)           | 0.0 (0.0 to 0.0)                  | 7839.4 (7160.3 to 8600.1) | 6342.8 (5690.1 to 7031.5)  | 1390.9 (1134.7 to 1680.1)     | 105.6 (77.6 to 143.9)           | 0.0 (0.0 to 0.0)                  |
| Sweden      | 2045 | 8406.1 (7603.3 to 9238.5)  | 6798.0 (6073.2 to 7555.2)  | 1494.2 (1217.3 to 1810.2)     | 113.9 (83.6 to 155.3)           | 0.0 (0.0 to 0.0)                  | 7940.5 (7182.2 to 8726.9) | 6421.5 (5736.9 to 7136.7)  | 1411.4 (1149.9 to 1709.9)     | 107.6 (79.0 to 146.7)           | 0.0 (0.0 to 0.0)                  |
| Sweden      | 2046 | 8501.8 (7686.6 to 9338.7)  | 6871.1 (6109.9 to 7668.9)  | 1514.8 (1233.4 to 1836.2)     | 115.8 (85.0 to 158.0)           | 0.0 (0.0 to 0.0)                  | 8030.9 (7260.9 to 8821.5) | 6490.6 (5771.5 to 7244.2)  | 1430.9 (1165.1 to 1734.5)     | 109.4 (80.3 to 149.3)           | 0.0 (0.0 to 0.0)                  |
| Sweden      | 2047 | 8602.8 (7759.6 to 9482.9)  | 6949.5 (6137.1 to 7788.9)  | 1535.5 (1249.2 to 1861.9)     | 117.8 (86.5 to 160.9)           | 0.0 (0.0 to 0.0)                  | 8126.3 (7329.9 to 8957.7) | 6564.6 (5797.2 to 7357.5)  | 1450.5 (1180.0 to 1758.8)     | 111.3 (81.7 to 151.9)           | 0.0 (0.0 to 0.0)                  |
| Sweden      | 2048 | 8703.6 (7786.2 to 9655.8)  | 7027.6 (6191.5 to 7907.0)  | 1556.2 (1263.9 to 1888.9)     | 119.8 (87.8 to 163.7)           | 0.0 (0.0 to 0.0)                  | 8221.6 (7355.0 to 9121.0) | 6638.4 (5848.6 to 7469.1)  | 1470.0 (1193.9 to 1784.3)     | 113.2 (83.0 to 154.6)           | 0.0 (0.0 to 0.0)                  |
| Sweden      | 2049 | 8805.1 (7886.7 to 9800.5)  | 7106.6 (6247.6 to 8018.6)  | 1576.7 (1280.9 to 1915.3)     | 121.7 (89.1 to 166.4)           | 0.0 (0.0 to 0.0)                  | 8317.4 (7449.9 to 9257.7) | 6713.0 (5901.6 to 7574.5)  | 1489.4 (1209.9 to 1809.2)     | 115.0 (84.1 to 157.2)           | 0.0 (0.0 to 0.0)                  |
| Sweden      | 2050 | 8908.9 (7972.7 to 9895.9)  | 7187.9 (6295.8 to 8150.2)  | 1597.3 (1297.6 to 1941.6)     | 123.7 (90.3 to 169.2)           | 0.0 (0.0 to 0.0)                  | 8415.5 (7531.2 to 9347.8) | 6789.8 (5947.1 to 7698.8)  | 1508.9 (1225.8 to 1834.1)     | 116.8 (85.3 to 159.8)           | 0.0 (0.0 to 0.0)                  |
| Switzerland | 1995 | 6642.4 (6456.7 to 6822.9)  | 3497.6 (3351.7 to 3649.5)  | 2371.6 (2292.3 to 2452.7)     | 773.2 (717.0 to 833.9)          | 0.0 (0.0 to 0.0)                  | 5031.0 (4890.3 to 5167.7) | 2649.1 (2538.6 to 2764.2)  | 1796.3 (1736.2 to 1857.7)     | 585.6 (543.0 to 631.6)          | 0.0 (0.0 to 0.0)                  |
| Switzerland | 1996 | 6742.4 (6599.7 to 6882.3)  | 3583.0 (3467.1 to 3703.9)  | 2377.8 (2322.0 to 2434.5)     | 781.7 (738.9 to 825.9)          | 0.0 (0.0 to 0.0)                  | 5106.8 (4998.7 to 5212.7) | 2713.8 (2626.0 to 2805.3)  | 1800.9 (1758.7 to 1843.9)     | 592.1 (559.6 to 625.6)          | 0.0 (0.0 to 0.0)                  |
| Switzerland | 1997 | 6871.3 (6742.3 to 7010.8)  | 3693.7 (3590.3 to 3804.7)  | 2400.8 (2342.2 to 2459.5)     | 776.8 (733.6 to 822.9)          | 0.0 (0.0 to 0.0)                  | 5204.4 (5106.7 to 5310.1) | 2797.6 (2719.3 to 2881.7)  | 1818.4 (1774.0 to 1862.8)     | 588.4 (555.6 to 623.2)          | 0.0 (0.0 to 0.0)                  |
| Switzerland | 1998 | 7009.0 (6872.7 to 7144.5)  | 3807.6 (3699.8 to 3916.2)  | 2426.1 (2370.3 to 2483.3)     | 775.3 (730.7 to 822.0)          | 0.0 (0.0 to 0.0)                  | 5308.7 (5205.5 to 5411.3) | 2883.9 (2802.3 to 2966.2)  | 1837.6 (1795.3 to 1880.9)     | 587.2 (553.4 to 622.6)          | 0.0 (0.0 to 0.0)                  |
| Switzerland | 1999 | 7039.8 (6916.2 to 7167.9)  | 3867.8 (3760.9 to 3968.5)  | 2410.8 (2359.1 to 2465.0)     | 761.1 (720.6 to 805.0)          | 0.0 (0.0 to 0.0)                  | 5332.0 (5238.4 to 5429.0) | 2929.5 (2848.5 to 3005.8)  | 1826.0 (1786.8 to 1867.0)     | 576.4 (545.8 to 609.7)          | 0.0 (0.0 to 0.0)                  |
| Switzerland | 2000 | 7155.8 (7035.1 to 7282.9)  | 4010.1 (3907.6 to 4116.2)  | 2385.0 (2333.5 to 2438.4)     | 760.7 (722.8 to 798.9)          | 0.0 (0.0 to 0.0)                  | 5419.9 (5328.4 to 5516.2) | 3037.3 (2959.6 to 3117.6)  | 1806.5 (1767.5 to 1846.9)     | 576.1 (547.4 to 605.1)          | 0.0 (0.0 to 0.0)                  |
| Switzerland | 2001 | 7361.2 (7230.9 to 7496.7)  | 4212.8 (4096.8 to 4322.5)  | 2384.4 (2329.9 to 2439.9)     | 764.1 (727.4 to 804.5)          | 0.0 (0.0 to 0.0)                  | 5575.5 (5476.8 to 5678.0) | 3190.8 (3103.0 to 3273.9)  | 1805.9 (1764.7 to 1848.0)     | 578.7 (550.9 to 609.4)          | 0.0 (0.0 to 0.0)                  |

| Country     | Year | 2018 US Dollars per capita   |                            |                               |                                 |                                   | 2018 PPP per capita       |                            |                               |                                 |                                   |
|-------------|------|------------------------------|----------------------------|-------------------------------|---------------------------------|-----------------------------------|---------------------------|----------------------------|-------------------------------|---------------------------------|-----------------------------------|
|             |      | Health spending              | Government health spending | Out-of-pocket health spending | Prepaid private health spending | Development assistance for health | Health spending           | Government health spending | Out-of-pocket health spending | Prepaid private health spending | Development assistance for health |
| Switzerland | 2002 | 7605.2 (7472.1 to 7732.3)    | 4448.7 (4336.0 to 4559.0)  | 2396.7 (2348.8 to 2446.8)     | 759.7 (724.9 to 800.1)          | 0.0 (0.0 to 0.0)                  | 5760.3 (5659.5 to 5856.5) | 3369.5 (3284.2 to 3453.0)  | 1815.3 (1779.0 to 1853.2)     | 575.4 (549.1 to 606.0)          | 0.0 (0.0 to 0.0)                  |
| Switzerland | 2003 | 7788.1 (7660.8 to 7920.6)    | 4609.5 (4499.7 to 4729.9)  | 2433.2 (2384.3 to 2486.4)     | 745.4 (709.0 to 782.4)          | 0.0 (0.0 to 0.0)                  | 5898.8 (5802.3 to 5999.1) | 3491.3 (3408.1 to 3582.4)  | 1843.0 (1805.9 to 1883.2)     | 564.6 (537.0 to 592.6)          | 0.0 (0.0 to 0.0)                  |
| Switzerland | 2004 | 7976.7 (7845.3 to 8109.6)    | 4754.2 (4639.1 to 4871.1)  | 2477.5 (2426.2 to 2528.9)     | 745.0 (708.7 to 783.9)          | 0.0 (0.0 to 0.0)                  | 6041.6 (5942.1 to 6142.3) | 3600.9 (3513.7 to 3689.4)  | 1876.5 (1837.6 to 1915.4)     | 564.3 (536.8 to 593.7)          | 0.0 (0.0 to 0.0)                  |
| Switzerland | 2005 | 7987.1 (7854.2 to 8123.5)    | 4801.7 (4689.9 to 4923.3)  | 2442.1 (2390.4 to 2493.0)     | 743.4 (707.7 to 780.6)          | 0.0 (0.0 to 0.0)                  | 6049.5 (5948.9 to 6152.8) | 3636.8 (3552.2 to 3728.9)  | 1849.6 (1810.5 to 1888.2)     | 563.1 (536.0 to 591.2)          | 0.0 (0.0 to 0.0)                  |
| Switzerland | 2006 | 7948.0 (7820.4 to 8080.6)    | 4814.4 (4708.1 to 4922.7)  | 2383.2 (2332.8 to 2434.2)     | 750.5 (716.5 to 789.1)          | 0.0 (0.0 to 0.0)                  | 6019.9 (5923.3 to 6120.3) | 3646.5 (3566.0 to 3728.5)  | 1805.0 (1766.9 to 1843.7)     | 568.4 (542.7 to 597.7)          | 0.0 (0.0 to 0.0)                  |
| Switzerland | 2007 | 8070.5 (7945.6 to 8211.5)    | 4926.9 (4812.5 to 5043.2)  | 2376.7 (2323.2 to 2432.7)     | 766.9 (730.2 to 807.2)          | 0.0 (0.0 to 0.0)                  | 6112.7 (6018.1 to 6219.5) | 3731.7 (3645.0 to 3819.8)  | 1800.2 (1759.6 to 1842.6)     | 580.8 (553.1 to 611.4)          | 0.0 (0.0 to 0.0)                  |
| Switzerland | 2008 | 8274.3 (8143.8 to 8405.2)    | 5085.5 (4975.2 to 5198.1)  | 2404.9 (2349.9 to 2459.0)     | 783.9 (745.4 to 824.7)          | 0.0 (0.0 to 0.0)                  | 6267.0 (6168.2 to 6366.2) | 3851.8 (3768.3 to 3937.1)  | 1821.5 (1779.8 to 1862.5)     | 593.7 (564.6 to 624.6)          | 0.0 (0.0 to 0.0)                  |
| Switzerland | 2009 | 8346.4 (8212.5 to 8470.8)    | 5134.4 (5024.4 to 5245.4)  | 2427.7 (2379.0 to 2478.5)     | 784.3 (747.2 to 824.0)          | 0.0 (0.0 to 0.0)                  | 6321.7 (6220.2 to 6415.9) | 3888.9 (3805.6 to 3972.9)  | 1838.8 (1801.9 to 1877.2)     | 594.0 (565.9 to 624.1)          | 0.0 (0.0 to 0.0)                  |
| Switzerland | 2010 | 8536.1 (8398.3 to 8670.9)    | 5282.0 (5171.6 to 5398.0)  | 2469.6 (2417.3 to 2520.8)     | 784.4 (746.1 to 824.7)          | 0.0 (0.0 to 0.0)                  | 6465.3 (6361.0 to 6567.4) | 4000.6 (3917.0 to 4088.5)  | 1870.5 (1830.9 to 1909.3)     | 594.1 (565.1 to 624.6)          | 0.0 (0.0 to 0.0)                  |
| Switzerland | 2011 | 8726.2 (8588.6 to 8860.1)    | 5462.7 (5347.3 to 5588.3)  | 2499.6 (2451.1 to 2551.5)     | 763.9 (725.3 to 803.0)          | 0.0 (0.0 to 0.0)                  | 6609.3 (6505.1 to 6710.8) | 4137.5 (4050.1 to 4232.7)  | 1893.2 (1856.5 to 1932.6)     | 578.6 (549.4 to 608.2)          | 0.0 (0.0 to 0.0)                  |
| Switzerland | 2012 | 8911.5 (8778.4 to 9031.7)    | 5651.8 (5532.5 to 5760.1)  | 2547.9 (2499.8 to 2601.7)     | 711.7 (674.8 to 747.7)          | 0.0 (0.0 to 0.0)                  | 6749.6 (6648.9 to 6840.7) | 4280.8 (4190.4 to 4362.8)  | 1929.8 (1893.4 to 1970.5)     | 539.0 (511.1 to 566.3)          | 0.0 (0.0 to 0.0)                  |
| Switzerland | 2013 | 9159.3 (9027.1 to 9286.0)    | 5843.0 (5721.2 to 5952.2)  | 2621.3 (2573.5 to 2673.7)     | 695.1 (657.3 to 729.6)          | 0.0 (0.0 to 0.0)                  | 6937.4 (6837.3 to 7033.3) | 4425.5 (4333.3 to 4508.3)  | 1985.4 (1949.2 to 2025.1)     | 526.5 (497.8 to 552.6)          | 0.0 (0.0 to 0.0)                  |
| Switzerland | 2014 | 9448.8 (9317.4 to 9580.5)    | 6005.1 (5888.1 to 6117.1)  | 2736.9 (2687.3 to 2796.6)     | 706.9 (669.9 to 743.0)          | 0.0 (0.0 to 0.0)                  | 7156.6 (7057.1 to 7256.3) | 4548.3 (4459.7 to 4633.2)  | 2073.0 (2035.4 to 2118.2)     | 535.4 (507.4 to 562.7)          | 0.0 (0.0 to 0.0)                  |
| Switzerland | 2015 | 9744.5 (9610.0 to 9888.3)    | 6161.4 (6033.8 to 6289.7)  | 2847.8 (2788.7 to 2901.0)     | 735.3 (694.3 to 772.8)          | 0.0 (0.0 to 0.0)                  | 7380.6 (7278.7 to 7489.5) | 4666.7 (4570.1 to 4763.9)  | 2157.0 (2112.2 to 2197.2)     | 556.9 (525.9 to 585.3)          | 0.0 (0.0 to 0.0)                  |
| Switzerland | 2016 | 10035.8 (9841.3 to 10235.1)  | 6308.0 (6137.6 to 6485.3)  | 2958.4 (2884.9 to 3036.3)     | 769.4 (718.7 to 821.8)          | 0.0 (0.0 to 0.0)                  | 7601.2 (7453.9 to 7752.2) | 4777.7 (4648.7 to 4912.0)  | 2240.8 (2185.0 to 2299.7)     | 582.7 (544.3 to 622.4)          | 0.0 (0.0 to 0.0)                  |
| Switzerland | 2017 | 10091.8 (9882.8 to 10300.5)  | 6342.8 (6167.6 to 6519.4)  | 2977.8 (2888.2 to 3073.8)     | 771.3 (719.4 to 823.7)          | 0.0 (0.0 to 0.0)                  | 7643.7 (7485.3 to 7801.7) | 4804.1 (4671.4 to 4937.9)  | 2255.4 (2187.5 to 2328.1)     | 584.2 (544.8 to 623.9)          | 0.0 (0.0 to 0.0)                  |
| Switzerland | 2018 | 10169.3 (9953.0 to 10393.2)  | 6387.8 (6206.6 to 6569.2)  | 3001.7 (2899.0 to 3103.9)     | 779.8 (726.7 to 833.2)          | 0.0 (0.0 to 0.0)                  | 7702.3 (7538.5 to 7871.9) | 4838.2 (4701.0 to 4975.6)  | 2273.5 (2195.7 to 2350.9)     | 590.6 (550.4 to 631.1)          | 0.0 (0.0 to 0.0)                  |
| Switzerland | 2019 | 10256.8 (10041.4 to 10490.7) | 6440.5 (6256.1 to 6636.6)  | 3026.9 (2905.4 to 3146.0)     | 789.4 (735.1 to 842.6)          | 0.0 (0.0 to 0.0)                  | 7768.6 (7605.5 to 7945.8) | 4878.1 (4738.4 to 5026.7)  | 2292.6 (2200.6 to 2382.8)     | 597.9 (556.8 to 638.2)          | 0.0 (0.0 to 0.0)                  |
| Switzerland | 2020 | 10359.5 (10126.9 to 10613.3) | 6502.9 (6309.6 to 6705.1)  | 3056.7 (2931.6 to 3191.0)     | 799.9 (745.5 to 853.8)          | 0.0 (0.0 to 0.0)                  | 7846.4 (7670.2 to 8038.6) | 4925.4 (4778.9 to 5078.5)  | 2315.2 (2220.4 to 2416.9)     | 605.9 (564.6 to 646.7)          | 0.0 (0.0 to 0.0)                  |
| Switzerland | 2021 | 10439.2 (10179.3 to 10701.0) | 6550.2 (6344.7 to 6757.4)  | 3080.2 (2945.9 to 3223.0)     | 808.7 (753.1 to 864.8)          | 0.0 (0.0 to 0.0)                  | 7906.7 (7709.9 to 8105.1) | 4961.2 (4805.5 to 5118.1)  | 2333.0 (2231.2 to 2441.1)     | 612.5 (570.4 to 655.0)          | 0.0 (0.0 to 0.0)                  |
| Switzerland | 2022 | 10525.1 (10258.9 to 10795.7) | 6603.6 (6388.6 to 6823.5)  | 3103.9 (2955.2 to 3254.5)     | 817.7 (761.6 to 874.3)          | 0.0 (0.0 to 0.0)                  | 7971.8 (7770.2 to 8176.8) | 5001.6 (4838.8 to 5168.2)  | 2350.9 (2238.3 to 2465.0)     | 619.3 (576.8 to 662.2)          | 0.0 (0.0 to 0.0)                  |



| Country     | Year | 2018 US Dollars per capita   |                            |                               |                                 |                                   | 2018 PPP per capita        |                            |                               |                                 |                                   |
|-------------|------|------------------------------|----------------------------|-------------------------------|---------------------------------|-----------------------------------|----------------------------|----------------------------|-------------------------------|---------------------------------|-----------------------------------|
|             |      | Health spending              | Government health spending | Out-of-pocket health spending | Prepaid private health spending | Development assistance for health | Health spending            | Government health spending | Out-of-pocket health spending | Prepaid private health spending | Development assistance for health |
| Switzerland | 2023 | 10609.4 (10326.3 to 10895.3) | 6657.3 (6431.7 to 6900.8)  | 3125.7 (2977.8 to 3285.2)     | 826.3 (769.9 to 884.4)          | 0.0 (0.0 to 0.0)                  | 8035.7 (7821.3 to 8252.2)  | 5042.3 (4871.4 to 5226.7)  | 2367.4 (2255.4 to 2488.3)     | 625.9 (583.2 to 669.9)          | 0.0 (0.0 to 0.0)                  |
| Switzerland | 2024 | 10691.7 (10391.6 to 10999.4) | 6710.4 (6469.0 to 6966.8)  | 3146.8 (2983.4 to 3324.0)     | 834.4 (777.0 to 893.9)          | 0.0 (0.0 to 0.0)                  | 8098.0 (7870.7 to 8331.1)  | 5082.6 (4899.7 to 5276.8)  | 2383.5 (2259.6 to 2517.6)     | 632.0 (588.5 to 677.0)          | 0.0 (0.0 to 0.0)                  |
| Switzerland | 2025 | 10775.8 (10453.7 to 11105.8) | 6765.9 (6502.6 to 7043.9)  | 3167.9 (2982.7 to 3350.5)     | 842.0 (782.8 to 903.8)          | 0.0 (0.0 to 0.0)                  | 8161.7 (7917.8 to 8411.7)  | 5124.5 (4925.1 to 5335.1)  | 2399.4 (2259.1 to 2537.7)     | 637.7 (592.9 to 684.5)          | 0.0 (0.0 to 0.0)                  |
| Switzerland | 2026 | 10859.2 (10519.8 to 11224.7) | 6822.2 (6538.3 to 7119.5)  | 3188.1 (2992.1 to 3389.7)     | 848.9 (788.6 to 912.7)          | 0.0 (0.0 to 0.0)                  | 8224.9 (7967.8 to 8501.7)  | 5167.2 (4952.1 to 5392.4)  | 2414.7 (2266.3 to 2567.4)     | 643.0 (597.3 to 691.3)          | 0.0 (0.0 to 0.0)                  |
| Switzerland | 2027 | 10945.8 (10558.4 to 11335.5) | 6882.7 (6575.0 to 7213.0)  | 3207.8 (2992.4 to 3439.7)     | 855.2 (792.6 to 921.4)          | 0.0 (0.0 to 0.0)                  | 8290.5 (7997.1 to 8585.6)  | 5213.1 (4980.0 to 5463.2)  | 2429.6 (2266.5 to 2605.3)     | 647.7 (600.4 to 697.9)          | 0.0 (0.0 to 0.0)                  |
| Switzerland | 2028 | 11038.2 (10605.2 to 11490.7) | 6948.8 (6608.0 to 7304.0)  | 3228.2 (2974.0 to 3510.7)     | 861.3 (797.4 to 927.6)          | 0.0 (0.0 to 0.0)                  | 8360.5 (8032.5 to 8703.2)  | 5263.1 (5005.0 to 5532.1)  | 2445.1 (2252.5 to 2659.0)     | 652.3 (604.0 to 702.6)          | 0.0 (0.0 to 0.0)                  |
| Switzerland | 2029 | 11134.0 (10673.1 to 11642.7) | 7017.1 (6651.0 to 7393.7)  | 3249.4 (2973.7 to 3581.2)     | 867.4 (802.3 to 938.2)          | 0.0 (0.0 to 0.0)                  | 8433.0 (8083.9 to 8818.3)  | 5314.8 (5037.5 to 5600.1)  | 2461.1 (2252.3 to 2712.4)     | 657.0 (607.7 to 710.6)          | 0.0 (0.0 to 0.0)                  |
| Switzerland | 2030 | 11233.2 (10731.9 to 11782.3) | 7088.1 (6689.5 to 7487.4)  | 3271.4 (2969.6 to 3650.7)     | 873.7 (806.9 to 949.3)          | 0.0 (0.0 to 0.0)                  | 8508.1 (8128.5 to 8924.1)  | 5368.6 (5066.7 to 5671.0)  | 2477.8 (2249.2 to 2765.1)     | 661.7 (611.1 to 719.0)          | 0.0 (0.0 to 0.0)                  |
| Switzerland | 2031 | 11326.2 (10791.0 to 11962.5) | 7153.2 (6727.6 to 7567.4)  | 3293.0 (2962.5 to 3728.8)     | 880.0 (810.5 to 957.7)          | 0.0 (0.0 to 0.0)                  | 8578.6 (8173.2 to 9060.5)  | 5417.9 (5095.6 to 5731.6)  | 2494.1 (2243.8 to 2824.3)     | 666.5 (613.9 to 725.4)          | 0.0 (0.0 to 0.0)                  |
| Switzerland | 2032 | 11419.1 (10836.2 to 12078.6) | 7217.9 (6764.0 to 7664.9)  | 3314.9 (2952.7 to 3802.4)     | 886.3 (814.6 to 967.4)          | 0.0 (0.0 to 0.0)                  | 8649.0 (8207.5 to 9148.4)  | 5466.9 (5123.1 to 5805.5)  | 2510.7 (2236.4 to 2880.0)     | 671.3 (617.0 to 732.7)          | 0.0 (0.0 to 0.0)                  |
| Switzerland | 2033 | 11520.2 (10910.3 to 12251.4) | 7288.0 (6801.6 to 7769.1)  | 3338.7 (2945.4 to 3878.1)     | 893.5 (819.0 to 977.2)          | 0.0 (0.0 to 0.0)                  | 8725.5 (8263.6 to 9279.3)  | 5520.0 (5151.6 to 5884.4)  | 2528.8 (2230.9 to 2937.3)     | 676.7 (620.3 to 740.1)          | 0.0 (0.0 to 0.0)                  |
| Switzerland | 2034 | 11629.5 (10984.5 to 12394.8) | 7363.0 (6859.6 to 7877.6)  | 3364.9 (2940.9 to 3946.0)     | 901.6 (823.8 to 990.8)          | 0.0 (0.0 to 0.0)                  | 8808.3 (8319.8 to 9388.0)  | 5576.8 (5195.5 to 5966.6)  | 2548.6 (2227.5 to 2988.7)     | 682.9 (623.9 to 750.4)          | 0.0 (0.0 to 0.0)                  |
| Switzerland | 2035 | 11751.2 (11040.0 to 12548.4) | 7445.7 (6915.2 to 7981.7)  | 3394.2 (2942.1 to 4018.1)     | 911.4 (830.5 to 1003.6)         | 0.0 (0.0 to 0.0)                  | 8900.5 (8361.8 to 9504.3)  | 5639.4 (5237.6 to 6045.4)  | 2570.8 (2228.4 to 3043.3)     | 690.3 (629.0 to 760.1)          | 0.0 (0.0 to 0.0)                  |
| Switzerland | 2036 | 11865.6 (11091.9 to 12714.8) | 7520.6 (6953.1 to 8080.0)  | 3423.3 (2945.8 to 4086.6)     | 921.7 (838.0 to 1017.0)         | 0.0 (0.0 to 0.0)                  | 8987.1 (8401.1 to 9630.3)  | 5696.2 (5266.4 to 6119.9)  | 2592.8 (2231.2 to 3095.2)     | 698.1 (634.7 to 770.3)          | 0.0 (0.0 to 0.0)                  |
| Switzerland | 2037 | 11988.1 (11167.6 to 12883.0) | 7600.1 (7011.6 to 8189.5)  | 3454.7 (2951.1 to 4155.2)     | 933.3 (846.1 to 1032.1)         | 0.0 (0.0 to 0.0)                  | 9079.9 (8458.4 to 9757.7)  | 5756.4 (5310.7 to 6202.8)  | 2616.6 (2235.2 to 3147.2)     | 706.9 (640.8 to 781.7)          | 0.0 (0.0 to 0.0)                  |
| Switzerland | 2038 | 12119.4 (11260.4 to 13098.8) | 7684.7 (7074.0 to 8297.7)  | 3488.6 (2960.8 to 4224.2)     | 946.1 (855.0 to 1048.2)         | 0.0 (0.0 to 0.0)                  | 9179.4 (8528.7 to 9921.1)  | 5820.5 (5358.0 to 6284.8)  | 2642.3 (2242.6 to 3199.5)     | 716.6 (647.6 to 793.9)          | 0.0 (0.0 to 0.0)                  |
| Switzerland | 2039 | 12255.1 (11360.5 to 13264.7) | 7771.9 (7143.2 to 8410.5)  | 3523.7 (2973.9 to 4302.5)     | 959.5 (865.2 to 1065.2)         | 0.0 (0.0 to 0.0)                  | 9282.2 (8604.6 to 10046.8) | 5886.5 (5410.4 to 6370.2)  | 2668.9 (2252.4 to 3258.8)     | 726.7 (655.3 to 806.8)          | 0.0 (0.0 to 0.0)                  |
| Switzerland | 2040 | 12398.4 (11482.0 to 13471.2) | 7864.1 (7202.2 to 8521.1)  | 3560.6 (2990.1 to 4383.4)     | 973.7 (875.0 to 1083.3)         | 0.0 (0.0 to 0.0)                  | 9390.7 (8696.6 to 10203.2) | 5956.4 (5455.0 to 6454.0)  | 2696.9 (2264.8 to 3320.0)     | 737.5 (662.7 to 820.5)          | 0.0 (0.0 to 0.0)                  |
| Switzerland | 2041 | 12532.6 (11564.0 to 13658.6) | 7948.1 (7258.6 to 8635.4)  | 3596.6 (3004.8 to 4452.3)     | 987.9 (885.7 to 1102.1)         | 0.0 (0.0 to 0.0)                  | 9492.3 (8758.7 to 10345.2) | 6020.0 (5497.8 to 6540.5)  | 2724.1 (2275.9 to 3372.2)     | 748.2 (670.9 to 834.8)          | 0.0 (0.0 to 0.0)                  |
| Switzerland | 2042 | 12671.5 (11653.4 to 13833.1) | 8034.9 (7319.9 to 8748.0)  | 3633.8 (3019.1 to 4520.6)     | 1002.8 (897.8 to 1121.3)        | 0.0 (0.0 to 0.0)                  | 9597.5 (8826.4 to 10477.3) | 6085.7 (5544.1 to 6625.8)  | 2752.3 (2286.7 to 3423.9)     | 759.5 (680.0 to 849.2)          | 0.0 (0.0 to 0.0)                  |
| Switzerland | 2043 | 12816.2 (11765.3 to 14060.4) | 8125.7 (7394.8 to 8864.4)  | 3672.4 (3037.2 to 4588.4)     | 1018.2 (910.1 to 1139.8)        | 0.0 (0.0 to 0.0)                  | 9707.1 (8911.2 to 10649.5) | 6154.5 (5600.9 to 6714.0)  | 2781.5 (2300.4 to 3475.3)     | 771.2 (689.3 to 863.3)          | 0.0 (0.0 to 0.0)                  |

| Country     | Year | 2018 US Dollars per capita   |                            |                               |                                 |                                   | 2018 PPP per capita         |                            |                               |                                 |                                   |
|-------------|------|------------------------------|----------------------------|-------------------------------|---------------------------------|-----------------------------------|-----------------------------|----------------------------|-------------------------------|---------------------------------|-----------------------------------|
|             |      | Health spending              | Government health spending | Out-of-pocket health spending | Prepaid private health spending | Development assistance for health | Health spending             | Government health spending | Out-of-pocket health spending | Prepaid private health spending | Development assistance for health |
| Switzerland | 2044 | 12966.3 (11906.7 to 14191.1) | 8220.4 (7458.8 to 8995.2)  | 3712.1 (3063.7 to 4655.2)     | 1033.9 (921.2 to 1160.3)        | 0.0 (0.0 to 0.0)                  | 9820.8 (9018.2 to 10748.5)  | 6226.2 (5649.4 to 6813.0)  | 2811.6 (2320.5 to 3525.9)     | 783.1 (697.7 to 878.8)          | 0.0 (0.0 to 0.0)                  |
| Switzerland | 2045 | 13116.7 (11995.8 to 14426.6) | 8316.0 (7522.6 to 9124.0)  | 3751.6 (3086.8 to 4718.9)     | 1049.0 (931.3 to 1180.8)        | 0.0 (0.0 to 0.0)                  | 9934.7 (9085.8 to 10926.9)  | 6298.6 (5697.7 to 6910.6)  | 2841.5 (2338.0 to 3574.2)     | 794.6 (705.4 to 894.4)          | 0.0 (0.0 to 0.0)                  |
| Switzerland | 2046 | 13258.6 (12103.3 to 14573.3) | 8404.3 (7582.4 to 9246.8)  | 3790.2 (3107.0 to 4776.3)     | 1064.1 (941.9 to 1201.4)        | 0.0 (0.0 to 0.0)                  | 10042.2 (9167.2 to 11038.0) | 6365.5 (5743.0 to 7003.6)  | 2870.7 (2353.3 to 3617.6)     | 806.0 (713.4 to 909.9)          | 0.0 (0.0 to 0.0)                  |
| Switzerland | 2047 | 13397.8 (12176.6 to 14799.7) | 8491.1 (7639.5 to 9356.7)  | 3828.1 (3119.1 to 4831.1)     | 1078.6 (951.7 to 1222.6)        | 0.0 (0.0 to 0.0)                  | 10147.6 (9222.7 to 11209.4) | 6431.2 (5786.2 to 7086.8)  | 2899.5 (2362.5 to 3659.2)     | 817.0 (720.8 to 926.0)          | 0.0 (0.0 to 0.0)                  |
| Switzerland | 2048 | 13538.9 (12293.4 to 14901.1) | 8579.8 (7695.2 to 9484.6)  | 3866.2 (3139.5 to 4892.1)     | 1093.0 (961.4 to 1244.0)        | 0.0 (0.0 to 0.0)                  | 10254.5 (9311.1 to 11286.3) | 6498.4 (5828.4 to 7183.7)  | 2928.3 (2377.9 to 3705.3)     | 827.8 (728.2 to 942.2)          | 0.0 (0.0 to 0.0)                  |
| Switzerland | 2049 | 13684.2 (12455.5 to 15037.0) | 8671.5 (7749.7 to 9610.6)  | 3905.1 (3154.1 to 4957.7)     | 1107.6 (971.3 to 1265.7)        | 0.0 (0.0 to 0.0)                  | 10364.6 (9434.0 to 11389.2) | 6567.9 (5869.7 to 7279.2)  | 2957.8 (2388.9 to 3755.0)     | 838.9 (735.6 to 958.7)          | 0.0 (0.0 to 0.0)                  |
| Switzerland | 2050 | 13831.5 (12510.6 to 15319.8) | 8764.5 (7813.9 to 9754.9)  | 3944.6 (3179.9 to 5012.7)     | 1122.5 (981.2 to 1286.5)        | 0.0 (0.0 to 0.0)                  | 10476.1 (9475.7 to 11603.3) | 6638.3 (5918.3 to 7388.5)  | 2987.7 (2408.5 to 3796.7)     | 850.2 (743.2 to 974.4)          | 0.0 (0.0 to 0.0)                  |
| Syria       | 1995 | 86.1 (69.9 to 105.5)         | 30.6 (23.6 to 39.5)        | 53.9 (40.5 to 71.3)           | 1.6 (0.7 to 3.2)                | 0.0 (0.0 to 0.0)                  | 1524.3 (1237.8 to 1868.0)   | 540.8 (416.9 to 698.4)     | 954.9 (716.6 to 1262.4)       | 28.6 (13.1 to 56.9)             | 0.0 (0.0 to 0.0)                  |
| Syria       | 1996 | 86.3 (70.7 to 106.0)         | 29.8 (23.1 to 38.2)        | 55.0 (41.6 to 71.9)           | 1.6 (0.7 to 3.1)                | 0.0 (0.0 to 0.0)                  | 1528.0 (1250.8 to 1875.5)   | 526.7 (409.5 to 675.5)     | 973.3 (737.1 to 1273.5)       | 28.0 (12.8 to 54.5)             | 0.0 (0.0 to 0.0)                  |
| Syria       | 1997 | 86.1 (70.9 to 105.0)         | 29.6 (23.1 to 37.9)        | 54.5 (41.6 to 71.9)           | 1.6 (0.7 to 3.1)                | 0.4 (0.4 to 0.4)                  | 1524.7 (1255.8 to 1858.4)   | 524.2 (408.7 to 670.1)     | 965.4 (735.5 to 1272.3)       | 28.6 (13.2 to 54.9)             | 6.5 (6.5 to 6.5)                  |
| Syria       | 1998 | 86.5 (71.4 to 103.5)         | 30.7 (24.0 to 39.4)        | 53.9 (41.2 to 70.7)           | 1.7 (0.8 to 3.3)                | 0.2 (0.2 to 0.2)                  | 1531.6 (1263.8 to 1831.6)   | 543.9 (424.2 to 697.3)     | 953.3 (729.2 to 1251.8)       | 30.9 (14.5 to 59.0)             | 3.5 (3.5 to 3.5)                  |
| Syria       | 1999 | 81.9 (68.0 to 98.4)          | 29.6 (22.9 to 37.7)        | 50.6 (38.9 to 66.5)           | 1.8 (0.8 to 3.3)                | 0.0 (0.0 to 0.0)                  | 1450.5 (1203.2 to 1742.1)   | 523.5 (405.6 to 667.3)     | 895.3 (688.7 to 1176.4)       | 31.3 (14.7 to 59.1)             | 0.4 (0.4 to 0.4)                  |
| Syria       | 2000 | 79.6 (66.2 to 95.1)          | 29.8 (22.9 to 37.9)        | 47.9 (37.3 to 62.6)           | 1.9 (0.9 to 3.4)                | 0.0 (0.0 to 0.0)                  | 1408.5 (1171.9 to 1684.0)   | 527.2 (405.6 to 671.3)     | 847.6 (659.6 to 1108.5)       | 33.1 (15.6 to 61.0)             | 0.6 (0.6 to 0.6)                  |
| Syria       | 2001 | 79.8 (66.4 to 95.2)          | 31.7 (24.5 to 40.5)        | 46.1 (35.6 to 60.0)           | 2.0 (1.0 to 3.7)                | 0.0 (0.0 to 0.0)                  | 1412.8 (1174.6 to 1684.2)   | 561.6 (433.2 to 716.7)     | 815.3 (629.8 to 1061.5)       | 35.7 (17.0 to 65.9)             | 0.3 (0.3 to 0.3)                  |
| Syria       | 2002 | 84.1 (70.3 to 99.9)          | 35.1 (27.4 to 44.8)        | 45.7 (35.2 to 58.7)           | 2.2 (1.1 to 4.1)                | 1.1 (1.1 to 1.1)                  | 1488.5 (1244.6 to 1767.5)   | 621.0 (484.3 to 793.3)     | 809.1 (622.9 to 1038.4)       | 39.6 (18.6 to 72.9)             | 18.8 (18.8 to 18.8)               |
| Syria       | 2003 | 81.6 (68.4 to 97.5)          | 35.8 (28.1 to 45.6)        | 43.4 (33.4 to 55.9)           | 2.3 (1.1 to 4.2)                | 0.2 (0.2 to 0.2)                  | 1445.0 (1211.6 to 1725.1)   | 633.2 (497.2 to 807.8)     | 768.2 (590.8 to 990.1)        | 40.7 (19.0 to 74.8)             | 2.9 (2.9 to 2.9)                  |
| Syria       | 2004 | 80.4 (67.2 to 96.0)          | 36.5 (28.4 to 46.3)        | 41.2 (31.7 to 53.0)           | 2.4 (1.1 to 4.4)                | 0.4 (0.4 to 0.4)                  | 1423.6 (1188.8 to 1699.0)   | 645.3 (502.8 to 819.9)     | 730.0 (560.3 to 938.9)        | 42.0 (19.7 to 77.2)             | 6.4 (6.4 to 6.4)                  |
| Syria       | 2005 | 81.2 (67.8 to 97.1)          | 37.9 (29.3 to 48.0)        | 39.9 (30.5 to 51.1)           | 2.5 (1.2 to 4.8)                | 0.9 (0.9 to 0.9)                  | 1436.4 (1199.7 to 1718.4)   | 670.3 (519.5 to 850.3)     | 705.5 (539.9 to 905.2)        | 44.3 (20.9 to 84.1)             | 16.2 (16.2 to 16.2)               |
| Syria       | 2006 | 72.4 (60.9 to 86.0)          | 33.5 (25.7 to 42.4)        | 36.4 (28.0 to 46.9)           | 2.3 (1.0 to 4.2)                | 0.3 (0.3 to 0.3)                  | 1281.5 (1078.8 to 1522.8)   | 592.1 (455.6 to 751.0)     | 644.9 (496.1 to 829.8)        | 39.9 (18.5 to 74.3)             | 4.5 (4.5 to 4.5)                  |
| Syria       | 2007 | 69.4 (57.9 to 81.4)          | 31.6 (24.3 to 40.4)        | 35.2 (27.1 to 45.4)           | 2.2 (1.0 to 4.1)                | 0.4 (0.4 to 0.4)                  | 1227.6 (1025.5 to 1440.5)   | 559.3 (430.3 to 715.0)     | 623.0 (479.3 to 804.1)        | 38.2 (18.2 to 72.3)             | 7.0 (7.0 to 7.0)                  |
| Syria       | 2008 | 67.2 (56.3 to 79.0)          | 30.0 (22.9 to 38.4)        | 34.3 (26.3 to 44.4)           | 2.1 (1.0 to 4.0)                | 0.9 (0.9 to 0.9)                  | 1190.2 (997.0 to 1399.0)    | 531.0 (405.8 to 679.0)     | 607.0 (465.0 to 785.8)        | 37.0 (17.7 to 71.2)             | 15.2 (15.2 to 15.2)               |

| Country | Year | 2018 US Dollars per capita |                            |                               |                                 |                                   | 2018 PPP per capita      |                            |                               |                                 |                                   |
|---------|------|----------------------------|----------------------------|-------------------------------|---------------------------------|-----------------------------------|--------------------------|----------------------------|-------------------------------|---------------------------------|-----------------------------------|
|         |      | Health spending            | Government health spending | Out-of-pocket health spending | Prepaid private health spending | Development assistance for health | Health spending          | Government health spending | Out-of-pocket health spending | Prepaid private health spending | Development assistance for health |
| Syria   | 2009 | 67.1 (55.8 to 79.8)        | 29.3 (22.4 to 37.2)        | 34.2 (26.0 to 44.7)           | 2.1 (1.0 to 3.8)                | 1.5 (1.5 to 1.5)                  | 1188.2 (988.4 to 1412.0) | 518.1 (395.9 to 658.5)     | 606.2 (459.7 to 791.6)        | 36.7 (17.1 to 67.0)             | 27.2 (27.2 to 27.2)               |
| Syria   | 2010 | 64.8 (53.5 to 77.8)        | 28.6 (21.9 to 36.2)        | 33.2 (25.3 to 43.4)           | 2.1 (1.0 to 3.9)                | 0.9 (0.9 to 0.9)                  | 1147.1 (946.9 to 1376.6) | 506.7 (387.6 to 641.6)     | 588.1 (448.4 to 768.9)        | 36.5 (17.1 to 68.8)             | 15.8 (15.8 to 15.8)               |
| Syria   | 2011 | 59.9 (49.1 to 71.9)        | 26.9 (20.5 to 34.3)        | 30.8 (23.4 to 40.6)           | 2.0 (1.0 to 3.8)                | 0.2 (0.2 to 0.2)                  | 1060.3 (868.5 to 1272.8) | 475.7 (363.6 to 606.9)     | 545.4 (414.0 to 718.3)        | 35.4 (17.1 to 67.7)             | 3.7 (3.7 to 3.7)                  |
| Syria   | 2012 | 51.4 (42.2 to 61.4)        | 22.7 (17.3 to 29.4)        | 26.6 (19.9 to 34.6)           | 1.8 (0.8 to 3.5)                | 0.2 (0.2 to 0.2)                  | 909.4 (746.8 to 1087.7)  | 402.7 (306.9 to 519.5)     | 471.2 (353.0 to 613.2)        | 31.5 (14.7 to 61.3)             | 4.1 (4.1 to 4.1)                  |
| Syria   | 2013 | 42.3 (34.4 to 51.0)        | 18.5 (14.1 to 24.2)        | 21.9 (16.2 to 28.7)           | 1.5 (0.7 to 2.9)                | 0.3 (0.3 to 0.3)                  | 748.4 (608.4 to 903.0)   | 328.3 (250.3 to 429.2)     | 388.3 (285.9 to 508.6)        | 26.8 (12.2 to 51.6)             | 4.9 (4.9 to 4.9)                  |
| Syria   | 2014 | 41.9 (34.1 to 50.6)        | 18.5 (13.9 to 24.3)        | 21.3 (15.6 to 28.4)           | 1.5 (0.7 to 2.9)                | 0.5 (0.5 to 0.5)                  | 741.1 (604.4 to 895.9)   | 328.1 (246.6 to 429.4)     | 376.4 (275.2 to 503.2)        | 27.3 (11.9 to 51.8)             | 9.3 (9.3 to 9.3)                  |
| Syria   | 2015 | 42.4 (34.5 to 51.3)        | 18.8 (14.0 to 24.7)        | 21.5 (15.8 to 28.9)           | 1.6 (0.7 to 2.9)                | 0.5 (0.5 to 0.5)                  | 750.5 (611.5 to 908.9)   | 333.3 (248.6 to 437.0)     | 380.0 (278.9 to 511.3)        | 28.1 (12.6 to 51.4)             | 9.2 (9.2 to 9.2)                  |
| Syria   | 2016 | 43.7 (35.6 to 52.8)        | 19.5 (14.6 to 25.7)        | 21.9 (15.8 to 29.8)           | 1.6 (0.8 to 3.0)                | 0.7 (0.7 to 0.7)                  | 773.1 (630.5 to 933.8)   | 344.7 (259.2 to 455.2)     | 387.9 (279.7 to 527.2)        | 28.9 (13.4 to 52.8)             | 11.7 (11.7 to 11.7)               |
| Syria   | 2017 | 46.7 (39.0 to 55.8)        | 19.7 (14.8 to 26.0)        | 21.8 (15.7 to 29.7)           | 1.7 (0.8 to 3.0)                | 3.5 (3.5 to 3.5)                  | 826.0 (690.0 to 988.2)   | 348.9 (262.1 to 460.3)     | 386.1 (278.2 to 525.9)        | 29.3 (13.7 to 53.3)             | 61.7 (61.7 to 61.7)               |
| Syria   | 2018 | 46.7 (38.5 to 56.3)        | 20.1 (15.0 to 26.5)        | 21.7 (15.7 to 29.8)           | 1.7 (0.8 to 3.1)                | 3.2 (3.2 to 3.2)                  | 826.2 (682.1 to 995.9)   | 355.1 (266.4 to 469.0)     | 384.5 (277.2 to 526.9)        | 29.8 (13.9 to 54.3)             | 56.8 (56.3 to 57.2)               |
| Syria   | 2019 | 47.1 (38.8 to 57.3)        | 20.4 (15.4 to 27.1)        | 21.6 (15.6 to 29.6)           | 1.7 (0.8 to 3.1)                | 3.3 (3.0 to 3.5)                  | 832.9 (686.0 to 1015.0)  | 362.0 (272.1 to 479.4)     | 382.8 (276.2 to 524.8)        | 30.2 (14.1 to 55.2)             | 57.9 (53.8 to 61.6)               |
| Syria   | 2020 | 47.5 (39.4 to 56.9)        | 21.0 (15.8 to 27.8)        | 21.5 (15.5 to 29.3)           | 1.7 (0.8 to 3.2)                | 3.3 (3.0 to 3.6)                  | 841.1 (697.4 to 1007.1)  | 371.2 (279.1 to 491.5)     | 380.6 (274.7 to 519.5)        | 30.7 (14.3 to 56.1)             | 58.6 (53.5 to 63.6)               |
| Syria   | 2021 | 48.3 (39.7 to 58.4)        | 21.5 (16.2 to 28.5)        | 21.6 (15.6 to 29.5)           | 1.8 (0.8 to 3.2)                | 3.3 (3.0 to 3.7)                  | 854.4 (702.8 to 1033.4)  | 381.4 (286.6 to 505.3)     | 383.0 (276.8 to 522.7)        | 31.4 (14.7 to 57.5)             | 58.6 (51.7 to 64.8)               |
| Syria   | 2022 | 49.0 (40.2 to 59.3)        | 22.0 (16.5 to 29.0)        | 21.9 (15.8 to 29.9)           | 1.8 (0.8 to 3.3)                | 3.3 (2.9 to 3.7)                  | 868.0 (712.3 to 1048.8)  | 389.3 (292.8 to 512.7)     | 388.2 (279.8 to 530.0)        | 32.1 (15.0 to 58.8)             | 58.3 (51.7 to 65.4)               |
| Syria   | 2023 | 49.7 (41.1 to 60.7)        | 22.4 (16.8 to 29.5)        | 22.2 (16.0 to 30.3)           | 1.8 (0.9 to 3.4)                | 3.3 (2.8 to 3.7)                  | 878.9 (728.2 to 1075.0)  | 396.2 (298.1 to 522.4)     | 392.1 (283.1 to 536.9)        | 32.7 (15.3 to 60.0)             | 57.9 (50.1 to 66.2)               |
| Syria   | 2024 | 50.4 (41.6 to 60.9)        | 22.9 (17.2 to 30.1)        | 22.4 (16.2 to 30.6)           | 1.9 (0.9 to 3.5)                | 3.2 (2.8 to 3.7)                  | 892.2 (736.9 to 1077.3)  | 405.6 (305.2 to 532.9)     | 395.8 (286.1 to 541.5)        | 33.3 (15.5 to 61.2)             | 57.5 (49.4 to 66.3)               |
| Syria   | 2025 | 51.0 (41.6 to 62.4)        | 23.3 (17.5 to 30.6)        | 22.6 (16.3 to 30.9)           | 1.9 (0.9 to 3.5)                | 3.2 (2.7 to 3.8)                  | 902.7 (736.6 to 1103.6)  | 411.7 (310.2 to 540.8)     | 400.0 (289.0 to 547.1)        | 34.0 (15.8 to 62.5)             | 57.1 (48.6 to 66.6)               |
| Syria   | 2026 | 51.6 (42.5 to 62.8)        | 23.6 (17.8 to 30.9)        | 22.8 (16.5 to 31.2)           | 2.0 (0.9 to 3.6)                | 3.2 (2.7 to 3.8)                  | 913.7 (751.8 to 1110.7)  | 418.1 (315.6 to 546.5)     | 404.1 (292.6 to 552.6)        | 34.7 (16.1 to 64.0)             | 56.8 (47.9 to 66.6)               |
| Syria   | 2027 | 52.3 (42.8 to 63.6)        | 24.0 (18.1 to 31.5)        | 23.1 (16.7 to 31.6)           | 2.0 (0.9 to 3.7)                | 3.2 (2.7 to 3.8)                  | 925.7 (756.9 to 1126.5)  | 425.2 (321.2 to 556.9)     | 408.3 (296.3 to 560.2)        | 35.4 (16.4 to 65.4)             | 56.8 (47.1 to 67.7)               |
| Syria   | 2028 | 53.4 (44.0 to 64.7)        | 24.7 (18.7 to 32.3)        | 23.4 (16.9 to 32.2)           | 2.0 (0.9 to 3.8)                | 3.2 (2.6 to 3.9)                  | 944.8 (779.5 to 1146.1)  | 437.7 (330.7 to 572.5)     | 413.8 (299.1 to 569.7)        | 36.1 (16.7 to 66.7)             | 57.1 (46.8 to 69.9)               |
| Syria   | 2029 | 54.3 (44.9 to 65.6)        | 25.3 (19.1 to 33.2)        | 23.7 (17.0 to 32.7)           | 2.1 (1.0 to 3.9)                | 3.3 (2.6 to 4.0)                  | 960.8 (794.8 to 1161.6)  | 447.4 (337.5 to 587.4)     | 419.0 (301.0 to 578.7)        | 36.9 (17.1 to 68.2)             | 57.6 (45.5 to 71.1)               |

| Country | Year | 2018 US Dollars per capita |                            |                               |                                 |                                   | 2018 PPP per capita       |                            |                               |                                 |                                   |
|---------|------|----------------------------|----------------------------|-------------------------------|---------------------------------|-----------------------------------|---------------------------|----------------------------|-------------------------------|---------------------------------|-----------------------------------|
|         |      | Health spending            | Government health spending | Out-of-pocket health spending | Prepaid private health spending | Development assistance for health | Health spending           | Government health spending | Out-of-pocket health spending | Prepaid private health spending | Development assistance for health |
| Syria   | 2030 | 55.1 (45.5 to 66.4)        | 25.8 (19.4 to 33.8)        | 23.9 (17.1 to 33.1)           | 2.1 (1.0 to 3.9)                | 3.3 (2.5 to 4.1)                  | 975.8 (805.2 to 1174.6)   | 456.5 (343.2 to 598.5)     | 423.6 (303.4 to 585.7)        | 37.6 (17.4 to 69.5)             | 58.1 (44.6 to 73.0)               |
| Syria   | 2031 | 56.1 (45.6 to 67.5)        | 26.4 (19.8 to 34.6)        | 24.2 (17.3 to 33.5)           | 2.2 (1.0 to 4.0)                | 3.3 (2.5 to 4.3)                  | 992.4 (807.0 to 1195.0)   | 466.6 (350.9 to 611.9)     | 428.6 (306.6 to 592.5)        | 38.3 (17.8 to 71.0)             | 58.9 (44.2 to 75.7)               |
| Syria   | 2032 | 57.0 (46.9 to 69.4)        | 26.9 (20.2 to 35.2)        | 24.5 (17.5 to 33.8)           | 2.2 (1.0 to 4.1)                | 3.4 (2.4 to 4.4)                  | 1008.6 (830.0 to 1229.1)  | 476.4 (357.2 to 623.8)     | 433.4 (309.6 to 599.1)        | 39.1 (18.1 to 72.4)             | 59.7 (42.9 to 77.8)               |
| Syria   | 2033 | 57.9 (47.4 to 69.3)        | 27.4 (20.5 to 35.9)        | 24.7 (17.6 to 34.3)           | 2.3 (1.0 to 4.2)                | 3.4 (2.4 to 4.6)                  | 1024.3 (839.1 to 1225.9)  | 485.7 (362.3 to 635.5)     | 437.9 (311.0 to 607.9)        | 39.9 (18.4 to 73.8)             | 60.7 (42.4 to 80.8)               |
| Syria   | 2034 | 58.7 (47.6 to 71.5)        | 28.0 (20.7 to 36.7)        | 25.0 (17.6 to 34.6)           | 2.3 (1.1 to 4.2)                | 3.5 (2.4 to 4.7)                  | 1039.4 (842.4 to 1265.9)  | 494.8 (367.0 to 649.5)     | 442.1 (312.0 to 613.3)        | 40.6 (18.8 to 75.1)             | 62.0 (42.1 to 83.1)               |
| Syria   | 2035 | 59.6 (48.5 to 72.1)        | 28.5 (21.1 to 37.4)        | 25.2 (17.7 to 35.0)           | 2.3 (1.1 to 4.3)                | 3.6 (2.4 to 4.9)                  | 1054.6 (858.8 to 1276.0)  | 503.9 (373.9 to 661.7)     | 446.1 (313.6 to 619.2)        | 41.3 (19.0 to 76.5)             | 63.3 (42.1 to 86.7)               |
| Syria   | 2036 | 60.4 (49.8 to 72.6)        | 28.9 (21.4 to 37.9)        | 25.4 (17.8 to 35.4)           | 2.4 (1.1 to 4.4)                | 3.7 (2.4 to 5.1)                  | 1068.6 (881.7 to 1285.2)  | 512.1 (377.9 to 671.5)     | 449.8 (315.8 to 625.9)        | 42.0 (19.3 to 77.8)             | 64.7 (42.3 to 90.2)               |
| Syria   | 2037 | 61.2 (49.1 to 74.8)        | 29.4 (21.6 to 38.8)        | 25.6 (18.0 to 35.7)           | 2.4 (1.1 to 4.5)                | 3.7 (2.4 to 5.3)                  | 1082.6 (868.7 to 1324.7)  | 520.6 (382.8 to 686.7)     | 453.3 (317.9 to 632.3)        | 42.7 (19.7 to 79.1)             | 66.1 (42.2 to 93.1)               |
| Syria   | 2038 | 61.9 (50.6 to 74.4)        | 29.9 (21.9 to 39.3)        | 25.8 (18.1 to 36.1)           | 2.5 (1.1 to 4.5)                | 3.8 (2.4 to 5.5)                  | 1096.4 (895.8 to 1317.1)  | 528.8 (387.7 to 696.3)     | 456.5 (319.9 to 638.3)        | 43.4 (20.0 to 80.4)             | 67.7 (42.6 to 96.8)               |
| Syria   | 2039 | 62.8 (51.0 to 76.6)        | 30.4 (22.2 to 40.0)        | 26.0 (18.2 to 36.3)           | 2.5 (1.2 to 4.6)                | 3.9 (2.5 to 5.6)                  | 1111.2 (902.8 to 1356.1)  | 538.0 (393.7 to 708.4)     | 459.9 (322.1 to 643.1)        | 44.1 (20.4 to 81.7)             | 69.2 (44.1 to 98.6)               |
| Syria   | 2040 | 63.6 (52.1 to 76.2)        | 30.9 (22.7 to 40.8)        | 26.2 (18.3 to 36.6)           | 2.5 (1.2 to 4.7)                | 4.0 (2.5 to 5.9)                  | 1125.8 (921.8 to 1348.5)  | 546.9 (401.2 to 722.8)     | 463.2 (324.3 to 647.7)        | 44.8 (20.6 to 83.2)             | 70.9 (44.4 to 103.6)              |
| Syria   | 2041 | 64.4 (52.1 to 78.4)        | 31.4 (23.1 to 41.6)        | 26.3 (18.4 to 36.8)           | 2.6 (1.2 to 4.8)                | 4.1 (2.5 to 5.9)                  | 1140.1 (922.2 to 1388.0)  | 555.7 (408.1 to 736.7)     | 466.2 (326.2 to 651.6)        | 45.4 (20.8 to 84.8)             | 72.8 (45.0 to 105.2)              |
| Syria   | 2042 | 65.2 (52.2 to 78.7)        | 31.9 (23.4 to 42.2)        | 26.5 (18.5 to 37.0)           | 2.6 (1.2 to 4.9)                | 4.2 (2.5 to 6.3)                  | 1154.5 (924.4 to 1393.6)  | 564.5 (413.4 to 746.8)     | 469.2 (328.2 to 655.3)        | 46.1 (21.0 to 86.3)             | 74.8 (44.8 to 111.8)              |
| Syria   | 2043 | 66.1 (53.8 to 80.0)        | 32.4 (23.7 to 43.0)        | 26.7 (18.7 to 37.2)           | 2.6 (1.2 to 4.9)                | 4.3 (2.6 to 6.6)                  | 1169.1 (951.6 to 1415.5)  | 573.7 (418.9 to 761.0)     | 472.0 (330.1 to 658.7)        | 46.7 (21.2 to 87.5)             | 76.7 (45.5 to 117.7)              |
| Syria   | 2044 | 66.9 (54.3 to 80.7)        | 33.0 (24.0 to 43.7)        | 26.8 (18.8 to 37.4)           | 2.7 (1.2 to 5.0)                | 4.5 (2.6 to 6.9)                  | 1184.4 (961.5 to 1429.2)  | 583.3 (425.1 to 774.4)     | 474.8 (332.1 to 662.1)        | 47.4 (21.6 to 88.7)             | 78.9 (46.9 to 122.9)              |
| Syria   | 2045 | 67.9 (55.6 to 82.8)        | 33.6 (24.4 to 44.7)        | 27.0 (18.9 to 37.6)           | 2.7 (1.2 to 5.1)                | 4.6 (2.7 to 7.2)                  | 1202.0 (983.7 to 1465.7)  | 594.8 (432.7 to 792.0)     | 478.0 (334.4 to 666.0)        | 48.1 (22.0 to 89.9)             | 81.1 (46.9 to 126.8)              |
| Syria   | 2046 | 69.1 (56.4 to 84.5)        | 34.4 (25.0 to 45.7)        | 27.2 (19.0 to 37.9)           | 2.8 (1.3 to 5.1)                | 4.7 (2.7 to 7.6)                  | 1222.6 (998.7 to 1496.5)  | 608.7 (442.1 to 809.4)     | 481.8 (337.2 to 670.2)        | 48.7 (22.4 to 91.1)             | 83.4 (48.2 to 134.3)              |
| Syria   | 2047 | 70.3 (57.0 to 85.9)        | 35.2 (25.5 to 46.8)        | 27.4 (19.2 to 38.2)           | 2.8 (1.3 to 5.2)                | 4.9 (2.8 to 7.9)                  | 1243.9 (1009.0 to 1520.3) | 623.2 (451.3 to 828.5)     | 485.4 (340.2 to 675.5)        | 49.4 (22.8 to 92.5)             | 85.9 (49.5 to 140.3)              |
| Syria   | 2048 | 71.6 (57.7 to 87.6)        | 36.1 (26.1 to 48.1)        | 27.6 (19.4 to 38.5)           | 2.8 (1.3 to 5.3)                | 5.0 (2.8 to 8.3)                  | 1267.4 (1021.2 to 1549.7) | 639.3 (462.3 to 851.4)     | 489.4 (342.7 to 681.8)        | 50.1 (23.1 to 94.0)             | 88.7 (49.9 to 146.7)              |
| Syria   | 2049 | 73.0 (58.7 to 89.2)        | 37.1 (26.7 to 49.3)        | 27.9 (19.5 to 38.8)           | 2.9 (1.3 to 5.4)                | 5.2 (2.9 to 8.9)                  | 1291.3 (1039.6 to 1578.2) | 656.1 (473.5 to 872.5)     | 493.1 (345.4 to 686.8)        | 50.7 (23.4 to 95.5)             | 91.4 (51.4 to 158.1)              |
| Syria   | 2050 | 74.5 (60.2 to 89.6)        | 38.2 (27.5 to 51.0)        | 28.1 (19.7 to 39.1)           | 2.9 (1.3 to 5.5)                | 5.3 (2.9 to 9.2)                  | 1319.1 (1066.2 to 1586.2) | 675.6 (487.3 to 902.6)     | 497.5 (348.6 to 692.2)        | 51.4 (23.6 to 96.9)             | 94.4 (52.1 to 163.5)              |

| Country | Year | 2018 US Dollars per capita |                            |                               |                                 |                                   | 2018 PPP per capita       |                            |                               |                                 |                                   |
|---------|------|----------------------------|----------------------------|-------------------------------|---------------------------------|-----------------------------------|---------------------------|----------------------------|-------------------------------|---------------------------------|-----------------------------------|
|         |      | Health spending            | Government health spending | Out-of-pocket health spending | Prepaid private health spending | Development assistance for health | Health spending           | Government health spending | Out-of-pocket health spending | Prepaid private health spending | Development assistance for health |
| Taiwan  | 1995 | 614.7 (583.8 to 647.0)     | 437.0 (406.2 to 469.3)     | 158.5 (141.0 to 168.8)        | 19.2 (8.8 to 36.6)              | 0.0 (0.0 to 0.0)                  | 1174.2 (1115.3 to 1235.9) | 834.8 (775.9 to 896.5)     | 302.7 (269.4 to 322.5)        | 36.6 (16.8 to 70.0)             | 0.0 (0.0 to 0.0)                  |
| Taiwan  | 1996 | 664.4 (640.2 to 689.6)     | 446.4 (422.2 to 471.5)     | 194.9 (174.4 to 207.4)        | 23.1 (10.6 to 43.6)             | 0.0 (0.0 to 0.0)                  | 1269.2 (1223.0 to 1317.3) | 852.8 (806.6 to 900.8)     | 372.4 (333.1 to 396.2)        | 44.1 (20.3 to 83.4)             | 0.0 (0.0 to 0.0)                  |
| Taiwan  | 1997 | 704.0 (681.3 to 727.2)     | 457.2 (434.5 to 480.4)     | 221.6 (198.0 to 235.5)        | 25.3 (11.3 to 48.9)             | 0.0 (0.0 to 0.0)                  | 1344.9 (1301.5 to 1389.2) | 873.3 (829.9 to 917.6)     | 423.2 (378.2 to 449.9)        | 48.3 (21.7 to 93.4)             | 0.0 (0.0 to 0.0)                  |
| Taiwan  | 1998 | 738.8 (714.5 to 762.5)     | 471.1 (446.8 to 494.8)     | 241.4 (218.1 to 256.1)        | 26.3 (11.6 to 49.5)             | 0.0 (0.0 to 0.0)                  | 1411.2 (1364.9 to 1456.5) | 899.9 (853.6 to 945.2)     | 461.1 (416.7 to 489.2)        | 50.2 (22.1 to 94.6)             | 0.0 (0.0 to 0.0)                  |
| Taiwan  | 1999 | 793.0 (770.0 to 815.8)     | 498.1 (475.2 to 520.9)     | 267.1 (243.1 to 282.2)        | 27.7 (12.6 to 51.7)             | 0.0 (0.0 to 0.0)                  | 1514.8 (1470.9 to 1558.4) | 951.6 (907.7 to 995.1)     | 510.2 (464.5 to 539.1)        | 53.0 (24.2 to 98.8)             | 0.0 (0.0 to 0.0)                  |
| Taiwan  | 2000 | 842.8 (819.4 to 865.4)     | 527.5 (504.0 to 550.0)     | 287.2 (263.4 to 302.8)        | 28.1 (12.6 to 51.9)             | 0.0 (0.0 to 0.0)                  | 1610.0 (1565.2 to 1653.1) | 1007.6 (962.7 to 1050.7)   | 548.7 (503.3 to 578.4)        | 53.8 (24.0 to 99.2)             | 0.0 (0.0 to 0.0)                  |
| Taiwan  | 2001 | 861.1 (838.1 to 885.5)     | 537.4 (514.3 to 561.8)     | 297.1 (273.4 to 311.5)        | 26.6 (12.2 to 50.4)             | 0.0 (0.0 to 0.0)                  | 1645.0 (1601.0 to 1691.6) | 1026.5 (982.5 to 1073.1)   | 567.6 (522.2 to 595.1)        | 50.8 (23.3 to 96.2)             | 0.0 (0.0 to 0.0)                  |
| Taiwan  | 2002 | 937.8 (913.8 to 962.2)     | 573.0 (548.9 to 597.3)     | 335.8 (311.0 to 351.7)        | 29.1 (13.1 to 53.8)             | 0.0 (0.0 to 0.0)                  | 1791.5 (1745.5 to 1838.0) | 1094.6 (1048.6 to 1141.0)  | 641.4 (594.2 to 671.9)        | 55.5 (25.1 to 102.8)            | 0.0 (0.0 to 0.0)                  |
| Taiwan  | 2003 | 995.3 (969.0 to 1021.2)    | 602.2 (575.9 to 628.1)     | 362.4 (335.8 to 379.3)        | 30.7 (13.8 to 57.3)             | 0.0 (0.0 to 0.0)                  | 1901.3 (1851.1 to 1950.8) | 1150.4 (1100.2 to 1199.9)  | 692.2 (641.5 to 724.5)        | 58.6 (26.4 to 109.4)            | 0.0 (0.0 to 0.0)                  |
| Taiwan  | 2004 | 1080.3 (1053.3 to 1107.8)  | 635.6 (608.6 to 663.1)     | 410.2 (379.3 to 429.0)        | 34.4 (15.7 to 65.4)             | 0.0 (0.0 to 0.0)                  | 2063.6 (2012.0 to 2116.2) | 1214.2 (1162.6 to 1266.8)  | 783.7 (724.5 to 819.5)        | 65.8 (30.0 to 124.9)            | 0.0 (0.0 to 0.0)                  |
| Taiwan  | 2005 | 1157.0 (1129.7 to 1185.1)  | 663.1 (635.8 to 691.2)     | 455.8 (423.9 to 476.7)        | 38.1 (17.1 to 70.0)             | 0.0 (0.0 to 0.0)                  | 2210.1 (2158.0 to 2263.9) | 1266.7 (1214.5 to 1320.5)  | 870.7 (809.8 to 910.7)        | 72.7 (32.8 to 133.7)            | 0.0 (0.0 to 0.0)                  |
| Taiwan  | 2006 | 1220.8 (1190.1 to 1247.9)  | 694.0 (663.3 to 721.1)     | 485.6 (450.6 to 508.4)        | 41.2 (18.3 to 76.2)             | 0.0 (0.0 to 0.0)                  | 2332.1 (2273.4 to 2383.7) | 1325.8 (1267.0 to 1377.4)  | 927.7 (860.8 to 971.3)        | 78.6 (35.0 to 145.5)            | 0.0 (0.0 to 0.0)                  |
| Taiwan  | 2007 | 1282.1 (1250.1 to 1311.9)  | 739.1 (707.1 to 768.9)     | 499.0 (461.8 to 524.4)        | 43.9 (18.5 to 81.2)             | 0.0 (0.0 to 0.0)                  | 2449.1 (2388.0 to 2506.1) | 1411.9 (1350.8 to 1468.9)  | 953.3 (882.1 to 1001.8)       | 83.9 (35.4 to 155.1)            | 0.0 (0.0 to 0.0)                  |
| Taiwan  | 2008 | 1328.1 (1298.4 to 1357.6)  | 754.5 (724.8 to 784.0)     | 525.4 (486.0 to 552.9)        | 48.2 (20.8 to 87.6)             | 0.0 (0.0 to 0.0)                  | 2537.1 (2480.3 to 2593.4) | 1441.3 (1384.5 to 1497.6)  | 1003.7 (928.5 to 1056.1)      | 92.1 (39.7 to 167.3)            | 0.0 (0.0 to 0.0)                  |
| Taiwan  | 2009 | 1362.8 (1333.8 to 1392.5)  | 772.4 (743.4 to 802.1)     | 539.8 (498.2 to 568.0)        | 50.7 (22.4 to 92.2)             | 0.0 (0.0 to 0.0)                  | 2603.3 (2547.9 to 2660.1) | 1475.5 (1420.1 to 1532.3)  | 1031.1 (951.7 to 1085.1)      | 96.8 (42.7 to 176.2)            | 0.0 (0.0 to 0.0)                  |
| Taiwan  | 2010 | 1441.3 (1409.4 to 1472.9)  | 838.1 (806.3 to 869.8)     | 550.1 (509.2 to 579.3)        | 53.0 (23.9 to 94.0)             | 0.0 (0.0 to 0.0)                  | 2753.2 (2692.4 to 2813.6) | 1601.1 (1540.3 to 1661.5)  | 1050.8 (972.6 to 1106.5)      | 101.3 (45.6 to 179.5)           | 0.0 (0.0 to 0.0)                  |
| Taiwan  | 2011 | 1509.3 (1479.2 to 1540.0)  | 867.8 (837.8 to 898.5)     | 585.2 (542.9 to 616.6)        | 56.3 (24.8 to 98.6)             | 0.0 (0.0 to 0.0)                  | 2883.1 (2825.7 to 2941.8) | 1657.8 (1600.4 to 1716.4)  | 1117.8 (1037.1 to 1177.9)     | 107.5 (47.5 to 188.3)           | 0.0 (0.0 to 0.0)                  |
| Taiwan  | 2012 | 1505.2 (1473.7 to 1537.9)  | 887.8 (856.4 to 920.6)     | 563.4 (522.9 to 593.2)        | 53.9 (24.1 to 94.4)             | 0.0 (0.0 to 0.0)                  | 2875.3 (2815.2 to 2937.9) | 1696.0 (1635.9 to 1758.6)  | 1076.3 (998.9 to 1133.2)      | 103.0 (46.0 to 180.4)           | 0.0 (0.0 to 0.0)                  |
| Taiwan  | 2013 | 1541.9 (1510.4 to 1574.8)  | 910.2 (878.6 to 943.1)     | 576.7 (535.4 to 607.1)        | 55.1 (24.7 to 96.4)             | 0.0 (0.0 to 0.0)                  | 2945.5 (2885.2 to 3008.3) | 1738.7 (1678.4 to 1801.5)  | 1101.6 (1022.7 to 1159.7)     | 105.2 (47.1 to 184.1)           | 0.0 (0.0 to 0.0)                  |
| Taiwan  | 2014 | 1582.0 (1546.9 to 1617.4)  | 938.7 (903.6 to 974.0)     | 586.6 (542.6 to 618.3)        | 56.7 (25.0 to 100.7)            | 0.0 (0.0 to 0.0)                  | 3022.1 (2955.0 to 3089.6) | 1793.2 (1726.0 to 1860.7)  | 1120.5 (1036.5 to 1181.1)     | 108.4 (47.8 to 192.4)           | 0.0 (0.0 to 0.0)                  |
| Taiwan  | 2015 | 1577.4 (1530.2 to 1627.3)  | 945.3 (898.1 to 995.2)     | 576.6 (535.9 to 607.0)        | 55.5 (25.1 to 96.2)             | 0.0 (0.0 to 0.0)                  | 3013.3 (2923.2 to 3108.6) | 1805.8 (1715.6 to 1901.1)  | 1101.4 (1023.8 to 1159.6)     | 106.1 (47.9 to 183.7)           | 0.0 (0.0 to 0.0)                  |

| Country | Year | 2018 US Dollars per capita |                            |                               |                                 |                                   | 2018 PPP per capita       |                            |                               |                                 |                                   |
|---------|------|----------------------------|----------------------------|-------------------------------|---------------------------------|-----------------------------------|---------------------------|----------------------------|-------------------------------|---------------------------------|-----------------------------------|
|         |      | Health spending            | Government health spending | Out-of-pocket health spending | Prepaid private health spending | Development assistance for health | Health spending           | Government health spending | Out-of-pocket health spending | Prepaid private health spending | Development assistance for health |
| Taiwan  | 2016 | 1632.0 (1537.9 to 1726.2)  | 972.5 (898.9 to 1051.2)    | 601.6 (557.4 to 634.0)        | 57.8 (25.4 to 102.1)            | 0.0 (0.0 to 0.0)                  | 3117.5 (2937.9 to 3297.4) | 1857.8 (1717.2 to 2008.2)  | 1149.3 (1064.8 to 1211.2)     | 110.5 (48.6 to 195.0)           | 0.0 (0.0 to 0.0)                  |
| Taiwan  | 2017 | 1673.6 (1582.7 to 1769.2)  | 993.1 (918.0 to 1075.1)    | 621.2 (574.2 to 657.5)        | 59.3 (26.0 to 104.8)            | 0.0 (0.0 to 0.0)                  | 3197.1 (3023.3 to 3379.6) | 1897.1 (1753.6 to 2053.8)  | 1186.7 (1097.0 to 1255.9)     | 113.3 (49.7 to 200.2)           | 0.0 (0.0 to 0.0)                  |
| Taiwan  | 2018 | 1730.2 (1626.5 to 1835.2)  | 1028.9 (949.2 to 1113.6)   | 640.1 (589.5 to 679.1)        | 61.1 (26.9 to 108.5)            | 0.0 (0.0 to 0.0)                  | 3305.1 (3107.1 to 3505.7) | 1965.6 (1813.2 to 2127.2)  | 1222.8 (1126.0 to 1297.2)     | 116.7 (51.3 to 207.2)           | 0.0 (0.0 to 0.0)                  |
| Taiwan  | 2019 | 1785.1 (1678.2 to 1895.3)  | 1063.4 (976.6 to 1153.7)   | 658.9 (608.2 to 700.7)        | 62.7 (27.6 to 111.1)            | 0.0 (0.0 to 0.0)                  | 3410.0 (3205.9 to 3620.6) | 2031.4 (1865.6 to 2203.9)  | 1258.7 (1161.9 to 1338.5)     | 119.8 (52.6 to 212.2)           | 0.0 (0.0 to 0.0)                  |
| Taiwan  | 2020 | 1831.8 (1712.5 to 1953.5)  | 1093.4 (999.6 to 1191.0)   | 674.1 (620.2 to 717.8)        | 64.3 (28.2 to 113.5)            | 0.0 (0.0 to 0.0)                  | 3499.3 (3271.3 to 3731.7) | 2088.8 (1909.5 to 2275.1)  | 1287.8 (1184.7 to 1371.3)     | 122.7 (53.9 to 216.8)           | 0.0 (0.0 to 0.0)                  |
| Taiwan  | 2021 | 1870.4 (1754.4 to 1992.2)  | 1121.9 (1025.3 to 1225.3)  | 682.8 (628.3 to 727.6)        | 65.7 (28.8 to 116.2)            | 0.0 (0.0 to 0.0)                  | 3572.9 (3351.4 to 3805.6) | 2143.1 (1958.7 to 2340.7)  | 1304.3 (1200.3 to 1389.8)     | 125.5 (55.1 to 222.1)           | 0.0 (0.0 to 0.0)                  |
| Taiwan  | 2022 | 1914.8 (1787.4 to 2048.5)  | 1157.0 (1055.1 to 1263.6)  | 690.5 (635.9 to 735.8)        | 67.3 (29.5 to 119.1)            | 0.0 (0.0 to 0.0)                  | 3657.8 (3414.4 to 3913.1) | 2210.2 (2015.5 to 2413.9)  | 1319.1 (1214.8 to 1405.6)     | 128.5 (56.4 to 227.6)           | 0.0 (0.0 to 0.0)                  |
| Taiwan  | 2023 | 1954.8 (1826.8 to 2090.0)  | 1188.8 (1082.9 to 1300.8)  | 697.3 (642.2 to 743.2)        | 68.7 (30.2 to 121.6)            | 0.0 (0.0 to 0.0)                  | 3734.1 (3489.8 to 3992.5) | 2270.9 (2068.7 to 2484.8)  | 1332.0 (1226.8 to 1419.8)     | 131.2 (57.8 to 232.4)           | 0.0 (0.0 to 0.0)                  |
| Taiwan  | 2024 | 1988.6 (1852.9 to 2130.2)  | 1215.5 (1103.9 to 1332.7)  | 703.1 (646.7 to 748.6)        | 70.0 (30.9 to 123.8)            | 0.0 (0.0 to 0.0)                  | 3798.8 (3539.6 to 4069.3) | 2322.0 (2108.8 to 2545.9)  | 1343.2 (1235.4 to 1430.1)     | 133.6 (59.0 to 236.4)           | 0.0 (0.0 to 0.0)                  |
| Taiwan  | 2025 | 2020.4 (1882.1 to 2163.3)  | 1240.8 (1122.0 to 1365.1)  | 708.4 (650.8 to 754.6)        | 71.2 (31.3 to 125.6)            | 0.0 (0.0 to 0.0)                  | 3859.5 (3595.4 to 4132.5) | 2370.3 (2143.4 to 2607.7)  | 1353.2 (1243.2 to 1441.6)     | 136.0 (59.9 to 239.9)           | 0.0 (0.0 to 0.0)                  |
| Taiwan  | 2026 | 2054.7 (1905.7 to 2209.6)  | 1268.8 (1146.9 to 1399.7)  | 713.4 (656.1 to 759.7)        | 72.5 (31.9 to 127.8)            | 0.0 (0.0 to 0.0)                  | 3925.0 (3640.4 to 4220.9) | 2423.7 (2190.9 to 2673.8)  | 1362.9 (1253.3 to 1451.2)     | 138.4 (61.0 to 244.1)           | 0.0 (0.0 to 0.0)                  |
| Taiwan  | 2027 | 2087.3 (1940.8 to 2239.0)  | 1296.0 (1169.1 to 1432.2)  | 717.7 (660.5 to 765.1)        | 73.7 (32.5 to 129.9)            | 0.0 (0.0 to 0.0)                  | 3987.3 (3707.4 to 4277.1) | 2475.7 (2233.2 to 2735.8)  | 1370.9 (1261.8 to 1461.5)     | 140.7 (62.0 to 248.2)           | 0.0 (0.0 to 0.0)                  |
| Taiwan  | 2028 | 2121.0 (1964.8 to 2283.2)  | 1324.6 (1194.4 to 1467.1)  | 721.5 (663.0 to 769.5)        | 74.9 (32.8 to 132.1)            | 0.0 (0.0 to 0.0)                  | 4051.6 (3753.3 to 4361.6) | 2530.3 (2281.7 to 2802.6)  | 1378.3 (1266.6 to 1469.9)     | 143.0 (62.7 to 252.4)           | 0.0 (0.0 to 0.0)                  |
| Taiwan  | 2029 | 2158.3 (2001.9 to 2324.4)  | 1356.6 (1220.2 to 1504.2)  | 725.5 (666.0 to 773.7)        | 76.1 (33.4 to 134.0)            | 0.0 (0.0 to 0.0)                  | 4122.9 (3824.2 to 4440.2) | 2591.5 (2330.9 to 2873.4)  | 1385.9 (1272.3 to 1478.0)     | 145.5 (63.7 to 256.0)           | 0.0 (0.0 to 0.0)                  |
| Taiwan  | 2030 | 2195.8 (2026.8 to 2369.5)  | 1388.5 (1245.0 to 1546.0)  | 729.9 (669.7 to 778.7)        | 77.5 (33.9 to 136.8)            | 0.0 (0.0 to 0.0)                  | 4194.6 (3871.8 to 4526.3) | 2652.4 (2378.3 to 2953.2)  | 1394.2 (1279.3 to 1487.4)     | 148.0 (64.8 to 261.3)           | 0.0 (0.0 to 0.0)                  |
| Taiwan  | 2031 | 2233.5 (2064.2 to 2410.5)  | 1420.1 (1269.2 to 1587.6)  | 734.7 (674.1 to 784.3)        | 78.8 (34.5 to 139.2)            | 0.0 (0.0 to 0.0)                  | 4266.6 (3943.1 to 4604.7) | 2712.7 (2424.5 to 3032.7)  | 1403.4 (1287.6 to 1498.3)     | 150.5 (65.9 to 266.0)           | 0.0 (0.0 to 0.0)                  |
| Taiwan  | 2032 | 2272.9 (2088.0 to 2463.1)  | 1452.4 (1293.9 to 1624.0)  | 740.2 (679.9 to 791.3)        | 80.2 (35.1 to 141.8)            | 0.0 (0.0 to 0.0)                  | 4341.8 (3988.6 to 4705.1) | 2774.5 (2471.7 to 3102.2)  | 1414.0 (1298.7 to 1511.6)     | 153.2 (67.1 to 270.9)           | 0.0 (0.0 to 0.0)                  |
| Taiwan  | 2033 | 2312.9 (2129.1 to 2503.9)  | 1485.2 (1317.9 to 1663.8)  | 746.0 (684.5 to 798.0)        | 81.7 (35.8 to 144.5)            | 0.0 (0.0 to 0.0)                  | 4418.2 (4067.2 to 4783.1) | 2837.1 (2517.5 to 3178.4)  | 1425.0 (1307.5 to 1524.5)     | 156.0 (68.3 to 276.0)           | 0.0 (0.0 to 0.0)                  |
| Taiwan  | 2034 | 2353.5 (2154.4 to 2561.1)  | 1518.2 (1341.7 to 1703.2)  | 752.1 (689.8 to 805.3)        | 83.2 (36.4 to 147.1)            | 0.0 (0.0 to 0.0)                  | 4495.7 (4115.4 to 4892.4) | 2900.1 (2563.1 to 3253.5)  | 1436.7 (1317.7 to 1538.4)     | 158.9 (69.5 to 281.1)           | 0.0 (0.0 to 0.0)                  |
| Taiwan  | 2035 | 2394.2 (2195.7 to 2598.9)  | 1550.9 (1366.7 to 1741.8)  | 758.6 (695.9 to 811.9)        | 84.7 (37.1 to 149.7)            | 0.0 (0.0 to 0.0)                  | 4573.6 (4194.3 to 4964.6) | 2962.6 (2610.9 to 3327.2)  | 1449.1 (1329.3 to 1550.9)     | 161.8 (70.8 to 286.0)           | 0.0 (0.0 to 0.0)                  |
| Taiwan  | 2036 | 2438.3 (2226.6 to 2663.6)  | 1585.3 (1392.8 to 1783.2)  | 766.6 (702.8 to 820.8)        | 86.4 (37.8 to 152.6)            | 0.0 (0.0 to 0.0)                  | 4657.9 (4253.4 to 5088.2) | 3028.3 (2660.6 to 3406.4)  | 1464.5 (1342.6 to 1567.9)     | 165.1 (72.2 to 291.5)           | 0.0 (0.0 to 0.0)                  |

| Country    | Year | 2018 US Dollars per capita |                            |                               |                                 |                                   | 2018 PPP per capita       |                            |                               |                                 |                                   |
|------------|------|----------------------------|----------------------------|-------------------------------|---------------------------------|-----------------------------------|---------------------------|----------------------------|-------------------------------|---------------------------------|-----------------------------------|
|            |      | Health spending            | Government health spending | Out-of-pocket health spending | Prepaid private health spending | Development assistance for health | Health spending           | Government health spending | Out-of-pocket health spending | Prepaid private health spending | Development assistance for health |
| Taiwan     | 2037 | 2485.2 (2268.3 to 2705.0)  | 1621.7 (1419.8 to 1827.9)  | 775.3 (710.7 to 830.8)        | 88.2 (38.6 to 155.6)            | 0.0 (0.0 to 0.0)                  | 4747.4 (4333.1 to 5167.3) | 3097.8 (2712.2 to 3491.8)  | 1481.0 (1357.7 to 1587.1)     | 168.5 (73.7 to 297.3)           | 0.0 (0.0 to 0.0)                  |
| Taiwan     | 2038 | 2530.9 (2303.8 to 2769.1)  | 1656.8 (1444.3 to 1871.5)  | 784.0 (718.1 to 840.5)        | 90.0 (39.4 to 158.6)            | 0.0 (0.0 to 0.0)                  | 4834.6 (4400.8 to 5289.7) | 3165.0 (2758.9 to 3575.0)  | 1497.6 (1371.8 to 1605.6)     | 172.0 (75.2 to 303.0)           | 0.0 (0.0 to 0.0)                  |
| Taiwan     | 2039 | 2575.4 (2344.7 to 2811.4)  | 1691.6 (1470.6 to 1913.6)  | 792.1 (724.9 to 849.5)        | 91.8 (40.2 to 161.6)            | 0.0 (0.0 to 0.0)                  | 4919.8 (4479.0 to 5370.6) | 3231.4 (2809.3 to 3655.4)  | 1513.1 (1384.8 to 1622.7)     | 175.4 (76.7 to 308.7)           | 0.0 (0.0 to 0.0)                  |
| Taiwan     | 2040 | 2620.8 (2379.0 to 2870.9)  | 1727.7 (1496.1 to 1957.9)  | 799.6 (731.2 to 858.6)        | 93.6 (40.9 to 164.7)            | 0.0 (0.0 to 0.0)                  | 5006.5 (4544.5 to 5484.2) | 3300.3 (2858.0 to 3740.2)  | 1527.4 (1396.8 to 1640.1)     | 178.7 (78.2 to 314.6)           | 0.0 (0.0 to 0.0)                  |
| Taiwan     | 2041 | 2665.1 (2413.2 to 2918.6)  | 1763.1 (1519.5 to 2004.8)  | 806.8 (737.1 to 867.0)        | 95.3 (41.7 to 167.5)            | 0.0 (0.0 to 0.0)                  | 5091.1 (4609.9 to 5575.4) | 3367.9 (2902.6 to 3829.7)  | 1541.2 (1408.0 to 1656.3)     | 182.0 (79.6 to 320.0)           | 0.0 (0.0 to 0.0)                  |
| Taiwan     | 2042 | 2707.9 (2457.9 to 2985.5)  | 1797.6 (1545.3 to 2049.8)  | 813.3 (741.3 to 875.0)        | 97.0 (42.4 to 170.2)            | 0.0 (0.0 to 0.0)                  | 5172.7 (4695.2 to 5703.1) | 3433.9 (2952.0 to 3915.7)  | 1553.6 (1416.1 to 1671.5)     | 185.2 (81.0 to 325.1)           | 0.0 (0.0 to 0.0)                  |
| Taiwan     | 2043 | 2751.2 (2481.6 to 3028.0)  | 1833.1 (1567.2 to 2098.6)  | 819.4 (745.2 to 882.9)        | 98.6 (43.2 to 172.9)            | 0.0 (0.0 to 0.0)                  | 5255.5 (4740.6 to 5784.4) | 3501.7 (2993.8 to 4008.9)  | 1565.3 (1423.5 to 1686.6)     | 188.4 (82.5 to 330.4)           | 0.0 (0.0 to 0.0)                  |
| Taiwan     | 2044 | 2793.9 (2523.4 to 3089.3)  | 1868.3 (1594.0 to 2144.1)  | 825.2 (750.0 to 890.3)        | 100.3 (44.0 to 175.7)           | 0.0 (0.0 to 0.0)                  | 5337.1 (4820.4 to 5901.3) | 3569.0 (3044.9 to 4095.8)  | 1576.4 (1432.7 to 1700.7)     | 191.6 (84.0 to 335.6)           | 0.0 (0.0 to 0.0)                  |
| Taiwan     | 2045 | 2837.6 (2550.7 to 3137.8)  | 1904.9 (1620.7 to 2189.9)  | 830.8 (755.8 to 897.4)        | 102.0 (44.8 to 178.4)           | 0.0 (0.0 to 0.0)                  | 5420.6 (4872.5 to 5994.1) | 3638.8 (3096.0 to 4183.3)  | 1587.0 (1443.8 to 1714.4)     | 194.8 (85.5 to 340.9)           | 0.0 (0.0 to 0.0)                  |
| Taiwan     | 2046 | 2884.0 (2578.2 to 3184.8)  | 1942.8 (1647.2 to 2236.1)  | 837.4 (761.6 to 905.1)        | 103.8 (45.6 to 181.5)           | 0.0 (0.0 to 0.0)                  | 5509.2 (4925.0 to 6083.8) | 3711.3 (3146.7 to 4271.6)  | 1599.7 (1454.9 to 1729.0)     | 198.2 (87.2 to 346.7)           | 0.0 (0.0 to 0.0)                  |
| Taiwan     | 2047 | 2932.0 (2622.1 to 3245.5)  | 1982.6 (1675.3 to 2287.4)  | 843.8 (765.9 to 913.2)        | 105.6 (46.5 to 185.0)           | 0.0 (0.0 to 0.0)                  | 5600.9 (5008.9 to 6199.8) | 3787.3 (3200.3 to 4369.5)  | 1611.9 (1463.1 to 1744.4)     | 201.7 (88.9 to 353.3)           | 0.0 (0.0 to 0.0)                  |
| Taiwan     | 2048 | 2982.6 (2659.8 to 3321.6)  | 2024.2 (1707.8 to 2340.5)  | 850.9 (770.7 to 921.3)        | 107.5 (47.4 to 188.1)           | 0.0 (0.0 to 0.0)                  | 5697.5 (5080.9 to 6345.2) | 3866.7 (3262.3 to 4471.0)  | 1625.4 (1472.3 to 1759.9)     | 205.4 (90.6 to 359.3)           | 0.0 (0.0 to 0.0)                  |
| Taiwan     | 2049 | 3036.4 (2710.2 to 3378.4)  | 2068.3 (1741.1 to 2396.8)  | 858.5 (776.6 to 931.0)        | 109.6 (48.4 to 191.5)           | 0.0 (0.0 to 0.0)                  | 5800.3 (5177.2 to 6453.7) | 3951.0 (3325.9 to 4578.6)  | 1640.1 (1483.6 to 1778.4)     | 209.3 (92.5 to 365.7)           | 0.0 (0.0 to 0.0)                  |
| Taiwan     | 2050 | 3093.0 (2748.5 to 3446.7)  | 2114.6 (1777.9 to 2457.5)  | 866.7 (783.0 to 941.3)        | 111.7 (49.4 to 195.2)           | 0.0 (0.0 to 0.0)                  | 5908.5 (5250.4 to 6584.2) | 4039.5 (3396.3 to 4694.5)  | 1655.7 (1495.7 to 1798.1)     | 213.4 (94.4 to 373.0)           | 0.0 (0.0 to 0.0)                  |
| Tajikistan | 1995 | 11.2 (9.2 to 14.0)         | 4.8 (3.7 to 6.3)           | 6.1 (4.3 to 8.4)              | 0.0 (0.0 to 0.0)                | 0.4 (0.4 to 0.4)                  | 44.6 (36.4 to 55.4)       | 18.9 (14.5 to 24.8)        | 24.2 (17.0 to 33.3)           | 0.0 (0.0 to 0.0)                | 1.5 (1.5 to 1.5)                  |
| Tajikistan | 1996 | 11.6 (9.7 to 14.0)         | 4.0 (3.0 to 5.1)           | 5.6 (4.0 to 7.6)              | 0.0 (0.0 to 0.0)                | 2.0 (2.0 to 2.0)                  | 45.9 (38.5 to 55.4)       | 15.7 (12.0 to 20.4)        | 22.2 (15.7 to 30.2)           | 0.0 (0.0 to 0.0)                | 7.9 (7.9 to 7.9)                  |
| Tajikistan | 1997 | 11.9 (9.9 to 14.3)         | 4.1 (3.1 to 5.2)           | 6.3 (4.4 to 8.5)              | 0.0 (0.0 to 0.0)                | 1.6 (1.6 to 1.6)                  | 47.2 (39.1 to 56.7)       | 16.2 (12.4 to 20.7)        | 24.8 (17.6 to 33.8)           | 0.0 (0.0 to 0.0)                | 6.2 (6.2 to 6.2)                  |
| Tajikistan | 1998 | 11.5 (9.2 to 14.2)         | 3.5 (2.7 to 4.4)           | 6.9 (4.9 to 9.3)              | 0.0 (0.0 to 0.0)                | 1.0 (1.0 to 1.0)                  | 45.4 (36.6 to 56.3)       | 13.8 (10.6 to 17.6)        | 27.4 (19.5 to 36.9)           | 0.0 (0.0 to 0.0)                | 4.1 (4.1 to 4.1)                  |
| Tajikistan | 1999 | 12.0 (9.7 to 15.1)         | 3.1 (2.3 to 4.0)           | 7.9 (5.7 to 10.8)             | 0.0 (0.0 to 0.0)                | 1.1 (1.1 to 1.1)                  | 47.7 (38.3 to 60.0)       | 12.2 (9.2 to 15.7)         | 31.2 (22.4 to 42.8)           | 0.0 (0.0 to 0.0)                | 4.4 (4.4 to 4.4)                  |
| Tajikistan | 2000 | 13.3 (10.5 to 16.9)        | 3.0 (2.2 to 3.8)           | 9.4 (6.8 to 12.9)             | 0.0 (0.0 to 0.0)                | 1.0 (1.0 to 1.0)                  | 52.8 (41.5 to 66.9)       | 11.8 (8.8 to 15.1)         | 37.1 (26.8 to 51.1)           | 0.0 (0.0 to 0.0)                | 3.9 (3.9 to 3.9)                  |
| Tajikistan | 2001 | 14.4 (11.2 to 18.5)        | 3.0 (2.3 to 3.9)           | 10.6 (7.7 to 14.6)            | 0.0 (0.0 to 0.0)                | 0.7 (0.7 to 0.7)                  | 57.2 (44.3 to 73.4)       | 12.1 (9.1 to 15.4)         | 42.2 (30.5 to 58.0)           | 0.0 (0.0 to 0.0)                | 2.9 (2.9 to 2.9)                  |

| Country    | Year | 2018 US Dollars per capita |                            |                               |                                 |                                   | 2018 PPP per capita    |                            |                               |                                 |                                   |
|------------|------|----------------------------|----------------------------|-------------------------------|---------------------------------|-----------------------------------|------------------------|----------------------------|-------------------------------|---------------------------------|-----------------------------------|
|            |      | Health spending            | Government health spending | Out-of-pocket health spending | Prepaid private health spending | Development assistance for health | Health spending        | Government health spending | Out-of-pocket health spending | Prepaid private health spending | Development assistance for health |
| Tajikistan | 2002 | 16.5 (12.9 to 20.9)        | 3.2 (2.4 to 4.1)           | 12.1 (8.7 to 16.4)            | 0.0 (0.0 to 0.0)                | 1.2 (1.2 to 1.2)                  | 65.4 (51.2 to 82.9)    | 12.7 (9.5 to 16.3)         | 47.9 (34.5 to 65.1)           | 0.0 (0.0 to 0.0)                | 4.8 (4.8 to 4.8)                  |
| Tajikistan | 2003 | 19.8 (15.5 to 25.1)        | 3.5 (2.6 to 4.5)           | 14.3 (10.2 to 19.4)           | 0.0 (0.0 to 0.0)                | 2.0 (2.0 to 2.0)                  | 78.4 (61.6 to 99.5)    | 14.0 (10.4 to 17.9)        | 56.6 (40.6 to 77.0)           | 0.1 (0.0 to 0.2)                | 7.7 (7.7 to 7.7)                  |
| Tajikistan | 2004 | 23.1 (18.7 to 28.9)        | 4.1 (3.0 to 5.2)           | 15.9 (11.5 to 21.5)           | 0.1 (0.0 to 0.2)                | 3.1 (3.1 to 3.1)                  | 91.8 (74.1 to 114.4)   | 16.1 (12.1 to 20.5)        | 63.1 (45.7 to 85.2)           | 0.3 (0.2 to 0.7)                | 12.3 (12.3 to 12.3)               |
| Tajikistan | 2005 | 24.5 (19.7 to 30.5)        | 4.5 (3.4 to 5.8)           | 17.1 (12.3 to 23.1)           | 0.2 (0.1 to 0.3)                | 2.7 (2.7 to 2.7)                  | 97.0 (78.1 to 120.8)   | 17.9 (13.3 to 23.1)        | 67.7 (48.9 to 91.4)           | 0.6 (0.3 to 1.2)                | 10.8 (10.8 to 10.8)               |
| Tajikistan | 2006 | 26.7 (21.6 to 32.9)        | 5.0 (3.7 to 6.3)           | 18.3 (13.3 to 24.5)           | 0.2 (0.1 to 0.3)                | 3.3 (3.3 to 3.3)                  | 105.7 (85.7 to 130.5)  | 19.7 (14.6 to 25.2)        | 72.3 (52.7 to 97.0)           | 0.6 (0.3 to 1.2)                | 13.0 (13.0 to 13.0)               |
| Tajikistan | 2007 | 29.8 (24.1 to 36.8)        | 5.7 (4.2 to 7.3)           | 19.9 (14.5 to 26.7)           | 0.1 (0.1 to 0.2)                | 4.1 (4.1 to 4.1)                  | 118.0 (95.6 to 145.8)  | 22.4 (16.7 to 28.9)        | 78.8 (57.4 to 105.8)          | 0.4 (0.2 to 0.8)                | 16.4 (16.4 to 16.4)               |
| Tajikistan | 2008 | 33.3 (27.2 to 40.7)        | 6.4 (4.8 to 8.3)           | 21.3 (15.4 to 28.6)           | 0.1 (0.0 to 0.1)                | 5.6 (5.6 to 5.6)                  | 132.2 (107.6 to 161.5) | 25.4 (19.1 to 32.9)        | 84.5 (61.0 to 113.3)          | 0.3 (0.2 to 0.6)                | 22.0 (22.0 to 22.0)               |
| Tajikistan | 2009 | 35.4 (29.2 to 43.1)        | 6.6 (4.9 to 8.7)           | 21.7 (15.6 to 29.3)           | 0.1 (0.0 to 0.1)                | 7.0 (7.0 to 7.0)                  | 140.3 (115.8 to 170.9) | 26.2 (19.5 to 34.3)        | 86.1 (61.7 to 116.3)          | 0.2 (0.1 to 0.4)                | 27.7 (27.7 to 27.7)               |
| Tajikistan | 2010 | 36.9 (30.2 to 45.4)        | 7.4 (5.5 to 9.4)           | 22.7 (16.2 to 30.7)           | 0.1 (0.0 to 0.1)                | 6.9 (6.9 to 6.9)                  | 146.5 (119.7 to 179.9) | 29.2 (21.8 to 37.4)        | 89.8 (64.3 to 121.8)          | 0.3 (0.1 to 0.5)                | 27.2 (27.2 to 27.2)               |
| Tajikistan | 2011 | 37.7 (30.7 to 46.5)        | 8.3 (6.3 to 10.6)          | 23.7 (17.1 to 31.9)           | 0.1 (0.1 to 0.2)                | 5.6 (5.6 to 5.6)                  | 149.5 (121.7 to 184.4) | 33.0 (24.8 to 42.1)        | 93.9 (67.9 to 126.5)          | 0.5 (0.2 to 0.9)                | 22.1 (22.1 to 22.1)               |
| Tajikistan | 2012 | 43.2 (35.8 to 52.8)        | 9.9 (7.5 to 12.8)          | 25.6 (18.5 to 34.9)           | 0.2 (0.1 to 0.3)                | 7.5 (7.5 to 7.5)                  | 171.2 (141.8 to 209.1) | 39.3 (29.7 to 50.6)        | 101.4 (73.2 to 138.3)         | 0.6 (0.3 to 1.1)                | 29.9 (29.9 to 29.9)               |
| Tajikistan | 2013 | 45.4 (37.5 to 55.7)        | 11.4 (8.6 to 14.9)         | 27.4 (19.8 to 37.8)           | 0.1 (0.1 to 0.3)                | 6.4 (6.4 to 6.4)                  | 179.8 (148.6 to 220.6) | 45.3 (34.1 to 59.1)        | 108.6 (78.3 to 149.9)         | 0.6 (0.3 to 1.0)                | 25.4 (25.4 to 25.4)               |
| Tajikistan | 2014 | 48.9 (40.2 to 59.8)        | 12.7 (9.5 to 16.5)         | 29.3 (21.6 to 40.0)           | 0.2 (0.1 to 0.3)                | 6.7 (6.7 to 6.7)                  | 193.8 (159.4 to 237.0) | 50.4 (37.8 to 65.5)        | 116.2 (85.5 to 158.5)         | 0.6 (0.3 to 1.1)                | 26.5 (26.5 to 26.5)               |
| Tajikistan | 2015 | 49.3 (40.2 to 61.4)        | 13.6 (10.2 to 17.8)        | 31.2 (23.0 to 42.4)           | 0.2 (0.1 to 0.3)                | 4.4 (4.4 to 4.4)                  | 195.6 (159.3 to 243.5) | 53.9 (40.5 to 70.4)        | 123.7 (91.0 to 168.0)         | 0.6 (0.3 to 1.2)                | 17.3 (17.3 to 17.3)               |
| Tajikistan | 2016 | 52.9 (42.7 to 65.9)        | 14.6 (11.1 to 19.1)        | 33.5 (24.4 to 46.1)           | 0.2 (0.1 to 0.3)                | 4.6 (4.6 to 4.6)                  | 209.5 (169.3 to 261.4) | 58.0 (44.1 to 75.6)        | 132.7 (96.9 to 182.6)         | 0.6 (0.3 to 1.2)                | 18.2 (18.2 to 18.2)               |
| Tajikistan | 2017 | 53.1 (42.9 to 66.8)        | 12.5 (9.5 to 16.3)         | 33.6 (24.6 to 46.4)           | 0.2 (0.1 to 0.3)                | 6.7 (6.7 to 6.7)                  | 210.3 (170.1 to 264.8) | 49.6 (37.7 to 64.7)        | 133.4 (97.6 to 183.7)         | 0.7 (0.3 to 1.2)                | 26.6 (26.6 to 26.6)               |
| Tajikistan | 2018 | 53.8 (43.7 to 67.1)        | 13.0 (9.9 to 17.0)         | 34.6 (25.3 to 48.0)           | 0.2 (0.1 to 0.3)                | 6.0 (5.9 to 6.0)                  | 213.2 (173.1 to 265.9) | 51.7 (39.3 to 67.4)        | 137.3 (100.2 to 190.1)        | 0.7 (0.3 to 1.3)                | 23.6 (23.4 to 23.9)               |
| Tajikistan | 2019 | 54.8 (44.6 to 68.7)        | 13.5 (10.3 to 17.7)        | 35.3 (25.8 to 48.6)           | 0.2 (0.1 to 0.3)                | 5.9 (5.5 to 6.2)                  | 217.1 (176.6 to 272.1) | 53.3 (40.8 to 70.1)        | 139.8 (102.4 to 192.8)        | 0.7 (0.3 to 1.3)                | 23.3 (21.7 to 24.7)               |
| Tajikistan | 2020 | 55.9 (45.3 to 70.2)        | 13.8 (10.5 to 18.1)        | 36.0 (26.4 to 49.6)           | 0.2 (0.1 to 0.3)                | 5.9 (5.4 to 6.4)                  | 221.4 (179.7 to 278.2) | 54.6 (41.7 to 71.8)        | 142.8 (104.6 to 196.6)        | 0.7 (0.3 to 1.3)                | 23.3 (21.3 to 25.2)               |
| Tajikistan | 2021 | 56.9 (46.3 to 71.7)        | 14.1 (10.8 to 18.5)        | 36.7 (26.8 to 50.3)           | 0.2 (0.1 to 0.3)                | 5.9 (5.3 to 6.6)                  | 225.5 (183.5 to 284.2) | 55.9 (42.7 to 73.4)        | 145.5 (106.4 to 199.5)        | 0.7 (0.3 to 1.4)                | 23.4 (21.1 to 26.0)               |
| Tajikistan | 2022 | 57.9 (47.0 to 72.6)        | 14.4 (11.0 to 18.8)        | 37.3 (27.4 to 50.9)           | 0.2 (0.1 to 0.4)                | 6.0 (5.3 to 6.7)                  | 229.3 (186.2 to 287.7) | 57.0 (43.5 to 74.7)        | 147.9 (108.5 to 201.9)        | 0.7 (0.3 to 1.4)                | 23.6 (20.9 to 26.4)               |



| Country    | Year | 2018 US Dollars per capita |                            |                               |                                 |                                   | 2018 PPP per capita    |                            |                               |                                 |                                   |
|------------|------|----------------------------|----------------------------|-------------------------------|---------------------------------|-----------------------------------|------------------------|----------------------------|-------------------------------|---------------------------------|-----------------------------------|
|            |      | Health spending            | Government health spending | Out-of-pocket health spending | Prepaid private health spending | Development assistance for health | Health spending        | Government health spending | Out-of-pocket health spending | Prepaid private health spending | Development assistance for health |
| Tajikistan | 2023 | 58.8 (47.8 to 73.5)        | 14.6 (11.2 to 19.1)        | 37.9 (27.7 to 52.1)           | 0.2 (0.1 to 0.4)                | 6.1 (5.3 to 7.0)                  | 233.1 (189.4 to 291.4) | 58.1 (44.4 to 75.9)        | 150.1 (109.8 to 206.4)        | 0.8 (0.3 to 1.4)                | 24.2 (21.0 to 27.7)               |
| Tajikistan | 2024 | 59.9 (48.6 to 74.6)        | 14.9 (11.4 to 19.4)        | 38.6 (27.9 to 53.0)           | 0.2 (0.1 to 0.4)                | 6.2 (5.3 to 7.2)                  | 237.3 (192.7 to 295.9) | 59.1 (45.3 to 77.0)        | 152.8 (110.7 to 210.2)        | 0.8 (0.4 to 1.4)                | 24.5 (21.0 to 28.4)               |
| Tajikistan | 2025 | 61.1 (49.9 to 76.0)        | 15.2 (11.7 to 19.8)        | 39.4 (28.5 to 53.8)           | 0.2 (0.1 to 0.4)                | 6.3 (5.3 to 7.4)                  | 242.2 (197.7 to 301.2) | 60.3 (46.2 to 78.6)        | 156.3 (112.9 to 213.4)        | 0.8 (0.4 to 1.5)                | 24.8 (21.2 to 29.1)               |
| Tajikistan | 2026 | 62.4 (50.4 to 78.0)        | 15.5 (11.9 to 20.3)        | 40.4 (29.1 to 55.5)           | 0.2 (0.1 to 0.4)                | 6.3 (5.3 to 7.4)                  | 247.5 (199.7 to 309.0) | 61.5 (47.3 to 80.4)        | 160.1 (115.4 to 219.9)        | 0.8 (0.4 to 1.5)                | 25.1 (21.2 to 29.4)               |
| Tajikistan | 2027 | 63.9 (51.3 to 80.3)        | 15.9 (12.2 to 20.7)        | 41.4 (29.6 to 56.8)           | 0.2 (0.1 to 0.4)                | 6.4 (5.3 to 7.6)                  | 253.1 (203.2 to 318.2) | 62.9 (48.2 to 82.2)        | 164.1 (117.3 to 225.3)        | 0.8 (0.4 to 1.5)                | 25.3 (21.1 to 30.2)               |
| Tajikistan | 2028 | 65.3 (51.8 to 82.3)        | 16.2 (12.4 to 21.2)        | 42.4 (30.1 to 58.3)           | 0.2 (0.1 to 0.4)                | 6.5 (5.4 to 7.9)                  | 258.9 (205.5 to 326.0) | 64.3 (49.2 to 84.2)        | 168.1 (119.5 to 231.0)        | 0.8 (0.4 to 1.6)                | 25.7 (21.3 to 31.2)               |
| Tajikistan | 2029 | 66.9 (52.6 to 84.0)        | 16.6 (12.7 to 21.8)        | 43.5 (30.5 to 60.3)           | 0.2 (0.1 to 0.4)                | 6.6 (5.4 to 8.1)                  | 265.0 (208.6 to 332.9) | 65.8 (50.2 to 86.3)        | 172.4 (121.0 to 239.2)        | 0.9 (0.4 to 1.6)                | 26.0 (21.3 to 32.0)               |
| Tajikistan | 2030 | 68.4 (53.4 to 86.6)        | 17.0 (13.0 to 22.4)        | 44.6 (31.0 to 62.5)           | 0.2 (0.1 to 0.4)                | 6.6 (5.4 to 8.2)                  | 271.1 (211.6 to 343.3) | 67.4 (51.3 to 88.6)        | 176.6 (123.0 to 247.8)        | 0.9 (0.4 to 1.6)                | 26.3 (21.5 to 32.4)               |
| Tajikistan | 2031 | 70.0 (55.0 to 89.4)        | 17.4 (13.3 to 23.0)        | 45.7 (31.8 to 64.8)           | 0.2 (0.1 to 0.4)                | 6.7 (5.4 to 8.5)                  | 277.5 (217.8 to 354.3) | 69.0 (52.6 to 91.1)        | 181.0 (125.9 to 257.0)        | 0.9 (0.4 to 1.7)                | 26.6 (21.5 to 33.7)               |
| Tajikistan | 2032 | 71.7 (56.0 to 91.9)        | 17.9 (13.6 to 23.5)        | 46.8 (32.4 to 67.2)           | 0.2 (0.1 to 0.4)                | 6.8 (5.4 to 8.6)                  | 284.2 (222.1 to 364.4) | 70.8 (54.0 to 93.3)        | 185.6 (128.4 to 266.4)        | 0.9 (0.4 to 1.7)                | 26.9 (21.5 to 34.1)               |
| Tajikistan | 2033 | 73.4 (57.2 to 95.3)        | 18.3 (14.0 to 24.2)        | 48.0 (32.9 to 69.4)           | 0.2 (0.1 to 0.4)                | 6.9 (5.4 to 8.9)                  | 291.0 (226.5 to 377.7) | 72.7 (55.4 to 95.8)        | 190.2 (130.4 to 274.9)        | 0.9 (0.4 to 1.8)                | 27.2 (21.6 to 35.2)               |
| Tajikistan | 2034 | 75.2 (58.7 to 97.4)        | 18.8 (14.3 to 24.9)        | 49.2 (33.6 to 71.3)           | 0.2 (0.1 to 0.5)                | 6.9 (5.4 to 9.0)                  | 298.1 (232.6 to 386.2) | 74.6 (56.8 to 98.5)        | 194.9 (133.1 to 282.5)        | 1.0 (0.5 to 1.8)                | 27.5 (21.5 to 35.6)               |
| Tajikistan | 2035 | 77.0 (59.7 to 100.7)       | 19.3 (14.7 to 25.6)        | 50.4 (34.2 to 73.2)           | 0.2 (0.1 to 0.5)                | 7.0 (5.5 to 9.2)                  | 305.2 (236.6 to 399.1) | 76.7 (58.2 to 101.3)       | 199.6 (135.7 to 290.2)        | 1.0 (0.5 to 1.9)                | 27.9 (21.7 to 36.5)               |
| Tajikistan | 2036 | 78.8 (60.5 to 104.1)       | 19.9 (15.0 to 26.2)        | 51.5 (34.8 to 75.6)           | 0.3 (0.1 to 0.5)                | 7.1 (5.5 to 9.6)                  | 312.2 (239.8 to 412.8) | 78.7 (59.6 to 104.0)       | 204.3 (137.8 to 299.6)        | 1.0 (0.5 to 1.9)                | 28.2 (21.6 to 38.0)               |
| Tajikistan | 2037 | 80.6 (62.3 to 106.0)       | 20.4 (15.4 to 26.9)        | 52.7 (35.3 to 77.7)           | 0.3 (0.1 to 0.5)                | 7.2 (5.5 to 9.7)                  | 319.4 (246.8 to 420.0) | 80.9 (61.1 to 106.5)       | 209.0 (140.0 to 308.0)        | 1.0 (0.5 to 2.0)                | 28.6 (21.9 to 38.4)               |
| Tajikistan | 2038 | 82.4 (62.9 to 109.0)       | 21.0 (15.8 to 27.6)        | 53.9 (35.9 to 79.7)           | 0.3 (0.1 to 0.5)                | 7.3 (5.5 to 10.1)                 | 326.7 (249.1 to 432.0) | 83.0 (62.6 to 109.3)       | 213.6 (142.3 to 316.0)        | 1.1 (0.5 to 2.0)                | 28.9 (22.0 to 40.2)               |
| Tajikistan | 2039 | 84.2 (64.6 to 111.2)       | 21.5 (16.2 to 28.3)        | 55.0 (36.5 to 81.5)           | 0.3 (0.1 to 0.5)                | 7.4 (5.6 to 10.1)                 | 333.7 (256.0 to 440.9) | 85.2 (64.2 to 112.2)       | 218.2 (144.8 to 323.2)        | 1.1 (0.5 to 2.1)                | 29.2 (22.2 to 40.1)               |
| Tajikistan | 2040 | 86.1 (66.1 to 114.7)       | 22.1 (16.6 to 29.1)        | 56.2 (37.2 to 83.7)           | 0.3 (0.1 to 0.5)                | 7.5 (5.6 to 10.3)                 | 341.1 (261.9 to 454.6) | 87.6 (65.7 to 115.2)       | 222.8 (147.5 to 331.9)        | 1.1 (0.5 to 2.1)                | 29.6 (22.3 to 41.0)               |
| Tajikistan | 2041 | 87.9 (67.5 to 116.4)       | 22.7 (17.0 to 29.8)        | 57.4 (37.9 to 86.1)           | 0.3 (0.1 to 0.6)                | 7.6 (5.7 to 10.7)                 | 348.3 (267.7 to 461.6) | 89.9 (67.4 to 118.2)       | 227.3 (150.3 to 341.2)        | 1.2 (0.5 to 2.2)                | 30.0 (22.5 to 42.4)               |
| Tajikistan | 2042 | 89.7 (68.7 to 118.3)       | 23.3 (17.4 to 30.6)        | 58.5 (38.7 to 88.3)           | 0.3 (0.1 to 0.6)                | 7.7 (5.7 to 11.1)                 | 355.5 (272.3 to 468.9) | 92.2 (69.0 to 121.2)       | 231.7 (153.6 to 350.0)        | 1.2 (0.6 to 2.2)                | 30.4 (22.5 to 44.1)               |
| Tajikistan | 2043 | 91.6 (69.1 to 121.0)       | 23.9 (17.8 to 31.4)        | 59.6 (39.4 to 90.0)           | 0.3 (0.1 to 0.6)                | 7.8 (5.7 to 11.5)                 | 362.9 (274.1 to 479.6) | 94.7 (70.7 to 124.4)       | 236.2 (156.2 to 356.7)        | 1.2 (0.6 to 2.3)                | 30.8 (22.7 to 45.5)               |

| Country    | Year | 2018 US Dollars per capita |                            |                               |                                 |                                   | 2018 PPP per capita    |                            |                               |                                 |                                   |
|------------|------|----------------------------|----------------------------|-------------------------------|---------------------------------|-----------------------------------|------------------------|----------------------------|-------------------------------|---------------------------------|-----------------------------------|
|            |      | Health spending            | Government health spending | Out-of-pocket health spending | Prepaid private health spending | Development assistance for health | Health spending        | Government health spending | Out-of-pocket health spending | Prepaid private health spending | Development assistance for health |
| Tajikistan | 2044 | 93.4 (70.6 to 123.8)       | 24.5 (18.2 to 32.2)        | 60.6 (40.0 to 91.6)           | 0.3 (0.2 to 0.6)                | 7.9 (5.8 to 11.7)                 | 370.0 (279.7 to 490.6) | 97.1 (72.3 to 127.6)       | 240.4 (158.7 to 362.9)        | 1.2 (0.6 to 2.4)                | 31.3 (22.8 to 46.3)               |
| Tajikistan | 2045 | 95.1 (71.4 to 127.4)       | 25.1 (18.7 to 33.0)        | 61.7 (40.6 to 93.1)           | 0.3 (0.2 to 0.6)                | 8.0 (5.8 to 12.2)                 | 377.0 (283.2 to 504.9) | 99.5 (74.1 to 130.7)       | 244.4 (161.0 to 369.0)        | 1.3 (0.6 to 2.4)                | 31.7 (22.9 to 48.3)               |
| Tajikistan | 2046 | 96.8 (73.1 to 131.0)       | 25.7 (19.1 to 33.9)        | 62.6 (41.2 to 95.0)           | 0.3 (0.2 to 0.6)                | 8.1 (5.9 to 12.4)                 | 383.8 (289.7 to 519.3) | 101.9 (75.7 to 134.3)      | 248.3 (163.2 to 376.6)        | 1.3 (0.6 to 2.5)                | 32.2 (23.2 to 49.3)               |
| Tajikistan | 2047 | 98.5 (73.5 to 133.1)       | 26.3 (19.5 to 34.7)        | 63.6 (41.7 to 96.2)           | 0.3 (0.2 to 0.6)                | 8.3 (5.9 to 12.9)                 | 390.4 (291.2 to 527.5) | 104.3 (77.4 to 137.7)      | 252.0 (165.4 to 381.4)        | 1.3 (0.6 to 2.5)                | 32.8 (23.4 to 51.2)               |
| Tajikistan | 2048 | 100.1 (74.6 to 133.6)      | 26.9 (19.9 to 35.6)        | 64.5 (42.3 to 97.8)           | 0.3 (0.2 to 0.7)                | 8.4 (5.9 to 13.5)                 | 396.9 (295.6 to 529.6) | 106.6 (78.9 to 141.1)      | 255.6 (167.5 to 387.7)        | 1.4 (0.7 to 2.6)                | 33.4 (23.6 to 53.5)               |
| Tajikistan | 2049 | 101.8 (75.9 to 136.1)      | 27.5 (20.3 to 36.4)        | 65.4 (42.8 to 99.2)           | 0.4 (0.2 to 0.7)                | 8.6 (6.0 to 13.8)                 | 403.5 (301.0 to 539.5) | 108.9 (80.5 to 144.4)      | 259.2 (169.7 to 393.4)        | 1.4 (0.7 to 2.6)                | 34.0 (23.9 to 54.5)               |
| Tajikistan | 2050 | 103.4 (77.8 to 138.9)      | 28.0 (20.7 to 37.2)        | 66.3 (43.3 to 101.4)          | 0.4 (0.2 to 0.7)                | 8.8 (6.1 to 14.1)                 | 409.9 (308.5 to 550.5) | 111.1 (82.0 to 147.3)      | 262.6 (171.5 to 401.9)        | 1.4 (0.7 to 2.7)                | 34.7 (24.3 to 55.8)               |
| Tanzania   | 1995 | 22.8 (18.5 to 28.3)        | 7.2 (5.5 to 9.3)           | 12.7 (9.1 to 17.9)            | 0.9 (0.4 to 1.8)                | 2.0 (2.0 to 2.0)                  | 72.7 (59.0 to 90.1)    | 22.8 (17.4 to 29.6)        | 40.6 (29.0 to 57.2)           | 3.0 (1.4 to 5.6)                | 6.3 (6.3 to 6.3)                  |
| Tanzania   | 1996 | 23.5 (19.4 to 28.9)        | 6.4 (4.9 to 8.4)           | 12.4 (8.8 to 17.3)            | 0.9 (0.4 to 1.7)                | 3.9 (3.9 to 3.9)                  | 75.0 (61.8 to 92.0)    | 20.4 (15.5 to 26.8)        | 39.4 (28.1 to 55.0)           | 2.9 (1.4 to 5.6)                | 12.3 (12.3 to 12.3)               |
| Tanzania   | 1997 | 23.2 (19.3 to 28.4)        | 6.0 (4.5 to 7.9)           | 12.1 (8.7 to 16.9)            | 0.9 (0.4 to 1.7)                | 4.2 (4.2 to 4.2)                  | 74.1 (61.7 to 90.5)    | 19.0 (14.4 to 25.1)        | 38.6 (27.7 to 54.0)           | 2.9 (1.4 to 5.5)                | 13.5 (13.5 to 13.5)               |
| Tanzania   | 1998 | 21.8 (18.0 to 26.7)        | 5.5 (4.1 to 7.2)           | 11.7 (8.3 to 16.2)            | 0.8 (0.4 to 1.6)                | 3.7 (3.7 to 3.7)                  | 69.4 (57.4 to 85.0)    | 17.5 (13.1 to 23.0)        | 37.3 (26.6 to 51.7)           | 2.7 (1.3 to 5.1)                | 11.9 (11.9 to 11.9)               |
| Tanzania   | 1999 | 23.5 (20.1 to 27.8)        | 5.0 (3.8 to 6.4)           | 11.0 (7.8 to 15.1)            | 0.7 (0.4 to 1.4)                | 6.8 (6.8 to 6.8)                  | 75.1 (64.0 to 88.8)    | 16.0 (12.0 to 20.5)        | 35.0 (24.8 to 48.2)           | 2.4 (1.1 to 4.5)                | 21.7 (21.7 to 21.7)               |
| Tanzania   | 2000 | 19.7 (16.4 to 23.9)        | 5.6 (4.3 to 7.1)           | 10.3 (7.2 to 14.2)            | 0.7 (0.3 to 1.3)                | 3.2 (3.2 to 3.2)                  | 62.9 (52.4 to 76.1)    | 17.7 (13.6 to 22.7)        | 32.8 (22.9 to 45.2)           | 2.3 (1.1 to 4.2)                | 10.1 (10.1 to 10.1)               |
| Tanzania   | 2001 | 24.8 (21.0 to 29.5)        | 6.9 (5.3 to 8.8)           | 11.4 (8.0 to 15.6)            | 1.0 (0.5 to 1.8)                | 5.7 (5.7 to 5.7)                  | 79.2 (67.1 to 94.0)    | 21.9 (16.8 to 28.1)        | 36.2 (25.6 to 49.7)           | 3.1 (1.5 to 5.7)                | 18.0 (18.0 to 18.0)               |
| Tanzania   | 2002 | 26.3 (22.1 to 31.9)        | 8.5 (6.5 to 11.0)          | 12.7 (8.9 to 17.4)            | 1.0 (0.5 to 1.9)                | 4.2 (4.2 to 4.2)                  | 84.0 (70.5 to 101.6)   | 27.0 (20.6 to 35.1)        | 40.4 (28.5 to 55.6)           | 3.2 (1.6 to 6.0)                | 13.4 (13.4 to 13.4)               |
| Tanzania   | 2003 | 29.5 (24.6 to 35.3)        | 10.2 (7.8 to 13.2)         | 13.7 (9.6 to 19.1)            | 1.0 (0.5 to 1.9)                | 4.6 (4.6 to 4.6)                  | 94.0 (78.6 to 112.4)   | 32.4 (24.9 to 42.2)        | 43.7 (30.5 to 60.7)           | 3.3 (1.6 to 6.1)                | 14.6 (14.6 to 14.6)               |
| Tanzania   | 2004 | 34.6 (29.3 to 40.9)        | 12.1 (9.3 to 15.8)         | 14.3 (9.9 to 19.6)            | 0.9 (0.5 to 1.7)                | 7.3 (7.3 to 7.3)                  | 110.2 (93.6 to 130.3)  | 38.6 (29.8 to 50.4)        | 45.5 (31.5 to 62.5)           | 3.0 (1.5 to 5.4)                | 23.1 (23.1 to 23.1)               |
| Tanzania   | 2005 | 36.9 (31.4 to 43.3)        | 13.4 (10.3 to 17.4)        | 14.0 (9.7 to 18.9)            | 0.8 (0.4 to 1.5)                | 8.7 (8.7 to 8.7)                  | 117.6 (100.2 to 137.9) | 42.7 (32.8 to 55.3)        | 44.5 (30.8 to 60.3)           | 2.6 (1.3 to 4.9)                | 27.8 (27.8 to 27.8)               |
| Tanzania   | 2006 | 38.7 (33.2 to 44.7)        | 13.8 (10.6 to 17.7)        | 13.5 (9.3 to 18.3)            | 0.7 (0.3 to 1.3)                | 10.7 (10.7 to 10.7)               | 123.4 (105.8 to 142.5) | 43.9 (33.8 to 56.5)        | 43.0 (29.5 to 58.4)           | 2.3 (1.1 to 4.2)                | 34.1 (34.1 to 34.1)               |
| Tanzania   | 2007 | 40.2 (34.8 to 46.6)        | 13.6 (10.3 to 17.6)        | 13.4 (9.2 to 18.3)            | 0.7 (0.3 to 1.2)                | 12.5 (12.5 to 12.5)               | 128.2 (110.9 to 148.7) | 43.5 (33.0 to 56.0)        | 42.8 (29.4 to 58.3)           | 2.2 (1.0 to 3.9)                | 39.7 (39.7 to 39.7)               |
| Tanzania   | 2008 | 43.8 (38.6 to 50.1)        | 13.3 (10.1 to 17.2)        | 13.2 (9.1 to 18.3)            | 0.7 (0.3 to 1.2)                | 16.7 (16.7 to 16.7)               | 139.8 (123.2 to 159.7) | 42.5 (32.2 to 54.8)        | 41.9 (28.9 to 58.3)           | 2.1 (1.0 to 3.9)                | 53.3 (53.3 to 53.3)               |

| Country  | Year | 2018 US Dollars per capita |                            |                               |                                 |                                   | 2018 PPP per capita    |                            |                               |                                 |                                   |
|----------|------|----------------------------|----------------------------|-------------------------------|---------------------------------|-----------------------------------|------------------------|----------------------------|-------------------------------|---------------------------------|-----------------------------------|
|          |      | Health spending            | Government health spending | Out-of-pocket health spending | Prepaid private health spending | Development assistance for health | Health spending        | Government health spending | Out-of-pocket health spending | Prepaid private health spending | Development assistance for health |
| Tanzania | 2009 | 39.6 (34.9 to 45.5)        | 11.9 (8.9 to 15.2)         | 12.6 (8.9 to 17.8)            | 0.6 (0.3 to 1.1)                | 14.5 (14.5 to 14.5)               | 126.3 (111.2 to 145.1) | 37.9 (28.4 to 48.4)        | 40.3 (28.3 to 56.6)           | 2.0 (0.9 to 3.6)                | 46.1 (46.1 to 46.1)               |
| Tanzania | 2010 | 42.2 (37.6 to 48.0)        | 11.3 (8.5 to 14.4)         | 12.3 (8.6 to 17.3)            | 0.6 (0.3 to 1.1)                | 18.1 (18.1 to 18.1)               | 134.7 (120.0 to 153.1) | 35.9 (27.2 to 45.8)        | 39.1 (27.4 to 55.0)           | 1.8 (0.9 to 3.4)                | 57.7 (57.7 to 57.7)               |
| Tanzania | 2011 | 40.7 (36.1 to 46.2)        | 10.9 (8.2 to 13.9)         | 11.9 (8.4 to 16.8)            | 0.7 (0.3 to 1.3)                | 17.2 (17.2 to 17.2)               | 129.7 (115.2 to 147.2) | 34.7 (26.3 to 44.2)        | 37.9 (26.9 to 53.5)           | 2.1 (1.0 to 4.1)                | 55.0 (55.0 to 55.0)               |
| Tanzania | 2012 | 39.7 (35.3 to 44.7)        | 10.5 (8.0 to 13.4)         | 10.8 (7.5 to 15.2)            | 0.8 (0.4 to 1.5)                | 17.7 (17.7 to 17.7)               | 126.5 (112.6 to 142.6) | 33.5 (25.7 to 42.9)        | 34.3 (23.9 to 48.5)           | 2.4 (1.1 to 4.7)                | 56.3 (56.3 to 56.3)               |
| Tanzania | 2013 | 41.8 (37.7 to 46.8)        | 10.7 (8.3 to 13.7)         | 10.0 (7.1 to 14.2)            | 0.6 (0.3 to 1.2)                | 20.4 (20.4 to 20.4)               | 133.4 (120.3 to 149.4) | 34.2 (26.4 to 43.7)        | 32.0 (22.6 to 45.3)           | 2.0 (1.0 to 3.9)                | 65.2 (65.2 to 65.2)               |
| Tanzania | 2014 | 40.4 (36.4 to 45.3)        | 11.4 (8.8 to 14.5)         | 9.6 (6.8 to 13.6)             | 0.5 (0.2 to 0.9)                | 19.0 (19.0 to 19.0)               | 128.8 (116.0 to 144.4) | 36.3 (28.0 to 46.3)        | 30.5 (21.6 to 43.3)           | 1.5 (0.7 to 2.8)                | 60.5 (60.5 to 60.5)               |
| Tanzania | 2015 | 36.9 (32.8 to 41.8)        | 12.4 (9.6 to 15.8)         | 9.4 (6.6 to 13.0)             | 0.5 (0.2 to 1.0)                | 14.7 (14.7 to 14.7)               | 117.8 (104.6 to 133.2) | 39.4 (30.5 to 50.2)        | 29.9 (20.9 to 41.6)           | 1.7 (0.8 to 3.2)                | 46.8 (46.8 to 46.8)               |
| Tanzania | 2016 | 40.6 (36.3 to 46.0)        | 13.9 (10.6 to 17.7)        | 9.3 (6.5 to 12.9)             | 0.5 (0.2 to 1.0)                | 16.8 (16.8 to 16.8)               | 129.4 (115.7 to 146.7) | 44.4 (33.9 to 56.5)        | 29.7 (20.7 to 41.1)           | 1.7 (0.8 to 3.2)                | 53.6 (53.6 to 53.6)               |
| Tanzania | 2017 | 42.7 (38.0 to 48.3)        | 15.0 (11.4 to 19.1)        | 9.5 (6.7 to 13.2)             | 0.6 (0.3 to 1.1)                | 17.6 (17.6 to 17.6)               | 136.1 (121.1 to 154.0) | 47.8 (36.4 to 60.8)        | 30.3 (21.3 to 42.0)           | 1.8 (0.8 to 3.4)                | 56.1 (56.1 to 56.1)               |
| Tanzania | 2018 | 41.7 (36.9 to 47.3)        | 15.3 (11.7 to 19.5)        | 9.6 (6.7 to 13.3)             | 0.6 (0.3 to 1.1)                | 16.2 (16.2 to 16.3)               | 133.1 (117.8 to 151.0) | 48.9 (37.4 to 62.3)        | 30.6 (21.4 to 42.4)           | 1.8 (0.9 to 3.5)                | 51.7 (51.6 to 51.8)               |
| Tanzania | 2019 | 42.0 (37.0 to 47.6)        | 15.7 (12.0 to 20.0)        | 9.7 (6.8 to 13.6)             | 0.6 (0.3 to 1.1)                | 16.0 (14.9 to 16.9)               | 133.8 (118.1 to 151.9) | 50.1 (38.2 to 63.8)        | 30.9 (21.7 to 43.4)           | 1.9 (0.9 to 3.6)                | 50.9 (47.5 to 53.8)               |
| Tanzania | 2020 | 42.3 (37.3 to 48.8)        | 16.1 (12.3 to 20.5)        | 9.8 (6.9 to 13.8)             | 0.6 (0.3 to 1.2)                | 15.8 (14.5 to 17.1)               | 135.0 (118.8 to 155.7) | 51.4 (39.2 to 65.3)        | 31.2 (21.8 to 43.9)           | 2.0 (0.9 to 3.7)                | 50.4 (46.2 to 54.6)               |
| Tanzania | 2021 | 42.8 (37.5 to 49.0)        | 16.5 (12.6 to 21.0)        | 9.9 (6.9 to 14.0)             | 0.6 (0.3 to 1.2)                | 15.7 (14.1 to 17.4)               | 136.4 (119.7 to 156.4) | 52.7 (40.2 to 66.9)        | 31.5 (21.9 to 44.7)           | 2.0 (0.9 to 3.8)                | 50.2 (45.0 to 55.5)               |
| Tanzania | 2022 | 43.3 (37.6 to 49.4)        | 17.0 (13.0 to 21.6)        | 10.0 (6.9 to 14.1)            | 0.6 (0.3 to 1.2)                | 15.7 (13.9 to 17.7)               | 138.1 (120.0 to 157.5) | 54.1 (41.4 to 68.7)        | 31.8 (22.0 to 45.0)           | 2.1 (1.0 to 3.9)                | 50.1 (44.4 to 56.4)               |
| Tanzania | 2023 | 43.9 (38.4 to 50.9)        | 17.4 (13.3 to 22.1)        | 10.1 (6.9 to 14.3)            | 0.7 (0.3 to 1.3)                | 15.7 (13.7 to 17.9)               | 139.9 (122.5 to 162.3) | 55.6 (42.4 to 70.5)        | 32.1 (22.2 to 45.5)           | 2.1 (1.0 to 4.0)                | 50.2 (43.6 to 57.1)               |
| Tanzania | 2024 | 44.5 (38.4 to 51.6)        | 17.9 (13.6 to 22.7)        | 10.1 (7.0 to 14.5)            | 0.7 (0.3 to 1.3)                | 15.8 (13.6 to 18.3)               | 141.9 (122.4 to 164.4) | 57.0 (43.5 to 72.5)        | 32.4 (22.4 to 46.2)           | 2.2 (1.0 to 4.1)                | 50.3 (43.2 to 58.2)               |
| Tanzania | 2025 | 45.1 (39.0 to 52.3)        | 18.4 (14.0 to 23.4)        | 10.2 (7.1 to 14.7)            | 0.7 (0.3 to 1.3)                | 15.8 (13.4 to 18.6)               | 143.7 (124.3 to 166.8) | 58.5 (44.7 to 74.5)        | 32.7 (22.6 to 46.7)           | 2.2 (1.0 to 4.3)                | 50.3 (42.8 to 59.2)               |
| Tanzania | 2026 | 45.7 (39.5 to 53.5)        | 18.9 (14.4 to 24.0)        | 10.3 (7.1 to 14.8)            | 0.7 (0.3 to 1.4)                | 15.7 (13.3 to 18.4)               | 145.6 (125.9 to 170.7) | 60.2 (45.8 to 76.6)        | 33.0 (22.8 to 47.1)           | 2.3 (1.1 to 4.4)                | 50.2 (42.4 to 58.7)               |
| Tanzania | 2027 | 46.3 (40.0 to 53.7)        | 19.4 (14.8 to 24.8)        | 10.5 (7.2 to 15.0)            | 0.7 (0.3 to 1.4)                | 15.7 (13.1 to 18.7)               | 147.7 (127.7 to 171.3) | 61.9 (47.1 to 79.0)        | 33.4 (23.1 to 47.8)           | 2.4 (1.1 to 4.5)                | 50.1 (41.9 to 59.6)               |
| Tanzania | 2028 | 47.0 (40.1 to 54.4)        | 20.0 (15.2 to 25.5)        | 10.6 (7.3 to 15.3)            | 0.8 (0.4 to 1.5)                | 15.7 (13.1 to 19.0)               | 149.8 (128.0 to 173.5) | 63.6 (48.5 to 81.2)        | 33.7 (23.3 to 48.6)           | 2.5 (1.1 to 4.7)                | 50.0 (41.8 to 60.4)               |
| Tanzania | 2029 | 47.7 (41.0 to 55.5)        | 20.6 (15.7 to 26.2)        | 10.7 (7.4 to 15.5)            | 0.8 (0.4 to 1.5)                | 15.7 (12.9 to 19.1)               | 152.2 (130.7 to 177.1) | 65.5 (50.0 to 83.7)        | 34.1 (23.5 to 49.4)           | 2.5 (1.2 to 4.9)                | 49.9 (41.1 to 61.0)               |

| Country  | Year | 2018 US Dollars per capita |                            |                               |                                 |                                   | 2018 PPP per capita    |                            |                               |                                 |                                   |
|----------|------|----------------------------|----------------------------|-------------------------------|---------------------------------|-----------------------------------|------------------------|----------------------------|-------------------------------|---------------------------------|-----------------------------------|
|          |      | Health spending            | Government health spending | Out-of-pocket health spending | Prepaid private health spending | Development assistance for health | Health spending        | Government health spending | Out-of-pocket health spending | Prepaid private health spending | Development assistance for health |
| Tanzania | 2030 | 48.5 (41.4 to 56.2)        | 21.2 (16.1 to 27.0)        | 10.8 (7.4 to 15.7)            | 0.8 (0.4 to 1.6)                | 15.6 (12.8 to 19.2)               | 154.5 (131.9 to 179.2) | 67.5 (51.5 to 86.0)        | 34.6 (23.6 to 50.1)           | 2.6 (1.2 to 5.0)                | 49.8 (40.8 to 61.1)               |
| Tanzania | 2031 | 49.3 (41.6 to 57.8)        | 21.8 (16.7 to 27.8)        | 11.0 (7.5 to 15.9)            | 0.8 (0.4 to 1.6)                | 15.6 (12.7 to 19.6)               | 157.1 (132.5 to 184.2) | 69.6 (53.2 to 88.6)        | 35.0 (23.9 to 50.8)           | 2.7 (1.2 to 5.2)                | 49.7 (40.4 to 62.5)               |
| Tanzania | 2032 | 50.1 (42.6 to 58.2)        | 22.5 (17.2 to 28.6)        | 11.1 (7.5 to 16.2)            | 0.9 (0.4 to 1.7)                | 15.6 (12.5 to 19.6)               | 159.8 (135.8 to 185.5) | 71.8 (54.9 to 91.3)        | 35.6 (24.1 to 51.6)           | 2.8 (1.3 to 5.3)                | 49.7 (39.9 to 62.5)               |
| Tanzania | 2033 | 51.0 (43.2 to 60.5)        | 23.2 (17.7 to 29.5)        | 11.3 (7.6 to 16.4)            | 0.9 (0.4 to 1.7)                | 15.6 (12.3 to 20.0)               | 162.6 (137.9 to 192.9) | 74.0 (56.6 to 94.1)        | 36.1 (24.3 to 52.3)           | 2.9 (1.3 to 5.5)                | 49.6 (39.3 to 63.7)               |
| Tanzania | 2034 | 52.0 (44.1 to 60.8)        | 24.0 (18.3 to 30.5)        | 11.5 (7.8 to 16.7)            | 0.9 (0.4 to 1.8)                | 15.6 (12.3 to 20.1)               | 165.7 (140.7 to 193.7) | 76.4 (58.3 to 97.4)        | 36.7 (24.7 to 53.3)           | 3.0 (1.4 to 5.7)                | 49.7 (39.1 to 64.2)               |
| Tanzania | 2035 | 53.0 (44.5 to 63.3)        | 24.8 (18.9 to 31.5)        | 11.7 (7.9 to 17.0)            | 1.0 (0.4 to 1.9)                | 15.6 (12.1 to 20.5)               | 169.0 (141.9 to 202.0) | 78.9 (60.2 to 100.4)       | 37.3 (25.0 to 54.3)           | 3.0 (1.4 to 5.9)                | 49.7 (38.6 to 65.5)               |
| Tanzania | 2036 | 54.0 (45.1 to 63.5)        | 25.6 (19.5 to 32.6)        | 11.9 (7.9 to 17.4)            | 1.0 (0.5 to 1.9)                | 15.6 (12.0 to 20.9)               | 172.3 (143.9 to 202.5) | 81.5 (62.2 to 103.8)       | 37.9 (25.3 to 55.6)           | 3.1 (1.5 to 6.1)                | 49.8 (38.3 to 66.7)               |
| Tanzania | 2037 | 55.1 (45.7 to 66.0)        | 26.4 (20.1 to 33.7)        | 12.1 (8.0 to 17.8)            | 1.0 (0.5 to 2.0)                | 15.6 (11.9 to 21.0)               | 175.8 (145.7 to 210.5) | 84.2 (64.2 to 107.3)       | 38.6 (25.7 to 56.7)           | 3.2 (1.5 to 6.3)                | 49.7 (38.1 to 66.9)               |
| Tanzania | 2038 | 56.3 (47.1 to 67.1)        | 27.3 (20.8 to 34.8)        | 12.3 (8.2 to 18.1)            | 1.0 (0.5 to 2.0)                | 15.6 (11.9 to 21.7)               | 179.5 (150.4 to 214.0) | 87.0 (66.4 to 111.0)       | 39.3 (26.0 to 57.8)           | 3.3 (1.6 to 6.5)                | 49.9 (38.0 to 69.1)               |
| Tanzania | 2039 | 57.5 (47.3 to 68.4)        | 28.2 (21.5 to 35.9)        | 12.5 (8.3 to 18.5)            | 1.1 (0.5 to 2.1)                | 15.6 (11.9 to 21.5)               | 183.2 (150.7 to 218.2) | 89.9 (68.4 to 114.4)       | 40.0 (26.4 to 59.1)           | 3.5 (1.6 to 6.7)                | 49.9 (37.9 to 68.6)               |
| Tanzania | 2040 | 58.8 (49.1 to 69.4)        | 29.2 (22.2 to 37.1)        | 12.8 (8.4 to 18.9)            | 1.1 (0.5 to 2.2)                | 15.7 (11.8 to 21.5)               | 187.4 (156.6 to 221.3) | 93.0 (70.7 to 118.4)       | 40.8 (26.8 to 60.3)           | 3.6 (1.6 to 6.9)                | 50.0 (37.7 to 68.4)               |
| Tanzania | 2041 | 60.1 (49.5 to 72.0)        | 30.2 (22.9 to 38.5)        | 13.0 (8.5 to 19.3)            | 1.2 (0.5 to 2.2)                | 15.7 (11.8 to 22.0)               | 191.6 (157.8 to 229.7) | 96.2 (72.9 to 122.8)       | 41.6 (27.3 to 61.5)           | 3.7 (1.7 to 7.1)                | 50.2 (37.7 to 70.2)               |
| Tanzania | 2042 | 61.5 (50.5 to 74.5)        | 31.2 (23.7 to 39.9)        | 13.3 (8.7 to 19.7)            | 1.2 (0.5 to 2.3)                | 15.8 (11.7 to 22.8)               | 196.1 (160.9 to 237.6) | 99.4 (75.4 to 127.1)       | 42.4 (27.7 to 62.8)           | 3.8 (1.7 to 7.3)                | 50.5 (37.3 to 72.9)               |
| Tanzania | 2043 | 63.0 (51.8 to 75.7)        | 32.2 (24.4 to 41.2)        | 13.6 (8.9 to 20.1)            | 1.2 (0.6 to 2.4)                | 15.9 (11.7 to 23.3)               | 200.8 (165.1 to 241.4) | 102.8 (77.9 to 131.5)      | 43.3 (28.2 to 64.2)           | 3.9 (1.8 to 7.6)                | 50.7 (37.4 to 74.2)               |
| Tanzania | 2044 | 64.5 (52.9 to 77.9)        | 33.4 (25.2 to 42.7)        | 13.9 (9.0 to 20.6)            | 1.3 (0.6 to 2.5)                | 16.0 (11.7 to 23.6)               | 205.6 (168.7 to 248.5) | 106.4 (80.4 to 136.0)      | 44.3 (28.8 to 65.6)           | 4.0 (1.9 to 7.8)                | 51.0 (37.2 to 75.3)               |
| Tanzania | 2045 | 66.1 (54.1 to 80.3)        | 34.5 (26.0 to 44.2)        | 14.2 (9.2 to 21.1)            | 1.3 (0.6 to 2.5)                | 16.1 (11.7 to 24.0)               | 210.7 (172.5 to 256.0) | 110.0 (83.0 to 140.9)      | 45.2 (29.4 to 67.2)           | 4.2 (1.9 to 8.1)                | 51.3 (37.4 to 76.5)               |
| Tanzania | 2046 | 67.7 (56.2 to 82.9)        | 35.7 (26.8 to 45.7)        | 14.5 (9.4 to 21.5)            | 1.3 (0.6 to 2.6)                | 16.2 (11.6 to 24.5)               | 215.9 (179.2 to 264.3) | 113.7 (85.6 to 145.8)      | 46.3 (30.1 to 68.6)           | 4.3 (2.0 to 8.4)                | 51.6 (37.1 to 78.3)               |
| Tanzania | 2047 | 69.4 (56.2 to 84.2)        | 36.8 (27.7 to 47.2)        | 14.8 (9.7 to 22.0)            | 1.4 (0.6 to 2.7)                | 16.3 (11.7 to 25.5)               | 221.3 (179.3 to 268.6) | 117.5 (88.2 to 150.7)      | 47.3 (30.8 to 70.1)           | 4.4 (2.0 to 8.7)                | 52.1 (37.4 to 81.3)               |
| Tanzania | 2048 | 71.2 (59.1 to 86.4)        | 38.1 (28.5 to 48.8)        | 15.2 (9.9 to 22.5)            | 1.4 (0.7 to 2.8)                | 16.5 (11.9 to 26.4)               | 226.9 (188.4 to 275.4) | 121.3 (91.0 to 155.7)      | 48.4 (31.4 to 71.8)           | 4.6 (2.1 to 8.9)                | 52.6 (37.8 to 84.2)               |
| Tanzania | 2049 | 72.9 (58.9 to 88.4)        | 39.3 (29.5 to 50.4)        | 15.5 (10.1 to 23.0)           | 1.5 (0.7 to 2.9)                | 16.7 (11.8 to 26.9)               | 232.6 (187.8 to 281.9) | 125.3 (93.9 to 160.9)      | 49.5 (32.1 to 73.5)           | 4.7 (2.1 to 9.2)                | 53.1 (37.6 to 85.8)               |
| Tanzania | 2050 | 74.8 (61.2 to 92.3)        | 40.6 (30.4 to 52.1)        | 15.9 (10.3 to 23.6)           | 1.5 (0.7 to 3.0)                | 16.8 (11.9 to 27.3)               | 238.6 (195.0 to 294.2) | 129.5 (97.0 to 166.0)      | 50.6 (32.7 to 75.2)           | 4.8 (2.2 to 9.5)                | 53.7 (38.1 to 87.1)               |

| Country  | Year | 2018 US Dollars per capita |                            |                               |                                 |                                   | 2018 PPP per capita    |                            |                               |                                 |                                   |
|----------|------|----------------------------|----------------------------|-------------------------------|---------------------------------|-----------------------------------|------------------------|----------------------------|-------------------------------|---------------------------------|-----------------------------------|
|          |      | Health spending            | Government health spending | Out-of-pocket health spending | Prepaid private health spending | Development assistance for health | Health spending        | Government health spending | Out-of-pocket health spending | Prepaid private health spending | Development assistance for health |
| Thailand | 1995 | 119.0 (101.8 to 139.1)     | 60.8 (49.9 to 73.5)        | 50.5 (37.7 to 66.9)           | 7.6 (3.9 to 13.4)               | 0.1 (0.1 to 0.1)                  | 336.8 (288.3 to 394.0) | 172.3 (141.3 to 208.1)     | 143.0 (106.7 to 189.3)        | 21.5 (11.0 to 37.9)             | 0.2 (0.2 to 0.2)                  |
| Thailand | 1996 | 129.5 (111.0 to 150.7)     | 67.8 (56.5 to 80.6)        | 52.8 (40.1 to 69.3)           | 8.7 (4.4 to 15.3)               | 0.2 (0.2 to 0.2)                  | 366.7 (314.4 to 426.8) | 192.0 (159.9 to 228.1)     | 149.5 (113.4 to 196.1)        | 24.5 (12.4 to 43.4)             | 0.7 (0.7 to 0.7)                  |
| Thailand | 1997 | 127.8 (109.6 to 148.6)     | 69.5 (58.5 to 82.1)        | 49.2 (37.1 to 63.5)           | 8.9 (4.4 to 16.0)               | 0.2 (0.2 to 0.2)                  | 361.9 (310.3 to 420.9) | 196.9 (165.5 to 232.6)     | 139.3 (105.2 to 179.8)        | 25.2 (12.4 to 45.3)             | 0.5 (0.5 to 0.5)                  |
| Thailand | 1998 | 117.1 (101.7 to 134.9)     | 65.2 (55.5 to 76.9)        | 43.3 (32.3 to 55.4)           | 8.5 (4.2 to 15.1)               | 0.1 (0.1 to 0.1)                  | 331.7 (287.9 to 382.1) | 184.6 (157.1 to 217.7)     | 122.6 (91.4 to 156.8)         | 24.1 (11.9 to 42.8)             | 0.4 (0.4 to 0.4)                  |
| Thailand | 1999 | 120.9 (105.9 to 137.7)     | 66.3 (56.6 to 77.8)        | 40.9 (30.8 to 52.0)           | 8.7 (4.3 to 15.6)               | 5.0 (5.0 to 5.0)                  | 342.2 (299.8 to 389.8) | 187.7 (160.3 to 220.4)     | 115.7 (87.1 to 147.3)         | 24.7 (12.1 to 44.2)             | 14.1 (14.1 to 14.1)               |
| Thailand | 2000 | 118.7 (103.7 to 135.7)     | 68.5 (58.6 to 80.1)        | 39.4 (29.6 to 50.3)           | 9.1 (4.5 to 16.4)               | 1.7 (1.7 to 1.7)                  | 336.0 (293.7 to 384.4) | 193.8 (165.8 to 226.9)     | 111.6 (83.8 to 142.5)         | 25.7 (12.7 to 46.4)             | 4.8 (4.8 to 4.8)                  |
| Thailand | 2001 | 119.3 (104.4 to 136.1)     | 71.4 (61.2 to 82.7)        | 38.1 (28.6 to 49.1)           | 9.2 (4.6 to 16.4)               | 0.5 (0.5 to 0.5)                  | 337.7 (295.5 to 385.3) | 202.1 (173.2 to 234.1)     | 107.9 (80.8 to 139.0)         | 26.2 (13.0 to 46.5)             | 1.5 (1.5 to 1.5)                  |
| Thailand | 2002 | 127.1 (111.7 to 145.7)     | 79.7 (68.2 to 92.0)        | 37.3 (27.8 to 47.8)           | 9.7 (4.9 to 17.3)               | 0.4 (0.4 to 0.4)                  | 359.9 (316.3 to 412.5) | 225.6 (193.1 to 260.4)     | 105.8 (78.6 to 135.4)         | 27.5 (14.0 to 49.1)             | 1.0 (1.0 to 1.0)                  |
| Thailand | 2003 | 134.8 (119.6 to 153.1)     | 87.4 (74.8 to 100.4)       | 36.8 (27.8 to 47.6)           | 10.1 (5.1 to 17.7)              | 0.6 (0.6 to 0.6)                  | 381.7 (338.7 to 433.6) | 247.3 (211.8 to 284.4)     | 104.2 (78.6 to 134.7)         | 28.5 (14.4 to 50.2)             | 1.6 (1.6 to 1.6)                  |
| Thailand | 2004 | 140.4 (124.0 to 158.4)     | 93.7 (81.4 to 107.3)       | 35.7 (27.1 to 45.8)           | 10.2 (5.2 to 17.9)              | 0.9 (0.9 to 0.9)                  | 397.5 (351.0 to 448.4) | 265.2 (230.5 to 303.9)     | 101.0 (76.6 to 129.6)         | 28.8 (14.7 to 50.8)             | 2.6 (2.6 to 2.6)                  |
| Thailand | 2005 | 144.2 (127.8 to 162.4)     | 99.6 (86.7 to 114.2)       | 33.7 (25.4 to 43.0)           | 10.3 (5.2 to 17.7)              | 0.7 (0.7 to 0.7)                  | 408.4 (361.7 to 459.9) | 281.9 (245.6 to 323.2)     | 95.4 (71.8 to 121.8)          | 29.2 (14.7 to 50.1)             | 1.9 (1.9 to 1.9)                  |
| Thailand | 2006 | 152.2 (134.7 to 171.2)     | 110.0 (95.7 to 126.1)      | 29.6 (22.5 to 37.8)           | 11.1 (5.9 to 18.9)              | 1.5 (1.5 to 1.5)                  | 430.9 (381.5 to 484.8) | 311.6 (271.0 to 357.0)     | 83.7 (63.8 to 107.1)          | 31.5 (16.6 to 53.4)             | 4.1 (4.1 to 4.1)                  |
| Thailand | 2007 | 162.7 (143.9 to 182.8)     | 121.9 (106.1 to 138.4)     | 27.6 (21.0 to 35.5)           | 12.1 (6.4 to 20.1)              | 1.1 (1.1 to 1.1)                  | 460.6 (407.6 to 517.7) | 345.0 (300.5 to 392.0)     | 78.1 (59.4 to 100.5)          | 34.2 (18.2 to 56.9)             | 3.3 (3.3 to 3.3)                  |
| Thailand | 2008 | 171.0 (151.7 to 192.5)     | 129.2 (112.4 to 147.6)     | 27.2 (20.8 to 35.5)           | 13.4 (7.1 to 22.6)              | 1.2 (1.2 to 1.2)                  | 484.1 (429.6 to 544.9) | 365.7 (318.1 to 417.9)     | 77.0 (58.8 to 100.6)          | 38.0 (20.1 to 64.1)             | 3.3 (3.3 to 3.3)                  |
| Thailand | 2009 | 174.4 (155.2 to 196.5)     | 131.8 (114.9 to 150.0)     | 27.1 (20.8 to 35.9)           | 14.7 (7.8 to 25.2)              | 0.9 (0.9 to 0.9)                  | 493.9 (439.5 to 556.5) | 373.0 (325.3 to 424.8)     | 76.6 (58.8 to 101.8)          | 41.7 (22.0 to 71.4)             | 2.5 (2.5 to 2.5)                  |
| Thailand | 2010 | 185.2 (164.9 to 207.2)     | 141.1 (123.7 to 159.5)     | 26.9 (20.3 to 35.6)           | 16.2 (8.6 to 27.4)              | 1.0 (1.0 to 1.0)                  | 524.3 (466.9 to 586.7) | 399.5 (350.3 to 451.7)     | 76.1 (57.5 to 100.9)          | 45.9 (24.3 to 77.6)             | 2.9 (2.9 to 2.9)                  |
| Thailand | 2011 | 190.1 (168.9 to 211.7)     | 145.8 (129.0 to 164.1)     | 26.2 (19.7 to 34.5)           | 16.6 (8.8 to 28.0)              | 1.5 (1.5 to 1.5)                  | 538.3 (478.1 to 599.6) | 412.9 (365.3 to 464.7)     | 74.2 (55.8 to 97.7)           | 47.0 (25.0 to 79.4)             | 4.2 (4.2 to 4.2)                  |
| Thailand | 2012 | 200.9 (177.1 to 223.4)     | 155.5 (137.8 to 174.6)     | 26.8 (20.1 to 35.4)           | 18.0 (9.7 to 30.2)              | 0.6 (0.6 to 0.6)                  | 568.8 (501.3 to 632.6) | 440.3 (390.2 to 494.4)     | 75.8 (56.9 to 100.4)          | 50.9 (27.5 to 85.6)             | 1.8 (1.8 to 1.8)                  |
| Thailand | 2013 | 204.9 (181.5 to 230.1)     | 158.2 (139.7 to 179.4)     | 26.5 (19.3 to 35.8)           | 19.0 (10.1 to 31.9)             | 1.2 (1.2 to 1.2)                  | 580.1 (513.9 to 651.6) | 447.9 (395.6 to 508.1)     | 75.1 (54.7 to 101.3)          | 53.8 (28.5 to 90.3)             | 3.3 (3.3 to 3.3)                  |
| Thailand | 2014 | 211.4 (186.1 to 238.0)     | 162.7 (142.3 to 185.0)     | 27.1 (19.5 to 36.6)           | 20.5 (10.9 to 35.1)             | 1.1 (1.1 to 1.1)                  | 598.5 (527.1 to 673.8) | 460.6 (403.0 to 523.8)     | 76.9 (55.1 to 103.7)          | 58.0 (31.0 to 99.5)             | 3.1 (3.1 to 3.1)                  |
| Thailand | 2015 | 220.4 (192.9 to 251.5)     | 169.9 (147.8 to 195.8)     | 27.8 (19.7 to 37.0)           | 22.1 (11.5 to 39.4)             | 0.6 (0.6 to 0.6)                  | 624.0 (546.3 to 712.2) | 481.1 (418.5 to 554.4)     | 78.6 (55.7 to 104.8)          | 62.5 (32.7 to 111.6)            | 1.8 (1.8 to 1.8)                  |

| Country  | Year | 2018 US Dollars per capita |                            |                               |                                 |                                   | 2018 PPP per capita      |                            |                               |                                 |                                   |
|----------|------|----------------------------|----------------------------|-------------------------------|---------------------------------|-----------------------------------|--------------------------|----------------------------|-------------------------------|---------------------------------|-----------------------------------|
|          |      | Health spending            | Government health spending | Out-of-pocket health spending | Prepaid private health spending | Development assistance for health | Health spending          | Government health spending | Out-of-pocket health spending | Prepaid private health spending | Development assistance for health |
| Thailand | 2016 | 231.1 (199.9 to 265.2)     | 178.6 (152.9 to 208.5)     | 28.5 (19.9 to 38.0)           | 23.4 (12.2 to 41.0)             | 0.7 (0.7 to 0.7)                  | 654.3 (566.1 to 751.0)   | 505.7 (433.0 to 590.3)     | 80.6 (56.5 to 107.6)          | 66.2 (34.6 to 116.0)            | 1.8 (1.8 to 1.8)                  |
| Thailand | 2017 | 244.0 (210.8 to 279.9)     | 189.9 (162.8 to 221.6)     | 29.0 (20.2 to 38.7)           | 24.5 (12.8 to 42.8)             | 0.8 (0.8 to 0.8)                  | 691.0 (596.8 to 792.6)   | 537.5 (461.1 to 627.4)     | 82.0 (57.3 to 109.7)          | 69.3 (36.3 to 121.2)            | 2.1 (2.1 to 2.1)                  |
| Thailand | 2018 | 251.6 (218.3 to 288.4)     | 196.4 (168.3 to 229.2)     | 29.2 (20.5 to 39.1)           | 25.2 (13.2 to 44.1)             | 0.7 (0.7 to 0.7)                  | 712.3 (618.2 to 816.5)   | 556.1 (476.4 to 648.9)     | 82.8 (58.1 to 110.6)          | 71.4 (37.4 to 125.0)            | 2.0 (2.0 to 2.0)                  |
| Thailand | 2019 | 258.6 (224.1 to 298.6)     | 202.5 (173.6 to 236.1)     | 29.5 (20.7 to 39.3)           | 25.9 (13.6 to 45.4)             | 0.7 (0.7 to 0.8)                  | 732.1 (634.7 to 845.5)   | 573.2 (491.6 to 668.6)     | 83.5 (58.6 to 111.2)          | 73.4 (38.5 to 128.6)            | 2.1 (1.9 to 2.2)                  |
| Thailand | 2020 | 264.9 (228.4 to 306.2)     | 207.9 (178.3 to 242.4)     | 29.7 (20.6 to 39.7)           | 26.6 (14.0 to 46.7)             | 0.7 (0.7 to 0.8)                  | 750.1 (646.8 to 867.1)   | 588.6 (504.9 to 686.3)     | 84.1 (58.4 to 112.5)          | 75.3 (39.6 to 132.2)            | 2.1 (1.9 to 2.3)                  |
| Thailand | 2021 | 271.1 (235.0 to 312.7)     | 213.1 (183.0 to 248.5)     | 29.9 (20.8 to 40.1)           | 27.3 (14.3 to 47.9)             | 0.8 (0.7 to 0.8)                  | 767.5 (665.5 to 885.3)   | 603.5 (518.2 to 703.6)     | 84.7 (59.0 to 113.5)          | 77.2 (40.6 to 135.6)            | 2.2 (1.9 to 2.4)                  |
| Thailand | 2022 | 276.6 (238.1 to 319.6)     | 217.9 (187.2 to 254.2)     | 30.1 (20.9 to 40.6)           | 27.9 (14.7 to 49.0)             | 0.8 (0.7 to 0.9)                  | 783.2 (674.3 to 905.0)   | 616.9 (529.9 to 719.9)     | 85.1 (59.2 to 114.9)          | 78.9 (41.6 to 138.7)            | 2.2 (2.0 to 2.5)                  |
| Thailand | 2023 | 281.9 (243.2 to 328.5)     | 222.4 (190.7 to 259.7)     | 30.2 (21.0 to 40.5)           | 28.5 (15.0 to 50.0)             | 0.8 (0.7 to 0.9)                  | 798.1 (688.6 to 930.1)   | 629.6 (540.0 to 735.3)     | 85.6 (59.5 to 114.6)          | 80.6 (42.5 to 141.5)            | 2.3 (2.0 to 2.6)                  |
| Thailand | 2024 | 287.0 (249.3 to 332.7)     | 226.7 (194.7 to 265.2)     | 30.4 (21.0 to 40.9)           | 29.1 (15.3 to 51.0)             | 0.8 (0.7 to 1.0)                  | 812.6 (706.0 to 941.9)   | 642.0 (551.3 to 750.9)     | 85.9 (59.6 to 115.7)          | 82.3 (43.4 to 144.4)            | 2.4 (2.1 to 2.7)                  |
| Thailand | 2025 | 295.0 (254.0 to 341.5)     | 233.8 (200.6 to 274.7)     | 30.5 (21.2 to 41.0)           | 29.8 (15.7 to 52.2)             | 0.9 (0.7 to 1.0)                  | 835.3 (719.1 to 966.9)   | 662.0 (568.0 to 777.7)     | 86.4 (59.9 to 116.2)          | 84.4 (44.4 to 147.8)            | 2.4 (2.1 to 2.9)                  |
| Thailand | 2026 | 302.8 (261.1 to 354.0)     | 240.7 (206.5 to 281.1)     | 30.7 (21.4 to 41.3)           | 30.5 (16.1 to 53.4)             | 0.9 (0.8 to 1.0)                  | 857.4 (739.2 to 1002.4)  | 681.5 (584.6 to 795.9)     | 86.9 (60.6 to 116.8)          | 86.4 (45.5 to 151.1)            | 2.5 (2.1 to 3.0)                  |
| Thailand | 2027 | 311.0 (269.4 to 362.0)     | 248.0 (212.6 to 289.4)     | 30.9 (21.7 to 41.6)           | 31.2 (16.4 to 54.6)             | 0.9 (0.8 to 1.1)                  | 880.6 (762.7 to 1025.1)  | 702.1 (601.9 to 819.3)     | 87.4 (61.5 to 117.7)          | 88.5 (46.5 to 154.6)            | 2.6 (2.2 to 3.1)                  |
| Thailand | 2028 | 319.5 (276.9 to 371.8)     | 255.5 (218.6 to 298.6)     | 31.1 (22.0 to 42.0)           | 32.0 (16.8 to 55.8)             | 1.0 (0.8 to 1.1)                  | 904.7 (783.9 to 1052.6)  | 723.4 (619.1 to 845.4)     | 88.0 (62.2 to 118.9)          | 90.6 (47.6 to 158.1)            | 2.7 (2.3 to 3.3)                  |
| Thailand | 2029 | 328.3 (284.0 to 381.1)     | 263.3 (224.7 to 307.4)     | 31.3 (22.1 to 42.4)           | 32.8 (17.2 to 57.1)             | 1.0 (0.8 to 1.2)                  | 929.6 (804.1 to 1079.2)  | 745.4 (636.2 to 870.4)     | 88.6 (62.5 to 120.1)          | 92.8 (48.7 to 161.7)            | 2.8 (2.3 to 3.4)                  |
| Thailand | 2030 | 337.2 (289.9 to 393.4)     | 271.1 (231.3 to 317.0)     | 31.5 (22.0 to 43.0)           | 33.6 (17.6 to 58.4)             | 1.0 (0.8 to 1.2)                  | 954.9 (820.9 to 1113.8)  | 767.7 (654.9 to 897.6)     | 89.3 (62.3 to 121.9)          | 95.0 (50.0 to 165.3)            | 2.9 (2.3 to 3.5)                  |
| Thailand | 2031 | 346.0 (296.5 to 403.3)     | 278.9 (237.5 to 328.0)     | 31.8 (22.2 to 43.8)           | 34.3 (18.0 to 59.7)             | 1.0 (0.8 to 1.3)                  | 979.8 (839.4 to 1141.9)  | 789.6 (672.6 to 928.6)     | 90.0 (62.8 to 124.0)          | 97.2 (50.9 to 168.9)            | 3.0 (2.4 to 3.7)                  |
| Thailand | 2032 | 354.9 (304.5 to 414.4)     | 286.7 (244.2 to 337.9)     | 32.1 (22.3 to 44.3)           | 35.1 (18.4 to 60.9)             | 1.1 (0.9 to 1.4)                  | 1005.0 (862.3 to 1173.3) | 811.7 (691.5 to 956.9)     | 90.8 (63.2 to 125.4)          | 99.4 (52.1 to 172.6)            | 3.1 (2.5 to 3.9)                  |
| Thailand | 2033 | 364.1 (310.3 to 423.5)     | 294.6 (250.8 to 347.1)     | 32.4 (22.5 to 44.8)           | 35.9 (18.8 to 62.3)             | 1.1 (0.9 to 1.4)                  | 1030.9 (878.7 to 1199.1) | 834.3 (710.0 to 982.8)     | 91.7 (63.7 to 127.0)          | 101.7 (53.2 to 176.3)           | 3.2 (2.5 to 4.1)                  |
| Thailand | 2034 | 373.2 (320.2 to 434.6)     | 302.6 (256.6 to 358.2)     | 32.7 (22.6 to 45.4)           | 36.7 (19.2 to 63.6)             | 1.2 (0.9 to 1.5)                  | 1056.6 (906.5 to 1230.5) | 856.7 (726.5 to 1014.1)    | 92.7 (63.9 to 128.6)          | 104.0 (54.4 to 180.1)           | 3.3 (2.6 to 4.2)                  |
| Thailand | 2035 | 382.3 (327.5 to 448.6)     | 310.4 (262.6 to 368.5)     | 33.1 (22.8 to 46.0)           | 37.6 (19.6 to 64.9)             | 1.2 (0.9 to 1.6)                  | 1082.4 (927.3 to 1270.2) | 879.0 (743.5 to 1043.5)    | 93.7 (64.6 to 130.3)          | 106.3 (55.5 to 183.8)           | 3.4 (2.6 to 4.4)                  |
| Thailand | 2036 | 391.3 (335.6 to 456.6)     | 318.2 (268.8 to 379.3)     | 33.5 (23.1 to 46.6)           | 38.4 (20.0 to 66.3)             | 1.2 (1.0 to 1.7)                  | 1108.0 (950.3 to 1292.7) | 901.0 (761.2 to 1073.9)    | 94.7 (65.3 to 132.0)          | 108.7 (56.7 to 187.8)           | 3.5 (2.7 to 4.7)                  |

| Country     | Year | 2018 US Dollars per capita |                            |                               |                                 |                                   | 2018 PPP per capita       |                            |                               |                                 |                                   |
|-------------|------|----------------------------|----------------------------|-------------------------------|---------------------------------|-----------------------------------|---------------------------|----------------------------|-------------------------------|---------------------------------|-----------------------------------|
|             |      | Health spending            | Government health spending | Out-of-pocket health spending | Prepaid private health spending | Development assistance for health | Health spending           | Government health spending | Out-of-pocket health spending | Prepaid private health spending | Development assistance for health |
| Thailand    | 2037 | 400.1 (341.2 to 470.6)     | 325.7 (274.2 to 389.5)     | 33.8 (23.3 to 47.1)           | 39.2 (20.4 to 67.8)             | 1.3 (1.0 to 1.7)                  | 1132.8 (966.0 to 1332.6)  | 922.3 (776.3 to 1102.8)    | 95.8 (65.9 to 133.5)          | 111.0 (57.9 to 192.0)           | 3.6 (2.8 to 4.9)                  |
| Thailand    | 2038 | 408.7 (347.0 to 478.9)     | 333.1 (280.1 to 399.5)     | 34.3 (23.5 to 48.0)           | 40.0 (20.8 to 69.1)             | 1.3 (1.0 to 1.9)                  | 1157.3 (982.5 to 1356.1)  | 943.2 (793.2 to 1131.1)    | 97.0 (66.5 to 135.8)          | 113.3 (59.0 to 195.6)           | 3.8 (2.9 to 5.2)                  |
| Thailand    | 2039 | 417.6 (352.6 to 493.7)     | 340.6 (287.0 to 409.7)     | 34.7 (23.8 to 48.8)           | 40.9 (21.3 to 70.3)             | 1.4 (1.1 to 1.9)                  | 1182.3 (998.5 to 1397.8)  | 964.4 (812.5 to 1160.0)    | 98.3 (67.3 to 138.3)          | 115.7 (60.2 to 199.2)           | 3.9 (3.0 to 5.4)                  |
| Thailand    | 2040 | 426.5 (359.5 to 504.7)     | 348.2 (292.1 to 420.1)     | 35.2 (24.1 to 49.8)           | 41.7 (21.7 to 71.9)             | 1.4 (1.1 to 2.0)                  | 1207.7 (1017.8 to 1428.9) | 985.8 (826.9 to 1189.6)    | 99.6 (68.1 to 141.0)          | 118.2 (61.4 to 203.6)           | 4.0 (3.1 to 5.6)                  |
| Thailand    | 2041 | 435.5 (369.6 to 517.3)     | 355.7 (298.2 to 430.5)     | 35.7 (24.4 to 50.8)           | 42.6 (22.1 to 73.4)             | 1.5 (1.1 to 2.1)                  | 1233.1 (1046.4 to 1464.7) | 1007.2 (844.3 to 1218.8)   | 101.0 (69.0 to 143.9)         | 120.7 (62.7 to 207.7)           | 4.2 (3.2 to 5.8)                  |
| Thailand    | 2042 | 444.5 (376.5 to 529.8)     | 363.2 (304.2 to 439.8)     | 36.2 (24.7 to 51.8)           | 43.5 (22.6 to 74.8)             | 1.5 (1.2 to 2.2)                  | 1258.6 (1065.9 to 1500.0) | 1028.4 (861.2 to 1245.2)   | 102.5 (69.8 to 146.6)         | 123.3 (64.0 to 211.9)           | 4.4 (3.3 to 6.2)                  |
| Thailand    | 2043 | 453.5 (384.0 to 539.8)     | 370.6 (309.8 to 449.9)     | 36.8 (25.0 to 52.5)           | 44.5 (23.1 to 76.3)             | 1.6 (1.2 to 2.3)                  | 1284.0 (1087.1 to 1528.3) | 1049.4 (877.3 to 1273.8)   | 104.1 (70.8 to 148.7)         | 125.9 (65.3 to 216.1)           | 4.5 (3.3 to 6.5)                  |
| Thailand    | 2044 | 462.7 (393.7 to 551.3)     | 378.3 (315.9 to 459.6)     | 37.4 (25.4 to 53.5)           | 45.4 (23.5 to 77.9)             | 1.7 (1.2 to 2.4)                  | 1310.2 (1114.7 to 1560.9) | 1071.0 (894.5 to 1301.2)   | 105.9 (71.9 to 151.4)         | 128.7 (66.7 to 220.6)           | 4.7 (3.5 to 6.8)                  |
| Thailand    | 2045 | 472.6 (397.1 to 563.8)     | 386.4 (322.2 to 468.6)     | 38.0 (25.8 to 54.4)           | 46.5 (24.0 to 79.6)             | 1.7 (1.2 to 2.6)                  | 1338.0 (1124.5 to 1596.4) | 1093.9 (912.1 to 1326.7)   | 107.7 (73.1 to 154.1)         | 131.5 (68.1 to 225.4)           | 4.9 (3.5 to 7.4)                  |
| Thailand    | 2046 | 483.4 (410.8 to 572.3)     | 395.3 (329.2 to 479.5)     | 38.7 (26.2 to 55.6)           | 47.5 (24.6 to 81.5)             | 1.8 (1.3 to 2.8)                  | 1368.6 (1163.1 to 1620.4) | 1119.2 (932.2 to 1357.5)   | 109.7 (74.3 to 157.5)         | 134.6 (69.6 to 230.6)           | 5.1 (3.7 to 7.8)                  |
| Thailand    | 2047 | 494.9 (418.3 to 591.5)     | 404.8 (337.0 to 491.9)     | 39.5 (26.7 to 56.9)           | 48.7 (25.2 to 83.5)             | 1.8 (1.3 to 2.9)                  | 1401.2 (1184.5 to 1674.7) | 1146.2 (954.2 to 1392.8)   | 111.9 (75.5 to 161.1)         | 137.9 (71.2 to 236.4)           | 5.2 (3.7 to 8.3)                  |
| Thailand    | 2048 | 507.3 (426.9 to 610.5)     | 415.2 (345.3 to 504.3)     | 40.3 (27.1 to 58.2)           | 49.9 (25.7 to 85.7)             | 1.9 (1.3 to 3.1)                  | 1436.3 (1208.7 to 1728.6) | 1175.5 (977.7 to 1427.9)   | 114.1 (76.8 to 164.8)         | 141.3 (72.9 to 242.5)           | 5.4 (3.8 to 8.9)                  |
| Thailand    | 2049 | 520.2 (440.0 to 617.6)     | 425.9 (353.5 to 517.1)     | 41.1 (27.6 to 59.5)           | 51.2 (26.3 to 87.9)             | 2.0 (1.2 to 3.3)                  | 1472.8 (1245.7 to 1748.6) | 1206.0 (1000.8 to 1464.1)  | 116.3 (78.2 to 168.5)         | 144.9 (74.5 to 248.9)           | 5.6 (3.4 to 9.2)                  |
| Thailand    | 2050 | 533.8 (451.5 to 637.6)     | 437.3 (363.1 to 530.6)     | 41.9 (28.1 to 60.9)           | 52.5 (26.9 to 90.2)             | 2.1 (0.0 to 3.4)                  | 1511.3 (1278.4 to 1805.2) | 1238.2 (1028.0 to 1502.2)  | 118.7 (79.6 to 172.5)         | 148.6 (76.3 to 255.5)           | 5.8 (0.0 to 9.6)                  |
| The Bahamas | 1995 | 1588.7 (1513.7 to 1669.7)  | 610.4 (569.2 to 657.2)     | 383.0 (345.1 to 423.9)        | 595.3 (542.1 to 650.0)          | 0.0 (0.0 to 0.0)                  | 1619.7 (1543.3 to 1702.3) | 622.3 (580.3 to 670.0)     | 390.5 (351.8 to 432.2)        | 606.9 (552.7 to 662.7)          | 0.0 (0.0 to 0.0)                  |
| The Bahamas | 1996 | 1570.8 (1511.2 to 1632.7)  | 624.2 (586.9 to 663.8)     | 370.0 (338.8 to 402.2)        | 576.7 (535.0 to 618.6)          | 0.0 (0.0 to 0.0)                  | 1601.5 (1540.7 to 1664.6) | 636.4 (598.3 to 676.8)     | 377.2 (345.4 to 410.1)        | 587.9 (545.5 to 630.7)          | 0.0 (0.0 to 0.0)                  |
| The Bahamas | 1997 | 1424.6 (1372.8 to 1479.9)  | 601.6 (568.5 to 635.6)     | 328.2 (302.0 to 353.8)        | 494.8 (459.3 to 532.7)          | 0.0 (0.0 to 0.0)                  | 1452.4 (1399.6 to 1508.8) | 613.3 (579.6 to 648.0)     | 334.6 (307.9 to 360.7)        | 504.4 (468.2 to 543.1)          | 0.0 (0.0 to 0.0)                  |
| The Bahamas | 1998 | 1393.7 (1343.7 to 1449.5)  | 620.4 (588.2 to 655.0)     | 309.4 (284.8 to 333.8)        | 464.0 (431.4 to 498.8)          | 0.0 (0.0 to 0.0)                  | 1420.9 (1369.9 to 1477.7) | 632.5 (599.7 to 667.8)     | 315.4 (290.4 to 340.3)        | 473.0 (439.8 to 508.5)          | 0.0 (0.0 to 0.0)                  |
| The Bahamas | 1999 | 1383.8 (1335.7 to 1438.2)  | 641.7 (607.8 to 676.6)     | 298.3 (275.1 to 321.3)        | 443.8 (413.3 to 475.2)          | 0.0 (0.0 to 0.0)                  | 1410.8 (1361.8 to 1466.3) | 654.2 (619.7 to 689.8)     | 304.1 (280.5 to 327.6)        | 452.4 (421.3 to 484.4)          | 0.0 (0.0 to 0.0)                  |
| The Bahamas | 2000 | 1378.6 (1332.3 to 1431.1)  | 652.4 (618.6 to 685.5)     | 296.5 (274.8 to 318.2)        | 429.7 (402.2 to 459.6)          | 0.0 (0.0 to 0.0)                  | 1405.5 (1358.3 to 1459.1) | 665.1 (630.6 to 698.8)     | 302.3 (280.2 to 324.4)        | 438.1 (410.0 to 468.6)          | 0.0 (0.0 to 0.0)                  |
| The Bahamas | 2001 | 1380.6 (1334.2 to 1427.3)  | 657.3 (625.2 to 690.4)     | 304.3 (283.9 to 324.7)        | 418.9 (392.2 to 445.7)          | 0.0 (0.0 to 0.0)                  | 1407.5 (1360.3 to 1455.2) | 670.2 (637.4 to 703.9)     | 310.2 (289.4 to 331.1)        | 427.1 (399.9 to 454.4)          | 0.0 (0.0 to 0.0)                  |

| Country     | Year | 2018 US Dollars per capita |                            |                               |                                 |                                   | 2018 PPP per capita       |                            |                               |                                 |                                   |
|-------------|------|----------------------------|----------------------------|-------------------------------|---------------------------------|-----------------------------------|---------------------------|----------------------------|-------------------------------|---------------------------------|-----------------------------------|
|             |      | Health spending            | Government health spending | Out-of-pocket health spending | Prepaid private health spending | Development assistance for health | Health spending           | Government health spending | Out-of-pocket health spending | Prepaid private health spending | Development assistance for health |
| The Bahamas | 2002 | 1447.5 (1398.6 to 1495.7)  | 688.6 (656.8 to 723.0)     | 336.1 (315.8 to 357.3)        | 422.8 (394.8 to 449.8)          | 0.0 (0.0 to 0.0)                  | 1475.7 (1425.9 to 1524.9) | 702.1 (669.6 to 737.1)     | 342.7 (322.0 to 364.3)        | 431.0 (402.5 to 458.6)          | 0.0 (0.0 to 0.0)                  |
| The Bahamas | 2003 | 1477.8 (1434.3 to 1525.1)  | 691.1 (660.1 to 724.5)     | 371.7 (350.0 to 392.9)        | 414.9 (388.0 to 442.9)          | 0.0 (0.0 to 0.0)                  | 1506.6 (1462.3 to 1554.9) | 704.6 (673.0 to 738.6)     | 379.0 (356.8 to 400.5)        | 423.0 (395.6 to 451.5)          | 0.0 (0.0 to 0.0)                  |
| The Bahamas | 2004 | 1545.9 (1498.5 to 1596.8)  | 711.5 (681.1 to 747.4)     | 418.1 (395.8 to 441.3)        | 416.3 (388.3 to 443.5)          | 0.0 (0.0 to 0.0)                  | 1576.0 (1527.7 to 1627.9) | 725.3 (694.4 to 762.0)     | 426.3 (403.5 to 449.9)        | 424.4 (395.8 to 452.1)          | 0.0 (0.0 to 0.0)                  |
| The Bahamas | 2005 | 1664.4 (1612.3 to 1713.0)  | 755.5 (722.7 to 791.0)     | 475.0 (449.4 to 501.2)        | 433.8 (406.5 to 462.7)          | 0.0 (0.0 to 0.0)                  | 1696.8 (1643.8 to 1746.4) | 770.3 (736.8 to 806.4)     | 484.3 (458.2 to 511.0)        | 442.3 (414.5 to 471.7)          | 0.0 (0.0 to 0.0)                  |
| The Bahamas | 2006 | 1812.0 (1758.8 to 1863.1)  | 819.2 (785.7 to 852.8)     | 526.4 (500.1 to 555.9)        | 466.4 (438.3 to 498.3)          | 0.0 (0.0 to 0.0)                  | 1847.4 (1793.1 to 1899.4) | 835.2 (801.0 to 869.5)     | 536.7 (509.9 to 566.8)        | 475.5 (446.8 to 508.0)          | 0.0 (0.0 to 0.0)                  |
| The Bahamas | 2007 | 1916.1 (1862.0 to 1970.2)  | 869.5 (834.2 to 903.8)     | 564.5 (537.7 to 594.6)        | 482.0 (453.5 to 512.7)          | 0.0 (0.0 to 0.0)                  | 1953.4 (1898.3 to 2008.6) | 886.5 (850.5 to 921.4)     | 575.5 (548.2 to 606.2)        | 491.5 (462.4 to 522.7)          | 0.0 (0.0 to 0.0)                  |
| The Bahamas | 2008 | 1932.1 (1877.1 to 1985.3)  | 891.0 (854.9 to 926.3)     | 566.4 (540.5 to 594.4)        | 474.7 (446.5 to 505.2)          | 0.0 (0.0 to 0.0)                  | 1969.8 (1913.7 to 2024.0) | 908.4 (871.5 to 944.3)     | 577.5 (551.1 to 606.0)        | 483.9 (455.3 to 515.1)          | 0.0 (0.0 to 0.0)                  |
| The Bahamas | 2009 | 1890.7 (1836.9 to 1945.7)  | 887.6 (853.8 to 923.2)     | 549.1 (523.8 to 576.1)        | 454.1 (427.5 to 482.4)          | 0.0 (0.0 to 0.0)                  | 1927.6 (1872.7 to 1983.7) | 904.9 (870.4 to 941.2)     | 559.8 (534.0 to 587.3)        | 462.9 (435.8 to 491.8)          | 0.0 (0.0 to 0.0)                  |
| The Bahamas | 2010 | 1922.3 (1865.5 to 1975.5)  | 912.1 (878.1 to 947.3)     | 552.3 (525.0 to 580.8)        | 457.9 (429.4 to 487.1)          | 0.0 (0.0 to 0.0)                  | 1959.8 (1901.9 to 2014.1) | 929.9 (895.2 to 965.8)     | 563.1 (535.2 to 592.1)        | 466.8 (437.8 to 496.6)          | 0.0 (0.0 to 0.0)                  |
| The Bahamas | 2011 | 1936.9 (1882.8 to 1989.2)  | 916.8 (883.3 to 953.6)     | 555.9 (529.3 to 582.2)        | 464.2 (435.3 to 492.9)          | 0.0 (0.0 to 0.0)                  | 1974.7 (1919.6 to 2028.0) | 934.7 (900.6 to 972.2)     | 566.7 (539.7 to 593.6)        | 473.2 (443.8 to 502.6)          | 0.0 (0.0 to 0.0)                  |
| The Bahamas | 2012 | 1958.6 (1904.3 to 2011.4)  | 922.5 (887.9 to 958.1)     | 562.5 (536.3 to 590.3)        | 473.6 (447.4 to 500.6)          | 0.0 (0.0 to 0.0)                  | 1996.8 (1941.5 to 2050.6) | 940.5 (905.3 to 976.8)     | 573.4 (546.8 to 601.8)        | 482.8 (456.1 to 510.4)          | 0.0 (0.0 to 0.0)                  |
| The Bahamas | 2013 | 1934.6 (1882.4 to 1985.0)  | 910.0 (873.7 to 945.3)     | 556.3 (529.2 to 583.4)        | 468.2 (440.2 to 497.5)          | 0.0 (0.0 to 0.0)                  | 1972.4 (1919.2 to 2023.7) | 927.8 (890.8 to 963.7)     | 567.2 (539.6 to 594.8)        | 477.4 (448.8 to 507.2)          | 0.0 (0.0 to 0.0)                  |
| The Bahamas | 2014 | 1902.7 (1849.6 to 1956.6)  | 898.5 (863.5 to 934.1)     | 548.4 (521.9 to 576.5)        | 455.7 (428.0 to 484.0)          | 0.0 (0.0 to 0.0)                  | 1939.8 (1885.7 to 1994.8) | 916.0 (880.4 to 952.3)     | 559.1 (532.0 to 587.8)        | 464.6 (436.3 to 493.5)          | 0.0 (0.0 to 0.0)                  |
| The Bahamas | 2015 | 1895.7 (1842.9 to 1952.0)  | 926.9 (889.7 to 964.4)     | 531.6 (502.1 to 560.1)        | 437.2 (409.8 to 466.7)          | 0.0 (0.0 to 0.0)                  | 1932.6 (1878.9 to 1990.1) | 945.0 (907.0 to 983.2)     | 541.9 (511.9 to 571.0)        | 445.7 (417.8 to 475.8)          | 0.0 (0.0 to 0.0)                  |
| The Bahamas | 2016 | 1937.9 (1864.6 to 2019.6)  | 966.3 (915.0 to 1017.7)    | 537.4 (499.6 to 575.5)        | 434.3 (397.0 to 477.1)          | 0.0 (0.0 to 0.0)                  | 1975.8 (1901.0 to 2059.0) | 985.1 (932.9 to 1037.6)    | 547.9 (509.3 to 586.7)        | 442.7 (404.7 to 486.4)          | 0.0 (0.0 to 0.0)                  |
| The Bahamas | 2017 | 2121.1 (2034.5 to 2212.4)  | 1106.3 (1046.8 to 1168.1)  | 556.3 (516.7 to 599.1)        | 458.5 (418.0 to 503.9)          | 0.0 (0.0 to 0.0)                  | 2162.4 (2074.2 to 2255.6) | 1127.9 (1067.2 to 1190.9)  | 567.1 (526.8 to 610.8)        | 467.5 (426.2 to 513.7)          | 0.0 (0.0 to 0.0)                  |
| The Bahamas | 2018 | 2144.4 (2061.3 to 2237.3)  | 1120.3 (1056.7 to 1183.2)  | 563.6 (523.2 to 606.9)        | 460.5 (419.3 to 505.5)          | 0.0 (0.0 to 0.0)                  | 2186.2 (2101.5 to 2280.9) | 1142.1 (1077.4 to 1206.2)  | 574.6 (533.4 to 618.8)        | 469.5 (427.5 to 515.4)          | 0.0 (0.0 to 0.0)                  |
| The Bahamas | 2019 | 2164.6 (2072.4 to 2263.0)  | 1129.8 (1066.7 to 1195.4)  | 570.0 (527.5 to 614.8)        | 464.8 (423.6 to 510.2)          | 0.0 (0.0 to 0.0)                  | 2206.9 (2112.9 to 2307.1) | 1151.8 (1087.5 to 1218.7)  | 581.1 (537.8 to 626.8)        | 473.9 (431.8 to 520.2)          | 0.0 (0.0 to 0.0)                  |
| The Bahamas | 2020 | 2183.9 (2093.8 to 2278.0)  | 1137.9 (1074.9 to 1203.6)  | 577.8 (534.3 to 623.8)        | 468.1 (426.8 to 513.6)          | 0.0 (0.0 to 0.0)                  | 2226.5 (2134.6 to 2322.5) | 1160.1 (1095.9 to 1227.1)  | 589.1 (544.7 to 636.0)        | 477.3 (435.1 to 523.6)          | 0.0 (0.0 to 0.0)                  |
| The Bahamas | 2021 | 2201.1 (2102.3 to 2296.4)  | 1144.8 (1082.1 to 1209.3)  | 585.2 (539.7 to 632.5)        | 471.0 (429.8 to 517.2)          | 0.0 (0.0 to 0.0)                  | 2244.0 (2143.3 to 2341.2) | 1167.1 (1103.2 to 1232.9)  | 596.7 (550.3 to 644.9)        | 480.2 (438.2 to 527.3)          | 0.0 (0.0 to 0.0)                  |
| The Bahamas | 2022 | 2215.2 (2128.3 to 2314.1)  | 1149.7 (1086.8 to 1214.4)  | 592.3 (543.8 to 643.0)        | 473.2 (431.7 to 519.3)          | 0.0 (0.0 to 0.0)                  | 2258.5 (2169.8 to 2359.2) | 1172.1 (1108.0 to 1238.1)  | 603.9 (554.4 to 655.5)        | 482.4 (440.1 to 529.4)          | 0.0 (0.0 to 0.0)                  |



| Country     | Year | 2018 US Dollars per capita |                            |                               |                                 |                                   | 2018 PPP per capita       |                            |                               |                                 |                                   |
|-------------|------|----------------------------|----------------------------|-------------------------------|---------------------------------|-----------------------------------|---------------------------|----------------------------|-------------------------------|---------------------------------|-----------------------------------|
|             |      | Health spending            | Government health spending | Out-of-pocket health spending | Prepaid private health spending | Development assistance for health | Health spending           | Government health spending | Out-of-pocket health spending | Prepaid private health spending | Development assistance for health |
| The Bahamas | 2023 | 2227.2 (2124.7 to 2325.0)  | 1153.2 (1088.7 to 1220.2)  | 599.1 (549.7 to 650.5)        | 474.9 (433.2 to 522.1)          | 0.0 (0.0 to 0.0)                  | 2270.6 (2166.2 to 2370.4) | 1175.7 (1109.9 to 1244.0)  | 610.8 (560.5 to 663.2)        | 484.1 (441.7 to 532.3)          | 0.0 (0.0 to 0.0)                  |
| The Bahamas | 2024 | 2232.8 (2146.1 to 2330.5)  | 1156.5 (1090.6 to 1226.7)  | 599.8 (549.7 to 651.5)        | 476.5 (434.5 to 523.6)          | 0.0 (0.0 to 0.0)                  | 2276.4 (2188.0 to 2376.0) | 1179.1 (1111.9 to 1250.7)  | 611.5 (560.5 to 664.2)        | 485.8 (442.9 to 533.8)          | 0.0 (0.0 to 0.0)                  |
| The Bahamas | 2025 | 2235.2 (2132.2 to 2331.8)  | 1159.3 (1092.7 to 1233.2)  | 597.8 (547.7 to 649.6)        | 478.0 (435.7 to 525.6)          | 0.0 (0.0 to 0.0)                  | 2278.8 (2173.8 to 2377.3) | 1182.0 (1114.0 to 1257.2)  | 609.5 (558.4 to 662.2)        | 487.4 (444.2 to 535.9)          | 0.0 (0.0 to 0.0)                  |
| The Bahamas | 2026 | 2239.0 (2147.1 to 2342.3)  | 1162.9 (1095.3 to 1238.8)  | 596.3 (543.3 to 649.3)        | 479.8 (436.6 to 529.8)          | 0.0 (0.0 to 0.0)                  | 2282.7 (2188.9 to 2388.0) | 1185.6 (1116.7 to 1263.0)  | 607.9 (553.9 to 662.0)        | 489.2 (445.1 to 540.2)          | 0.0 (0.0 to 0.0)                  |
| The Bahamas | 2027 | 2240.9 (2133.9 to 2346.2)  | 1165.4 (1096.8 to 1243.8)  | 594.3 (540.4 to 649.8)        | 481.3 (437.4 to 532.0)          | 0.0 (0.0 to 0.0)                  | 2284.6 (2175.6 to 2392.0) | 1188.1 (1118.2 to 1268.0)  | 605.9 (550.9 to 662.5)        | 490.6 (445.9 to 542.4)          | 0.0 (0.0 to 0.0)                  |
| The Bahamas | 2028 | 2247.1 (2151.0 to 2357.5)  | 1170.0 (1100.2 to 1250.2)  | 593.4 (537.3 to 651.9)        | 483.6 (439.7 to 534.6)          | 0.0 (0.0 to 0.0)                  | 2290.9 (2193.0 to 2403.5) | 1192.9 (1121.7 to 1274.6)  | 605.0 (547.7 to 664.7)        | 493.1 (448.2 to 545.1)          | 0.0 (0.0 to 0.0)                  |
| The Bahamas | 2029 | 2255.4 (2144.7 to 2368.7)  | 1175.8 (1105.0 to 1257.9)  | 593.1 (535.6 to 656.1)        | 486.5 (442.1 to 537.5)          | 0.0 (0.0 to 0.0)                  | 2299.4 (2186.6 to 2414.9) | 1198.7 (1126.6 to 1282.4)  | 604.6 (546.0 to 668.9)        | 496.0 (450.7 to 548.0)          | 0.0 (0.0 to 0.0)                  |
| The Bahamas | 2030 | 2262.9 (2163.5 to 2383.9)  | 1181.1 (1108.9 to 1265.2)  | 592.6 (534.1 to 657.9)        | 489.3 (444.8 to 540.4)          | 0.0 (0.0 to 0.0)                  | 2307.1 (2205.7 to 2430.4) | 1204.2 (1130.5 to 1289.8)  | 604.1 (544.5 to 670.8)        | 498.8 (453.5 to 550.9)          | 0.0 (0.0 to 0.0)                  |
| The Bahamas | 2031 | 2269.2 (2151.0 to 2393.3)  | 1185.7 (1110.2 to 1273.3)  | 591.7 (531.8 to 660.3)        | 491.8 (447.1 to 543.5)          | 0.0 (0.0 to 0.0)                  | 2313.5 (2193.0 to 2440.0) | 1208.9 (1131.8 to 1298.2)  | 603.2 (542.2 to 673.2)        | 501.4 (455.8 to 554.1)          | 0.0 (0.0 to 0.0)                  |
| The Bahamas | 2032 | 2278.2 (2167.0 to 2404.6)  | 1191.8 (1114.3 to 1283.1)  | 591.5 (530.5 to 665.9)        | 494.9 (449.2 to 547.8)          | 0.0 (0.0 to 0.0)                  | 2322.6 (2209.3 to 2451.5) | 1215.0 (1136.1 to 1308.1)  | 603.0 (540.9 to 678.9)        | 504.5 (458.0 to 558.5)          | 0.0 (0.0 to 0.0)                  |
| The Bahamas | 2033 | 2288.8 (2161.1 to 2421.6)  | 1198.7 (1118.8 to 1293.8)  | 591.7 (528.2 to 668.8)        | 498.4 (452.4 to 552.0)          | 0.0 (0.0 to 0.0)                  | 2333.5 (2203.3 to 2468.8) | 1222.1 (1140.6 to 1319.1)  | 603.2 (538.5 to 681.8)        | 508.1 (461.2 to 562.7)          | 0.0 (0.0 to 0.0)                  |
| The Bahamas | 2034 | 2298.1 (2181.9 to 2442.2)  | 1204.9 (1121.6 to 1303.5)  | 591.5 (525.5 to 670.9)        | 501.7 (454.6 to 556.1)          | 0.0 (0.0 to 0.0)                  | 2343.0 (2224.5 to 2489.8) | 1228.4 (1143.5 to 1329.0)  | 603.1 (535.7 to 684.0)        | 511.5 (463.4 to 567.0)          | 0.0 (0.0 to 0.0)                  |
| The Bahamas | 2035 | 2308.0 (2173.0 to 2449.6)  | 1211.4 (1125.1 to 1313.1)  | 591.5 (523.1 to 673.7)        | 505.1 (456.7 to 560.3)          | 0.0 (0.0 to 0.0)                  | 2353.0 (2215.4 to 2497.4) | 1235.0 (1147.1 to 1338.7)  | 603.1 (533.3 to 686.8)        | 514.9 (465.6 to 571.2)          | 0.0 (0.0 to 0.0)                  |
| The Bahamas | 2036 | 2317.1 (2191.5 to 2462.6)  | 1217.6 (1128.3 to 1322.7)  | 591.2 (520.7 to 678.2)        | 508.3 (458.6 to 564.5)          | 0.0 (0.0 to 0.0)                  | 2362.3 (2234.3 to 2510.6) | 1241.3 (1150.3 to 1348.5)  | 602.8 (530.9 to 691.5)        | 518.2 (467.5 to 575.5)          | 0.0 (0.0 to 0.0)                  |
| The Bahamas | 2037 | 2324.5 (2179.2 to 2481.8)  | 1222.7 (1130.5 to 1330.1)  | 590.5 (518.1 to 684.3)        | 511.3 (460.2 to 567.6)          | 0.0 (0.0 to 0.0)                  | 2369.9 (2221.7 to 2530.3) | 1246.6 (1152.6 to 1356.1)  | 602.0 (528.2 to 697.7)        | 521.2 (469.2 to 578.7)          | 0.0 (0.0 to 0.0)                  |
| The Bahamas | 2038 | 2332.2 (2199.2 to 2489.8)  | 1228.1 (1133.0 to 1338.8)  | 589.8 (515.5 to 689.2)        | 514.2 (462.3 to 571.5)          | 0.0 (0.0 to 0.0)                  | 2377.7 (2242.1 to 2538.4) | 1252.1 (1155.1 to 1365.0)  | 601.3 (525.5 to 702.7)        | 524.3 (471.3 to 582.7)          | 0.0 (0.0 to 0.0)                  |
| The Bahamas | 2039 | 2341.5 (2189.3 to 2507.5)  | 1234.4 (1135.3 to 1348.0)  | 589.5 (514.0 to 693.2)        | 517.7 (464.5 to 576.6)          | 0.0 (0.0 to 0.0)                  | 2387.2 (2232.0 to 2556.5) | 1258.4 (1157.5 to 1374.3)  | 601.0 (524.0 to 706.7)        | 527.8 (473.6 to 587.8)          | 0.0 (0.0 to 0.0)                  |
| The Bahamas | 2040 | 2352.1 (2208.4 to 2527.7)  | 1241.3 (1138.6 to 1357.0)  | 589.5 (513.0 to 699.4)        | 521.3 (466.9 to 581.4)          | 0.0 (0.0 to 0.0)                  | 2398.0 (2251.5 to 2577.0) | 1265.5 (1160.8 to 1383.5)  | 601.0 (523.0 to 713.1)        | 531.5 (476.1 to 592.7)          | 0.0 (0.0 to 0.0)                  |
| The Bahamas | 2041 | 2364.2 (2206.5 to 2541.4)  | 1248.9 (1144.1 to 1367.0)  | 589.8 (512.2 to 706.0)        | 525.5 (470.1 to 586.6)          | 0.0 (0.0 to 0.0)                  | 2410.3 (2249.5 to 2591.0) | 1273.3 (1166.5 to 1393.7)  | 601.3 (522.2 to 719.7)        | 535.7 (479.3 to 598.0)          | 0.0 (0.0 to 0.0)                  |
| The Bahamas | 2042 | 2378.3 (2226.8 to 2554.9)  | 1257.7 (1149.4 to 1379.3)  | 590.6 (512.0 to 712.7)        | 530.1 (473.6 to 592.9)          | 0.0 (0.0 to 0.0)                  | 2424.7 (2270.3 to 2604.8) | 1282.2 (1171.9 to 1406.2)  | 602.1 (521.9 to 726.6)        | 540.4 (482.8 to 604.5)          | 0.0 (0.0 to 0.0)                  |
| The Bahamas | 2043 | 2393.9 (2229.8 to 2580.3)  | 1267.2 (1155.5 to 1393.7)  | 591.7 (511.5 to 719.6)        | 535.0 (476.5 to 598.9)          | 0.0 (0.0 to 0.0)                  | 2440.6 (2273.3 to 2630.6) | 1292.0 (1178.0 to 1420.9)  | 603.2 (521.5 to 733.7)        | 545.4 (485.8 to 610.6)          | 0.0 (0.0 to 0.0)                  |

| Country     | Year | 2018 US Dollars per capita |                            |                               |                                 |                                   | 2018 PPP per capita       |                            |                               |                                 |                                   |
|-------------|------|----------------------------|----------------------------|-------------------------------|---------------------------------|-----------------------------------|---------------------------|----------------------------|-------------------------------|---------------------------------|-----------------------------------|
|             |      | Health spending            | Government health spending | Out-of-pocket health spending | Prepaid private health spending | Development assistance for health | Health spending           | Government health spending | Out-of-pocket health spending | Prepaid private health spending | Development assistance for health |
| The Bahamas | 2044 | 2407.6 (2246.0 to 2605.5)  | 1275.8 (1159.0 to 1407.7)  | 592.2 (510.9 to 726.3)        | 539.6 (479.9 to 605.5)          | 0.0 (0.0 to 0.0)                  | 2454.6 (2289.8 to 2656.3) | 1300.7 (1181.6 to 1435.2)  | 603.8 (520.8 to 740.5)        | 550.1 (489.2 to 617.3)          | 0.0 (0.0 to 0.0)                  |
| The Bahamas | 2045 | 2420.4 (2241.1 to 2617.2)  | 1284.1 (1162.6 to 1421.7)  | 592.4 (509.7 to 730.5)        | 543.9 (483.0 to 611.9)          | 0.0 (0.0 to 0.0)                  | 2467.6 (2284.8 to 2668.2) | 1309.2 (1185.3 to 1449.4)  | 604.0 (519.7 to 744.8)        | 554.5 (492.4 to 623.8)          | 0.0 (0.0 to 0.0)                  |
| The Bahamas | 2046 | 2433.3 (2267.8 to 2633.8)  | 1292.6 (1167.8 to 1435.1)  | 592.5 (508.7 to 737.0)        | 548.1 (485.7 to 618.9)          | 0.0 (0.0 to 0.0)                  | 2480.8 (2312.0 to 2685.2) | 1317.8 (1190.6 to 1463.1)  | 604.1 (518.6 to 751.3)        | 558.8 (495.1 to 631.0)          | 0.0 (0.0 to 0.0)                  |
| The Bahamas | 2047 | 2445.4 (2256.4 to 2641.4)  | 1300.8 (1171.3 to 1448.7)  | 592.3 (508.2 to 743.8)        | 552.2 (488.0 to 625.4)          | 0.0 (0.0 to 0.0)                  | 2493.1 (2300.5 to 2693.0) | 1326.2 (1194.2 to 1477.0)  | 603.9 (518.1 to 758.3)        | 563.0 (497.5 to 637.6)          | 0.0 (0.0 to 0.0)                  |
| The Bahamas | 2048 | 2457.2 (2286.5 to 2670.5)  | 1309.0 (1174.8 to 1462.9)  | 592.0 (507.5 to 751.0)        | 556.2 (489.1 to 631.7)          | 0.0 (0.0 to 0.0)                  | 2505.2 (2331.1 to 2722.6) | 1334.5 (1197.7 to 1491.4)  | 603.5 (517.4 to 765.6)        | 567.1 (498.6 to 644.0)          | 0.0 (0.0 to 0.0)                  |
| The Bahamas | 2049 | 2468.7 (2273.9 to 2687.4)  | 1317.1 (1178.2 to 1477.0)  | 591.5 (506.4 to 755.5)        | 560.1 (491.2 to 638.0)          | 0.0 (0.0 to 0.0)                  | 2516.9 (2318.3 to 2739.8) | 1342.8 (1201.2 to 1505.9)  | 603.0 (516.3 to 770.2)        | 571.0 (500.8 to 650.5)          | 0.0 (0.0 to 0.0)                  |
| The Bahamas | 2050 | 2478.9 (2289.5 to 2705.5)  | 1324.6 (1181.1 to 1489.6)  | 590.6 (505.4 to 761.4)        | 563.6 (492.8 to 643.6)          | 0.0 (0.0 to 0.0)                  | 2527.2 (2334.2 to 2758.3) | 1350.5 (1204.1 to 1518.7)  | 602.2 (515.3 to 776.2)        | 574.6 (502.4 to 656.2)          | 0.0 (0.0 to 0.0)                  |
| The Gambia  | 1995 | 18.5 (15.2 to 22.6)        | 7.8 (5.9 to 10.2)          | 5.5 (3.8 to 7.6)              | 3.3 (1.6 to 6.2)                | 1.9 (1.9 to 1.9)                  | 67.1 (55.0 to 82.1)       | 28.3 (21.6 to 37.1)        | 20.0 (13.7 to 27.7)           | 12.0 (5.8 to 22.5)              | 6.9 (6.9 to 6.9)                  |
| The Gambia  | 1996 | 20.2 (17.0 to 24.3)        | 7.6 (5.9 to 10.0)          | 5.6 (3.8 to 7.8)              | 3.3 (1.6 to 6.1)                | 3.7 (3.7 to 3.7)                  | 73.3 (61.6 to 88.3)       | 27.6 (21.2 to 36.1)        | 20.3 (13.8 to 28.2)           | 12.0 (5.7 to 22.3)              | 13.5 (13.5 to 13.5)               |
| The Gambia  | 1997 | 21.1 (17.9 to 25.1)        | 7.3 (5.7 to 9.5)           | 5.4 (3.8 to 7.6)              | 3.3 (1.5 to 6.1)                | 5.0 (5.0 to 5.0)                  | 76.5 (65.0 to 90.9)       | 26.6 (20.6 to 34.5)        | 19.8 (13.6 to 27.4)           | 11.9 (5.6 to 22.0)              | 18.2 (18.2 to 18.2)               |
| The Gambia  | 1998 | 19.2 (16.1 to 23.2)        | 7.0 (5.4 to 9.1)           | 5.5 (3.9 to 7.8)              | 3.3 (1.6 to 5.9)                | 3.3 (3.3 to 3.3)                  | 69.7 (58.4 to 84.1)       | 25.5 (19.7 to 33.1)        | 20.1 (14.0 to 28.3)           | 11.9 (5.8 to 21.5)              | 12.1 (12.1 to 12.1)               |
| The Gambia  | 1999 | 19.1 (16.1 to 22.9)        | 6.6 (5.1 to 8.5)           | 5.6 (3.9 to 7.9)              | 3.3 (1.6 to 6.0)                | 3.6 (3.6 to 3.6)                  | 69.3 (58.6 to 82.9)       | 23.8 (18.5 to 31.0)        | 20.3 (14.0 to 28.6)           | 11.9 (5.8 to 21.8)              | 13.2 (13.2 to 13.2)               |
| The Gambia  | 2000 | 18.0 (15.0 to 21.5)        | 5.6 (4.3 to 7.3)           | 5.5 (3.7 to 7.6)              | 3.1 (1.5 to 5.7)                | 3.8 (3.8 to 3.8)                  | 65.3 (54.6 to 78.2)       | 20.4 (15.7 to 26.4)        | 19.8 (13.4 to 27.7)           | 11.4 (5.3 to 20.6)              | 13.7 (13.7 to 13.7)               |
| The Gambia  | 2001 | 18.2 (15.3 to 21.8)        | 5.7 (4.4 to 7.4)           | 5.4 (3.7 to 7.5)              | 3.1 (1.5 to 5.8)                | 4.0 (4.0 to 4.0)                  | 66.1 (55.4 to 79.2)       | 20.9 (16.0 to 26.9)        | 19.5 (13.5 to 27.2)           | 11.3 (5.3 to 21.0)              | 14.4 (14.4 to 14.4)               |
| The Gambia  | 2002 | 21.1 (18.3 to 24.4)        | 5.5 (4.2 to 7.2)           | 5.1 (3.5 to 7.1)              | 2.8 (1.3 to 5.1)                | 7.7 (7.7 to 7.7)                  | 76.4 (66.4 to 88.4)       | 20.1 (15.2 to 26.2)        | 18.4 (12.6 to 25.6)           | 10.2 (4.7 to 18.5)              | 27.8 (27.8 to 27.8)               |
| The Gambia  | 2003 | 23.5 (20.5 to 26.9)        | 7.1 (5.3 to 9.1)           | 5.0 (3.5 to 7.0)              | 2.7 (1.3 to 4.9)                | 8.7 (8.7 to 8.7)                  | 85.2 (74.2 to 97.6)       | 25.6 (19.4 to 33.1)        | 18.3 (12.6 to 25.4)           | 9.9 (4.7 to 17.9)               | 31.4 (31.4 to 31.4)               |
| The Gambia  | 2004 | 31.9 (28.5 to 35.6)        | 8.7 (6.5 to 11.3)          | 5.0 (3.5 to 7.0)              | 2.8 (1.3 to 5.2)                | 15.3 (15.3 to 15.3)               | 115.7 (103.5 to 129.1)    | 31.7 (23.7 to 41.0)        | 18.3 (12.7 to 25.5)           | 10.3 (4.8 to 18.7)              | 55.5 (55.5 to 55.5)               |
| The Gambia  | 2005 | 34.7 (31.2 to 38.5)        | 9.0 (6.9 to 11.8)          | 5.1 (3.6 to 7.0)              | 2.9 (1.3 to 5.3)                | 17.7 (17.7 to 17.7)               | 125.8 (113.1 to 139.8)    | 32.8 (24.9 to 42.7)        | 18.5 (12.9 to 25.3)           | 10.4 (4.8 to 19.2)              | 64.0 (64.0 to 64.0)               |
| The Gambia  | 2006 | 28.5 (25.0 to 32.5)        | 8.9 (6.7 to 11.5)          | 5.2 (3.6 to 7.1)              | 3.0 (1.4 to 5.6)                | 11.4 (11.4 to 11.4)               | 103.3 (90.8 to 117.8)     | 32.2 (24.2 to 41.6)        | 19.0 (13.1 to 25.8)           | 10.9 (5.1 to 20.2)              | 41.2 (41.2 to 41.2)               |
| The Gambia  | 2007 | 29.7 (26.2 to 33.8)        | 9.1 (6.8 to 11.9)          | 5.5 (3.8 to 7.5)              | 3.4 (1.6 to 6.3)                | 11.8 (11.8 to 11.8)               | 107.9 (94.9 to 122.6)     | 32.9 (24.6 to 43.2)        | 20.0 (13.9 to 27.3)           | 12.2 (5.9 to 22.7)              | 42.8 (42.8 to 42.8)               |
| The Gambia  | 2008 | 29.7 (25.9 to 34.2)        | 9.4 (7.1 to 12.3)          | 5.8 (4.1 to 8.0)              | 3.8 (1.8 to 7.1)                | 10.6 (10.6 to 10.6)               | 107.7 (94.1 to 123.9)     | 34.2 (25.8 to 44.6)        | 21.1 (14.8 to 29.2)           | 13.9 (6.6 to 25.8)              | 38.5 (38.5 to 38.5)               |

| Country    | Year | 2018 US Dollars per capita |                            |                               |                                 |                                   | 2018 PPP per capita    |                            |                               |                                 |                                   |
|------------|------|----------------------------|----------------------------|-------------------------------|---------------------------------|-----------------------------------|------------------------|----------------------------|-------------------------------|---------------------------------|-----------------------------------|
|            |      | Health spending            | Government health spending | Out-of-pocket health spending | Prepaid private health spending | Development assistance for health | Health spending        | Government health spending | Out-of-pocket health spending | Prepaid private health spending | Development assistance for health |
| The Gambia | 2009 | 32.3 (28.4 to 37.2)        | 10.0 (7.6 to 13.0)         | 6.1 (4.3 to 8.7)              | 4.1 (1.9 to 7.6)                | 12.1 (12.1 to 12.1)               | 117.1 (102.9 to 135.0) | 36.3 (27.6 to 47.3)        | 22.1 (15.5 to 31.4)           | 14.8 (7.0 to 27.5)              | 43.9 (43.9 to 43.9)               |
| The Gambia | 2010 | 37.0 (33.3 to 41.8)        | 9.9 (7.6 to 12.9)          | 6.3 (4.4 to 8.8)              | 3.9 (1.9 to 7.1)                | 16.9 (16.9 to 16.9)               | 134.2 (120.7 to 151.7) | 36.1 (27.4 to 46.8)        | 22.7 (15.9 to 32.0)           | 14.2 (6.8 to 25.6)              | 61.2 (61.2 to 61.2)               |
| The Gambia | 2011 | 37.8 (34.4 to 42.3)        | 9.2 (7.0 to 11.8)          | 6.2 (4.3 to 8.5)              | 3.5 (1.7 to 6.4)                | 18.9 (18.9 to 18.9)               | 137.1 (124.7 to 153.5) | 33.2 (25.4 to 42.6)        | 22.4 (15.5 to 31.0)           | 12.8 (6.1 to 23.1)              | 68.7 (68.7 to 68.7)               |
| The Gambia | 2012 | 38.0 (34.8 to 42.2)        | 8.9 (6.9 to 11.4)          | 6.3 (4.3 to 8.7)              | 3.1 (1.4 to 5.6)                | 19.8 (19.8 to 19.8)               | 138.0 (126.2 to 153.3) | 32.3 (25.0 to 41.2)        | 22.8 (15.6 to 31.7)           | 11.3 (5.2 to 20.3)              | 71.7 (71.7 to 71.7)               |
| The Gambia | 2013 | 39.8 (36.9 to 43.6)        | 7.6 (5.9 to 9.7)           | 6.1 (4.2 to 8.4)              | 2.3 (1.1 to 4.3)                | 23.8 (23.8 to 23.8)               | 144.5 (133.9 to 158.1) | 27.5 (21.3 to 35.2)        | 22.2 (15.3 to 30.5)           | 8.5 (4.0 to 15.5)               | 86.3 (86.3 to 86.3)               |
| The Gambia | 2014 | 31.2 (28.7 to 34.4)        | 6.0 (4.7 to 7.7)           | 5.8 (4.0 to 8.0)              | 2.0 (1.0 to 3.6)                | 17.3 (17.3 to 17.3)               | 113.2 (104.0 to 124.8) | 21.9 (17.0 to 28.0)        | 21.2 (14.5 to 29.2)           | 7.3 (3.5 to 13.1)               | 62.9 (62.9 to 62.9)               |
| The Gambia | 2015 | 28.4 (25.8 to 31.5)        | 5.1 (3.9 to 6.5)           | 5.5 (3.8 to 7.6)              | 2.3 (1.1 to 4.2)                | 15.5 (15.5 to 15.5)               | 103.1 (93.6 to 114.1)  | 18.3 (14.0 to 23.6)        | 19.9 (13.9 to 27.6)           | 8.5 (4.1 to 15.3)               | 56.3 (56.3 to 56.3)               |
| The Gambia | 2016 | 28.6 (26.2 to 31.5)        | 4.6 (3.5 to 5.9)           | 5.2 (3.7 to 7.2)              | 2.5 (1.2 to 4.4)                | 16.2 (16.2 to 16.2)               | 103.6 (95.0 to 114.2)  | 16.8 (12.7 to 21.6)        | 19.0 (13.3 to 26.2)           | 9.0 (4.3 to 16.1)               | 58.8 (58.8 to 58.8)               |
| The Gambia | 2017 | 42.1 (39.6 to 45.2)        | 5.1 (3.9 to 6.6)           | 5.3 (3.7 to 7.4)              | 2.6 (1.2 to 4.6)                | 29.0 (29.0 to 29.0)               | 152.7 (143.6 to 163.8) | 18.7 (14.2 to 24.0)        | 19.3 (13.4 to 26.7)           | 9.4 (4.4 to 16.7)               | 105.3 (105.3 to 105.3)            |
| The Gambia | 2018 | 40.3 (37.7 to 43.4)        | 5.2 (4.0 to 6.7)           | 5.4 (3.7 to 7.4)              | 2.6 (1.2 to 4.7)                | 27.0 (27.0 to 27.1)               | 146.1 (136.9 to 157.4) | 19.0 (14.5 to 24.5)        | 19.4 (13.6 to 27.0)           | 9.5 (4.5 to 16.9)               | 98.1 (98.0 to 98.2)               |
| The Gambia | 2019 | 40.3 (37.1 to 43.8)        | 5.4 (4.1 to 6.9)           | 5.4 (3.8 to 7.5)              | 2.7 (1.3 to 4.8)                | 26.8 (25.1 to 28.4)               | 146.3 (134.7 to 158.9) | 19.5 (14.8 to 25.1)        | 19.7 (13.7 to 27.3)           | 9.7 (4.6 to 17.3)               | 97.4 (91.0 to 103.0)              |
| The Gambia | 2020 | 40.5 (37.0 to 44.4)        | 5.5 (4.2 to 7.1)           | 5.5 (3.8 to 7.6)              | 2.7 (1.3 to 4.9)                | 26.9 (24.6 to 29.0)               | 147.0 (134.3 to 161.2) | 19.9 (15.1 to 25.6)        | 19.8 (13.9 to 27.5)           | 9.9 (4.6 to 17.6)               | 97.4 (89.4 to 105.2)              |
| The Gambia | 2021 | 40.9 (37.0 to 45.2)        | 5.6 (4.3 to 7.2)           | 5.5 (3.8 to 7.6)              | 2.8 (1.3 to 4.9)                | 27.0 (24.3 to 29.8)               | 148.3 (134.1 to 163.9) | 20.3 (15.5 to 26.2)        | 19.9 (13.9 to 27.7)           | 10.1 (4.7 to 17.9)              | 98.0 (88.2 to 108.2)              |
| The Gambia | 2022 | 41.5 (37.3 to 46.2)        | 5.7 (4.3 to 7.4)           | 5.5 (3.8 to 7.6)              | 2.8 (1.3 to 5.0)                | 27.5 (24.5 to 30.7)               | 150.6 (135.3 to 167.6) | 20.7 (15.8 to 26.8)        | 20.0 (13.9 to 27.7)           | 10.2 (4.8 to 18.2)              | 99.7 (88.8 to 111.5)              |
| The Gambia | 2023 | 42.1 (37.4 to 47.1)        | 5.8 (4.4 to 7.5)           | 5.6 (3.9 to 7.7)              | 2.9 (1.3 to 5.1)                | 27.9 (24.1 to 31.7)               | 152.8 (135.9 to 171.0) | 21.1 (16.0 to 27.3)        | 20.2 (14.0 to 27.8)           | 10.4 (4.9 to 18.5)              | 101.1 (87.5 to 115.1)             |
| The Gambia | 2024 | 42.7 (37.9 to 48.1)        | 6.0 (4.5 to 7.7)           | 5.6 (3.9 to 7.8)              | 2.9 (1.4 to 5.2)                | 28.2 (24.2 to 32.5)               | 154.8 (137.3 to 174.4) | 21.6 (16.5 to 27.9)        | 20.3 (14.1 to 28.2)           | 10.6 (5.0 to 18.8)              | 102.2 (87.9 to 118.0)             |
| The Gambia | 2025 | 43.1 (38.0 to 48.9)        | 6.1 (4.7 to 7.9)           | 5.7 (3.9 to 7.8)              | 3.0 (1.4 to 5.3)                | 28.4 (24.2 to 33.1)               | 156.4 (137.8 to 177.5) | 22.1 (16.9 to 28.6)        | 20.5 (14.2 to 28.4)           | 10.8 (5.1 to 19.2)              | 103.0 (87.8 to 120.2)             |
| The Gambia | 2026 | 43.7 (38.2 to 49.6)        | 6.2 (4.8 to 8.1)           | 5.7 (3.9 to 7.9)              | 3.0 (1.4 to 5.4)                | 28.7 (24.2 to 33.8)               | 158.6 (138.4 to 180.1) | 22.6 (17.3 to 29.3)        | 20.7 (14.3 to 28.7)           | 11.0 (5.2 to 19.6)              | 104.2 (87.6 to 122.6)             |
| The Gambia | 2027 | 44.3 (38.4 to 50.5)        | 6.4 (4.8 to 8.2)           | 5.8 (4.0 to 8.0)              | 3.1 (1.5 to 5.5)                | 29.1 (24.2 to 34.5)               | 160.9 (139.3 to 183.2) | 23.2 (17.6 to 29.9)        | 20.9 (14.5 to 29.0)           | 11.2 (5.3 to 19.9)              | 105.6 (87.7 to 125.2)             |
| The Gambia | 2028 | 45.0 (38.9 to 51.8)        | 6.5 (5.0 to 8.4)           | 5.8 (4.0 to 8.1)              | 3.2 (1.5 to 5.6)                | 29.5 (24.4 to 35.9)               | 163.2 (141.0 to 188.1) | 23.7 (18.0 to 30.5)        | 21.1 (14.6 to 29.3)           | 11.4 (5.4 to 20.3)              | 107.0 (88.7 to 130.4)             |
| The Gambia | 2029 | 45.7 (39.0 to 53.6)        | 6.7 (5.0 to 8.6)           | 5.9 (4.1 to 8.2)              | 3.2 (1.5 to 5.7)                | 29.9 (24.4 to 36.8)               | 165.6 (141.3 to 194.5) | 24.2 (18.3 to 31.1)        | 21.3 (14.8 to 29.6)           | 11.7 (5.5 to 20.6)              | 108.5 (88.5 to 133.5)             |

| Country    | Year | 2018 US Dollars per capita |                            |                               |                                 |                                   | 2018 PPP per capita    |                            |                               |                                 |                                   |
|------------|------|----------------------------|----------------------------|-------------------------------|---------------------------------|-----------------------------------|------------------------|----------------------------|-------------------------------|---------------------------------|-----------------------------------|
|            |      | Health spending            | Government health spending | Out-of-pocket health spending | Prepaid private health spending | Development assistance for health | Health spending        | Government health spending | Out-of-pocket health spending | Prepaid private health spending | Development assistance for health |
| The Gambia | 2030 | 46.3 (39.3 to 54.5)        | 6.8 (5.2 to 8.8)           | 5.9 (4.1 to 8.3)              | 3.3 (1.5 to 5.8)                | 30.2 (24.5 to 37.3)               | 167.8 (142.7 to 197.8) | 24.8 (18.8 to 31.9)        | 21.5 (14.9 to 29.9)           | 11.9 (5.6 to 21.0)              | 109.7 (89.0 to 135.3)             |
| The Gambia | 2031 | 46.9 (39.5 to 55.7)        | 7.0 (5.3 to 9.0)           | 6.0 (4.1 to 8.3)              | 3.3 (1.6 to 5.9)                | 30.6 (24.3 to 39.0)               | 170.3 (143.4 to 202.2) | 25.4 (19.2 to 32.6)        | 21.7 (15.0 to 30.2)           | 12.1 (5.7 to 21.4)              | 111.1 (88.3 to 141.5)             |
| The Gambia | 2032 | 47.6 (40.0 to 57.0)        | 7.2 (5.4 to 9.2)           | 6.0 (4.2 to 8.4)              | 3.4 (1.6 to 6.0)                | 31.0 (24.4 to 39.8)               | 172.8 (145.0 to 206.8) | 26.0 (19.6 to 33.5)        | 21.9 (15.1 to 30.5)           | 12.3 (5.8 to 21.9)              | 112.5 (88.5 to 144.4)             |
| The Gambia | 2033 | 48.3 (40.4 to 58.3)        | 7.4 (5.6 to 9.5)           | 6.1 (4.2 to 8.6)              | 3.5 (1.6 to 6.2)                | 31.4 (24.3 to 40.7)               | 175.4 (146.7 to 211.6) | 26.7 (20.1 to 34.4)        | 22.2 (15.3 to 31.1)           | 12.6 (5.9 to 22.4)              | 113.9 (88.2 to 147.6)             |
| The Gambia | 2034 | 49.1 (40.5 to 59.8)        | 7.5 (5.7 to 9.7)           | 6.2 (4.3 to 8.7)              | 3.5 (1.7 to 6.3)                | 31.9 (24.2 to 41.9)               | 178.2 (147.0 to 216.9) | 27.3 (20.7 to 35.3)        | 22.4 (15.5 to 31.6)           | 12.8 (6.0 to 22.8)              | 115.6 (87.9 to 152.0)             |
| The Gambia | 2035 | 49.9 (41.0 to 61.2)        | 7.7 (5.8 to 10.0)          | 6.3 (4.3 to 8.8)              | 3.6 (1.7 to 6.4)                | 32.3 (24.4 to 43.4)               | 181.0 (148.7 to 222.0) | 28.0 (21.1 to 36.2)        | 22.7 (15.6 to 32.0)           | 13.1 (6.2 to 23.3)              | 117.2 (88.5 to 157.6)             |
| The Gambia | 2036 | 50.7 (41.1 to 63.4)        | 7.9 (6.0 to 10.2)          | 6.3 (4.3 to 8.9)              | 3.7 (1.7 to 6.6)                | 32.8 (24.3 to 45.3)               | 183.9 (149.0 to 229.9) | 28.6 (21.6 to 37.0)        | 22.9 (15.8 to 32.4)           | 13.3 (6.3 to 23.8)              | 119.0 (88.2 to 164.4)             |
| The Gambia | 2037 | 51.4 (41.3 to 65.1)        | 8.0 (6.1 to 10.4)          | 6.4 (4.4 to 9.1)              | 3.7 (1.8 to 6.7)                | 33.2 (24.3 to 46.3)               | 186.4 (149.9 to 236.0) | 29.2 (22.0 to 37.8)        | 23.2 (15.9 to 32.8)           | 13.6 (6.5 to 24.3)              | 120.5 (88.3 to 167.9)             |
| The Gambia | 2038 | 52.2 (41.7 to 67.0)        | 8.2 (6.2 to 10.6)          | 6.5 (4.4 to 9.2)              | 3.8 (1.8 to 6.8)                | 33.7 (24.4 to 47.7)               | 189.4 (151.2 to 243.2) | 29.8 (22.4 to 38.6)        | 23.5 (16.1 to 33.2)           | 13.8 (6.6 to 24.8)              | 122.3 (88.6 to 172.9)             |
| The Gambia | 2039 | 52.9 (42.2 to 67.4)        | 8.4 (6.3 to 10.9)          | 6.5 (4.5 to 9.3)              | 3.9 (1.9 to 7.0)                | 34.1 (24.4 to 49.3)               | 192.1 (153.2 to 244.7) | 30.5 (23.0 to 39.4)        | 23.7 (16.2 to 33.7)           | 14.1 (6.8 to 25.3)              | 123.8 (88.5 to 178.7)             |
| The Gambia | 2040 | 53.8 (42.8 to 70.2)        | 8.6 (6.5 to 11.1)          | 6.6 (4.5 to 9.4)              | 4.0 (1.9 to 7.1)                | 34.6 (24.7 to 50.1)               | 195.3 (155.3 to 254.6) | 31.2 (23.5 to 40.4)        | 24.0 (16.3 to 34.1)           | 14.4 (6.9 to 25.9)              | 125.6 (89.5 to 181.9)             |
| The Gambia | 2041 | 54.8 (43.2 to 70.5)        | 8.8 (6.6 to 11.5)          | 6.7 (4.5 to 9.5)              | 4.0 (1.9 to 7.3)                | 35.2 (24.9 to 51.2)               | 198.8 (156.8 to 255.7) | 32.0 (24.1 to 41.6)        | 24.3 (16.5 to 34.6)           | 14.7 (7.1 to 26.4)              | 127.9 (90.2 to 185.8)             |
| The Gambia | 2042 | 55.8 (43.6 to 73.3)        | 9.0 (6.8 to 11.8)          | 6.8 (4.6 to 9.6)              | 4.1 (2.0 to 7.4)                | 35.9 (25.0 to 53.2)               | 202.6 (158.3 to 265.8) | 32.7 (24.6 to 42.7)        | 24.6 (16.7 to 35.0)           | 15.0 (7.2 to 27.0)              | 130.3 (90.8 to 192.9)             |
| The Gambia | 2043 | 56.9 (44.1 to 75.2)        | 9.3 (7.0 to 12.1)          | 6.9 (4.7 to 9.8)              | 4.2 (2.0 to 7.6)                | 36.5 (24.9 to 55.7)               | 206.3 (159.9 to 272.7) | 33.6 (25.3 to 43.8)        | 24.9 (16.9 to 35.4)           | 15.3 (7.3 to 27.6)              | 132.5 (90.3 to 202.0)             |
| The Gambia | 2044 | 58.0 (44.8 to 78.3)        | 9.5 (7.1 to 12.4)          | 6.9 (4.7 to 9.9)              | 4.3 (2.0 to 7.8)                | 37.3 (24.8 to 57.8)               | 210.4 (162.7 to 284.1) | 34.4 (25.9 to 44.9)        | 25.2 (17.1 to 35.8)           | 15.6 (7.4 to 28.1)              | 135.2 (90.2 to 209.8)             |
| The Gambia | 2045 | 59.1 (44.5 to 81.7)        | 9.7 (7.3 to 12.7)          | 7.0 (4.8 to 10.0)             | 4.4 (2.1 to 7.9)                | 38.0 (25.1 to 60.3)               | 214.5 (161.6 to 296.5) | 35.3 (26.5 to 46.3)        | 25.5 (17.3 to 36.1)           | 15.9 (7.6 to 28.8)              | 137.8 (91.0 to 218.6)             |
| The Gambia | 2046 | 60.3 (45.5 to 84.7)        | 10.0 (7.5 to 13.1)         | 7.1 (4.8 to 10.1)             | 4.5 (2.1 to 8.1)                | 38.7 (25.3 to 62.6)               | 218.8 (165.3 to 307.4) | 36.2 (27.1 to 47.5)        | 25.9 (17.6 to 36.6)           | 16.2 (7.7 to 29.4)              | 140.5 (91.7 to 227.1)             |
| The Gambia | 2047 | 61.6 (46.2 to 85.4)        | 10.2 (7.7 to 13.4)         | 7.2 (4.9 to 10.2)             | 4.5 (2.2 to 8.3)                | 39.6 (25.6 to 63.3)               | 223.3 (167.6 to 309.9) | 37.1 (27.8 to 48.6)        | 26.2 (17.8 to 37.0)           | 16.5 (7.8 to 30.0)              | 143.5 (92.8 to 229.6)             |
| The Gambia | 2048 | 62.9 (46.9 to 90.2)        | 10.5 (7.8 to 13.7)         | 7.3 (5.0 to 10.3)             | 4.6 (2.2 to 8.4)                | 40.5 (25.8 to 66.6)               | 228.2 (170.0 to 327.1) | 38.0 (28.3 to 49.7)        | 26.5 (18.1 to 37.5)           | 16.8 (8.0 to 30.6)              | 146.8 (93.6 to 241.7)             |
| The Gambia | 2049 | 64.2 (47.7 to 92.6)        | 10.7 (8.0 to 14.1)         | 7.4 (5.1 to 10.5)             | 4.7 (2.2 to 8.6)                | 41.3 (25.8 to 69.3)               | 232.9 (172.9 to 335.8) | 38.9 (28.9 to 51.1)        | 26.9 (18.4 to 38.0)           | 17.2 (8.1 to 31.3)              | 149.9 (93.5 to 251.5)             |
| The Gambia | 2050 | 65.6 (48.2 to 95.7)        | 11.0 (8.1 to 14.4)         | 7.5 (5.1 to 10.7)             | 4.8 (2.3 to 8.8)                | 42.3 (26.2 to 72.9)               | 238.1 (174.8 to 347.0) | 39.8 (29.5 to 52.3)        | 27.3 (18.6 to 38.7)           | 17.5 (8.3 to 31.8)              | 153.5 (95.0 to 264.4)             |

| Country     | Year | 2018 US Dollars per capita |                            |                               |                                 |                                   | 2018 PPP per capita    |                            |                               |                                 |                                   |
|-------------|------|----------------------------|----------------------------|-------------------------------|---------------------------------|-----------------------------------|------------------------|----------------------------|-------------------------------|---------------------------------|-----------------------------------|
|             |      | Health spending            | Government health spending | Out-of-pocket health spending | Prepaid private health spending | Development assistance for health | Health spending        | Government health spending | Out-of-pocket health spending | Prepaid private health spending | Development assistance for health |
| Timor-Leste | 1995 | 30.3 (25.0 to 36.8)        | 17.5 (13.3 to 23.3)        | 9.9 (7.1 to 13.6)             | 0.0 (0.0 to 0.0)                | 2.9 (2.9 to 2.9)                  | 74.0 (61.2 to 89.7)    | 42.7 (32.5 to 57.0)        | 24.2 (17.3 to 33.1)           | 0.0 (0.0 to 0.0)                | 7.1 (7.1 to 7.1)                  |
| Timor-Leste | 1996 | 32.1 (26.2 to 39.3)        | 19.4 (14.8 to 25.6)        | 11.2 (7.8 to 15.4)            | 0.0 (0.0 to 0.0)                | 1.5 (1.5 to 1.5)                  | 78.4 (63.9 to 96.1)    | 47.3 (36.0 to 62.5)        | 27.3 (19.1 to 37.7)           | 0.0 (0.0 to 0.0)                | 3.7 (3.7 to 3.7)                  |
| Timor-Leste | 1997 | 34.8 (28.3 to 42.0)        | 20.6 (15.6 to 27.2)        | 12.2 (8.4 to 16.9)            | 0.0 (0.0 to 0.0)                | 2.0 (2.0 to 2.0)                  | 85.0 (69.0 to 102.6)   | 50.2 (38.1 to 66.5)        | 29.9 (20.6 to 41.3)           | 0.0 (0.0 to 0.0)                | 4.9 (4.9 to 4.9)                  |
| Timor-Leste | 1998 | 35.1 (28.7 to 42.9)        | 20.7 (15.5 to 27.2)        | 12.8 (8.8 to 17.7)            | 0.0 (0.0 to 0.0)                | 1.7 (1.7 to 1.7)                  | 85.7 (70.1 to 104.8)   | 50.4 (37.9 to 66.5)        | 31.1 (21.5 to 43.2)           | 0.0 (0.0 to 0.0)                | 4.1 (4.1 to 4.1)                  |
| Timor-Leste | 1999 | 27.5 (22.5 to 33.5)        | 15.0 (11.3 to 19.8)        | 10.9 (7.6 to 15.0)            | 0.0 (0.0 to 0.0)                | 1.6 (1.6 to 1.6)                  | 67.2 (54.9 to 81.9)    | 36.7 (27.7 to 48.3)        | 26.5 (18.5 to 36.6)           | 0.0 (0.0 to 0.0)                | 4.0 (4.0 to 4.0)                  |
| Timor-Leste | 2000 | 29.4 (23.9 to 36.1)        | 16.6 (12.7 to 22.0)        | 11.5 (8.1 to 16.0)            | 0.0 (0.0 to 0.0)                | 1.3 (1.3 to 1.3)                  | 71.9 (58.4 to 88.2)    | 40.5 (31.0 to 53.7)        | 28.2 (19.8 to 39.0)           | 0.0 (0.0 to 0.0)                | 3.2 (3.2 to 3.2)                  |
| Timor-Leste | 2001 | 32.0 (26.3 to 38.8)        | 16.1 (12.3 to 21.1)        | 11.8 (8.3 to 16.1)            | 0.0 (0.0 to 0.0)                | 4.1 (4.1 to 4.1)                  | 78.0 (64.3 to 94.6)    | 39.4 (30.1 to 51.4)        | 28.7 (20.3 to 39.3)           | 0.0 (0.0 to 0.0)                | 9.9 (9.9 to 9.9)                  |
| Timor-Leste | 2002 | 44.3 (39.5 to 50.0)        | 12.3 (9.4 to 15.9)         | 10.5 (7.3 to 14.6)            | 0.0 (0.0 to 0.0)                | 21.5 (21.5 to 21.5)               | 108.1 (96.5 to 122.1)  | 29.9 (23.0 to 38.9)        | 25.6 (17.8 to 35.5)           | 0.0 (0.0 to 0.0)                | 52.6 (52.6 to 52.6)               |
| Timor-Leste | 2003 | 24.0 (19.9 to 29.1)        | 10.5 (8.1 to 13.5)         | 9.7 (6.8 to 13.6)             | 0.0 (0.0 to 0.0)                | 3.9 (3.9 to 3.9)                  | 58.6 (48.7 to 71.1)    | 25.6 (19.8 to 33.0)        | 23.6 (16.5 to 33.3)           | 0.0 (0.0 to 0.0)                | 9.4 (9.4 to 9.4)                  |
| Timor-Leste | 2004 | 32.8 (28.3 to 38.3)        | 12.6 (9.7 to 16.1)         | 10.4 (7.2 to 14.6)            | 0.0 (0.0 to 0.0)                | 9.8 (9.8 to 9.8)                  | 80.0 (69.0 to 93.6)    | 30.6 (23.7 to 39.4)        | 25.4 (17.7 to 35.7)           | 0.0 (0.0 to 0.1)                | 23.9 (23.9 to 23.9)               |
| Timor-Leste | 2005 | 36.5 (31.7 to 42.2)        | 14.5 (11.3 to 18.6)        | 10.5 (7.2 to 14.6)            | 0.0 (0.0 to 0.0)                | 11.5 (11.5 to 11.5)               | 89.1 (77.3 to 103.1)   | 35.4 (27.6 to 45.4)        | 25.5 (17.7 to 35.7)           | 0.0 (0.0 to 0.1)                | 28.1 (28.1 to 28.1)               |
| Timor-Leste | 2006 | 35.4 (30.4 to 41.4)        | 16.8 (13.1 to 21.3)        | 9.7 (6.6 to 13.6)             | 0.0 (0.0 to 0.1)                | 8.9 (8.9 to 8.9)                  | 86.4 (74.1 to 101.1)   | 41.0 (31.9 to 52.0)        | 23.7 (16.2 to 33.2)           | 0.1 (0.0 to 0.1)                | 21.6 (21.6 to 21.6)               |
| Timor-Leste | 2007 | 44.4 (40.1 to 49.8)        | 15.5 (12.2 to 19.8)        | 8.1 (5.5 to 11.3)             | 0.0 (0.0 to 0.1)                | 20.7 (20.7 to 20.7)               | 108.3 (98.0 to 121.5)  | 37.9 (29.8 to 48.3)        | 19.7 (13.4 to 27.7)           | 0.1 (0.0 to 0.1)                | 50.6 (50.6 to 50.6)               |
| Timor-Leste | 2008 | 46.0 (40.8 to 52.7)        | 22.8 (18.0 to 28.9)        | 7.6 (5.2 to 10.6)             | 0.0 (0.0 to 0.1)                | 15.6 (15.6 to 15.6)               | 112.4 (99.5 to 128.7)  | 55.7 (44.1 to 70.5)        | 18.6 (12.8 to 25.8)           | 0.0 (0.0 to 0.1)                | 38.1 (38.1 to 38.1)               |
| Timor-Leste | 2009 | 54.5 (48.4 to 62.0)        | 27.3 (21.8 to 34.5)        | 7.1 (5.0 to 10.0)             | 0.0 (0.0 to 0.1)                | 20.1 (20.1 to 20.1)               | 133.2 (118.2 to 151.4) | 66.6 (53.2 to 84.1)        | 17.4 (12.1 to 24.4)           | 0.0 (0.0 to 0.1)                | 49.2 (49.2 to 49.2)               |
| Timor-Leste | 2010 | 61.9 (54.8 to 70.8)        | 32.5 (25.7 to 41.3)        | 7.3 (5.1 to 10.2)             | 0.0 (0.0 to 0.1)                | 22.0 (22.0 to 22.0)               | 151.2 (133.7 to 172.9) | 79.5 (62.8 to 100.8)       | 17.9 (12.5 to 24.9)           | 0.0 (0.0 to 0.1)                | 53.8 (53.8 to 53.8)               |
| Timor-Leste | 2011 | 62.2 (53.6 to 72.7)        | 39.3 (30.9 to 50.4)        | 7.3 (5.1 to 10.2)             | 0.0 (0.0 to 0.0)                | 15.6 (15.6 to 15.6)               | 151.9 (130.9 to 177.5) | 96.0 (75.4 to 122.9)       | 17.9 (12.4 to 24.9)           | 0.0 (0.0 to 0.0)                | 38.0 (38.0 to 38.0)               |
| Timor-Leste | 2012 | 77.6 (67.1 to 89.8)        | 47.1 (36.9 to 59.3)        | 7.5 (5.1 to 10.6)             | 0.0 (0.0 to 0.0)                | 23.0 (23.0 to 23.0)               | 189.4 (163.7 to 219.3) | 114.9 (90.1 to 144.8)      | 18.4 (12.5 to 25.8)           | 0.0 (0.0 to 0.0)                | 56.1 (56.1 to 56.1)               |
| Timor-Leste | 2013 | 80.5 (69.3 to 93.8)        | 52.0 (40.9 to 65.3)        | 7.7 (5.2 to 10.8)             | 0.0 (0.0 to 0.0)                | 20.8 (20.8 to 20.8)               | 196.6 (169.1 to 229.0) | 126.9 (99.8 to 159.4)      | 18.7 (12.8 to 26.3)           | 0.0 (0.0 to 0.0)                | 50.9 (50.9 to 50.9)               |
| Timor-Leste | 2014 | 74.9 (64.0 to 87.3)        | 49.6 (39.0 to 62.3)        | 8.1 (5.6 to 11.4)             | 0.1 (0.0 to 0.2)                | 17.2 (17.2 to 17.2)               | 183.0 (156.4 to 213.1) | 121.0 (95.2 to 152.0)      | 19.7 (13.6 to 27.8)           | 0.2 (0.1 to 0.4)                | 42.0 (42.0 to 42.0)               |
| Timor-Leste | 2015 | 83.5 (70.6 to 97.9)        | 58.4 (45.8 to 73.0)        | 8.9 (6.2 to 12.6)             | 0.6 (0.3 to 1.1)                | 15.6 (15.6 to 15.6)               | 203.9 (172.4 to 238.9) | 142.6 (111.9 to 178.2)     | 21.7 (15.1 to 30.7)           | 1.4 (0.6 to 2.6)                | 38.2 (38.2 to 38.2)               |

| Country     | Year | 2018 US Dollars per capita |                            |                               |                                 |                                   | 2018 PPP per capita    |                            |                               |                                 |                                   |
|-------------|------|----------------------------|----------------------------|-------------------------------|---------------------------------|-----------------------------------|------------------------|----------------------------|-------------------------------|---------------------------------|-----------------------------------|
|             |      | Health spending            | Government health spending | Out-of-pocket health spending | Prepaid private health spending | Development assistance for health | Health spending        | Government health spending | Out-of-pocket health spending | Prepaid private health spending | Development assistance for health |
| Timor-Leste | 2016 | 85.4 (72.9 to 100.5)       | 55.8 (43.8 to 70.4)        | 9.0 (6.3 to 12.7)             | 1.1 (0.5 to 2.1)                | 19.4 (19.4 to 19.4)               | 208.6 (178.0 to 245.4) | 136.4 (107.0 to 171.8)     | 22.0 (15.3 to 30.9)           | 2.8 (1.3 to 5.1)                | 47.4 (47.4 to 47.4)               |
| Timor-Leste | 2017 | 65.6 (56.6 to 76.1)        | 39.6 (31.0 to 49.7)        | 8.5 (6.0 to 11.9)             | 0.9 (0.4 to 1.7)                | 16.6 (16.6 to 16.6)               | 160.3 (138.3 to 185.7) | 96.7 (75.6 to 121.4)       | 20.8 (14.6 to 29.1)           | 2.3 (1.0 to 4.2)                | 40.4 (40.4 to 40.4)               |
| Timor-Leste | 2018 | 64.8 (56.1 to 75.5)        | 39.8 (31.2 to 50.2)        | 8.5 (6.0 to 12.0)             | 1.0 (0.4 to 1.8)                | 15.6 (15.5 to 15.6)               | 158.3 (137.0 to 184.4) | 97.1 (76.1 to 122.6)       | 20.8 (14.6 to 29.4)           | 2.4 (1.1 to 4.3)                | 38.0 (37.9 to 38.0)               |
| Timor-Leste | 2019 | 65.2 (56.4 to 76.1)        | 40.1 (31.5 to 50.6)        | 8.6 (6.0 to 12.2)             | 1.0 (0.4 to 1.8)                | 15.6 (14.5 to 16.5)               | 159.2 (137.7 to 185.9) | 97.8 (76.9 to 123.6)       | 20.9 (14.6 to 29.7)           | 2.4 (1.1 to 4.4)                | 38.0 (35.5 to 40.2)               |
| Timor-Leste | 2020 | 65.7 (56.4 to 76.2)        | 40.4 (31.8 to 50.9)        | 8.6 (6.0 to 12.1)             | 1.0 (0.5 to 1.9)                | 15.7 (14.4 to 17.0)               | 160.4 (137.6 to 186.1) | 98.6 (77.6 to 124.3)       | 21.0 (14.6 to 29.6)           | 2.5 (1.1 to 4.5)                | 38.3 (35.1 to 41.4)               |
| Timor-Leste | 2021 | 66.3 (56.8 to 77.3)        | 40.8 (32.2 to 51.5)        | 8.6 (6.0 to 12.2)             | 1.0 (0.5 to 1.9)                | 15.9 (14.3 to 17.6)               | 162.0 (138.6 to 188.8) | 99.6 (78.5 to 125.7)       | 21.1 (14.6 to 29.8)           | 2.5 (1.1 to 4.6)                | 38.8 (34.9 to 42.9)               |
| Timor-Leste | 2022 | 67.0 (57.6 to 77.6)        | 41.1 (32.5 to 51.9)        | 8.7 (6.0 to 12.3)             | 1.1 (0.5 to 1.9)                | 16.2 (14.4 to 18.1)               | 163.6 (140.6 to 189.4) | 100.4 (79.3 to 126.7)      | 21.1 (14.7 to 30.0)           | 2.6 (1.2 to 4.7)                | 39.5 (35.1 to 44.1)               |
| Timor-Leste | 2023 | 67.5 (57.7 to 78.3)        | 41.4 (32.7 to 52.2)        | 8.7 (6.0 to 12.3)             | 1.1 (0.5 to 2.0)                | 16.4 (14.3 to 18.6)               | 164.9 (140.8 to 191.3) | 101.0 (79.8 to 127.5)      | 21.2 (14.7 to 30.0)           | 2.6 (1.2 to 4.8)                | 40.1 (35.0 to 45.5)               |
| Timor-Leste | 2024 | 68.2 (58.4 to 79.7)        | 41.7 (32.9 to 52.6)        | 8.7 (6.0 to 12.4)             | 1.1 (0.5 to 2.0)                | 16.7 (14.4 to 19.3)               | 166.4 (142.6 to 194.7) | 101.8 (80.2 to 128.3)      | 21.2 (14.7 to 30.2)           | 2.7 (1.2 to 4.9)                | 40.8 (35.2 to 47.0)               |
| Timor-Leste | 2025 | 68.9 (59.0 to 80.2)        | 42.1 (33.1 to 53.0)        | 8.7 (6.1 to 12.4)             | 1.1 (0.5 to 2.0)                | 17.0 (14.5 to 19.9)               | 168.1 (144.0 to 195.8) | 102.7 (80.7 to 129.3)      | 21.3 (14.8 to 30.2)           | 2.7 (1.2 to 5.0)                | 41.4 (35.3 to 48.5)               |
| Timor-Leste | 2026 | 69.7 (59.2 to 81.5)        | 42.6 (33.4 to 53.7)        | 8.8 (6.1 to 12.5)             | 1.1 (0.5 to 2.1)                | 17.2 (14.5 to 20.2)               | 170.1 (144.4 to 198.9) | 104.0 (81.6 to 131.2)      | 21.4 (14.9 to 30.5)           | 2.8 (1.2 to 5.1)                | 42.0 (35.5 to 49.3)               |
| Timor-Leste | 2027 | 70.6 (60.5 to 82.0)        | 43.2 (33.8 to 54.3)        | 8.8 (6.2 to 12.6)             | 1.2 (0.5 to 2.1)                | 17.5 (14.6 to 20.8)               | 172.4 (147.6 to 200.1) | 105.4 (82.5 to 132.7)      | 21.5 (15.0 to 30.7)           | 2.8 (1.3 to 5.2)                | 42.6 (35.6 to 50.7)               |
| Timor-Leste | 2028 | 71.6 (60.6 to 83.7)        | 43.8 (34.3 to 55.2)        | 8.9 (6.1 to 12.7)             | 1.2 (0.5 to 2.2)                | 17.7 (14.8 to 21.4)               | 174.8 (147.9 to 204.4) | 107.0 (83.7 to 134.7)      | 21.7 (15.0 to 30.9)           | 2.9 (1.3 to 5.3)                | 43.3 (36.1 to 52.2)               |
| Timor-Leste | 2029 | 72.7 (61.7 to 84.9)        | 44.5 (34.9 to 56.1)        | 8.9 (6.2 to 12.9)             | 1.2 (0.5 to 2.2)                | 18.0 (14.8 to 22.0)               | 177.5 (150.7 to 207.3) | 108.8 (85.1 to 137.0)      | 21.8 (15.1 to 31.4)           | 2.9 (1.3 to 5.4)                | 43.9 (36.2 to 53.7)               |
| Timor-Leste | 2030 | 74.3 (62.3 to 88.0)        | 45.8 (35.8 to 57.8)        | 9.0 (6.2 to 13.0)             | 1.2 (0.6 to 2.3)                | 18.3 (14.9 to 22.4)               | 181.5 (152.2 to 214.8) | 111.8 (87.4 to 141.2)      | 22.0 (15.1 to 31.6)           | 3.0 (1.4 to 5.5)                | 44.6 (36.4 to 54.8)               |
| Timor-Leste | 2031 | 76.0 (64.2 to 89.2)        | 47.1 (36.8 to 59.6)        | 9.1 (6.2 to 13.1)             | 1.3 (0.6 to 2.3)                | 18.5 (15.0 to 23.3)               | 185.7 (156.7 to 217.9) | 115.1 (89.8 to 145.6)      | 22.3 (15.1 to 32.0)           | 3.1 (1.4 to 5.7)                | 45.2 (36.7 to 56.8)               |
| Timor-Leste | 2032 | 77.8 (65.0 to 92.0)        | 48.5 (37.8 to 61.3)        | 9.2 (6.2 to 13.3)             | 1.3 (0.6 to 2.4)                | 18.8 (15.1 to 23.8)               | 190.0 (158.8 to 224.5) | 118.4 (92.2 to 149.6)      | 22.5 (15.2 to 32.5)           | 3.2 (1.4 to 5.8)                | 45.9 (36.9 to 58.1)               |
| Timor-Leste | 2033 | 79.6 (67.1 to 94.4)        | 49.9 (38.8 to 62.9)        | 9.3 (6.2 to 13.6)             | 1.3 (0.6 to 2.4)                | 19.1 (15.2 to 24.6)               | 194.4 (163.8 to 230.4) | 121.7 (94.6 to 153.5)      | 22.8 (15.3 to 33.1)           | 3.2 (1.5 to 6.0)                | 46.7 (37.1 to 60.1)               |
| Timor-Leste | 2034 | 81.5 (67.8 to 96.3)        | 51.3 (39.8 to 64.7)        | 9.4 (6.3 to 13.8)             | 1.4 (0.6 to 2.5)                | 19.5 (15.3 to 25.0)               | 199.1 (165.6 to 235.0) | 125.2 (97.1 to 157.9)      | 23.1 (15.3 to 33.7)           | 3.3 (1.5 to 6.1)                | 47.5 (37.5 to 61.1)               |
| Timor-Leste | 2035 | 83.4 (69.7 to 99.8)        | 52.7 (40.8 to 66.7)        | 9.6 (6.3 to 14.0)             | 1.4 (0.6 to 2.6)                | 19.8 (15.4 to 26.0)               | 203.7 (170.2 to 243.7) | 128.6 (99.6 to 162.7)      | 23.4 (15.4 to 34.2)           | 3.4 (1.5 to 6.3)                | 48.3 (37.7 to 63.4)               |
| Timor-Leste | 2036 | 85.4 (70.8 to 101.9)       | 54.2 (41.9 to 68.7)        | 9.7 (6.4 to 14.3)             | 1.4 (0.6 to 2.6)                | 20.1 (15.6 to 27.1)               | 208.6 (172.9 to 248.8) | 132.2 (102.2 to 167.7)     | 23.7 (15.6 to 34.8)           | 3.5 (1.6 to 6.5)                | 49.2 (38.1 to 66.2)               |

| Country     | Year | 2018 US Dollars per capita |                            |                               |                                 |                                   | 2018 PPP per capita    |                            |                               |                                 |                                   |
|-------------|------|----------------------------|----------------------------|-------------------------------|---------------------------------|-----------------------------------|------------------------|----------------------------|-------------------------------|---------------------------------|-----------------------------------|
|             |      | Health spending            | Government health spending | Out-of-pocket health spending | Prepaid private health spending | Development assistance for health | Health spending        | Government health spending | Out-of-pocket health spending | Prepaid private health spending | Development assistance for health |
| Timor-Leste | 2037 | 87.4 (73.4 to 104.3)       | 55.6 (42.9 to 70.7)        | 9.8 (6.4 to 14.5)             | 1.5 (0.7 to 2.7)                | 20.5 (15.8 to 27.4)               | 213.4 (179.2 to 254.7) | 135.7 (104.7 to 172.6)     | 24.0 (15.7 to 35.5)           | 3.6 (1.6 to 6.6)                | 50.0 (38.5 to 66.9)               |
| Timor-Leste | 2038 | 89.4 (74.3 to 106.6)       | 57.1 (44.0 to 72.5)        | 10.0 (6.5 to 14.8)            | 1.5 (0.7 to 2.8)                | 20.9 (15.9 to 28.5)               | 218.4 (181.4 to 260.3) | 139.4 (107.4 to 177.0)     | 24.4 (15.9 to 36.1)           | 3.7 (1.6 to 6.7)                | 51.0 (38.8 to 69.7)               |
| Timor-Leste | 2039 | 91.6 (76.2 to 110.2)       | 58.7 (45.1 to 74.6)        | 10.1 (6.6 to 15.0)            | 1.5 (0.7 to 2.8)                | 21.2 (16.1 to 29.0)               | 223.6 (186.0 to 269.1) | 143.2 (110.1 to 182.1)     | 24.8 (16.0 to 36.7)           | 3.7 (1.7 to 6.9)                | 51.8 (39.4 to 70.7)               |
| Timor-Leste | 2040 | 93.8 (78.4 to 112.3)       | 60.4 (46.4 to 76.8)        | 10.3 (6.6 to 15.3)            | 1.6 (0.7 to 2.9)                | 21.6 (16.4 to 29.6)               | 229.1 (191.3 to 274.3) | 147.4 (113.3 to 187.5)     | 25.2 (16.2 to 37.3)           | 3.8 (1.7 to 7.0)                | 52.7 (40.1 to 72.4)               |
| Timor-Leste | 2041 | 96.3 (79.6 to 115.4)       | 62.2 (47.7 to 79.2)        | 10.5 (6.7 to 15.6)            | 1.6 (0.7 to 3.0)                | 22.0 (16.5 to 31.0)               | 235.1 (194.4 to 281.7) | 151.9 (116.6 to 193.4)     | 25.6 (16.4 to 38.1)           | 3.9 (1.8 to 7.2)                | 53.7 (40.2 to 75.6)               |
| Timor-Leste | 2042 | 98.9 (82.2 to 120.0)       | 64.2 (49.1 to 81.8)        | 10.7 (6.8 to 16.0)            | 1.7 (0.7 to 3.1)                | 22.4 (16.6 to 32.4)               | 241.5 (200.6 to 293.0) | 156.7 (119.9 to 199.7)     | 26.1 (16.6 to 38.9)           | 4.1 (1.8 to 7.5)                | 54.7 (40.5 to 79.2)               |
| Timor-Leste | 2043 | 101.7 (84.5 to 123.2)      | 66.3 (50.6 to 84.6)        | 10.9 (6.9 to 16.3)            | 1.7 (0.8 to 3.2)                | 22.8 (16.8 to 33.6)               | 248.2 (206.3 to 300.7) | 161.9 (123.5 to 206.5)     | 26.6 (16.8 to 39.9)           | 4.2 (1.8 to 7.7)                | 55.6 (41.1 to 82.0)               |
| Timor-Leste | 2044 | 104.4 (86.1 to 126.7)      | 68.4 (52.3 to 87.4)        | 11.1 (7.0 to 16.7)            | 1.8 (0.8 to 3.2)                | 23.2 (17.0 to 34.2)               | 255.0 (210.2 to 309.4) | 167.0 (127.6 to 213.3)     | 27.1 (17.1 to 40.8)           | 4.3 (1.9 to 7.9)                | 56.6 (41.6 to 83.5)               |
| Timor-Leste | 2045 | 107.2 (88.6 to 130.8)      | 70.5 (53.9 to 90.3)        | 11.3 (7.1 to 17.1)            | 1.8 (0.8 to 3.3)                | 23.7 (17.1 to 35.7)               | 261.8 (216.3 to 319.4) | 172.0 (131.6 to 220.4)     | 27.6 (17.4 to 41.8)           | 4.4 (2.0 to 8.2)                | 57.8 (41.8 to 87.3)               |
| Timor-Leste | 2046 | 110.1 (90.5 to 133.9)      | 72.6 (55.3 to 93.2)        | 11.6 (7.2 to 17.5)            | 1.9 (0.8 to 3.4)                | 24.1 (17.4 to 36.7)               | 268.8 (220.9 to 326.8) | 177.2 (134.9 to 227.6)     | 28.2 (17.7 to 42.8)           | 4.5 (2.0 to 8.4)                | 58.9 (42.6 to 89.5)               |
| Timor-Leste | 2047 | 113.0 (92.5 to 138.3)      | 74.6 (56.7 to 96.1)        | 11.8 (7.4 to 17.8)            | 1.9 (0.8 to 3.5)                | 24.6 (17.7 to 38.9)               | 275.9 (225.8 to 337.7) | 182.2 (138.5 to 234.6)     | 28.8 (18.0 to 43.5)           | 4.7 (2.1 to 8.6)                | 60.1 (43.2 to 94.9)               |
| Timor-Leste | 2048 | 115.9 (95.2 to 142.9)      | 76.7 (58.2 to 98.9)        | 12.1 (7.5 to 18.2)            | 2.0 (0.9 to 3.6)                | 25.2 (18.0 to 40.7)               | 283.0 (232.3 to 348.8) | 187.2 (142.1 to 241.5)     | 29.5 (18.3 to 44.4)           | 4.8 (2.1 to 8.9)                | 61.5 (44.1 to 99.4)               |
| Timor-Leste | 2049 | 118.9 (97.1 to 146.5)      | 78.8 (59.7 to 101.9)       | 12.3 (7.7 to 18.6)            | 2.0 (0.9 to 3.8)                | 25.7 (18.2 to 41.4)               | 290.3 (237.1 to 357.6) | 192.5 (145.8 to 248.7)     | 30.1 (18.7 to 45.3)           | 4.9 (2.2 to 9.2)                | 62.8 (44.3 to 101.1)              |
| Timor-Leste | 2050 | 122.0 (99.4 to 151.3)      | 81.0 (61.2 to 104.9)       | 12.6 (7.8 to 19.0)            | 2.1 (0.9 to 3.9)                | 26.3 (18.5 to 42.3)               | 297.9 (242.6 to 369.5) | 197.8 (149.5 to 256.1)     | 30.8 (19.0 to 46.4)           | 5.0 (2.2 to 9.4)                | 64.3 (45.1 to 103.2)              |
| Togo        | 1995 | 25.8 (19.9 to 33.3)        | 4.8 (3.7 to 6.3)           | 18.5 (12.9 to 25.6)           | 1.9 (0.9 to 3.7)                | 0.5 (0.5 to 0.5)                  | 67.0 (51.8 to 86.7)    | 12.6 (9.6 to 16.3)         | 48.1 (33.5 to 66.7)           | 5.0 (2.3 to 9.6)                | 1.3 (1.3 to 1.3)                  |
| Togo        | 1996 | 31.4 (25.7 to 38.8)        | 4.6 (3.5 to 5.9)           | 18.2 (12.5 to 25.4)           | 1.9 (0.9 to 3.6)                | 6.8 (6.8 to 6.8)                  | 81.6 (66.8 to 101.0)   | 11.9 (9.1 to 15.2)         | 47.4 (32.6 to 66.2)           | 4.8 (2.3 to 9.3)                | 17.6 (17.6 to 17.6)               |
| Togo        | 1997 | 26.3 (20.5 to 33.7)        | 4.8 (3.7 to 6.2)           | 18.7 (12.8 to 25.7)           | 2.0 (0.9 to 3.7)                | 0.8 (0.8 to 0.8)                  | 68.3 (53.3 to 87.7)    | 12.5 (9.7 to 16.1)         | 48.5 (33.2 to 66.9)           | 5.1 (2.4 to 9.7)                | 2.2 (2.2 to 2.2)                  |
| Togo        | 1998 | 27.1 (21.3 to 34.0)        | 4.5 (3.5 to 5.8)           | 18.2 (12.5 to 25.0)           | 1.9 (0.9 to 3.5)                | 2.6 (2.6 to 2.6)                  | 70.4 (55.4 to 88.4)    | 11.7 (9.0 to 15.0)         | 47.2 (32.5 to 65.0)           | 4.9 (2.3 to 9.2)                | 6.6 (6.6 to 6.6)                  |
| Togo        | 1999 | 24.8 (19.2 to 31.9)        | 4.2 (3.3 to 5.4)           | 18.0 (12.6 to 24.6)           | 1.9 (0.9 to 3.6)                | 0.7 (0.7 to 0.7)                  | 64.5 (49.9 to 83.0)    | 10.9 (8.5 to 14.0)         | 46.8 (32.7 to 64.0)           | 4.9 (2.3 to 9.3)                | 1.8 (1.8 to 1.8)                  |
| Togo        | 2000 | 23.4 (18.3 to 29.7)        | 3.4 (2.6 to 4.4)           | 16.9 (11.9 to 23.2)           | 1.7 (0.8 to 3.2)                | 1.4 (1.4 to 1.4)                  | 60.8 (47.5 to 77.3)    | 8.9 (6.9 to 11.5)          | 43.9 (30.9 to 60.4)           | 4.4 (2.1 to 8.3)                | 3.6 (3.6 to 3.6)                  |
| Togo        | 2001 | 21.8 (16.9 to 27.7)        | 3.2 (2.4 to 4.1)           | 16.2 (11.4 to 22.2)           | 1.6 (0.8 to 3.0)                | 0.8 (0.8 to 0.8)                  | 56.8 (44.1 to 72.1)    | 8.2 (6.3 to 10.7)          | 42.2 (29.8 to 57.6)           | 4.2 (2.0 to 7.8)                | 2.2 (2.2 to 2.2)                  |

| Country | Year | 2018 US Dollars per capita |                            |                               |                                 |                                   | 2018 PPP per capita   |                            |                               |                                 |                                   |
|---------|------|----------------------------|----------------------------|-------------------------------|---------------------------------|-----------------------------------|-----------------------|----------------------------|-------------------------------|---------------------------------|-----------------------------------|
|         |      | Health spending            | Government health spending | Out-of-pocket health spending | Prepaid private health spending | Development assistance for health | Health spending       | Government health spending | Out-of-pocket health spending | Prepaid private health spending | Development assistance for health |
| Togo    | 2002 | 21.6 (16.7 to 27.6)        | 3.2 (2.5 to 4.2)           | 16.1 (11.6 to 21.8)           | 1.6 (0.8 to 3.0)                | 0.7 (0.7 to 0.7)                  | 56.1 (43.3 to 71.7)   | 8.3 (6.4 to 10.9)          | 41.8 (30.2 to 56.7)           | 4.2 (2.0 to 7.7)                | 1.8 (1.8 to 1.8)                  |
| Togo    | 2003 | 24.4 (19.5 to 30.8)        | 3.5 (2.7 to 4.6)           | 16.5 (11.8 to 22.5)           | 1.7 (0.8 to 3.1)                | 2.7 (2.7 to 2.7)                  | 63.4 (50.8 to 80.2)   | 9.1 (7.0 to 11.8)          | 42.8 (30.6 to 58.6)           | 4.3 (2.0 to 8.0)                | 7.1 (7.1 to 7.1)                  |
| Togo    | 2004 | 24.8 (20.0 to 31.0)        | 3.8 (2.9 to 4.9)           | 16.3 (11.6 to 22.2)           | 1.7 (0.8 to 3.1)                | 3.0 (3.0 to 3.0)                  | 64.4 (52.0 to 80.5)   | 9.8 (7.5 to 12.8)          | 42.4 (30.2 to 57.6)           | 4.3 (2.0 to 8.1)                | 7.9 (7.9 to 7.9)                  |
| Togo    | 2005 | 25.3 (20.6 to 31.4)        | 4.0 (3.0 to 5.3)           | 16.0 (11.5 to 21.9)           | 1.6 (0.8 to 3.0)                | 3.7 (3.7 to 3.7)                  | 65.9 (53.5 to 81.7)   | 10.4 (7.9 to 13.7)         | 41.5 (29.9 to 56.9)           | 4.2 (2.0 to 7.8)                | 9.7 (9.7 to 9.7)                  |
| Togo    | 2006 | 25.4 (20.4 to 31.5)        | 4.5 (3.4 to 5.9)           | 16.2 (11.6 to 22.0)           | 1.7 (0.8 to 3.0)                | 3.1 (3.1 to 3.1)                  | 66.1 (53.1 to 81.8)   | 11.6 (8.9 to 15.2)         | 42.2 (30.2 to 57.3)           | 4.3 (2.0 to 7.7)                | 8.0 (8.0 to 8.0)                  |
| Togo    | 2007 | 28.2 (23.1 to 34.3)        | 4.9 (3.7 to 6.3)           | 16.6 (11.7 to 22.5)           | 1.7 (0.8 to 3.0)                | 5.1 (5.1 to 5.1)                  | 73.3 (60.2 to 89.3)   | 12.6 (9.6 to 16.5)         | 43.1 (30.5 to 58.6)           | 4.3 (2.0 to 7.8)                | 13.2 (13.2 to 13.2)               |
| Togo    | 2008 | 29.7 (24.7 to 36.4)        | 5.2 (3.9 to 6.8)           | 16.9 (11.8 to 23.0)           | 1.6 (0.8 to 3.0)                | 6.1 (6.1 to 6.1)                  | 77.3 (64.2 to 94.6)   | 13.4 (10.3 to 17.6)        | 43.9 (30.7 to 59.7)           | 4.2 (2.0 to 7.9)                | 15.8 (15.8 to 15.8)               |
| Togo    | 2009 | 32.2 (26.5 to 39.2)        | 6.1 (4.6 to 7.9)           | 18.6 (13.1 to 25.2)           | 1.7 (0.8 to 3.2)                | 5.9 (5.9 to 5.9)                  | 83.8 (69.0 to 102.0)  | 15.7 (12.0 to 20.7)        | 48.2 (34.0 to 65.5)           | 4.5 (2.1 to 8.3)                | 15.3 (15.3 to 15.3)               |
| Togo    | 2010 | 35.6 (29.2 to 43.1)        | 7.4 (5.6 to 9.8)           | 20.7 (14.7 to 28.1)           | 1.9 (0.9 to 3.6)                | 5.6 (5.6 to 5.6)                  | 92.5 (76.0 to 112.0)  | 19.2 (14.6 to 25.4)        | 53.8 (38.3 to 73.0)           | 4.9 (2.3 to 9.4)                | 14.5 (14.5 to 14.5)               |
| Togo    | 2011 | 38.2 (31.4 to 46.0)        | 8.0 (6.0 to 10.6)          | 21.5 (15.3 to 29.0)           | 2.0 (0.9 to 3.8)                | 6.7 (6.7 to 6.7)                  | 99.4 (81.6 to 119.5)  | 20.9 (15.7 to 27.5)        | 55.8 (39.7 to 75.4)           | 5.2 (2.4 to 10.0)               | 17.5 (17.5 to 17.5)               |
| Togo    | 2012 | 35.1 (27.9 to 42.7)        | 8.4 (6.4 to 11.0)          | 21.5 (15.2 to 29.1)           | 2.1 (1.0 to 3.8)                | 3.0 (3.0 to 3.0)                  | 91.2 (72.6 to 111.1)  | 21.9 (16.6 to 28.6)        | 55.9 (39.6 to 75.8)           | 5.5 (2.5 to 10.0)               | 7.9 (7.9 to 7.9)                  |
| Togo    | 2013 | 40.7 (33.7 to 48.9)        | 8.7 (6.6 to 11.2)          | 22.0 (15.5 to 29.7)           | 2.4 (1.1 to 4.4)                | 7.7 (7.7 to 7.7)                  | 105.9 (87.6 to 127.1) | 22.5 (17.2 to 29.1)        | 57.1 (40.3 to 77.1)           | 6.2 (2.8 to 11.4)               | 20.1 (20.1 to 20.1)               |
| Togo    | 2014 | 39.0 (31.8 to 47.5)        | 8.8 (6.7 to 11.4)          | 22.2 (15.6 to 30.0)           | 2.8 (1.3 to 5.2)                | 5.3 (5.3 to 5.3)                  | 101.5 (82.6 to 123.5) | 22.8 (17.5 to 29.6)        | 57.7 (40.6 to 78.1)           | 7.3 (3.4 to 13.5)               | 13.7 (13.7 to 13.7)               |
| Togo    | 2015 | 38.6 (30.9 to 47.1)        | 8.8 (6.7 to 11.6)          | 22.5 (16.1 to 30.6)           | 3.2 (1.5 to 6.0)                | 3.9 (3.9 to 3.9)                  | 100.2 (80.4 to 122.5) | 23.0 (17.5 to 30.3)        | 58.6 (41.9 to 79.6)           | 8.4 (4.0 to 15.6)               | 10.2 (10.2 to 10.2)               |
| Togo    | 2016 | 41.4 (34.2 to 50.3)        | 9.0 (6.9 to 11.8)          | 22.8 (16.3 to 30.7)           | 3.6 (1.7 to 6.7)                | 6.0 (6.0 to 6.0)                  | 107.7 (89.0 to 130.8) | 23.5 (17.8 to 30.6)        | 59.3 (42.3 to 79.9)           | 9.4 (4.5 to 17.4)               | 15.6 (15.6 to 15.6)               |
| Togo    | 2017 | 40.9 (34.2 to 48.9)        | 7.2 (5.5 to 9.4)           | 22.2 (15.8 to 29.9)           | 3.4 (1.6 to 6.3)                | 8.1 (8.1 to 8.1)                  | 106.3 (88.9 to 127.3) | 18.7 (14.2 to 24.5)        | 57.7 (41.2 to 77.8)           | 8.8 (4.2 to 16.4)               | 21.2 (21.2 to 21.2)               |
| Togo    | 2018 | 40.8 (33.9 to 49.2)        | 7.4 (5.6 to 9.6)           | 22.4 (15.9 to 30.3)           | 3.4 (1.7 to 6.4)                | 7.6 (7.6 to 7.6)                  | 106.1 (88.2 to 128.0) | 19.2 (14.6 to 25.1)        | 58.3 (41.4 to 78.9)           | 8.9 (4.3 to 16.7)               | 19.8 (19.7 to 19.8)               |
| Togo    | 2019 | 41.2 (34.1 to 49.6)        | 7.5 (5.7 to 9.8)           | 22.6 (16.0 to 30.7)           | 3.5 (1.7 to 6.5)                | 7.6 (7.1 to 8.0)                  | 107.0 (88.6 to 129.0) | 19.5 (14.8 to 25.5)        | 58.8 (41.7 to 79.7)           | 9.1 (4.4 to 17.0)               | 19.7 (18.4 to 20.9)               |
| Togo    | 2020 | 41.6 (34.5 to 50.3)        | 7.6 (5.8 to 10.0)          | 22.8 (16.2 to 31.0)           | 3.5 (1.7 to 6.6)                | 7.6 (7.0 to 8.2)                  | 108.1 (89.6 to 130.8) | 19.8 (15.0 to 25.9)        | 59.3 (42.2 to 80.7)           | 9.2 (4.4 to 17.2)               | 19.8 (18.2 to 21.4)               |
| Togo    | 2021 | 42.1 (34.8 to 50.8)        | 7.7 (5.9 to 10.1)          | 23.0 (16.3 to 31.3)           | 3.6 (1.7 to 6.7)                | 7.7 (6.9 to 8.5)                  | 109.4 (90.5 to 132.2) | 20.1 (15.3 to 26.3)        | 59.9 (42.4 to 81.5)           | 9.4 (4.5 to 17.5)               | 20.0 (18.0 to 22.1)               |
| Togo    | 2022 | 42.6 (35.3 to 51.5)        | 7.9 (6.0 to 10.3)          | 23.3 (16.5 to 31.6)           | 3.7 (1.8 to 6.9)                | 7.8 (6.9 to 8.7)                  | 110.8 (91.9 to 134.0) | 20.5 (15.5 to 26.8)        | 60.5 (43.0 to 82.2)           | 9.6 (4.6 to 17.9)               | 20.3 (18.0 to 22.7)               |



| Country | Year | 2018 US Dollars per capita |                            |                               |                                 |                                   | 2018 PPP per capita    |                            |                               |                                 |                                   |
|---------|------|----------------------------|----------------------------|-------------------------------|---------------------------------|-----------------------------------|------------------------|----------------------------|-------------------------------|---------------------------------|-----------------------------------|
|         |      | Health spending            | Government health spending | Out-of-pocket health spending | Prepaid private health spending | Development assistance for health | Health spending        | Government health spending | Out-of-pocket health spending | Prepaid private health spending | Development assistance for health |
| Togo    | 2023 | 43.2 (35.7 to 52.0)        | 8.0 (6.1 to 10.5)          | 23.5 (16.7 to 31.9)           | 3.8 (1.8 to 7.0)                | 7.9 (6.9 to 9.0)                  | 112.3 (92.7 to 135.3)  | 20.8 (15.8 to 27.3)        | 61.2 (43.4 to 83.0)           | 9.8 (4.7 to 18.2)               | 20.6 (17.9 to 23.3)               |
| Togo    | 2024 | 43.8 (36.4 to 53.0)        | 8.2 (6.2 to 10.7)          | 23.8 (16.9 to 32.4)           | 3.8 (1.8 to 7.1)                | 8.0 (6.9 to 9.2)                  | 114.0 (94.5 to 137.8)  | 21.2 (16.2 to 27.9)        | 61.9 (43.9 to 84.2)           | 10.0 (4.8 to 18.6)              | 20.9 (18.0 to 24.0)               |
| Togo    | 2025 | 44.4 (36.4 to 53.5)        | 8.3 (6.3 to 10.9)          | 24.1 (17.1 to 32.7)           | 3.9 (1.9 to 7.3)                | 8.1 (7.0 to 9.5)                  | 115.6 (94.7 to 139.1)  | 21.6 (16.5 to 28.4)        | 62.6 (44.4 to 85.0)           | 10.2 (4.9 to 19.0)              | 21.1 (18.1 to 24.8)               |
| Togo    | 2026 | 45.0 (37.1 to 54.6)        | 8.5 (6.5 to 11.1)          | 24.4 (17.3 to 33.1)           | 4.0 (1.9 to 7.4)                | 8.2 (6.9 to 9.6)                  | 117.1 (96.6 to 141.9)  | 22.0 (16.8 to 28.9)        | 63.3 (45.0 to 86.1)           | 10.4 (5.0 to 19.3)              | 21.4 (18.0 to 25.0)               |
| Togo    | 2027 | 45.6 (37.3 to 55.1)        | 8.6 (6.6 to 11.4)          | 24.6 (17.5 to 33.4)           | 4.1 (1.9 to 7.6)                | 8.3 (7.0 to 9.9)                  | 118.6 (97.1 to 143.2)  | 22.4 (17.1 to 29.5)        | 64.0 (45.5 to 86.9)           | 10.5 (5.1 to 19.7)              | 21.7 (18.1 to 25.8)               |
| Togo    | 2028 | 46.2 (38.2 to 56.1)        | 8.8 (6.7 to 11.6)          | 24.8 (17.7 to 33.6)           | 4.1 (2.0 to 7.7)                | 8.5 (7.1 to 10.2)                 | 120.0 (99.4 to 145.8)  | 22.8 (17.4 to 30.1)        | 64.6 (46.0 to 87.4)           | 10.7 (5.1 to 20.1)              | 22.0 (18.3 to 26.6)               |
| Togo    | 2029 | 46.7 (38.3 to 56.7)        | 8.9 (6.8 to 11.8)          | 25.1 (17.8 to 34.1)           | 4.2 (2.0 to 7.9)                | 8.6 (7.1 to 10.5)                 | 121.5 (99.7 to 147.5)  | 23.1 (17.6 to 30.6)        | 65.2 (46.4 to 88.6)           | 10.9 (5.3 to 20.5)              | 22.3 (18.4 to 27.2)               |
| Togo    | 2030 | 47.3 (39.1 to 57.5)        | 9.0 (6.9 to 12.0)          | 25.3 (18.0 to 34.5)           | 4.3 (2.1 to 8.0)                | 8.7 (7.1 to 10.7)                 | 123.0 (101.5 to 149.4) | 23.5 (17.9 to 31.2)        | 65.8 (46.9 to 89.8)           | 11.1 (5.3 to 20.8)              | 22.6 (18.5 to 27.8)               |
| Togo    | 2031 | 47.9 (39.3 to 58.3)        | 9.2 (7.0 to 12.2)          | 25.5 (18.2 to 34.9)           | 4.4 (2.1 to 8.2)                | 8.8 (7.2 to 11.1)                 | 124.6 (102.1 to 151.5) | 23.9 (18.1 to 31.7)        | 66.4 (47.4 to 90.6)           | 11.3 (5.5 to 21.2)              | 23.0 (18.7 to 28.9)               |
| Togo    | 2032 | 48.5 (40.0 to 58.7)        | 9.3 (7.1 to 12.4)          | 25.7 (18.4 to 35.3)           | 4.4 (2.1 to 8.3)                | 9.0 (7.2 to 11.4)                 | 126.1 (104.0 to 152.7) | 24.2 (18.4 to 32.3)        | 66.9 (47.8 to 91.7)           | 11.5 (5.6 to 21.6)              | 23.4 (18.8 to 29.5)               |
| Togo    | 2033 | 49.1 (40.2 to 59.5)        | 9.5 (7.2 to 12.6)          | 26.0 (18.5 to 35.6)           | 4.5 (2.2 to 8.5)                | 9.1 (7.2 to 11.7)                 | 127.7 (104.6 to 154.6) | 24.7 (18.8 to 32.8)        | 67.6 (48.1 to 92.6)           | 11.7 (5.7 to 22.0)              | 23.8 (18.8 to 30.5)               |
| Togo    | 2034 | 49.8 (41.2 to 60.1)        | 9.6 (7.3 to 12.8)          | 26.2 (18.7 to 36.0)           | 4.6 (2.2 to 8.6)                | 9.3 (7.3 to 11.9)                 | 129.4 (107.1 to 156.2) | 25.0 (19.0 to 33.3)        | 68.2 (48.6 to 93.5)           | 11.9 (5.8 to 22.4)              | 24.2 (19.1 to 31.0)               |
| Togo    | 2035 | 50.4 (41.2 to 61.1)        | 9.8 (7.4 to 13.0)          | 26.5 (18.9 to 36.3)           | 4.7 (2.3 to 8.8)                | 9.5 (7.4 to 12.4)                 | 131.0 (107.0 to 158.8) | 25.4 (19.3 to 33.8)        | 68.8 (49.0 to 94.4)           | 12.1 (5.9 to 22.8)              | 24.6 (19.2 to 32.1)               |
| Togo    | 2036 | 51.0 (42.0 to 62.0)        | 9.9 (7.5 to 13.2)          | 26.7 (19.0 to 36.6)           | 4.7 (2.3 to 8.9)                | 9.6 (7.5 to 13.0)                 | 132.7 (109.2 to 161.3) | 25.8 (19.6 to 34.3)        | 69.4 (49.5 to 95.2)           | 12.3 (6.0 to 23.1)              | 25.1 (19.4 to 33.7)               |
| Togo    | 2037 | 51.6 (42.3 to 62.4)        | 10.1 (7.6 to 13.3)         | 26.9 (19.2 to 36.9)           | 4.8 (2.4 to 9.0)                | 9.8 (7.6 to 13.2)                 | 134.2 (110.1 to 162.1) | 26.2 (19.9 to 34.7)        | 70.0 (49.9 to 96.0)           | 12.5 (6.1 to 23.5)              | 25.5 (19.7 to 34.4)               |
| Togo    | 2038 | 52.3 (42.9 to 63.5)        | 10.2 (7.7 to 13.6)         | 27.1 (19.3 to 37.3)           | 4.9 (2.4 to 9.2)                | 10.0 (7.6 to 13.7)                | 135.9 (111.5 to 165.2) | 26.6 (20.1 to 35.3)        | 70.6 (50.3 to 96.9)           | 12.8 (6.2 to 23.9)              | 26.0 (19.8 to 35.6)               |
| Togo    | 2039 | 52.9 (42.9 to 64.2)        | 10.4 (7.8 to 13.8)         | 27.4 (19.5 to 37.6)           | 5.0 (2.4 to 9.3)                | 10.1 (7.7 to 13.9)                | 137.5 (111.7 to 166.9) | 27.0 (20.4 to 35.9)        | 71.1 (50.7 to 97.9)           | 13.0 (6.3 to 24.2)              | 26.4 (20.1 to 36.1)               |
| Togo    | 2040 | 53.5 (44.2 to 64.8)        | 10.5 (7.9 to 14.0)         | 27.6 (19.7 to 38.0)           | 5.1 (2.5 to 9.4)                | 10.3 (7.9 to 14.1)                | 139.1 (114.9 to 168.5) | 27.4 (20.6 to 36.5)        | 71.7 (51.1 to 98.8)           | 13.2 (6.4 to 24.5)              | 26.9 (20.4 to 36.8)               |
| Togo    | 2041 | 54.1 (43.7 to 65.8)        | 10.7 (8.0 to 14.2)         | 27.8 (19.8 to 38.4)           | 5.2 (2.5 to 9.6)                | 10.5 (7.9 to 14.7)                | 140.8 (113.6 to 171.0) | 27.8 (20.9 to 37.0)        | 72.3 (51.4 to 99.8)           | 13.4 (6.5 to 24.9)              | 27.3 (20.6 to 38.3)               |
| Togo    | 2042 | 54.8 (44.9 to 66.4)        | 10.8 (8.1 to 14.5)         | 28.0 (19.9 to 38.7)           | 5.2 (2.5 to 9.7)                | 10.7 (8.0 to 15.5)                | 142.5 (116.8 to 172.5) | 28.2 (21.1 to 37.6)        | 72.8 (51.8 to 100.7)          | 13.6 (6.6 to 25.3)              | 27.9 (20.8 to 40.3)               |
| Togo    | 2043 | 55.5 (44.9 to 67.2)        | 11.0 (8.2 to 14.7)         | 28.2 (20.1 to 39.1)           | 5.3 (2.6 to 9.9)                | 10.9 (8.1 to 16.0)                | 144.2 (116.6 to 174.8) | 28.6 (21.4 to 38.1)        | 73.4 (52.2 to 101.6)          | 13.8 (6.7 to 25.8)              | 28.4 (21.0 to 41.6)               |

| Country | Year | 2018 US Dollars per capita |                            |                               |                                 |                                   | 2018 PPP per capita    |                            |                               |                                 |                                   |
|---------|------|----------------------------|----------------------------|-------------------------------|---------------------------------|-----------------------------------|------------------------|----------------------------|-------------------------------|---------------------------------|-----------------------------------|
|         |      | Health spending            | Government health spending | Out-of-pocket health spending | Prepaid private health spending | Development assistance for health | Health spending        | Government health spending | Out-of-pocket health spending | Prepaid private health spending | Development assistance for health |
| Togo    | 2044 | 56.1 (45.9 to 68.5)        | 11.1 (8.3 to 14.9)         | 28.4 (20.2 to 39.4)           | 5.4 (2.6 to 10.1)               | 11.1 (8.2 to 16.3)                | 145.9 (119.3 to 178.2) | 29.0 (21.7 to 38.7)        | 73.9 (52.6 to 102.4)          | 14.1 (6.8 to 26.2)              | 28.9 (21.4 to 42.4)               |
| Togo    | 2045 | 56.8 (45.6 to 68.9)        | 11.3 (8.5 to 15.1)         | 28.6 (20.3 to 39.6)           | 5.5 (2.7 to 10.3)               | 11.4 (8.2 to 17.1)                | 147.7 (118.5 to 179.1) | 29.4 (22.0 to 39.3)        | 74.5 (52.9 to 103.1)          | 14.3 (6.9 to 26.7)              | 29.5 (21.4 to 44.6)               |
| Togo    | 2046 | 57.5 (46.8 to 70.7)        | 11.5 (8.6 to 15.4)         | 28.9 (20.5 to 39.9)           | 5.6 (2.7 to 10.5)               | 11.6 (8.3 to 17.5)                | 149.5 (121.7 to 183.7) | 29.8 (22.3 to 40.0)        | 75.1 (53.3 to 103.8)          | 14.5 (7.0 to 27.2)              | 30.1 (21.7 to 45.5)               |
| Togo    | 2047 | 58.3 (46.3 to 70.8)        | 11.7 (8.7 to 15.6)         | 29.1 (20.7 to 40.2)           | 5.7 (2.7 to 10.7)               | 11.8 (8.5 to 18.5)                | 151.6 (120.5 to 184.2) | 30.3 (22.6 to 40.7)        | 75.7 (53.9 to 104.6)          | 14.8 (7.1 to 27.8)              | 30.7 (22.1 to 48.1)               |
| Togo    | 2048 | 59.1 (47.8 to 72.2)        | 11.9 (8.8 to 15.9)         | 29.4 (20.9 to 40.5)           | 5.8 (2.8 to 10.9)               | 12.1 (8.6 to 19.3)                | 153.6 (124.2 to 187.7) | 30.8 (23.0 to 41.4)        | 76.4 (54.3 to 105.4)          | 15.0 (7.3 to 28.3)              | 31.4 (22.5 to 50.3)               |
| Togo    | 2049 | 59.9 (47.9 to 73.5)        | 12.1 (9.0 to 16.2)         | 29.6 (21.1 to 40.8)           | 5.9 (2.8 to 11.1)               | 12.3 (8.8 to 19.9)                | 155.7 (124.7 to 191.0) | 31.3 (23.3 to 42.2)        | 77.0 (54.8 to 106.2)          | 15.3 (7.4 to 28.7)              | 32.1 (22.9 to 51.6)               |
| Togo    | 2050 | 60.8 (49.0 to 74.5)        | 12.3 (9.1 to 16.5)         | 29.9 (21.3 to 41.3)           | 6.0 (2.9 to 11.2)               | 12.6 (8.9 to 20.5)                | 158.0 (127.5 to 193.6) | 31.9 (23.7 to 43.0)        | 77.7 (55.4 to 107.3)          | 15.5 (7.5 to 29.2)              | 32.8 (23.2 to 53.4)               |
| Tonga   | 1995 | 117.0 (99.4 to 136.6)      | 88.3 (72.5 to 106.4)       | 18.6 (13.0 to 25.8)           | 4.3 (2.1 to 8.3)                | 5.9 (5.9 to 5.9)                  | 171.8 (145.9 to 200.6) | 129.6 (106.4 to 156.2)     | 27.3 (19.1 to 37.9)           | 6.3 (3.1 to 12.1)               | 8.6 (8.6 to 8.6)                  |
| Tonga   | 1996 | 113.9 (96.8 to 132.0)      | 88.7 (73.3 to 105.8)       | 18.7 (13.1 to 26.0)           | 4.2 (2.1 to 8.0)                | 2.2 (2.2 to 2.2)                  | 167.2 (142.2 to 193.8) | 130.3 (107.7 to 155.3)     | 27.5 (19.3 to 38.3)           | 6.2 (3.1 to 11.8)               | 3.2 (3.2 to 3.2)                  |
| Tonga   | 1997 | 127.8 (111.5 to 144.6)     | 87.3 (73.0 to 103.3)       | 18.7 (13.1 to 25.8)           | 3.8 (1.9 to 7.1)                | 17.9 (17.9 to 17.9)               | 187.7 (163.7 to 212.3) | 128.2 (107.2 to 151.7)     | 27.5 (19.2 to 37.9)           | 5.6 (2.9 to 10.4)               | 26.3 (26.3 to 26.3)               |
| Tonga   | 1998 | 109.1 (93.2 to 125.9)      | 86.8 (73.2 to 102.5)       | 18.8 (13.1 to 25.6)           | 3.2 (1.6 to 5.7)                | 0.3 (0.3 to 0.3)                  | 160.2 (136.9 to 184.8) | 127.4 (107.4 to 150.4)     | 27.6 (19.3 to 37.6)           | 4.7 (2.4 to 8.4)                | 0.5 (0.5 to 0.5)                  |
| Tonga   | 1999 | 112.1 (97.5 to 128.1)      | 84.5 (71.5 to 99.5)        | 18.7 (13.2 to 25.6)           | 2.1 (1.1 to 3.7)                | 6.9 (6.9 to 6.9)                  | 164.6 (143.2 to 188.1) | 124.0 (104.9 to 146.1)     | 27.5 (19.4 to 37.6)           | 3.1 (1.6 to 5.5)                | 10.1 (10.1 to 10.1)               |
| Tonga   | 2000 | 105.9 (92.2 to 120.5)      | 80.4 (68.7 to 94.5)        | 18.2 (12.8 to 24.9)           | 0.9 (0.4 to 1.6)                | 6.5 (6.5 to 6.5)                  | 155.5 (135.4 to 177.0) | 118.1 (100.8 to 138.7)     | 26.7 (18.8 to 36.6)           | 1.3 (0.7 to 2.4)                | 9.5 (9.5 to 9.5)                  |
| Tonga   | 2001 | 110.6 (97.3 to 126.1)      | 81.2 (69.6 to 95.5)        | 17.1 (12.1 to 23.3)           | 0.2 (0.1 to 0.3)                | 12.1 (12.1 to 12.1)               | 162.4 (142.9 to 185.2) | 119.3 (102.2 to 140.3)     | 25.1 (17.7 to 34.2)           | 0.2 (0.1 to 0.4)                | 17.8 (17.8 to 17.8)               |
| Tonga   | 2002 | 115.5 (101.8 to 132.5)     | 82.0 (70.3 to 96.3)        | 18.5 (13.1 to 25.1)           | 1.2 (0.6 to 2.2)                | 13.8 (13.8 to 13.8)               | 169.7 (149.5 to 194.6) | 120.4 (103.2 to 141.3)     | 27.1 (19.2 to 36.8)           | 1.8 (0.9 to 3.2)                | 20.3 (20.3 to 20.3)               |
| Tonga   | 2003 | 131.4 (117.5 to 147.7)     | 82.5 (70.9 to 97.0)        | 20.1 (14.4 to 27.5)           | 3.2 (1.6 to 5.8)                | 25.6 (25.6 to 25.6)               | 192.9 (172.5 to 216.8) | 121.1 (104.1 to 142.4)     | 29.5 (21.2 to 40.4)           | 4.7 (2.4 to 8.6)                | 37.6 (37.6 to 37.6)               |
| Tonga   | 2004 | 150.0 (135.4 to 166.7)     | 83.9 (71.5 to 98.3)        | 20.2 (14.4 to 27.7)           | 5.2 (2.6 to 9.5)                | 40.6 (40.6 to 40.6)               | 220.3 (198.7 to 244.8) | 123.2 (105.0 to 144.3)     | 29.7 (21.2 to 40.7)           | 7.7 (3.9 to 13.9)               | 59.7 (59.7 to 59.7)               |
| Tonga   | 2005 | 271.5 (255.3 to 288.8)     | 87.8 (74.4 to 103.3)       | 19.9 (14.1 to 27.8)           | 7.0 (3.6 to 12.6)               | 156.8 (156.8 to 156.8)            | 398.7 (374.9 to 424.1) | 128.9 (109.2 to 151.7)     | 29.2 (20.7 to 40.8)           | 10.3 (5.2 to 18.5)              | 230.3 (230.3 to 230.3)            |
| Tonga   | 2006 | 177.0 (159.8 to 195.3)     | 91.7 (77.6 to 107.7)       | 19.4 (13.7 to 26.9)           | 9.2 (4.6 to 16.8)               | 56.6 (56.6 to 56.6)               | 259.9 (234.7 to 286.8) | 134.7 (113.9 to 158.2)     | 28.4 (20.1 to 39.5)           | 13.6 (6.8 to 24.6)              | 83.2 (83.2 to 83.2)               |
| Tonga   | 2007 | 175.9 (159.0 to 194.2)     | 92.4 (77.7 to 107.7)       | 19.8 (14.1 to 27.7)           | 10.2 (5.1 to 18.4)              | 53.6 (53.6 to 53.6)               | 258.4 (233.4 to 285.2) | 135.7 (114.0 to 158.1)     | 29.0 (20.6 to 40.7)           | 14.9 (7.4 to 27.1)              | 78.7 (78.7 to 78.7)               |
| Tonga   | 2008 | 160.2 (143.3 to 178.5)     | 93.5 (79.1 to 108.3)       | 19.6 (14.0 to 27.6)           | 10.6 (5.2 to 19.0)              | 36.5 (36.5 to 36.5)               | 235.2 (210.5 to 262.1) | 137.2 (116.1 to 159.0)     | 28.8 (20.6 to 40.5)           | 15.6 (7.7 to 28.0)              | 53.6 (53.6 to 53.6)               |

| Country | Year | 2018 US Dollars per capita |                            |                               |                                 |                                   | 2018 PPP per capita    |                            |                               |                                 |                                   |
|---------|------|----------------------------|----------------------------|-------------------------------|---------------------------------|-----------------------------------|------------------------|----------------------------|-------------------------------|---------------------------------|-----------------------------------|
|         |      | Health spending            | Government health spending | Out-of-pocket health spending | Prepaid private health spending | Development assistance for health | Health spending        | Government health spending | Out-of-pocket health spending | Prepaid private health spending | Development assistance for health |
| Tonga   | 2009 | 174.8 (158.0 to 192.4)     | 95.1 (80.3 to 110.2)       | 19.6 (14.0 to 26.9)           | 11.1 (5.6 to 20.3)              | 49.0 (49.0 to 49.0)               | 256.7 (232.0 to 282.5) | 139.6 (117.9 to 161.9)     | 28.8 (20.5 to 39.5)           | 16.3 (8.2 to 29.7)              | 71.9 (71.9 to 71.9)               |
| Tonga   | 2010 | 213.0 (196.0 to 230.7)     | 95.0 (80.3 to 110.6)       | 19.4 (13.7 to 26.9)           | 11.6 (6.0 to 21.6)              | 87.0 (87.0 to 87.0)               | 312.8 (287.8 to 338.8) | 139.5 (117.9 to 162.4)     | 28.5 (20.2 to 39.6)           | 17.0 (8.8 to 31.7)              | 127.8 (127.8 to 127.8)            |
| Tonga   | 2011 | 332.1 (315.7 to 349.3)     | 94.2 (80.5 to 108.9)       | 19.1 (13.6 to 26.4)           | 10.4 (5.4 to 18.9)              | 208.4 (208.4 to 208.4)            | 487.6 (463.6 to 512.8) | 138.3 (118.2 to 159.9)     | 28.0 (20.0 to 38.7)           | 15.3 (8.0 to 27.8)              | 306.0 (306.0 to 306.0)            |
| Tonga   | 2012 | 210.9 (194.7 to 227.5)     | 92.6 (78.7 to 106.8)       | 19.2 (13.7 to 26.0)           | 9.7 (4.9 to 16.9)               | 89.5 (89.5 to 89.5)               | 309.6 (286.0 to 334.1) | 135.9 (115.5 to 156.8)     | 28.1 (20.1 to 38.2)           | 14.2 (7.2 to 24.9)              | 131.4 (131.4 to 131.4)            |
| Tonga   | 2013 | 173.8 (156.7 to 190.8)     | 94.2 (80.0 to 108.9)       | 20.3 (14.5 to 27.9)           | 9.3 (4.7 to 16.1)               | 50.0 (50.0 to 50.0)               | 255.2 (230.1 to 280.1) | 138.3 (117.4 to 159.9)     | 29.8 (21.3 to 41.0)           | 13.7 (6.9 to 23.6)              | 73.5 (73.5 to 73.5)               |
| Tonga   | 2014 | 164.5 (145.9 to 183.2)     | 100.1 (84.5 to 117.0)      | 21.1 (14.9 to 29.1)           | 9.3 (4.8 to 16.2)               | 33.9 (33.9 to 33.9)               | 241.6 (214.2 to 269.1) | 147.1 (124.0 to 171.9)     | 31.0 (22.0 to 42.8)           | 13.7 (7.0 to 23.8)              | 49.8 (49.8 to 49.8)               |
| Tonga   | 2015 | 173.6 (153.3 to 194.3)     | 108.3 (90.1 to 128.3)      | 21.7 (15.3 to 29.5)           | 9.4 (4.8 to 16.7)               | 34.2 (34.2 to 34.2)               | 255.0 (225.1 to 285.3) | 159.1 (132.3 to 188.4)     | 31.8 (22.5 to 43.3)           | 13.8 (7.0 to 24.5)              | 50.2 (50.2 to 50.2)               |
| Tonga   | 2016 | 219.4 (195.6 to 245.5)     | 123.4 (101.5 to 147.9)     | 22.3 (15.6 to 30.3)           | 9.9 (5.0 to 17.8)               | 63.7 (63.7 to 63.7)               | 322.1 (287.2 to 360.5) | 181.3 (149.0 to 217.2)     | 32.8 (23.0 to 44.4)           | 14.5 (7.3 to 26.2)              | 93.5 (93.5 to 93.5)               |
| Tonga   | 2017 | 224.9 (198.4 to 256.5)     | 145.2 (119.3 to 173.7)     | 23.3 (16.4 to 31.7)           | 10.7 (5.3 to 19.3)              | 45.8 (45.8 to 45.8)               | 330.3 (291.3 to 376.6) | 213.3 (175.2 to 255.0)     | 34.2 (24.0 to 46.5)           | 15.7 (7.8 to 28.3)              | 67.2 (67.2 to 67.2)               |
| Tonga   | 2018 | 224.1 (195.9 to 255.9)     | 146.8 (120.7 to 175.7)     | 23.5 (16.5 to 32.1)           | 10.8 (5.4 to 19.5)              | 43.1 (43.0 to 43.1)               | 329.1 (287.6 to 375.8) | 215.5 (177.3 to 258.0)     | 34.5 (24.2 to 47.1)           | 15.8 (7.9 to 28.6)              | 63.2 (63.1 to 63.3)               |
| Tonga   | 2019 | 227.2 (198.5 to 258.3)     | 149.2 (122.7 to 179.0)     | 23.8 (16.7 to 32.5)           | 11.0 (5.5 to 19.8)              | 43.3 (40.3 to 45.8)               | 333.7 (291.4 to 379.3) | 219.1 (180.1 to 262.9)     | 34.9 (24.6 to 47.8)           | 16.1 (8.0 to 29.1)              | 63.5 (59.2 to 67.2)               |
| Tonga   | 2020 | 231.2 (201.9 to 263.1)     | 152.1 (124.8 to 182.3)     | 24.0 (16.9 to 32.7)           | 11.2 (5.6 to 20.2)              | 43.9 (40.3 to 47.4)               | 339.5 (296.5 to 386.4) | 223.3 (183.3 to 267.7)     | 35.3 (24.9 to 48.1)           | 16.4 (8.2 to 29.7)              | 64.5 (59.1 to 69.6)               |
| Tonga   | 2021 | 236.0 (205.5 to 268.8)     | 155.8 (127.8 to 187.5)     | 24.4 (17.2 to 33.4)           | 11.4 (5.7 to 20.6)              | 44.5 (40.1 to 49.3)               | 346.6 (301.8 to 394.8) | 228.7 (187.7 to 275.3)     | 35.8 (25.3 to 49.1)           | 16.8 (8.3 to 30.2)              | 65.4 (58.9 to 72.3)               |
| Tonga   | 2022 | 241.5 (209.6 to 275.7)     | 159.9 (131.6 to 192.5)     | 24.7 (17.4 to 34.1)           | 11.6 (5.8 to 20.9)              | 45.2 (40.2 to 50.6)               | 354.6 (307.7 to 404.9) | 234.8 (193.2 to 282.7)     | 36.3 (25.6 to 50.0)           | 17.1 (8.5 to 30.8)              | 66.4 (59.1 to 74.2)               |
| Tonga   | 2023 | 247.1 (215.6 to 282.5)     | 164.2 (134.7 to 197.3)     | 25.1 (17.5 to 34.8)           | 11.9 (5.9 to 21.4)              | 46.0 (40.0 to 52.5)               | 362.9 (316.6 to 414.8) | 241.1 (197.8 to 289.8)     | 36.8 (25.8 to 51.1)           | 17.4 (8.7 to 31.4)              | 67.6 (58.7 to 77.0)               |
| Tonga   | 2024 | 252.8 (219.7 to 289.0)     | 168.4 (137.2 to 202.4)     | 25.4 (17.7 to 35.0)           | 12.1 (6.0 to 21.8)              | 46.9 (40.3 to 53.9)               | 371.2 (322.6 to 424.4) | 247.3 (201.4 to 297.2)     | 37.3 (26.0 to 51.4)           | 17.7 (8.9 to 32.0)              | 68.8 (59.2 to 79.1)               |
| Tonga   | 2025 | 258.3 (224.9 to 294.2)     | 172.6 (140.3 to 207.4)     | 25.8 (18.1 to 35.5)           | 12.3 (6.2 to 22.2)              | 47.6 (40.7 to 55.6)               | 379.2 (330.2 to 432.0) | 253.4 (206.0 to 304.6)     | 37.9 (26.6 to 52.2)           | 18.1 (9.1 to 32.6)              | 69.9 (59.7 to 81.6)               |
| Tonga   | 2026 | 263.9 (229.7 to 300.6)     | 176.9 (143.8 to 213.4)     | 26.2 (18.4 to 36.1)           | 12.6 (6.3 to 22.7)              | 48.3 (40.6 to 56.7)               | 387.6 (337.3 to 441.4) | 259.7 (211.1 to 313.3)     | 38.4 (27.0 to 53.0)           | 18.5 (9.2 to 33.3)              | 70.9 (59.6 to 83.3)               |
| Tonga   | 2027 | 269.7 (233.5 to 309.2)     | 181.2 (147.2 to 219.2)     | 26.6 (18.7 to 36.9)           | 12.9 (6.4 to 23.2)              | 49.0 (41.0 to 58.4)               | 396.0 (342.9 to 454.0) | 266.1 (216.1 to 321.8)     | 39.0 (27.5 to 54.3)           | 18.9 (9.4 to 34.1)              | 71.9 (60.2 to 85.7)               |
| Tonga   | 2028 | 275.5 (238.3 to 318.0)     | 185.5 (150.2 to 224.0)     | 27.0 (18.9 to 37.7)           | 13.2 (6.5 to 23.8)              | 49.8 (41.6 to 60.0)               | 404.6 (349.9 to 467.0) | 272.5 (220.6 to 328.9)     | 39.7 (27.8 to 55.3)           | 19.4 (9.6 to 35.0)              | 73.1 (61.1 to 88.1)               |
| Tonga   | 2029 | 281.4 (242.5 to 324.9)     | 189.9 (153.6 to 229.2)     | 27.4 (19.0 to 38.2)           | 13.5 (6.7 to 24.4)              | 50.5 (41.7 to 61.9)               | 413.2 (356.1 to 477.1) | 278.8 (225.6 to 336.6)     | 40.3 (27.9 to 56.0)           | 19.8 (9.8 to 35.8)              | 74.2 (61.2 to 91.0)               |

| Country | Year | 2018 US Dollars per capita |                            |                               |                                 |                                   | 2018 PPP per capita    |                            |                               |                                 |                                   |
|---------|------|----------------------------|----------------------------|-------------------------------|---------------------------------|-----------------------------------|------------------------|----------------------------|-------------------------------|---------------------------------|-----------------------------------|
|         |      | Health spending            | Government health spending | Out-of-pocket health spending | Prepaid private health spending | Development assistance for health | Health spending        | Government health spending | Out-of-pocket health spending | Prepaid private health spending | Development assistance for health |
| Tonga   | 2030 | 287.2 (248.0 to 329.9)     | 194.2 (157.0 to 234.9)     | 27.9 (19.3 to 38.9)           | 13.8 (6.8 to 24.9)              | 51.3 (41.9 to 62.8)               | 421.6 (364.2 to 484.4) | 285.2 (230.6 to 344.9)     | 40.9 (28.3 to 57.1)           | 20.2 (10.0 to 36.6)             | 75.3 (61.6 to 92.3)               |
| Tonga   | 2031 | 293.2 (254.2 to 337.3)     | 198.7 (160.8 to 240.9)     | 28.3 (19.6 to 39.7)           | 14.1 (7.0 to 25.5)              | 52.0 (42.2 to 65.5)               | 430.5 (373.3 to 495.2) | 291.8 (236.1 to 353.8)     | 41.6 (28.7 to 58.2)           | 20.7 (10.3 to 37.4)             | 76.4 (61.9 to 96.1)               |
| Tonga   | 2032 | 299.3 (257.1 to 345.3)     | 203.3 (164.8 to 246.3)     | 28.8 (19.7 to 40.4)           | 14.4 (7.1 to 26.0)              | 52.8 (42.4 to 66.7)               | 439.5 (377.5 to 507.0) | 298.6 (242.1 to 361.7)     | 42.2 (29.0 to 59.3)           | 21.1 (10.4 to 38.2)             | 77.6 (62.3 to 97.9)               |
| Tonga   | 2033 | 305.4 (262.7 to 352.6)     | 207.8 (168.3 to 251.1)     | 29.2 (19.9 to 41.0)           | 14.7 (7.2 to 26.5)              | 53.7 (42.6 to 69.2)               | 448.5 (385.7 to 517.8) | 305.2 (247.1 to 368.8)     | 42.9 (29.3 to 60.3)           | 21.5 (10.6 to 38.9)             | 78.8 (62.6 to 101.6)              |
| Tonga   | 2034 | 311.6 (266.9 to 359.9)     | 212.3 (171.7 to 257.2)     | 29.6 (20.2 to 42.1)           | 14.9 (7.4 to 27.1)              | 54.7 (43.1 to 70.5)               | 457.5 (391.9 to 528.5) | 311.8 (252.1 to 377.6)     | 43.5 (29.6 to 61.8)           | 21.9 (10.8 to 39.7)             | 80.3 (63.3 to 103.5)              |
| Tonga   | 2035 | 317.8 (271.4 to 365.1)     | 216.9 (175.4 to 264.1)     | 30.1 (20.4 to 42.7)           | 15.2 (7.5 to 27.5)              | 55.6 (43.2 to 72.7)               | 466.6 (398.6 to 536.2) | 318.5 (257.5 to 387.7)     | 44.2 (30.0 to 62.7)           | 22.3 (11.0 to 40.4)             | 81.7 (63.5 to 106.7)              |
| Tonga   | 2036 | 324.3 (277.6 to 372.9)     | 221.7 (179.2 to 271.1)     | 30.5 (20.7 to 43.3)           | 15.5 (7.6 to 28.0)              | 56.6 (43.9 to 76.1)               | 476.2 (407.6 to 547.5) | 325.6 (263.1 to 398.1)     | 44.8 (30.3 to 63.6)           | 22.7 (11.2 to 41.1)             | 83.1 (64.5 to 111.8)              |
| Tonga   | 2037 | 330.8 (281.1 to 383.0)     | 226.5 (183.3 to 277.2)     | 31.0 (20.9 to 43.9)           | 15.7 (7.7 to 28.5)              | 57.5 (44.2 to 77.3)               | 485.7 (412.7 to 562.4) | 332.7 (269.2 to 407.0)     | 45.5 (30.7 to 64.5)           | 23.1 (11.3 to 41.8)             | 84.4 (65.0 to 113.5)              |
| Tonga   | 2038 | 337.2 (287.2 to 393.0)     | 231.3 (186.6 to 282.9)     | 31.4 (21.2 to 44.3)           | 16.0 (7.8 to 28.9)              | 58.6 (44.5 to 81.4)               | 495.2 (421.8 to 577.1) | 339.6 (273.9 to 415.4)     | 46.1 (31.2 to 65.1)           | 23.5 (11.5 to 42.5)             | 86.0 (65.3 to 119.5)              |
| Tonga   | 2039 | 343.4 (293.3 to 401.6)     | 235.8 (190.0 to 288.3)     | 31.9 (21.5 to 44.9)           | 16.2 (7.9 to 29.4)              | 59.5 (45.4 to 82.4)               | 504.3 (430.7 to 589.6) | 346.2 (279.0 to 423.3)     | 46.8 (31.6 to 65.9)           | 23.8 (11.6 to 43.2)             | 87.4 (66.6 to 120.9)              |
| Tonga   | 2040 | 349.7 (298.7 to 408.0)     | 240.2 (193.3 to 294.4)     | 32.3 (21.8 to 45.4)           | 16.5 (8.0 to 29.9)              | 60.6 (46.1 to 83.8)               | 513.5 (438.5 to 599.1) | 352.8 (283.8 to 432.2)     | 47.5 (32.0 to 66.7)           | 24.2 (11.8 to 43.8)             | 89.0 (67.6 to 123.0)              |
| Tonga   | 2041 | 356.1 (303.8 to 417.0)     | 244.8 (196.4 to 300.3)     | 32.8 (22.2 to 46.4)           | 16.8 (8.2 to 30.4)              | 61.7 (46.5 to 85.9)               | 523.0 (446.1 to 612.3) | 359.4 (288.5 to 440.9)     | 48.2 (32.6 to 68.2)           | 24.6 (12.0 to 44.6)             | 90.7 (68.2 to 126.1)              |
| Tonga   | 2042 | 362.6 (308.4 to 424.3)     | 249.2 (200.4 to 306.7)     | 33.3 (22.5 to 47.2)           | 17.1 (8.4 to 31.0)              | 62.9 (47.3 to 89.9)               | 532.4 (452.9 to 623.0) | 366.0 (294.3 to 450.3)     | 49.0 (33.1 to 69.2)           | 25.1 (12.3 to 45.5)             | 92.4 (69.4 to 132.0)              |
| Tonga   | 2043 | 369.0 (315.7 to 432.9)     | 253.6 (203.6 to 314.4)     | 33.9 (22.9 to 47.9)           | 17.4 (8.5 to 31.5)              | 64.1 (47.5 to 93.3)               | 541.8 (463.6 to 635.6) | 372.4 (299.0 to 461.7)     | 49.7 (33.6 to 70.3)           | 25.5 (12.6 to 46.3)             | 94.1 (69.7 to 137.0)              |
| Tonga   | 2044 | 375.5 (319.9 to 439.6)     | 258.0 (206.6 to 319.8)     | 34.4 (23.2 to 48.9)           | 17.7 (8.7 to 32.1)              | 65.4 (48.4 to 94.7)               | 551.3 (469.7 to 645.5) | 378.8 (303.4 to 469.6)     | 50.5 (34.1 to 71.8)           | 26.0 (12.8 to 47.2)             | 96.0 (71.0 to 139.1)              |
| Tonga   | 2045 | 382.1 (322.3 to 451.3)     | 262.5 (210.1 to 326.0)     | 35.0 (23.5 to 49.5)           | 18.0 (8.9 to 32.7)              | 66.7 (48.2 to 100.1)              | 561.1 (473.2 to 662.7) | 385.4 (308.4 to 478.6)     | 51.3 (34.5 to 72.6)           | 26.5 (13.1 to 48.1)             | 97.9 (70.8 to 147.0)              |
| Tonga   | 2046 | 389.1 (329.3 to 463.8)     | 267.2 (214.0 to 331.4)     | 35.6 (23.9 to 50.4)           | 18.4 (9.1 to 33.4)              | 68.0 (49.0 to 104.3)              | 571.3 (483.6 to 681.0) | 392.4 (314.2 to 486.6)     | 52.2 (35.1 to 74.0)           | 27.0 (13.3 to 49.0)             | 99.8 (71.9 to 153.1)              |
| Tonga   | 2047 | 396.3 (334.0 to 476.8)     | 272.1 (218.3 to 337.8)     | 36.2 (24.3 to 51.4)           | 18.7 (9.2 to 34.1)              | 69.4 (49.9 to 110.1)              | 582.0 (490.4 to 700.1) | 399.5 (320.5 to 496.1)     | 53.1 (35.6 to 75.4)           | 27.5 (13.6 to 50.1)             | 101.9 (73.3 to 161.6)             |
| Tonga   | 2048 | 403.7 (339.5 to 487.9)     | 276.9 (221.3 to 345.2)     | 36.8 (24.7 to 52.5)           | 19.1 (9.4 to 34.8)              | 70.9 (50.6 to 113.9)              | 592.8 (498.6 to 716.4) | 406.6 (324.9 to 506.8)     | 54.0 (36.2 to 77.1)           | 28.0 (13.8 to 51.1)             | 104.1 (74.3 to 167.3)             |
| Tonga   | 2049 | 410.6 (344.7 to 495.5)     | 281.4 (225.4 to 352.4)     | 37.4 (25.1 to 53.3)           | 19.4 (9.6 to 35.5)              | 72.4 (51.6 to 116.0)              | 602.9 (506.1 to 727.6) | 413.1 (331.0 to 517.4)     | 54.9 (36.8 to 78.2)           | 28.6 (14.1 to 52.1)             | 106.3 (75.8 to 170.3)             |
| Tonga   | 2050 | 417.7 (350.3 to 507.4)     | 285.8 (228.9 to 358.2)     | 38.0 (25.5 to 54.1)           | 19.8 (9.8 to 36.3)              | 74.1 (52.0 to 122.0)              | 613.4 (514.3 to 745.1) | 419.6 (336.1 to 526.0)     | 55.9 (37.5 to 79.4)           | 29.1 (14.3 to 53.2)             | 108.8 (76.3 to 179.2)             |

| Country             | Year | 2018 US Dollars per capita |                            |                               |                                 |                                   | 2018 PPP per capita       |                            |                               |                                 |                                   |
|---------------------|------|----------------------------|----------------------------|-------------------------------|---------------------------------|-----------------------------------|---------------------------|----------------------------|-------------------------------|---------------------------------|-----------------------------------|
|                     |      | Health spending            | Government health spending | Out-of-pocket health spending | Prepaid private health spending | Development assistance for health | Health spending           | Government health spending | Out-of-pocket health spending | Prepaid private health spending | Development assistance for health |
| Trinidad and Tobago | 1995 | 343.1 (304.1 to 385.2)     | 133.8 (111.6 to 157.2)     | 186.3 (157.0 to 218.0)        | 22.1 (13.3 to 35.9)             | 0.8 (0.8 to 0.8)                  | 703.2 (623.5 to 789.7)    | 274.3 (228.8 to 322.2)     | 381.9 (321.9 to 446.9)        | 45.3 (27.3 to 73.5)             | 1.7 (1.7 to 1.7)                  |
| Trinidad and Tobago | 1996 | 353.0 (316.0 to 390.8)     | 134.9 (113.9 to 156.4)     | 189.6 (163.3 to 218.2)        | 22.3 (13.9 to 34.7)             | 6.2 (6.2 to 6.2)                  | 723.7 (647.8 to 801.1)    | 276.5 (233.4 to 320.7)     | 388.7 (334.8 to 447.3)        | 45.7 (28.5 to 71.1)             | 12.7 (12.7 to 12.7)               |
| Trinidad and Tobago | 1997 | 369.8 (335.9 to 404.3)     | 138.8 (119.0 to 158.9)     | 196.3 (172.8 to 222.1)        | 22.8 (14.9 to 34.4)             | 11.9 (11.9 to 11.9)               | 758.1 (688.6 to 828.7)    | 284.6 (244.0 to 325.7)     | 402.4 (354.3 to 455.2)        | 46.7 (30.5 to 70.4)             | 24.4 (24.4 to 24.4)               |
| Trinidad and Tobago | 1998 | 379.9 (349.3 to 412.1)     | 141.2 (122.7 to 159.7)     | 204.3 (182.2 to 229.8)        | 22.8 (15.2 to 33.9)             | 11.6 (11.6 to 11.6)               | 778.7 (715.9 to 844.8)    | 289.5 (251.5 to 327.3)     | 418.8 (373.5 to 471.1)        | 46.7 (31.1 to 69.6)             | 23.7 (23.7 to 23.7)               |
| Trinidad and Tobago | 1999 | 411.4 (380.3 to 445.3)     | 156.6 (137.8 to 176.3)     | 219.6 (196.8 to 244.5)        | 24.0 (16.4 to 35.6)             | 11.2 (11.2 to 11.2)               | 843.4 (779.5 to 912.7)    | 321.0 (282.4 to 361.3)     | 450.2 (403.3 to 501.2)        | 49.1 (33.7 to 72.9)             | 23.0 (23.0 to 23.0)               |
| Trinidad and Tobago | 2000 | 435.6 (401.9 to 469.3)     | 169.4 (150.3 to 188.3)     | 231.1 (207.3 to 256.2)        | 24.5 (16.5 to 36.1)             | 10.7 (10.7 to 10.7)               | 893.0 (823.9 to 962.0)    | 347.2 (308.1 to 386.0)     | 473.7 (425.0 to 525.1)        | 50.2 (33.8 to 74.0)             | 21.9 (21.9 to 21.9)               |
| Trinidad and Tobago | 2001 | 448.3 (415.0 to 482.8)     | 180.3 (160.8 to 199.6)     | 232.7 (208.8 to 259.7)        | 24.7 (16.7 to 35.7)             | 10.5 (10.5 to 10.5)               | 918.9 (850.6 to 989.6)    | 369.7 (329.6 to 409.2)     | 477.0 (428.0 to 532.3)        | 50.7 (34.3 to 73.1)             | 21.5 (21.5 to 21.5)               |
| Trinidad and Tobago | 2002 | 488.9 (455.0 to 525.3)     | 200.4 (178.4 to 222.1)     | 251.2 (226.7 to 278.1)        | 27.0 (18.3 to 38.6)             | 10.3 (10.3 to 10.3)               | 1002.3 (932.7 to 1076.9)  | 410.9 (365.7 to 455.2)     | 514.9 (464.8 to 570.1)        | 55.4 (37.6 to 79.1)             | 21.1 (21.1 to 21.1)               |
| Trinidad and Tobago | 2003 | 540.3 (502.9 to 578.0)     | 232.2 (209.1 to 254.6)     | 269.3 (244.0 to 296.1)        | 28.8 (19.7 to 40.2)             | 10.0 (10.0 to 10.0)               | 1107.5 (1030.9 to 1184.8) | 475.9 (428.7 to 522.0)     | 552.1 (500.1 to 607.1)        | 59.0 (40.5 to 82.4)             | 20.5 (20.5 to 20.5)               |
| Trinidad and Tobago | 2004 | 585.5 (550.1 to 623.1)     | 254.0 (230.5 to 278.9)     | 288.6 (262.4 to 315.5)        | 28.2 (19.3 to 38.6)             | 14.7 (14.7 to 14.7)               | 1200.2 (1127.6 to 1277.2) | 520.6 (472.6 to 571.6)     | 591.5 (537.9 to 646.6)        | 57.9 (39.6 to 79.2)             | 30.2 (30.2 to 30.2)               |
| Trinidad and Tobago | 2005 | 620.2 (584.4 to 659.4)     | 277.8 (252.2 to 303.0)     | 300.7 (275.8 to 328.7)        | 31.2 (21.8 to 42.4)             | 10.6 (10.6 to 10.6)               | 1271.4 (1198.0 to 1351.6) | 569.4 (523.0 to 621.1)     | 616.3 (565.4 to 673.9)        | 63.9 (44.7 to 86.8)             | 21.7 (21.7 to 21.7)               |
| Trinidad and Tobago | 2006 | 663.1 (627.7 to 701.2)     | 305.9 (282.4 to 331.4)     | 323.4 (298.5 to 351.6)        | 33.8 (24.1 to 45.6)             | 0.0 (0.0 to 0.0)                  | 1359.2 (1286.6 to 1437.3) | 627.0 (578.8 to 679.4)     | 663.0 (611.8 to 720.7)        | 69.3 (49.4 to 93.4)             | 0.0 (0.0 to 0.0)                  |
| Trinidad and Tobago | 2007 | 698.0 (663.5 to 735.3)     | 327.1 (302.3 to 351.9)     | 337.1 (311.4 to 363.2)        | 33.8 (24.7 to 44.5)             | 0.0 (0.0 to 0.0)                  | 1430.9 (1360.1 to 1507.2) | 670.5 (619.7 to 721.4)     | 691.1 (638.4 to 744.4)        | 69.3 (50.7 to 91.2)             | 0.0 (0.0 to 0.0)                  |
| Trinidad and Tobago | 2008 | 752.5 (716.6 to 794.2)     | 361.8 (335.8 to 387.1)     | 353.9 (328.4 to 381.4)        | 36.8 (27.2 to 48.4)             | 0.0 (0.0 to 0.0)                  | 1542.6 (1469.0 to 1627.9) | 741.6 (688.4 to 793.4)     | 725.5 (673.2 to 781.7)        | 75.5 (55.8 to 99.3)             | 0.0 (0.0 to 0.0)                  |
| Trinidad and Tobago | 2009 | 781.0 (746.0 to 823.1)     | 367.4 (342.5 to 392.6)     | 374.6 (349.6 to 403.7)        | 39.1 (29.7 to 50.8)             | 0.0 (0.0 to 0.0)                  | 1601.0 (1529.2 to 1687.2) | 753.0 (702.2 to 804.7)     | 767.8 (716.7 to 827.4)        | 80.1 (60.8 to 104.0)            | 0.0 (0.0 to 0.0)                  |
| Trinidad and Tobago | 2010 | 823.4 (786.3 to 862.9)     | 396.3 (370.7 to 423.5)     | 384.4 (359.0 to 415.3)        | 42.7 (32.4 to 55.8)             | 0.0 (0.0 to 0.0)                  | 1687.9 (1611.7 to 1768.8) | 812.4 (760.0 to 868.2)     | 787.9 (735.8 to 851.4)        | 87.6 (66.4 to 114.5)            | 0.0 (0.0 to 0.0)                  |
| Trinidad and Tobago | 2011 | 829.5 (791.9 to 871.1)     | 409.8 (383.4 to 436.1)     | 375.0 (349.0 to 406.6)        | 44.7 (34.2 to 57.5)             | 0.0 (0.0 to 0.0)                  | 1700.3 (1623.3 to 1785.6) | 840.1 (785.9 to 894.0)     | 768.7 (715.4 to 833.5)        | 91.6 (70.2 to 117.8)            | 0.0 (0.0 to 0.0)                  |
| Trinidad and Tobago | 2012 | 843.5 (803.7 to 882.2)     | 421.2 (393.9 to 447.2)     | 373.5 (345.5 to 402.0)        | 48.8 (37.2 to 62.5)             | 0.0 (0.0 to 0.0)                  | 1729.0 (1647.4 to 1808.4) | 863.4 (807.5 to 916.6)     | 765.6 (708.3 to 824.0)        | 100.0 (76.3 to 128.1)           | 0.0 (0.0 to 0.0)                  |
| Trinidad and Tobago | 2013 | 890.1 (850.7 to 930.9)     | 452.6 (424.7 to 479.5)     | 384.3 (357.1 to 411.7)        | 53.2 (41.0 to 68.3)             | 0.0 (0.0 to 0.0)                  | 1824.6 (1743.9 to 1908.1) | 927.8 (870.6 to 982.9)     | 787.7 (732.0 to 843.9)        | 109.0 (84.1 to 140.1)           | 0.0 (0.0 to 0.0)                  |
| Trinidad and Tobago | 2014 | 945.4 (907.7 to 988.4)     | 483.8 (456.1 to 513.7)     | 399.9 (372.7 to 429.8)        | 61.7 (48.8 to 80.1)             | 0.0 (0.0 to 0.0)                  | 1937.9 (1860.6 to 2026.1) | 991.7 (934.9 to 1053.0)    | 819.7 (763.9 to 881.0)        | 126.6 (99.9 to 164.1)           | 0.0 (0.0 to 0.0)                  |
| Trinidad and Tobago | 2015 | 1026.8 (980.1 to 1078.3)   | 530.5 (499.3 to 563.2)     | 424.4 (393.0 to 457.9)        | 71.9 (55.6 to 94.4)             | 0.0 (0.0 to 0.0)                  | 2104.7 (2009.0 to 2210.3) | 1087.5 (1023.5 to 1154.6)  | 869.9 (805.6 to 938.5)        | 147.4 (113.9 to 193.5)          | 0.0 (0.0 to 0.0)                  |

| Country             | Year | 2018 US Dollars per capita |                            |                               |                                 |                                   | 2018 PPP per capita       |                            |                               |                                 |                                   |
|---------------------|------|----------------------------|----------------------------|-------------------------------|---------------------------------|-----------------------------------|---------------------------|----------------------------|-------------------------------|---------------------------------|-----------------------------------|
|                     |      | Health spending            | Government health spending | Out-of-pocket health spending | Prepaid private health spending | Development assistance for health | Health spending           | Government health spending | Out-of-pocket health spending | Prepaid private health spending | Development assistance for health |
| Trinidad and Tobago | 2016 | 1048.1 (982.6 to 1111.3)   | 546.1 (506.2 to 587.8)     | 426.4 (387.5 to 467.1)        | 75.6 (55.2 to 101.4)            | 0.0 (0.0 to 0.0)                  | 2148.4 (2014.2 to 2277.9) | 1119.3 (1037.6 to 1204.9)  | 874.0 (794.4 to 957.5)        | 155.1 (113.1 to 207.8)          | 0.0 (0.0 to 0.0)                  |
| Trinidad and Tobago | 2017 | 1017.2 (952.8 to 1081.0)   | 526.4 (488.0 to 567.0)     | 417.8 (377.5 to 458.8)        | 73.0 (53.4 to 97.6)             | 0.0 (0.0 to 0.0)                  | 2085.1 (1953.1 to 2215.8) | 1079.1 (1000.3 to 1162.2)  | 856.4 (773.9 to 940.4)        | 149.6 (109.5 to 200.0)          | 0.0 (0.0 to 0.0)                  |
| Trinidad and Tobago | 2018 | 1024.6 (959.8 to 1091.3)   | 527.6 (488.8 to 568.7)     | 423.5 (381.9 to 466.1)        | 73.5 (53.6 to 98.2)             | 0.0 (0.0 to 0.0)                  | 2100.3 (1967.4 to 2237.1) | 1081.5 (1002.0 to 1165.7)  | 868.1 (782.7 to 955.5)        | 150.7 (109.9 to 201.4)          | 0.0 (0.0 to 0.0)                  |
| Trinidad and Tobago | 2019 | 1036.3 (970.0 to 1103.5)   | 532.8 (492.7 to 574.3)     | 429.6 (386.6 to 475.0)        | 73.9 (54.0 to 98.7)             | 0.0 (0.0 to 0.0)                  | 2124.3 (1988.4 to 2261.9) | 1092.1 (1010.1 to 1177.3)  | 880.6 (792.4 to 973.8)        | 151.6 (110.8 to 202.4)          | 0.0 (0.0 to 0.0)                  |
| Trinidad and Tobago | 2020 | 1047.9 (978.9 to 1116.3)   | 537.8 (496.3 to 581.8)     | 435.7 (391.7 to 482.9)        | 74.4 (54.3 to 99.3)             | 0.0 (0.0 to 0.0)                  | 2148.1 (2006.6 to 2288.1) | 1102.5 (1017.2 to 1192.6)  | 893.2 (803.0 to 989.8)        | 152.4 (111.3 to 203.6)          | 0.0 (0.0 to 0.0)                  |
| Trinidad and Tobago | 2021 | 1059.8 (991.5 to 1132.6)   | 543.3 (500.1 to 587.0)     | 441.7 (395.8 to 490.3)        | 74.8 (54.8 to 100.1)            | 0.0 (0.0 to 0.0)                  | 2172.4 (2032.5 to 2321.6) | 1113.6 (1025.2 to 1203.2)  | 905.4 (811.4 to 1005.0)       | 153.4 (112.4 to 205.3)          | 0.0 (0.0 to 0.0)                  |
| Trinidad and Tobago | 2022 | 1073.3 (1000.0 to 1148.5)  | 548.4 (504.9 to 593.6)     | 449.6 (402.6 to 498.5)        | 75.3 (55.2 to 100.9)            | 0.0 (0.0 to 0.0)                  | 2200.1 (2049.9 to 2354.2) | 1124.1 (1035.1 to 1216.9)  | 921.6 (825.3 to 1021.9)       | 154.4 (113.1 to 206.9)          | 0.0 (0.0 to 0.0)                  |
| Trinidad and Tobago | 2023 | 1086.6 (1012.4 to 1160.2)  | 553.4 (508.6 to 599.6)     | 457.5 (409.7 to 509.2)        | 75.8 (55.3 to 101.7)            | 0.0 (0.0 to 0.0)                  | 2227.3 (2075.3 to 2378.3) | 1134.3 (1042.5 to 1229.1)  | 937.7 (839.8 to 1043.7)       | 155.3 (113.3 to 208.4)          | 0.0 (0.0 to 0.0)                  |
| Trinidad and Tobago | 2024 | 1100.5 (1024.5 to 1175.9)  | 558.9 (511.8 to 607.6)     | 465.3 (416.4 to 517.6)        | 76.3 (55.8 to 102.5)            | 0.0 (0.0 to 0.0)                  | 2255.8 (2100.0 to 2410.3) | 1145.7 (1049.2 to 1245.5)  | 953.7 (853.5 to 1061.0)       | 156.3 (114.3 to 210.1)          | 0.0 (0.0 to 0.0)                  |
| Trinidad and Tobago | 2025 | 1114.2 (1035.6 to 1194.2)  | 564.8 (516.8 to 614.3)     | 472.6 (422.8 to 527.1)        | 76.8 (56.3 to 103.2)            | 0.0 (0.0 to 0.0)                  | 2284.0 (2122.7 to 2448.0) | 1157.8 (1059.3 to 1259.2)  | 968.8 (866.7 to 1080.4)       | 157.4 (115.3 to 211.6)          | 0.0 (0.0 to 0.0)                  |
| Trinidad and Tobago | 2026 | 1128.4 (1049.7 to 1211.4)  | 571.0 (521.4 to 621.6)     | 480.1 (427.7 to 532.5)        | 77.2 (56.6 to 104.1)            | 0.0 (0.0 to 0.0)                  | 2313.0 (2151.8 to 2483.1) | 1170.5 (1068.7 to 1274.2)  | 984.1 (876.8 to 1091.6)       | 158.3 (116.0 to 213.3)          | 0.0 (0.0 to 0.0)                  |
| Trinidad and Tobago | 2027 | 1143.4 (1061.9 to 1229.1)  | 577.8 (528.0 to 631.5)     | 487.8 (433.1 to 546.1)        | 77.8 (57.0 to 104.8)            | 0.0 (0.0 to 0.0)                  | 2343.7 (2176.7 to 2519.4) | 1184.4 (1082.3 to 1294.5)  | 999.9 (887.9 to 1119.3)       | 159.4 (116.9 to 214.7)          | 0.0 (0.0 to 0.0)                  |
| Trinidad and Tobago | 2028 | 1159.1 (1074.8 to 1245.8)  | 585.0 (533.8 to 640.7)     | 495.7 (436.9 to 557.7)        | 78.4 (57.6 to 105.3)            | 0.0 (0.0 to 0.0)                  | 2376.0 (2203.2 to 2553.7) | 1199.2 (1094.1 to 1313.3)  | 1016.1 (895.6 to 1143.3)      | 160.7 (118.0 to 215.8)          | 0.0 (0.0 to 0.0)                  |
| Trinidad and Tobago | 2029 | 1174.6 (1087.5 to 1268.8)  | 591.9 (538.3 to 648.6)     | 503.7 (440.6 to 570.7)        | 79.0 (57.9 to 106.1)            | 0.0 (0.0 to 0.0)                  | 2407.8 (2229.1 to 2600.8) | 1213.4 (1103.3 to 1329.6)  | 1032.4 (903.2 to 1169.9)      | 162.0 (118.7 to 217.4)          | 0.0 (0.0 to 0.0)                  |
| Trinidad and Tobago | 2030 | 1189.0 (1095.9 to 1287.4)  | 597.9 (542.9 to 657.0)     | 511.4 (444.1 to 583.6)        | 79.7 (58.2 to 107.0)            | 0.0 (0.0 to 0.0)                  | 2437.2 (2246.5 to 2639.0) | 1225.5 (1112.9 to 1346.7)  | 1048.3 (910.4 to 1196.2)      | 163.4 (119.4 to 219.3)          | 0.0 (0.0 to 0.0)                  |
| Trinidad and Tobago | 2031 | 1202.4 (1105.2 to 1304.8)  | 603.1 (547.0 to 663.3)     | 519.0 (446.9 to 596.1)        | 80.3 (58.6 to 108.0)            | 0.0 (0.0 to 0.0)                  | 2464.8 (2265.5 to 2674.6) | 1236.2 (1121.2 to 1359.7)  | 1063.9 (916.0 to 1221.8)      | 164.7 (120.1 to 221.3)          | 0.0 (0.0 to 0.0)                  |
| Trinidad and Tobago | 2032 | 1216.9 (1116.5 to 1327.5)  | 608.8 (551.4 to 670.2)     | 527.0 (450.0 to 611.4)        | 81.2 (59.3 to 109.2)            | 0.0 (0.0 to 0.0)                  | 2494.4 (2288.6 to 2721.2) | 1247.8 (1130.4 to 1373.8)  | 1080.2 (922.3 to 1253.4)      | 166.3 (121.6 to 223.8)          | 0.0 (0.0 to 0.0)                  |
| Trinidad and Tobago | 2033 | 1230.5 (1123.1 to 1347.3)  | 613.7 (554.6 to 676.6)     | 534.8 (453.4 to 625.9)        | 82.0 (60.1 to 110.4)            | 0.0 (0.0 to 0.0)                  | 2522.3 (2302.1 to 2761.7) | 1258.1 (1136.9 to 1387.0)  | 1096.2 (929.3 to 1283.1)      | 168.0 (123.3 to 226.3)          | 0.0 (0.0 to 0.0)                  |
| Trinidad and Tobago | 2034 | 1244.7 (1132.5 to 1370.1)  | 619.2 (559.1 to 684.1)     | 542.7 (457.0 to 641.1)        | 82.9 (60.6 to 111.6)            | 0.0 (0.0 to 0.0)                  | 2551.5 (2321.5 to 2808.4) | 1269.3 (1146.1 to 1402.2)  | 1112.4 (936.7 to 1314.1)      | 169.8 (124.3 to 228.7)          | 0.0 (0.0 to 0.0)                  |
| Trinidad and Tobago | 2035 | 1258.2 (1145.2 to 1391.8)  | 624.2 (563.7 to 690.3)     | 550.3 (460.4 to 655.6)        | 83.7 (61.0 to 112.5)            | 0.0 (0.0 to 0.0)                  | 2579.0 (2347.4 to 2852.9) | 1279.5 (1155.5 to 1415.1)  | 1128.0 (943.7 to 1343.9)      | 171.5 (125.0 to 230.7)          | 0.0 (0.0 to 0.0)                  |
| Trinidad and Tobago | 2036 | 1271.9 (1150.3 to 1412.0)  | 629.6 (567.4 to 699.5)     | 557.8 (463.6 to 669.8)        | 84.5 (61.3 to 113.5)            | 0.0 (0.0 to 0.0)                  | 2607.1 (2357.9 to 2894.3) | 1290.6 (1163.0 to 1433.8)  | 1143.3 (950.3 to 1372.9)      | 173.2 (125.7 to 232.6)          | 0.0 (0.0 to 0.0)                  |

| Country             | Year | 2018 US Dollars per capita |                            |                               |                                 |                                   | 2018 PPP per capita       |                            |                               |                                 |                                   |
|---------------------|------|----------------------------|----------------------------|-------------------------------|---------------------------------|-----------------------------------|---------------------------|----------------------------|-------------------------------|---------------------------------|-----------------------------------|
|                     |      | Health spending            | Government health spending | Out-of-pocket health spending | Prepaid private health spending | Development assistance for health | Health spending           | Government health spending | Out-of-pocket health spending | Prepaid private health spending | Development assistance for health |
| Trinidad and Tobago | 2037 | 1284.6 (1158.4 to 1425.5)  | 634.5 (571.1 to 706.5)     | 564.9 (465.8 to 683.7)        | 85.2 (61.6 to 114.5)            | 0.0 (0.0 to 0.0)                  | 2633.3 (2374.5 to 2922.0) | 1300.6 (1170.7 to 1448.1)  | 1157.9 (954.7 to 1401.4)      | 174.7 (126.3 to 234.7)          | 0.0 (0.0 to 0.0)                  |
| Trinidad and Tobago | 2038 | 1297.1 (1165.3 to 1443.6)  | 639.3 (573.7 to 712.0)     | 571.8 (468.6 to 696.0)        | 86.0 (62.0 to 115.7)            | 0.0 (0.0 to 0.0)                  | 2658.9 (2388.7 to 2959.1) | 1310.6 (1176.0 to 1459.5)  | 1172.1 (960.6 to 1426.6)      | 176.2 (127.1 to 237.2)          | 0.0 (0.0 to 0.0)                  |
| Trinidad and Tobago | 2039 | 1309.0 (1174.1 to 1465.4)  | 643.8 (575.8 to 720.0)     | 578.5 (471.5 to 709.0)        | 86.7 (62.6 to 116.9)            | 0.0 (0.0 to 0.0)                  | 2683.2 (2406.7 to 3003.9) | 1319.7 (1180.4 to 1476.0)  | 1185.8 (966.5 to 1453.4)      | 177.7 (128.4 to 239.5)          | 0.0 (0.0 to 0.0)                  |
| Trinidad and Tobago | 2040 | 1320.9 (1181.8 to 1480.9)  | 648.4 (578.4 to 725.9)     | 585.1 (474.2 to 720.9)        | 87.4 (63.3 to 117.8)            | 0.0 (0.0 to 0.0)                  | 2707.7 (2422.5 to 3035.6) | 1329.1 (1185.6 to 1487.9)  | 1199.3 (972.0 to 1477.8)      | 179.2 (129.7 to 241.6)          | 0.0 (0.0 to 0.0)                  |
| Trinidad and Tobago | 2041 | 1332.0 (1191.4 to 1499.1)  | 652.7 (581.0 to 731.4)     | 591.2 (477.6 to 732.6)        | 88.0 (63.7 to 118.6)            | 0.0 (0.0 to 0.0)                  | 2730.3 (2442.2 to 3072.9) | 1338.0 (1191.0 to 1499.2)  | 1211.8 (979.1 to 1501.8)      | 180.5 (130.6 to 243.0)          | 0.0 (0.0 to 0.0)                  |
| Trinidad and Tobago | 2042 | 1343.1 (1199.3 to 1514.8)  | 657.1 (582.6 to 738.0)     | 597.2 (480.7 to 742.1)        | 88.7 (64.0 to 119.4)            | 0.0 (0.0 to 0.0)                  | 2753.1 (2458.4 to 3105.1) | 1347.0 (1194.3 to 1512.8)  | 1224.2 (985.3 to 1521.2)      | 181.8 (131.3 to 244.7)          | 0.0 (0.0 to 0.0)                  |
| Trinidad and Tobago | 2043 | 1353.8 (1206.3 to 1530.3)  | 661.4 (585.4 to 745.8)     | 603.0 (483.2 to 750.4)        | 89.4 (64.5 to 120.5)            | 0.0 (0.0 to 0.0)                  | 2775.0 (2472.7 to 3136.9) | 1355.7 (1199.9 to 1528.8)  | 1236.1 (990.5 to 1538.2)      | 183.2 (132.3 to 247.1)          | 0.0 (0.0 to 0.0)                  |
| Trinidad and Tobago | 2044 | 1364.4 (1213.4 to 1542.3)  | 666.0 (587.6 to 752.7)     | 608.5 (486.0 to 759.1)        | 89.9 (65.2 to 121.6)            | 0.0 (0.0 to 0.0)                  | 2796.9 (2487.2 to 3161.5) | 1365.2 (1204.5 to 1542.8)  | 1247.3 (996.2 to 1556.0)      | 184.4 (133.6 to 249.3)          | 0.0 (0.0 to 0.0)                  |
| Trinidad and Tobago | 2045 | 1374.5 (1220.3 to 1555.3)  | 670.5 (590.4 to 760.5)     | 613.5 (489.4 to 766.0)        | 90.4 (65.5 to 122.4)            | 0.0 (0.0 to 0.0)                  | 2817.4 (2501.3 to 3188.2) | 1374.4 (1210.2 to 1558.9)  | 1257.6 (1003.3 to 1570.3)     | 185.4 (134.3 to 251.0)          | 0.0 (0.0 to 0.0)                  |
| Trinidad and Tobago | 2046 | 1385.0 (1231.7 to 1579.7)  | 675.9 (592.9 to 769.7)     | 618.2 (493.2 to 772.8)        | 90.9 (65.7 to 123.2)            | 0.0 (0.0 to 0.0)                  | 2839.0 (2524.7 to 3238.1) | 1385.4 (1215.3 to 1577.9)  | 1267.3 (1011.0 to 1584.1)     | 186.3 (134.6 to 252.5)          | 0.0 (0.0 to 0.0)                  |
| Trinidad and Tobago | 2047 | 1394.4 (1233.7 to 1586.2)  | 680.8 (594.6 to 777.7)     | 622.4 (496.9 to 780.0)        | 91.2 (65.8 to 123.7)            | 0.0 (0.0 to 0.0)                  | 2858.3 (2528.9 to 3251.4) | 1395.6 (1218.8 to 1594.3)  | 1275.8 (1018.6 to 1598.8)     | 186.9 (134.8 to 253.6)          | 0.0 (0.0 to 0.0)                  |
| Trinidad and Tobago | 2048 | 1403.9 (1244.9 to 1597.2)  | 685.8 (596.8 to 786.5)     | 626.5 (500.6 to 785.6)        | 91.5 (65.9 to 123.9)            | 0.0 (0.0 to 0.0)                  | 2877.7 (2551.8 to 3274.0) | 1405.9 (1223.3 to 1612.2)  | 1284.3 (1026.1 to 1610.3)     | 187.5 (135.0 to 254.0)          | 0.0 (0.0 to 0.0)                  |
| Trinidad and Tobago | 2049 | 1412.9 (1244.1 to 1612.7)  | 690.5 (599.4 to 795.7)     | 630.7 (504.0 to 792.5)        | 91.8 (66.0 to 124.0)            | 0.0 (0.0 to 0.0)                  | 2896.2 (2550.3 to 3305.8) | 1415.3 (1228.7 to 1631.0)  | 1292.7 (1033.2 to 1624.6)     | 188.1 (135.4 to 254.3)          | 0.0 (0.0 to 0.0)                  |
| Trinidad and Tobago | 2050 | 1422.1 (1247.7 to 1622.8)  | 695.1 (601.0 to 803.9)     | 635.0 (507.4 to 799.7)        | 92.1 (66.1 to 124.3)            | 0.0 (0.0 to 0.0)                  | 2915.1 (2557.7 to 3326.4) | 1424.7 (1232.0 to 1647.9)  | 1301.5 (1040.1 to 1639.2)     | 188.8 (135.6 to 254.8)          | 0.0 (0.0 to 0.0)                  |
| Tunisia             | 1995 | 100.8 (86.4 to 117.3)      | 52.8 (42.3 to 64.3)        | 45.5 (35.2 to 60.0)           | 1.1 (0.6 to 2.1)                | 1.3 (1.3 to 1.3)                  | 352.7 (302.1 to 410.1)    | 184.8 (147.9 to 224.9)     | 159.2 (123.0 to 209.9)        | 4.0 (2.0 to 7.3)                | 4.7 (4.7 to 4.7)                  |
| Tunisia             | 1996 | 103.1 (88.5 to 118.8)      | 56.3 (45.3 to 68.2)        | 44.1 (34.5 to 57.4)           | 0.4 (0.2 to 0.8)                | 2.3 (2.3 to 2.3)                  | 360.5 (309.5 to 415.5)    | 196.8 (158.5 to 238.5)     | 154.2 (120.8 to 200.6)        | 1.4 (0.7 to 2.7)                | 8.0 (8.0 to 8.0)                  |
| Tunisia             | 1997 | 102.8 (87.9 to 118.8)      | 56.9 (46.5 to 68.8)        | 44.3 (34.8 to 56.4)           | 0.4 (0.2 to 0.8)                | 1.2 (1.2 to 1.2)                  | 359.5 (307.5 to 415.4)    | 198.9 (162.7 to 240.7)     | 155.0 (121.7 to 197.3)        | 1.4 (0.7 to 2.7)                | 4.2 (4.2 to 4.2)                  |
| Tunisia             | 1998 | 108.2 (93.5 to 124.4)      | 59.2 (48.5 to 71.3)        | 45.9 (36.6 to 57.6)           | 0.7 (0.3 to 1.3)                | 2.4 (2.4 to 2.4)                  | 378.5 (327.1 to 435.0)    | 207.2 (169.7 to 249.2)     | 160.5 (127.9 to 201.5)        | 2.5 (1.2 to 4.6)                | 8.3 (8.3 to 8.3)                  |
| Tunisia             | 1999 | 114.0 (99.2 to 130.2)      | 61.9 (51.4 to 74.4)        | 48.0 (38.6 to 59.8)           | 1.7 (0.9 to 3.3)                | 2.4 (2.4 to 2.4)                  | 398.9 (347.0 to 455.5)    | 216.6 (179.7 to 260.2)     | 167.8 (135.1 to 209.1)        | 6.1 (3.0 to 11.5)               | 8.4 (8.4 to 8.4)                  |
| Tunisia             | 2000 | 118.1 (103.1 to 134.3)     | 63.4 (52.7 to 75.3)        | 49.2 (39.3 to 60.7)           | 4.4 (2.2 to 8.3)                | 1.1 (1.1 to 1.1)                  | 413.1 (360.7 to 469.6)    | 221.7 (184.5 to 263.5)     | 171.9 (137.5 to 212.4)        | 15.5 (7.6 to 28.9)              | 4.0 (4.0 to 4.0)                  |
| Tunisia             | 2001 | 125.4 (109.6 to 143.1)     | 65.4 (55.0 to 77.8)        | 51.1 (40.8 to 63.3)           | 7.0 (3.4 to 12.7)               | 2.0 (2.0 to 2.0)                  | 438.7 (383.3 to 500.5)    | 228.6 (192.2 to 272.0)     | 178.6 (142.8 to 221.5)        | 24.5 (11.9 to 44.4)             | 6.9 (6.9 to 6.9)                  |

| Country | Year | 2018 US Dollars per capita |                            |                               |                                 |                                   | 2018 PPP per capita     |                            |                               |                                 |                                   |
|---------|------|----------------------------|----------------------------|-------------------------------|---------------------------------|-----------------------------------|-------------------------|----------------------------|-------------------------------|---------------------------------|-----------------------------------|
|         |      | Health spending            | Government health spending | Out-of-pocket health spending | Prepaid private health spending | Development assistance for health | Health spending         | Government health spending | Out-of-pocket health spending | Prepaid private health spending | Development assistance for health |
| Tunisia | 2002 | 130.7 (114.5 to 149.4)     | 66.7 (55.7 to 79.3)        | 53.2 (43.0 to 66.1)           | 8.6 (4.2 to 15.8)               | 2.2 (2.2 to 2.2)                  | 457.1 (400.5 to 522.5)  | 233.2 (194.9 to 277.3)     | 186.2 (150.4 to 231.2)        | 30.1 (14.6 to 55.4)             | 7.5 (7.5 to 7.5)                  |
| Tunisia | 2003 | 138.1 (120.8 to 157.3)     | 69.9 (58.6 to 82.3)        | 56.5 (45.9 to 69.9)           | 9.4 (4.5 to 17.6)               | 2.3 (2.3 to 2.3)                  | 483.2 (422.5 to 550.2)  | 244.4 (205.1 to 287.9)     | 197.6 (160.7 to 244.5)        | 33.0 (15.6 to 61.5)             | 8.2 (8.2 to 8.2)                  |
| Tunisia | 2004 | 143.6 (126.3 to 162.9)     | 73.4 (61.8 to 86.0)        | 59.9 (48.9 to 73.8)           | 9.5 (4.5 to 17.5)               | 0.9 (0.9 to 0.9)                  | 502.3 (441.8 to 569.9)  | 256.6 (216.1 to 300.7)     | 209.4 (171.0 to 258.2)        | 33.2 (15.8 to 61.2)             | 3.1 (3.1 to 3.1)                  |
| Tunisia | 2005 | 147.3 (130.0 to 166.9)     | 75.7 (64.0 to 87.8)        | 62.4 (50.7 to 76.5)           | 8.6 (4.1 to 15.5)               | 0.5 (0.5 to 0.5)                  | 515.2 (454.7 to 583.9)  | 264.9 (223.8 to 307.1)     | 218.4 (177.5 to 267.6)        | 30.1 (14.4 to 54.3)             | 1.8 (1.8 to 1.8)                  |
| Tunisia | 2006 | 156.2 (138.6 to 176.3)     | 80.3 (68.5 to 92.3)        | 65.6 (53.2 to 80.2)           | 7.0 (3.5 to 12.3)               | 3.3 (3.3 to 3.3)                  | 546.2 (484.8 to 616.5)  | 280.9 (239.6 to 322.7)     | 229.6 (186.2 to 280.5)        | 24.4 (12.1 to 43.0)             | 11.4 (11.4 to 11.4)               |
| Tunisia | 2007 | 162.2 (143.9 to 182.8)     | 86.5 (74.3 to 99.5)        | 69.4 (56.4 to 84.8)           | 5.4 (2.7 to 9.6)                | 0.9 (0.9 to 0.9)                  | 567.4 (503.3 to 639.2)  | 302.5 (260.0 to 348.1)     | 242.9 (197.2 to 296.7)        | 18.9 (9.6 to 33.6)              | 3.0 (3.0 to 3.0)                  |
| Tunisia | 2008 | 173.1 (154.8 to 193.4)     | 92.6 (80.1 to 106.7)       | 72.7 (59.6 to 88.8)           | 4.1 (2.0 to 7.3)                | 3.7 (3.7 to 3.7)                  | 605.5 (541.4 to 676.3)  | 324.0 (280.0 to 373.1)     | 254.3 (208.3 to 310.5)        | 14.4 (7.1 to 25.6)              | 12.8 (12.8 to 12.8)               |
| Tunisia | 2009 | 179.7 (160.7 to 201.7)     | 99.6 (86.6 to 115.3)       | 76.3 (61.7 to 92.5)           | 3.2 (1.6 to 5.9)                | 0.6 (0.6 to 0.6)                  | 628.6 (562.1 to 705.6)  | 348.4 (303.0 to 403.3)     | 266.7 (215.8 to 323.5)        | 11.3 (5.5 to 20.6)              | 2.2 (2.2 to 2.2)                  |
| Tunisia | 2010 | 192.5 (171.4 to 215.7)     | 108.4 (94.5 to 126.1)      | 80.3 (65.0 to 97.4)           | 2.8 (1.4 to 5.2)                | 1.1 (1.1 to 1.1)                  | 673.3 (599.5 to 754.5)  | 379.1 (330.5 to 441.0)     | 280.7 (227.2 to 340.6)        | 9.6 (4.7 to 18.2)               | 3.8 (3.8 to 3.8)                  |
| Tunisia | 2011 | 198.9 (176.6 to 222.8)     | 113.2 (97.9 to 131.5)      | 82.5 (66.6 to 100.5)          | 2.7 (1.3 to 5.0)                | 0.5 (0.5 to 0.5)                  | 695.6 (617.7 to 779.1)  | 396.0 (342.3 to 460.0)     | 288.5 (232.8 to 351.6)        | 9.4 (4.6 to 17.4)               | 1.7 (1.7 to 1.7)                  |
| Tunisia | 2012 | 213.4 (190.0 to 239.1)     | 122.2 (104.8 to 140.6)     | 86.7 (70.0 to 105.0)          | 3.8 (1.8 to 7.1)                | 0.7 (0.7 to 0.7)                  | 746.5 (664.4 to 836.4)  | 427.5 (366.5 to 491.9)     | 303.4 (245.0 to 367.3)        | 13.2 (6.3 to 24.8)              | 2.3 (2.3 to 2.3)                  |
| Tunisia | 2013 | 223.7 (199.3 to 251.1)     | 129.2 (110.4 to 149.4)     | 89.0 (71.8 to 108.3)          | 4.8 (2.3 to 9.0)                | 0.7 (0.7 to 0.7)                  | 782.4 (697.1 to 878.3)  | 452.0 (386.0 to 522.4)     | 311.2 (251.1 to 378.9)        | 16.9 (8.2 to 31.3)              | 2.4 (2.4 to 2.4)                  |
| Tunisia | 2014 | 231.7 (205.5 to 259.5)     | 133.6 (113.2 to 154.5)     | 90.9 (73.1 to 110.9)          | 6.6 (3.1 to 12.1)               | 0.6 (0.6 to 0.6)                  | 810.2 (718.9 to 907.7)  | 467.3 (396.0 to 540.4)     | 317.8 (255.6 to 387.8)        | 23.1 (10.8 to 42.5)             | 2.0 (2.0 to 2.0)                  |
| Tunisia | 2015 | 237.7 (207.7 to 268.7)     | 136.1 (114.1 to 159.5)     | 93.4 (74.0 to 114.7)          | 7.5 (3.6 to 13.9)               | 0.6 (0.6 to 0.6)                  | 831.3 (726.6 to 939.7)  | 476.1 (399.1 to 557.7)     | 326.6 (258.9 to 401.0)        | 26.4 (12.6 to 48.8)             | 2.2 (2.2 to 2.2)                  |
| Tunisia | 2016 | 242.1 (211.1 to 275.4)     | 137.5 (113.9 to 162.8)     | 94.8 (74.2 to 117.9)          | 8.0 (3.8 to 15.1)               | 1.7 (1.7 to 1.7)                  | 846.7 (738.4 to 963.2)  | 480.9 (398.4 to 569.4)     | 331.6 (259.6 to 412.4)        | 28.1 (13.3 to 52.7)             | 6.0 (6.0 to 6.0)                  |
| Tunisia | 2017 | 250.7 (218.1 to 285.1)     | 145.2 (120.3 to 171.8)     | 96.5 (75.7 to 120.2)          | 8.1 (3.8 to 15.2)               | 0.9 (0.9 to 0.9)                  | 877.0 (762.9 to 997.3)  | 508.0 (420.7 to 600.8)     | 337.4 (264.7 to 420.4)        | 28.3 (13.4 to 53.1)             | 3.2 (3.2 to 3.2)                  |
| Tunisia | 2018 | 254.0 (221.2 to 289.2)     | 147.3 (122.0 to 174.3)     | 97.6 (76.6 to 121.5)          | 8.3 (3.9 to 15.5)               | 0.8 (0.8 to 0.8)                  | 888.4 (773.7 to 1011.7) | 515.2 (426.7 to 609.8)     | 341.5 (267.8 to 425.0)        | 28.9 (13.6 to 54.1)             | 2.9 (2.9 to 2.9)                  |
| Tunisia | 2019 | 257.6 (224.2 to 294.4)     | 149.4 (123.8 to 177.0)     | 98.9 (77.3 to 122.8)          | 8.4 (4.0 to 15.7)               | 0.8 (0.8 to 0.9)                  | 900.8 (784.2 to 1029.6) | 522.5 (432.9 to 619.0)     | 346.1 (270.4 to 429.6)        | 29.4 (13.8 to 55.0)             | 2.9 (2.7 to 3.1)                  |
| Tunisia | 2020 | 261.1 (227.9 to 298.2)     | 151.2 (125.2 to 179.1)     | 100.5 (78.5 to 124.7)         | 8.5 (4.0 to 15.9)               | 0.8 (0.8 to 0.9)                  | 913.3 (797.3 to 1043.1) | 528.9 (438.0 to 626.3)     | 351.6 (274.7 to 436.1)        | 29.8 (14.0 to 55.8)             | 2.9 (2.7 to 3.2)                  |
| Tunisia | 2021 | 264.7 (230.6 to 302.2)     | 153.1 (126.7 to 181.3)     | 102.2 (80.2 to 126.5)         | 8.7 (4.1 to 16.2)               | 0.9 (0.8 to 0.9)                  | 925.9 (806.5 to 1057.1) | 535.3 (443.1 to 634.0)     | 357.3 (280.3 to 442.5)        | 30.3 (14.2 to 56.5)             | 3.0 (2.7 to 3.3)                  |
| Tunisia | 2022 | 267.9 (233.1 to 304.8)     | 154.6 (127.9 to 183.2)     | 103.6 (81.0 to 128.7)         | 8.8 (4.1 to 16.3)               | 0.9 (0.8 to 1.0)                  | 937.1 (815.3 to 1066.2) | 540.9 (447.2 to 640.9)     | 362.5 (283.3 to 450.1)        | 30.7 (14.4 to 57.2)             | 3.1 (2.7 to 3.5)                  |



| Country | Year | 2018 US Dollars per capita |                            |                               |                                 |                                   | 2018 PPP per capita       |                            |                               |                                 |                                   |
|---------|------|----------------------------|----------------------------|-------------------------------|---------------------------------|-----------------------------------|---------------------------|----------------------------|-------------------------------|---------------------------------|-----------------------------------|
|         |      | Health spending            | Government health spending | Out-of-pocket health spending | Prepaid private health spending | Development assistance for health | Health spending           | Government health spending | Out-of-pocket health spending | Prepaid private health spending | Development assistance for health |
| Tunisia | 2023 | 270.6 (235.0 to 309.3)     | 155.8 (128.9 to 184.8)     | 105.0 (82.0 to 130.5)         | 8.8 (4.2 to 16.5)               | 0.9 (0.8 to 1.0)                  | 946.4 (821.8 to 1081.8)   | 545.1 (451.0 to 646.5)     | 367.2 (286.8 to 456.3)        | 30.9 (14.6 to 57.7)             | 3.1 (2.7 to 3.6)                  |
| Tunisia | 2024 | 273.5 (237.7 to 311.9)     | 157.0 (129.9 to 186.3)     | 106.6 (83.5 to 133.7)         | 8.9 (4.2 to 16.6)               | 0.9 (0.8 to 1.1)                  | 956.4 (831.5 to 1090.8)   | 549.1 (454.3 to 651.7)     | 372.8 (292.0 to 467.5)        | 31.2 (14.7 to 58.1)             | 3.2 (2.8 to 3.7)                  |
| Tunisia | 2025 | 276.6 (240.5 to 315.8)     | 158.3 (130.9 to 188.1)     | 108.3 (84.3 to 135.5)         | 9.0 (4.2 to 16.8)               | 0.9 (0.8 to 1.1)                  | 967.3 (841.1 to 1104.4)   | 553.7 (457.7 to 658.0)     | 378.7 (294.8 to 474.0)        | 31.6 (14.8 to 58.7)             | 3.3 (2.8 to 3.9)                  |
| Tunisia | 2026 | 279.7 (243.1 to 321.4)     | 159.6 (131.7 to 189.9)     | 110.0 (85.3 to 138.2)         | 9.1 (4.3 to 16.9)               | 1.0 (0.8 to 1.1)                  | 978.2 (850.2 to 1124.0)   | 558.2 (460.8 to 664.0)     | 384.7 (298.3 to 483.4)        | 31.9 (14.9 to 59.2)             | 3.4 (2.9 to 4.0)                  |
| Tunisia | 2027 | 283.1 (245.3 to 324.3)     | 161.1 (132.5 to 191.7)     | 111.8 (86.5 to 141.1)         | 9.2 (4.3 to 17.1)               | 1.0 (0.8 to 1.2)                  | 990.1 (858.1 to 1134.1)   | 563.3 (463.5 to 670.6)     | 391.1 (302.5 to 493.4)        | 32.2 (15.1 to 59.9)             | 3.5 (2.9 to 4.2)                  |
| Tunisia | 2028 | 286.8 (248.4 to 329.8)     | 162.8 (134.1 to 193.9)     | 113.7 (87.4 to 144.3)         | 9.3 (4.4 to 17.4)               | 1.0 (0.9 to 1.2)                  | 1003.2 (868.7 to 1153.6)  | 569.3 (468.9 to 678.1)     | 397.6 (305.7 to 504.6)        | 32.6 (15.2 to 60.8)             | 3.6 (3.0 to 4.3)                  |
| Tunisia | 2029 | 290.7 (251.1 to 334.2)     | 164.6 (135.7 to 195.9)     | 115.6 (88.5 to 147.1)         | 9.5 (4.4 to 17.6)               | 1.1 (0.9 to 1.3)                  | 1016.7 (878.2 to 1168.8)  | 575.6 (474.7 to 685.3)     | 404.3 (309.7 to 514.4)        | 33.1 (15.4 to 61.7)             | 3.7 (3.0 to 4.5)                  |
| Tunisia | 2030 | 294.8 (254.1 to 339.5)     | 166.5 (137.4 to 198.1)     | 117.6 (89.2 to 150.1)         | 9.6 (4.5 to 17.9)               | 1.1 (0.9 to 1.3)                  | 1031.0 (888.6 to 1187.3)  | 582.5 (480.6 to 693.0)     | 411.2 (311.8 to 524.9)        | 33.5 (15.6 to 62.7)             | 3.8 (3.1 to 4.7)                  |
| Tunisia | 2031 | 299.1 (257.5 to 344.1)     | 168.7 (139.0 to 200.6)     | 119.6 (90.3 to 153.3)         | 9.7 (4.5 to 18.2)               | 1.1 (0.9 to 1.4)                  | 1046.2 (900.6 to 1203.6)  | 590.0 (486.2 to 701.6)     | 418.3 (315.9 to 536.0)        | 34.0 (15.8 to 63.7)             | 3.9 (3.2 to 4.9)                  |
| Tunisia | 2032 | 303.8 (261.1 to 349.9)     | 171.1 (140.9 to 203.4)     | 121.7 (91.5 to 157.0)         | 9.9 (4.6 to 18.6)               | 1.1 (0.9 to 1.4)                  | 1062.6 (913.1 to 1223.7)  | 598.4 (492.7 to 711.3)     | 425.6 (320.1 to 549.2)        | 34.6 (16.0 to 64.9)             | 4.0 (3.2 to 5.1)                  |
| Tunisia | 2033 | 308.8 (264.8 to 356.6)     | 173.7 (143.2 to 206.9)     | 123.9 (92.9 to 160.4)         | 10.1 (4.7 to 18.9)              | 1.2 (0.9 to 1.5)                  | 1080.0 (926.3 to 1247.2)  | 607.5 (500.7 to 723.5)     | 433.2 (325.0 to 561.2)        | 35.2 (16.3 to 66.2)             | 4.1 (3.3 to 5.3)                  |
| Tunisia | 2034 | 313.8 (268.1 to 363.3)     | 176.4 (145.3 to 210.1)     | 126.0 (94.3 to 163.9)         | 10.2 (4.8 to 19.2)              | 1.2 (1.0 to 1.6)                  | 1097.6 (937.7 to 1270.8)  | 616.8 (508.3 to 734.9)     | 440.8 (329.7 to 573.2)        | 35.8 (16.6 to 67.3)             | 4.2 (3.3 to 5.4)                  |
| Tunisia | 2035 | 318.9 (271.7 to 369.7)     | 179.1 (147.5 to 213.5)     | 128.2 (95.5 to 167.3)         | 10.4 (4.8 to 19.6)              | 1.2 (1.0 to 1.6)                  | 1115.6 (950.2 to 1293.2)  | 626.4 (516.0 to 746.8)     | 448.4 (333.9 to 585.0)        | 36.4 (17.0 to 68.5)             | 4.3 (3.4 to 5.7)                  |
| Tunisia | 2036 | 324.1 (275.0 to 375.7)     | 181.9 (149.8 to 217.3)     | 130.4 (96.6 to 170.6)         | 10.6 (4.9 to 20.0)              | 1.3 (1.0 to 1.7)                  | 1133.7 (962.0 to 1314.2)  | 636.3 (523.9 to 759.9)     | 456.0 (337.7 to 596.6)        | 37.0 (17.2 to 69.9)             | 4.5 (3.5 to 6.0)                  |
| Tunisia | 2037 | 329.6 (278.3 to 385.2)     | 184.9 (151.9 to 220.9)     | 132.6 (97.8 to 173.7)         | 10.8 (5.0 to 20.4)              | 1.3 (1.0 to 1.8)                  | 1152.7 (973.5 to 1347.5)  | 646.7 (531.2 to 772.5)     | 463.6 (342.0 to 607.5)        | 37.7 (17.5 to 71.3)             | 4.6 (3.5 to 6.2)                  |
| Tunisia | 2038 | 335.0 (284.5 to 391.6)     | 187.9 (154.0 to 225.0)     | 134.7 (98.9 to 177.2)         | 11.0 (5.1 to 20.8)              | 1.3 (1.0 to 1.9)                  | 1171.7 (995.1 to 1369.6)  | 657.3 (538.6 to 786.8)     | 471.3 (345.8 to 619.9)        | 38.4 (17.8 to 72.8)             | 4.7 (3.6 to 6.5)                  |
| Tunisia | 2039 | 340.4 (287.5 to 398.4)     | 190.9 (156.1 to 229.0)     | 136.9 (100.1 to 180.5)        | 11.2 (5.2 to 21.3)              | 1.4 (1.1 to 1.9)                  | 1190.7 (1005.7 to 1393.4) | 667.9 (546.0 to 801.1)     | 478.9 (350.2 to 631.4)        | 39.1 (18.1 to 74.3)             | 4.8 (3.7 to 6.7)                  |
| Tunisia | 2040 | 345.6 (292.7 to 406.8)     | 193.8 (158.1 to 232.6)     | 139.0 (101.2 to 183.7)        | 11.4 (5.3 to 21.6)              | 1.4 (1.1 to 2.0)                  | 1208.9 (1023.9 to 1422.7) | 678.0 (553.0 to 813.5)     | 486.2 (353.9 to 642.6)        | 39.8 (18.4 to 75.7)             | 5.0 (3.8 to 6.9)                  |
| Tunisia | 2041 | 350.8 (297.3 to 413.5)     | 196.7 (160.1 to 236.3)     | 141.1 (102.3 to 186.9)        | 11.6 (5.4 to 22.1)              | 1.5 (1.1 to 2.0)                  | 1227.1 (1039.8 to 1446.3) | 688.1 (559.8 to 826.6)     | 493.5 (357.9 to 653.6)        | 40.4 (18.7 to 77.1)             | 5.1 (3.9 to 7.1)                  |
| Tunisia | 2042 | 356.0 (301.4 to 419.6)     | 199.6 (162.0 to 240.3)     | 143.1 (103.5 to 190.3)        | 11.7 (5.4 to 22.5)              | 1.5 (1.1 to 2.2)                  | 1245.0 (1054.3 to 1467.6) | 698.1 (566.6 to 840.4)     | 500.6 (362.0 to 665.7)        | 41.1 (19.0 to 78.6)             | 5.3 (4.0 to 7.6)                  |
| Tunisia | 2043 | 361.0 (306.6 to 425.8)     | 202.4 (163.8 to 244.6)     | 145.1 (104.7 to 193.9)        | 11.9 (5.5 to 22.9)              | 1.6 (1.2 to 2.2)                  | 1262.5 (1072.2 to 1489.2) | 707.8 (572.7 to 855.6)     | 507.5 (366.1 to 678.2)        | 41.7 (19.3 to 79.9)             | 5.4 (4.0 to 7.9)                  |

| Country | Year | 2018 US Dollars per capita |                            |                               |                                 |                                   | 2018 PPP per capita       |                            |                               |                                 |                                   |
|---------|------|----------------------------|----------------------------|-------------------------------|---------------------------------|-----------------------------------|---------------------------|----------------------------|-------------------------------|---------------------------------|-----------------------------------|
|         |      | Health spending            | Government health spending | Out-of-pocket health spending | Prepaid private health spending | Development assistance for health | Health spending           | Government health spending | Out-of-pocket health spending | Prepaid private health spending | Development assistance for health |
| Tunisia | 2044 | 365.8 (308.6 to 432.2)     | 205.0 (165.2 to 248.7)     | 147.0 (105.8 to 197.2)        | 12.1 (5.6 to 23.2)              | 1.6 (1.2 to 2.3)                  | 1279.4 (1079.5 to 1511.7) | 717.2 (578.0 to 869.7)     | 514.2 (370.1 to 689.9)        | 42.4 (19.6 to 81.2)             | 5.6 (4.1 to 8.1)                  |
| Tunisia | 2045 | 370.4 (314.1 to 440.1)     | 207.6 (166.9 to 252.2)     | 148.9 (107.0 to 199.8)        | 12.3 (5.7 to 23.7)              | 1.7 (1.2 to 2.5)                  | 1295.6 (1098.5 to 1539.4) | 726.1 (583.8 to 882.2)     | 520.7 (374.1 to 698.7)        | 43.0 (19.8 to 82.7)             | 5.8 (4.2 to 8.7)                  |
| Tunisia | 2046 | 374.9 (315.9 to 446.3)     | 210.1 (168.8 to 255.7)     | 150.7 (108.3 to 201.8)        | 12.5 (5.7 to 24.0)              | 1.7 (1.2 to 2.6)                  | 1311.3 (1104.8 to 1561.2) | 734.8 (590.3 to 894.5)     | 526.9 (378.8 to 705.7)        | 43.6 (20.1 to 84.1)             | 6.0 (4.3 to 9.1)                  |
| Tunisia | 2047 | 379.3 (318.3 to 449.1)     | 212.5 (170.5 to 259.5)     | 152.4 (109.5 to 204.4)        | 12.6 (5.8 to 24.4)              | 1.8 (1.3 to 2.8)                  | 1326.5 (1113.3 to 1570.8) | 743.2 (596.3 to 907.7)     | 532.9 (383.2 to 714.9)        | 44.2 (20.3 to 85.4)             | 6.1 (4.4 to 9.7)                  |
| Tunisia | 2048 | 383.5 (320.3 to 457.3)     | 214.8 (172.2 to 262.9)     | 154.1 (110.4 to 207.2)        | 12.8 (5.9 to 24.8)              | 1.8 (1.3 to 2.9)                  | 1341.4 (1120.2 to 1599.6) | 751.4 (602.2 to 919.7)     | 538.9 (386.3 to 724.6)        | 44.7 (20.6 to 86.7)             | 6.4 (4.6 to 10.1)                 |
| Tunisia | 2049 | 387.7 (323.9 to 460.7)     | 217.1 (173.6 to 266.3)     | 155.8 (111.5 to 209.6)        | 13.0 (5.9 to 25.1)              | 1.9 (1.3 to 3.0)                  | 1356.2 (1132.7 to 1611.5) | 759.4 (607.1 to 931.4)     | 544.9 (390.0 to 733.0)        | 45.3 (20.8 to 87.9)             | 6.6 (4.7 to 10.6)                 |
| Tunisia | 2050 | 391.8 (329.9 to 467.6)     | 219.3 (175.1 to 269.2)     | 157.5 (112.7 to 212.3)        | 13.1 (6.0 to 25.5)              | 1.9 (1.4 to 3.2)                  | 1370.5 (1153.9 to 1635.6) | 767.1 (612.4 to 941.4)     | 550.8 (394.3 to 742.5)        | 45.9 (21.1 to 89.1)             | 6.8 (4.8 to 11.2)                 |
| Turkey  | 1995 | 154.7 (136.2 to 174.6)     | 98.4 (84.0 to 112.8)       | 42.4 (32.2 to 54.9)           | 12.0 (6.0 to 21.6)              | 1.8 (1.8 to 1.8)                  | 385.0 (339.0 to 434.7)    | 245.0 (209.2 to 280.7)     | 105.6 (80.1 to 136.6)         | 29.9 (14.9 to 53.8)             | 4.5 (4.5 to 4.5)                  |
| Turkey  | 1996 | 176.6 (157.9 to 199.0)     | 113.1 (99.0 to 127.6)      | 48.1 (37.4 to 60.8)           | 14.3 (7.3 to 25.3)              | 1.1 (1.1 to 1.1)                  | 439.5 (392.9 to 495.4)    | 281.6 (246.4 to 317.6)     | 119.6 (93.0 to 151.3)         | 35.5 (18.1 to 63.1)             | 2.8 (2.8 to 2.8)                  |
| Turkey  | 1997 | 201.9 (182.9 to 225.7)     | 130.0 (115.7 to 144.9)     | 53.4 (42.2 to 67.4)           | 17.3 (8.8 to 30.4)              | 1.2 (1.2 to 1.2)                  | 502.6 (455.3 to 561.7)    | 323.6 (287.9 to 360.6)     | 132.9 (105.2 to 167.8)        | 43.1 (21.9 to 75.6)             | 3.0 (3.0 to 3.0)                  |
| Turkey  | 1998 | 225.6 (203.9 to 252.1)     | 144.9 (130.9 to 160.7)     | 59.5 (47.4 to 74.6)           | 20.2 (10.3 to 35.2)             | 1.0 (1.0 to 1.0)                  | 561.5 (507.6 to 627.4)    | 360.6 (325.9 to 400.0)     | 148.2 (118.0 to 185.8)        | 50.2 (25.7 to 87.5)             | 2.5 (2.5 to 2.5)                  |
| Turkey  | 1999 | 241.5 (217.9 to 269.3)     | 153.6 (139.3 to 169.4)     | 65.2 (51.7 to 80.8)           | 22.0 (11.8 to 37.5)             | 0.7 (0.7 to 0.7)                  | 601.2 (542.4 to 670.3)    | 382.4 (346.8 to 421.7)     | 162.3 (128.7 to 201.1)        | 54.7 (29.4 to 93.3)             | 1.9 (1.9 to 1.9)                  |
| Turkey  | 2000 | 271.3 (245.7 to 300.8)     | 174.7 (159.7 to 192.1)     | 69.8 (55.0 to 87.1)           | 25.2 (14.0 to 42.4)             | 1.5 (1.5 to 1.5)                  | 675.3 (611.5 to 748.8)    | 434.8 (397.5 to 478.1)     | 173.8 (136.8 to 216.9)        | 62.8 (34.8 to 105.7)            | 3.8 (3.8 to 3.8)                  |
| Turkey  | 2001 | 272.5 (248.2 to 302.3)     | 180.9 (165.2 to 197.7)     | 65.6 (52.3 to 81.3)           | 25.6 (14.6 to 42.8)             | 0.4 (0.4 to 0.4)                  | 678.4 (617.7 to 752.6)    | 450.3 (411.2 to 492.1)     | 163.4 (130.1 to 202.4)        | 63.8 (36.3 to 106.6)            | 1.0 (1.0 to 1.0)                  |
| Turkey  | 2002 | 291.2 (265.3 to 321.5)     | 198.6 (180.6 to 216.5)     | 64.6 (52.0 to 79.8)           | 27.5 (15.5 to 44.8)             | 0.5 (0.5 to 0.5)                  | 724.9 (660.3 to 800.2)    | 494.3 (449.4 to 539.0)     | 160.8 (129.5 to 198.7)        | 68.5 (38.5 to 111.4)            | 1.3 (1.3 to 1.3)                  |
| Turkey  | 2003 | 302.2 (276.8 to 331.3)     | 209.2 (191.1 to 228.0)     | 64.6 (52.6 to 79.8)           | 27.9 (15.7 to 45.4)             | 0.5 (0.5 to 0.5)                  | 752.3 (689.1 to 824.7)    | 520.8 (475.7 to 567.6)     | 160.9 (130.9 to 198.7)        | 69.4 (39.0 to 113.0)            | 1.3 (1.3 to 1.3)                  |
| Turkey  | 2004 | 326.1 (300.0 to 356.1)     | 227.7 (209.1 to 248.2)     | 70.0 (57.8 to 85.7)           | 28.0 (16.2 to 44.1)             | 0.4 (0.4 to 0.4)                  | 811.8 (746.7 to 886.4)    | 566.8 (520.4 to 617.9)     | 174.2 (143.8 to 213.3)        | 69.6 (40.2 to 109.9)            | 1.1 (1.1 to 1.1)                  |
| Turkey  | 2005 | 349.6 (321.2 to 382.2)     | 243.0 (222.8 to 263.9)     | 77.7 (64.1 to 95.7)           | 28.4 (16.4 to 44.7)             | 0.6 (0.6 to 0.6)                  | 870.3 (799.5 to 951.4)    | 604.8 (554.5 to 656.9)     | 193.5 (159.5 to 238.3)        | 70.6 (40.7 to 111.4)            | 1.4 (1.4 to 1.4)                  |
| Turkey  | 2006 | 378.3 (348.8 to 410.7)     | 263.9 (243.4 to 286.4)     | 83.3 (68.2 to 102.4)          | 29.0 (16.9 to 45.2)             | 2.1 (2.1 to 2.1)                  | 941.7 (868.2 to 1022.2)   | 656.8 (605.7 to 713.0)     | 207.2 (169.8 to 254.9)        | 72.3 (42.2 to 112.6)            | 5.3 (5.3 to 5.3)                  |
| Turkey  | 2007 | 396.8 (366.0 to 431.0)     | 282.7 (260.8 to 305.8)     | 84.0 (69.0 to 102.8)          | 29.3 (17.5 to 45.0)             | 0.8 (0.8 to 0.8)                  | 987.6 (911.1 to 1072.7)   | 703.8 (649.1 to 761.3)     | 209.0 (171.7 to 255.8)        | 72.8 (43.6 to 111.9)            | 1.9 (1.9 to 1.9)                  |
| Turkey  | 2008 | 399.9 (369.7 to 431.4)     | 294.1 (271.8 to 318.0)     | 76.7 (61.9 to 93.3)           | 27.8 (16.7 to 43.3)             | 1.4 (1.4 to 1.4)                  | 995.5 (920.3 to 1073.7)   | 732.0 (676.6 to 791.6)     | 190.9 (154.2 to 232.1)        | 69.2 (41.5 to 107.9)            | 3.5 (3.5 to 3.5)                  |

| Country | Year | 2018 US Dollars per capita |                            |                               |                                 |                                   | 2018 PPP per capita       |                            |                               |                                 |                                   |
|---------|------|----------------------------|----------------------------|-------------------------------|---------------------------------|-----------------------------------|---------------------------|----------------------------|-------------------------------|---------------------------------|-----------------------------------|
|         |      | Health spending            | Government health spending | Out-of-pocket health spending | Prepaid private health spending | Development assistance for health | Health spending           | Government health spending | Out-of-pocket health spending | Prepaid private health spending | Development assistance for health |
| Turkey  | 2009 | 385.4 (357.1 to 417.1)     | 293.8 (272.3 to 317.6)     | 67.6 (54.4 to 82.3)           | 23.5 (14.1 to 36.5)             | 0.4 (0.4 to 0.4)                  | 959.2 (888.9 to 1038.3)   | 731.4 (677.8 to 790.5)     | 168.3 (135.5 to 204.8)        | 58.4 (35.0 to 90.8)             | 1.1 (1.1 to 1.1)                  |
| Turkey  | 2010 | 396.7 (368.7 to 428.2)     | 303.8 (282.4 to 329.0)     | 66.5 (53.1 to 81.2)           | 21.9 (12.8 to 34.7)             | 4.5 (4.5 to 4.5)                  | 987.4 (917.8 to 1065.9)   | 756.1 (703.0 to 819.0)     | 165.6 (132.1 to 202.1)        | 54.6 (31.8 to 86.3)             | 11.2 (11.2 to 11.2)               |
| Turkey  | 2011 | 404.1 (375.5 to 434.7)     | 315.1 (292.8 to 339.3)     | 66.2 (52.7 to 81.0)           | 21.2 (12.5 to 35.0)             | 1.6 (1.6 to 1.6)                  | 1005.9 (934.6 to 1082.0)  | 784.3 (728.7 to 844.5)     | 164.7 (131.2 to 201.6)        | 52.9 (31.1 to 87.1)             | 4.0 (4.0 to 4.0)                  |
| Turkey  | 2012 | 402.3 (375.1 to 431.9)     | 315.3 (293.3 to 338.4)     | 66.2 (52.8 to 80.8)           | 20.5 (12.0 to 34.2)             | 0.3 (0.3 to 0.3)                  | 1001.5 (933.7 to 1075.1)  | 784.9 (730.1 to 842.2)     | 164.7 (131.4 to 201.2)        | 51.1 (29.8 to 85.2)             | 0.9 (0.9 to 0.9)                  |
| Turkey  | 2013 | 413.7 (383.4 to 443.5)     | 323.5 (300.7 to 346.8)     | 69.2 (55.3 to 84.8)           | 20.7 (11.8 to 34.8)             | 0.4 (0.4 to 0.4)                  | 1029.8 (954.2 to 1104.0)  | 805.2 (748.6 to 863.3)     | 172.2 (137.6 to 211.1)        | 51.6 (29.4 to 86.7)             | 0.9 (0.9 to 0.9)                  |
| Turkey  | 2014 | 421.8 (390.1 to 453.4)     | 328.6 (306.0 to 352.7)     | 71.7 (56.2 to 89.8)           | 21.1 (11.7 to 36.3)             | 0.4 (0.4 to 0.4)                  | 1049.9 (971.1 to 1128.5)  | 817.9 (761.7 to 877.8)     | 178.5 (139.9 to 223.6)        | 52.6 (29.0 to 90.4)             | 0.9 (0.9 to 0.9)                  |
| Turkey  | 2015 | 435.3 (401.1 to 471.3)     | 339.4 (312.5 to 369.8)     | 73.3 (57.1 to 92.3)           | 22.3 (12.0 to 38.8)             | 0.3 (0.3 to 0.3)                  | 1083.5 (998.4 to 1173.2)  | 844.9 (777.8 to 920.6)     | 182.4 (142.1 to 229.8)        | 55.6 (30.0 to 96.6)             | 0.6 (0.6 to 0.6)                  |
| Turkey  | 2016 | 444.9 (405.2 to 490.3)     | 346.3 (312.8 to 382.5)     | 74.6 (57.2 to 94.6)           | 23.4 (12.4 to 40.8)             | 0.6 (0.6 to 0.6)                  | 1107.4 (1008.6 to 1220.4) | 862.0 (778.6 to 952.0)     | 185.8 (142.3 to 235.4)        | 58.2 (31.0 to 101.6)            | 1.4 (1.4 to 1.4)                  |
| Turkey  | 2017 | 464.9 (422.6 to 511.1)     | 358.5 (324.5 to 396.3)     | 79.0 (60.3 to 99.9)           | 24.8 (13.2 to 43.3)             | 2.6 (2.6 to 2.6)                  | 1157.3 (1052.0 to 1272.3) | 892.4 (807.7 to 986.5)     | 196.6 (150.0 to 248.6)        | 61.7 (32.9 to 107.7)            | 6.5 (6.5 to 6.5)                  |
| Turkey  | 2018 | 479.3 (435.9 to 528.0)     | 370.1 (334.9 to 408.5)     | 81.1 (62.0 to 102.6)          | 25.7 (13.7 to 44.8)             | 2.4 (2.4 to 2.4)                  | 1193.1 (1084.9 to 1314.3) | 921.2 (833.7 to 1016.7)    | 201.9 (154.4 to 255.4)        | 63.9 (34.0 to 111.5)            | 6.1 (6.0 to 6.1)                  |
| Turkey  | 2019 | 493.6 (448.6 to 543.5)     | 381.5 (344.8 to 421.3)     | 83.1 (63.6 to 105.2)          | 26.5 (14.1 to 46.3)             | 2.4 (2.3 to 2.6)                  | 1228.6 (1116.7 to 1352.9) | 949.6 (858.2 to 1048.7)    | 206.9 (158.3 to 261.9)        | 66.1 (35.0 to 115.3)            | 6.0 (5.6 to 6.4)                  |
| Turkey  | 2020 | 507.3 (460.5 to 559.4)     | 392.9 (354.6 to 434.5)     | 85.0 (64.9 to 107.8)          | 27.4 (14.5 to 47.8)             | 2.0 (0.0 to 2.6)                  | 1262.7 (1146.2 to 1392.5) | 977.9 (882.7 to 1081.5)    | 211.6 (161.6 to 268.4)        | 68.1 (36.1 to 119.0)            | 5.0 (0.0 to 6.5)                  |
| Turkey  | 2021 | 521.9 (471.5 to 572.5)     | 405.4 (365.4 to 449.6)     | 86.9 (66.3 to 109.7)          | 28.2 (15.0 to 49.4)             | 1.4 (0.0 to 2.7)                  | 1299.1 (1173.5 to 1424.9) | 1009.1 (909.5 to 1119.2)   | 216.2 (165.0 to 273.1)        | 70.3 (37.3 to 123.0)            | 3.4 (0.0 to 6.7)                  |
| Turkey  | 2022 | 534.3 (483.5 to 589.0)     | 415.6 (373.9 to 460.3)     | 88.6 (67.8 to 112.0)          | 29.1 (15.4 to 50.9)             | 1.1 (0.0 to 2.8)                  | 1330.0 (1203.4 to 1466.1) | 1034.4 (930.7 to 1145.8)   | 220.4 (168.8 to 278.9)        | 72.3 (38.3 to 126.6)            | 2.8 (0.0 to 6.9)                  |
| Turkey  | 2023 | 547.2 (495.9 to 604.8)     | 426.2 (383.3 to 472.0)     | 90.1 (68.9 to 113.9)          | 29.9 (15.9 to 52.2)             | 1.0 (0.0 to 2.9)                  | 1362.0 (1234.4 to 1505.4) | 1060.9 (954.0 to 1174.8)   | 224.4 (171.4 to 283.6)        | 74.3 (39.5 to 129.9)            | 2.5 (0.0 to 7.2)                  |
| Turkey  | 2024 | 559.9 (506.4 to 619.2)     | 436.6 (391.5 to 485.3)     | 91.7 (70.0 to 115.6)          | 30.6 (16.3 to 53.5)             | 1.0 (0.0 to 3.0)                  | 1393.6 (1260.6 to 1541.4) | 1086.6 (974.6 to 1207.9)   | 228.3 (174.3 to 287.9)        | 76.3 (40.6 to 133.1)            | 2.4 (0.0 to 7.5)                  |
| Turkey  | 2025 | 573.0 (516.5 to 634.9)     | 447.2 (401.1 to 496.4)     | 93.3 (71.4 to 118.2)          | 31.5 (16.7 to 54.9)             | 1.0 (0.0 to 3.1)                  | 1426.2 (1285.6 to 1580.3) | 1113.2 (998.5 to 1235.6)   | 232.2 (177.8 to 294.2)        | 78.3 (41.7 to 136.7)            | 2.4 (0.0 to 7.7)                  |
| Turkey  | 2026 | 586.8 (528.5 to 648.1)     | 458.6 (410.6 to 510.0)     | 94.9 (72.3 to 121.0)          | 32.3 (17.2 to 56.4)             | 1.0 (0.0 to 3.2)                  | 1460.7 (1315.4 to 1613.1) | 1141.4 (1022.0 to 1269.5)  | 236.3 (180.0 to 301.1)        | 80.5 (42.7 to 140.5)            | 2.4 (0.0 to 8.1)                  |
| Turkey  | 2027 | 601.1 (541.9 to 670.1)     | 470.3 (420.9 to 526.0)     | 96.6 (73.4 to 123.0)          | 33.2 (17.6 to 58.0)             | 1.0 (0.0 to 3.3)                  | 1496.3 (1349.0 to 1667.9) | 1170.7 (1047.8 to 1309.3)  | 240.4 (182.6 to 306.1)        | 82.7 (43.8 to 144.3)            | 2.5 (0.0 to 8.3)                  |
| Turkey  | 2028 | 615.6 (554.4 to 684.7)     | 482.1 (430.7 to 540.0)     | 98.3 (74.6 to 125.7)          | 34.1 (18.0 to 59.7)             | 1.0 (0.0 to 3.4)                  | 1532.3 (1379.9 to 1704.3) | 1200.1 (1072.1 to 1344.1)  | 244.7 (185.8 to 312.8)        | 84.9 (44.9 to 148.6)            | 2.5 (0.0 to 8.6)                  |
| Turkey  | 2029 | 630.9 (566.5 to 704.3)     | 494.7 (440.5 to 555.8)     | 100.1 (76.1 to 128.1)         | 35.1 (18.5 to 61.3)             | 1.1 (0.0 to 3.6)                  | 1570.4 (1410.2 to 1753.0) | 1231.4 (1096.4 to 1383.4)  | 249.1 (189.5 to 318.9)        | 87.2 (46.1 to 152.5)            | 2.6 (0.0 to 8.9)                  |

| Country | Year | 2018 US Dollars per capita |                            |                               |                                 |                                   | 2018 PPP per capita       |                            |                               |                                 |                                   |
|---------|------|----------------------------|----------------------------|-------------------------------|---------------------------------|-----------------------------------|---------------------------|----------------------------|-------------------------------|---------------------------------|-----------------------------------|
|         |      | Health spending            | Government health spending | Out-of-pocket health spending | Prepaid private health spending | Development assistance for health | Health spending           | Government health spending | Out-of-pocket health spending | Prepaid private health spending | Development assistance for health |
| Turkey  | 2030 | 646.3 (577.2 to 724.7)     | 507.3 (451.3 to 574.2)     | 101.9 (77.3 to 130.6)         | 36.0 (19.0 to 63.0)             | 1.1 (0.0 to 3.7)                  | 1608.7 (1436.8 to 1803.8) | 1262.9 (1123.4 to 1429.2)  | 253.6 (192.5 to 325.1)        | 89.6 (47.2 to 156.7)            | 2.7 (0.0 to 9.2)                  |
| Turkey  | 2031 | 661.9 (592.6 to 740.0)     | 520.1 (461.5 to 590.4)     | 103.7 (78.6 to 133.5)         | 37.0 (19.5 to 64.7)             | 1.1 (0.0 to 3.9)                  | 1647.6 (1475.1 to 1842.0) | 1294.7 (1148.8 to 1469.6)  | 258.2 (195.7 to 332.3)        | 92.0 (48.4 to 161.0)            | 2.7 (0.0 to 9.6)                  |
| Turkey  | 2032 | 678.0 (604.9 to 764.2)     | 533.3 (472.7 to 608.1)     | 105.6 (79.6 to 135.8)         | 38.0 (19.9 to 66.5)             | 1.1 (0.0 to 4.0)                  | 1687.6 (1505.8 to 1902.2) | 1327.5 (1176.6 to 1513.7)  | 262.9 (198.2 to 338.1)        | 94.5 (49.6 to 165.4)            | 2.8 (0.0 to 10.0)                 |
| Turkey  | 2033 | 693.3 (621.9 to 783.4)     | 545.8 (482.2 to 626.2)     | 107.5 (81.1 to 138.6)         | 38.9 (20.4 to 68.2)             | 1.2 (0.0 to 4.1)                  | 1725.8 (1548.1 to 1949.9) | 1358.5 (1200.1 to 1558.7)  | 267.5 (201.9 to 345.0)        | 96.9 (50.8 to 169.8)            | 2.9 (0.0 to 10.3)                 |
| Turkey  | 2034 | 709.7 (631.0 to 809.6)     | 559.1 (492.3 to 646.4)     | 109.4 (82.3 to 142.3)         | 40.0 (20.9 to 70.0)             | 1.2 (0.0 to 4.3)                  | 1766.5 (1570.7 to 2015.2) | 1391.7 (1225.4 to 1609.1)  | 272.3 (204.7 to 354.2)        | 99.5 (52.1 to 174.3)            | 3.0 (0.0 to 10.6)                 |
| Turkey  | 2035 | 725.3 (647.8 to 829.7)     | 571.8 (500.8 to 664.2)     | 111.3 (83.4 to 145.4)         | 41.0 (21.4 to 71.8)             | 1.2 (0.0 to 4.4)                  | 1805.3 (1612.5 to 2065.2) | 1423.3 (1246.5 to 1653.3)  | 277.0 (207.6 to 362.0)        | 102.0 (53.3 to 178.7)           | 3.1 (0.0 to 10.9)                 |
| Turkey  | 2036 | 742.1 (656.8 to 847.2)     | 585.5 (511.0 to 684.7)     | 113.3 (84.6 to 148.3)         | 42.0 (22.0 to 73.7)             | 1.3 (0.0 to 4.7)                  | 1847.2 (1634.9 to 2108.7) | 1457.5 (1272.0 to 1704.2)  | 282.0 (210.7 to 369.2)        | 104.6 (54.7 to 183.4)           | 3.2 (0.0 to 11.6)                 |
| Turkey  | 2037 | 759.3 (670.4 to 874.8)     | 599.5 (521.8 to 703.9)     | 115.3 (86.2 to 152.1)         | 43.1 (22.5 to 75.7)             | 1.3 (0.0 to 4.8)                  | 1890.0 (1668.8 to 2177.6) | 1492.4 (1298.7 to 1752.1)  | 287.1 (214.7 to 378.6)        | 107.3 (56.1 to 188.3)           | 3.2 (0.0 to 11.9)                 |
| Turkey  | 2038 | 775.4 (683.4 to 896.7)     | 612.5 (531.0 to 724.9)     | 117.4 (87.3 to 155.5)         | 44.2 (23.1 to 77.6)             | 1.3 (0.0 to 4.9)                  | 1930.0 (1701.1 to 2232.0) | 1524.7 (1321.8 to 1804.3)  | 292.1 (217.2 to 387.0)        | 109.9 (57.4 to 193.0)           | 3.3 (0.0 to 12.2)                 |
| Turkey  | 2039 | 792.9 (698.5 to 927.8)     | 626.8 (541.4 to 743.8)     | 119.5 (88.3 to 158.6)         | 45.3 (23.6 to 79.5)             | 1.4 (0.0 to 5.0)                  | 1973.6 (1738.8 to 2309.5) | 1560.1 (1347.7 to 1851.5)  | 297.4 (219.9 to 394.9)        | 112.7 (58.8 to 197.8)           | 3.4 (0.0 to 12.5)                 |
| Turkey  | 2040 | 809.8 (708.9 to 944.0)     | 640.5 (551.4 to 766.4)     | 121.6 (89.7 to 161.8)         | 46.4 (24.1 to 81.4)             | 1.4 (0.0 to 5.3)                  | 2015.8 (1764.4 to 2349.6) | 1594.2 (1372.5 to 1907.7)  | 302.6 (223.3 to 402.8)        | 115.4 (60.1 to 202.6)           | 3.5 (0.0 to 13.2)                 |
| Turkey  | 2041 | 826.8 (722.3 to 972.2)     | 654.2 (561.9 to 787.5)     | 123.7 (91.1 to 165.3)         | 47.5 (24.8 to 83.3)             | 1.5 (0.0 to 5.7)                  | 2058.1 (1797.9 to 2419.9) | 1628.3 (1398.7 to 1960.2)  | 307.9 (226.7 to 411.4)        | 118.2 (61.6 to 207.4)           | 3.6 (0.0 to 14.1)                 |
| Turkey  | 2042 | 844.4 (734.7 to 997.0)     | 668.3 (571.9 to 807.1)     | 125.9 (92.4 to 168.4)         | 48.6 (25.4 to 85.3)             | 1.5 (0.0 to 5.9)                  | 2101.8 (1828.7 to 2481.8) | 1663.5 (1423.5 to 2009.0)  | 313.4 (230.1 to 419.1)        | 121.1 (63.1 to 212.3)           | 3.8 (0.0 to 14.7)                 |
| Turkey  | 2043 | 861.6 (752.5 to 1024.6)    | 682.2 (581.7 to 833.3)     | 128.1 (93.9 to 172.5)         | 49.8 (26.0 to 87.3)             | 1.6 (0.0 to 6.2)                  | 2144.7 (1873.0 to 2550.4) | 1698.0 (1447.8 to 2074.1)  | 318.9 (233.7 to 429.3)        | 123.9 (64.6 to 217.3)           | 3.9 (0.0 to 15.4)                 |
| Turkey  | 2044 | 879.8 (755.5 to 1053.3)    | 696.8 (592.0 to 857.4)     | 130.4 (95.3 to 175.5)         | 51.0 (26.6 to 89.3)             | 1.6 (0.0 to 6.3)                  | 2189.9 (1880.6 to 2621.7) | 1734.5 (1473.6 to 2134.2)  | 324.6 (237.1 to 437.0)        | 126.9 (66.2 to 222.3)           | 4.0 (0.0 to 15.8)                 |
| Turkey  | 2045 | 897.0 (780.2 to 1075.0)    | 710.6 (601.6 to 879.4)     | 132.6 (96.8 to 178.4)         | 52.1 (27.3 to 91.3)             | 1.7 (0.0 to 6.6)                  | 2232.8 (1941.9 to 2675.7) | 1768.7 (1497.4 to 2188.8)  | 330.2 (240.9 to 444.2)        | 129.8 (67.9 to 227.3)           | 4.2 (0.0 to 16.4)                 |
| Turkey  | 2046 | 914.3 (785.2 to 1095.5)    | 724.4 (611.4 to 904.5)     | 134.9 (98.3 to 181.6)         | 53.3 (28.0 to 93.3)             | 1.7 (0.0 to 6.9)                  | 2275.9 (1954.4 to 2726.8) | 1803.2 (1521.8 to 2251.5)  | 335.8 (244.7 to 451.9)        | 132.7 (69.7 to 232.3)           | 4.3 (0.0 to 17.2)                 |
| Turkey  | 2047 | 932.4 (807.1 to 1135.1)    | 738.9 (620.9 to 925.8)     | 137.2 (100.0 to 185.1)        | 54.5 (28.7 to 95.4)             | 1.8 (0.0 to 7.3)                  | 2320.9 (2009.1 to 2825.4) | 1839.2 (1545.5 to 2304.5)  | 341.6 (248.8 to 460.7)        | 135.7 (71.4 to 237.5)           | 4.5 (0.0 to 18.3)                 |
| Turkey  | 2048 | 950.1 (818.2 to 1154.2)    | 753.0 (630.5 to 945.6)     | 139.5 (101.6 to 188.5)        | 55.7 (29.3 to 97.4)             | 1.9 (0.0 to 7.5)                  | 2364.9 (2036.7 to 2873.0) | 1874.4 (1569.5 to 2353.8)  | 347.3 (252.9 to 469.2)        | 138.6 (73.0 to 242.6)           | 4.6 (0.0 to 18.6)                 |
| Turkey  | 2049 | 967.8 (825.6 to 1191.4)    | 767.2 (640.3 to 968.0)     | 141.8 (103.2 to 191.9)        | 56.9 (30.0 to 99.5)             | 1.9 (0.0 to 8.2)                  | 2409.0 (2055.0 to 2965.5) | 1909.6 (1593.9 to 2409.6)  | 353.0 (257.0 to 477.8)        | 141.6 (74.7 to 247.7)           | 4.8 (0.0 to 20.3)                 |
| Turkey  | 2050 | 986.2 (846.9 to 1196.6)    | 781.9 (650.2 to 989.9)     | 144.2 (104.7 to 195.0)        | 58.1 (30.7 to 101.6)            | 2.0 (0.0 to 8.5)                  | 2454.8 (2108.1 to 2978.5) | 1946.3 (1618.4 to 2464.1)  | 358.8 (260.7 to 485.4)        | 144.6 (76.4 to 252.9)           | 5.0 (0.0 to 21.1)                 |

| Country      | Year | 2018 US Dollars per capita |                            |                               |                                 |                                   | 2018 PPP per capita       |                            |                               |                                 |                                   |
|--------------|------|----------------------------|----------------------------|-------------------------------|---------------------------------|-----------------------------------|---------------------------|----------------------------|-------------------------------|---------------------------------|-----------------------------------|
|              |      | Health spending            | Government health spending | Out-of-pocket health spending | Prepaid private health spending | Development assistance for health | Health spending           | Government health spending | Out-of-pocket health spending | Prepaid private health spending | Development assistance for health |
| Turkmenistan | 1995 | 162.1 (139.1 to 188.8)     | 43.0 (34.3 to 53.2)        | 114.2 (92.7 to 137.8)         | 4.2 (1.9 to 7.6)                | 0.8 (0.8 to 0.8)                  | 438.3 (376.2 to 510.6)    | 116.2 (92.8 to 143.8)      | 308.7 (250.6 to 372.6)        | 11.3 (5.3 to 20.6)              | 2.1 (2.1 to 2.1)                  |
| Turkmenistan | 1996 | 168.7 (147.7 to 192.2)     | 49.5 (39.9 to 60.6)        | 113.6 (93.8 to 134.8)         | 5.2 (2.5 to 9.6)                | 0.4 (0.4 to 0.4)                  | 456.2 (399.4 to 519.7)    | 134.0 (107.8 to 163.8)     | 307.1 (253.6 to 364.5)        | 14.1 (6.8 to 26.0)              | 1.1 (1.1 to 1.1)                  |
| Turkmenistan | 1997 | 182.4 (160.5 to 206.0)     | 53.3 (43.6 to 64.2)        | 122.9 (102.8 to 143.5)        | 5.8 (2.8 to 10.5)               | 0.4 (0.4 to 0.4)                  | 493.3 (433.9 to 557.0)    | 144.2 (117.9 to 173.6)     | 332.4 (278.0 to 388.0)        | 15.6 (7.6 to 28.5)              | 1.1 (1.1 to 1.1)                  |
| Turkmenistan | 1998 | 197.5 (175.3 to 221.9)     | 58.5 (47.9 to 69.7)        | 131.0 (110.2 to 152.1)        | 6.2 (3.1 to 11.2)               | 1.8 (1.8 to 1.8)                  | 534.1 (474.1 to 600.1)    | 158.1 (129.7 to 188.4)     | 354.4 (297.9 to 411.3)        | 16.8 (8.3 to 30.2)              | 4.8 (4.8 to 4.8)                  |
| Turkmenistan | 1999 | 204.9 (182.4 to 229.5)     | 61.4 (50.3 to 73.1)        | 132.3 (112.4 to 154.2)        | 6.6 (3.3 to 11.4)               | 4.7 (4.7 to 4.7)                  | 554.2 (493.3 to 620.7)    | 166.0 (135.9 to 197.7)     | 357.7 (304.0 to 416.9)        | 17.8 (8.9 to 30.8)              | 12.7 (12.7 to 12.7)               |
| Turkmenistan | 2000 | 211.8 (189.0 to 236.4)     | 72.6 (60.6 to 86.4)        | 127.0 (108.7 to 148.6)        | 7.7 (3.9 to 13.6)               | 4.4 (4.4 to 4.4)                  | 572.7 (511.1 to 639.2)    | 196.4 (163.8 to 233.6)     | 343.5 (294.1 to 401.8)        | 20.8 (10.4 to 36.7)             | 11.9 (11.9 to 11.9)               |
| Turkmenistan | 2001 | 222.7 (199.4 to 247.2)     | 70.8 (58.7 to 84.1)        | 133.8 (115.0 to 155.7)        | 8.7 (4.4 to 15.3)               | 9.3 (9.3 to 9.3)                  | 602.1 (539.3 to 668.5)    | 191.5 (158.7 to 227.3)     | 361.9 (310.9 to 421.0)        | 23.6 (12.0 to 41.4)             | 25.1 (25.1 to 25.1)               |
| Turkmenistan | 2002 | 219.7 (197.6 to 244.6)     | 68.3 (57.3 to 81.5)        | 139.8 (120.9 to 160.6)        | 9.3 (4.8 to 16.1)               | 2.3 (2.3 to 2.3)                  | 594.1 (534.4 to 661.4)    | 184.7 (155.1 to 220.4)     | 378.0 (326.9 to 434.3)        | 25.1 (13.0 to 43.6)             | 6.3 (6.3 to 6.3)                  |
| Turkmenistan | 2003 | 241.7 (217.3 to 269.5)     | 67.9 (56.4 to 81.6)        | 161.8 (142.2 to 183.7)        | 11.0 (5.7 to 19.8)              | 1.0 (1.0 to 1.0)                  | 653.5 (587.6 to 728.7)    | 183.6 (152.4 to 220.7)     | 437.7 (384.4 to 496.7)        | 29.7 (15.4 to 53.5)             | 2.6 (2.6 to 2.6)                  |
| Turkmenistan | 2004 | 268.2 (242.6 to 296.9)     | 64.7 (54.1 to 78.0)        | 190.1 (167.2 to 213.5)        | 12.8 (6.6 to 23.0)              | 0.6 (0.6 to 0.6)                  | 725.1 (656.0 to 802.8)    | 175.0 (146.4 to 210.9)     | 514.0 (452.2 to 577.2)        | 34.6 (17.8 to 62.1)             | 1.5 (1.5 to 1.5)                  |
| Turkmenistan | 2005 | 284.3 (256.7 to 315.6)     | 63.1 (52.9 to 75.8)        | 206.8 (184.1 to 230.7)        | 13.9 (7.2 to 24.5)              | 0.5 (0.5 to 0.5)                  | 768.9 (694.3 to 853.6)    | 170.7 (143.1 to 205.0)     | 559.1 (497.8 to 623.8)        | 37.6 (19.6 to 66.1)             | 1.5 (1.5 to 1.5)                  |
| Turkmenistan | 2006 | 273.6 (246.3 to 302.6)     | 58.0 (48.4 to 69.7)        | 201.8 (178.9 to 225.9)        | 13.4 (7.1 to 23.1)              | 0.5 (0.5 to 0.5)                  | 739.9 (666.1 to 818.2)    | 156.8 (130.8 to 188.5)     | 545.6 (483.7 to 610.8)        | 36.1 (19.3 to 62.5)             | 1.3 (1.3 to 1.3)                  |
| Turkmenistan | 2007 | 245.3 (220.6 to 271.5)     | 53.8 (44.5 to 64.9)        | 179.2 (157.3 to 202.2)        | 11.8 (6.4 to 20.6)              | 0.5 (0.5 to 0.5)                  | 663.5 (596.5 to 734.2)    | 145.5 (120.2 to 175.6)     | 484.7 (425.3 to 546.9)        | 31.9 (17.3 to 55.6)             | 1.3 (1.3 to 1.3)                  |
| Turkmenistan | 2008 | 240.7 (215.8 to 266.9)     | 50.6 (41.7 to 60.3)        | 178.0 (155.0 to 200.8)        | 11.5 (6.4 to 19.5)              | 0.6 (0.6 to 0.6)                  | 650.8 (583.7 to 721.8)    | 136.7 (112.8 to 163.0)     | 481.4 (419.2 to 543.0)        | 31.2 (17.2 to 52.7)             | 1.5 (1.5 to 1.5)                  |
| Turkmenistan | 2009 | 239.8 (214.9 to 264.2)     | 55.0 (45.7 to 65.2)        | 172.8 (150.0 to 196.6)        | 11.5 (6.3 to 19.7)              | 0.5 (0.5 to 0.5)                  | 648.6 (581.0 to 714.5)    | 148.7 (123.5 to 176.4)     | 467.2 (405.7 to 531.6)        | 31.2 (17.1 to 53.3)             | 1.5 (1.5 to 1.5)                  |
| Turkmenistan | 2010 | 250.8 (225.2 to 277.5)     | 60.5 (50.7 to 72.2)        | 177.6 (154.8 to 202.6)        | 12.1 (6.6 to 20.5)              | 0.6 (0.6 to 0.6)                  | 678.3 (609.0 to 750.5)    | 163.5 (137.1 to 195.1)     | 480.4 (418.6 to 547.9)        | 32.7 (17.8 to 55.5)             | 1.7 (1.7 to 1.7)                  |
| Turkmenistan | 2011 | 276.5 (249.8 to 305.7)     | 70.2 (59.0 to 83.9)        | 191.6 (168.2 to 216.9)        | 13.3 (7.3 to 22.6)              | 1.4 (1.4 to 1.4)                  | 747.8 (675.4 to 826.6)    | 189.7 (159.7 to 226.9)     | 518.1 (454.9 to 586.6)        | 36.1 (19.8 to 61.2)             | 3.9 (3.9 to 3.9)                  |
| Turkmenistan | 2012 | 304.5 (277.4 to 335.5)     | 79.6 (67.2 to 95.3)        | 209.5 (186.6 to 235.6)        | 14.6 (8.1 to 25.0)              | 0.6 (0.6 to 0.6)                  | 823.3 (750.1 to 907.2)    | 215.4 (181.7 to 257.6)     | 566.7 (504.6 to 637.0)        | 39.6 (22.0 to 67.5)             | 1.7 (1.7 to 1.7)                  |
| Turkmenistan | 2013 | 351.4 (320.5 to 385.1)     | 92.4 (78.1 to 109.9)       | 240.8 (215.9 to 268.2)        | 16.9 (9.0 to 29.3)              | 1.2 (1.2 to 1.2)                  | 950.2 (866.8 to 1041.5)   | 249.9 (211.2 to 297.3)     | 651.2 (584.0 to 725.2)        | 45.7 (24.5 to 79.3)             | 3.3 (3.3 to 3.3)                  |
| Turkmenistan | 2014 | 406.4 (370.8 to 445.4)     | 103.0 (86.4 to 122.3)      | 282.9 (254.8 to 312.9)        | 19.7 (10.5 to 34.1)             | 0.9 (0.9 to 0.9)                  | 1099.1 (1002.7 to 1204.6) | 278.5 (233.6 to 330.6)     | 764.9 (689.2 to 846.2)        | 53.2 (28.3 to 92.1)             | 2.5 (2.5 to 2.5)                  |
| Turkmenistan | 2015 | 463.1 (418.8 to 506.8)     | 108.1 (89.8 to 129.4)      | 331.7 (295.8 to 368.0)        | 22.5 (12.2 to 38.3)             | 0.8 (0.8 to 0.8)                  | 1252.5 (1132.6 to 1370.4) | 292.4 (243.0 to 350.0)     | 897.0 (799.9 to 995.1)        | 61.0 (33.0 to 103.7)            | 2.1 (2.1 to 2.1)                  |

| Country      | Year | 2018 US Dollars per capita |                            |                               |                                 |                                   | 2018 PPP per capita       |                            |                               |                                 |                                   |
|--------------|------|----------------------------|----------------------------|-------------------------------|---------------------------------|-----------------------------------|---------------------------|----------------------------|-------------------------------|---------------------------------|-----------------------------------|
|              |      | Health spending            | Government health spending | Out-of-pocket health spending | Prepaid private health spending | Development assistance for health | Health spending           | Government health spending | Out-of-pocket health spending | Prepaid private health spending | Development assistance for health |
| Turkmenistan | 2016 | 511.0 (462.0 to 565.2)     | 108.1 (88.8 to 129.7)      | 376.1 (332.4 to 423.1)        | 24.9 (13.2 to 42.9)             | 1.9 (1.9 to 1.9)                  | 1382.0 (1249.4 to 1528.5) | 292.4 (240.2 to 350.7)     | 1017.0 (898.9 to 1144.2)      | 67.4 (35.6 to 116.1)            | 5.1 (5.1 to 5.1)                  |
| Turkmenistan | 2017 | 577.8 (522.5 to 638.1)     | 138.1 (113.0 to 165.8)     | 409.7 (361.9 to 460.0)        | 27.9 (14.8 to 48.0)             | 2.1 (2.1 to 2.1)                  | 1562.5 (1413.0 to 1725.6) | 373.5 (305.5 to 448.4)     | 1107.8 (978.6 to 1244.0)      | 75.3 (40.2 to 129.9)            | 5.7 (5.7 to 5.7)                  |
| Turkmenistan | 2018 | 605.1 (548.3 to 668.0)     | 144.3 (118.2 to 173.5)     | 430.1 (379.4 to 486.1)        | 28.8 (15.3 to 49.7)             | 2.0 (2.0 to 2.0)                  | 1636.4 (1482.6 to 1806.4) | 390.2 (319.7 to 469.1)     | 1163.1 (1025.9 to 1314.4)     | 77.8 (41.4 to 134.4)            | 5.3 (5.3 to 5.3)                  |
| Turkmenistan | 2019 | 634.6 (571.9 to 704.6)     | 151.4 (124.1 to 182.7)     | 451.3 (398.4 to 510.6)        | 30.0 (16.0 to 52.0)             | 1.9 (1.8 to 2.1)                  | 1716.2 (1546.5 to 1905.5) | 409.4 (335.5 to 494.1)     | 1220.3 (1077.3 to 1380.8)     | 81.2 (43.3 to 140.6)            | 5.3 (4.9 to 5.6)                  |
| Turkmenistan | 2020 | 666.1 (602.2 to 735.7)     | 160.1 (131.2 to 193.8)     | 472.8 (417.3 to 534.6)        | 31.3 (16.7 to 54.3)             | 1.9 (1.8 to 2.1)                  | 1801.4 (1628.5 to 1989.6) | 432.9 (354.9 to 524.1)     | 1278.5 (1128.5 to 1445.8)     | 84.7 (45.1 to 146.9)            | 5.2 (4.8 to 5.7)                  |
| Turkmenistan | 2021 | 699.3 (631.8 to 776.8)     | 169.8 (138.8 to 204.3)     | 495.0 (437.9 to 561.4)        | 32.7 (17.4 to 56.8)             | 1.9 (1.7 to 2.1)                  | 1891.2 (1708.6 to 2100.7) | 459.1 (375.4 to 552.4)     | 1338.5 (1184.2 to 1518.1)     | 88.4 (47.0 to 153.5)            | 5.2 (4.7 to 5.7)                  |
| Turkmenistan | 2022 | 731.0 (657.5 to 817.2)     | 178.7 (146.0 to 216.1)     | 516.4 (455.8 to 588.6)        | 33.9 (18.0 to 58.8)             | 2.0 (1.7 to 2.2)                  | 1976.9 (1778.2 to 2209.8) | 483.3 (394.9 to 584.4)     | 1396.6 (1232.6 to 1591.6)     | 91.7 (48.8 to 159.1)            | 5.3 (4.7 to 5.9)                  |
| Turkmenistan | 2023 | 761.4 (682.7 to 849.3)     | 187.1 (152.6 to 226.3)     | 537.3 (473.7 to 611.5)        | 35.0 (18.7 to 60.7)             | 2.0 (1.7 to 2.3)                  | 2058.9 (1846.2 to 2296.8) | 505.9 (412.7 to 611.8)     | 1452.9 (1281.1 to 1653.6)     | 94.7 (50.5 to 164.3)            | 5.4 (4.7 to 6.2)                  |
| Turkmenistan | 2024 | 791.9 (716.6 to 883.2)     | 195.5 (158.6 to 235.8)     | 558.2 (492.0 to 634.3)        | 36.2 (19.2 to 62.8)             | 2.1 (1.8 to 2.4)                  | 2141.5 (1938.0 to 2388.4) | 528.8 (428.9 to 637.6)     | 1509.4 (1330.4 to 1715.4)     | 97.8 (52.0 to 169.7)            | 5.6 (4.8 to 6.5)                  |
| Turkmenistan | 2025 | 825.2 (738.6 to 915.8)     | 204.0 (165.9 to 247.2)     | 581.7 (512.0 to 664.7)        | 37.3 (19.8 to 64.8)             | 2.1 (1.8 to 2.5)                  | 2231.6 (1997.3 to 2476.6) | 551.8 (448.7 to 668.4)     | 1573.1 (1384.6 to 1797.6)     | 100.9 (53.7 to 175.2)           | 5.8 (4.9 to 6.7)                  |
| Turkmenistan | 2026 | 860.2 (767.1 to 961.6)     | 212.9 (172.9 to 258.1)     | 606.6 (530.4 to 694.3)        | 38.6 (20.5 to 66.9)             | 2.2 (1.8 to 2.6)                  | 2326.2 (2074.5 to 2600.4) | 575.7 (467.7 to 698.1)     | 1640.3 (1434.4 to 1877.6)     | 104.3 (55.4 to 180.8)           | 5.9 (5.0 to 7.0)                  |
| Turkmenistan | 2027 | 897.0 (797.4 to 1019.0)    | 222.3 (179.8 to 270.4)     | 632.6 (549.3 to 730.1)        | 39.9 (21.2 to 69.1)             | 2.2 (1.9 to 2.7)                  | 2425.7 (2156.4 to 2755.6) | 601.1 (486.3 to 731.3)     | 1710.7 (1485.4 to 1974.2)     | 107.8 (57.2 to 186.8)           | 6.1 (5.0 to 7.3)                  |
| Turkmenistan | 2028 | 935.4 (824.8 to 1049.6)    | 232.2 (187.7 to 282.9)     | 659.7 (566.5 to 765.7)        | 41.3 (21.9 to 71.5)             | 2.3 (1.9 to 2.8)                  | 2529.7 (2230.5 to 2838.3) | 627.9 (507.5 to 765.0)     | 1783.9 (1531.9 to 2070.7)     | 111.7 (59.2 to 193.3)           | 6.2 (5.2 to 7.5)                  |
| Turkmenistan | 2029 | 973.4 (862.6 to 1093.0)    | 241.5 (194.6 to 295.3)     | 686.9 (586.4 to 802.0)        | 42.7 (22.6 to 73.9)             | 2.3 (1.9 to 2.9)                  | 2632.4 (2332.8 to 2955.6) | 653.1 (526.3 to 798.5)     | 1857.5 (1585.6 to 2168.8)     | 115.5 (61.2 to 199.7)           | 6.3 (5.2 to 7.8)                  |
| Turkmenistan | 2030 | 1013.2 (897.6 to 1145.0)   | 251.8 (202.7 to 308.2)     | 714.8 (604.6 to 838.4)        | 44.3 (23.4 to 76.5)             | 2.4 (1.9 to 3.0)                  | 2740.0 (2427.5 to 3096.3) | 680.9 (548.2 to 833.4)     | 1933.0 (1635.1 to 2267.2)     | 119.7 (63.3 to 206.8)           | 6.4 (5.3 to 8.0)                  |
| Turkmenistan | 2031 | 1055.8 (927.0 to 1190.8)   | 263.1 (211.7 to 322.3)     | 744.3 (624.1 to 876.0)        | 46.0 (24.3 to 79.4)             | 2.4 (1.9 to 3.1)                  | 2855.1 (2506.9 to 3220.2) | 711.4 (572.4 to 871.6)     | 2012.8 (1687.8 to 2368.9)     | 124.4 (65.8 to 214.7)           | 6.5 (5.2 to 8.3)                  |
| Turkmenistan | 2032 | 1099.8 (959.5 to 1251.5)   | 275.0 (220.5 to 337.5)     | 774.6 (644.3 to 917.5)        | 47.9 (25.3 to 82.5)             | 2.4 (1.9 to 3.1)                  | 2974.2 (2594.8 to 3384.3) | 743.6 (596.4 to 912.8)     | 2094.6 (1742.2 to 2481.1)     | 129.5 (68.4 to 223.2)           | 6.6 (5.3 to 8.4)                  |
| Turkmenistan | 2033 | 1145.1 (997.1 to 1309.0)   | 287.4 (229.7 to 353.6)     | 805.4 (664.6 to 956.3)        | 49.9 (26.2 to 85.8)             | 2.4 (0.0 to 3.2)                  | 3096.5 (2696.4 to 3539.9) | 777.3 (621.2 to 956.3)     | 2177.9 (1797.3 to 2586.1)     | 134.8 (70.9 to 232.1)           | 6.5 (0.0 to 8.6)                  |
| Turkmenistan | 2034 | 1190.3 (1027.0 to 1368.1)  | 300.0 (238.5 to 368.0)     | 836.1 (685.9 to 998.5)        | 51.9 (27.2 to 89.2)             | 2.3 (0.0 to 3.3)                  | 3218.8 (2777.2 to 3699.7) | 811.2 (645.0 to 995.2)     | 2261.0 (1854.8 to 2700.1)     | 140.3 (73.6 to 241.2)           | 6.4 (0.0 to 8.8)                  |
| Turkmenistan | 2035 | 1235.7 (1056.8 to 1441.0)  | 312.7 (248.4 to 387.5)     | 866.7 (705.0 to 1038.3)       | 53.9 (28.3 to 92.7)             | 2.3 (0.0 to 3.3)                  | 3341.7 (2857.8 to 3896.8) | 845.7 (671.8 to 1047.9)    | 2343.9 (1906.5 to 2807.9)     | 145.9 (76.6 to 250.6)           | 6.3 (0.0 to 9.0)                  |
| Turkmenistan | 2036 | 1282.1 (1106.6 to 1476.6)  | 326.0 (258.5 to 403.4)     | 897.8 (726.3 to 1083.7)       | 56.1 (29.5 to 96.3)             | 2.2 (0.0 to 3.5)                  | 3467.2 (2992.6 to 3993.2) | 881.6 (699.0 to 1090.8)    | 2427.9 (1964.0 to 2930.5)     | 151.7 (79.8 to 260.4)           | 6.0 (0.0 to 9.4)                  |

| Country      | Year | 2018 US Dollars per capita |                            |                               |                                 |                                   | 2018 PPP per capita       |                            |                               |                                 |                                   |
|--------------|------|----------------------------|----------------------------|-------------------------------|---------------------------------|-----------------------------------|---------------------------|----------------------------|-------------------------------|---------------------------------|-----------------------------------|
|              |      | Health spending            | Government health spending | Out-of-pocket health spending | Prepaid private health spending | Development assistance for health | Health spending           | Government health spending | Out-of-pocket health spending | Prepaid private health spending | Development assistance for health |
| Turkmenistan | 2037 | 1328.8 (1133.8 to 1549.0)  | 339.5 (269.1 to 420.6)     | 928.8 (746.1 to 1124.8)       | 58.4 (30.7 to 100.1)            | 2.1 (0.0 to 3.5)                  | 3593.4 (3066.0 to 4188.9) | 918.2 (727.7 to 1137.4)    | 2511.6 (2017.6 to 3041.8)     | 157.8 (83.1 to 270.6)           | 5.8 (0.0 to 9.5)                  |
| Turkmenistan | 2038 | 1375.7 (1168.2 to 1606.5)  | 353.5 (280.3 to 439.3)     | 959.5 (765.4 to 1168.0)       | 60.7 (31.9 to 103.9)            | 2.0 (0.0 to 3.6)                  | 3720.3 (3159.2 to 4344.4) | 956.0 (758.0 to 1188.0)    | 2594.8 (2069.9 to 3158.5)     | 164.1 (86.4 to 281.0)           | 5.4 (0.0 to 9.7)                  |
| Turkmenistan | 2039 | 1423.5 (1209.5 to 1672.5)  | 368.2 (290.9 to 456.6)     | 990.4 (786.5 to 1214.3)       | 63.1 (33.2 to 107.9)            | 1.8 (0.0 to 3.7)                  | 3849.5 (3270.9 to 4522.8) | 995.6 (786.7 to 1234.9)    | 2678.4 (2126.8 to 3283.7)     | 170.6 (89.7 to 291.9)           | 4.9 (0.0 to 10.0)                 |
| Turkmenistan | 2040 | 1470.2 (1261.3 to 1724.8)  | 382.7 (302.7 to 475.1)     | 1020.4 (806.8 to 1258.3)      | 65.5 (34.4 to 111.9)            | 1.6 (0.0 to 3.7)                  | 3975.8 (3410.9 to 4664.4) | 1035.0 (818.5 to 1284.8)   | 2759.3 (2181.7 to 3402.8)     | 177.1 (93.1 to 302.7)           | 4.4 (0.0 to 10.1)                 |
| Turkmenistan | 2041 | 1517.1 (1291.2 to 1783.4)  | 397.8 (312.6 to 497.2)     | 1050.0 (827.3 to 1301.6)      | 68.0 (35.8 to 116.2)            | 1.4 (0.0 to 3.8)                  | 4102.7 (3491.7 to 4822.9) | 1075.7 (845.4 to 1344.5)   | 2839.4 (2237.1 to 3519.7)     | 183.8 (96.8 to 314.2)           | 3.9 (0.0 to 10.2)                 |
| Turkmenistan | 2042 | 1563.6 (1306.9 to 1831.2)  | 413.1 (323.3 to 517.9)     | 1078.8 (847.5 to 1343.2)      | 70.5 (37.2 to 120.5)            | 1.3 (0.0 to 4.0)                  | 4228.4 (3534.1 to 4951.9) | 1117.0 (874.2 to 1400.6)   | 2917.3 (2291.9 to 3632.3)     | 190.5 (100.5 to 325.8)          | 3.5 (0.0 to 10.8)                 |
| Turkmenistan | 2043 | 1611.7 (1351.4 to 1900.4)  | 429.5 (335.6 to 541.3)     | 1107.9 (868.1 to 1381.5)      | 73.1 (38.7 to 125.1)            | 1.2 (0.0 to 4.0)                  | 4358.4 (3654.6 to 5139.2) | 1161.4 (907.7 to 1463.9)   | 2996.0 (2347.6 to 3735.8)     | 197.8 (104.5 to 338.4)          | 3.1 (0.0 to 10.9)                 |
| Turkmenistan | 2044 | 1657.7 (1392.2 to 1952.5)  | 445.5 (348.7 to 563.0)     | 1135.3 (886.4 to 1415.9)      | 75.7 (40.1 to 129.6)            | 1.1 (0.0 to 4.1)                  | 4482.7 (3764.7 to 5280.2) | 1204.8 (942.9 to 1522.5)   | 3070.2 (2397.0 to 3829.0)     | 204.8 (108.5 to 350.6)          | 2.9 (0.0 to 11.0)                 |
| Turkmenistan | 2045 | 1704.7 (1427.0 to 2012.0)  | 462.5 (360.5 to 587.2)     | 1162.6 (905.2 to 1456.7)      | 78.5 (41.7 to 134.6)            | 1.0 (0.0 to 4.2)                  | 4609.8 (3859.1 to 5440.9) | 1250.7 (974.9 to 1588.0)   | 3144.1 (2447.9 to 3939.3)     | 212.3 (112.7 to 364.0)          | 2.7 (0.0 to 11.3)                 |
| Turkmenistan | 2046 | 1750.5 (1455.9 to 2087.6)  | 479.8 (373.9 to 606.5)     | 1188.5 (925.6 to 1495.5)      | 81.3 (43.2 to 139.6)            | 0.9 (0.0 to 4.2)                  | 4733.7 (3937.0 to 5645.3) | 1297.5 (1011.0 to 1640.2)  | 3213.9 (2503.1 to 4044.1)     | 219.8 (116.7 to 377.5)          | 2.5 (0.0 to 11.3)                 |
| Turkmenistan | 2047 | 1795.5 (1499.7 to 2166.0)  | 497.4 (386.0 to 633.0)     | 1213.2 (943.1 to 1531.4)      | 84.1 (44.6 to 144.7)            | 0.9 (0.0 to 4.3)                  | 4855.5 (4055.5 to 5857.4) | 1345.0 (1043.7 to 1711.7)  | 3280.7 (2550.3 to 4141.3)     | 227.4 (120.5 to 391.3)          | 2.4 (0.0 to 11.7)                 |
| Turkmenistan | 2048 | 1840.7 (1527.9 to 2192.7)  | 515.2 (398.1 to 652.7)     | 1237.7 (962.3 to 1567.1)      | 86.9 (45.9 to 149.2)            | 0.8 (0.0 to 4.5)                  | 4977.7 (4131.9 to 5929.7) | 1393.3 (1076.5 to 1765.1)  | 3347.2 (2602.3 to 4237.8)     | 235.0 (124.2 to 403.5)          | 2.3 (0.0 to 12.2)                 |
| Turkmenistan | 2049 | 1887.3 (1572.1 to 2264.9)  | 533.9 (413.0 to 680.3)     | 1262.8 (981.2 to 1604.7)      | 89.8 (47.4 to 154.4)            | 0.8 (0.0 to 4.5)                  | 5103.8 (4251.2 to 6124.8) | 1443.8 (1116.9 to 1839.6)  | 3415.1 (2653.5 to 4339.4)     | 242.8 (128.1 to 417.7)          | 2.1 (0.0 to 12.1)                 |
| Turkmenistan | 2050 | 1933.7 (1606.6 to 2298.4)  | 552.7 (427.5 to 704.1)     | 1287.6 (999.2 to 1642.6)      | 92.6 (48.8 to 159.7)            | 0.8 (0.0 to 4.8)                  | 5229.3 (4344.7 to 6215.4) | 1494.7 (1156.1 to 1904.1)  | 3482.0 (2702.0 to 4441.9)     | 250.5 (131.9 to 431.9)          | 2.1 (0.0 to 12.9)                 |
| Uganda       | 1995 | 27.2 (22.5 to 33.0)        | 9.3 (7.1 to 12.1)          | 10.0 (7.1 to 13.9)            | 4.2 (2.1 to 8.0)                | 3.7 (3.7 to 3.7)                  | 95.6 (79.1 to 115.6)      | 32.8 (25.1 to 42.3)        | 35.1 (24.8 to 48.7)           | 14.7 (7.4 to 28.0)              | 13.1 (13.1 to 13.1)               |
| Uganda       | 1996 | 28.7 (24.1 to 34.6)        | 9.5 (7.2 to 12.2)          | 10.2 (7.2 to 14.2)            | 4.3 (2.1 to 8.0)                | 4.8 (4.8 to 4.8)                  | 100.7 (84.5 to 121.3)     | 33.2 (25.3 to 42.8)        | 35.9 (25.3 to 49.9)           | 15.0 (7.3 to 28.1)              | 16.7 (16.7 to 16.7)               |
| Uganda       | 1997 | 29.3 (24.6 to 34.9)        | 9.4 (7.2 to 12.1)          | 10.4 (7.3 to 14.3)            | 4.3 (2.1 to 8.0)                | 5.2 (5.2 to 5.2)                  | 102.7 (86.3 to 122.4)     | 33.1 (25.2 to 42.5)        | 36.4 (25.8 to 50.2)           | 15.1 (7.4 to 28.0)              | 18.1 (18.1 to 18.1)               |
| Uganda       | 1998 | 29.3 (24.6 to 35.2)        | 9.4 (7.2 to 12.1)          | 10.8 (7.6 to 14.7)            | 4.5 (2.2 to 8.1)                | 4.6 (4.6 to 4.6)                  | 102.8 (86.1 to 123.3)     | 33.1 (25.4 to 42.6)        | 37.9 (26.7 to 51.7)           | 15.8 (7.7 to 28.6)              | 16.1 (16.1 to 16.1)               |
| Uganda       | 1999 | 29.3 (24.5 to 35.3)        | 9.2 (7.0 to 11.8)          | 11.1 (7.8 to 15.0)            | 4.7 (2.3 to 8.5)                | 4.3 (4.3 to 4.3)                  | 102.7 (86.0 to 124.0)     | 32.3 (24.7 to 41.5)        | 38.8 (27.3 to 52.6)           | 16.4 (8.0 to 29.9)              | 15.1 (15.1 to 15.1)               |
| Uganda       | 2000 | 29.4 (24.7 to 35.4)        | 8.5 (6.4 to 10.8)          | 11.1 (7.8 to 15.0)            | 4.6 (2.2 to 8.3)                | 5.3 (5.3 to 5.3)                  | 103.0 (86.6 to 124.3)     | 29.7 (22.6 to 37.8)        | 38.8 (27.5 to 52.7)           | 16.0 (7.9 to 29.0)              | 18.6 (18.6 to 18.6)               |
| Uganda       | 2001 | 33.6 (28.3 to 39.7)        | 8.6 (6.6 to 10.9)          | 11.5 (8.2 to 15.5)            | 5.7 (2.8 to 10.4)               | 7.7 (7.7 to 7.7)                  | 117.7 (99.4 to 139.3)     | 30.3 (23.1 to 38.3)        | 40.3 (28.8 to 54.4)           | 20.0 (9.9 to 36.5)              | 27.1 (27.1 to 27.1)               |

| Country | Year | 2018 US Dollars per capita |                            |                               |                                 |                                   | 2018 PPP per capita    |                            |                               |                                 |                                   |
|---------|------|----------------------------|----------------------------|-------------------------------|---------------------------------|-----------------------------------|------------------------|----------------------------|-------------------------------|---------------------------------|-----------------------------------|
|         |      | Health spending            | Government health spending | Out-of-pocket health spending | Prepaid private health spending | Development assistance for health | Health spending        | Government health spending | Out-of-pocket health spending | Prepaid private health spending | Development assistance for health |
| Uganda  | 2002 | 33.1 (27.0 to 40.8)        | 9.3 (7.0 to 11.8)          | 12.3 (8.8 to 16.9)            | 7.7 (3.8 to 14.1)               | 3.9 (3.9 to 3.9)                  | 116.2 (94.6 to 143.3)  | 32.5 (24.7 to 41.4)        | 43.2 (30.9 to 59.2)           | 26.9 (13.2 to 49.4)             | 13.6 (13.6 to 13.6)               |
| Uganda  | 2003 | 41.6 (34.3 to 50.6)        | 9.9 (7.6 to 12.6)          | 13.3 (9.5 to 18.1)            | 9.3 (4.6 to 16.5)               | 9.1 (9.1 to 9.1)                  | 145.9 (120.2 to 177.6) | 34.9 (26.6 to 44.1)        | 46.5 (33.4 to 63.5)           | 32.5 (16.1 to 57.9)             | 32.0 (32.0 to 32.0)               |
| Uganda  | 2004 | 48.3 (40.5 to 57.5)        | 11.1 (8.5 to 13.9)         | 15.3 (11.1 to 20.8)           | 9.6 (4.7 to 16.9)               | 12.3 (12.3 to 12.3)               | 169.5 (142.2 to 201.7) | 38.8 (29.8 to 48.8)        | 53.9 (38.8 to 73.1)           | 33.6 (16.6 to 59.4)             | 43.3 (43.3 to 43.3)               |
| Uganda  | 2005 | 53.8 (45.1 to 63.5)        | 12.3 (9.4 to 15.4)         | 18.3 (13.3 to 24.8)           | 10.0 (4.9 to 17.6)              | 13.2 (13.2 to 13.2)               | 188.6 (158.3 to 222.9) | 43.1 (33.1 to 54.0)        | 64.1 (46.7 to 87.1)           | 35.2 (17.2 to 61.8)             | 46.2 (46.2 to 46.2)               |
| Uganda  | 2006 | 57.8 (48.6 to 68.7)        | 13.4 (10.3 to 16.8)        | 21.0 (15.2 to 28.2)           | 10.4 (4.9 to 18.5)              | 13.0 (13.0 to 13.0)               | 202.8 (170.5 to 241.0) | 46.9 (36.2 to 58.9)        | 73.8 (53.4 to 99.1)           | 36.4 (17.3 to 65.0)             | 45.7 (45.7 to 45.7)               |
| Uganda  | 2007 | 61.5 (52.0 to 73.4)        | 13.7 (10.5 to 17.4)        | 22.8 (16.4 to 30.9)           | 10.4 (5.1 to 18.9)              | 14.6 (14.6 to 14.6)               | 215.9 (182.6 to 257.5) | 48.1 (36.7 to 61.2)        | 80.1 (57.6 to 108.4)          | 36.5 (17.8 to 66.1)             | 51.1 (51.1 to 51.1)               |
| Uganda  | 2008 | 59.7 (50.2 to 70.9)        | 12.9 (9.8 to 16.7)         | 23.4 (16.6 to 31.5)           | 9.4 (4.5 to 17.6)               | 14.0 (14.0 to 14.0)               | 209.3 (176.2 to 248.8) | 45.2 (34.5 to 58.6)        | 82.1 (58.3 to 110.6)          | 32.8 (15.9 to 61.8)             | 49.1 (49.1 to 49.1)               |
| Uganda  | 2009 | 55.8 (47.4 to 65.5)        | 11.6 (8.7 to 14.8)         | 22.3 (15.6 to 30.2)           | 6.6 (3.2 to 12.2)               | 15.3 (15.3 to 15.3)               | 195.6 (166.4 to 229.7) | 40.6 (30.6 to 52.1)        | 78.3 (54.8 to 106.0)          | 23.2 (11.3 to 42.7)             | 53.6 (53.6 to 53.6)               |
| Uganda  | 2010 | 48.9 (41.8 to 57.1)        | 9.9 (7.4 to 12.6)          | 21.1 (14.6 to 28.8)           | 3.1 (1.5 to 5.7)                | 14.9 (14.9 to 14.9)               | 171.7 (146.5 to 200.4) | 34.7 (26.0 to 44.4)        | 73.9 (51.2 to 101.2)          | 10.8 (5.4 to 19.9)              | 52.2 (52.2 to 52.2)               |
| Uganda  | 2011 | 46.1 (39.3 to 54.0)        | 9.2 (6.9 to 11.8)          | 20.6 (14.4 to 28.4)           | 1.8 (0.9 to 3.3)                | 14.5 (14.5 to 14.5)               | 161.8 (138.0 to 189.4) | 32.2 (24.3 to 41.4)        | 72.2 (50.4 to 99.8)           | 6.3 (3.2 to 11.7)               | 51.0 (51.0 to 51.0)               |
| Uganda  | 2012 | 49.4 (43.1 to 56.6)        | 8.3 (6.3 to 10.6)          | 19.6 (13.7 to 26.6)           | 1.7 (0.9 to 3.2)                | 19.7 (19.7 to 19.7)               | 173.2 (151.3 to 198.4) | 29.2 (22.1 to 37.4)        | 68.6 (48.2 to 93.4)           | 6.1 (3.1 to 11.3)               | 69.2 (69.2 to 69.2)               |
| Uganda  | 2013 | 44.9 (38.7 to 52.0)        | 7.8 (5.9 to 10.0)          | 18.5 (12.9 to 25.1)           | 1.8 (0.9 to 3.2)                | 16.8 (16.8 to 16.8)               | 157.4 (135.9 to 182.4) | 27.3 (20.7 to 35.1)        | 64.7 (45.4 to 87.9)           | 6.2 (3.0 to 11.4)               | 59.1 (59.1 to 59.1)               |
| Uganda  | 2014 | 43.7 (38.2 to 50.2)        | 7.2 (5.5 to 9.3)           | 17.4 (12.1 to 23.9)           | 1.4 (0.7 to 2.5)                | 17.7 (17.7 to 17.7)               | 153.2 (133.9 to 176.0) | 25.3 (19.2 to 32.5)        | 61.1 (42.5 to 83.8)           | 4.8 (2.4 to 8.9)                | 62.0 (62.0 to 62.0)               |
| Uganda  | 2015 | 41.0 (35.6 to 47.8)        | 7.0 (5.3 to 9.0)           | 17.1 (11.8 to 23.4)           | 1.2 (0.6 to 2.3)                | 15.6 (15.6 to 15.6)               | 143.9 (125.0 to 167.8) | 24.7 (18.7 to 31.7)        | 60.0 (41.5 to 81.9)           | 4.4 (2.1 to 7.9)                | 54.9 (54.9 to 54.9)               |
| Uganda  | 2016 | 43.7 (38.2 to 50.4)        | 7.0 (5.2 to 9.0)           | 16.8 (11.5 to 23.2)           | 1.2 (0.6 to 2.3)                | 18.7 (18.7 to 18.7)               | 153.3 (133.9 to 176.8) | 24.5 (18.4 to 31.6)        | 58.9 (40.5 to 81.5)           | 4.3 (2.0 to 8.1)                | 65.6 (65.6 to 65.6)               |
| Uganda  | 2017 | 42.4 (37.0 to 49.1)        | 6.9 (5.2 to 8.9)           | 17.1 (11.8 to 23.5)           | 1.2 (0.6 to 2.3)                | 17.2 (17.2 to 17.2)               | 148.6 (129.8 to 172.2) | 24.1 (18.1 to 31.2)        | 59.9 (41.2 to 82.6)           | 4.3 (2.1 to 8.2)                | 60.3 (60.3 to 60.3)               |
| Uganda  | 2018 | 41.7 (35.8 to 48.5)        | 7.0 (5.3 to 9.1)           | 17.5 (12.0 to 24.1)           | 1.3 (0.6 to 2.4)                | 15.9 (15.9 to 15.9)               | 146.2 (125.7 to 170.2) | 24.7 (18.6 to 31.9)        | 61.4 (42.2 to 84.7)           | 4.4 (2.1 to 8.3)                | 55.7 (55.6 to 55.8)               |
| Uganda  | 2019 | 41.8 (35.8 to 49.2)        | 7.2 (5.4 to 9.2)           | 17.7 (12.2 to 24.4)           | 1.3 (0.6 to 2.4)                | 15.7 (14.6 to 16.6)               | 146.8 (125.8 to 172.5) | 25.1 (19.0 to 32.4)        | 62.2 (42.9 to 85.6)           | 4.5 (2.2 to 8.5)                | 55.0 (51.3 to 58.1)               |
| Uganda  | 2020 | 42.1 (36.1 to 49.5)        | 7.3 (5.5 to 9.4)           | 18.0 (12.4 to 24.8)           | 1.3 (0.6 to 2.5)                | 15.6 (14.3 to 16.8)               | 147.8 (126.7 to 173.7) | 25.5 (19.3 to 32.9)        | 63.0 (43.4 to 86.9)           | 4.6 (2.2 to 8.7)                | 54.7 (50.1 to 59.0)               |
| Uganda  | 2021 | 42.5 (36.4 to 50.1)        | 7.4 (5.6 to 9.6)           | 18.2 (12.6 to 25.1)           | 1.3 (0.6 to 2.5)                | 15.5 (14.0 to 17.2)               | 149.1 (127.8 to 175.8) | 26.0 (19.6 to 33.6)        | 63.9 (44.1 to 88.0)           | 4.7 (2.2 to 8.9)                | 54.5 (49.1 to 60.3)               |
| Uganda  | 2022 | 42.9 (36.4 to 51.0)        | 7.5 (5.7 to 9.7)           | 18.5 (12.8 to 25.5)           | 1.4 (0.7 to 2.6)                | 15.6 (13.8 to 17.4)               | 150.6 (127.6 to 179.0) | 26.4 (20.1 to 34.1)        | 64.7 (44.8 to 89.5)           | 4.8 (2.3 to 9.1)                | 54.6 (48.5 to 61.0)               |



| Country | Year | 2018 US Dollars per capita |                            |                               |                                 |                                   | 2018 PPP per capita    |                            |                               |                                 |                                   |
|---------|------|----------------------------|----------------------------|-------------------------------|---------------------------------|-----------------------------------|------------------------|----------------------------|-------------------------------|---------------------------------|-----------------------------------|
|         |      | Health spending            | Government health spending | Out-of-pocket health spending | Prepaid private health spending | Development assistance for health | Health spending        | Government health spending | Out-of-pocket health spending | Prepaid private health spending | Development assistance for health |
| Uganda  | 2023 | 43.3 (37.1 to 51.2)        | 7.7 (5.8 to 9.9)           | 18.7 (12.9 to 25.9)           | 1.4 (0.7 to 2.7)                | 15.5 (13.5 to 17.6)               | 152.0 (130.2 to 179.6) | 26.9 (20.5 to 34.7)        | 65.7 (45.2 to 90.9)           | 4.9 (2.3 to 9.3)                | 54.5 (47.5 to 61.9)               |
| Uganda  | 2024 | 43.8 (36.9 to 52.4)        | 7.8 (5.9 to 10.1)          | 19.0 (13.1 to 26.3)           | 1.4 (0.7 to 2.7)                | 15.6 (13.4 to 17.9)               | 153.6 (129.6 to 183.8) | 27.4 (20.8 to 35.3)        | 66.6 (46.0 to 92.3)           | 5.0 (2.4 to 9.5)                | 54.6 (47.0 to 62.9)               |
| Uganda  | 2025 | 44.2 (37.8 to 52.3)        | 7.9 (6.0 to 10.3)          | 19.3 (13.3 to 26.7)           | 1.5 (0.7 to 2.8)                | 15.5 (13.2 to 18.2)               | 155.1 (132.5 to 183.4) | 27.9 (21.2 to 36.0)        | 67.6 (46.7 to 93.8)           | 5.1 (2.4 to 9.7)                | 54.5 (46.4 to 63.8)               |
| Uganda  | 2026 | 44.6 (37.3 to 53.4)        | 8.1 (6.1 to 10.5)          | 19.5 (13.5 to 27.1)           | 1.5 (0.7 to 2.8)                | 15.5 (13.1 to 18.2)               | 156.6 (130.9 to 187.5) | 28.4 (21.5 to 36.7)        | 68.6 (47.4 to 95.0)           | 5.2 (2.5 to 9.9)                | 54.4 (46.0 to 63.7)               |
| Uganda  | 2027 | 45.1 (38.2 to 53.8)        | 8.3 (6.2 to 10.7)          | 19.8 (13.8 to 27.4)           | 1.5 (0.7 to 2.9)                | 15.5 (12.9 to 18.4)               | 158.3 (133.9 to 188.6) | 29.0 (21.9 to 37.5)        | 69.6 (48.3 to 96.2)           | 5.4 (2.5 to 10.2)               | 54.3 (45.4 to 64.6)               |
| Uganda  | 2028 | 45.6 (38.2 to 54.3)        | 8.4 (6.4 to 10.9)          | 20.1 (13.9 to 27.8)           | 1.6 (0.7 to 3.0)                | 15.5 (12.9 to 18.7)               | 160.1 (134.2 to 190.7) | 29.6 (22.3 to 38.3)        | 70.6 (48.9 to 97.6)           | 5.5 (2.6 to 10.4)               | 54.4 (45.4 to 65.7)               |
| Uganda  | 2029 | 46.2 (38.9 to 55.3)        | 8.6 (6.5 to 11.2)          | 20.4 (14.1 to 28.3)           | 1.6 (0.8 to 3.0)                | 15.5 (12.8 to 19.0)               | 161.9 (136.5 to 194.0) | 30.2 (22.7 to 39.2)        | 71.7 (49.6 to 99.1)           | 5.6 (2.7 to 10.7)               | 54.5 (44.8 to 66.6)               |
| Uganda  | 2030 | 46.7 (38.9 to 55.9)        | 8.8 (6.6 to 11.4)          | 20.7 (14.3 to 28.8)           | 1.6 (0.8 to 3.1)                | 15.5 (12.7 to 19.1)               | 163.8 (136.3 to 196.2) | 30.8 (23.1 to 39.9)        | 72.8 (50.2 to 100.9)          | 5.7 (2.7 to 10.9)               | 54.5 (44.5 to 67.0)               |
| Uganda  | 2031 | 47.2 (39.6 to 57.1)        | 9.0 (6.8 to 11.7)          | 21.1 (14.4 to 29.3)           | 1.7 (0.8 to 3.2)                | 15.5 (12.6 to 19.5)               | 165.8 (139.0 to 200.4) | 31.5 (23.7 to 40.9)        | 73.9 (50.7 to 102.8)          | 5.9 (2.8 to 11.2)               | 54.5 (44.2 to 68.4)               |
| Uganda  | 2032 | 47.8 (39.4 to 57.6)        | 9.2 (6.9 to 11.9)          | 21.4 (14.6 to 29.9)           | 1.7 (0.8 to 3.3)                | 15.6 (12.5 to 19.7)               | 167.9 (138.3 to 202.2) | 32.2 (24.2 to 41.8)        | 75.0 (51.4 to 104.8)          | 6.0 (2.8 to 11.5)               | 54.7 (43.9 to 69.2)               |
| Uganda  | 2033 | 48.5 (40.6 to 58.2)        | 9.4 (7.0 to 12.2)          | 21.7 (14.8 to 30.4)           | 1.7 (0.8 to 3.4)                | 15.6 (12.4 to 20.1)               | 170.0 (142.6 to 204.1) | 33.0 (24.7 to 43.0)        | 76.1 (52.0 to 106.8)          | 6.1 (2.9 to 11.8)               | 54.8 (43.6 to 70.6)               |
| Uganda  | 2034 | 49.1 (40.4 to 59.1)        | 9.6 (7.2 to 12.5)          | 22.0 (15.1 to 30.9)           | 1.8 (0.8 to 3.4)                | 15.7 (12.4 to 20.2)               | 172.3 (141.6 to 207.5) | 33.7 (25.2 to 43.9)        | 77.2 (52.8 to 108.4)          | 6.3 (3.0 to 12.1)               | 55.1 (43.5 to 70.8)               |
| Uganda  | 2035 | 49.8 (41.4 to 60.3)        | 9.8 (7.3 to 12.8)          | 22.4 (15.3 to 31.5)           | 1.8 (0.9 to 3.5)                | 15.8 (12.3 to 20.7)               | 174.7 (145.2 to 211.4) | 34.6 (25.7 to 44.8)        | 78.4 (53.6 to 110.5)          | 6.4 (3.1 to 12.4)               | 55.3 (43.2 to 72.6)               |
| Uganda  | 2036 | 50.5 (40.8 to 61.0)        | 10.1 (7.5 to 13.1)         | 22.7 (15.5 to 32.0)           | 1.9 (0.9 to 3.6)                | 15.8 (12.3 to 21.3)               | 177.1 (143.2 to 213.9) | 35.4 (26.3 to 45.9)        | 79.6 (54.3 to 112.2)          | 6.6 (3.1 to 12.7)               | 55.6 (43.0 to 74.8)               |
| Uganda  | 2037 | 51.2 (42.0 to 61.7)        | 10.3 (7.7 to 13.4)         | 23.0 (15.7 to 32.4)           | 1.9 (0.9 to 3.7)                | 15.9 (12.2 to 21.3)               | 179.5 (147.3 to 216.6) | 36.2 (26.9 to 47.1)        | 80.7 (55.1 to 113.7)          | 6.7 (3.2 to 12.9)               | 55.8 (42.9 to 74.7)               |
| Uganda  | 2038 | 51.9 (42.2 to 63.1)        | 10.6 (7.8 to 13.8)         | 23.4 (15.9 to 33.0)           | 2.0 (0.9 to 3.8)                | 16.0 (12.2 to 21.9)               | 182.1 (148.2 to 221.5) | 37.1 (27.5 to 48.4)        | 82.0 (56.0 to 115.6)          | 6.9 (3.3 to 13.2)               | 56.1 (42.7 to 76.8)               |
| Uganda  | 2039 | 52.6 (42.9 to 63.9)        | 10.9 (8.0 to 14.1)         | 23.7 (16.2 to 33.6)           | 2.0 (1.0 to 3.9)                | 16.1 (12.2 to 21.9)               | 184.7 (150.4 to 224.4) | 38.1 (28.2 to 49.5)        | 83.2 (56.8 to 117.8)          | 7.0 (3.3 to 13.5)               | 56.4 (42.8 to 77.0)               |
| Uganda  | 2040 | 53.4 (43.2 to 65.2)        | 11.1 (8.3 to 14.6)         | 24.1 (16.4 to 34.2)           | 2.1 (1.0 to 3.9)                | 16.2 (12.3 to 22.2)               | 187.4 (151.7 to 228.6) | 39.0 (29.0 to 51.1)        | 84.4 (57.7 to 120.0)          | 7.2 (3.4 to 13.8)               | 56.7 (43.1 to 77.9)               |
| Uganda  | 2041 | 54.2 (44.3 to 66.9)        | 11.4 (8.5 to 15.0)         | 24.4 (16.7 to 34.8)           | 2.1 (1.0 to 4.0)                | 16.3 (12.2 to 22.9)               | 190.2 (155.5 to 234.7) | 40.0 (29.8 to 52.5)        | 85.7 (58.6 to 122.1)          | 7.4 (3.5 to 14.1)               | 57.1 (42.8 to 80.5)               |
| Uganda  | 2042 | 55.1 (44.5 to 67.0)        | 11.7 (8.7 to 15.3)         | 24.8 (16.9 to 35.3)           | 2.2 (1.0 to 4.1)                | 16.4 (12.2 to 23.8)               | 193.1 (156.0 to 235.1) | 41.0 (30.5 to 53.8)        | 86.9 (59.5 to 123.9)          | 7.6 (3.6 to 14.4)               | 57.6 (42.7 to 83.5)               |
| Uganda  | 2043 | 55.9 (45.4 to 69.7)        | 12.0 (8.9 to 15.6)         | 25.1 (17.2 to 35.8)           | 2.2 (1.0 to 4.2)                | 16.6 (12.3 to 24.4)               | 196.1 (159.4 to 244.5) | 42.0 (31.2 to 54.8)        | 88.2 (60.3 to 125.7)          | 7.7 (3.7 to 14.7)               | 58.1 (43.0 to 85.7)               |

| Country | Year | 2018 US Dollars per capita |                            |                               |                                 |                                   | 2018 PPP per capita    |                            |                               |                                 |                                   |
|---------|------|----------------------------|----------------------------|-------------------------------|---------------------------------|-----------------------------------|------------------------|----------------------------|-------------------------------|---------------------------------|-----------------------------------|
|         |      | Health spending            | Government health spending | Out-of-pocket health spending | Prepaid private health spending | Development assistance for health | Health spending        | Government health spending | Out-of-pocket health spending | Prepaid private health spending | Development assistance for health |
| Uganda  | 2044 | 56.8 (45.7 to 68.9)        | 12.3 (9.1 to 16.1)         | 25.5 (17.4 to 36.3)           | 2.3 (1.1 to 4.3)                | 16.7 (12.3 to 24.6)               | 199.1 (160.2 to 241.6) | 43.1 (32.1 to 56.6)        | 89.5 (61.2 to 127.5)          | 7.9 (3.8 to 15.1)               | 58.7 (43.1 to 86.4)               |
| Uganda  | 2045 | 57.7 (46.3 to 71.0)        | 12.6 (9.4 to 16.6)         | 25.9 (17.7 to 37.0)           | 2.3 (1.1 to 4.4)                | 16.9 (12.2 to 25.5)               | 202.4 (162.5 to 249.2) | 44.3 (32.9 to 58.3)        | 90.8 (62.0 to 129.8)          | 8.1 (3.8 to 15.4)               | 59.2 (42.9 to 89.5)               |
| Uganda  | 2046 | 58.7 (47.4 to 72.5)        | 13.0 (9.7 to 17.1)         | 26.3 (17.9 to 37.6)           | 2.4 (1.1 to 4.5)                | 17.1 (12.3 to 25.9)               | 205.9 (166.1 to 254.3) | 45.6 (33.9 to 60.1)        | 92.1 (62.9 to 131.9)          | 8.3 (3.9 to 15.8)               | 59.9 (43.3 to 91.0)               |
| Uganda  | 2047 | 59.8 (48.3 to 75.1)        | 13.4 (9.9 to 17.7)         | 26.7 (18.2 to 38.2)           | 2.4 (1.1 to 4.6)                | 17.3 (12.4 to 27.3)               | 209.6 (169.6 to 263.3) | 47.0 (34.9 to 62.1)        | 93.6 (63.8 to 134.0)          | 8.5 (4.0 to 16.2)               | 60.6 (43.5 to 95.6)               |
| Uganda  | 2048 | 60.9 (49.6 to 75.5)        | 13.8 (10.3 to 18.3)        | 27.1 (18.5 to 38.8)           | 2.5 (1.2 to 4.7)                | 17.5 (12.5 to 28.3)               | 213.8 (173.9 to 265.0) | 48.5 (36.1 to 64.2)        | 95.1 (64.8 to 136.2)          | 8.7 (4.1 to 16.7)               | 61.4 (44.0 to 99.2)               |
| Uganda  | 2049 | 62.2 (49.9 to 78.4)        | 14.3 (10.6 to 18.9)        | 27.6 (18.8 to 39.5)           | 2.6 (1.2 to 4.9)                | 17.7 (12.5 to 28.5)               | 218.1 (175.0 to 275.2) | 50.2 (37.2 to 66.5)        | 96.7 (65.8 to 138.5)          | 9.0 (4.2 to 17.1)               | 62.1 (43.9 to 100.1)              |
| Uganda  | 2050 | 63.5 (51.0 to 79.3)        | 14.8 (10.9 to 19.6)        | 28.0 (19.1 to 40.2)           | 2.6 (1.2 to 5.0)                | 18.0 (12.6 to 28.8)               | 222.7 (179.0 to 278.3) | 52.1 (38.4 to 68.8)        | 98.4 (66.9 to 140.9)          | 9.2 (4.3 to 17.6)               | 63.0 (44.3 to 101.1)              |
| Ukraine | 1995 | 117.1 (99.5 to 137.9)      | 74.0 (59.3 to 93.8)        | 37.8 (28.1 to 48.6)           | 5.4 (2.6 to 10.6)               | 0.0 (0.0 to 0.0)                  | 389.4 (330.7 to 458.5) | 246.0 (197.2 to 311.7)     | 125.6 (93.6 to 161.5)         | 17.8 (8.6 to 35.1)              | 0.0 (0.0 to 0.0)                  |
| Ukraine | 1996 | 107.6 (91.9 to 125.8)      | 64.0 (51.5 to 80.2)        | 37.6 (28.4 to 48.4)           | 5.2 (2.5 to 10.4)               | 0.7 (0.7 to 0.7)                  | 357.7 (305.4 to 418.4) | 212.9 (171.2 to 266.8)     | 125.0 (94.5 to 160.9)         | 17.4 (8.4 to 34.5)              | 2.4 (2.4 to 2.4)                  |
| Ukraine | 1997 | 101.1 (86.3 to 118.4)      | 55.9 (45.1 to 69.5)        | 40.0 (30.8 to 51.3)           | 5.0 (2.5 to 9.7)                | 0.0 (0.0 to 0.0)                  | 336.1 (286.9 to 393.6) | 186.0 (150.1 to 231.0)     | 133.1 (102.4 to 170.7)        | 16.8 (8.3 to 32.4)              | 0.1 (0.1 to 0.1)                  |
| Ukraine | 1998 | 95.5 (82.1 to 111.8)       | 48.9 (39.7 to 59.5)        | 41.8 (32.8 to 53.3)           | 4.7 (2.3 to 9.1)                | 0.0 (0.0 to 0.0)                  | 317.4 (272.9 to 371.6) | 162.7 (132.1 to 197.9)     | 138.9 (108.9 to 177.3)        | 15.7 (7.6 to 30.1)              | 0.1 (0.1 to 0.1)                  |
| Ukraine | 1999 | 91.1 (78.8 to 105.4)       | 44.4 (36.3 to 53.7)        | 42.0 (33.0 to 53.4)           | 4.3 (2.1 to 8.3)                | 0.4 (0.4 to 0.4)                  | 302.9 (262.1 to 350.3) | 147.6 (120.7 to 178.7)     | 139.6 (109.6 to 177.4)        | 14.4 (7.0 to 27.6)              | 1.3 (1.3 to 1.3)                  |
| Ukraine | 2000 | 92.8 (80.6 to 106.9)       | 45.3 (37.4 to 54.3)        | 43.1 (34.3 to 54.9)           | 4.0 (2.0 to 7.8)                | 0.4 (0.4 to 0.4)                  | 308.5 (267.9 to 355.6) | 150.7 (124.5 to 180.6)     | 143.2 (114.0 to 182.5)        | 13.3 (6.5 to 25.9)              | 1.2 (1.2 to 1.2)                  |
| Ukraine | 2001 | 101.0 (87.7 to 115.8)      | 50.6 (41.8 to 60.7)        | 46.3 (36.5 to 58.7)           | 4.1 (2.0 to 8.0)                | 0.1 (0.1 to 0.1)                  | 335.9 (291.6 to 385.2) | 168.3 (138.9 to 201.7)     | 153.8 (121.3 to 195.0)        | 13.5 (6.8 to 26.5)              | 0.2 (0.2 to 0.2)                  |
| Ukraine | 2002 | 111.1 (96.6 to 127.3)      | 57.4 (47.4 to 68.4)        | 49.4 (38.8 to 61.6)           | 4.2 (2.1 to 8.2)                | 0.1 (0.1 to 0.1)                  | 369.4 (321.1 to 423.2) | 190.8 (157.6 to 227.5)     | 164.1 (129.1 to 204.8)        | 14.1 (7.0 to 27.4)              | 0.4 (0.4 to 0.4)                  |
| Ukraine | 2003 | 126.4 (109.5 to 145.5)     | 68.1 (56.5 to 81.8)        | 53.5 (42.3 to 66.8)           | 4.6 (2.2 to 8.7)                | 0.2 (0.2 to 0.2)                  | 420.2 (364.2 to 483.8) | 226.5 (187.8 to 272.1)     | 177.9 (140.7 to 222.2)        | 15.3 (7.4 to 28.8)              | 0.6 (0.6 to 0.6)                  |
| Ukraine | 2004 | 142.2 (123.7 to 162.5)     | 79.2 (65.8 to 94.1)        | 57.4 (45.9 to 71.7)           | 5.0 (2.4 to 9.6)                | 0.6 (0.6 to 0.6)                  | 472.7 (411.1 to 540.2) | 263.3 (218.9 to 312.9)     | 191.0 (152.6 to 238.5)        | 16.5 (7.8 to 31.8)              | 1.9 (1.9 to 1.9)                  |
| Ukraine | 2005 | 152.5 (133.3 to 175.5)     | 86.7 (72.2 to 103.6)       | 58.9 (47.1 to 73.3)           | 5.3 (2.5 to 9.7)                | 1.5 (1.5 to 1.5)                  | 506.9 (443.2 to 583.5) | 288.4 (239.9 to 344.3)     | 195.8 (156.7 to 243.6)        | 17.5 (8.4 to 32.3)              | 5.1 (5.1 to 5.1)                  |
| Ukraine | 2006 | 164.2 (143.8 to 186.8)     | 95.3 (79.8 to 113.3)       | 61.4 (49.0 to 76.4)           | 5.7 (2.7 to 10.6)               | 1.7 (1.7 to 1.7)                  | 546.1 (478.0 to 621.0) | 316.9 (265.2 to 376.9)     | 204.2 (163.0 to 254.2)        | 19.1 (8.9 to 35.1)              | 5.8 (5.8 to 5.8)                  |
| Ukraine | 2007 | 174.4 (153.3 to 198.7)     | 102.0 (85.4 to 120.3)      | 64.4 (51.5 to 79.6)           | 6.4 (3.0 to 11.6)               | 1.7 (1.7 to 1.7)                  | 580.0 (509.7 to 660.5) | 339.0 (284.0 to 399.9)     | 214.1 (171.3 to 264.7)        | 21.1 (10.1 to 38.4)             | 5.8 (5.8 to 5.8)                  |
| Ukraine | 2008 | 177.8 (155.9 to 202.3)     | 103.2 (87.0 to 121.4)      | 66.5 (53.2 to 82.4)           | 6.4 (3.1 to 12.2)               | 1.7 (1.7 to 1.7)                  | 591.3 (518.5 to 672.5) | 343.2 (289.4 to 403.7)     | 221.1 (176.9 to 274.0)        | 21.4 (10.4 to 40.4)             | 5.5 (5.5 to 5.5)                  |

| Country | Year | 2018 US Dollars per capita |                            |                               |                                 |                                   | 2018 PPP per capita    |                            |                               |                                 |                                   |
|---------|------|----------------------------|----------------------------|-------------------------------|---------------------------------|-----------------------------------|------------------------|----------------------------|-------------------------------|---------------------------------|-----------------------------------|
|         |      | Health spending            | Government health spending | Out-of-pocket health spending | Prepaid private health spending | Development assistance for health | Health spending        | Government health spending | Out-of-pocket health spending | Prepaid private health spending | Development assistance for health |
| Ukraine | 2009 | 166.2 (145.0 to 187.7)     | 92.8 (78.8 to 109.0)       | 66.0 (53.8 to 81.4)           | 6.0 (2.9 to 11.5)               | 1.4 (1.4 to 1.4)                  | 552.6 (482.3 to 624.2) | 308.5 (262.1 to 362.6)     | 219.6 (179.0 to 270.7)        | 19.8 (9.7 to 38.2)              | 4.8 (4.8 to 4.8)                  |
| Ukraine | 2010 | 176.9 (156.3 to 199.7)     | 96.0 (82.2 to 111.6)       | 73.8 (60.9 to 90.4)           | 6.2 (3.0 to 11.8)               | 1.0 (1.0 to 1.0)                  | 588.1 (519.8 to 663.8) | 319.1 (273.3 to 371.2)     | 245.3 (202.3 to 300.6)        | 20.5 (9.9 to 39.4)              | 3.2 (3.2 to 3.2)                  |
| Ukraine | 2011 | 188.7 (167.1 to 212.3)     | 98.7 (84.7 to 115.0)       | 82.4 (67.7 to 100.3)          | 6.3 (3.0 to 12.2)               | 1.3 (1.3 to 1.3)                  | 627.4 (555.6 to 705.8) | 328.2 (281.7 to 382.5)     | 273.8 (225.1 to 333.5)        | 21.0 (10.0 to 40.7)             | 4.3 (4.3 to 4.3)                  |
| Ukraine | 2012 | 194.0 (170.2 to 219.0)     | 98.9 (84.1 to 115.6)       | 87.2 (71.6 to 105.2)          | 6.4 (3.0 to 12.2)               | 1.5 (1.5 to 1.5)                  | 644.9 (566.0 to 728.0) | 328.7 (279.6 to 384.4)     | 289.9 (238.1 to 349.9)        | 21.3 (10.0 to 40.4)             | 5.0 (5.0 to 5.0)                  |
| Ukraine | 2013 | 194.1 (169.8 to 220.3)     | 95.3 (80.4 to 112.4)       | 91.0 (74.4 to 110.7)          | 6.3 (3.0 to 11.6)               | 1.5 (1.5 to 1.5)                  | 645.5 (564.6 to 732.6) | 317.0 (267.2 to 373.6)     | 302.6 (247.3 to 368.0)        | 21.0 (9.9 to 38.7)              | 4.9 (4.9 to 4.9)                  |
| Ukraine | 2014 | 181.7 (157.4 to 205.9)     | 84.0 (70.5 to 100.4)       | 90.1 (73.2 to 109.7)          | 5.8 (2.7 to 11.0)               | 1.8 (1.8 to 1.8)                  | 604.1 (523.3 to 684.5) | 279.2 (234.3 to 333.8)     | 299.7 (243.3 to 364.8)        | 19.2 (9.0 to 36.7)              | 6.0 (6.0 to 6.0)                  |
| Ukraine | 2015 | 170.7 (147.4 to 194.4)     | 75.3 (62.7 to 90.4)        | 88.4 (70.8 to 108.7)          | 5.3 (2.4 to 10.0)               | 1.8 (1.8 to 1.8)                  | 567.6 (490.0 to 646.4) | 250.2 (208.6 to 300.7)     | 294.0 (235.5 to 361.4)        | 17.5 (8.1 to 33.1)              | 5.9 (5.9 to 5.9)                  |
| Ukraine | 2016 | 170.6 (145.8 to 196.6)     | 73.8 (60.8 to 90.4)        | 89.4 (70.0 to 111.3)          | 5.1 (2.4 to 9.7)                | 2.2 (2.2 to 2.2)                  | 567.3 (484.9 to 653.6) | 245.4 (202.0 to 300.5)     | 297.3 (232.8 to 370.2)        | 17.1 (8.0 to 32.2)              | 7.5 (7.5 to 7.5)                  |
| Ukraine | 2017 | 178.5 (153.0 to 205.7)     | 78.8 (64.8 to 96.1)        | 92.3 (72.4 to 115.3)          | 5.3 (2.5 to 10.0)               | 2.1 (2.1 to 2.1)                  | 593.5 (508.6 to 684.1) | 262.0 (215.3 to 319.6)     | 306.7 (240.6 to 383.4)        | 17.7 (8.3 to 33.3)              | 7.0 (7.0 to 7.0)                  |
| Ukraine | 2018 | 180.3 (154.7 to 208.5)     | 79.4 (64.9 to 97.0)        | 93.5 (73.6 to 116.2)          | 5.3 (2.5 to 10.1)               | 2.0 (2.0 to 2.0)                  | 599.5 (514.4 to 693.1) | 264.0 (215.8 to 322.5)     | 310.9 (244.6 to 386.3)        | 17.8 (8.3 to 33.5)              | 6.8 (6.8 to 6.8)                  |
| Ukraine | 2019 | 181.9 (156.0 to 209.5)     | 79.8 (65.4 to 97.3)        | 94.7 (74.2 to 117.7)          | 5.4 (2.5 to 10.1)               | 2.1 (2.0 to 2.2)                  | 604.9 (518.7 to 696.6) | 265.2 (217.5 to 323.4)     | 314.8 (246.8 to 391.4)        | 17.9 (8.4 to 33.7)              | 7.0 (6.5 to 7.4)                  |
| Ukraine | 2020 | 183.6 (157.6 to 212.1)     | 80.1 (65.5 to 97.8)        | 95.9 (75.4 to 119.3)          | 5.4 (2.5 to 10.2)               | 2.2 (2.0 to 2.4)                  | 610.4 (524.0 to 705.4) | 266.5 (217.7 to 325.2)     | 318.8 (250.8 to 396.8)        | 17.9 (8.4 to 33.9)              | 7.2 (6.6 to 7.8)                  |
| Ukraine | 2021 | 185.3 (158.7 to 215.5)     | 80.5 (65.4 to 98.1)        | 97.0 (76.1 to 120.6)          | 5.4 (2.5 to 10.2)               | 2.3 (2.0 to 2.5)                  | 616.0 (527.8 to 716.6) | 267.8 (217.6 to 326.0)     | 322.6 (253.0 to 400.9)        | 18.0 (8.4 to 33.9)              | 7.5 (6.8 to 8.3)                  |
| Ukraine | 2022 | 187.0 (160.2 to 217.2)     | 80.9 (66.0 to 98.3)        | 98.2 (77.2 to 121.8)          | 5.4 (2.6 to 10.2)               | 2.4 (2.1 to 2.6)                  | 621.7 (532.7 to 722.3) | 269.0 (219.3 to 327.0)     | 326.6 (256.7 to 405.0)        | 18.1 (8.5 to 34.0)              | 7.9 (7.0 to 8.8)                  |
| Ukraine | 2023 | 188.7 (161.7 to 219.4)     | 81.3 (66.2 to 99.0)        | 99.5 (78.4 to 123.5)          | 5.5 (2.6 to 10.3)               | 2.5 (2.2 to 2.8)                  | 627.4 (537.7 to 729.6) | 270.2 (220.1 to 329.0)     | 330.8 (260.7 to 410.6)        | 18.2 (8.5 to 34.3)              | 8.2 (7.2 to 9.3)                  |
| Ukraine | 2024 | 190.6 (162.2 to 221.4)     | 81.7 (66.6 to 99.8)        | 100.8 (79.3 to 125.3)         | 5.5 (2.6 to 10.4)               | 2.6 (2.2 to 3.0)                  | 633.8 (539.3 to 736.0) | 271.7 (221.3 to 331.7)     | 335.1 (263.5 to 416.5)        | 18.3 (8.6 to 34.6)              | 8.6 (7.4 to 9.9)                  |
| Ukraine | 2025 | 192.6 (165.1 to 224.2)     | 82.2 (66.8 to 100.9)       | 102.1 (80.2 to 127.5)         | 5.5 (2.6 to 10.5)               | 2.7 (2.3 to 3.2)                  | 640.3 (548.8 to 745.6) | 273.3 (222.1 to 335.3)     | 339.6 (266.5 to 423.9)        | 18.4 (8.6 to 34.8)              | 9.0 (7.7 to 10.5)                 |
| Ukraine | 2026 | 194.6 (165.2 to 225.6)     | 82.8 (67.3 to 101.6)       | 103.5 (81.0 to 129.5)         | 5.6 (2.6 to 10.5)               | 2.8 (2.4 to 3.3)                  | 647.1 (549.3 to 750.0) | 275.2 (223.7 to 337.8)     | 344.0 (269.4 to 430.7)        | 18.5 (8.7 to 35.0)              | 9.4 (7.9 to 11.0)                 |
| Ukraine | 2027 | 197.0 (167.9 to 228.9)     | 83.5 (68.0 to 102.5)       | 104.9 (82.0 to 131.7)         | 5.6 (2.6 to 10.6)               | 2.9 (2.5 to 3.5)                  | 654.9 (558.1 to 761.2) | 277.6 (226.1 to 340.8)     | 348.9 (272.6 to 437.8)        | 18.7 (8.7 to 35.2)              | 9.8 (8.2 to 11.6)                 |
| Ukraine | 2028 | 199.4 (168.5 to 232.7)     | 84.2 (68.7 to 103.1)       | 106.4 (82.9 to 133.9)         | 5.7 (2.7 to 10.6)               | 3.1 (2.6 to 3.7)                  | 663.0 (560.3 to 773.8) | 280.1 (228.4 to 342.9)     | 353.9 (275.6 to 445.1)        | 18.8 (8.8 to 35.4)              | 10.2 (8.5 to 12.3)                |
| Ukraine | 2029 | 201.8 (170.7 to 235.1)     | 84.9 (68.9 to 104.2)       | 108.0 (83.5 to 135.8)         | 5.7 (2.7 to 10.8)               | 3.2 (2.6 to 3.9)                  | 671.1 (567.5 to 781.8) | 282.4 (229.1 to 346.3)     | 359.0 (277.5 to 451.6)        | 19.0 (8.9 to 35.7)              | 10.6 (8.8 to 13.0)                |

| Country | Year | 2018 US Dollars per capita |                            |                               |                                 |                                   | 2018 PPP per capita     |                            |                               |                                 |                                   |
|---------|------|----------------------------|----------------------------|-------------------------------|---------------------------------|-----------------------------------|-------------------------|----------------------------|-------------------------------|---------------------------------|-----------------------------------|
|         |      | Health spending            | Government health spending | Out-of-pocket health spending | Prepaid private health spending | Development assistance for health | Health spending         | Government health spending | Out-of-pocket health spending | Prepaid private health spending | Development assistance for health |
| Ukraine | 2030 | 204.4 (171.8 to 238.0)     | 85.7 (69.4 to 105.1)       | 109.6 (84.4 to 138.2)         | 5.8 (2.7 to 10.9)               | 3.3 (2.7 to 4.1)                  | 679.5 (571.4 to 791.2)  | 284.8 (230.8 to 349.6)     | 364.3 (280.6 to 459.5)        | 19.2 (9.0 to 36.2)              | 11.1 (9.1 to 13.6)                |
| Ukraine | 2031 | 207.0 (175.5 to 241.7)     | 86.5 (69.7 to 106.3)       | 111.2 (85.4 to 140.5)         | 5.8 (2.7 to 11.0)               | 3.5 (2.8 to 4.4)                  | 688.3 (583.4 to 803.8)  | 287.6 (231.9 to 353.3)     | 369.8 (284.1 to 467.1)        | 19.4 (9.1 to 36.6)              | 11.5 (9.3 to 14.5)                |
| Ukraine | 2032 | 209.7 (177.5 to 244.9)     | 87.3 (70.4 to 107.3)       | 112.9 (86.2 to 143.2)         | 5.9 (2.8 to 11.2)               | 3.6 (2.9 to 4.5)                  | 697.2 (590.1 to 814.4)  | 290.1 (234.0 to 356.9)     | 375.4 (286.6 to 476.2)        | 19.7 (9.3 to 37.1)              | 12.0 (9.6 to 15.1)                |
| Ukraine | 2033 | 212.4 (179.1 to 248.9)     | 88.0 (70.8 to 107.9)       | 114.6 (86.7 to 146.3)         | 6.0 (2.8 to 11.3)               | 3.8 (3.0 to 4.8)                  | 706.1 (595.4 to 827.6)  | 292.6 (235.5 to 358.9)     | 381.1 (288.4 to 486.5)        | 19.9 (9.4 to 37.6)              | 12.5 (9.9 to 16.1)                |
| Ukraine | 2034 | 215.0 (180.4 to 252.8)     | 88.7 (71.2 to 109.1)       | 116.3 (87.6 to 148.6)         | 6.1 (2.8 to 11.4)               | 3.9 (3.1 to 5.0)                  | 714.9 (599.8 to 840.5)  | 295.0 (236.7 to 362.6)     | 386.7 (291.3 to 494.2)        | 20.1 (9.4 to 37.9)              | 13.1 (10.3 to 16.8)               |
| Ukraine | 2035 | 217.8 (182.1 to 256.3)     | 89.5 (71.7 to 110.0)       | 118.0 (88.8 to 152.3)         | 6.1 (2.9 to 11.5)               | 4.1 (3.2 to 5.4)                  | 724.2 (605.5 to 852.3)  | 297.7 (238.5 to 365.9)     | 392.5 (295.4 to 506.4)        | 20.4 (9.5 to 38.3)              | 13.6 (10.6 to 17.8)               |
| Ukraine | 2036 | 220.5 (183.9 to 261.0)     | 90.4 (72.5 to 111.6)       | 119.7 (90.0 to 155.0)         | 6.2 (2.9 to 11.7)               | 4.3 (3.3 to 5.7)                  | 733.3 (611.5 to 868.0)  | 300.5 (241.1 to 371.1)     | 397.9 (299.3 to 515.5)        | 20.6 (9.6 to 38.7)              | 14.2 (11.0 to 19.1)               |
| Ukraine | 2037 | 223.3 (186.8 to 264.3)     | 91.2 (73.1 to 113.0)       | 121.3 (91.1 to 158.6)         | 6.3 (2.9 to 11.8)               | 4.4 (3.4 to 6.0)                  | 742.3 (621.0 to 878.6)  | 303.3 (243.0 to 375.8)     | 403.3 (303.0 to 527.3)        | 20.9 (9.7 to 39.2)              | 14.8 (11.4 to 19.8)               |
| Ukraine | 2038 | 225.8 (188.5 to 268.1)     | 92.0 (73.8 to 114.0)       | 122.8 (92.1 to 161.9)         | 6.3 (2.9 to 11.9)               | 4.6 (3.5 to 6.4)                  | 750.8 (626.8 to 891.5)  | 305.9 (245.3 to 378.9)     | 408.5 (306.2 to 538.2)        | 21.1 (9.8 to 39.6)              | 15.4 (11.7 to 21.2)               |
| Ukraine | 2039 | 228.4 (190.1 to 271.4)     | 92.8 (74.0 to 114.7)       | 124.4 (92.8 to 164.2)         | 6.4 (3.0 to 12.1)               | 4.8 (3.7 to 6.6)                  | 759.5 (631.9 to 902.4)  | 308.6 (246.2 to 381.4)     | 413.6 (308.6 to 545.9)        | 21.3 (9.9 to 40.1)              | 16.0 (12.2 to 22.1)               |
| Ukraine | 2040 | 231.1 (192.4 to 274.4)     | 93.7 (74.6 to 116.2)       | 125.9 (93.3 to 166.9)         | 6.5 (3.0 to 12.2)               | 5.0 (3.8 to 6.9)                  | 768.4 (639.7 to 912.3)  | 311.4 (248.0 to 386.3)     | 418.7 (310.3 to 554.9)        | 21.5 (10.0 to 40.6)             | 16.7 (12.8 to 23.0)               |
| Ukraine | 2041 | 233.6 (194.1 to 278.6)     | 94.5 (75.3 to 117.8)       | 127.3 (94.2 to 169.4)         | 6.5 (3.0 to 12.4)               | 5.3 (4.0 to 7.3)                  | 776.8 (645.2 to 926.2)  | 314.2 (250.5 to 391.8)     | 423.4 (313.3 to 563.2)        | 21.7 (10.1 to 41.1)             | 17.5 (13.2 to 24.3)               |
| Ukraine | 2042 | 236.2 (196.8 to 282.3)     | 95.4 (75.7 to 119.2)       | 128.8 (95.0 to 171.4)         | 6.6 (3.1 to 12.5)               | 5.5 (4.1 to 7.9)                  | 785.4 (654.3 to 938.5)  | 317.1 (251.6 to 396.2)     | 428.1 (315.9 to 569.9)        | 22.0 (10.3 to 41.6)             | 18.2 (13.7 to 26.2)               |
| Ukraine | 2043 | 238.7 (198.7 to 285.1)     | 96.2 (76.4 to 120.5)       | 130.1 (95.8 to 173.8)         | 6.7 (3.1 to 12.7)               | 5.7 (4.3 to 8.3)                  | 793.8 (660.8 to 948.0)  | 319.9 (254.1 to 400.6)     | 432.7 (318.6 to 577.8)        | 22.2 (10.4 to 42.1)             | 19.0 (14.2 to 27.7)               |
| Ukraine | 2044 | 241.2 (200.1 to 289.1)     | 97.0 (76.8 to 121.7)       | 131.5 (96.6 to 175.7)         | 6.7 (3.2 to 12.8)               | 6.0 (4.4 to 8.7)                  | 802.0 (665.3 to 961.3)  | 322.5 (255.4 to 404.8)     | 437.1 (321.1 to 584.3)        | 22.4 (10.5 to 42.4)             | 19.9 (14.7 to 28.9)               |
| Ukraine | 2045 | 243.6 (201.7 to 291.9)     | 97.8 (77.3 to 123.2)       | 132.7 (97.2 to 177.9)         | 6.8 (3.2 to 12.8)               | 6.3 (4.5 to 9.4)                  | 809.9 (670.7 to 970.5)  | 325.2 (257.1 to 409.5)     | 441.3 (323.3 to 591.4)        | 22.6 (10.6 to 42.6)             | 20.8 (15.1 to 31.3)               |
| Ukraine | 2046 | 245.8 (202.5 to 294.5)     | 98.6 (77.7 to 124.1)       | 133.8 (98.0 to 179.6)         | 6.8 (3.2 to 12.9)               | 6.6 (4.7 to 10.0)                 | 817.4 (673.2 to 979.0)  | 327.8 (258.4 to 412.5)     | 445.0 (325.9 to 597.2)        | 22.7 (10.7 to 43.1)             | 21.8 (15.7 to 33.2)               |
| Ukraine | 2047 | 248.2 (204.8 to 298.7)     | 99.4 (78.1 to 125.2)       | 135.0 (98.7 to 180.6)         | 6.9 (3.3 to 13.1)               | 6.9 (5.0 to 10.8)                 | 825.2 (680.9 to 993.1)  | 330.6 (259.6 to 416.3)     | 448.8 (328.3 to 600.5)        | 22.9 (10.8 to 43.5)             | 22.8 (16.5 to 35.9)               |
| Ukraine | 2048 | 250.5 (205.2 to 302.9)     | 100.2 (78.2 to 126.3)      | 136.1 (99.5 to 181.9)         | 6.9 (3.3 to 13.2)               | 7.2 (5.2 to 11.4)                 | 832.8 (682.4 to 1007.3) | 333.2 (260.1 to 420.0)     | 452.5 (330.9 to 604.7)        | 23.1 (10.9 to 43.9)             | 24.0 (17.2 to 38.0)               |
| Ukraine | 2049 | 252.6 (207.0 to 304.9)     | 100.9 (78.8 to 127.0)      | 137.1 (100.2 to 183.1)        | 7.0 (3.3 to 13.3)               | 7.6 (5.4 to 12.2)                 | 839.8 (688.2 to 1013.7) | 335.5 (261.9 to 422.1)     | 456.0 (333.1 to 608.8)        | 23.2 (11.0 to 44.1)             | 25.1 (18.0 to 40.5)               |
| Ukraine | 2050 | 254.8 (207.6 to 306.2)     | 101.7 (79.0 to 128.6)      | 138.2 (100.9 to 184.5)        | 7.0 (3.3 to 13.3)               | 7.9 (5.6 to 13.0)                 | 847.3 (690.3 to 1018.1) | 338.0 (262.8 to 427.5)     | 459.6 (335.4 to 613.3)        | 23.4 (11.0 to 44.3)             | 26.4 (18.7 to 43.4)               |

| Country              | Year | 2018 US Dollars per capita |                            |                               |                                 |                                   | 2018 PPP per capita       |                            |                               |                                 |                                   |
|----------------------|------|----------------------------|----------------------------|-------------------------------|---------------------------------|-----------------------------------|---------------------------|----------------------------|-------------------------------|---------------------------------|-----------------------------------|
|                      |      | Health spending            | Government health spending | Out-of-pocket health spending | Prepaid private health spending | Development assistance for health | Health spending           | Government health spending | Out-of-pocket health spending | Prepaid private health spending | Development assistance for health |
| United Arab Emirates | 1995 | 1530.2 (1426.4 to 1638.6)  | 1149.0 (1056.4 to 1241.8)  | 258.3 (216.1 to 304.9)        | 122.9 (95.9 to 153.2)           | 0.0 (0.0 to 0.0)                  | 2748.0 (2561.6 to 2942.7) | 2063.4 (1897.2 to 2230.1)  | 463.9 (388.1 to 547.5)        | 220.8 (172.3 to 275.1)          | 0.0 (0.0 to 0.0)                  |
| United Arab Emirates | 1996 | 1528.2 (1446.7 to 1609.4)  | 1139.7 (1069.6 to 1208.0)  | 264.1 (225.1 to 304.4)        | 124.5 (99.9 to 150.1)           | 0.0 (0.0 to 0.0)                  | 2744.5 (2598.1 to 2890.3) | 2046.7 (1920.8 to 2169.4)  | 474.2 (404.2 to 546.7)        | 223.6 (179.5 to 269.5)          | 0.0 (0.0 to 0.0)                  |
| United Arab Emirates | 1997 | 1597.2 (1522.5 to 1673.1)  | 1164.1 (1099.4 to 1227.0)  | 299.1 (261.8 to 337.2)        | 134.0 (111.5 to 159.2)          | 0.0 (0.0 to 0.0)                  | 2868.4 (2734.2 to 3004.6) | 2090.6 (1974.4 to 2203.5)  | 537.2 (470.2 to 605.6)        | 240.6 (200.3 to 285.9)          | 0.0 (0.0 to 0.0)                  |
| United Arab Emirates | 1998 | 1586.8 (1514.3 to 1661.1)  | 1101.2 (1040.6 to 1161.6)  | 345.5 (309.2 to 387.6)        | 140.0 (118.2 to 165.2)          | 0.0 (0.0 to 0.0)                  | 2849.6 (2719.4 to 2983.1) | 1977.7 (1868.8 to 2086.1)  | 620.5 (555.2 to 696.1)        | 251.4 (212.2 to 296.7)          | 0.0 (0.0 to 0.0)                  |
| United Arab Emirates | 1999 | 1587.9 (1514.3 to 1660.5)  | 1086.1 (1026.5 to 1142.5)  | 360.1 (321.7 to 400.8)        | 141.7 (121.5 to 164.4)          | 0.0 (0.0 to 0.0)                  | 2851.6 (2719.5 to 2982.0) | 1950.6 (1843.4 to 2051.7)  | 646.7 (577.7 to 719.8)        | 254.4 (218.3 to 295.3)          | 0.0 (0.0 to 0.0)                  |
| United Arab Emirates | 2000 | 1701.5 (1627.8 to 1776.4)  | 1174.2 (1113.3 to 1240.1)  | 374.0 (336.5 to 413.0)        | 153.4 (132.1 to 177.7)          | 0.0 (0.0 to 0.0)                  | 3055.7 (2923.2 to 3190.1) | 2108.7 (1999.4 to 2227.1)  | 671.6 (604.3 to 741.7)        | 275.4 (237.3 to 319.1)          | 0.0 (0.0 to 0.0)                  |
| United Arab Emirates | 2001 | 1623.7 (1553.9 to 1695.0)  | 1110.4 (1050.5 to 1168.7)  | 361.5 (327.2 to 397.6)        | 151.8 (130.2 to 173.2)          | 0.0 (0.0 to 0.0)                  | 2915.9 (2790.5 to 3044.0) | 1994.1 (1886.6 to 2098.8)  | 649.2 (587.6 to 714.0)        | 272.6 (233.8 to 311.1)          | 0.0 (0.0 to 0.0)                  |
| United Arab Emirates | 2002 | 1616.6 (1548.7 to 1686.0)  | 1027.5 (973.0 to 1087.7)   | 422.1 (383.9 to 461.6)        | 167.0 (145.6 to 188.0)          | 0.0 (0.0 to 0.0)                  | 2903.2 (2781.3 to 3027.8) | 1845.3 (1747.3 to 1953.4)  | 758.0 (689.5 to 828.9)        | 299.8 (261.4 to 337.6)          | 0.0 (0.0 to 0.0)                  |
| United Arab Emirates | 2003 | 1646.5 (1577.0 to 1715.5)  | 998.1 (945.0 to 1055.2)    | 463.2 (423.1 to 502.7)        | 185.1 (162.7 to 207.2)          | 0.0 (0.0 to 0.0)                  | 2956.8 (2832.1 to 3080.9) | 1792.5 (1697.1 to 1895.0)  | 831.9 (759.8 to 902.8)        | 332.4 (292.3 to 372.2)          | 0.0 (0.0 to 0.0)                  |
| United Arab Emirates | 2004 | 1653.0 (1579.7 to 1727.1)  | 966.0 (906.9 to 1029.6)    | 488.0 (447.1 to 527.7)        | 199.0 (176.1 to 221.8)          | 0.0 (0.0 to 0.0)                  | 2968.5 (2836.9 to 3101.6) | 1734.8 (1628.7 to 1849.1)  | 876.4 (803.0 to 947.7)        | 357.3 (316.2 to 398.4)          | 0.0 (0.0 to 0.0)                  |
| United Arab Emirates | 2005 | 1638.6 (1564.2 to 1720.1)  | 946.5 (887.3 to 1011.0)    | 485.5 (443.2 to 526.9)        | 206.7 (183.1 to 231.3)          | 0.0 (0.0 to 0.0)                  | 2942.7 (2809.1 to 3089.1) | 1699.7 (1593.4 to 1815.6)  | 871.8 (796.0 to 946.2)        | 371.2 (328.7 to 415.4)          | 0.0 (0.0 to 0.0)                  |
| United Arab Emirates | 2006 | 1616.2 (1538.9 to 1695.5)  | 946.3 (890.2 to 1006.4)    | 467.2 (426.4 to 507.3)        | 202.6 (179.1 to 226.0)          | 0.0 (0.0 to 0.0)                  | 2902.4 (2763.7 to 3044.8) | 1699.5 (1598.6 to 1807.4)  | 839.0 (765.7 to 911.0)        | 363.9 (321.7 to 405.9)          | 0.0 (0.0 to 0.0)                  |
| United Arab Emirates | 2007 | 1528.7 (1455.8 to 1607.1)  | 929.6 (876.4 to 990.3)     | 414.6 (377.4 to 453.4)        | 184.5 (163.7 to 208.1)          | 0.0 (0.0 to 0.0)                  | 2745.3 (2614.3 to 2886.0) | 1669.5 (1573.9 to 1778.4)  | 744.6 (677.8 to 814.2)        | 331.3 (293.9 to 373.8)          | 0.0 (0.0 to 0.0)                  |
| United Arab Emirates | 2008 | 1468.8 (1398.7 to 1544.9)  | 950.1 (896.3 to 1010.7)    | 350.2 (314.0 to 385.3)        | 168.4 (148.5 to 191.0)          | 0.0 (0.0 to 0.0)                  | 2637.7 (2511.9 to 2774.4) | 1706.3 (1609.6 to 1815.1)  | 629.0 (563.9 to 691.9)        | 302.4 (266.7 to 343.0)          | 0.0 (0.0 to 0.0)                  |
| United Arab Emirates | 2009 | 1370.2 (1307.8 to 1440.2)  | 937.8 (882.5 to 995.6)     | 279.3 (247.7 to 309.9)        | 153.0 (133.3 to 175.1)          | 0.0 (0.0 to 0.0)                  | 2460.6 (2348.6 to 2586.4) | 1684.1 (1584.8 to 1788.0)  | 501.7 (444.9 to 556.6)        | 274.8 (239.4 to 314.5)          | 0.0 (0.0 to 0.0)                  |
| United Arab Emirates | 2010 | 1332.7 (1269.8 to 1399.8)  | 937.0 (884.1 to 995.3)     | 250.8 (221.2 to 281.7)        | 145.0 (126.4 to 166.2)          | 0.0 (0.0 to 0.0)                  | 2393.4 (2280.3 to 2513.7) | 1682.6 (1587.7 to 1787.4)  | 450.4 (397.2 to 505.8)        | 260.4 (227.1 to 298.5)          | 0.0 (0.0 to 0.0)                  |
| United Arab Emirates | 2011 | 1367.7 (1300.7 to 1436.9)  | 982.5 (924.3 to 1041.8)    | 238.8 (210.4 to 269.3)        | 146.4 (127.5 to 168.0)          | 0.0 (0.0 to 0.0)                  | 2456.3 (2335.8 to 2580.5) | 1764.4 (1659.8 to 1870.9)  | 428.9 (377.9 to 483.6)        | 262.9 (229.0 to 301.6)          | 0.0 (0.0 to 0.0)                  |
| United Arab Emirates | 2012 | 1365.7 (1295.4 to 1437.4)  | 987.0 (929.1 to 1049.0)    | 232.9 (204.3 to 262.7)        | 145.7 (126.7 to 167.2)          | 0.0 (0.0 to 0.0)                  | 2452.5 (2326.4 to 2581.3) | 1772.5 (1668.6 to 1883.8)  | 418.3 (367.0 to 471.8)        | 261.7 (227.5 to 300.3)          | 0.0 (0.0 to 0.0)                  |
| United Arab Emirates | 2013 | 1422.0 (1352.5 to 1492.7)  | 1026.3 (965.3 to 1085.1)   | 242.3 (211.5 to 274.6)        | 153.4 (133.2 to 176.1)          | 0.0 (0.0 to 0.0)                  | 2553.6 (2428.9 to 2680.7) | 1843.1 (1733.5 to 1948.7)  | 435.1 (379.8 to 493.2)        | 275.5 (239.2 to 316.2)          | 0.0 (0.0 to 0.0)                  |
| United Arab Emirates | 2014 | 1420.3 (1346.6 to 1492.3)  | 1018.0 (958.8 to 1078.9)   | 248.6 (215.5 to 282.6)        | 153.7 (134.3 to 175.6)          | 0.0 (0.0 to 0.0)                  | 2550.7 (2418.2 to 2679.9) | 1828.3 (1721.9 to 1937.6)  | 446.4 (387.1 to 507.6)        | 276.0 (241.1 to 315.4)          | 0.0 (0.0 to 0.0)                  |
| United Arab Emirates | 2015 | 1426.6 (1343.5 to 1508.6)  | 1023.6 (960.3 to 1091.6)   | 253.4 (216.4 to 291.1)        | 149.6 (127.6 to 176.8)          | 0.0 (0.0 to 0.0)                  | 2562.0 (2412.7 to 2709.1) | 1838.2 (1724.6 to 1960.3)  | 455.1 (388.6 to 522.8)        | 268.6 (229.2 to 317.6)          | 0.0 (0.0 to 0.0)                  |

| Country              | Year | 2018 US Dollars per capita |                            |                               |                                 |                                   | 2018 PPP per capita       |                            |                               |                                 |                                   |
|----------------------|------|----------------------------|----------------------------|-------------------------------|---------------------------------|-----------------------------------|---------------------------|----------------------------|-------------------------------|---------------------------------|-----------------------------------|
|                      |      | Health spending            | Government health spending | Out-of-pocket health spending | Prepaid private health spending | Development assistance for health | Health spending           | Government health spending | Out-of-pocket health spending | Prepaid private health spending | Development assistance for health |
| United Arab Emirates | 2016 | 1440.0 (1345.7 to 1537.9)  | 1038.1 (960.6 to 1125.5)   | 260.1 (218.7 to 305.9)        | 141.8 (115.9 to 177.5)          | 0.0 (0.0 to 0.0)                  | 2586.1 (2416.6 to 2761.9) | 1864.2 (1725.2 to 2021.2)  | 467.2 (392.7 to 549.3)        | 254.7 (208.1 to 318.7)          | 0.0 (0.0 to 0.0)                  |
| United Arab Emirates | 2017 | 1438.3 (1336.0 to 1543.6)  | 1038.7 (947.8 to 1132.8)   | 256.9 (215.8 to 301.6)        | 142.7 (116.9 to 178.3)          | 0.0 (0.0 to 0.0)                  | 2583.0 (2399.2 to 2772.0) | 1865.3 (1702.1 to 2034.3)  | 461.3 (387.5 to 541.7)        | 256.3 (209.9 to 320.1)          | 0.0 (0.0 to 0.0)                  |
| United Arab Emirates | 2018 | 1457.4 (1344.7 to 1570.8)  | 1056.5 (959.6 to 1162.3)   | 256.9 (215.6 to 301.8)        | 143.9 (117.7 to 179.8)          | 0.0 (0.0 to 0.0)                  | 2617.2 (2414.9 to 2820.9) | 1897.4 (1723.3 to 2087.3)  | 461.3 (387.2 to 542.0)        | 258.5 (211.4 to 323.0)          | 0.0 (0.0 to 0.0)                  |
| United Arab Emirates | 2019 | 1475.1 (1355.8 to 1598.3)  | 1073.8 (969.6 to 1190.2)   | 256.2 (215.0 to 301.2)        | 145.1 (118.6 to 181.5)          | 0.0 (0.0 to 0.0)                  | 2649.1 (2434.8 to 2870.3) | 1928.4 (1741.2 to 2137.4)  | 460.2 (386.0 to 540.8)        | 260.5 (212.9 to 325.9)          | 0.0 (0.0 to 0.0)                  |
| United Arab Emirates | 2020 | 1497.7 (1362.8 to 1632.3)  | 1095.9 (971.8 to 1227.1)   | 255.5 (214.2 to 299.8)        | 146.3 (119.8 to 182.9)          | 0.0 (0.0 to 0.0)                  | 2689.6 (2447.4 to 2931.4) | 1968.0 (1745.3 to 2203.7)  | 458.8 (384.7 to 538.4)        | 262.7 (215.2 to 328.5)          | 0.0 (0.0 to 0.0)                  |
| United Arab Emirates | 2021 | 1523.7 (1373.6 to 1679.0)  | 1124.4 (986.3 to 1274.6)   | 253.3 (212.7 to 296.9)        | 146.0 (119.5 to 183.0)          | 0.0 (0.0 to 0.0)                  | 2736.4 (2466.7 to 3015.3) | 2019.2 (1771.3 to 2289.0)  | 454.9 (382.0 to 533.1)        | 262.3 (214.6 to 328.7)          | 0.0 (0.0 to 0.0)                  |
| United Arab Emirates | 2022 | 1553.0 (1393.1 to 1730.5)  | 1155.9 (1002.0 to 1338.4)  | 251.3 (211.3 to 294.6)        | 145.9 (119.4 to 183.2)          | 0.0 (0.0 to 0.0)                  | 2789.0 (2501.8 to 3107.8) | 2075.7 (1799.5 to 2403.6)  | 451.3 (379.4 to 529.1)        | 262.0 (214.4 to 329.1)          | 0.0 (0.0 to 0.0)                  |
| United Arab Emirates | 2023 | 1568.0 (1397.1 to 1778.6)  | 1172.4 (1008.5 to 1378.3)  | 249.6 (209.9 to 292.9)        | 146.0 (119.5 to 183.3)          | 0.0 (0.0 to 0.0)                  | 2815.9 (2508.9 to 3194.1) | 2105.5 (1811.0 to 2475.3)  | 448.3 (376.9 to 526.0)        | 262.1 (214.6 to 329.2)          | 0.0 (0.0 to 0.0)                  |
| United Arab Emirates | 2024 | 1584.5 (1391.3 to 1843.6)  | 1190.3 (1008.1 to 1443.5)  | 248.1 (209.1 to 291.4)        | 146.1 (119.7 to 183.3)          | 0.0 (0.0 to 0.0)                  | 2845.5 (2498.6 to 3310.9) | 2137.7 (1810.4 to 2592.3)  | 445.5 (375.6 to 523.2)        | 262.3 (215.1 to 329.2)          | 0.0 (0.0 to 0.0)                  |
| United Arab Emirates | 2025 | 1590.2 (1401.4 to 1834.6)  | 1197.0 (1017.8 to 1443.1)  | 246.8 (208.0 to 289.9)        | 146.4 (119.8 to 183.7)          | 0.0 (0.0 to 0.0)                  | 2855.8 (2516.8 to 3294.7) | 2149.6 (1827.8 to 2591.6)  | 443.3 (373.6 to 520.6)        | 263.0 (215.1 to 329.9)          | 0.0 (0.0 to 0.0)                  |
| United Arab Emirates | 2026 | 1588.3 (1393.7 to 1823.5)  | 1198.0 (1012.7 to 1439.1)  | 244.3 (205.7 to 286.9)        | 146.0 (119.4 to 183.1)          | 0.0 (0.0 to 0.0)                  | 2852.4 (2502.9 to 3274.7) | 2151.5 (1818.7 to 2584.5)  | 438.7 (369.4 to 515.2)        | 262.2 (214.4 to 328.8)          | 0.0 (0.0 to 0.0)                  |
| United Arab Emirates | 2027 | 1591.1 (1397.8 to 1835.9)  | 1202.7 (1014.3 to 1451.3)  | 242.5 (204.2 to 284.8)        | 146.0 (119.1 to 183.0)          | 0.0 (0.0 to 0.0)                  | 2857.4 (2510.2 to 3297.1) | 2159.8 (1821.5 to 2606.2)  | 435.4 (366.8 to 511.5)        | 262.2 (214.0 to 328.6)          | 0.0 (0.0 to 0.0)                  |
| United Arab Emirates | 2028 | 1595.1 (1395.4 to 1865.4)  | 1208.1 (1012.9 to 1488.1)  | 240.8 (202.9 to 283.2)        | 146.1 (119.3 to 183.1)          | 0.0 (0.0 to 0.0)                  | 2864.5 (2505.9 to 3350.0) | 2169.6 (1818.9 to 2672.4)  | 432.5 (364.4 to 508.5)        | 262.4 (214.3 to 328.7)          | 0.0 (0.0 to 0.0)                  |
| United Arab Emirates | 2029 | 1598.4 (1390.0 to 1902.9)  | 1212.7 (1011.8 to 1515.3)  | 239.4 (201.3 to 281.6)        | 146.3 (119.6 to 183.2)          | 0.0 (0.0 to 0.0)                  | 2870.5 (2496.2 to 3417.3) | 2177.8 (1817.1 to 2721.2)  | 429.9 (361.6 to 505.6)        | 262.7 (214.7 to 329.1)          | 0.0 (0.0 to 0.0)                  |
| United Arab Emirates | 2030 | 1604.9 (1394.2 to 1933.9)  | 1219.5 (1013.2 to 1549.7)  | 238.5 (200.5 to 280.7)        | 146.9 (119.7 to 184.0)          | 0.0 (0.0 to 0.0)                  | 2882.2 (2503.8 to 3473.0) | 2190.1 (1819.5 to 2783.0)  | 428.4 (360.1 to 504.0)        | 263.7 (214.9 to 330.4)          | 0.0 (0.0 to 0.0)                  |
| United Arab Emirates | 2031 | 1605.2 (1385.4 to 1985.9)  | 1221.8 (1008.6 to 1594.8)  | 236.6 (198.6 to 278.5)        | 146.8 (119.6 to 183.7)          | 0.0 (0.0 to 0.0)                  | 2882.6 (2487.9 to 3566.3) | 2194.2 (1811.3 to 2863.9)  | 424.9 (356.6 to 500.1)        | 263.6 (214.7 to 329.9)          | 0.0 (0.0 to 0.0)                  |
| United Arab Emirates | 2032 | 1605.2 (1382.9 to 2028.4)  | 1223.5 (1006.7 to 1638.4)  | 234.9 (197.4 to 276.6)        | 146.8 (119.8 to 183.8)          | 0.0 (0.0 to 0.0)                  | 2882.8 (2483.5 to 3642.8) | 2197.2 (1807.8 to 2942.2)  | 421.9 (354.4 to 496.8)        | 263.7 (215.1 to 330.0)          | 0.0 (0.0 to 0.0)                  |
| United Arab Emirates | 2033 | 1609.3 (1380.9 to 2060.3)  | 1228.5 (1004.9 to 1687.3)  | 233.7 (196.5 to 275.2)        | 147.1 (120.0 to 184.5)          | 0.0 (0.0 to 0.0)                  | 2890.0 (2480.0 to 3700.0) | 2206.1 (1804.7 to 3030.1)  | 419.7 (352.9 to 494.3)        | 264.2 (215.5 to 331.3)          | 0.0 (0.0 to 0.0)                  |
| United Arab Emirates | 2034 | 1612.2 (1373.5 to 2107.0)  | 1232.5 (1004.3 to 1733.1)  | 232.3 (195.5 to 273.7)        | 147.4 (120.0 to 184.8)          | 0.0 (0.0 to 0.0)                  | 2895.3 (2466.7 to 3783.8) | 2213.4 (1803.6 to 3112.4)  | 417.2 (351.1 to 491.6)        | 264.6 (215.5 to 331.8)          | 0.0 (0.0 to 0.0)                  |
| United Arab Emirates | 2035 | 1617.9 (1372.6 to 2167.6)  | 1238.8 (1003.6 to 1777.0)  | 231.3 (194.9 to 272.6)        | 147.8 (120.3 to 185.1)          | 0.0 (0.0 to 0.0)                  | 2905.5 (2465.0 to 3892.8) | 2224.7 (1802.3 to 3191.2)  | 415.4 (349.9 to 489.5)        | 265.4 (216.0 to 332.4)          | 0.0 (0.0 to 0.0)                  |
| United Arab Emirates | 2036 | 1613.3 (1366.5 to 2190.2)  | 1237.2 (997.7 to 1832.0)   | 228.8 (192.9 to 269.8)        | 147.3 (119.5 to 184.5)          | 0.0 (0.0 to 0.0)                  | 2897.2 (2454.1 to 3933.2) | 2221.8 (1791.8 to 3289.9)  | 410.9 (346.5 to 484.4)        | 264.5 (214.6 to 331.4)          | 0.0 (0.0 to 0.0)                  |

| Country              | Year | 2018 US Dollars per capita |                            |                               |                                 |                                   | 2018 PPP per capita       |                            |                               |                                 |                                   |
|----------------------|------|----------------------------|----------------------------|-------------------------------|---------------------------------|-----------------------------------|---------------------------|----------------------------|-------------------------------|---------------------------------|-----------------------------------|
|                      |      | Health spending            | Government health spending | Out-of-pocket health spending | Prepaid private health spending | Development assistance for health | Health spending           | Government health spending | Out-of-pocket health spending | Prepaid private health spending | Development assistance for health |
| United Arab Emirates | 2037 | 1611.0 (1356.1 to 2249.7)  | 1237.3 (993.6 to 1881.7)   | 226.7 (191.2 to 267.3)        | 147.0 (119.2 to 184.2)          | 0.0 (0.0 to 0.0)                  | 2893.1 (2435.3 to 4040.2) | 2222.0 (1784.4 to 3379.2)  | 407.1 (343.4 to 480.1)        | 264.1 (214.1 to 330.9)          | 0.0 (0.0 to 0.0)                  |
| United Arab Emirates | 2038 | 1609.0 (1349.2 to 2323.4)  | 1237.7 (987.8 to 1945.7)   | 224.5 (189.5 to 265.0)        | 146.7 (118.5 to 184.2)          | 0.0 (0.0 to 0.0)                  | 2889.5 (2423.1 to 4172.5) | 2222.8 (1773.9 to 3494.2)  | 403.2 (340.3 to 475.8)        | 263.5 (212.9 to 330.8)          | 0.0 (0.0 to 0.0)                  |
| United Arab Emirates | 2039 | 1607.3 (1339.5 to 2335.3)  | 1238.2 (983.4 to 1993.3)   | 222.6 (187.7 to 263.2)        | 146.6 (118.3 to 183.4)          | 0.0 (0.0 to 0.0)                  | 2886.6 (2405.6 to 4193.8) | 2223.6 (1766.1 to 3579.6)  | 399.8 (337.2 to 472.6)        | 263.2 (212.5 to 329.4)          | 0.0 (0.0 to 0.0)                  |
| United Arab Emirates | 2040 | 1606.1 (1333.8 to 2366.7)  | 1238.8 (978.7 to 2018.7)   | 220.8 (186.0 to 261.5)        | 146.5 (118.2 to 183.7)          | 0.0 (0.0 to 0.0)                  | 2884.4 (2395.3 to 4250.3) | 2224.7 (1757.6 to 3625.3)  | 396.6 (334.1 to 469.7)        | 263.1 (212.4 to 329.9)          | 0.0 (0.0 to 0.0)                  |
| United Arab Emirates | 2041 | 1598.1 (1325.2 to 2380.1)  | 1233.8 (970.2 to 2031.1)   | 218.4 (183.7 to 258.8)        | 145.9 (117.8 to 183.2)          | 0.0 (0.0 to 0.0)                  | 2869.9 (2379.9 to 4274.2) | 2215.7 (1742.3 to 3647.6)  | 392.1 (329.8 to 464.7)        | 262.1 (211.5 to 329.1)          | 0.0 (0.0 to 0.0)                  |
| United Arab Emirates | 2042 | 1593.9 (1312.7 to 2404.4)  | 1232.1 (964.5 to 2069.6)   | 216.2 (181.9 to 256.3)        | 145.6 (117.6 to 183.2)          | 0.0 (0.0 to 0.0)                  | 2862.4 (2357.4 to 4317.9) | 2212.6 (1732.1 to 3716.6)  | 388.3 (326.6 to 460.3)        | 261.5 (211.2 to 329.1)          | 0.0 (0.0 to 0.0)                  |
| United Arab Emirates | 2043 | 1590.8 (1310.7 to 2419.6)  | 1231.0 (959.8 to 2060.9)   | 214.4 (180.1 to 254.3)        | 145.4 (117.3 to 183.4)          | 0.0 (0.0 to 0.0)                  | 2856.9 (2353.8 to 4345.2) | 2210.8 (1723.7 to 3701.0)  | 385.0 (323.5 to 456.7)        | 261.2 (210.7 to 329.3)          | 0.0 (0.0 to 0.0)                  |
| United Arab Emirates | 2044 | 1587.7 (1307.7 to 2472.7)  | 1229.7 (955.9 to 2133.4)   | 212.6 (178.6 to 252.7)        | 145.3 (117.2 to 183.5)          | 0.0 (0.0 to 0.0)                  | 2851.3 (2348.5 to 4440.5) | 2208.4 (1716.6 to 3831.2)  | 381.9 (320.7 to 453.7)        | 261.0 (210.5 to 329.5)          | 0.0 (0.0 to 0.0)                  |
| United Arab Emirates | 2045 | 1588.5 (1307.8 to 2470.3)  | 1231.3 (952.8 to 2112.1)   | 211.5 (177.4 to 251.4)        | 145.7 (117.4 to 183.8)          | 0.0 (0.0 to 0.0)                  | 2852.7 (2348.6 to 4436.2) | 2211.3 (1711.2 to 3793.1)  | 379.8 (318.6 to 451.4)        | 261.6 (210.9 to 330.1)          | 0.0 (0.0 to 0.0)                  |
| United Arab Emirates | 2046 | 1583.2 (1291.0 to 2478.2)  | 1228.1 (946.9 to 2124.2)   | 209.6 (175.6 to 248.9)        | 145.5 (117.2 to 183.5)          | 0.0 (0.0 to 0.0)                  | 2843.3 (2318.5 to 4450.4) | 2205.6 (1700.5 to 3814.7)  | 376.5 (315.3 to 447.1)        | 261.2 (210.4 to 329.5)          | 0.0 (0.0 to 0.0)                  |
| United Arab Emirates | 2047 | 1582.0 (1289.4 to 2519.9)  | 1228.0 (945.6 to 2149.0)   | 208.3 (174.2 to 247.4)        | 145.6 (117.3 to 183.6)          | 0.0 (0.0 to 0.0)                  | 2841.0 (2315.5 to 4525.4) | 2205.4 (1698.2 to 3859.3)  | 374.1 (312.8 to 444.3)        | 261.5 (210.7 to 329.7)          | 0.0 (0.0 to 0.0)                  |
| United Arab Emirates | 2048 | 1581.9 (1287.0 to 2518.5)  | 1228.9 (944.7 to 2158.2)   | 207.1 (172.9 to 246.2)        | 145.9 (117.4 to 183.9)          | 0.0 (0.0 to 0.0)                  | 2840.9 (2311.3 to 4522.9) | 2206.9 (1696.5 to 3875.9)  | 372.0 (310.6 to 442.1)        | 262.0 (210.9 to 330.2)          | 0.0 (0.0 to 0.0)                  |
| United Arab Emirates | 2049 | 1583.1 (1288.3 to 2495.8)  | 1230.5 (945.5 to 2152.4)   | 206.3 (171.9 to 245.2)        | 146.4 (117.3 to 185.0)          | 0.0 (0.0 to 0.0)                  | 2843.0 (2313.6 to 4482.0) | 2209.7 (1698.0 to 3865.4)  | 370.4 (308.8 to 440.4)        | 262.8 (210.6 to 332.2)          | 0.0 (0.0 to 0.0)                  |
| United Arab Emirates | 2050 | 1587.6 (1289.8 to 2542.9)  | 1234.9 (945.7 to 2209.5)   | 205.7 (171.6 to 245.0)        | 147.0 (117.2 to 185.9)          | 0.0 (0.0 to 0.0)                  | 2851.1 (2316.3 to 4566.7) | 2217.7 (1698.3 to 3967.9)  | 369.3 (308.2 to 439.9)        | 264.1 (210.5 to 333.8)          | 0.0 (0.0 to 0.0)                  |
| United Kingdom       | 1995 | 1677.0 (1594.9 to 1766.9)  | 1469.9 (1393.3 to 1548.6)  | 150.5 (126.0 to 179.3)        | 56.7 (40.1 to 76.7)             | 0.0 (0.0 to 0.0)                  | 1779.1 (1692.1 to 1874.5) | 1559.4 (1478.1 to 1642.9)  | 159.6 (133.7 to 190.2)        | 60.1 (42.6 to 81.4)             | 0.0 (0.0 to 0.0)                  |
| United Kingdom       | 1996 | 1710.0 (1644.4 to 1781.6)  | 1475.0 (1415.9 to 1530.6)  | 161.0 (136.8 to 189.1)        | 74.0 (55.3 to 93.5)             | 0.0 (0.0 to 0.0)                  | 1814.1 (1744.5 to 1890.1) | 1564.9 (1502.1 to 1623.8)  | 170.8 (145.2 to 200.7)        | 78.5 (58.7 to 99.2)             | 0.0 (0.0 to 0.0)                  |
| United Kingdom       | 1997 | 1771.5 (1710.9 to 1835.9)  | 1488.4 (1439.2 to 1538.0)  | 177.8 (154.5 to 204.2)        | 105.3 (83.0 to 128.2)           | 0.0 (0.0 to 0.0)                  | 1879.4 (1815.0 to 1947.7) | 1579.0 (1526.9 to 1631.6)  | 188.7 (163.9 to 216.7)        | 111.7 (88.1 to 136.0)           | 0.0 (0.0 to 0.0)                  |
| United Kingdom       | 1998 | 1858.5 (1797.1 to 1922.6)  | 1537.2 (1487.5 to 1590.8)  | 195.4 (172.9 to 221.5)        | 125.9 (105.4 to 148.9)          | 0.0 (0.0 to 0.0)                  | 1971.7 (1906.6 to 2039.7) | 1630.8 (1578.1 to 1687.6)  | 207.3 (183.4 to 235.0)        | 133.6 (111.8 to 157.9)          | 0.0 (0.0 to 0.0)                  |
| United Kingdom       | 1999 | 1975.8 (1912.7 to 2042.4)  | 1621.1 (1567.2 to 1676.9)  | 215.2 (192.8 to 241.3)        | 139.5 (119.0 to 163.2)          | 0.0 (0.0 to 0.0)                  | 2096.1 (2029.2 to 2166.8) | 1719.8 (1662.6 to 1779.0)  | 228.4 (204.6 to 256.0)        | 148.0 (126.2 to 173.1)          | 0.0 (0.0 to 0.0)                  |
| United Kingdom       | 2000 | 2126.4 (2063.0 to 2194.1)  | 1738.2 (1682.4 to 1796.8)  | 239.3 (215.1 to 265.2)        | 148.9 (128.8 to 172.1)          | 0.0 (0.0 to 0.0)                  | 2255.9 (2188.6 to 2327.7) | 1844.0 (1784.8 to 1906.2)  | 253.9 (228.2 to 281.3)        | 158.0 (136.7 to 182.5)          | 0.0 (0.0 to 0.0)                  |
| United Kingdom       | 2001 | 2280.1 (2214.6 to 2350.0)  | 1862.1 (1803.9 to 1919.1)  | 259.0 (234.5 to 284.7)        | 159.0 (138.8 to 182.8)          | 0.0 (0.0 to 0.0)                  | 2418.9 (2349.4 to 2493.0) | 1975.5 (1913.8 to 2035.9)  | 274.8 (248.8 to 302.0)        | 168.7 (147.2 to 194.0)          | 0.0 (0.0 to 0.0)                  |

| Country        | Year | 2018 US Dollars per capita |                            |                               |                                 |                                   | 2018 PPP per capita       |                            |                               |                                 |                                   |
|----------------|------|----------------------------|----------------------------|-------------------------------|---------------------------------|-----------------------------------|---------------------------|----------------------------|-------------------------------|---------------------------------|-----------------------------------|
|                |      | Health spending            | Government health spending | Out-of-pocket health spending | Prepaid private health spending | Development assistance for health | Health spending           | Government health spending | Out-of-pocket health spending | Prepaid private health spending | Development assistance for health |
| United Kingdom | 2002 | 2429.5 (2363.2 to 2493.9)  | 1989.1 (1931.4 to 2045.8)  | 274.4 (250.6 to 300.8)        | 166.0 (146.9 to 187.8)          | 0.0 (0.0 to 0.0)                  | 2577.4 (2507.1 to 2645.7) | 2110.2 (2049.0 to 2170.3)  | 291.1 (265.8 to 319.1)        | 176.1 (155.8 to 199.2)          | 0.0 (0.0 to 0.0)                  |
| United Kingdom | 2003 | 2584.8 (2514.5 to 2651.2)  | 2125.2 (2064.6 to 2183.2)  | 286.5 (260.3 to 313.2)        | 173.1 (152.6 to 196.1)          | 0.0 (0.0 to 0.0)                  | 2742.1 (2667.6 to 2812.6) | 2254.6 (2190.3 to 2316.2)  | 303.9 (276.1 to 332.2)        | 183.6 (161.9 to 208.1)          | 0.0 (0.0 to 0.0)                  |
| United Kingdom | 2004 | 2726.5 (2656.6 to 2796.1)  | 2260.5 (2200.1 to 2320.6)  | 288.9 (263.7 to 316.1)        | 177.2 (156.5 to 199.9)          | 0.0 (0.0 to 0.0)                  | 2892.6 (2818.4 to 2966.4) | 2398.1 (2334.0 to 2461.9)  | 306.5 (279.7 to 335.3)        | 188.0 (166.0 to 212.0)          | 0.0 (0.0 to 0.0)                  |
| United Kingdom | 2005 | 2835.1 (2765.1 to 2908.5)  | 2366.1 (2309.2 to 2426.8)  | 291.1 (265.7 to 318.9)        | 177.9 (157.7 to 200.3)          | 0.0 (0.0 to 0.0)                  | 3007.8 (2933.4 to 3085.6) | 2510.2 (2449.8 to 2574.5)  | 308.9 (281.9 to 338.4)        | 188.7 (167.3 to 212.5)          | 0.0 (0.0 to 0.0)                  |
| United Kingdom | 2006 | 2944.4 (2881.2 to 3016.2)  | 2473.1 (2415.5 to 2534.8)  | 297.7 (271.7 to 326.9)        | 173.5 (153.2 to 196.0)          | 0.0 (0.0 to 0.0)                  | 3123.7 (3056.6 to 3199.8) | 2623.7 (2562.6 to 2689.1)  | 315.9 (288.2 to 346.8)        | 184.0 (162.6 to 207.9)          | 0.0 (0.0 to 0.0)                  |
| United Kingdom | 2007 | 3062.7 (2997.9 to 3135.1)  | 2580.8 (2519.7 to 2643.8)  | 303.6 (279.4 to 331.7)        | 178.3 (156.5 to 200.6)          | 0.0 (0.0 to 0.0)                  | 3249.2 (3180.4 to 3326.0) | 2737.9 (2673.1 to 2804.8)  | 322.1 (296.4 to 351.9)        | 189.1 (166.0 to 212.8)          | 0.0 (0.0 to 0.0)                  |
| United Kingdom | 2008 | 3157.2 (3087.9 to 3226.3)  | 2671.9 (2612.2 to 2732.8)  | 303.8 (279.9 to 332.6)        | 181.5 (159.0 to 204.2)          | 0.0 (0.0 to 0.0)                  | 3349.4 (3275.9 to 3422.7) | 2834.6 (2771.3 to 2899.2)  | 322.3 (296.9 to 352.9)        | 192.6 (168.7 to 216.6)          | 0.0 (0.0 to 0.0)                  |
| United Kingdom | 2009 | 3205.6 (3142.0 to 3273.1)  | 2714.4 (2656.5 to 2770.5)  | 310.0 (285.0 to 336.9)        | 181.1 (159.5 to 204.2)          | 0.0 (0.0 to 0.0)                  | 3400.7 (3333.3 to 3472.4) | 2879.7 (2818.3 to 2939.2)  | 328.8 (302.4 to 357.5)        | 192.2 (169.2 to 216.6)          | 0.0 (0.0 to 0.0)                  |
| United Kingdom | 2010 | 3276.2 (3213.8 to 3346.9)  | 2766.1 (2708.3 to 2826.8)  | 326.6 (300.5 to 354.4)        | 183.6 (162.6 to 207.1)          | 0.0 (0.0 to 0.0)                  | 3475.7 (3409.5 to 3550.7) | 2934.5 (2873.2 to 2999.0)  | 346.4 (318.8 to 376.0)        | 194.8 (172.5 to 219.7)          | 0.0 (0.0 to 0.0)                  |
| United Kingdom | 2011 | 3327.5 (3260.0 to 3398.3)  | 2788.7 (2729.1 to 2852.7)  | 351.6 (325.3 to 379.0)        | 187.2 (165.5 to 209.4)          | 0.0 (0.0 to 0.0)                  | 3530.1 (3458.5 to 3605.2) | 2958.5 (2895.3 to 3026.4)  | 373.0 (345.1 to 402.1)        | 198.6 (175.5 to 222.2)          | 0.0 (0.0 to 0.0)                  |
| United Kingdom | 2012 | 3452.9 (3378.3 to 3530.4)  | 2864.4 (2798.5 to 2930.1)  | 398.5 (371.3 to 428.7)        | 189.9 (167.9 to 212.4)          | 0.0 (0.0 to 0.0)                  | 3663.2 (3584.0 to 3745.4) | 3038.9 (2968.9 to 3108.6)  | 422.8 (393.9 to 454.8)        | 201.5 (178.1 to 225.4)          | 0.0 (0.0 to 0.0)                  |
| United Kingdom | 2013 | 3748.9 (3675.7 to 3825.4)  | 3048.0 (2982.4 to 3109.9)  | 505.9 (474.5 to 541.4)        | 195.0 (173.8 to 218.6)          | 0.0 (0.0 to 0.0)                  | 3977.2 (3899.5 to 4058.3) | 3233.6 (3164.0 to 3299.2)  | 536.7 (503.4 to 574.4)        | 206.9 (184.3 to 231.9)          | 0.0 (0.0 to 0.0)                  |
| United Kingdom | 2014 | 3961.0 (3879.5 to 4043.4)  | 3188.2 (3122.1 to 3257.4)  | 575.9 (541.6 to 612.4)        | 196.9 (175.1 to 220.3)          | 0.0 (0.0 to 0.0)                  | 4202.2 (4115.7 to 4289.6) | 3382.3 (3312.2 to 3455.7)  | 611.0 (574.6 to 649.7)        | 208.9 (185.7 to 233.7)          | 0.0 (0.0 to 0.0)                  |
| United Kingdom | 2015 | 4074.3 (3993.4 to 4158.3)  | 3263.7 (3201.4 to 3329.3)  | 615.2 (578.4 to 655.5)        | 195.5 (171.5 to 220.1)          | 0.0 (0.0 to 0.0)                  | 4322.4 (4236.6 to 4411.5) | 3462.4 (3396.3 to 3532.1)  | 652.6 (613.6 to 695.4)        | 207.4 (181.9 to 233.5)          | 0.0 (0.0 to 0.0)                  |
| United Kingdom | 2016 | 4113.2 (4009.8 to 4216.4)  | 3289.6 (3202.6 to 3376.5)  | 630.9 (583.6 to 683.9)        | 192.7 (161.1 to 226.8)          | 0.0 (0.0 to 0.0)                  | 4363.6 (4254.0 to 4473.2) | 3489.9 (3397.7 to 3582.1)  | 669.3 (619.1 to 725.6)        | 204.5 (170.9 to 240.6)          | 0.0 (0.0 to 0.0)                  |
| United Kingdom | 2017 | 4154.9 (4047.0 to 4262.0)  | 3321.0 (3233.2 to 3409.0)  | 637.1 (588.9 to 691.3)        | 196.7 (164.4 to 231.0)          | 0.0 (0.0 to 0.0)                  | 4407.9 (4293.4 to 4521.5) | 3523.3 (3430.1 to 3616.6)  | 675.9 (624.8 to 733.4)        | 208.7 (174.4 to 245.1)          | 0.0 (0.0 to 0.0)                  |
| United Kingdom | 2018 | 4209.9 (4101.5 to 4320.7)  | 3357.8 (3267.0 to 3446.9)  | 652.8 (601.2 to 706.9)        | 199.3 (166.3 to 233.6)          | 0.0 (0.0 to 0.0)                  | 4466.3 (4351.3 to 4583.8) | 3562.2 (3465.9 to 3656.8)  | 692.6 (637.8 to 750.0)        | 211.5 (176.5 to 247.8)          | 0.0 (0.0 to 0.0)                  |
| United Kingdom | 2019 | 4260.1 (4153.6 to 4377.4)  | 3390.4 (3296.9 to 3484.5)  | 667.9 (614.5 to 724.7)        | 201.9 (168.6 to 236.7)          | 0.0 (0.0 to 0.0)                  | 4519.5 (4406.5 to 4643.9) | 3596.8 (3497.7 to 3696.7)  | 708.5 (652.0 to 768.8)        | 214.2 (178.9 to 251.2)          | 0.0 (0.0 to 0.0)                  |
| United Kingdom | 2020 | 4313.3 (4198.3 to 4429.2)  | 3425.4 (3328.0 to 3525.7)  | 683.4 (627.9 to 743.8)        | 204.5 (170.8 to 240.2)          | 0.0 (0.0 to 0.0)                  | 4575.9 (4454.0 to 4698.9) | 3634.0 (3530.7 to 3740.4)  | 725.0 (666.1 to 789.0)        | 216.9 (181.2 to 254.8)          | 0.0 (0.0 to 0.0)                  |
| United Kingdom | 2021 | 4363.0 (4240.1 to 4487.2)  | 3457.2 (3358.1 to 3559.1)  | 698.9 (639.2 to 763.7)        | 206.9 (172.9 to 242.8)          | 0.0 (0.0 to 0.0)                  | 4628.7 (4498.2 to 4760.4) | 3667.7 (3562.6 to 3775.8)  | 741.5 (678.2 to 810.2)        | 219.5 (183.4 to 257.6)          | 0.0 (0.0 to 0.0)                  |
| United Kingdom | 2022 | 4412.8 (4288.4 to 4536.3)  | 3488.8 (3381.0 to 3595.3)  | 714.8 (655.5 to 778.7)        | 209.3 (175.0 to 245.3)          | 0.0 (0.0 to 0.0)                  | 4681.5 (4549.5 to 4812.5) | 3701.2 (3586.9 to 3814.3)  | 758.3 (695.4 to 826.2)        | 222.0 (185.7 to 260.3)          | 0.0 (0.0 to 0.0)                  |



| Country        | Year | 2018 US Dollars per capita |                            |                               |                                 |                                   | 2018 PPP per capita       |                            |                               |                                 |                                   |
|----------------|------|----------------------------|----------------------------|-------------------------------|---------------------------------|-----------------------------------|---------------------------|----------------------------|-------------------------------|---------------------------------|-----------------------------------|
|                |      | Health spending            | Government health spending | Out-of-pocket health spending | Prepaid private health spending | Development assistance for health | Health spending           | Government health spending | Out-of-pocket health spending | Prepaid private health spending | Development assistance for health |
| United Kingdom | 2023 | 4462.6 (4331.9 to 4598.6)  | 3520.2 (3410.4 to 3639.8)  | 730.8 (666.3 to 796.1)        | 211.6 (177.0 to 248.0)          | 0.0 (0.0 to 0.0)                  | 4734.3 (4595.7 to 4878.7) | 3734.5 (3618.1 to 3861.4)  | 775.3 (706.9 to 844.6)        | 224.4 (187.7 to 263.1)          | 0.0 (0.0 to 0.0)                  |
| United Kingdom | 2024 | 4507.1 (4362.2 to 4651.5)  | 3547.0 (3426.6 to 3672.7)  | 746.6 (681.9 to 814.6)        | 213.5 (178.6 to 250.2)          | 0.0 (0.0 to 0.0)                  | 4781.5 (4627.8 to 4934.7) | 3762.9 (3635.2 to 3896.3)  | 792.1 (723.4 to 864.2)        | 226.5 (189.5 to 265.4)          | 0.0 (0.0 to 0.0)                  |
| United Kingdom | 2025 | 4547.3 (4404.8 to 4694.0)  | 3569.7 (3442.8 to 3699.5)  | 762.4 (692.5 to 834.4)        | 215.1 (180.2 to 251.9)          | 0.0 (0.0 to 0.0)                  | 4824.2 (4673.0 to 4979.9) | 3787.1 (3652.4 to 3924.8)  | 808.9 (734.6 to 885.2)        | 228.2 (191.1 to 267.3)          | 0.0 (0.0 to 0.0)                  |
| United Kingdom | 2026 | 4589.3 (4435.0 to 4754.4)  | 3593.8 (3455.5 to 3733.2)  | 778.7 (704.9 to 859.2)        | 216.8 (181.4 to 254.1)          | 0.0 (0.0 to 0.0)                  | 4868.7 (4705.0 to 5043.9) | 3812.6 (3666.0 to 3960.5)  | 826.1 (747.8 to 911.5)        | 230.0 (192.5 to 269.6)          | 0.0 (0.0 to 0.0)                  |
| United Kingdom | 2027 | 4638.2 (4472.1 to 4805.1)  | 3623.5 (3478.6 to 3771.3)  | 795.9 (717.8 to 881.3)        | 218.8 (183.3 to 256.7)          | 0.0 (0.0 to 0.0)                  | 4920.7 (4744.5 to 5097.7) | 3844.1 (3690.5 to 4001.0)  | 844.4 (761.5 to 934.9)        | 232.1 (194.5 to 272.3)          | 0.0 (0.0 to 0.0)                  |
| United Kingdom | 2028 | 4692.7 (4516.7 to 4875.8)  | 3658.1 (3509.2 to 3814.9)  | 813.6 (727.0 to 910.3)        | 221.1 (185.6 to 259.4)          | 0.0 (0.0 to 0.0)                  | 4978.4 (4791.8 to 5172.7) | 3880.8 (3722.9 to 4047.2)  | 863.1 (771.3 to 965.7)        | 234.5 (196.9 to 275.2)          | 0.0 (0.0 to 0.0)                  |
| United Kingdom | 2029 | 4750.2 (4551.4 to 4944.4)  | 3695.3 (3538.2 to 3868.6)  | 831.4 (736.5 to 938.4)        | 223.5 (188.0 to 261.9)          | 0.0 (0.0 to 0.0)                  | 5039.4 (4828.6 to 5245.5) | 3920.3 (3753.7 to 4104.2)  | 882.0 (781.3 to 995.6)        | 237.1 (199.4 to 277.8)          | 0.0 (0.0 to 0.0)                  |
| United Kingdom | 2030 | 4806.9 (4589.3 to 5019.2)  | 3732.0 (3555.6 to 3913.8)  | 849.1 (743.6 to 965.9)        | 225.8 (189.8 to 265.1)          | 0.0 (0.0 to 0.0)                  | 5099.6 (4868.7 to 5324.8) | 3959.3 (3772.1 to 4152.1)  | 900.8 (788.8 to 1024.7)       | 239.6 (201.3 to 281.2)          | 0.0 (0.0 to 0.0)                  |
| United Kingdom | 2031 | 4862.8 (4639.8 to 5094.3)  | 3767.9 (3573.9 to 3961.3)  | 866.6 (753.0 to 994.5)        | 228.3 (191.8 to 268.8)          | 0.0 (0.0 to 0.0)                  | 5158.9 (4922.4 to 5404.6) | 3997.4 (3791.6 to 4202.5)  | 919.3 (798.8 to 1055.1)       | 242.2 (203.5 to 285.2)          | 0.0 (0.0 to 0.0)                  |
| United Kingdom | 2032 | 4917.8 (4688.7 to 5176.9)  | 3803.2 (3601.2 to 4008.2)  | 883.8 (759.9 to 1023.7)       | 230.7 (193.7 to 272.0)          | 0.0 (0.0 to 0.0)                  | 5217.2 (4974.2 to 5492.1) | 4034.8 (3820.5 to 4252.3)  | 937.7 (806.2 to 1086.0)       | 244.8 (205.5 to 288.6)          | 0.0 (0.0 to 0.0)                  |
| United Kingdom | 2033 | 4973.4 (4729.5 to 5230.2)  | 3839.1 (3628.0 to 4062.7)  | 901.0 (770.7 to 1051.1)       | 233.3 (195.5 to 275.4)          | 0.0 (0.0 to 0.0)                  | 5276.2 (5017.5 to 5548.6) | 4072.9 (3848.9 to 4310.1)  | 955.9 (817.6 to 1115.1)       | 247.5 (207.4 to 292.1)          | 0.0 (0.0 to 0.0)                  |
| United Kingdom | 2034 | 5029.8 (4768.8 to 5296.1)  | 3875.9 (3649.6 to 4110.3)  | 918.0 (776.2 to 1077.4)       | 235.9 (197.4 to 278.8)          | 0.0 (0.0 to 0.0)                  | 5336.0 (5059.1 to 5618.6) | 4111.9 (3871.8 to 4360.5)  | 973.9 (823.5 to 1143.0)       | 250.3 (209.4 to 295.8)          | 0.0 (0.0 to 0.0)                  |
| United Kingdom | 2035 | 5087.8 (4813.1 to 5367.7)  | 3914.1 (3678.4 to 4156.6)  | 935.0 (781.9 to 1103.9)       | 238.7 (199.2 to 282.6)          | 0.0 (0.0 to 0.0)                  | 5397.7 (5106.1 to 5694.6) | 4152.4 (3902.4 to 4409.7)  | 992.0 (829.5 to 1171.1)       | 253.3 (211.3 to 299.8)          | 0.0 (0.0 to 0.0)                  |
| United Kingdom | 2036 | 5141.9 (4842.7 to 5437.0)  | 3948.8 (3704.5 to 4209.3)  | 951.5 (788.7 to 1129.0)       | 241.6 (201.1 to 286.3)          | 0.0 (0.0 to 0.0)                  | 5455.0 (5137.6 to 5768.1) | 4189.2 (3930.0 to 4465.6)  | 1009.5 (836.7 to 1197.8)      | 256.3 (213.4 to 303.7)          | 0.0 (0.0 to 0.0)                  |
| United Kingdom | 2037 | 5199.5 (4874.9 to 5506.1)  | 3986.6 (3729.7 to 4264.4)  | 968.1 (797.9 to 1153.8)       | 244.7 (203.7 to 290.3)          | 0.0 (0.0 to 0.0)                  | 5516.1 (5171.8 to 5841.4) | 4229.4 (3956.8 to 4524.1)  | 1027.1 (846.5 to 1224.1)      | 259.6 (216.1 to 308.0)          | 0.0 (0.0 to 0.0)                  |
| United Kingdom | 2038 | 5255.2 (4938.1 to 5582.2)  | 4023.1 (3750.8 to 4309.4)  | 984.2 (807.4 to 1177.6)       | 247.9 (205.9 to 294.5)          | 0.0 (0.0 to 0.0)                  | 5575.2 (5238.8 to 5922.1) | 4268.0 (3979.2 to 4571.8)  | 1044.2 (856.5 to 1249.3)      | 263.0 (218.4 to 312.4)          | 0.0 (0.0 to 0.0)                  |
| United Kingdom | 2039 | 5312.6 (4987.2 to 5659.6)  | 4061.2 (3768.8 to 4358.9)  | 1000.2 (816.5 to 1200.8)      | 251.2 (208.2 to 298.9)          | 0.0 (0.0 to 0.0)                  | 5636.1 (5290.9 to 6004.3) | 4308.5 (3998.3 to 4624.3)  | 1061.1 (866.2 to 1273.9)      | 266.5 (220.9 to 317.1)          | 0.0 (0.0 to 0.0)                  |
| United Kingdom | 2040 | 5371.2 (5018.1 to 5735.6)  | 4100.6 (3798.1 to 4414.0)  | 1016.0 (826.6 to 1223.4)      | 254.6 (210.6 to 303.3)          | 0.0 (0.0 to 0.0)                  | 5698.2 (5323.7 to 6084.8) | 4350.3 (4029.4 to 4682.8)  | 1077.9 (876.9 to 1297.8)      | 270.1 (223.4 to 321.8)          | 0.0 (0.0 to 0.0)                  |
| United Kingdom | 2041 | 5426.0 (5046.6 to 5805.4)  | 4137.0 (3819.6 to 4457.7)  | 1031.1 (836.1 to 1244.4)      | 257.9 (213.0 to 307.7)          | 0.0 (0.0 to 0.0)                  | 5756.3 (5353.9 to 6158.9) | 4388.9 (4052.2 to 4729.2)  | 1093.9 (887.0 to 1320.2)      | 273.6 (226.0 to 326.5)          | 0.0 (0.0 to 0.0)                  |
| United Kingdom | 2042 | 5482.6 (5077.1 to 5879.7)  | 4175.3 (3846.6 to 4508.0)  | 1046.0 (844.9 to 1265.9)      | 261.4 (215.5 to 312.3)          | 0.0 (0.0 to 0.0)                  | 5816.5 (5386.3 to 6237.7) | 4429.5 (4080.8 to 4782.5)  | 1109.7 (896.4 to 1343.0)      | 277.3 (228.7 to 331.4)          | 0.0 (0.0 to 0.0)                  |
| United Kingdom | 2043 | 5538.4 (5118.8 to 5964.9)  | 4213.0 (3864.0 to 4561.0)  | 1060.4 (851.2 to 1287.6)      | 265.0 (217.9 to 317.0)          | 0.0 (0.0 to 0.0)                  | 5875.6 (5430.5 to 6328.1) | 4469.5 (4099.3 to 4838.7)  | 1125.0 (903.0 to 1366.0)      | 281.1 (231.2 to 336.3)          | 0.0 (0.0 to 0.0)                  |

|                |      | 2018 US Dollars per capita |                            |                               |                                 |                                   | 2018 PPP per capita       |                            |                               |                                 |                                   |
|----------------|------|----------------------------|----------------------------|-------------------------------|---------------------------------|-----------------------------------|---------------------------|----------------------------|-------------------------------|---------------------------------|-----------------------------------|
| Country        | Year | Health spending            | Government health spending | Out-of-pocket health spending | Prepaid private health spending | Development assistance for health | Health spending           | Government health spending | Out-of-pocket health spending | Prepaid private health spending | Development assistance for health |
| United Kingdom | 2044 | 5595.6 (5170.2 to 6033.8)  | 4252.5 (3895.0 to 4614.6)  | 1074.5 (861.7 to 1308.8)      | 268.6 (220.3 to 321.7)          | 0.0 (0.0 to 0.0)                  | 5936.4 (5485.0 to 6401.2) | 4511.5 (4132.2 to 4895.6)  | 1140.0 (914.2 to 1388.5)      | 284.9 (233.7 to 341.3)          | 0.0 (0.0 to 0.0)                  |
| United Kingdom | 2045 | 5651.2 (5212.0 to 6091.0)  | 4291.2 (3921.3 to 4672.9)  | 1088.0 (871.2 to 1329.2)      | 272.0 (222.5 to 326.2)          | 0.0 (0.0 to 0.0)                  | 5995.3 (5529.4 to 6461.9) | 4552.5 (4160.0 to 4957.4)  | 1154.2 (924.2 to 1410.1)      | 288.6 (236.1 to 346.0)          | 0.0 (0.0 to 0.0)                  |
| United Kingdom | 2046 | 5703.0 (5237.8 to 6179.5)  | 4326.9 (3939.3 to 4728.3)  | 1100.6 (879.6 to 1347.5)      | 275.4 (225.2 to 330.7)          | 0.0 (0.0 to 0.0)                  | 6050.2 (5556.8 to 6555.8) | 4590.4 (4179.2 to 5016.2)  | 1167.7 (933.1 to 1429.6)      | 292.2 (238.9 to 350.8)          | 0.0 (0.0 to 0.0)                  |
| United Kingdom | 2047 | 5753.1 (5274.8 to 6233.7)  | 4361.8 (3954.6 to 4766.9)  | 1112.6 (888.1 to 1362.9)      | 278.8 (227.2 to 335.2)          | 0.0 (0.0 to 0.0)                  | 6103.5 (5596.0 to 6613.3) | 4627.4 (4195.4 to 5057.2)  | 1180.4 (942.2 to 1445.9)      | 295.7 (241.0 to 355.6)          | 0.0 (0.0 to 0.0)                  |
| United Kingdom | 2048 | 5804.3 (5319.6 to 6327.8)  | 4397.5 (3981.2 to 4823.0)  | 1124.7 (896.7 to 1376.5)      | 282.1 (228.8 to 339.4)          | 0.0 (0.0 to 0.0)                  | 6157.7 (5643.5 to 6713.1) | 4665.2 (4223.6 to 5116.7)  | 1193.2 (951.3 to 1460.3)      | 299.3 (242.7 to 360.1)          | 0.0 (0.0 to 0.0)                  |
| United Kingdom | 2049 | 5854.4 (5360.2 to 6386.1)  | 4432.3 (3995.2 to 4874.4)  | 1136.8 (905.2 to 1395.4)      | 285.3 (230.9 to 343.6)          | 0.0 (0.0 to 0.0)                  | 6210.9 (5686.6 to 6775.0) | 4702.2 (4238.5 to 5171.2)  | 1206.0 (960.4 to 1480.4)      | 302.7 (245.0 to 364.5)          | 0.0 (0.0 to 0.0)                  |
| United Kingdom | 2050 | 5907.2 (5384.5 to 6421.1)  | 4469.5 (4017.6 to 4936.1)  | 1149.1 (915.7 to 1415.4)      | 288.6 (232.7 to 347.8)          | 0.0 (0.0 to 0.0)                  | 6266.9 (5712.3 to 6812.1) | 4741.6 (4262.3 to 5236.6)  | 1219.1 (971.5 to 1501.5)      | 306.2 (246.9 to 369.0)          | 0.0 (0.0 to 0.0)                  |
| United States  | 1995 | 5427.9 (5256.6 to 5614.2)  | 2378.8 (2229.4 to 2530.9)  | 853.0 (805.6 to 897.8)        | 2196.1 (2125.3 to 2266.4)       | 0.0 (0.0 to 0.0)                  | 5427.9 (5256.6 to 5614.2) | 2378.8 (2229.4 to 2530.9)  | 853.0 (805.6 to 897.8)        | 2196.1 (2125.3 to 2266.4)       | 0.0 (0.0 to 0.0)                  |
| United States  | 1996 | 5547.5 (5411.1 to 5691.3)  | 2424.0 (2306.2 to 2538.9)  | 872.9 (837.6 to 908.6)        | 2250.6 (2195.6 to 2306.3)       | 0.0 (0.0 to 0.0)                  | 5547.5 (5411.1 to 5691.3) | 2424.0 (2306.2 to 2538.9)  | 872.9 (837.6 to 908.6)        | 2250.6 (2195.6 to 2306.3)       | 0.0 (0.0 to 0.0)                  |
| United States  | 1997 | 5708.7 (5583.3 to 5847.6)  | 2482.2 (2373.9 to 2600.9)  | 906.5 (874.5 to 943.1)        | 2320.0 (2260.6 to 2377.0)       | 0.0 (0.0 to 0.0)                  | 5708.7 (5583.3 to 5847.6) | 2482.2 (2373.9 to 2600.9)  | 906.5 (874.5 to 943.1)        | 2320.0 (2260.6 to 2377.0)       | 0.0 (0.0 to 0.0)                  |
| United States  | 1998 | 5920.9 (5793.6 to 6059.2)  | 2552.6 (2444.5 to 2678.2)  | 947.7 (916.4 to 981.1)        | 2420.5 (2361.2 to 2478.2)       | 0.0 (0.0 to 0.0)                  | 5920.9 (5793.6 to 6059.2) | 2552.6 (2444.5 to 2678.2)  | 947.7 (916.4 to 981.1)        | 2420.5 (2361.2 to 2478.2)       | 0.0 (0.0 to 0.0)                  |
| United States  | 1999 | 6196.1 (6061.4 to 6325.6)  | 2686.4 (2578.3 to 2807.2)  | 982.4 (949.4 to 1014.6)       | 2527.4 (2471.2 to 2586.0)       | 0.0 (0.0 to 0.0)                  | 6196.1 (6061.4 to 6325.6) | 2686.4 (2578.3 to 2807.2)  | 982.4 (949.4 to 1014.6)       | 2527.4 (2471.2 to 2586.0)       | 0.0 (0.0 to 0.0)                  |
| United States  | 2000 | 6562.4 (6425.8 to 6702.5)  | 2905.5 (2787.5 to 3033.9)  | 1011.0 (981.7 to 1042.5)      | 2645.9 (2597.7 to 2700.8)       | 0.0 (0.0 to 0.0)                  | 6562.4 (6425.8 to 6702.5) | 2905.5 (2787.5 to 3033.9)  | 1011.0 (981.7 to 1042.5)      | 2645.9 (2597.7 to 2700.8)       | 0.0 (0.0 to 0.0)                  |
| United States  | 2001 | 6899.2 (6773.0 to 7031.5)  | 3096.5 (2984.5 to 3215.2)  | 1027.1 (997.5 to 1057.7)      | 2775.6 (2724.8 to 2828.5)       | 0.0 (0.0 to 0.0)                  | 6899.2 (6773.0 to 7031.5) | 3096.5 (2984.5 to 3215.2)  | 1027.1 (997.5 to 1057.7)      | 2775.6 (2724.8 to 2828.5)       | 0.0 (0.0 to 0.0)                  |
| United States  | 2002 | 7335.5 (7214.0 to 7468.3)  | 3292.0 (3184.1 to 3407.2)  | 1057.0 (1029.6 to 1084.8)     | 2986.6 (2931.4 to 3046.7)       | 0.0 (0.0 to 0.0)                  | 7335.5 (7214.0 to 7468.3) | 3292.0 (3184.1 to 3407.2)  | 1057.0 (1029.6 to 1084.8)     | 2986.6 (2931.4 to 3046.7)       | 0.0 (0.0 to 0.0)                  |
| United States  | 2003 | 7735.7 (7604.4 to 7868.3)  | 3467.7 (3358.0 to 3589.2)  | 1092.4 (1064.1 to 1124.4)     | 3175.5 (3121.9 to 3229.7)       | 0.0 (0.0 to 0.0)                  | 7735.7 (7604.4 to 7868.3) | 3467.7 (3358.0 to 3589.2)  | 1092.4 (1064.1 to 1124.4)     | 3175.5 (3121.9 to 3229.7)       | 0.0 (0.0 to 0.0)                  |
| United States  | 2004 | 8035.5 (7905.1 to 8171.1)  | 3627.6 (3512.2 to 3752.4)  | 1119.8 (1090.5 to 1153.2)     | 3288.2 (3230.8 to 3349.8)       | 0.0 (0.0 to 0.0)                  | 8035.5 (7905.1 to 8171.1) | 3627.6 (3512.2 to 3752.4)  | 1119.8 (1090.5 to 1153.2)     | 3288.2 (3230.8 to 3349.8)       | 0.0 (0.0 to 0.0)                  |
| United States  | 2005 | 8244.0 (8108.4 to 8377.9)  | 3758.0 (3639.8 to 3879.0)  | 1136.7 (1107.5 to 1168.2)     | 3349.3 (3293.7 to 3405.4)       | 0.0 (0.0 to 0.0)                  | 8244.0 (8108.4 to 8377.9) | 3758.0 (3639.8 to 3879.0)  | 1136.7 (1107.5 to 1168.2)     | 3349.3 (3293.7 to 3405.4)       | 0.0 (0.0 to 0.0)                  |
| United States  | 2006 | 8443.9 (8308.7 to 8579.7)  | 3899.3 (3776.8 to 4019.9)  | 1145.1 (1113.4 to 1174.4)     | 3399.4 (3345.7 to 3460.9)       | 0.0 (0.0 to 0.0)                  | 8443.9 (8308.7 to 8579.7) | 3899.3 (3776.8 to 4019.9)  | 1145.1 (1113.4 to 1174.4)     | 3399.4 (3345.7 to 3460.9)       | 0.0 (0.0 to 0.0)                  |
| United States  | 2007 | 8660.5 (8522.3 to 8805.1)  | 4053.1 (3932.0 to 4168.9)  | 1153.5 (1121.5 to 1184.2)     | 3454.0 (3397.1 to 3513.4)       | 0.0 (0.0 to 0.0)                  | 8660.5 (8522.3 to 8805.1) | 4053.1 (3932.0 to 4168.9)  | 1153.5 (1121.5 to 1184.2)     | 3454.0 (3397.1 to 3513.4)       | 0.0 (0.0 to 0.0)                  |
| United States  | 2008 | 8816.9 (8693.2 to 8953.9)  | 4195.3 (4077.9 to 4323.8)  | 1145.6 (1116.6 to 1174.0)     | 3476.0 (3418.5 to 3532.0)       | 0.0 (0.0 to 0.0)                  | 8816.9 (8693.2 to 8953.9) | 4195.3 (4077.9 to 4323.8)  | 1145.6 (1116.6 to 1174.0)     | 3476.0 (3418.5 to 3532.0)       | 0.0 (0.0 to 0.0)                  |

| Country       | Year | 2018 US Dollars per capita   |                            |                               |                                 |                                   | 2018 PPP per capita          |                            |                               |                                 |                                   |
|---------------|------|------------------------------|----------------------------|-------------------------------|---------------------------------|-----------------------------------|------------------------------|----------------------------|-------------------------------|---------------------------------|-----------------------------------|
|               |      | Health spending              | Government health spending | Out-of-pocket health spending | Prepaid private health spending | Development assistance for health | Health spending              | Government health spending | Out-of-pocket health spending | Prepaid private health spending | Development assistance for health |
| United States | 2009 | 8936.4 (8804.4 to 9078.1)    | 4289.4 (4170.3 to 4417.9)  | 1125.8 (1094.1 to 1154.9)     | 3521.2 (3460.3 to 3580.9)       | 0.0 (0.0 to 0.0)                  | 8936.4 (8804.4 to 9078.1)    | 4289.4 (4170.3 to 4417.9)  | 1125.8 (1094.1 to 1154.9)     | 3521.2 (3460.3 to 3580.9)       | 0.0 (0.0 to 0.0)                  |
| United States | 2010 | 9203.9 (9065.1 to 9348.3)    | 4463.8 (4344.1 to 4589.7)  | 1129.8 (1095.1 to 1161.0)     | 3610.3 (3553.0 to 3669.5)       | 0.0 (0.0 to 0.0)                  | 9203.9 (9065.1 to 9348.3)    | 4463.8 (4344.1 to 4589.7)  | 1129.8 (1095.1 to 1161.0)     | 3610.3 (3553.0 to 3669.5)       | 0.0 (0.0 to 0.0)                  |
| United States | 2011 | 9277.8 (9139.3 to 9419.1)    | 4511.5 (4384.5 to 4641.6)  | 1130.9 (1100.8 to 1162.6)     | 3635.4 (3583.5 to 3693.3)       | 0.0 (0.0 to 0.0)                  | 9277.8 (9139.3 to 9419.1)    | 4511.5 (4384.5 to 4641.6)  | 1130.9 (1100.8 to 1162.6)     | 3635.4 (3583.5 to 3693.3)       | 0.0 (0.0 to 0.0)                  |
| United States | 2012 | 9321.1 (9187.4 to 9462.9)    | 4501.5 (4383.5 to 4628.4)  | 1126.9 (1095.9 to 1159.1)     | 3692.7 (3637.9 to 3750.8)       | 0.0 (0.0 to 0.0)                  | 9321.1 (9187.4 to 9462.9)    | 4501.5 (4383.5 to 4628.4)  | 1126.9 (1095.9 to 1159.1)     | 3692.7 (3637.9 to 3750.8)       | 0.0 (0.0 to 0.0)                  |
| United States | 2013 | 9187.3 (9068.7 to 9310.5)    | 4382.5 (4278.4 to 4484.9)  | 1097.8 (1069.7 to 1130.5)     | 3706.9 (3646.3 to 3769.1)       | 0.0 (0.0 to 0.0)                  | 9187.3 (9068.7 to 9310.5)    | 4382.5 (4278.4 to 4484.9)  | 1097.8 (1069.7 to 1130.5)     | 3706.9 (3646.3 to 3769.1)       | 0.0 (0.0 to 0.0)                  |
| United States | 2014 | 9976.2 (9817.4 to 10141.5)   | 8154.5 (7998.0 to 8317.7)  | 1141.9 (1110.3 to 1176.7)     | 679.9 (652.6 to 707.0)          | 0.0 (0.0 to 0.0)                  | 9976.2 (9817.4 to 10141.5)   | 8154.5 (7998.0 to 8317.7)  | 1141.9 (1110.3 to 1176.7)     | 679.9 (652.6 to 707.0)          | 0.0 (0.0 to 0.0)                  |
| United States | 2015 | 10055.3 (9896.8 to 10207.2)  | 8225.2 (8066.9 to 8368.8)  | 1127.8 (1095.2 to 1160.0)     | 702.4 (669.0 to 739.4)          | 0.0 (0.0 to 0.0)                  | 10055.3 (9896.8 to 10207.2)  | 8225.2 (8066.9 to 8368.8)  | 1127.8 (1095.2 to 1160.0)     | 702.4 (669.0 to 739.4)          | 0.0 (0.0 to 0.0)                  |
| United States | 2016 | 10271.4 (10054.1 to 10498.4) | 8404.9 (8201.1 to 8631.9)  | 1136.3 (1093.8 to 1177.6)     | 730.2 (681.8 to 784.6)          | 0.0 (0.0 to 0.0)                  | 10271.4 (10054.1 to 10498.4) | 8404.9 (8201.1 to 8631.9)  | 1136.3 (1093.8 to 1177.6)     | 730.2 (681.8 to 784.6)          | 0.0 (0.0 to 0.0)                  |
| United States | 2017 | 10532.5 (10305.2 to 10772.3) | 8634.7 (8417.3 to 8862.9)  | 1153.1 (1110.3 to 1195.4)     | 744.7 (695.5 to 798.9)          | 0.0 (0.0 to 0.0)                  | 10532.5 (10305.2 to 10772.3) | 8634.7 (8417.3 to 8862.9)  | 1153.1 (1110.3 to 1195.4)     | 744.7 (695.5 to 798.9)          | 0.0 (0.0 to 0.0)                  |
| United States | 2018 | 10647.2 (10416.9 to 10898.3) | 8736.3 (8504.7 to 8978.8)  | 1156.5 (1113.4 to 1201.7)     | 754.4 (705.2 to 809.4)          | 0.0 (0.0 to 0.0)                  | 10647.2 (10416.9 to 10898.3) | 8736.3 (8504.7 to 8978.8)  | 1156.5 (1113.4 to 1201.7)     | 754.4 (705.2 to 809.4)          | 0.0 (0.0 to 0.0)                  |
| United States | 2019 | 10752.6 (10481.1 to 11011.0) | 8829.9 (8581.8 to 9088.4)  | 1159.3 (1115.8 to 1205.2)     | 763.4 (712.5 to 819.1)          | 0.0 (0.0 to 0.0)                  | 10752.6 (10481.1 to 11011.0) | 8829.9 (8581.8 to 9088.4)  | 1159.3 (1115.8 to 1205.2)     | 763.4 (712.5 to 819.1)          | 0.0 (0.0 to 0.0)                  |
| United States | 2020 | 10870.3 (10615.5 to 11166.3) | 8933.8 (8675.6 to 9202.7)  | 1163.4 (1121.1 to 1209.1)     | 773.1 (721.0 to 828.1)          | 0.0 (0.0 to 0.0)                  | 10870.3 (10615.5 to 11166.3) | 8933.8 (8675.6 to 9202.7)  | 1163.4 (1121.1 to 1209.1)     | 773.1 (721.0 to 828.1)          | 0.0 (0.0 to 0.0)                  |
| United States | 2021 | 10988.2 (10699.8 to 11282.6) | 9038.7 (8764.9 to 9322.5)  | 1167.3 (1125.0 to 1212.9)     | 782.2 (729.8 to 839.4)          | 0.0 (0.0 to 0.0)                  | 10988.2 (10699.8 to 11282.6) | 9038.7 (8764.9 to 9322.5)  | 1167.3 (1125.0 to 1212.9)     | 782.2 (729.8 to 839.4)          | 0.0 (0.0 to 0.0)                  |
| United States | 2022 | 11114.2 (10821.3 to 11430.7) | 9149.7 (8849.6 to 9456.1)  | 1172.3 (1128.7 to 1218.1)     | 792.2 (738.8 to 850.7)          | 0.0 (0.0 to 0.0)                  | 11114.2 (10821.3 to 11430.7) | 9149.7 (8849.6 to 9456.1)  | 1172.3 (1128.7 to 1218.1)     | 792.2 (738.8 to 850.7)          | 0.0 (0.0 to 0.0)                  |
| United States | 2023 | 11255.7 (10928.1 to 11587.6) | 9272.6 (8964.0 to 9601.6)  | 1179.5 (1136.1 to 1225.6)     | 803.6 (748.1 to 863.4)          | 0.0 (0.0 to 0.0)                  | 11255.7 (10928.1 to 11587.6) | 9272.6 (8964.0 to 9601.6)  | 1179.5 (1136.1 to 1225.6)     | 803.6 (748.1 to 863.4)          | 0.0 (0.0 to 0.0)                  |
| United States | 2024 | 11399.5 (11050.0 to 11764.3) | 9397.0 (9074.3 to 9758.6)  | 1187.1 (1144.0 to 1232.9)     | 815.3 (759.5 to 876.3)          | 0.0 (0.0 to 0.0)                  | 11399.5 (11050.0 to 11764.3) | 9397.0 (9074.3 to 9758.6)  | 1187.1 (1144.0 to 1232.9)     | 815.3 (759.5 to 876.3)          | 0.0 (0.0 to 0.0)                  |
| United States | 2025 | 11521.7 (11158.7 to 11895.5) | 9502.6 (9149.5 to 9865.6)  | 1193.4 (1149.5 to 1241.9)     | 825.7 (768.9 to 887.1)          | 0.0 (0.0 to 0.0)                  | 11521.7 (11158.7 to 11895.5) | 9502.6 (9149.5 to 9865.6)  | 1193.4 (1149.5 to 1241.9)     | 825.7 (768.9 to 887.1)          | 0.0 (0.0 to 0.0)                  |
| United States | 2026 | 11652.7 (11271.0 to 12043.2) | 9615.0 (9255.8 to 9992.5)  | 1200.8 (1155.5 to 1251.1)     | 837.0 (778.7 to 899.2)          | 0.0 (0.0 to 0.0)                  | 11652.7 (11271.0 to 12043.2) | 9615.0 (9255.8 to 9992.5)  | 1200.8 (1155.5 to 1251.1)     | 837.0 (778.7 to 899.2)          | 0.0 (0.0 to 0.0)                  |
| United States | 2027 | 11783.0 (11372.3 to 12191.7) | 9726.2 (9328.1 to 10135.8) | 1208.3 (1161.6 to 1263.4)     | 848.4 (788.7 to 912.3)          | 0.0 (0.0 to 0.0)                  | 11783.0 (11372.3 to 12191.7) | 9726.2 (9328.1 to 10135.8) | 1208.3 (1161.6 to 1263.4)     | 848.4 (788.7 to 912.3)          | 0.0 (0.0 to 0.0)                  |
| United States | 2028 | 11918.4 (11491.8 to 12363.3) | 9841.0 (9423.5 to 10273.0) | 1216.7 (1167.8 to 1278.1)     | 860.7 (799.4 to 926.9)          | 0.0 (0.0 to 0.0)                  | 11918.4 (11491.8 to 12363.3) | 9841.0 (9423.5 to 10273.0) | 1216.7 (1167.8 to 1278.1)     | 860.7 (799.4 to 926.9)          | 0.0 (0.0 to 0.0)                  |
| United States | 2029 | 12056.3 (11608.4 to 12510.4) | 9957.4 (9527.3 to 10414.7) | 1225.5 (1173.9 to 1299.9)     | 873.4 (810.5 to 941.6)          | 0.0 (0.0 to 0.0)                  | 12056.3 (11608.4 to 12510.4) | 9957.4 (9527.3 to 10414.7) | 1225.5 (1173.9 to 1299.9)     | 873.4 (810.5 to 941.6)          | 0.0 (0.0 to 0.0)                  |

|               |      | 2018 US Dollars per capita   |                              |                               |                                 |                                   | 2018 PPP per capita          |                              |                               |                                 |                                   |
|---------------|------|------------------------------|------------------------------|-------------------------------|---------------------------------|-----------------------------------|------------------------------|------------------------------|-------------------------------|---------------------------------|-----------------------------------|
| Country       | Year | Health spending              | Government health spending   | Out-of-pocket health spending | Prepaid private health spending | Development assistance for health | Health spending              | Government health spending   | Out-of-pocket health spending | Prepaid private health spending | Development assistance for health |
| United States | 2030 | 12206.3 (11726.0 to 12712.5) | 10084.7 (9630.4 to 10567.7)  | 1235.0 (1180.8 to 1320.1)     | 886.7 (822.0 to 957.1)          | 0.0 (0.0 to 0.0)                  | 12206.3 (11726.0 to 12712.5) | 10084.7 (9630.4 to 10567.7)  | 1235.0 (1180.8 to 1320.1)     | 886.7 (822.0 to 957.1)          | 0.0 (0.0 to 0.0)                  |
| United States | 2031 | 12347.3 (11841.7 to 12872.5) | 10202.4 (9711.4 to 10709.3)  | 1244.6 (1187.4 to 1341.2)     | 900.2 (832.4 to 973.2)          | 0.0 (0.0 to 0.0)                  | 12347.3 (11841.7 to 12872.5) | 10202.4 (9711.4 to 10709.3)  | 1244.6 (1187.4 to 1341.2)     | 900.2 (832.4 to 973.2)          | 0.0 (0.0 to 0.0)                  |
| United States | 2032 | 12490.0 (11971.7 to 13029.4) | 10321.4 (9794.9 to 10841.3)  | 1254.4 (1194.0 to 1360.5)     | 914.2 (844.5 to 988.8)          | 0.0 (0.0 to 0.0)                  | 12490.0 (11971.7 to 13029.4) | 10321.4 (9794.9 to 10841.3)  | 1254.4 (1194.0 to 1360.5)     | 914.2 (844.5 to 988.8)          | 0.0 (0.0 to 0.0)                  |
| United States | 2033 | 12633.8 (12086.5 to 13187.5) | 10440.4 (9882.0 to 10984.3)  | 1264.8 (1201.8 to 1383.5)     | 928.6 (855.1 to 1008.1)         | 0.0 (0.0 to 0.0)                  | 12633.8 (12086.5 to 13187.5) | 10440.4 (9882.0 to 10984.3)  | 1264.8 (1201.8 to 1383.5)     | 928.6 (855.1 to 1008.1)         | 0.0 (0.0 to 0.0)                  |
| United States | 2034 | 12782.8 (12205.4 to 13318.6) | 10563.4 (9984.4 to 11106.4)  | 1275.6 (1210.9 to 1404.9)     | 943.7 (866.9 to 1027.3)         | 0.0 (0.0 to 0.0)                  | 12782.8 (12205.4 to 13318.6) | 10563.4 (9984.4 to 11106.4)  | 1275.6 (1210.9 to 1404.9)     | 943.7 (866.9 to 1027.3)         | 0.0 (0.0 to 0.0)                  |
| United States | 2035 | 12940.0 (12323.1 to 13553.5) | 10693.2 (10098.1 to 11276.2) | 1287.3 (1218.5 to 1426.4)     | 959.5 (879.5 to 1046.5)         | 0.0 (0.0 to 0.0)                  | 12940.0 (12323.1 to 13553.5) | 10693.2 (10098.1 to 11276.2) | 1287.3 (1218.5 to 1426.4)     | 959.5 (879.5 to 1046.5)         | 0.0 (0.0 to 0.0)                  |
| United States | 2036 | 13099.3 (12465.0 to 13740.5) | 10823.6 (10210.1 to 11426.6) | 1299.6 (1228.9 to 1448.2)     | 976.1 (894.0 to 1066.1)         | 0.0 (0.0 to 0.0)                  | 13099.3 (12465.0 to 13740.5) | 10823.6 (10210.1 to 11426.6) | 1299.6 (1228.9 to 1448.2)     | 976.1 (894.0 to 1066.1)         | 0.0 (0.0 to 0.0)                  |
| United States | 2037 | 13261.0 (12602.4 to 13916.6) | 10955.3 (10315.9 to 11601.0) | 1312.4 (1239.5 to 1470.2)     | 993.3 (907.5 to 1086.9)         | 0.0 (0.0 to 0.0)                  | 13261.0 (12602.4 to 13916.6) | 10955.3 (10315.9 to 11601.0) | 1312.4 (1239.5 to 1470.2)     | 993.3 (907.5 to 1086.9)         | 0.0 (0.0 to 0.0)                  |
| United States | 2038 | 13428.9 (12719.4 to 14125.3) | 11091.9 (10412.7 to 11758.8) | 1325.9 (1249.9 to 1493.5)     | 1011.2 (921.0 to 1110.5)        | 0.0 (0.0 to 0.0)                  | 13428.9 (12719.4 to 14125.3) | 11091.9 (10412.7 to 11758.8) | 1325.9 (1249.9 to 1493.5)     | 1011.2 (921.0 to 1110.5)        | 0.0 (0.0 to 0.0)                  |
| United States | 2039 | 13610.2 (12882.3 to 14306.1) | 11239.7 (10518.5 to 11903.0) | 1340.3 (1263.0 to 1517.3)     | 1030.2 (936.9 to 1133.9)        | 0.0 (0.0 to 0.0)                  | 13610.2 (12882.3 to 14306.1) | 11239.7 (10518.5 to 11903.0) | 1340.3 (1263.0 to 1517.3)     | 1030.2 (936.9 to 1133.9)        | 0.0 (0.0 to 0.0)                  |
| United States | 2040 | 13795.6 (13036.9 to 14529.1) | 11391.3 (10671.6 to 12102.0) | 1354.9 (1275.0 to 1540.9)     | 1049.4 (952.0 to 1159.5)        | 0.0 (0.0 to 0.0)                  | 13795.6 (13036.9 to 14529.1) | 11391.3 (10671.6 to 12102.0) | 1354.9 (1275.0 to 1540.9)     | 1049.4 (952.0 to 1159.5)        | 0.0 (0.0 to 0.0)                  |
| United States | 2041 | 13978.0 (13195.6 to 14757.9) | 11538.8 (10777.7 to 12292.0) | 1369.9 (1287.5 to 1567.0)     | 1069.3 (967.2 to 1184.9)        | 0.0 (0.0 to 0.0)                  | 13978.0 (13195.6 to 14757.9) | 11538.8 (10777.7 to 12292.0) | 1369.9 (1287.5 to 1567.0)     | 1069.3 (967.2 to 1184.9)        | 0.0 (0.0 to 0.0)                  |
| United States | 2042 | 14168.9 (13364.4 to 15000.2) | 11693.3 (10906.4 to 12471.4) | 1385.6 (1301.8 to 1593.6)     | 1090.0 (983.3 to 1210.5)        | 0.0 (0.0 to 0.0)                  | 14168.9 (13364.4 to 15000.2) | 11693.3 (10906.4 to 12471.4) | 1385.6 (1301.8 to 1593.6)     | 1090.0 (983.3 to 1210.5)        | 0.0 (0.0 to 0.0)                  |
| United States | 2043 | 14365.6 (13495.0 to 15192.9) | 11852.6 (11028.3 to 12664.8) | 1401.7 (1316.0 to 1617.2)     | 1111.4 (1001.6 to 1236.5)       | 0.0 (0.0 to 0.0)                  | 14365.6 (13495.0 to 15192.9) | 11852.6 (11028.3 to 12664.8) | 1401.7 (1316.0 to 1617.2)     | 1111.4 (1001.6 to 1236.5)       | 0.0 (0.0 to 0.0)                  |
| United States | 2044 | 14568.9 (13702.5 to 15439.7) | 12017.5 (11145.8 to 12900.4) | 1418.1 (1329.2 to 1638.3)     | 1133.2 (1017.8 to 1263.9)       | 0.0 (0.0 to 0.0)                  | 14568.9 (13702.5 to 15439.7) | 12017.5 (11145.8 to 12900.4) | 1418.1 (1329.2 to 1638.3)     | 1133.2 (1017.8 to 1263.9)       | 0.0 (0.0 to 0.0)                  |
| United States | 2045 | 14779.8 (13828.1 to 15750.5) | 12189.8 (11265.2 to 13115.4) | 1434.6 (1343.1 to 1658.6)     | 1155.4 (1035.9 to 1291.5)       | 0.0 (0.0 to 0.0)                  | 14779.8 (13828.1 to 15750.5) | 12189.8 (11265.2 to 13115.4) | 1434.6 (1343.1 to 1658.6)     | 1155.4 (1035.9 to 1291.5)       | 0.0 (0.0 to 0.0)                  |

|               |      | 2018 US Dollars per capita   |                              |                               |                                 |                                   | 2018 PPP per capita          |                              |                               |                                 |                                   |
|---------------|------|------------------------------|------------------------------|-------------------------------|---------------------------------|-----------------------------------|------------------------------|------------------------------|-------------------------------|---------------------------------|-----------------------------------|
| Country       | Year | Health spending              | Government health spending   | Out-of-pocket health spending | Prepaid private health spending | Development assistance for health | Health spending              | Government health spending   | Out-of-pocket health spending | Prepaid private health spending | Development assistance for health |
| United States | 2046 | 14980.8 (14028.3 to 15996.2) | 12352.4 (11377.8 to 13339.5) | 1450.7 (1355.7 to 1680.0)     | 1177.6 (1052.6 to 1319.2)       | 0.0 (0.0 to 0.0)                  | 14980.8 (14028.3 to 15996.2) | 12352.4 (11377.8 to 13339.5) | 1450.7 (1355.7 to 1680.0)     | 1177.6 (1052.6 to 1319.2)       | 0.0 (0.0 to 0.0)                  |
| United States | 2047 | 15187.0 (14151.8 to 16175.9) | 12519.6 (11504.4 to 13535.7) | 1467.1 (1368.5 to 1702.0)     | 1200.3 (1068.4 to 1348.9)       | 0.0 (0.0 to 0.0)                  | 15187.0 (14151.8 to 16175.9) | 12519.6 (11504.4 to 13535.7) | 1467.1 (1368.5 to 1702.0)     | 1200.3 (1068.4 to 1348.9)       | 0.0 (0.0 to 0.0)                  |
| United States | 2048 | 15395.5 (14356.8 to 16430.6) | 12689.4 (11669.7 to 13784.0) | 1483.2 (1380.8 to 1724.1)     | 1222.9 (1084.0 to 1379.8)       | 0.0 (0.0 to 0.0)                  | 15395.5 (14356.8 to 16430.6) | 12689.4 (11669.7 to 13784.0) | 1483.2 (1380.8 to 1724.1)     | 1222.9 (1084.0 to 1379.8)       | 0.0 (0.0 to 0.0)                  |
| United States | 2049 | 15607.2 (14501.3 to 16717.5) | 12861.7 (11755.0 to 13972.2) | 1499.4 (1393.4 to 1746.4)     | 1246.1 (1102.1 to 1410.8)       | 0.0 (0.0 to 0.0)                  | 15607.2 (14501.3 to 16717.5) | 12861.7 (11755.0 to 13972.2) | 1499.4 (1393.4 to 1746.4)     | 1246.1 (1102.1 to 1410.8)       | 0.0 (0.0 to 0.0)                  |
| United States | 2050 | 15825.3 (14669.5 to 16938.5) | 13040.3 (11927.2 to 14153.1) | 1515.6 (1406.5 to 1768.9)     | 1269.4 (1119.3 to 1441.5)       | 0.0 (0.0 to 0.0)                  | 15825.3 (14669.5 to 16938.5) | 13040.3 (11927.2 to 14153.1) | 1515.6 (1406.5 to 1768.9)     | 1269.4 (1119.3 to 1441.5)       | 0.0 (0.0 to 0.0)                  |
| Uruguay       | 1995 | 982.2 (915.3 to 1049.6)      | 542.9 (503.6 to 586.7)       | 244.5 (215.2 to 278.0)        | 194.5 (160.4 to 236.9)          | 0.3 (0.3 to 0.3)                  | 1324.0 (1233.8 to 1414.8)    | 731.9 (678.8 to 790.8)       | 329.5 (290.1 to 374.8)        | 262.1 (216.2 to 319.4)          | 0.4 (0.4 to 0.4)                  |
| Uruguay       | 1996 | 982.9 (930.7 to 1036.3)      | 539.7 (508.5 to 574.7)       | 246.3 (219.7 to 276.4)        | 196.3 (168.1 to 228.4)          | 0.6 (0.6 to 0.6)                  | 1324.9 (1254.6 to 1396.9)    | 727.5 (685.5 to 774.7)       | 332.0 (296.2 to 372.5)        | 264.6 (226.5 to 307.8)          | 0.8 (0.8 to 0.8)                  |
| Uruguay       | 1997 | 981.7 (934.9 to 1032.8)      | 528.7 (501.2 to 558.6)       | 246.7 (222.8 to 273.4)        | 205.7 (179.3 to 236.7)          | 0.6 (0.6 to 0.6)                  | 1323.3 (1260.3 to 1392.2)    | 712.6 (675.7 to 753.0)       | 332.6 (300.3 to 368.6)        | 277.3 (241.7 to 319.0)          | 0.8 (0.8 to 0.8)                  |
| Uruguay       | 1998 | 1011.1 (964.5 to 1062.1)     | 525.9 (497.0 to 556.5)       | 250.0 (227.7 to 274.9)        | 234.2 (206.7 to 266.6)          | 1.0 (1.0 to 1.0)                  | 1363.0 (1300.1 to 1431.7)    | 708.9 (670.0 to 750.2)       | 337.0 (306.9 to 370.5)        | 315.7 (278.7 to 359.4)          | 1.3 (1.3 to 1.3)                  |
| Uruguay       | 1999 | 1046.5 (997.7 to 1100.9)     | 506.8 (477.9 to 536.3)       | 250.5 (227.5 to 274.7)        | 288.4 (254.5 to 323.4)          | 0.8 (0.8 to 0.8)                  | 1410.7 (1344.8 to 1484.0)    | 683.1 (644.2 to 722.9)       | 337.7 (306.6 to 370.3)        | 388.8 (343.0 to 436.0)          | 1.0 (1.0 to 1.0)                  |
| Uruguay       | 2000 | 1067.3 (1016.3 to 1119.6)    | 486.8 (458.8 to 515.1)       | 254.4 (230.1 to 279.9)        | 326.0 (293.1 to 361.2)          | 0.1 (0.1 to 0.1)                  | 1438.8 (1370.0 to 1509.2)    | 656.2 (618.5 to 694.3)       | 343.0 (310.2 to 377.3)        | 439.5 (395.1 to 486.9)          | 0.2 (0.2 to 0.2)                  |
| Uruguay       | 2001 | 1080.6 (1028.1 to 1136.5)    | 491.0 (464.3 to 520.8)       | 249.9 (225.7 to 276.3)        | 335.4 (298.5 to 372.4)          | 4.3 (4.3 to 4.3)                  | 1456.6 (1385.9 to 1531.9)    | 661.9 (625.8 to 702.0)       | 336.8 (304.3 to 372.4)        | 452.1 (402.4 to 502.0)          | 5.8 (5.8 to 5.8)                  |
| Uruguay       | 2002 | 1026.4 (976.0 to 1081.7)     | 476.7 (450.3 to 504.6)       | 230.3 (207.4 to 254.7)        | 305.1 (273.2 to 340.1)          | 14.4 (14.4 to 14.4)               | 1383.6 (1315.7 to 1458.1)    | 642.5 (607.0 to 680.2)       | 310.5 (279.5 to 343.3)        | 411.2 (368.2 to 458.4)          | 19.4 (19.4 to 19.4)               |
| Uruguay       | 2003 | 1003.8 (957.0 to 1052.1)     | 485.8 (456.8 to 515.7)       | 224.2 (201.5 to 247.8)        | 275.5 (245.5 to 310.1)          | 18.2 (18.2 to 18.2)               | 1353.1 (1290.0 to 1418.2)    | 654.9 (615.8 to 695.1)       | 302.3 (271.7 to 334.1)        | 371.3 (331.0 to 418.0)          | 24.6 (24.6 to 24.6)               |
| Uruguay       | 2004 | 940.8 (899.2 to 986.6)       | 477.3 (449.7 to 507.0)       | 222.2 (199.7 to 245.7)        | 240.9 (213.8 to 272.7)          | 0.3 (0.3 to 0.3)                  | 1268.2 (1212.1 to 1329.9)    | 643.4 (606.2 to 683.5)       | 299.6 (269.2 to 331.2)        | 324.8 (288.2 to 367.6)          | 0.5 (0.5 to 0.5)                  |
| Uruguay       | 2005 | 935.0 (893.9 to 980.1)       | 474.9 (449.5 to 502.6)       | 223.8 (201.2 to 248.0)        | 224.8 (197.4 to 255.1)          | 11.6 (11.6 to 11.6)               | 1260.4 (1204.9 to 1321.2)    | 640.1 (605.9 to 677.5)       | 301.6 (271.2 to 334.2)        | 303.0 (266.1 to 343.9)          | 15.6 (15.6 to 15.6)               |
| Uruguay       | 2006 | 939.1 (895.7 to 985.2)       | 511.7 (484.3 to 540.8)       | 223.8 (203.1 to 246.9)        | 203.4 (175.0 to 233.6)          | 0.3 (0.3 to 0.3)                  | 1265.9 (1207.4 to 1328.1)    | 689.7 (652.8 to 729.0)       | 301.7 (273.7 to 332.8)        | 274.2 (235.9 to 314.9)          | 0.4 (0.4 to 0.4)                  |
| Uruguay       | 2007 | 983.5 (937.8 to 1032.4)      | 562.8 (533.9 to 594.8)       | 227.8 (207.0 to 250.6)        | 191.8 (164.7 to 220.2)          | 1.1 (1.1 to 1.1)                  | 1325.7 (1264.2 to 1391.7)    | 758.7 (719.6 to 801.8)       | 307.0 (279.1 to 337.8)        | 258.6 (222.1 to 296.8)          | 1.4 (1.4 to 1.4)                  |
| Uruguay       | 2008 | 1052.6 (1006.6 to 1102.6)    | 622.9 (593.7 to 656.1)       | 235.1 (212.4 to 258.8)        | 194.0 (167.6 to 221.7)          | 0.5 (0.5 to 0.5)                  | 1418.8 (1356.8 to 1486.3)    | 839.7 (800.3 to 884.5)       | 317.0 (286.3 to 348.9)        | 261.5 (225.9 to 298.9)          | 0.7 (0.7 to 0.7)                  |

| Country | Year | 2018 US Dollars per capita |                            |                               |                                 |                                   | 2018 PPP per capita       |                            |                               |                                 |                                   |
|---------|------|----------------------------|----------------------------|-------------------------------|---------------------------------|-----------------------------------|---------------------------|----------------------------|-------------------------------|---------------------------------|-----------------------------------|
|         |      | Health spending            | Government health spending | Out-of-pocket health spending | Prepaid private health spending | Development assistance for health | Health spending           | Government health spending | Out-of-pocket health spending | Prepaid private health spending | Development assistance for health |
| Uruguay | 2009 | 1117.7 (1069.8 to 1166.7)  | 671.0 (640.6 to 702.5)     | 238.5 (215.0 to 262.7)        | 207.7 (181.0 to 237.2)          | 0.4 (0.4 to 0.4)                  | 1506.6 (1442.1 to 1572.7) | 904.5 (863.5 to 947.0)     | 321.4 (289.8 to 354.1)        | 280.0 (243.9 to 319.7)          | 0.6 (0.6 to 0.6)                  |
| Uruguay | 2010 | 1209.3 (1161.8 to 1261.2)  | 741.2 (707.6 to 776.3)     | 246.2 (223.1 to 270.6)        | 219.8 (192.7 to 250.9)          | 2.0 (2.0 to 2.0)                  | 1630.1 (1566.0 to 1700.0) | 999.2 (953.9 to 1046.5)    | 331.9 (300.7 to 364.8)        | 296.3 (259.8 to 338.2)          | 2.8 (2.8 to 2.8)                  |
| Uruguay | 2011 | 1277.1 (1228.4 to 1325.8)  | 804.3 (769.7 to 837.9)     | 249.1 (227.8 to 272.2)        | 216.6 (190.7 to 245.4)          | 7.0 (7.0 to 7.0)                  | 1721.5 (1655.8 to 1787.2) | 1084.2 (1037.5 to 1129.5)  | 335.8 (307.1 to 366.9)        | 292.0 (257.1 to 330.8)          | 9.4 (9.4 to 9.4)                  |
| Uruguay | 2012 | 1320.8 (1276.0 to 1370.6)  | 864.1 (830.7 to 896.7)     | 249.5 (229.4 to 271.2)        | 207.3 (181.7 to 234.4)          | 0.0 (0.0 to 0.0)                  | 1780.5 (1720.0 to 1847.6) | 1164.7 (1119.8 to 1208.7)  | 336.3 (309.3 to 365.6)        | 279.4 (244.9 to 316.0)          | 0.1 (0.1 to 0.1)                  |
| Uruguay | 2013 | 1391.6 (1344.0 to 1439.9)  | 936.2 (901.6 to 968.7)     | 252.0 (232.7 to 271.6)        | 203.3 (179.0 to 229.6)          | 0.1 (0.1 to 0.1)                  | 1875.9 (1811.7 to 1941.0) | 1262.0 (1215.4 to 1305.8)  | 339.7 (313.7 to 366.1)        | 274.1 (241.3 to 309.5)          | 0.1 (0.1 to 0.1)                  |
| Uruguay | 2014 | 1441.9 (1396.1 to 1486.5)  | 993.0 (959.5 to 1026.1)    | 253.2 (233.9 to 271.7)        | 195.6 (172.3 to 223.3)          | 0.1 (0.1 to 0.1)                  | 1943.7 (1882.0 to 2003.9) | 1338.6 (1293.4 to 1383.1)  | 341.3 (315.3 to 366.3)        | 263.7 (232.3 to 301.0)          | 0.1 (0.1 to 0.1)                  |
| Uruguay | 2015 | 1471.3 (1425.4 to 1521.4)  | 1031.8 (997.4 to 1067.7)   | 255.3 (234.7 to 276.9)        | 184.1 (158.7 to 212.0)          | 0.1 (0.1 to 0.1)                  | 1983.3 (1921.4 to 2050.8) | 1390.9 (1344.5 to 1439.3)  | 344.1 (316.3 to 373.3)        | 248.2 (213.9 to 285.8)          | 0.1 (0.1 to 0.1)                  |
| Uruguay | 2016 | 1519.7 (1457.4 to 1586.2)  | 1081.8 (1034.7 to 1134.3)  | 261.7 (236.1 to 289.1)        | 176.2 (145.9 to 210.7)          | 0.0 (0.0 to 0.0)                  | 2048.5 (1964.6 to 2138.2) | 1458.2 (1394.8 to 1529.0)  | 352.8 (318.3 to 389.7)        | 237.5 (196.7 to 284.1)          | 0.0 (0.0 to 0.0)                  |
| Uruguay | 2017 | 1557.0 (1493.3 to 1627.0)  | 1106.4 (1056.1 to 1160.0)  | 267.0 (239.1 to 294.9)        | 183.5 (151.9 to 219.8)          | 0.0 (0.0 to 0.0)                  | 2098.8 (2012.9 to 2193.2) | 1491.4 (1423.6 to 1563.7)  | 360.0 (322.3 to 397.5)        | 247.4 (204.7 to 296.3)          | 0.0 (0.0 to 0.0)                  |
| Uruguay | 2018 | 1585.1 (1519.2 to 1655.5)  | 1127.2 (1075.3 to 1181.2)  | 271.0 (242.6 to 300.0)        | 186.9 (154.4 to 224.3)          | 0.0 (0.0 to 0.0)                  | 2136.7 (2047.8 to 2231.5) | 1519.4 (1449.5 to 1592.3)  | 365.3 (327.0 to 404.4)        | 252.0 (208.2 to 302.4)          | 0.0 (0.0 to 0.0)                  |
| Uruguay | 2019 | 1606.0 (1539.4 to 1678.3)  | 1140.8 (1087.5 to 1196.3)  | 274.7 (245.2 to 304.3)        | 190.5 (157.1 to 228.9)          | 0.0 (0.0 to 0.0)                  | 2164.9 (2075.2 to 2262.4) | 1537.8 (1465.9 to 1612.6)  | 370.3 (330.5 to 410.2)        | 256.7 (211.7 to 308.6)          | 0.0 (0.0 to 0.0)                  |
| Uruguay | 2020 | 1626.6 (1558.4 to 1701.5)  | 1154.3 (1101.0 to 1211.5)  | 278.5 (248.3 to 310.4)        | 193.9 (159.8 to 233.3)          | 0.0 (0.0 to 0.0)                  | 2192.6 (2100.7 to 2293.6) | 1555.9 (1484.1 to 1633.1)  | 375.4 (334.7 to 418.5)        | 261.3 (215.4 to 314.4)          | 0.0 (0.0 to 0.0)                  |
| Uruguay | 2021 | 1648.1 (1578.3 to 1726.0)  | 1168.4 (1112.6 to 1226.6)  | 282.3 (250.5 to 314.4)        | 197.4 (162.3 to 237.3)          | 0.0 (0.0 to 0.0)                  | 2221.7 (2127.6 to 2326.6) | 1575.0 (1499.8 to 1653.5)  | 380.5 (337.7 to 423.9)        | 266.1 (218.8 to 319.9)          | 0.0 (0.0 to 0.0)                  |
| Uruguay | 2022 | 1668.2 (1596.3 to 1747.6)  | 1181.3 (1124.1 to 1241.9)  | 286.0 (253.4 to 320.0)        | 200.8 (165.1 to 241.6)          | 0.0 (0.0 to 0.0)                  | 2248.7 (2151.8 to 2355.8) | 1592.4 (1515.3 to 1674.0)  | 385.6 (341.6 to 431.4)        | 270.7 (222.6 to 325.7)          | 0.0 (0.0 to 0.0)                  |
| Uruguay | 2023 | 1689.1 (1615.2 to 1771.6)  | 1195.0 (1134.7 to 1258.5)  | 289.8 (256.7 to 324.2)        | 204.3 (168.3 to 245.9)          | 0.0 (0.0 to 0.0)                  | 2276.9 (2177.2 to 2388.0) | 1610.9 (1529.6 to 1696.5)  | 390.7 (346.0 to 437.0)        | 275.4 (226.9 to 331.5)          | 0.0 (0.0 to 0.0)                  |
| Uruguay | 2024 | 1711.8 (1634.9 to 1796.4)  | 1210.3 (1147.9 to 1276.1)  | 293.7 (259.4 to 329.4)        | 207.8 (171.6 to 250.3)          | 0.0 (0.0 to 0.0)                  | 2307.4 (2203.8 to 2421.5) | 1631.5 (1547.4 to 1720.1)  | 395.9 (349.7 to 444.1)        | 280.1 (231.3 to 337.4)          | 0.0 (0.0 to 0.0)                  |
| Uruguay | 2025 | 1733.7 (1653.7 to 1819.8)  | 1224.9 (1159.8 to 1292.4)  | 297.6 (261.7 to 335.4)        | 211.3 (174.8 to 254.7)          | 0.0 (0.0 to 0.0)                  | 2337.0 (2229.1 to 2453.1) | 1651.1 (1563.4 to 1742.2)  | 401.1 (352.7 to 452.1)        | 284.8 (235.6 to 343.3)          | 0.0 (0.0 to 0.0)                  |
| Uruguay | 2026 | 1755.1 (1673.0 to 1844.4)  | 1239.0 (1172.2 to 1309.0)  | 301.4 (264.4 to 340.6)        | 214.7 (177.7 to 259.0)          | 0.0 (0.0 to 0.0)                  | 2365.9 (2255.2 to 2486.2) | 1670.1 (1580.1 to 1764.5)  | 406.3 (356.4 to 459.2)        | 289.4 (239.5 to 349.1)          | 0.0 (0.0 to 0.0)                  |
| Uruguay | 2027 | 1778.3 (1692.1 to 1871.3)  | 1254.4 (1183.7 to 1327.8)  | 305.5 (266.5 to 347.2)        | 218.4 (180.8 to 263.6)          | 0.0 (0.0 to 0.0)                  | 2397.1 (2280.9 to 2522.5) | 1690.9 (1595.6 to 1789.8)  | 411.8 (359.2 to 468.1)        | 294.4 (243.7 to 355.4)          | 0.0 (0.0 to 0.0)                  |
| Uruguay | 2028 | 1804.8 (1715.4 to 1902.3)  | 1273.1 (1197.1 to 1349.6)  | 309.6 (269.2 to 352.4)        | 222.1 (183.9 to 268.3)          | 0.0 (0.0 to 0.0)                  | 2432.9 (2312.3 to 2564.3) | 1716.1 (1613.7 to 1819.2)  | 417.4 (362.9 to 475.0)        | 299.4 (247.9 to 361.7)          | 0.0 (0.0 to 0.0)                  |
| Uruguay | 2029 | 1831.8 (1735.9 to 1935.2)  | 1292.2 (1211.3 to 1374.0)  | 313.8 (270.9 to 359.8)        | 225.8 (187.0 to 273.0)          | 0.0 (0.0 to 0.0)                  | 2469.2 (2340.0 to 2608.6) | 1741.8 (1632.8 to 1852.2)  | 423.0 (365.1 to 485.0)        | 304.4 (252.1 to 368.0)          | 0.0 (0.0 to 0.0)                  |

| Country | Year | 2018 US Dollars per capita |                            |                               |                                 |                                   | 2018 PPP per capita       |                            |                               |                                 |                                   |
|---------|------|----------------------------|----------------------------|-------------------------------|---------------------------------|-----------------------------------|---------------------------|----------------------------|-------------------------------|---------------------------------|-----------------------------------|
|         |      | Health spending            | Government health spending | Out-of-pocket health spending | Prepaid private health spending | Development assistance for health | Health spending           | Government health spending | Out-of-pocket health spending | Prepaid private health spending | Development assistance for health |
| Uruguay | 2030 | 1859.5 (1759.2 to 1967.0)  | 1311.8 (1226.5 to 1397.9)  | 318.1 (272.5 to 367.6)        | 229.6 (189.6 to 277.8)          | 0.0 (0.0 to 0.0)                  | 2506.6 (2371.4 to 2651.5) | 1768.3 (1653.4 to 1884.3)  | 428.7 (367.3 to 495.5)        | 309.6 (255.5 to 374.5)          | 0.0 (0.0 to 0.0)                  |
| Uruguay | 2031 | 1889.1 (1784.9 to 2003.6)  | 1332.9 (1243.5 to 1422.7)  | 322.5 (274.9 to 374.0)        | 233.7 (192.6 to 282.9)          | 0.0 (0.0 to 0.0)                  | 2546.5 (2406.0 to 2700.9) | 1796.7 (1676.2 to 1917.8)  | 434.7 (370.5 to 504.1)        | 315.1 (259.6 to 381.4)          | 0.0 (0.0 to 0.0)                  |
| Uruguay | 2032 | 1918.4 (1808.6 to 2039.4)  | 1353.7 (1260.1 to 1449.9)  | 326.9 (277.0 to 382.6)        | 237.8 (195.8 to 288.3)          | 0.0 (0.0 to 0.0)                  | 2586.0 (2437.9 to 2749.1) | 1824.8 (1698.7 to 1954.5)  | 440.7 (373.4 to 515.7)        | 320.5 (264.0 to 388.7)          | 0.0 (0.0 to 0.0)                  |
| Uruguay | 2033 | 1948.2 (1833.8 to 2077.2)  | 1374.8 (1277.0 to 1476.0)  | 331.4 (279.3 to 392.5)        | 241.9 (199.3 to 293.9)          | 0.0 (0.0 to 0.0)                  | 2626.1 (2472.0 to 2800.1) | 1853.3 (1721.4 to 1989.6)  | 446.8 (376.4 to 529.1)        | 326.1 (268.6 to 396.1)          | 0.0 (0.0 to 0.0)                  |
| Uruguay | 2034 | 1978.0 (1857.1 to 2112.2)  | 1396.0 (1292.8 to 1502.2)  | 336.0 (280.9 to 400.9)        | 246.0 (202.1 to 299.5)          | 0.0 (0.0 to 0.0)                  | 2666.4 (2503.4 to 2847.2) | 1881.8 (1742.7 to 2024.9)  | 452.9 (378.7 to 540.5)        | 331.6 (272.4 to 403.7)          | 0.0 (0.0 to 0.0)                  |
| Uruguay | 2035 | 2007.3 (1882.3 to 2149.3)  | 1416.6 (1308.3 to 1527.2)  | 340.6 (282.2 to 409.3)        | 250.1 (204.8 to 304.9)          | 0.0 (0.0 to 0.0)                  | 2705.8 (2537.4 to 2897.3) | 1909.6 (1763.5 to 2058.7)  | 459.1 (380.4 to 551.7)        | 337.1 (276.1 to 411.1)          | 0.0 (0.0 to 0.0)                  |
| Uruguay | 2036 | 2036.9 (1906.5 to 2184.5)  | 1437.5 (1325.1 to 1552.6)  | 345.2 (283.8 to 417.9)        | 254.2 (207.7 to 310.5)          | 0.0 (0.0 to 0.0)                  | 2745.7 (2569.9 to 2944.6) | 1937.7 (1786.3 to 2092.9)  | 465.4 (382.6 to 563.3)        | 342.7 (280.0 to 418.6)          | 0.0 (0.0 to 0.0)                  |
| Uruguay | 2037 | 2067.1 (1932.0 to 2221.8)  | 1458.7 (1341.5 to 1578.6)  | 350.0 (285.6 to 425.3)        | 258.4 (211.1 to 316.0)          | 0.0 (0.0 to 0.0)                  | 2786.4 (2604.3 to 2994.9) | 1966.3 (1808.4 to 2127.9)  | 471.8 (385.0 to 573.3)        | 348.3 (284.6 to 425.9)          | 0.0 (0.0 to 0.0)                  |
| Uruguay | 2038 | 2096.6 (1958.7 to 2258.0)  | 1479.4 (1358.3 to 1605.0)  | 354.7 (287.6 to 434.1)        | 262.5 (214.5 to 321.1)          | 0.0 (0.0 to 0.0)                  | 2826.1 (2640.4 to 3043.8) | 1994.2 (1830.9 to 2163.5)  | 478.2 (387.7 to 585.1)        | 353.8 (289.2 to 432.8)          | 0.0 (0.0 to 0.0)                  |
| Uruguay | 2039 | 2126.3 (1982.1 to 2293.6)  | 1500.1 (1375.0 to 1632.8)  | 359.5 (290.0 to 441.4)        | 266.6 (217.9 to 326.3)          | 0.0 (0.0 to 0.0)                  | 2866.2 (2671.9 to 3091.8) | 2022.2 (1853.4 to 2201.1)  | 484.6 (390.9 to 595.0)        | 359.4 (293.8 to 439.8)          | 0.0 (0.0 to 0.0)                  |
| Uruguay | 2040 | 2155.5 (2002.5 to 2328.0)  | 1520.4 (1389.5 to 1657.8)  | 364.3 (292.2 to 447.4)        | 270.7 (221.3 to 331.3)          | 0.0 (0.0 to 0.0)                  | 2905.5 (2699.3 to 3138.2) | 2049.5 (1873.0 to 2234.7)  | 491.1 (393.9 to 603.1)        | 364.9 (298.3 to 446.6)          | 0.0 (0.0 to 0.0)                  |
| Uruguay | 2041 | 2185.2 (2027.8 to 2363.1)  | 1541.1 (1403.7 to 1682.9)  | 369.2 (294.4 to 454.4)        | 274.8 (224.5 to 336.6)          | 0.0 (0.0 to 0.0)                  | 2945.6 (2733.5 to 3185.5) | 2077.4 (1892.2 to 2268.5)  | 497.7 (396.9 to 612.5)        | 370.5 (302.6 to 453.7)          | 0.0 (0.0 to 0.0)                  |
| Uruguay | 2042 | 2214.3 (2054.8 to 2400.5)  | 1561.3 (1418.6 to 1707.5)  | 374.1 (297.0 to 462.3)        | 278.9 (226.9 to 342.1)          | 0.0 (0.0 to 0.0)                  | 2984.9 (2769.8 to 3235.8) | 2104.6 (1912.3 to 2301.7)  | 504.3 (400.3 to 623.2)        | 376.0 (305.9 to 461.1)          | 0.0 (0.0 to 0.0)                  |
| Uruguay | 2043 | 2244.8 (2074.9 to 2436.1)  | 1582.4 (1434.9 to 1734.8)  | 379.1 (299.7 to 469.0)        | 283.2 (229.6 to 347.8)          | 0.0 (0.0 to 0.0)                  | 3025.9 (2797.0 to 3283.8) | 2133.1 (1934.3 to 2338.5)  | 511.0 (404.1 to 632.2)        | 381.8 (309.5 to 468.8)          | 0.0 (0.0 to 0.0)                  |
| Uruguay | 2044 | 2275.5 (2104.3 to 2474.2)  | 1603.8 (1450.9 to 1763.7)  | 384.2 (302.7 to 475.5)        | 287.5 (232.4 to 353.1)          | 0.0 (0.0 to 0.0)                  | 3067.3 (2836.6 to 3335.3) | 2161.9 (1955.8 to 2377.5)  | 517.9 (408.1 to 640.9)        | 387.6 (313.3 to 476.0)          | 0.0 (0.0 to 0.0)                  |
| Uruguay | 2045 | 2309.9 (2134.0 to 2517.5)  | 1628.0 (1467.8 to 1796.2)  | 389.6 (306.9 to 482.8)        | 292.4 (235.7 to 359.2)          | 0.0 (0.0 to 0.0)                  | 3113.7 (2876.6 to 3393.5) | 2194.5 (1978.6 to 2421.3)  | 525.1 (413.7 to 650.7)        | 394.1 (317.7 to 484.2)          | 0.0 (0.0 to 0.0)                  |
| Uruguay | 2046 | 2343.4 (2156.7 to 2557.7)  | 1651.4 (1485.6 to 1826.3)  | 394.9 (310.9 to 490.0)        | 297.1 (238.9 to 366.1)          | 0.0 (0.0 to 0.0)                  | 3158.9 (2907.2 to 3447.8) | 2226.1 (2002.6 to 2461.8)  | 532.3 (419.1 to 660.5)        | 400.5 (322.0 to 493.4)          | 0.0 (0.0 to 0.0)                  |
| Uruguay | 2047 | 2378.4 (2185.3 to 2597.7)  | 1676.0 (1504.4 to 1857.5)  | 400.3 (314.7 to 497.5)        | 302.1 (242.3 to 373.2)          | 0.0 (0.0 to 0.0)                  | 3206.0 (2945.8 to 3501.7) | 2259.3 (2027.9 to 2504.0)  | 539.6 (424.3 to 670.6)        | 407.2 (326.6 to 503.1)          | 0.0 (0.0 to 0.0)                  |
| Uruguay | 2048 | 2413.8 (2214.2 to 2638.3)  | 1701.0 (1523.2 to 1888.5)  | 405.7 (319.2 to 505.1)        | 307.1 (246.2 to 380.5)          | 0.0 (0.0 to 0.0)                  | 3253.8 (2984.8 to 3556.4) | 2292.9 (2053.2 to 2545.7)  | 546.9 (430.2 to 680.8)        | 414.0 (331.9 to 512.9)          | 0.0 (0.0 to 0.0)                  |
| Uruguay | 2049 | 2448.7 (2243.9 to 2686.9)  | 1725.4 (1541.2 to 1919.6)  | 411.2 (323.3 to 512.6)        | 312.1 (249.4 to 387.6)          | 0.0 (0.0 to 0.0)                  | 3300.8 (3024.7 to 3621.9) | 2325.8 (2077.5 to 2587.6)  | 554.3 (435.8 to 691.0)        | 420.7 (336.1 to 522.4)          | 0.0 (0.0 to 0.0)                  |
| Uruguay | 2050 | 2483.4 (2273.8 to 2734.0)  | 1749.6 (1558.9 to 1951.6)  | 416.7 (328.3 to 518.6)        | 317.1 (252.5 to 394.5)          | 0.0 (0.0 to 0.0)                  | 3347.6 (3065.0 to 3685.4) | 2358.4 (2101.4 to 2630.7)  | 561.8 (442.6 to 699.0)        | 427.4 (340.4 to 531.8)          | 0.0 (0.0 to 0.0)                  |

| Country    | Year | 2018 US Dollars per capita |                            |                               |                                 |                                   | 2018 PPP per capita    |                            |                               |                                 |                                   |
|------------|------|----------------------------|----------------------------|-------------------------------|---------------------------------|-----------------------------------|------------------------|----------------------------|-------------------------------|---------------------------------|-----------------------------------|
|            |      | Health spending            | Government health spending | Out-of-pocket health spending | Prepaid private health spending | Development assistance for health | Health spending        | Government health spending | Out-of-pocket health spending | Prepaid private health spending | Development assistance for health |
| Uzbekistan | 1995 | 31.8 (25.9 to 38.9)        | 15.8 (12.1 to 20.1)        | 14.7 (10.4 to 20.3)           | 0.1 (0.0 to 0.2)                | 1.2 (1.2 to 1.2)                  | 176.0 (143.7 to 215.8) | 87.3 (66.8 to 111.6)       | 81.3 (57.5 to 112.6)          | 0.6 (0.3 to 1.0)                | 6.8 (6.8 to 6.8)                  |
| Uzbekistan | 1996 | 30.9 (25.1 to 38.1)        | 15.4 (11.9 to 19.8)        | 14.9 (10.6 to 20.6)           | 0.1 (0.0 to 0.2)                | 0.5 (0.5 to 0.5)                  | 171.3 (138.9 to 211.1) | 85.5 (65.9 to 109.5)       | 82.3 (58.7 to 114.0)          | 0.6 (0.3 to 1.1)                | 2.9 (2.9 to 2.9)                  |
| Uzbekistan | 1997 | 30.1 (24.5 to 37.1)        | 14.7 (11.3 to 18.8)        | 14.9 (10.6 to 20.8)           | 0.1 (0.0 to 0.2)                | 0.3 (0.3 to 0.3)                  | 166.7 (135.8 to 205.6) | 81.7 (62.7 to 104.4)       | 82.7 (58.5 to 115.0)          | 0.6 (0.3 to 1.1)                | 1.8 (1.8 to 1.8)                  |
| Uzbekistan | 1998 | 29.2 (23.7 to 36.0)        | 14.0 (10.7 to 18.0)        | 14.6 (10.4 to 20.0)           | 0.1 (0.0 to 0.2)                | 0.4 (0.4 to 0.4)                  | 161.6 (131.4 to 199.3) | 77.4 (59.5 to 99.6)        | 81.2 (57.8 to 110.8)          | 0.6 (0.3 to 1.1)                | 2.4 (2.4 to 2.4)                  |
| Uzbekistan | 1999 | 29.0 (23.5 to 35.4)        | 13.5 (10.5 to 17.6)        | 14.2 (10.2 to 19.5)           | 0.1 (0.0 to 0.2)                | 1.1 (1.1 to 1.1)                  | 160.5 (130.4 to 196.4) | 75.1 (58.2 to 97.5)        | 78.9 (56.5 to 108.0)          | 0.6 (0.3 to 1.1)                | 5.9 (5.9 to 5.9)                  |
| Uzbekistan | 2000 | 28.0 (22.7 to 34.3)        | 12.9 (9.9 to 16.7)         | 14.3 (10.2 to 19.4)           | 0.1 (0.0 to 0.2)                | 0.7 (0.7 to 0.7)                  | 155.0 (125.9 to 189.8) | 71.6 (55.0 to 92.7)        | 79.0 (56.8 to 107.4)          | 0.6 (0.3 to 1.1)                | 3.8 (3.8 to 3.8)                  |
| Uzbekistan | 2001 | 28.8 (23.3 to 35.3)        | 12.9 (9.9 to 16.5)         | 14.7 (10.5 to 20.0)           | 0.1 (0.1 to 0.2)                | 1.2 (1.2 to 1.2)                  | 159.6 (129.2 to 195.5) | 71.2 (55.0 to 91.5)        | 81.4 (58.1 to 111.0)          | 0.6 (0.3 to 1.1)                | 6.4 (6.4 to 6.4)                  |
| Uzbekistan | 2002 | 29.2 (23.5 to 35.5)        | 12.8 (9.9 to 16.5)         | 14.9 (10.6 to 20.0)           | 0.1 (0.1 to 0.2)                | 1.4 (1.4 to 1.4)                  | 161.6 (130.4 to 196.9) | 70.9 (54.8 to 91.5)        | 82.6 (58.6 to 110.8)          | 0.6 (0.3 to 1.2)                | 7.5 (7.5 to 7.5)                  |
| Uzbekistan | 2003 | 29.4 (23.9 to 35.7)        | 13.1 (10.1 to 16.9)        | 15.1 (10.8 to 20.5)           | 0.1 (0.1 to 0.2)                | 1.1 (1.1 to 1.1)                  | 162.7 (132.5 to 197.6) | 72.5 (55.9 to 93.9)        | 83.4 (59.8 to 113.5)          | 0.7 (0.3 to 1.3)                | 6.2 (6.2 to 6.2)                  |
| Uzbekistan | 2004 | 30.8 (25.4 to 37.6)        | 13.6 (10.5 to 17.5)        | 15.3 (11.0 to 20.7)           | 0.1 (0.1 to 0.3)                | 1.7 (1.7 to 1.7)                  | 170.7 (140.6 to 208.2) | 75.4 (58.3 to 97.2)        | 84.8 (61.1 to 114.6)          | 0.8 (0.4 to 1.5)                | 9.7 (9.7 to 9.7)                  |
| Uzbekistan | 2005 | 31.3 (25.5 to 38.0)        | 14.4 (11.0 to 18.5)        | 15.7 (11.3 to 21.2)           | 0.2 (0.1 to 0.3)                | 1.1 (1.1 to 1.1)                  | 173.2 (141.4 to 210.7) | 79.5 (61.0 to 102.5)       | 86.9 (62.4 to 117.5)          | 0.9 (0.4 to 1.7)                | 5.9 (5.9 to 5.9)                  |
| Uzbekistan | 2006 | 32.4 (26.5 to 39.4)        | 15.0 (11.5 to 19.1)        | 16.1 (11.7 to 21.7)           | 0.2 (0.1 to 0.3)                | 1.2 (1.2 to 1.2)                  | 179.7 (146.6 to 218.4) | 83.0 (63.8 to 105.7)       | 89.3 (65.0 to 120.3)          | 0.9 (0.4 to 1.8)                | 6.5 (6.5 to 6.5)                  |
| Uzbekistan | 2007 | 35.2 (28.8 to 43.0)        | 16.3 (12.6 to 20.6)        | 17.3 (12.6 to 23.4)           | 0.2 (0.1 to 0.4)                | 1.4 (1.4 to 1.4)                  | 195.0 (159.8 to 238.5) | 90.2 (69.7 to 114.0)       | 95.8 (69.7 to 129.6)          | 1.0 (0.5 to 1.9)                | 8.0 (8.0 to 8.0)                  |
| Uzbekistan | 2008 | 38.0 (31.0 to 46.0)        | 17.8 (13.8 to 22.6)        | 18.3 (13.3 to 25.0)           | 0.2 (0.1 to 0.4)                | 1.7 (1.7 to 1.7)                  | 210.5 (171.7 to 255.0) | 98.8 (76.7 to 125.3)       | 101.3 (73.7 to 138.4)         | 1.1 (0.5 to 2.1)                | 9.3 (9.3 to 9.3)                  |
| Uzbekistan | 2009 | 41.8 (34.0 to 50.6)        | 19.8 (15.5 to 25.1)        | 19.8 (14.2 to 27.0)           | 0.2 (0.1 to 0.4)                | 1.9 (1.9 to 1.9)                  | 231.4 (188.4 to 280.2) | 109.9 (86.0 to 139.2)      | 109.6 (78.9 to 149.7)         | 1.2 (0.5 to 2.2)                | 10.8 (10.8 to 10.8)               |
| Uzbekistan | 2010 | 45.8 (37.4 to 55.4)        | 22.5 (17.6 to 28.3)        | 21.4 (15.4 to 29.4)           | 0.2 (0.1 to 0.4)                | 1.7 (1.7 to 1.7)                  | 253.8 (207.3 to 306.9) | 124.6 (97.3 to 156.9)      | 118.6 (85.3 to 163.0)         | 1.3 (0.6 to 2.5)                | 9.4 (9.4 to 9.4)                  |
| Uzbekistan | 2011 | 50.1 (41.2 to 60.3)        | 24.9 (19.6 to 31.2)        | 23.3 (17.1 to 32.0)           | 0.2 (0.1 to 0.5)                | 1.7 (1.7 to 1.7)                  | 277.7 (228.1 to 334.0) | 138.1 (108.5 to 173.1)     | 129.0 (94.6 to 177.4)         | 1.4 (0.6 to 2.6)                | 9.2 (9.2 to 9.2)                  |
| Uzbekistan | 2012 | 56.4 (46.2 to 68.1)        | 27.7 (21.8 to 34.8)        | 25.9 (19.2 to 35.2)           | 0.3 (0.1 to 0.5)                | 2.5 (2.5 to 2.5)                  | 312.5 (256.2 to 377.3) | 153.3 (120.7 to 192.6)     | 143.8 (106.2 to 195.1)        | 1.5 (0.7 to 2.8)                | 14.0 (14.0 to 14.0)               |
| Uzbekistan | 2013 | 60.2 (48.9 to 72.6)        | 30.3 (23.6 to 38.4)        | 28.3 (20.5 to 38.7)           | 0.3 (0.1 to 0.5)                | 1.3 (1.3 to 1.3)                  | 333.8 (270.9 to 402.5) | 168.1 (131.0 to 212.8)     | 156.7 (113.4 to 214.2)        | 1.6 (0.7 to 3.0)                | 7.3 (7.3 to 7.3)                  |
| Uzbekistan | 2014 | 64.7 (52.6 to 77.9)        | 32.3 (25.1 to 40.6)        | 30.2 (21.9 to 41.2)           | 0.3 (0.1 to 0.6)                | 1.9 (1.9 to 1.9)                  | 358.6 (291.3 to 431.7) | 178.8 (139.0 to 224.8)     | 167.4 (121.1 to 228.3)        | 1.7 (0.8 to 3.3)                | 10.8 (10.8 to 10.8)               |
| Uzbekistan | 2015 | 69.7 (56.6 to 83.8)        | 34.2 (26.4 to 43.2)        | 33.4 (24.1 to 45.5)           | 0.3 (0.2 to 0.6)                | 1.7 (1.7 to 1.7)                  | 386.3 (313.6 to 464.5) | 189.8 (146.1 to 239.6)     | 185.3 (133.4 to 252.0)        | 1.8 (0.8 to 3.5)                | 9.4 (9.4 to 9.4)                  |



| Country    | Year | 2018 US Dollars per capita |                            |                               |                                 |                                   | 2018 PPP per capita    |                            |                               |                                 |                                   |
|------------|------|----------------------------|----------------------------|-------------------------------|---------------------------------|-----------------------------------|------------------------|----------------------------|-------------------------------|---------------------------------|-----------------------------------|
|            |      | Health spending            | Government health spending | Out-of-pocket health spending | Prepaid private health spending | Development assistance for health | Health spending        | Government health spending | Out-of-pocket health spending | Prepaid private health spending | Development assistance for health |
| Uzbekistan | 2016 | 76.3 (62.8 to 92.6)        | 36.0 (27.3 to 45.6)        | 37.0 (26.3 to 50.4)           | 0.4 (0.2 to 0.7)                | 2.9 (2.9 to 2.9)                  | 422.6 (348.1 to 513.0) | 199.4 (151.4 to 252.4)     | 205.0 (145.7 to 279.3)        | 2.0 (0.9 to 3.7)                | 16.3 (16.3 to 16.3)               |
| Uzbekistan | 2017 | 80.2 (65.5 to 96.5)        | 38.6 (29.5 to 48.9)        | 38.3 (27.5 to 51.9)           | 0.4 (0.2 to 0.7)                | 2.9 (2.9 to 2.9)                  | 444.7 (363.1 to 534.6) | 213.9 (163.5 to 271.1)     | 212.4 (152.3 to 287.9)        | 2.0 (0.9 to 3.8)                | 16.3 (16.3 to 16.3)               |
| Uzbekistan | 2018 | 82.2 (67.7 to 100.2)       | 40.0 (30.6 to 50.8)        | 39.1 (28.1 to 53.1)           | 0.4 (0.2 to 0.7)                | 2.7 (2.6 to 2.8)                  | 455.8 (375.1 to 555.5) | 221.9 (169.7 to 281.7)     | 216.9 (155.5 to 294.1)        | 2.1 (1.0 to 3.9)                | 14.9 (14.5 to 15.2)               |
| Uzbekistan | 2019 | 84.5 (68.5 to 101.3)       | 41.5 (31.8 to 52.8)        | 39.9 (28.5 to 54.0)           | 0.4 (0.2 to 0.7)                | 2.7 (2.5 to 2.9)                  | 468.0 (379.3 to 561.3) | 230.1 (176.3 to 292.5)     | 220.9 (158.0 to 299.4)        | 2.1 (1.0 to 4.0)                | 14.9 (13.8 to 16.0)               |
| Uzbekistan | 2020 | 86.2 (71.0 to 105.1)       | 42.5 (32.6 to 54.0)        | 40.6 (29.1 to 54.8)           | 0.4 (0.2 to 0.7)                | 2.7 (2.5 to 3.0)                  | 477.7 (393.4 to 582.6) | 235.6 (180.5 to 299.3)     | 224.8 (161.3 to 303.7)        | 2.2 (1.0 to 4.1)                | 15.1 (13.6 to 16.4)               |
| Uzbekistan | 2021 | 87.9 (71.3 to 105.6)       | 43.5 (33.3 to 55.1)        | 41.3 (29.5 to 56.0)           | 0.4 (0.2 to 0.8)                | 2.8 (2.5 to 3.1)                  | 487.2 (395.2 to 585.4) | 241.1 (184.5 to 305.6)     | 228.6 (163.4 to 310.1)        | 2.3 (1.0 to 4.2)                | 15.2 (13.6 to 16.9)               |
| Uzbekistan | 2022 | 89.6 (73.6 to 108.5)       | 44.5 (33.9 to 56.2)        | 41.9 (29.9 to 57.2)           | 0.4 (0.2 to 0.8)                | 2.8 (2.5 to 3.2)                  | 496.3 (408.1 to 601.2) | 246.4 (188.0 to 311.7)     | 232.1 (165.7 to 316.8)        | 2.3 (1.1 to 4.3)                | 15.6 (13.7 to 17.6)               |
| Uzbekistan | 2023 | 91.2 (74.3 to 109.2)       | 45.4 (34.6 to 57.5)        | 42.5 (30.4 to 57.7)           | 0.4 (0.2 to 0.8)                | 2.9 (2.4 to 3.3)                  | 505.4 (411.9 to 605.4) | 251.6 (191.5 to 318.7)     | 235.6 (168.3 to 319.7)        | 2.4 (1.1 to 4.4)                | 15.8 (13.5 to 18.2)               |
| Uzbekistan | 2024 | 92.9 (76.6 to 112.4)       | 46.4 (35.2 to 58.8)        | 43.2 (30.6 to 58.8)           | 0.4 (0.2 to 0.8)                | 2.9 (2.5 to 3.4)                  | 514.6 (424.6 to 623.0) | 256.9 (195.3 to 325.6)     | 239.1 (169.8 to 326.0)        | 2.4 (1.1 to 4.5)                | 16.2 (13.7 to 19.0)               |
| Uzbekistan | 2025 | 94.6 (77.2 to 113.6)       | 47.4 (36.0 to 60.2)        | 43.8 (31.1 to 59.6)           | 0.4 (0.2 to 0.8)                | 3.0 (2.5 to 3.5)                  | 524.3 (427.7 to 629.6) | 262.5 (199.4 to 333.4)     | 242.8 (172.6 to 330.0)        | 2.5 (1.2 to 4.6)                | 16.6 (14.0 to 19.5)               |
| Uzbekistan | 2026 | 96.3 (79.3 to 117.1)       | 48.3 (36.6 to 61.6)        | 44.5 (31.7 to 60.3)           | 0.5 (0.2 to 0.9)                | 3.1 (2.5 to 3.6)                  | 533.7 (439.5 to 648.7) | 267.9 (203.0 to 341.2)     | 246.4 (175.4 to 334.0)        | 2.5 (1.2 to 4.8)                | 16.9 (14.0 to 20.0)               |
| Uzbekistan | 2027 | 98.2 (80.6 to 118.0)       | 49.4 (37.3 to 63.1)        | 45.2 (32.2 to 61.1)           | 0.5 (0.2 to 0.9)                | 3.1 (2.6 to 3.8)                  | 544.3 (446.5 to 653.9) | 273.9 (206.9 to 349.7)     | 250.5 (178.6 to 338.6)        | 2.6 (1.2 to 4.9)                | 17.3 (14.2 to 20.8)               |
| Uzbekistan | 2028 | 100.3 (82.8 to 121.6)      | 50.6 (38.2 to 64.6)        | 46.0 (32.8 to 62.0)           | 0.5 (0.2 to 0.9)                | 3.2 (2.6 to 3.9)                  | 555.7 (458.6 to 674.1) | 280.5 (211.8 to 358.1)     | 254.9 (182.0 to 343.6)        | 2.7 (1.2 to 5.0)                | 17.6 (14.5 to 21.7)               |
| Uzbekistan | 2029 | 102.3 (84.1 to 122.8)      | 51.8 (39.0 to 66.2)        | 46.8 (33.5 to 63.3)           | 0.5 (0.2 to 0.9)                | 3.2 (2.6 to 4.0)                  | 567.1 (466.3 to 680.3) | 287.0 (216.4 to 366.7)     | 259.4 (185.6 to 350.9)        | 2.7 (1.3 to 5.1)                | 17.9 (14.5 to 22.3)               |
| Uzbekistan | 2030 | 104.5 (86.1 to 127.0)      | 53.1 (39.9 to 67.8)        | 47.7 (34.2 to 64.6)           | 0.5 (0.2 to 0.9)                | 3.3 (2.6 to 4.1)                  | 579.3 (477.1 to 704.0) | 294.1 (221.1 to 375.9)     | 264.2 (189.4 to 357.7)        | 2.8 (1.3 to 5.2)                | 18.2 (14.5 to 22.7)               |
| Uzbekistan | 2031 | 106.9 (87.6 to 128.8)      | 54.4 (40.9 to 69.6)        | 48.6 (34.9 to 66.2)           | 0.5 (0.2 to 1.0)                | 3.3 (2.6 to 4.2)                  | 592.2 (485.5 to 714.0) | 301.6 (226.8 to 385.9)     | 269.3 (193.4 to 366.7)        | 2.9 (1.3 to 5.4)                | 18.4 (14.5 to 23.3)               |
| Uzbekistan | 2032 | 109.4 (89.9 to 133.2)      | 55.9 (41.9 to 71.5)        | 49.6 (35.7 to 67.6)           | 0.5 (0.2 to 1.0)                | 3.4 (2.6 to 4.3)                  | 606.2 (498.2 to 738.1) | 309.8 (232.2 to 396.1)     | 274.7 (197.6 to 374.6)        | 3.0 (1.4 to 5.5)                | 18.7 (14.5 to 23.8)               |
| Uzbekistan | 2033 | 112.0 (91.3 to 134.7)      | 57.4 (43.1 to 73.3)        | 50.6 (36.4 to 69.0)           | 0.6 (0.3 to 1.0)                | 3.4 (2.6 to 4.5)                  | 620.5 (506.0 to 746.3) | 318.1 (238.6 to 406.2)     | 280.4 (201.9 to 382.5)        | 3.1 (1.4 to 5.7)                | 18.9 (14.4 to 24.8)               |
| Uzbekistan | 2034 | 114.6 (94.3 to 138.9)      | 58.9 (44.2 to 75.1)        | 51.6 (37.2 to 70.3)           | 0.6 (0.3 to 1.1)                | 3.5 (2.6 to 4.6)                  | 635.0 (522.7 to 769.8) | 326.5 (244.9 to 416.3)     | 286.2 (206.2 to 389.8)        | 3.1 (1.4 to 5.9)                | 19.2 (14.4 to 25.6)               |
| Uzbekistan | 2035 | 117.3 (95.4 to 141.2)      | 60.5 (45.3 to 77.3)        | 52.7 (37.9 to 71.7)           | 0.6 (0.3 to 1.1)                | 3.5 (2.6 to 4.8)                  | 649.8 (528.6 to 782.4) | 335.1 (251.0 to 428.3)     | 292.1 (210.0 to 397.6)        | 3.2 (1.5 to 6.0)                | 19.4 (14.4 to 26.4)               |
| Uzbekistan | 2036 | 120.0 (98.8 to 145.2)      | 62.1 (46.5 to 79.5)        | 53.8 (38.6 to 73.2)           | 0.6 (0.3 to 1.1)                | 3.6 (2.5 to 5.0)                  | 665.0 (547.6 to 804.6) | 343.9 (257.7 to 440.5)     | 298.1 (214.0 to 405.9)        | 3.3 (1.5 to 6.2)                | 19.7 (14.1 to 27.6)               |

| Country    | Year | 2018 US Dollars per capita |                            |                               |                                 |                                   | 2018 PPP per capita     |                            |                               |                                 |                                   |
|------------|------|----------------------------|----------------------------|-------------------------------|---------------------------------|-----------------------------------|-------------------------|----------------------------|-------------------------------|---------------------------------|-----------------------------------|
|            |      | Health spending            | Government health spending | Out-of-pocket health spending | Prepaid private health spending | Development assistance for health | Health spending         | Government health spending | Out-of-pocket health spending | Prepaid private health spending | Development assistance for health |
| Uzbekistan | 2037 | 122.7 (99.3 to 148.3)      | 63.7 (47.6 to 81.5)        | 54.9 (39.4 to 74.6)           | 0.6 (0.3 to 1.1)                | 3.6 (2.6 to 5.1)                  | 680.2 (550.2 to 821.7)  | 352.8 (263.9 to 451.6)     | 304.0 (218.3 to 413.2)        | 3.4 (1.6 to 6.4)                | 19.9 (14.2 to 28.2)               |
| Uzbekistan | 2038 | 125.6 (103.1 to 152.5)     | 65.3 (48.9 to 83.9)        | 56.0 (40.2 to 76.0)           | 0.6 (0.3 to 1.2)                | 3.6 (2.5 to 5.1)                  | 695.9 (571.6 to 845.0)  | 362.0 (270.9 to 464.8)     | 310.2 (222.7 to 421.0)        | 3.5 (1.6 to 6.5)                | 20.2 (14.0 to 28.4)               |
| Uzbekistan | 2039 | 128.6 (104.3 to 155.5)     | 67.1 (50.2 to 86.4)        | 57.1 (41.0 to 77.7)           | 0.7 (0.3 to 1.2)                | 3.7 (2.5 to 5.3)                  | 712.4 (578.0 to 861.5)  | 371.7 (278.3 to 478.8)     | 316.7 (227.4 to 430.4)        | 3.6 (1.7 to 6.7)                | 20.4 (14.0 to 29.6)               |
| Uzbekistan | 2040 | 131.5 (108.2 to 159.7)     | 68.8 (51.6 to 88.9)        | 58.3 (41.8 to 79.4)           | 0.7 (0.3 to 1.2)                | 3.7 (2.5 to 5.6)                  | 728.8 (599.6 to 885.0)  | 381.3 (285.7 to 492.6)     | 323.1 (231.8 to 439.8)        | 3.7 (1.7 to 6.9)                | 20.7 (14.0 to 31.1)               |
| Uzbekistan | 2041 | 134.4 (109.0 to 162.9)     | 70.5 (52.9 to 91.3)        | 59.4 (42.7 to 81.0)           | 0.7 (0.3 to 1.3)                | 3.8 (2.5 to 5.8)                  | 745.0 (604.1 to 902.7)  | 390.7 (292.9 to 506.0)     | 329.4 (236.4 to 448.8)        | 3.8 (1.8 to 7.1)                | 21.1 (14.1 to 32.1)               |
| Uzbekistan | 2042 | 137.4 (112.3 to 166.9)     | 72.3 (54.1 to 93.9)        | 60.6 (43.4 to 82.6)           | 0.7 (0.3 to 1.3)                | 3.9 (2.5 to 6.0)                  | 761.5 (622.3 to 924.8)  | 400.4 (299.6 to 520.1)     | 335.6 (240.7 to 457.8)        | 3.9 (1.8 to 7.3)                | 21.5 (14.0 to 33.3)               |
| Uzbekistan | 2043 | 140.3 (113.4 to 170.5)     | 73.9 (55.2 to 95.9)        | 61.7 (44.2 to 84.2)           | 0.7 (0.3 to 1.4)                | 4.0 (2.6 to 6.3)                  | 777.6 (628.3 to 944.7)  | 409.7 (305.7 to 531.4)     | 341.8 (244.9 to 466.8)        | 4.0 (1.9 to 7.5)                | 22.0 (14.3 to 35.1)               |
| Uzbekistan | 2044 | 143.2 (116.9 to 173.9)     | 75.6 (56.3 to 97.9)        | 62.8 (45.0 to 85.8)           | 0.7 (0.3 to 1.4)                | 4.1 (2.6 to 6.6)                  | 793.7 (647.9 to 963.8)  | 419.1 (311.7 to 542.5)     | 348.0 (249.1 to 475.5)        | 4.2 (1.9 to 7.7)                | 22.5 (14.3 to 36.3)               |
| Uzbekistan | 2045 | 146.1 (117.3 to 177.7)     | 77.3 (57.4 to 100.4)       | 63.9 (45.7 to 87.4)           | 0.8 (0.4 to 1.4)                | 4.2 (2.6 to 6.8)                  | 809.8 (650.0 to 985.0)  | 428.4 (318.0 to 556.4)     | 354.0 (253.5 to 484.1)        | 4.3 (2.0 to 7.9)                | 23.1 (14.7 to 37.6)               |
| Uzbekistan | 2046 | 148.9 (122.0 to 181.3)     | 78.9 (58.7 to 102.6)       | 64.9 (46.5 to 88.8)           | 0.8 (0.4 to 1.5)                | 4.3 (2.7 to 7.1)                  | 825.0 (676.0 to 1004.9) | 437.2 (325.2 to 568.8)     | 359.7 (257.5 to 492.1)        | 4.4 (2.0 to 8.1)                | 23.8 (14.9 to 39.3)               |
| Uzbekistan | 2047 | 151.6 (122.0 to 185.4)     | 80.5 (59.6 to 104.7)       | 65.9 (47.1 to 90.2)           | 0.8 (0.4 to 1.5)                | 4.4 (2.7 to 7.4)                  | 840.1 (676.2 to 1027.2) | 446.0 (330.3 to 580.5)     | 365.2 (261.1 to 499.7)        | 4.5 (2.1 to 8.3)                | 24.5 (15.2 to 41.0)               |
| Uzbekistan | 2048 | 154.2 (125.4 to 187.6)     | 81.9 (60.4 to 106.8)       | 66.8 (47.8 to 91.5)           | 0.8 (0.4 to 1.5)                | 4.6 (2.8 to 8.0)                  | 854.3 (695.0 to 1039.5) | 453.9 (334.8 to 591.8)     | 370.4 (264.7 to 507.1)        | 4.6 (2.1 to 8.5)                | 25.4 (15.6 to 44.1)               |
| Uzbekistan | 2049 | 156.6 (125.8 to 191.5)     | 83.3 (61.3 to 108.9)       | 67.7 (48.3 to 92.7)           | 0.8 (0.4 to 1.6)                | 4.7 (2.8 to 8.1)                  | 867.6 (697.1 to 1061.0) | 461.5 (339.5 to 603.4)     | 375.3 (267.9 to 513.9)        | 4.7 (2.1 to 8.7)                | 26.2 (15.7 to 44.7)               |
| Uzbekistan | 2050 | 158.8 (129.8 to 193.3)     | 84.5 (62.2 to 110.6)       | 68.5 (48.9 to 93.9)           | 0.9 (0.4 to 1.6)                | 4.9 (3.0 to 8.6)                  | 880.2 (719.2 to 1071.1) | 468.4 (344.6 to 613.0)     | 379.7 (270.8 to 520.3)        | 4.8 (2.2 to 8.9)                | 27.3 (16.4 to 47.8)               |
| Vanuatu    | 1995 | 81.5 (66.7 to 98.8)        | 67.5 (53.0 to 84.1)        | 8.7 (6.1 to 12.2)             | 3.3 (1.5 to 6.2)                | 2.0 (2.0 to 2.0)                  | 71.5 (58.6 to 86.7)     | 59.3 (46.5 to 73.8)        | 7.7 (5.4 to 10.7)             | 2.9 (1.3 to 5.5)                | 1.7 (1.7 to 1.7)                  |
| Vanuatu    | 1996 | 79.6 (64.6 to 95.6)        | 67.3 (53.2 to 82.0)        | 8.7 (6.2 to 12.0)             | 3.2 (1.5 to 6.2)                | 0.4 (0.4 to 0.4)                  | 69.9 (56.7 to 83.9)     | 59.1 (46.7 to 72.0)        | 7.7 (5.4 to 10.5)             | 2.8 (1.3 to 5.4)                | 0.3 (0.3 to 0.3)                  |
| Vanuatu    | 1997 | 82.5 (68.2 to 97.4)        | 65.9 (52.2 to 80.7)        | 8.7 (6.1 to 11.9)             | 3.2 (1.5 to 6.0)                | 4.7 (4.7 to 4.7)                  | 72.4 (59.9 to 85.5)     | 57.8 (45.8 to 70.9)        | 7.6 (5.4 to 10.5)             | 2.8 (1.3 to 5.3)                | 4.2 (4.2 to 4.2)                  |
| Vanuatu    | 1998 | 106.0 (92.2 to 121.1)      | 66.3 (52.9 to 81.0)        | 8.7 (6.2 to 12.0)             | 3.2 (1.5 to 5.9)                | 27.8 (27.8 to 27.8)               | 93.1 (80.9 to 106.3)    | 58.2 (46.5 to 71.1)        | 7.6 (5.5 to 10.6)             | 2.8 (1.3 to 5.2)                | 24.4 (24.4 to 24.4)               |
| Vanuatu    | 1999 | 92.2 (78.4 to 107.4)       | 67.3 (54.0 to 81.9)        | 8.5 (6.0 to 12.0)             | 3.1 (1.5 to 5.9)                | 13.3 (13.3 to 13.3)               | 80.9 (68.8 to 94.3)     | 59.0 (47.4 to 71.9)        | 7.5 (5.3 to 10.6)             | 2.7 (1.3 to 5.2)                | 11.7 (11.7 to 11.7)               |
| Vanuatu    | 2000 | 96.1 (80.8 to 112.0)       | 72.8 (58.7 to 88.5)        | 8.4 (5.8 to 11.8)             | 3.2 (1.5 to 6.0)                | 11.8 (11.8 to 11.8)               | 84.4 (70.9 to 98.3)     | 63.9 (51.5 to 77.7)        | 7.3 (5.1 to 10.3)             | 2.8 (1.3 to 5.3)                | 10.3 (10.3 to 10.3)               |
| Vanuatu    | 2001 | 99.4 (84.8 to 114.4)       | 70.2 (56.5 to 85.2)        | 8.2 (5.7 to 11.4)             | 3.1 (1.5 to 5.9)                | 17.8 (17.8 to 17.8)               | 87.2 (74.5 to 100.5)    | 61.7 (49.6 to 74.8)        | 7.2 (5.0 to 10.0)             | 2.8 (1.3 to 5.2)                | 15.6 (15.6 to 15.6)               |

| Country | Year | 2018 US Dollars per capita |                            |                               |                                 |                                   | 2018 PPP per capita    |                            |                               |                                 |                                   |
|---------|------|----------------------------|----------------------------|-------------------------------|---------------------------------|-----------------------------------|------------------------|----------------------------|-------------------------------|---------------------------------|-----------------------------------|
|         |      | Health spending            | Government health spending | Out-of-pocket health spending | Prepaid private health spending | Development assistance for health | Health spending        | Government health spending | Out-of-pocket health spending | Prepaid private health spending | Development assistance for health |
| Vanuatu | 2002 | 91.0 (78.0 to 104.9)       | 65.2 (52.5 to 78.7)        | 8.4 (5.9 to 11.9)             | 3.2 (1.6 to 6.0)                | 14.2 (14.2 to 14.2)               | 79.9 (68.5 to 92.1)    | 57.2 (46.0 to 69.1)        | 7.4 (5.2 to 10.4)             | 2.8 (1.4 to 5.3)                | 12.4 (12.4 to 12.4)               |
| Vanuatu | 2003 | 99.9 (87.2 to 113.5)       | 63.2 (51.2 to 76.5)        | 8.6 (6.0 to 11.9)             | 3.3 (1.6 to 6.1)                | 24.8 (24.8 to 24.8)               | 87.7 (76.6 to 99.6)    | 55.5 (44.9 to 67.2)        | 7.6 (5.2 to 10.5)             | 2.9 (1.4 to 5.4)                | 21.7 (21.7 to 21.7)               |
| Vanuatu | 2004 | 103.2 (91.1 to 117.1)      | 60.8 (49.0 to 73.6)        | 8.6 (6.1 to 11.9)             | 3.3 (1.6 to 6.0)                | 30.4 (30.4 to 30.4)               | 90.6 (79.9 to 102.8)   | 53.4 (43.1 to 64.6)        | 7.6 (5.3 to 10.4)             | 2.9 (1.4 to 5.3)                | 26.7 (26.7 to 26.7)               |
| Vanuatu | 2005 | 100.1 (88.1 to 113.5)      | 59.9 (48.5 to 72.5)        | 8.6 (6.1 to 11.8)             | 3.2 (1.6 to 5.9)                | 28.3 (28.3 to 28.3)               | 87.8 (77.4 to 99.6)    | 52.6 (42.6 to 63.7)        | 7.6 (5.3 to 10.4)             | 2.9 (1.4 to 5.2)                | 24.8 (24.8 to 24.8)               |
| Vanuatu | 2006 | 100.9 (89.0 to 115.3)      | 62.7 (51.6 to 76.4)        | 8.7 (6.1 to 12.0)             | 3.3 (1.6 to 6.2)                | 26.1 (26.1 to 26.1)               | 88.6 (78.1 to 101.2)   | 55.0 (45.3 to 67.1)        | 7.7 (5.4 to 10.6)             | 2.9 (1.4 to 5.5)                | 22.9 (22.9 to 22.9)               |
| Vanuatu | 2007 | 100.5 (88.1 to 115.4)      | 65.2 (53.3 to 79.1)        | 8.8 (6.2 to 12.2)             | 3.4 (1.6 to 6.4)                | 23.1 (23.1 to 23.1)               | 88.2 (77.3 to 101.3)   | 57.2 (46.8 to 69.5)        | 7.7 (5.4 to 10.7)             | 3.0 (1.4 to 5.7)                | 20.3 (20.3 to 20.3)               |
| Vanuatu | 2008 | 114.4 (100.8 to 129.4)     | 68.2 (55.3 to 82.8)        | 9.0 (6.4 to 12.5)             | 3.6 (1.6 to 6.8)                | 33.6 (33.6 to 33.6)               | 100.4 (88.5 to 113.6)  | 59.8 (48.5 to 72.7)        | 7.9 (5.6 to 11.0)             | 3.1 (1.4 to 6.0)                | 29.5 (29.5 to 29.5)               |
| Vanuatu | 2009 | 152.1 (139.2 to 166.6)     | 67.4 (55.5 to 80.6)        | 9.2 (6.5 to 12.8)             | 3.7 (1.7 to 6.9)                | 71.9 (71.9 to 71.9)               | 133.5 (122.2 to 146.2) | 59.2 (48.7 to 70.8)        | 8.1 (5.7 to 11.2)             | 3.2 (1.5 to 6.1)                | 63.1 (63.1 to 63.1)               |
| Vanuatu | 2010 | 129.3 (117.0 to 143.3)     | 66.1 (54.3 to 79.3)        | 9.4 (6.6 to 13.0)             | 3.8 (1.7 to 7.2)                | 50.0 (50.0 to 50.0)               | 113.5 (102.7 to 125.8) | 58.0 (47.6 to 69.6)        | 8.3 (5.8 to 11.5)             | 3.3 (1.5 to 6.3)                | 43.9 (43.9 to 43.9)               |
| Vanuatu | 2011 | 125.1 (112.6 to 139.0)     | 65.2 (53.5 to 78.0)        | 9.5 (6.7 to 13.0)             | 3.8 (1.7 to 7.3)                | 46.5 (46.5 to 46.5)               | 109.8 (98.8 to 122.0)  | 57.3 (47.0 to 68.4)        | 8.3 (5.9 to 11.4)             | 3.4 (1.5 to 6.4)                | 40.9 (40.9 to 40.9)               |
| Vanuatu | 2012 | 133.4 (121.7 to 147.1)     | 60.5 (49.2 to 73.2)        | 9.4 (6.6 to 13.0)             | 3.8 (1.8 to 7.2)                | 59.7 (59.7 to 59.7)               | 117.1 (106.9 to 129.1) | 53.1 (43.2 to 64.2)        | 8.3 (5.8 to 11.4)             | 3.3 (1.5 to 6.3)                | 52.4 (52.4 to 52.4)               |
| Vanuatu | 2013 | 157.3 (146.8 to 169.4)     | 52.7 (42.6 to 64.1)        | 9.3 (6.4 to 12.7)             | 3.7 (1.7 to 6.9)                | 91.6 (91.6 to 91.6)               | 138.0 (128.9 to 148.7) | 46.2 (37.4 to 56.3)        | 8.2 (5.6 to 11.2)             | 3.2 (1.5 to 6.0)                | 80.4 (80.4 to 80.4)               |
| Vanuatu | 2014 | 108.9 (100.4 to 119.5)     | 40.9 (32.7 to 50.7)        | 9.0 (6.2 to 12.3)             | 3.2 (1.5 to 6.1)                | 55.8 (55.8 to 55.8)               | 95.6 (88.1 to 104.9)   | 35.9 (28.7 to 44.5)        | 7.9 (5.4 to 10.8)             | 2.8 (1.3 to 5.4)                | 49.0 (49.0 to 49.0)               |
| Vanuatu | 2015 | 89.7 (78.7 to 102.9)       | 50.7 (40.3 to 63.0)        | 9.6 (6.6 to 13.4)             | 3.8 (1.7 to 7.4)                | 25.5 (25.5 to 25.5)               | 78.7 (69.1 to 90.3)    | 44.5 (35.4 to 55.3)        | 8.4 (5.8 to 11.7)             | 3.3 (1.5 to 6.5)                | 22.4 (22.4 to 22.4)               |
| Vanuatu | 2016 | 96.0 (82.9 to 112.0)       | 58.0 (45.7 to 73.6)        | 10.0 (6.9 to 14.0)            | 4.1 (1.9 to 7.6)                | 23.9 (23.9 to 23.9)               | 84.3 (72.8 to 98.3)    | 50.9 (40.1 to 64.6)        | 8.8 (6.1 to 12.3)             | 3.6 (1.7 to 6.6)                | 21.0 (21.0 to 21.0)               |
| Vanuatu | 2017 | 97.9 (83.7 to 114.7)       | 62.3 (49.0 to 78.9)        | 10.2 (7.0 to 14.3)            | 4.2 (1.9 to 7.7)                | 21.1 (21.1 to 21.1)               | 85.9 (73.5 to 100.7)   | 54.7 (43.0 to 69.3)        | 8.9 (6.2 to 12.6)             | 3.7 (1.7 to 6.8)                | 18.6 (18.6 to 18.6)               |
| Vanuatu | 2018 | 97.0 (82.3 to 114.0)       | 63.4 (49.9 to 80.0)        | 10.3 (7.1 to 14.5)            | 4.3 (2.0 to 7.9)                | 19.0 (19.0 to 19.1)               | 85.1 (72.3 to 100.1)   | 55.6 (43.8 to 70.3)        | 9.1 (6.2 to 12.8)             | 3.8 (1.7 to 6.9)                | 16.7 (16.6 to 16.8)               |
| Vanuatu | 2019 | 98.4 (83.5 to 116.3)       | 64.4 (50.7 to 81.2)        | 10.4 (7.2 to 14.8)            | 4.3 (2.0 to 8.0)                | 19.2 (17.9 to 20.2)               | 86.4 (73.3 to 102.1)   | 56.6 (44.5 to 71.3)        | 9.2 (6.3 to 13.0)             | 3.8 (1.7 to 7.0)                | 16.8 (15.7 to 17.8)               |
| Vanuatu | 2020 | 100.0 (84.8 to 117.8)      | 65.6 (51.6 to 82.5)        | 10.6 (7.3 to 15.0)            | 4.4 (2.0 to 8.1)                | 19.5 (17.9 to 21.0)               | 87.8 (74.4 to 103.4)   | 57.5 (45.3 to 72.4)        | 9.3 (6.4 to 13.2)             | 3.9 (1.8 to 7.1)                | 17.1 (15.7 to 18.5)               |
| Vanuatu | 2021 | 101.6 (86.3 to 119.7)      | 66.5 (52.3 to 83.5)        | 10.7 (7.4 to 15.2)            | 4.5 (2.1 to 8.2)                | 19.9 (17.9 to 22.0)               | 89.2 (75.8 to 105.0)   | 58.4 (45.9 to 73.3)        | 9.4 (6.5 to 13.3)             | 3.9 (1.8 to 7.2)                | 17.5 (15.8 to 19.3)               |
| Vanuatu | 2022 | 103.5 (88.1 to 122.0)      | 67.6 (53.1 to 84.8)        | 10.8 (7.5 to 15.4)            | 4.6 (2.1 to 8.4)                | 20.5 (18.2 to 22.9)               | 90.8 (77.3 to 107.1)   | 59.3 (46.6 to 74.5)        | 9.5 (6.5 to 13.5)             | 4.0 (1.8 to 7.4)                | 18.0 (16.0 to 20.1)               |

| Country | Year | 2018 US Dollars per capita |                            |                               |                                 |                                   | 2018 PPP per capita    |                            |                               |                                 |                                   |
|---------|------|----------------------------|----------------------------|-------------------------------|---------------------------------|-----------------------------------|------------------------|----------------------------|-------------------------------|---------------------------------|-----------------------------------|
|         |      | Health spending            | Government health spending | Out-of-pocket health spending | Prepaid private health spending | Development assistance for health | Health spending        | Government health spending | Out-of-pocket health spending | Prepaid private health spending | Development assistance for health |
| Vanuatu | 2023 | 105.4 (89.8 to 124.1)      | 68.8 (54.1 to 86.3)        | 11.0 (7.6 to 15.6)            | 4.6 (2.1 to 8.5)                | 21.0 (18.3 to 23.9)               | 92.5 (78.9 to 109.0)   | 60.4 (47.5 to 75.7)        | 9.6 (6.7 to 13.7)             | 4.1 (1.9 to 7.5)                | 18.5 (16.0 to 20.9)               |
| Vanuatu | 2024 | 107.4 (91.0 to 126.0)      | 70.1 (55.1 to 87.9)        | 11.2 (7.6 to 15.9)            | 4.7 (2.2 to 8.7)                | 21.4 (18.5 to 24.6)               | 94.3 (79.9 to 110.6)   | 61.5 (48.4 to 77.1)        | 9.8 (6.7 to 13.9)             | 4.2 (1.9 to 7.6)                | 18.8 (16.2 to 21.6)               |
| Vanuatu | 2025 | 109.2 (92.4 to 128.5)      | 71.3 (56.1 to 89.4)        | 11.3 (7.7 to 16.1)            | 4.8 (2.2 to 8.9)                | 21.7 (18.6 to 25.3)               | 95.8 (81.1 to 112.8)   | 62.6 (49.3 to 78.4)        | 9.9 (6.8 to 14.1)             | 4.2 (1.9 to 7.8)                | 19.0 (16.3 to 22.2)               |
| Vanuatu | 2026 | 111.0 (94.0 to 130.2)      | 72.5 (57.0 to 90.8)        | 11.5 (7.9 to 16.3)            | 4.9 (2.3 to 9.1)                | 22.0 (18.6 to 25.8)               | 97.4 (82.5 to 114.3)   | 63.7 (50.1 to 79.7)        | 10.1 (6.9 to 14.3)            | 4.3 (2.0 to 8.0)                | 19.3 (16.3 to 22.7)               |
| Vanuatu | 2027 | 112.9 (95.4 to 133.2)      | 73.9 (58.0 to 92.3)        | 11.7 (8.0 to 16.5)            | 5.0 (2.3 to 9.3)                | 22.3 (18.7 to 26.5)               | 99.1 (83.8 to 117.0)   | 64.8 (50.9 to 81.1)        | 10.2 (7.0 to 14.5)            | 4.4 (2.0 to 8.1)                | 19.6 (16.4 to 23.3)               |
| Vanuatu | 2028 | 114.8 (96.6 to 134.8)      | 75.2 (59.0 to 94.0)        | 11.8 (8.1 to 16.8)            | 5.1 (2.4 to 9.5)                | 22.7 (19.0 to 27.3)               | 100.8 (84.8 to 118.3)  | 66.0 (51.8 to 82.5)        | 10.4 (7.1 to 14.7)            | 4.5 (2.1 to 8.3)                | 19.9 (16.7 to 24.0)               |
| Vanuatu | 2029 | 116.9 (98.9 to 137.6)      | 76.6 (60.0 to 95.7)        | 12.0 (8.2 to 17.0)            | 5.2 (2.4 to 9.7)                | 23.1 (19.0 to 28.3)               | 102.6 (86.8 to 120.8)  | 67.2 (52.7 to 84.0)        | 10.6 (7.2 to 15.0)            | 4.6 (2.1 to 8.5)                | 20.2 (16.7 to 24.8)               |
| Vanuatu | 2030 | 118.9 (100.7 to 139.7)     | 78.0 (61.0 to 97.4)        | 12.2 (8.3 to 17.3)            | 5.3 (2.5 to 9.9)                | 23.4 (19.2 to 28.9)               | 104.4 (88.4 to 122.6)  | 68.5 (53.6 to 85.5)        | 10.7 (7.3 to 15.2)            | 4.7 (2.2 to 8.7)                | 20.6 (16.9 to 25.3)               |
| Vanuatu | 2031 | 120.9 (102.5 to 142.8)     | 79.3 (62.1 to 98.8)        | 12.4 (8.4 to 17.6)            | 5.4 (2.5 to 10.1)               | 23.8 (19.3 to 29.9)               | 106.2 (90.0 to 125.3)  | 69.6 (54.5 to 86.8)        | 10.9 (7.4 to 15.4)            | 4.8 (2.2 to 8.8)                | 20.9 (16.9 to 26.2)               |
| Vanuatu | 2032 | 123.0 (103.7 to 145.1)     | 80.7 (63.2 to 100.6)       | 12.6 (8.5 to 17.9)            | 5.5 (2.5 to 10.3)               | 24.2 (19.5 to 30.5)               | 108.0 (91.1 to 127.4)  | 70.8 (55.5 to 88.3)        | 11.1 (7.5 to 15.7)            | 4.8 (2.2 to 9.0)                | 21.2 (17.1 to 26.7)               |
| Vanuatu | 2033 | 125.1 (105.5 to 147.8)     | 82.1 (64.4 to 102.3)       | 12.8 (8.6 to 18.1)            | 5.6 (2.6 to 10.5)               | 24.6 (19.6 to 31.7)               | 109.8 (92.6 to 129.8)  | 72.1 (56.5 to 89.8)        | 11.2 (7.6 to 15.9)            | 4.9 (2.3 to 9.2)                | 21.6 (17.2 to 27.8)               |
| Vanuatu | 2034 | 127.3 (107.0 to 150.8)     | 83.6 (65.6 to 104.2)       | 13.0 (8.7 to 18.4)            | 5.7 (2.6 to 10.6)               | 25.1 (19.7 to 32.1)               | 111.8 (93.9 to 132.4)  | 73.4 (57.6 to 91.5)        | 11.4 (7.7 to 16.2)            | 5.0 (2.3 to 9.3)                | 22.0 (17.3 to 28.2)               |
| Vanuatu | 2035 | 129.5 (108.6 to 151.8)     | 85.0 (66.7 to 106.0)       | 13.2 (8.8 to 18.7)            | 5.8 (2.7 to 10.8)               | 25.5 (19.8 to 33.2)               | 113.7 (95.4 to 133.3)  | 74.6 (58.5 to 93.0)        | 11.6 (7.8 to 16.4)            | 5.1 (2.3 to 9.5)                | 22.4 (17.4 to 29.2)               |
| Vanuatu | 2036 | 131.7 (110.0 to 154.3)     | 86.4 (67.8 to 107.7)       | 13.4 (9.0 to 19.0)            | 5.9 (2.7 to 11.0)               | 26.0 (20.3 to 34.7)               | 115.6 (96.5 to 135.4)  | 75.8 (59.5 to 94.6)        | 11.8 (7.9 to 16.7)            | 5.2 (2.4 to 9.6)                | 22.8 (17.8 to 30.4)               |
| Vanuatu | 2037 | 134.0 (112.2 to 156.8)     | 87.9 (68.9 to 109.5)       | 13.6 (9.1 to 19.5)            | 6.0 (2.8 to 11.2)               | 26.4 (20.3 to 35.3)               | 117.6 (98.5 to 137.7)  | 77.2 (60.5 to 96.1)        | 12.0 (8.0 to 17.1)            | 5.3 (2.4 to 9.8)                | 23.2 (17.8 to 31.0)               |
| Vanuatu | 2038 | 136.3 (113.5 to 161.2)     | 89.5 (70.1 to 111.4)       | 13.9 (9.2 to 19.8)            | 6.2 (2.8 to 11.4)               | 26.9 (20.5 to 37.2)               | 119.7 (99.6 to 141.5)  | 78.5 (61.5 to 97.8)        | 12.2 (8.1 to 17.4)            | 5.4 (2.5 to 10.0)               | 23.6 (18.0 to 32.7)               |
| Vanuatu | 2039 | 138.7 (115.4 to 164.8)     | 91.0 (71.3 to 113.6)       | 14.1 (9.3 to 20.3)            | 6.3 (2.9 to 11.6)               | 27.3 (20.8 to 37.8)               | 121.8 (101.3 to 144.7) | 79.9 (62.5 to 99.7)        | 12.4 (8.2 to 17.8)            | 5.5 (2.5 to 10.2)               | 24.0 (18.3 to 33.2)               |
| Vanuatu | 2040 | 141.1 (117.6 to 167.8)     | 92.6 (72.3 to 115.5)       | 14.3 (9.4 to 20.7)            | 6.4 (2.9 to 11.9)               | 27.8 (21.1 to 38.5)               | 123.9 (103.3 to 147.3) | 81.3 (63.4 to 101.4)       | 12.6 (8.3 to 18.2)            | 5.6 (2.6 to 10.4)               | 24.4 (18.5 to 33.8)               |
| Vanuatu | 2041 | 143.6 (119.5 to 171.2)     | 94.1 (73.2 to 117.3)       | 14.6 (9.5 to 21.2)            | 6.5 (3.0 to 12.1)               | 28.3 (21.2 to 39.4)               | 126.0 (104.9 to 150.3) | 82.6 (64.3 to 103.0)       | 12.8 (8.4 to 18.6)            | 5.7 (2.6 to 10.6)               | 24.9 (18.7 to 34.6)               |
| Vanuatu | 2042 | 146.1 (121.1 to 174.8)     | 95.7 (74.3 to 119.4)       | 14.8 (9.7 to 21.6)            | 6.6 (3.0 to 12.3)               | 28.9 (21.6 to 41.3)               | 128.2 (106.3 to 153.4) | 84.0 (65.2 to 104.8)       | 13.0 (8.5 to 19.0)            | 5.8 (2.7 to 10.8)               | 25.4 (18.9 to 36.3)               |
| Vanuatu | 2043 | 148.6 (123.2 to 177.4)     | 97.4 (75.5 to 121.7)       | 15.1 (9.8 to 22.0)            | 6.7 (3.1 to 12.6)               | 29.4 (21.7 to 42.4)               | 130.5 (108.1 to 155.7) | 85.5 (66.2 to 106.8)       | 13.3 (8.6 to 19.3)            | 5.9 (2.7 to 11.0)               | 25.8 (19.0 to 37.2)               |

| Country   | Year | 2018 US Dollars per capita |                            |                               |                                 |                                   | 2018 PPP per capita       |                            |                               |                                 |                                   |
|-----------|------|----------------------------|----------------------------|-------------------------------|---------------------------------|-----------------------------------|---------------------------|----------------------------|-------------------------------|---------------------------------|-----------------------------------|
|           |      | Health spending            | Government health spending | Out-of-pocket health spending | Prepaid private health spending | Development assistance for health | Health spending           | Government health spending | Out-of-pocket health spending | Prepaid private health spending | Development assistance for health |
| Vanuatu   | 2044 | 151.2 (125.2 to 179.8)     | 99.0 (76.5 to 123.7)       | 15.4 (10.0 to 22.4)           | 6.9 (3.1 to 12.8)               | 30.1 (22.1 to 43.4)               | 132.8 (109.9 to 157.9)    | 86.9 (67.2 to 108.6)       | 13.5 (8.8 to 19.6)            | 6.0 (2.8 to 11.2)               | 26.4 (19.4 to 38.1)               |
| Vanuatu   | 2045 | 153.8 (126.9 to 184.4)     | 100.5 (77.5 to 125.9)      | 15.6 (10.1 to 22.9)           | 7.0 (3.2 to 13.0)               | 30.7 (22.1 to 46.3)               | 135.0 (111.4 to 161.9)    | 88.2 (68.0 to 110.5)       | 13.7 (8.9 to 20.1)            | 6.1 (2.8 to 11.4)               | 27.0 (19.4 to 40.7)               |
| Vanuatu   | 2046 | 156.4 (129.3 to 187.8)     | 102.1 (78.6 to 128.2)      | 15.9 (10.3 to 23.3)           | 7.1 (3.2 to 13.2)               | 31.4 (22.6 to 48.3)               | 137.3 (113.5 to 164.8)    | 89.6 (69.0 to 112.5)       | 14.0 (9.0 to 20.4)            | 6.2 (2.8 to 11.6)               | 27.5 (19.8 to 42.4)               |
| Vanuatu   | 2047 | 159.2 (131.4 to 190.8)     | 103.7 (80.0 to 130.7)      | 16.2 (10.5 to 23.7)           | 7.2 (3.3 to 13.5)               | 32.1 (22.9 to 51.0)               | 139.7 (115.3 to 167.5)    | 91.0 (70.2 to 114.7)       | 14.2 (9.2 to 20.8)            | 6.3 (2.9 to 11.9)               | 28.2 (20.1 to 44.8)               |
| Vanuatu   | 2048 | 161.9 (133.3 to 196.0)     | 105.2 (81.2 to 133.0)      | 16.5 (10.7 to 24.1)           | 7.3 (3.4 to 13.7)               | 32.9 (23.6 to 52.7)               | 142.1 (117.0 to 172.1)    | 92.4 (71.3 to 116.8)       | 14.5 (9.4 to 21.2)            | 6.4 (2.9 to 12.1)               | 28.8 (20.7 to 46.2)               |
| Vanuatu   | 2049 | 164.7 (135.8 to 201.9)     | 106.8 (82.2 to 135.5)      | 16.8 (10.8 to 24.6)           | 7.4 (3.4 to 14.0)               | 33.6 (23.9 to 54.3)               | 144.6 (119.2 to 177.2)    | 93.8 (72.2 to 118.9)       | 14.7 (9.5 to 21.6)            | 6.5 (3.0 to 12.3)               | 29.5 (21.0 to 47.7)               |
| Vanuatu   | 2050 | 167.5 (136.6 to 205.0)     | 108.3 (83.0 to 137.8)      | 17.1 (10.9 to 25.1)           | 7.6 (3.5 to 14.2)               | 34.5 (24.2 to 56.4)               | 147.0 (119.9 to 180.0)    | 95.1 (72.9 to 121.0)       | 15.0 (9.6 to 22.0)            | 6.6 (3.0 to 12.5)               | 30.3 (21.3 to 49.5)               |
| Venezuela | 1995 | 580.5 (528.1 to 637.7)     | 196.3 (165.4 to 228.2)     | 275.6 (241.2 to 314.5)        | 105.7 (81.7 to 134.8)           | 2.8 (2.8 to 2.8)                  | 962.5 (875.5 to 1057.4)   | 325.5 (274.2 to 378.4)     | 457.0 (399.9 to 521.5)        | 175.3 (135.4 to 223.5)          | 4.6 (4.6 to 4.6)                  |
| Venezuela | 1996 | 550.0 (509.7 to 594.3)     | 188.8 (163.6 to 216.5)     | 267.1 (241.6 to 296.4)        | 92.3 (73.9 to 112.8)            | 1.8 (1.8 to 1.8)                  | 911.9 (845.0 to 985.3)    | 313.0 (271.2 to 359.0)     | 442.9 (400.5 to 491.4)        | 153.0 (122.6 to 187.0)          | 3.0 (3.0 to 3.0)                  |
| Venezuela | 1997 | 562.5 (523.1 to 604.4)     | 191.8 (168.0 to 218.5)     | 266.5 (242.7 to 292.4)        | 101.6 (84.3 to 122.2)           | 2.6 (2.6 to 2.6)                  | 932.6 (867.3 to 1002.2)   | 318.0 (278.6 to 362.4)     | 441.9 (402.5 to 484.8)        | 168.5 (139.7 to 202.7)          | 4.4 (4.4 to 4.4)                  |
| Venezuela | 1998 | 575.4 (537.3 to 614.4)     | 191.6 (169.5 to 218.3)     | 266.2 (242.2 to 292.1)        | 113.1 (94.8 to 134.3)           | 4.4 (4.4 to 4.4)                  | 954.0 (890.8 to 1018.7)   | 317.7 (281.1 to 361.9)     | 441.4 (401.6 to 484.4)        | 187.6 (157.1 to 222.7)          | 7.4 (7.4 to 7.4)                  |
| Venezuela | 1999 | 573.7 (536.0 to 616.2)     | 188.5 (166.8 to 213.7)     | 262.3 (236.7 to 287.4)        | 120.2 (101.6 to 141.5)          | 2.7 (2.7 to 2.7)                  | 951.3 (888.7 to 1021.7)   | 312.5 (276.6 to 354.3)     | 435.0 (392.4 to 476.5)        | 199.4 (168.5 to 234.6)          | 4.4 (4.4 to 4.4)                  |
| Venezuela | 2000 | 560.7 (521.5 to 604.1)     | 194.0 (171.7 to 221.1)     | 262.3 (236.5 to 286.7)        | 103.1 (85.5 to 123.1)           | 1.2 (1.2 to 1.2)                  | 929.7 (864.6 to 1001.6)   | 321.7 (284.7 to 366.5)     | 434.9 (392.1 to 475.4)        | 171.0 (141.8 to 204.1)          | 2.0 (2.0 to 2.0)                  |
| Venezuela | 2001 | 554.1 (515.4 to 597.8)     | 195.0 (172.5 to 222.1)     | 262.1 (237.9 to 287.7)        | 95.7 (78.8 to 116.0)            | 1.3 (1.3 to 1.3)                  | 918.8 (854.6 to 991.2)    | 323.3 (285.9 to 368.2)     | 434.6 (394.5 to 476.9)        | 158.7 (130.7 to 192.3)          | 2.1 (2.1 to 2.1)                  |
| Venezuela | 2002 | 495.3 (458.3 to 532.7)     | 172.6 (151.6 to 196.7)     | 240.0 (218.1 to 264.2)        | 81.8 (66.8 to 100.5)            | 1.0 (1.0 to 1.0)                  | 821.3 (759.8 to 883.2)    | 286.1 (251.3 to 326.1)     | 397.9 (361.7 to 438.0)        | 135.6 (110.7 to 166.7)          | 1.7 (1.7 to 1.7)                  |
| Venezuela | 2003 | 453.9 (420.5 to 486.2)     | 155.5 (136.4 to 176.7)     | 221.5 (200.9 to 245.1)        | 76.1 (62.5 to 92.7)             | 0.8 (0.8 to 0.8)                  | 752.6 (697.2 to 806.2)    | 257.8 (226.2 to 293.0)     | 367.3 (333.2 to 406.4)        | 126.3 (103.6 to 153.7)          | 1.3 (1.3 to 1.3)                  |
| Venezuela | 2004 | 497.3 (460.4 to 534.0)     | 176.8 (154.6 to 200.0)     | 232.6 (211.9 to 256.9)        | 87.1 (72.0 to 105.0)            | 0.8 (0.8 to 0.8)                  | 824.5 (763.4 to 885.4)    | 293.1 (256.4 to 331.6)     | 385.7 (351.3 to 425.9)        | 144.4 (119.4 to 174.1)          | 1.3 (1.3 to 1.3)                  |
| Venezuela | 2005 | 545.4 (506.3 to 584.9)     | 194.5 (172.3 to 219.0)     | 246.4 (223.0 to 272.1)        | 103.6 (86.5 to 122.6)           | 0.9 (0.9 to 0.9)                  | 904.3 (839.4 to 969.8)    | 322.5 (285.7 to 363.1)     | 408.5 (369.7 to 451.1)        | 171.7 (143.4 to 203.3)          | 1.5 (1.5 to 1.5)                  |
| Venezuela | 2006 | 619.6 (575.6 to 663.8)     | 216.6 (193.4 to 242.6)     | 271.2 (246.3 to 298.2)        | 131.7 (110.8 to 153.6)          | 0.1 (0.1 to 0.1)                  | 1027.3 (954.3 to 1100.6)  | 359.1 (320.6 to 402.3)     | 449.7 (408.3 to 494.4)        | 218.3 (183.7 to 254.7)          | 0.2 (0.2 to 0.2)                  |
| Venezuela | 2007 | 711.9 (665.1 to 758.3)     | 240.6 (215.5 to 270.1)     | 305.1 (278.7 to 333.0)        | 166.0 (142.7 to 191.6)          | 0.2 (0.2 to 0.2)                  | 1180.4 (1102.8 to 1257.4) | 399.0 (357.3 to 447.9)     | 505.8 (462.1 to 552.1)        | 275.3 (236.6 to 317.6)          | 0.3 (0.3 to 0.3)                  |
| Venezuela | 2008 | 784.2 (737.9 to 833.0)     | 254.8 (228.9 to 286.0)     | 332.9 (304.7 to 363.6)        | 196.4 (170.1 to 226.4)          | 0.1 (0.1 to 0.1)                  | 1300.3 (1223.5 to 1381.2) | 422.5 (379.6 to 474.2)     | 552.0 (505.2 to 602.9)        | 325.6 (282.0 to 375.4)          | 0.2 (0.2 to 0.2)                  |

| Country   | Year | 2018 US Dollars per capita |                            |                               |                                 |                                   | 2018 PPP per capita       |                            |                               |                                 |                                   |
|-----------|------|----------------------------|----------------------------|-------------------------------|---------------------------------|-----------------------------------|---------------------------|----------------------------|-------------------------------|---------------------------------|-----------------------------------|
|           |      | Health spending            | Government health spending | Out-of-pocket health spending | Prepaid private health spending | Development assistance for health | Health spending           | Government health spending | Out-of-pocket health spending | Prepaid private health spending | Development assistance for health |
| Venezuela | 2009 | 791.0 (744.7 to 842.2)     | 243.8 (219.4 to 270.6)     | 337.7 (307.3 to 369.5)        | 209.3 (180.2 to 238.6)          | 0.2 (0.2 to 0.2)                  | 1311.6 (1234.8 to 1396.4) | 404.2 (363.8 to 448.6)     | 560.0 (509.5 to 612.6)        | 347.1 (298.8 to 395.7)          | 0.3 (0.3 to 0.3)                  |
| Venezuela | 2010 | 774.8 (730.1 to 826.6)     | 246.9 (221.9 to 273.0)     | 320.6 (291.5 to 351.4)        | 207.1 (179.3 to 236.5)          | 0.2 (0.2 to 0.2)                  | 1284.6 (1210.5 to 1370.5) | 409.4 (367.9 to 452.6)     | 531.6 (483.3 to 582.6)        | 343.4 (297.3 to 392.1)          | 0.3 (0.3 to 0.3)                  |
| Venezuela | 2011 | 778.3 (729.1 to 832.3)     | 262.8 (237.0 to 292.6)     | 298.8 (271.1 to 328.0)        | 216.7 (186.8 to 250.2)          | 0.1 (0.1 to 0.1)                  | 1290.4 (1208.9 to 1380.0) | 435.7 (392.9 to 485.2)     | 495.3 (449.4 to 543.8)        | 359.3 (309.7 to 414.9)          | 0.1 (0.1 to 0.1)                  |
| Venezuela | 2012 | 743.9 (692.2 to 795.8)     | 257.3 (229.1 to 284.8)     | 260.6 (236.1 to 288.4)        | 226.0 (196.5 to 257.9)          | 0.1 (0.1 to 0.1)                  | 1233.5 (1147.8 to 1319.4) | 426.6 (379.9 to 472.2)     | 432.1 (391.4 to 478.1)        | 374.8 (325.8 to 427.6)          | 0.1 (0.1 to 0.1)                  |
| Venezuela | 2013 | 707.4 (660.7 to 755.6)     | 244.9 (217.6 to 272.8)     | 229.9 (207.7 to 253.1)        | 232.6 (205.1 to 264.1)          | 0.1 (0.1 to 0.1)                  | 1172.9 (1095.5 to 1252.9) | 406.0 (360.7 to 452.2)     | 381.2 (344.3 to 419.6)        | 385.6 (340.0 to 437.9)          | 0.1 (0.1 to 0.1)                  |
| Venezuela | 2014 | 666.9 (622.0 to 714.0)     | 229.6 (201.5 to 257.2)     | 202.3 (182.6 to 225.0)        | 235.0 (207.9 to 264.3)          | 0.0 (0.0 to 0.0)                  | 1105.7 (1031.2 to 1183.8) | 380.7 (334.1 to 426.5)     | 335.4 (302.7 to 373.1)        | 389.6 (344.7 to 438.2)          | 0.0 (0.0 to 0.0)                  |
| Venezuela | 2015 | 562.0 (517.0 to 608.1)     | 195.8 (168.4 to 223.9)     | 168.5 (148.2 to 189.9)        | 197.7 (171.1 to 227.5)          | 0.0 (0.0 to 0.0)                  | 931.8 (857.3 to 1008.2)   | 324.6 (279.1 to 371.3)     | 279.4 (245.7 to 314.9)        | 327.8 (283.7 to 377.1)          | 0.1 (0.1 to 0.1)                  |
| Venezuela | 2016 | 383.6 (344.9 to 427.3)     | 127.4 (106.2 to 150.8)     | 129.6 (108.9 to 152.6)        | 126.5 (99.7 to 158.2)           | 0.0 (0.0 to 0.0)                  | 635.9 (571.9 to 708.4)    | 211.2 (176.1 to 250.0)     | 214.9 (180.5 to 253.0)        | 209.7 (165.2 to 262.3)          | 0.0 (0.0 to 0.0)                  |
| Venezuela | 2017 | 362.6 (325.1 to 405.0)     | 127.0 (105.4 to 149.8)     | 115.5 (97.1 to 136.1)         | 120.1 (94.9 to 150.1)           | 0.0 (0.0 to 0.0)                  | 601.2 (539.1 to 671.5)    | 210.5 (174.8 to 248.3)     | 191.6 (161.0 to 225.6)        | 199.1 (157.3 to 248.9)          | 0.0 (0.0 to 0.0)                  |
| Venezuela | 2018 | 360.5 (322.7 to 401.5)     | 127.5 (105.6 to 150.4)     | 114.5 (96.3 to 134.5)         | 118.6 (93.6 to 147.8)           | 0.0 (0.0 to 0.0)                  | 597.8 (535.0 to 665.7)    | 211.3 (175.1 to 249.4)     | 189.8 (159.7 to 223.0)        | 196.6 (155.2 to 245.1)          | 0.0 (0.0 to 0.0)                  |
| Venezuela | 2019 | 365.4 (328.0 to 408.6)     | 130.3 (107.7 to 154.0)     | 114.5 (96.2 to 134.8)         | 120.6 (95.1 to 150.4)           | 0.0 (0.0 to 0.0)                  | 605.9 (543.8 to 677.4)    | 216.1 (178.5 to 255.3)     | 189.8 (159.6 to 223.5)        | 200.0 (157.7 to 249.4)          | 0.0 (0.0 to 0.0)                  |
| Venezuela | 2020 | 369.5 (329.9 to 412.9)     | 133.4 (110.4 to 157.4)     | 113.6 (95.9 to 133.9)         | 122.5 (96.8 to 152.9)           | 0.0 (0.0 to 0.0)                  | 612.7 (547.0 to 684.5)    | 221.1 (183.1 to 261.0)     | 188.4 (159.0 to 222.1)        | 203.1 (160.5 to 253.5)          | 0.0 (0.0 to 0.0)                  |
| Venezuela | 2021 | 373.5 (334.1 to 417.9)     | 136.3 (112.8 to 160.7)     | 112.9 (95.1 to 133.8)         | 124.3 (98.0 to 155.4)           | 0.0 (0.0 to 0.0)                  | 619.3 (554.0 to 692.9)    | 226.0 (187.1 to 266.5)     | 187.2 (157.7 to 221.9)        | 206.1 (162.5 to 257.6)          | 0.0 (0.0 to 0.1)                  |
| Venezuela | 2022 | 378.6 (337.4 to 423.0)     | 139.2 (115.5 to 164.4)     | 113.4 (95.3 to 134.6)         | 126.0 (99.3 to 157.5)           | 0.0 (0.0 to 0.0)                  | 627.8 (559.4 to 701.3)    | 230.8 (191.5 to 272.5)     | 188.0 (158.1 to 223.2)        | 208.9 (164.6 to 261.2)          | 0.0 (0.0 to 0.1)                  |
| Venezuela | 2023 | 382.7 (342.6 to 428.2)     | 141.3 (117.0 to 166.6)     | 113.8 (95.5 to 135.1)         | 127.6 (100.5 to 159.5)          | 0.0 (0.0 to 0.0)                  | 634.6 (568.1 to 709.9)    | 234.3 (194.0 to 276.3)     | 188.7 (158.3 to 224.0)        | 211.5 (166.6 to 264.5)          | 0.0 (0.0 to 0.1)                  |
| Venezuela | 2024 | 386.6 (344.2 to 431.7)     | 143.1 (118.6 to 168.6)     | 114.3 (96.1 to 134.9)         | 129.1 (101.8 to 161.5)          | 0.0 (0.0 to 0.0)                  | 640.9 (570.8 to 715.8)    | 237.3 (196.7 to 279.5)     | 189.4 (159.4 to 223.7)        | 214.1 (168.8 to 267.7)          | 0.1 (0.0 to 0.1)                  |
| Venezuela | 2025 | 390.4 (349.1 to 436.7)     | 145.1 (120.5 to 170.9)     | 114.6 (96.3 to 135.7)         | 130.7 (103.0 to 163.6)          | 0.0 (0.0 to 0.0)                  | 647.4 (578.8 to 724.0)    | 240.7 (199.9 to 283.4)     | 190.0 (159.7 to 225.0)        | 216.7 (170.9 to 271.2)          | 0.1 (0.0 to 0.1)                  |
| Venezuela | 2026 | 393.8 (350.2 to 440.8)     | 147.0 (122.0 to 173.5)     | 114.8 (96.2 to 135.9)         | 132.0 (104.3 to 165.4)          | 0.0 (0.0 to 0.0)                  | 653.0 (580.7 to 730.8)    | 243.8 (202.3 to 287.6)     | 190.3 (159.5 to 225.4)        | 218.9 (173.0 to 274.2)          | 0.1 (0.0 to 0.1)                  |
| Venezuela | 2027 | 397.5 (355.6 to 445.8)     | 149.0 (123.4 to 175.9)     | 115.0 (96.5 to 136.2)         | 133.5 (105.3 to 167.1)          | 0.0 (0.0 to 0.0)                  | 659.0 (589.6 to 739.2)    | 247.0 (204.6 to 291.6)     | 190.7 (159.9 to 225.8)        | 221.3 (174.6 to 277.0)          | 0.1 (0.0 to 0.1)                  |
| Venezuela | 2028 | 401.2 (358.0 to 449.1)     | 151.0 (124.8 to 178.8)     | 115.2 (96.1 to 136.5)         | 135.0 (106.3 to 169.3)          | 0.0 (0.0 to 0.0)                  | 665.2 (593.5 to 744.7)    | 250.3 (206.9 to 296.5)     | 191.1 (159.4 to 226.3)        | 223.8 (176.2 to 280.8)          | 0.1 (0.0 to 0.1)                  |
| Venezuela | 2029 | 404.9 (363.1 to 454.1)     | 152.9 (126.2 to 181.1)     | 115.5 (96.4 to 137.1)         | 136.5 (107.4 to 171.5)          | 0.0 (0.0 to 0.0)                  | 671.4 (602.1 to 752.9)    | 253.6 (209.2 to 300.3)     | 191.5 (159.9 to 227.2)        | 226.3 (178.1 to 284.4)          | 0.1 (0.0 to 0.1)                  |

| Country   | Year | 2018 US Dollars per capita |                            |                               |                                 |                                   | 2018 PPP per capita    |                            |                               |                                 |                                   |
|-----------|------|----------------------------|----------------------------|-------------------------------|---------------------------------|-----------------------------------|------------------------|----------------------------|-------------------------------|---------------------------------|-----------------------------------|
|           |      | Health spending            | Government health spending | Out-of-pocket health spending | Prepaid private health spending | Development assistance for health | Health spending        | Government health spending | Out-of-pocket health spending | Prepaid private health spending | Development assistance for health |
| Venezuela | 2030 | 408.5 (363.1 to 457.5)     | 154.9 (127.9 to 183.8)     | 115.7 (96.7 to 137.4)         | 137.9 (108.5 to 173.5)          | 0.0 (0.0 to 0.0)                  | 677.3 (602.1 to 758.5) | 256.8 (212.0 to 304.7)     | 191.8 (160.4 to 227.8)        | 228.7 (180.0 to 287.6)          | 0.1 (0.0 to 0.1)                  |
| Venezuela | 2031 | 407.3 (364.4 to 456.6)     | 155.0 (128.0 to 184.5)     | 114.5 (95.5 to 135.9)         | 137.7 (108.6 to 173.2)          | 0.0 (0.0 to 0.0)                  | 675.3 (604.2 to 757.1) | 257.0 (212.2 to 305.9)     | 189.9 (158.4 to 225.3)        | 228.3 (180.0 to 287.1)          | 0.1 (0.0 to 0.1)                  |
| Venezuela | 2032 | 405.9 (360.7 to 454.7)     | 155.0 (127.7 to 184.6)     | 113.4 (94.4 to 134.9)         | 137.5 (108.5 to 173.3)          | 0.0 (0.0 to 0.0)                  | 673.1 (598.1 to 753.9) | 257.1 (211.8 to 306.1)     | 188.0 (156.5 to 223.7)        | 228.0 (180.0 to 287.4)          | 0.1 (0.1 to 0.1)                  |
| Venezuela | 2033 | 404.7 (362.0 to 454.3)     | 155.1 (127.8 to 184.4)     | 112.2 (93.2 to 133.8)         | 137.3 (108.3 to 173.3)          | 0.0 (0.0 to 0.1)                  | 671.1 (600.2 to 753.3) | 257.2 (211.8 to 305.8)     | 186.1 (154.6 to 221.8)        | 227.7 (179.5 to 287.3)          | 0.1 (0.1 to 0.1)                  |
| Venezuela | 2034 | 403.4 (357.9 to 453.1)     | 155.2 (127.7 to 184.7)     | 111.1 (92.1 to 132.9)         | 137.1 (108.1 to 173.4)          | 0.0 (0.0 to 0.1)                  | 668.8 (593.4 to 751.3) | 257.3 (211.7 to 306.3)     | 184.2 (152.7 to 220.3)        | 227.3 (179.2 to 287.5)          | 0.1 (0.1 to 0.1)                  |
| Venezuela | 2035 | 402.6 (359.3 to 452.1)     | 155.4 (127.9 to 185.0)     | 110.1 (91.1 to 131.8)         | 137.0 (107.9 to 173.4)          | 0.0 (0.0 to 0.1)                  | 667.5 (595.8 to 749.6) | 257.6 (212.1 to 306.7)     | 182.6 (151.0 to 218.5)        | 227.2 (178.9 to 287.5)          | 0.1 (0.1 to 0.1)                  |
| Venezuela | 2036 | 401.7 (356.0 to 451.7)     | 155.6 (128.1 to 185.5)     | 109.1 (90.0 to 130.8)         | 137.0 (107.6 to 173.3)          | 0.0 (0.0 to 0.1)                  | 666.1 (590.3 to 749.0) | 258.0 (212.4 to 307.5)     | 180.9 (149.3 to 216.9)        | 227.1 (178.4 to 287.4)          | 0.1 (0.1 to 0.1)                  |
| Venezuela | 2037 | 400.9 (357.4 to 451.1)     | 155.8 (128.3 to 186.4)     | 108.2 (89.0 to 129.8)         | 136.9 (107.3 to 173.2)          | 0.0 (0.0 to 0.1)                  | 664.7 (592.7 to 748.0) | 258.3 (212.7 to 309.1)     | 179.3 (147.6 to 215.1)        | 227.0 (177.9 to 287.2)          | 0.1 (0.1 to 0.1)                  |
| Venezuela | 2038 | 400.2 (354.3 to 450.8)     | 156.0 (128.3 to 187.1)     | 107.2 (88.1 to 128.6)         | 136.9 (107.0 to 173.2)          | 0.0 (0.0 to 0.1)                  | 663.5 (587.4 to 747.5) | 258.6 (212.8 to 310.3)     | 177.8 (146.1 to 213.3)        | 227.0 (177.3 to 287.1)          | 0.1 (0.1 to 0.1)                  |
| Venezuela | 2039 | 399.4 (355.5 to 450.5)     | 156.2 (128.3 to 187.5)     | 106.3 (87.2 to 127.6)         | 136.9 (106.8 to 173.0)          | 0.0 (0.0 to 0.1)                  | 662.2 (589.5 to 746.9) | 258.9 (212.7 to 310.9)     | 176.3 (144.5 to 211.6)        | 227.0 (177.0 to 286.8)          | 0.1 (0.1 to 0.1)                  |
| Venezuela | 2040 | 398.5 (352.4 to 449.2)     | 156.3 (128.1 to 187.9)     | 105.4 (86.3 to 126.8)         | 136.8 (106.6 to 172.7)          | 0.0 (0.0 to 0.1)                  | 660.8 (584.3 to 744.7) | 259.2 (212.4 to 311.5)     | 174.7 (143.0 to 210.3)        | 226.9 (176.8 to 286.4)          | 0.1 (0.1 to 0.1)                  |
| Venezuela | 2041 | 398.0 (353.7 to 449.4)     | 156.6 (128.3 to 188.4)     | 104.5 (85.5 to 126.0)         | 136.9 (106.6 to 172.5)          | 0.1 (0.0 to 0.1)                  | 659.9 (586.5 to 745.1) | 259.6 (212.7 to 312.3)     | 173.3 (141.7 to 208.9)        | 226.9 (176.8 to 286.0)          | 0.1 (0.1 to 0.1)                  |
| Venezuela | 2042 | 397.0 (351.0 to 449.0)     | 156.6 (128.1 to 188.6)     | 103.6 (84.6 to 124.9)         | 136.8 (106.4 to 172.4)          | 0.1 (0.0 to 0.1)                  | 658.3 (582.0 to 744.4) | 259.7 (212.4 to 312.7)     | 171.7 (140.3 to 207.1)        | 226.8 (176.4 to 285.9)          | 0.1 (0.1 to 0.1)                  |
| Venezuela | 2043 | 396.0 (350.9 to 447.8)     | 156.7 (127.8 to 188.4)     | 102.6 (83.7 to 123.8)         | 136.6 (106.1 to 172.7)          | 0.1 (0.0 to 0.1)                  | 656.6 (581.7 to 742.4) | 259.8 (211.9 to 312.5)     | 170.1 (138.8 to 205.2)        | 226.6 (175.9 to 286.4)          | 0.1 (0.1 to 0.1)                  |
| Venezuela | 2044 | 395.1 (348.5 to 447.8)     | 156.7 (127.5 to 188.7)     | 101.7 (82.9 to 122.6)         | 136.6 (106.1 to 173.2)          | 0.1 (0.0 to 0.1)                  | 655.0 (577.9 to 742.5) | 259.9 (211.4 to 312.8)     | 168.6 (137.5 to 203.4)        | 226.4 (175.9 to 287.1)          | 0.1 (0.1 to 0.1)                  |
| Venezuela | 2045 | 394.0 (349.0 to 446.2)     | 156.7 (127.1 to 188.7)     | 100.8 (82.1 to 121.5)         | 136.5 (105.6 to 173.5)          | 0.1 (0.0 to 0.1)                  | 653.3 (578.7 to 739.8) | 259.9 (210.8 to 312.8)     | 167.1 (136.2 to 201.5)        | 226.3 (175.1 to 287.7)          | 0.1 (0.1 to 0.1)                  |
| Venezuela | 2046 | 393.3 (346.9 to 447.0)     | 156.8 (127.2 to 189.3)     | 99.9 (81.4 to 120.5)          | 136.5 (105.1 to 173.7)          | 0.1 (0.0 to 0.1)                  | 652.1 (575.2 to 741.1) | 260.0 (210.9 to 313.9)     | 165.7 (135.0 to 199.7)        | 226.3 (174.3 to 288.1)          | 0.1 (0.1 to 0.2)                  |
| Venezuela | 2047 | 392.8 (346.9 to 445.9)     | 157.0 (127.4 to 189.7)     | 99.2 (80.9 to 119.5)          | 136.6 (105.1 to 173.6)          | 0.1 (0.0 to 0.1)                  | 651.3 (575.1 to 739.4) | 260.3 (211.2 to 314.6)     | 164.5 (134.1 to 198.1)        | 226.5 (174.2 to 287.9)          | 0.1 (0.1 to 0.2)                  |
| Venezuela | 2048 | 392.5 (344.8 to 446.3)     | 157.2 (127.3 to 190.2)     | 98.5 (80.3 to 118.5)          | 136.8 (105.1 to 174.1)          | 0.1 (0.0 to 0.1)                  | 650.7 (571.7 to 739.9) | 260.6 (211.1 to 315.4)     | 163.3 (133.1 to 196.5)        | 226.7 (174.3 to 288.7)          | 0.1 (0.1 to 0.2)                  |
| Venezuela | 2049 | 391.8 (345.4 to 446.0)     | 157.2 (127.1 to 190.4)     | 97.7 (79.7 to 117.6)          | 136.8 (105.0 to 174.6)          | 0.1 (0.0 to 0.1)                  | 649.6 (572.6 to 739.5) | 260.7 (210.7 to 315.7)     | 162.0 (132.1 to 194.9)        | 226.9 (174.1 to 289.5)          | 0.1 (0.1 to 0.2)                  |
| Venezuela | 2050 | 391.2 (342.2 to 445.2)     | 157.3 (127.0 to 190.6)     | 96.9 (79.1 to 116.7)          | 136.9 (105.1 to 175.0)          | 0.1 (0.1 to 0.1)                  | 648.6 (567.4 to 738.2) | 260.7 (210.5 to 316.1)     | 160.7 (131.2 to 193.5)        | 227.0 (174.2 to 290.1)          | 0.1 (0.1 to 0.2)                  |

| Country | Year | 2018 US Dollars per capita |                            |                               |                                 |                                   | 2018 PPP per capita    |                            |                               |                                 |                                   |
|---------|------|----------------------------|----------------------------|-------------------------------|---------------------------------|-----------------------------------|------------------------|----------------------------|-------------------------------|---------------------------------|-----------------------------------|
|         |      | Health spending            | Government health spending | Out-of-pocket health spending | Prepaid private health spending | Development assistance for health | Health spending        | Government health spending | Out-of-pocket health spending | Prepaid private health spending | Development assistance for health |
| Vietnam | 1995 | 30.4 (24.5 to 36.4)        | 19.8 (15.3 to 24.9)        | 9.7 (6.9 to 13.4)             | 0.4 (0.2 to 0.8)                | 0.5 (0.5 to 0.5)                  | 89.0 (71.6 to 106.5)   | 57.8 (44.6 to 73.0)        | 28.4 (20.2 to 39.2)           | 1.3 (0.7 to 2.5)                | 1.5 (1.5 to 1.5)                  |
| Vietnam | 1996 | 31.9 (25.7 to 38.3)        | 20.5 (15.8 to 26.0)        | 10.6 (7.6 to 14.7)            | 0.5 (0.2 to 0.9)                | 0.4 (0.4 to 0.4)                  | 93.4 (75.1 to 112.2)   | 59.8 (46.1 to 76.1)        | 31.0 (22.2 to 42.9)           | 1.3 (0.7 to 2.6)                | 1.2 (1.2 to 1.2)                  |
| Vietnam | 1997 | 34.3 (28.0 to 41.3)        | 21.1 (16.5 to 26.8)        | 11.4 (8.1 to 15.4)            | 0.5 (0.2 to 0.9)                | 1.3 (1.3 to 1.3)                  | 100.3 (81.9 to 120.7)  | 61.7 (48.2 to 78.3)        | 33.4 (23.7 to 45.1)           | 1.4 (0.7 to 2.7)                | 3.8 (3.8 to 3.8)                  |
| Vietnam | 1998 | 35.0 (29.0 to 42.0)        | 21.5 (16.8 to 27.0)        | 12.2 (8.7 to 16.5)            | 0.5 (0.2 to 0.9)                | 0.8 (0.8 to 0.8)                  | 102.4 (84.7 to 122.8)  | 62.8 (49.1 to 79.0)        | 35.8 (25.5 to 48.3)           | 1.4 (0.7 to 2.7)                | 2.5 (2.5 to 2.5)                  |
| Vietnam | 1999 | 36.1 (30.0 to 43.1)        | 21.3 (16.7 to 26.7)        | 13.3 (9.6 to 17.8)            | 0.5 (0.2 to 0.9)                | 1.1 (1.1 to 1.1)                  | 105.6 (87.6 to 126.0)  | 62.2 (48.9 to 78.2)        | 38.8 (28.0 to 52.2)           | 1.4 (0.7 to 2.7)                | 3.1 (3.1 to 3.1)                  |
| Vietnam | 2000 | 37.5 (31.2 to 44.6)        | 20.9 (16.6 to 26.2)        | 15.2 (11.1 to 20.1)           | 0.5 (0.2 to 0.9)                | 1.0 (1.0 to 1.0)                  | 109.7 (91.3 to 130.5)  | 61.0 (48.4 to 76.7)        | 44.5 (32.4 to 58.8)           | 1.3 (0.7 to 2.5)                | 2.8 (2.8 to 2.8)                  |
| Vietnam | 2001 | 39.1 (32.6 to 46.2)        | 21.0 (16.7 to 26.0)        | 16.7 (12.1 to 21.9)           | 0.4 (0.2 to 0.9)                | 0.9 (0.9 to 0.9)                  | 114.2 (95.3 to 135.2)  | 61.4 (49.0 to 76.1)        | 48.7 (35.4 to 64.2)           | 1.3 (0.7 to 2.5)                | 2.8 (2.8 to 2.8)                  |
| Vietnam | 2002 | 41.5 (34.8 to 49.2)        | 22.1 (17.5 to 27.3)        | 17.9 (13.0 to 23.5)           | 0.5 (0.2 to 0.9)                | 1.1 (1.1 to 1.1)                  | 121.5 (101.9 to 144.0) | 64.6 (51.3 to 79.8)        | 52.3 (38.0 to 68.6)           | 1.3 (0.7 to 2.6)                | 3.2 (3.2 to 3.2)                  |
| Vietnam | 2003 | 44.8 (37.7 to 53.0)        | 23.4 (18.7 to 28.8)        | 19.5 (14.3 to 25.8)           | 0.5 (0.2 to 0.9)                | 1.4 (1.4 to 1.4)                  | 131.0 (110.4 to 155.0) | 68.4 (54.7 to 84.2)        | 57.1 (41.7 to 75.4)           | 1.4 (0.7 to 2.6)                | 4.2 (4.2 to 4.2)                  |
| Vietnam | 2004 | 50.4 (42.0 to 59.7)        | 26.0 (20.8 to 32.0)        | 22.1 (16.2 to 29.0)           | 0.5 (0.3 to 1.0)                | 1.8 (1.8 to 1.8)                  | 147.3 (122.9 to 174.5) | 76.1 (60.9 to 93.7)        | 64.6 (47.3 to 84.9)           | 1.5 (0.7 to 2.8)                | 5.2 (5.2 to 5.2)                  |
| Vietnam | 2005 | 56.3 (47.1 to 66.8)        | 28.8 (22.8 to 35.6)        | 24.8 (18.0 to 32.7)           | 0.6 (0.3 to 1.0)                | 2.2 (2.2 to 2.2)                  | 164.7 (137.6 to 195.4) | 84.4 (66.7 to 104.0)       | 72.4 (52.8 to 95.5)           | 1.6 (0.8 to 3.1)                | 6.3 (6.3 to 6.3)                  |
| Vietnam | 2006 | 61.6 (51.5 to 72.7)        | 31.1 (24.7 to 38.4)        | 27.2 (20.1 to 36.0)           | 0.6 (0.3 to 1.1)                | 2.6 (2.6 to 2.6)                  | 180.1 (150.7 to 212.6) | 91.0 (72.2 to 112.4)       | 79.7 (58.7 to 105.2)          | 1.7 (0.9 to 3.2)                | 7.7 (7.7 to 7.7)                  |
| Vietnam | 2007 | 66.0 (55.7 to 77.9)        | 33.1 (26.3 to 40.9)        | 29.3 (21.4 to 38.4)           | 0.6 (0.3 to 1.1)                | 3.0 (3.0 to 3.0)                  | 193.0 (163.0 to 227.7) | 96.8 (77.0 to 119.5)       | 85.6 (62.6 to 112.4)          | 1.8 (0.9 to 3.4)                | 8.8 (8.8 to 8.8)                  |
| Vietnam | 2008 | 70.2 (59.7 to 82.6)        | 35.0 (28.1 to 43.4)        | 30.8 (22.9 to 40.6)           | 0.7 (0.3 to 1.2)                | 3.7 (3.7 to 3.7)                  | 205.3 (174.6 to 241.5) | 102.3 (82.1 to 127.0)      | 90.2 (67.0 to 118.9)          | 1.9 (1.0 to 3.4)                | 10.9 (10.9 to 10.9)               |
| Vietnam | 2009 | 74.3 (63.1 to 86.9)        | 37.2 (30.2 to 46.1)        | 33.1 (25.0 to 43.3)           | 0.7 (0.4 to 1.3)                | 3.2 (3.2 to 3.2)                  | 217.2 (184.6 to 254.1) | 108.9 (88.3 to 134.8)      | 96.9 (73.0 to 126.6)          | 2.0 (1.0 to 3.7)                | 9.4 (9.4 to 9.4)                  |
| Vietnam | 2010 | 83.3 (70.9 to 97.7)        | 41.8 (33.5 to 51.3)        | 37.1 (27.9 to 48.2)           | 0.8 (0.4 to 1.4)                | 3.6 (3.6 to 3.6)                  | 243.6 (207.4 to 285.9) | 122.3 (98.0 to 150.1)      | 108.5 (81.7 to 140.9)         | 2.2 (1.1 to 4.1)                | 10.5 (10.5 to 10.5)               |
| Vietnam | 2011 | 90.3 (76.8 to 106.8)       | 45.1 (36.2 to 55.5)        | 40.5 (30.6 to 52.6)           | 0.8 (0.4 to 1.5)                | 3.9 (3.9 to 3.9)                  | 264.2 (224.7 to 312.5) | 132.0 (105.7 to 162.3)     | 118.3 (89.5 to 153.9)         | 2.4 (1.2 to 4.2)                | 11.5 (11.5 to 11.5)               |
| Vietnam | 2012 | 98.8 (83.9 to 116.9)       | 49.3 (39.3 to 60.8)        | 45.0 (33.9 to 57.9)           | 0.9 (0.4 to 1.6)                | 3.7 (3.7 to 3.7)                  | 289.0 (245.3 to 341.9) | 144.2 (115.0 to 177.8)     | 131.5 (99.2 to 169.5)         | 2.6 (1.3 to 4.7)                | 10.8 (10.8 to 10.8)               |
| Vietnam | 2013 | 104.9 (89.4 to 123.9)      | 51.9 (41.8 to 64.3)        | 48.0 (35.7 to 61.8)           | 0.9 (0.5 to 1.8)                | 4.0 (4.0 to 4.0)                  | 306.9 (261.5 to 362.4) | 151.9 (122.2 to 188.2)     | 140.5 (104.5 to 180.7)        | 2.7 (1.3 to 5.2)                | 11.8 (11.8 to 11.8)               |
| Vietnam | 2014 | 105.8 (89.1 to 125.3)      | 52.2 (41.7 to 64.4)        | 49.6 (36.2 to 64.6)           | 1.0 (0.5 to 1.9)                | 3.0 (3.0 to 3.0)                  | 309.4 (260.6 to 366.3) | 152.5 (122.1 to 188.3)     | 145.0 (106.0 to 188.9)        | 2.9 (1.4 to 5.6)                | 8.9 (8.9 to 8.9)                  |
| Vietnam | 2015 | 110.5 (93.0 to 129.9)      | 54.3 (43.2 to 66.6)        | 52.3 (38.5 to 68.6)           | 1.1 (0.5 to 2.1)                | 2.8 (2.8 to 2.8)                  | 323.2 (271.9 to 380.0) | 158.8 (126.3 to 194.9)     | 152.9 (112.6 to 200.6)        | 3.1 (1.5 to 6.1)                | 8.3 (8.3 to 8.3)                  |



| Country | Year | 2018 US Dollars per capita |                            |                               |                                 |                                   | 2018 PPP per capita    |                            |                               |                                 |                                   |
|---------|------|----------------------------|----------------------------|-------------------------------|---------------------------------|-----------------------------------|------------------------|----------------------------|-------------------------------|---------------------------------|-----------------------------------|
|         |      | Health spending            | Government health spending | Out-of-pocket health spending | Prepaid private health spending | Development assistance for health | Health spending        | Government health spending | Out-of-pocket health spending | Prepaid private health spending | Development assistance for health |
| Vietnam | 2016 | 118.8 (98.2 to 140.0)      | 58.9 (46.8 to 72.6)        | 55.5 (40.9 to 73.8)           | 1.1 (0.6 to 2.2)                | 3.2 (3.2 to 3.2)                  | 347.4 (287.4 to 409.5) | 172.2 (136.7 to 212.4)     | 162.5 (119.5 to 215.8)        | 3.3 (1.6 to 6.5)                | 9.4 (9.4 to 9.4)                  |
| Vietnam | 2017 | 123.3 (102.1 to 147.9)     | 60.4 (48.0 to 74.3)        | 58.6 (43.2 to 77.6)           | 1.2 (0.6 to 2.4)                | 3.2 (3.2 to 3.2)                  | 360.7 (298.5 to 432.5) | 176.6 (140.5 to 217.4)     | 171.3 (126.3 to 227.0)        | 3.5 (1.7 to 6.9)                | 9.3 (9.3 to 9.3)                  |
| Vietnam | 2018 | 128.7 (107.3 to 155.5)     | 63.2 (50.2 to 77.8)        | 61.4 (45.4 to 81.5)           | 1.2 (0.6 to 2.5)                | 3.0 (3.0 to 3.0)                  | 376.6 (313.9 to 454.9) | 184.7 (146.8 to 227.7)     | 179.5 (132.8 to 238.4)        | 3.6 (1.8 to 7.2)                | 8.7 (8.7 to 8.8)                  |
| Vietnam | 2019 | 134.3 (111.0 to 160.8)     | 65.8 (52.2 to 81.0)        | 64.2 (47.4 to 84.8)           | 1.3 (0.6 to 2.5)                | 3.0 (2.8 to 3.2)                  | 392.9 (324.6 to 470.2) | 192.5 (152.7 to 236.9)     | 187.8 (138.6 to 248.2)        | 3.8 (1.8 to 7.4)                | 8.8 (8.2 to 9.3)                  |
| Vietnam | 2020 | 140.2 (116.2 to 167.5)     | 68.6 (54.3 to 84.1)        | 67.2 (49.3 to 88.6)           | 1.3 (0.7 to 2.6)                | 3.1 (2.8 to 3.3)                  | 410.0 (339.9 to 489.8) | 200.7 (158.7 to 246.1)     | 196.4 (144.3 to 259.0)        | 3.9 (1.9 to 7.7)                | 8.9 (8.2 to 9.6)                  |
| Vietnam | 2021 | 145.3 (120.8 to 172.7)     | 70.7 (56.0 to 86.5)        | 70.1 (51.6 to 92.8)           | 1.4 (0.7 to 2.7)                | 3.1 (2.8 to 3.4)                  | 425.0 (353.3 to 505.1) | 206.8 (163.7 to 253.1)     | 205.1 (150.9 to 271.5)        | 4.0 (2.0 to 7.9)                | 9.1 (8.2 to 10.1)                 |
| Vietnam | 2022 | 150.5 (126.1 to 178.7)     | 72.8 (57.6 to 88.9)        | 73.2 (53.4 to 96.7)           | 1.4 (0.7 to 2.8)                | 3.2 (2.8 to 3.6)                  | 440.3 (368.7 to 522.6) | 212.9 (168.5 to 260.0)     | 214.0 (156.1 to 282.8)        | 4.1 (2.0 to 8.1)                | 9.3 (8.3 to 10.4)                 |
| Vietnam | 2023 | 155.8 (129.7 to 184.7)     | 74.8 (59.2 to 91.2)        | 76.3 (56.1 to 100.7)          | 1.5 (0.7 to 2.9)                | 3.3 (2.8 to 3.7)                  | 455.8 (379.5 to 540.3) | 218.8 (173.2 to 266.8)     | 223.1 (164.2 to 294.5)        | 4.3 (2.1 to 8.4)                | 9.5 (8.3 to 10.8)                 |
| Vietnam | 2024 | 161.4 (133.7 to 192.3)     | 76.9 (60.9 to 93.9)        | 79.6 (58.4 to 104.5)          | 1.5 (0.7 to 2.9)                | 3.3 (2.9 to 3.9)                  | 471.9 (391.2 to 562.5) | 225.0 (178.2 to 274.8)     | 232.7 (170.9 to 305.6)        | 4.4 (2.2 to 8.6)                | 9.8 (8.5 to 11.3)                 |
| Vietnam | 2025 | 167.2 (138.8 to 198.3)     | 79.2 (62.7 to 96.8)        | 83.0 (60.6 to 110.0)          | 1.5 (0.8 to 3.0)                | 3.4 (2.9 to 4.0)                  | 489.0 (405.9 to 580.1) | 231.6 (183.4 to 283.0)     | 242.8 (177.1 to 321.6)        | 4.5 (2.2 to 8.9)                | 10.0 (8.6 to 11.7)                |
| Vietnam | 2026 | 173.3 (143.6 to 204.5)     | 81.5 (64.6 to 99.7)        | 86.7 (63.2 to 114.4)          | 1.6 (0.8 to 3.1)                | 3.5 (3.0 to 4.1)                  | 506.8 (420.0 to 598.2) | 238.5 (188.9 to 291.5)     | 253.4 (185.0 to 334.7)        | 4.7 (2.3 to 9.2)                | 10.3 (8.7 to 12.0)                |
| Vietnam | 2027 | 179.7 (148.6 to 212.9)     | 84.0 (66.6 to 102.7)       | 90.5 (66.4 to 119.7)          | 1.6 (0.8 to 3.2)                | 3.6 (3.0 to 4.3)                  | 525.7 (434.6 to 622.7) | 245.8 (194.8 to 300.5)     | 264.6 (194.1 to 350.0)        | 4.8 (2.4 to 9.5)                | 10.5 (8.8 to 12.5)                |
| Vietnam | 2028 | 186.5 (153.2 to 222.3)     | 86.7 (68.7 to 106.1)       | 94.4 (68.6 to 125.3)          | 1.7 (0.8 to 3.3)                | 3.7 (3.1 to 4.5)                  | 545.5 (448.1 to 650.0) | 253.5 (201.0 to 310.3)     | 276.2 (200.6 to 366.4)        | 5.0 (2.4 to 9.8)                | 10.8 (9.0 to 13.0)                |
| Vietnam | 2029 | 193.5 (159.6 to 231.7)     | 89.5 (70.8 to 109.7)       | 98.5 (70.6 to 131.3)          | 1.8 (0.9 to 3.4)                | 3.8 (3.1 to 4.6)                  | 565.8 (466.9 to 677.5) | 261.7 (207.0 to 320.8)     | 287.9 (206.6 to 384.1)        | 5.1 (2.5 to 10.1)               | 11.1 (9.1 to 13.5)                |
| Vietnam | 2030 | 200.5 (163.9 to 240.9)     | 92.3 (73.1 to 113.3)       | 102.5 (73.3 to 136.4)         | 1.8 (0.9 to 3.6)                | 3.9 (3.2 to 4.8)                  | 586.4 (479.5 to 704.5) | 270.0 (213.7 to 331.5)     | 299.8 (214.5 to 399.0)        | 5.3 (2.6 to 10.4)               | 11.3 (9.3 to 13.9)                |
| Vietnam | 2031 | 207.8 (171.2 to 249.2)     | 95.3 (75.5 to 117.2)       | 106.6 (76.0 to 142.5)         | 1.9 (0.9 to 3.7)                | 4.0 (3.2 to 5.0)                  | 607.7 (500.7 to 729.0) | 278.7 (220.9 to 342.7)     | 311.9 (222.3 to 416.9)        | 5.5 (2.7 to 10.7)               | 11.6 (9.4 to 14.6)                |
| Vietnam | 2032 | 215.3 (175.4 to 258.4)     | 98.4 (77.9 to 120.9)       | 110.8 (78.4 to 148.6)         | 1.9 (0.9 to 3.8)                | 4.1 (3.3 to 5.2)                  | 629.6 (512.9 to 755.9) | 287.8 (227.8 to 353.5)     | 324.2 (229.3 to 434.6)        | 5.7 (2.7 to 11.1)               | 11.9 (9.6 to 15.1)                |
| Vietnam | 2033 | 222.7 (182.2 to 270.4)     | 101.6 (80.3 to 124.9)      | 115.0 (80.5 to 154.4)         | 2.0 (1.0 to 3.9)                | 4.2 (3.3 to 5.4)                  | 651.5 (532.9 to 790.9) | 297.0 (235.0 to 365.4)     | 336.4 (235.5 to 451.6)        | 5.8 (2.8 to 11.5)               | 12.2 (9.7 to 15.7)                |
| Vietnam | 2034 | 230.3 (187.2 to 278.8)     | 104.8 (82.9 to 129.0)      | 119.2 (83.6 to 160.0)         | 2.1 (1.0 to 4.1)                | 4.3 (3.4 to 5.5)                  | 673.7 (547.6 to 815.5) | 306.5 (242.6 to 377.4)     | 348.7 (244.4 to 468.0)        | 6.0 (2.9 to 11.9)               | 12.6 (9.9 to 16.2)                |
| Vietnam | 2035 | 238.1 (193.5 to 291.0)     | 108.1 (85.6 to 133.3)      | 123.4 (86.0 to 166.2)         | 2.1 (1.0 to 4.2)                | 4.4 (3.4 to 5.7)                  | 696.3 (565.9 to 851.2) | 316.2 (250.5 to 389.9)     | 361.0 (251.5 to 486.2)        | 6.2 (3.0 to 12.2)               | 12.9 (10.0 to 16.8)               |
| Vietnam | 2036 | 245.9 (198.8 to 299.2)     | 111.6 (88.4 to 137.9)      | 127.6 (88.4 to 172.7)         | 2.2 (1.1 to 4.3)                | 4.5 (3.5 to 6.1)                  | 719.3 (581.4 to 875.1) | 326.4 (258.4 to 403.3)     | 373.3 (258.6 to 505.2)        | 6.4 (3.1 to 12.7)               | 13.2 (10.3 to 17.8)               |

| Country              | Year | 2018 US Dollars per capita |                            |                               |                                 |                                   | 2018 PPP per capita      |                            |                               |                                 |                                   |
|----------------------|------|----------------------------|----------------------------|-------------------------------|---------------------------------|-----------------------------------|--------------------------|----------------------------|-------------------------------|---------------------------------|-----------------------------------|
|                      |      | Health spending            | Government health spending | Out-of-pocket health spending | Prepaid private health spending | Development assistance for health | Health spending          | Government health spending | Out-of-pocket health spending | Prepaid private health spending | Development assistance for health |
| Vietnam              | 2037 | 253.9 (207.0 to 311.4)     | 115.1 (91.2 to 142.7)      | 131.8 (90.8 to 178.8)         | 2.3 (1.1 to 4.5)                | 4.6 (3.6 to 6.3)                  | 742.5 (605.4 to 910.8)   | 336.7 (266.9 to 417.4)     | 385.6 (265.6 to 523.0)        | 6.6 (3.2 to 13.1)               | 13.6 (10.4 to 18.3)               |
| Vietnam              | 2038 | 261.9 (212.2 to 319.6)     | 118.8 (94.3 to 147.6)      | 136.0 (93.5 to 184.8)         | 2.3 (1.1 to 4.6)                | 4.8 (3.6 to 6.6)                  | 766.1 (620.6 to 934.7)   | 347.5 (275.7 to 431.6)     | 397.8 (273.5 to 540.4)        | 6.9 (3.3 to 13.5)               | 14.0 (10.6 to 19.4)               |
| Vietnam              | 2039 | 270.0 (219.9 to 327.6)     | 122.6 (97.3 to 152.4)      | 140.2 (95.8 to 191.9)         | 2.4 (1.2 to 4.8)                | 4.9 (3.7 to 6.8)                  | 789.8 (643.0 to 958.1)   | 358.4 (284.5 to 445.9)     | 409.9 (280.2 to 561.4)        | 7.1 (3.4 to 13.9)               | 14.3 (10.9 to 19.9)               |
| Vietnam              | 2040 | 278.4 (228.7 to 338.9)     | 126.5 (100.3 to 157.4)     | 144.3 (98.2 to 199.3)         | 2.5 (1.2 to 4.9)                | 5.0 (3.8 to 7.0)                  | 814.1 (669.0 to 991.1)   | 370.0 (293.4 to 460.5)     | 422.1 (287.2 to 582.9)        | 7.3 (3.5 to 14.4)               | 14.7 (11.2 to 20.5)               |
| Vietnam              | 2041 | 286.8 (233.4 to 350.3)     | 130.6 (103.3 to 162.3)     | 148.4 (100.5 to 205.7)        | 2.6 (1.3 to 5.1)                | 5.2 (3.9 to 7.2)                  | 838.8 (682.8 to 1024.5)  | 382.1 (302.3 to 474.7)     | 434.1 (294.0 to 601.8)        | 7.6 (3.7 to 14.9)               | 15.1 (11.4 to 21.1)               |
| Vietnam              | 2042 | 295.4 (239.0 to 361.5)     | 135.0 (106.7 to 168.2)     | 152.5 (103.0 to 211.9)        | 2.7 (1.3 to 5.3)                | 5.3 (3.9 to 7.6)                  | 864.1 (699.0 to 1057.4)  | 394.7 (312.0 to 492.0)     | 446.0 (301.4 to 619.8)        | 7.8 (3.8 to 15.4)               | 15.6 (11.5 to 22.4)               |
| Vietnam              | 2043 | 304.1 (244.5 to 372.4)     | 139.4 (110.3 to 174.2)     | 156.5 (105.6 to 218.2)        | 2.8 (1.3 to 5.4)                | 5.5 (4.0 to 7.9)                  | 889.5 (715.0 to 1089.3)  | 407.7 (322.6 to 509.6)     | 457.7 (308.8 to 638.3)        | 8.1 (3.9 to 15.9)               | 16.0 (11.8 to 23.2)               |
| Vietnam              | 2044 | 312.7 (251.5 to 385.4)     | 143.9 (113.9 to 179.7)     | 160.4 (108.1 to 223.9)        | 2.9 (1.4 to 5.6)                | 5.6 (4.1 to 8.2)                  | 914.7 (735.6 to 1127.3)  | 420.8 (333.1 to 525.5)     | 469.1 (316.2 to 654.9)        | 8.3 (4.1 to 16.4)               | 16.5 (12.1 to 23.9)               |
| Vietnam              | 2045 | 321.3 (257.6 to 398.7)     | 148.4 (117.4 to 185.2)     | 164.1 (110.7 to 229.5)        | 2.9 (1.4 to 5.8)                | 5.8 (4.2 to 8.7)                  | 939.8 (753.6 to 1166.1)  | 434.1 (343.3 to 541.7)     | 480.1 (323.9 to 671.2)        | 8.6 (4.2 to 17.0)               | 17.0 (12.2 to 25.5)               |
| Vietnam              | 2046 | 329.7 (262.7 to 408.1)     | 152.9 (120.8 to 190.6)     | 167.7 (113.1 to 235.1)        | 3.0 (1.5 to 6.0)                | 6.0 (4.3 to 9.2)                  | 964.2 (768.4 to 1193.6)  | 447.3 (353.5 to 557.6)     | 490.5 (330.8 to 687.5)        | 8.9 (4.3 to 17.5)               | 17.5 (12.6 to 27.0)               |
| Vietnam              | 2047 | 337.9 (269.4 to 418.0)     | 157.5 (124.4 to 196.7)     | 171.1 (115.4 to 240.3)        | 3.1 (1.5 to 6.2)                | 6.2 (4.4 to 9.7)                  | 988.3 (787.9 to 1222.7)  | 460.7 (363.7 to 575.5)     | 500.4 (337.4 to 702.9)        | 9.2 (4.5 to 18.0)               | 18.0 (12.9 to 28.3)               |
| Vietnam              | 2048 | 346.0 (275.9 to 426.8)     | 162.0 (127.8 to 202.8)     | 174.4 (117.6 to 245.7)        | 3.2 (1.6 to 6.3)                | 6.4 (4.5 to 10.3)                 | 1012.1 (806.9 to 1248.3) | 473.8 (373.7 to 593.2)     | 510.2 (343.9 to 718.7)        | 9.4 (4.6 to 18.6)               | 18.7 (13.2 to 30.1)               |
| Vietnam              | 2049 | 354.1 (283.9 to 435.1)     | 166.5 (131.2 to 208.4)     | 177.7 (119.8 to 251.5)        | 3.3 (1.6 to 6.5)                | 6.6 (4.7 to 10.7)                 | 1035.7 (830.2 to 1272.7) | 486.8 (383.7 to 609.6)     | 519.9 (350.4 to 735.5)        | 9.7 (4.7 to 19.1)               | 19.3 (13.7 to 31.2)               |
| Vietnam              | 2050 | 362.2 (288.4 to 447.6)     | 170.9 (134.4 to 214.5)     | 181.1 (122.0 to 257.2)        | 3.4 (1.7 to 6.7)                | 6.8 (4.8 to 11.1)                 | 1059.4 (843.6 to 1309.2) | 499.8 (393.1 to 627.3)     | 529.6 (356.9 to 752.4)        | 10.0 (4.9 to 19.6)              | 20.0 (14.0 to 32.4)               |
| Virgin Islands, U.S. | 1995 | 906.3 (739.4 to 1103.1)    | 566.7 (440.1 to 728.5)     | 286.7 (194.5 to 402.2)        | 52.9 (25.6 to 98.6)             | 0.0 (0.0 to 0.0)                  | 487.1 (397.4 to 592.9)   | 304.6 (236.5 to 391.5)     | 154.1 (104.5 to 216.1)        | 28.4 (13.8 to 53.0)             | 0.0 (0.0 to 0.0)                  |
| Virgin Islands, U.S. | 1996 | 935.3 (761.5 to 1129.0)    | 585.5 (453.7 to 749.6)     | 295.1 (199.7 to 414.9)        | 54.7 (26.6 to 100.1)            | 0.0 (0.0 to 0.0)                  | 502.7 (409.3 to 606.8)   | 314.7 (243.8 to 402.9)     | 158.6 (107.3 to 223.0)        | 29.4 (14.3 to 53.8)             | 0.0 (0.0 to 0.0)                  |
| Virgin Islands, U.S. | 1997 | 963.0 (784.7 to 1170.8)    | 604.2 (463.7 to 786.8)     | 303.4 (207.9 to 425.0)        | 55.5 (27.5 to 101.4)            | 0.0 (0.0 to 0.0)                  | 517.6 (421.7 to 629.2)   | 324.7 (249.2 to 422.8)     | 163.0 (111.7 to 228.4)        | 29.8 (14.8 to 54.5)             | 0.0 (0.0 to 0.0)                  |
| Virgin Islands, U.S. | 1998 | 980.1 (798.3 to 1198.5)    | 615.6 (474.1 to 807.6)     | 309.1 (212.7 to 432.9)        | 55.4 (27.3 to 102.4)            | 0.0 (0.0 to 0.0)                  | 526.7 (429.0 to 644.1)   | 330.9 (254.8 to 434.0)     | 166.1 (114.3 to 232.7)        | 29.8 (14.7 to 55.0)             | 0.0 (0.0 to 0.0)                  |
| Virgin Islands, U.S. | 1999 | 998.6 (808.5 to 1220.3)    | 628.0 (478.0 to 818.8)     | 315.1 (220.5 to 439.8)        | 55.6 (26.9 to 101.2)            | 0.0 (0.0 to 0.0)                  | 536.7 (434.5 to 655.8)   | 337.5 (256.9 to 440.1)     | 169.3 (118.5 to 236.4)        | 29.9 (14.4 to 54.4)             | 0.0 (0.0 to 0.0)                  |
| Virgin Islands, U.S. | 2000 | 1028.5 (831.4 to 1254.6)   | 648.6 (490.8 to 840.3)     | 323.5 (229.0 to 451.3)        | 56.4 (26.0 to 102.6)            | 0.0 (0.0 to 0.0)                  | 552.7 (446.8 to 674.3)   | 348.6 (263.8 to 451.6)     | 173.8 (123.1 to 242.6)        | 30.3 (14.0 to 55.2)             | 0.0 (0.0 to 0.0)                  |
| Virgin Islands, U.S. | 2001 | 1047.7 (840.7 to 1272.7)   | 661.6 (497.9 to 854.0)     | 330.2 (233.9 to 455.3)        | 55.9 (25.6 to 100.7)            | 0.0 (0.0 to 0.0)                  | 563.1 (451.8 to 684.0)   | 355.6 (267.6 to 459.0)     | 177.5 (125.7 to 244.7)        | 30.0 (13.8 to 54.1)             | 0.0 (0.0 to 0.0)                  |

| Country              | Year | 2018 US Dollars per capita |                            |                               |                                 |                                   | 2018 PPP per capita       |                            |                               |                                 |                                   |
|----------------------|------|----------------------------|----------------------------|-------------------------------|---------------------------------|-----------------------------------|---------------------------|----------------------------|-------------------------------|---------------------------------|-----------------------------------|
|                      |      | Health spending            | Government health spending | Out-of-pocket health spending | Prepaid private health spending | Development assistance for health | Health spending           | Government health spending | Out-of-pocket health spending | Prepaid private health spending | Development assistance for health |
| Virgin Islands, U.S. | 2002 | 1466.3 (1181.8 to 1778.9)  | 965.2 (721.3 to 1247.1)    | 419.7 (295.0 to 579.0)        | 81.5 (38.2 to 151.5)            | 0.0 (0.0 to 0.0)                  | 788.1 (635.2 to 956.1)    | 518.7 (387.7 to 670.2)     | 225.6 (158.5 to 311.2)        | 43.8 (20.5 to 81.4)             | 0.0 (0.0 to 0.0)                  |
| Virgin Islands, U.S. | 2003 | 1531.8 (1231.1 to 1865.8)  | 998.7 (750.0 to 1285.4)    | 442.1 (311.6 to 609.3)        | 91.0 (41.8 to 173.8)            | 0.0 (0.0 to 0.0)                  | 823.2 (661.7 to 1002.8)   | 536.7 (403.1 to 690.8)     | 237.6 (167.5 to 327.5)        | 48.9 (22.5 to 93.4)             | 0.0 (0.0 to 0.0)                  |
| Virgin Islands, U.S. | 2004 | 1646.5 (1322.8 to 2016.2)  | 1065.5 (806.5 to 1373.7)   | 472.7 (331.5 to 653.6)        | 108.3 (50.8 to 213.4)           | 0.0 (0.0 to 0.0)                  | 884.9 (710.9 to 1083.6)   | 572.6 (433.4 to 738.3)     | 254.1 (178.1 to 351.3)        | 58.2 (27.3 to 114.7)            | 0.0 (0.0 to 0.0)                  |
| Virgin Islands, U.S. | 2005 | 1777.7 (1429.2 to 2185.2)  | 1145.9 (870.4 to 1479.0)   | 504.1 (351.9 to 698.9)        | 127.7 (57.2 to 248.6)           | 0.0 (0.0 to 0.0)                  | 955.4 (768.1 to 1174.4)   | 615.8 (467.8 to 794.9)     | 270.9 (189.1 to 375.6)        | 68.6 (30.7 to 133.6)            | 0.0 (0.0 to 0.0)                  |
| Virgin Islands, U.S. | 2006 | 1908.0 (1538.6 to 2341.3)  | 1227.5 (939.7 to 1580.3)   | 533.1 (372.7 to 748.6)        | 147.4 (66.4 to 290.1)           | 0.0 (0.0 to 0.0)                  | 1025.4 (826.9 to 1258.3)  | 659.7 (505.0 to 849.3)     | 286.5 (200.3 to 402.3)        | 79.2 (35.7 to 155.9)            | 0.0 (0.0 to 0.0)                  |
| Virgin Islands, U.S. | 2007 | 2069.0 (1669.0 to 2535.4)  | 1334.3 (1001.1 to 1714.2)  | 564.0 (395.7 to 797.4)        | 170.7 (77.2 to 329.9)           | 0.0 (0.0 to 0.0)                  | 1112.0 (897.0 to 1362.6)  | 717.1 (538.0 to 921.3)     | 303.1 (212.7 to 428.5)        | 91.7 (41.5 to 177.3)            | 0.0 (0.0 to 0.0)                  |
| Virgin Islands, U.S. | 2008 | 2189.0 (1753.1 to 2697.7)  | 1412.2 (1063.0 to 1831.5)  | 586.0 (404.3 to 822.9)        | 190.8 (85.6 to 372.7)           | 0.0 (0.0 to 0.0)                  | 1176.4 (942.2 to 1449.8)  | 759.0 (571.3 to 984.3)     | 314.9 (217.3 to 442.3)        | 102.5 (46.0 to 200.3)           | 0.0 (0.0 to 0.0)                  |
| Virgin Islands, U.S. | 2009 | 2196.5 (1768.6 to 2724.9)  | 1409.2 (1053.7 to 1821.4)  | 587.2 (401.2 to 827.9)        | 200.1 (90.6 to 382.0)           | 0.0 (0.0 to 0.0)                  | 1180.5 (950.5 to 1464.4)  | 757.4 (566.3 to 978.9)     | 315.6 (215.6 to 444.9)        | 107.5 (48.7 to 205.3)           | 0.0 (0.0 to 0.0)                  |
| Virgin Islands, U.S. | 2010 | 2313.1 (1854.3 to 2897.2)  | 1485.2 (1117.0 to 1945.6)  | 608.3 (416.6 to 865.0)        | 219.6 (100.6 to 412.2)          | 0.0 (0.0 to 0.0)                  | 1243.1 (996.5 to 1557.1)  | 798.2 (600.3 to 1045.6)    | 326.9 (223.9 to 464.9)        | 118.0 (54.1 to 221.5)           | 0.0 (0.0 to 0.0)                  |
| Virgin Islands, U.S. | 2011 | 2265.5 (1810.6 to 2818.5)  | 1442.3 (1082.6 to 1864.1)  | 601.2 (414.0 to 840.6)        | 222.1 (100.8 to 425.7)          | 0.0 (0.0 to 0.0)                  | 1217.6 (973.1 to 1514.8)  | 775.1 (581.8 to 1001.8)    | 323.1 (222.5 to 451.8)        | 119.3 (54.2 to 228.8)           | 0.0 (0.0 to 0.0)                  |
| Virgin Islands, U.S. | 2012 | 2092.6 (1674.1 to 2574.3)  | 1312.8 (979.4 to 1693.1)   | 568.9 (396.4 to 789.2)        | 210.9 (96.0 to 415.2)           | 0.0 (0.0 to 0.0)                  | 1124.6 (899.7 to 1383.5)  | 705.5 (526.4 to 910.0)     | 305.8 (213.0 to 424.2)        | 113.3 (51.6 to 223.2)           | 0.0 (0.0 to 0.0)                  |
| Virgin Islands, U.S. | 2013 | 2065.1 (1661.6 to 2542.7)  | 1292.4 (975.9 to 1655.3)   | 560.0 (390.6 to 779.3)        | 212.7 (95.1 to 411.4)           | 0.0 (0.0 to 0.0)                  | 1109.9 (893.0 to 1366.6)  | 694.6 (524.5 to 889.6)     | 300.9 (209.9 to 418.8)        | 114.3 (51.1 to 221.1)           | 0.0 (0.0 to 0.0)                  |
| Virgin Islands, U.S. | 2014 | 2104.7 (1699.1 to 2593.3)  | 1321.8 (1007.7 to 1694.4)  | 562.6 (390.1 to 785.2)        | 220.3 (97.8 to 423.0)           | 0.0 (0.0 to 0.0)                  | 1131.1 (913.2 to 1393.7)  | 710.4 (541.6 to 910.6)     | 302.4 (209.6 to 422.0)        | 118.4 (52.6 to 227.3)           | 0.0 (0.0 to 0.0)                  |
| Virgin Islands, U.S. | 2015 | 2159.3 (1747.4 to 2652.8)  | 1364.7 (1033.6 to 1761.5)  | 567.2 (387.5 to 796.7)        | 227.4 (100.6 to 429.2)          | 0.0 (0.0 to 0.0)                  | 1160.5 (939.1 to 1425.7)  | 733.4 (555.5 to 946.7)     | 304.8 (208.2 to 428.2)        | 122.2 (54.1 to 230.7)           | 0.0 (0.0 to 0.0)                  |
| Virgin Islands, U.S. | 2016 | 2195.6 (1799.3 to 2665.3)  | 1393.0 (1071.2 to 1802.8)  | 571.3 (391.1 to 786.3)        | 231.3 (102.9 to 424.5)          | 0.0 (0.0 to 0.0)                  | 1180.0 (967.0 to 1432.4)  | 748.6 (575.7 to 968.9)     | 307.1 (210.2 to 422.6)        | 124.3 (55.3 to 228.1)           | 0.0 (0.0 to 0.0)                  |
| Virgin Islands, U.S. | 2017 | 2228.6 (1817.5 to 2713.3)  | 1417.1 (1086.0 to 1835.5)  | 577.6 (396.8 to 804.2)        | 233.9 (104.0 to 429.4)          | 0.0 (0.0 to 0.0)                  | 1197.8 (976.8 to 1458.2)  | 761.6 (583.7 to 986.5)     | 310.4 (213.3 to 432.2)        | 125.7 (55.9 to 230.8)           | 0.0 (0.0 to 0.0)                  |
| Virgin Islands, U.S. | 2018 | 2254.6 (1816.8 to 2715.2)  | 1435.7 (1100.2 to 1844.4)  | 582.7 (400.3 to 808.1)        | 236.1 (105.0 to 433.5)          | 0.0 (0.0 to 0.0)                  | 1211.7 (976.4 to 1459.3)  | 771.6 (591.3 to 991.2)     | 313.2 (215.1 to 434.3)        | 126.9 (56.4 to 233.0)           | 0.0 (0.0 to 0.0)                  |
| Virgin Islands, U.S. | 2019 | 2278.8 (1839.2 to 2740.7)  | 1453.2 (1114.7 to 1863.1)  | 587.6 (405.6 to 822.0)        | 238.0 (106.0 to 437.1)          | 0.0 (0.0 to 0.0)                  | 1224.7 (988.5 to 1472.9)  | 781.0 (599.1 to 1001.3)    | 315.8 (218.0 to 441.8)        | 127.9 (57.0 to 234.9)           | 0.0 (0.0 to 0.0)                  |
| Virgin Islands, U.S. | 2020 | 2305.6 (1869.1 to 2794.6)  | 1472.7 (1129.8 to 1898.5)  | 592.8 (409.8 to 824.5)        | 240.1 (106.6 to 441.1)          | 0.0 (0.0 to 0.0)                  | 1239.1 (1004.5 to 1501.9) | 791.5 (607.2 to 1020.3)    | 318.6 (220.2 to 443.1)        | 129.0 (57.3 to 237.1)           | 0.0 (0.0 to 0.0)                  |
| Virgin Islands, U.S. | 2021 | 2333.5 (1867.2 to 2830.2)  | 1492.8 (1143.4 to 1934.3)  | 598.2 (412.9 to 844.6)        | 242.4 (107.5 to 445.3)          | 0.0 (0.0 to 0.0)                  | 1254.1 (1003.5 to 1521.1) | 802.3 (614.5 to 1039.6)    | 321.5 (221.9 to 453.9)        | 130.3 (57.8 to 239.3)           | 0.0 (0.0 to 0.0)                  |
| Virgin Islands, U.S. | 2022 | 2362.4 (1924.6 to 2880.9)  | 1513.9 (1161.2 to 1956.7)  | 603.8 (415.5 to 852.6)        | 244.8 (108.4 to 449.9)          | 0.0 (0.0 to 0.0)                  | 1269.7 (1034.4 to 1548.3) | 813.6 (624.1 to 1051.6)    | 324.5 (223.3 to 458.2)        | 131.6 (58.3 to 241.8)           | 0.0 (0.0 to 0.0)                  |

| Country              | Year | 2018 US Dollars per capita |                            |                               |                                 |                                   | 2018 PPP per capita       |                            |                               |                                 |                                   |
|----------------------|------|----------------------------|----------------------------|-------------------------------|---------------------------------|-----------------------------------|---------------------------|----------------------------|-------------------------------|---------------------------------|-----------------------------------|
|                      |      | Health spending            | Government health spending | Out-of-pocket health spending | Prepaid private health spending | Development assistance for health | Health spending           | Government health spending | Out-of-pocket health spending | Prepaid private health spending | Development assistance for health |
| Virgin Islands, U.S. | 2023 | 2389.1 (1930.8 to 2898.2)  | 1533.2 (1170.0 to 1975.4)  | 609.1 (419.3 to 853.9)        | 246.9 (109.3 to 453.7)          | 0.0 (0.0 to 0.0)                  | 1284.0 (1037.7 to 1557.6) | 824.0 (628.8 to 1061.7)    | 327.3 (225.3 to 458.9)        | 132.7 (58.7 to 243.8)           | 0.0 (0.0 to 0.0)                  |
| Virgin Islands, U.S. | 2024 | 2417.1 (1963.5 to 2962.8)  | 1553.0 (1185.8 to 2002.6)  | 615.0 (423.0 to 859.1)        | 249.1 (110.2 to 457.8)          | 0.0 (0.0 to 0.0)                  | 1299.1 (1055.2 to 1592.3) | 834.6 (637.3 to 1076.3)    | 330.5 (227.3 to 461.7)        | 133.9 (59.2 to 246.1)           | 0.0 (0.0 to 0.0)                  |
| Virgin Islands, U.S. | 2025 | 2443.1 (1958.7 to 2962.4)  | 1571.0 (1199.0 to 2025.5)  | 621.0 (427.3 to 868.8)        | 251.1 (111.0 to 461.6)          | 0.0 (0.0 to 0.0)                  | 1313.0 (1052.7 to 1592.1) | 844.3 (644.4 to 1088.6)    | 333.8 (229.7 to 466.9)        | 134.9 (59.6 to 248.1)           | 0.0 (0.0 to 0.0)                  |
| Virgin Islands, U.S. | 2026 | 2472.0 (1974.9 to 3052.2)  | 1590.8 (1208.6 to 2044.5)  | 627.6 (432.5 to 877.2)        | 253.5 (112.0 to 466.3)          | 0.0 (0.0 to 0.0)                  | 1328.5 (1061.4 to 1640.4) | 854.9 (649.5 to 1098.8)    | 337.3 (232.5 to 471.4)        | 136.3 (60.2 to 250.6)           | 0.0 (0.0 to 0.0)                  |
| Virgin Islands, U.S. | 2027 | 2501.5 (2029.6 to 3050.2)  | 1610.8 (1219.0 to 2073.2)  | 634.5 (435.4 to 890.8)        | 256.2 (113.0 to 471.4)          | 0.0 (0.0 to 0.0)                  | 1344.4 (1090.8 to 1639.3) | 865.7 (655.2 to 1114.2)    | 341.0 (234.0 to 478.7)        | 137.7 (60.8 to 253.3)           | 0.0 (0.0 to 0.0)                  |
| Virgin Islands, U.S. | 2028 | 2531.2 (2068.7 to 3080.9)  | 1630.8 (1237.0 to 2100.4)  | 641.5 (438.1 to 903.3)        | 258.9 (114.2 to 476.5)          | 0.0 (0.0 to 0.0)                  | 1360.4 (1111.8 to 1655.8) | 876.4 (664.8 to 1128.8)    | 344.8 (235.5 to 485.5)        | 139.2 (61.4 to 256.1)           | 0.0 (0.0 to 0.0)                  |
| Virgin Islands, U.S. | 2029 | 2560.5 (2068.3 to 3109.2)  | 1650.3 (1249.1 to 2126.9)  | 648.6 (442.2 to 907.7)        | 261.6 (115.3 to 481.7)          | 0.0 (0.0 to 0.0)                  | 1376.1 (1111.6 to 1671.0) | 886.9 (671.3 to 1143.1)    | 348.6 (237.6 to 487.8)        | 140.6 (61.9 to 258.9)           | 0.0 (0.0 to 0.0)                  |
| Virgin Islands, U.S. | 2030 | 2591.7 (2089.3 to 3134.5)  | 1671.2 (1261.0 to 2153.1)  | 656.0 (445.4 to 923.4)        | 264.5 (116.5 to 487.2)          | 0.0 (0.0 to 0.0)                  | 1392.9 (1122.9 to 1684.6) | 898.2 (677.7 to 1157.2)    | 352.5 (239.4 to 496.3)        | 142.2 (62.6 to 261.8)           | 0.0 (0.0 to 0.0)                  |
| Virgin Islands, U.S. | 2031 | 2622.6 (2114.2 to 3199.5)  | 1691.5 (1278.7 to 2191.9)  | 663.5 (448.3 to 941.8)        | 267.6 (117.7 to 493.0)          | 0.0 (0.0 to 0.0)                  | 1409.5 (1136.3 to 1719.5) | 909.1 (687.2 to 1178.0)    | 356.6 (240.9 to 506.2)        | 143.8 (63.3 to 264.9)           | 0.0 (0.0 to 0.0)                  |
| Virgin Islands, U.S. | 2032 | 2655.0 (2156.3 to 3253.0)  | 1712.8 (1297.4 to 2212.1)  | 671.3 (452.6 to 954.9)        | 270.8 (119.1 to 499.1)          | 0.0 (0.0 to 0.0)                  | 1426.9 (1158.9 to 1748.3) | 920.5 (697.3 to 1188.8)    | 360.8 (243.3 to 513.2)        | 145.5 (64.0 to 268.2)           | 0.0 (0.0 to 0.0)                  |
| Virgin Islands, U.S. | 2033 | 2685.3 (2154.5 to 3277.0)  | 1732.5 (1304.6 to 2245.2)  | 679.0 (454.4 to 968.1)        | 273.9 (120.3 to 504.9)          | 0.0 (0.0 to 0.0)                  | 1443.2 (1157.9 to 1761.2) | 931.1 (701.2 to 1206.7)    | 364.9 (244.2 to 520.3)        | 147.2 (64.7 to 271.4)           | 0.0 (0.0 to 0.0)                  |
| Virgin Islands, U.S. | 2034 | 2717.4 (2184.6 to 3273.5)  | 1753.3 (1322.8 to 2273.8)  | 686.9 (459.2 to 985.6)        | 277.2 (121.7 to 511.1)          | 0.0 (0.0 to 0.0)                  | 1460.4 (1174.1 to 1759.3) | 942.3 (710.9 to 1222.0)    | 369.2 (246.8 to 529.7)        | 149.0 (65.4 to 274.7)           | 0.0 (0.0 to 0.0)                  |
| Virgin Islands, U.S. | 2035 | 2748.1 (2183.7 to 3348.5)  | 1772.7 (1337.7 to 2303.6)  | 694.9 (463.3 to 999.0)        | 280.4 (123.0 to 517.3)          | 0.0 (0.0 to 0.0)                  | 1476.9 (1173.6 to 1799.6) | 952.7 (718.9 to 1238.0)    | 373.5 (249.0 to 536.9)        | 150.7 (66.1 to 278.0)           | 0.0 (0.0 to 0.0)                  |
| Virgin Islands, U.S. | 2036 | 2782.6 (2239.5 to 3380.9)  | 1794.7 (1351.7 to 2333.6)  | 703.6 (468.6 to 1013.1)       | 284.3 (124.6 to 524.6)          | 0.0 (0.0 to 0.0)                  | 1495.5 (1203.6 to 1817.0) | 964.5 (726.4 to 1254.2)    | 378.2 (251.9 to 544.5)        | 152.8 (67.0 to 281.9)           | 0.0 (0.0 to 0.0)                  |
| Virgin Islands, U.S. | 2037 | 2816.9 (2261.9 to 3409.5)  | 1816.3 (1368.0 to 2361.4)  | 712.4 (473.8 to 1027.0)       | 288.1 (126.2 to 531.9)          | 0.0 (0.0 to 0.0)                  | 1513.9 (1215.6 to 1832.4) | 976.2 (735.2 to 1269.1)    | 382.9 (254.7 to 551.9)        | 154.9 (67.8 to 285.9)           | 0.0 (0.0 to 0.0)                  |
| Virgin Islands, U.S. | 2038 | 2851.0 (2303.3 to 3500.3)  | 1837.6 (1380.6 to 2391.7)  | 721.3 (478.5 to 1045.2)       | 292.1 (128.0 to 538.1)          | 0.0 (0.0 to 0.0)                  | 1532.2 (1237.9 to 1881.2) | 987.6 (742.0 to 1285.4)    | 387.6 (257.2 to 561.7)        | 157.0 (68.8 to 289.2)           | 0.0 (0.0 to 0.0)                  |
| Virgin Islands, U.S. | 2039 | 2885.3 (2304.1 to 3519.6)  | 1858.8 (1394.0 to 2420.6)  | 730.3 (483.4 to 1060.1)       | 296.2 (129.8 to 544.5)          | 0.0 (0.0 to 0.0)                  | 1550.7 (1238.3 to 1891.6) | 999.0 (749.2 to 1301.0)    | 392.5 (259.8 to 569.7)        | 159.2 (69.8 to 292.7)           | 0.0 (0.0 to 0.0)                  |
| Virgin Islands, U.S. | 2040 | 2917.0 (2358.8 to 3580.8)  | 1878.0 (1410.0 to 2437.4)  | 739.1 (489.0 to 1074.5)       | 300.0 (131.3 to 553.3)          | 0.0 (0.0 to 0.0)                  | 1567.7 (1267.7 to 1924.4) | 1009.3 (757.8 to 1310.0)   | 397.2 (262.8 to 577.5)        | 161.2 (70.6 to 297.3)           | 0.0 (0.0 to 0.0)                  |
| Virgin Islands, U.S. | 2041 | 2955.0 (2347.2 to 3608.2)  | 1901.5 (1431.2 to 2465.2)  | 748.9 (494.4 to 1089.5)       | 304.7 (133.1 to 563.4)          | 0.0 (0.0 to 0.0)                  | 1588.1 (1261.5 to 1939.2) | 1021.9 (769.2 to 1324.9)   | 402.5 (265.7 to 585.6)        | 163.7 (71.5 to 302.8)           | 0.0 (0.0 to 0.0)                  |
| Virgin Islands, U.S. | 2042 | 2992.1 (2392.8 to 3697.7)  | 1924.1 (1442.1 to 2498.1)  | 758.7 (500.0 to 1104.6)       | 309.3 (134.9 to 572.3)          | 0.0 (0.0 to 0.0)                  | 1608.1 (1286.0 to 1987.3) | 1034.1 (775.0 to 1342.6)   | 407.7 (268.7 to 593.7)        | 166.2 (72.5 to 307.6)           | 0.0 (0.0 to 0.0)                  |
| Virgin Islands, U.S. | 2043 | 3026.4 (2419.3 to 3749.7)  | 1944.5 (1460.4 to 2521.6)  | 768.2 (505.0 to 1119.1)       | 313.7 (136.8 to 580.8)          | 0.0 (0.0 to 0.0)                  | 1626.5 (1300.2 to 2015.3) | 1045.0 (784.9 to 1355.2)   | 412.9 (271.4 to 601.5)        | 168.6 (73.5 to 312.1)           | 0.0 (0.0 to 0.0)                  |

| Country              | Year | 2018 US Dollars per capita |                            |                               |                                 |                                   | 2018 PPP per capita       |                            |                               |                                 |                                   |
|----------------------|------|----------------------------|----------------------------|-------------------------------|---------------------------------|-----------------------------------|---------------------------|----------------------------|-------------------------------|---------------------------------|-----------------------------------|
|                      |      | Health spending            | Government health spending | Out-of-pocket health spending | Prepaid private health spending | Development assistance for health | Health spending           | Government health spending | Out-of-pocket health spending | Prepaid private health spending | Development assistance for health |
| Virgin Islands, U.S. | 2044 | 3062.4 (2456.6 to 3774.0)  | 1965.9 (1477.7 to 2544.1)  | 778.0 (510.7 to 1134.8)       | 318.4 (138.7 to 589.7)          | 0.0 (0.0 to 0.0)                  | 1645.8 (1320.3 to 2028.3) | 1056.6 (794.2 to 1367.3)   | 418.1 (274.5 to 609.9)        | 171.1 (74.5 to 316.9)           | 0.0 (0.0 to 0.0)                  |
| Virgin Islands, U.S. | 2045 | 3098.8 (2489.6 to 3825.4)  | 1987.6 (1493.3 to 2581.5)  | 788.0 (516.7 to 1151.5)       | 323.2 (140.9 to 598.8)          | 0.0 (0.0 to 0.0)                  | 1665.4 (1338.0 to 2055.9) | 1068.2 (802.6 to 1387.4)   | 423.5 (277.7 to 618.9)        | 173.7 (75.7 to 321.8)           | 0.0 (0.0 to 0.0)                  |
| Virgin Islands, U.S. | 2046 | 3139.0 (2484.8 to 3880.6)  | 2011.8 (1513.6 to 2612.2)  | 798.7 (523.4 to 1168.1)       | 328.5 (143.1 to 609.0)          | 0.0 (0.0 to 0.0)                  | 1687.0 (1335.4 to 2085.6) | 1081.2 (813.5 to 1403.9)   | 429.3 (281.3 to 627.8)        | 176.6 (76.9 to 327.3)           | 0.0 (0.0 to 0.0)                  |
| Virgin Islands, U.S. | 2047 | 3179.3 (2514.6 to 3943.0)  | 2035.8 (1528.1 to 2654.1)  | 809.5 (530.9 to 1182.4)       | 334.0 (145.3 to 619.4)          | 0.0 (0.0 to 0.0)                  | 1708.7 (1351.4 to 2119.1) | 1094.1 (821.3 to 1426.4)   | 435.1 (285.3 to 635.5)        | 179.5 (78.1 to 332.9)           | 0.0 (0.0 to 0.0)                  |
| Virgin Islands, U.S. | 2048 | 3218.9 (2524.6 to 4031.3)  | 2059.2 (1542.7 to 2691.6)  | 820.3 (538.0 to 1198.6)       | 339.4 (147.4 to 629.7)          | 0.0 (0.0 to 0.0)                  | 1729.9 (1356.8 to 2166.6) | 1106.7 (829.1 to 1446.6)   | 440.8 (289.1 to 644.2)        | 182.4 (79.2 to 338.4)           | 0.0 (0.0 to 0.0)                  |
| Virgin Islands, U.S. | 2049 | 3258.2 (2606.7 to 4024.2)  | 2082.1 (1554.4 to 2741.8)  | 831.2 (545.2 to 1216.7)       | 344.8 (149.6 to 640.2)          | 0.0 (0.0 to 0.0)                  | 1751.1 (1400.9 to 2162.7) | 1119.0 (835.4 to 1473.6)   | 446.7 (293.0 to 653.9)        | 185.3 (80.4 to 344.1)           | 0.0 (0.0 to 0.0)                  |
| Virgin Islands, U.S. | 2050 | 3295.6 (2615.5 to 4103.5)  | 2103.4 (1564.4 to 2776.5)  | 842.0 (551.6 to 1231.8)       | 350.2 (152.0 to 650.4)          | 0.0 (0.0 to 0.0)                  | 1771.2 (1405.7 to 2205.4) | 1130.4 (840.8 to 1492.2)   | 452.5 (296.5 to 662.0)        | 188.2 (81.7 to 349.6)           | 0.0 (0.0 to 0.0)                  |
| Yemen                | 1995 | 73.4 (60.5 to 88.7)        | 25.4 (19.7 to 31.7)        | 45.0 (33.9 to 58.5)           | 1.5 (0.7 to 2.8)                | 1.4 (1.4 to 1.4)                  | 157.8 (130.0 to 190.8)    | 54.7 (42.4 to 68.3)        | 96.7 (73.0 to 125.8)          | 3.3 (1.6 to 6.0)                | 3.1 (3.1 to 3.1)                  |
| Yemen                | 1996 | 77.4 (64.2 to 92.0)        | 28.9 (22.6 to 36.1)        | 44.5 (33.9 to 57.1)           | 1.6 (0.7 to 2.9)                | 2.3 (2.3 to 2.3)                  | 166.4 (138.1 to 197.9)    | 62.2 (48.6 to 77.6)        | 95.7 (73.0 to 122.8)          | 3.4 (1.6 to 6.3)                | 5.0 (5.0 to 5.0)                  |
| Yemen                | 1997 | 82.3 (68.9 to 97.7)        | 33.8 (26.6 to 41.8)        | 44.8 (35.0 to 56.5)           | 1.7 (0.8 to 3.1)                | 2.0 (2.0 to 2.0)                  | 177.0 (148.3 to 210.1)    | 72.7 (57.2 to 90.0)        | 96.4 (75.3 to 121.6)          | 3.6 (1.7 to 6.6)                | 4.3 (4.3 to 4.3)                  |
| Yemen                | 1998 | 88.3 (74.6 to 104.5)       | 38.8 (30.4 to 48.3)        | 45.7 (35.8 to 57.2)           | 1.9 (0.9 to 3.5)                | 2.0 (2.0 to 2.0)                  | 190.0 (160.4 to 224.7)    | 83.4 (65.3 to 103.8)       | 98.3 (76.9 to 123.1)          | 4.0 (1.9 to 7.5)                | 4.2 (4.2 to 4.2)                  |
| Yemen                | 1999 | 87.4 (74.5 to 102.0)       | 39.9 (31.1 to 50.0)        | 43.5 (33.9 to 54.1)           | 1.9 (0.9 to 3.5)                | 2.1 (2.1 to 2.1)                  | 188.0 (160.2 to 219.4)    | 85.9 (66.8 to 107.6)       | 93.6 (72.8 to 116.4)          | 4.1 (1.9 to 7.6)                | 4.4 (4.4 to 4.4)                  |
| Yemen                | 2000 | 87.9 (75.2 to 102.4)       | 41.7 (32.3 to 52.1)        | 42.7 (33.5 to 53.6)           | 2.1 (1.0 to 3.9)                | 1.4 (1.4 to 1.4)                  | 188.9 (161.7 to 220.3)    | 89.6 (69.5 to 112.1)       | 91.8 (71.9 to 115.3)          | 4.5 (2.2 to 8.4)                | 3.1 (3.1 to 3.1)                  |
| Yemen                | 2001 | 90.3 (77.1 to 105.3)       | 42.0 (32.5 to 52.3)        | 44.3 (34.8 to 55.4)           | 2.2 (1.0 to 4.1)                | 1.8 (1.8 to 1.8)                  | 194.1 (165.8 to 226.4)    | 90.3 (69.8 to 112.5)       | 95.2 (74.8 to 119.1)          | 4.7 (2.3 to 8.9)                | 3.8 (3.8 to 3.8)                  |
| Yemen                | 2002 | 92.0 (78.5 to 107.7)       | 41.0 (31.5 to 51.3)        | 47.7 (37.4 to 59.1)           | 2.2 (1.0 to 4.1)                | 1.2 (1.2 to 1.2)                  | 197.9 (168.8 to 231.6)    | 88.1 (67.8 to 110.3)       | 102.6 (80.4 to 127.1)         | 4.7 (2.2 to 8.8)                | 2.6 (2.6 to 2.6)                  |
| Yemen                | 2003 | 98.5 (83.9 to 115.2)       | 39.4 (30.4 to 49.3)        | 54.8 (42.8 to 67.4)           | 2.1 (1.0 to 3.8)                | 2.2 (2.2 to 2.2)                  | 211.8 (180.5 to 247.7)    | 84.7 (65.4 to 105.9)       | 117.7 (92.1 to 145.0)         | 4.5 (2.1 to 8.3)                | 4.8 (4.8 to 4.8)                  |
| Yemen                | 2004 | 99.3 (84.7 to 116.3)       | 36.3 (28.3 to 45.6)        | 60.1 (48.0 to 73.9)           | 1.8 (0.8 to 3.3)                | 1.1 (1.1 to 1.1)                  | 213.5 (182.2 to 250.1)    | 78.0 (60.9 to 98.2)        | 129.3 (103.2 to 158.9)        | 3.8 (1.8 to 7.0)                | 2.4 (2.4 to 2.4)                  |
| Yemen                | 2005 | 105.0 (89.4 to 122.7)      | 34.9 (27.3 to 43.9)        | 66.1 (53.1 to 81.1)           | 1.6 (0.7 to 3.0)                | 2.4 (2.4 to 2.4)                  | 225.7 (192.2 to 264.0)    | 75.0 (58.8 to 94.5)        | 142.0 (114.2 to 174.4)        | 3.4 (1.6 to 6.5)                | 5.2 (5.2 to 5.2)                  |
| Yemen                | 2006 | 106.8 (91.5 to 125.6)      | 32.4 (25.1 to 40.6)        | 70.5 (57.0 to 86.8)           | 1.4 (0.7 to 2.8)                | 2.4 (2.4 to 2.4)                  | 229.6 (196.7 to 270.2)    | 69.7 (54.0 to 87.4)        | 151.7 (122.6 to 186.7)        | 3.1 (1.5 to 6.0)                | 5.1 (5.1 to 5.1)                  |
| Yemen                | 2007 | 109.5 (93.3 to 128.5)      | 30.5 (23.9 to 38.2)        | 75.0 (60.4 to 93.0)           | 1.3 (0.6 to 2.7)                | 2.7 (2.7 to 2.7)                  | 235.5 (200.6 to 276.4)    | 65.6 (51.5 to 82.2)        | 161.2 (130.0 to 199.9)        | 2.9 (1.4 to 5.7)                | 5.7 (5.7 to 5.7)                  |
| Yemen                | 2008 | 111.2 (94.8 to 129.9)      | 29.1 (22.8 to 36.3)        | 77.9 (63.0 to 96.8)           | 1.3 (0.6 to 2.5)                | 2.9 (2.9 to 2.9)                  | 239.2 (204.0 to 279.3)    | 62.6 (49.1 to 78.1)        | 167.5 (135.4 to 208.2)        | 2.8 (1.3 to 5.4)                | 6.3 (6.3 to 6.3)                  |

| Country | Year | 2018 US Dollars per capita |                            |                               |                                 |                                   | 2018 PPP per capita    |                            |                               |                                 |                                   |
|---------|------|----------------------------|----------------------------|-------------------------------|---------------------------------|-----------------------------------|------------------------|----------------------------|-------------------------------|---------------------------------|-----------------------------------|
|         |      | Health spending            | Government health spending | Out-of-pocket health spending | Prepaid private health spending | Development assistance for health | Health spending        | Government health spending | Out-of-pocket health spending | Prepaid private health spending | Development assistance for health |
| Yemen   | 2009 | 108.5 (91.8 to 127.7)      | 26.3 (20.4 to 33.2)        | 78.9 (63.8 to 97.8)           | 1.2 (0.6 to 2.4)                | 2.1 (2.1 to 2.1)                  | 233.3 (197.3 to 274.7) | 56.5 (43.8 to 71.5)        | 169.6 (137.1 to 210.4)        | 2.6 (1.3 to 5.2)                | 4.5 (4.5 to 4.5)                  |
| Yemen   | 2010 | 106.7 (90.3 to 125.1)      | 25.2 (19.4 to 32.1)        | 77.4 (62.0 to 95.3)           | 1.2 (0.5 to 2.3)                | 2.9 (2.9 to 2.9)                  | 229.5 (194.1 to 269.1) | 54.2 (41.8 to 69.1)        | 166.4 (133.2 to 205.0)        | 2.5 (1.2 to 4.9)                | 6.3 (6.3 to 6.3)                  |
| Yemen   | 2011 | 92.7 (78.6 to 108.9)       | 20.8 (16.1 to 26.7)        | 68.0 (54.8 to 84.1)           | 1.0 (0.5 to 1.8)                | 2.9 (2.9 to 2.9)                  | 199.4 (169.1 to 234.1) | 44.8 (34.5 to 57.4)        | 146.1 (117.8 to 180.9)        | 2.1 (1.0 to 4.0)                | 6.3 (6.3 to 6.3)                  |
| Yemen   | 2012 | 90.6 (75.8 to 107.2)       | 19.3 (14.9 to 25.0)        | 66.5 (52.7 to 82.5)           | 1.0 (0.5 to 1.9)                | 3.8 (3.8 to 3.8)                  | 194.8 (163.1 to 230.6) | 41.6 (32.0 to 53.7)        | 143.0 (113.3 to 177.3)        | 2.1 (1.0 to 4.0)                | 8.1 (8.1 to 8.1)                  |
| Yemen   | 2013 | 88.5 (73.4 to 105.1)       | 17.2 (13.2 to 22.3)        | 65.7 (51.4 to 82.0)           | 0.9 (0.5 to 1.8)                | 4.7 (4.7 to 4.7)                  | 190.4 (157.9 to 226.0) | 37.1 (28.4 to 48.0)        | 141.2 (110.5 to 176.4)        | 2.0 (1.0 to 3.9)                | 10.0 (10.0 to 10.0)               |
| Yemen   | 2014 | 82.9 (68.0 to 99.2)        | 14.3 (11.0 to 18.6)        | 62.6 (48.4 to 78.9)           | 0.9 (0.4 to 1.7)                | 5.1 (5.1 to 5.1)                  | 178.4 (146.3 to 213.3) | 30.8 (23.7 to 39.9)        | 134.7 (104.0 to 169.7)        | 1.9 (0.9 to 3.6)                | 11.0 (11.0 to 11.0)               |
| Yemen   | 2015 | 65.0 (52.8 to 78.9)        | 8.9 (6.8 to 11.6)          | 50.4 (38.9 to 64.0)           | 0.6 (0.3 to 1.2)                | 5.1 (5.1 to 5.1)                  | 139.7 (113.4 to 169.7) | 19.2 (14.7 to 24.9)        | 108.3 (83.6 to 137.7)         | 1.3 (0.6 to 2.6)                | 10.9 (10.9 to 10.9)               |
| Yemen   | 2016 | 58.5 (46.7 to 73.2)        | 8.2 (6.2 to 10.6)          | 46.8 (35.4 to 60.8)           | 0.6 (0.3 to 1.1)                | 3.0 (3.0 to 3.0)                  | 125.8 (100.4 to 157.5) | 17.5 (13.4 to 22.7)        | 100.6 (76.1 to 130.7)         | 1.2 (0.6 to 2.3)                | 6.4 (6.4 to 6.4)                  |
| Yemen   | 2017 | 60.3 (49.9 to 73.2)        | 4.0 (3.0 to 5.2)           | 42.6 (32.3 to 55.6)           | 0.4 (0.2 to 0.7)                | 13.3 (13.3 to 13.3)               | 129.8 (107.2 to 157.4) | 8.6 (6.5 to 11.1)          | 91.7 (69.4 to 119.5)          | 0.8 (0.4 to 1.6)                | 28.6 (28.6 to 28.6)               |
| Yemen   | 2018 | 58.4 (48.3 to 71.0)        | 3.8 (2.9 to 4.9)           | 41.7 (31.6 to 54.2)           | 0.4 (0.2 to 0.7)                | 12.6 (12.5 to 12.6)               | 125.7 (103.8 to 152.8) | 8.2 (6.2 to 10.6)          | 89.6 (68.1 to 116.6)          | 0.8 (0.4 to 1.6)                | 27.0 (27.0 to 27.1)               |
| Yemen   | 2019 | 57.4 (47.3 to 69.7)        | 3.6 (2.7 to 4.6)           | 40.9 (30.9 to 53.4)           | 0.4 (0.2 to 0.7)                | 12.6 (11.8 to 13.4)               | 123.5 (101.7 to 150.0) | 7.7 (5.8 to 10.0)          | 87.9 (66.6 to 114.9)          | 0.8 (0.4 to 1.5)                | 27.2 (25.4 to 28.8)               |
| Yemen   | 2020 | 56.7 (46.7 to 68.6)        | 3.3 (2.5 to 4.4)           | 40.1 (30.2 to 52.4)           | 0.4 (0.2 to 0.7)                | 12.9 (11.8 to 13.9)               | 121.9 (100.5 to 147.6) | 7.2 (5.5 to 9.4)           | 86.1 (65.0 to 112.7)          | 0.8 (0.4 to 1.4)                | 27.8 (25.5 to 30.0)               |
| Yemen   | 2021 | 56.0 (46.0 to 67.9)        | 3.2 (2.4 to 4.1)           | 39.3 (29.7 to 51.3)           | 0.3 (0.2 to 0.6)                | 13.2 (11.9 to 14.6)               | 120.5 (99.0 to 145.9)  | 6.8 (5.2 to 8.8)           | 84.5 (63.9 to 110.3)          | 0.7 (0.3 to 1.4)                | 28.5 (25.6 to 31.5)               |
| Yemen   | 2022 | 55.8 (46.1 to 67.8)        | 3.0 (2.3 to 3.9)           | 39.0 (29.4 to 50.7)           | 0.3 (0.2 to 0.6)                | 13.5 (12.0 to 15.0)               | 120.0 (99.0 to 145.9)  | 6.5 (5.0 to 8.5)           | 83.8 (63.2 to 109.1)          | 0.7 (0.3 to 1.3)                | 29.0 (25.8 to 32.4)               |
| Yemen   | 2023 | 56.0 (46.2 to 68.0)        | 3.0 (2.3 to 3.9)           | 39.1 (29.5 to 50.8)           | 0.3 (0.2 to 0.6)                | 13.6 (11.9 to 15.5)               | 120.4 (99.3 to 146.2)  | 6.4 (4.8 to 8.3)           | 84.0 (63.3 to 109.3)          | 0.7 (0.3 to 1.3)                | 29.3 (25.5 to 33.2)               |
| Yemen   | 2024 | 56.1 (46.2 to 68.5)        | 2.9 (2.2 to 3.8)           | 39.0 (29.5 to 50.7)           | 0.3 (0.1 to 0.6)                | 13.9 (12.0 to 15.9)               | 120.6 (99.4 to 147.3)  | 6.2 (4.7 to 8.1)           | 83.8 (63.4 to 109.0)          | 0.7 (0.3 to 1.3)                | 29.8 (25.8 to 34.2)               |
| Yemen   | 2025 | 56.5 (46.6 to 69.0)        | 2.9 (2.2 to 3.7)           | 39.3 (29.8 to 50.7)           | 0.3 (0.2 to 0.6)                | 14.0 (12.0 to 16.4)               | 121.6 (100.2 to 148.3) | 6.2 (4.7 to 8.1)           | 84.6 (64.1 to 109.1)          | 0.7 (0.3 to 1.3)                | 30.1 (25.7 to 35.2)               |
| Yemen   | 2026 | 57.0 (46.8 to 69.5)        | 2.9 (2.2 to 3.7)           | 39.7 (30.0 to 51.4)           | 0.3 (0.2 to 0.6)                | 14.1 (11.9 to 16.6)               | 122.6 (100.7 to 149.4) | 6.2 (4.7 to 8.0)           | 85.4 (64.6 to 110.5)          | 0.7 (0.3 to 1.3)                | 30.4 (25.7 to 35.8)               |
| Yemen   | 2027 | 57.6 (47.4 to 70.0)        | 2.8 (2.2 to 3.7)           | 40.1 (30.3 to 51.8)           | 0.3 (0.2 to 0.6)                | 14.3 (12.0 to 17.0)               | 123.8 (101.9 to 150.6) | 6.1 (4.7 to 8.0)           | 86.2 (65.1 to 111.5)          | 0.7 (0.3 to 1.3)                | 30.8 (25.8 to 36.6)               |
| Yemen   | 2028 | 58.1 (47.6 to 71.1)        | 2.8 (2.2 to 3.7)           | 40.5 (30.3 to 52.6)           | 0.3 (0.2 to 0.6)                | 14.5 (12.2 to 17.5)               | 125.0 (102.3 to 152.9) | 6.1 (4.6 to 8.0)           | 87.1 (65.1 to 113.1)          | 0.7 (0.3 to 1.4)                | 31.2 (26.2 to 37.6)               |
| Yemen   | 2029 | 58.8 (48.1 to 72.0)        | 2.9 (2.2 to 3.7)           | 40.9 (30.6 to 53.5)           | 0.3 (0.2 to 0.6)                | 14.7 (12.1 to 18.0)               | 126.5 (103.4 to 154.9) | 6.1 (4.6 to 8.0)           | 88.0 (65.9 to 115.1)          | 0.7 (0.3 to 1.4)                | 31.6 (26.0 to 38.7)               |

| Country | Year | 2018 US Dollars per capita |                            |                               |                                 |                                   | 2018 PPP per capita    |                            |                               |                                 |                                   |
|---------|------|----------------------------|----------------------------|-------------------------------|---------------------------------|-----------------------------------|------------------------|----------------------------|-------------------------------|---------------------------------|-----------------------------------|
|         |      | Health spending            | Government health spending | Out-of-pocket health spending | Prepaid private health spending | Development assistance for health | Health spending        | Government health spending | Out-of-pocket health spending | Prepaid private health spending | Development assistance for health |
| Yemen   | 2030 | 59.5 (48.2 to 73.5)        | 2.9 (2.2 to 3.8)           | 41.4 (30.8 to 54.4)           | 0.3 (0.2 to 0.6)                | 14.9 (12.2 to 18.3)               | 127.9 (103.6 to 158.0) | 6.2 (4.7 to 8.1)           | 89.0 (66.2 to 116.9)          | 0.7 (0.3 to 1.4)                | 32.0 (26.3 to 39.4)               |
| Yemen   | 2031 | 60.3 (48.7 to 74.7)        | 2.9 (2.2 to 3.8)           | 41.9 (31.1 to 55.6)           | 0.3 (0.2 to 0.7)                | 15.1 (12.3 to 18.9)               | 129.6 (104.7 to 160.7) | 6.3 (4.7 to 8.2)           | 90.1 (66.8 to 119.6)          | 0.7 (0.3 to 1.4)                | 32.5 (26.4 to 40.7)               |
| Yemen   | 2032 | 61.0 (49.0 to 75.8)        | 3.0 (2.2 to 3.9)           | 42.4 (31.4 to 56.8)           | 0.3 (0.2 to 0.7)                | 15.3 (12.4 to 19.3)               | 131.3 (105.5 to 162.9) | 6.4 (4.8 to 8.4)           | 91.2 (67.4 to 122.1)          | 0.7 (0.3 to 1.4)                | 33.0 (26.7 to 41.6)               |
| Yemen   | 2033 | 61.8 (49.3 to 77.2)        | 3.0 (2.3 to 3.9)           | 42.9 (31.4 to 57.5)           | 0.4 (0.2 to 0.7)                | 15.6 (12.4 to 20.0)               | 133.0 (106.1 to 165.9) | 6.4 (4.9 to 8.4)           | 92.2 (67.6 to 123.6)          | 0.8 (0.3 to 1.4)                | 33.5 (26.6 to 43.0)               |
| Yemen   | 2034 | 62.7 (49.8 to 79.3)        | 3.0 (2.3 to 4.0)           | 43.4 (31.6 to 58.2)           | 0.4 (0.2 to 0.7)                | 15.9 (12.5 to 20.4)               | 134.7 (107.2 to 170.5) | 6.5 (4.9 to 8.6)           | 93.3 (67.9 to 125.2)          | 0.8 (0.4 to 1.5)                | 34.1 (26.9 to 44.0)               |
| Yemen   | 2035 | 63.5 (50.6 to 80.3)        | 3.1 (2.3 to 4.0)           | 43.9 (31.7 to 59.6)           | 0.4 (0.2 to 0.7)                | 16.2 (12.5 to 21.1)               | 136.5 (108.7 to 172.7) | 6.6 (5.0 to 8.7)           | 94.4 (68.3 to 128.1)          | 0.8 (0.4 to 1.5)                | 34.7 (26.9 to 45.4)               |
| Yemen   | 2036 | 64.3 (51.3 to 81.8)        | 3.1 (2.4 to 4.1)           | 44.4 (32.1 to 60.7)           | 0.4 (0.2 to 0.7)                | 16.4 (12.8 to 22.1)               | 138.2 (110.2 to 175.8) | 6.7 (5.1 to 8.8)           | 95.4 (69.0 to 130.5)          | 0.8 (0.4 to 1.5)                | 35.4 (27.5 to 47.4)               |
| Yemen   | 2037 | 65.1 (51.8 to 83.2)        | 3.2 (2.4 to 4.1)           | 44.8 (32.3 to 61.6)           | 0.4 (0.2 to 0.7)                | 16.7 (12.9 to 22.3)               | 140.0 (111.3 to 178.9) | 6.8 (5.1 to 8.9)           | 96.4 (69.5 to 132.5)          | 0.8 (0.4 to 1.5)                | 36.0 (27.6 to 48.1)               |
| Yemen   | 2038 | 65.9 (51.9 to 83.7)        | 3.2 (2.4 to 4.2)           | 45.3 (32.6 to 62.4)           | 0.4 (0.2 to 0.7)                | 17.0 (13.0 to 23.6)               | 141.8 (111.7 to 180.0) | 6.9 (5.2 to 9.1)           | 97.5 (70.2 to 134.3)          | 0.8 (0.4 to 1.6)                | 36.6 (28.0 to 50.7)               |
| Yemen   | 2039 | 66.8 (52.4 to 84.4)        | 3.3 (2.4 to 4.3)           | 45.8 (32.8 to 63.1)           | 0.4 (0.2 to 0.7)                | 17.3 (13.2 to 24.0)               | 143.6 (112.8 to 181.5) | 7.0 (5.3 to 9.2)           | 98.5 (70.6 to 135.7)          | 0.8 (0.4 to 1.6)                | 37.2 (28.4 to 51.5)               |
| Yemen   | 2040 | 67.6 (53.2 to 86.3)        | 3.3 (2.5 to 4.4)           | 46.3 (32.9 to 63.8)           | 0.4 (0.2 to 0.8)                | 17.7 (13.4 to 24.4)               | 145.5 (114.3 to 185.5) | 7.1 (5.3 to 9.4)           | 99.5 (70.8 to 137.2)          | 0.8 (0.4 to 1.6)                | 38.0 (28.8 to 52.5)               |
| Yemen   | 2041 | 68.5 (53.3 to 87.6)        | 3.4 (2.5 to 4.4)           | 46.7 (33.0 to 64.5)           | 0.4 (0.2 to 0.8)                | 18.0 (13.5 to 24.9)               | 147.4 (114.6 to 188.3) | 7.3 (5.4 to 9.6)           | 100.5 (71.1 to 138.7)         | 0.9 (0.4 to 1.6)                | 38.7 (29.1 to 53.6)               |
| Yemen   | 2042 | 69.5 (54.2 to 88.8)        | 3.4 (2.6 to 4.5)           | 47.2 (33.2 to 65.4)           | 0.4 (0.2 to 0.8)                | 18.4 (13.8 to 26.4)               | 149.4 (116.6 to 191.0) | 7.4 (5.5 to 9.8)           | 101.6 (71.5 to 140.6)         | 0.9 (0.4 to 1.7)                | 39.5 (29.6 to 56.9)               |
| Yemen   | 2043 | 70.4 (54.5 to 90.8)        | 3.5 (2.6 to 4.6)           | 47.7 (33.4 to 66.3)           | 0.4 (0.2 to 0.8)                | 18.8 (13.9 to 27.1)               | 151.3 (117.2 to 195.2) | 7.6 (5.6 to 10.0)          | 102.5 (71.8 to 142.6)         | 0.9 (0.4 to 1.7)                | 40.4 (29.9 to 58.3)               |
| Yemen   | 2044 | 71.3 (55.1 to 92.2)        | 3.6 (2.7 to 4.7)           | 48.1 (33.7 to 67.2)           | 0.4 (0.2 to 0.8)                | 19.2 (14.2 to 27.7)               | 153.3 (118.5 to 198.2) | 7.7 (5.7 to 10.2)          | 103.5 (72.4 to 144.6)         | 0.9 (0.4 to 1.7)                | 41.3 (30.5 to 59.6)               |
| Yemen   | 2045 | 72.3 (55.8 to 94.1)        | 3.7 (2.7 to 4.8)           | 48.6 (34.0 to 68.2)           | 0.4 (0.2 to 0.8)                | 19.6 (14.1 to 29.5)               | 155.4 (119.9 to 202.4) | 7.9 (5.8 to 10.4)          | 104.4 (73.2 to 146.6)         | 0.9 (0.4 to 1.8)                | 42.2 (30.4 to 63.5)               |
| Yemen   | 2046 | 73.2 (56.5 to 95.6)        | 3.7 (2.8 to 5.0)           | 49.0 (34.3 to 68.9)           | 0.4 (0.2 to 0.8)                | 20.1 (14.5 to 30.8)               | 157.5 (121.5 to 205.6) | 8.0 (5.9 to 10.7)          | 105.4 (73.8 to 148.3)         | 0.9 (0.4 to 1.8)                | 43.1 (31.1 to 66.2)               |
| Yemen   | 2047 | 74.3 (56.8 to 97.5)        | 3.8 (2.8 to 5.1)           | 49.5 (34.5 to 69.4)           | 0.4 (0.2 to 0.8)                | 20.5 (14.8 to 32.3)               | 159.7 (122.2 to 209.7) | 8.2 (6.1 to 10.9)          | 106.4 (74.2 to 149.2)         | 0.9 (0.4 to 1.8)                | 44.2 (31.8 to 69.4)               |
| Yemen   | 2048 | 75.3 (57.7 to 100.0)       | 3.9 (2.9 to 5.2)           | 49.9 (34.7 to 70.4)           | 0.4 (0.2 to 0.9)                | 21.1 (15.1 to 33.6)               | 162.0 (124.0 to 214.9) | 8.4 (6.2 to 11.2)          | 107.3 (74.6 to 151.3)         | 1.0 (0.4 to 1.8)                | 45.3 (32.4 to 72.3)               |
| Yemen   | 2049 | 76.4 (58.1 to 101.1)       | 4.0 (3.0 to 5.3)           | 50.4 (35.0 to 71.4)           | 0.4 (0.2 to 0.9)                | 21.6 (15.4 to 34.8)               | 164.4 (124.9 to 217.3) | 8.7 (6.4 to 11.5)          | 108.4 (75.2 to 153.6)         | 1.0 (0.4 to 1.9)                | 46.4 (33.0 to 74.7)               |
| Yemen   | 2050 | 77.6 (58.7 to 102.5)       | 4.1 (3.1 to 5.5)           | 50.9 (35.3 to 72.6)           | 0.5 (0.2 to 0.9)                | 22.1 (15.6 to 36.3)               | 166.9 (126.3 to 220.5) | 8.9 (6.6 to 11.8)          | 109.4 (76.0 to 156.1)         | 1.0 (0.4 to 1.9)                | 47.6 (33.5 to 78.0)               |

| Country | Year | 2018 US Dollars per capita |                            |                               |                                 |                                   | 2018 PPP per capita    |                            |                               |                                 |                                   |
|---------|------|----------------------------|----------------------------|-------------------------------|---------------------------------|-----------------------------------|------------------------|----------------------------|-------------------------------|---------------------------------|-----------------------------------|
|         |      | Health spending            | Government health spending | Out-of-pocket health spending | Prepaid private health spending | Development assistance for health | Health spending        | Government health spending | Out-of-pocket health spending | Prepaid private health spending | Development assistance for health |
| Zambia  | 1995 | 52.3 (44.2 to 62.9)        | 11.0 (8.4 to 14.3)         | 20.4 (14.1 to 28.1)           | 9.5 (4.7 to 17.6)               | 11.5 (11.5 to 11.5)               | 152.7 (129.1 to 183.7) | 32.2 (24.6 to 41.8)        | 59.4 (41.0 to 82.0)           | 27.6 (13.8 to 51.3)             | 33.5 (33.5 to 33.5)               |
| Zambia  | 1996 | 50.3 (41.9 to 61.1)        | 12.4 (9.6 to 16.2)         | 18.9 (13.3 to 25.8)           | 10.0 (5.0 to 18.5)              | 9.0 (9.0 to 9.0)                  | 146.8 (122.5 to 178.3) | 36.3 (28.1 to 47.4)        | 55.2 (38.8 to 75.2)           | 29.1 (14.6 to 53.9)             | 26.1 (26.1 to 26.1)               |
| Zambia  | 1997 | 51.6 (43.0 to 62.5)        | 14.0 (10.8 to 18.4)        | 18.2 (12.8 to 25.0)           | 10.3 (5.2 to 18.1)              | 9.1 (9.1 to 9.1)                  | 150.7 (125.7 to 182.6) | 40.9 (31.6 to 53.7)        | 53.1 (37.5 to 72.9)           | 30.1 (15.1 to 52.8)             | 26.6 (26.6 to 26.6)               |
| Zambia  | 1998 | 47.5 (38.8 to 59.0)        | 15.9 (12.3 to 20.6)        | 17.3 (12.1 to 23.9)           | 10.4 (5.2 to 17.8)              | 4.0 (4.0 to 4.0)                  | 138.6 (113.4 to 172.3) | 46.3 (36.0 to 60.3)        | 50.5 (35.4 to 69.7)           | 30.2 (15.2 to 52.0)             | 11.6 (11.6 to 11.6)               |
| Zambia  | 1999 | 51.8 (42.8 to 63.5)        | 18.3 (14.1 to 23.6)        | 16.4 (11.3 to 22.9)           | 11.2 (5.7 to 18.9)              | 5.9 (5.9 to 5.9)                  | 151.2 (124.9 to 185.6) | 53.4 (41.1 to 69.0)        | 47.8 (33.0 to 66.7)           | 32.7 (16.6 to 55.2)             | 17.3 (17.3 to 17.3)               |
| Zambia  | 2000 | 60.4 (50.0 to 74.1)        | 22.2 (17.2 to 28.5)        | 16.8 (11.5 to 23.7)           | 13.2 (6.7 to 22.3)              | 8.2 (8.2 to 8.2)                  | 176.5 (146.1 to 216.3) | 64.9 (50.2 to 83.1)        | 49.0 (33.6 to 69.1)           | 38.6 (19.5 to 65.2)             | 23.9 (23.9 to 23.9)               |
| Zambia  | 2001 | 62.1 (51.7 to 76.0)        | 23.9 (18.4 to 30.6)        | 16.6 (11.5 to 23.2)           | 12.7 (6.4 to 22.2)              | 9.0 (9.0 to 9.0)                  | 181.3 (151.1 to 222.0) | 69.7 (53.6 to 89.4)        | 48.4 (33.6 to 67.7)           | 37.0 (18.6 to 64.7)             | 26.2 (26.2 to 26.2)               |
| Zambia  | 2002 | 61.6 (51.5 to 74.6)        | 23.6 (18.2 to 30.1)        | 16.5 (11.7 to 22.8)           | 12.2 (6.1 to 21.6)              | 9.4 (9.4 to 9.4)                  | 180.0 (150.5 to 217.8) | 69.0 (53.2 to 87.9)        | 48.0 (34.0 to 66.6)           | 35.6 (17.7 to 63.0)             | 27.4 (27.4 to 27.4)               |
| Zambia  | 2003 | 66.1 (56.3 to 78.1)        | 22.1 (17.1 to 28.1)        | 16.9 (11.9 to 23.7)           | 11.4 (5.4 to 20.4)              | 15.6 (15.6 to 15.6)               | 193.0 (164.5 to 228.1) | 64.6 (49.9 to 82.2)        | 49.4 (34.7 to 69.1)           | 33.3 (15.8 to 59.6)             | 45.6 (45.6 to 45.6)               |
| Zambia  | 2004 | 66.7 (57.9 to 78.0)        | 20.4 (15.6 to 25.7)        | 17.7 (12.4 to 25.0)           | 8.9 (4.4 to 16.2)               | 19.7 (19.7 to 19.7)               | 194.9 (169.0 to 227.8) | 59.6 (45.7 to 75.1)        | 51.7 (36.3 to 72.9)           | 26.1 (12.7 to 47.4)             | 57.6 (57.6 to 57.6)               |
| Zambia  | 2005 | 66.8 (58.6 to 77.0)        | 17.5 (13.2 to 22.1)        | 18.4 (12.9 to 26.0)           | 6.3 (3.1 to 11.6)               | 24.5 (24.5 to 24.5)               | 195.0 (171.3 to 224.8) | 51.2 (38.6 to 64.6)        | 53.7 (37.6 to 75.9)           | 18.5 (9.2 to 34.0)              | 71.6 (71.6 to 71.6)               |
| Zambia  | 2006 | 57.5 (49.7 to 66.7)        | 14.9 (11.3 to 18.8)        | 17.8 (12.4 to 25.2)           | 5.2 (2.6 to 9.4)                | 19.6 (19.6 to 19.6)               | 168.0 (145.2 to 194.9) | 43.6 (32.9 to 55.0)        | 52.0 (36.2 to 73.7)           | 15.1 (7.5 to 27.5)              | 57.2 (57.2 to 57.2)               |
| Zambia  | 2007 | 60.6 (53.8 to 68.7)        | 12.0 (9.0 to 15.1)         | 16.1 (11.1 to 22.5)           | 4.3 (2.2 to 8.0)                | 28.2 (28.2 to 28.2)               | 176.9 (157.2 to 200.5) | 34.9 (26.3 to 44.1)        | 47.1 (32.4 to 65.6)           | 12.6 (6.3 to 23.4)              | 82.2 (82.2 to 82.2)               |
| Zambia  | 2008 | 64.4 (58.8 to 71.3)        | 9.4 (7.2 to 12.0)          | 14.4 (10.0 to 20.0)           | 3.6 (1.8 to 6.6)                | 37.0 (37.0 to 37.0)               | 188.1 (171.6 to 208.1) | 27.6 (21.1 to 34.9)        | 42.0 (29.2 to 58.5)           | 10.5 (5.2 to 19.3)              | 108.1 (108.1 to 108.1)            |
| Zambia  | 2009 | 54.6 (49.6 to 60.7)        | 9.1 (6.9 to 11.6)          | 12.8 (8.9 to 17.8)            | 3.2 (1.6 to 5.9)                | 29.5 (29.5 to 29.5)               | 159.4 (145.0 to 177.3) | 26.5 (20.2 to 33.8)        | 37.3 (25.9 to 51.9)           | 9.5 (4.6 to 17.2)               | 86.2 (86.2 to 86.2)               |
| Zambia  | 2010 | 50.5 (45.4 to 56.3)        | 11.4 (8.8 to 14.7)         | 11.7 (8.2 to 16.1)            | 3.3 (1.6 to 5.9)                | 24.1 (24.1 to 24.1)               | 147.6 (132.7 to 164.4) | 33.4 (25.7 to 43.0)        | 34.1 (24.0 to 47.1)           | 9.7 (4.6 to 17.4)               | 70.3 (70.3 to 70.3)               |
| Zambia  | 2011 | 61.9 (56.9 to 67.8)        | 14.3 (11.0 to 18.4)        | 10.5 (7.4 to 14.3)            | 3.2 (1.5 to 5.8)                | 33.9 (33.9 to 33.9)               | 180.9 (166.0 to 197.9) | 41.8 (32.2 to 53.7)        | 30.6 (21.5 to 41.8)           | 9.4 (4.5 to 16.8)               | 99.1 (99.1 to 99.1)               |
| Zambia  | 2012 | 62.9 (57.6 to 68.9)        | 16.9 (13.0 to 21.5)        | 9.5 (6.6 to 12.9)             | 3.0 (1.4 to 5.3)                | 33.5 (33.5 to 33.5)               | 183.7 (168.3 to 201.2) | 49.4 (37.9 to 62.8)        | 27.7 (19.3 to 37.7)           | 8.8 (4.2 to 15.4)               | 97.8 (97.8 to 97.8)               |
| Zambia  | 2013 | 71.2 (65.7 to 77.7)        | 19.3 (14.8 to 24.5)        | 8.5 (6.0 to 11.5)             | 2.8 (1.3 to 4.9)                | 40.6 (40.6 to 40.6)               | 207.8 (191.7 to 226.8) | 56.4 (43.2 to 71.5)        | 24.8 (17.4 to 33.7)           | 8.2 (3.9 to 14.4)               | 118.5 (118.5 to 118.5)            |
| Zambia  | 2014 | 62.7 (56.6 to 70.3)        | 22.8 (17.4 to 29.1)        | 8.2 (5.8 to 11.2)             | 2.9 (1.4 to 5.1)                | 28.9 (28.9 to 28.9)               | 183.2 (165.2 to 205.2) | 66.6 (50.9 to 85.1)        | 23.8 (16.9 to 32.7)           | 8.5 (4.0 to 14.9)               | 84.3 (84.3 to 84.3)               |
| Zambia  | 2015 | 57.0 (50.2 to 65.2)        | 24.7 (18.9 to 31.7)        | 8.0 (5.6 to 11.0)             | 3.2 (1.4 to 5.7)                | 21.1 (21.1 to 21.1)               | 166.3 (146.5 to 190.3) | 72.2 (55.2 to 92.6)        | 23.4 (16.5 to 32.2)           | 9.2 (4.2 to 16.7)               | 61.5 (61.5 to 61.5)               |



| Country | Year | 2018 US Dollars per capita |                            |                               |                                 |                                   | 2018 PPP per capita    |                            |                               |                                 |                                   |
|---------|------|----------------------------|----------------------------|-------------------------------|---------------------------------|-----------------------------------|------------------------|----------------------------|-------------------------------|---------------------------------|-----------------------------------|
|         |      | Health spending            | Government health spending | Out-of-pocket health spending | Prepaid private health spending | Development assistance for health | Health spending        | Government health spending | Out-of-pocket health spending | Prepaid private health spending | Development assistance for health |
| Zambia  | 2016 | 64.0 (57.2 to 71.6)        | 24.5 (18.7 to 31.2)        | 7.9 (5.6 to 10.6)             | 3.6 (1.7 to 6.5)                | 28.1 (28.1 to 28.1)               | 186.9 (167.0 to 209.0) | 71.4 (54.6 to 91.2)        | 23.0 (16.3 to 30.9)           | 10.6 (5.0 to 19.0)              | 81.9 (81.9 to 81.9)               |
| Zambia  | 2017 | 71.2 (63.9 to 79.0)        | 25.5 (19.5 to 32.8)        | 8.0 (5.6 to 10.7)             | 3.6 (1.7 to 6.5)                | 34.0 (34.0 to 34.0)               | 207.8 (186.7 to 230.6) | 74.5 (56.9 to 95.7)        | 23.3 (16.5 to 31.4)           | 10.6 (5.0 to 19.1)              | 99.4 (99.4 to 99.4)               |
| Zambia  | 2018 | 69.0 (61.6 to 77.2)        | 25.8 (19.7 to 33.2)        | 8.0 (5.7 to 10.8)             | 3.7 (1.7 to 6.7)                | 31.6 (31.5 to 31.6)               | 201.6 (179.8 to 225.4) | 75.2 (57.5 to 96.8)        | 23.4 (16.6 to 31.6)           | 10.8 (5.1 to 19.5)              | 92.2 (92.0 to 92.3)               |
| Zambia  | 2019 | 69.1 (61.6 to 77.6)        | 26.0 (19.8 to 33.5)        | 8.0 (5.6 to 10.8)             | 3.8 (1.8 to 6.8)                | 31.3 (29.3 to 33.1)               | 201.8 (179.8 to 226.6) | 76.0 (57.9 to 97.9)        | 23.4 (16.5 to 31.6)           | 11.0 (5.2 to 19.8)              | 91.5 (85.5 to 96.7)               |
| Zambia  | 2020 | 69.4 (61.3 to 78.4)        | 26.3 (20.0 to 33.9)        | 8.0 (5.7 to 10.8)             | 3.8 (1.8 to 6.9)                | 31.3 (28.7 to 33.8)               | 202.7 (179.1 to 228.8) | 76.7 (58.4 to 98.9)        | 23.3 (16.5 to 31.6)           | 11.2 (5.3 to 20.2)              | 91.4 (83.9 to 98.8)               |
| Zambia  | 2021 | 69.9 (61.4 to 79.0)        | 26.6 (20.2 to 34.4)        | 8.0 (5.6 to 10.8)             | 3.9 (1.8 to 7.1)                | 31.4 (28.3 to 34.7)               | 204.1 (179.4 to 230.7) | 77.7 (59.0 to 100.4)       | 23.3 (16.4 to 31.4)           | 11.4 (5.4 to 20.6)              | 91.7 (82.5 to 101.3)              |
| Zambia  | 2022 | 70.4 (62.1 to 79.8)        | 26.9 (20.4 to 34.8)        | 8.0 (5.6 to 10.8)             | 4.0 (1.9 to 7.2)                | 31.5 (28.0 to 35.2)               | 205.6 (181.3 to 233.0) | 78.6 (59.4 to 101.7)       | 23.3 (16.4 to 31.6)           | 11.6 (5.5 to 21.0)              | 92.1 (81.7 to 102.8)              |
| Zambia  | 2023 | 71.0 (62.2 to 81.1)        | 27.3 (20.5 to 35.3)        | 8.0 (5.6 to 10.9)             | 4.0 (1.9 to 7.3)                | 31.7 (27.5 to 36.0)               | 207.2 (181.7 to 236.9) | 79.7 (59.8 to 103.2)       | 23.3 (16.5 to 31.7)           | 11.8 (5.6 to 21.4)              | 92.4 (80.4 to 105.0)              |
| Zambia  | 2024 | 71.6 (63.0 to 81.9)        | 27.6 (20.7 to 35.9)        | 8.0 (5.7 to 10.8)             | 4.1 (2.0 to 7.5)                | 31.9 (27.5 to 36.8)               | 209.2 (184.1 to 239.2) | 80.7 (60.5 to 104.9)       | 23.3 (16.5 to 31.6)           | 12.1 (5.7 to 21.8)              | 93.1 (80.3 to 107.4)              |
| Zambia  | 2025 | 72.2 (63.3 to 82.0)        | 28.0 (20.9 to 36.2)        | 8.0 (5.6 to 10.9)             | 4.2 (2.0 to 7.6)                | 32.1 (27.3 to 37.6)               | 211.0 (185.0 to 239.3) | 81.7 (61.0 to 105.7)       | 23.3 (16.5 to 31.8)           | 12.3 (5.8 to 22.3)              | 93.7 (79.9 to 109.7)              |
| Zambia  | 2026 | 72.9 (63.8 to 83.6)        | 28.3 (21.1 to 36.7)        | 8.0 (5.6 to 10.9)             | 4.3 (2.0 to 7.8)                | 32.2 (27.2 to 37.8)               | 212.8 (186.4 to 244.0) | 82.7 (61.6 to 107.1)       | 23.4 (16.4 to 31.9)           | 12.5 (5.9 to 22.7)              | 94.2 (79.4 to 110.3)              |
| Zambia  | 2027 | 73.6 (64.1 to 84.8)        | 28.7 (21.4 to 37.2)        | 8.0 (5.6 to 11.0)             | 4.4 (2.1 to 7.9)                | 32.5 (27.2 to 38.7)               | 214.8 (187.3 to 247.7) | 83.8 (62.4 to 108.5)       | 23.4 (16.5 to 32.0)           | 12.8 (6.0 to 23.2)              | 94.8 (79.4 to 112.9)              |
| Zambia  | 2028 | 74.4 (64.2 to 86.2)        | 29.2 (21.7 to 37.8)        | 8.0 (5.6 to 11.0)             | 4.5 (2.1 to 8.1)                | 32.7 (27.3 to 39.5)               | 217.1 (187.6 to 251.8) | 85.2 (63.5 to 110.3)       | 23.4 (16.4 to 32.2)           | 13.1 (6.2 to 23.6)              | 95.5 (79.9 to 115.3)              |
| Zambia  | 2029 | 75.2 (64.6 to 87.6)        | 29.7 (22.1 to 38.4)        | 8.0 (5.6 to 11.1)             | 4.6 (2.2 to 8.2)                | 33.0 (27.1 to 40.2)               | 219.7 (188.7 to 255.7) | 86.7 (64.5 to 112.3)       | 23.5 (16.3 to 32.4)           | 13.3 (6.3 to 24.1)              | 96.2 (79.2 to 117.5)              |
| Zambia  | 2030 | 76.1 (65.2 to 88.2)        | 30.2 (22.5 to 39.1)        | 8.1 (5.6 to 11.2)             | 4.7 (2.2 to 8.4)                | 33.2 (27.2 to 40.6)               | 222.2 (190.3 to 257.6) | 88.2 (65.7 to 114.1)       | 23.6 (16.3 to 32.7)           | 13.6 (6.4 to 24.5)              | 96.9 (79.3 to 118.7)              |
| Zambia  | 2031 | 77.0 (65.6 to 89.2)        | 30.7 (22.9 to 39.8)        | 8.1 (5.6 to 11.3)             | 4.7 (2.2 to 8.5)                | 33.4 (27.1 to 41.9)               | 225.0 (191.5 to 260.6) | 89.8 (66.7 to 116.3)       | 23.7 (16.3 to 33.0)           | 13.8 (6.6 to 25.0)              | 97.6 (79.1 to 122.5)              |
| Zambia  | 2032 | 78.0 (66.4 to 91.2)        | 31.3 (23.3 to 40.6)        | 8.2 (5.6 to 11.4)             | 4.8 (2.3 to 8.7)                | 33.7 (27.0 to 42.4)               | 227.8 (194.0 to 266.2) | 91.4 (68.1 to 118.4)       | 23.8 (16.2 to 33.3)           | 14.1 (6.7 to 25.4)              | 98.4 (78.8 to 123.7)              |
| Zambia  | 2033 | 79.1 (67.0 to 93.0)        | 31.9 (23.7 to 41.4)        | 8.2 (5.6 to 11.5)             | 4.9 (2.3 to 8.9)                | 34.0 (27.0 to 43.6)               | 230.9 (195.6 to 271.6) | 93.2 (69.3 to 120.8)       | 24.0 (16.4 to 33.6)           | 14.4 (6.8 to 25.9)              | 99.3 (78.8 to 127.5)              |
| Zambia  | 2034 | 80.3 (67.6 to 94.3)        | 32.6 (24.2 to 42.2)        | 8.3 (5.6 to 11.6)             | 5.0 (2.4 to 9.0)                | 34.4 (27.1 to 44.2)               | 234.4 (197.4 to 275.5) | 95.1 (70.8 to 123.3)       | 24.2 (16.5 to 34.0)           | 14.7 (6.9 to 26.4)              | 100.4 (79.0 to 129.2)             |
| Zambia  | 2035 | 81.4 (69.1 to 96.3)        | 33.2 (24.6 to 43.1)        | 8.4 (5.6 to 11.8)             | 5.1 (2.4 to 9.2)                | 34.7 (27.0 to 45.6)               | 237.8 (201.8 to 281.1) | 97.0 (72.0 to 125.9)       | 24.4 (16.5 to 34.4)           | 15.0 (7.1 to 26.9)              | 101.5 (78.9 to 133.0)             |
| Zambia  | 2036 | 82.7 (69.0 to 98.2)        | 33.9 (25.2 to 44.1)        | 8.4 (5.7 to 11.9)             | 5.2 (2.5 to 9.4)                | 35.1 (27.1 to 47.2)               | 241.6 (201.6 to 286.8) | 99.1 (73.5 to 128.7)       | 24.6 (16.5 to 34.9)           | 15.3 (7.2 to 27.4)              | 102.5 (79.2 to 137.7)             |

| Country  | Year | 2018 US Dollars per capita |                            |                               |                                 |                                   | 2018 PPP per capita    |                            |                               |                                 |                                   |
|----------|------|----------------------------|----------------------------|-------------------------------|---------------------------------|-----------------------------------|------------------------|----------------------------|-------------------------------|---------------------------------|-----------------------------------|
|          |      | Health spending            | Government health spending | Out-of-pocket health spending | Prepaid private health spending | Development assistance for health | Health spending        | Government health spending | Out-of-pocket health spending | Prepaid private health spending | Development assistance for health |
| Zambia   | 2037 | 84.0 (70.3 to 99.5)        | 34.7 (25.7 to 45.1)        | 8.5 (5.7 to 12.1)             | 5.3 (2.5 to 9.6)                | 35.4 (27.3 to 47.4)               | 245.2 (205.2 to 290.7) | 101.3 (75.2 to 131.6)      | 24.9 (16.6 to 35.4)           | 15.5 (7.3 to 27.9)              | 103.5 (79.7 to 138.5)             |
| Zambia   | 2038 | 85.3 (71.5 to 101.2)       | 35.4 (26.3 to 46.0)        | 8.6 (5.7 to 12.3)             | 5.4 (2.5 to 9.8)                | 35.9 (27.4 to 49.7)               | 249.2 (208.9 to 295.5) | 103.5 (76.8 to 134.4)      | 25.2 (16.8 to 36.0)           | 15.8 (7.4 to 28.5)              | 104.7 (79.9 to 145.1)             |
| Zambia   | 2039 | 86.7 (73.1 to 103.1)       | 36.2 (26.9 to 47.1)        | 8.7 (5.8 to 12.5)             | 5.5 (2.6 to 9.9)                | 36.2 (27.6 to 50.2)               | 253.2 (213.6 to 301.0) | 105.8 (78.5 to 137.5)      | 25.5 (16.9 to 36.4)           | 16.1 (7.6 to 29.0)              | 105.7 (80.6 to 146.6)             |
| Zambia   | 2040 | 88.2 (73.0 to 105.3)       | 37.1 (27.4 to 48.2)        | 8.9 (5.8 to 12.7)             | 5.6 (2.6 to 10.1)               | 36.6 (27.9 to 50.7)               | 257.6 (213.2 to 307.4) | 108.3 (80.1 to 140.9)      | 25.8 (17.0 to 37.0)           | 16.4 (7.7 to 29.5)              | 107.0 (81.5 to 148.0)             |
| Zambia   | 2041 | 89.7 (74.7 to 108.2)       | 37.9 (28.0 to 49.3)        | 9.0 (5.9 to 12.9)             | 5.7 (2.7 to 10.3)               | 37.1 (28.0 to 51.6)               | 262.0 (218.1 to 316.0) | 110.7 (81.9 to 144.0)      | 26.2 (17.2 to 37.8)           | 16.8 (7.8 to 30.0)              | 108.3 (81.7 to 150.6)             |
| Zambia   | 2042 | 91.3 (75.9 to 110.4)       | 38.7 (28.7 to 50.5)        | 9.1 (6.0 to 13.2)             | 5.8 (2.7 to 10.5)               | 37.6 (28.2 to 53.7)               | 266.6 (221.7 to 322.5) | 113.1 (83.8 to 147.6)      | 26.6 (17.5 to 38.5)           | 17.1 (8.0 to 30.5)              | 109.8 (82.3 to 156.9)             |
| Zambia   | 2043 | 92.9 (75.7 to 113.6)       | 39.6 (29.1 to 51.8)        | 9.3 (6.1 to 13.4)             | 6.0 (2.8 to 10.6)               | 38.1 (28.3 to 55.2)               | 271.3 (221.2 to 331.6) | 115.6 (85.1 to 151.2)      | 27.0 (17.7 to 39.1)           | 17.4 (8.2 to 31.1)              | 111.3 (82.7 to 161.2)             |
| Zambia   | 2044 | 94.7 (78.2 to 116.5)       | 40.5 (29.8 to 53.1)        | 9.4 (6.2 to 13.6)             | 6.1 (2.9 to 10.8)               | 38.7 (28.6 to 56.0)               | 276.4 (228.5 to 340.3) | 118.3 (87.1 to 155.1)      | 27.5 (18.0 to 39.8)           | 17.7 (8.3 to 31.6)              | 112.9 (83.5 to 163.5)             |
| Zambia   | 2045 | 96.4 (78.7 to 119.9)       | 41.4 (30.4 to 54.3)        | 9.6 (6.3 to 13.9)             | 6.2 (2.9 to 11.0)               | 39.2 (28.3 to 59.1)               | 281.6 (229.8 to 350.2) | 120.9 (88.8 to 158.5)      | 28.0 (18.3 to 40.6)           | 18.1 (8.5 to 32.1)              | 114.6 (82.7 to 172.7)             |
| Zambia   | 2046 | 98.2 (80.0 to 122.4)       | 42.3 (31.0 to 55.5)        | 9.8 (6.4 to 14.2)             | 6.3 (3.0 to 11.2)               | 39.8 (28.8 to 61.1)               | 286.8 (233.6 to 357.6) | 123.5 (90.4 to 162.1)      | 28.5 (18.6 to 41.5)           | 18.4 (8.7 to 32.8)              | 116.3 (84.1 to 178.5)             |
| Zambia   | 2047 | 100.1 (81.4 to 124.9)      | 43.2 (31.6 to 56.8)        | 9.9 (6.5 to 14.6)             | 6.4 (3.0 to 11.5)               | 40.5 (29.1 to 63.7)               | 292.3 (237.8 to 364.9) | 126.3 (92.4 to 165.8)      | 29.0 (19.0 to 42.5)           | 18.8 (8.8 to 33.5)              | 118.3 (85.0 to 186.1)             |
| Zambia   | 2048 | 102.1 (82.5 to 130.5)      | 44.2 (32.4 to 58.1)        | 10.1 (6.6 to 14.9)            | 6.6 (3.1 to 11.8)               | 41.2 (29.6 to 65.9)               | 298.3 (241.0 to 381.1) | 129.1 (94.5 to 169.6)      | 29.6 (19.3 to 43.4)           | 19.1 (9.0 to 34.3)              | 120.4 (86.3 to 192.5)             |
| Zambia   | 2049 | 104.2 (83.9 to 132.8)      | 45.2 (33.1 to 59.5)        | 10.3 (6.7 to 15.1)            | 6.7 (3.1 to 12.0)               | 41.9 (29.9 to 67.4)               | 304.2 (244.9 to 387.7) | 132.0 (96.7 to 173.7)      | 30.2 (19.6 to 44.1)           | 19.5 (9.1 to 35.0)              | 122.5 (87.3 to 196.8)             |
| Zambia   | 2050 | 106.3 (84.5 to 138.9)      | 46.2 (34.0 to 60.9)        | 10.5 (6.8 to 15.5)            | 6.8 (3.2 to 12.2)               | 42.8 (30.1 to 70.0)               | 310.4 (246.9 to 405.7) | 134.9 (99.2 to 177.9)      | 30.8 (20.0 to 45.2)           | 19.9 (9.3 to 35.6)              | 124.9 (87.9 to 204.6)             |
| Zimbabwe | 1995 | 98.7 (80.3 to 121.2)       | 35.1 (27.4 to 44.4)        | 47.8 (33.3 to 67.0)           | 10.9 (5.0 to 19.9)              | 4.9 (4.9 to 4.9)                  | 184.6 (150.2 to 226.7) | 65.7 (51.2 to 83.0)        | 89.3 (62.3 to 125.2)          | 20.4 (9.3 to 37.2)              | 9.2 (9.2 to 9.2)                  |
| Zimbabwe | 1996 | 103.4 (85.1 to 126.2)      | 37.0 (28.9 to 46.8)        | 49.5 (34.7 to 69.9)           | 11.4 (5.4 to 20.2)              | 5.6 (5.6 to 5.6)                  | 193.4 (159.1 to 236.0) | 69.2 (54.0 to 87.5)        | 92.5 (64.8 to 130.7)          | 21.2 (10.2 to 37.7)             | 10.4 (10.4 to 10.4)               |
| Zimbabwe | 1997 | 99.9 (82.9 to 121.1)       | 34.5 (26.8 to 43.1)        | 48.0 (33.8 to 67.1)           | 10.6 (5.1 to 18.7)              | 6.9 (6.9 to 6.9)                  | 186.9 (155.1 to 226.4) | 64.4 (50.2 to 80.5)        | 89.7 (63.3 to 125.4)          | 19.8 (9.6 to 34.9)              | 12.9 (12.9 to 12.9)               |
| Zimbabwe | 1998 | 96.7 (80.4 to 115.6)       | 33.1 (25.8 to 41.4)        | 47.5 (33.9 to 65.1)           | 10.2 (5.0 to 18.2)              | 5.9 (5.9 to 5.9)                  | 180.8 (150.4 to 216.2) | 61.9 (48.2 to 77.5)        | 88.8 (63.3 to 121.7)          | 19.1 (9.4 to 33.9)              | 11.0 (11.0 to 11.0)               |
| Zimbabwe | 1999 | 93.2 (77.3 to 111.1)       | 31.9 (24.8 to 39.6)        | 46.9 (33.7 to 63.4)           | 9.9 (4.9 to 17.6)               | 4.5 (4.5 to 4.5)                  | 174.3 (144.6 to 207.7) | 59.7 (46.3 to 74.1)        | 87.7 (63.0 to 118.5)          | 18.4 (9.2 to 32.9)              | 8.5 (8.5 to 8.5)                  |
| Zimbabwe | 2000 | 89.5 (74.3 to 105.5)       | 30.2 (23.7 to 37.8)        | 45.5 (32.9 to 60.3)           | 9.3 (4.7 to 16.9)               | 4.5 (4.5 to 4.5)                  | 167.3 (138.9 to 197.4) | 56.4 (44.3 to 70.6)        | 85.0 (61.4 to 112.7)          | 17.4 (8.8 to 31.6)              | 8.4 (8.4 to 8.4)                  |
| Zimbabwe | 2001 | 88.3 (72.5 to 103.9)       | 30.8 (24.4 to 38.9)        | 43.7 (31.5 to 57.9)           | 9.5 (4.6 to 17.1)               | 4.3 (4.3 to 4.3)                  | 165.1 (135.6 to 194.4) | 57.6 (45.7 to 72.7)        | 81.7 (58.9 to 108.3)          | 17.7 (8.7 to 32.0)              | 8.1 (8.1 to 8.1)                  |

| Country  | Year | 2018 US Dollars per capita |                            |                               |                                 |                                   | 2018 PPP per capita    |                            |                               |                                 |                                   |
|----------|------|----------------------------|----------------------------|-------------------------------|---------------------------------|-----------------------------------|------------------------|----------------------------|-------------------------------|---------------------------------|-----------------------------------|
|          |      | Health spending            | Government health spending | Out-of-pocket health spending | Prepaid private health spending | Development assistance for health | Health spending        | Government health spending | Out-of-pocket health spending | Prepaid private health spending | Development assistance for health |
| Zimbabwe | 2002 | 86.2 (70.7 to 101.6)       | 29.9 (23.6 to 37.5)        | 42.9 (31.5 to 56.8)           | 9.3 (4.6 to 16.9)               | 4.0 (4.0 to 4.0)                  | 161.1 (132.2 to 190.0) | 55.9 (44.1 to 70.0)        | 80.2 (59.0 to 106.1)          | 17.5 (8.6 to 31.6)              | 7.5 (7.5 to 7.5)                  |
| Zimbabwe | 2003 | 86.4 (71.3 to 101.5)       | 28.5 (22.5 to 35.6)        | 44.3 (33.2 to 57.6)           | 9.1 (4.5 to 16.7)               | 4.5 (4.5 to 4.5)                  | 161.5 (133.3 to 189.7) | 53.3 (42.0 to 66.6)        | 82.8 (62.0 to 107.8)          | 17.0 (8.3 to 31.2)              | 8.4 (8.4 to 8.4)                  |
| Zimbabwe | 2004 | 89.2 (73.8 to 105.9)       | 29.1 (22.8 to 36.4)        | 46.0 (34.4 to 59.4)           | 9.3 (4.6 to 17.4)               | 4.9 (4.9 to 4.9)                  | 166.8 (138.0 to 198.0) | 54.4 (42.7 to 68.0)        | 86.0 (64.3 to 111.0)          | 17.4 (8.6 to 32.5)              | 9.1 (9.1 to 9.1)                  |
| Zimbabwe | 2005 | 93.7 (78.2 to 110.1)       | 28.9 (22.5 to 36.3)        | 45.3 (33.9 to 58.4)           | 9.3 (4.6 to 17.8)               | 10.1 (10.1 to 10.1)               | 175.1 (146.3 to 205.9) | 54.1 (42.1 to 67.9)        | 84.7 (63.4 to 109.1)          | 17.4 (8.6 to 33.2)              | 19.0 (19.0 to 19.0)               |
| Zimbabwe | 2006 | 93.7 (78.3 to 109.1)       | 29.5 (23.2 to 36.9)        | 44.4 (33.1 to 57.3)           | 9.4 (4.7 to 17.2)               | 10.3 (10.3 to 10.3)               | 175.2 (146.3 to 203.9) | 55.2 (43.4 to 69.1)        | 83.1 (61.9 to 107.2)          | 17.7 (8.9 to 32.1)              | 19.2 (19.2 to 19.2)               |
| Zimbabwe | 2007 | 100.3 (84.4 to 116.2)      | 30.8 (24.3 to 38.6)        | 45.2 (34.0 to 58.3)           | 9.9 (4.9 to 17.8)               | 14.4 (14.4 to 14.4)               | 187.6 (157.8 to 217.3) | 57.5 (45.4 to 72.1)        | 84.6 (63.5 to 109.1)          | 18.5 (9.2 to 33.2)              | 27.0 (27.0 to 27.0)               |
| Zimbabwe | 2008 | 85.8 (72.1 to 100.1)       | 26.6 (21.0 to 33.6)        | 40.3 (30.1 to 52.5)           | 8.9 (4.3 to 16.0)               | 10.0 (10.0 to 10.0)               | 160.5 (134.8 to 187.3) | 49.7 (39.4 to 62.8)        | 75.4 (56.3 to 98.1)           | 16.6 (8.1 to 29.9)              | 18.7 (18.7 to 18.7)               |
| Zimbabwe | 2009 | 96.3 (81.8 to 111.9)       | 29.4 (23.6 to 36.7)        | 39.4 (29.2 to 51.6)           | 9.9 (4.8 to 17.6)               | 17.6 (17.6 to 17.6)               | 180.0 (152.9 to 209.3) | 55.1 (44.0 to 68.6)        | 73.6 (54.5 to 96.6)           | 18.4 (8.9 to 33.0)              | 32.9 (32.9 to 32.9)               |
| Zimbabwe | 2010 | 93.6 (79.0 to 109.8)       | 29.2 (23.1 to 36.4)        | 38.3 (28.8 to 50.5)           | 10.0 (4.8 to 17.7)              | 16.1 (16.1 to 16.1)               | 174.9 (147.7 to 205.3) | 54.6 (43.3 to 68.1)        | 71.7 (53.8 to 94.3)           | 18.7 (9.0 to 33.1)              | 30.0 (30.0 to 30.0)               |
| Zimbabwe | 2011 | 86.3 (73.5 to 101.6)       | 28.4 (22.4 to 35.5)        | 35.1 (26.5 to 46.5)           | 9.8 (4.7 to 17.8)               | 13.0 (13.0 to 13.0)               | 161.4 (137.3 to 189.9) | 53.2 (41.9 to 66.4)        | 65.6 (49.5 to 87.0)           | 18.3 (8.8 to 33.2)              | 24.3 (24.3 to 24.3)               |
| Zimbabwe | 2012 | 101.1 (88.3 to 116.8)      | 30.0 (23.5 to 37.7)        | 32.1 (23.9 to 42.9)           | 10.5 (5.0 to 19.1)              | 28.5 (28.5 to 28.5)               | 189.1 (165.1 to 218.4) | 56.1 (44.0 to 70.5)        | 60.1 (44.7 to 80.2)           | 19.6 (9.4 to 35.7)              | 53.3 (53.3 to 53.3)               |
| Zimbabwe | 2013 | 92.6 (80.2 to 109.1)       | 32.6 (25.6 to 41.4)        | 29.6 (21.9 to 39.6)           | 10.1 (4.9 to 19.4)              | 20.3 (20.3 to 20.3)               | 173.2 (150.0 to 203.9) | 61.0 (47.8 to 77.4)        | 55.4 (40.9 to 74.0)           | 18.8 (9.2 to 36.2)              | 38.0 (38.0 to 38.0)               |
| Zimbabwe | 2014 | 98.3 (84.6 to 115.5)       | 38.3 (29.7 to 48.6)        | 29.5 (21.7 to 39.4)           | 10.4 (5.1 to 19.7)              | 20.1 (20.1 to 20.1)               | 183.8 (158.2 to 216.0) | 71.7 (55.6 to 90.9)        | 55.1 (40.6 to 73.8)           | 19.5 (9.6 to 36.9)              | 37.6 (37.6 to 37.6)               |
| Zimbabwe | 2015 | 110.2 (94.9 to 127.5)      | 44.3 (34.7 to 56.8)        | 29.7 (21.6 to 39.5)           | 10.7 (5.3 to 20.5)              | 25.5 (25.5 to 25.5)               | 206.0 (177.4 to 238.4) | 82.9 (64.9 to 106.2)       | 55.5 (40.4 to 73.8)           | 19.9 (9.8 to 38.3)              | 47.6 (47.6 to 47.6)               |
| Zimbabwe | 2016 | 106.0 (91.3 to 123.5)      | 47.8 (37.1 to 61.2)        | 28.1 (20.4 to 37.6)           | 10.2 (4.9 to 19.5)              | 19.9 (19.9 to 19.9)               | 198.3 (170.7 to 231.0) | 89.4 (69.4 to 114.5)       | 52.5 (38.1 to 70.4)           | 19.1 (9.2 to 36.5)              | 37.2 (37.2 to 37.2)               |
| Zimbabwe | 2017 | 108.9 (92.6 to 127.9)      | 50.9 (39.5 to 65.2)        | 28.2 (20.5 to 37.8)           | 10.6 (5.1 to 20.2)              | 19.2 (19.2 to 19.2)               | 203.6 (173.2 to 239.1) | 95.2 (73.9 to 121.9)       | 52.7 (38.3 to 70.7)           | 19.8 (9.5 to 37.7)              | 35.9 (35.9 to 35.9)               |
| Zimbabwe | 2018 | 108.2 (92.2 to 125.1)      | 51.6 (40.1 to 66.0)        | 28.0 (20.3 to 37.6)           | 10.7 (5.2 to 20.4)              | 17.9 (17.8 to 17.9)               | 202.4 (172.5 to 233.9) | 96.6 (74.9 to 123.3)       | 52.4 (38.0 to 70.3)           | 20.0 (9.6 to 38.1)              | 33.4 (33.4 to 33.4)               |
| Zimbabwe | 2019 | 108.7 (92.1 to 127.7)      | 52.3 (40.7 to 66.7)        | 27.8 (20.1 to 37.6)           | 10.9 (5.2 to 20.7)              | 17.7 (16.6 to 18.8)               | 203.3 (172.3 to 238.7) | 97.7 (76.1 to 124.8)       | 52.1 (37.6 to 70.4)           | 20.3 (9.8 to 38.6)              | 33.2 (31.0 to 35.1)               |
| Zimbabwe | 2020 | 109.2 (93.1 to 127.5)      | 52.8 (41.2 to 67.2)        | 27.7 (20.0 to 37.5)           | 11.0 (5.3 to 21.0)              | 17.8 (16.3 to 19.2)               | 204.3 (174.1 to 238.5) | 98.7 (77.0 to 125.7)       | 51.7 (37.4 to 70.1)           | 20.6 (9.9 to 39.2)              | 33.2 (30.5 to 35.9)               |
| Zimbabwe | 2021 | 109.9 (93.8 to 128.8)      | 53.4 (41.6 to 68.1)        | 27.5 (19.9 to 37.4)           | 11.2 (5.4 to 21.2)              | 17.9 (16.1 to 19.7)               | 205.5 (175.4 to 240.9) | 99.8 (77.8 to 127.3)       | 51.4 (37.3 to 69.8)           | 20.9 (10.0 to 39.7)             | 33.4 (30.1 to 36.9)               |
| Zimbabwe | 2022 | 110.4 (91.9 to 130.0)      | 53.8 (42.0 to 69.1)        | 27.3 (19.7 to 36.9)           | 11.3 (5.4 to 21.5)              | 18.0 (16.0 to 20.1)               | 206.5 (171.8 to 243.0) | 100.7 (78.6 to 129.2)      | 51.0 (36.9 to 69.1)           | 21.1 (10.1 to 40.1)             | 33.7 (29.9 to 37.6)               |

| Country  | Year | 2018 US Dollars per capita |                            |                               |                                 |                                   | 2018 PPP per capita    |                            |                               |                                 |                                   |
|----------|------|----------------------------|----------------------------|-------------------------------|---------------------------------|-----------------------------------|------------------------|----------------------------|-------------------------------|---------------------------------|-----------------------------------|
|          |      | Health spending            | Government health spending | Out-of-pocket health spending | Prepaid private health spending | Development assistance for health | Health spending        | Government health spending | Out-of-pocket health spending | Prepaid private health spending | Development assistance for health |
| Zimbabwe | 2023 | 111.1 (94.5 to 130.3)      | 54.2 (42.1 to 69.7)        | 27.0 (19.6 to 36.7)           | 11.4 (5.5 to 21.7)              | 18.4 (16.1 to 21.0)               | 207.7 (176.7 to 243.6) | 101.3 (78.8 to 130.3)      | 50.6 (36.6 to 68.7)           | 21.3 (10.2 to 40.5)             | 34.5 (30.1 to 39.2)               |
| Zimbabwe | 2024 | 112.0 (95.2 to 130.2)      | 54.7 (42.6 to 70.4)        | 26.8 (19.4 to 36.4)           | 11.5 (5.5 to 21.9)              | 18.9 (16.3 to 21.9)               | 209.4 (178.0 to 243.5) | 102.2 (79.7 to 131.6)      | 50.2 (36.3 to 68.1)           | 21.6 (10.3 to 41.0)             | 35.4 (30.5 to 40.9)               |
| Zimbabwe | 2025 | 113.0 (96.2 to 133.5)      | 55.3 (43.2 to 71.2)        | 26.7 (19.3 to 36.0)           | 11.7 (5.6 to 22.2)              | 19.3 (16.4 to 22.7)               | 211.3 (179.9 to 249.6) | 103.4 (80.7 to 133.1)      | 49.9 (36.1 to 67.4)           | 21.8 (10.4 to 41.5)             | 36.1 (30.7 to 42.4)               |
| Zimbabwe | 2026 | 113.9 (96.6 to 133.0)      | 55.9 (43.6 to 71.9)        | 26.6 (19.3 to 35.8)           | 11.8 (5.6 to 22.4)              | 19.7 (16.6 to 23.0)               | 213.1 (180.6 to 248.8) | 104.5 (81.6 to 134.4)      | 49.7 (36.1 to 67.0)           | 22.1 (10.6 to 42.0)             | 36.7 (31.1 to 43.1)               |
| Zimbabwe | 2027 | 115.1 (98.0 to 135.0)      | 56.7 (44.3 to 72.8)        | 26.5 (19.1 to 35.7)           | 12.0 (5.7 to 22.8)              | 19.9 (16.7 to 23.9)               | 215.2 (183.2 to 252.4) | 106.0 (82.8 to 136.1)      | 49.5 (35.6 to 66.8)           | 22.5 (10.7 to 42.6)             | 37.3 (31.2 to 44.7)               |
| Zimbabwe | 2028 | 116.3 (98.1 to 135.8)      | 57.5 (45.0 to 73.8)        | 26.4 (19.0 to 35.8)           | 12.2 (5.8 to 23.1)              | 20.2 (16.9 to 24.3)               | 217.5 (183.5 to 253.9) | 107.6 (84.1 to 138.0)      | 49.4 (35.5 to 66.9)           | 22.9 (10.9 to 43.3)             | 37.8 (31.5 to 45.4)               |
| Zimbabwe | 2029 | 117.7 (99.8 to 137.8)      | 58.4 (45.6 to 74.9)        | 26.4 (19.0 to 35.8)           | 12.4 (6.0 to 23.6)              | 20.4 (16.7 to 25.1)               | 220.0 (186.6 to 257.7) | 109.3 (85.3 to 140.0)      | 49.3 (35.4 to 67.0)           | 23.3 (11.1 to 44.0)             | 38.2 (31.3 to 46.9)               |
| Zimbabwe | 2030 | 119.0 (100.0 to 140.2)     | 59.4 (46.4 to 75.9)        | 26.4 (18.9 to 35.9)           | 12.7 (6.1 to 24.0)              | 20.6 (16.7 to 25.5)               | 222.5 (187.1 to 262.1) | 111.0 (86.7 to 141.9)      | 49.3 (35.4 to 67.2)           | 23.7 (11.3 to 44.9)             | 38.5 (31.3 to 47.7)               |
| Zimbabwe | 2031 | 120.4 (102.1 to 140.8)     | 60.4 (47.2 to 77.2)        | 26.4 (18.9 to 36.2)           | 12.9 (6.2 to 24.4)              | 20.7 (16.4 to 25.9)               | 225.1 (190.9 to 263.2) | 112.9 (88.2 to 144.3)      | 49.4 (35.4 to 67.7)           | 24.1 (11.6 to 45.6)             | 38.7 (30.7 to 48.4)               |
| Zimbabwe | 2032 | 121.9 (103.2 to 144.6)     | 61.4 (47.9 to 78.4)        | 26.5 (18.8 to 36.5)           | 13.1 (6.3 to 24.9)              | 20.9 (16.3 to 26.4)               | 227.9 (192.9 to 270.4) | 114.8 (89.6 to 146.6)      | 49.5 (35.2 to 68.2)           | 24.6 (11.8 to 46.5)             | 39.0 (30.6 to 49.4)               |
| Zimbabwe | 2033 | 123.4 (103.8 to 145.5)     | 62.4 (48.7 to 79.8)        | 26.6 (18.9 to 36.7)           | 13.4 (6.4 to 25.4)              | 21.0 (16.1 to 27.3)               | 230.8 (194.1 to 272.1) | 116.8 (91.1 to 149.2)      | 49.7 (35.3 to 68.6)           | 25.1 (12.0 to 47.4)             | 39.3 (30.2 to 51.0)               |
| Zimbabwe | 2034 | 125.0 (105.3 to 148.4)     | 63.5 (49.6 to 81.3)        | 26.7 (18.8 to 37.0)           | 13.7 (6.6 to 25.9)              | 21.2 (16.0 to 28.4)               | 233.8 (197.0 to 277.5) | 118.7 (92.7 to 152.0)      | 49.9 (35.2 to 69.2)           | 25.5 (12.3 to 48.4)             | 39.6 (29.9 to 53.0)               |
| Zimbabwe | 2035 | 126.6 (106.9 to 149.9)     | 64.5 (50.3 to 82.6)        | 26.8 (18.9 to 37.2)           | 13.9 (6.7 to 26.4)              | 21.4 (15.7 to 28.7)               | 236.8 (200.0 to 280.2) | 120.6 (94.1 to 154.5)      | 50.1 (35.3 to 69.6)           | 26.0 (12.5 to 49.3)             | 40.0 (29.4 to 53.7)               |
| Zimbabwe | 2036 | 128.3 (107.1 to 152.8)     | 65.5 (51.0 to 83.8)        | 27.0 (18.9 to 37.5)           | 14.1 (6.8 to 26.8)              | 21.6 (15.7 to 29.5)               | 239.8 (200.2 to 285.6) | 122.5 (95.4 to 156.7)      | 50.4 (35.3 to 70.1)           | 26.5 (12.7 to 50.2)             | 40.5 (29.4 to 55.2)               |
| Zimbabwe | 2037 | 129.9 (108.9 to 154.5)     | 66.5 (51.7 to 84.9)        | 27.1 (18.9 to 37.8)           | 14.4 (6.9 to 27.3)              | 21.9 (15.5 to 30.3)               | 242.9 (203.7 to 289.0) | 124.4 (96.7 to 158.8)      | 50.7 (35.3 to 70.7)           | 26.9 (13.0 to 51.1)             | 40.9 (29.0 to 56.7)               |
| Zimbabwe | 2038 | 131.6 (109.6 to 157.7)     | 67.5 (52.4 to 86.0)        | 27.3 (18.8 to 38.1)           | 14.6 (7.1 to 27.8)              | 22.1 (15.4 to 31.5)               | 246.1 (204.9 to 294.8) | 126.2 (98.0 to 160.8)      | 51.1 (35.1 to 71.3)           | 27.4 (13.2 to 52.0)             | 41.4 (28.9 to 59.0)               |
| Zimbabwe | 2039 | 133.3 (110.6 to 158.3)     | 68.4 (53.1 to 87.3)        | 27.5 (18.9 to 38.4)           | 14.9 (7.2 to 28.2)              | 22.4 (15.4 to 32.8)               | 249.2 (206.8 to 296.0) | 128.0 (99.2 to 163.3)      | 51.5 (35.3 to 71.8)           | 27.8 (13.4 to 52.7)             | 41.9 (28.8 to 61.4)               |
| Zimbabwe | 2040 | 135.0 (112.7 to 163.3)     | 69.4 (53.7 to 88.5)        | 27.8 (19.0 to 38.7)           | 15.1 (7.3 to 28.6)              | 22.8 (15.3 to 34.5)               | 252.5 (210.8 to 305.3) | 129.7 (100.5 to 165.6)     | 51.9 (35.5 to 72.3)           | 28.2 (13.7 to 53.5)             | 42.6 (28.7 to 64.5)               |
| Zimbabwe | 2041 | 136.8 (114.0 to 162.7)     | 70.2 (54.3 to 89.7)        | 28.0 (19.1 to 39.0)           | 15.3 (7.4 to 29.0)              | 23.2 (15.3 to 35.5)               | 255.7 (213.1 to 304.3) | 131.3 (101.6 to 167.8)     | 52.4 (35.7 to 73.0)           | 28.6 (13.9 to 54.3)             | 43.4 (28.6 to 66.5)               |
| Zimbabwe | 2042 | 138.7 (114.9 to 168.6)     | 71.2 (55.0 to 90.9)        | 28.3 (19.2 to 39.5)           | 15.6 (7.5 to 29.6)              | 23.6 (15.4 to 36.8)               | 259.3 (214.9 to 315.3) | 133.1 (102.9 to 170.0)     | 52.9 (35.8 to 73.9)           | 29.1 (14.1 to 55.3)             | 44.2 (28.8 to 68.9)               |
| Zimbabwe | 2043 | 140.5 (116.5 to 168.9)     | 72.0 (55.6 to 91.9)        | 28.6 (19.3 to 40.1)           | 15.8 (7.7 to 30.1)              | 24.1 (15.4 to 38.9)               | 262.7 (217.9 to 315.8) | 134.7 (104.0 to 171.9)     | 53.5 (36.1 to 74.9)           | 29.5 (14.3 to 56.2)             | 45.0 (28.7 to 72.7)               |

| Country  | Year | 2018 US Dollars per capita |                            |                               |                                 |                                   | 2018 PPP per capita    |                            |                               |                                 |                                   |
|----------|------|----------------------------|----------------------------|-------------------------------|---------------------------------|-----------------------------------|------------------------|----------------------------|-------------------------------|---------------------------------|-----------------------------------|
|          |      | Health spending            | Government health spending | Out-of-pocket health spending | Prepaid private health spending | Development assistance for health | Health spending        | Government health spending | Out-of-pocket health spending | Prepaid private health spending | Development assistance for health |
| Zimbabwe | 2044 | 142.3 (117.9 to 172.3)     | 72.8 (56.2 to 92.9)        | 28.9 (19.4 to 40.6)           | 16.0 (7.8 to 30.6)              | 24.6 (15.5 to 39.7)               | 266.1 (220.5 to 322.2) | 136.2 (105.0 to 173.7)     | 54.0 (36.3 to 75.9)           | 29.9 (14.5 to 57.1)             | 46.0 (29.0 to 74.3)               |
| Zimbabwe | 2045 | 144.3 (119.7 to 175.4)     | 73.7 (56.8 to 94.0)        | 29.3 (19.6 to 41.1)           | 16.2 (7.9 to 31.0)              | 25.1 (15.8 to 41.0)               | 269.8 (223.9 to 328.0) | 137.8 (106.2 to 175.7)     | 54.7 (36.6 to 76.8)           | 30.3 (14.7 to 57.9)             | 47.0 (29.5 to 76.7)               |
| Zimbabwe | 2046 | 146.3 (118.9 to 179.3)     | 74.5 (57.3 to 95.0)        | 29.6 (19.8 to 41.6)           | 16.4 (8.0 to 31.4)              | 25.7 (15.9 to 42.7)               | 273.5 (222.4 to 335.2) | 139.3 (107.2 to 177.6)     | 55.4 (37.0 to 77.9)           | 30.7 (15.0 to 58.7)             | 48.1 (29.7 to 79.9)               |
| Zimbabwe | 2047 | 148.3 (123.3 to 181.8)     | 75.3 (57.9 to 95.9)        | 30.0 (20.0 to 42.2)           | 16.6 (8.1 to 31.8)              | 26.4 (15.8 to 46.5)               | 277.4 (230.6 to 340.0) | 140.9 (108.3 to 179.2)     | 56.1 (37.4 to 78.9)           | 31.1 (15.1 to 59.5)             | 49.3 (29.6 to 87.0)               |
| Zimbabwe | 2048 | 150.6 (122.6 to 183.9)     | 76.2 (58.5 to 97.0)        | 30.4 (20.2 to 42.9)           | 16.9 (8.1 to 32.2)              | 27.1 (16.1 to 48.6)               | 281.5 (229.2 to 343.8) | 142.5 (109.4 to 181.4)     | 56.9 (37.8 to 80.1)           | 31.5 (15.2 to 60.3)             | 50.6 (30.0 to 90.9)               |
| Zimbabwe | 2049 | 152.7 (126.5 to 189.2)     | 77.1 (59.0 to 98.2)        | 30.8 (20.4 to 43.5)           | 17.1 (8.2 to 32.6)              | 27.8 (16.2 to 49.8)               | 285.6 (236.6 to 353.8) | 144.1 (110.4 to 183.7)     | 57.6 (38.1 to 81.3)           | 32.0 (15.4 to 61.0)             | 51.9 (30.3 to 93.1)               |
| Zimbabwe | 2050 | 155.0 (127.0 to 191.6)     | 77.9 (59.5 to 99.4)        | 31.2 (20.6 to 44.0)           | 17.3 (8.4 to 33.1)              | 28.6 (16.4 to 51.8)               | 289.8 (237.5 to 358.3) | 145.7 (111.3 to 185.9)     | 58.4 (38.5 to 82.3)           | 32.4 (15.6 to 61.8)             | 53.4 (30.6 to 96.9)               |

B.2 Table

|                     | Health spending per capita (\$USD) | Health spending per capita (\$PPP) | Health spending per GDP (%) | Government health spending per total health spending (%) | Out-of-pocket spending per total health spending (%) | Development assistance for health per total health spending (%) | Annualised rate of change in health spending, 2017-2050 (%) (\$USD) | Annualised rate of change in health spending per capita, 2017-2050 (%) (\$USD) | Annualised rate of change in health spending per GDP 2017-2050 (%) (\$USD) | Government health spending per capita (\$USD) | Difference between government health spending per capita reference scenario and better scenario 1, 2050 (\$USD) | Difference between government health spending per capita reference scenario and better scenario 2, 2050 (\$USD) |
|---------------------|------------------------------------|------------------------------------|-----------------------------|----------------------------------------------------------|------------------------------------------------------|-----------------------------------------------------------------|---------------------------------------------------------------------|--------------------------------------------------------------------------------|----------------------------------------------------------------------------|-----------------------------------------------|-----------------------------------------------------------------------------------------------------------------|-----------------------------------------------------------------------------------------------------------------|
| <b>Global</b>       |                                    |                                    |                             |                                                          |                                                      |                                                                 |                                                                     |                                                                                |                                                                            |                                               |                                                                                                                 |                                                                                                                 |
| Afghanistan         | 98 (71 to 134)                     | 353 (255 to 480)                   | 8.6% (6.2 to 11.7)          | 6.3% (4.1 to 9.6)                                        | 87.7% (81.6 to 91.8)                                 | 5.6% (3.3 to 9.7)                                               | 4.21% (3.82 to 4.62)                                                | 1.73% (1.35 to 2.13)                                                           | 0.43% (0.05 to 0.83)                                                       | 6 (4 to 8)                                    | 47 (46 to 52)                                                                                                   | 82 (79 to 91)                                                                                                   |
| Albania             | 655 (563 to 771)                   | 1720 (1478 to 2025)                | 6.9% (5.9 to 8.1)           | 49.4% (41.8 to 56.4)                                     | 50.0% (42.9 to 57.6)                                 | 0.6% (0.4 to 1.1)                                               | 1.64% (1.07 to 2.24)                                                | 1.98% (1.41 to 2.59)                                                           | 0.42% (-0.14 to 1.02)                                                      | 323 (262 to 390)                              | 159 (142 to 194)                                                                                                | 412 (399 to 439)                                                                                                |
| Algeria             | 469 (388 to 556)                   | 1626 (1345 to 1929)                | 6.1% (5.1 to 7.3)           | 64.6% (56.4 to 72.4)                                     | 34.0% (26.2 to 42.3)                                 | 0.0% (0.0 to 0.0)                                               | 2.96% (2.73 to 3.17)                                                | 1.54% (1.32 to 1.75)                                                           | 1.06% (0.84 to 1.27)                                                       | 303 (244 to 369)                              | 179 (162 to 211)                                                                                                | 286 (271 to 313)                                                                                                |
| American Samoa      | 887 (740 to 1044)                  | 887 (740 to 1044)                  | 7.5% (6.3 to 8.8)           | 91.1% (87.6 to 93.9)                                     | 7.0% (4.7 to 9.9)                                    | 0.0% (0.0 to 0.0)                                               | 1.79% (1.59 to 1.97)                                                | 0.76% (0.57 to 0.95)                                                           | 0.45% (0.25 to 0.63)                                                       | 809 (664 to 960)                              | 0 (0 to 1)                                                                                                      | 241 (204 to 286)                                                                                                |
| Andorra             | 5463 (5006 to 5931)                | 10148 (9299 to 11017)              | 9.4% (8.6 to 10.2)          | 55.2% (51.3 to 59.0)                                     | 34.4% (30.6 to 37.5)                                 | 0.0% (0.0 to 0.0)                                               | 0.11% (-0.16 to 0.35)                                               | 0.70% (0.43 to 0.95)                                                           | 0.42% (0.15 to 0.67)                                                       | 3018 (2635 to 3422)                           | 698 (616 to 884)                                                                                                | 1458 (1374 to 1618)                                                                                             |
| Angola              | 177 (143 to 217)                   | 295 (238 to 360)                   | 2.9% (2.3 to 3.5)           | 43.4% (34.1 to 53.6)                                     | 36.2% (26.9 to 46.5)                                 | 3.2% (2.1 to 5.2)                                               | 3.44% (3.04 to 3.83)                                                | 1.25% (0.86 to 1.63)                                                           | 0.60% (0.21 to 0.98)                                                       | 77 (59 to 98)                                 | 188 (184 to 200)                                                                                                | 396 (388 to 432)                                                                                                |
| Antigua and Barbuda | 1111 (1000 to 1229)                | 1803 (1623 to 1994)                | 5.3% (4.8 to 5.9)           | 67.4% (62.9 to 72.0)                                     | 25.3% (21.6 to 29.4)                                 | 0.0% (0.0 to 0.1)                                               | 1.26% (0.99 to 1.51)                                                | 1.14% (0.87 to 1.40)                                                           | 0.35% (0.08 to 0.60)                                                       | 750 (655 to 866)                              | 40 (13 to 92)                                                                                                   | 854 (831 to 935)                                                                                                |
| Argentina           | 1722 (1544 to 1915)                | 2598 (2330 to 2888)                | 9.8% (8.8 to 10.9)          | 80.1% (76.7 to 83.3)                                     | 11.1% (9.0 to 13.4)                                  | 0.0% (0.0 to 0.0)                                               | 1.86% (1.68 to 2.05)                                                | 1.43% (1.25 to 1.62)                                                           | 0.68% (0.50 to 0.86)                                                       | 1380 (1212 to 1560)                           | 10 (0 to 79)                                                                                                    | 10 (0 to 79)                                                                                                    |
| Armenia             | 1107 (862 to 1392)                 | 2831 (2204 to 3561)                | 12.1% (9.4 to 15.2)         | 14.2% (9.7 to 19.7)                                      | 83.5% (77.7 to 88.4)                                 | 1.2% (0.8 to 2.0)                                               | 2.67% (1.82 to 3.49)                                                | 3.22% (2.37 to 4.04)                                                           | 1.32% (0.49 to 2.13)                                                       | 156 (114 to 210)                              | 274 (264 to 292)                                                                                                | 549 (540 to 580)                                                                                                |
| Australia           | 8875 (8222 to 9605)                | 8110 (7512 to 8777)                | 8.8% (8.1 to 9.5)           | 67.7% (63.8 to 71.1)                                     | 19.3% (16.0 to 23.0)                                 | 0.0% (0.0 to 0.0)                                               | 2.29% (2.06 to 2.52)                                                | 1.41% (1.18 to 1.63)                                                           | 0.64% (0.42 to 0.87)                                                       | 6004 (5424 to 6572)                           | 728 (610 to 990)                                                                                                | 1789 (1664 to 2170)                                                                                             |
| Austria             | 7666 (7012 to 8382)                | 7616 (6966 to 8328)                | 10.9% (10.0 to 11.9)        | 71.5% (67.5 to 75.1)                                     | 19.6% (16.2 to 23.5)                                 | 0.0% (0.0 to 0.0)                                               | 1.00% (0.71 to 1.28)                                                | 1.09% (0.80 to 1.37)                                                           | 0.56% (0.27 to 0.83)                                                       | 5484 (4875 to 6154)                           | 377 (242 to 679)                                                                                                | 377 (242 to 679)                                                                                                |

|                        |                        |                       |                      |                      |                      |                      |                      |                         |                        |                     |                     |                     |
|------------------------|------------------------|-----------------------|----------------------|----------------------|----------------------|----------------------|----------------------|-------------------------|------------------------|---------------------|---------------------|---------------------|
| Azerbaijan             | 660 (414 to 895)       | 2651 (1663 to 3594)   | 6.2% (3.9 to 8.4)    | 18.0% (11.7 to 28.1) | 80.9% (70.5 to 87.4) | 0.5% (0.3 to 1.0)    | 2.40% (1.06 to 3.39) | 2.27% (0.94 to 3.26)    | 1.50% (0.17 to 2.48)   | 114 (87 to 148)     | 560 (551 to 608)    | 708 (691 to 774)    |
| Bahrain                | 1851 (1519 to 2231)    | 3744 (3072 to 4512)   | 6.9% (5.6 to 8.3)    | 67.7% (59.1 to 75.2) | 23.6% (16.9 to 31.8) | 0.0% (0.0 to 0.0)    | 2.85% (2.38 to 3.31) | 1.47% (1.00 to 1.92)    | 1.54% (1.08 to 2.00)   | 1256 (947 to 1598)  | 321 (173 to 546)    | 818 (720 to 1016)   |
| Bangladesh             | 119 (87 to 161)        | 318 (234 to 432)      | 3.8% (2.8 to 5.1)    | 22.7% (14.4 to 32.5) | 70.0% (59.0 to 79.8) | 4.3% (2.4 to 7.5)    | 3.69% (2.53 to 4.90) | 3.39% (2.24 to 4.59)    | 0.62% (-0.50 to 1.79)  | 27 (18 to 40)       | 55 (51 to 60)       | 215 (211 to 232)    |
| Barbados               | 1751 (1560 to 1999)    | 1834 (1634 to 2094)   | 8.0% (7.2 to 9.2)    | 44.6% (38.5 to 50.7) | 48.0% (41.4 to 54.8) | 0.0% (0.0 to 0.0)    | 0.65% (0.40 to 0.97) | 1.14% (0.89 to 1.46)    | 0.71% (0.47 to 1.03)   | 779 (679 to 891)    | 725 (701 to 799)    | 903 (878 to 999)    |
| Belarus                | 773 (657 to 918)       | 2554 (2170 to 3034)   | 7.5% (6.3 to 8.9)    | 46.3% (37.7 to 54.6) | 51.0% (42.3 to 59.7) | 0.5% (0.3 to 0.8)    | 1.78% (1.31 to 2.30) | 2.36% (1.88 to 2.88)    | 1.29% (0.81 to 1.80)   | 356 (299 to 420)    | 428 (415 to 461)    | 443 (430 to 477)    |
| Belgium                | 6613 (6063 to 7219)    | 6658 (6104 to 7268)   | 10.2% (9.3 to 11.1)  | 80.3% (77.9 to 82.4) | 13.1% (11.4 to 14.9) | 0.0% (0.0 to 0.0)    | 0.91% (0.71 to 1.12) | 0.82% (0.61 to 1.03)    | 0.33% (0.12 to 0.54)   | 5310 (4795 to 5890) | 448 (326 to 664)    | 448 (326 to 664)    |
| Belize                 | 490 (402 to 589)       | 885 (725 to 1063)     | 7.1% (5.8 to 8.5)    | 72.4% (64.7 to 79.2) | 18.5% (13.7 to 24.1) | 2.2% (1.5 to 3.6)    | 2.79% (2.32 to 3.22) | 1.70% (1.23 to 2.13)    | 0.69% (0.22 to 1.11)   | 356 (278 to 453)    | 67 (20 to 122)      | 180 (147 to 229)    |
| Benin                  | 58 (46 to 71)          | 150 (121 to 186)      | 3.4% (2.7 to 4.2)    | 29.4% (22.0 to 38.2) | 39.2% (29.3 to 49.9) | 24.2% (17.2 to 35.1) | 3.31% (2.46 to 4.21) | 1.39% (0.55 to 2.28)    | -0.02% (-0.85 to 0.85) | 17 (12 to 22)       | 63 (62 to 68)       | 114 (112 to 124)    |
| Bermuda                | 15572 (13384 to 18170) | 10064 (8650 to 11743) | 14.2% (12.2 to 16.6) | 30.2% (25.5 to 35.9) | 8.1% (5.9 to 10.9)   | 0.0% (0.0 to 0.0)    | 1.23% (0.90 to 1.61) | 1.03% (0.70 to 1.40)    | 0.62% (0.29 to 0.99)   | 4680 (3999 to 5479) | 484 (268 to 892)    | 3751 (3602 to 4015) |
| Bhutan                 | 245 (193 to 328)       | 754 (594 to 1009)     | 3.0% (2.4 to 4.1)    | 79.0% (71.2 to 86.1) | 17.3% (11.2 to 24.3) | 2.4% (1.5 to 4.0)    | 3.52% (3.25 to 3.94) | 3.04% (2.77 to 3.46)    | 0.41% (0.15 to 0.83)   | 194 (146 to 277)    | 241 (212 to 265)    | 429 (420 to 444)    |
| Bolivia                | 375 (310 to 443)       | 851 (703 to 1005)     | 7.6% (6.3 to 9.0)    | 70.3% (63.1 to 77.2) | 23.5% (17.3 to 30.1) | 2.4% (1.6 to 3.9)    | 2.82% (2.32 to 3.36) | 1.64% (1.15 to 2.18)    | 0.39% (-0.10 to 0.92)  | 264 (209 to 326)    | 92 (72 to 128)      | 118 (99 to 152)     |
| Bosnia and Herzegovina | 1054 (938 to 1181)     | 2550 (2269 to 2859)   | 8.4% (7.5 to 9.4)    | 71.0% (66.1 to 75.5) | 24.9% (20.6 to 29.6) | 2.0% (1.4 to 3.3)    | 1.32% (0.94 to 1.71) | 2.14% (1.76 to 2.53)    | 0.23% (-0.15 to 0.62)  | 748 (644 to 866)    | 62 (33 to 123)      | 216 (191 to 270)    |
| Botswana               | 815 (656 to 991)       | 1907 (1534 to 2319)   | 5.1% (4.1 to 6.1)    | 55.8% (46.4 to 66.2) | 4.6% (2.9 to 6.6)    | 4.8% (0.0 to 10.7)   | 2.81% (2.36 to 3.29) | 2.00% (1.55 to 2.47)    | 0.47% (0.03 to 0.94)   | 456 (345 to 609)    | 418 (368 to 483)    | 787 (751 to 831)    |
| Brazil                 | 1463 (1334 to 1599)    | 2448 (2231 to 2674)   | 8.9% (8.1 to 9.7)    | 36.5% (32.0 to 41.2) | 37.8% (33.7 to 42.3) | 0.1% (0.0 to 0.2)    | 1.09% (0.80 to 1.37) | 0.84% (0.55 to 1.12)    | 0.34% (0.05 to 0.62)   | 535 (454 to 632)    | 763 (744 to 829)    | 763 (744 to 829)    |
| Brunei                 | 611 (520 to 711)       | 1519 (1293 to 1768)   | 1.6% (1.4 to 1.9)    | 90.5% (86.1 to 93.6) | 4.3% (2.9 to 6.4)    | 0.0% (0.0 to 0.0)    | 0.32% (0.13 to 0.51) | -0.33% (-0.51 to -0.14) | 0.23% (0.05 to 0.43)   | 553 (466 to 656)    | 1527 (1499 to 1680) | 2382 (2314 to 2640) |

|                             |                           |                           |                            |                         |                            |                         |                            |                              |                              |                        |                     |                      |
|-----------------------------|---------------------------|---------------------------|----------------------------|-------------------------|----------------------------|-------------------------|----------------------------|------------------------------|------------------------------|------------------------|---------------------|----------------------|
| Bulgaria                    | 1647<br>(1426 to<br>1916) | 4320<br>(3740 to<br>5025) | 8.7%<br>(7.5 to<br>10.1)   | 45.2% (38.7<br>to 52.2) | 53.2%<br>(46.1 to<br>60.2) | 0.1% (0.0 to<br>0.2)    | 1.53%<br>(1.12 to<br>2.01) | 2.56%<br>(2.14 to<br>3.04)   | 0.70%<br>(0.30 to<br>1.18)   | 742 (643 to<br>861)    | 403 (383 to<br>442) | 719 (697 to<br>779)  |
| Burkina Faso                | 89 (72 to<br>109)         | 246 (199<br>to 301)       | 5.1%<br>(4.1 to<br>6.2)    | 50.8% (41.0<br>to 60.4) | 32.0%<br>(22.8 to<br>41.7) | 9.5% (6.4 to<br>15.0)   | 4.59%<br>(3.98 to<br>5.21) | 2.39%<br>(1.79 to<br>2.99)   | 0.25% (-<br>0.34 to<br>0.84) | 45 (34 to 59)          | 52 (49 to<br>58)    | 89 (87 to<br>94)     |
| Burundi                     | 37 (29 to<br>54)          | 81 (62 to<br>117)         | 15.1%<br>(11.6 to<br>21.8) | 22.3% (13.8<br>to 30.8) | 16.6%<br>(10.3 to<br>24.0) | 59.7% (48.0<br>to 73.9) | 3.41%<br>(2.53 to<br>4.69) | 0.87%<br>(0.01 to<br>2.12)   | 1.08%<br>(0.22 to<br>2.33)   | 8 (6 to 11)            | 2 (0 to 3)          | 11 (10 to<br>12)     |
| Cambodia                    | 196 (159<br>to 245)       | 584 (474<br>to 729)       | 6.2%<br>(5.0 to<br>7.7)    | 31.5% (23.4<br>to 40.7) | 59.9%<br>(50.5 to<br>69.6) | 8.0% (5.0 to<br>13.0)   | 3.42%<br>(2.32 to<br>4.52) | 2.78%<br>(1.69 to<br>3.88)   | 0.15% (-<br>0.91 to<br>1.22) | 62 (46 to 82)          | 78 (73 to<br>86)    | 185 (181 to<br>195)  |
| Cameroon                    | 96 (75 to<br>122)         | 242 (190<br>to 310)       | 3.5%<br>(2.7 to<br>4.4)    | 16.6% (11.4<br>to 22.5) | 64.5%<br>(54.8 to<br>73.5) | 16.0% (10.3<br>to 25.4) | 2.79%<br>(1.62 to<br>4.05) | 1.32%<br>(0.17 to<br>2.56)   | 0.04% (-<br>1.09 to<br>1.27) | 16 (11 to 21)          | 90 (88 to<br>97)    | 197 (190 to<br>218)  |
| Canada                      | 7041<br>(6432 to<br>7723) | 7535<br>(6883 to<br>8265) | 9.4%<br>(8.6 to<br>10.3)   | 74.7% (71.2<br>to 77.4) | 12.6%<br>(10.9 to<br>15.8) | 0.0% (0.0 to<br>0.0)    | 1.60%<br>(1.31 to<br>1.88) | 1.06%<br>(0.77 to<br>1.34)   | 0.49%<br>(0.20 to<br>0.76)   | 5262 (4677<br>to 5879) | 17 (0 to<br>199)    | 640 (589 to<br>774)  |
| Cape Verde                  | 321 (265<br>to 386)       | 675 (558<br>to 811)       | 4.6%<br>(3.8 to<br>5.5)    | 61.9% (52.3<br>to 70.1) | 32.1%<br>(23.5 to<br>41.5) | 3.5% (2.4 to<br>5.7)    | 2.91%<br>(2.55 to<br>3.27) | 2.09%<br>(1.74 to<br>2.45)   | 0.60%<br>(0.25 to<br>0.95)   | 198 (155 to<br>247)    | 163 (153 to<br>188) | 343 (334 to<br>362)  |
| Central African<br>Republic | 38 (29 to<br>55)          | 66 (49 to<br>96)          | 8.0%<br>(6.0 to<br>11.6)   | 13.1% (8.0<br>to 19.0)  | 26.5%<br>(15.1 to<br>38.0) | 59.5% (47.0<br>to 73.9) | 2.55%<br>(1.59 to<br>3.85) | 1.68%<br>(0.73 to<br>2.98)   | 1.10%<br>(0.15 to<br>2.39)   | 5 (3 to 7)             | 9 (8 to 9)          | 32 (31 to<br>35)     |
| Chad                        | 35 (28 to<br>44)          | 97 (78 to<br>120)         | 3.1%<br>(2.5 to<br>3.8)    | 26.0% (18.7<br>to 34.4) | 55.2%<br>(44.3 to<br>65.1) | 12.2% (7.2 to<br>20.4)  | 3.51%<br>(2.54 to<br>4.52) | 0.20% (-<br>0.74 to<br>1.18) | 0.06% (-<br>0.88 to<br>1.04) | 9 (7 to 12)            | 21 (21 to<br>22)    | 79 (77 to<br>87)     |
| Chile                       | 2100<br>(1919 to<br>2303) | 3713<br>(3394 to<br>4073) | 8.5%<br>(7.8 to<br>9.4)    | 64.1% (60.2<br>to 68.1) | 28.7%<br>(25.2 to<br>32.1) | 0.0% (0.0 to<br>0.0)    | 1.88%<br>(1.64 to<br>2.15) | 1.55%<br>(1.31 to<br>1.81)   | 0.65%<br>(0.40 to<br>0.90)   | 1347 (1192<br>to 1518) | 0 (0 to 0)          | 923 (816 to<br>1039) |
| China                       | 2054<br>(1728 to<br>2407) | 3803<br>(3200 to<br>4458) | 6.9%<br>(5.8 to<br>8.0)    | 66.5% (58.8<br>to 73.5) | 28.0%<br>(21.6 to<br>35.4) | 0.0% (0.0 to<br>0.0)    | 4.33%<br>(3.77 to<br>4.90) | 4.60%<br>(4.04 to<br>5.17)   | 0.94%<br>(0.40 to<br>1.49)   | 1367 (1116<br>to 1653) | 395 (311 to<br>552) | 941 (879 to<br>1070) |
| Colombia                    | 584 (500<br>to 675)       | 1393<br>(1192 to<br>1609) | 4.7%<br>(4.0 to<br>5.4)    | 67.8% (60.1<br>to 73.8) | 17.0%<br>(13.2 to<br>21.6) | 0.1% (0.1 to<br>0.2)    | 1.77%<br>(1.52 to<br>2.01) | 1.40%<br>(1.15 to<br>1.63)   | 0.52%<br>(0.28 to<br>0.75)   | 396 (332 to<br>472)    | 303 (289 to<br>331) | 564 (547 to<br>605)  |
| Comoros                     | 100 (80<br>to 124)        | 196 (157<br>to 243)       | 6.5%<br>(5.2 to<br>8.1)    | 17.9% (12.6<br>to 24.2) | 61.6%<br>(51.2 to<br>70.2) | 19.1% (12.5<br>to 29.1) | 2.13%<br>(0.95 to<br>3.35) | 0.89% (-<br>0.27 to<br>2.10) | 0.33% (-<br>0.83 to<br>1.52) | 18 (13 to 24)          | 73 (72 to<br>78)    | 100 (99 to<br>109)   |
| Congo                       | 80 (64 to<br>99)          | 237 (190<br>to 294)       | 1.8%<br>(1.4 to<br>2.2)    | 33.1% (24.1<br>to 42.7) | 53.0%<br>(43.0 to<br>63.8) | 9.4% (6.3 to<br>15.3)   | 1.94%<br>(0.86 to<br>3.06) | 0.69% (-<br>0.37 to<br>1.81) | 0.11% (-<br>0.95 to<br>1.22) | 26 (19 to 36)          | 169 (165 to<br>183) | 317 (306 to<br>350)  |
| Costa Rica                  | 1659<br>(1511 to<br>1818) | 2479<br>(2258 to<br>2717) | 9.7%<br>(8.8 to<br>10.6)   | 79.2% (75.7<br>to 82.4) | 17.8%<br>(15.1 to<br>20.9) | 0.0% (0.0 to<br>0.1)    | 1.98%<br>(1.76 to<br>2.19) | 1.64%<br>(1.43 to<br>1.85)   | 0.55%<br>(0.33 to<br>0.75)   | 1315 (1179<br>to 1466) | 0 (0 to 0)          | 756 (678 to<br>843)  |



|                                  |                     |                     |                      |                      |                      |                      |                      |                      |                        |                     |                     |                     |
|----------------------------------|---------------------|---------------------|----------------------|----------------------|----------------------|----------------------|----------------------|----------------------|------------------------|---------------------|---------------------|---------------------|
| Cote d'Ivoire                    | 128 (101 to 161)    | 296 (235 to 373)    | 4.2% (3.4 to 5.3)    | 28.8% (21.1 to 37.5) | 33.4% (23.9 to 43.3) | 14.7% (9.8 to 22.8)  | 3.36% (2.74 to 4.01) | 1.45% (0.84 to 2.08) | 0.12% (-0.48 to 0.75)  | 37 (27 to 49)       | 92 (90 to 96)       | 196 (193 to 212)    |
| Croatia                          | 1570 (1407 to 1748) | 2855 (2559 to 3180) | 6.3% (5.6 to 7.0)    | 80.0% (76.2 to 83.4) | 13.2% (10.7 to 15.6) | 0.0% (0.0 to 0.0)    | 0.70% (0.48 to 0.92) | 1.50% (1.27 to 1.71) | 0.44% (0.22 to 0.65)   | 1257 (1103 to 1430) | 805 (771 to 886)    | 805 (771 to 886)    |
| Cuba                             | 1925 (1687 to 2180) | 4215 (3693 to 4774) | 19.5% (17.1 to 22.0) | 82.9% (77.1 to 87.7) | 9.8% (6.4 to 13.4)   | 0.2% (0.1 to 0.3)    | 0.97% (0.55 to 1.35) | 1.58% (1.16 to 1.97) | 0.78% (0.36 to 1.16)   | 1596 (1395 to 1819) | 0 (0 to 0)          | 0 (0 to 0)          |
| Cyprus                           | 1744 (1573 to 1935) | 2436 (2196 to 2702) | 4.6% (4.2 to 5.1)    | 49.6% (44.7 to 54.7) | 37.2% (32.8 to 42.0) | 0.0% (0.0 to 0.0)    | 1.16% (0.87 to 1.45) | 0.96% (0.68 to 1.25) | 0.49% (0.20 to 0.78)   | 867 (737 to 1015)   | 1719 (1687 to 1889) | 2033 (1997 to 2241) |
| Czech Republic                   | 2848 (2506 to 3188) | 4719 (4153 to 5282) | 6.8% (6.0 to 7.6)    | 79.7% (75.6 to 83.4) | 16.9% (13.5 to 20.9) | 0.0% (0.0 to 0.0)    | 1.51% (1.18 to 1.83) | 1.78% (1.46 to 2.11) | 0.49% (0.17 to 0.81)   | 2271 (1953 to 2604) | 437 (371 to 612)    | 970 (904 to 1117)   |
| Democratic Republic of the Congo | 33 (26 to 44)       | 52 (40 to 68)       | 5.0% (3.9 to 6.6)    | 17.6% (11.7 to 24.1) | 33.2% (21.6 to 44.4) | 40.8% (30.4 to 55.5) | 3.78% (2.90 to 4.78) | 1.49% (0.63 to 2.46) | 0.54% (-0.31 to 1.50)  | 6 (4 to 8)          | 12 (11 to 12)       | 45 (44 to 50)       |
| Denmark                          | 8846 (7697 to 9960) | 7482 (6511 to 8425) | 9.2% (8.0 to 10.4)   | 84.0% (80.8 to 86.7) | 13.5% (11.1 to 16.7) | 0.0% (0.0 to 0.0)    | 1.26% (0.83 to 1.63) | 1.07% (0.65 to 1.44) | 0.23% (-0.19 to 0.60)  | 7434 (6337 to 8501) | 1080 (808 to 1726)  | 1080 (808 to 1726)  |
| Djibouti                         | 87 (70 to 108)      | 162 (131 to 201)    | 3.4% (2.7 to 4.2)    | 54.7% (44.5 to 64.3) | 21.9% (14.6 to 30.2) | 22.1% (15.2 to 32.6) | 2.69% (2.17 to 3.24) | 1.22% (0.71 to 1.77) | 0.31% (-0.20 to 0.84)  | 48 (35 to 64)       | 145 (142 to 152)    | 151 (148 to 159)    |
| Dominica                         | 697 (600 to 801)    | 1017 (874 to 1168)  | 6.9% (6.0 to 8.0)    | 71.8% (66.4 to 77.0) | 24.4% (19.5 to 29.4) | 2.4% (1.6 to 4.0)    | 1.55% (1.05 to 2.09) | 1.54% (1.03 to 2.08) | 0.69% (0.19 to 1.23)   | 501 (408 to 600)    | 265 (241 to 318)    | 274 (250 to 327)    |
| Dominican Republic               | 1193 (1033 to 1376) | 2825 (2446 to 3257) | 6.9% (6.0 to 8.0)    | 56.9% (50.0 to 63.4) | 33.4% (27.8 to 39.5) | 0.4% (0.0 to 1.1)    | 3.62% (3.32 to 3.90) | 3.06% (2.75 to 3.34) | 0.88% (0.58 to 1.15)   | 679 (550 to 827)    | 134 (86 to 220)     | 647 (617 to 708)    |
| Ecuador                          | 917 (798 to 1066)   | 1737 (1511 to 2020) | 11.2% (9.8 to 13.0)  | 55.5% (47.7 to 62.8) | 36.8% (29.6 to 45.3) | 0.2% (0.1 to 0.3)    | 2.39% (2.13 to 2.67) | 1.64% (1.39 to 1.93) | 0.80% (0.55 to 1.08)   | 508 (424 to 607)    | 51 (20 to 105)      | 122 (99 to 173)     |
| Egypt                            | 218 (181 to 263)    | 1010 (836 to 1216)  | 4.2% (3.4 to 5.0)    | 36.9% (28.7 to 46.0) | 53.3% (43.7 to 62.6) | 0.8% (0.5 to 1.4)    | 2.46% (1.74 to 3.21) | 1.67% (0.96 to 2.41) | 0.33% (-0.37 to 1.06)  | 80 (61 to 104)      | 198 (194 to 209)    | 324 (319 to 350)    |
| El Salvador                      | 558 (486 to 633)    | 1169 (1018 to 1327) | 8.9% (7.7 to 10.1)   | 71.6% (65.0 to 76.9) | 18.4% (14.1 to 23.8) | 3.6% (2.5 to 5.9)    | 1.63% (1.35 to 1.89) | 1.69% (1.41 to 1.94) | 0.63% (0.35 to 0.88)   | 399 (340 to 468)    | 0 (0 to 0)          | 335 (285 to 392)    |
| Equatorial Guinea                | 655 (523 to 824)    | 1686 (1347 to 2120) | 2.4% (1.9 to 3.0)    | 14.9% (10.8 to 19.9) | 81.2% (75.3 to 86.2) | 0.7% (0.0 to 2.9)    | 4.81% (4.08 to 5.55) | 2.48% (1.77 to 3.20) | 1.23% (0.53 to 1.94)   | 97 (74 to 122)      | 1577 (1511 to 1757) | 2016 (1927 to 2250) |
| Eritrea                          | 51 (41 to 63)       | 77 (63 to 96)       | 4.6% (3.8 to 5.7)    | 22.2% (15.6 to 29.8) | 54.1% (42.8 to 64.6) | 21.6% (15.1 to 32.2) | 2.69% (1.71 to 3.70) | 1.33% (0.37 to 2.33) | -0.00% (-0.95 to 0.99) | 11 (8 to 15)        | 55 (54 to 59)       | 73 (72 to 80)       |

|                                |                        |                        |                         |                            |                         |                     |                         |                         |                         |                     |                     |                     |
|--------------------------------|------------------------|------------------------|-------------------------|----------------------------|-------------------------|---------------------|-------------------------|-------------------------|-------------------------|---------------------|---------------------|---------------------|
| Estonia                        | 2975<br>(2694 to 3280) | 4384<br>(3969 to 4834) | 7.8%<br>(7.1 to 8.6)    | 71.8% (66.8 to 76.4)       | 26.5%<br>(21.9 to 31.5) | 0.0% (0.0 to 0.0)   | 1.56%<br>(1.34 to 1.78) | 2.20%<br>(1.99 to 2.43) | 0.72%<br>(0.50 to 0.94) | 2134 (1903 to 2379) | 521 (472 to 618)    | 791 (741 to 907)    |
| Ethiopia                       | 66 (53 to 84)          | 178 (142 to 225)       | 5.3%<br>(4.2 to 6.6)    | 31.0% (22.5 to 40.1)       | 34.2%<br>(24.7 to 44.4) | 12.8% (8.2 to 20.1) | 4.08%<br>(3.22 to 4.90) | 2.13%<br>(1.27 to 2.93) | -0.09% (-0.92 to 0.69)  | 20 (15 to 27)       | 24 (23 to 27)       | 77 (76 to 82)       |
| Federated States of Micronesia | 223 (180 to 271)       | 247 (199 to 300)       | 4.6%<br>(3.7 to 5.5)    | 84.9% (78.9 to 88.9)       | 6.5%<br>(4.4 to 9.3)    | 8.5% (5.7 to 13.8)  | 2.54%<br>(1.69 to 3.36) | 1.62%<br>(0.78 to 2.44) | 0.47% (-0.36 to 1.28)   | 189 (149 to 237)    | 313 (304 to 329)    | 313 (304 to 329)    |
| Fiji                           | 386 (324 to 462)       | 675 (567 to 808)       | 4.7%<br>(4.0 to 5.7)    | 61.7% (52.7 to 69.6)       | 21.0%<br>(14.8 to 28.6) | 4.2% (2.8 to 6.8)   | 1.79%<br>(1.64 to 1.95) | 1.81%<br>(1.66 to 1.97) | 0.71%<br>(0.57 to 0.88) | 238 (192 to 295)    | 226 (215 to 248)    | 392 (381 to 412)    |
| Finland                        | 7410<br>(6781 to 8067) | 6740<br>(6168 to 7338) | 9.7%<br>(8.9 to 10.5)   | 76.8% (73.1 to 80.5)       | 20.5%<br>(16.9 to 24.4) | 0.0% (0.0 to 0.0)   | 1.38%<br>(1.17 to 1.58) | 1.38%<br>(1.17 to 1.58) | 0.47%<br>(0.26 to 0.67) | 5690 (5175 to 6279) | 1517 (1396 to 1813) | 1517 (1396 to 1813) |
| France                         | 7154<br>(6558 to 7776) | 7446<br>(6826 to 8094) | 11.6%<br>(10.6 to 12.6) | 78.2% (75.3 to 81.1)       | 10.8%<br>(8.8 to 13.2)  | 0.0% (0.0 to 0.0)   | 1.18%<br>(0.93 to 1.45) | 1.06%<br>(0.80 to 1.32) | 0.49%<br>(0.24 to 0.76) | 5596 (5061 to 6190) | 424 (304 to 645)    | 424 (304 to 645)    |
| Gabon                          | 359 (283 to 431)       | 828 (654 to 996)       | 2.6%<br>(2.1 to 3.2)    | 55.1% (45.7 to 67.5)       | 18.9%<br>(13.2 to 26.4) | 13.3% (0.0 to 23.2) | 1.71%<br>(1.09 to 2.17) | 0.63%<br>(0.01 to 1.09) | 0.40% (-0.22 to 0.85)   | 197 (157 to 242)    | 266 (258 to 281)    | 853 (835 to 937)    |
| Georgia                        | 707 (589 to 850)       | 1885<br>(1571 to 2265) | 7.1%<br>(5.9 to 8.5)    | 39.0% (31.1 to 46.9)       | 52.5%<br>(43.4 to 61.4) | 2.5% (1.6 to 4.1)   | 1.81%<br>(1.26 to 2.37) | 2.33%<br>(1.77 to 2.89) | 0.45% (-0.10 to 1.00)   | 275 (219 to 341)    | 304 (291 to 329)    | 498 (486 to 527)    |
| Germany                        | 7606<br>(6916 to 8317) | 8120<br>(7384 to 8880) | 10.8%<br>(9.8 to 11.8)  | 85.6% (83.6 to 87.5)       | 11.0%<br>(9.7 to 12.5)  | 0.0% (0.0 to 0.0)   | 0.75%<br>(0.46 to 1.05) | 1.05%<br>(0.76 to 1.36) | 0.34%<br>(0.05 to 0.65) | 6512 (5819 to 7214) | 0 (0 to 0)          | 391 (350 to 433)    |
| Ghana                          | 186 (154 to 228)       | 524 (433 to 640)       | 4.0%<br>(3.3 to 4.9)    | 50.6% (41.6 to 59.9)       | 34.6%<br>(26.1 to 44.6) | 7.0% (4.7 to 11.3)  | 4.12%<br>(3.46 to 4.67) | 2.82%<br>(2.18 to 3.37) | 0.52% (-0.11 to 1.05)   | 94 (72 to 125)      | 150 (145 to 160)    | 264 (259 to 278)    |
| Greece                         | 1902<br>(1713 to 2134) | 2688<br>(2421 to 3016) | 7.3%<br>(6.6 to 8.2)    | 65.3% (60.8 to 70.0)       | 29.4%<br>(25.1 to 33.4) | 0.0% (0.0 to 0.0)   | -0.13% (-0.42 to 0.17)  | 0.33%<br>(0.04 to 0.63) | 0.44%<br>(0.14 to 0.73) | 1243 (1074 to 1460) | 1166 (1128 to 1243) | 1166 (1128 to 1243) |
| Greenland                      | 8047<br>(7244 to 8938) | 6348<br>(5715 to 7052) | 9.6%<br>(8.6 to 10.6)   | 100.0%<br>(100.0 to 100.0) | 0.0%<br>(0.0 to 0.0)    | 0.0% (0.0 to 0.0)   | 1.59%<br>(1.45 to 1.73) | 1.72%<br>(1.58 to 1.86) | 0.52%<br>(0.38 to 0.65) | 8045 (7244 to 8936) | 0 (0 to 0)          | 1264 (1138 to 1403) |
| Grenada                        | 921 (778 to 1076)      | 1371<br>(1158 to 1603) | 6.3%<br>(5.3 to 7.4)    | 41.7% (34.4 to 49.3)       | 53.2%<br>(45.3 to 60.7) | 5.1% (0.0 to 8.9)   | 1.52%<br>(1.02 to 2.01) | 1.81%<br>(1.31 to 2.30) | 0.66%<br>(0.17 to 1.15) | 383 (312 to 461)    | 191 (174 to 231)    | 739 (723 to 798)    |
| Guam                           | 2990<br>(2271 to 3838) | 2990<br>(2271 to 3838) | 6.7%<br>(5.1 to 8.6)    | 86.8% (80.4 to 91.6)       | 9.2%<br>(5.9 to 14.5)   | 0.0% (0.0 to 0.0)   | 1.83%<br>(1.74 to 1.94) | 1.19%<br>(1.11 to 1.30) | 0.58%<br>(0.49 to 0.68) | 2600 (1897 to 3442) | 280 (0 to 806)      | 861 (596 to 1352)   |
| Guatemala                      | 421 (361 to 483)       | 770 (660 to 883)       | 7.4%<br>(6.4 to 8.5)    | 43.1% (35.8 to 49.9)       | 46.8%<br>(39.6 to 54.0) | 1.5% (1.0 to 2.5)   | 2.56%<br>(1.96 to 3.13) | 1.43%<br>(0.84 to 1.99) | 0.27% (-0.31 to 0.83)   | 181 (143 to 223)    | 0 (0 to 0)          | 425 (335 to 523)    |

|               |                       |                       |                      |                      |                      |                      |                       |                      |                       |                     |                     |                     |
|---------------|-----------------------|-----------------------|----------------------|----------------------|----------------------|----------------------|-----------------------|----------------------|-----------------------|---------------------|---------------------|---------------------|
| Guinea        | 78 (60 to 100)        | 208 (161 to 268)      | 5.5% (4.2 to 7.1)    | 14.8% (10.2 to 20.8) | 55.0% (42.5 to 65.9) | 16.9% (11.2 to 26.7) | 3.55% (2.32 to 4.83)  | 1.85% (0.64 to 3.10) | 0.02% (-1.17 to 1.25) | 11 (8 to 15)        | 41 (40 to 44)       | 98 (95 to 108)      |
| Guinea-Bissau | 75 (61 to 93)         | 168 (138 to 208)      | 6.2% (5.0 to 7.6)    | 41.6% (31.3 to 51.7) | 31.5% (23.4 to 41.1) | 26.9% (19.3 to 39.7) | 2.99% (2.24 to 3.80)  | 1.45% (0.70 to 2.24) | 0.25% (-0.49 to 1.03) | 31 (23 to 41)       | 13 (8 to 19)        | 63 (61 to 66)       |
| Guyana        | 494 (413 to 588)      | 896 (749 to 1067)     | 6.1% (5.1 to 7.3)    | 55.1% (46.5 to 64.0) | 40.1% (30.9 to 49.0) | 4.8% (3.3 to 7.7)    | 2.60% (1.98 to 3.21)  | 2.48% (1.87 to 3.10) | 0.81% (0.21 to 1.42)  | 272 (216 to 340)    | 163 (147 to 196)    | 350 (339 to 373)    |
| Haiti         | 66 (52 to 91)         | 159 (126 to 219)      | 6.5% (5.2 to 9.0)    | 15.0% (10.1 to 20.2) | 28.7% (18.9 to 39.1) | 51.7% (41.2 to 64.4) | 2.22% (1.47 to 3.27)  | 1.35% (0.61 to 2.39) | 0.91% (0.18 to 1.95)  | 10 (7 to 13)        | 26 (26 to 27)       | 68 (67 to 75)       |
| Honduras      | 336 (277 to 401)      | 699 (576 to 835)      | 8.2% (6.7 to 9.7)    | 50.7% (42.1 to 60.4) | 40.3% (31.4 to 48.5) | 1.7% (1.1 to 2.7)    | 2.77% (2.08 to 3.43)  | 1.64% (0.96 to 2.29) | 0.43% (-0.25 to 1.07) | 171 (130 to 230)    | 30 (0 to 59)        | 147 (129 to 170)    |
| Hungary       | 2054 (1854 to 2273)   | 4259 (3843 to 4713)   | 7.0% (6.4 to 7.8)    | 66.7% (61.7 to 71.2) | 28.5% (23.9 to 33.7) | 0.0% (0.0 to 0.0)    | 1.26% (1.02 to 1.52)  | 1.87% (1.63 to 2.13) | 0.49% (0.25 to 0.75)  | 1370 (1213 to 1539) | 1128 (1088 to 1266) | 1128 (1088 to 1266) |
| Iceland       | 10390 (9576 to 11233) | 7161 (6600 to 7742)   | 11.8% (10.9 to 12.7) | 82.7% (79.5 to 85.4) | 15.6% (12.9 to 18.7) | 0.0% (0.0 to 0.0)    | 1.94% (1.76 to 2.13)  | 1.58% (1.40 to 1.76) | 0.45% (0.27 to 0.63)  | 8590 (7861 to 9366) | 0 (0 to 0)          | 547 (501 to 597)    |
| India         | 210 (163 to 262)      | 802 (624 to 1001)     | 3.3% (2.6 to 4.2)    | 33.3% (24.5 to 43.6) | 55.0% (43.3 to 65.9) | 0.6% (0.4 to 1.0)    | 3.68% (2.81 to 4.63)  | 3.47% (2.60 to 4.42) | 0.38% (-0.46 to 1.30) | 70 (51 to 92)       | 262 (258 to 280)    | 414 (407 to 451)    |
| Indonesia     | 292 (239 to 360)      | 977 (800 to 1203)     | 2.7% (2.2 to 3.4)    | 44.3% (34.7 to 54.4) | 34.5% (26.0 to 43.9) | 0.6% (0.4 to 1.1)    | 3.17% (2.49 to 3.85)  | 2.75% (2.07 to 3.42) | 0.50% (-0.16 to 1.16) | 129 (97 to 165)     | 213 (206 to 226)    | 698 (685 to 764)    |
| Iran          | 605 (516 to 701)      | 2459 (2097 to 2846)   | 5.8% (5.0 to 6.8)    | 49.0% (41.0 to 56.5) | 38.9% (31.3 to 47.2) | 0.0% (0.0 to 0.0)    | 1.58% (1.33 to 1.86)  | 1.13% (0.88 to 1.41) | 0.72% (0.47 to 1.01)  | 296 (244 to 353)    | 50 (33 to 83)       | 502 (489 to 543)    |
| Iraq          | 244 (201 to 294)      | 784 (648 to 945)      | 2.1% (1.7 to 2.5)    | 24.7% (18.3 to 31.6) | 74.9% (68.1 to 81.4) | 0.3% (0.2 to 0.5)    | 3.13% (2.05 to 4.23)  | 1.44% (0.38 to 2.51) | 0.18% (-0.87 to 1.24) | 60 (45 to 78)       | 621 (600 to 687)    | 832 (800 to 924)    |
| Ireland       | 9839 (9037 to 10659)  | 10027 (9210 to 10863) | 6.1% (5.6 to 6.6)    | 66.9% (63.4 to 70.2) | 13.9% (11.9 to 16.9) | 0.0% (0.0 to 0.0)    | 2.34% (2.18 to 2.51)  | 1.87% (1.71 to 2.04) | 0.04% (-0.12 to 0.20) | 6587 (5866 to 7314) | 0 (0 to 0)          | 6873 (6121 to 7632) |
| Israel        | 4295 (3948 to 4671)   | 4046 (3718 to 4399)   | 7.3% (6.7 to 8.0)    | 63.4% (59.6 to 67.2) | 22.0% (18.4 to 26.0) | 0.0% (0.0 to 0.0)    | 2.52% (2.30 to 2.75)  | 1.24% (1.03 to 1.47) | 0.20% (-0.02 to 0.42) | 2724 (2455 to 3026) | 956 (897 to 1111)   | 1790 (1727 to 2047) |
| Italy         | 3598 (3269 to 3964)   | 4072 (3700 to 4487)   | 8.6% (7.8 to 9.5)    | 73.9% (69.2 to 77.7) | 23.5% (19.6 to 28.1) | 0.0% (0.0 to 0.0)    | 0.01% (-0.27 to 0.29) | 0.46% (0.18 to 0.75) | 0.48% (0.20 to 0.76)  | 2658 (2382 to 2961) | 869 (804 to 1019)   | 869 (804 to 1019)   |
| Jamaica       | 442 (378 to 513)      | 802 (685 to 931)      | 7.2% (6.2 to 8.4)    | 61.8% (53.8 to 68.7) | 15.6% (11.9 to 20.1) | 6.0% (4.1 to 9.7)    | 0.36% (0.02 to 0.67)  | 0.95% (0.61 to 1.26) | 0.80% (0.46 to 1.11)  | 273 (221 to 330)    | 24 (3 to 60)        | 199 (187 to 226)    |

|            |                        |                        |                         |                      |                         |                      |                         |                         |                         |                     |                     |                     |
|------------|------------------------|------------------------|-------------------------|----------------------|-------------------------|----------------------|-------------------------|-------------------------|-------------------------|---------------------|---------------------|---------------------|
| Japan      | 6525<br>(5889 to 7183) | 7293<br>(6582 to 8029) | 8.3%<br>(7.5 to 9.2)    | 83.5% (80.7 to 86.0) | 13.3%<br>(10.9 to 16.0) | 0.0% (0.0 to 0.0)    | 0.53%<br>(0.26 to 0.79) | 1.30%<br>(1.03 to 1.56) | 0.42%<br>(0.15 to 0.68) | 5448 (4831 to 6052) | 1 (0 to 4)          | 1007 (910 to 1118)  |
| Jordan     | 338 (276 to 401)       | 766 (627 to 910)       | 6.5%<br>(5.3 to 7.7)    | 68.0% (59.9 to 74.5) | 19.7%<br>(15.0 to 25.5) | 5.7% (3.2 to 10.4)   | 2.01%<br>(1.52 to 2.43) | 1.11%<br>(0.62 to 1.53) | 0.54%<br>(0.06 to 0.96) | 230 (175 to 287)    | 18 (0 to 58)        | 176 (160 to 207)    |
| Kazakhstan | 688 (570 to 806)       | 2021<br>(1674 to 2369) | 3.0%<br>(2.5 to 3.6)    | 64.4% (56.4 to 73.0) | 30.7%<br>(22.8 to 39.0) | 0.1% (0.0 to 0.7)    | 2.72%<br>(2.19 to 3.27) | 2.28%<br>(1.75 to 2.82) | 0.94%<br>(0.41 to 1.47) | 443 (345 to 541)    | 568 (547 to 613)    | 1305 (1280 to 1423) |
| Kenya      | 149 (118 to 186)       | 304 (242 to 382)       | 7.6%<br>(6.0 to 9.5)    | 42.4% (31.9 to 53.8) | 21.2%<br>(14.0 to 30.0) | 19.7% (12.2 to 30.9) | 3.33%<br>(2.74 to 3.97) | 1.72%<br>(1.15 to 2.35) | 0.52% (-0.05 to 1.14)   | 63 (46 to 83)       | 34 (26 to 46)       | 88 (84 to 97)       |
| Kiribati   | 260 (219 to 315)       | 306 (257 to 370)       | 10.3%<br>(8.7 to 12.4)  | 56.0% (46.0 to 64.1) | 13.7%<br>(8.9 to 19.7)  | 25.8% (19.0 to 37.6) | 2.32%<br>(1.71 to 3.00) | 0.96%<br>(0.36 to 1.63) | 0.53% (-0.06 to 1.20)   | 146 (116 to 180)    | 282 (276 to 299)    | 282 (276 to 299)    |
| Kuwait     | 1653<br>(1246 to 2153) | 3824<br>(2883 to 4979) | 4.7%<br>(3.6 to 6.1)    | 85.8% (80.4 to 90.3) | 12.9%<br>(8.7 to 18.0)  | 0.0% (0.0 to 0.0)    | 1.81%<br>(1.03 to 2.56) | 0.94%<br>(0.17 to 1.68) | 1.69%<br>(0.91 to 2.43) | 1424 (1007 to 1921) | 1378 (1222 to 1647) | 1378 (1222 to 1647) |
| Kyrgyzstan | 157 (122 to 195)       | 519 (404 to 646)       | 8.3%<br>(6.4 to 10.3)   | 41.6% (31.0 to 53.3) | 49.0%<br>(36.3 to 60.8) | 9.3% (6.1 to 14.7)   | 2.68%<br>(1.98 to 3.41) | 1.90%<br>(1.21 to 2.62) | 1.09%<br>(0.40 to 1.80) | 65 (48 to 86)       | 73 (68 to 83)       | 81 (77 to 91)       |
| Laos       | 166 (134 to 203)       | 503 (406 to 616)       | 2.7%<br>(2.2 to 3.3)    | 45.9% (35.1 to 55.6) | 43.5%<br>(33.2 to 54.9) | 6.7% (4.3 to 11.1)   | 4.24%<br>(3.26 to 5.19) | 3.37%<br>(2.39 to 4.31) | 0.27% (-0.68 to 1.18)   | 76 (55 to 102)      | 184 (180 to 191)    | 400 (394 to 433)    |
| Latvia     | 2077<br>(1859 to 2351) | 3412<br>(3054 to 3863) | 6.2%<br>(5.6 to 7.0)    | 53.1% (46.9 to 58.7) | 45.8%<br>(40.2 to 52.1) | 0.0% (0.0 to 0.0)    | 1.22%<br>(0.89 to 1.57) | 2.09%<br>(1.76 to 2.44) | 0.40%<br>(0.08 to 0.75) | 1101 (972 to 1230)  | 910 (879 to 1028)   | 1482 (1447 to 1670) |
| Lebanon    | 644 (567 to 737)       | 1129<br>(994 to 1293)  | 6.2%<br>(5.4 to 7.1)    | 54.2% (47.6 to 60.7) | 27.1%<br>(21.1 to 33.4) | 1.4% (1.0 to 2.2)    | 0.63%<br>(0.35 to 0.93) | 0.83%<br>(0.56 to 1.14) | 0.46%<br>(0.18 to 0.76) | 349 (295 to 406)    | 164 (151 to 191)    | 456 (444 to 497)    |
| Lesotho    | 290 (238 to 361)       | 768 (629 to 955)       | 8.2%<br>(6.7 to 10.2)   | 55.5% (44.9 to 64.6) | 12.7%<br>(8.4 to 17.7)  | 30.2% (21.9 to 42.6) | 2.78%<br>(2.34 to 3.43) | 2.25%<br>(1.81 to 2.90) | 0.19% (-0.24 to 0.82)   | 161 (126 to 203)    | 135 (126 to 155)    | 135 (126 to 155)    |
| Liberia    | 147 (113 to 199)       | 326 (249 to 440)       | 20.7%<br>(15.9 to 28.0) | 8.1% (5.3 to 11.6)   | 43.3%<br>(29.9 to 56.4) | 43.5% (31.1 to 57.9) | 3.55%<br>(2.73 to 4.59) | 2.15%<br>(1.34 to 3.17) | 1.36%<br>(0.56 to 2.38) | 12 (9 to 16)        | 33 (33 to 35)       | 43 (42 to 46)       |
| Libya      | 485 (387 to 604)       | 883 (705 to 1099)      | 3.2%<br>(2.6 to 4.0)    | 74.1% (65.3 to 81.8) | 18.1%<br>(12.3 to 24.6) | 0.2% (0.0 to 0.6)    | 2.97%<br>(2.50 to 3.43) | 2.05%<br>(1.58 to 2.51) | -0.03% (-0.49 to 0.42)  | 360 (267 to 479)    | 1191 (1168 to 1263) | 1191 (1168 to 1263) |
| Lithuania  | 2527<br>(2246 to 2843) | 4608<br>(4096 to 5184) | 7.1%<br>(6.3 to 7.9)    | 61.4% (54.9 to 66.7) | 37.1%<br>(32.0 to 43.7) | 0.0% (0.0 to 0.0)    | 1.64%<br>(1.26 to 2.04) | 2.36%<br>(1.98 to 2.77) | 0.66%<br>(0.28 to 1.05) | 1550 (1358 to 1765) | 537 (498 to 619)    | 1212 (1170 to 1337) |
| Luxembourg | 8718<br>(7754 to 9667) | 8284<br>(7368 to 9186) | 6.2%<br>(5.5 to 6.9)    | 84.0% (81.7 to 86.3) | 9.3%<br>(7.7 to 11.0)   | 0.0% (0.0 to 0.0)    | 1.39%<br>(1.04 to 1.73) | 0.65%<br>(0.30 to 0.98) | 0.54%<br>(0.20 to 0.88) | 7331 (6369 to 8286) | 2719 (2517 to 3157) | 3490 (3296 to 3922) |

|                  |                     |                      |                      |                      |                      |                      |                       |                      |                        |                     |                  |                     |
|------------------|---------------------|----------------------|----------------------|----------------------|----------------------|----------------------|-----------------------|----------------------|------------------------|---------------------|------------------|---------------------|
| Macedonia        | 516 (444 to 597)    | 1345 (1158 to 1555)  | 6.7% (5.7 to 7.7)    | 63.0% (55.3 to 70.0) | 34.7% (27.6 to 42.3) | 0.5% (0.4 to 0.9)    | 0.60% (0.40 to 0.80)  | 1.01% (0.81 to 1.21) | 0.46% (0.26 to 0.66)   | 325 (272 to 391)    | 78 (60 to 109)   | 273 (262 to 295)    |
| Madagascar       | 36 (30 to 44)       | 128 (104 to 156)     | 4.7% (3.9 to 5.8)    | 58.6% (48.8 to 68.5) | 23.2% (15.8 to 31.4) | 9.9% (6.7 to 15.7)   | 3.68% (3.09 to 4.24)  | 1.35% (0.78 to 1.90) | 0.42% (-0.15 to 0.97)  | 21 (16 to 28)       | 4 (1 to 8)       | 38 (37 to 40)       |
| Malawi           | 60 (48 to 82)       | 217 (174 to 297)     | 6.6% (5.3 to 9.1)    | 28.6% (19.3 to 37.3) | 9.8% (6.1 to 14.1)   | 54.3% (44.1 to 67.9) | 3.02% (2.41 to 3.98)  | 1.03% (0.43 to 1.98) | -0.26% (-0.85 to 0.68) | 17 (13 to 22)       | 28 (27 to 30)    | 53 (52 to 56)       |
| Malaysia         | 968 (818 to 1146)   | 2732 (2311 to 3237)  | 3.7% (3.1 to 4.4)    | 53.5% (45.3 to 61.4) | 34.6% (26.9 to 43.4) | 0.0% (0.0 to 0.0)    | 3.61% (3.28 to 3.97)  | 2.54% (2.22 to 2.90) | 0.66% (0.35 to 1.01)   | 517 (416 to 629)    | 441 (416 to 492) | 1512 (1484 to 1648) |
| Maldives         | 1882 (1688 to 2116) | 2972 (2666 to 3342)  | 10.9% (9.8 to 12.3)  | 71.3% (66.0 to 76.1) | 18.1% (14.1 to 22.9) | 0.0% (0.0 to 0.0)    | 2.88% (2.67 to 3.10)  | 2.06% (1.85 to 2.27) | 0.45% (0.24 to 0.66)   | 1341 (1184 to 1524) | 0 (0 to 0)       | 207 (183 to 236)    |
| Mali             | 54 (44 to 68)       | 140 (113 to 176)     | 2.6% (2.1 to 3.2)    | 37.9% (28.8 to 47.9) | 42.0% (31.0 to 52.3) | 18.0% (12.1 to 27.8) | 4.15% (3.42 to 4.91)  | 1.56% (0.85 to 2.30) | -0.53% (-1.22 to 0.20) | 21 (15 to 28)       | 69 (68 to 73)    | 144 (140 to 157)    |
| Malta            | 6377 (5767 to 7083) | 9200 (8319 to 10218) | 10.7% (9.7 to 11.9)  | 59.9% (54.2 to 65.2) | 37.9% (32.4 to 43.7) | 0.0% (0.0 to 0.0)    | 2.15% (1.83 to 2.46)  | 2.37% (2.04 to 2.68) | 0.58% (0.26 to 0.89)   | 3815 (3422 to 4213) | 130 (43 to 315)  | 782 (692 to 958)    |
| Marshall Islands | 1287 (1083 to 1507) | 1261 (1062 to 1477)  | 21.4% (18.0 to 25.1) | 81.0% (75.9 to 85.5) | 10.1% (7.0 to 13.8)  | 5.7% (3.9 to 8.9)    | 3.22% (2.77 to 3.63)  | 2.19% (1.74 to 2.59) | 0.91% (0.46 to 1.31)   | 1044 (844 to 1262)  | 0 (0 to 0)       | 0 (0 to 0)          |
| Mauritania       | 86 (69 to 106)      | 296 (238 to 363)     | 3.5% (2.8 to 4.3)    | 38.2% (28.6 to 48.0) | 46.6% (36.4 to 57.4) | 10.3% (6.9 to 16.7)  | 3.18% (2.44 to 3.89)  | 1.23% (0.51 to 1.93) | 0.19% (-0.52 to 0.89)  | 33 (25 to 44)       | 86 (85 to 90)    | 156 (154 to 169)    |
| Mauritius        | 1565 (1332 to 1830) | 3476 (2958 to 4065)  | 6.7% (5.7 to 7.8)    | 46.5% (38.8 to 53.7) | 47.6% (40.3 to 56.2) | 0.1% (0.0 to 0.5)    | 2.65% (2.17 to 3.17)  | 2.95% (2.46 to 3.46) | 1.00% (0.53 to 1.51)   | 726 (595 to 880)    | 444 (411 to 512) | 1088 (1057 to 1159) |
| Mexico           | 733 (641 to 858)    | 1600 (1398 to 1872)  | 4.8% (4.2 to 5.6)    | 57.6% (51.2 to 64.6) | 34.0% (28.0 to 39.4) | 0.2% (0.0 to 0.3)    | 1.85% (1.47 to 2.25)  | 1.17% (0.79 to 1.57) | 0.50% (0.13 to 0.90)   | 423 (345 to 534)    | 282 (251 to 323) | 749 (732 to 782)    |
| Moldova          | 333 (285 to 392)    | 813 (695 to 958)     | 9.3% (8.0 to 11.0)   | 52.4% (44.4 to 60.9) | 40.9% (32.6 to 49.3) | 5.4% (3.7 to 8.7)    | 0.62% (-0.05 to 1.29) | 1.38% (0.70 to 2.05) | 0.40% (-0.27 to 1.07)  | 175 (137 to 222)    | 55 (38 to 80)    | 101 (88 to 124)     |
| Mongolia         | 360 (283 to 453)    | 1216 (957 to 1531)   | 3.4% (2.7 to 4.3)    | 46.1% (34.9 to 57.4) | 36.5% (25.9 to 49.0) | 14.0% (8.6 to 22.3)  | 3.37% (2.65 to 4.10)  | 2.71% (1.99 to 3.44) | 0.78% (0.08 to 1.50)   | 165 (125 to 222)    | 321 (313 to 336) | 645 (634 to 688)    |
| Montenegro       | 1222 (1071 to 1394) | 2686 (2354 to 3066)  | 8.5% (7.4 to 9.7)    | 79.8% (74.3 to 84.3) | 19.8% (15.3 to 25.1) | 0.1% (0.0 to 0.1)    | 1.78% (1.45 to 2.13)  | 2.02% (1.70 to 2.37) | 0.68% (0.35 to 1.02)   | 975 (828 to 1133)   | 252 (217 to 334) | 252 (217 to 334)    |
| Morocco          | 350 (294 to 425)    | 947 (795 to 1150)    | 5.5% (4.6 to 6.7)    | 52.1% (43.0 to 60.7) | 40.8% (32.1 to 49.9) | 2.5% (1.5 to 4.3)    | 2.55% (1.83 to 3.36)  | 1.90% (1.18 to 2.71) | 0.47% (-0.24 to 1.27)  | 182 (140 to 238)    | 150 (135 to 175) | 305 (296 to 322)    |

|                          |                       |                      |                      |                      |                      |                      |                       |                        |                        |                      |                     |                     |
|--------------------------|-----------------------|----------------------|----------------------|----------------------|----------------------|----------------------|-----------------------|------------------------|------------------------|----------------------|---------------------|---------------------|
| Mozambique               | 51 (40 to 71)         | 144 (113 to 201)     | 3.7% (2.9 to 5.2)    | 28.7% (18.6 to 37.8) | 6.8% (4.2 to 10.1)   | 62.0% (51.9 to 74.4) | 2.73% (1.98 to 3.82)  | 1.21% (0.47 to 2.28)   | -0.79% (-1.52 to 0.26) | 14 (11 to 19)        | 66 (65 to 72)       | 90 (88 to 98)       |
| Myanmar                  | 221 (170 to 292)      | 1119 (863 to 1479)   | 3.6% (2.8 to 4.8)    | 24.4% (16.9 to 32.8) | 72.2% (63.5 to 80.8) | 3.3% (2.0 to 5.7)    | 4.47% (3.42 to 5.58)  | 3.90% (2.86 to 5.01)   | 0.31% (-0.70 to 1.38)  | 53 (39 to 72)        | 187 (184 to 198)    | 414 (403 to 453)    |
| Namibia                  | 846 (738 to 962)      | 1848 (1612 to 2102)  | 9.4% (8.2 to 10.7)   | 57.2% (50.6 to 64.0) | 8.6% (5.6 to 12.5)   | 8.6% (6.1 to 13.6)   | 2.85% (2.66 to 3.08)  | 1.57% (1.37 to 1.79)   | 0.84% (0.65 to 1.06)   | 484 (406 to 565)     | 172 (154 to 215)    | 209 (191 to 250)    |
| Nepal                    | 106 (84 to 134)       | 340 (268 to 429)     | 6.2% (4.9 to 7.8)    | 26.9% (19.4 to 35.1) | 51.7% (40.4 to 61.7) | 5.7% (3.7 to 9.5)    | 2.51% (1.34 to 3.69)  | 2.17% (1.00 to 3.34)   | 0.27% (-0.88 to 1.42)  | 28 (21 to 37)        | 61 (59 to 63)       | 104 (103 to 112)    |
| Netherlands              | 8805 (7935 to 9710)   | 9258 (8343 to 10210) | 10.1% (9.1 to 11.2)  | 80.2% (76.7 to 83.5) | 11.4% (9.0 to 14.0)  | 0.0% (0.0 to 0.0)    | 1.36% (1.04 to 1.66)  | 1.43% (1.11 to 1.74)   | 0.47% (0.15 to 0.77)   | 7068 (6276 to 7912)  | 1 (0 to 0)          | 300 (268 to 335)    |
| New Zealand              | 6467 (5906 to 7065)   | 6053 (5528 to 6613)  | 10.9% (9.9 to 11.9)  | 77.8% (74.5 to 80.9) | 14.1% (11.4 to 17.1) | 0.0% (0.0 to 0.0)    | 1.90% (1.62 to 2.17)  | 1.24% (0.97 to 1.52)   | 0.53% (0.26 to 0.80)   | 5031 (4524 to 5583)  | 0 (0 to 0)          | 1906 (1714 to 2115) |
| Nicaragua                | 356 (295 to 425)      | 969 (804 to 1156)    | 11.4% (9.5 to 13.6)  | 61.4% (52.0 to 70.5) | 29.1% (20.6 to 38.3) | 7.4% (5.0 to 11.8)   | 2.63% (2.39 to 2.89)  | 1.92% (1.69 to 2.18)   | 1.09% (0.86 to 1.35)   | 219 (170 to 274)     | 0 (0 to 0)          | 133 (103 to 167)    |
| Niger                    | 38 (30 to 48)         | 94 (74 to 118)       | 5.2% (4.1 to 6.5)    | 30.0% (21.6 to 39.0) | 53.9% (43.8 to 64.8) | 8.8% (5.9 to 14.2)   | 4.49% (3.23 to 5.70)  | 0.97% (-0.25 to 2.14)  | -0.12% (-1.32 to 1.04) | 11 (8 to 15)         | 30 (29 to 31)       | 45 (44 to 48)       |
| Nigeria                  | 101 (80 to 125)       | 283 (224 to 351)     | 2.6% (2.1 to 3.2)    | 21.6% (15.2 to 28.8) | 68.5% (60.2 to 76.6) | 7.7% (4.8 to 12.9)   | 3.52% (2.45 to 4.51)  | 1.00% (-0.04 to 1.97)  | 0.14% (-0.90 to 1.09)  | 22 (16 to 28)        | 71 (69 to 75)       | 276 (266 to 306)    |
| North Korea              | 92 (73 to 113)        | 61 (48 to 75)        | 7.2% (5.8 to 8.9)    | 68.1% (57.9 to 77.0) | 28.4% (19.6 to 38.3) | 2.5% (1.6 to 4.2)    | 0.66% (-0.30 to 1.68) | 0.94% (-0.02 to 1.97)  | 0.64% (-0.32 to 1.66)  | 62 (46 to 82)        | 4 (0 to 16)         | 37 (32 to 47)       |
| Northern Mariana Islands | 415 (317 to 531)      | 415 (317 to 531)     | 1.4% (1.1 to 1.8)    | 86.5% (80.0 to 90.8) | 12.1% (8.1 to 18.4)  | 0.0% (0.0 to 0.0)    | 2.27% (1.93 to 2.56)  | 1.42% (1.08 to 1.71)   | 0.44% (0.10 to 0.72)   | 359 (260 to 473)     | 1264 (1240 to 1348) | 1892 (1862 to 2053) |
| Norway                   | 10668 (9682 to 11626) | 9944 (9025 to 10837) | 8.1% (7.4 to 8.8)    | 85.0% (81.8 to 87.8) | 14.6% (11.8 to 17.6) | 0.0% (0.0 to 0.0)    | 1.37% (1.07 to 1.67)  | 0.76% (0.46 to 1.06)   | 0.42% (0.12 to 0.72)   | 9071 (8128 to 10020) | 1945 (1725 to 2397) | 1945 (1725 to 2397) |
| Oman                     | 619 (541 to 707)      | 1509 (1318 to 1722)  | 3.4% (2.9 to 3.8)    | 86.8% (82.4 to 90.3) | 7.2% (4.6 to 10.6)   | 0.0% (0.0 to 0.0)    | 1.26% (1.08 to 1.42)  | -0.03% (-0.21 to 0.12) | 0.48% (0.31 to 0.64)   | 537 (465 to 616)     | 720 (702 to 795)    | 881 (862 to 976)    |
| Pakistan                 | 76 (62 to 95)         | 265 (216 to 331)     | 2.8% (2.3 to 3.5)    | 32.8% (24.5 to 42.4) | 57.7% (46.9 to 67.2) | 6.2% (4.0 to 10.1)   | 2.88% (1.64 to 4.16)  | 1.78% (0.56 to 3.05)   | 0.16% (-1.05 to 1.41)  | 25 (18 to 32)        | 80 (79 to 86)       | 183 (179 to 201)    |
| Palestine                | 565 (481 to 672)      | 199 (169 to 237)     | 12.3% (10.5 to 14.7) | 41.6% (34.0 to 49.7) | 31.7% (25.5 to 38.9) | 4.4% (3.0 to 7.1)    | 3.23% (2.70 to 3.73)  | 1.61% (1.09 to 2.10)   | 0.35% (-0.16 to 0.84)  | 235 (184 to 301)     | 26 (0 to 63)        | 119 (101 to 151)    |

|                                     |                           |                           |                          |                         |                            |                         |                              |                            |                               |                        |                       |                        |
|-------------------------------------|---------------------------|---------------------------|--------------------------|-------------------------|----------------------------|-------------------------|------------------------------|----------------------------|-------------------------------|------------------------|-----------------------|------------------------|
| Panama                              | 2067<br>(1870 to<br>2283) | 3587<br>(3246 to<br>3963) | 9.6%<br>(8.7 to<br>10.7) | 69.9% (65.8<br>to 73.9) | 23.1%<br>(19.7 to<br>26.7) | 0.0% (0.0 to<br>0.0)    | 2.63%<br>(2.35 to<br>2.89)   | 1.86%<br>(1.59 to<br>2.12) | 0.51%<br>(0.24 to<br>0.77)    | 1445 (1263<br>to 1641) | 0 (0 to 0)            | 747 (653 to<br>849)    |
| Papua New Guinea                    | 84 (68 to<br>103)         | 104 (85<br>to 128)        | 1.8%<br>(1.5 to<br>2.2)  | 73.6% (63.9<br>to 80.5) | 8.1%<br>(4.9 to<br>12.4)   | 16.6% (11.3<br>to 25.8) | 3.11%<br>(2.84 to<br>3.45)   | 1.33%<br>(1.06 to<br>1.66) | 0.28%<br>(0.02 to<br>0.61)    | 62 (47 to 80)          | 97 (93 to<br>103)     | 297 (292 to<br>323)    |
| Paraguay                            | 668 (567<br>to 778)       | 1564<br>(1326 to<br>1820) | 8.4%<br>(7.1 to<br>9.8)  | 56.9% (48.9<br>to 64.1) | 32.0%<br>(25.2 to<br>40.5) | 0.6% (0.4 to<br>1.0)    | 2.65%<br>(2.30 to<br>2.96)   | 1.93%<br>(1.58 to<br>2.24) | 0.69%<br>(0.35 to<br>1.00)    | 380 (311 to<br>457)    | 82 (61 to<br>126)     | 234 (217 to<br>270)    |
| Peru                                | 709 (607<br>to 821)       | 1437<br>(1229 to<br>1663) | 6.1%<br>(5.2 to<br>7.0)  | 67.4% (59.9<br>to 74.5) | 24.9%<br>(18.5 to<br>32.2) | 0.2% (0.1 to<br>0.3)    | 3.28%<br>(3.16 to<br>3.41)   | 2.21%<br>(2.08 to<br>2.33) | 0.88%<br>(0.76 to<br>1.01)    | 478 (397 to<br>573)    | 5 (0 to 38)           | 466 (428 to<br>547)    |
| Philippines                         | 340 (274<br>to 423)       | 990 (796<br>to 1232)      | 4.9%<br>(4.0 to<br>6.1)  | 34.6% (25.2<br>to 43.9) | 50.9%<br>(39.9 to<br>62.2) | 0.9% (0.6 to<br>1.5)    | 4.04%<br>(3.32 to<br>4.75)   | 2.91%<br>(2.19 to<br>3.60) | 0.83%<br>(0.12 to<br>1.51)    | 117 (87 to<br>153)     | 142 (134 to<br>158)   | 414 (407 to<br>443)    |
| Poland                              | 1918<br>(1720 to<br>2126) | 3923<br>(3518 to<br>4349) | 6.2%<br>(5.6 to<br>6.9)  | 72.2% (67.6<br>to 77.0) | 20.7%<br>(16.5 to<br>25.5) | 0.0% (0.0 to<br>0.0)    | 1.55%<br>(1.24 to<br>1.86)   | 2.14%<br>(1.83 to<br>2.46) | 0.57%<br>(0.27 to<br>0.88)    | 1385 (1211<br>to 1564) | 742 (708 to<br>822)   | 994 (960 to<br>1107)   |
| Portugal                            | 2449<br>(2224 to<br>2709) | 3319<br>(3015 to<br>3672) | 8.5%<br>(7.7 to<br>9.4)  | 62.9% (58.0<br>to 67.3) | 30.5%<br>(26.1 to<br>35.6) | 0.0% (0.0 to<br>0.0)    | 0.07% (-<br>0.12 to<br>0.27) | 0.61%<br>(0.42 to<br>0.81) | 0.42%<br>(0.23 to<br>0.62)    | 1540 (1373<br>to 1725) | 571 (531 to<br>650)   | 683 (642 to<br>770)    |
| Puerto Rico                         | 1936<br>(1680 to<br>2234) | 2372<br>(2059 to<br>2738) | 5.9%<br>(5.1 to<br>6.8)  | 71.2% (63.4<br>to 77.9) | 20.2%<br>(14.1 to<br>27.0) | 0.0% (0.0 to<br>0.0)    | 0.12% (-<br>0.28 to<br>0.52) | 0.91%<br>(0.51 to<br>1.32) | 0.62%<br>(0.22 to<br>1.03)    | 1378 (1188<br>to 1606) | 9 (0 to 84)           | 1240 (1159<br>to 1426) |
| Qatar                               | 3134<br>(2188 to<br>4226) | 6293<br>(4393 to<br>8486) | 4.2%<br>(2.9 to<br>5.6)  | 87.8% (82.8<br>to 91.6) | 4.9%<br>(3.1 to<br>7.6)    | 0.0% (0.0 to<br>0.0)    | 3.14%<br>(2.16 to<br>4.09)   | 1.68%<br>(0.72 to<br>2.62) | 2.12%<br>(1.16 to<br>3.06)    | 2761 (1830<br>to 3856) | 1558 (994<br>to 2259) | 3009 (2616<br>to 3634) |
| Romania                             | 1461<br>(1279 to<br>1658) | 3214<br>(2815 to<br>3647) | 5.1%<br>(4.5 to<br>5.8)  | 78.7% (73.2<br>to 83.6) | 20.3%<br>(15.3 to<br>25.9) | 0.0% (0.0 to<br>0.6)    | 2.10%<br>(1.78 to<br>2.45)   | 2.83%<br>(2.50 to<br>3.18) | 0.48%<br>(0.16 to<br>0.82)    | 1150 (993 to<br>1324)  | 464 (432 to<br>535)   | 1042 (1008<br>to 1138) |
| Russian Federation                  | 920 (794<br>to 1060)      | 2358<br>(2034 to<br>2717) | 4.5%<br>(3.9 to<br>5.2)  | 52.6% (45.2<br>to 59.8) | 44.7%<br>(37.3 to<br>52.2) | 0.0% (0.0 to<br>0.0)    | 0.95%<br>(0.51 to<br>1.34)   | 1.44%<br>(1.00 to<br>1.83) | 0.81%<br>(0.37 to<br>1.20)    | 483 (403 to<br>575)    | 734 (716 to<br>794)   | 1096 (1075<br>to 1199) |
| Rwanda                              | 95 (76 to<br>120)         | 262 (209<br>to 332)       | 4.8%<br>(3.8 to<br>6.1)  | 54.6% (42.7<br>to 65.3) | 7.2%<br>(4.3 to<br>11.1)   | 23.1% (16.0<br>to 34.2) | 4.22%<br>(3.58 to<br>4.93)   | 2.24%<br>(1.61 to<br>2.94) | -0.15% (-<br>0.76 to<br>0.53) | 52 (37 to 70)          | 39 (32 to<br>49)      | 101 (98 to<br>108)     |
| Saint Lucia                         | 826 (723<br>to 947)       | 1292<br>(1131 to<br>1483) | 7.2%<br>(6.3 to<br>8.2)  | 47.3% (40.3<br>to 54.0) | 34.9%<br>(29.5 to<br>41.0) | 11.7% (7.5 to<br>19.2)  | 1.41%<br>(0.97 to<br>1.86)   | 1.44%<br>(1.00 to<br>1.89) | 0.84%<br>(0.40 to<br>1.28)    | 391 (304 to<br>487)    | 202 (179 to<br>257)   | 499 (483 to<br>538)    |
| Saint Vincent and<br>the Grenadines | 470 (398<br>to 558)       | 768 (650<br>to 912)       | 4.8%<br>(4.1 to<br>5.7)  | 72.9% (66.1<br>to 79.2) | 17.4%<br>(12.0 to<br>23.6) | 7.1% (4.7 to<br>11.6)   | 1.40%<br>(1.20 to<br>1.63)   | 1.64%<br>(1.44 to<br>1.87) | 0.83%<br>(0.63 to<br>1.06)    | 343 (282 to<br>425)    | 187 (168 to<br>220)   | 408 (396 to<br>432)    |
| Samoa                               | 412 (354<br>to 479)       | 570 (489<br>to 663)       | 5.8%<br>(5.0 to<br>6.8)  | 80.3% (74.5<br>to 85.0) | 10.9%<br>(7.5 to<br>15.7)  | 7.8% (5.4 to<br>12.4)   | 2.97%<br>(2.40 to<br>3.54)   | 1.77%<br>(1.21 to<br>2.34) | 0.60%<br>(0.04 to<br>1.16)    | 331 (277 to<br>400)    | 67 (48 to<br>100)     | 213 (200 to<br>238)    |

|                       |                     |                      |                      |                      |                      |                      |                      |                      |                       |                     |                  |                     |
|-----------------------|---------------------|----------------------|----------------------|----------------------|----------------------|----------------------|----------------------|----------------------|-----------------------|---------------------|------------------|---------------------|
| Sao Tome and Principe | 169 (137 to 217)    | 288 (234 to 370)     | 7.2% (5.8 to 9.2)    | 43.6% (32.3 to 52.9) | 13.7% (8.9 to 19.7)  | 40.9% (31.1 to 54.5) | 2.30% (1.78 to 3.08) | 1.39% (0.88 to 2.16) | 0.22% (-0.28 to 0.99) | 73 (55 to 93)       | 56 (50 to 67)    | 109 (104 to 117)    |
| Saudi Arabia          | 1357 (1237 to 1495) | 3455 (3149 to 3806)  | 4.7% (4.3 to 5.2)    | 68.5% (64.5 to 72.3) | 12.9% (10.6 to 15.4) | 0.0% (0.0 to 0.0)    | 1.34% (1.17 to 1.51) | 0.51% (0.34 to 0.68) | 0.35% (0.18 to 0.52)  | 930 (816 to 1054)   | 665 (641 to 736) | 1274 (1245 to 1420) |
| Senegal               | 117 (96 to 142)     | 295 (242 to 357)     | 5.7% (4.7 to 6.9)    | 33.3% (25.3 to 42.5) | 42.6% (32.3 to 53.6) | 15.0% (10.2 to 23.3) | 3.21% (2.24 to 4.20) | 1.38% (0.43 to 2.36) | 0.18% (-0.76 to 1.15) | 39 (29 to 51)       | 69 (67 to 73)    | 120 (118 to 127)    |
| Serbia                | 899 (784 to 1033)   | 2179 (1901 to 2505)  | 7.7% (6.7 to 8.8)    | 52.6% (45.3 to 59.8) | 44.7% (37.4 to 52.1) | 1.2% (0.8 to 2.1)    | 1.11% (0.79 to 1.47) | 1.98% (1.65 to 2.34) | 0.73% (0.41 to 1.09)  | 471 (401 to 548)    | 398 (381 to 430) | 432 (415 to 466)    |
| Seychelles            | 1027 (867 to 1217)  | 1926 (1627 to 2283)  | 5.2% (4.4 to 6.1)    | 98.9% (98.4 to 99.3) | 1.0% (0.6 to 1.5)    | 0.1% (0.0 to 0.2)    | 1.72% (1.32 to 2.13) | 1.77% (1.38 to 2.19) | 1.05% (0.66 to 1.46)  | 1016 (856 to 1206)  | 264 (220 to 356) | 519 (482 to 597)    |
| Sierra Leone          | 126 (98 to 165)     | 395 (305 to 516)     | 16.0% (12.4 to 20.9) | 13.2% (8.8 to 17.8)  | 44.4% (32.0 to 57.3) | 36.7% (25.3 to 50.8) | 3.13% (2.31 to 4.00) | 1.67% (0.86 to 2.53) | 0.62% (-0.18 to 1.47) | 16 (12 to 22)       | 20 (19 to 22)    | 44 (43 to 47)       |
| Singapore             | 5617 (5040 to 6277) | 9232 (8285 to 10317) | 5.8% (5.2 to 6.5)    | 60.1% (54.8 to 65.1) | 26.4% (21.9 to 31.6) | 0.0% (0.0 to 0.0)    | 2.93% (2.65 to 3.23) | 2.27% (1.99 to 2.57) | 1.18% (0.91 to 1.49)  | 3376 (2896 to 3959) | 26 (0 to 204)    | 4336 (4035 to 5016) |
| Slovakia              | 2396 (2181 to 2629) | 4219 (3841 to 4630)  | 6.6% (6.0 to 7.2)    | 81.8% (79.2 to 84.3) | 15.3% (13.2 to 17.5) | 0.0% (0.0 to 0.0)    | 1.22% (0.96 to 1.46) | 1.70% (1.45 to 1.94) | 0.41% (0.16 to 0.65)  | 1959 (1746 to 2194) | 547 (498 to 639) | 839 (789 to 949)    |
| Slovenia              | 3761 (3415 to 4139) | 5140 (4667 to 5656)  | 8.7% (7.9 to 9.6)    | 71.9% (68.4 to 75.4) | 11.5% (9.3 to 14.1)  | 0.0% (0.0 to 0.0)    | 1.26% (1.02 to 1.49) | 1.67% (1.44 to 1.90) | 0.60% (0.37 to 0.83)  | 2707 (2388 to 3042) | 407 (338 to 561) | 632 (566 to 774)    |
| Solomon Islands       | 190 (154 to 237)    | 198 (160 to 247)     | 6.7% (5.5 to 8.4)    | 64.9% (52.4 to 74.3) | 3.9% (2.5 to 5.8)    | 31.2% (22.2 to 44.4) | 2.91% (2.50 to 3.52) | 1.39% (0.98 to 1.98) | 0.33% (-0.08 to 0.92) | 123 (95 to 160)     | 90 (79 to 107)   | 95 (84 to 111)      |
| Somalia               | 19 (15 to 26)       | 38 (30 to 52)        | 17.6% (13.9 to 24.4) | 21.0% (14.0 to 29.2) | 22.9% (14.1 to 32.0) | 54.4% (43.3 to 68.1) | 3.69% (2.75 to 4.80) | 1.13% (0.22 to 2.22) | 0.79% (-0.12 to 1.87) | 4 (3 to 5)          | 0 (0 to 0)       | 62 (45 to 82)       |
| South Africa          | 815 (712 to 920)    | 1851 (1616 to 2089)  | 7.6% (6.6 to 8.6)    | 56.1% (49.8 to 62.4) | 6.3% (4.3 to 9.0)    | 3.3% (2.3 to 5.4)    | 1.97% (1.76 to 2.17) | 1.38% (1.18 to 1.58) | 0.88% (0.67 to 1.07)  | 457 (376 to 540)    | 181 (162 to 228) | 369 (352 to 406)    |
| South Korea           | 4722 (4170 to 5341) | 6221 (5495 to 7037)  | 10.4% (9.2 to 11.8)  | 64.7% (58.4 to 70.2) | 28.4% (23.0 to 34.4) | 0.0% (0.0 to 0.0)    | 1.97% (1.63 to 2.32) | 2.28% (1.93 to 2.63) | 1.13% (0.79 to 1.48)  | 3053 (2615 to 3552) | 0 (0 to 0)       | 1619 (1387 to 1884) |
| South Sudan           | 77 (63 to 94)       | 364 (298 to 446)     | 3.1% (2.6 to 3.9)    | 38.3% (28.7 to 47.2) | 29.7% (21.0 to 40.8) | 27.1% (19.0 to 39.9) | 4.03% (3.15 to 4.88) | 1.14% (0.30 to 1.97) | 0.33% (-0.51 to 1.15) | 29 (22 to 39)       | 132 (130 to 143) | 158 (156 to 172)    |
| Spain                 | 3544 (3150 to 4039) | 4509 (4008 to 5139)  | 9.2% (8.2 to 10.5)   | 68.3% (63.1 to 73.3) | 26.6% (21.9 to 32.1) | 0.0% (0.0 to 0.0)    | 0.51% (0.23 to 0.85) | 0.77% (0.49 to 1.11) | 0.77% (0.49 to 1.11)  | 2421 (2111 to 2850) | 417 (296 to 576) | 535 (422 to 688)    |



|             |                        |                       |                      |                      |                      |                      |                        |                      |                        |                     |                  |                     |
|-------------|------------------------|-----------------------|----------------------|----------------------|----------------------|----------------------|------------------------|----------------------|------------------------|---------------------|------------------|---------------------|
| Sri Lanka   | 398 (328 to 479)       | 1265 (1042 to 1523)   | 4.4% (3.6 to 5.3)    | 44.6% (34.9 to 54.1) | 46.4% (37.3 to 56.9) | 2.8% (1.8 to 4.6)    | 2.59% (2.06 to 3.16)   | 2.71% (2.18 to 3.29) | 0.63% (0.11 to 1.20)   | 177 (136 to 229)    | 154 (142 to 178) | 520 (511 to 554)    |
| Sudan       | 213 (169 to 266)       | 502 (399 to 628)      | 6.2% (5.0 to 7.8)    | 26.4% (19.2 to 34.9) | 67.8% (58.8 to 75.9) | 1.9% (1.2 to 3.3)    | 3.66% (3.04 to 4.26)   | 1.98% (1.38 to 2.57) | 0.68% (0.08 to 1.26)   | 56 (42 to 72)       | 16 (9 to 26)     | 208 (205 to 224)    |
| Suriname    | 513 (449 to 591)       | 1155 (1009 to 1330)   | 6.0% (5.3 to 6.9)    | 60.1% (53.1 to 66.8) | 18.0% (13.9 to 22.4) | 4.6% (3.1 to 7.6)    | 0.72% (0.32 to 1.13)   | 0.54% (0.14 to 0.95) | 0.54% (0.14 to 0.95)   | 309 (255 to 378)    | 75 (54 to 109)   | 349 (338 to 368)    |
| Swaziland   | 588 (494 to 715)       | 1565 (1316 to 1905)   | 8.5% (7.2 to 10.4)   | 61.8% (51.0 to 69.5) | 8.0% (5.3 to 11.7)   | 22.9% (15.6 to 35.8) | 2.92% (2.60 to 3.45)   | 1.79% (1.47 to 2.31) | 0.79% (0.47 to 1.31)   | 362 (300 to 437)    | 82 (64 to 120)   | 171 (156 to 204)    |
| Sweden      | 8909 (7973 to 9896)    | 8416 (7531 to 9348)   | 9.0% (8.0 to 9.9)    | 80.7% (76.8 to 83.9) | 17.9% (14.8 to 21.8) | 0.0% (0.0 to 0.0)    | 1.48% (1.13 to 1.81)   | 1.13% (0.78 to 1.46) | 0.14% (-0.21 to 0.47)  | 7188 (6296 to 8150) | 495 (306 to 982) | 495 (306 to 982)    |
| Switzerland | 13832 (12511 to 15320) | 10476 (9476 to 11603) | 12.0% (10.8 to 13.3) | 63.4% (58.1 to 68.0) | 28.5% (23.8 to 34.0) | 0.0% (0.0 to 0.0)    | 1.31% (1.03 to 1.61)   | 0.96% (0.67 to 1.25) | 0.56% (0.28 to 0.86)   | 8764 (7814 to 9755) | 0 (0 to 0)       | 2792 (2489 to 3107) |
| Syria       | 75 (60 to 90)          | 1319 (1066 to 1586)   | 3.0% (2.4 to 3.6)    | 51.2% (41.0 to 61.4) | 37.7% (27.9 to 48.0) | 7.2% (4.0 to 12.1)   | 2.83% (2.12 to 3.48)   | 1.43% (0.73 to 2.07) | 0.49% (-0.21 to 1.13)  | 38 (28 to 51)       | 43 (40 to 49)    | 153 (150 to 163)    |
| Taiwan      | 3093 (2748 to 3447)    | 5909 (5250 to 6584)   | 8.3% (7.4 to 9.3)    | 68.3% (63.8 to 72.3) | 28.1% (24.7 to 31.6) | 0.0% (0.0 to 0.0)    | -0.19% (-0.46 to 0.06) | 1.87% (1.60 to 2.14) | 0.83% (0.56 to 1.09)   | 2115 (1778 to 2458) | 0 (0 to 0)       | 2816 (2367 to 3272) |
| Tajikistan  | 103 (78 to 139)        | 410 (309 to 551)      | 5.1% (3.8 to 6.9)    | 27.6% (18.7 to 37.2) | 63.5% (52.2 to 74.4) | 8.6% (5.4 to 14.0)   | 3.59% (2.62 to 4.63)   | 2.03% (1.08 to 3.06) | 0.46% (-0.47 to 1.48)  | 28 (21 to 37)       | 91 (89 to 96)    | 128 (126 to 138)    |
| Tanzania    | 75 (61 to 92)          | 239 (195 to 294)      | 3.4% (2.8 to 4.2)    | 54.3% (44.0 to 63.9) | 21.2% (14.0 to 29.5) | 22.5% (15.6 to 33.7) | 3.95% (3.31 to 4.65)   | 1.71% (1.07 to 2.39) | -0.58% (-1.20 to 0.09) | 41 (30 to 52)       | 61 (58 to 65)    | 130 (127 to 139)    |
| Thailand    | 534 (451 to 638)       | 1511 (1278 to 1805)   | 4.4% (3.7 to 5.2)    | 81.9% (75.0 to 87.6) | 7.9% (5.2 to 11.4)   | 0.4% (0.0 to 0.7)    | 1.94% (1.41 to 2.47)   | 2.40% (1.86 to 2.92) | 0.87% (0.34 to 1.39)   | 437 (363 to 531)    | 15 (0 to 62)     | 514 (491 to 585)    |
| The Bahamas | 2479 (2290 to 2705)    | 2527 (2334 to 2758)   | 8.5% (7.8 to 9.2)    | 53.4% (49.1 to 57.3) | 23.8% (20.7 to 28.6) | 0.0% (0.0 to 0.0)    | 0.73% (0.55 to 0.95)   | 0.47% (0.29 to 0.69) | 0.48% (0.31 to 0.70)   | 1325 (1181 to 1490) | 19 (0 to 85)     | 947 (913 to 1050)   |
| The Gambia  | 66 (48 to 96)          | 238 (175 to 347)      | 7.9% (5.8 to 11.5)   | 17.2% (10.7 to 25.2) | 11.8% (6.8 to 17.5)  | 63.5% (51.7 to 76.4) | 3.10% (2.22 to 4.34)   | 1.31% (0.44 to 2.53) | 0.28% (-0.58 to 1.48)  | 11 (8 to 14)        | 47 (46 to 50)    | 53 (52 to 58)       |
| Timor-Leste | 122 (99 to 151)        | 298 (243 to 369)      | 1.9% (1.5 to 2.3)    | 66.4% (55.7 to 74.5) | 10.4% (6.6 to 16.3)  | 21.5% (15.2 to 32.0) | 2.95% (2.60 to 3.42)   | 1.89% (1.54 to 2.36) | 0.31% (-0.03 to 0.77)  | 81 (61 to 105)      | 487 (477 to 533) | 487 (477 to 533)    |
| Togo        | 61 (49 to 74)          | 158 (127 to 194)      | 5.6% (4.5 to 6.8)    | 20.3% (15.2 to 27.5) | 49.1% (38.7 to 59.9) | 20.8% (14.5 to 31.5) | 2.57% (1.51 to 3.63)   | 1.20% (0.16 to 2.25) | 0.12% (-0.91 to 1.15)  | 12 (9 to 17)        | 34 (34 to 36)    | 72 (70 to 78)       |

|                      |                        |                        |                      |                      |                      |                      |                       |                       |                        |                        |                   |                     |
|----------------------|------------------------|------------------------|----------------------|----------------------|----------------------|----------------------|-----------------------|-----------------------|------------------------|------------------------|-------------------|---------------------|
| Tonga                | 418 (350 to 507)       | 613 (514 to 745)       | 5.6% (4.7 to 6.8)    | 68.4% (59.9 to 75.4) | 9.1% (6.0 to 13.3)   | 17.7% (12.4 to 26.6) | 3.25% (2.76 to 3.76)  | 1.89% (1.41 to 2.40)  | 0.72% (0.25 to 1.22)   | 286 (229 to 358)       | 353 (341 to 379)  | 353 (341 to 379)    |
| Trinidad and Tobago  | 1422 (1248 to 1623)    | 2915 (2558 to 3326)    | 7.3% (6.4 to 8.3)    | 49.0% (42.7 to 55.1) | 44.6% (38.3 to 50.8) | 0.0% (0.0 to 0.0)    | 0.74% (0.44 to 1.03)  | 1.02% (0.71 to 1.30)  | 1.09% (0.79 to 1.38)   | 695 (601 to 804)       | 495 (473 to 538)  | 811 (788 to 887)    |
| Tunisia              | 392 (330 to 468)       | 1371 (1154 to 1636)    | 6.1% (5.2 to 7.3)    | 56.1% (45.9 to 65.1) | 40.1% (30.8 to 49.9) | 0.5% (0.3 to 0.8)    | 1.82% (1.60 to 2.07)  | 1.36% (1.14 to 1.60)  | 0.66% (0.44 to 0.90)   | 219 (175 to 269)       | 115 (102 to 141)  | 273 (263 to 291)    |
| Turkey               | 986 (847 to 1197)      | 2455 (2108 to 2978)    | 3.2% (2.7 to 3.9)    | 79.2% (73.2 to 84.4) | 14.7% (10.1 to 19.7) | 0.2% (0.0 to 0.9)    | 2.62% (2.33 to 3.01)  | 2.30% (2.01 to 2.69)  | 0.33% (0.05 to 0.71)   | 782 (650 to 990)       | 849 (823 to 893)  | 1594 (1573 to 1678) |
| Turkmenistan         | 1934 (1607 to 2298)    | 5229 (4345 to 6215)    | 8.5% (7.1 to 10.1)   | 28.7% (22.0 to 35.7) | 66.4% (58.3 to 73.9) | 0.0% (0.0 to 0.2)    | 4.74% (4.11 to 5.37)  | 3.72% (3.09 to 4.35)  | 0.93% (0.32 to 1.54)   | 553 (428 to 704)       | 252 (199 to 335)  | 1202 (1177 to 1266) |
| Uganda               | 63 (51 to 79)          | 223 (179 to 278)       | 5.1% (4.1 to 6.4)    | 23.5% (16.7 to 30.8) | 44.1% (32.7 to 54.7) | 28.2% (19.8 to 41.0) | 3.59% (2.69 to 4.51)  | 1.22% (0.34 to 2.12)  | -0.34% (-1.21 to 0.54) | 15 (11 to 20)          | 25 (24 to 27)     | 80 (79 to 87)       |
| Ukraine              | 255 (208 to 306)       | 847 (690 to 1018)      | 6.6% (5.3 to 7.9)    | 40.0% (31.2 to 49.1) | 54.0% (44.3 to 63.1) | 3.1% (2.1 to 5.0)    | 0.10% (-0.29 to 0.47) | 1.08% (0.69 to 1.46)  | 0.92% (0.52 to 1.30)   | 102 (79 to 129)        | 159 (154 to 168)  | 198 (193 to 208)    |
| United Arab Emirates | 1588 (1290 to 2543)    | 2851 (2316 to 4567)    | 3.9% (3.2 to 6.3)    | 77.2% (71.9 to 86.7) | 13.3% (7.6 to 16.8)  | 0.0% (0.0 to 0.0)    | 1.10% (0.66 to 2.45)  | 0.26% (-0.17 to 1.59) | 0.95% (0.51 to 2.29)   | 1235 (946 to 2209)     | 956 (250 to 1129) | 1882 (1289 to 2003) |
| United Kingdom       | 5907 (5384 to 6421)    | 6267 (5712 to 6812)    | 9.8% (8.9 to 10.6)   | 75.7% (71.8 to 79.0) | 19.4% (16.0 to 23.3) | 0.0% (0.0 to 0.0)    | 1.32% (1.03 to 1.58)  | 1.07% (0.79 to 1.33)  | 0.52% (0.24 to 0.78)   | 4469 (4018 to 4936)    | 0 (0 to 0)        | 616 (554 to 680)    |
| United States        | 15825 (14669 to 16939) | 15825 (14669 to 16939) | 19.5% (18.0 to 20.8) | 82.4% (80.5 to 83.9) | 9.6% (8.6 to 11.1)   | 0.0% (0.0 to 0.0)    | 1.59% (1.34 to 1.82)  | 1.24% (1.00 to 1.47)  | 0.36% (0.12 to 0.59)   | 13040 (11927 to 14153) | 0 (0 to 0)        | 2919 (2670 to 3168) |
| Uruguay              | 2483 (2274 to 2734)    | 3348 (3065 to 3685)    | 10.1% (9.2 to 11.1)  | 70.4% (66.0 to 74.4) | 16.8% (13.4 to 20.5) | 0.0% (0.0 to 0.0)    | 1.45% (1.28 to 1.62)  | 1.42% (1.25 to 1.59)  | 0.50% (0.34 to 0.67)   | 1750 (1559 to 1952)    | 0 (0 to 0)        | 610 (544 to 681)    |
| Uzbekistan           | 159 (130 to 193)       | 880 (719 to 1071)      | 3.4% (2.8 to 4.2)    | 53.2% (42.7 to 62.7) | 43.1% (33.6 to 53.6) | 3.1% (1.8 to 5.6)    | 2.65% (1.75 to 3.56)  | 2.09% (1.19 to 2.99)  | 0.13% (-0.75 to 1.02)  | 85 (62 to 111)         | 181 (176 to 189)  | 274 (269 to 292)    |
| Vanuatu              | 167 (137 to 205)       | 147 (120 to 180)       | 3.2% (2.6 to 3.9)    | 64.6% (54.6 to 73.3) | 10.3% (6.7 to 14.8)  | 20.6% (14.2 to 30.5) | 3.02% (2.78 to 3.40)  | 1.64% (1.39 to 2.00)  | 0.59% (0.35 to 0.96)   | 108 (83 to 138)        | 187 (181 to 196)  | 292 (286 to 312)    |
| Venezuela            | 391 (342 to 445)       | 649 (567 to 738)       | 5.4% (4.7 to 6.2)    | 40.2% (34.0 to 46.9) | 24.8% (20.3 to 29.7) | 0.0% (0.0 to 0.0)    | 0.74% (0.41 to 1.04)  | 0.23% (-0.11 to 0.53) | 0.58% (0.24 to 0.88)   | 157 (127 to 191)       | 505 (497 to 553)  | 505 (497 to 553)    |
| Vietnam              | 362 (288 to 448)       | 1059 (844 to 1309)     | 7.1% (5.6 to 8.8)    | 47.4% (36.9 to 58.1) | 49.7% (38.7 to 60.2) | 1.9% (1.2 to 3.1)    | 3.42% (2.69 to 4.15)  | 3.31% (2.58 to 4.04)  | 0.81% (0.10 to 1.52)   | 171 (134 to 214)       | 95 (82 to 118)    | 223 (214 to 238)    |

|                      |                           |                           |                            |                         |                            |                         |                              |                            |                              |                        |                  |                        |
|----------------------|---------------------------|---------------------------|----------------------------|-------------------------|----------------------------|-------------------------|------------------------------|----------------------------|------------------------------|------------------------|------------------|------------------------|
| Virgin Islands, U.S. | 3296<br>(2616 to<br>4104) | 1771<br>(1406 to<br>2205) | 7.9%<br>(6.2 to<br>9.8)    | 63.8% (53.2<br>to 73.5) | 25.6%<br>(17.6 to<br>35.7) | 0.0% (0.0 to<br>0.0)    | 0.15% (-<br>0.62 to<br>0.96) | 1.19%<br>(0.41 to<br>2.01) | 0.66% (-<br>0.12 to<br>1.48) | 2103 (1564<br>to 2777) | 41 (0 to<br>308) | 1396 (1225<br>to 1756) |
| Yemen                | 78 (59 to<br>103)         | 167 (126<br>to 221)       | 15.4%<br>(11.6 to<br>20.3) | 5.4% (3.6 to<br>7.8)    | 65.3%<br>(51.5 to<br>75.2) | 28.6% (19.4<br>to 42.6) | 2.45%<br>(2.07 to<br>3.00)   | 0.75%<br>(0.38 to<br>1.30) | 0.97%<br>(0.60 to<br>1.52)   | 4 (3 to 5)             | 9 (8 to 9)       | 35 (34 to<br>38)       |
| Zambia               | 106 (85<br>to 139)        | 310 (247<br>to 406)       | 3.6%<br>(2.8 to<br>4.7)    | 43.7% (32.6<br>to 54.0) | 10.0%<br>(6.4 to<br>14.7)  | 39.9% (30.5<br>to 53.0) | 3.32%<br>(2.72 to<br>4.13)   | 1.21%<br>(0.63 to<br>2.01) | 0.01% (-<br>0.57 to<br>0.80) | 46 (34 to 61)          | 91 (89 to<br>96) | 184 (181 to<br>198)    |
| Zimbabwe             | 155 (127<br>to 192)       | 290 (237<br>to 358)       | 10.8%<br>(8.8 to<br>13.3)  | 50.4% (39.6<br>to 60.4) | 20.2%<br>(13.4 to<br>27.6) | 18.3% (11.0<br>to 30.3) | 2.94%<br>(2.48 to<br>3.48)   | 1.07%<br>(0.62 to<br>1.60) | 0.26% (-<br>0.18 to<br>0.79) | 78 (60 to 99)          | 3 (0 to 15)      | 37 (33 to<br>46)       |

---

## **B.2 Figure: Future Health Scenarios**

This set of figures included show fix panels of the dependent variables that we forecasted, starting with DAH, GHE, PPP, OOP and THE per capita. Each variable contain their respective reference, better and worse scenarios. The currency is 2018 USD.

# Afghanistan

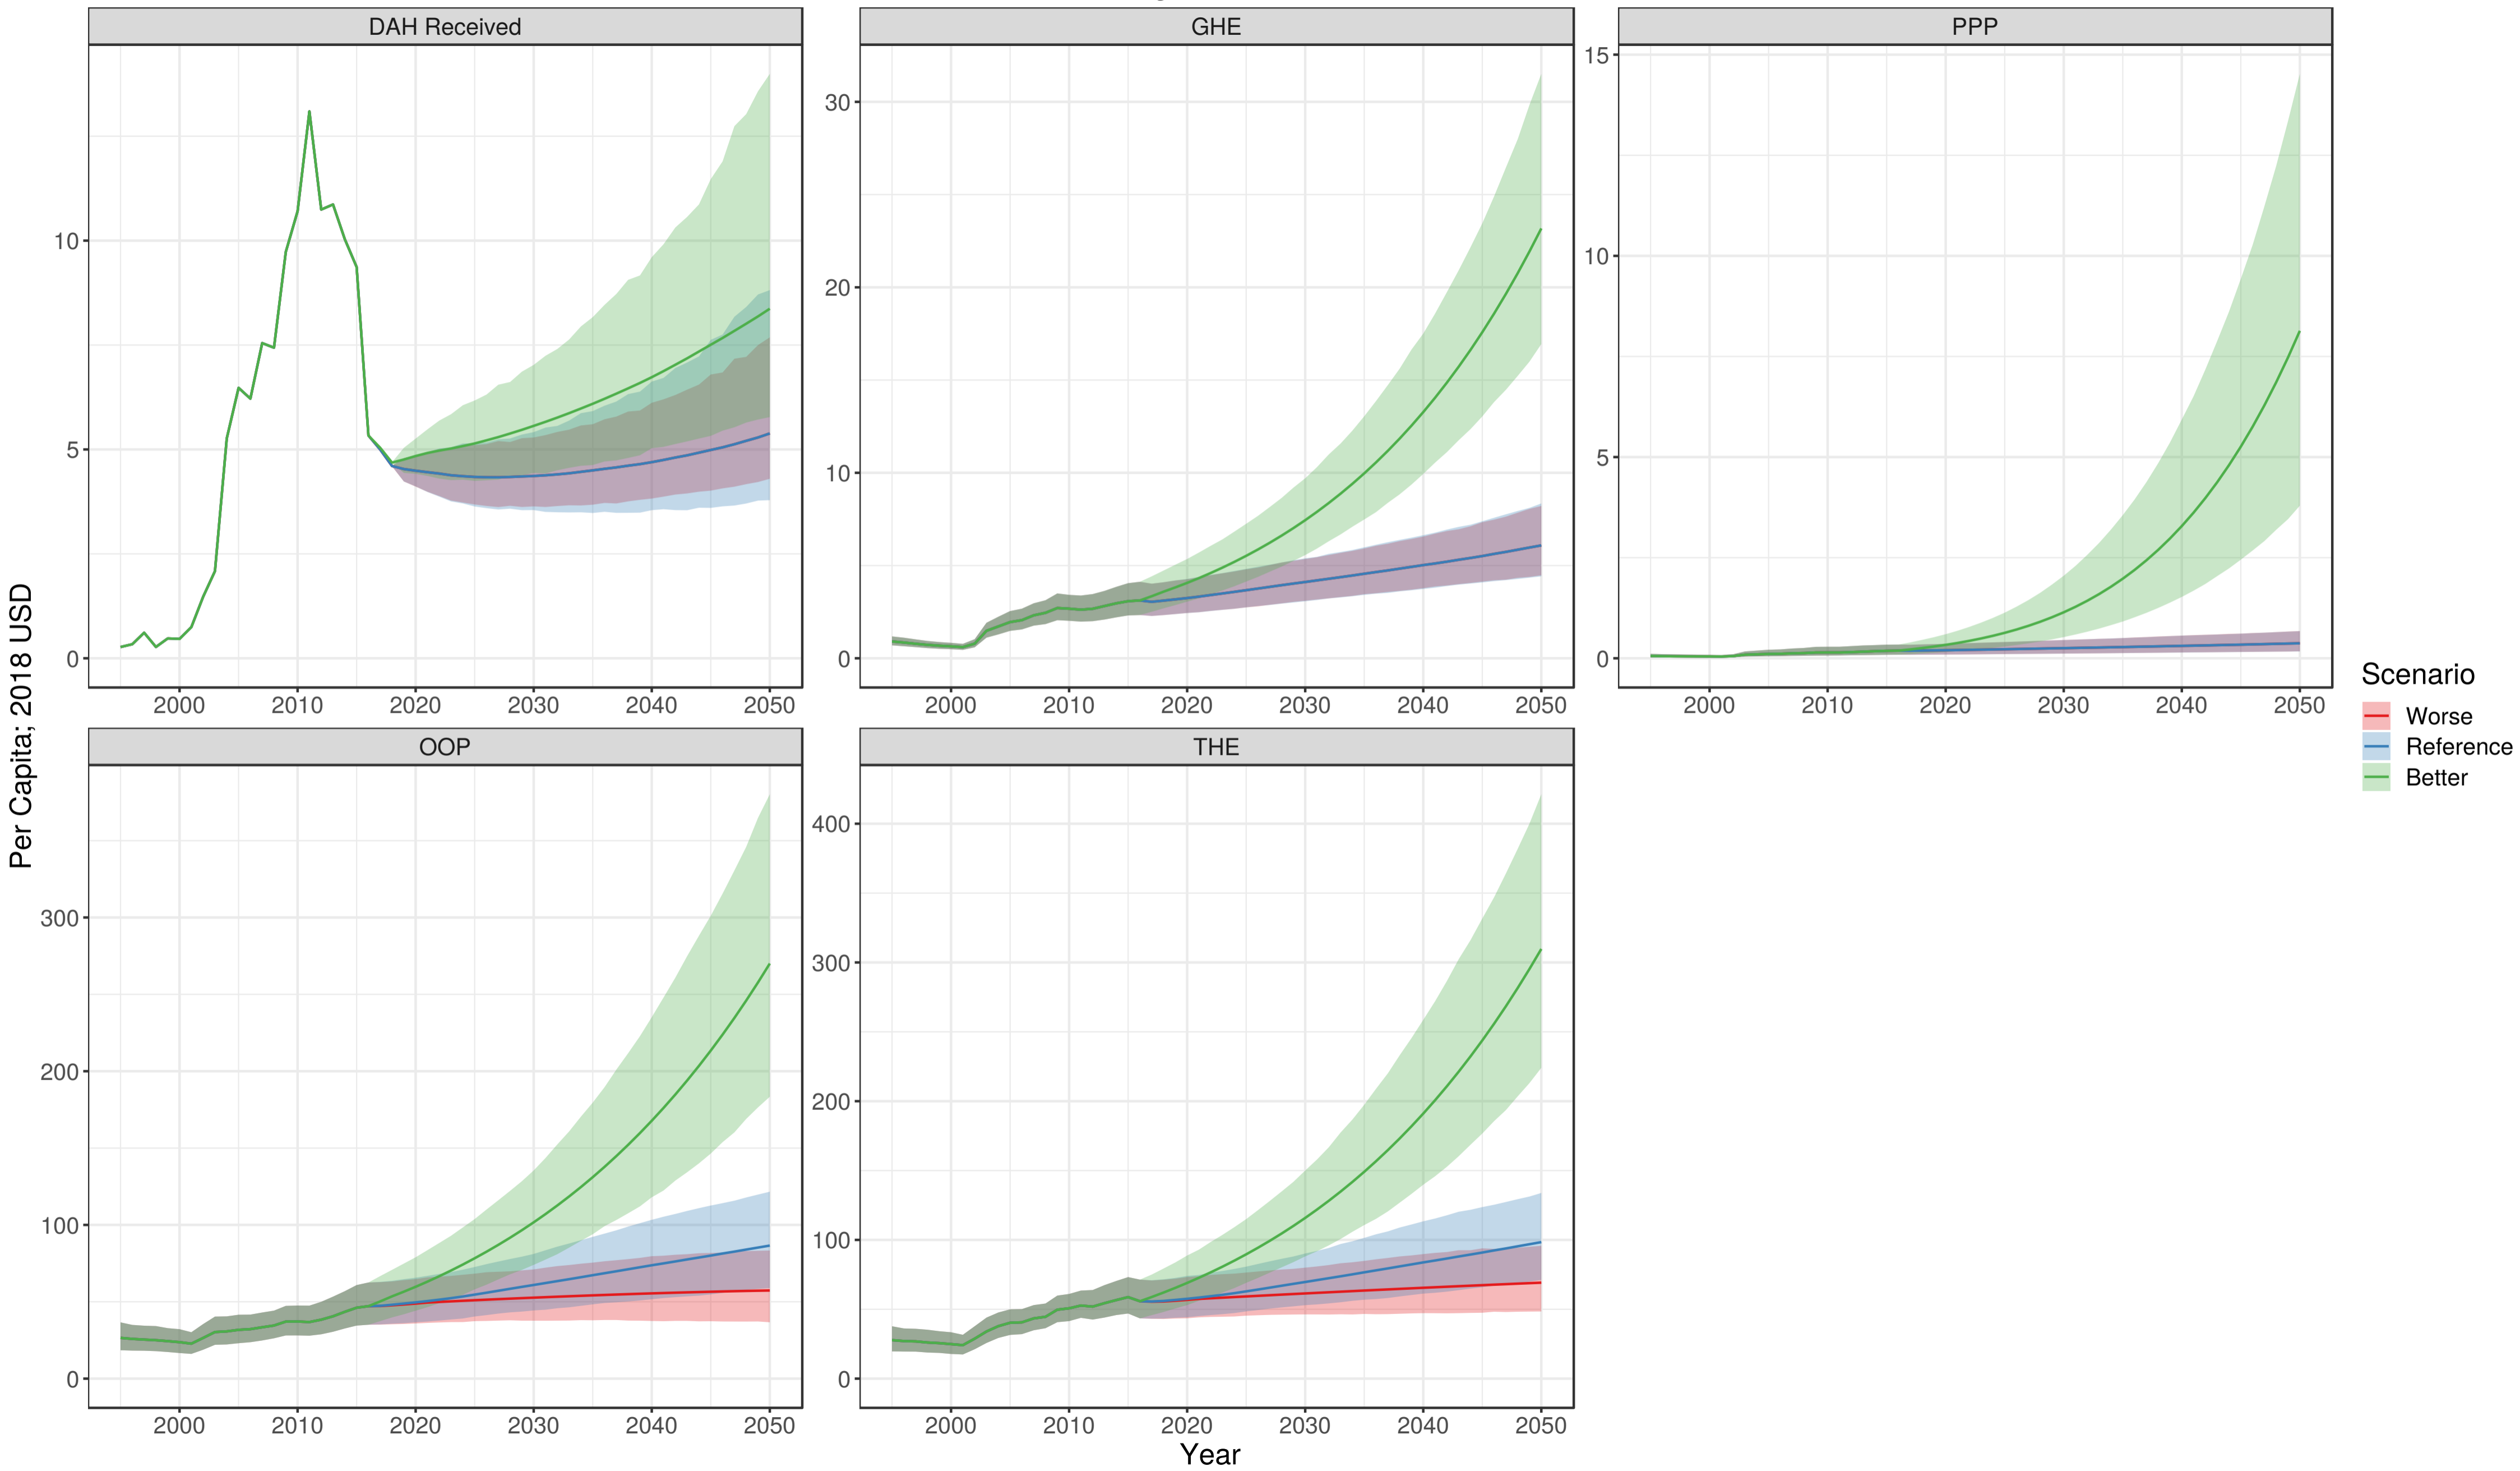

# Albania

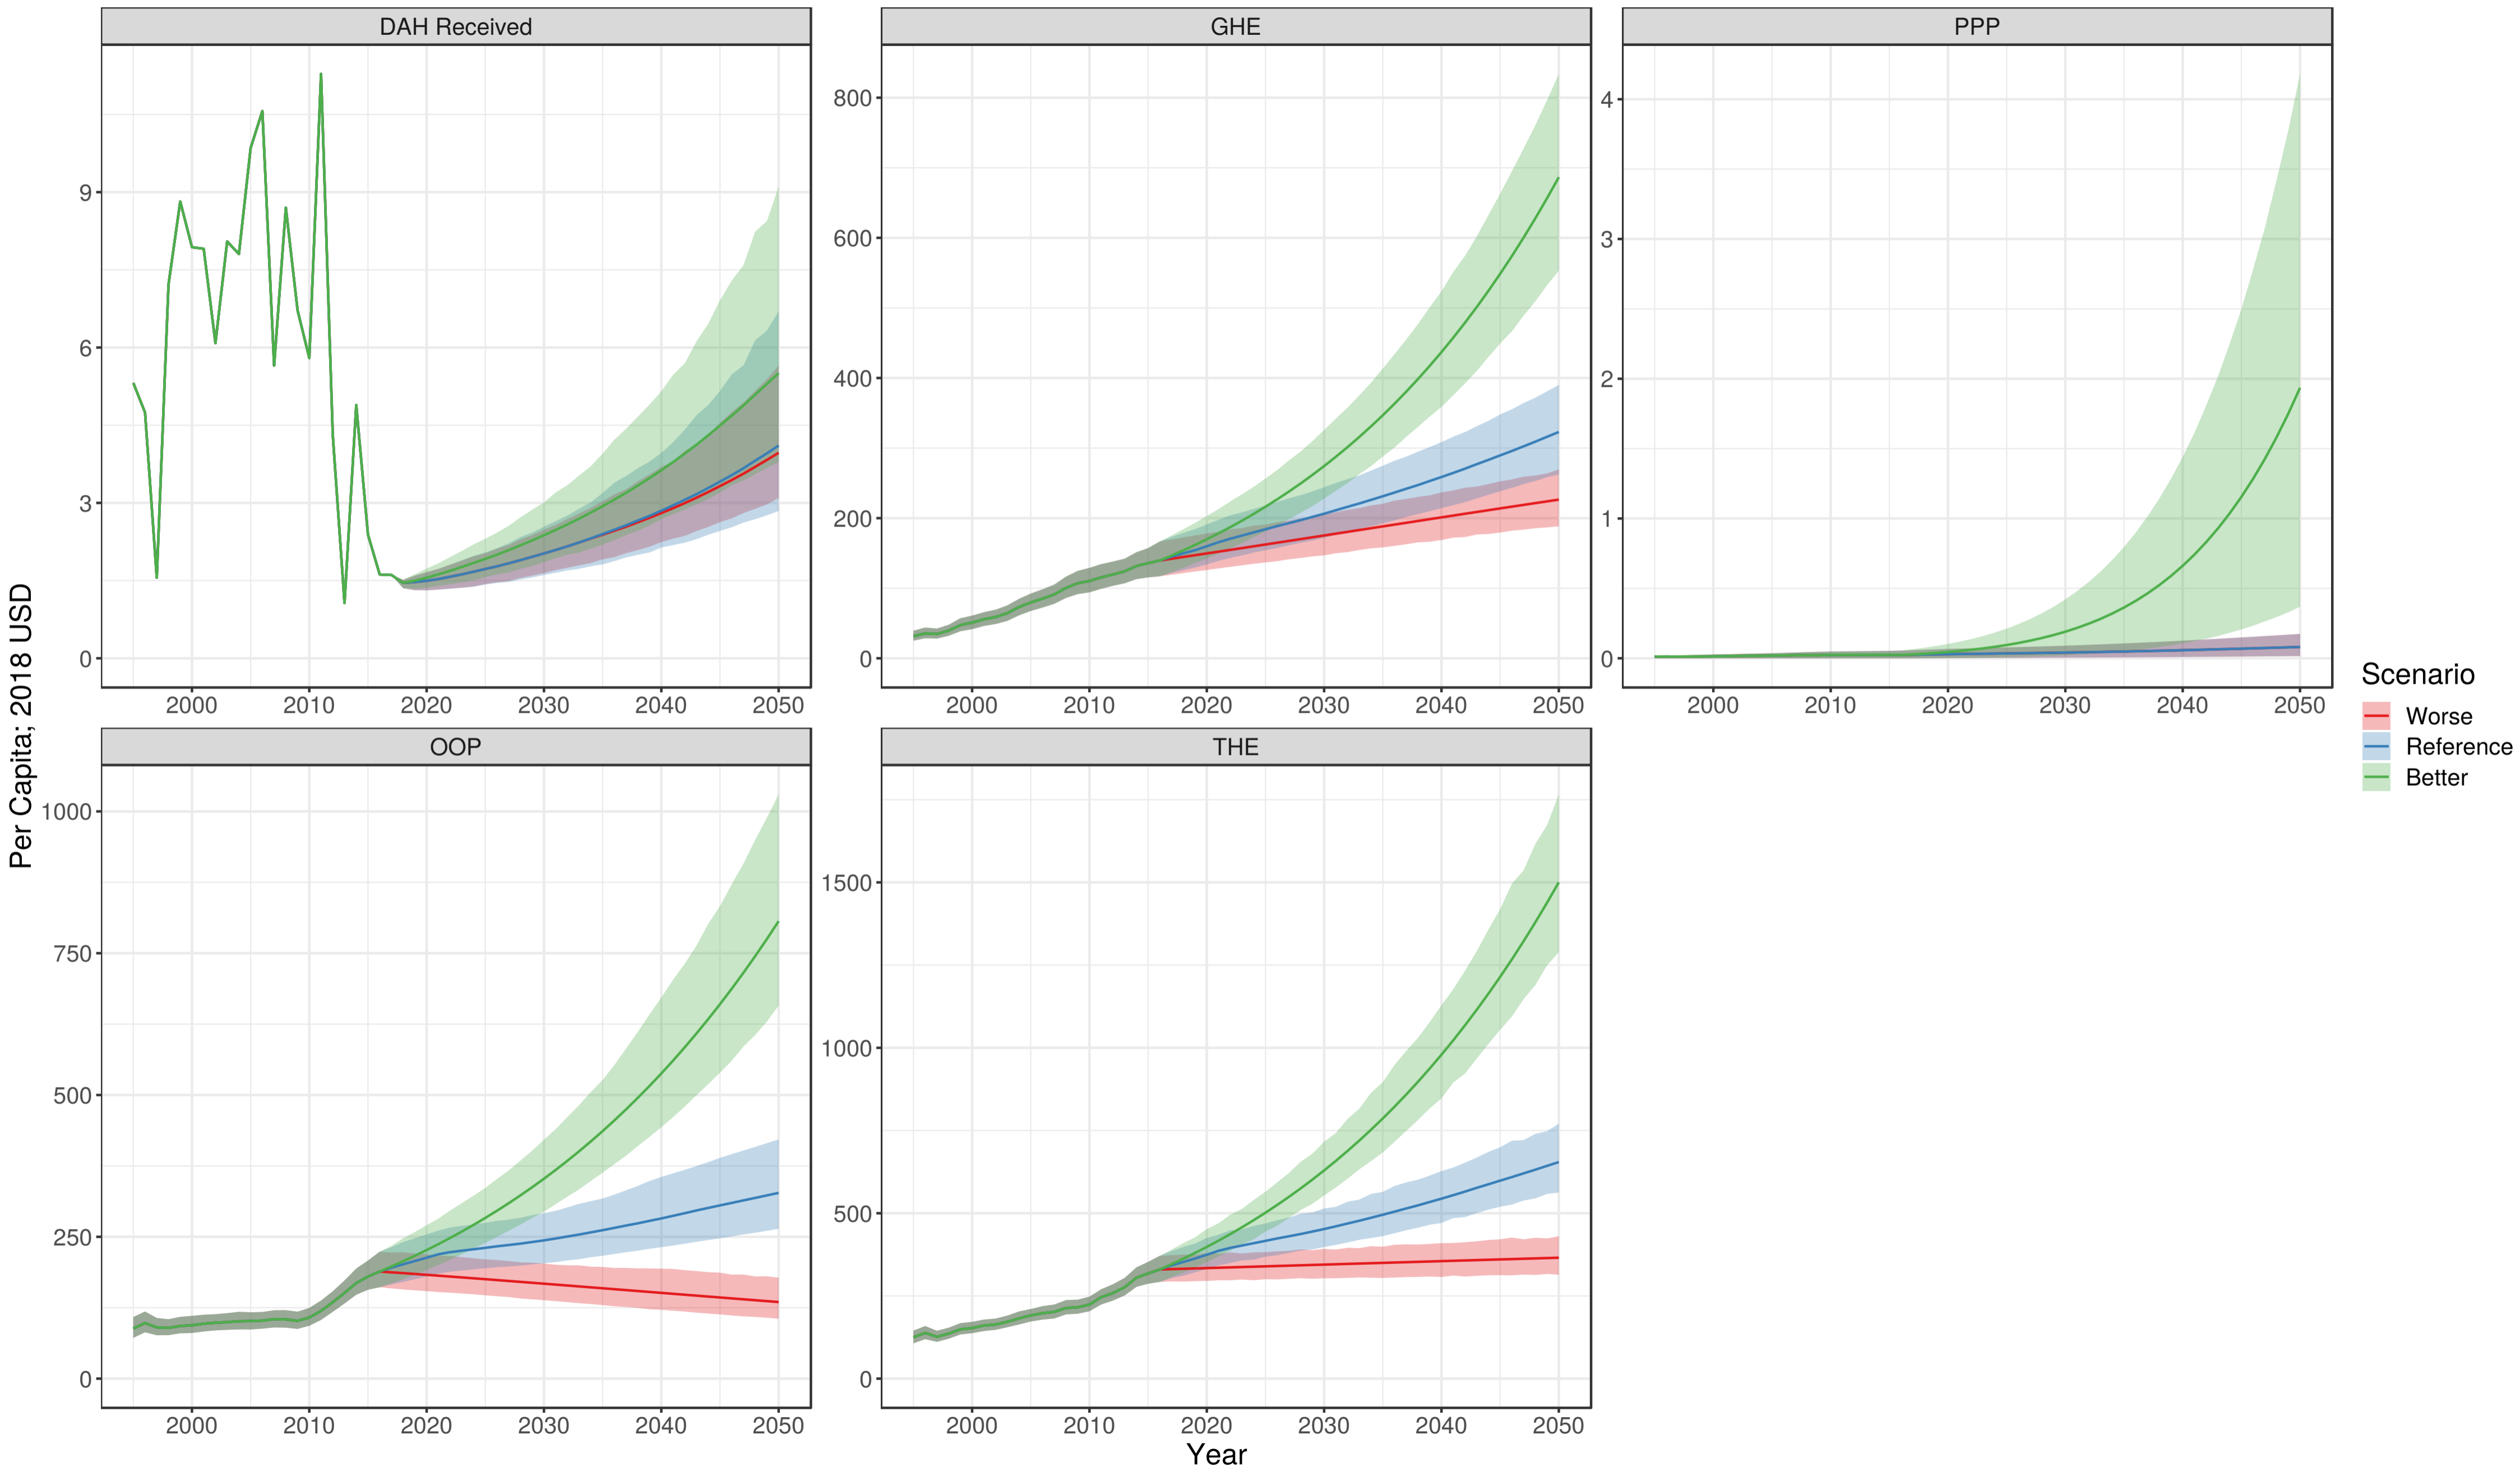

# Algeria

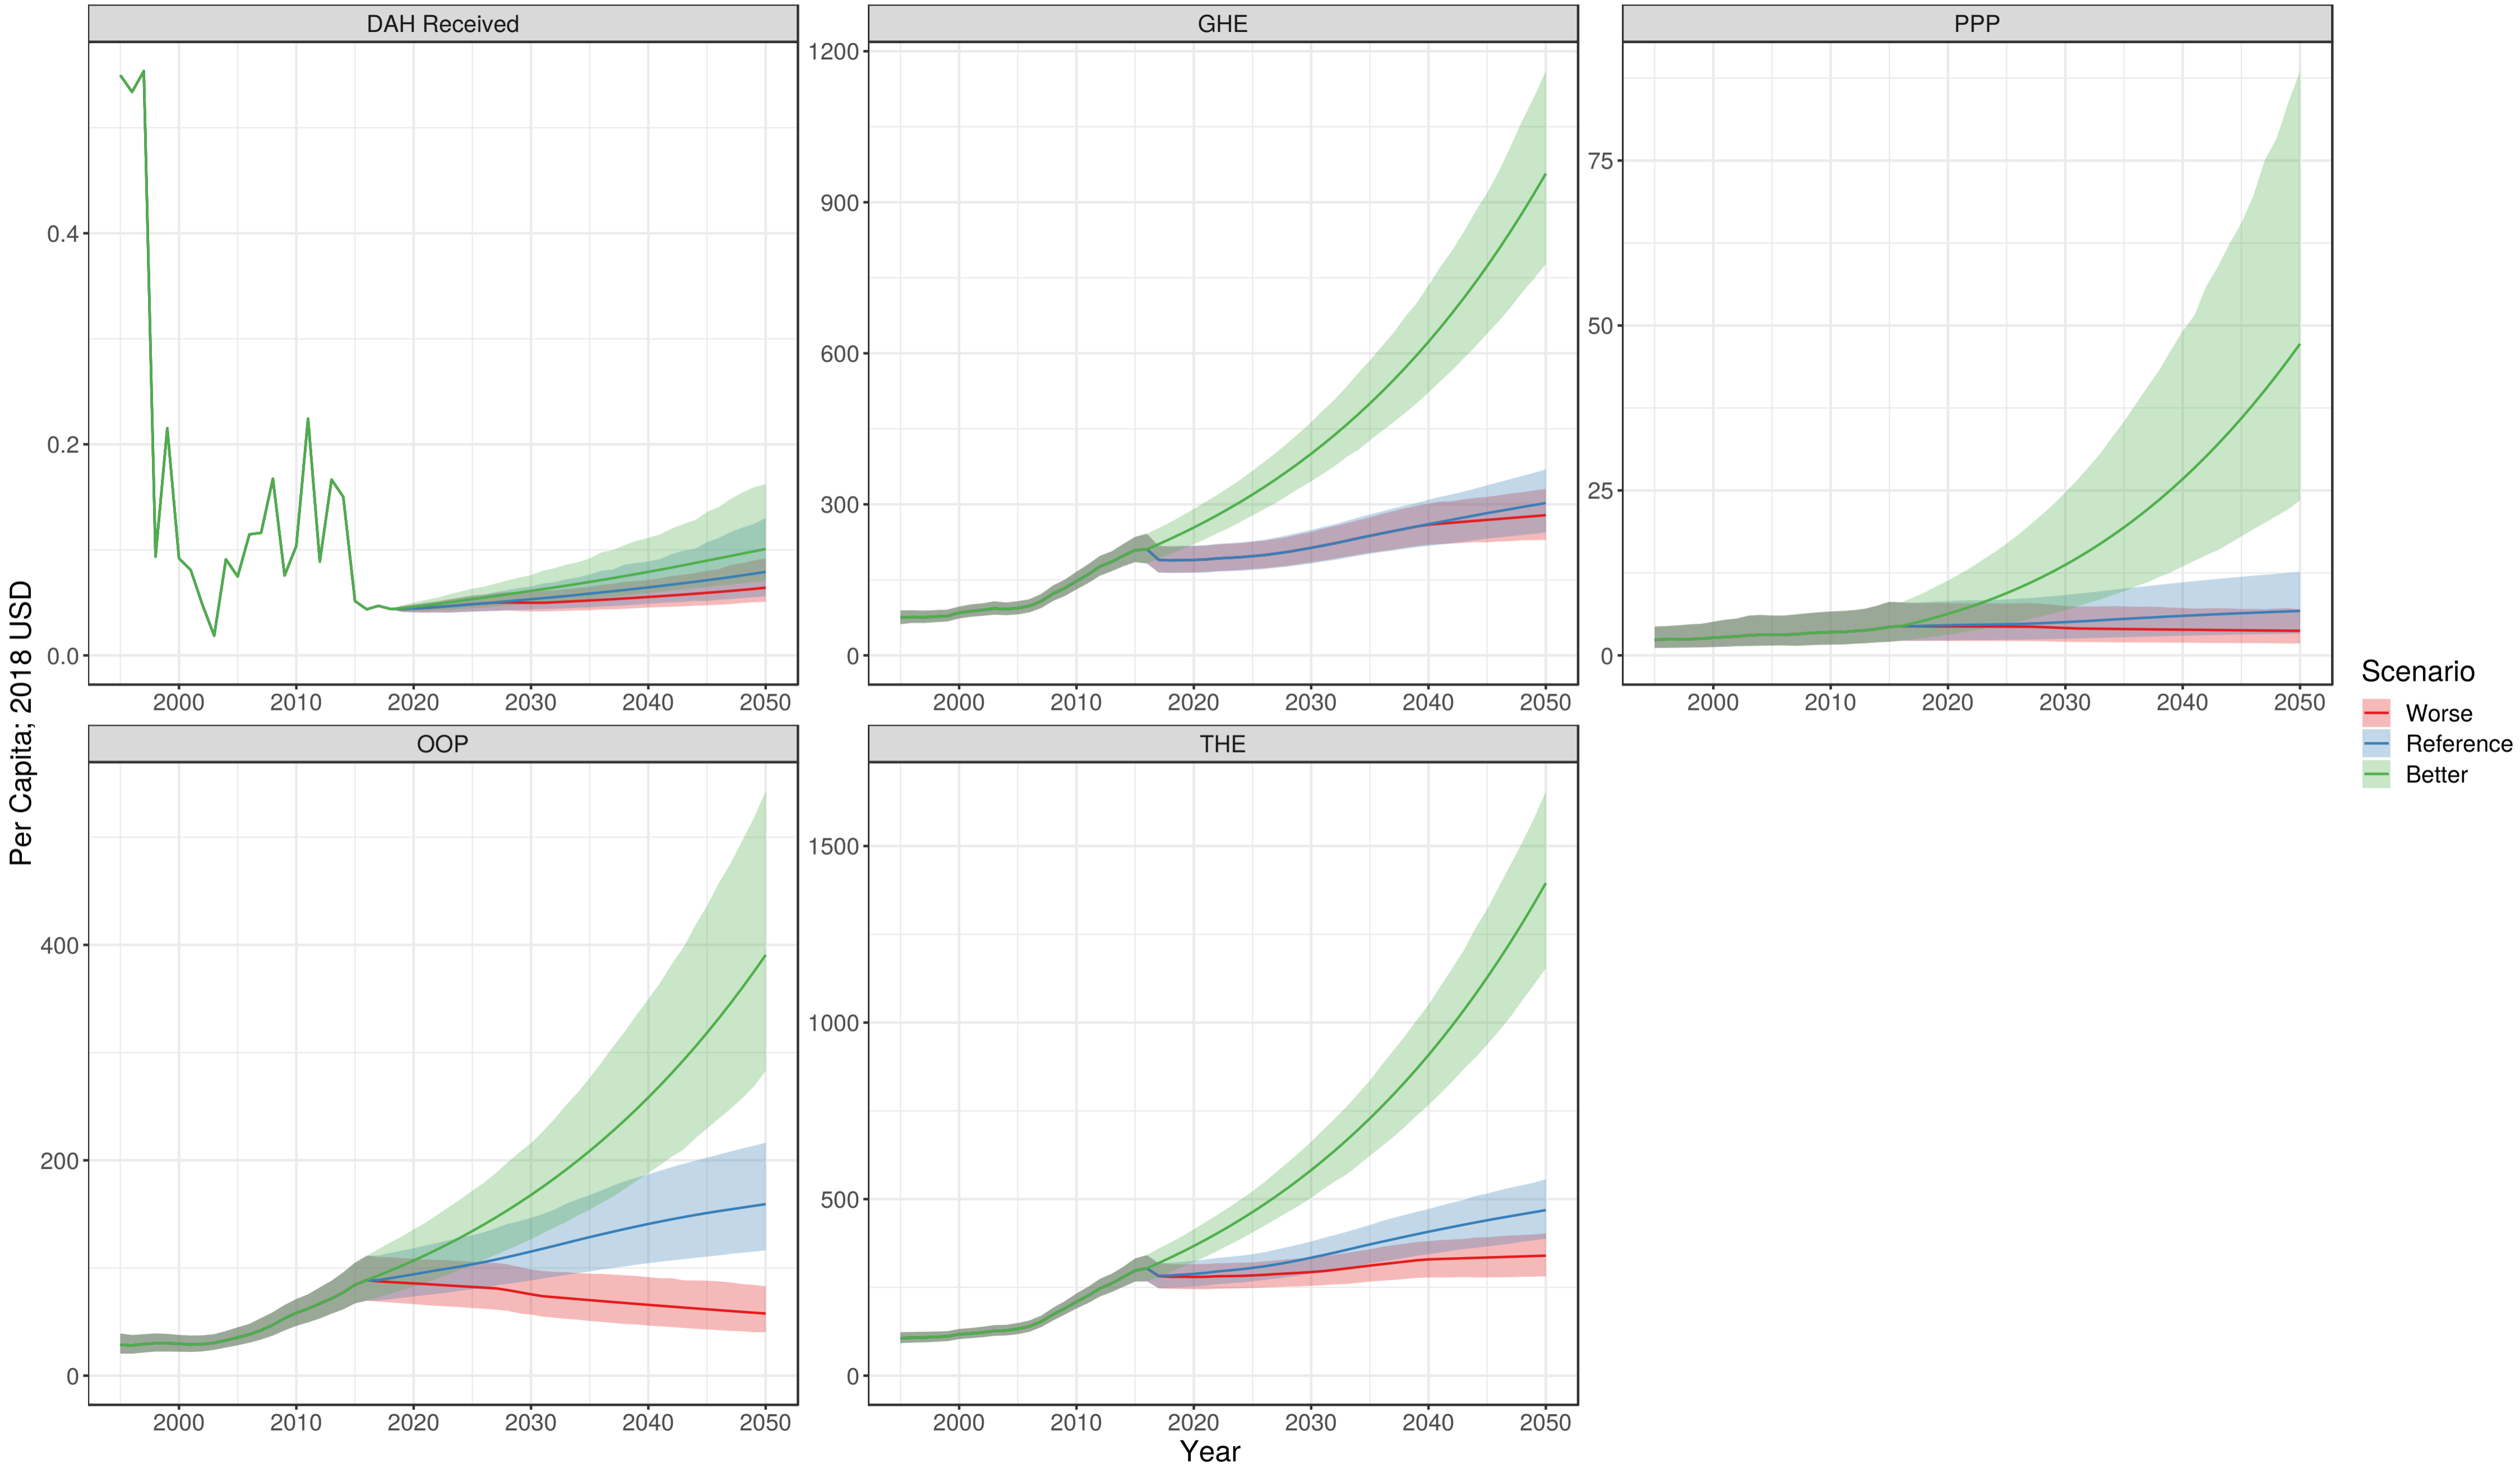

# American Samoa

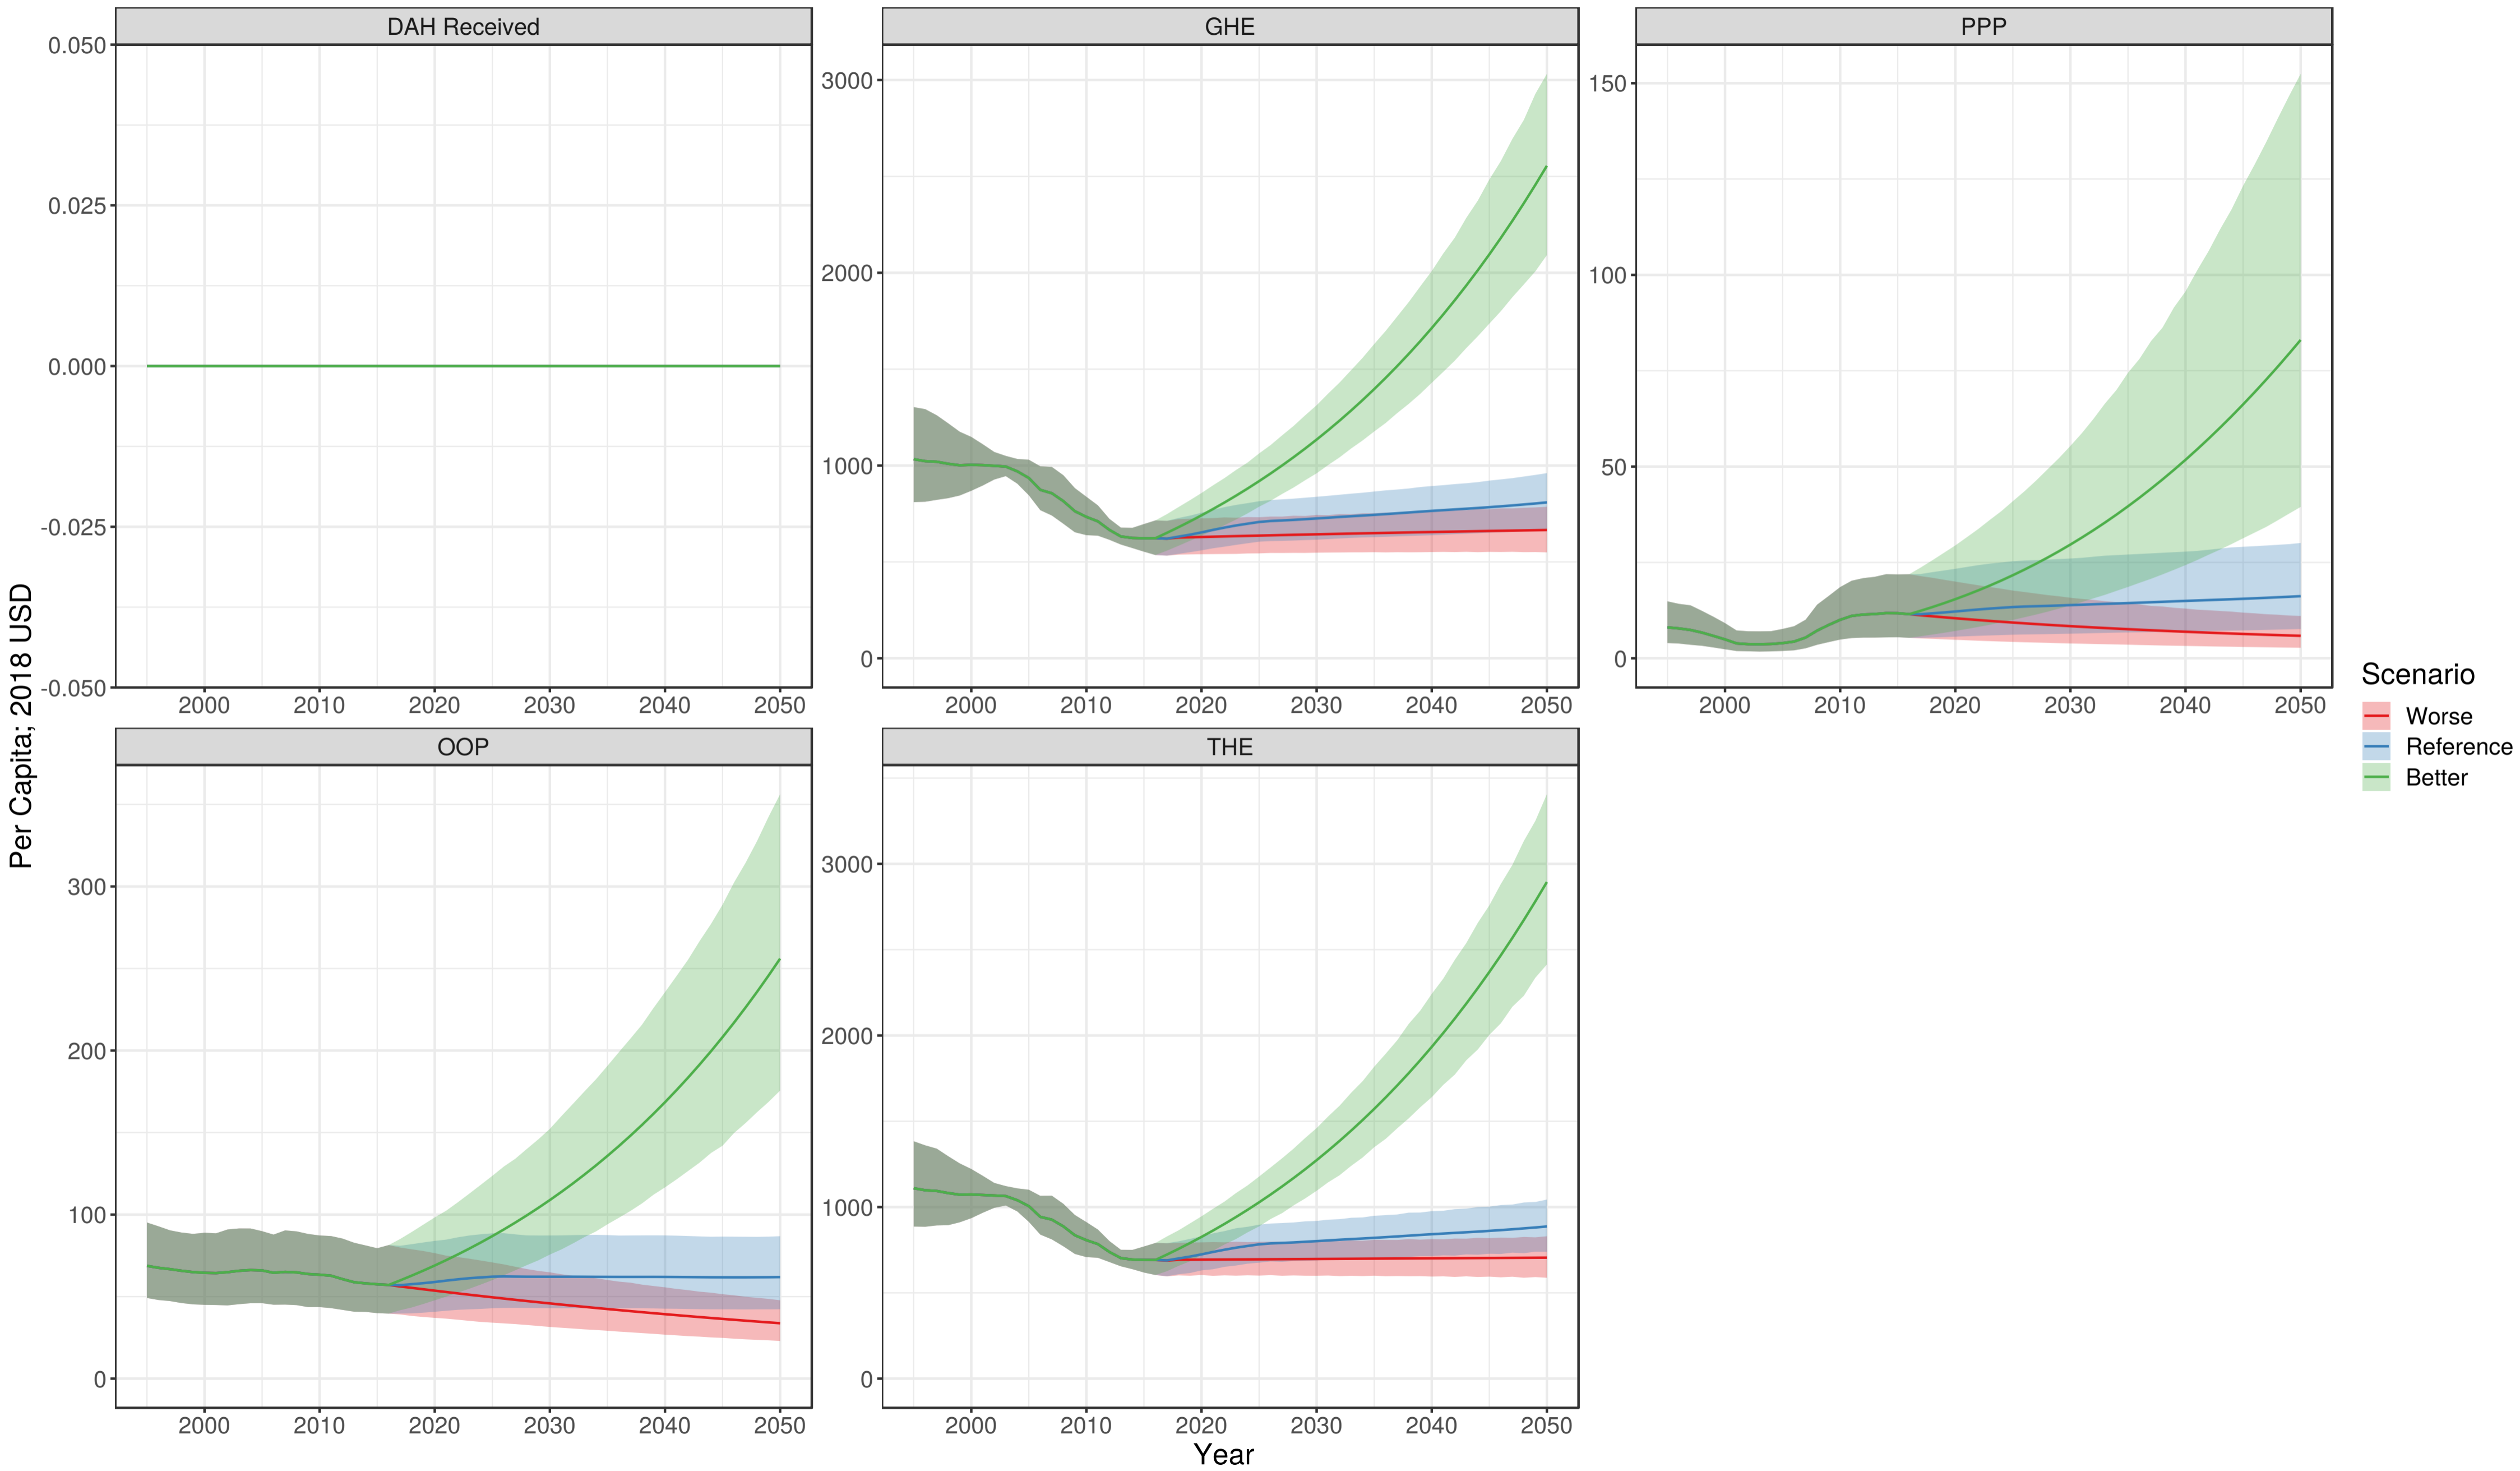



# Andorra

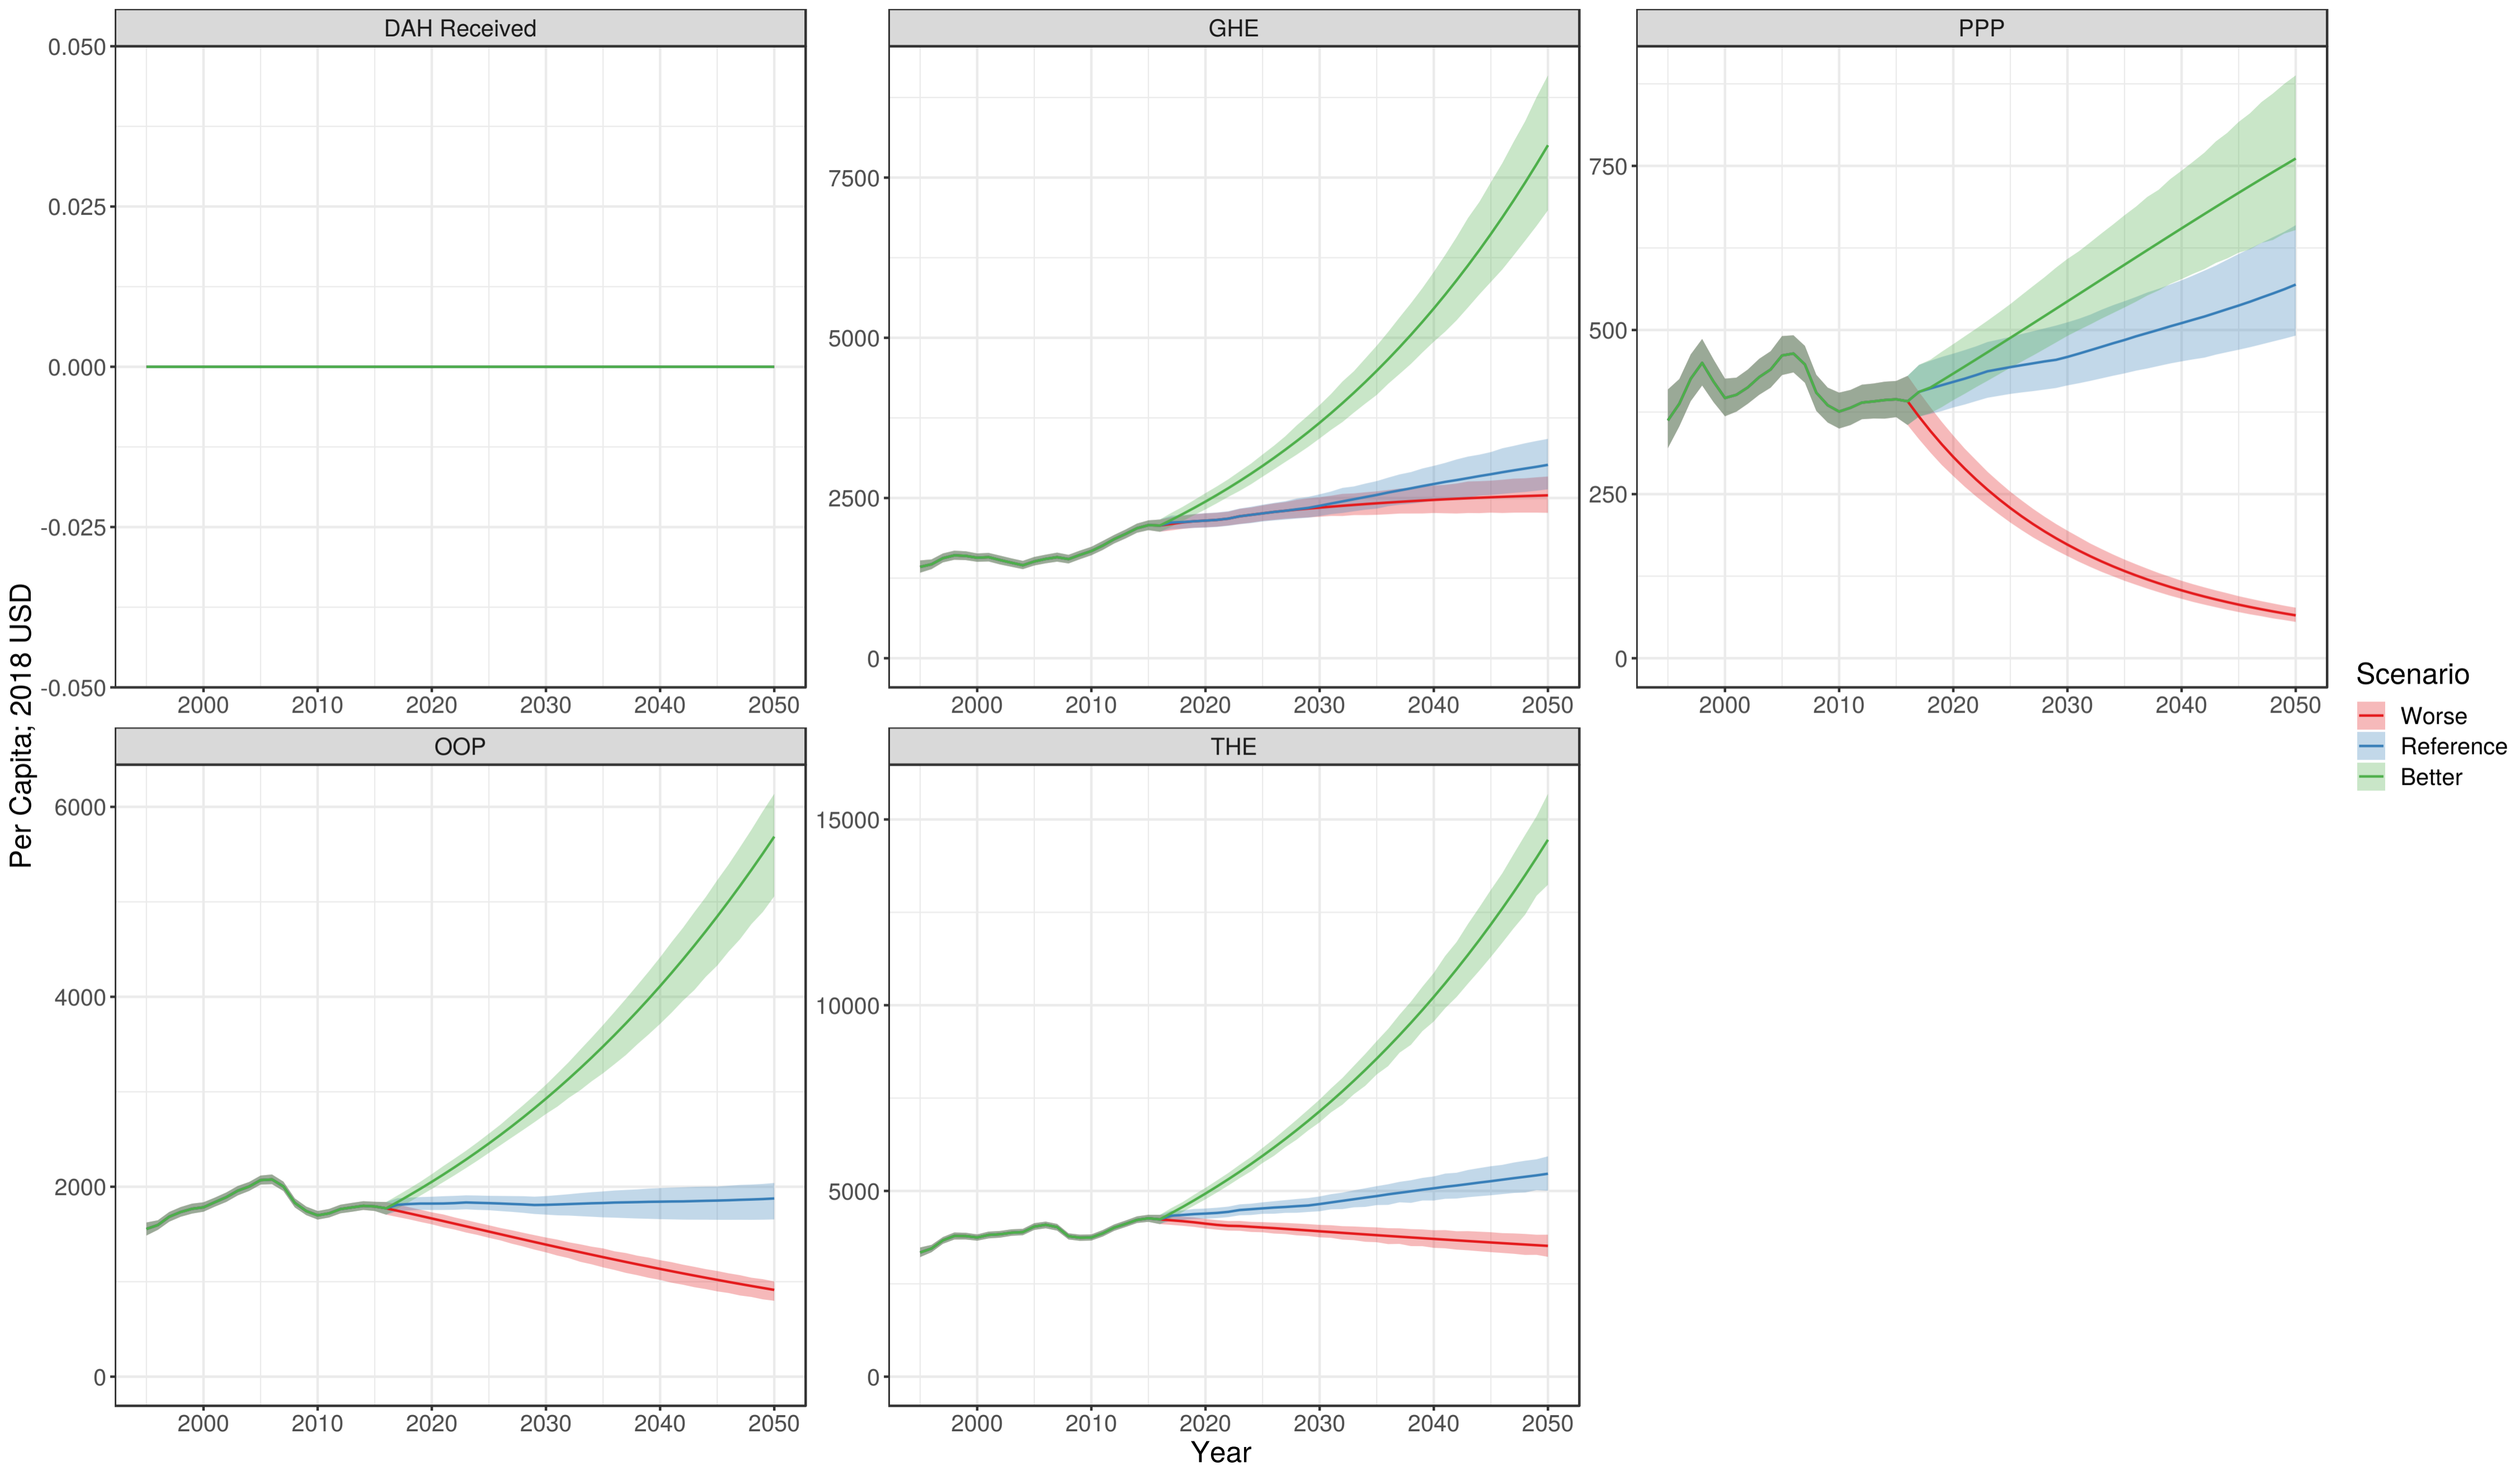

# Angola

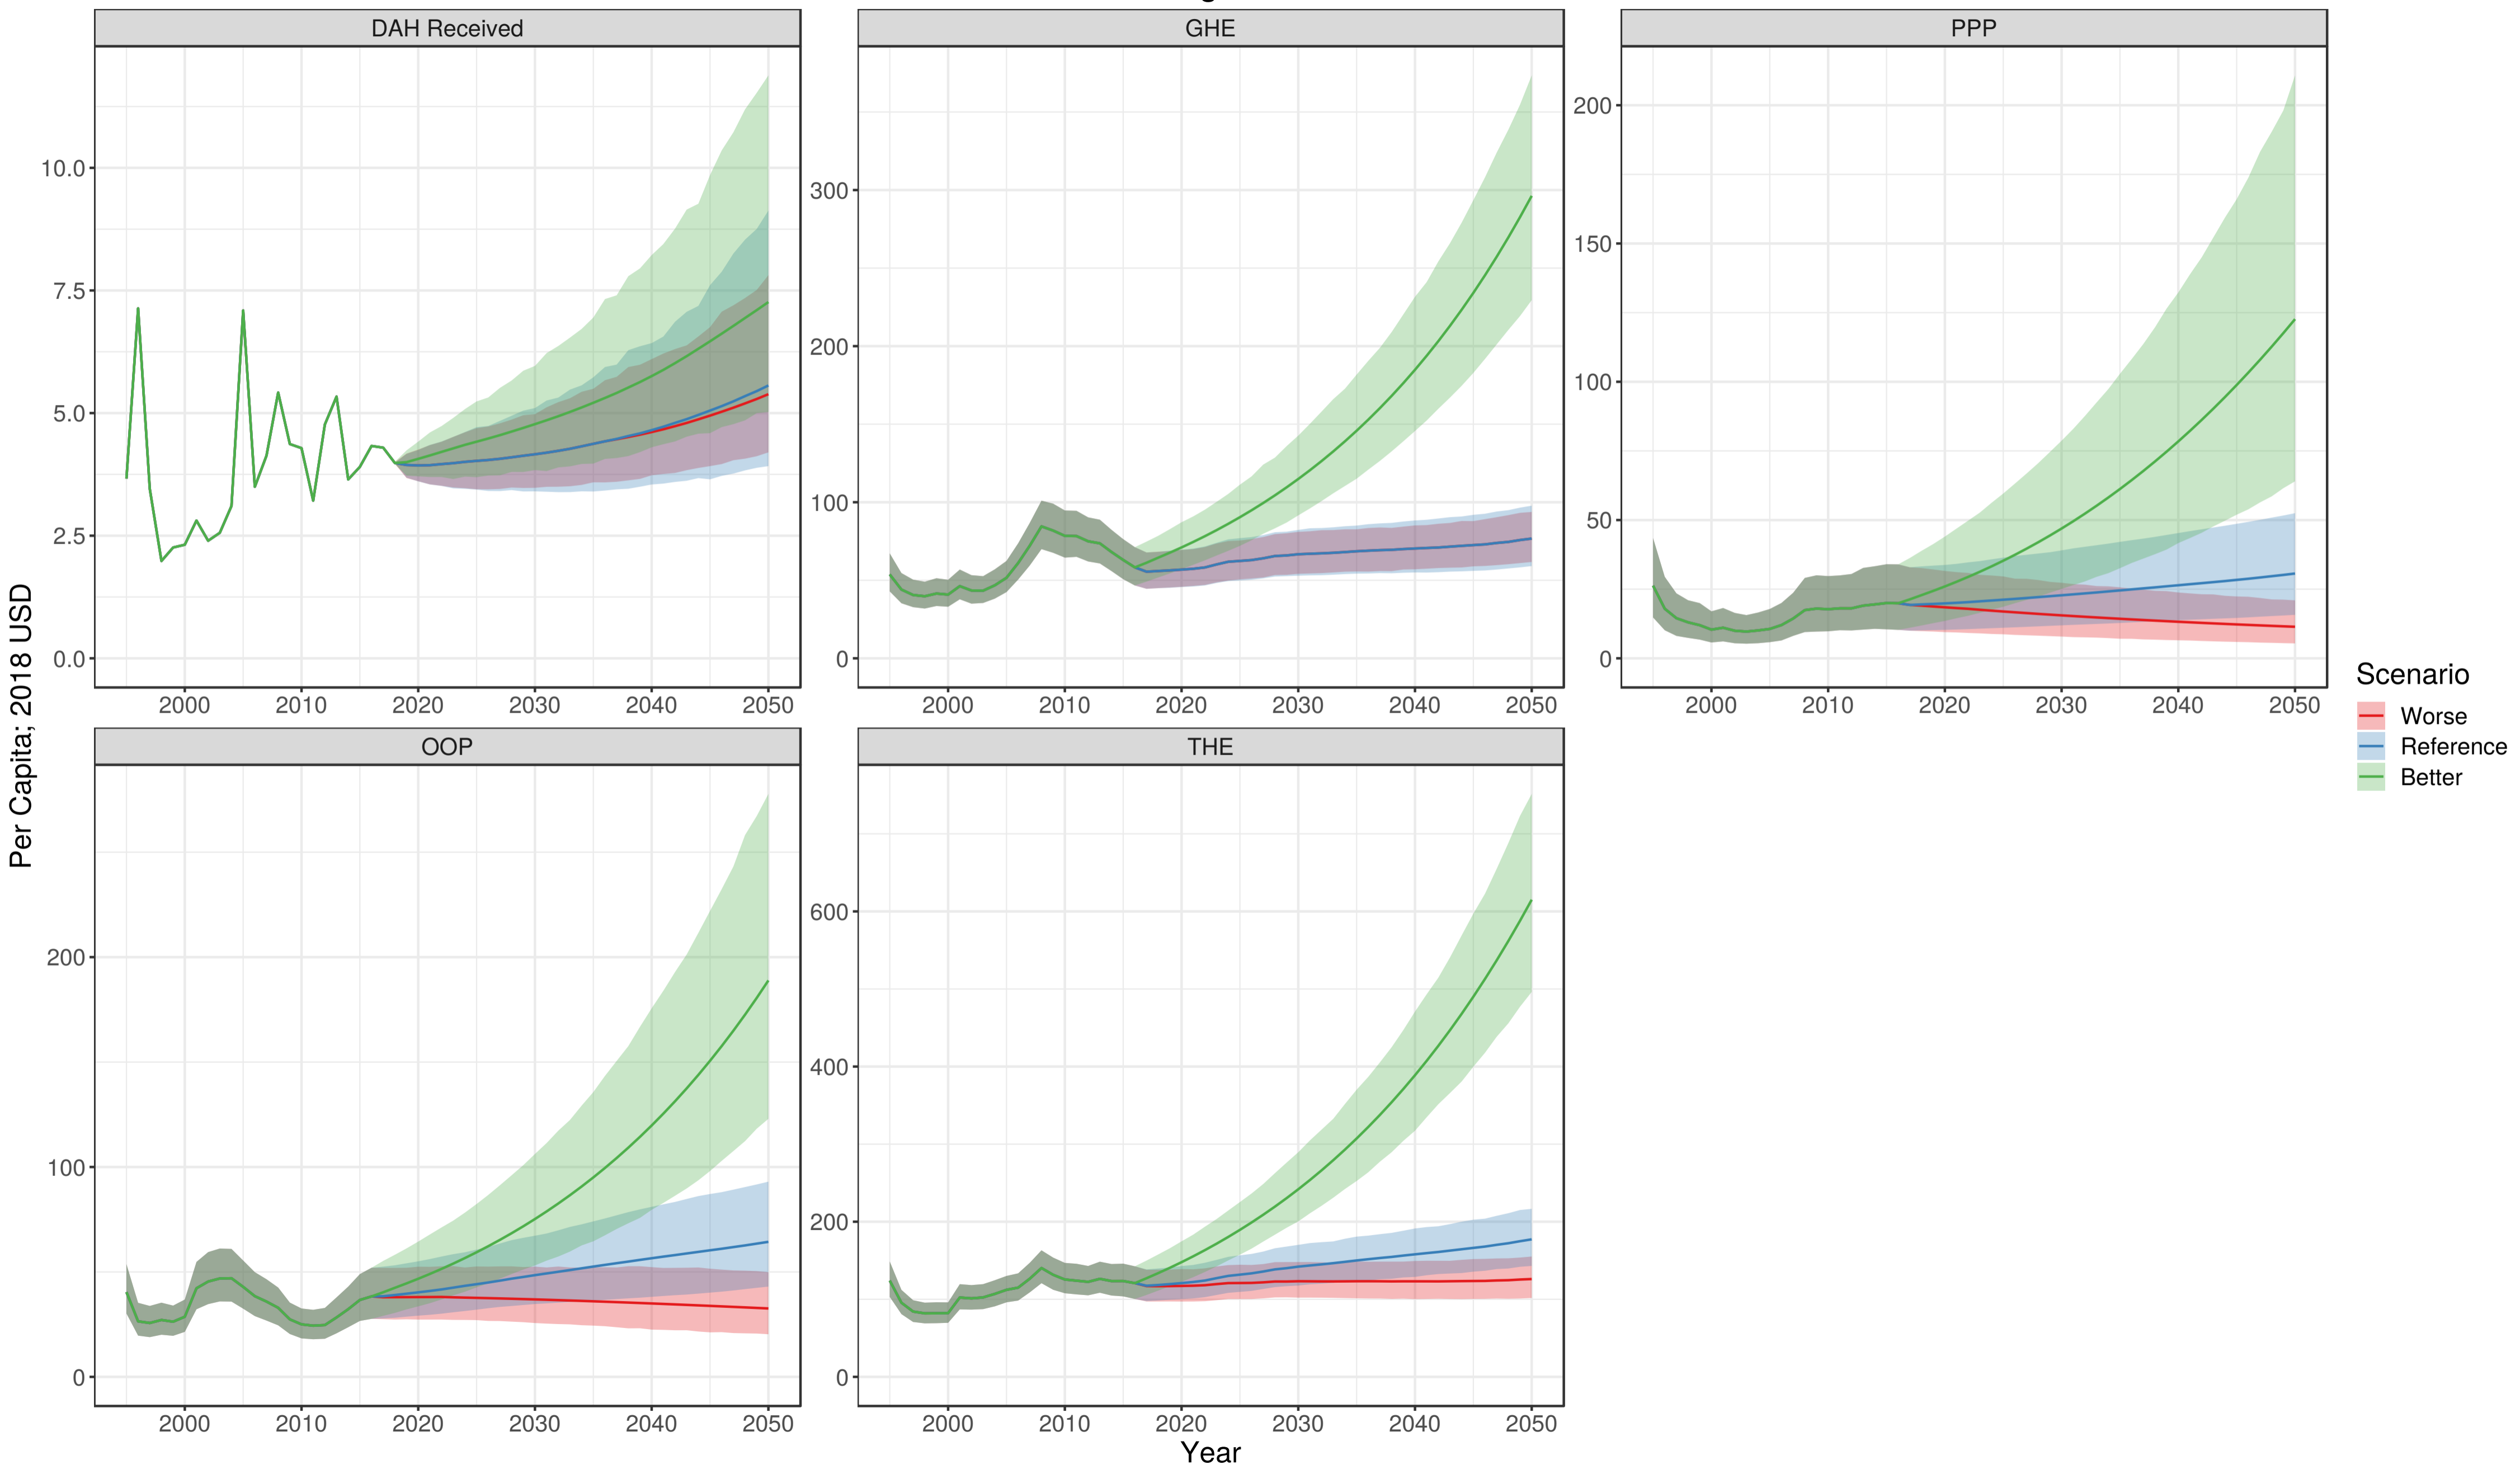

# Antigua and Barbuda

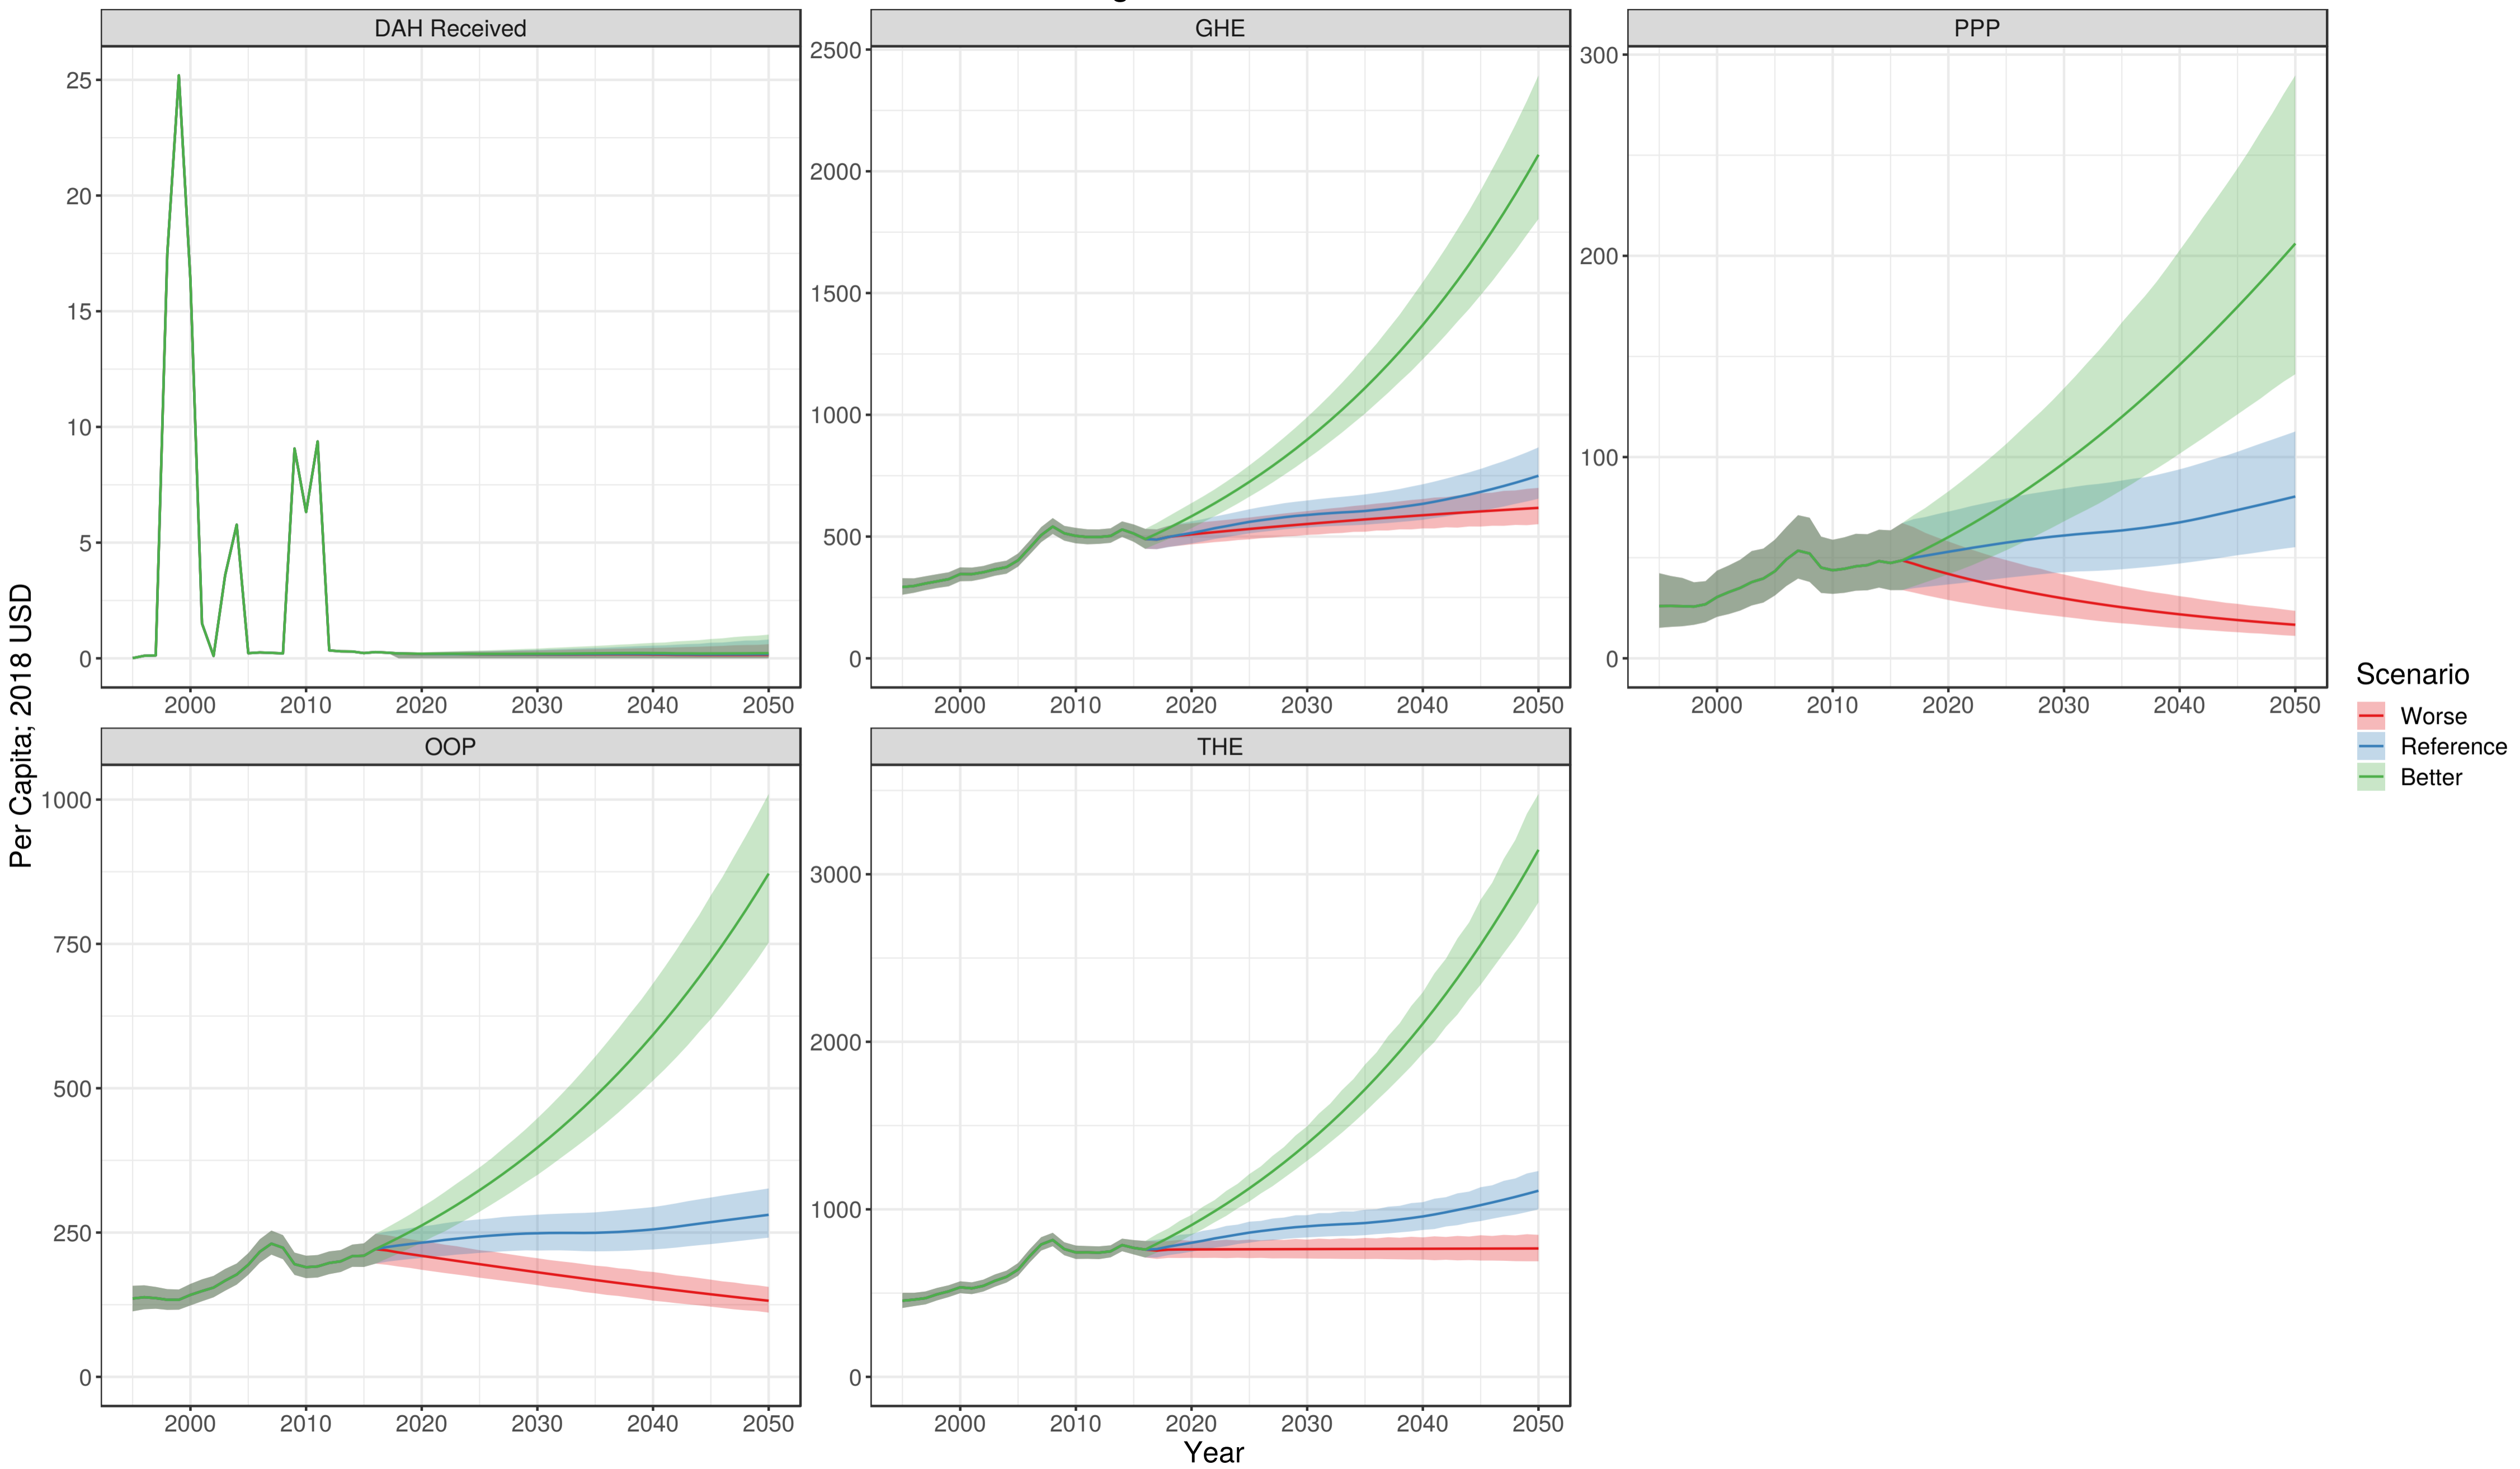

# Argentina

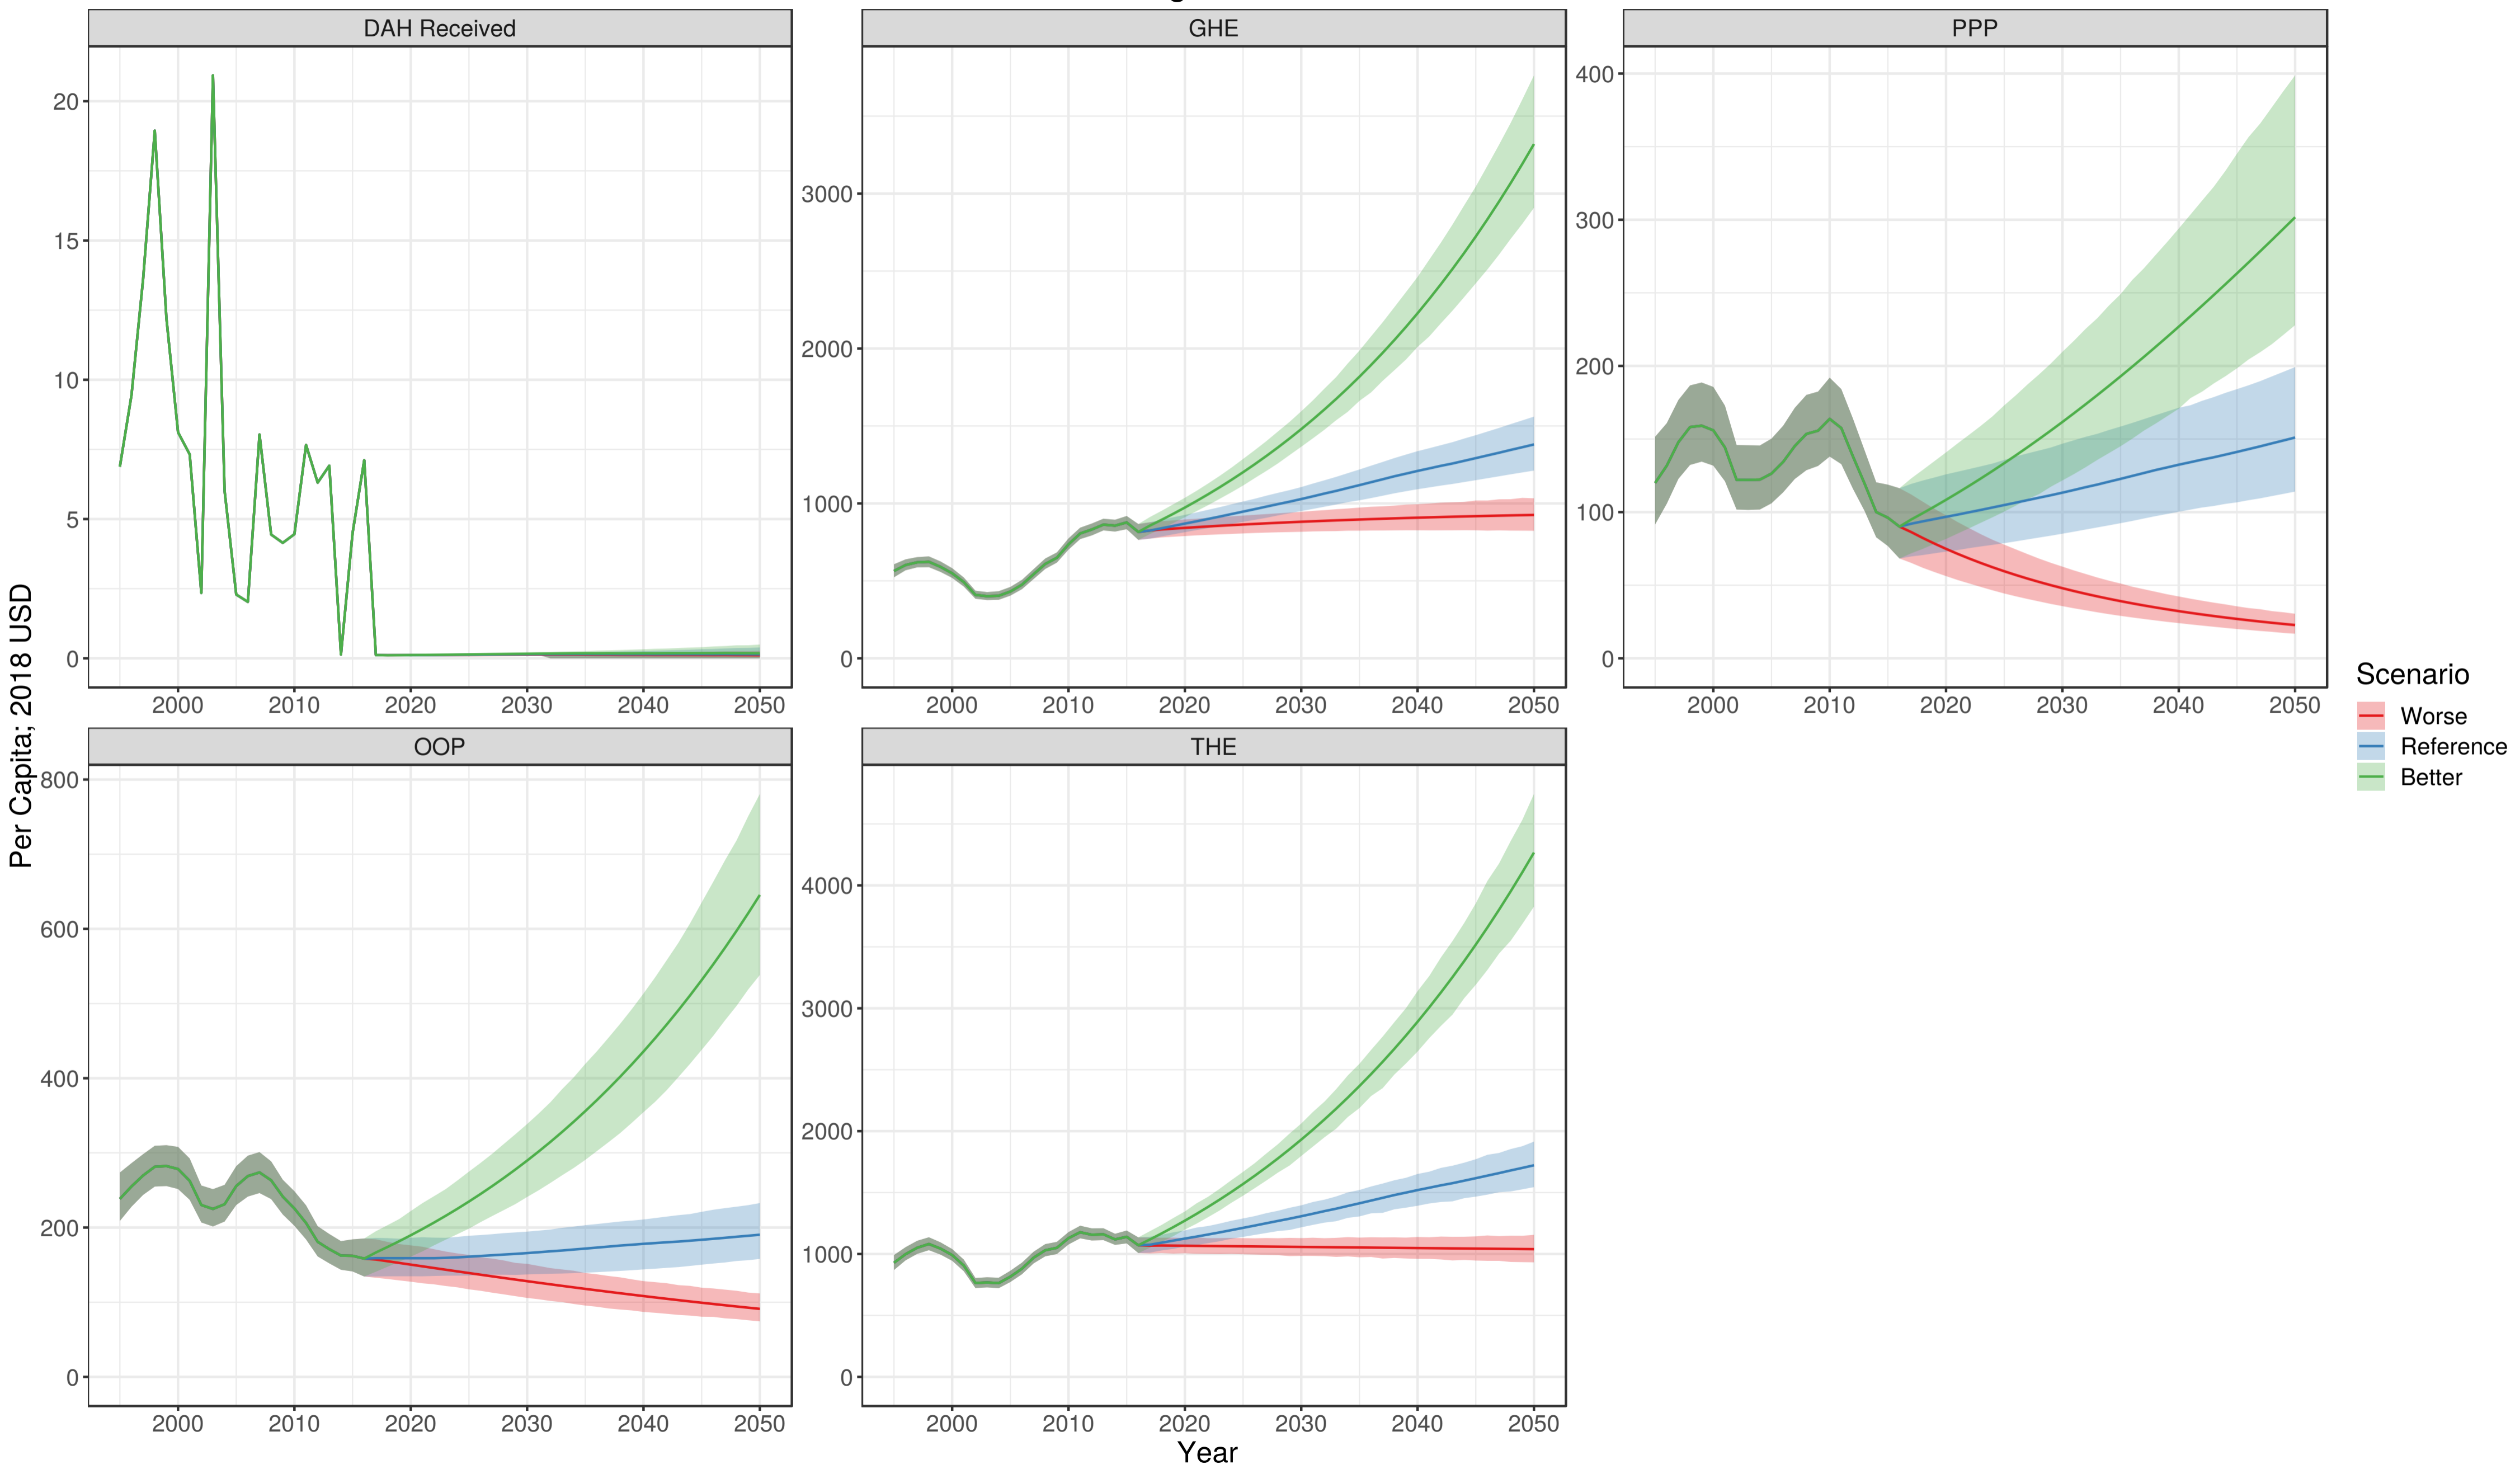

# Armenia

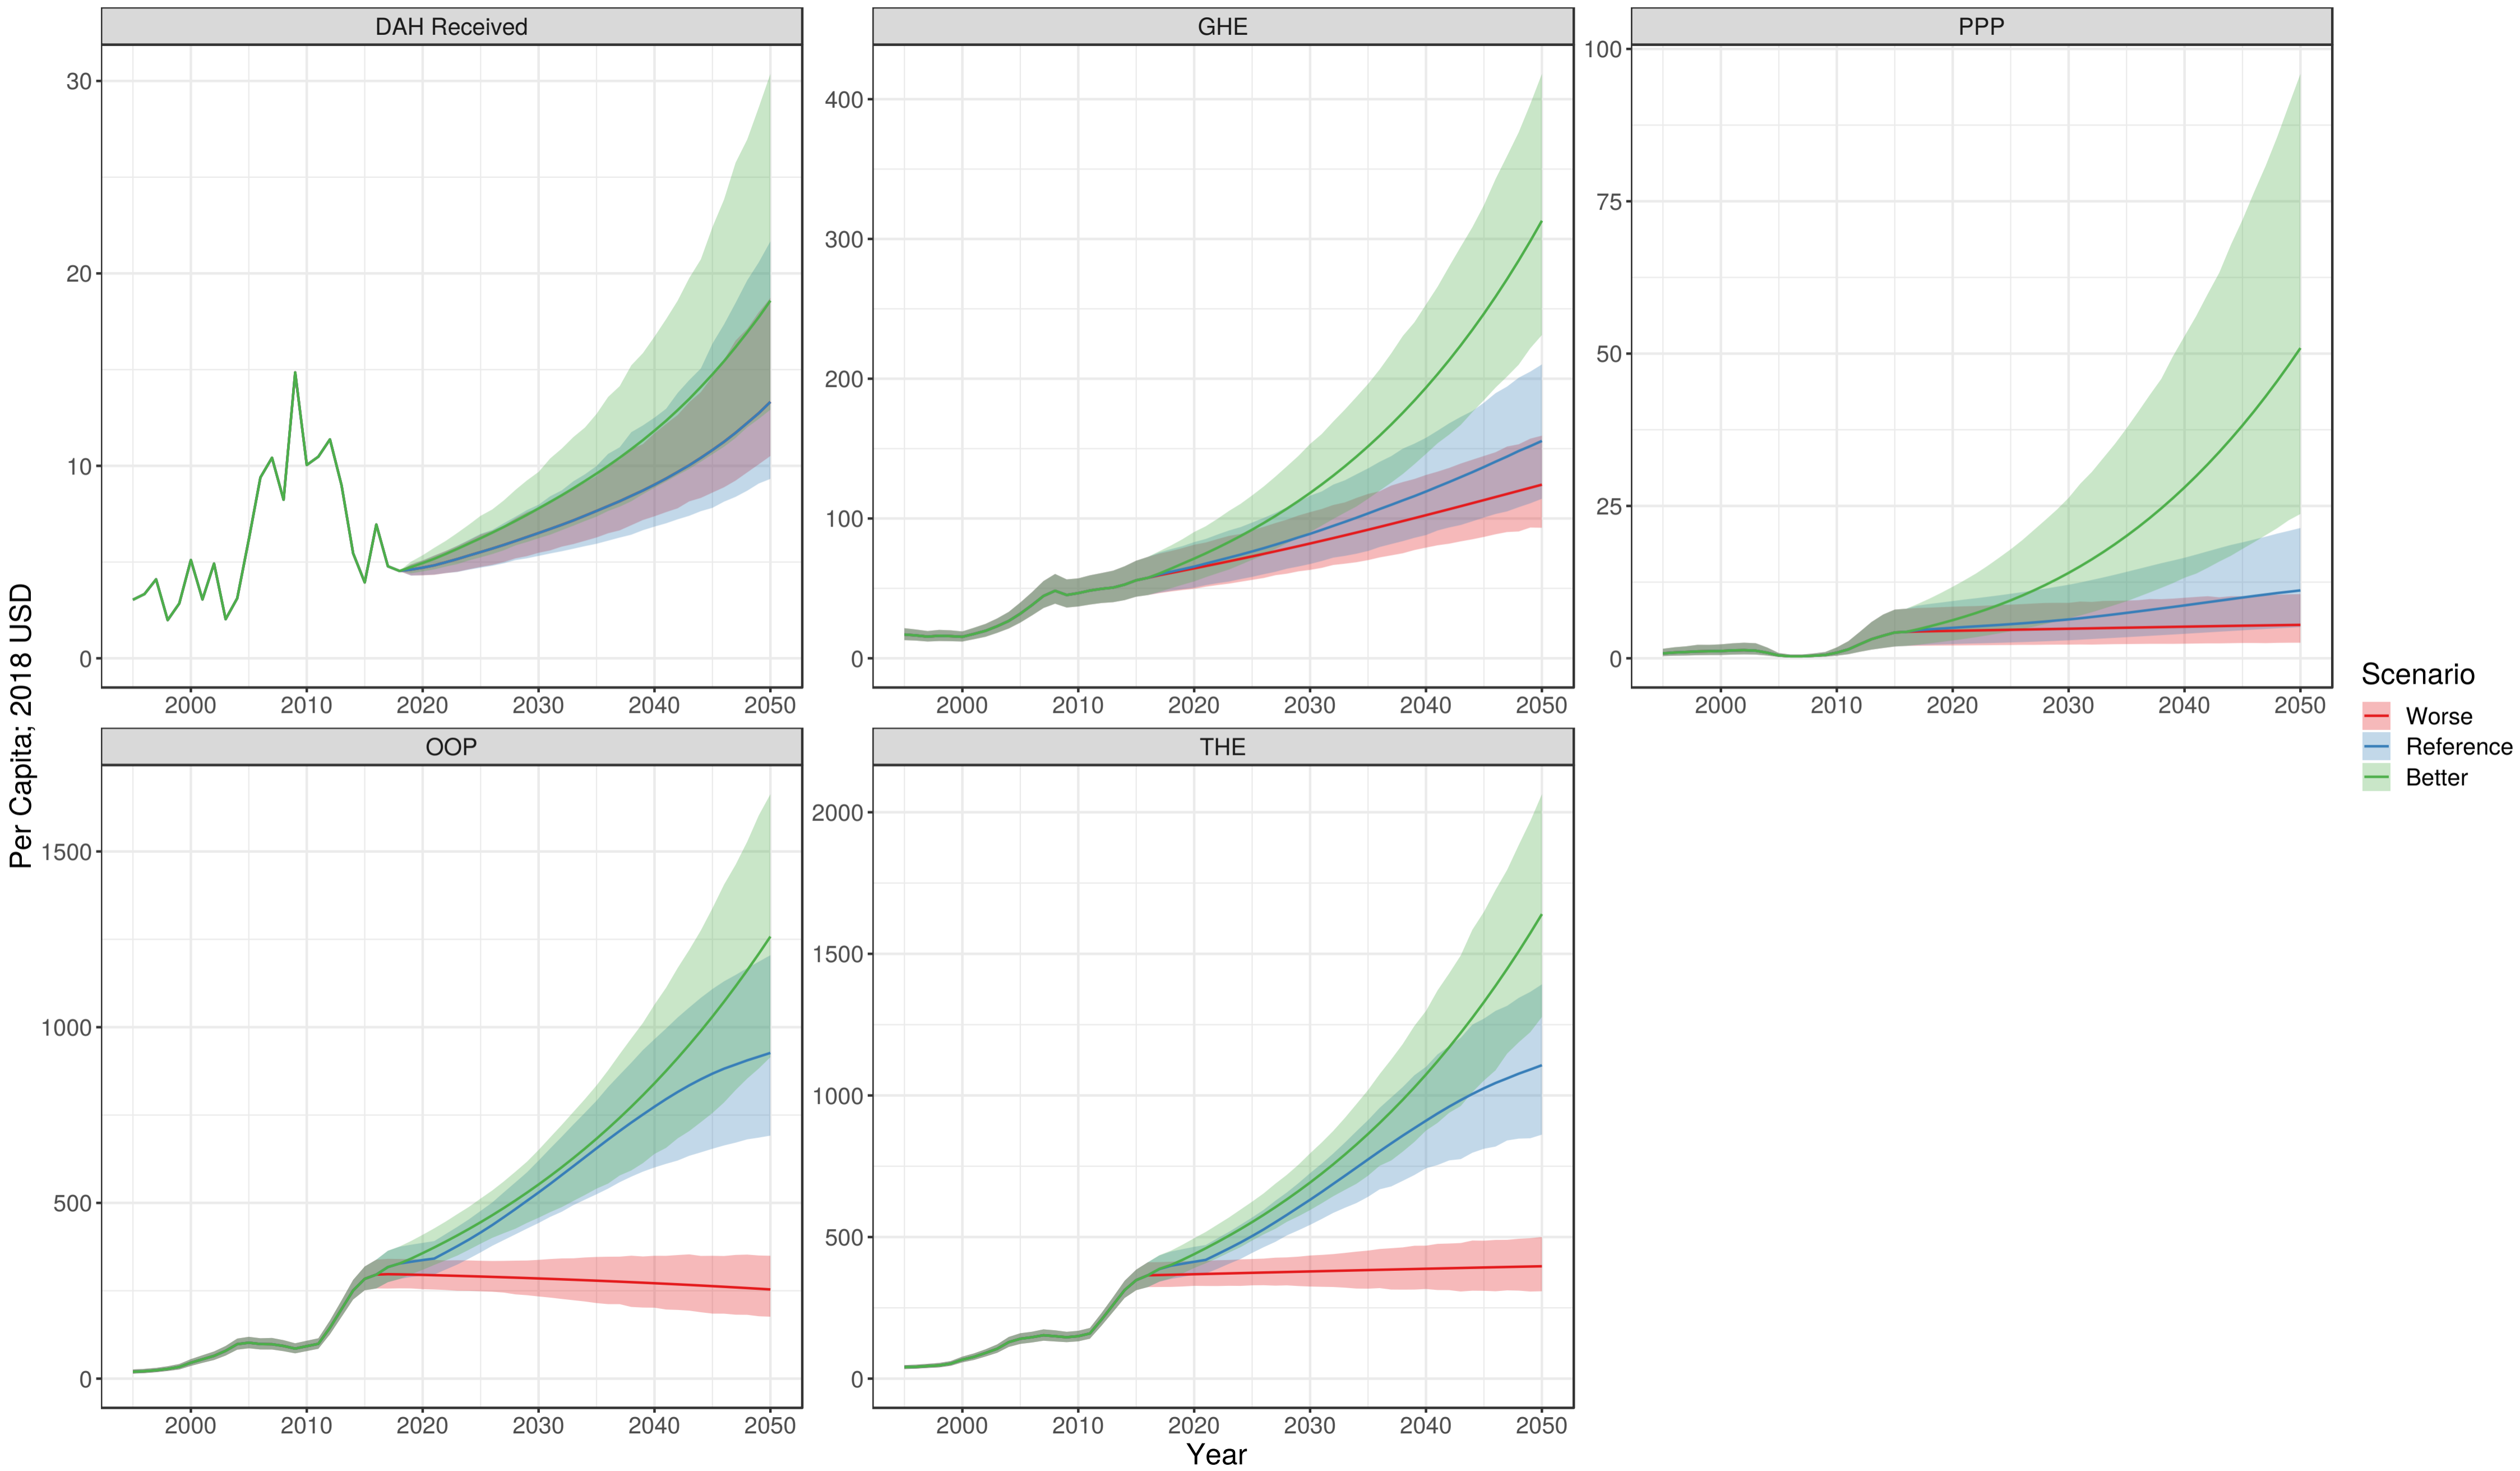

# Australia

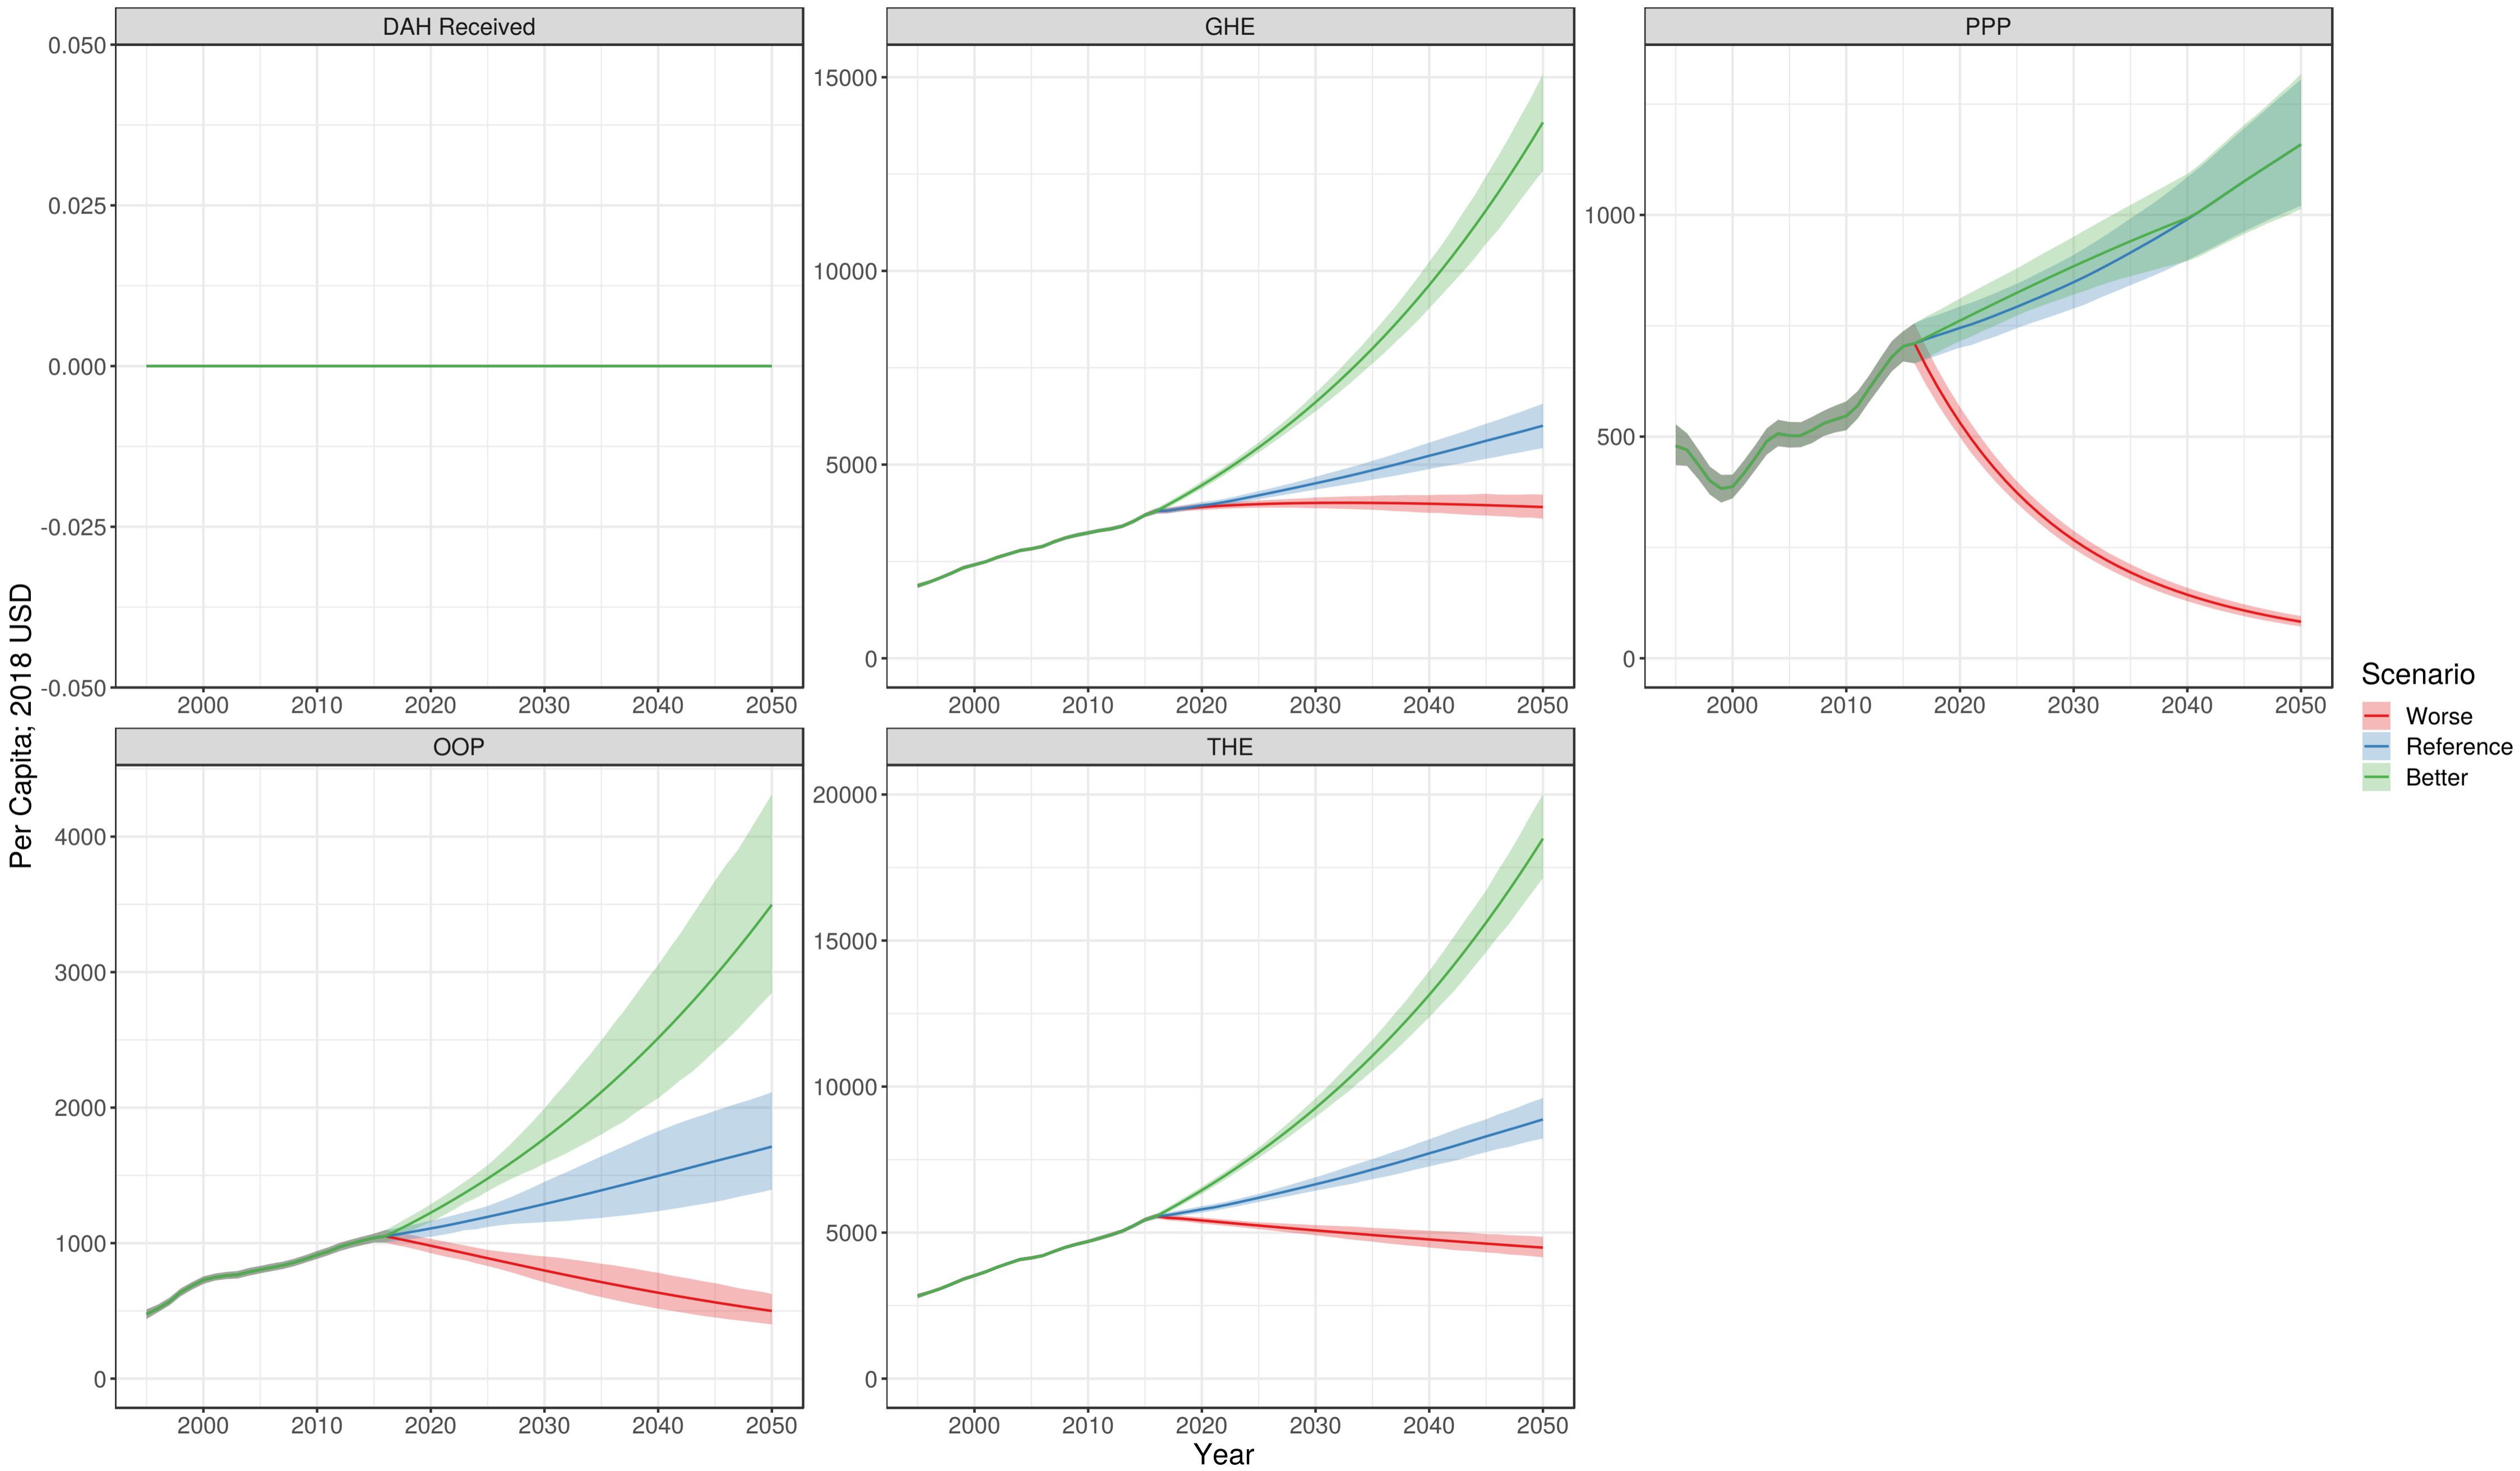

# Austria

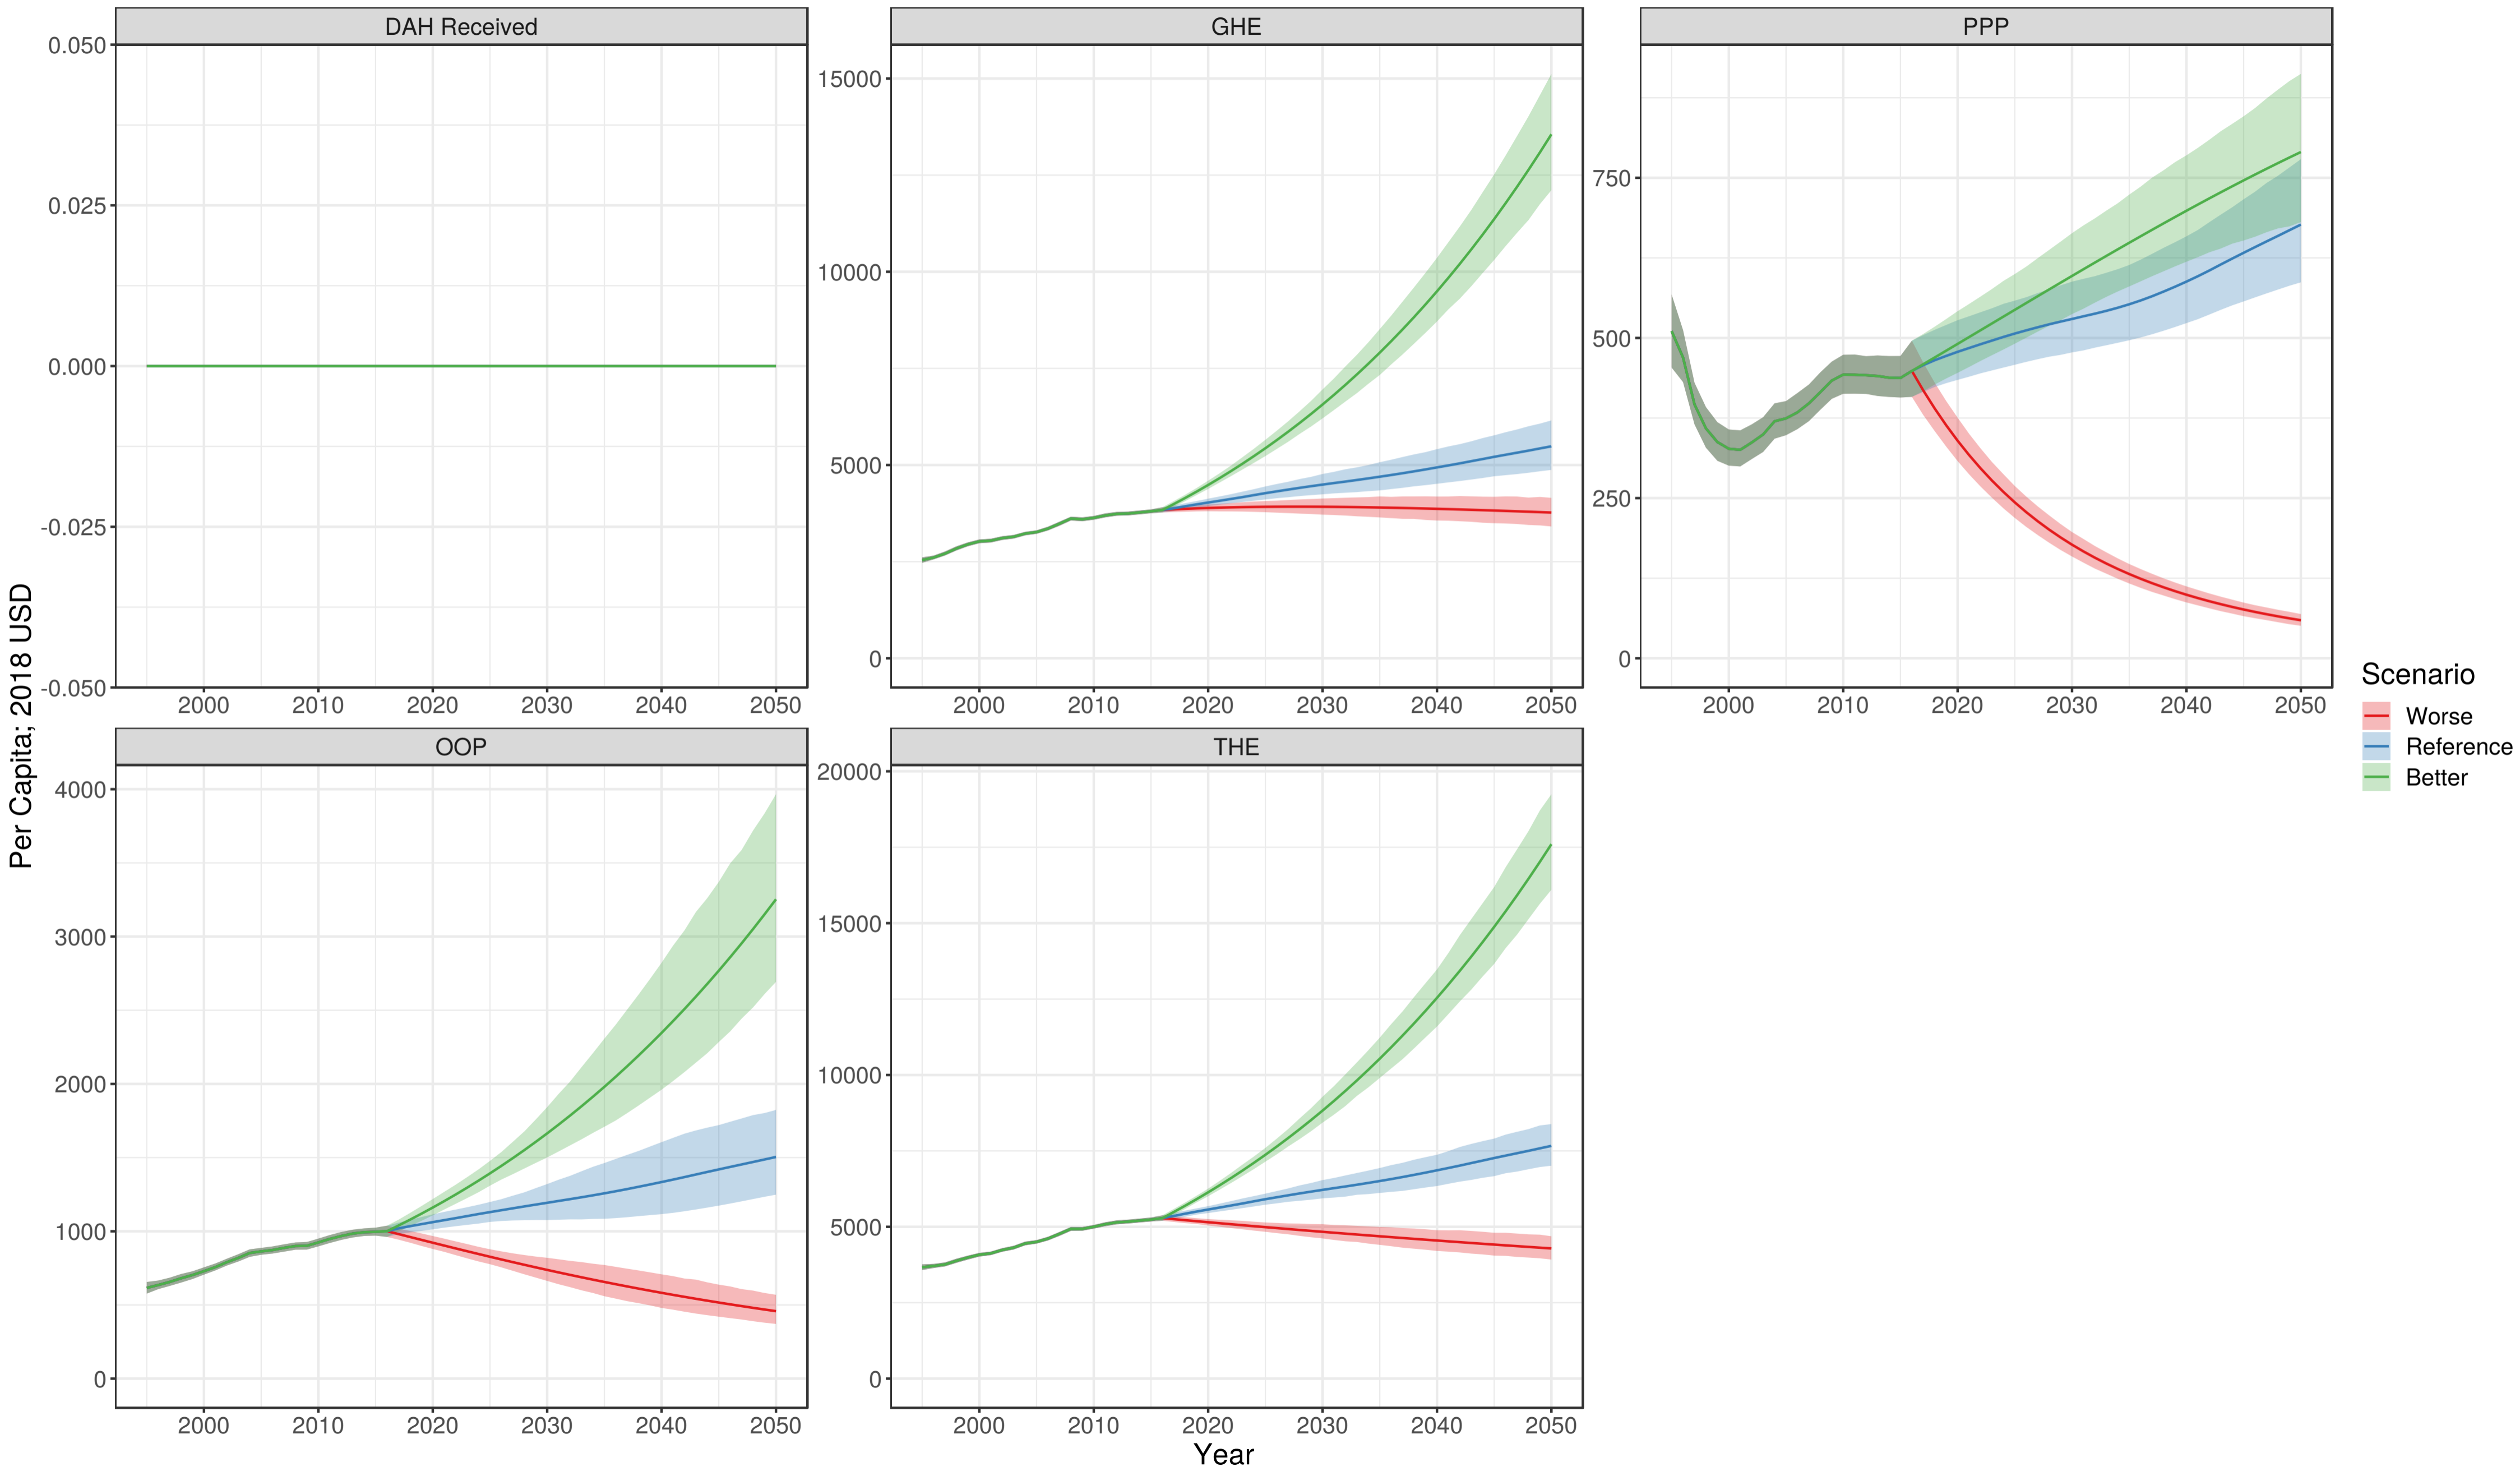

# Azerbaijan

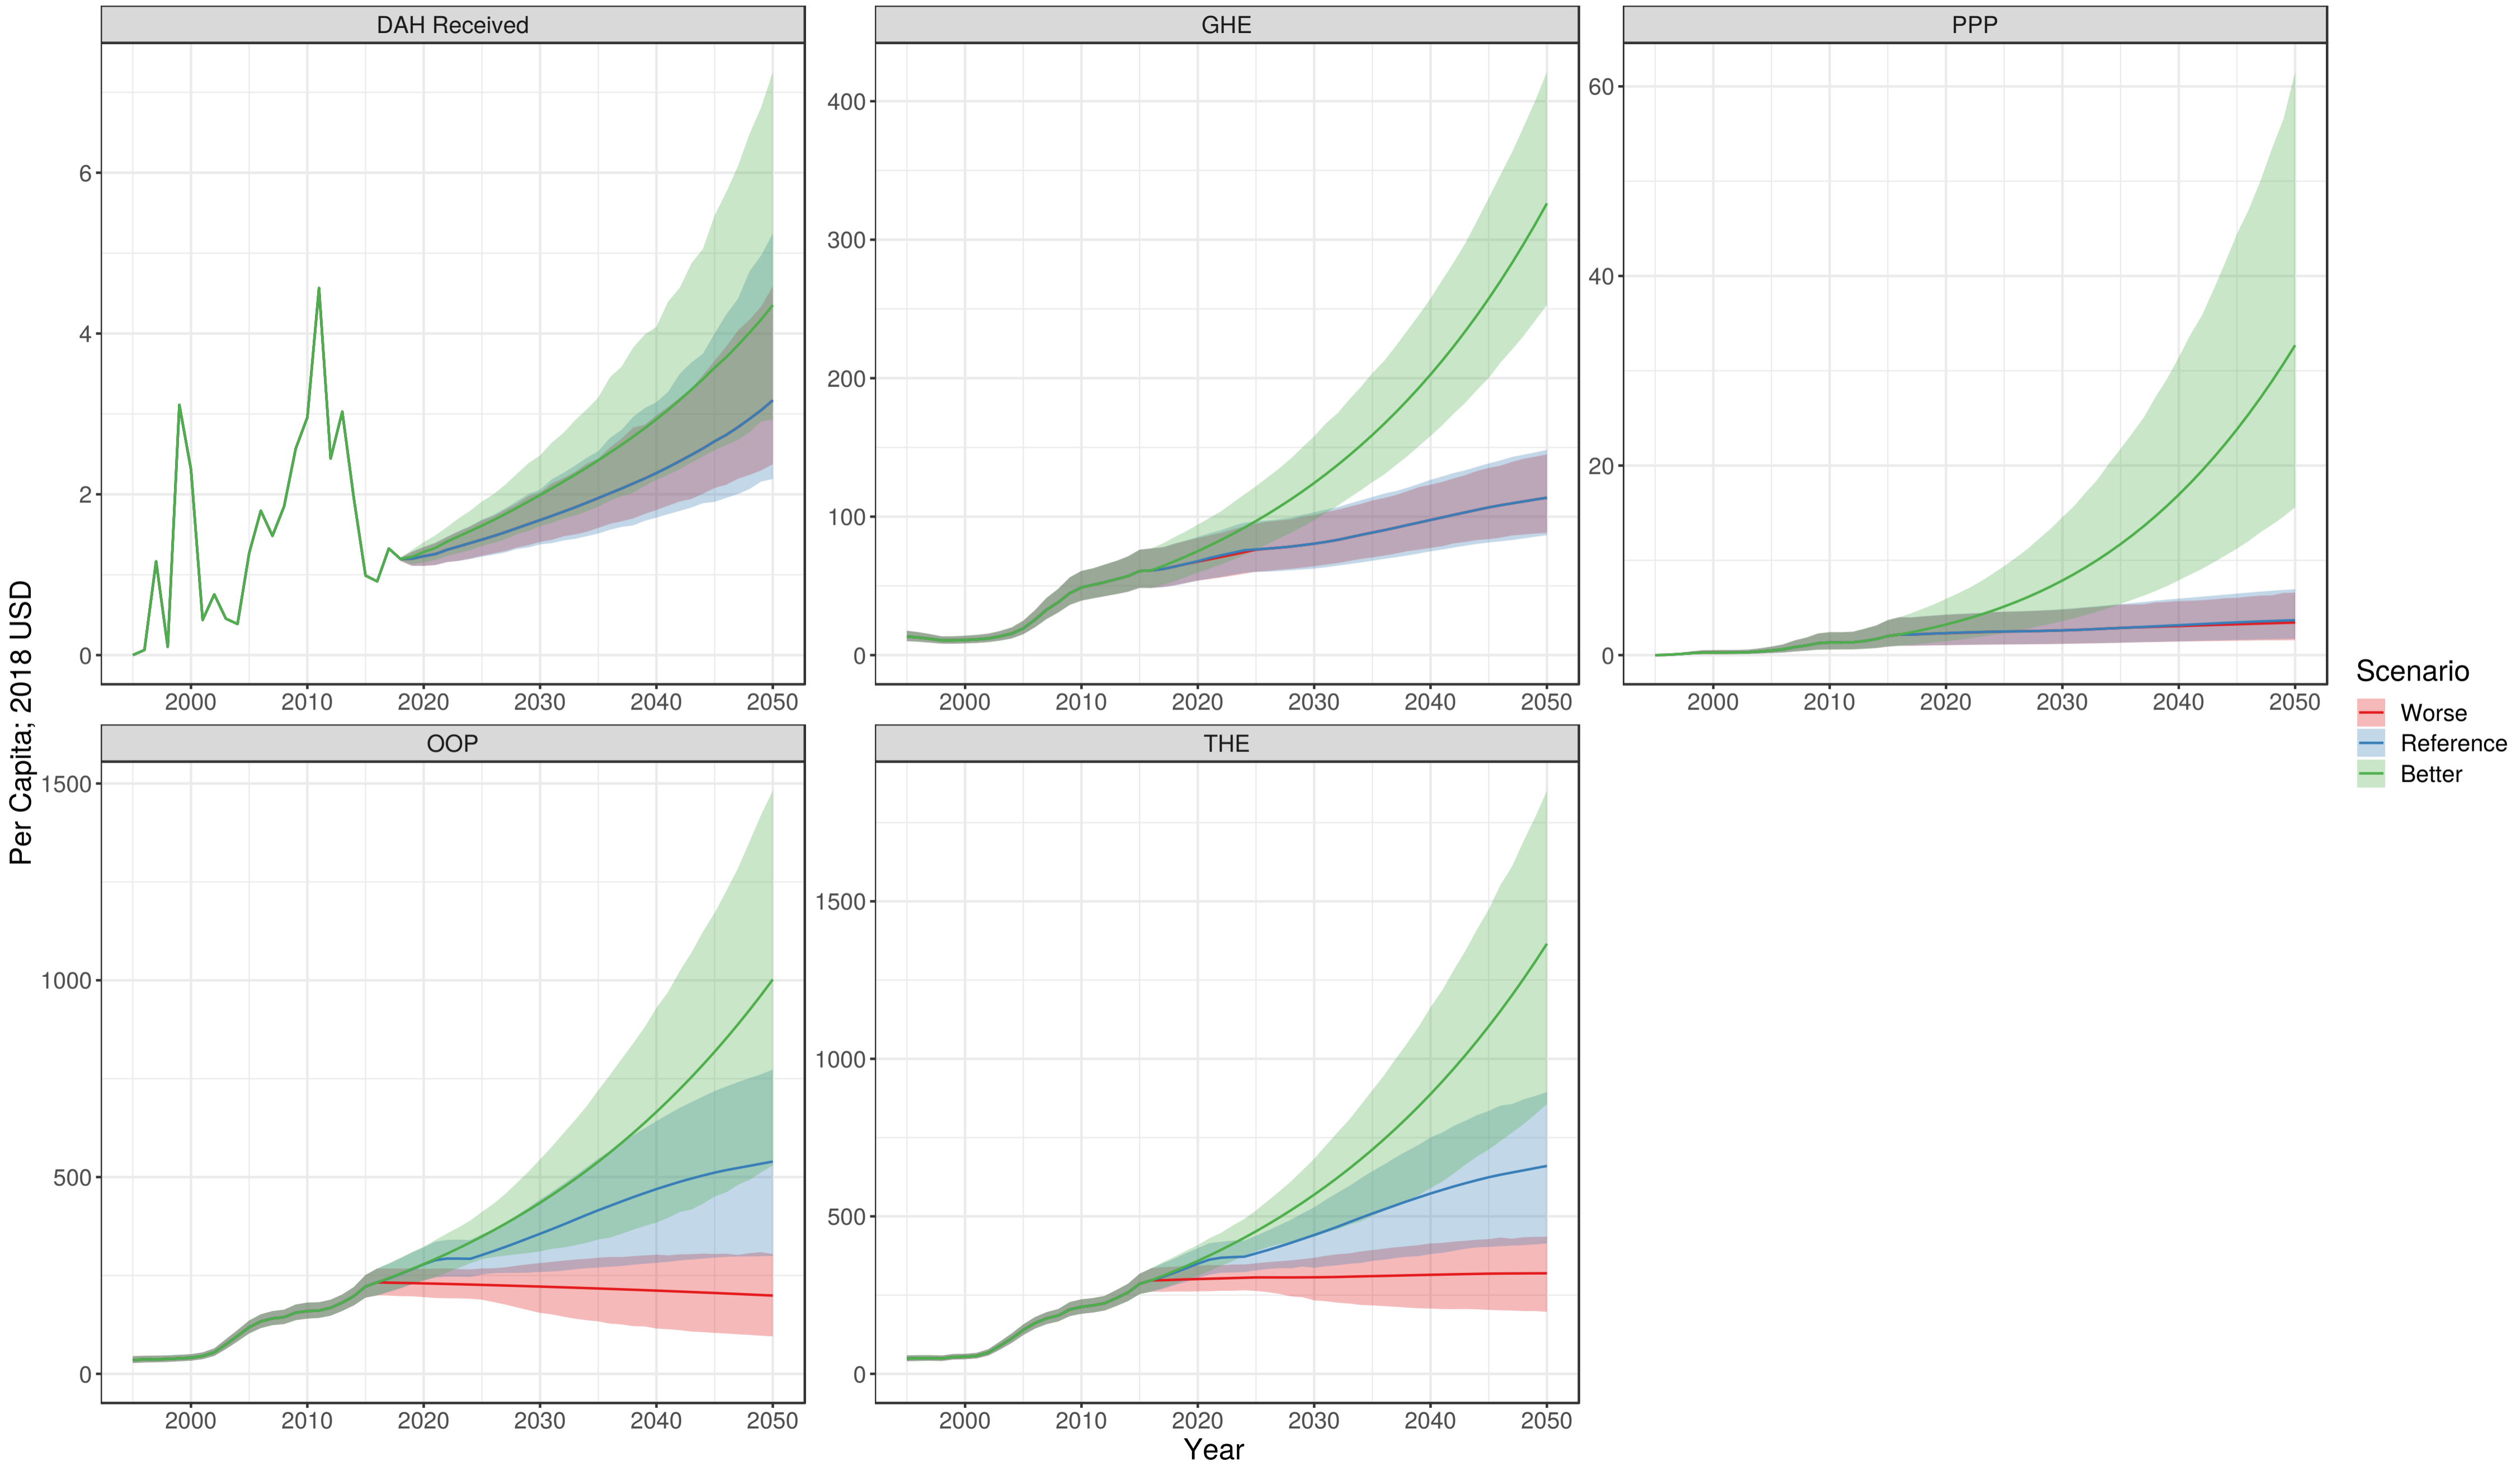



# Bahrain

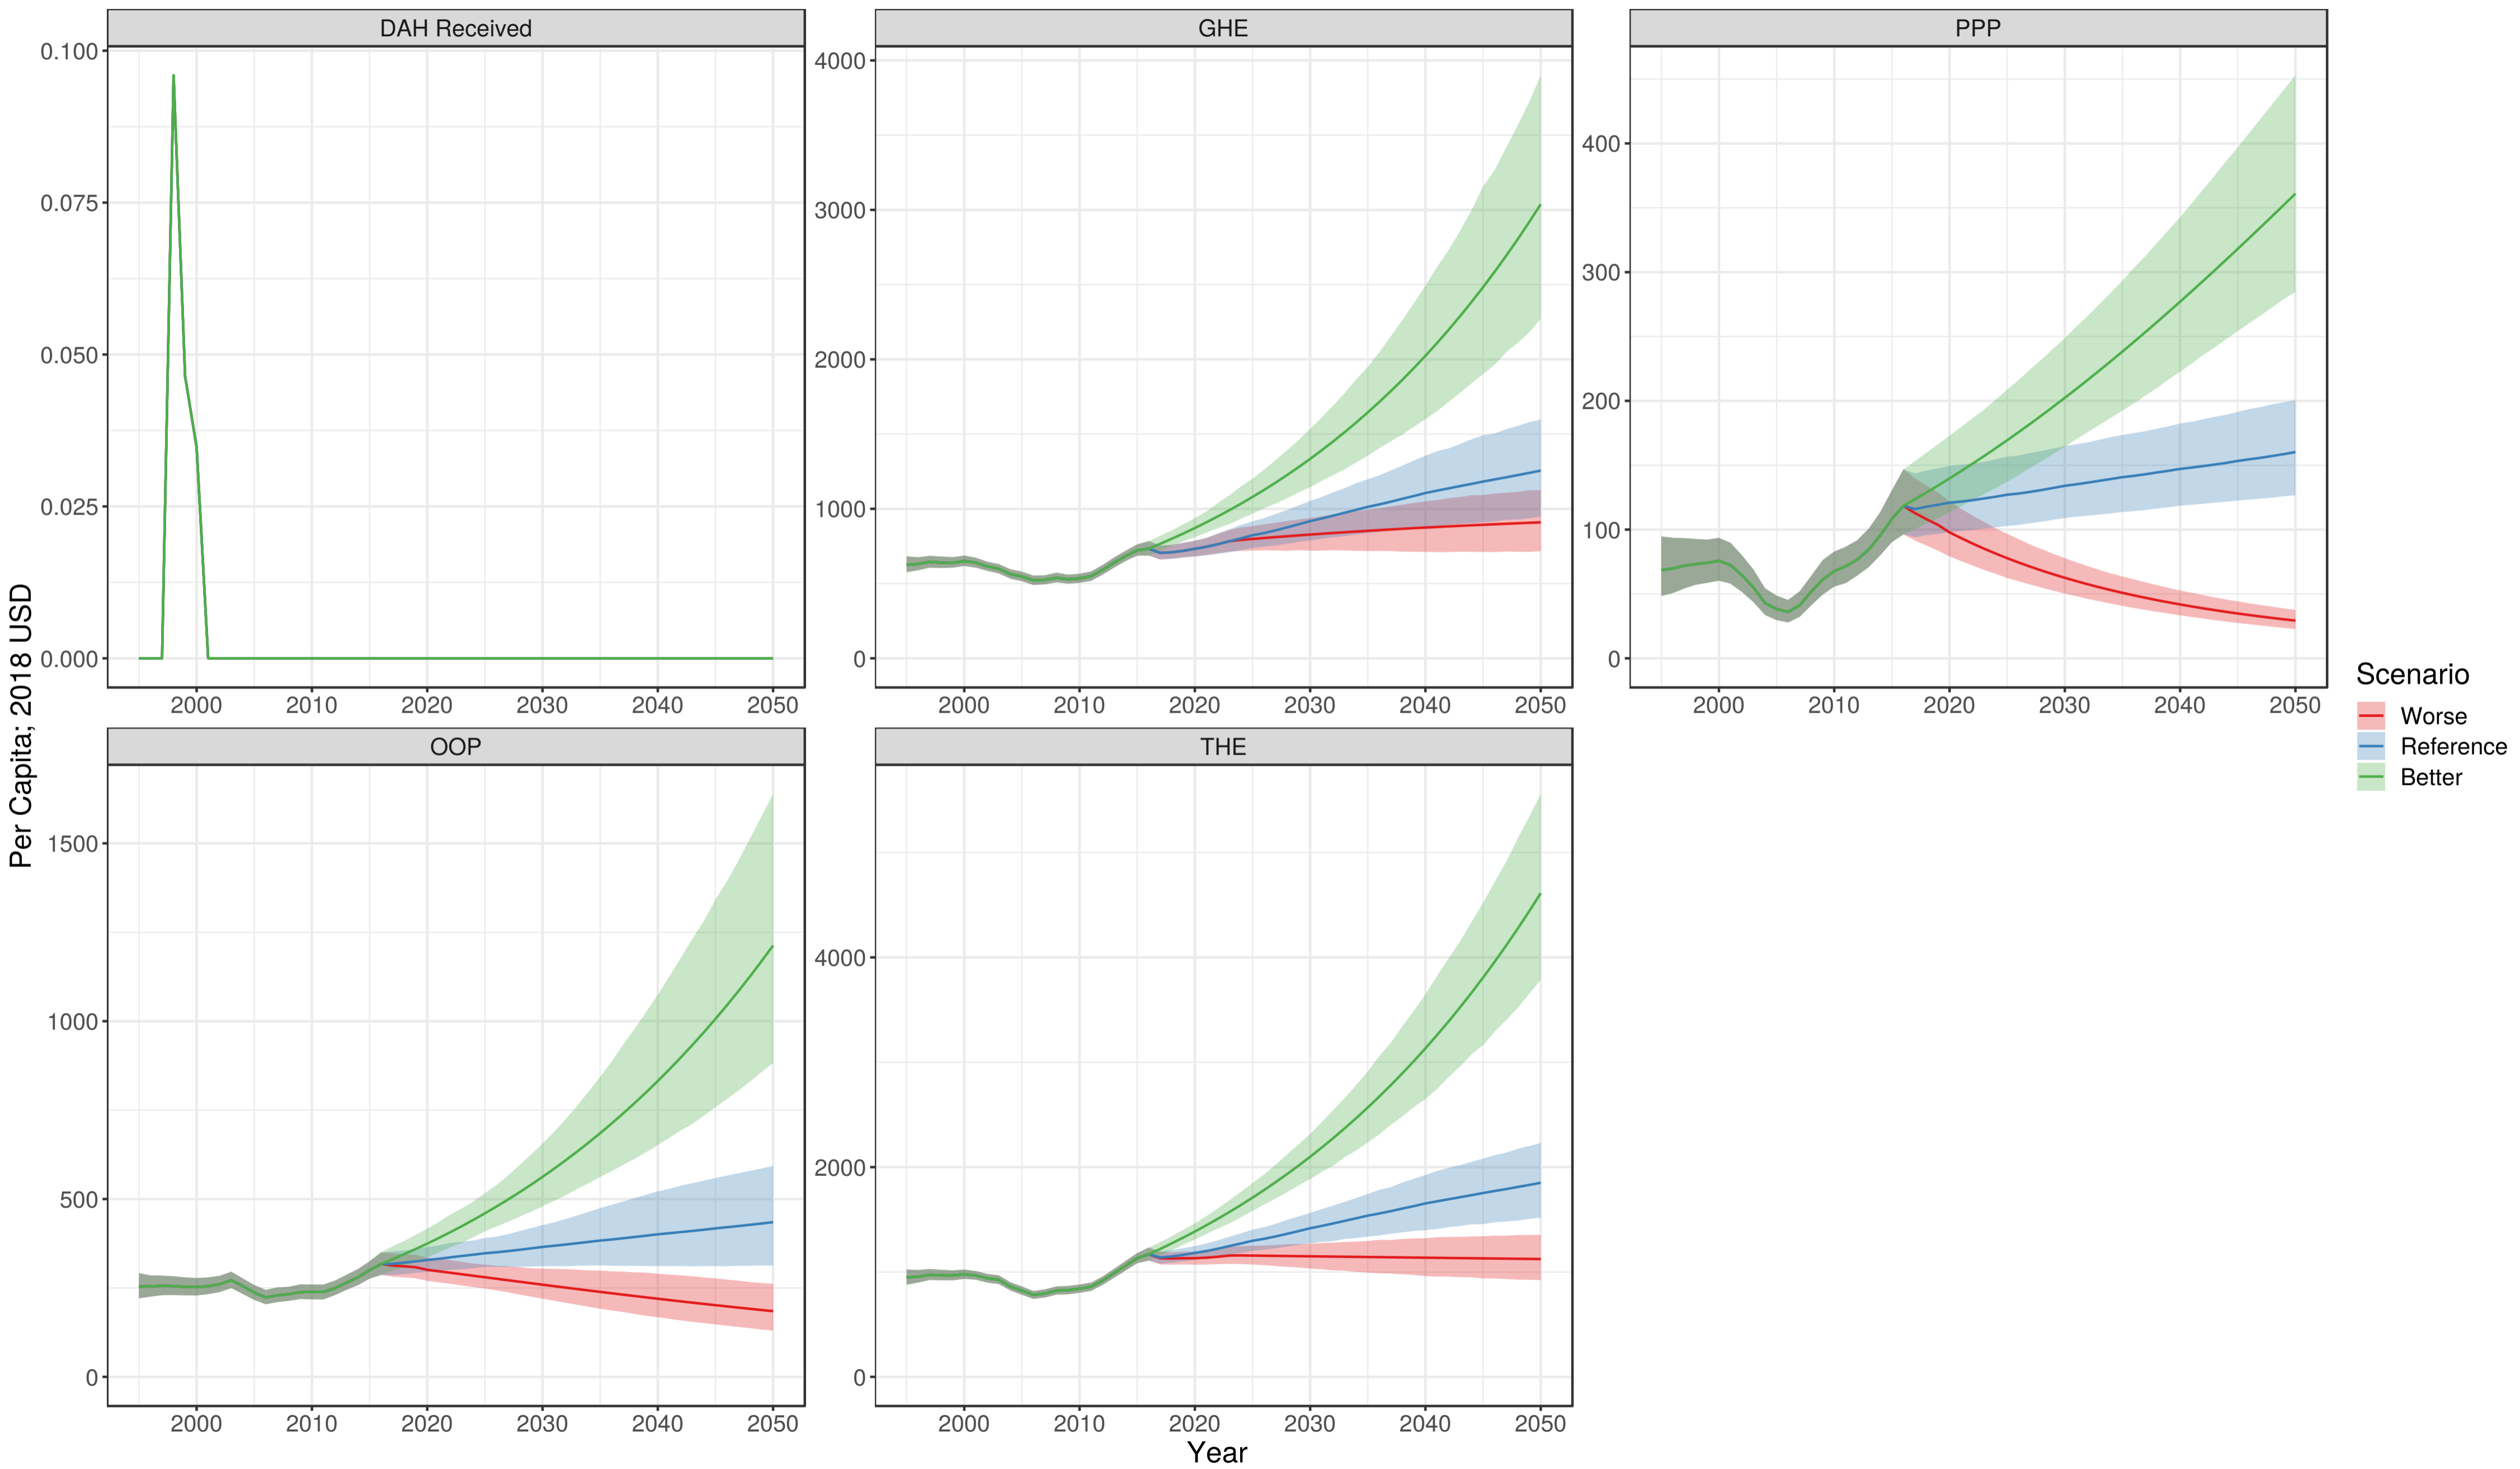

# Bangladesh

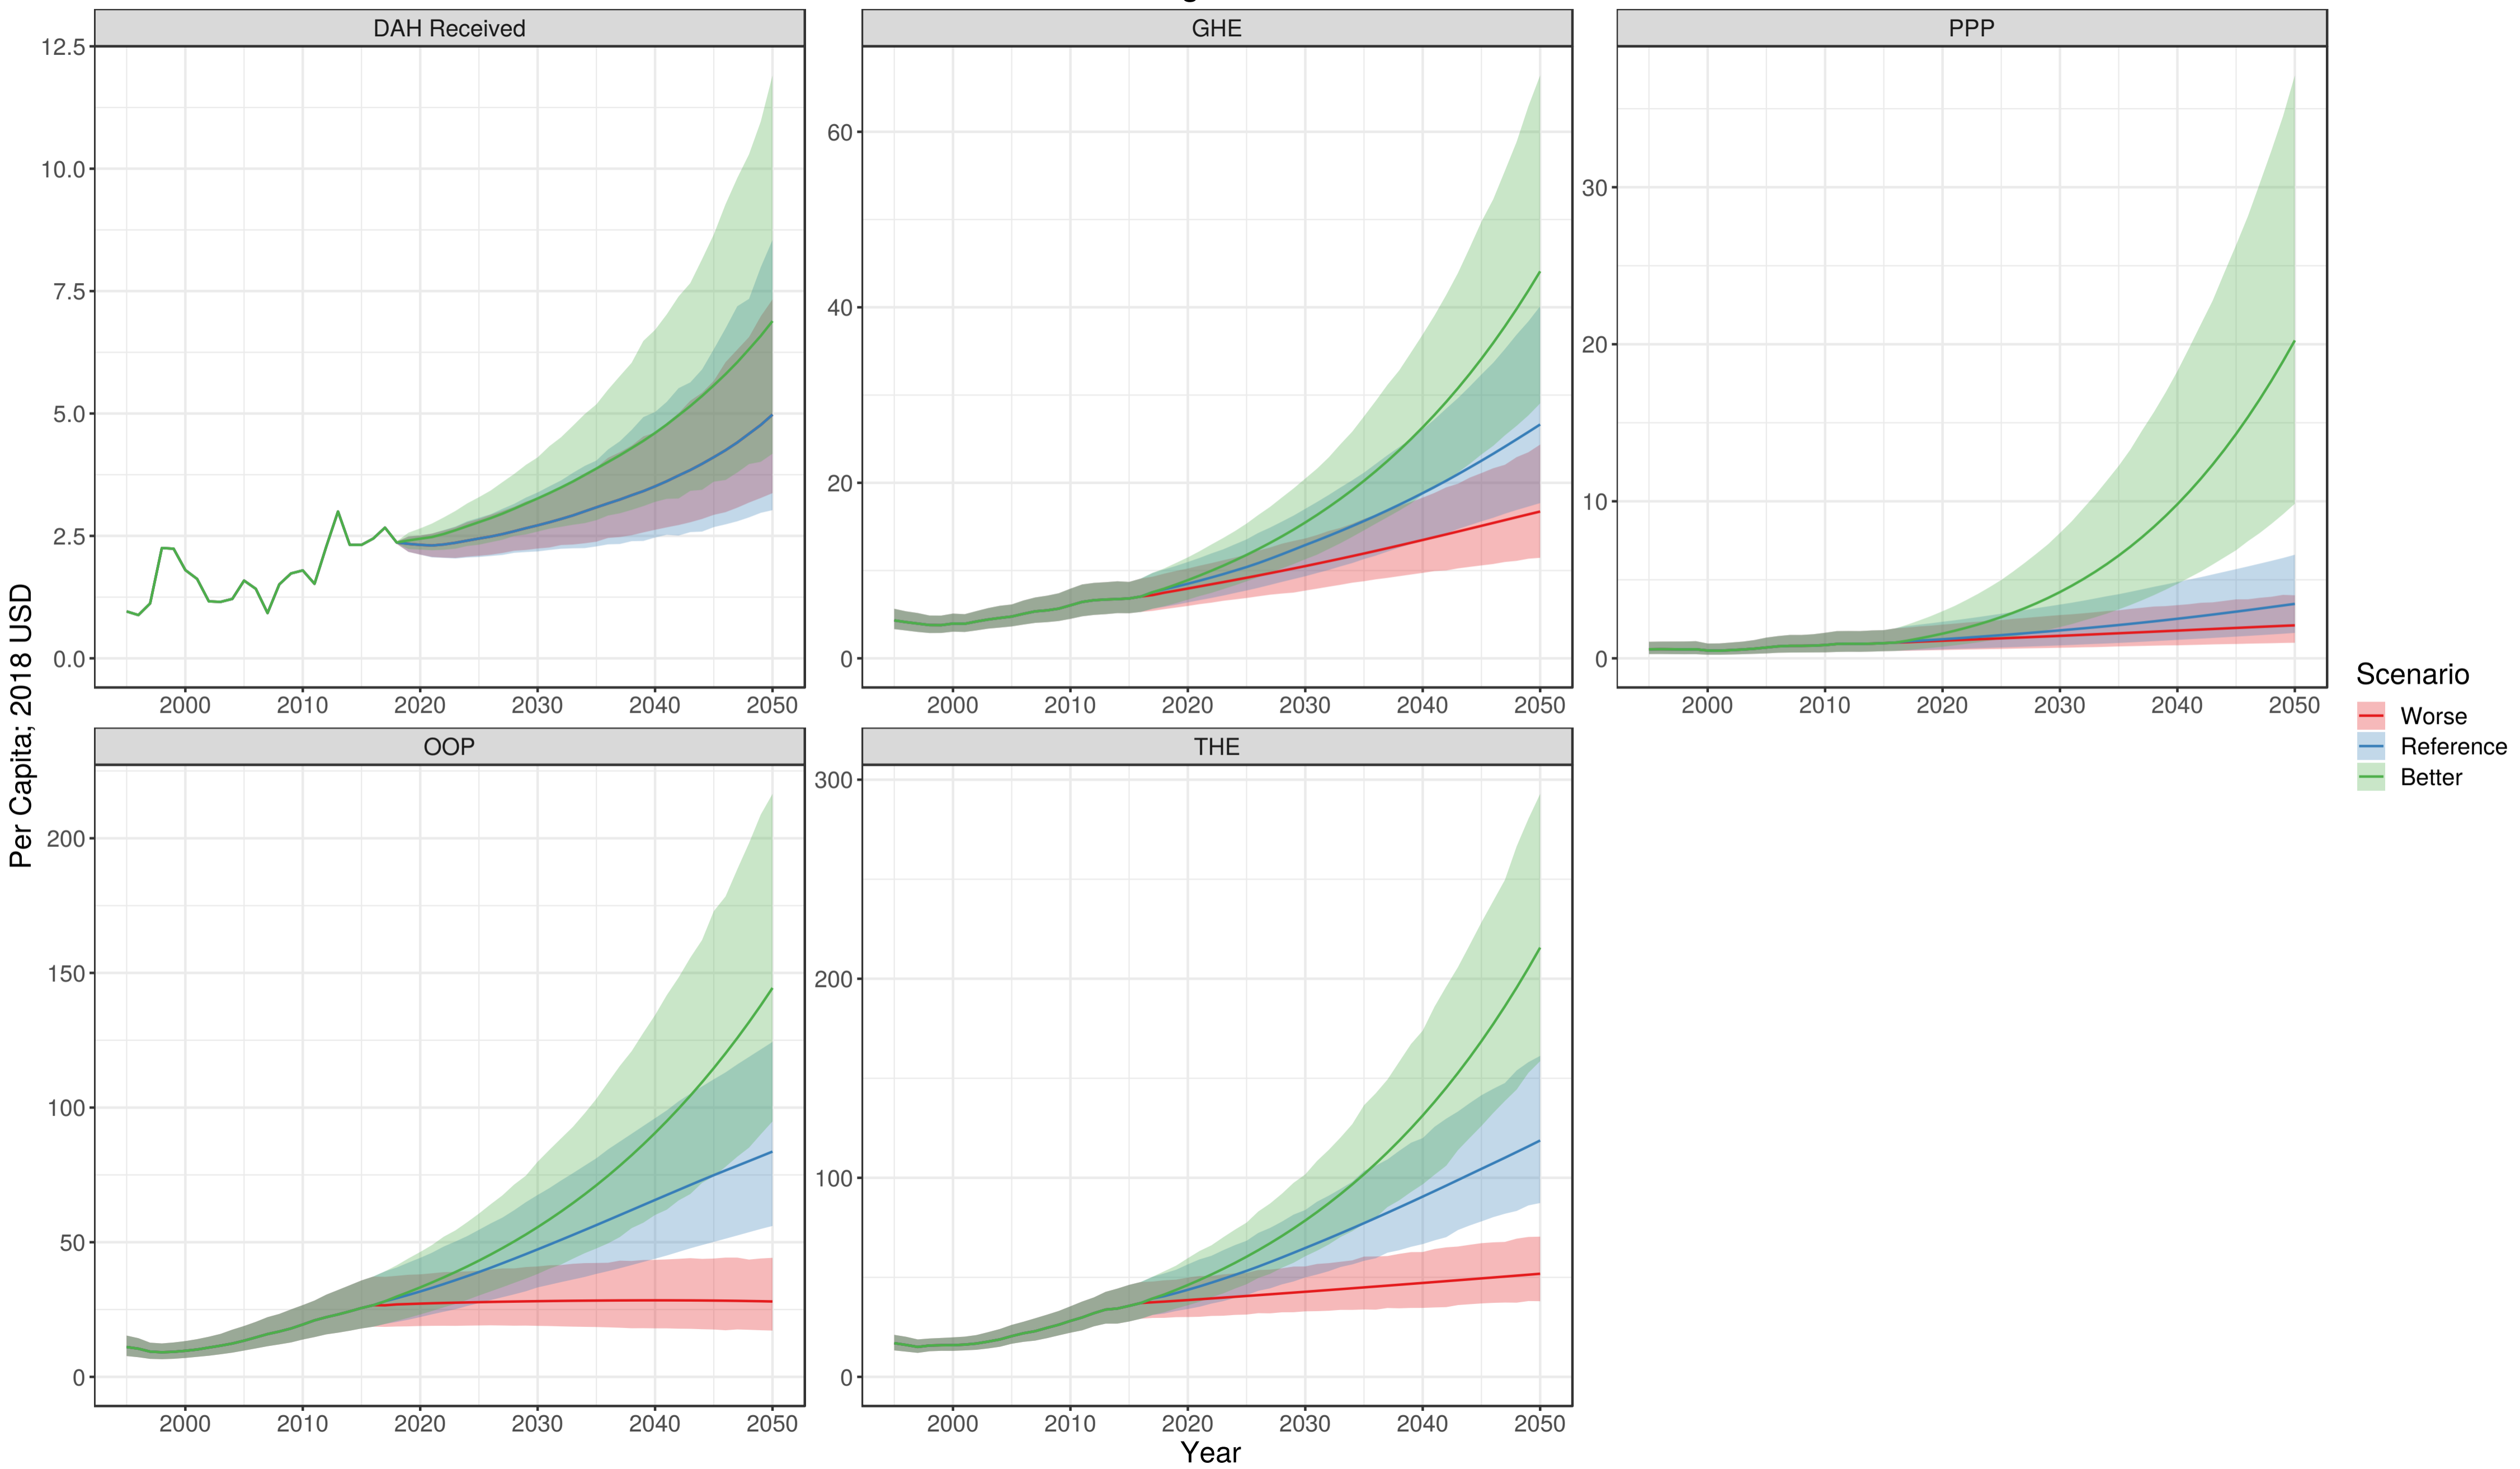

# Barbados

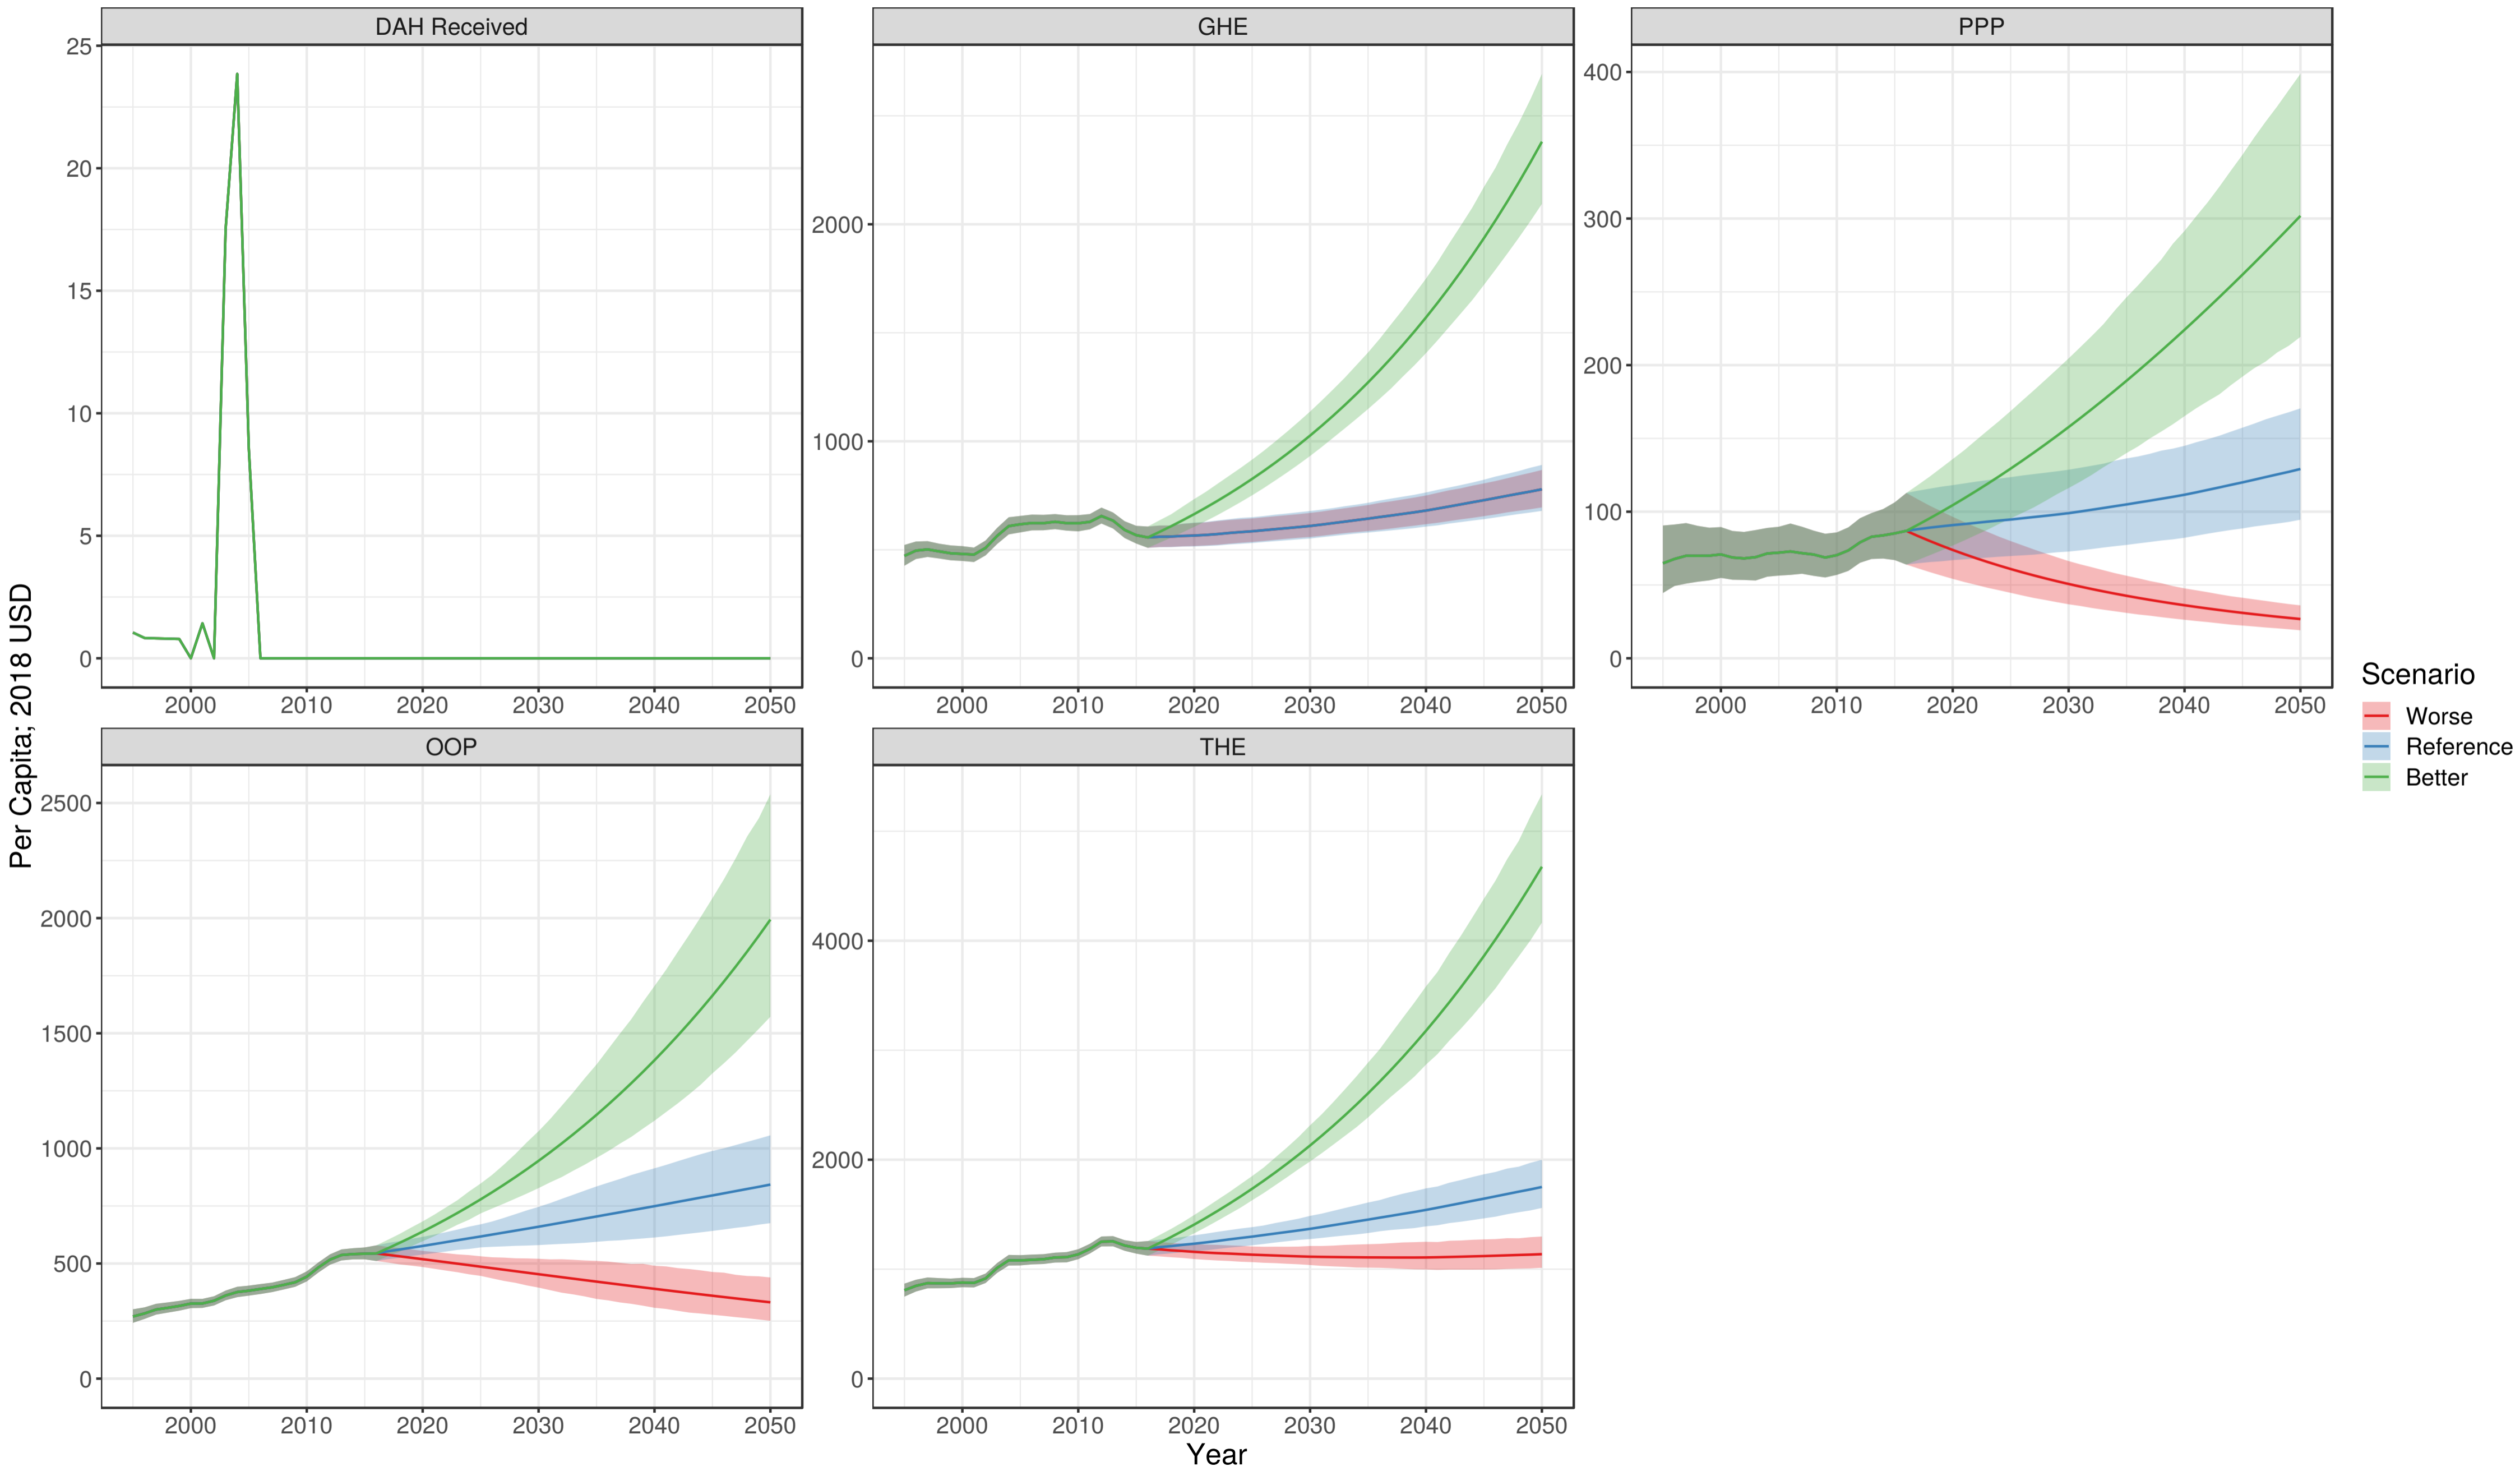

# Belarus

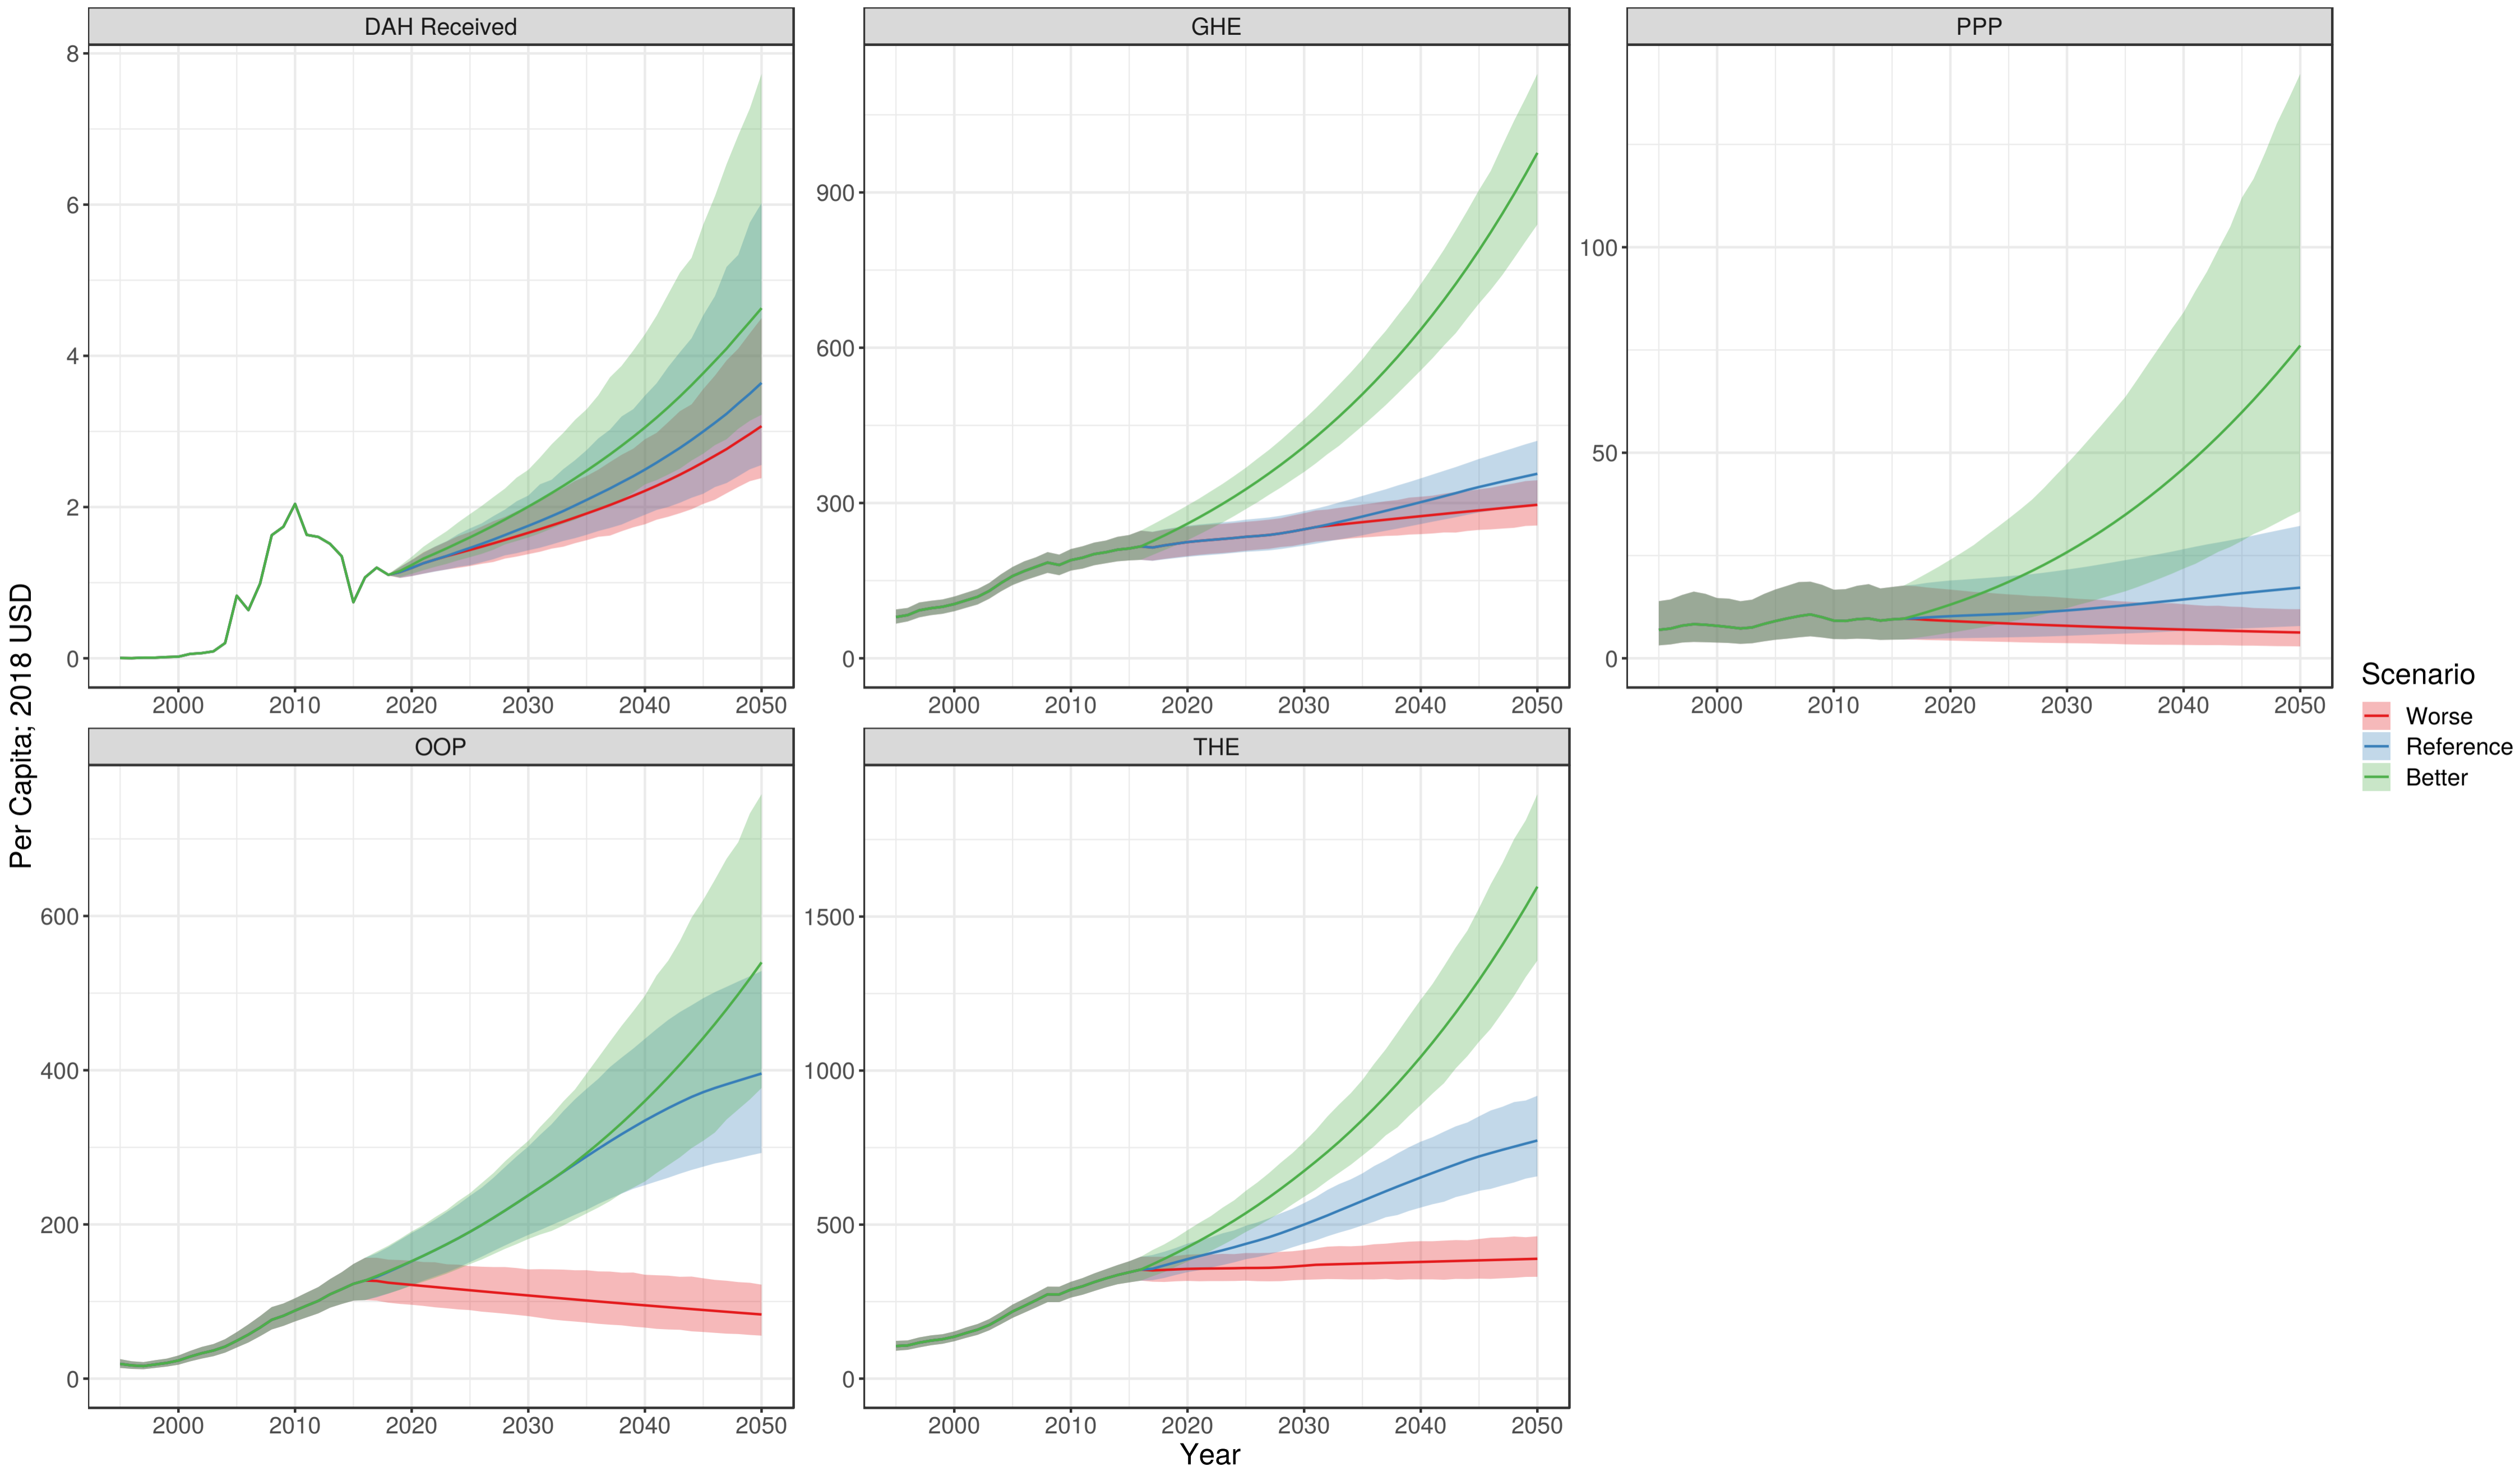

# Belgium

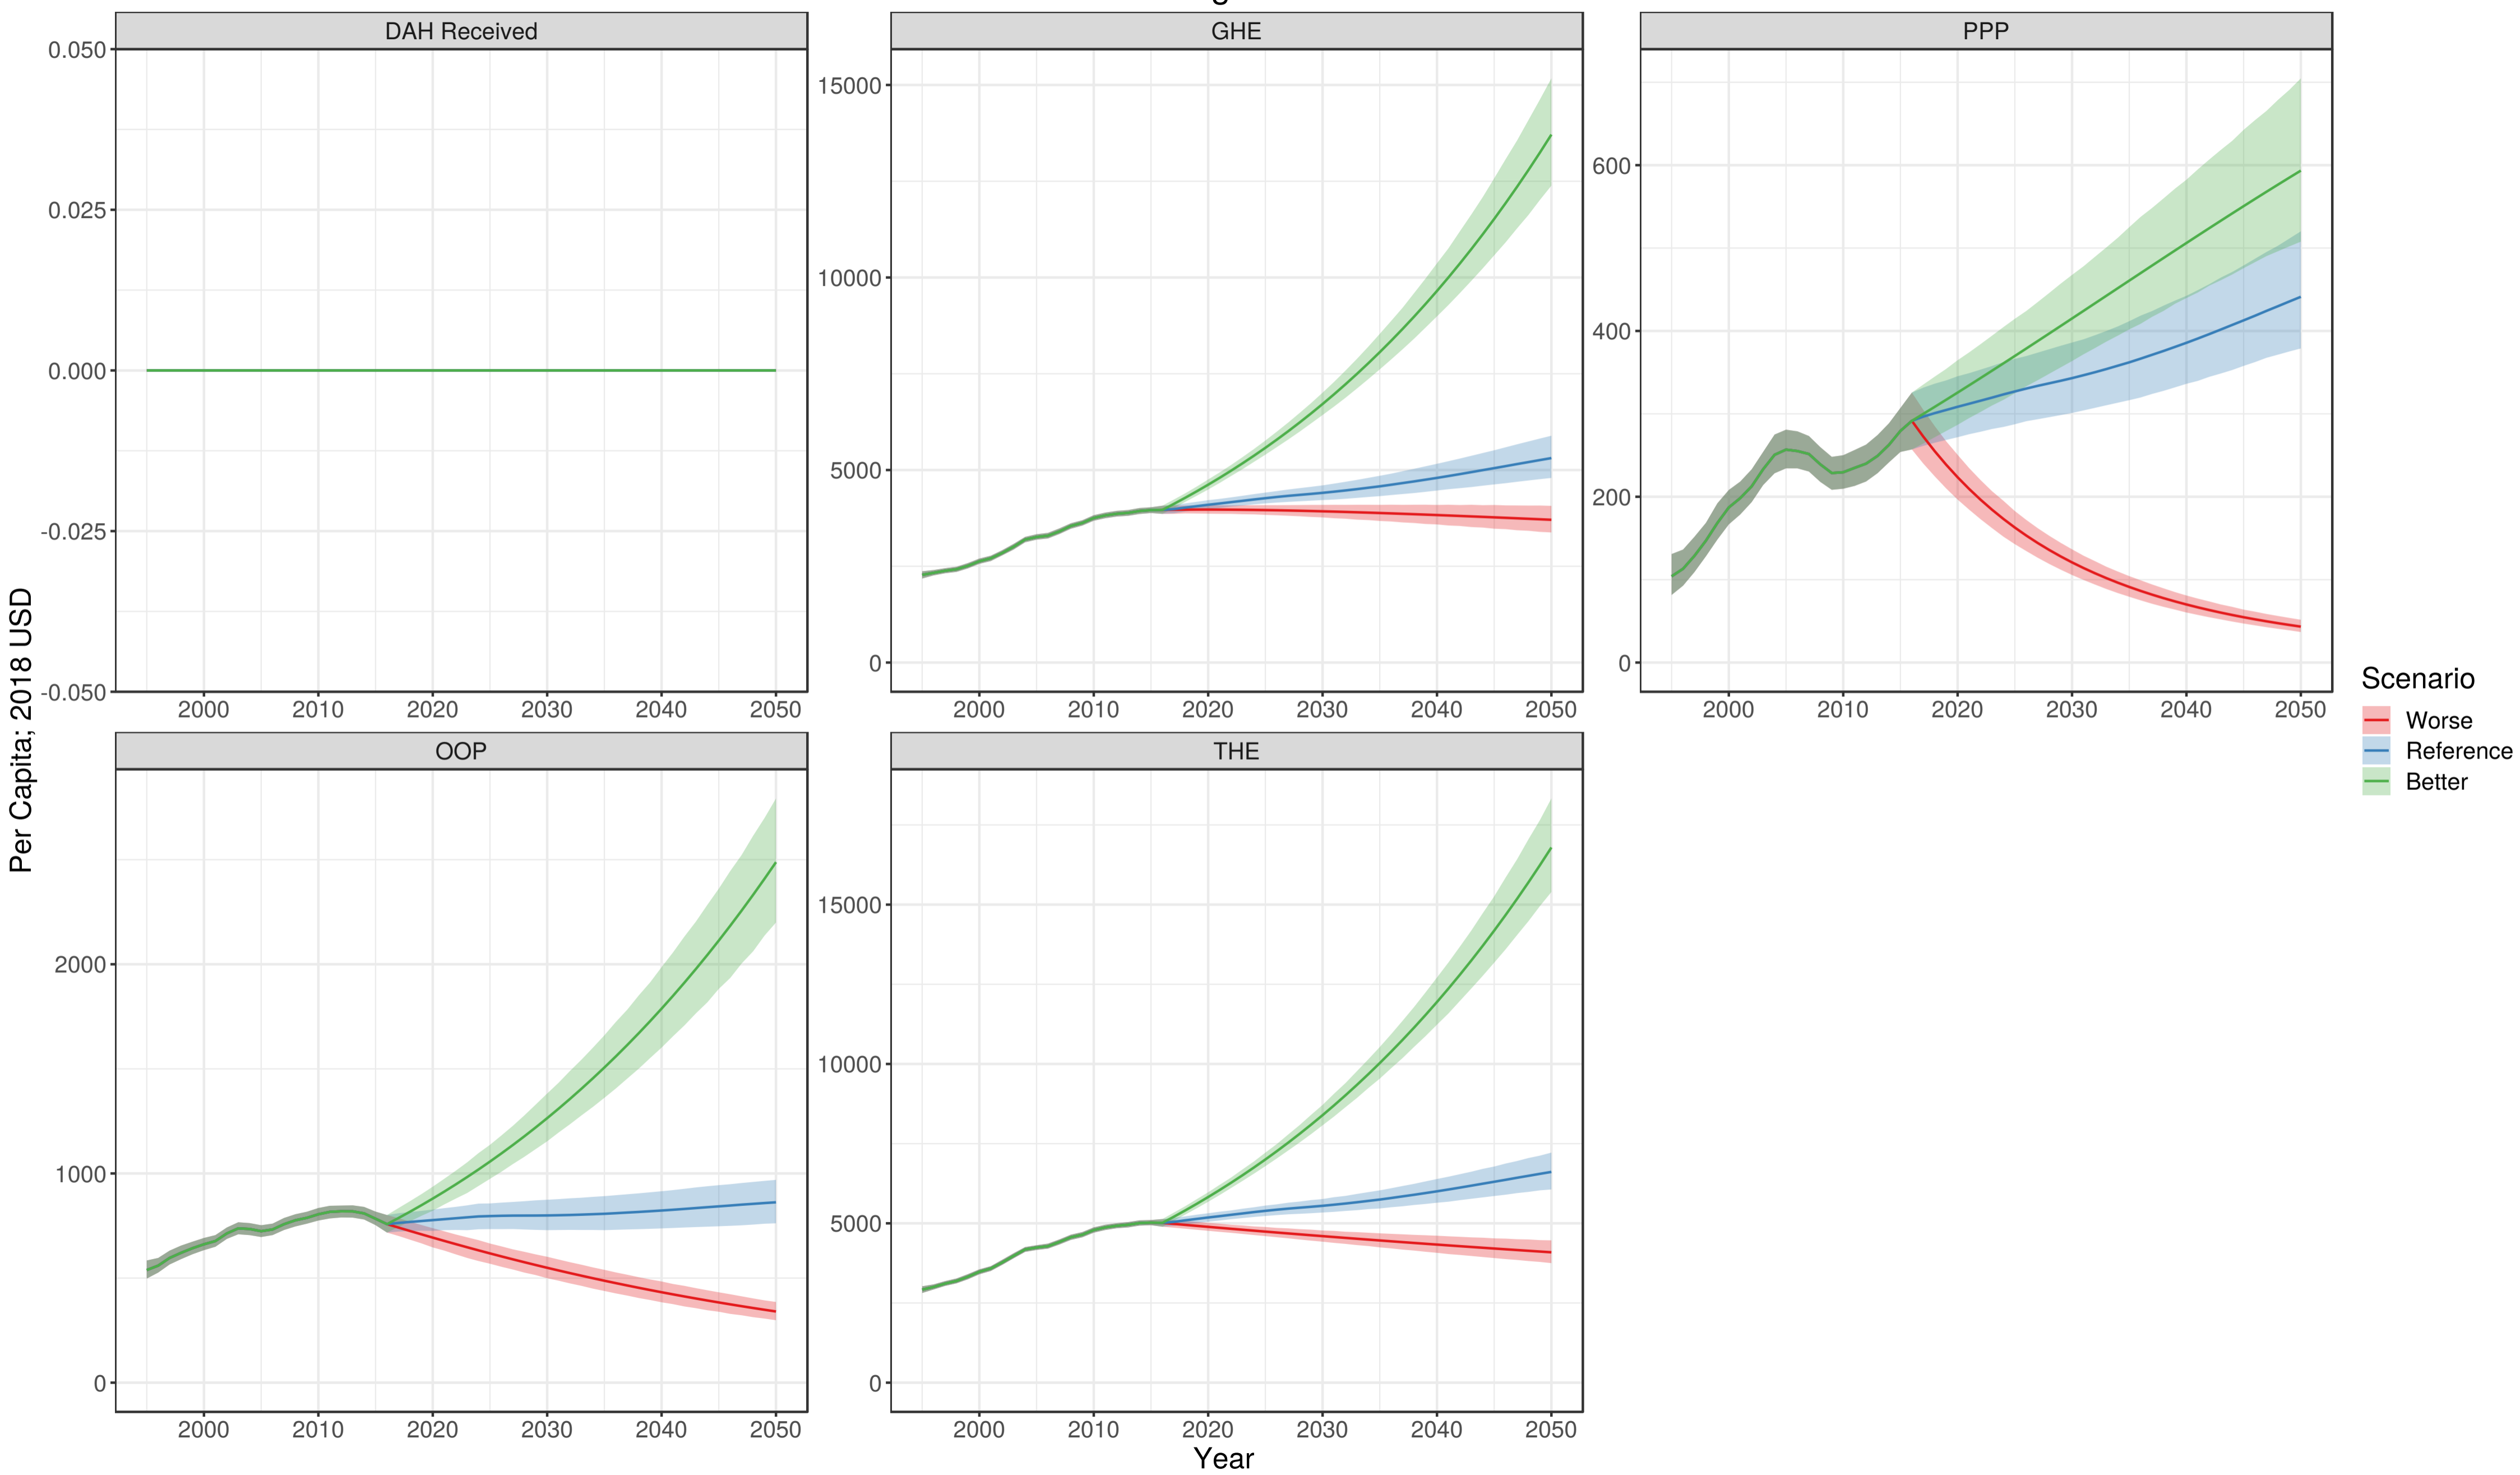

# Belize

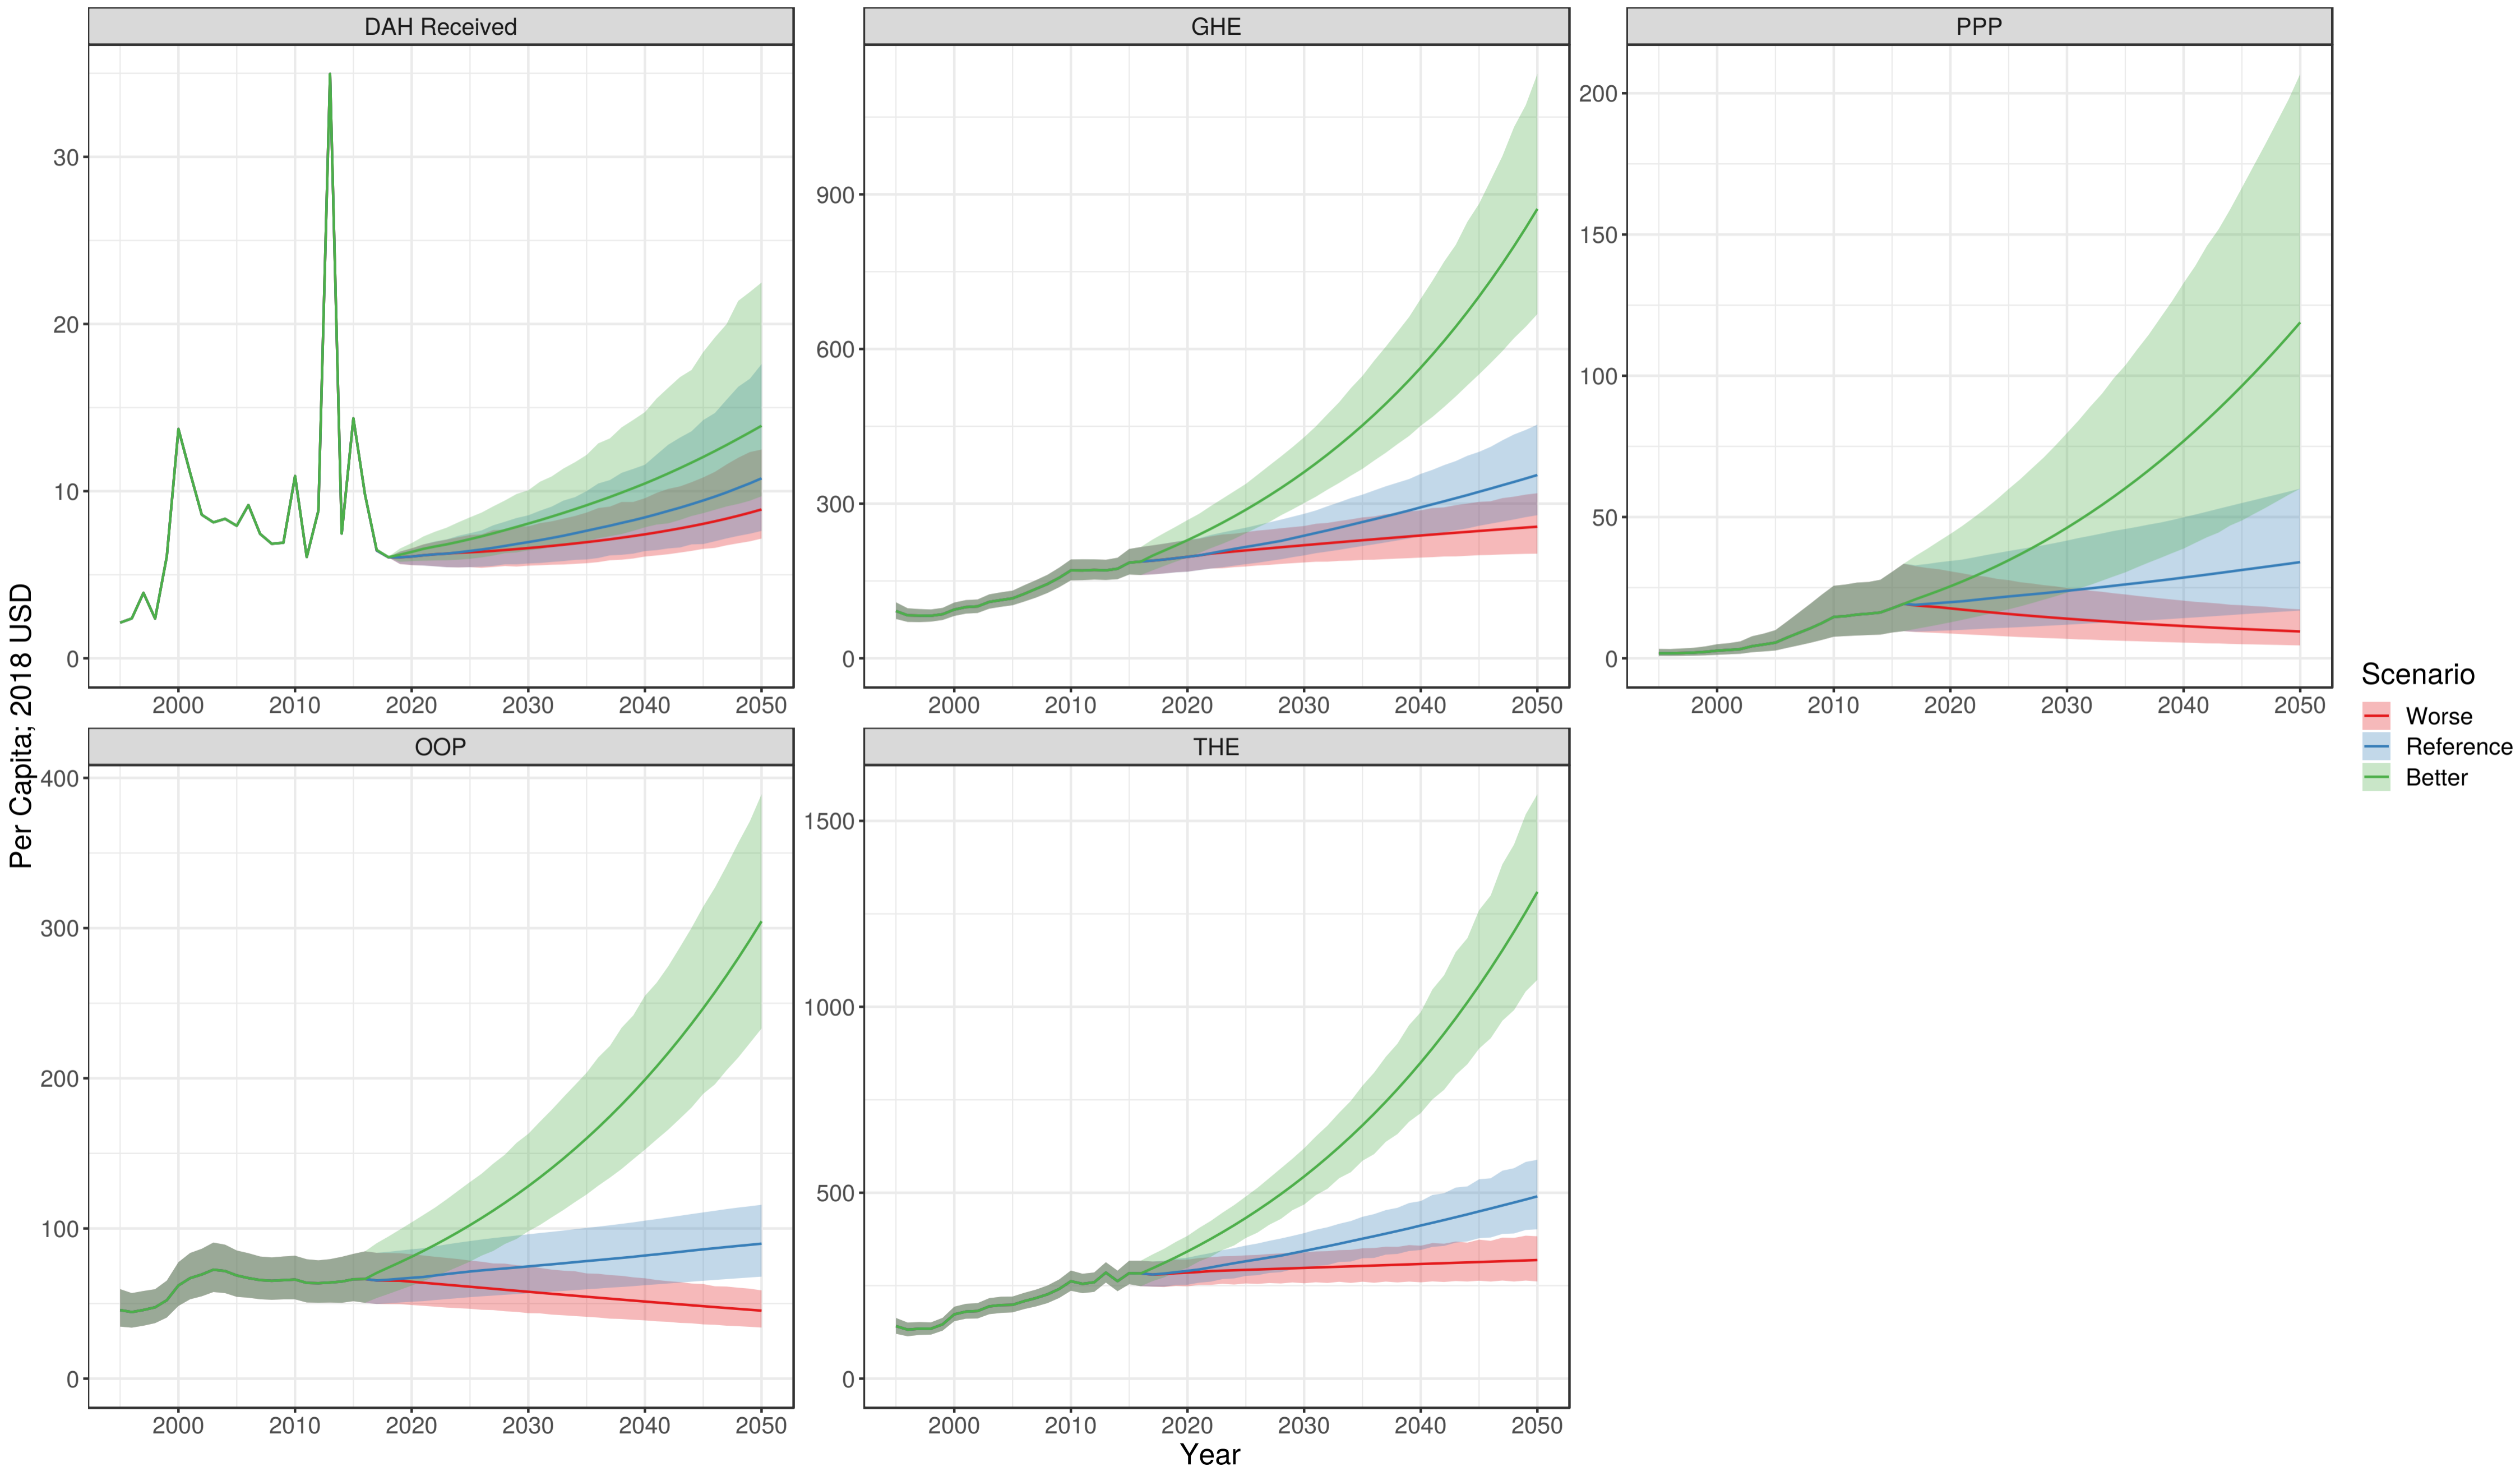

# Benin

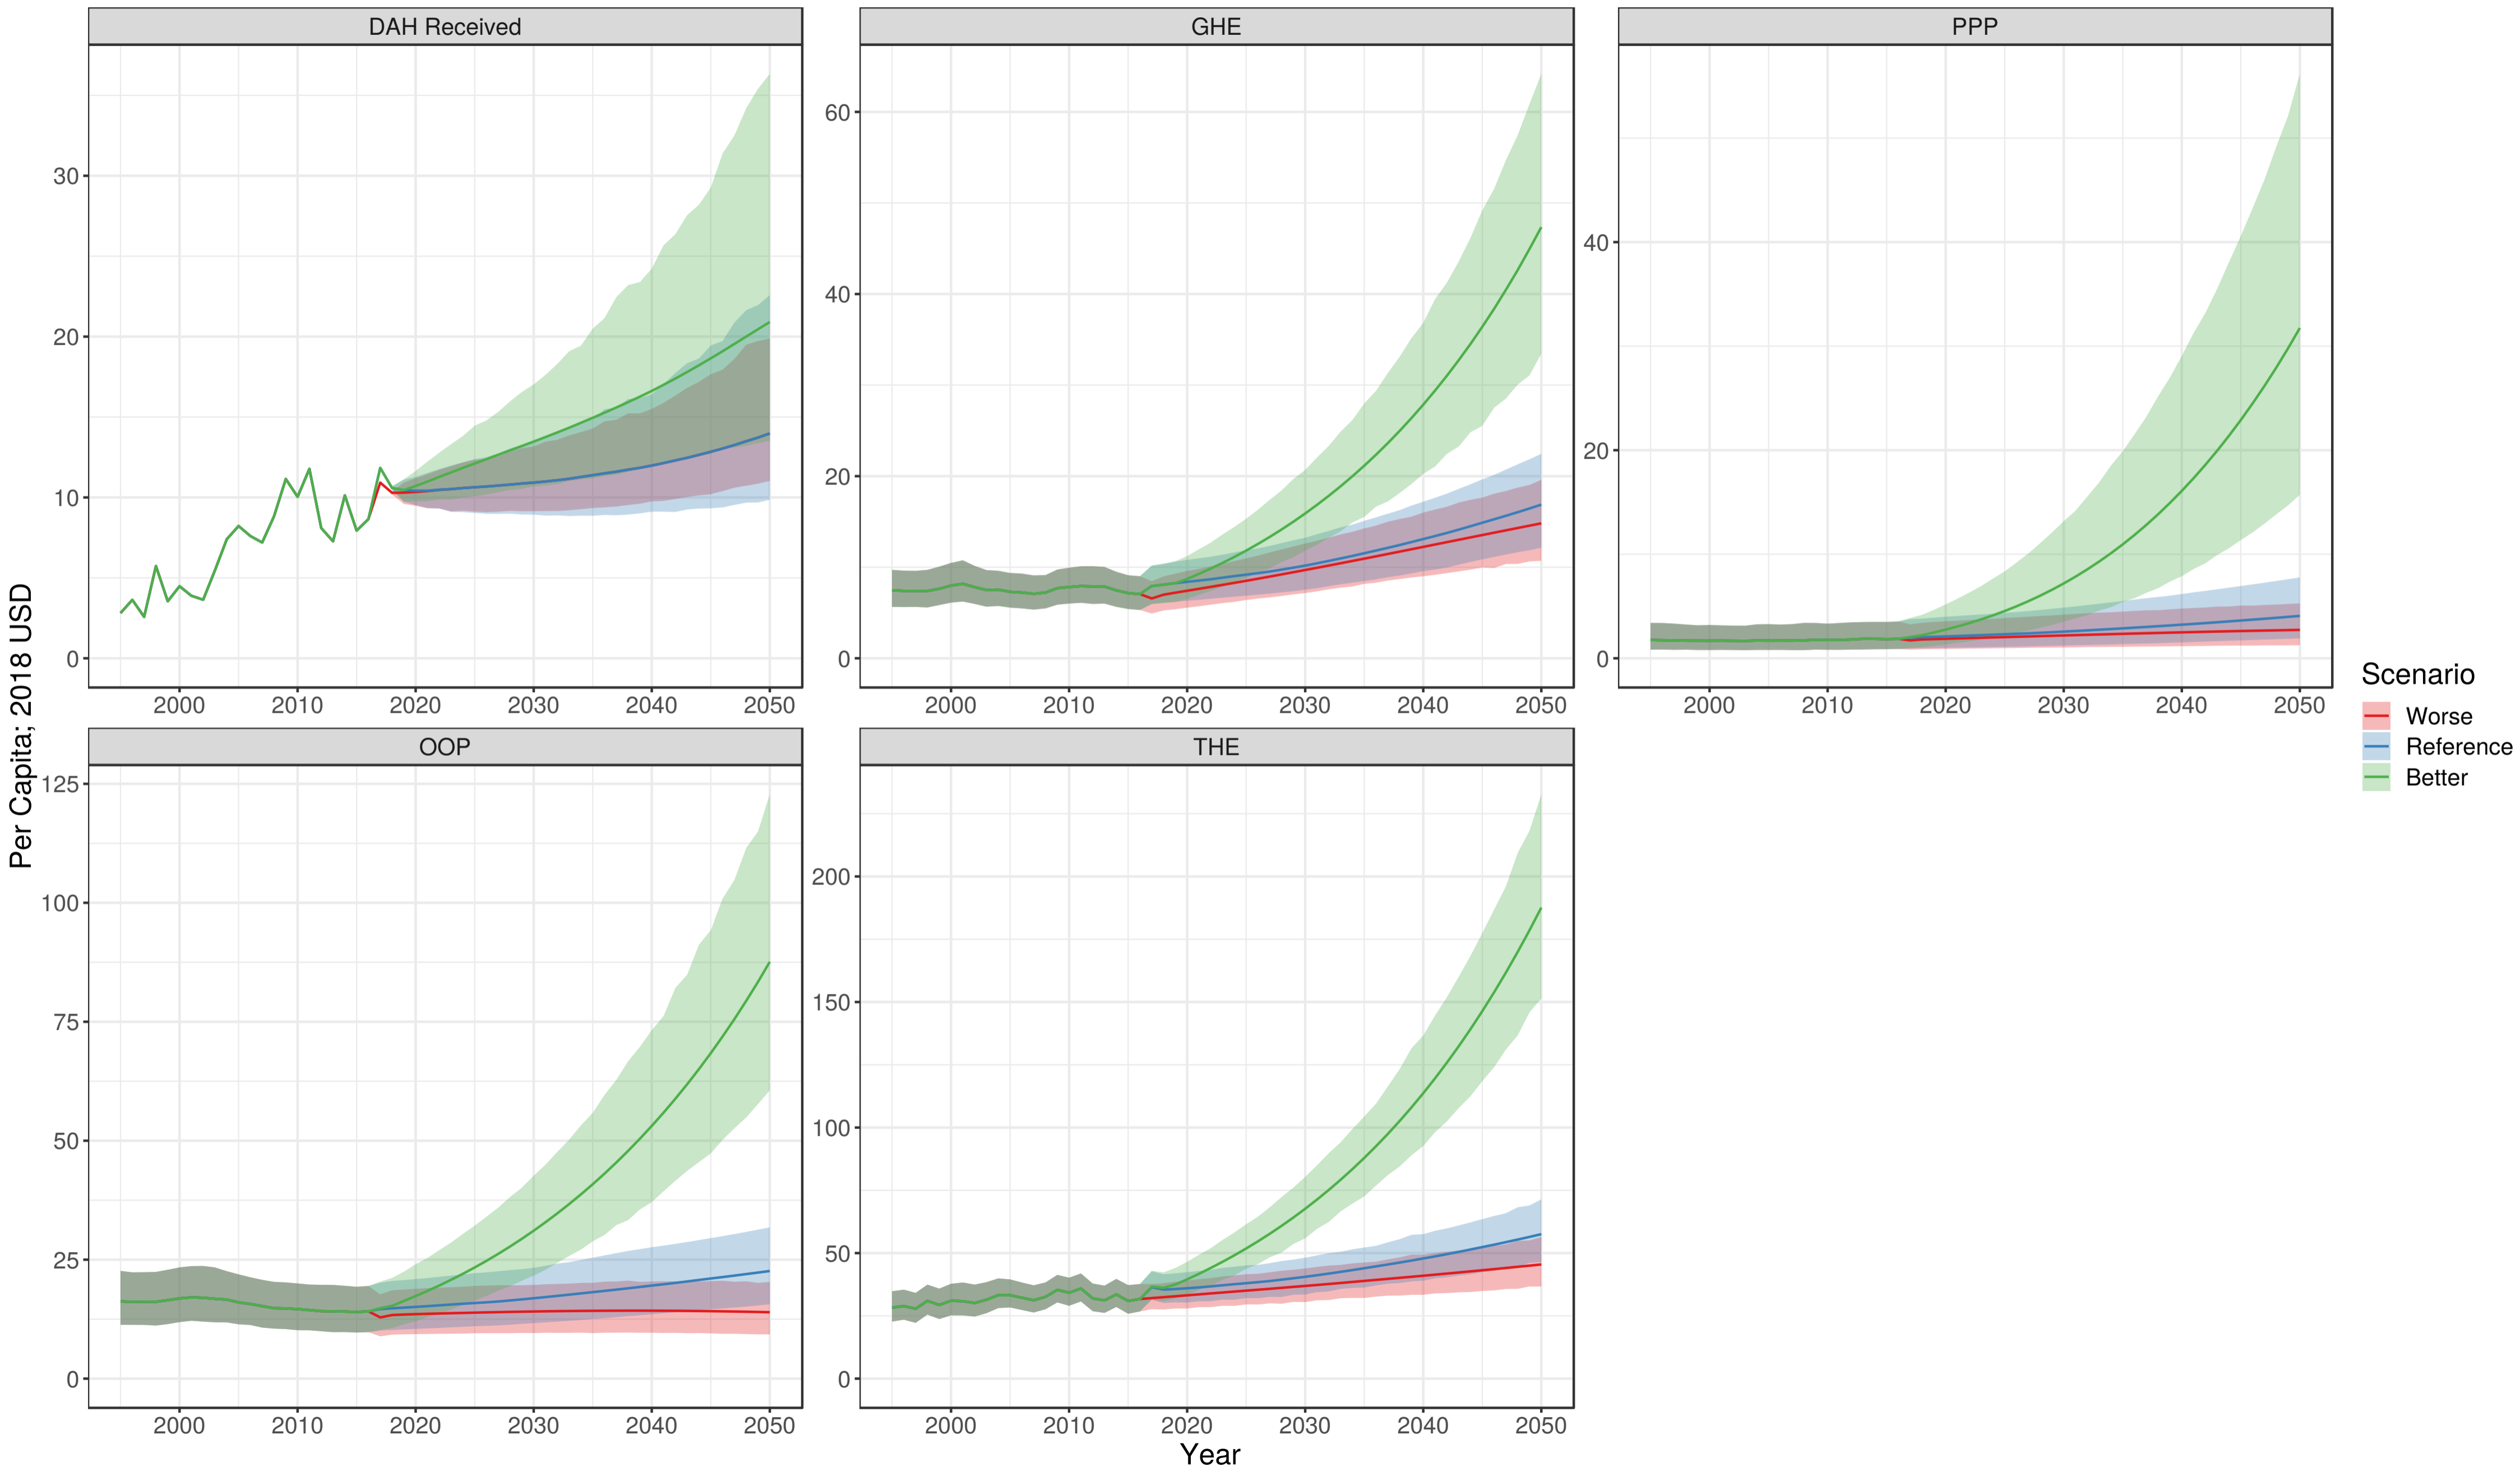

# Bermuda

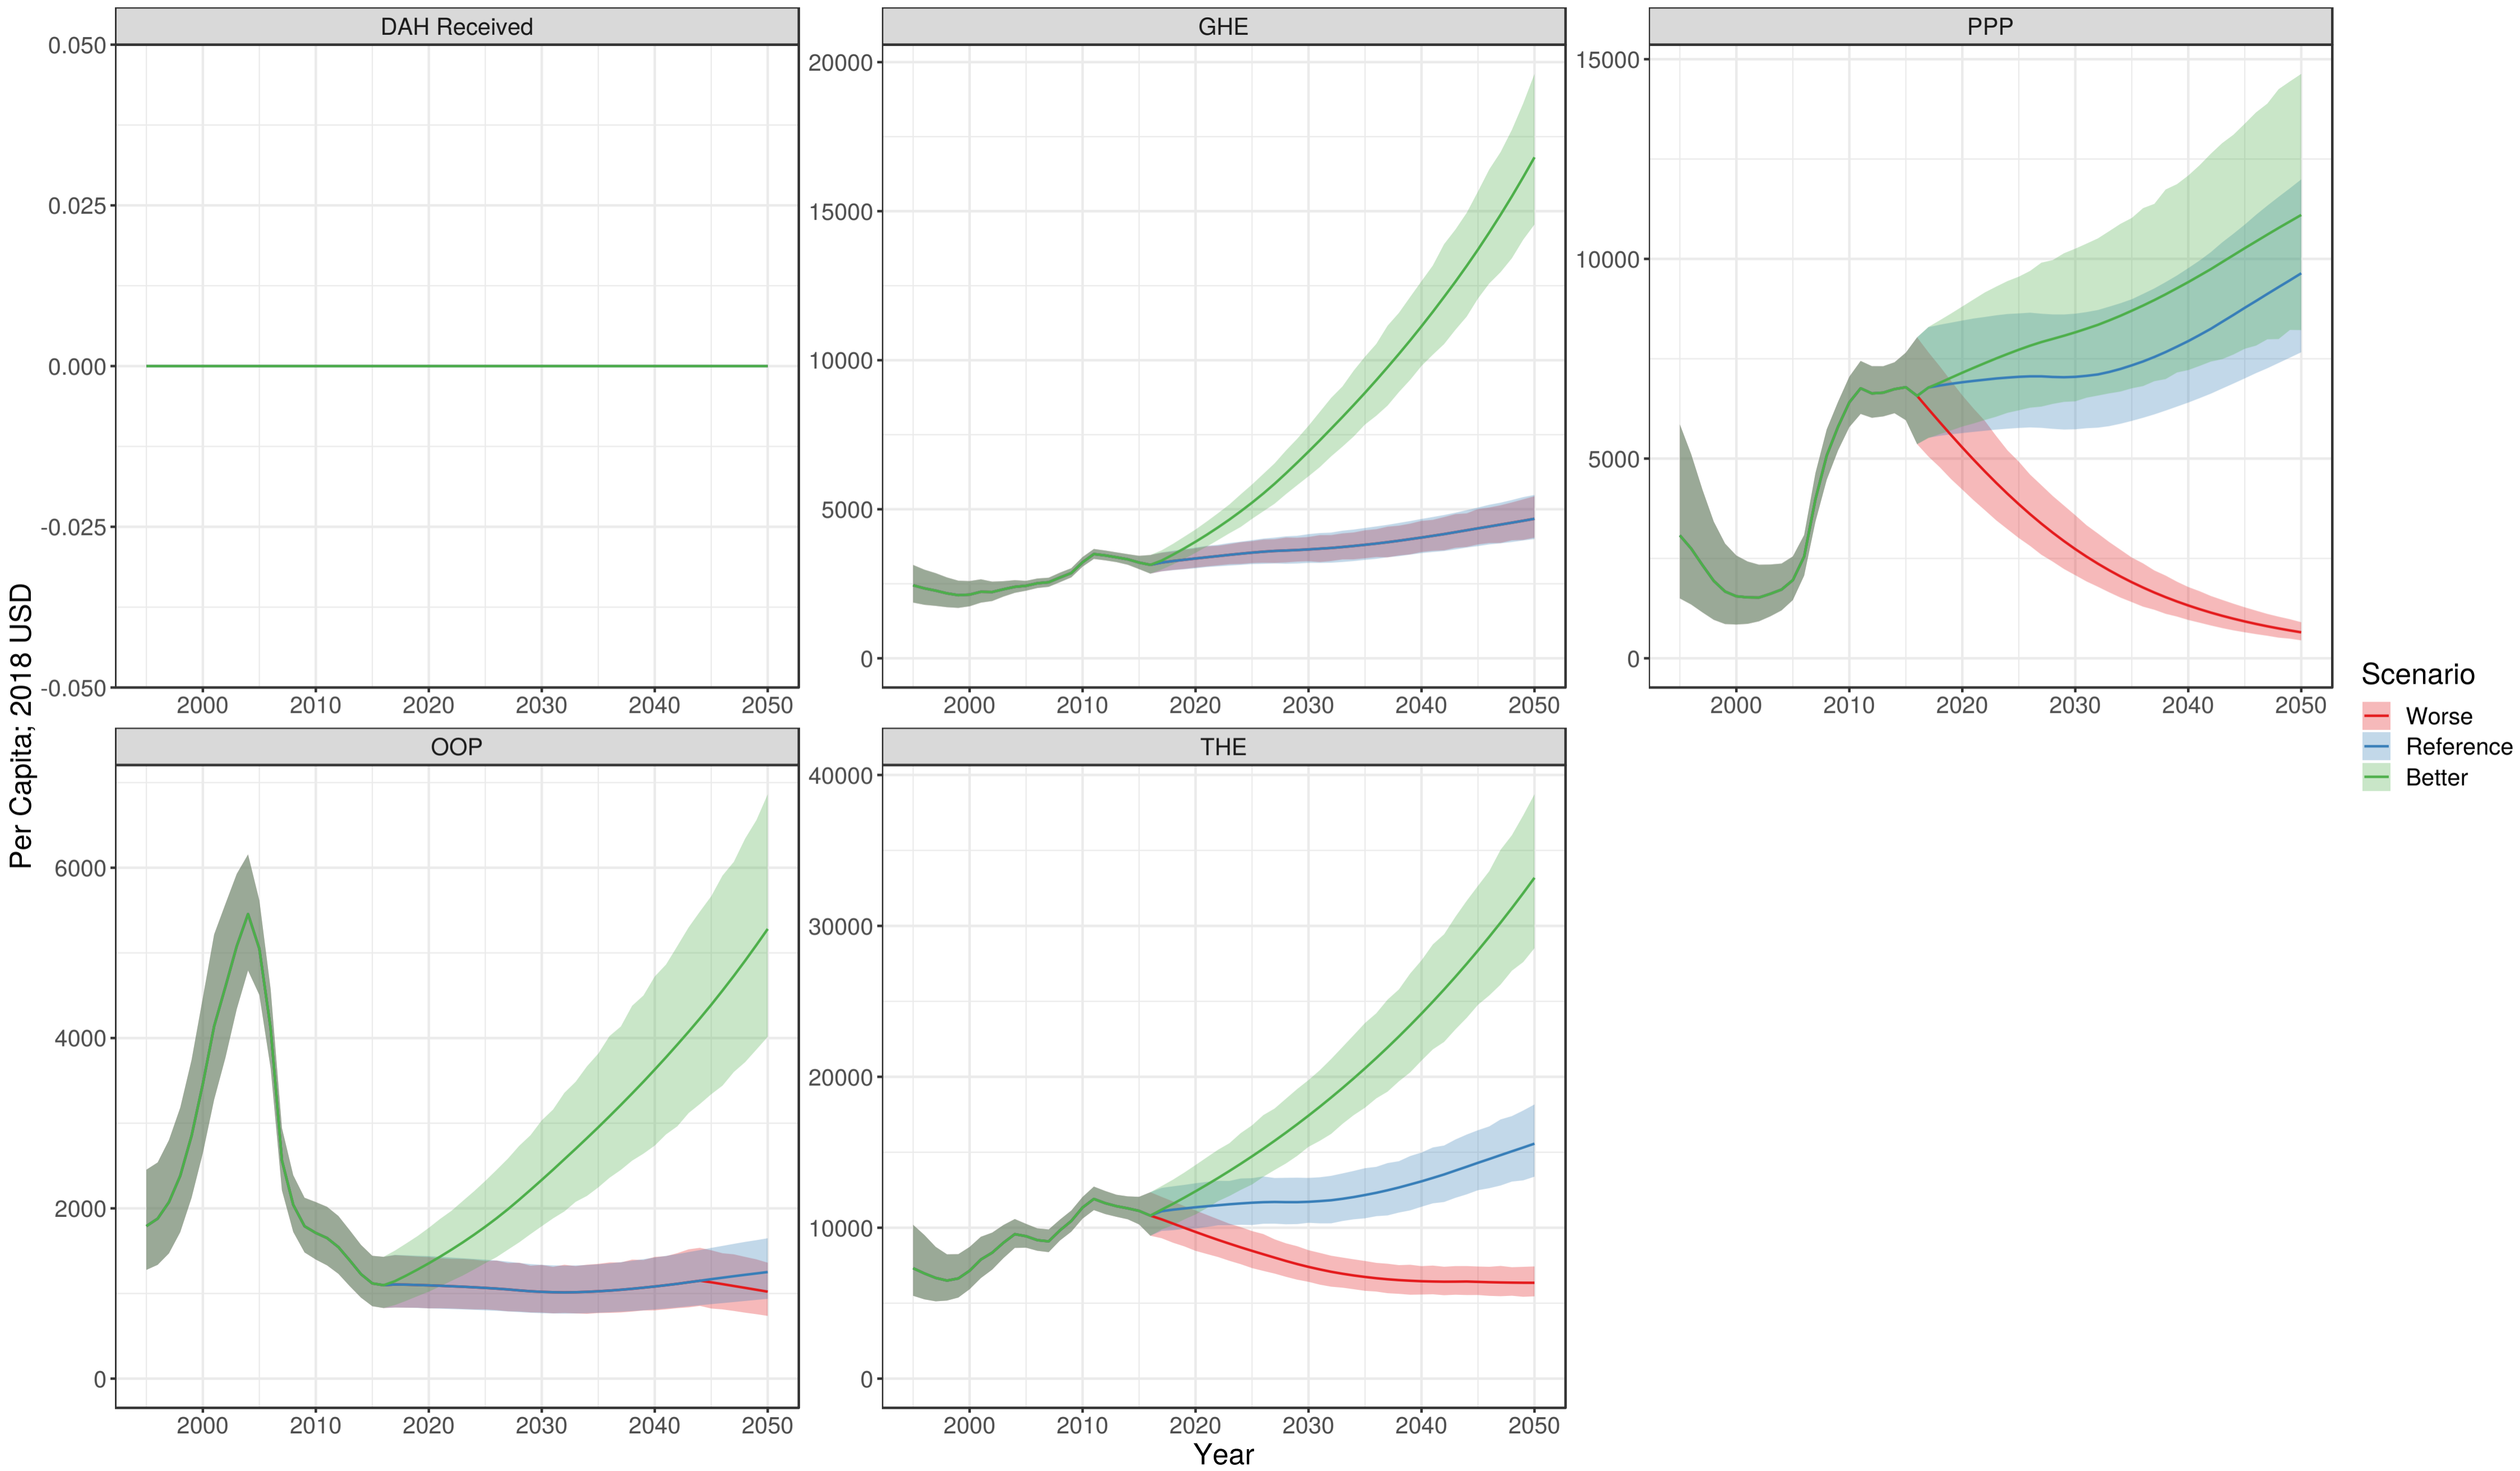



# Bhutan

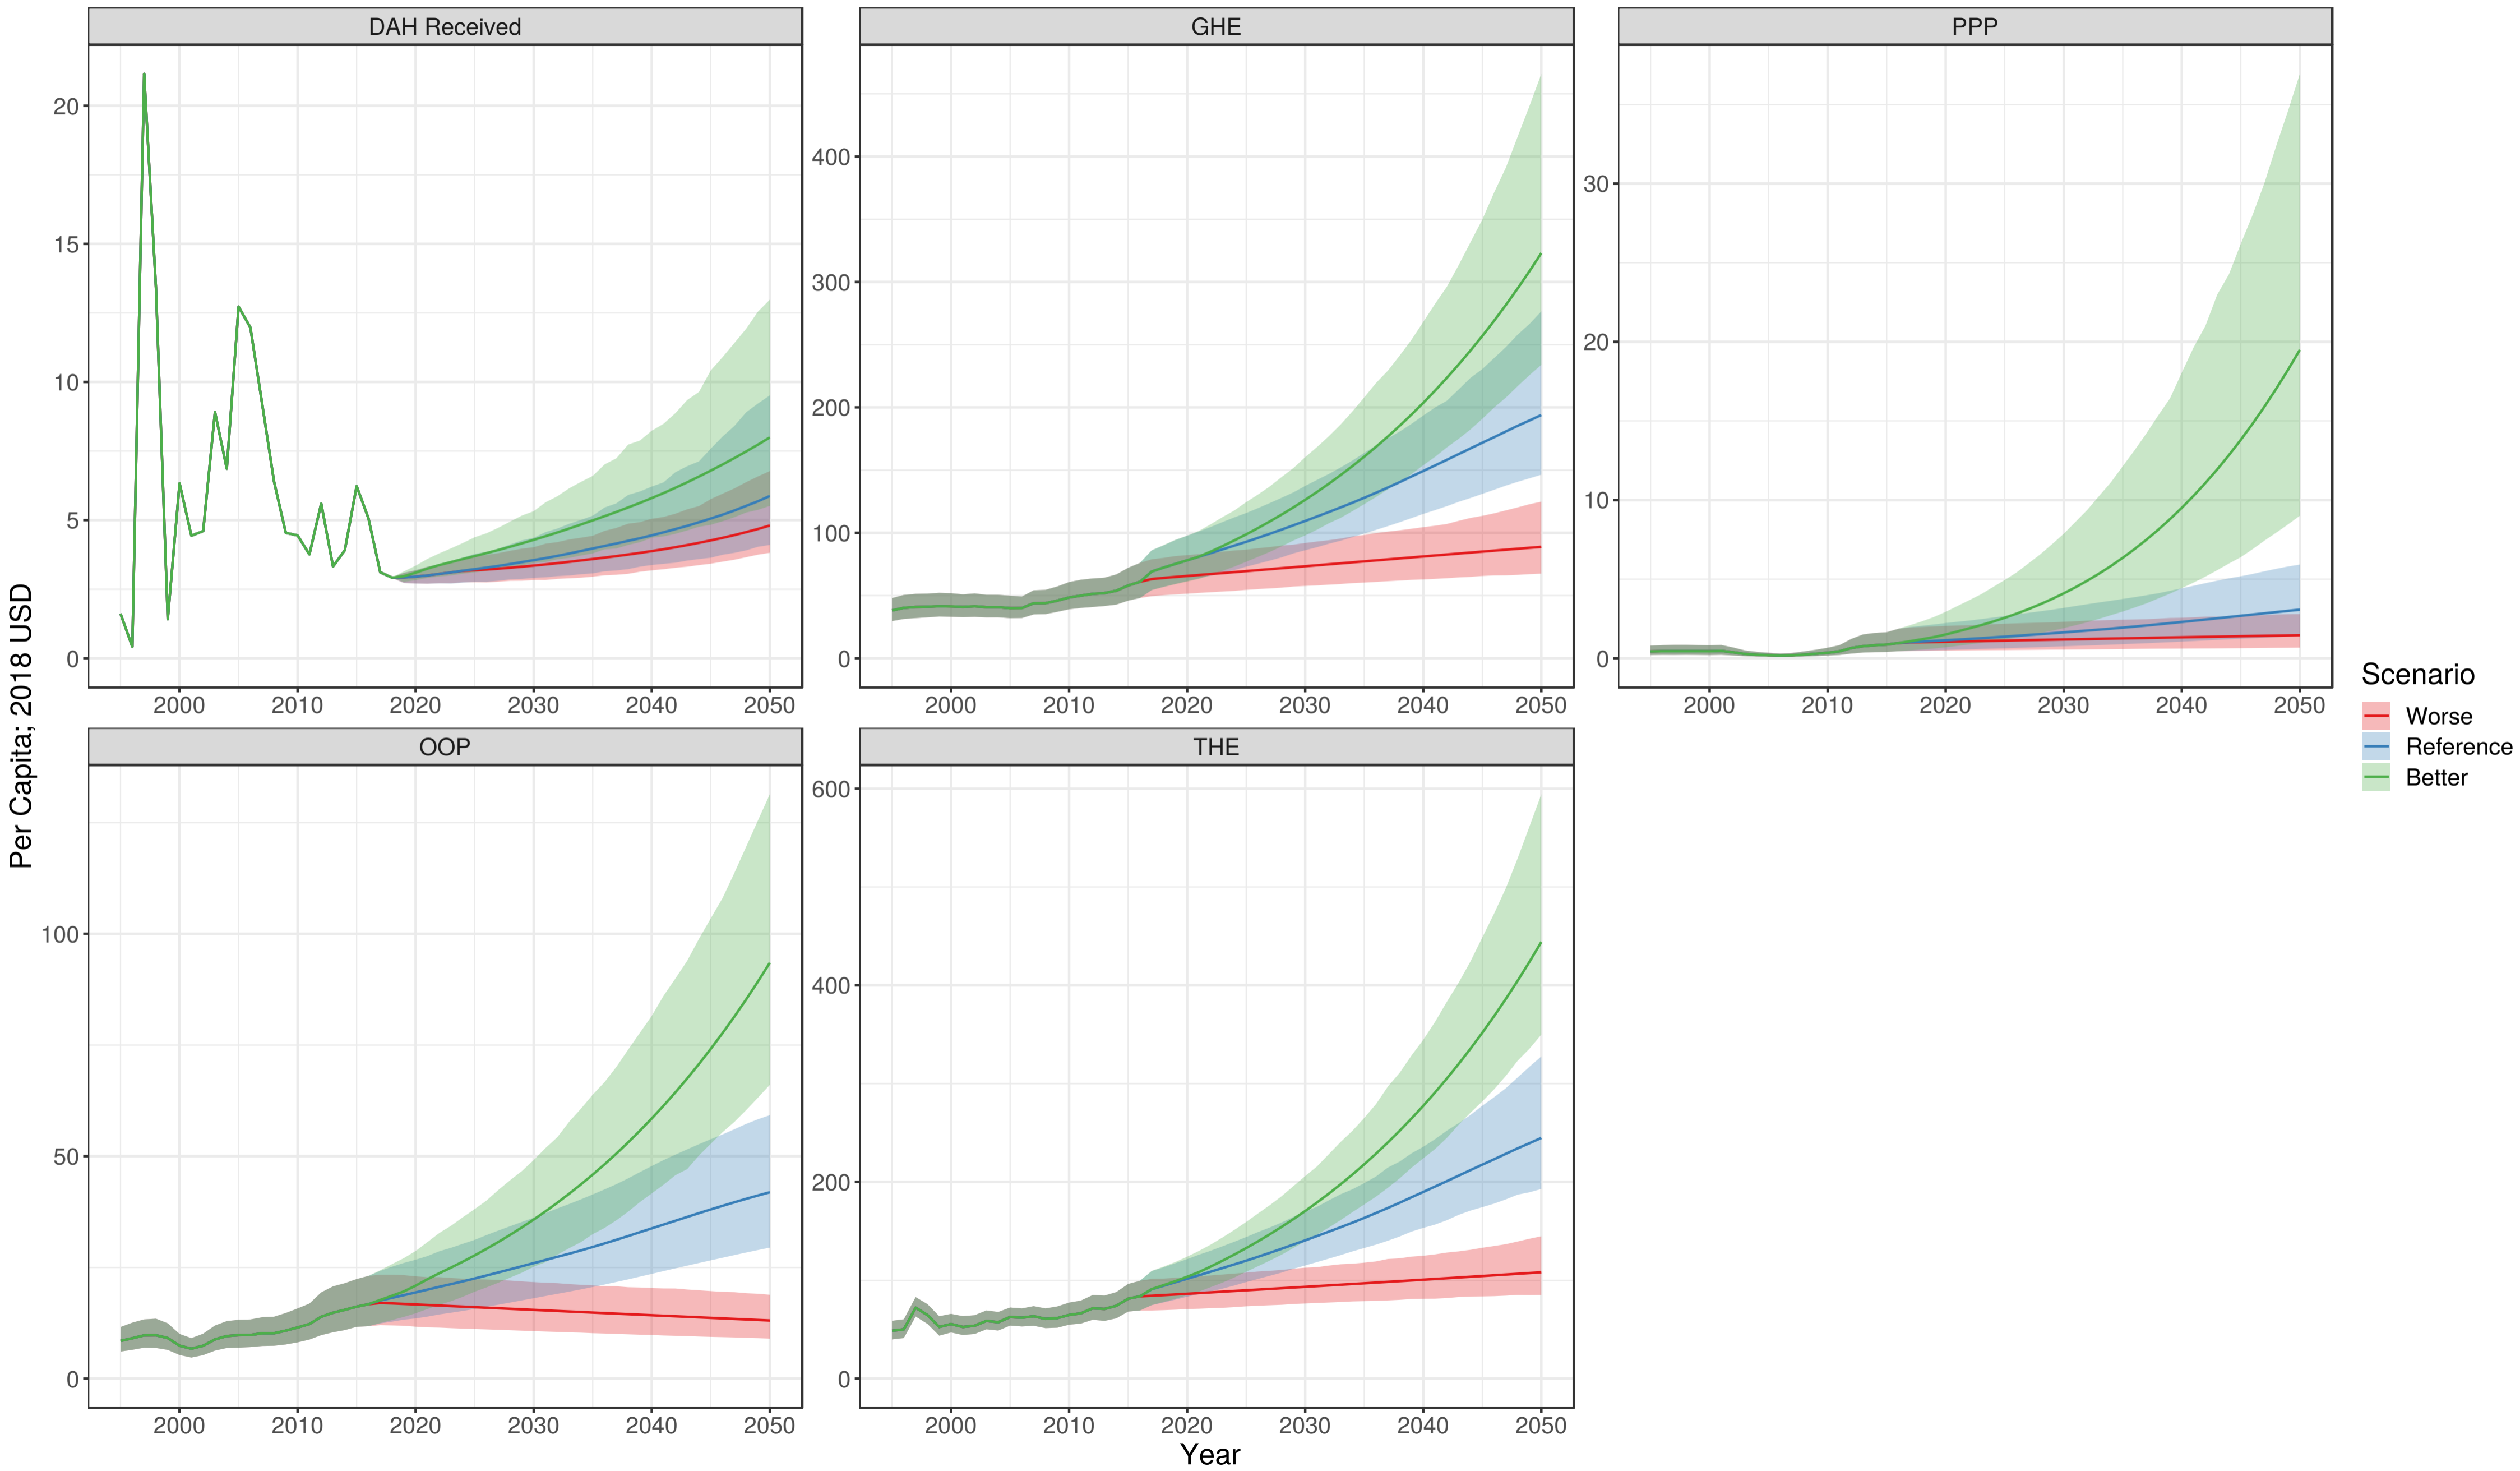

# Bolivia

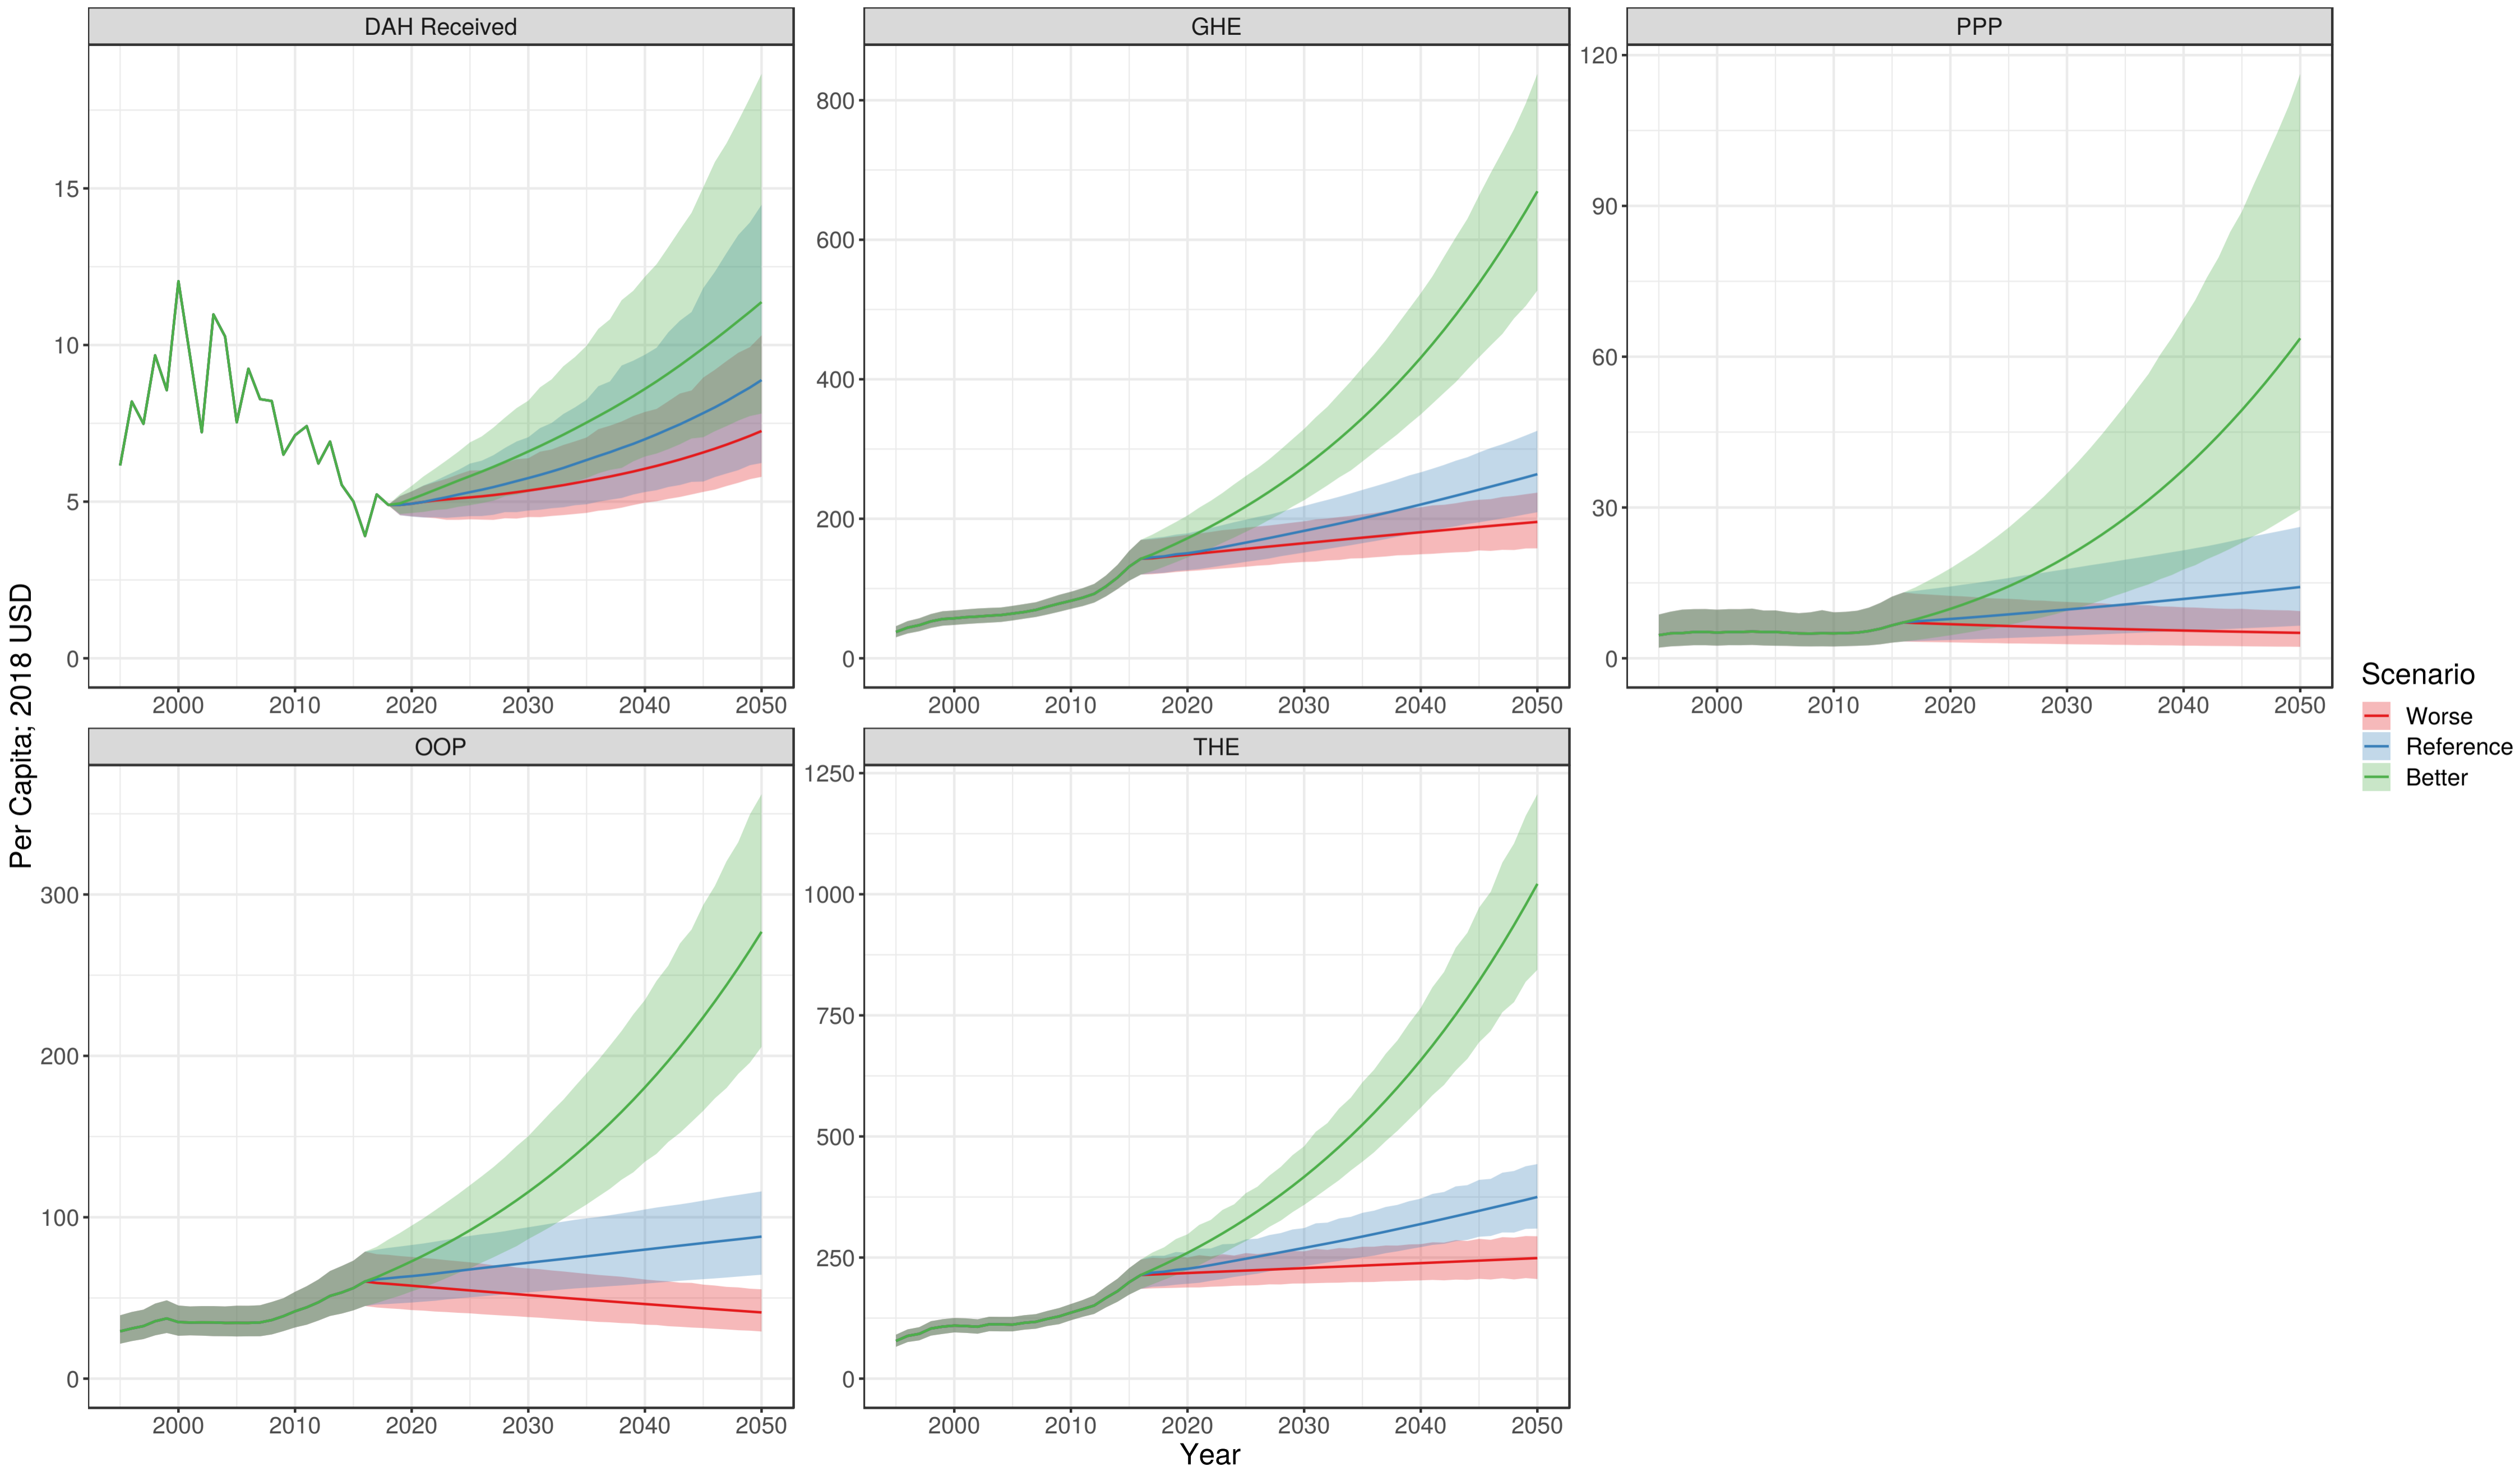

# Bosnia and Herzegovina

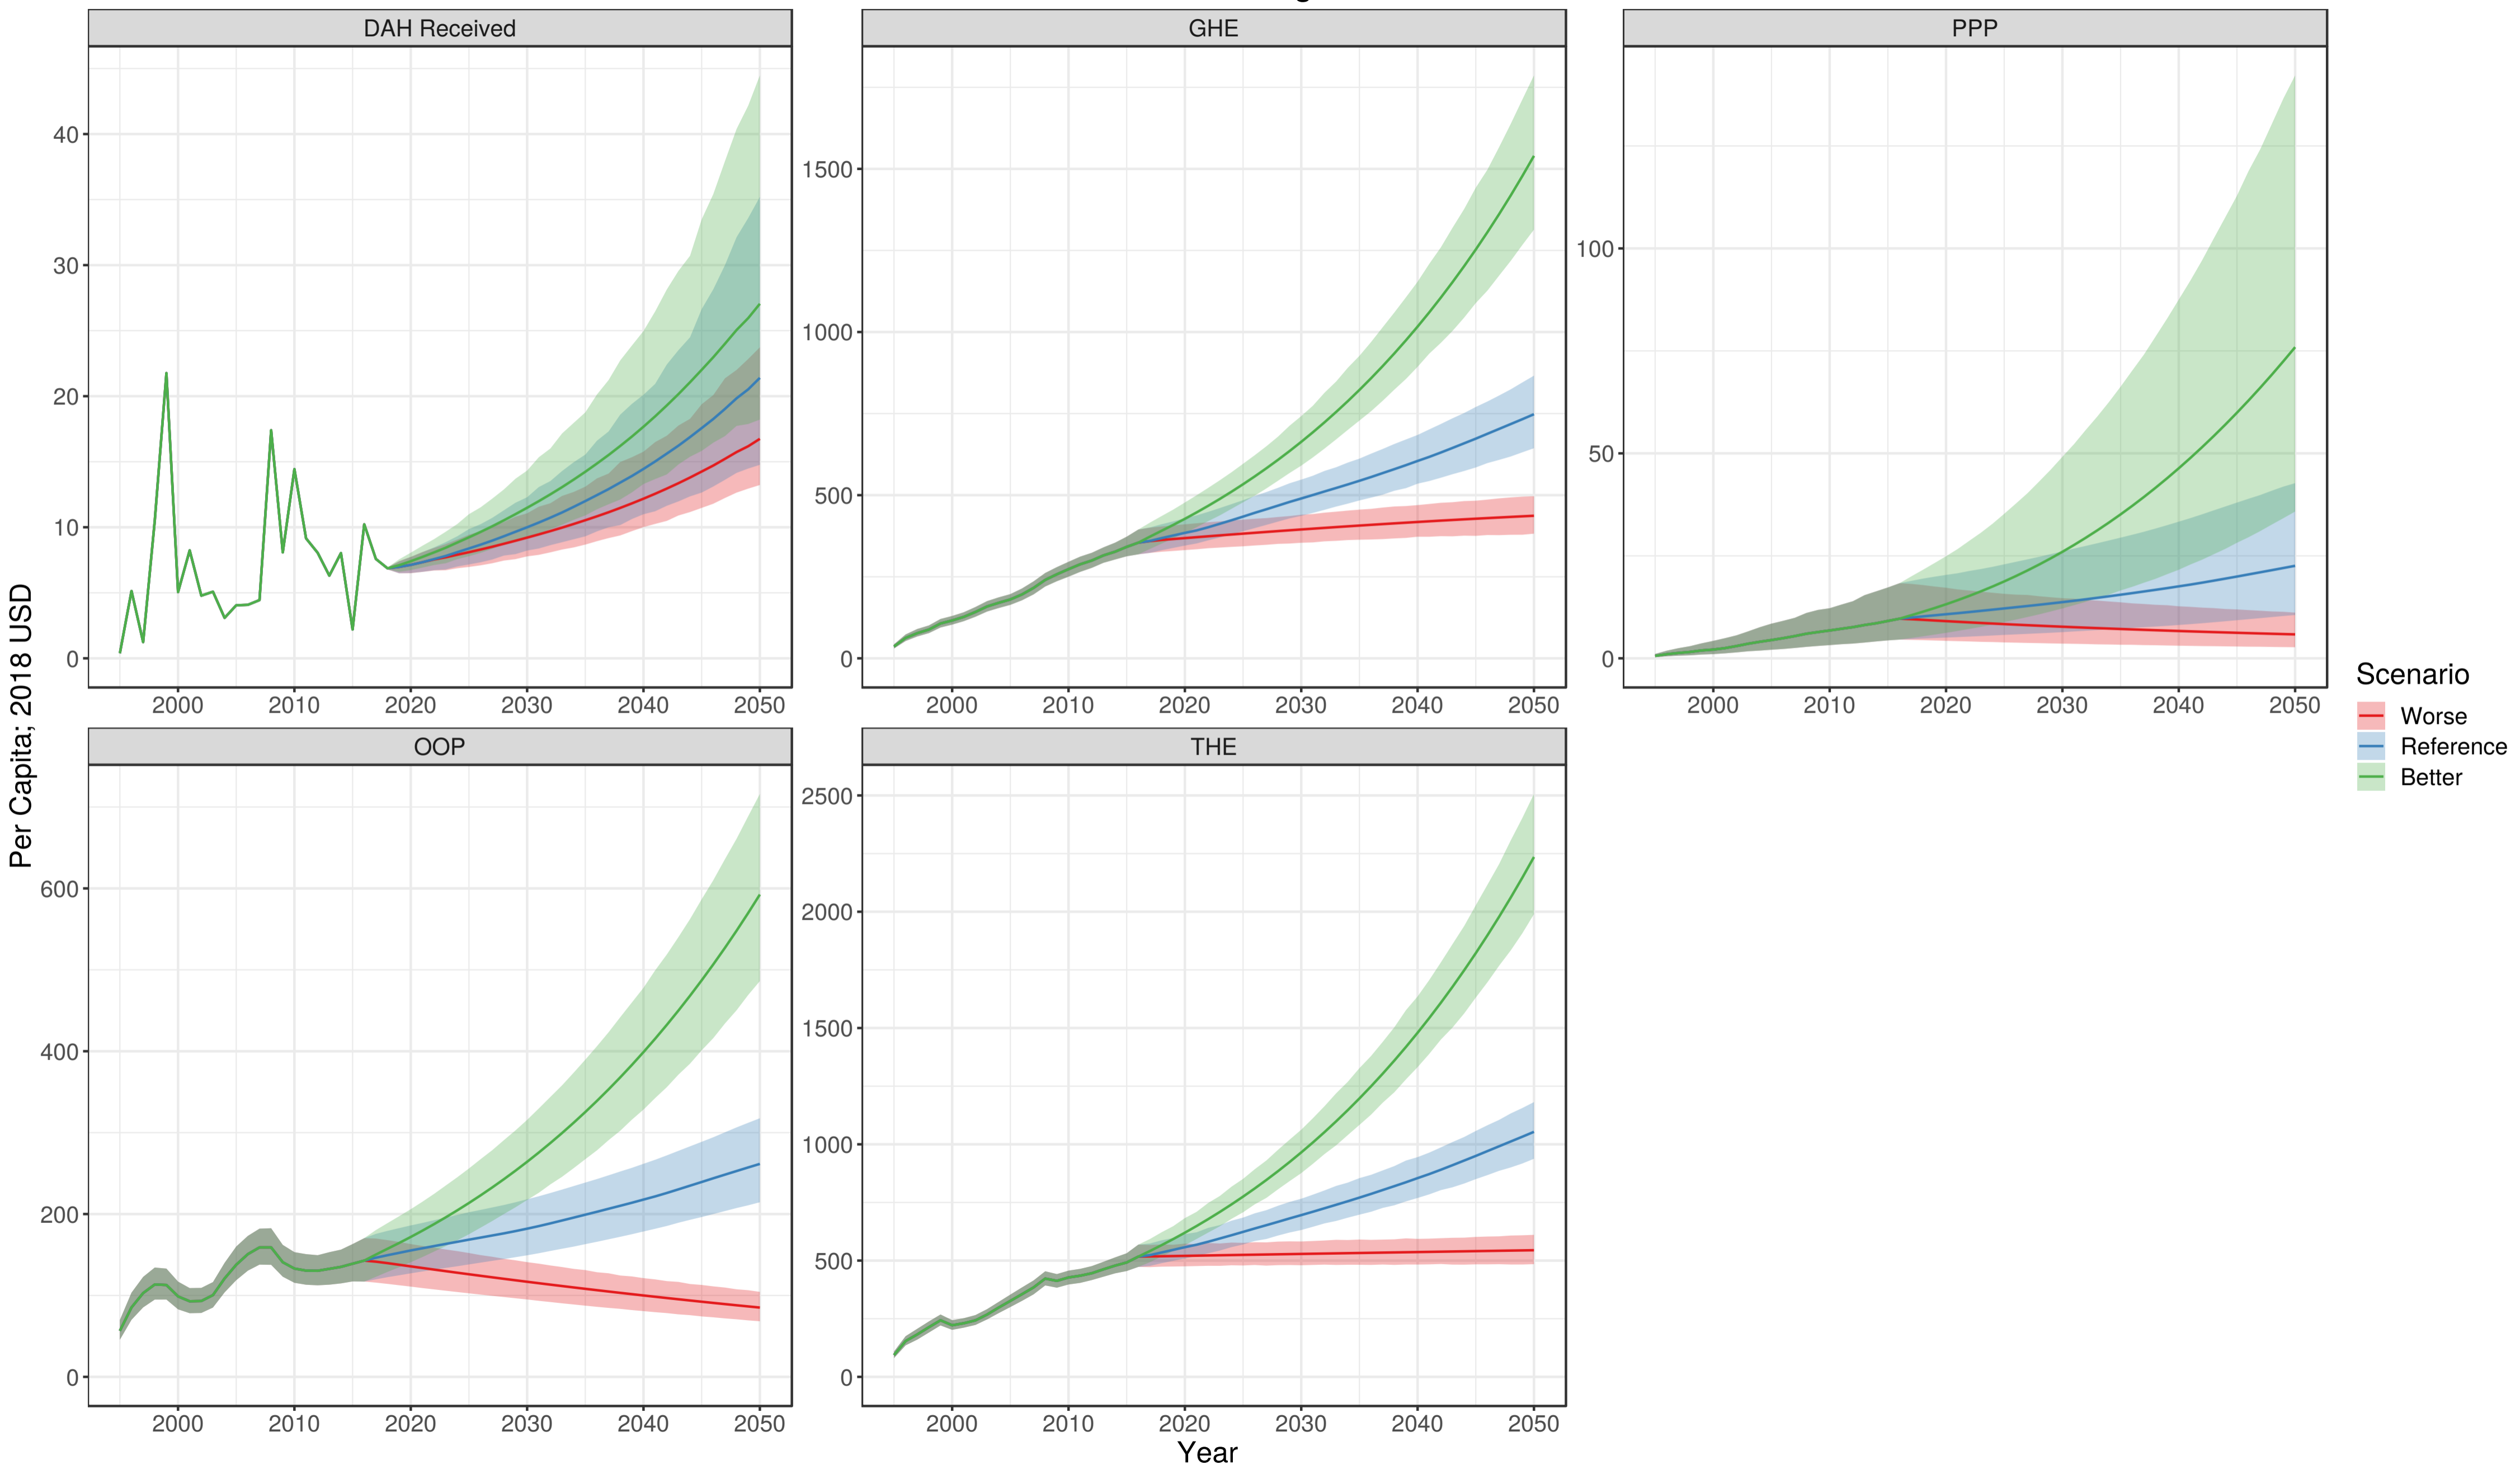

# Botswana

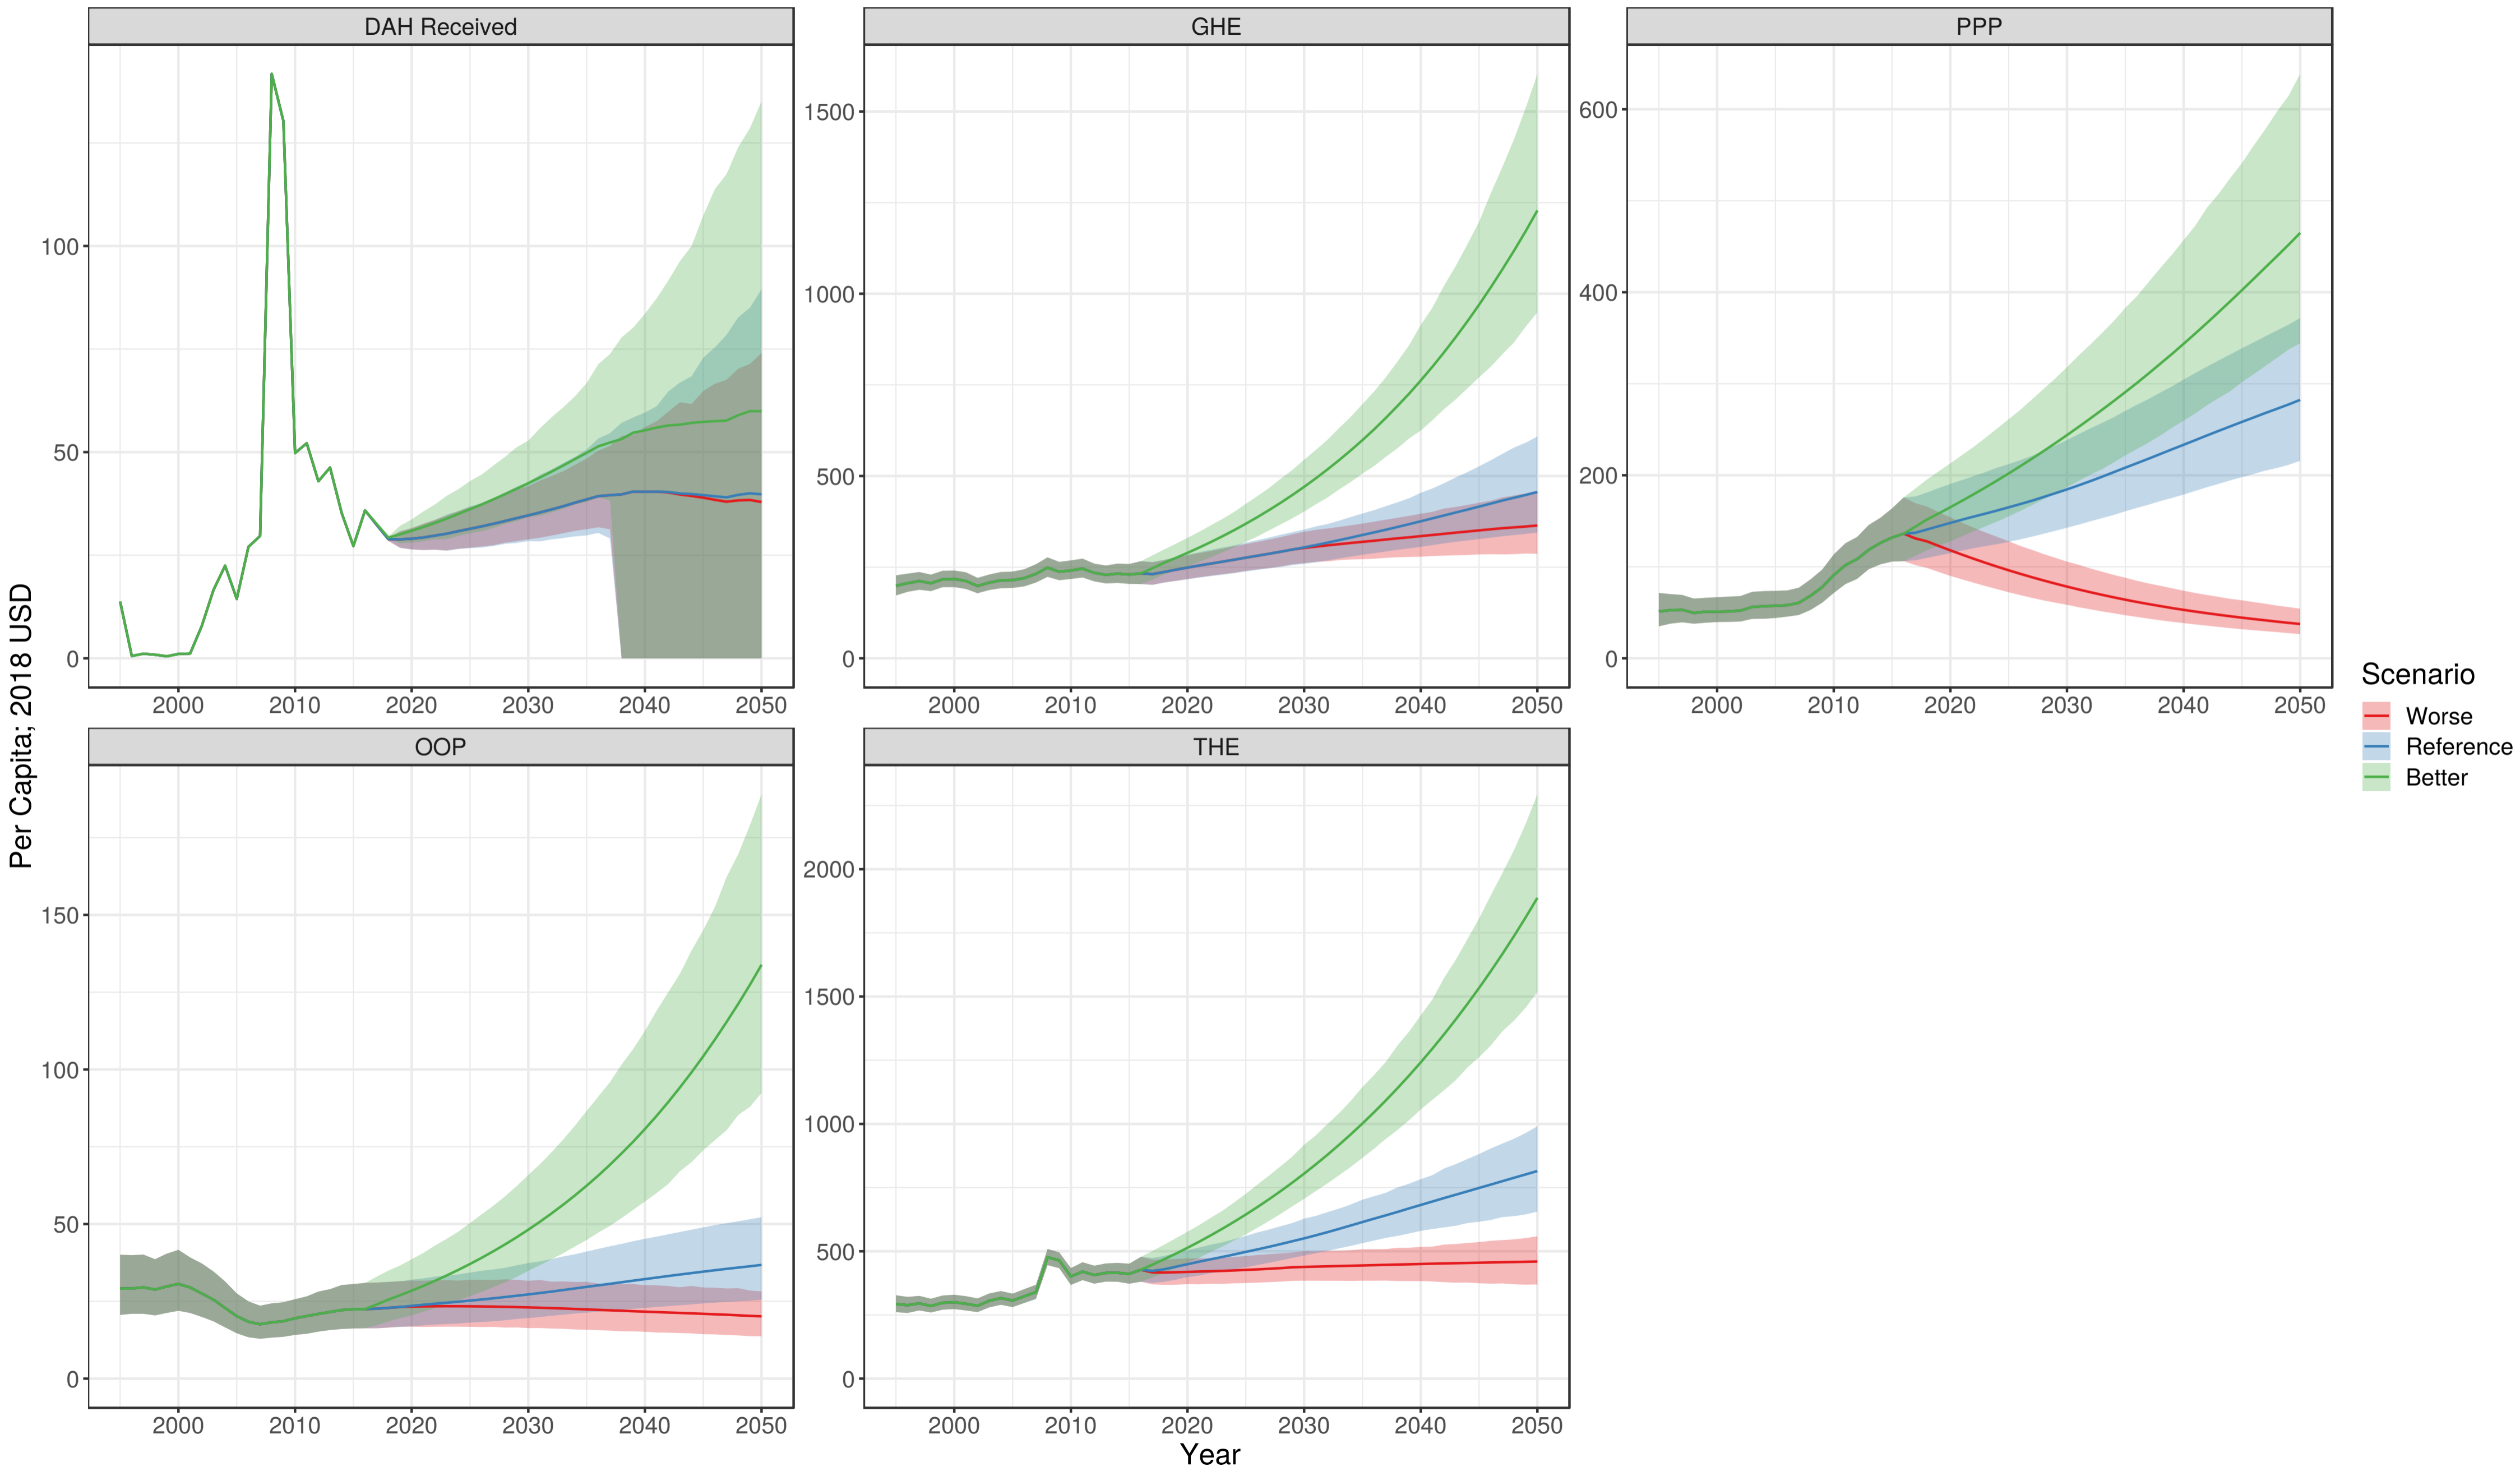

# Brazil

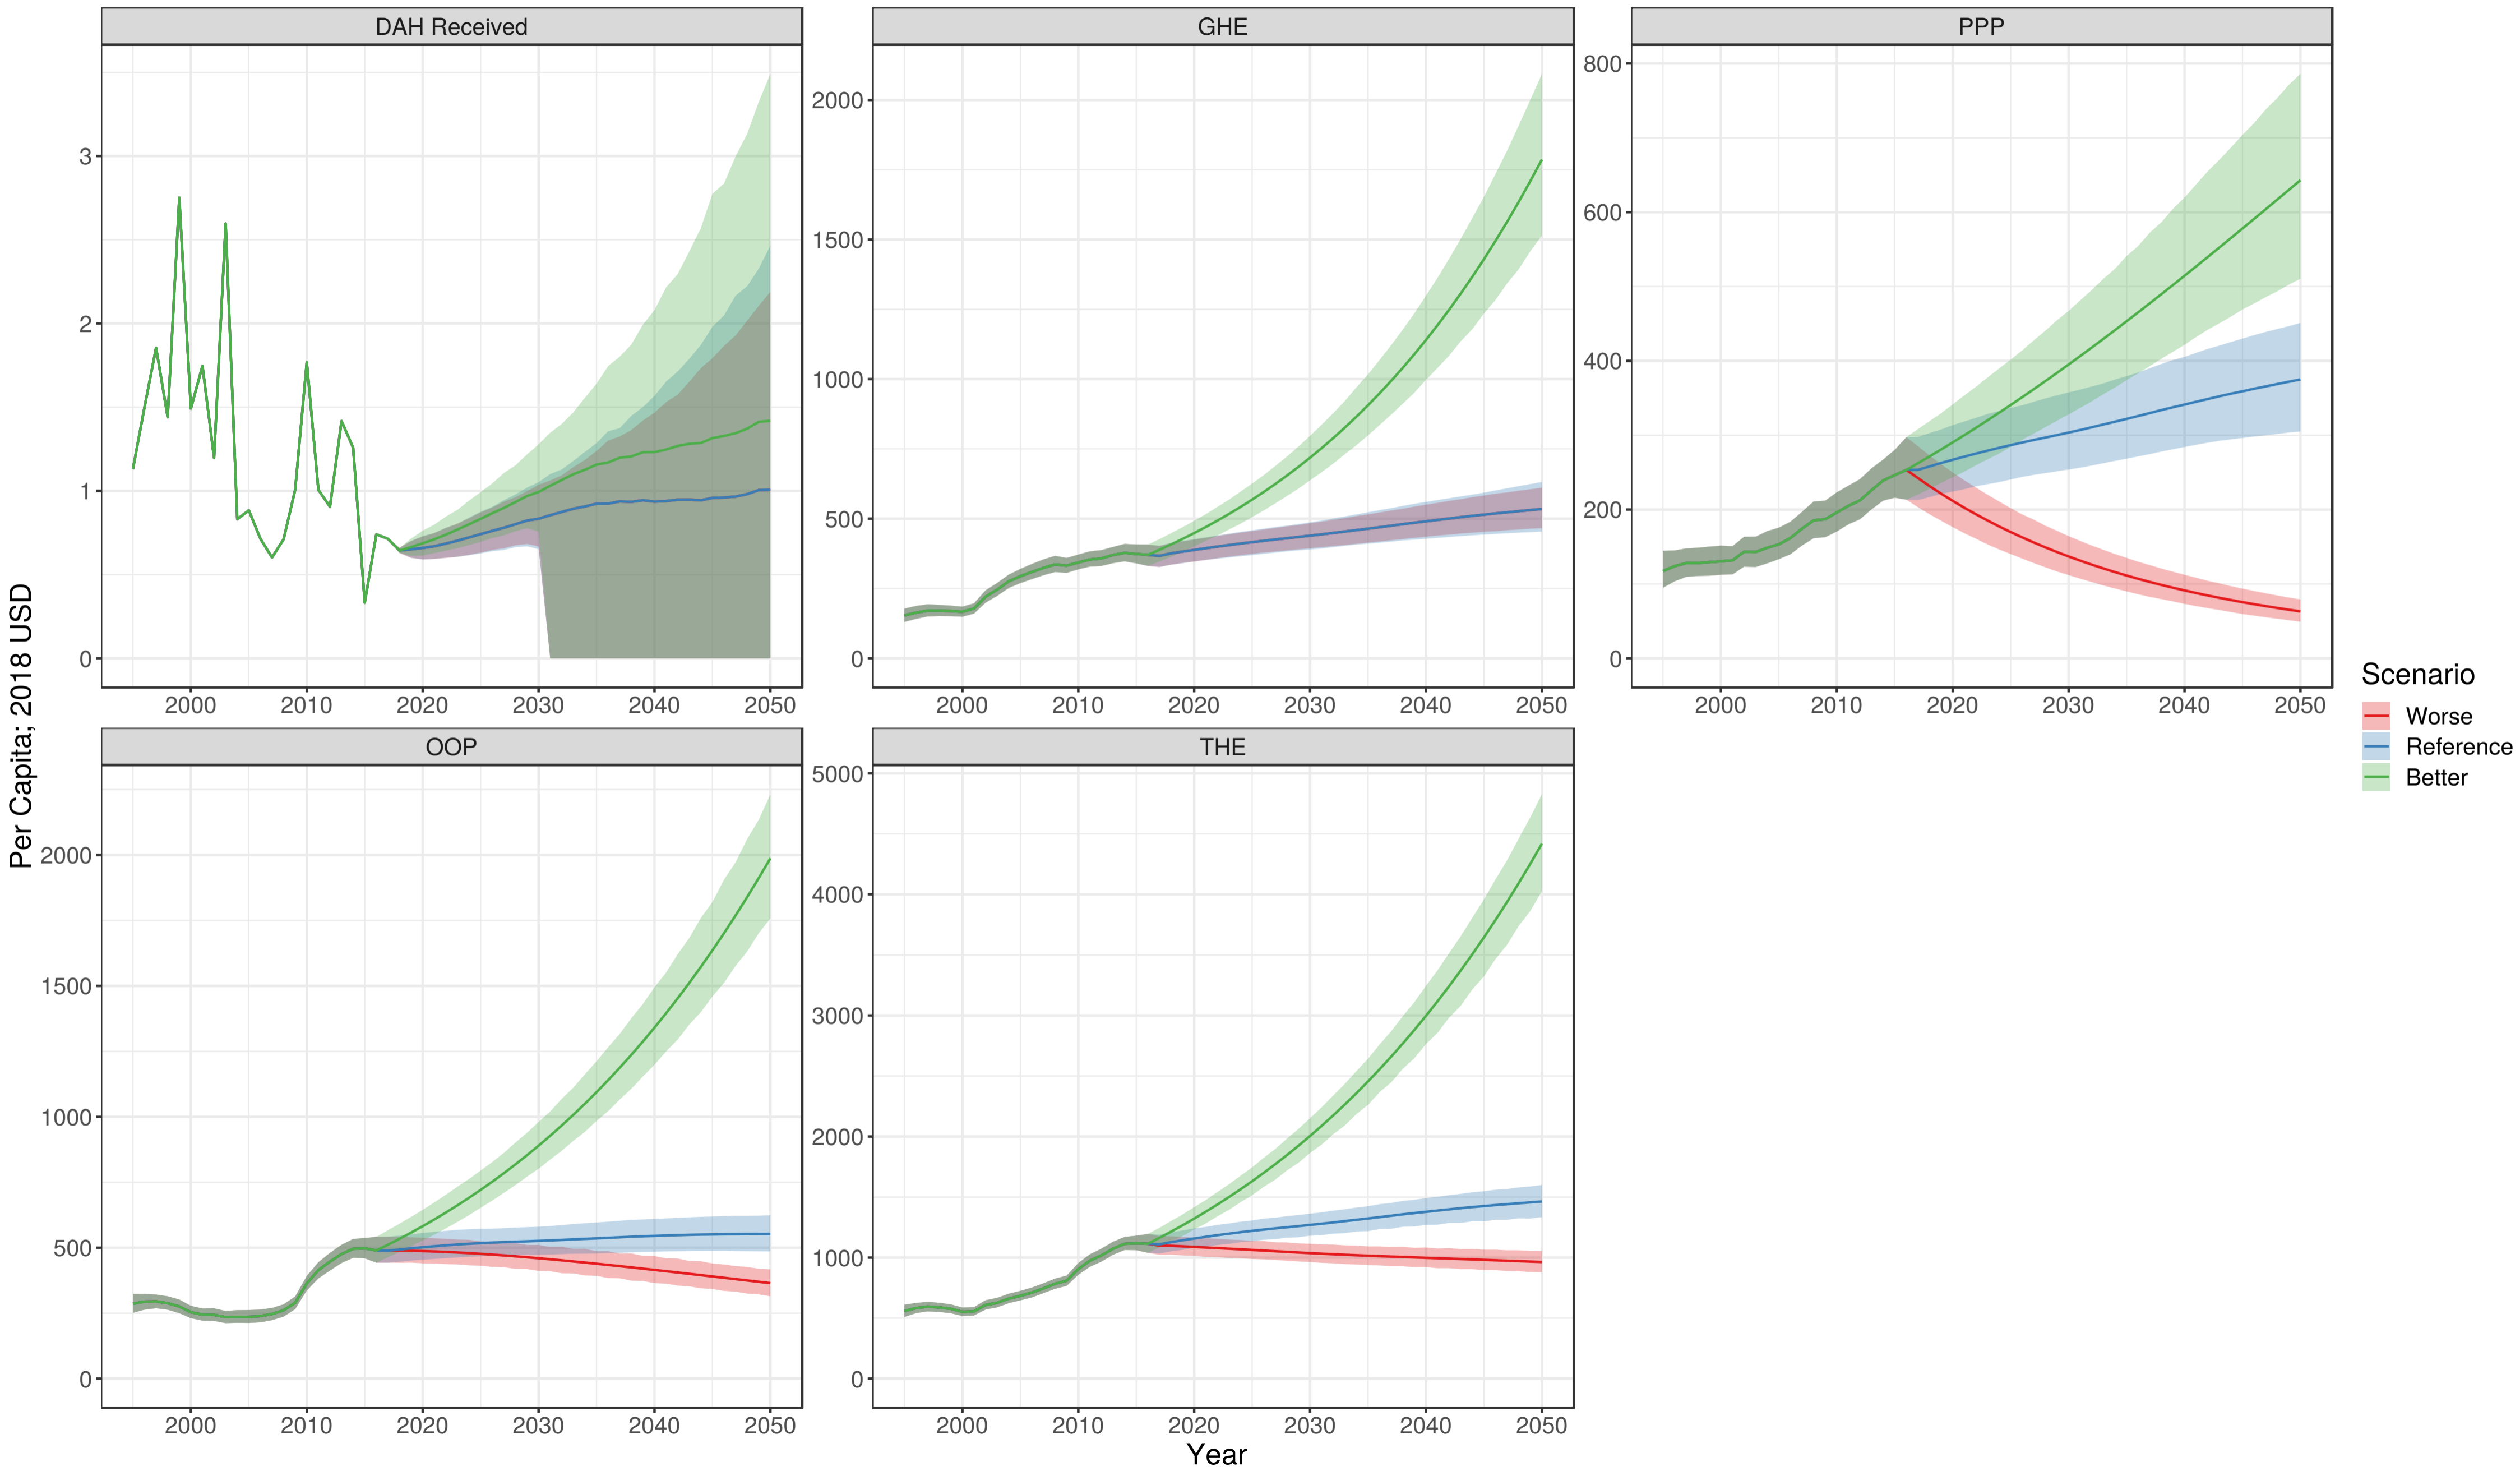

# Brunei

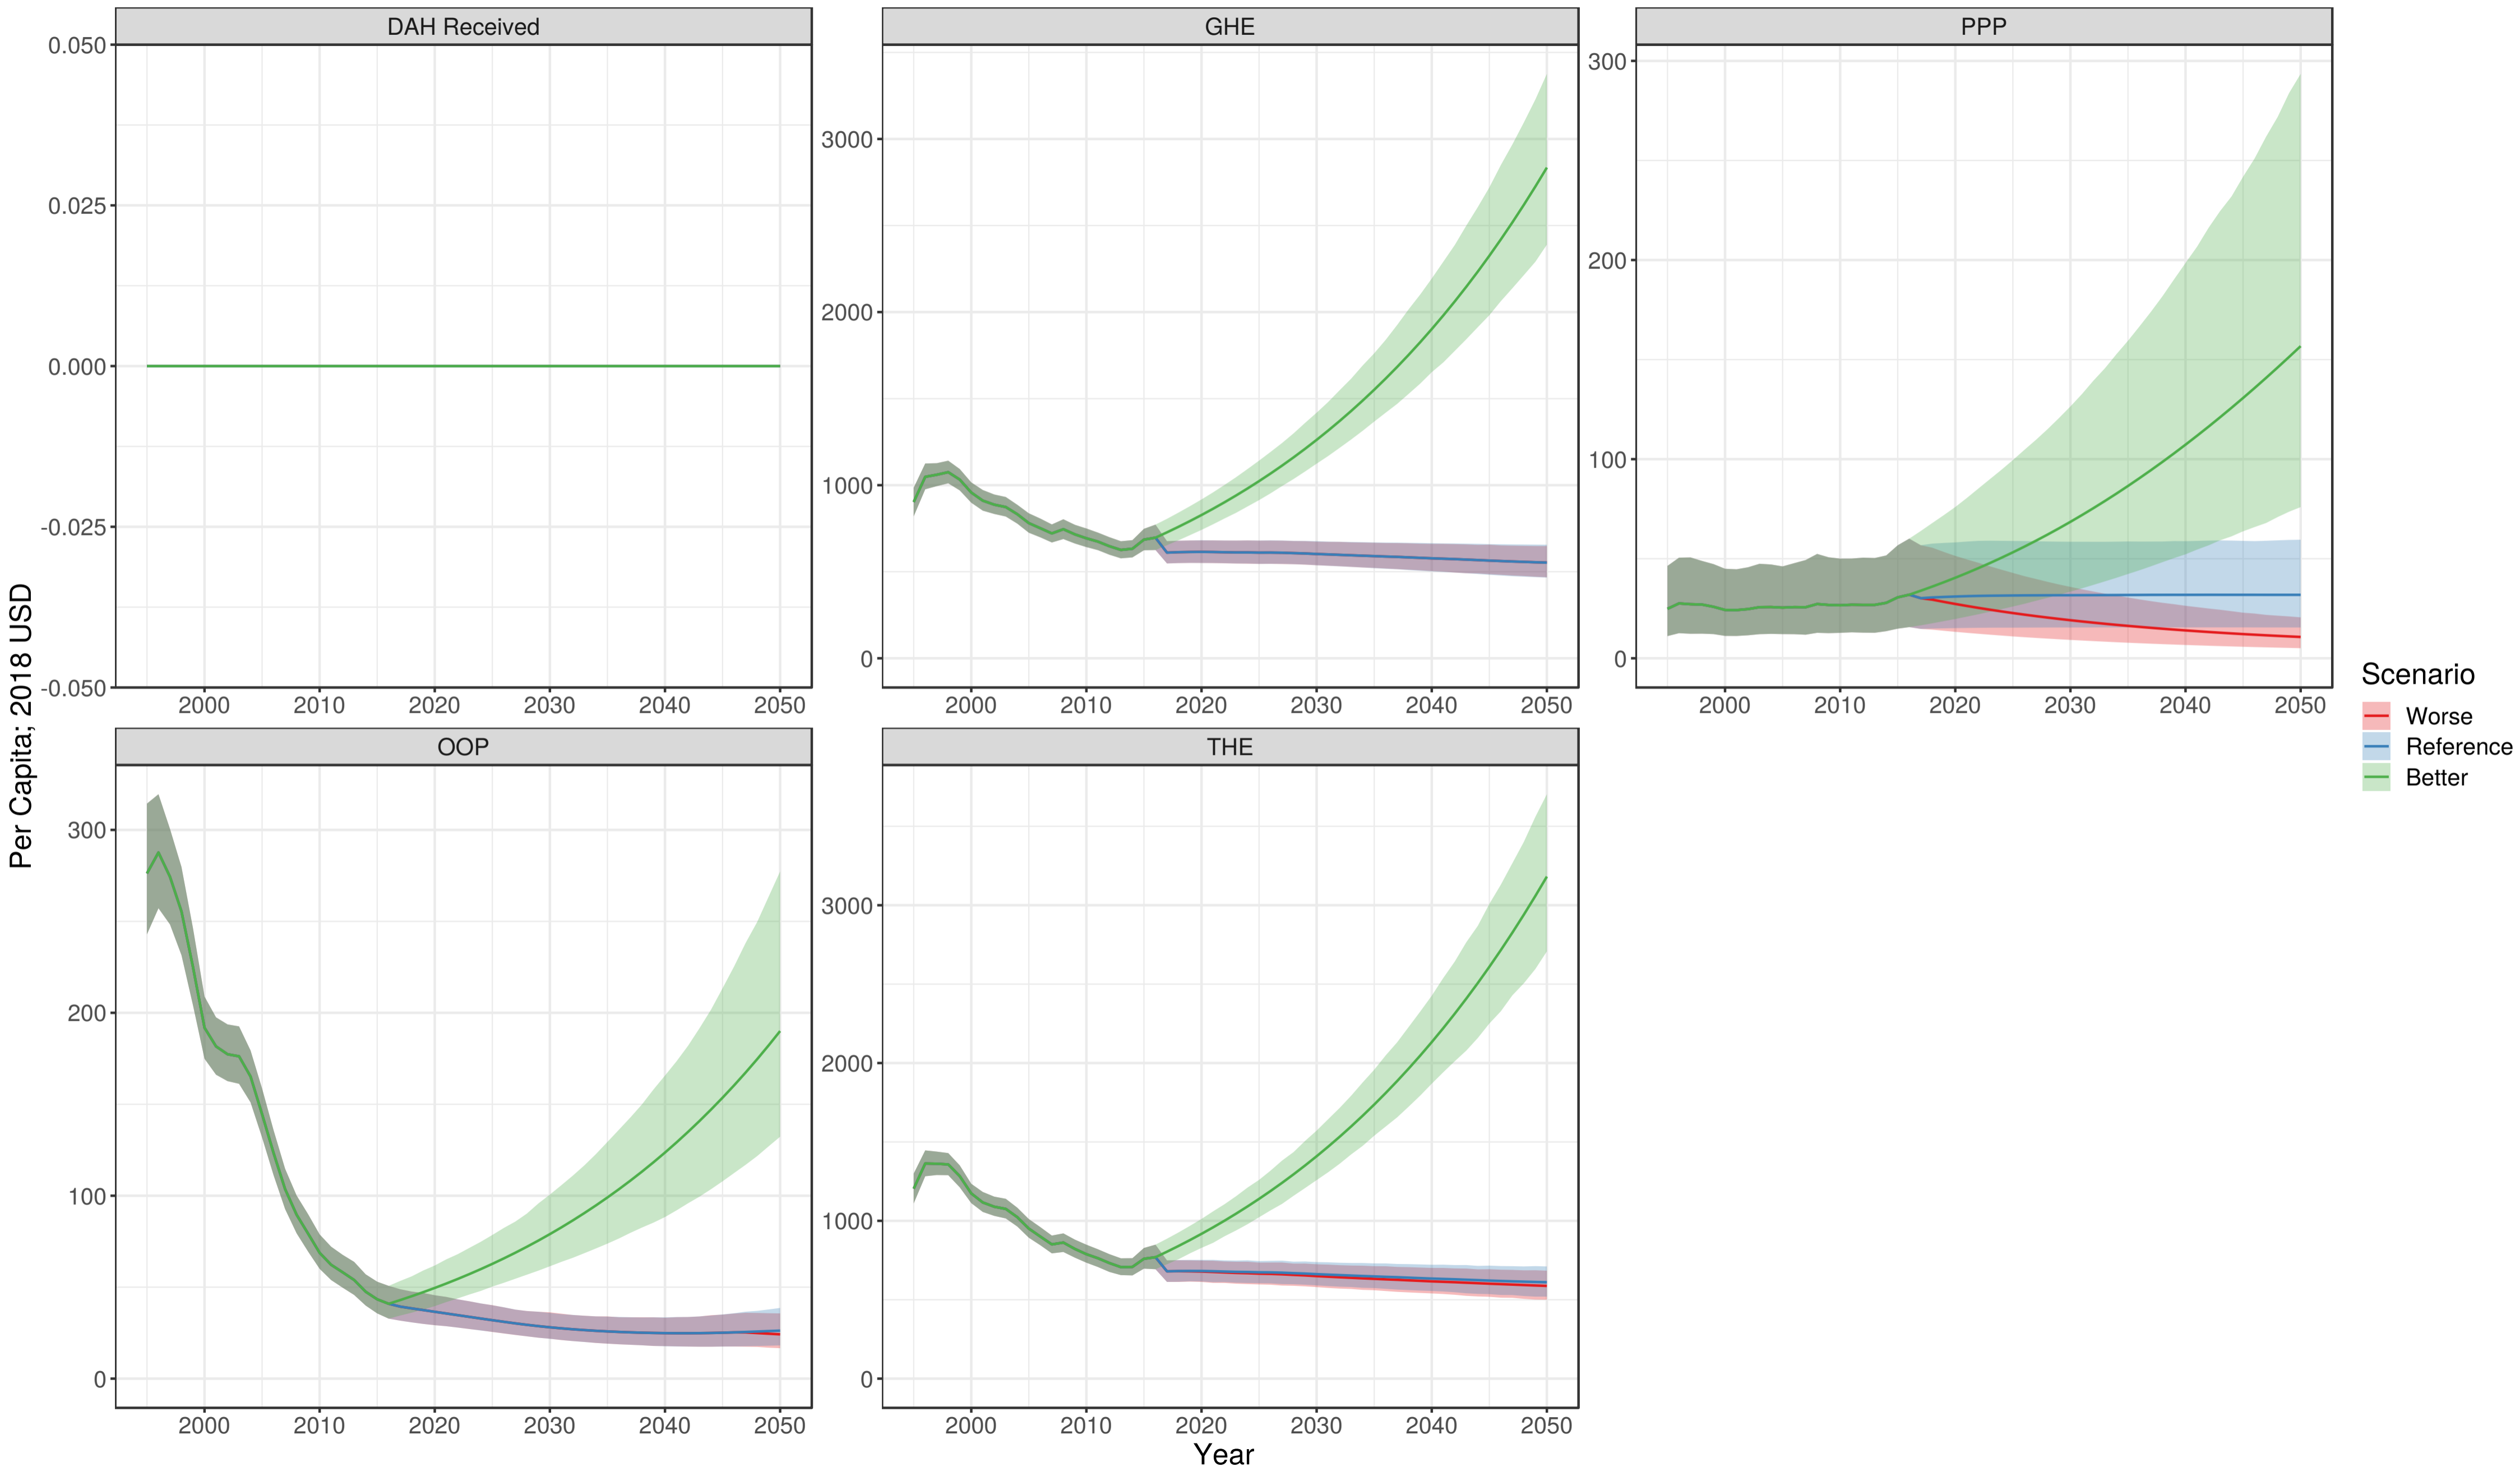

# Bulgaria

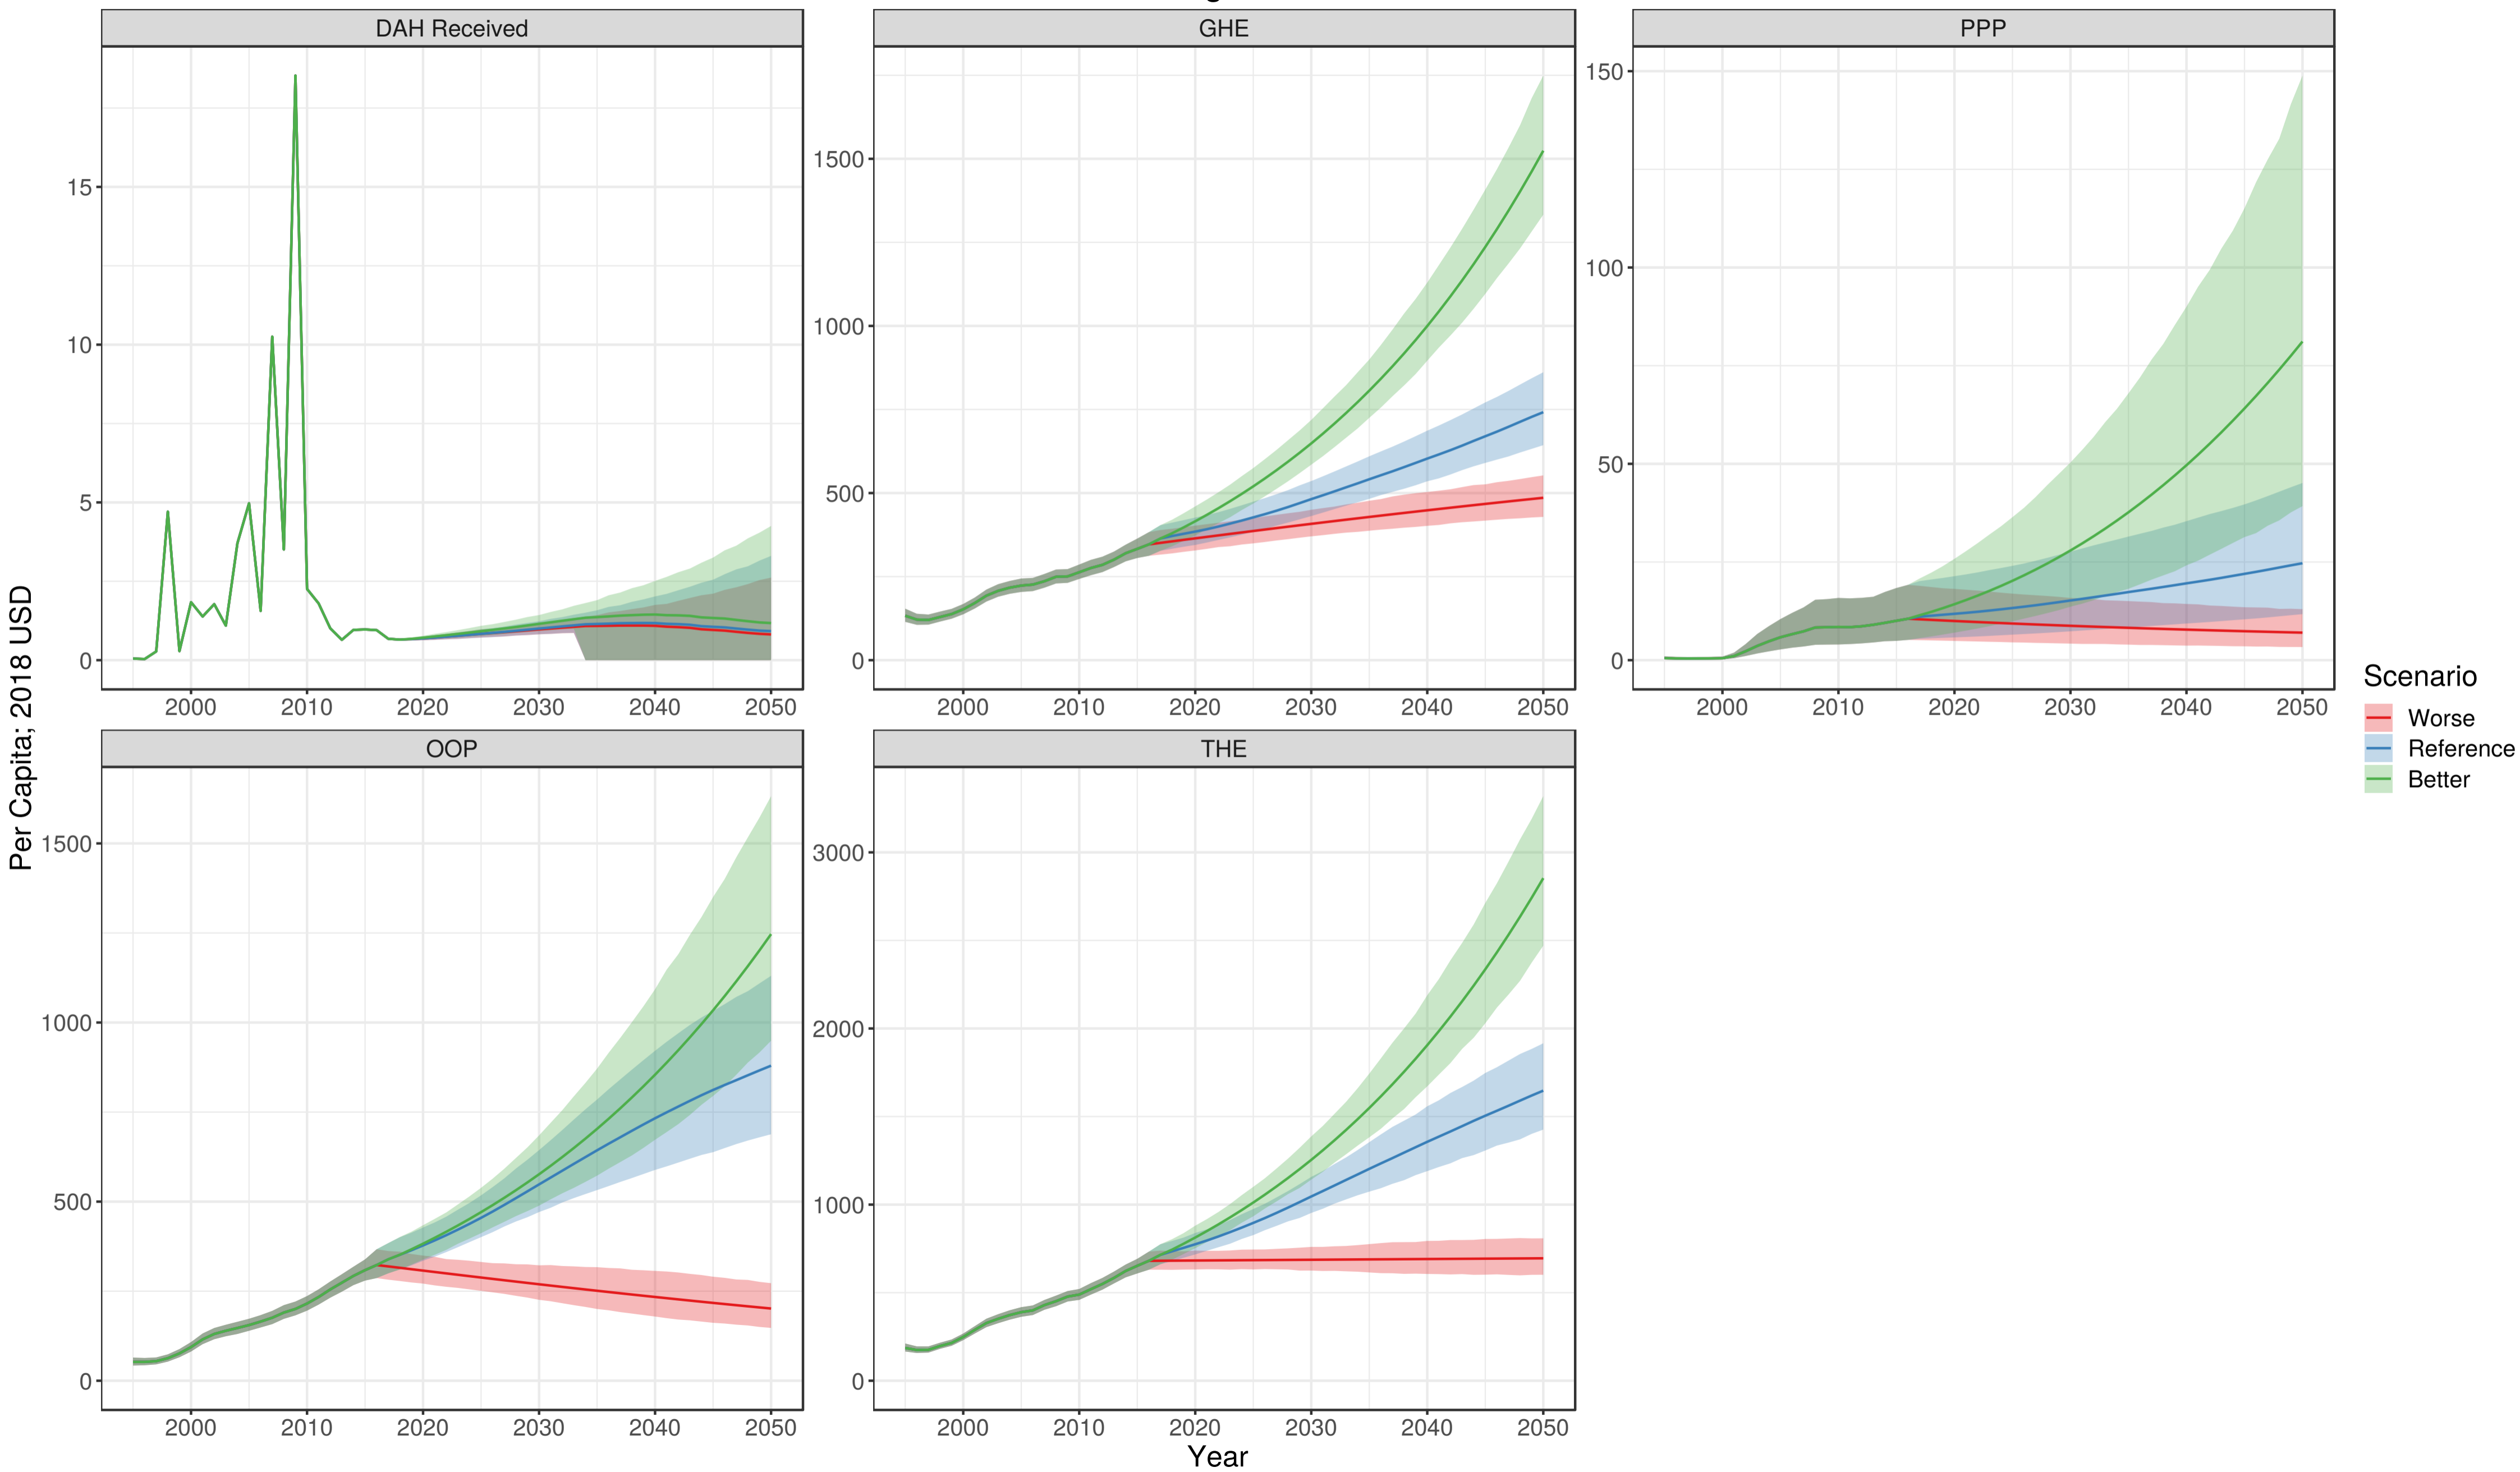

# Burkina Faso

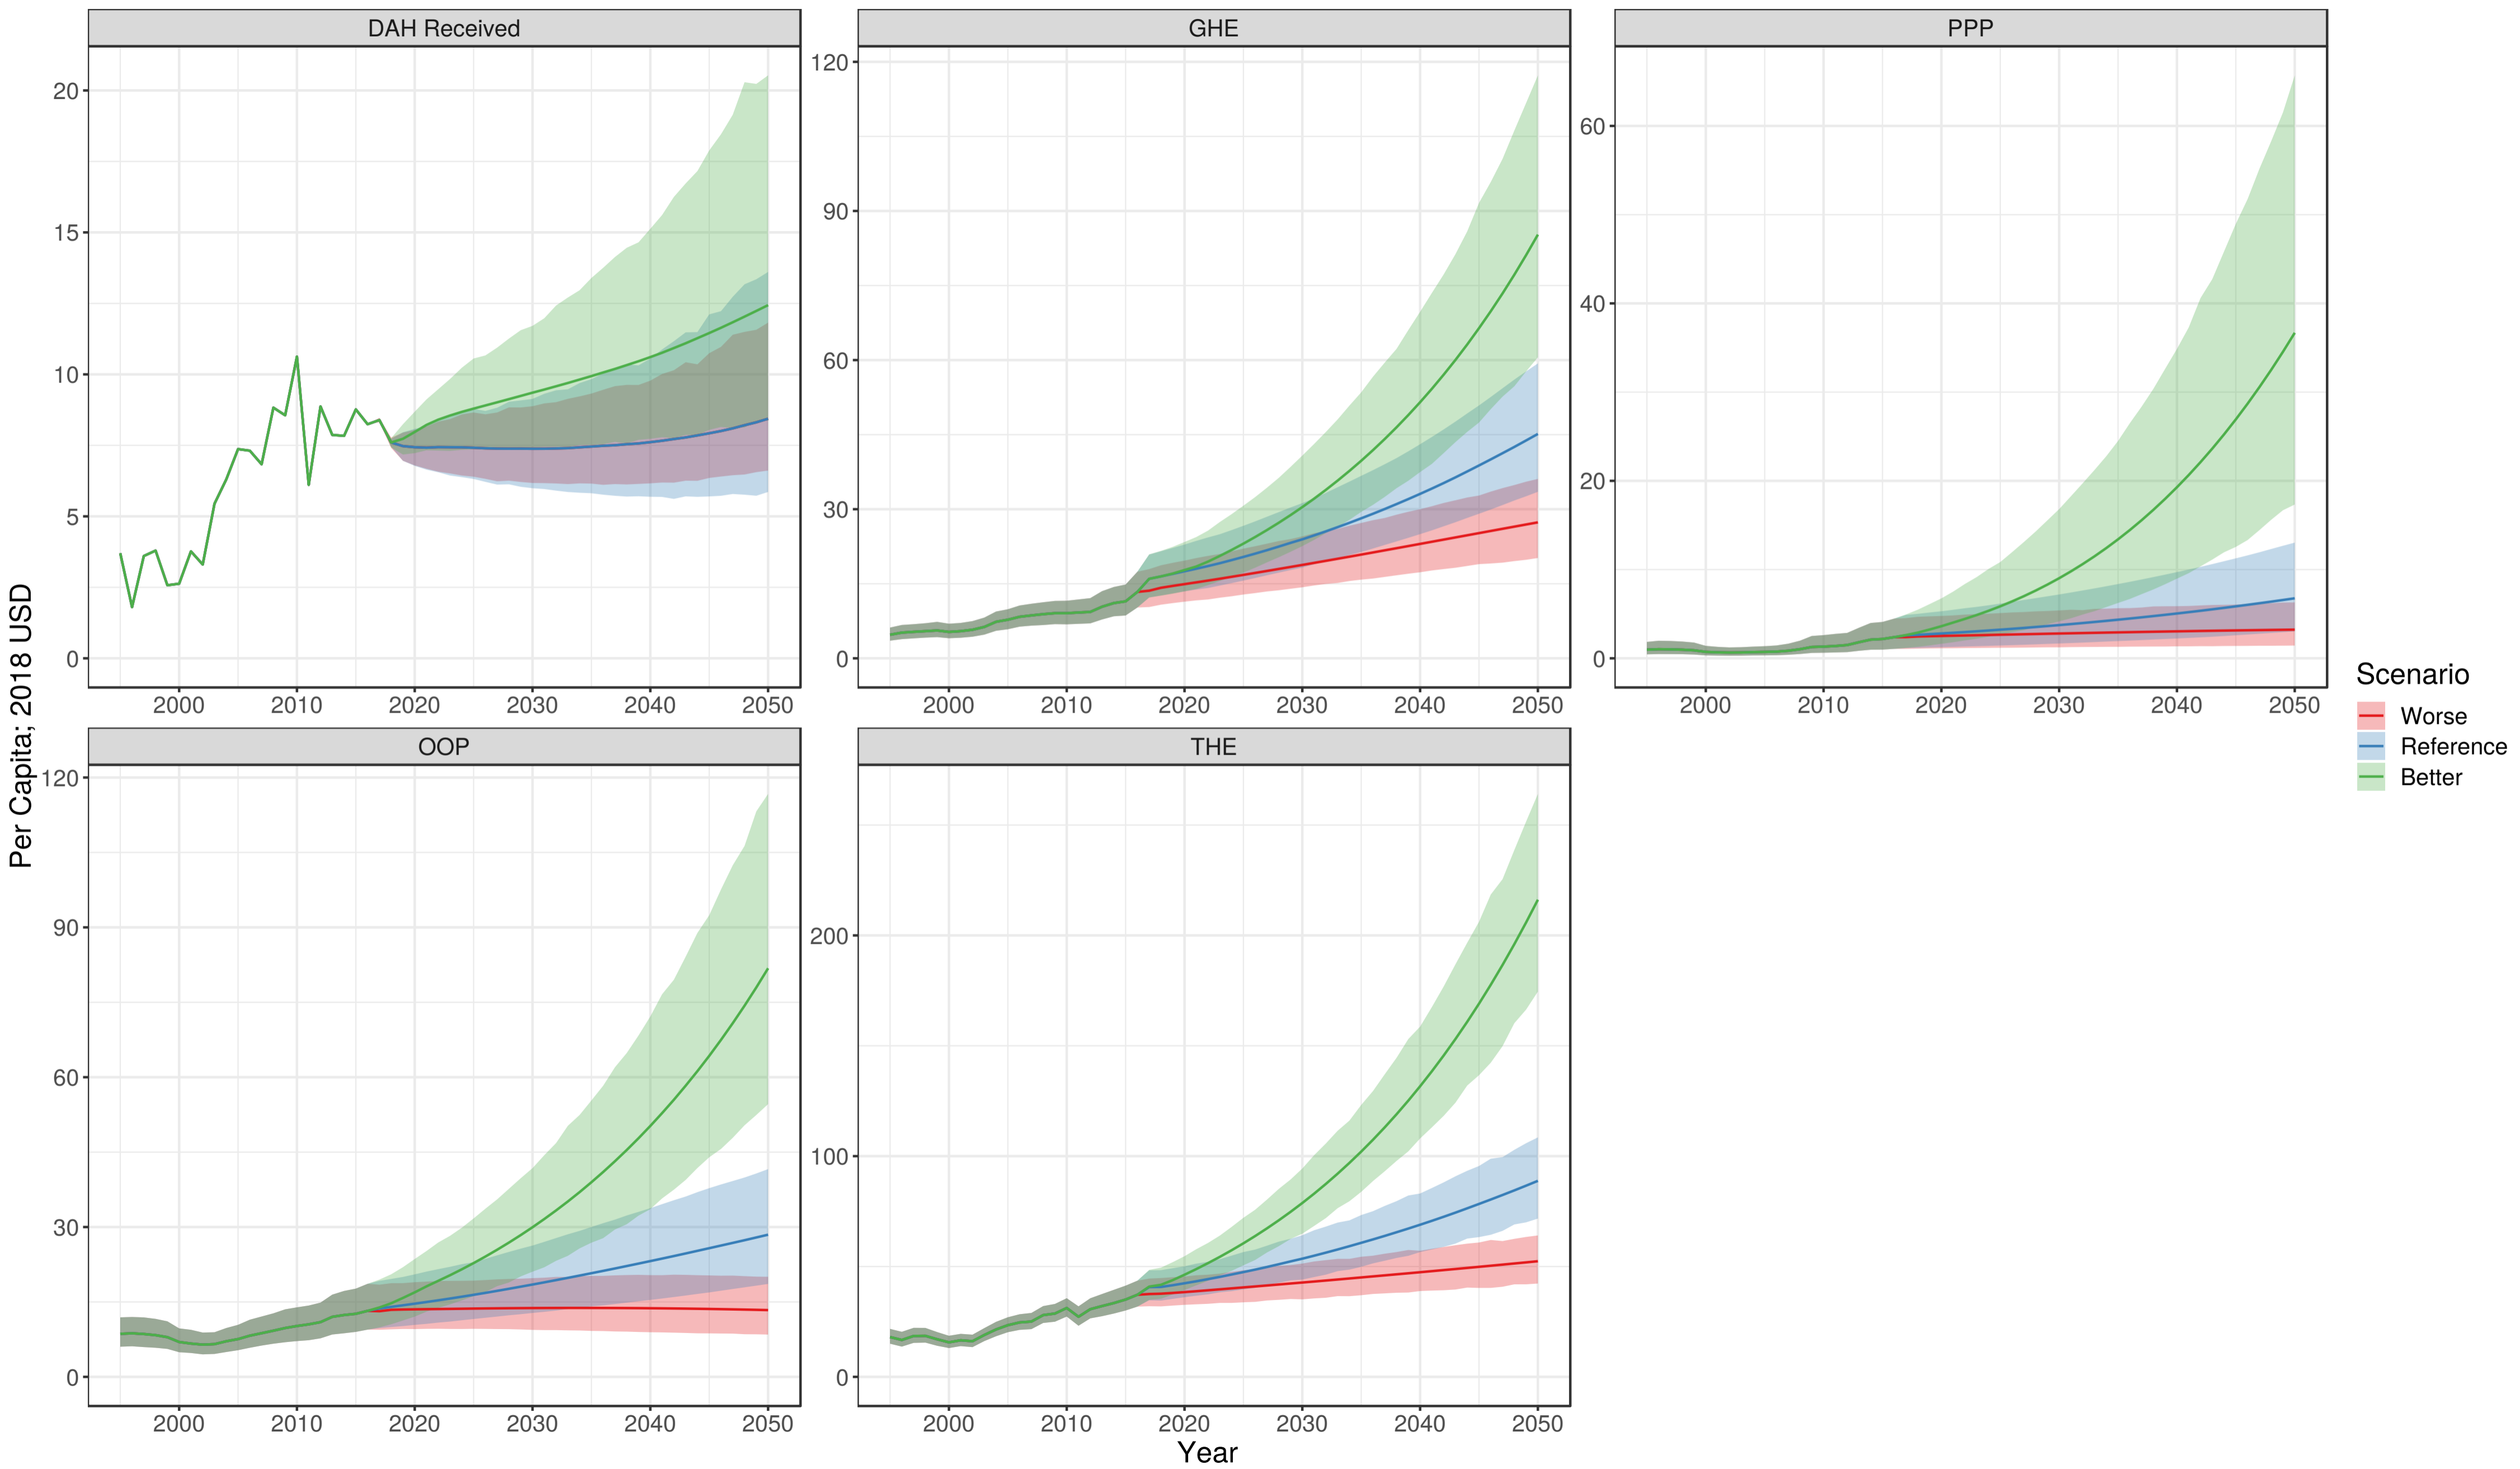



# Burundi

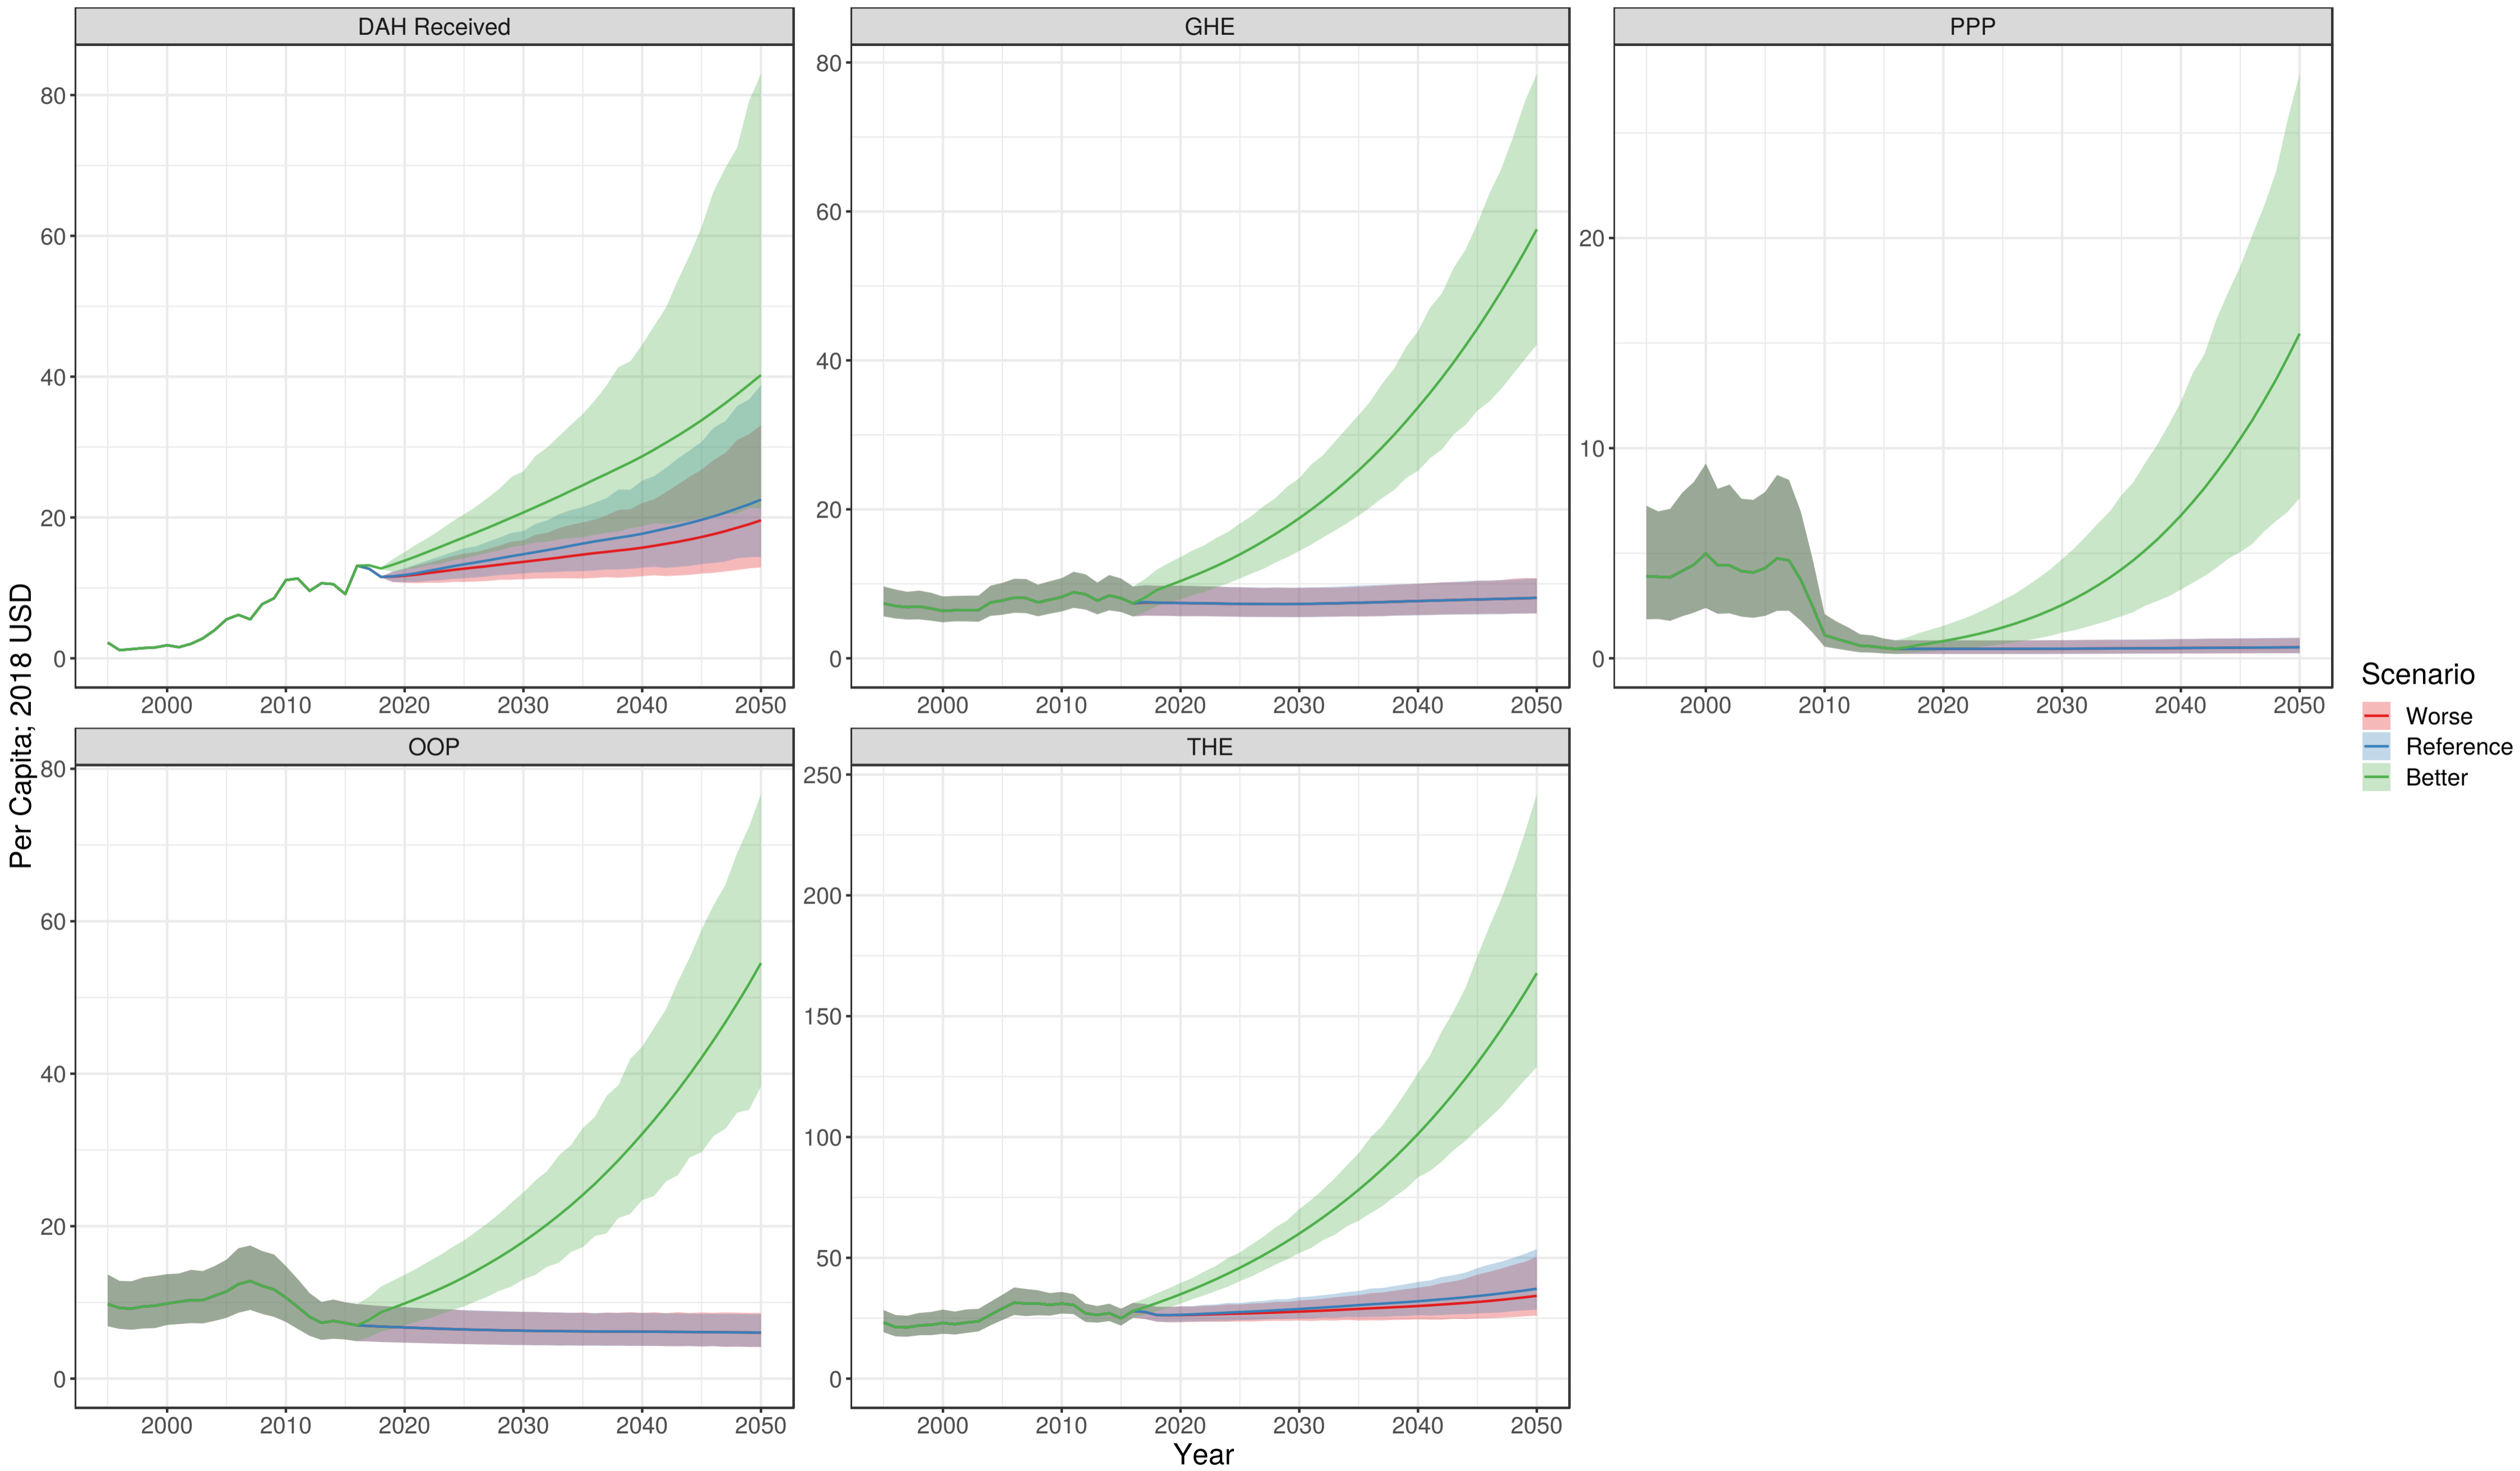

# Cambodia

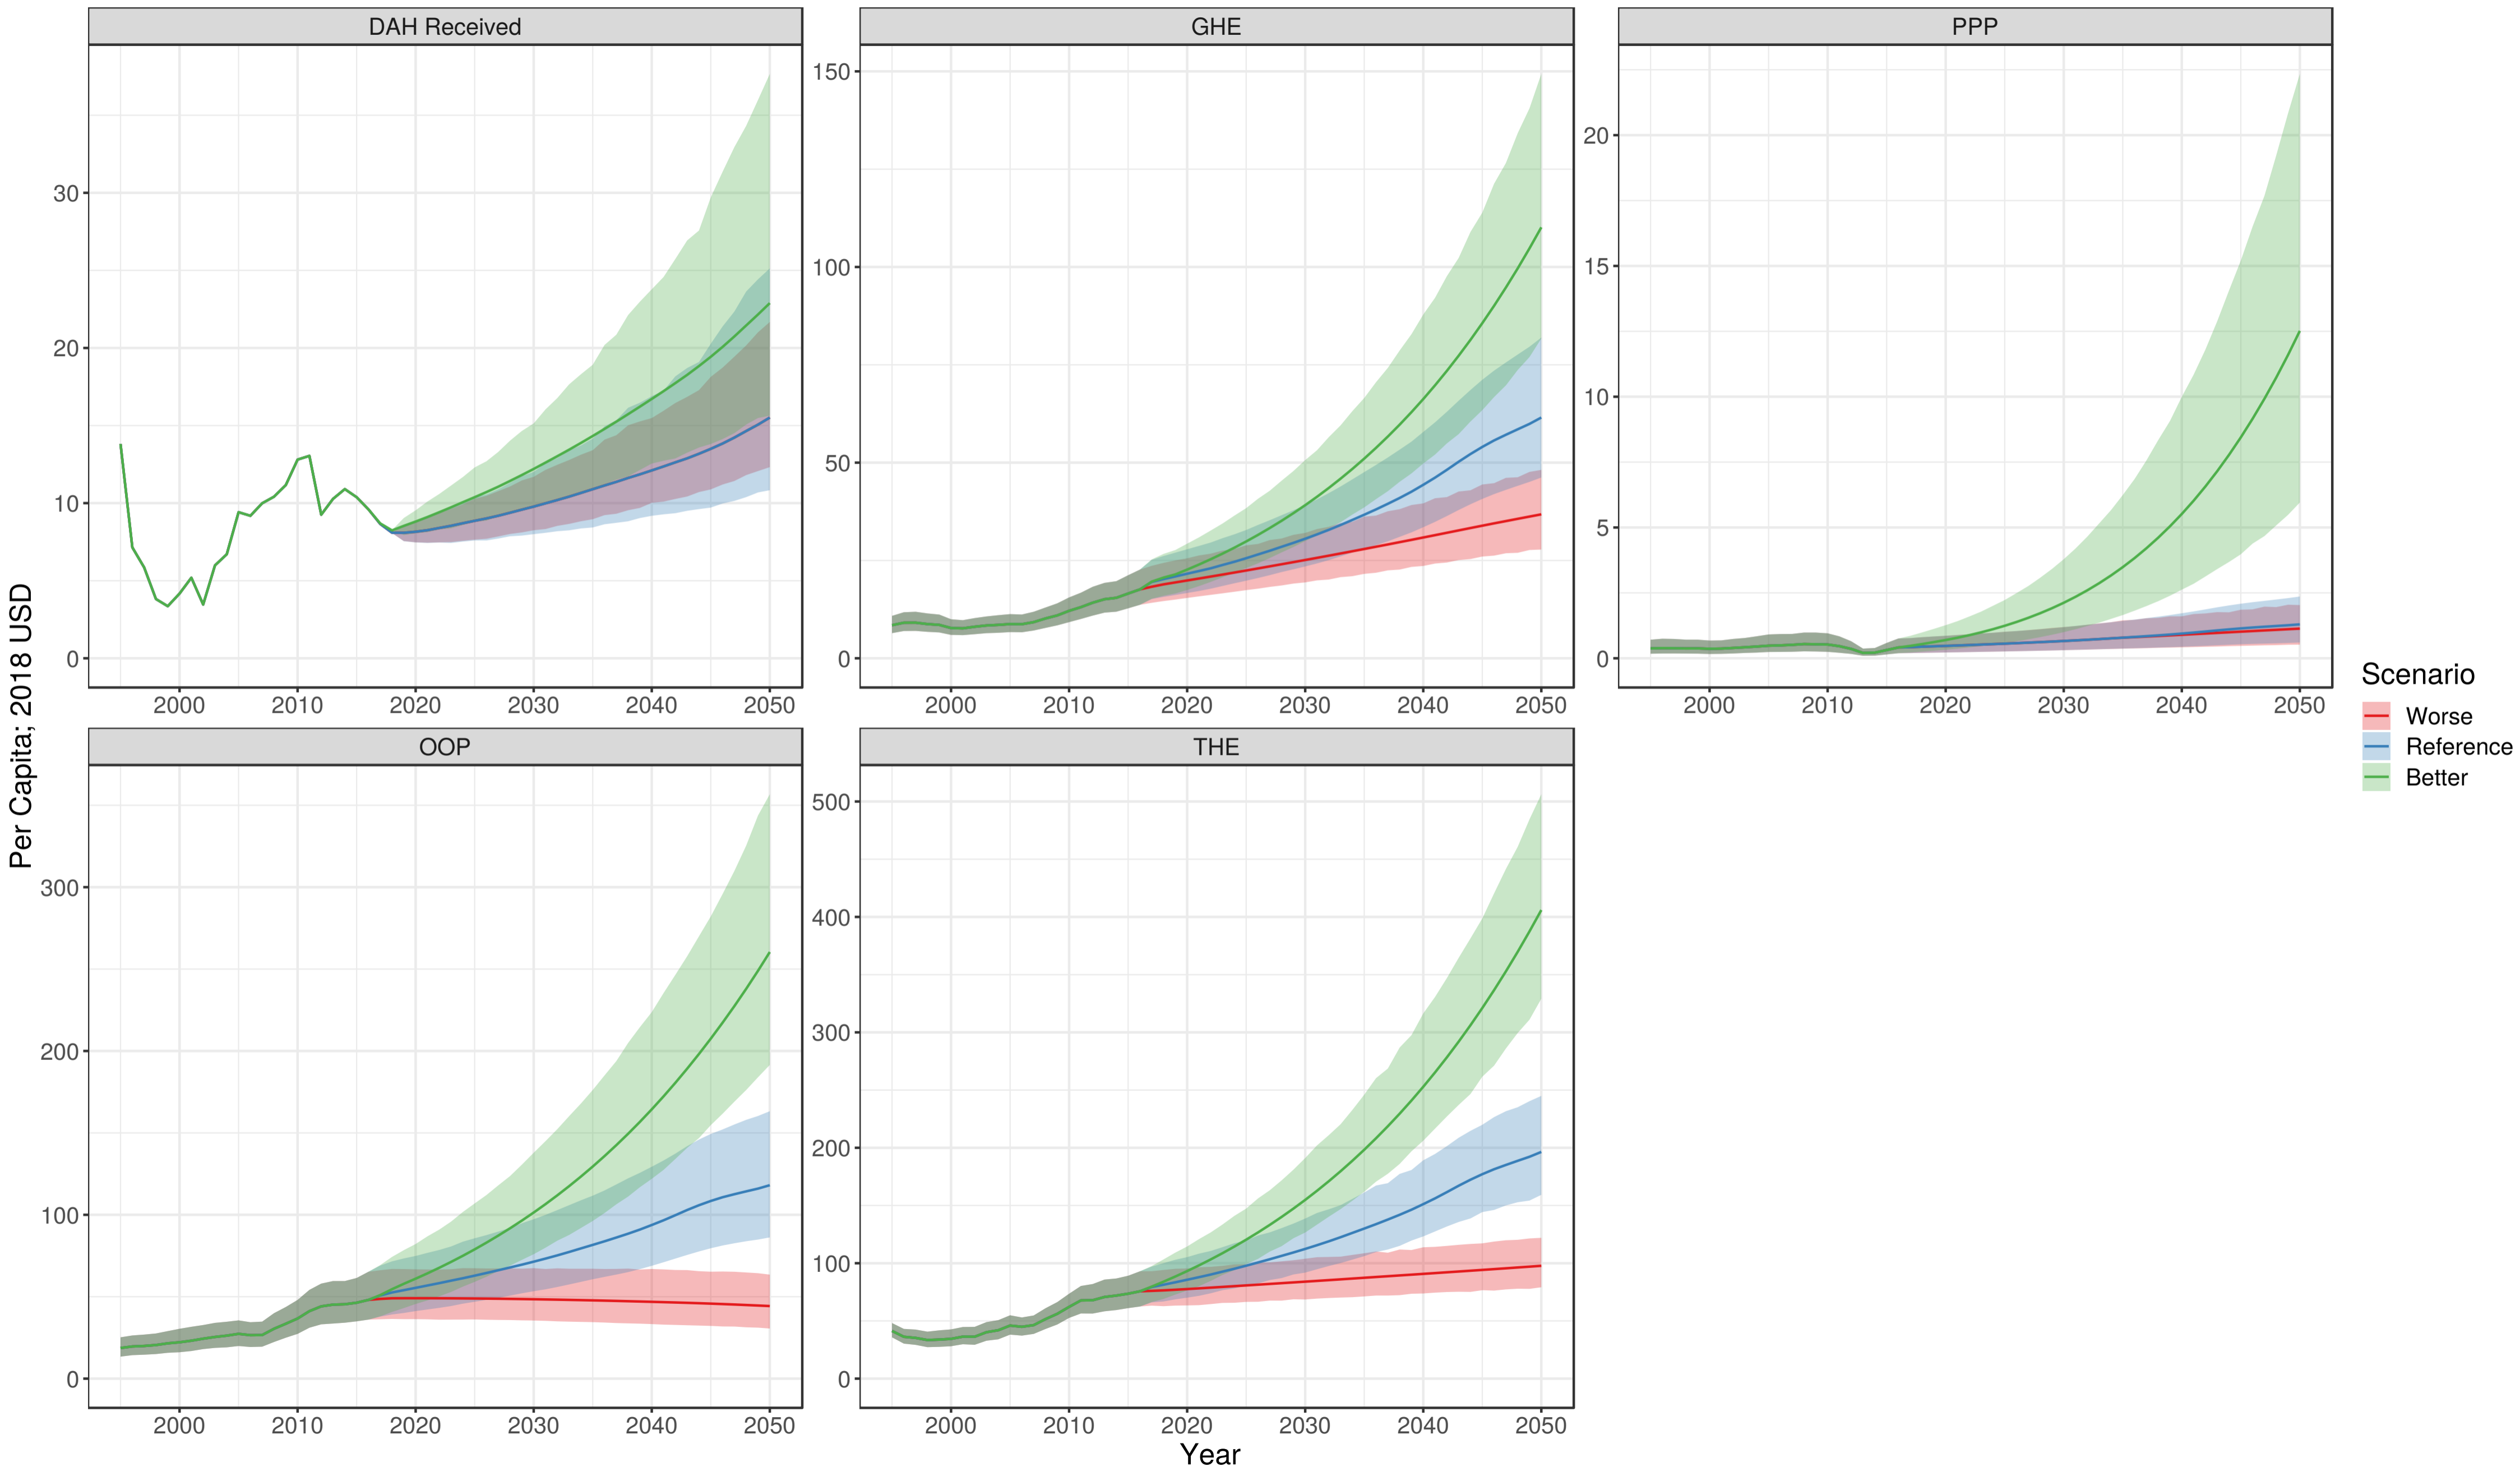

# Cameroon

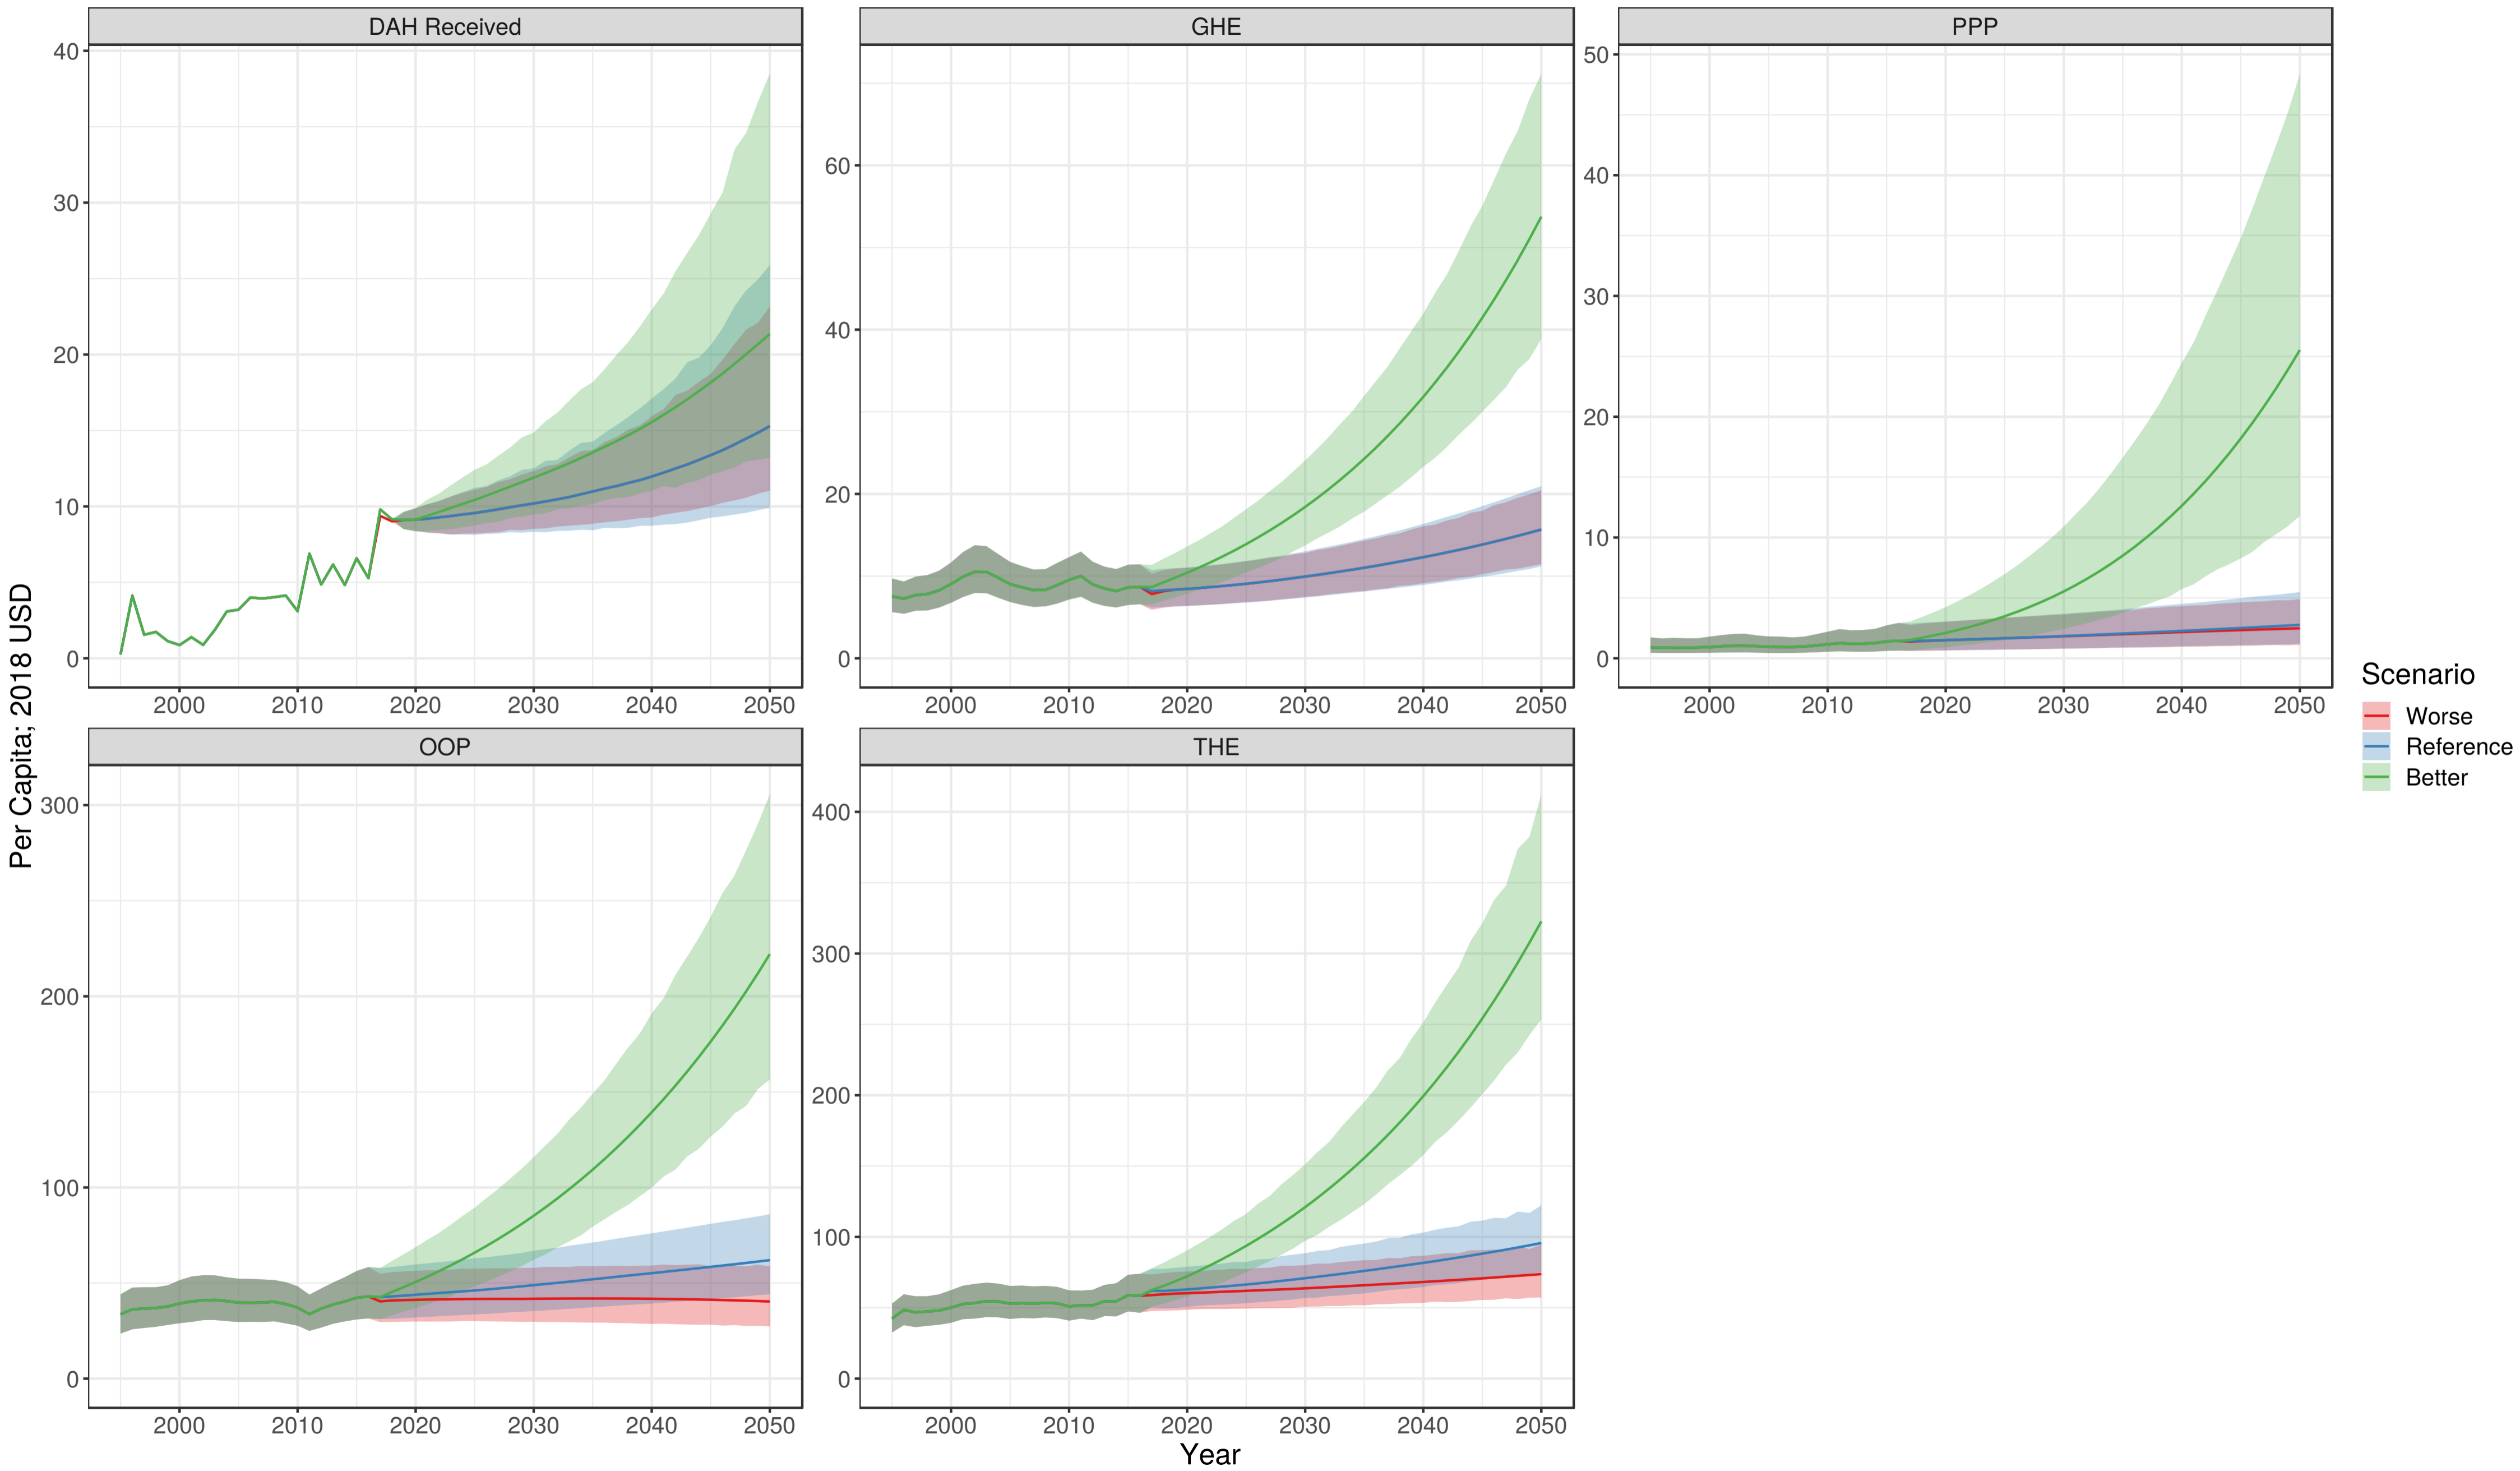

# Canada

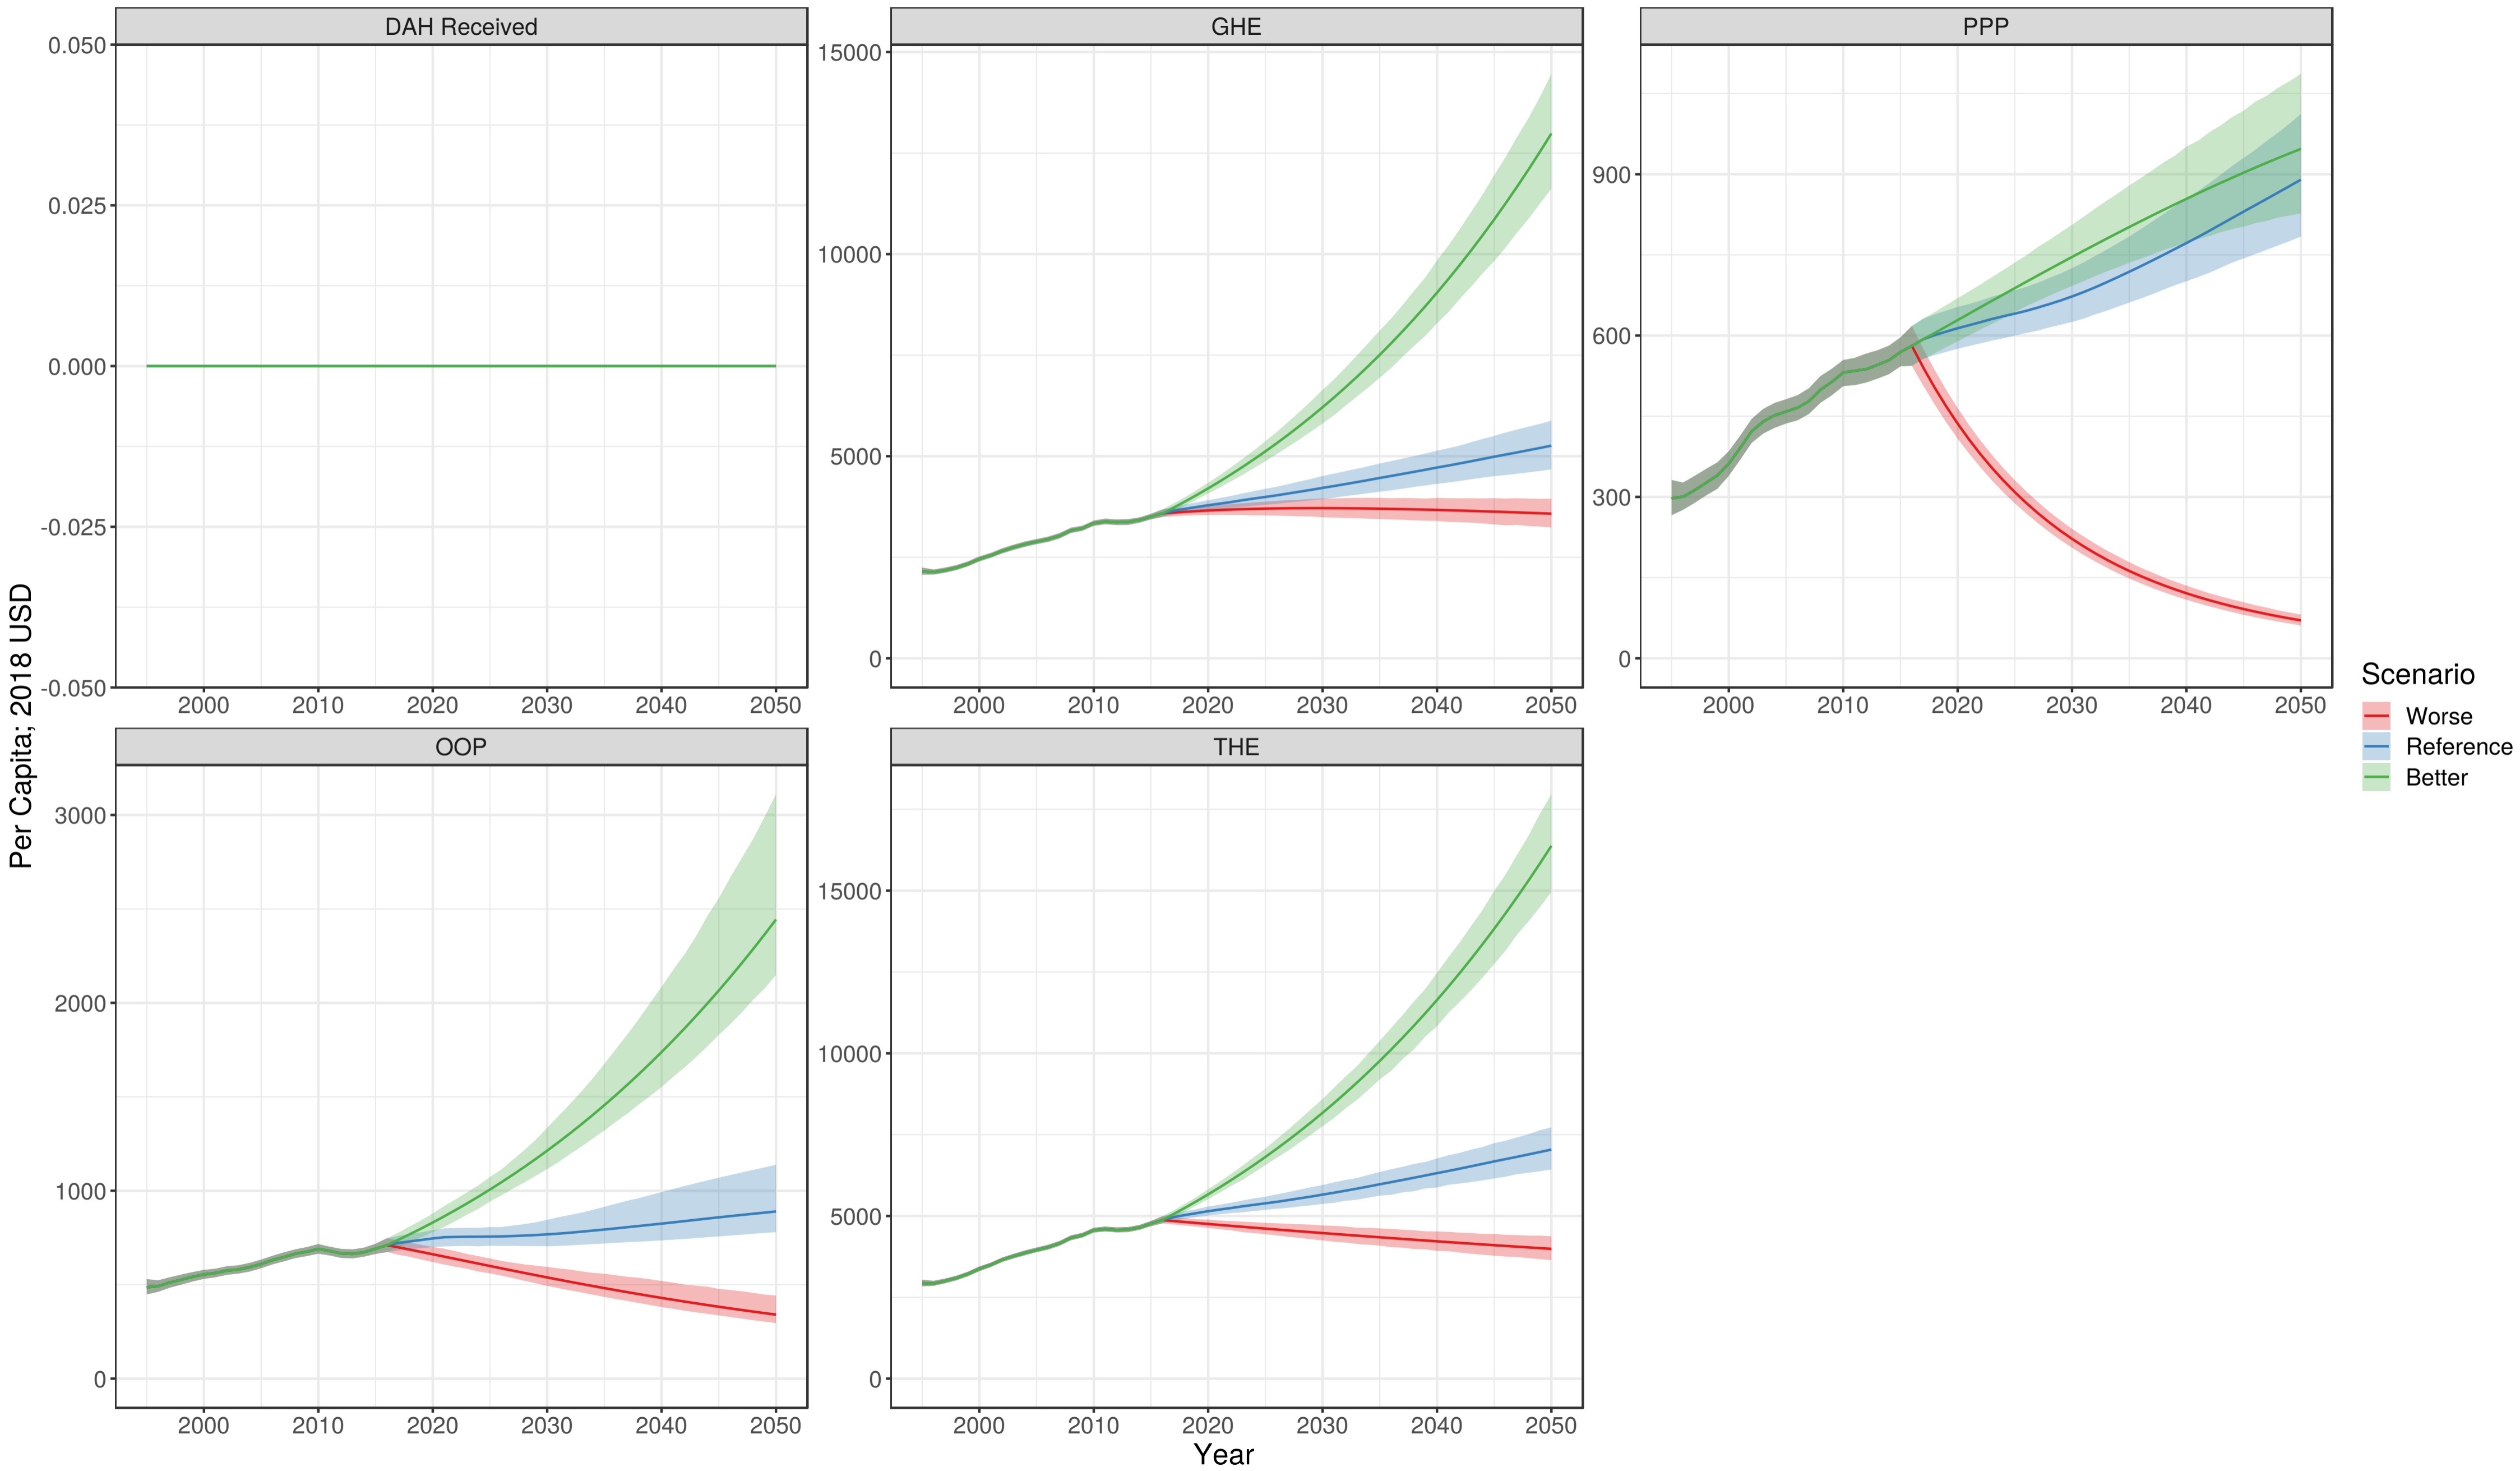

# Cape Verde

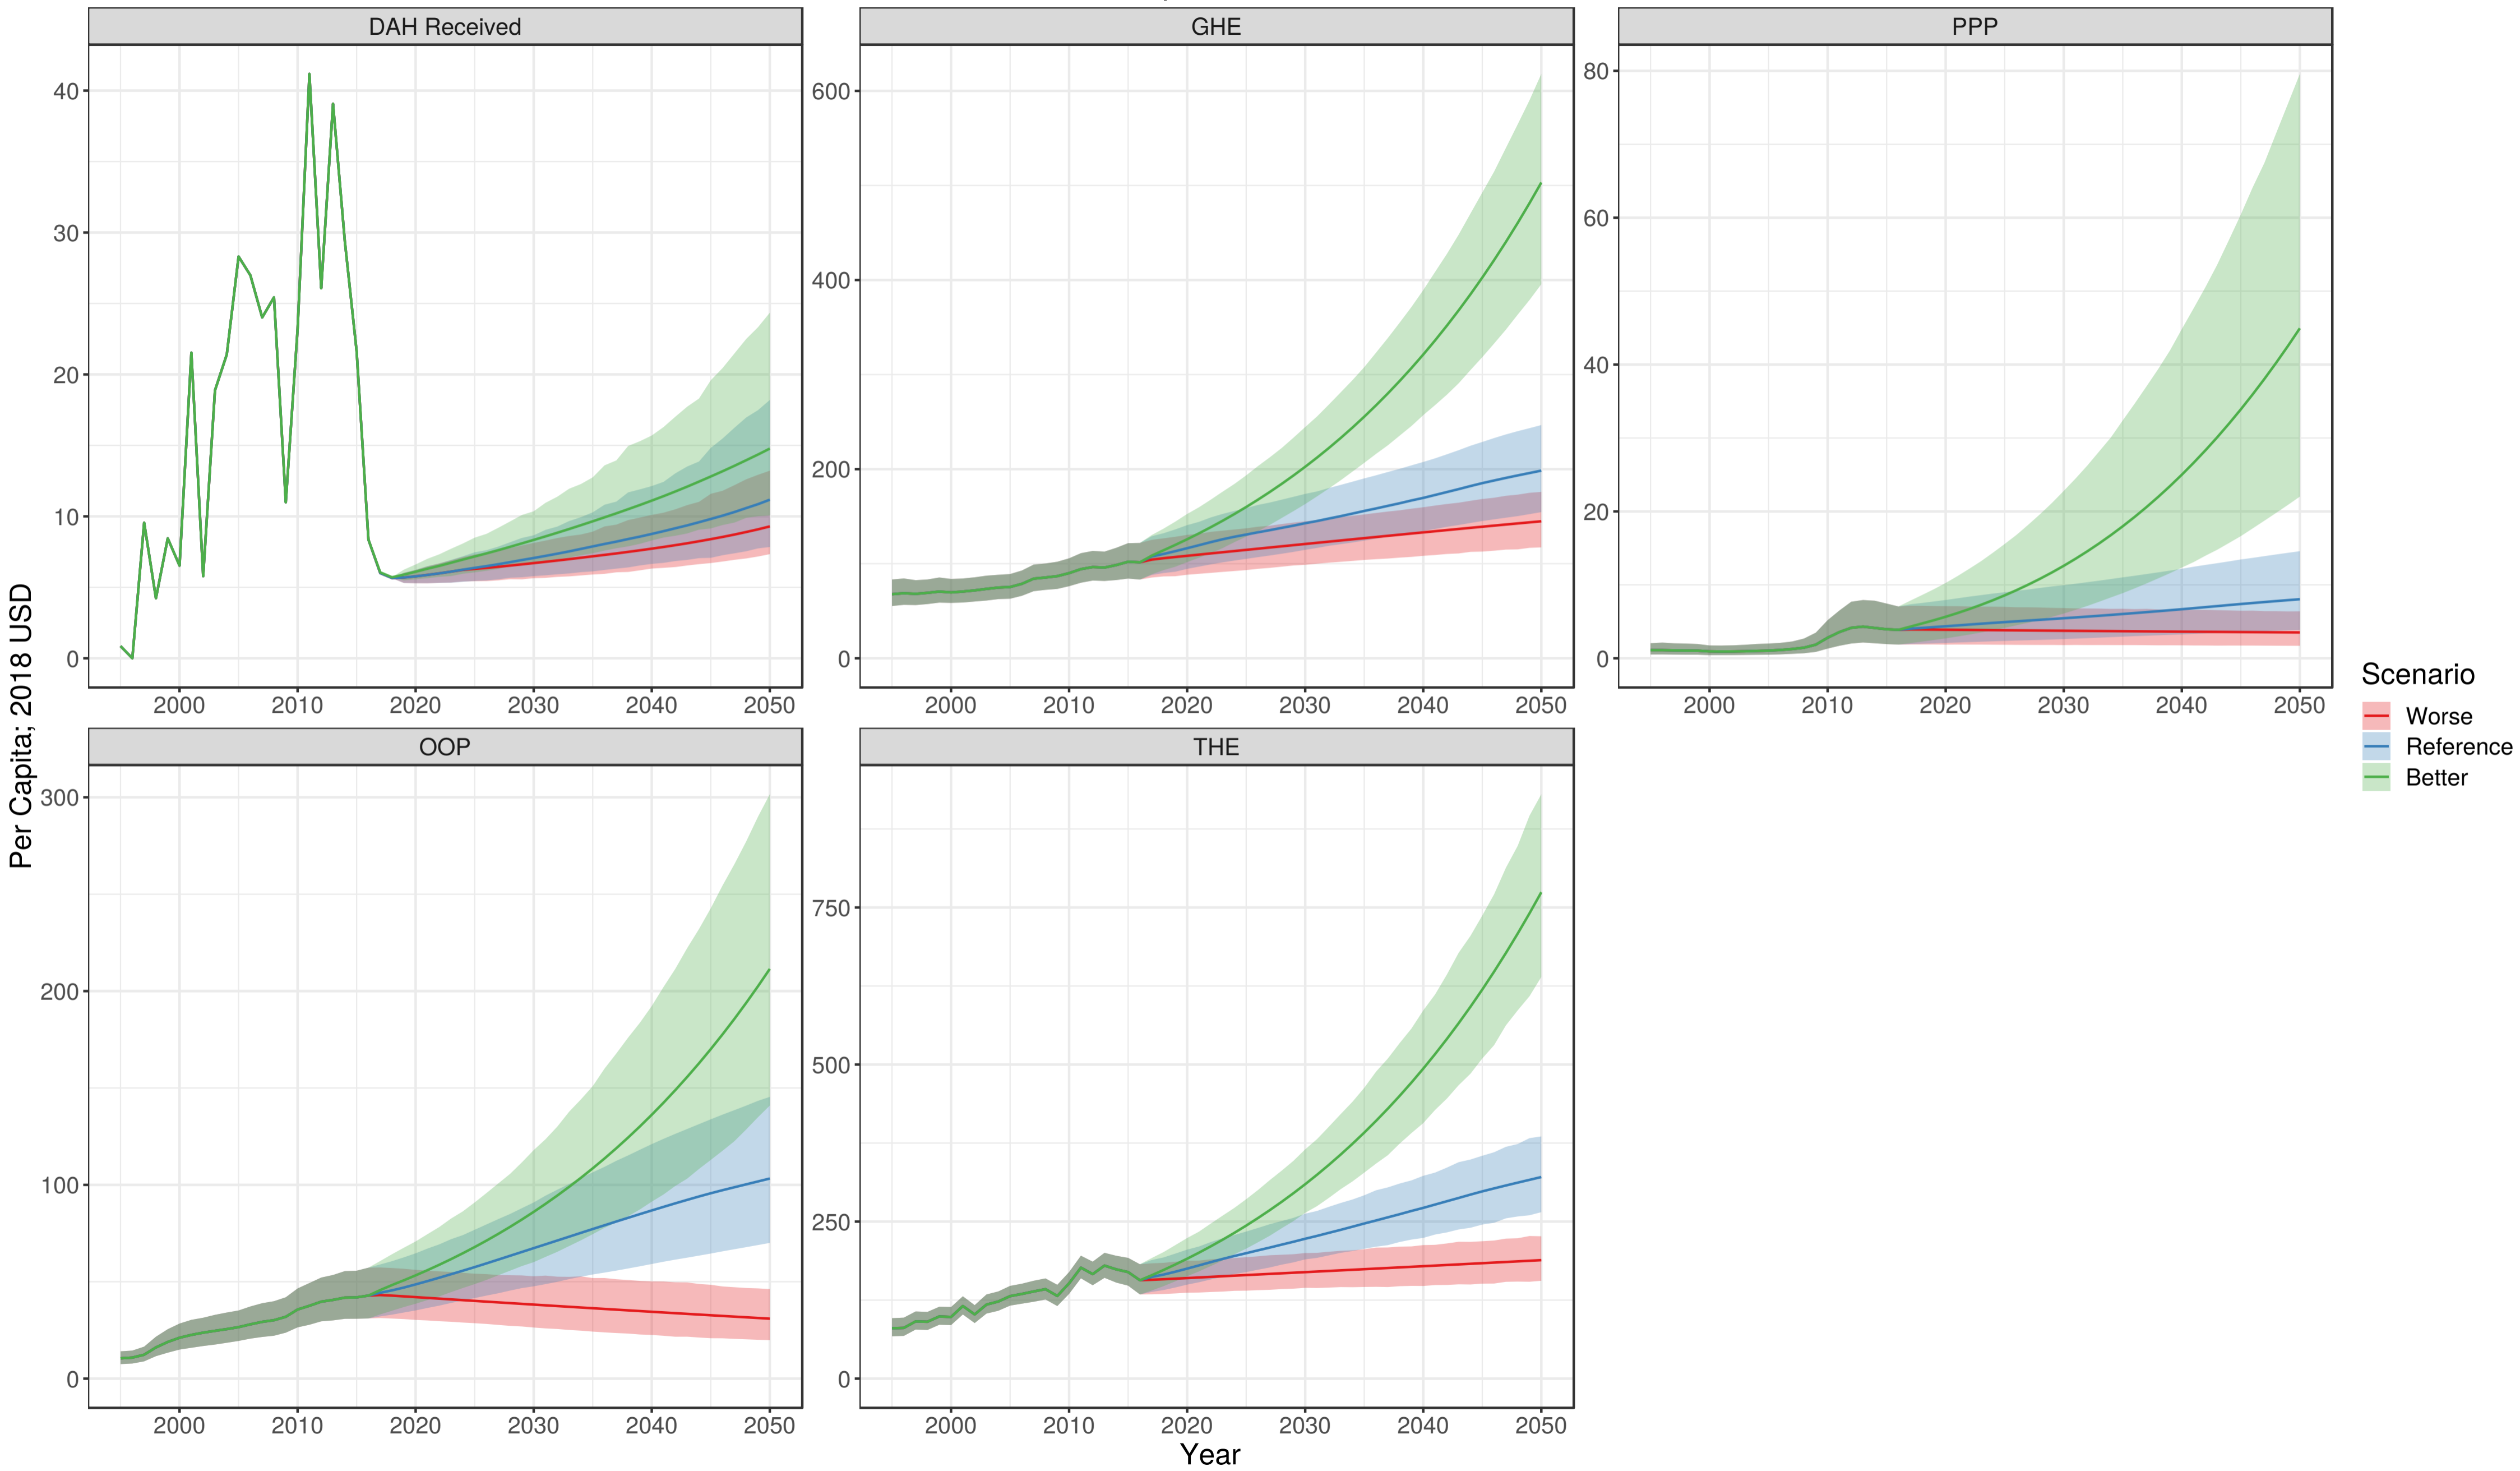

# Central African Republic

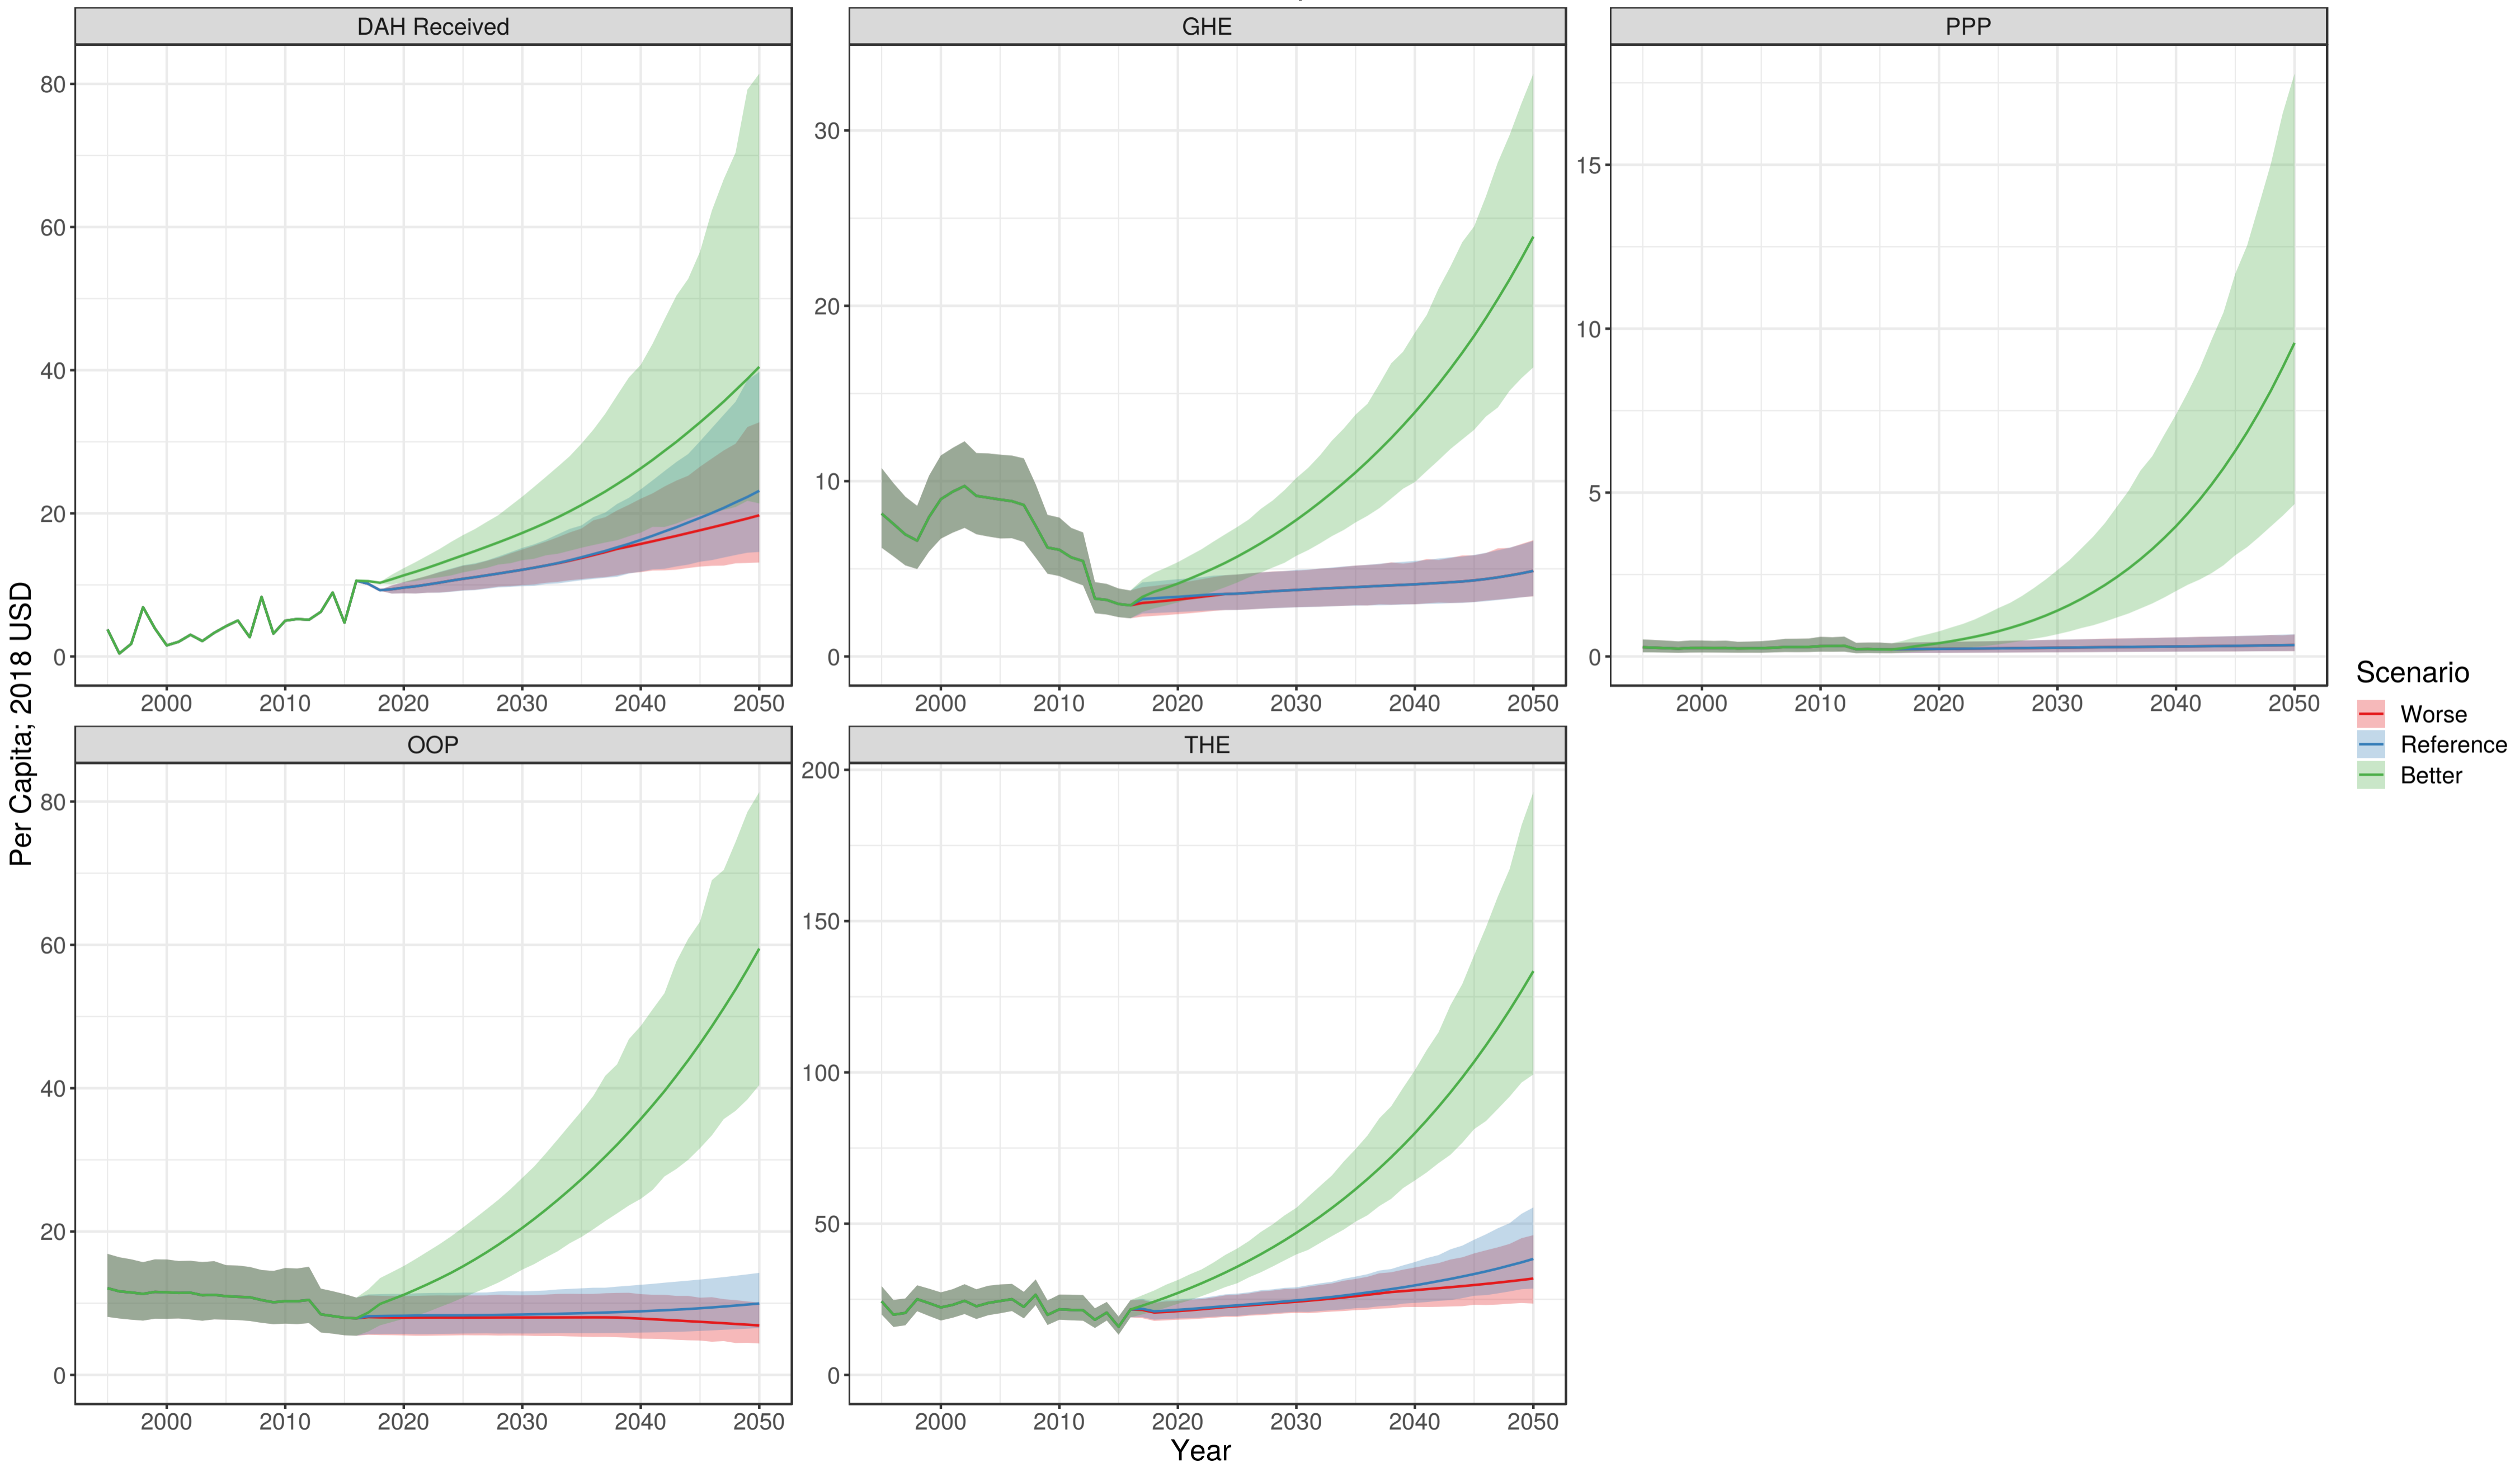

# Chad

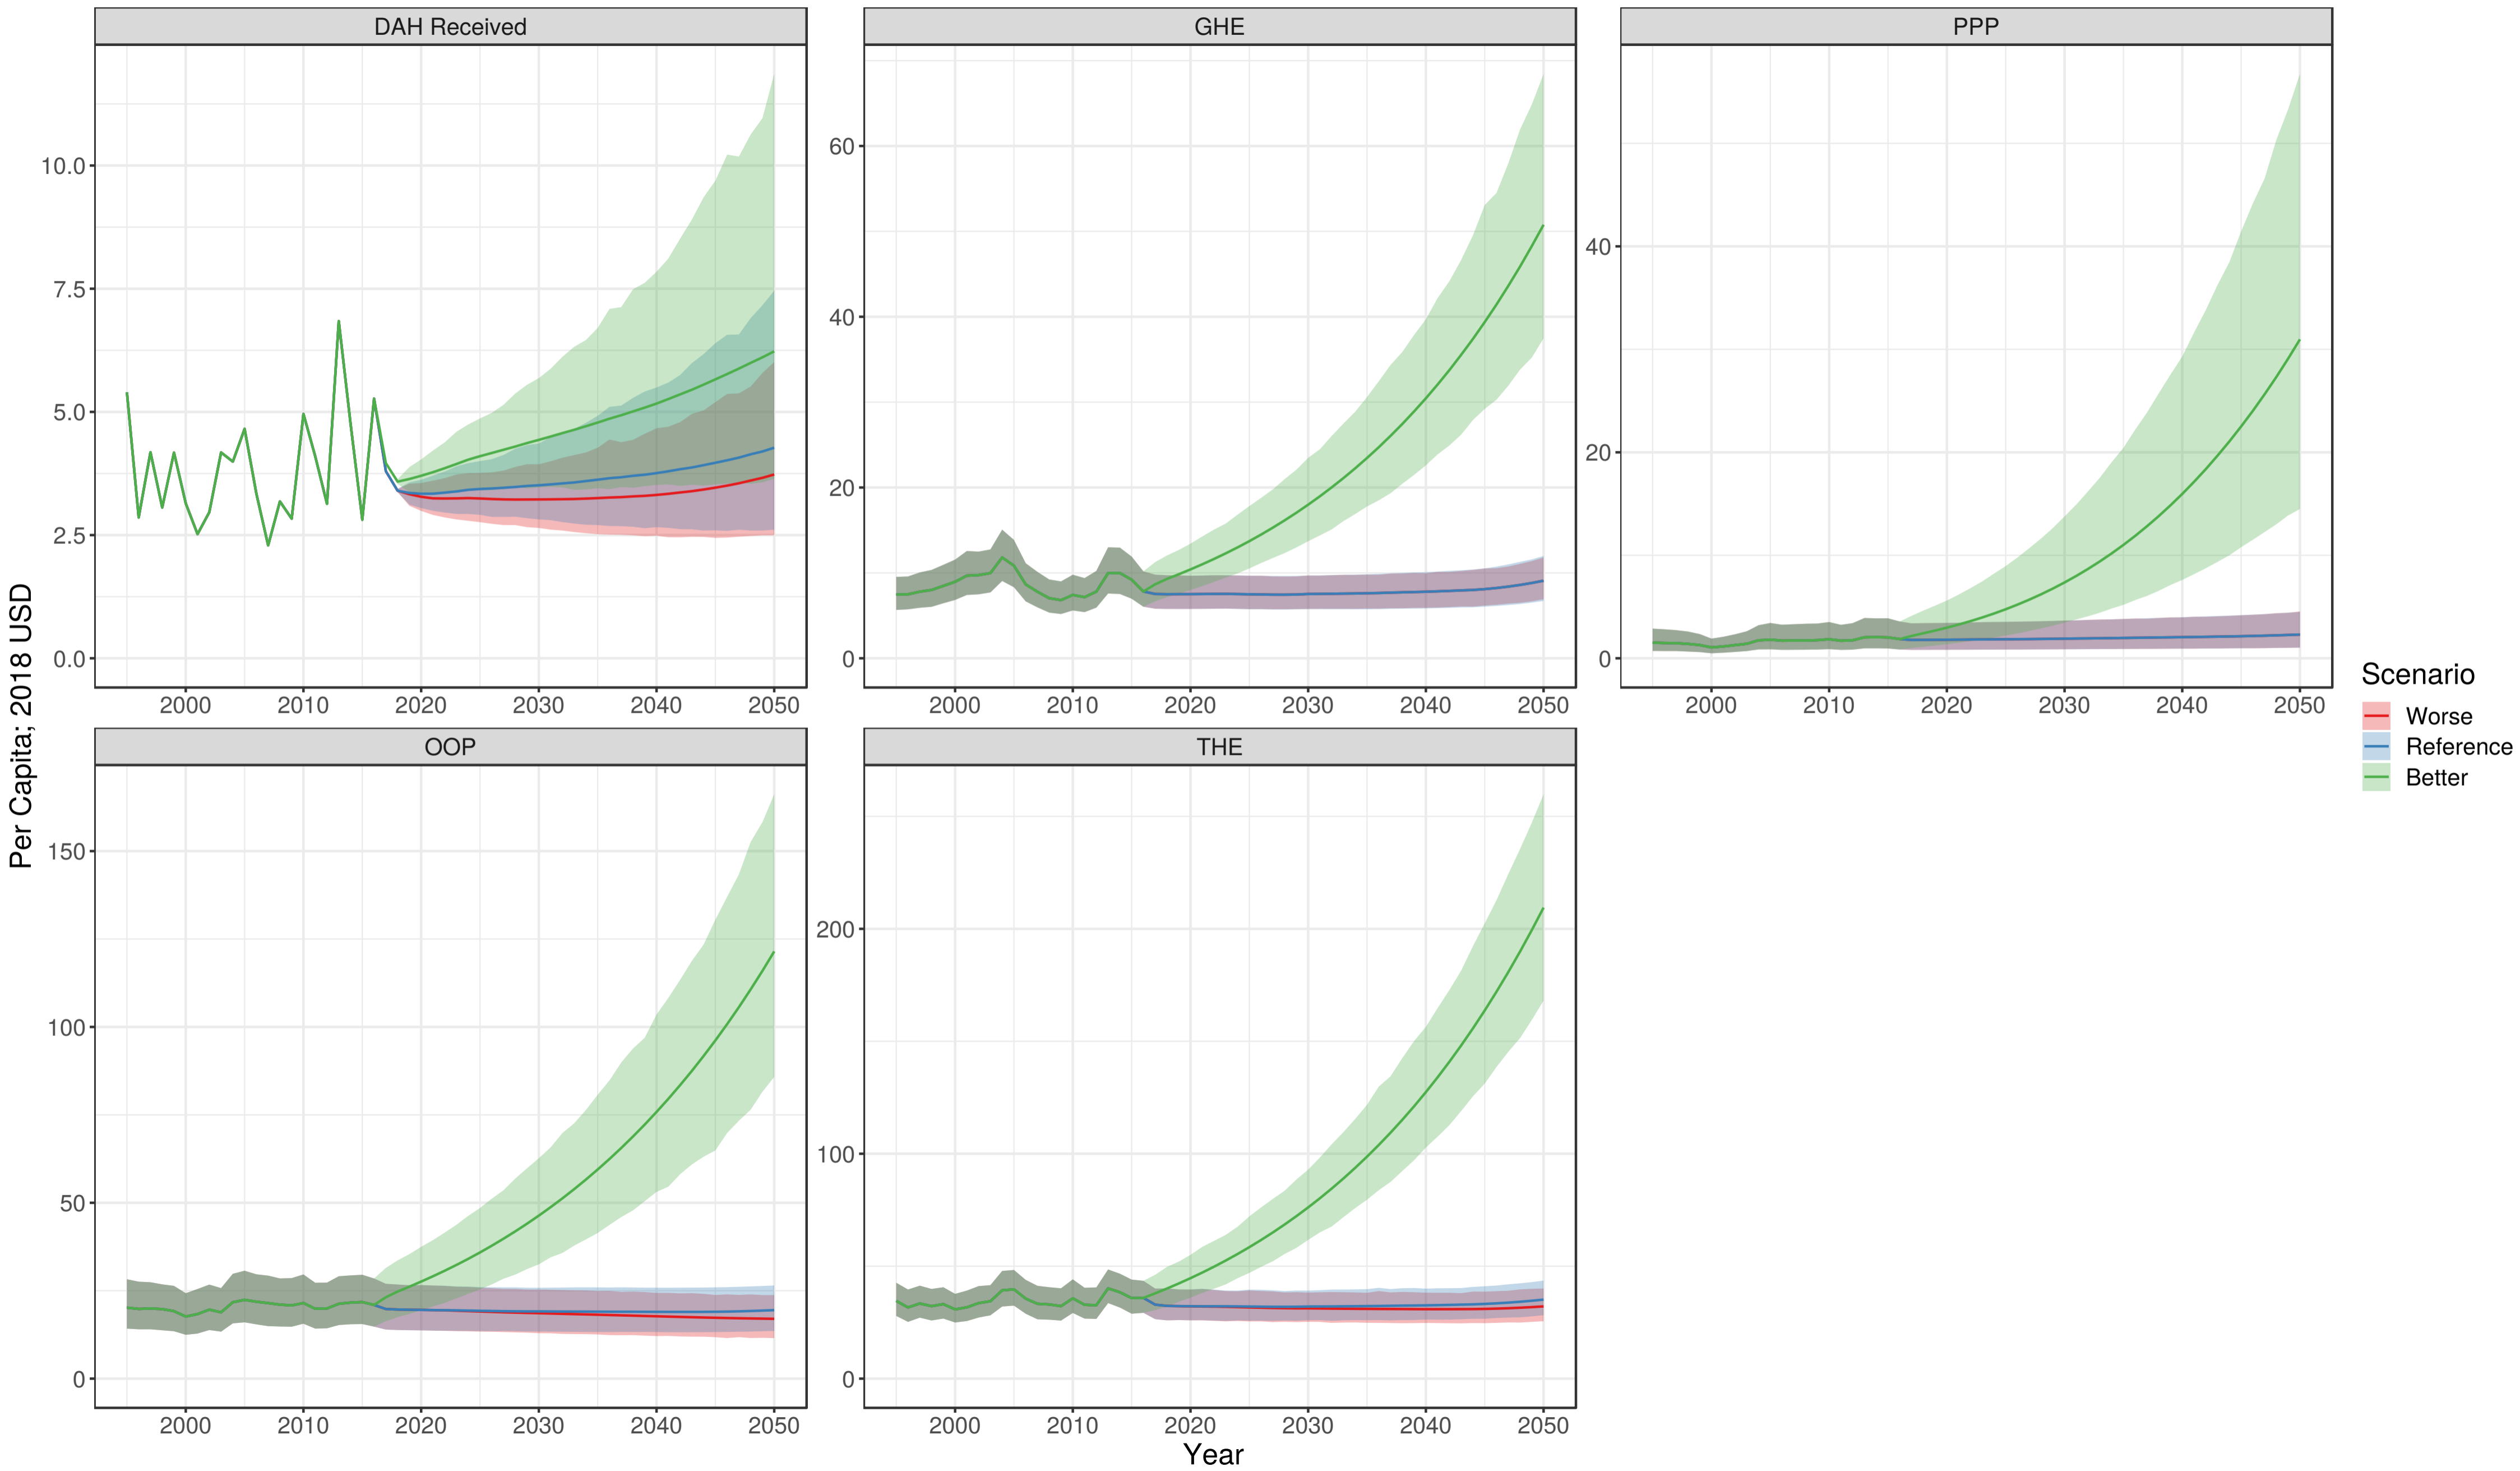

# Chile

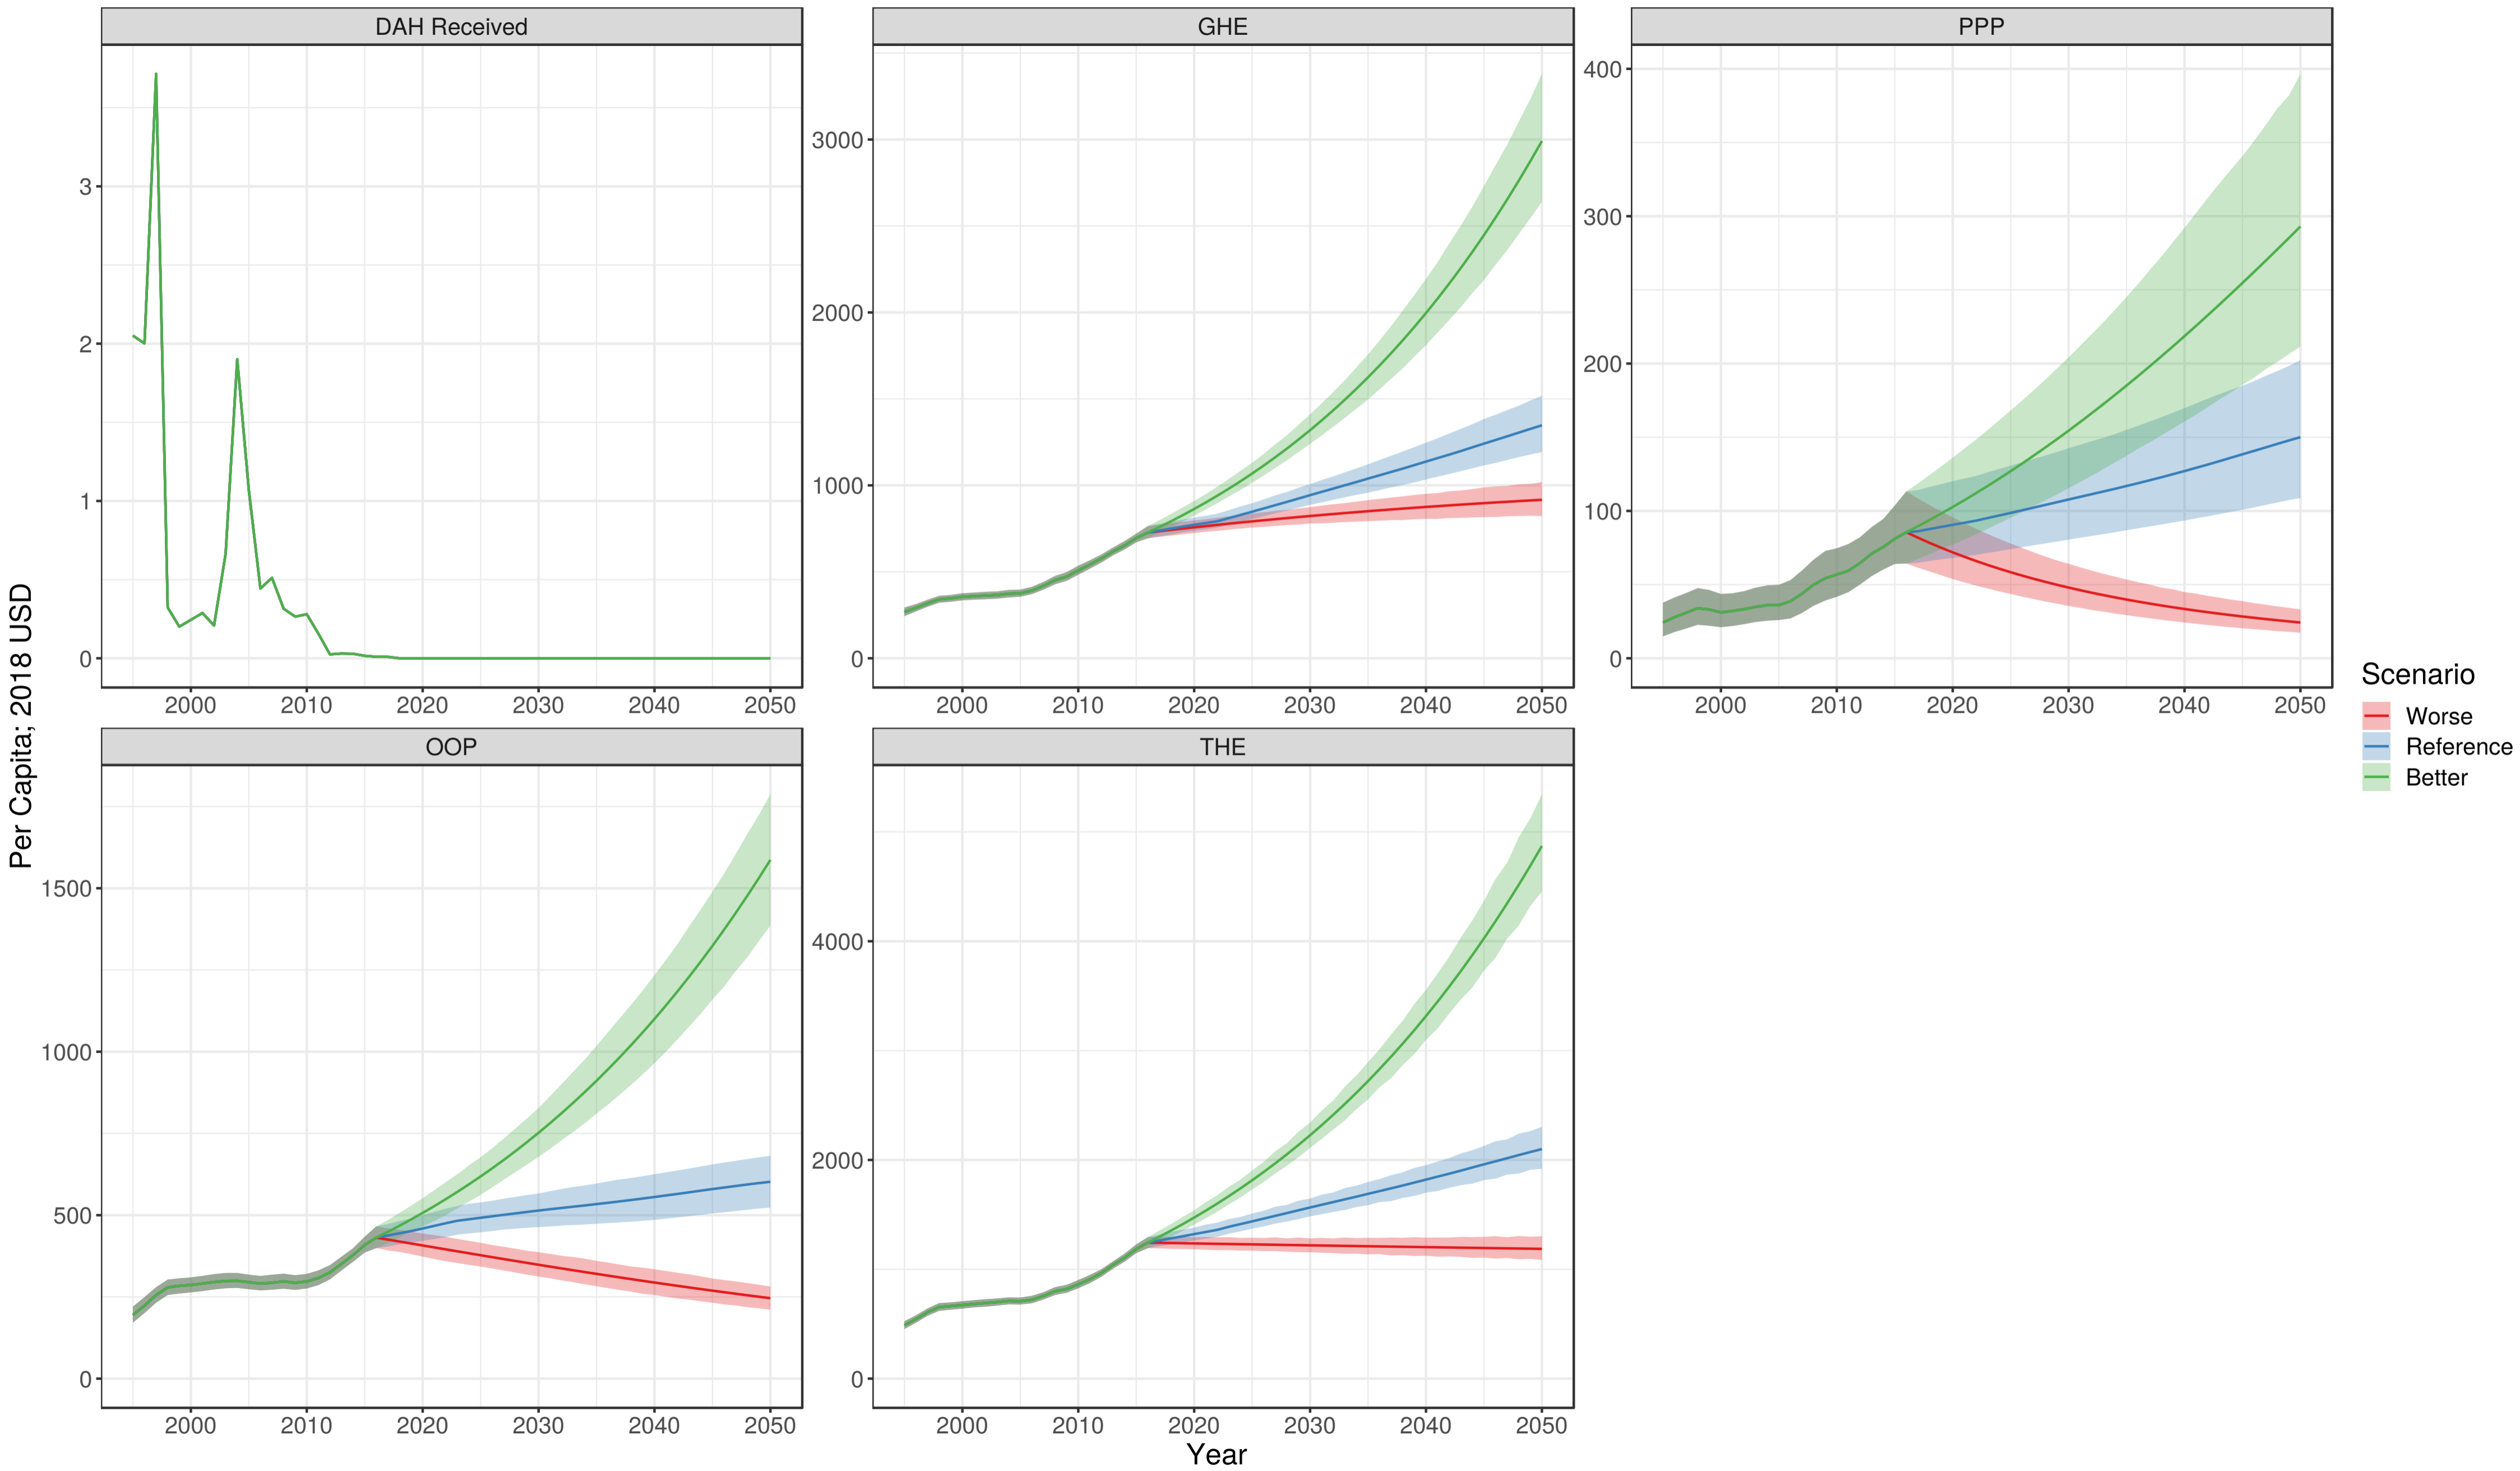



# China

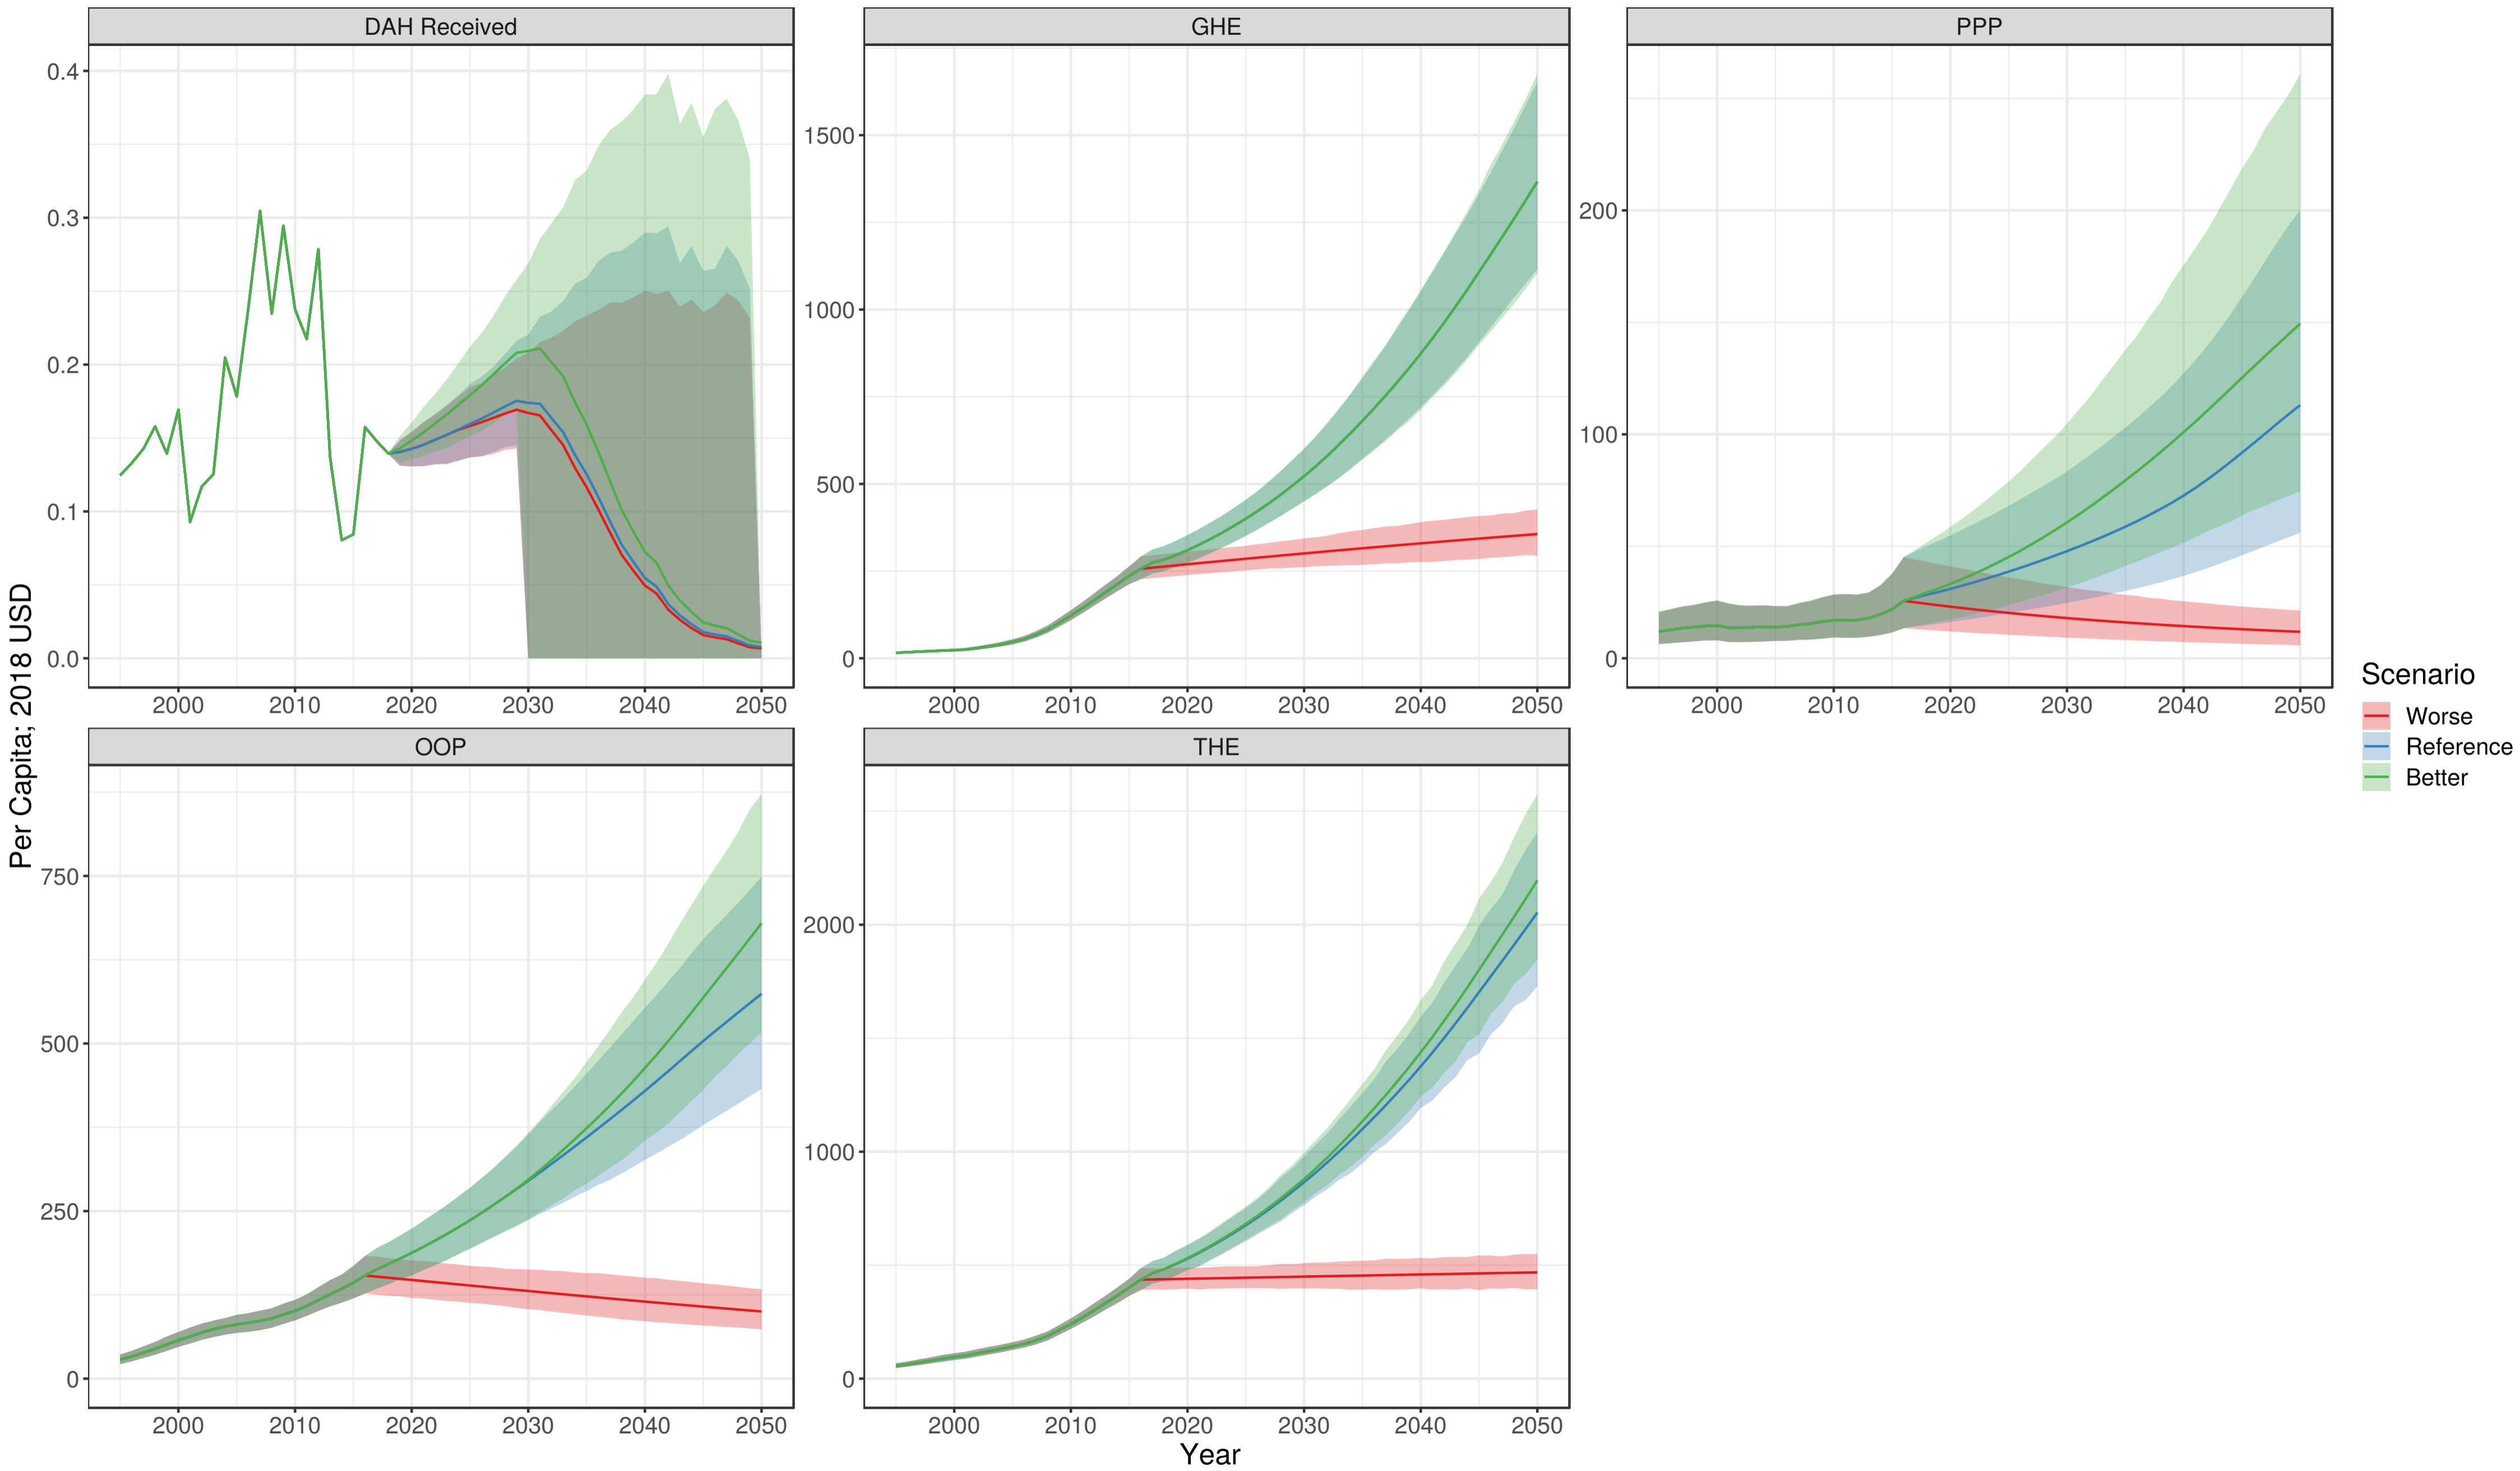

# Colombia

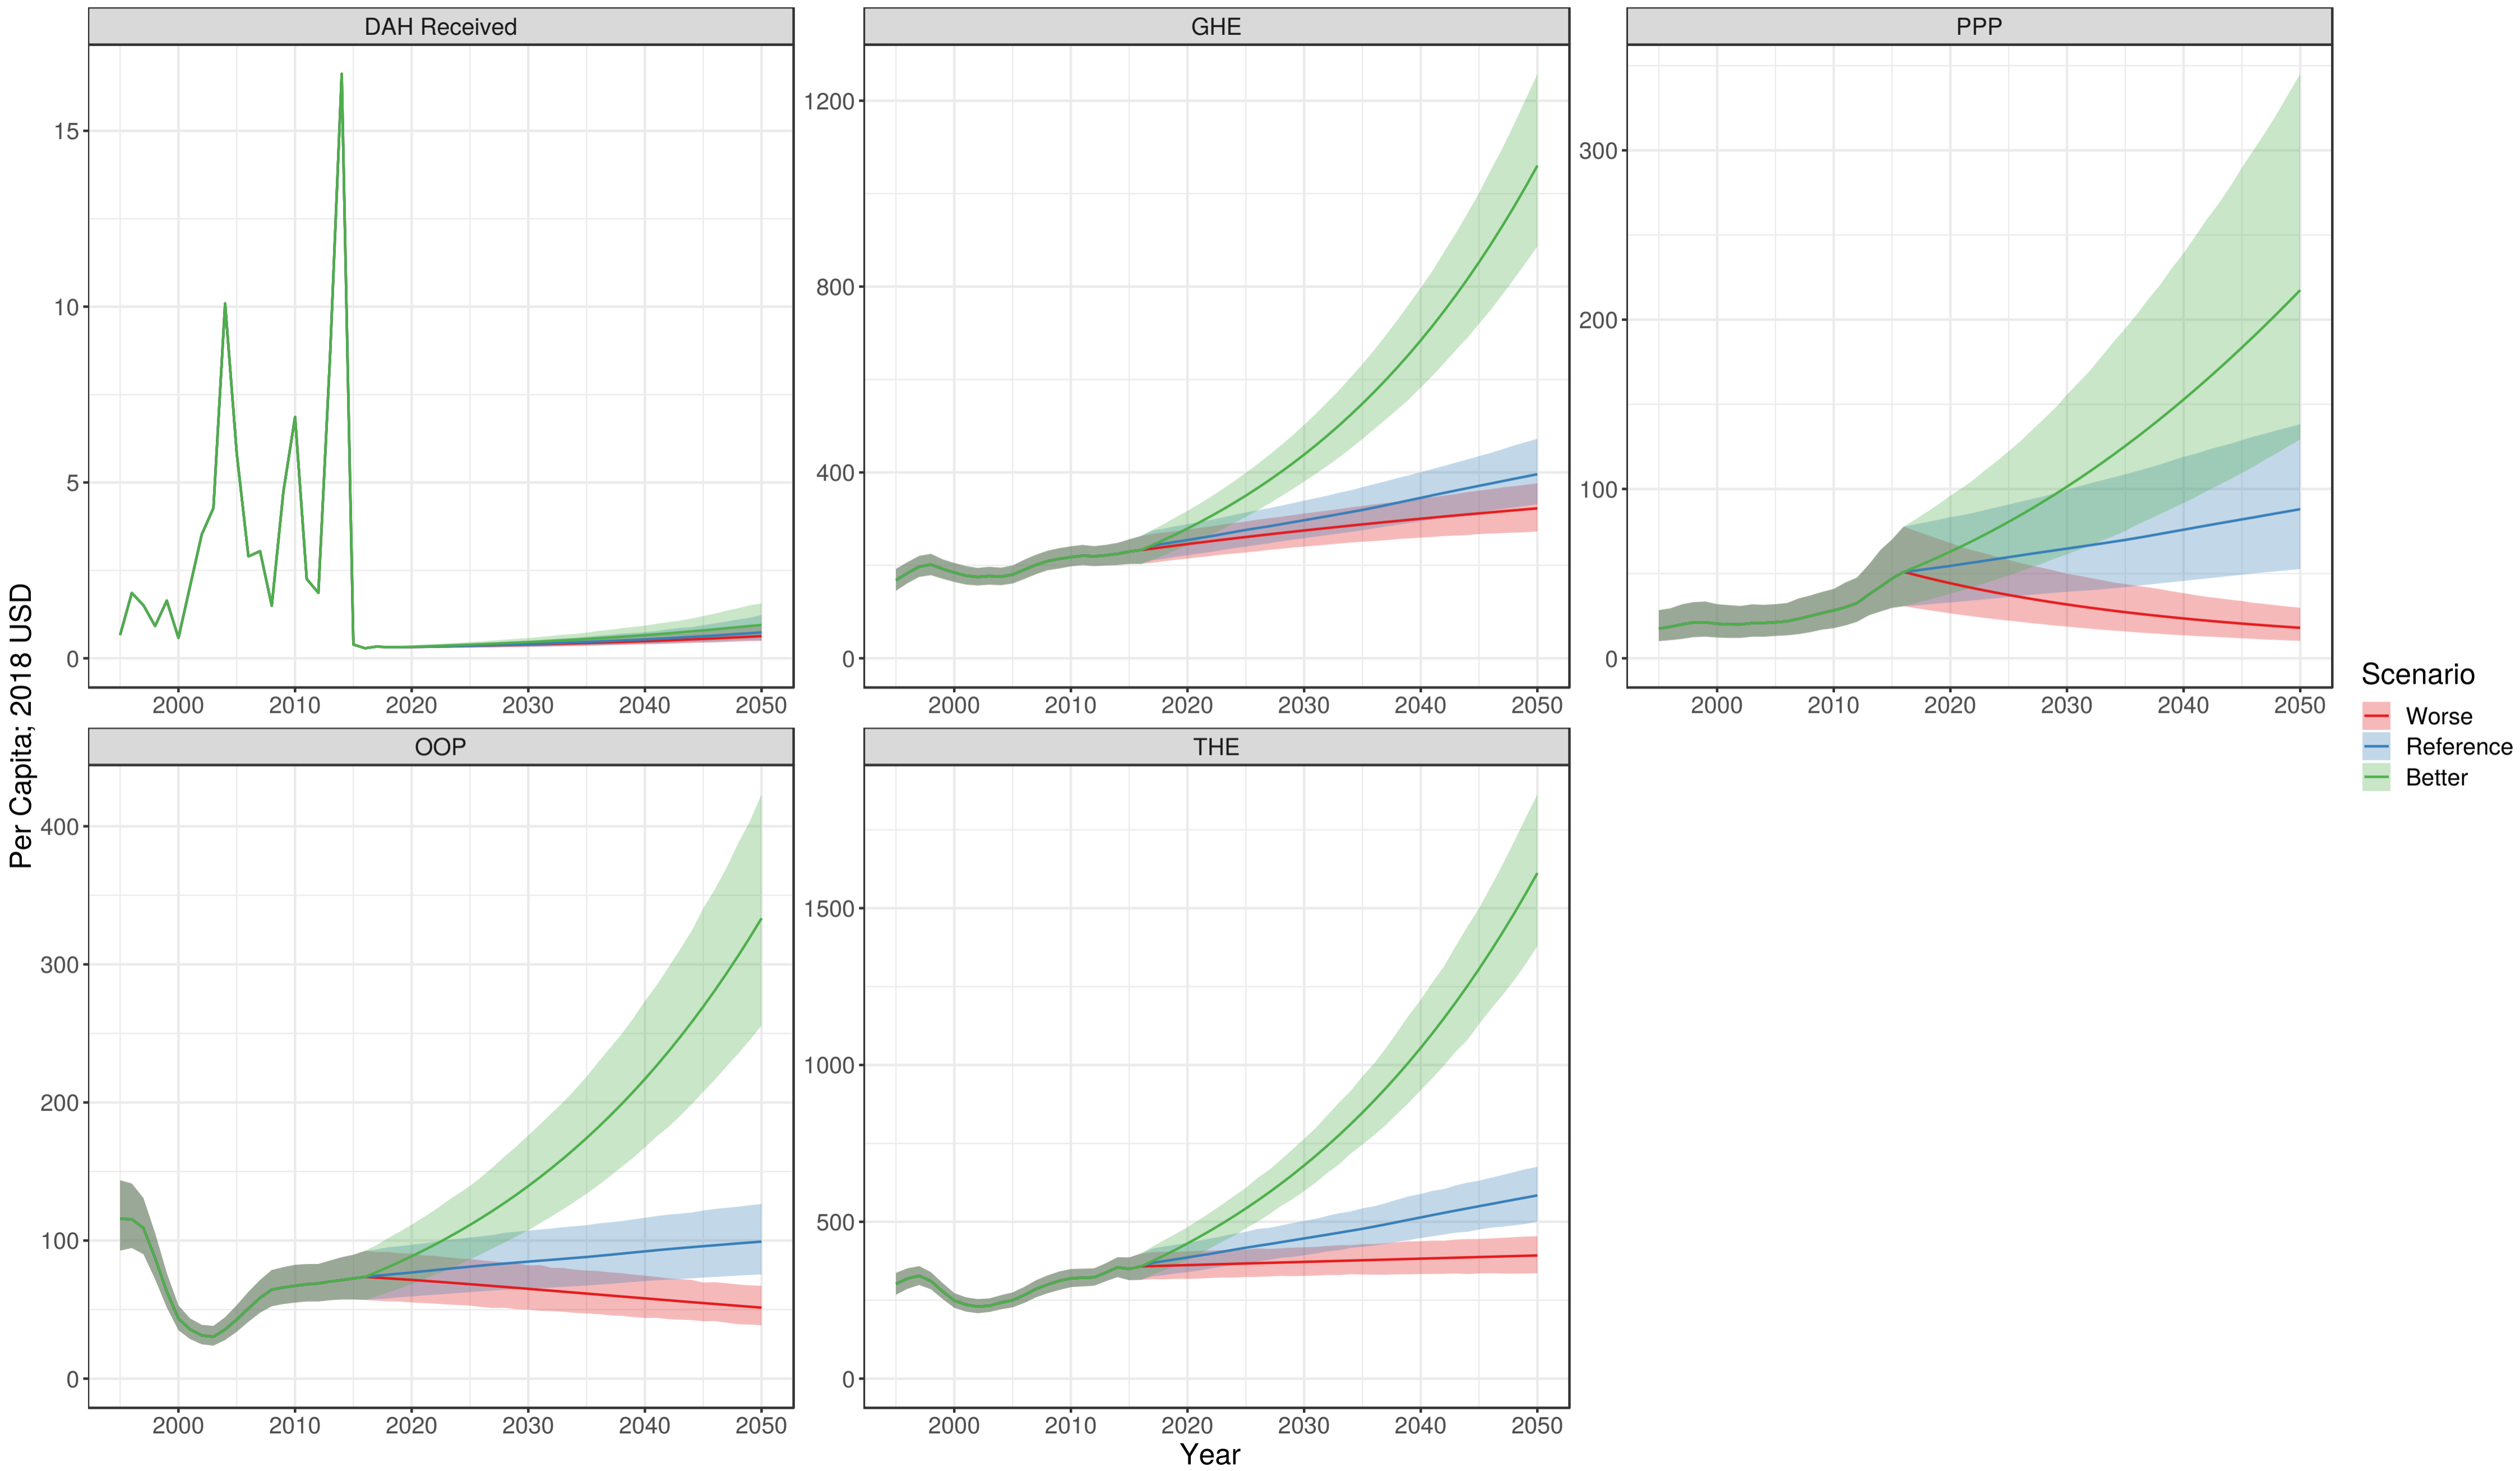

# Comoros

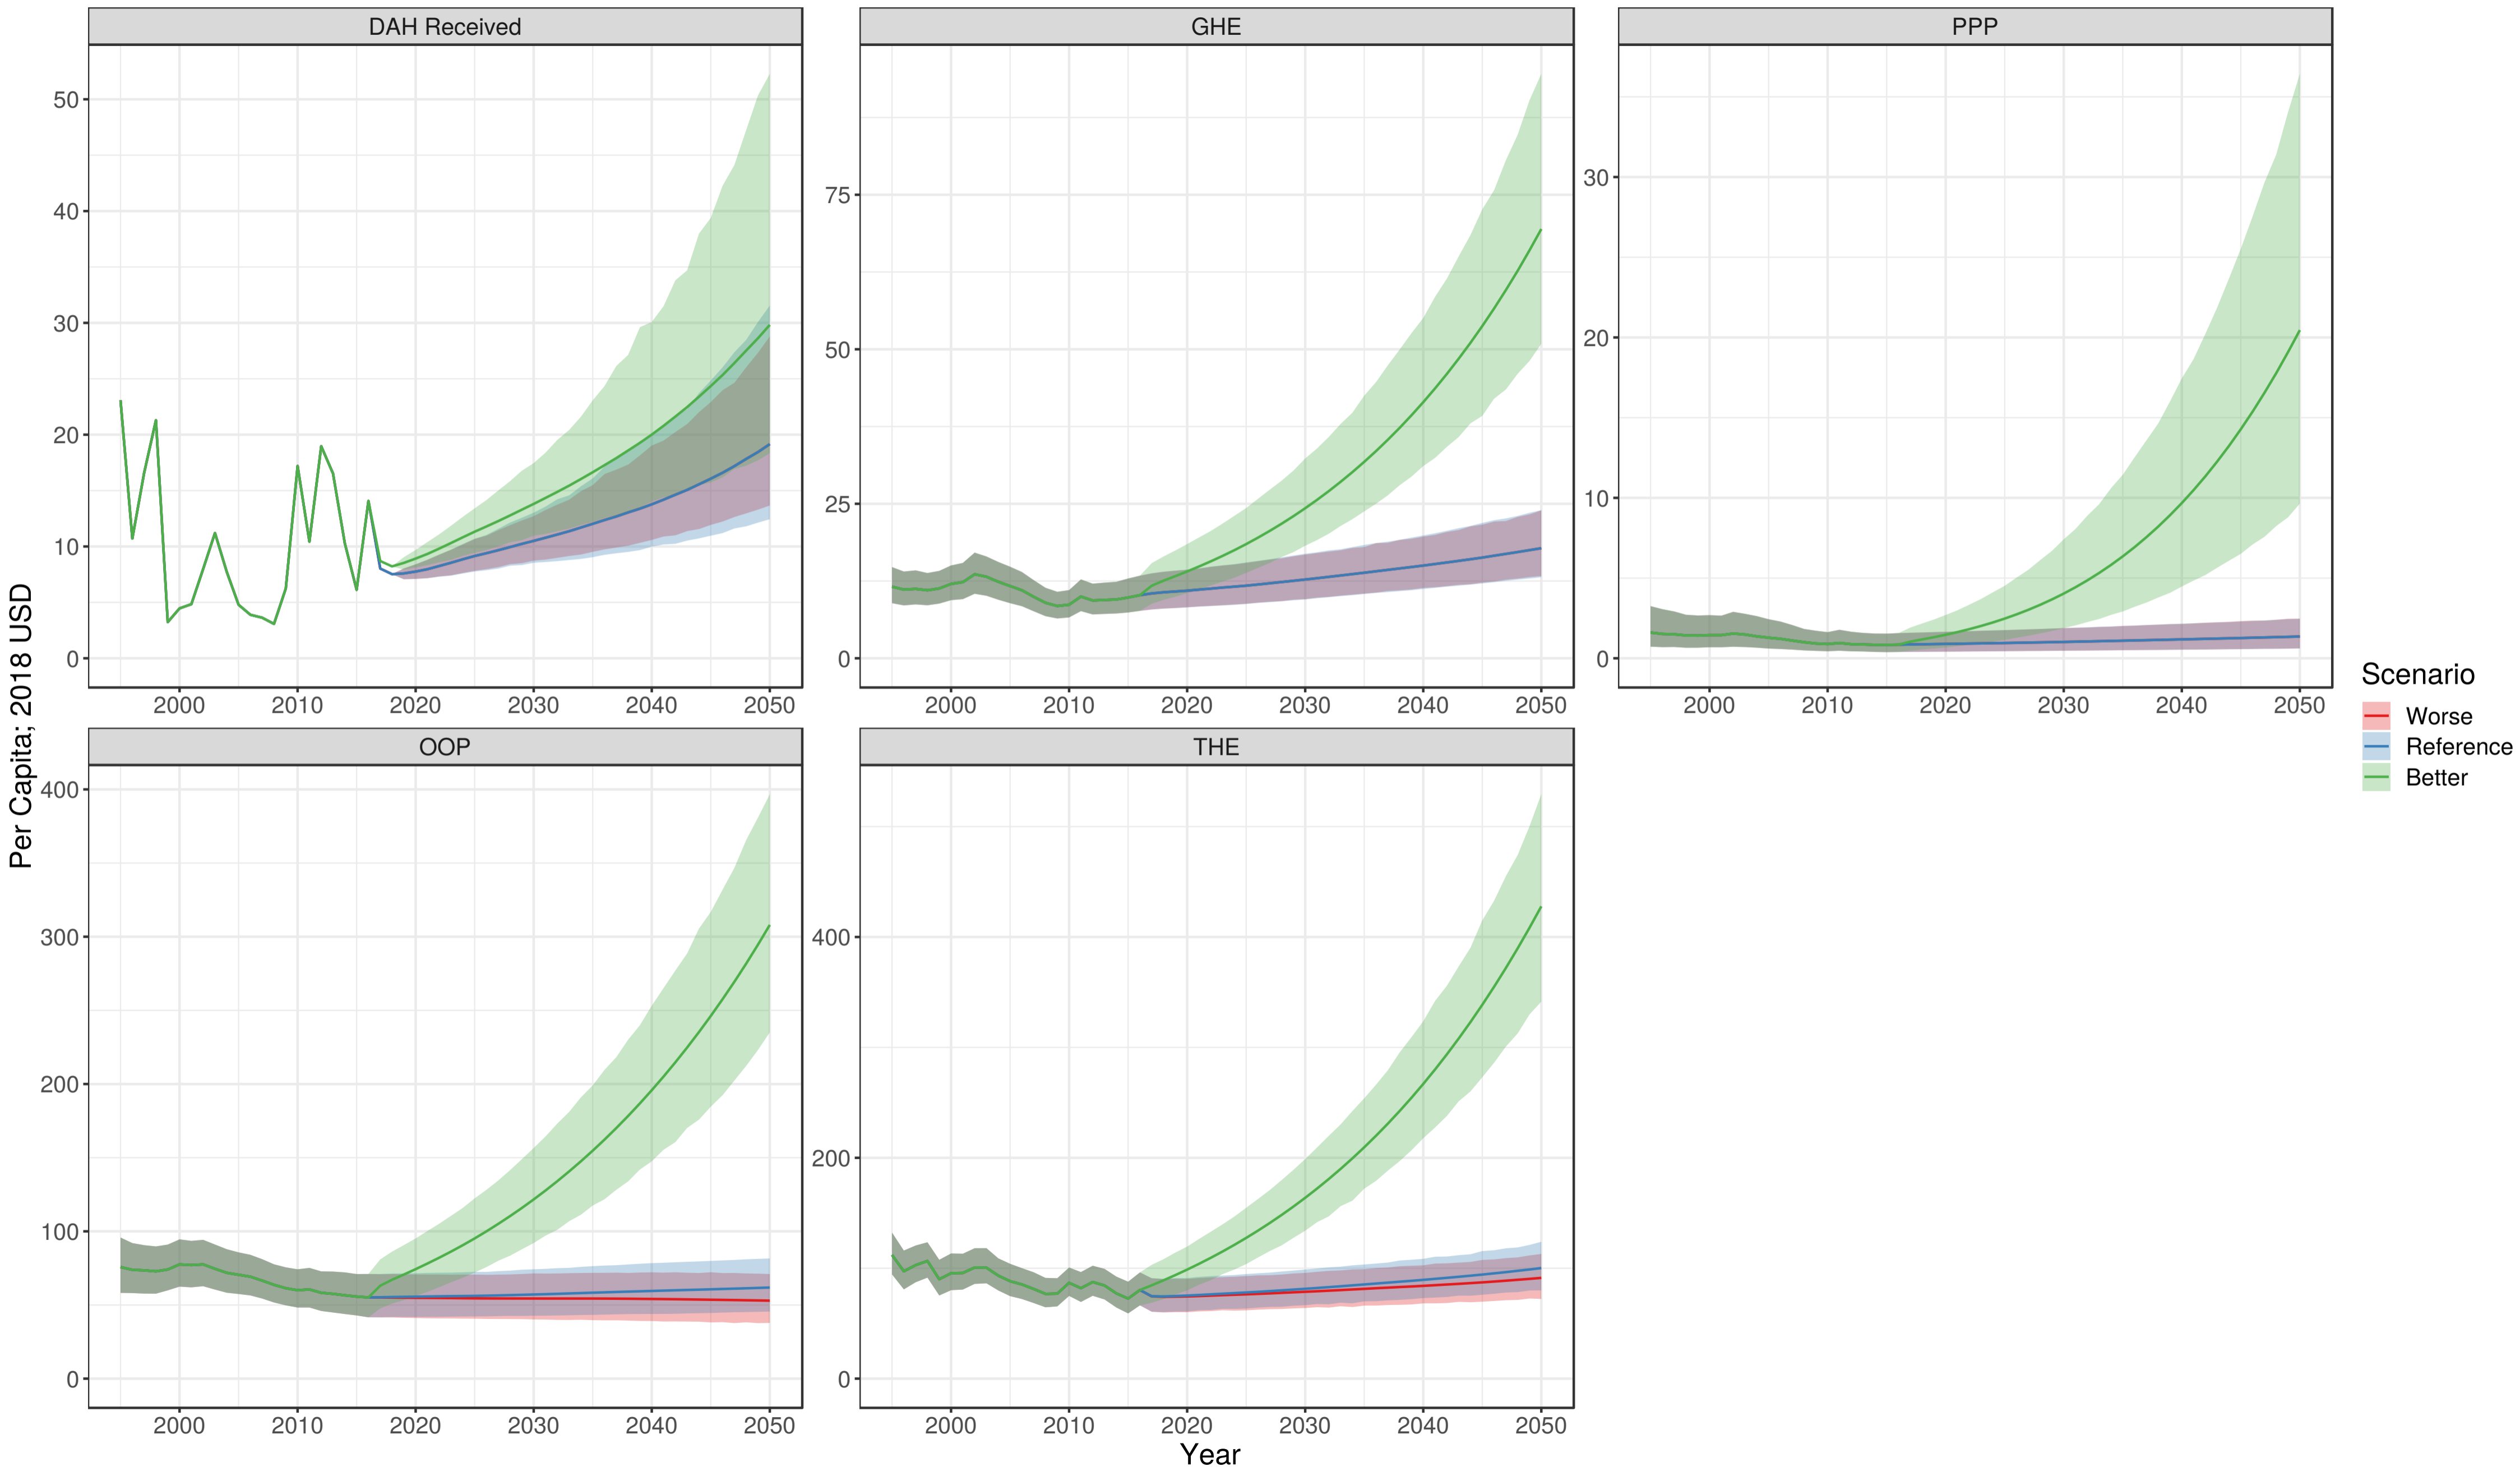

# Congo

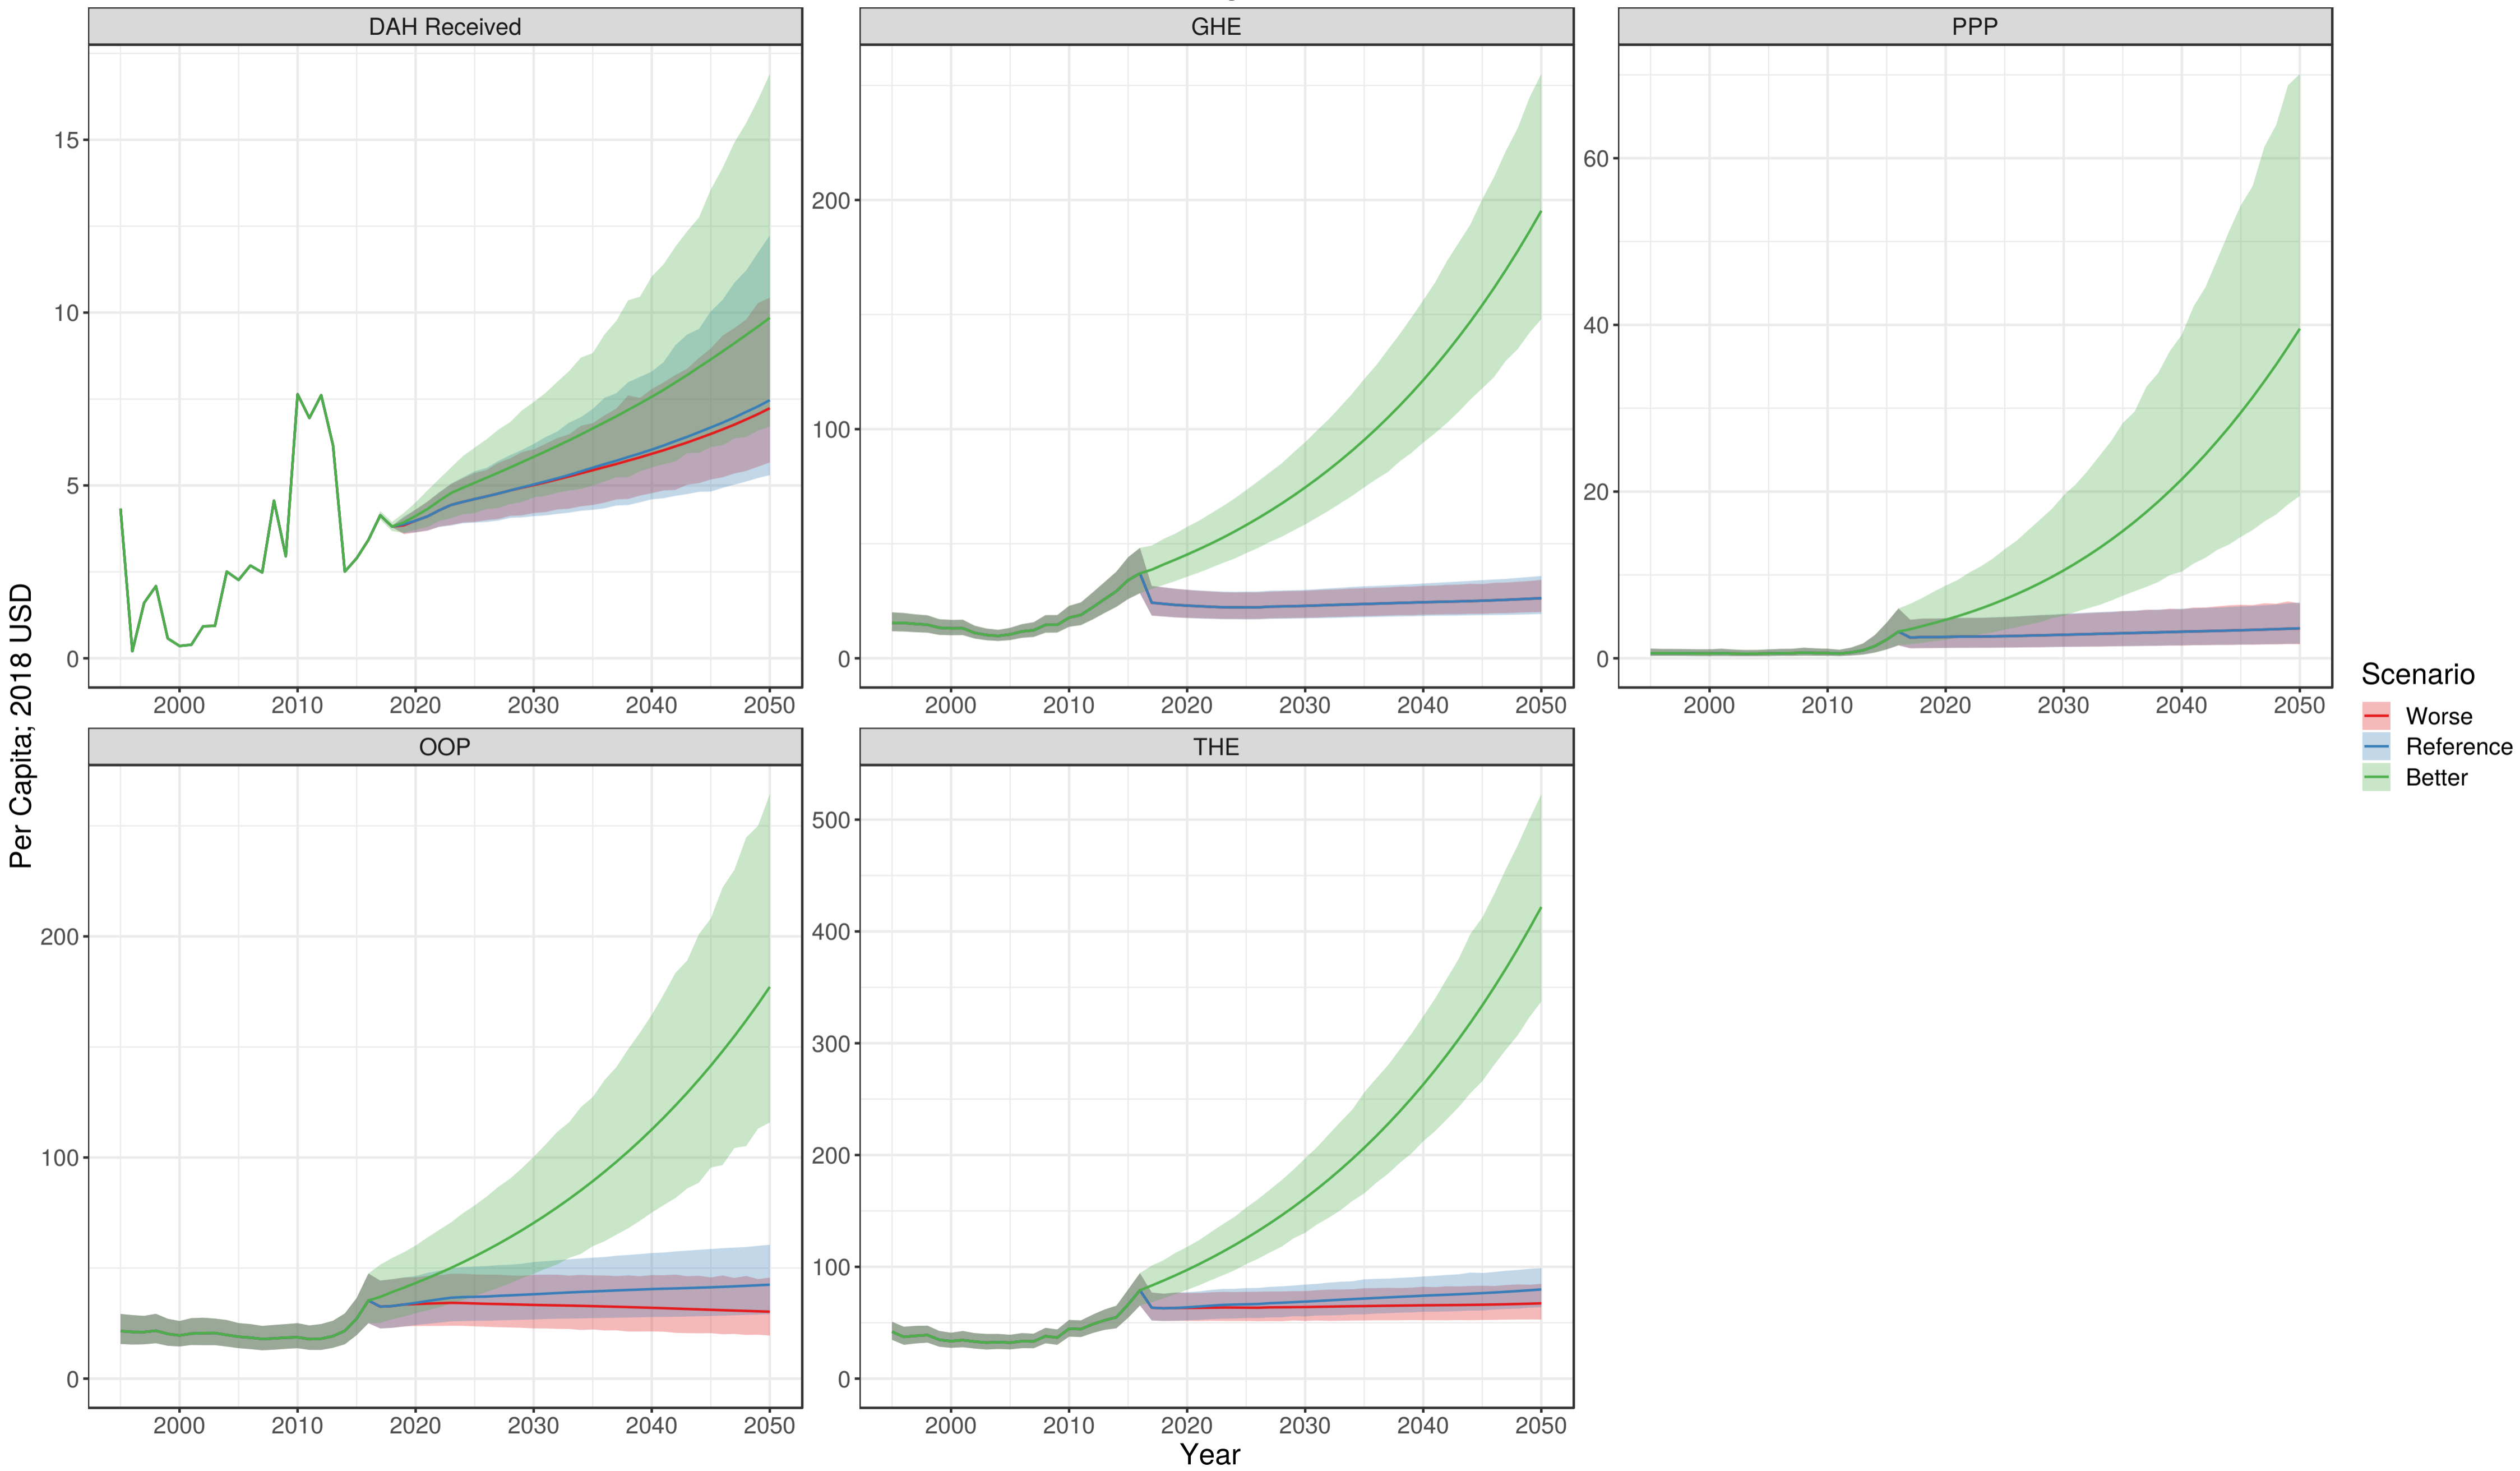

# Costa Rica

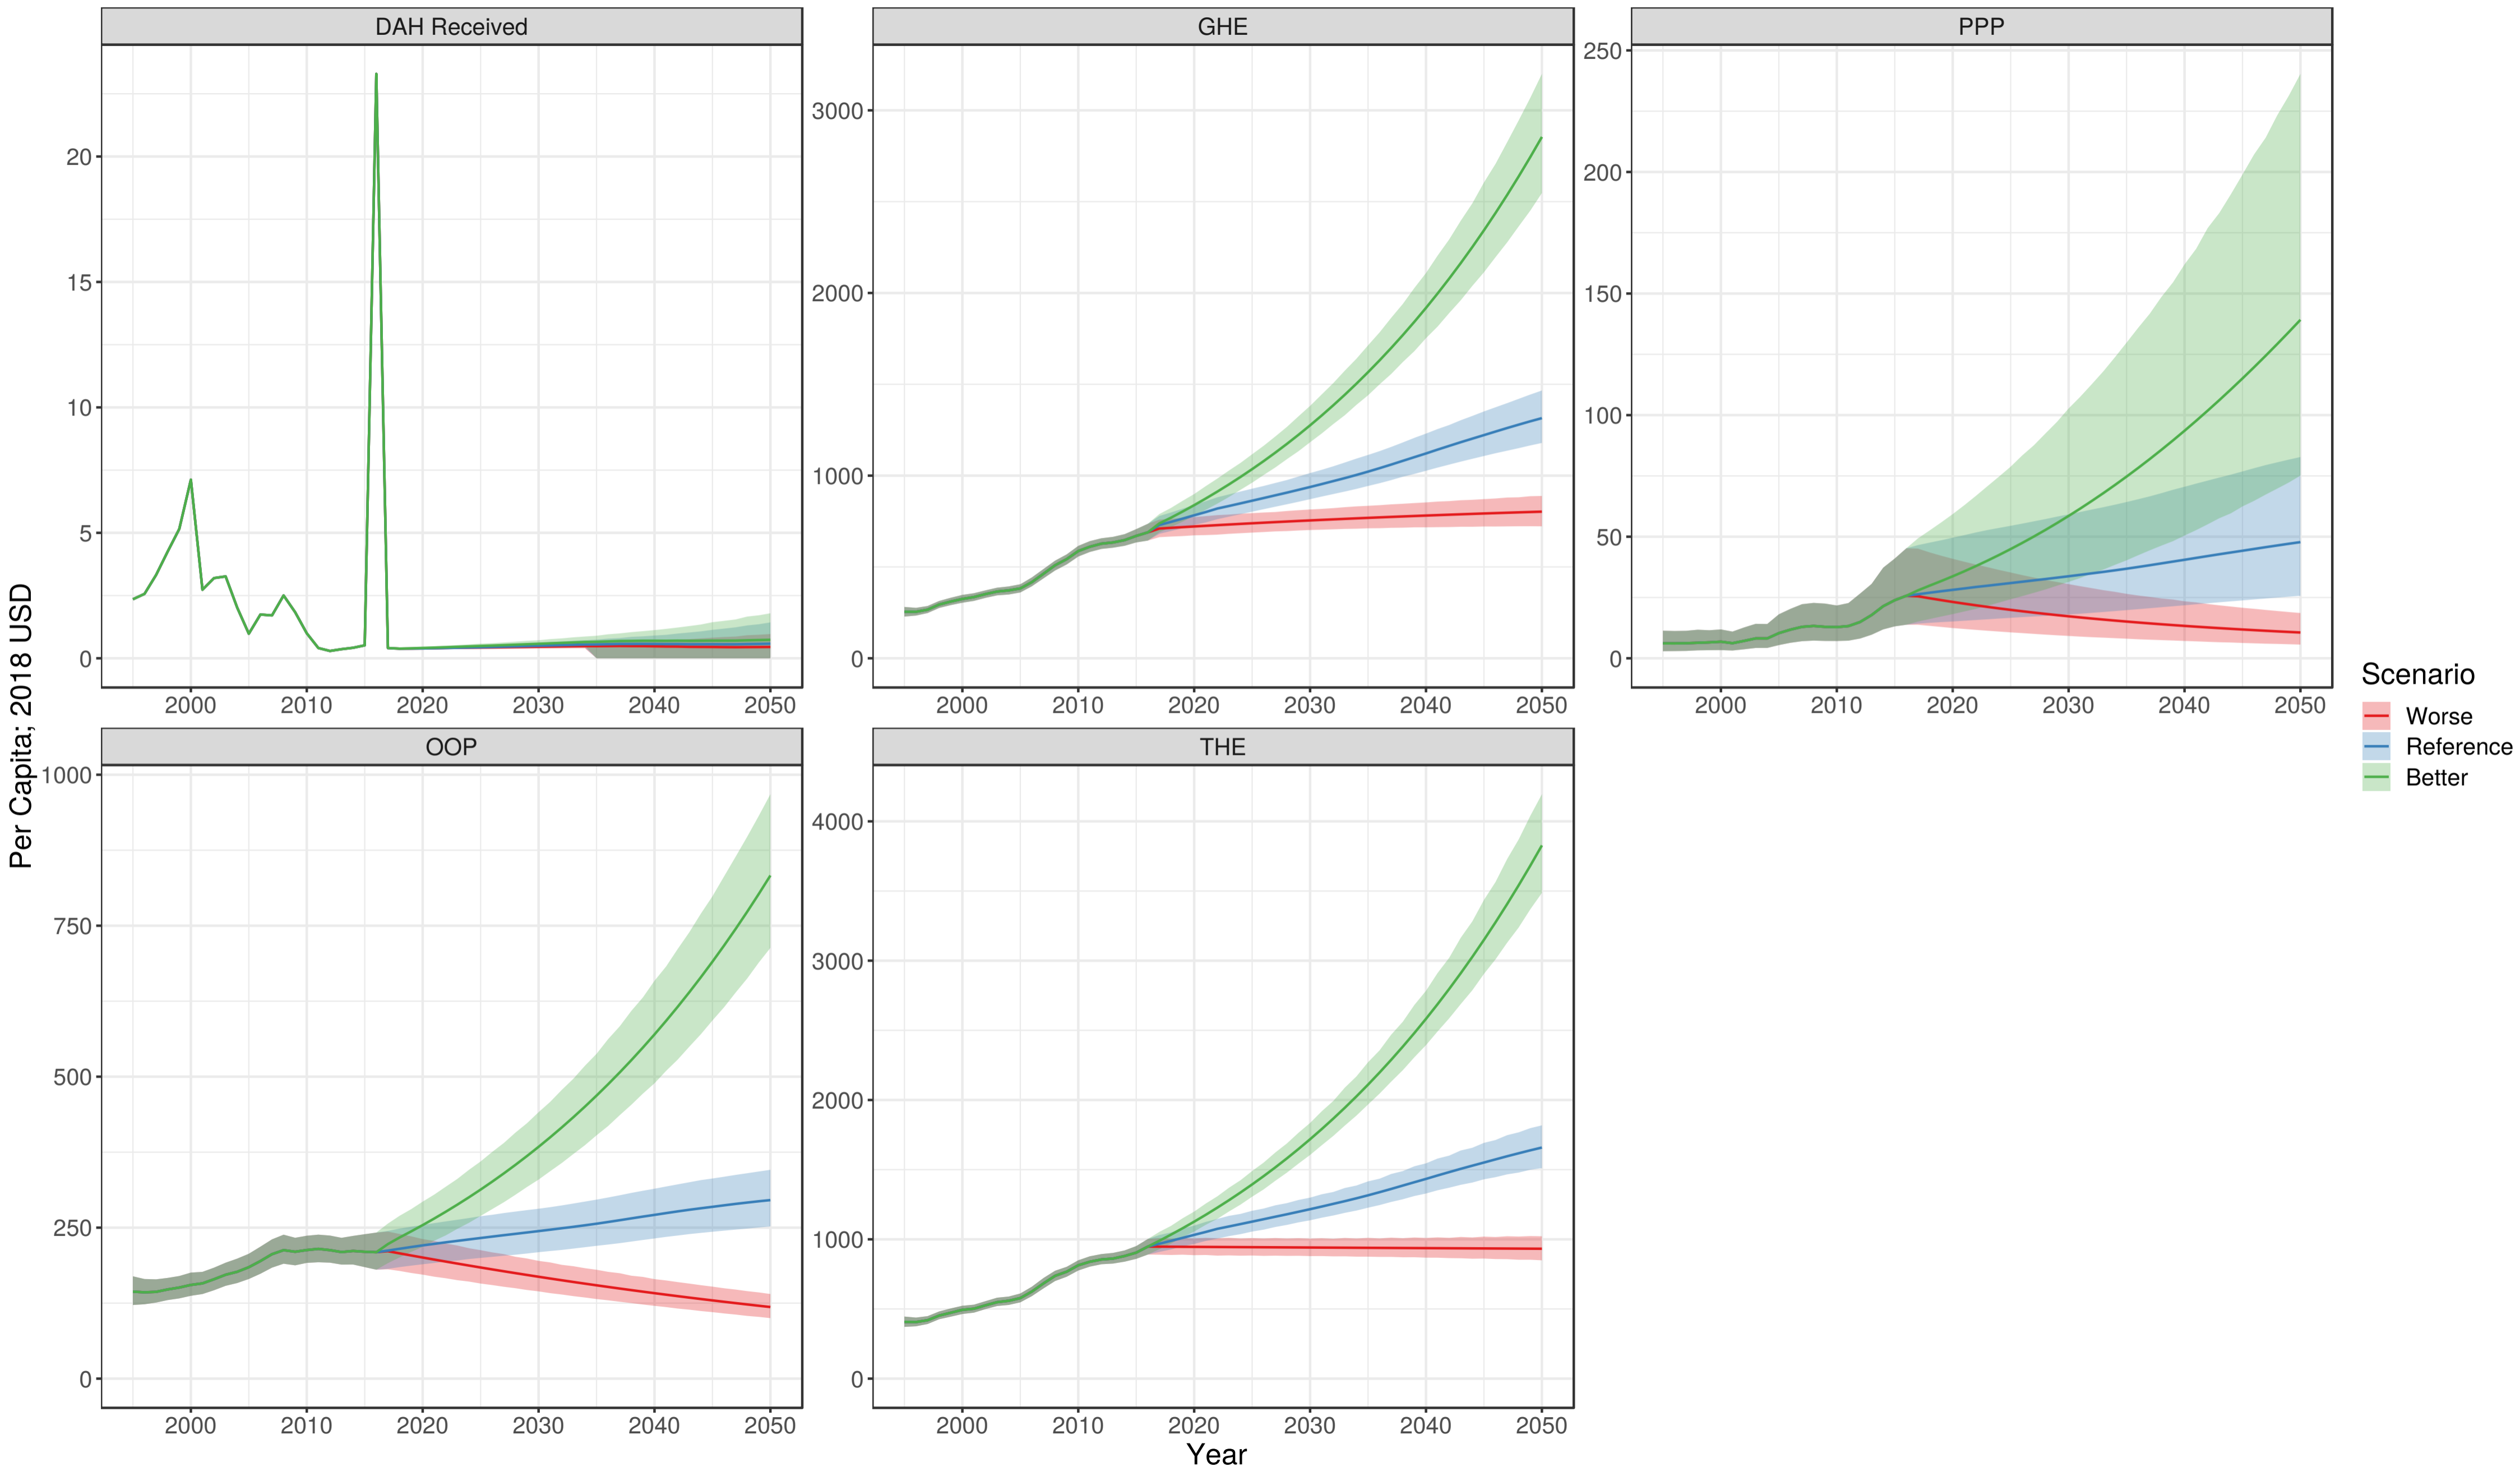

# Cote d'Ivoire

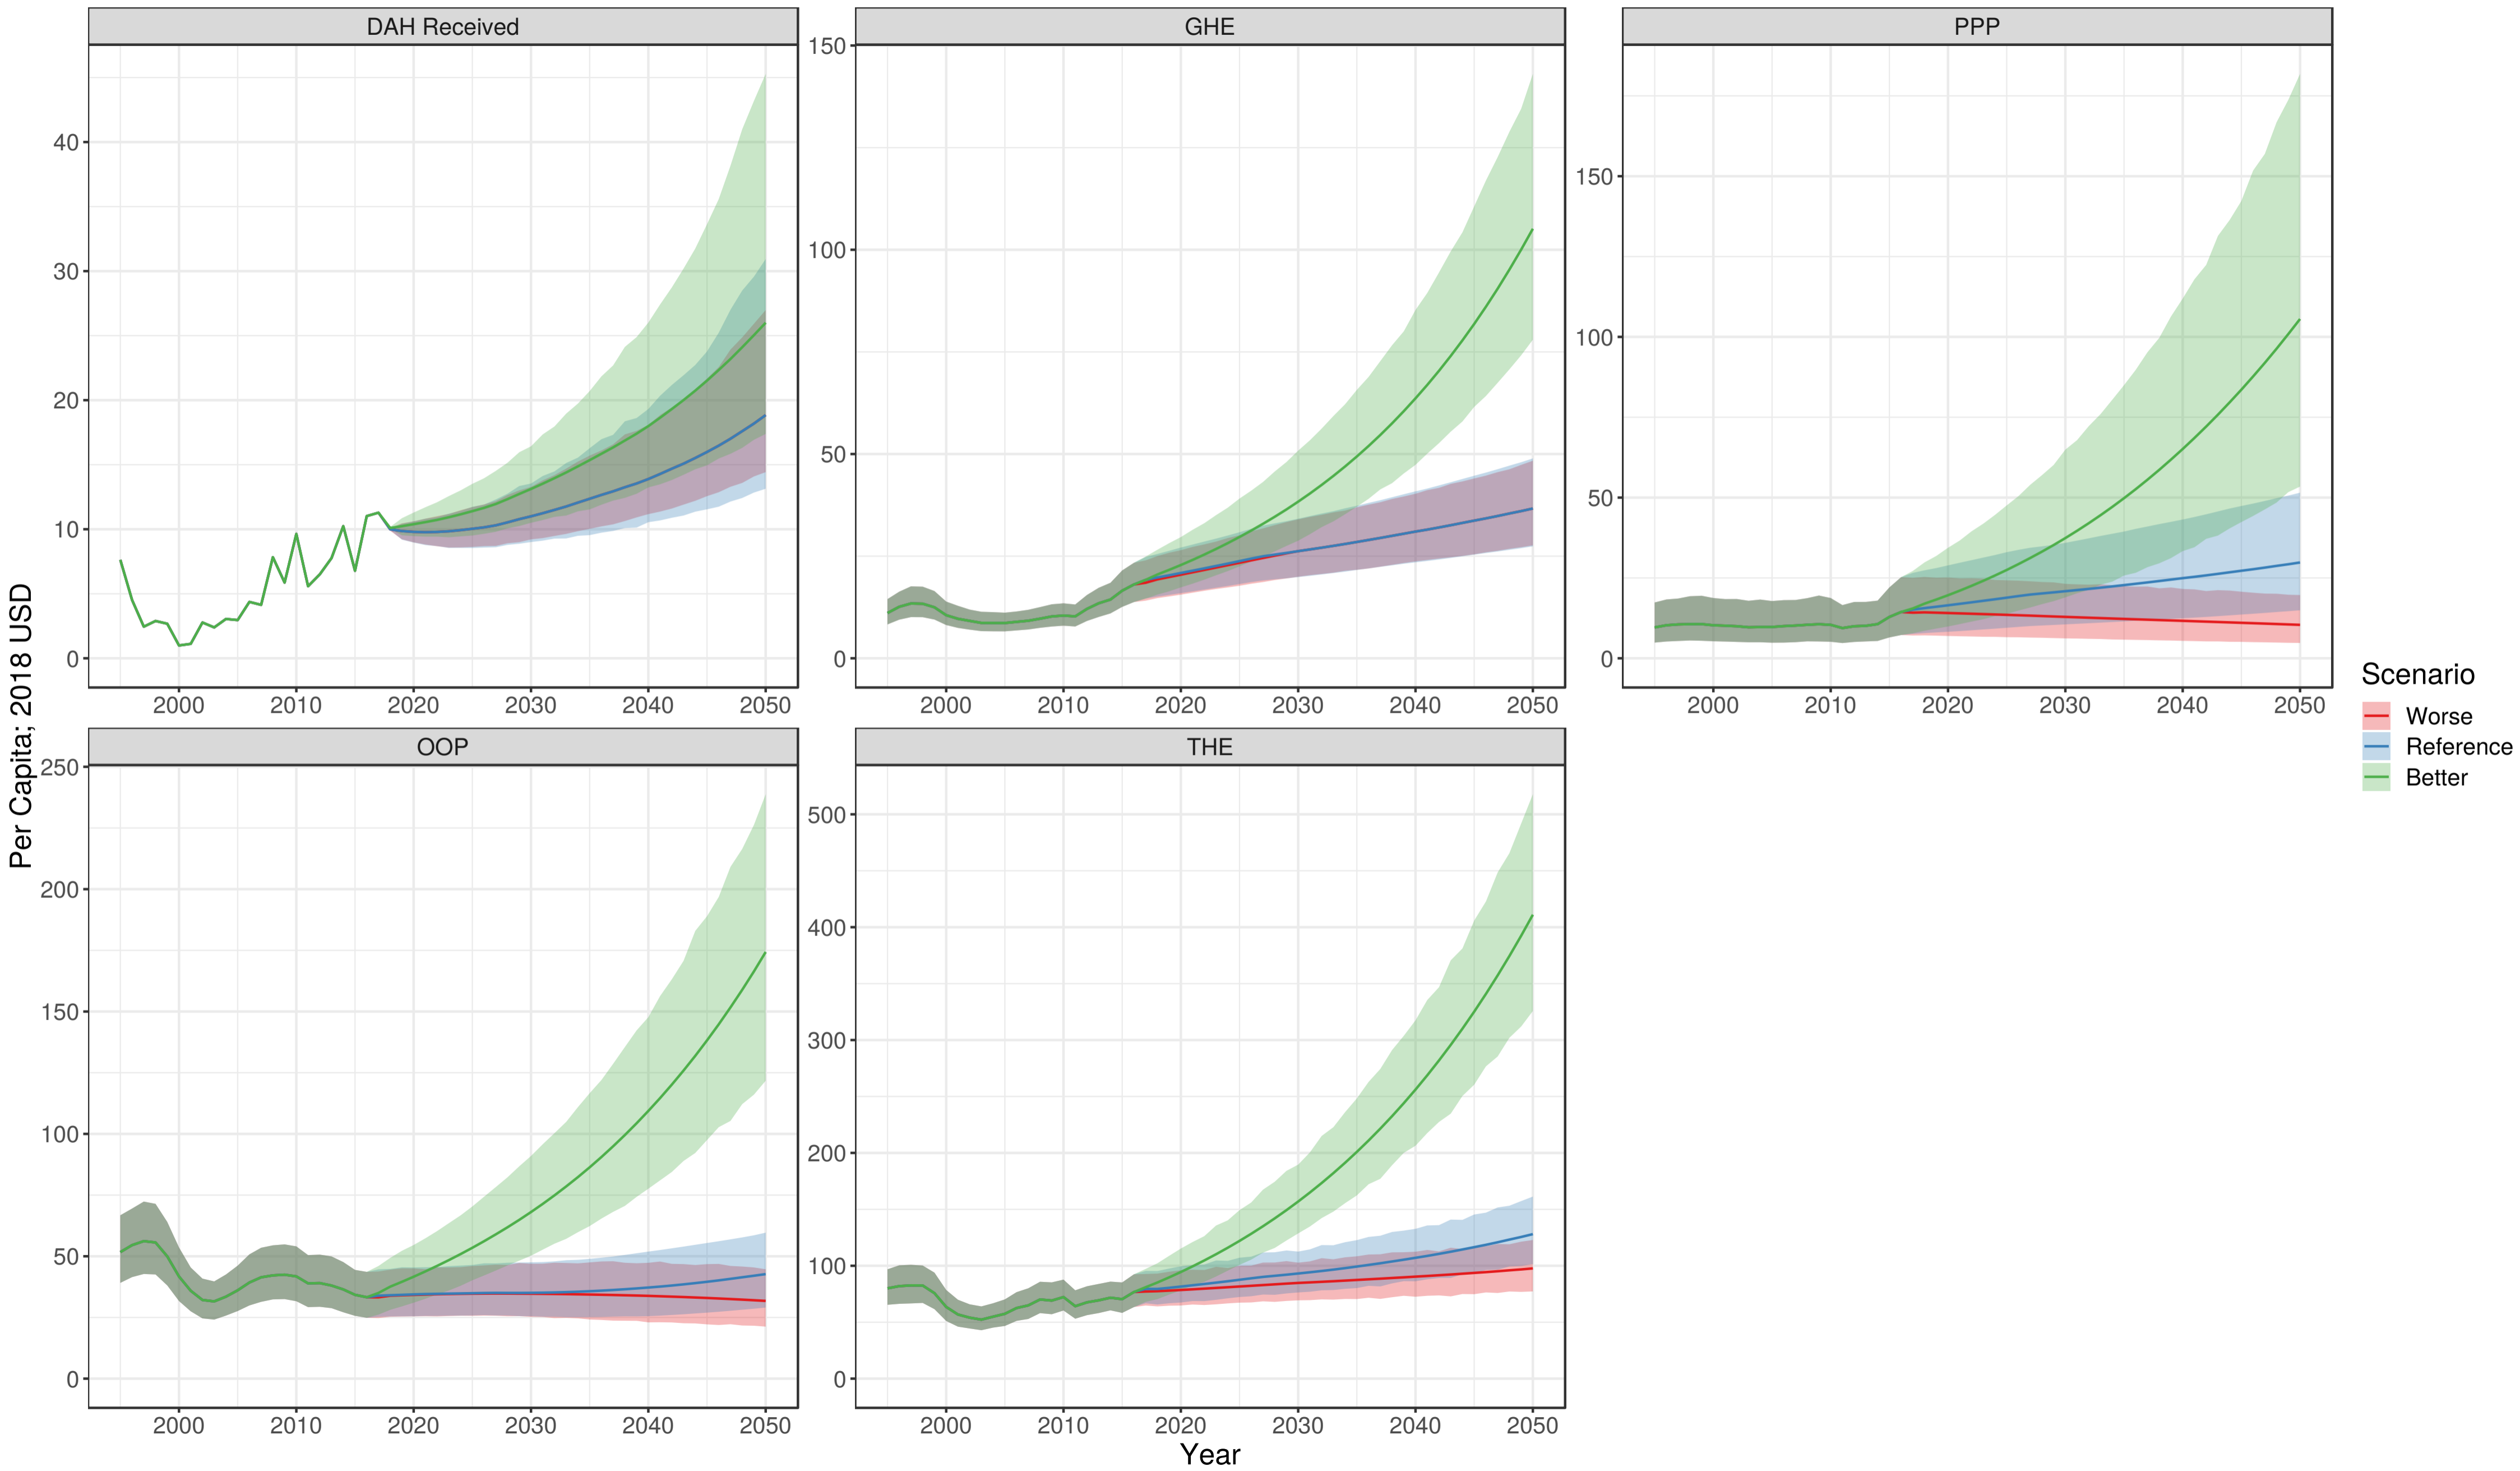

# Croatia

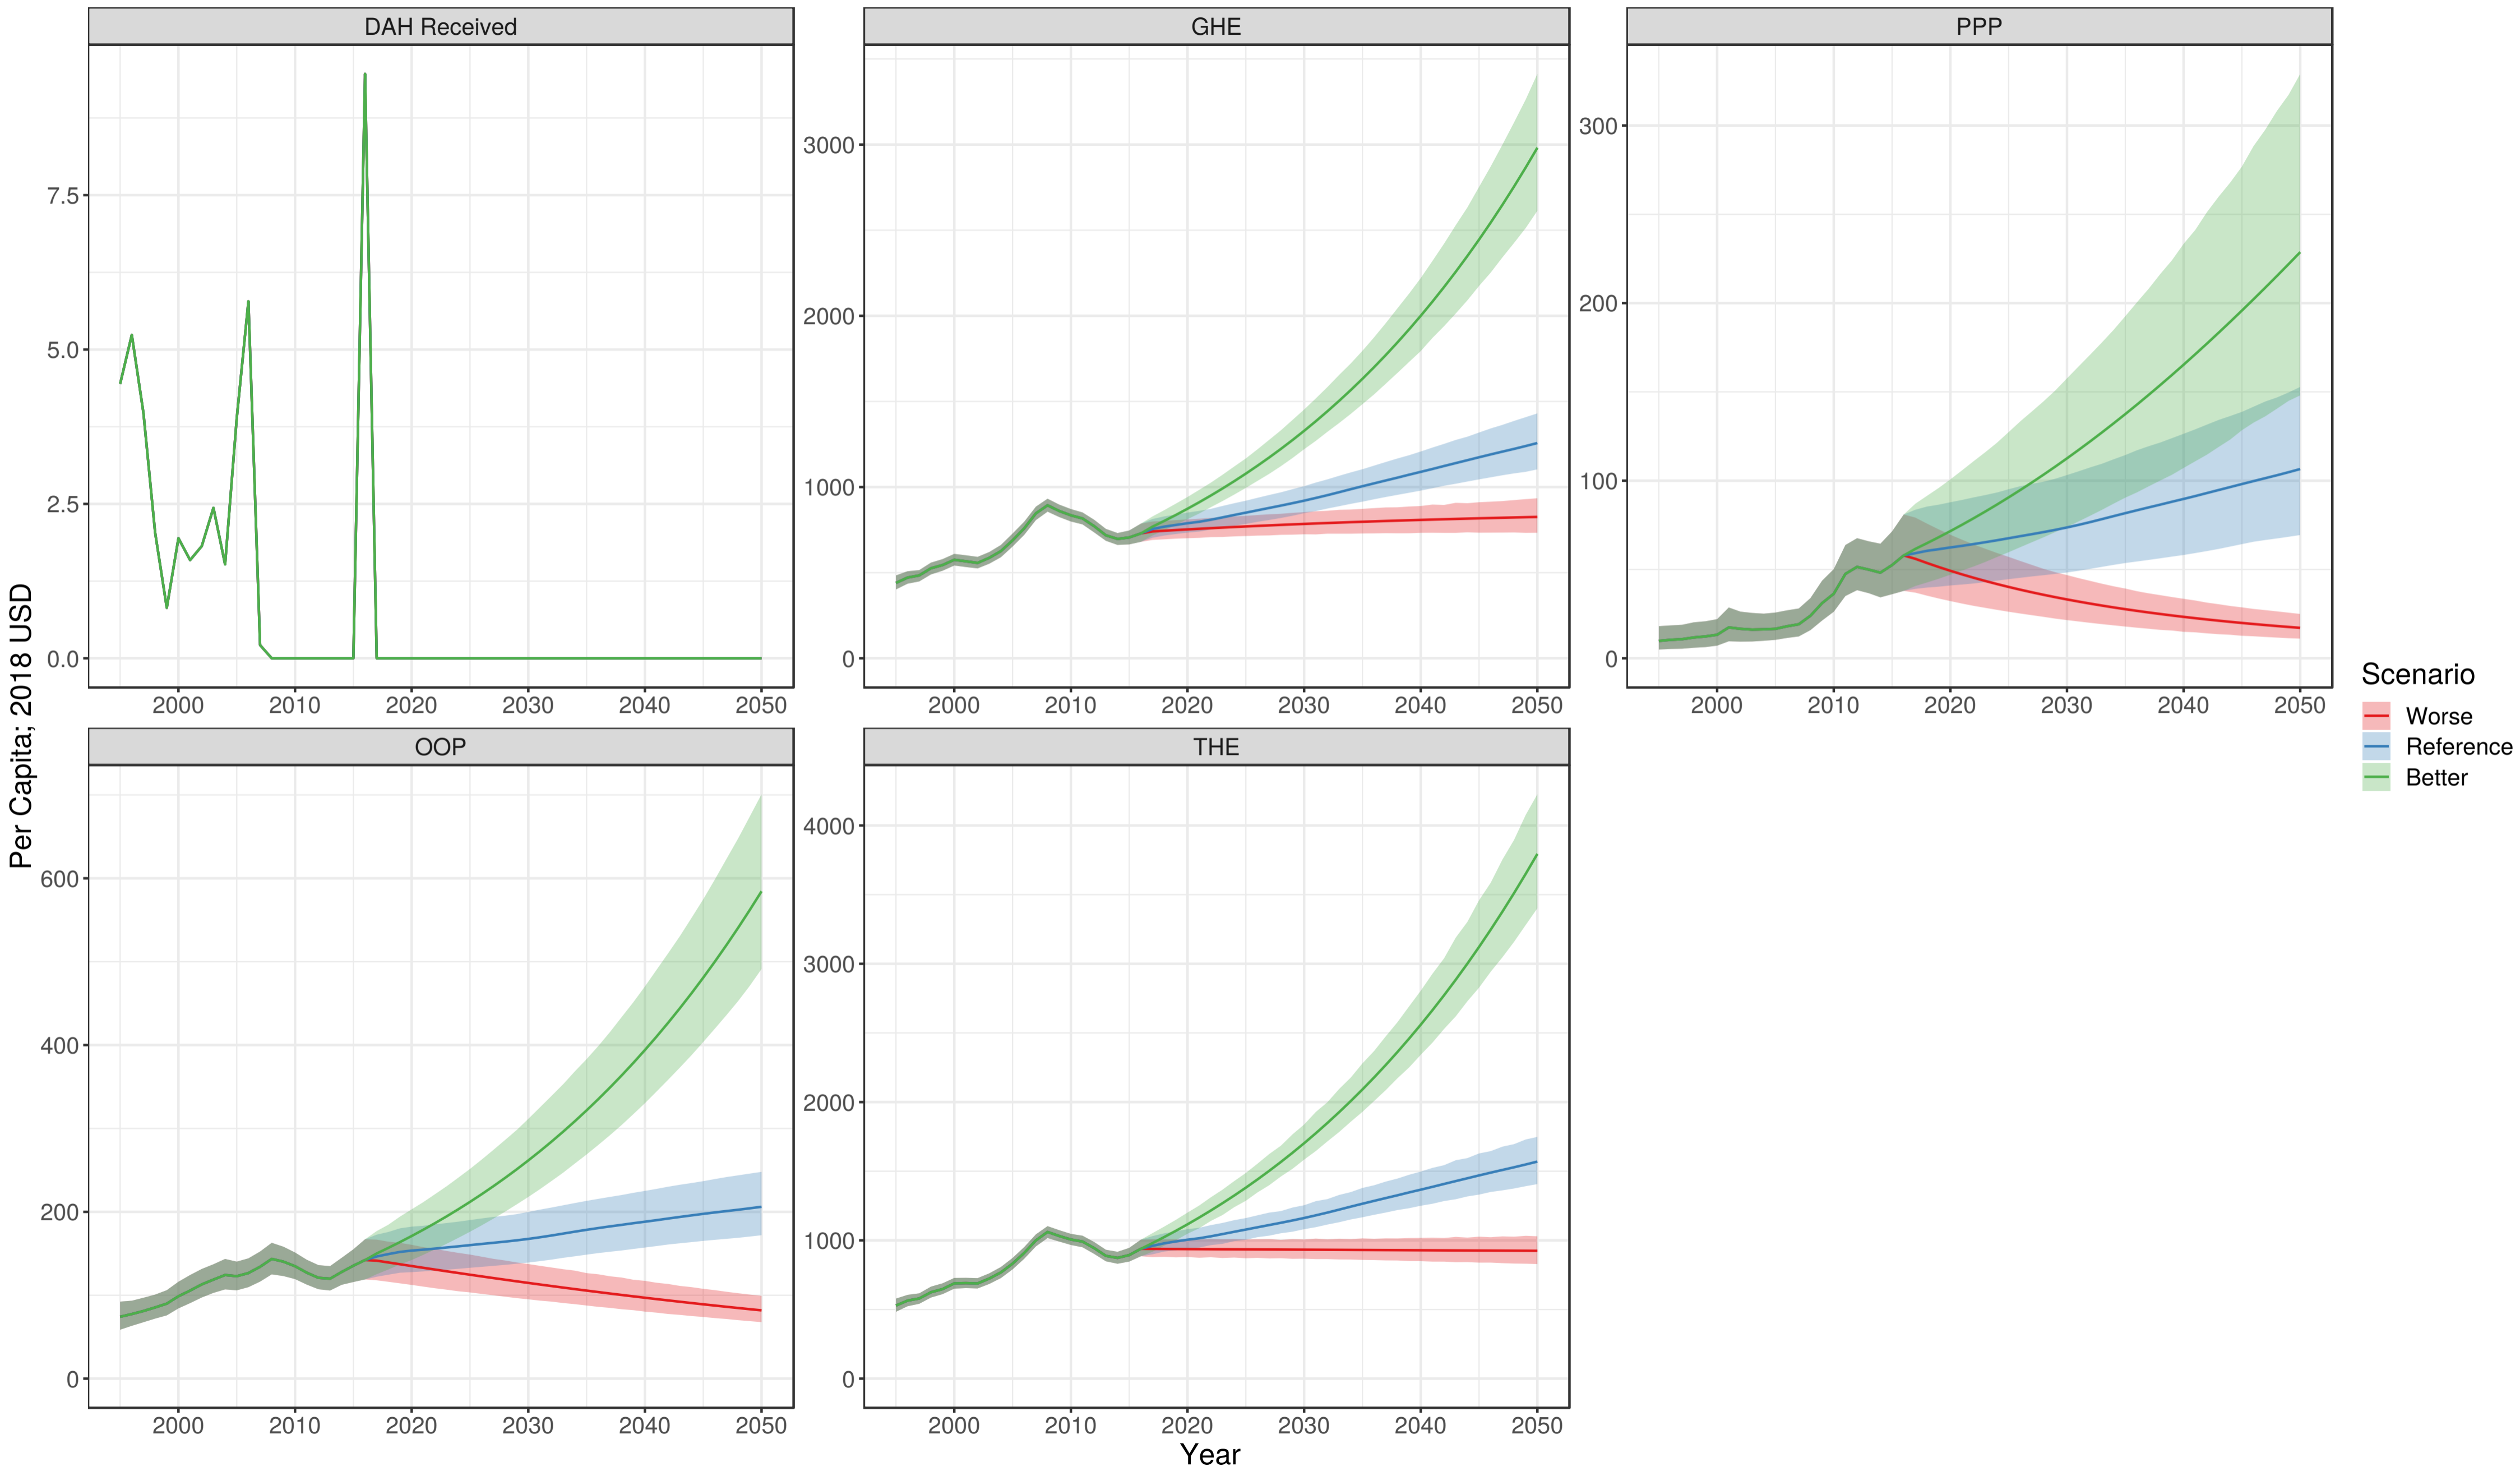

# Cuba

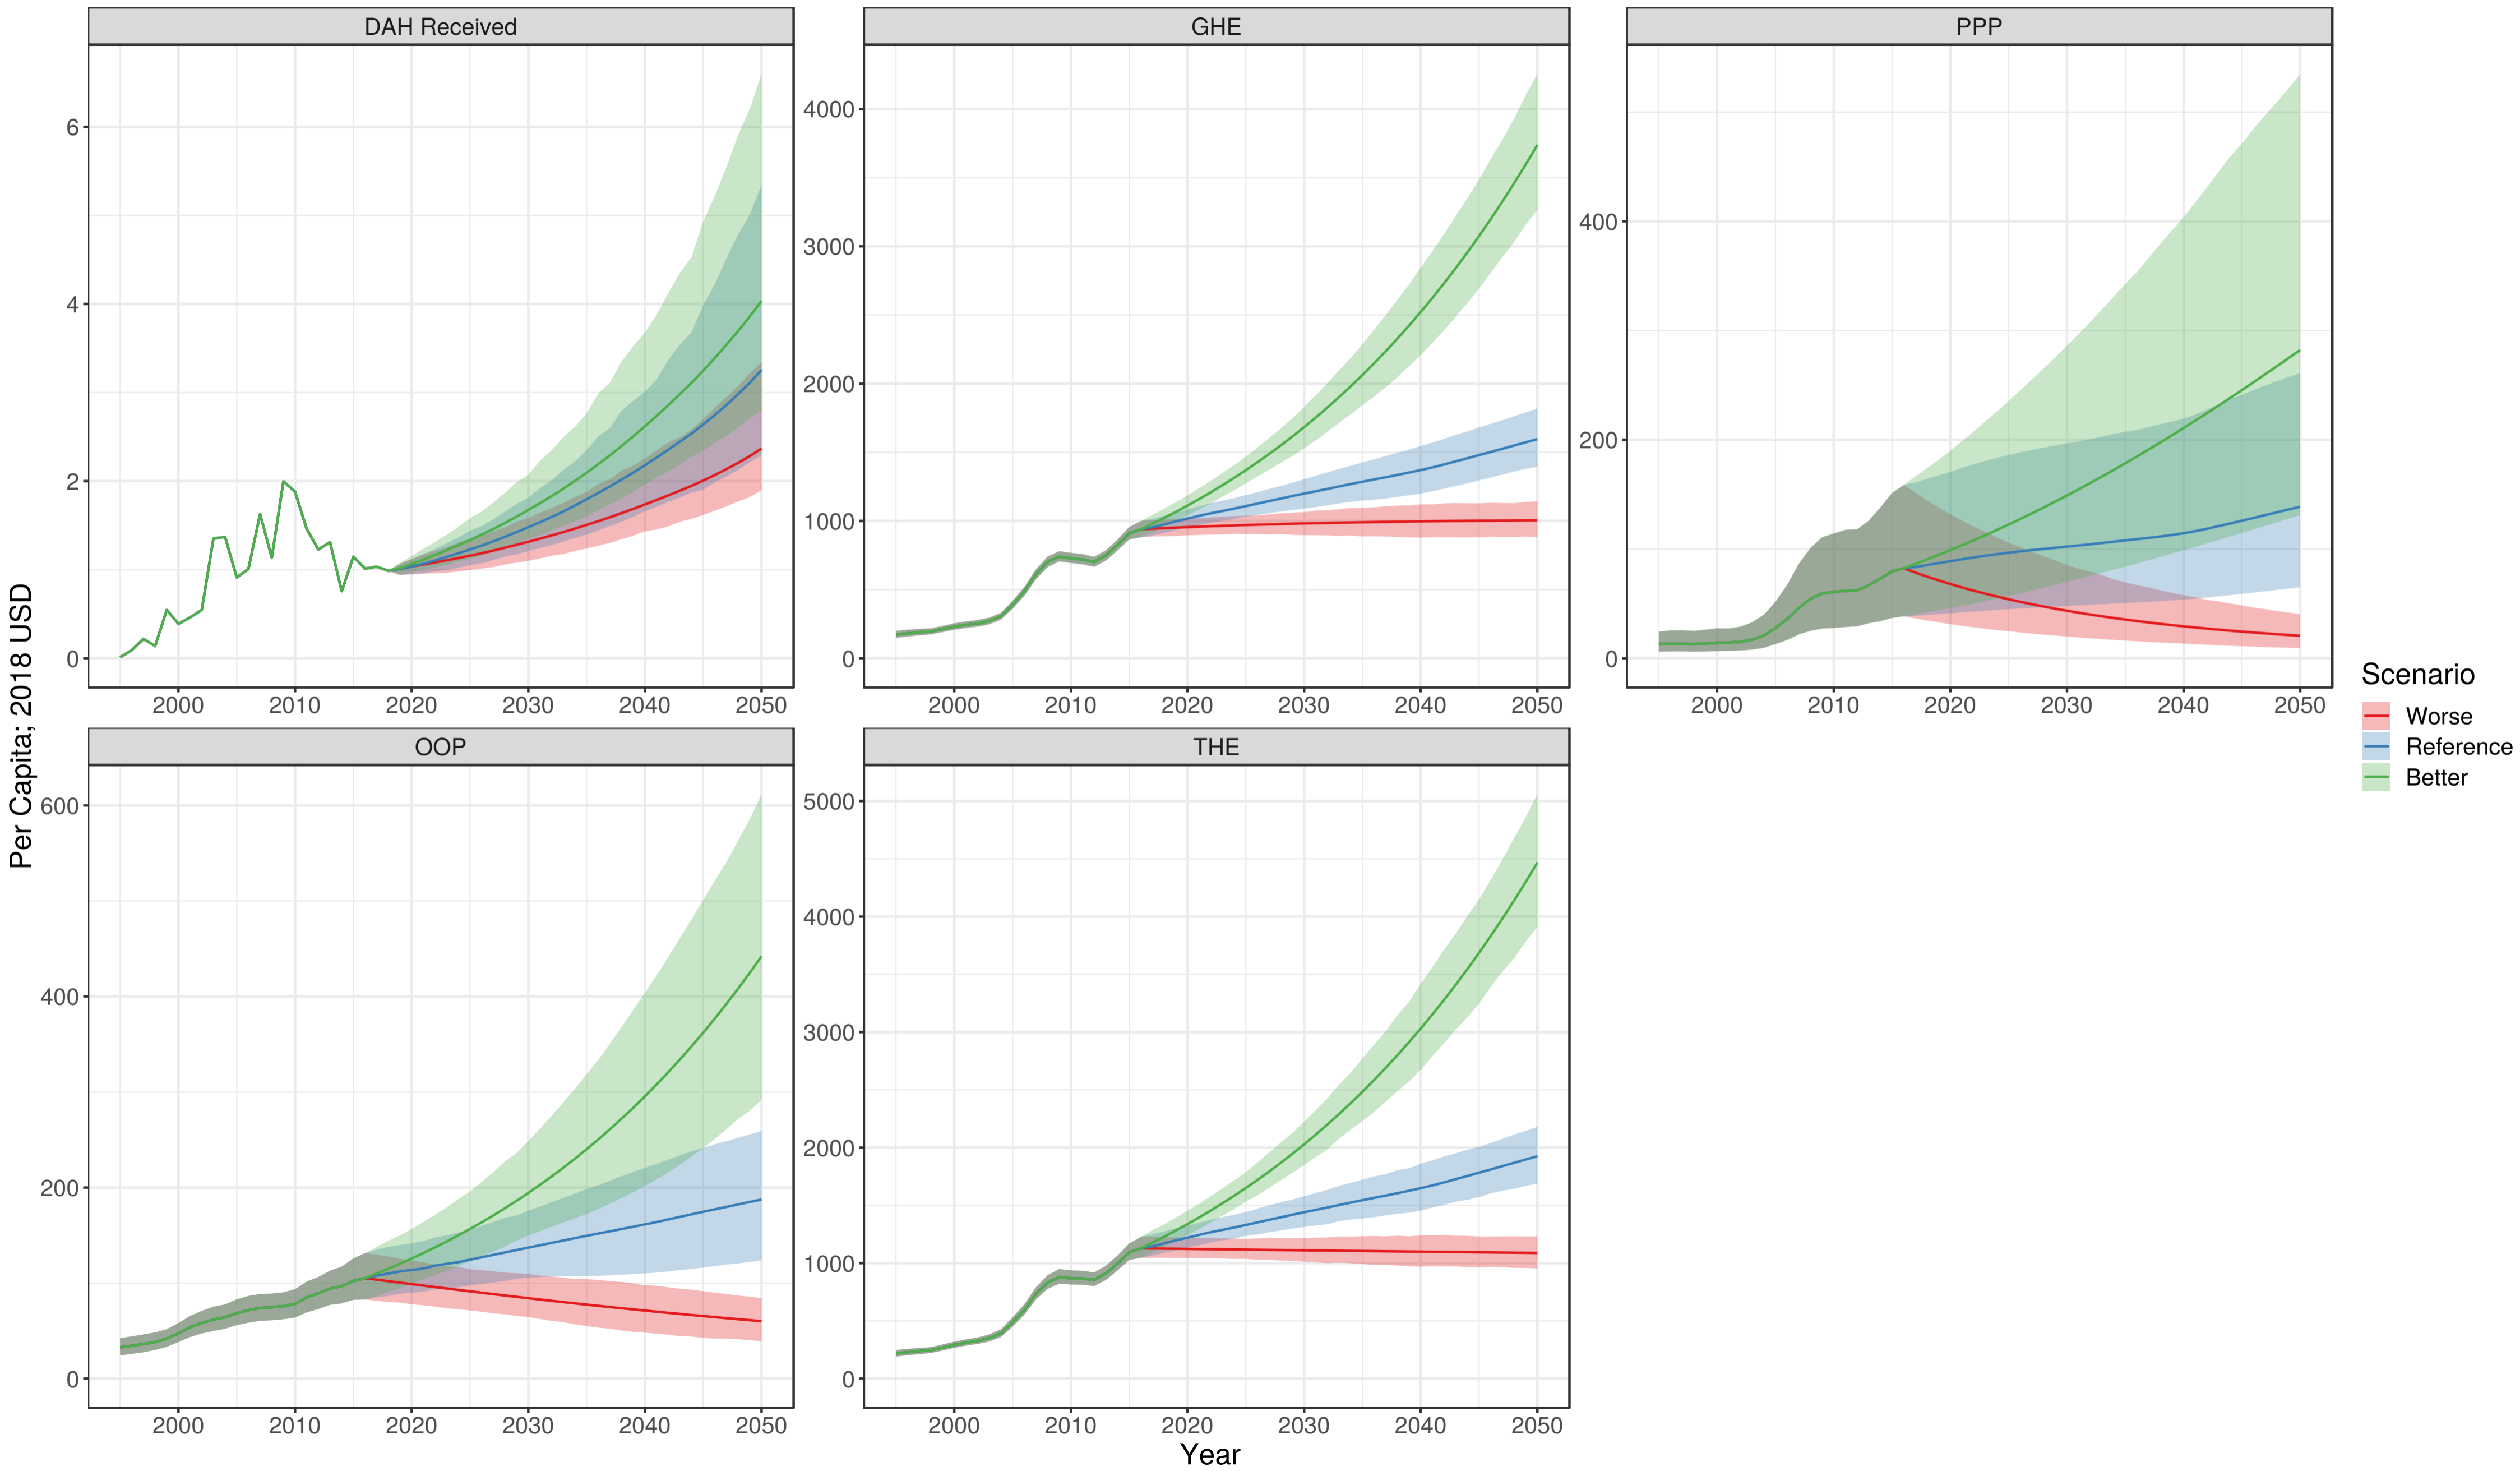



# Cyprus

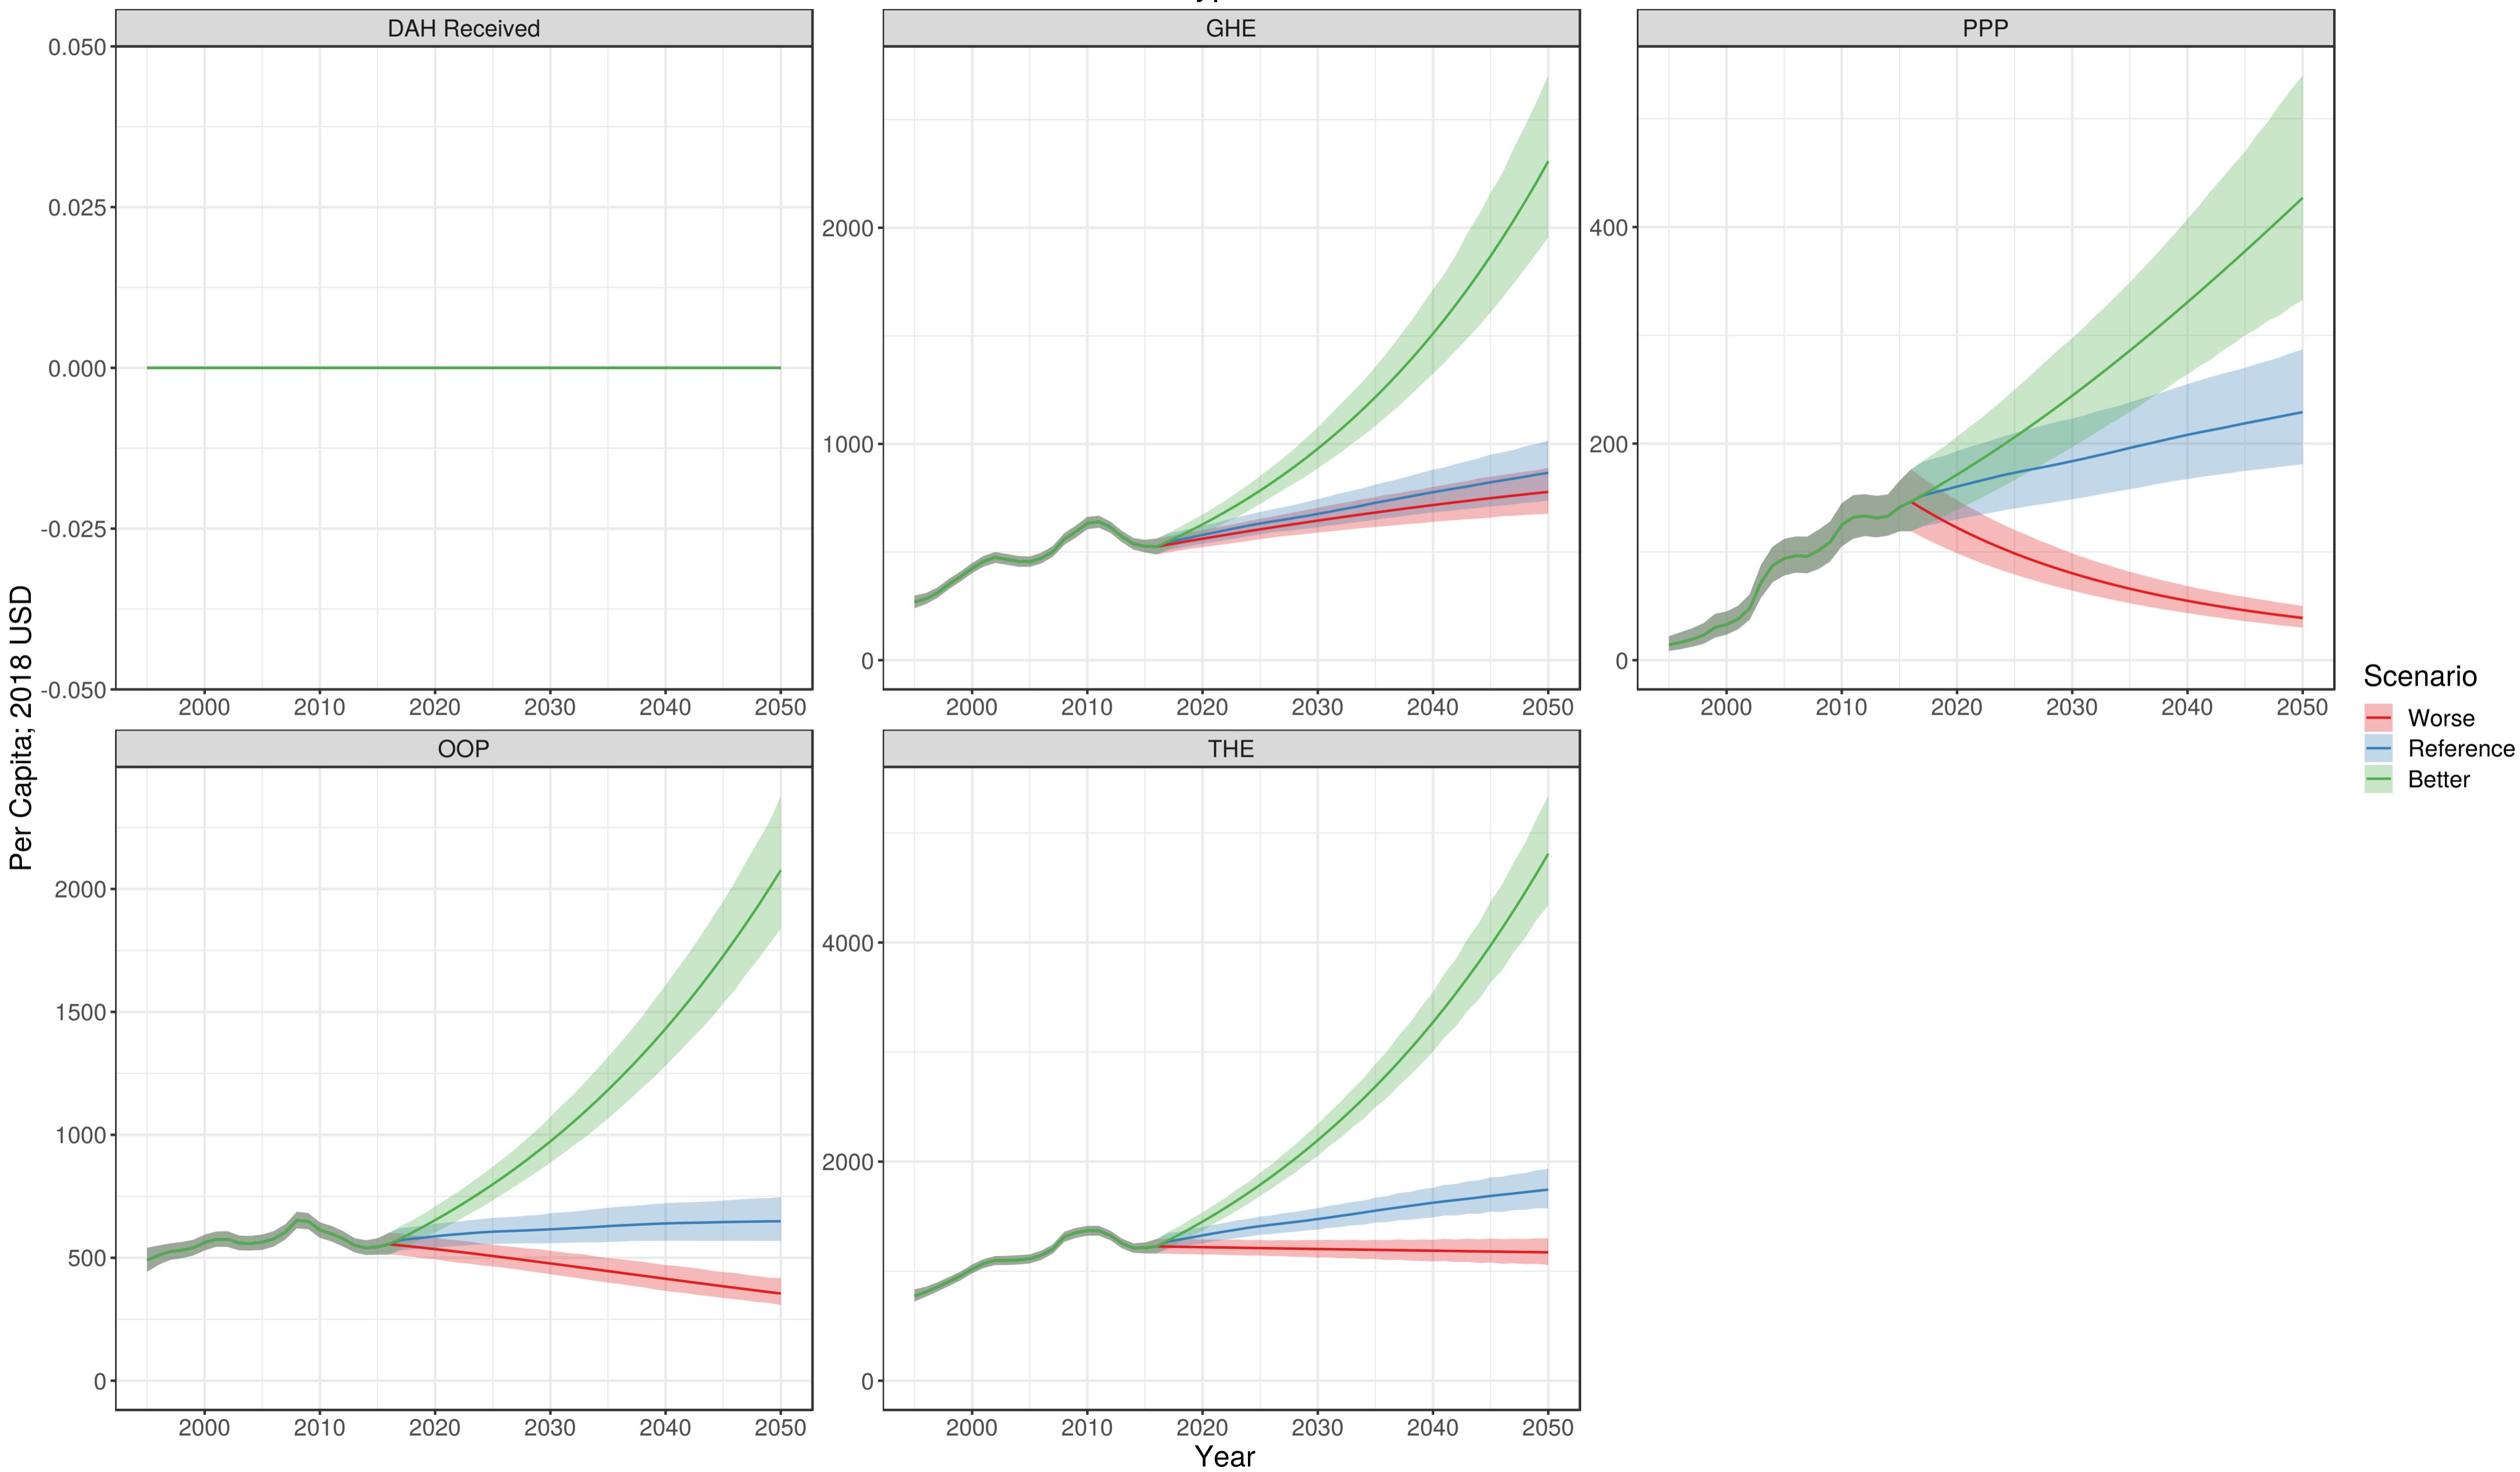

# Czech Republic

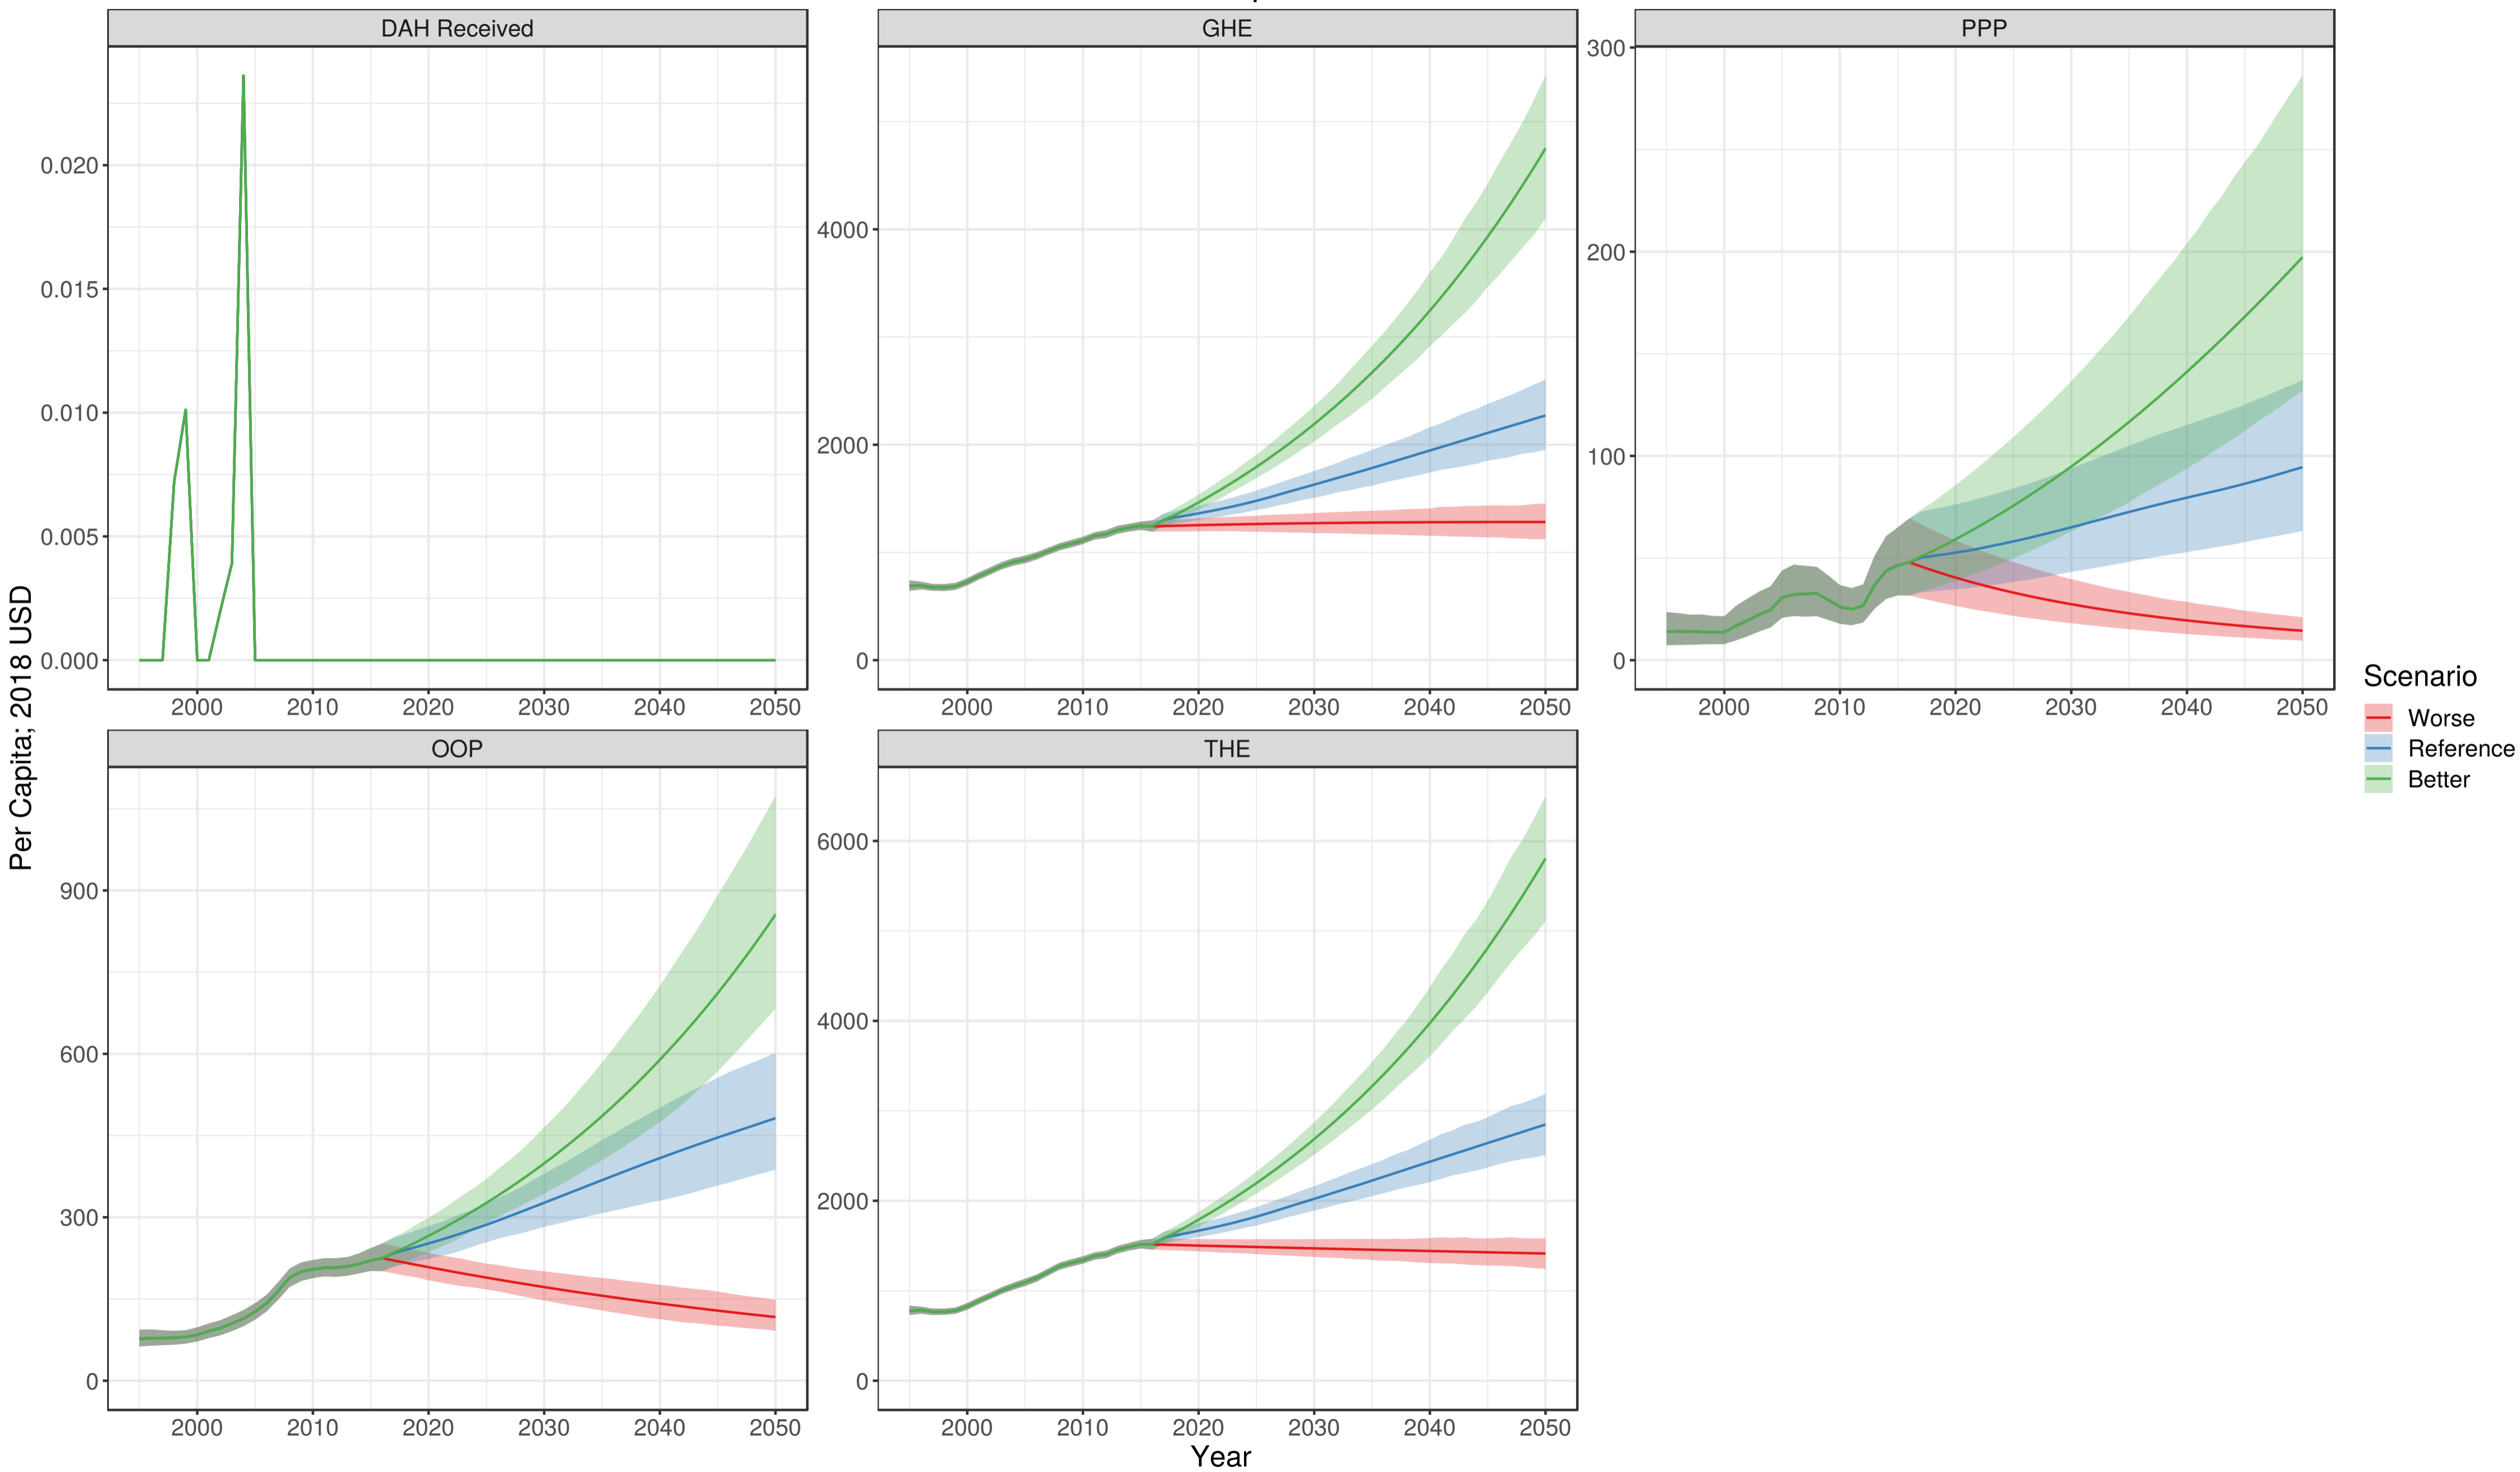

# Democratic Republic of the Congo

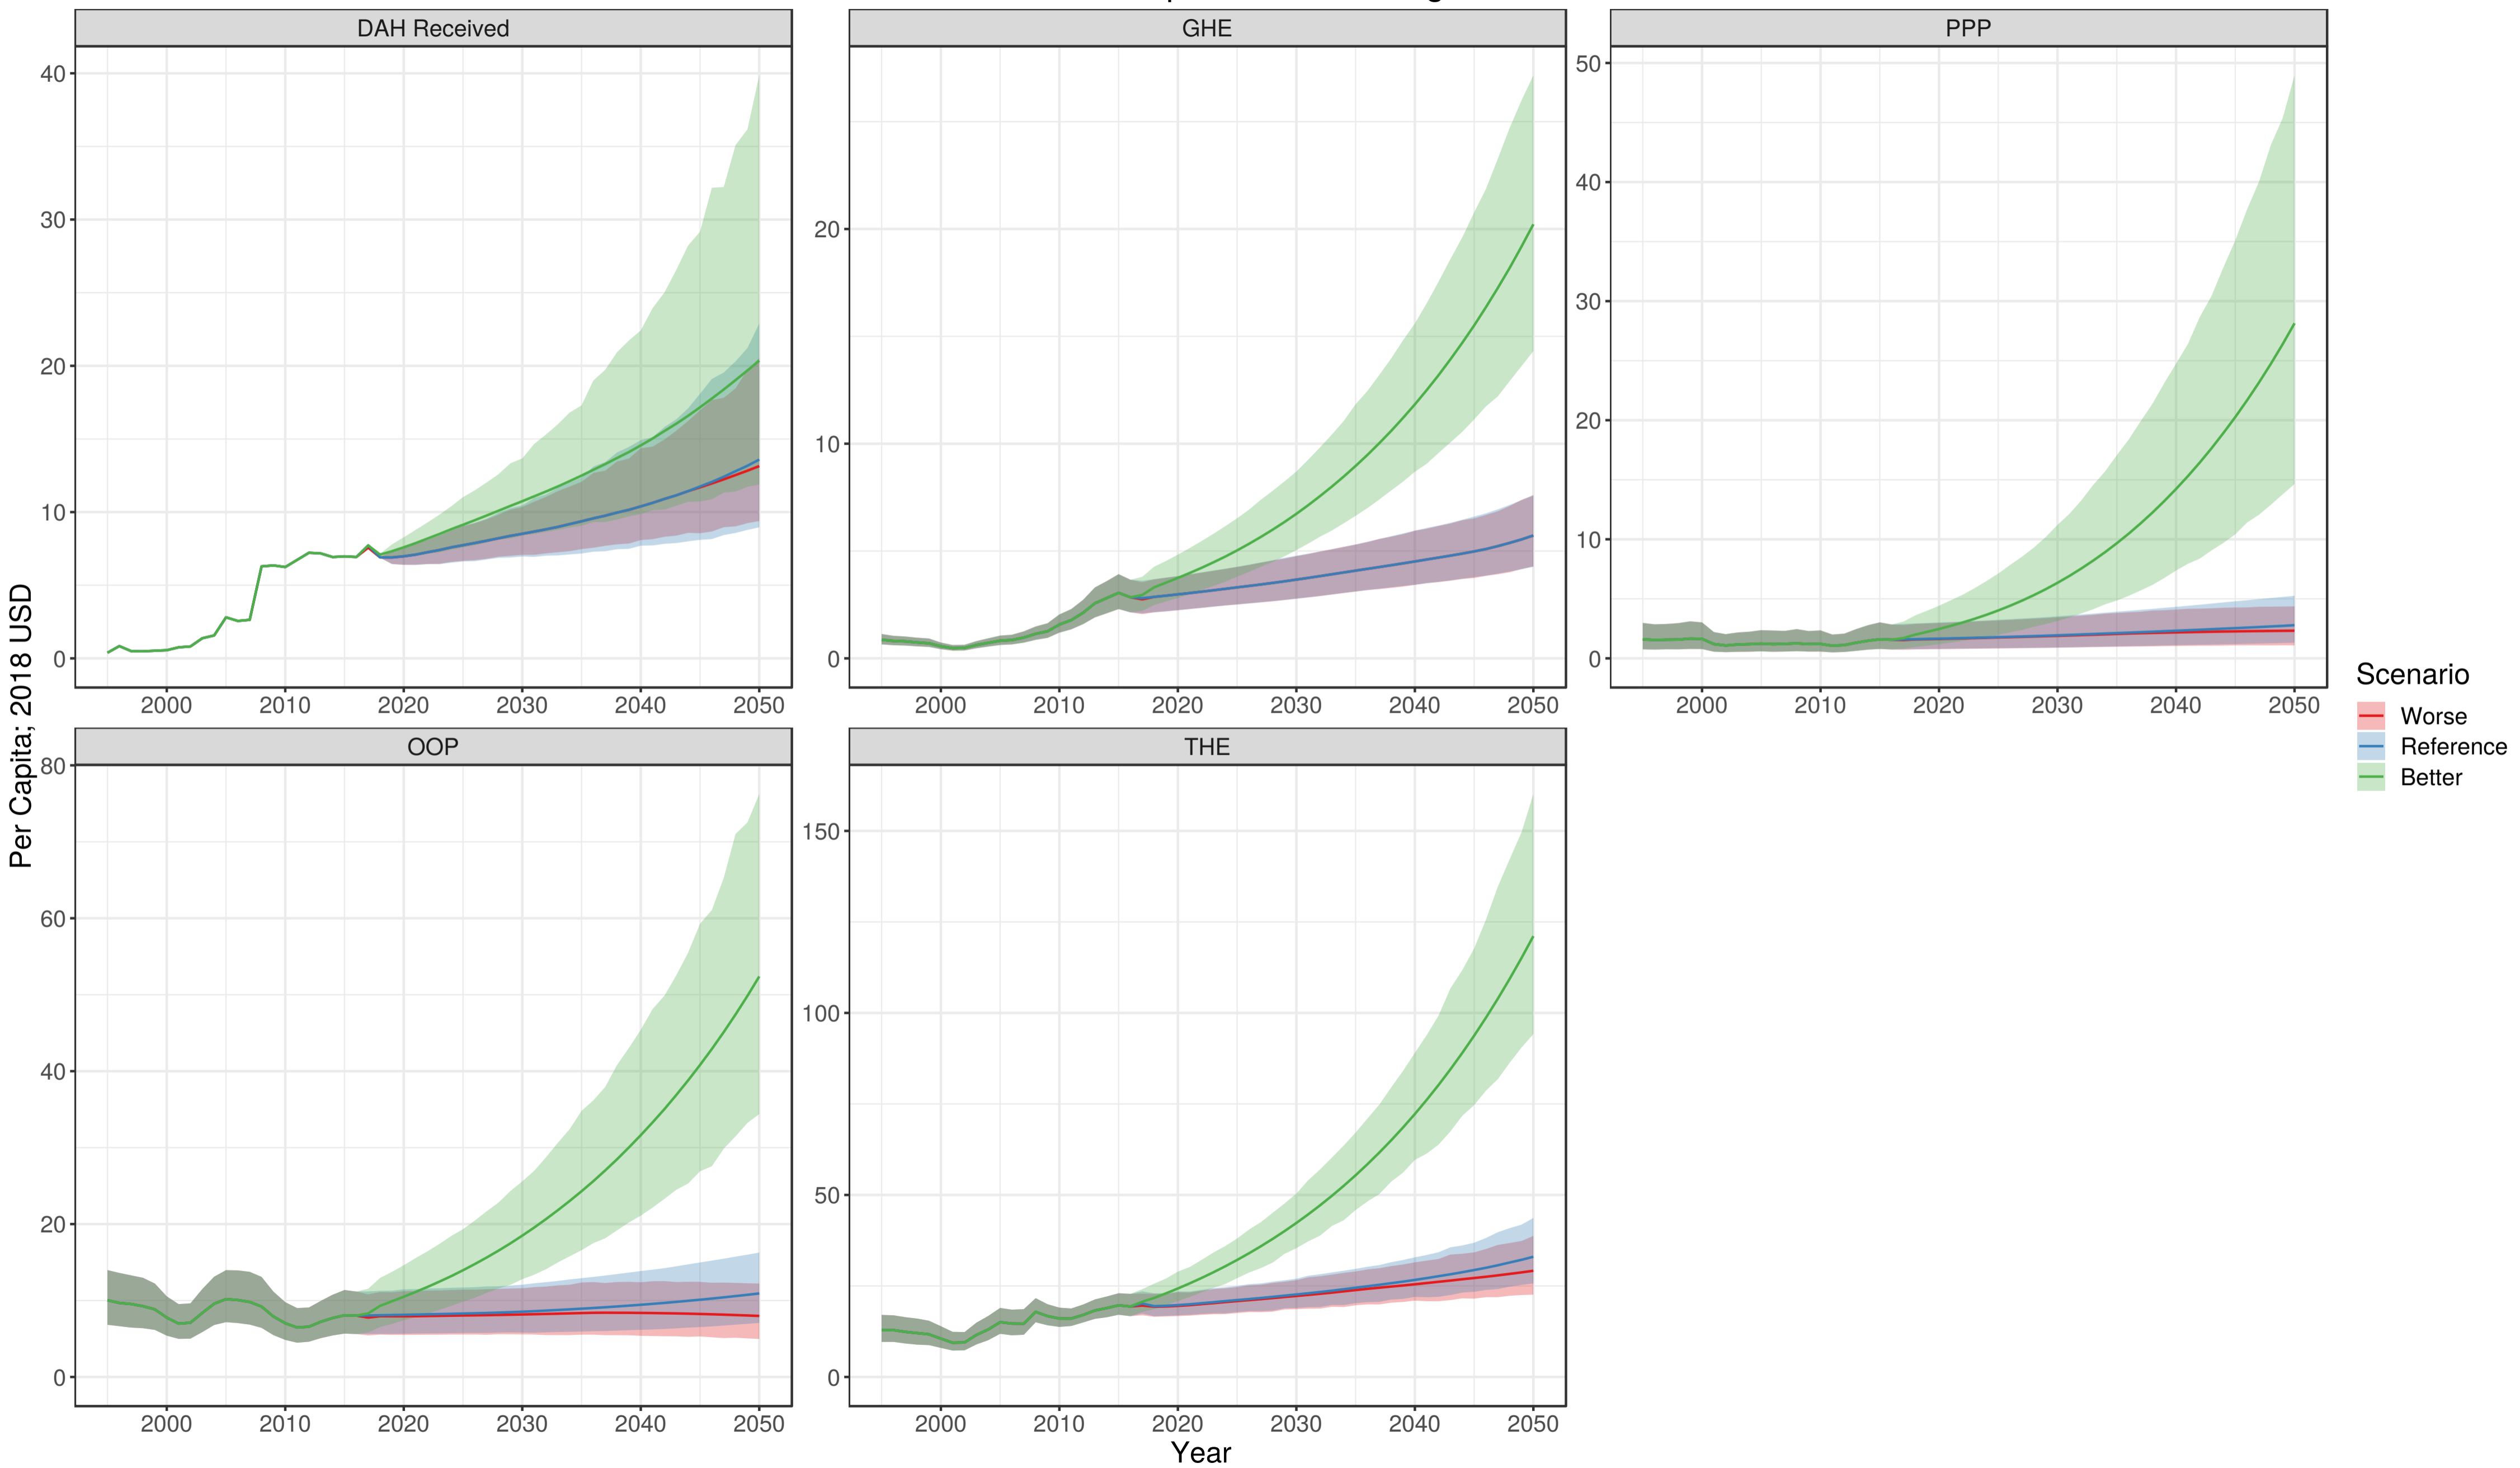

# Denmark

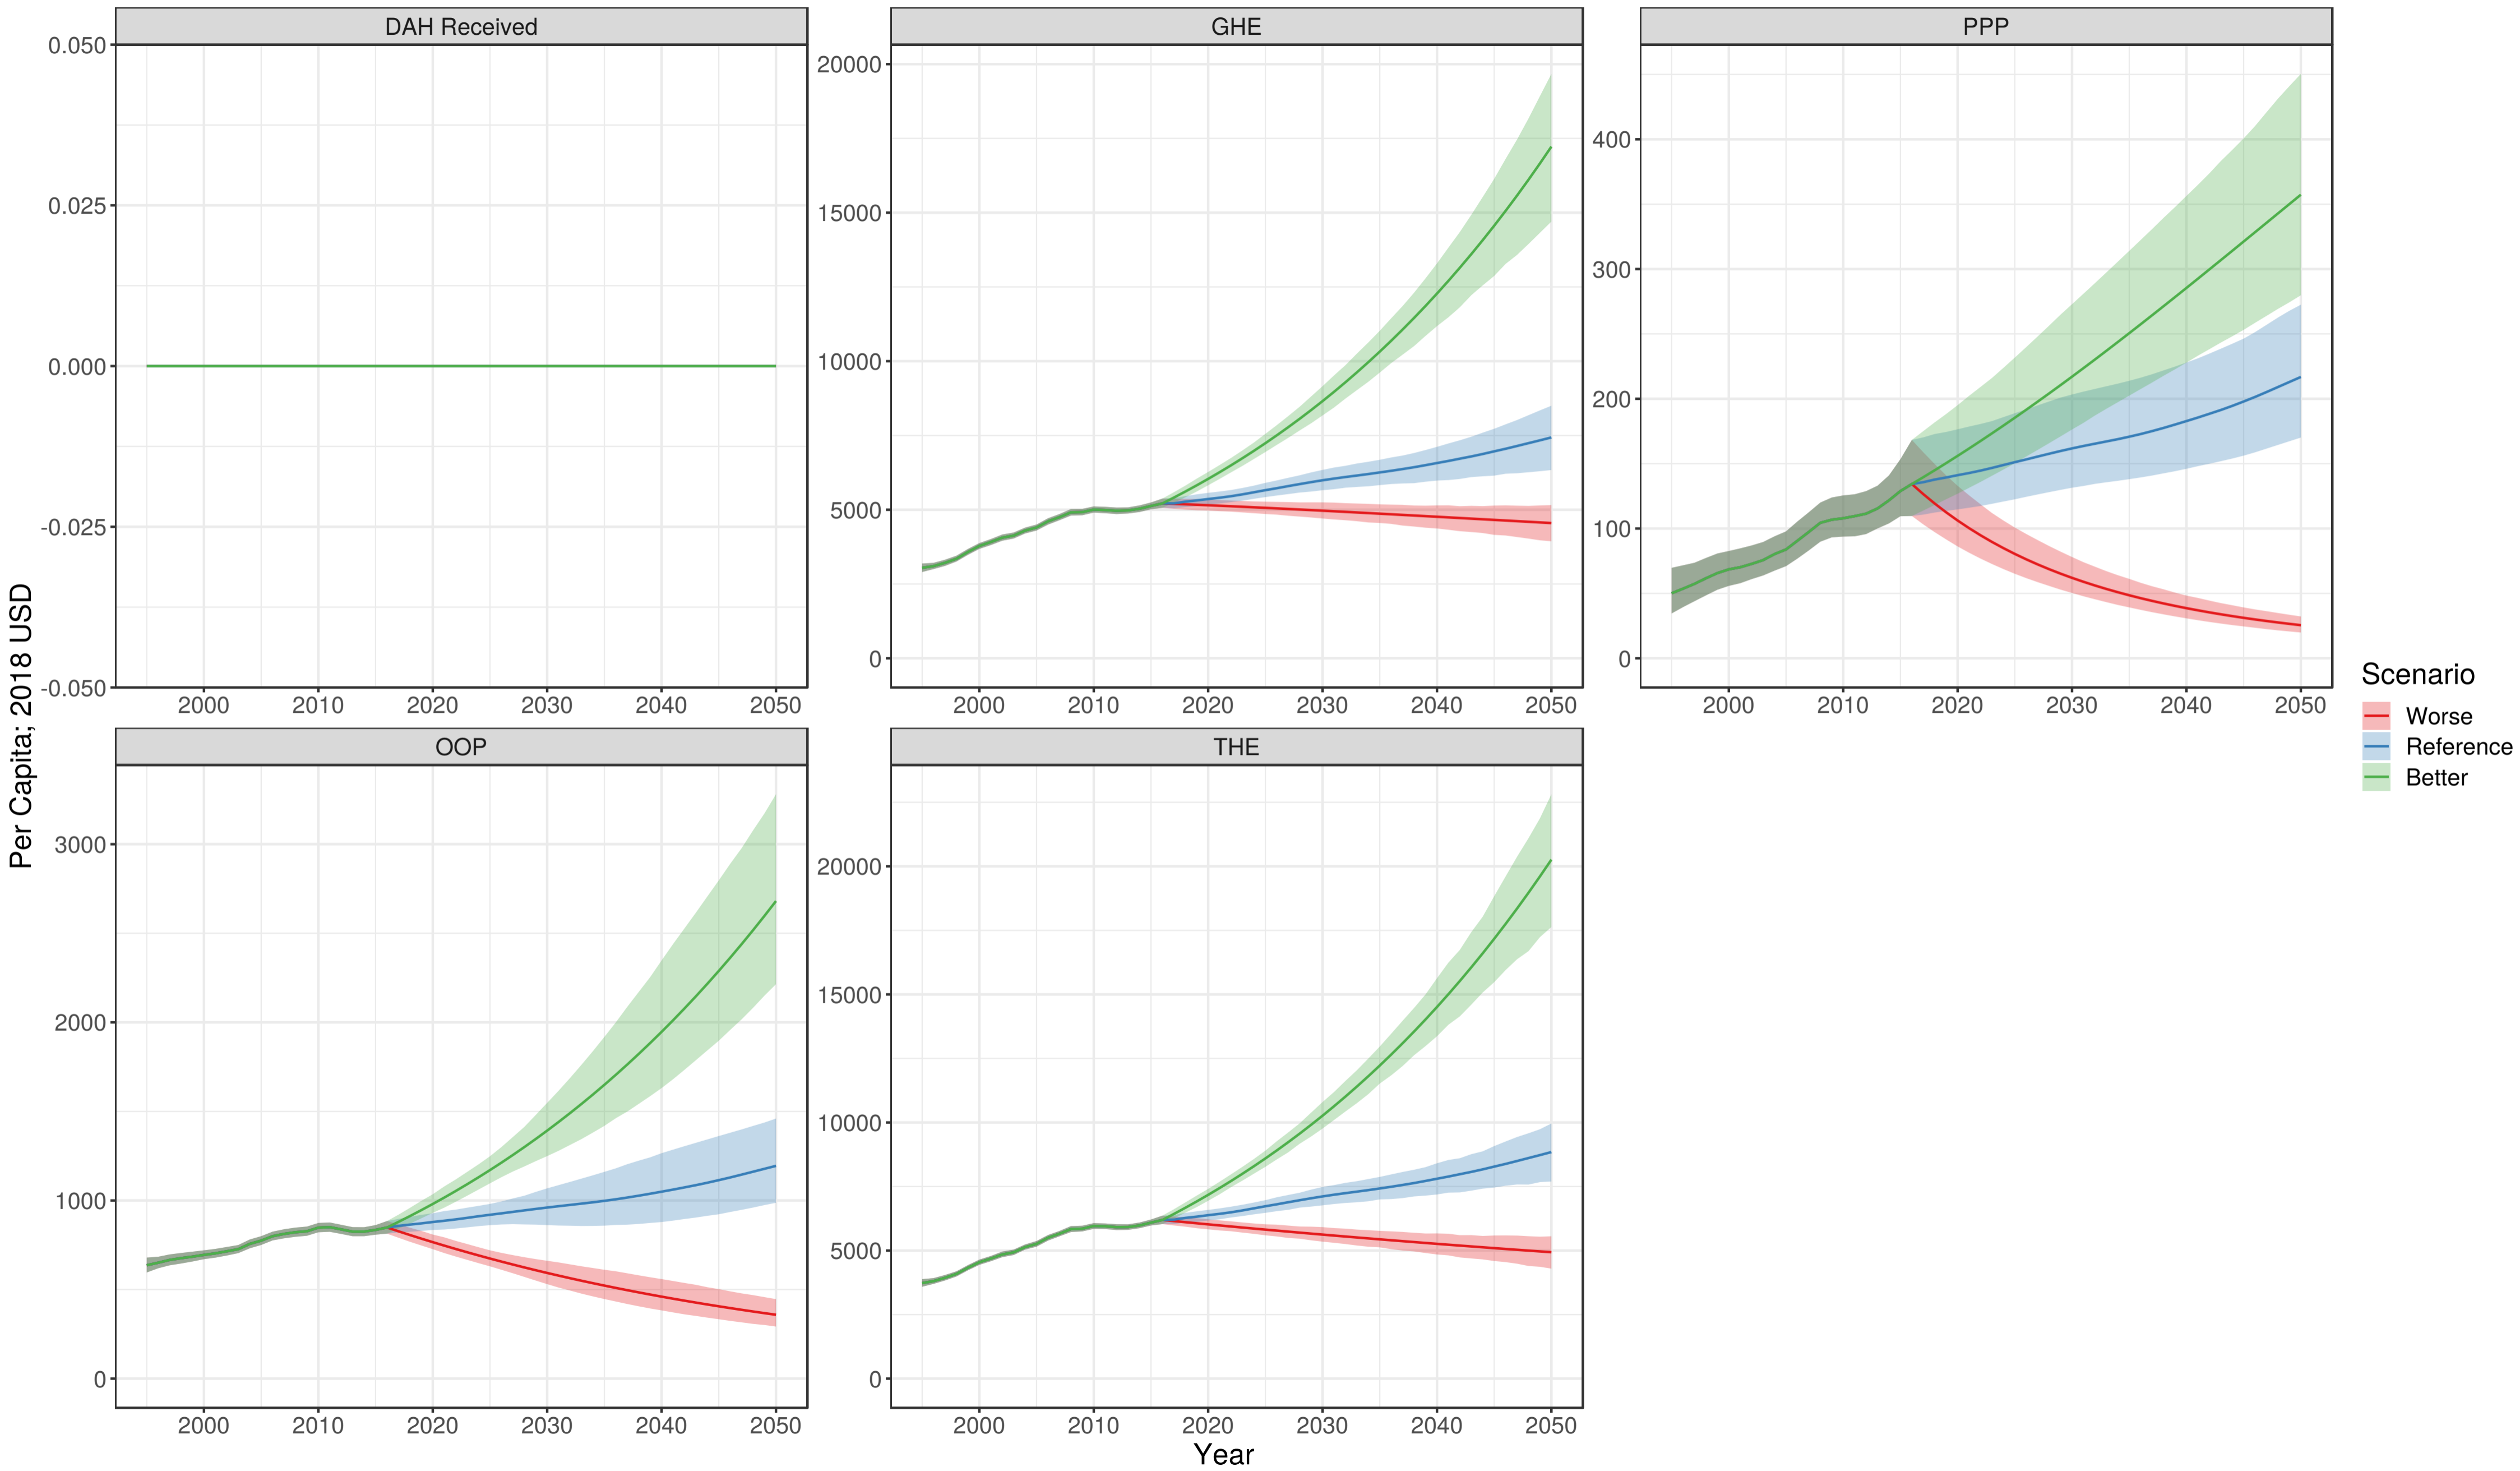

# Djibouti

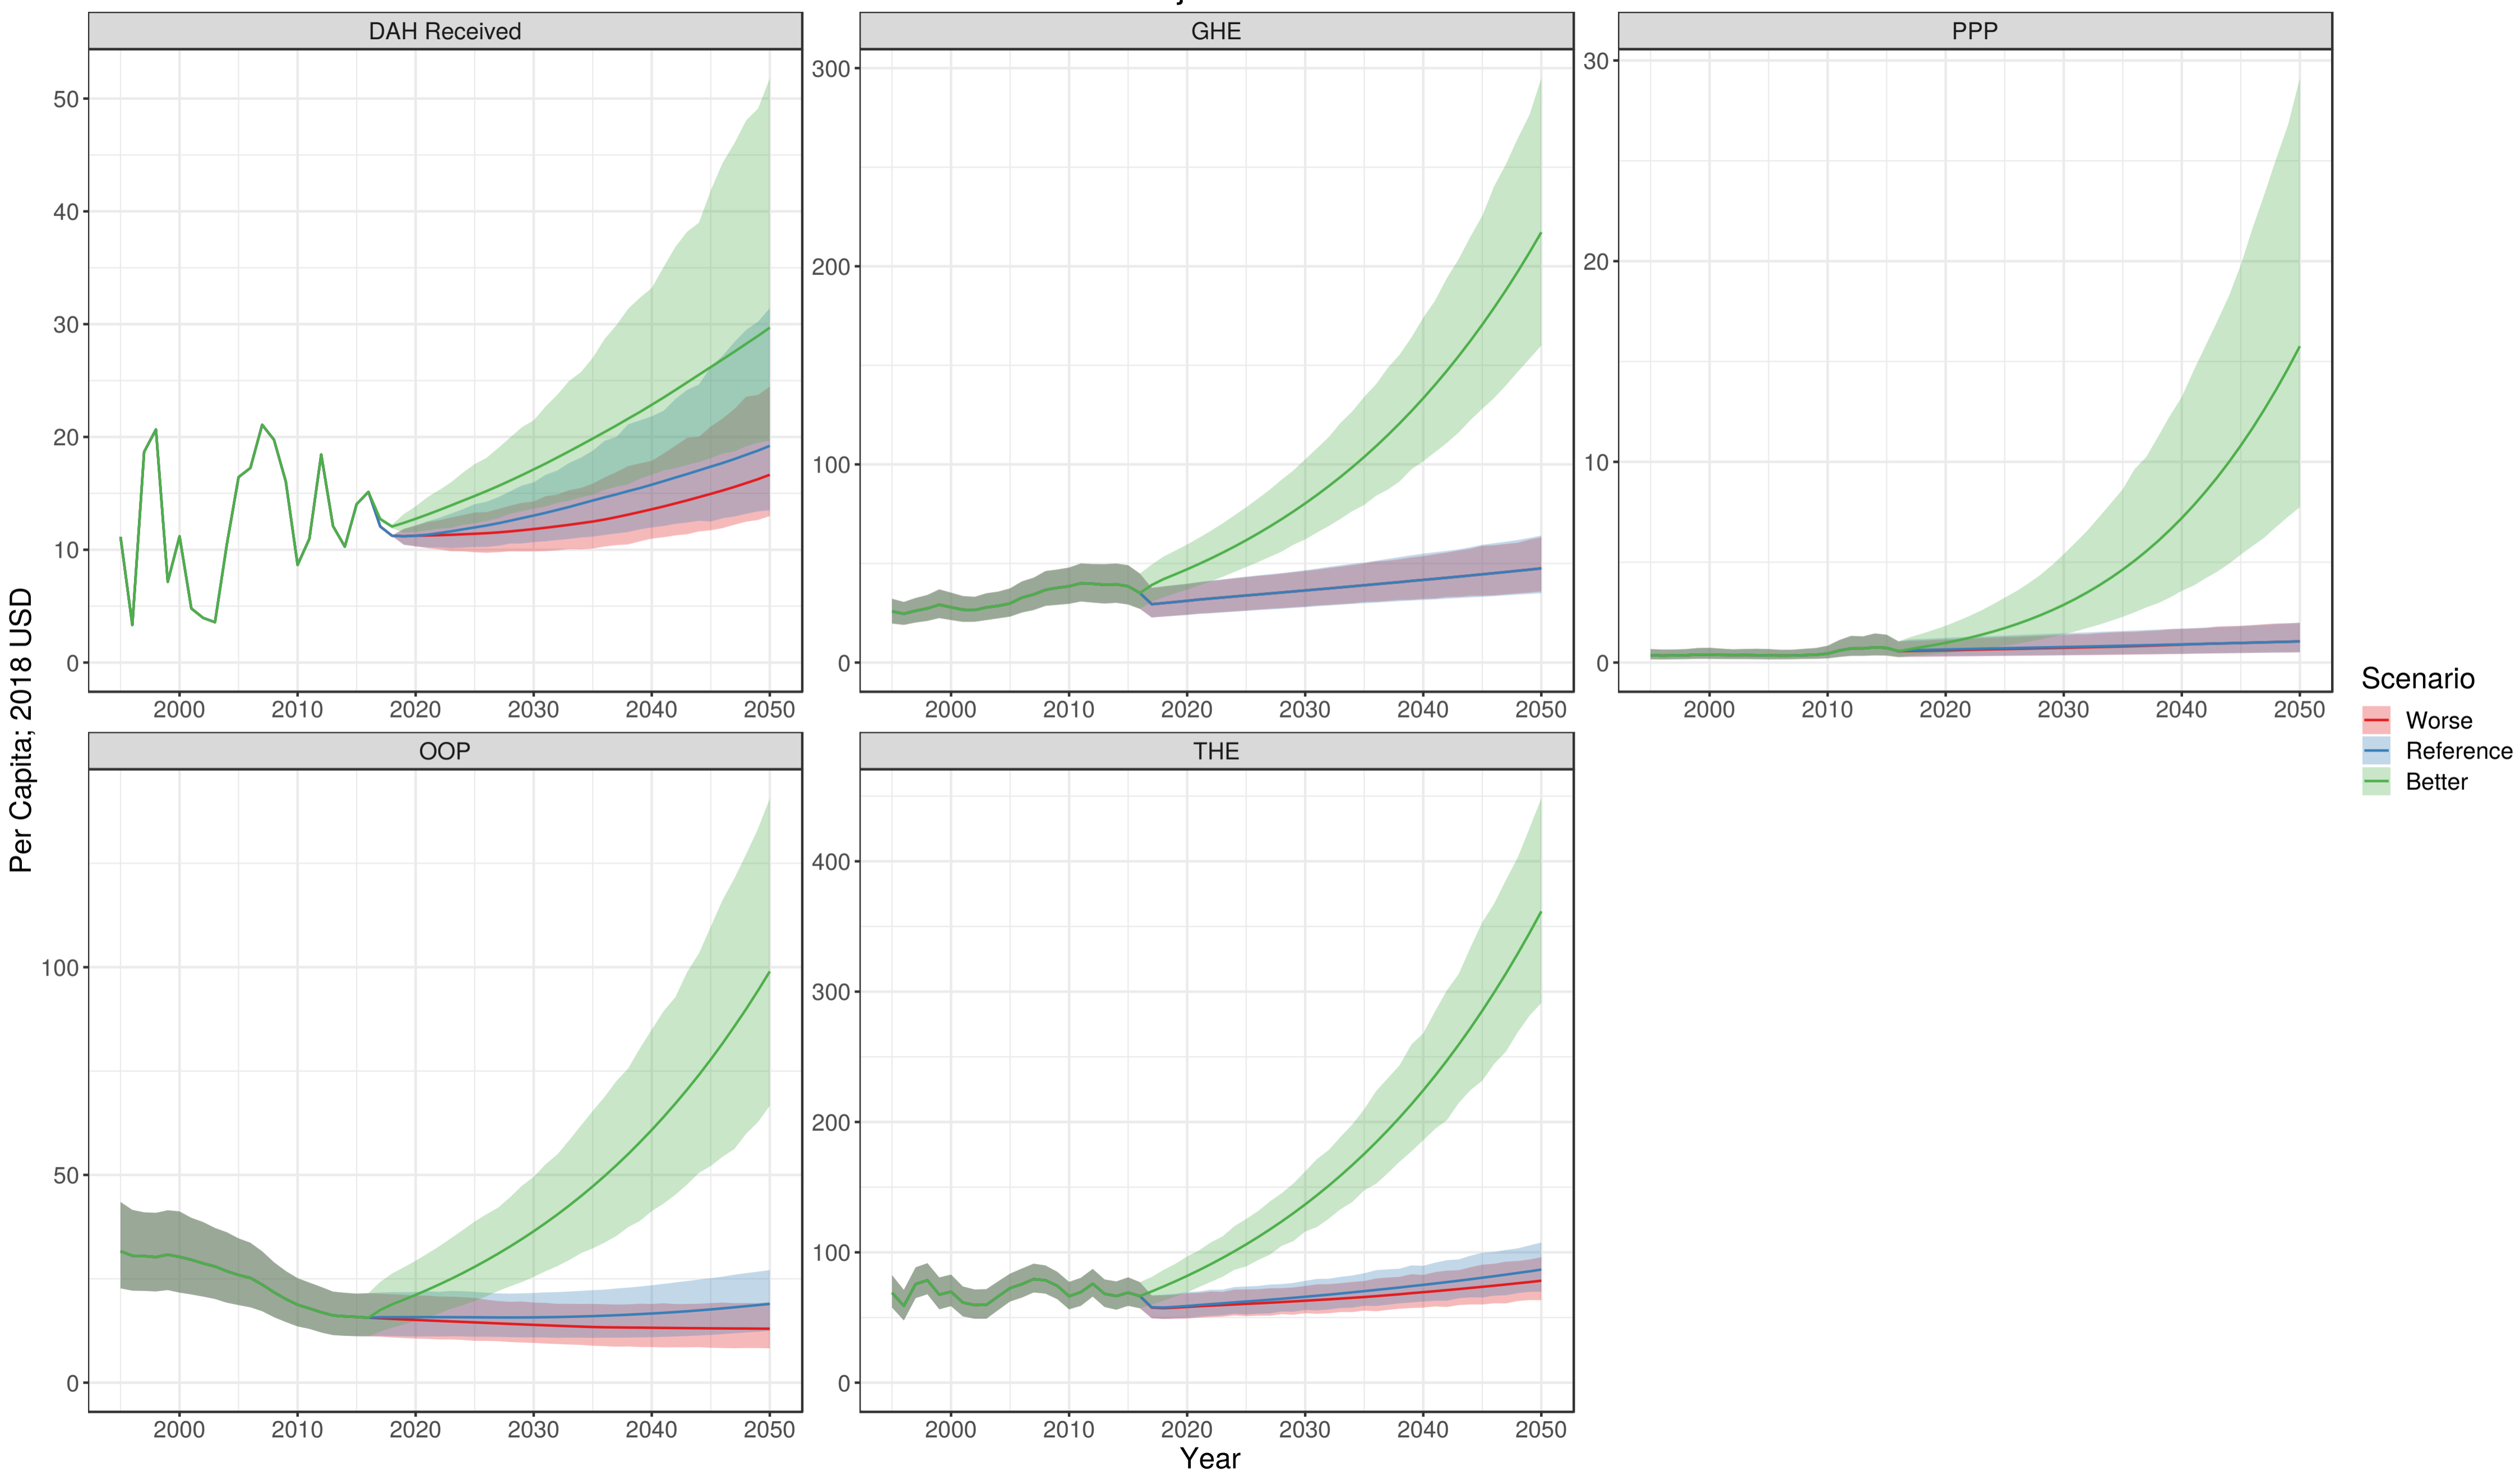

# Dominica

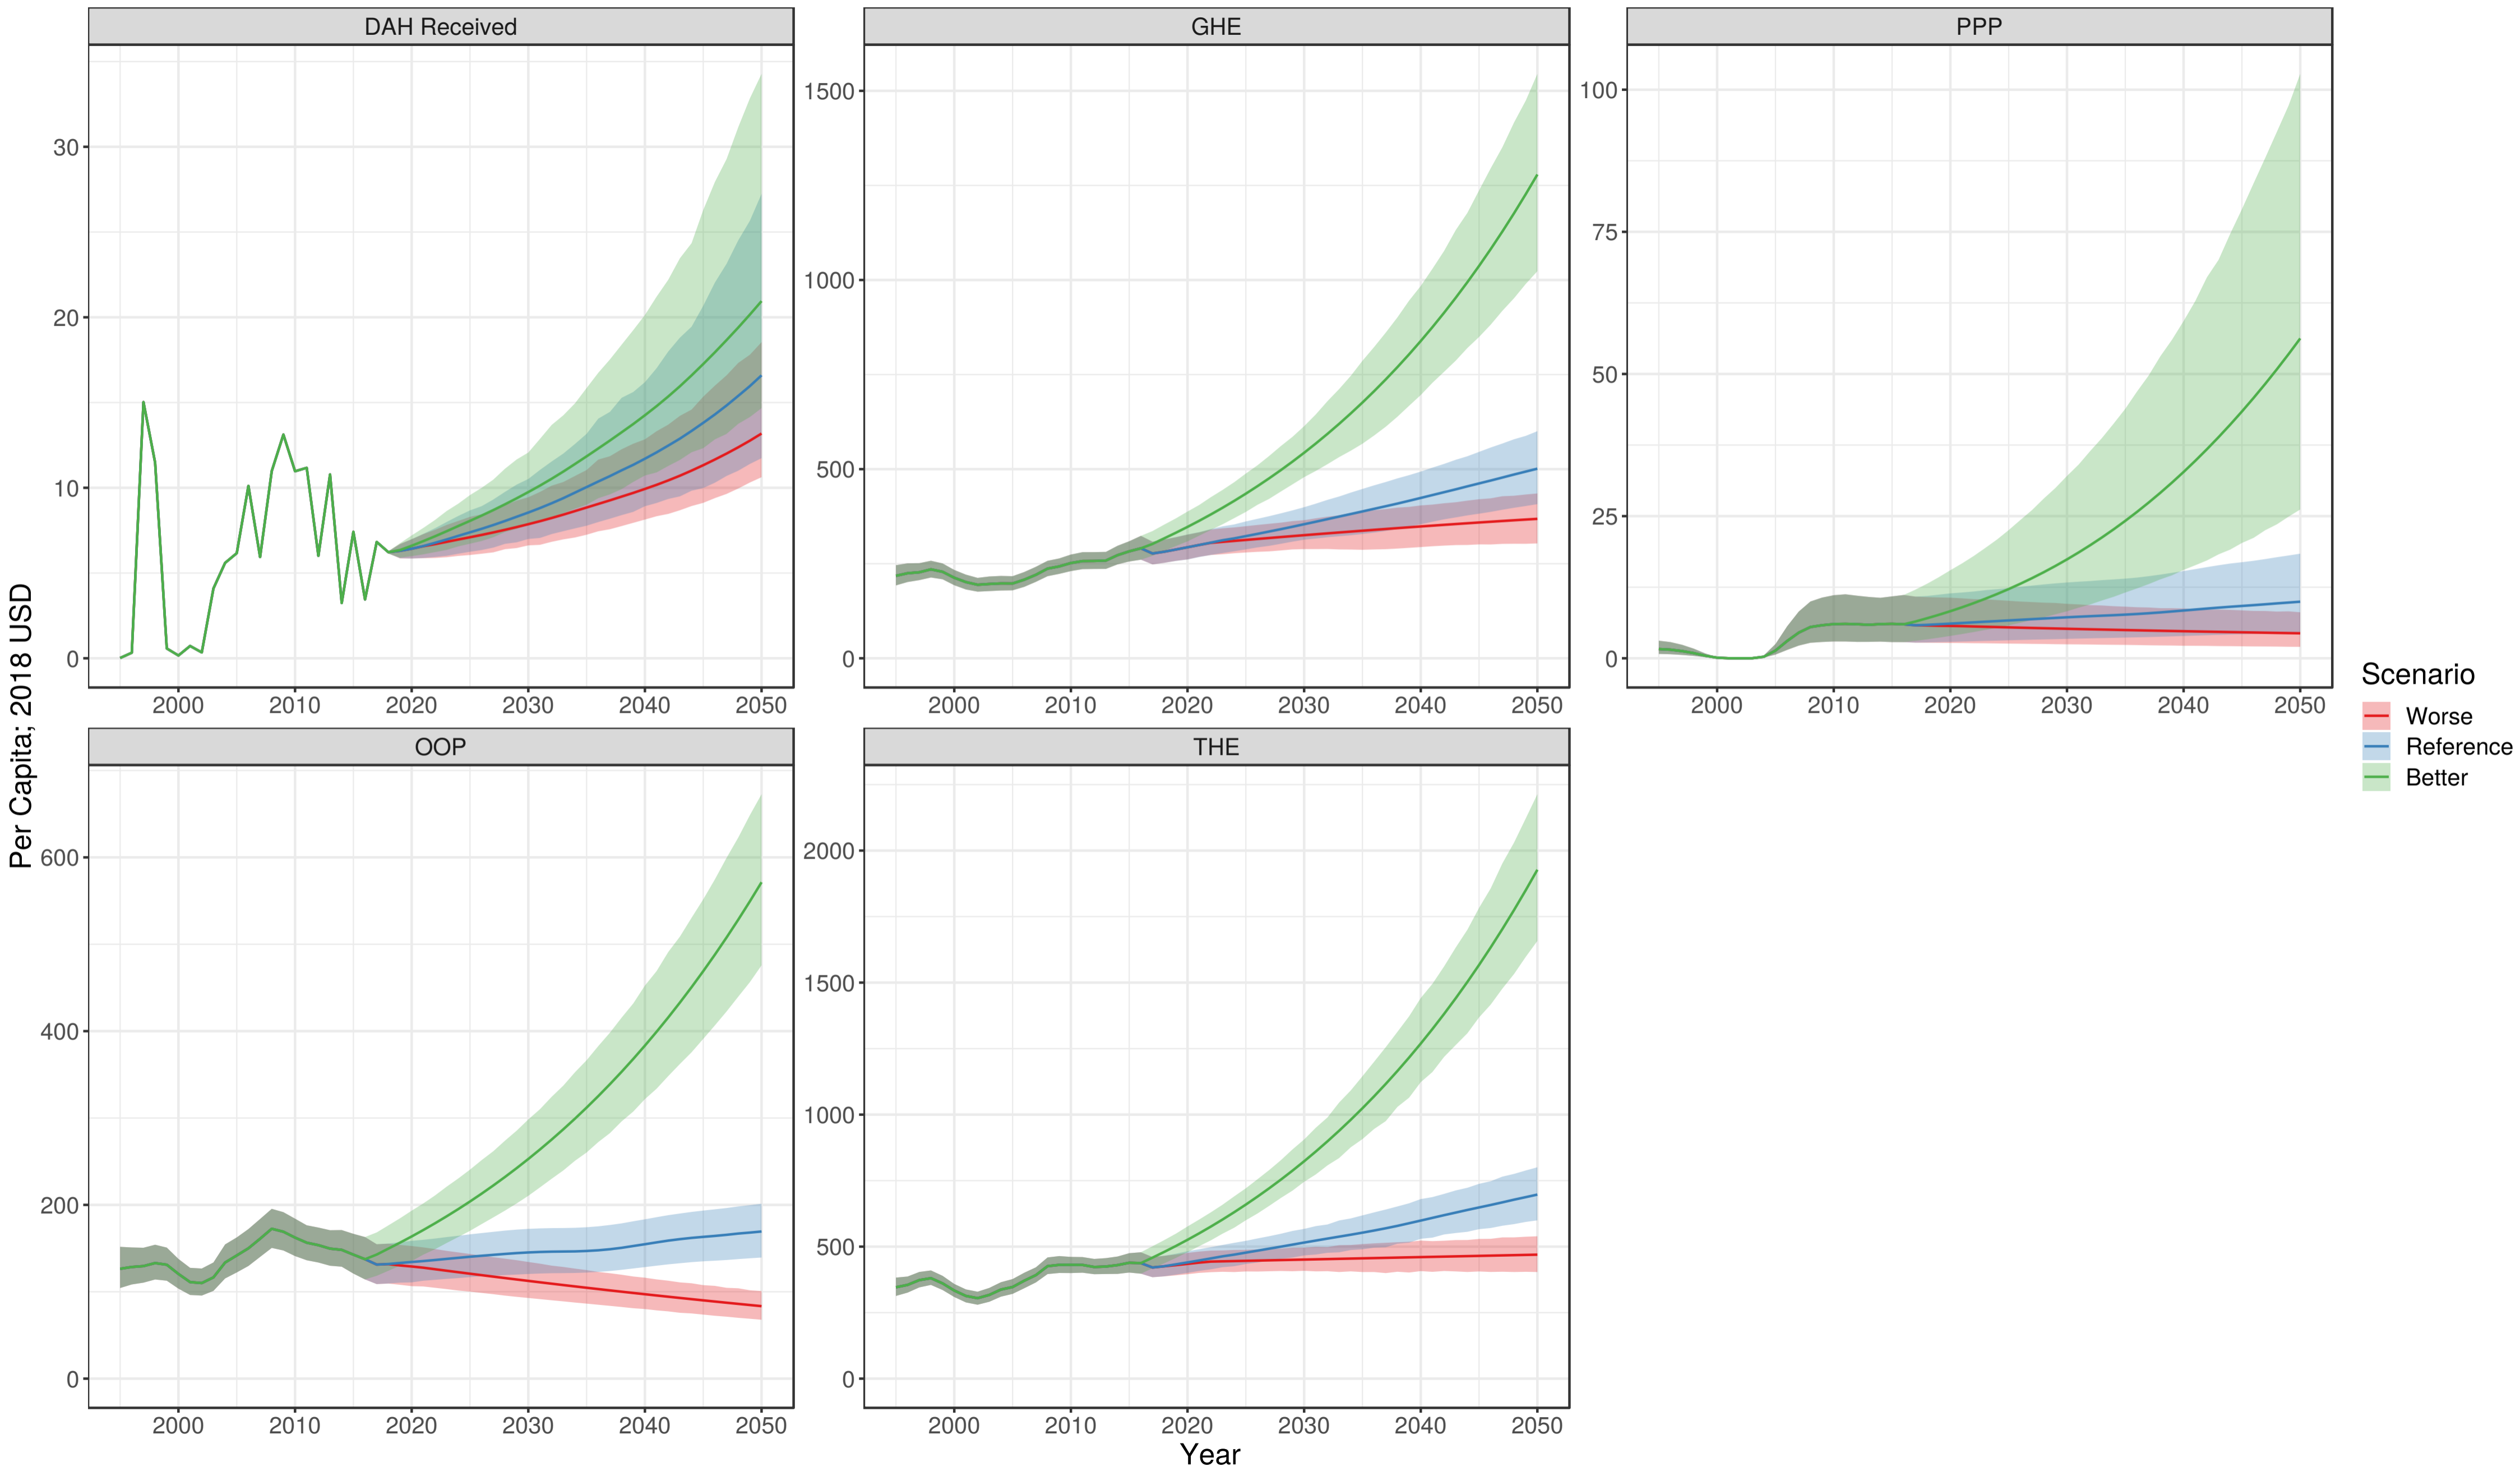

# Dominican Republic

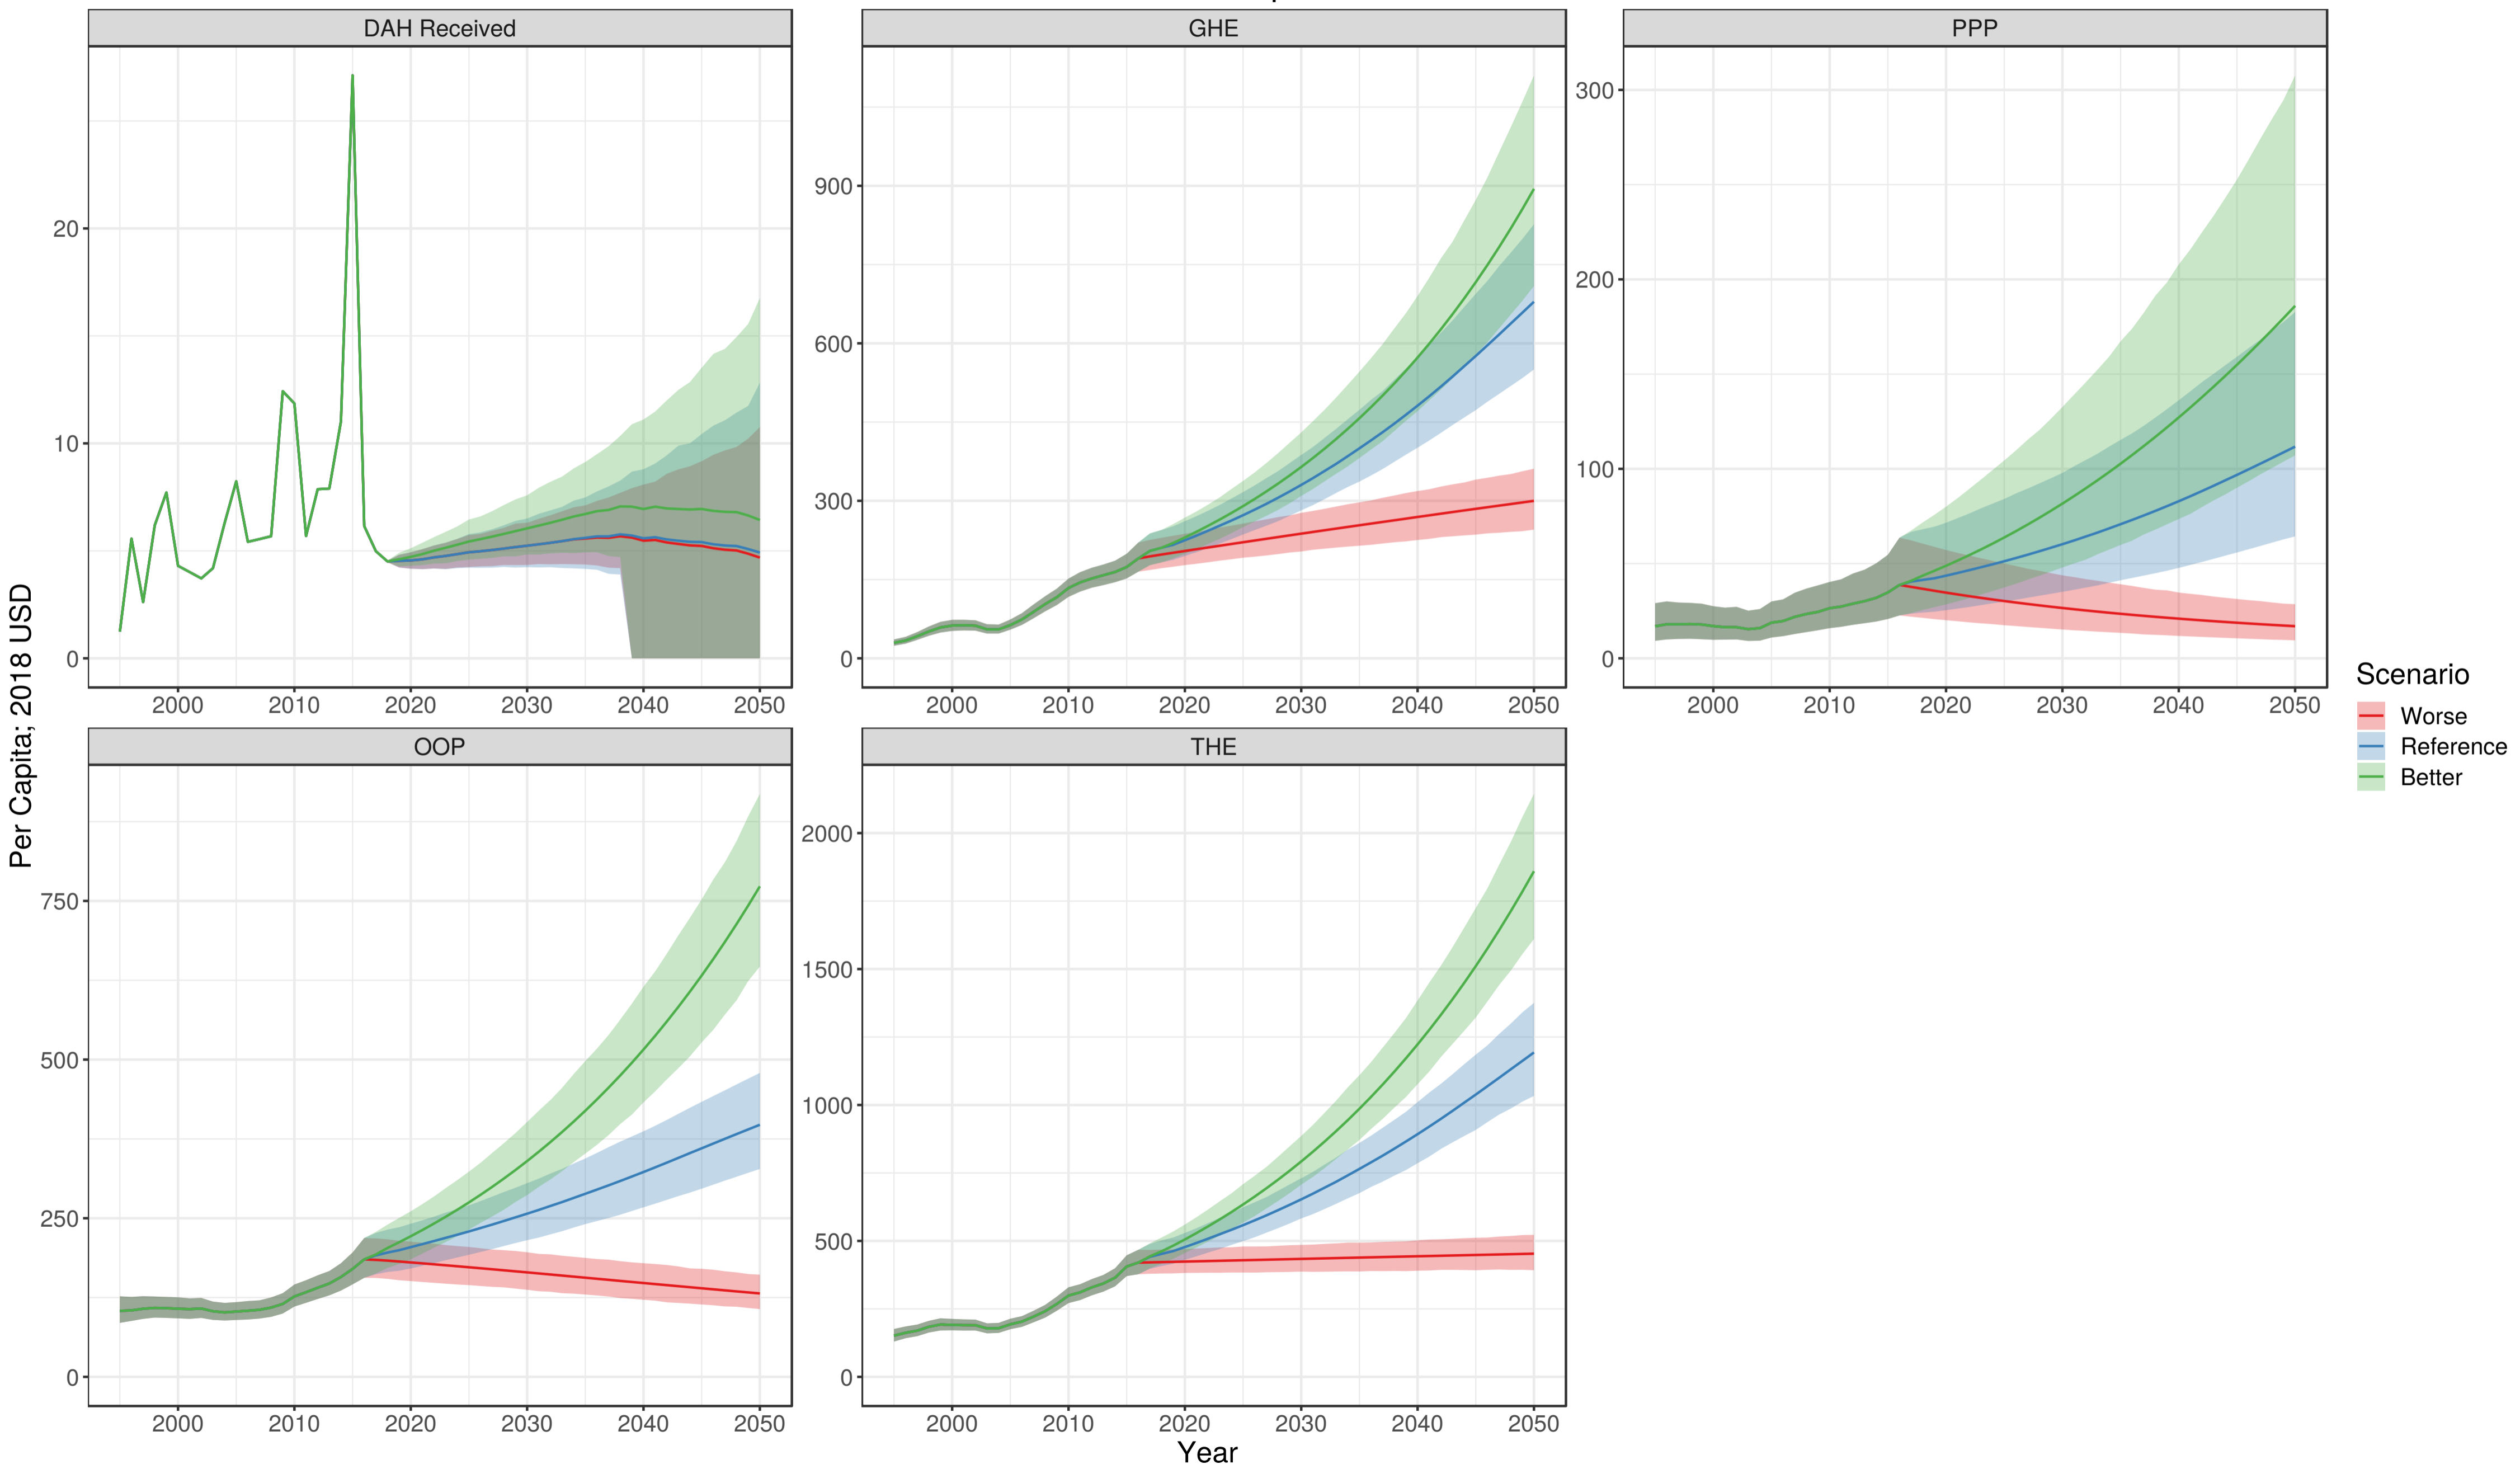

# Ecuador

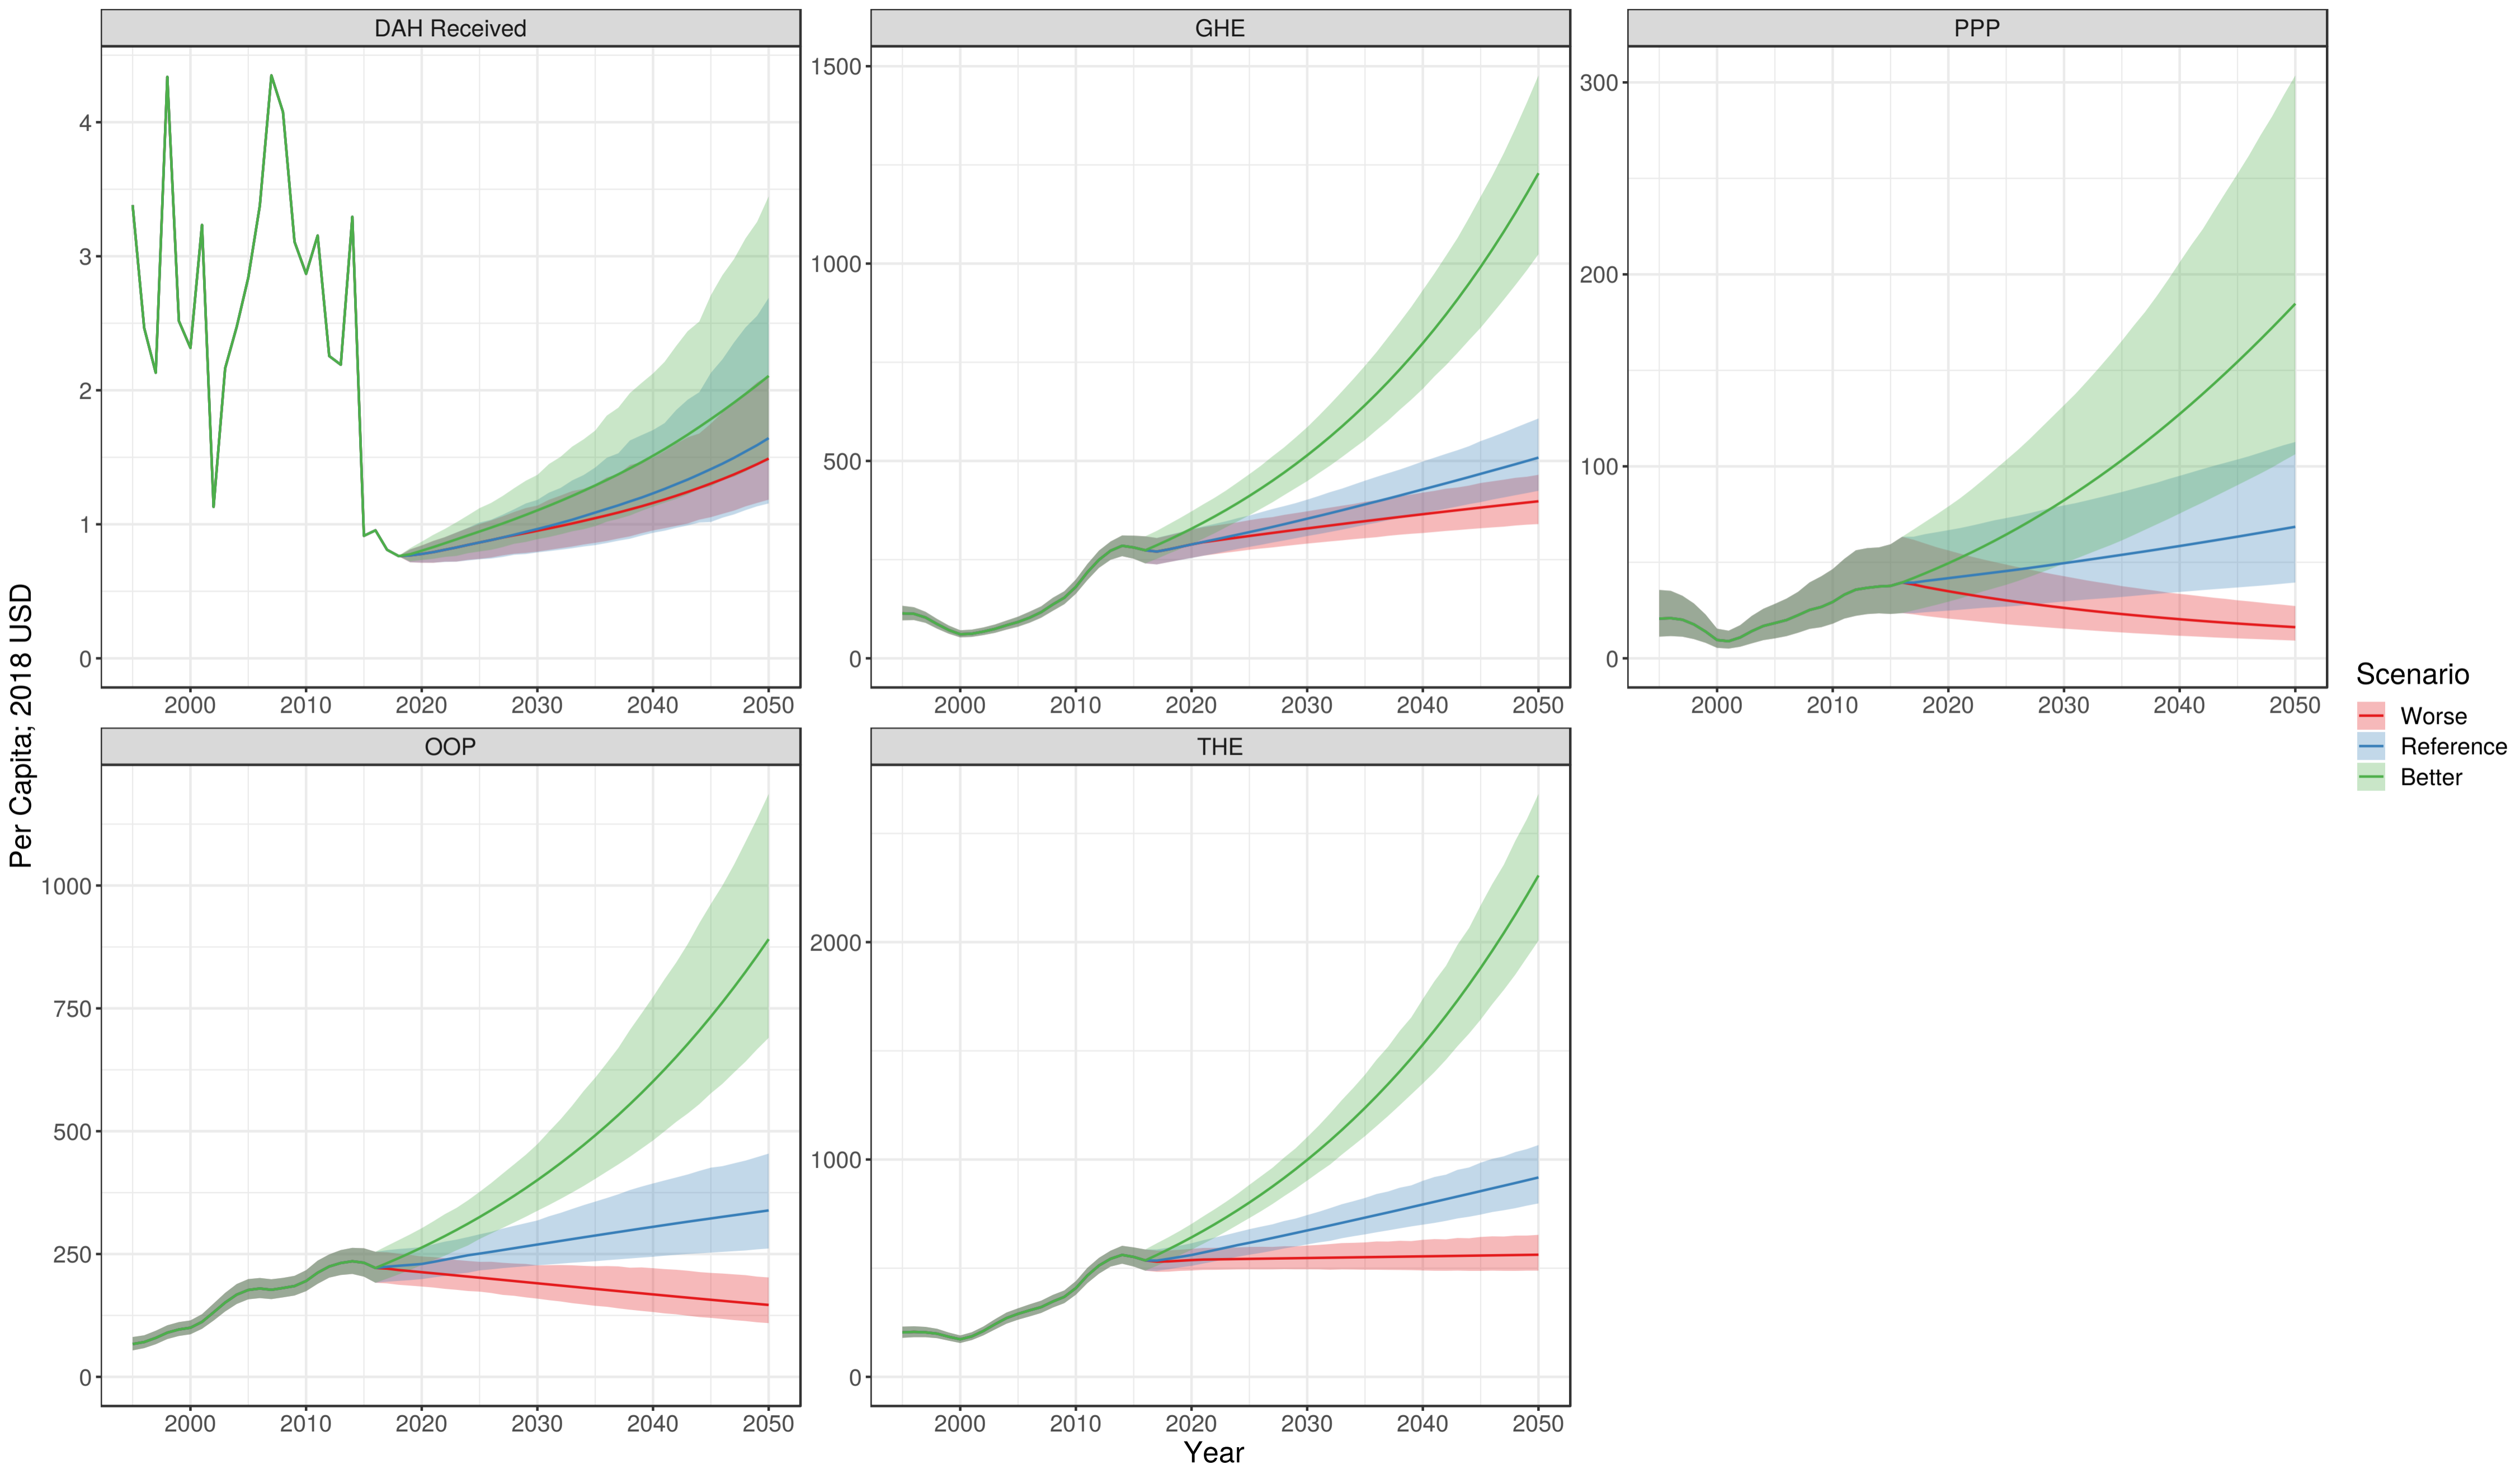



# Egypt

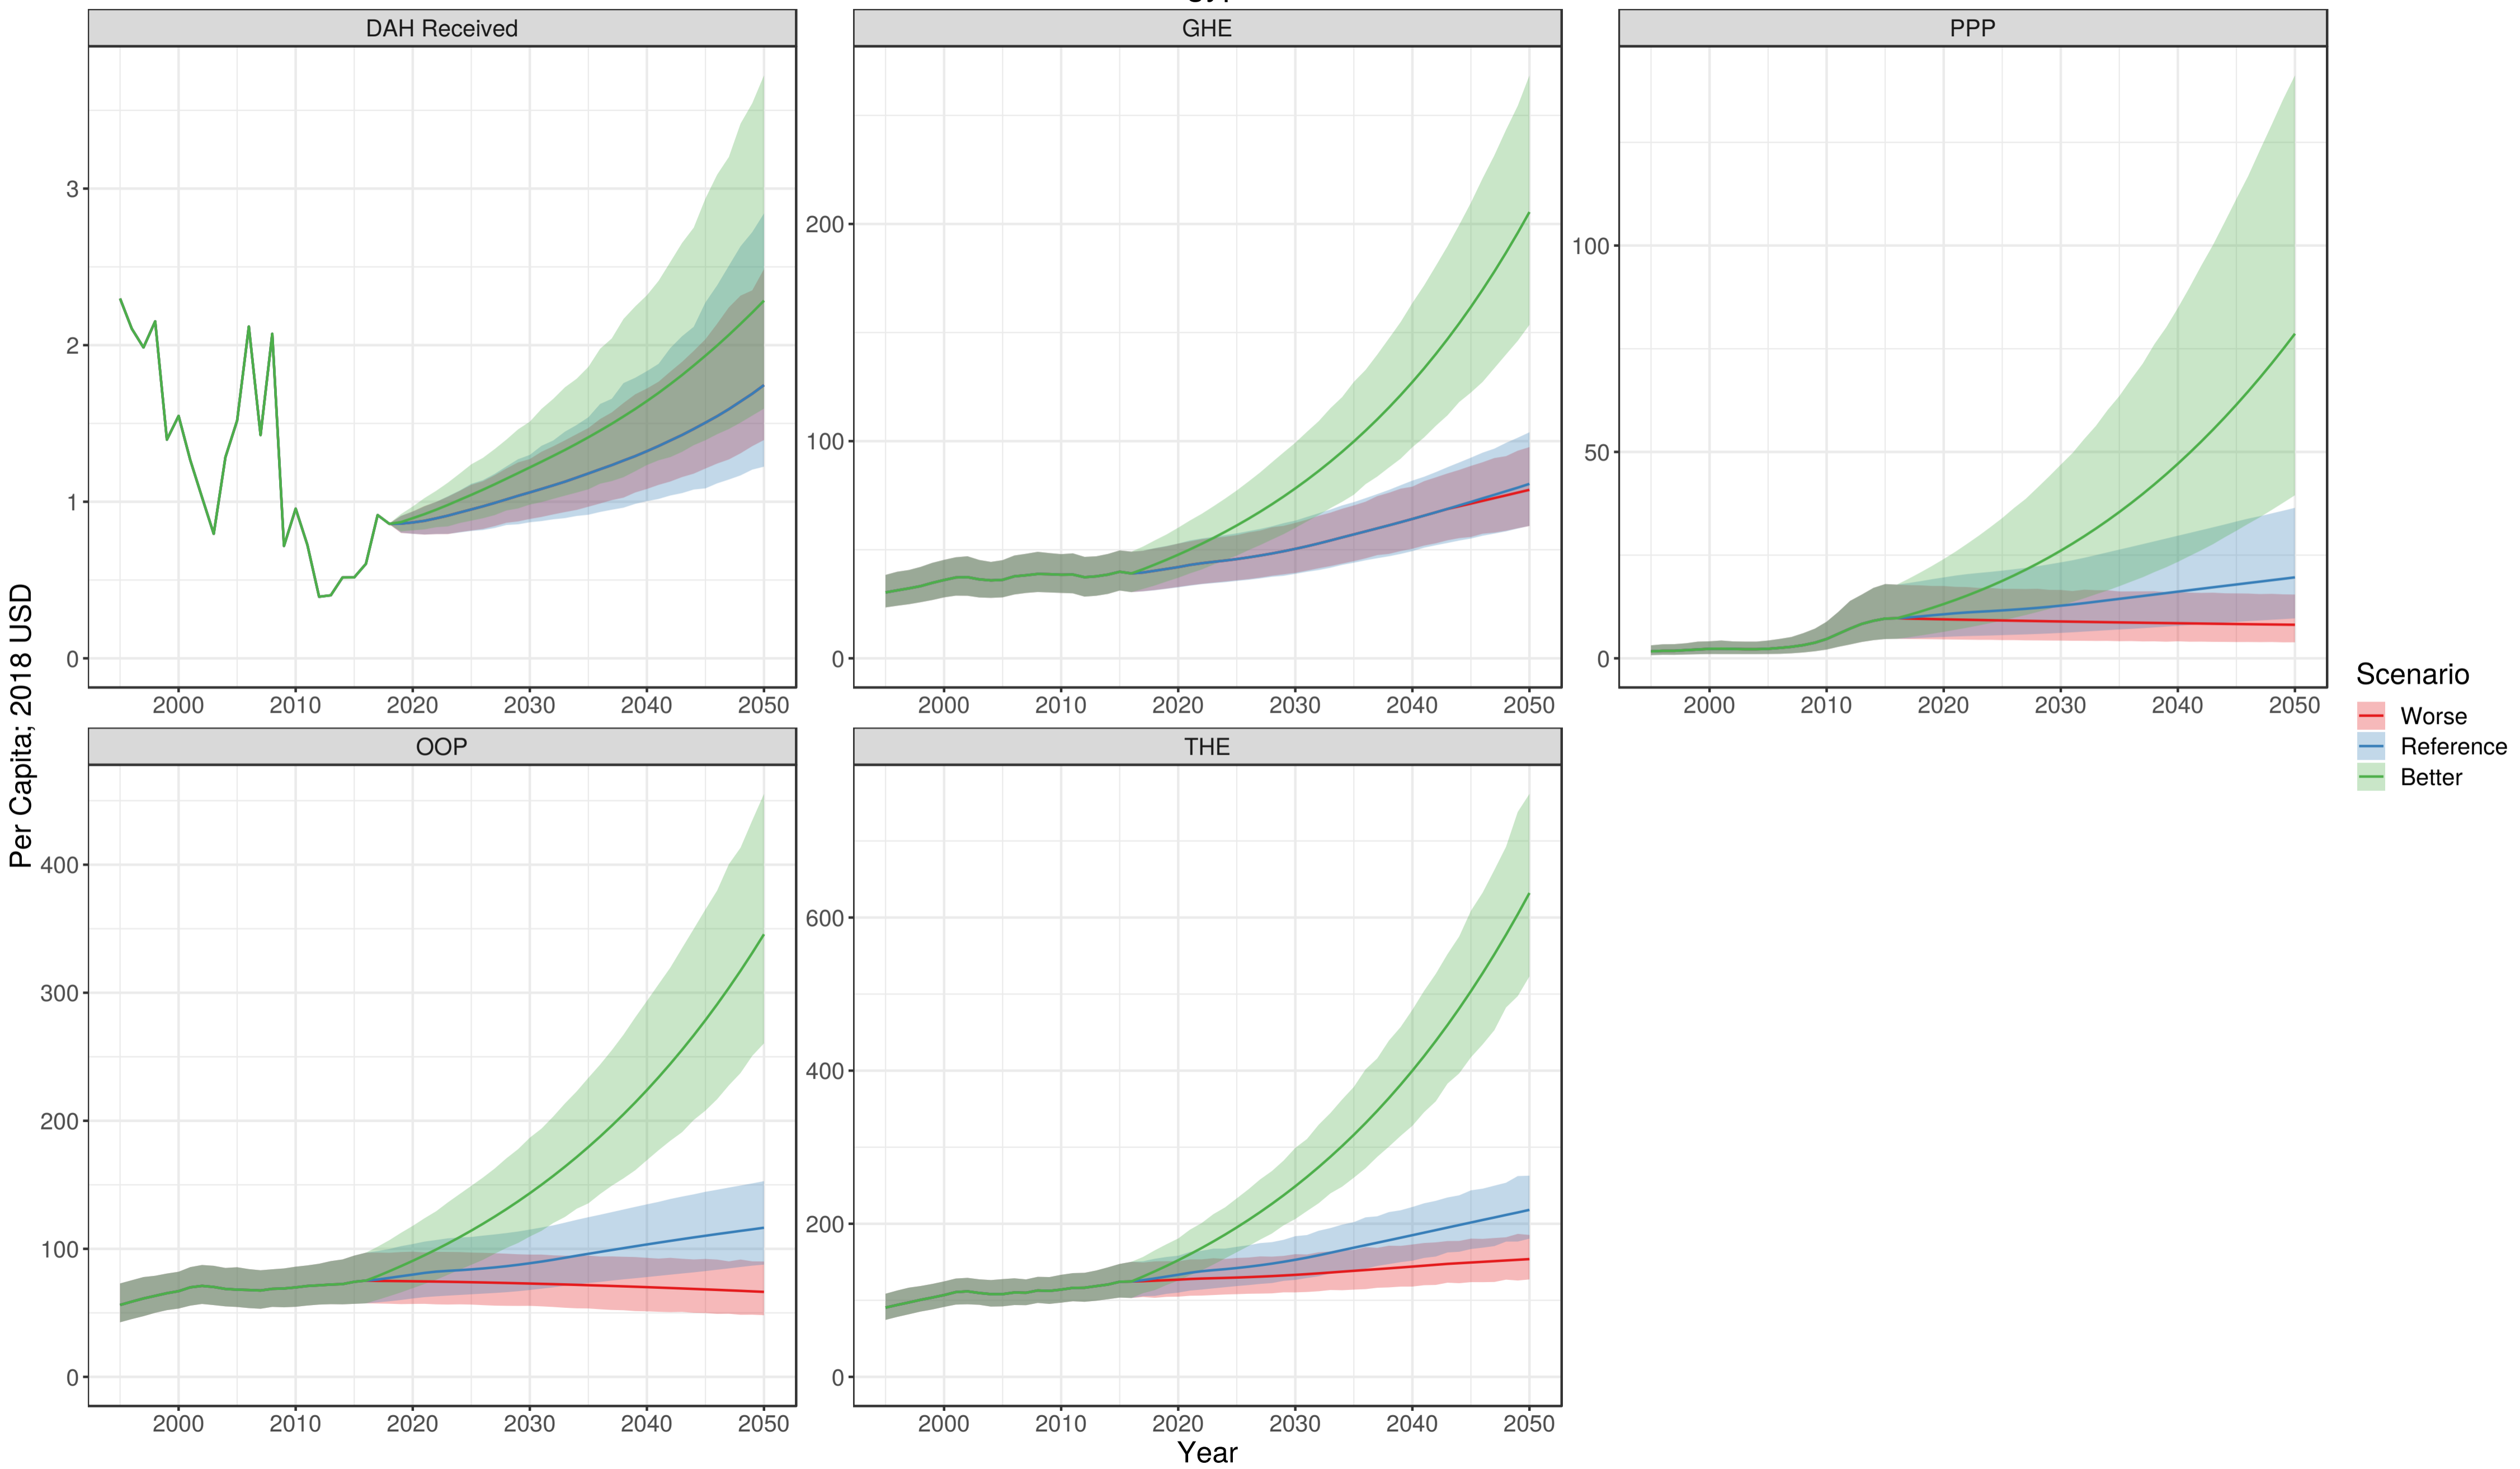

# El Salvador

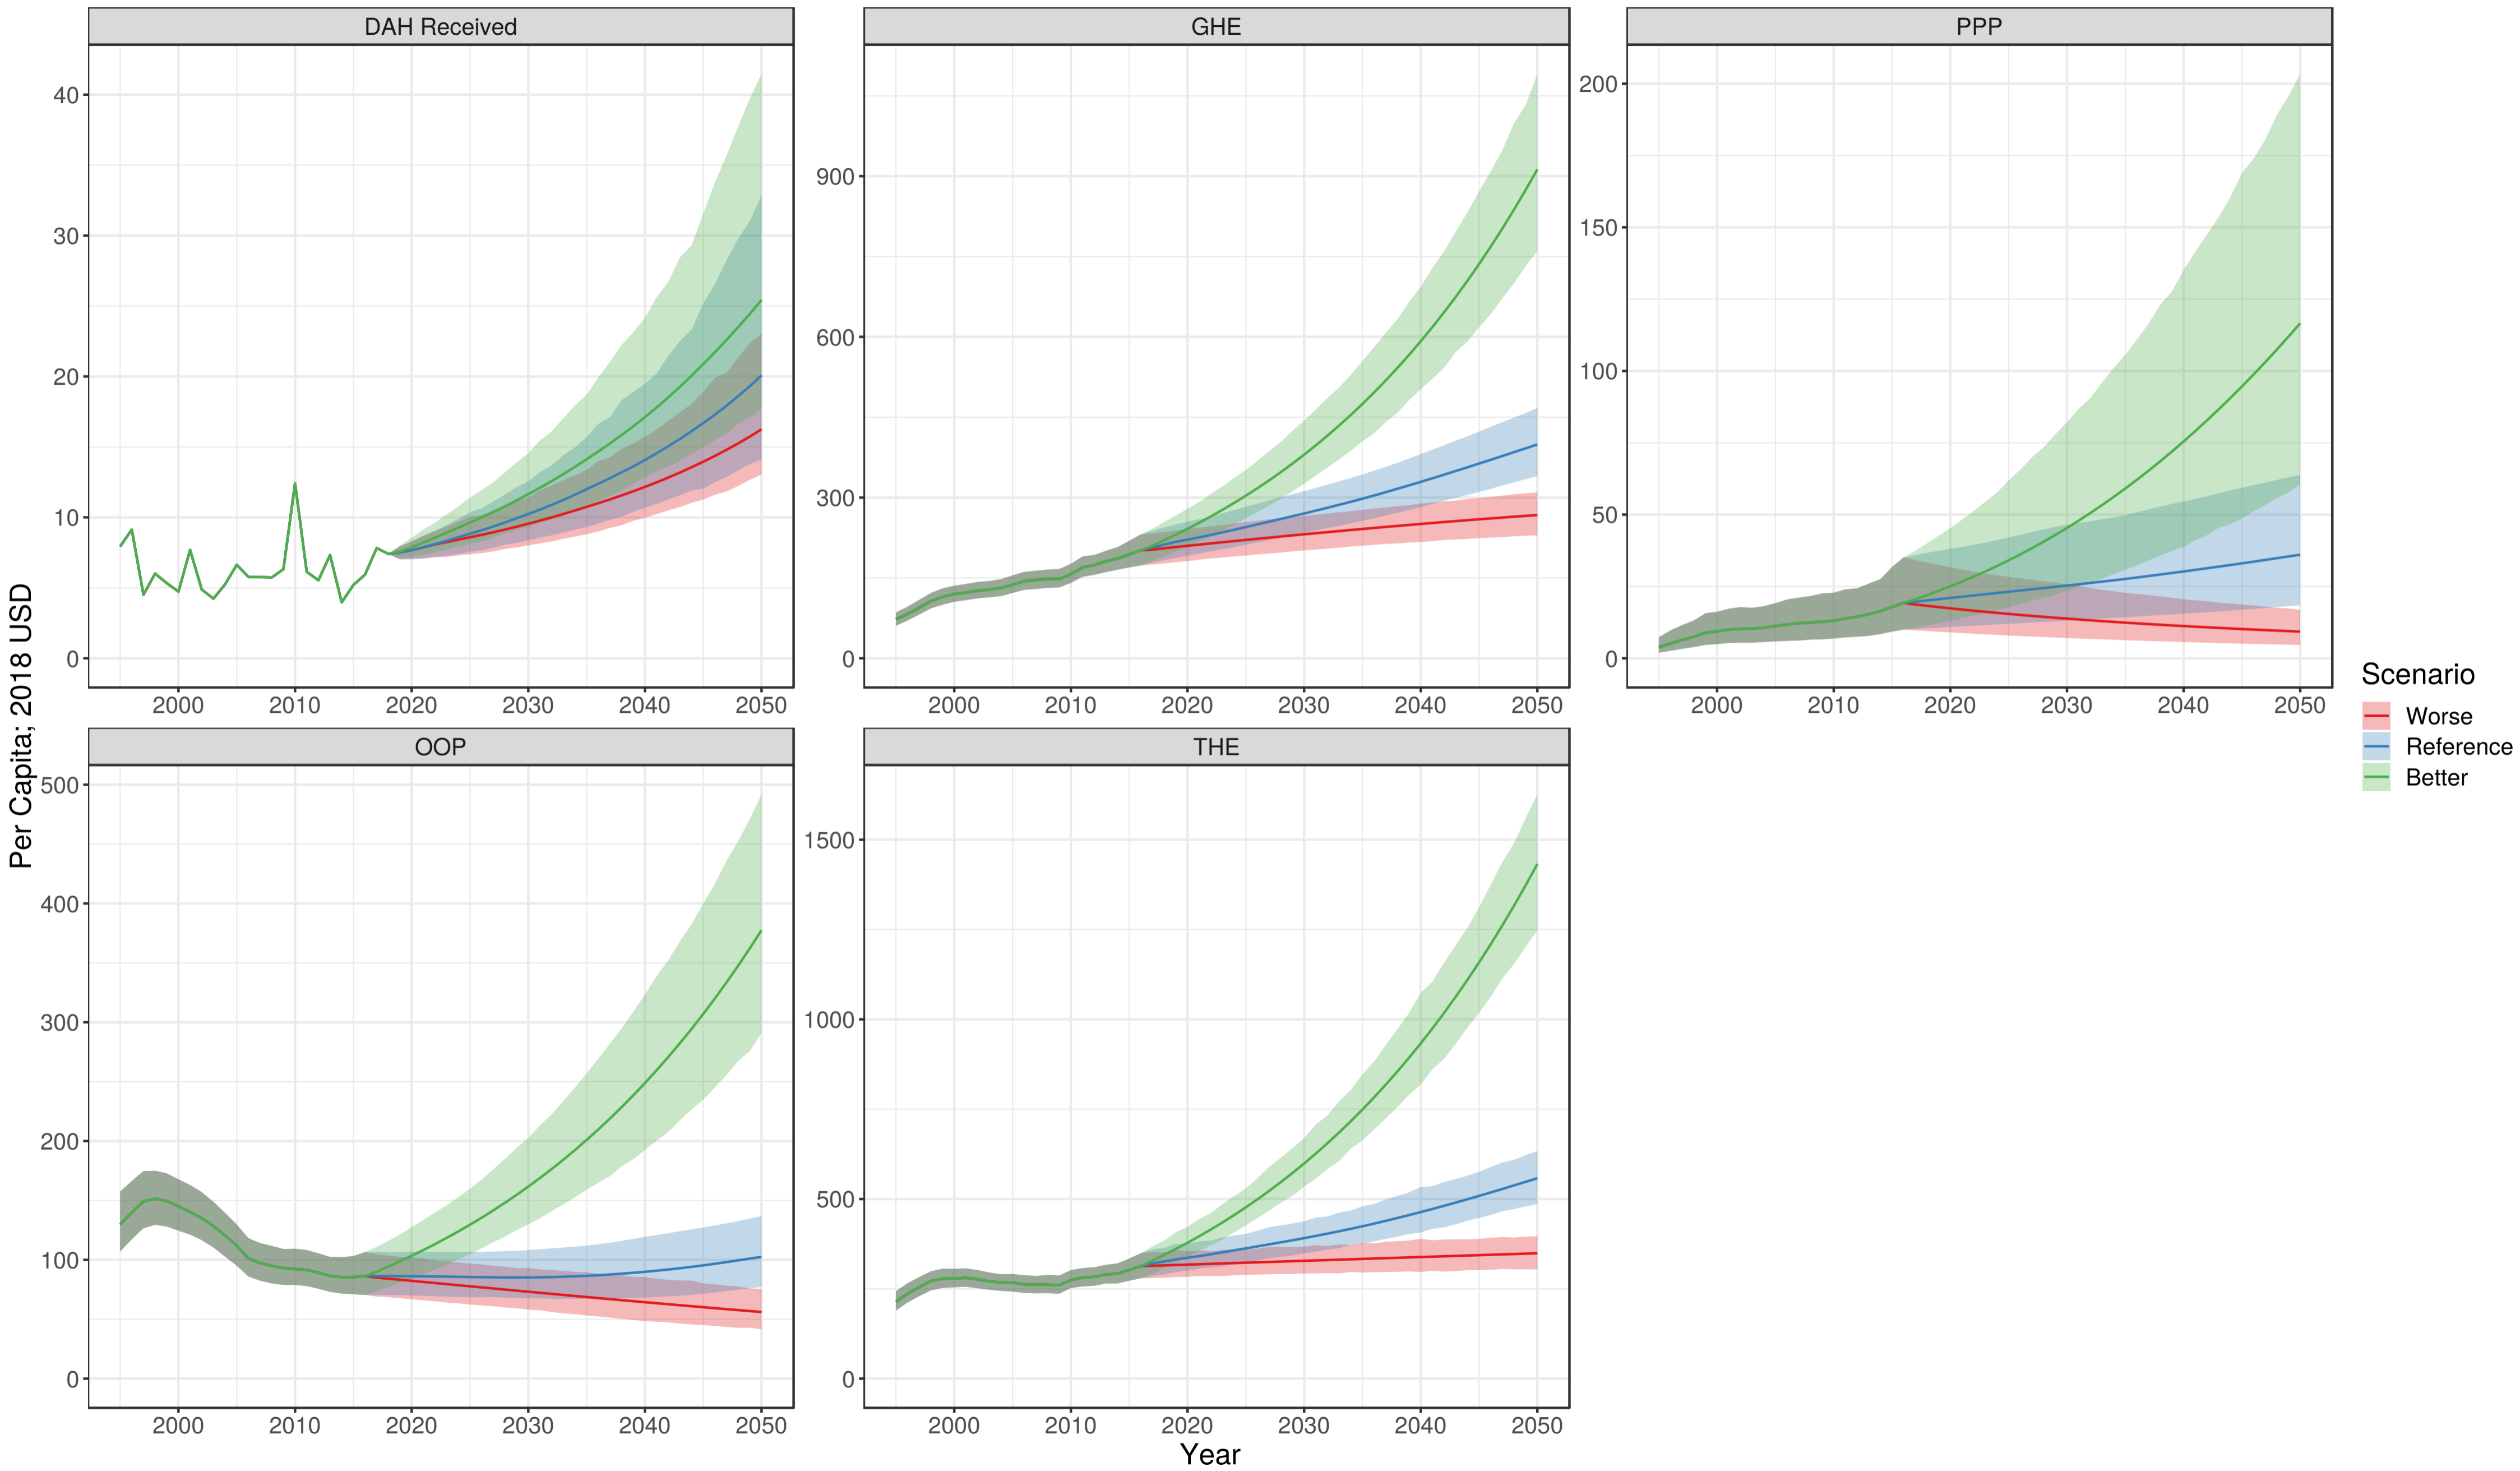

# Equatorial Guinea

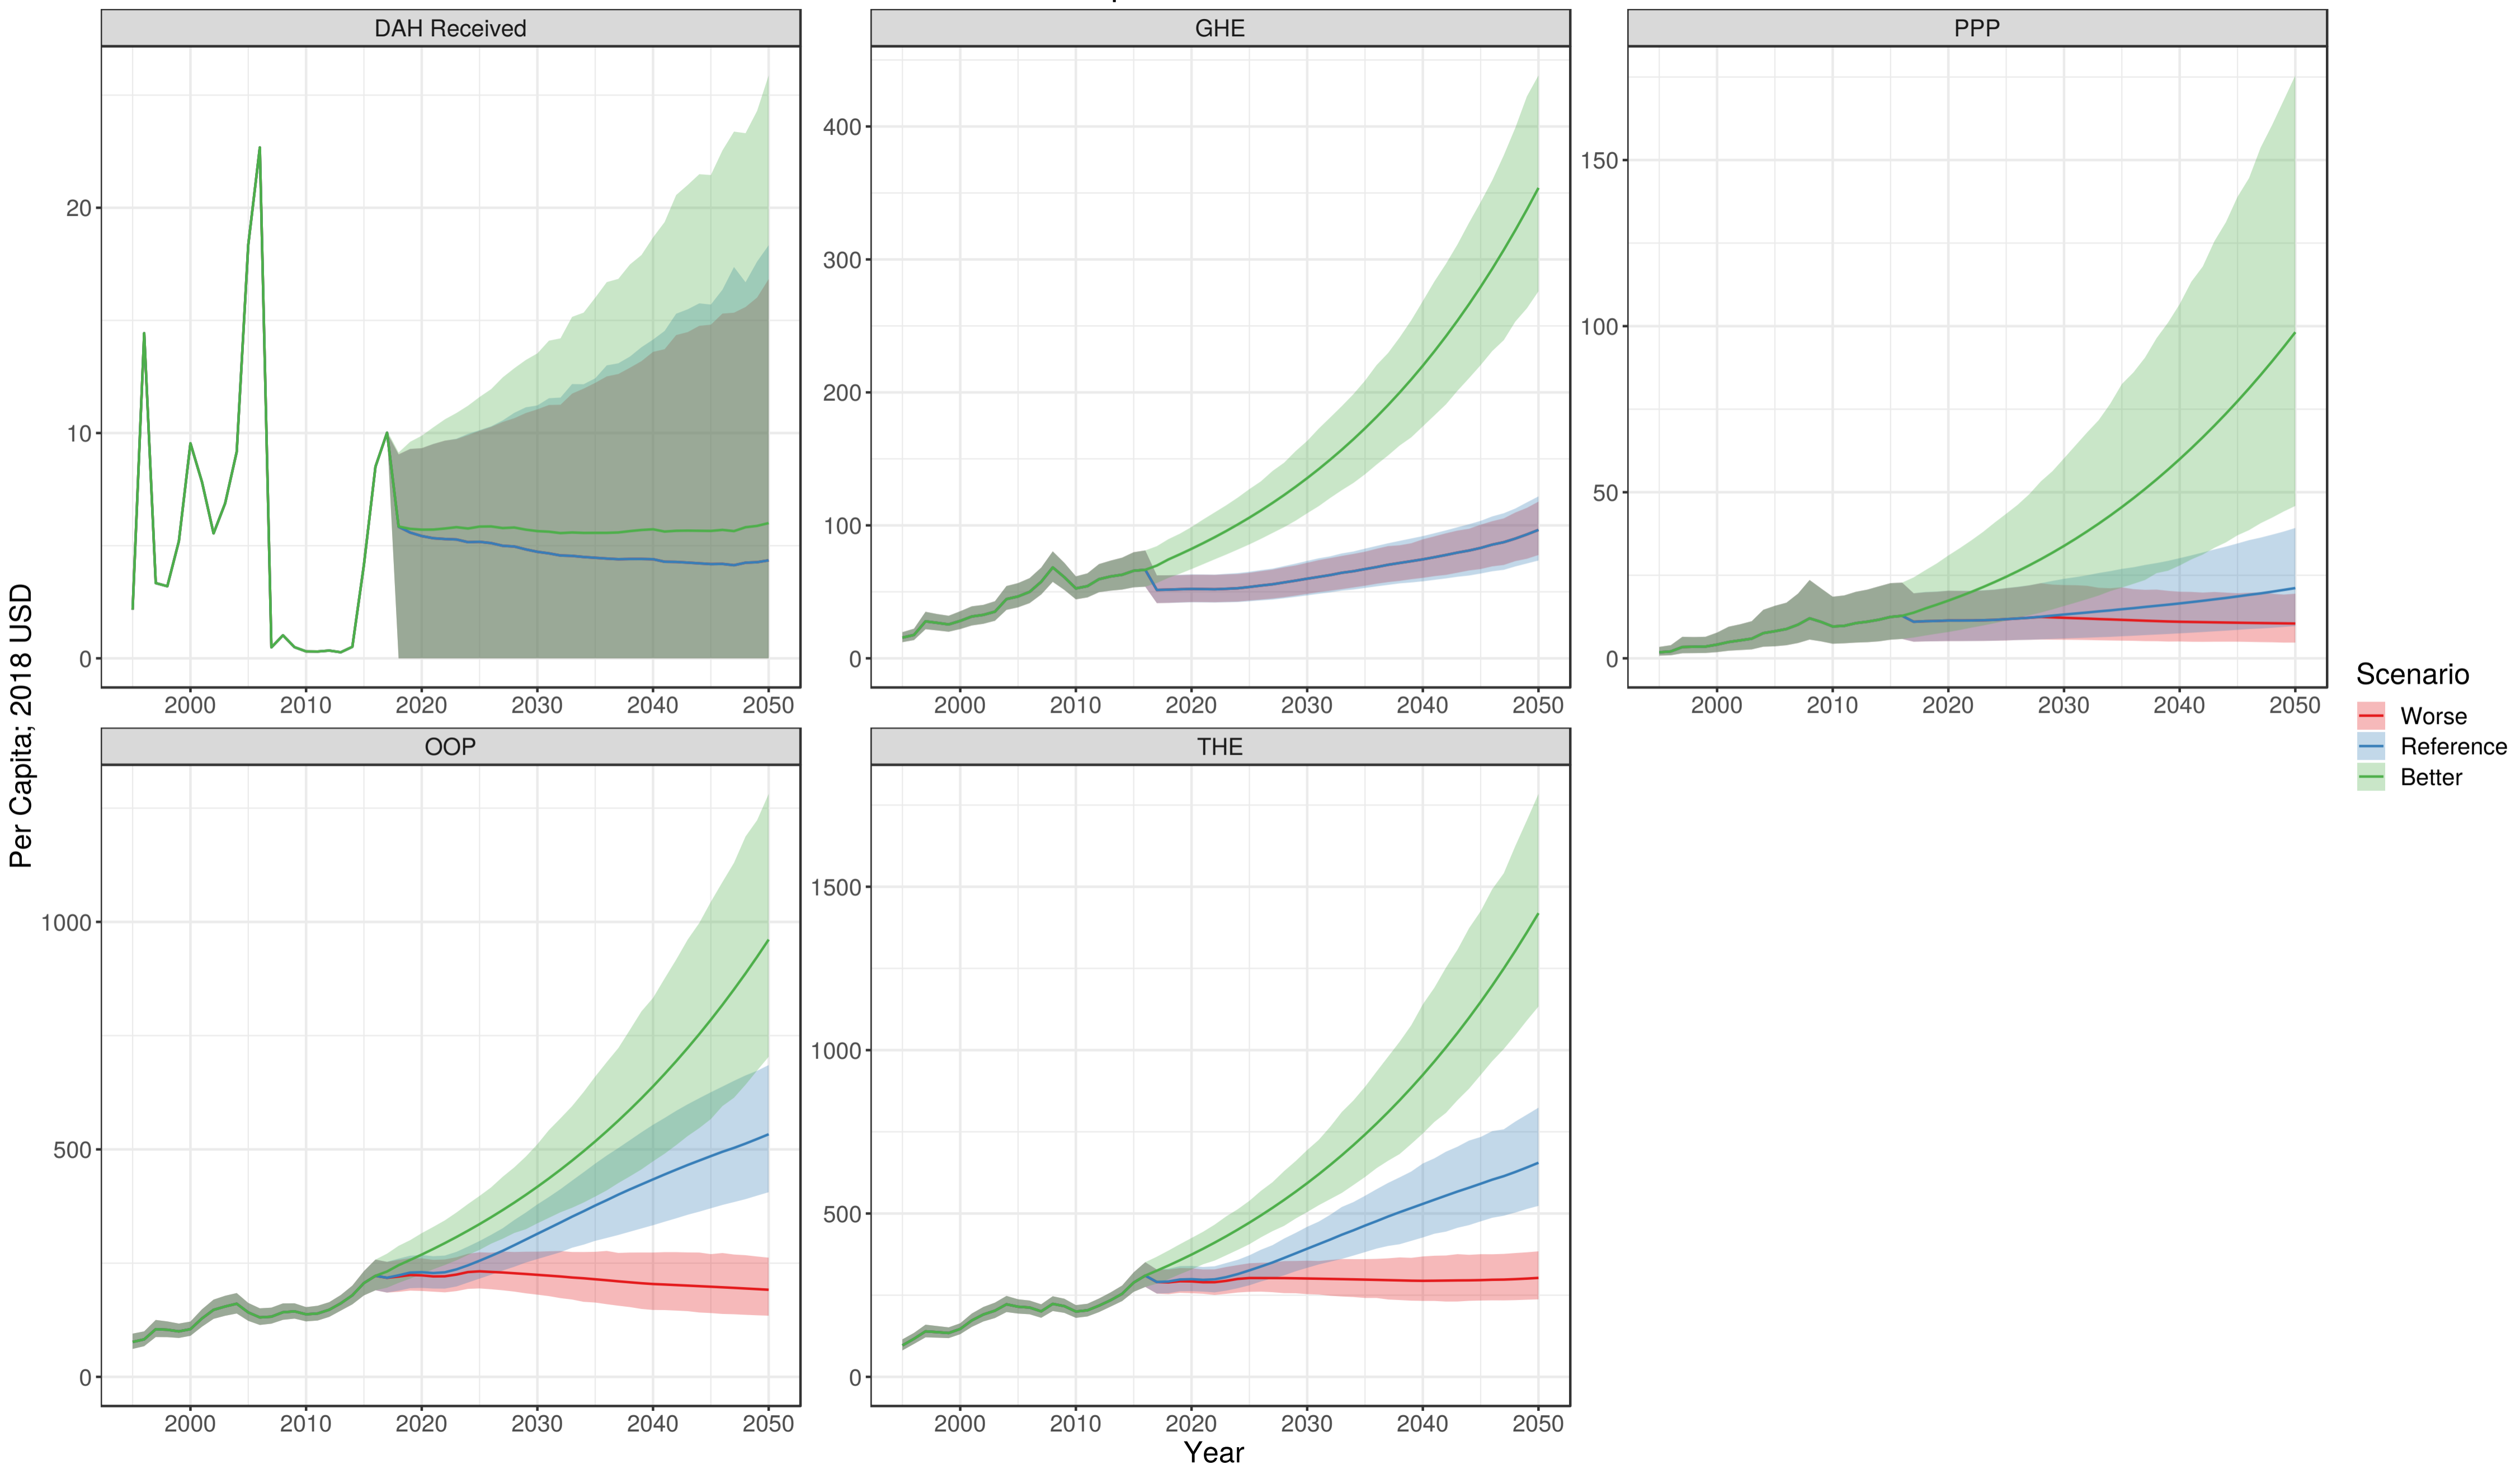

# Eritrea

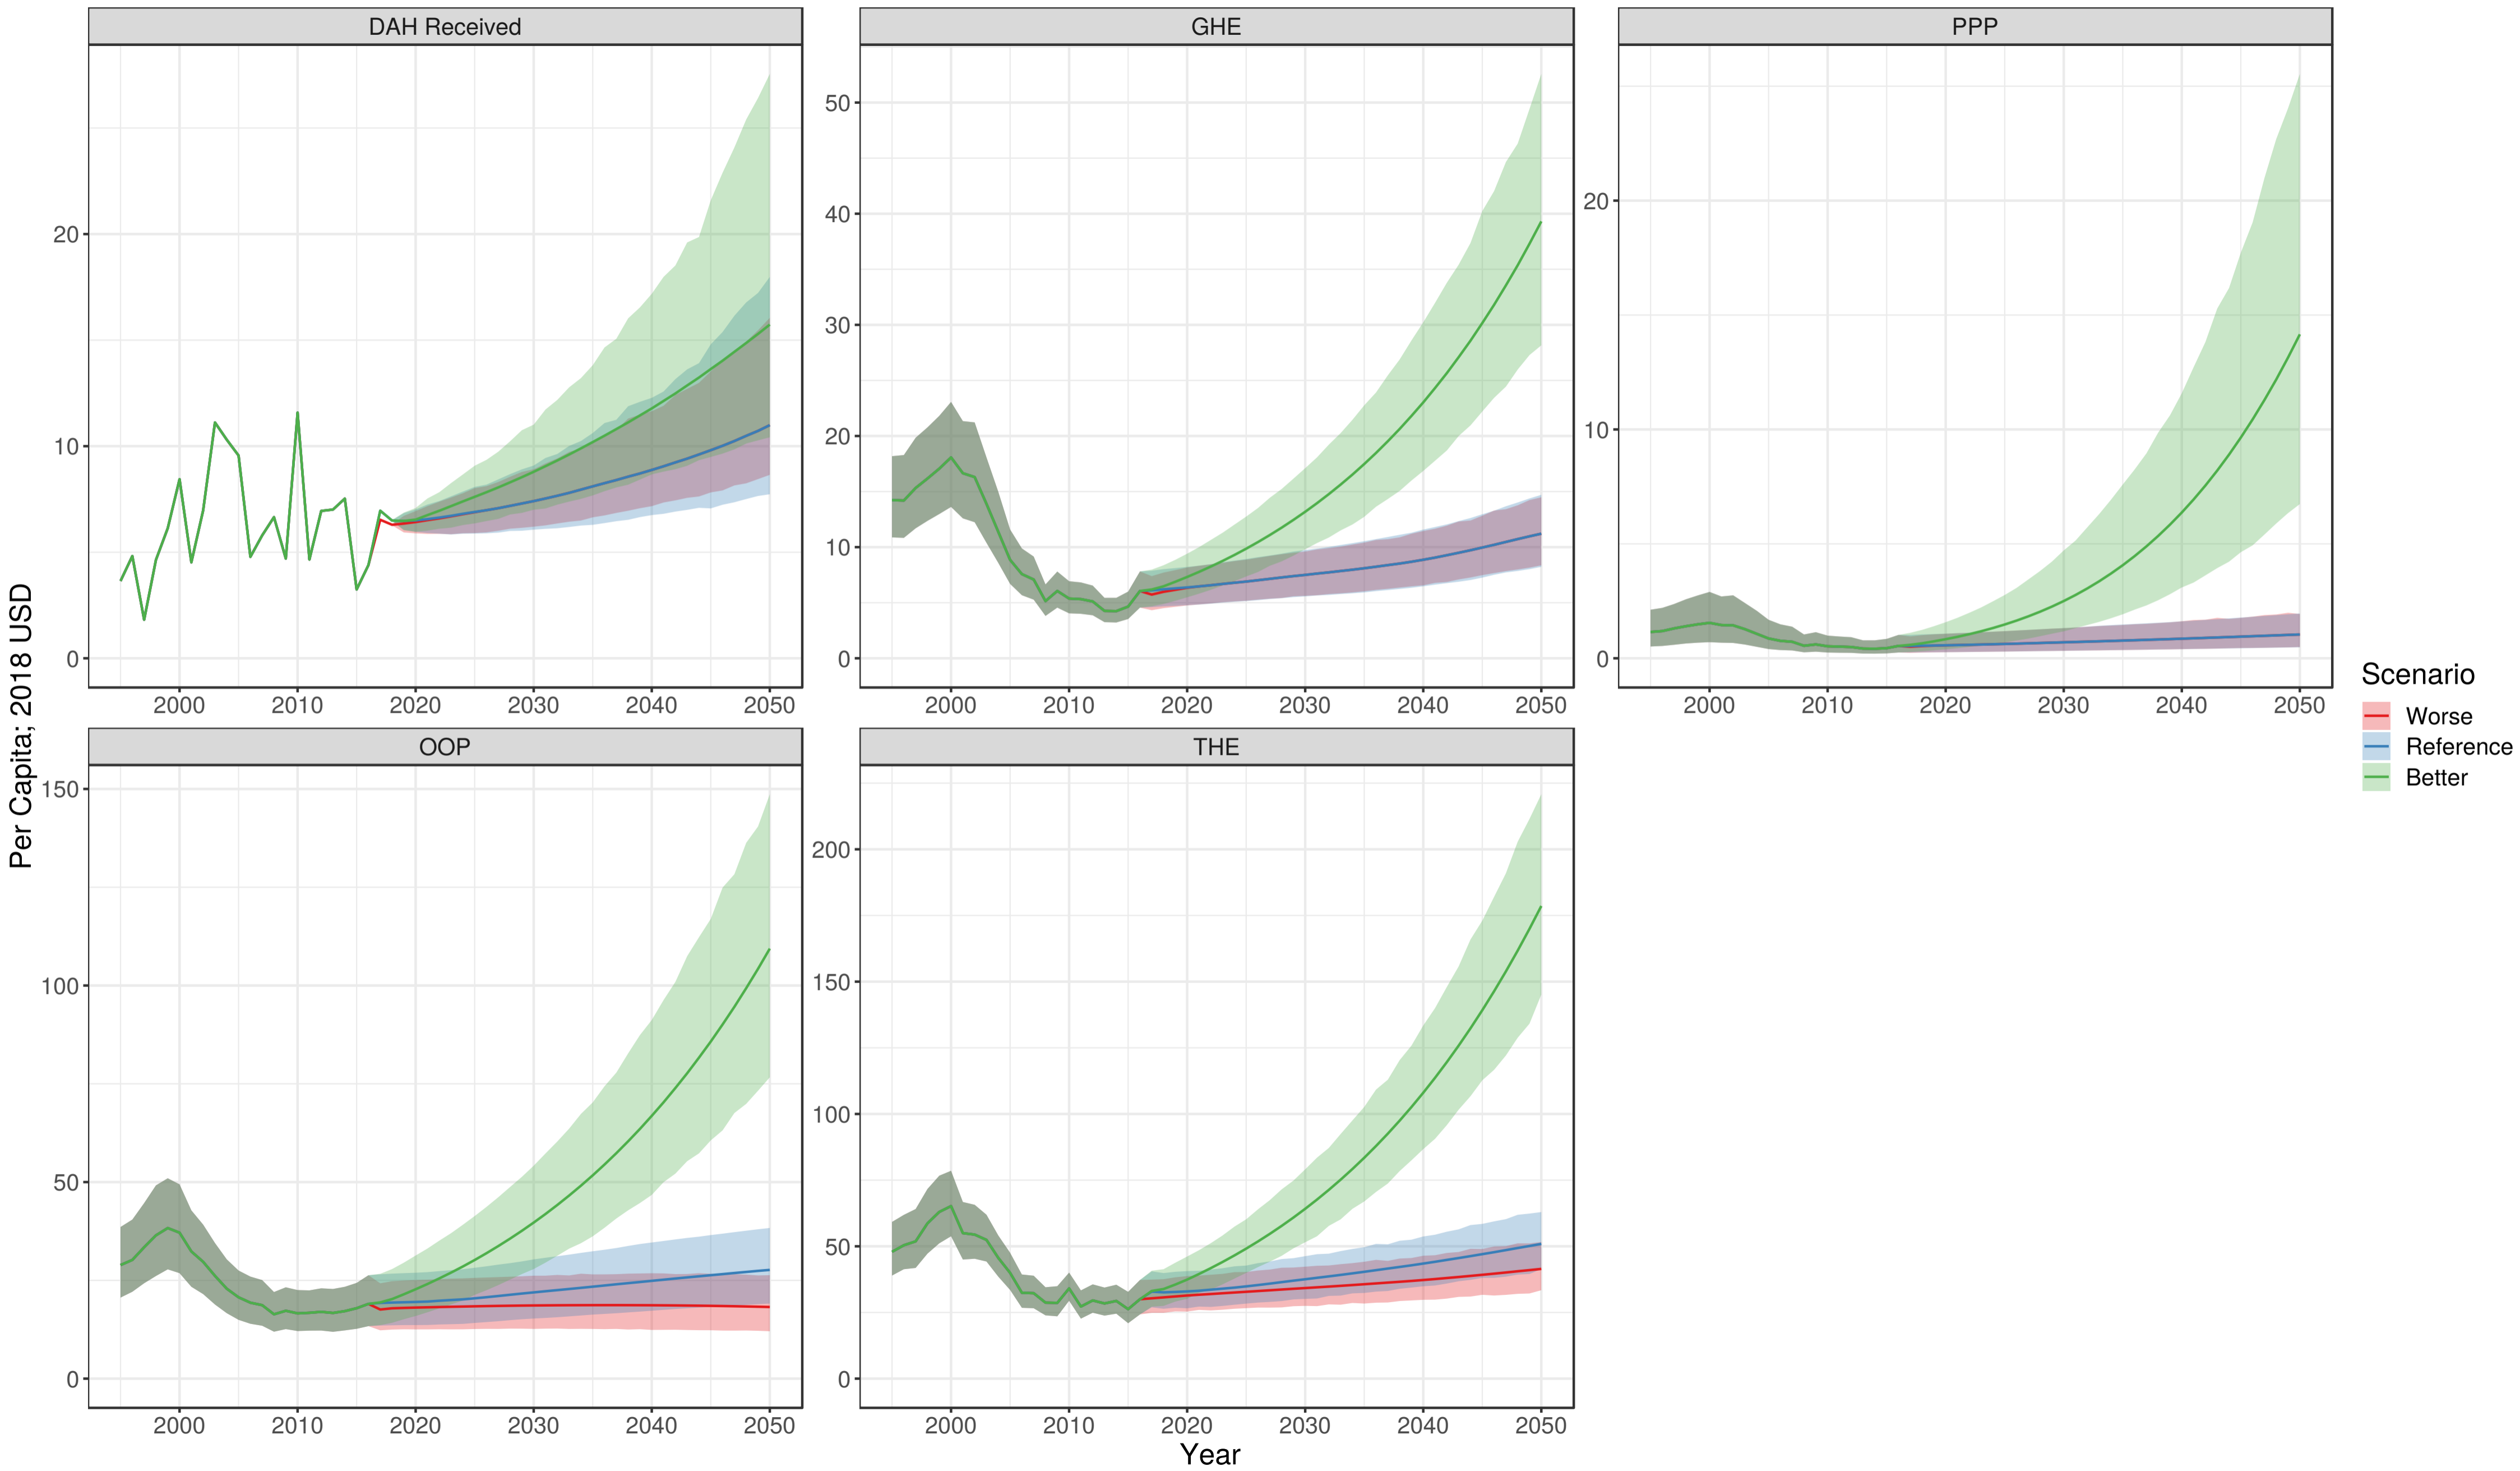

# Estonia

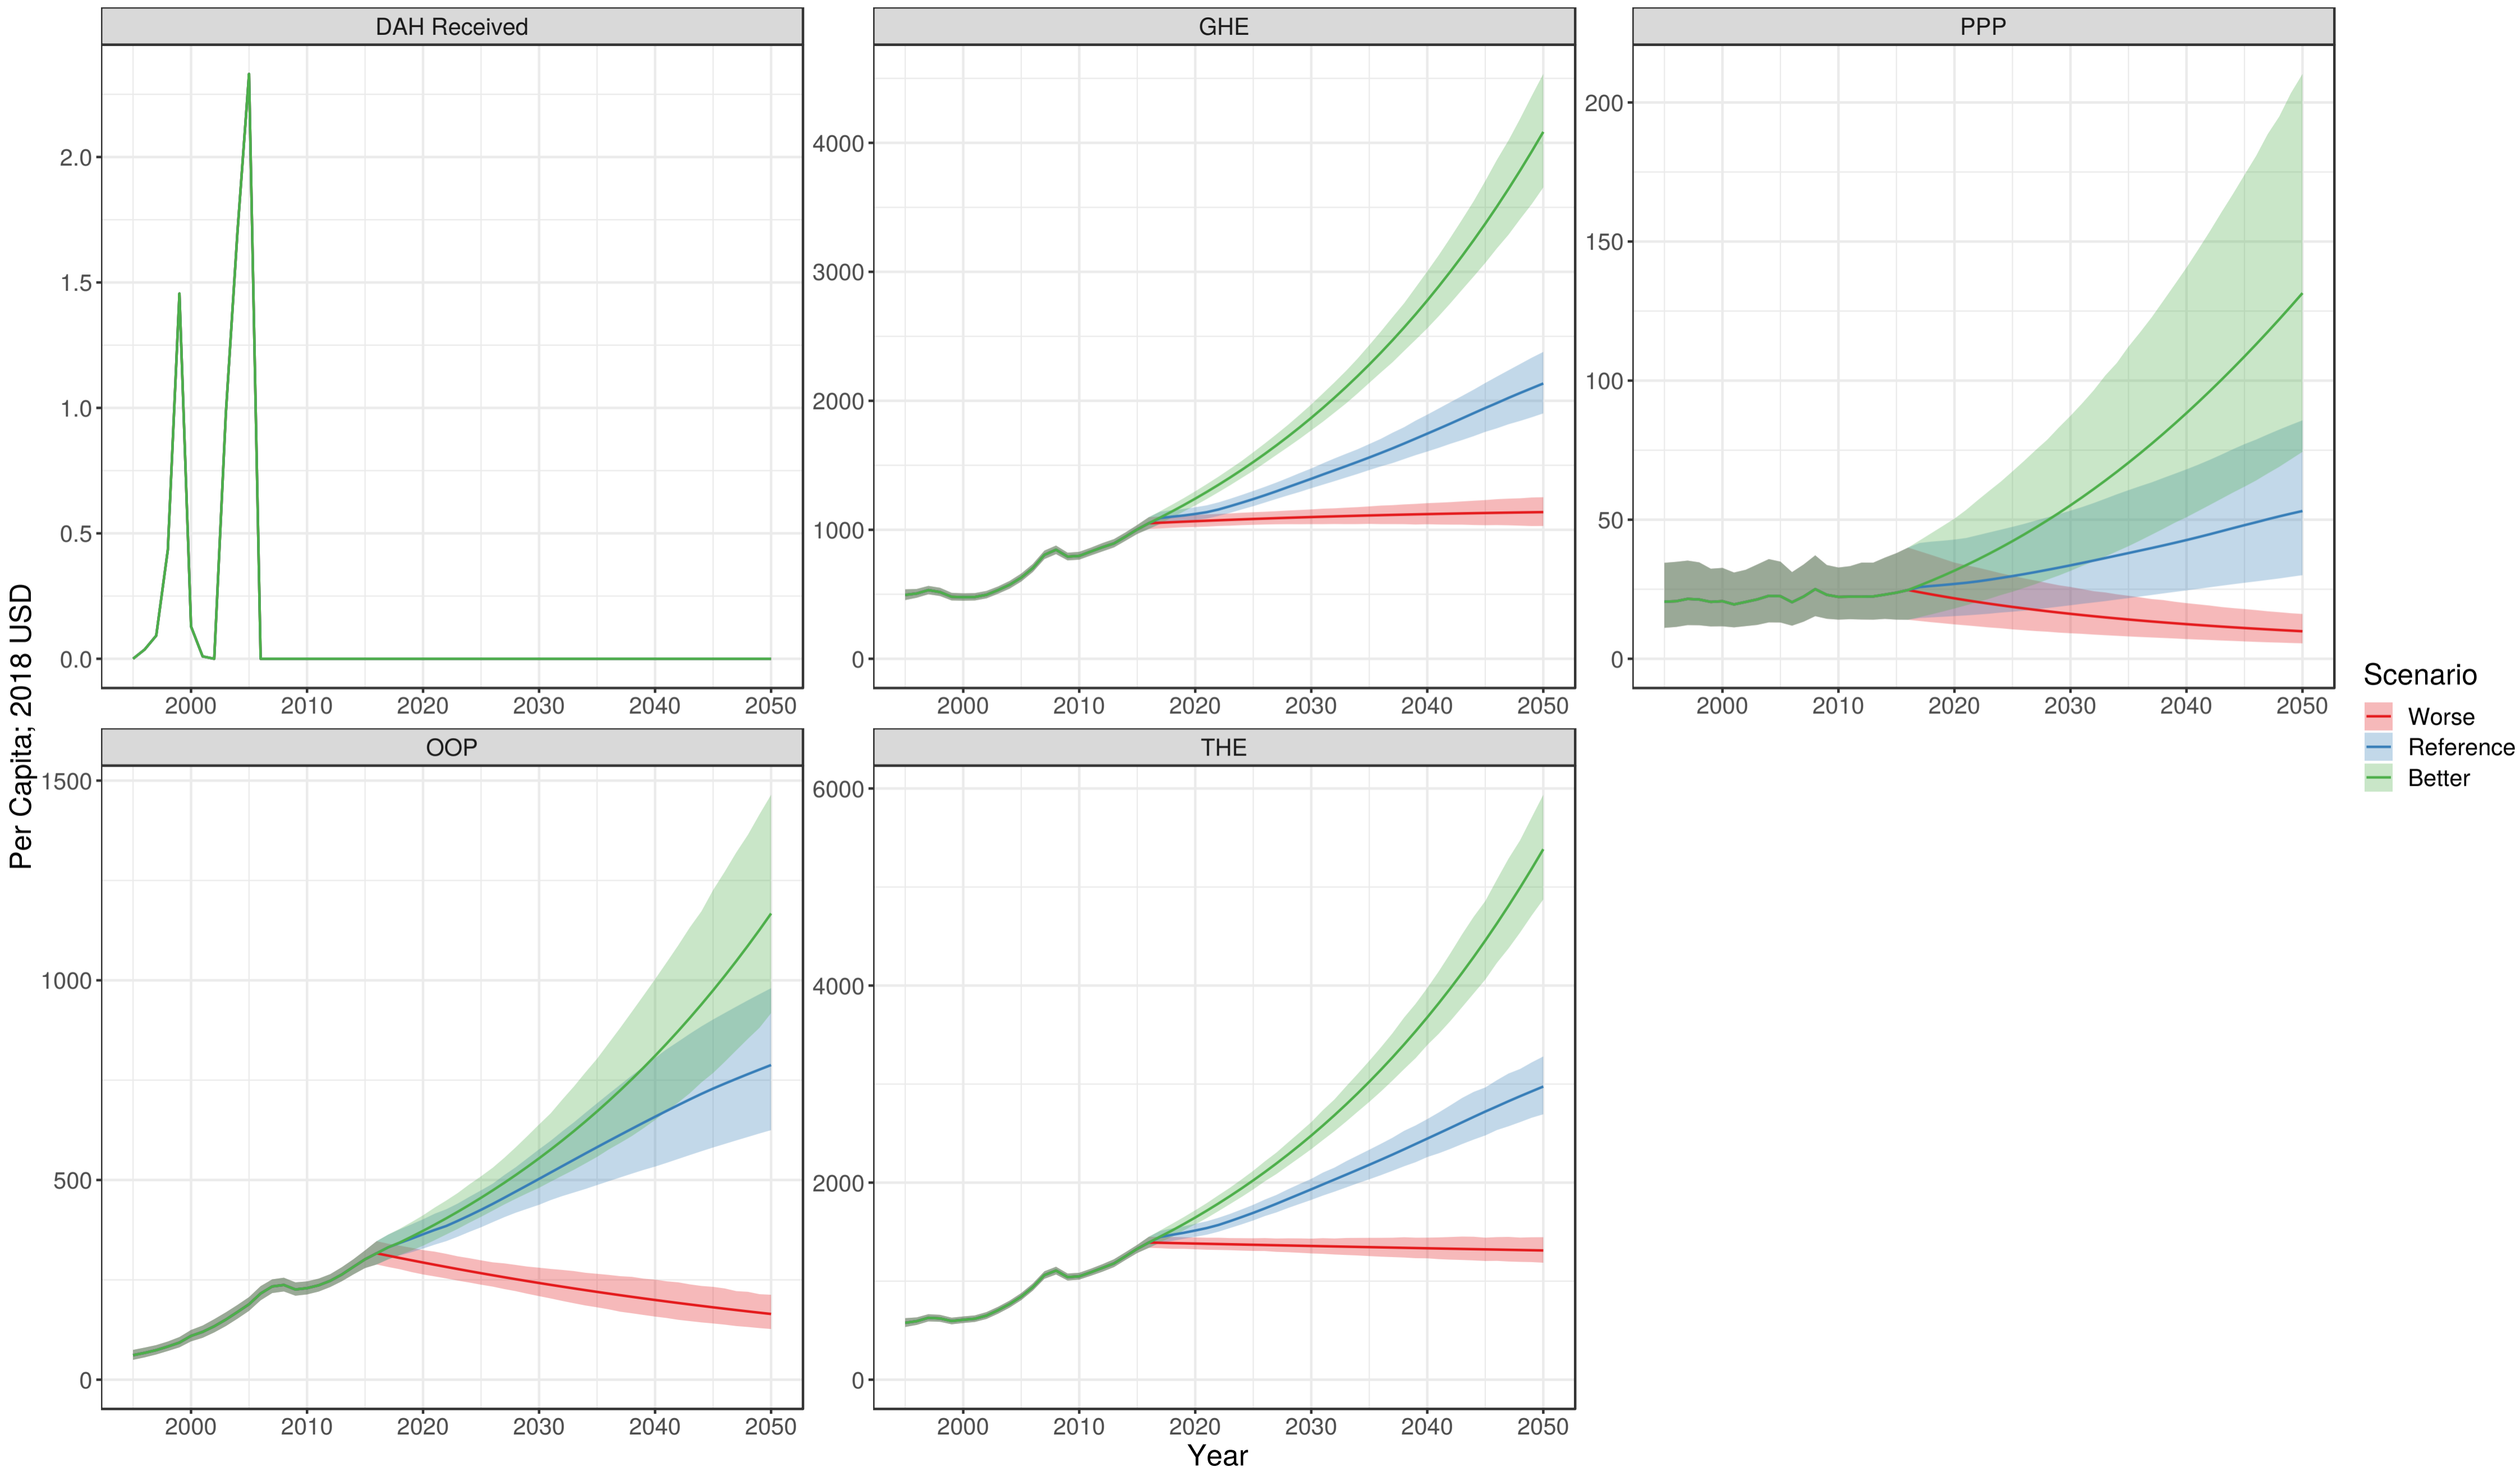

# Ethiopia

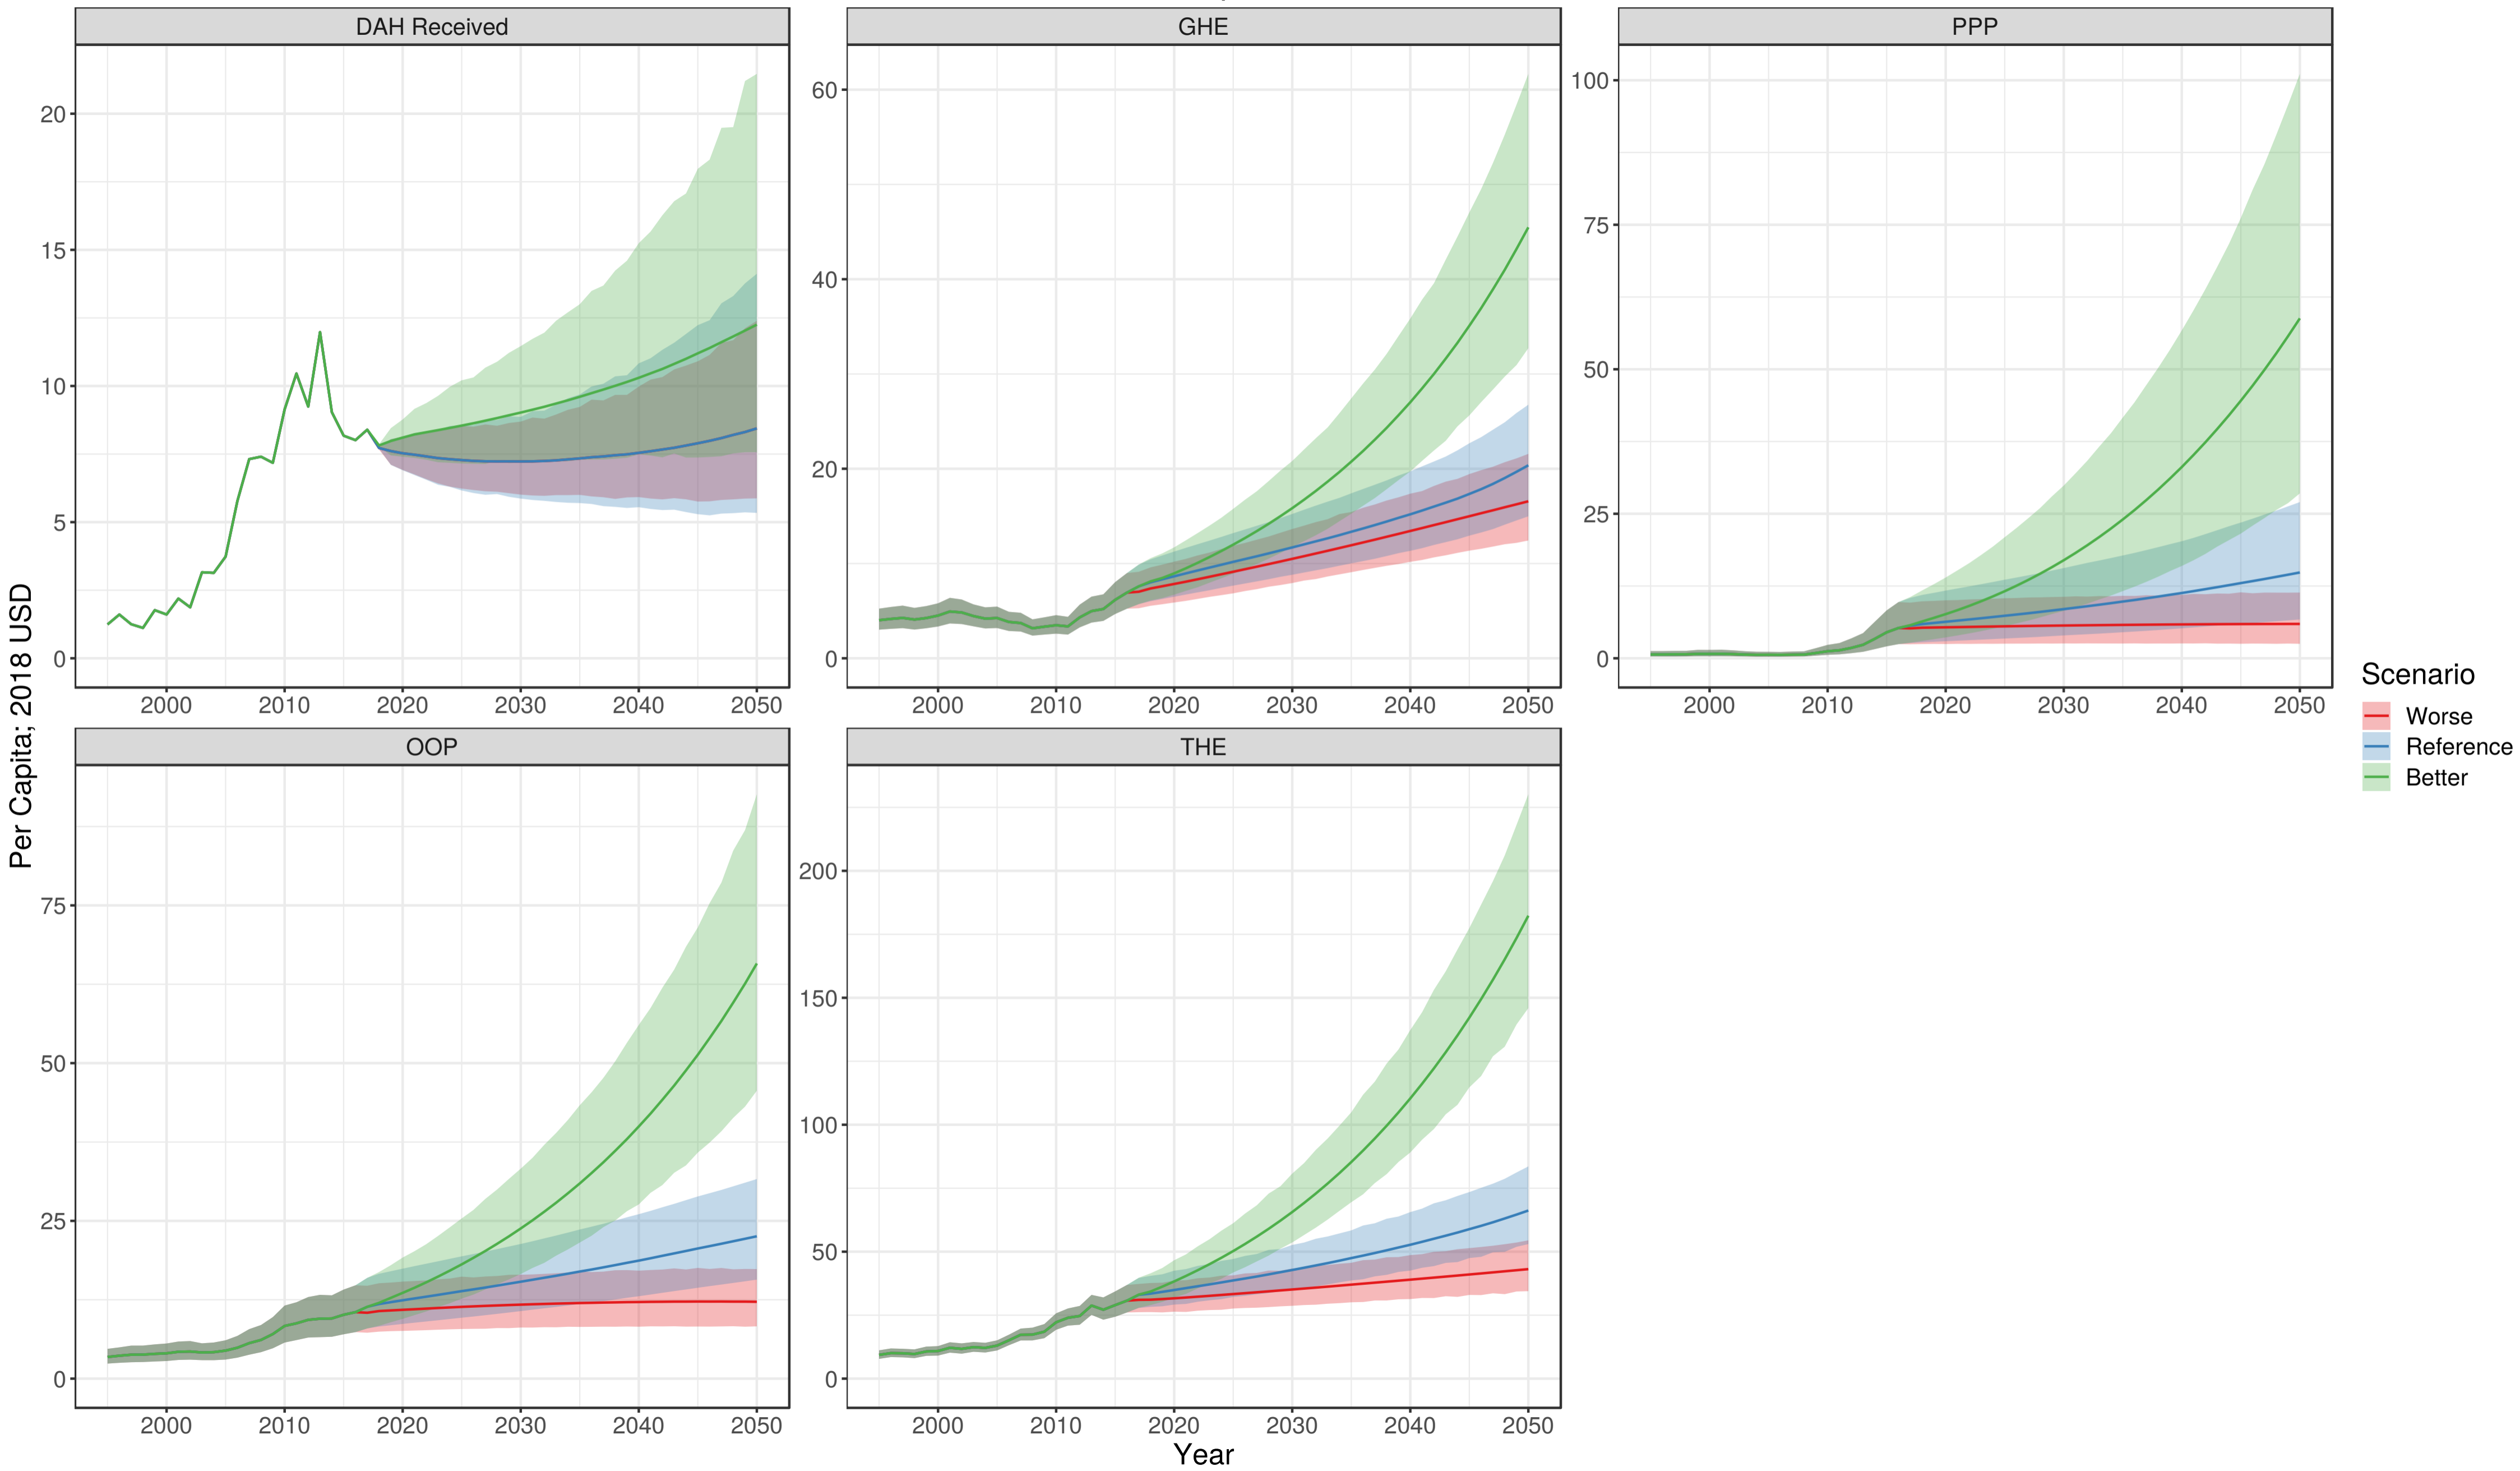

# Federated States of Micronesia

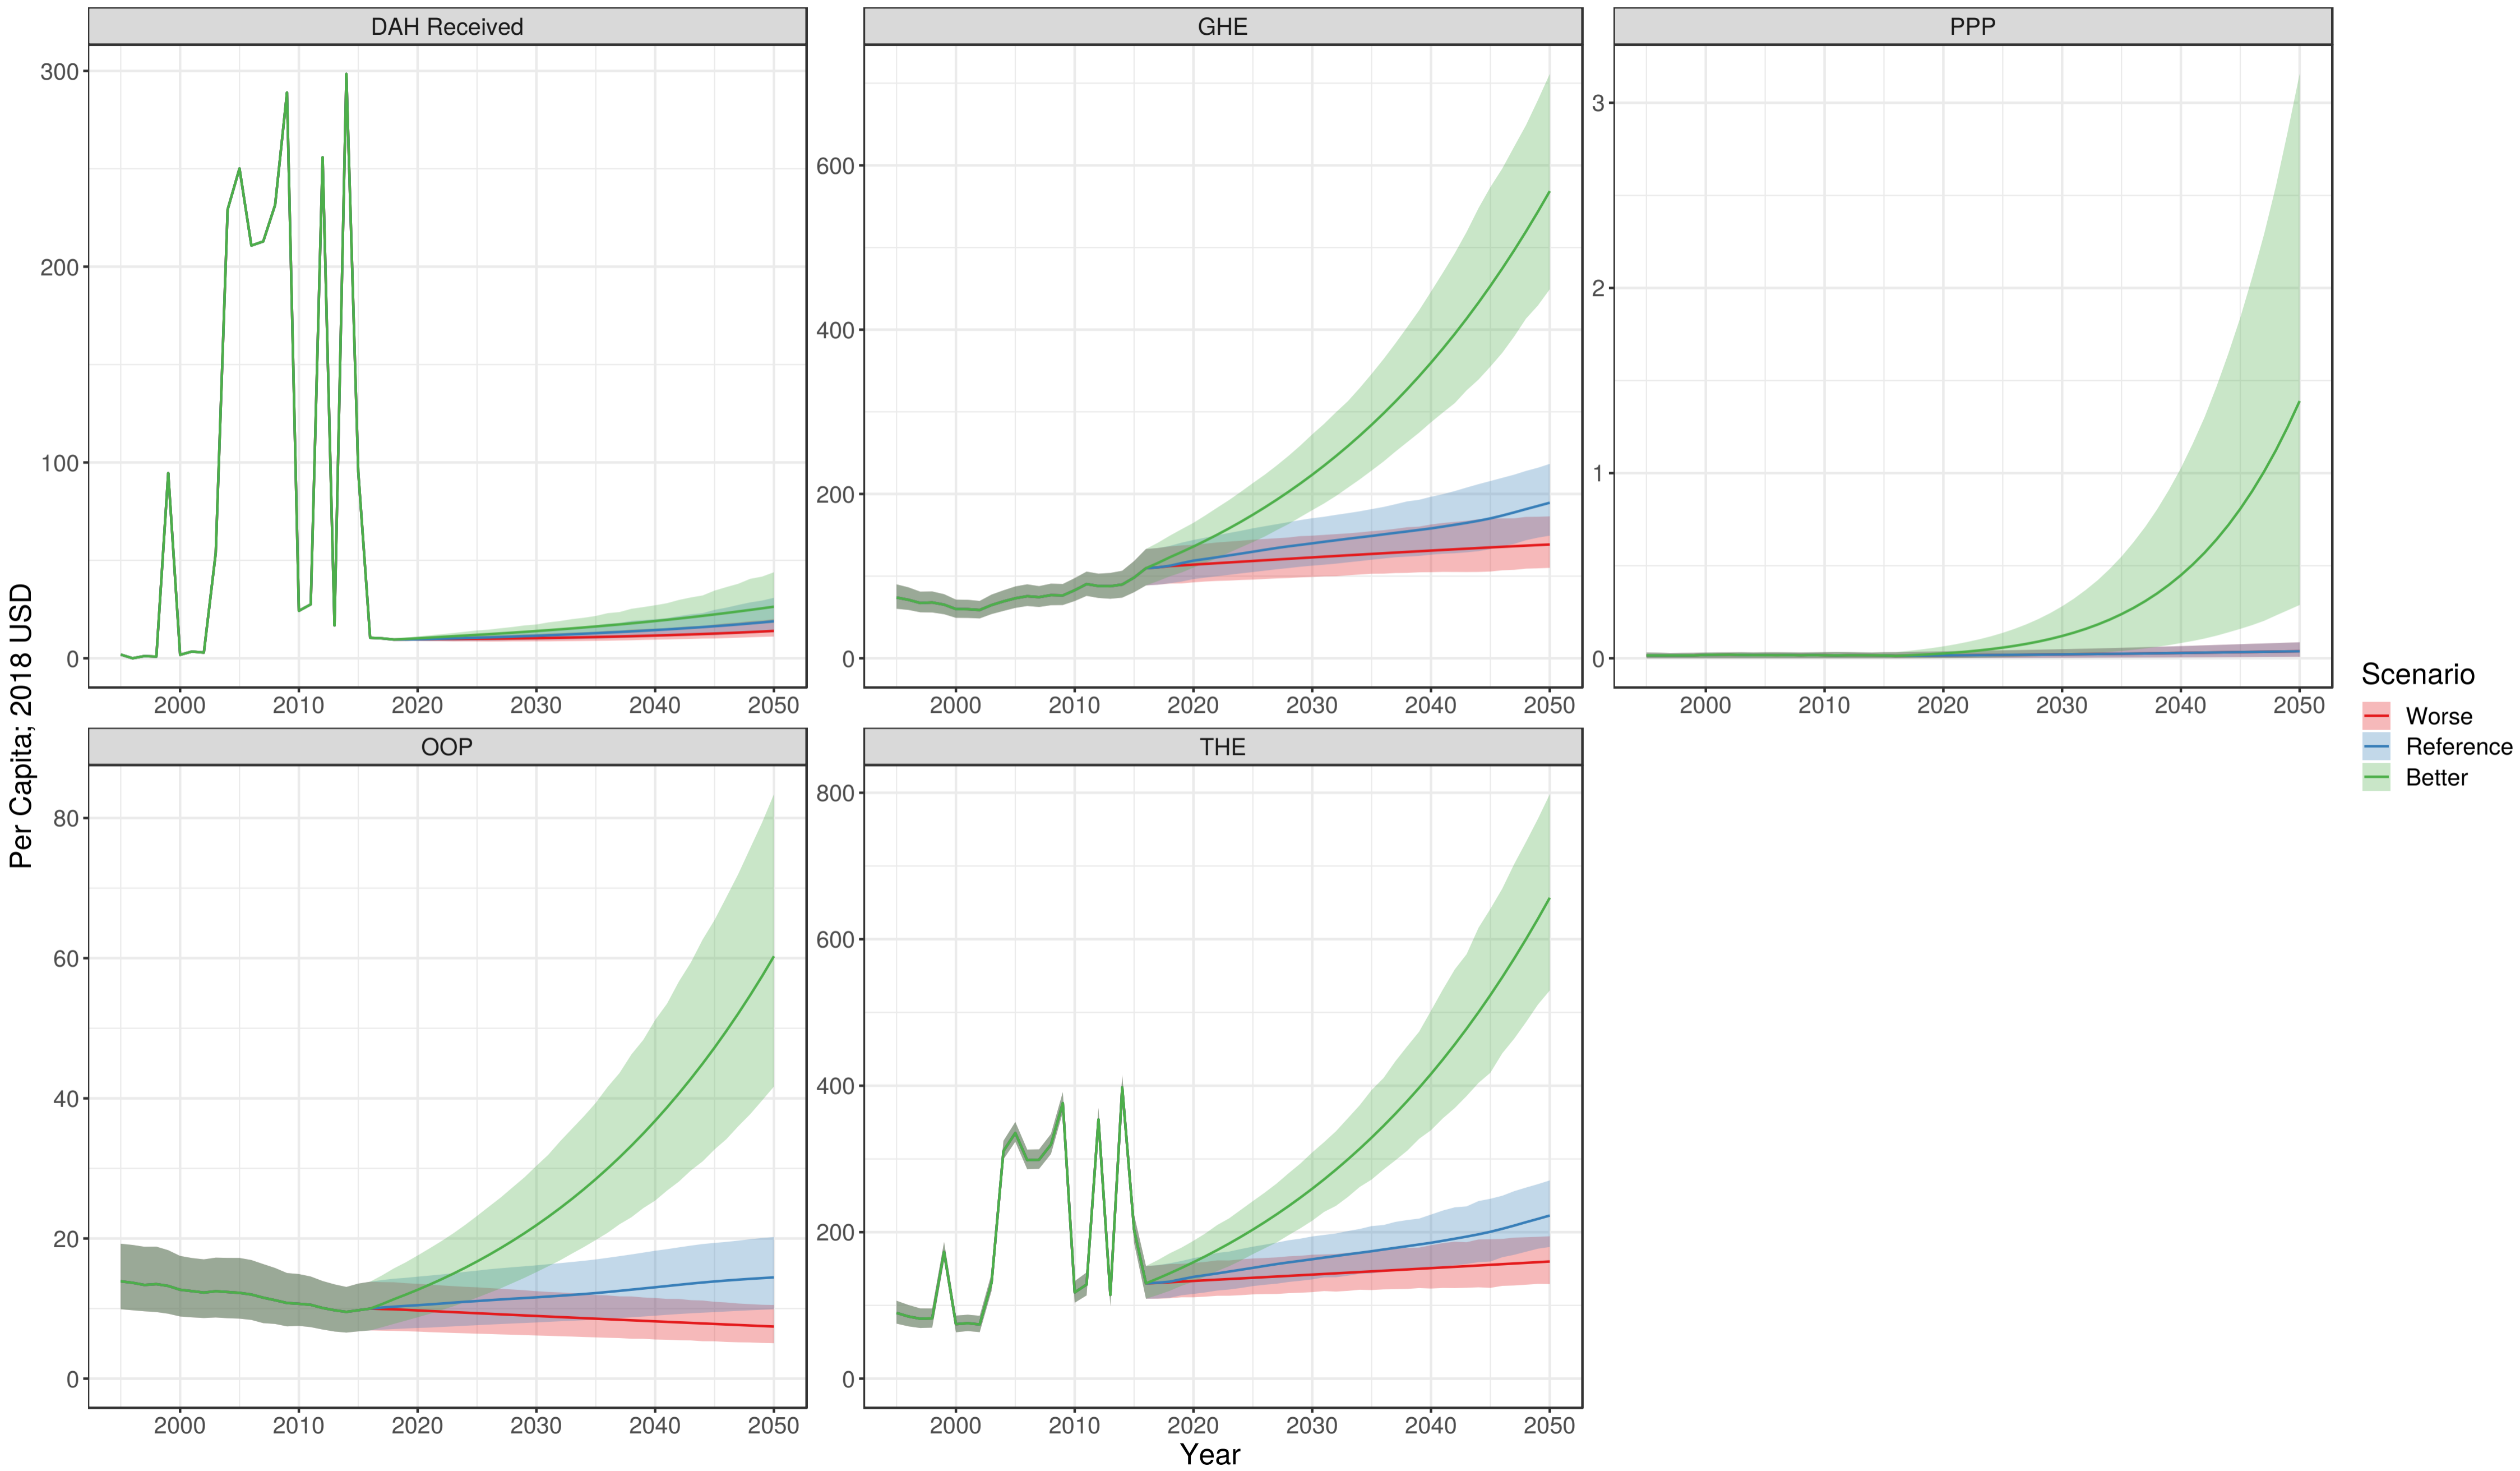

# Fiji

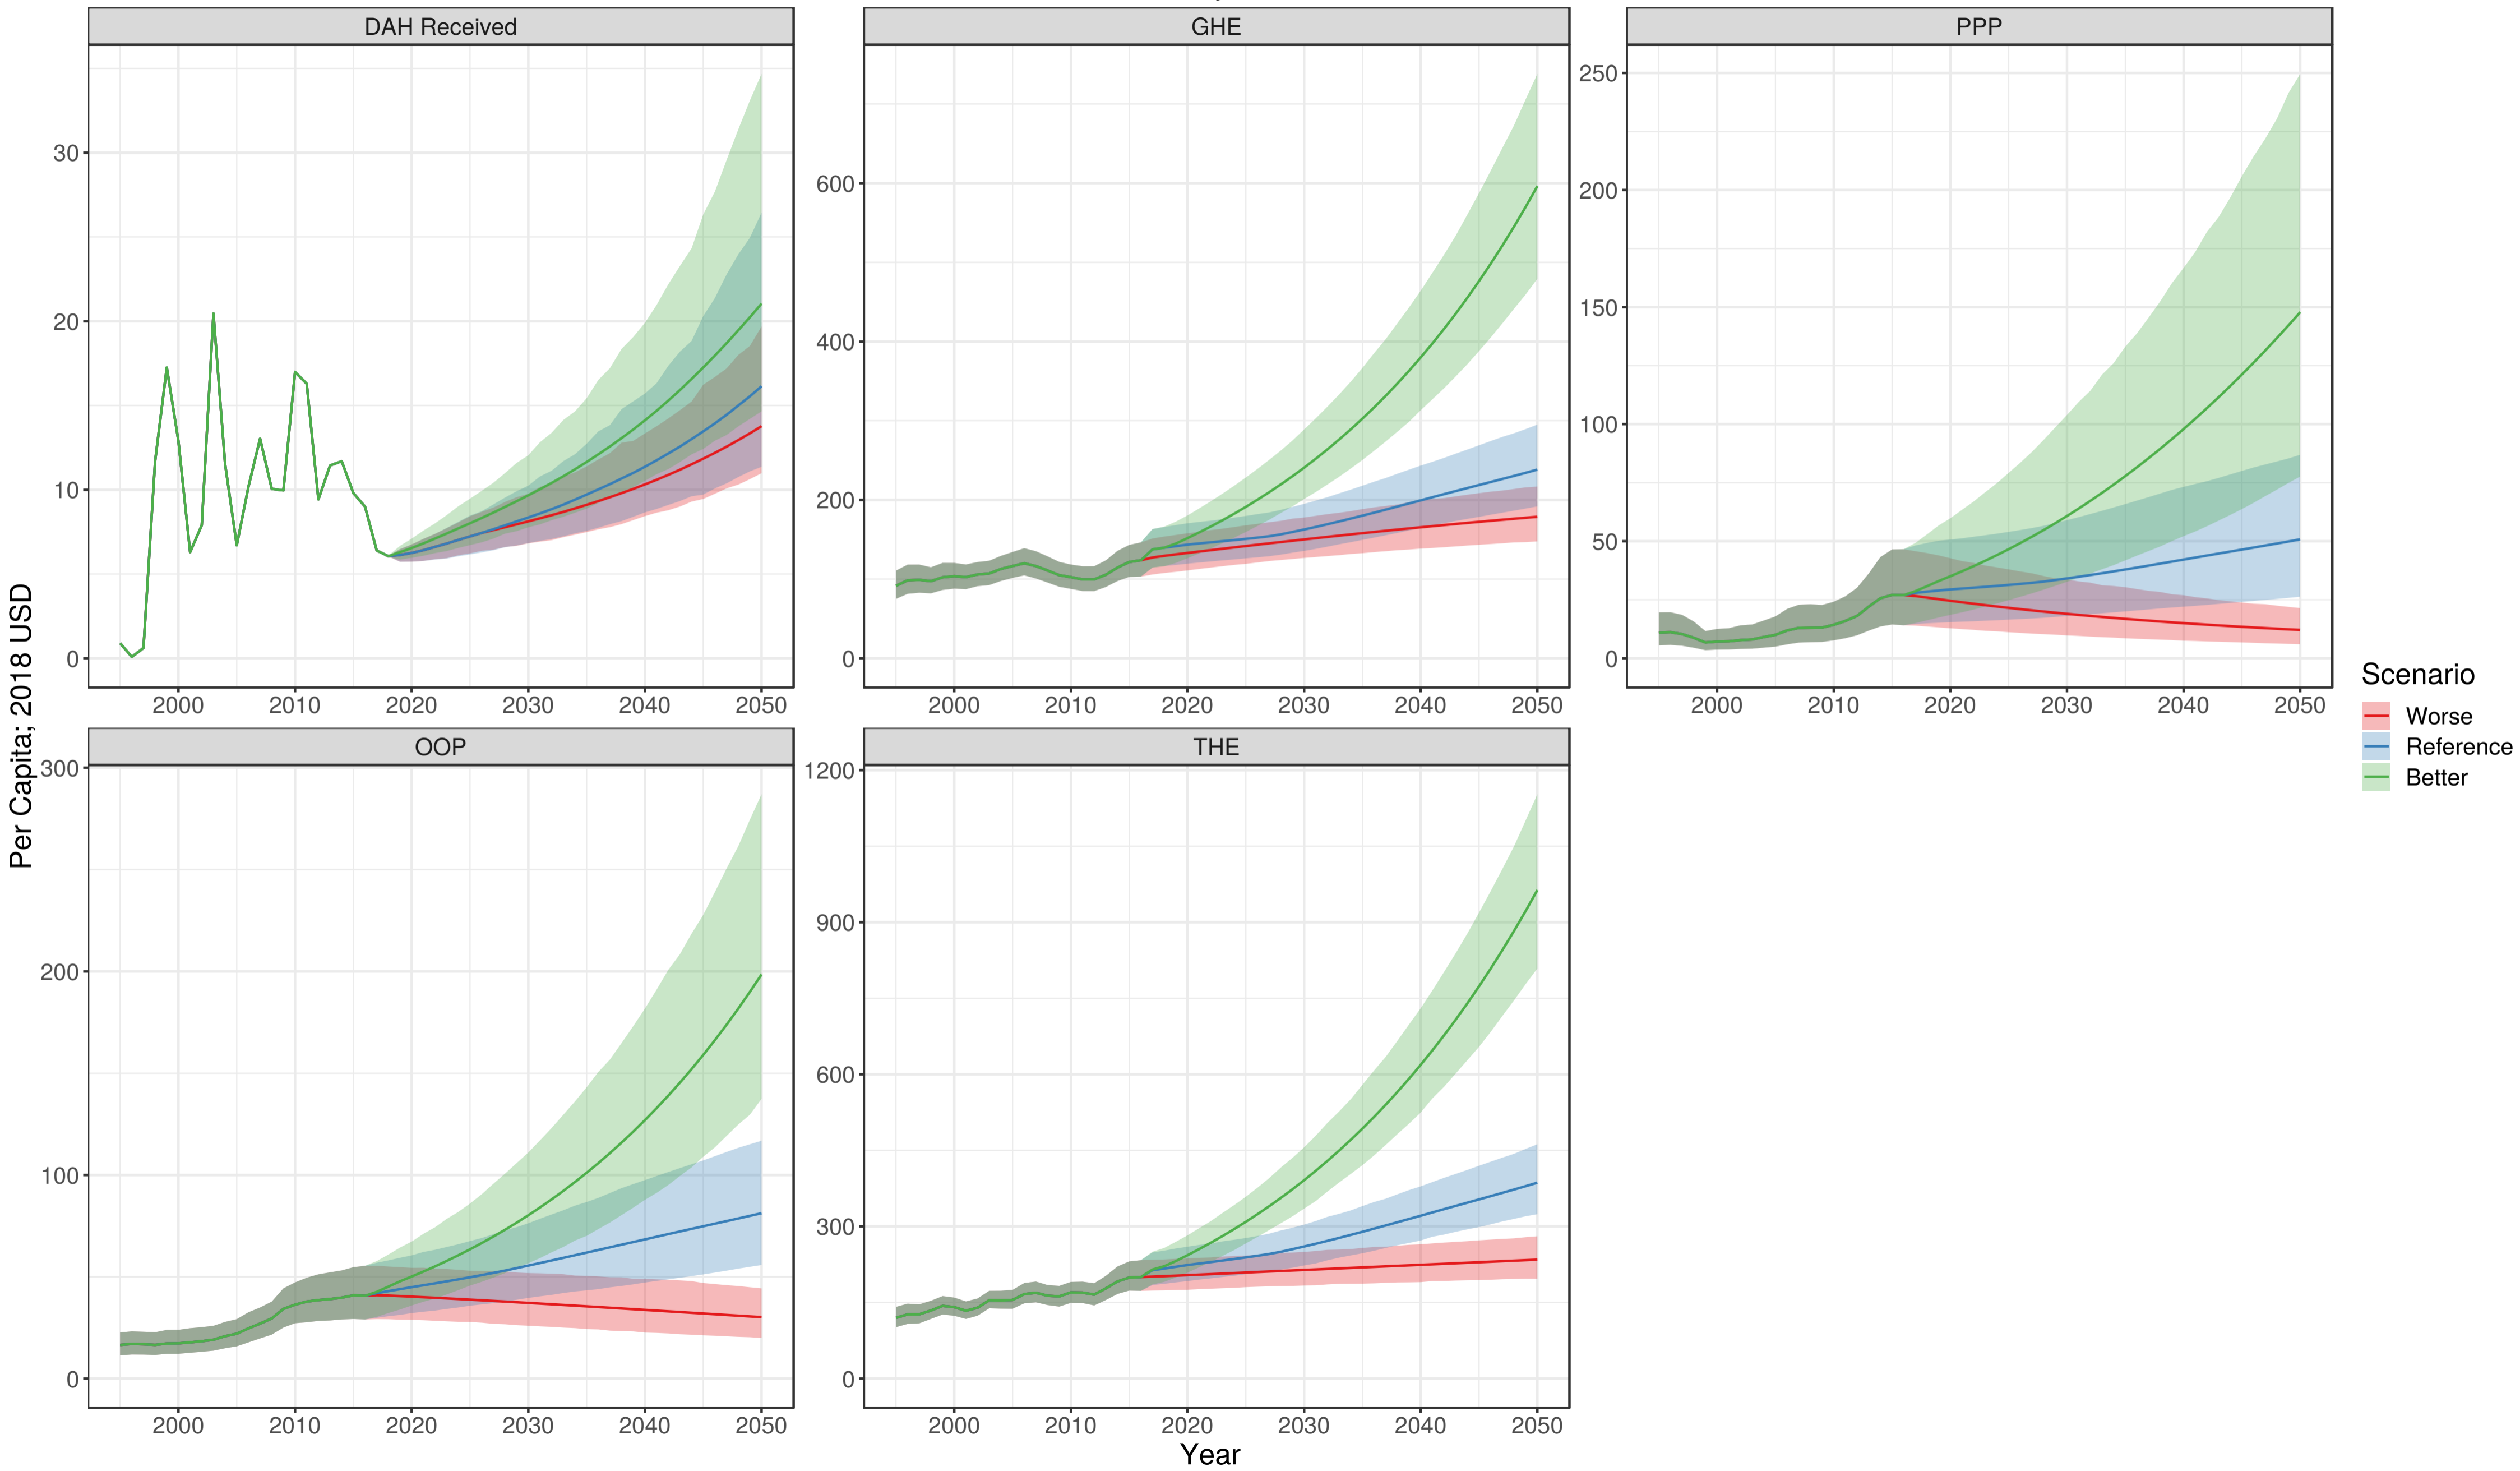



# Finland

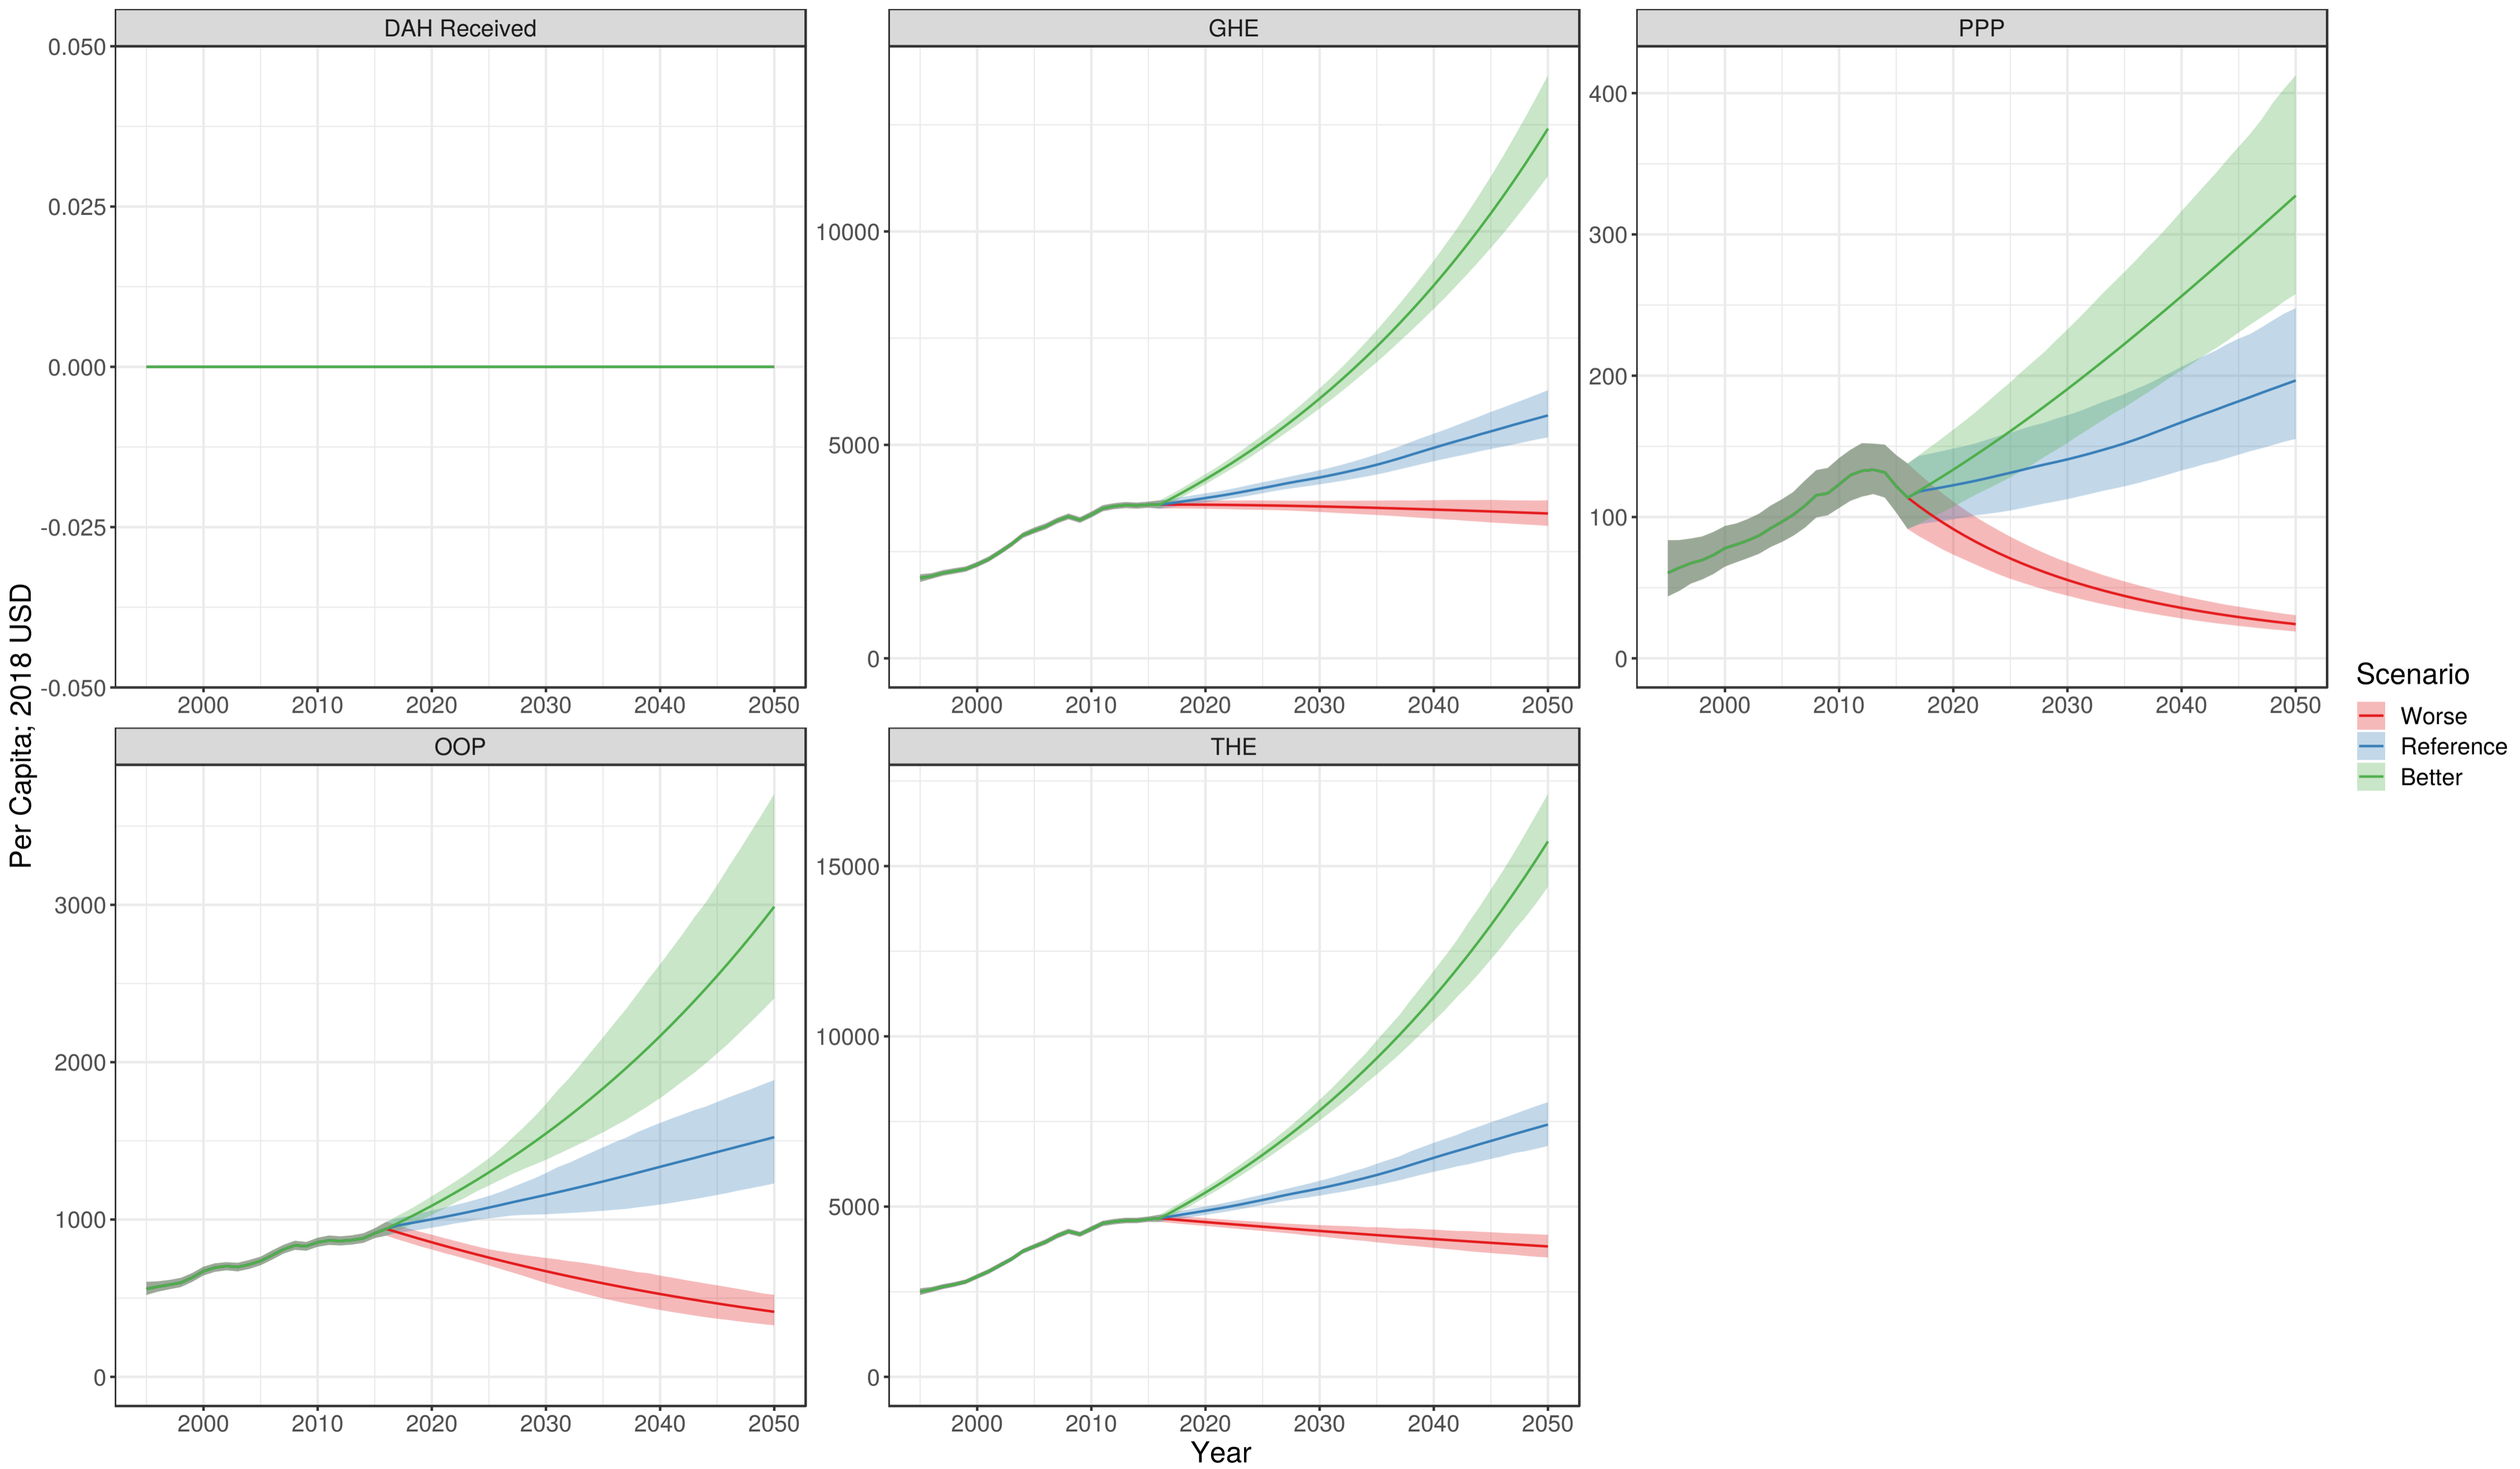

# France

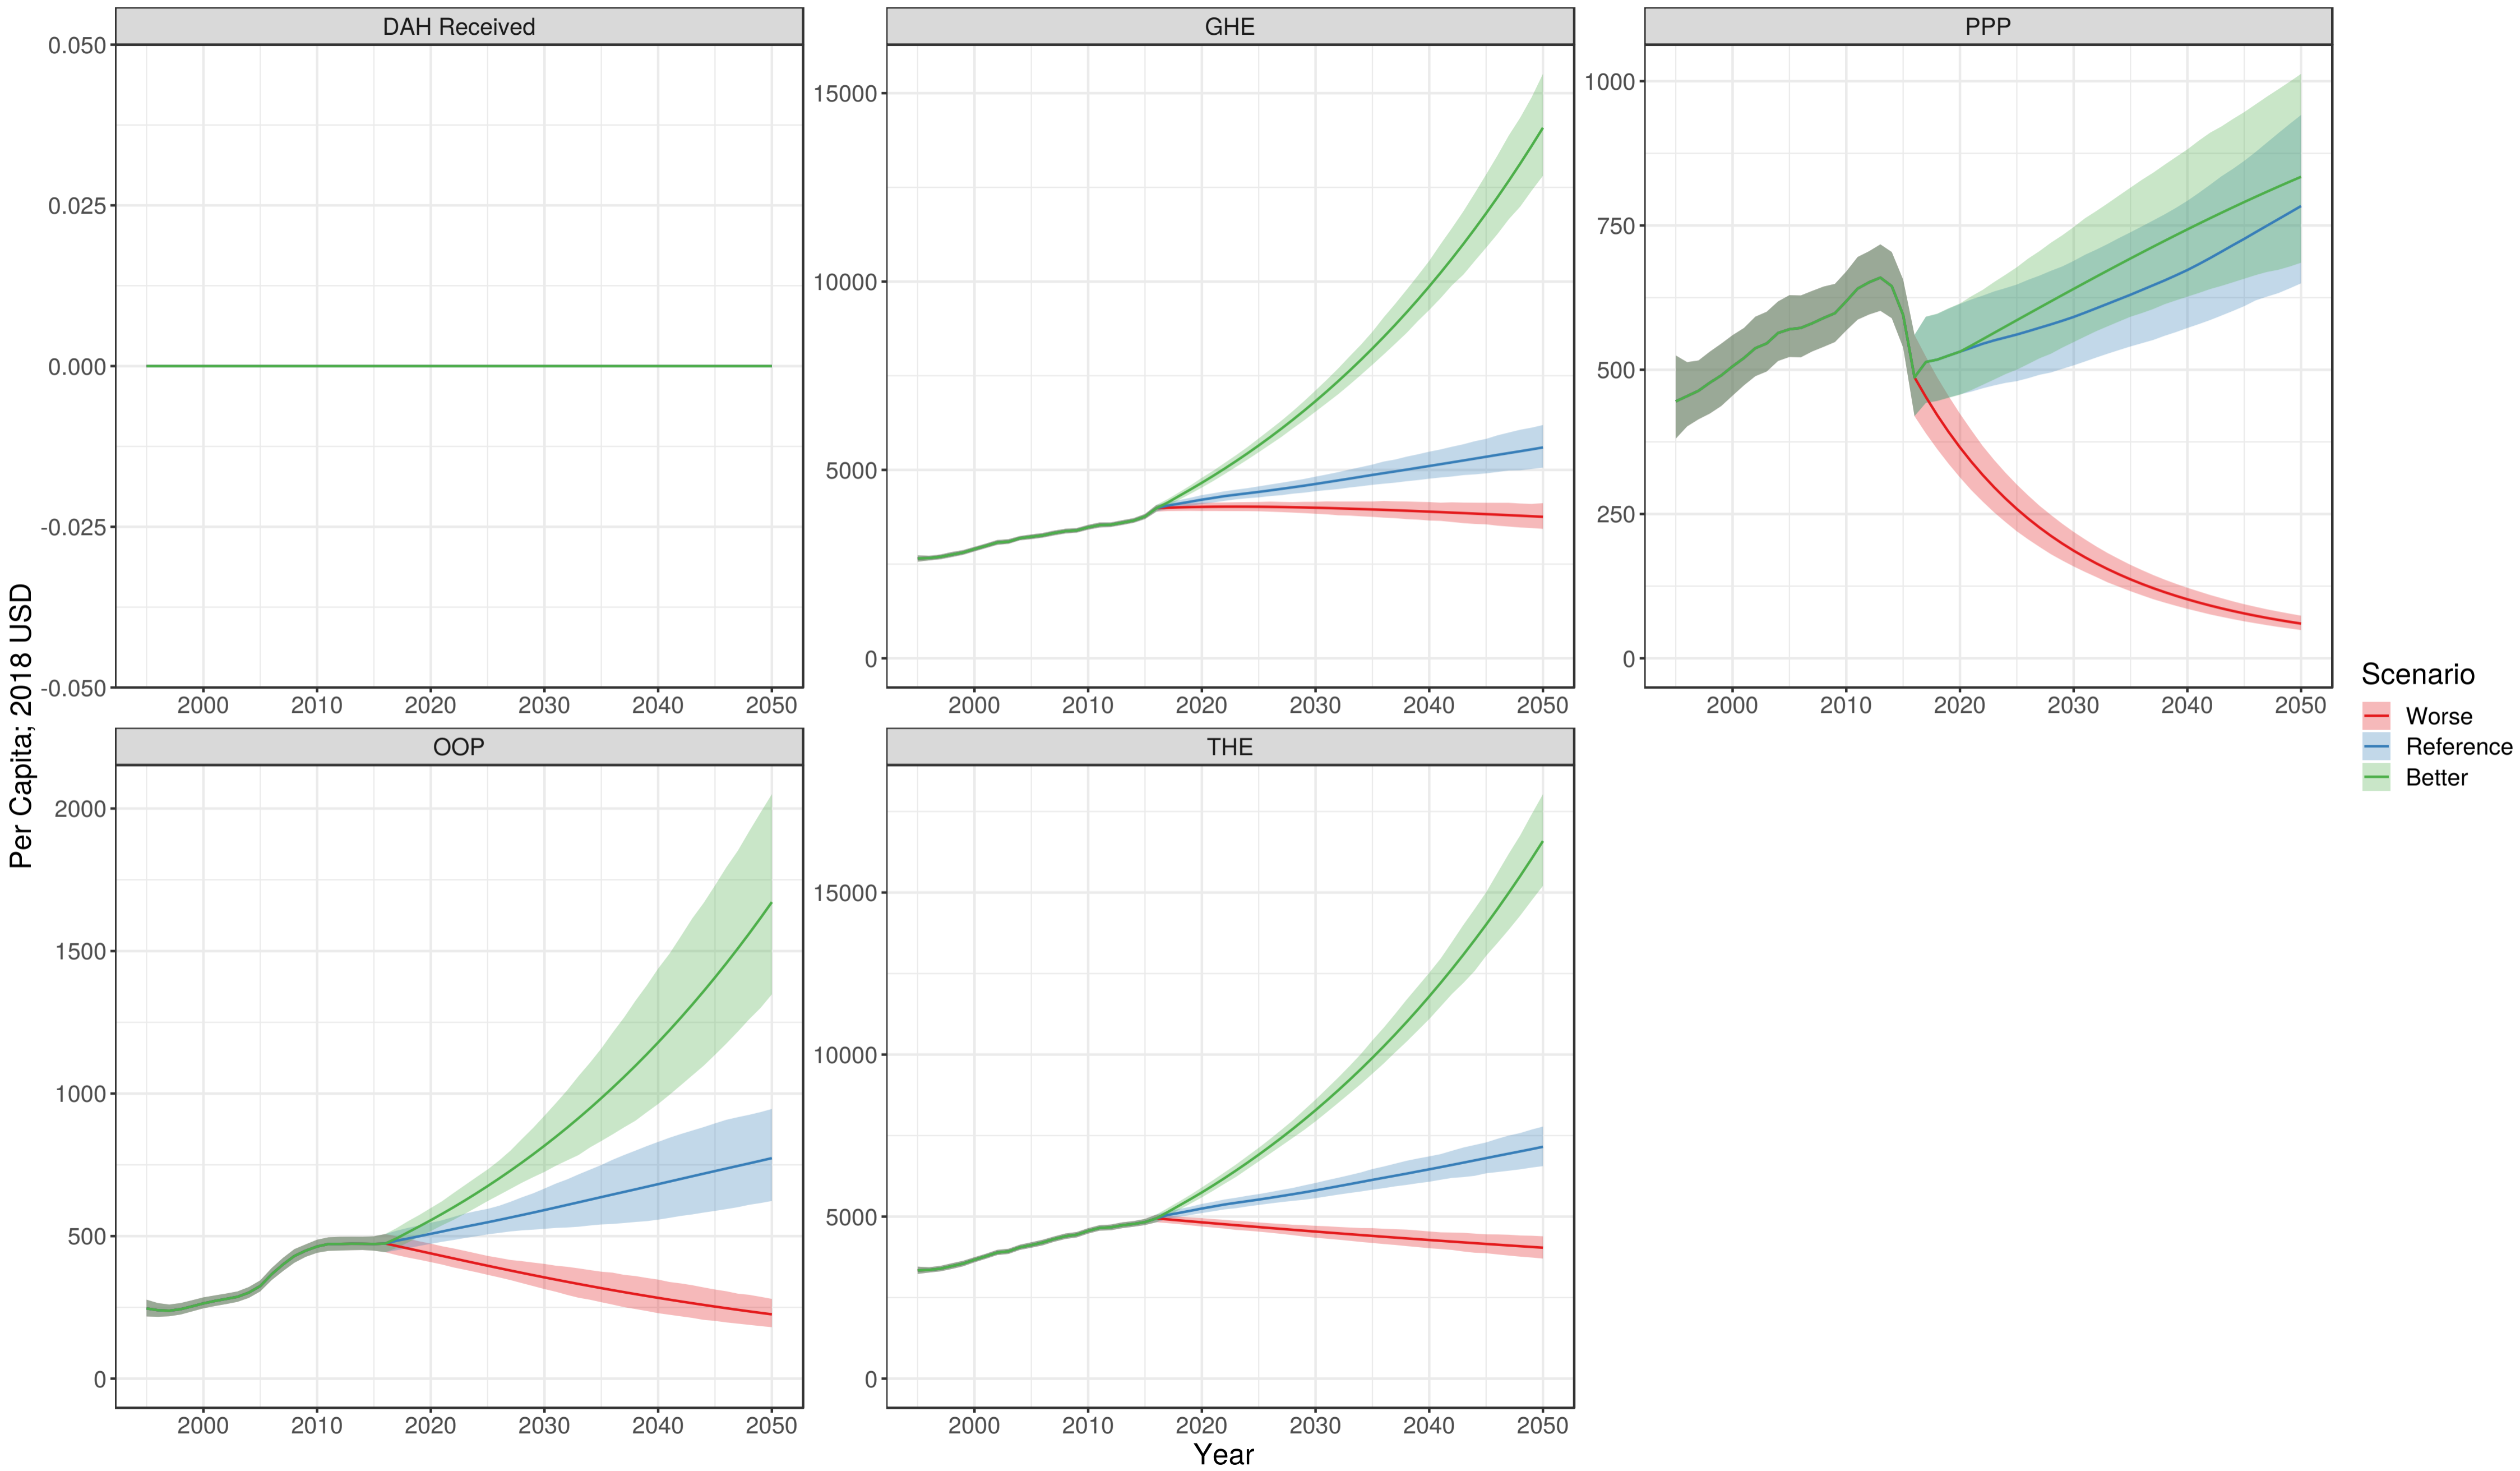

# Gabon

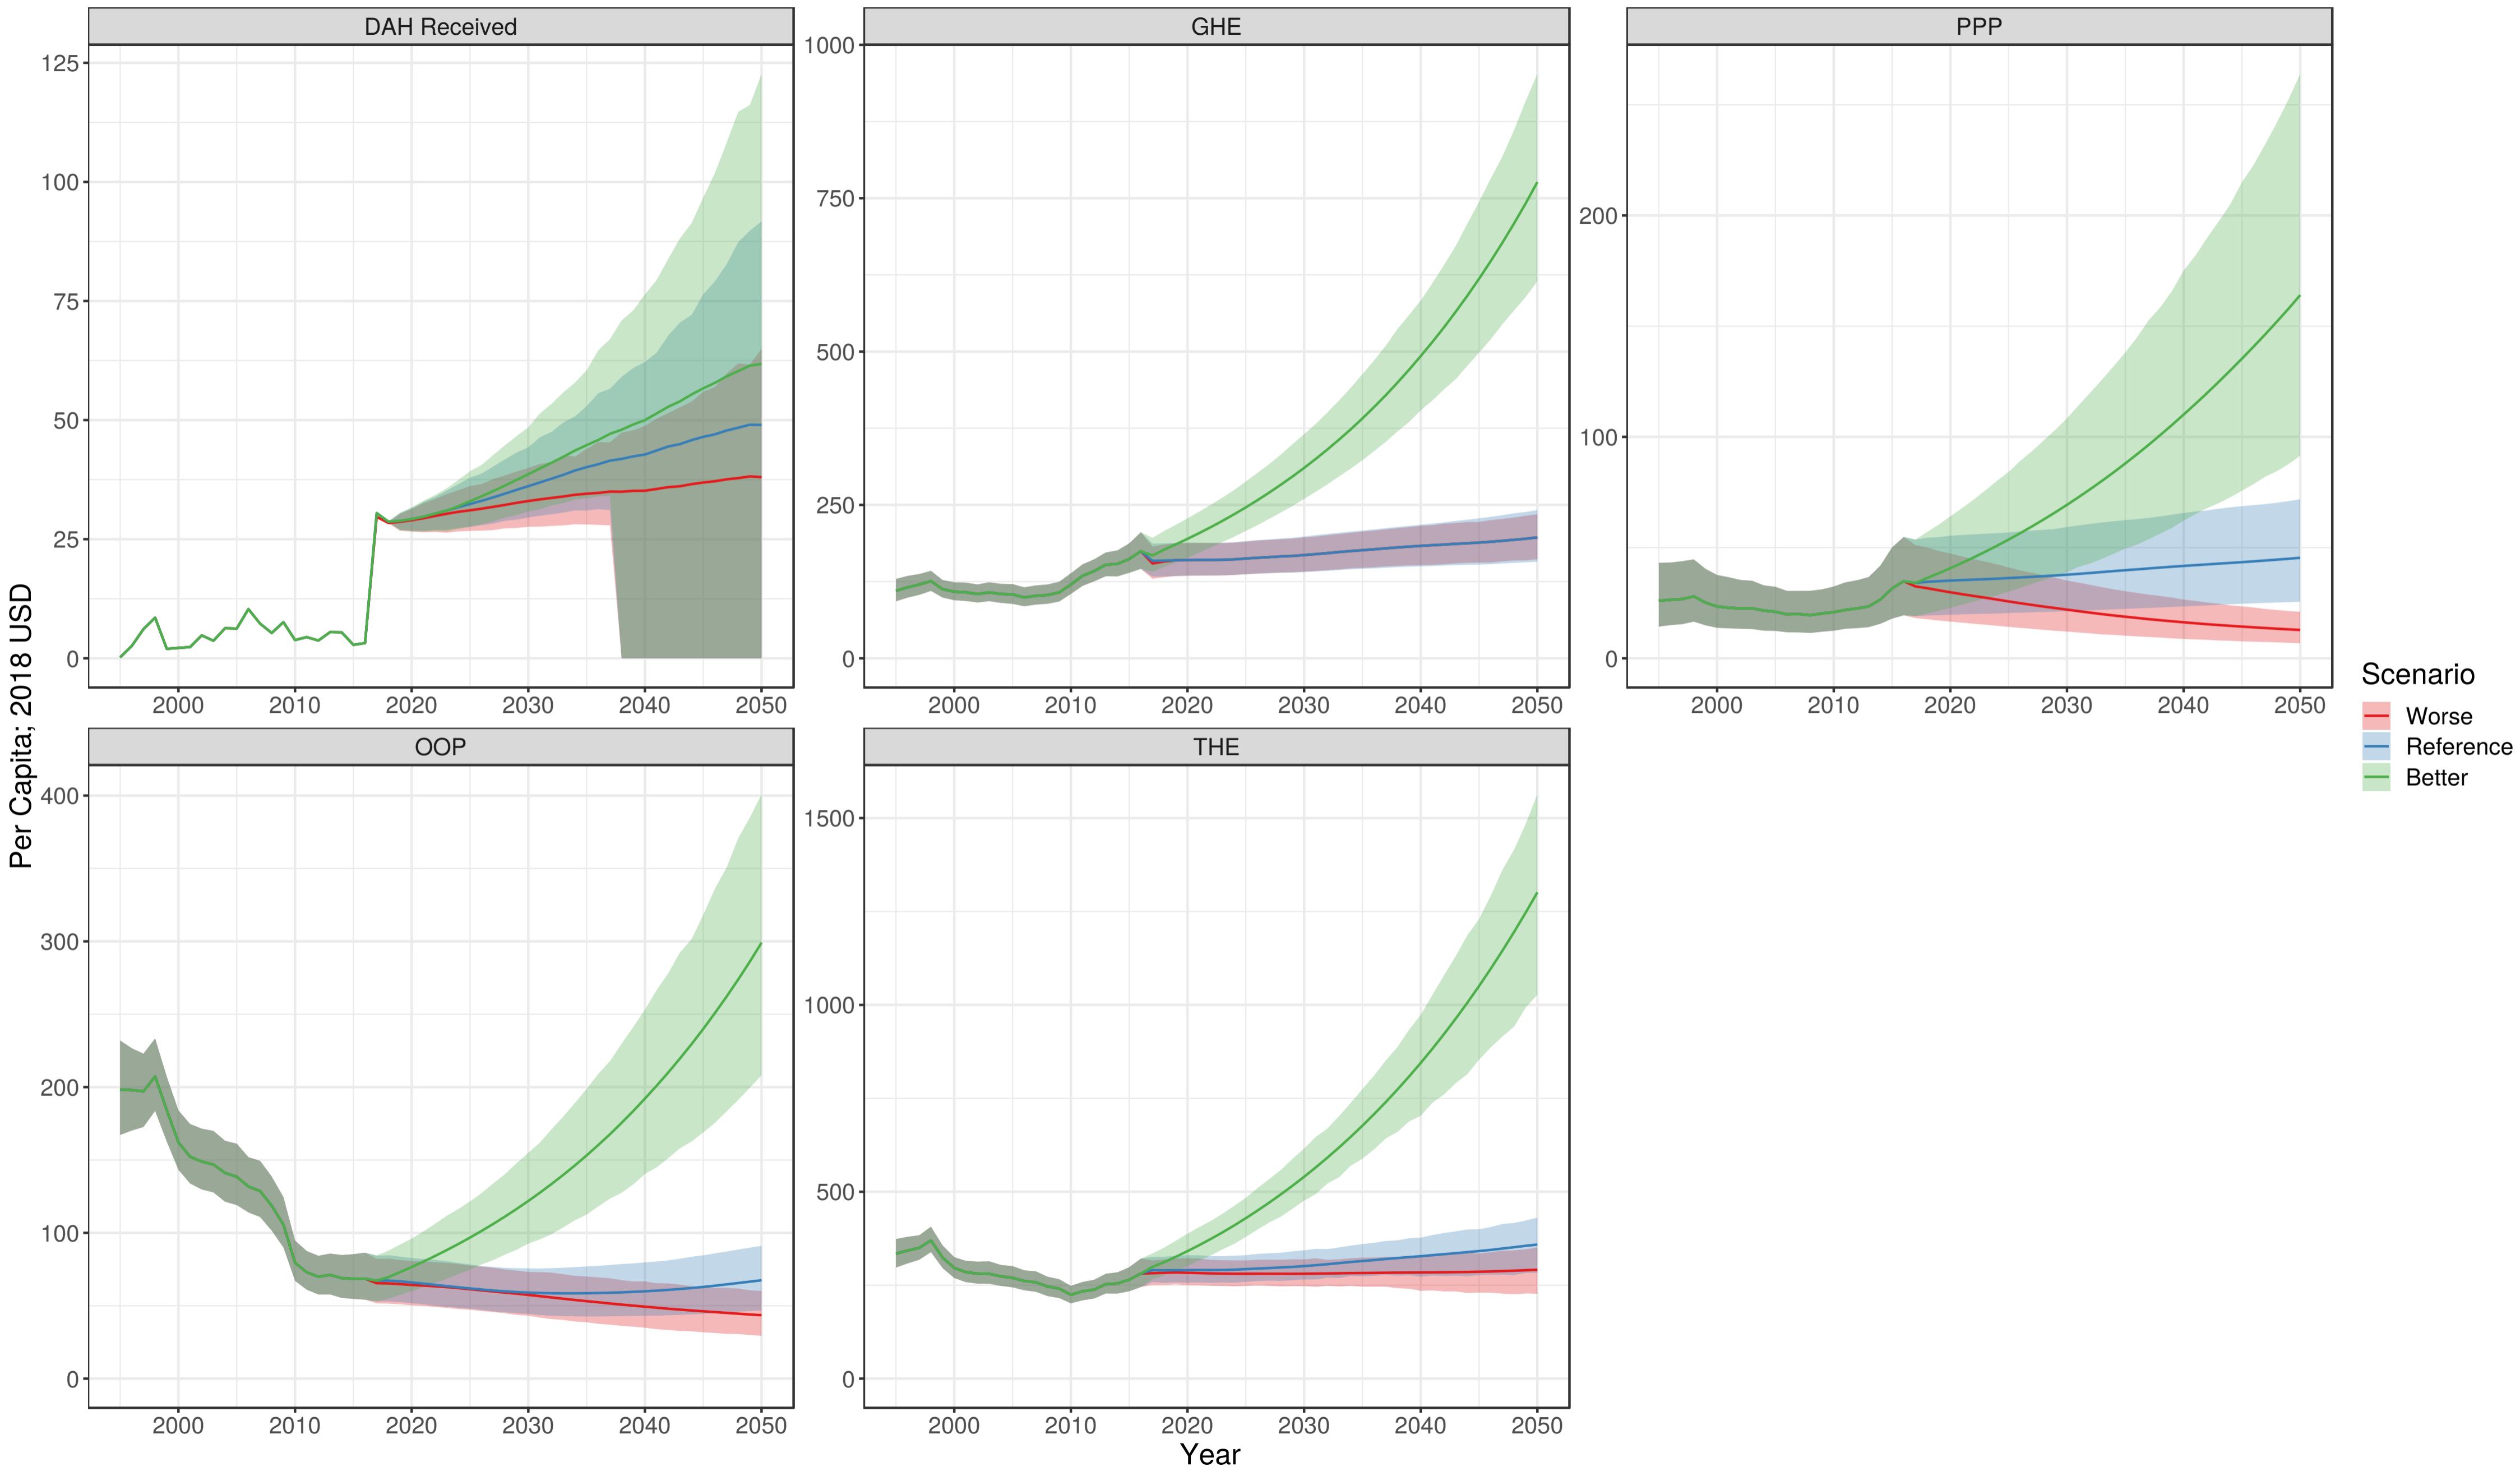

# Georgia

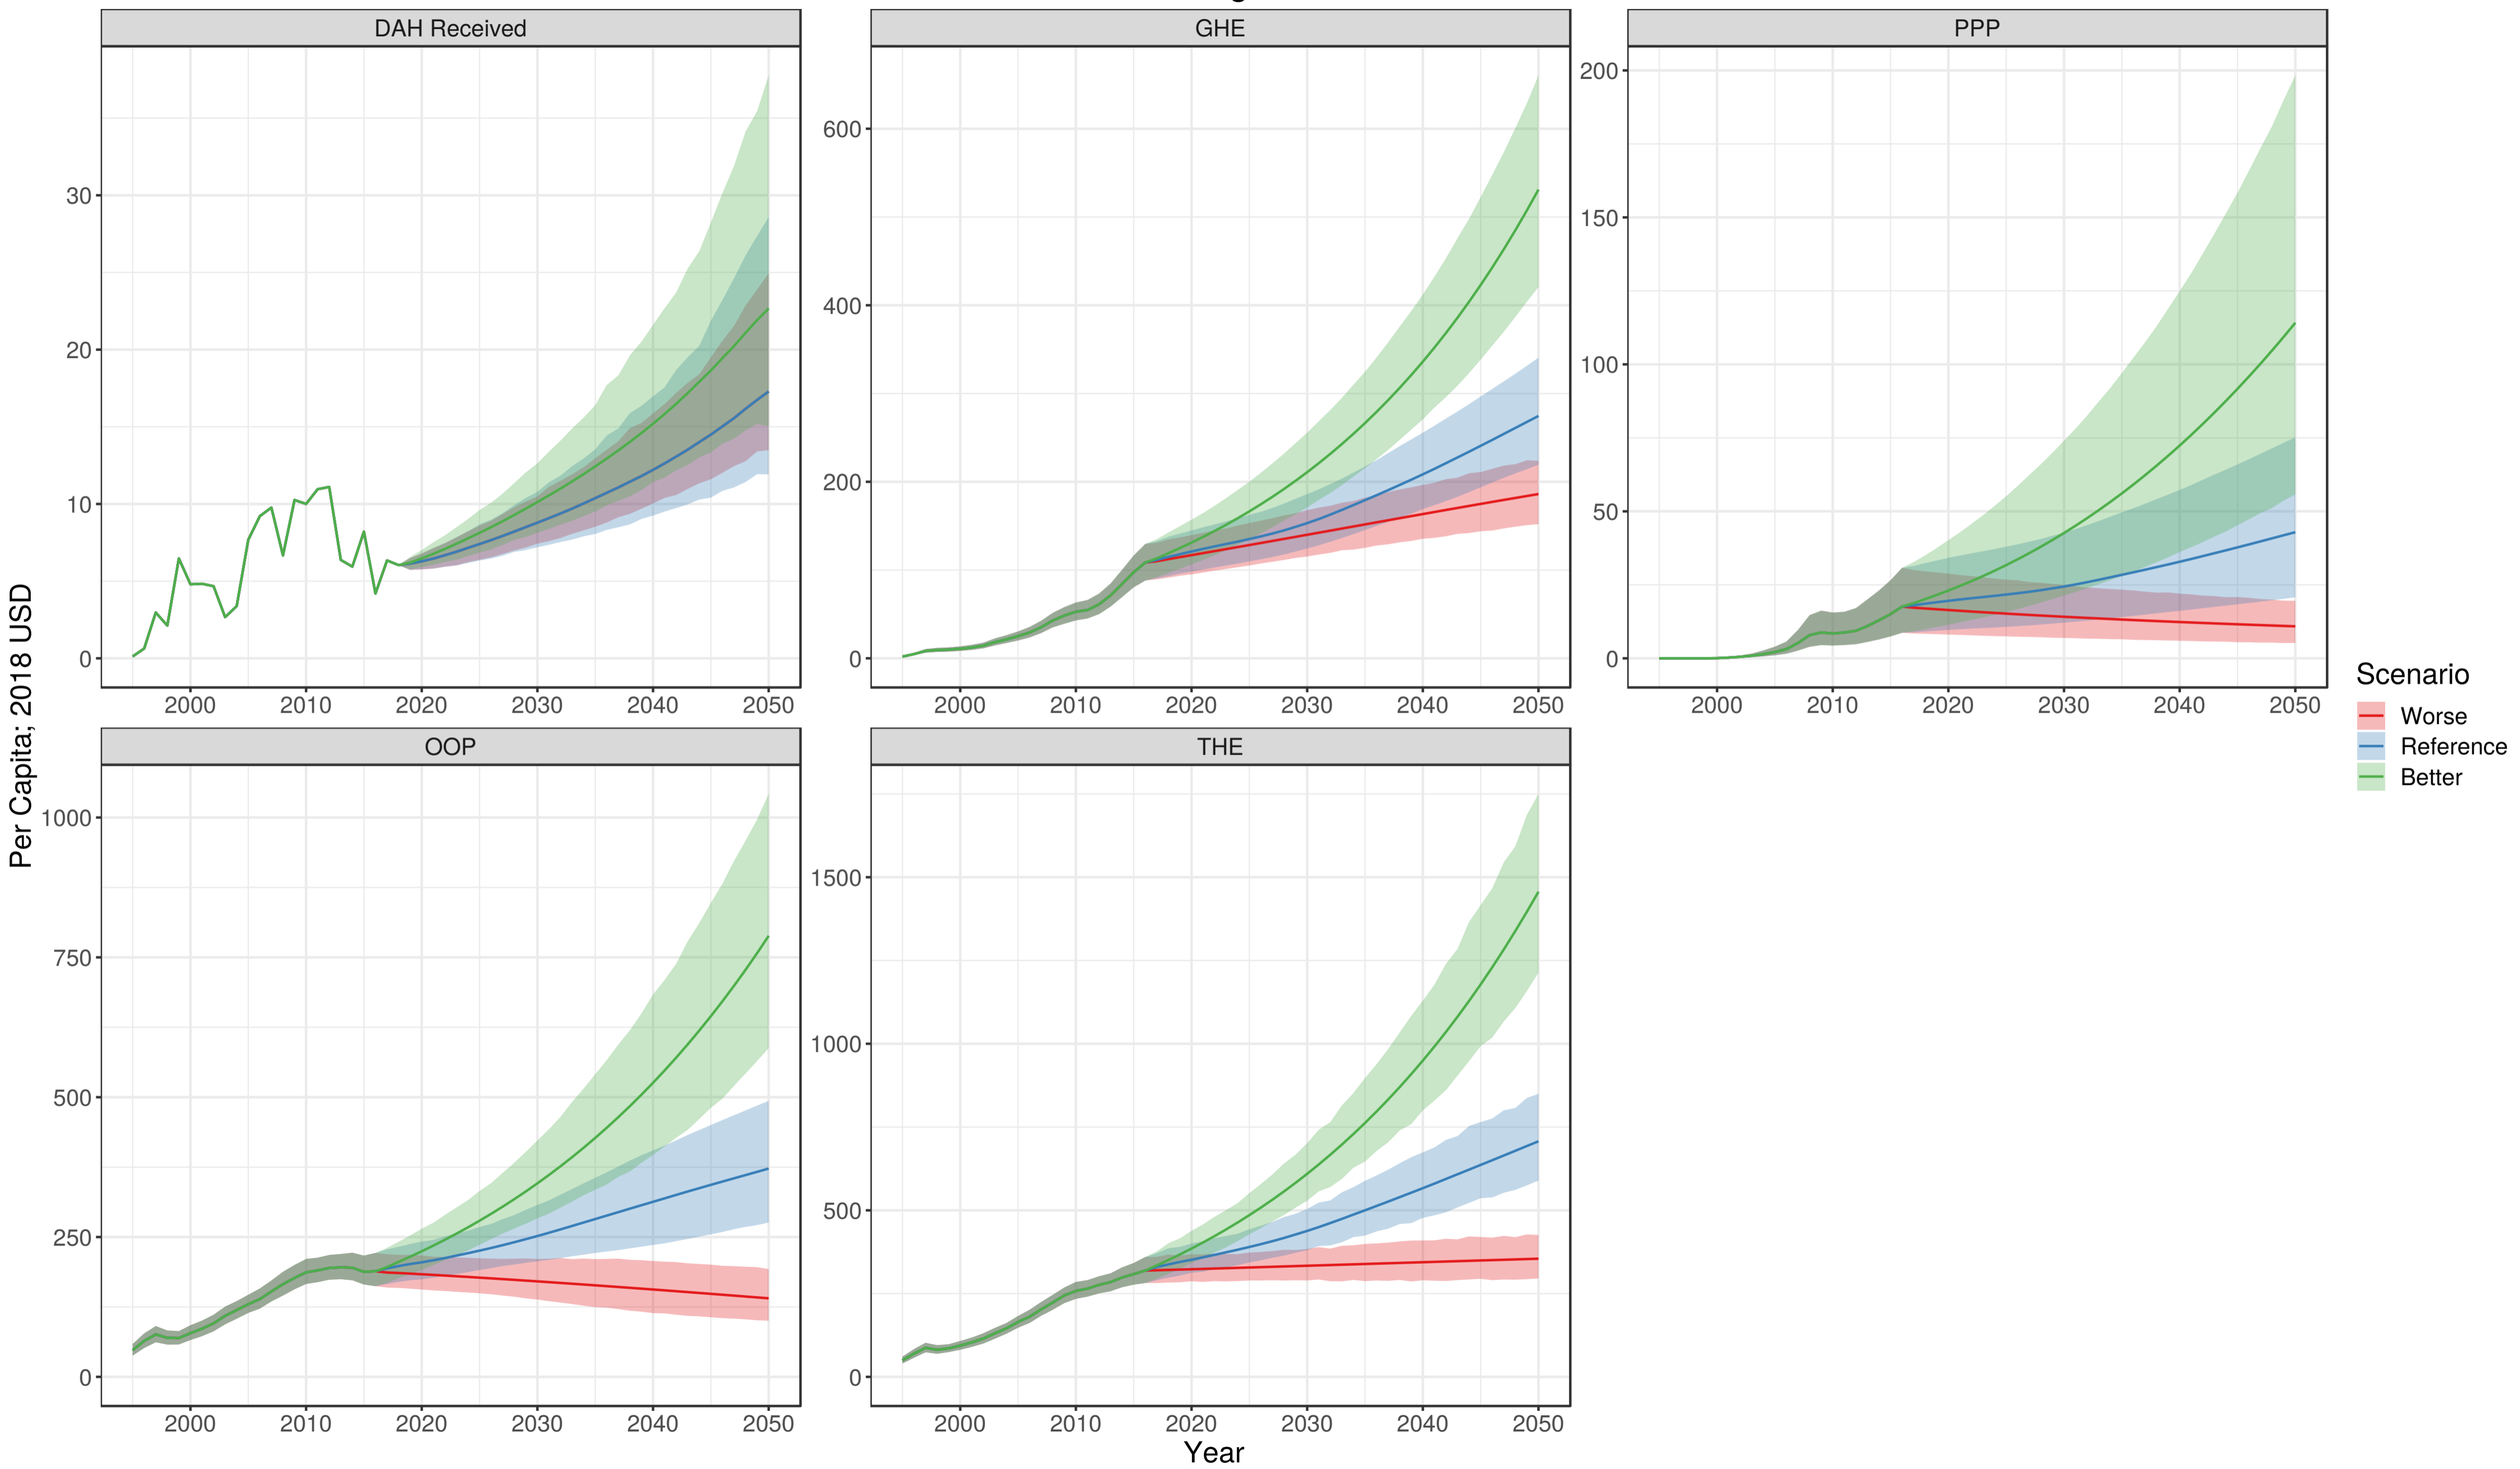

# Germany

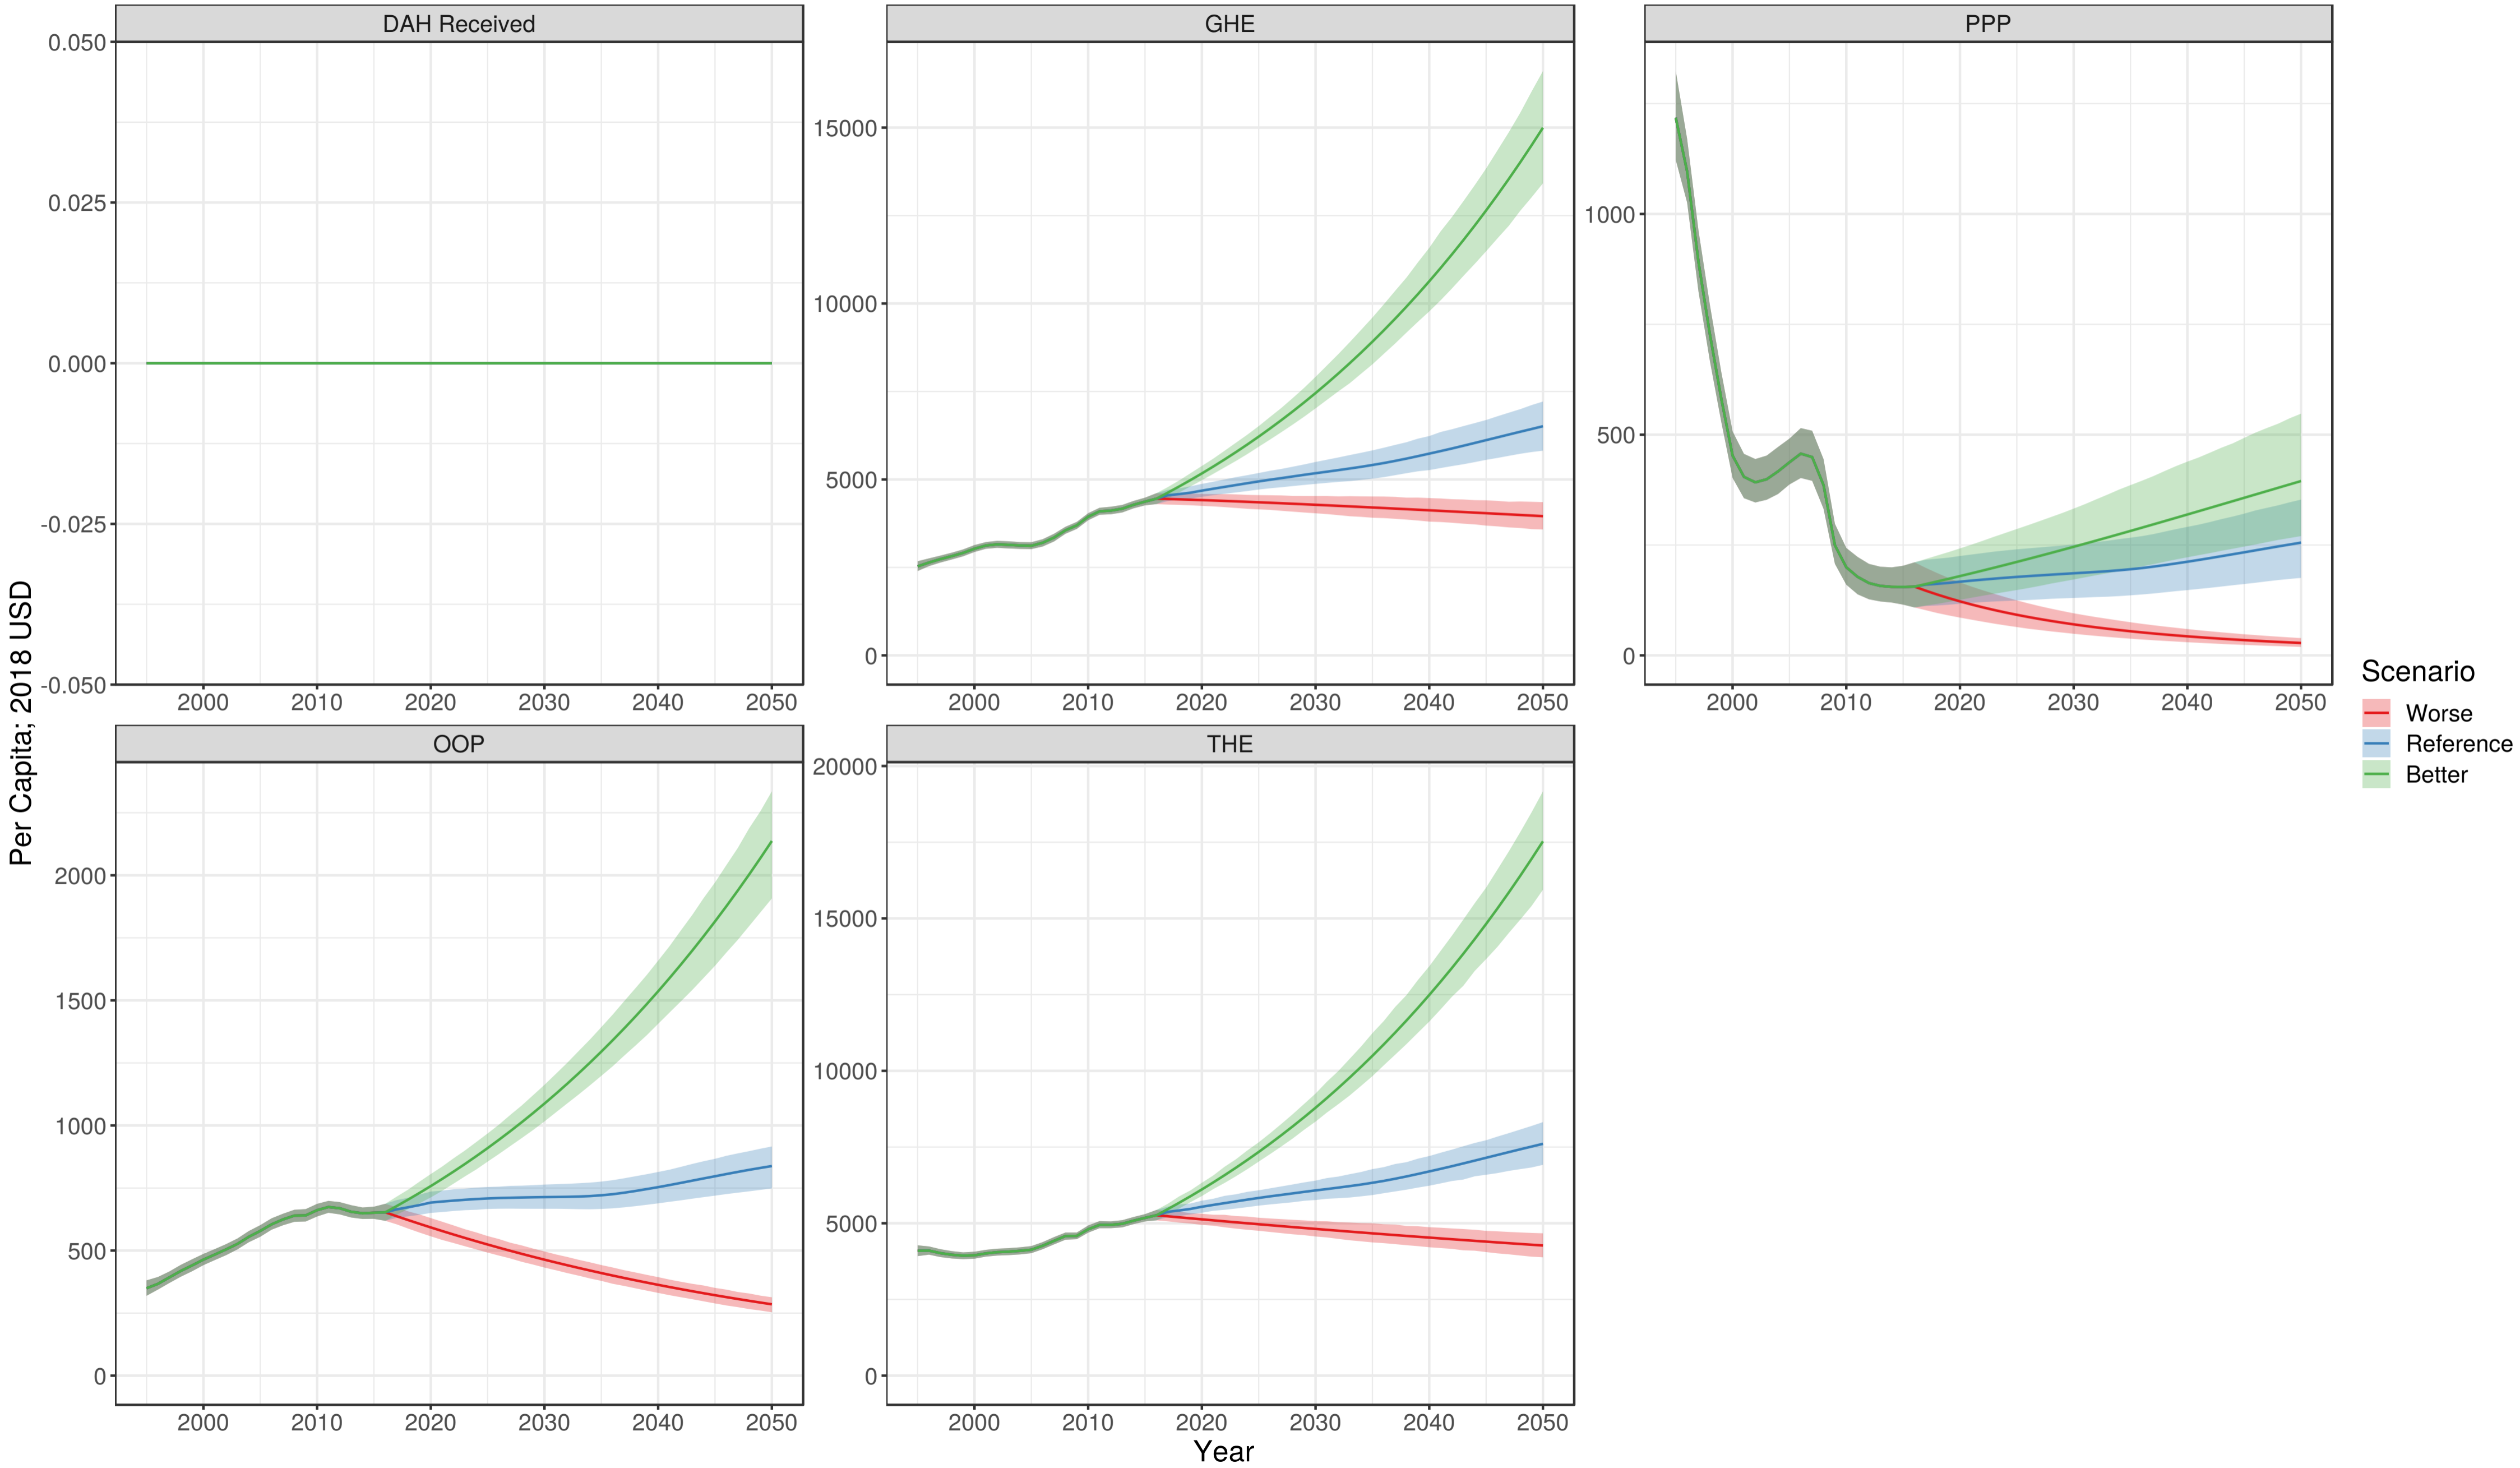

# Ghana

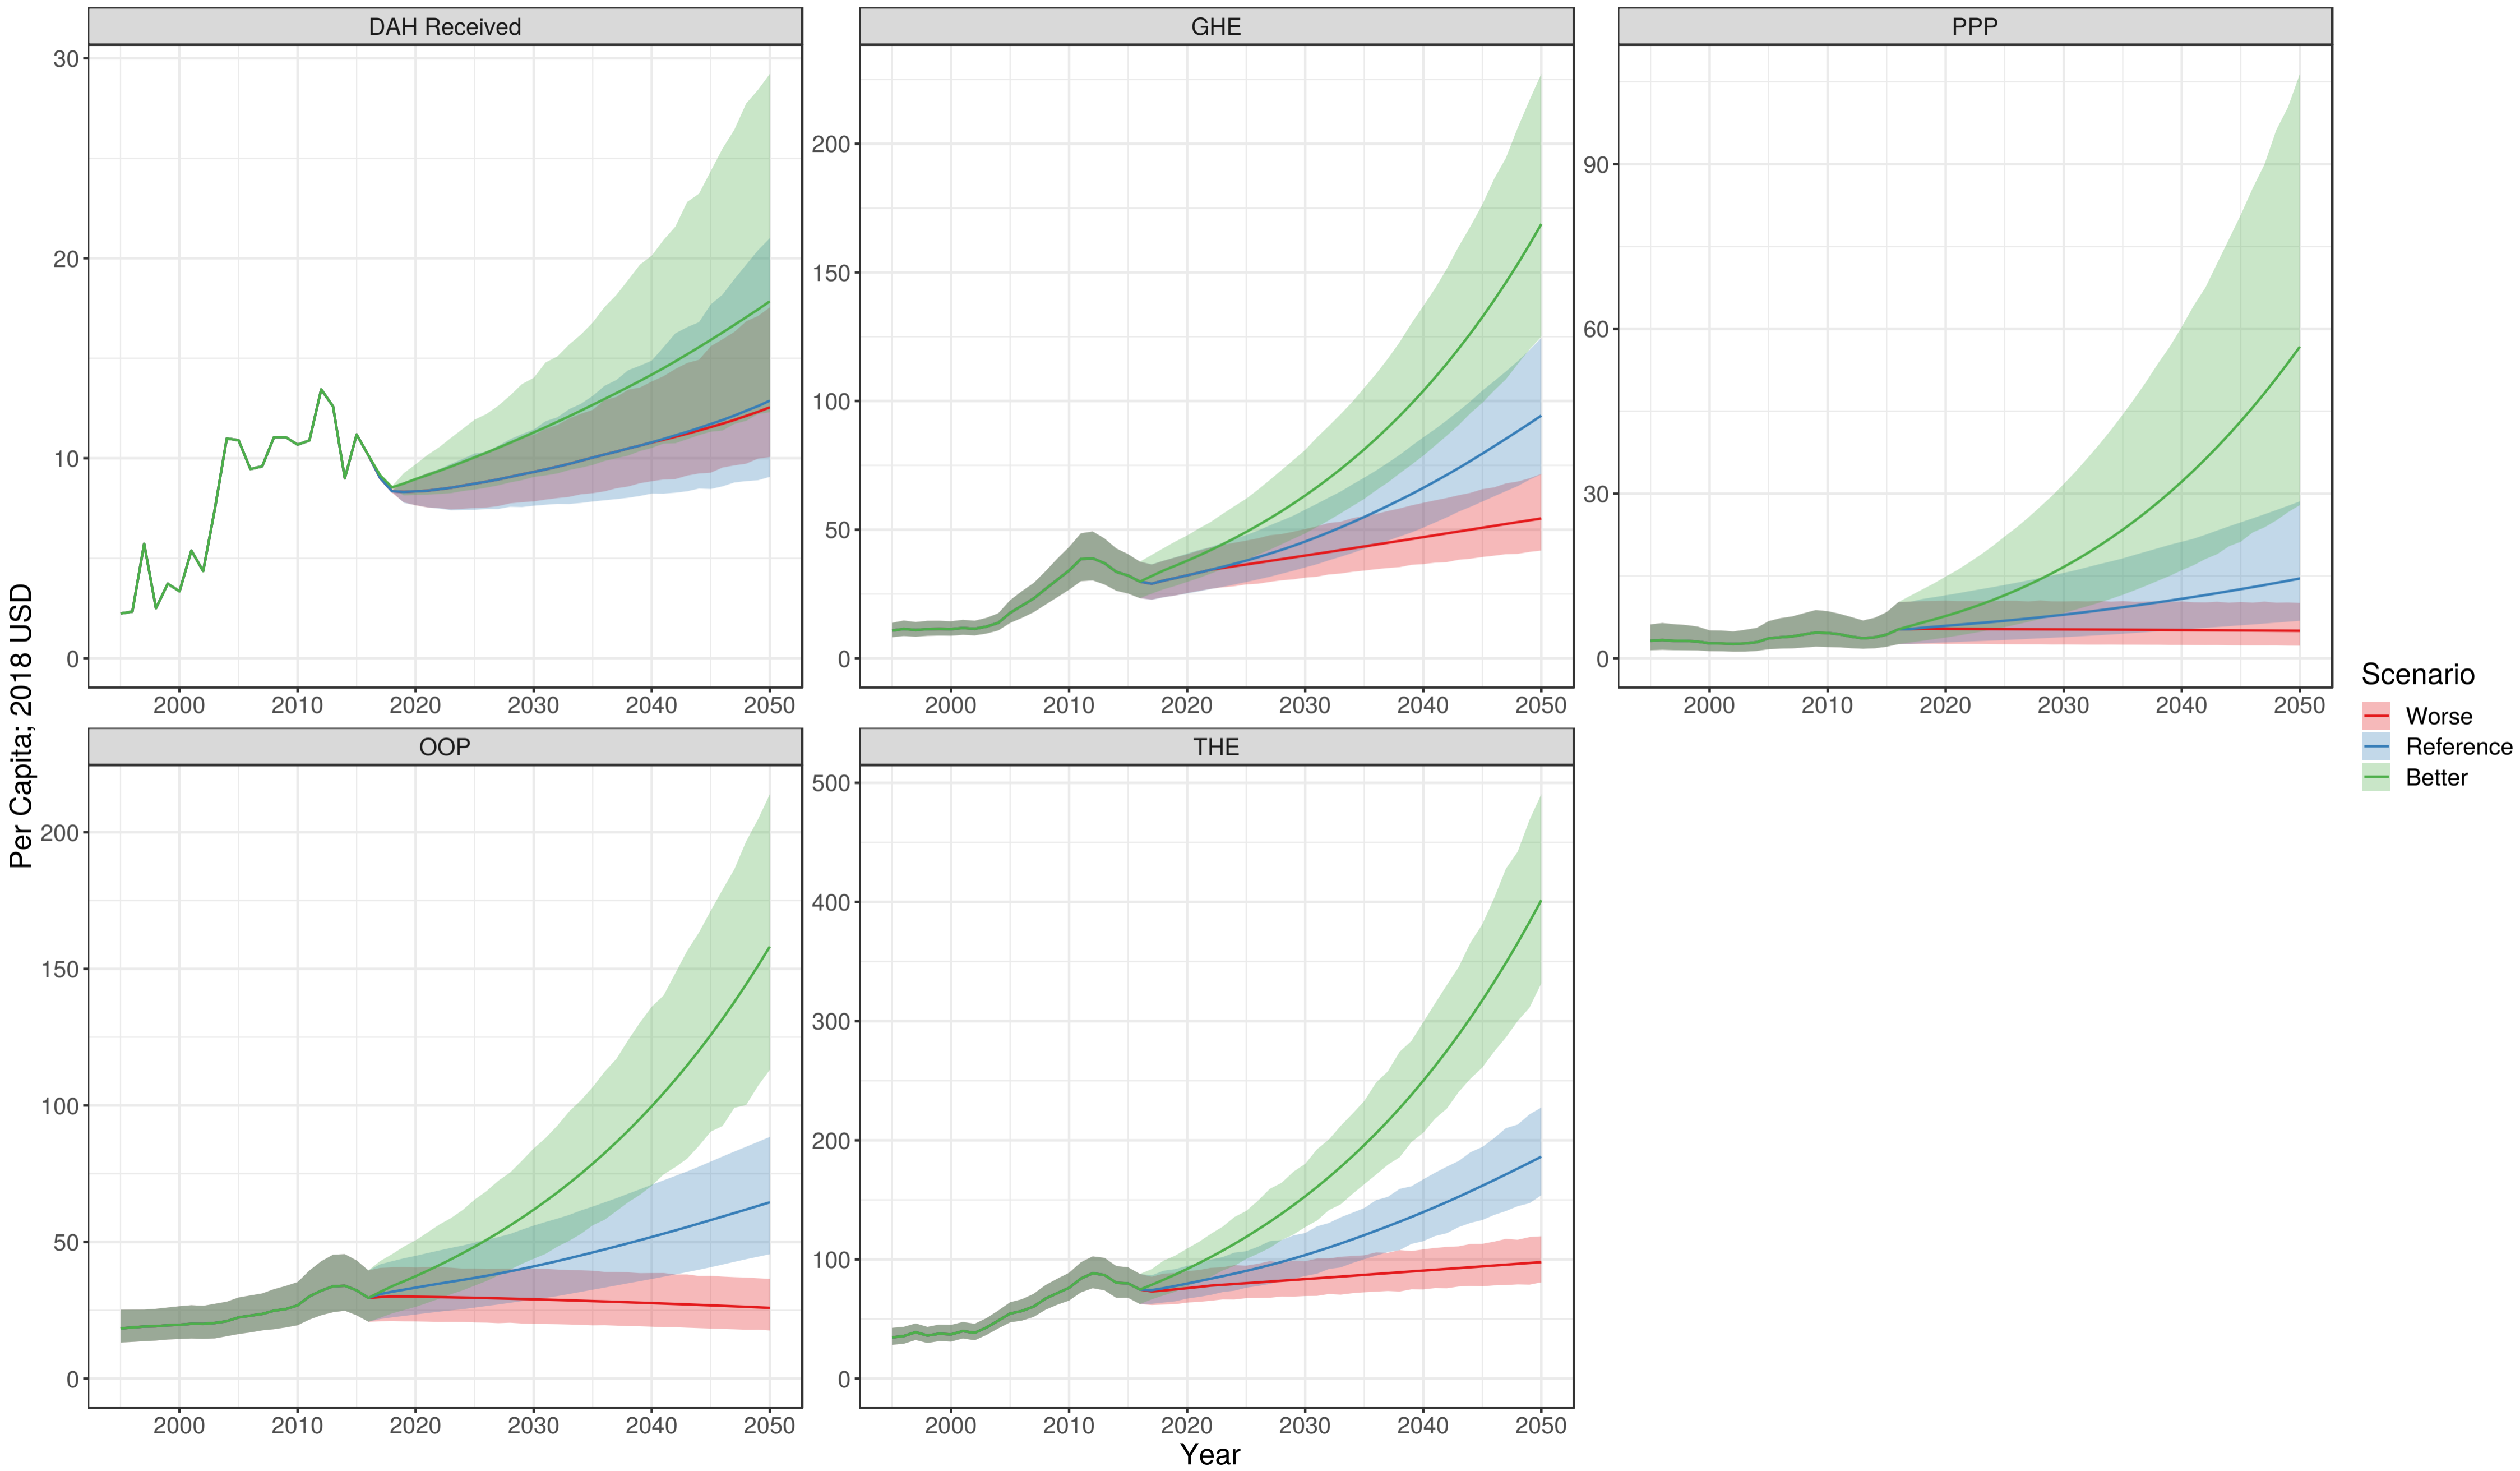

# Greece

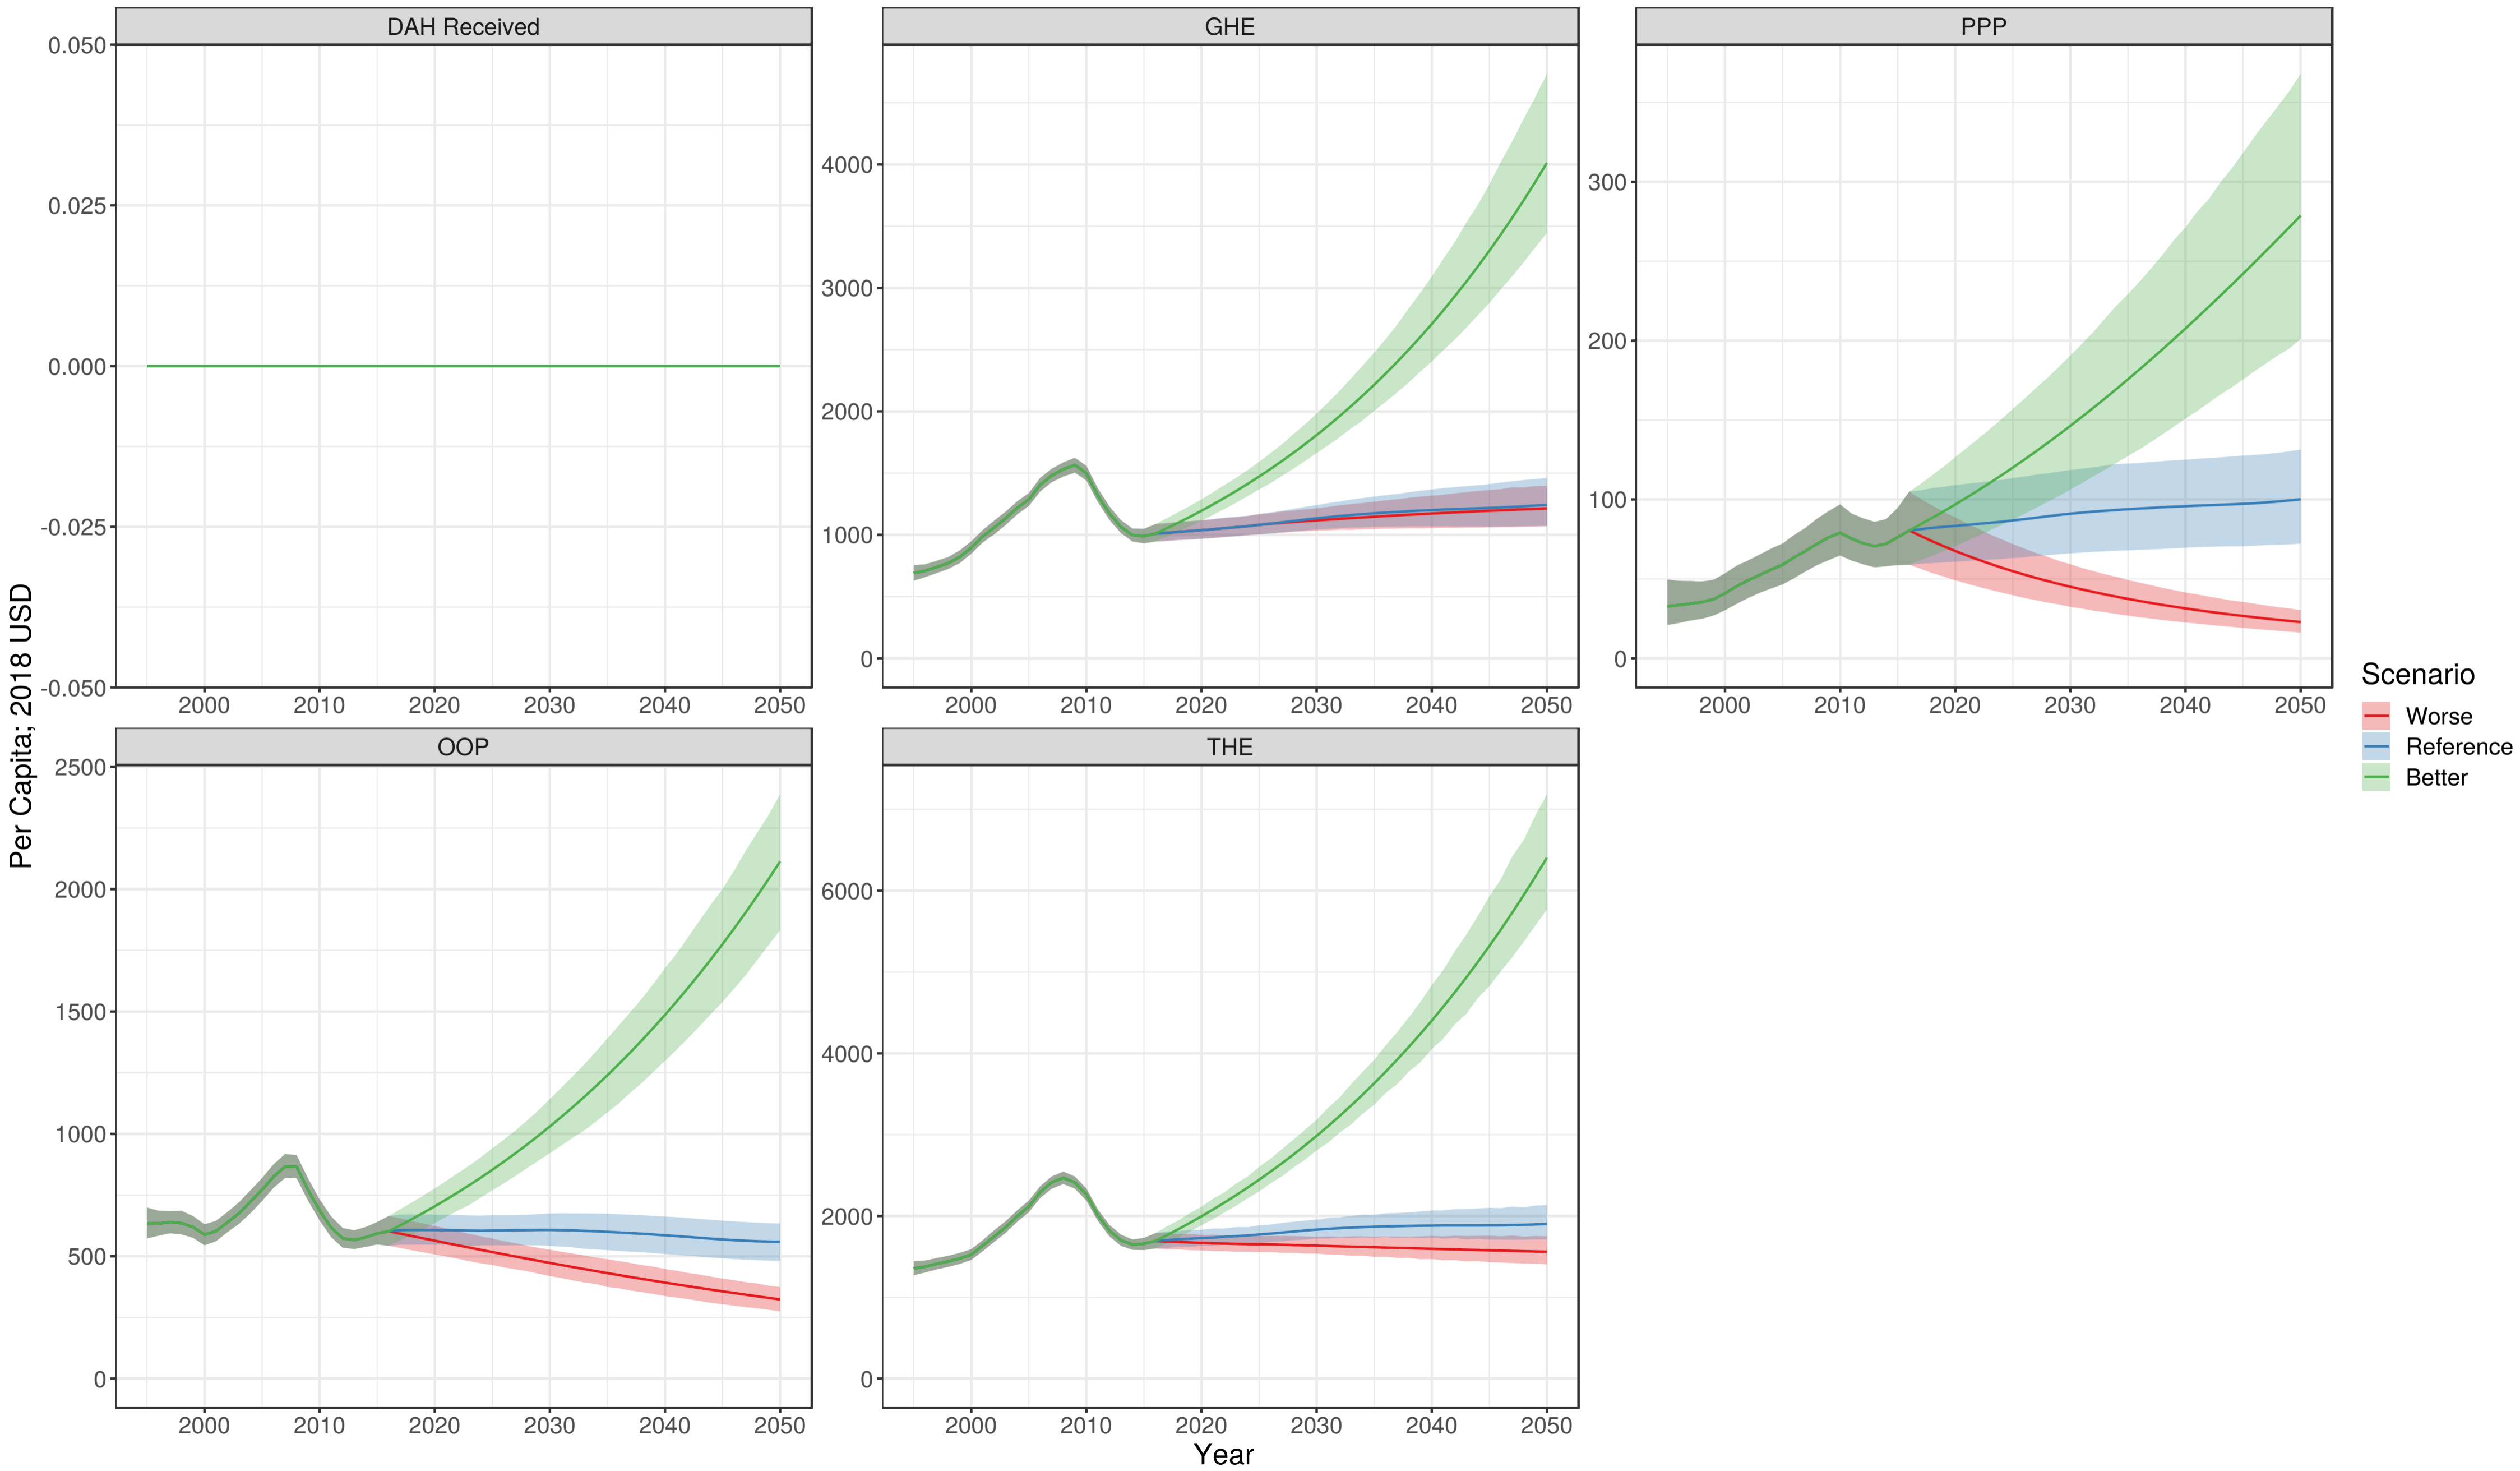

# Greenland

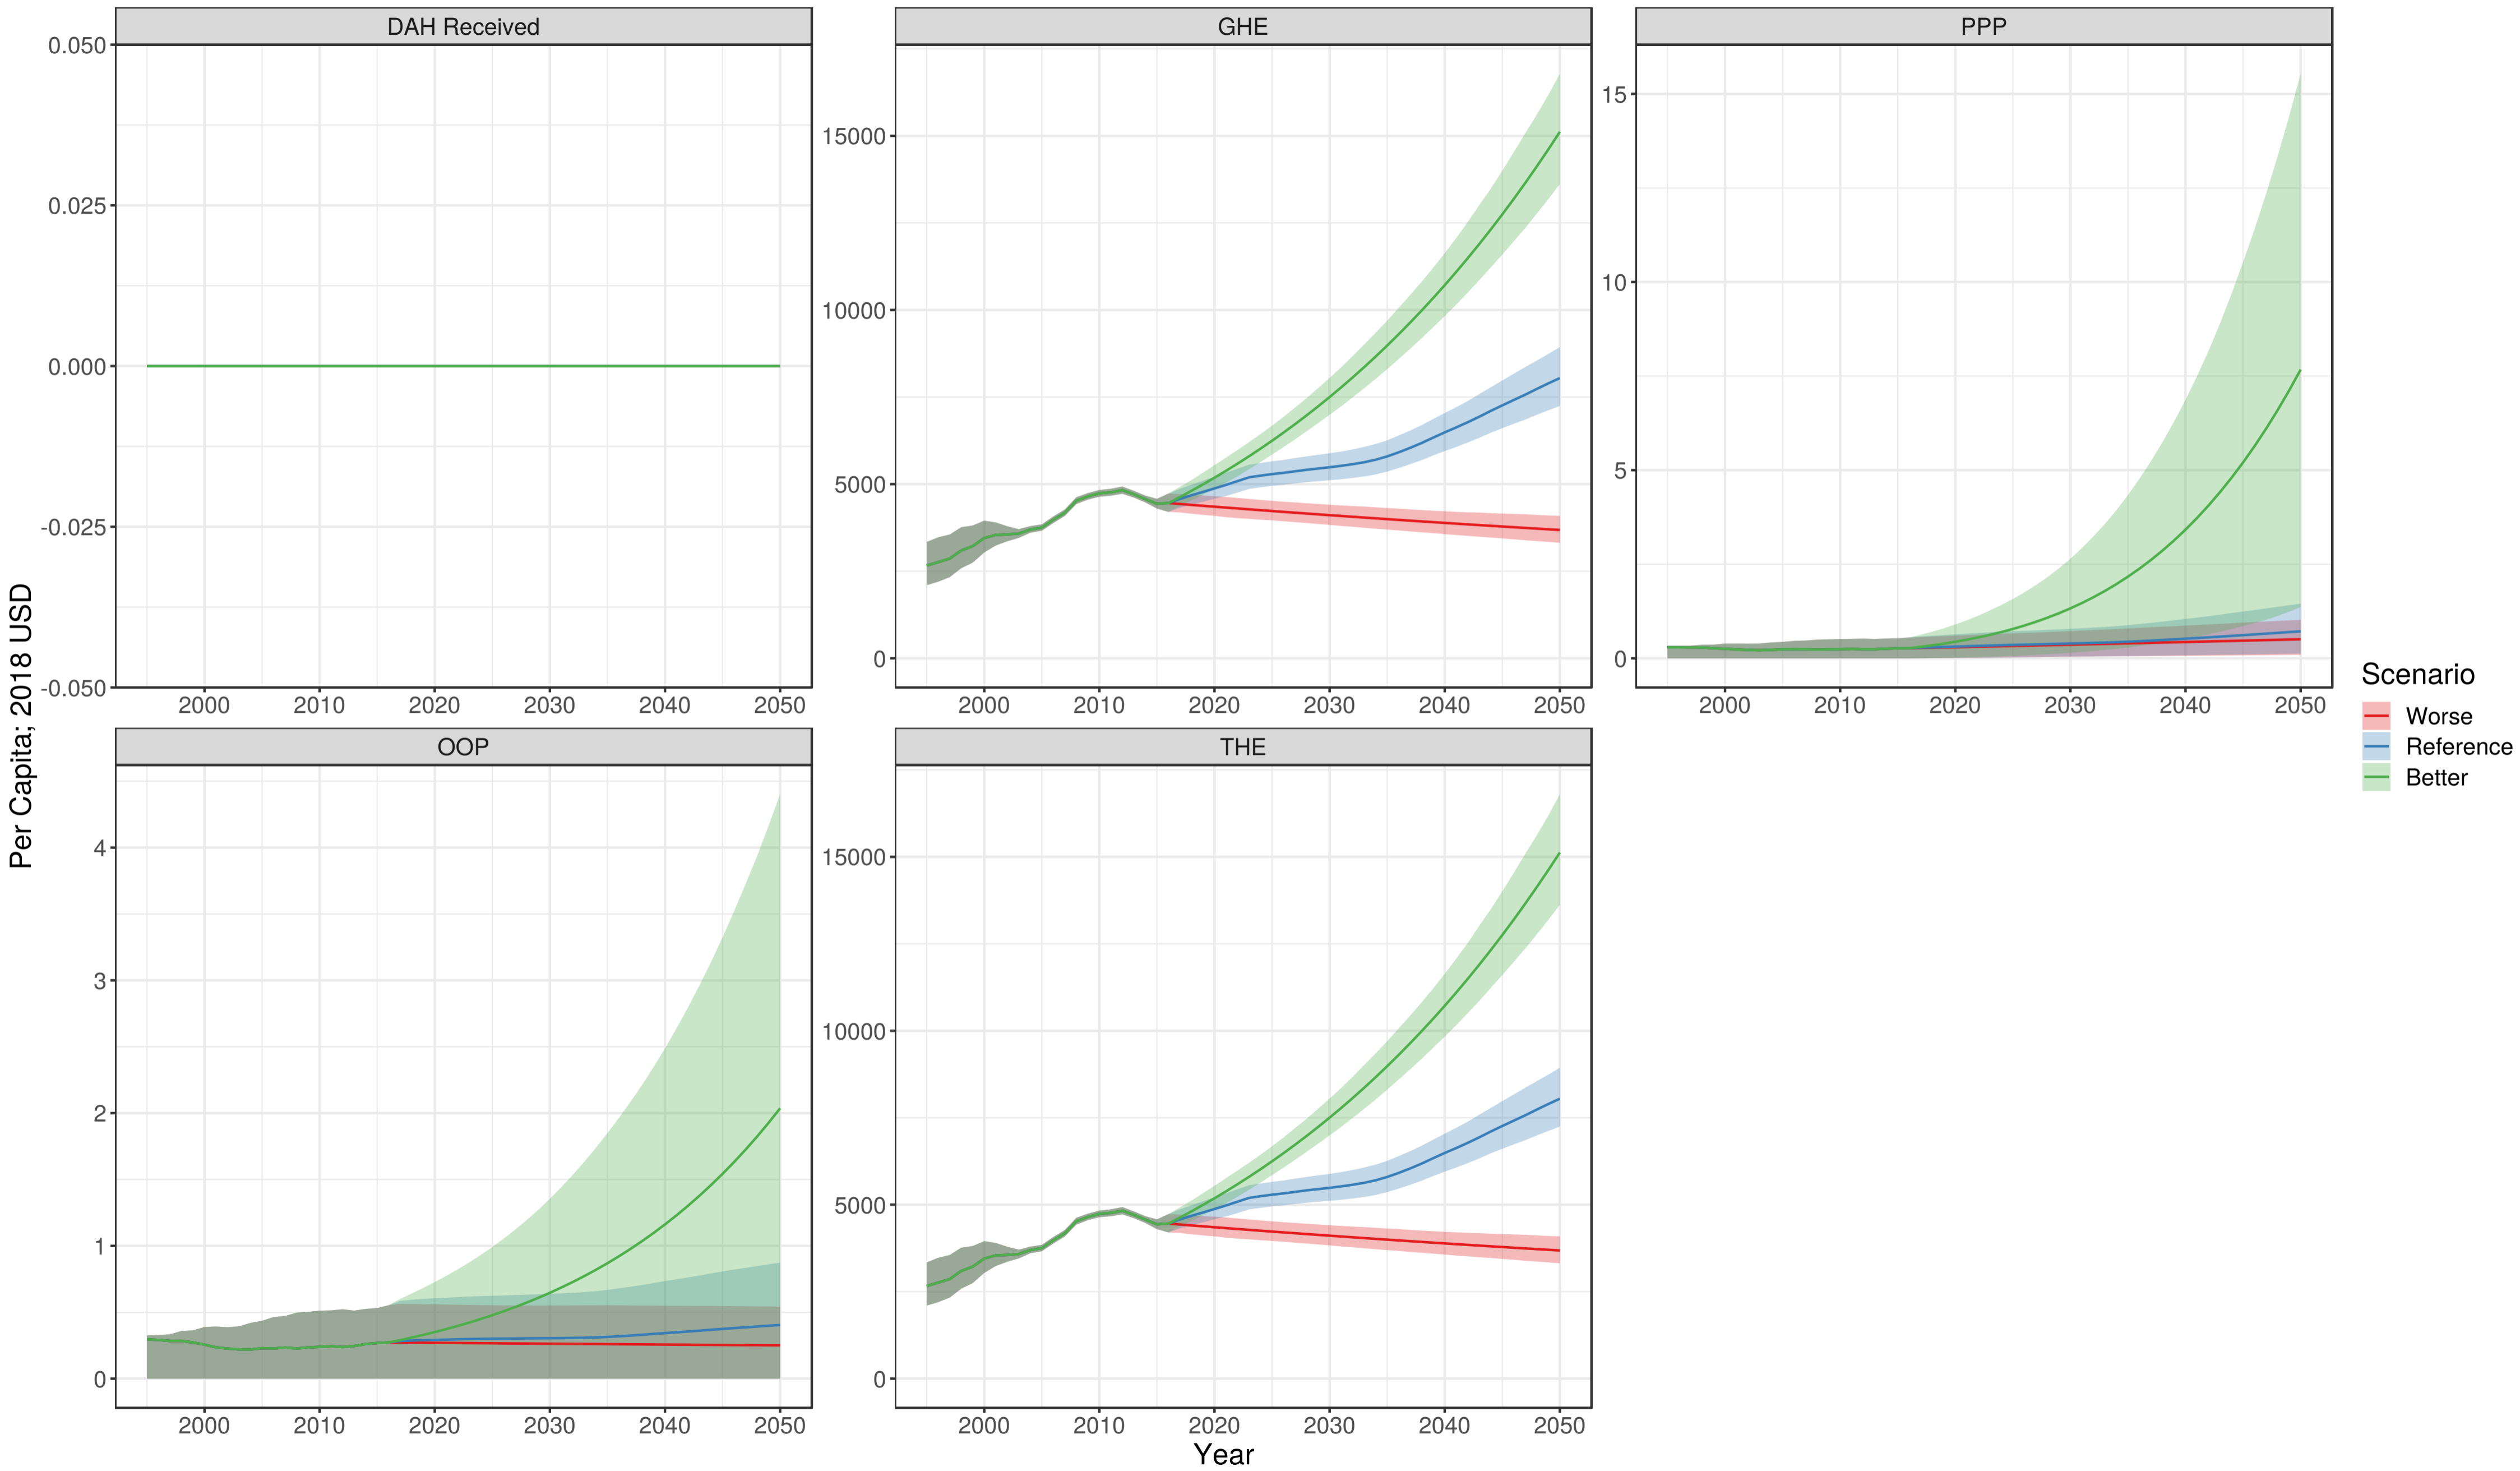



# Grenada

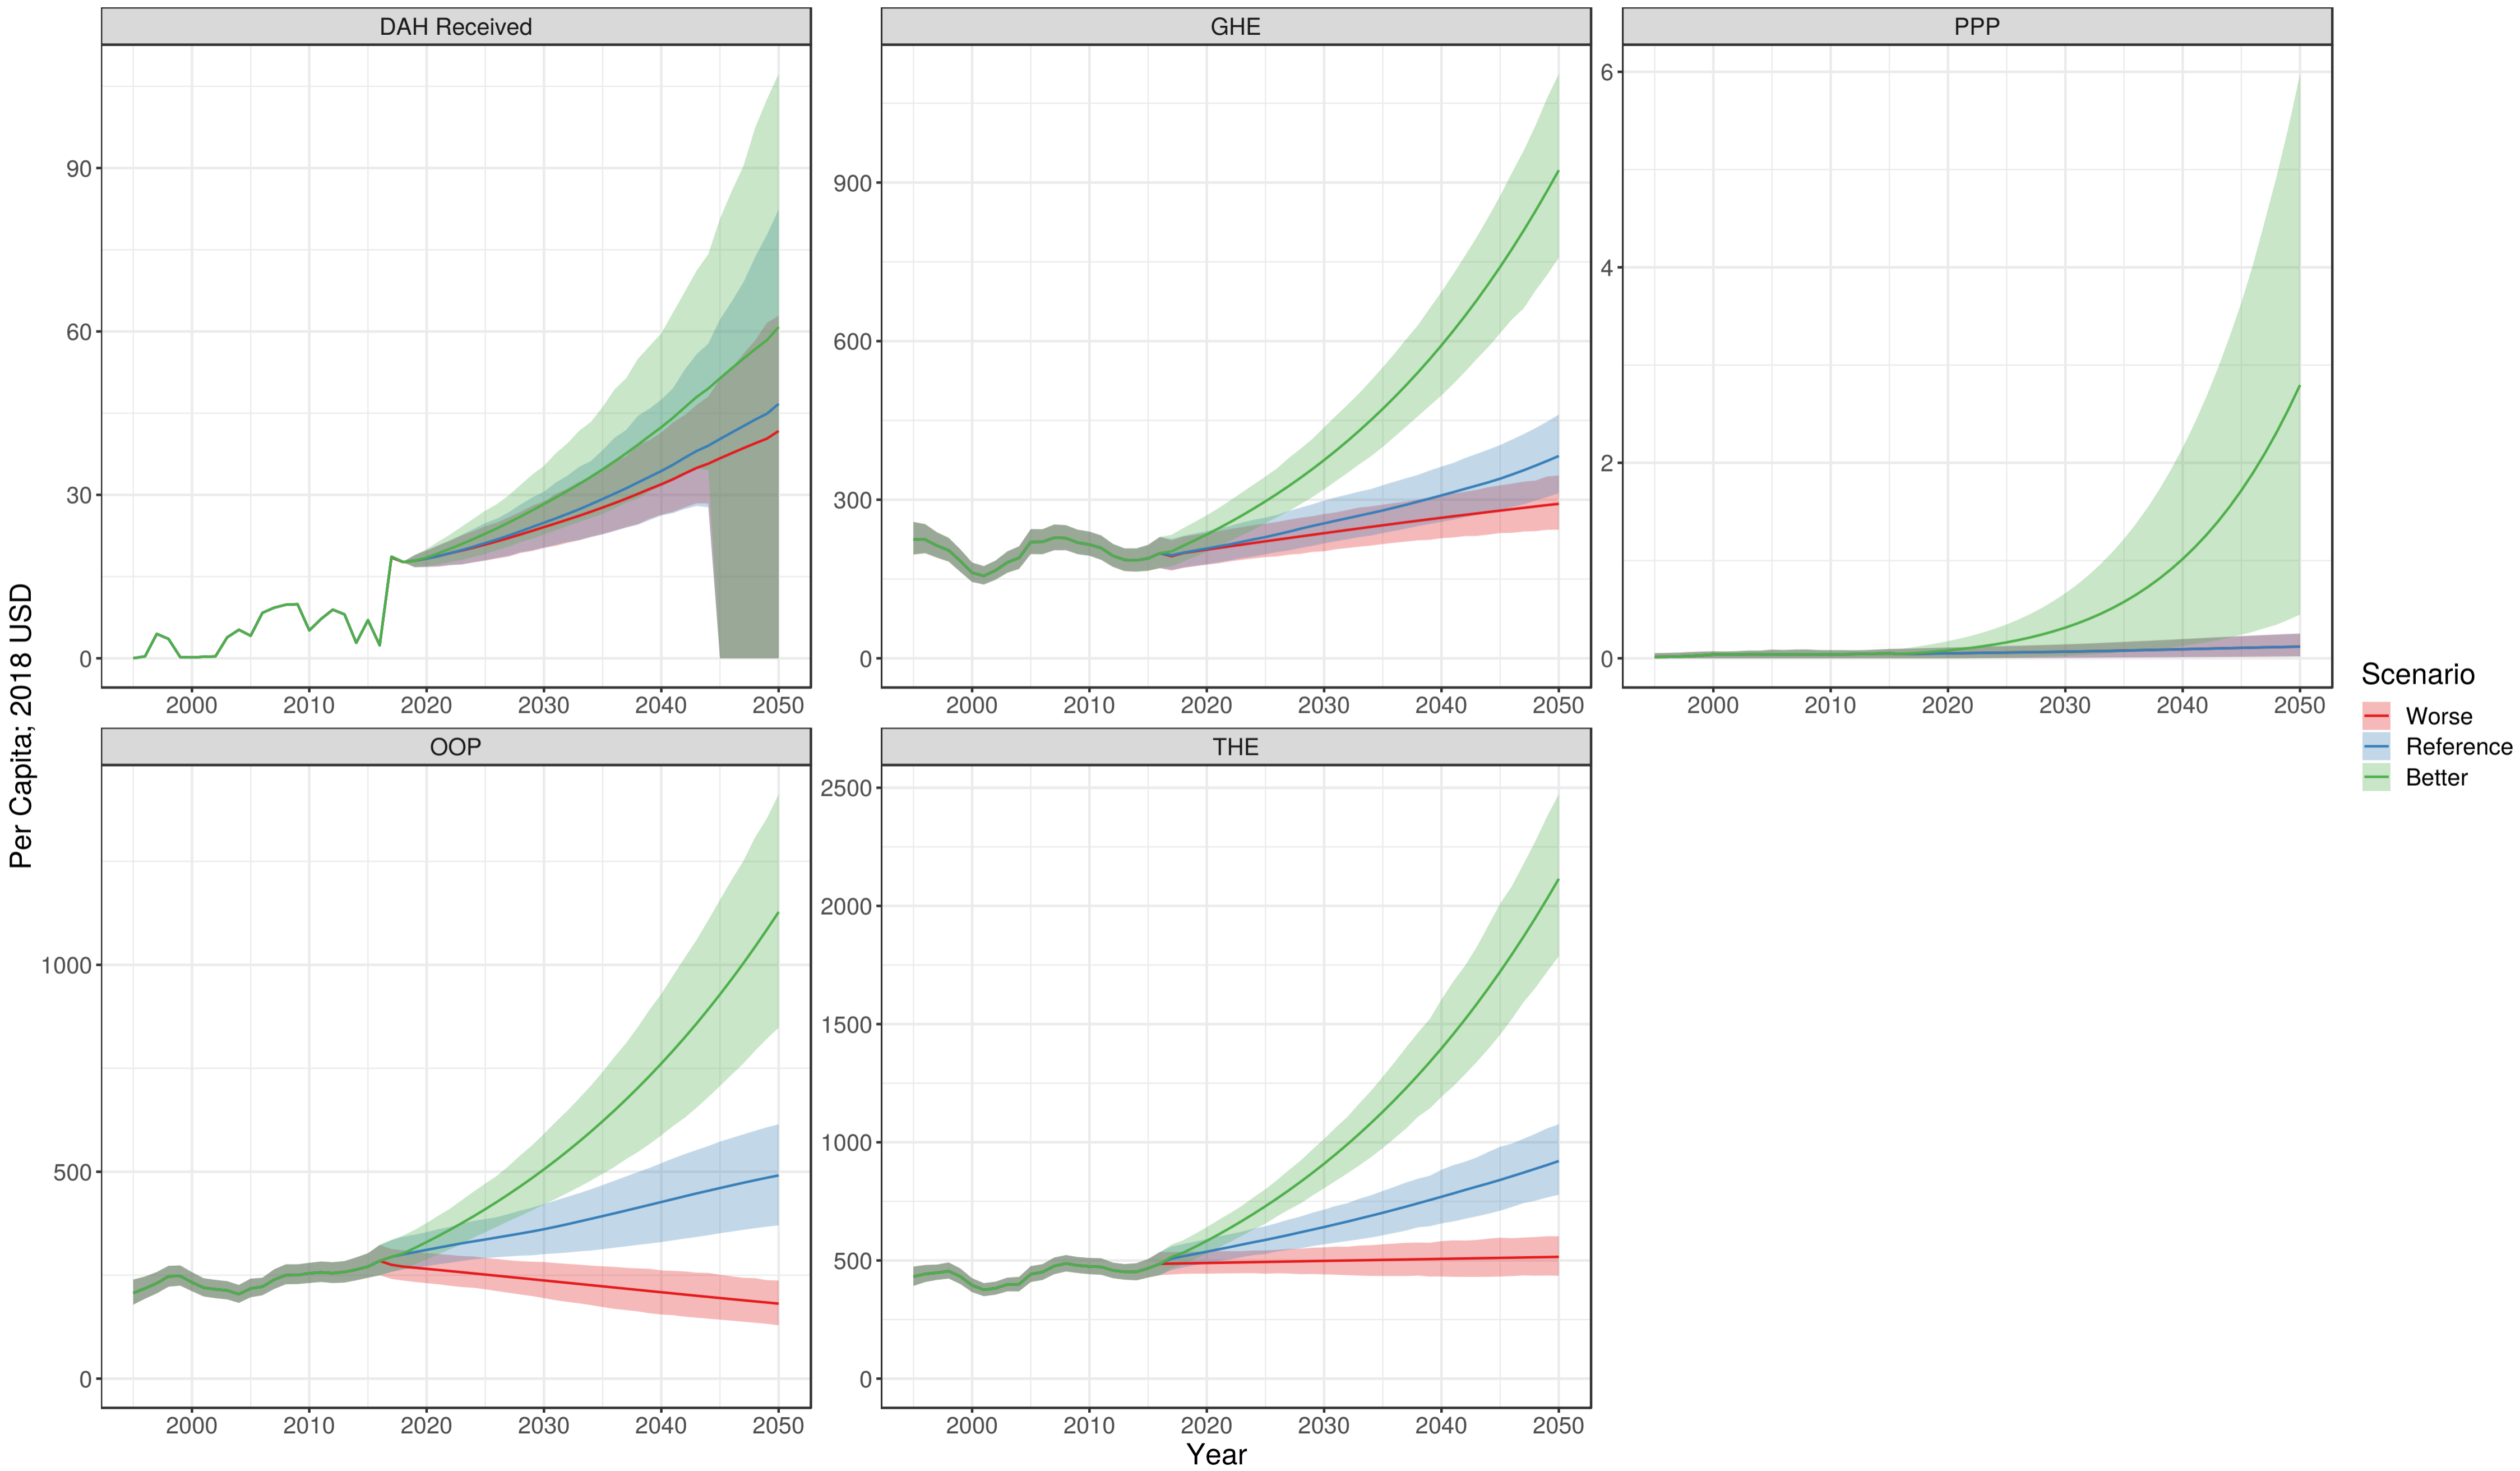

# Guam

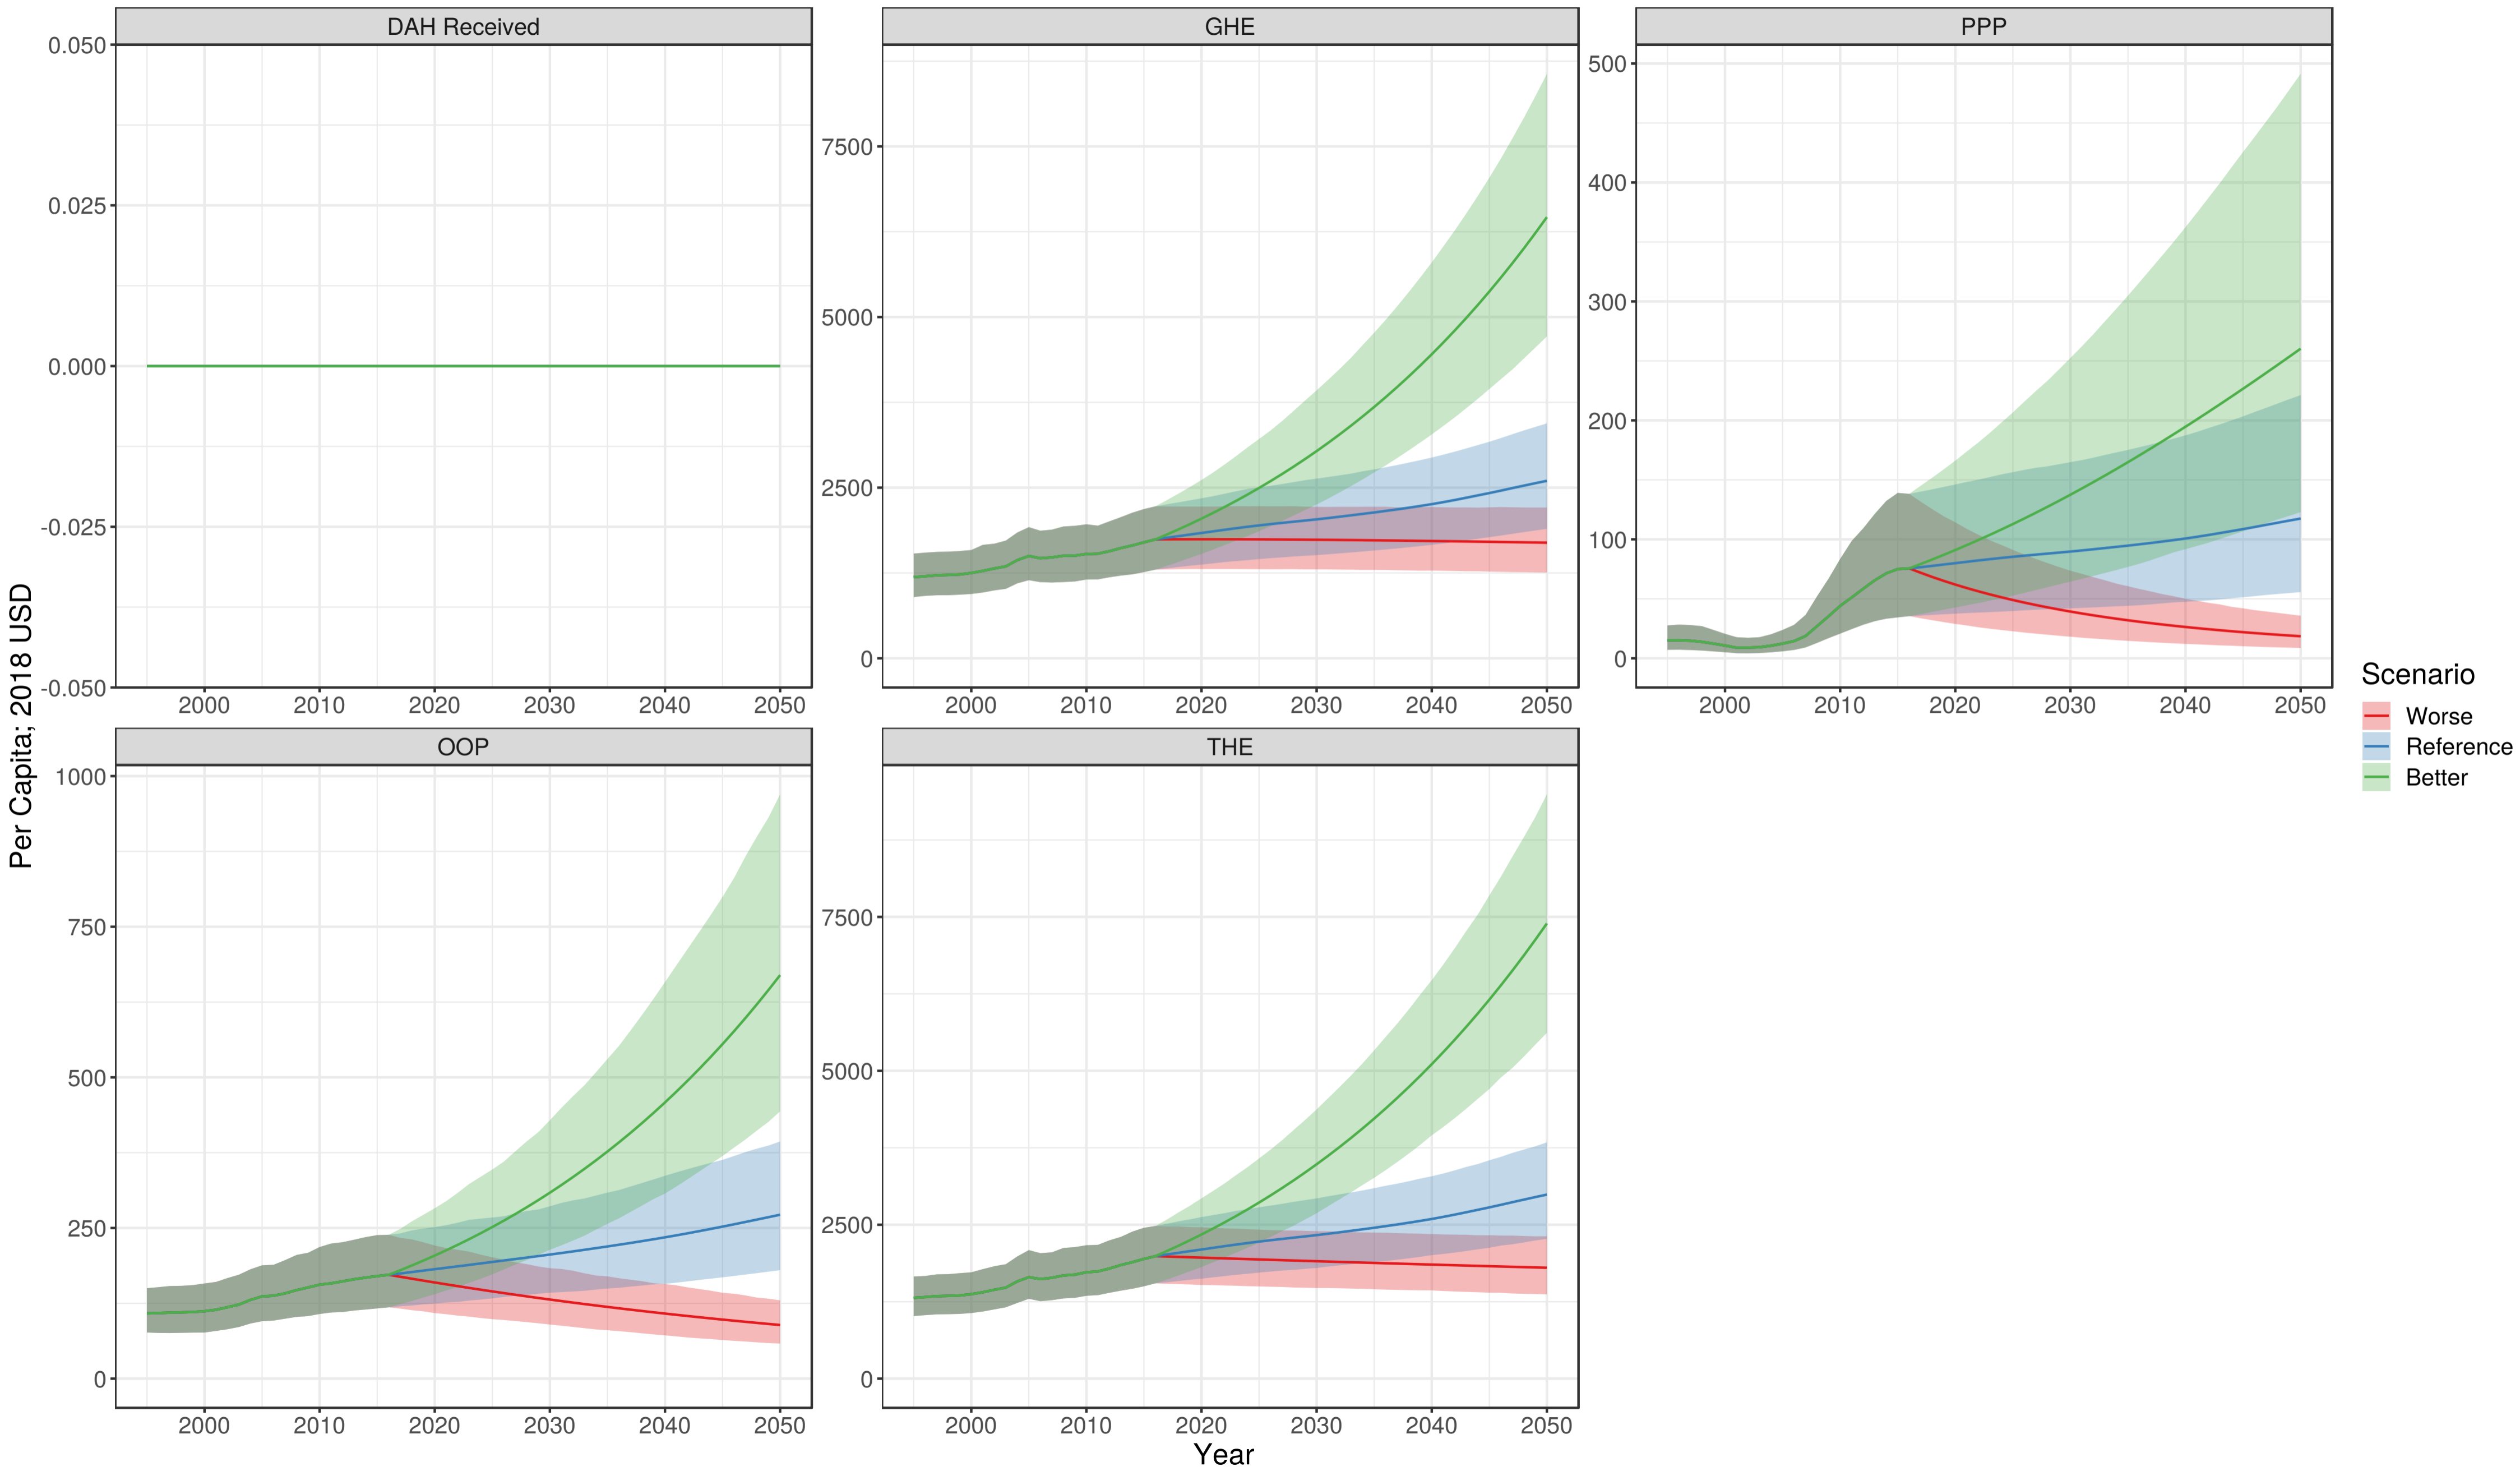

# Guatemala

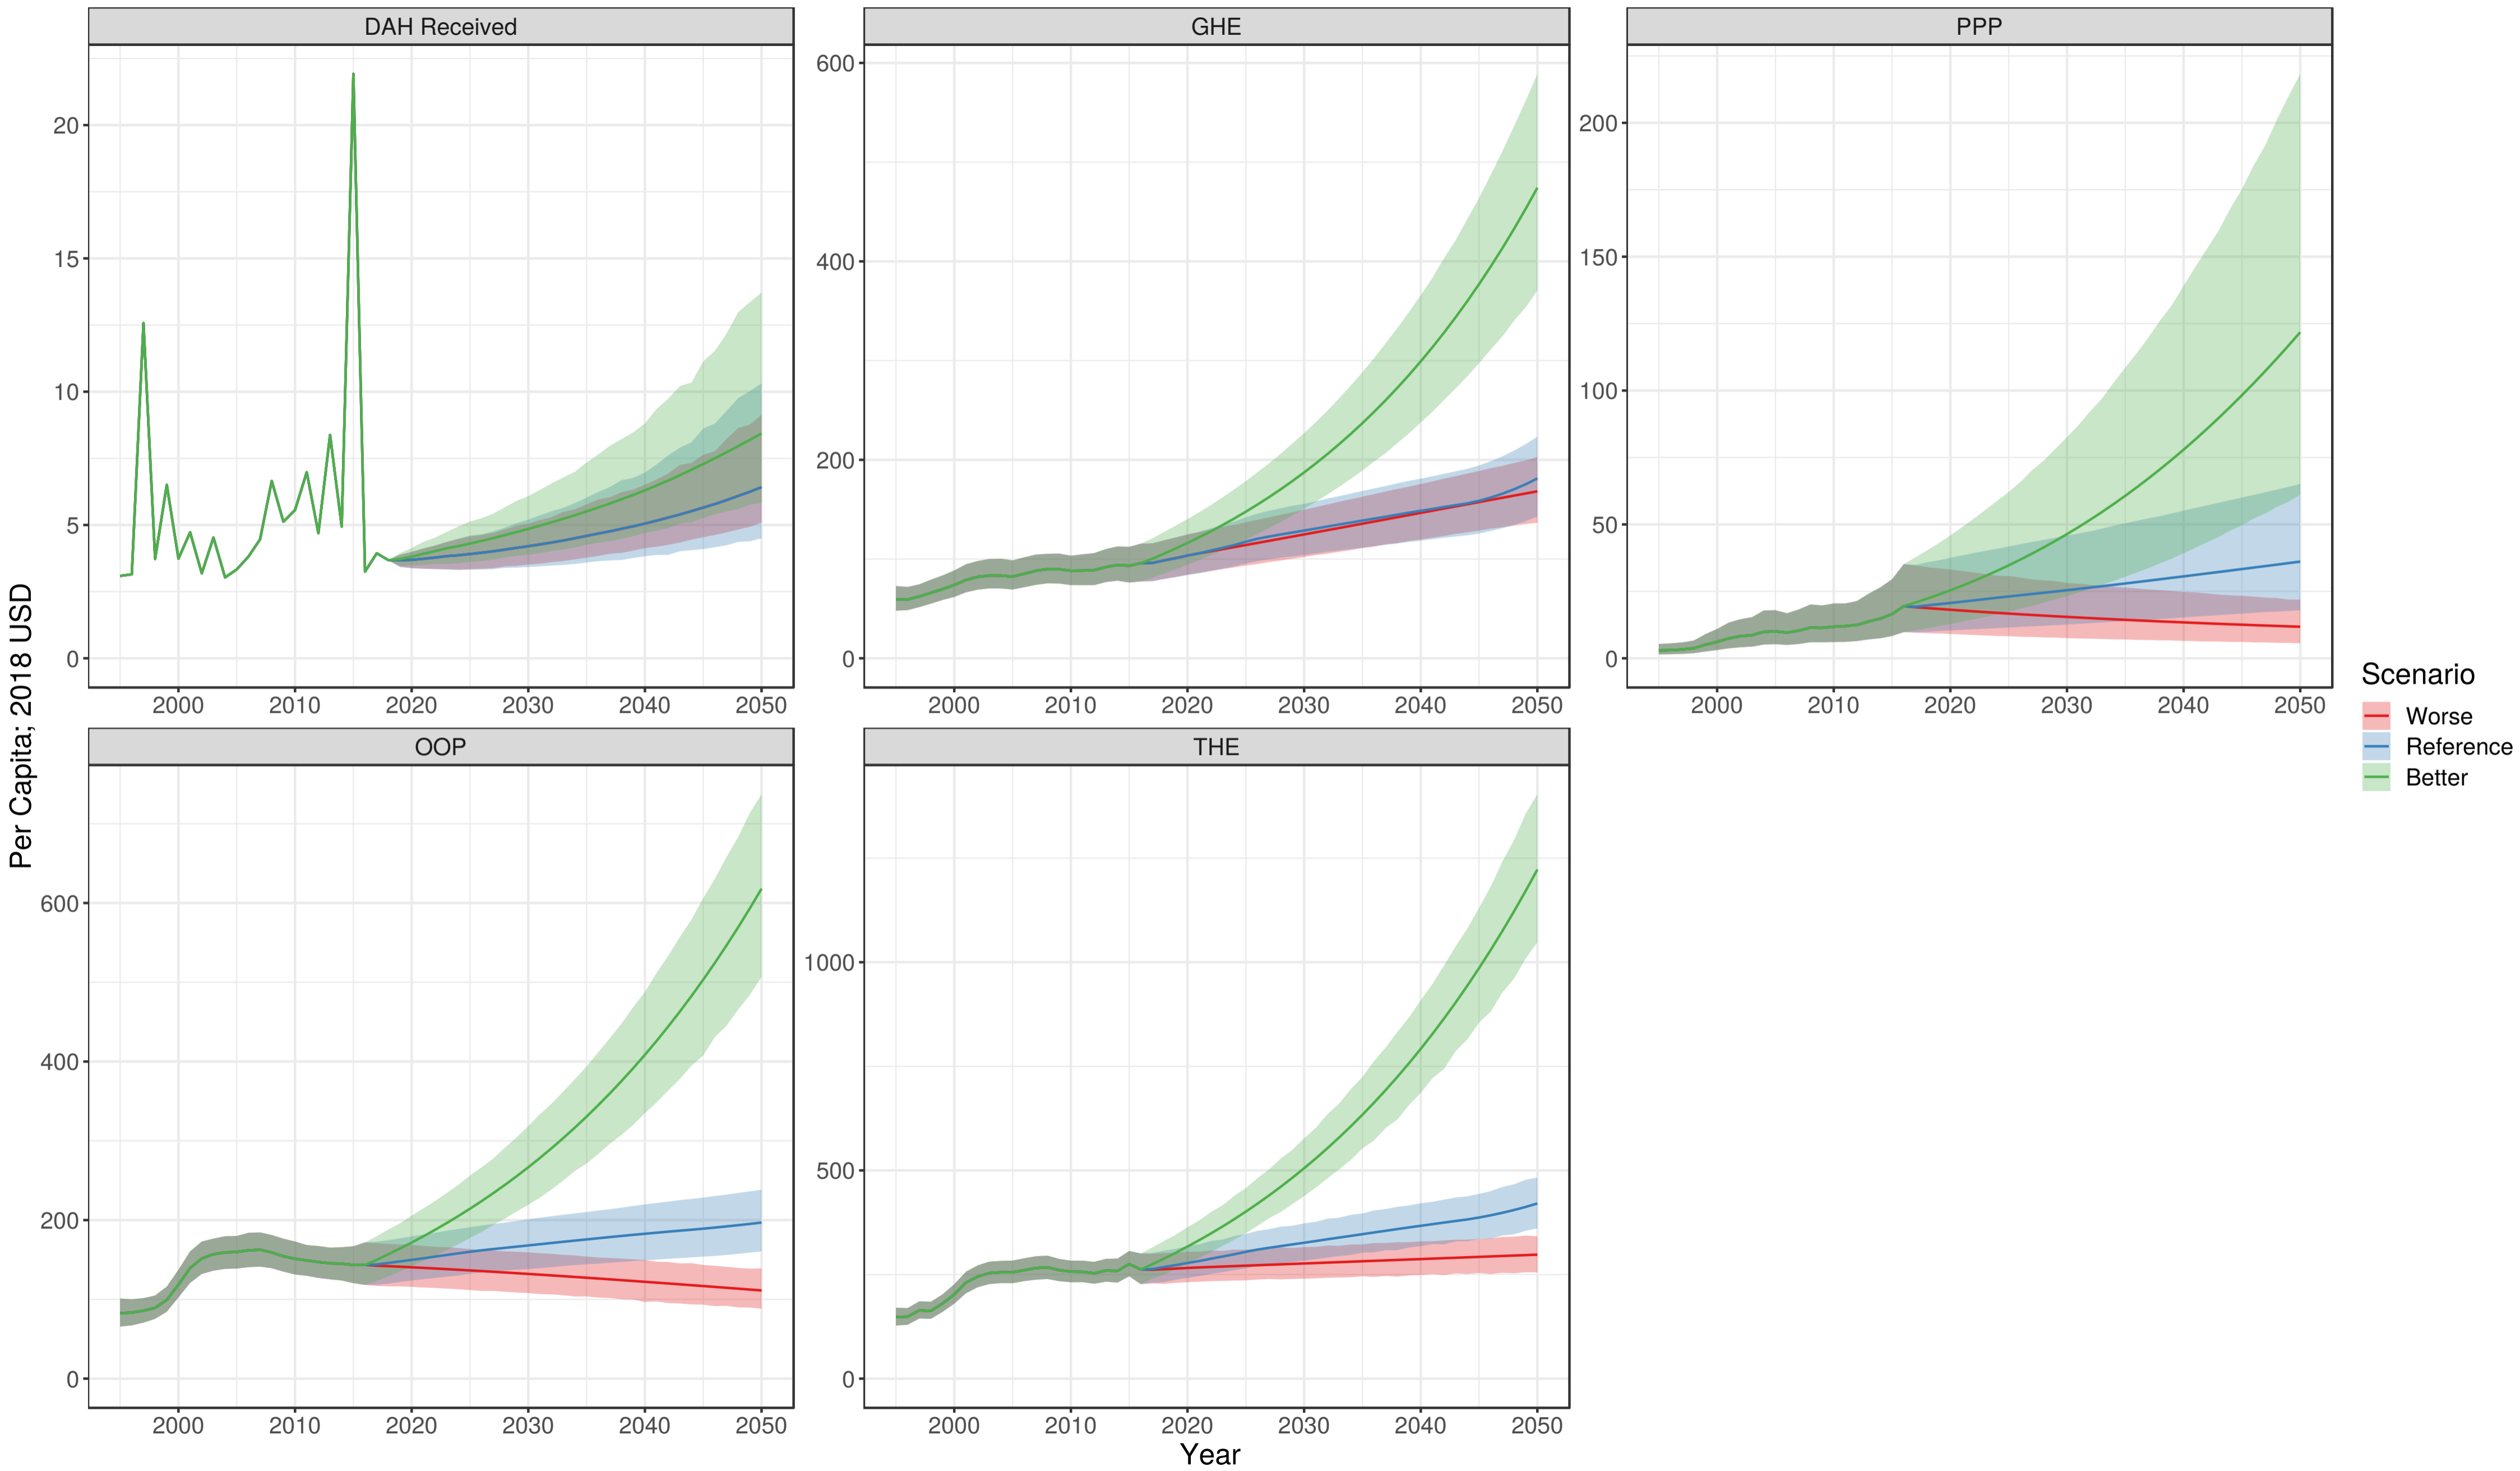

# Guinea

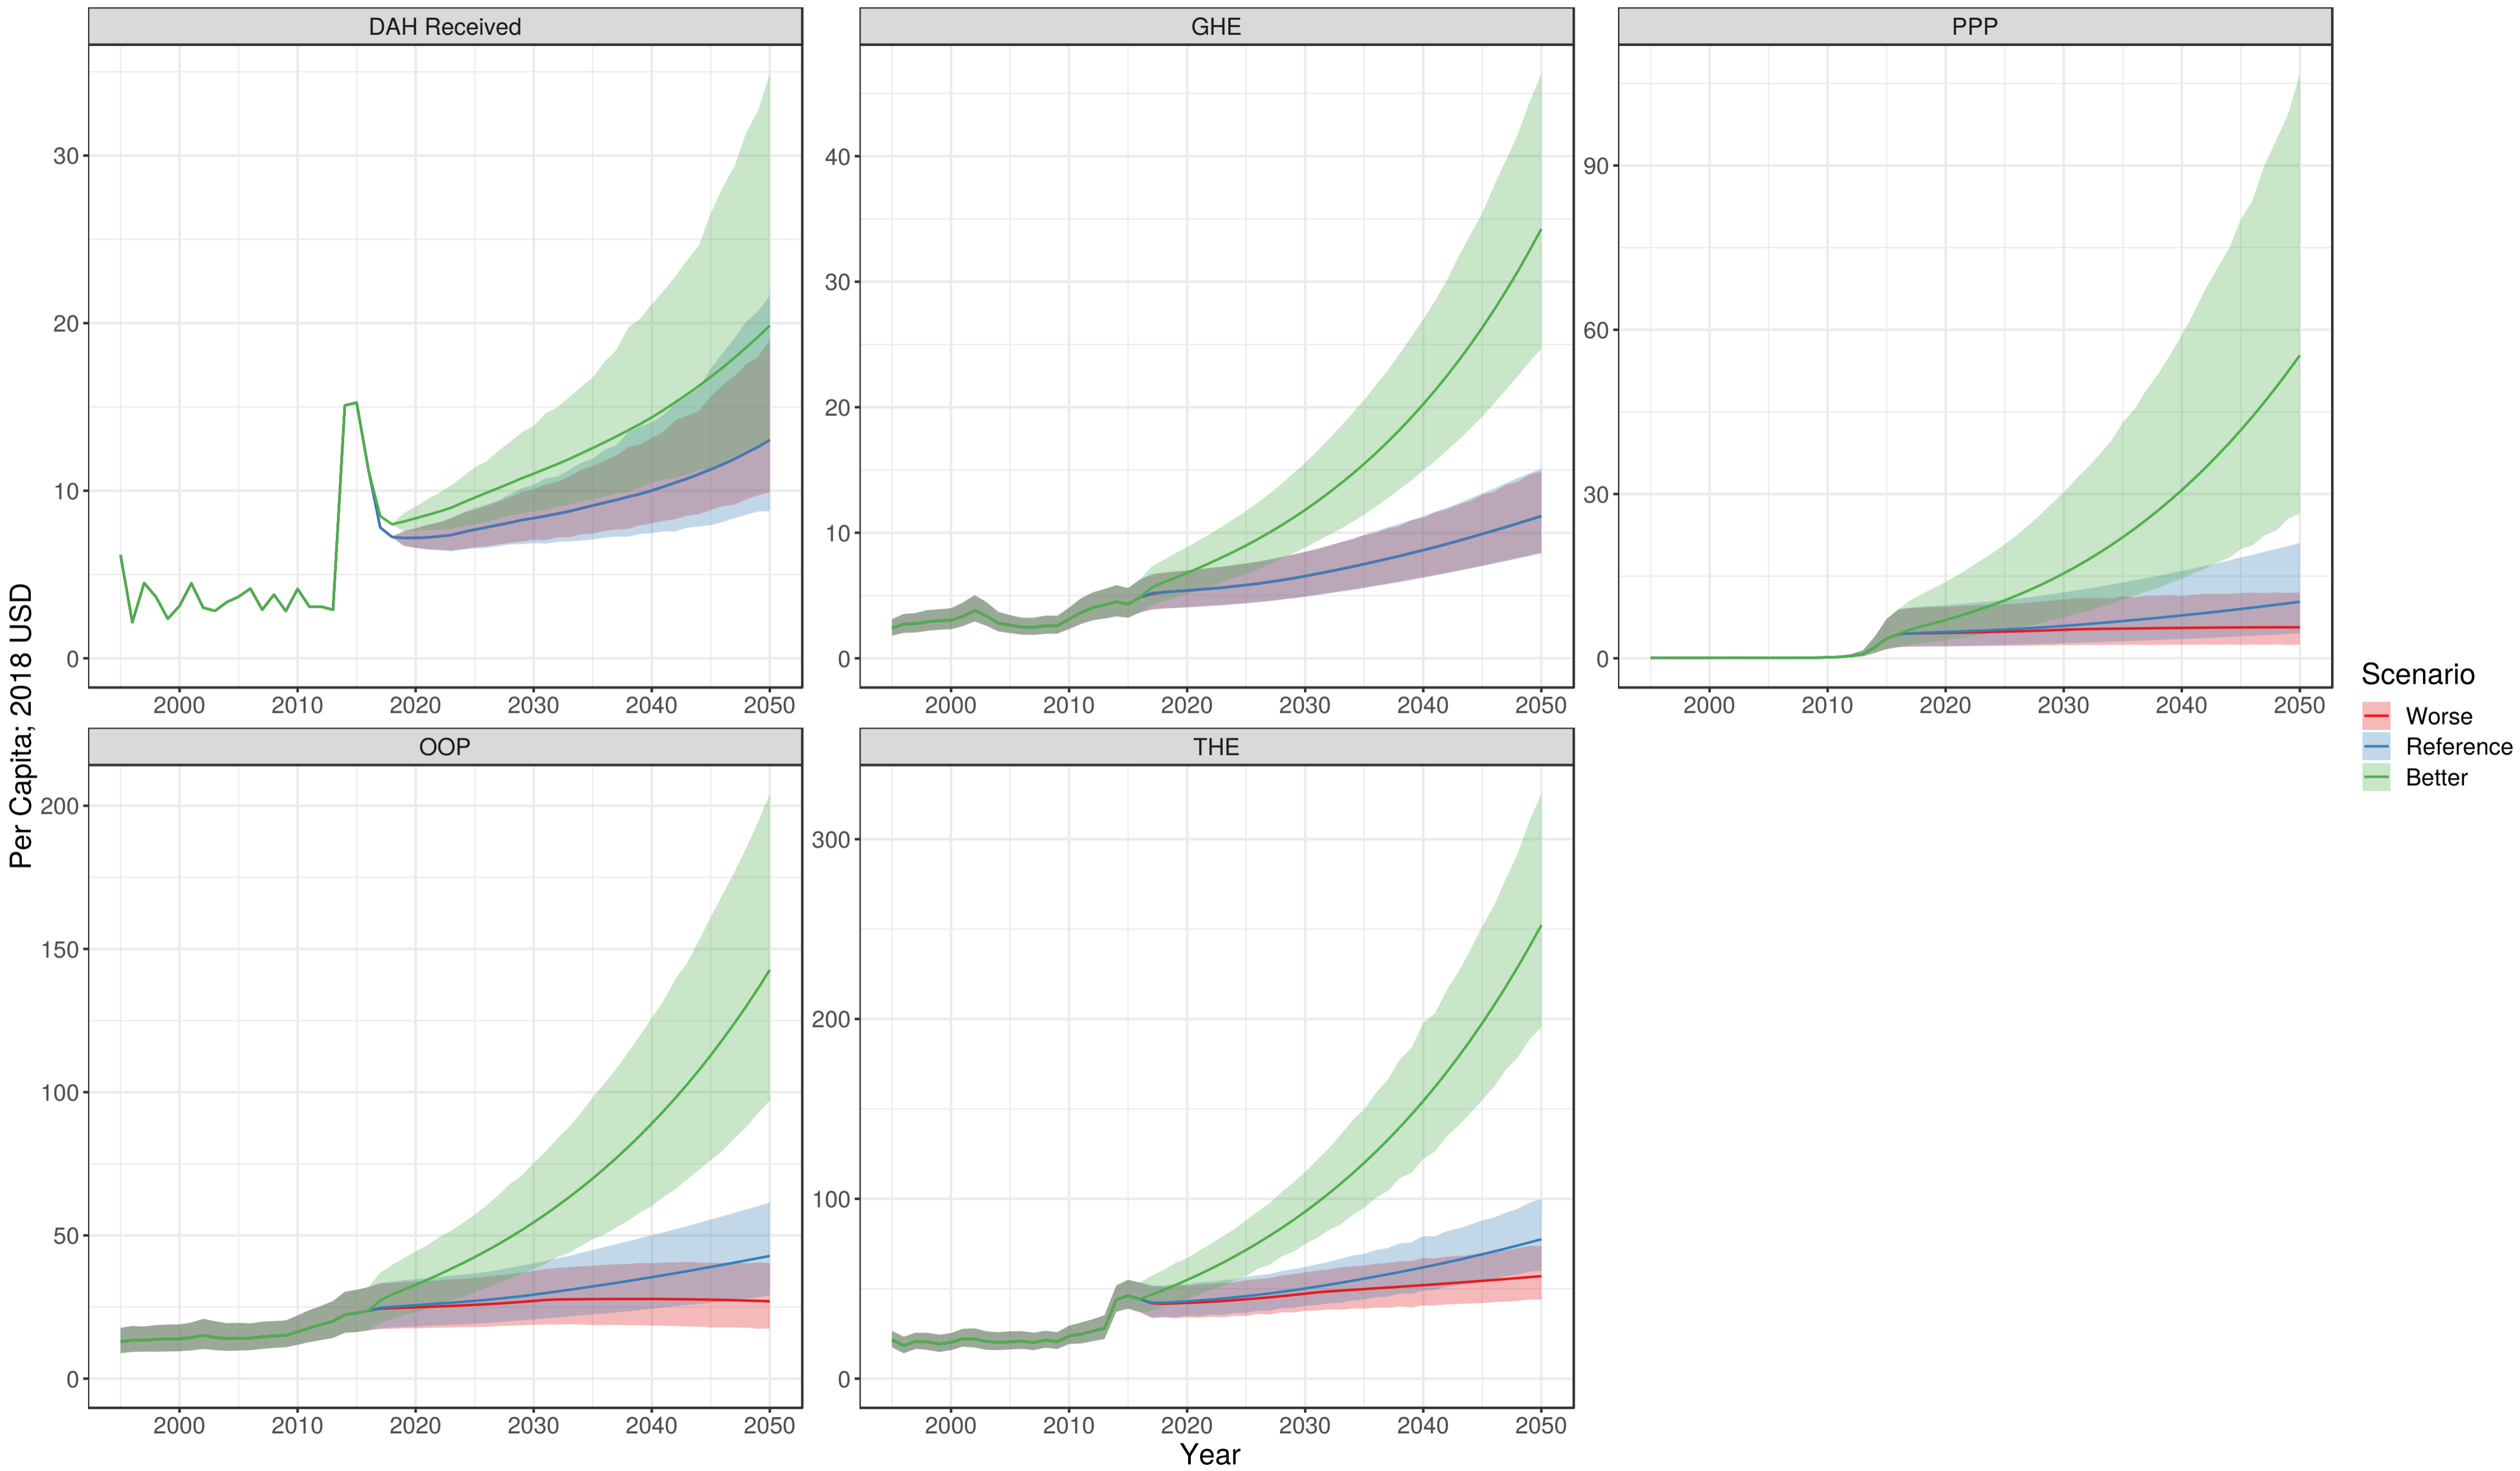

# Guinea-Bissau

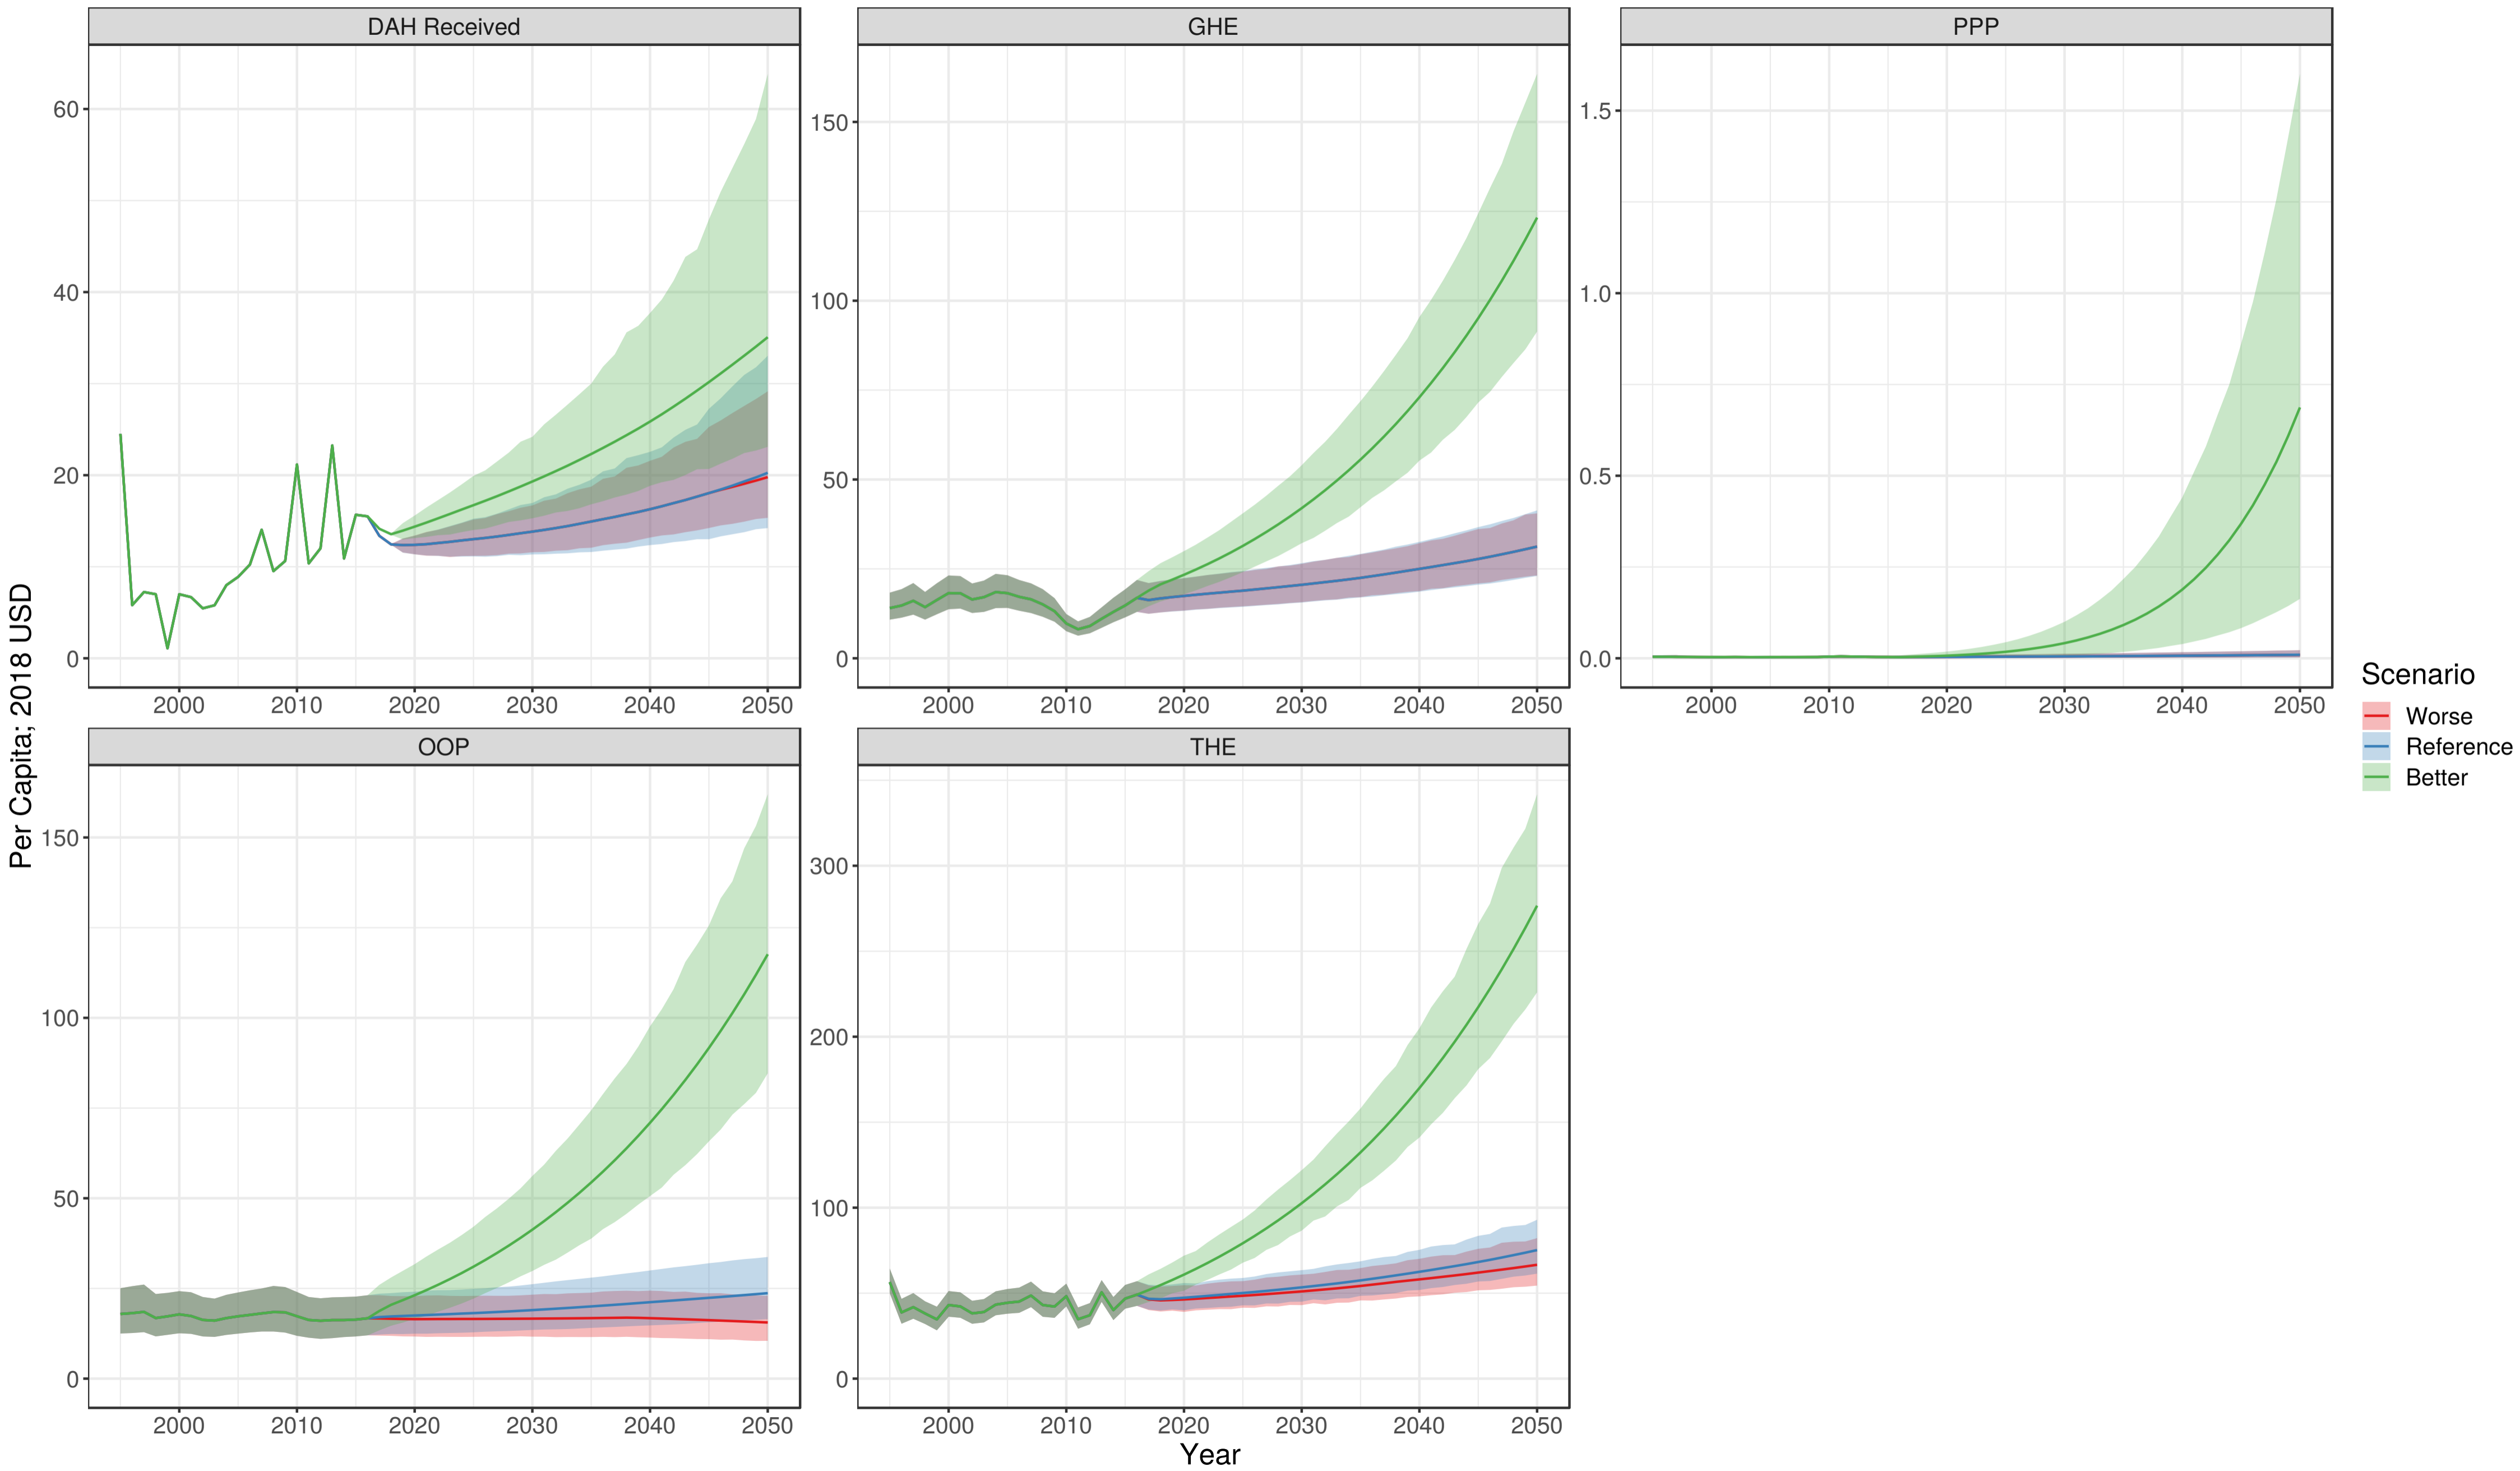

# Guyana

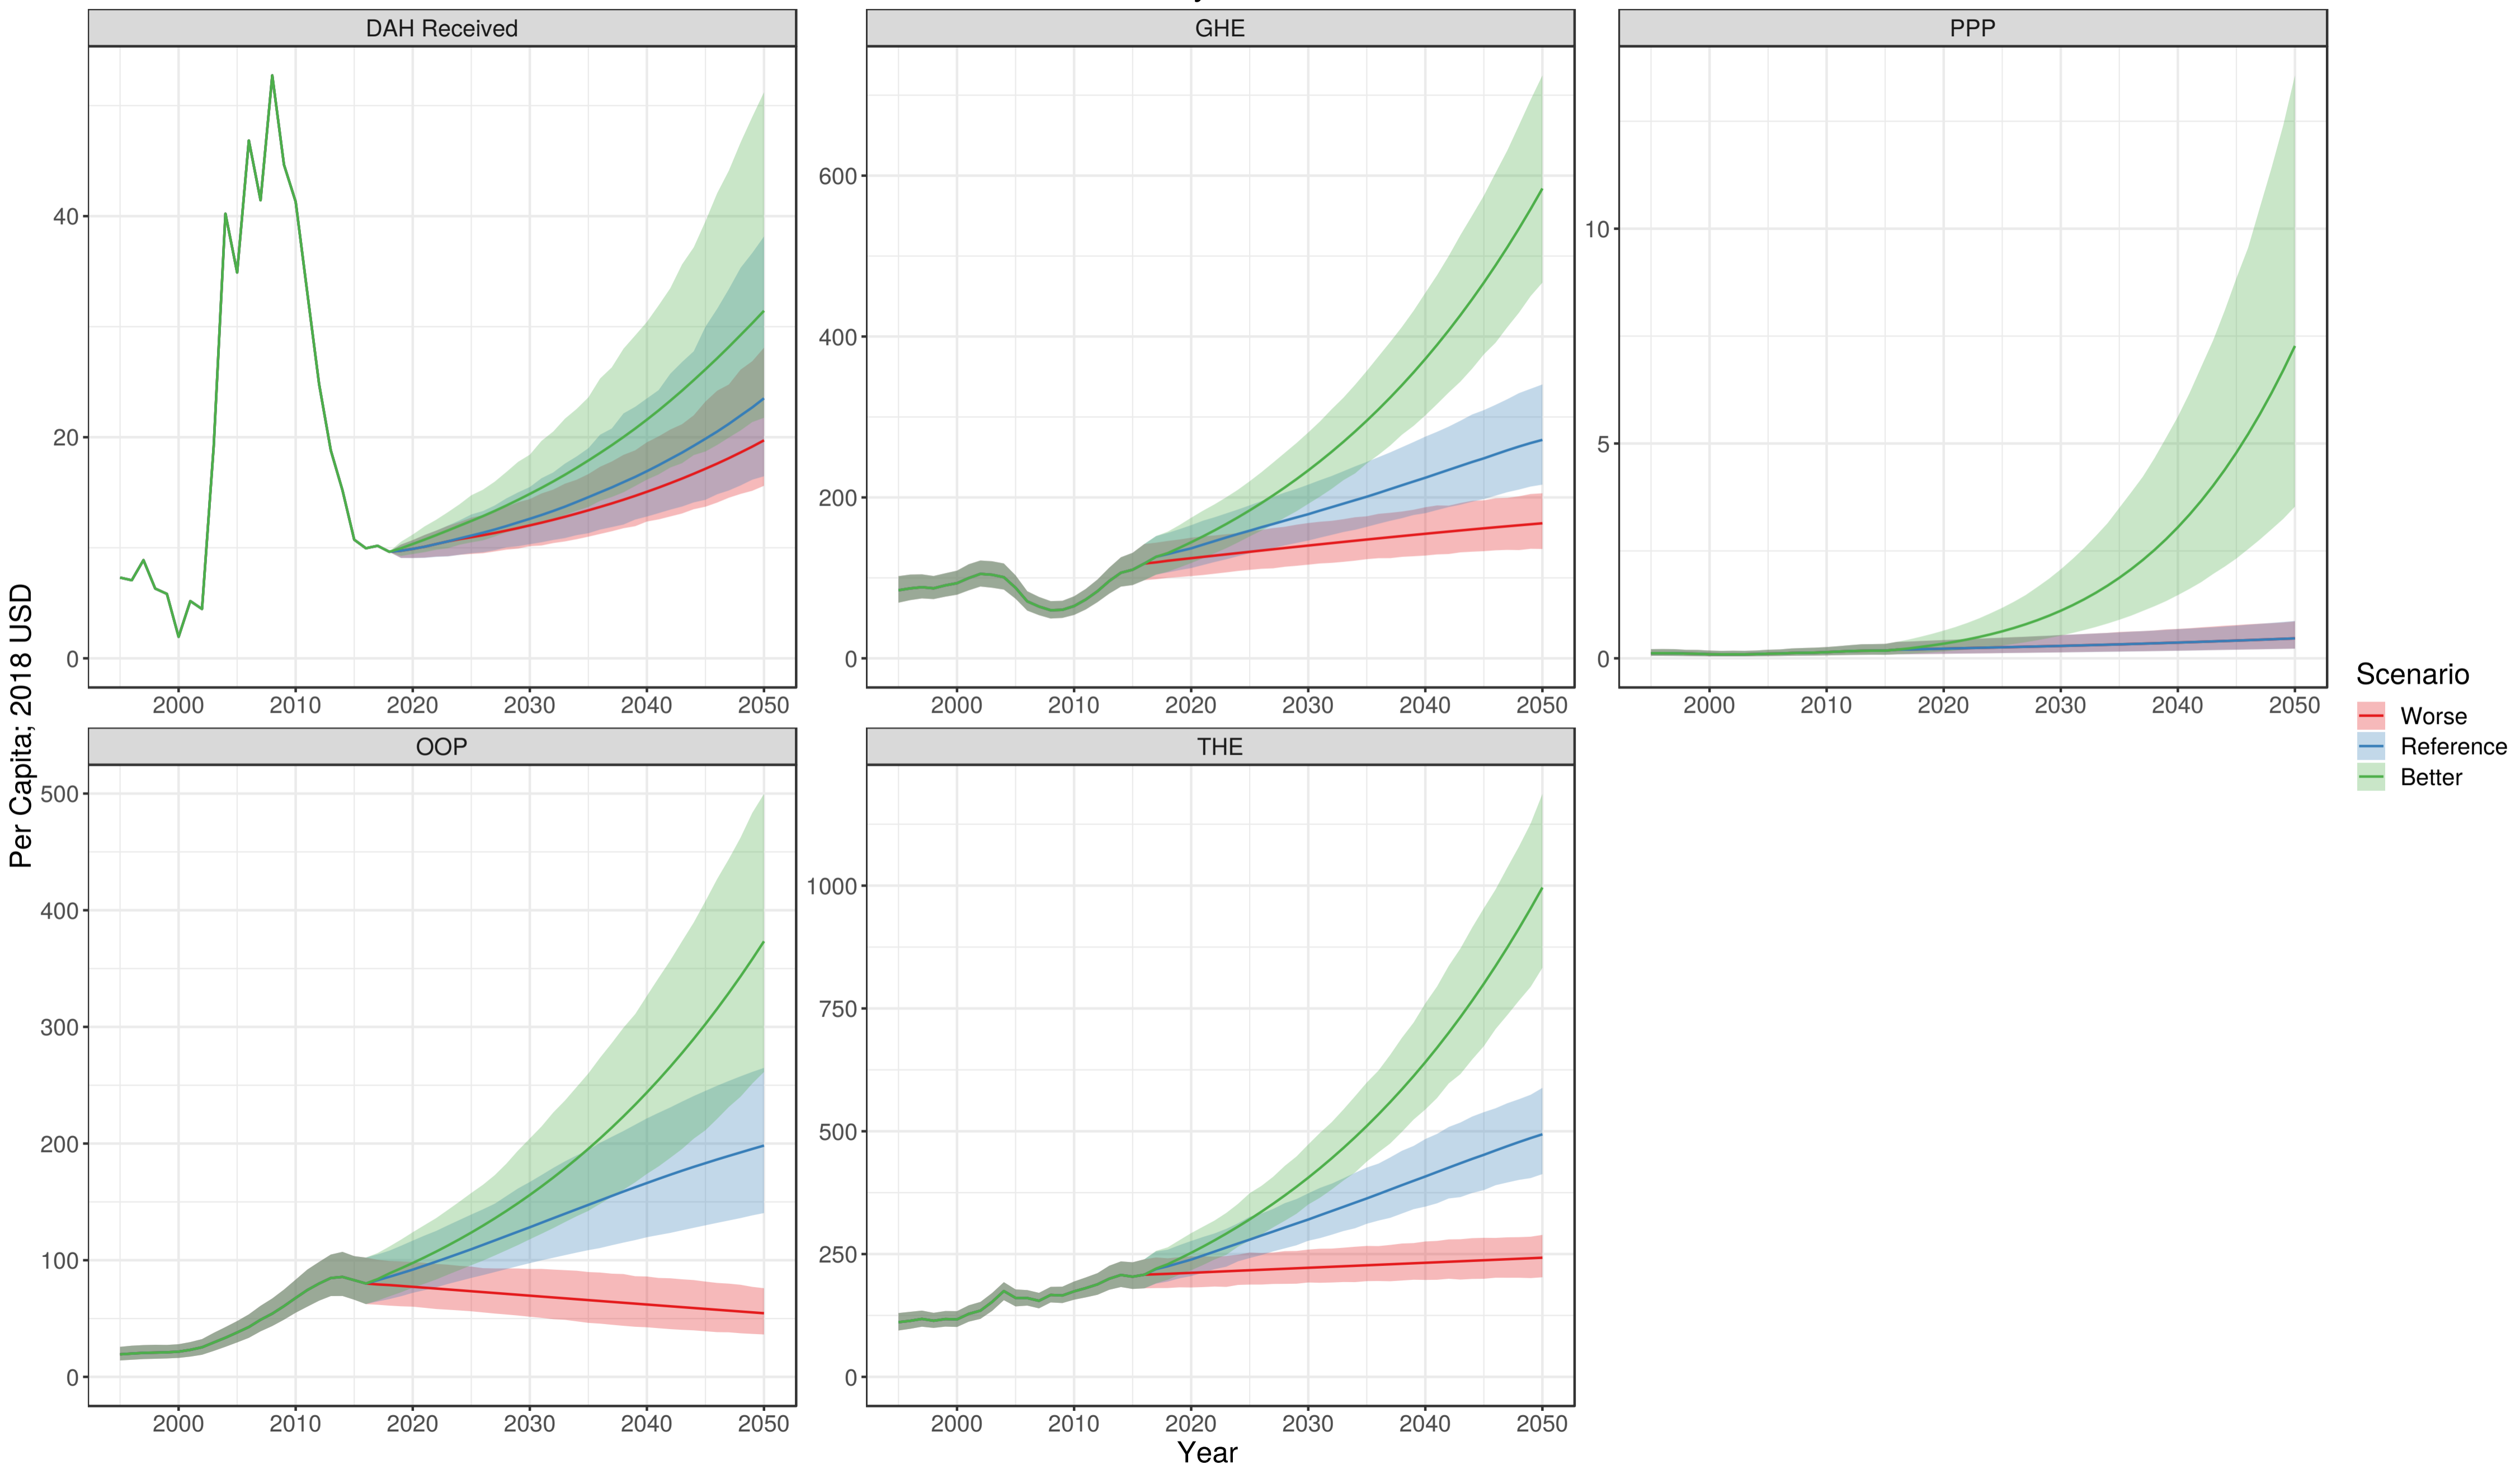

# Haiti

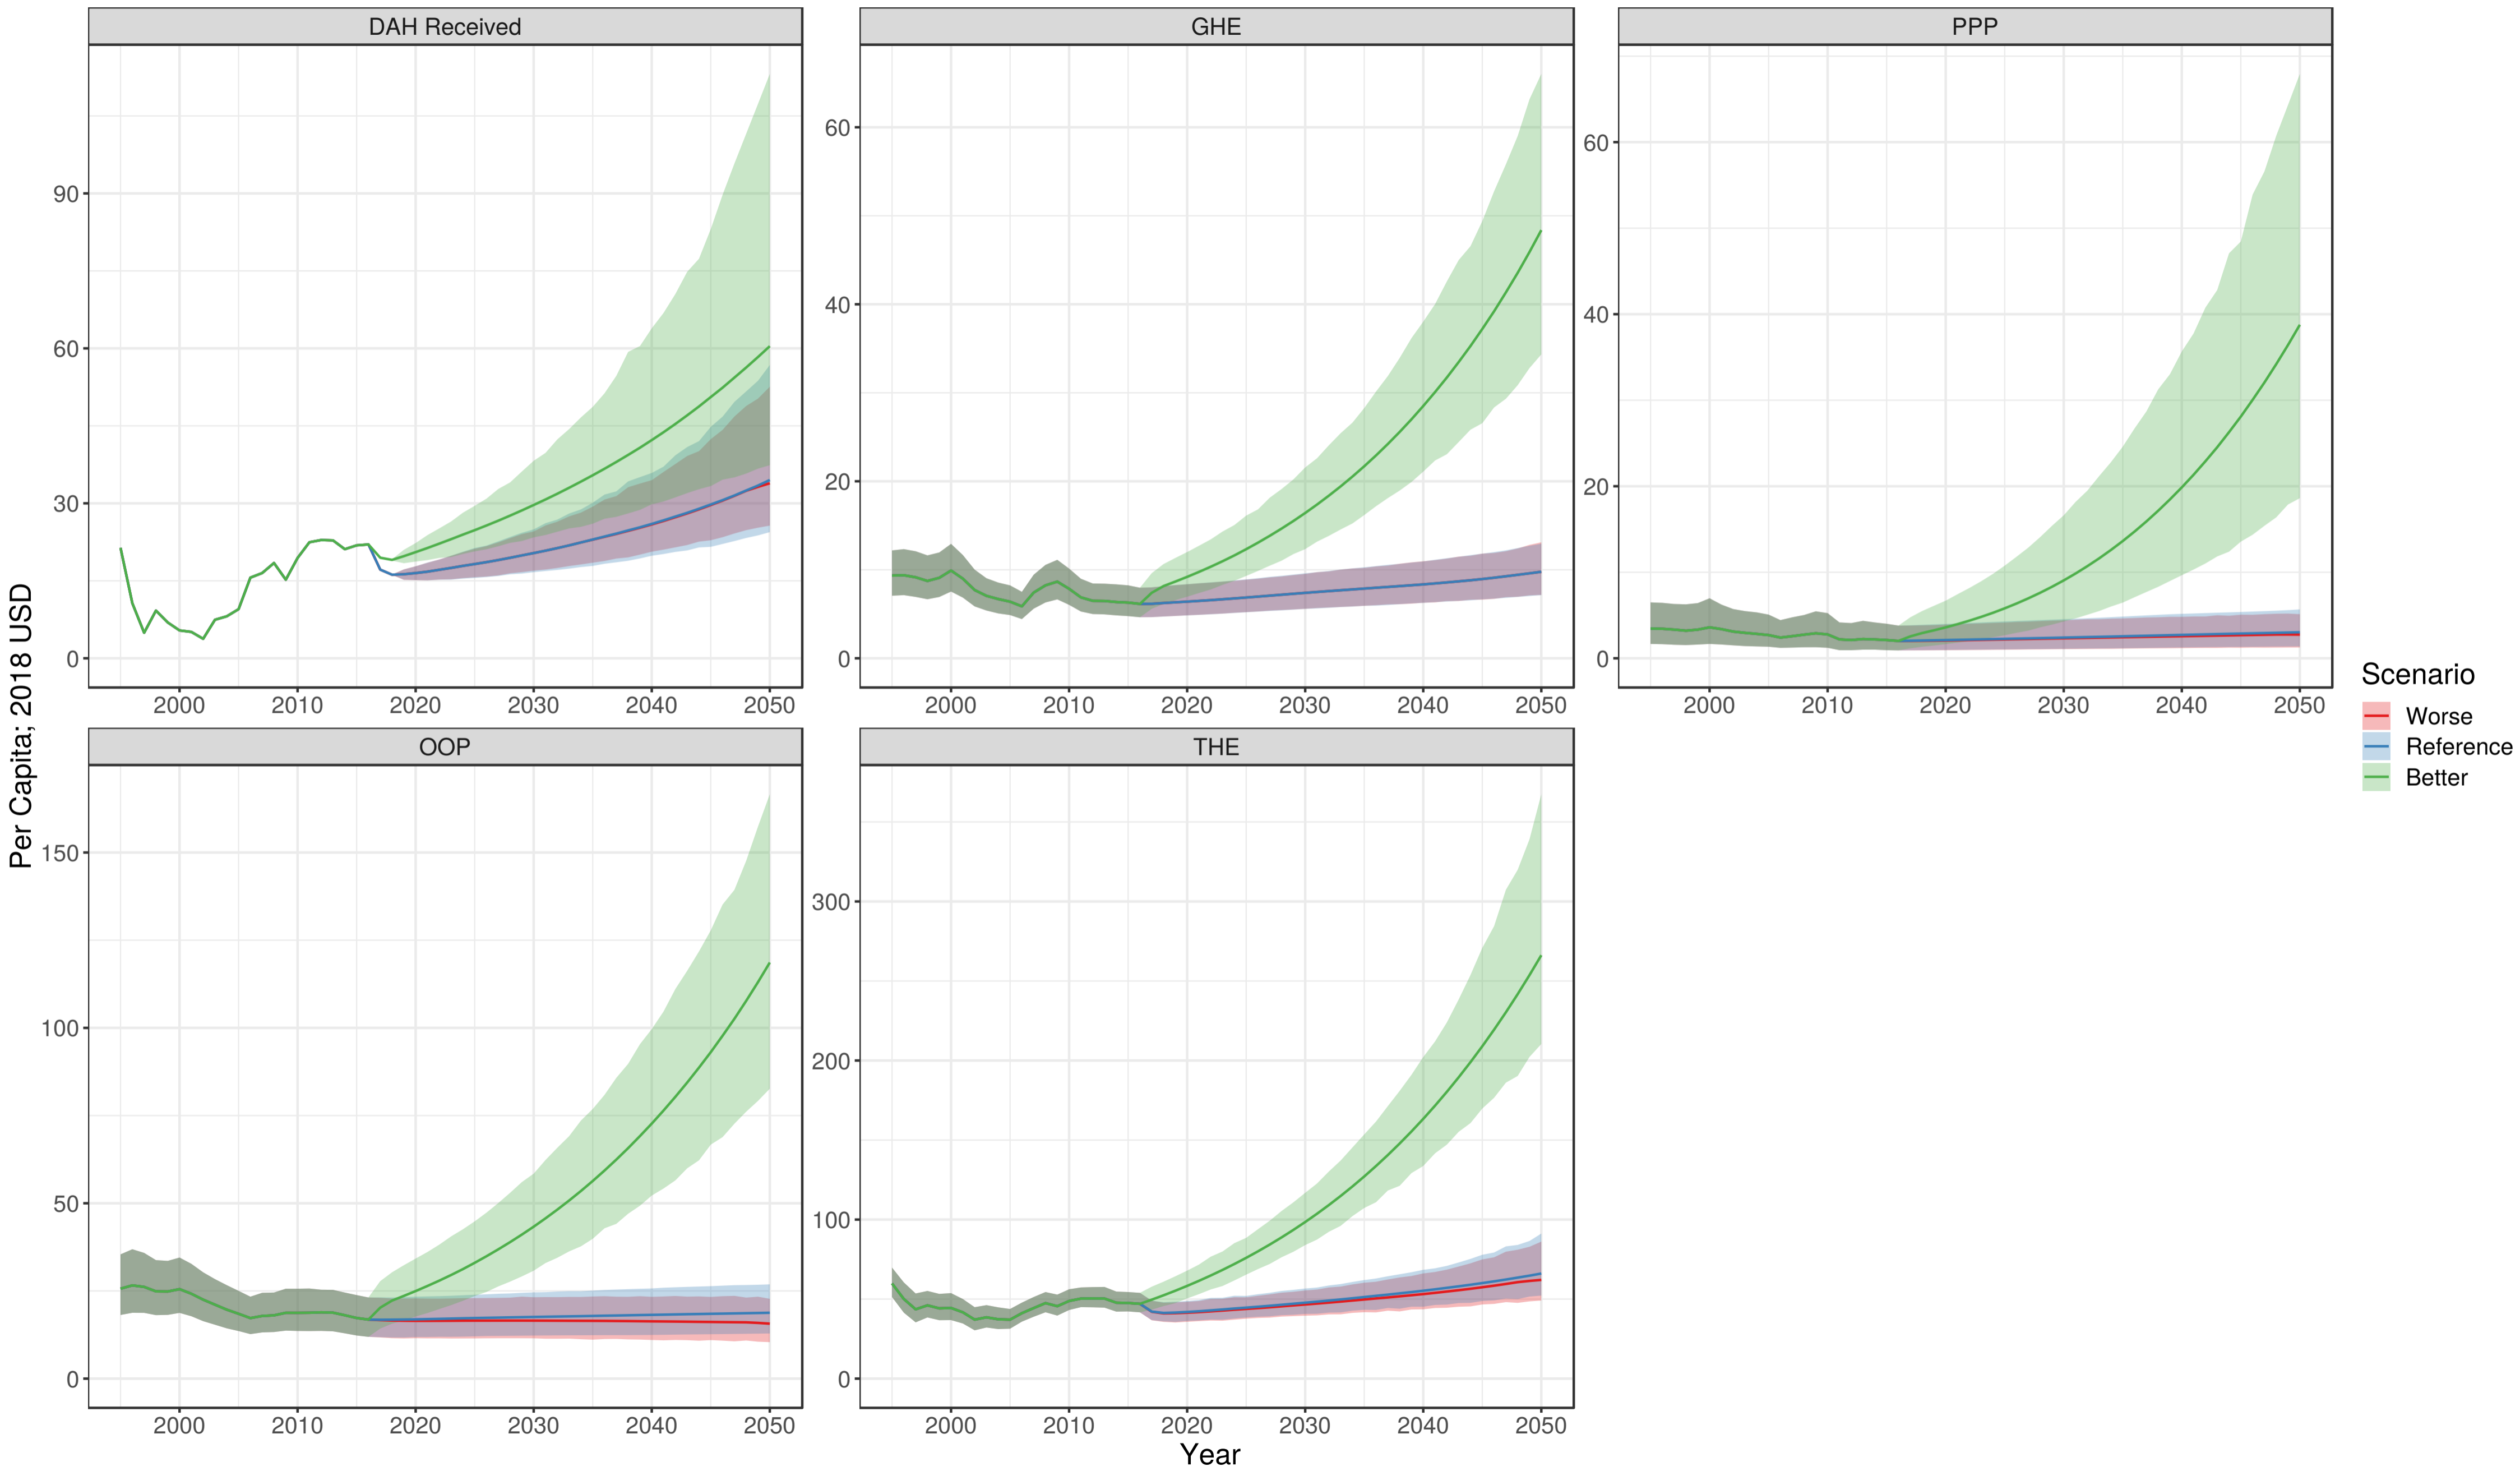

# Honduras

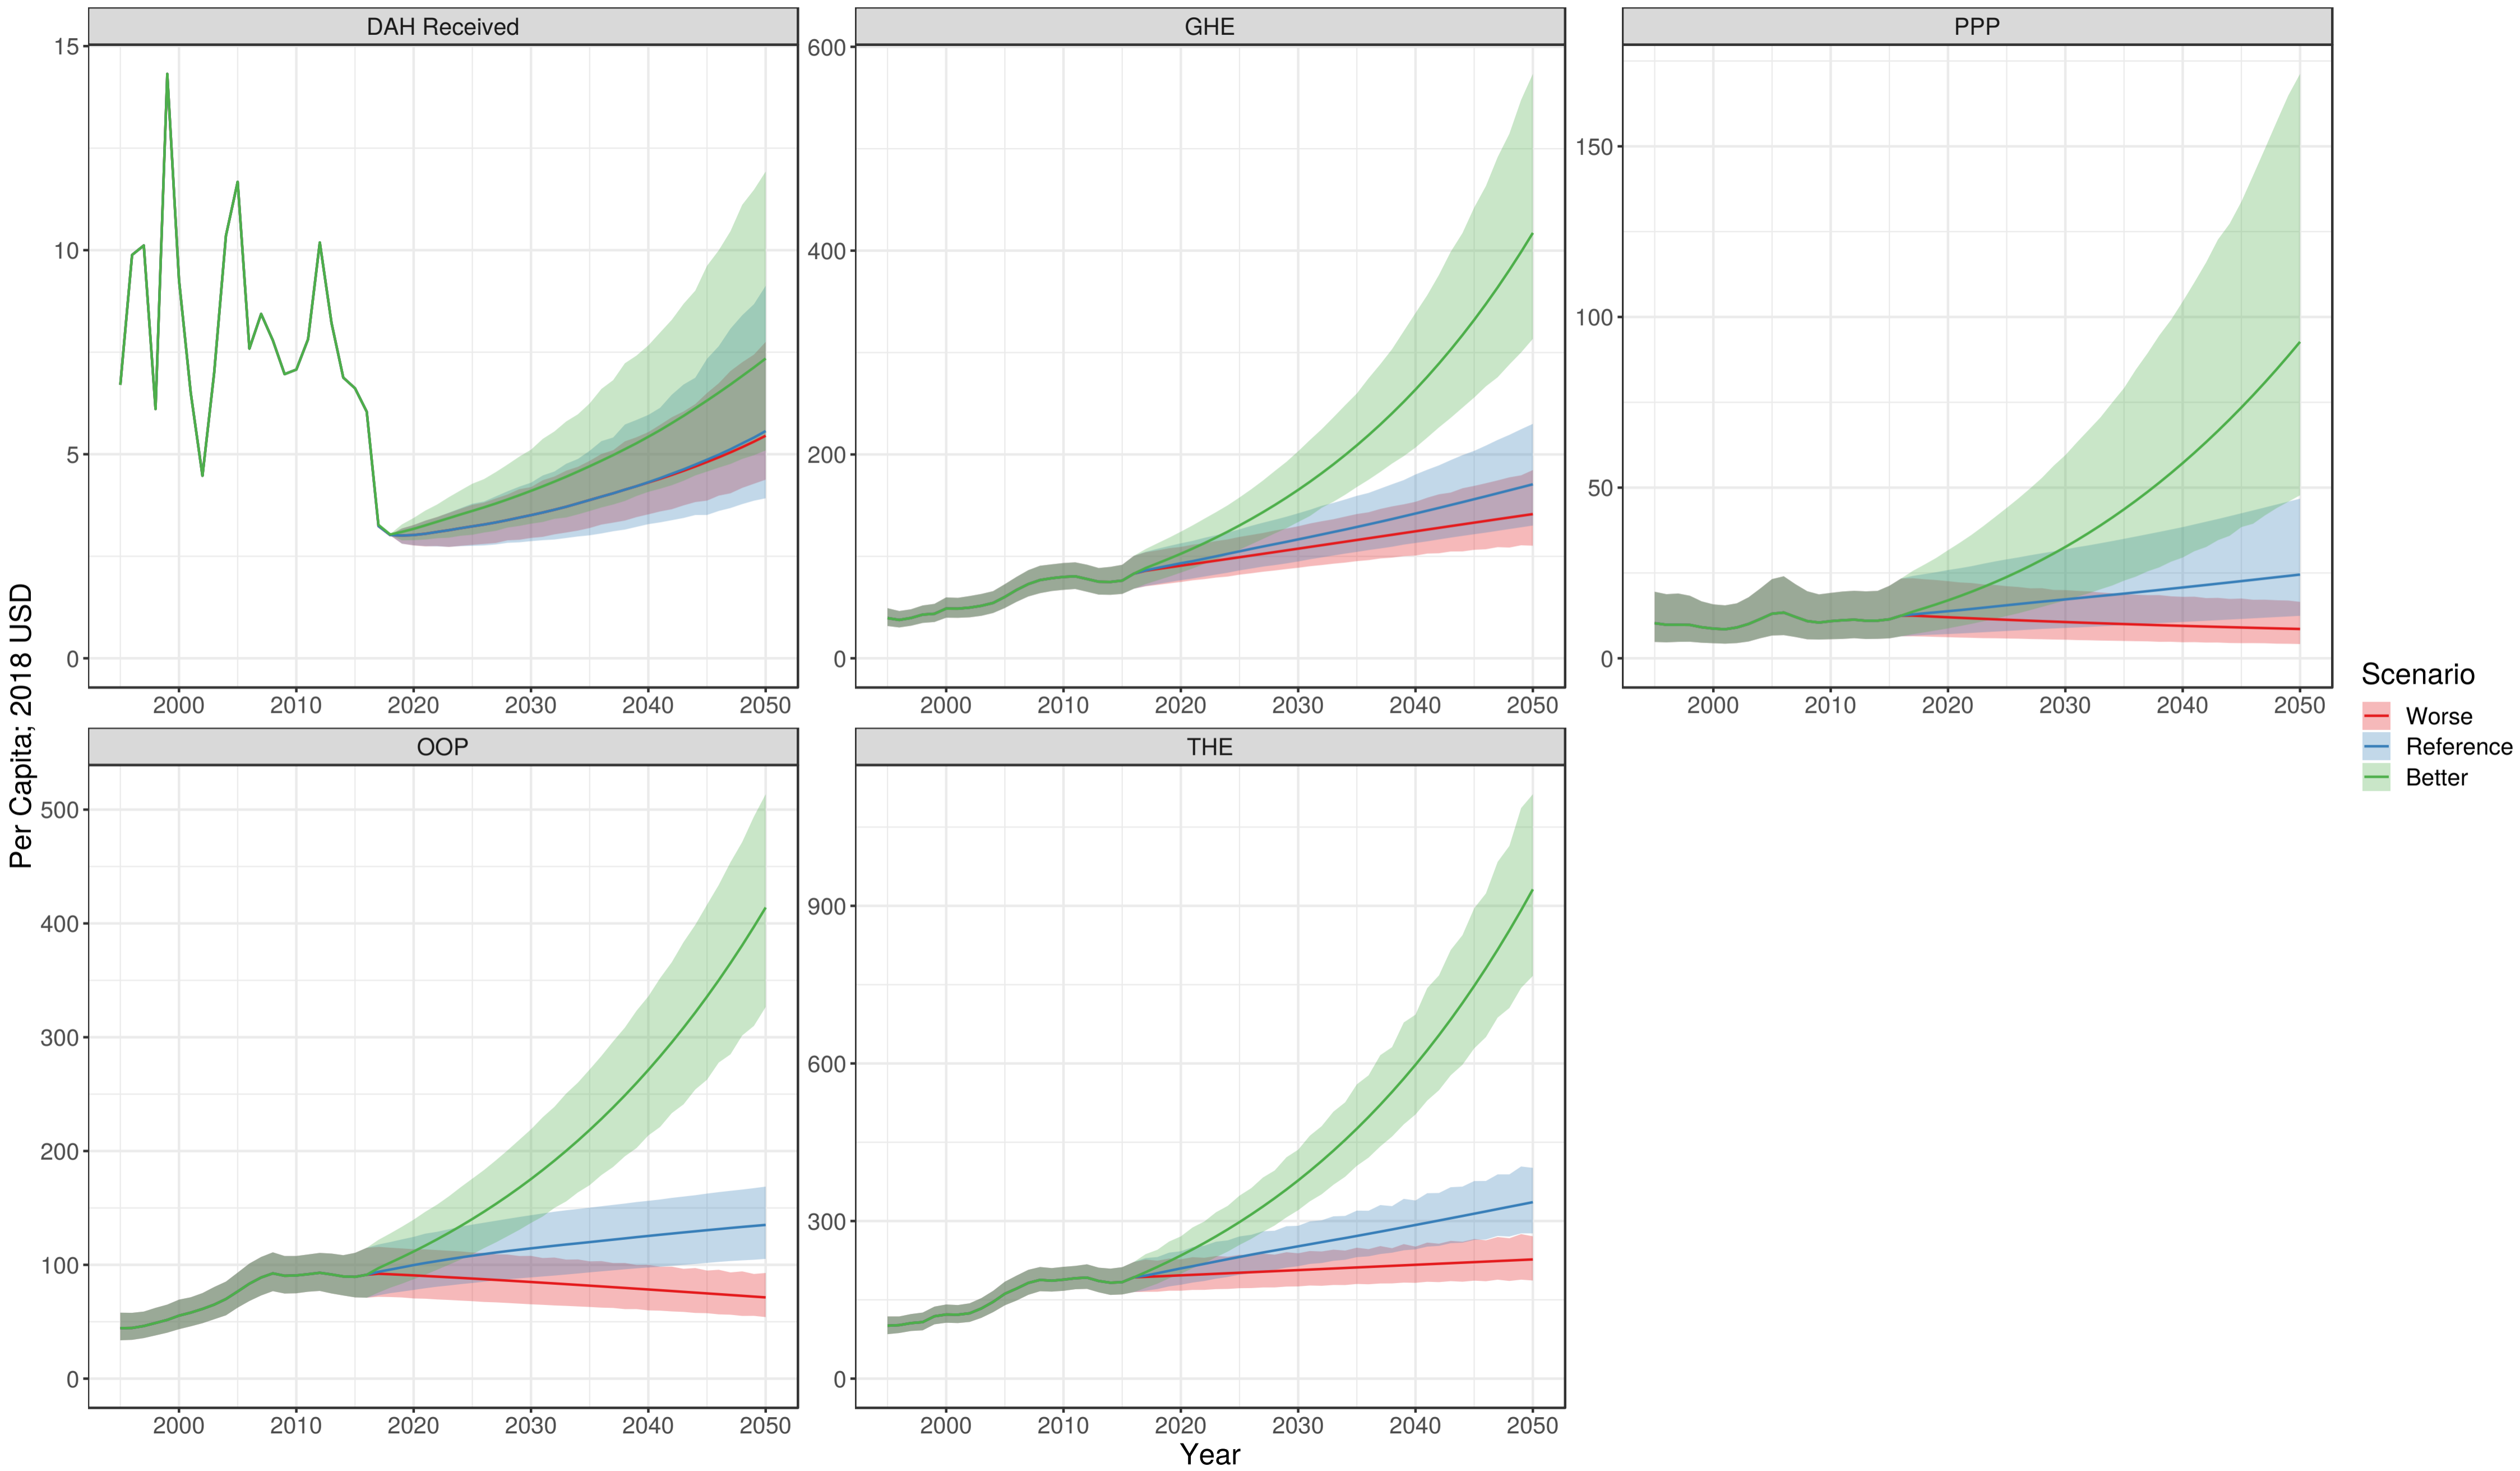



# Hungary

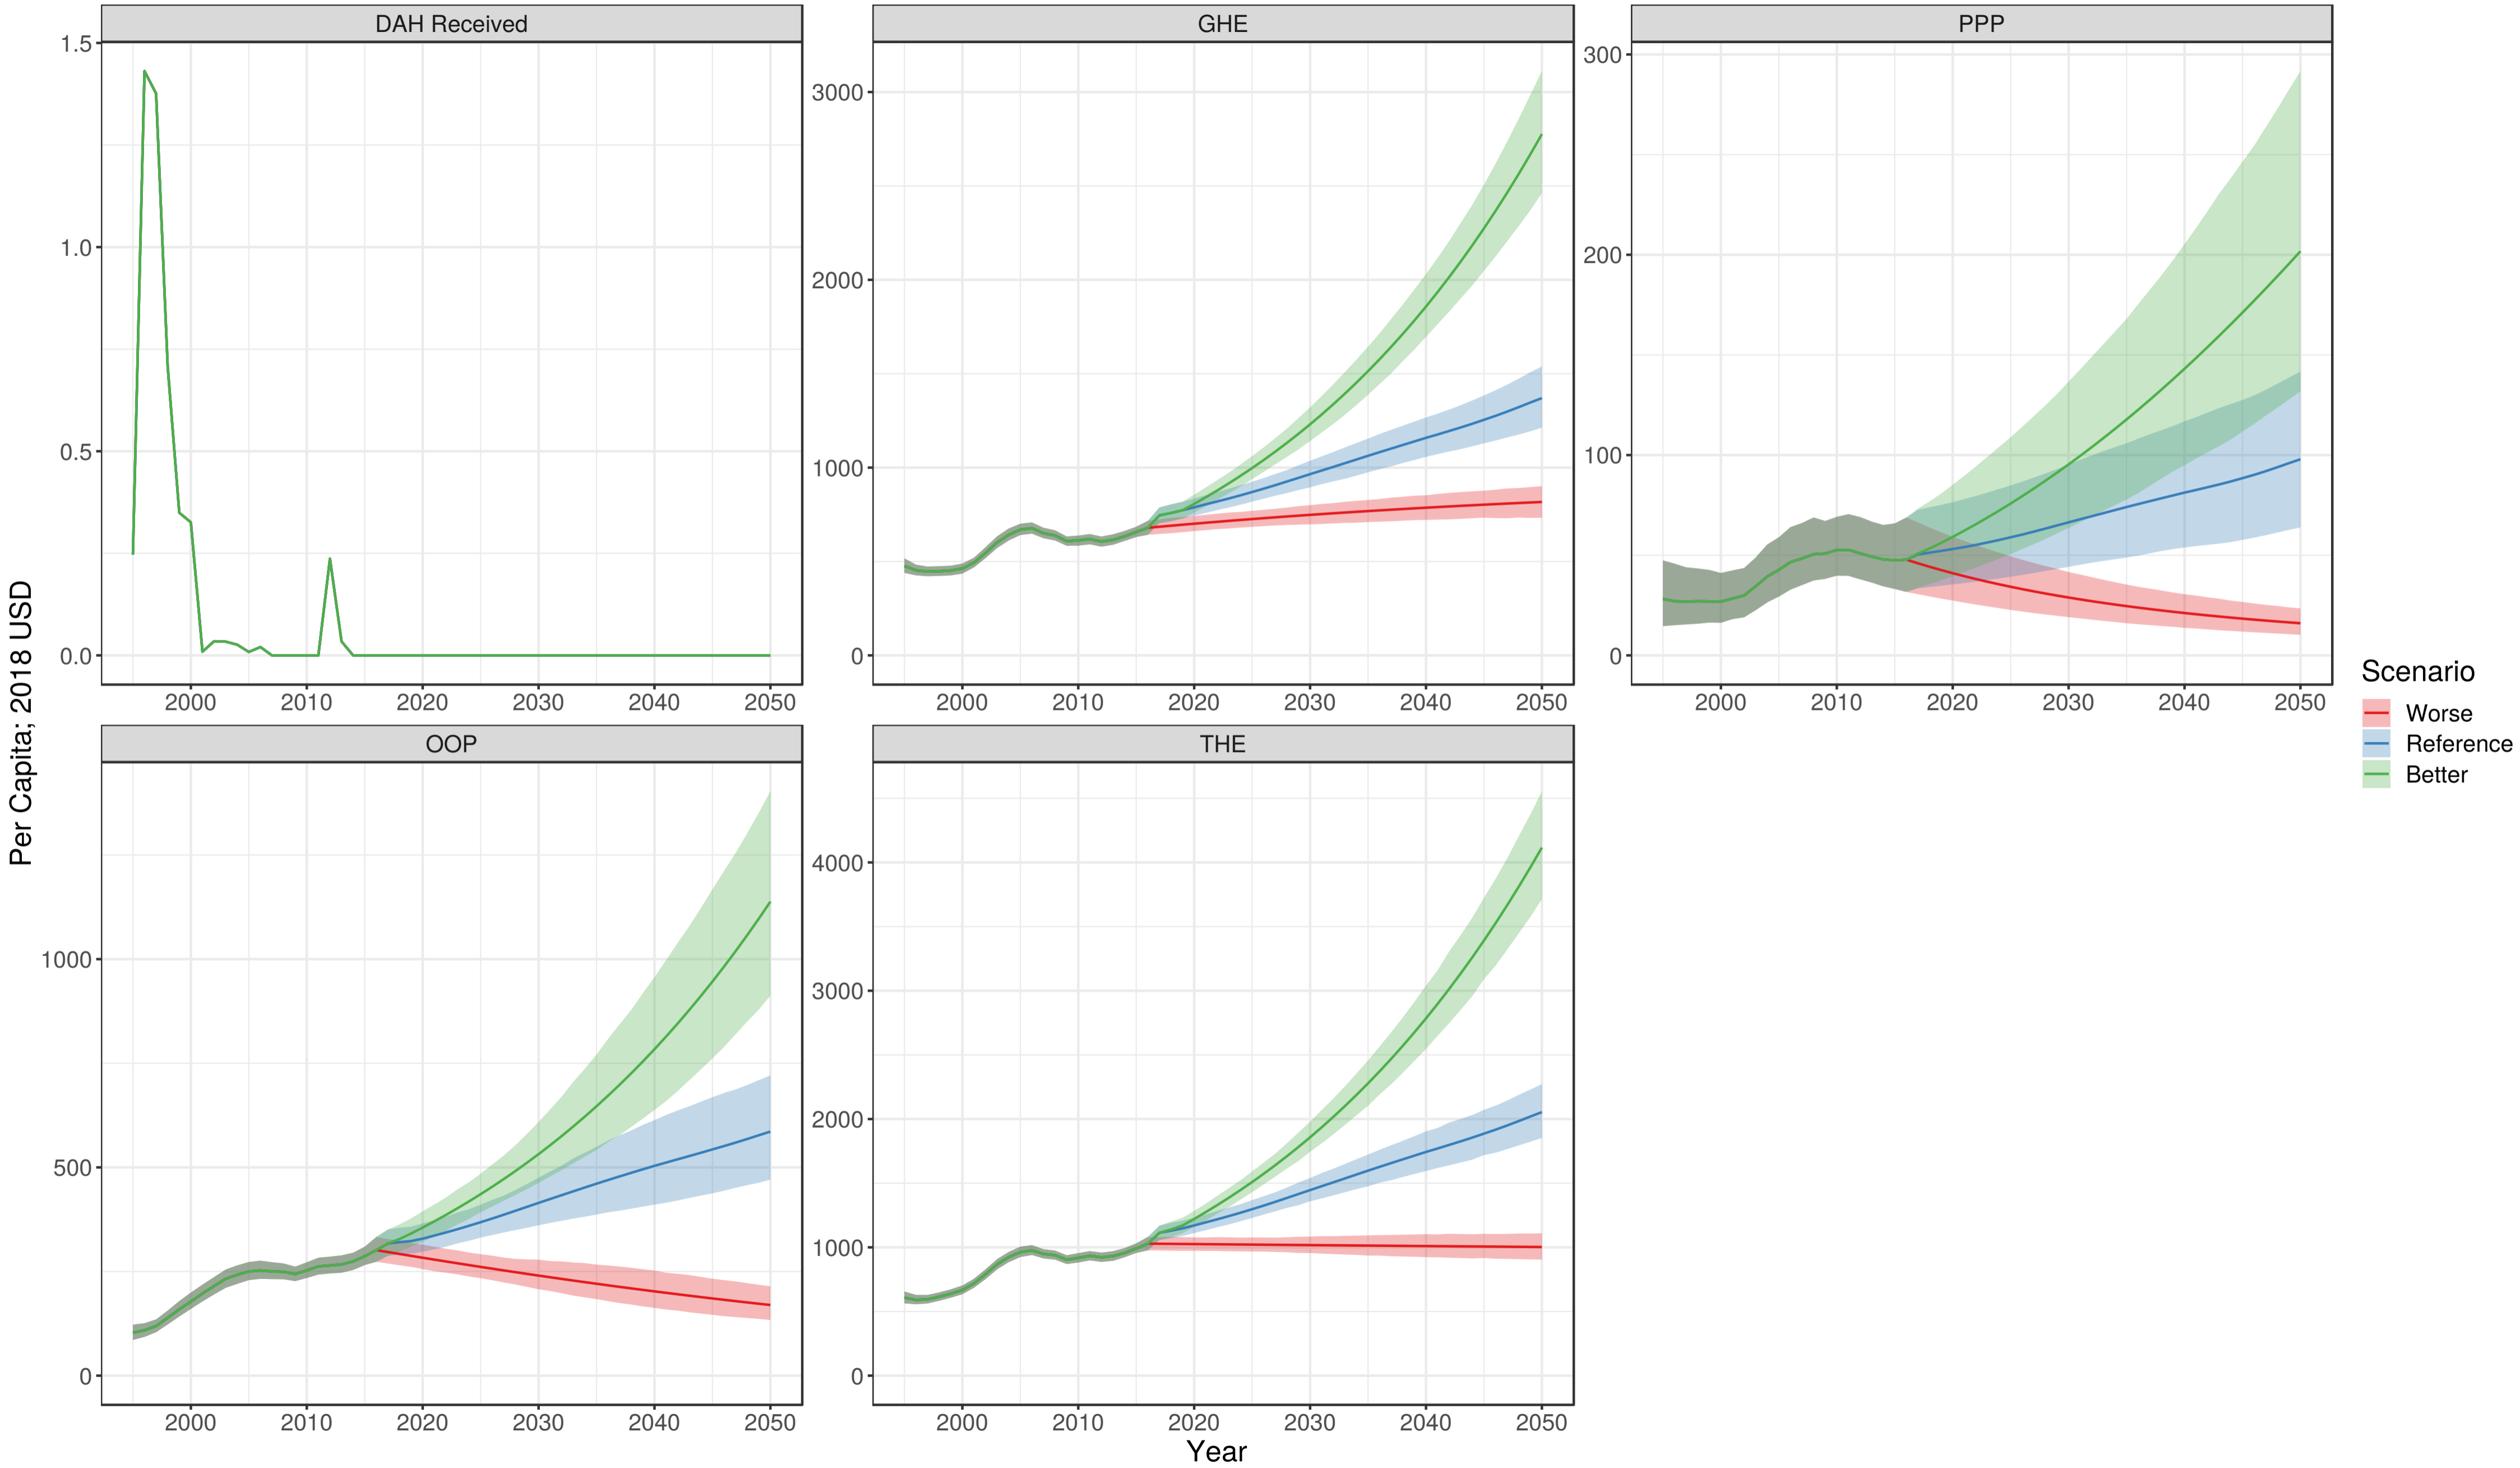

# Iceland

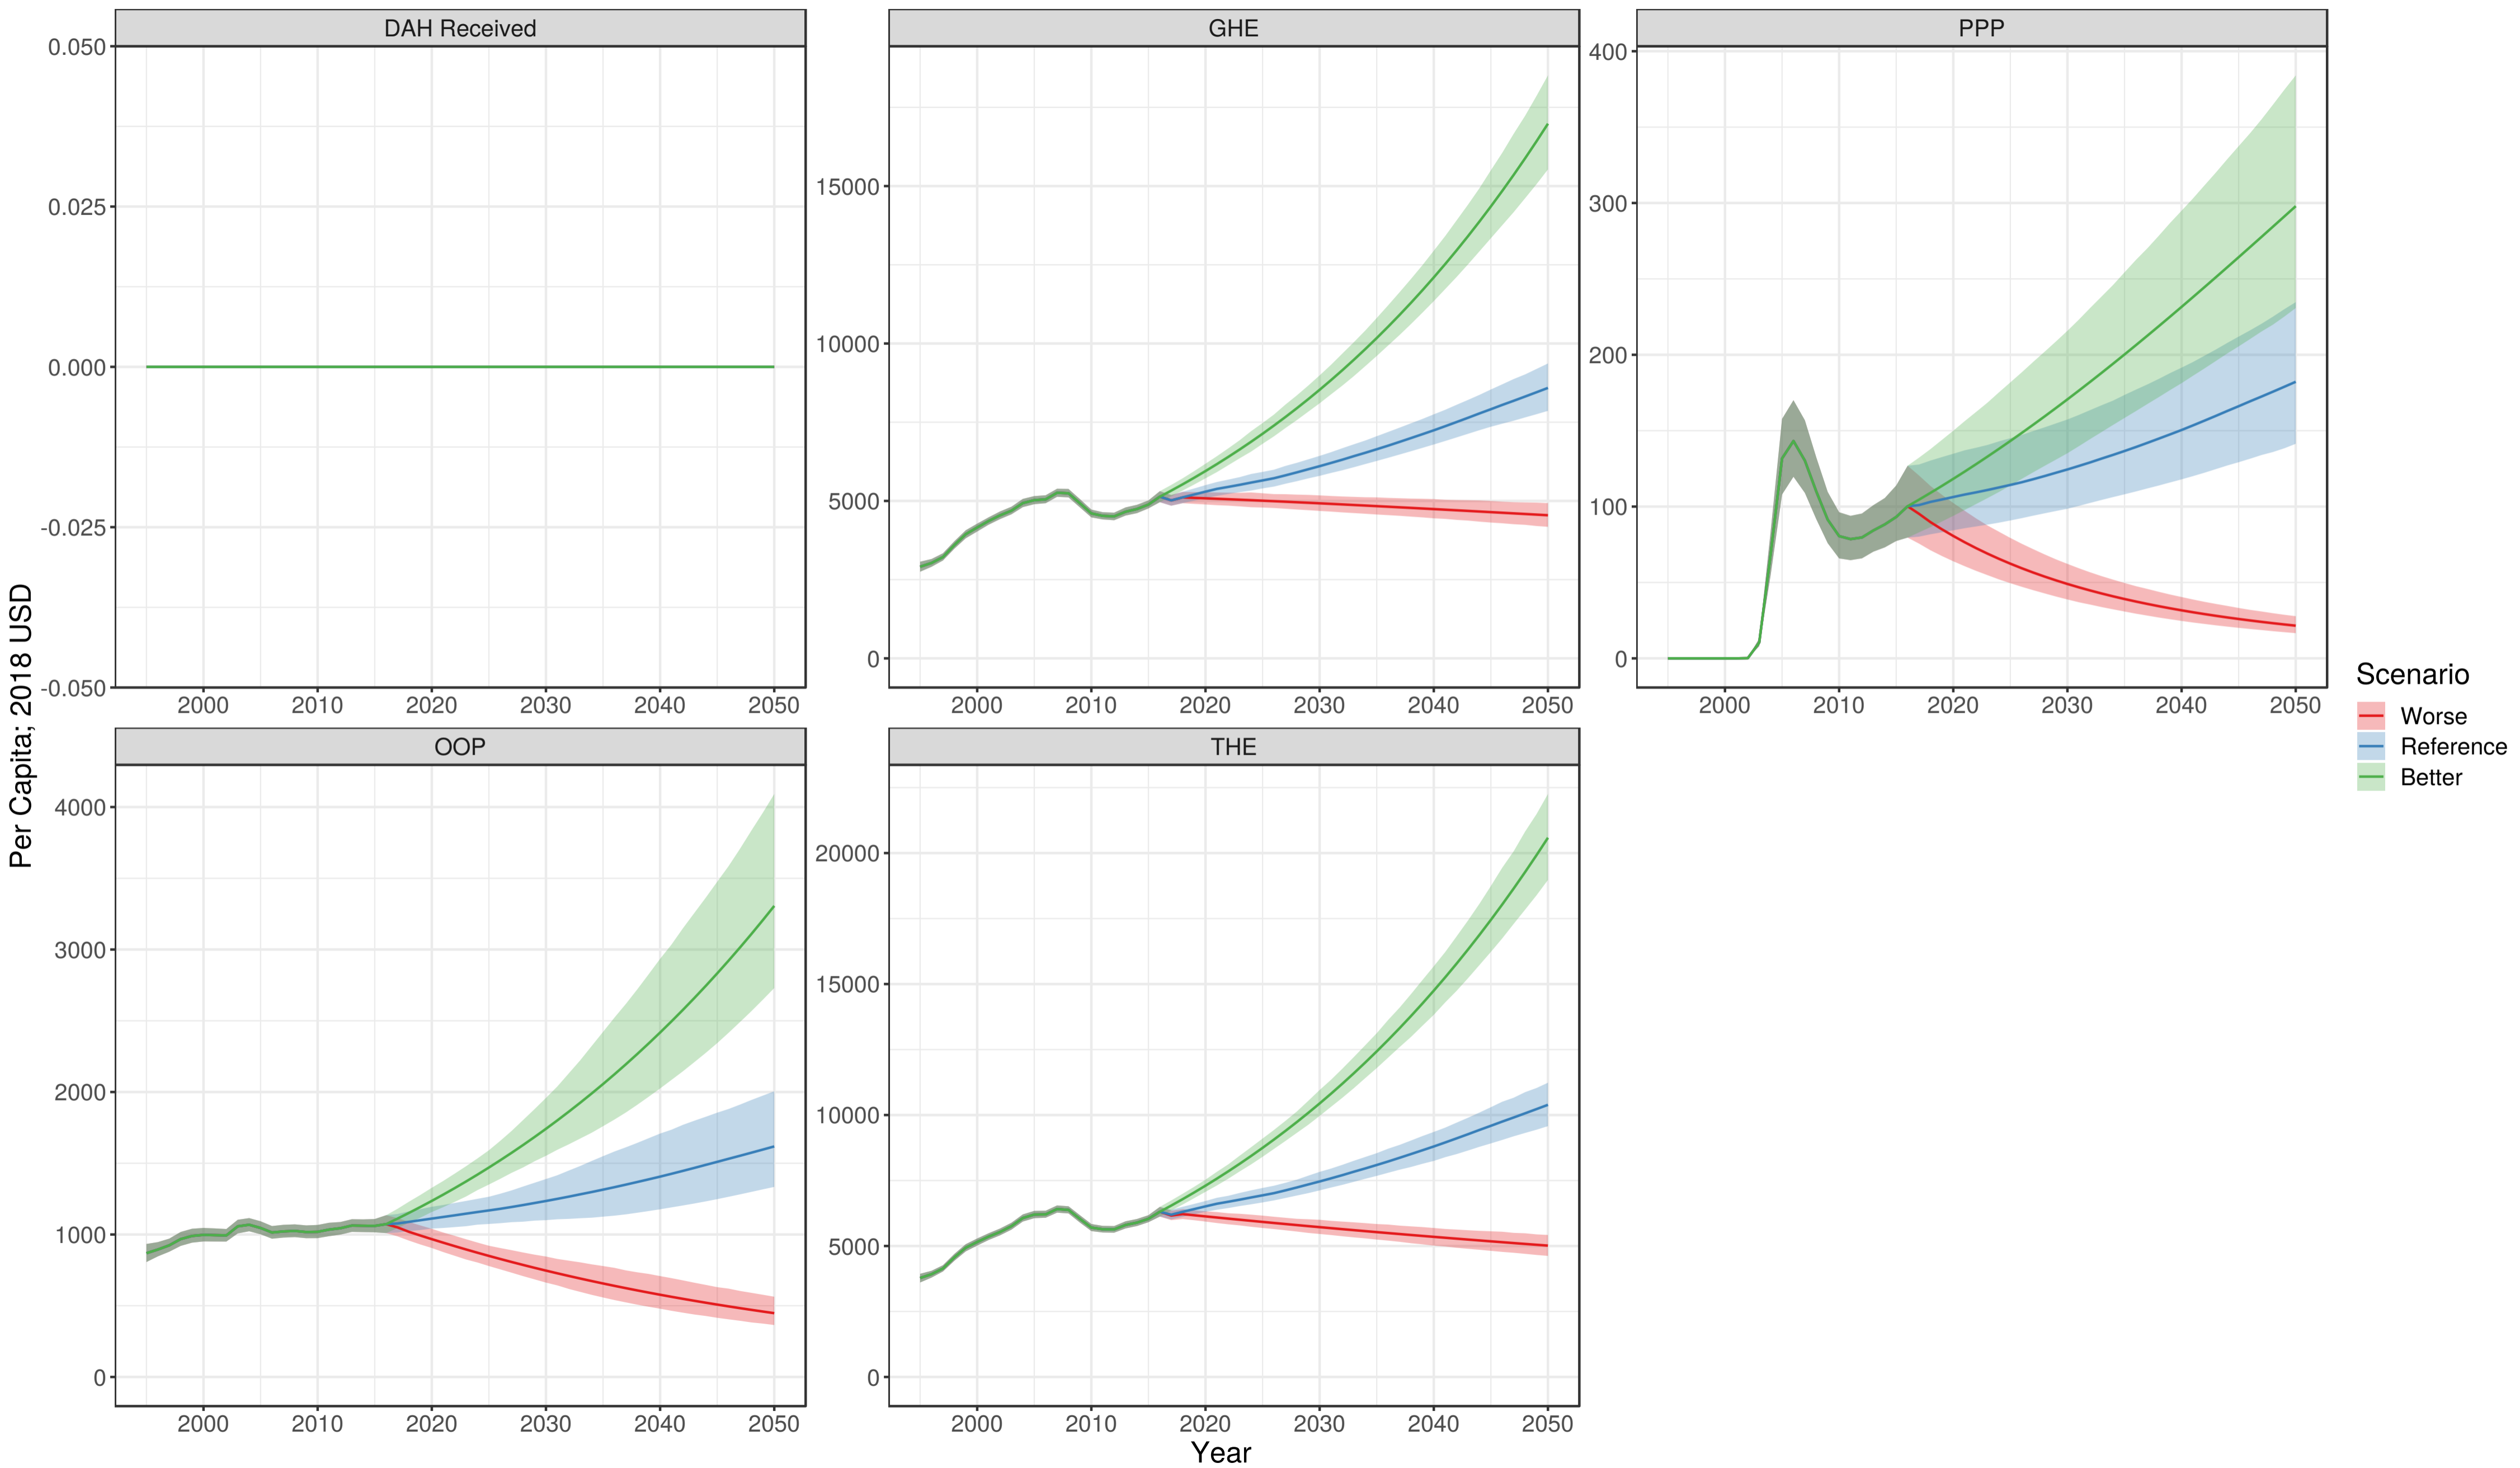

# India

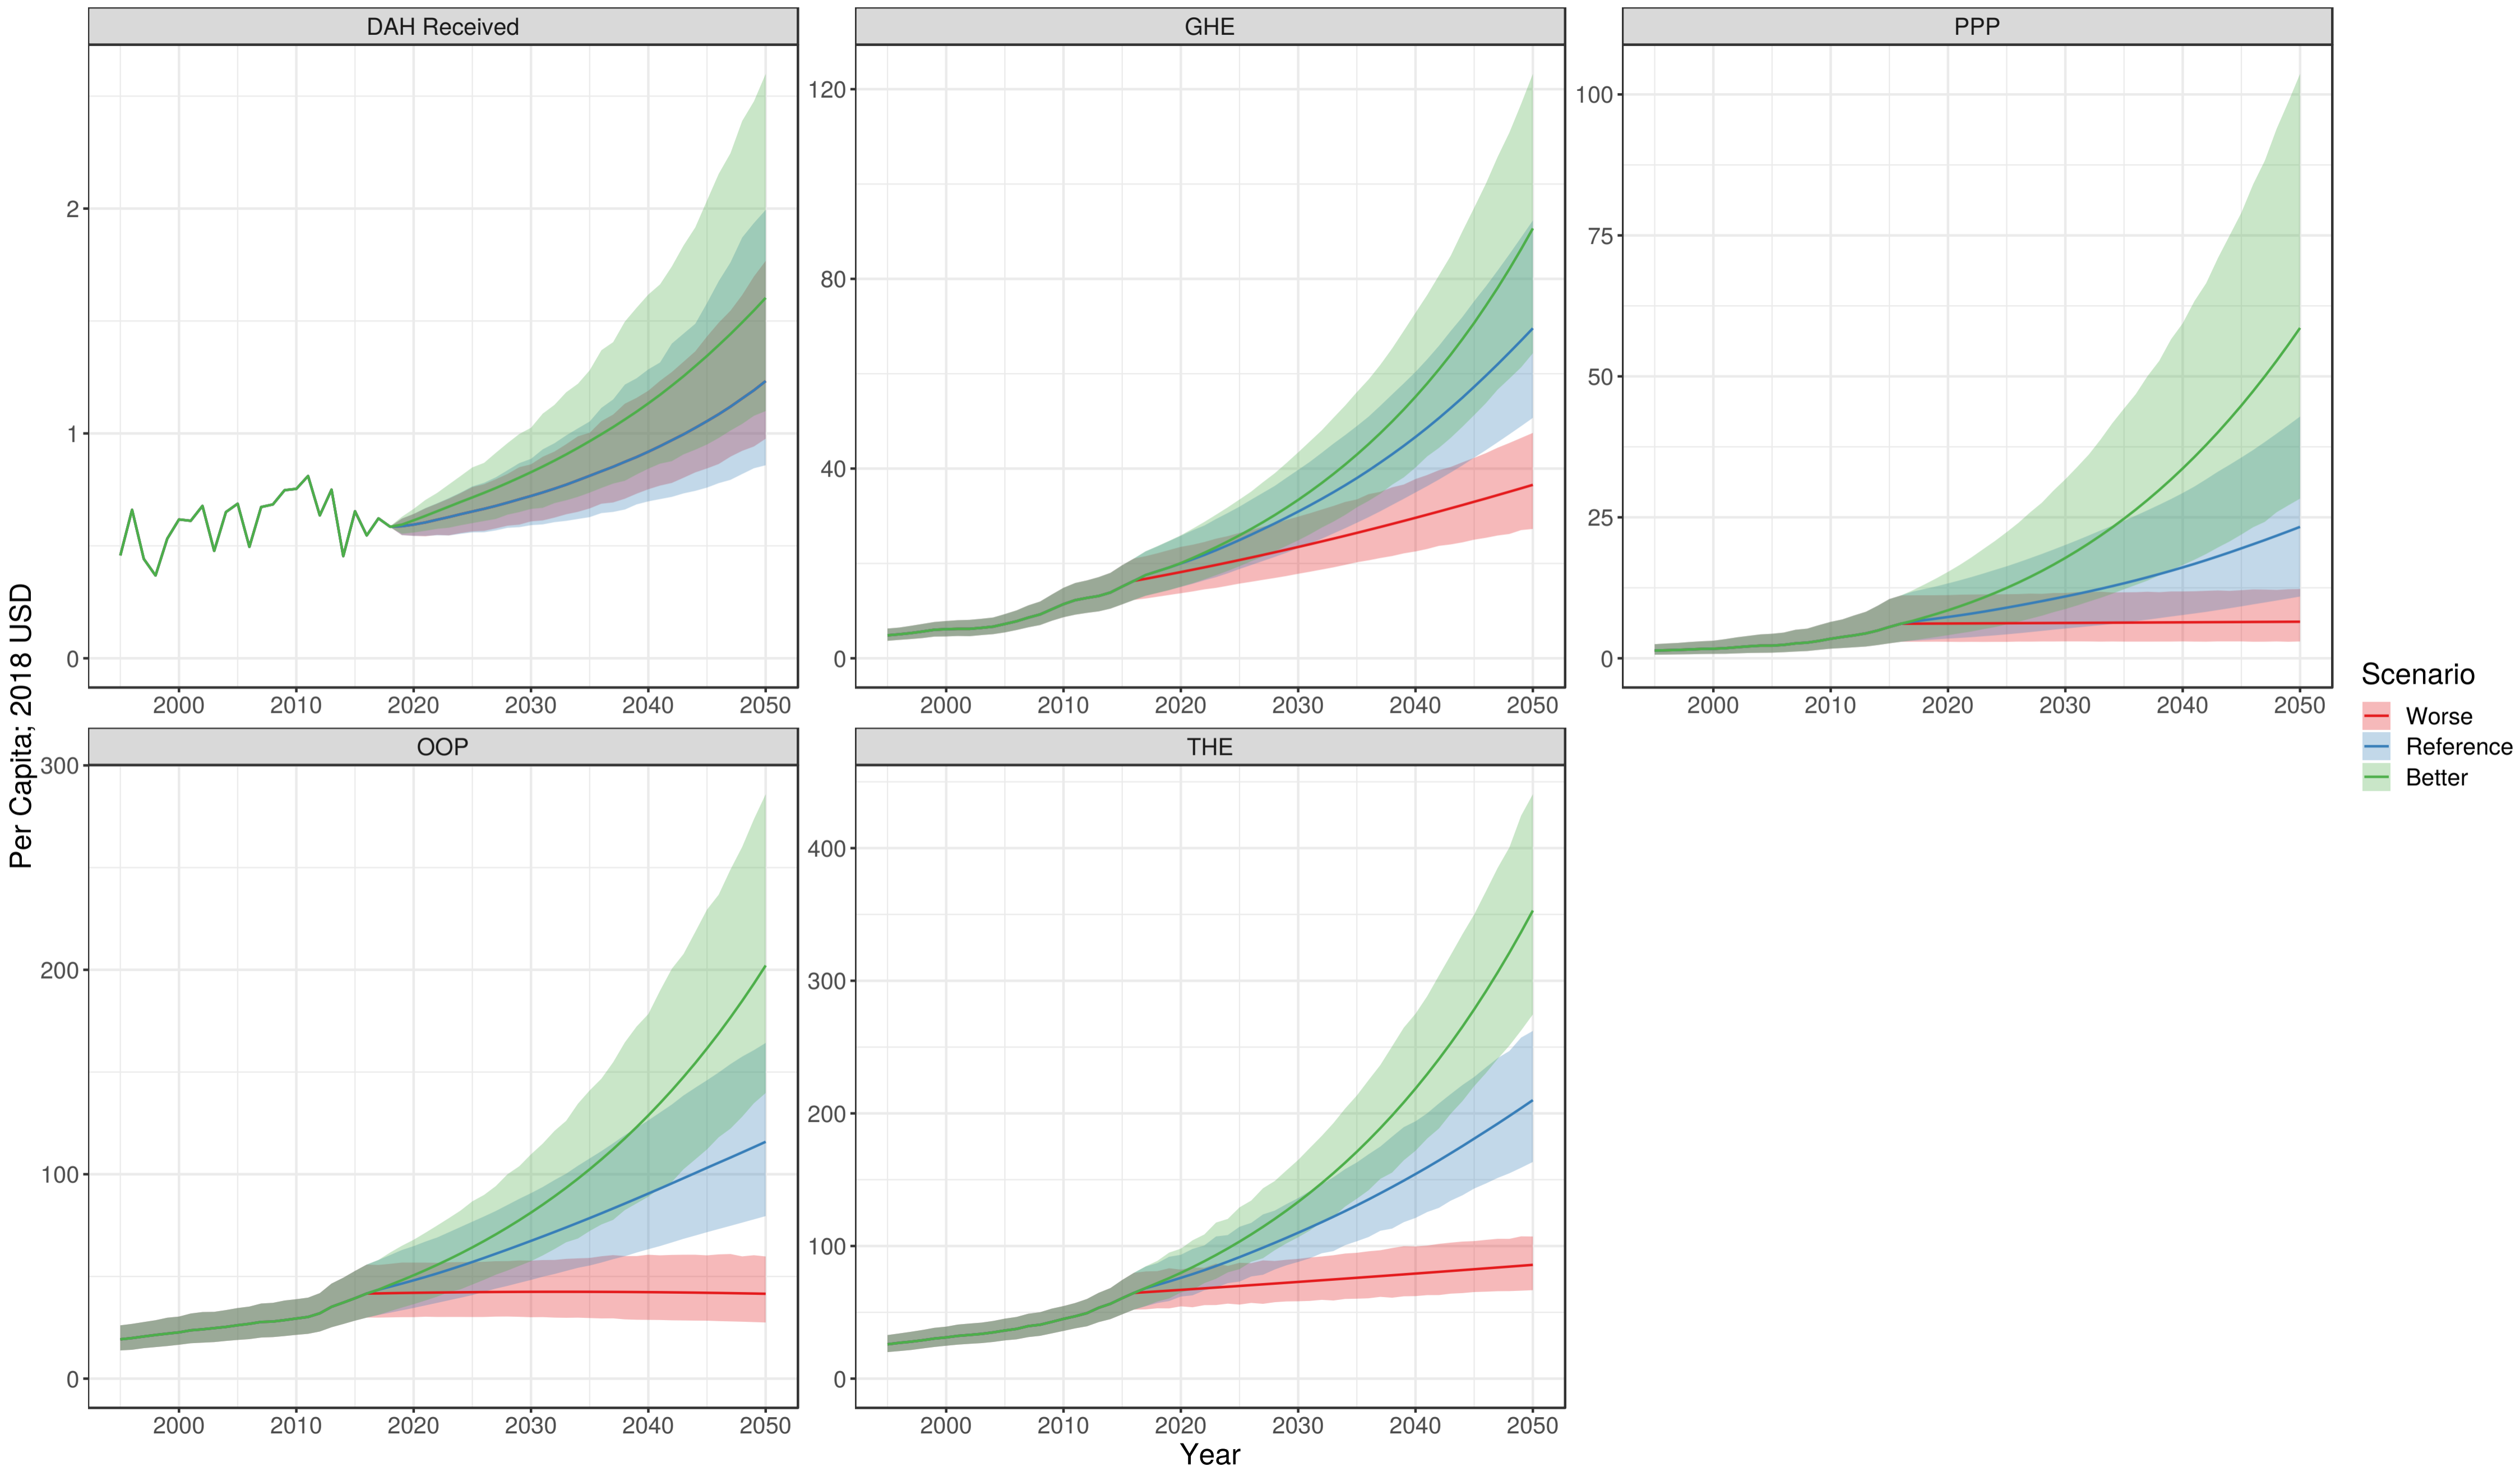

# Indonesia

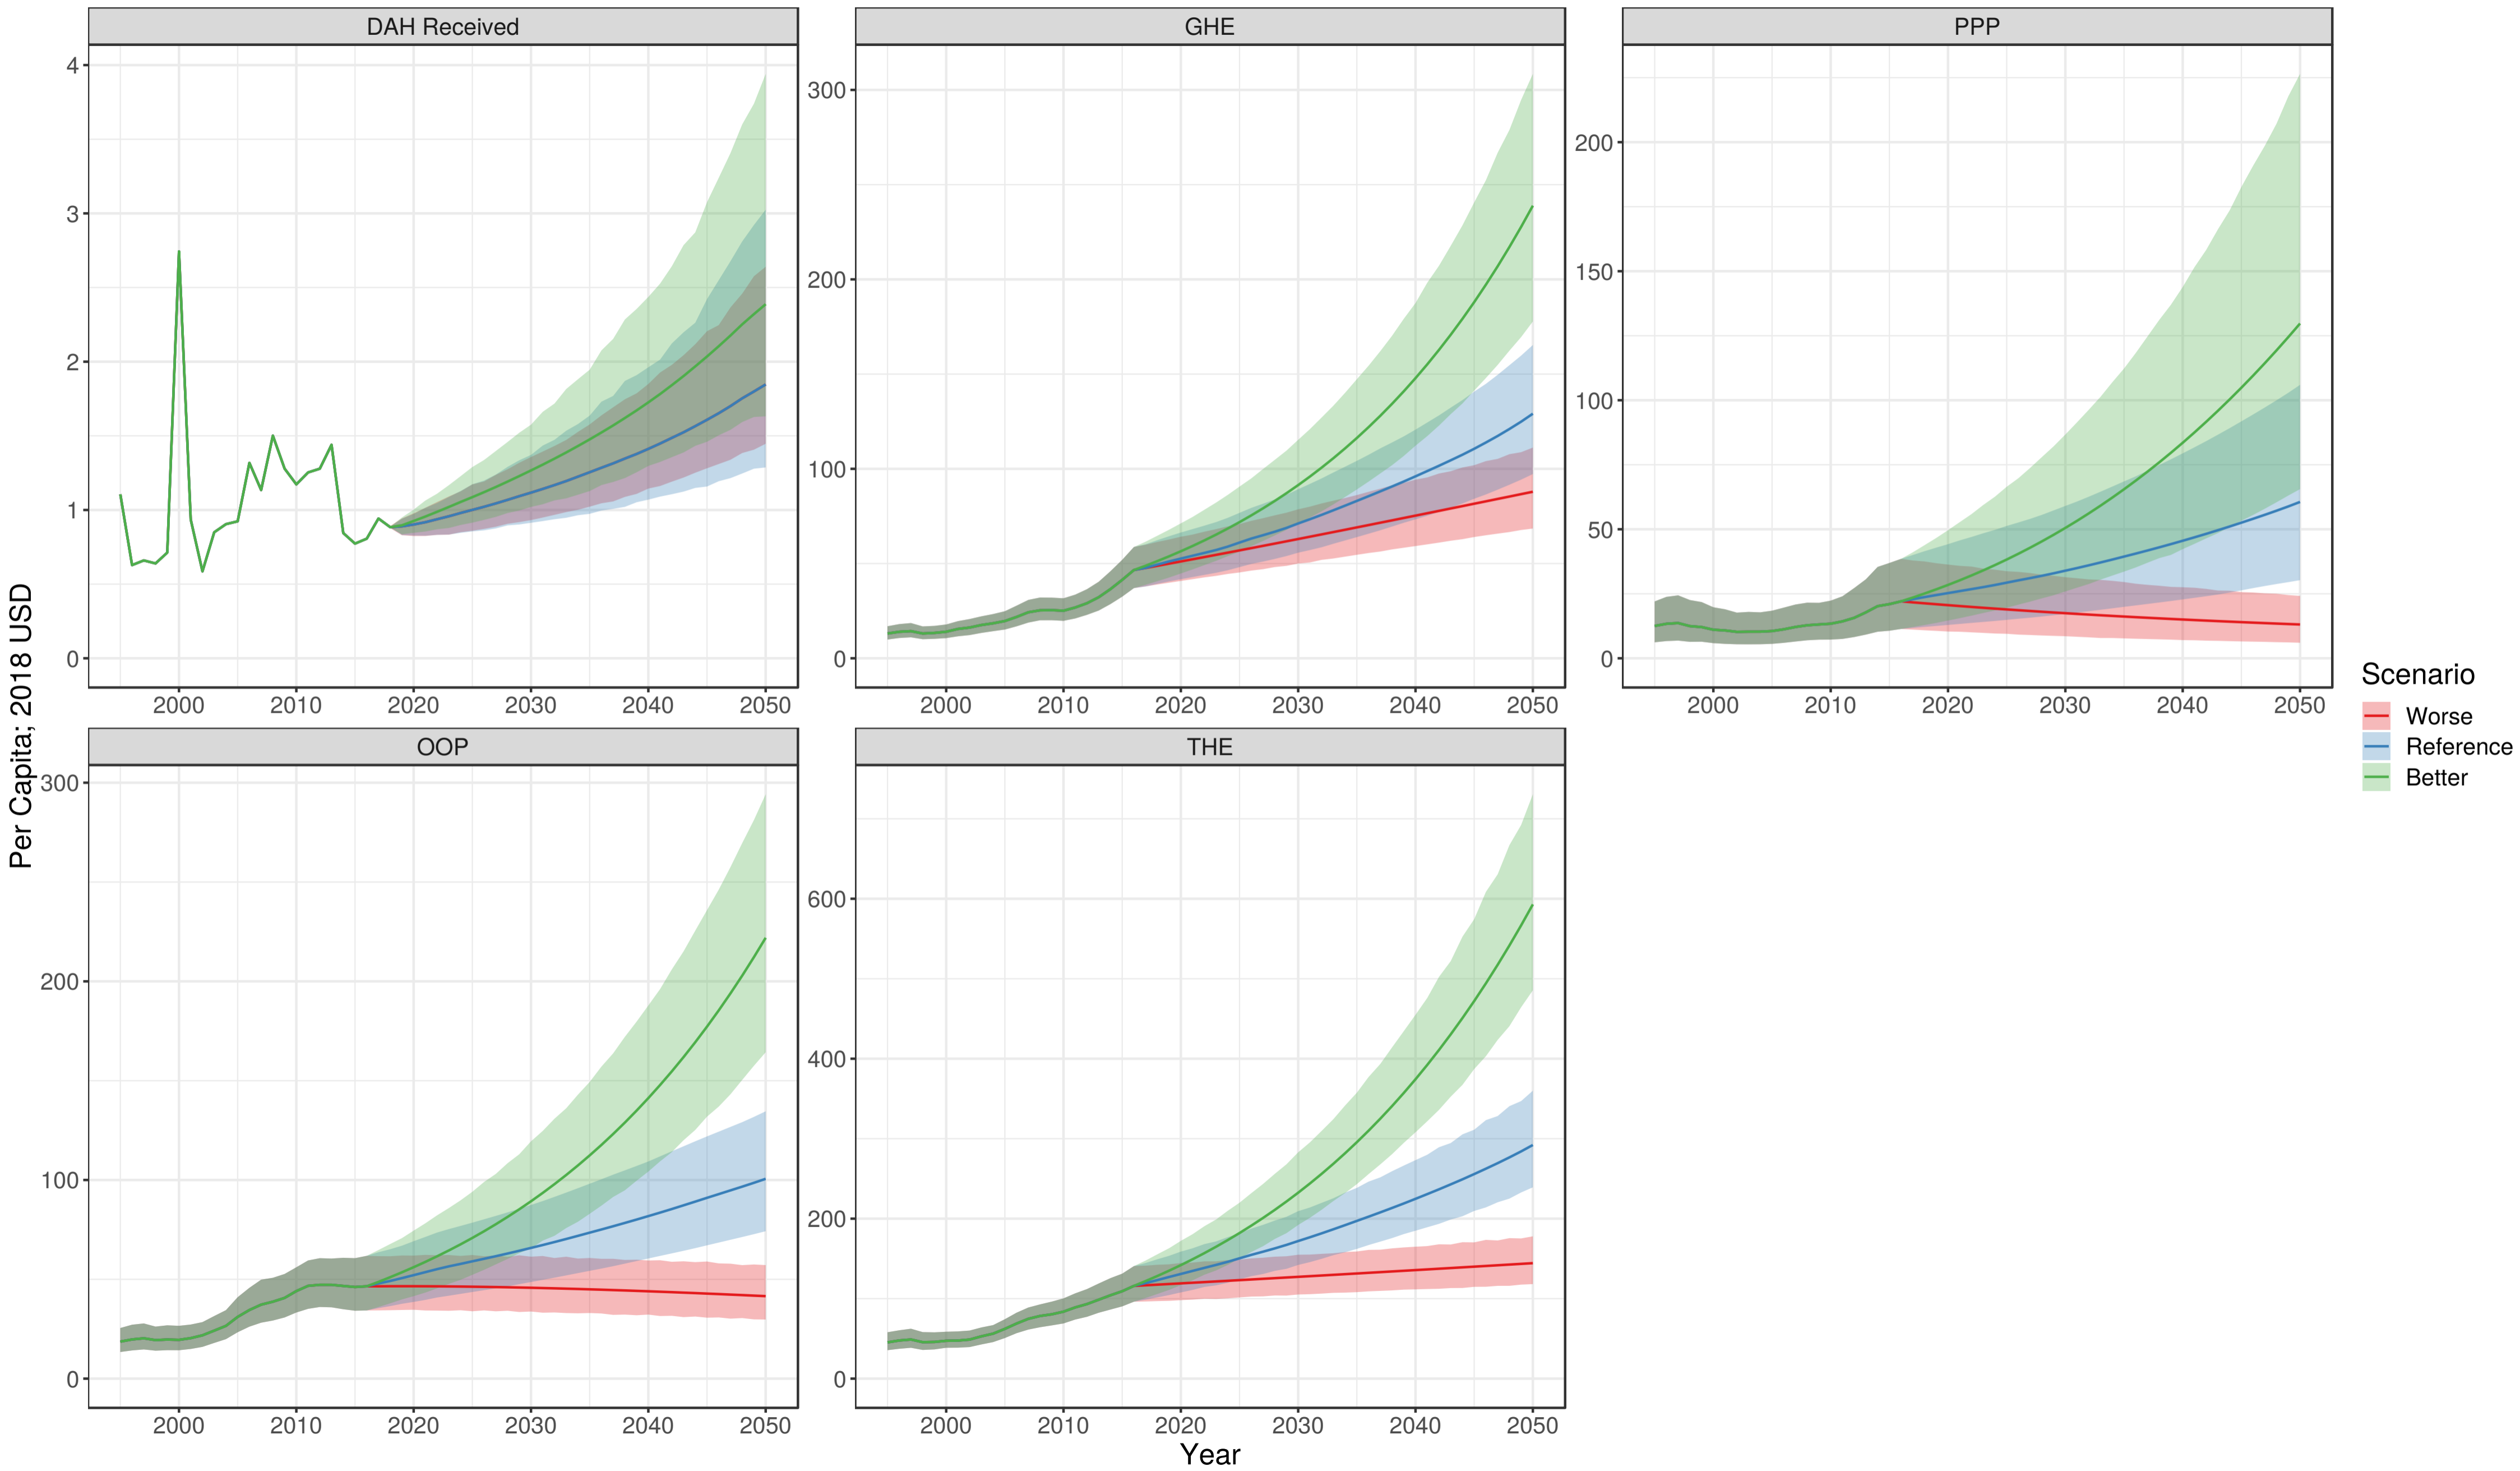

# Iran

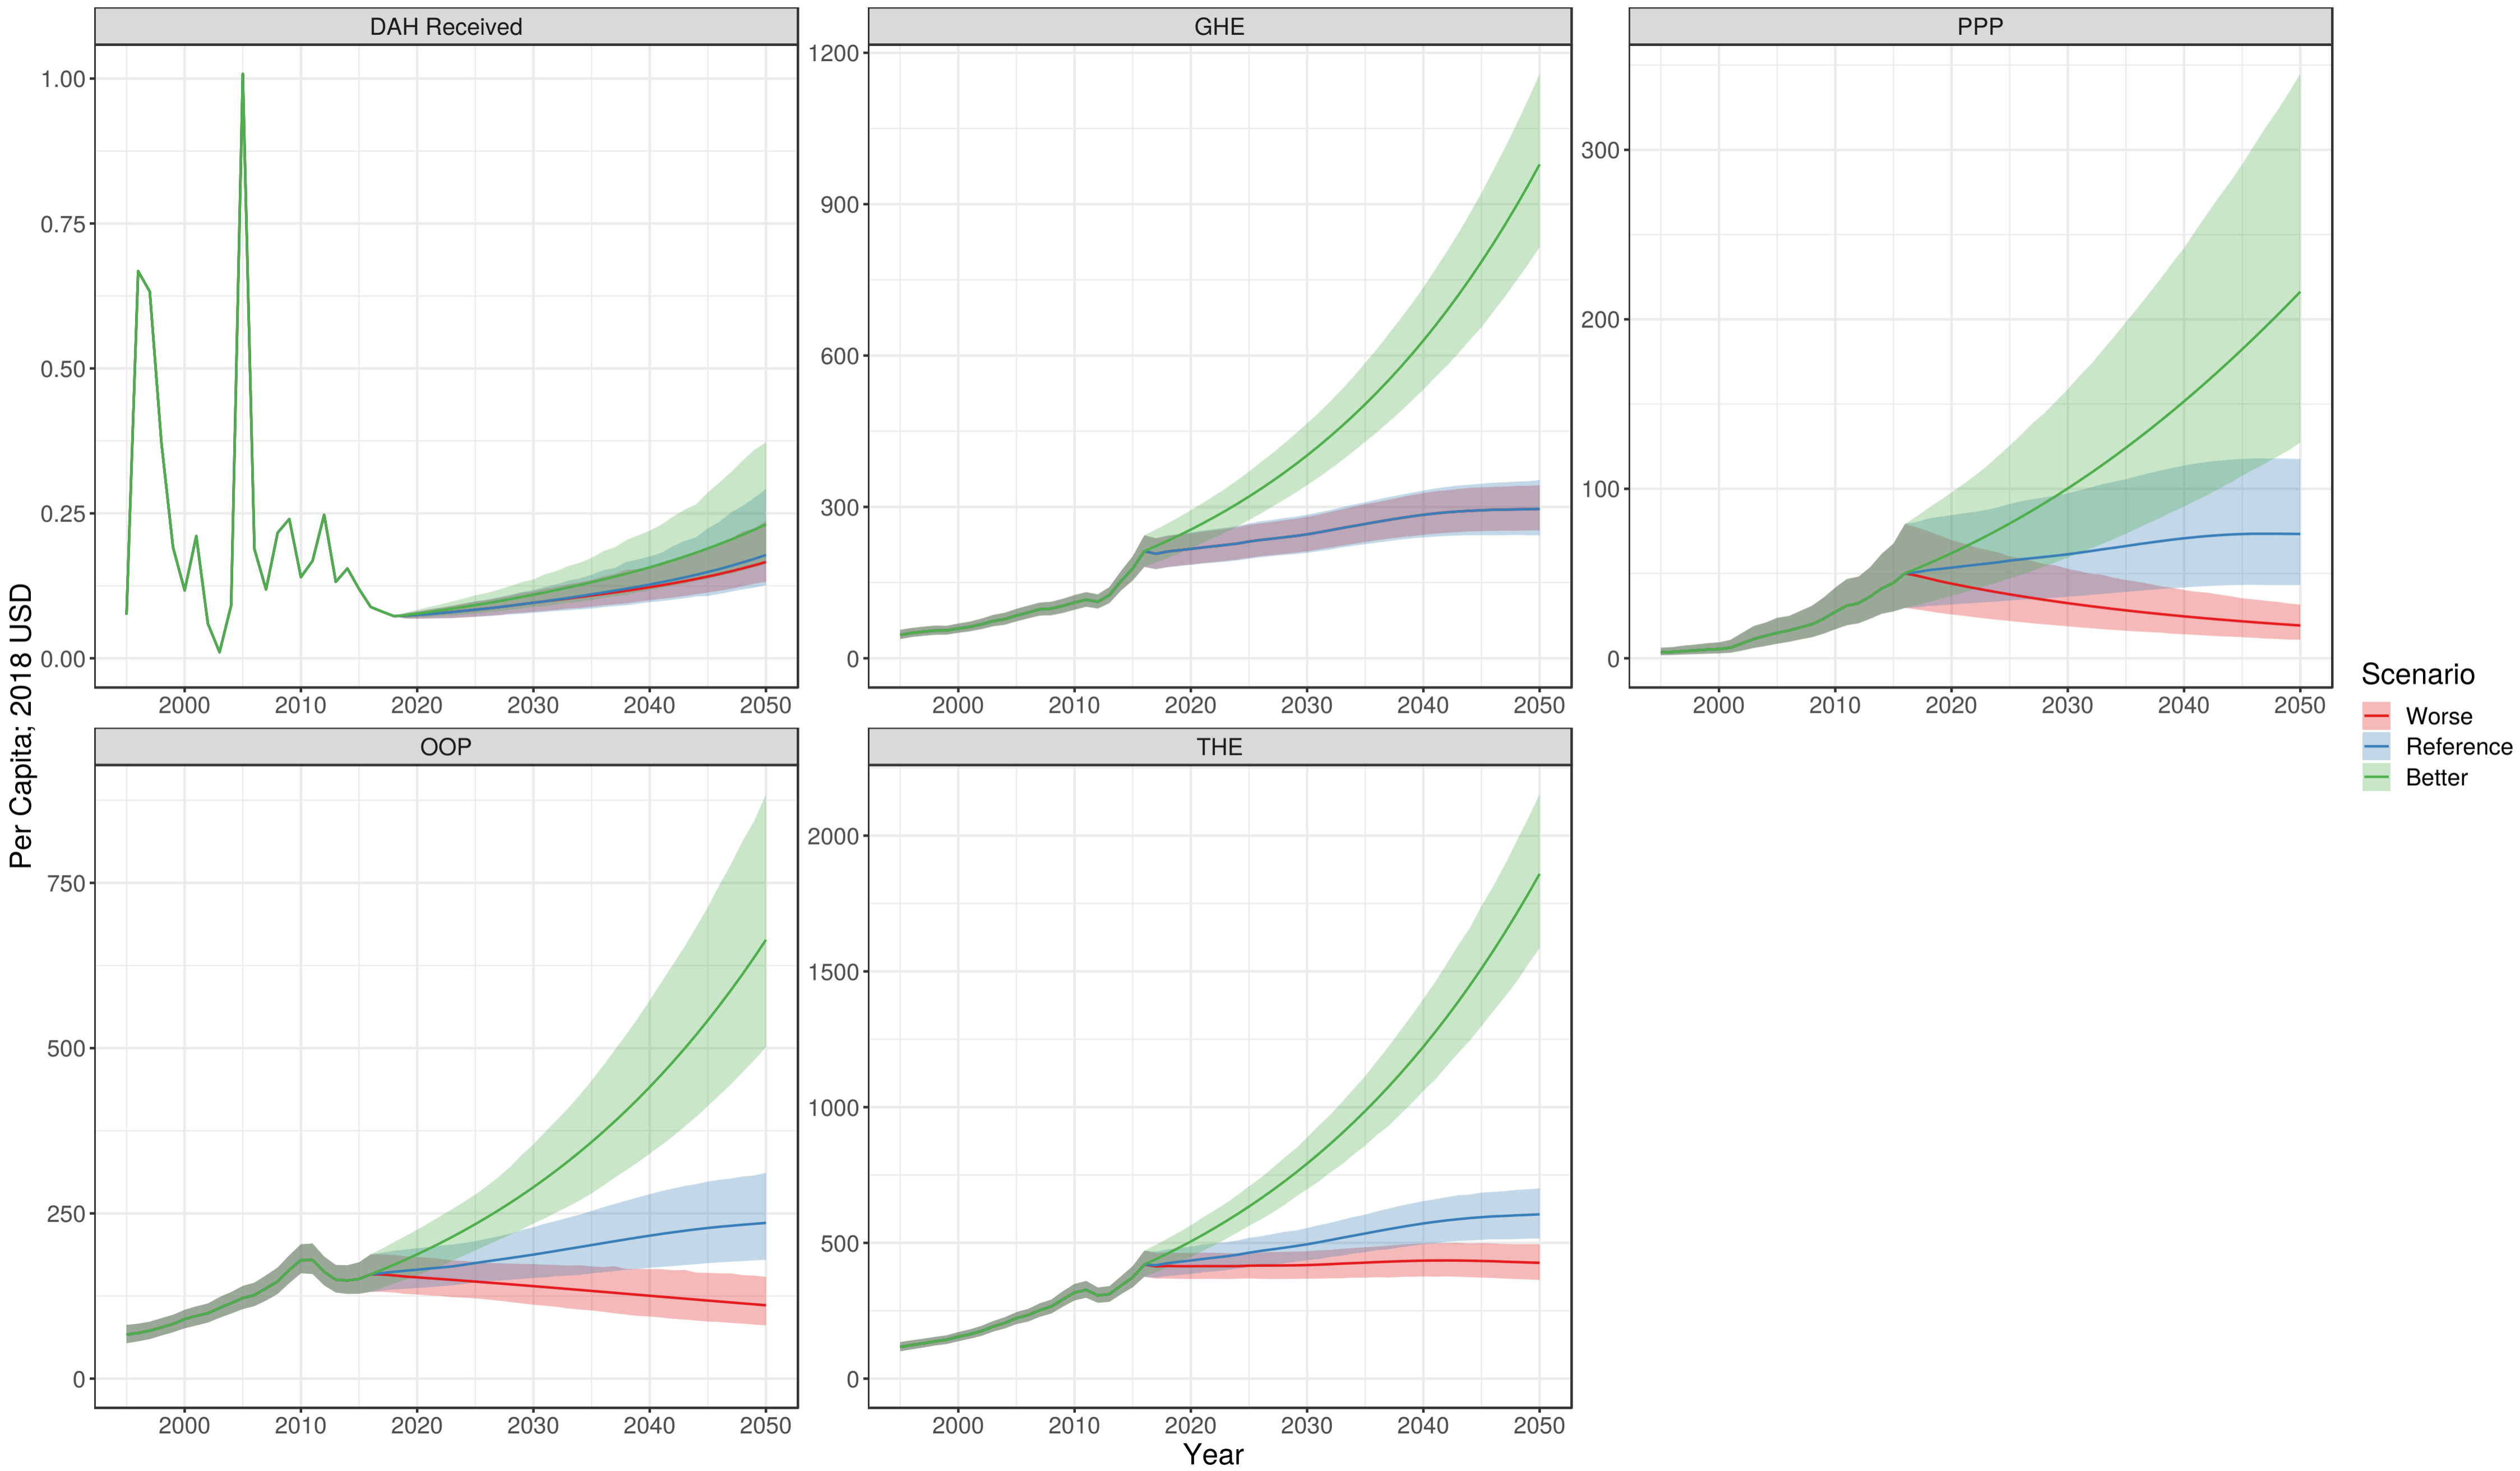

# Iraq

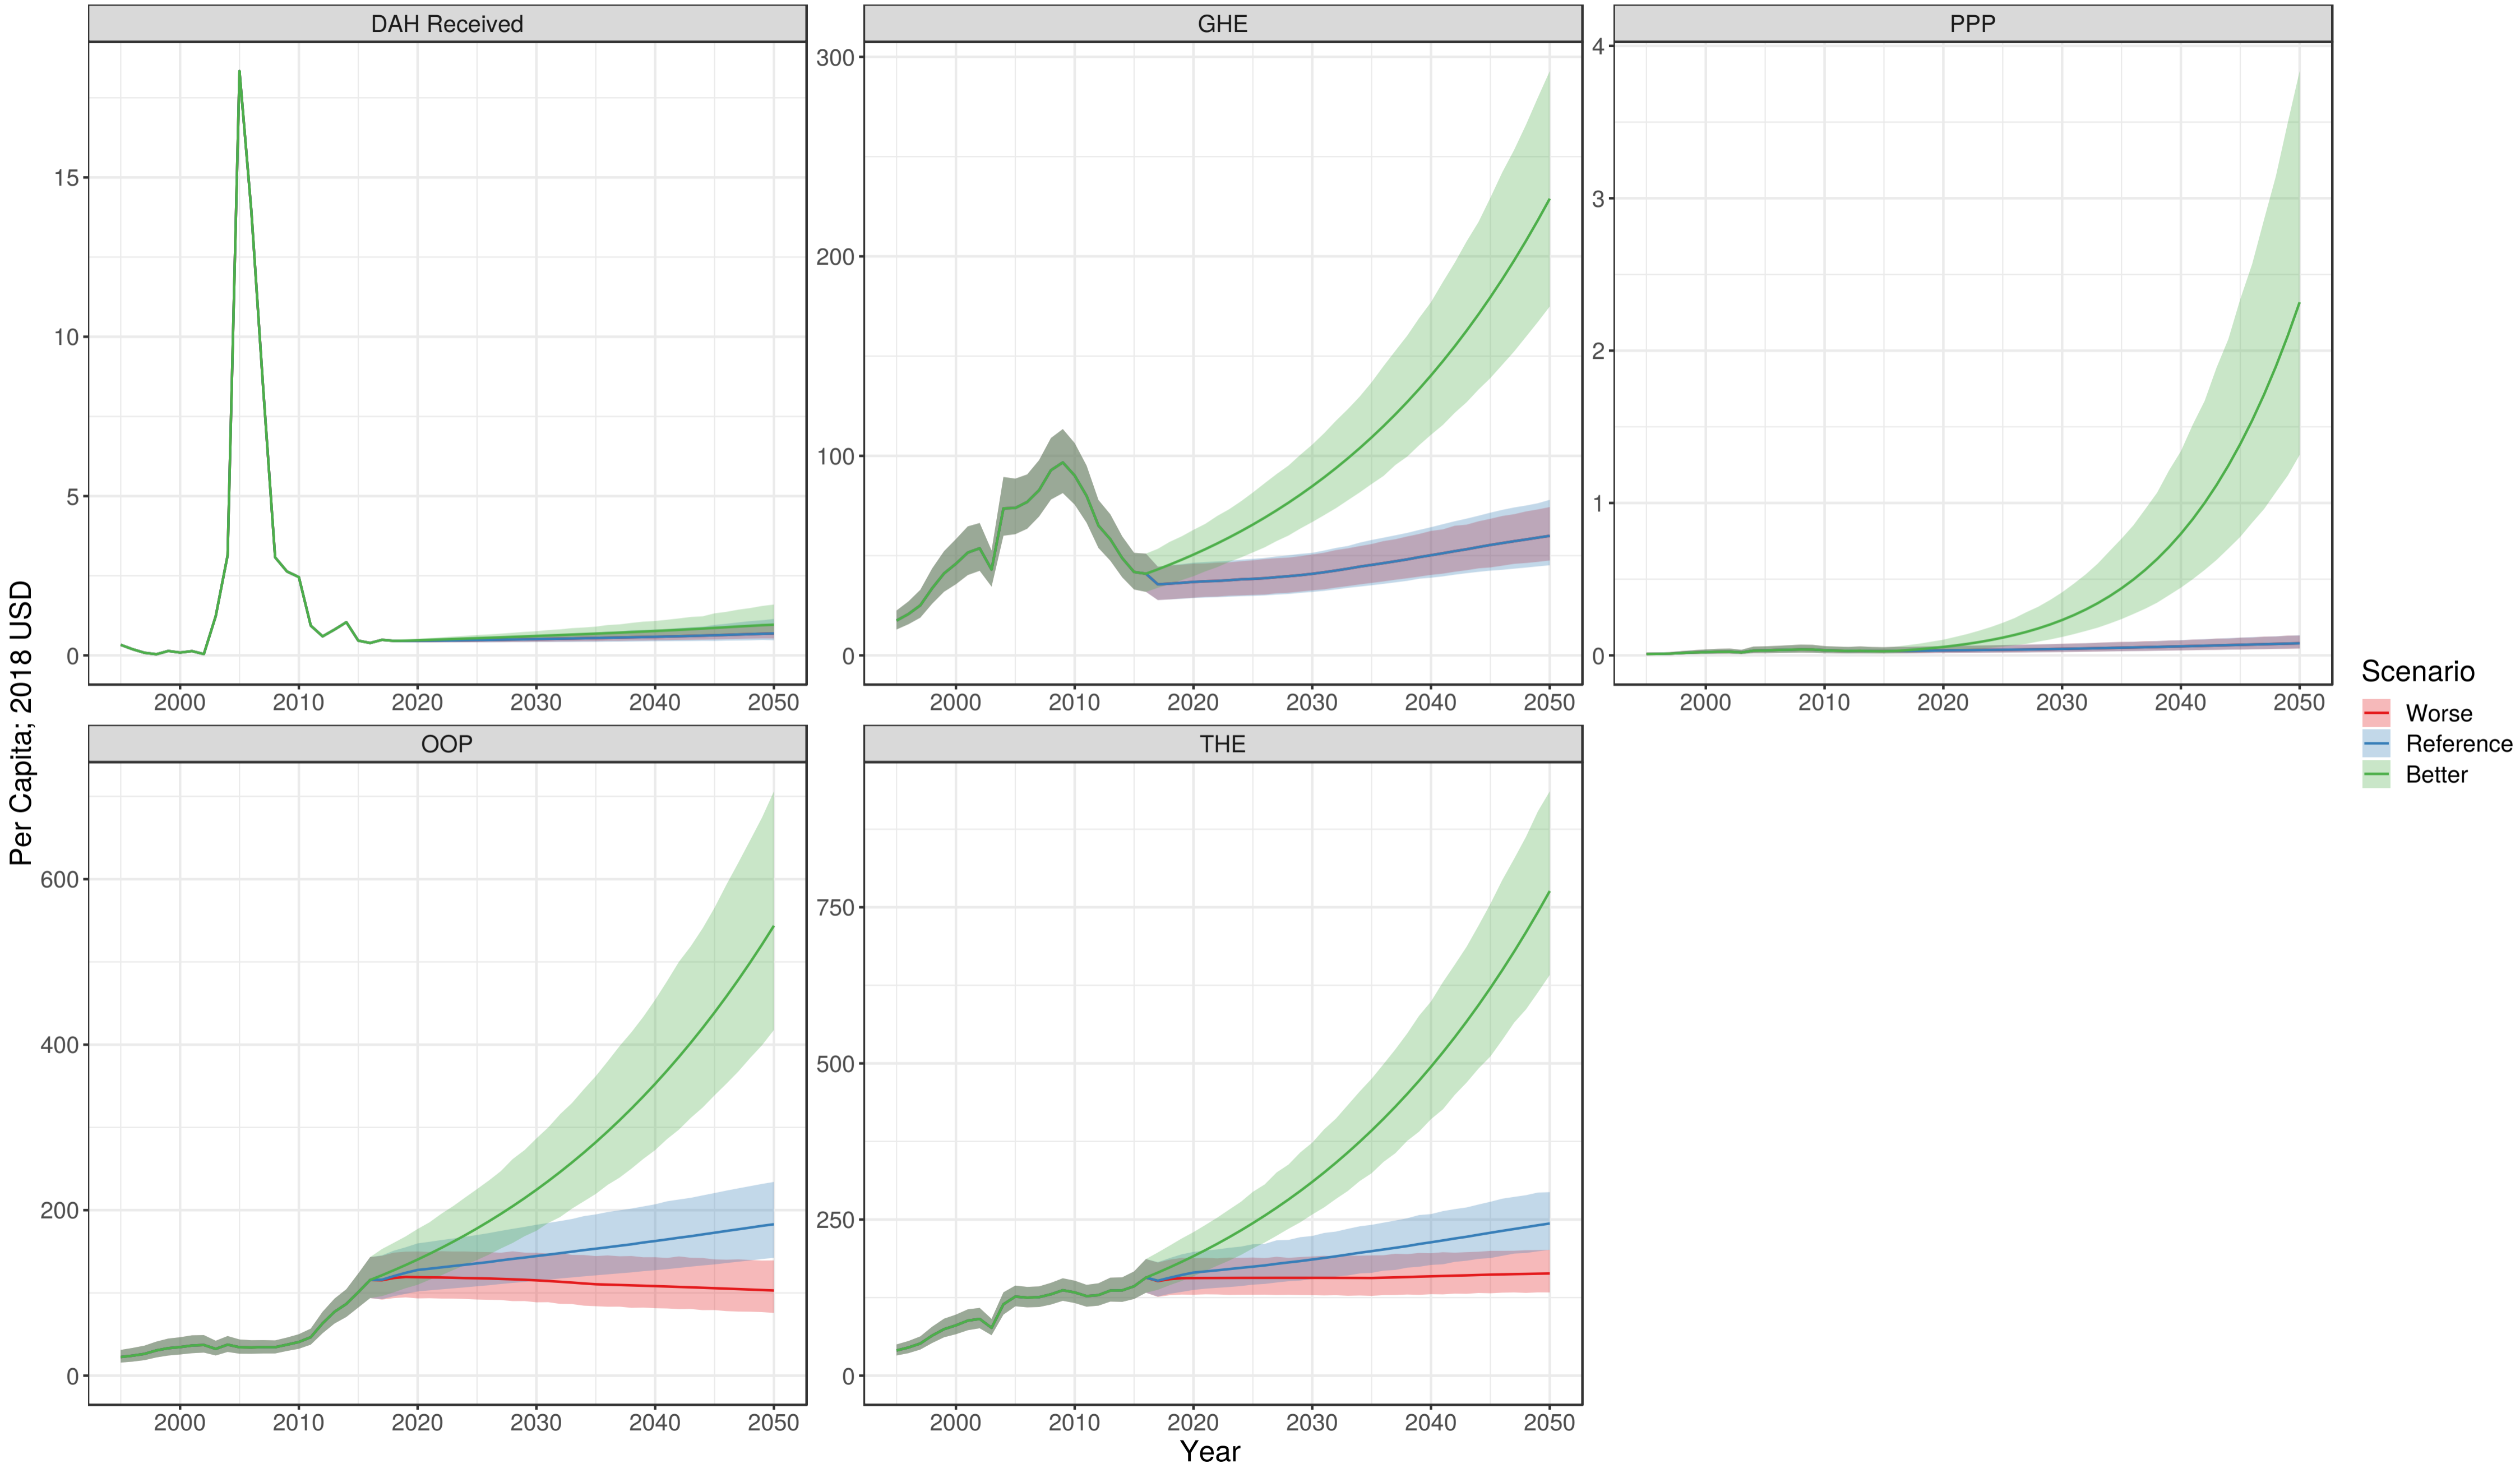

# Ireland

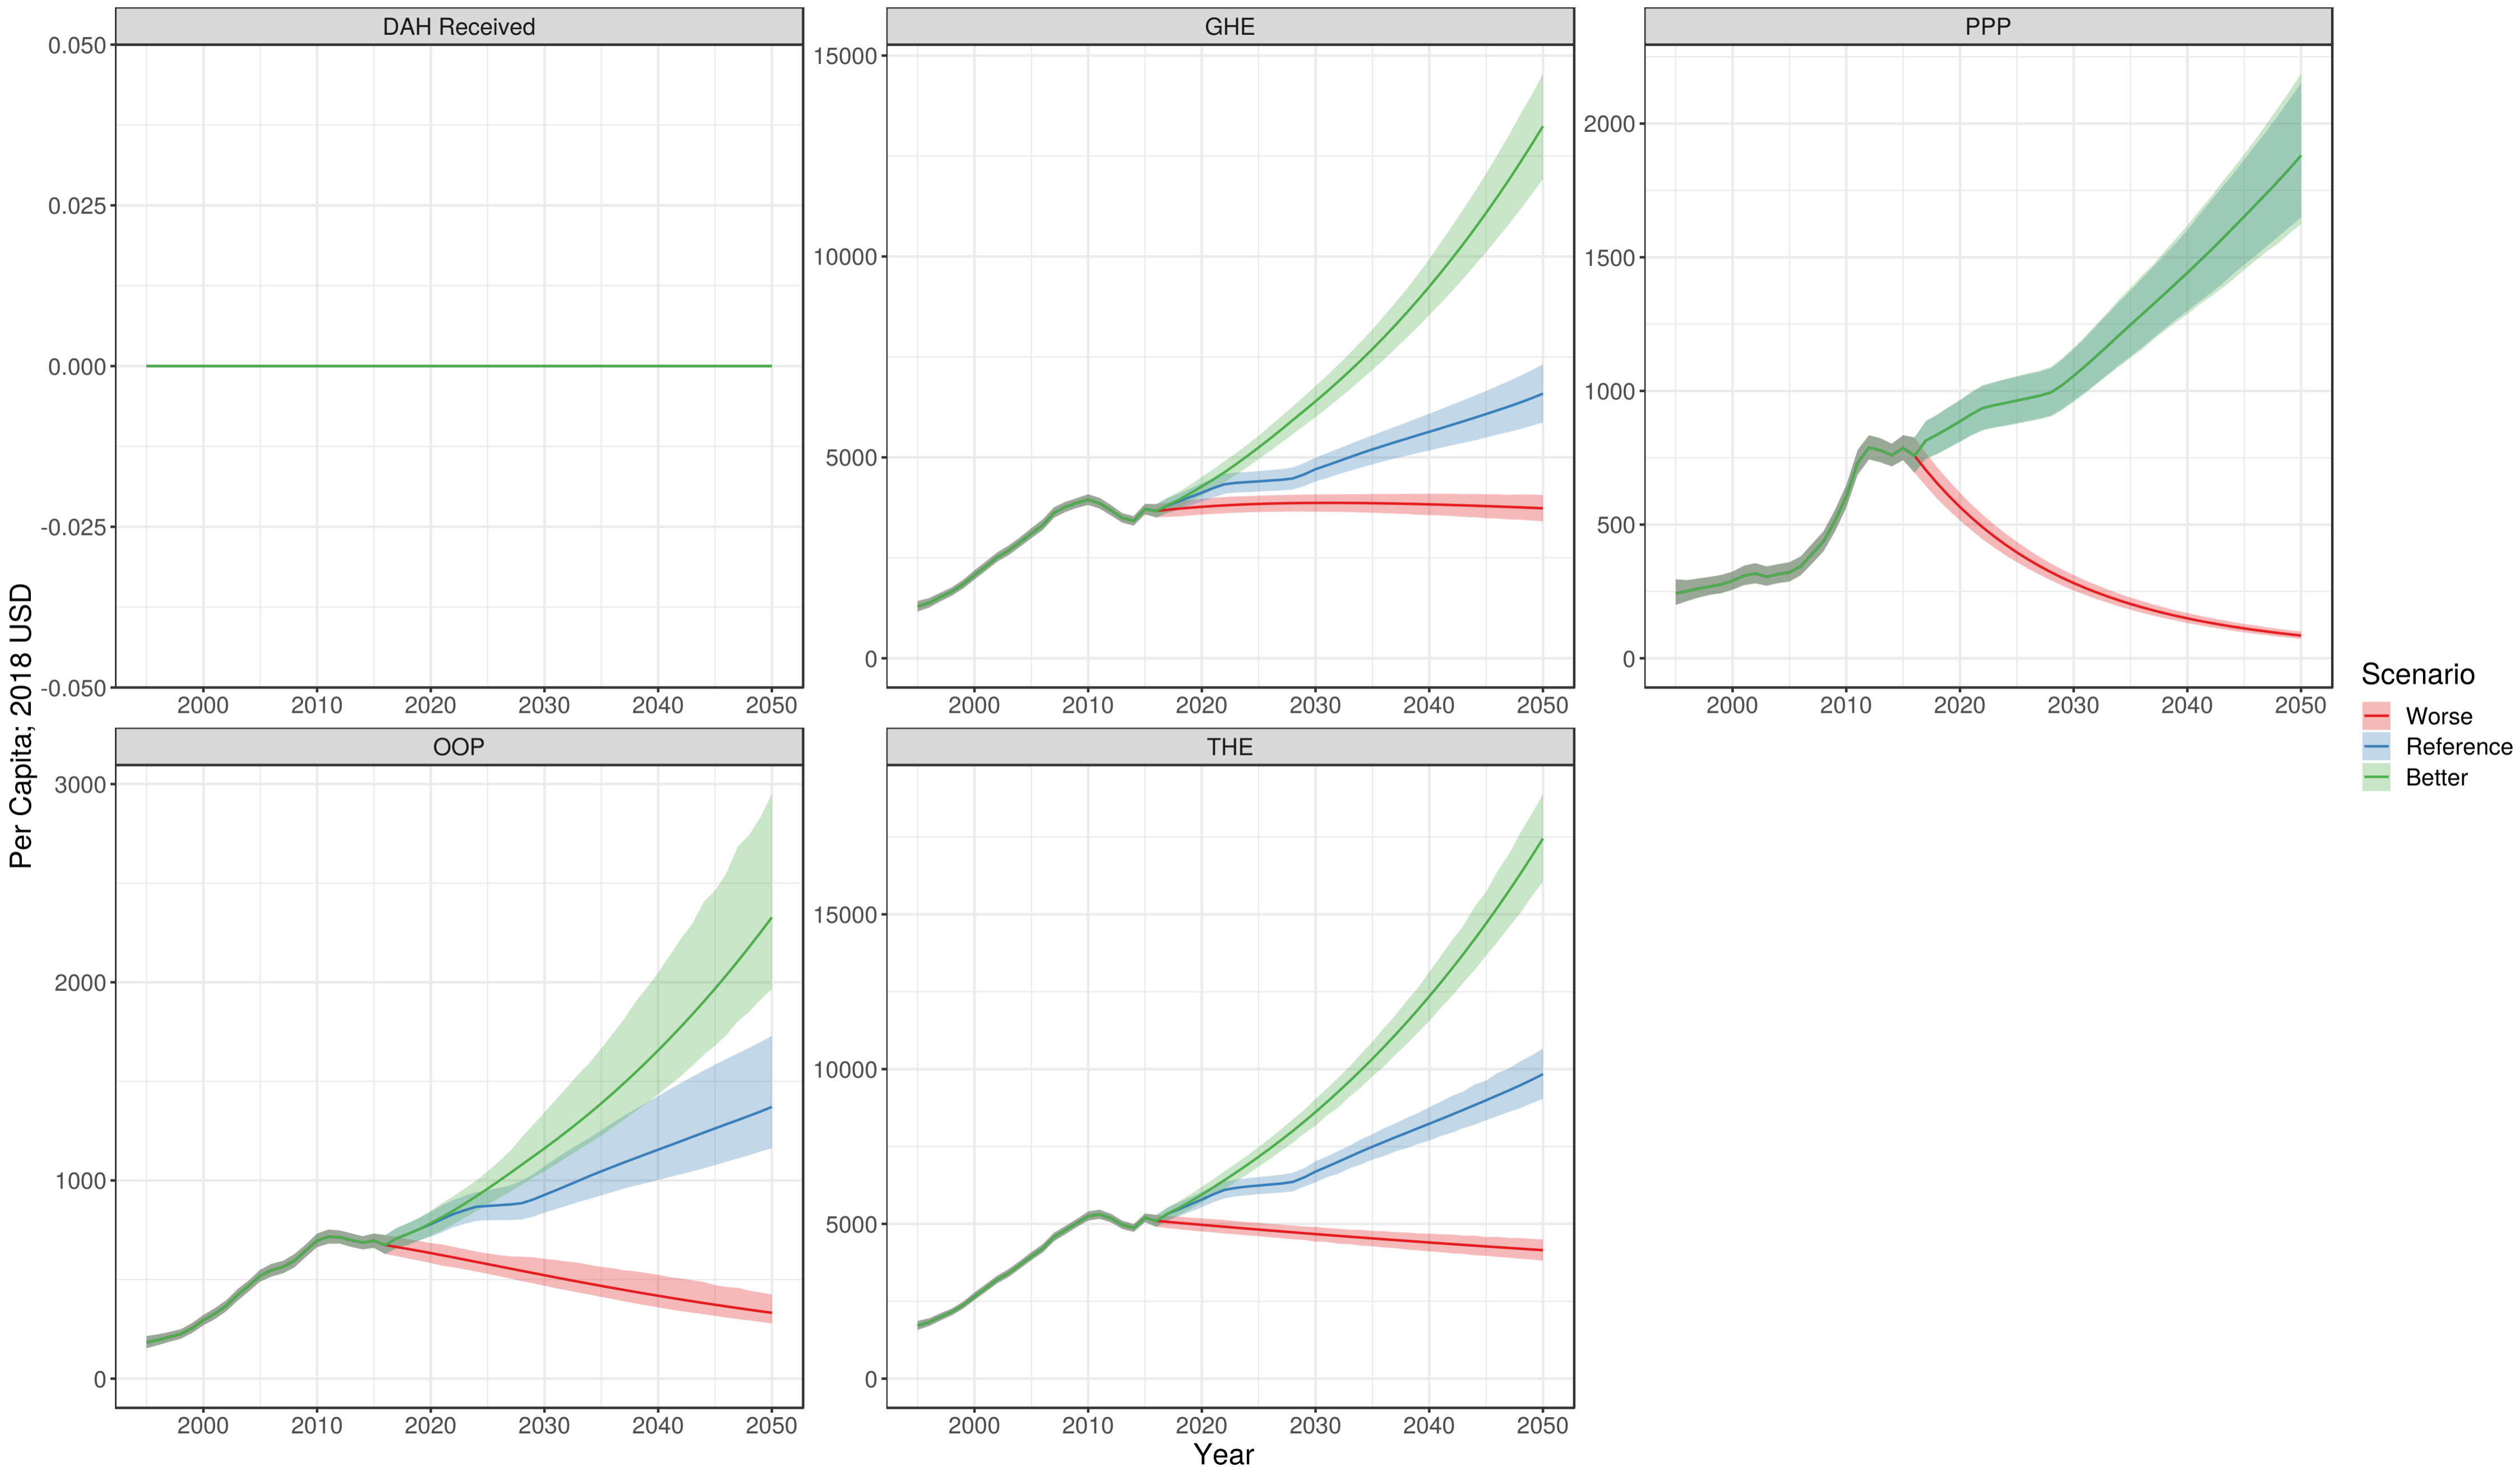

# Israel

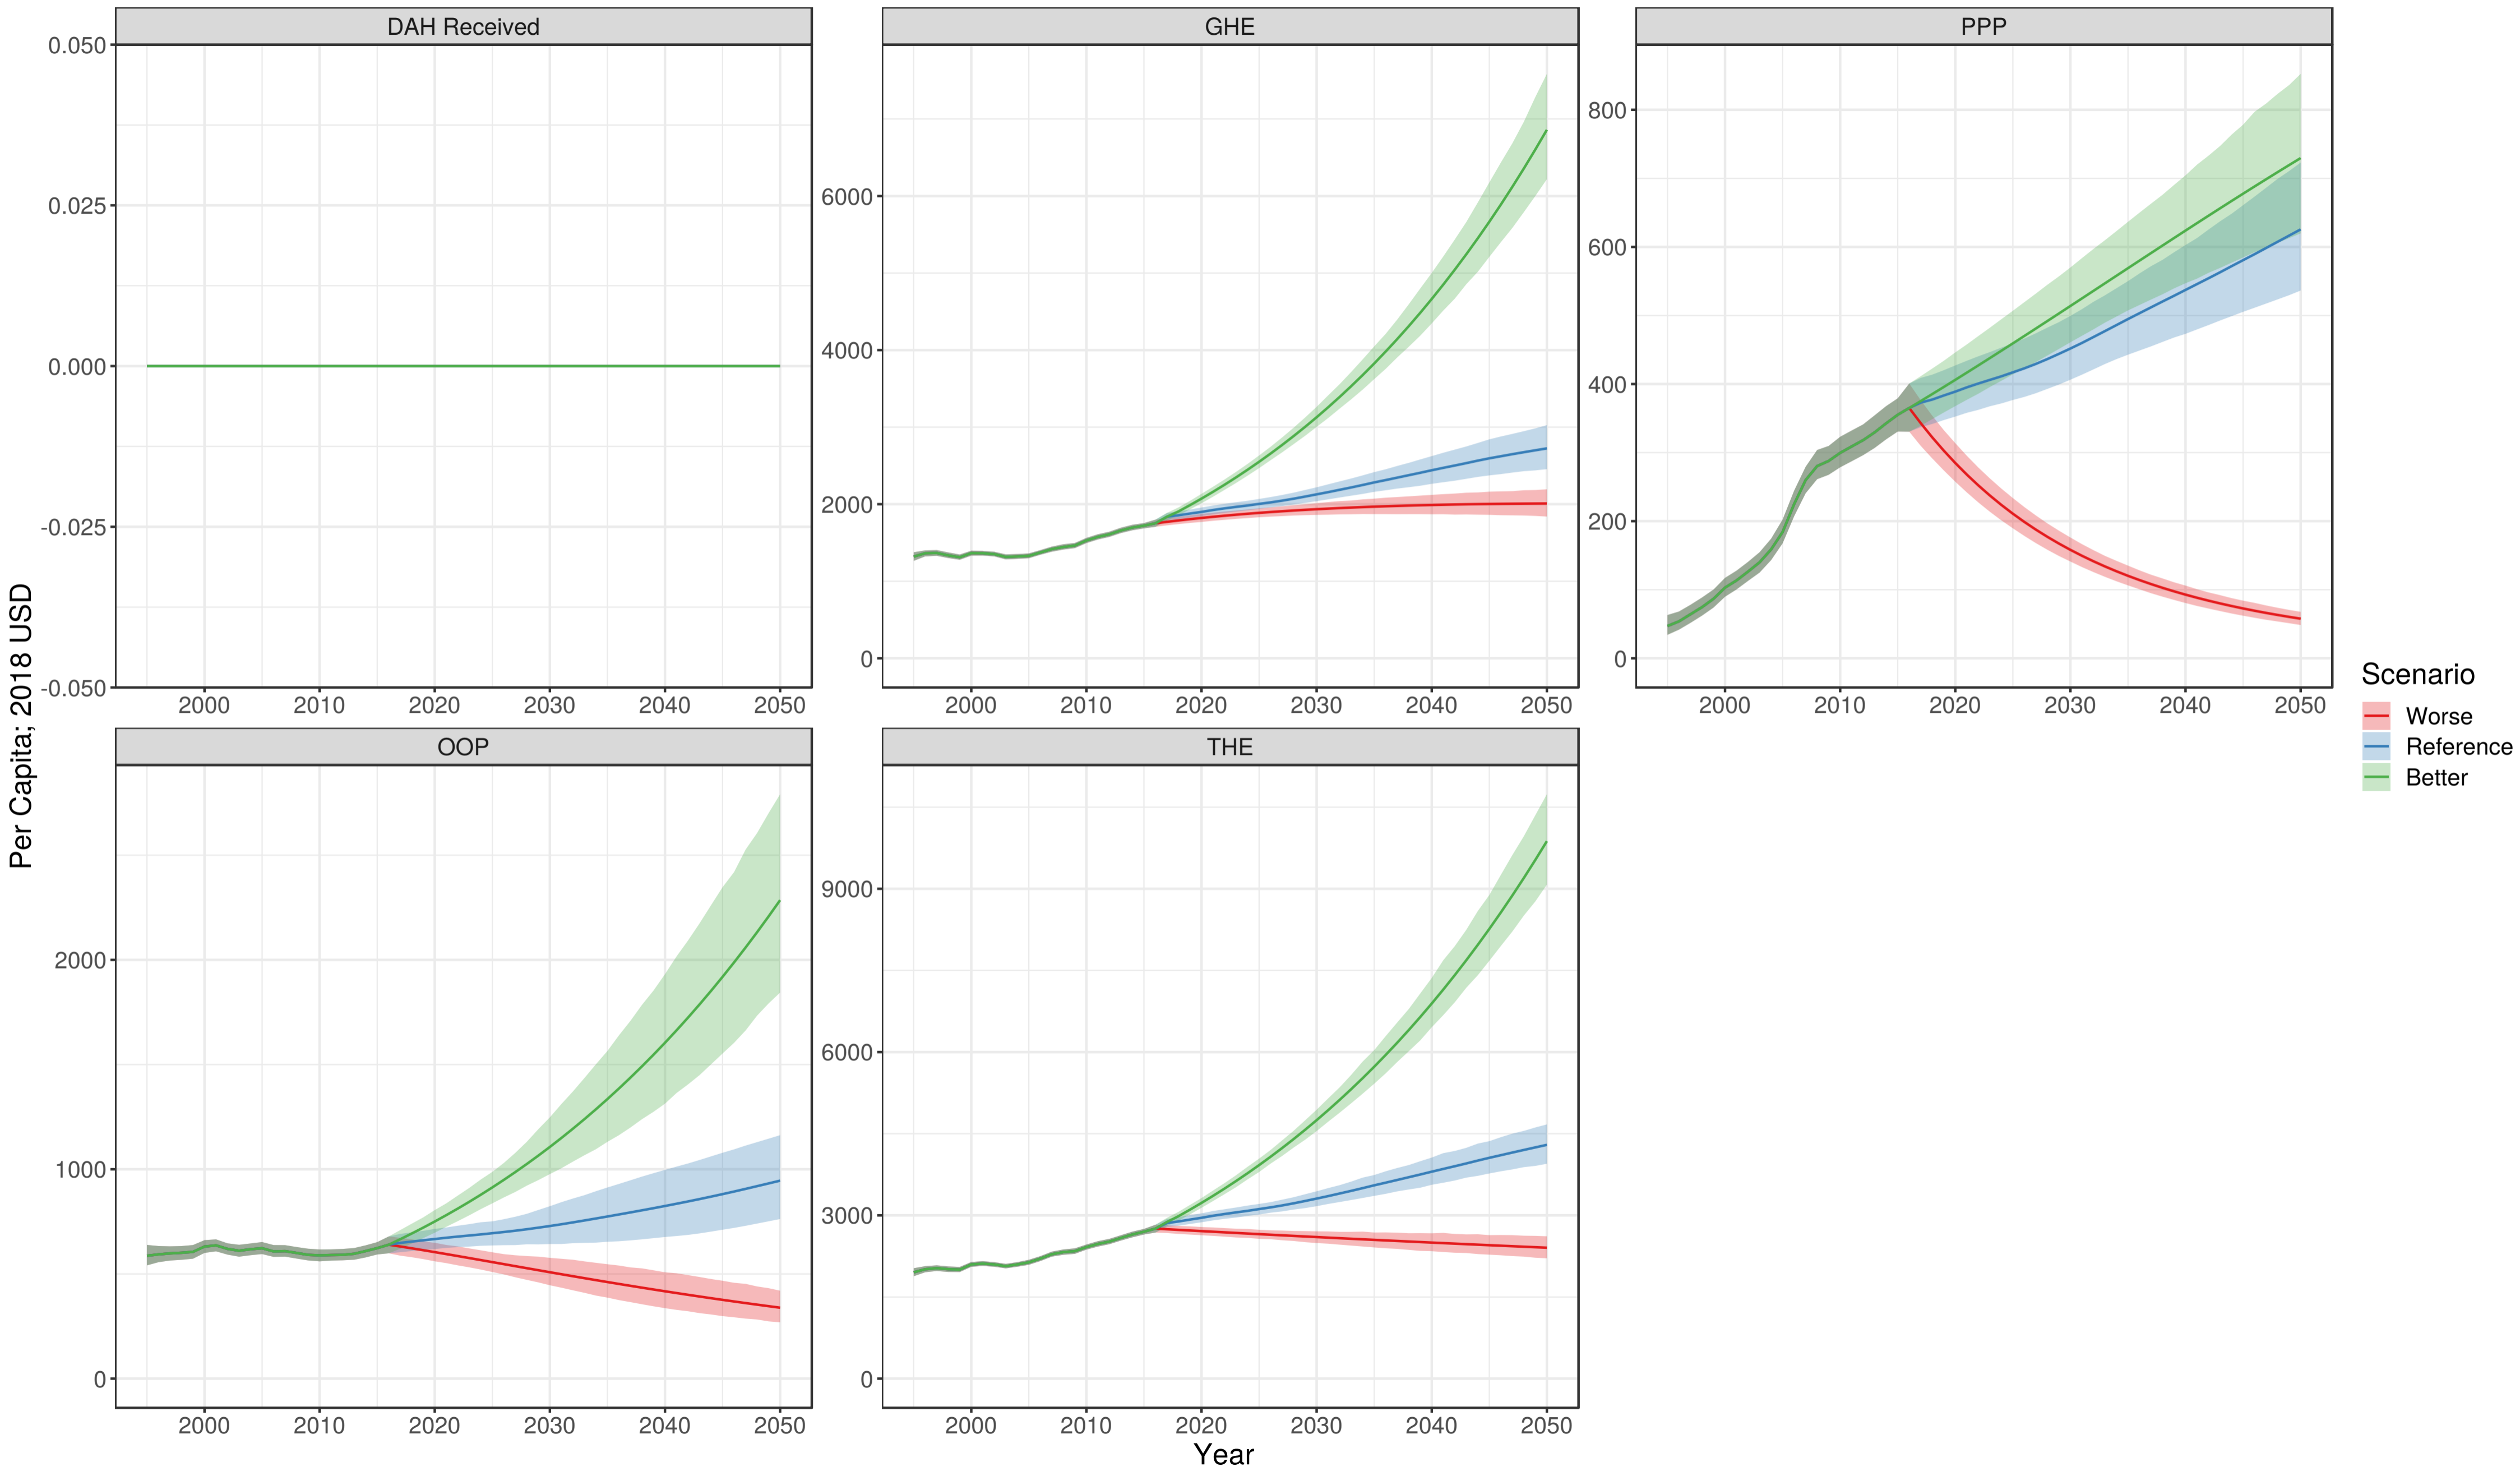



# Italy

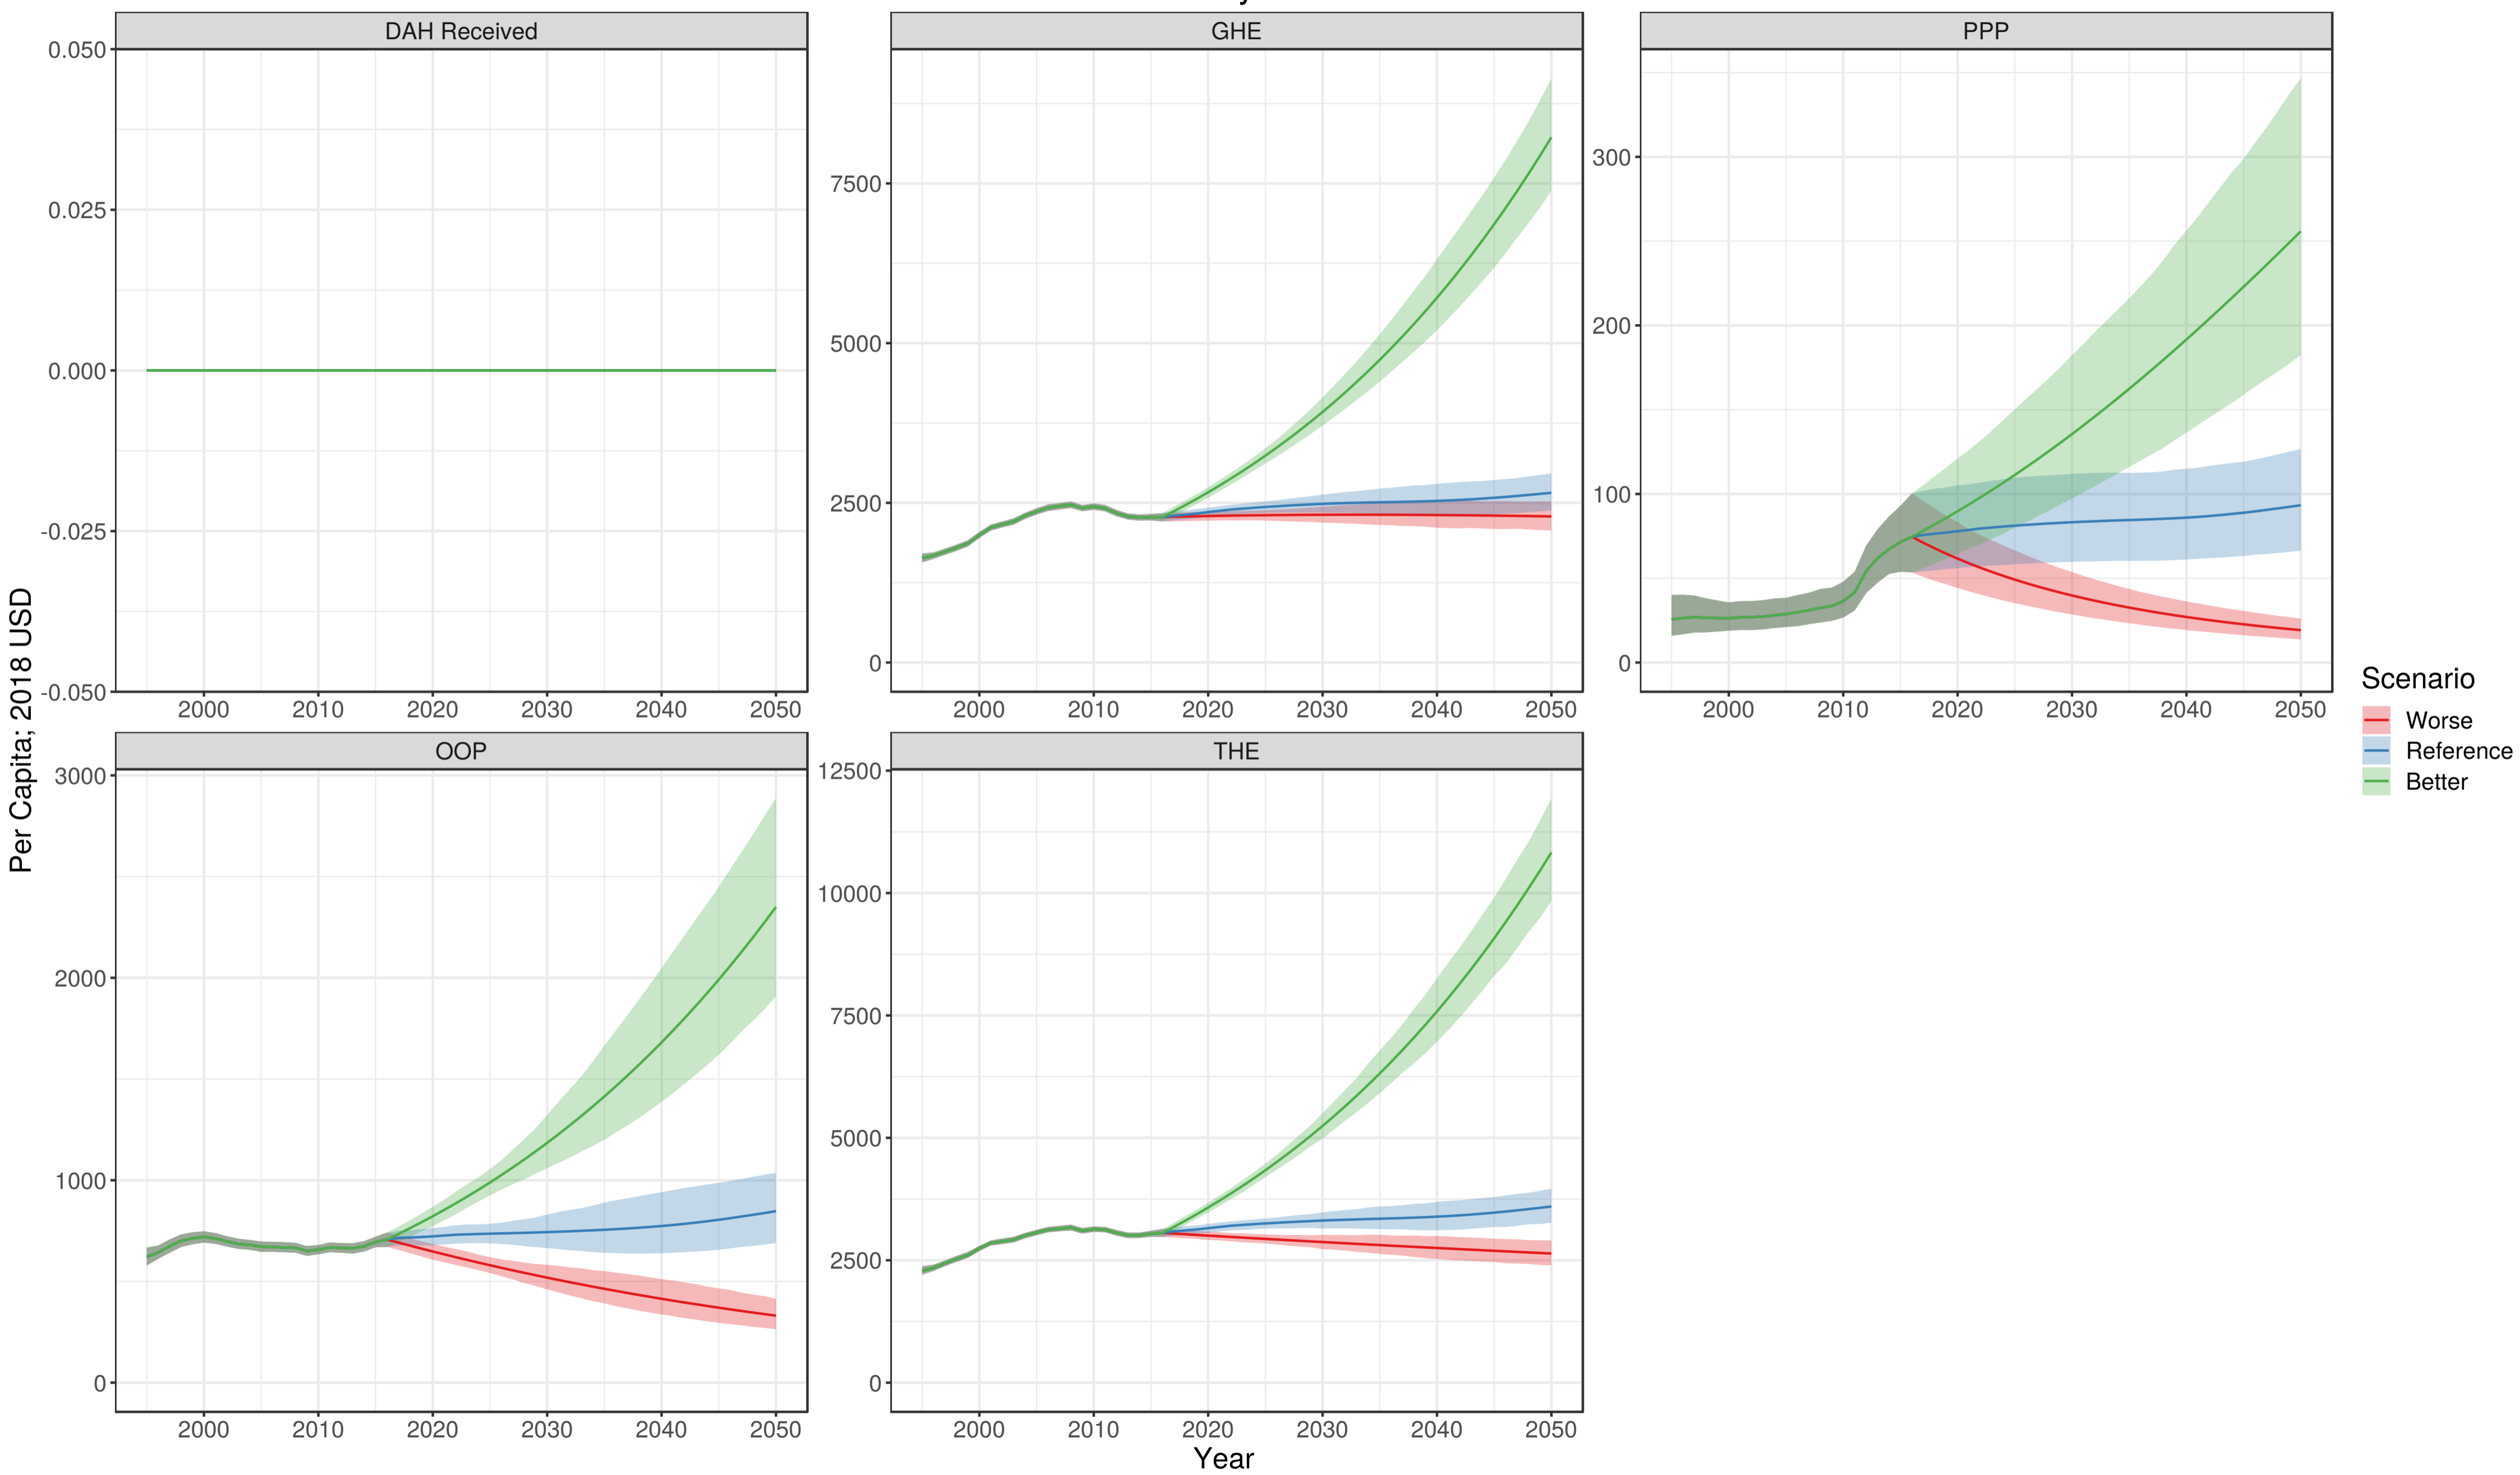

# Jamaica

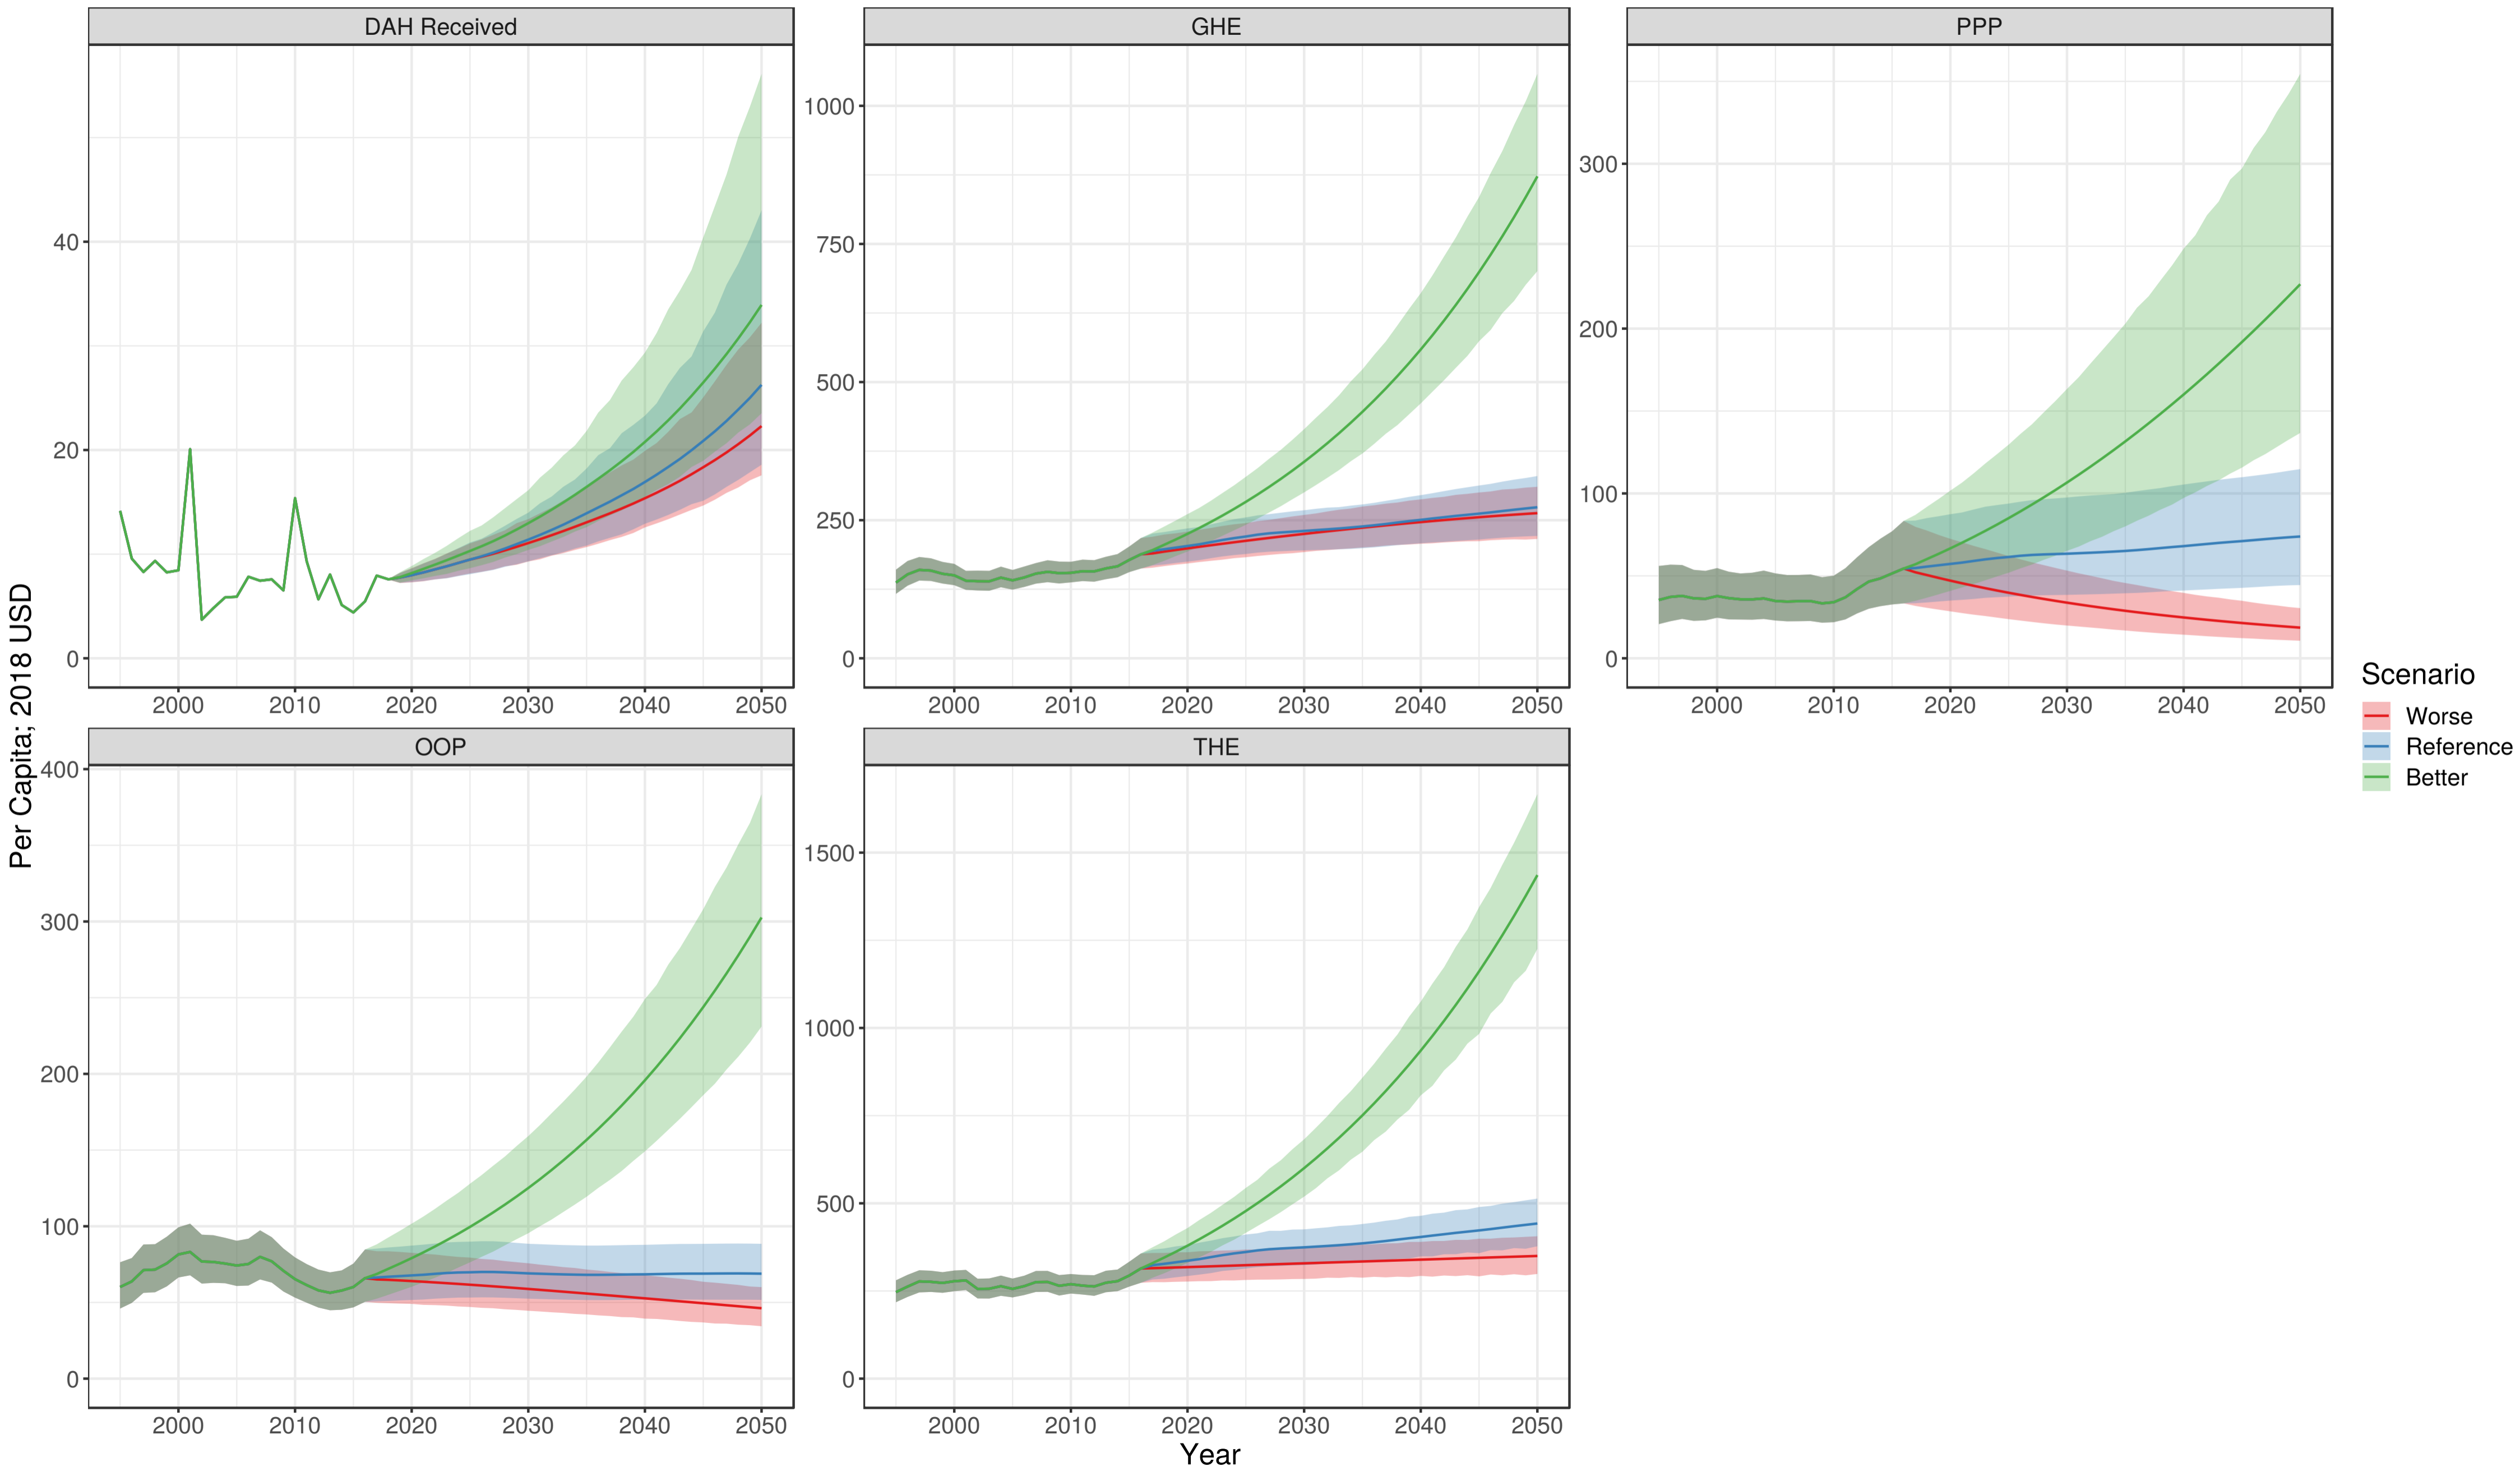

# Japan

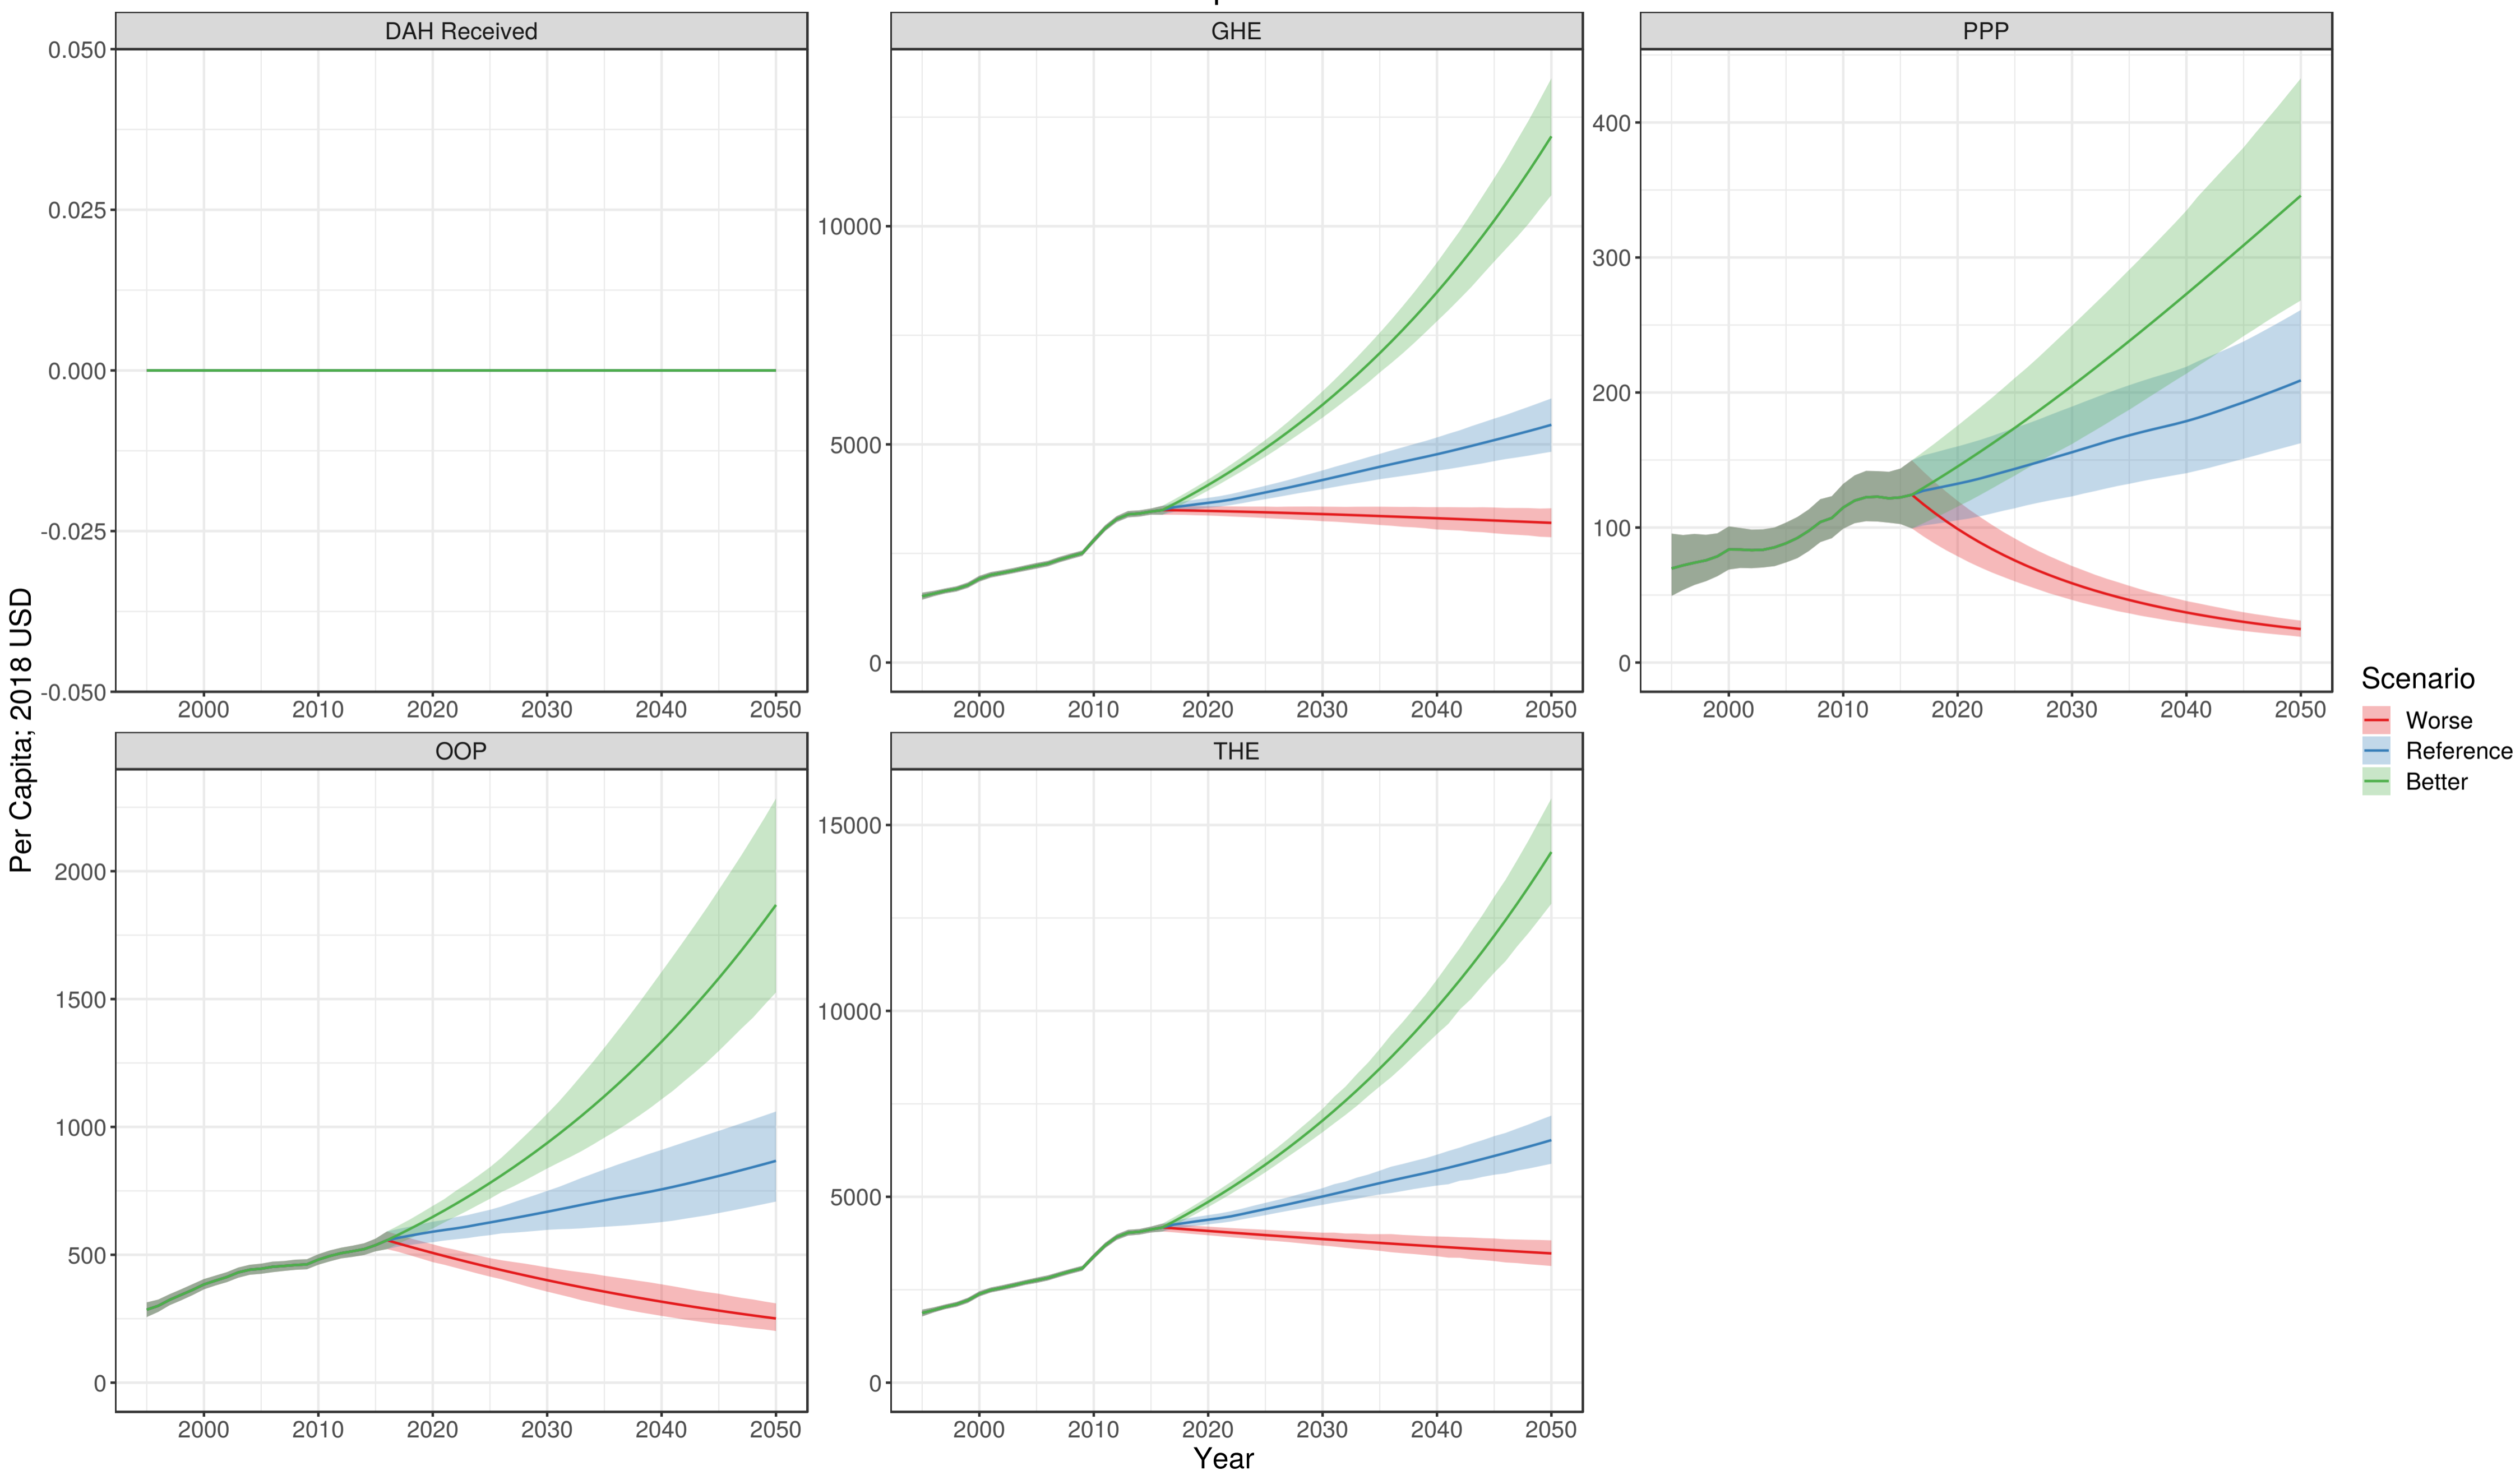

# Jordan

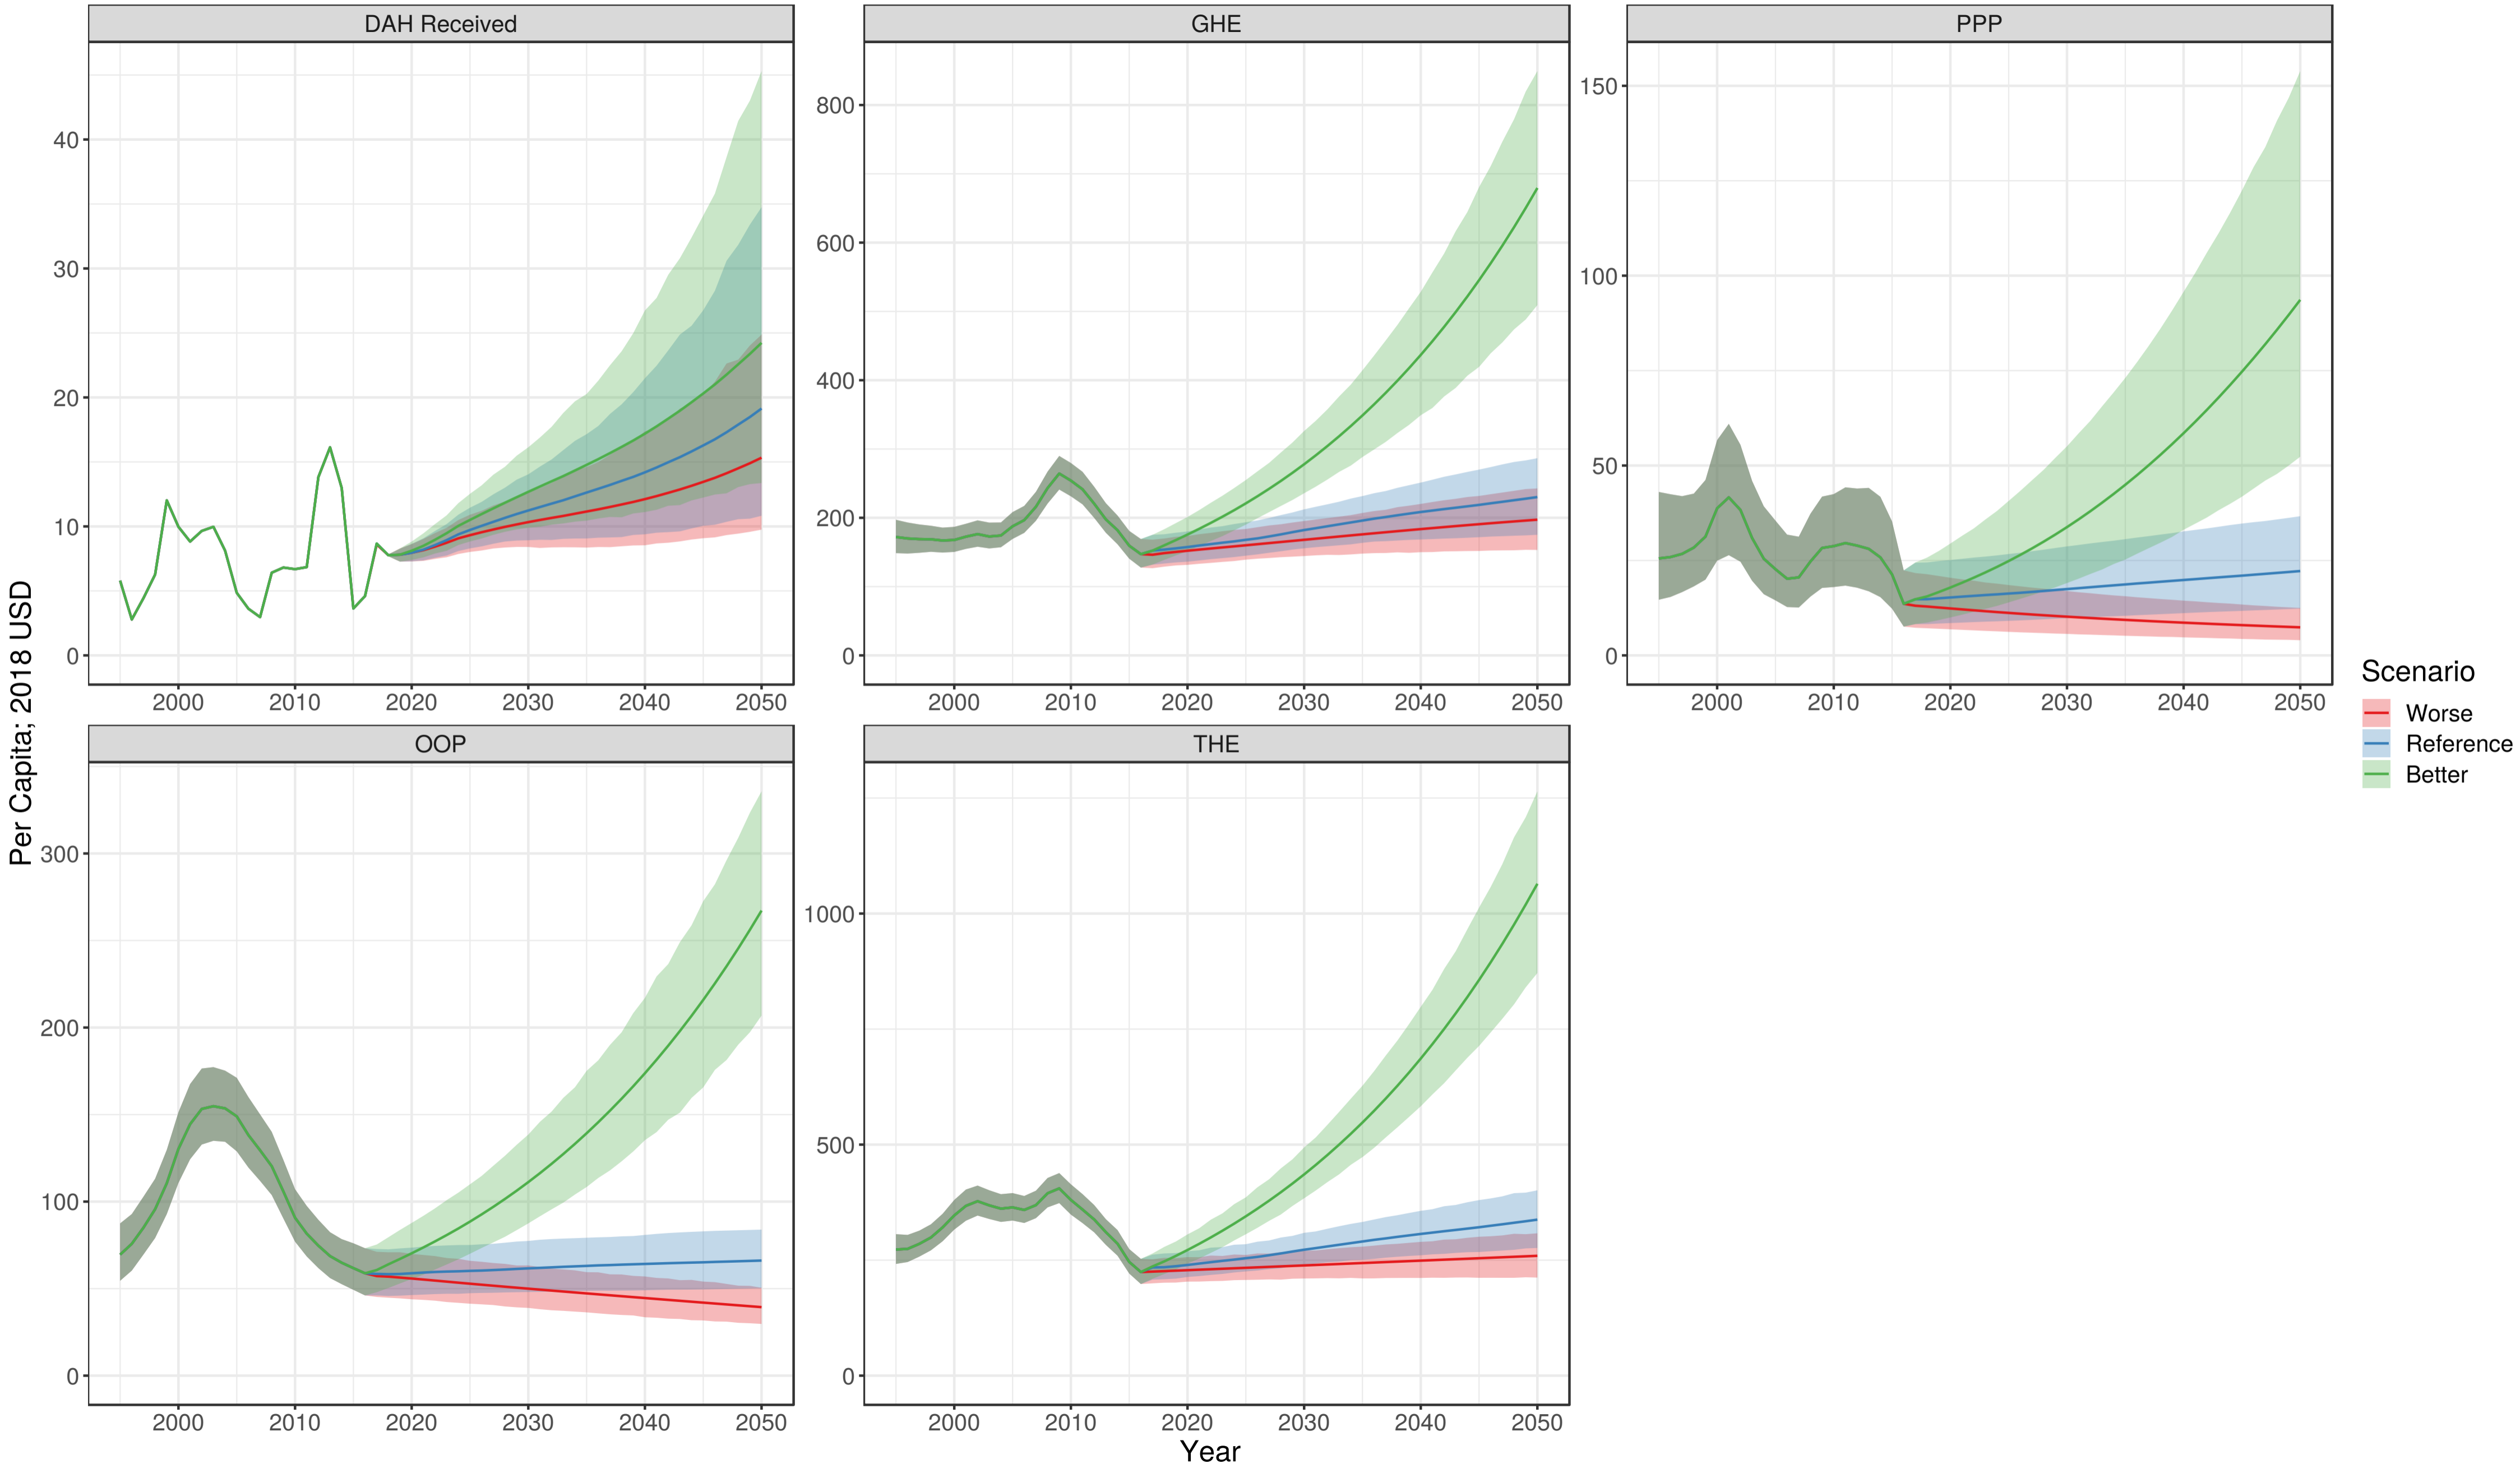

# Kazakhstan

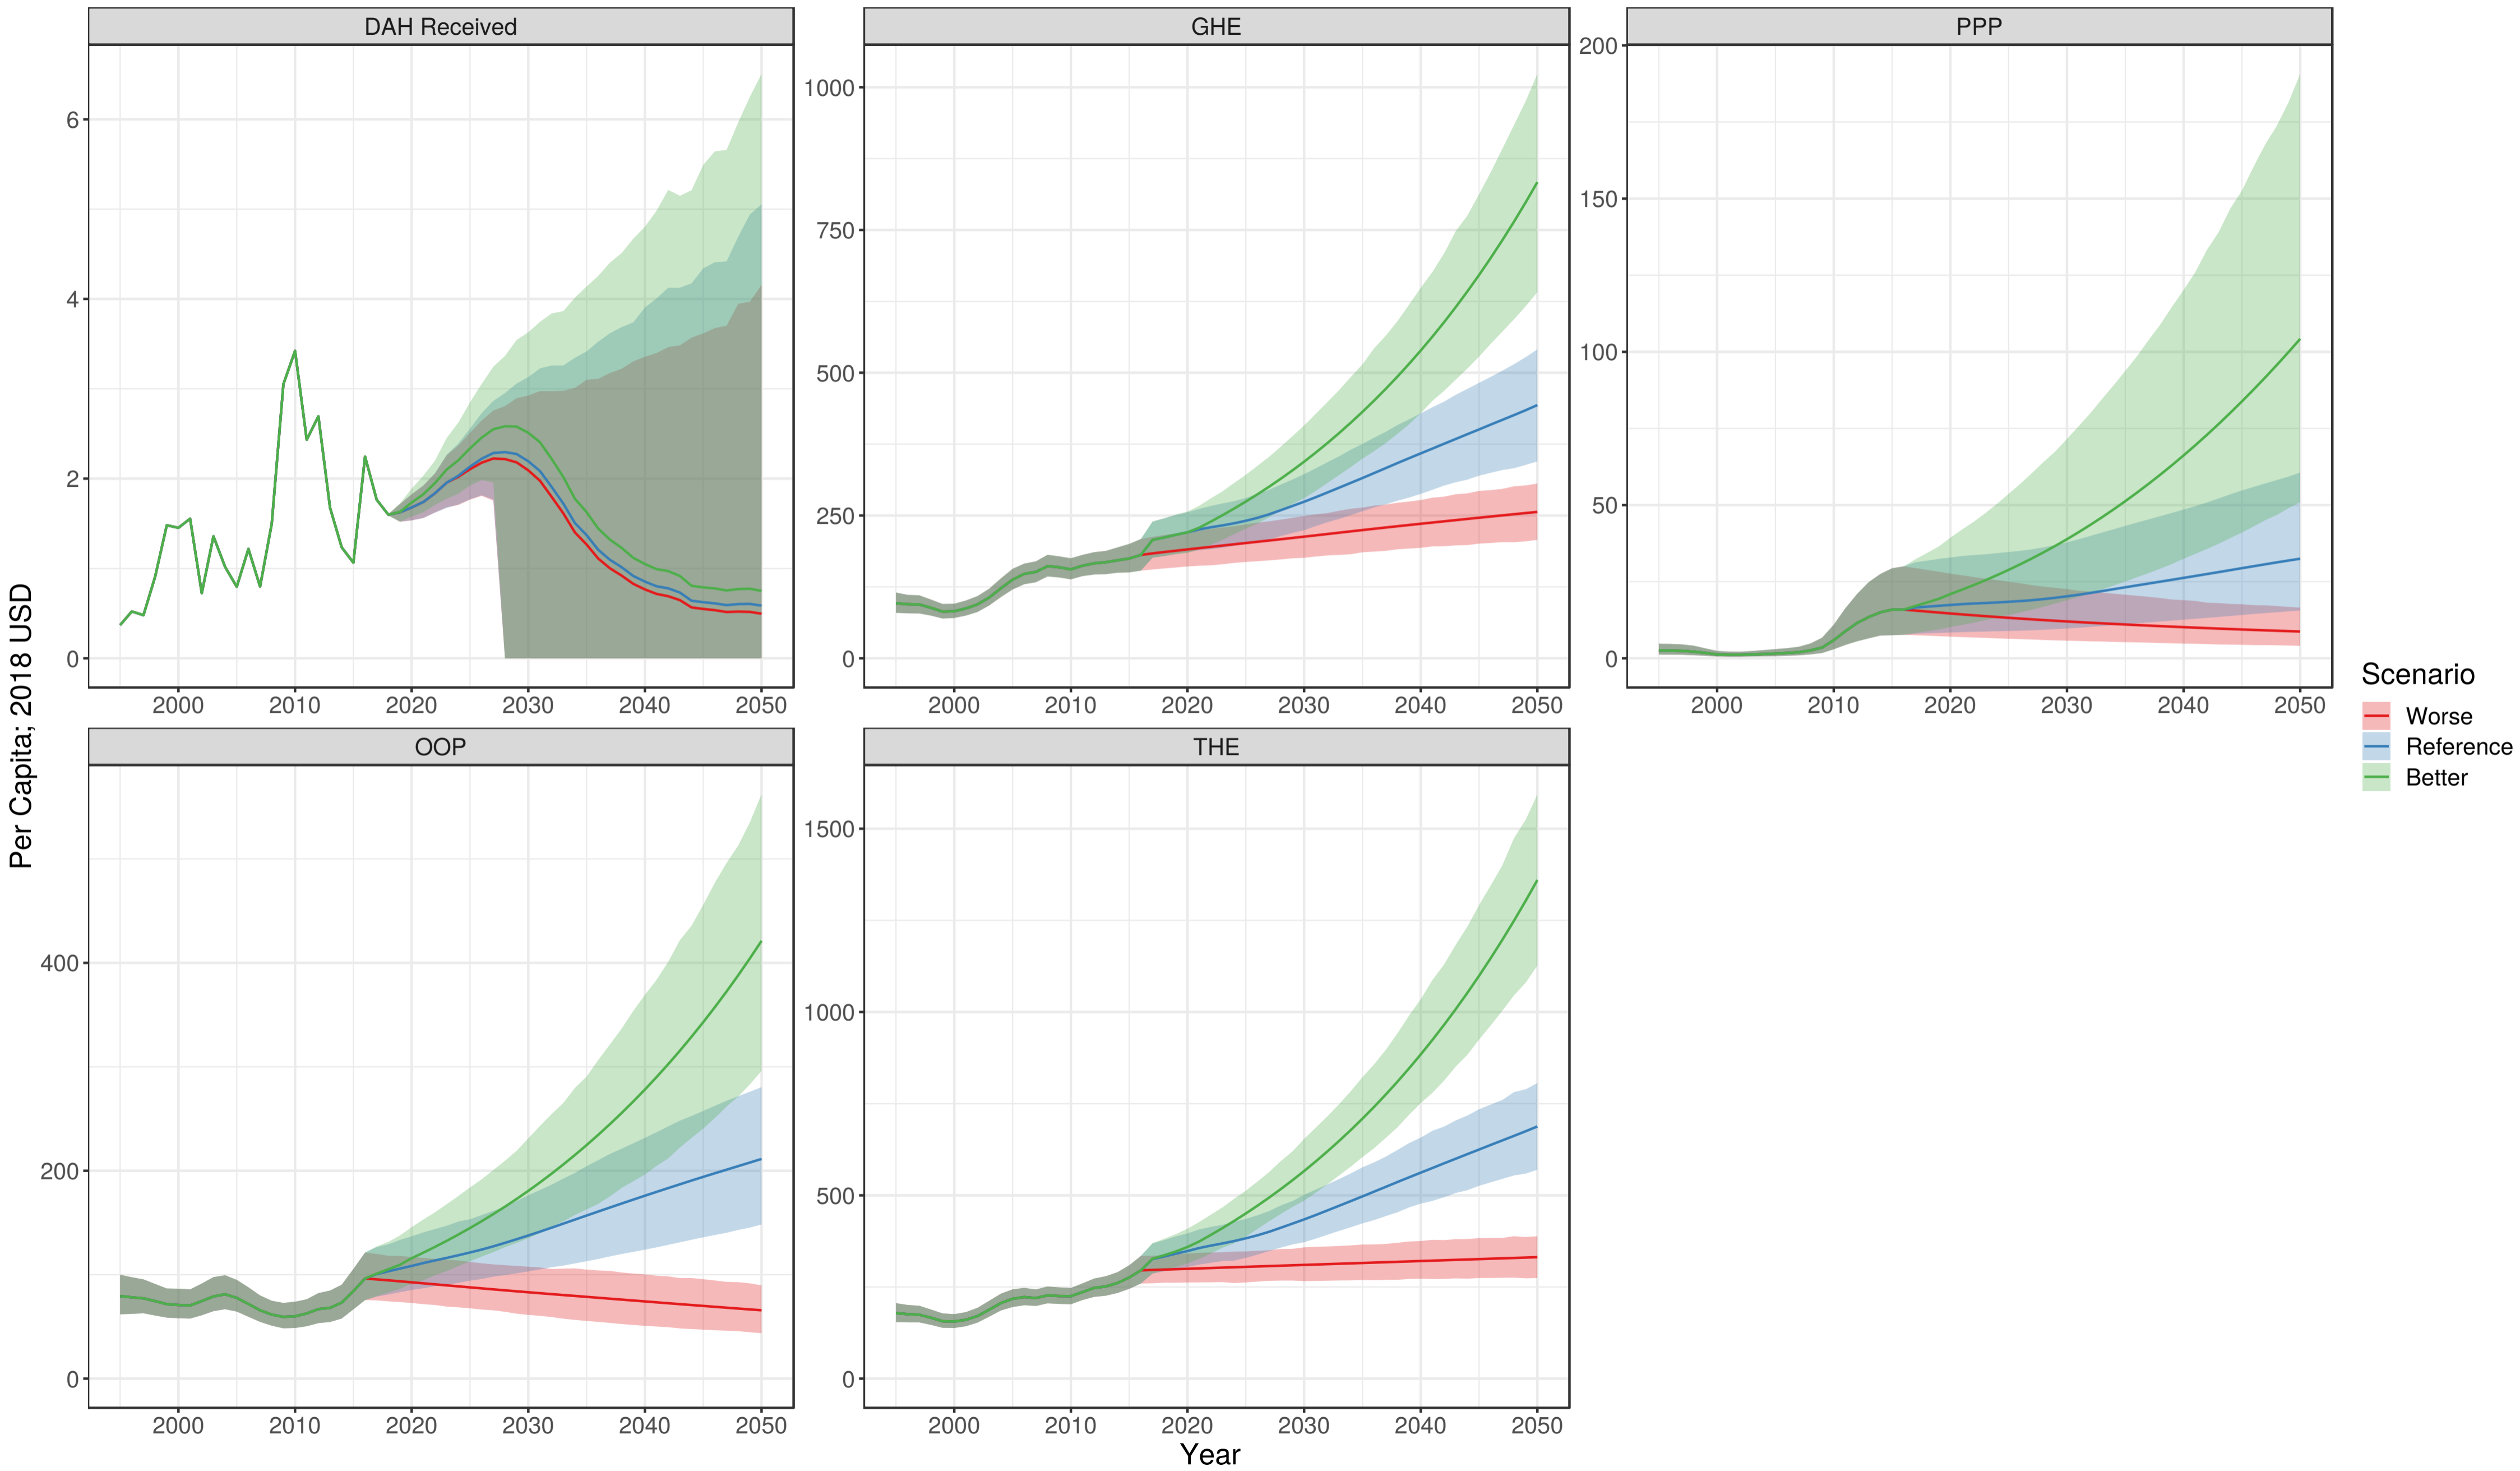

# Kenya

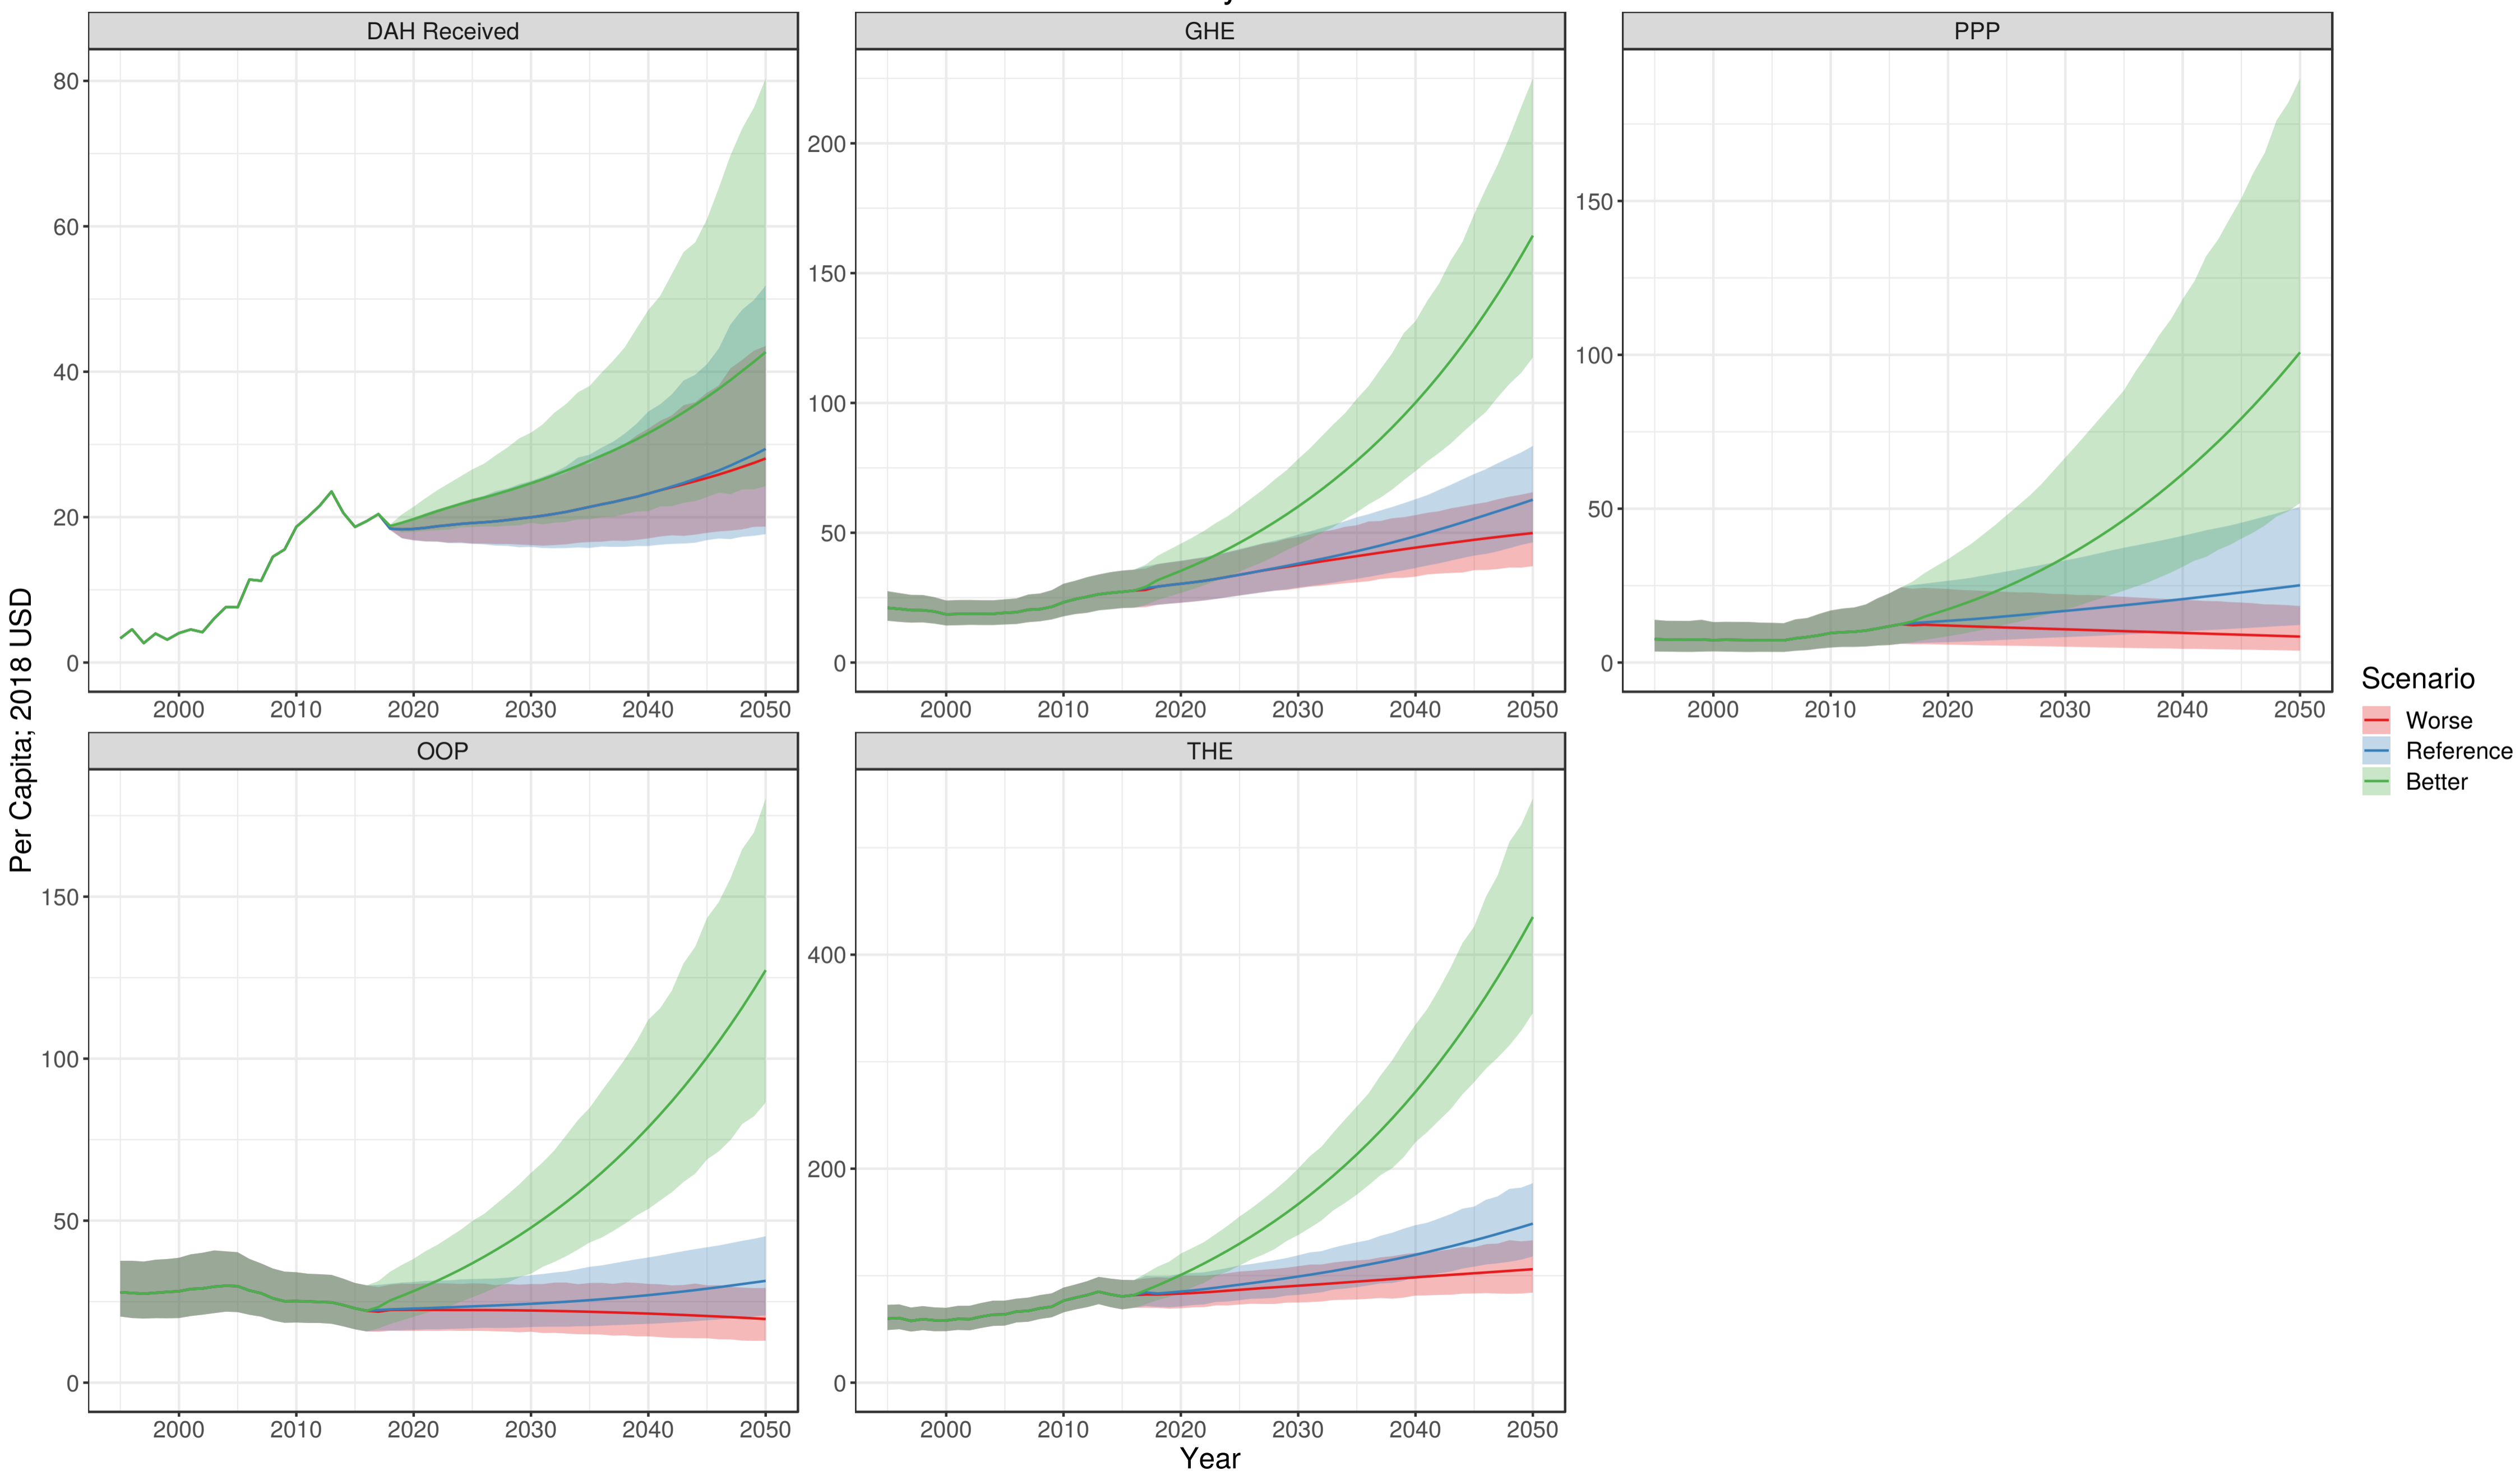

# Kiribati

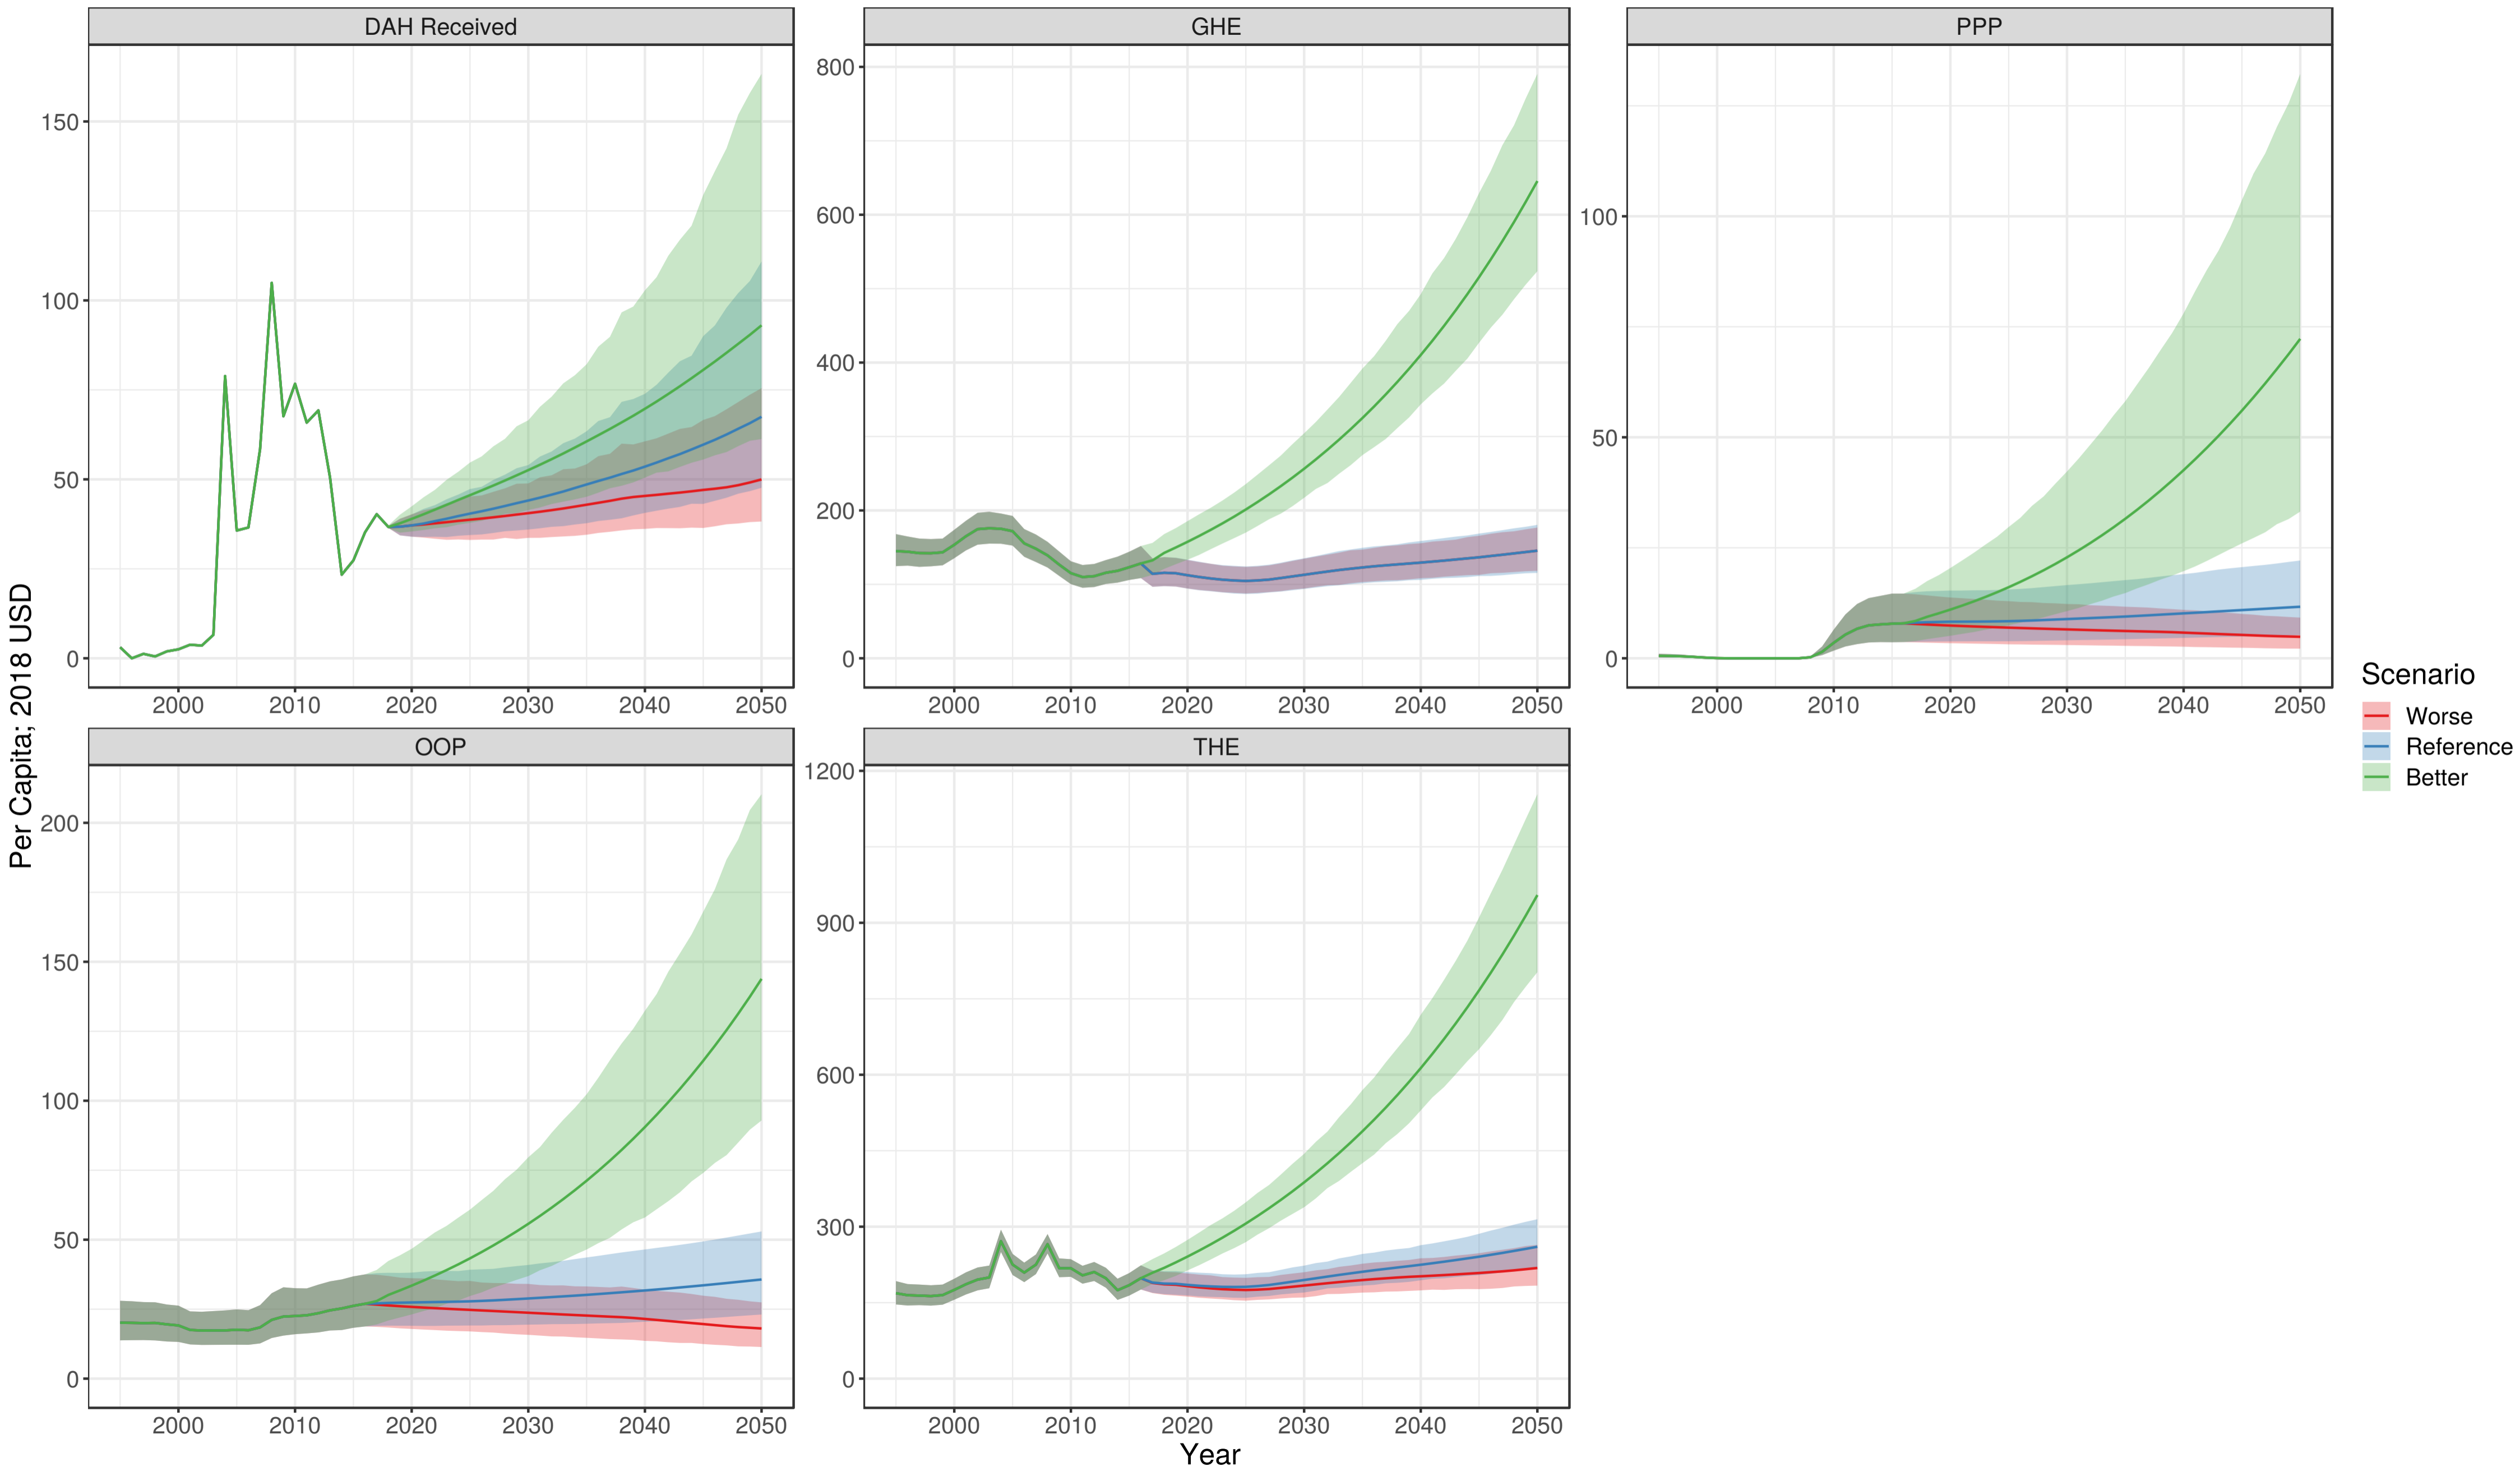

# Kuwait

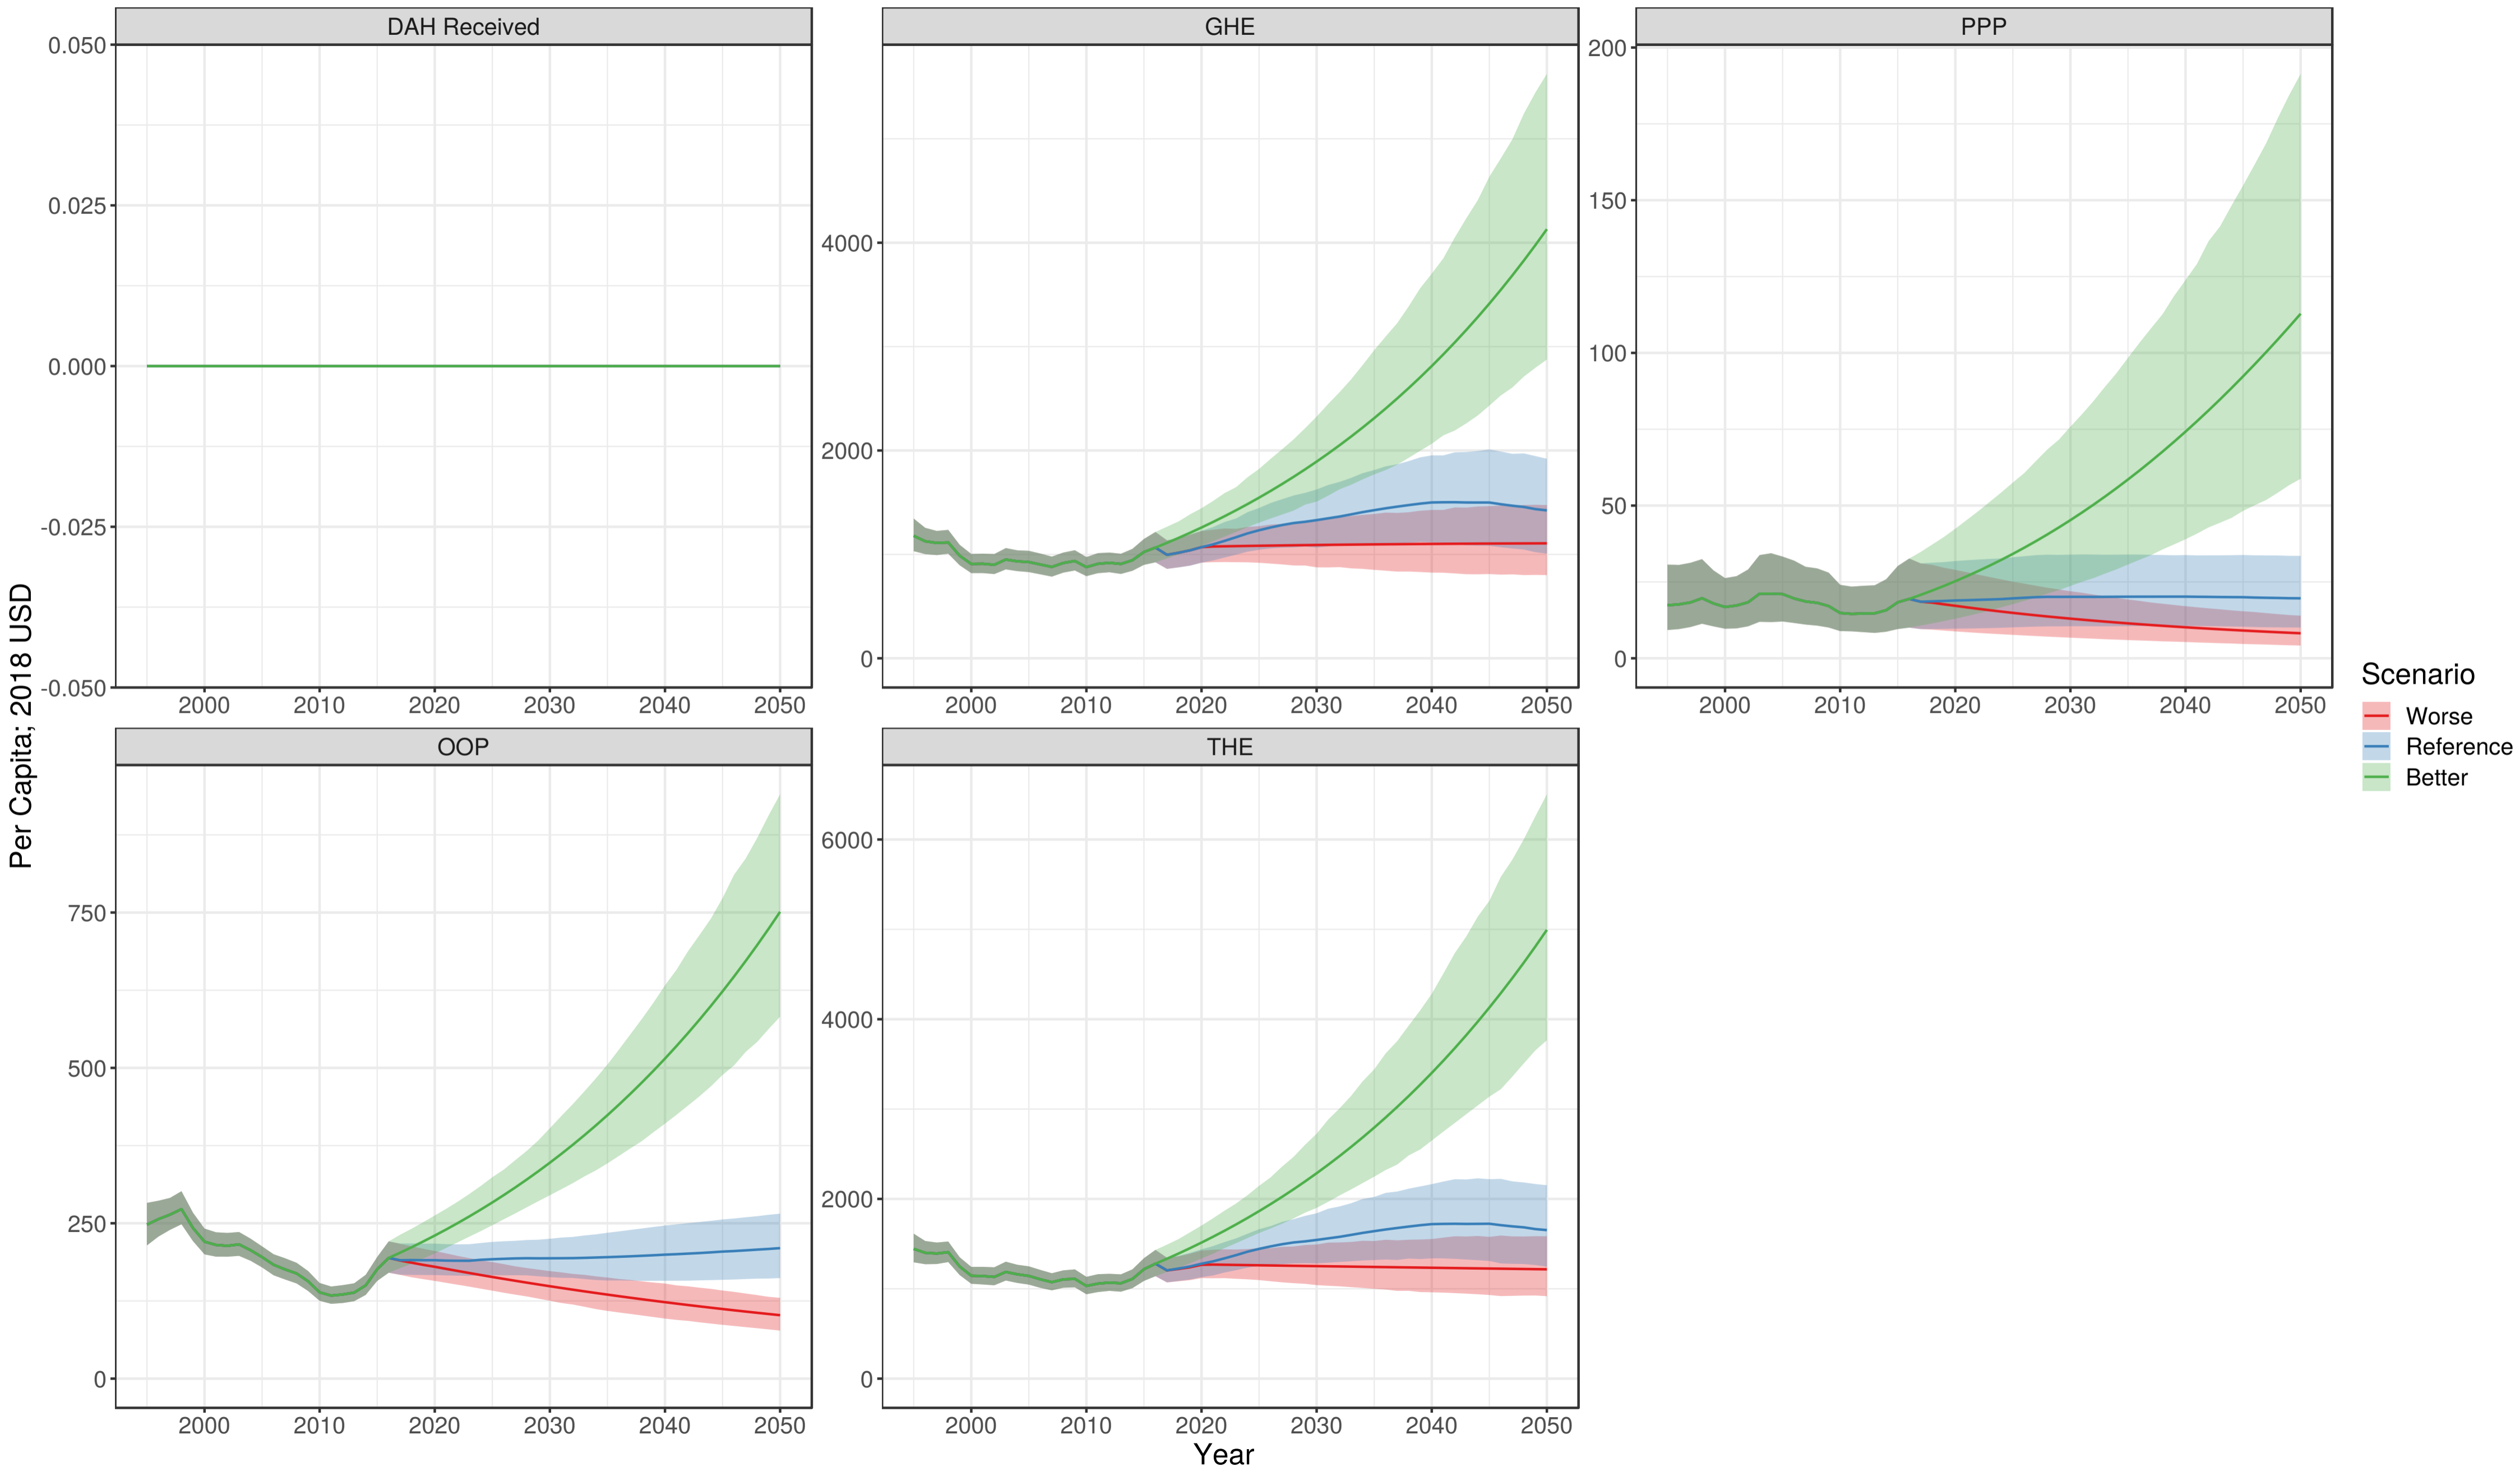



# Kyrgyzstan

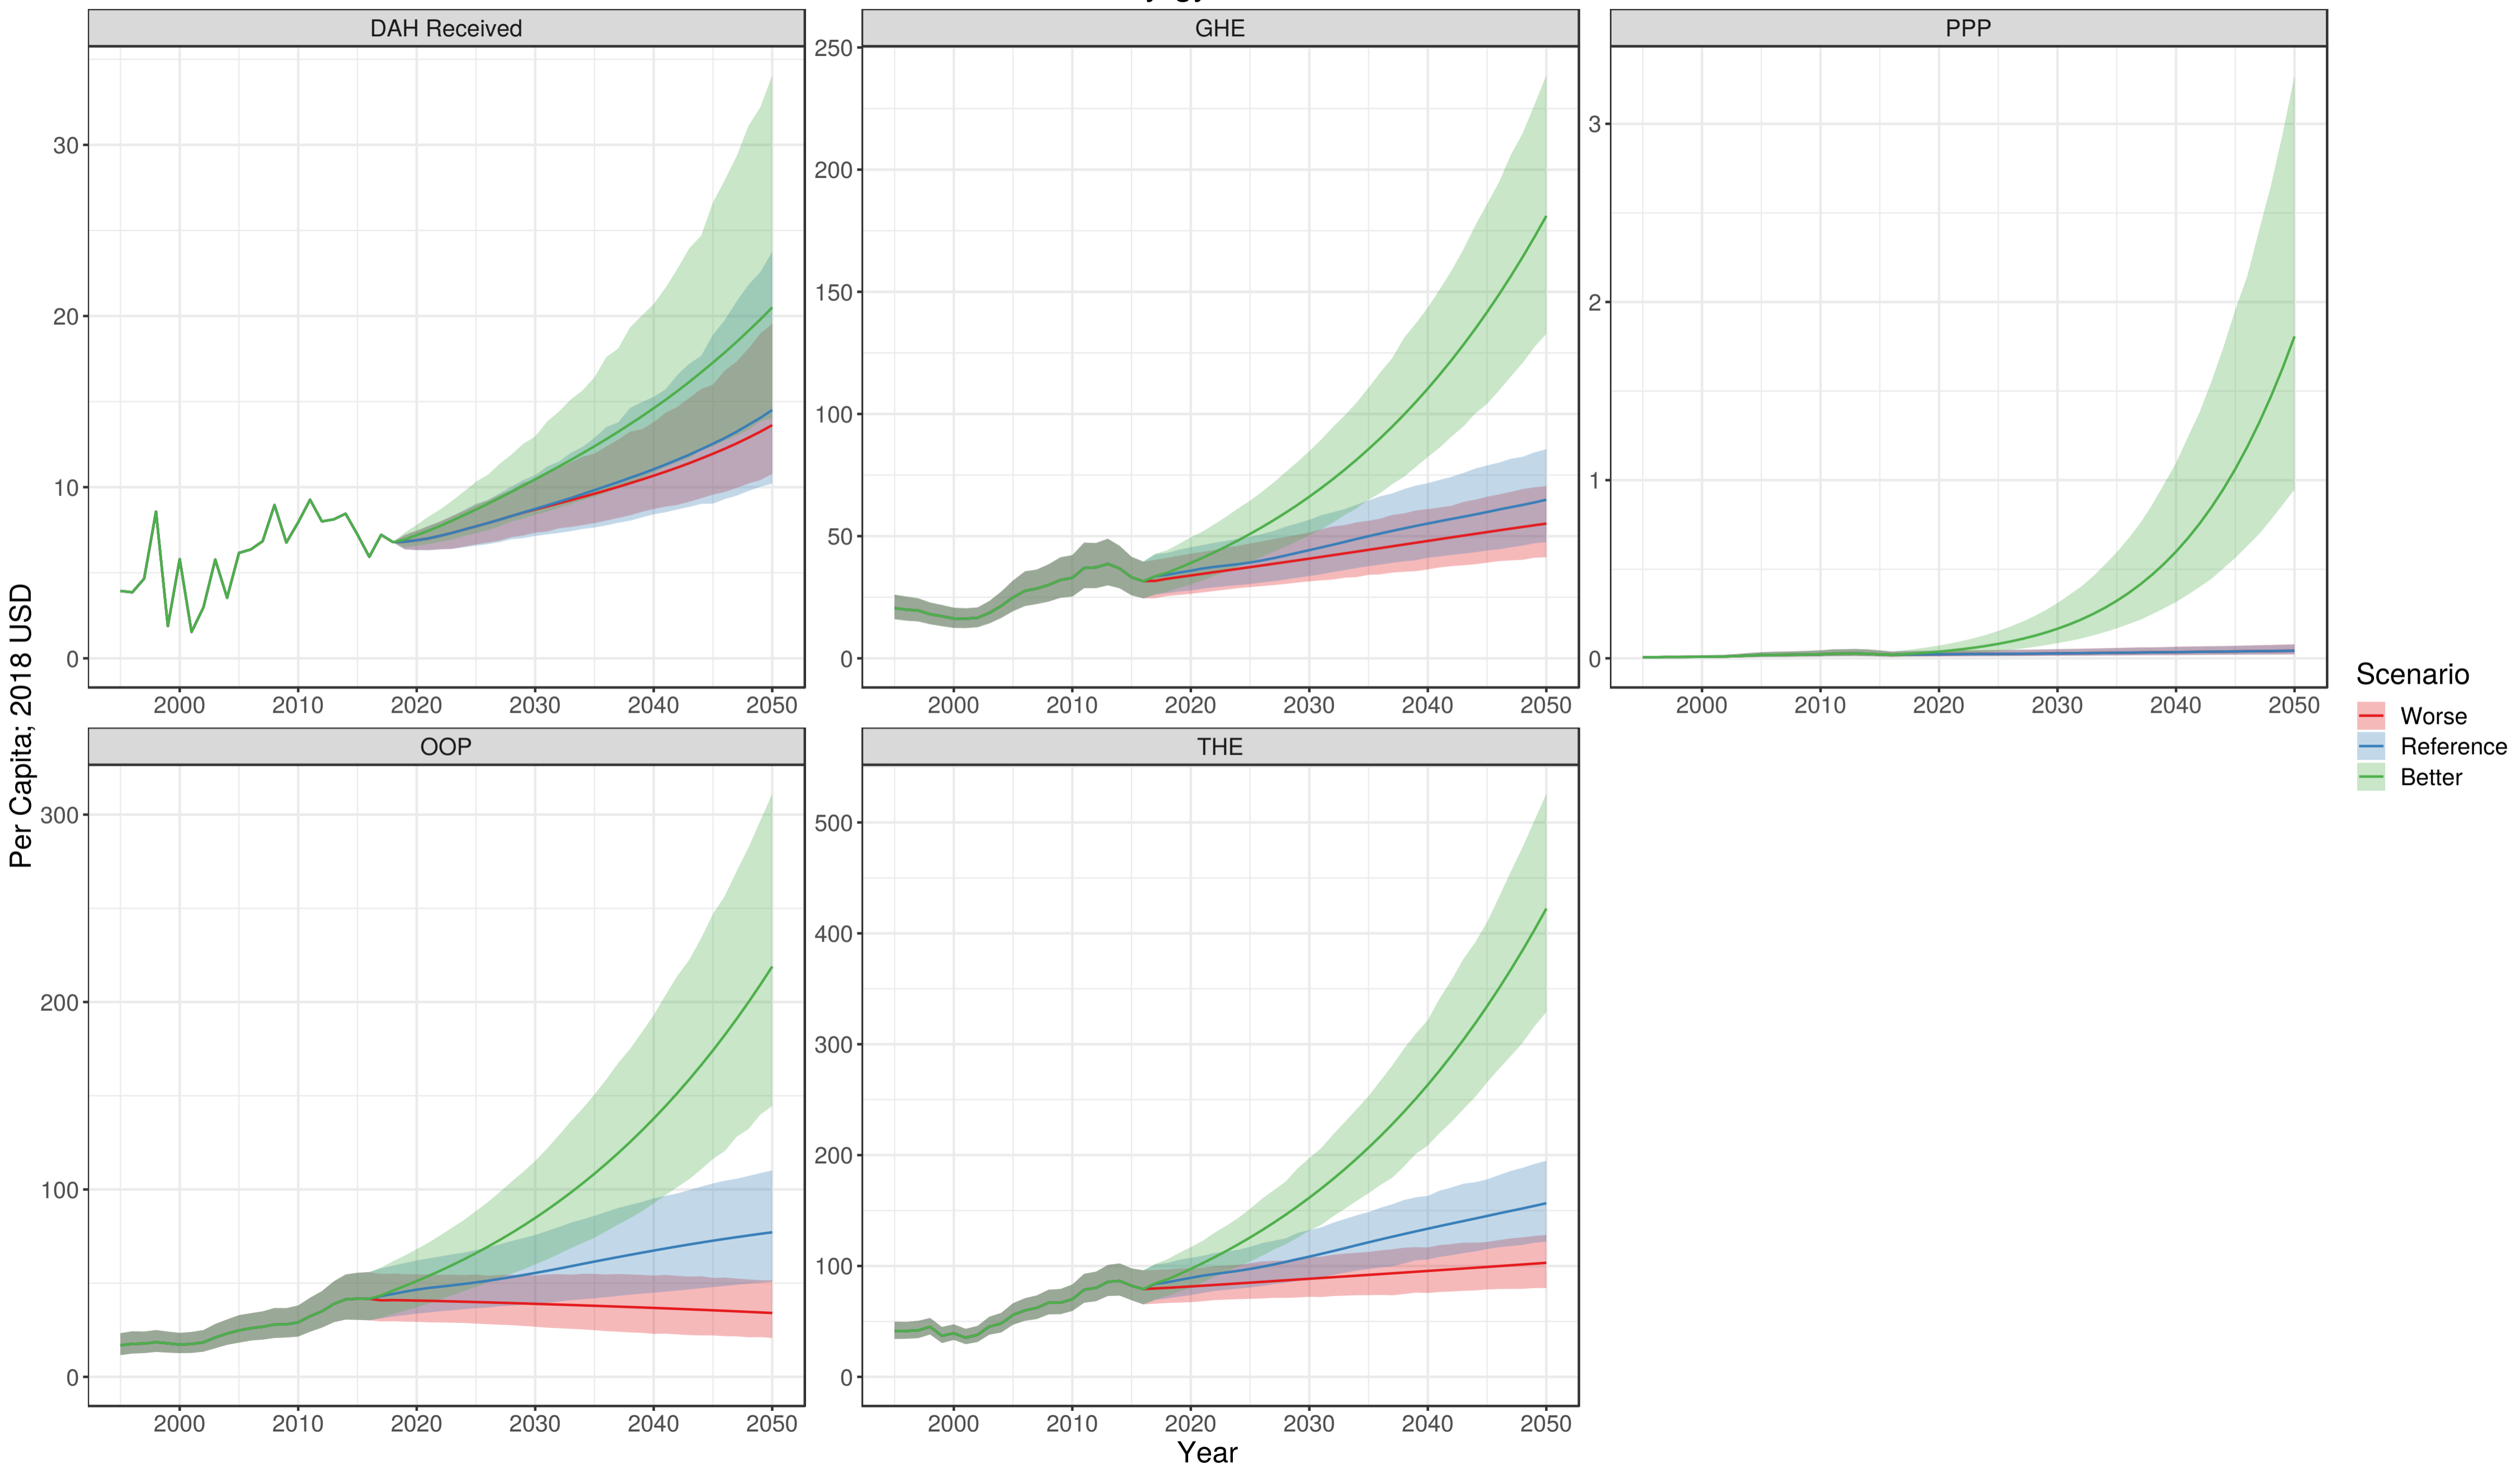

# Laos

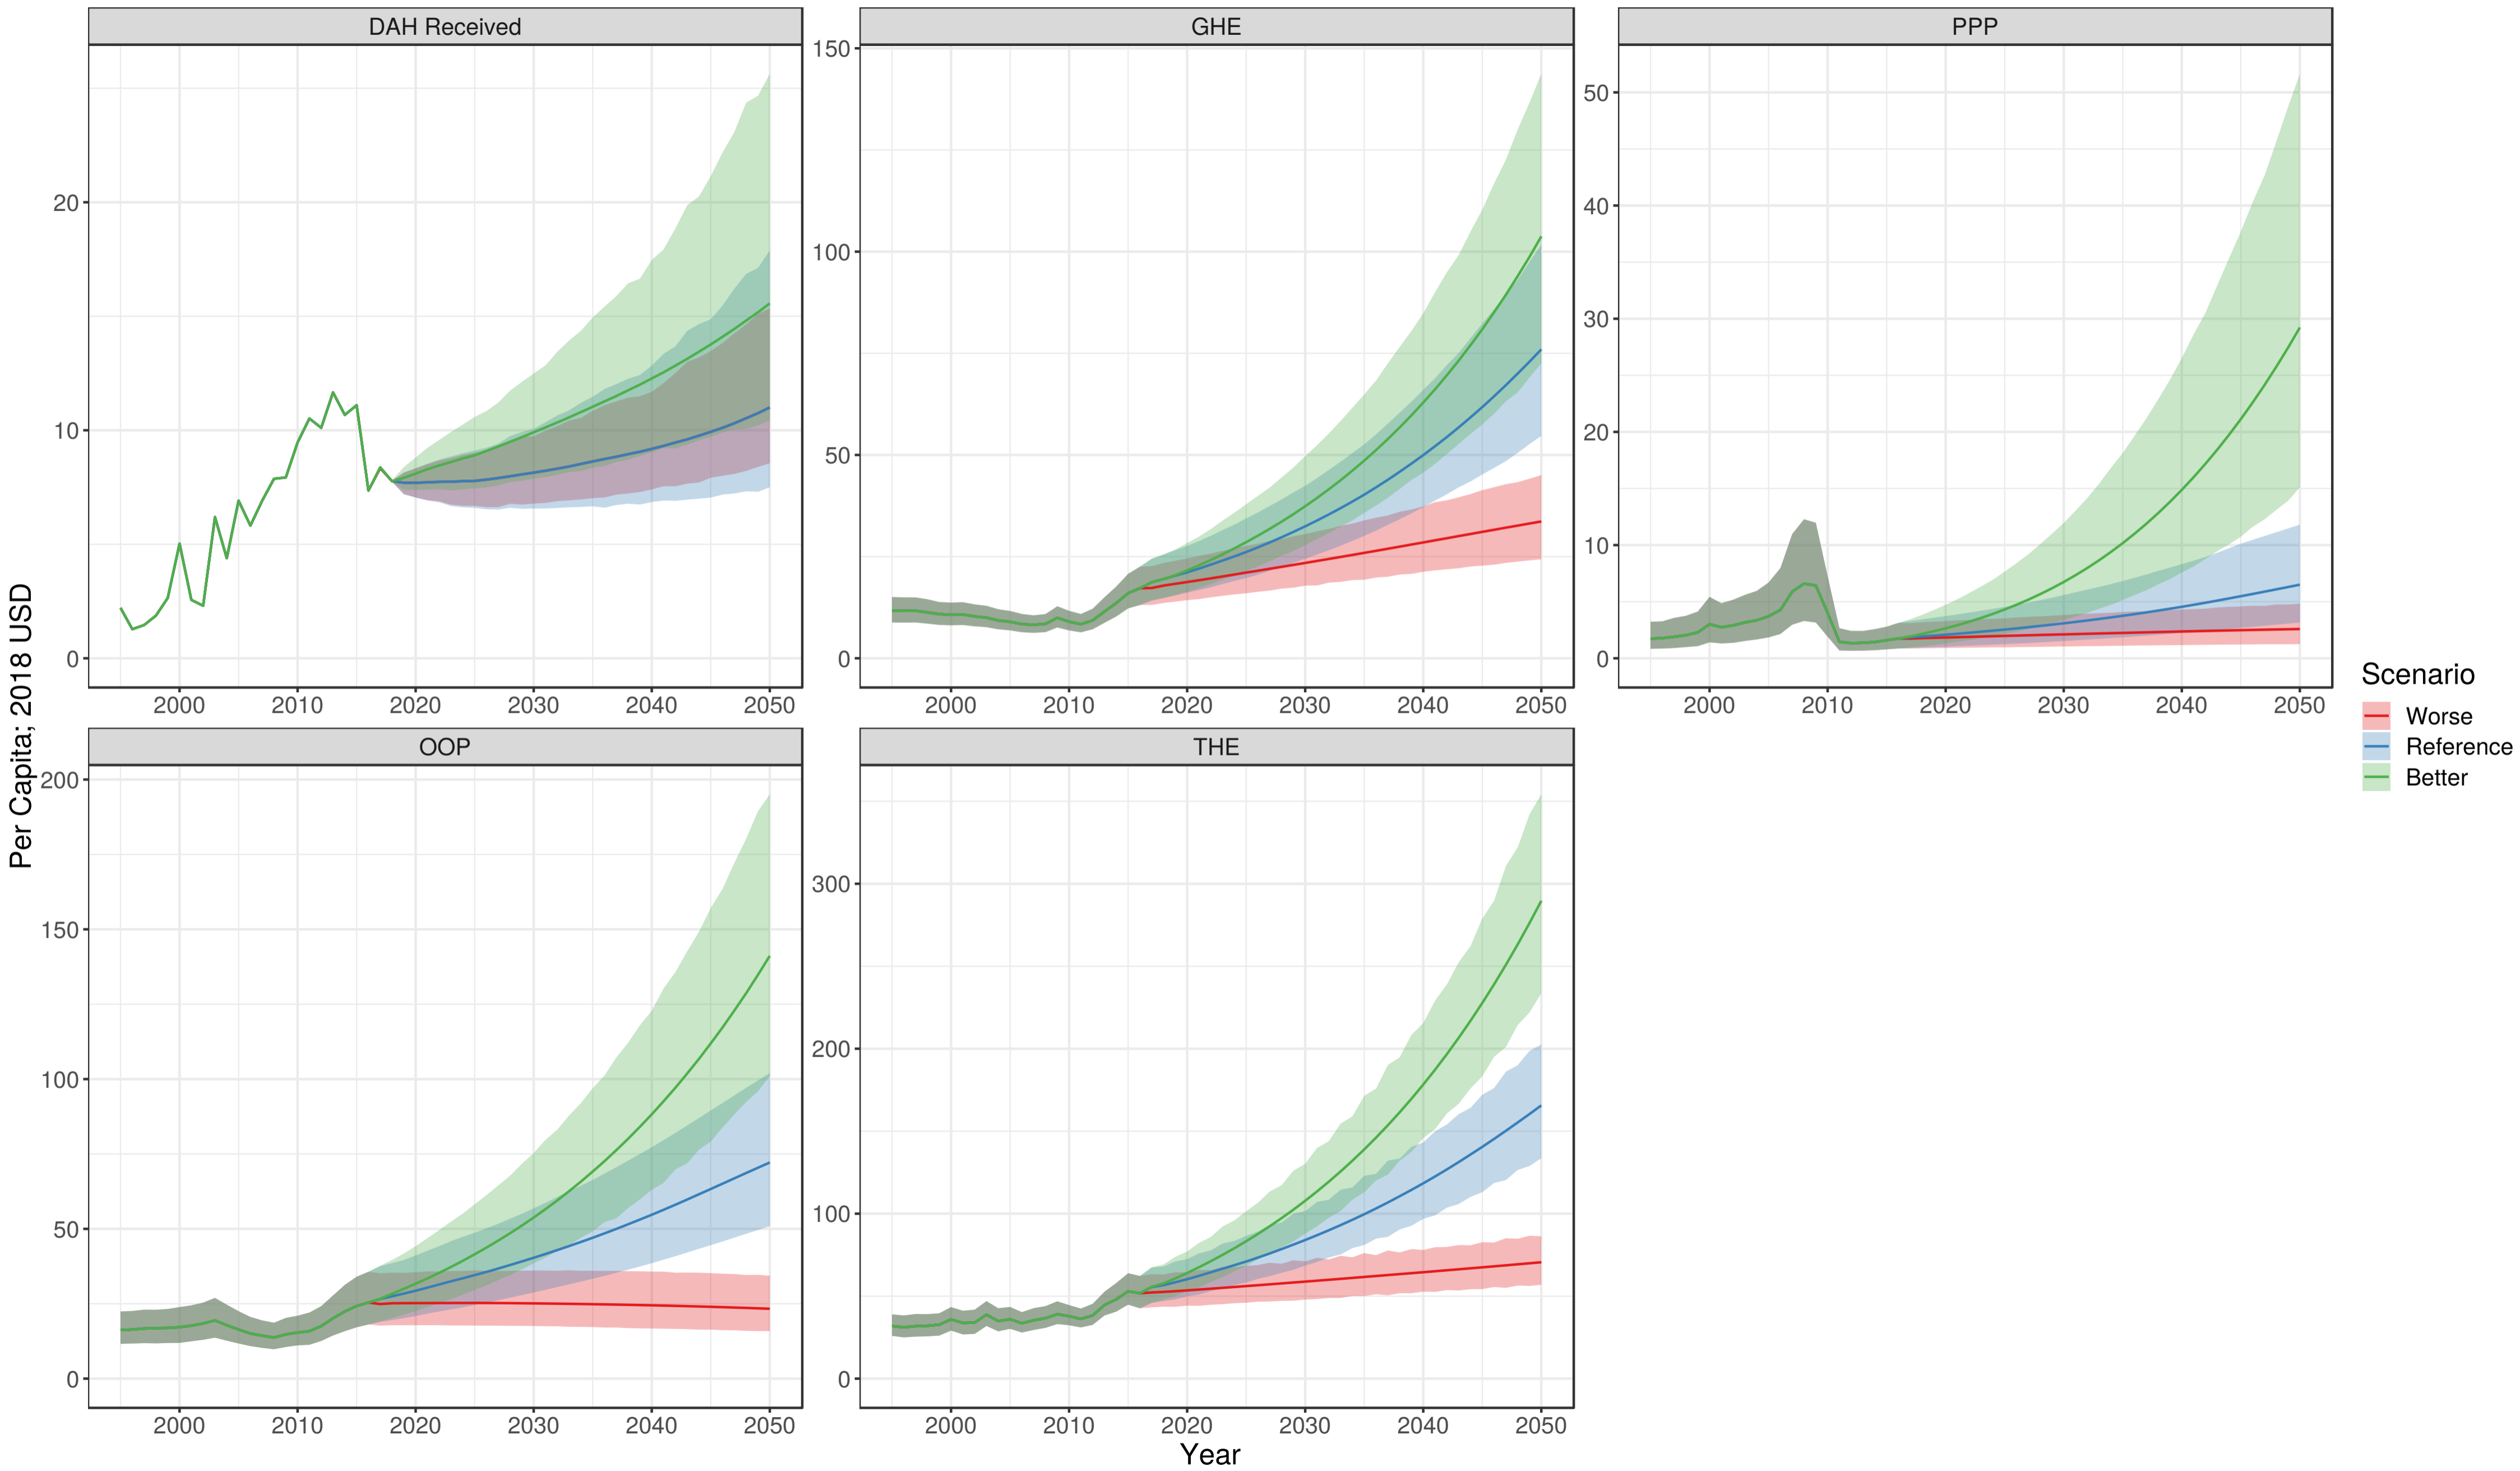

# Latvia

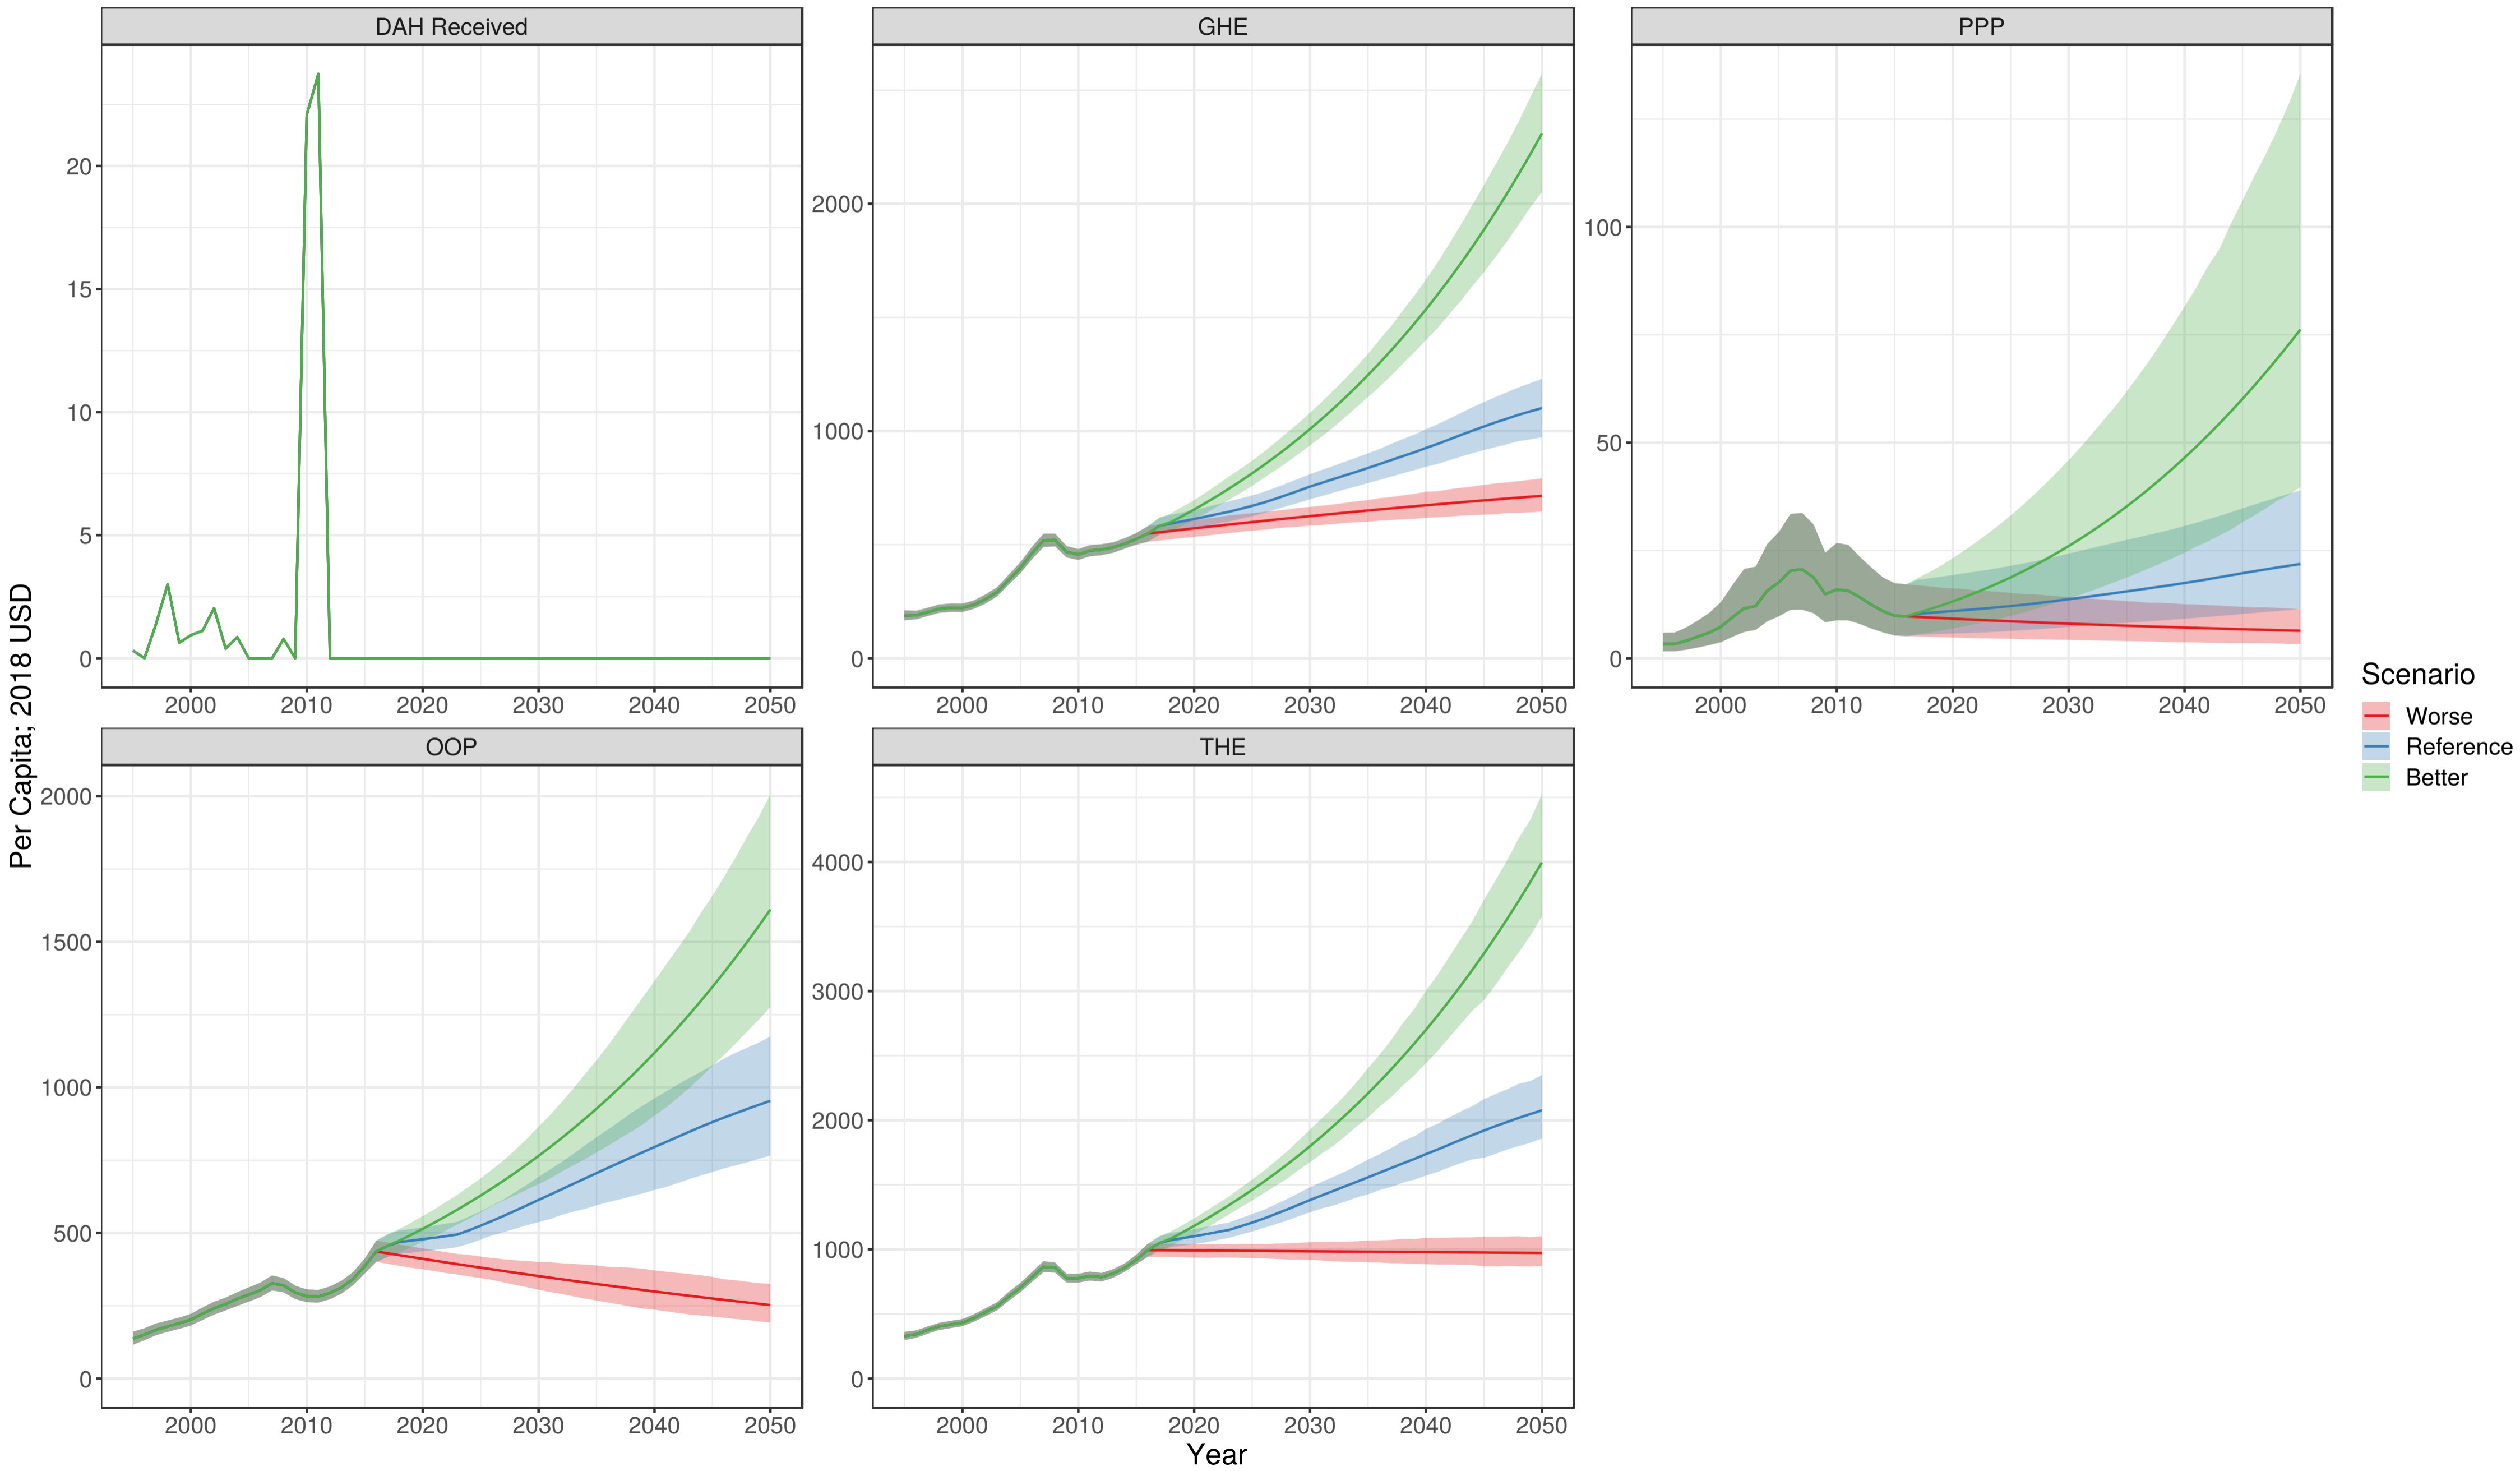

# Lebanon

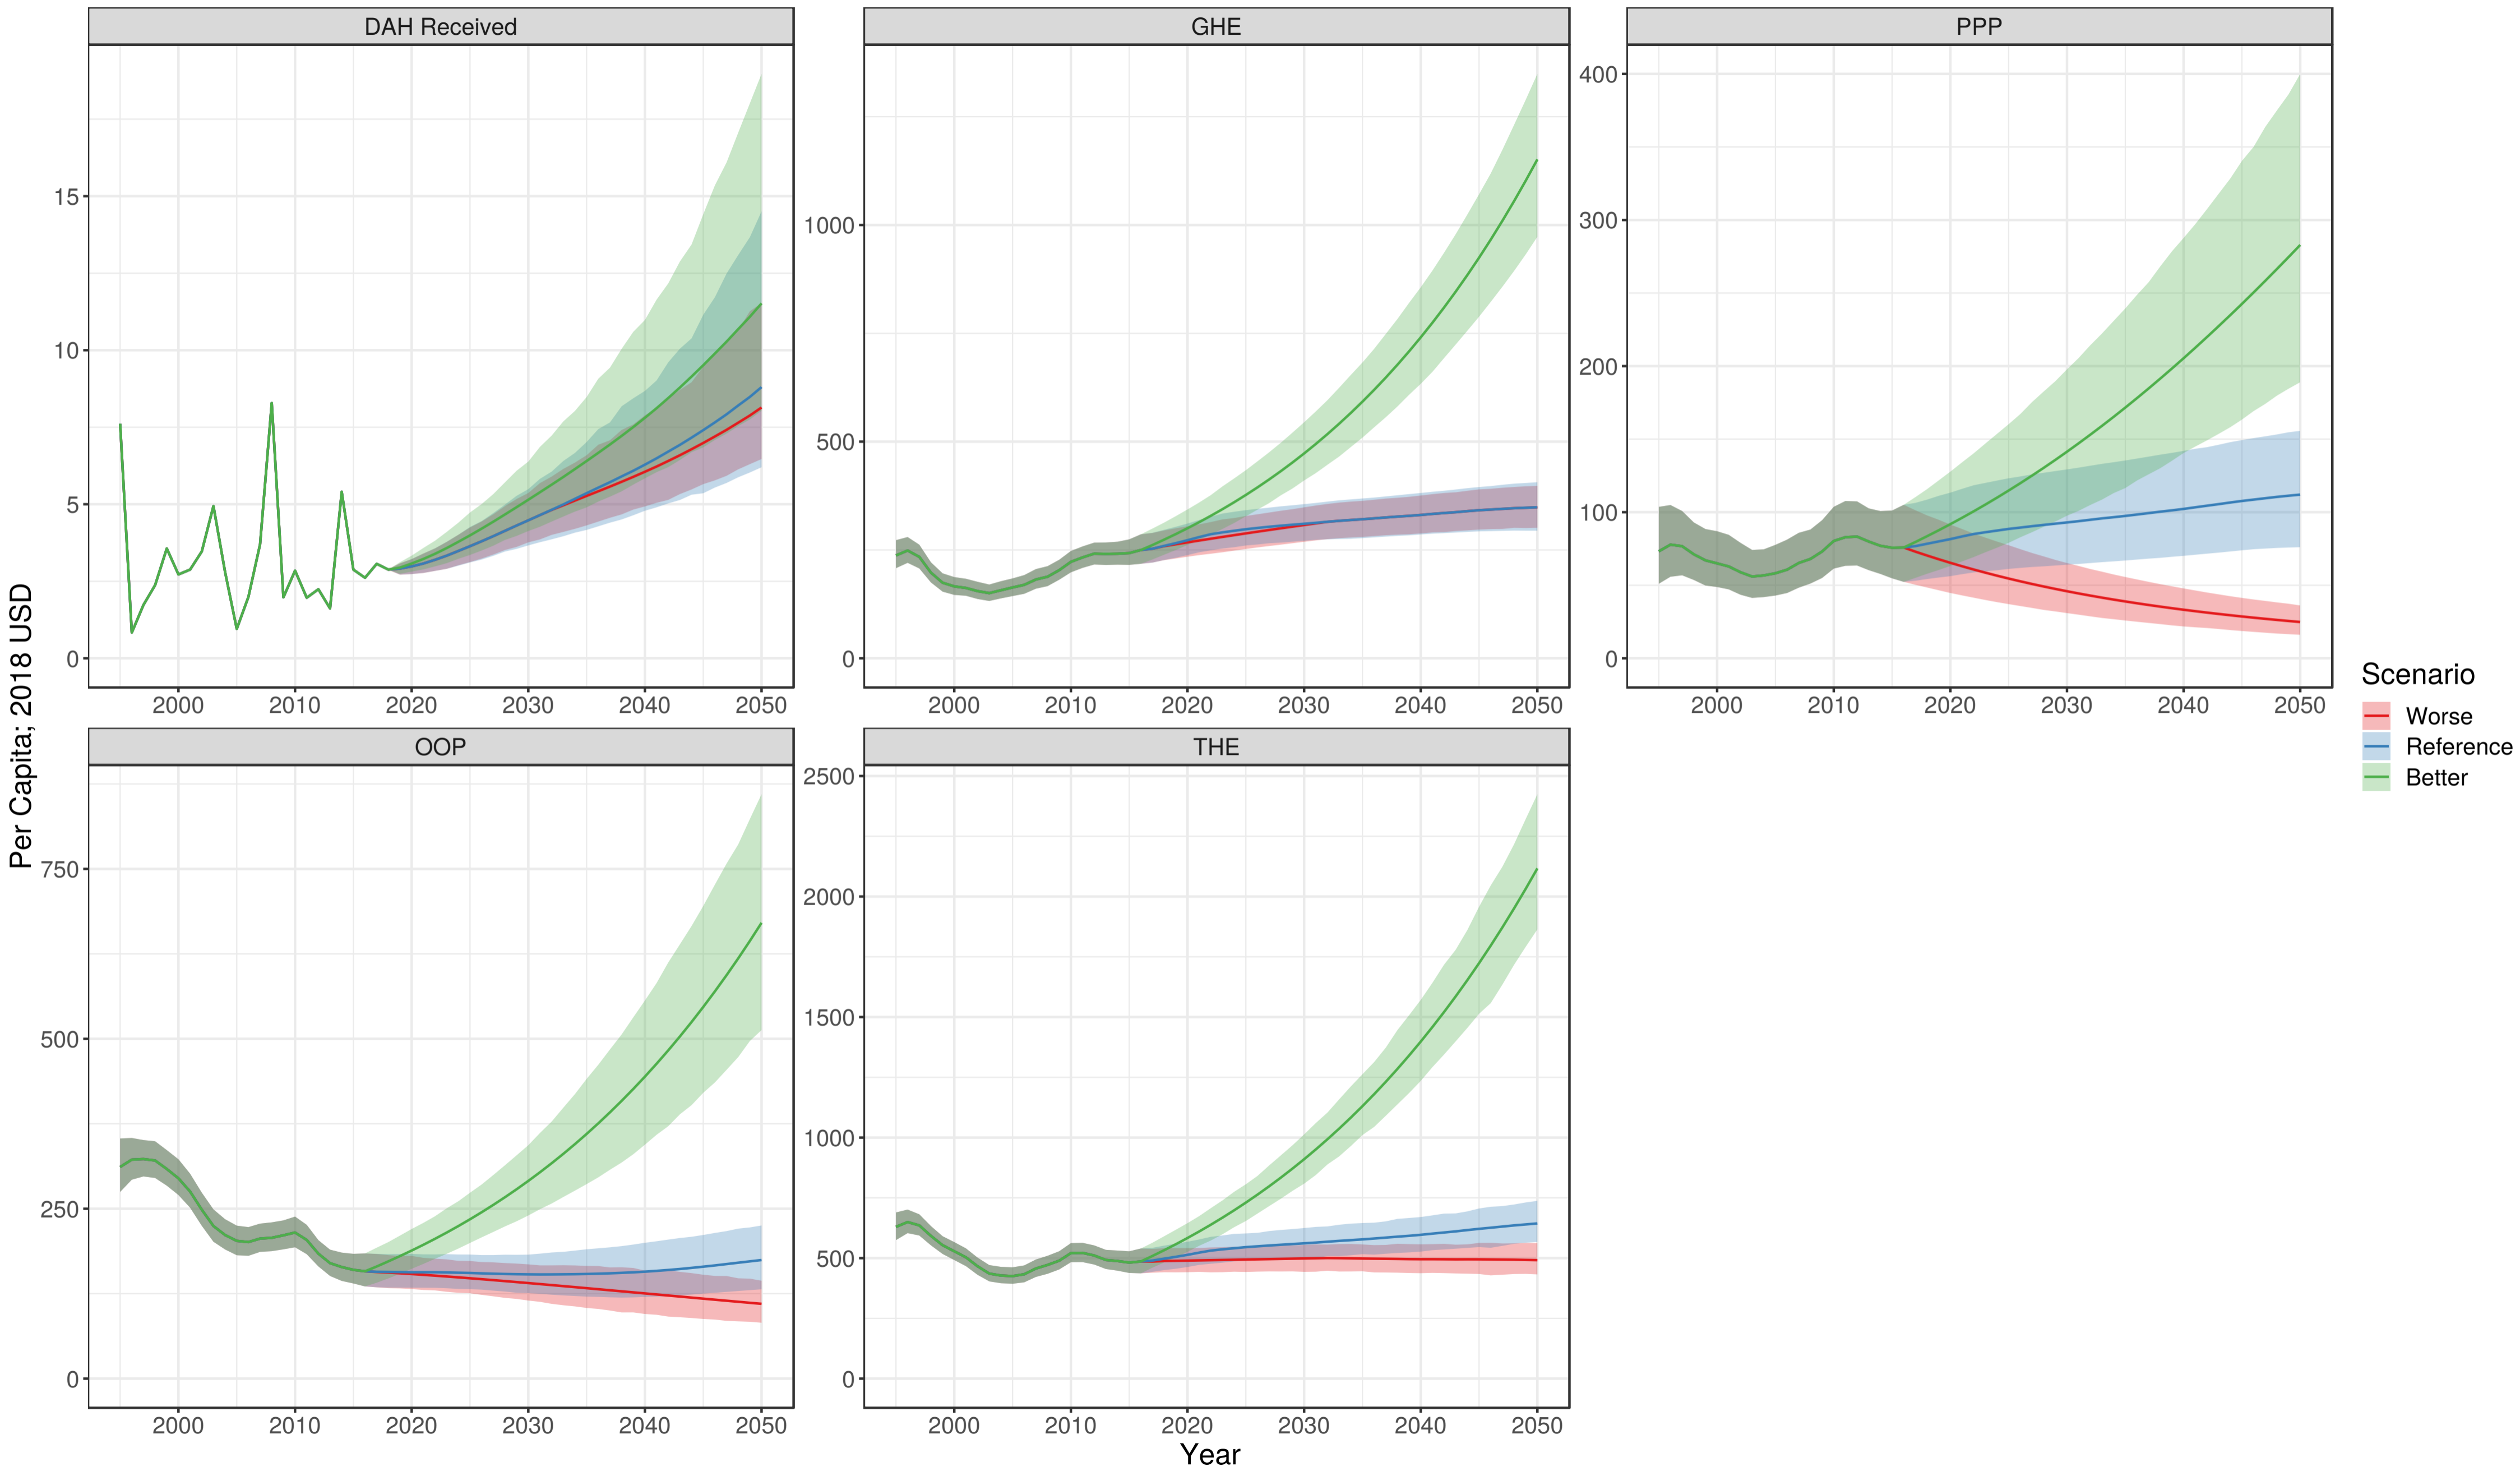

# Lesotho

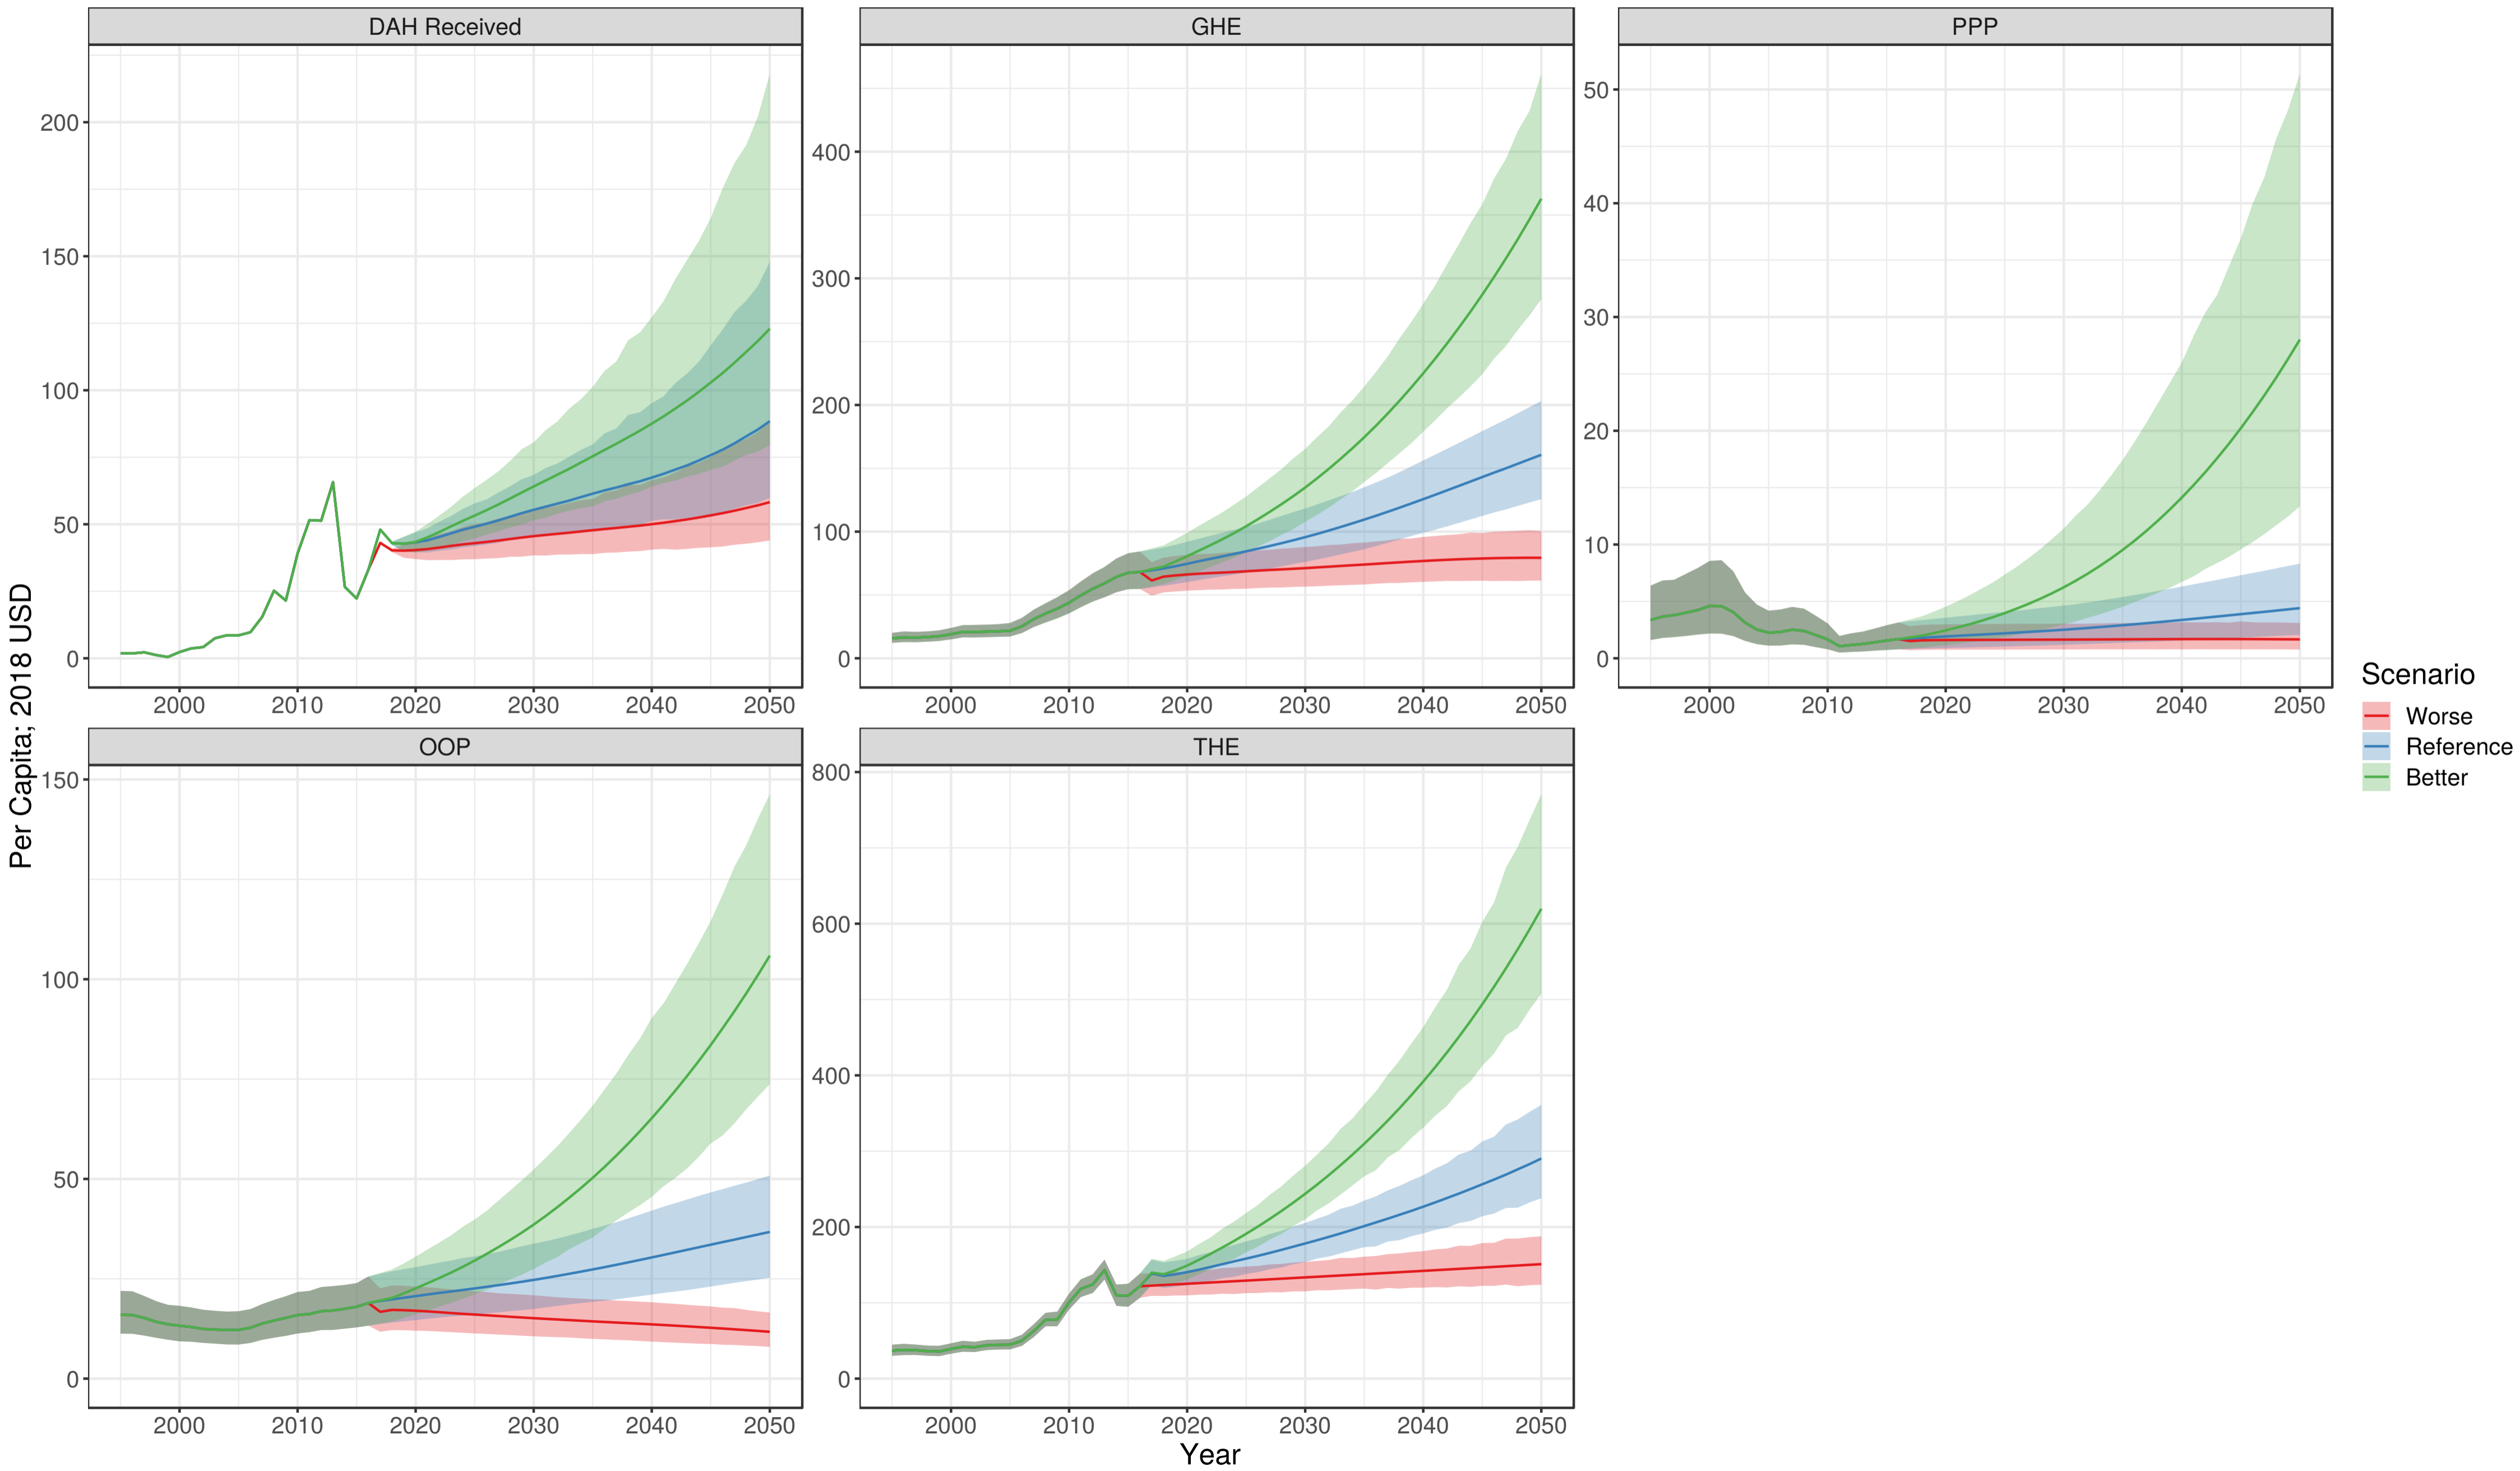

# Liberia

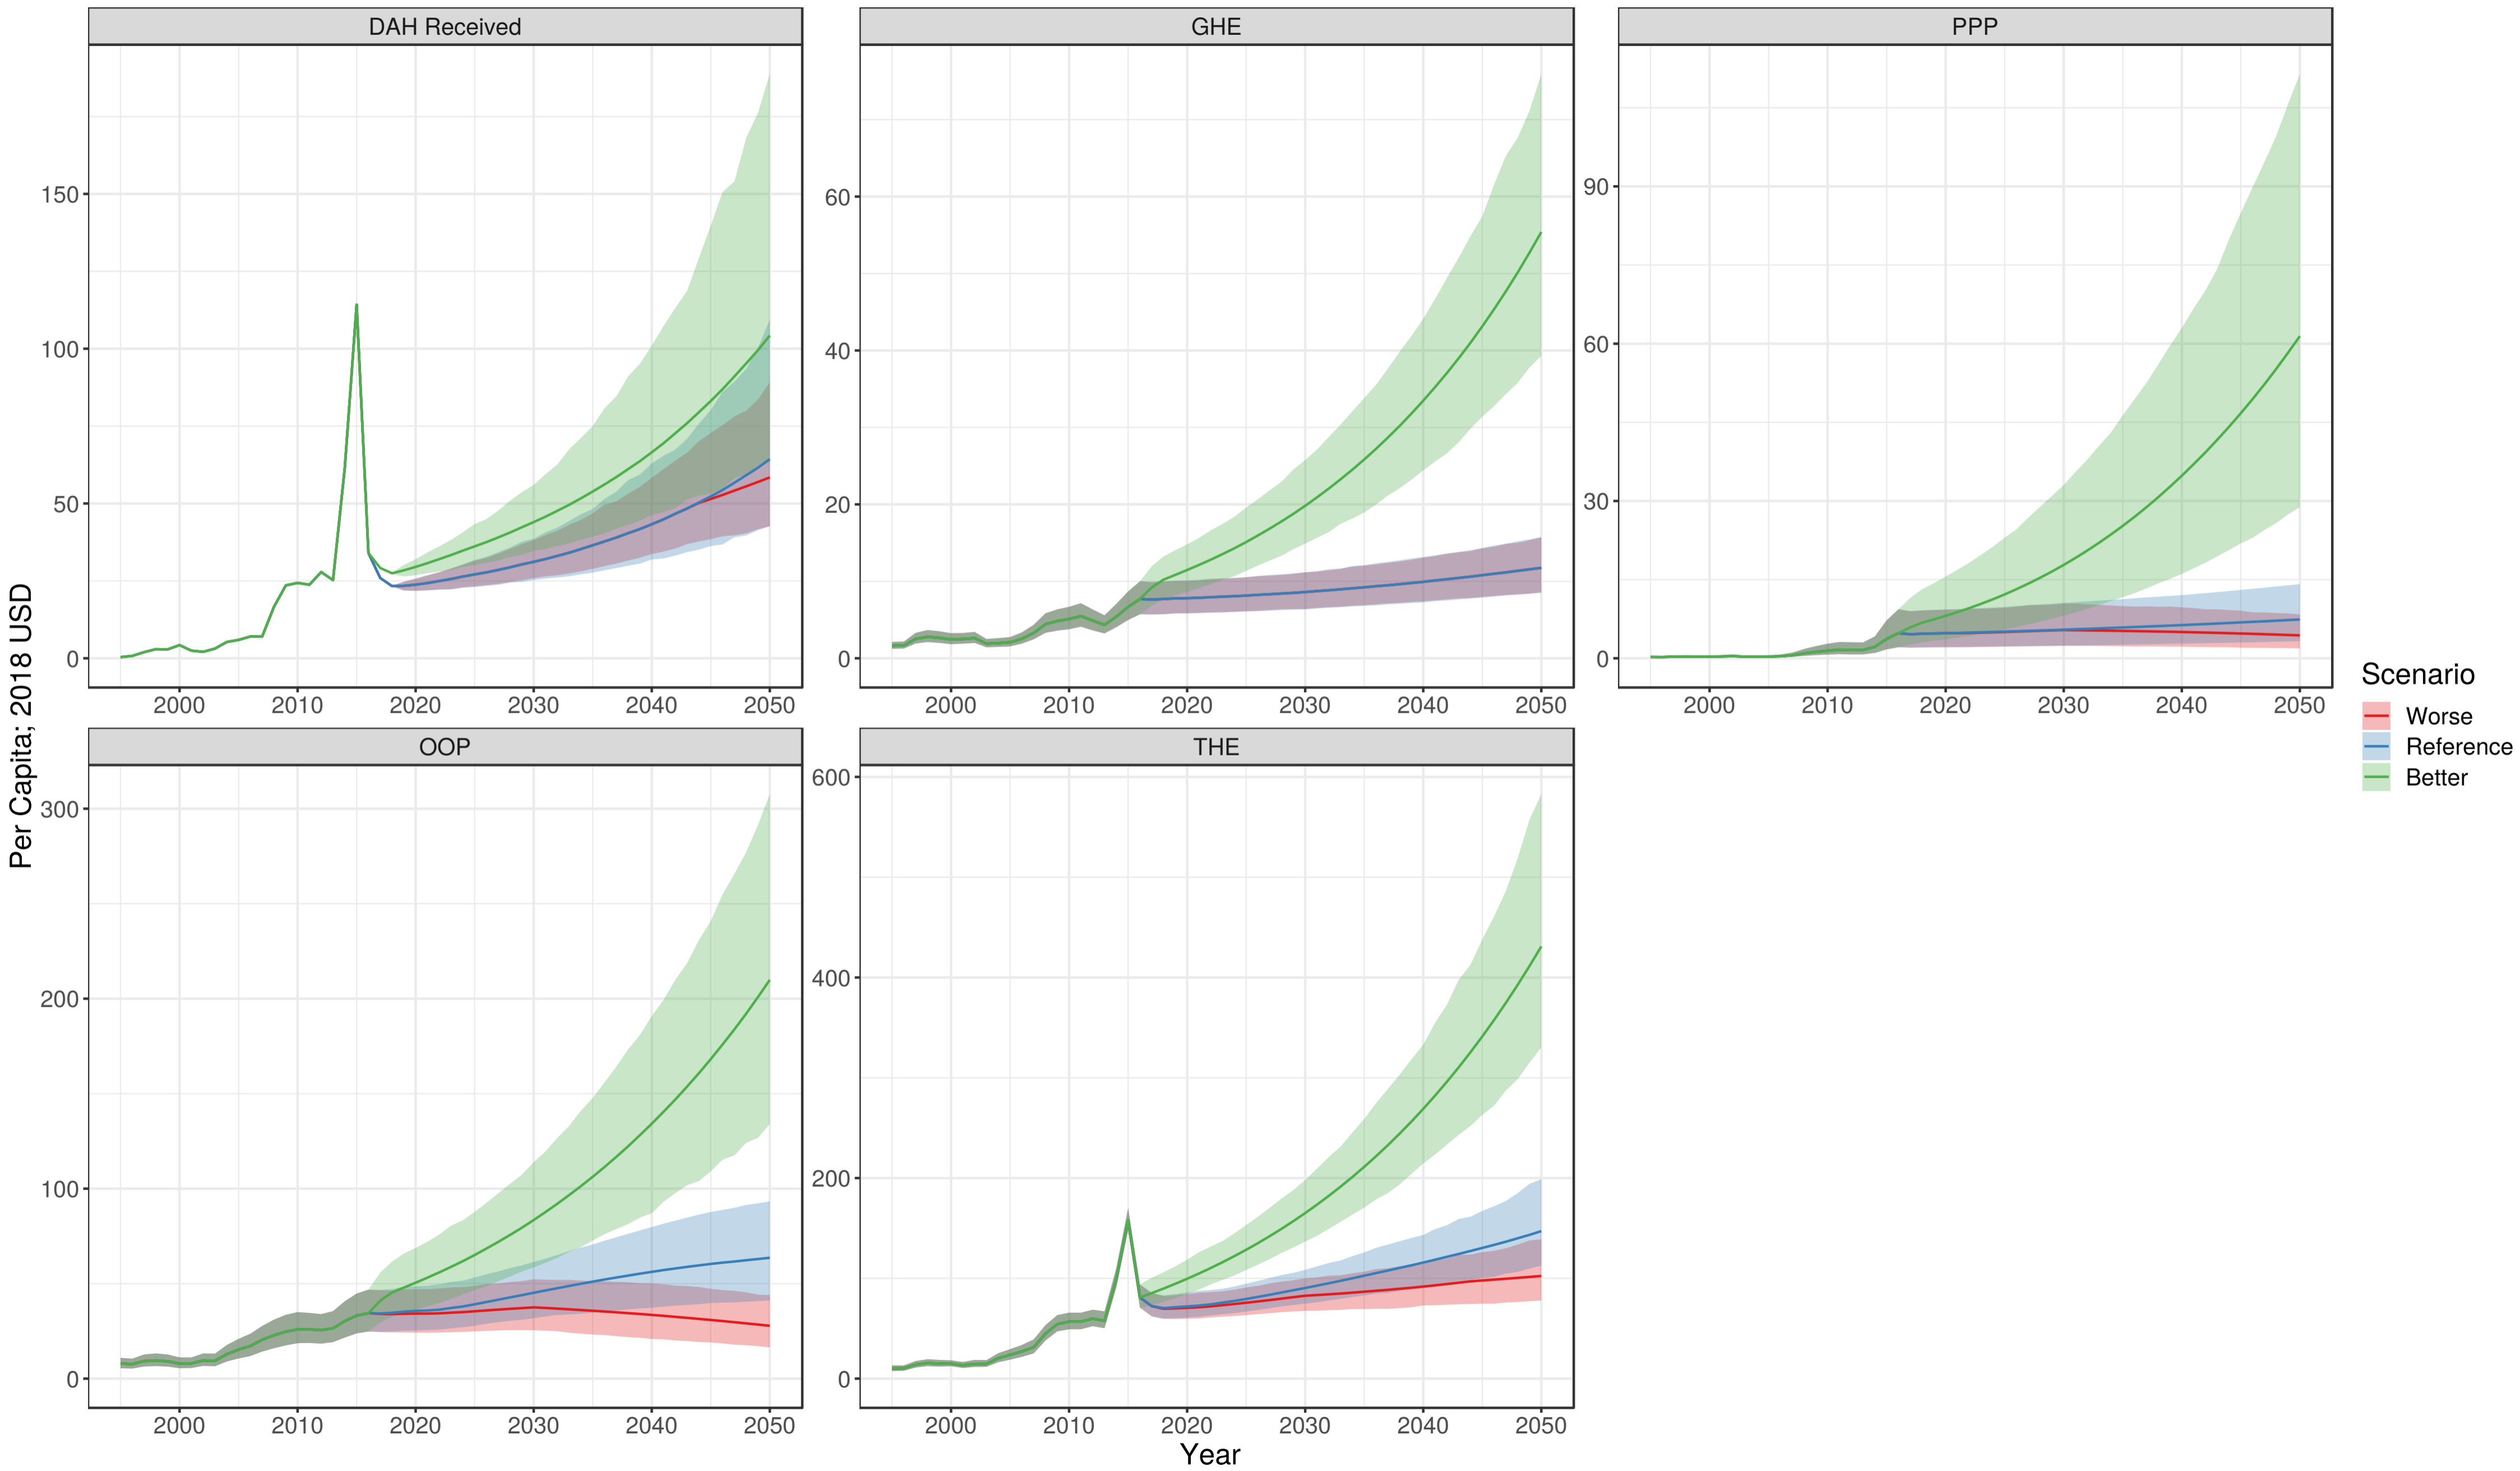

# Libya

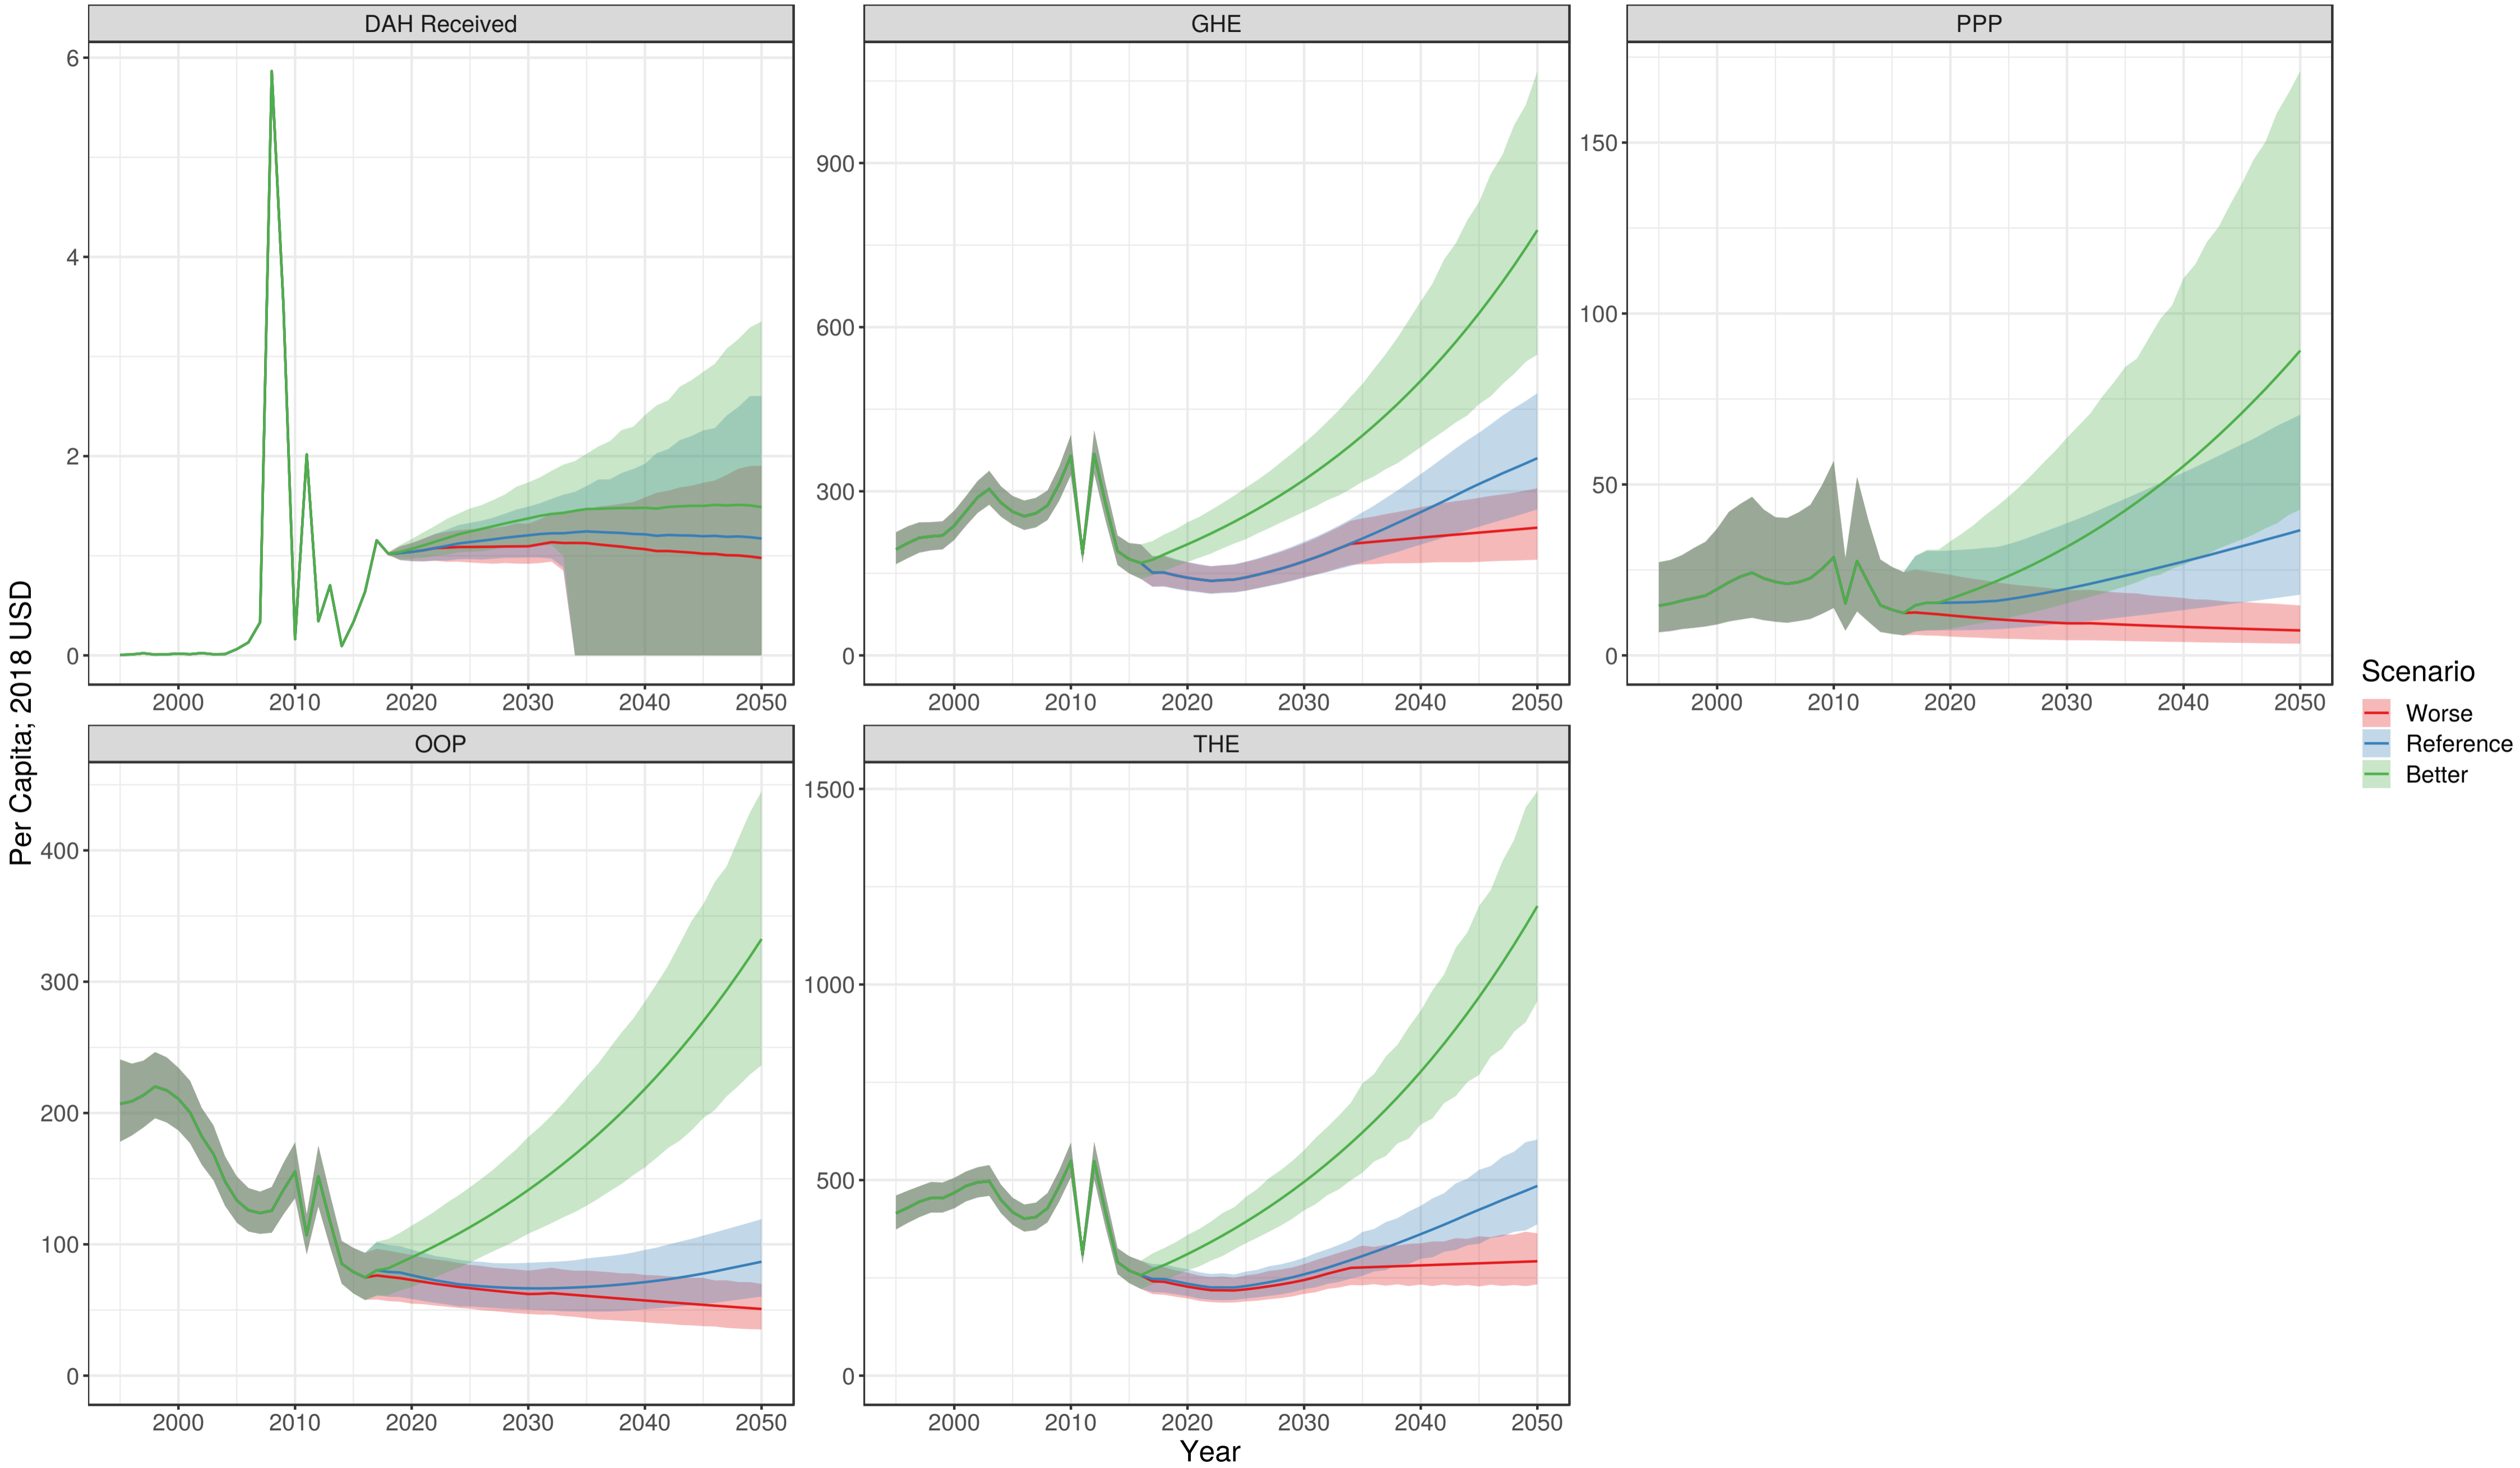

# Lithuania

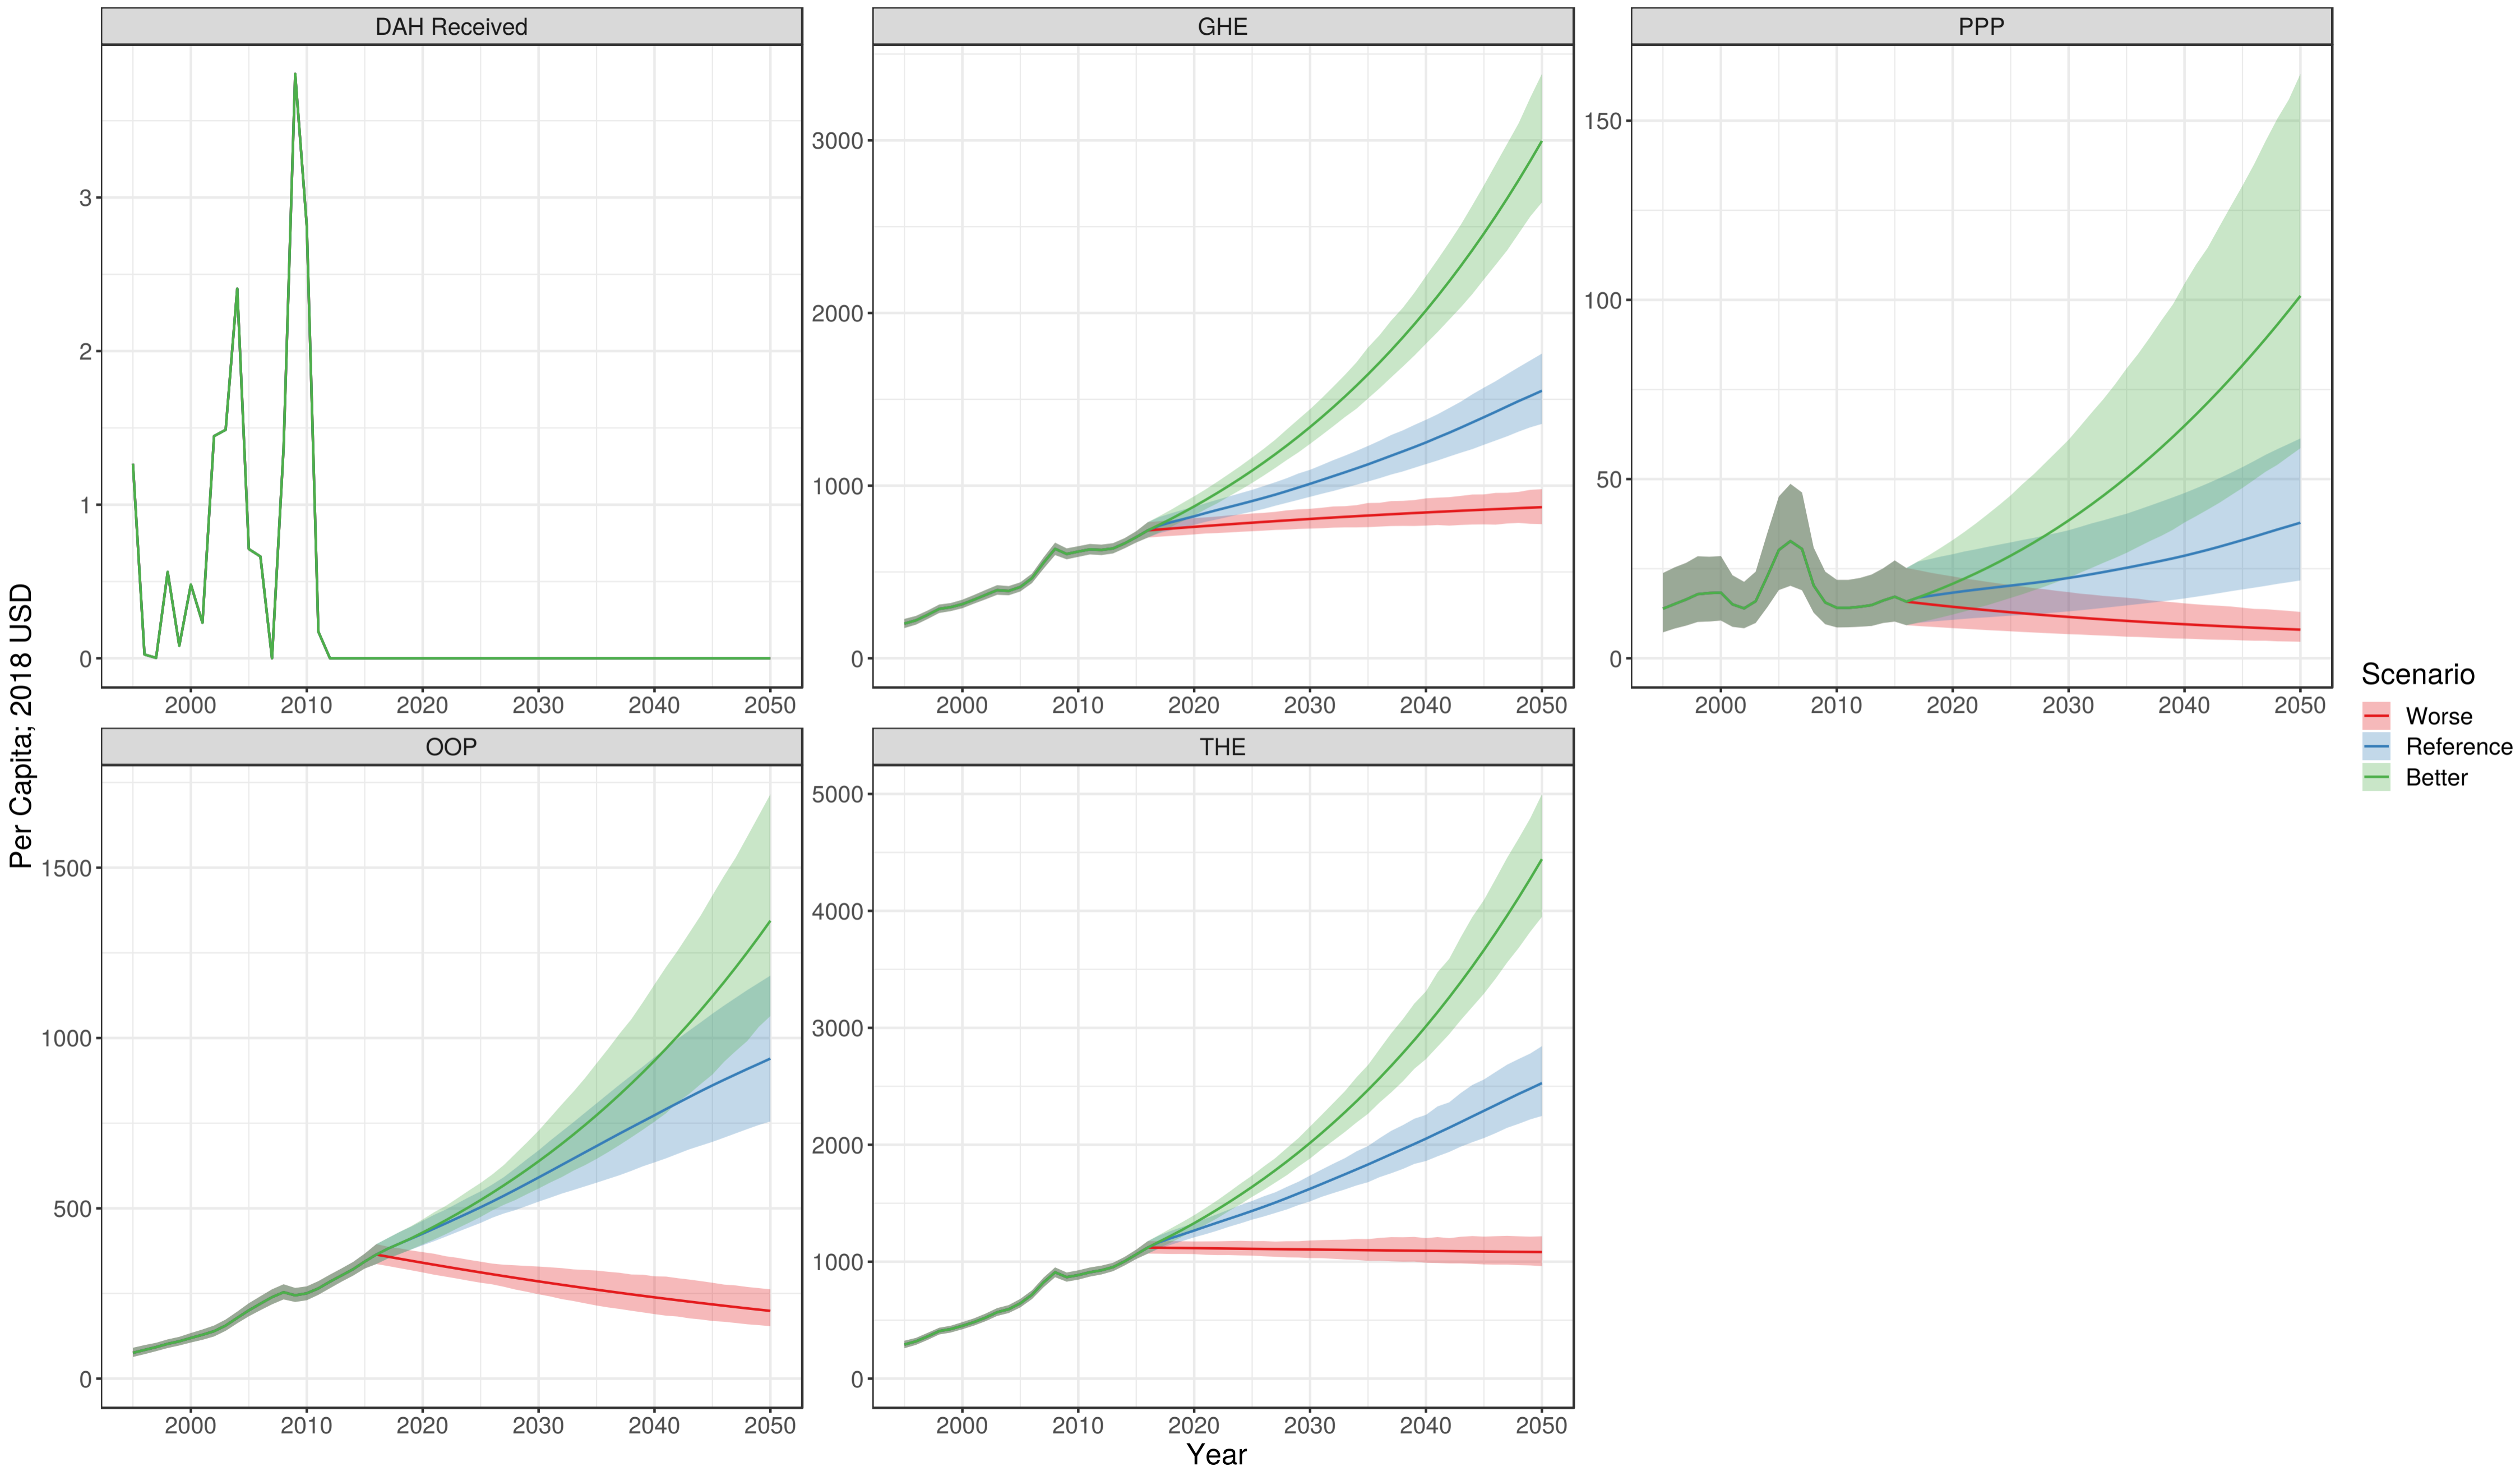



# Luxembourg

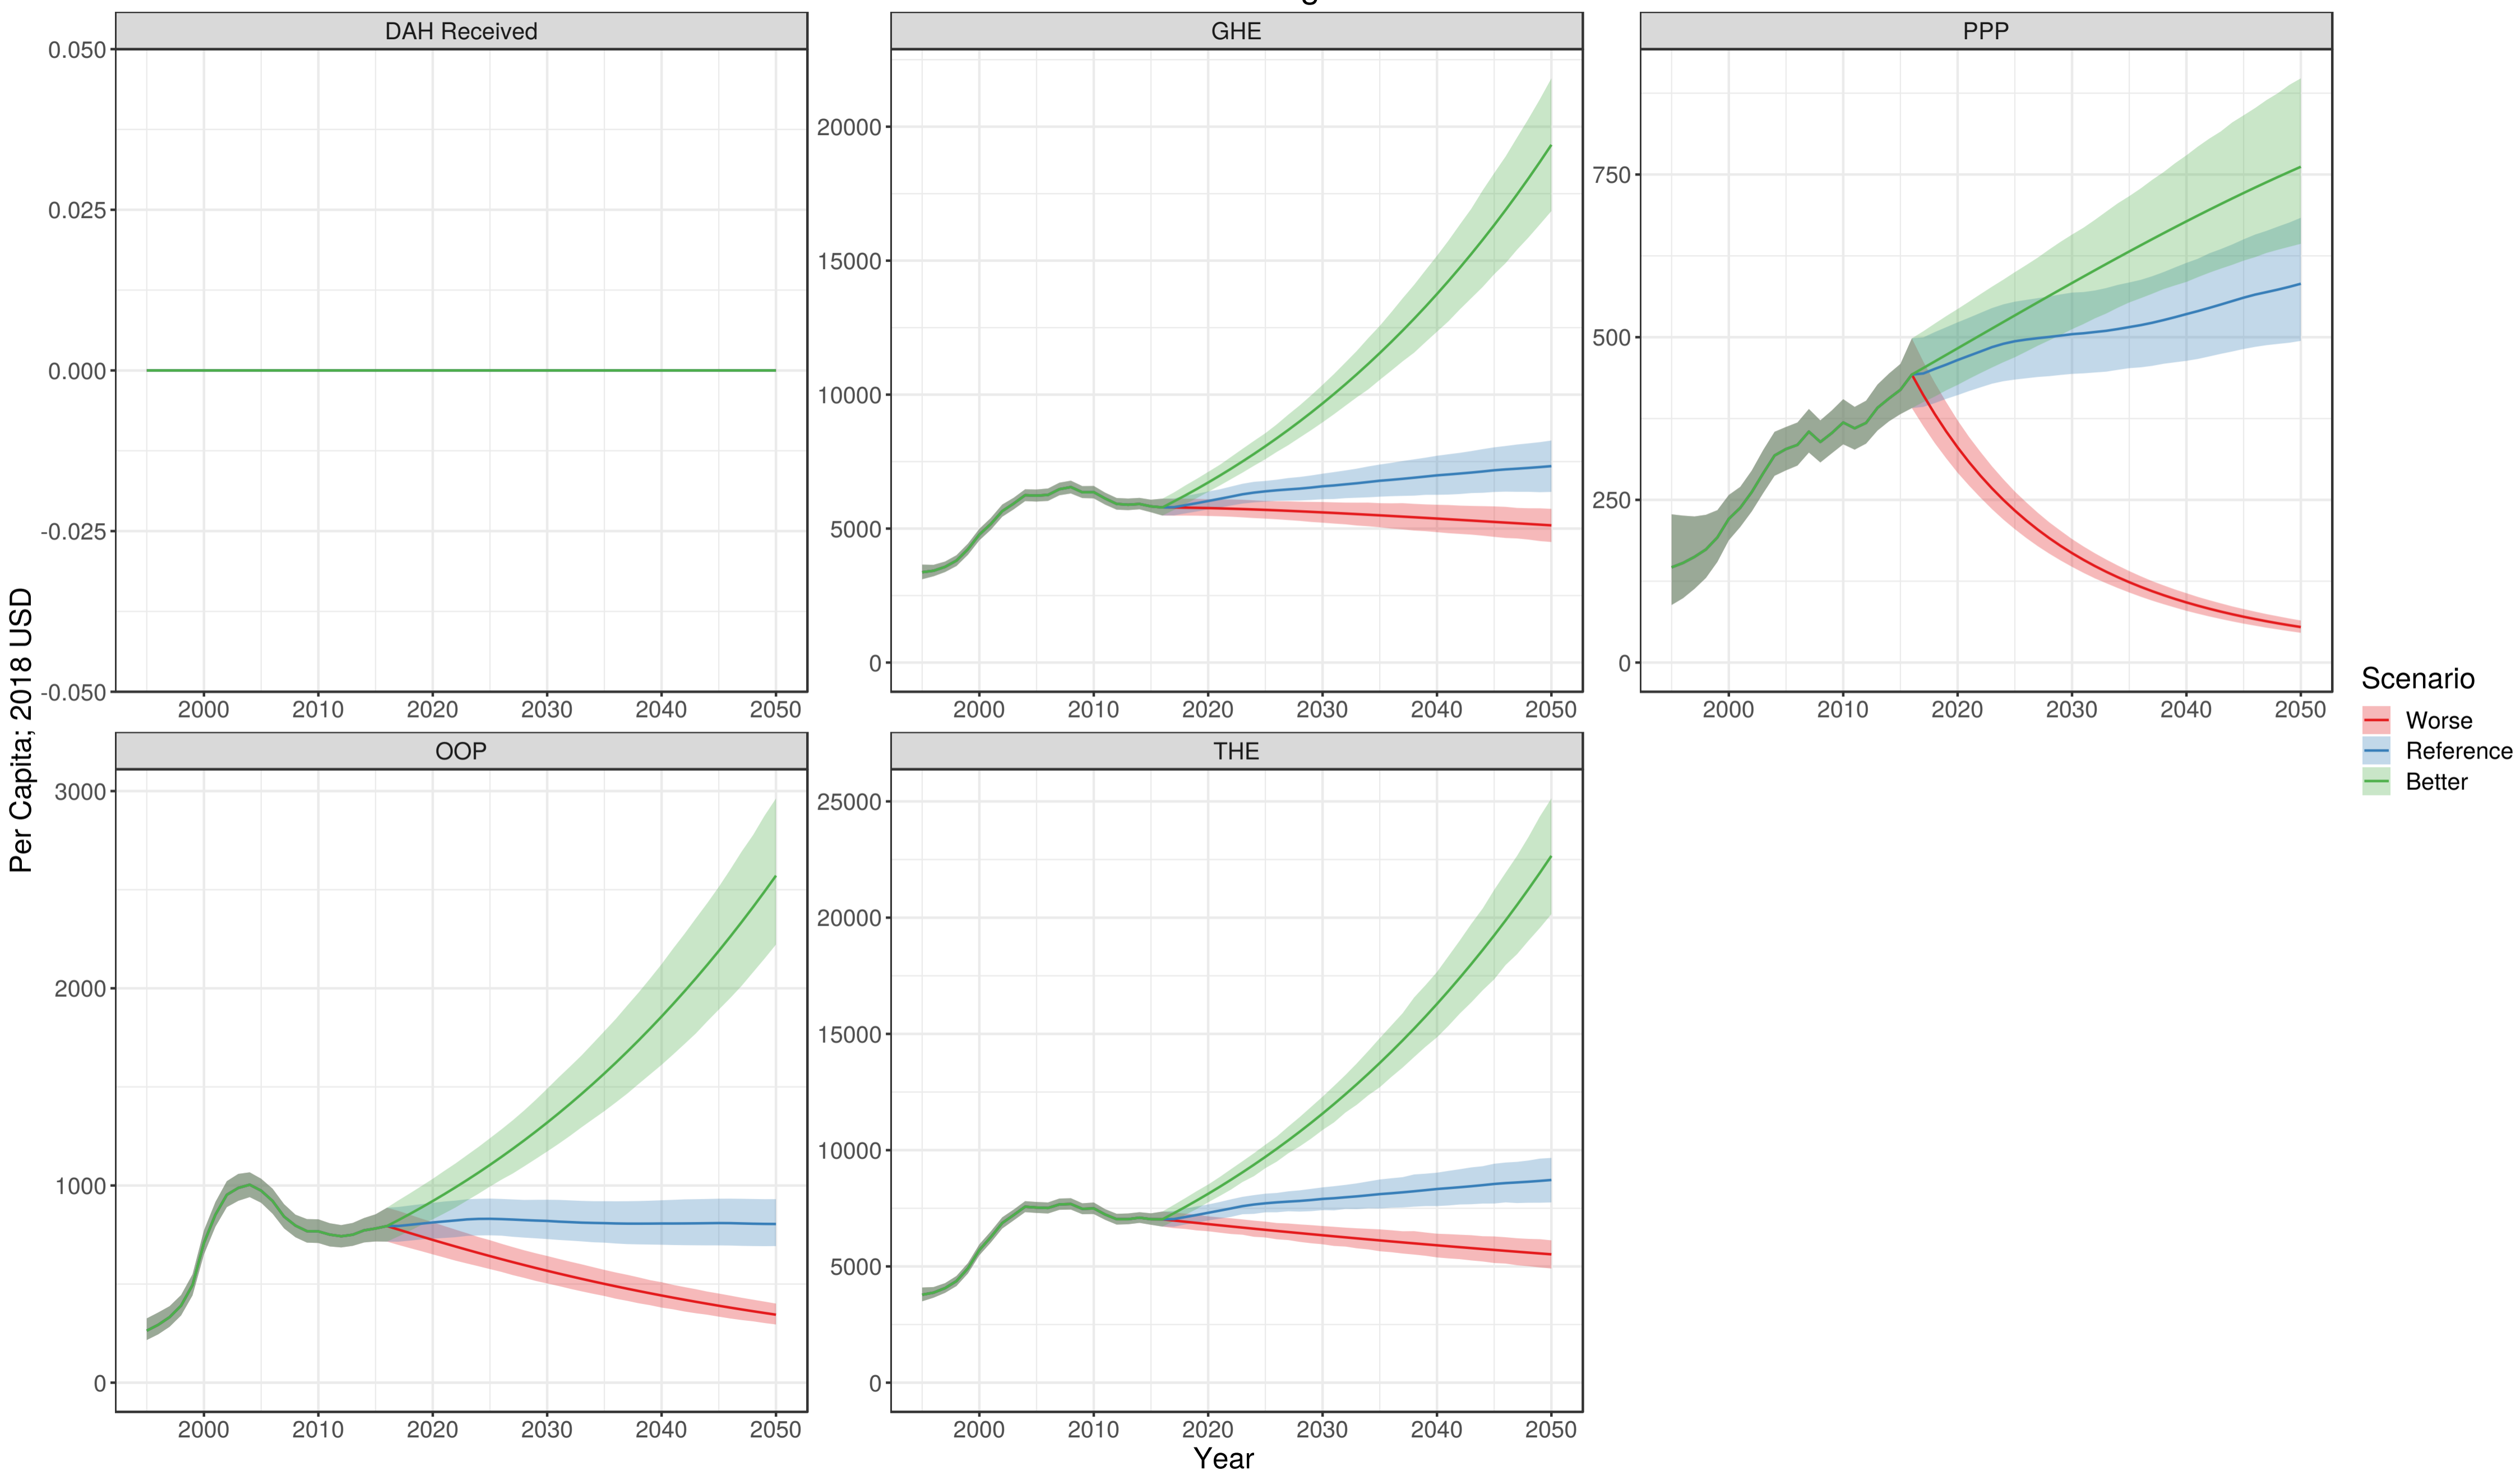

# Macedonia

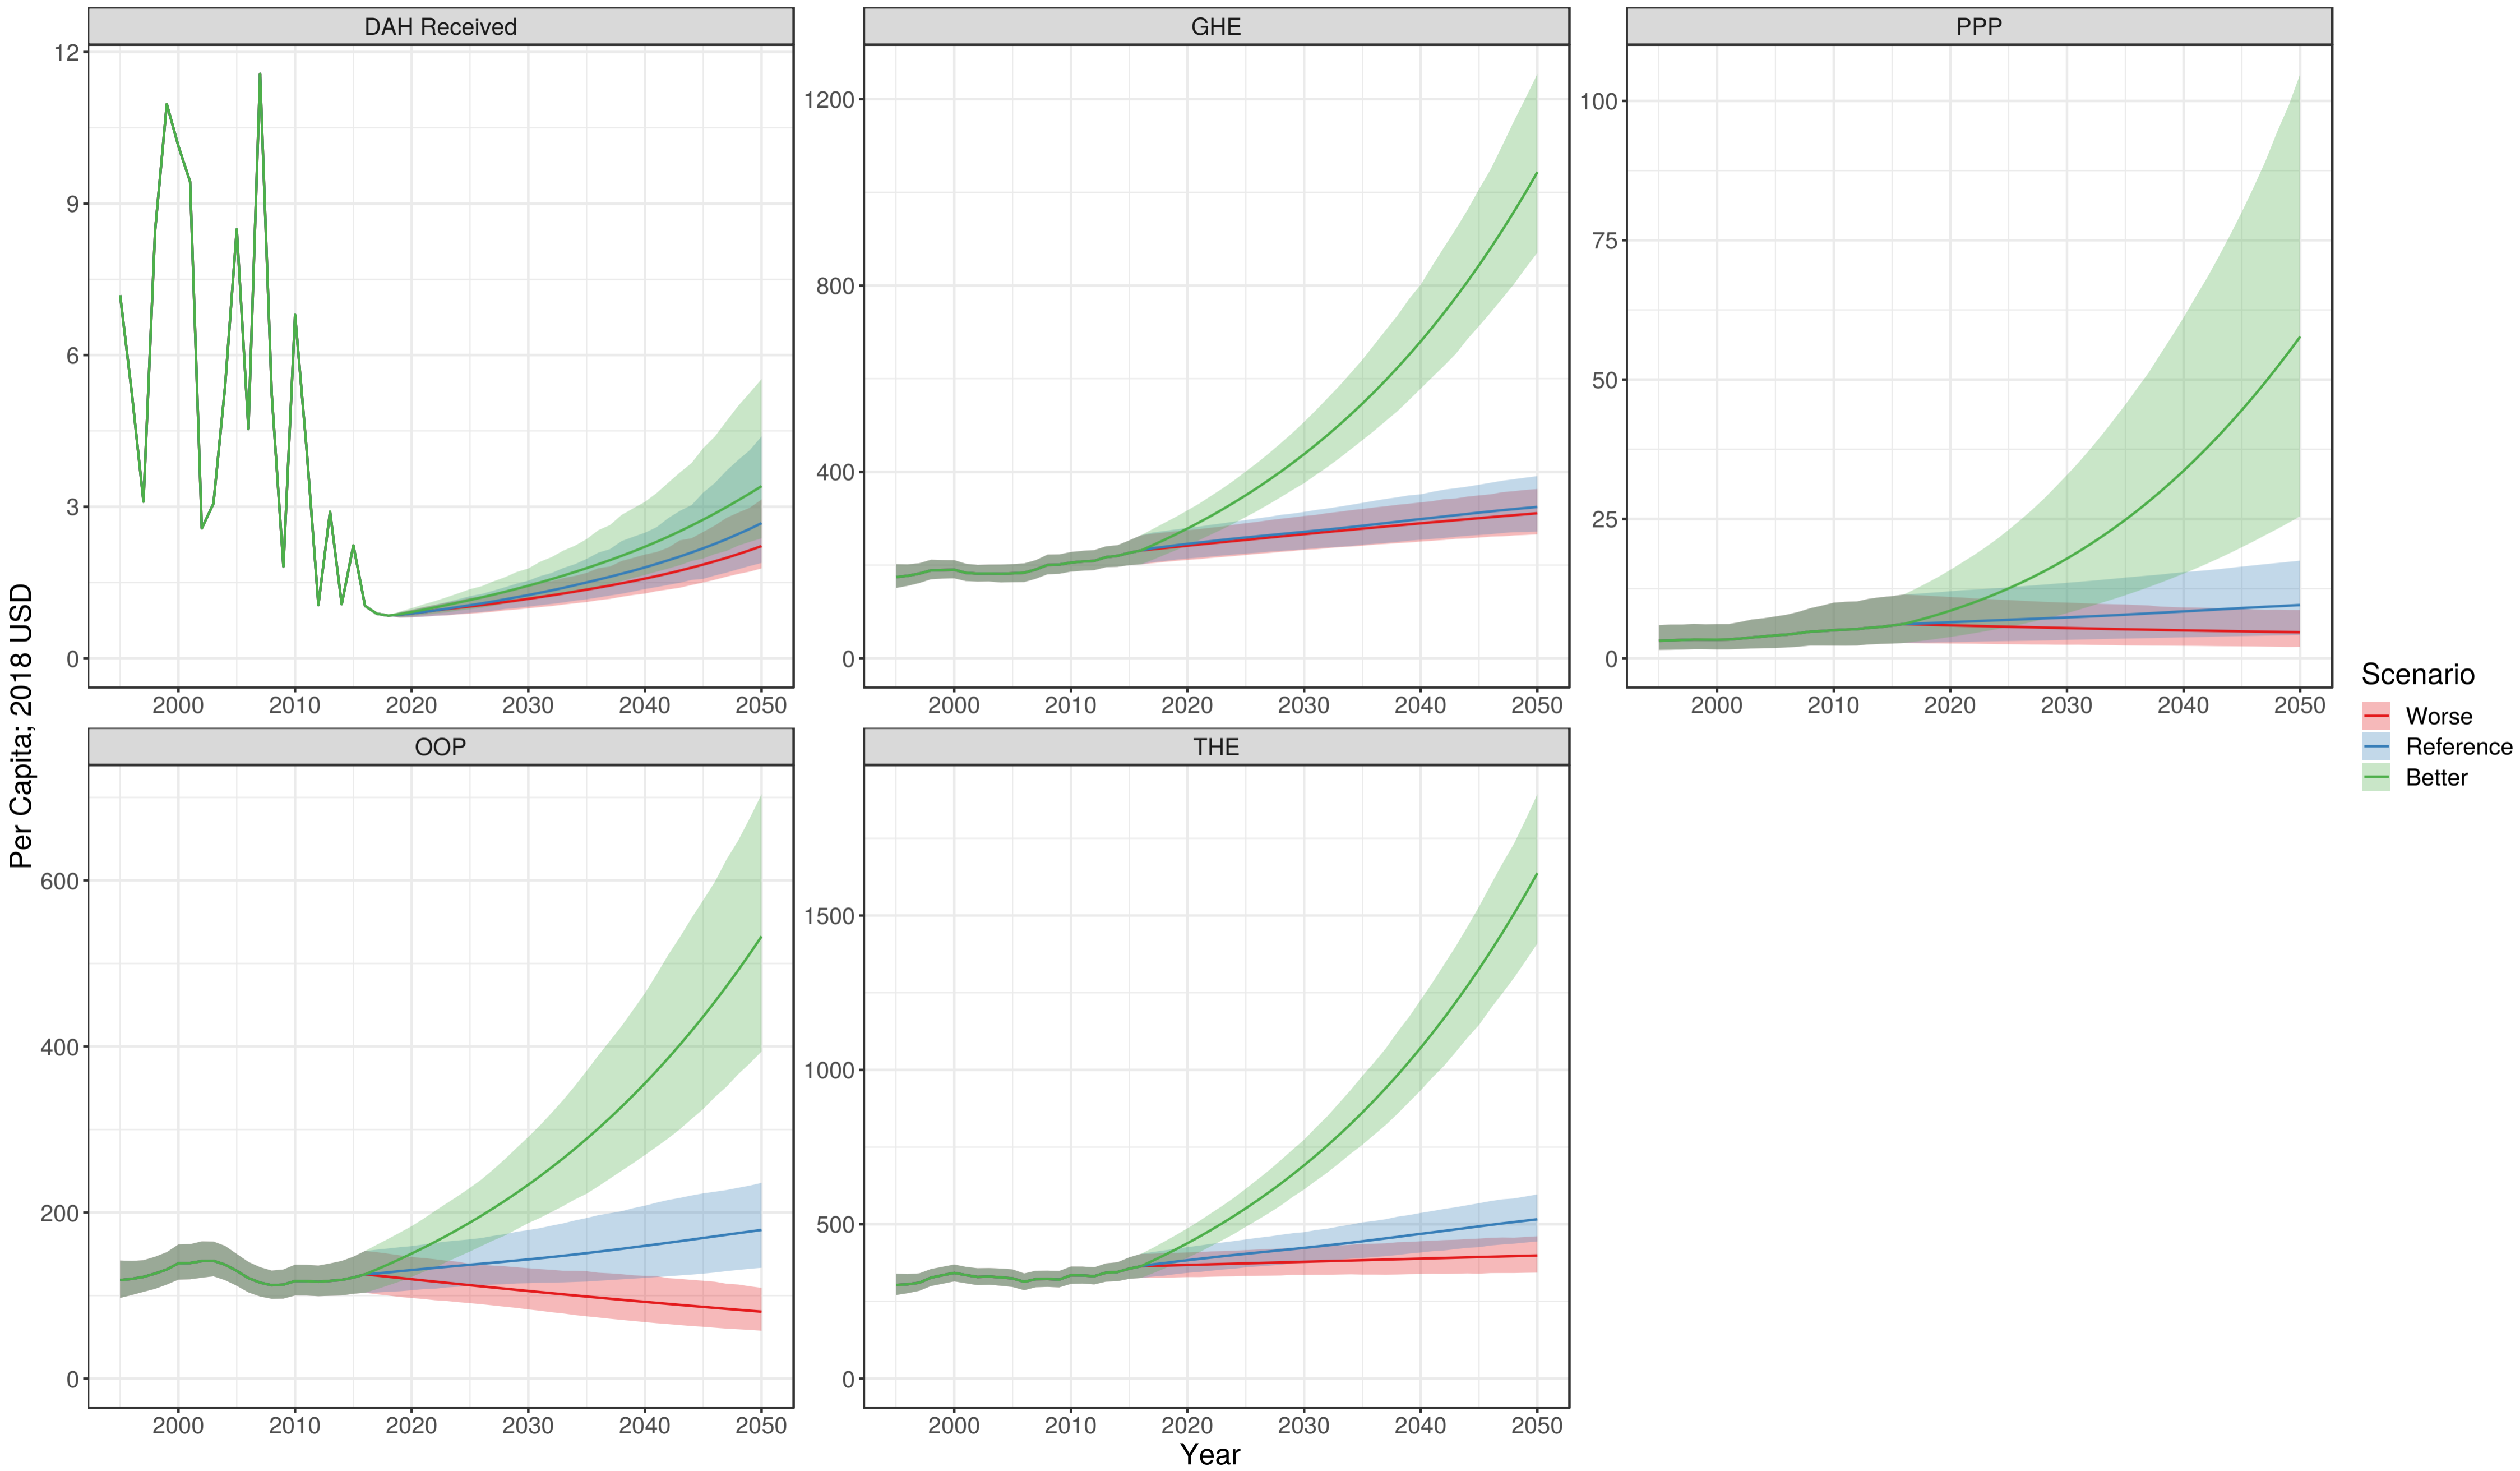

# Madagascar

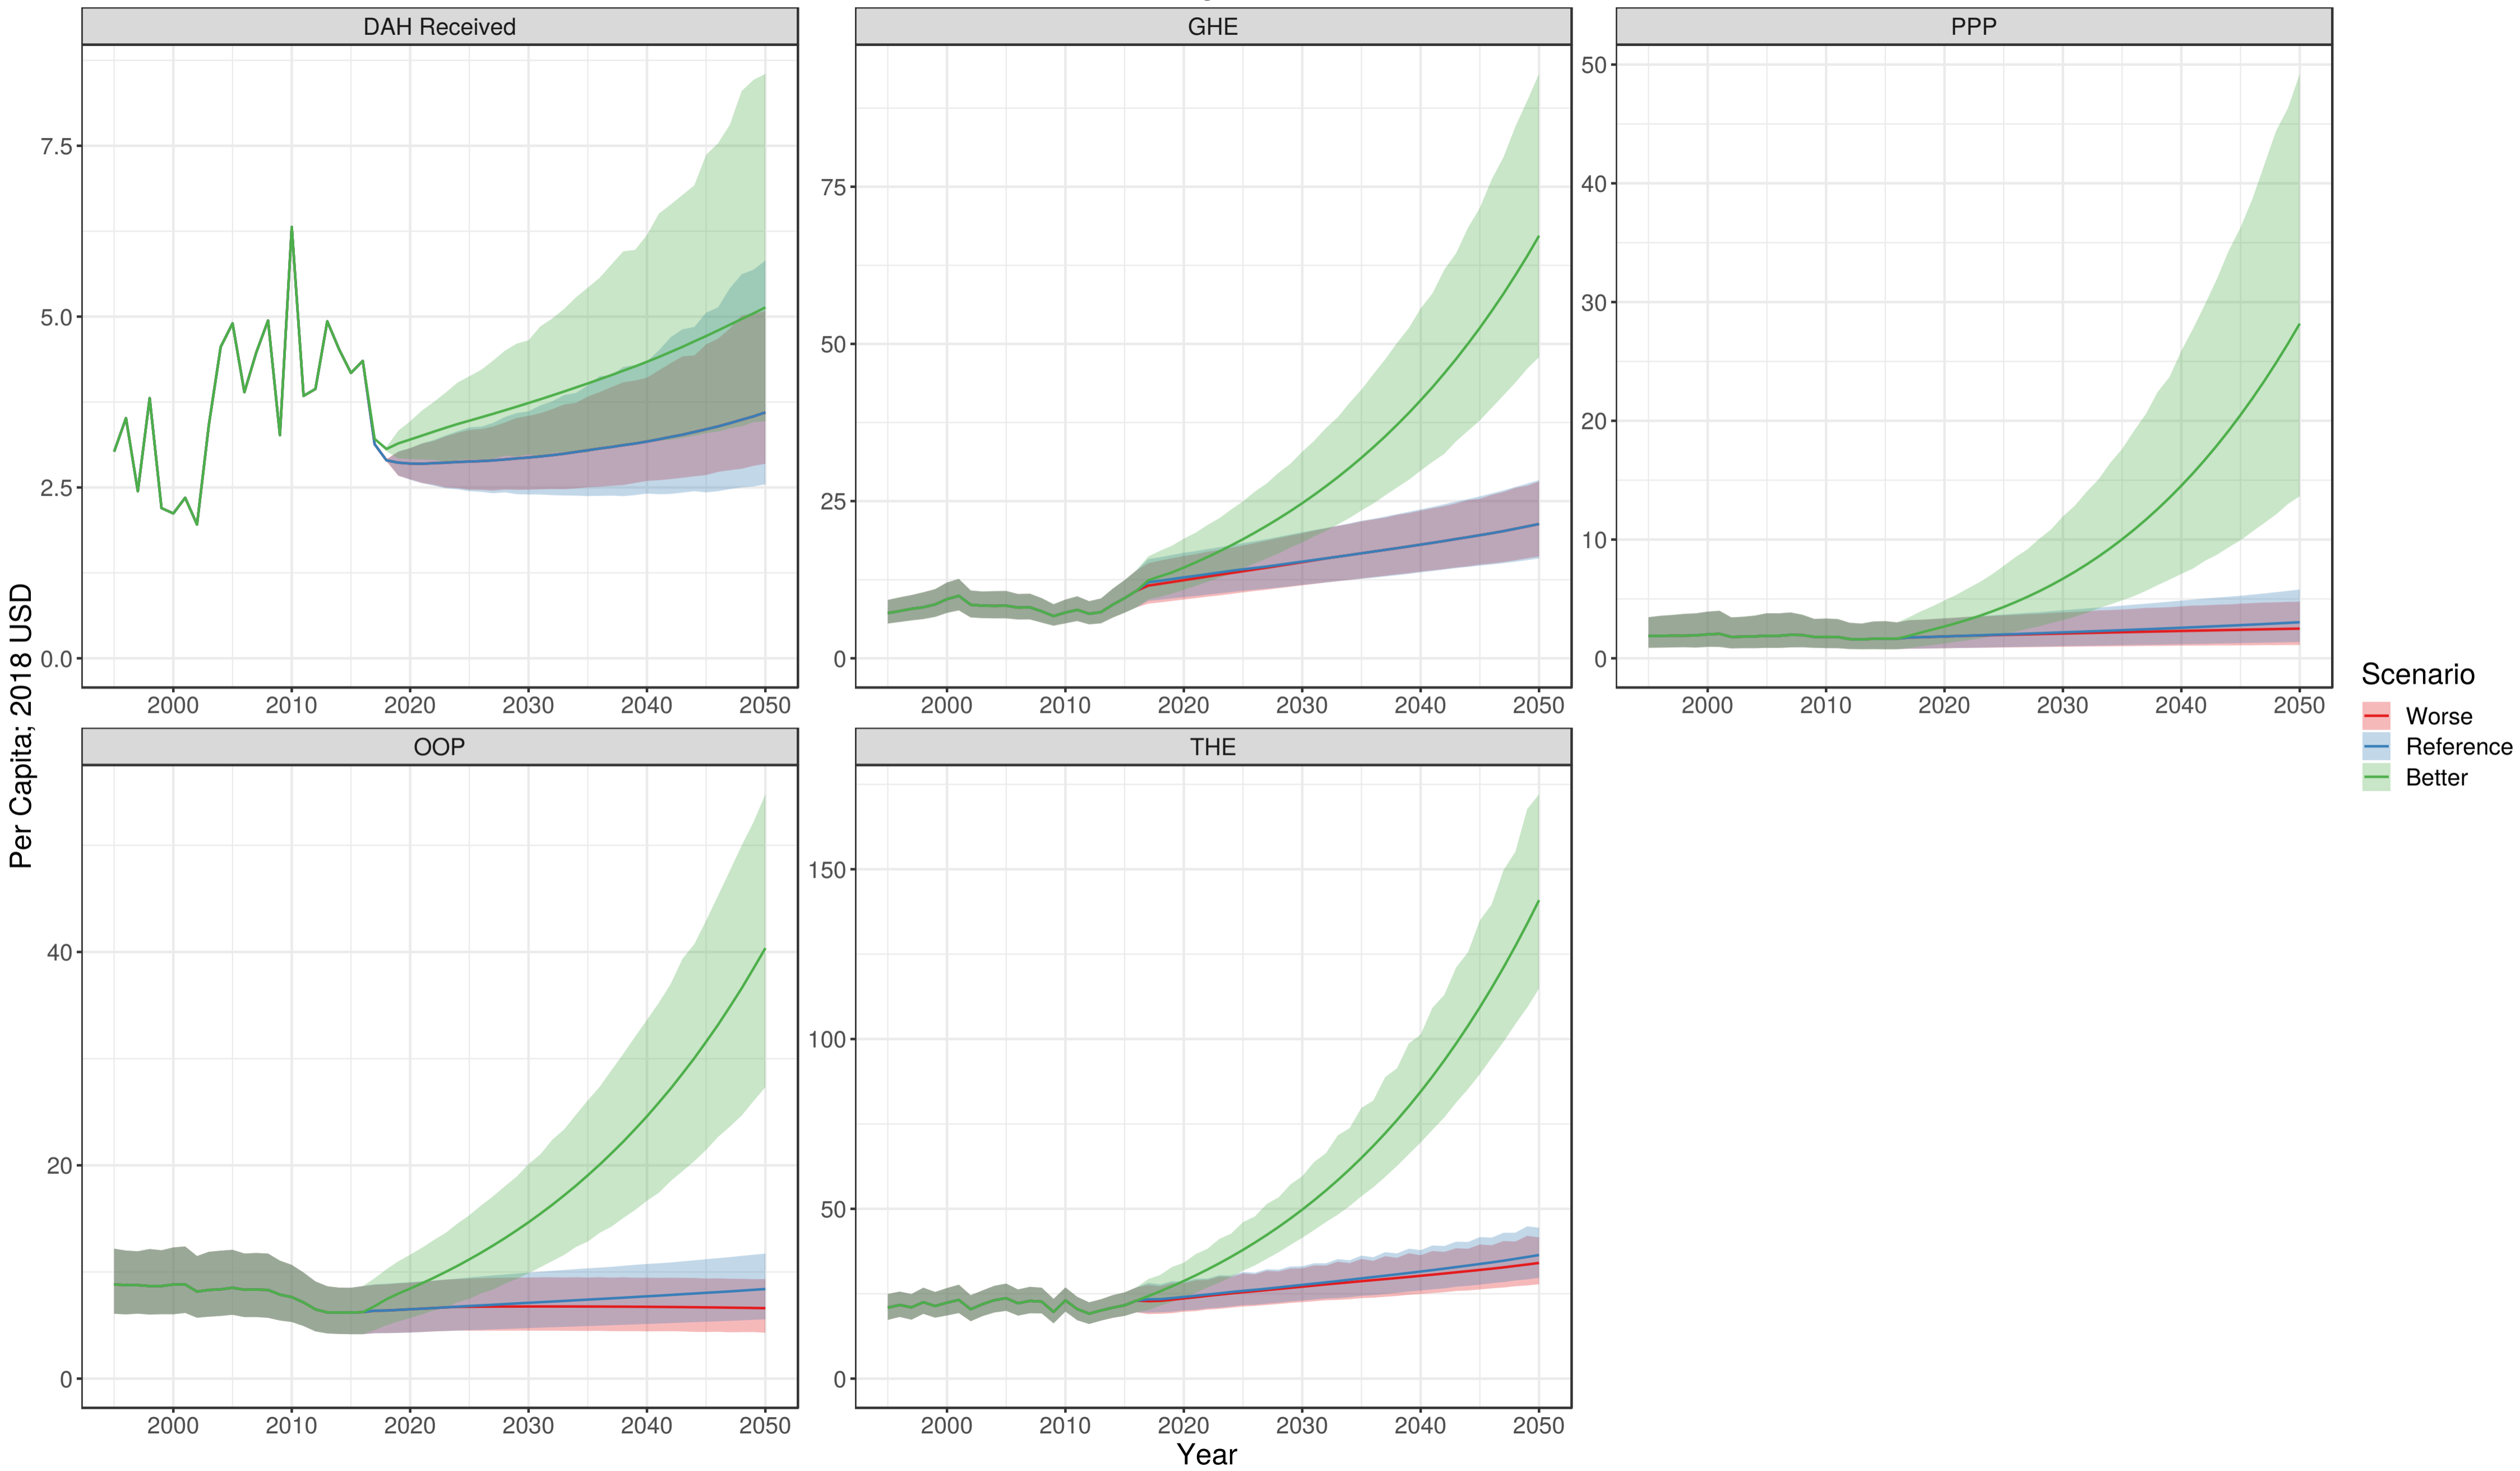

# Malawi

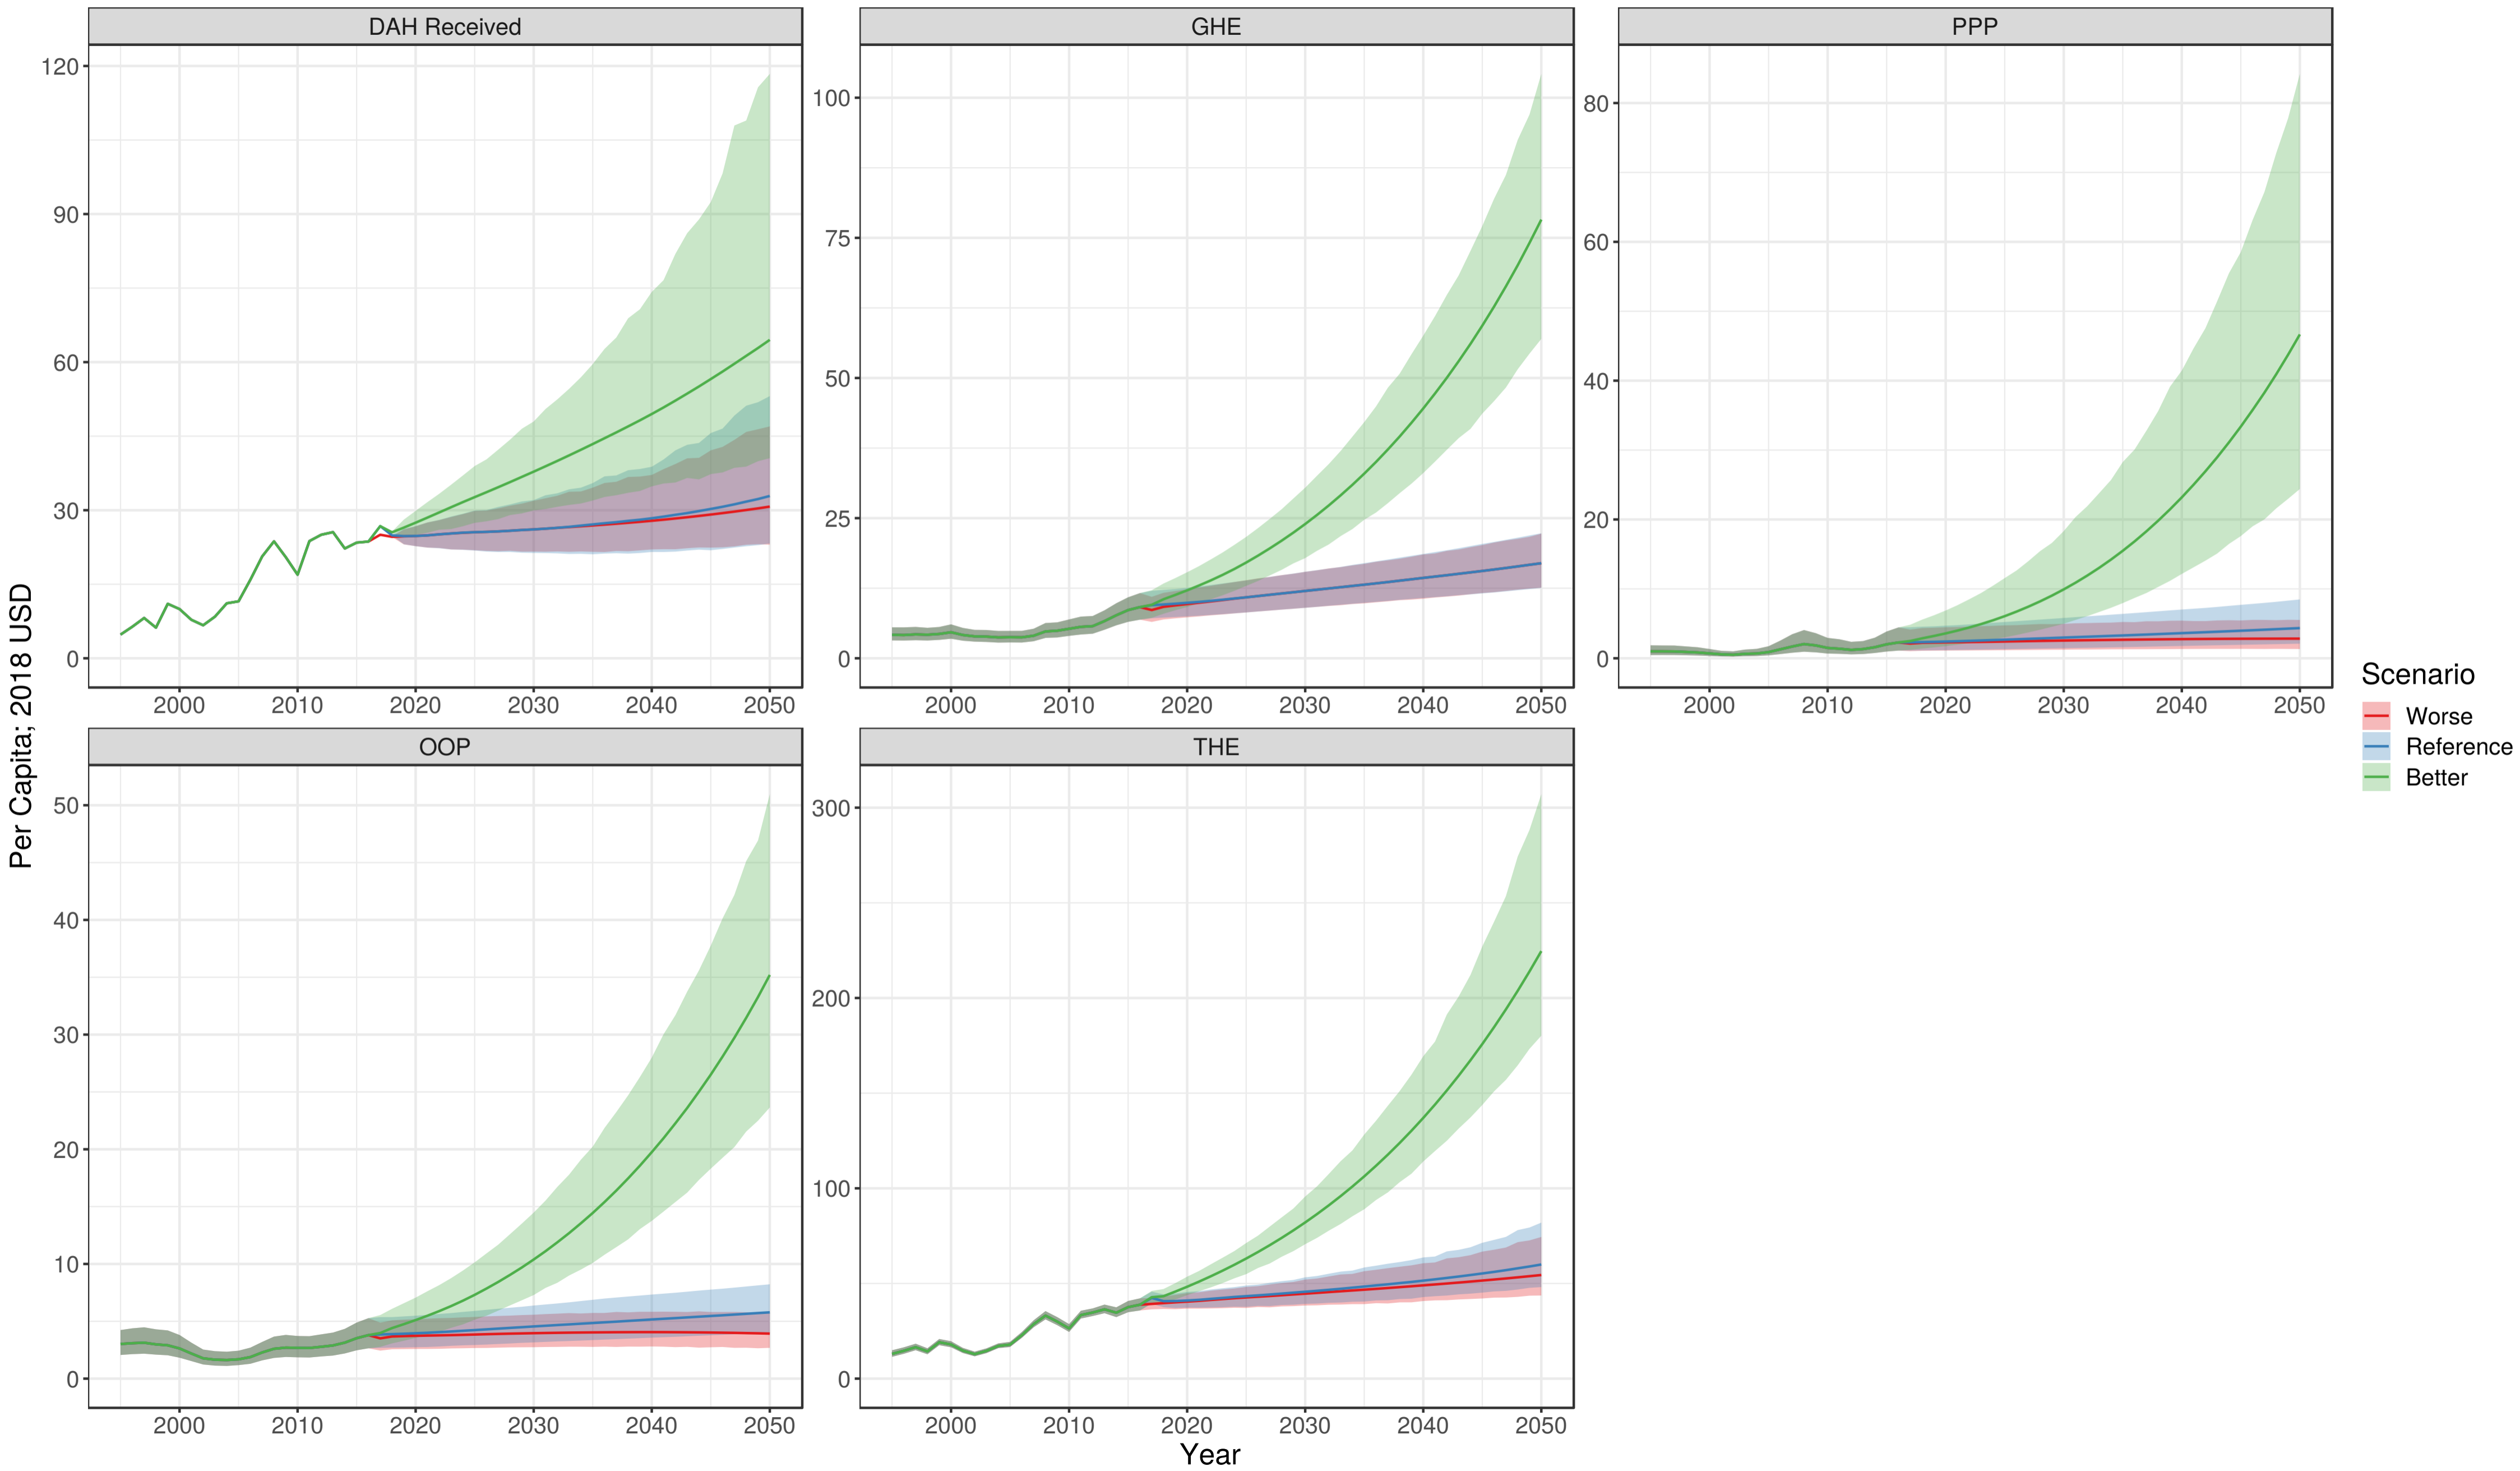

# Malaysia

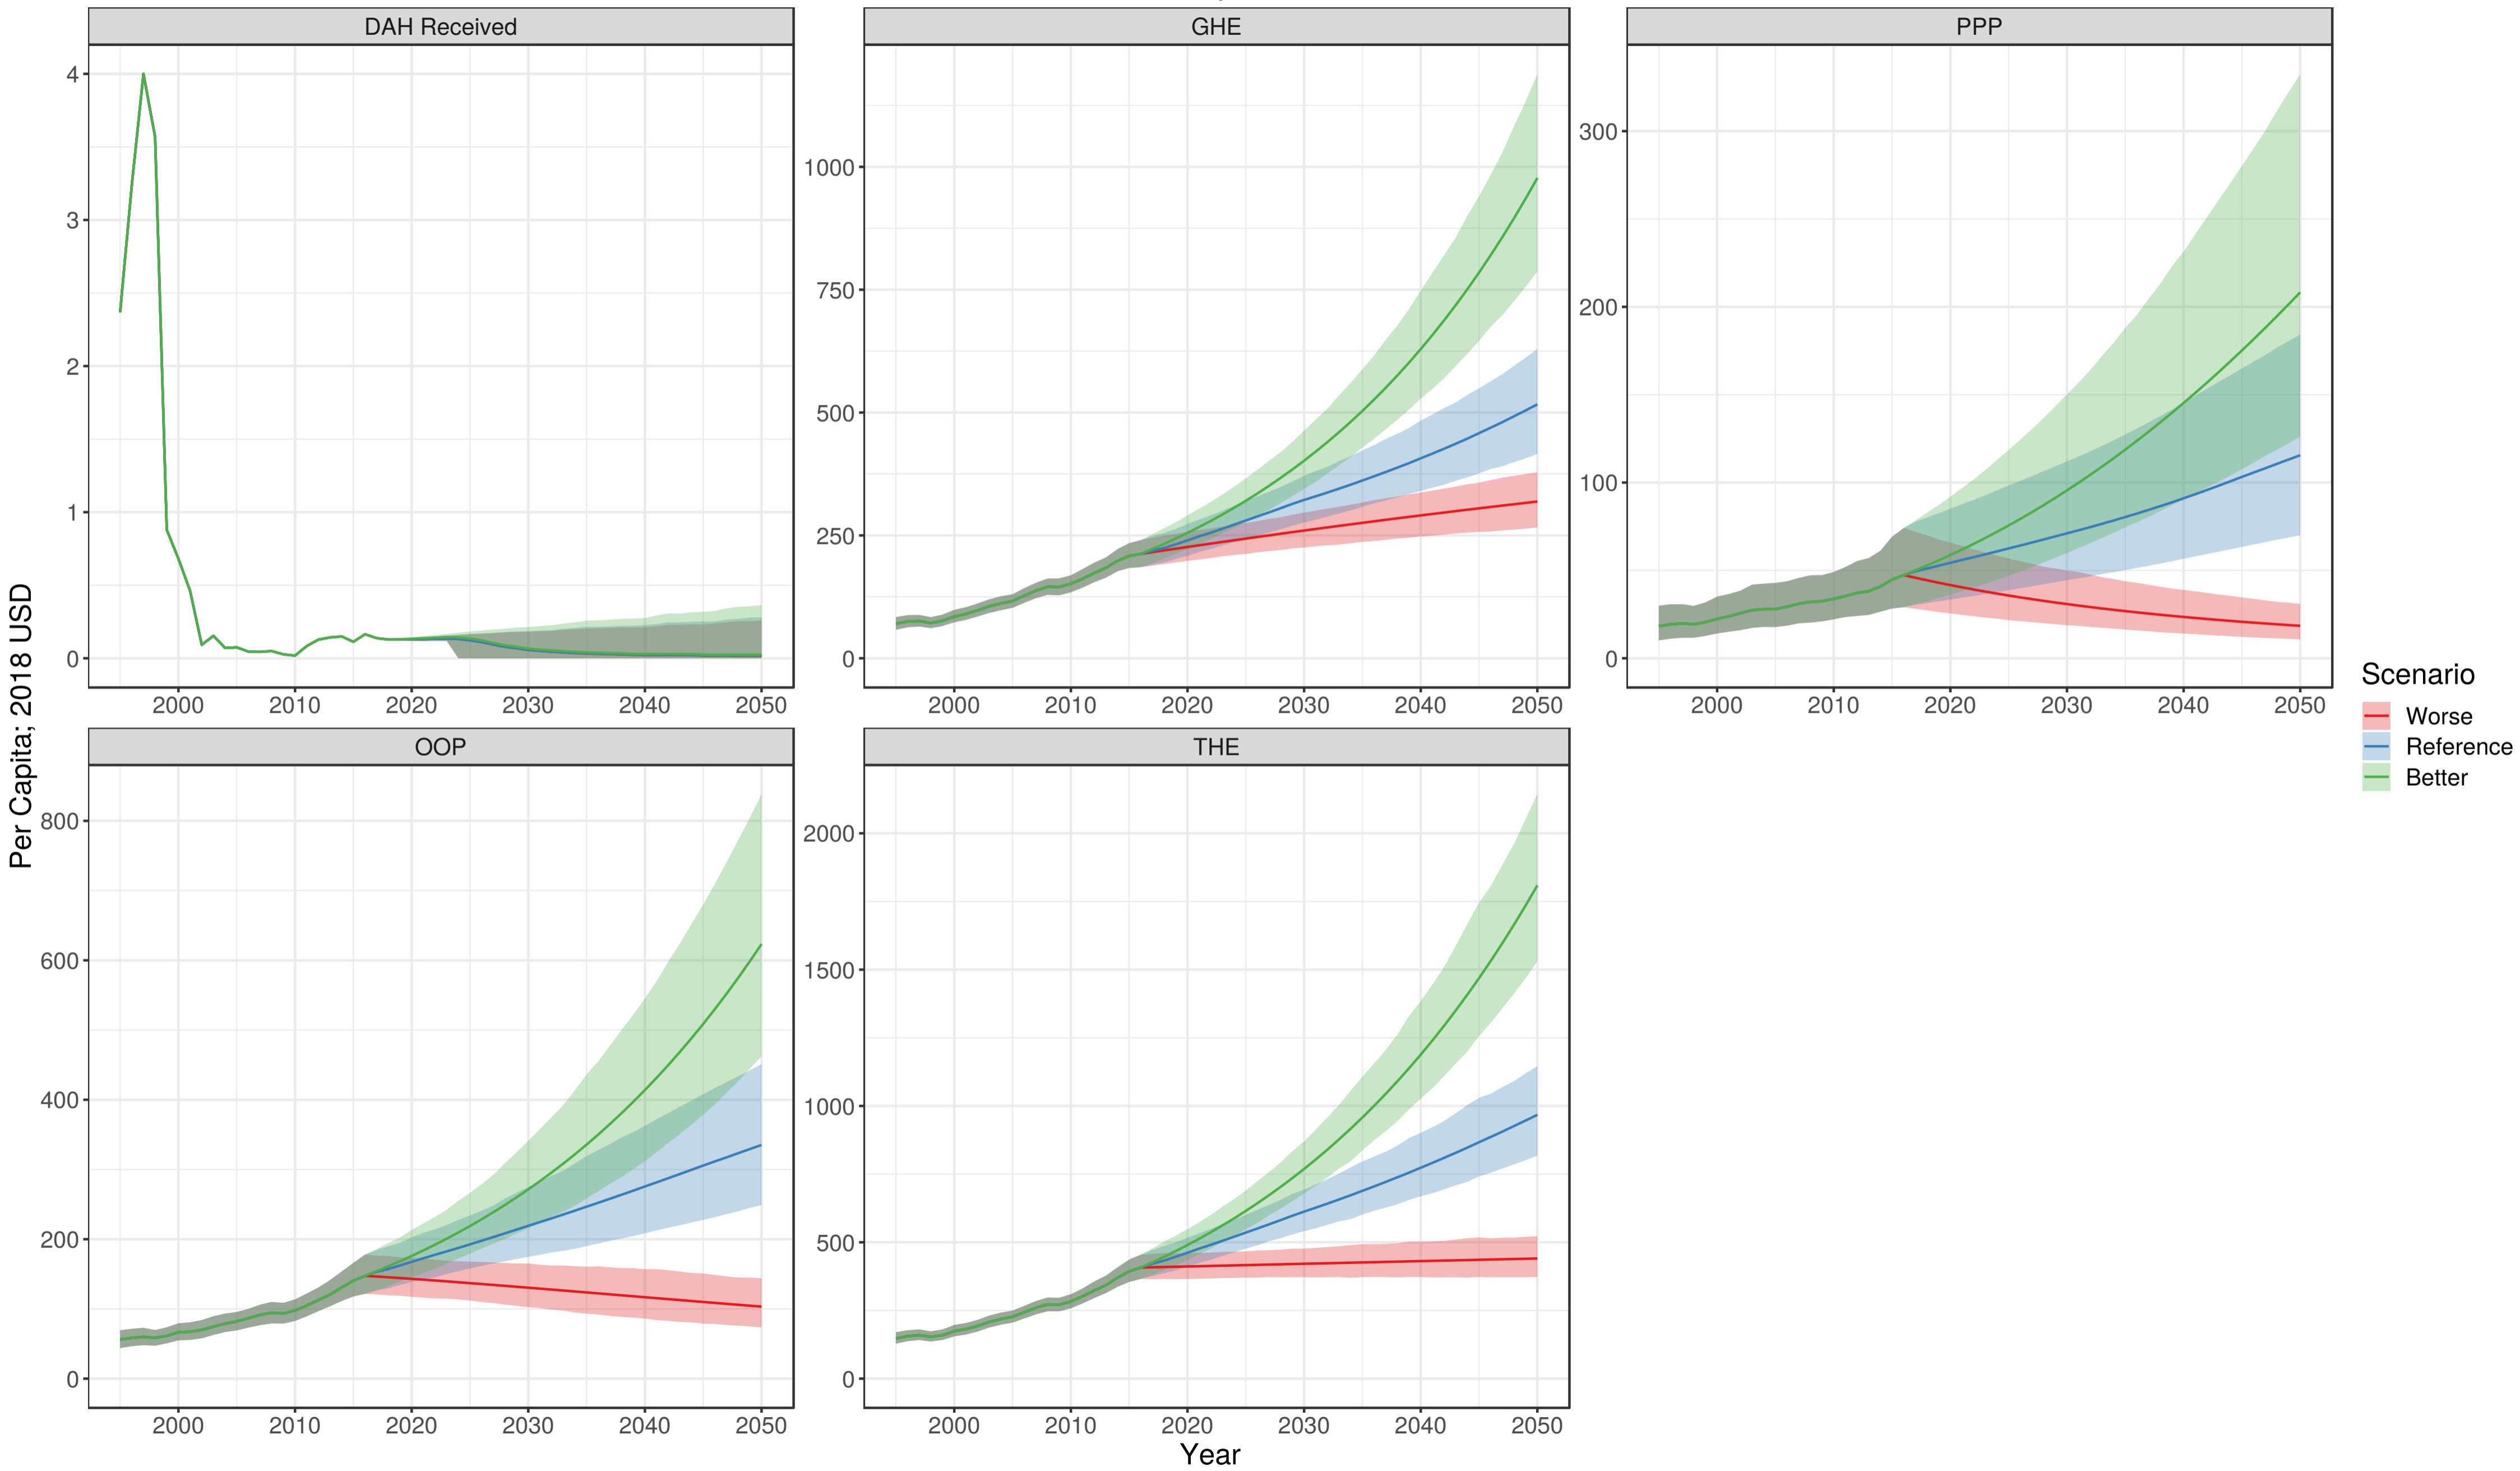

# Maldives

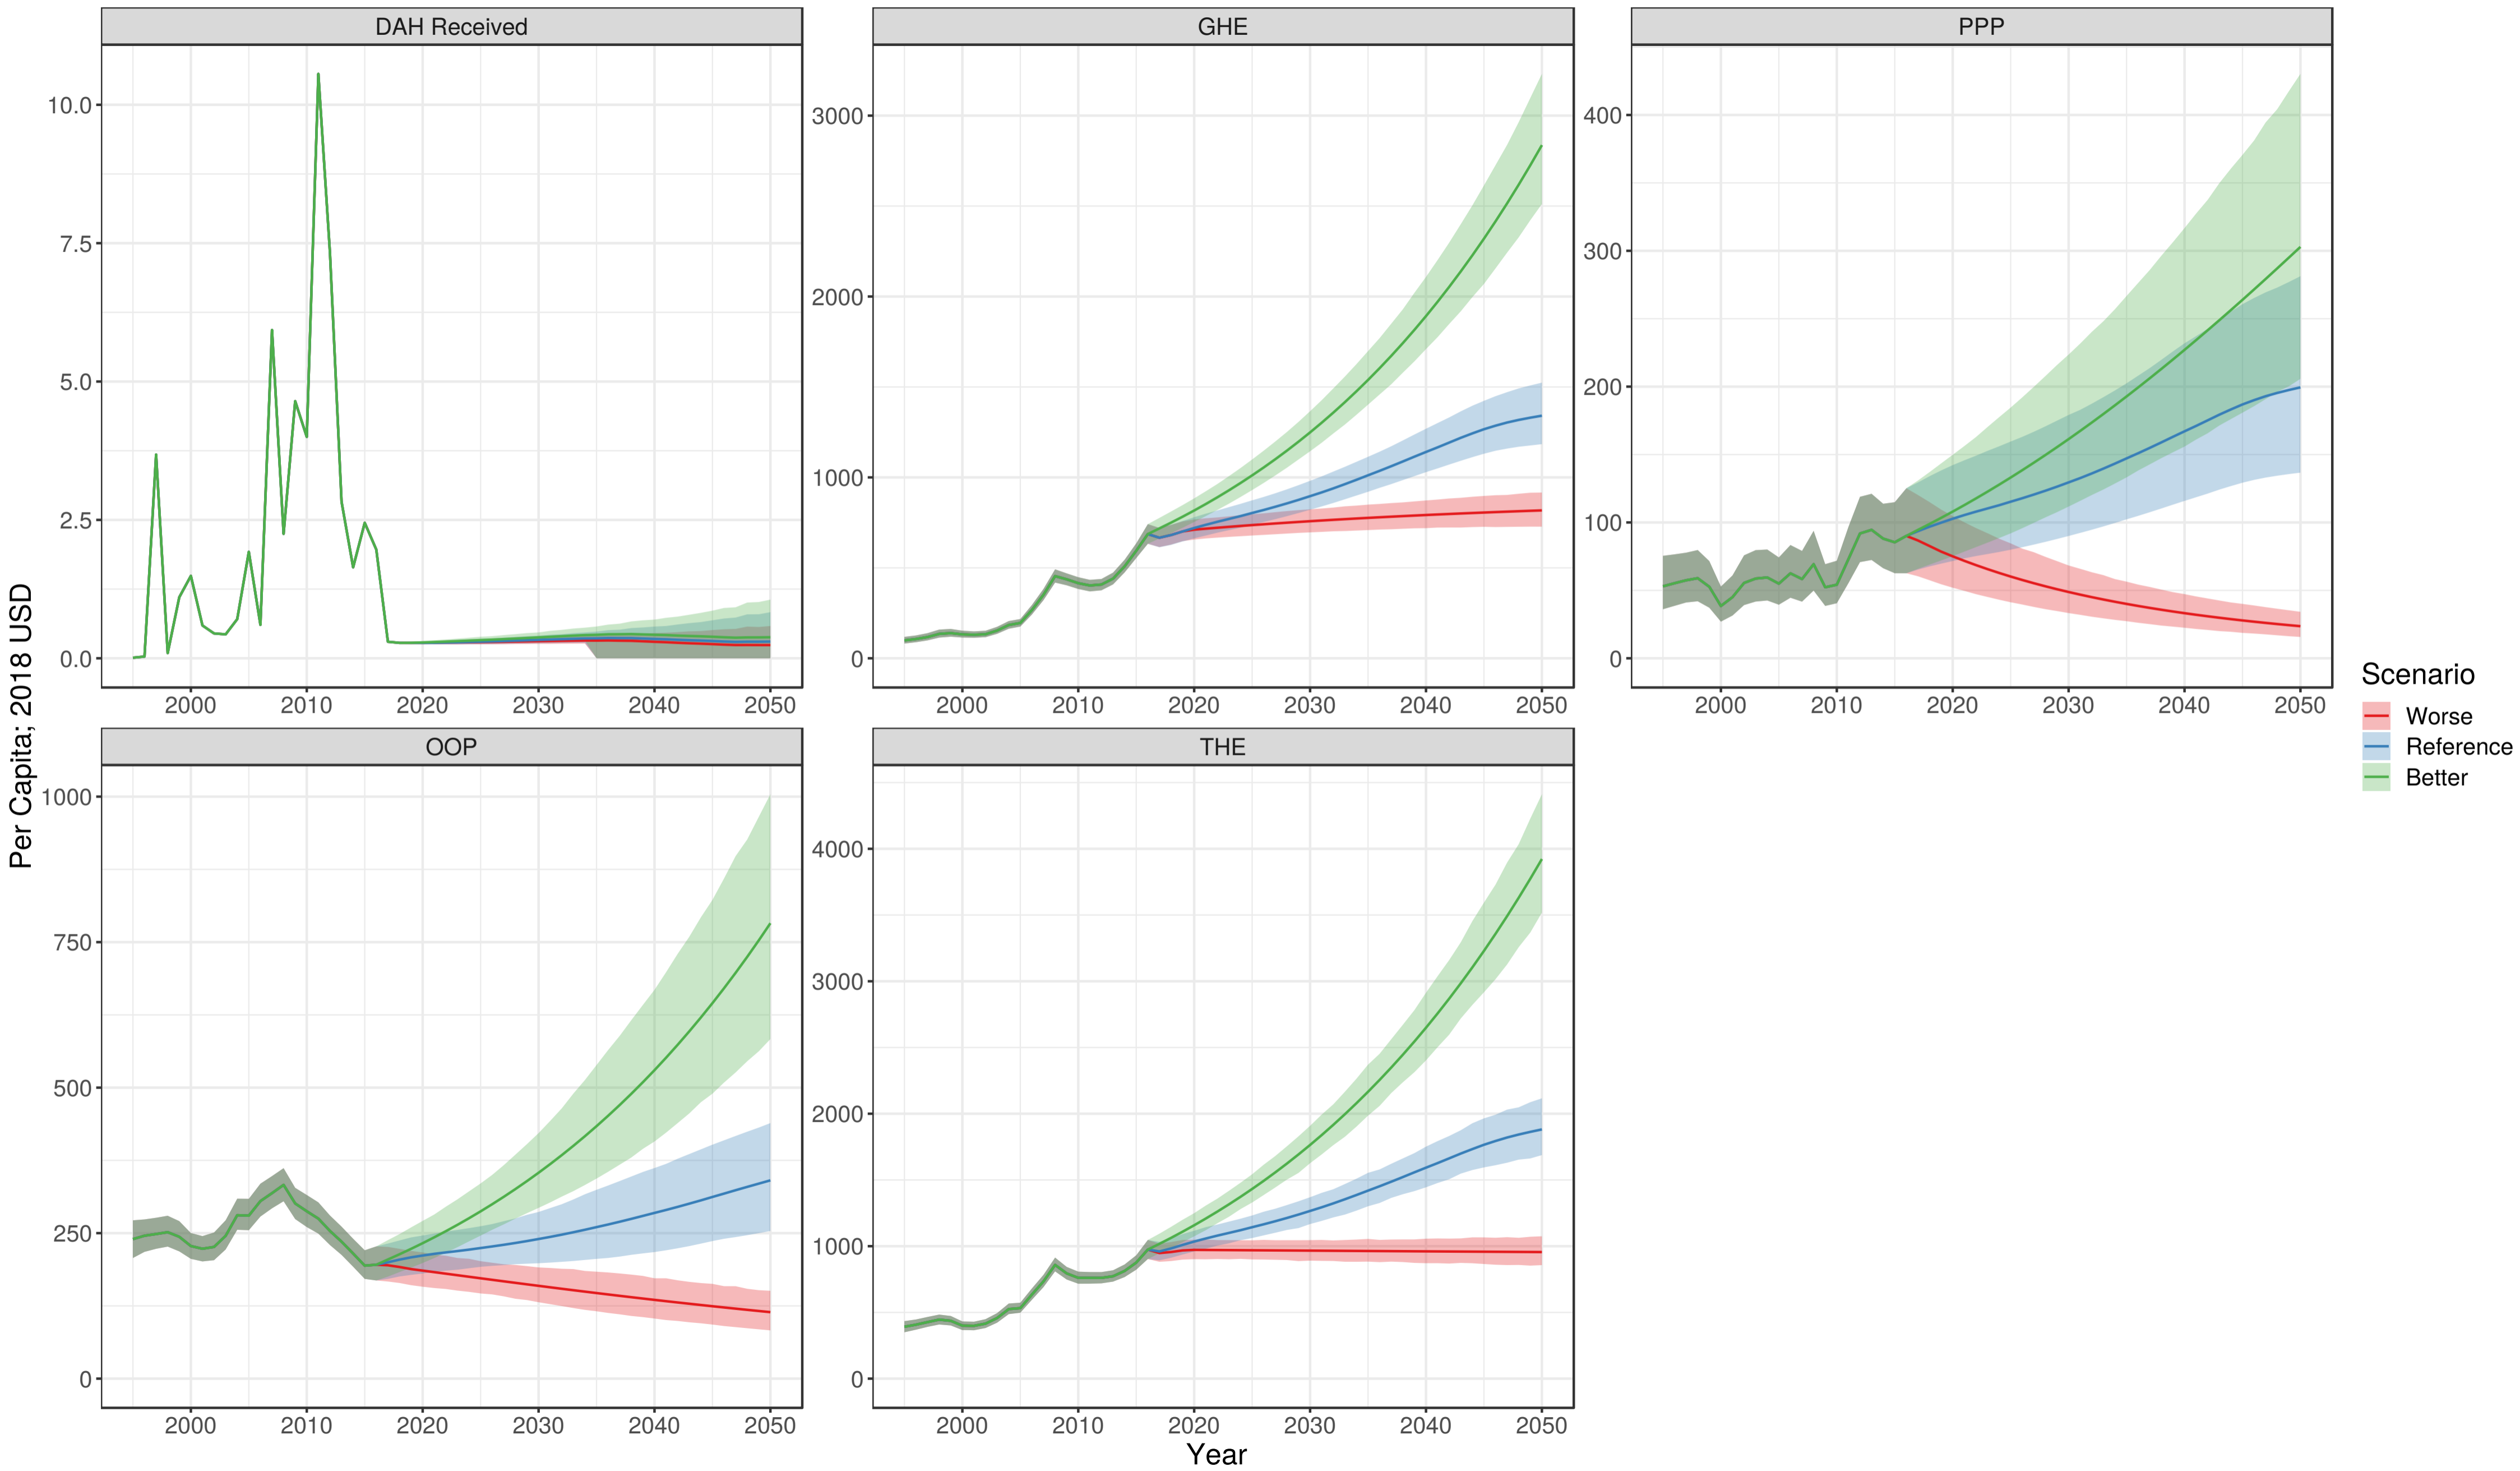

# Mali

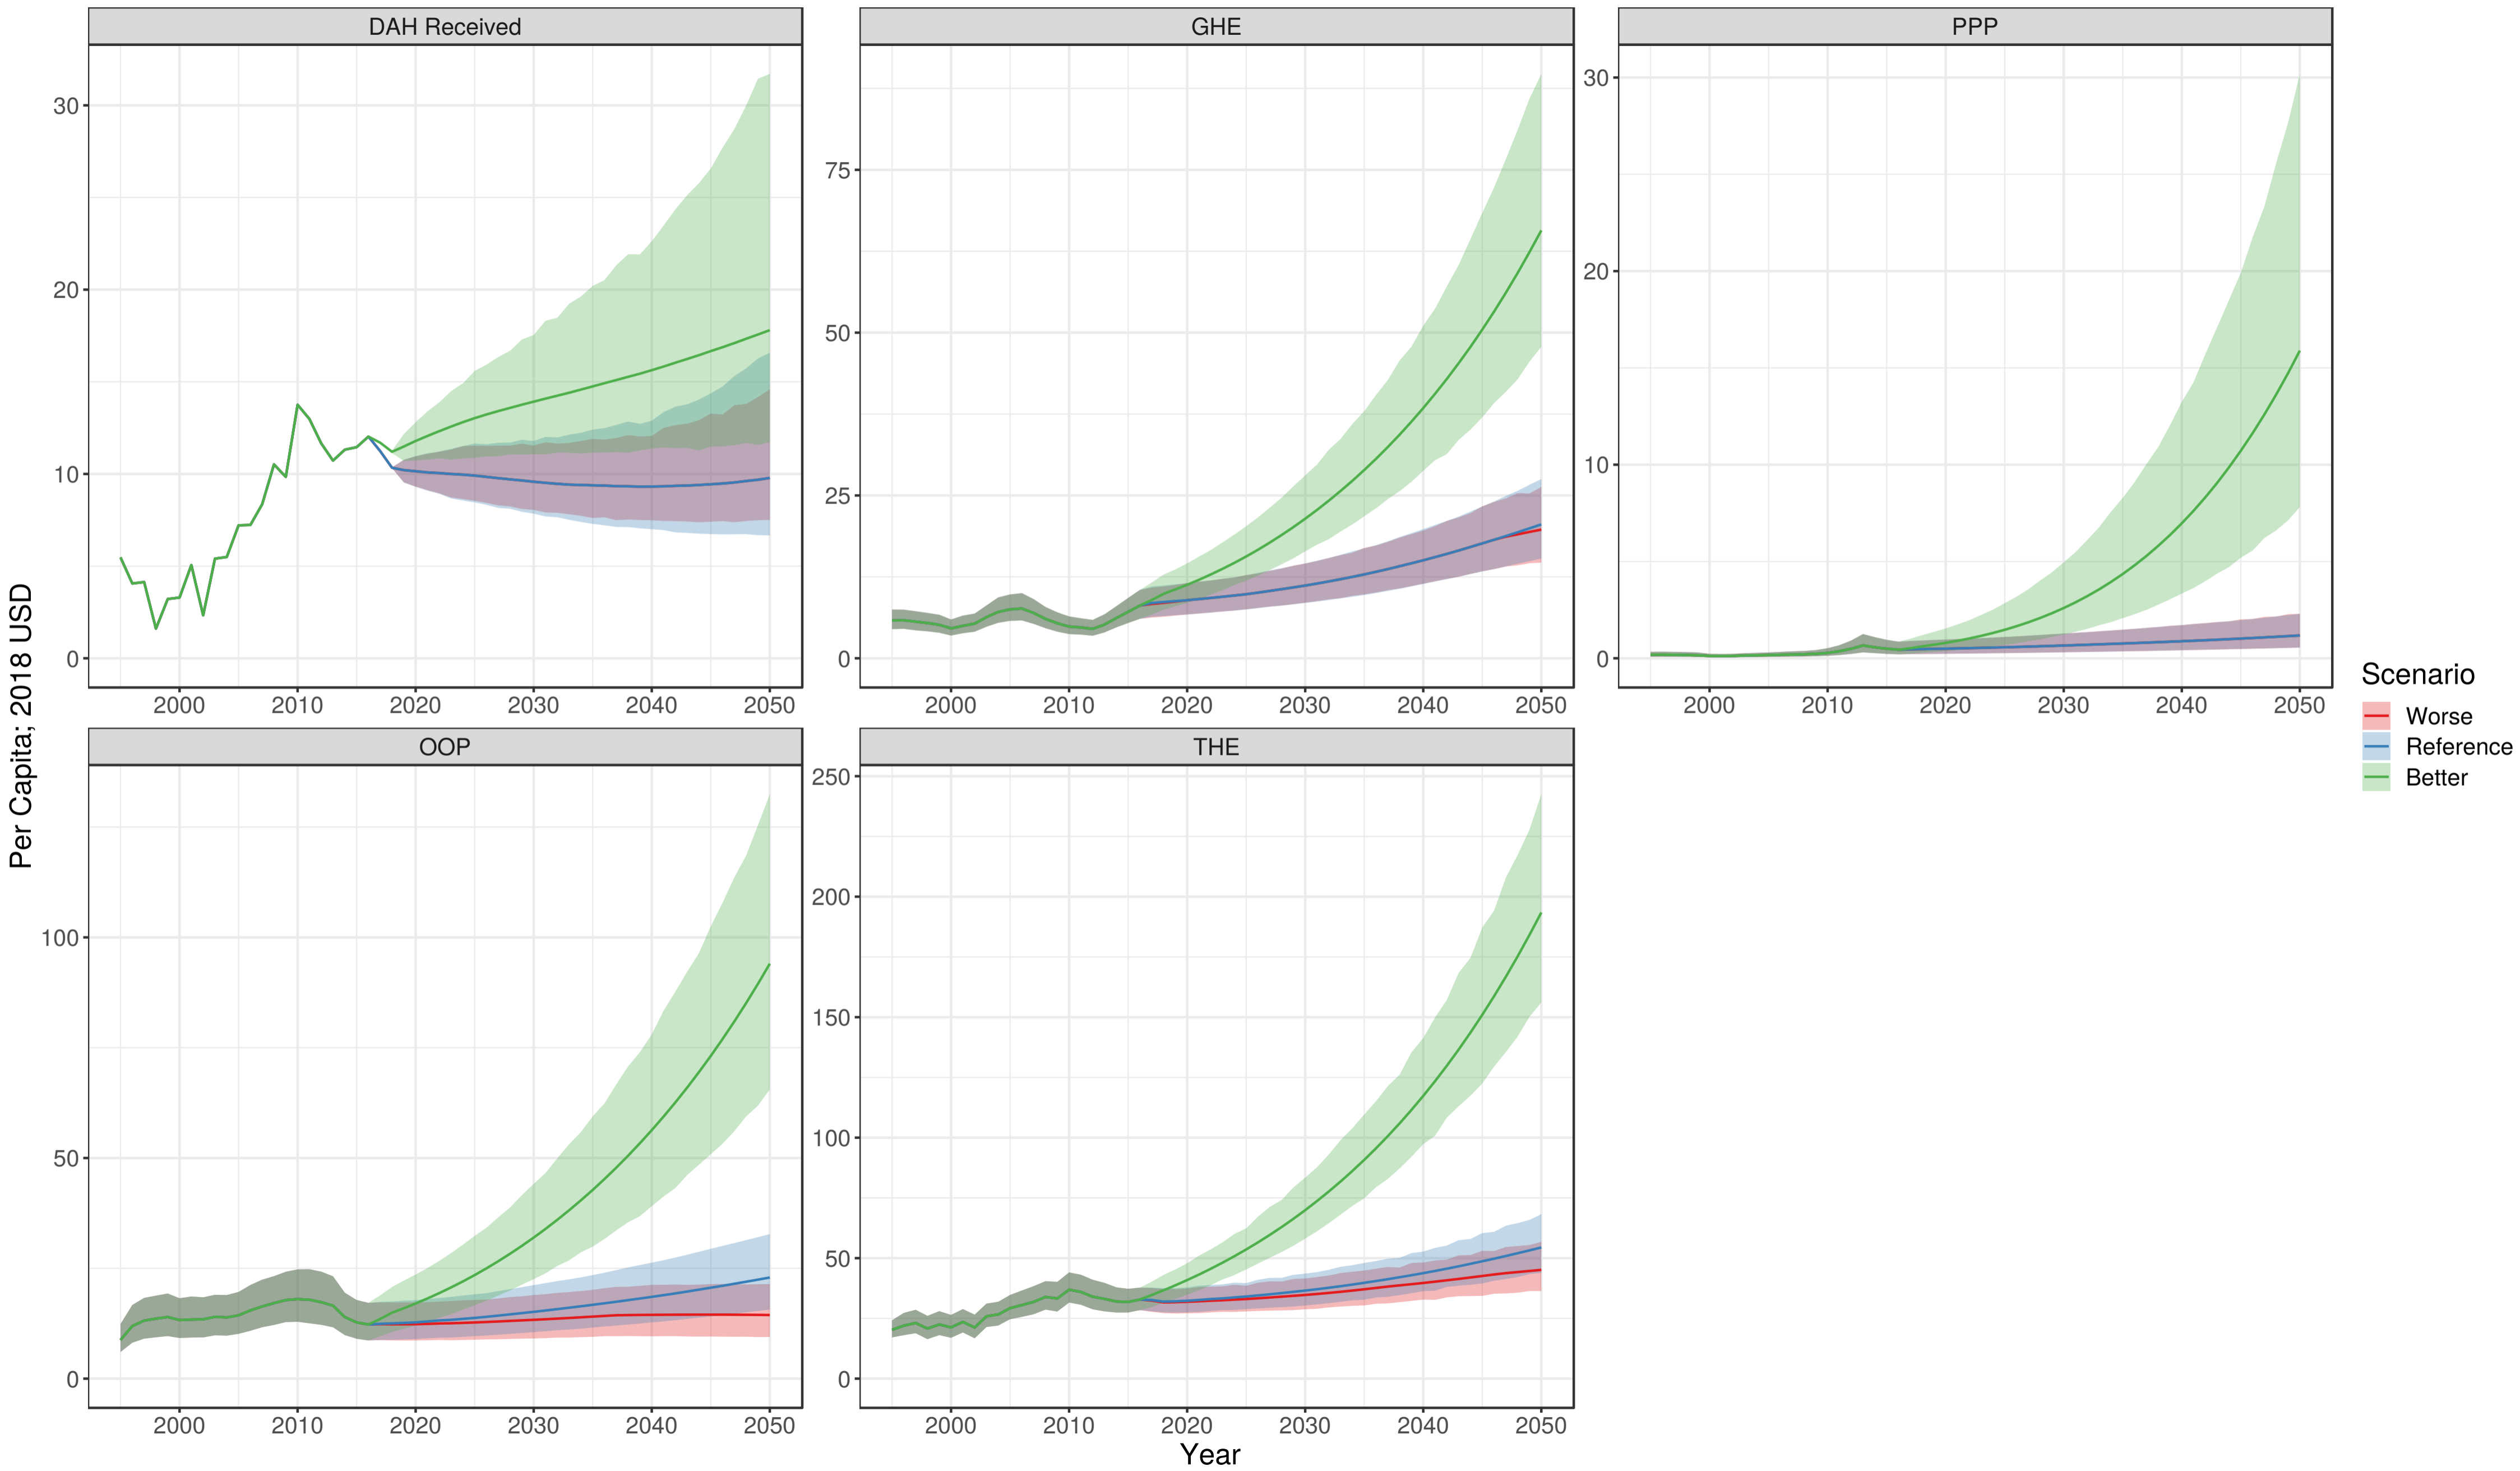

# Malta

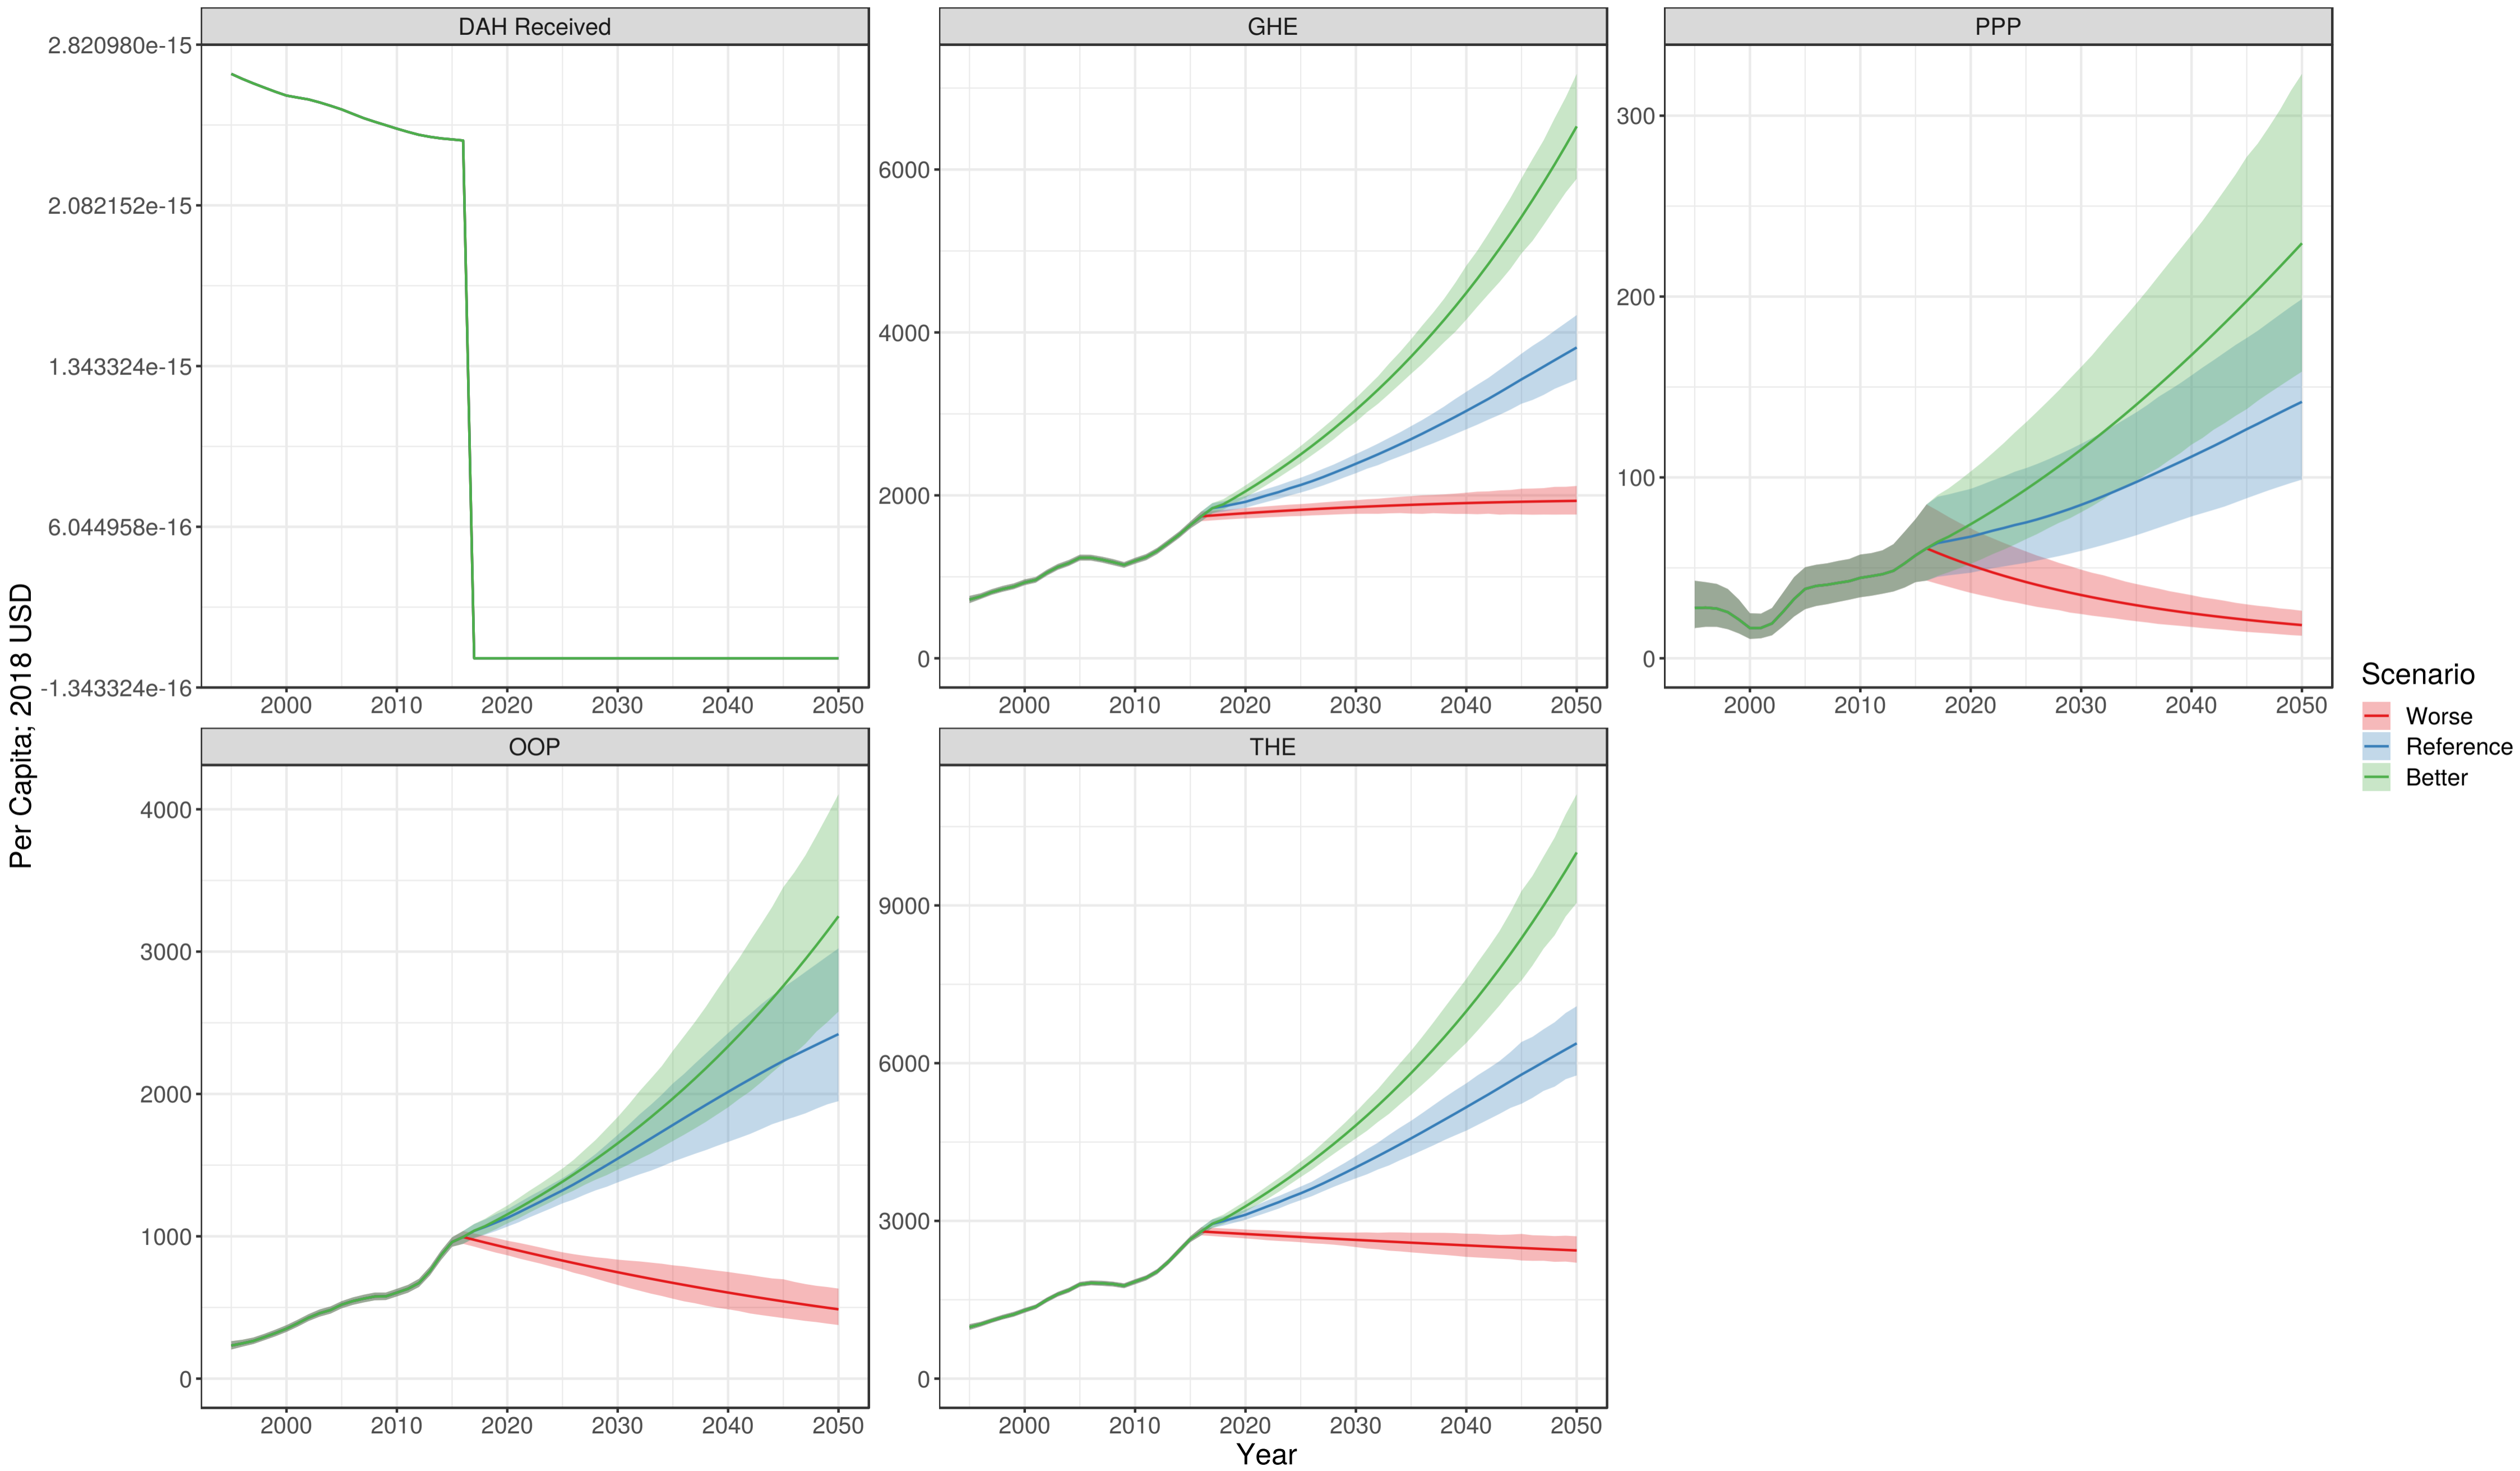



# Marshall Islands

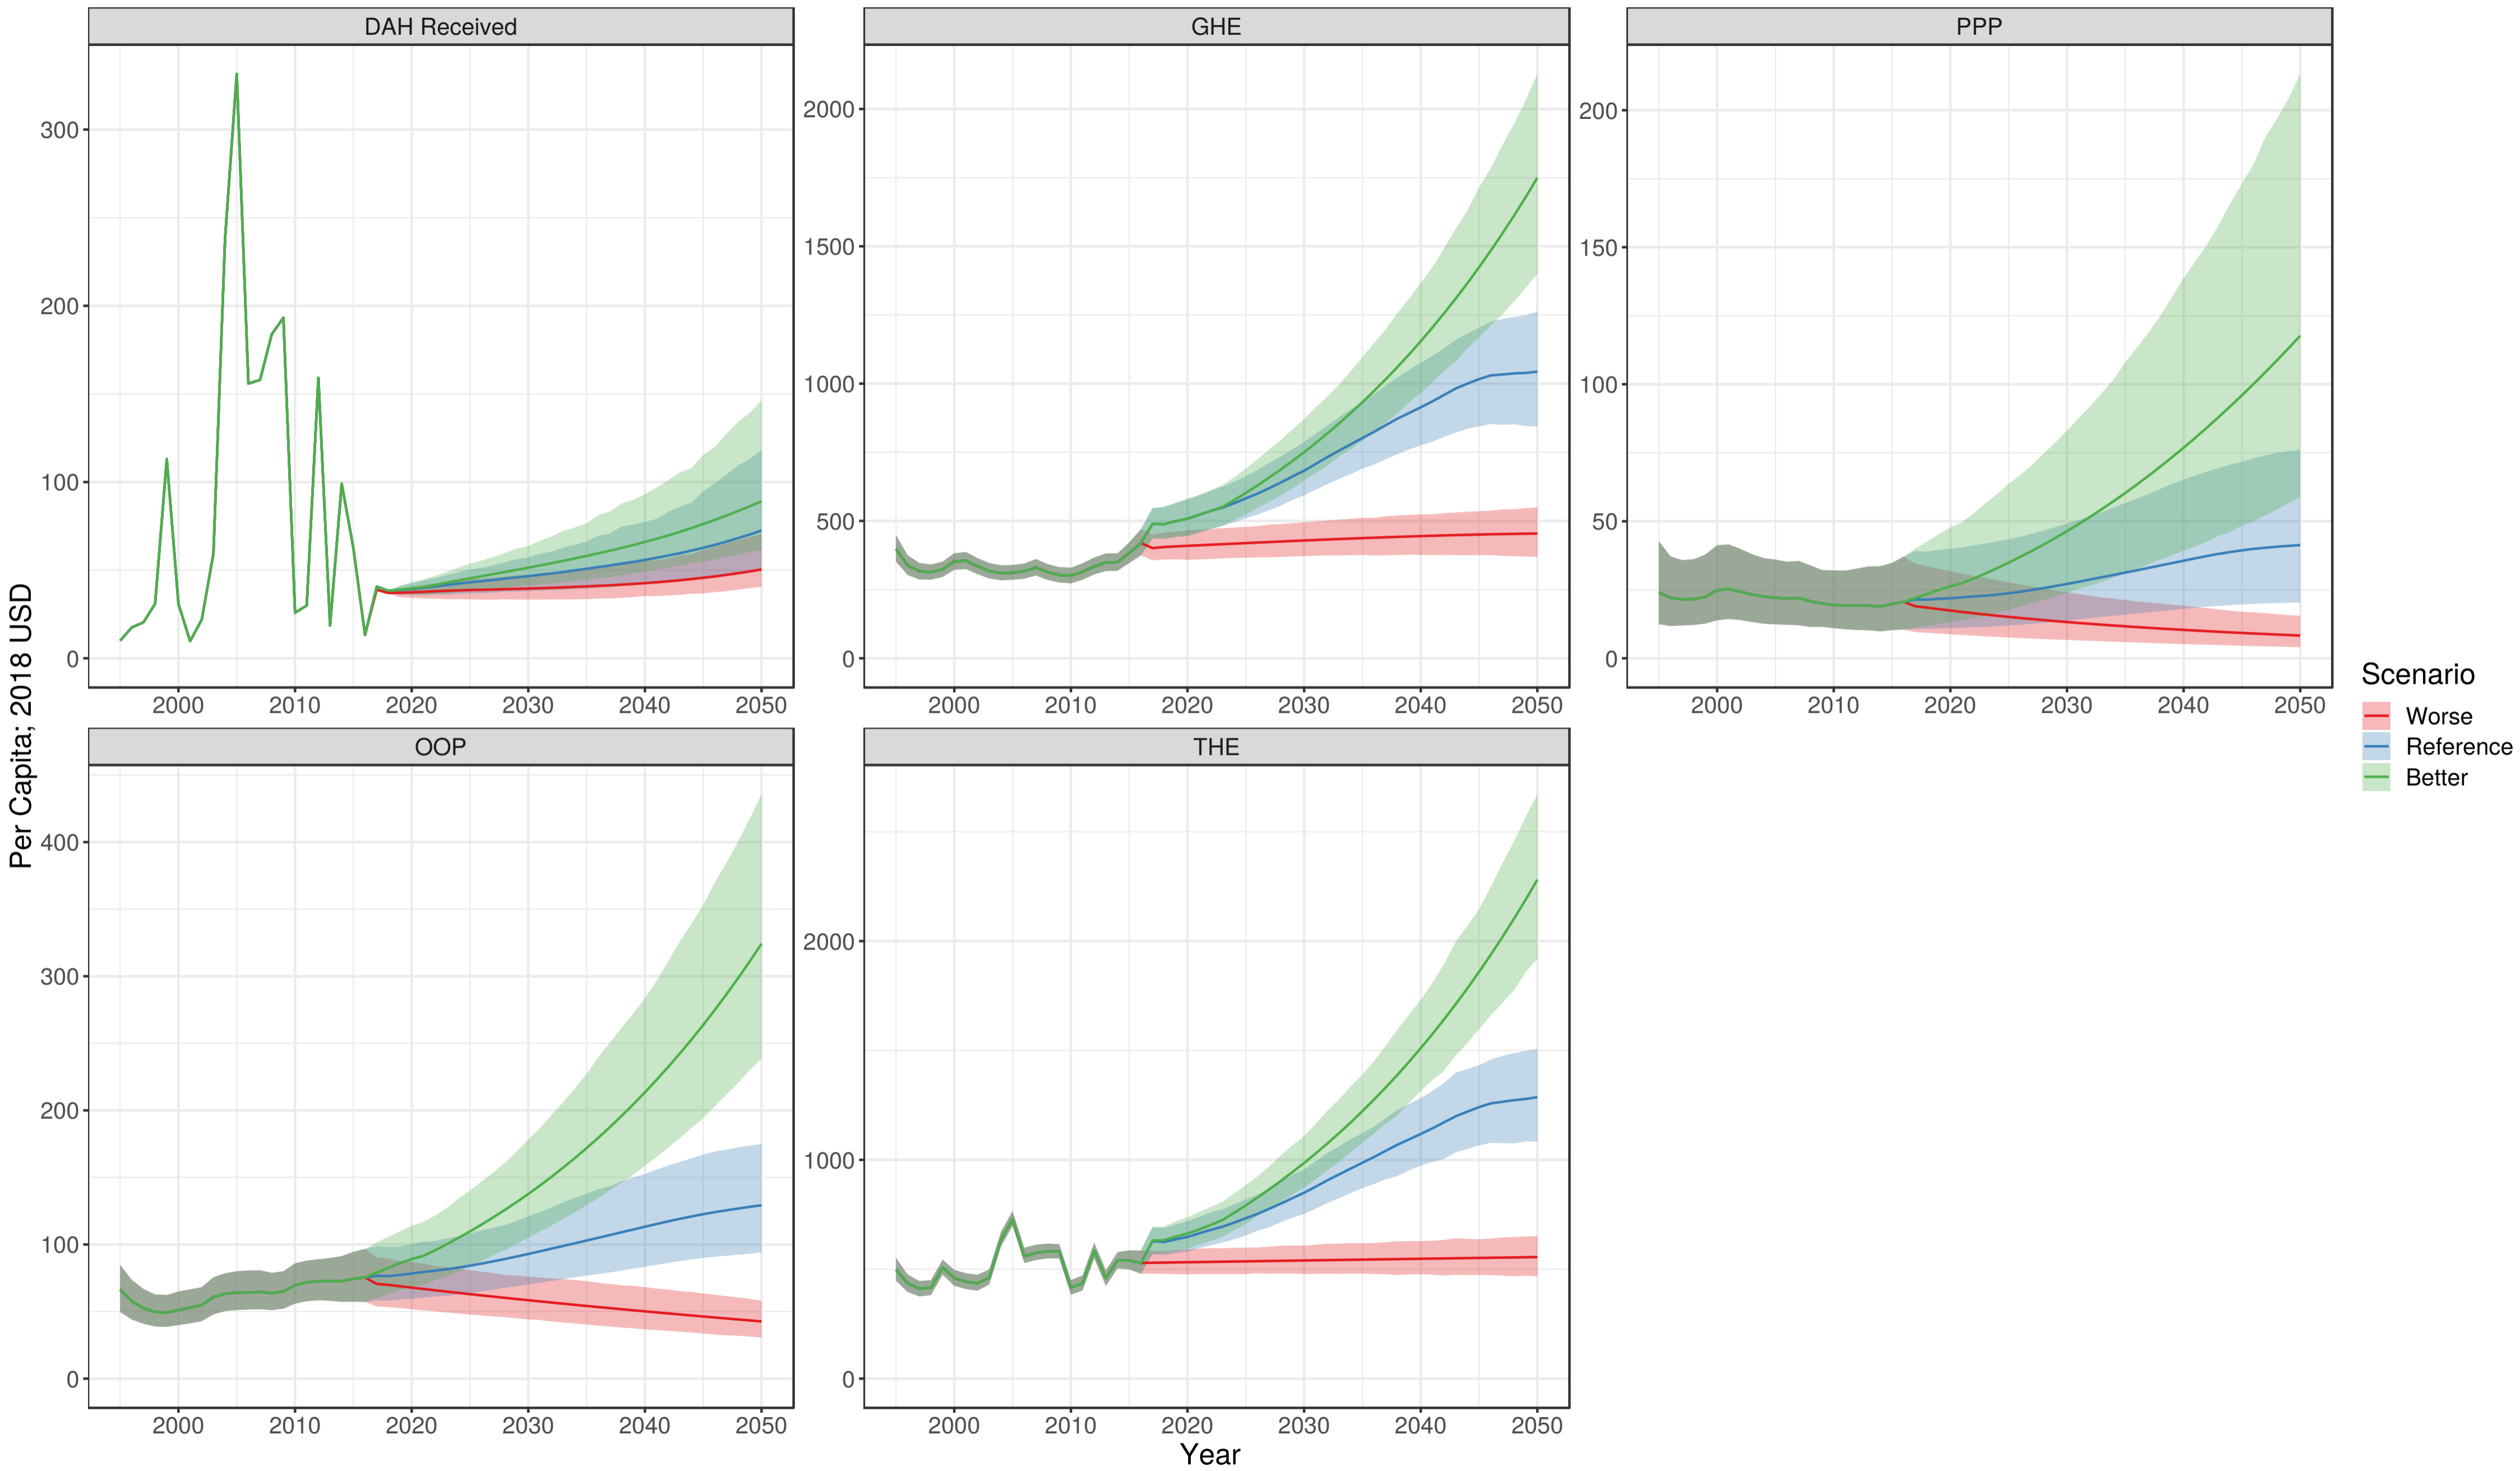

# Mauritania

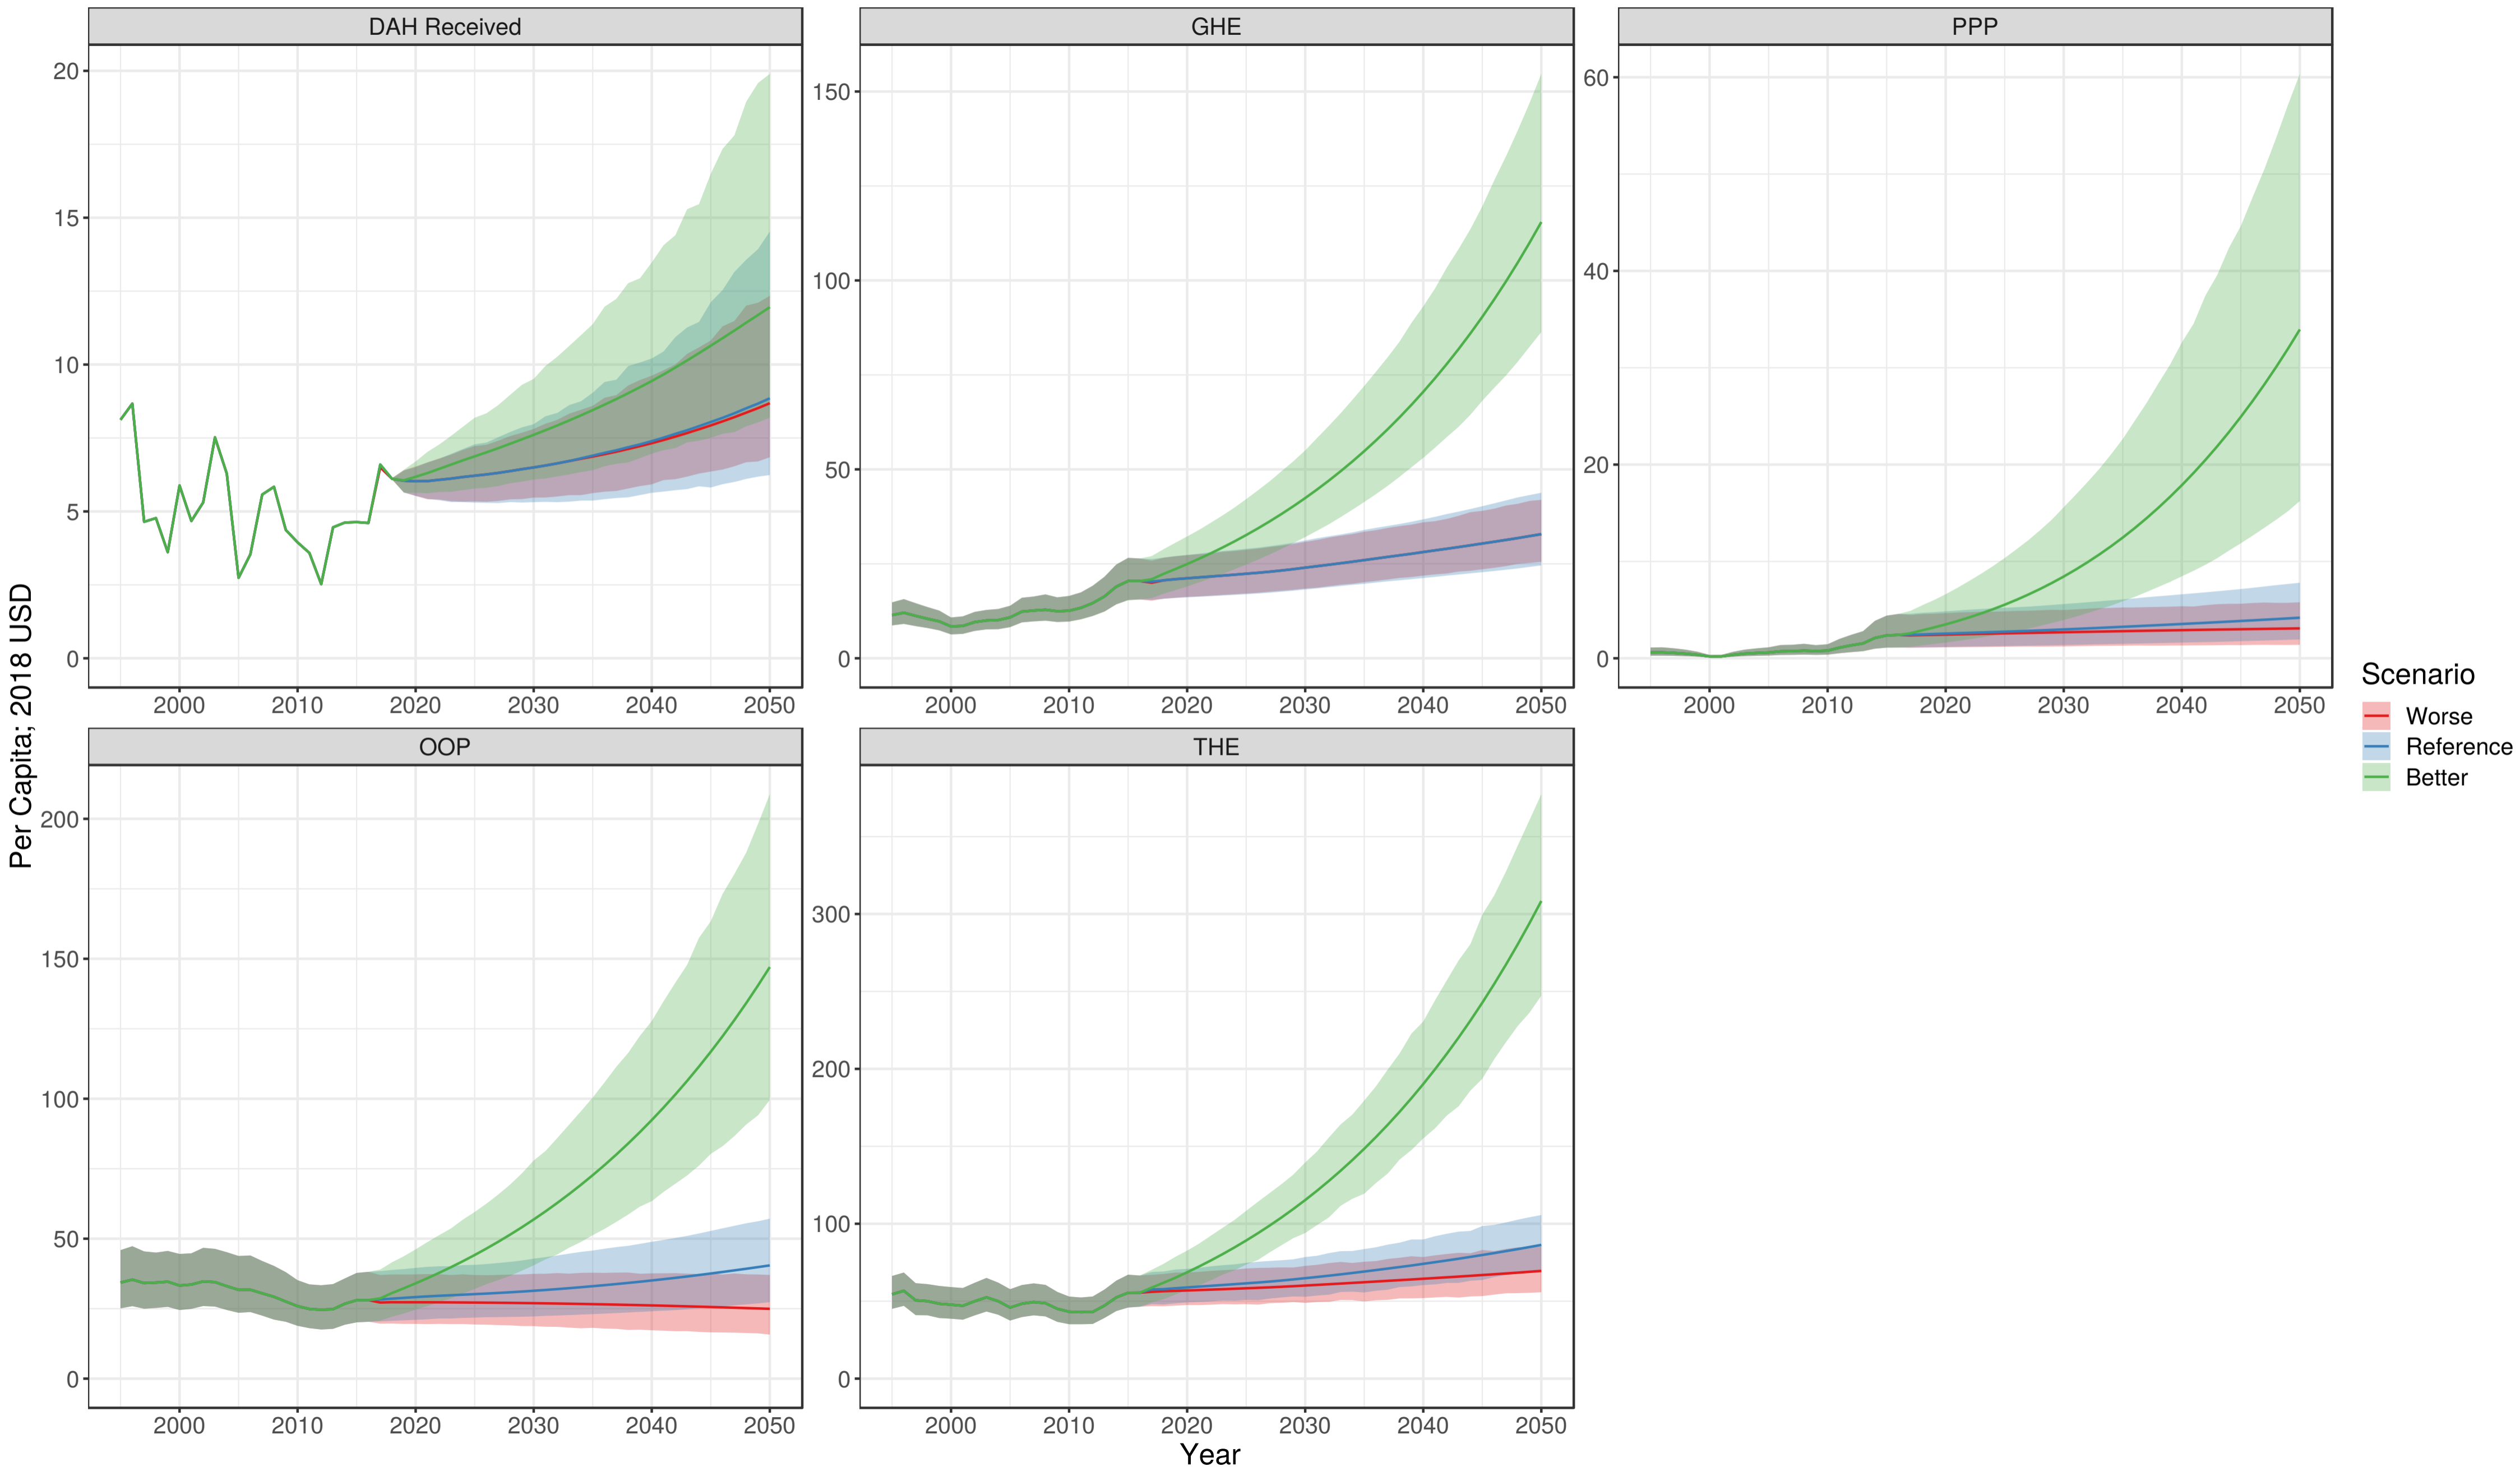

# Mauritius

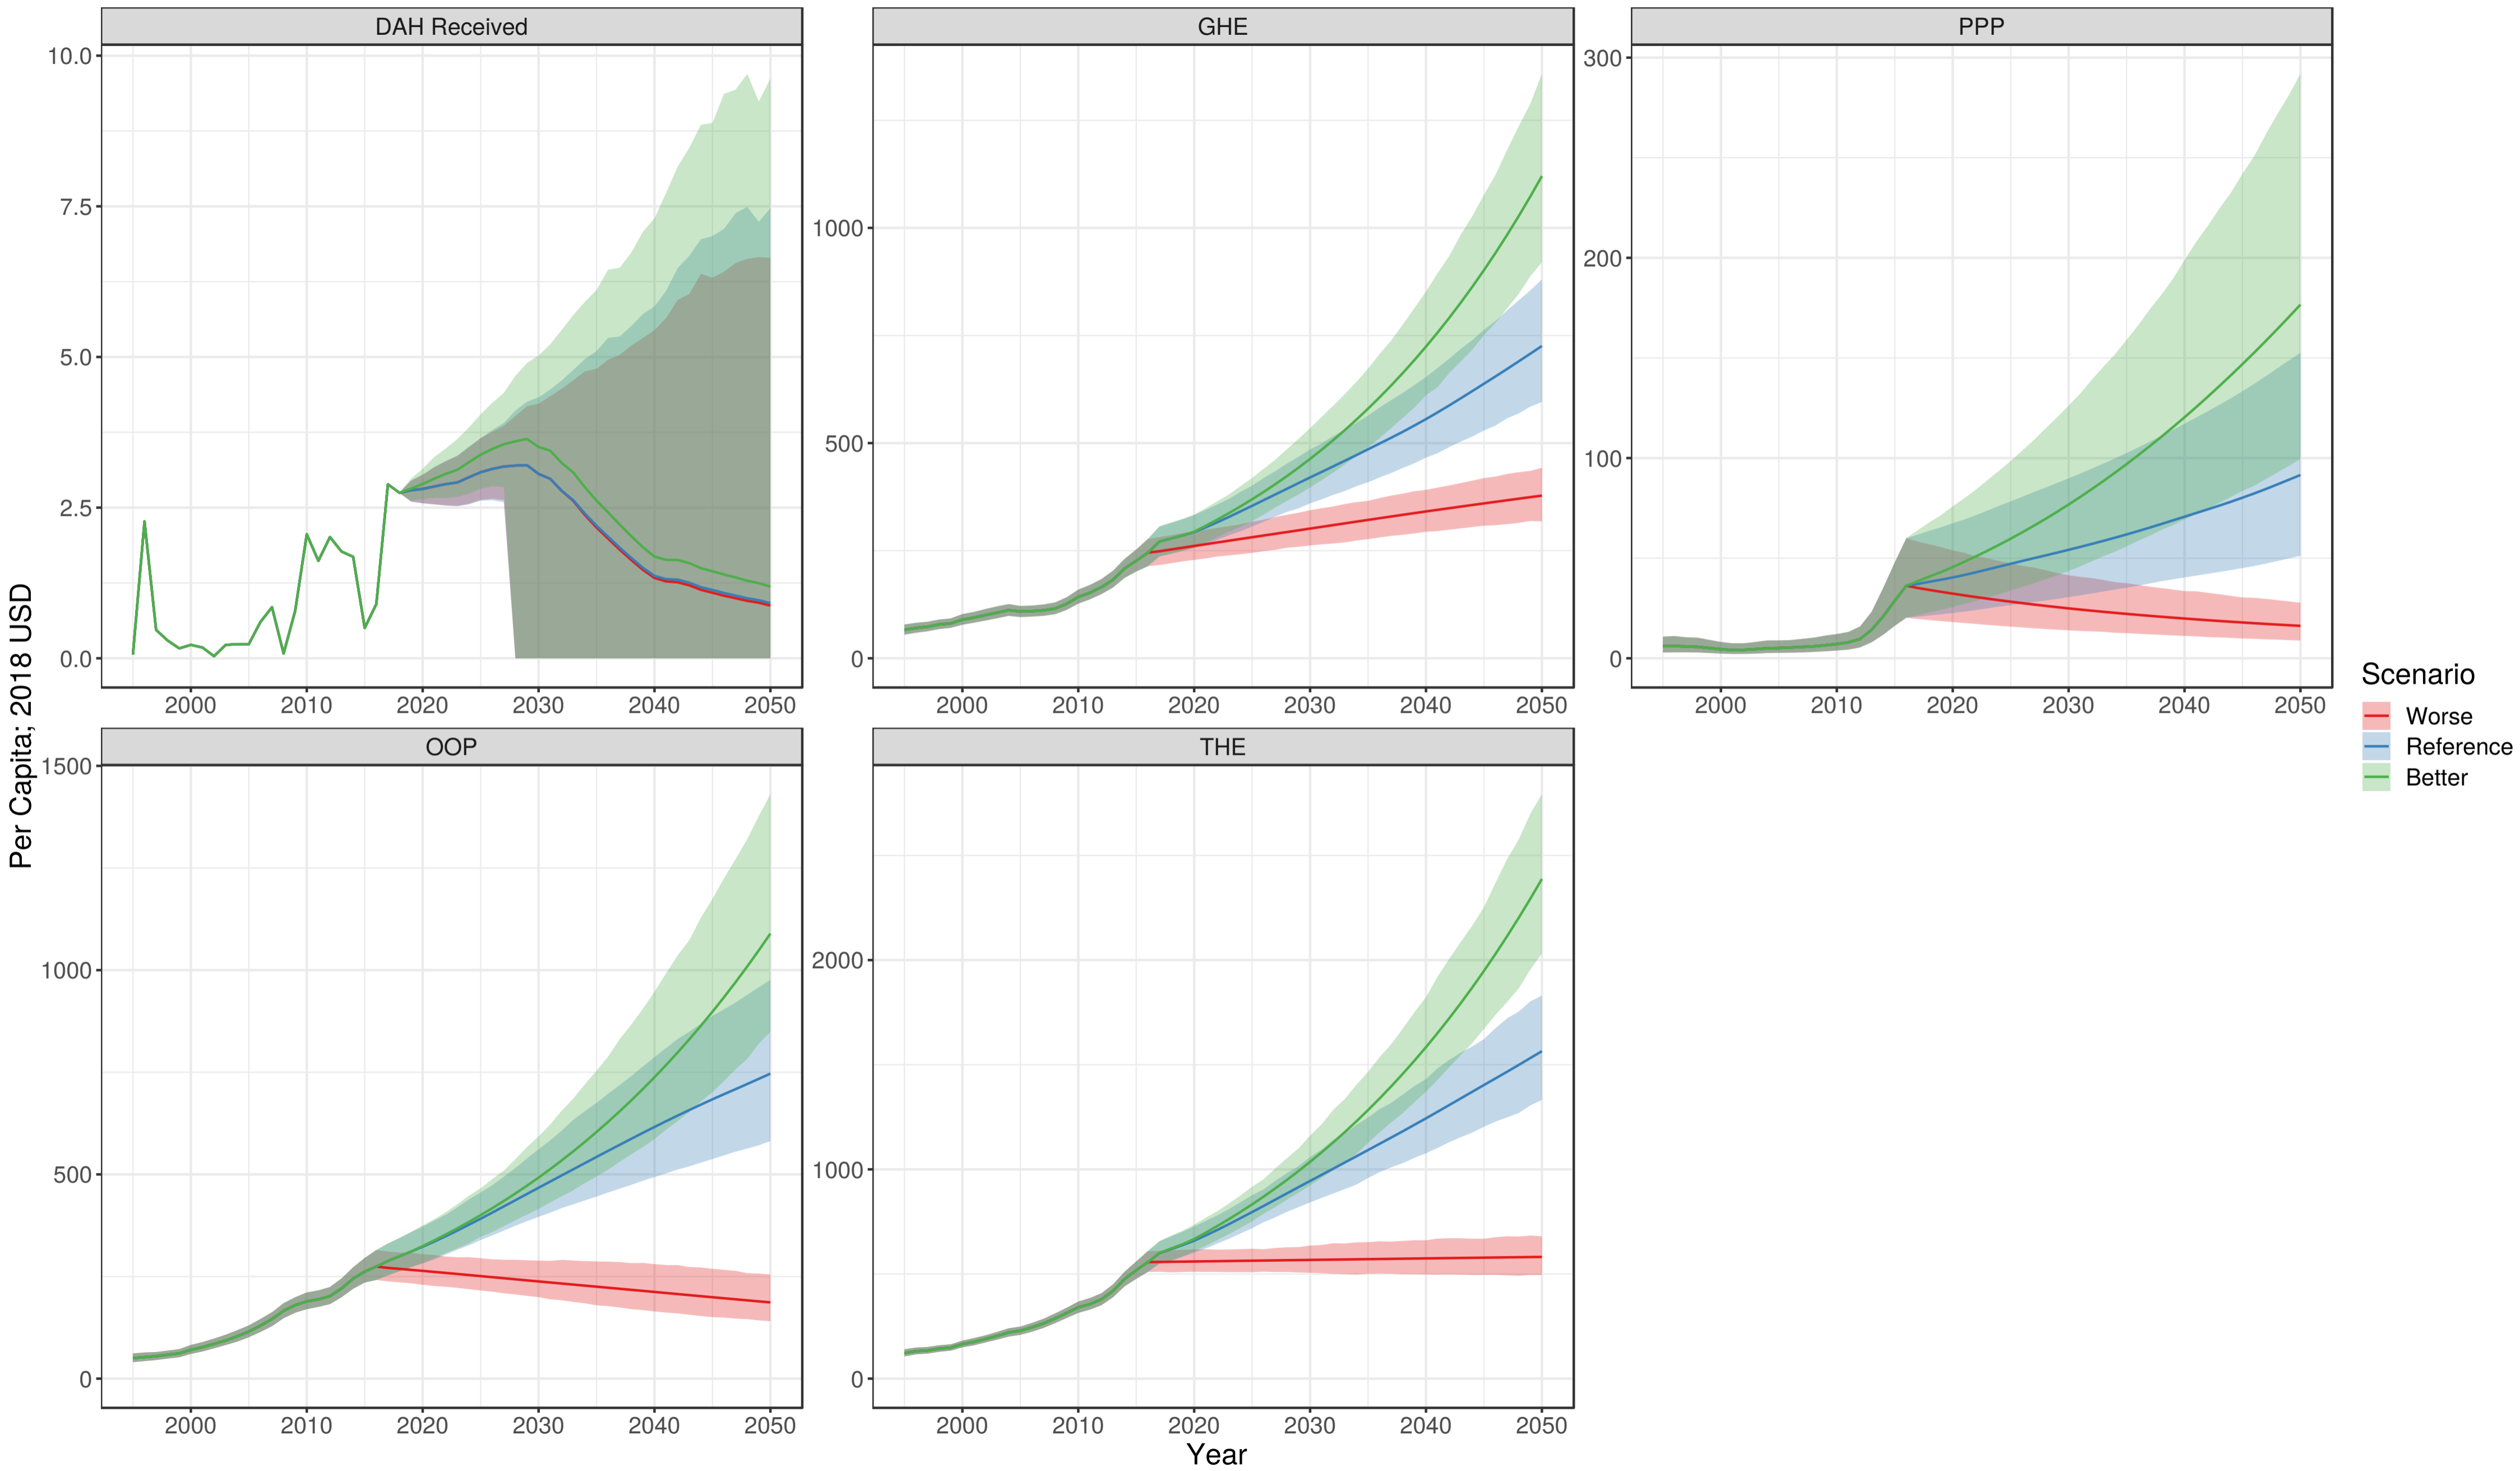

# Mexico

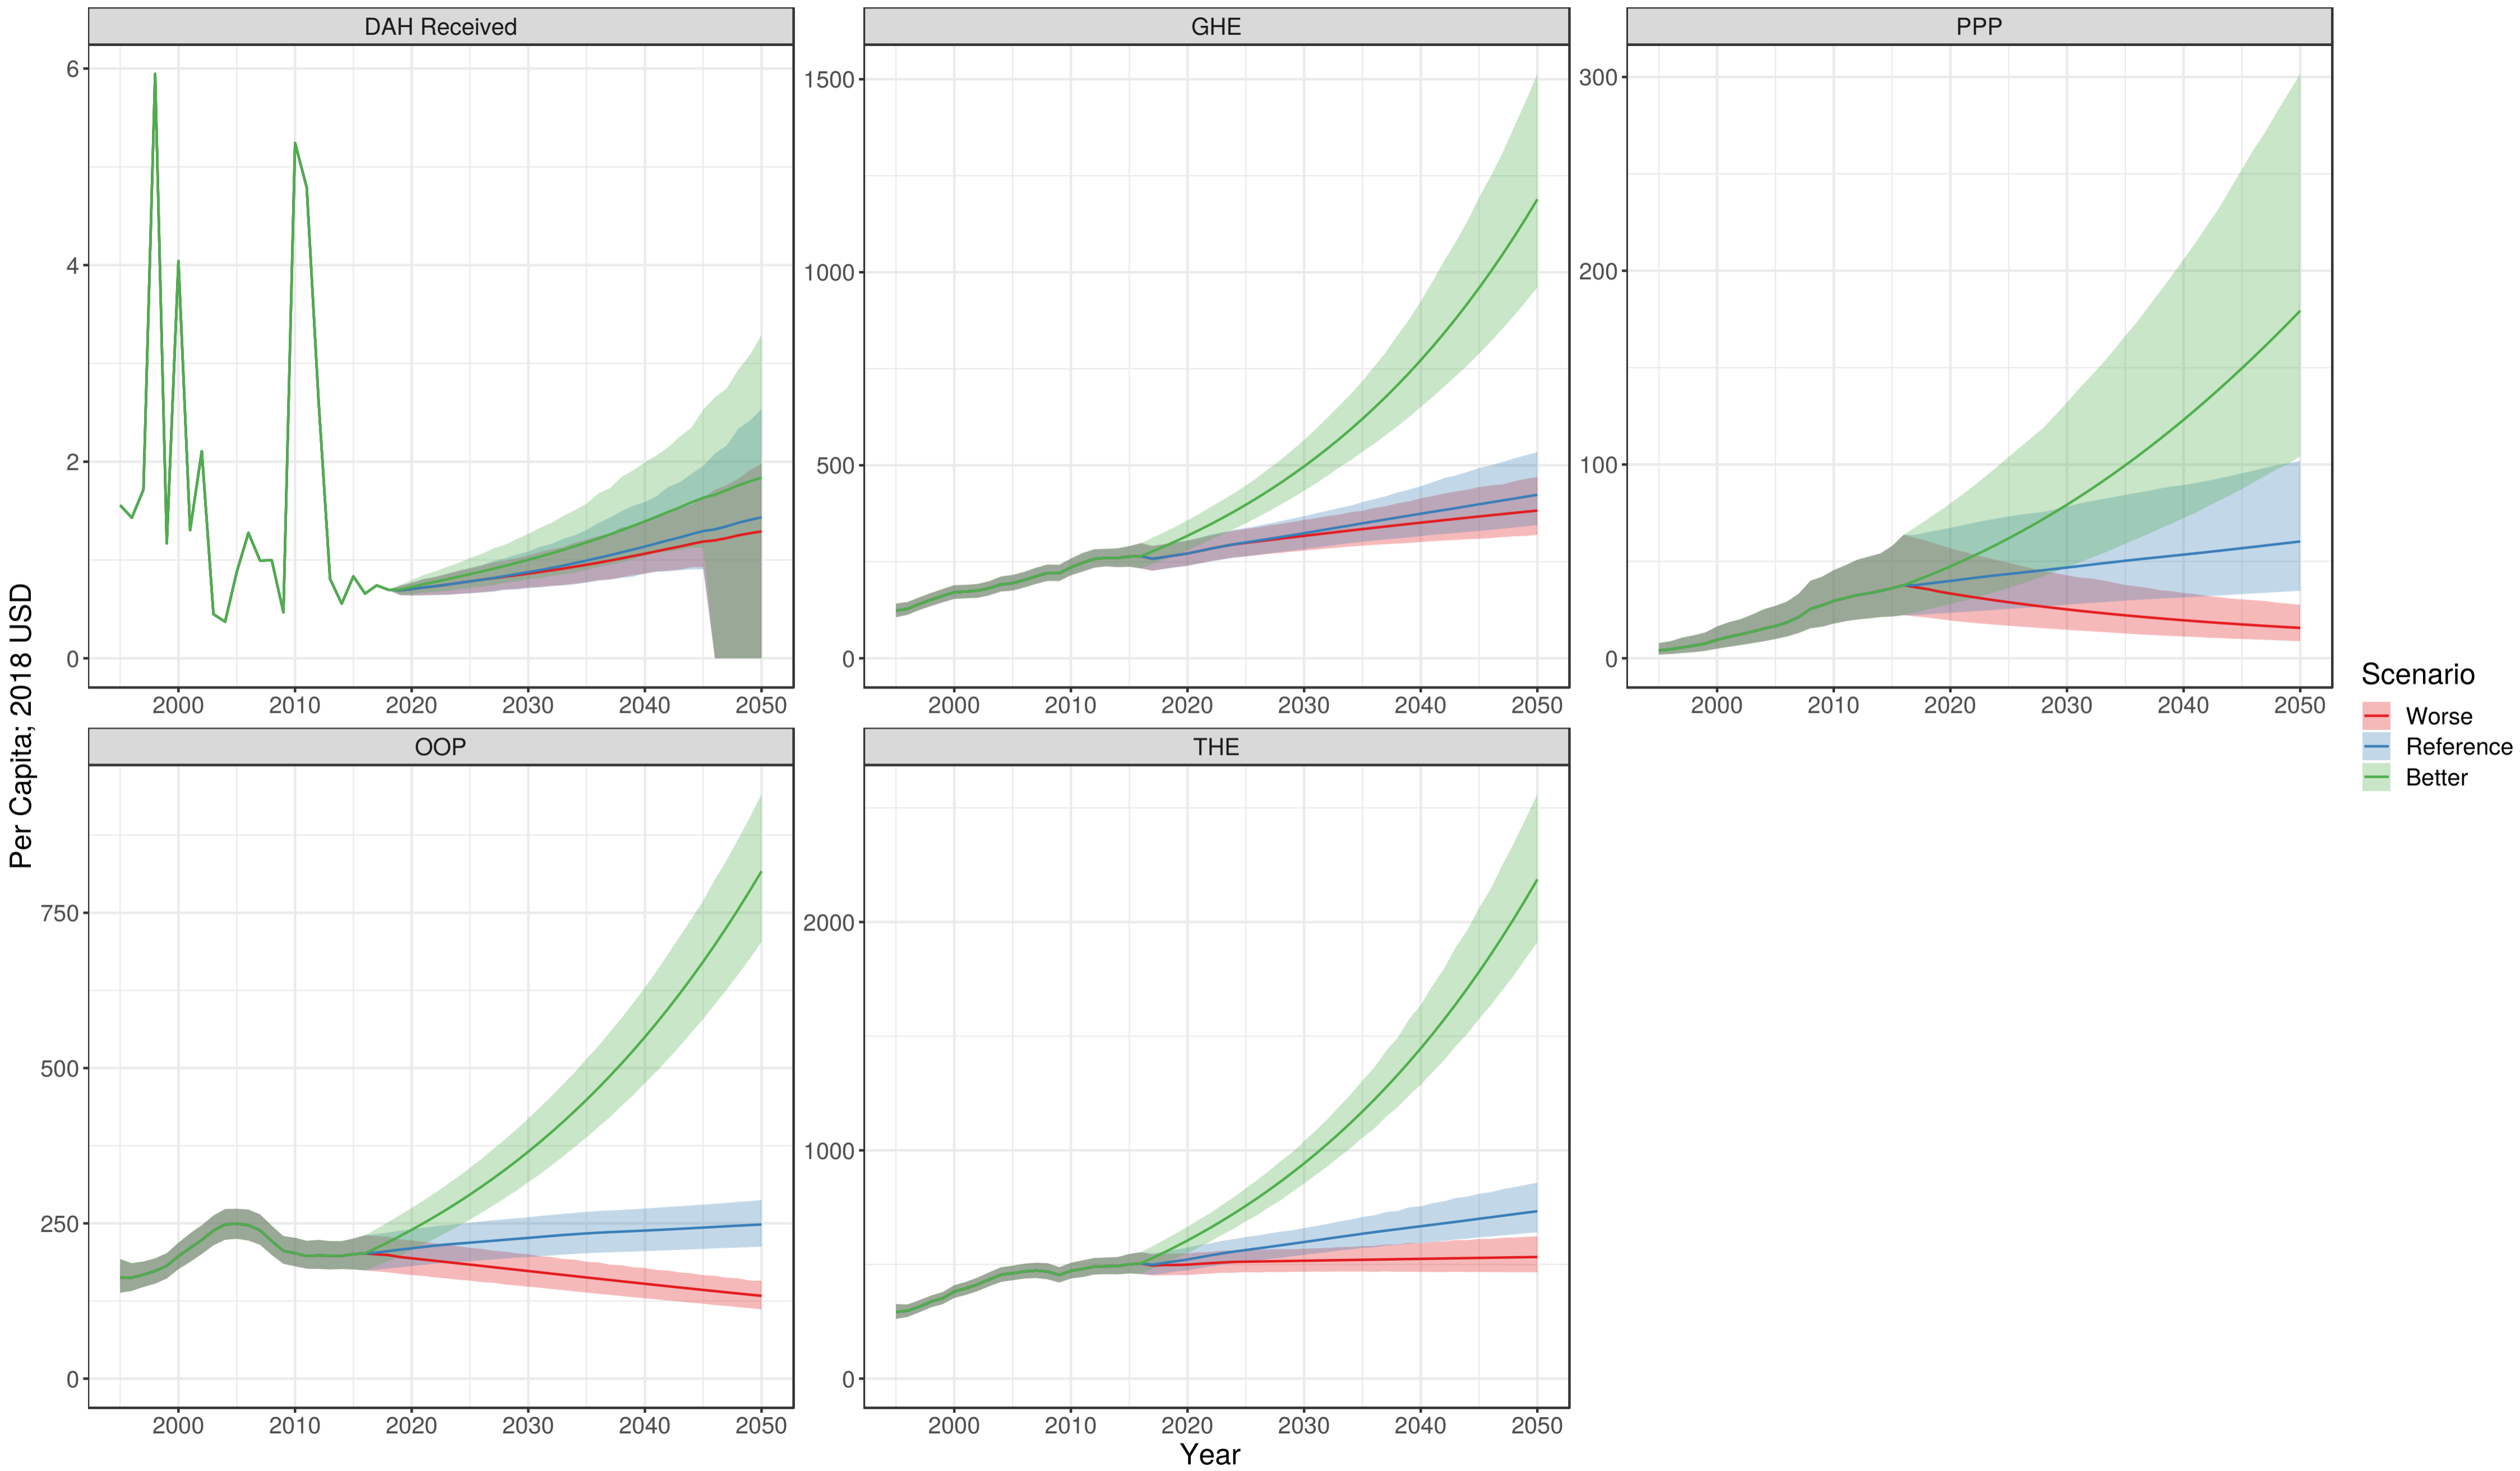

# Moldova

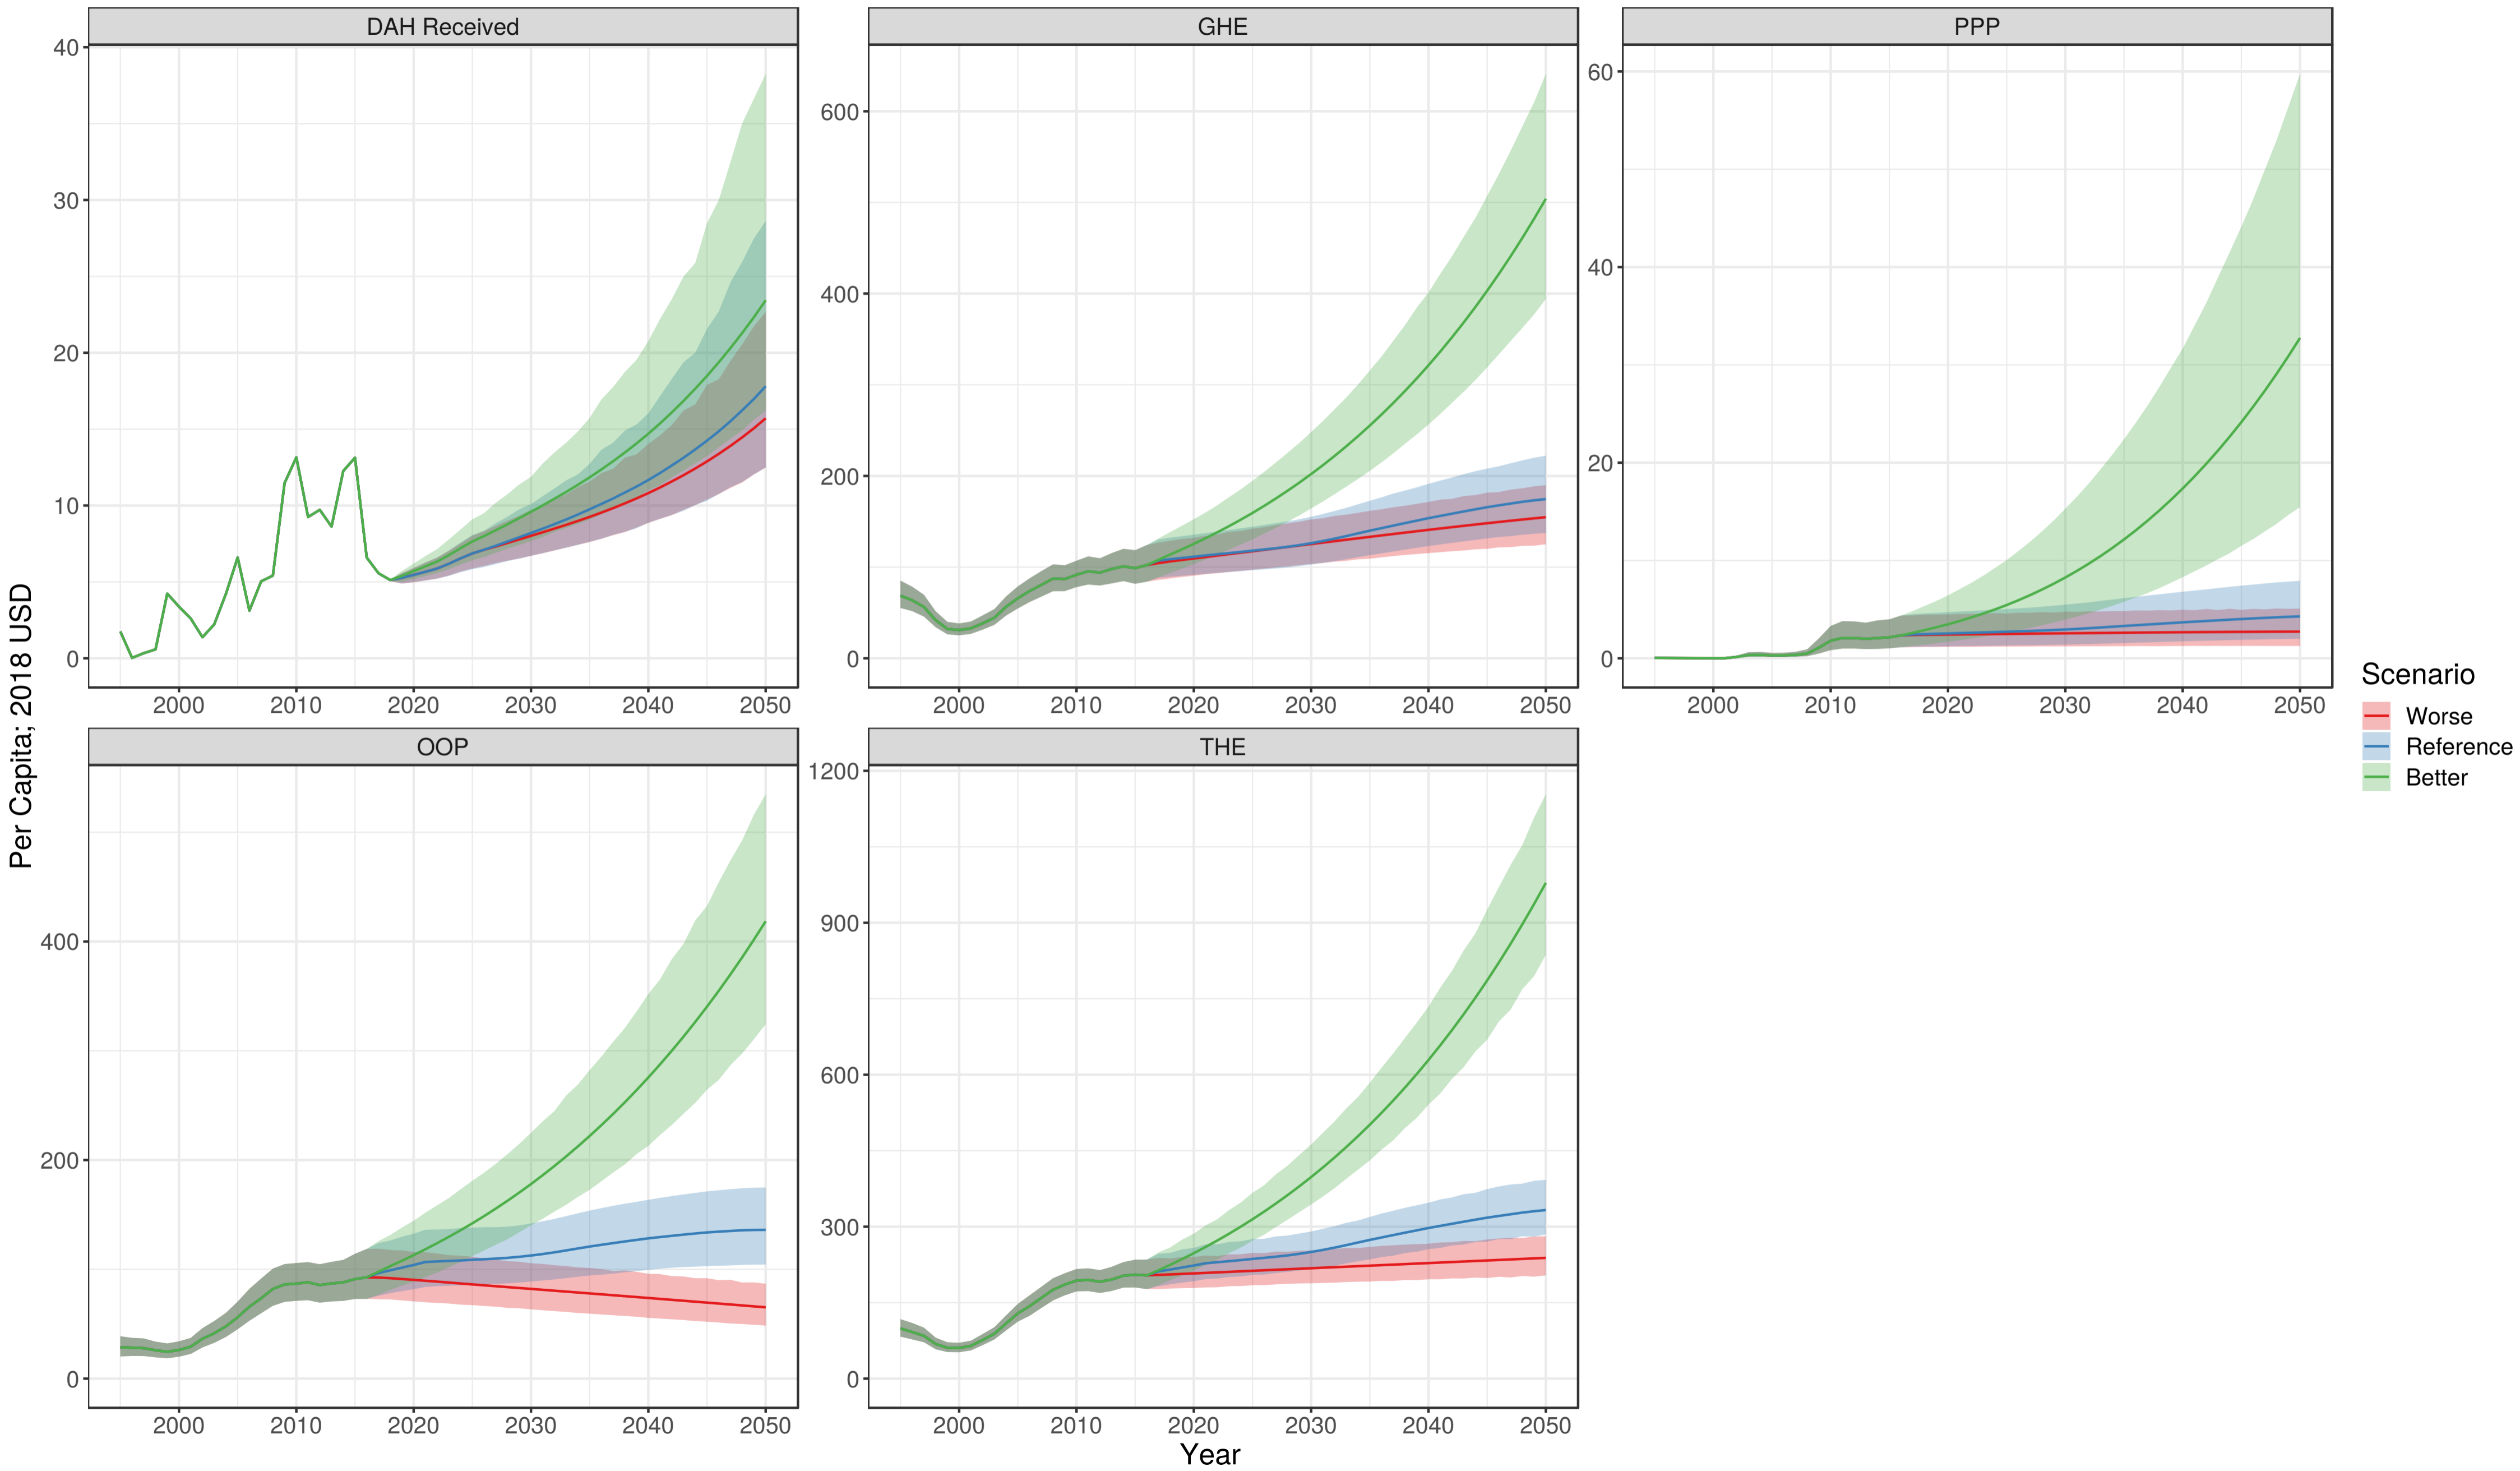

# Mongolia

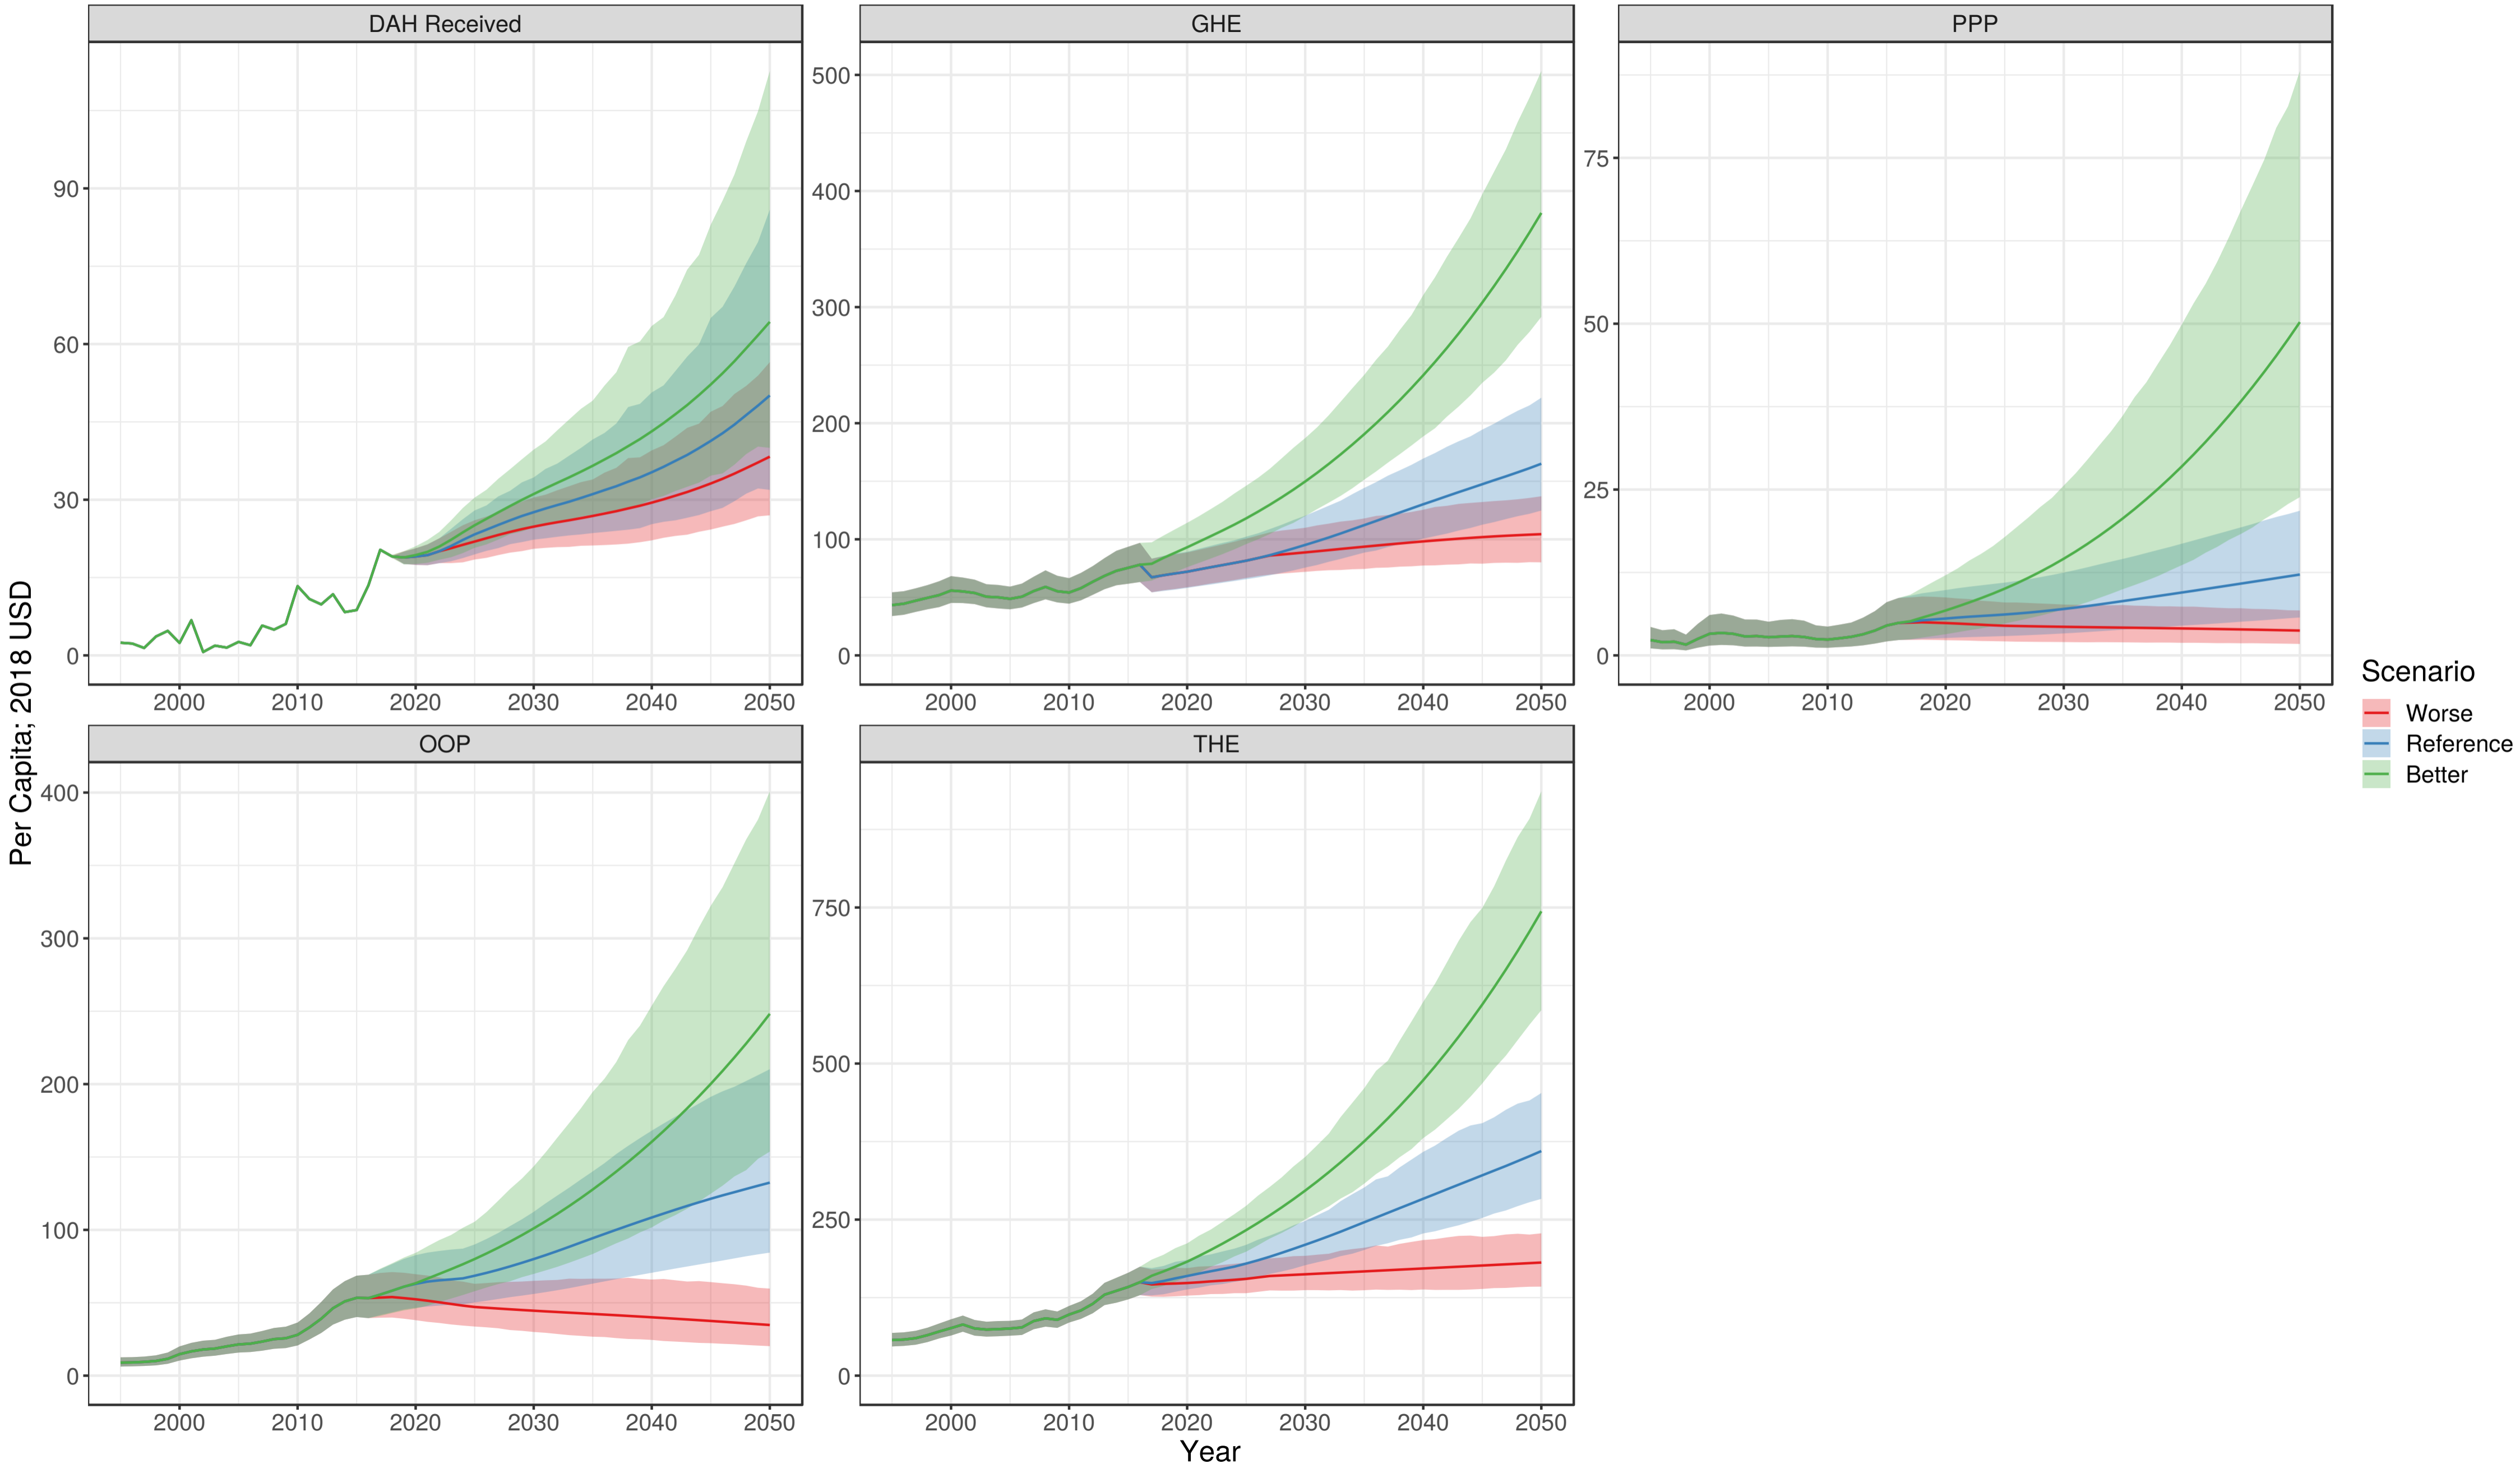

# Montenegro

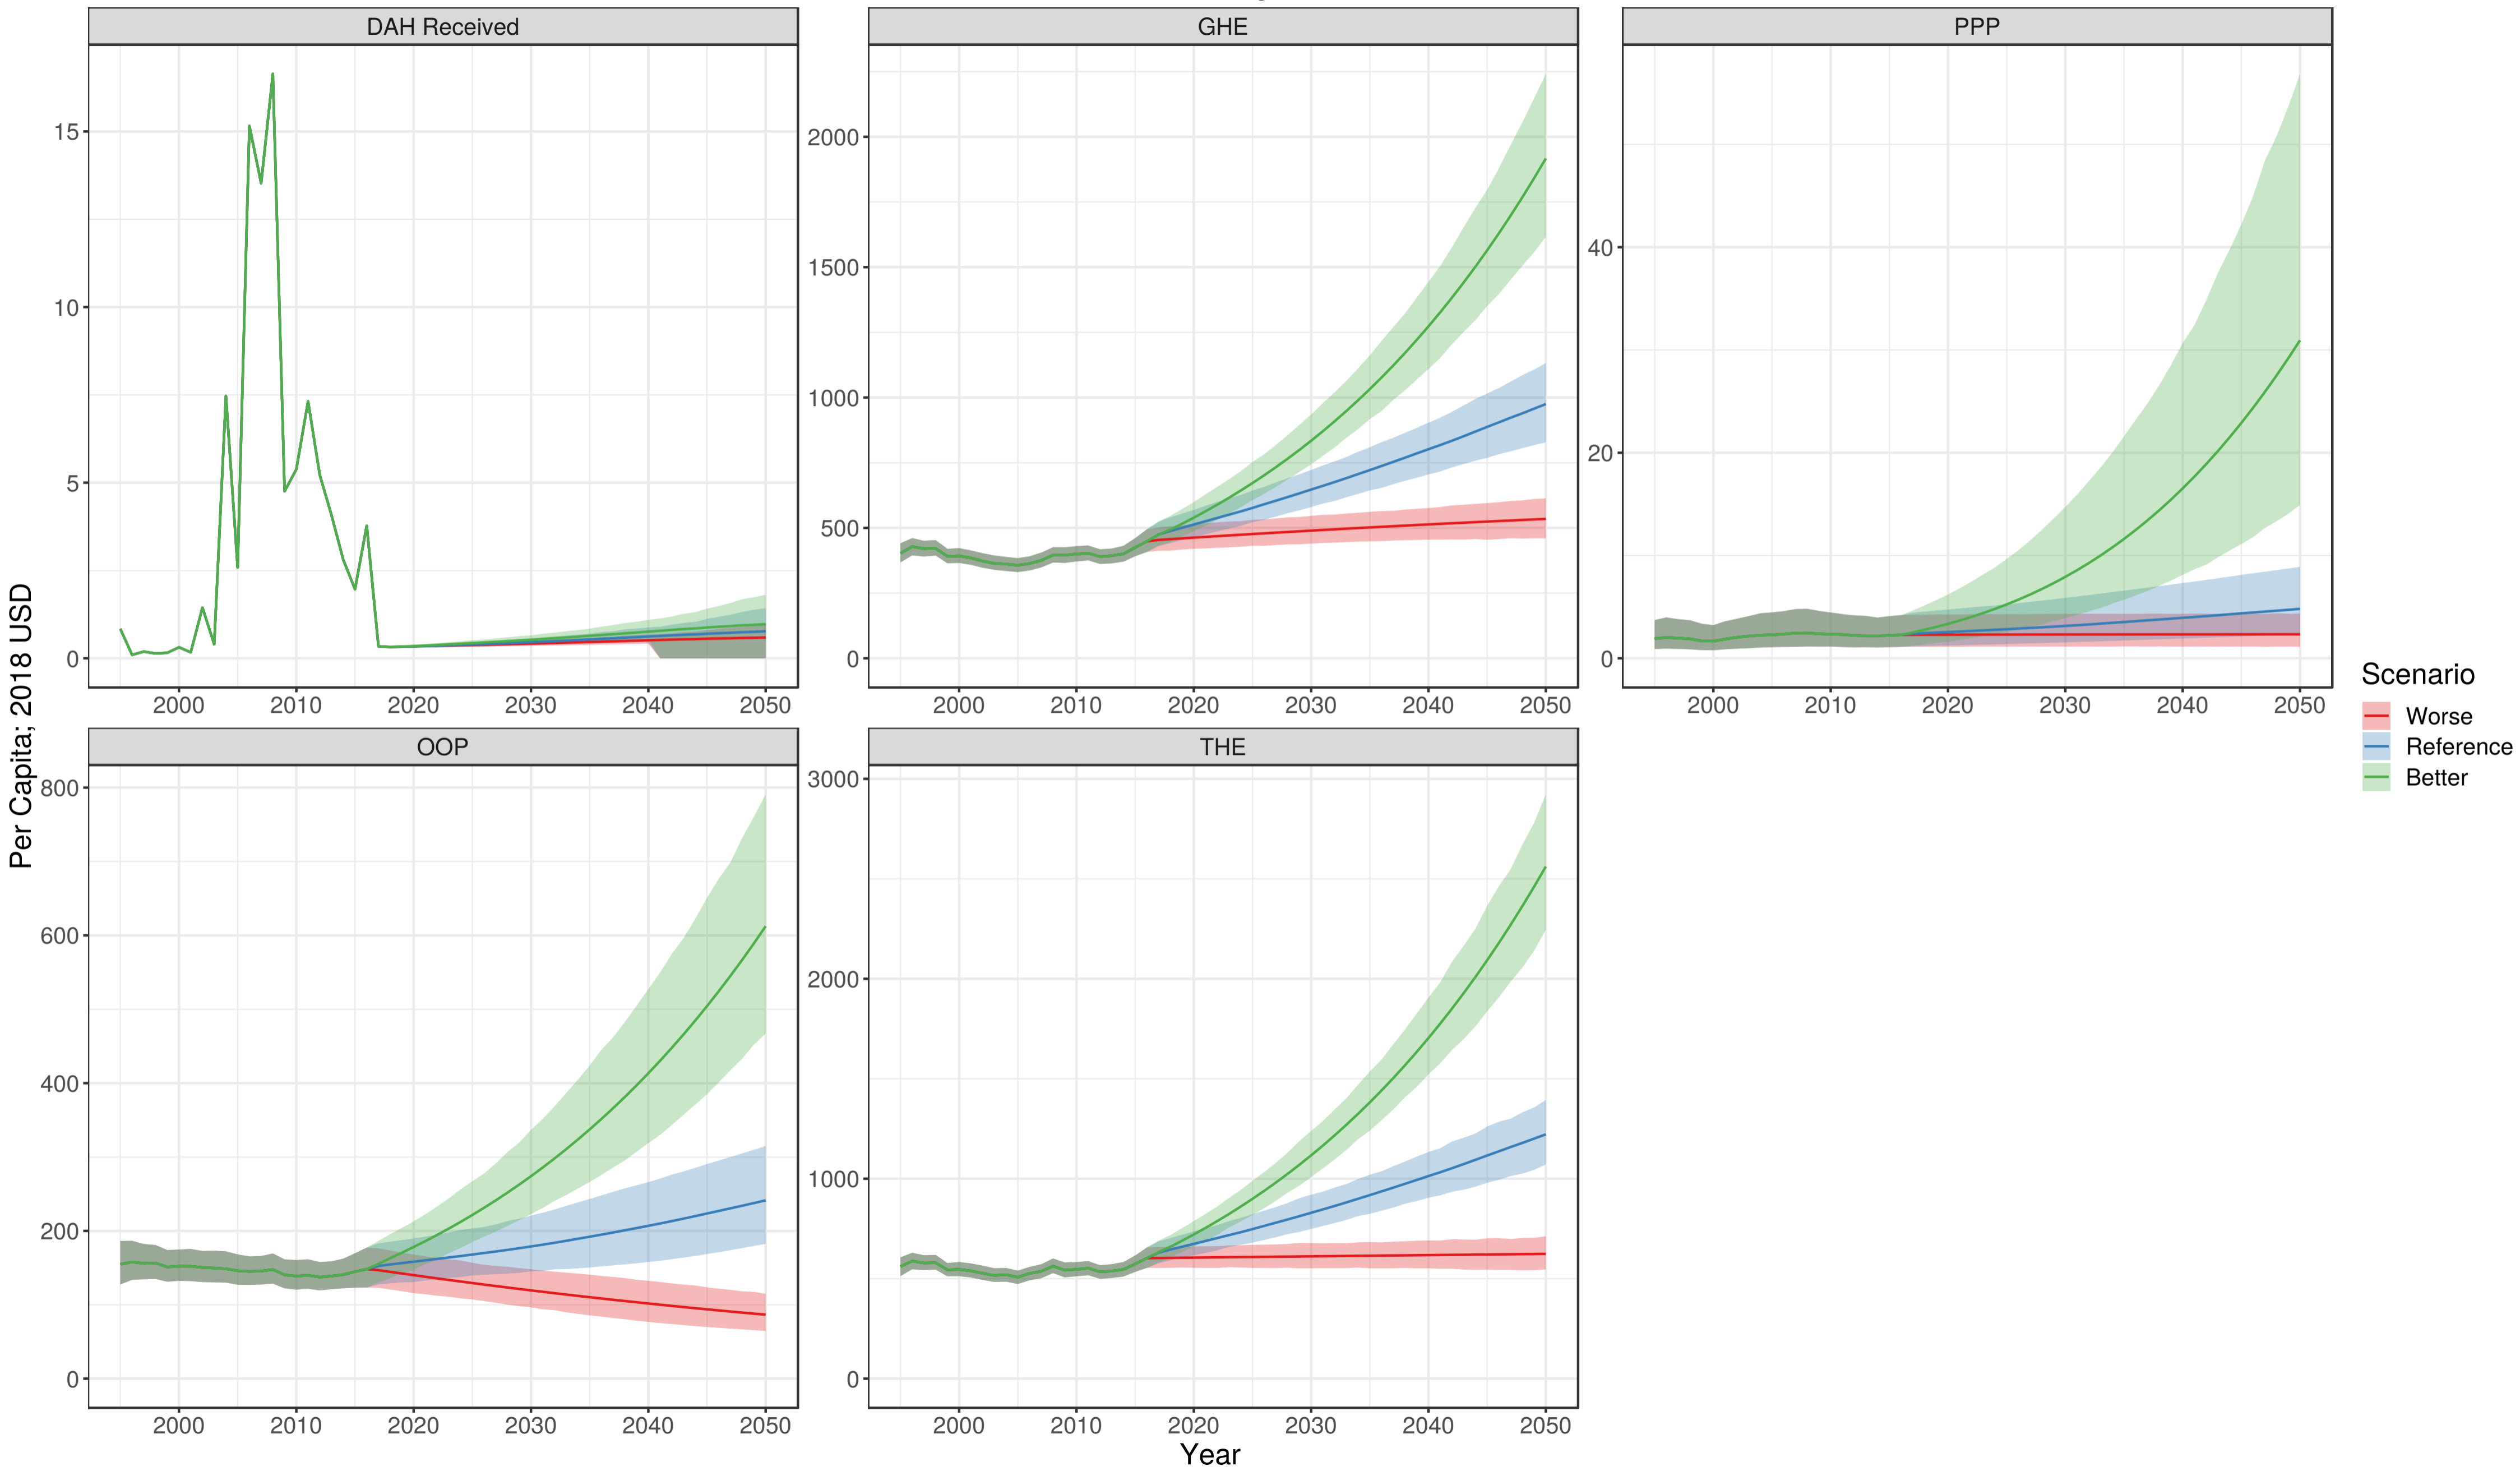

# Morocco

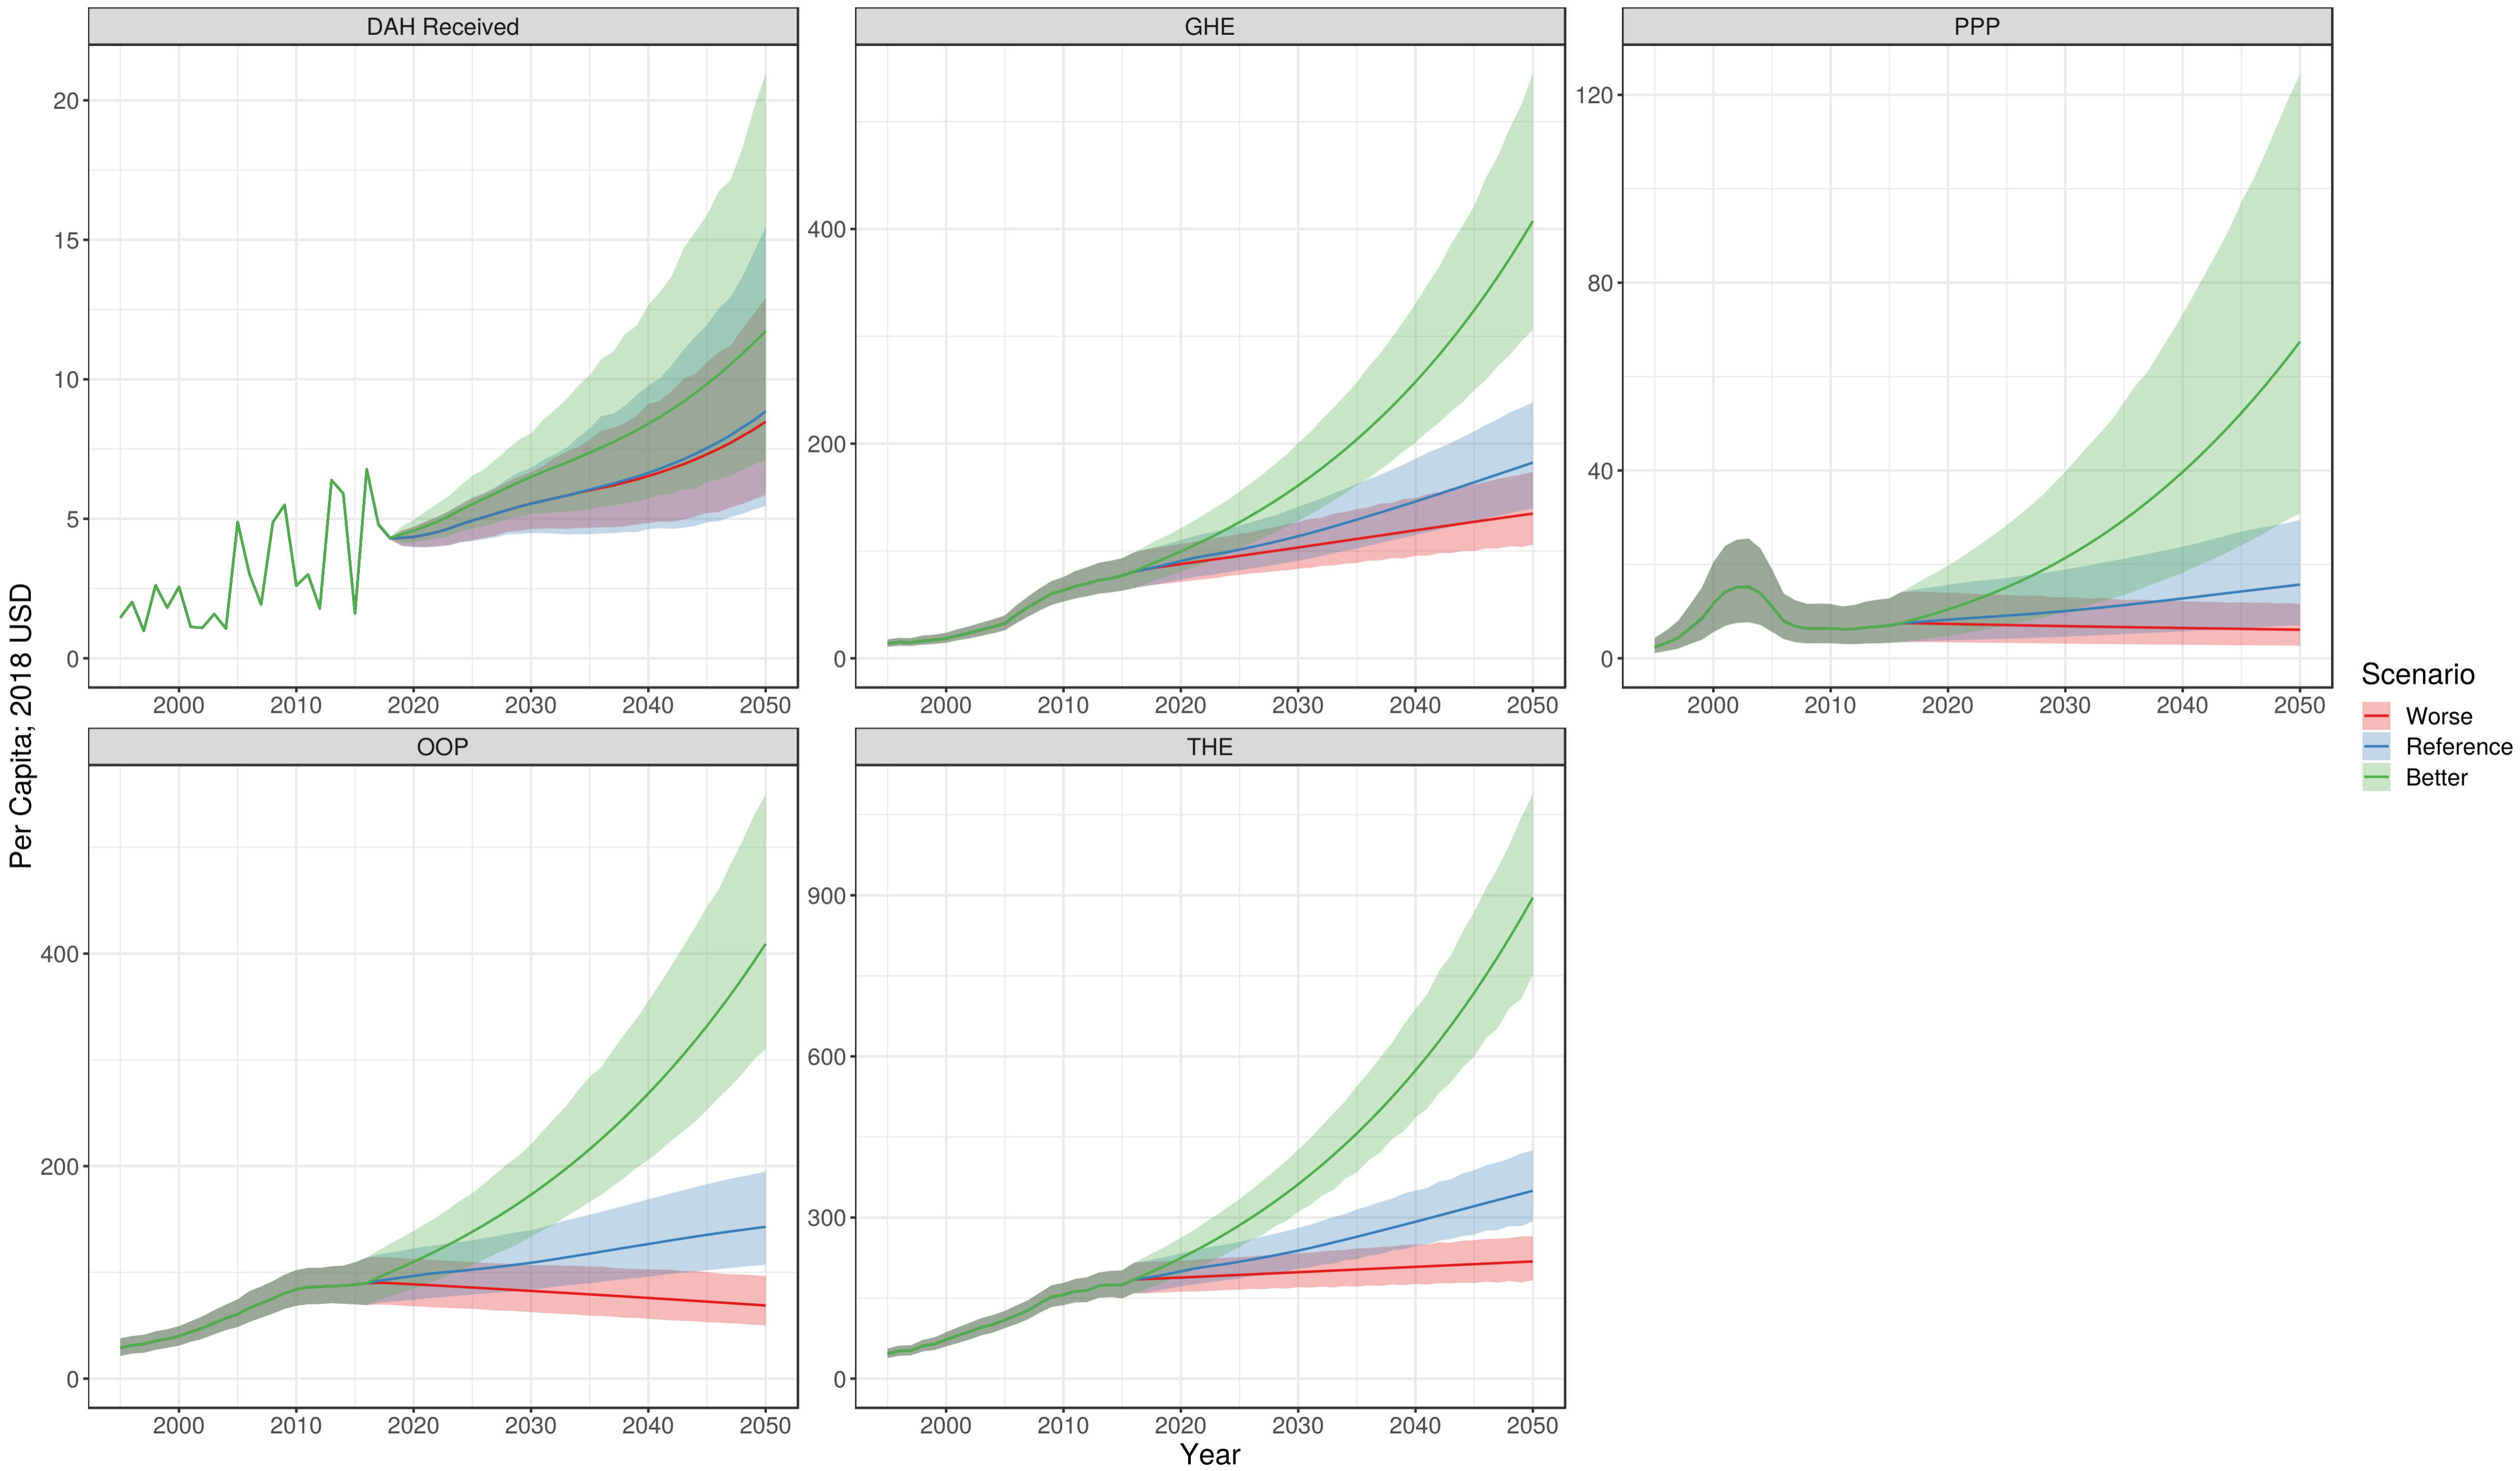



# Mozambique

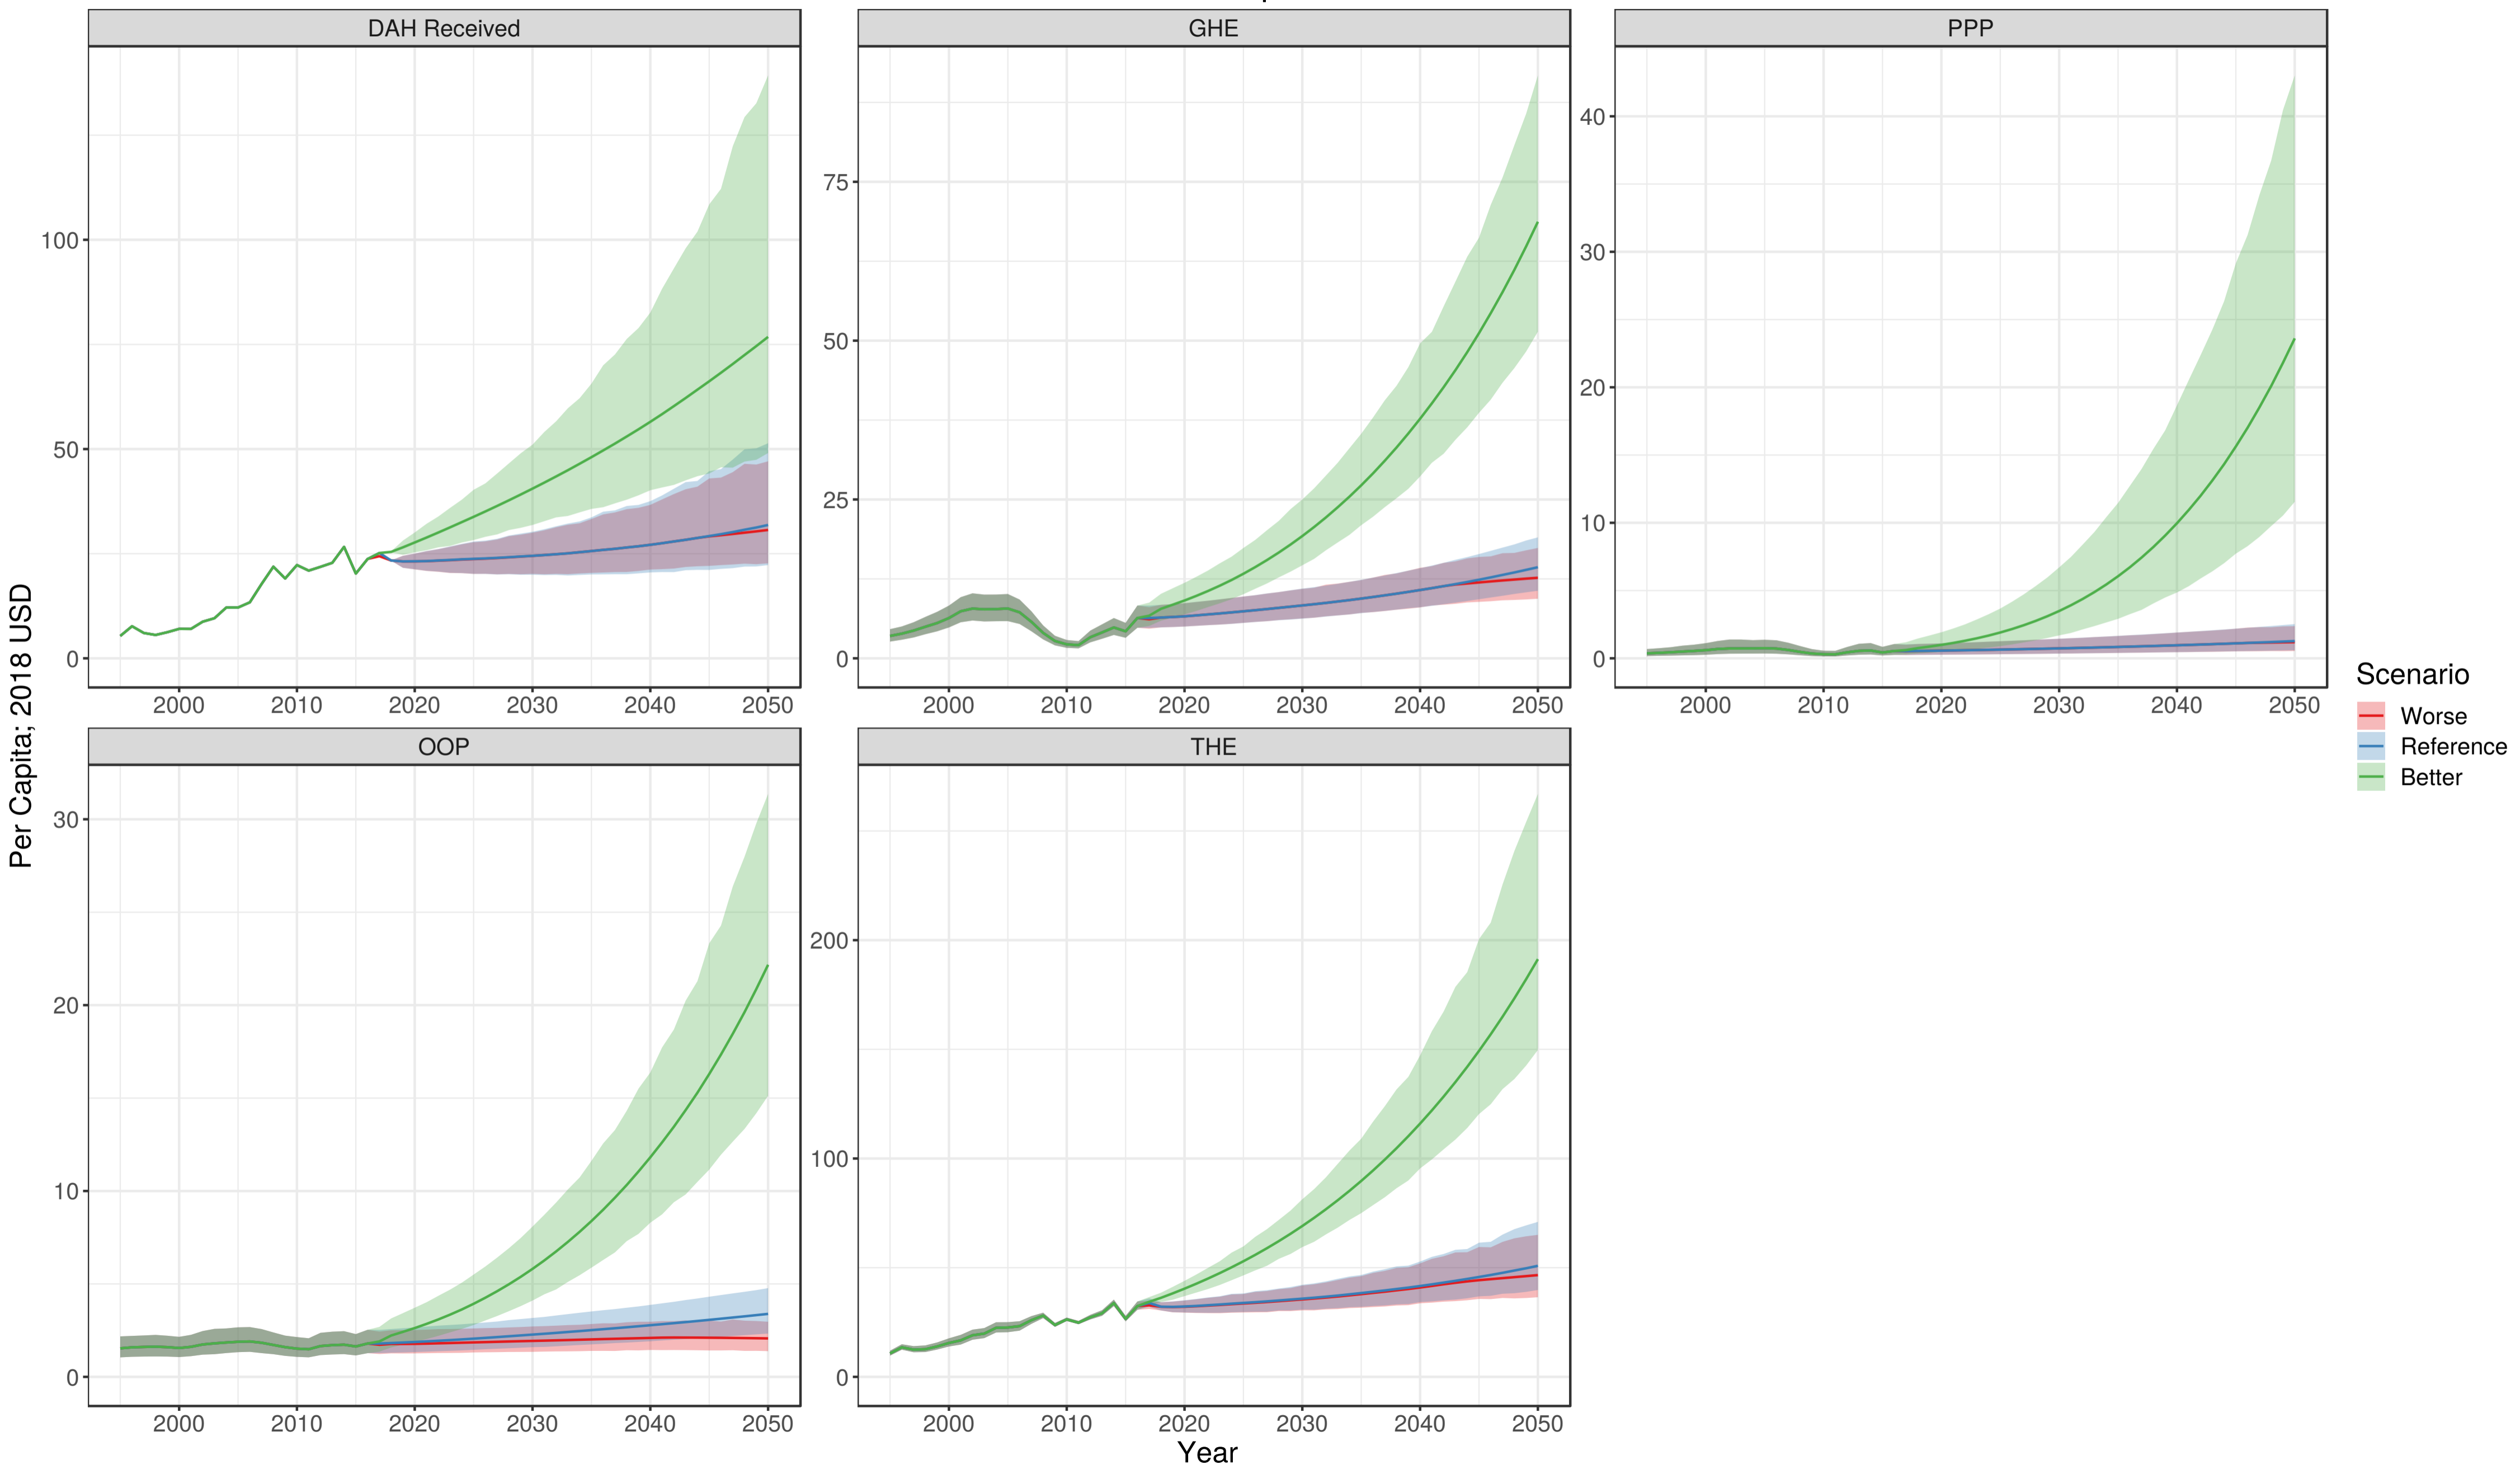



# Namibia

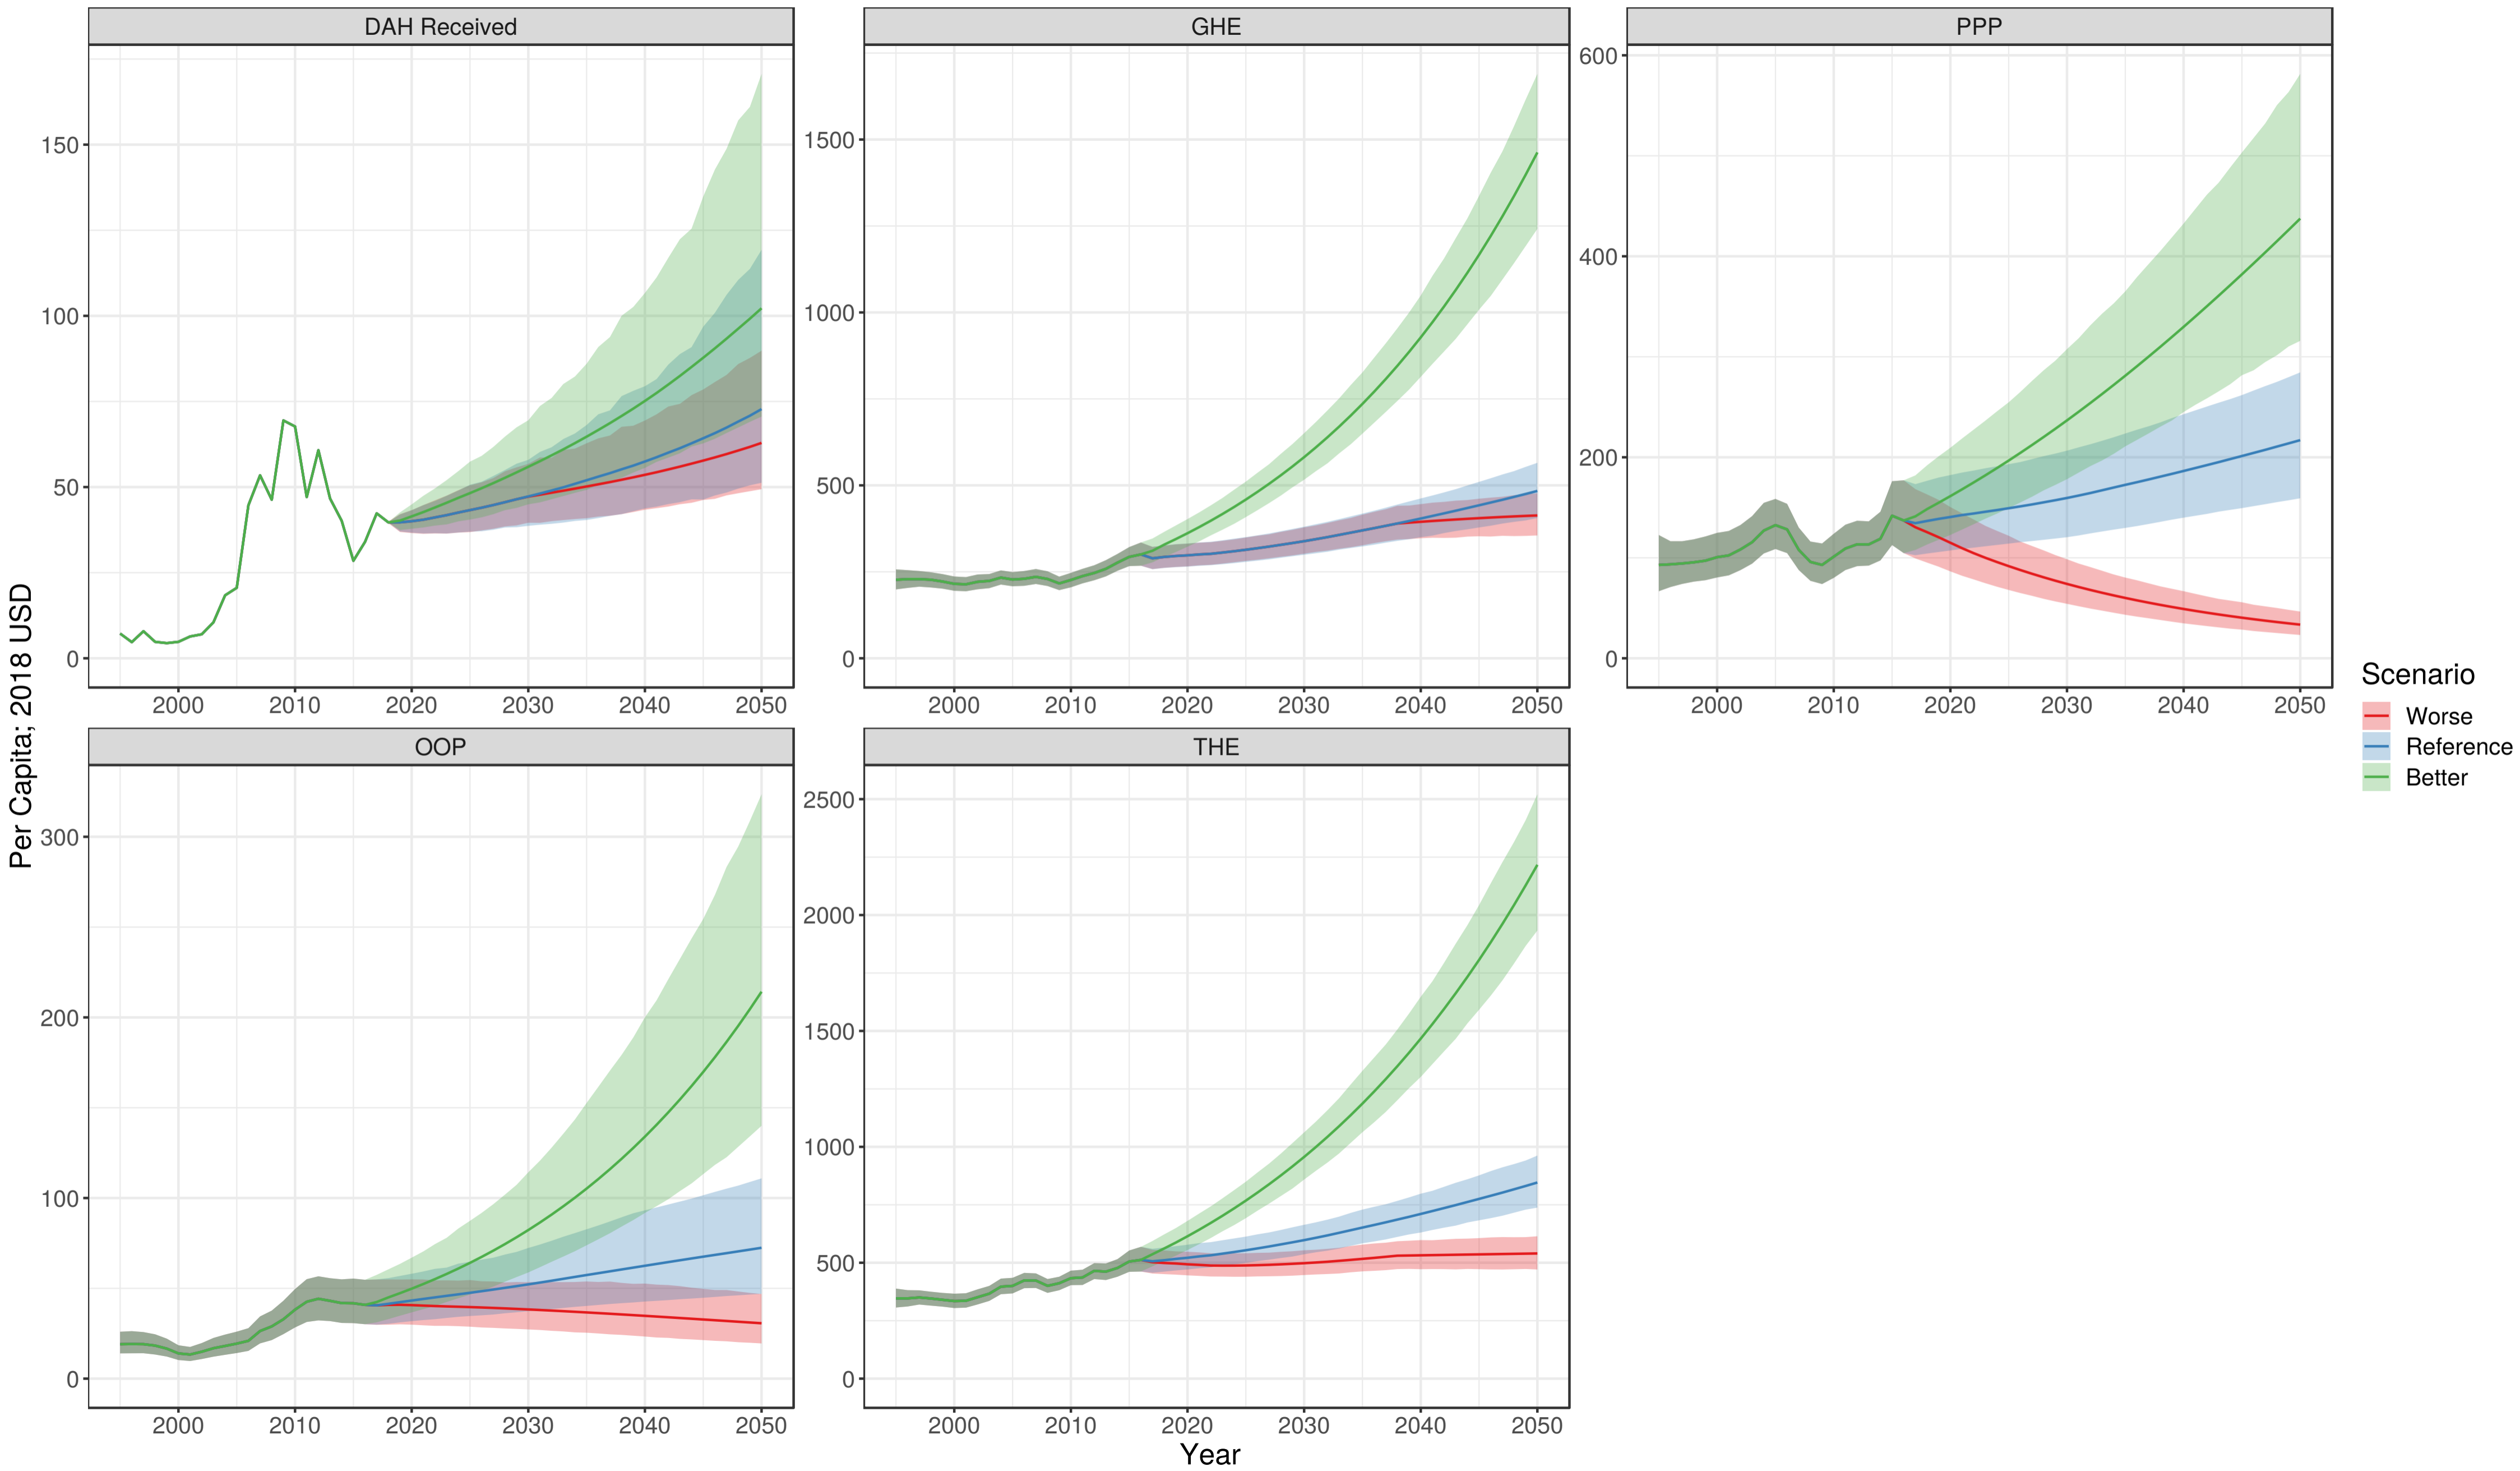

# Nepal

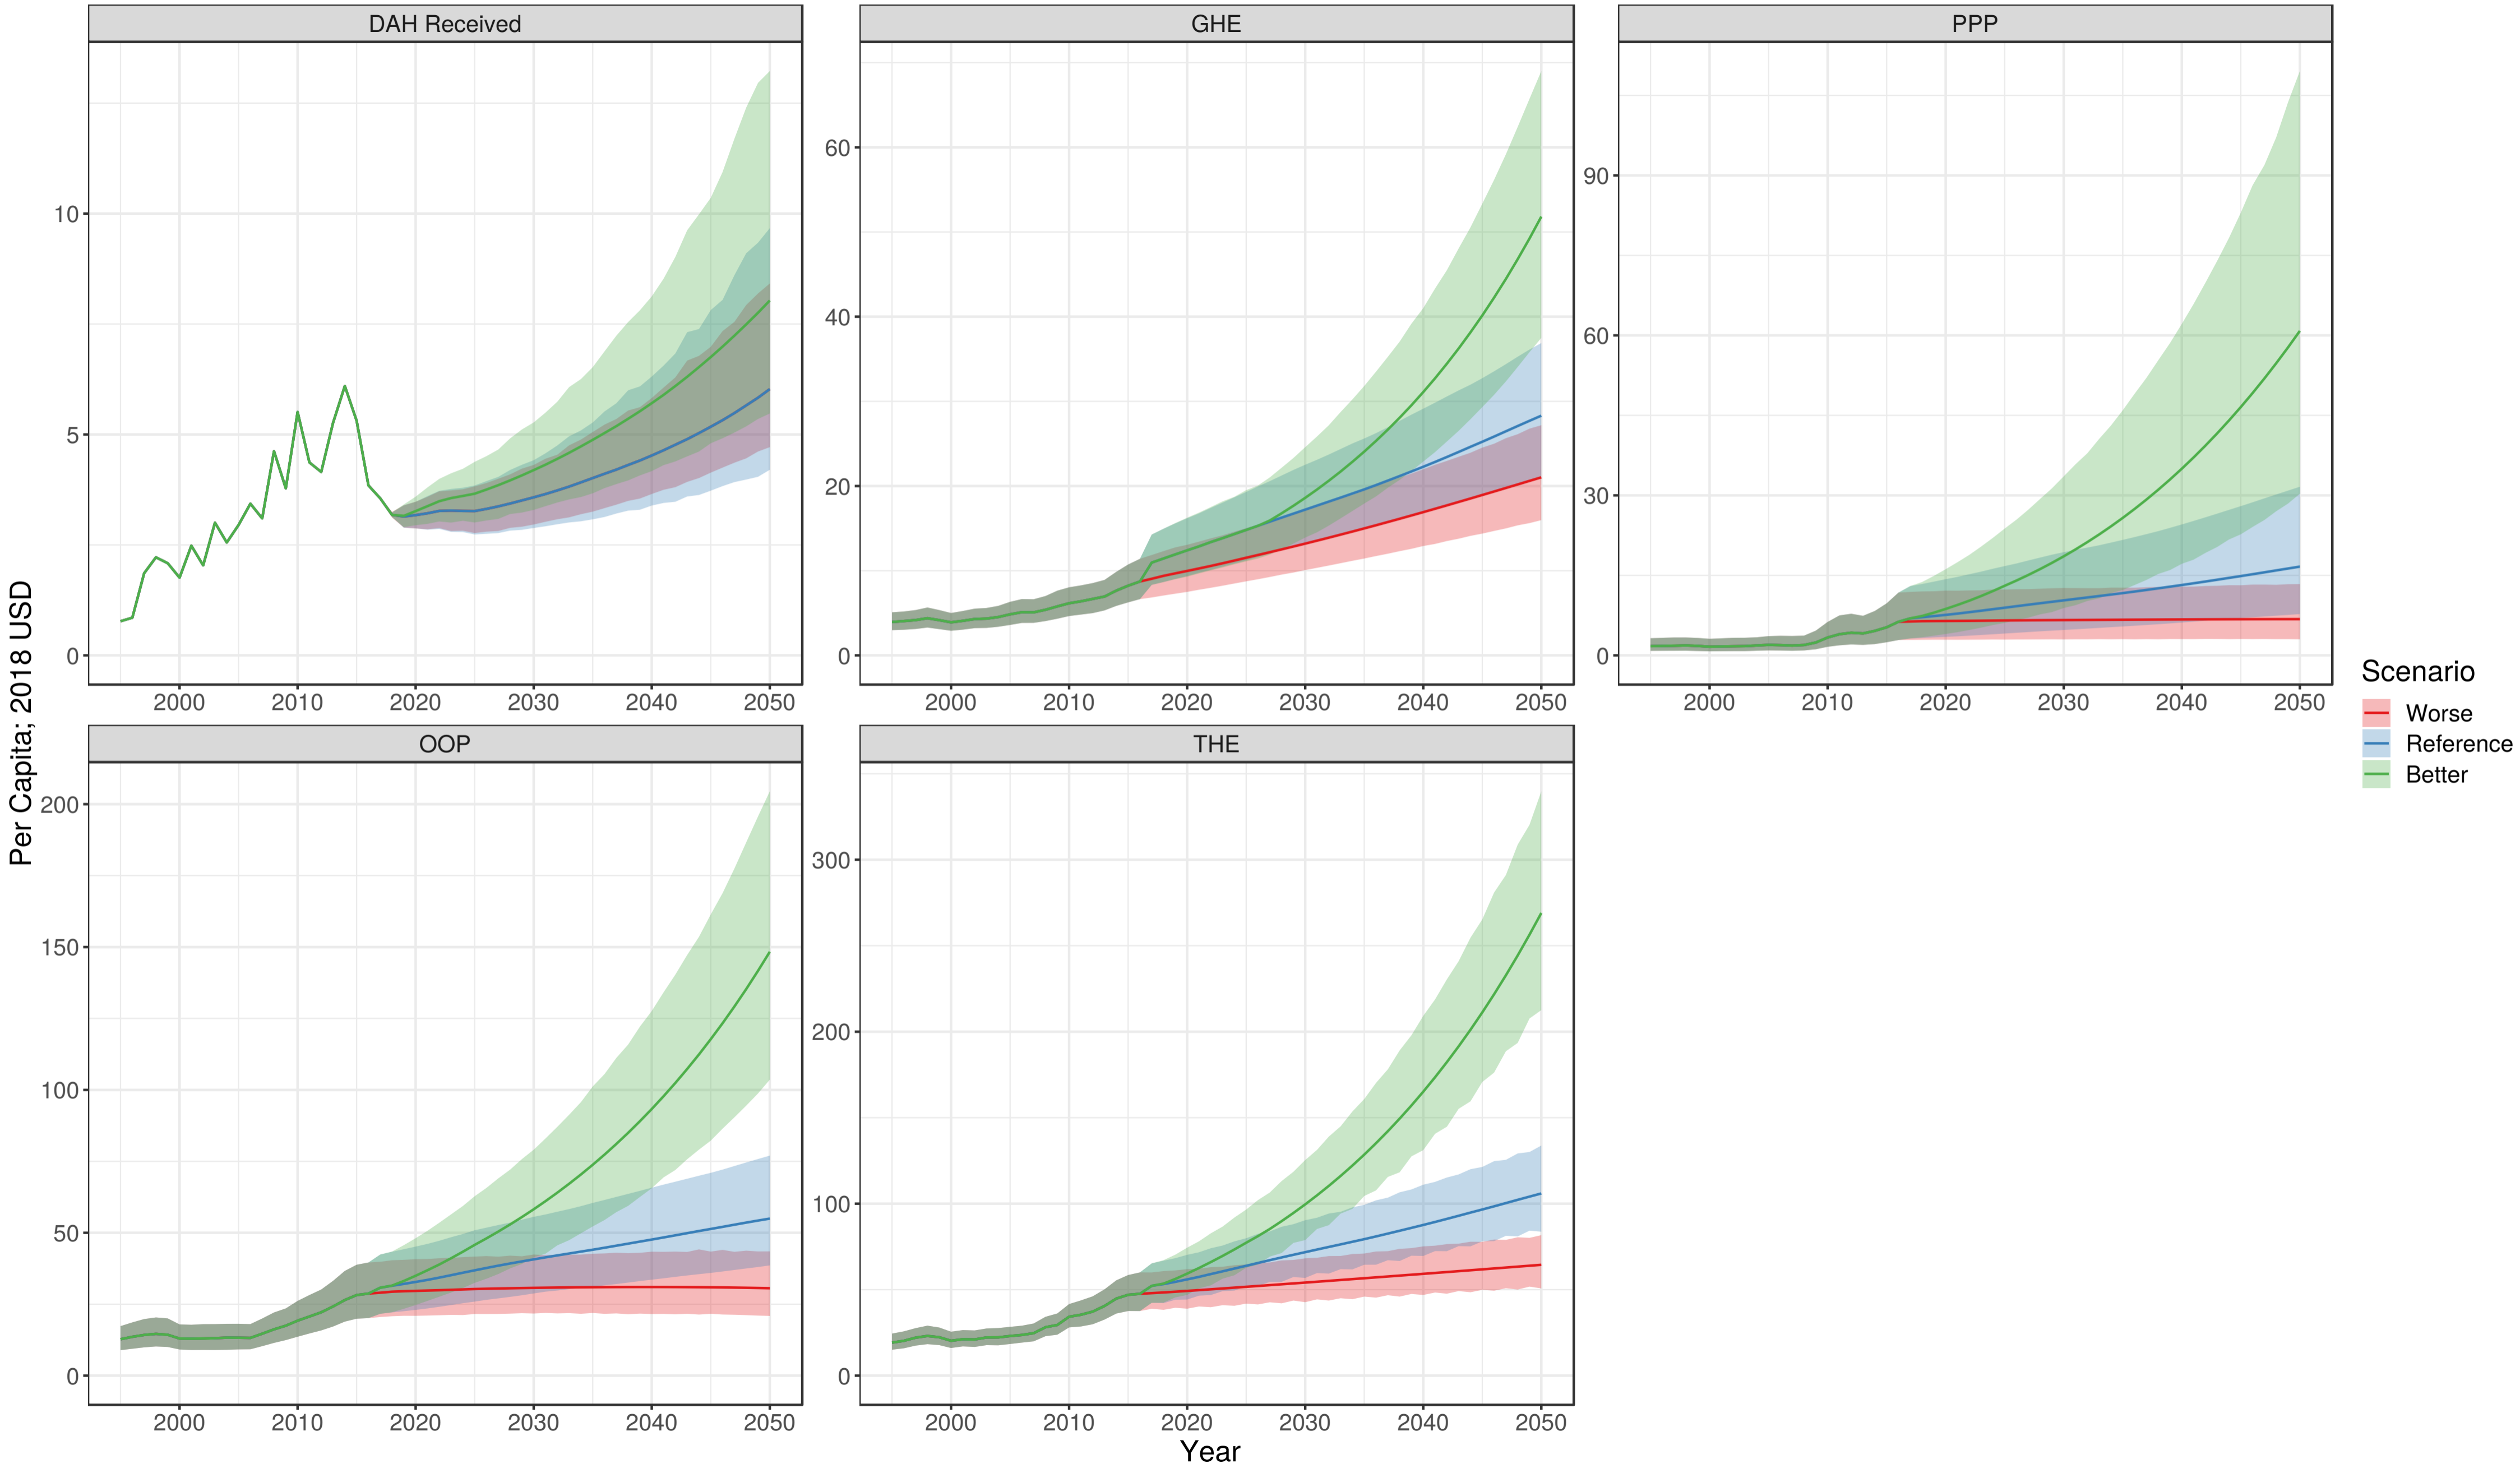

# Netherlands

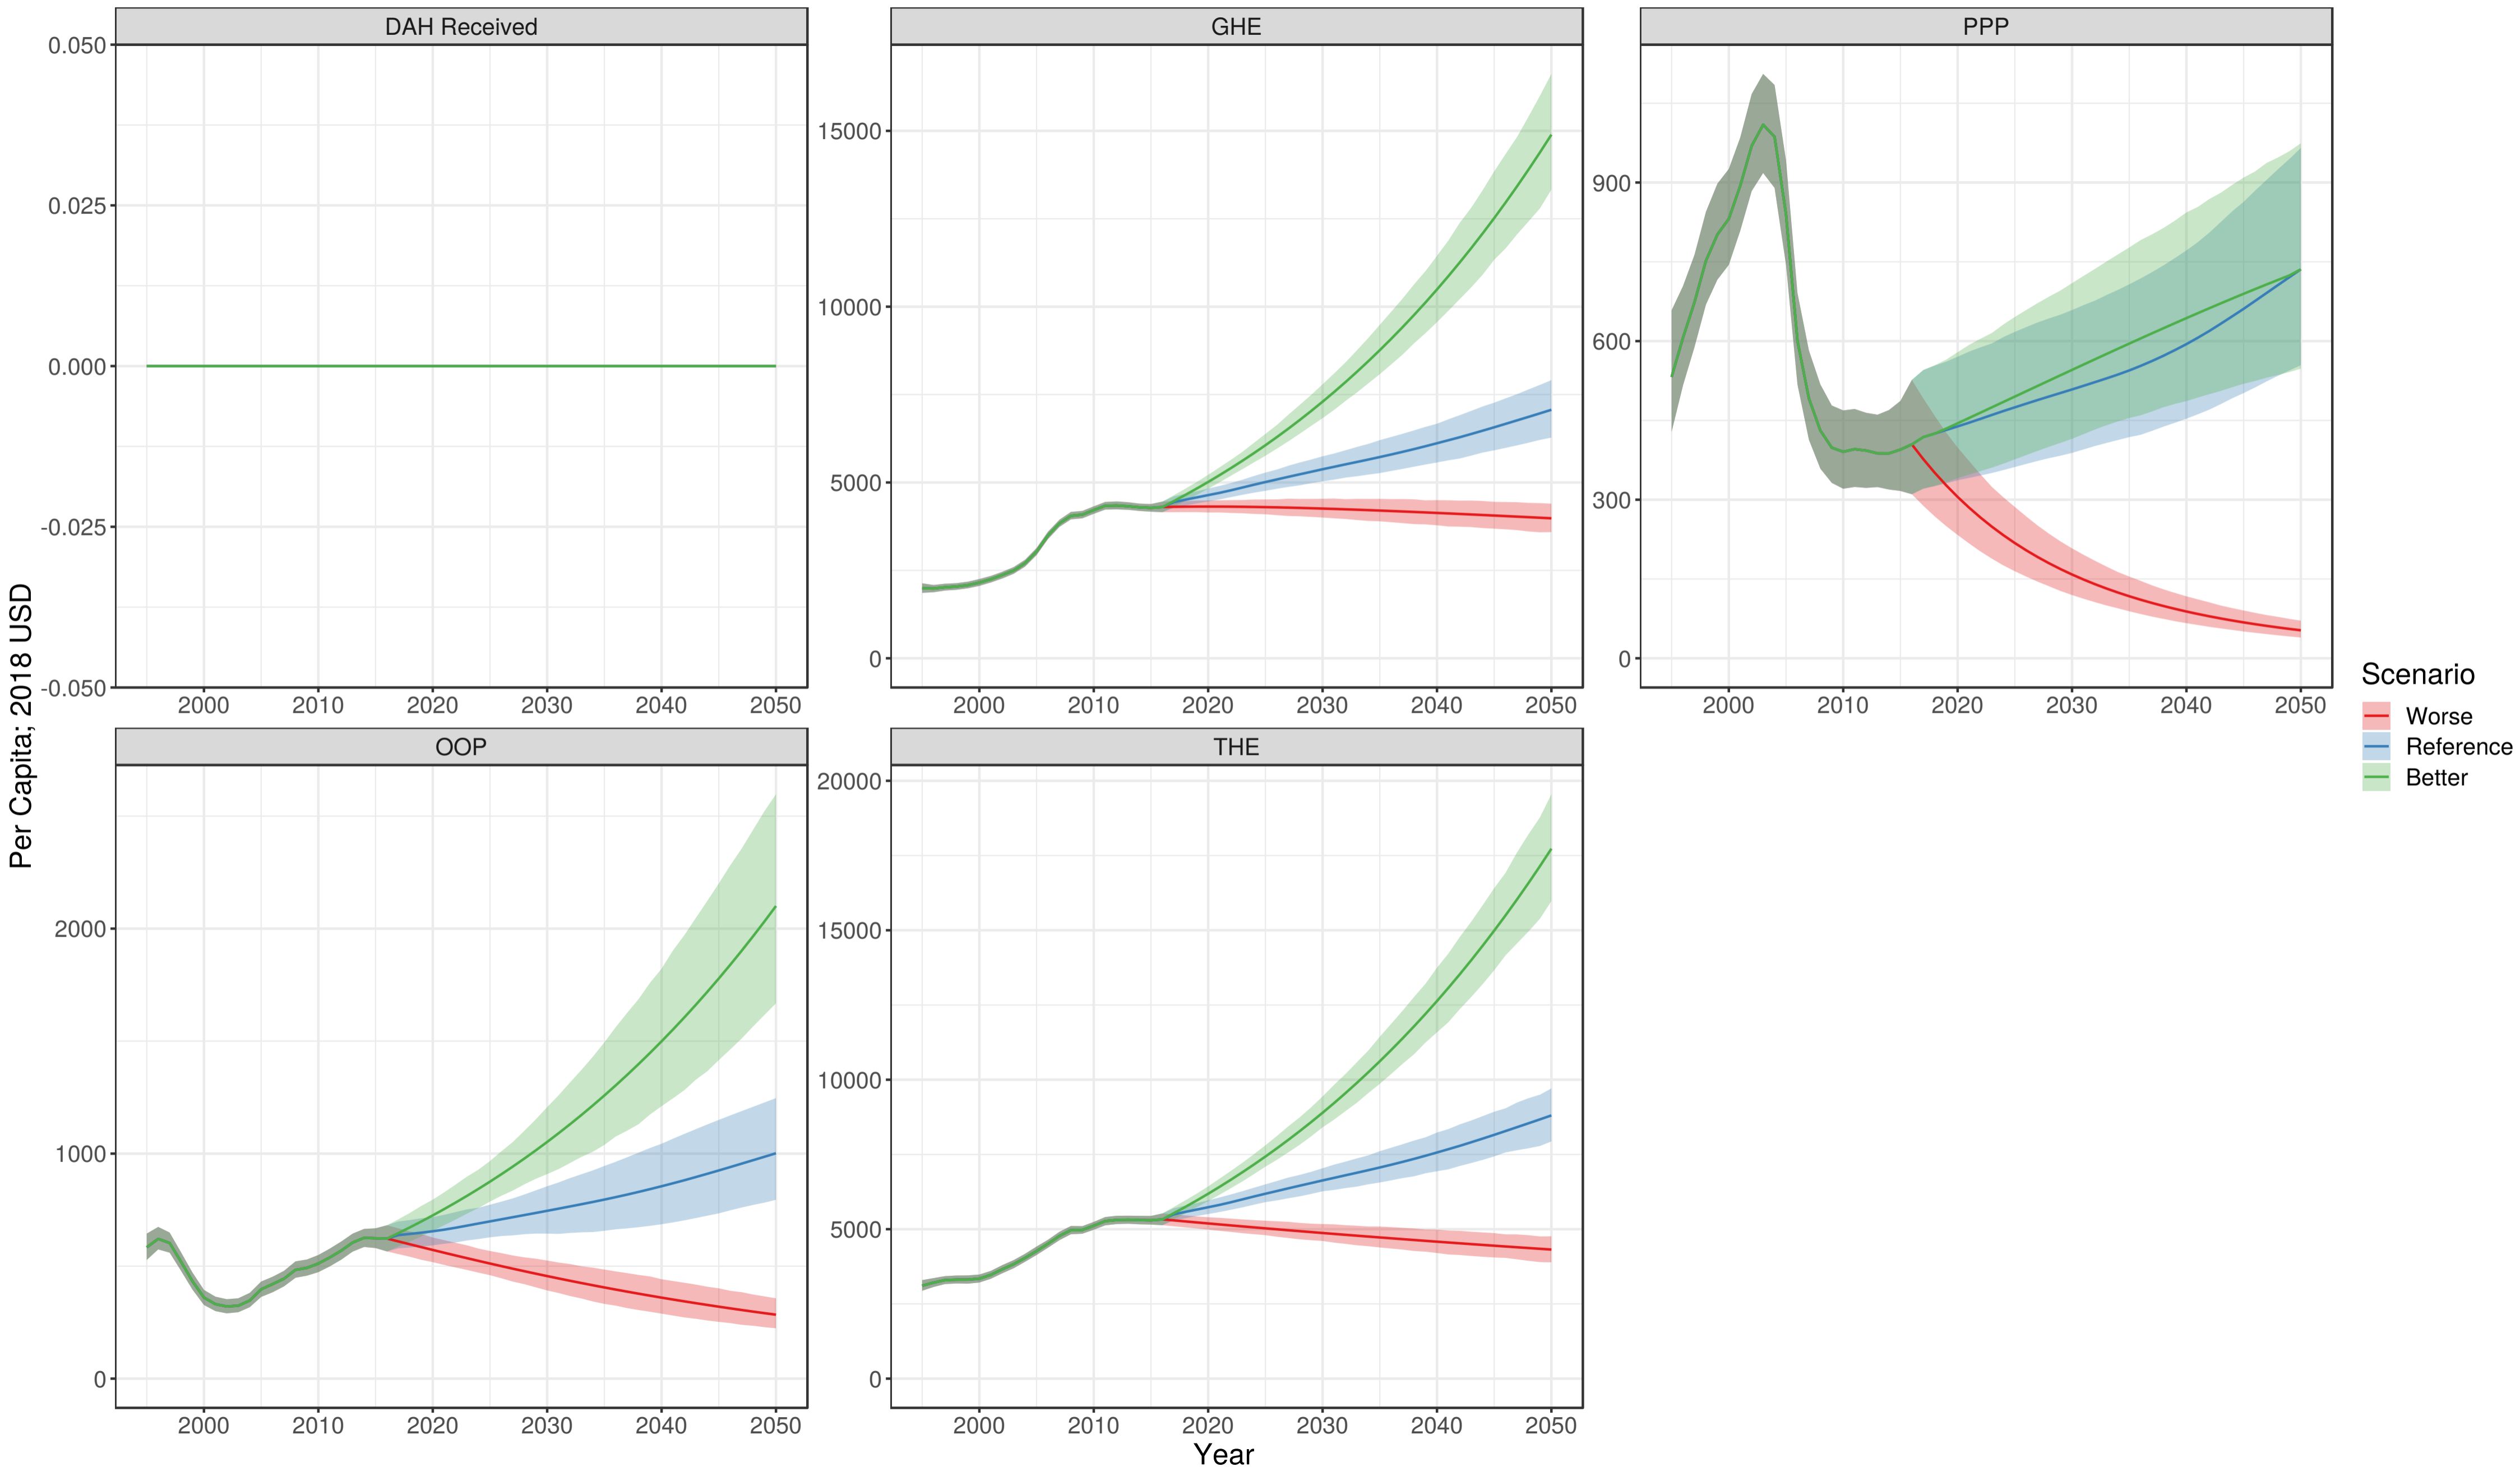

# New Zealand

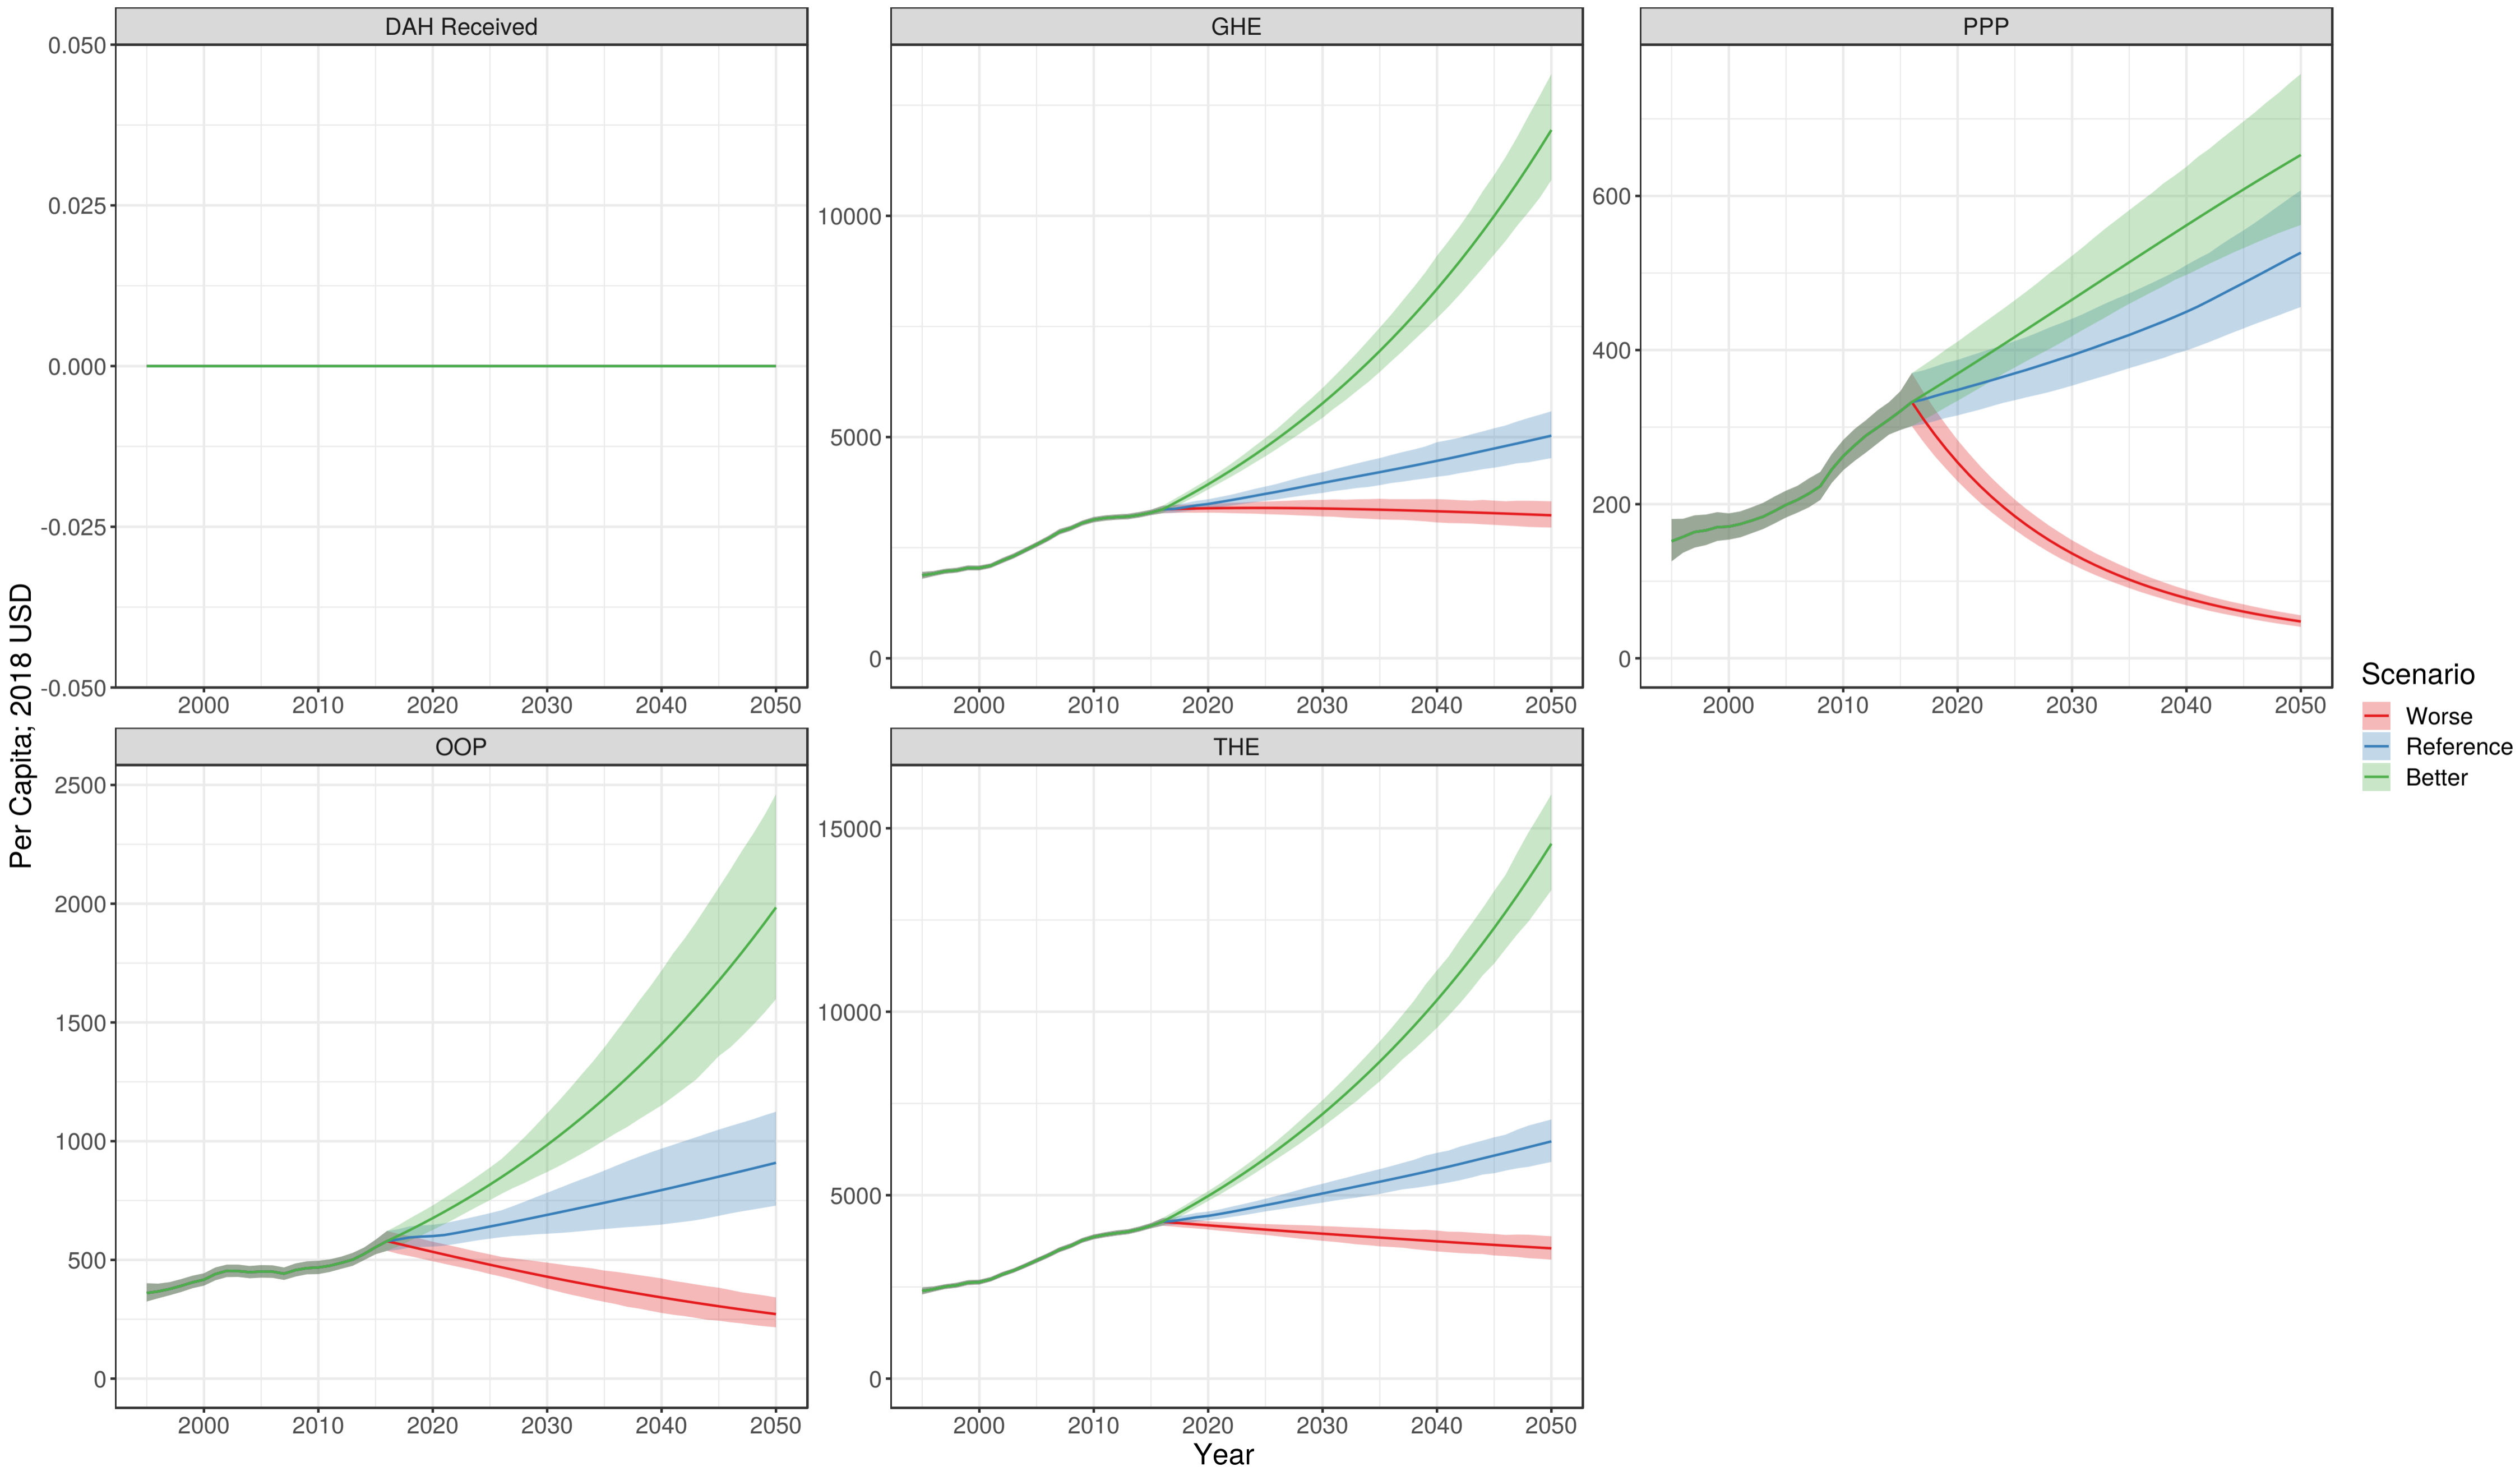

# Nicaragua

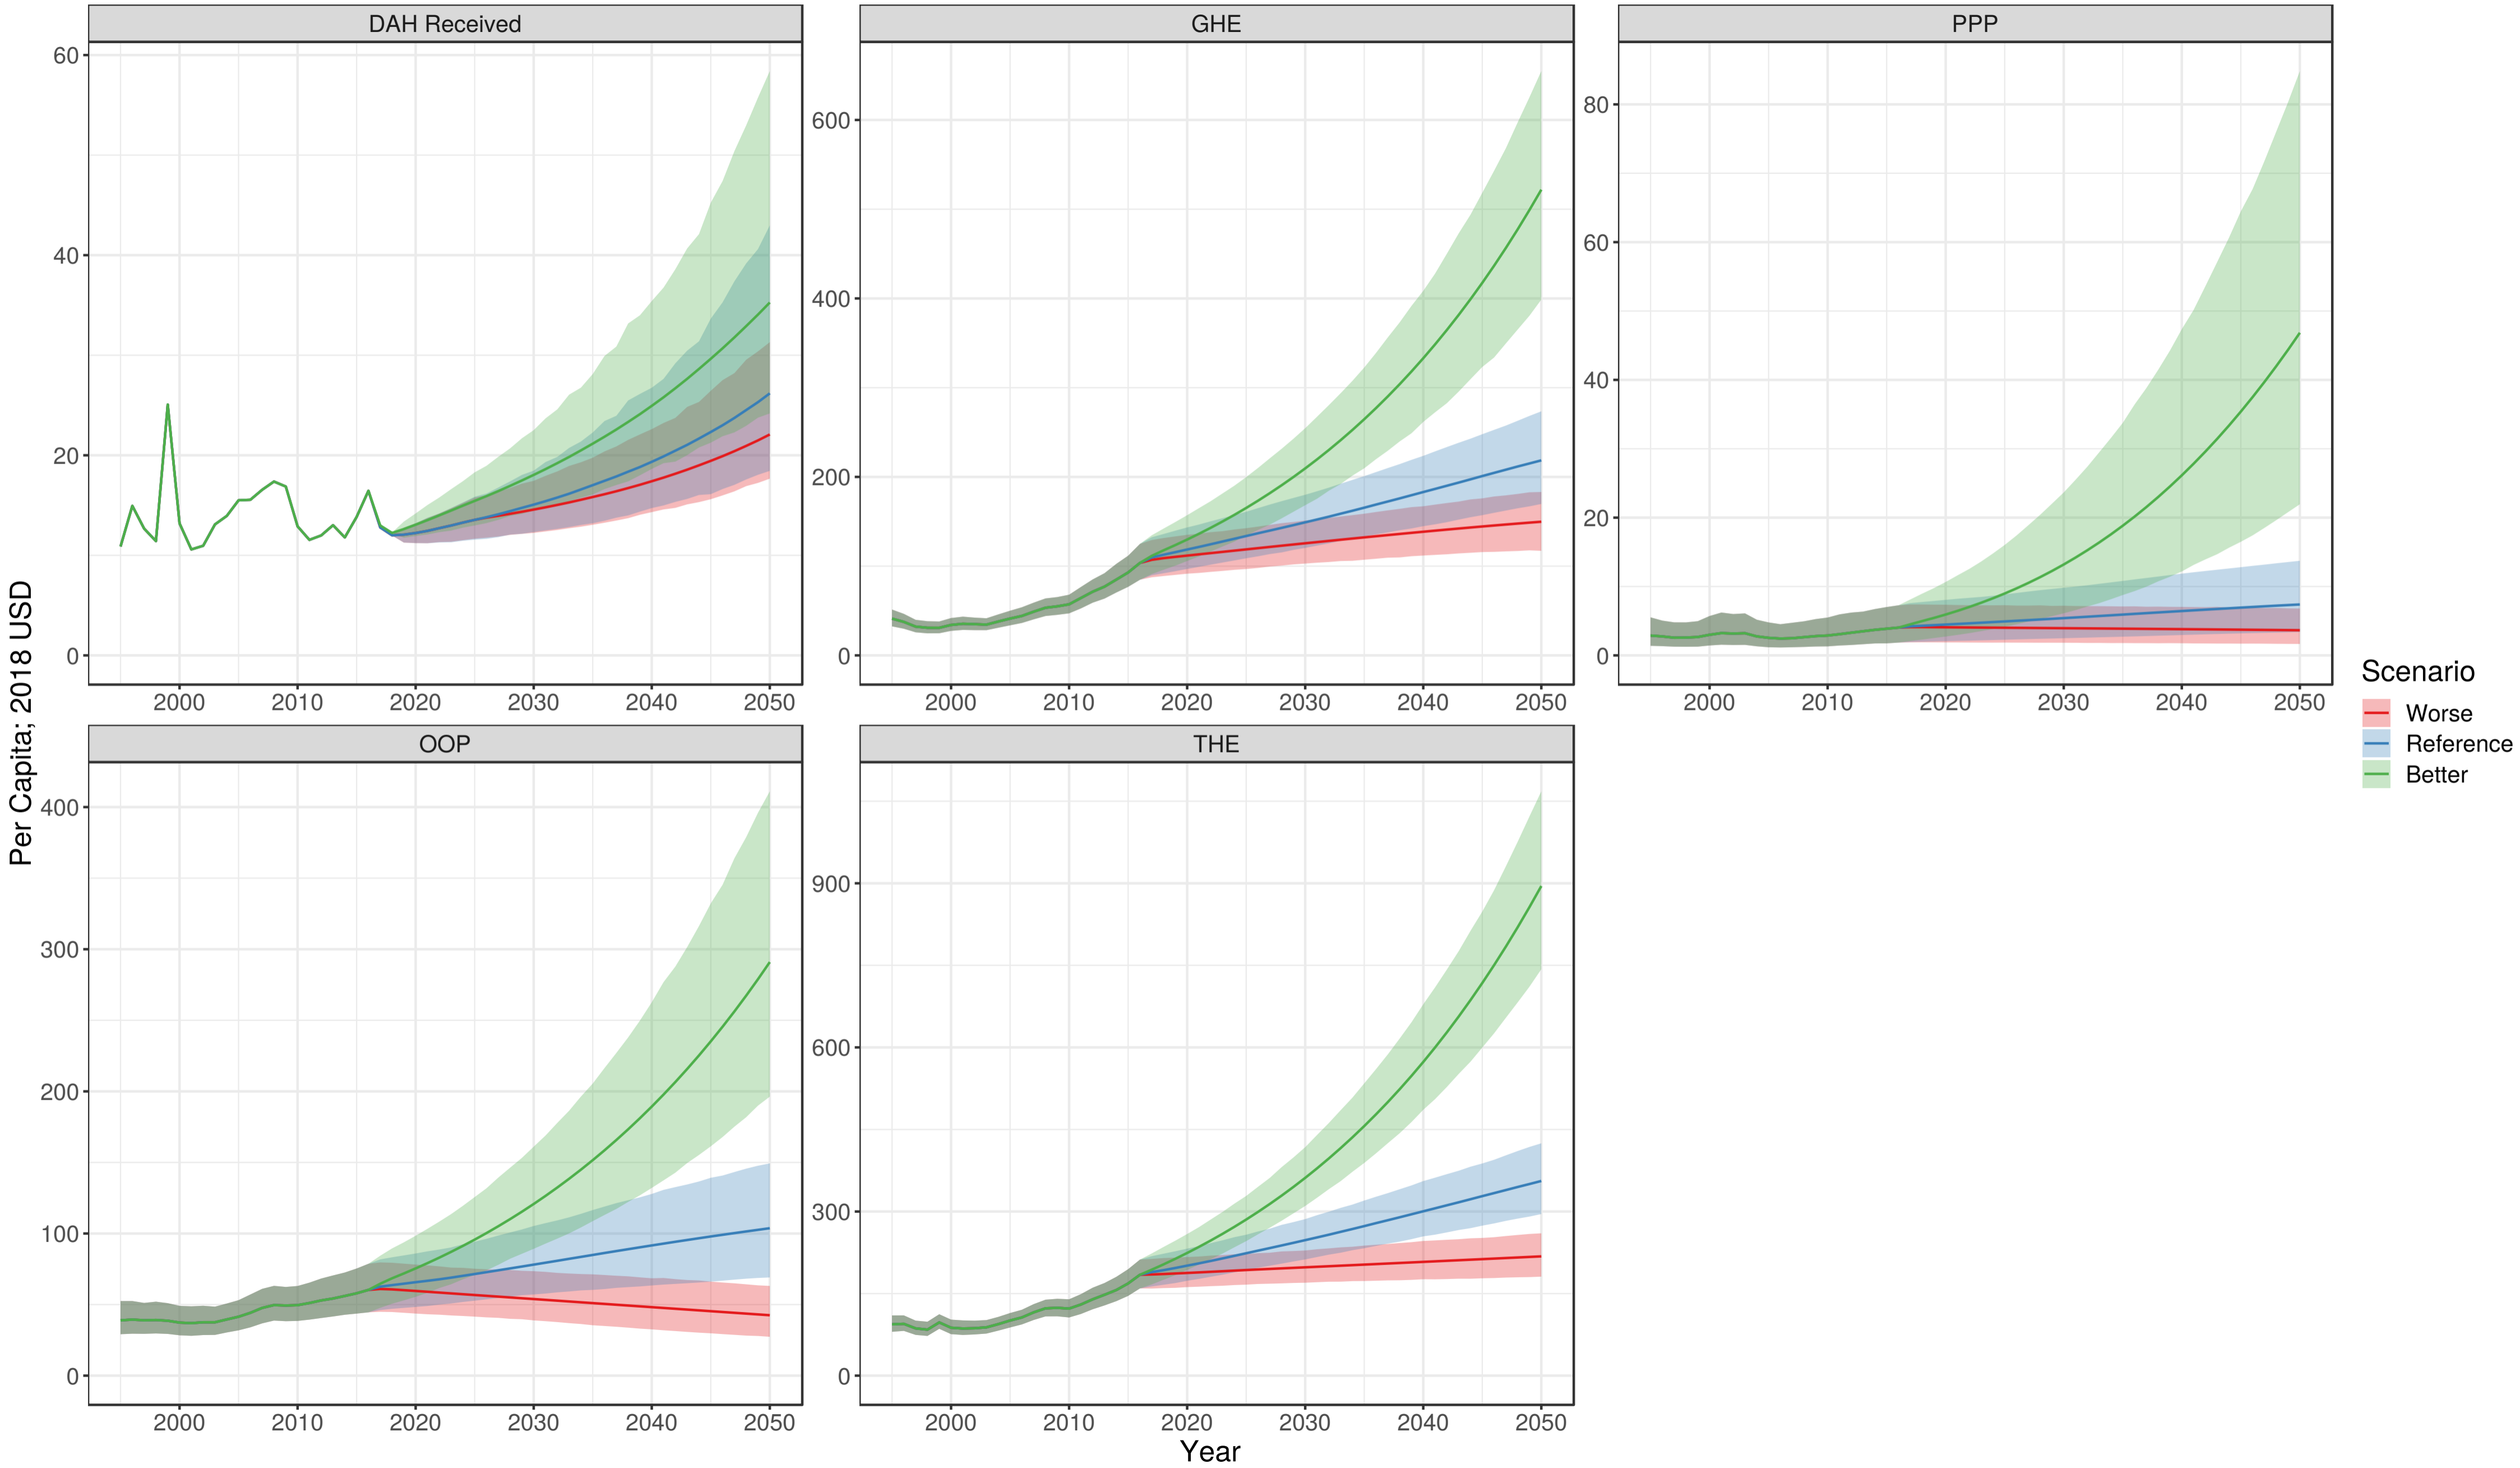

# Niger

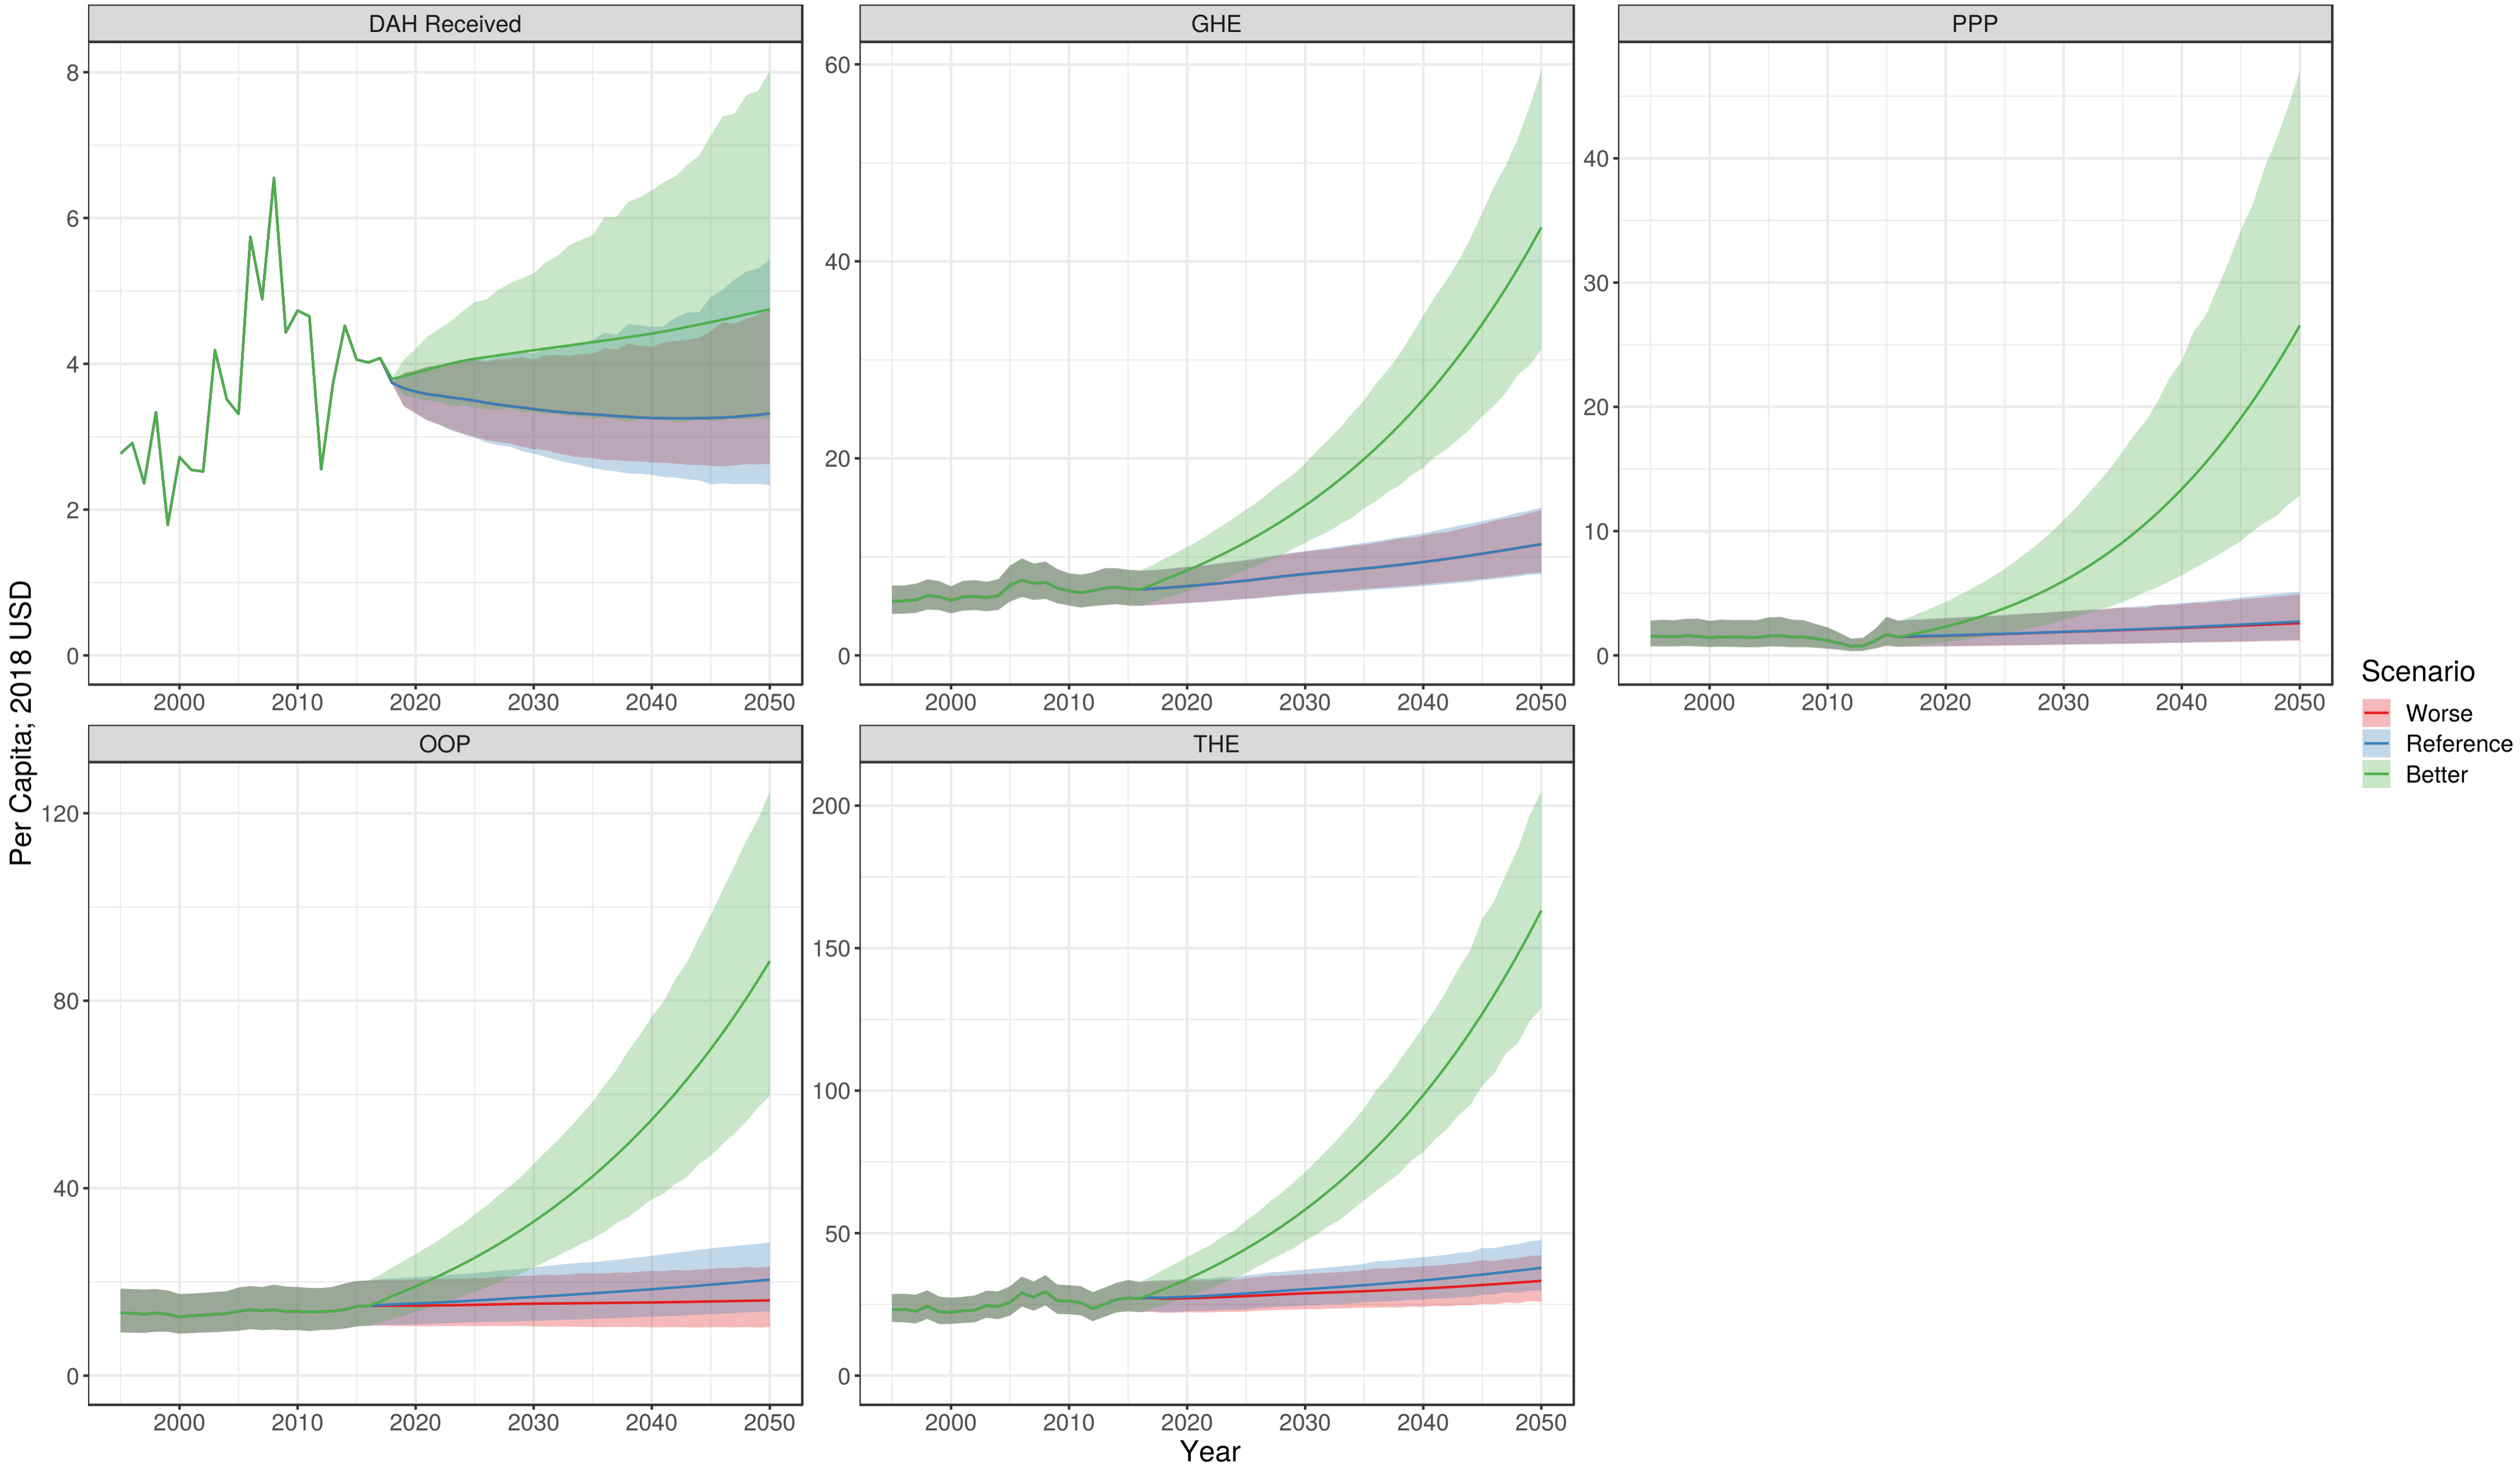



# Nigeria

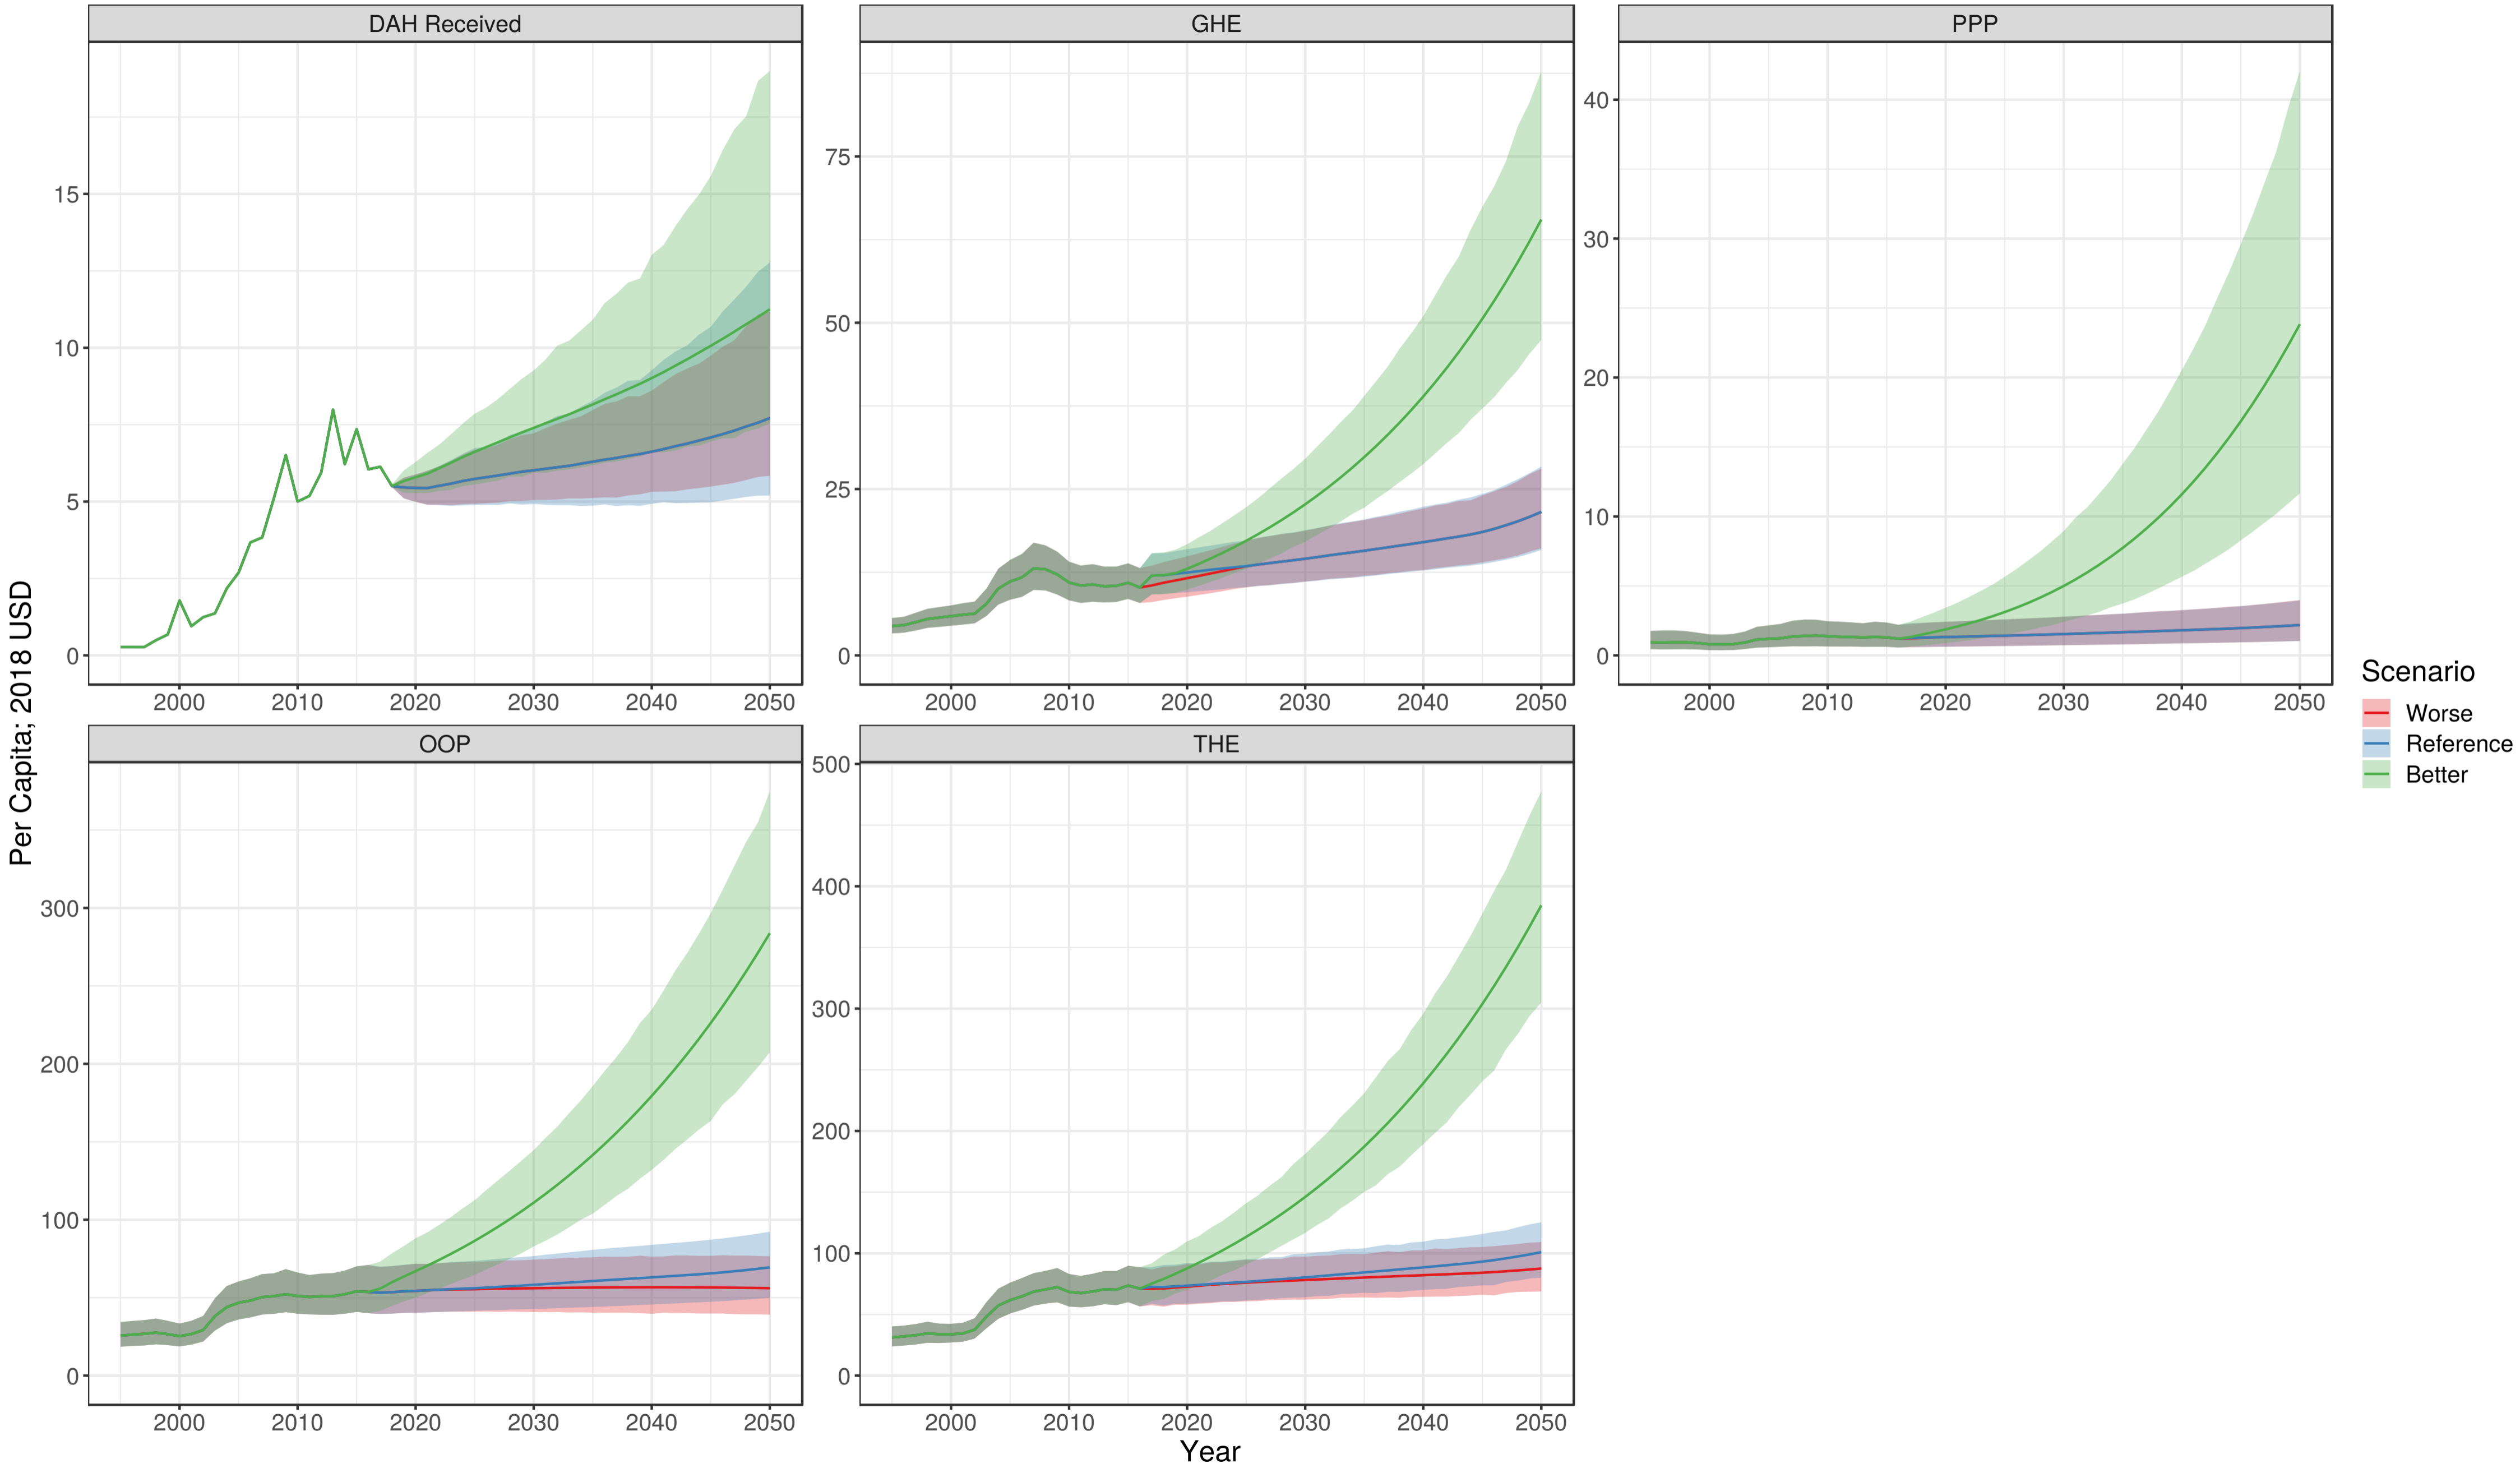

# North Korea

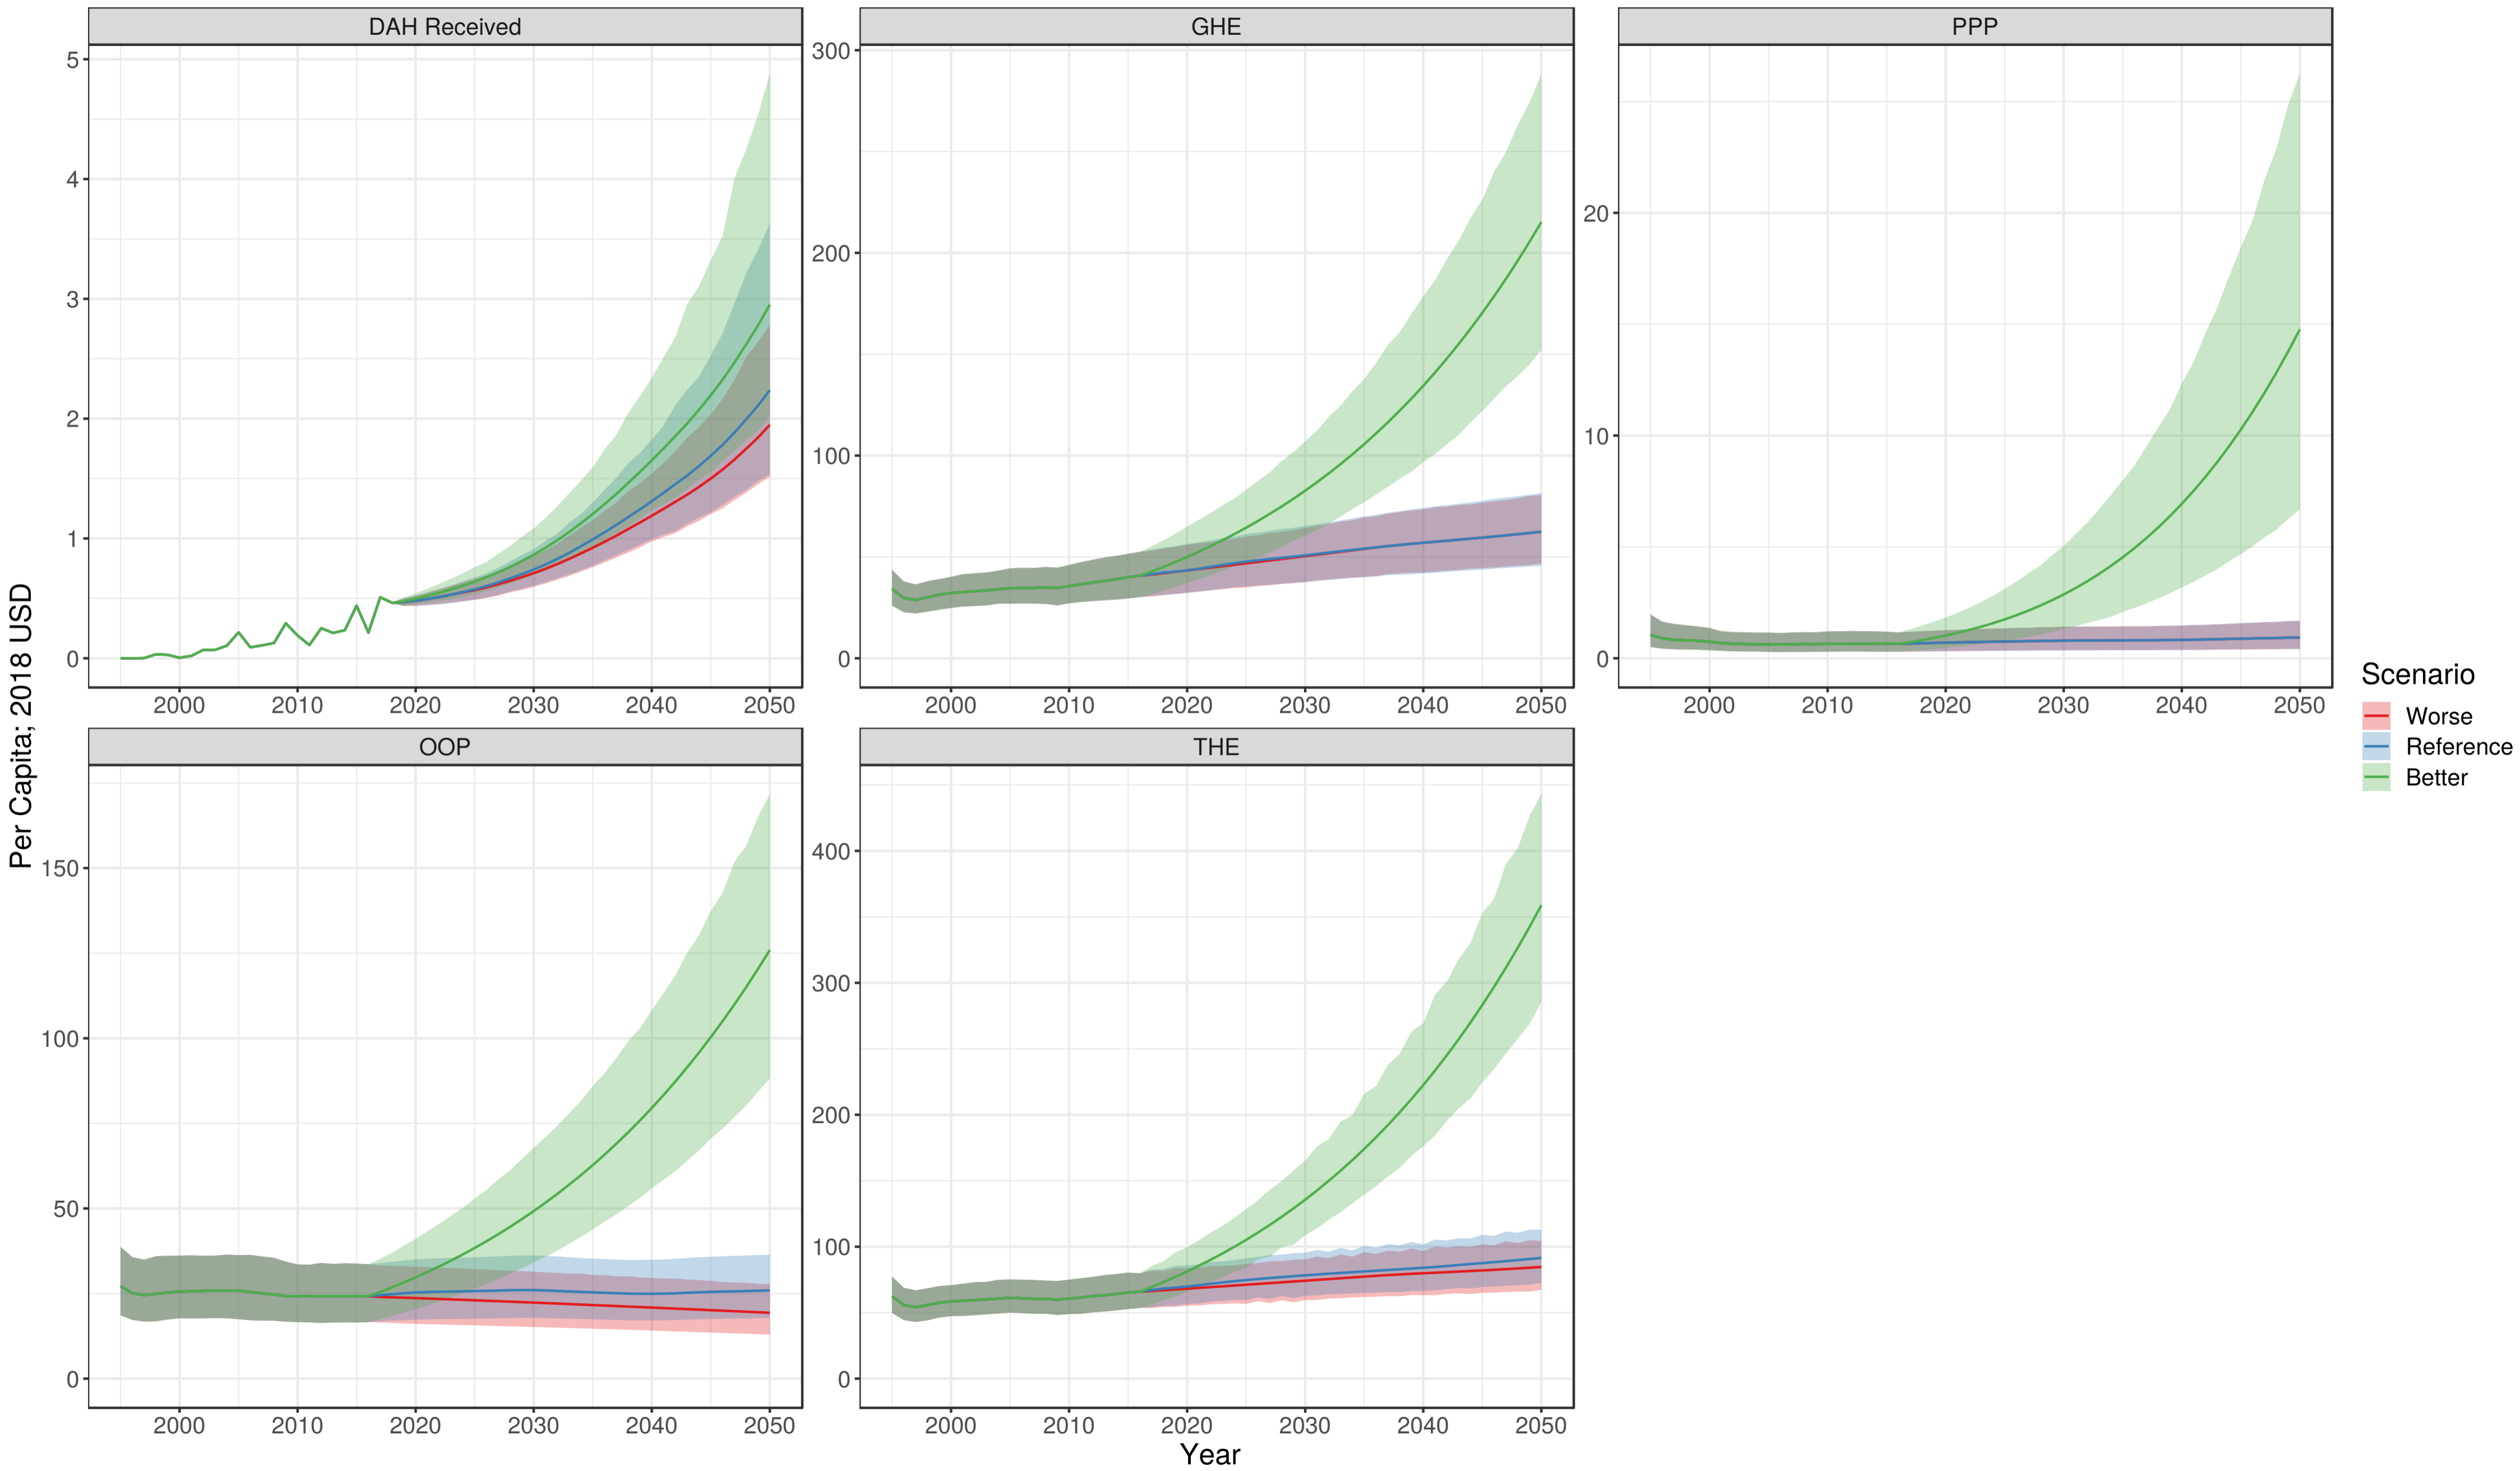

# Northern Mariana Islands

Per Capita; 2018 USD

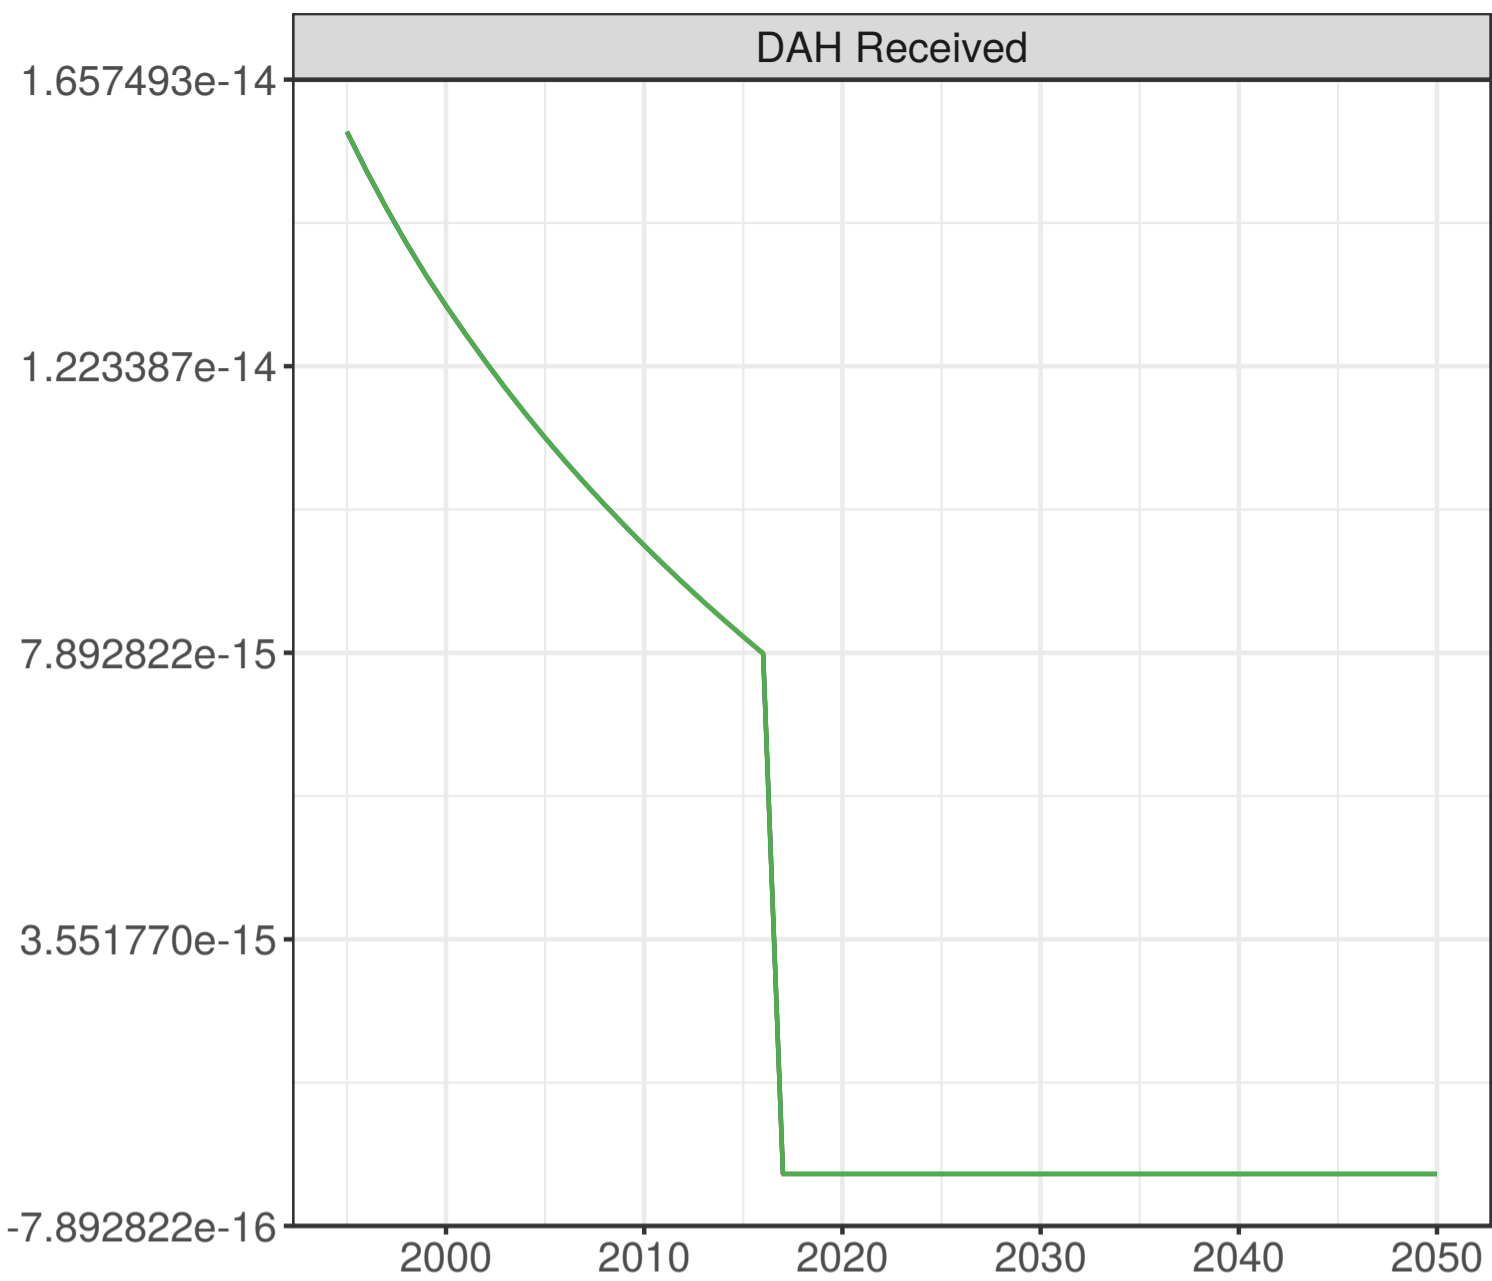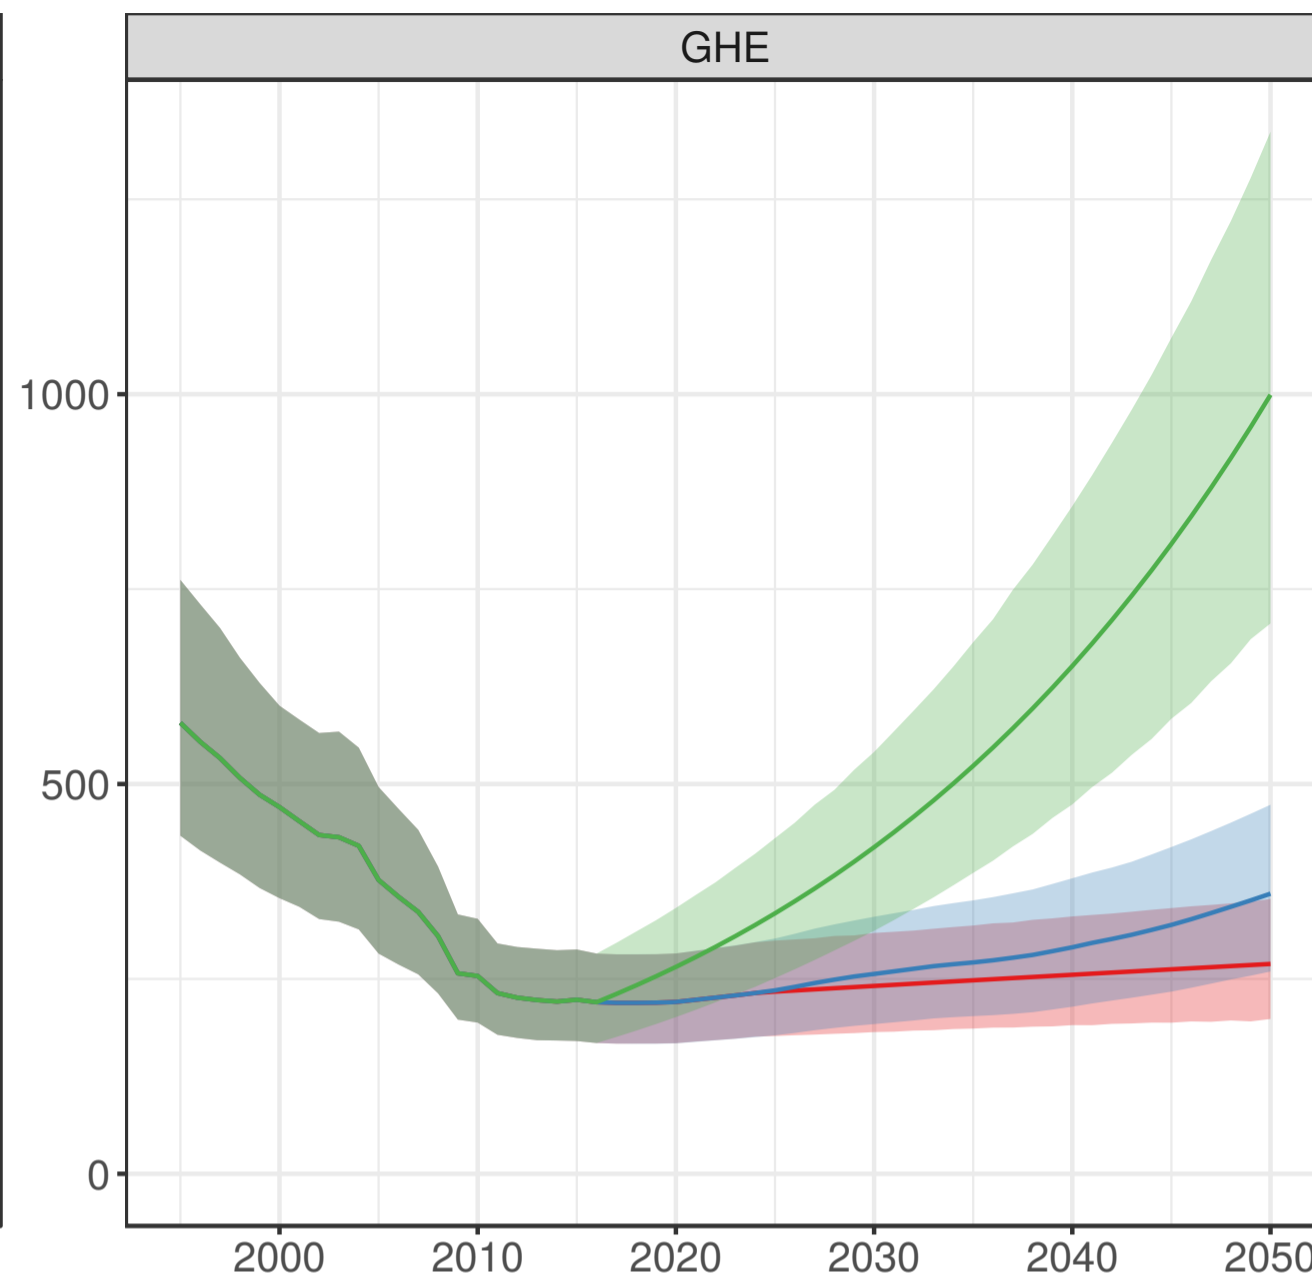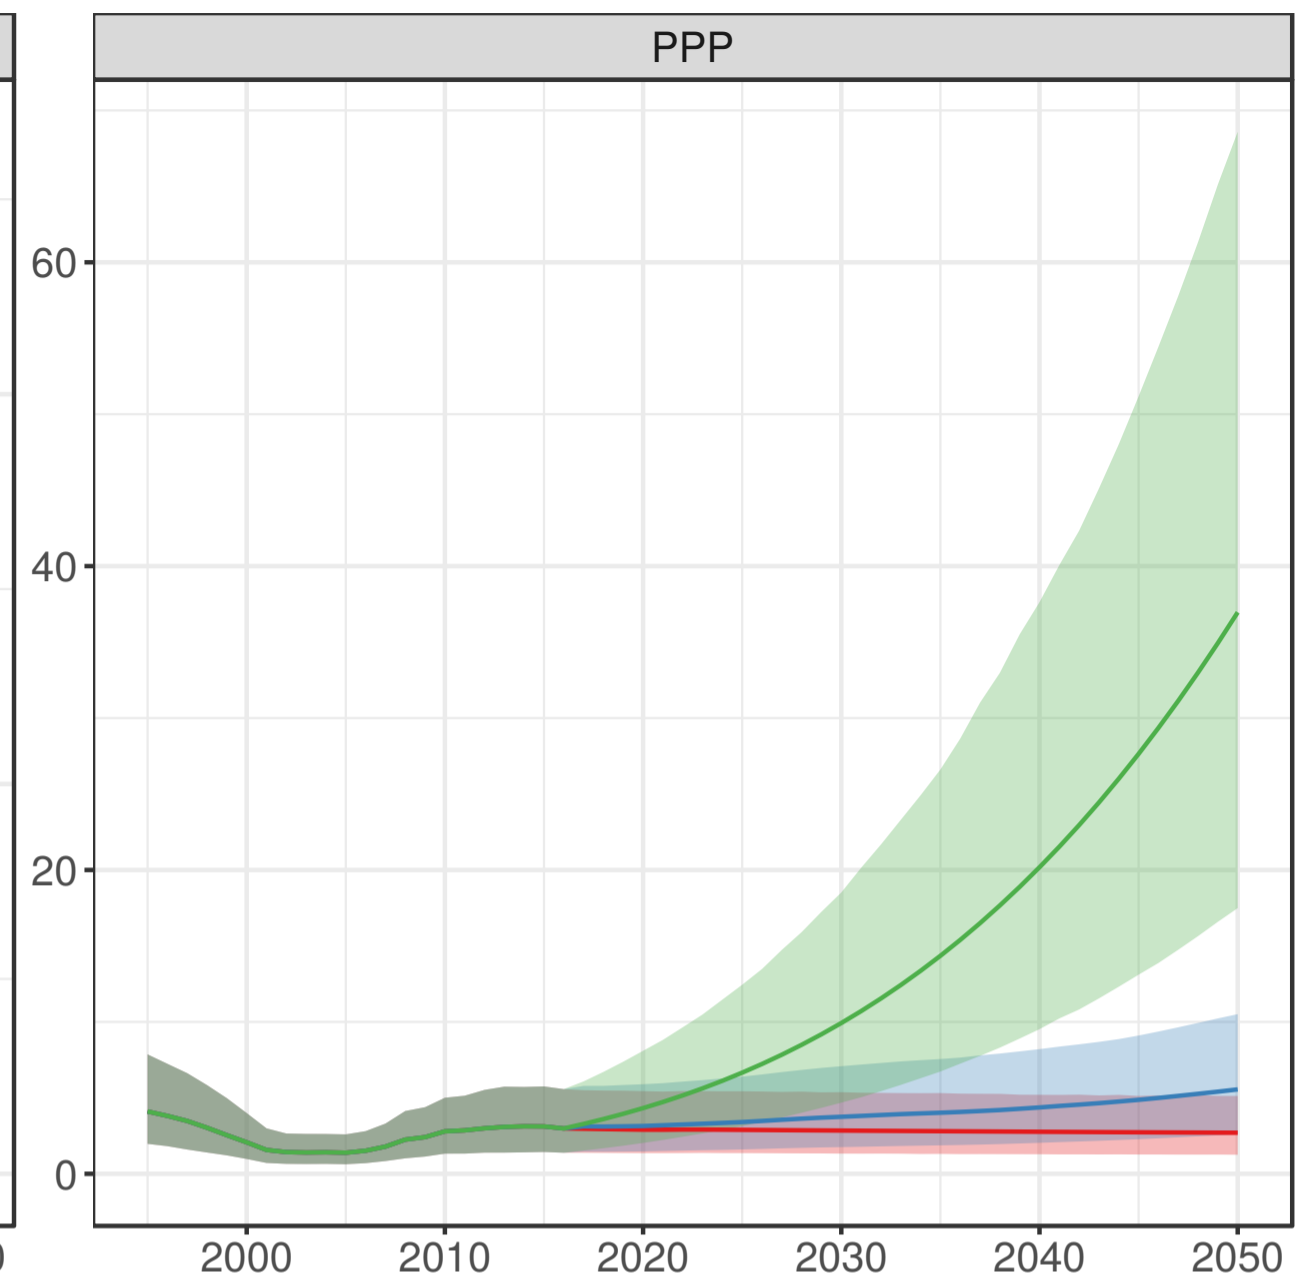

Scenario  
Worse  
Reference  
Better

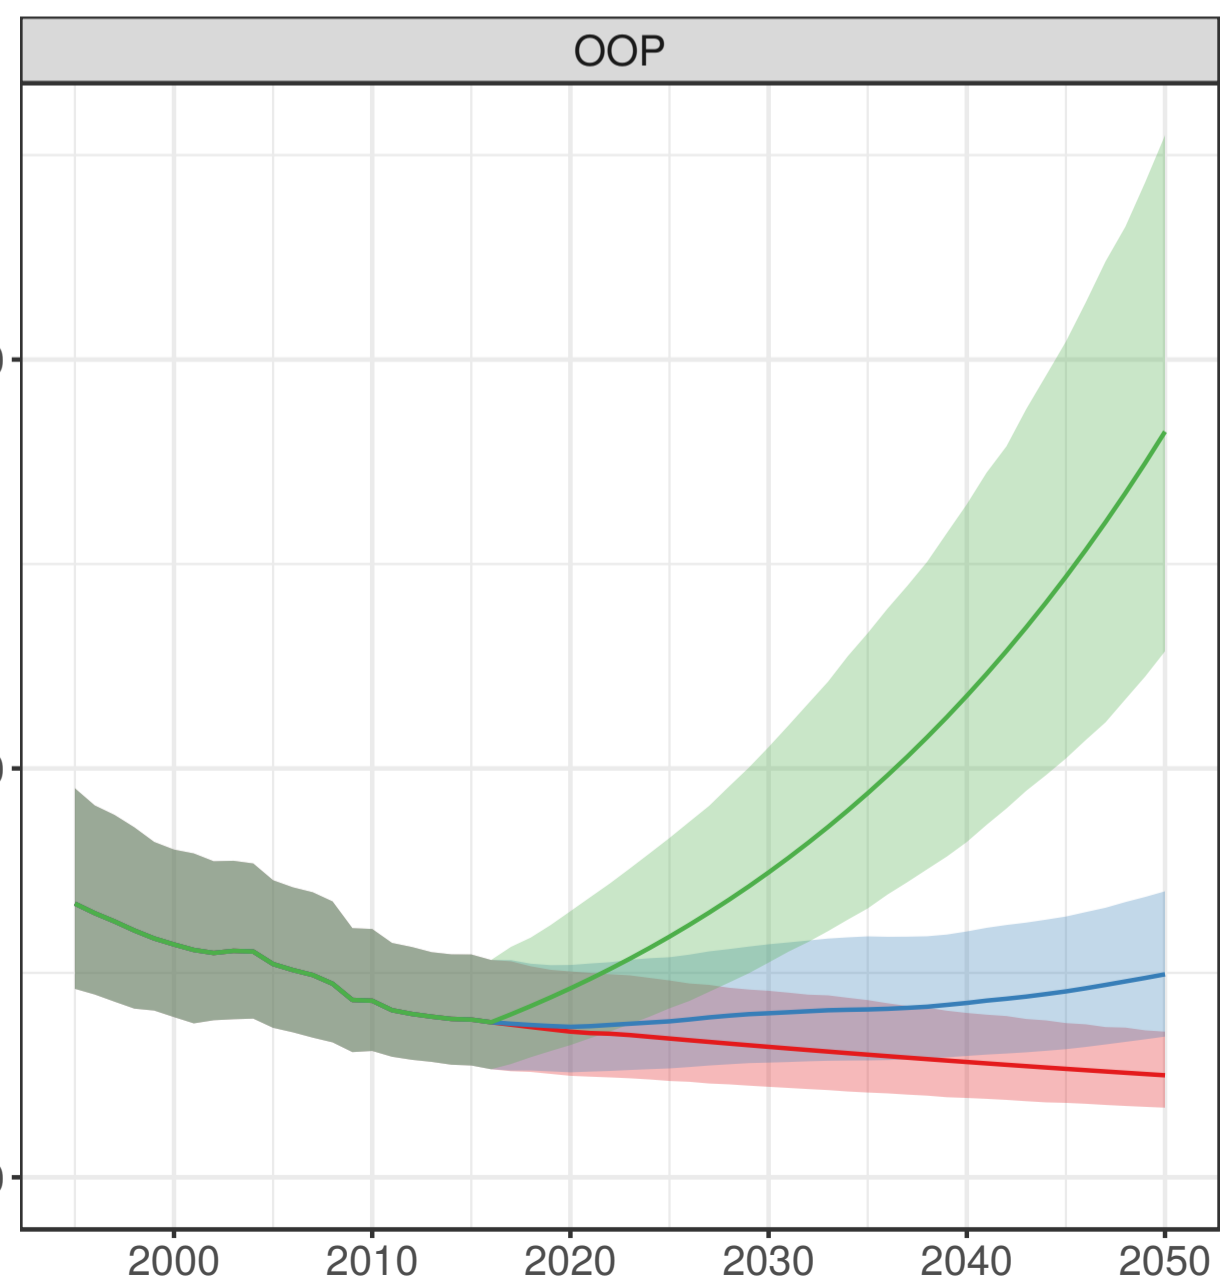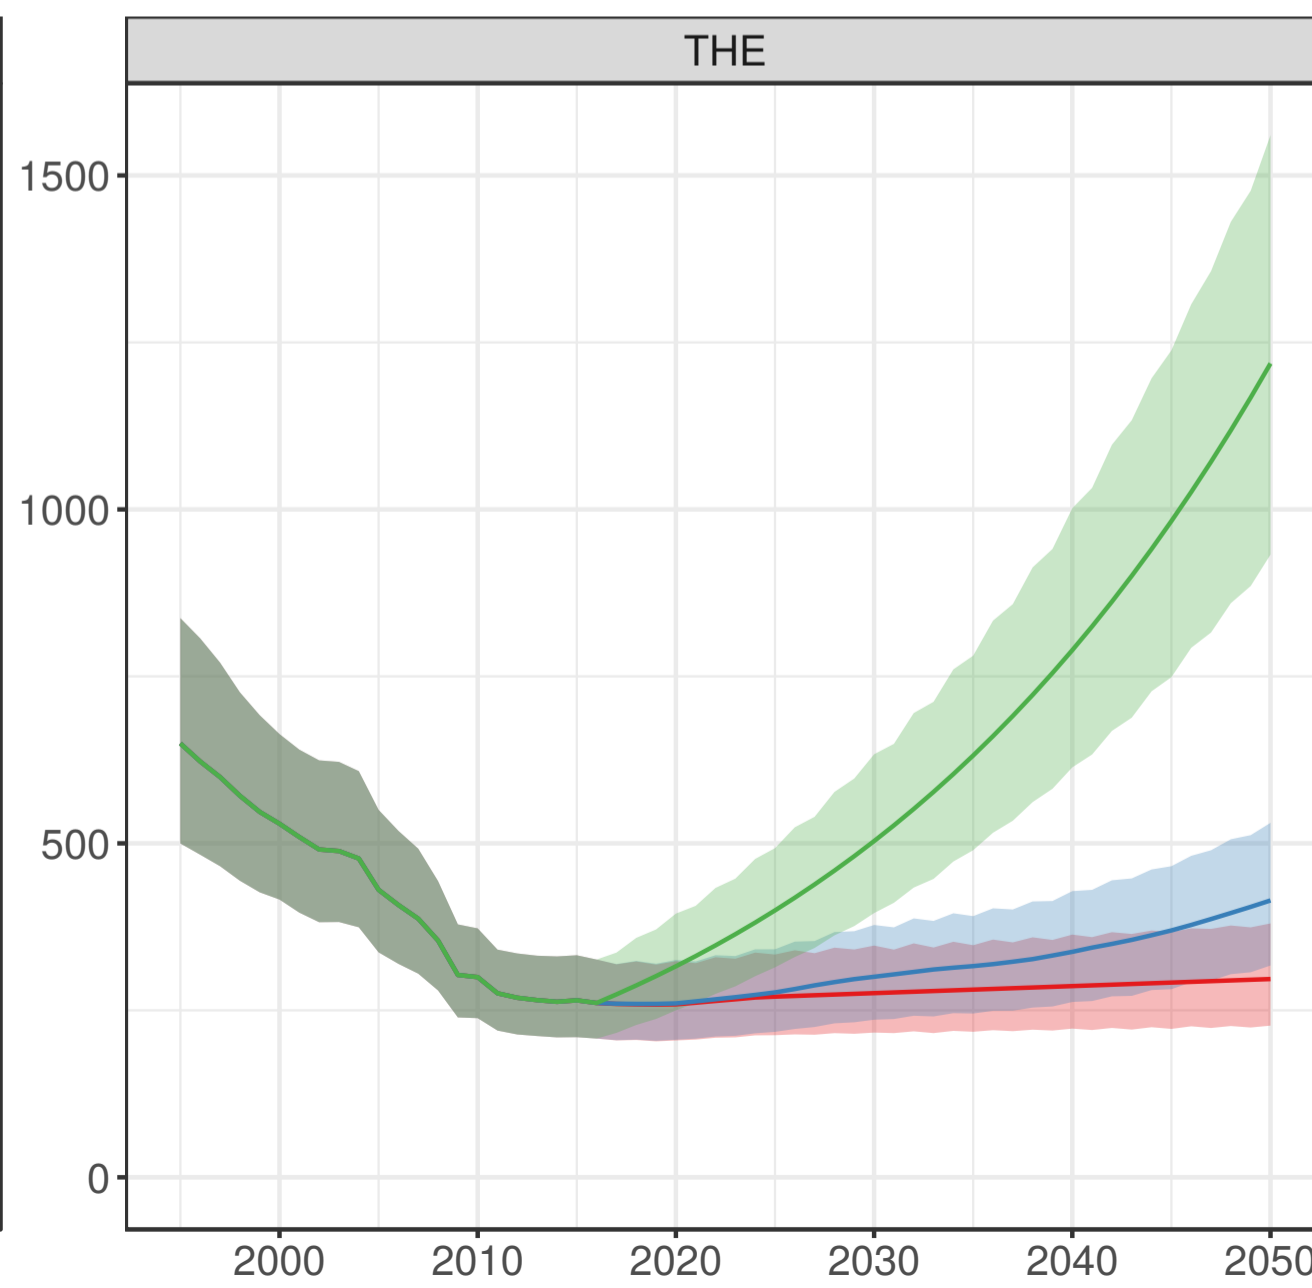

Year

# Norway

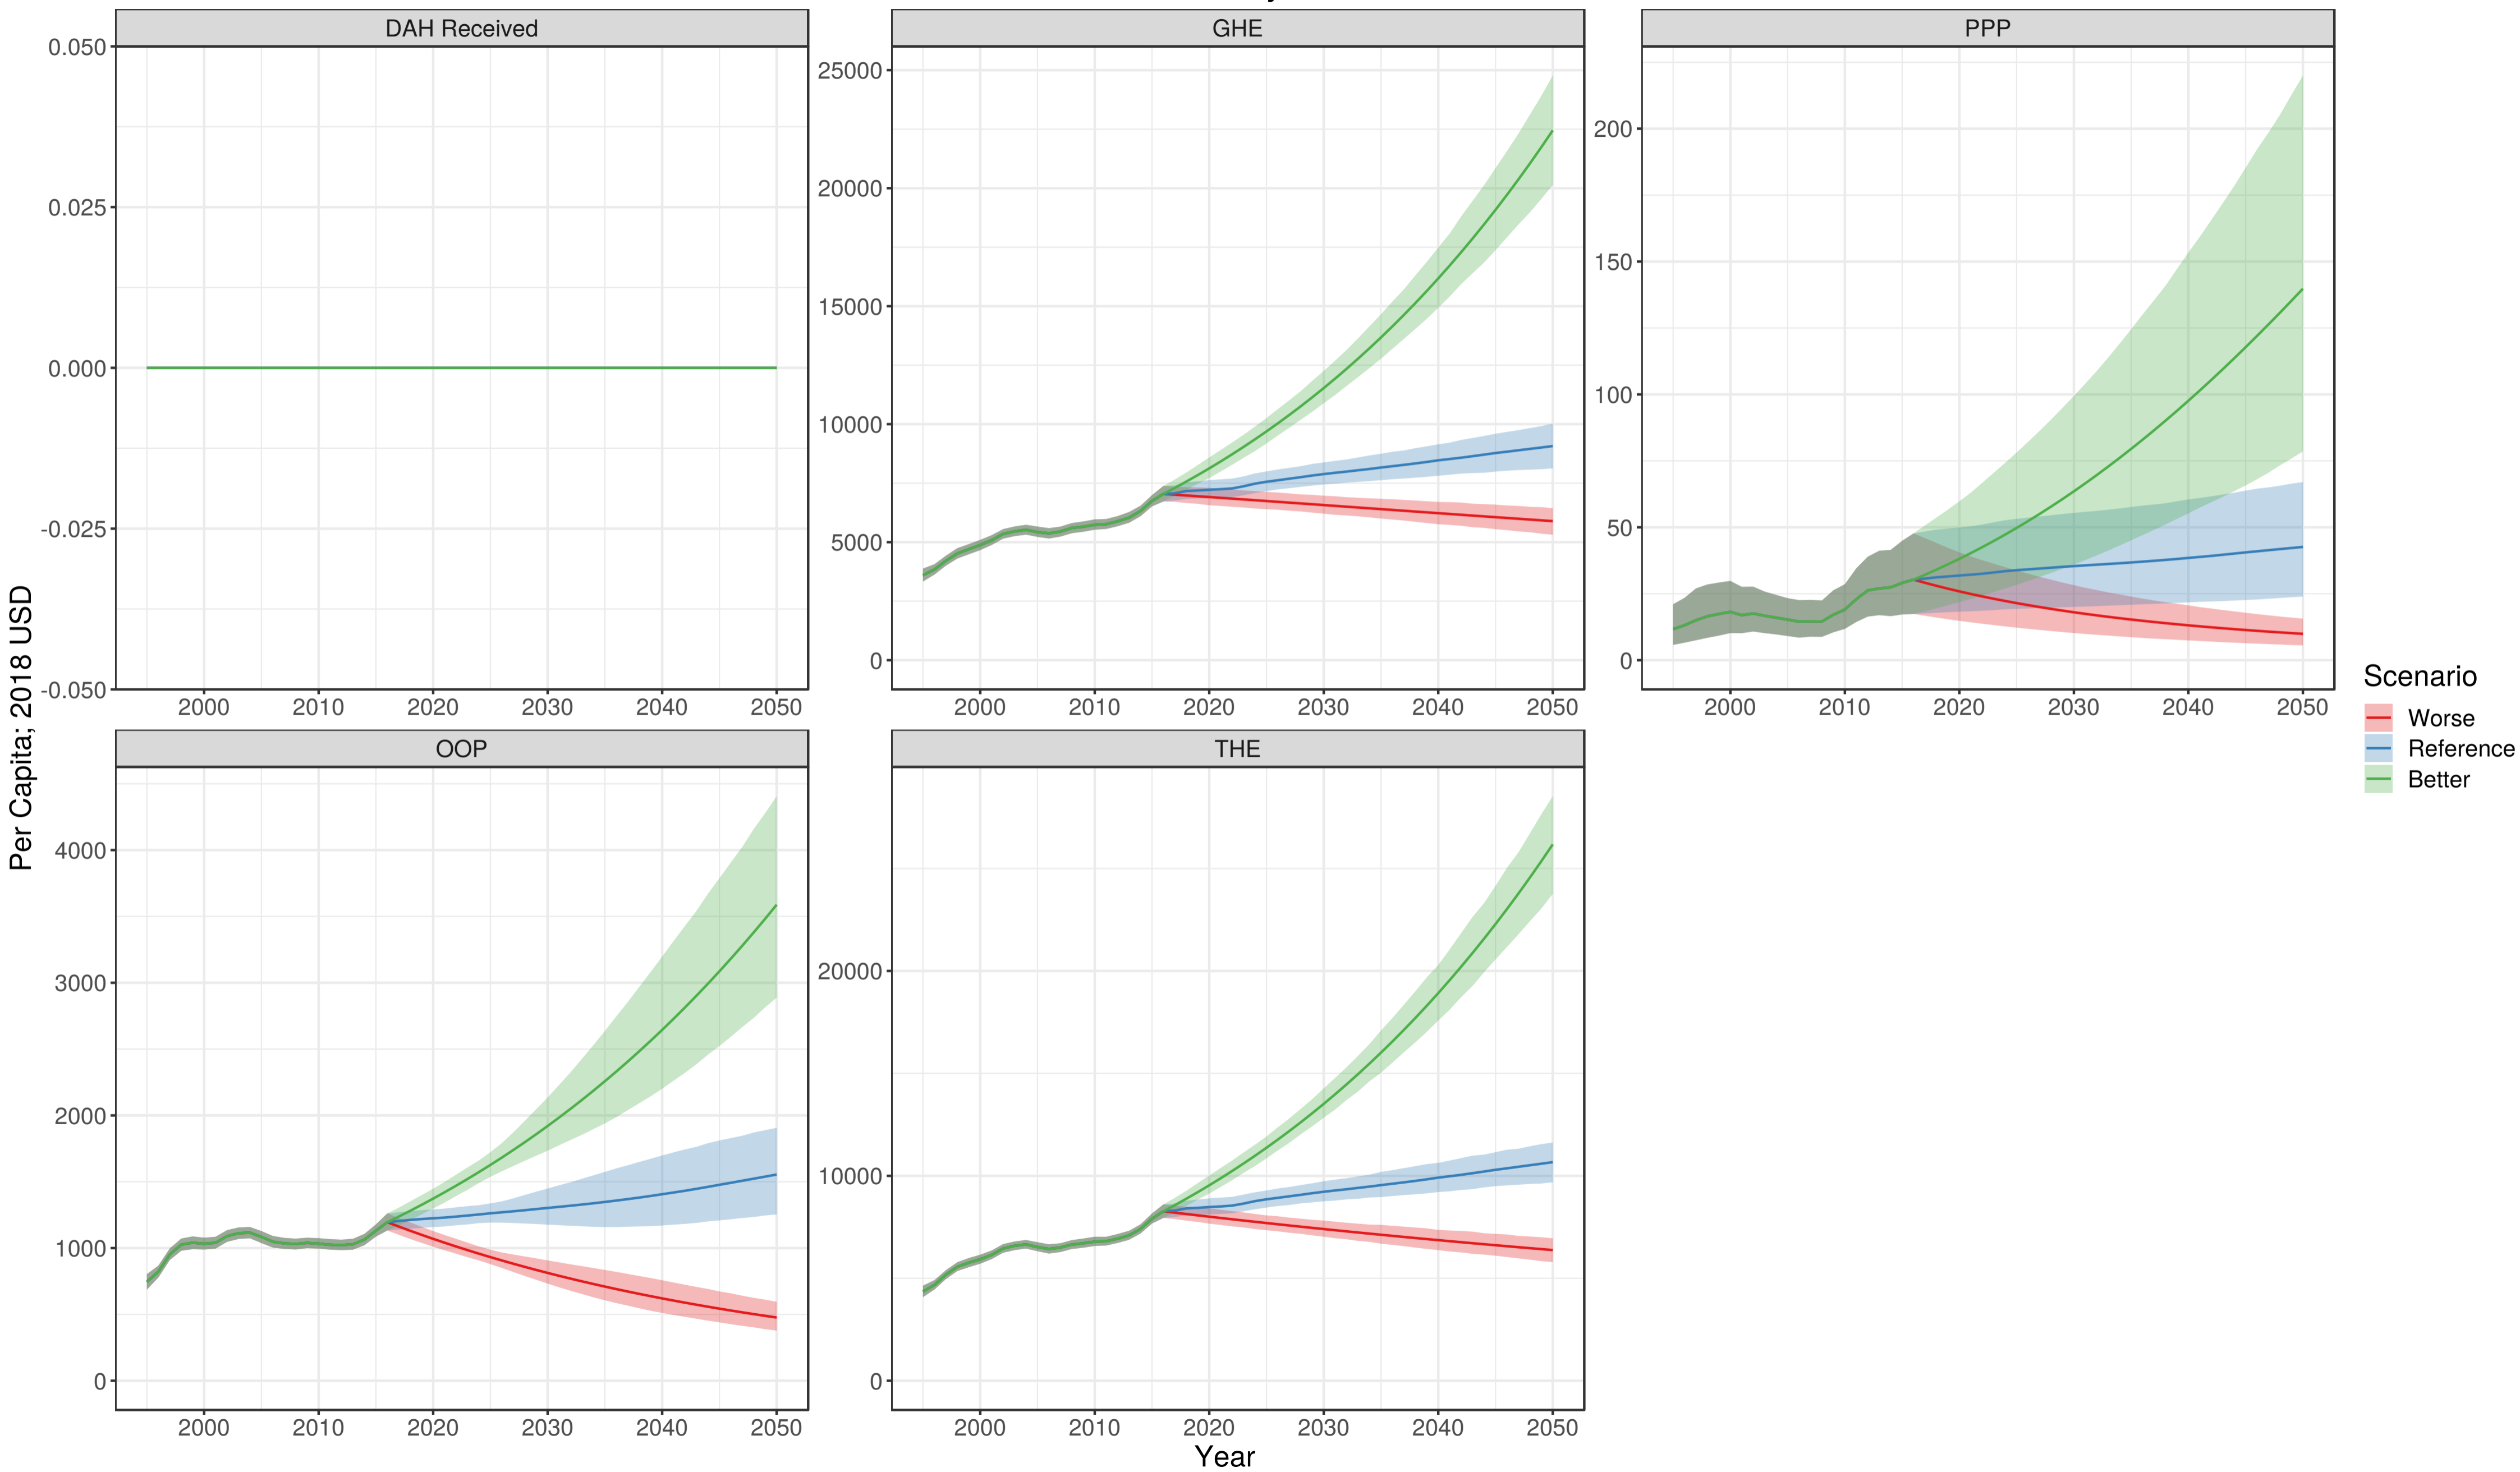

# Oman

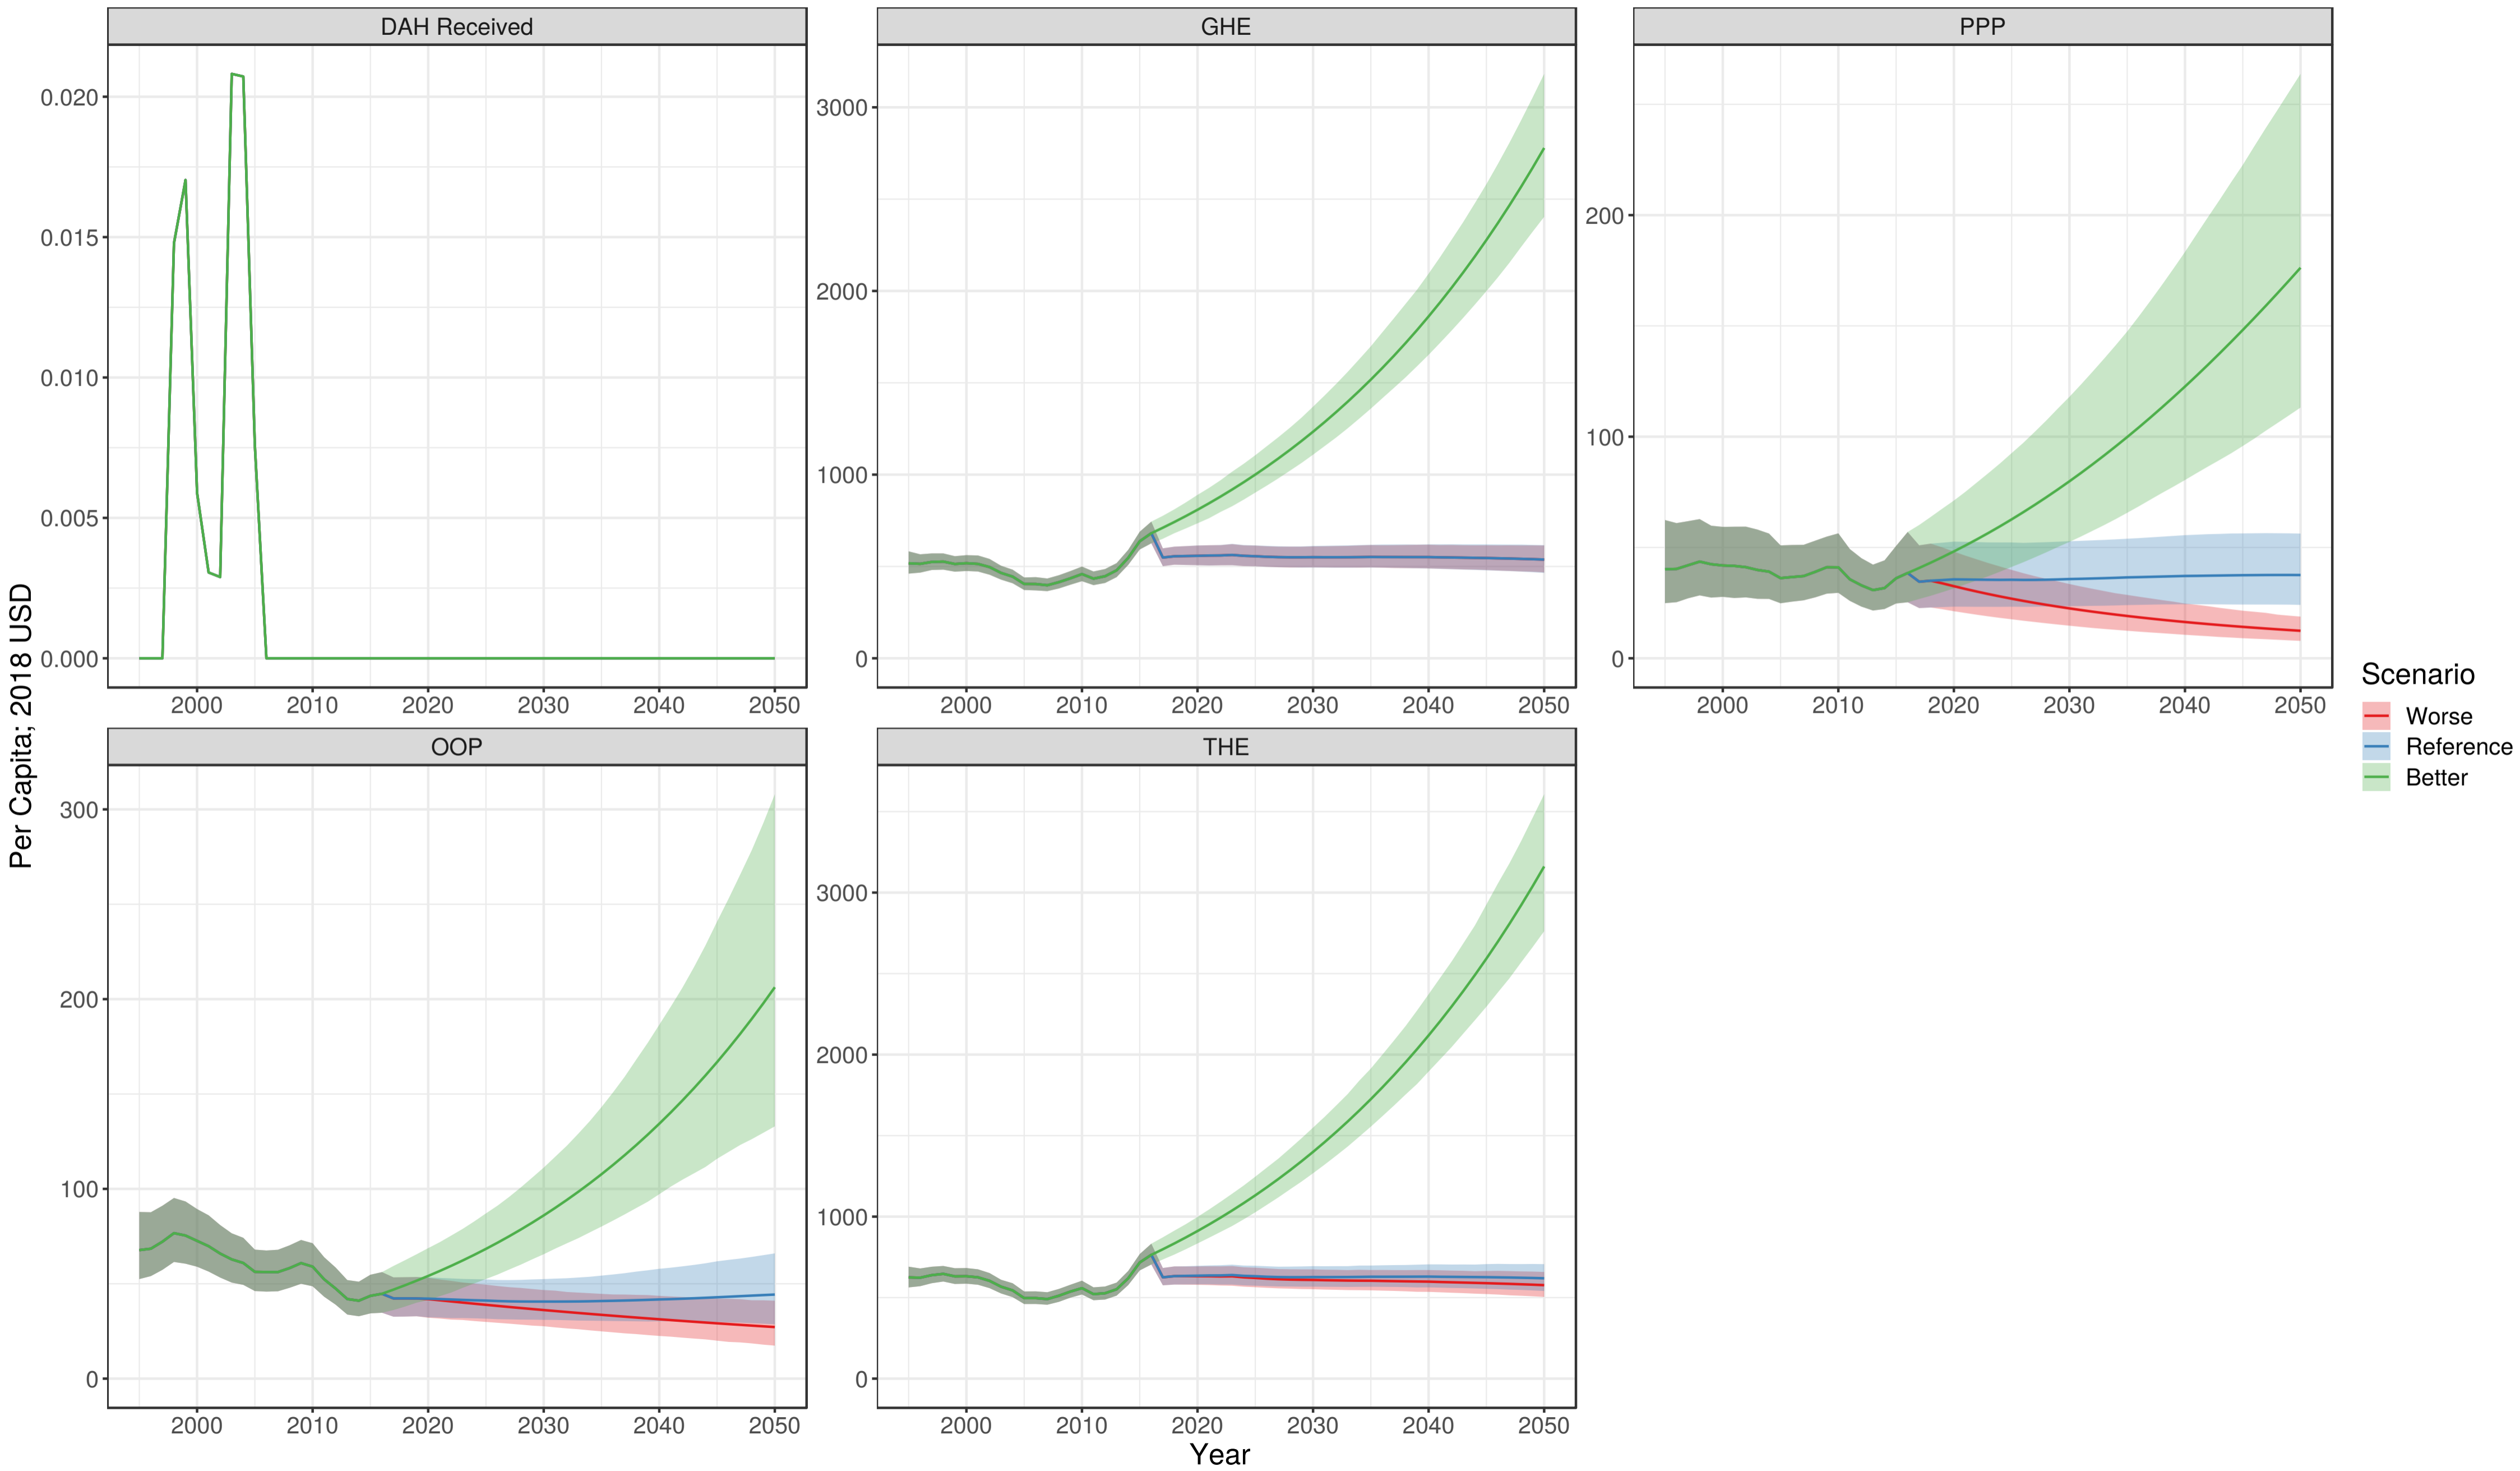

# Pakistan

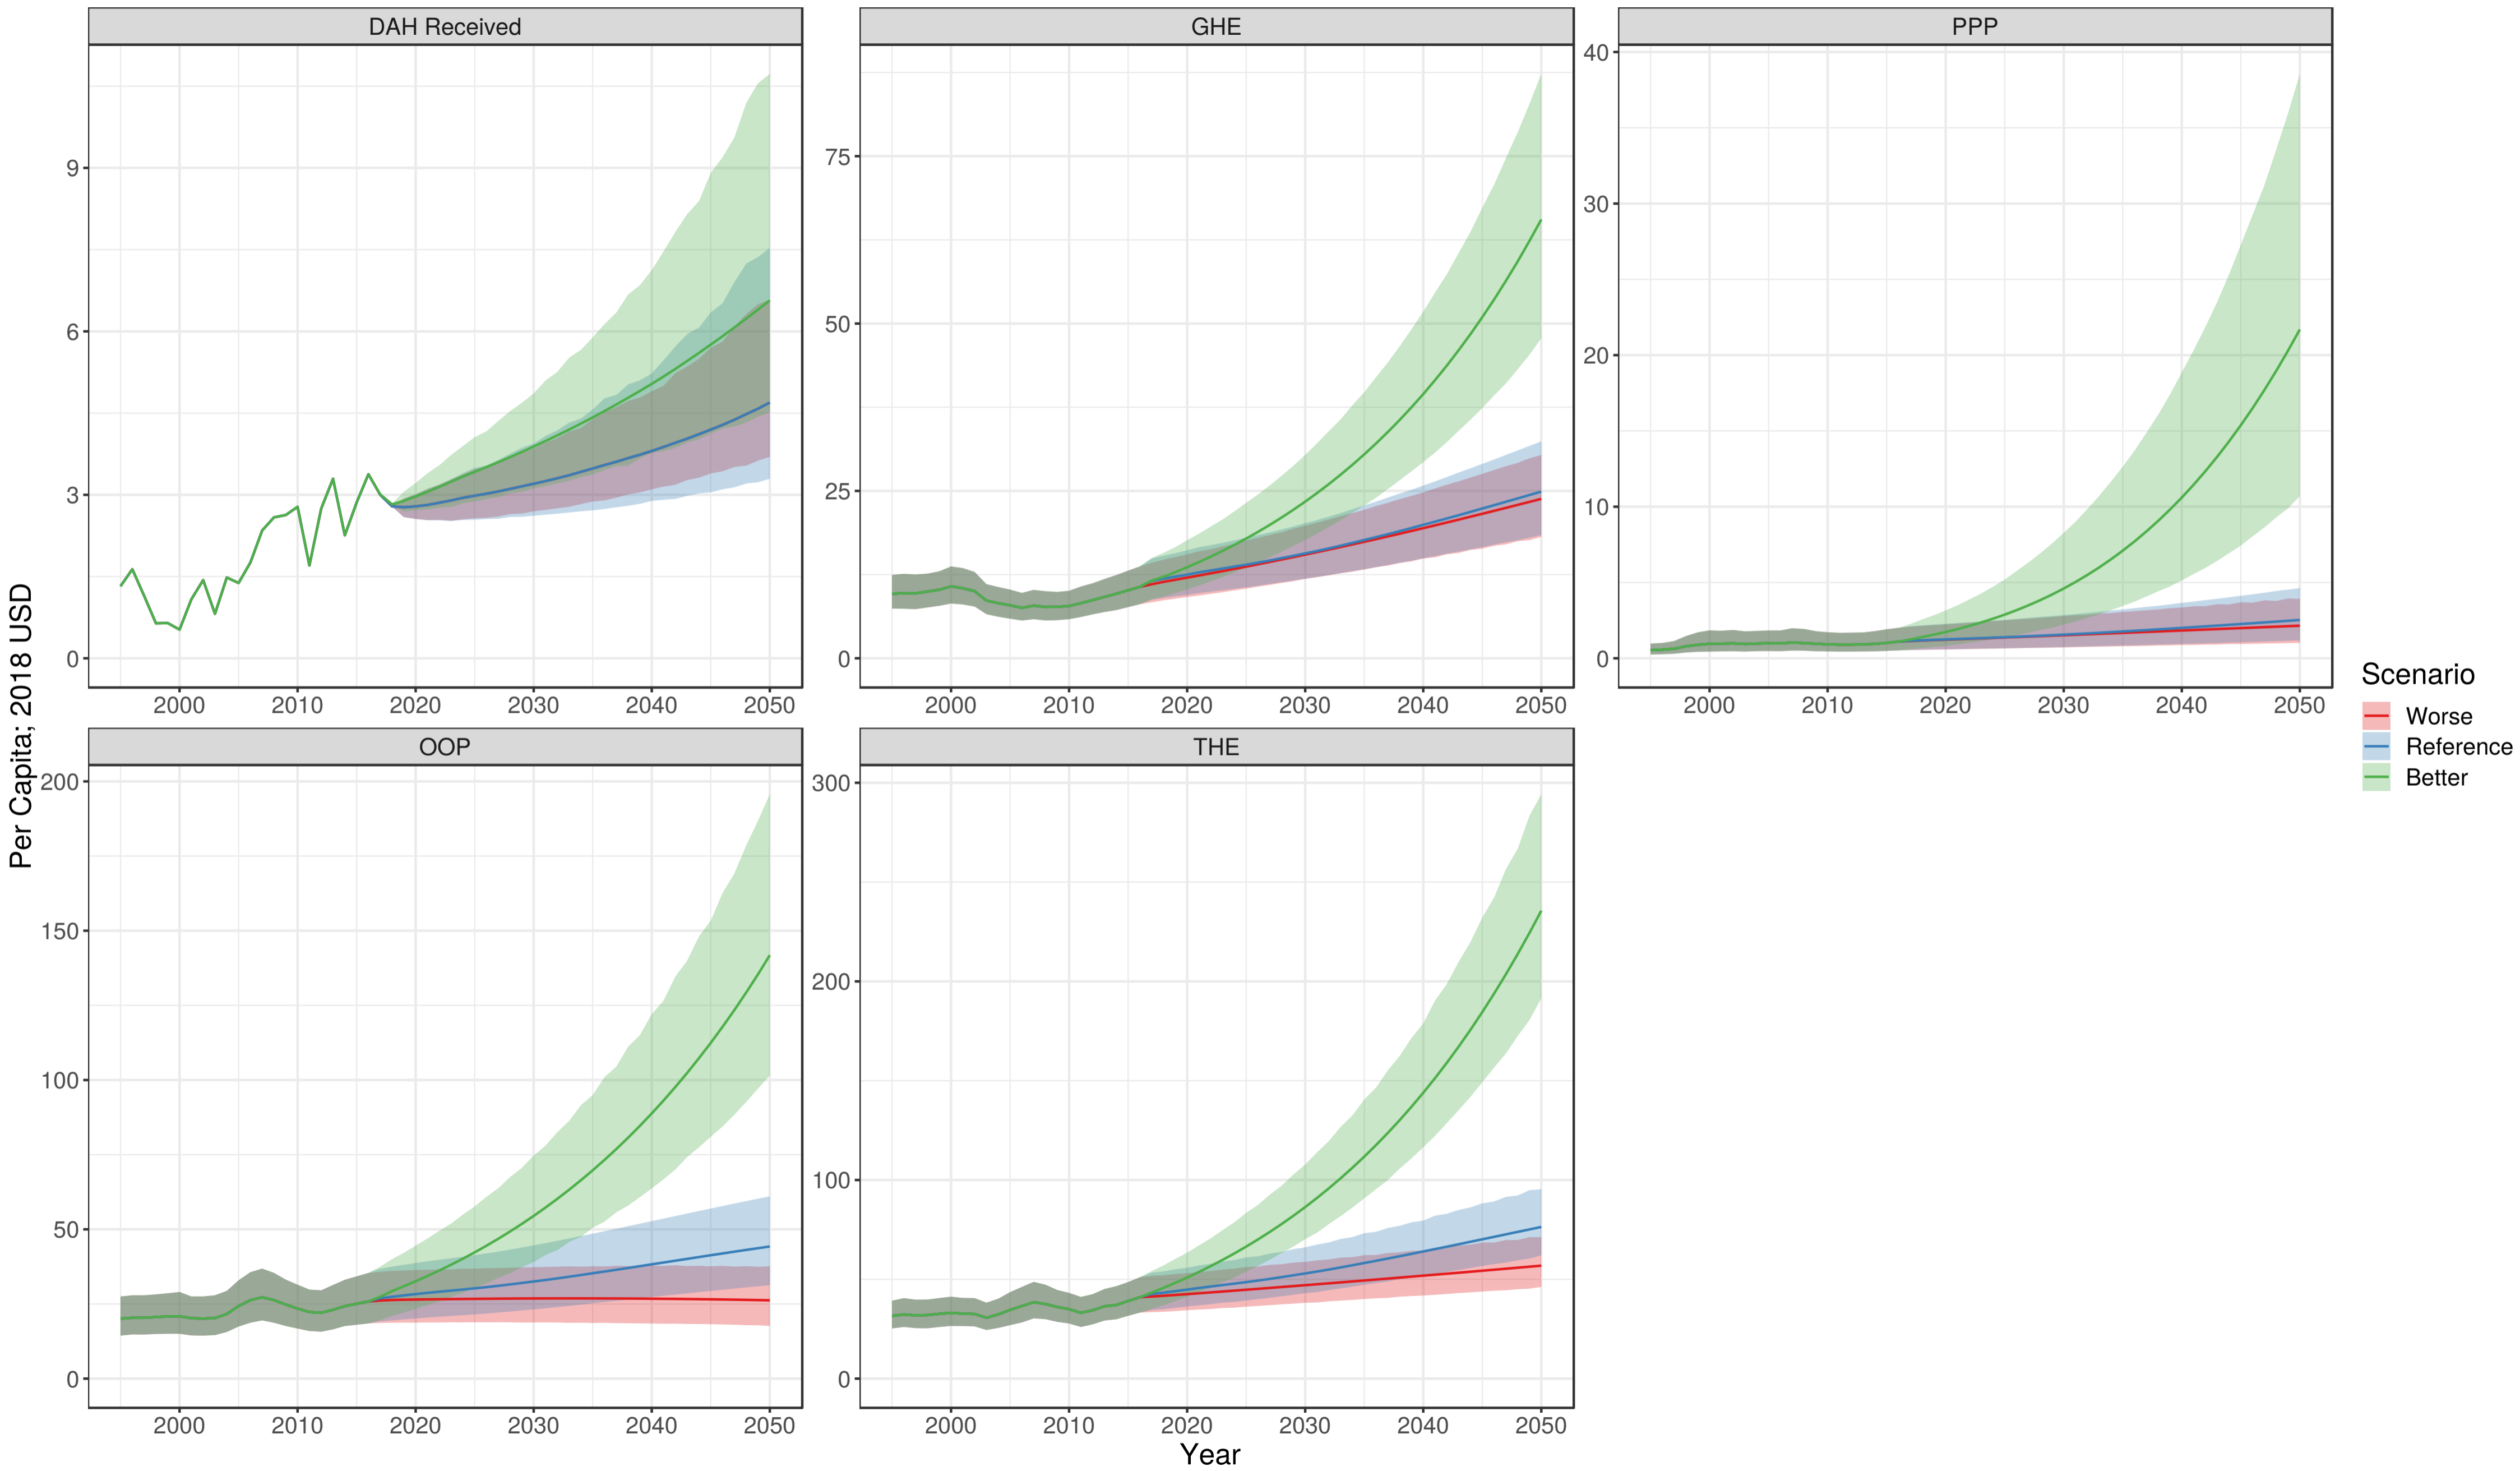

# Palestine

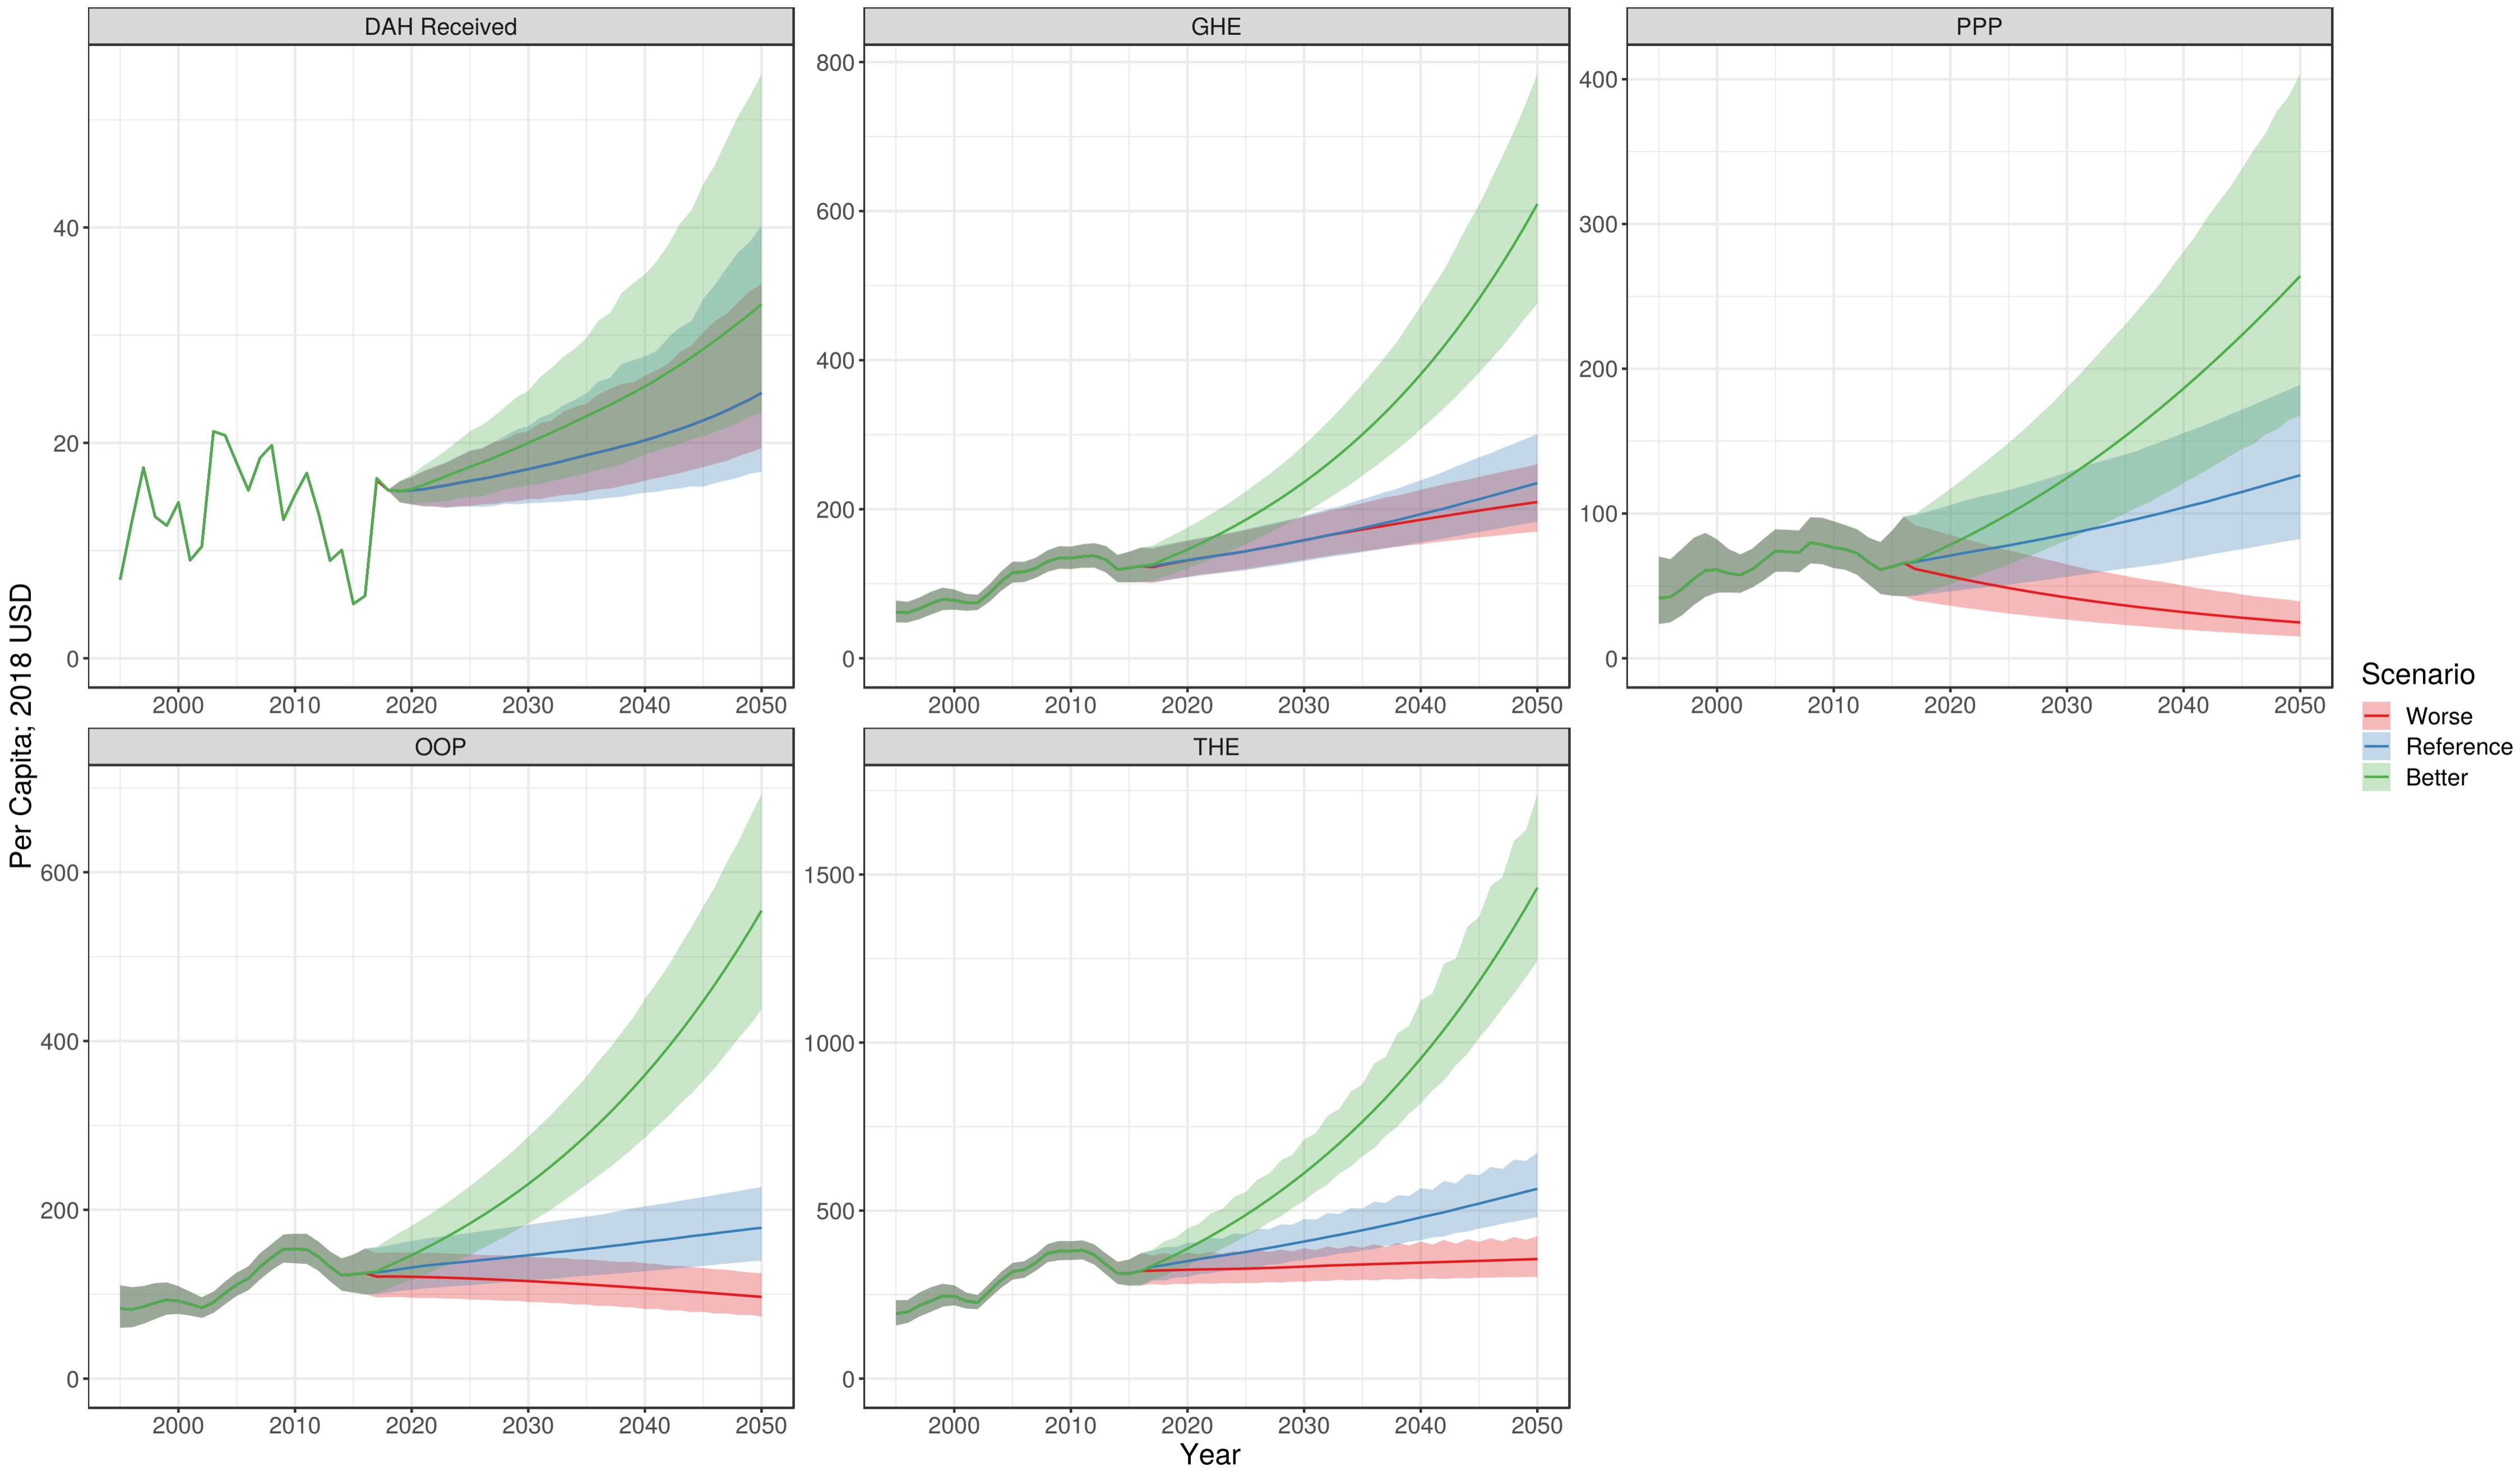

# Panama

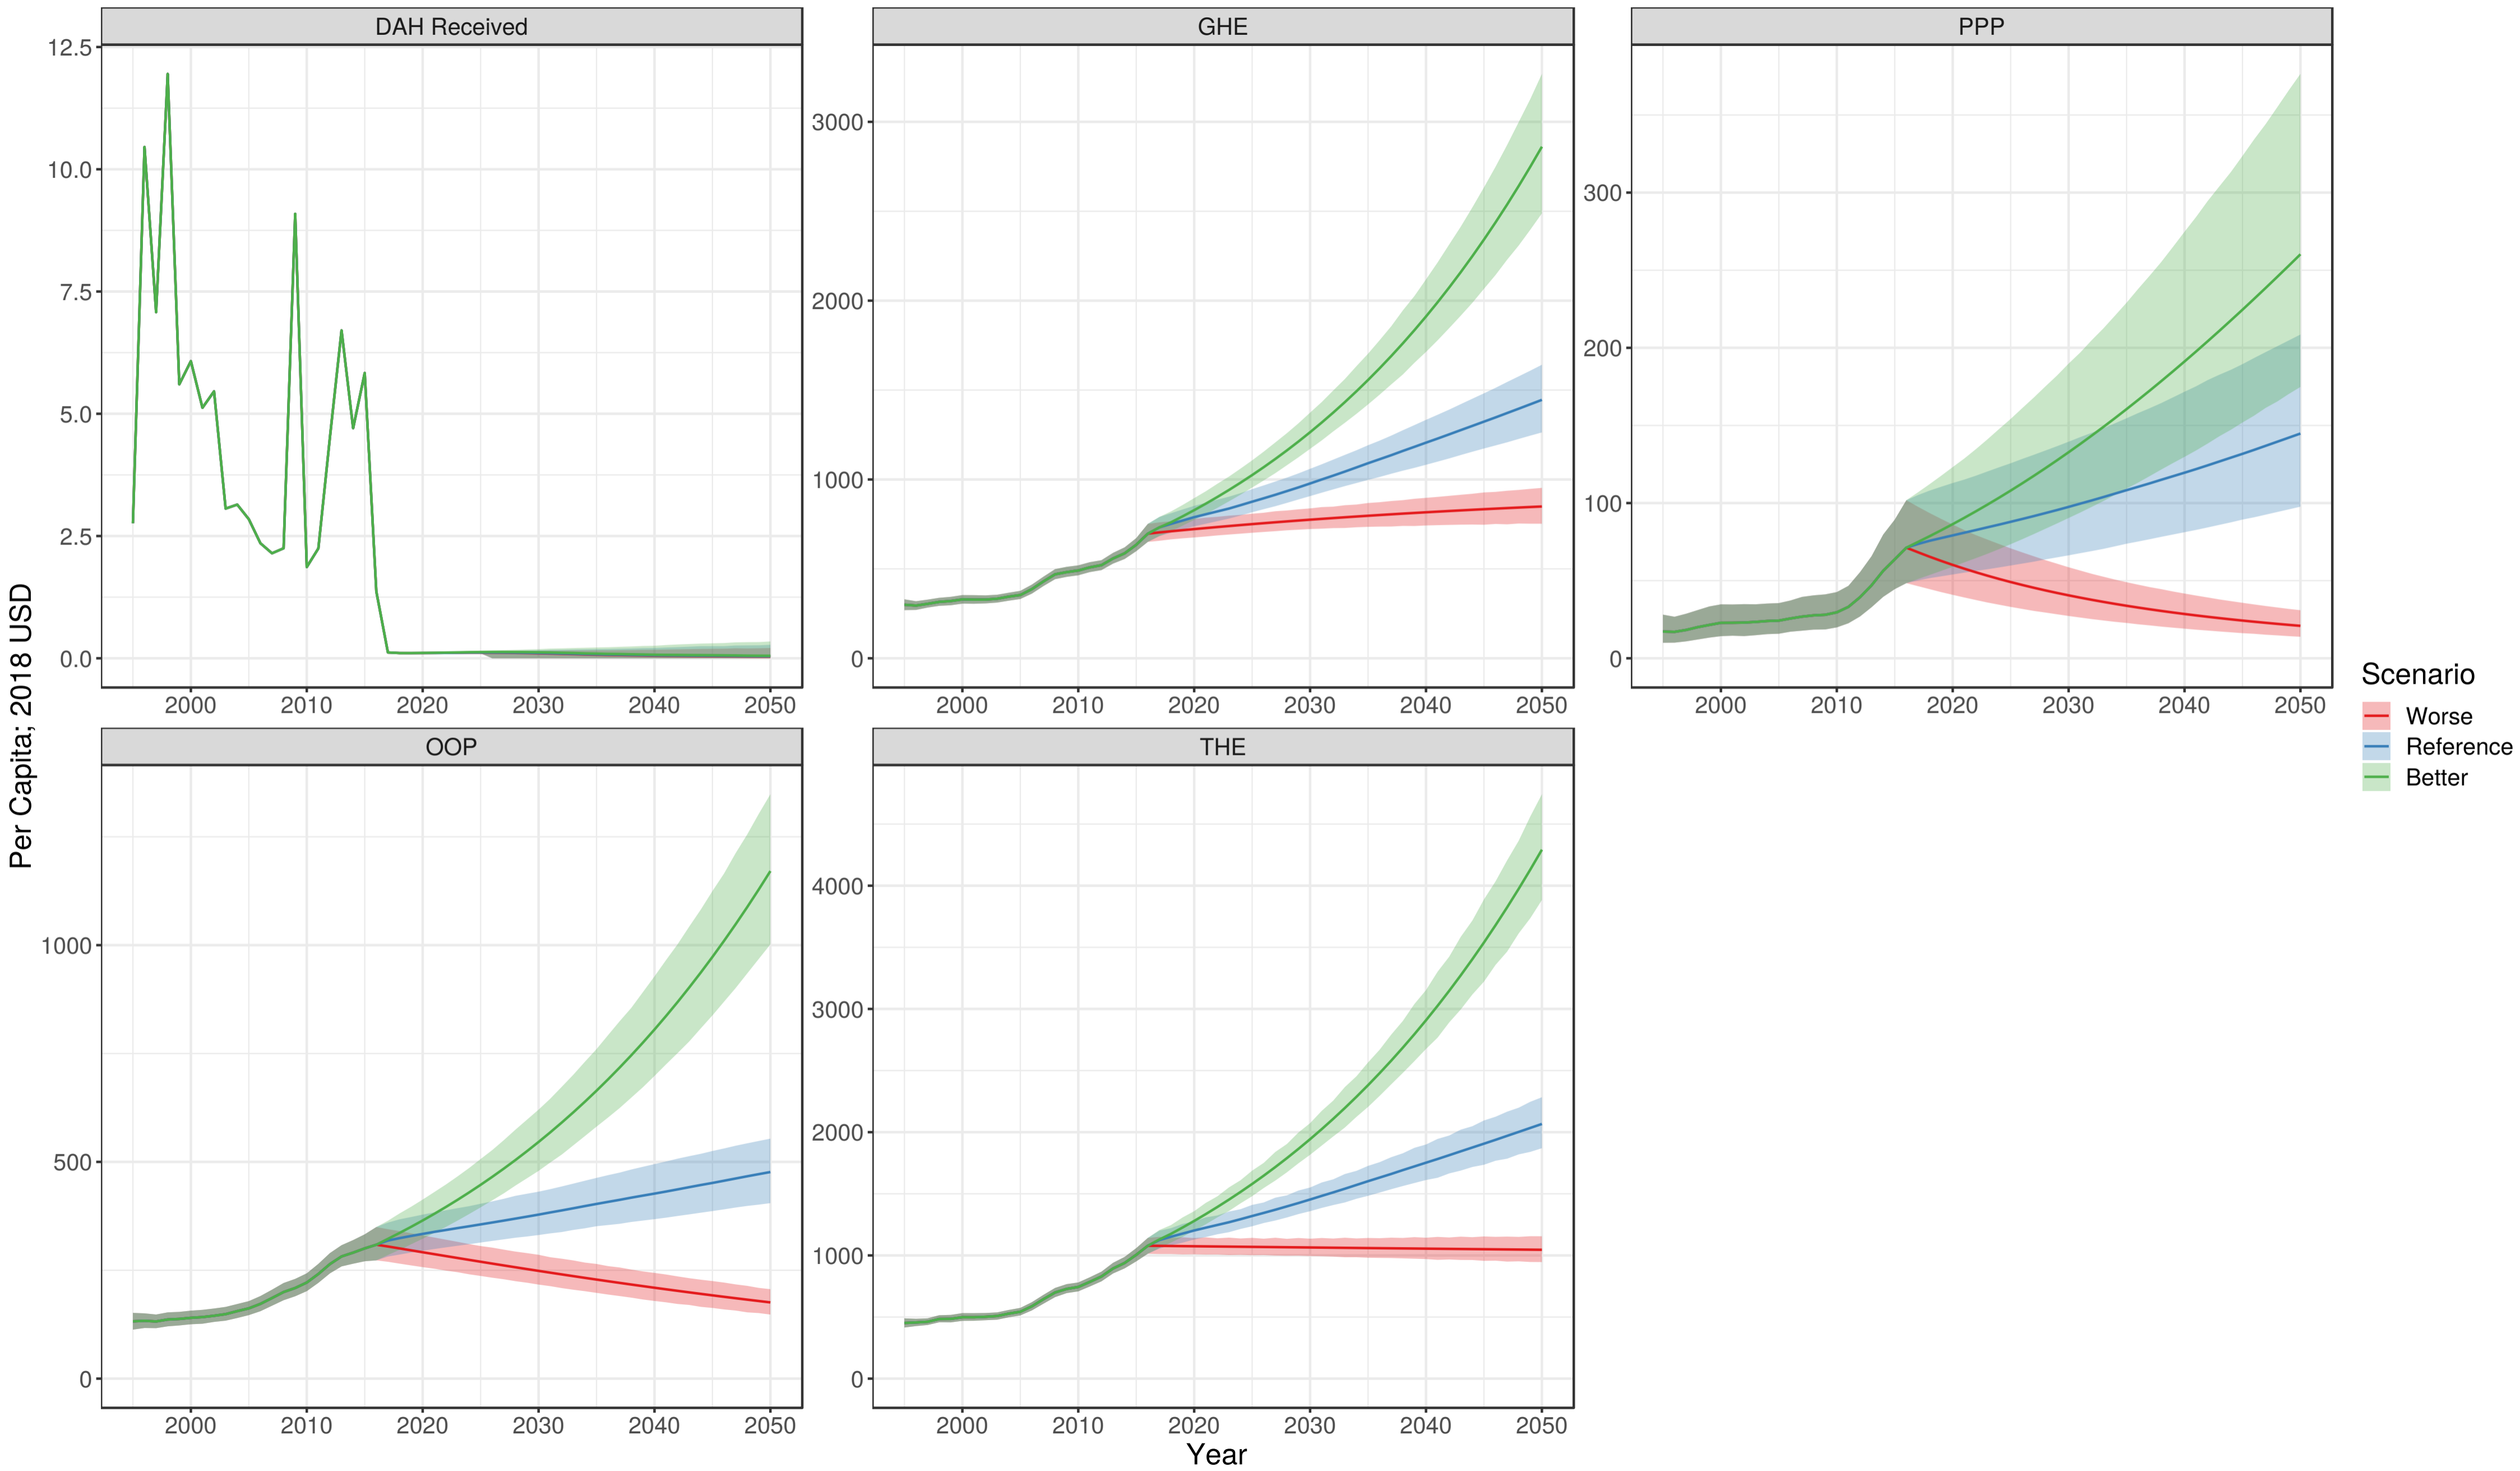



# Papua New Guinea

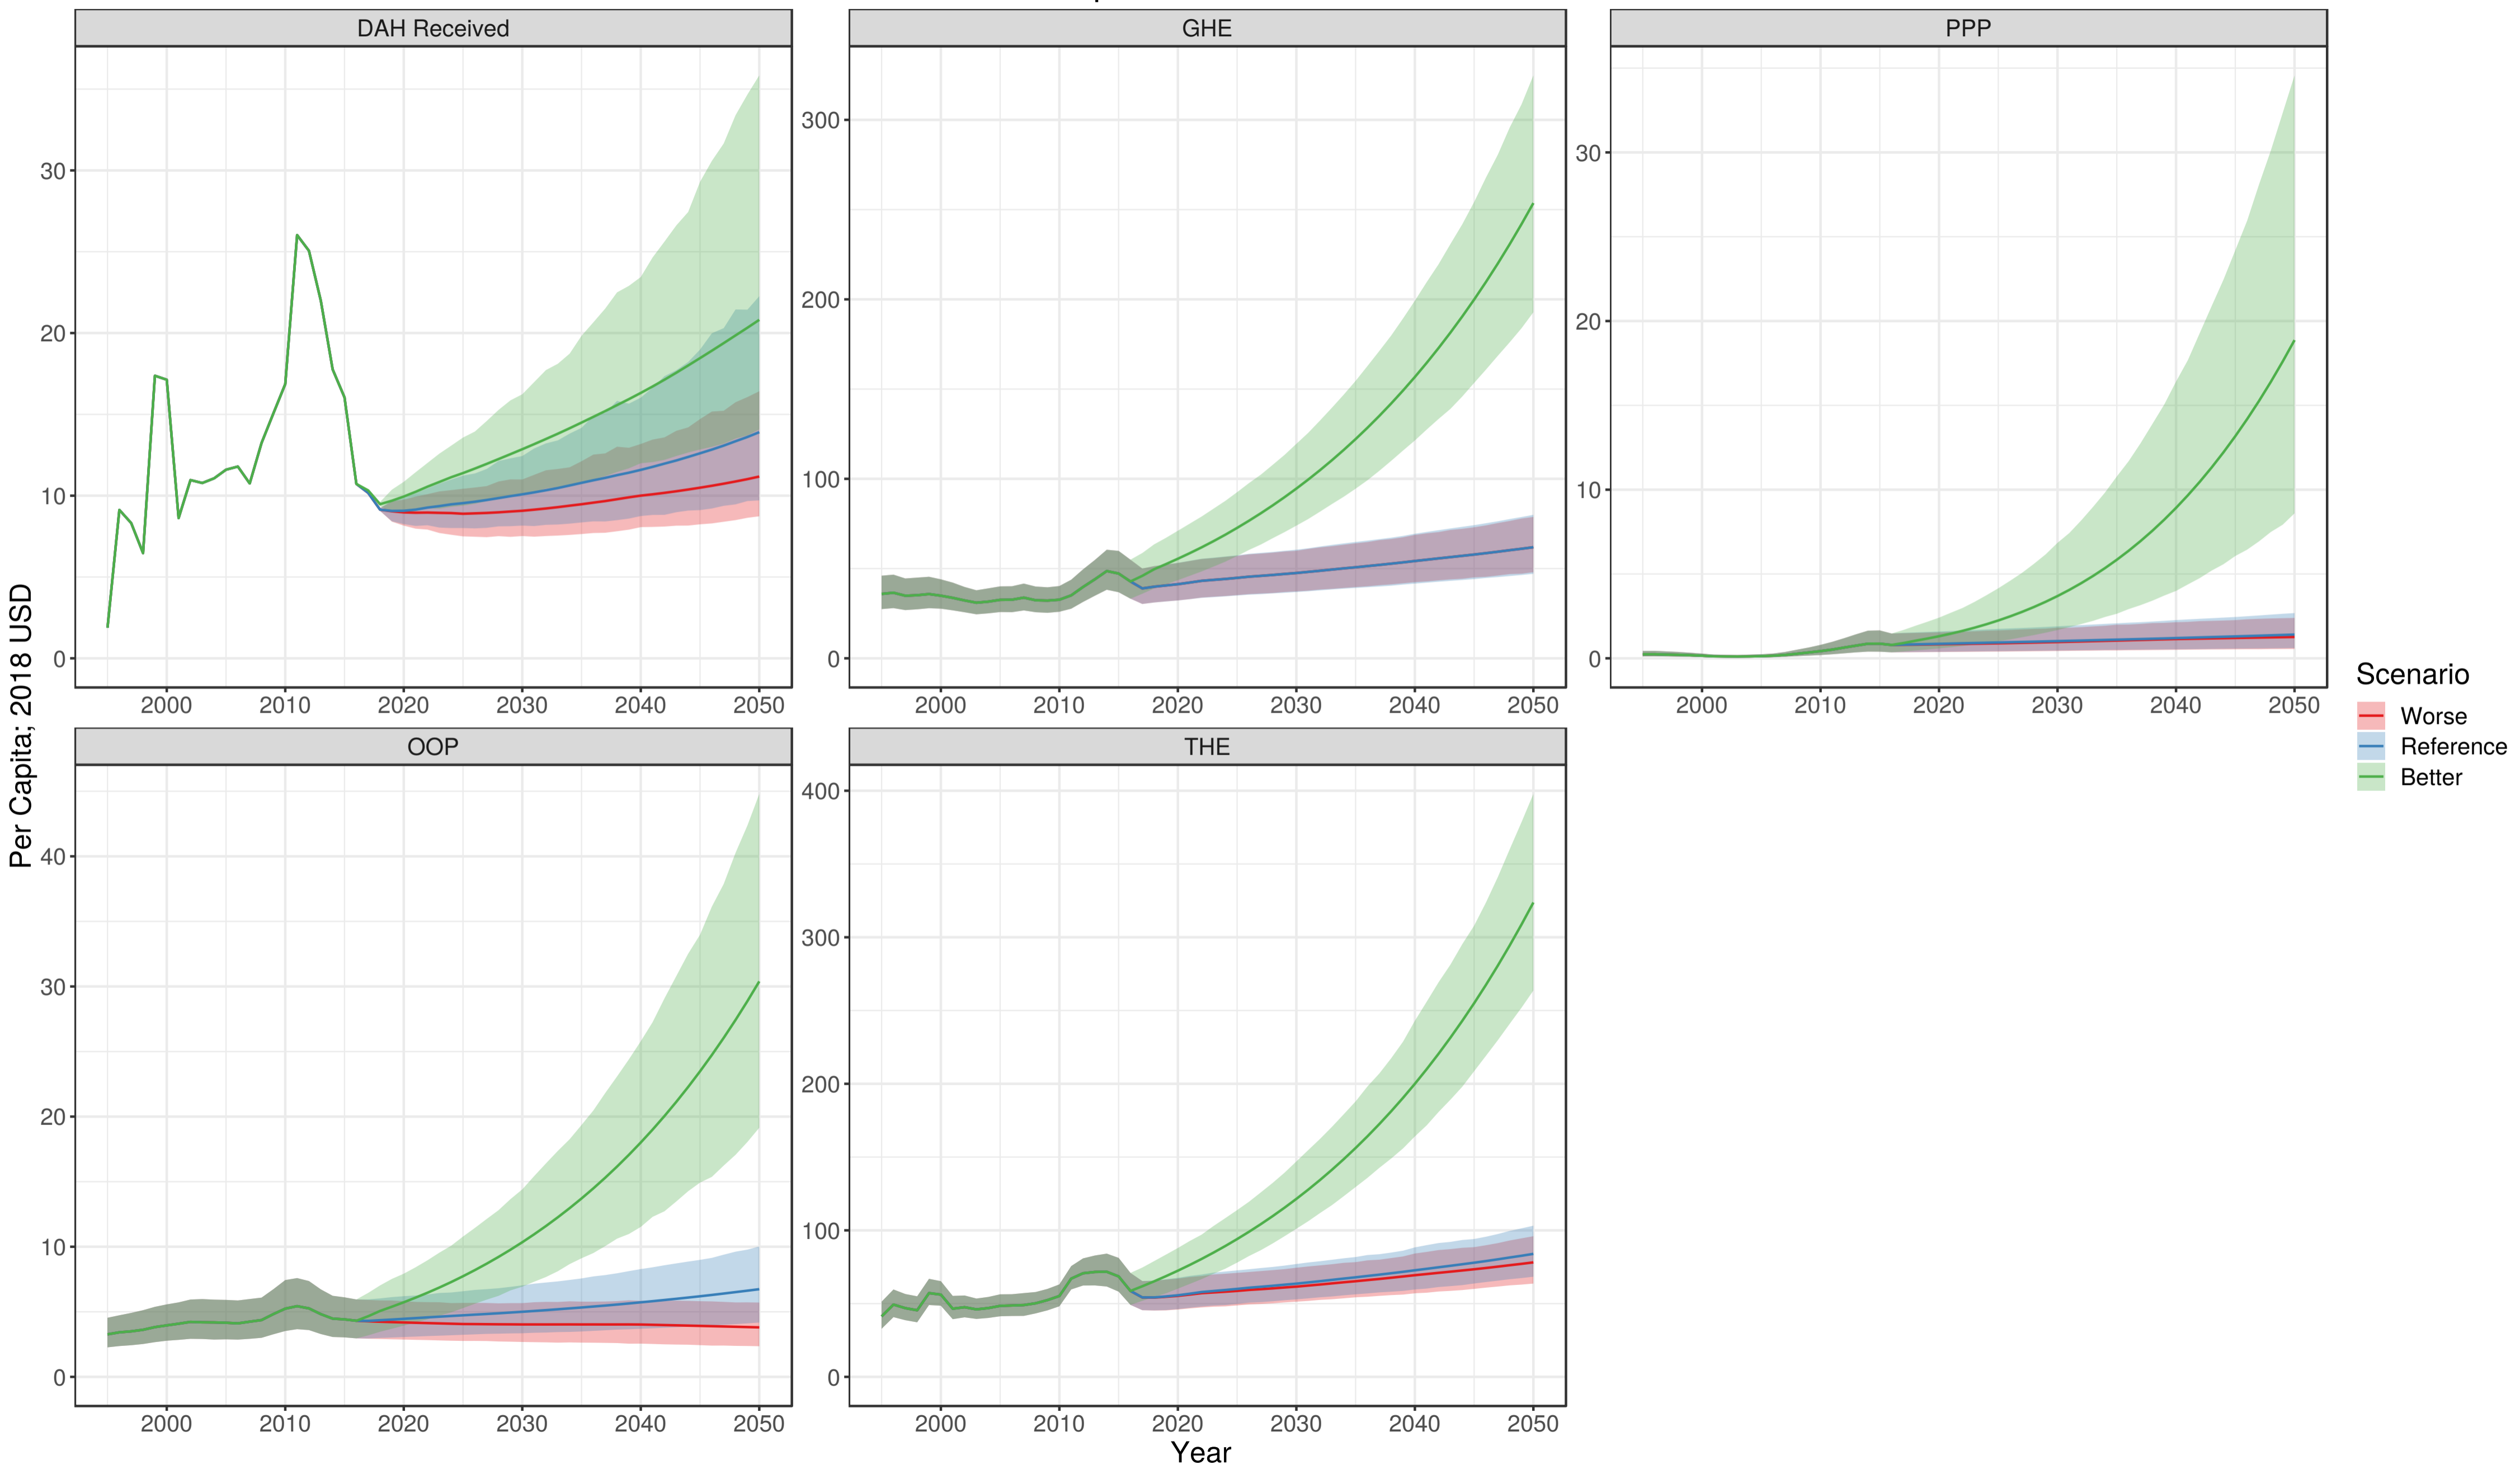

# Paraguay

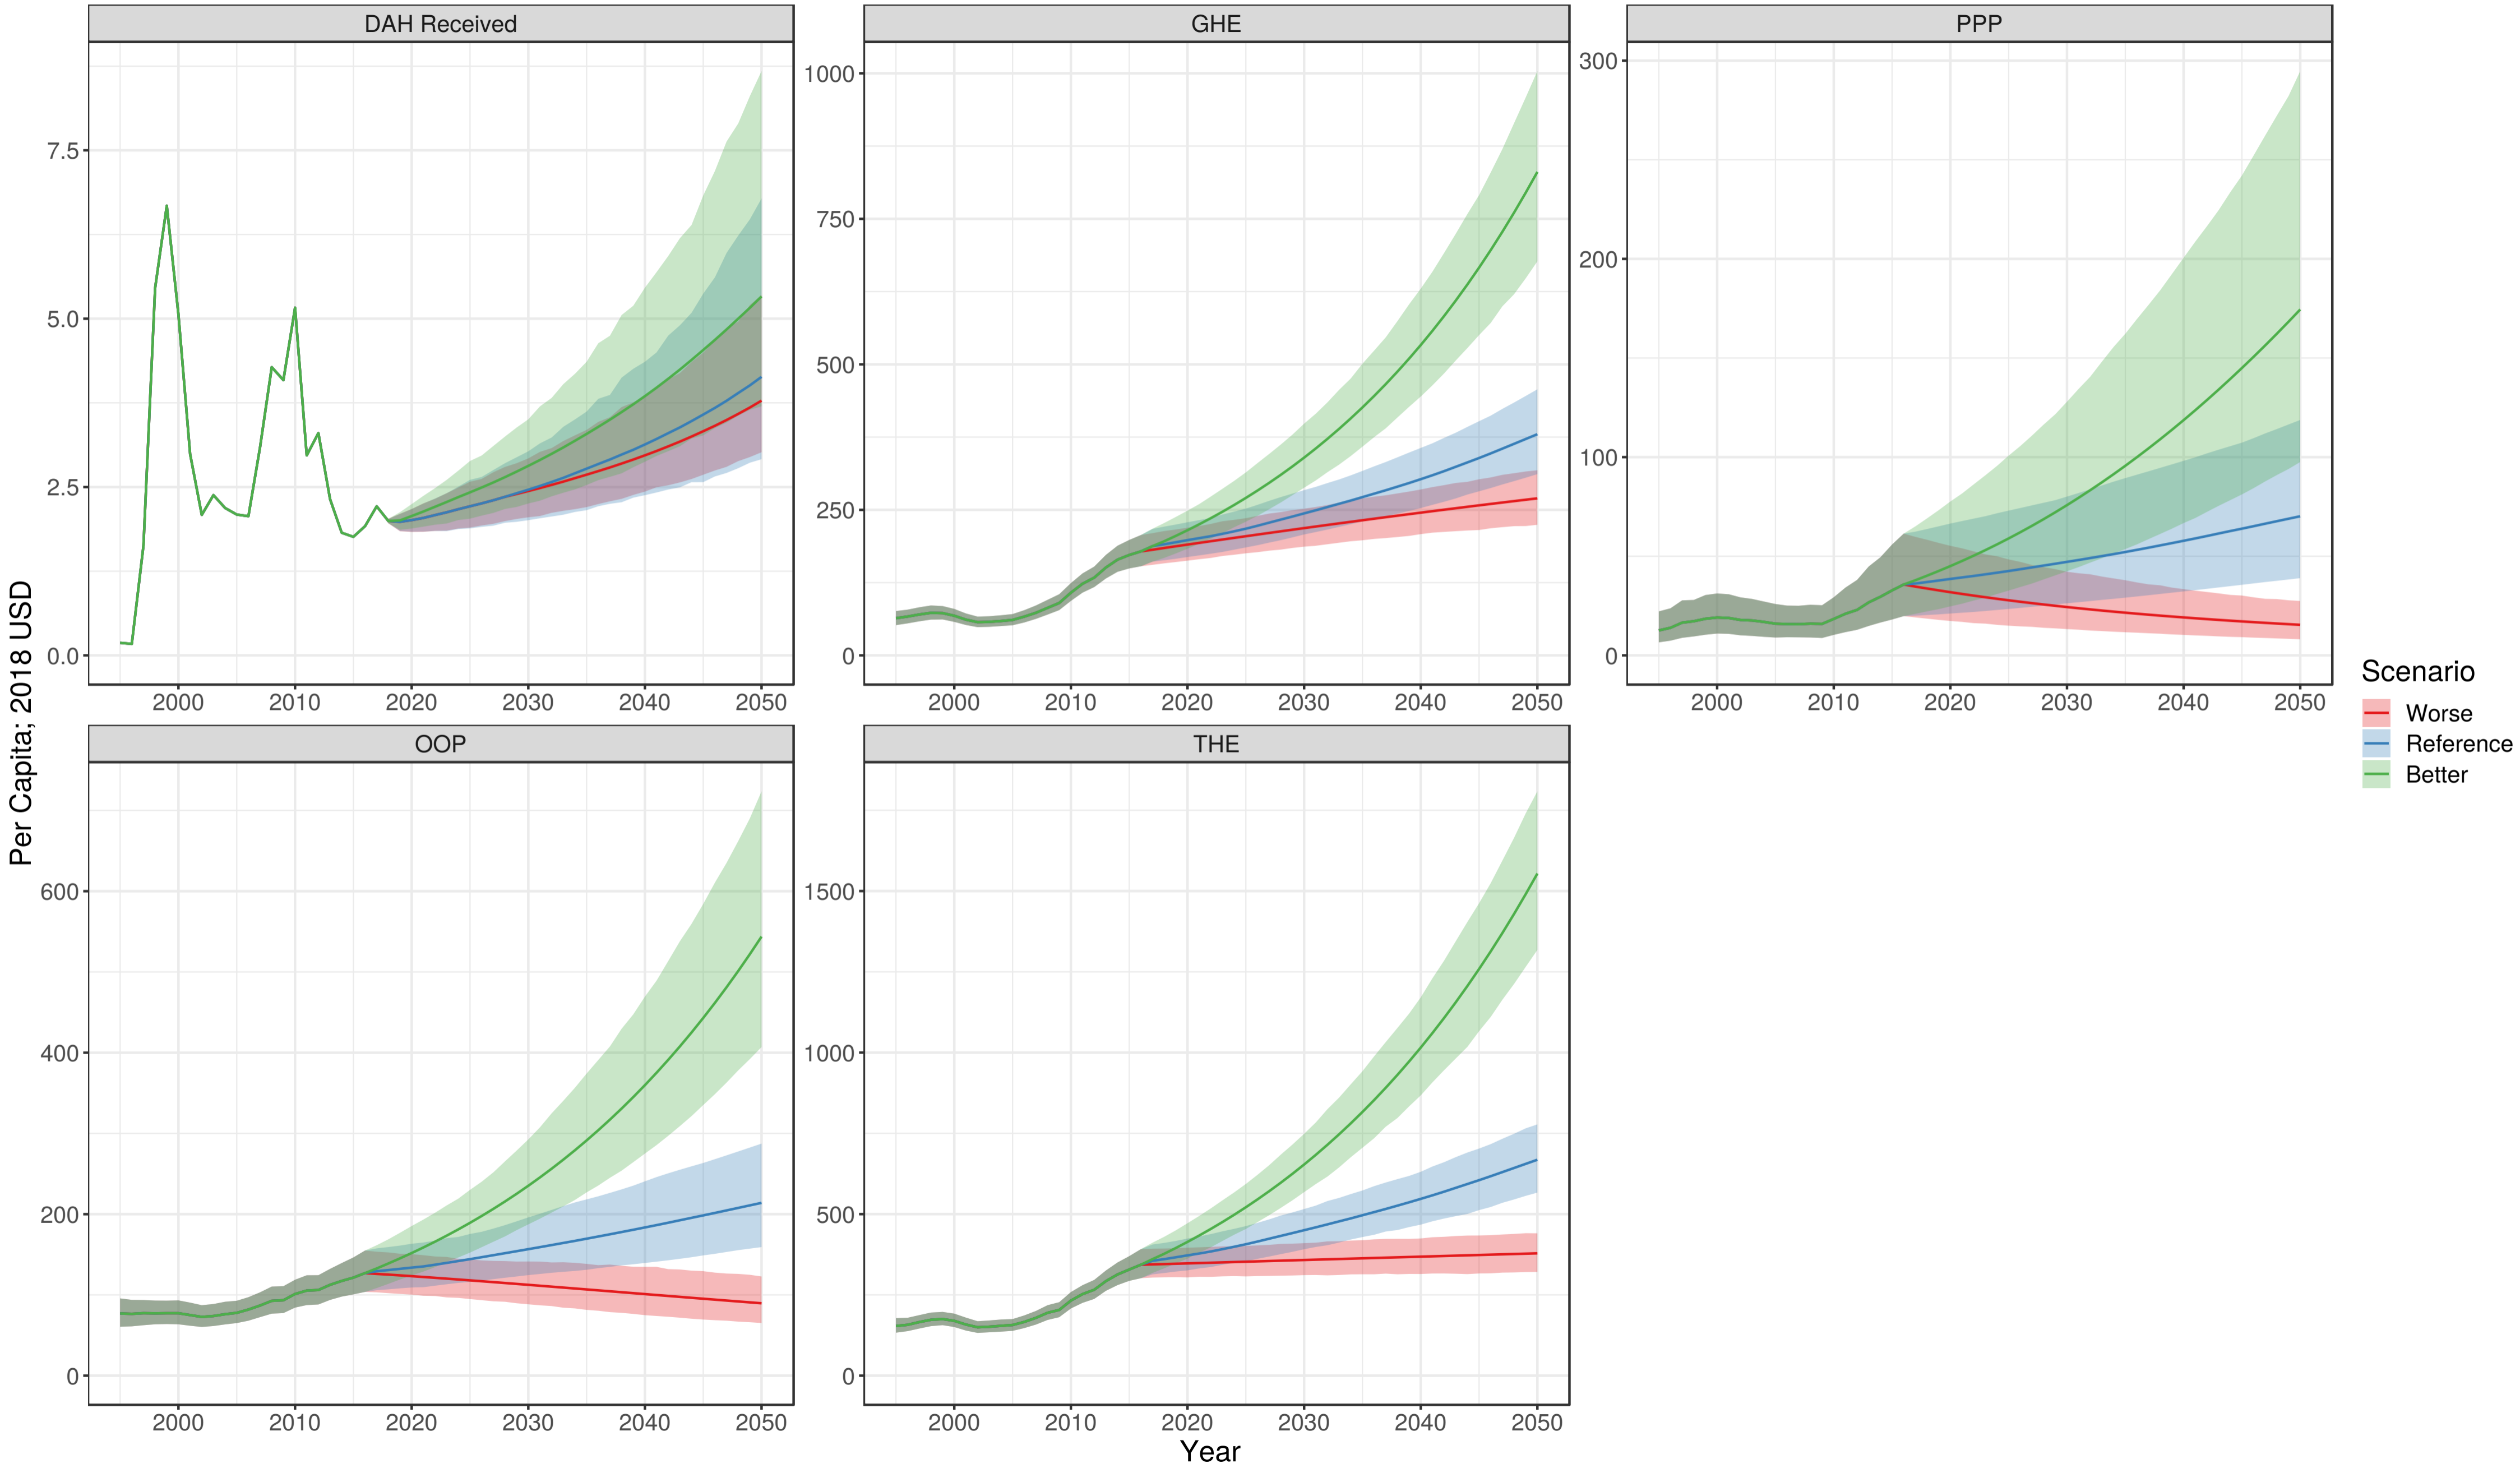

# Peru

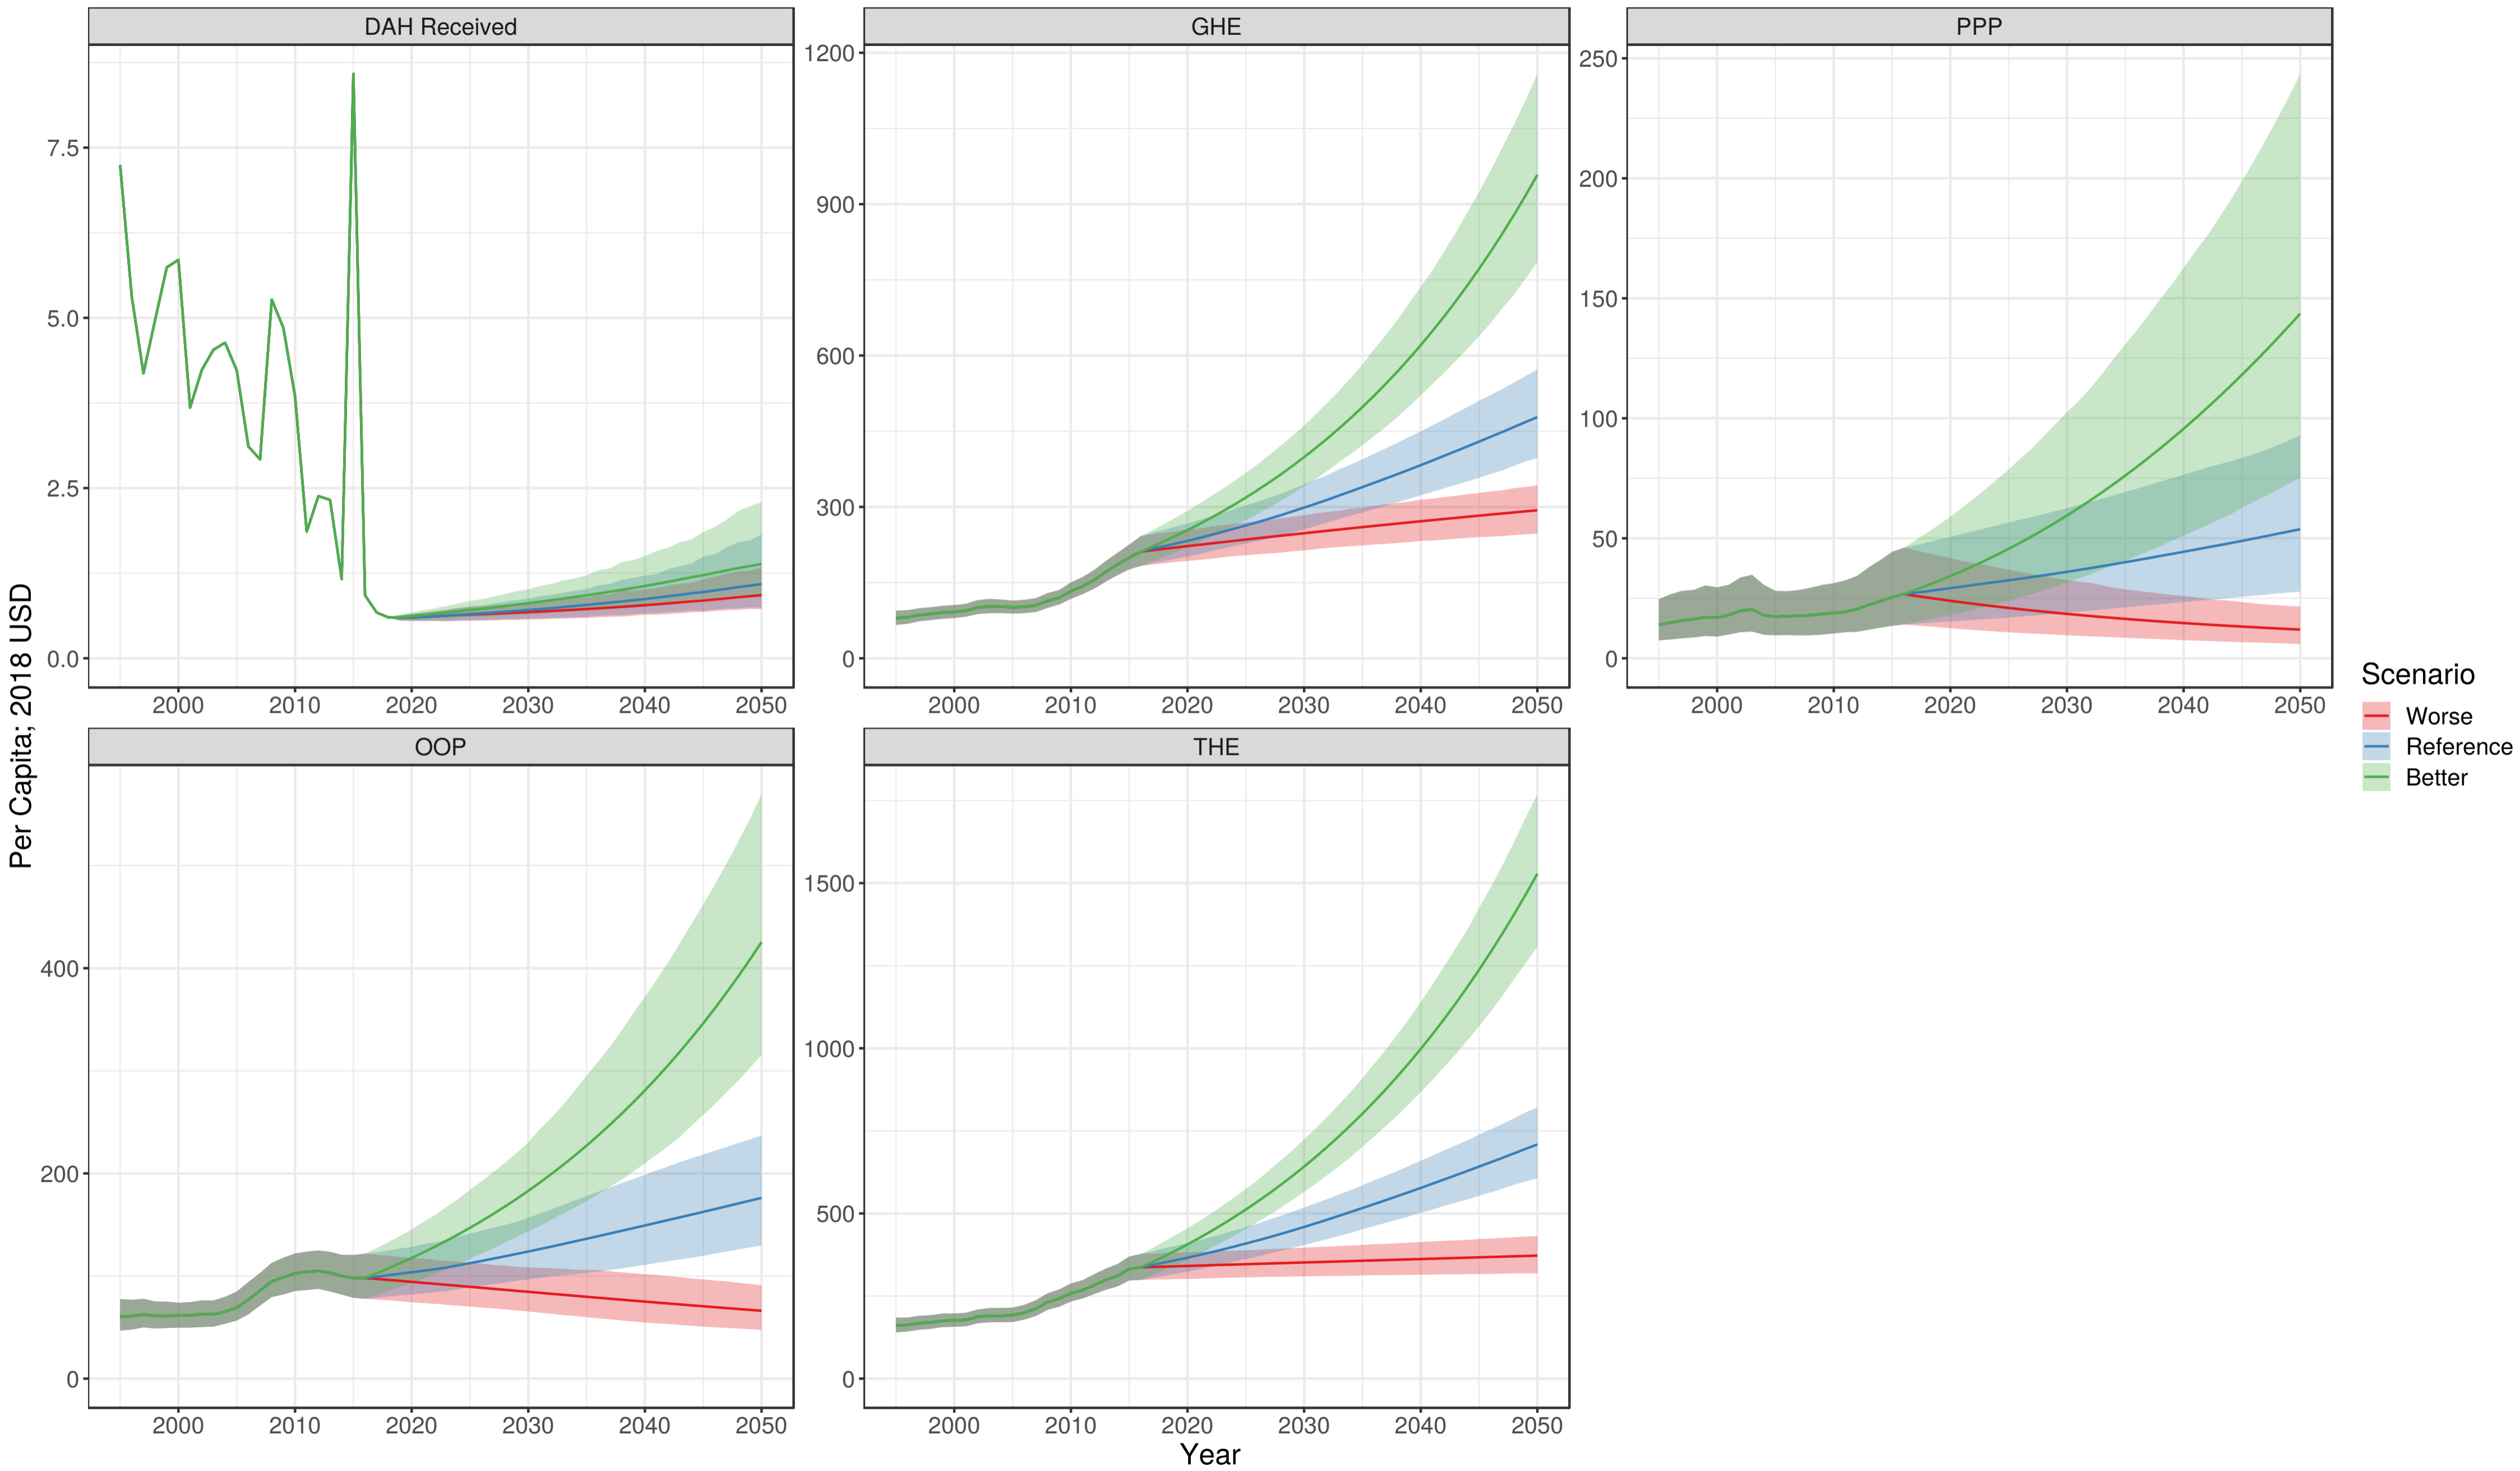

# Philippines

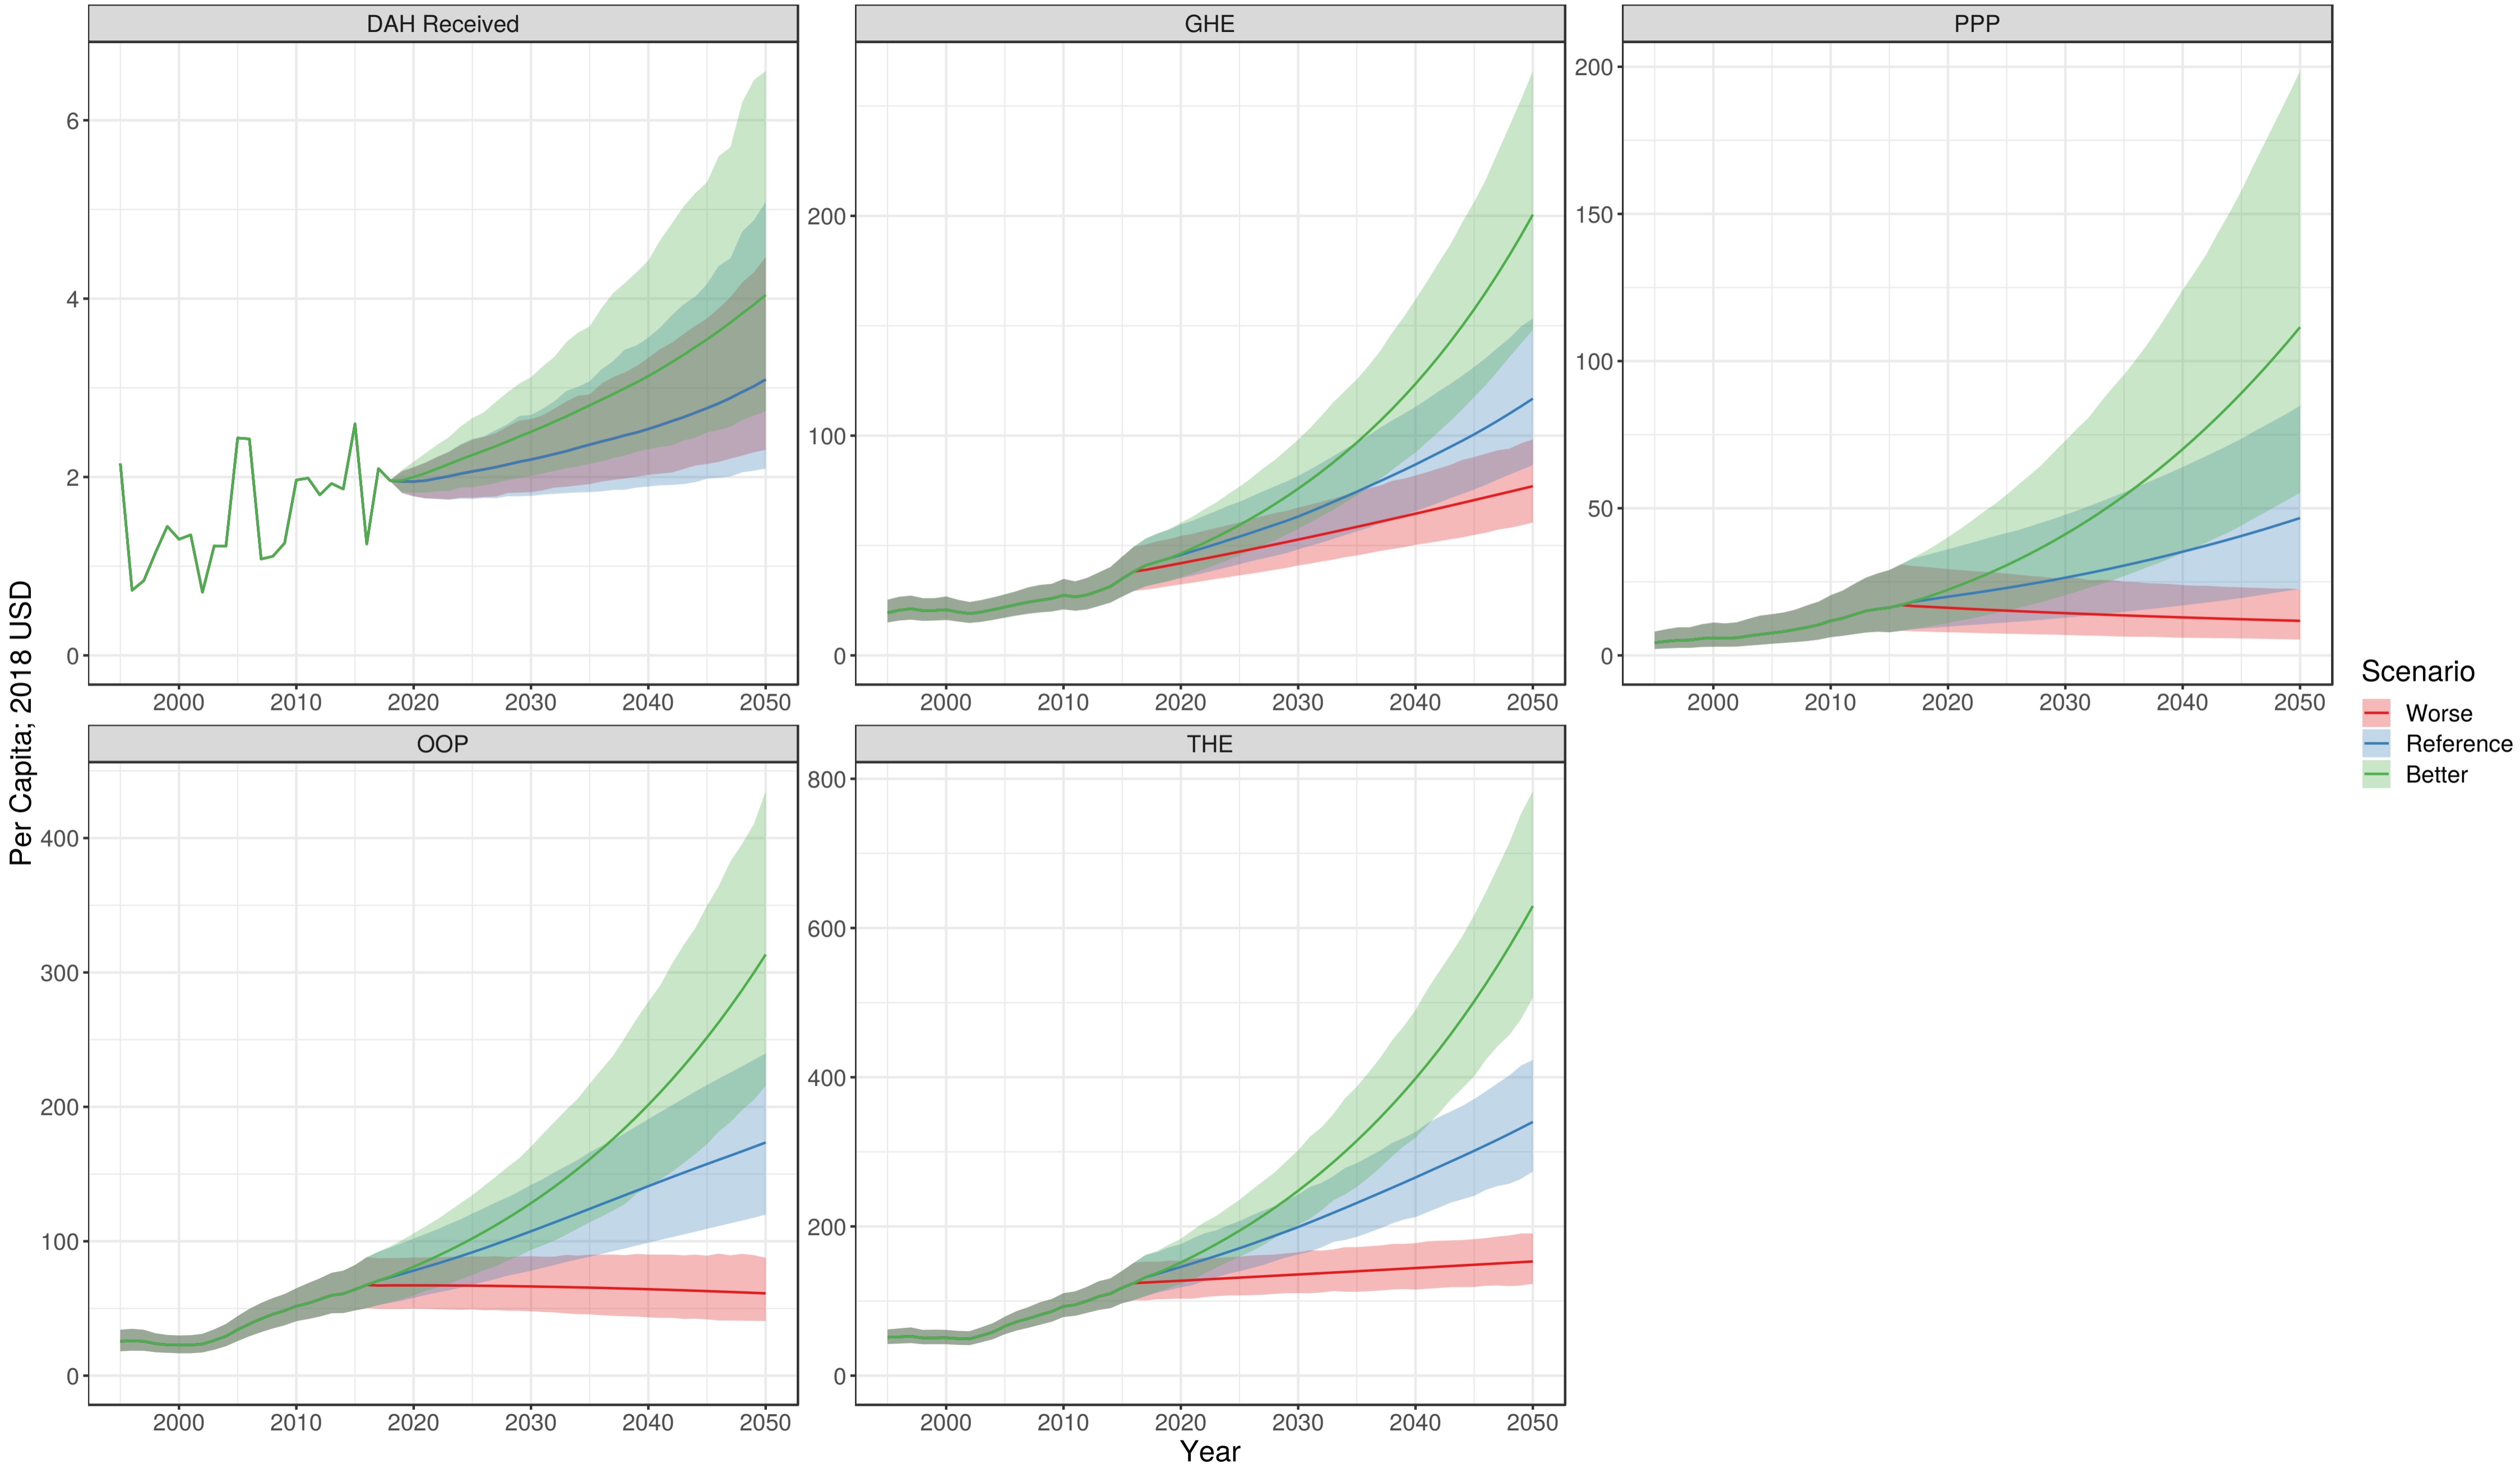

# Poland

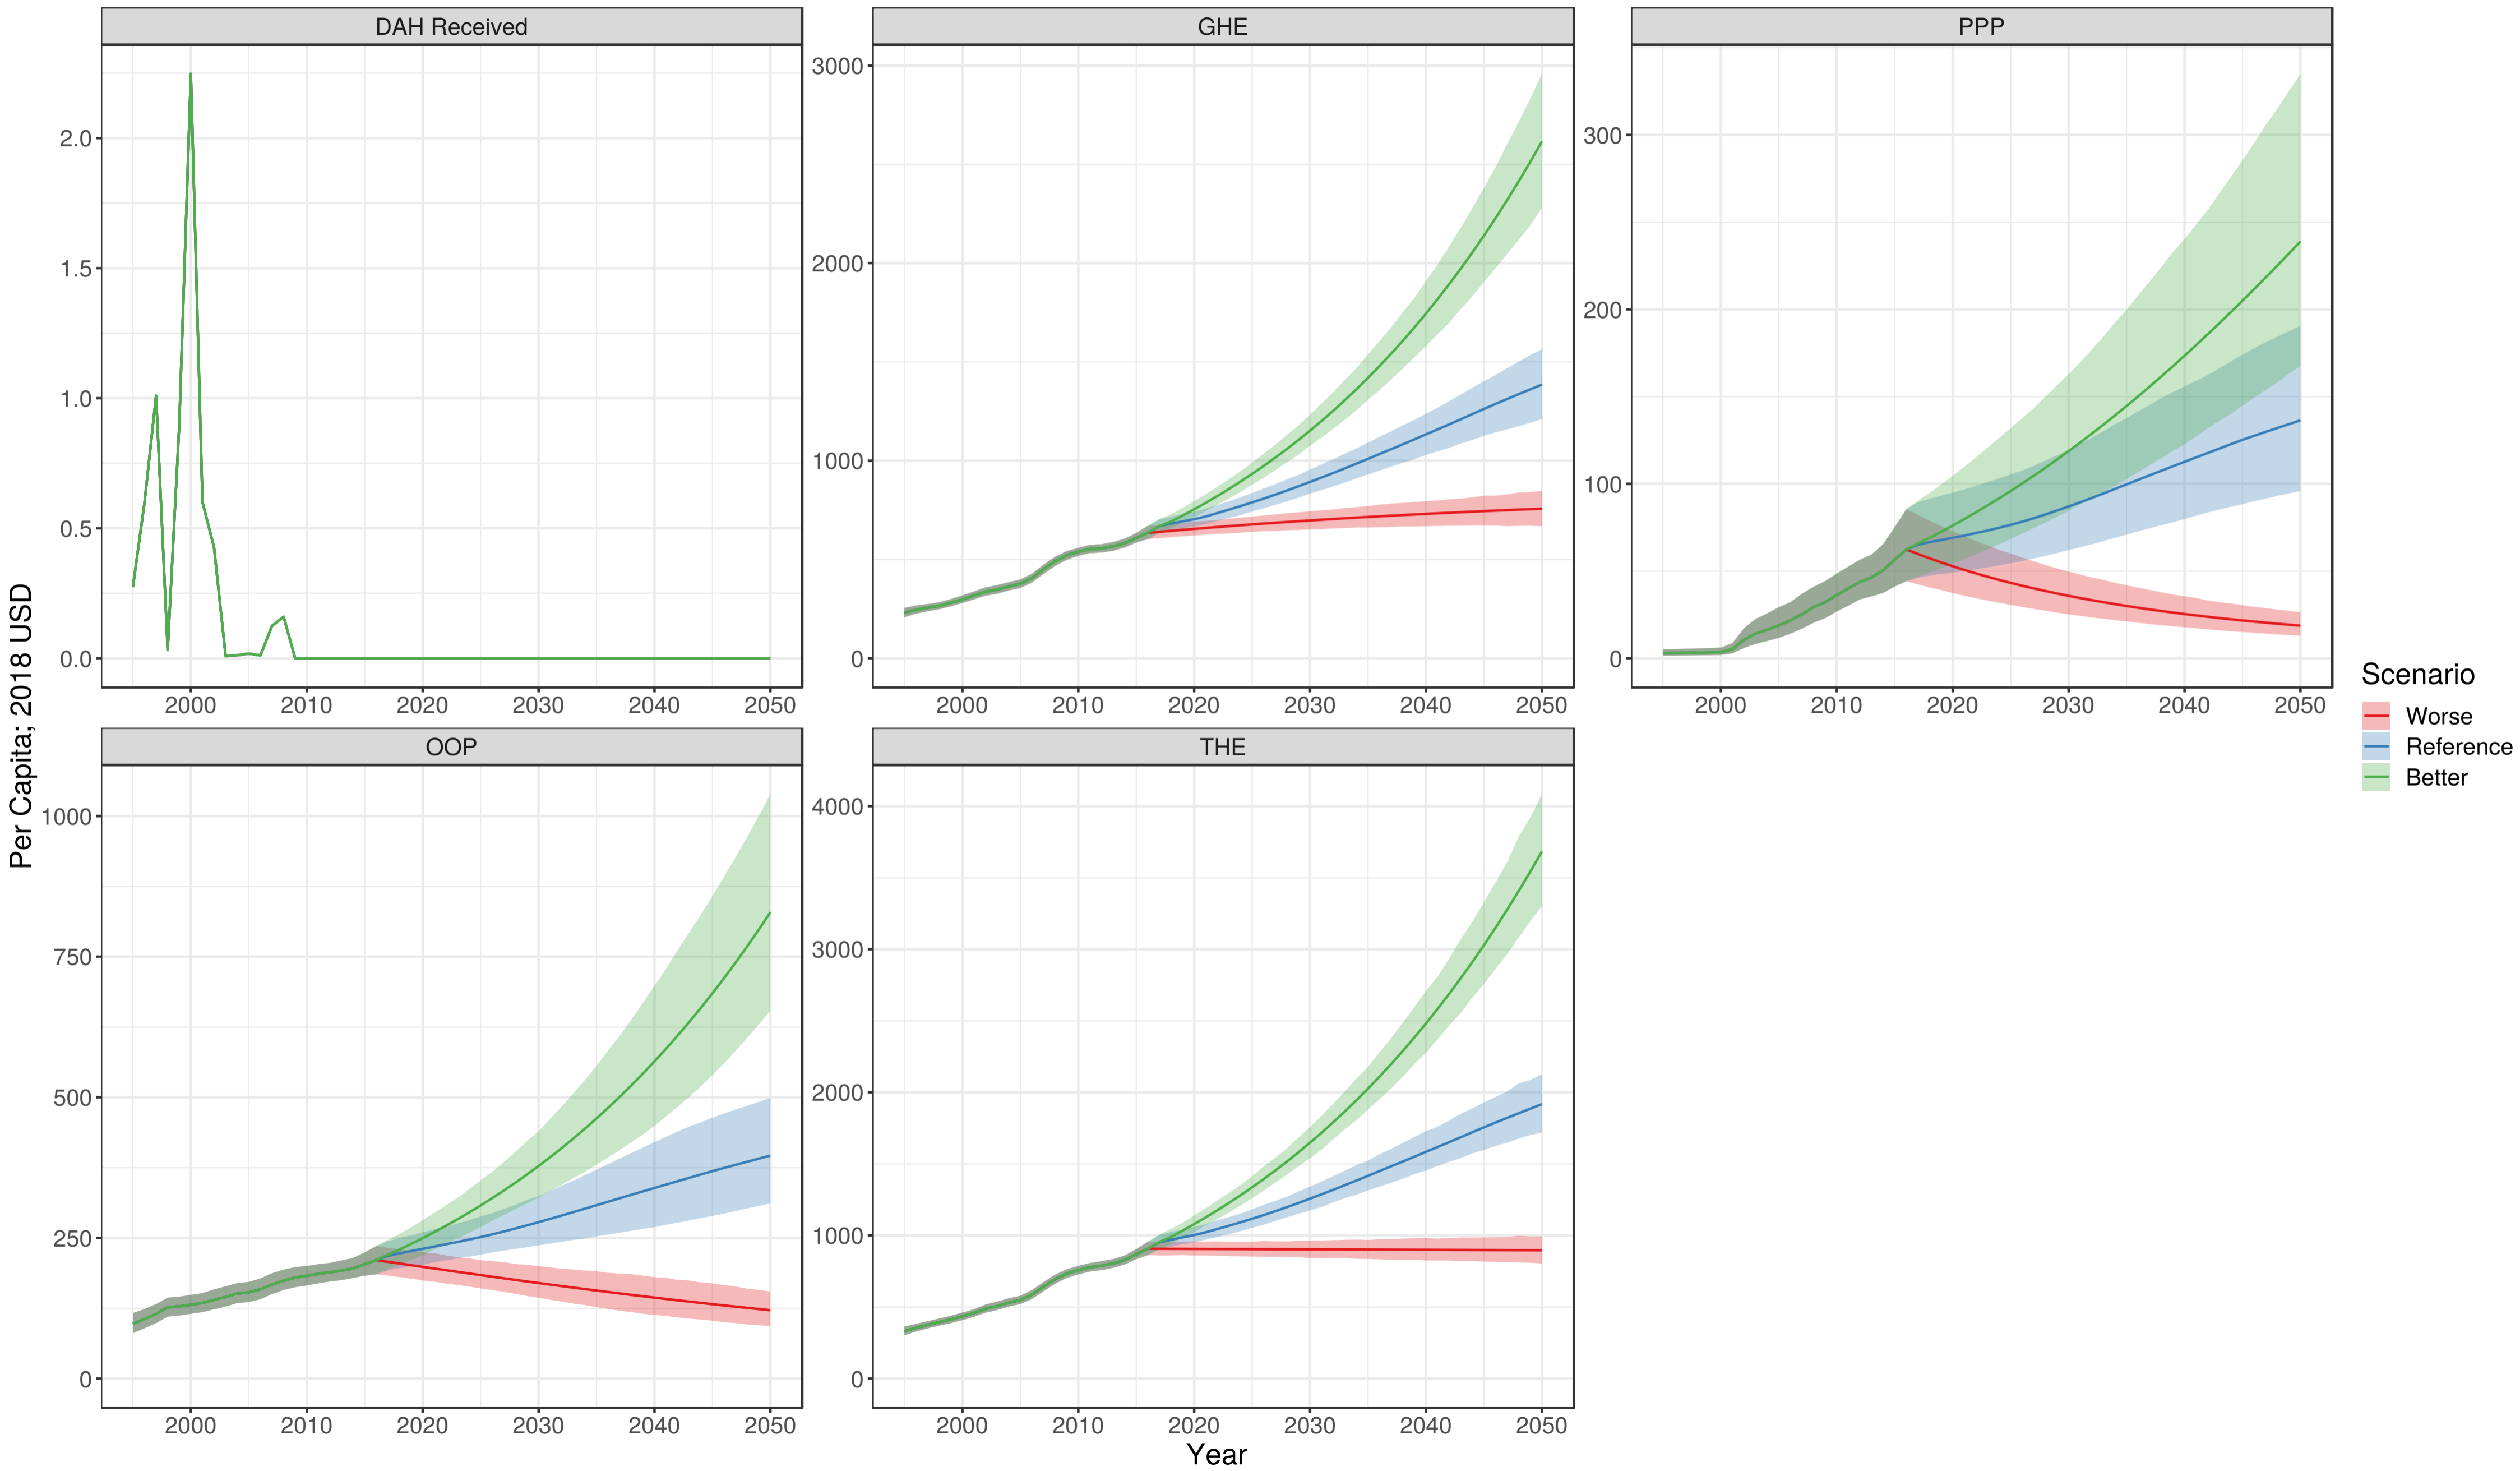

# Portugal

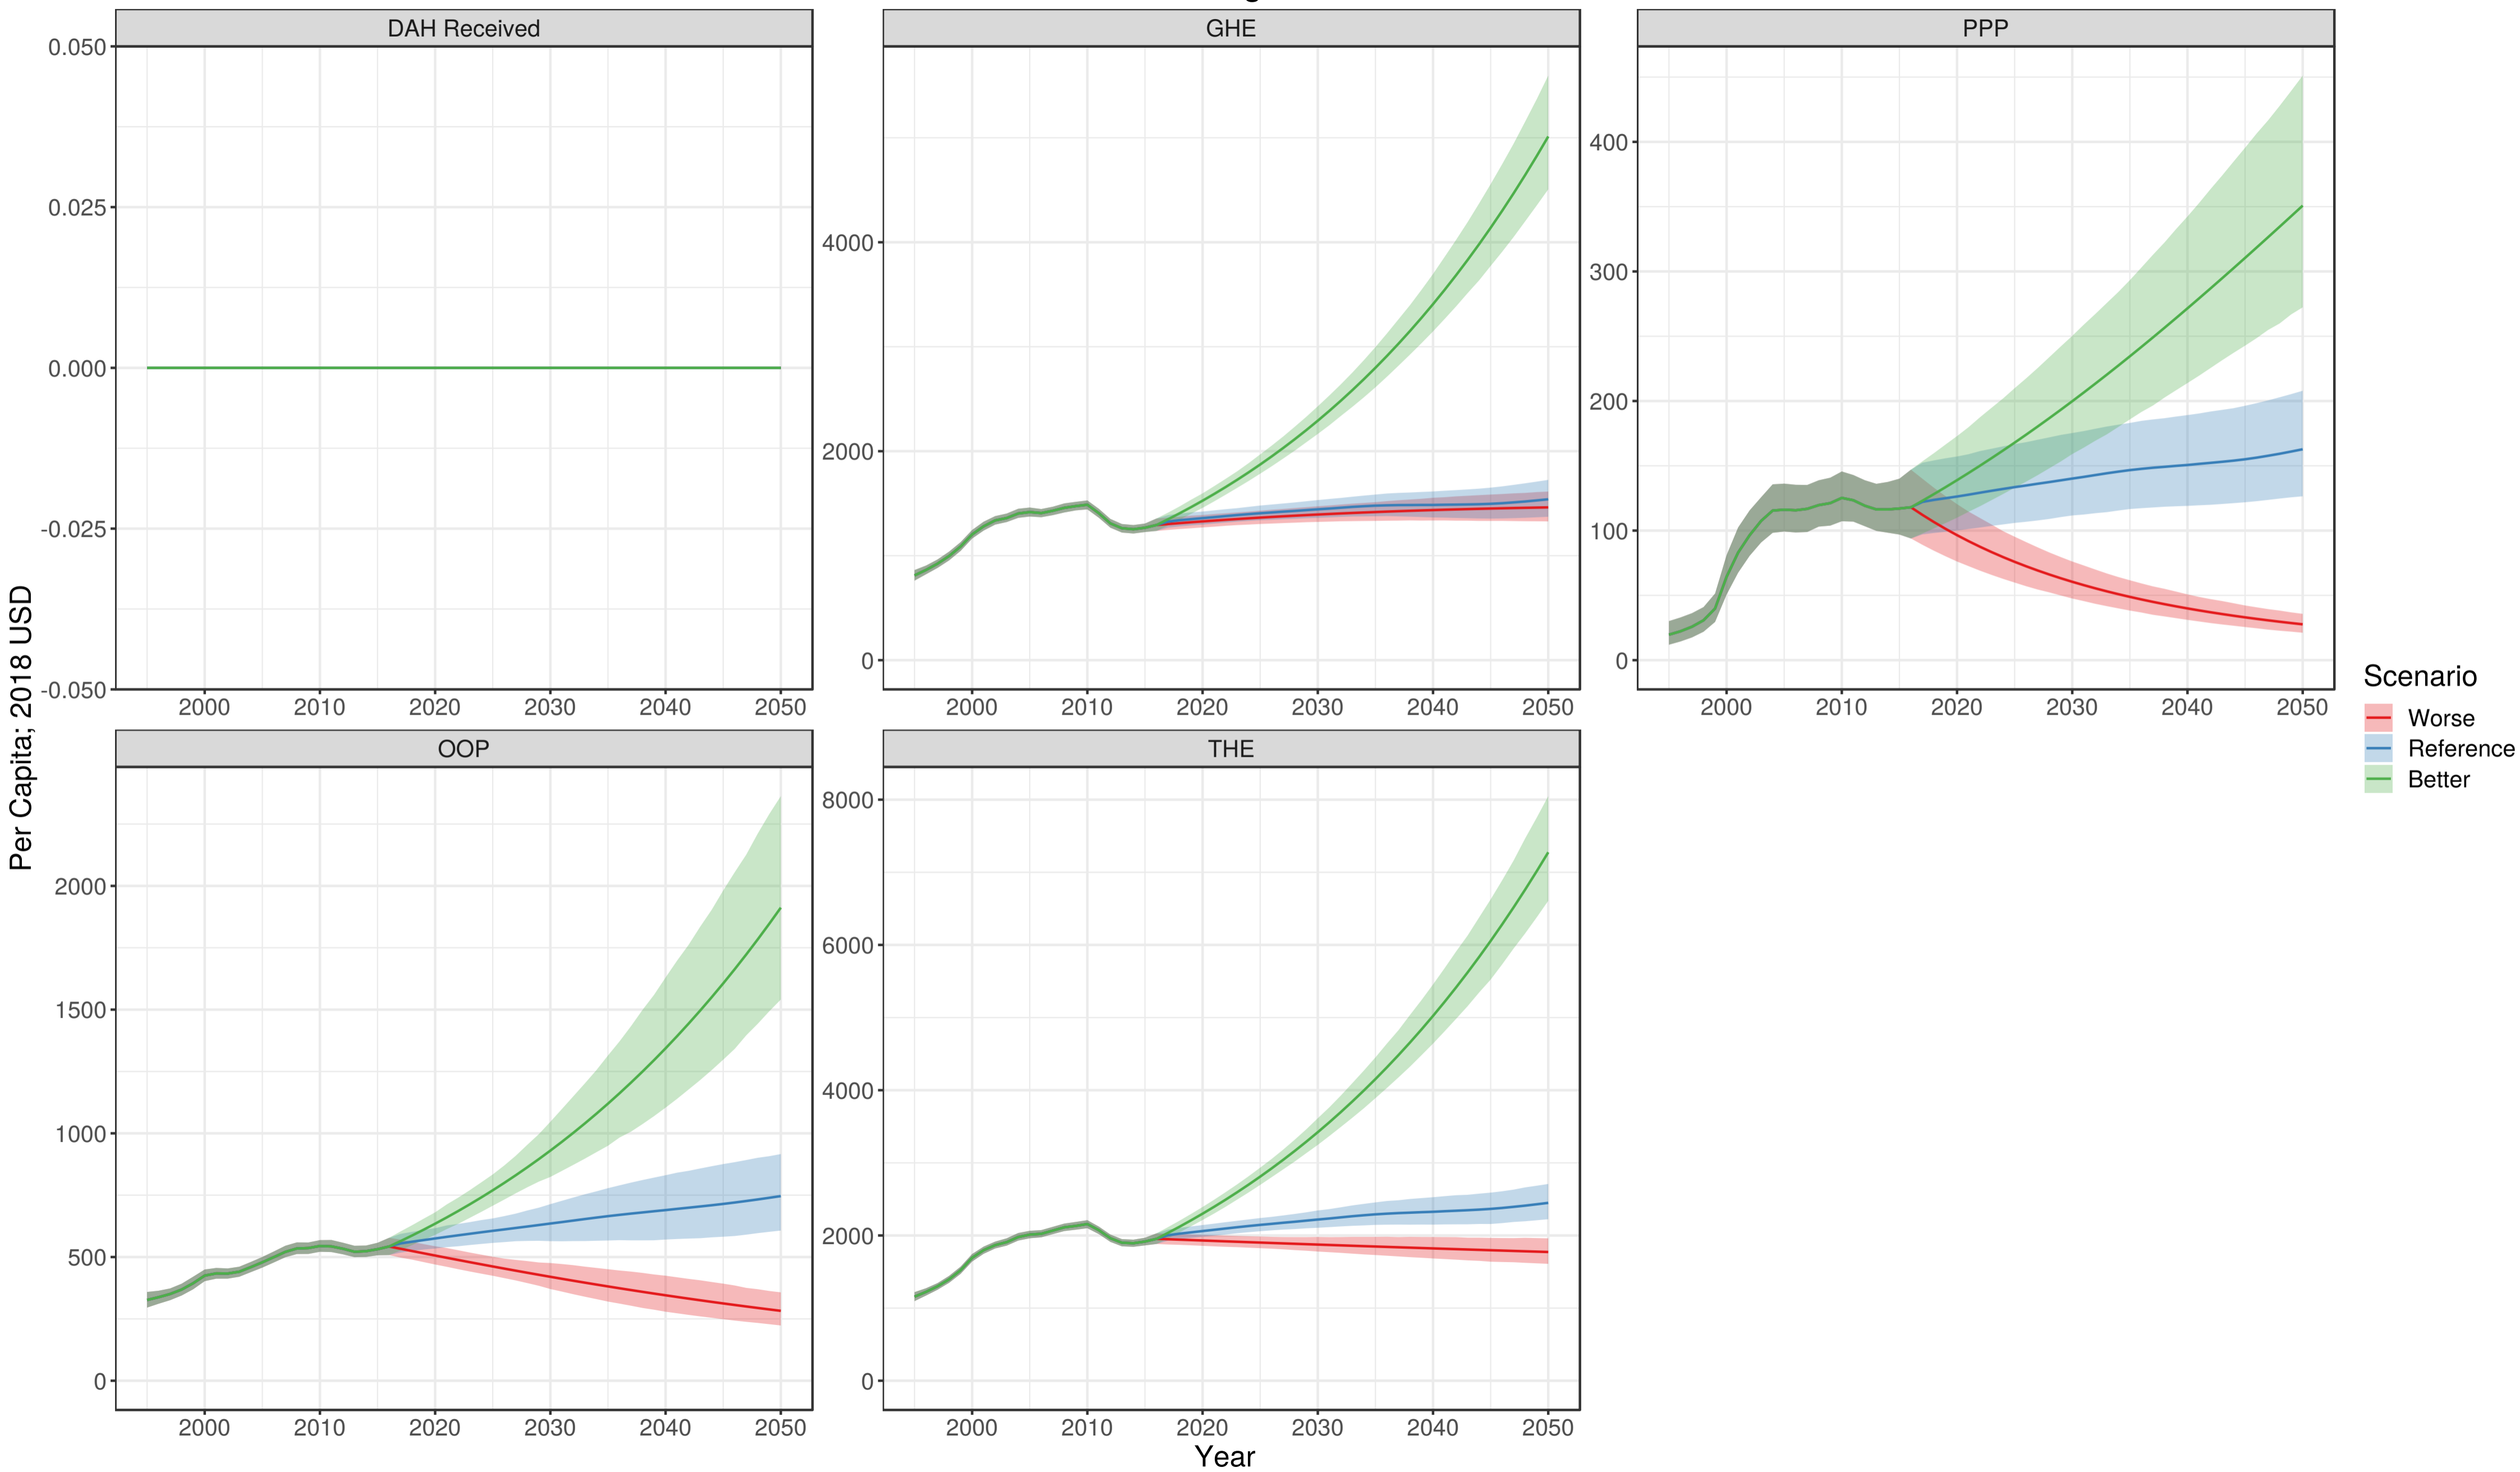

# Puerto Rico

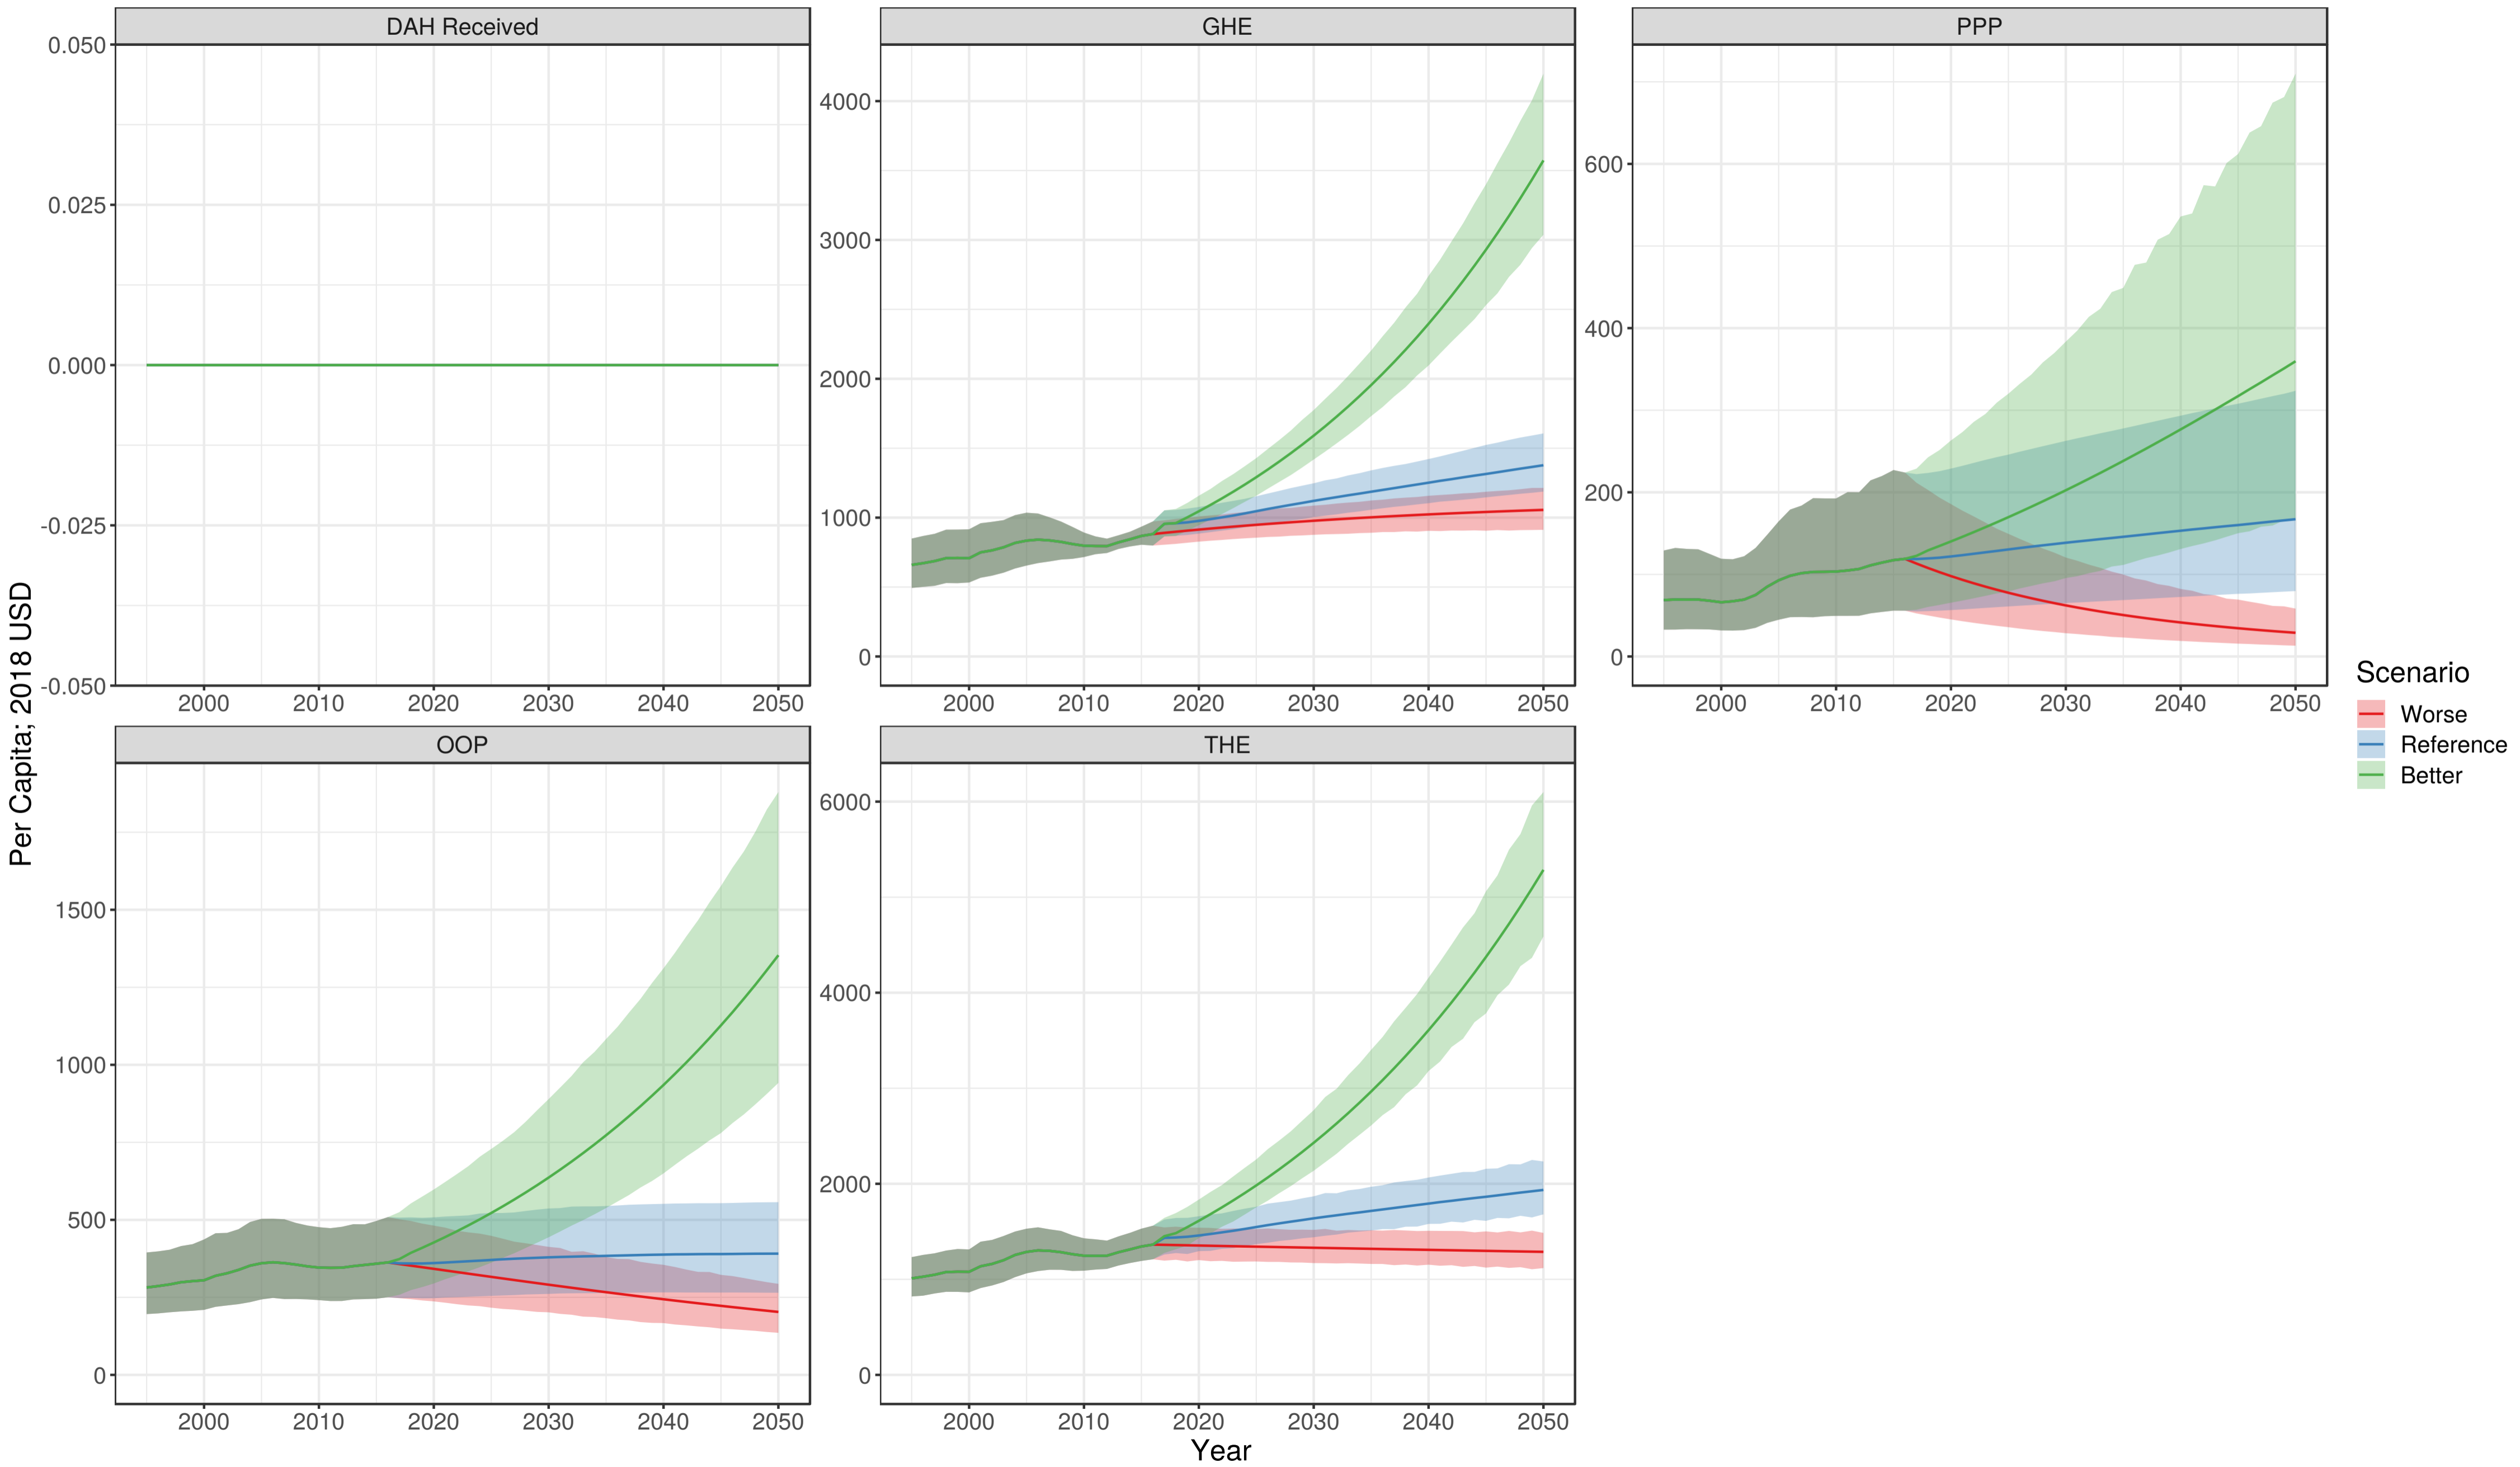

# Qatar

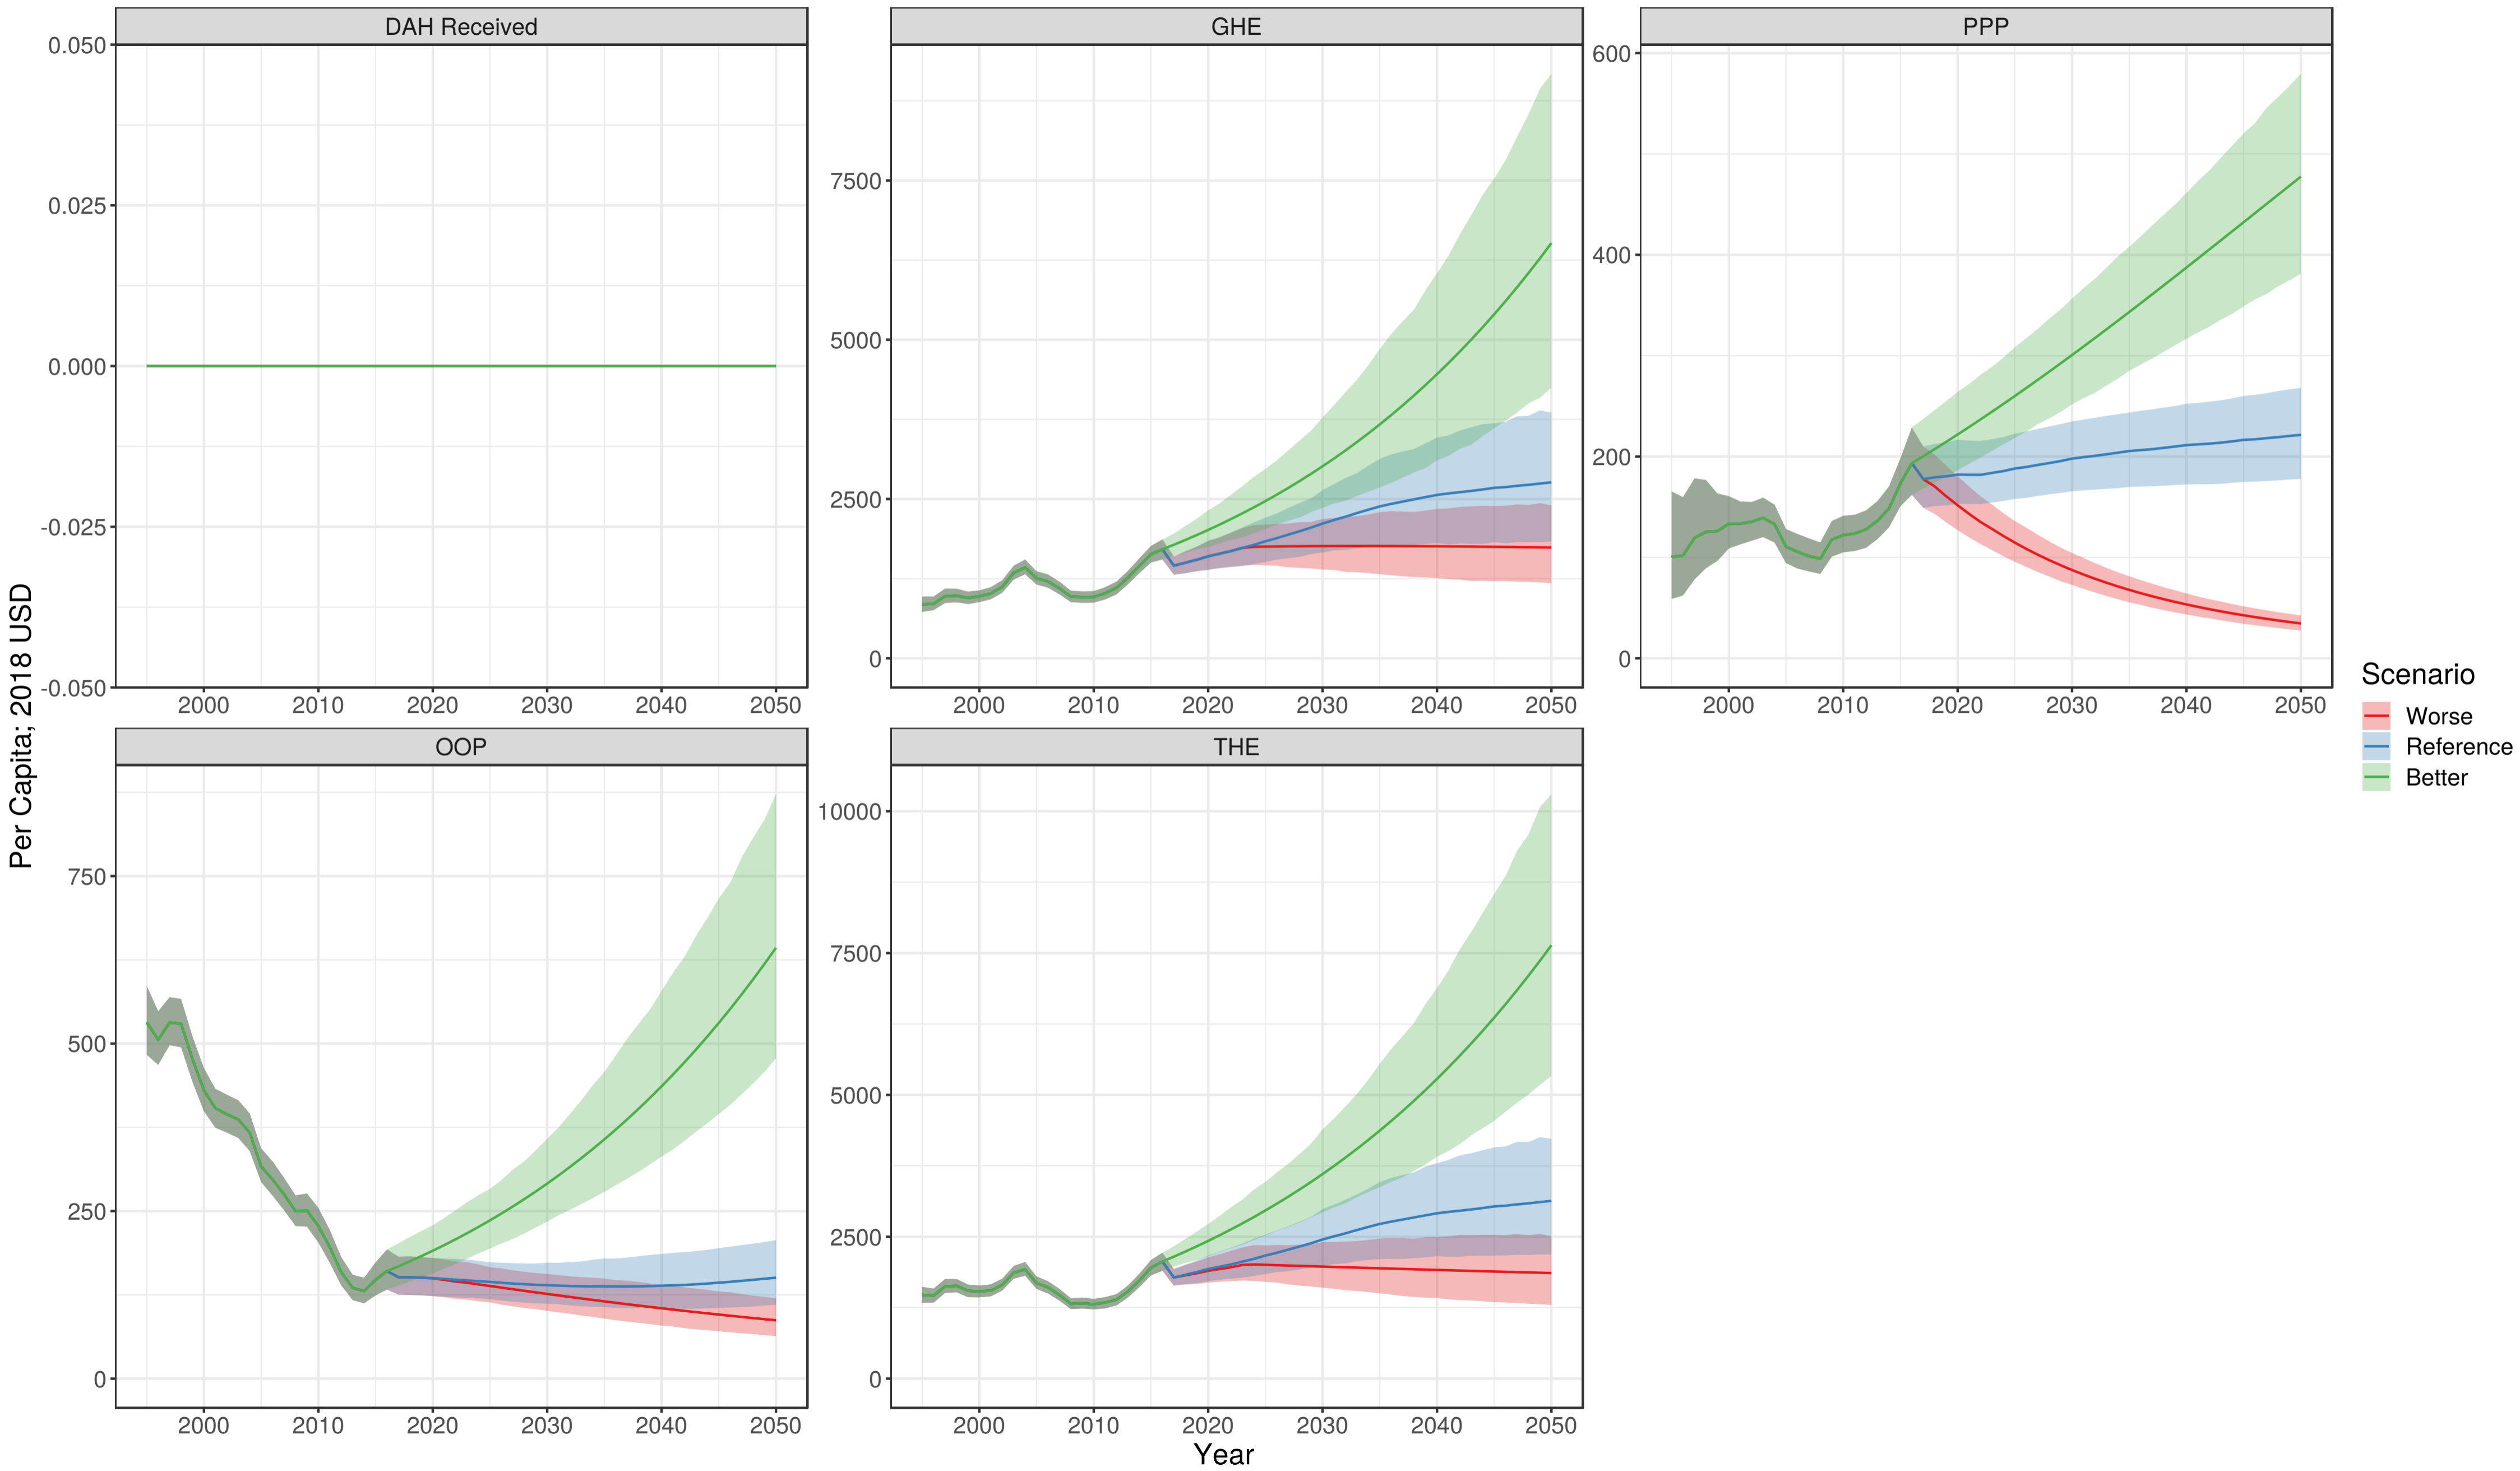



# Romania

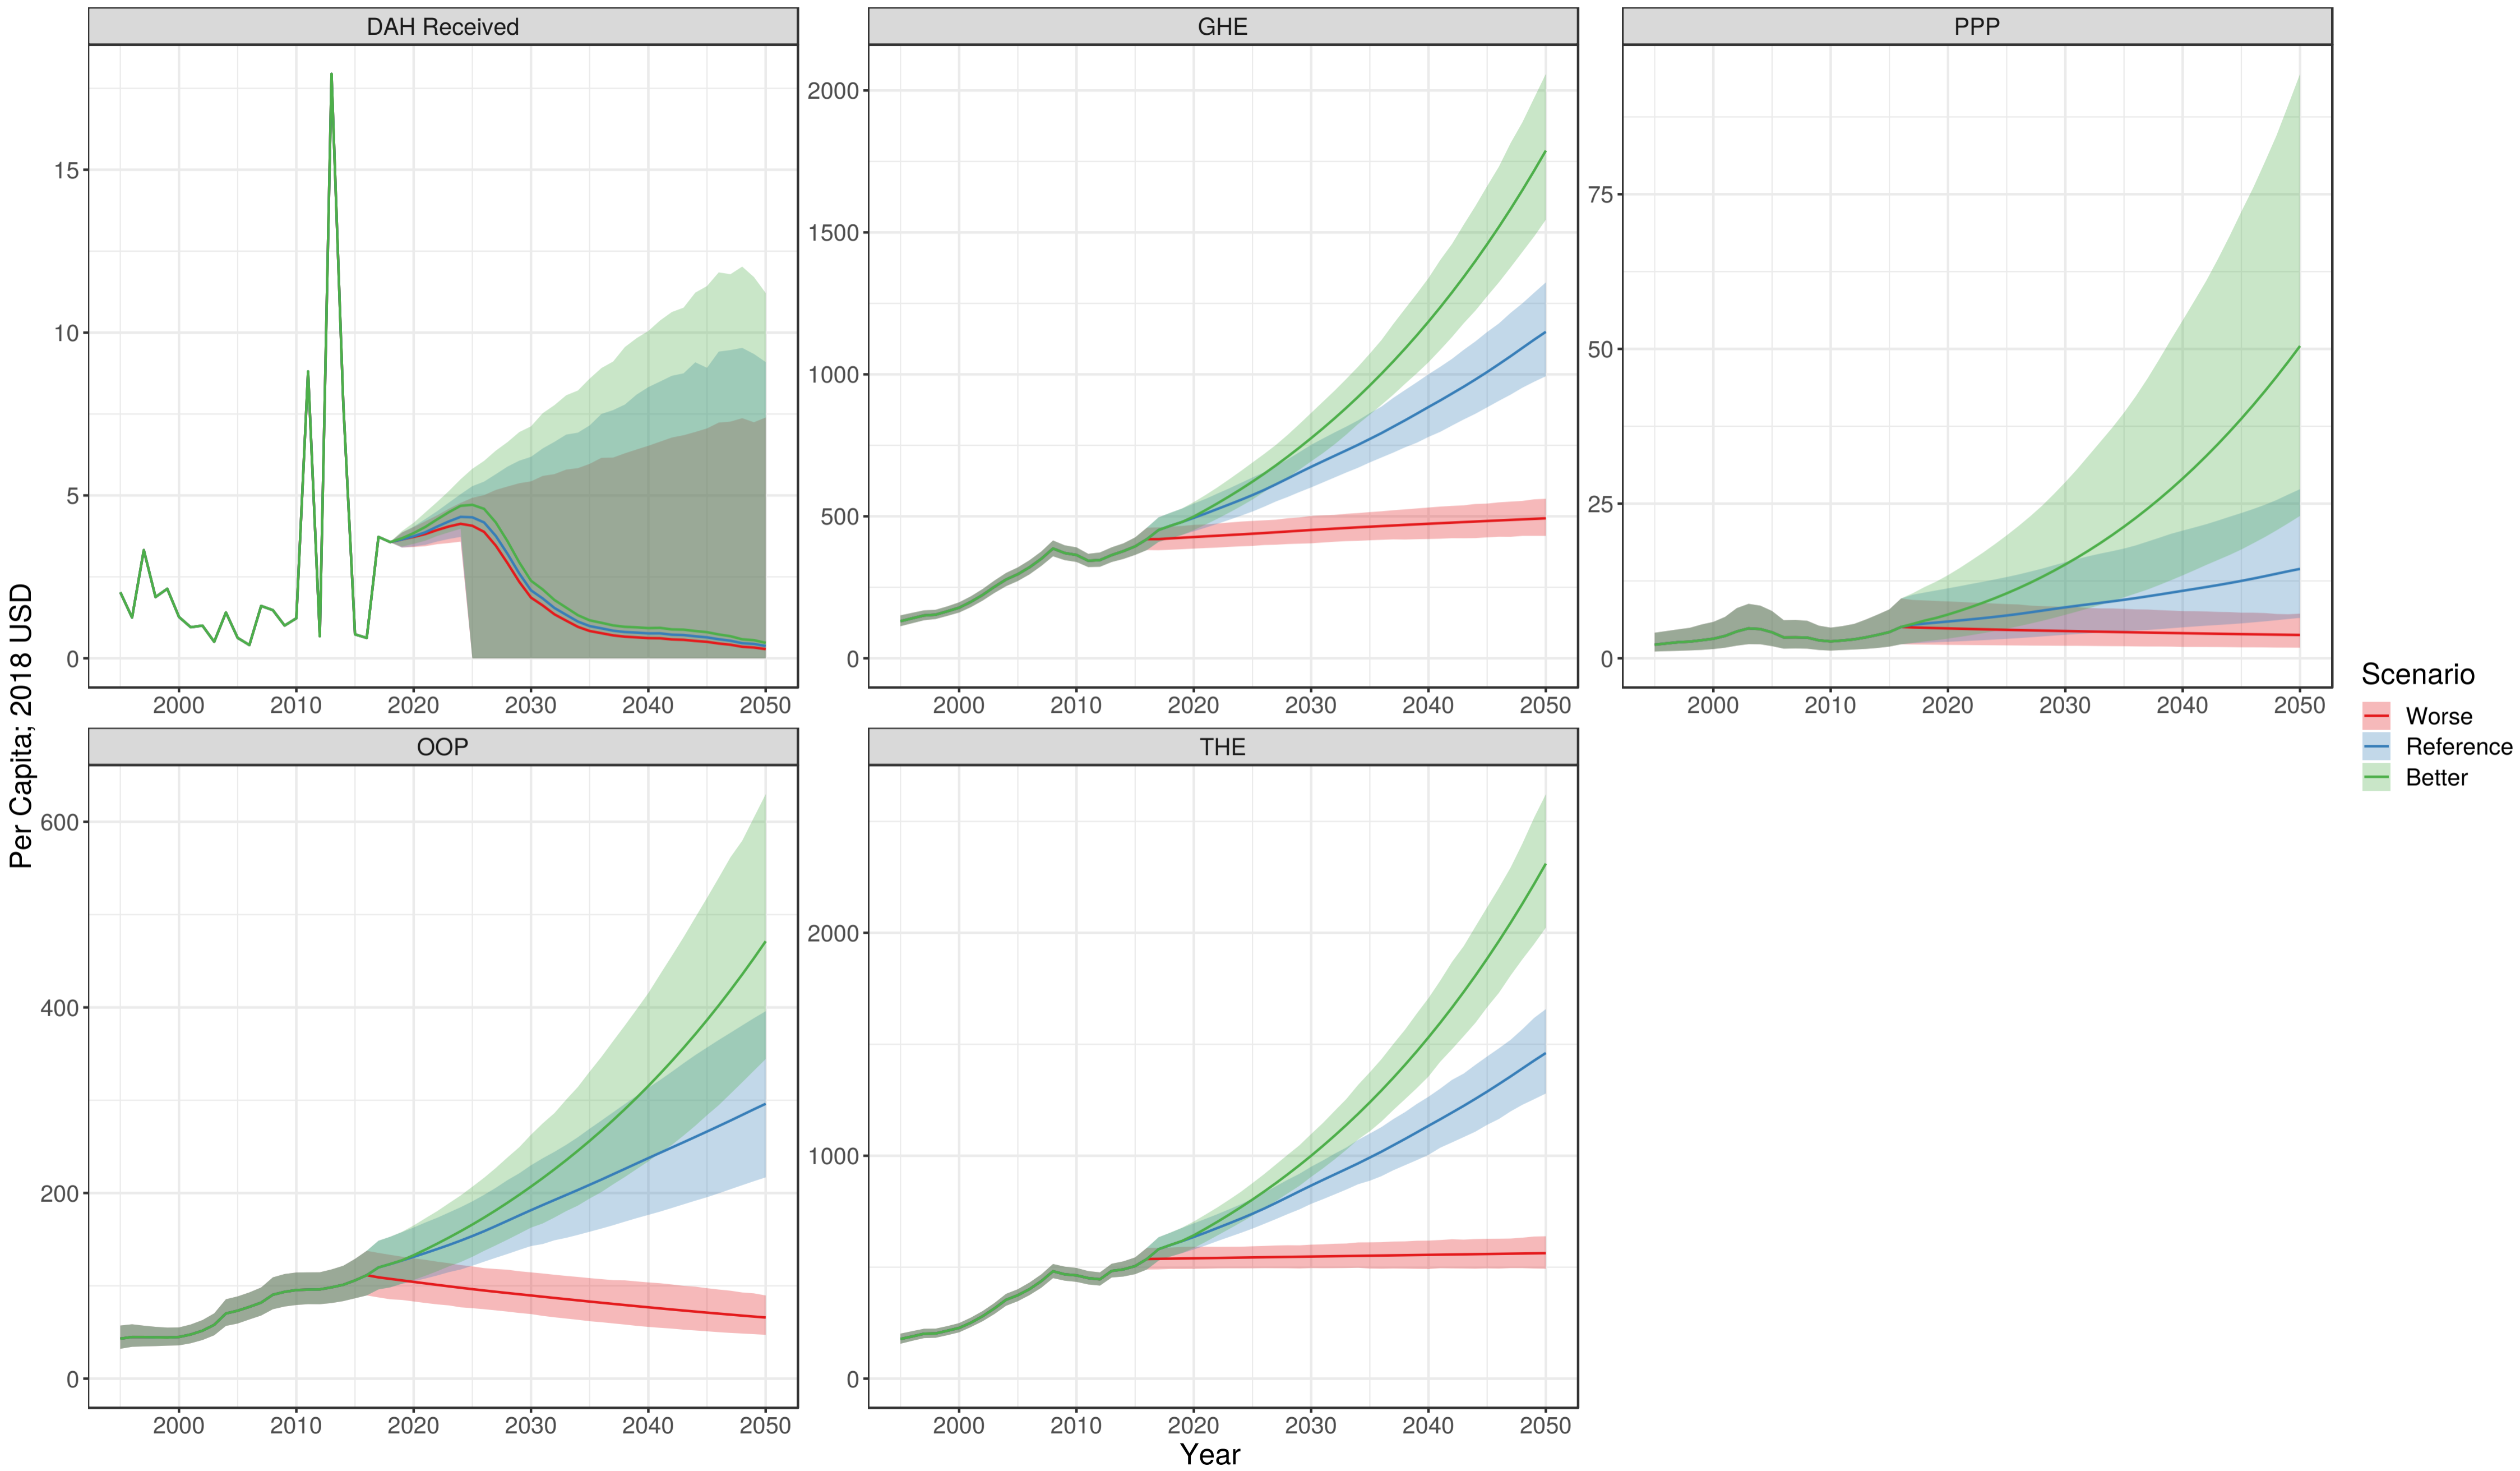

# Russia

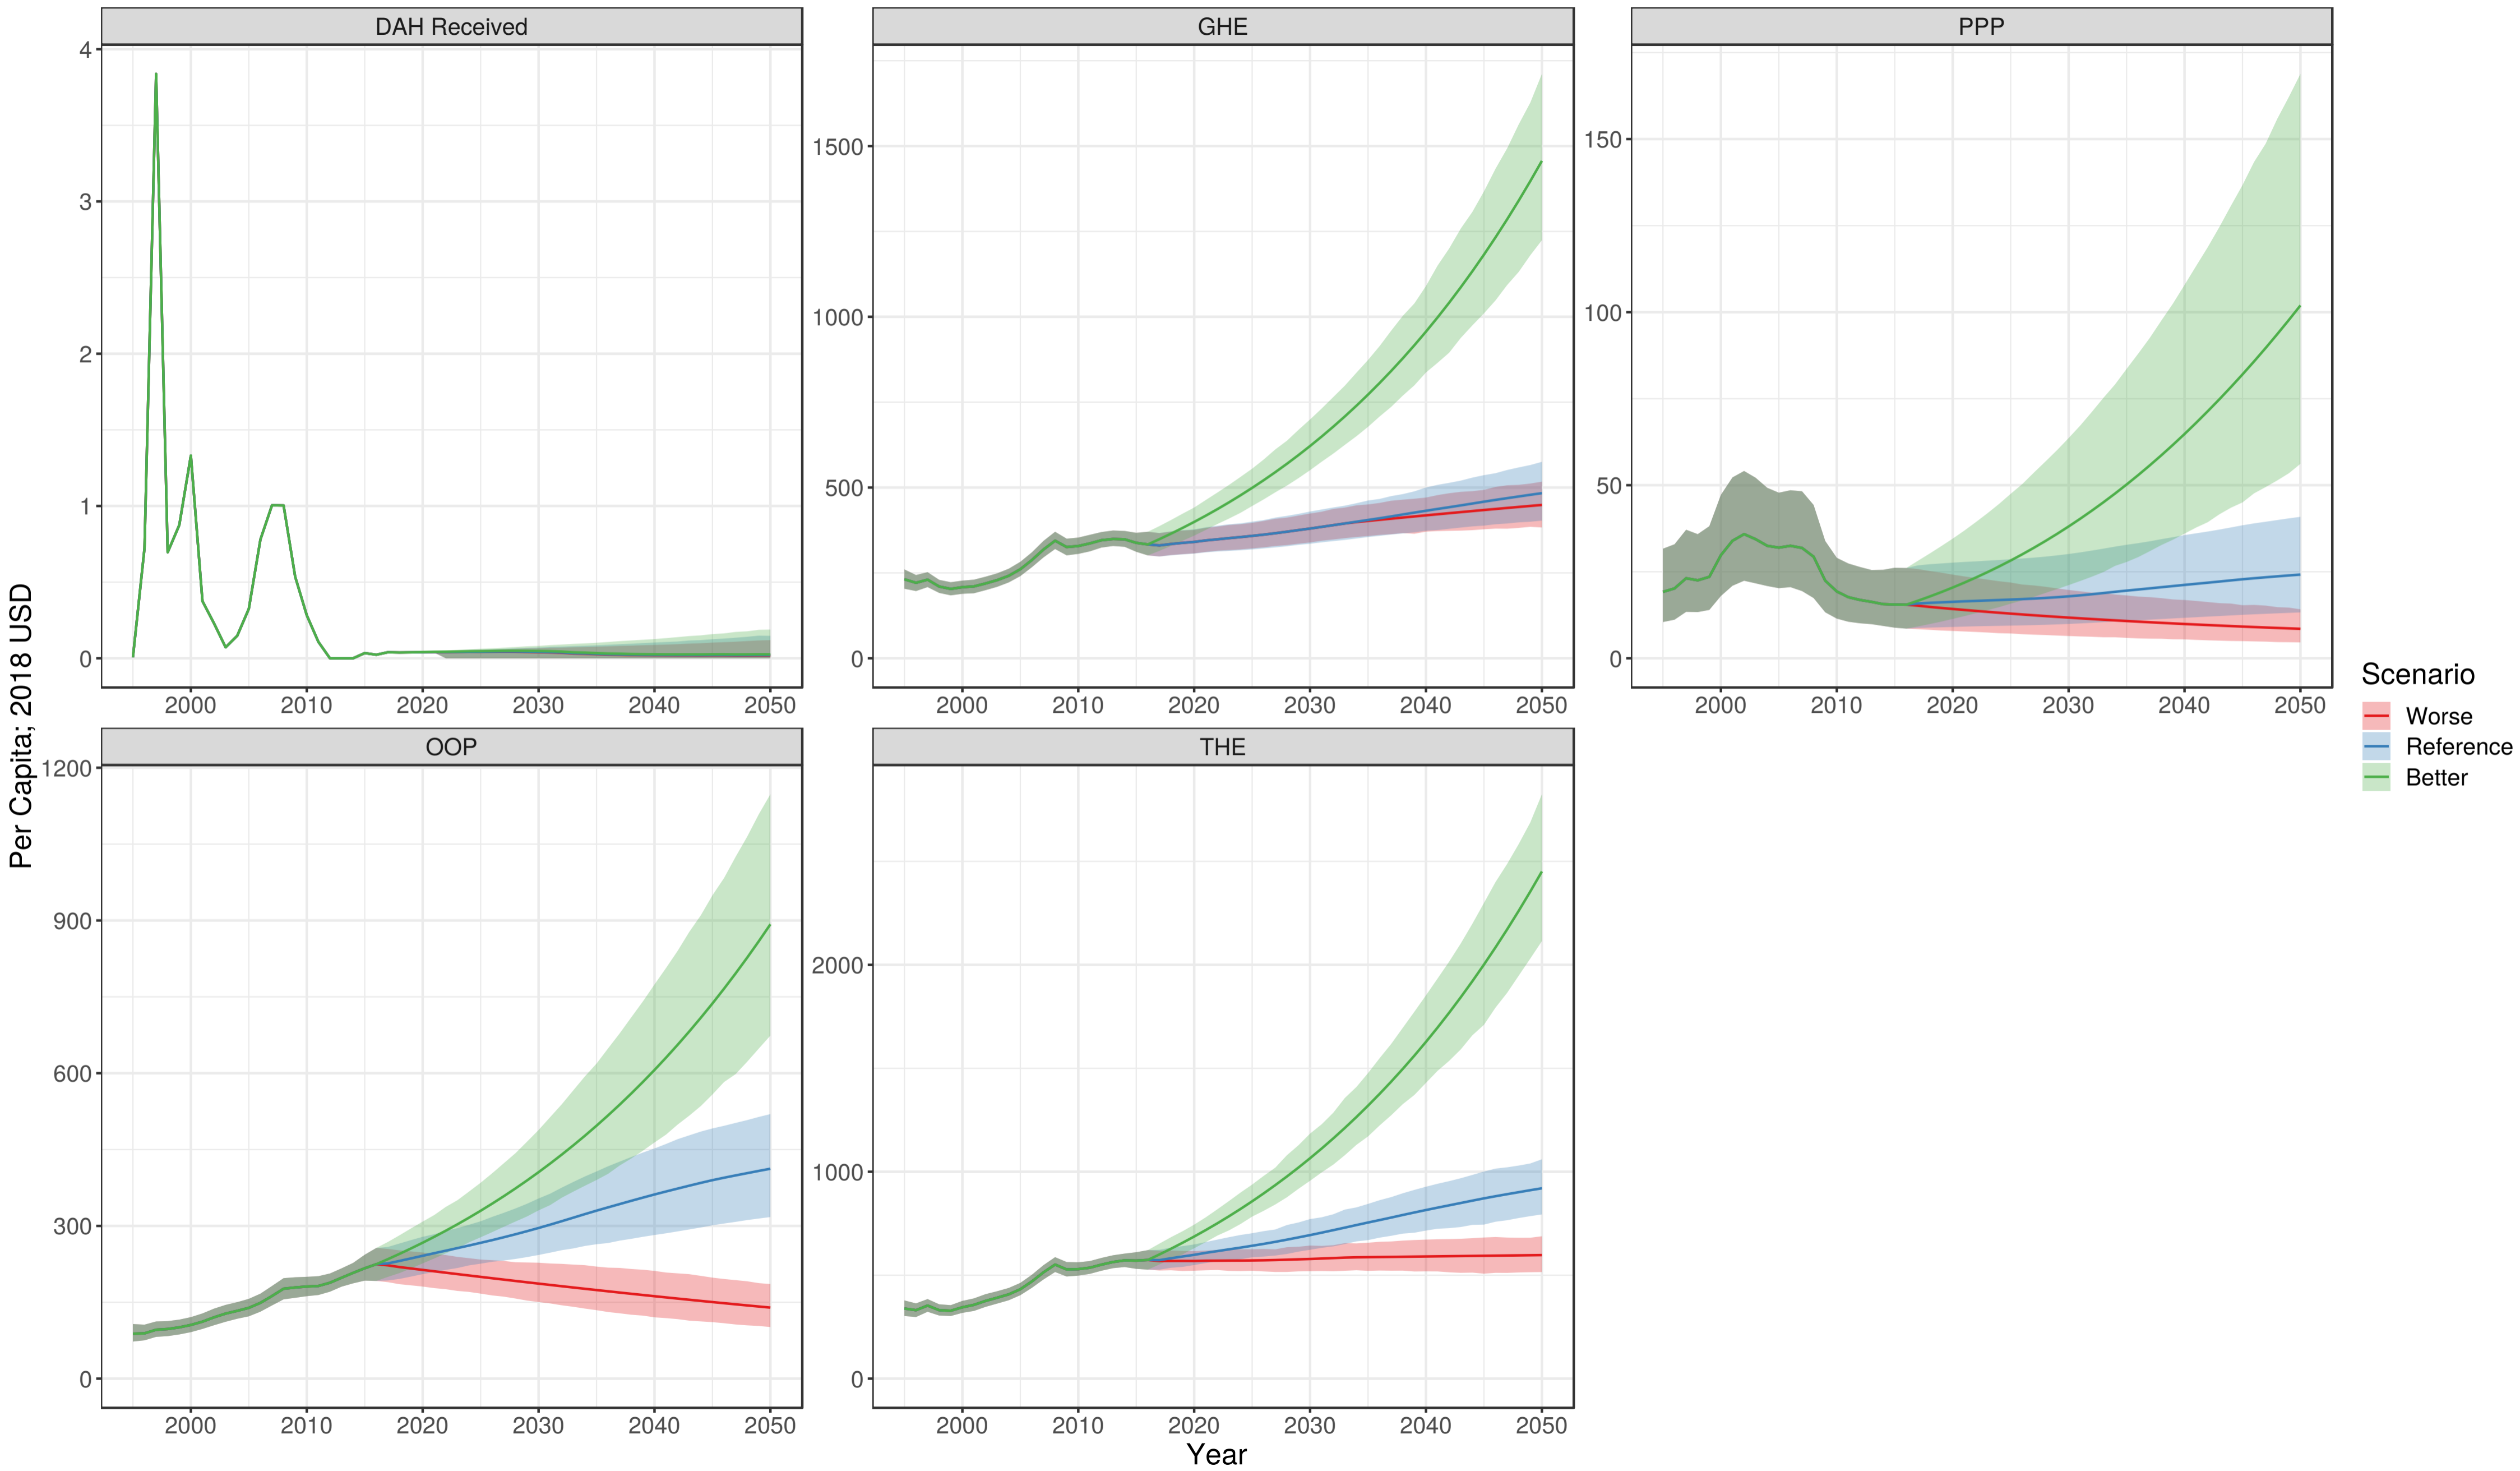

# Rwanda

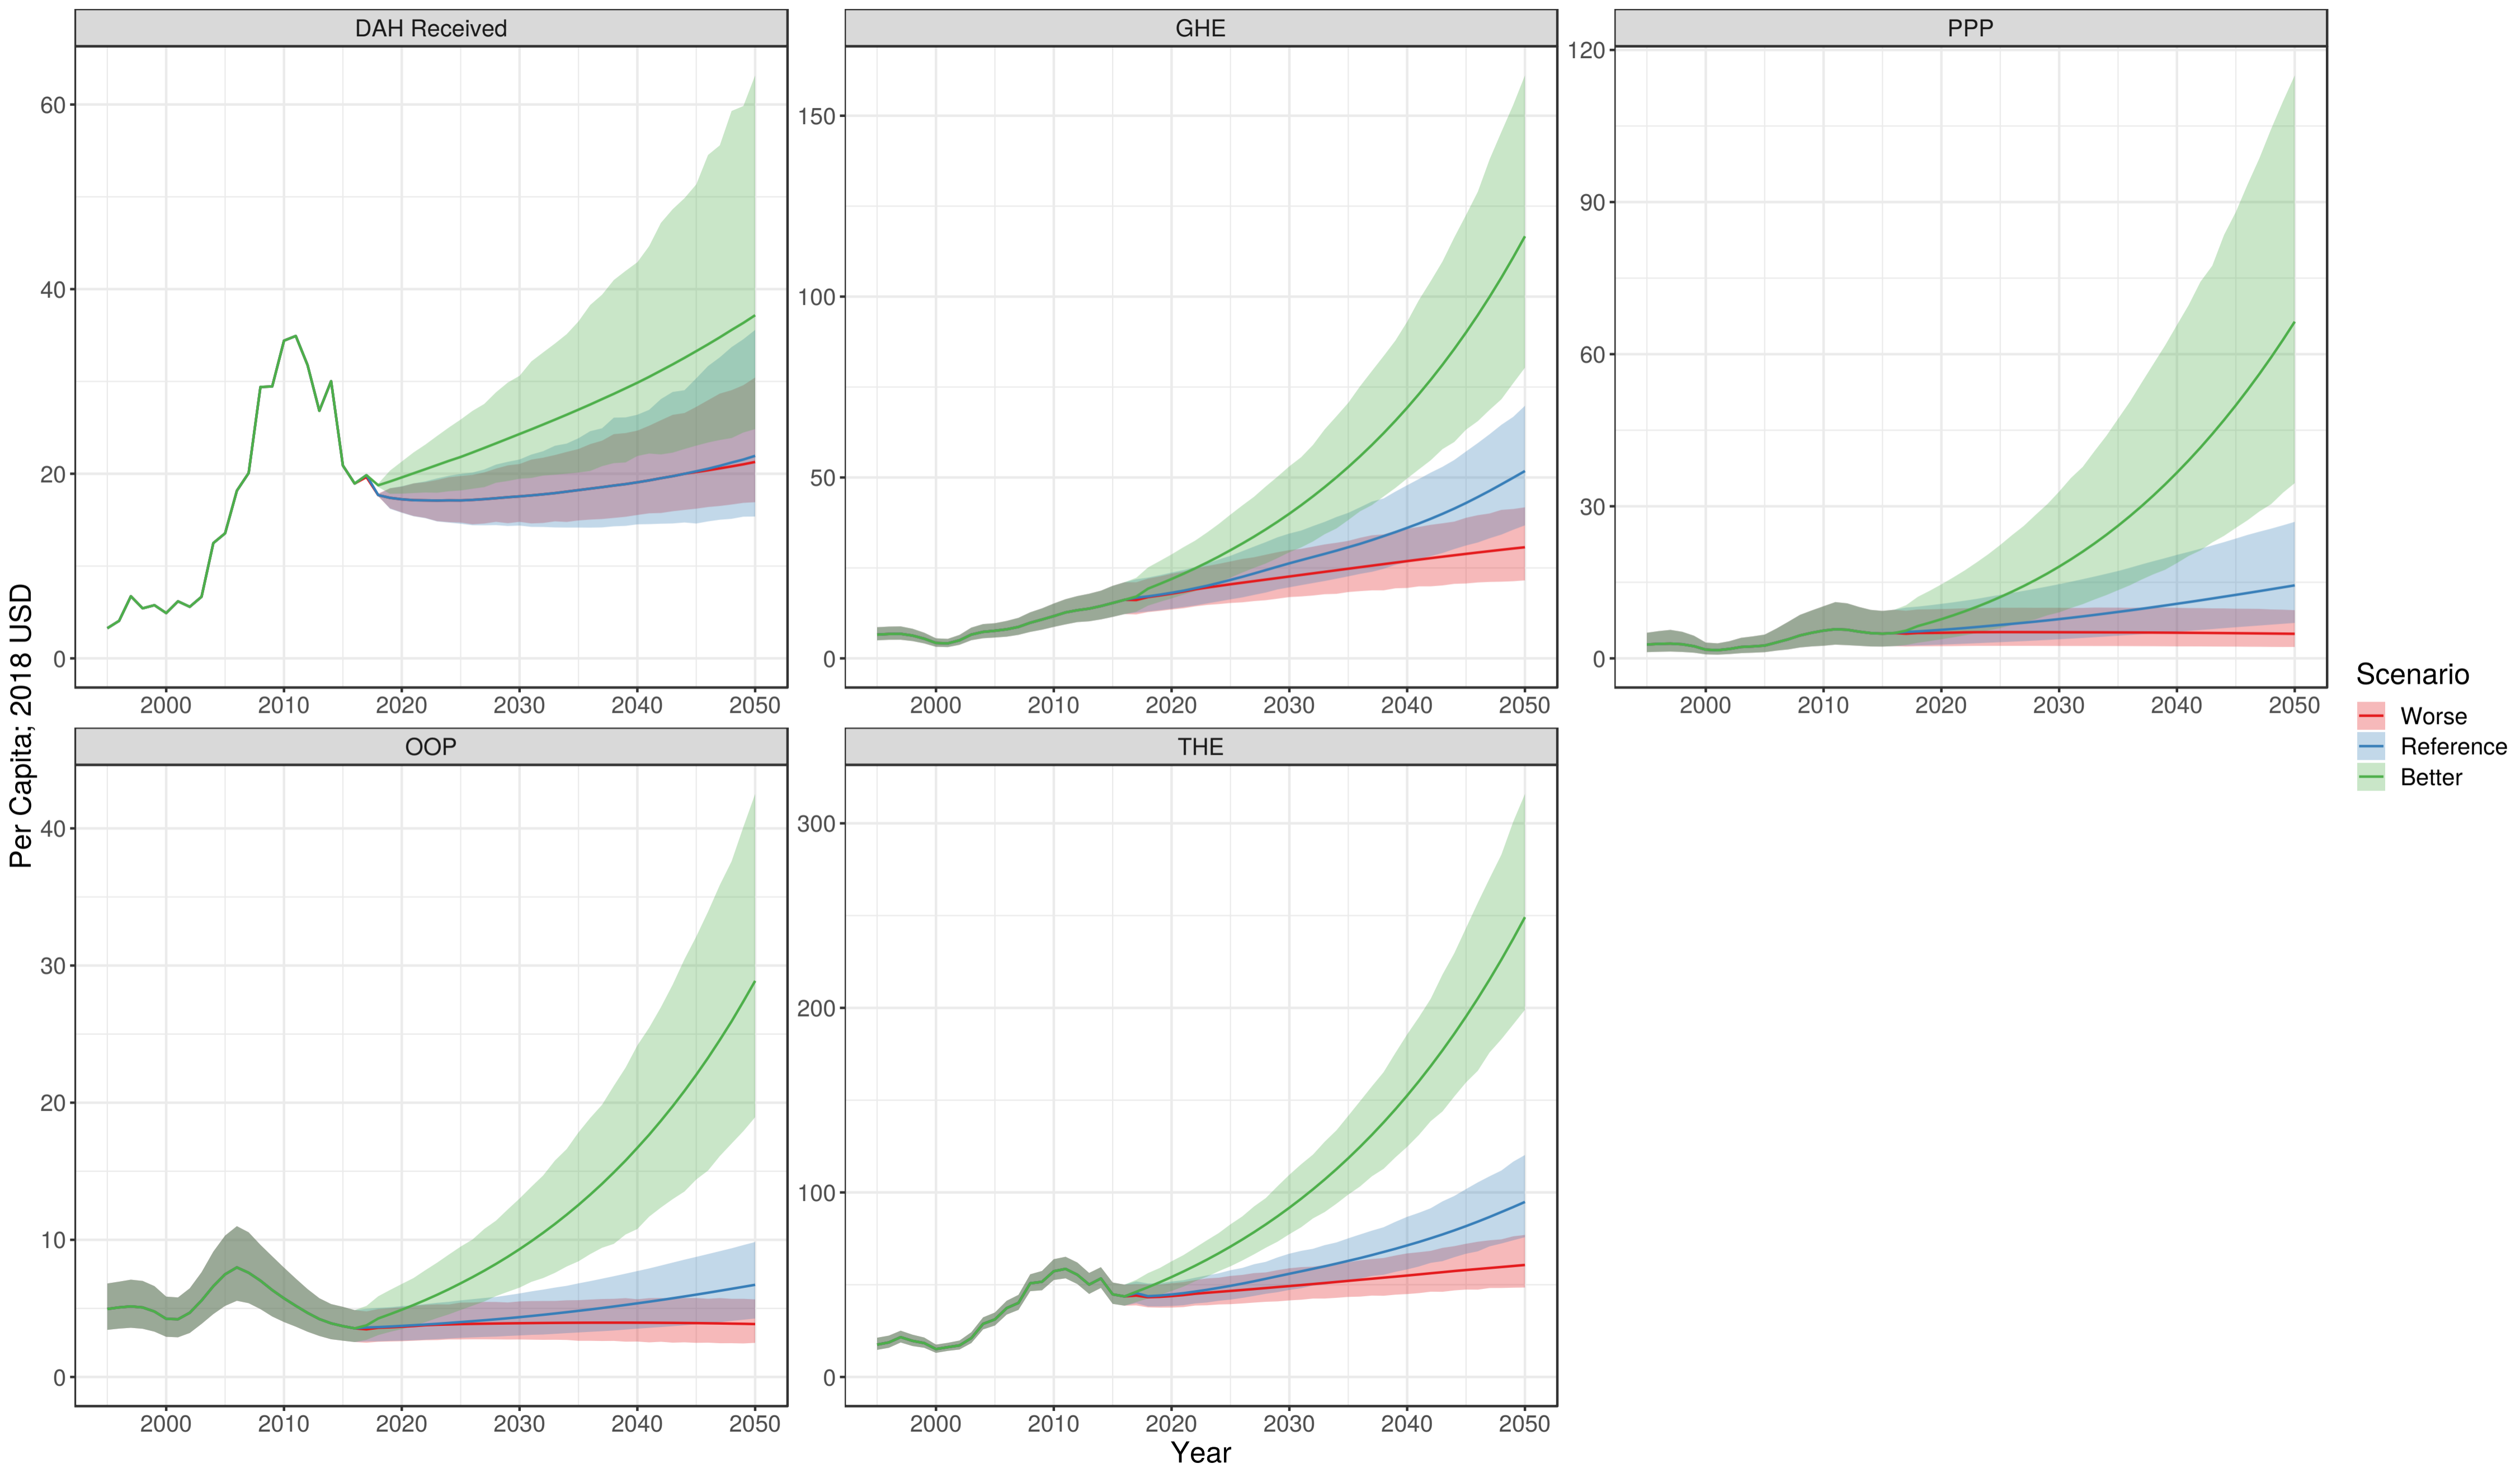

# Saint Lucia

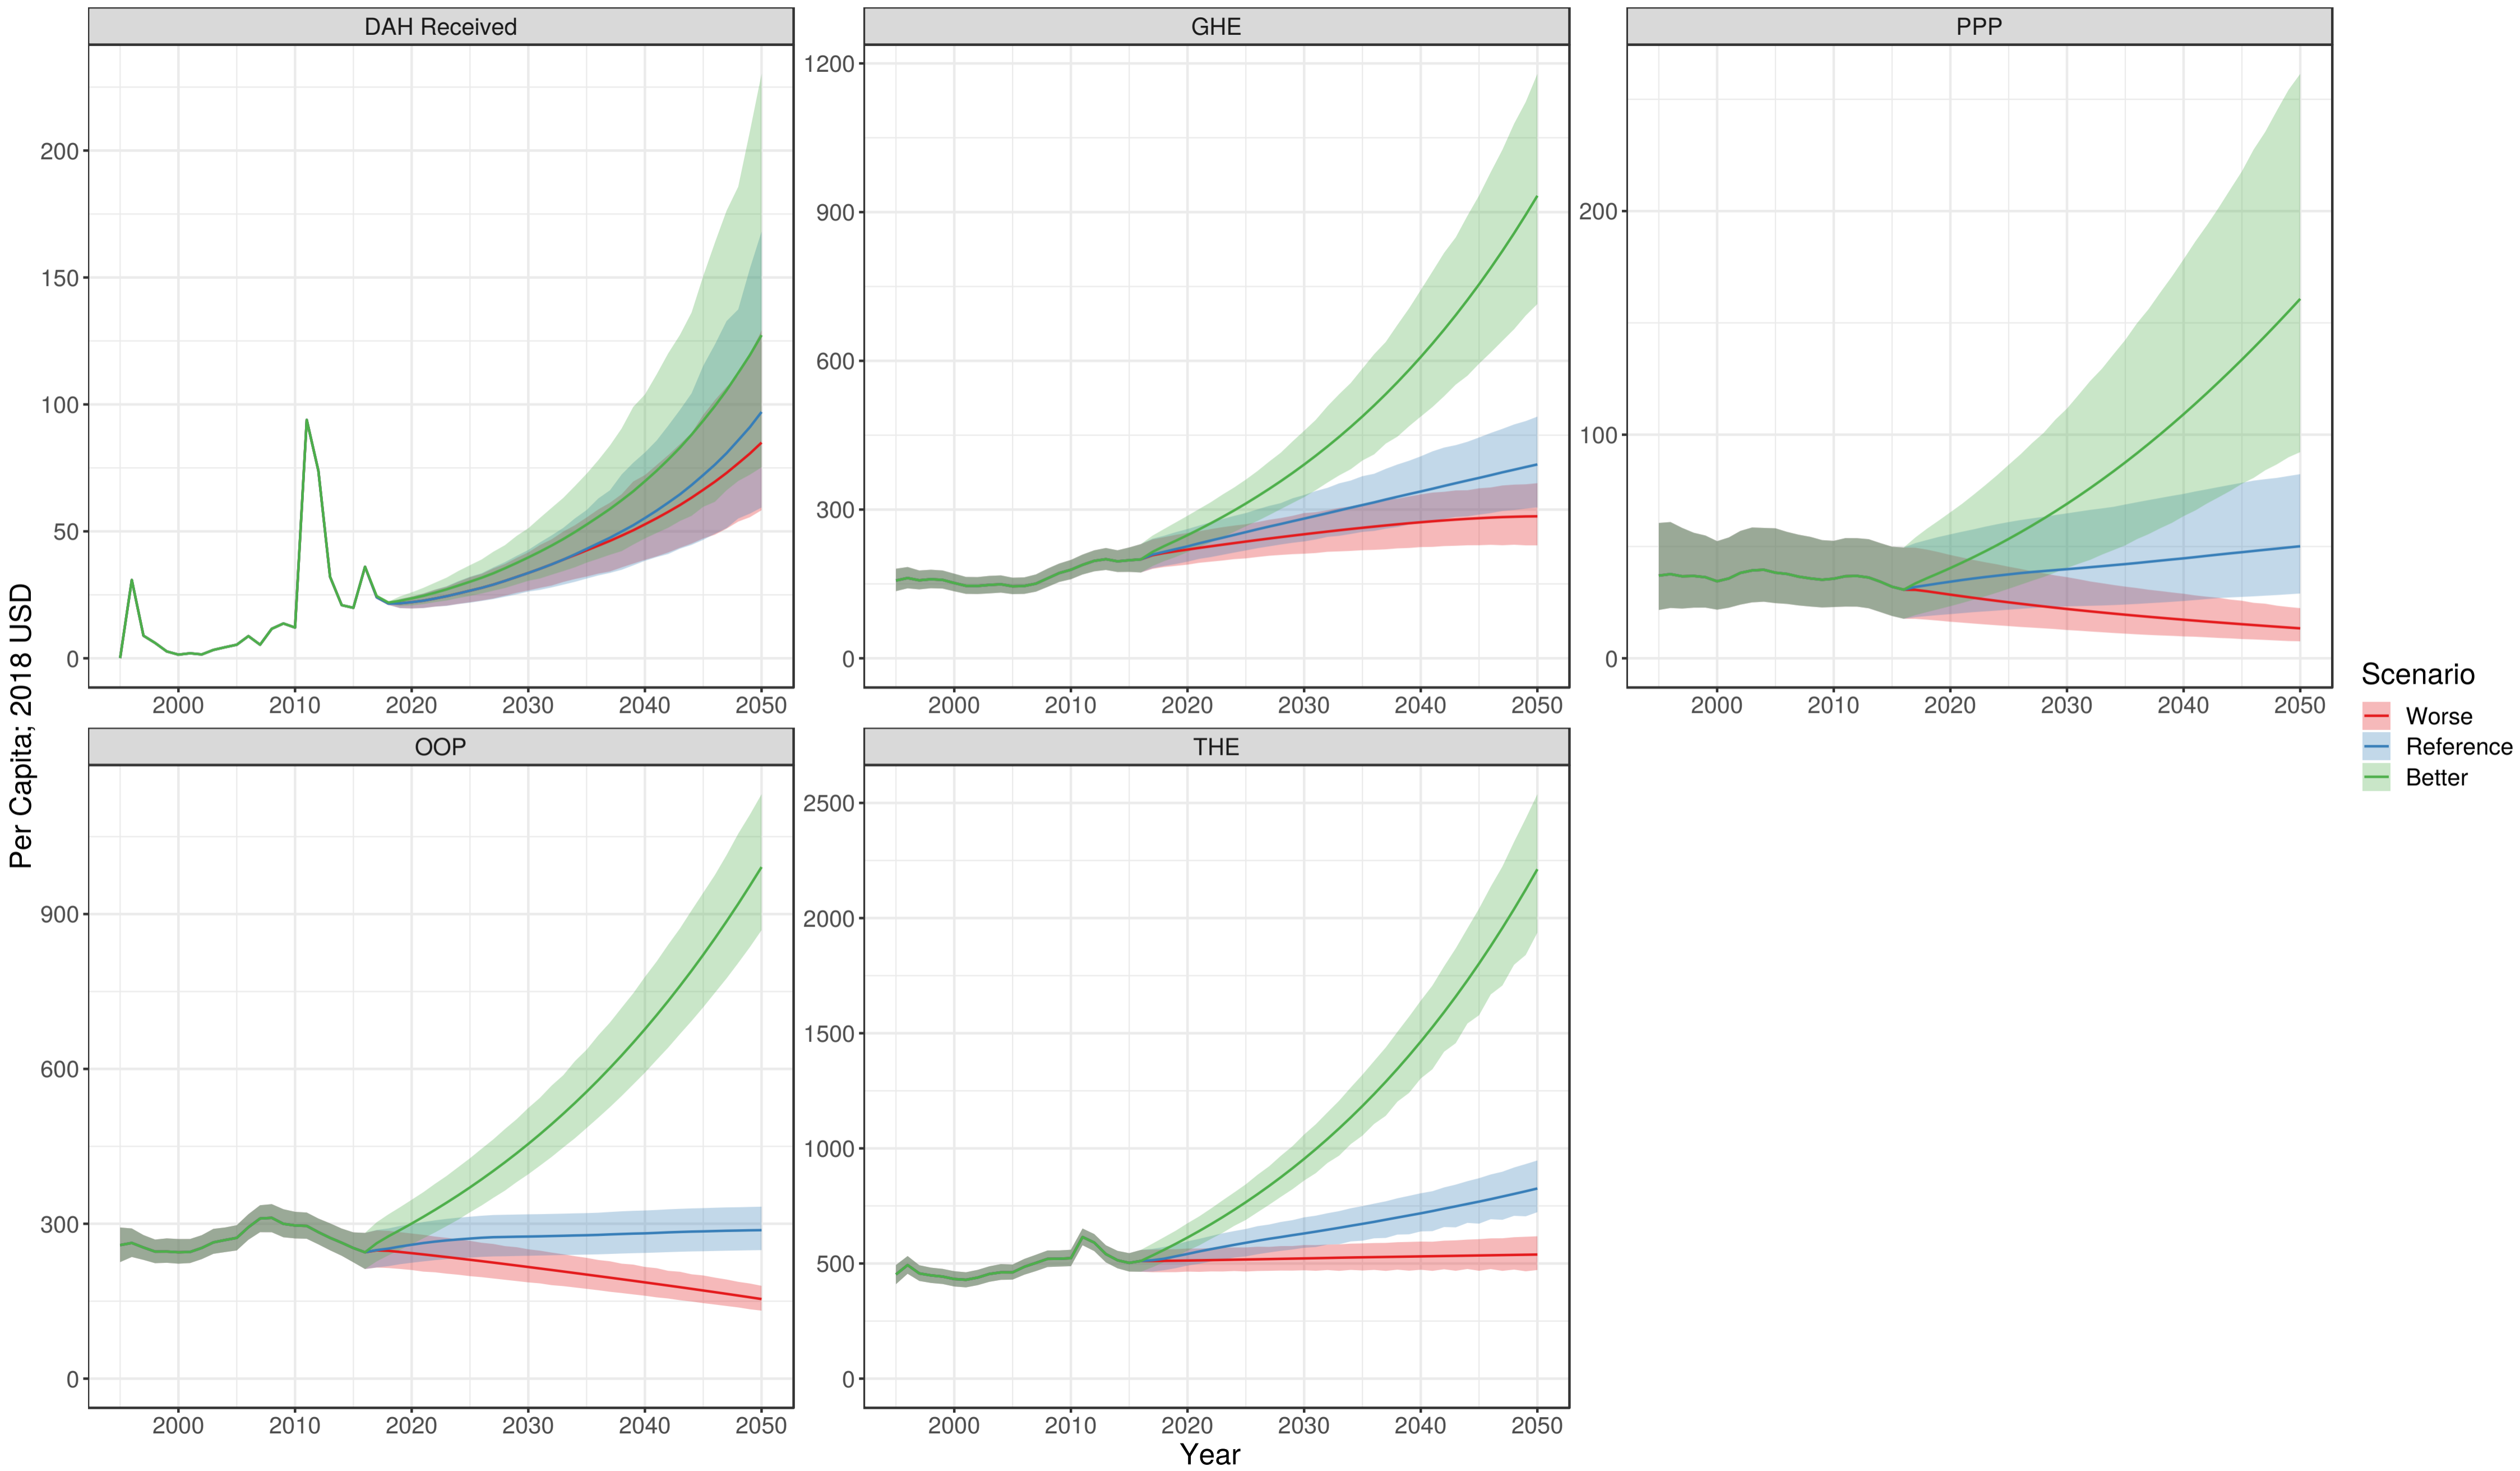

# Saint Vincent and the Grenadines

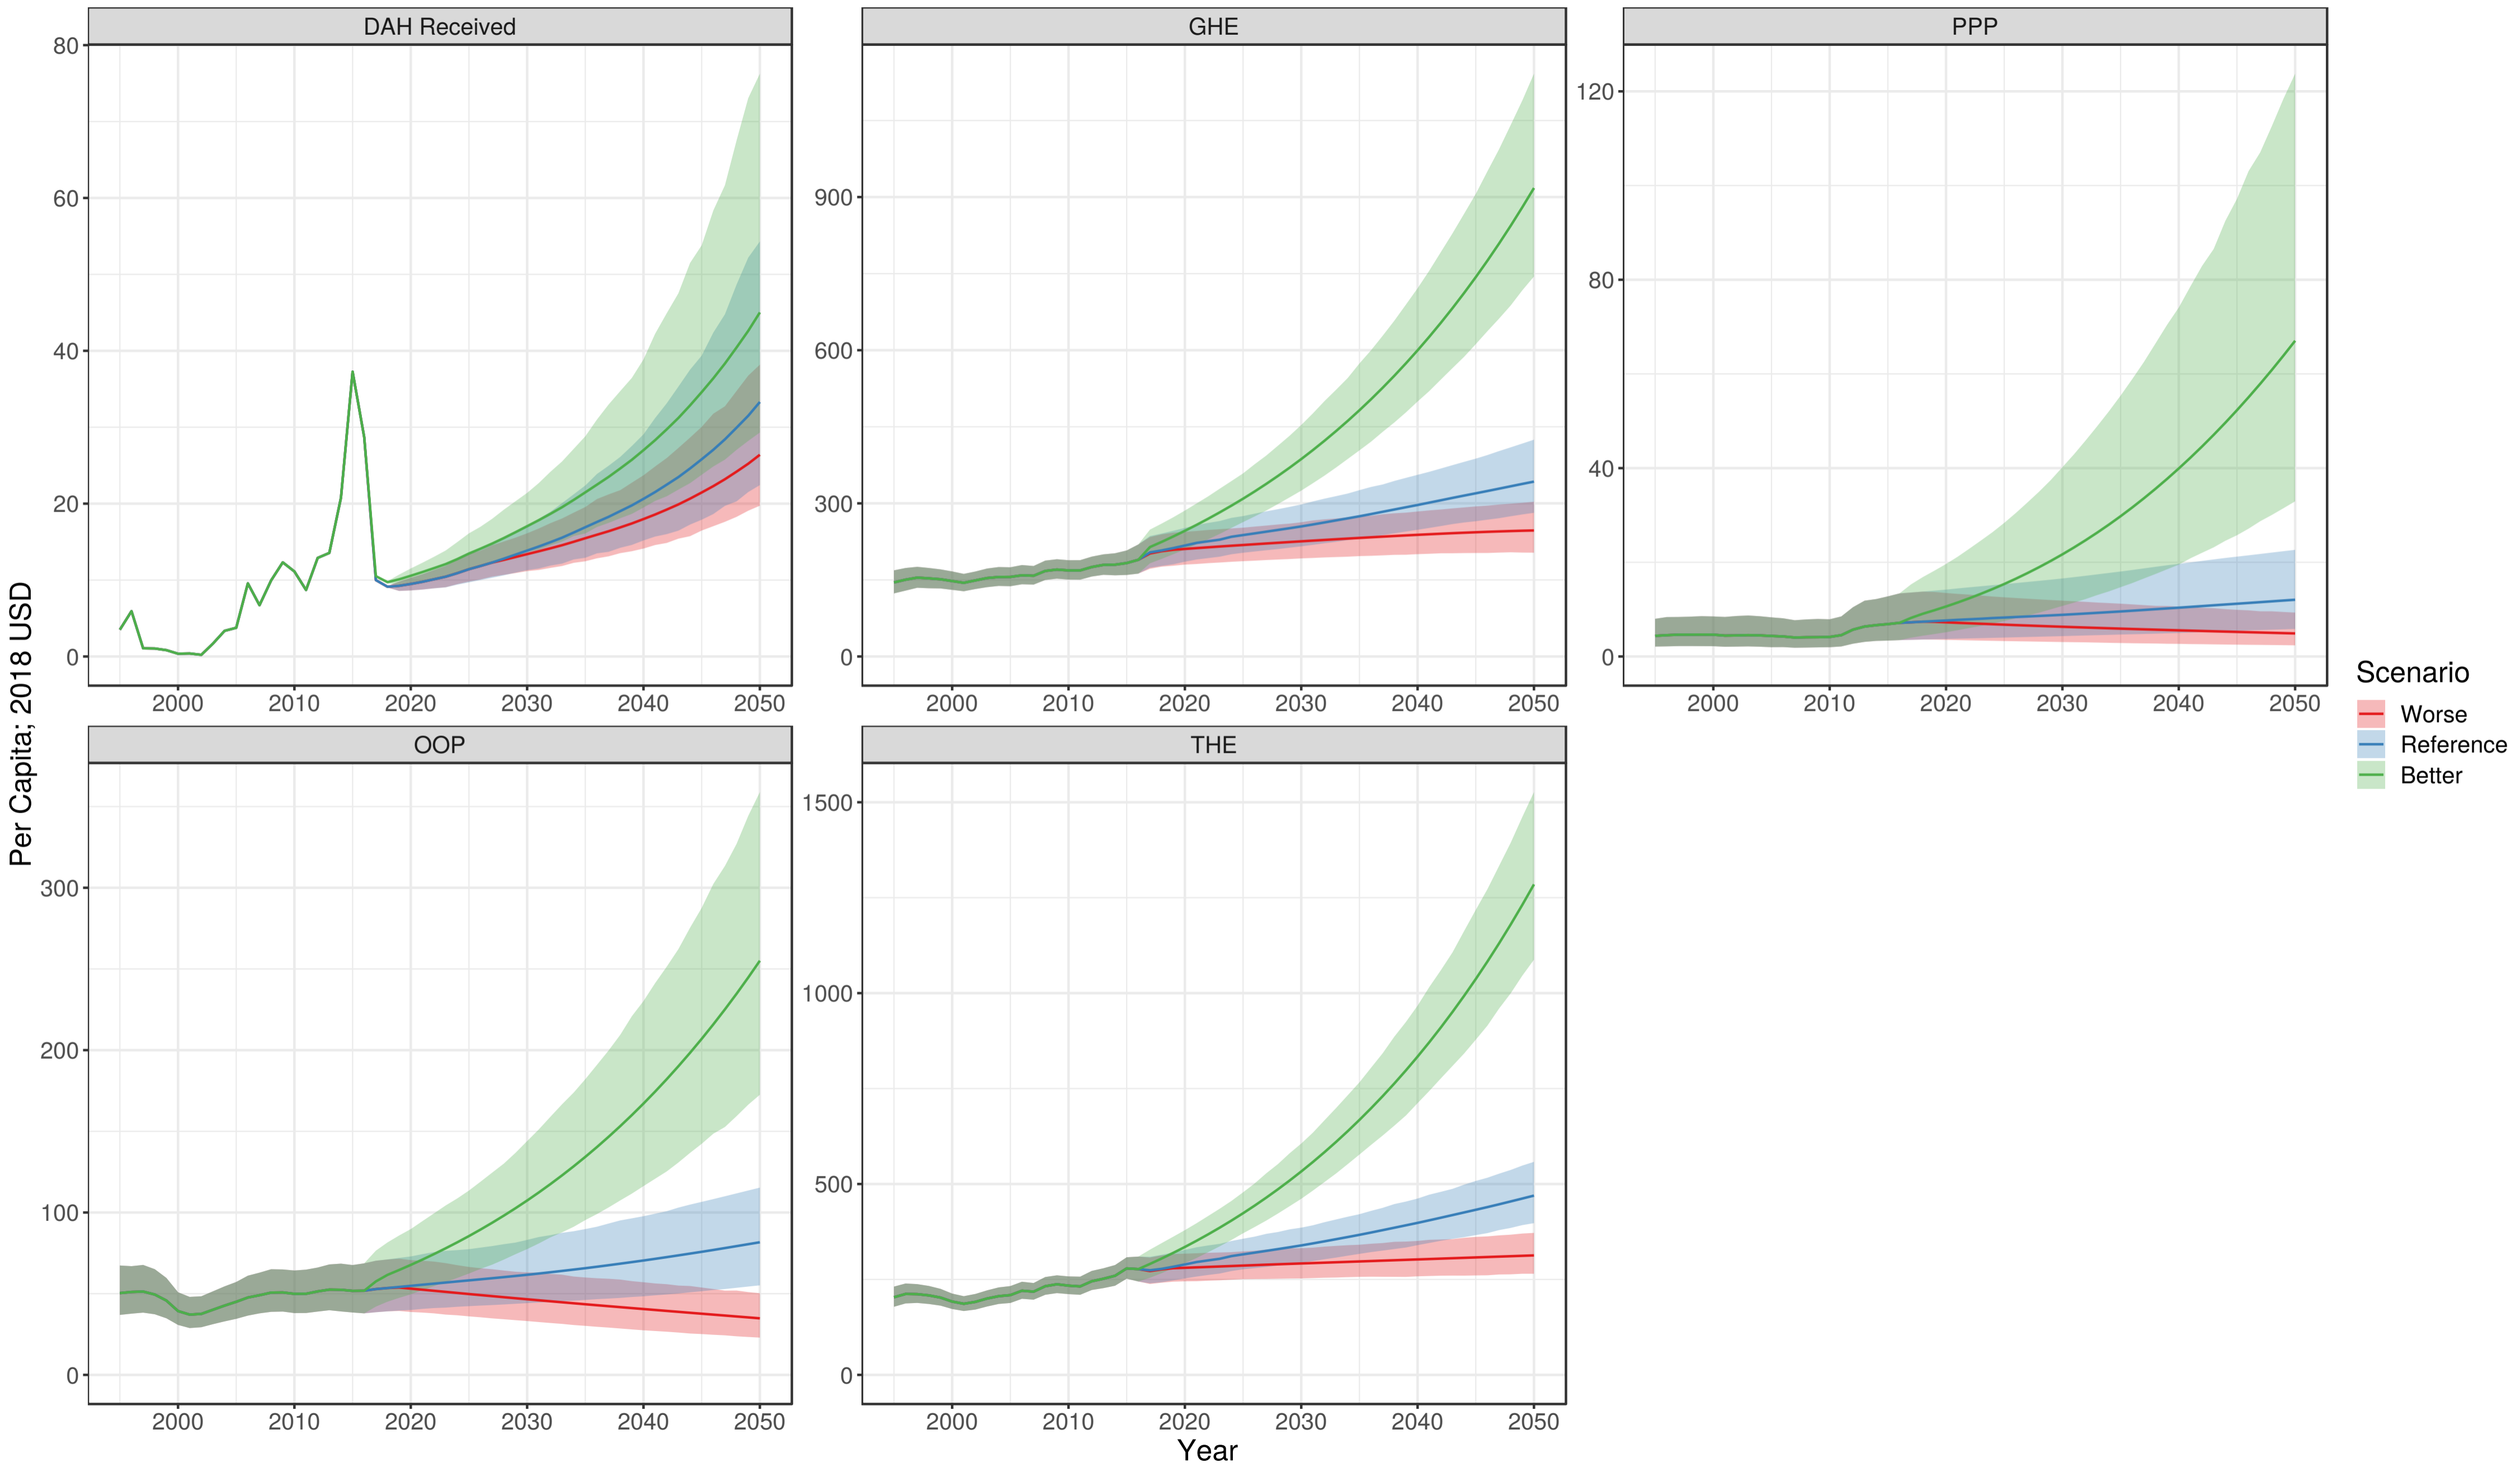

# Samoa

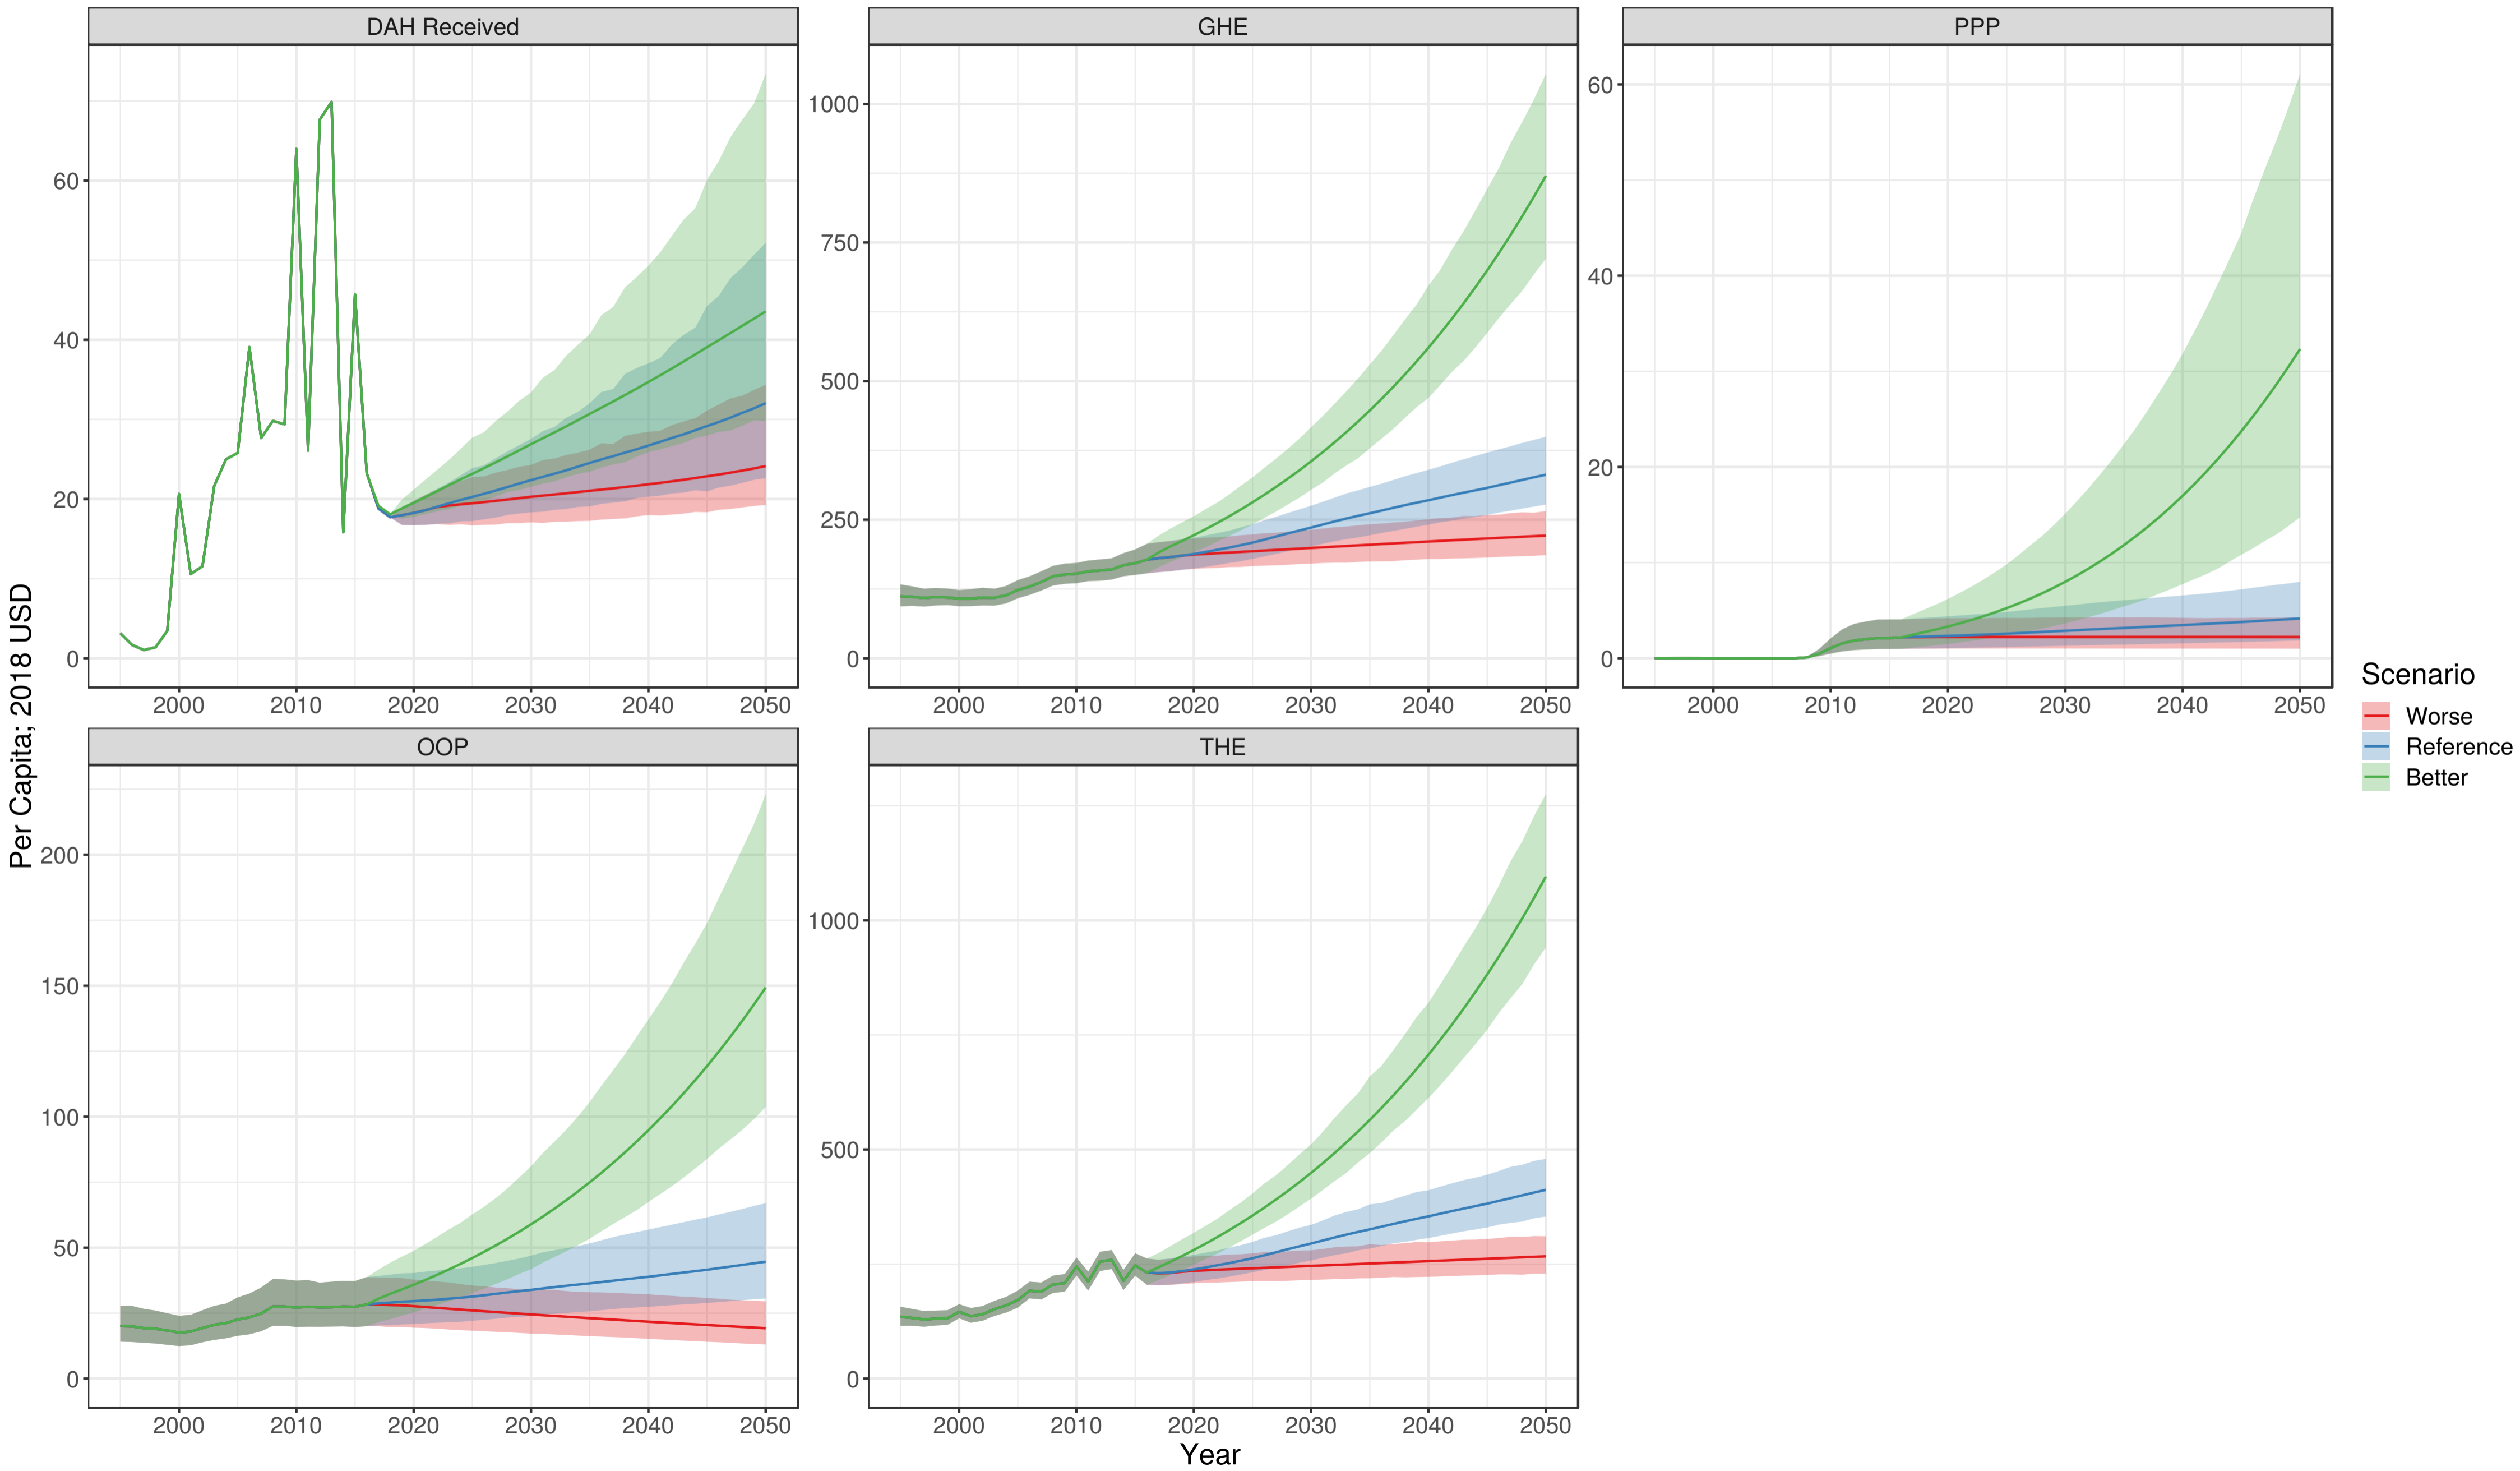

# Sao Tome and Principe

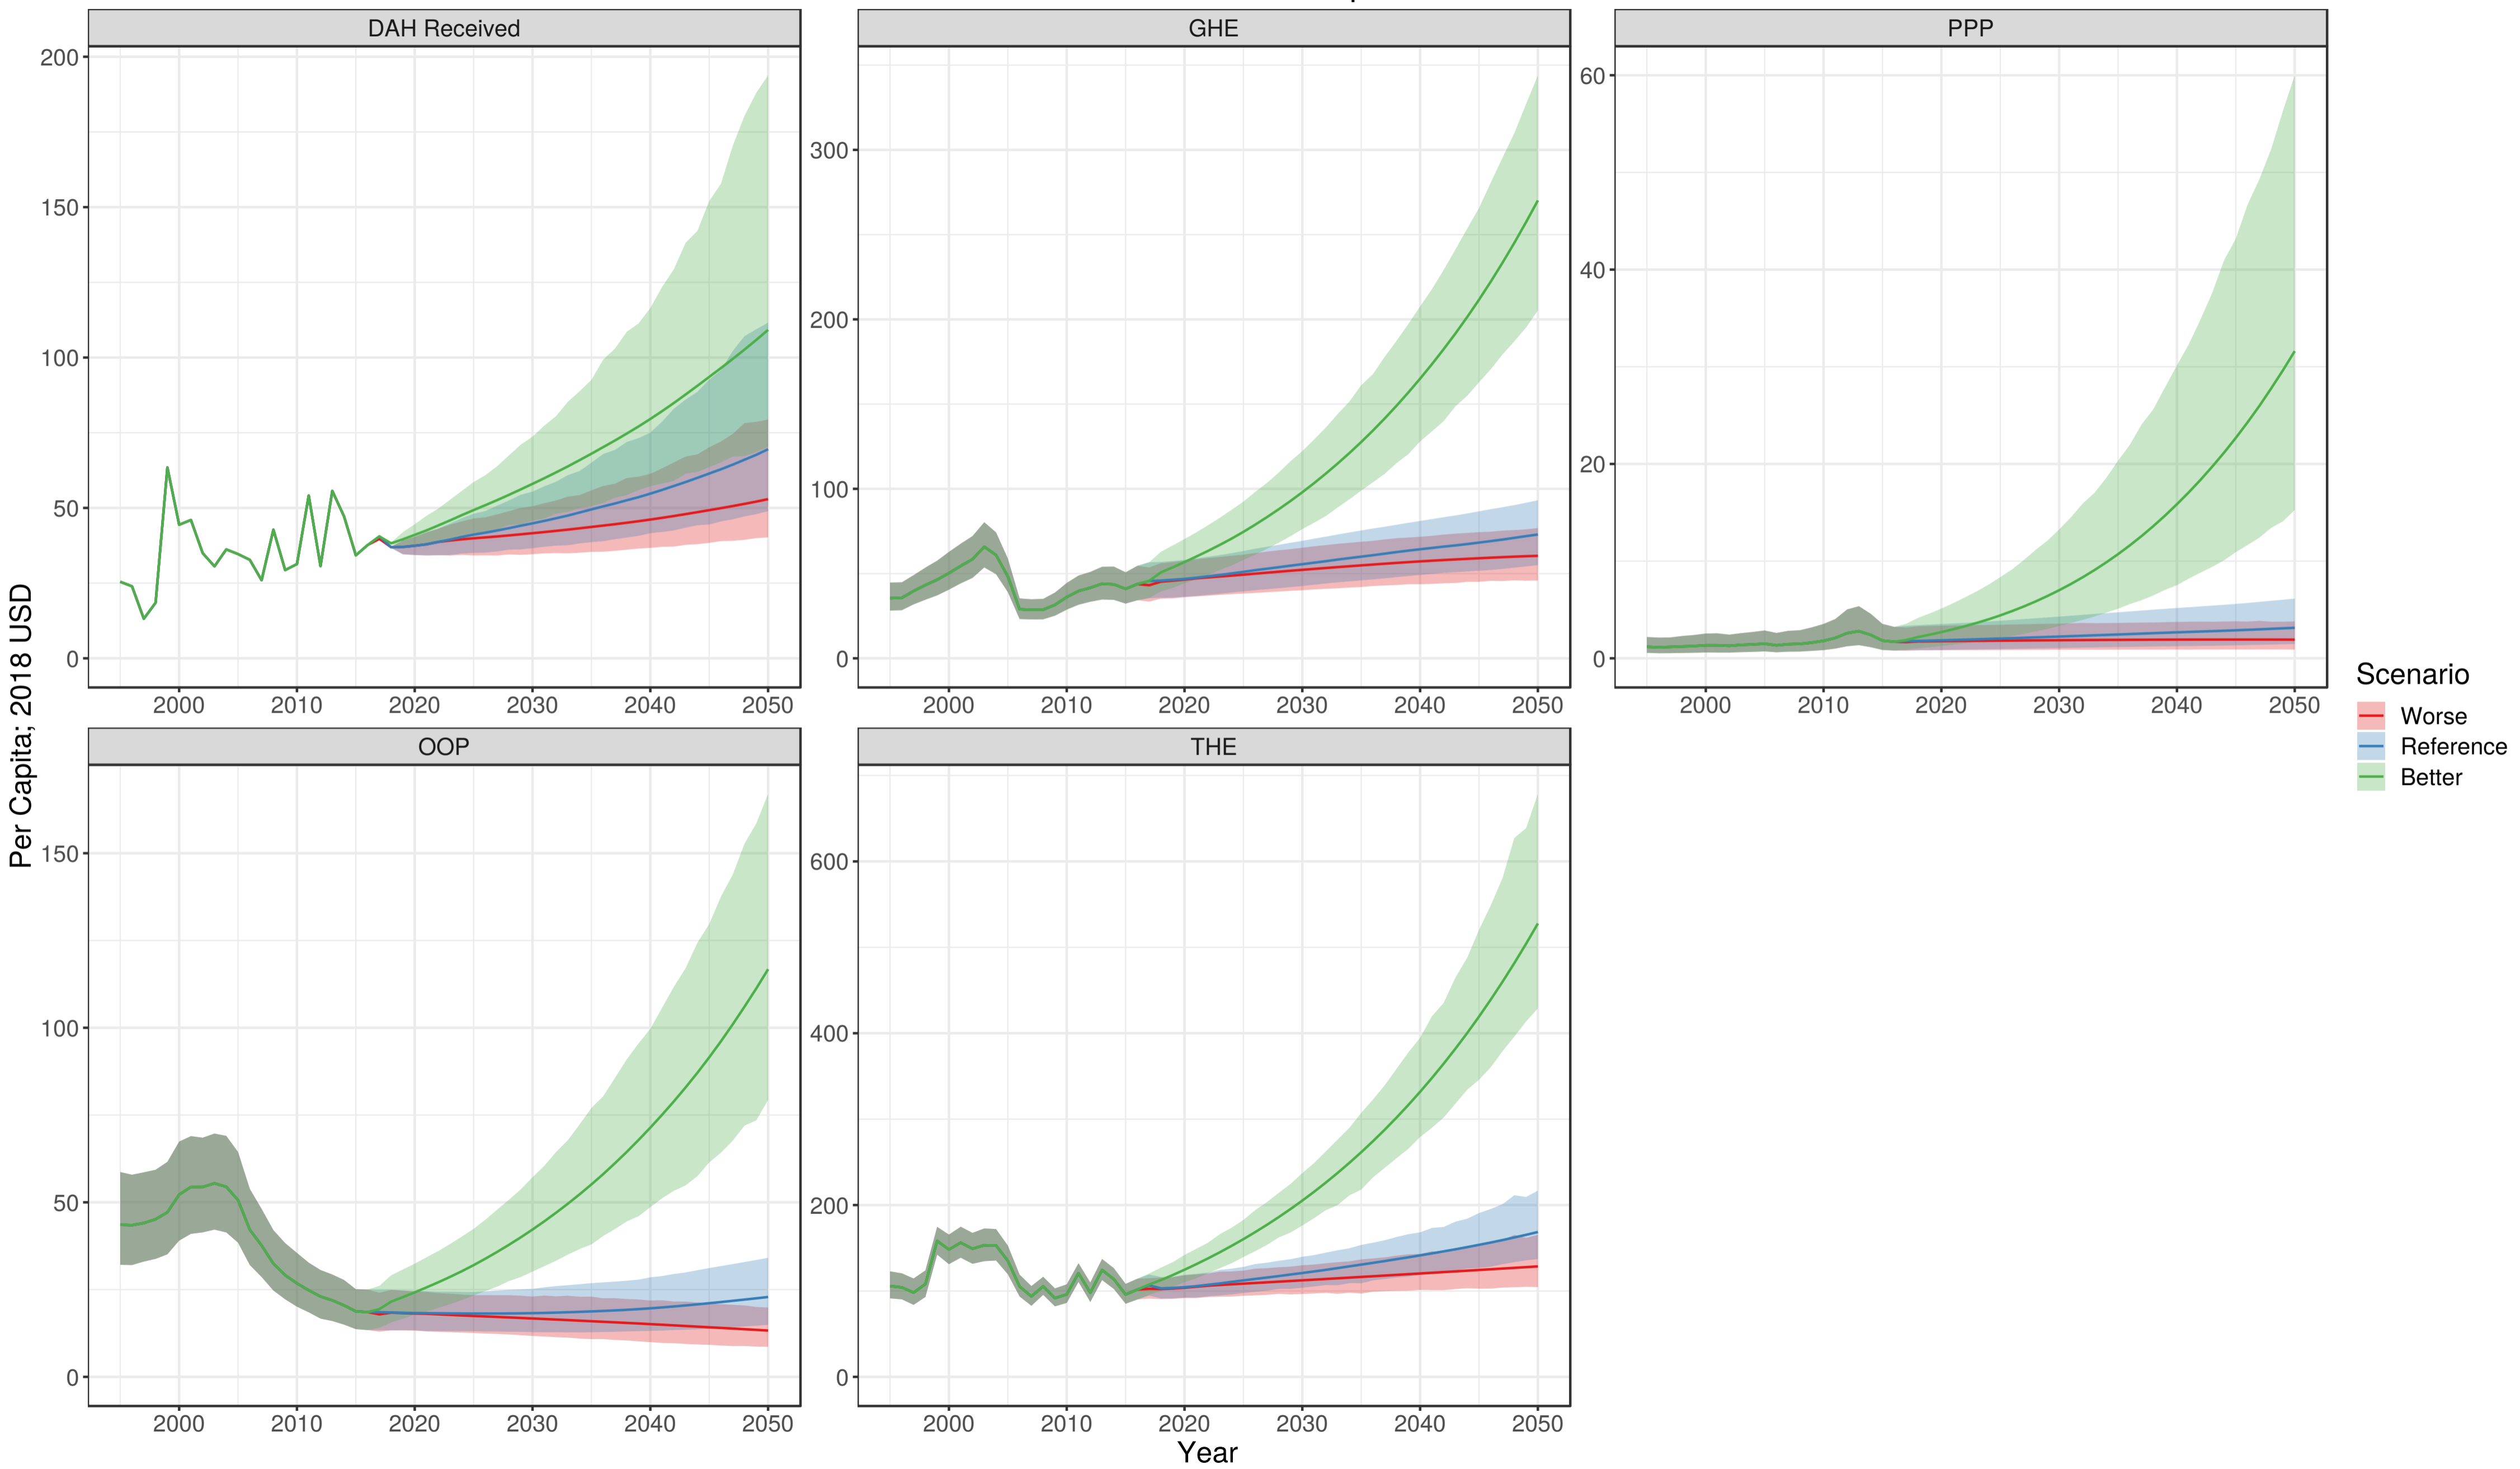

# Saudi Arabia

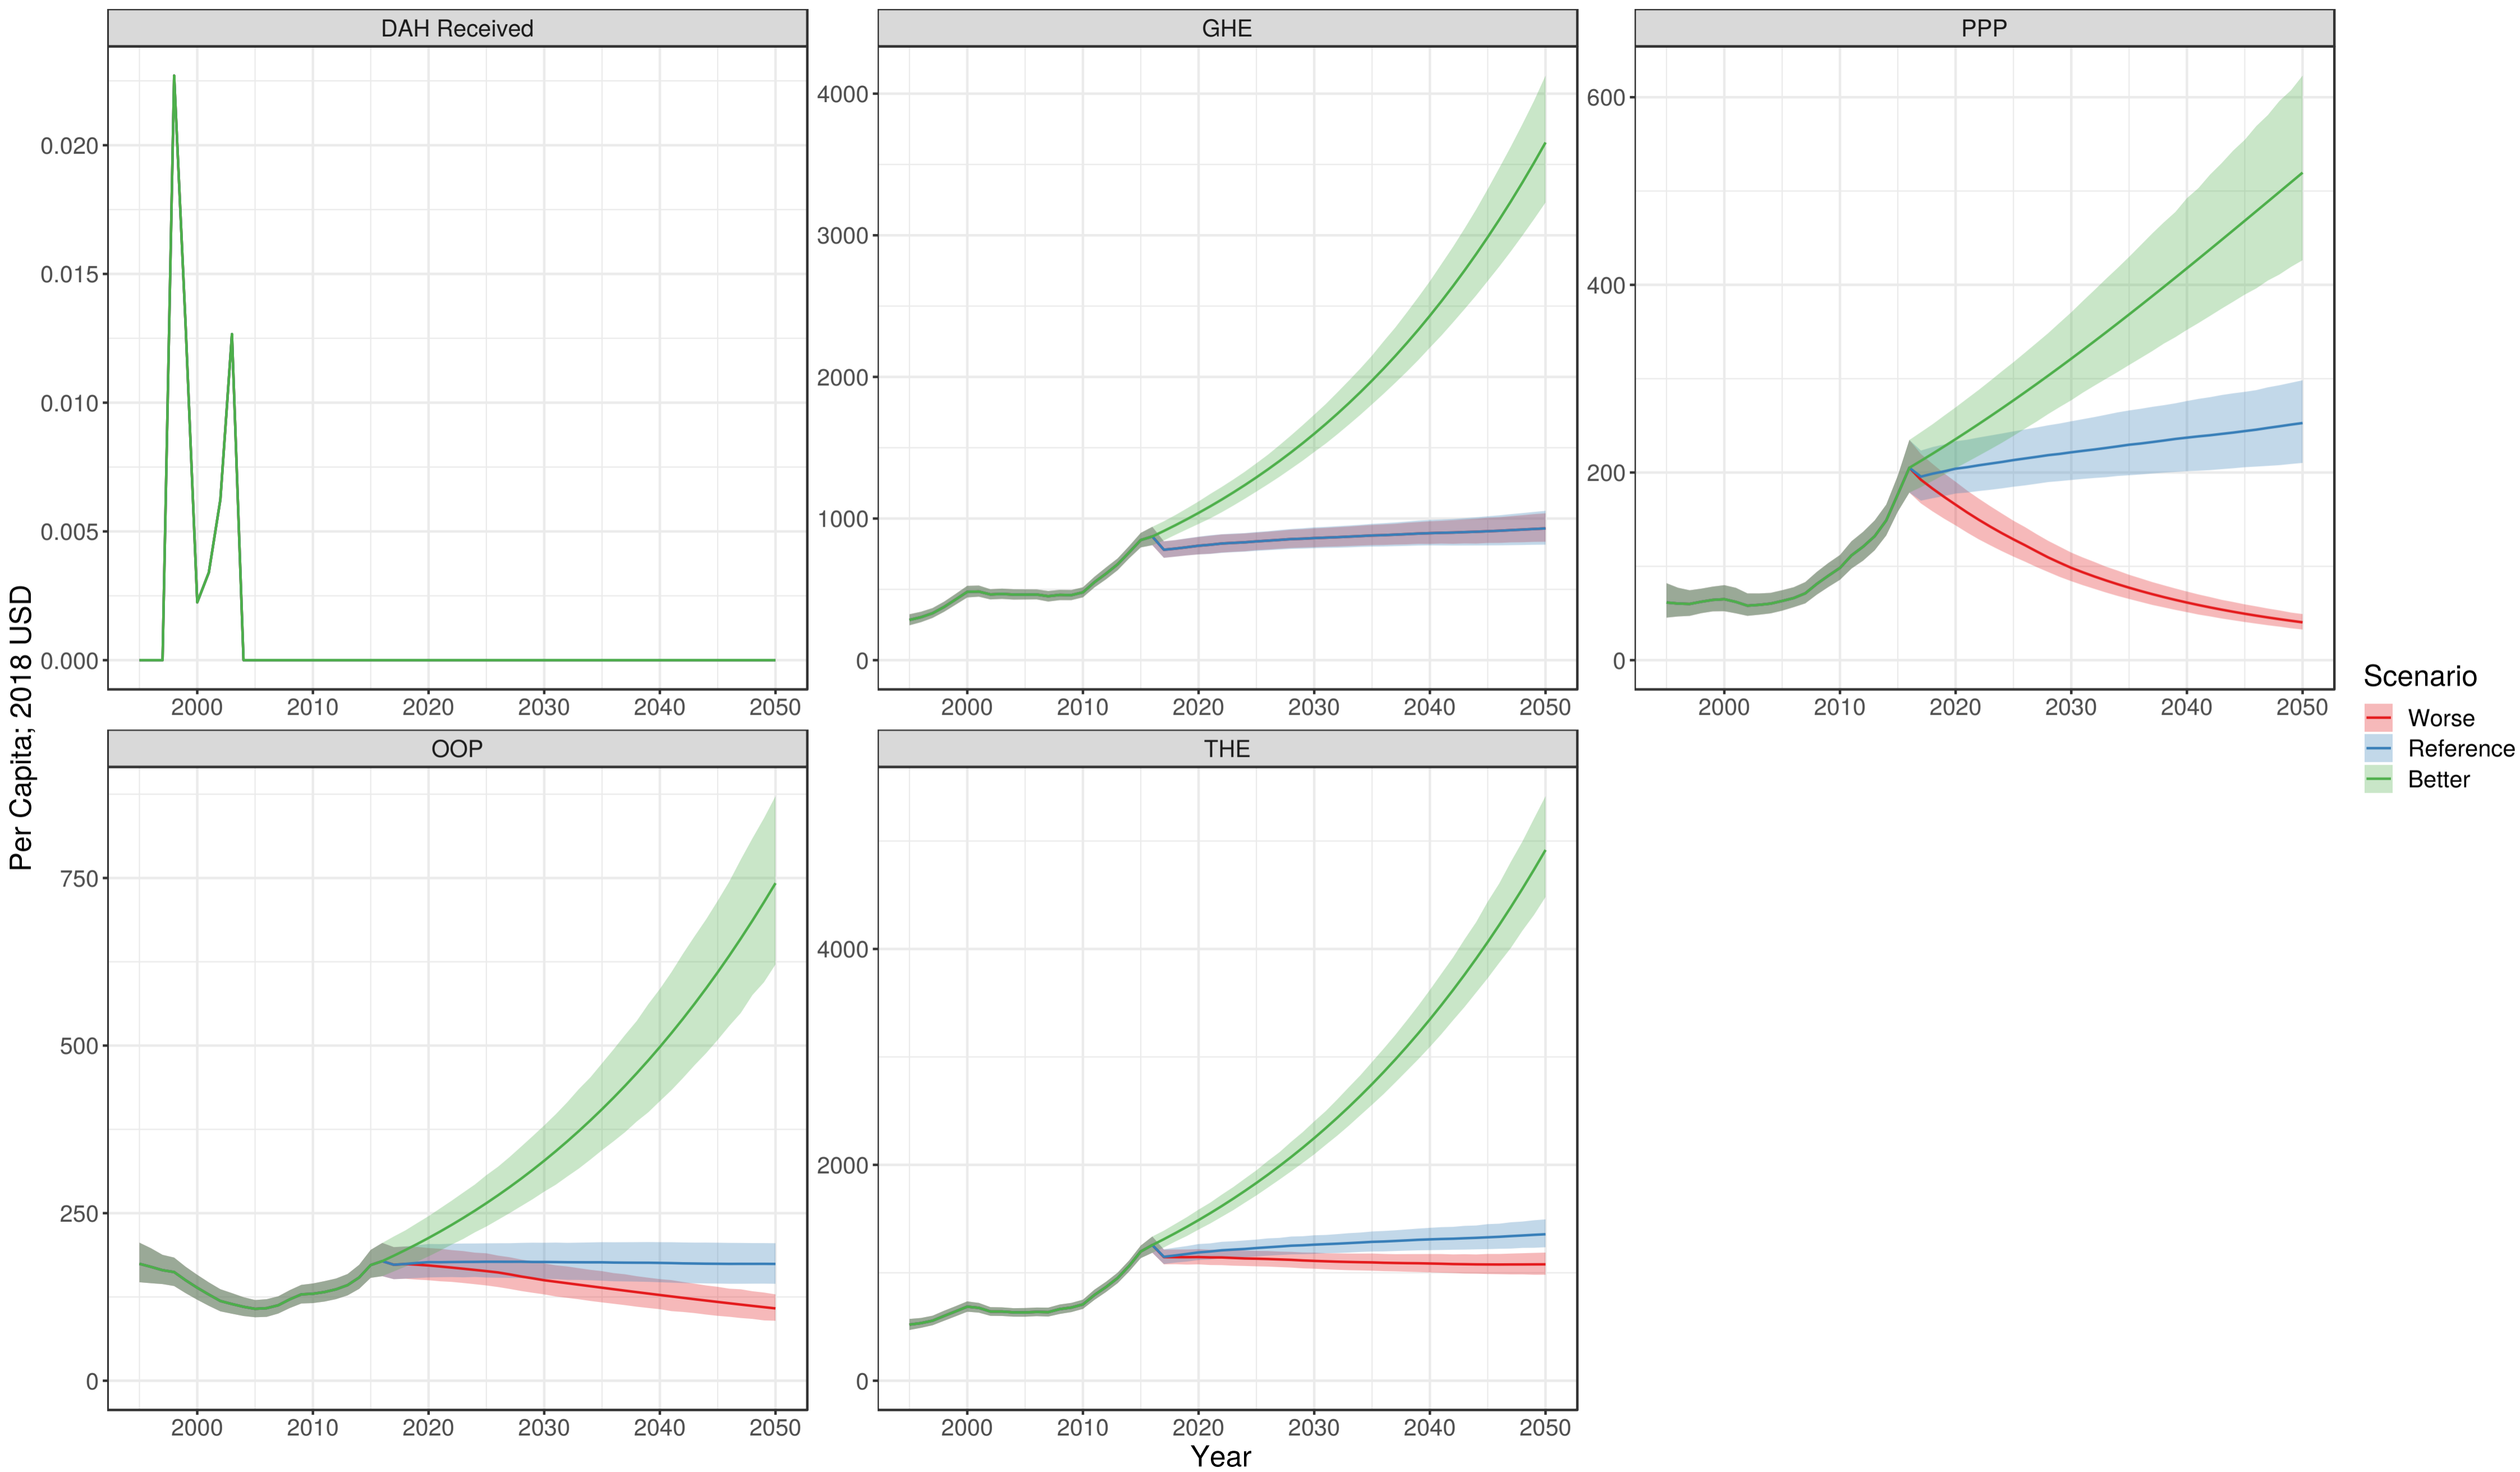



# Senegal

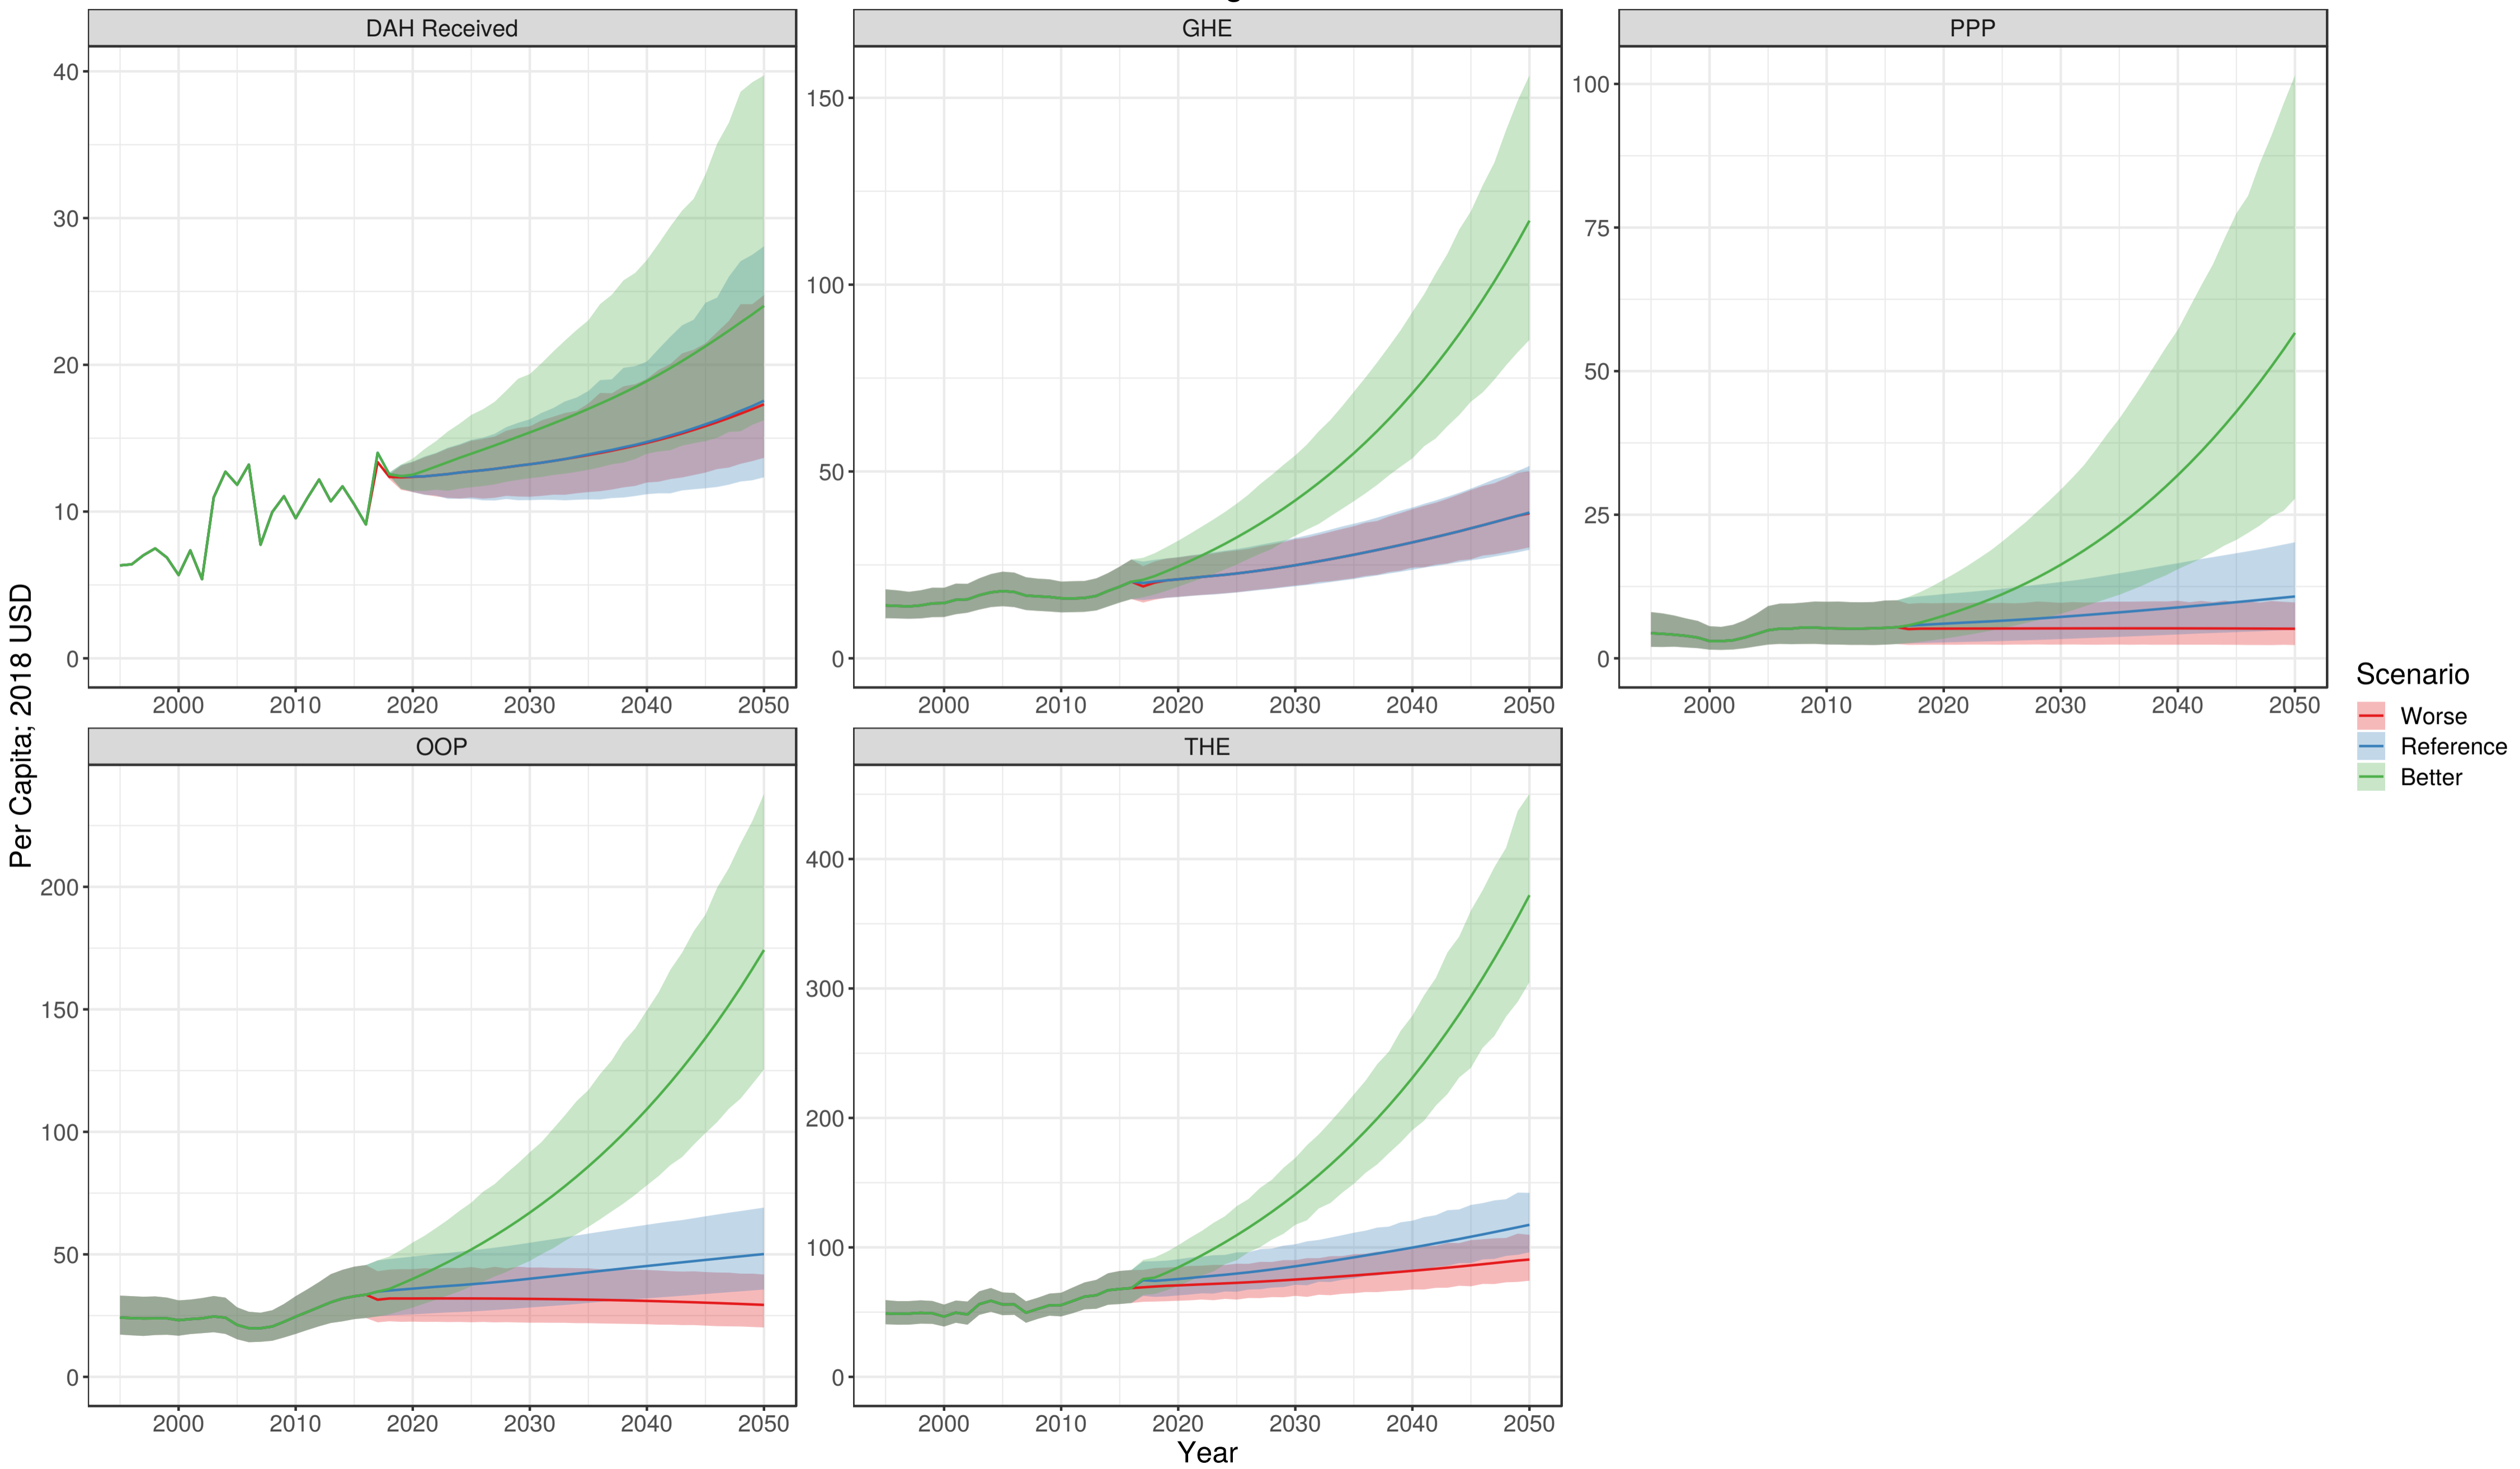

# Serbia

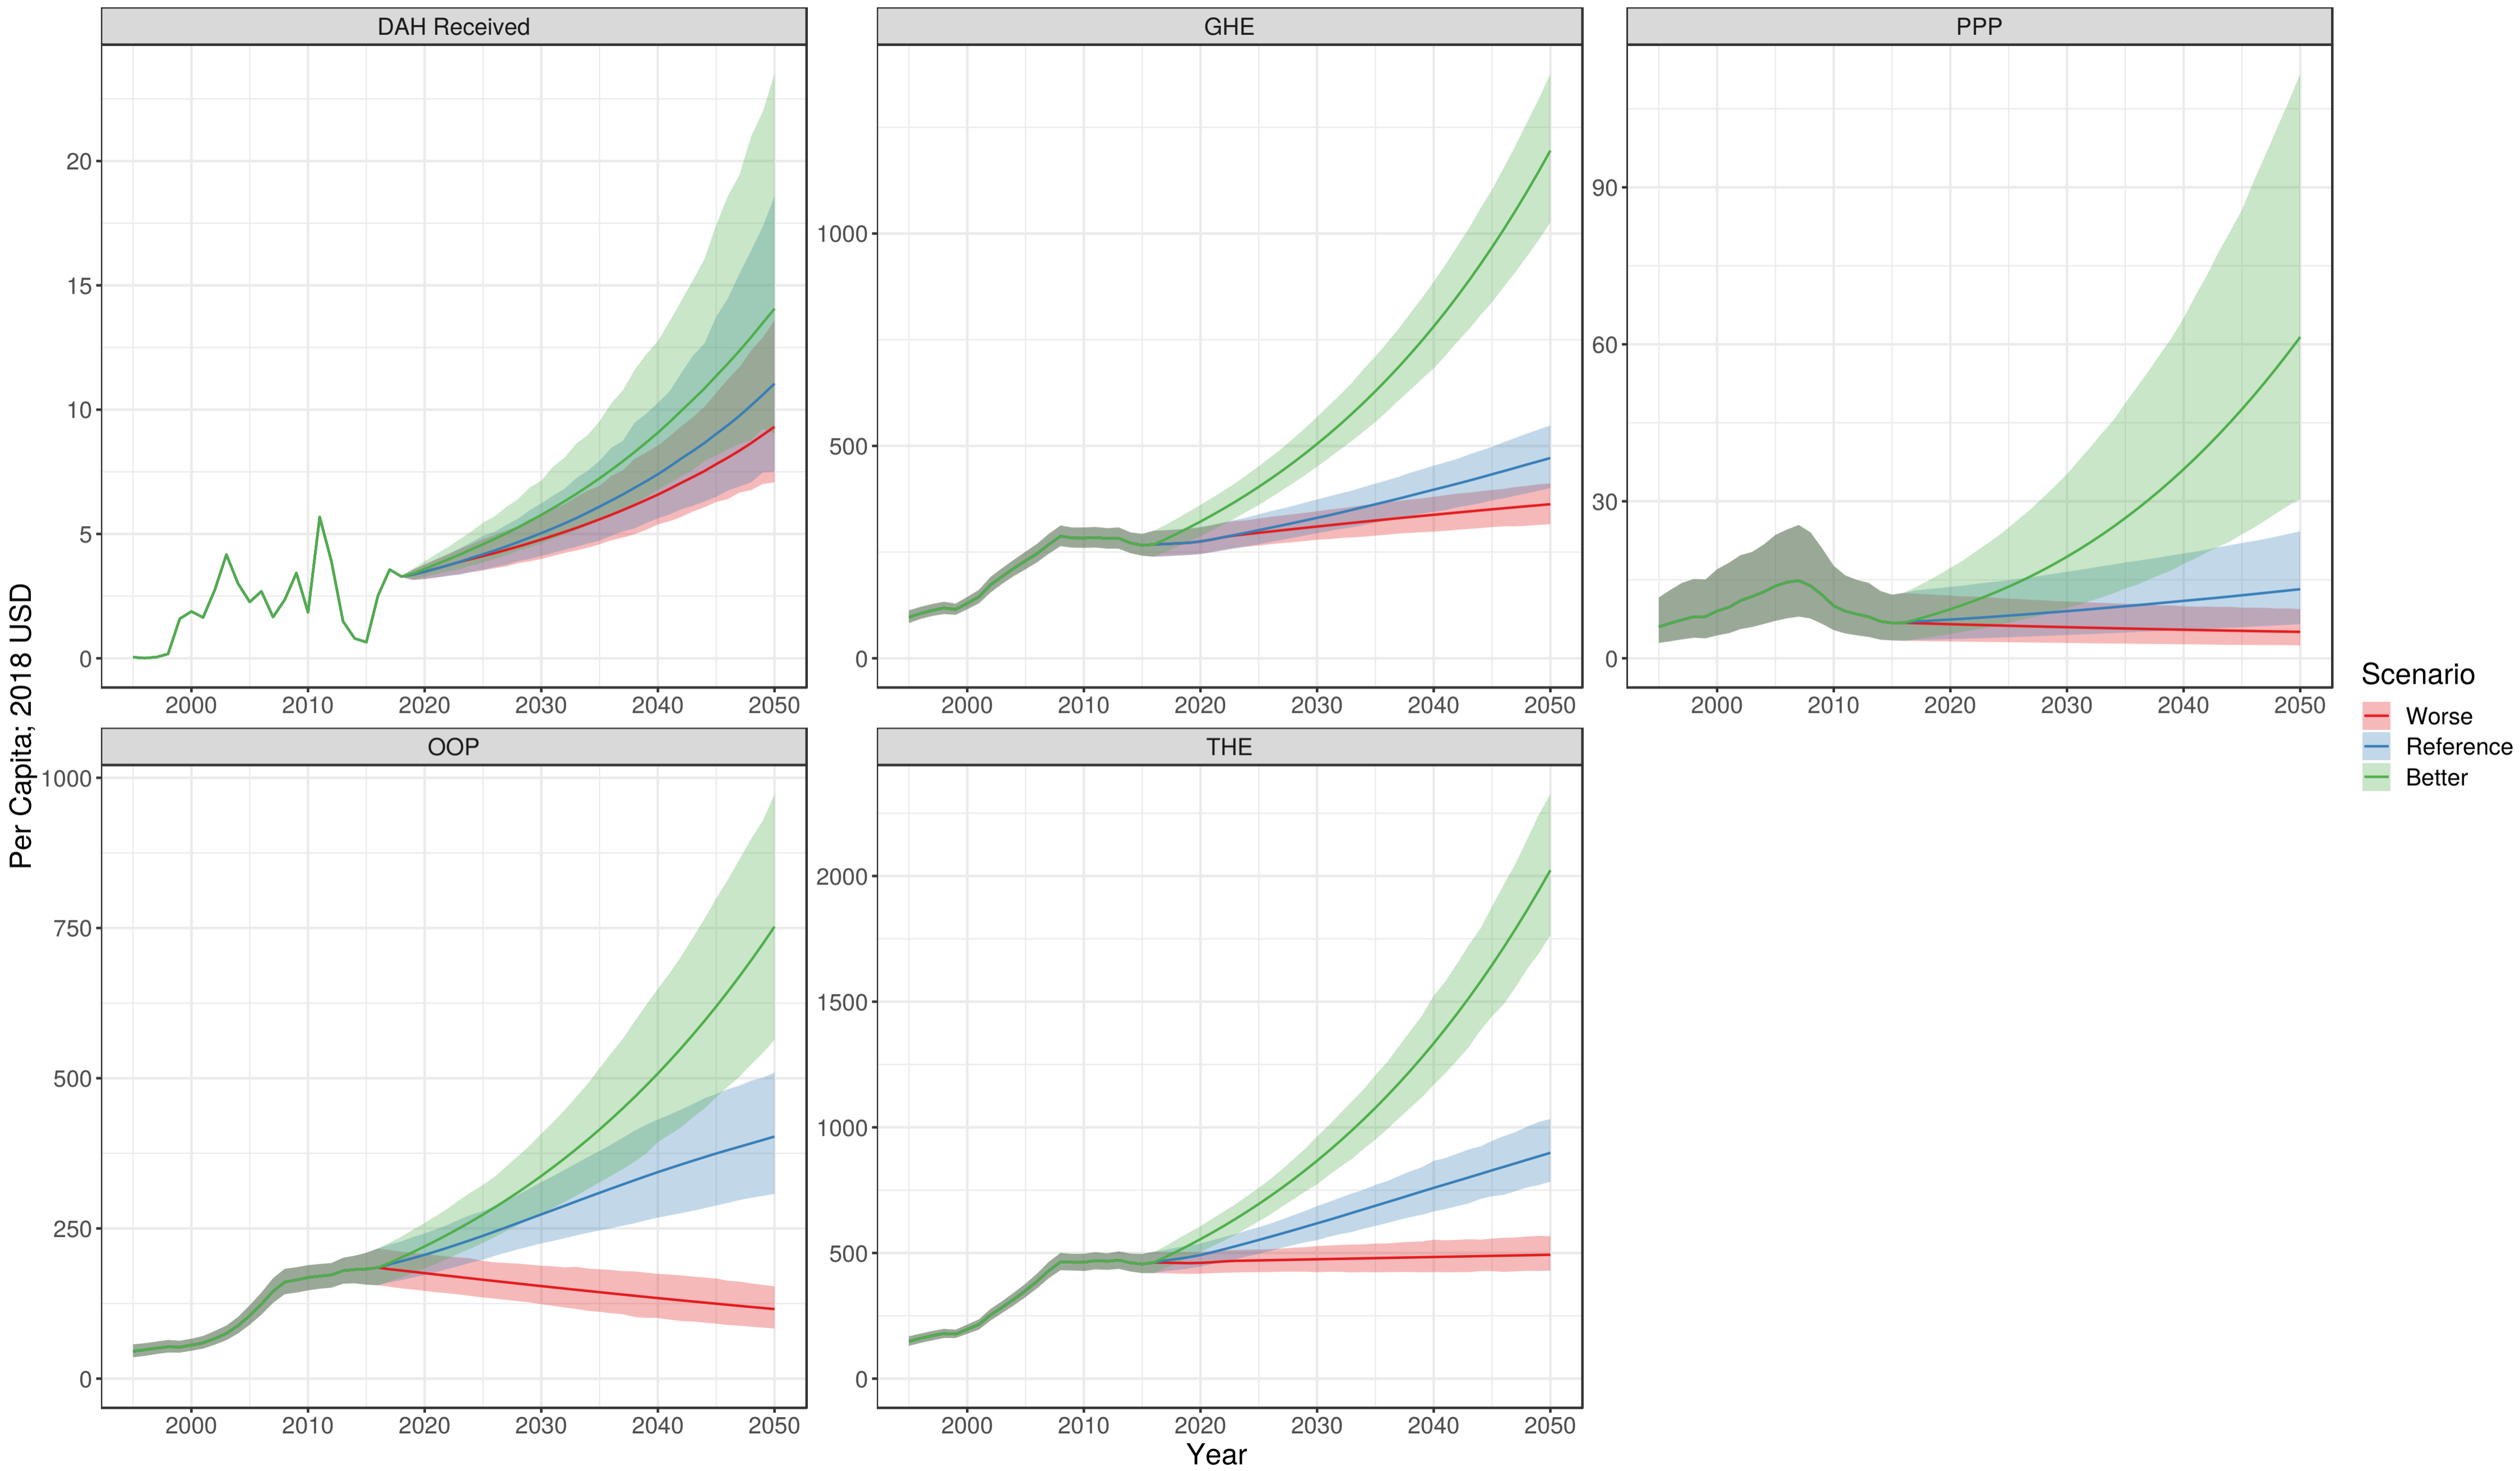

# Seychelles

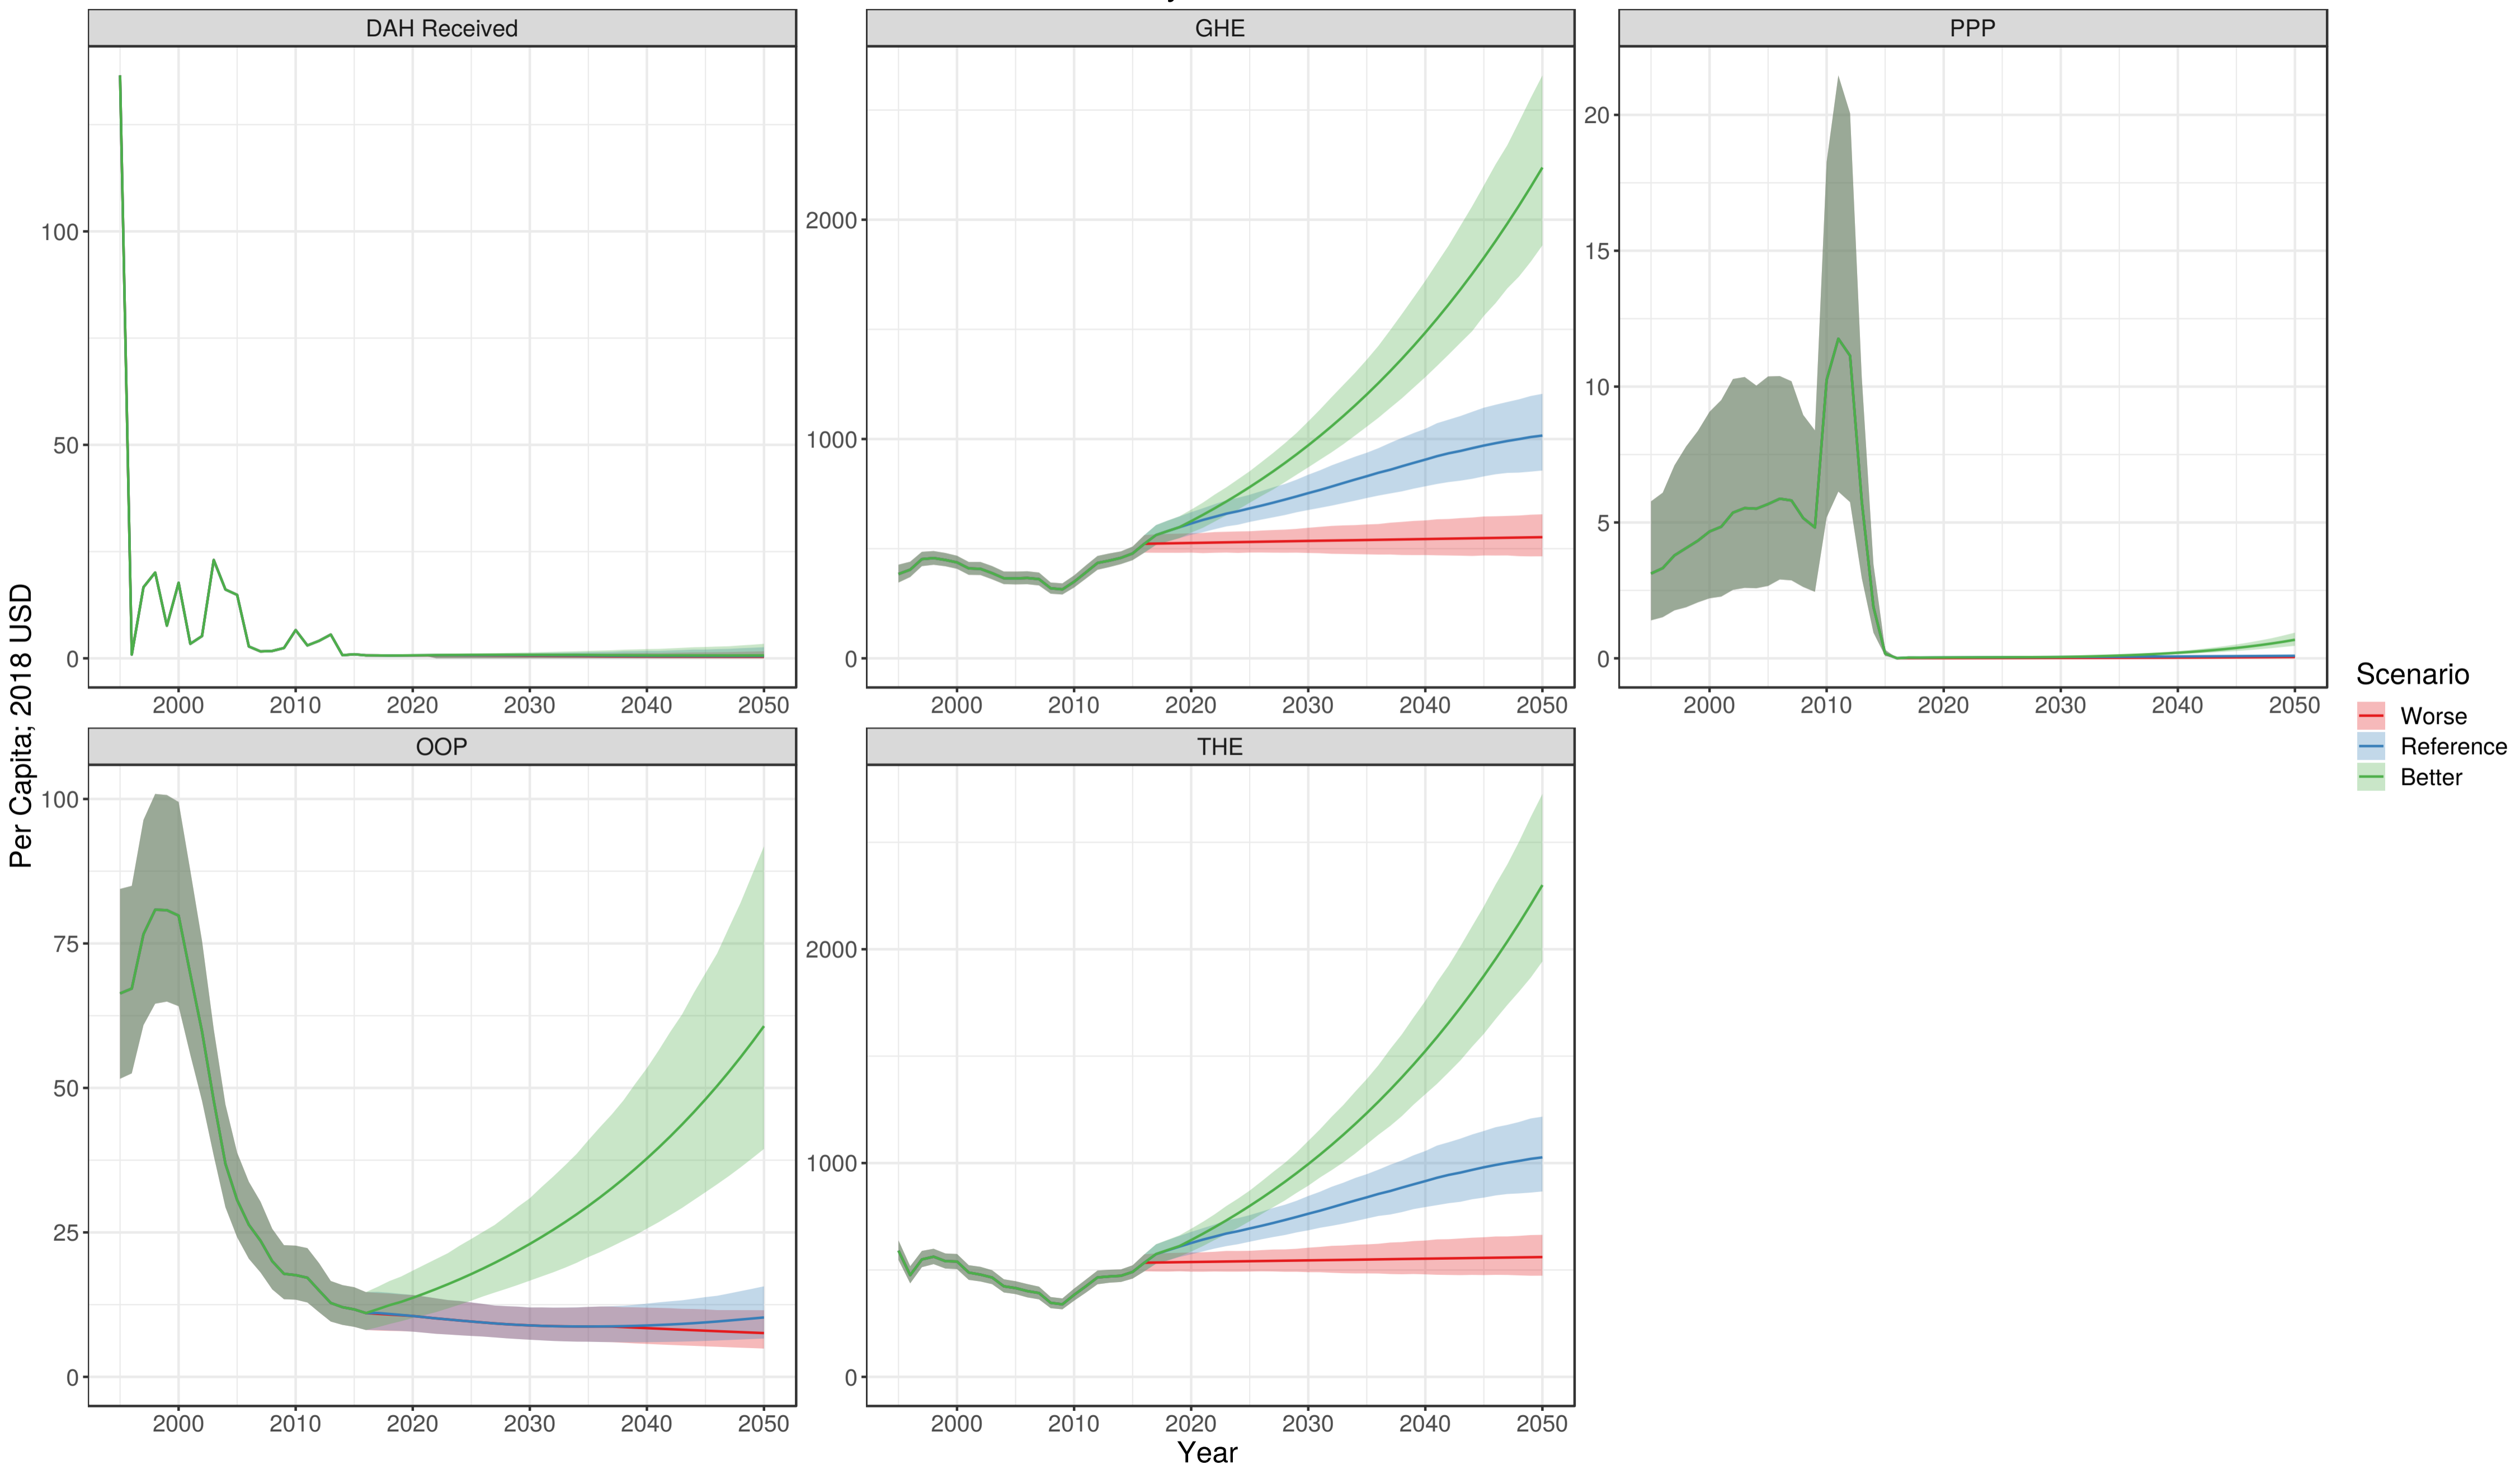

# Sierra Leone

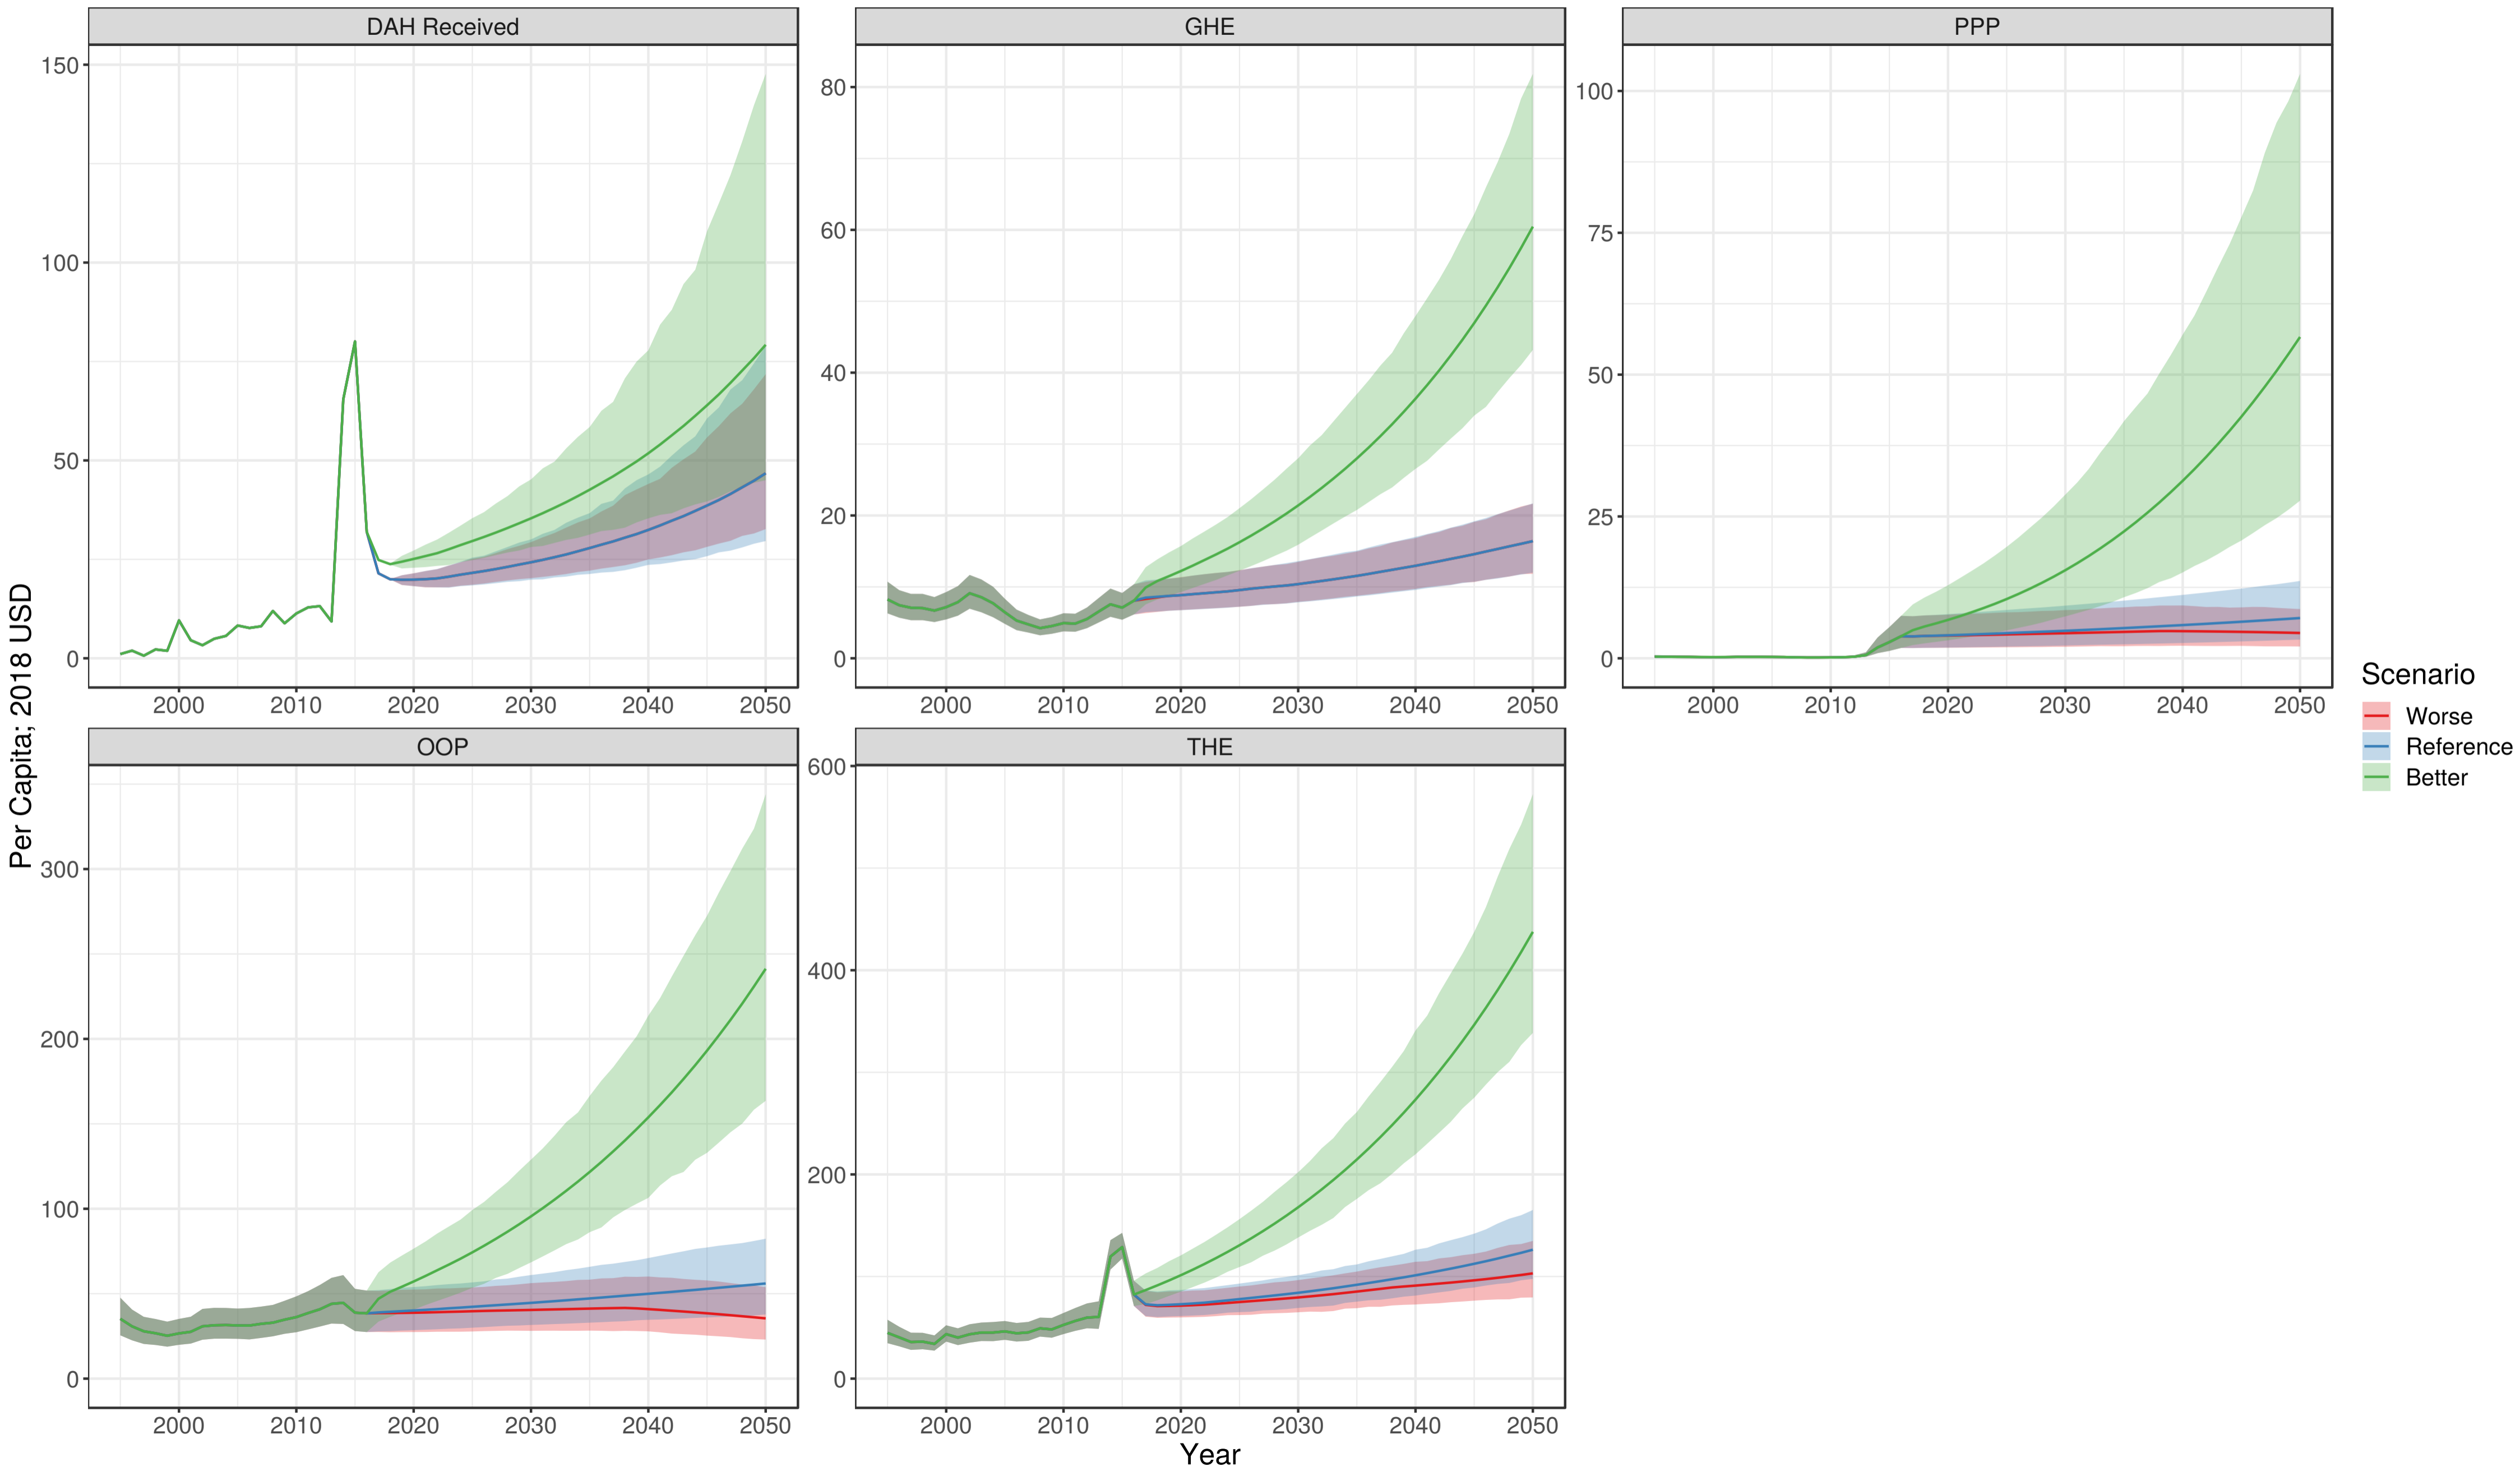

# Singapore

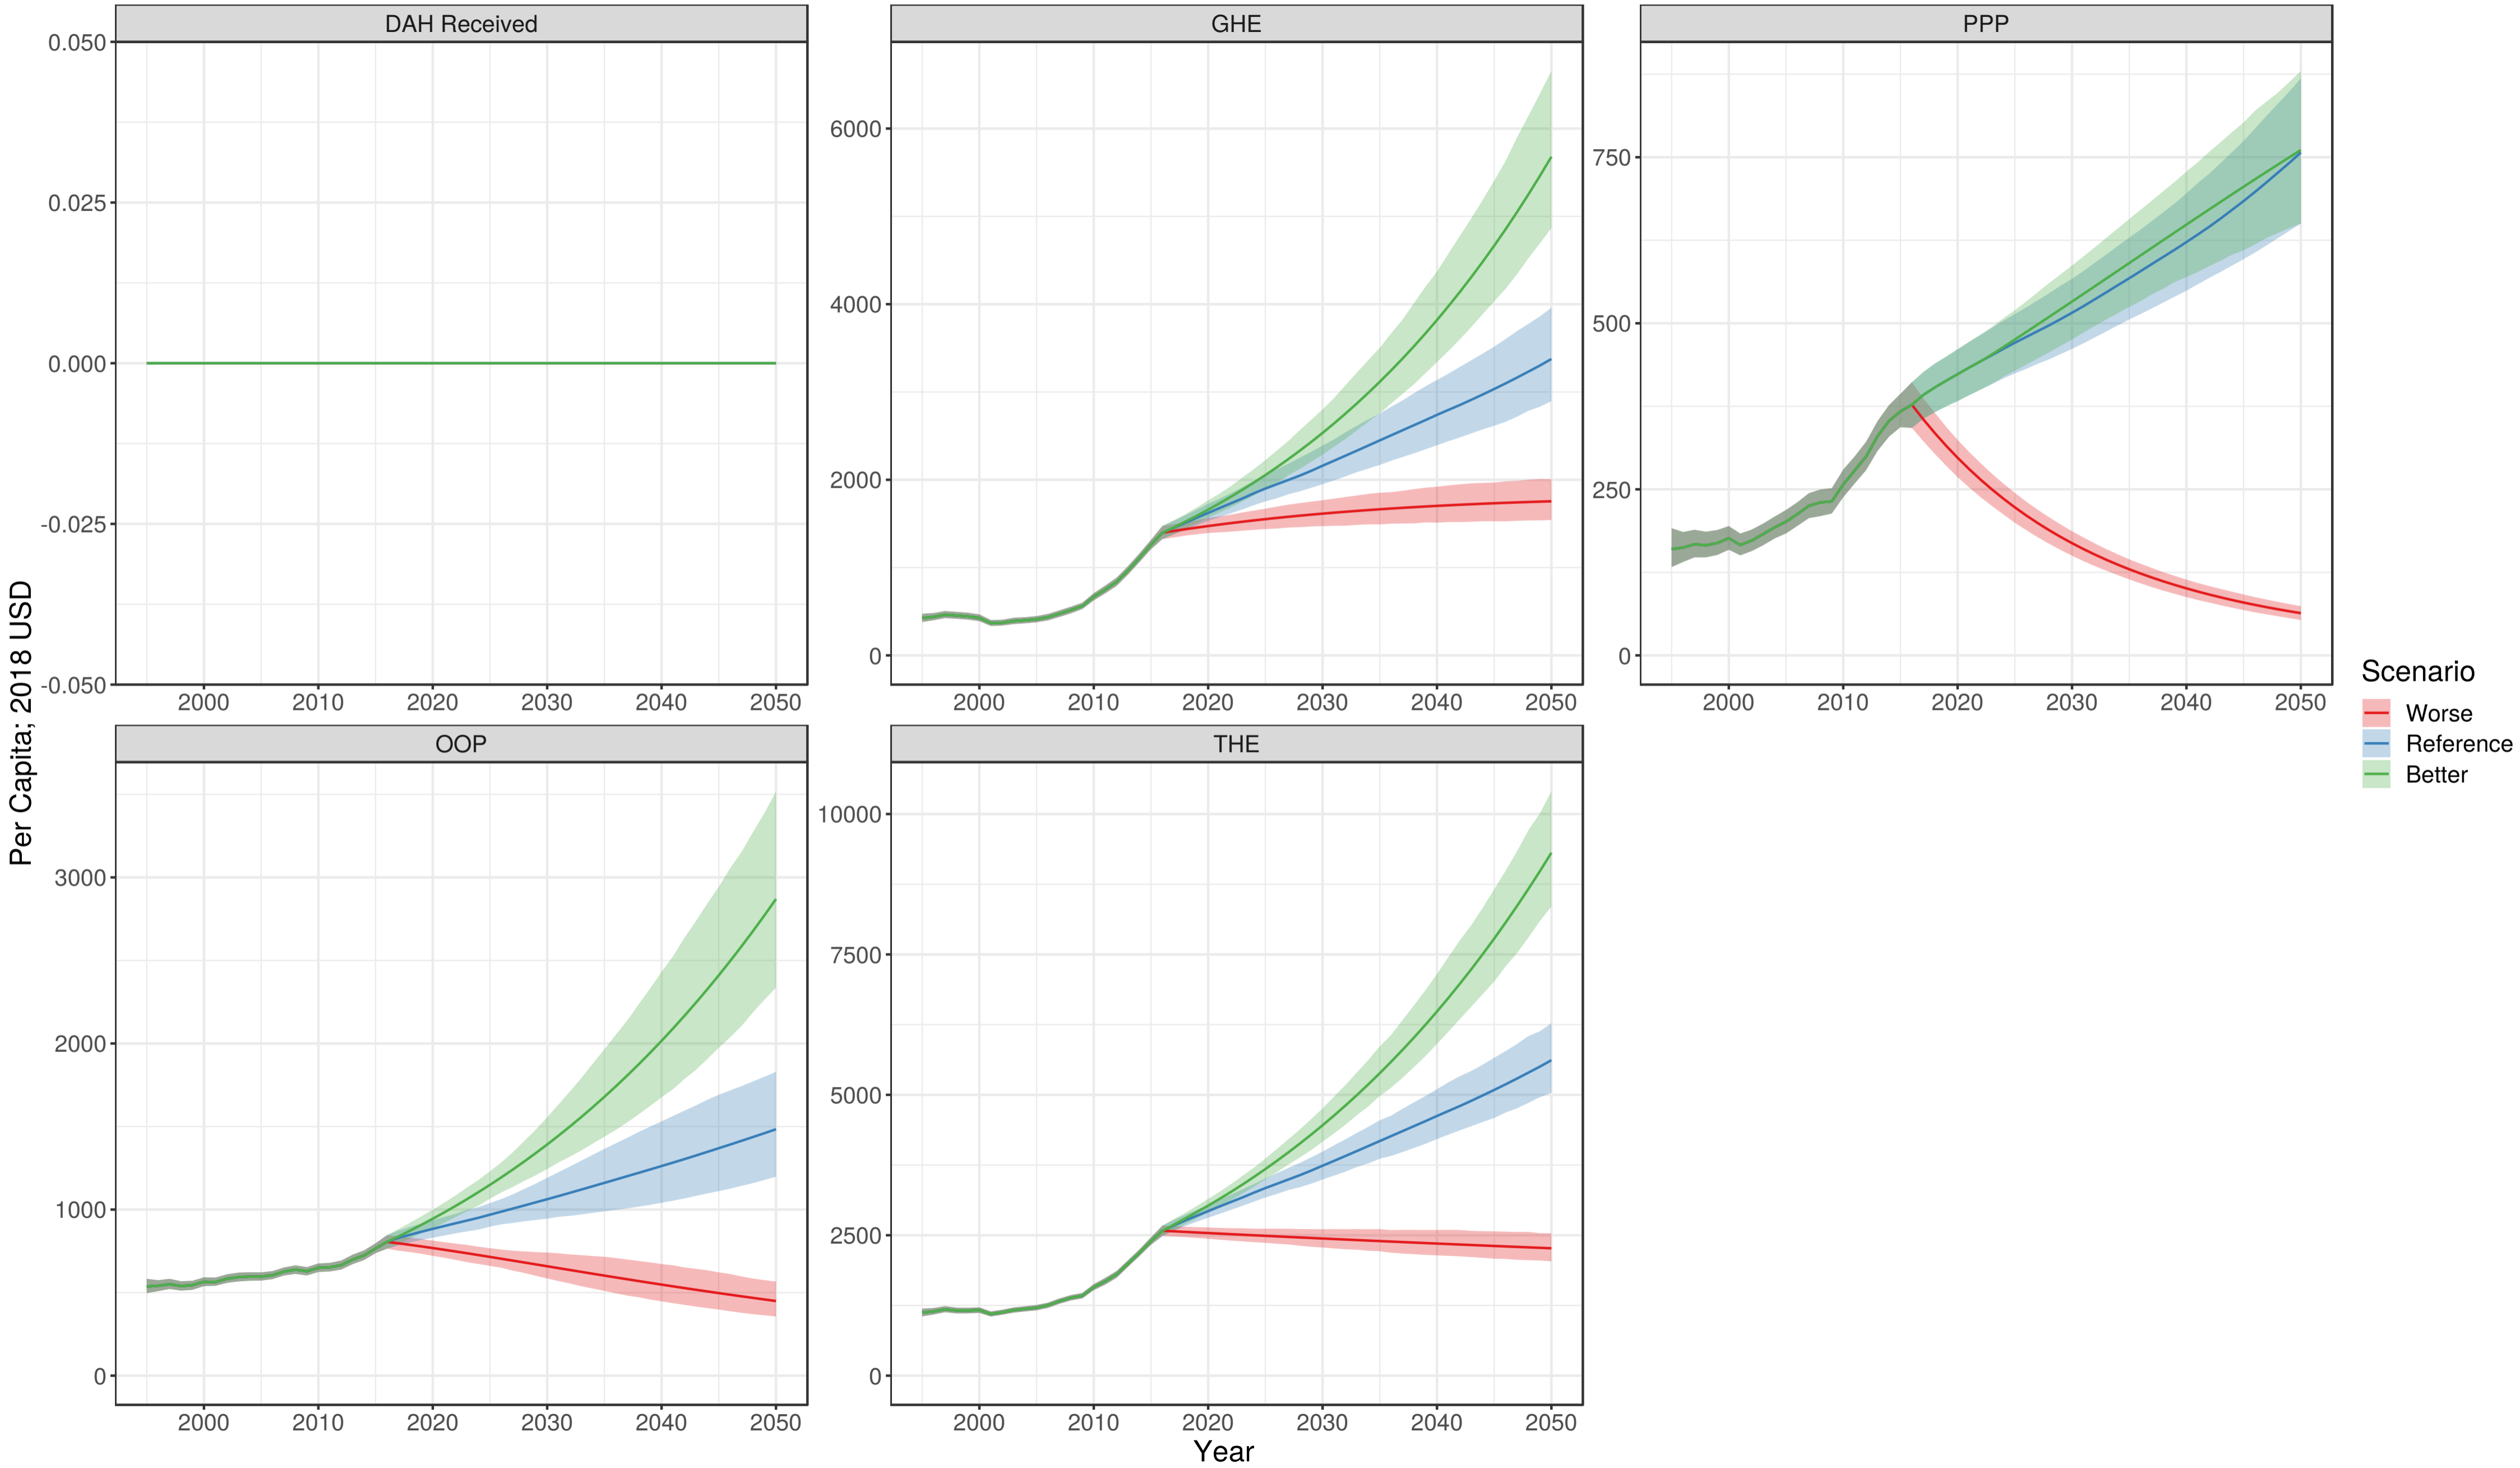

# Slovakia

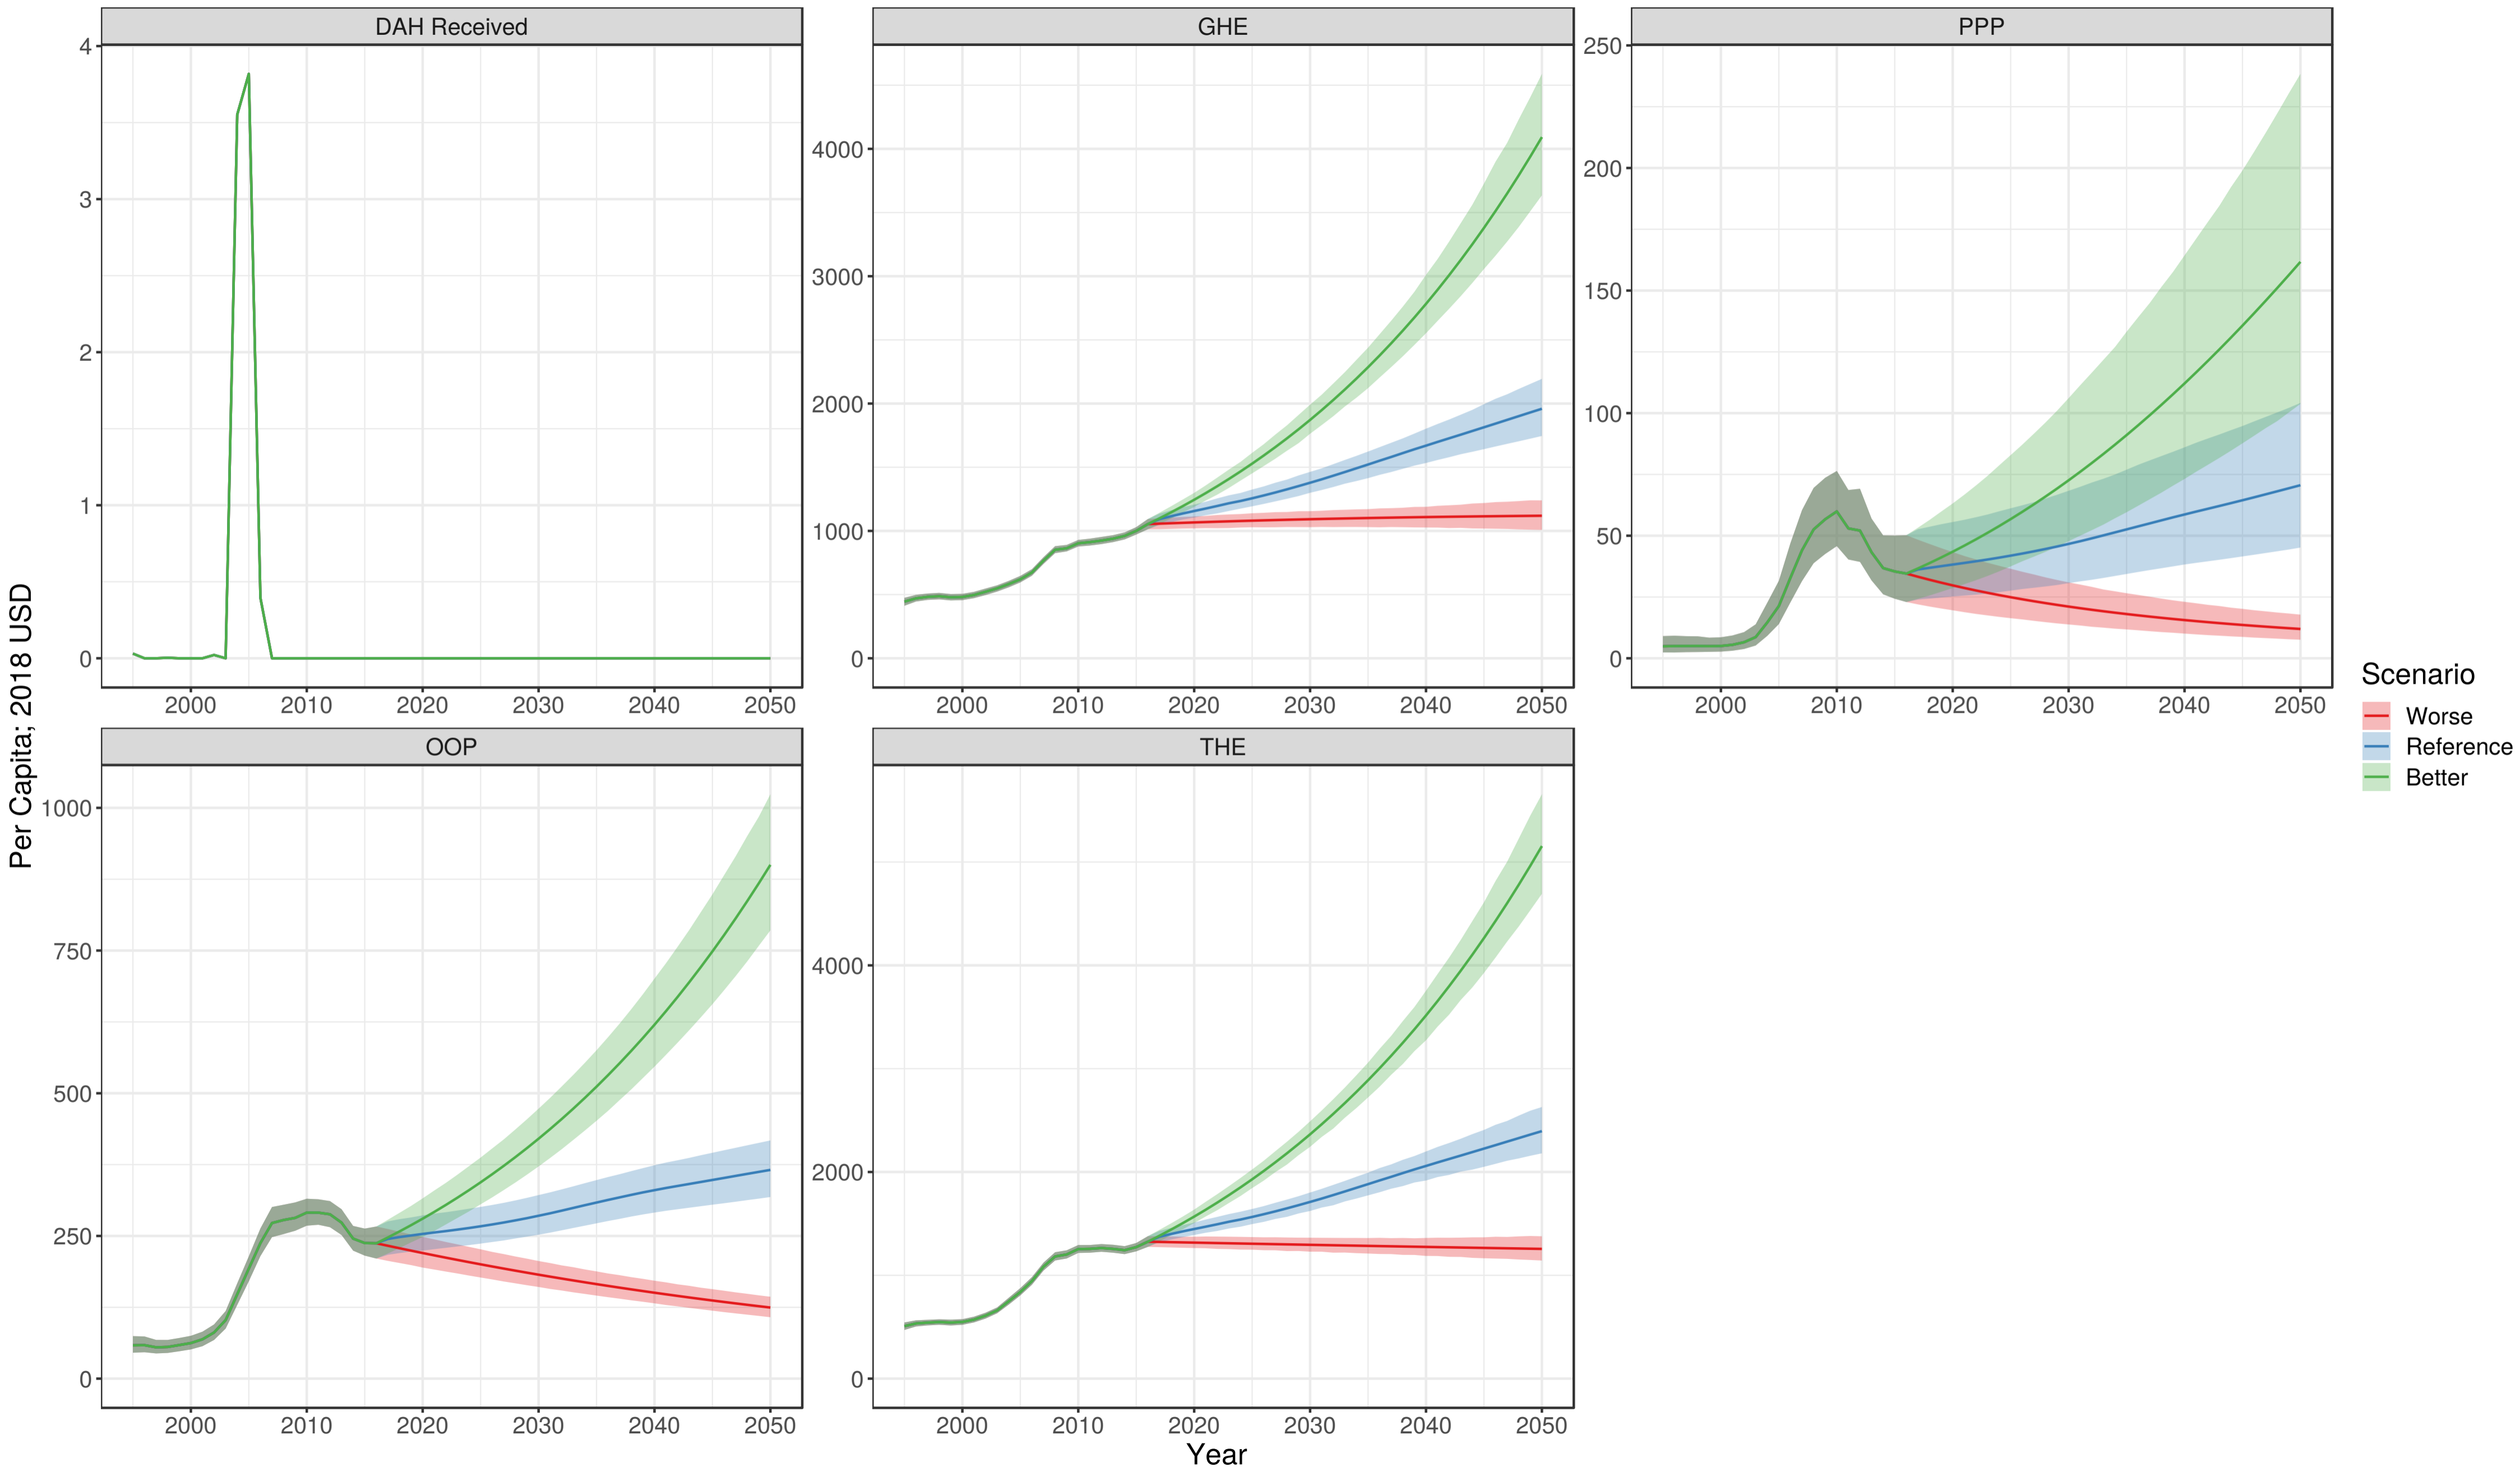

# Slovenia

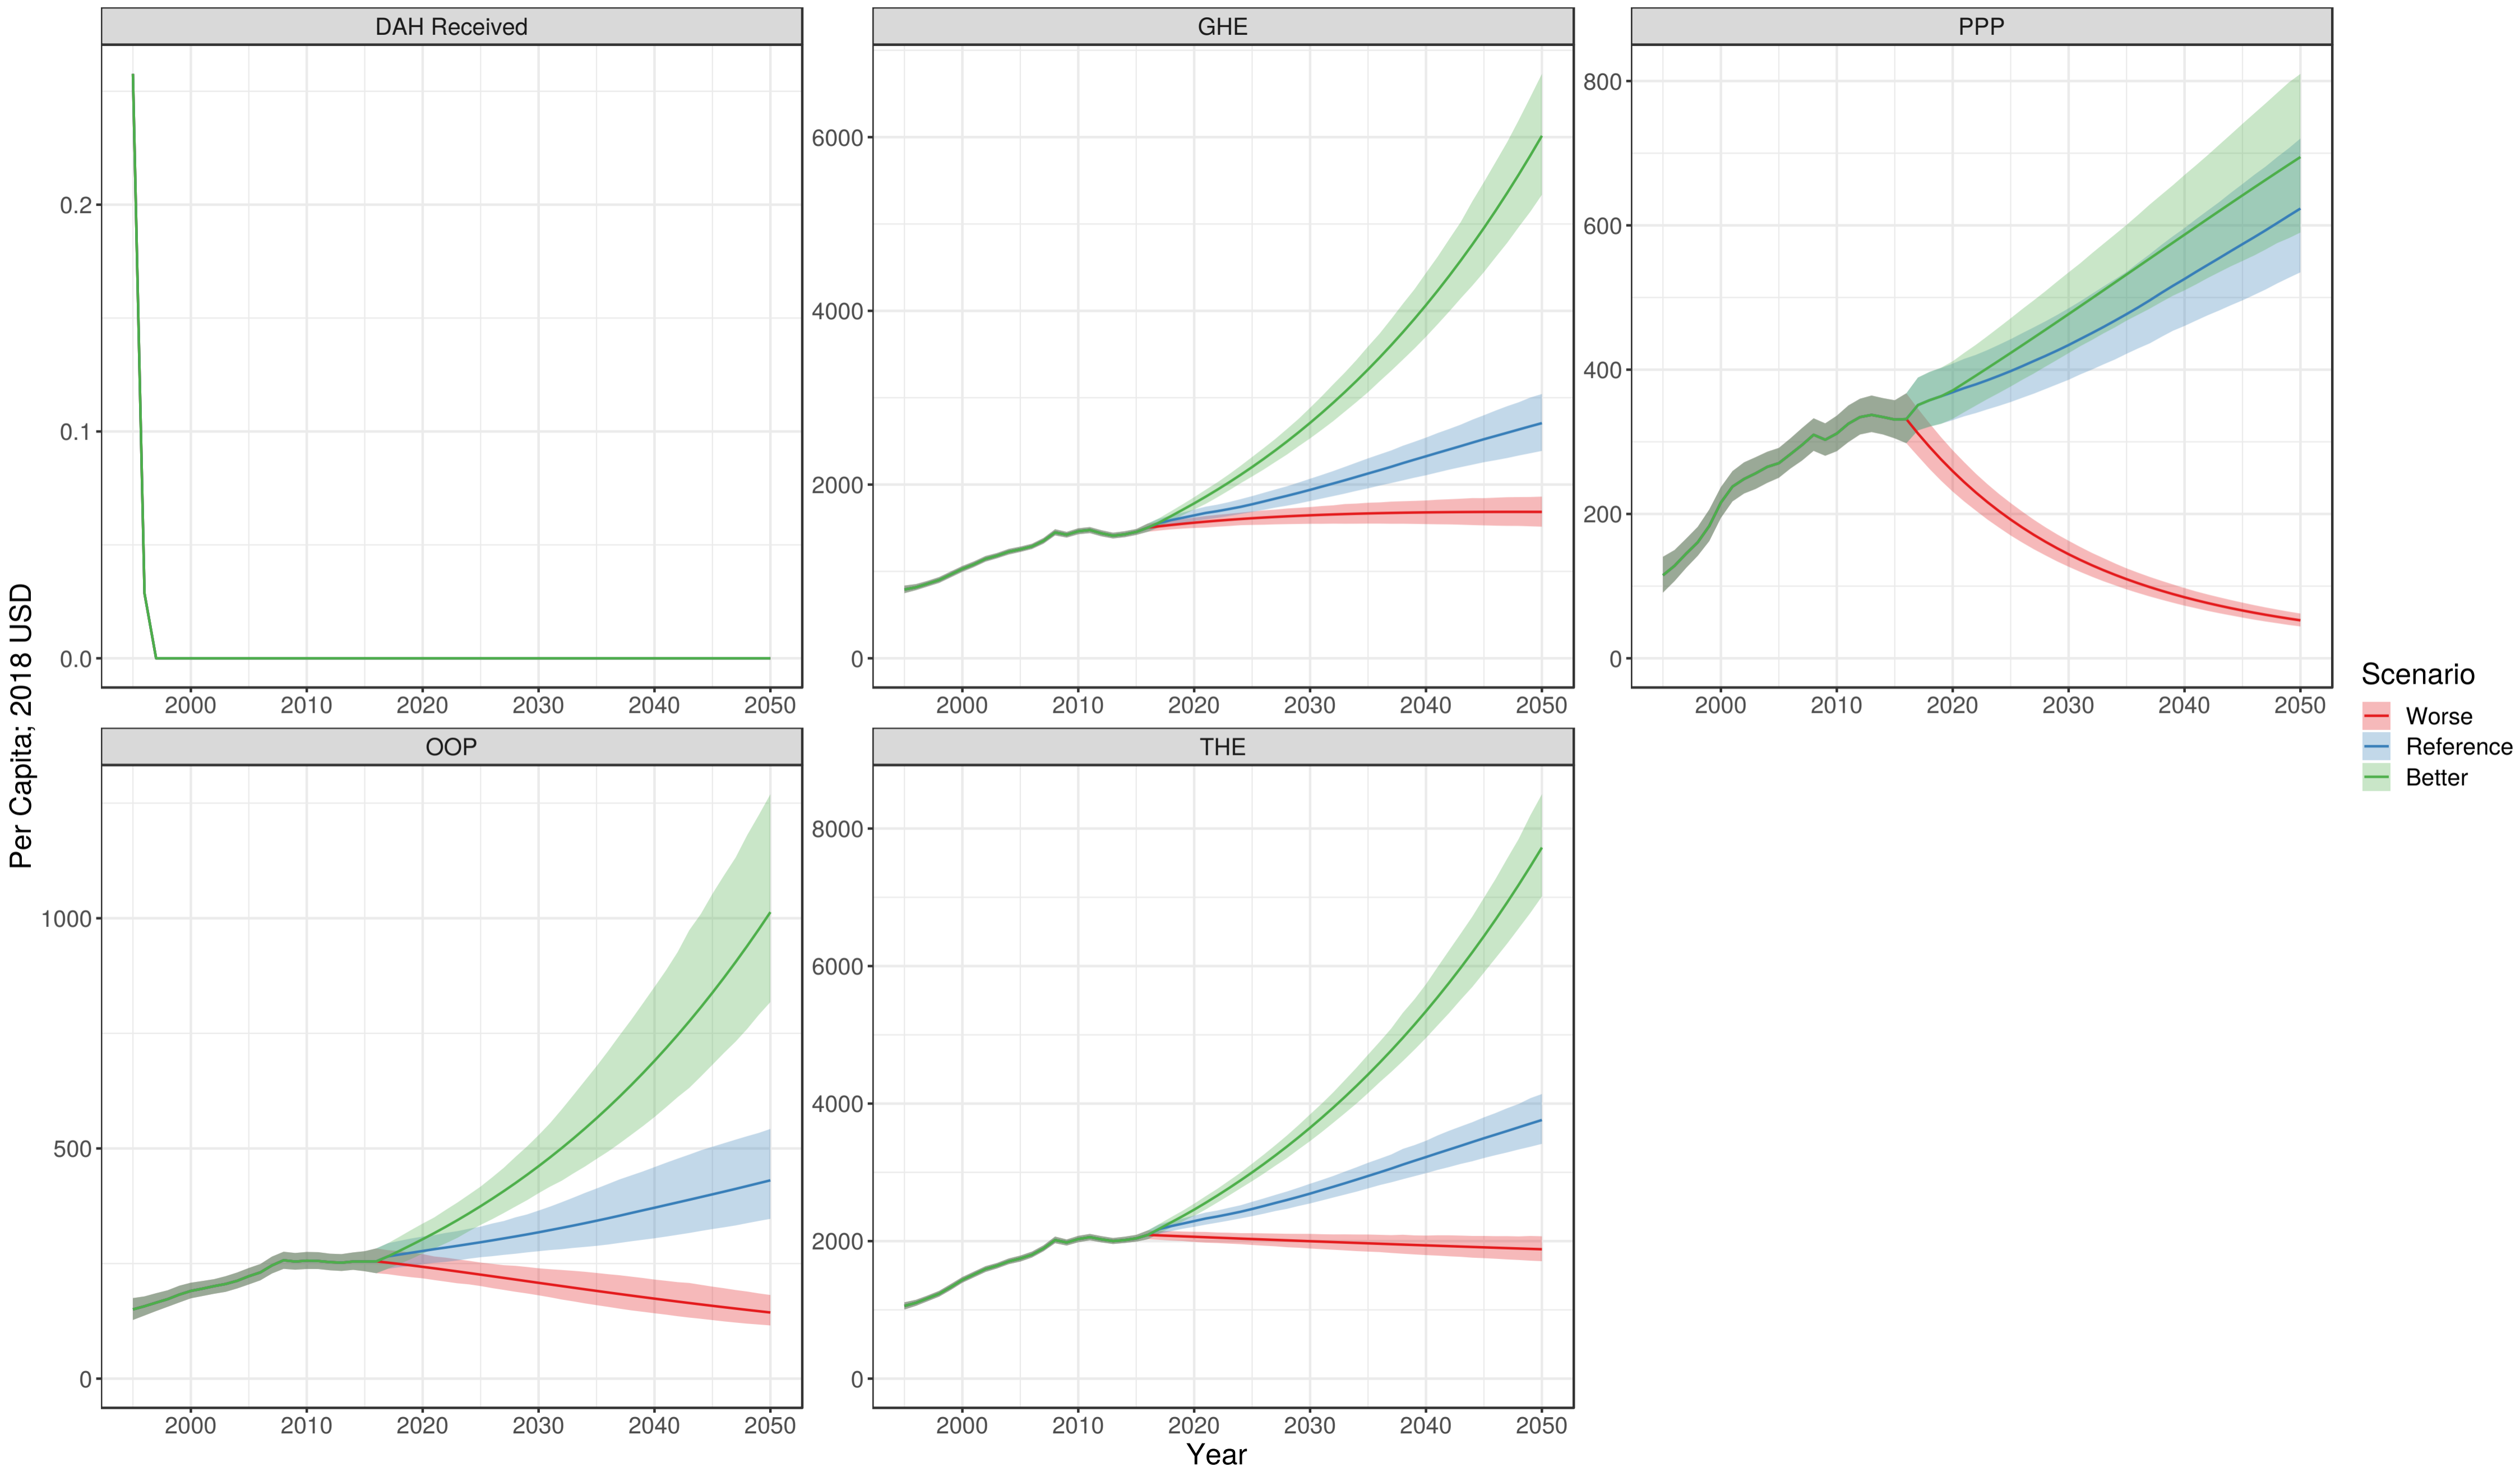

# Solomon Islands

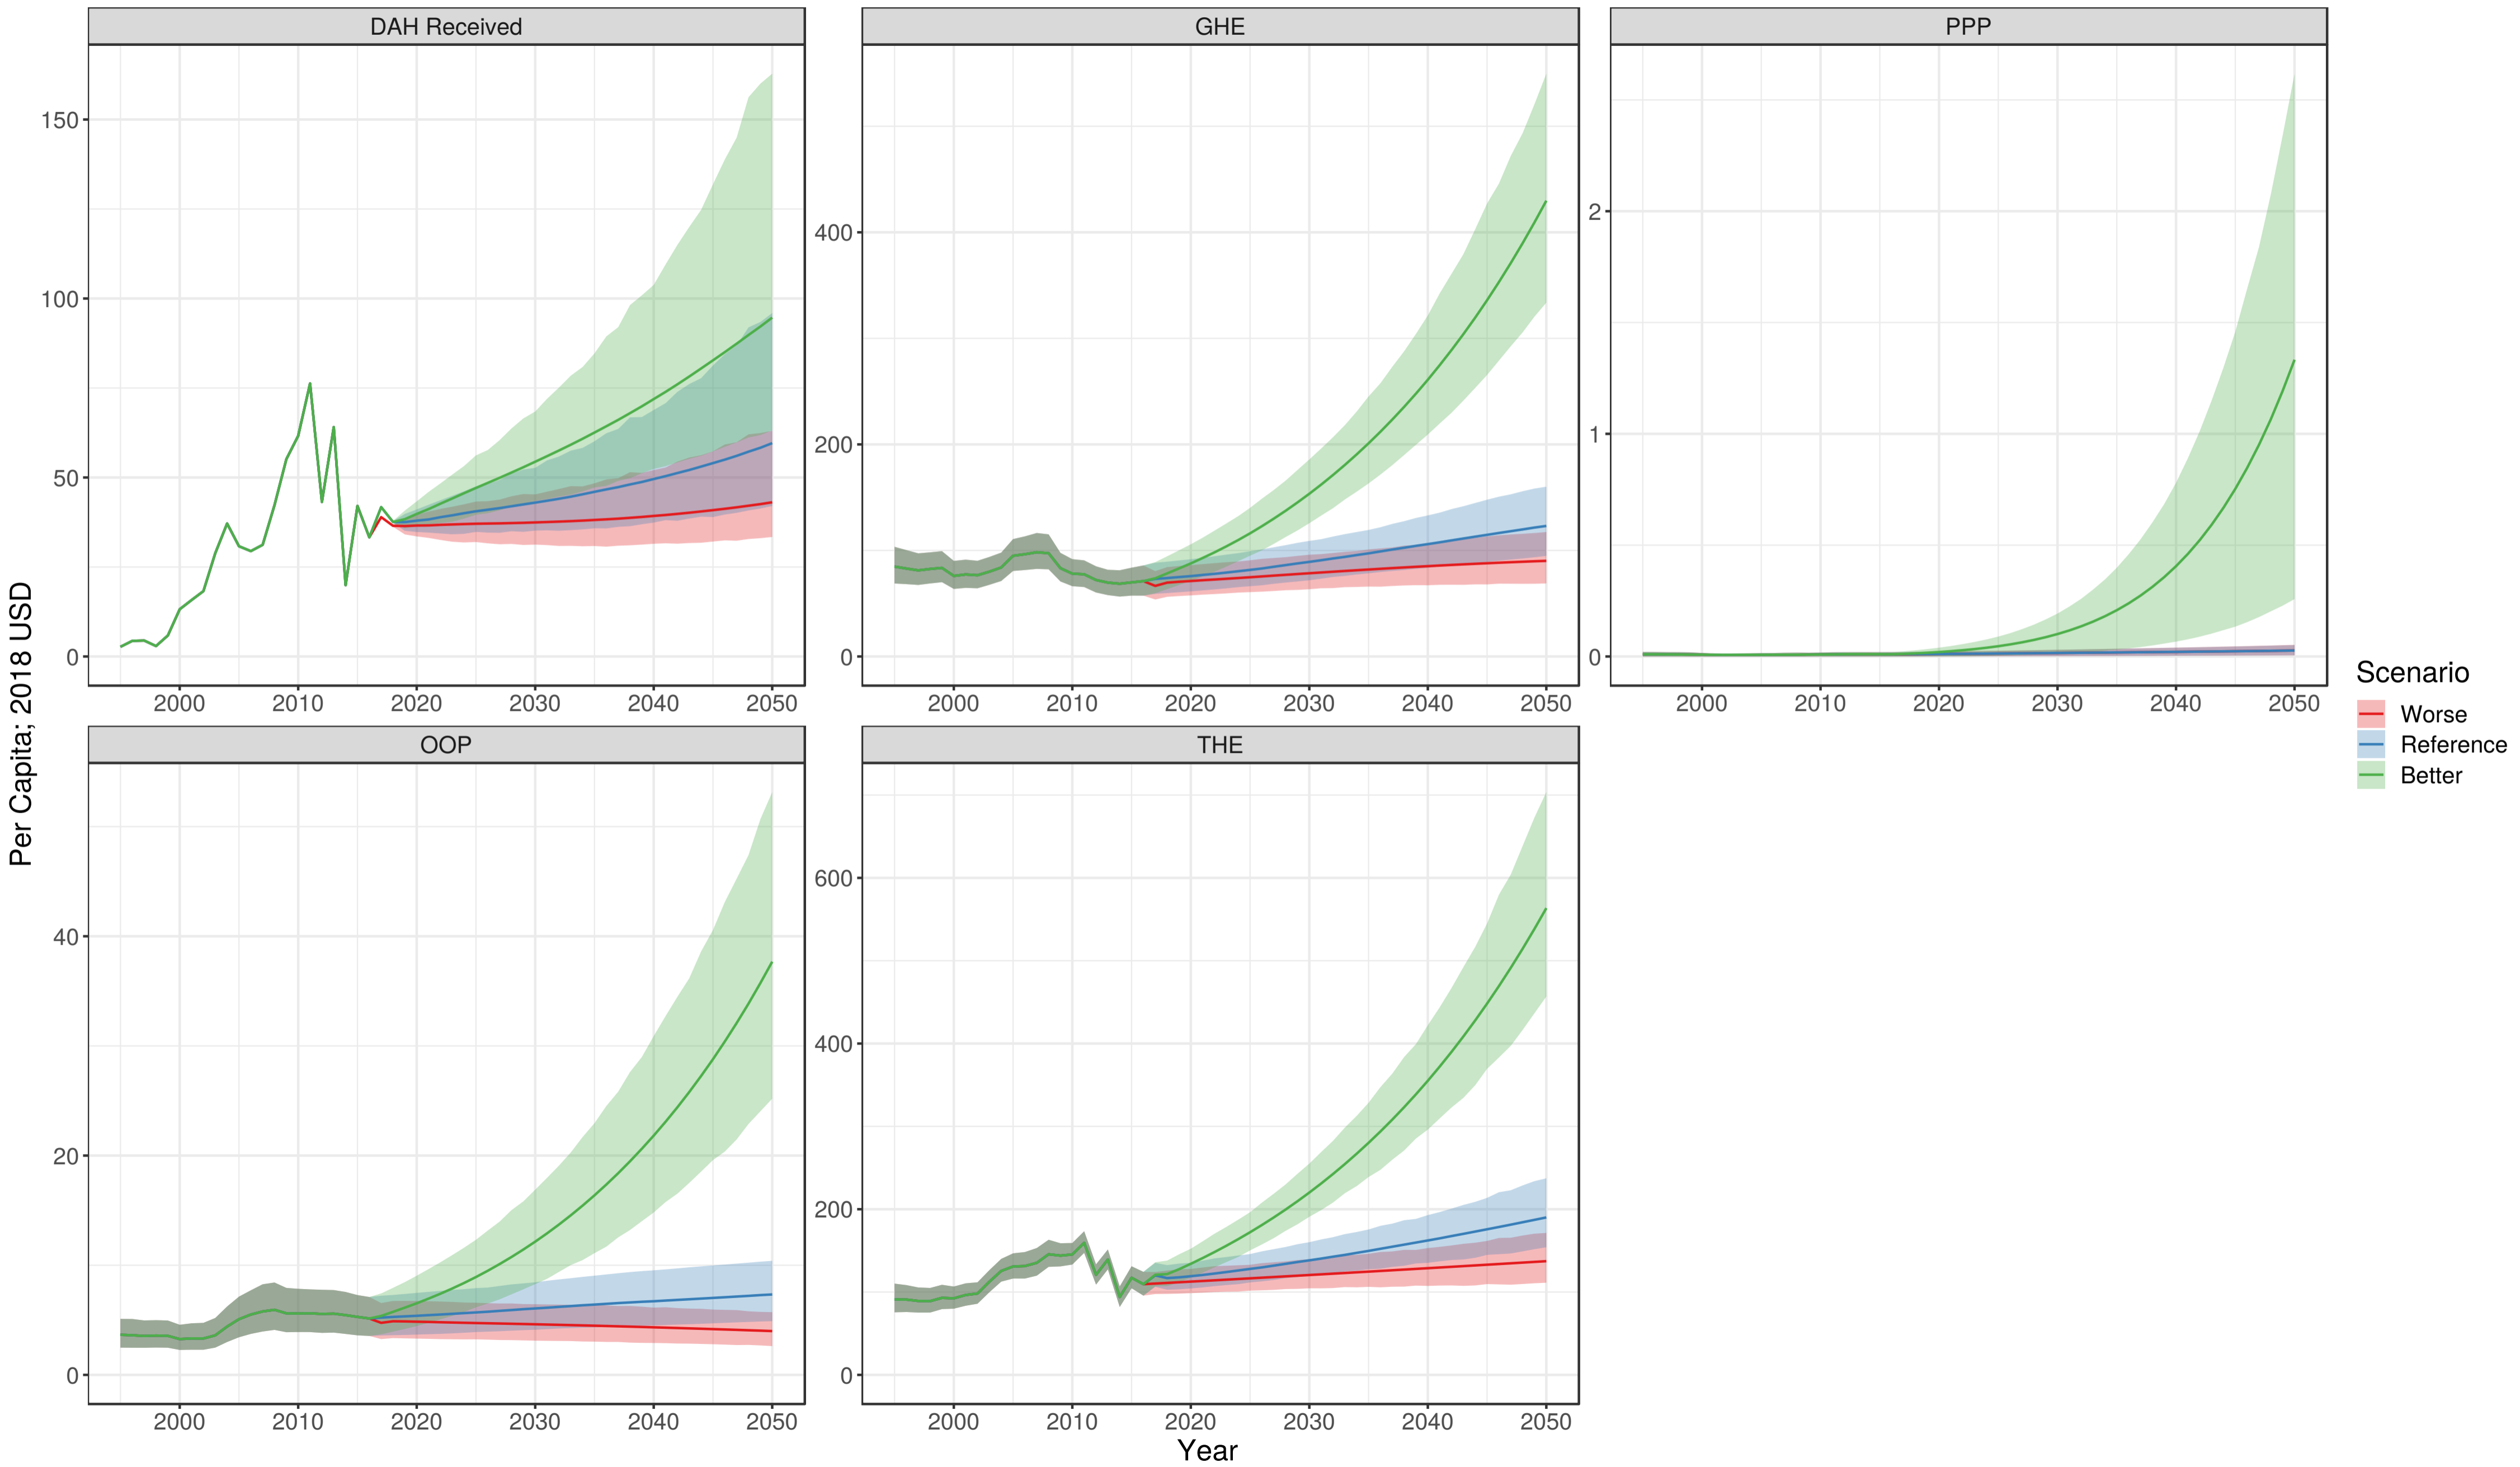



# Somalia

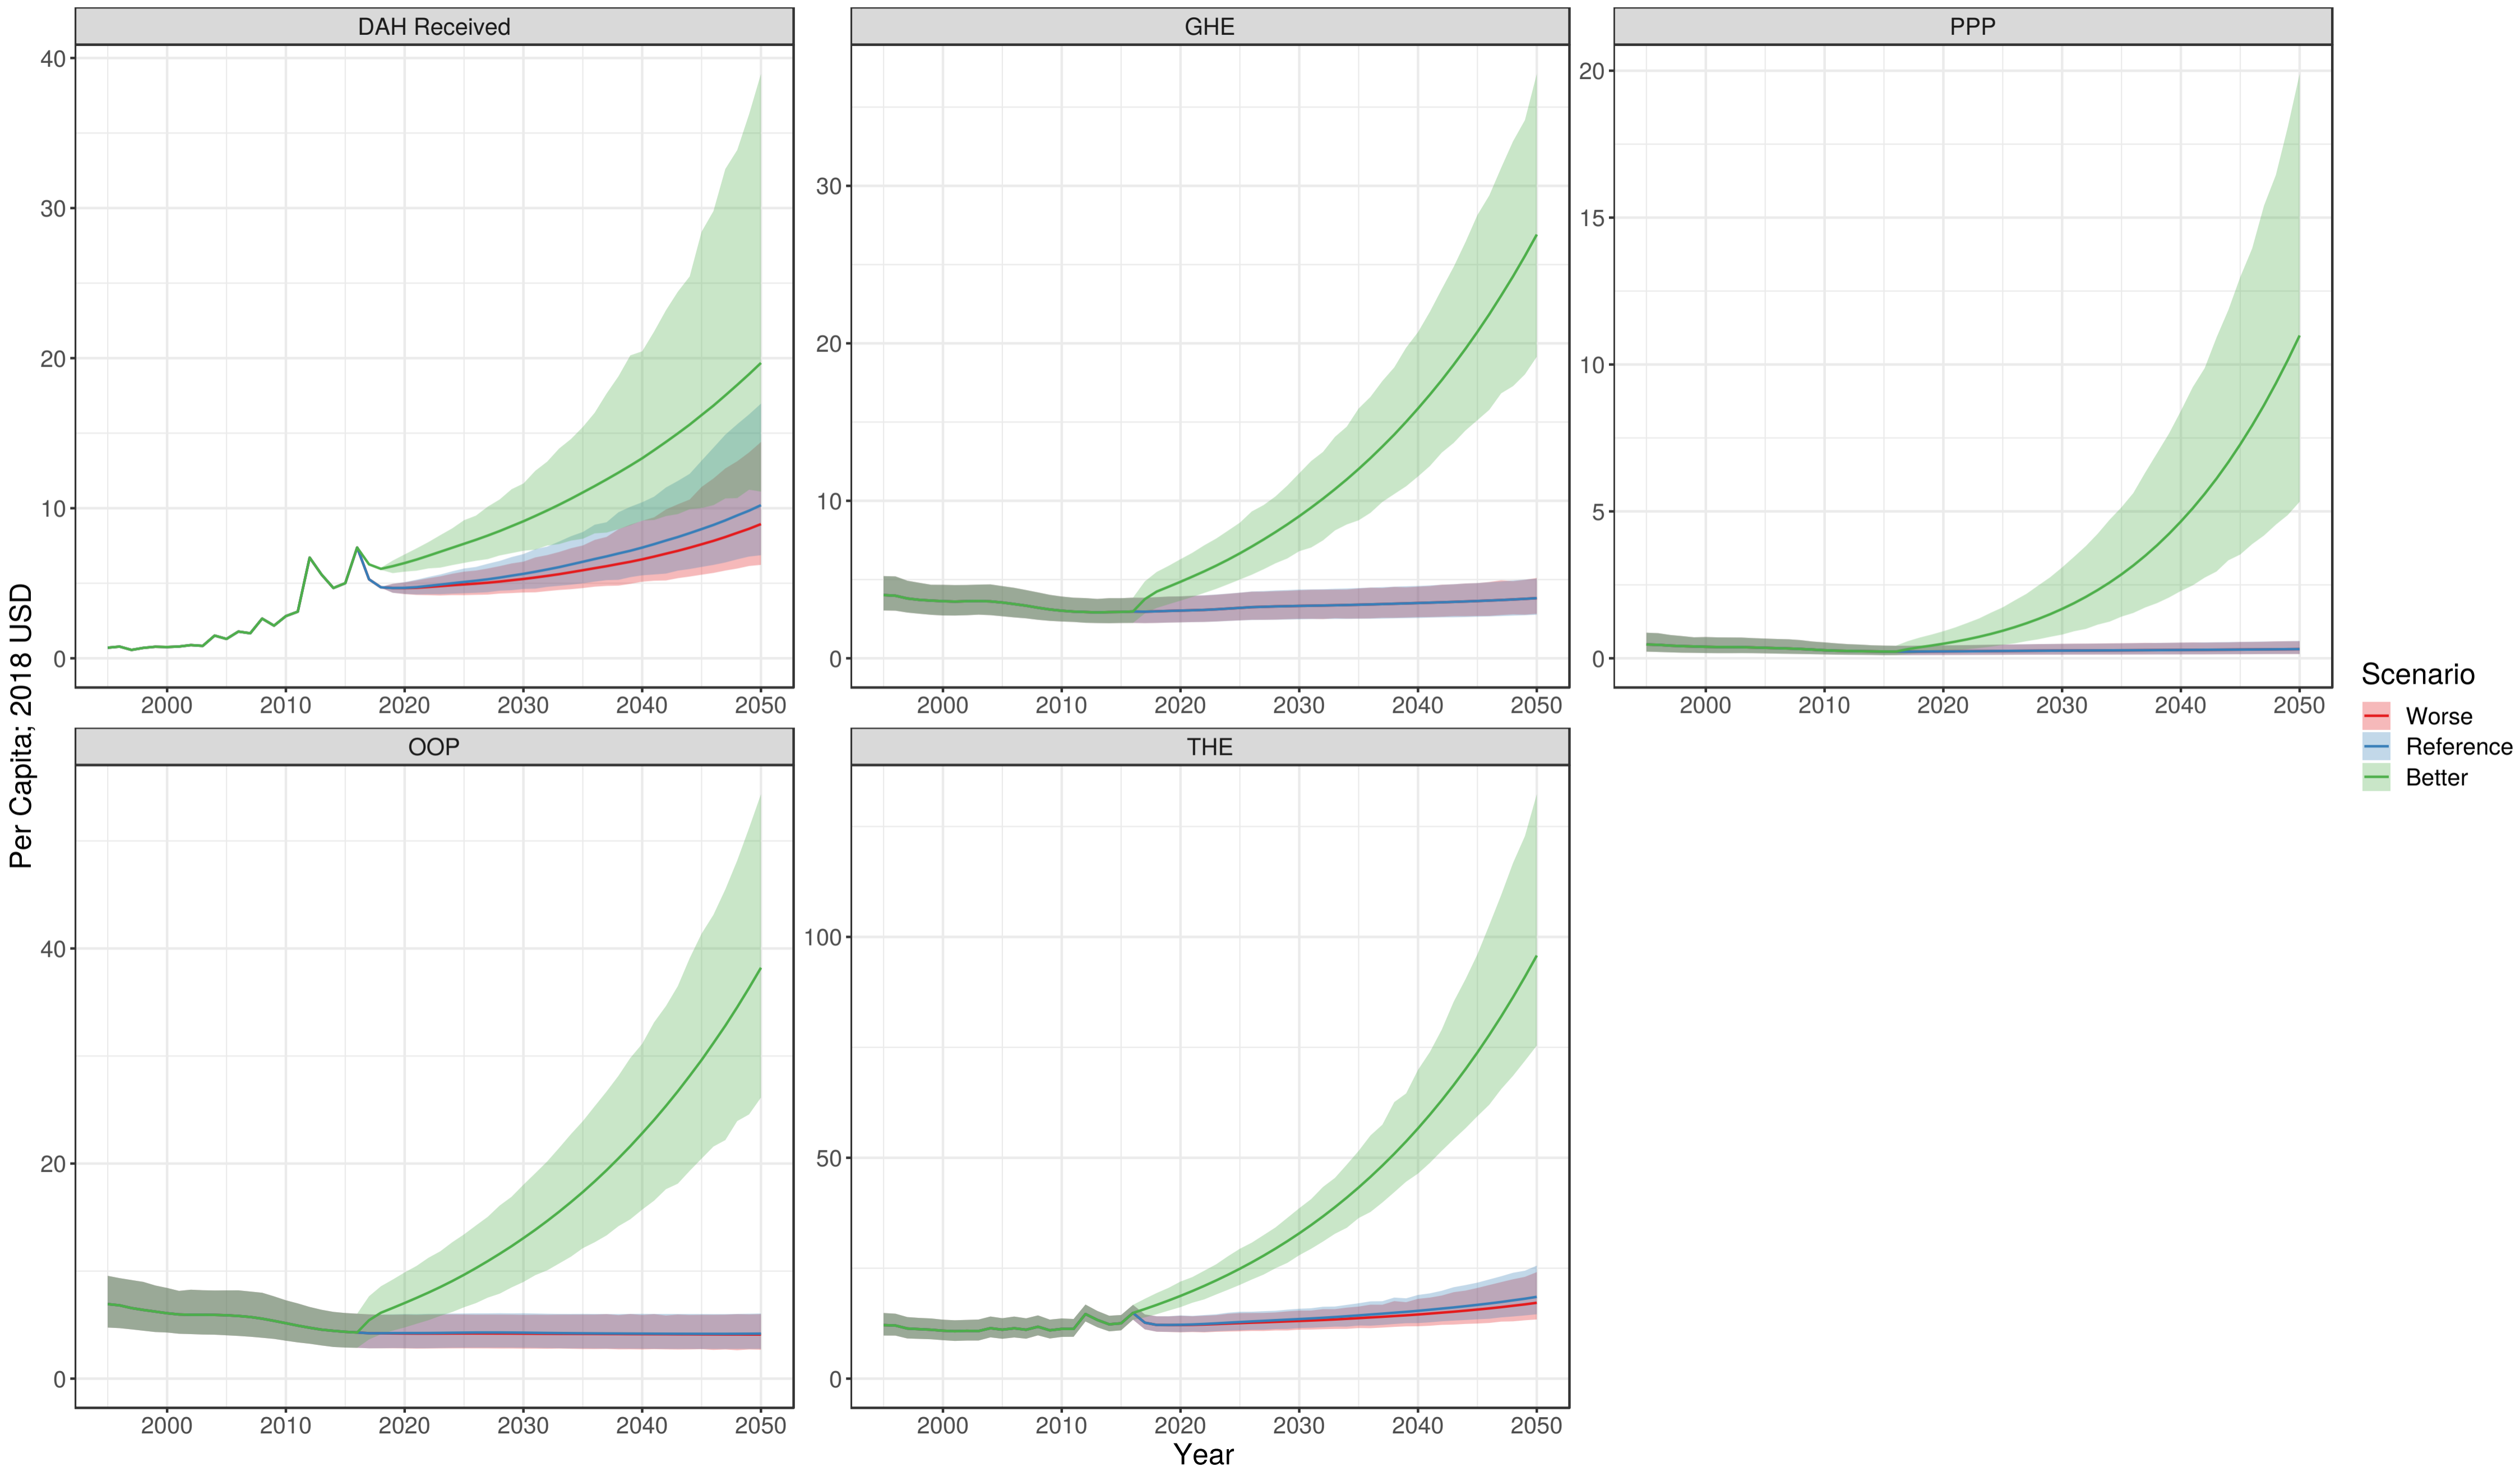

# South Africa

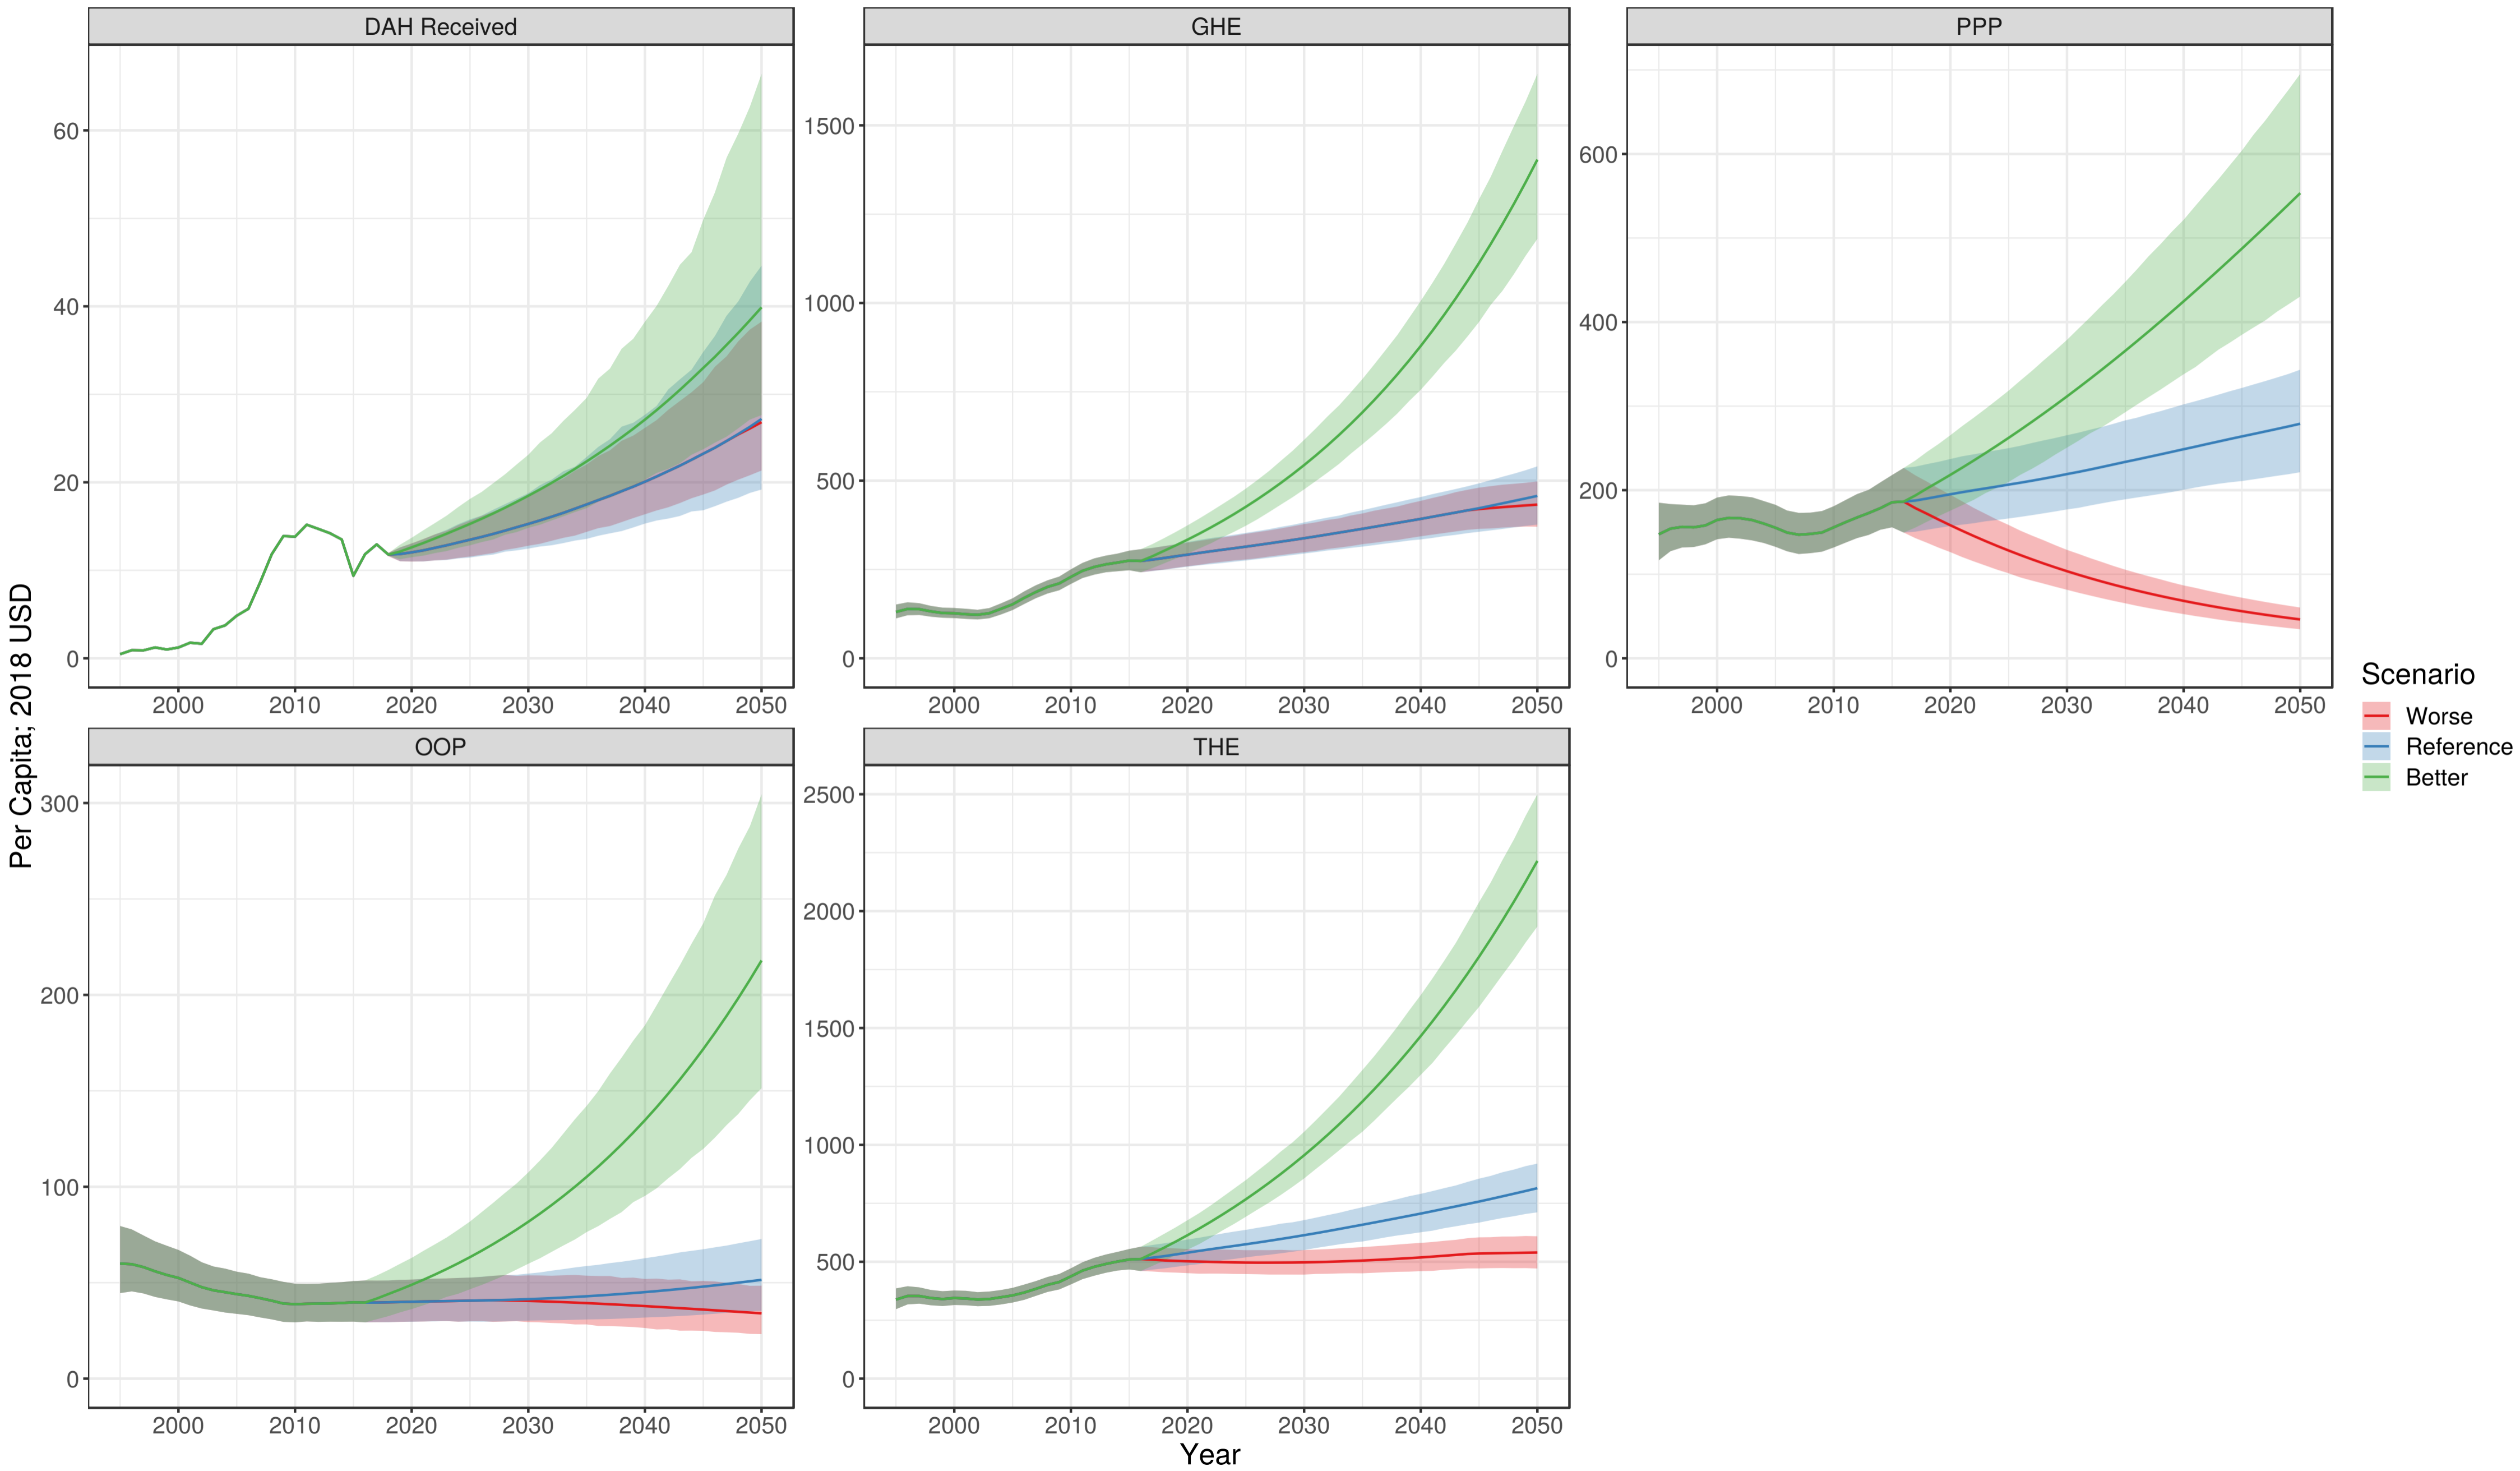

# South Korea

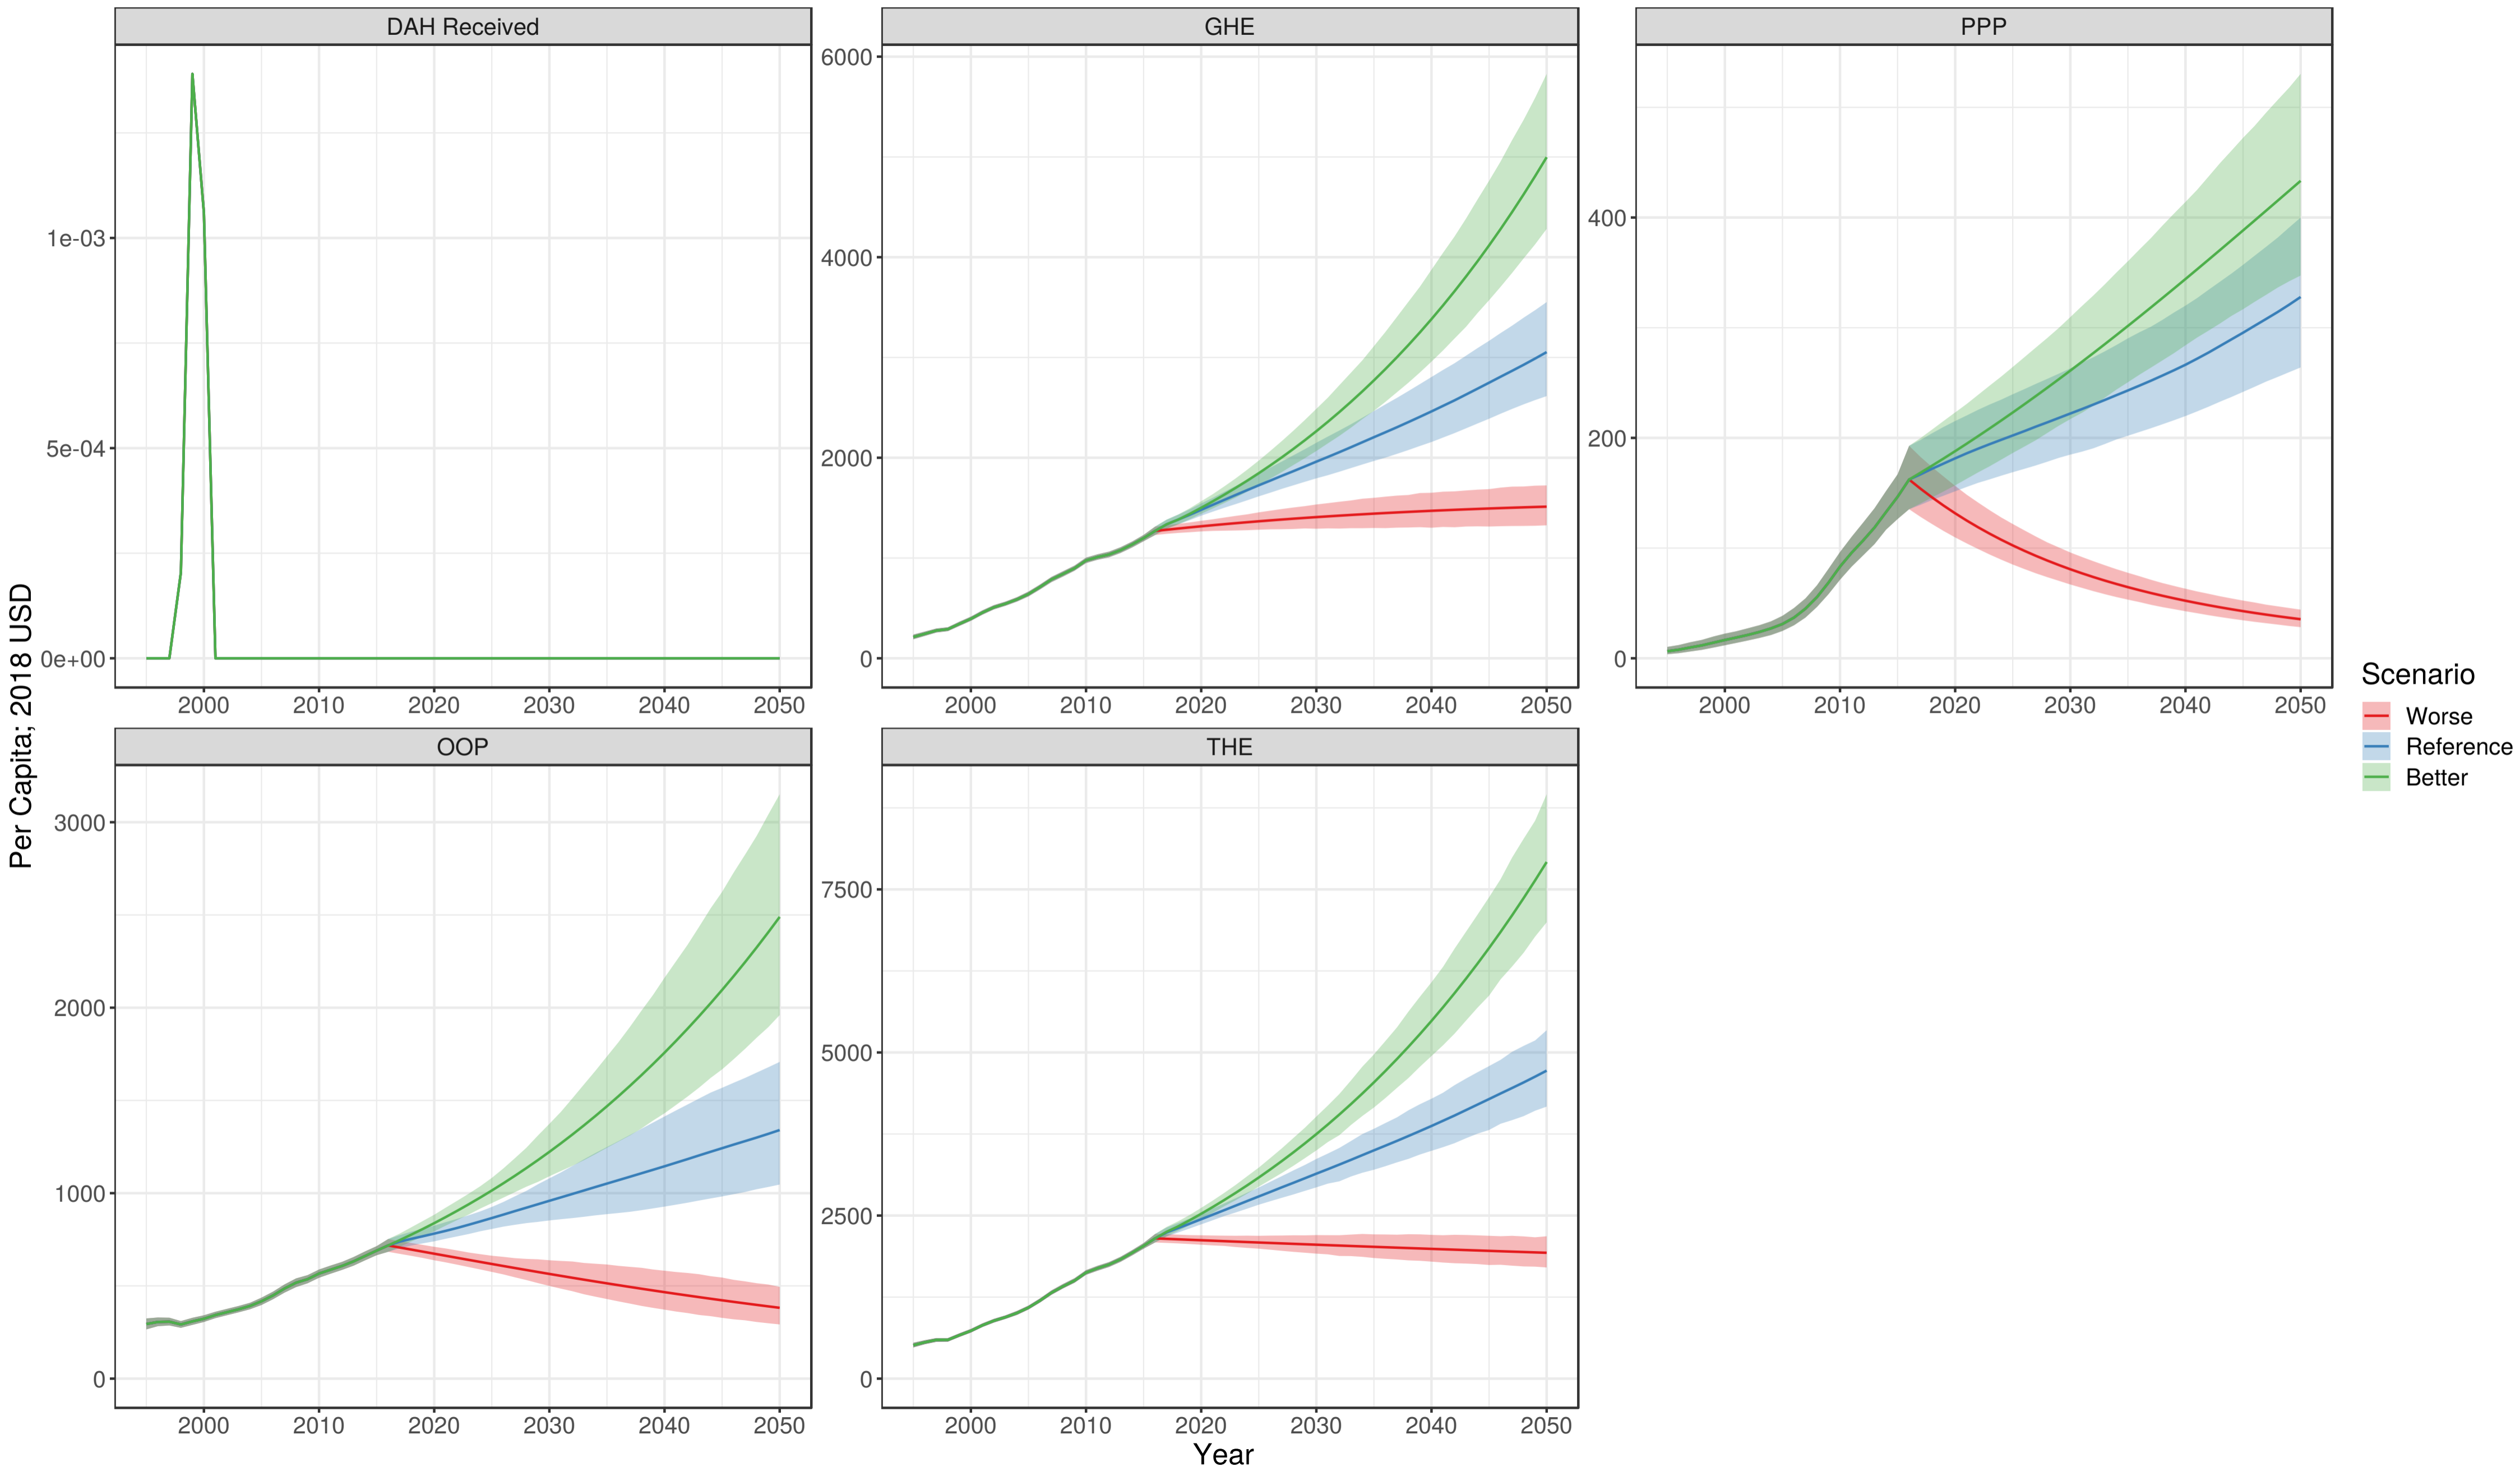

# South Sudan

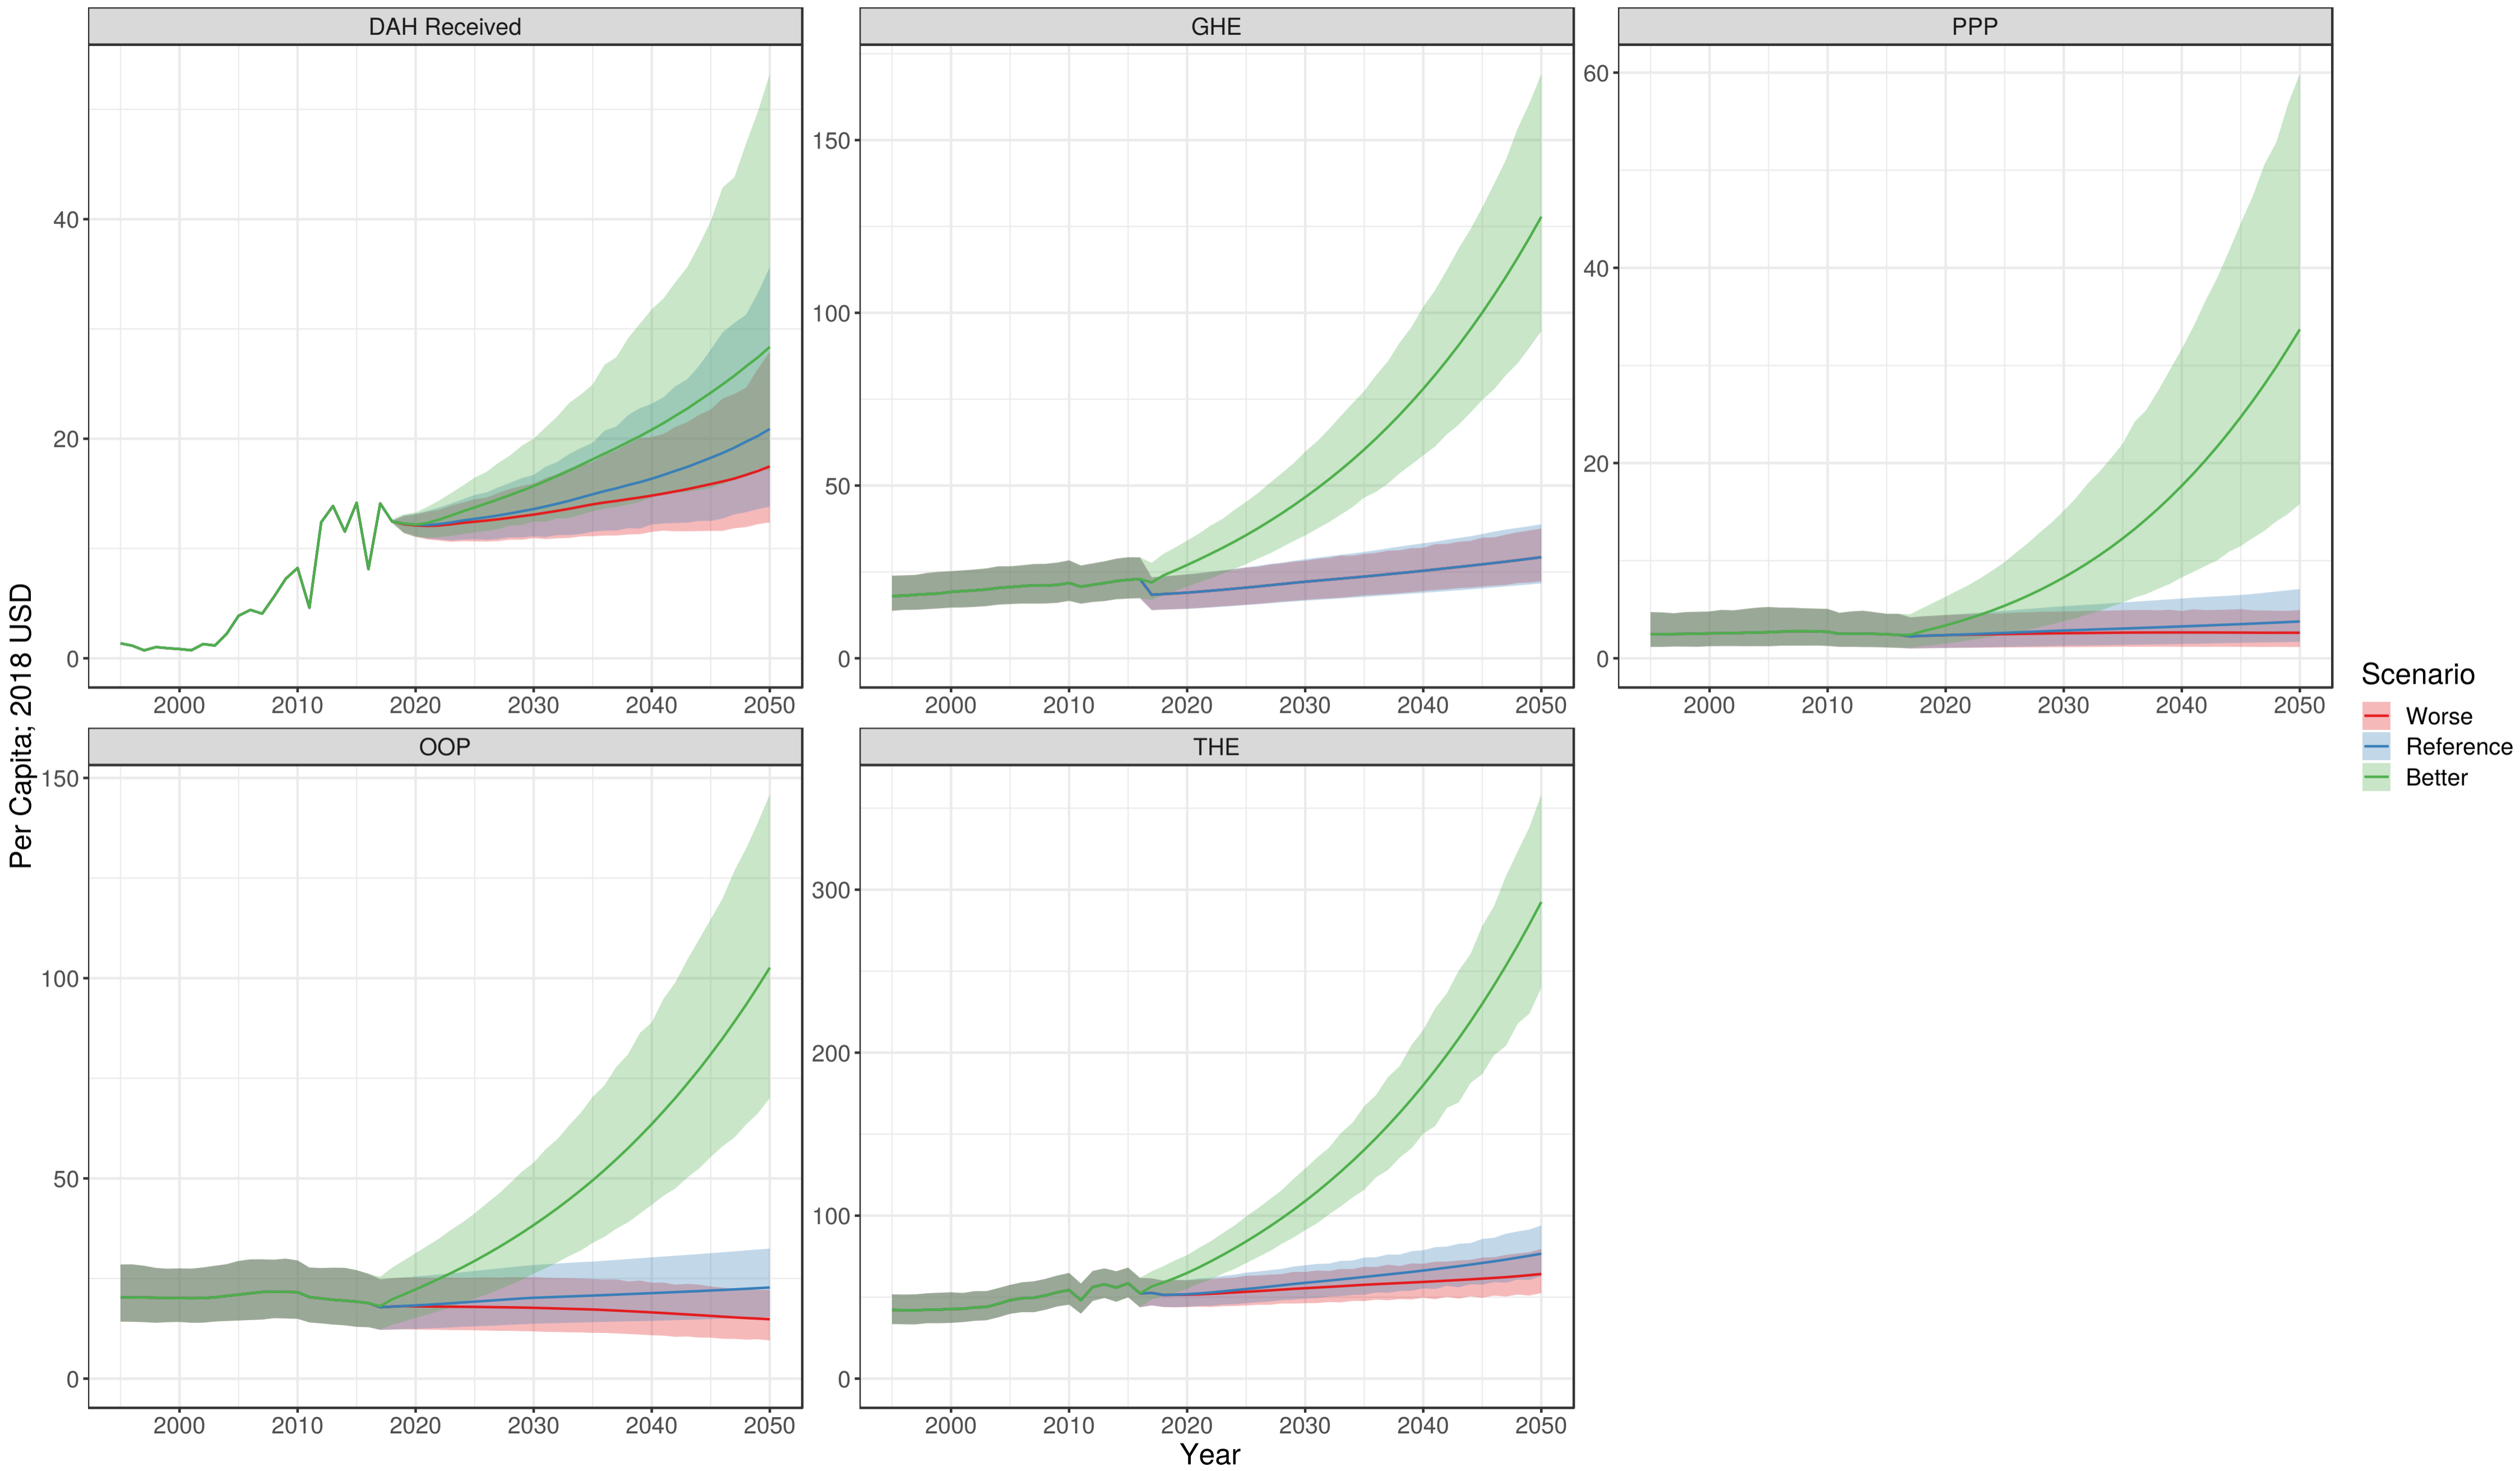

# Spain

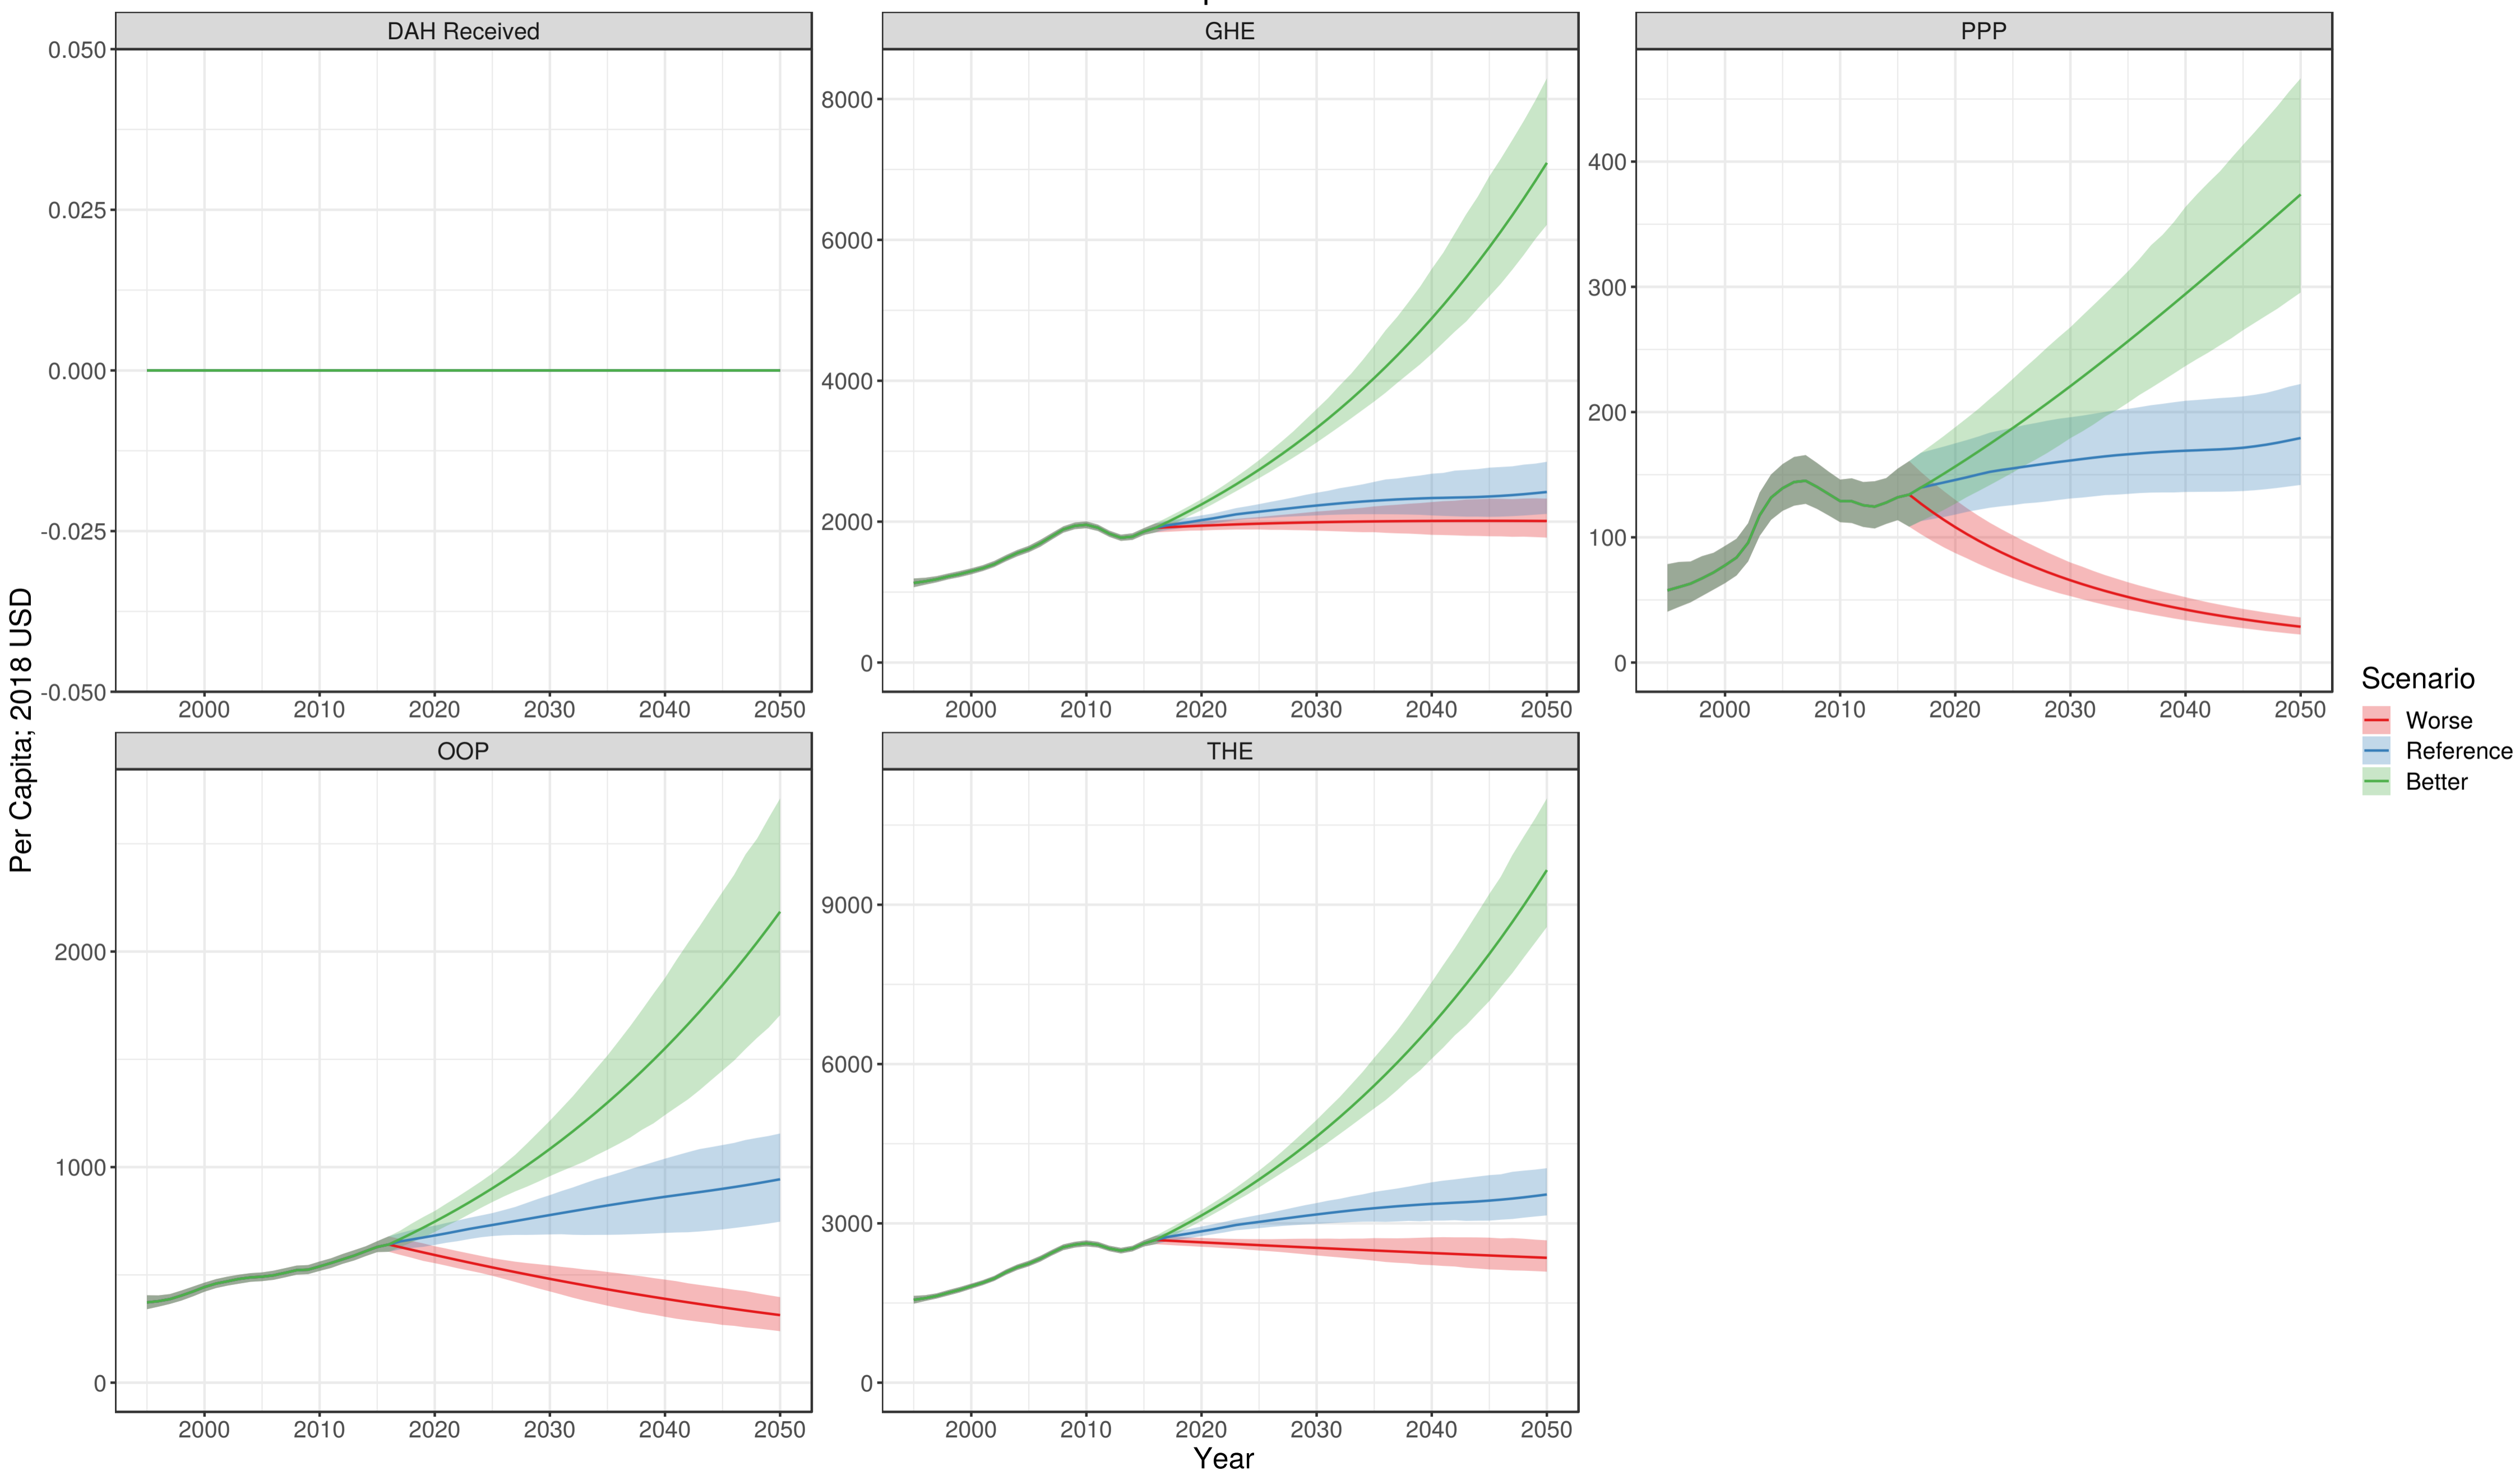

# Sri Lanka

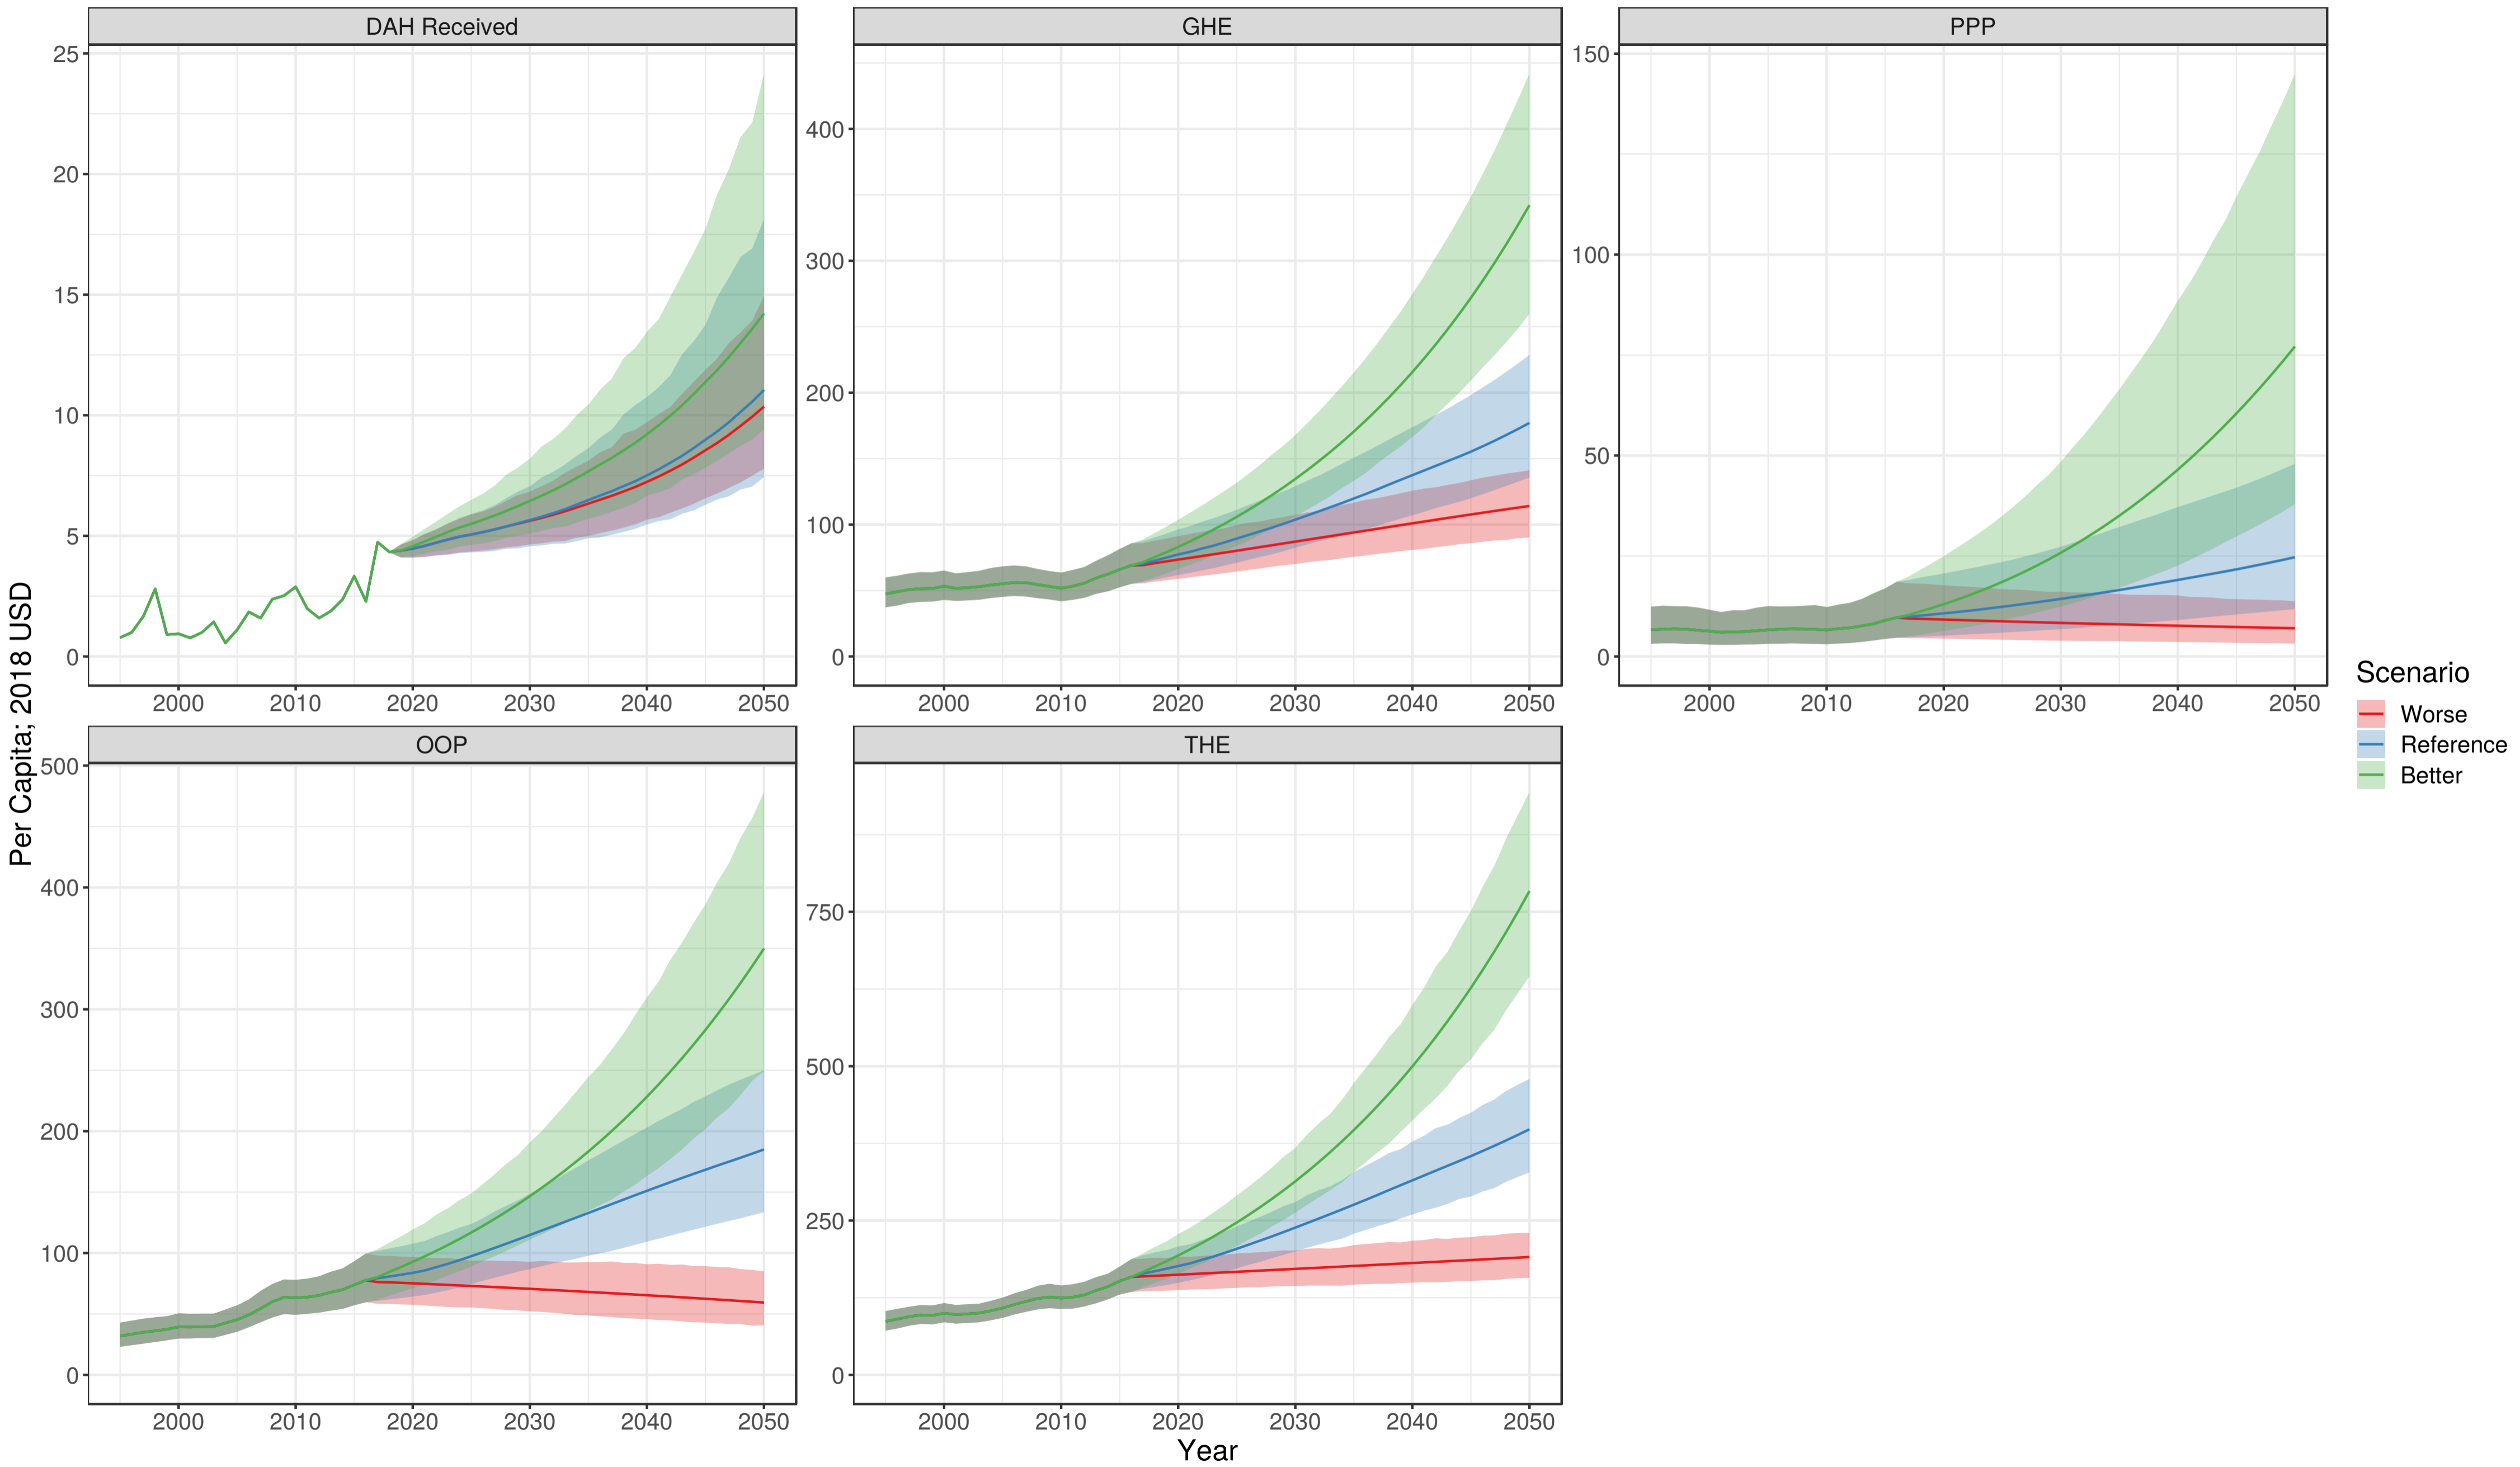

# Sudan

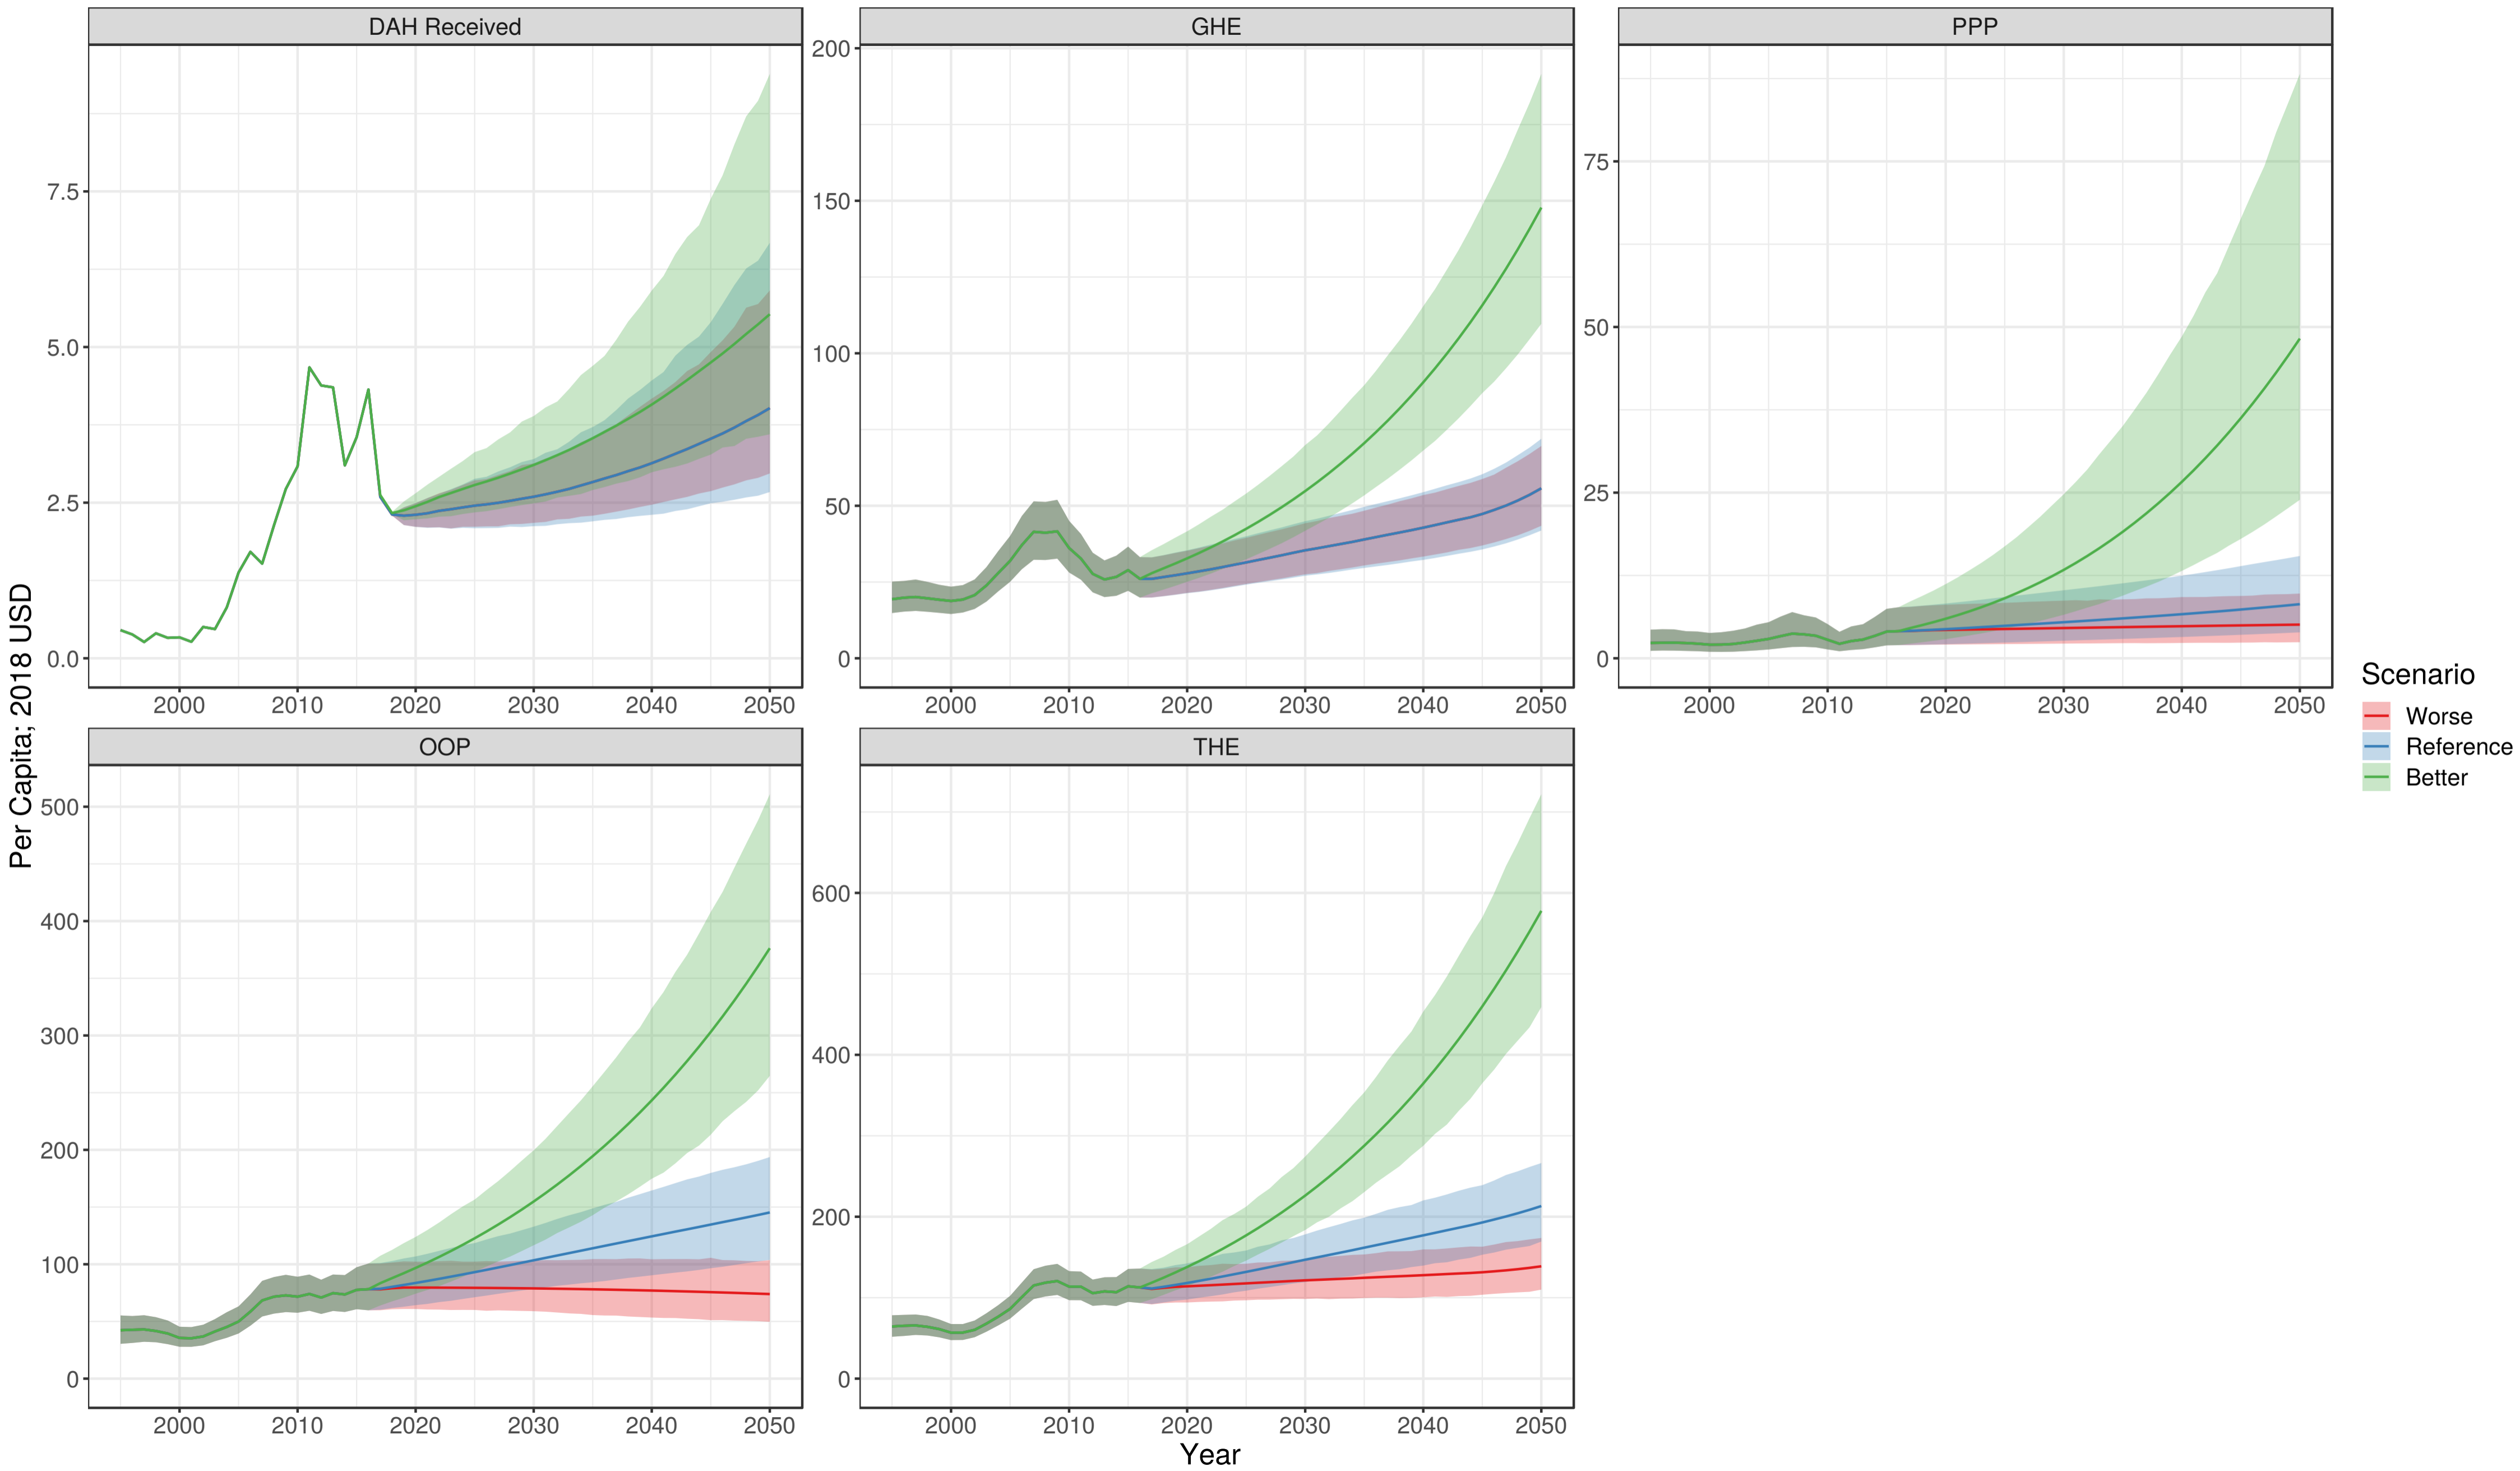

# Suriname

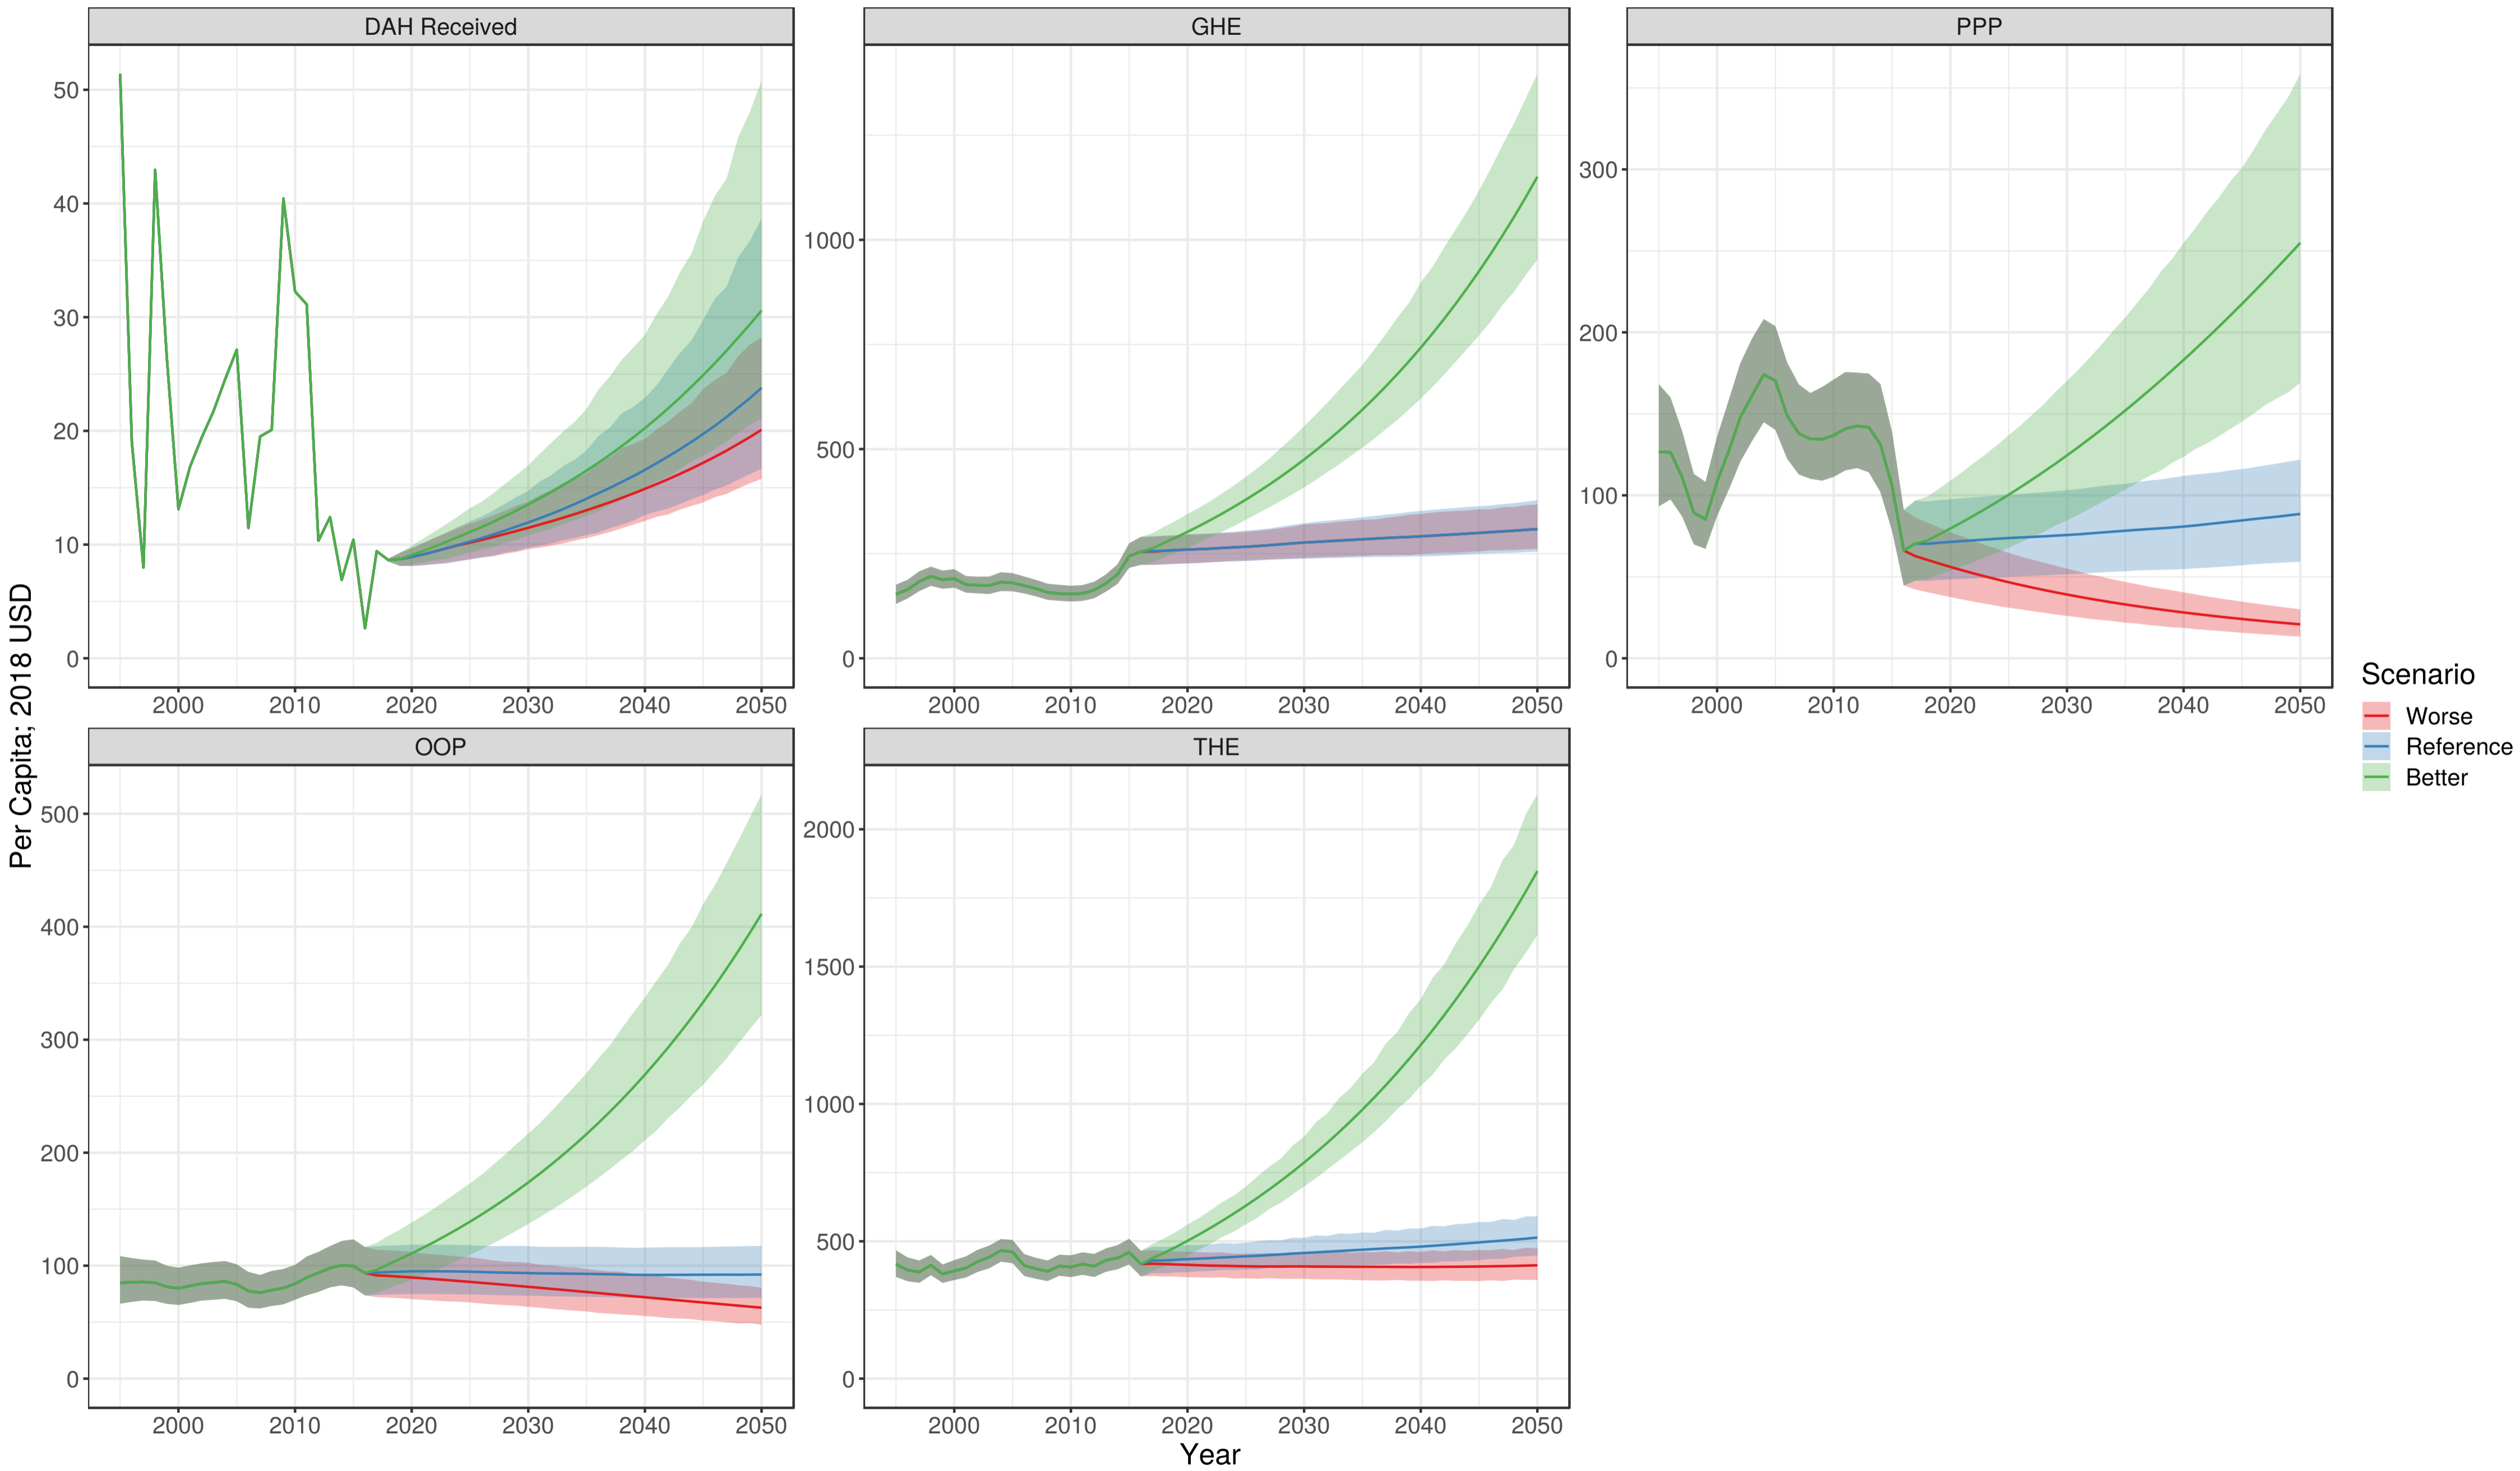



# Swaziland

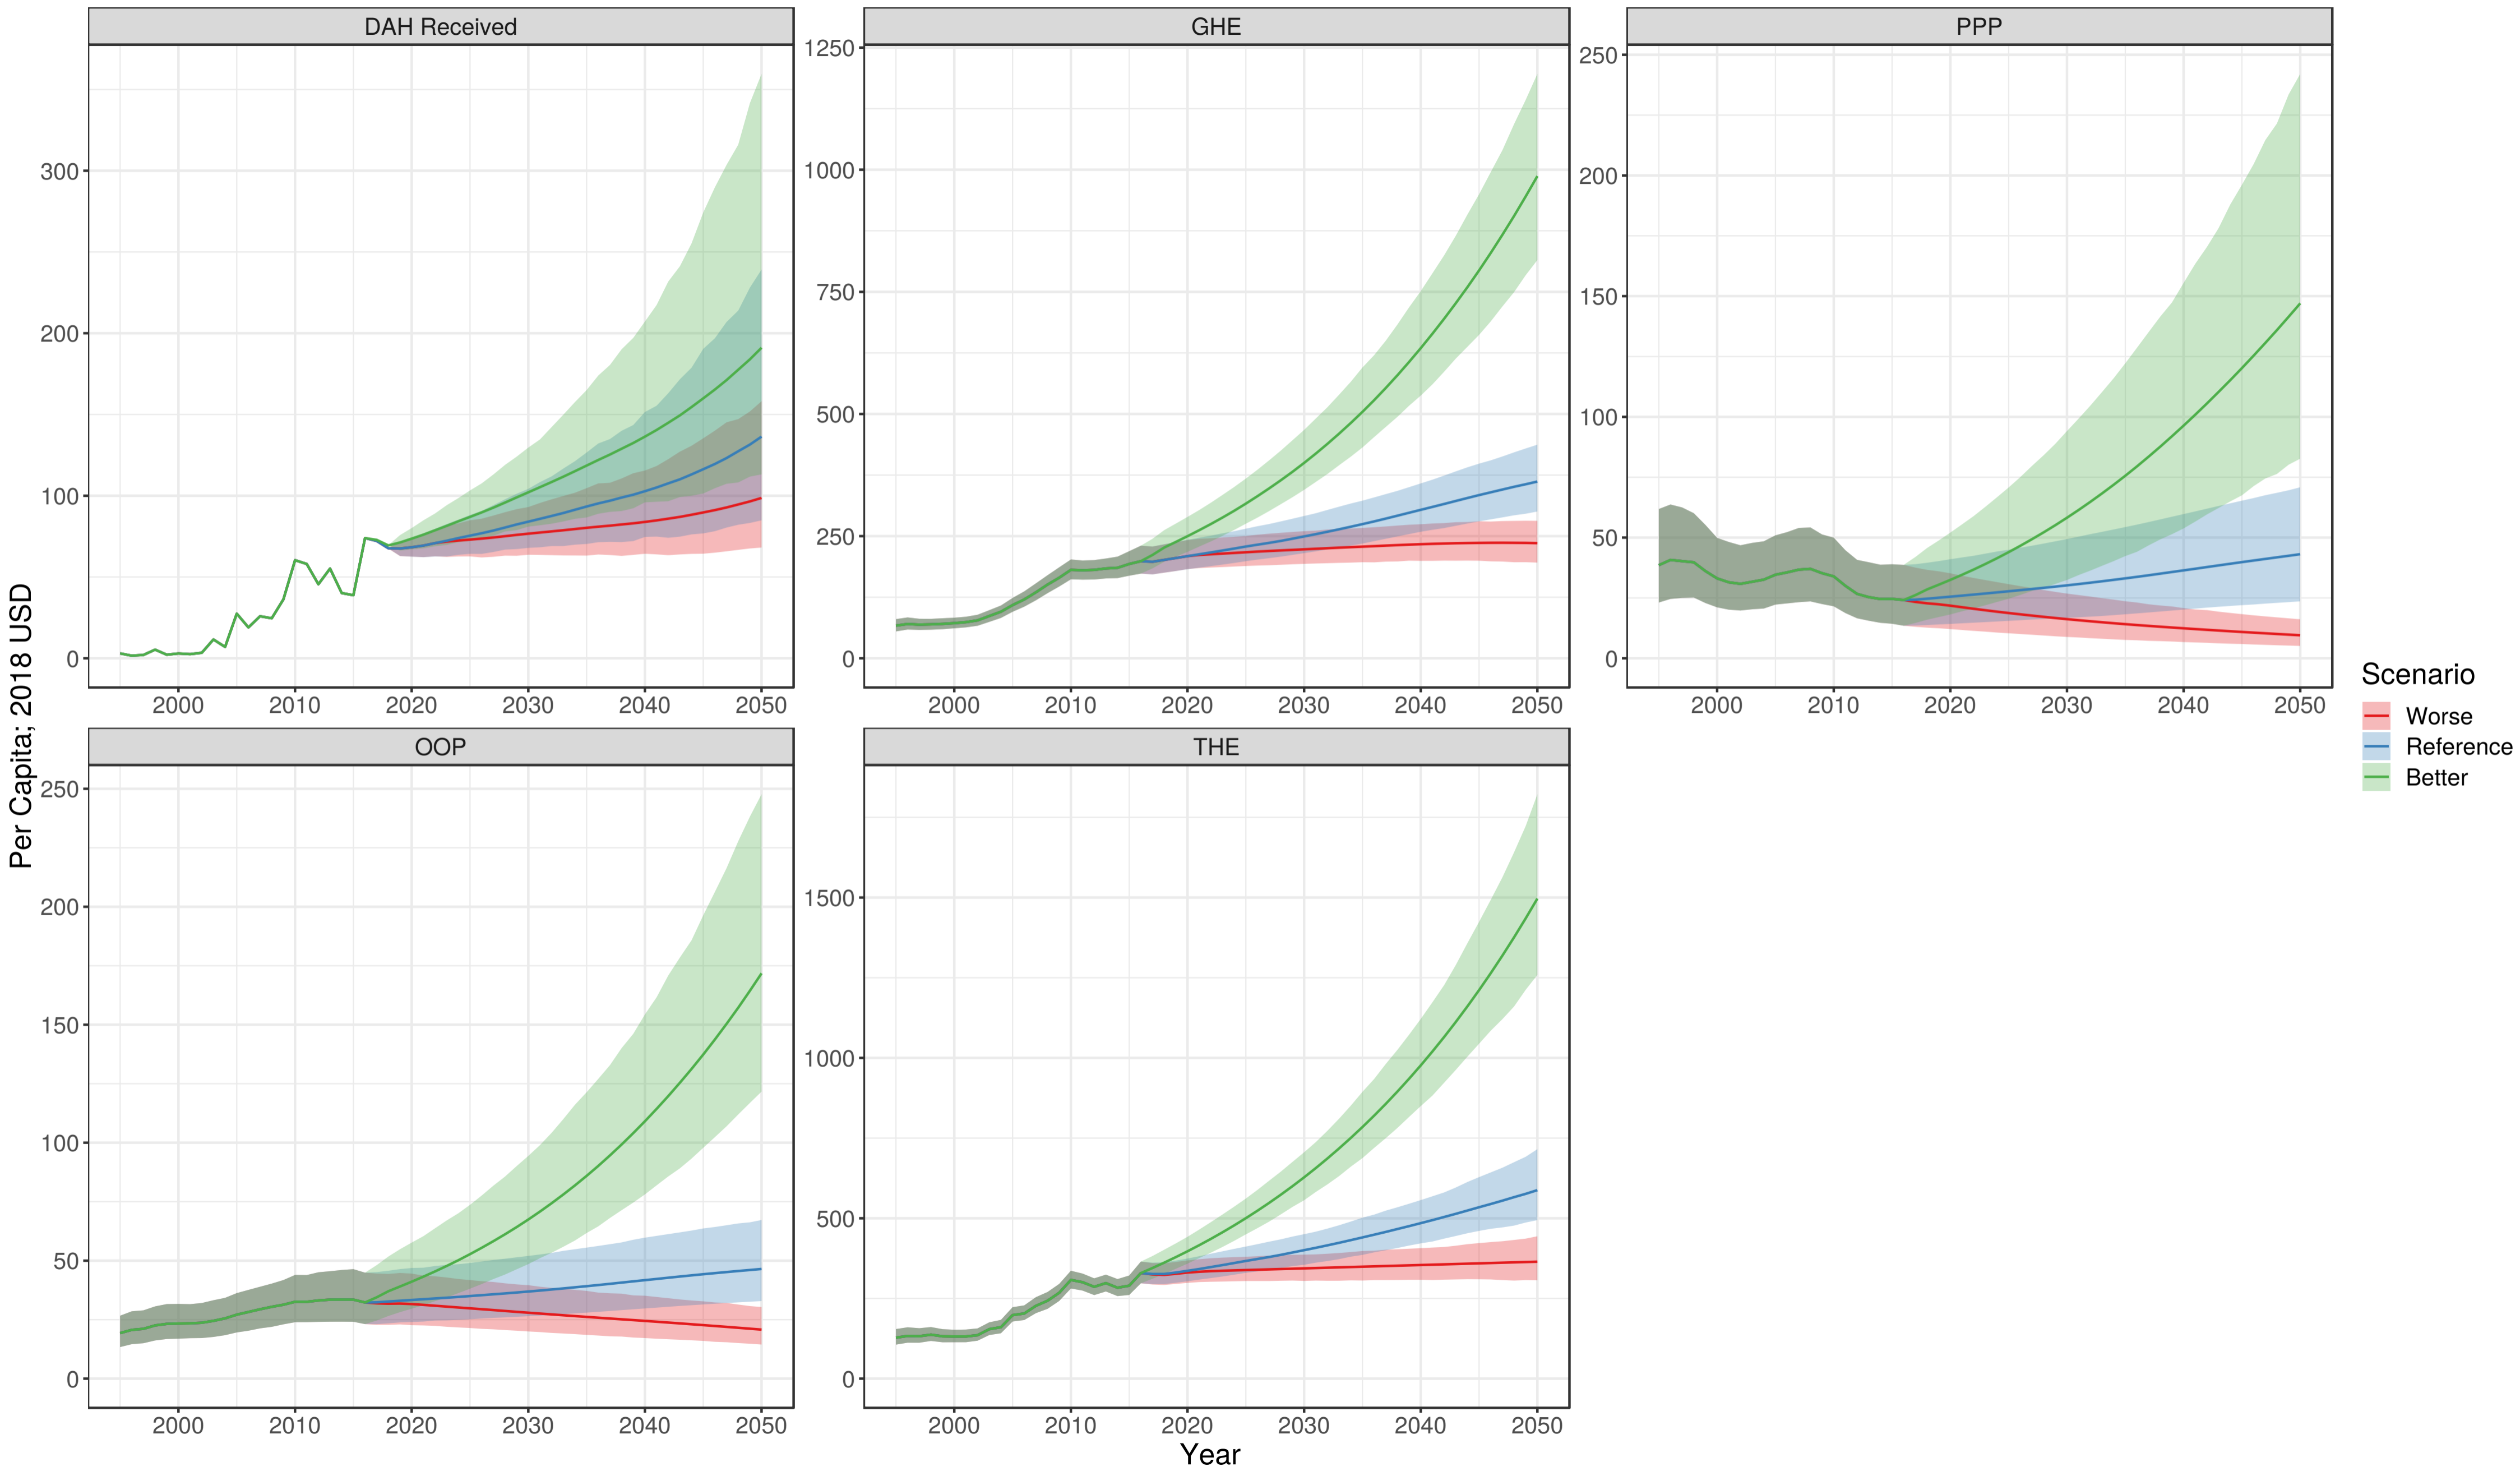

# Sweden

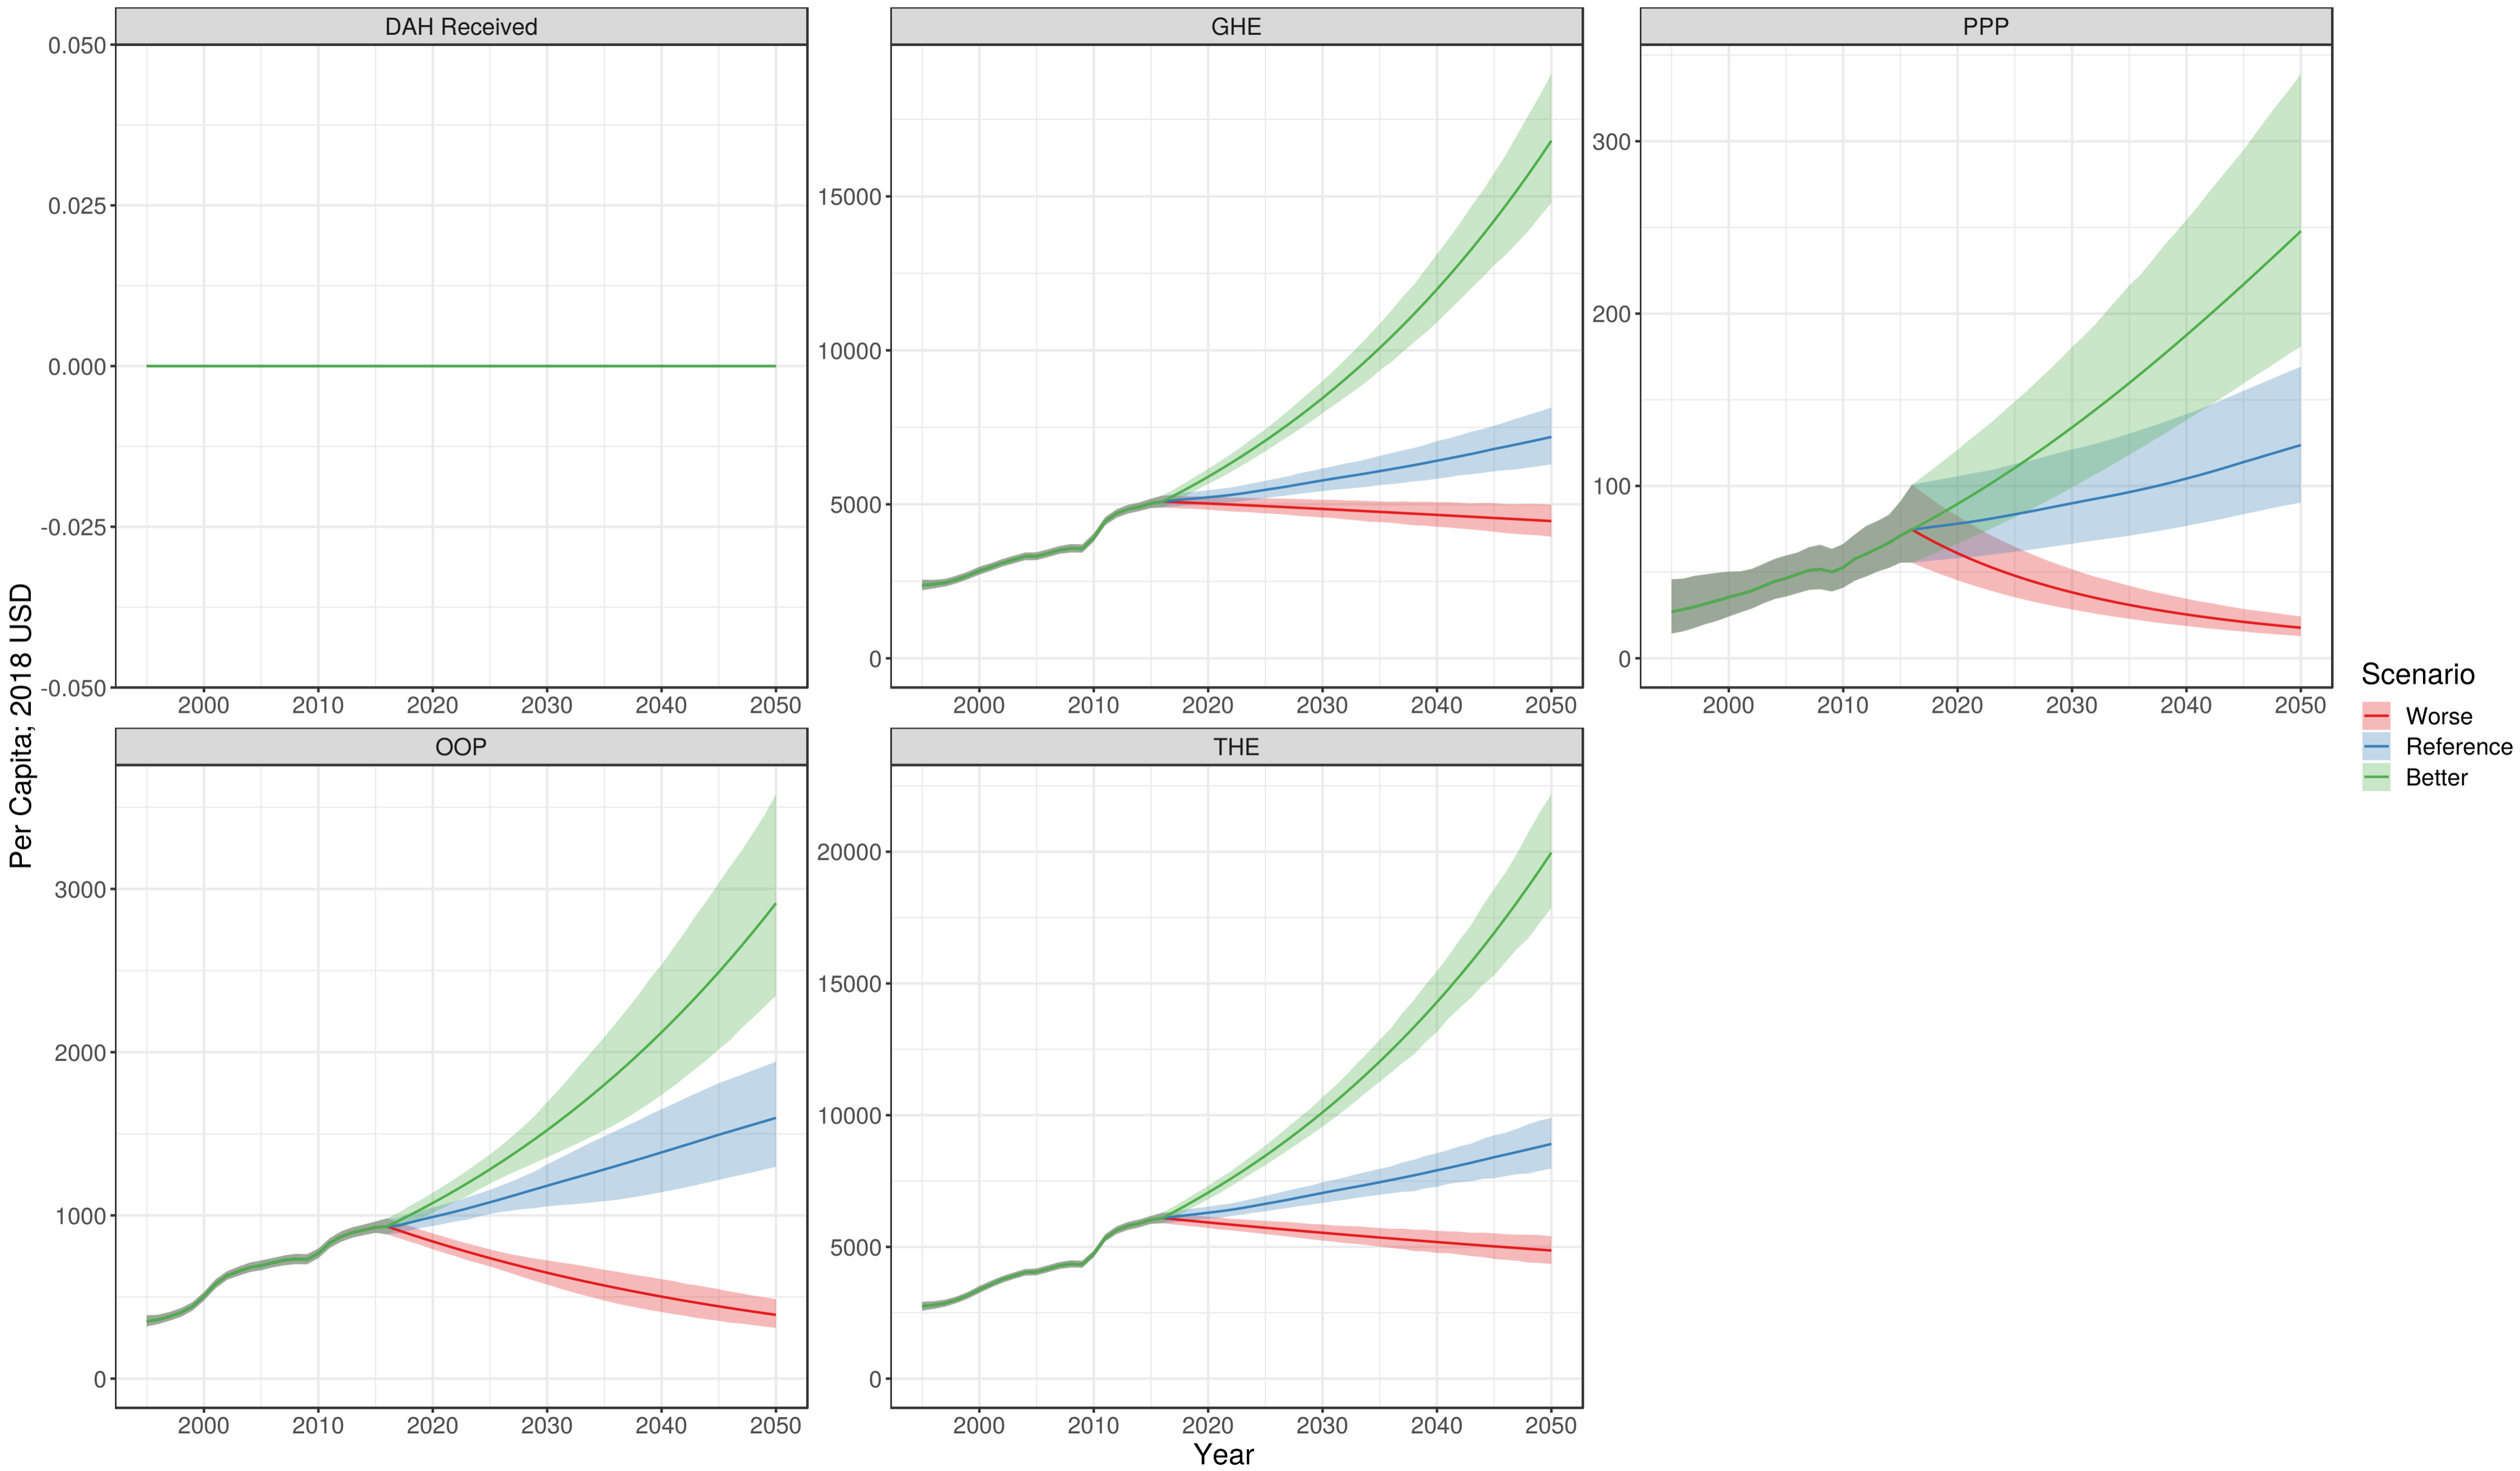

# Switzerland

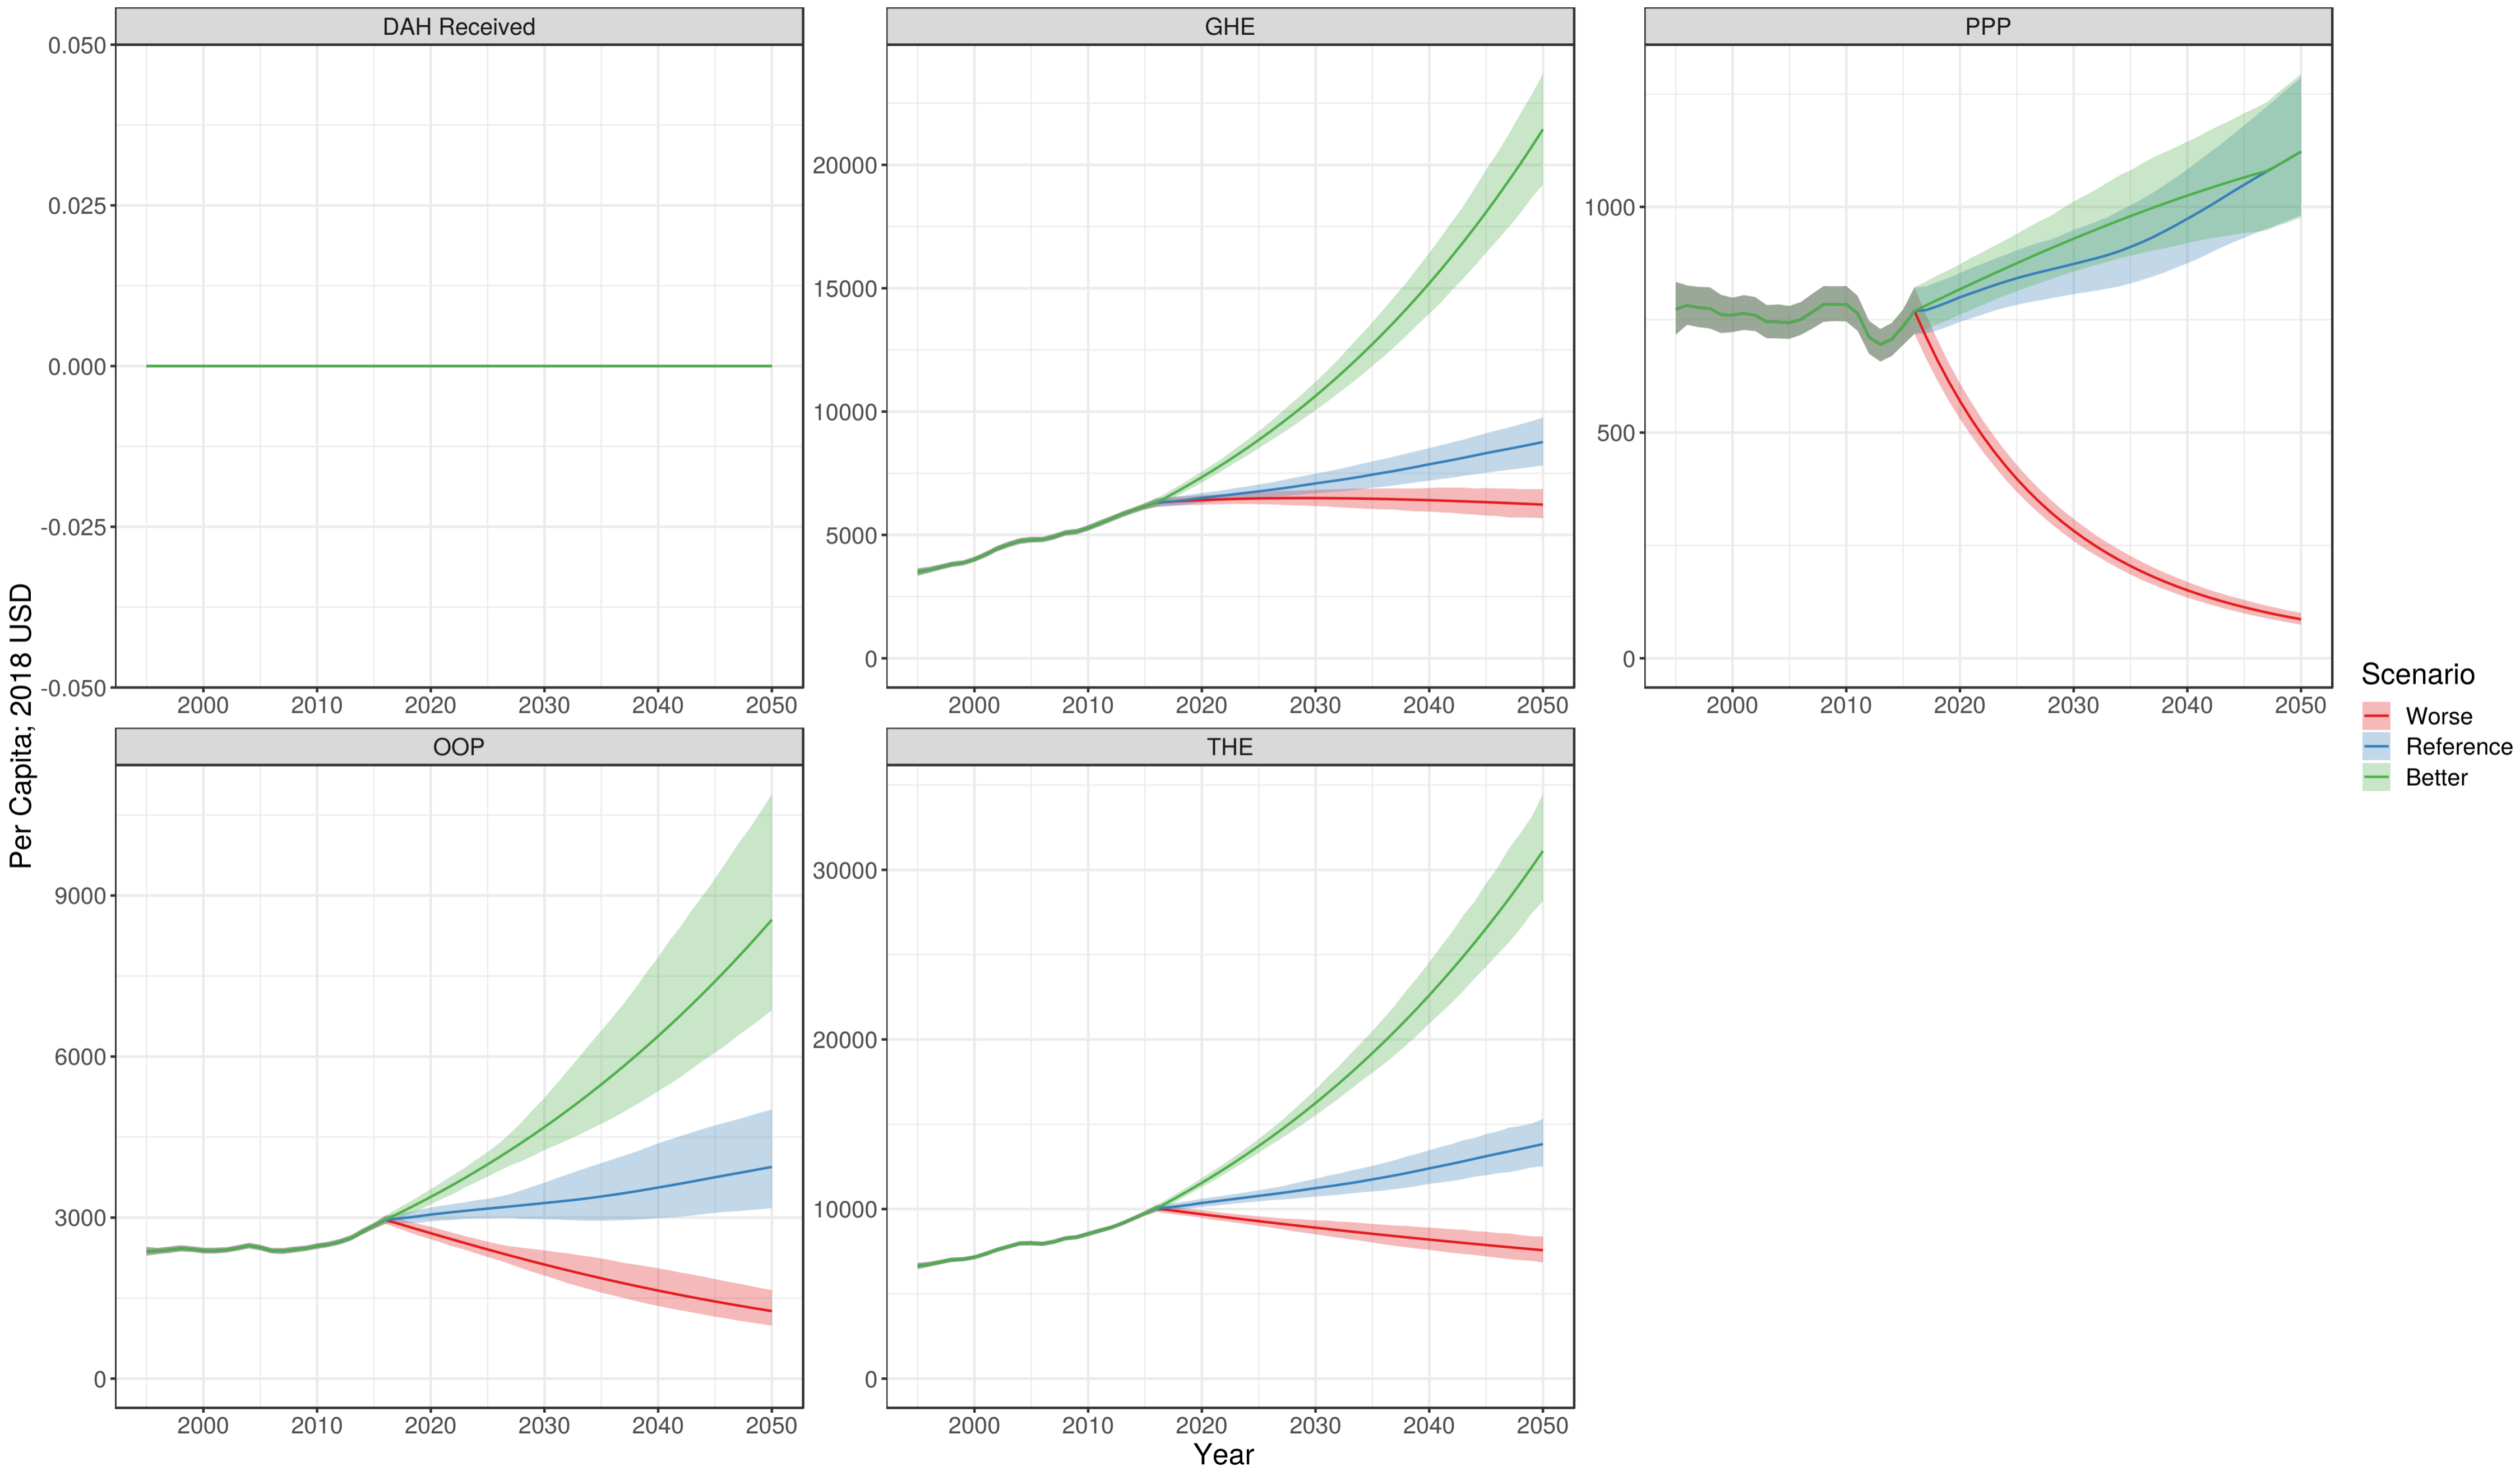

# Syria

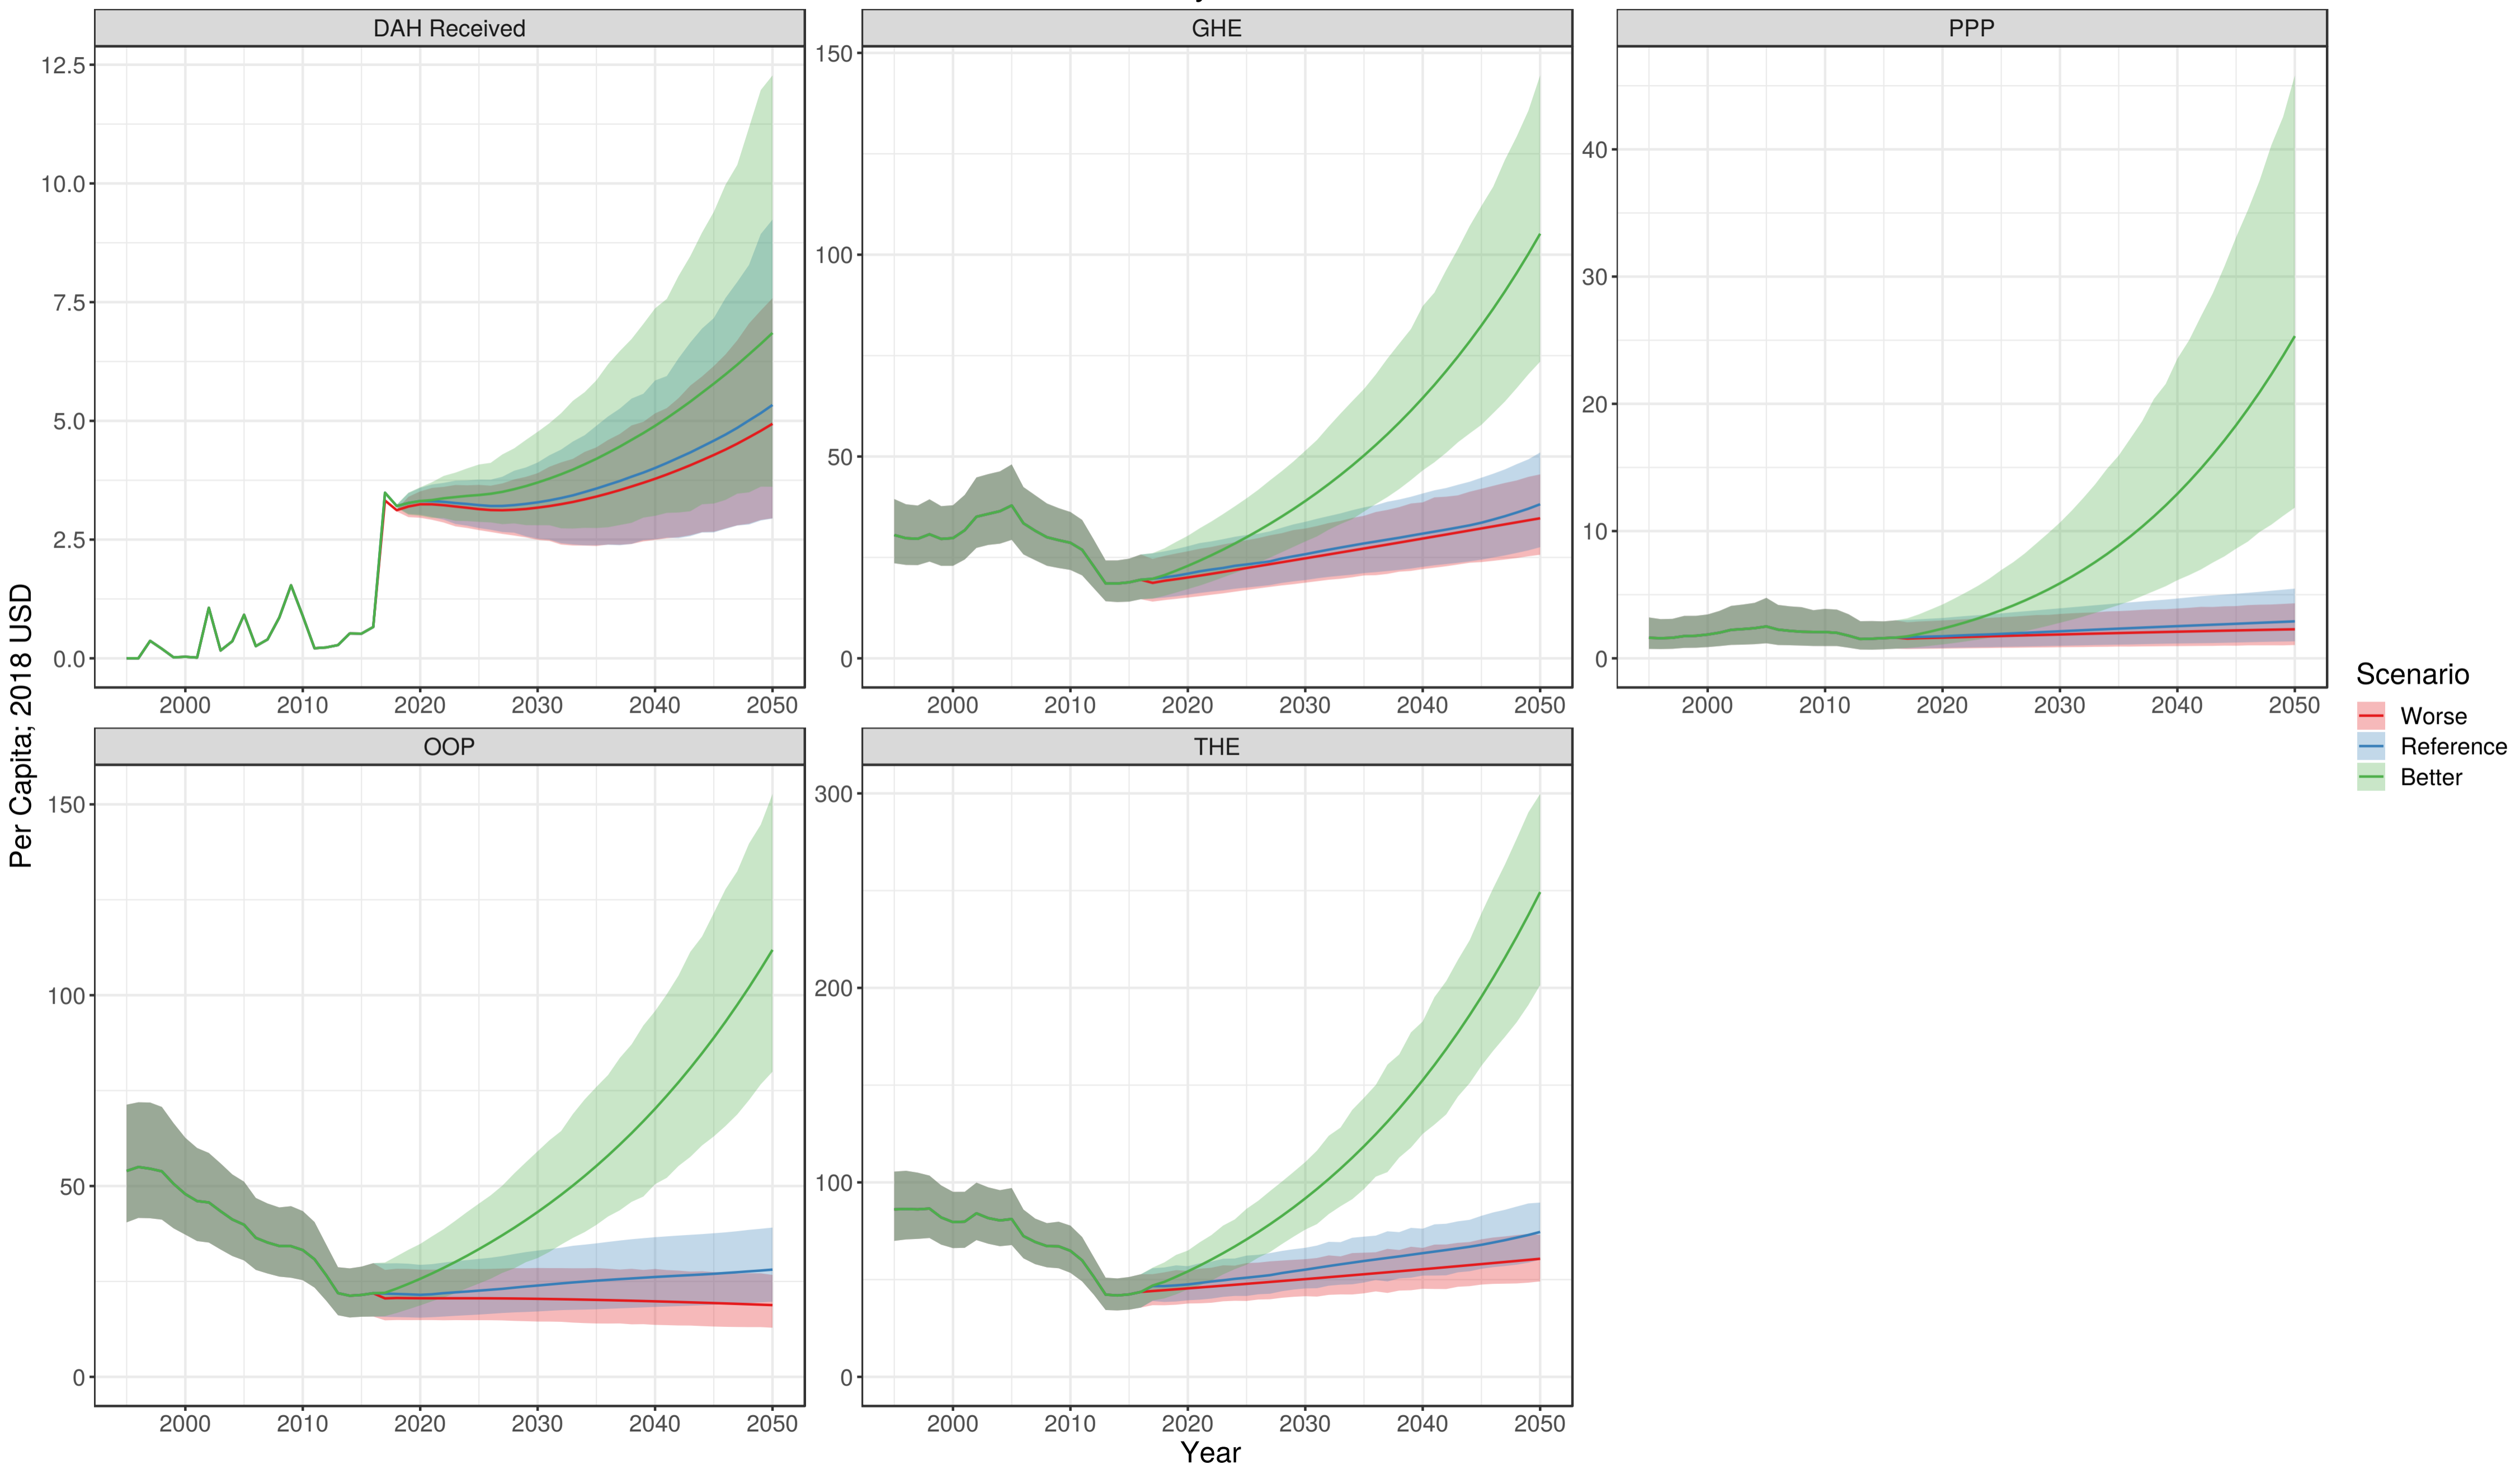

# Taiwan

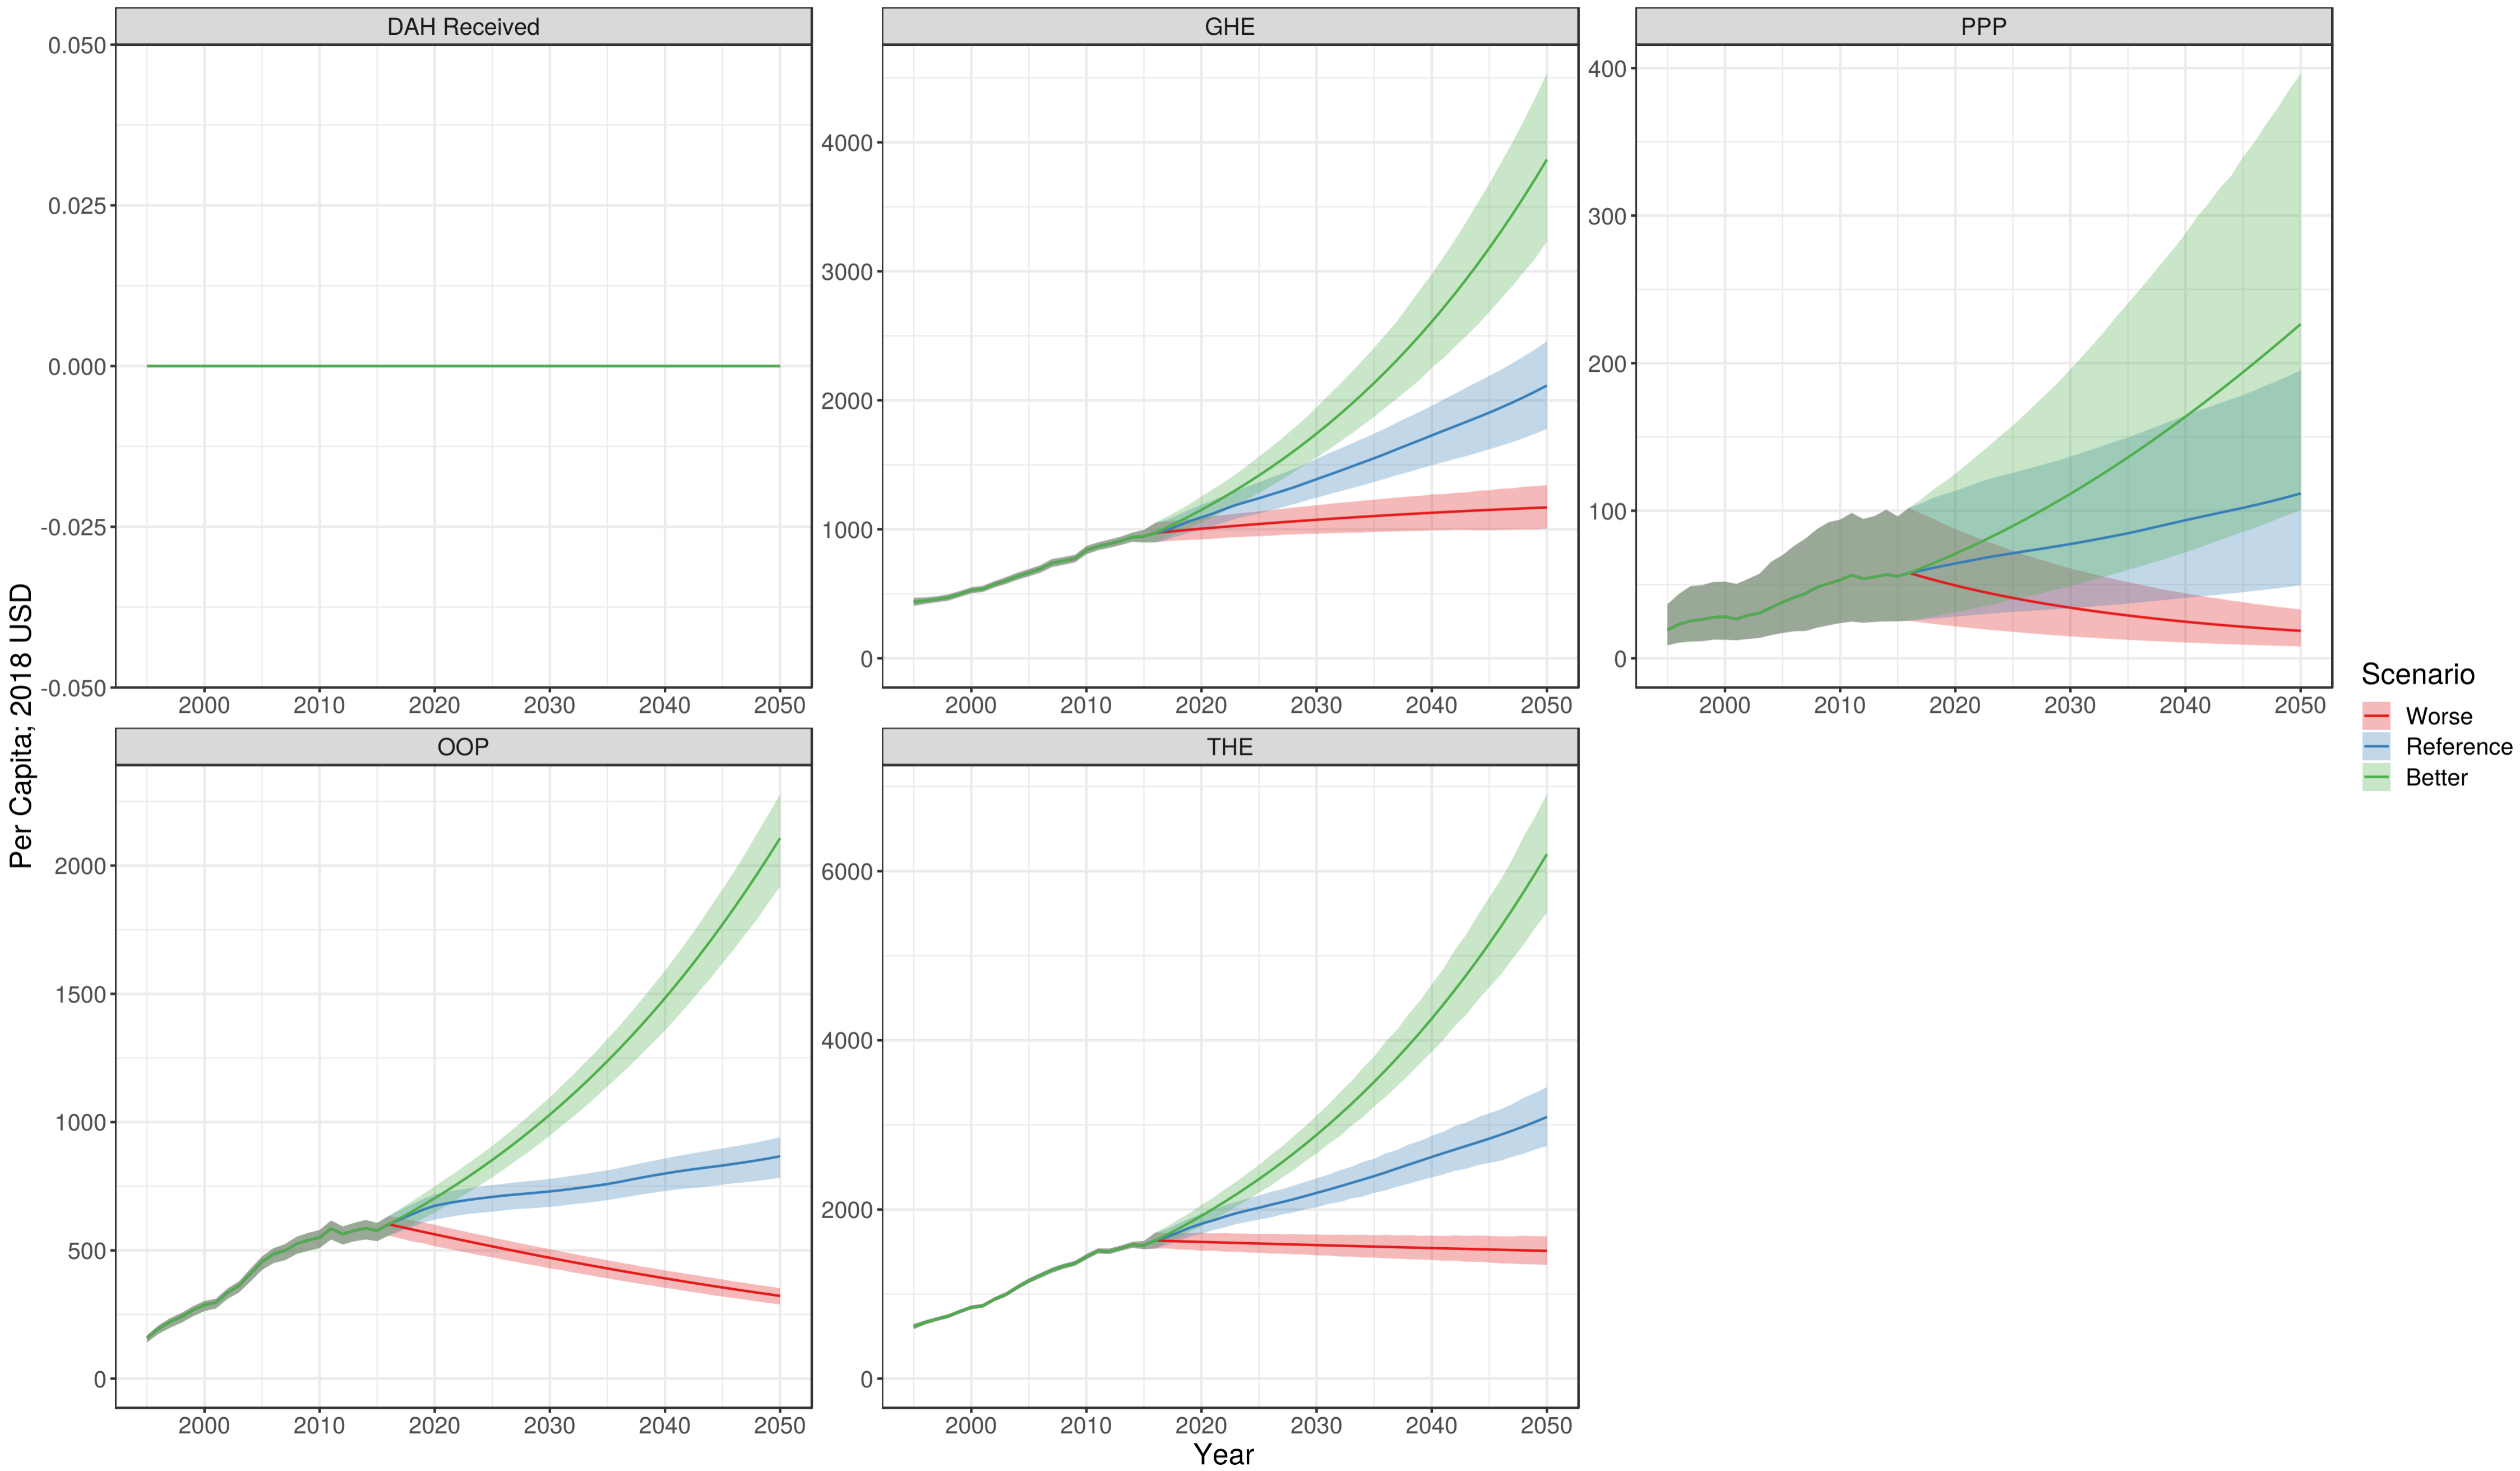

# Tajikistan

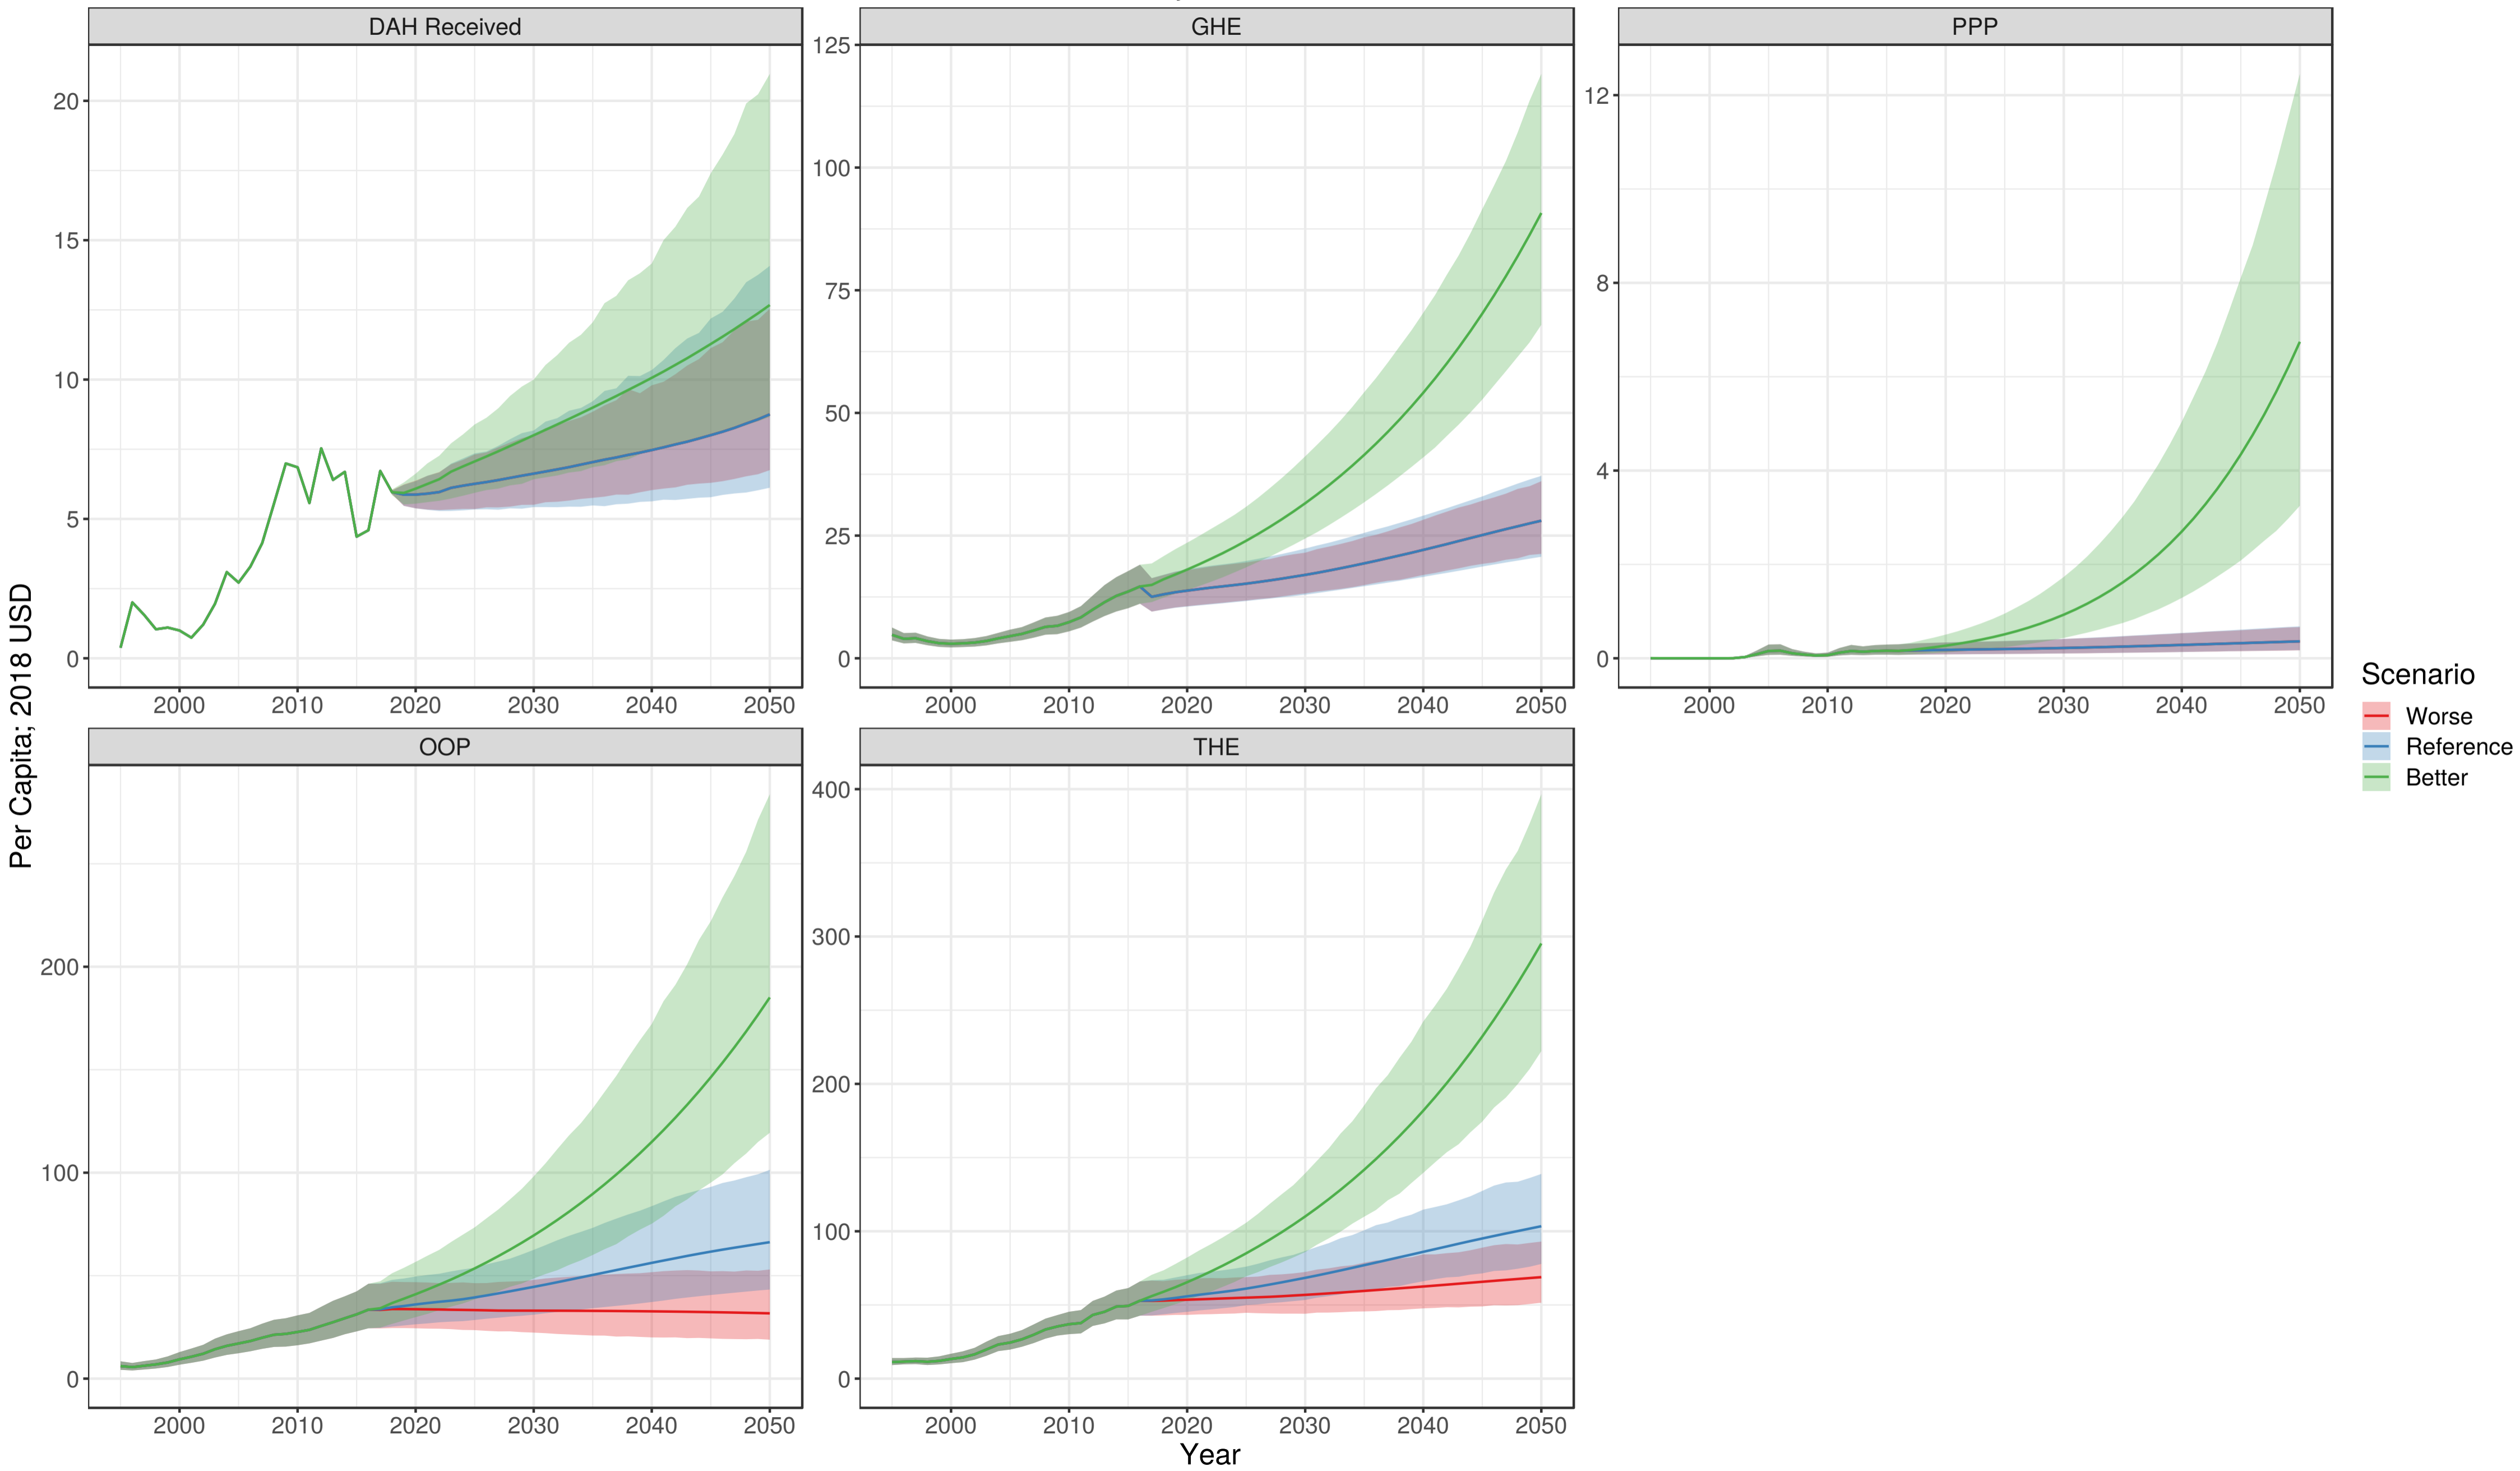

# Tanzania

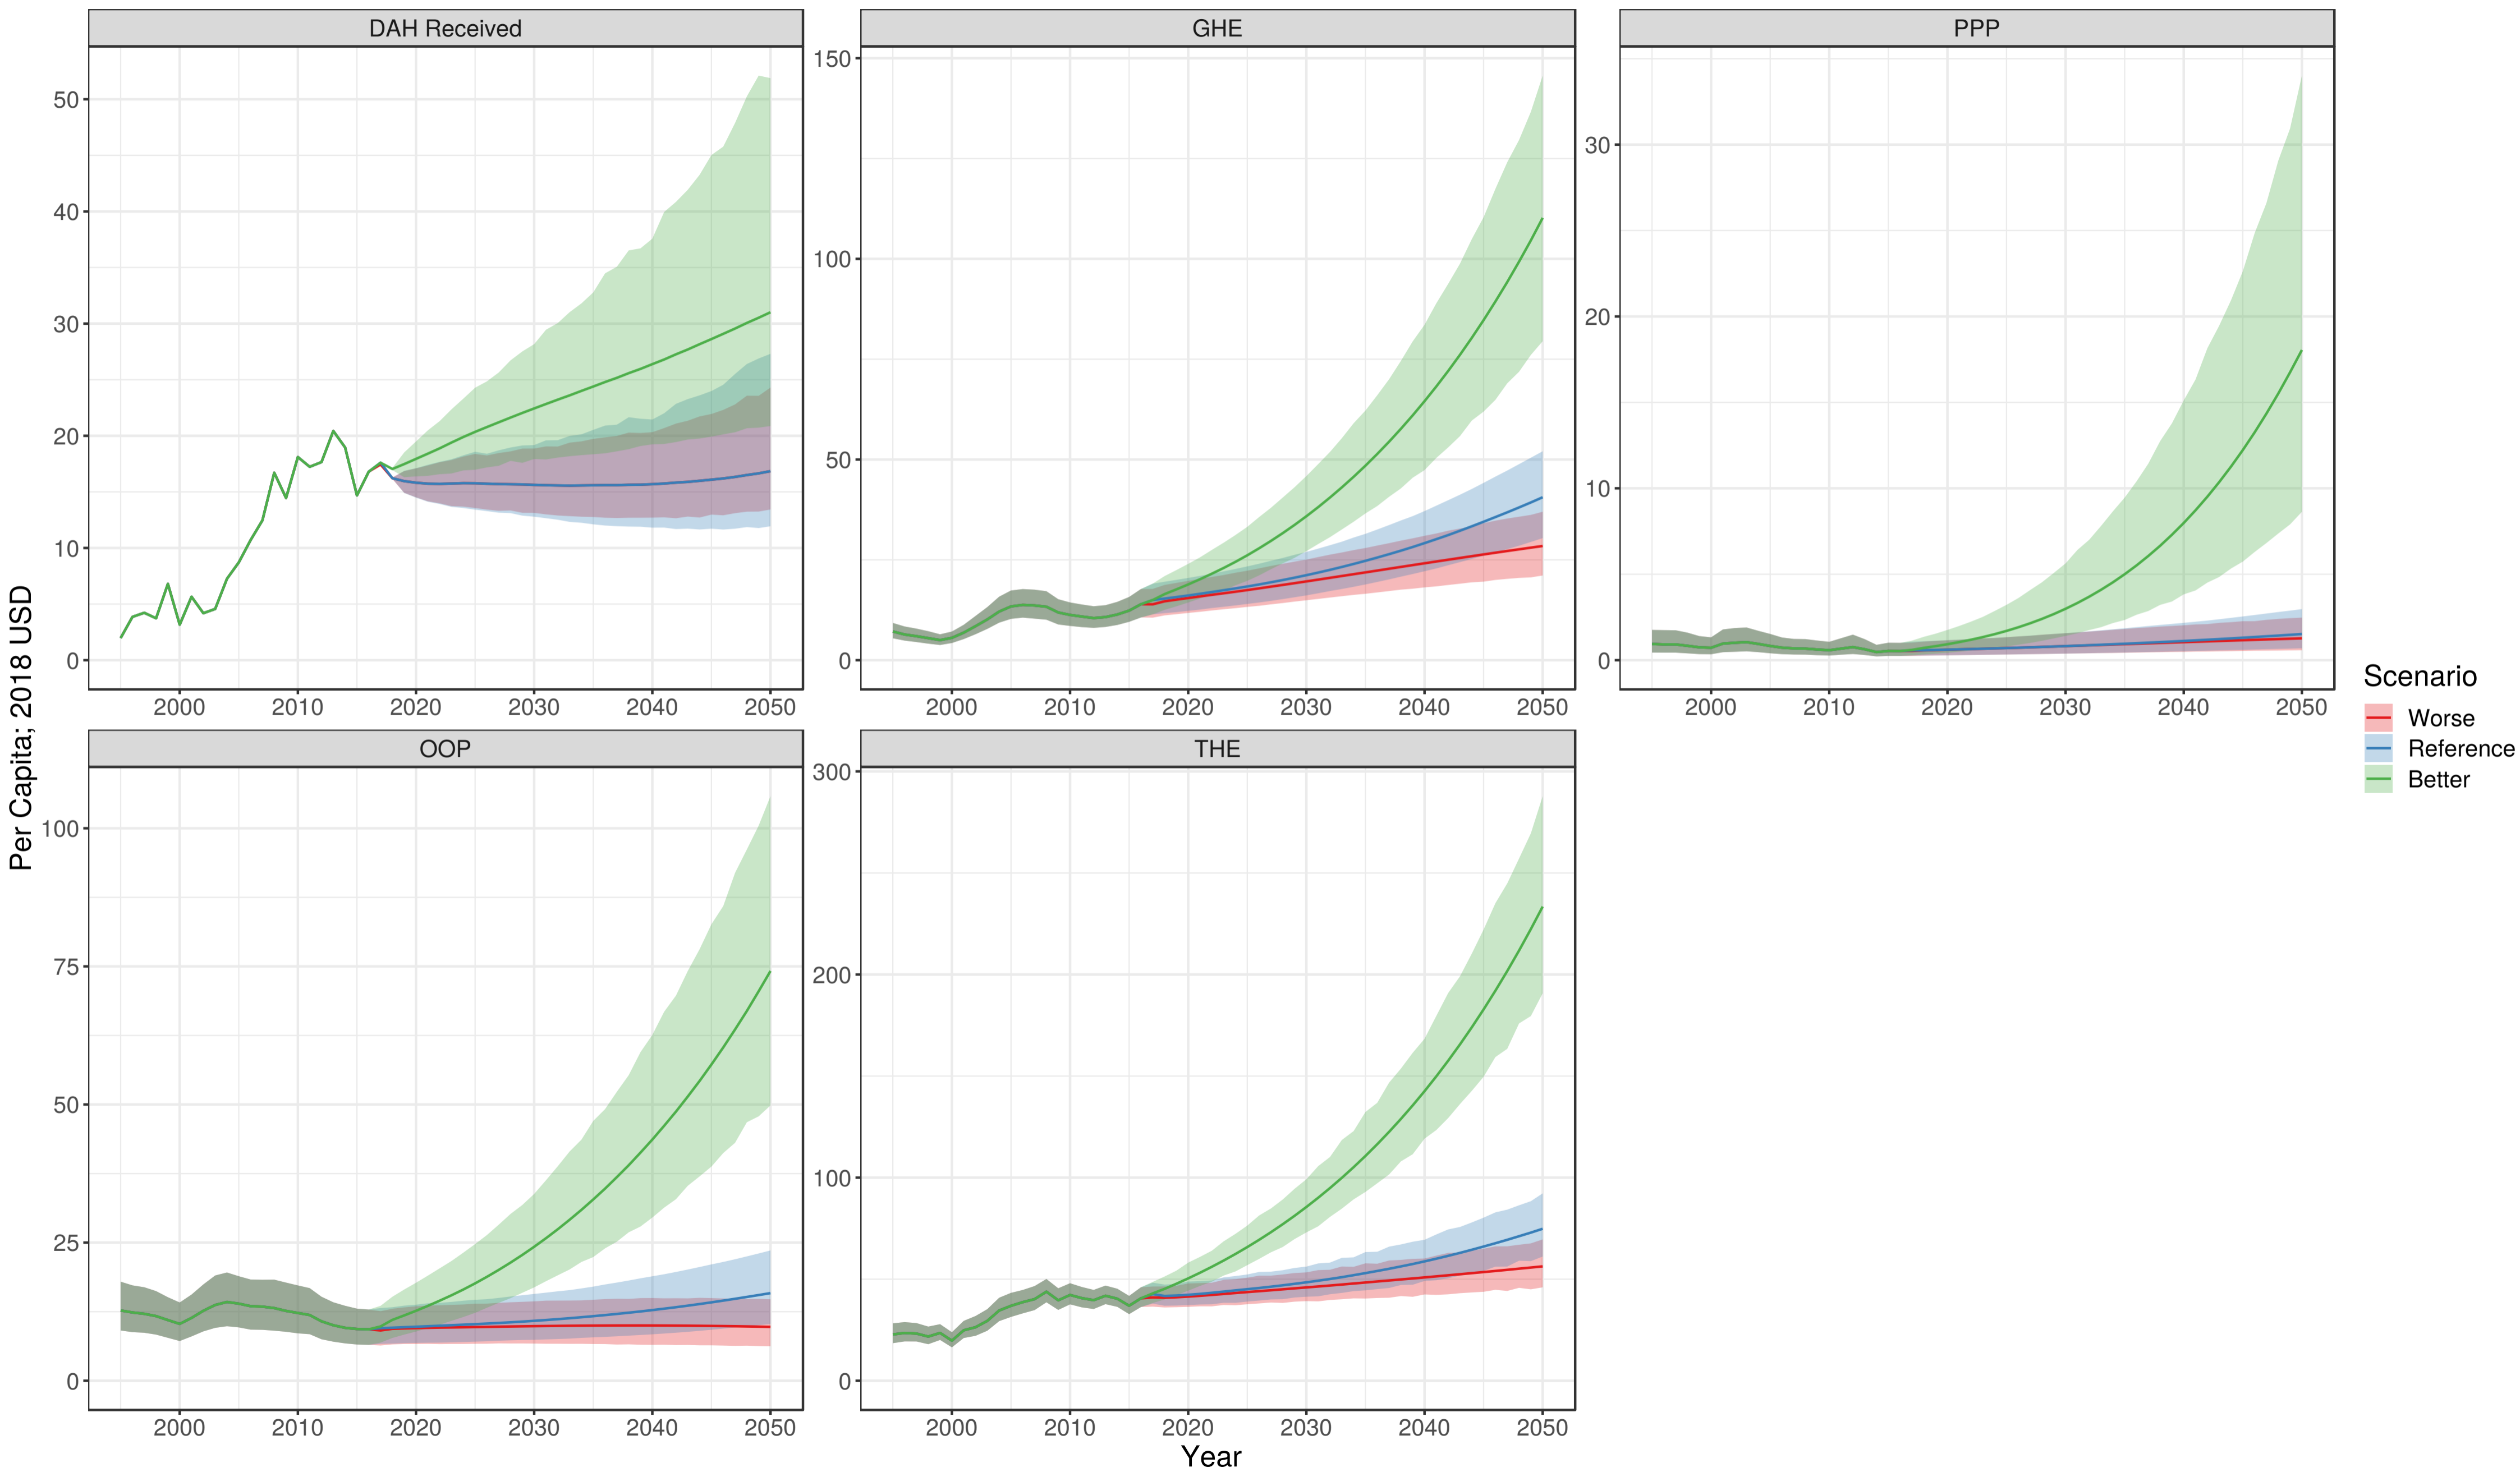

# Thailand

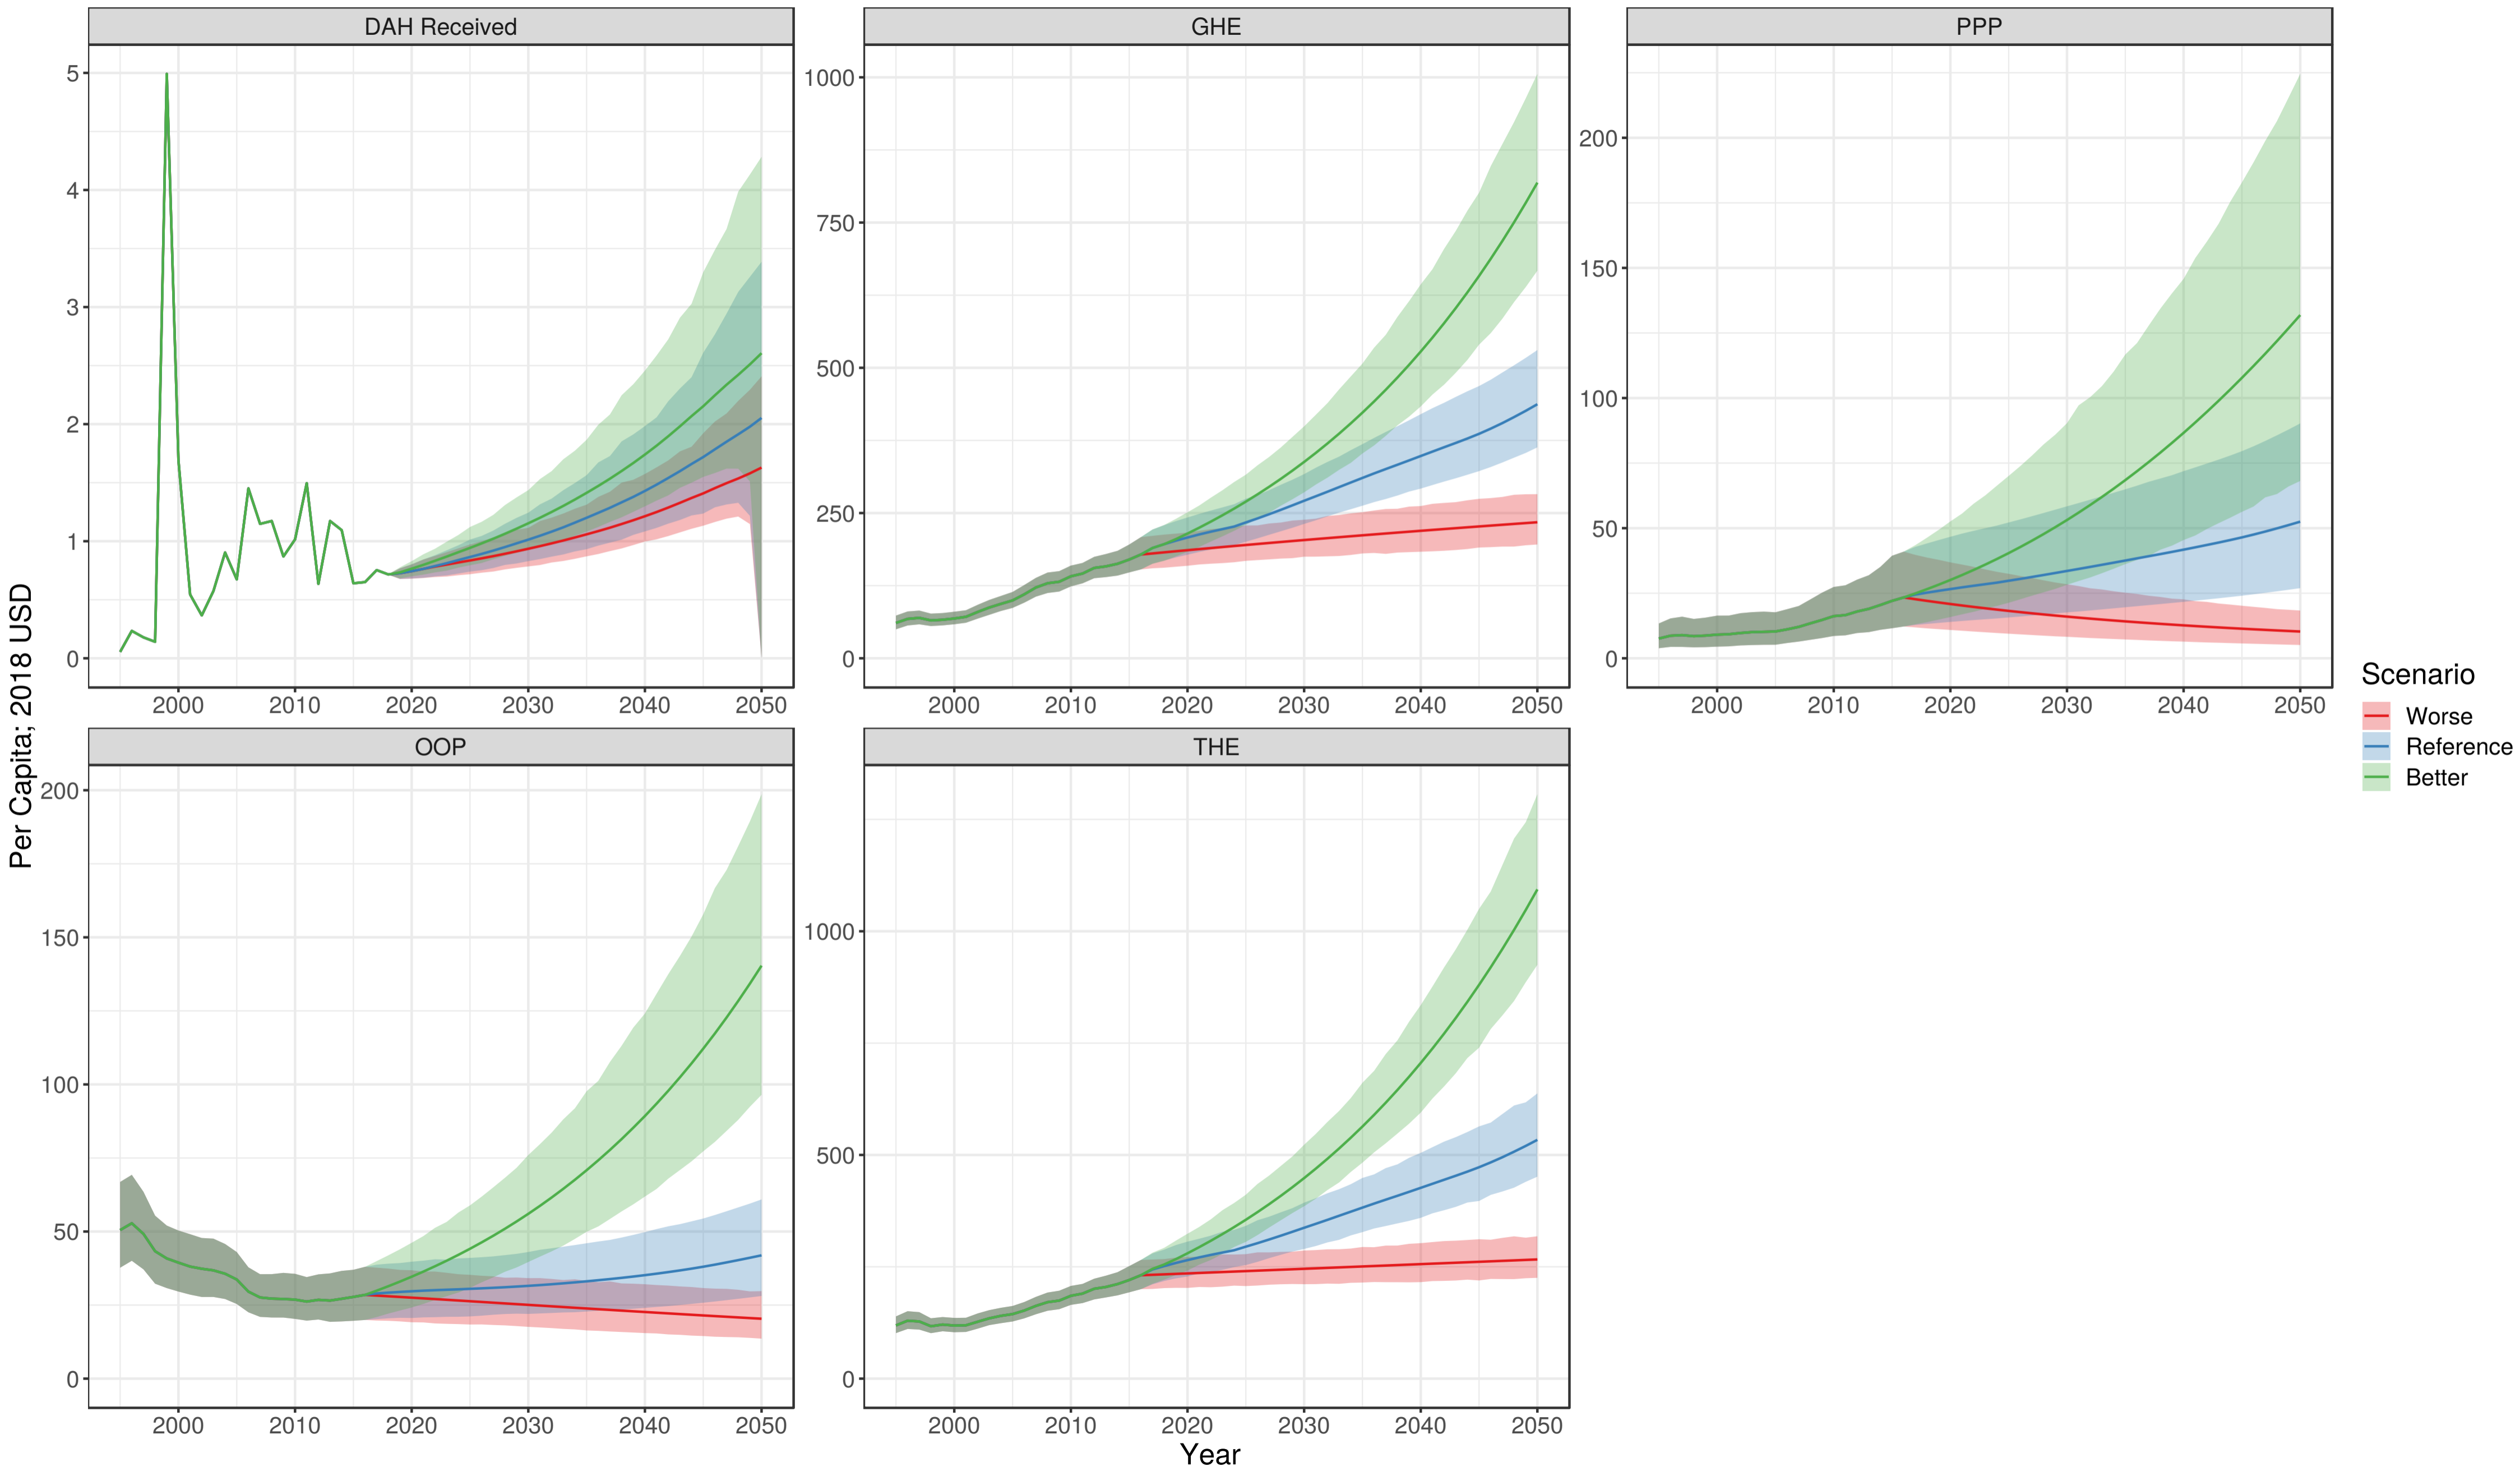



# The Bahamas

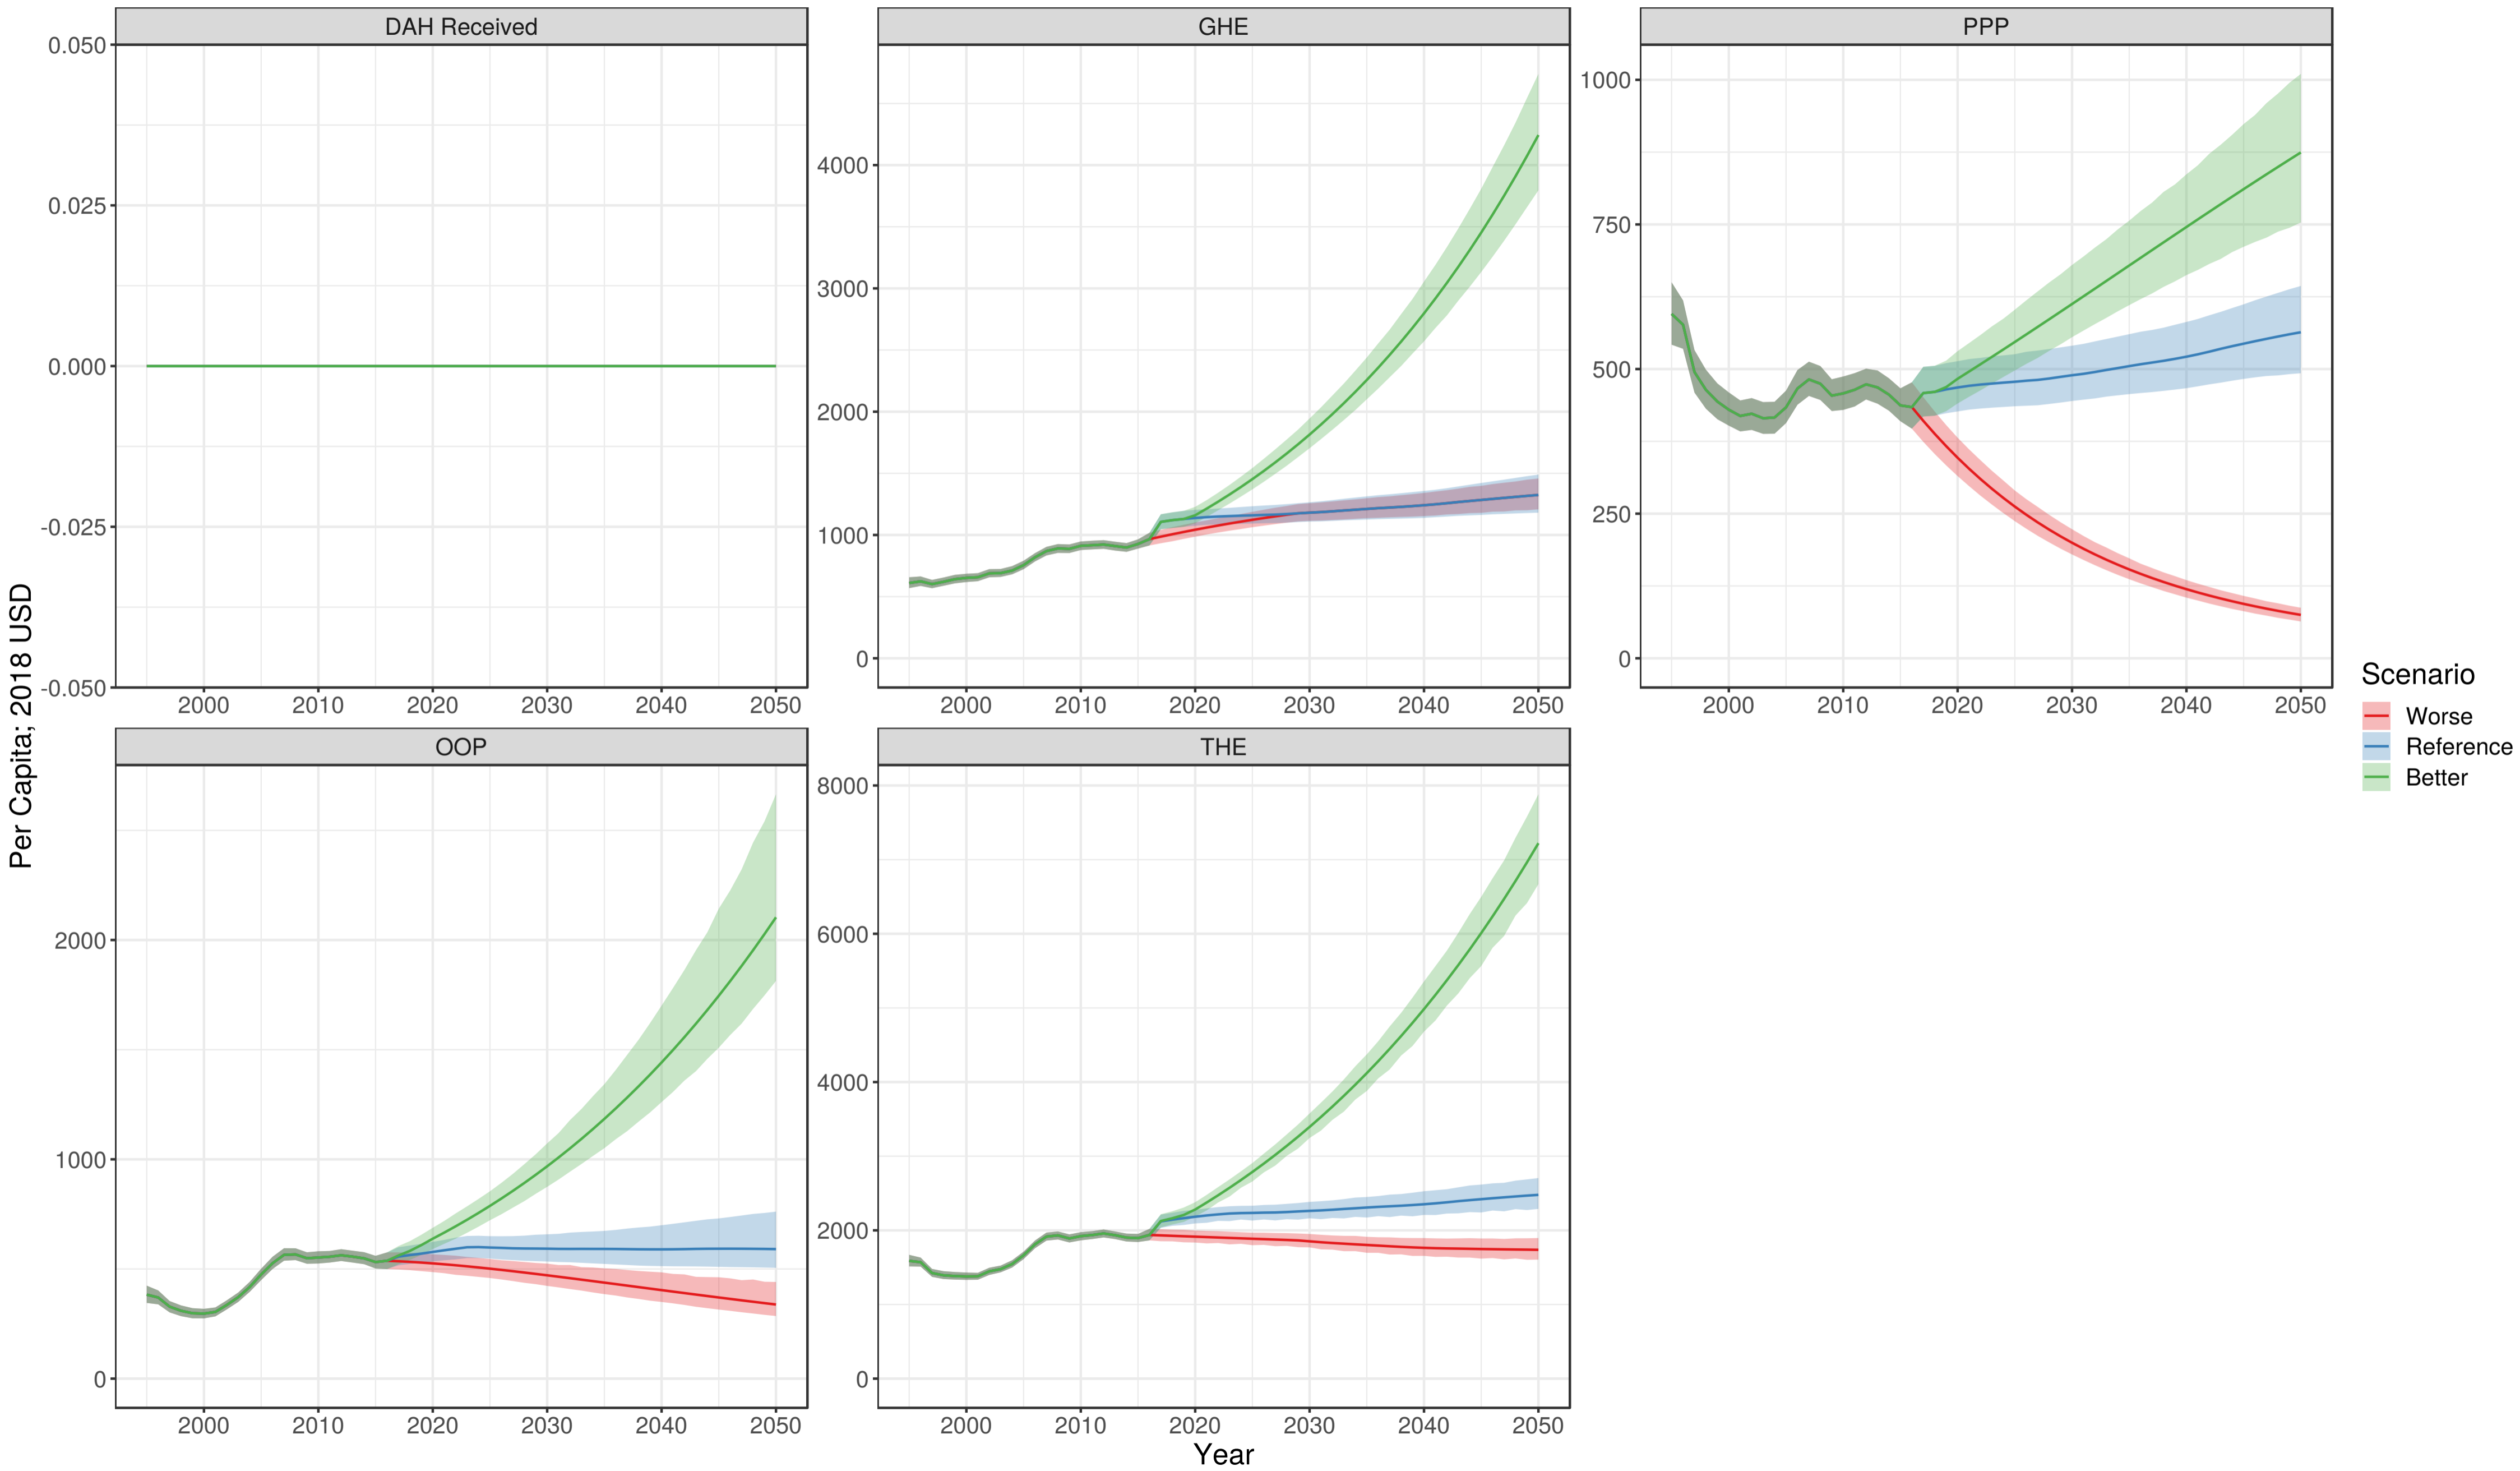

# The Gambia

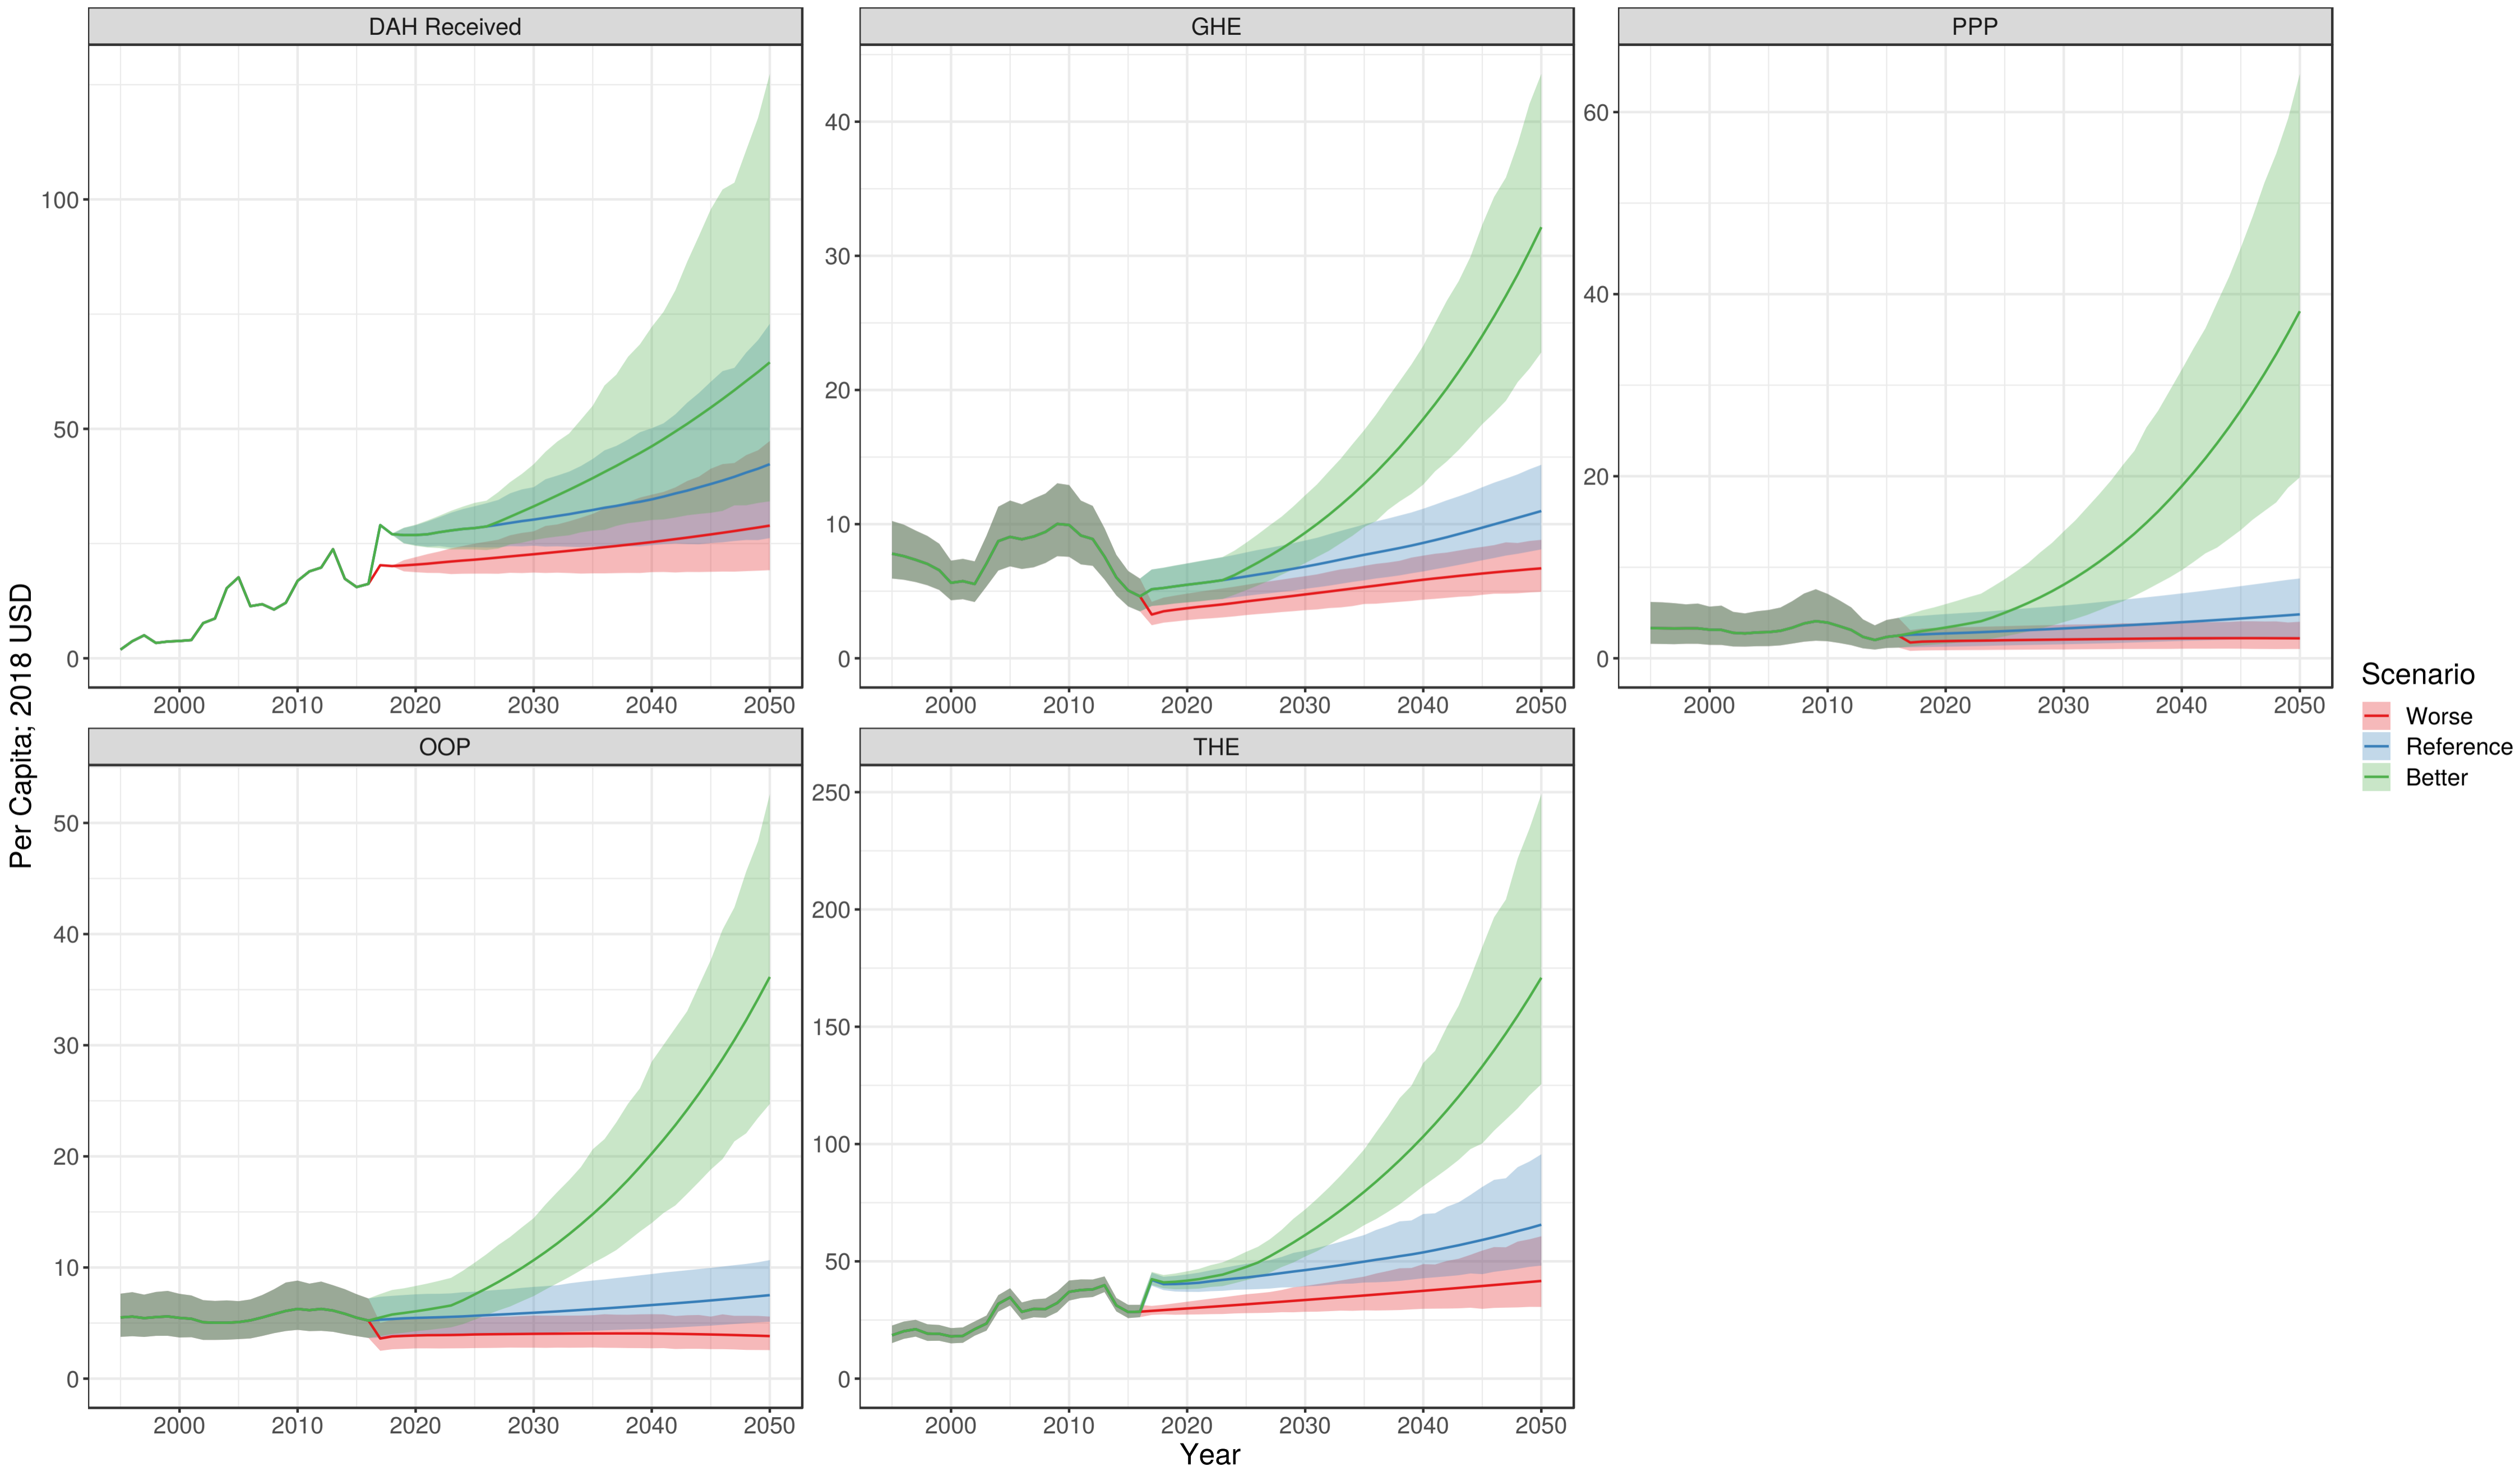

# Timor-Leste

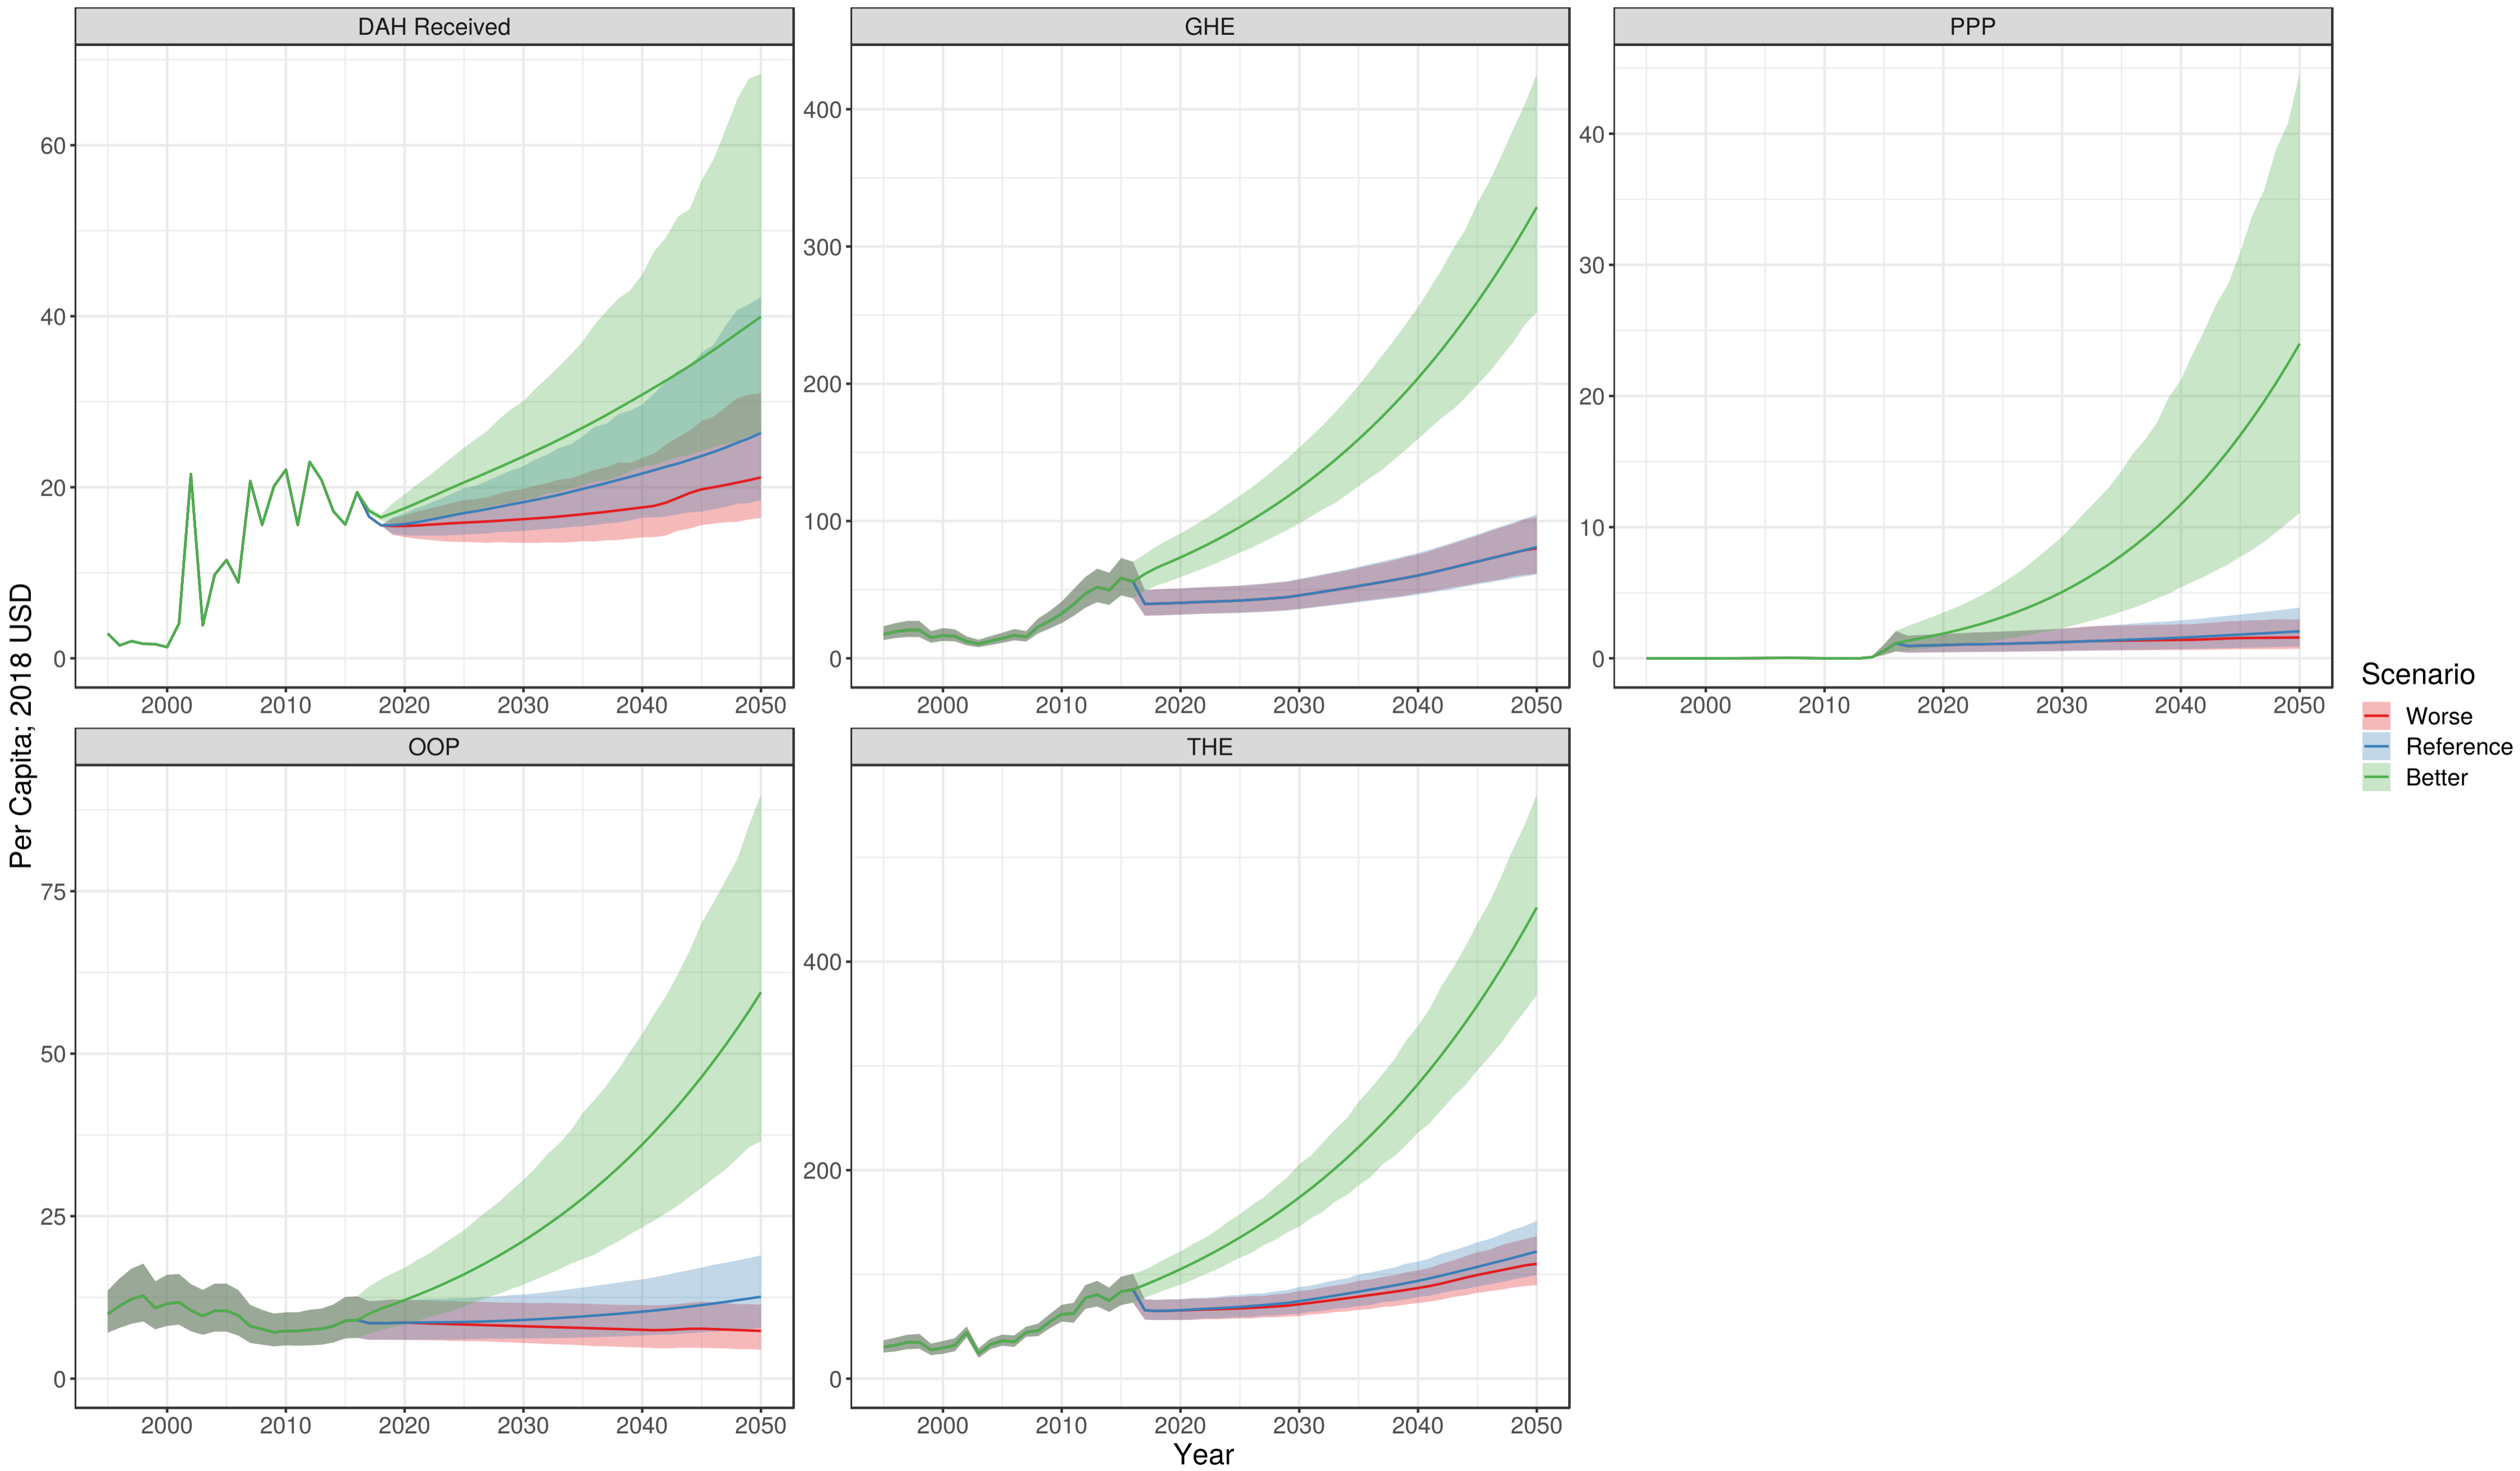

# Togo

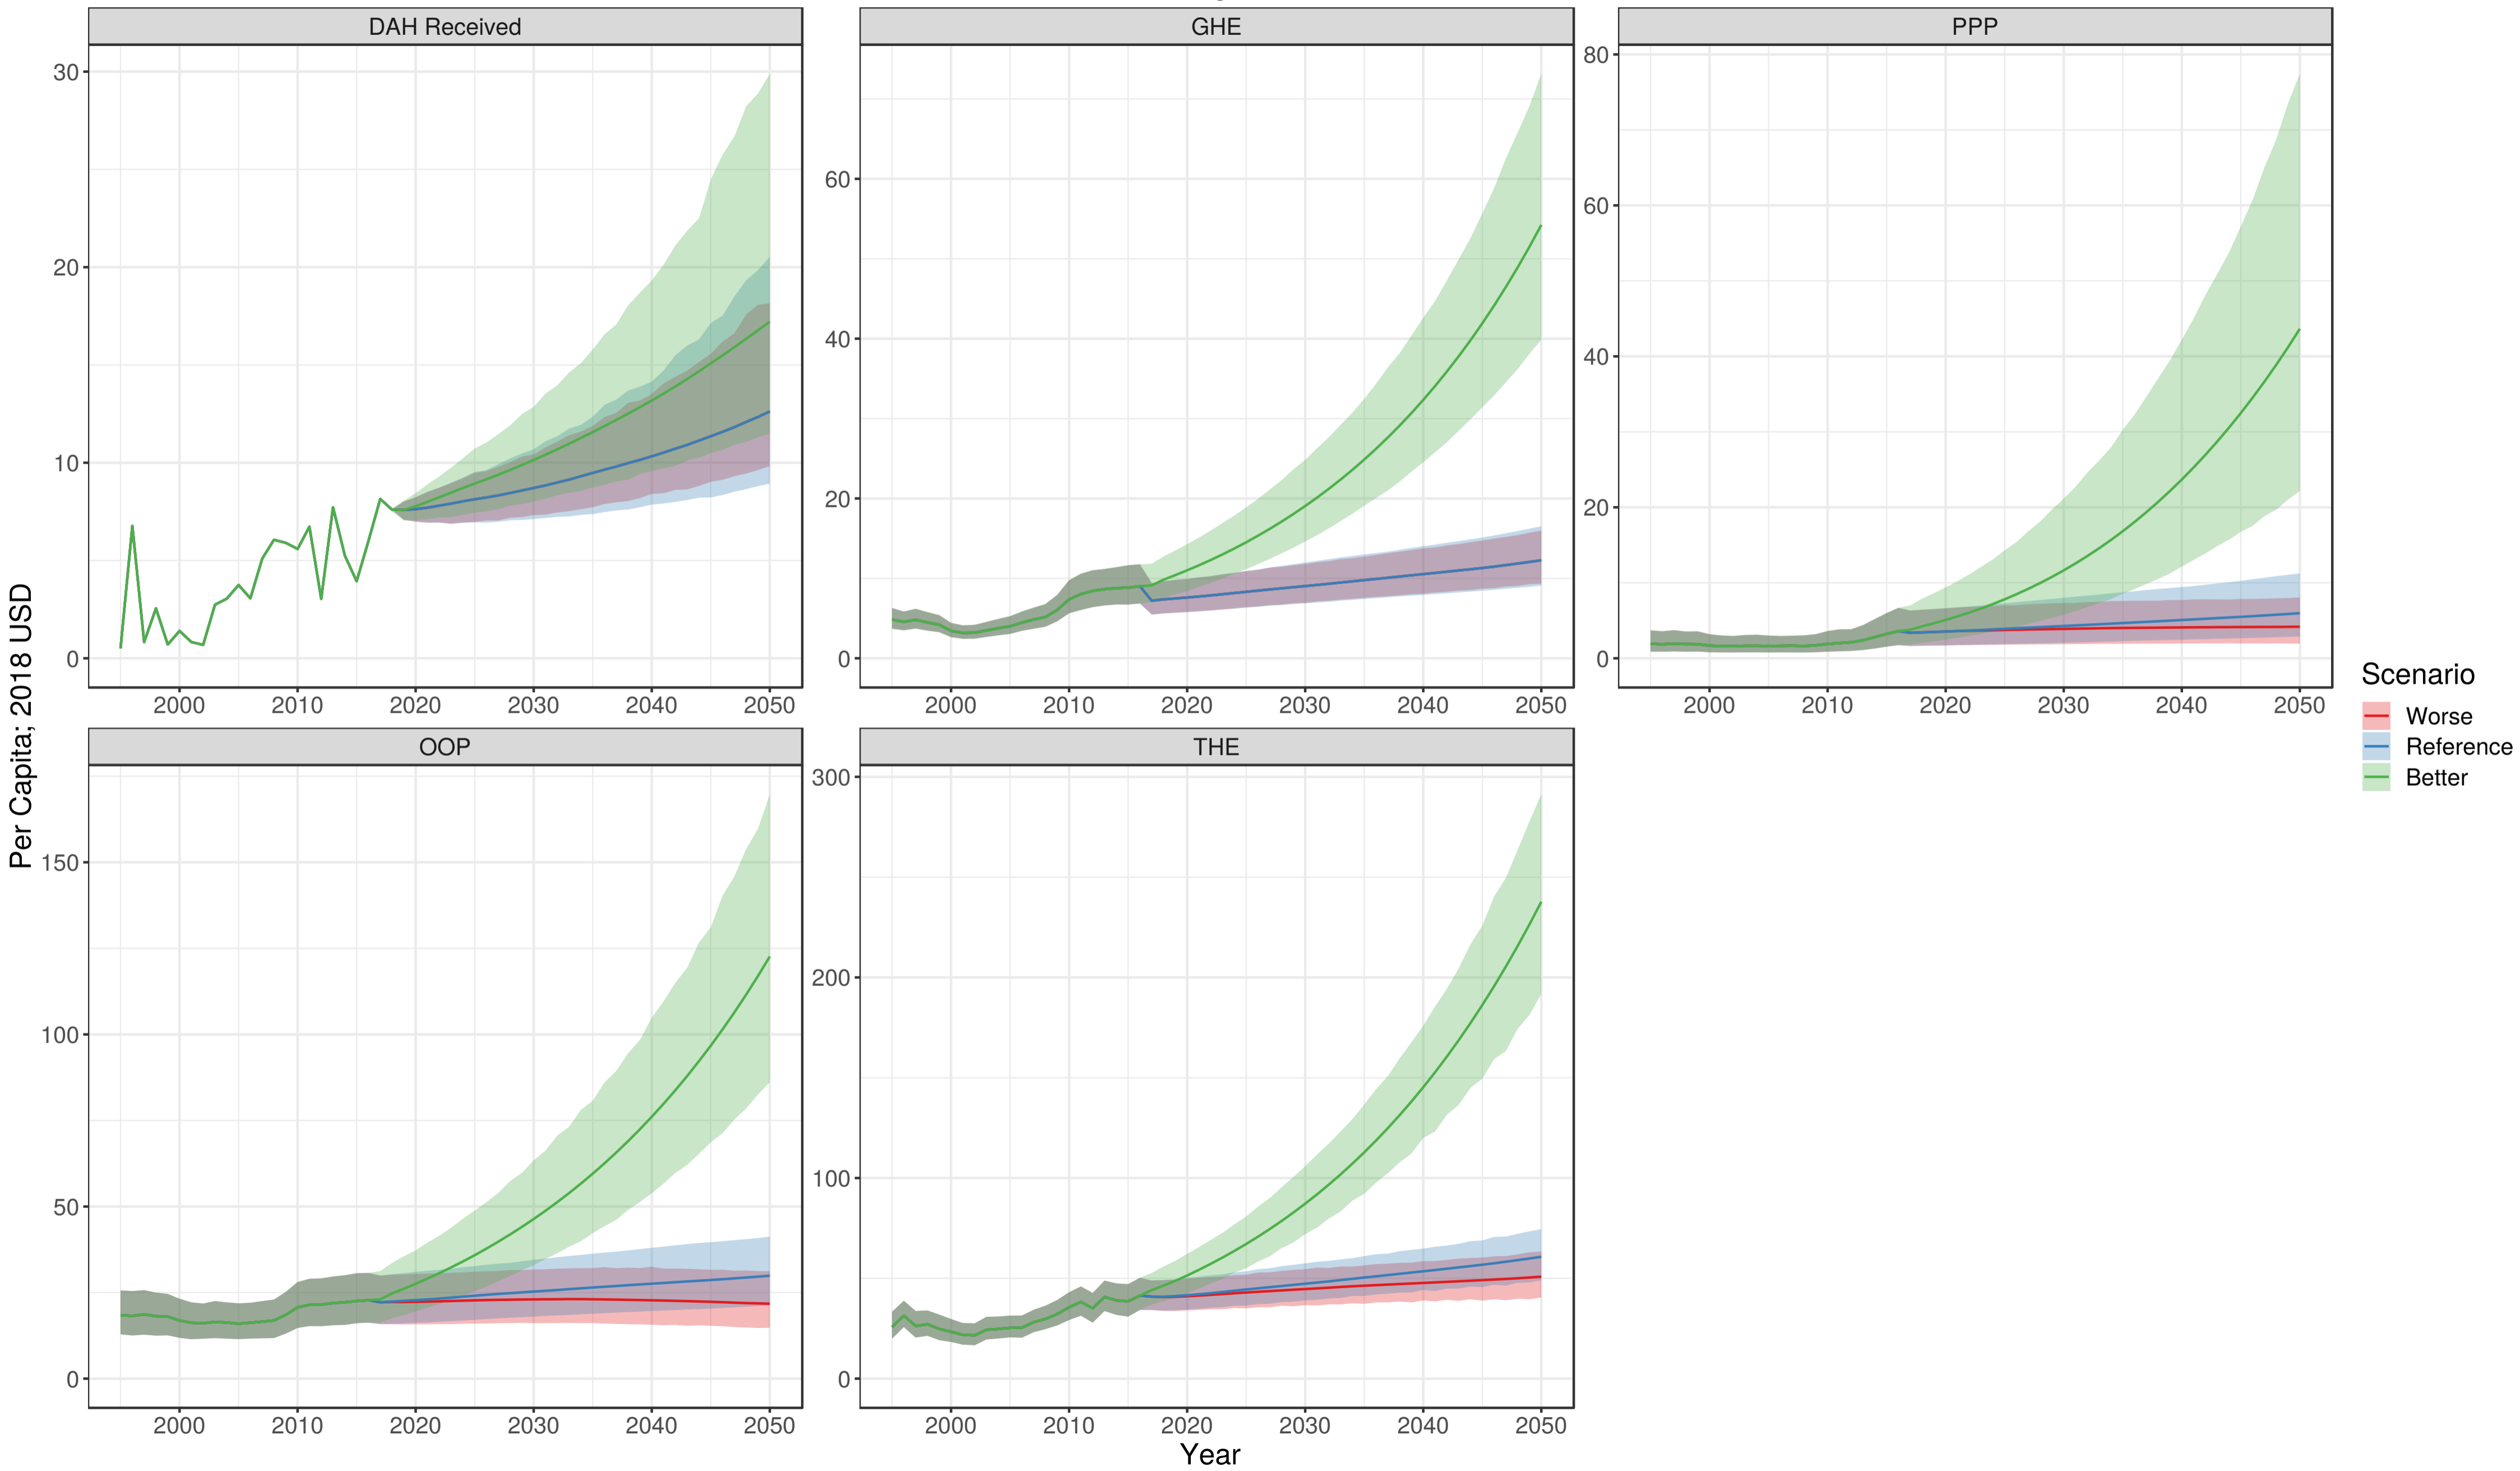

# Tonga

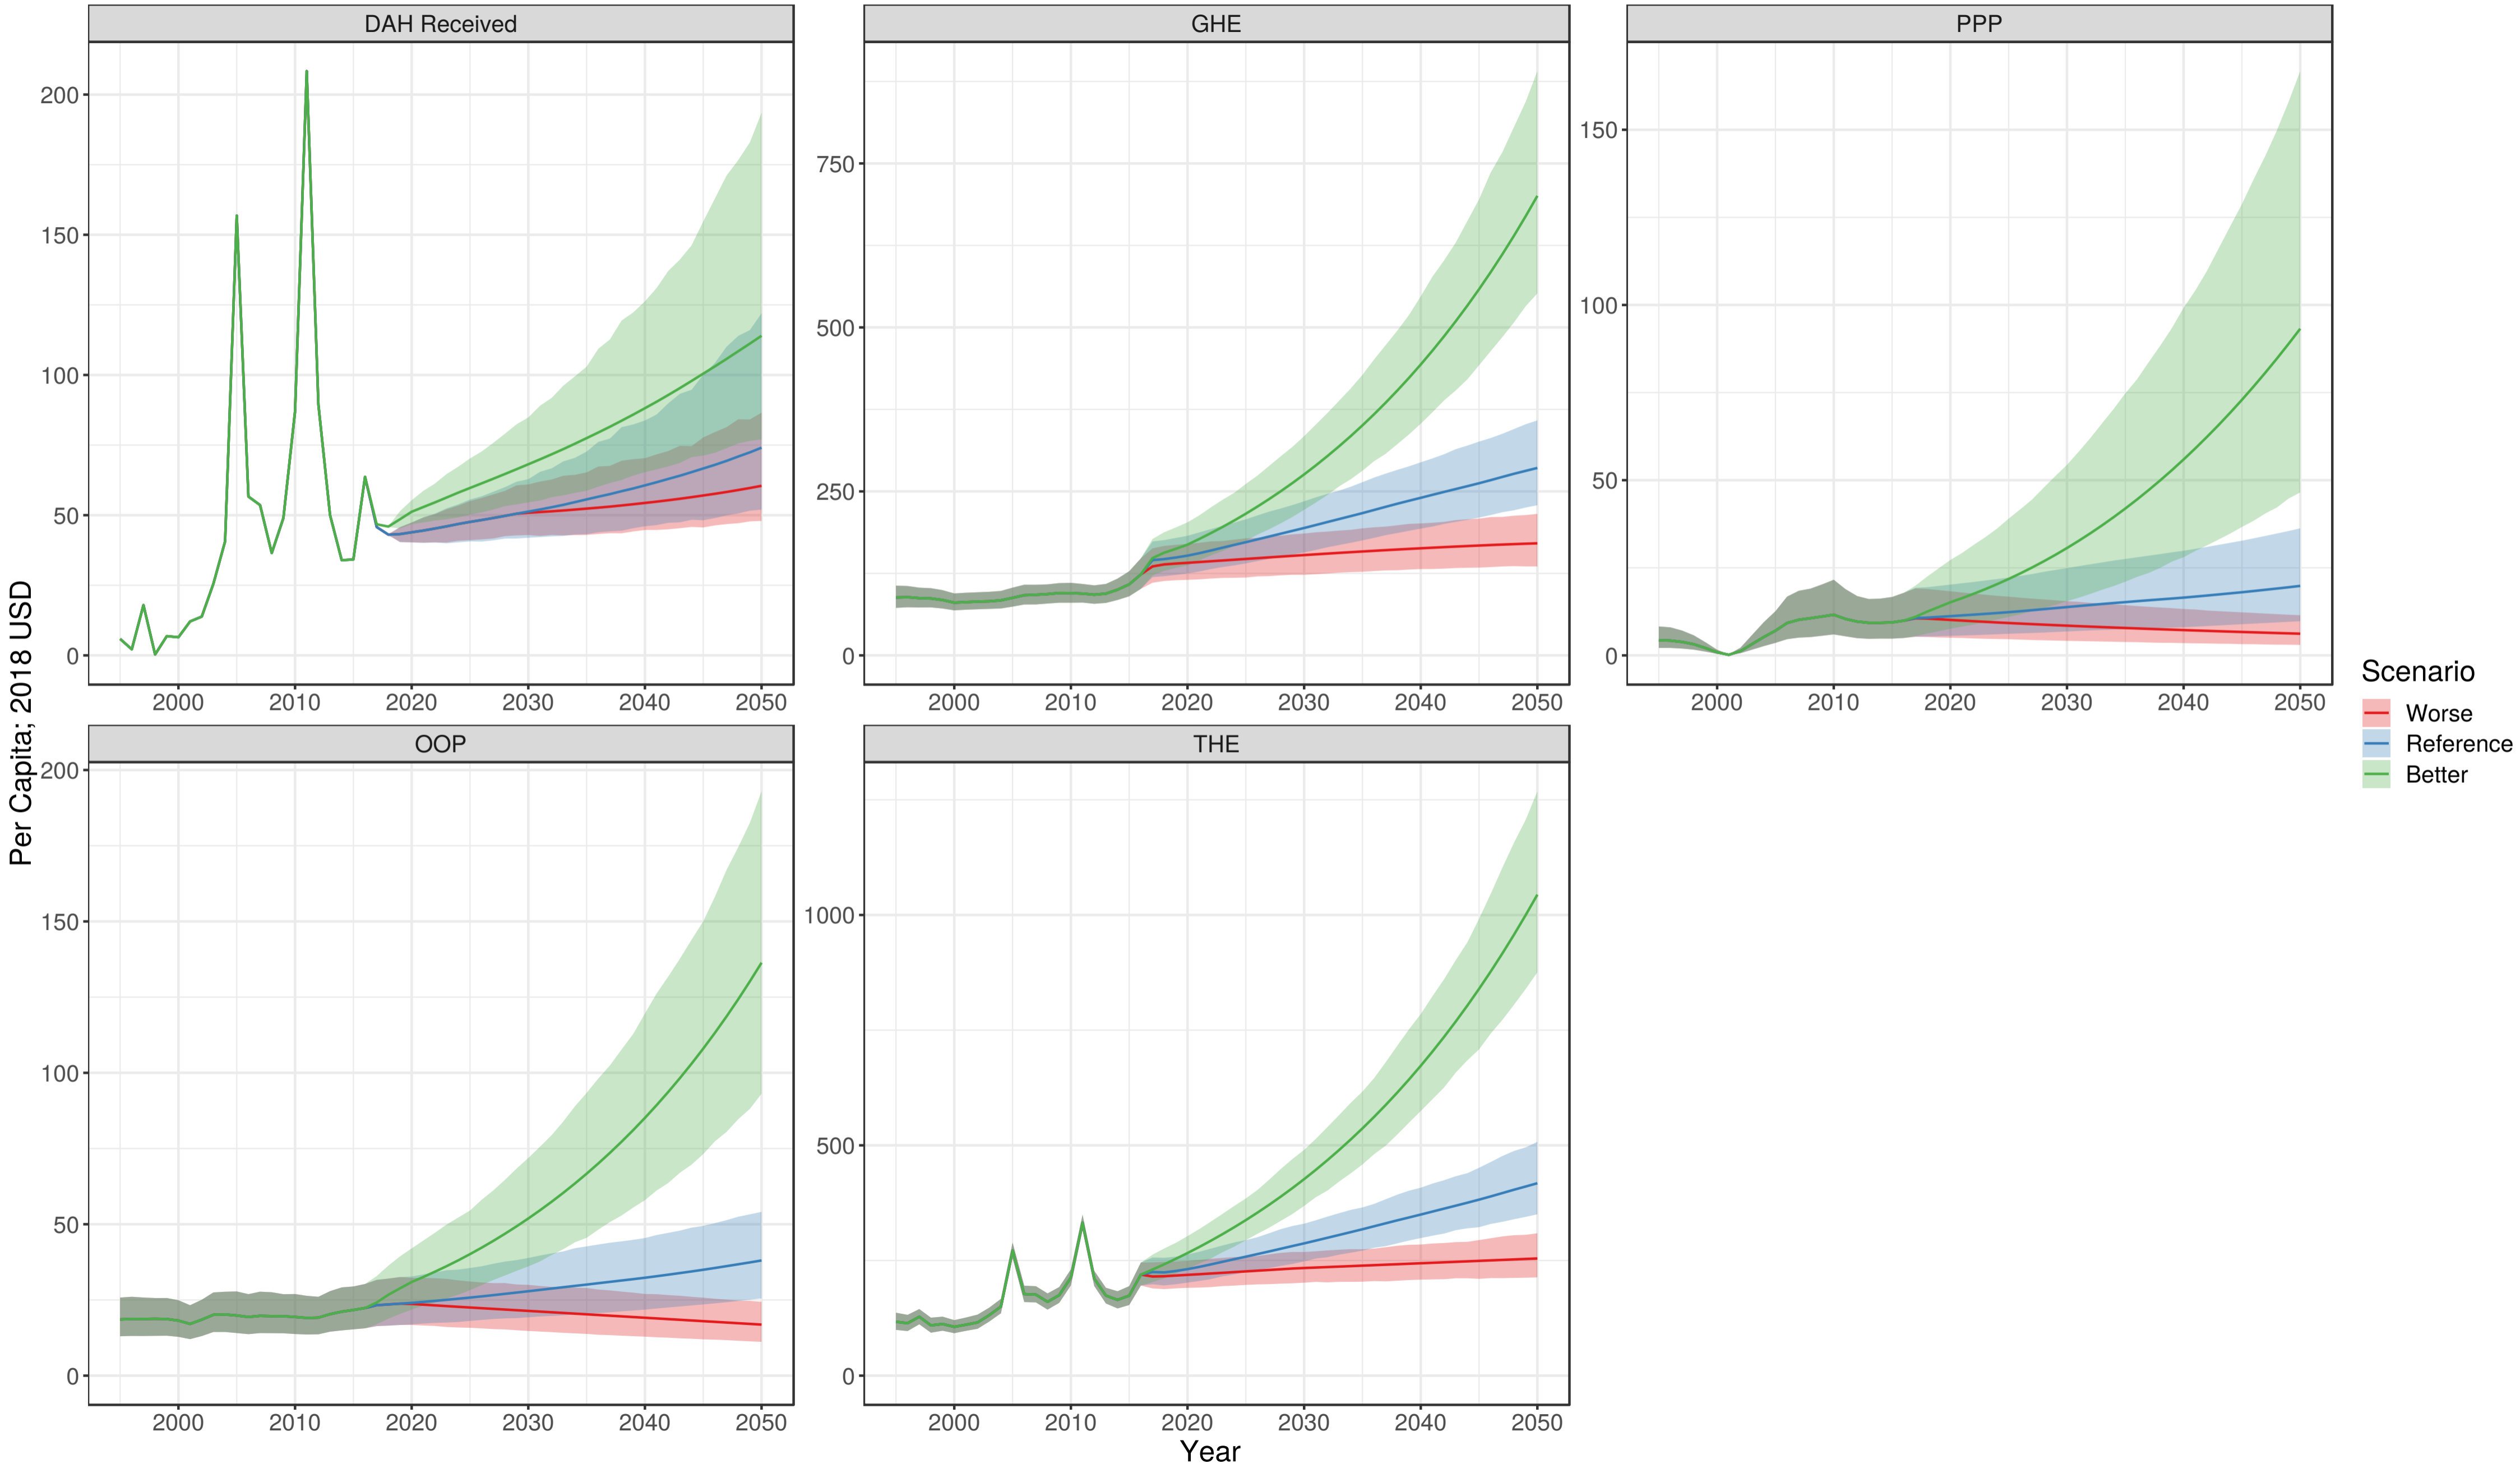

# Trinidad and Tobago

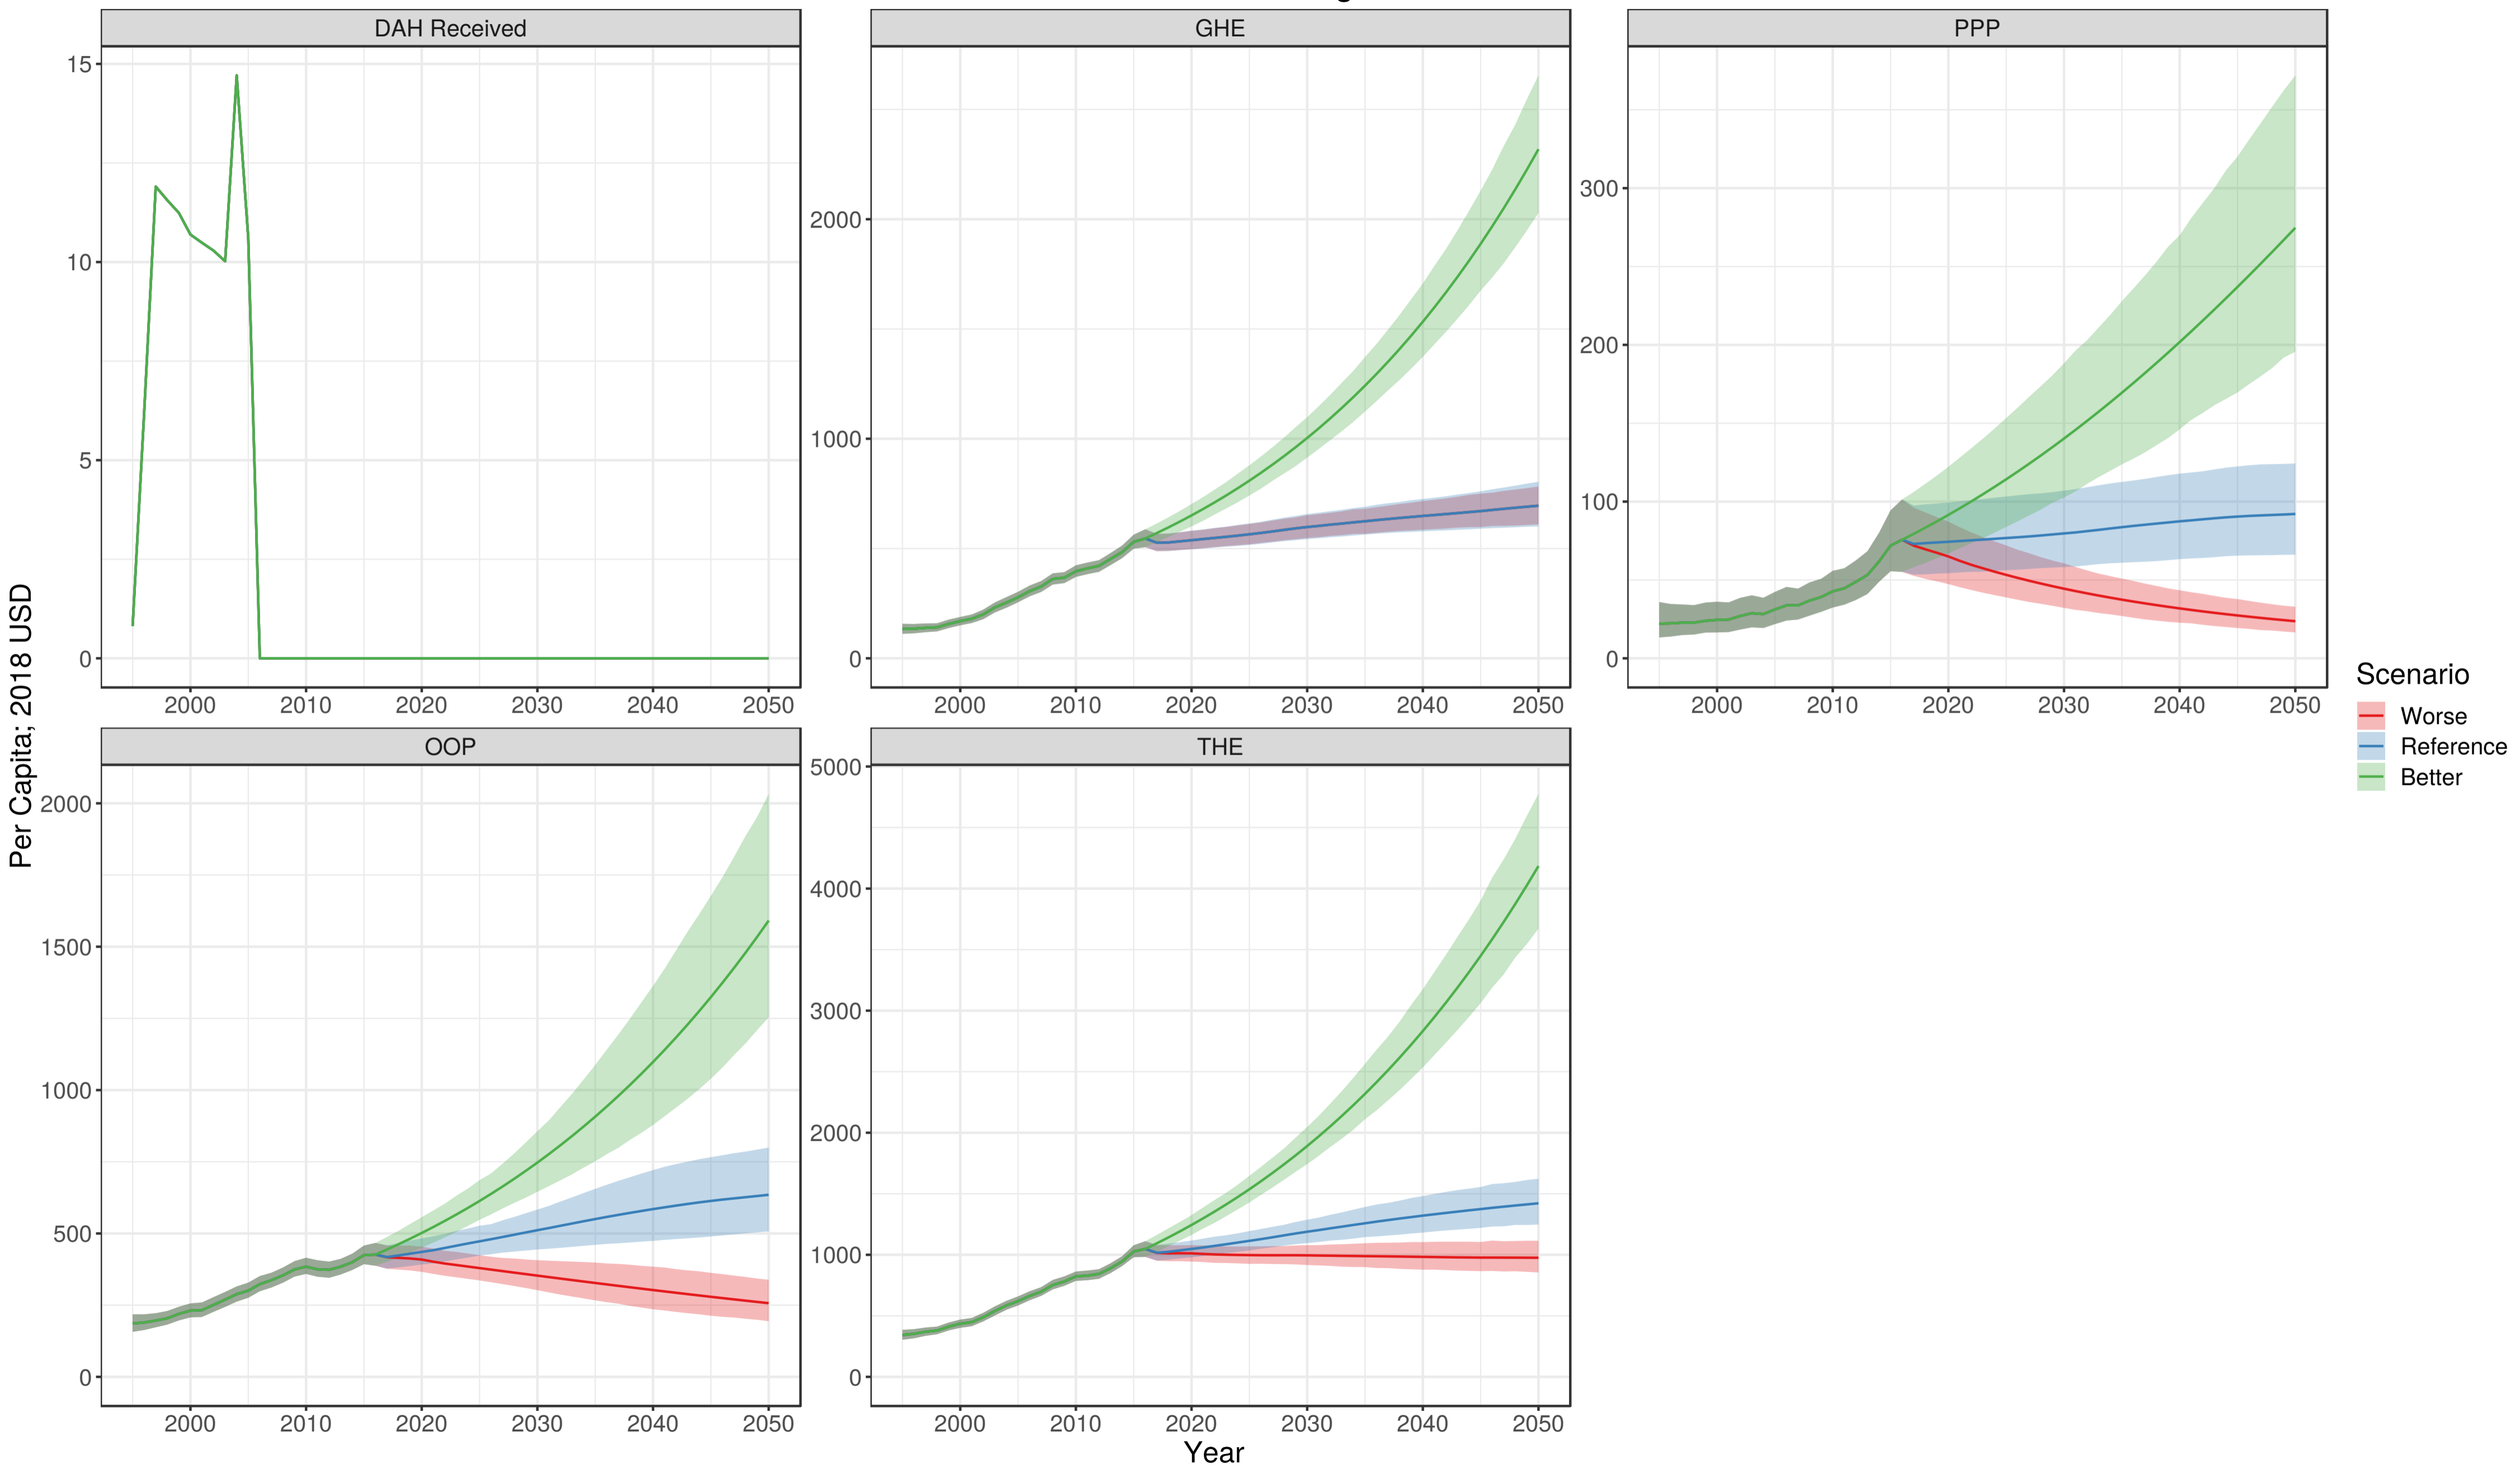

# Tunisia

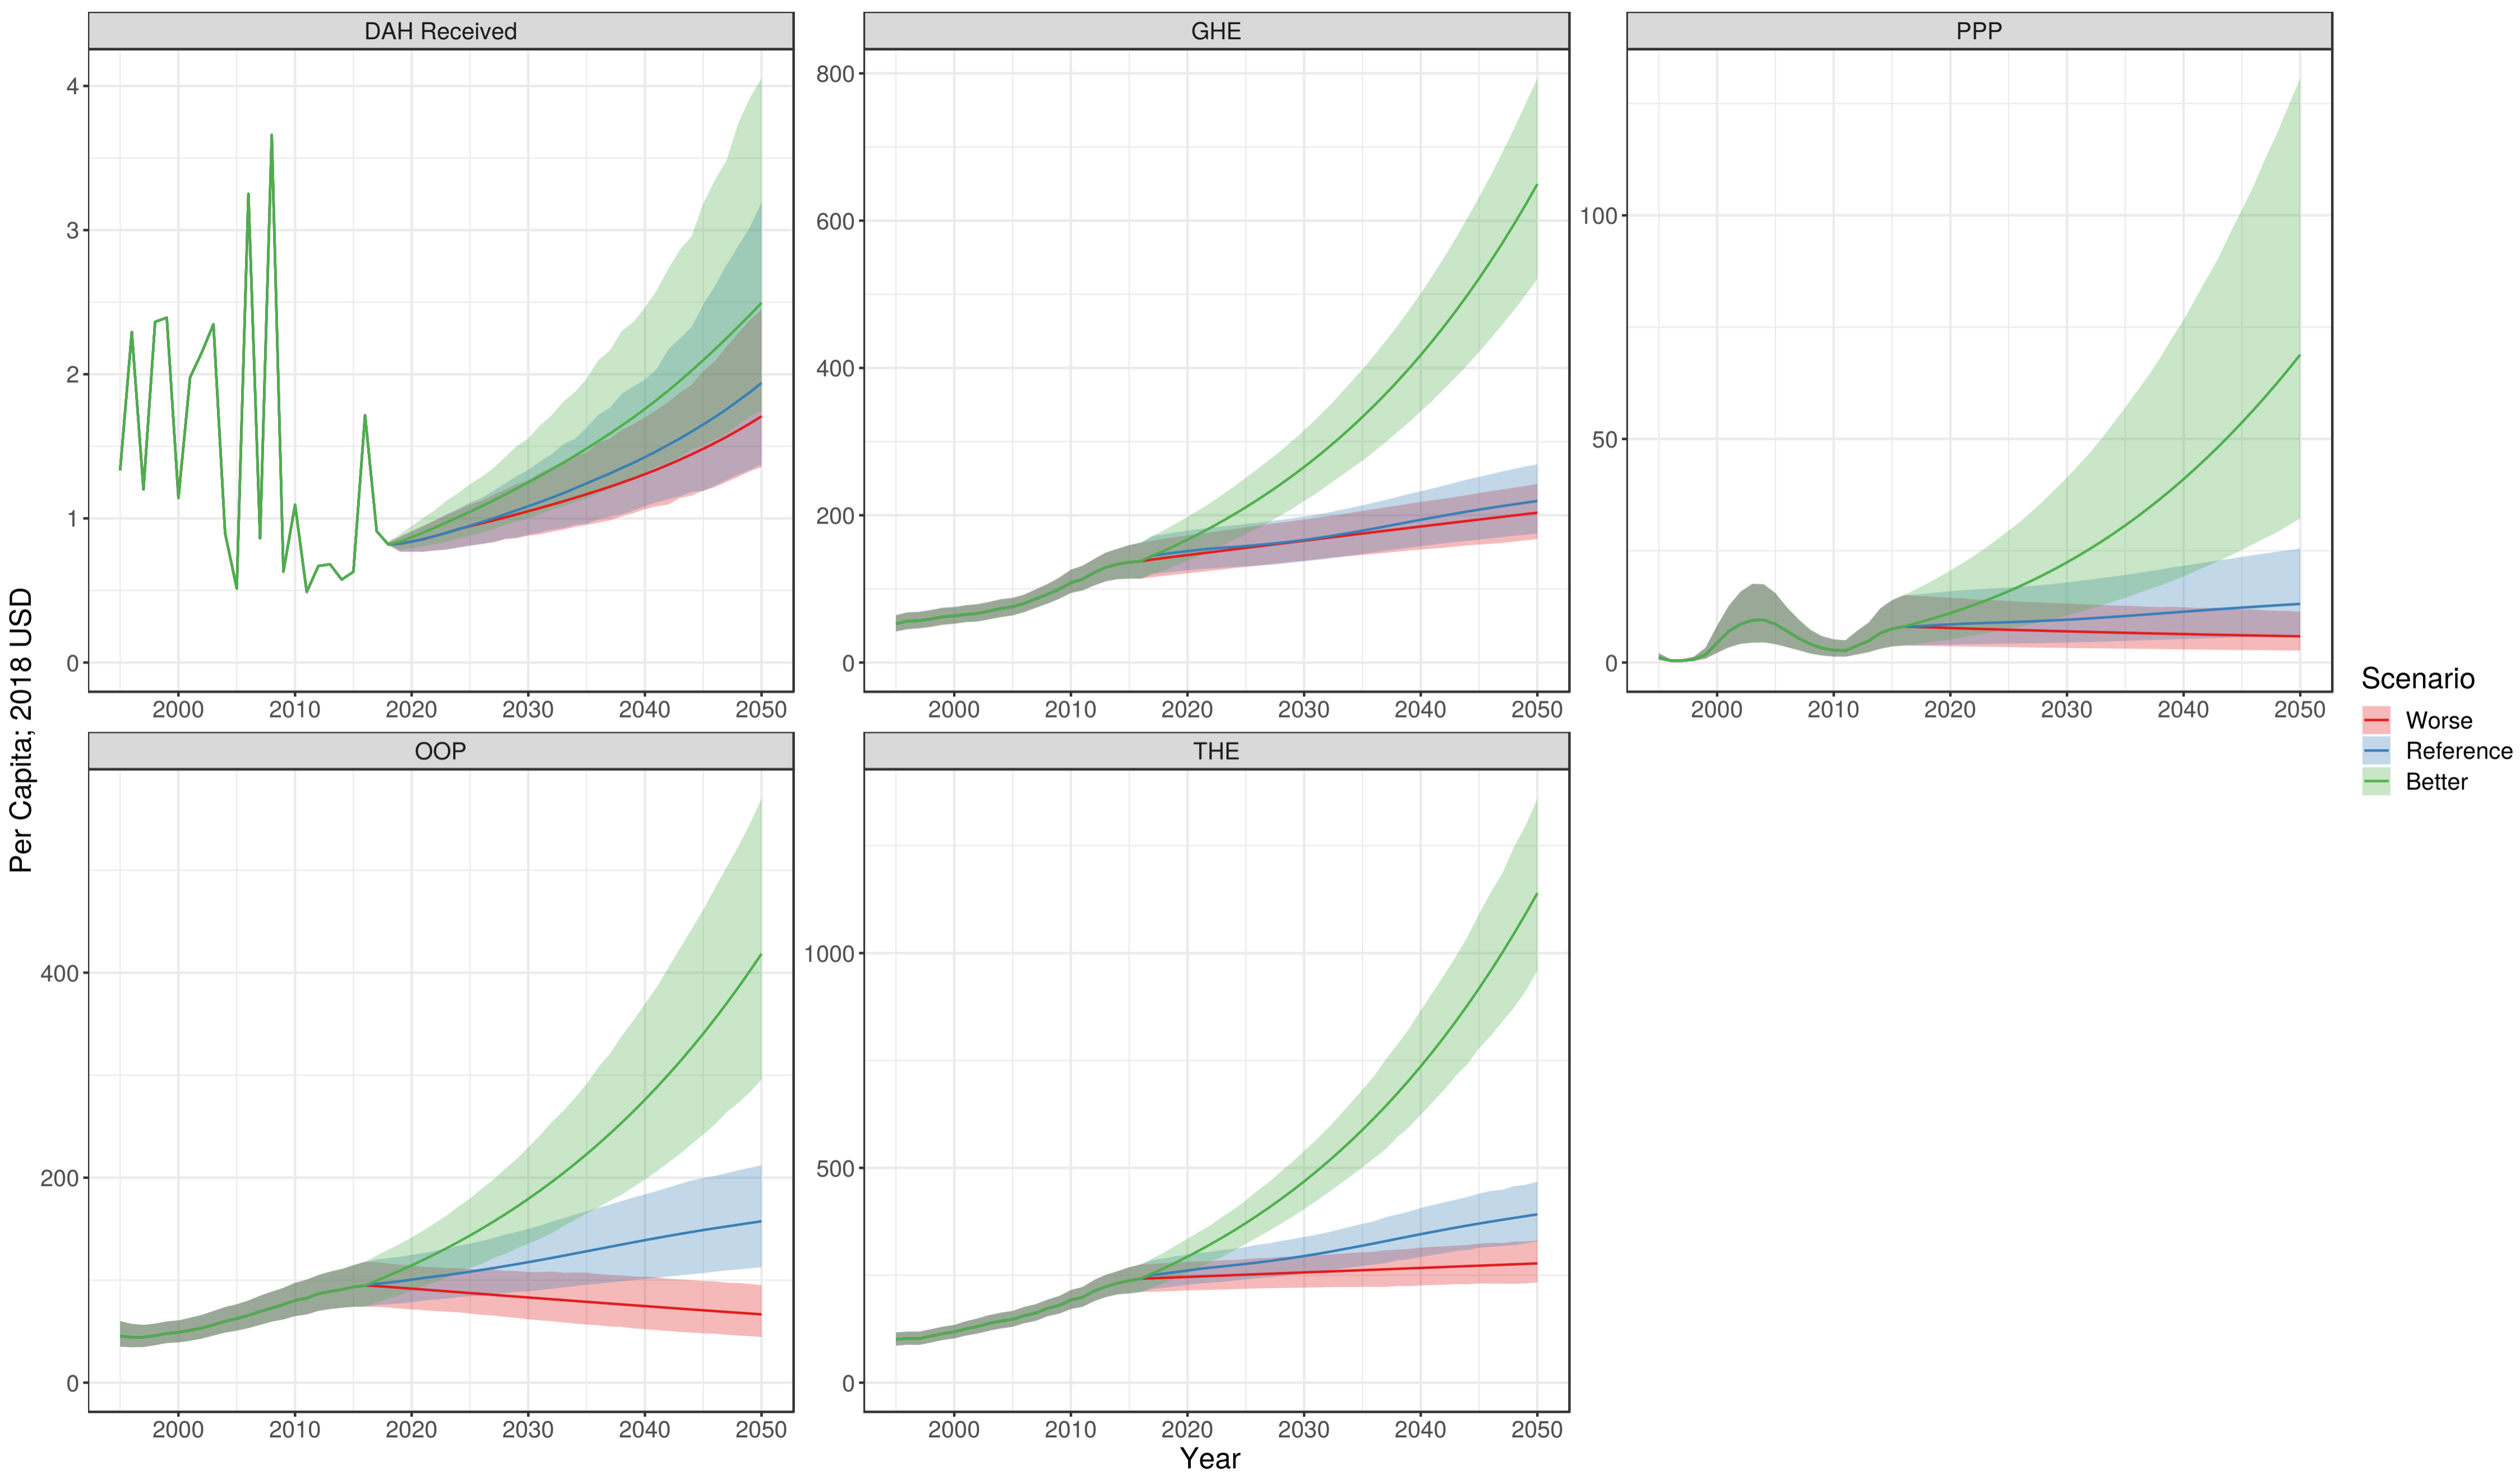

# Turkey

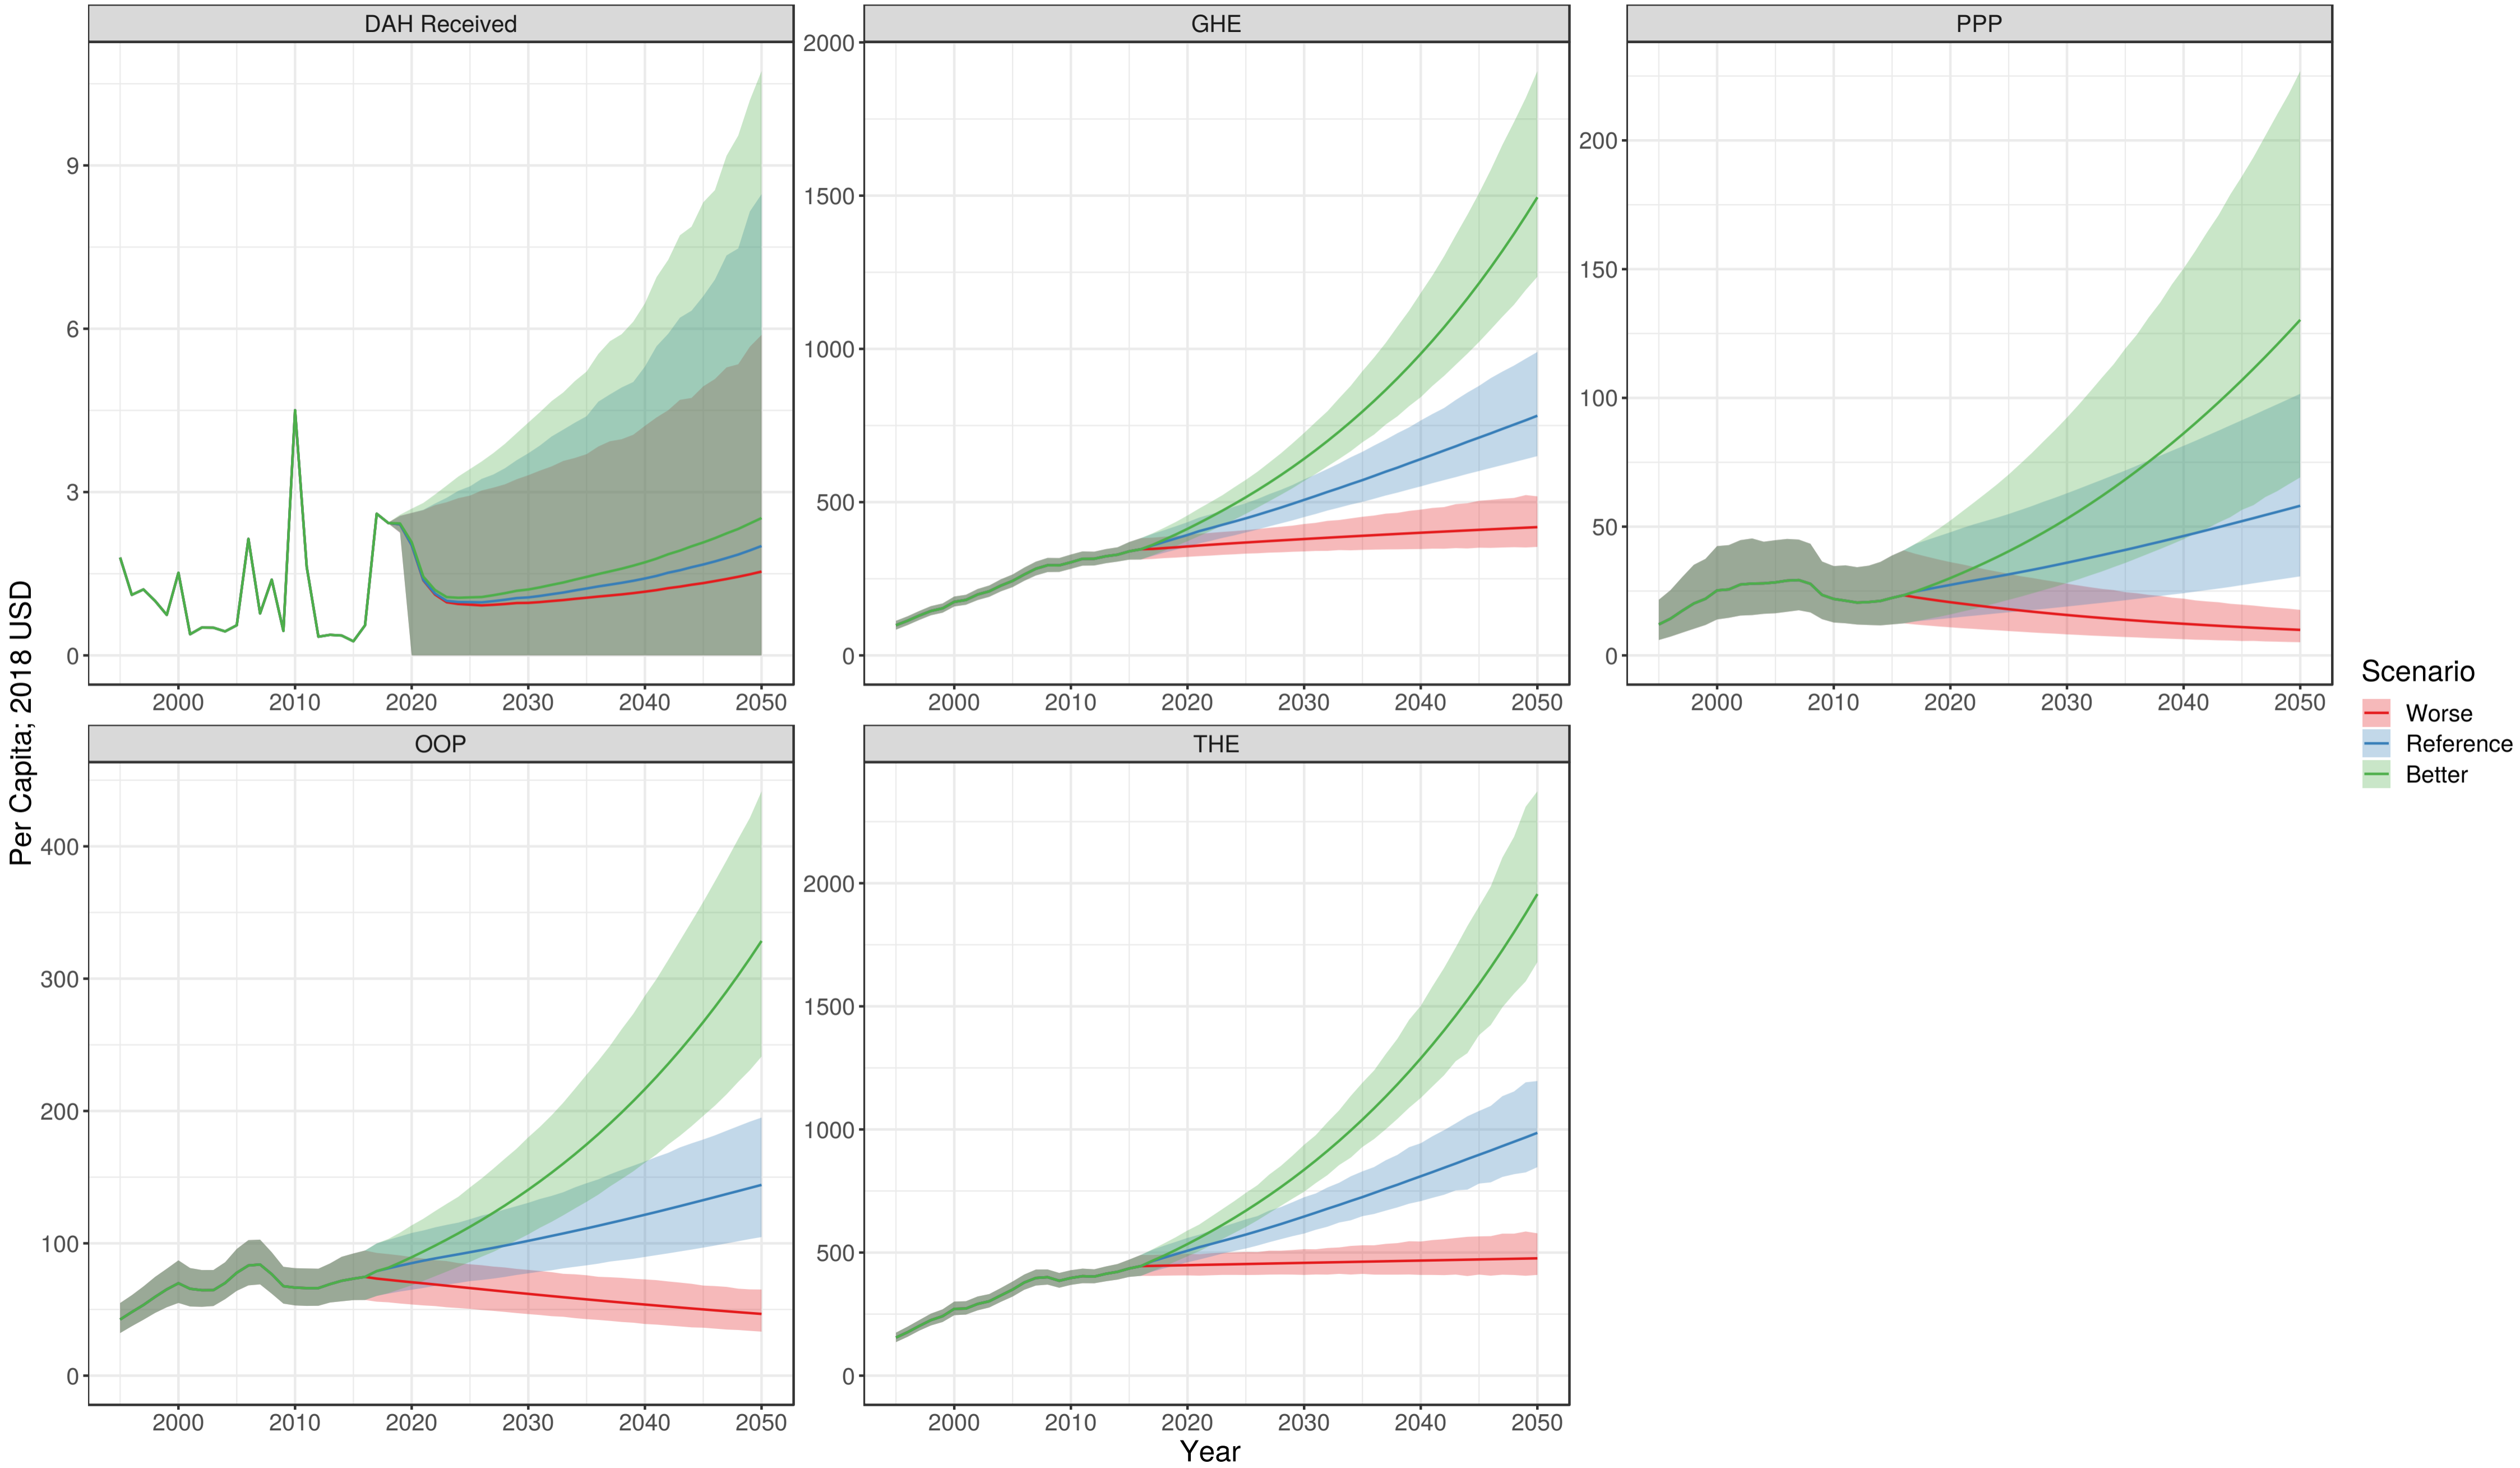



# Turkmenistan

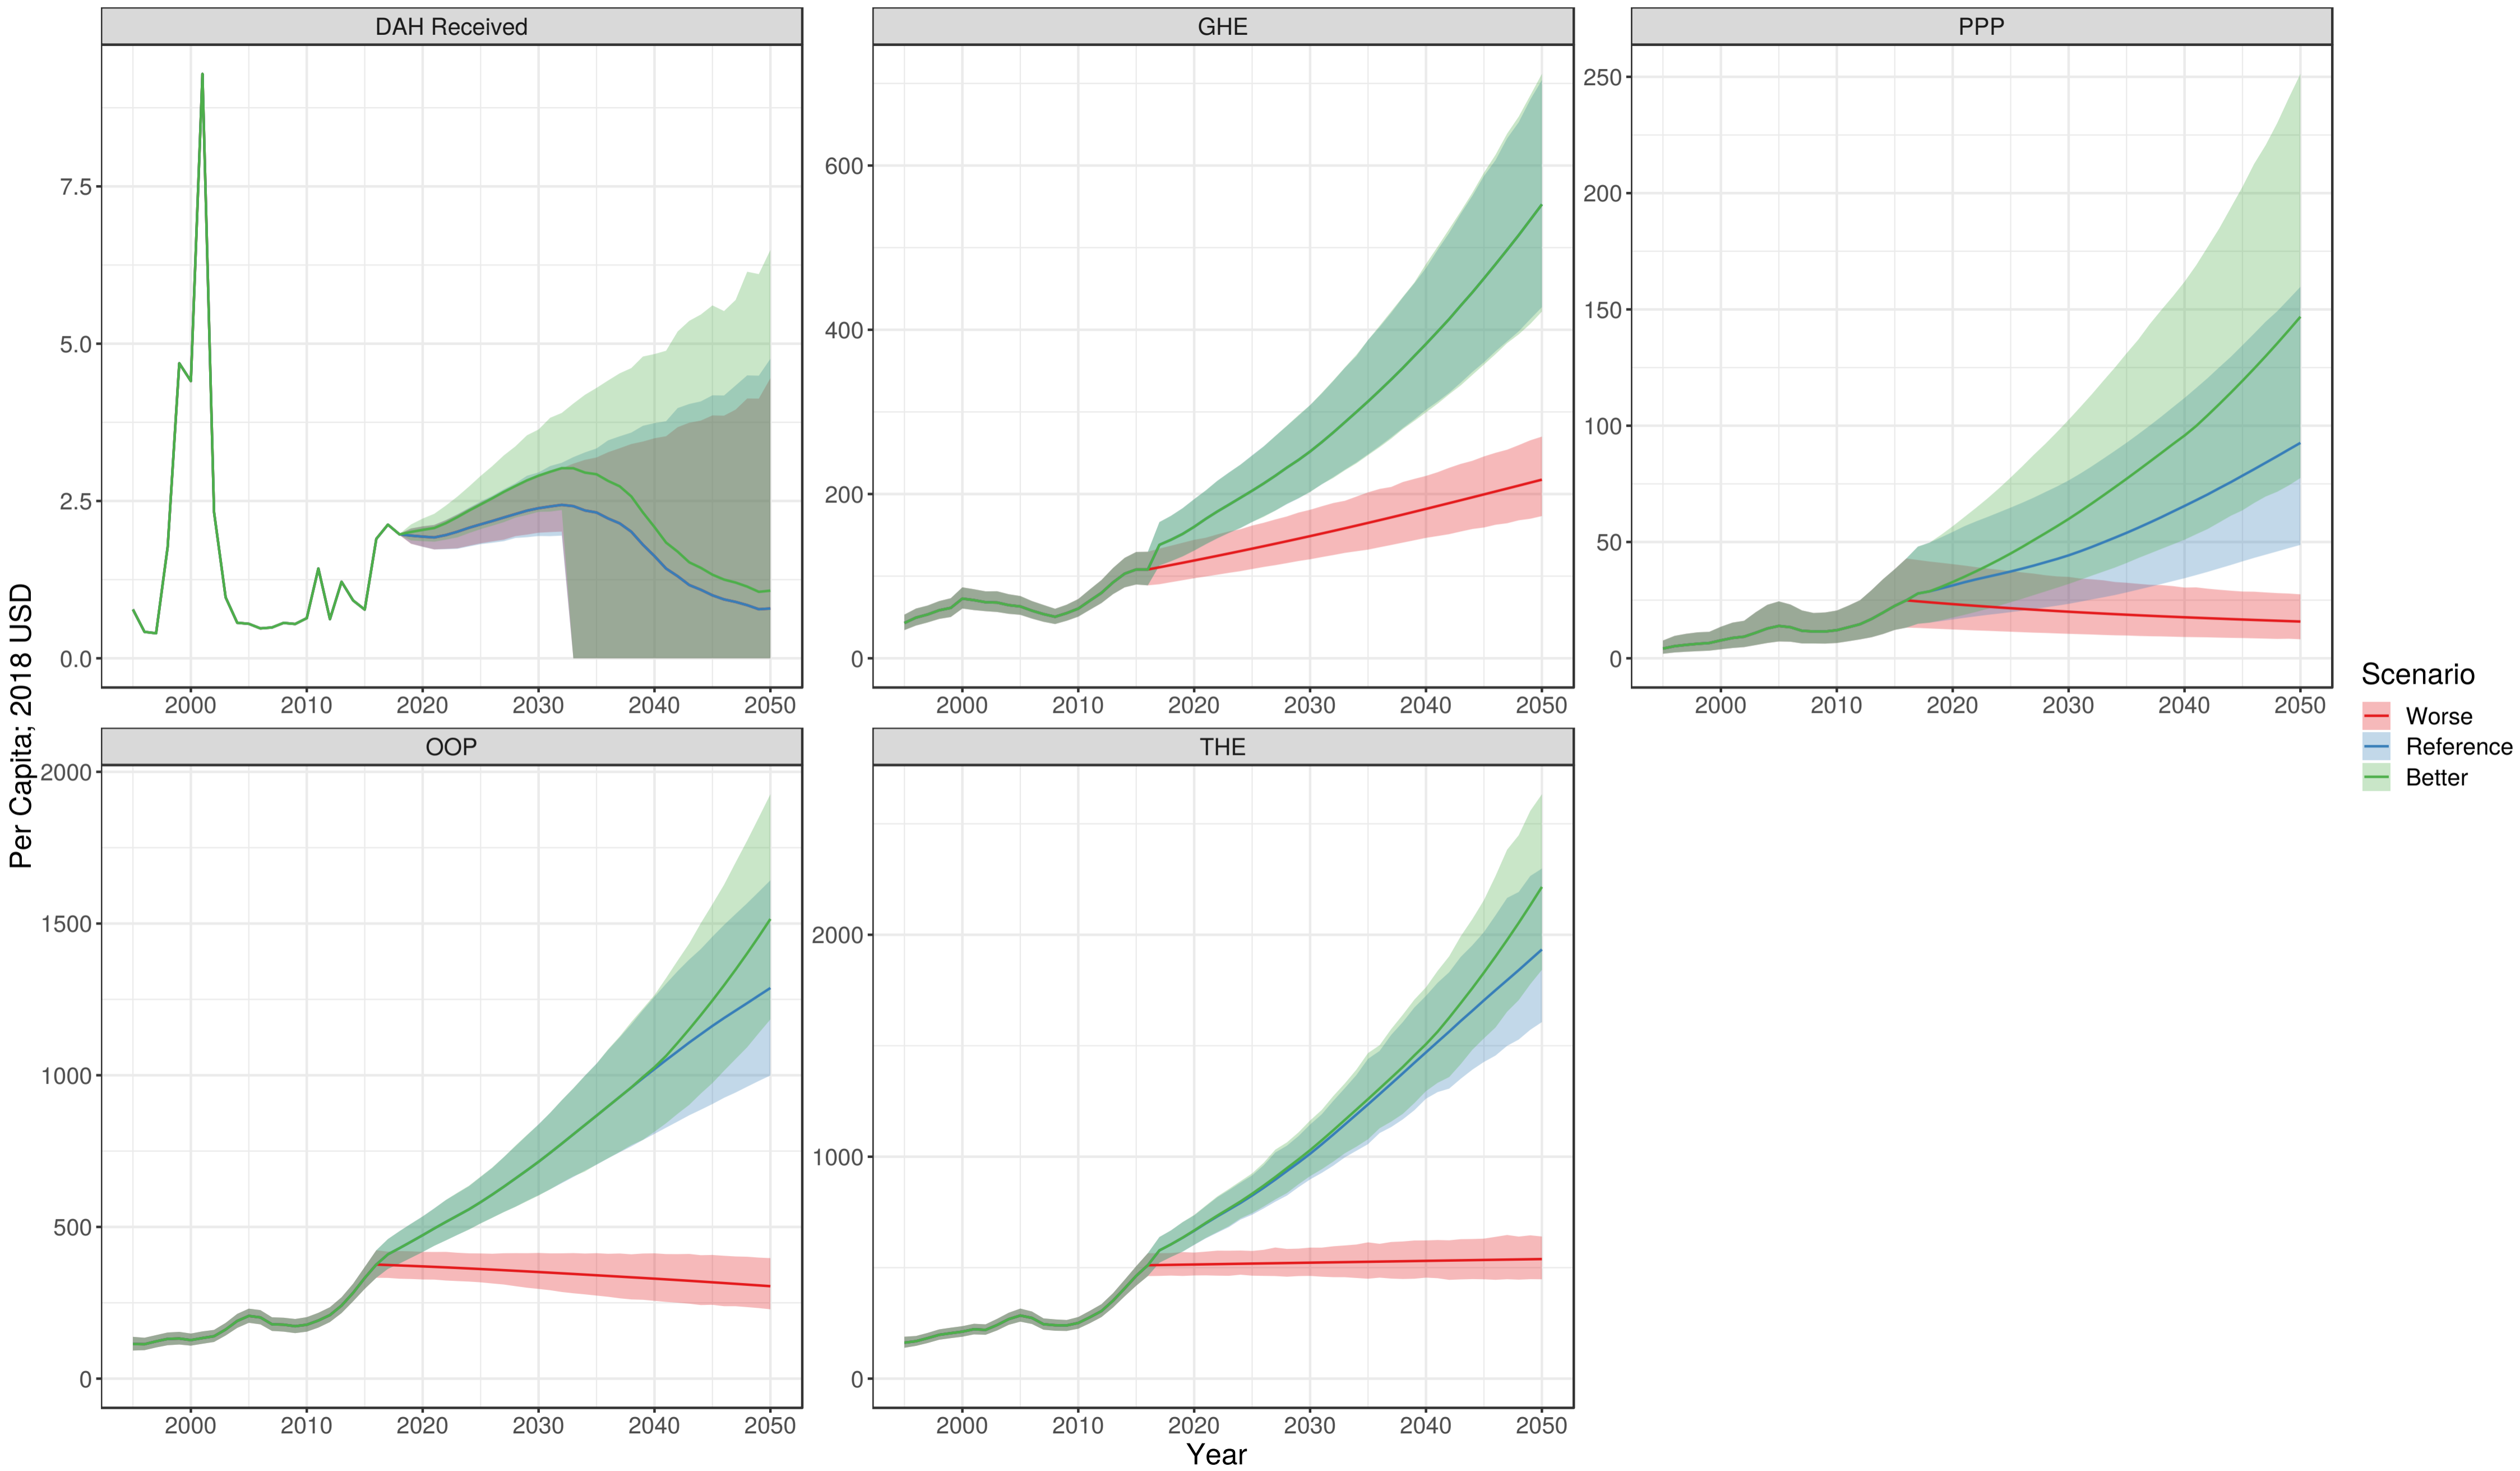

# Uganda

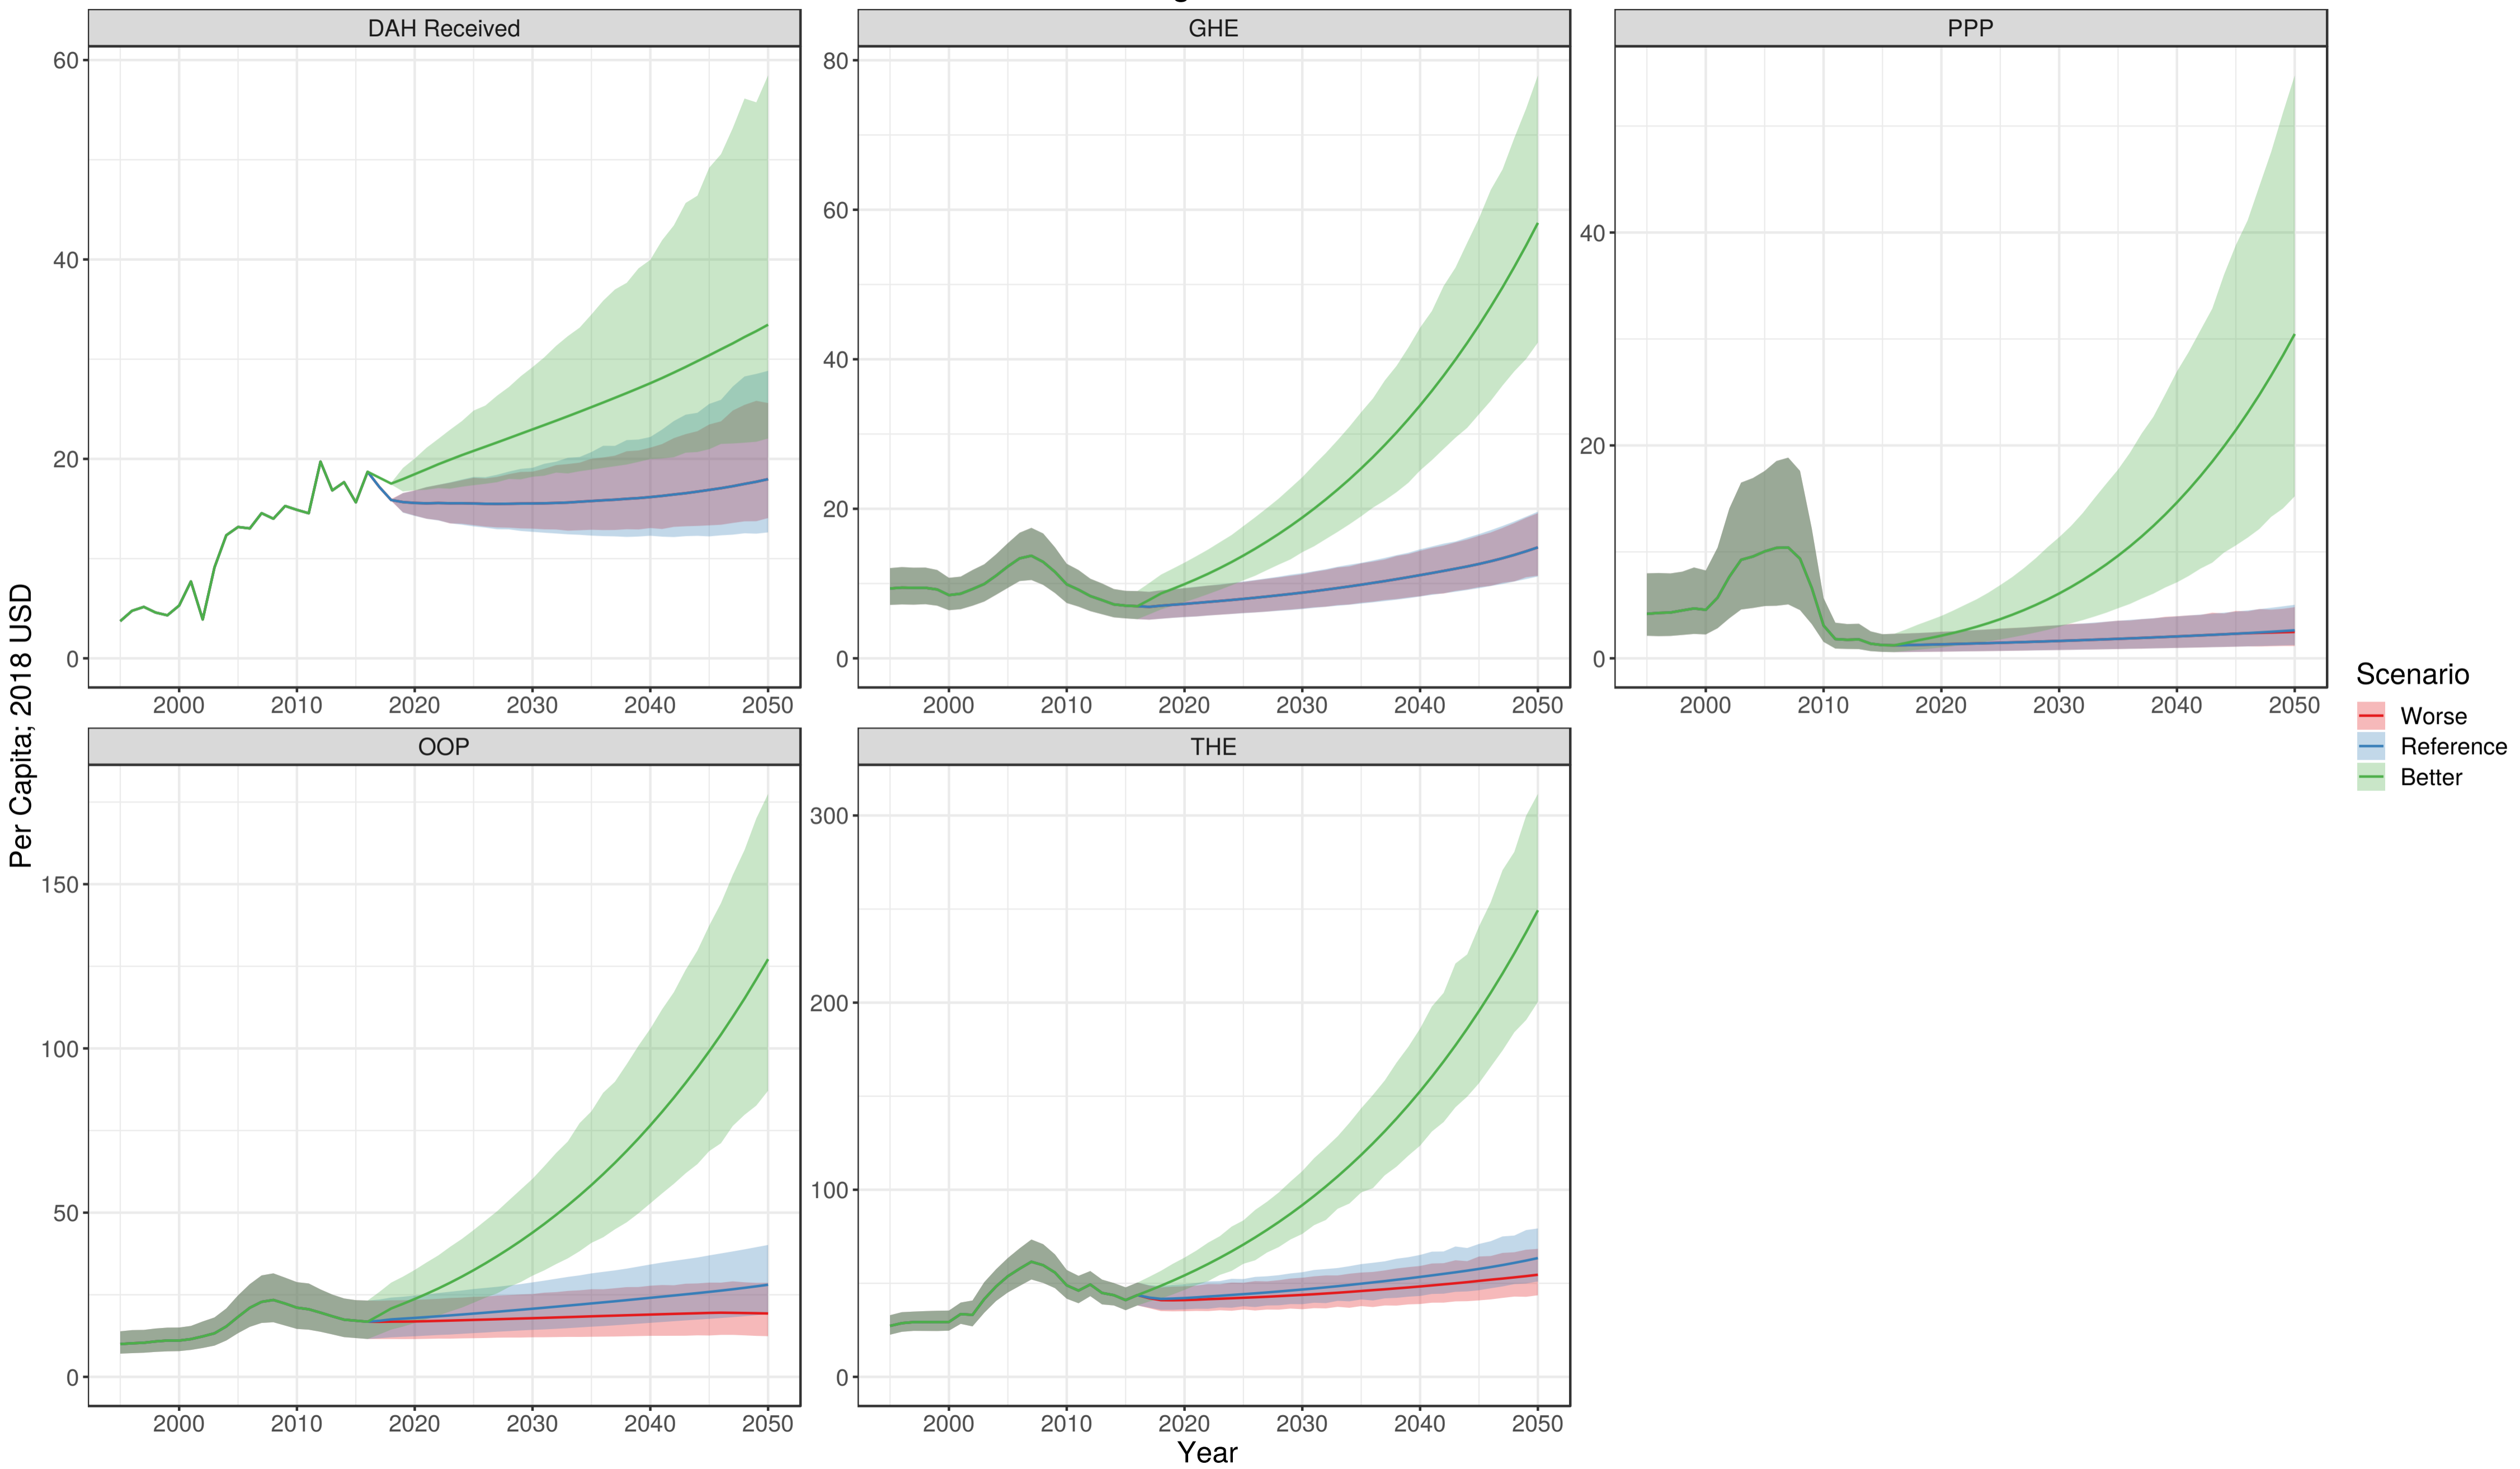

# Ukraine

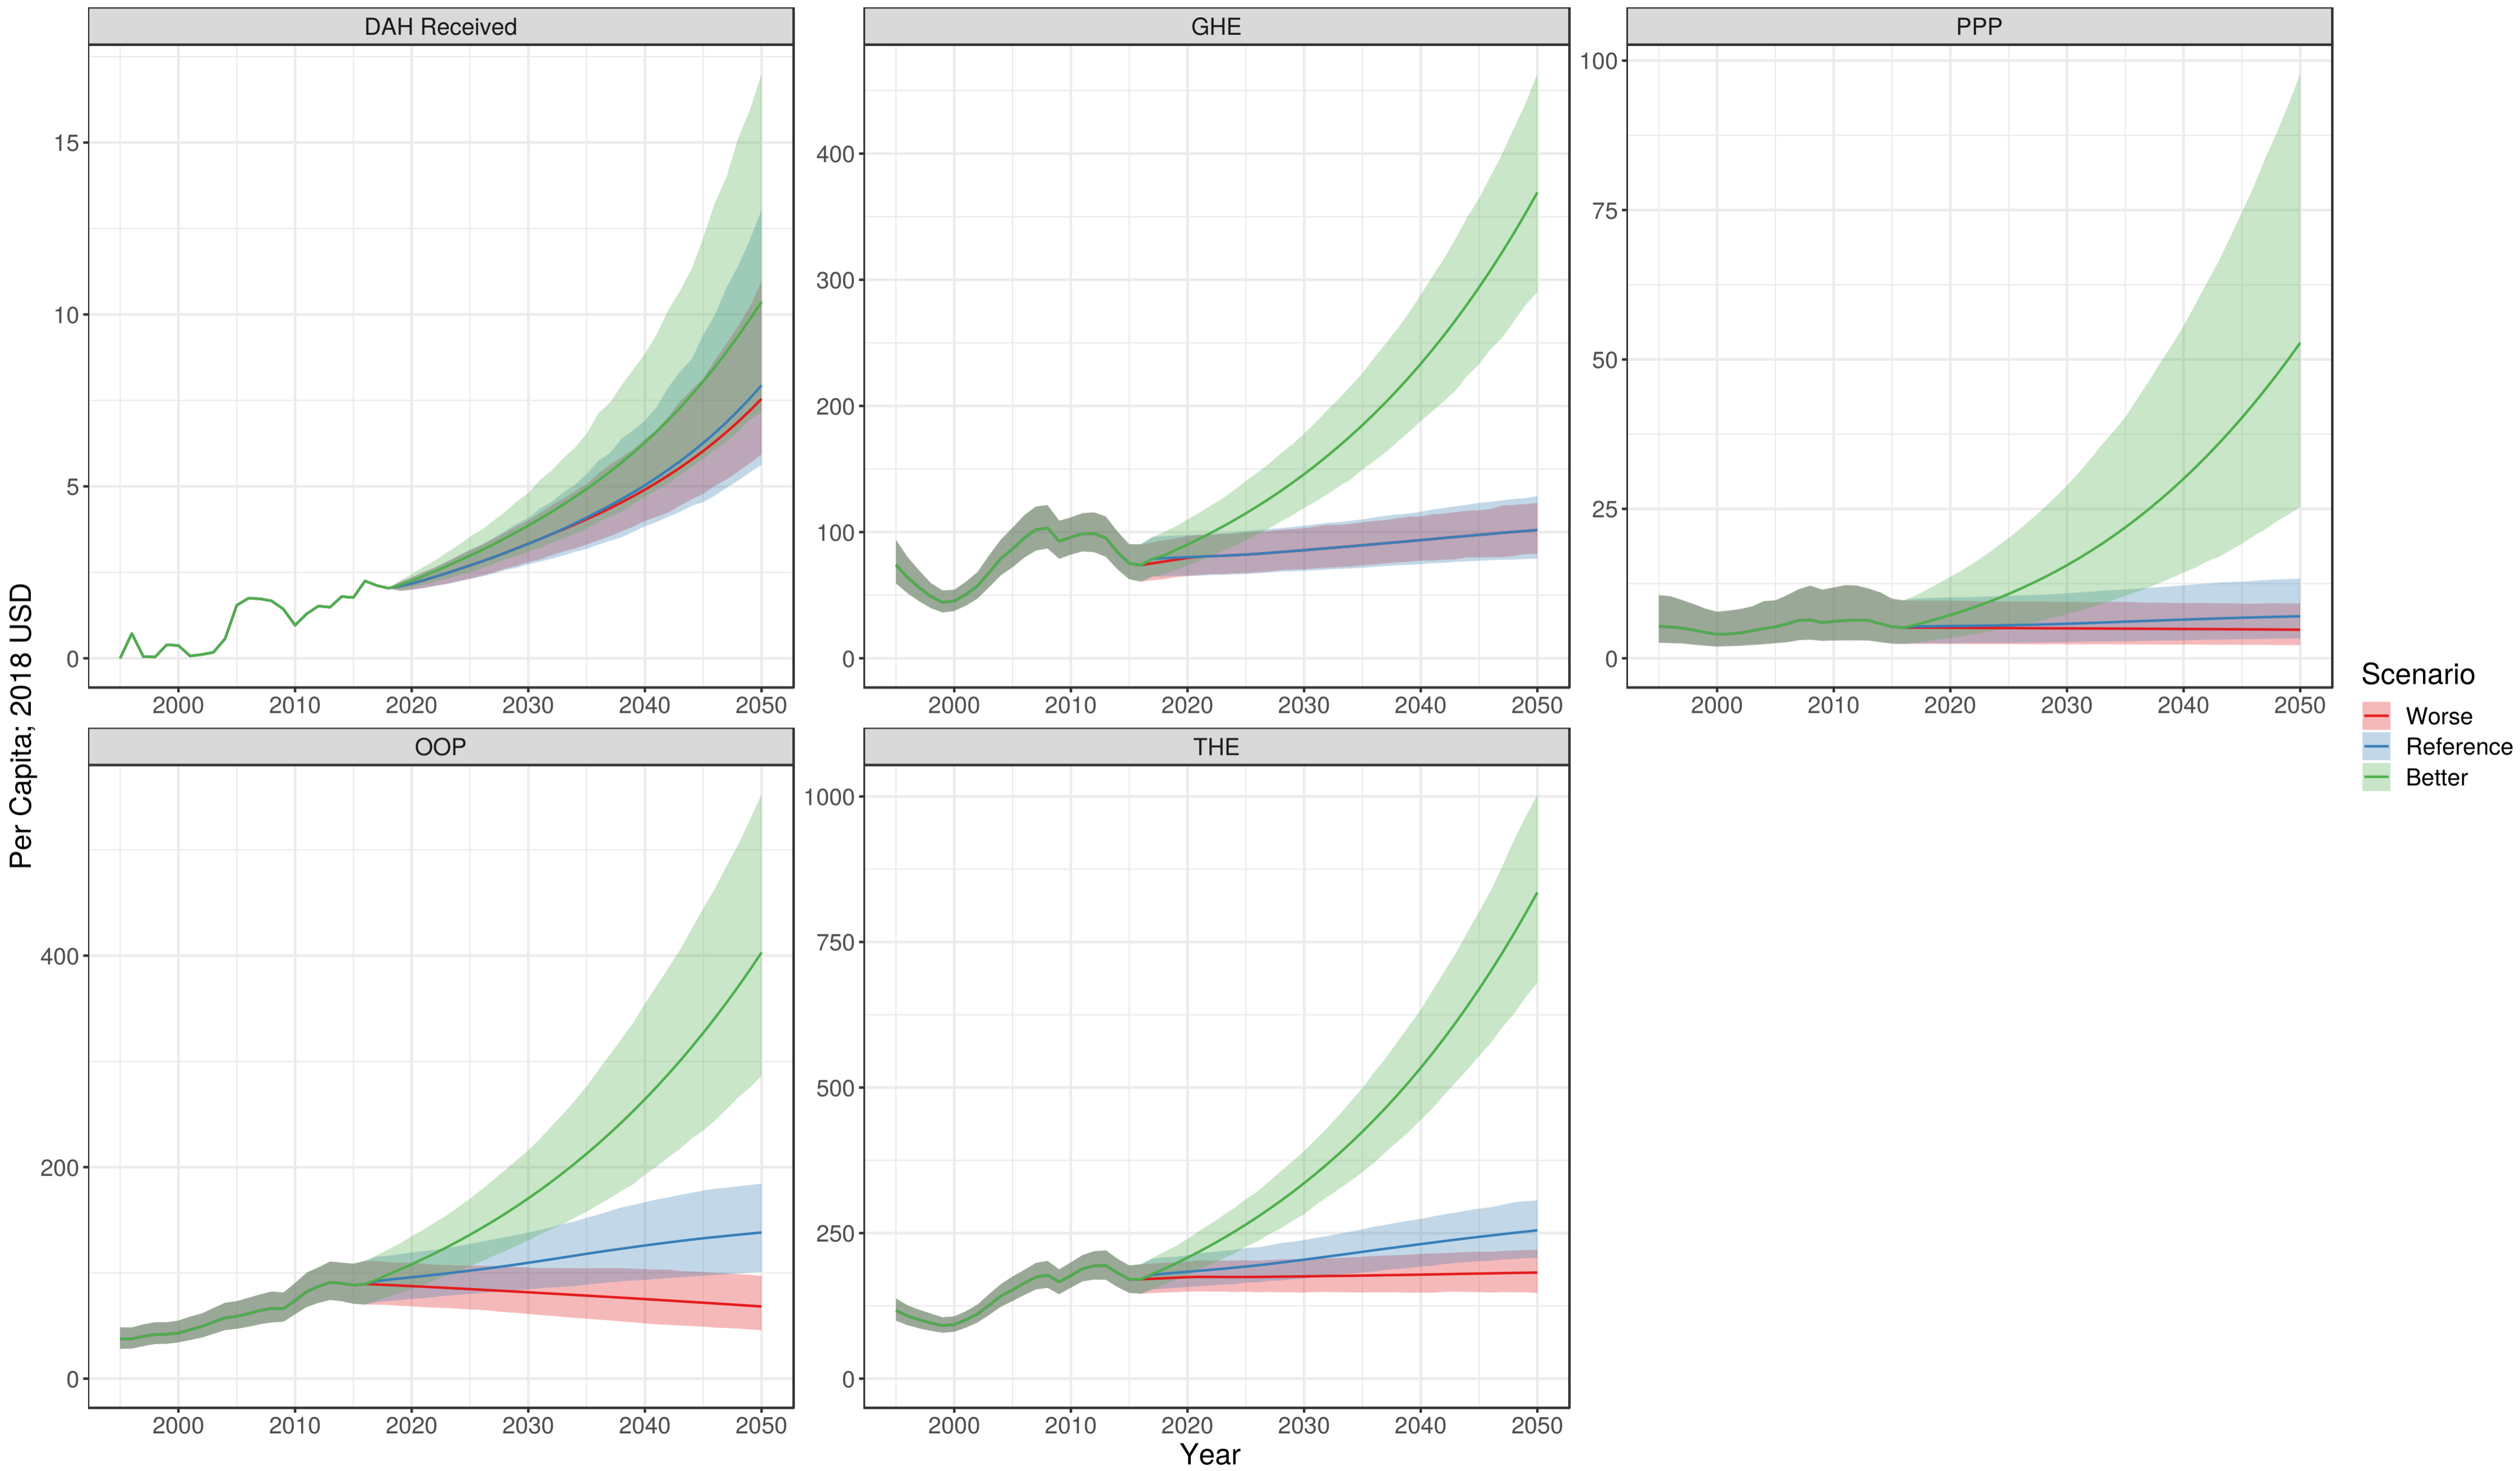

# United Arab Emirates

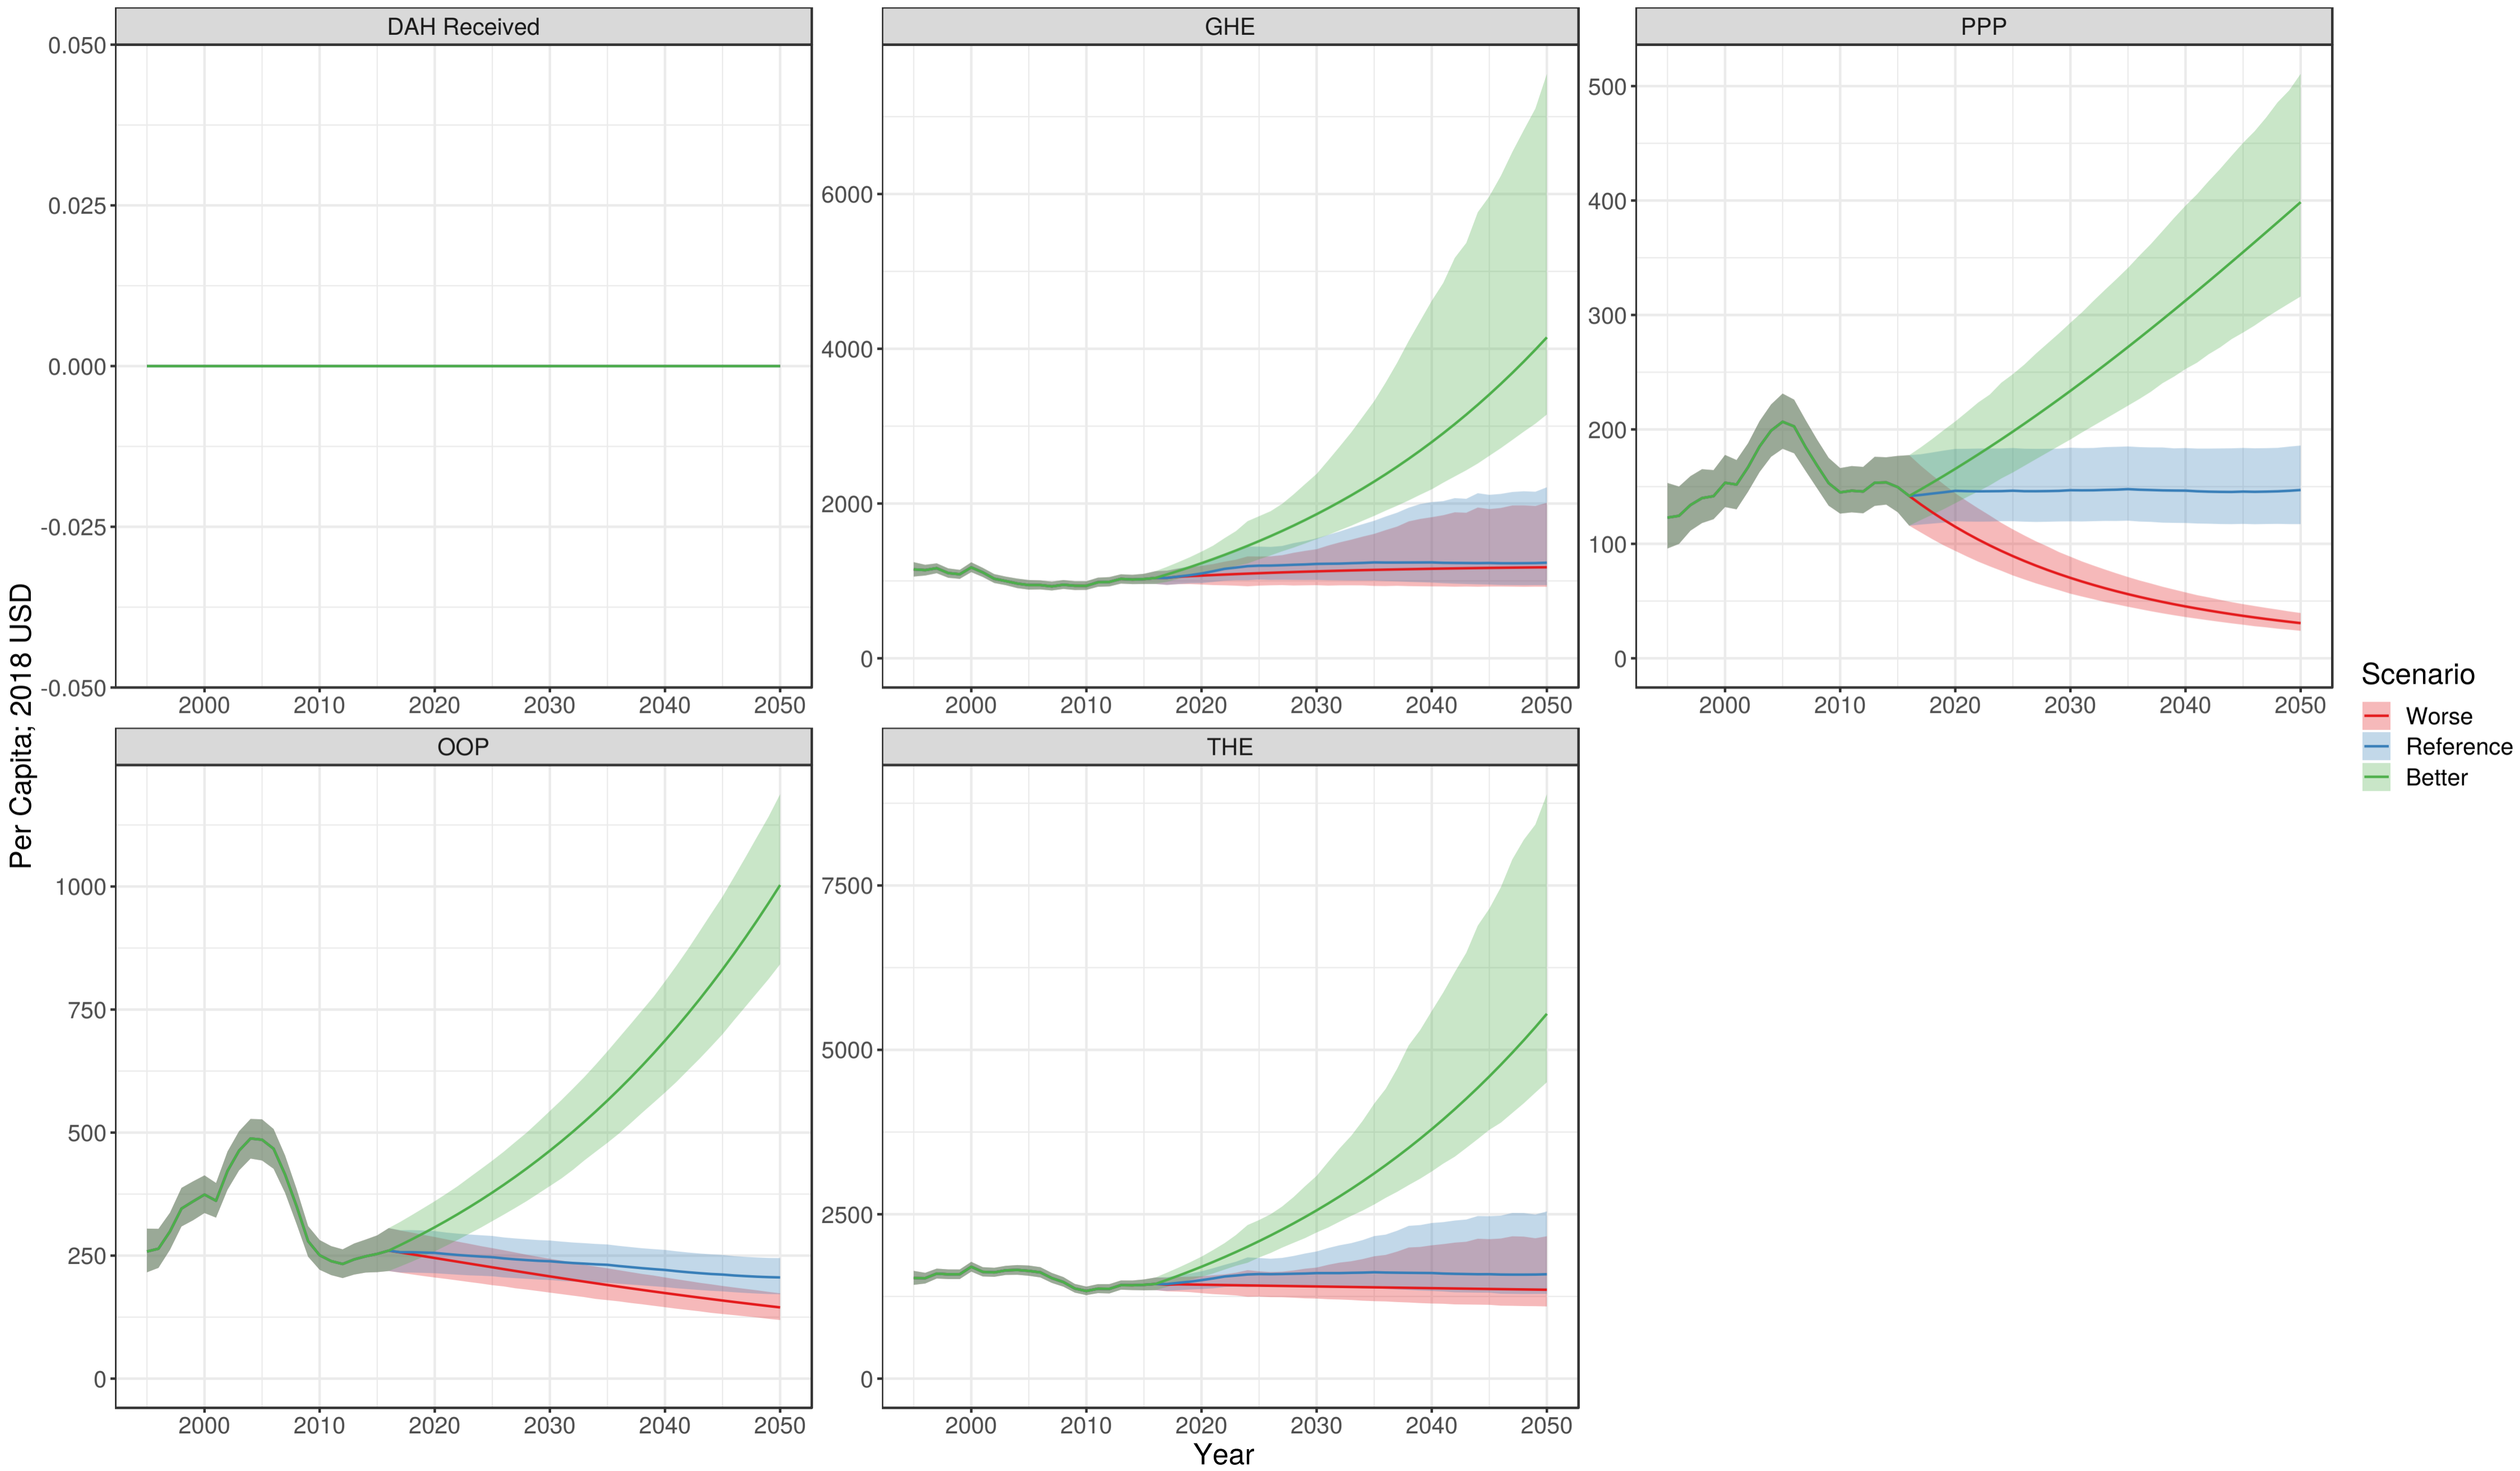

# United Kingdom

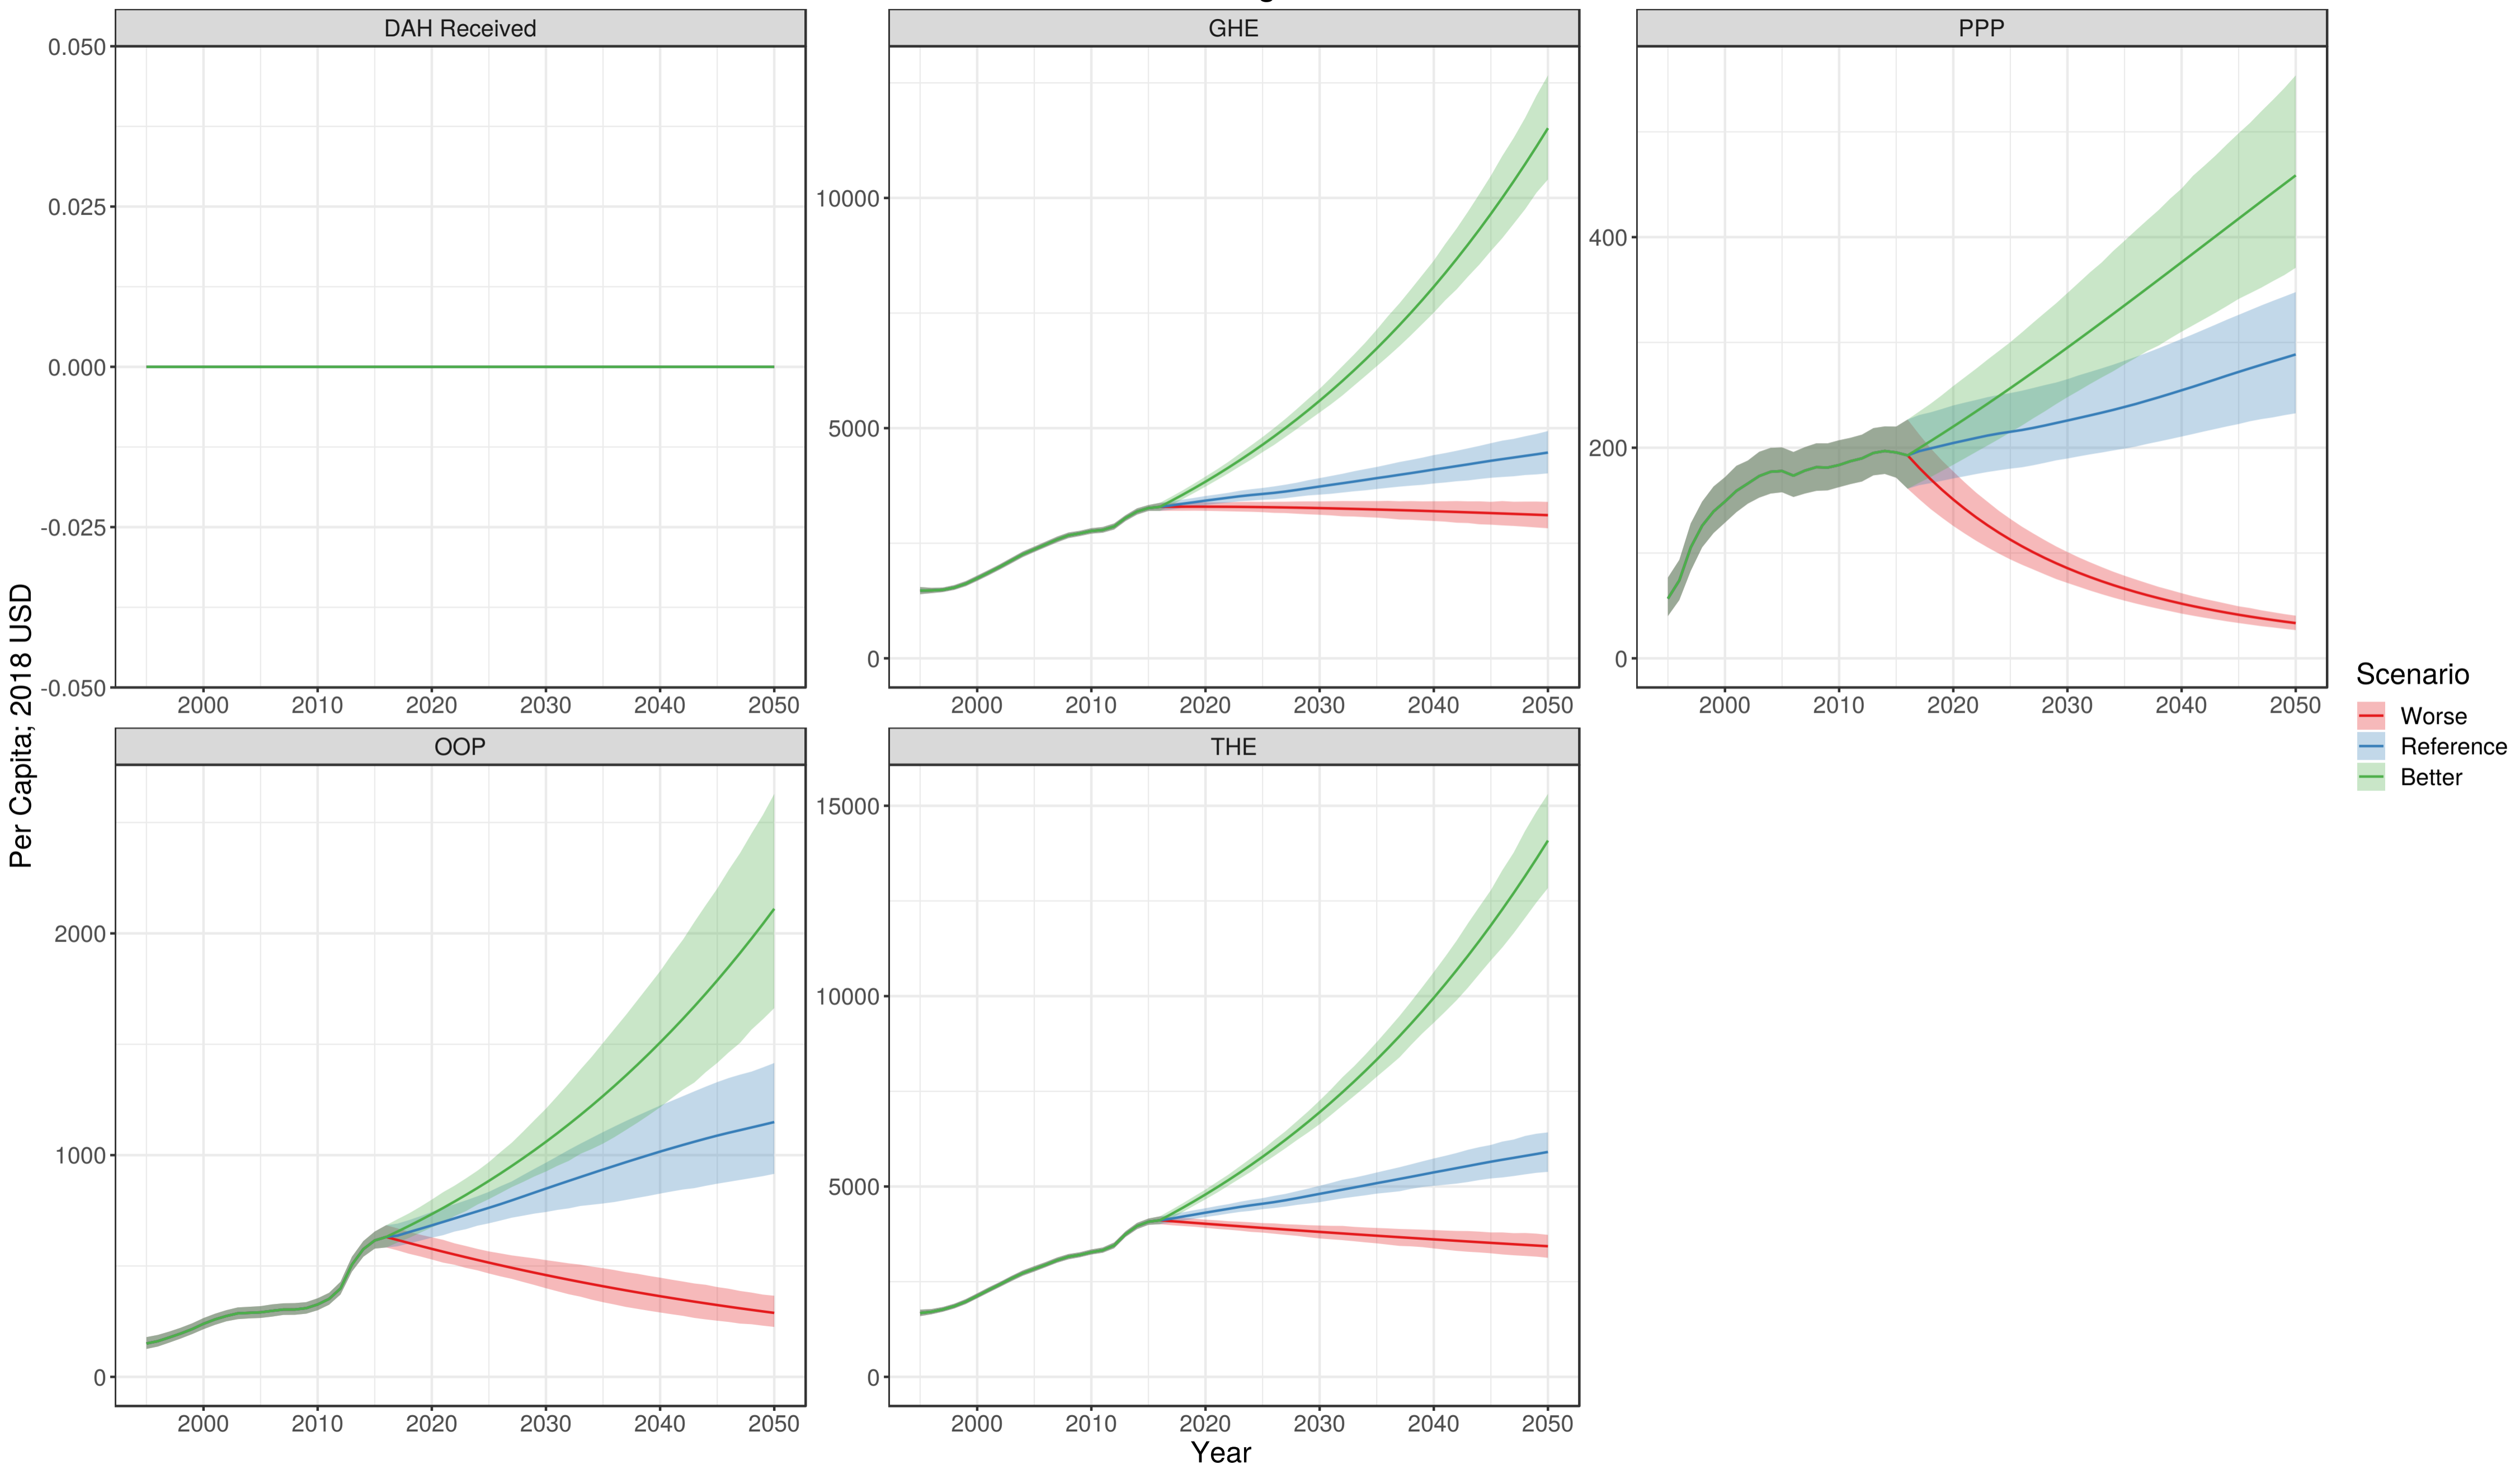

# United States

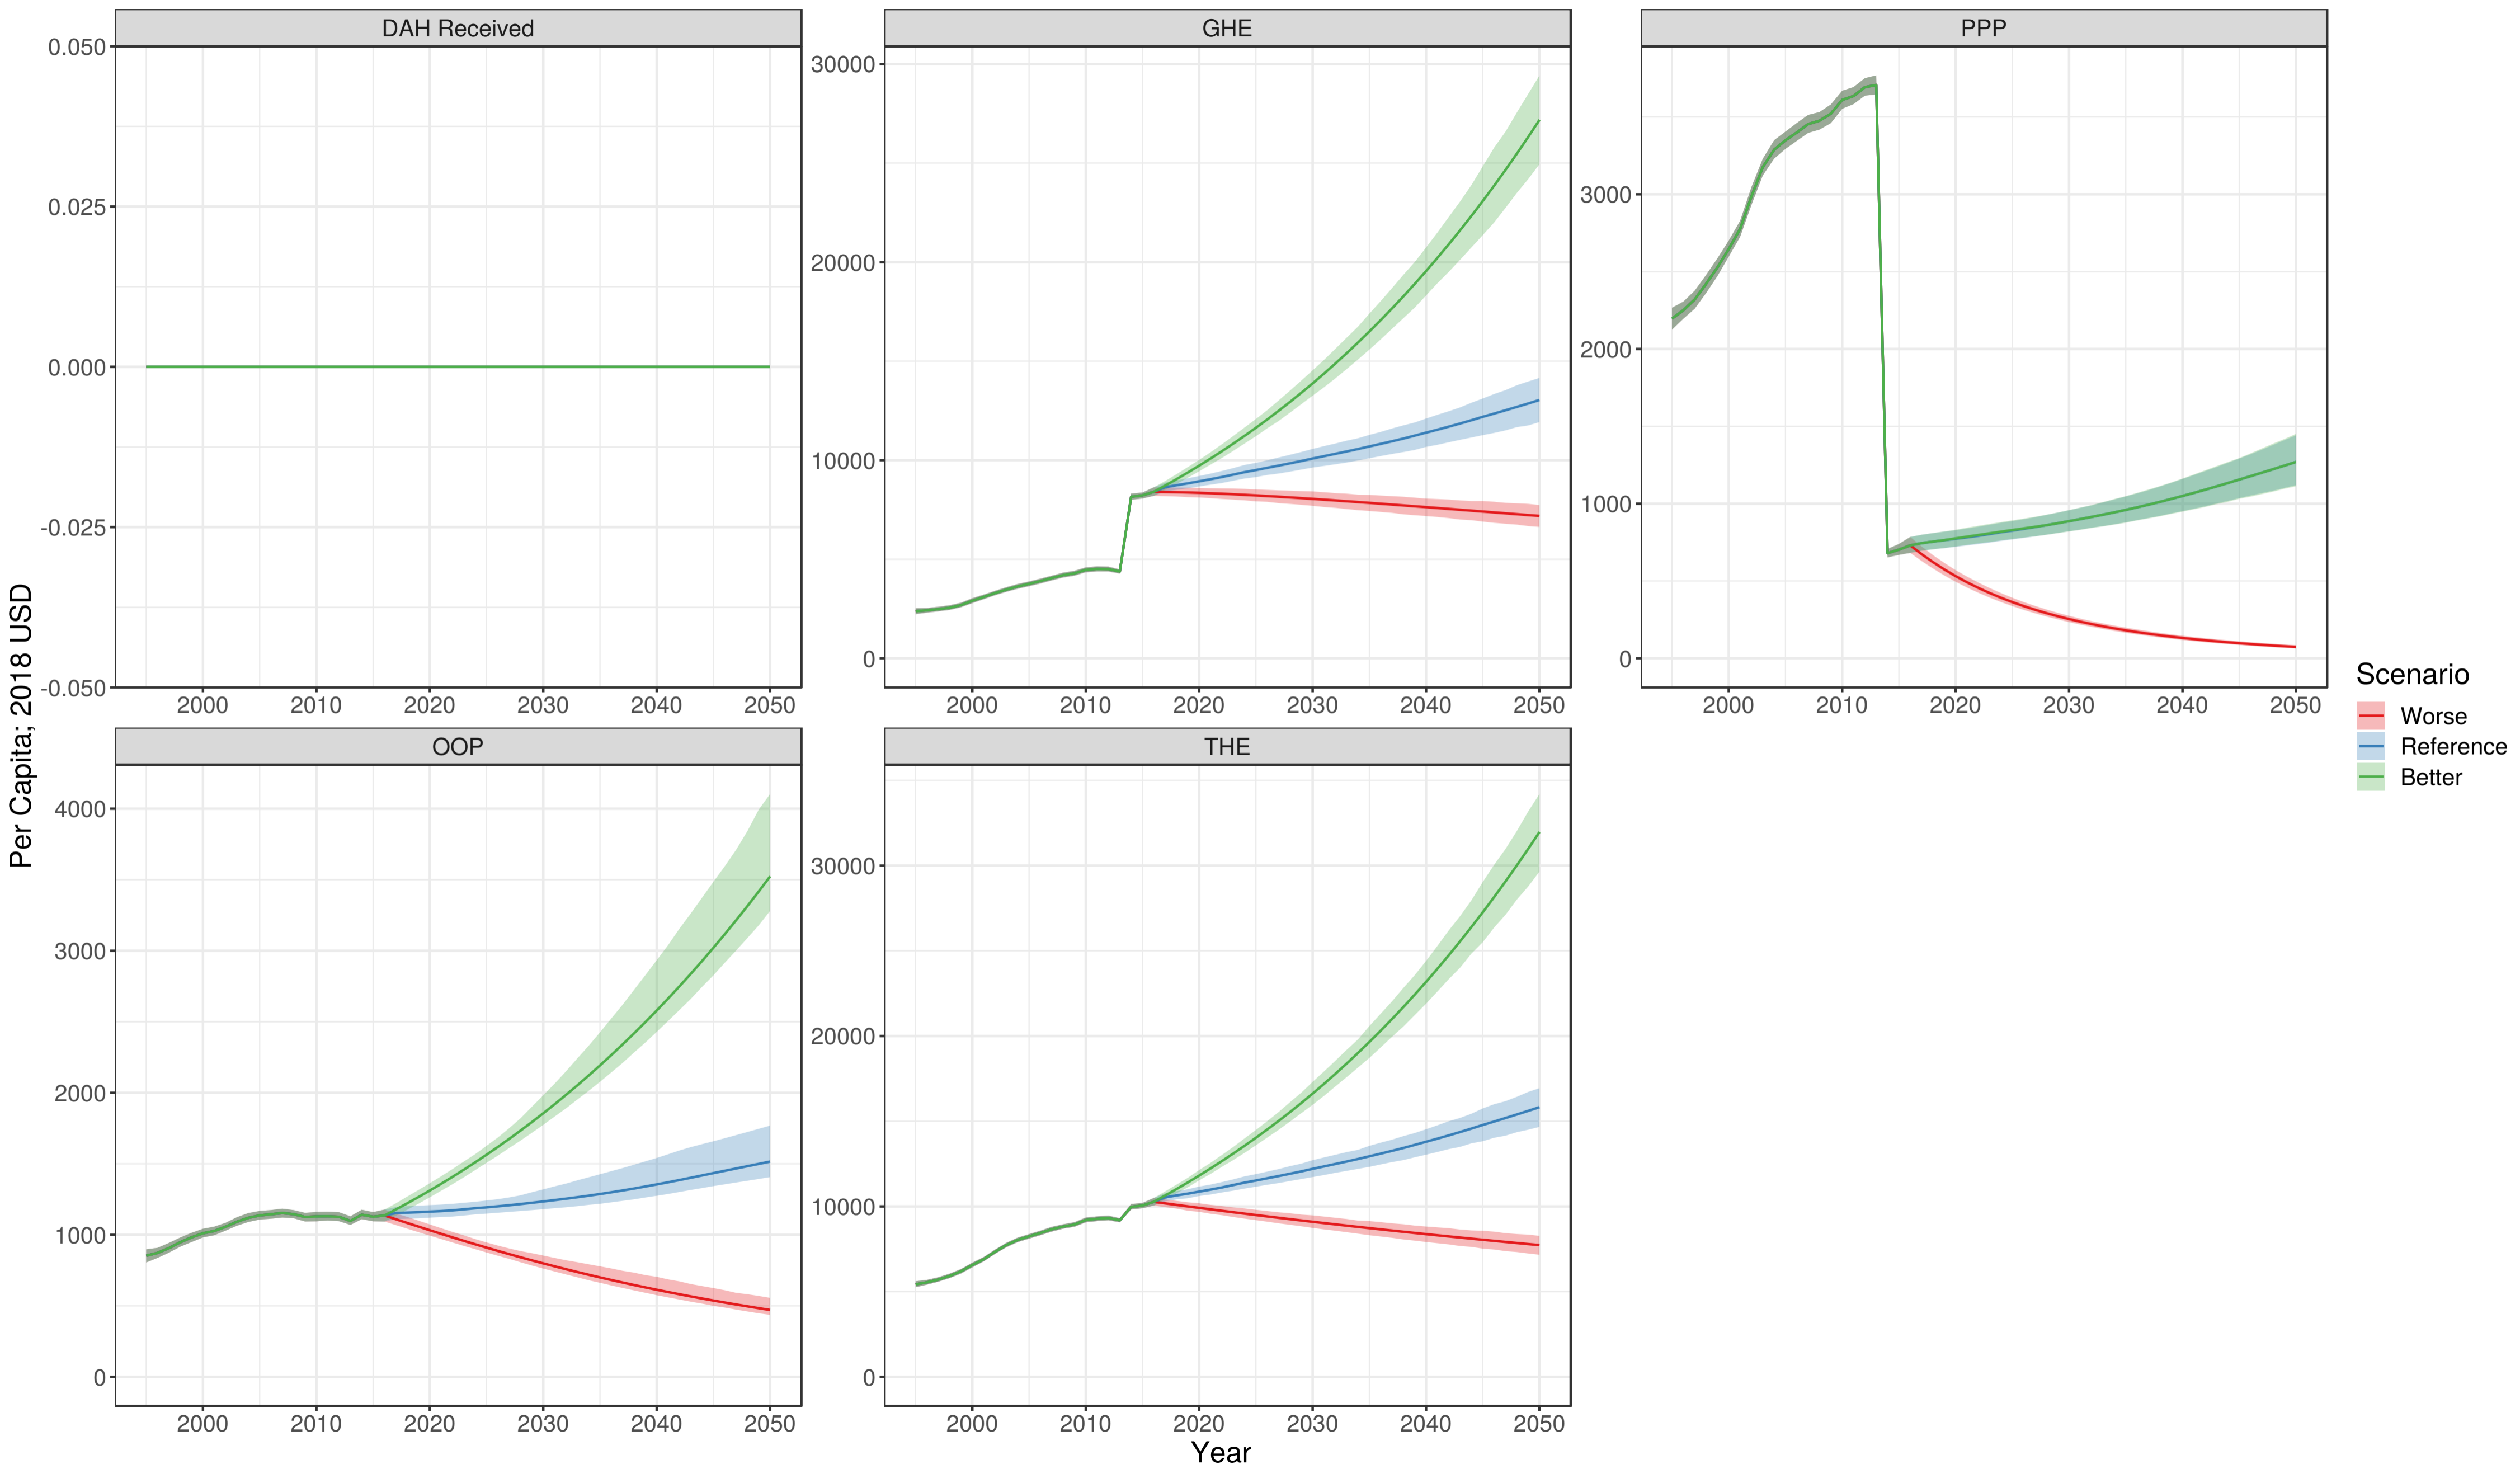

# Uruguay

Per Capita; 2018 USD

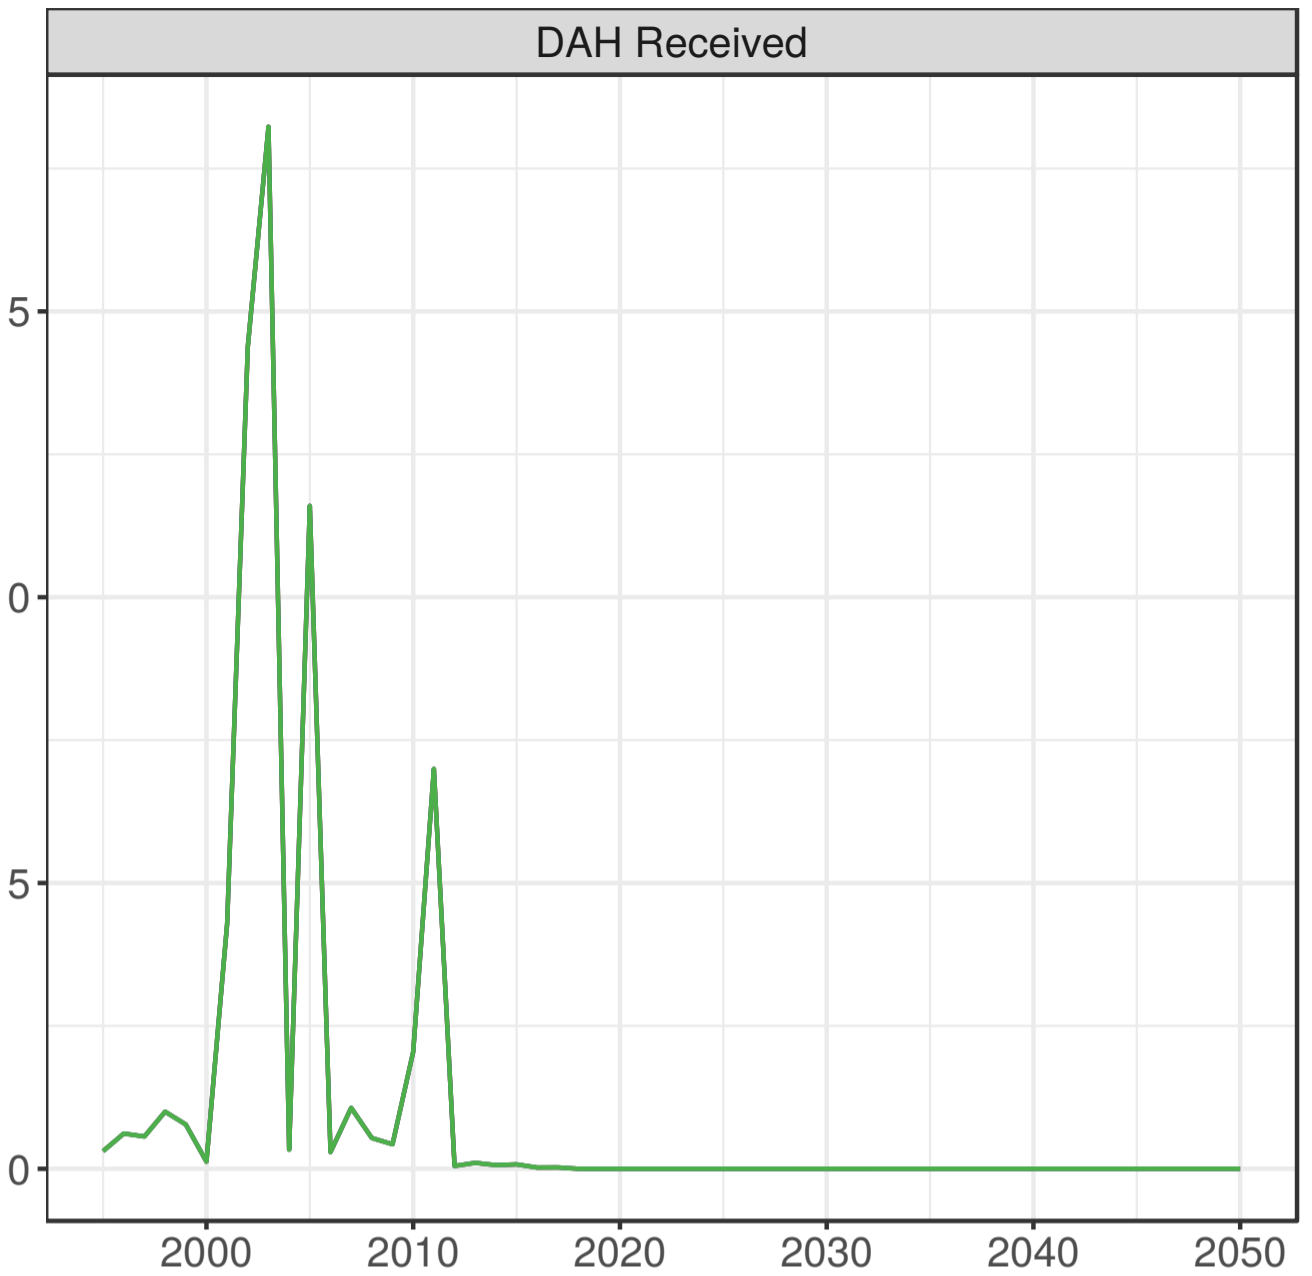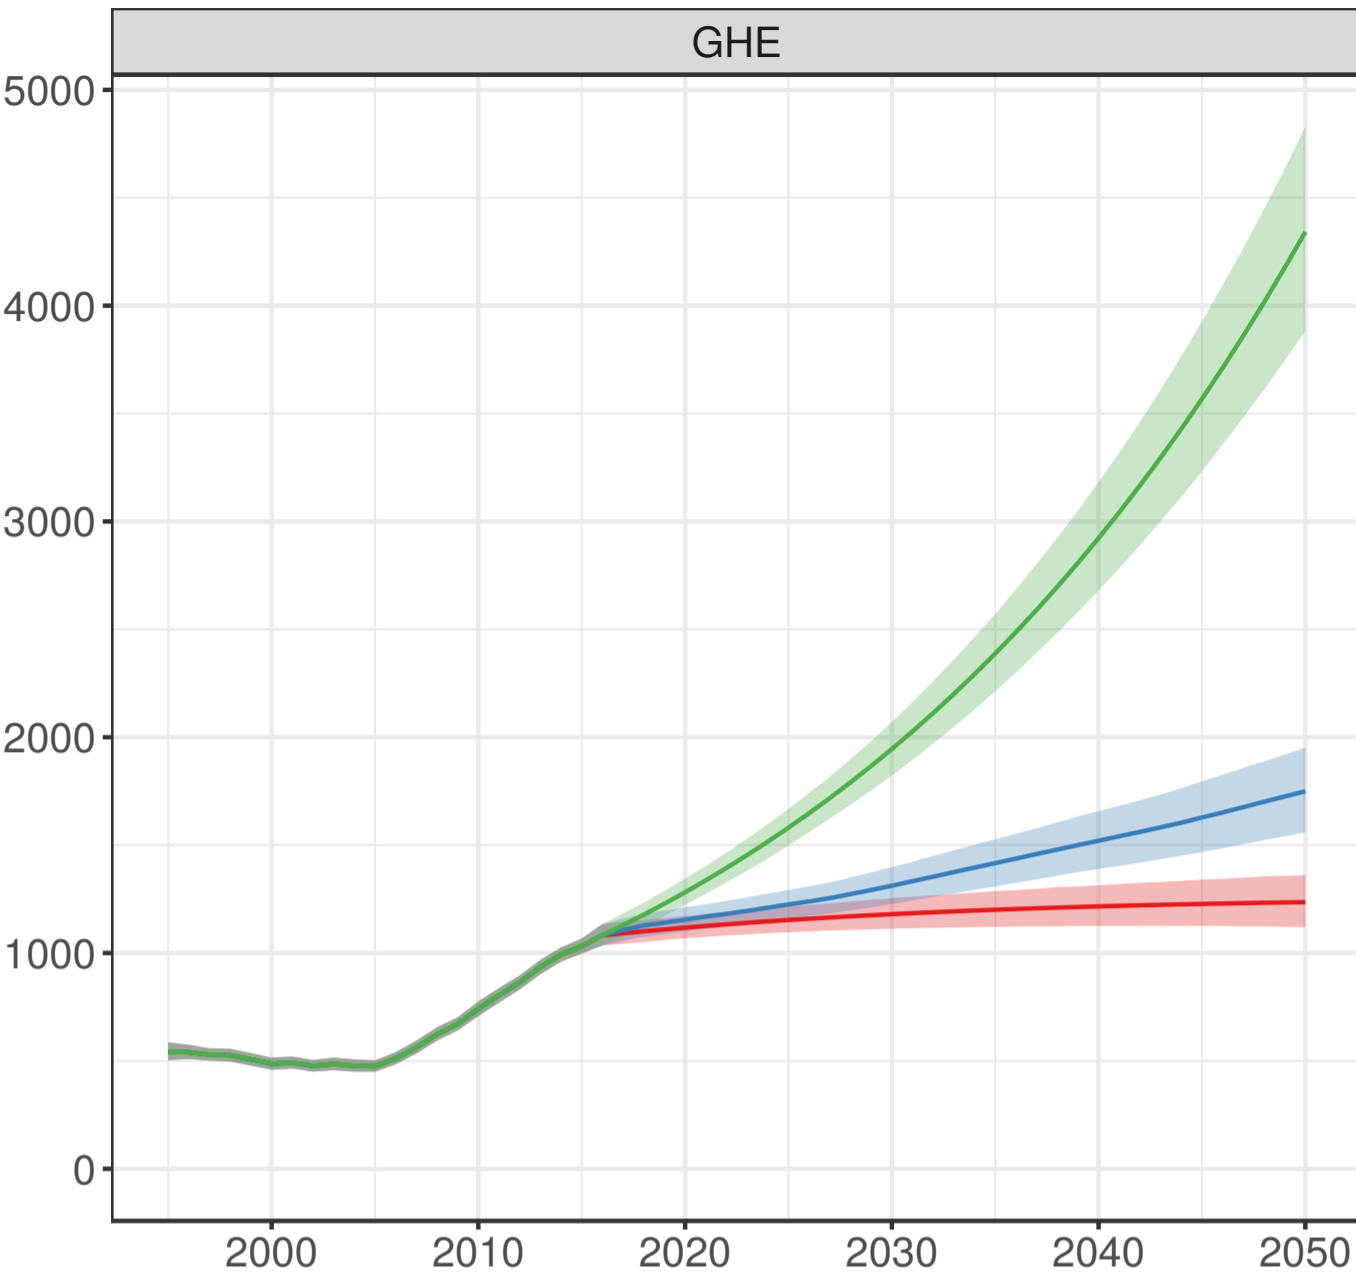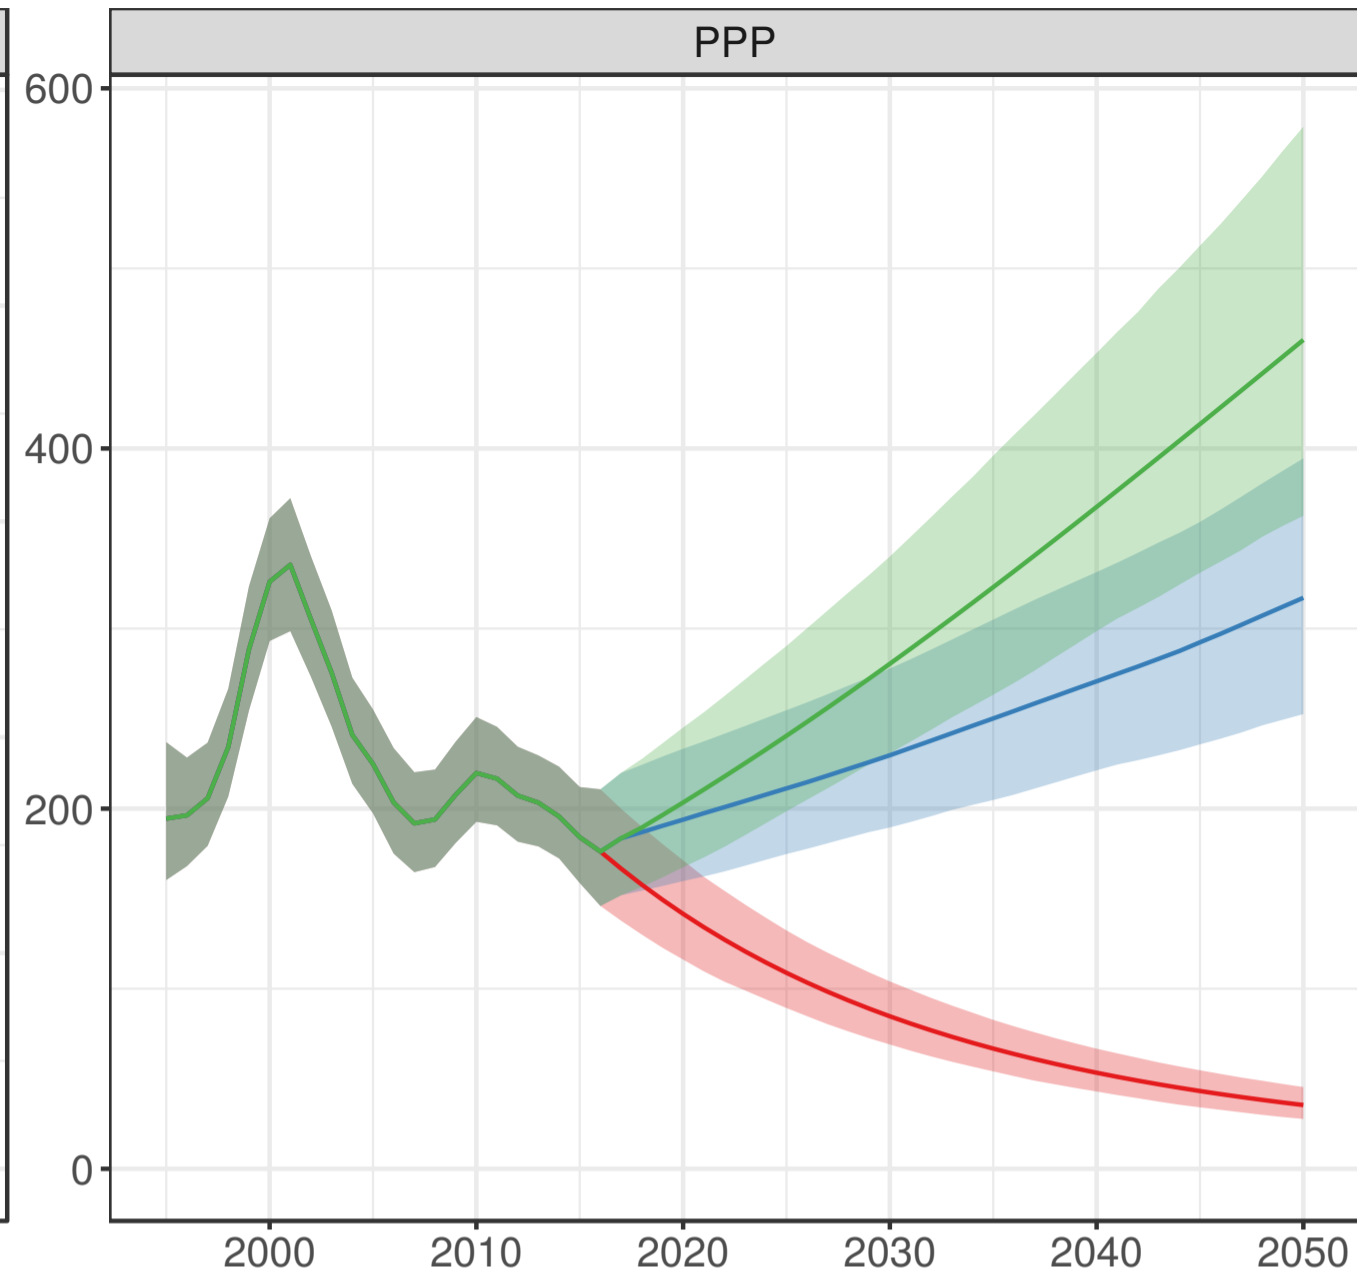

Scenario  
Worse  
Reference  
Better

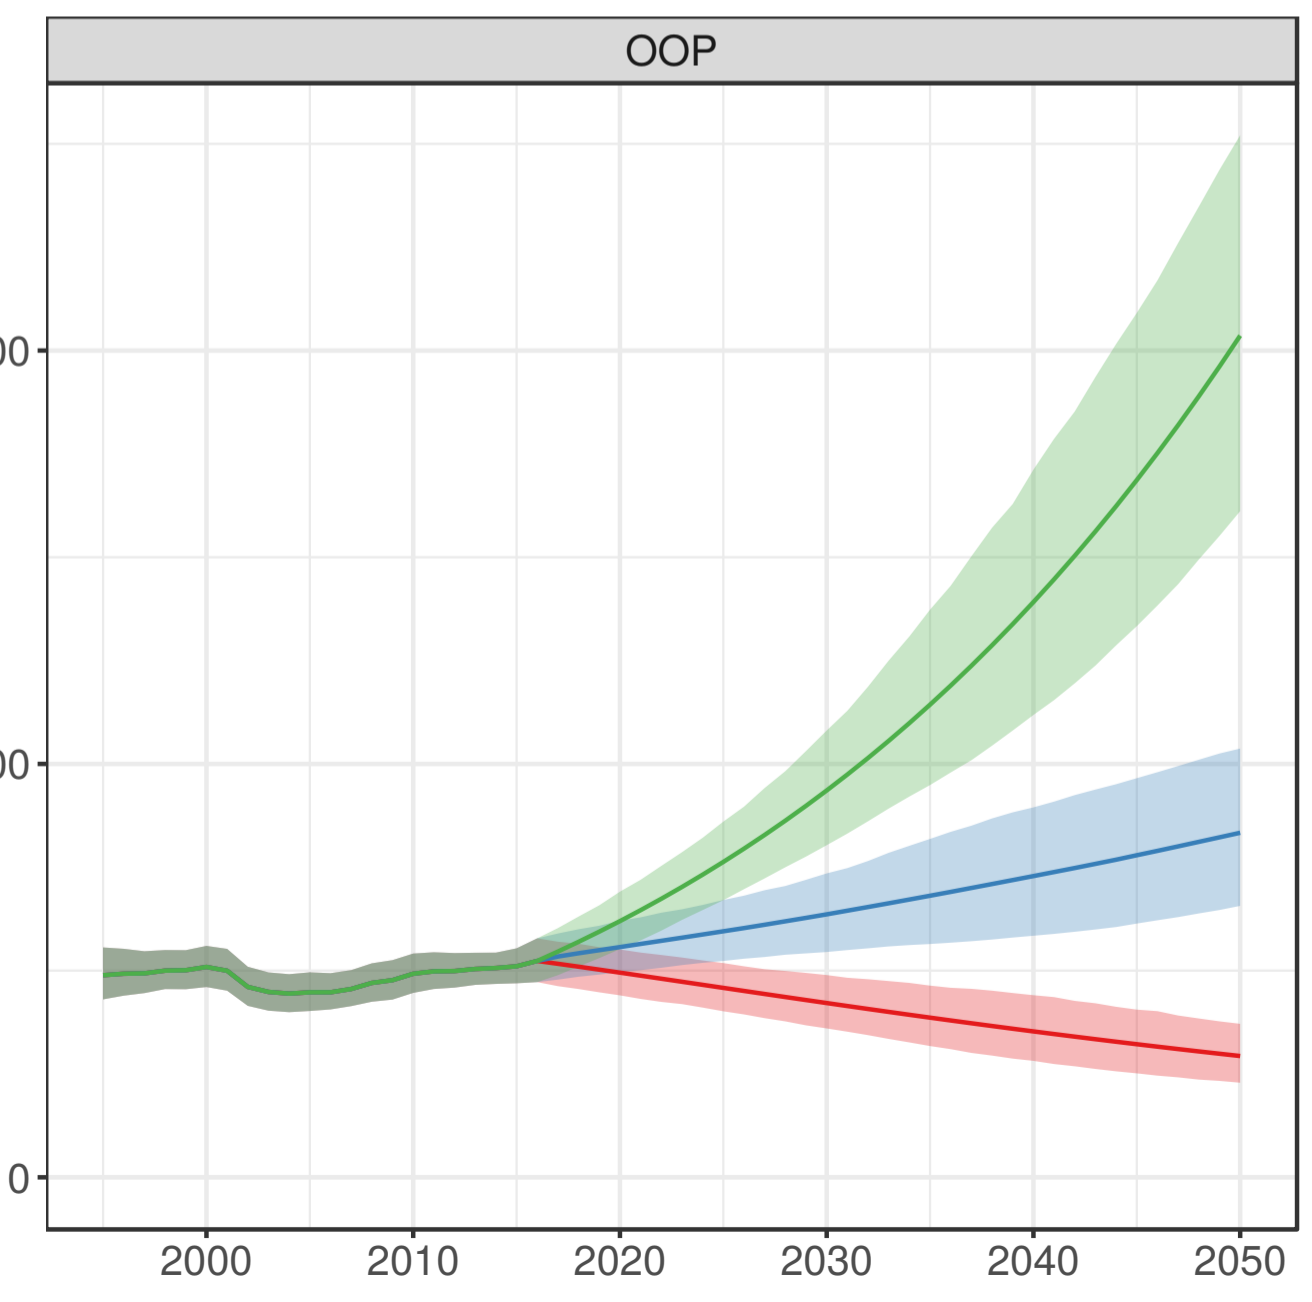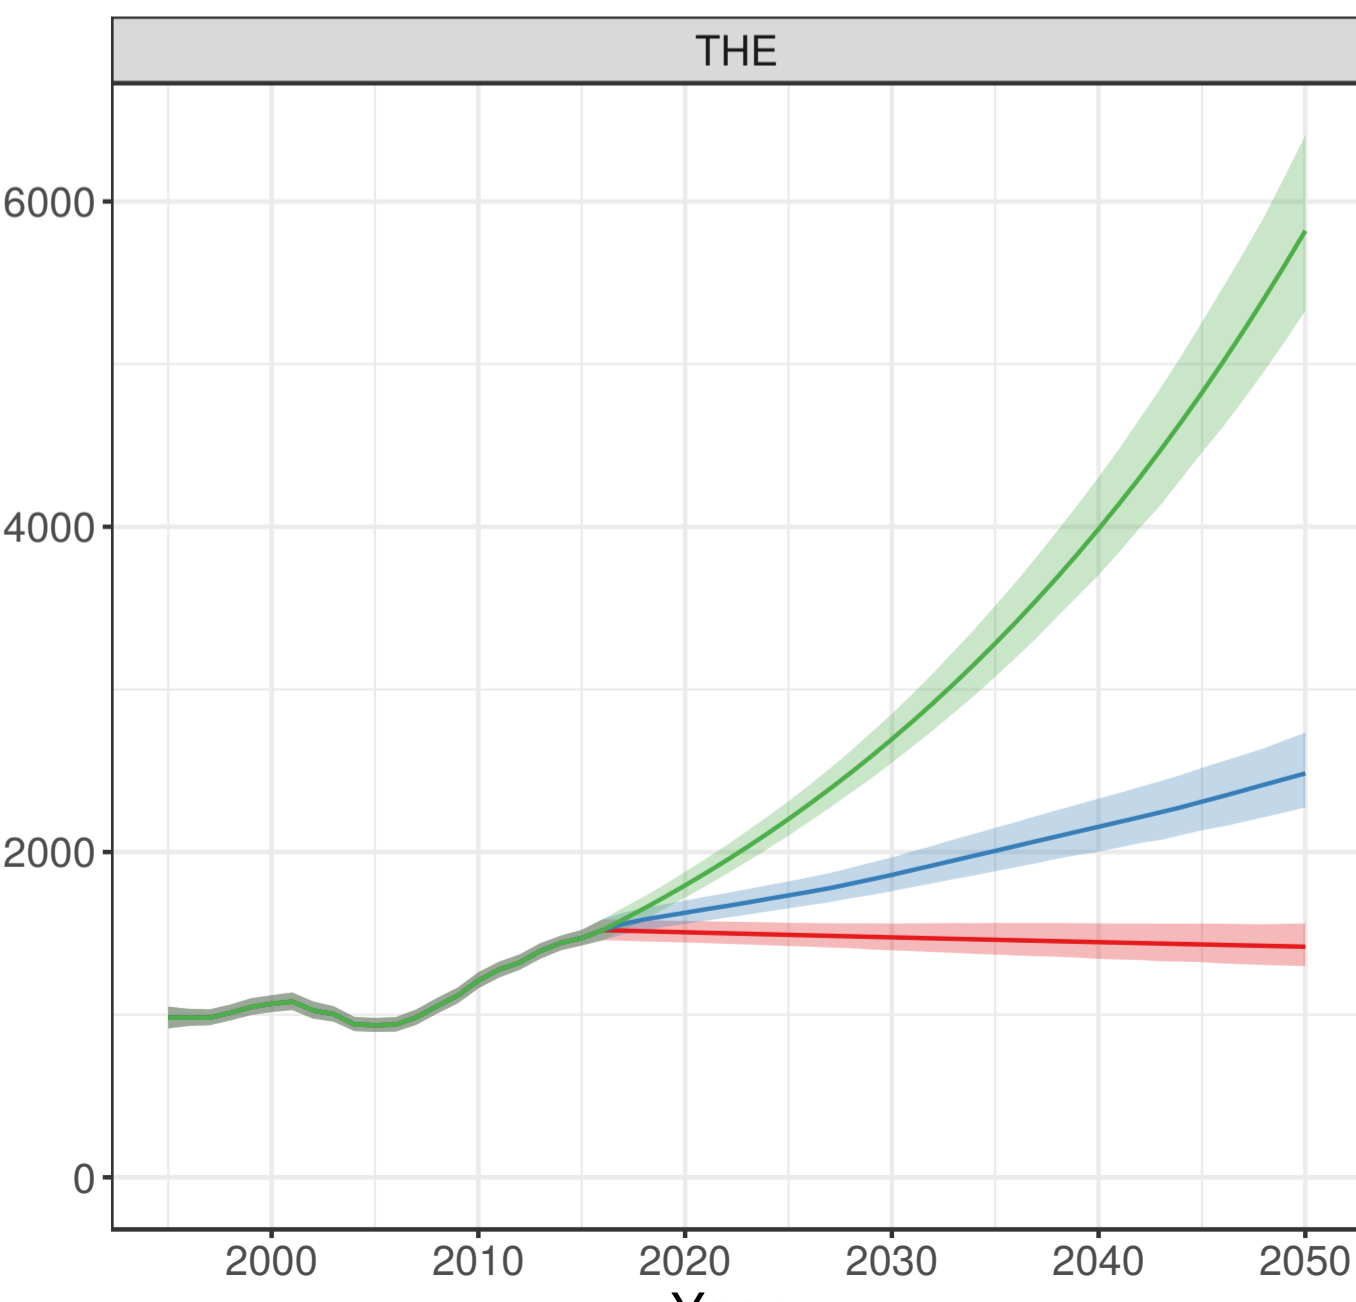

Year

# Uzbekistan

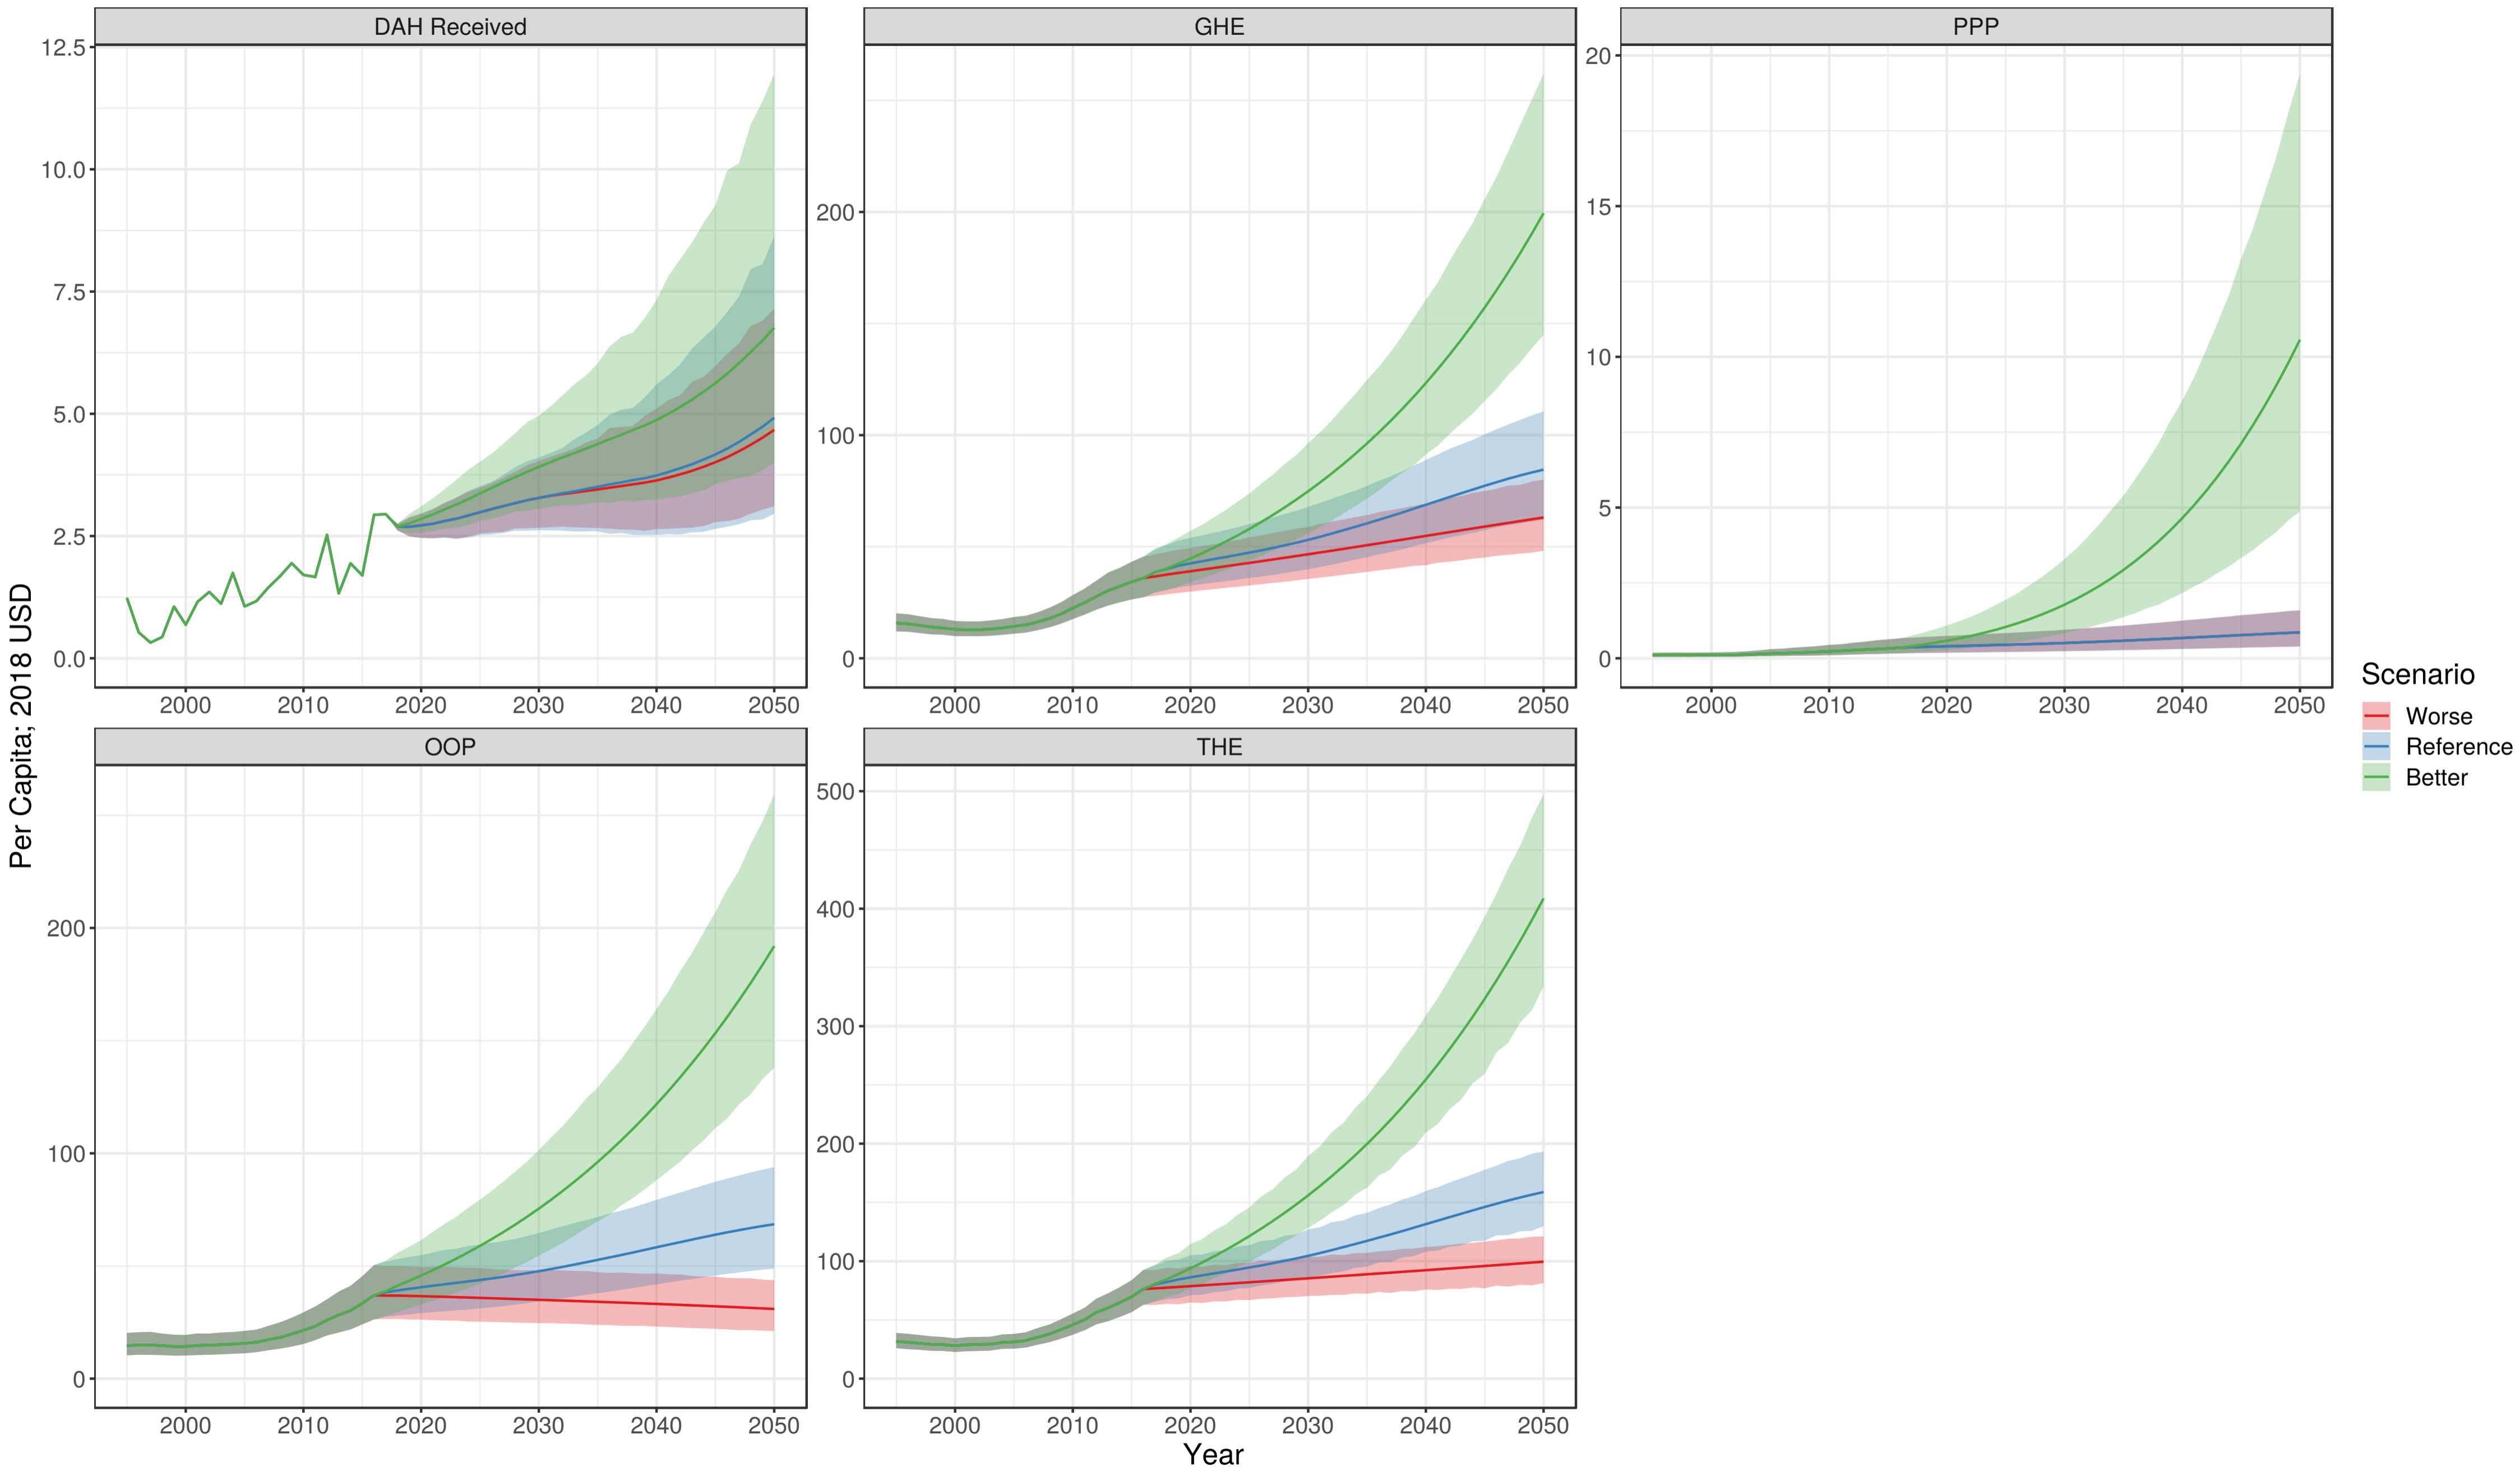



# Vanuatu

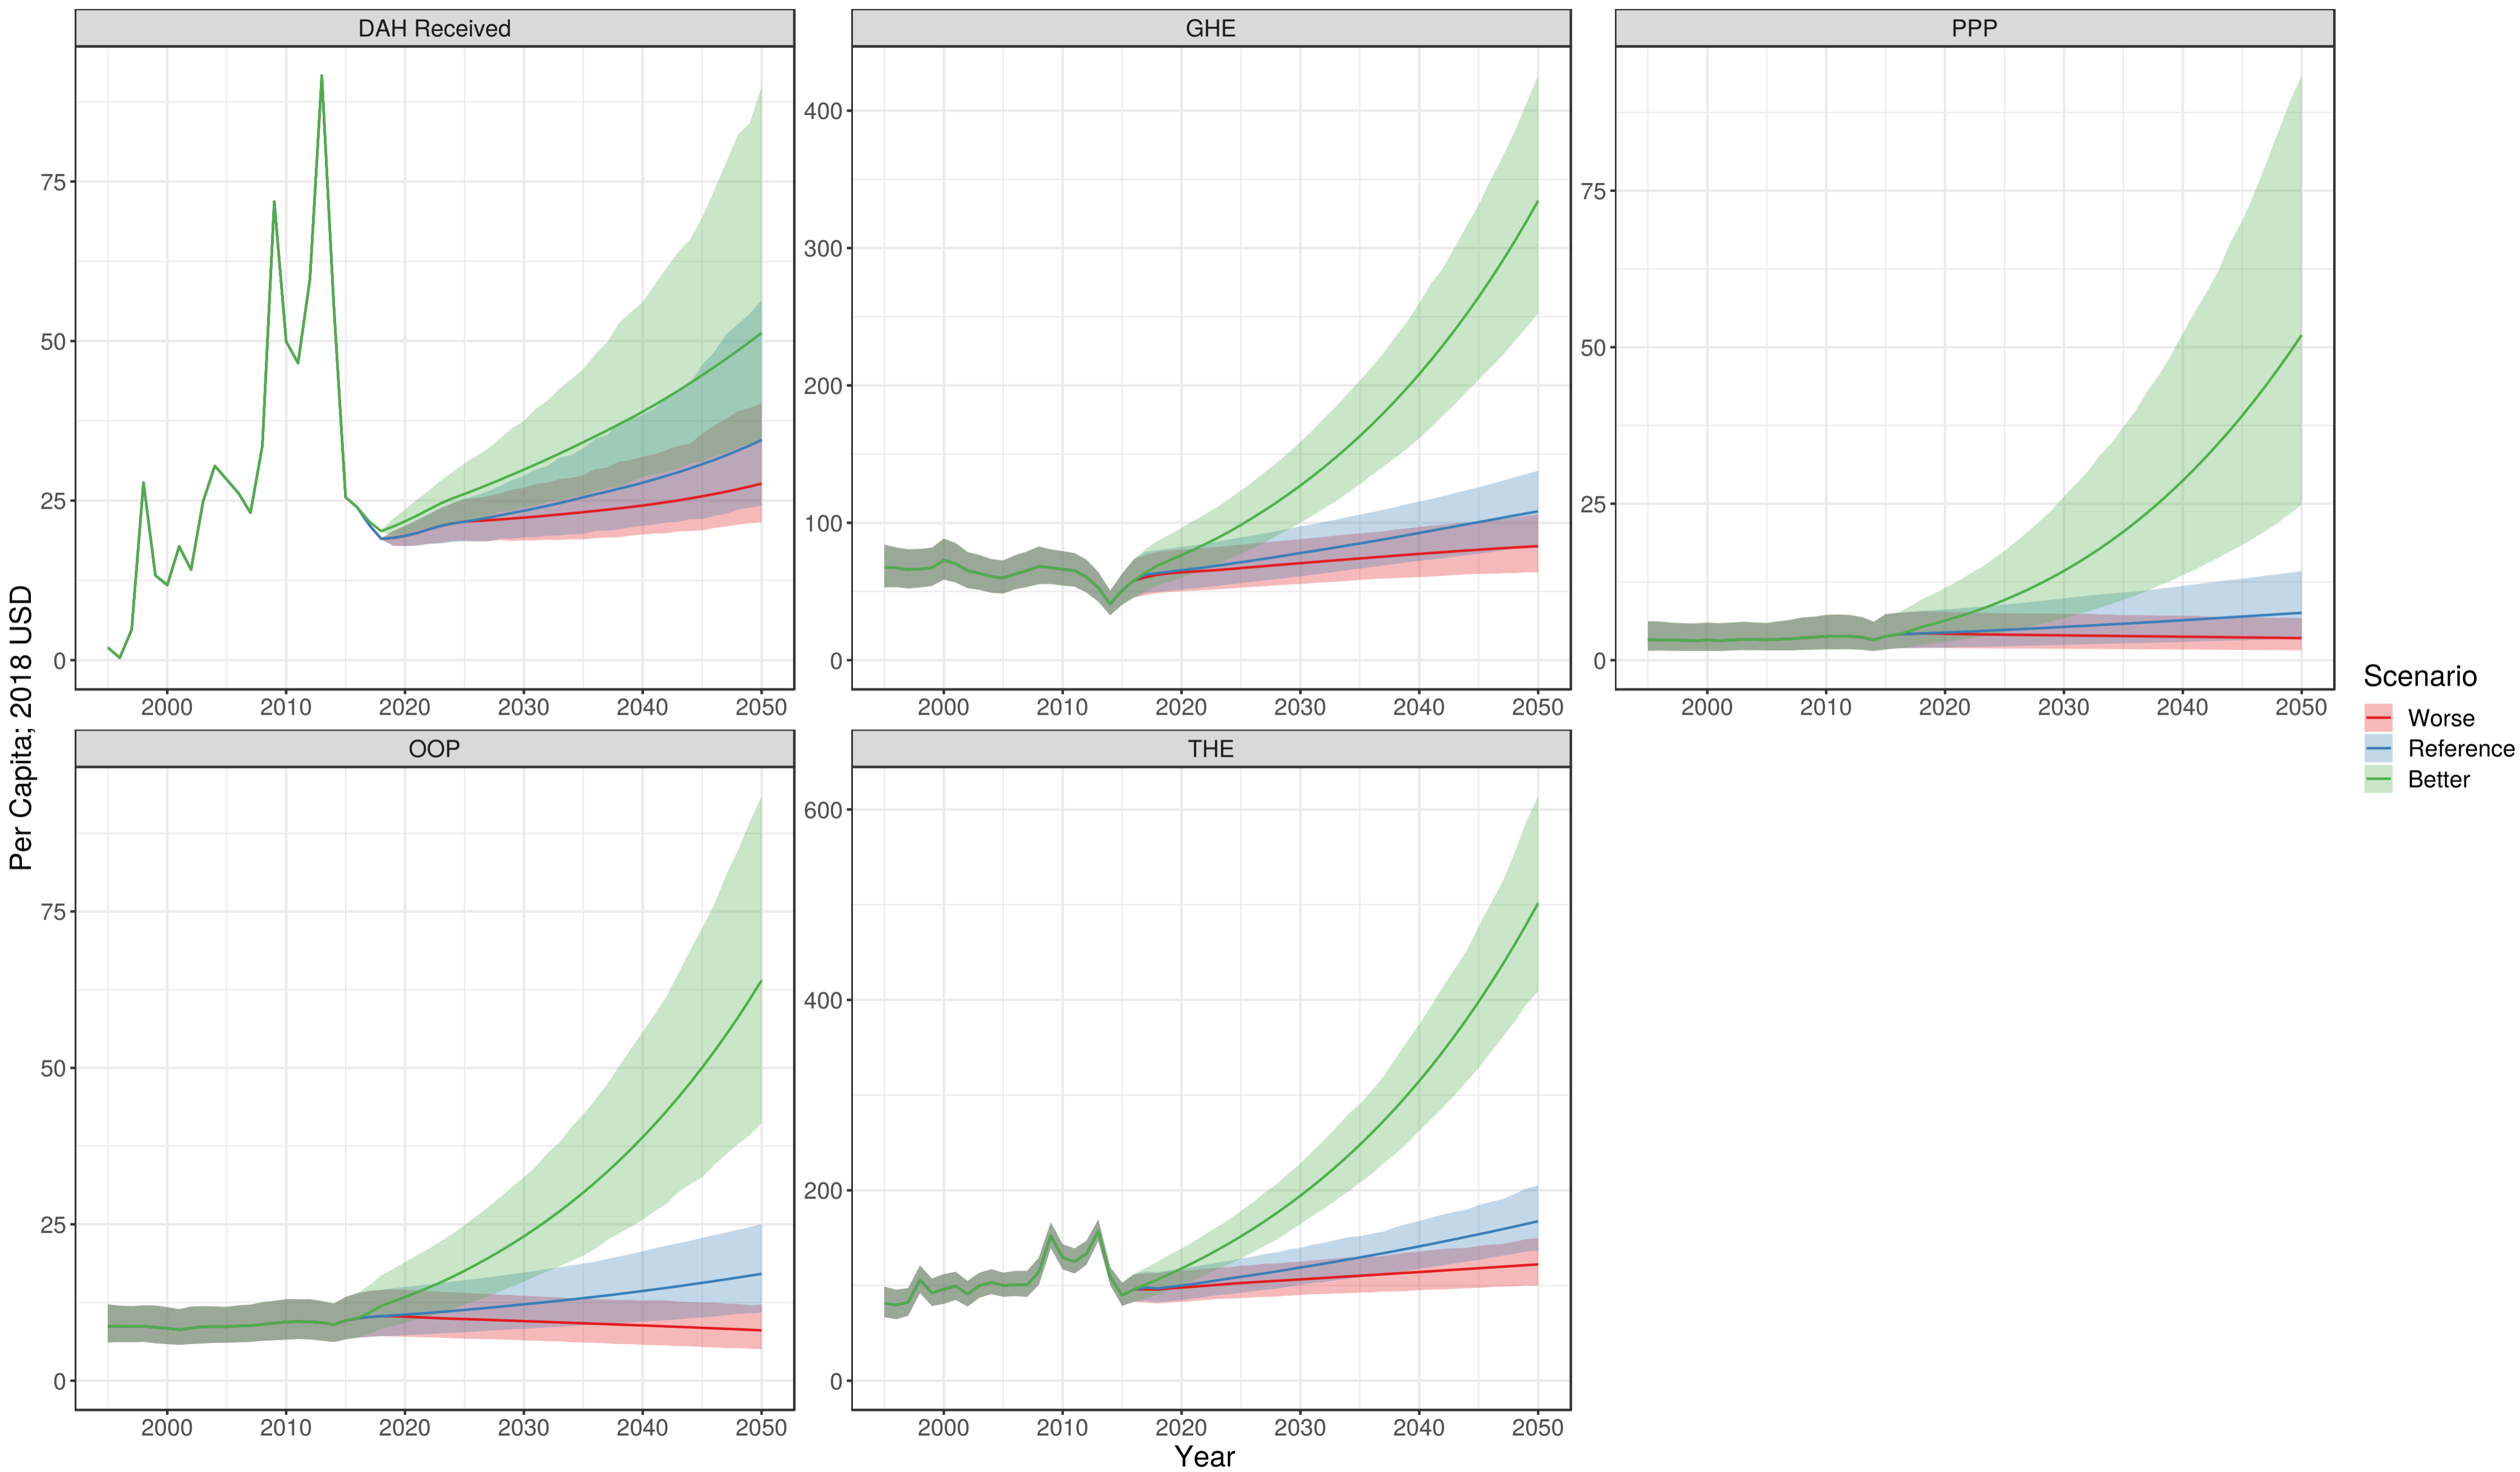

# Venezuela

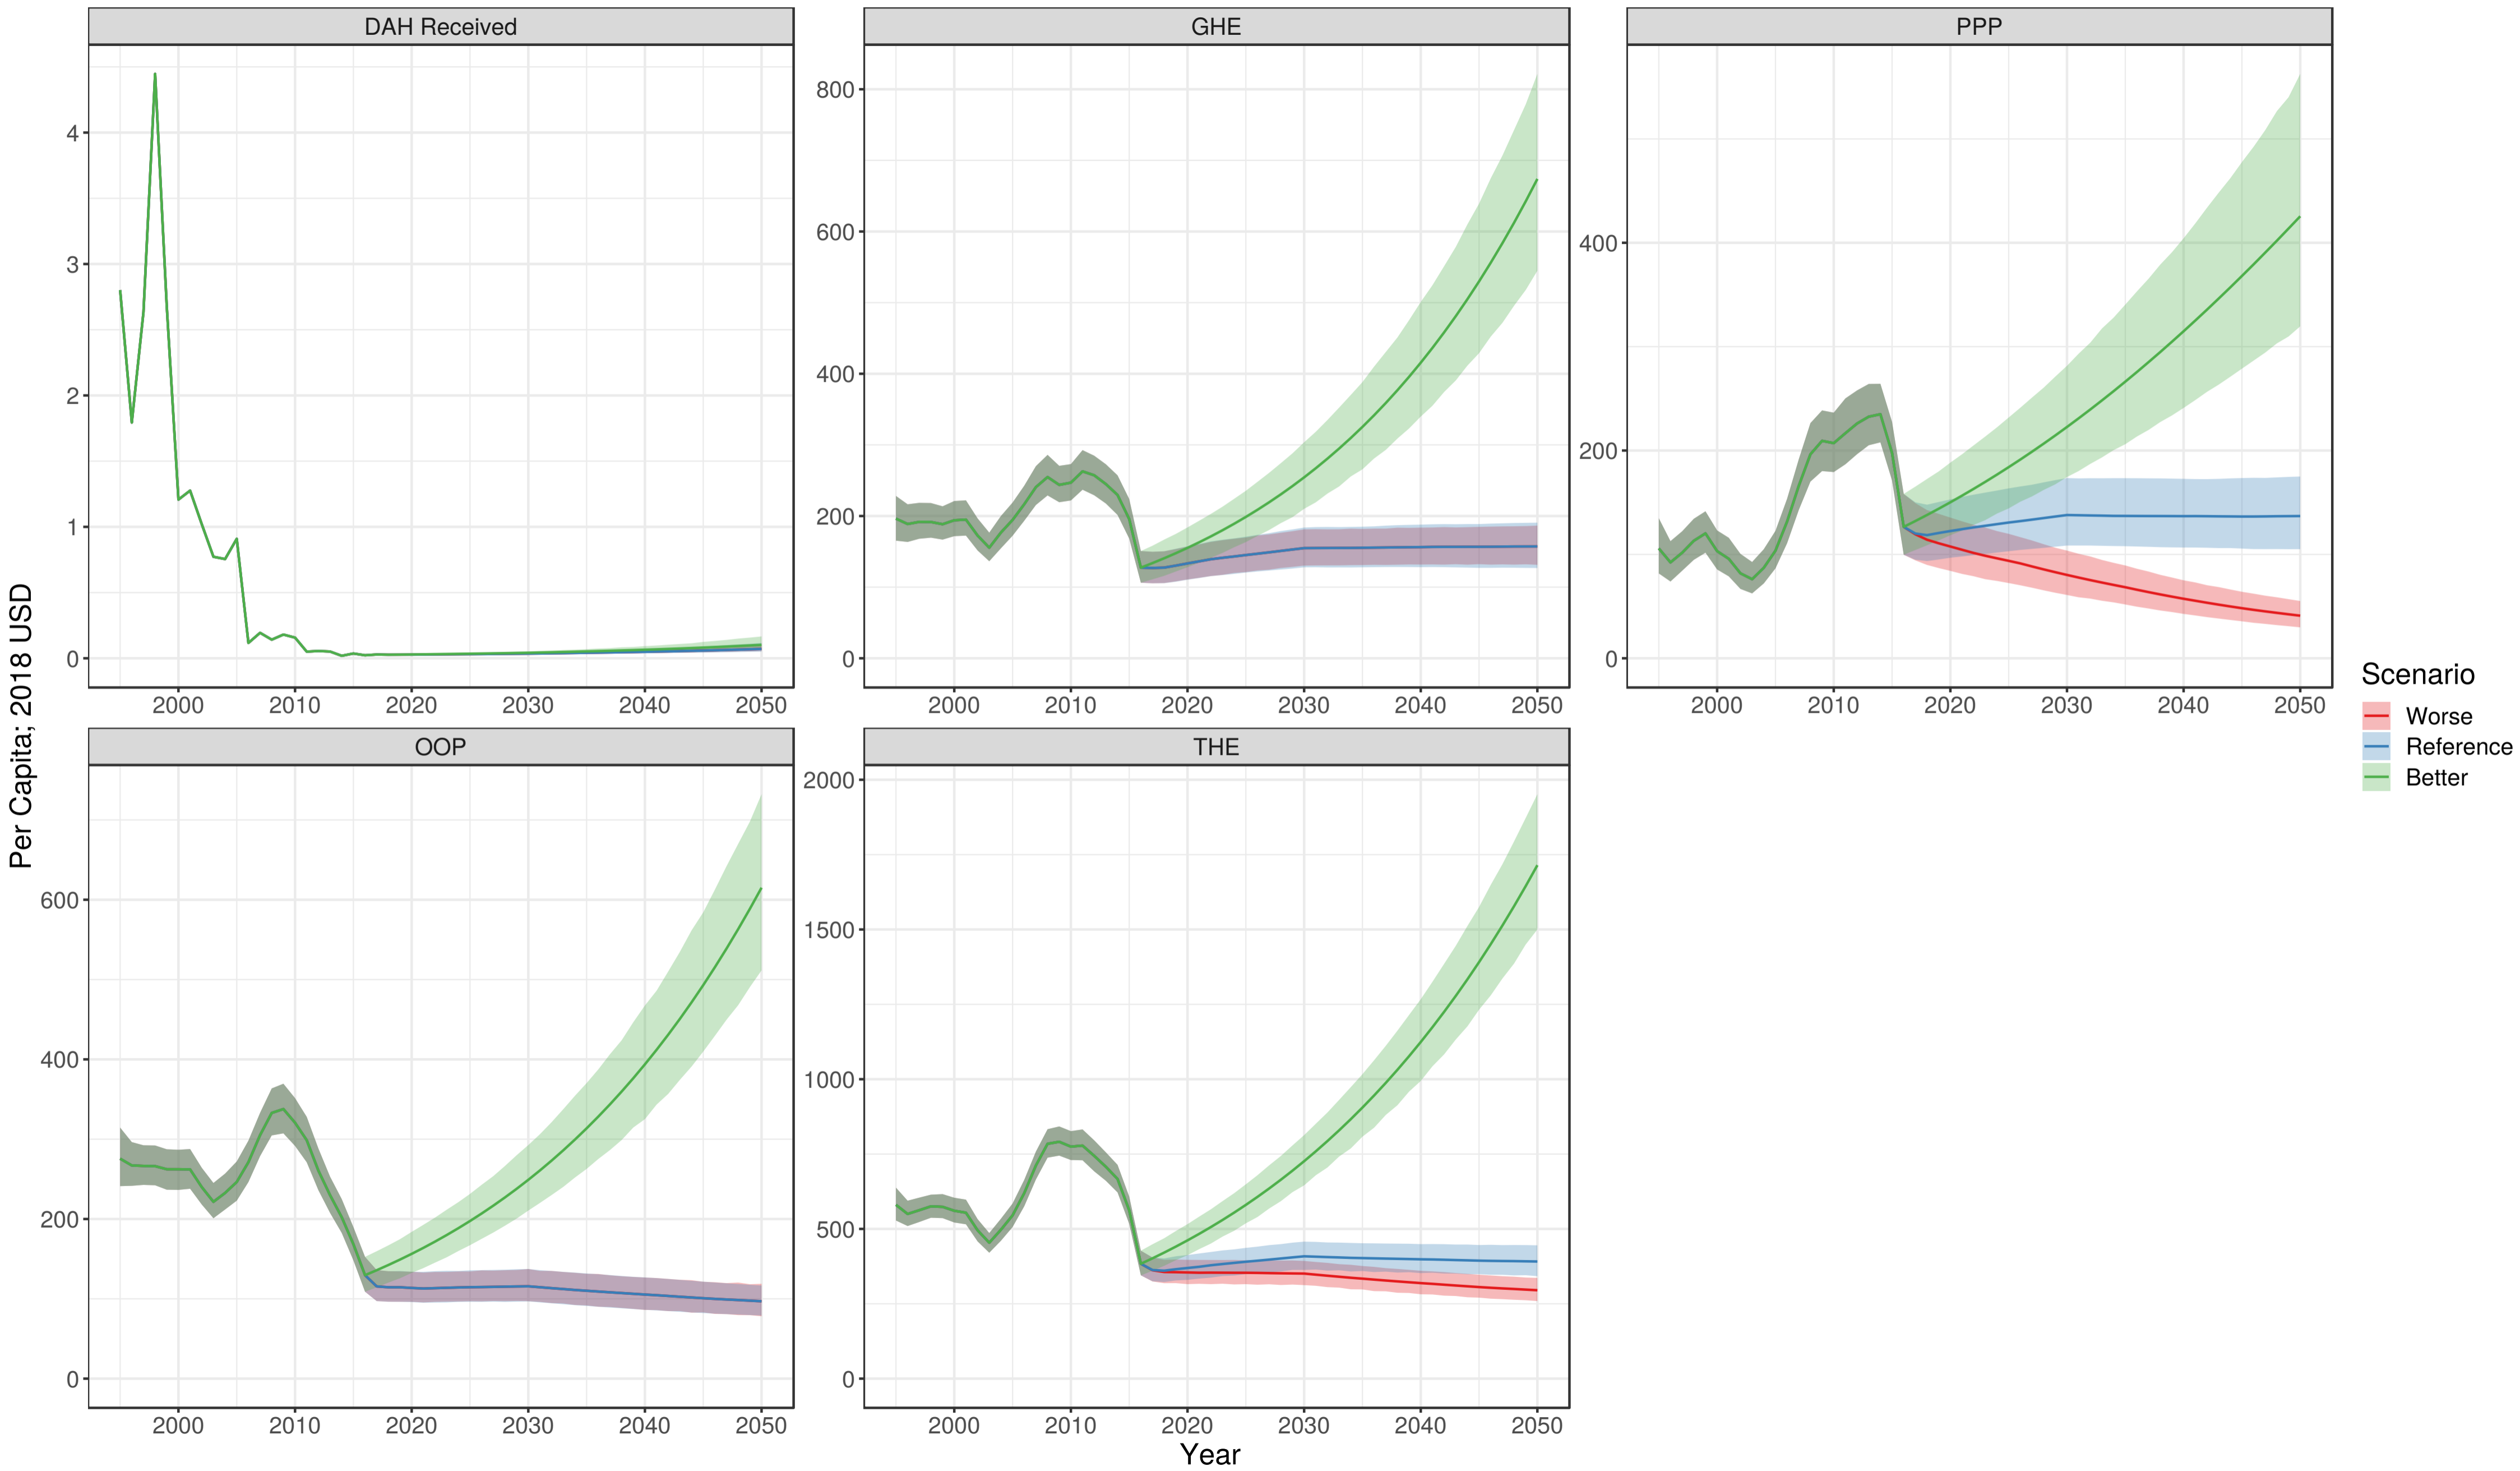

# Vietnam

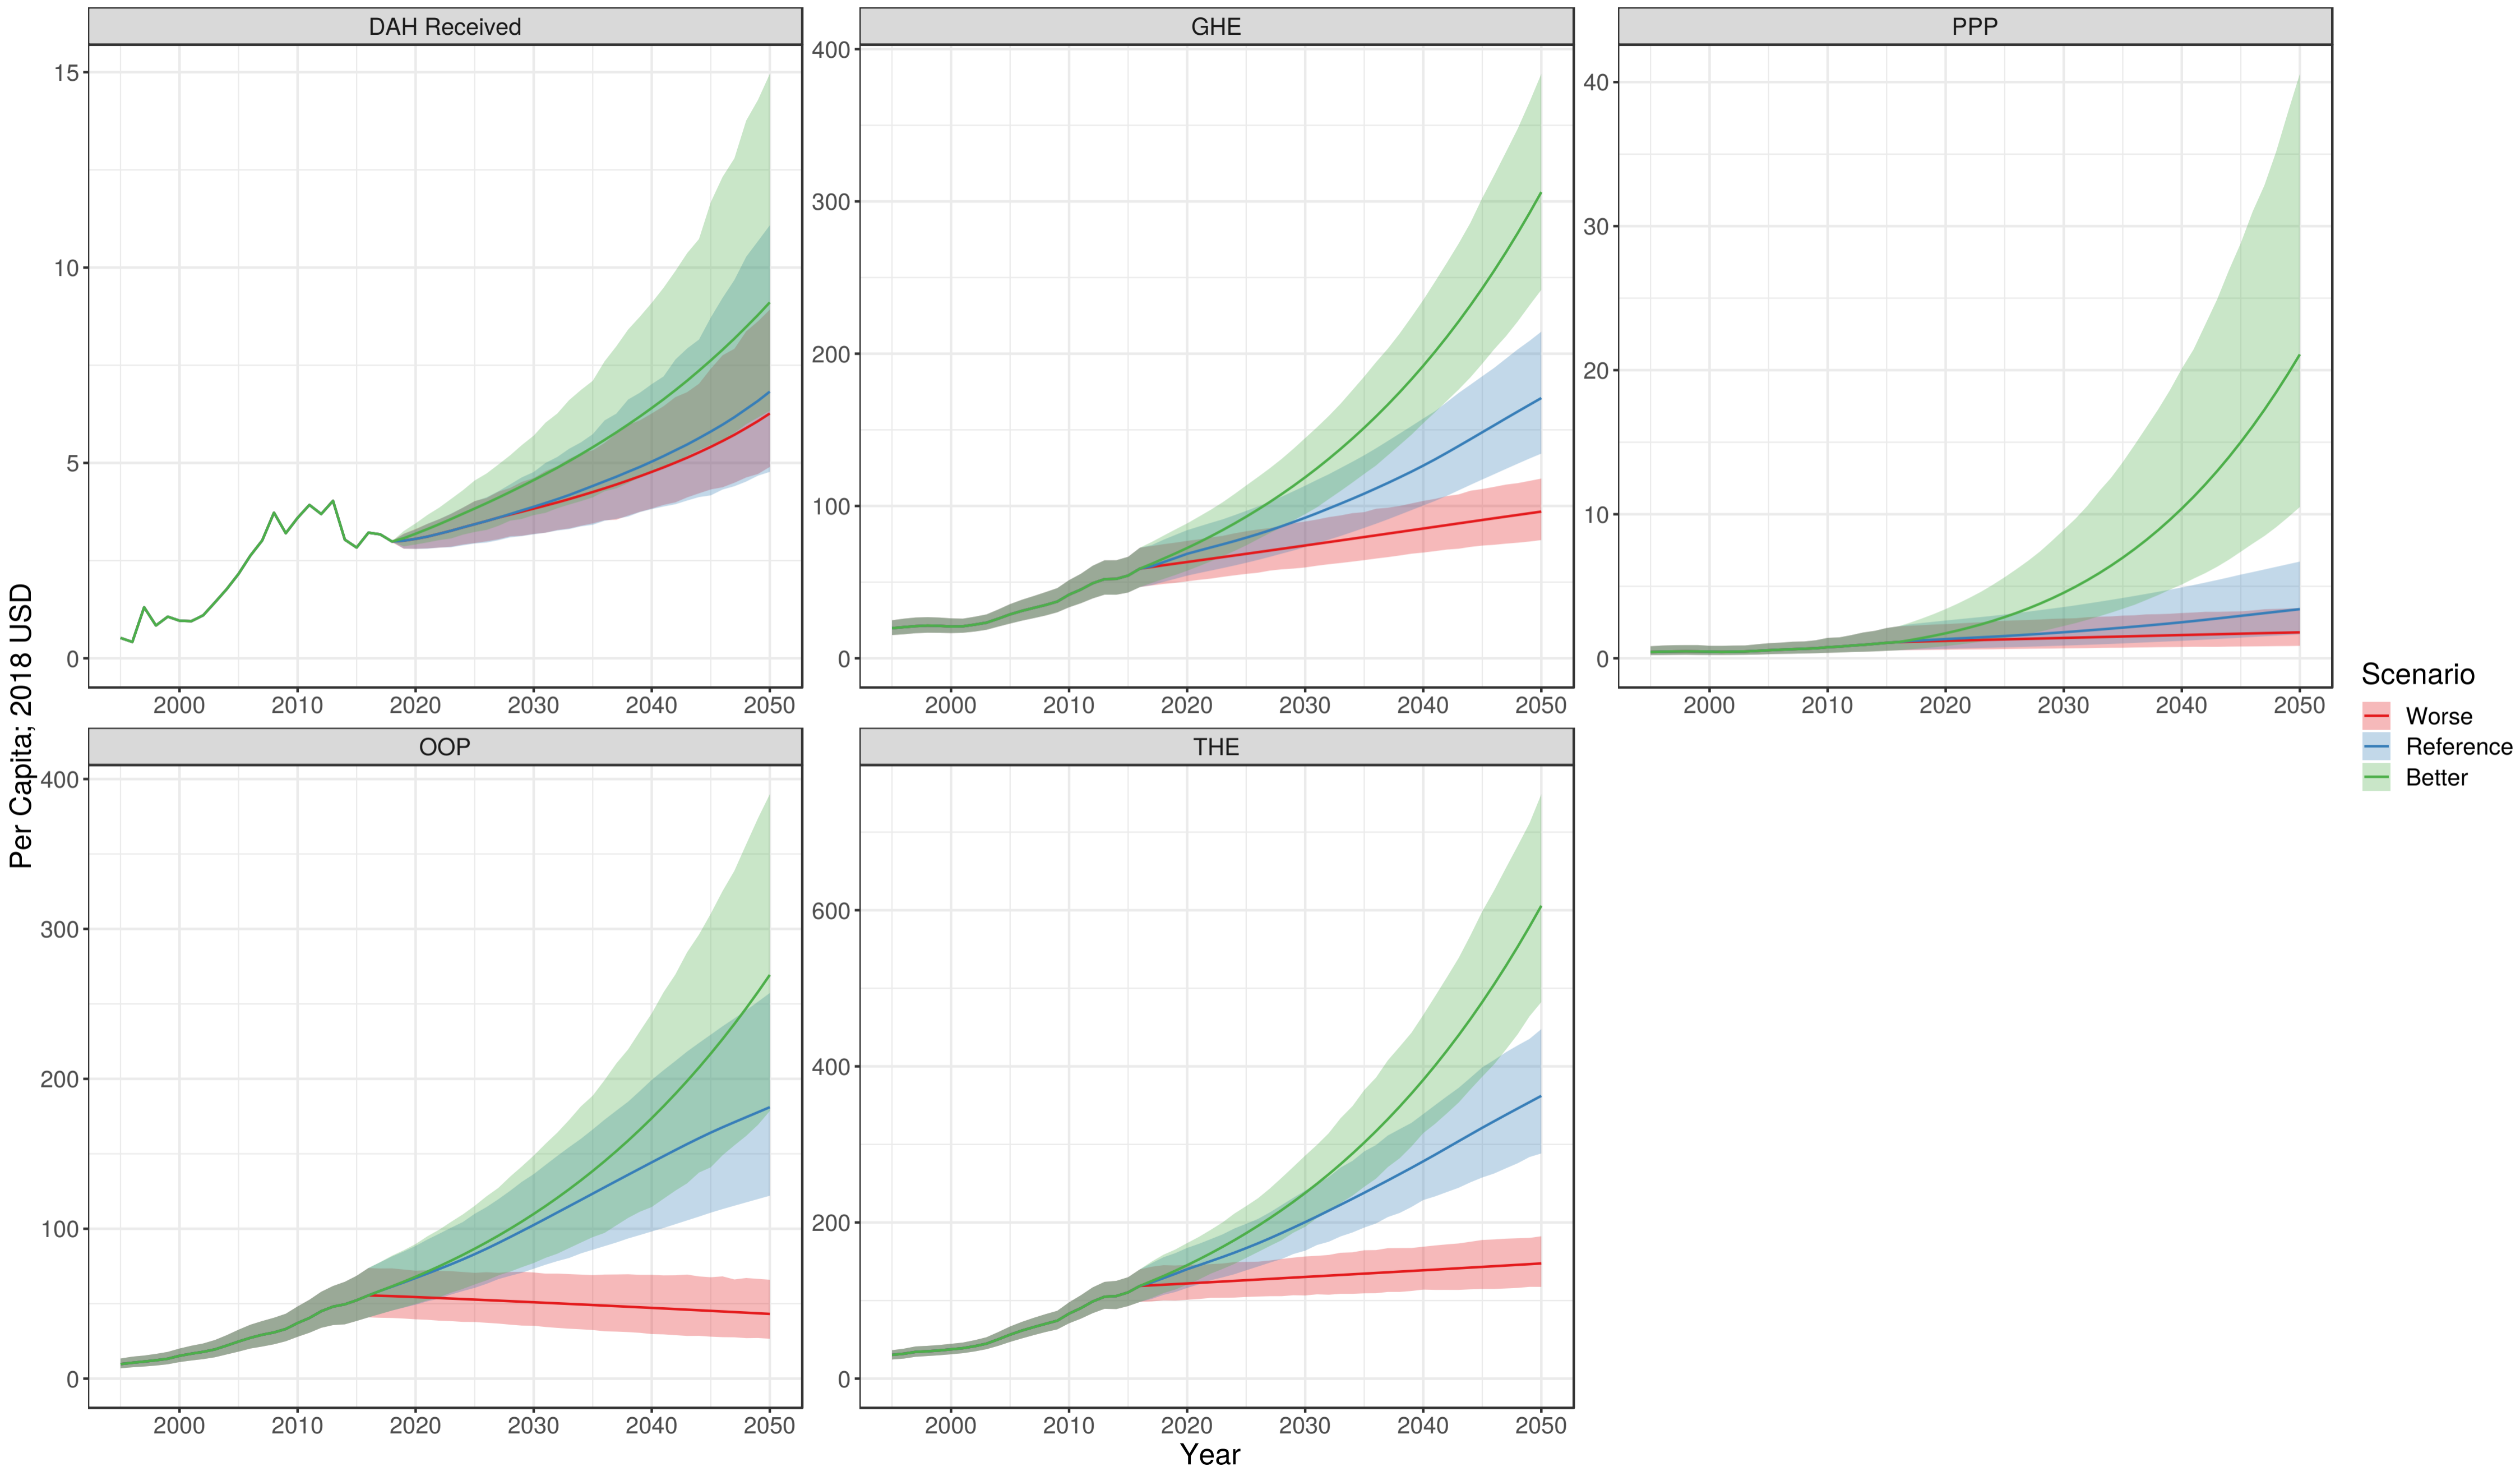

# Virgin Islands, U.S.

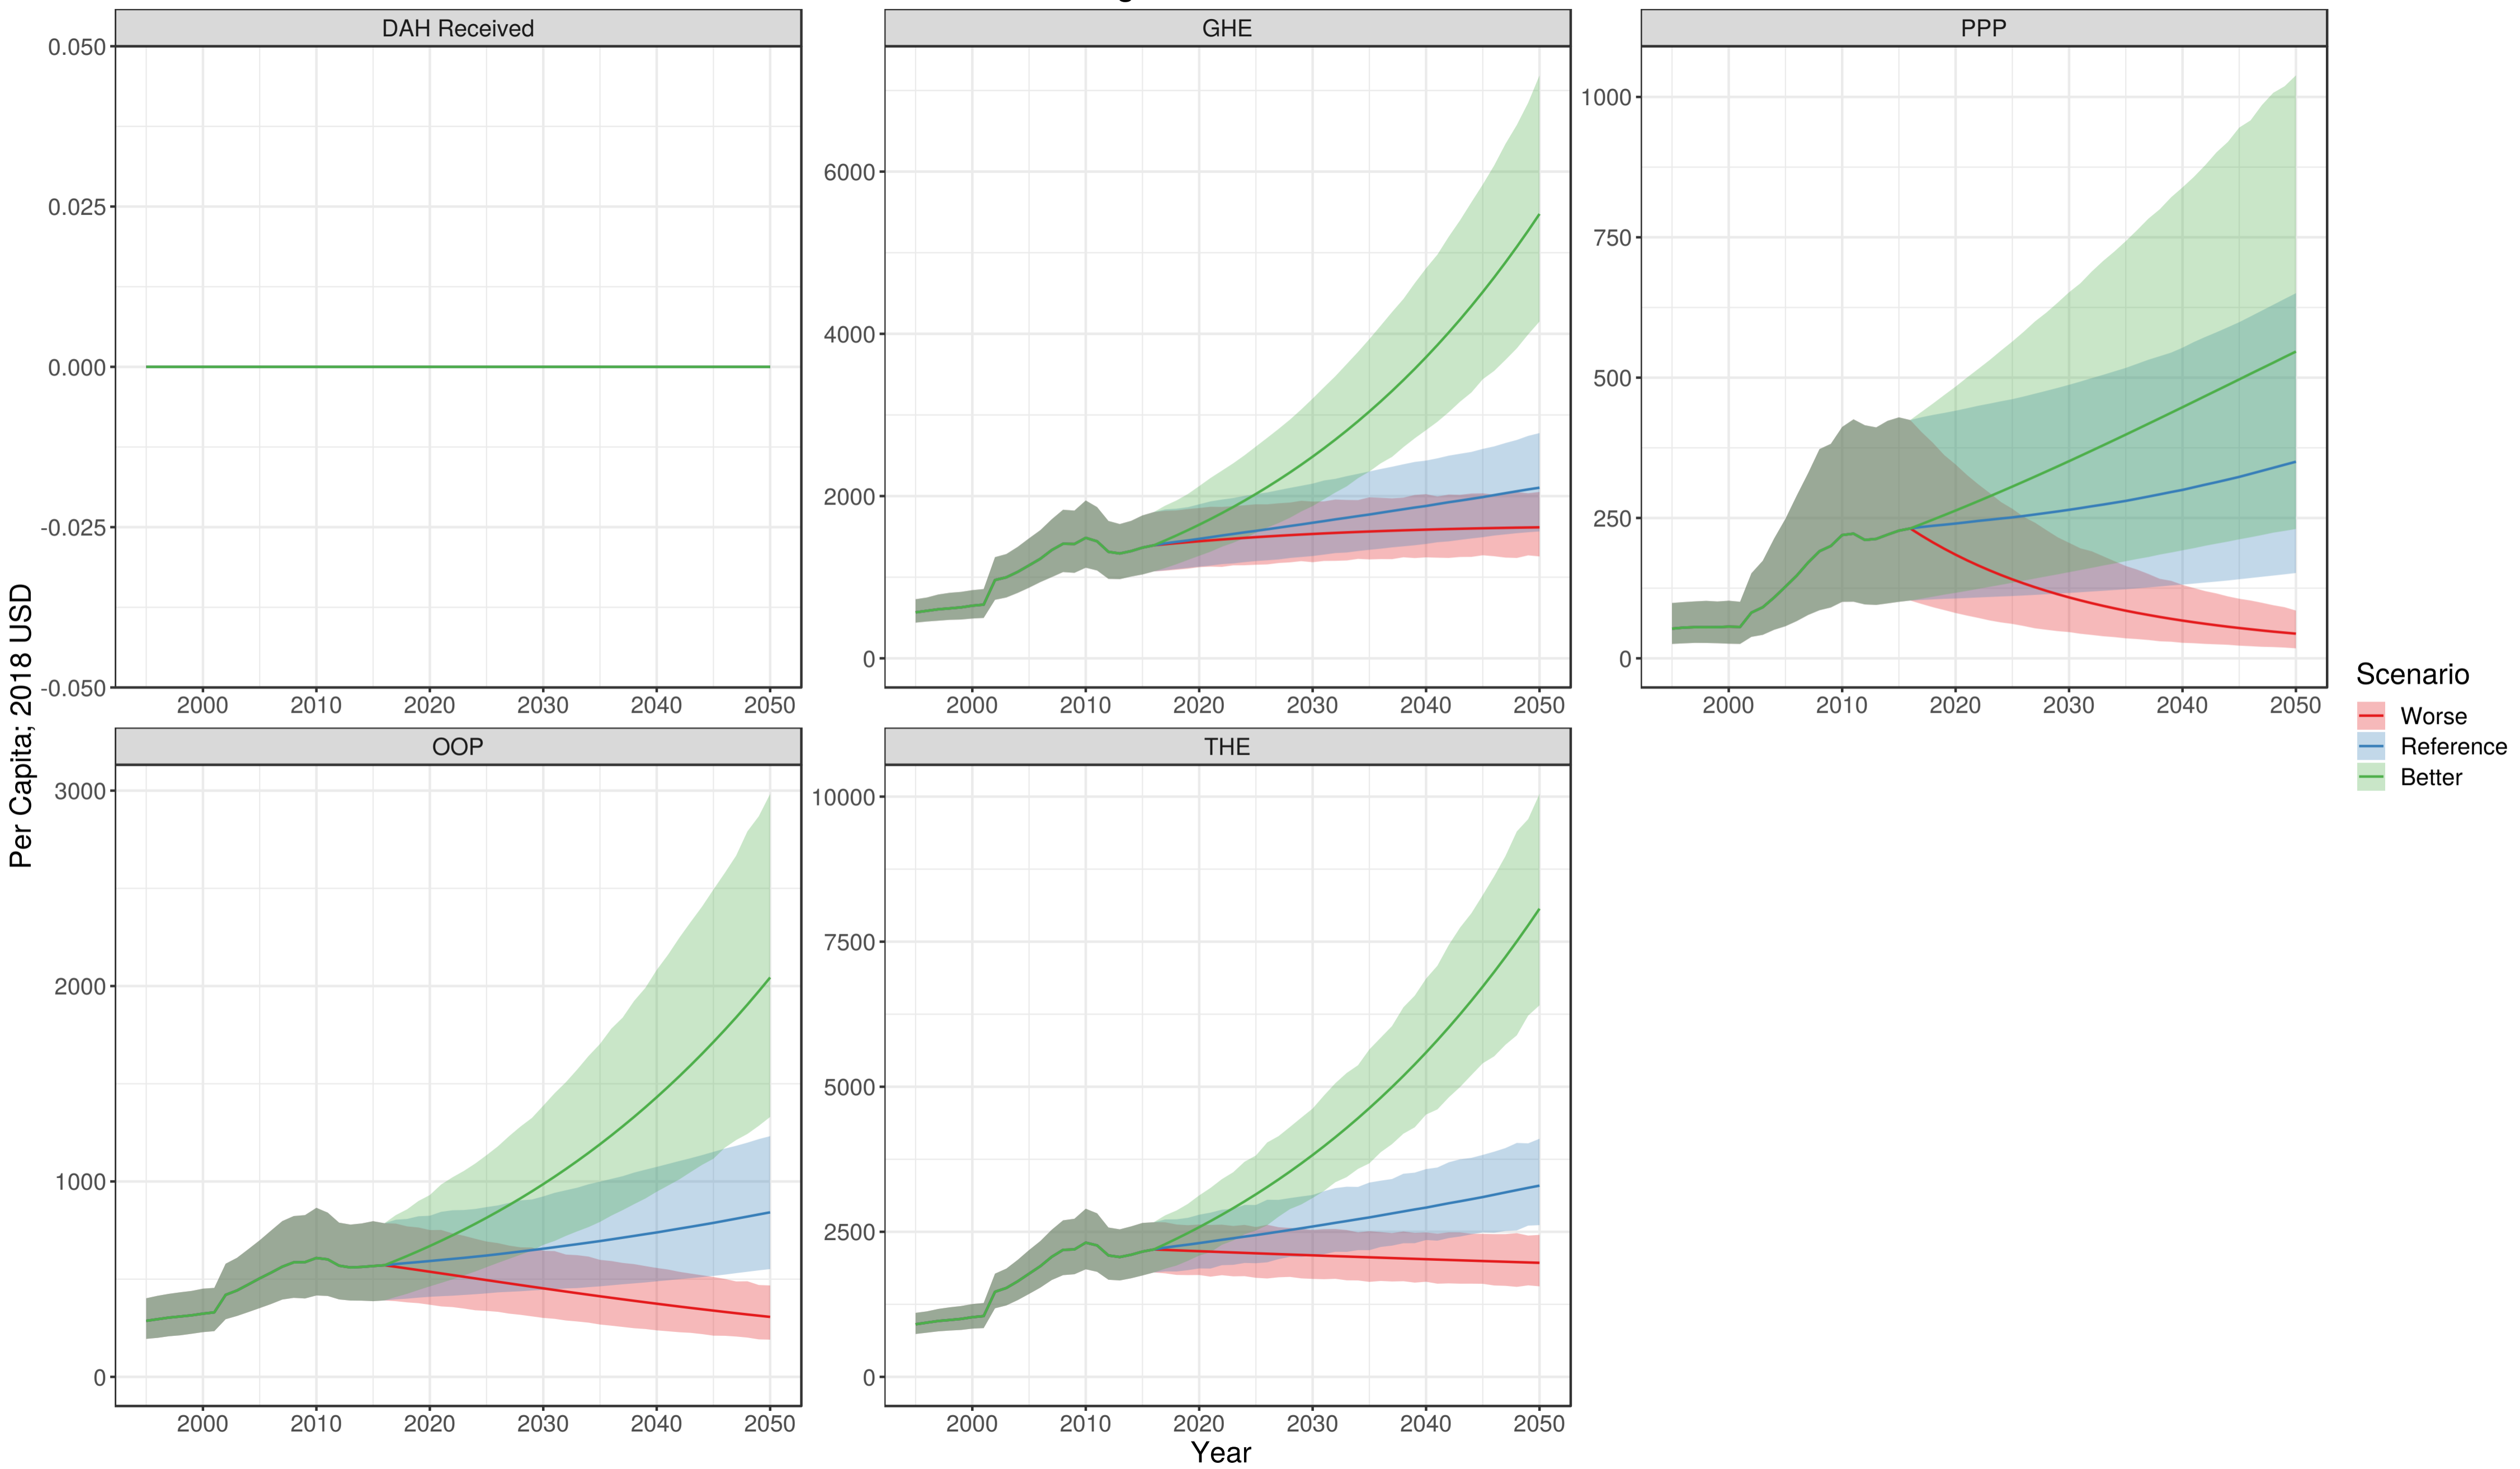

# Yemen

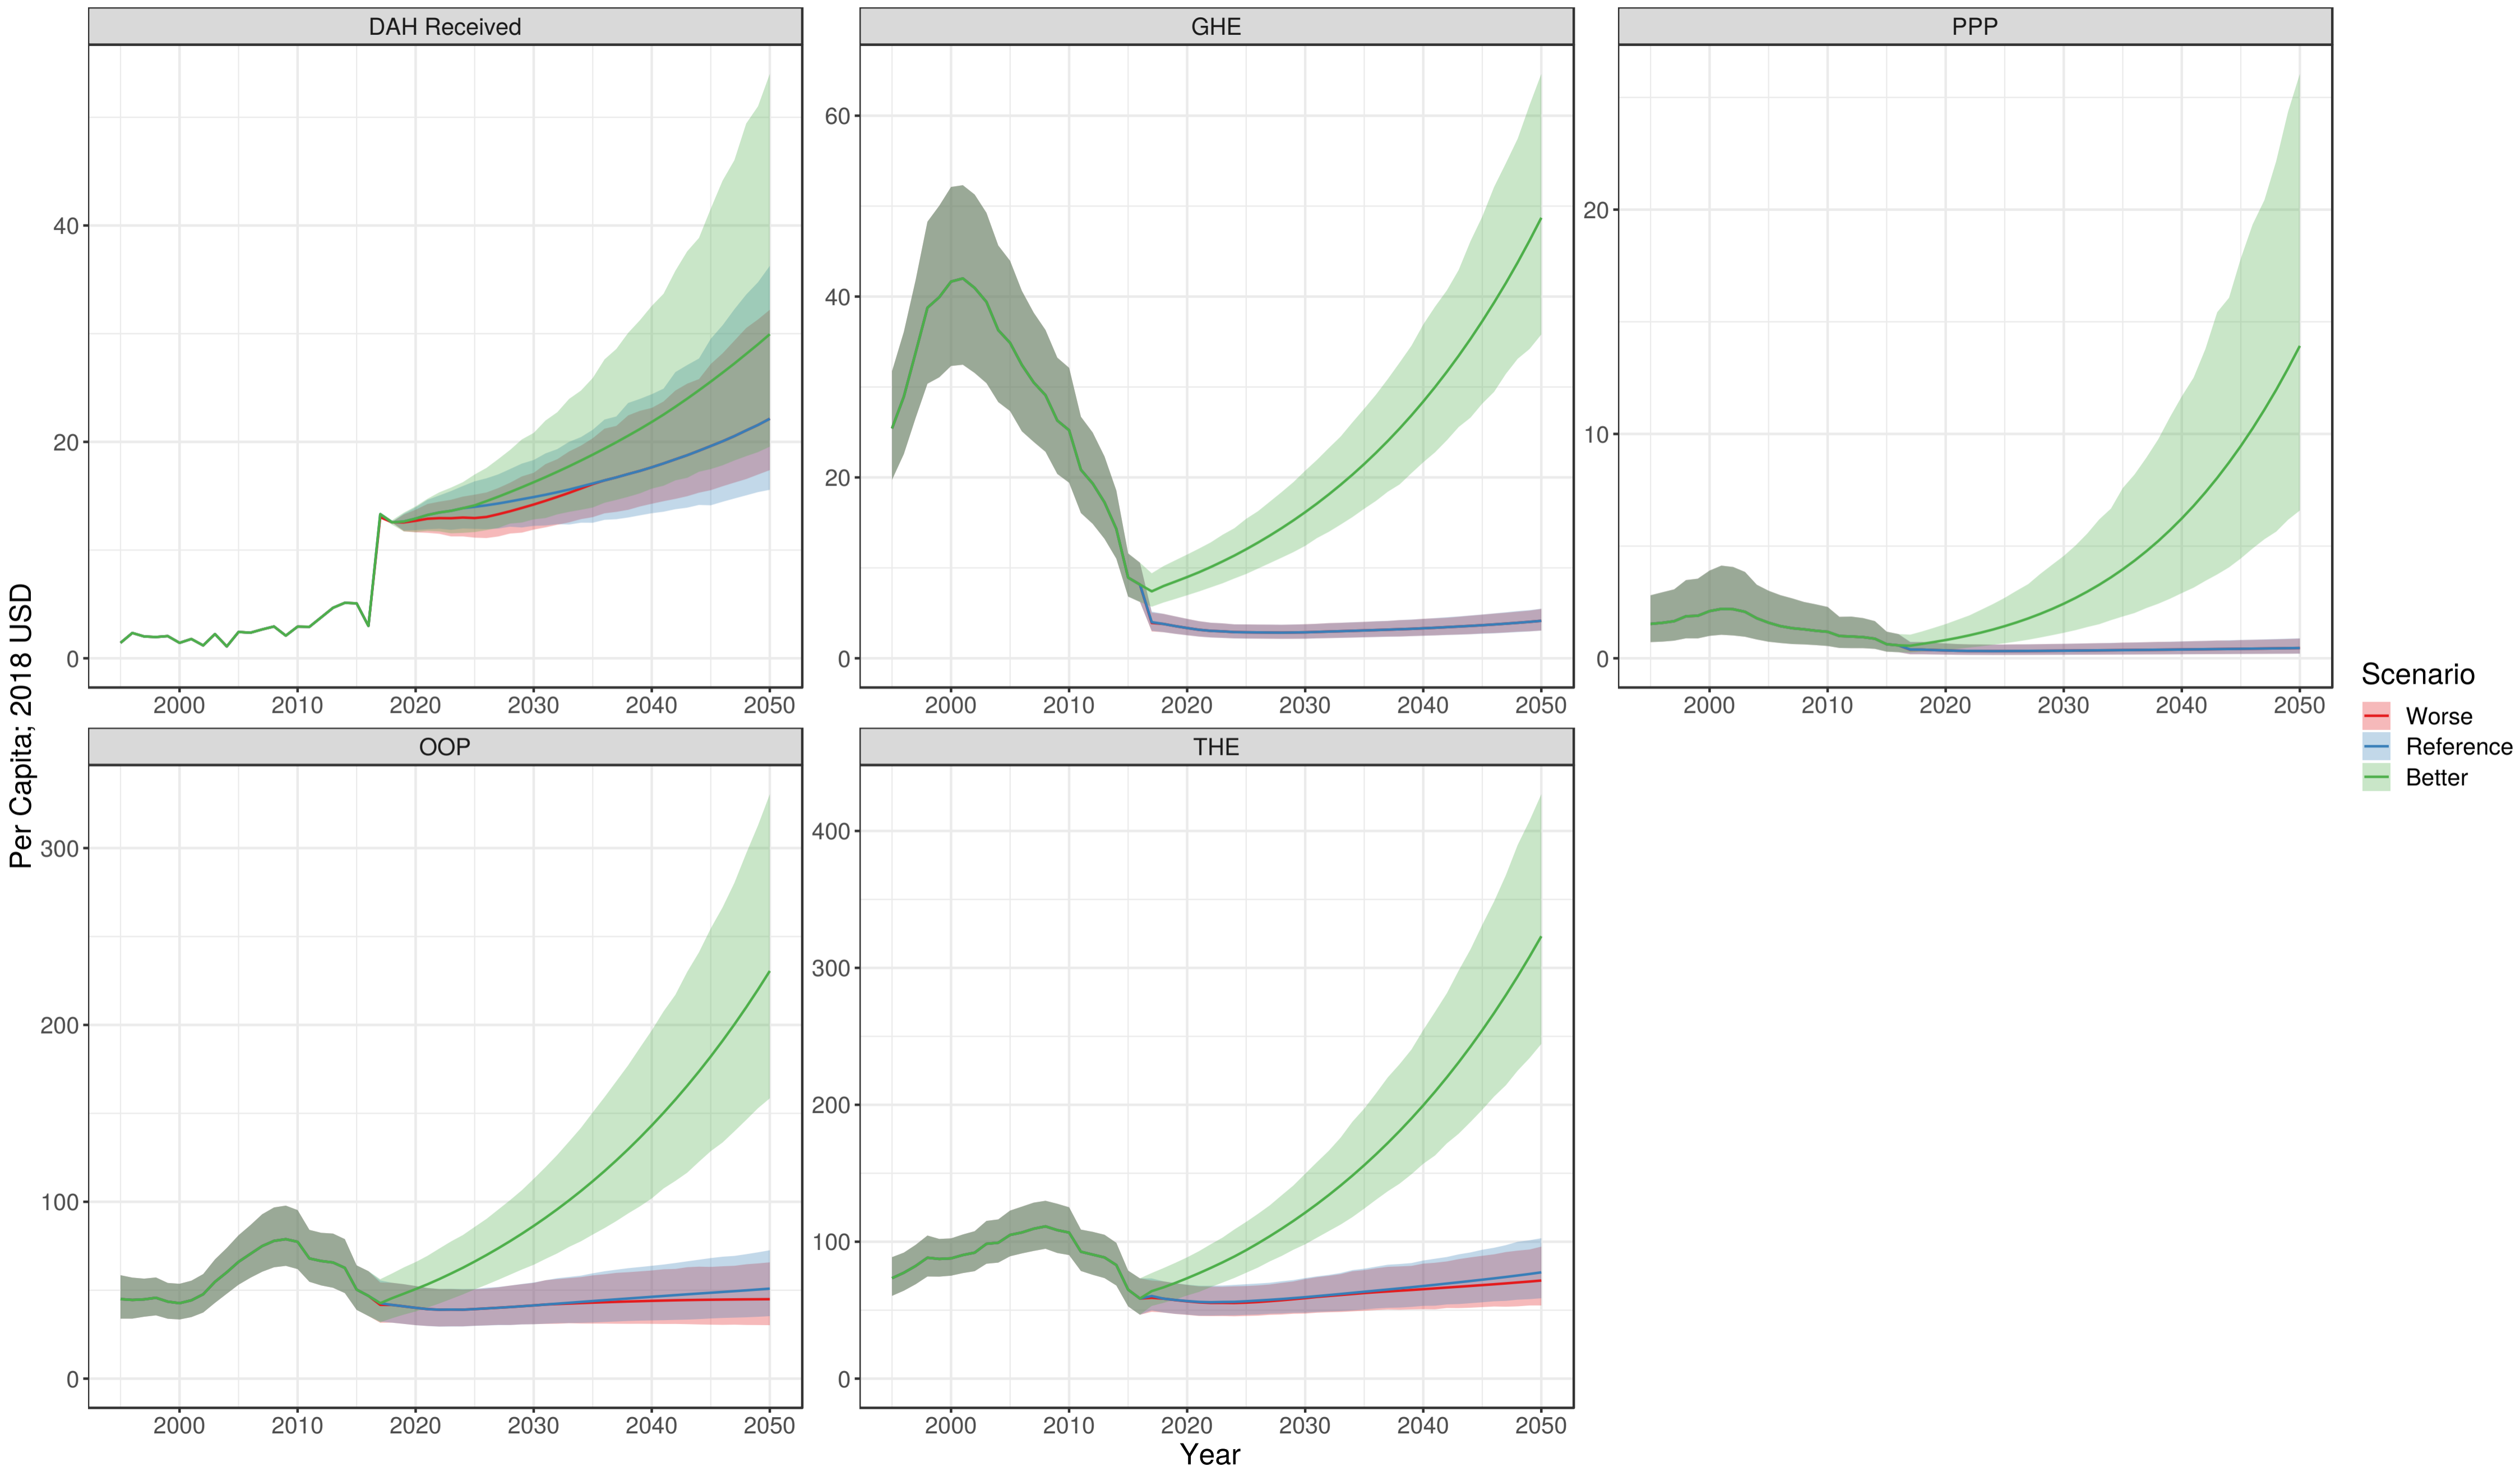

# Zambia

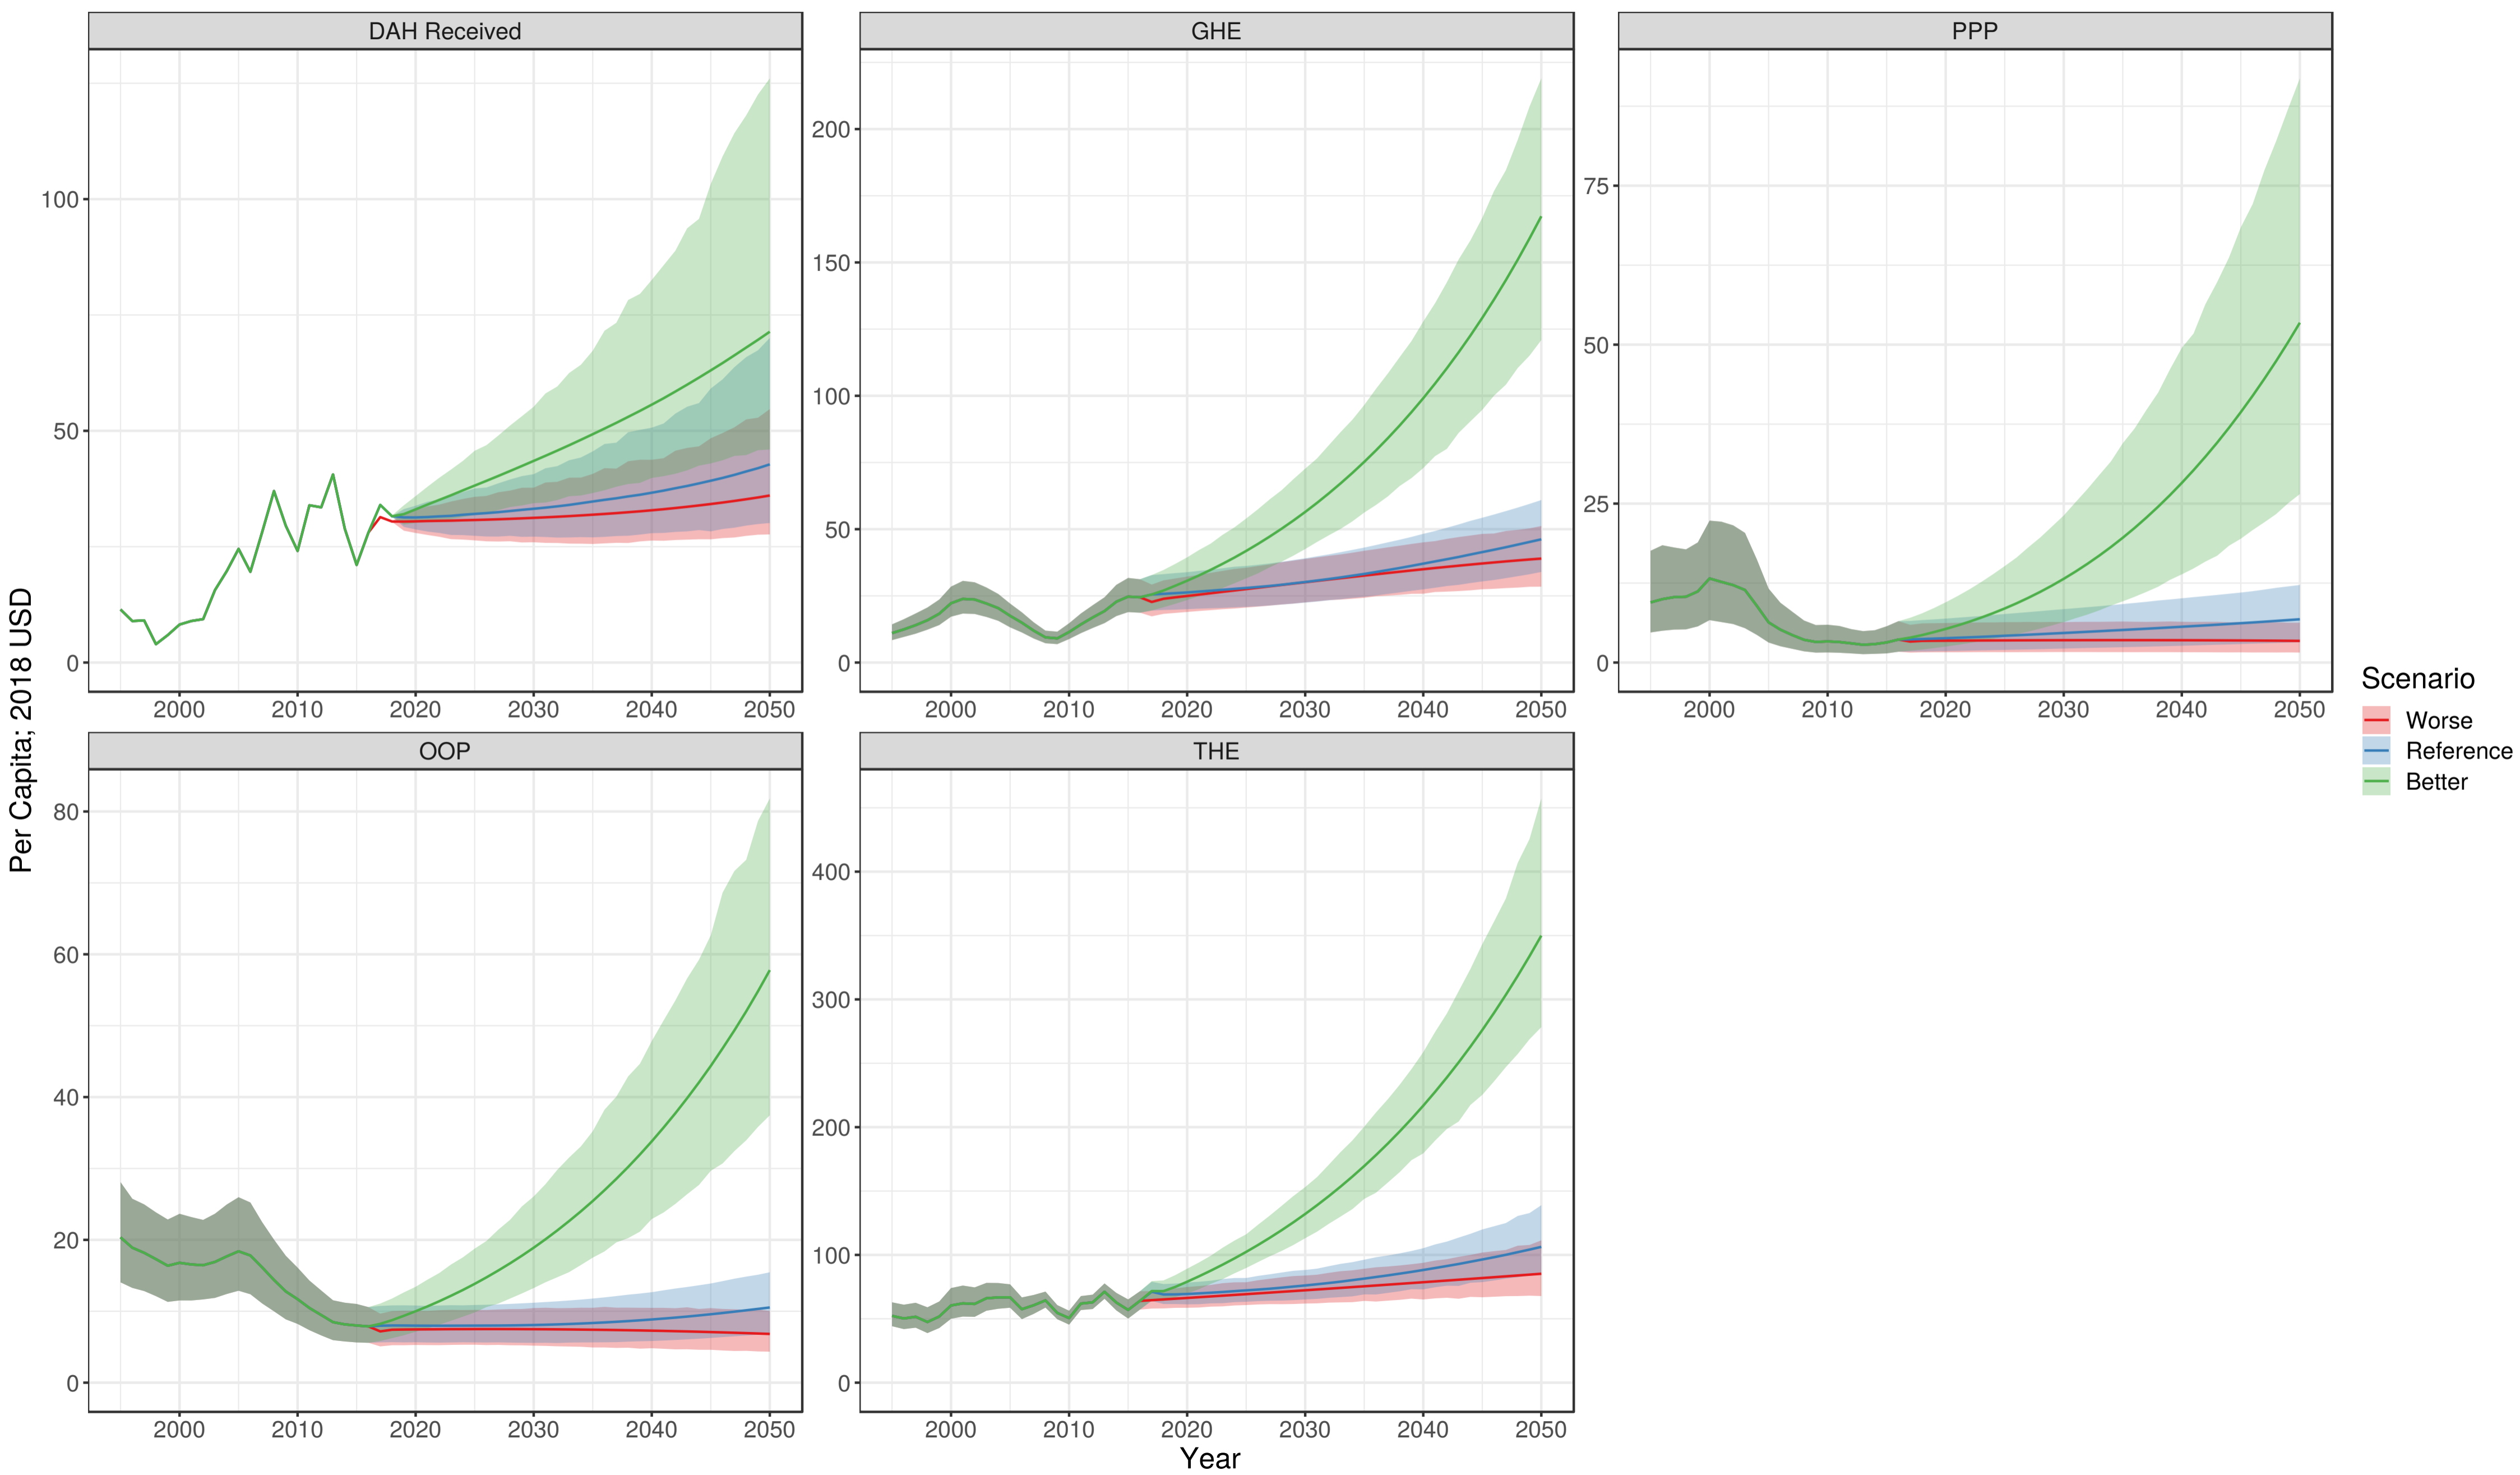

# Zimbabwe

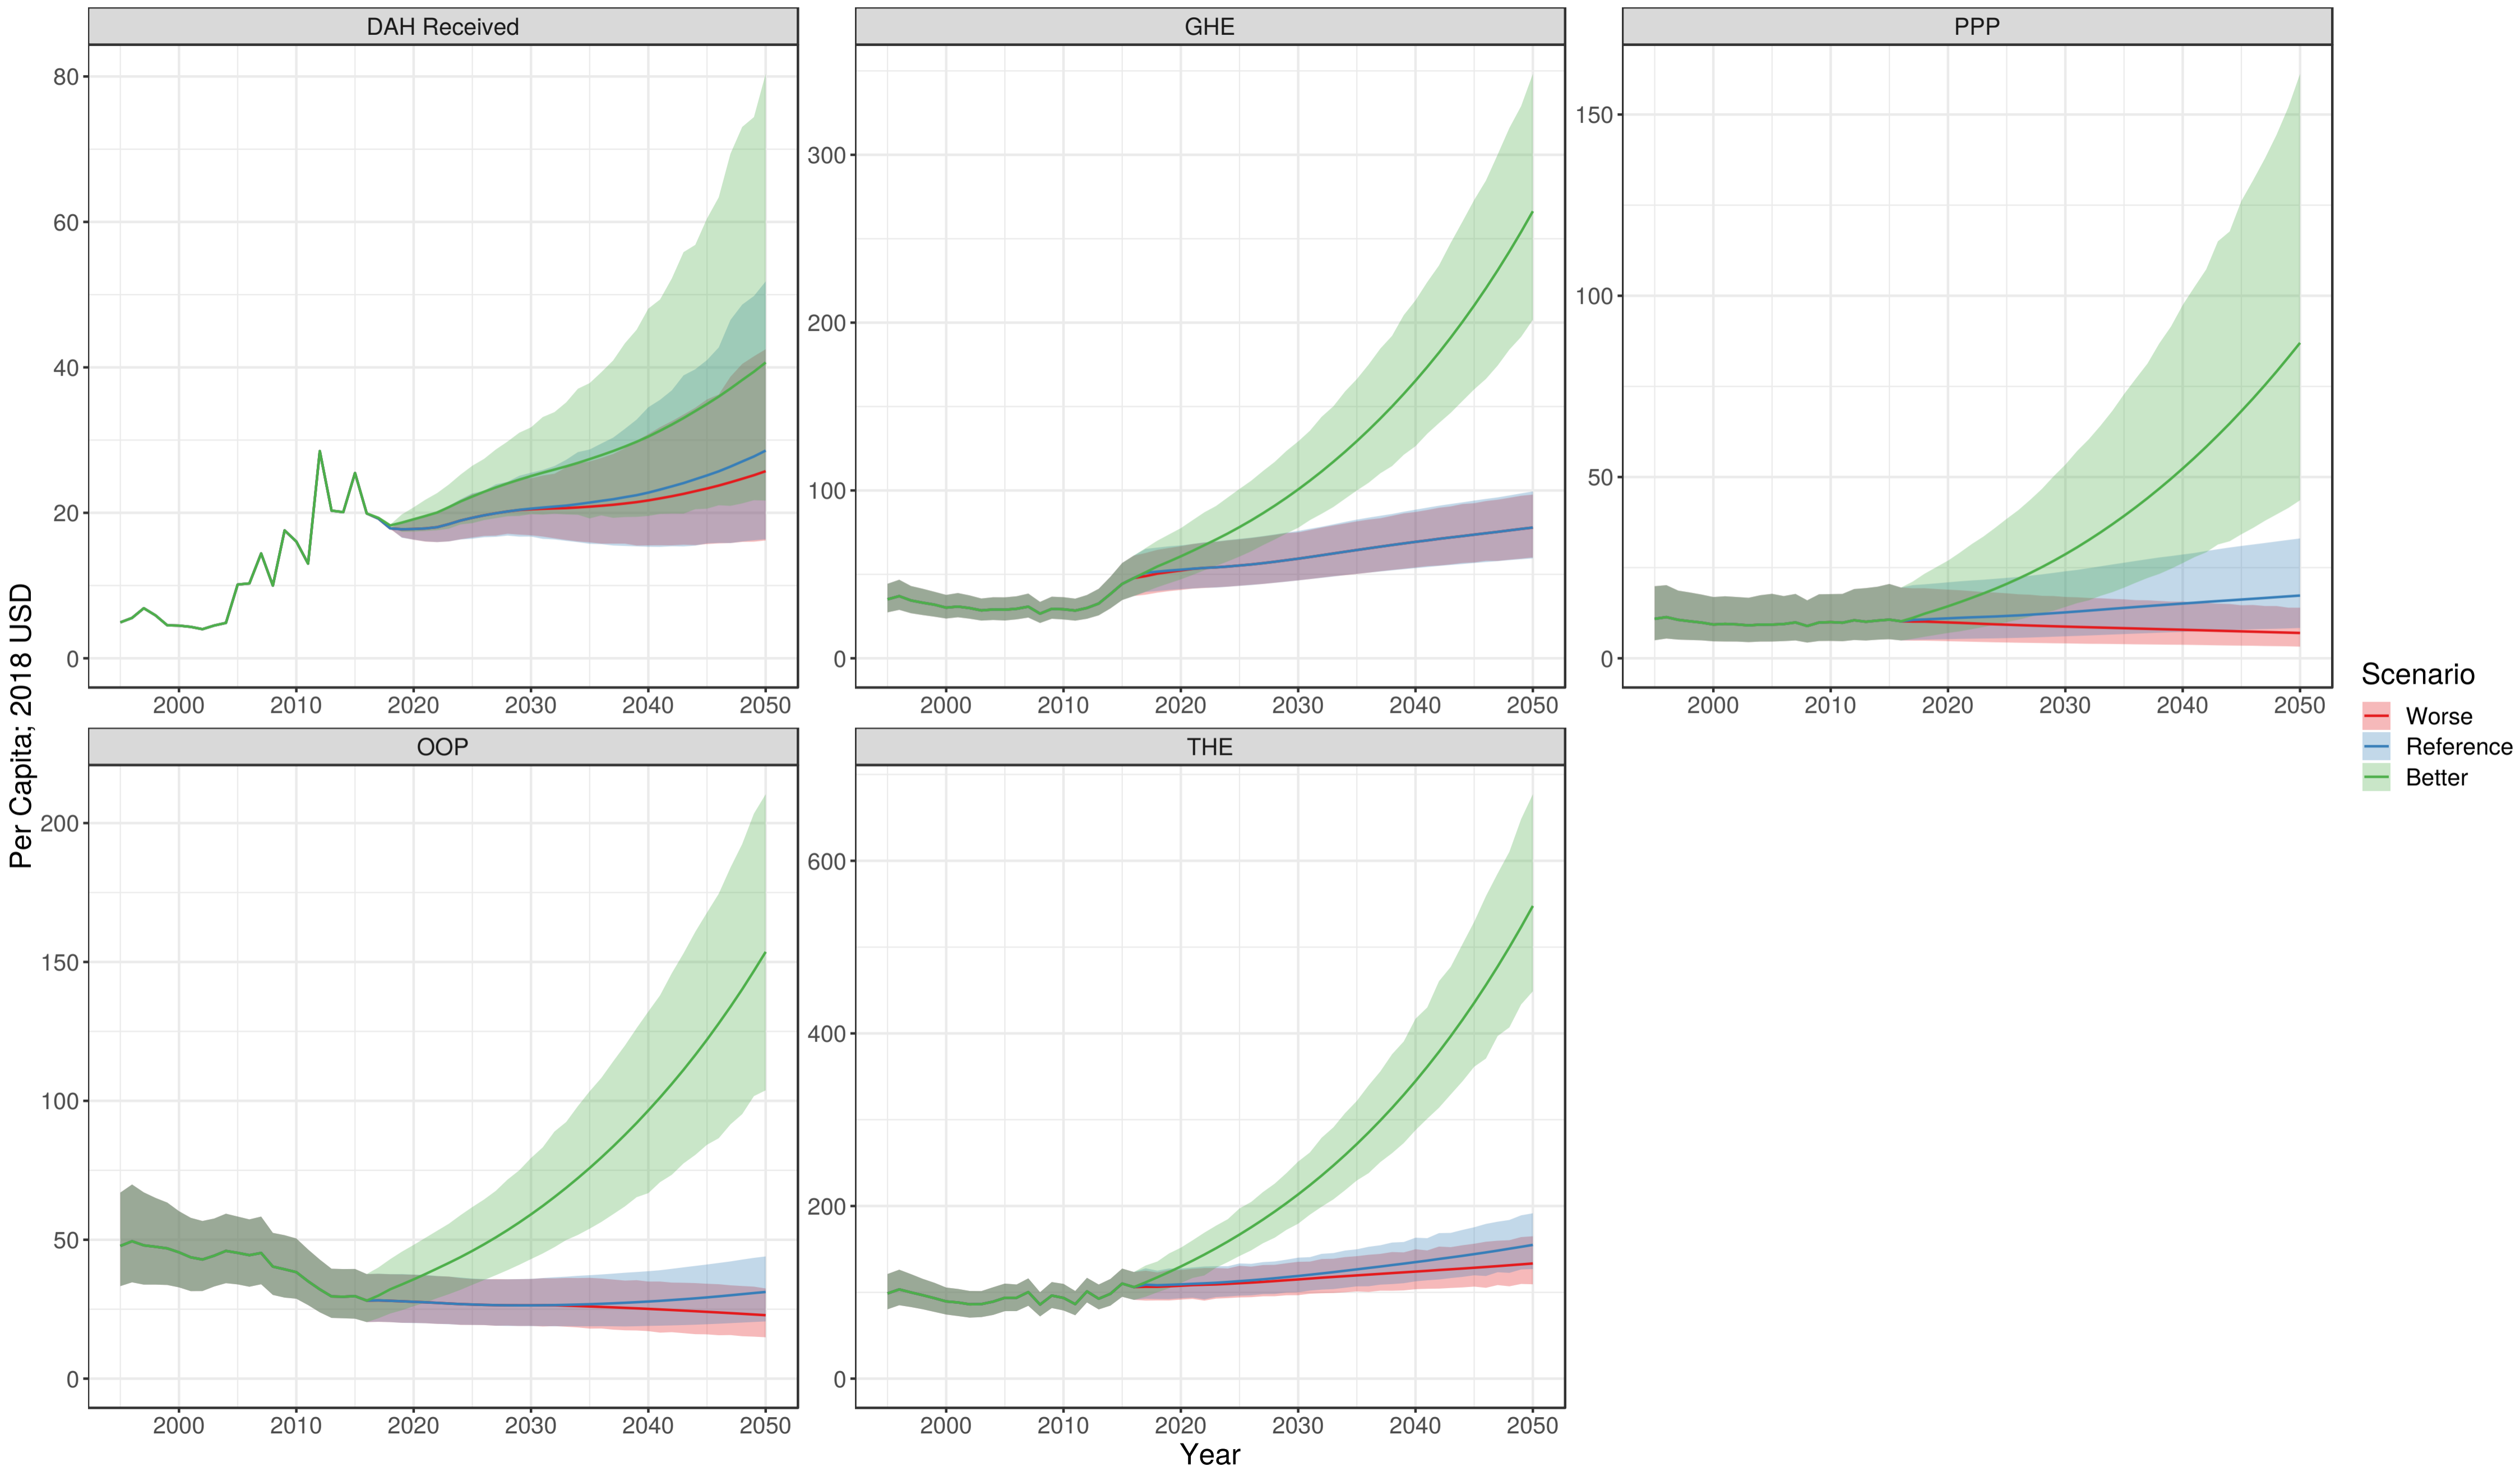

Supplement: mmc1.pdf [file mmc1.pdf]
